# Supplementary material
Source: PubMed Central journal article supplement (PMC8943859)
Supplement: NIHMS1784653-supplement-supplemental_table_s1.pdf [file NIHMS1784653-supplement-supplemental_table_s1.pdf]

| Gene_ID           | CBM      | WT       | log2FoldCh | pvalue   | padj     | GeneName | Chrom | Strand   | Start    | End  | GeneLength |
|-------------------|----------|----------|------------|----------|----------|----------|-------|----------|----------|------|------------|
| ENSG000001270.673 | 971.9825 | 0.38624  | 0.018132   | 0.036117 | TSPAN6   | chrX     | -     | 99883667 | 99894988 | 2206 |            |
| ENSG000001817.579 | 47.17688 | 5.2514   | 6.76E-88   | 3.25E-86 | TNMD     | chrX     | +     | 99839799 | 99854882 | 1339 |            |
| ENSG00000506.2518 | 583.8852 | -0.20523 | 0.22734    | 0.32039  | DPM1     | chr20    | -     | 49551404 | 49575092 | 1161 |            |
| ENSG00000137.6919 | 78.63109 | 0.80436  | 0.000145   | 0.000404 | SCYL3    | chr1     | -     | 1.7E+08  | 1.7E+08  | 3477 |            |
| ENSG00000180.0755 | 296.5424 | -0.71562 | 6.64E-06   | 2.18E-05 | C1orf112 | chr1     | +     | 1.7E+08  | 1.7E+08  | 4355 |            |
| ENSG0000012.54105 | 7.022276 | 0.78684  | 0.24891    | 0.34522  | FGR      | chr1     | -     | 27938575 | 27961788 | 2729 |            |
| ENSG00000193.3196 | 0        | 9.0239   | 5.90E-17   | 4.31E-16 | CFH      | chr1     | +     | 1.97E+08 | 1.97E+08 | 6985 |            |
| ENSG00000561.2039 | 516.0278 | 0.12012  | 0.37805    | 0.48221  | FUCA2    | chr6     | -     | 1.44E+08 | 1.44E+08 | 1690 |            |
| ENSG00000278.9136 | 741.9308 | -1.4083  | 1.04E-16   | 7.46E-16 | GCLC     | chr6     | -     | 53362139 | 53481768 | 3813 |            |
| ENSG000001155.73  | 604.6991 | 0.93439  | 6.51E-16   | 4.49E-15 | NFYA     | chr6     | +     | 41040684 | 41067715 | 3811 |            |
| ENSG0000090.59909 | 194.9253 | -1.0968  | 0.001215   | 0.002973 | STPG1    | chr1     | -     | 24683489 | 24743424 | 6016 |            |
| ENSG00000236.4371 | 211.0066 | 0.16176  | 0.33576    | 0.43943  | NIPAL3   | chr1     | +     | 24742284 | 24799466 | 5481 |            |
| ENSG00000807.003  | 1669.818 | -1.0477  | 4.50E-22   | 4.15E-21 | LAS1L    | chrX     | -     | 64732462 | 64754655 | 5205 |            |
| ENSG0000028.74477 | 39.06147 | -0.43624 | 0.26695    | 0.36563  | ENPP4    | chr6     | +     | 46097730 | 46114436 | 4651 |            |
| ENSG000001713.334 | 1664.067 | 0.041792 | 0.86984    | 0.90945  | SEMA3F   | chr3     | +     | 50192478 | 50226508 | 3802 |            |
| ENSG000006.888332 | 8.357568 | -0.27942 | 0.7189     | 0.792    | CFTR     | chr7     | +     | 1.17E+08 | 1.17E+08 | 6128 |            |
| ENSG000001561.418 | 686.3151 | 1.1842   | 1.40E-24   | 1.45E-23 | ANKIB1   | chr7     | +     | 91875548 | 92030698 | 6081 |            |
| ENSG00000113.9077 | 55.68032 | 1.0203   | 5.70E-05   | 0.000167 | CYP51A1  | chr7     | -     | 91741465 | 91772266 | 3210 |            |
| ENSG00000301.2173 | 303.2296 | -0.00899 | 0.95526    | 0.97241  | KRIT1    | chr7     | -     | 91828283 | 91875480 | 4762 |            |
| ENSG00000174.4376 | 141.4135 | 0.30459  | 0.14543    | 0.22101  | RAD52    | chr12    | -     | 1021243  | 1100356  | 2826 |            |
| ENSG000009.389794 | 11.49851 | -0.29362 | 0.6935     | 0.77146  | MYH16    | chr7     | +     | 98836417 | 98908753 | 6294 |            |
| ENSG0000039.61517 | 32.19864 | 0.29374  | 0.42407    | 0.52946  | BAD      | chr11    | -     | 64037302 | 64052176 | 1157 |            |
| ENSG00000987.0301 | 1179.954 | -0.25686 | 0.034049   | 0.063577 | LAP3     | chr4     | +     | 17578815 | 17609595 | 2213 |            |
| ENSG0000010313.02 | 1151.22  | 3.1607   | 4.92E-22   | 1.40E-22 | CD99     | chrX     | +     | 2609220  | 2659350  | 1245 |            |
| ENSG0000015.44586 | 23.84752 | -0.60844 | 0.20323    | 0.29209  | HS3ST1   | chr4     | -     | 11394774 | 11431389 | 8031 |            |
| ENSG000000        | 2.811501 | -2.7201  | 0.104      | 0.16679  | ABP1     | chr7     | +     | 1.51E+08 | 1.51E+08 | 3135 |            |
| ENSG000007.31319  | 3.042118 | 1.145    | 0.29505    | 0.39711  | WNT16    | chr7     | +     | 1.21E+08 | 1.21E+08 | 3147 |            |
| ENSG00000514.7411 | 82.54076 | 2.6365   | 6.27E-53   | 1.55E-51 | HECW1    | chr7     | +     | 43152198 | 43602938 | 6839 |            |
| ENSG00000880.4835 | 767.1226 | 0.19829  | 0.13848    | 0.21199  | MAD1L1   | chr7     | -     | 1855429  | 2272878  | 2991 |            |
| ENSG000008686.305 | 4816.503 | 0.85026  | 1.02E-18   | 8.05E-18 | LASP1    | chr17    | +     | 37026112 | 37078023 | 4109 |            |
| ENSG00000418.5091 | 399.0145 | 0.069402 | 0.66984    | 0.75241  | SNX11    | chr17    | +     | 46180719 | 46200436 | 2733 |            |
| ENSG000001.359003 | 3.06884  | -1.032   | 0.38471    | 0.48891  | TMEM176A | chr7     | +     | 1.5E+08  | 1.51E+08 | 2065 |            |
| ENSG00000881.9861 | 1107.479 | -0.32766 | 0.001706   | 0.004082 | M6PR     | chr12    | -     | 9092959  | 9102551  | 2756 |            |
| ENSG000002.592987 | 121.6475 | -5.3958  | 3.88E-23   | 3.78E-22 | KLHL13   | chrX     | -     | 1.17E+08 | 1.17E+08 | 5331 |            |
| ENSG0000029.98829 | 2.309719 | 3.5218   | 3.41E-06   | 1.15E-05 | CYP26B1  | chr2     | -     | 72356367 | 72375167 | 4732 |            |
| ENSG0000040.39797 | 251.0191 | -2.6233  | 8.48E-28   | 9.96E-27 | ICA1     | chr7     | -     | 8152814  | 8302317  | 2458 |            |
| ENSG00000812.9321 | 2288.277 | -1.4917  | 6.40E-40   | 1.12E-38 | DBNDD1   | chr16    | -     | 90071273 | 90086536 | 2889 |            |
| ENSG00000886.671  | 805.3396 | 0.13805  | 0.23216    | 0.32558  | ALS2     | chr2     | -     | 2.03E+08 | 2.03E+08 | 6644 |            |
| ENSG000002.894453 | 41.88189 | -3.7036  | 1.12E-08   | 4.73E-08 | CASP10   | chr2     | +     | 2.02E+08 | 2.02E+08 | 5928 |            |
| ENSG00000277.5646 | 203.1125 | 0.45106  | 0.007739   | 0.016602 | CFLAR    | chr2     | +     | 2.02E+08 | 2.02E+08 | 4415 |            |
| ENSG00000143.7933 | 77.87177 | 0.8789   | 0.006257   | 0.013673 | TFPI     | chr2     | -     | 1.88E+08 | 1.88E+08 | 7690 |            |
| ENSG00000188.4772 | 593.7715 | -1.6503  | 1.24E-27   | 1.44E-26 | NDUFAF7  | chr2     | +     | 37458774 | 37480546 | 2974 |            |
| ENSG000001330.89  | 656.8055 | 1.0172   | 1.34E-09   | 6.11E-09 | RBM5     | chr3     | +     | 50126341 | 50156454 | 5616 |            |
| ENSG0000015.75832 | 70.98243 | -2.1571  | 2.29E-08   | 9.45E-08 | MTMR7    | chr8     | -     | 17155539 | 17271037 | 3850 |            |
| ENSG00000167.3435 | 480.9355 | -1.5216  | 9.44E-26   | 1.02E-24 | SLC7A2   | chr8     | +     | 17354597 | 17428082 | 7638 |            |
| ENSG000001302.587 | 1473.622 | -0.17753 | 0.18498    | 0.27036  | ARF5     | chr7     | +     | 1.27E+08 | 1.27E+08 | 1509 |            |
| ENSG00000200.8908 | 29.36129 | 2.7416   | 9.16E-21   | 8.00E-20 | SARM1    | chr17    | +     | 26691378 | 26728065 | 7304 |            |
| ENSG000001710.099 | 1940.865 | -0.18213 | 0.20508    | 0.29437  | POLDIP2  | chr17    | -     | 26673659 | 26684545 | 2588 |            |
| ENSG000008864.178 | 2230.236 | 1.9863   | 1.44E-33   | 2.09E-32 | PLXND1   | chr3     | -     | 1.29E+08 | 1.29E+08 | 7101 |            |
| ENSG000001468.579 | 1399.131 | 0.070131 | 0.5942     | 0.68876  | AK2      | chr1     | -     | 33473585 | 33546597 | 3586 |            |
| ENSG000000.632843 | 4.507789 | -2.3526  | 0.06832    | 0.11665  | CD38     | chr4     | +     | 15779898 | 15851069 | 1884 |            |
| ENSG000001784.144 | 5251.303 | -1.5564  | 7.48E-56   | 1.97E-54 | FKBP4    | chr12    | +     | 2904119  | 2914576  | 2267 |            |
| ENSG000003639.213 | 6197.688 | -0.76772 | 1.03E-16   | 7.38E-16 | KDM1A    | chr1     | +     | 23345941 | 23410182 | 3059 |            |
| ENSG000001756.683 | 1339.152 | 0.39092  | 7.87E-05   | 0.000227 | RBM6     | chr3     | +     | 49977440 | 50137478 | 4324 |            |
| ENSG00000308.1473 | 278.5248 | 0.14458  | 0.61123    | 0.70359  | CAMKK1   | chr17    | -     | 3763609  | 3798185  | 3898 |            |
| ENSG000001142.525 | 404.6789 | 1.4945   | 5.49E-15   | 3.60E-14 | RECQL    | chr12    | -     | 21621845 | 21654603 | 3702 |            |
| ENSG00000212.111  | 107.096  | 0.98047  | 0.002479   | 0.005782 | CCDC132  | chr7     | +     | 92861653 | 92988338 | 3614 |            |
| ENSG000004.056471 | 15.8104  | -1.9056  | 0.005763   | 0.012672 | HSPB6    | chr19    | -     | 36245469 | 36248980 | 1634 |            |
| ENSG00000226.5595 | 528.2991 | -1.2171  | 3.37E-10   | 1.61E-09 | ARHGAP33 | chr19    | +     | 36265434 | 36279724 | 4401 |            |
| ENSG00000686.6787 | 1261.496 | -0.87661 | 4.22E-13   | 2.46E-12 | NDUFAB1  | chr16    | -     | 23592323 | 23607677 | 885  |            |
| ENSG000001.681007 | 0.686276 | 0.97937  | 0.52405    | 0.62628  | PDK4     | chr7     | -     | 95212811 | 95225803 | 3576 |            |
| ENSG000000        | 0.357707 | -0.41864 | 0.81278    | NA       | SLC22A16 | chr6     | -     | 1.11E+08 | 1.11E+08 | 1987 |            |
| ENSG0000017.41879 | 5.415818 | 1.5991   | 0.013642   | 0.027879 | ZMYND10  | chr3     | -     | 50378541 | 50384283 | 2896 |            |
| ENSG000001.213446 | 6.48565  | -2.062   | 0.07869    | 0.13166  | ABCB5    | chr7     | +     | 20654830 | 20816658 | 5811 |            |

|            |          |          |          |          |          |          |       |   |          |          |       |
|------------|----------|----------|----------|----------|----------|----------|-------|---|----------|----------|-------|
| ENSG000001 | 0.580602 | 1.372552 | -0.71233 | 0.68356  | 0.76375  | ARX      | chrX  | - | 25021811 | 25034065 | 2876  |
| ENSG000001 | 413.4634 | 1028.618 | -1.3116  | 3.53E-18 | 2.72E-17 | SLC25A13 | chr7  | - | 95749532 | 95951459 | 3192  |
| ENSG000001 | 260.0517 | 156.8151 | 0.73027  | 0.000401 | 0.001053 | ST7      | chr7  | + | 1.17E+08 | 1.17E+08 | 2899  |
| ENSG000001 | 1447.781 | 591.9263 | 1.2884   | 9.64E-26 | 1.04E-24 | CDC27    | chr17 | - | 45195069 | 45266788 | 5801  |
| ENSG000001 | 0        | 1.294874 | -1.8547  | 0.27869  | NA       | SLC4A1   | chr17 | - | 42325753 | 42345509 | 4965  |
| ENSG000001 | 0        | 5.34942  | -3.9497  | 0.005052 | 0.011245 | CALCR    | chr7  | - | 93053799 | 93204042 | 3696  |
| ENSG000001 | 338.023  | 430.8192 | -0.34847 | 0.16223  | 0.24256  | HCCS     | chrX  | + | 11129421 | 11141198 | 2277  |
| ENSG000001 | 1691.417 | 1430.643 | 0.24175  | 0.046712 | 0.083858 | DVL2     | chr17 | - | 7128660  | 7137864  | 3018  |
| ENSG000001 | 0.342542 | 10.44882 | -4.185   | 0.000618 | 0.001583 | PRSS22   | chr16 | - | 2902728  | 2908171  | 1386  |
| ENSG000001 | 3034.513 | 4346.308 | -0.51784 | 6.27E-06 | 2.07E-05 | UPF1     | chr19 | + | 18942747 | 18979045 | 5348  |
| ENSG000001 | 274.6693 | 64.06213 | 2.0886   | 3.11E-22 | 2.89E-21 | SKAP2    | chr7  | - | 26706681 | 27034858 | 3998  |
| ENSG000001 | 3227.087 | 5665.955 | -0.81102 | 4.85E-12 | 2.62E-11 | SLC25A5  | chrX  | + | 1.19E+08 | 1.19E+08 | 1274  |
| ENSG000001 | 715.7638 | 280.3872 | 1.3504   | 1.42E-22 | 1.35E-21 | CCDC109B | chr4  | + | 1.1E+08  | 1.11E+08 | 2270  |
| ENSG000001 | 302.5562 | 3.431379 | 5.1911   | 0.000179 | 0.000493 | HOXA11   | chr7  | - | 27221129 | 27224842 | 2295  |
| ENSG000001 | 569.7478 | 634.7196 | -0.15487 | 0.29397  | 0.39595  | POLR2J   | chr7  | - | 1.02E+08 | 1.02E+08 | 932   |
| ENSG000001 | 576.6191 | 1577.357 | -1.448   | 1.44E-15 | 9.75E-15 | DHX33    | chr17 | - | 5344232  | 5372380  | 5618  |
| ENSG000001 | 376.4647 | 1.730259 | 7.5809   | 2.86E-36 | 4.51E-35 | MEOX1    | chr17 | - | 41717756 | 41739322 | 2707  |
| ENSG000001 | 97.09632 | 9.57718  | 3.3019   | 5.55E-17 | 4.06E-16 | THSD7A   | chr7  | - | 11414247 | 11871824 | 6385  |
| ENSG000001 | 966.1223 | 1515.545 | -0.64852 | 5.42E-07 | 1.98E-06 | LIG3     | chr17 | + | 33307513 | 33332083 | 4664  |
| ENSG000001 | 399.0565 | 313.4091 | 0.34884  | 0.13911  | 0.21279  | RPAP3    | chr12 | - | 48057070 | 48099844 | 2332  |
| ENSG000001 | 2.354926 | 56.92989 | -4.4385  | 6.23E-11 | 3.14E-10 | ACSM3    | chr16 | + | 20621565 | 20808903 | 2845  |
| ENSG000001 | 69.50826 | 116.7561 | -0.74915 | 0.001987 | 0.004705 | AC004381 | chr16 | + | 20817751 | 20860987 | 2719  |
| ENSG000001 | 678.8989 | 1162.419 | -0.77446 | 1.73E-08 | 7.22E-08 | CIAPIN1  | chr16 | - | 57462081 | 57481440 | 2182  |
| ENSG000001 | 1360.092 | 1337.022 | 0.024328 | 0.8215   | 0.87444  | SPPL2B   | chr19 | + | 2328617  | 2355099  | 3811  |
| ENSG000001 | 975.9856 | 139.5265 | 2.7996   | 1.11E-85 | 5.15E-84 | FAM214B  | chr9  | - | 35104109 | 35116338 | 5771  |
| ENSG000001 | 424.3894 | 3.06884  | 7.0135   | 2.43E-47 | 5.15E-46 | COPZ2    | chr17 | - | 46103533 | 46115392 | 891   |
| ENSG000001 | 425.2901 | 706.5483 | -0.73288 | 2.03E-08 | 8.39E-08 | PRKAR2B  | chr7  | + | 1.07E+08 | 1.07E+08 | 3745  |
| ENSG000001 | 427.006  | 203.4054 | 1.0684   | 1.06E-08 | 4.50E-08 | MSL3     | chrX  | + | 11776278 | 11793870 | 3446  |
| ENSG000001 | 2881.349 | 2373.02  | 0.27938  | 0.11559  | 0.1829   | CREBBP   | chr16 | - | 3775055  | 3930727  | 10803 |
| ENSG000001 | 29.72953 | 61.57772 | -1.0353  | 0.012845 | 0.026414 | BZRAP1   | chr17 | - | 56378592 | 56406152 | 7626  |
| ENSG000001 | 0        | 78.99256 | -2.6062  | NA       | NA       | MPO      | chr17 | - | 56347217 | 56358296 | 3311  |
| ENSG000001 | 0        | 4.320007 | -3.6589  | 0.01078  | 0.022498 | PON1     | chr7  | - | 94926988 | 95025673 | 2568  |
| ENSG000001 | 246.7462 | 242.2258 | 0.02692  | 0.875    | 0.91316  | GCFC2    | chr2  | - | 75879126 | 75938115 | 4440  |
| ENSG000001 | 381.3592 | 786.4128 | -1.0399  | 1.03E-06 | 3.68E-06 | WDR54    | chr2  | + | 74648805 | 74652882 | 2356  |
| ENSG000001 | 113.2287 | 39.35848 | 1.5108   | 4.18E-07 | 1.54E-06 | CROT     | chr7  | + | 86974997 | 87029111 | 3175  |
| ENSG000001 | 3.910914 | 22.31632 | -2.4268  | 9.76E-05 | 0.000278 | ABCB4    | chr7  | - | 87031013 | 87109751 | 4020  |
| ENSG000001 | 984.6033 | 614.3198 | 0.67754  | 0.004535 | 0.010165 | MLL5     | chr7  | + | 1.05E+08 | 1.05E+08 | 7013  |
| ENSG000001 | 1052.954 | 751.3868 | 0.48621  | 7.91E-05 | 0.000228 | RHBDD2   | chr7  | + | 75471920 | 75518244 | 1878  |
| ENSG000001 | 2101.171 | 454.6779 | 2.1989   | 9.85E-24 | 9.79E-23 | SOX8     | chr16 | + | 1031808  | 1036979  | 4153  |
| ENSG000001 | 1487.434 | 436.52   | 1.7675   | 2.35E-31 | 3.16E-30 | IBTK     | chr6  | - | 82879700 | 82957471 | 6054  |
| ENSG000001 | 297.6424 | 811.0185 | -1.4414  | 3.98E-12 | 2.16E-11 | ZNF195   | chr11 | - | 3360491  | 3400448  | 2970  |
| ENSG000001 | 1723.104 | 476.8464 | 1.8522   | 5.19E-39 | 8.91E-38 | MYCBP2   | chr13 | - | 77618792 | 77901185 | 15025 |
| ENSG000001 | 669.6384 | 204.2227 | 1.7091   | 2.64E-17 | 1.96E-16 | FBXL3    | chr13 | - | 77566740 | 77601330 | 3503  |
| ENSG000001 | 6.318081 | 1.638012 | 1.7798   | 0.065439 | 0.11249  | ITGAL    | chr16 | + | 30483979 | 30534506 | 5213  |
| ENSG000001 | 234.2138 | 128.5362 | 0.86451  | 6.73E-06 | 2.21E-05 | PDK2     | chr17 | + | 48172101 | 48189516 | 3440  |
| ENSG000001 | 795.0426 | 793.2363 | 0.002773 | 0.98559  | 0.99156  | ITGA3    | chr17 | + | 48133332 | 48167845 | 5479  |
| ENSG000001 | 511.2966 | 264.9447 | 0.94523  | 5.02E-05 | 0.000148 | ZFX      | chrX  | + | 24167290 | 24234372 | 7558  |
| ENSG000001 | 1699.532 | 604.4566 | 1.4891   | 3.78E-40 | 6.67E-39 | LAMP2    | chrX  | - | 1.2E+08  | 1.2E+08  | 4030  |
| ENSG000001 | 1224.066 | 800.776  | 0.61132  | 7.21E-08 | 2.84E-07 | GGNBP2   | chr17 | + | 34900737 | 34946278 | 3497  |
| ENSG000001 | 14.68025 | 233.1394 | -3.97    | 1.69E-35 | 2.61E-34 | ITGA2B   | chr17 | - | 42449548 | 42466873 | 3333  |
| ENSG000001 | 0        | 0.715414 | -0.84936 | 0.6309   | NA       | ASB4     | chr7  | + | 95107756 | 95169544 | 3825  |
| ENSG000001 | 857.6788 | 815.9483 | 0.071931 | 0.50849  | 0.61197  | GDE1     | chr16 | - | 19513015 | 19533467 | 2954  |
| ENSG000001 | 843.5063 | 831.1299 | 0.021367 | 0.891    | 0.92441  | C19orf60 | chr19 | + | 18699495 | 18703146 | 2465  |
| ENSG000001 | 695.8765 | 1200.141 | -0.78205 | 0.003057 | 0.007036 | CRLF1    | chr19 | - | 18683030 | 18718551 | 1792  |
| ENSG000001 | 245.0383 | 122.6001 | 0.993    | 2.13E-07 | 8.08E-07 | OSBPL7   | chr17 | - | 45884738 | 45899200 | 4497  |
| ENSG000001 | 1710.482 | 1254.011 | 0.44736  | 0.006317 | 0.013794 | TMEM98   | chr17 | + | 31254928 | 31272124 | 4434  |
| ENSG000001 | 1.939605 | 476.1506 | -7.6861  | 6.88E-40 | 1.20E-38 | YBX2     | chr17 | - | 7191571  | 7197934  | 4553  |
| ENSG000001 | 469.383  | 58.77905 | 2.9927   | 3.83E-56 | 1.02E-54 | MAP3K14  | chr17 | - | 43340488 | 43394414 | 4465  |
| ENSG000001 | 0        | 12.4761  | -5.2751  | 1.58E-05 | 4.97E-05 | ABCC8    | chr11 | - | 17414432 | 17498449 | 4981  |
| ENSG000001 | 0        | 0.715414 | -0.84936 | 0.6309   | NA       | CCL3     | chr17 | - | 34415602 | 34417515 | 1494  |
| ENSG000001 | 1078.881 | 692.6081 | 0.63837  | 4.49E-09 | 1.96E-08 | SYNRG    | chr17 | - | 35874900 | 35969544 | 8229  |
| ENSG000001 | 0        | 0.343138 | -0.41864 | 0.81278  | NA       | CACNG3   | chr16 | + | 24266874 | 24374122 | 3088  |
| ENSG000001 | 4290.721 | 2396.266 | 0.83881  | 3.97E-08 | 1.60E-07 | TMEM132A | chr11 | + | 60691935 | 60704631 | 3981  |
| ENSG000001 | 6846.605 | 4860.29  | 0.49409  | 1.41E-07 | 5.44E-07 | AP2B1    | chr17 | + | 33905065 | 34053436 | 6085  |
| ENSG000001 | 22.5936  | 7.125803 | 1.6136   | 0.015782 | 0.031821 | TAC1     | chr7  | + | 97361220 | 97369784 | 1239  |

|                    |          |          |          |          |           |       |   |          |          |       |
|--------------------|----------|----------|----------|----------|-----------|-------|---|----------|----------|-------|
| ENSG000001599.8356 | 845.6191 | -0.49348 | 0.022609 | 0.044093 | ZNF263    | chr16 | + | 3313743  | 3351401  | 3830  |
| ENSG000001104.4881 | 17.49695 | 2.5572   | 1.12E-16 | 8.02E-16 | CX3CL1    | chr16 | + | 57406370 | 57418960 | 5796  |
| ENSG0000011474.011 | 554.2053 | 1.4086   | 1.88E-25 | 2.00E-24 | SPATA20   | chr17 | + | 48620419 | 48633213 | 3539  |
| ENSG000001423.8861 | 642.778  | -0.59881 | 0.00108  | 0.002662 | CACNA1G   | chr17 | + | 48638429 | 48704835 | 7848  |
| ENSG0000012905.671 | 1453.54  | 0.99858  | 2.27E-28 | 2.71E-27 | TNFRSF12A | chr16 | + | 3068446  | 3072384  | 1678  |
| ENSG0000012209369  | 2.073397 | 0.10351  | 0.93681  | 0.95831  | DLX6      | chr7  | + | 96634860 | 96640351 | 2304  |
| ENSG000001129.5068 | 860.7808 | -2.7252  | 4.52E-45 | 9.02E-44 | MAP3K9    | chr14 | - | 71189243 | 71276251 | 11169 |
| ENSG0000011088.842 | 1375.212 | -0.33703 | 0.001535 | 0.003701 | RALA      | chr7  | + | 39663082 | 39747723 | 2880  |
| ENSG000001142.2132 | 526.8958 | -1.8847  | 8.73E-22 | 7.97E-21 | BAIAP2L1  | chr7  | - | 97920963 | 98030380 | 3622  |
| ENSG000001231.0555 | 330.2849 | -0.51318 | 0.053273 | 0.093999 | JHDM1D    | chr7  | - | 1.4E+08  | 1.4E+08  | 9272  |
| ENSG0000011179.156 | 1003.991 | 0.23239  | 0.075198 | 0.12677  | ETV1      | chr7  | - | 13930853 | 14031050 | 6752  |
| ENSG000001393.4915 | 426.5489 | -0.11674 | 0.45293  | 0.55838  | AGK       | chr7  | + | 1.41E+08 | 1.41E+08 | 3849  |
| ENSG00000155.95833 | 38.95062 | 0.5074   | 0.14813  | 0.2246   | ALDH3B1   | chr11 | + | 67776048 | 67796744 | 5876  |
| ENSG0000010        | 22.5041  | -6.0811  | 2.66E-07 | 1.00E-06 | TTC22     | chr1  | - | 55245385 | 55266940 | 3345  |
| ENSG0000011607.587 | 290.4305 | 2.4678   | 1.55E-81 | 6.61E-80 | PHTF2     | chr7  | + | 77428122 | 77586818 | 5005  |
| ENSG0000010        | 9.15066  | -4.7568  | 0.000267 | 0.00072  | CCL26     | chr7  | - | 75398851 | 75419214 | 703   |
| ENSG000001379.4112 | 182.2968 | 1.0568   | 2.63E-12 | 1.45E-11 | FARP2     | chr2  | + | 2.42E+08 | 2.42E+08 | 4051  |
| ENSG0000010        | 32.04893 | -6.5087  | 4.63E-08 | 1.86E-07 | USH1C     | chr11 | - | 17515442 | 17565963 | 2700  |
| ENSG000001437.9836 | 1047.304 | -1.2578  | 8.64E-25 | 8.96E-24 | GGCT      | chr7  | - | 30536237 | 30591095 | 1173  |
| ENSG000001372.6594 | 567.0152 | -0.60321 | 0.004798 | 0.010715 | DBF4      | chr7  | + | 87505531 | 87538856 | 3907  |
| ENSG000001101.8932 | 15.17024 | 2.7174   | 1.06E-14 | 6.85E-14 | TBXA2R    | chr19 | - | 3594504  | 3606838  | 2608  |
| ENSG000001544.7557 | 299.5192 | 0.85771  | 0.003336 | 0.007636 | IFRD1     | chr7  | + | 1.12E+08 | 1.12E+08 | 2290  |
| ENSG000001276.1749 | 442.2208 | -0.67748 | 4.12E-06 | 1.38E-05 | COX10     | chr17 | + | 13972813 | 14111994 | 2873  |
| ENSG000001777.5764 | 865.7043 | -0.15544 | 0.36955  | 0.47408  | GTF2IRD1  | chr7  | + | 73868120 | 74016931 | 5868  |
| ENSG0000011286.388 | 710.8905 | 0.85338  | 1.93E-05 | 5.98E-05 | PAF1      | chr19 | - | 39876492 | 39881835 | 2066  |
| ENSG0000011059.817 | 558.3623 | 0.92308  | 5.11E-08 | 2.04E-07 | VPS41     | chr7  | - | 38762563 | 38971994 | 5903  |
| ENSG00000132.41844 | 649.0439 | -4.3014  | 3.52E-55 | 9.11E-54 | ARHGAP44  | chr17 | + | 12692856 | 12894960 | 4428  |
| ENSG0000011122.152 | 2324.096 | -1.0491  | 7.96E-16 | 5.46E-15 | ELAC2     | chr17 | - | 12895708 | 12921504 | 3738  |
| ENSG00000130.81102 | 5.987157 | 2.3074   | 1.96E-05 | 6.08E-05 | SCIN      | chr7  | + | 12610203 | 12693228 | 3137  |
| ENSG000001205.3726 | 78.34368 | 1.39     | 5.02E-12 | 2.71E-11 | ARSD      | chrX  | - | 2822011  | 2847392  | 5159  |
| ENSG00000195.05125 | 221.8195 | -1.2135  | 1.43E-09 | 6.53E-09 | PNPLA4    | chrX  | - | 7866288  | 7895780  | 3372  |
| ENSG0000010580602  | 0.700845 | -0.12342 | 0.94316  | NA       | MYH13     | chr17 | - | 10201401 | 10276447 | 6296  |
| ENSG0000011582.02  | 976.3297 | 0.69527  | 1.03E-06 | 3.66E-06 | ADIPOR2   | chr12 | + | 1797740  | 1897844  | 4018  |
| ENSG00000127.17941 | 37.73008 | -0.459   | 0.25332  | 0.35027  | CDKL3     | chr5  | - | 1.34E+08 | 1.34E+08 | 2160  |
| ENSG0000012.624689 | 2.69898  | -0.0283  | 0.98185  | 0.98993  | UPP2      | chr2  | + | 1.59E+08 | 1.59E+08 | 2435  |
| ENSG0000010        | 3.219363 | -2.4755  | 0.16027  | 0.24004  | PRSS21    | chr16 | + | 2867164  | 2876305  | 1159  |
| ENSG0000011489.766 | 1523.637 | -0.03244 | 0.89232  | 0.92526  | MARK4     | chr19 | + | 45582546 | 45808541 | 5209  |
| ENSG0000011447.658 | 1347.438 | 0.10352  | 0.4764   | 0.58096  | PROM1     | chr4  | - | 15964699 | 16086001 | 4349  |
| ENSG0000011910.781 | 2146.862 | -0.16793 | 0.11898  | 0.18755  | CCDC124   | chr19 | + | 18043825 | 18054800 | 1055  |
| ENSG0000010        | 0.343138 | -0.41864 | 0.81278  | NA       | CEACAM21  | chr19 | + | 42055886 | 42093197 | 1691  |
| ENSG0000012731.024 | 1546.899 | 0.81976  | 1.70E-17 | 1.27E-16 | PAFAH1B1  | chr17 | + | 2496504  | 2588909  | 5497  |
| ENSG0000010923144  | 27.26674 | -4.4781  | 2.81E-07 | 1.05E-06 | NOS2      | chr17 | - | 26083792 | 26127525 | 4176  |
| ENSG00000110.70512 | 23.67343 | -1.1084  | 0.04118  | 0.075226 | DNAH9     | chr17 | + | 11501748 | 11873485 | 14170 |
| ENSG0000012779.087 | 1628.826 | 0.76984  | 1.24E-10 | 6.06E-10 | KIAA0100  | chr17 | - | 26941458 | 26972472 | 7407  |
| ENSG000001157.7989 | 371.0068 | -1.2314  | 1.49E-08 | 6.22E-08 | GAS7      | chr17 | - | 9813926  | 10101868 | 8181  |
| ENSG000001162.255  | 745.619  | -2.1886  | 3.53E-17 | 2.61E-16 | TRAPPC6A  | chr19 | - | 45666186 | 45681495 | 805   |
| ENSG0000010.72616  | 537.6553 | -9.0444  | 2.43E-29 | 3.02E-28 | MATK      | chr19 | - | 3777971  | 3802127  | 2133  |
| ENSG0000010        | 0.343138 | -0.41864 | 0.81278  | NA       | CEACAM7   | chr19 | - | 42177235 | 42210895 | 2489  |
| ENSG0000010.342542 | 9.044717 | -3.7002  | 0.008906 | 0.018903 | CD79B     | chr17 | - | 62006100 | 62009714 | 1269  |
| ENSG0000010.632843 | 185.3246 | -7.5809  | 1.46E-19 | 1.20E-18 | SCN4A     | chr17 | - | 62015914 | 62050278 | 7805  |
| ENSG000001142.34   | 125.77   | 0.17914  | 0.34359  | 0.44759  | ST7L      | chr1  | - | 1.13E+08 | 1.13E+08 | 4528  |
| ENSG0000010        | 3.137654 | -3.0959  | 0.046868 | 0.084094 | TKTL1     | chrX  | + | 1.54E+08 | 1.54E+08 | 2642  |
| ENSG00000189.51743 | 40.08665 | 1.1395   | 0.015646 | 0.031573 | PAX6      | chr11 | - | 31806340 | 31839509 | 6922  |
| ENSG000001636.3923 | 906.2418 | -0.50844 | 0.000756 | 0.001911 | RPUSD1    | chr16 | - | 834974   | 838397   | 2159  |
| ENSG0000011778.715 | 915.4276 | 0.95641  | 2.20E-14 | 1.39E-13 | RHBDF1    | chr16 | - | 108058   | 126354   | 2992  |
| ENSG0000011072.541 | 1169.082 | -0.12405 | 0.43742  | 0.54297  | LUC7L     | chr16 | - | 238968   | 279462   | 2737  |
| ENSG00000134.47109 | 781.4225 | -4.4795  | 3.39E-72 | 1.26E-70 | CACNA2D2  | chr3  | - | 50400233 | 50541675 | 5500  |
| ENSG0000019.18939  | 261.4577 | -4.7348  | 2.34E-30 | 3.02E-29 | BAIAP3    | chr16 | + | 1383602  | 1399439  | 4678  |
| ENSG0000011109.826 | 961.5206 | 0.2063   | 0.10766  | 0.17189  | TSR3      | chr16 | - | 1399241  | 1401912  | 1243  |
| ENSG0000011295.161 | 677.4008 | 0.93323  | 1.48E-07 | 5.69E-07 | PIGQ      | chr16 | + | 616995   | 634136   | 3006  |
| ENSG000001402.5789 | 356.2377 | 0.17509  | 0.22839  | 0.32149  | CRAMP1L   | chr16 | + | 1662326  | 1727909  | 7772  |
| ENSG0000011046.114 | 1226.324 | -0.22925 | 0.035098 | 0.065308 | TEAD3     | chr6  | - | 35441374 | 35464853 | 2983  |
| ENSG000001868.8681 | 1320.267 | -0.60233 | 0.000244 | 0.000661 | DNAJC11   | chr1  | - | 6694228  | 6761984  | 3311  |
| ENSG0000010        | 0.343138 | -0.41864 | 0.81278  | NA       | FMO3      | chr1  | + | 1.71E+08 | 1.71E+08 | 2087  |
| ENSG000001218.7319 | 950.902  | -2.1141  | 2.20E-46 | 4.54E-45 | MYLIP     | chr6  | + | 16129356 | 16148479 | 2796  |

|            |          |          |          |           |           |          |       |   |          |          |       |
|------------|----------|----------|----------|-----------|-----------|----------|-------|---|----------|----------|-------|
| ENSG000001 | 2.188831 | 4.76996  | -0.97026 | 0.38254   | 0.48671   | NOX1     | chrX  | - | 1E+08    | 1E+08    | 2529  |
| ENSG000001 | 131.2129 | 285.4238 | -1.1144  | 1.10E-08  | 4.67E-08  | E2F2     | chr1  | - | 23832922 | 23857712 | 5191  |
| ENSG000001 | 1907.917 | 2190.624 | -0.19896 | 0.09408   | 0.15348   | PSMB1    | chr6  | - | 1.71E+08 | 1.71E+08 | 1939  |
| ENSG000001 | 36.15307 | 111.7206 | -1.612   | 2.82E-09  | 1.25E-08  | SYN1     | chrX  | - | 47431303 | 47479252 | 3203  |
| ENSG000001 | 871.5089 | 10672.37 | -3.6121  | 0         | 0         | JARID2   | chr6  | + | 15246527 | 15522252 | 5755  |
| ENSG000001 | 331.5838 | 68.24209 | 2.2709   | 2.30E-23  | 2.25E-22  | CDKL5    | chrX  | + | 18443703 | 18671749 | 3459  |
| ENSG000001 | 6.724028 | 7.625169 | -0.17973 | 0.81438   | 0.86966   | CAMK1G   | chr1  | + | 2.1E+08  | 2.1E+08  | 2612  |
| ENSG000001 | 5.488253 | 7.73769  | -0.4955  | 0.53843   | 0.63912   | CDK11A   | chr1  | - | 1634169  | 1655766  | 2653  |
| ENSG000001 | 1065.78  | 1964.964 | -0.88131 | 6.69E-17  | 4.87E-16  | NADK     | chr1  | - | 1682671  | 1711896  | 3663  |
| ENSG000001 | 394.4598 | 0.343138 | 9.1676   | 2.97E-22  | 2.77E-21  | TFAP2B   | chr6  | + | 50786436 | 50815326 | 5797  |
| ENSG000001 | 0.685084 | 0        | 0.85004  | 0.63064   | NA        | TFAP2D   | chr6  | + | 50681541 | 50740701 | 1711  |
| ENSG000001 | 4.595998 | 12.98433 | -1.4327  | 0.042236  | 0.076891  | DLEC1    | chr3  | + | 38080696 | 38165516 | 6426  |
| ENSG000001 | 1090.995 | 489.6812 | 1.1513   | 6.81E-08  | 2.69E-07  | CYTH3    | chr7  | - | 6201407  | 6312275  | 4505  |
| ENSG000001 | 102.33   | 240.7984 | -1.2346  | 8.64E-11  | 4.29E-10  | ADAM22   | chr7  | + | 87563458 | 87832204 | 9334  |
| ENSG000001 | 765.568  | 792.1479 | -0.04867 | 0.67196   | 0.75438   | SYPL1    | chr7  | - | 1.06E+08 | 1.06E+08 | 2151  |
| ENSG000001 | 212.476  | 863.1338 | -2.0172  | 6.19E-34  | 9.12E-33  | CYB561   | chr17 | - | 61509665 | 61523739 | 3200  |
| ENSG000001 | 1962.467 | 679.7712 | 1.5273   | 4.29E-31  | 5.72E-30  | SPAG9    | chr17 | - | 49039535 | 49198226 | 8273  |
| ENSG000001 | 271.3235 | 1625.423 | -2.5763  | 1.42E-44  | 2.80E-43  | CELSR3   | chr3  | - | 48673902 | 48700348 | 11971 |
| ENSG000001 | 572.5001 | 2109.75  | -1.8799  | 6.84E-54  | 1.73E-52  | AASS     | chr7  | - | 1.22E+08 | 1.22E+08 | 3233  |
| ENSG000001 | 11.43127 | 579.3943 | -5.5971  | 5.75E-53  | 1.43E-51  | PLEKHG6  | chr12 | + | 6419602  | 6437672  | 3111  |
| ENSG000001 | 168.0866 | 359.6874 | -1.0948  | 2.32E-08  | 9.57E-08  | SS18L2   | chr3  | + | 42623332 | 42636606 | 1047  |
| ENSG000001 | 106.1041 | 144.915  | -0.44964 | 0.11681   | 0.18457   | MPND     | chr19 | + | 4343524  | 4360083  | 1611  |
| ENSG000001 | 302.7968 | 2336.397 | -2.9431  | 1.78E-84  | 8.08E-83  | MGST1    | chr12 | + | 16500076 | 16762193 | 2152  |
| ENSG000001 | 413.3804 | 363.6671 | 0.18365  | 0.23921   | 0.33384   | CRY1     | chr12 | - | 1.07E+08 | 1.07E+08 | 3834  |
| ENSG000001 | 7.022889 | 8.326014 | -0.21792 | 0.7592    | 0.82506   | PGLYRP1  | chr19 | - | 46522411 | 46526323 | 720   |
| ENSG000001 | 3478.637 | 13.4424  | 7.9658   | 3.87E-224 | 1.07E-221 | NFIX     | chr19 | + | 13106422 | 13209610 | 5530  |
| ENSG000001 | 1081.535 | 144.1928 | 2.9037   | 1.38E-103 | 8.41E-102 | ST3GAL1  | chr8  | - | 1.34E+08 | 1.35E+08 | 6967  |
| ENSG000001 | 28.76531 | 1371.012 | -5.5493  | 4.21E-153 | 4.99E-151 | MMP25    | chr16 | + | 3096682  | 3110727  | 3554  |
| ENSG000001 | 9.874474 | 20.41768 | -1.0063  | 0.071112  | 0.12077   | IL32     | chr16 | + | 3115298  | 3131908  | 1381  |
| ENSG000001 | 4871.512 | 1454.813 | 1.736    | 4.44E-14  | 2.74E-13  | PKD1     | chr16 | - | 2138711  | 2185899  | 14138 |
| ENSG000001 | 15.30111 | 116.7317 | -2.8899  | 6.55E-14  | 4.00E-13  | MAPK8IP2 | chr22 | + | 51039114 | 51052409 | 5595  |
| ENSG000001 | 2114.732 | 2717.759 | -0.36167 | 3.62E-05  | 0.000109  | MED24    | chr17 | - | 38175350 | 38217468 | 3896  |
| ENSG000001 | 802.1546 | 157.7034 | 2.3366   | 1.35E-38  | 2.28E-37  | RHOBTB2  | chr8  | + | 22844930 | 22877712 | 5451  |
| ENSG000001 | 481.1181 | 330.7191 | 0.54026  | 0.000308  | 0.000823  | HEATR5B  | chr2  | - | 37195526 | 37311485 | 6905  |
| ENSG000001 | 1962.716 | 1052.122 | 0.89575  | 0.000212  | 0.000578  | SEC62    | chr3  | + | 1.7E+08  | 1.7E+08  | 6568  |
| ENSG000001 | 7245.47  | 11037.34 | -0.60673 | 8.08E-11  | 4.03E-10  | RPS20    | chr8  | - | 56979854 | 56987069 | 1826  |
| ENSG000001 | 10031.68 | 10916.36 | -0.12173 | 0.25576   | 0.35308   | CSDE1    | chr1  | - | 1.15E+08 | 1.15E+08 | 4167  |
| ENSG000001 | 2358.97  | 1591.455 | 0.56757  | 4.81E-09  | 2.09E-08  | UBE3C    | chr7  | + | 1.57E+08 | 1.57E+08 | 5229  |
| ENSG000001 | 501.232  | 132.8746 | 1.9133   | 2.10E-18  | 1.63E-17  | REV3L    | chr6  | - | 1.12E+08 | 1.12E+08 | 10964 |
| ENSG000001 | 30.00867 | 174.0874 | -2.5118  | 1.86E-15  | 1.25E-14  | TENM1    | chrX  | - | 1.24E+08 | 1.24E+08 | 12891 |
| ENSG000001 | 6.566328 | 98.63662 | -3.8438  | 4.50E-12  | 2.44E-11  | PAX7     | chr1  | + | 18957500 | 19075360 | 5538  |
| ENSG000001 | 53.92296 | 98.84079 | -0.86617 | 0.000745  | 0.001884  | MASP2    | chr1  | - | 11086580 | 11107290 | 2439  |
| ENSG000001 | 126.1629 | 170.0459 | -0.42856 | 0.053307  | 0.094033  | FAM76A   | chr1  | + | 28052490 | 28089633 | 3567  |
| ENSG000001 | 40.17507 | 35.10803 | 0.1923   | 0.63587   | 0.72421   | TRAF3IP3 | chr1  | + | 2.1E+08  | 2.1E+08  | 3302  |
| ENSG000001 | 808.3949 | 595.6461 | 0.4411   | 0.000123  | 0.000348  | POMT2    | chr14 | - | 77741299 | 77787227 | 5647  |
| ENSG000001 | 821.5958 | 745.5884 | 0.14042  | 0.38113   | 0.48522   | VTA1     | chr6  | + | 1.42E+08 | 1.43E+08 | 3287  |
| ENSG000001 | 0.36308  | 101.4186 | -7.2745  | 2.00E-12  | 1.11E-11  | MLXIPL   | chr7  | - | 73007524 | 73038873 | 3278  |
| ENSG000001 | 3025.304 | 2208.718 | 0.45358  | 2.22E-05  | 6.84E-05  | BAZ1B    | chr7  | - | 72854728 | 72936608 | 6102  |
| ENSG000001 | 841.9789 | 667.0081 | 0.33553  | 0.032405  | 0.060787  | RANBP9   | chr6  | - | 13621730 | 13711796 | 3113  |
| ENSG000001 | 0.705622 | 15.39844 | -4.0686  | 7.93E-05  | 0.000229  | ETV7     | chr6  | - | 36322419 | 36356164 | 2157  |
| ENSG000001 | 223.1086 | 187.8661 | 0.24817  | 0.32122   | 0.42404   | SPRTN    | chr1  | + | 2.31E+08 | 2.31E+08 | 3559  |
| ENSG000001 | 706.2104 | 1347.496 | -0.93001 | 9.87E-10  | 4.55E-09  | METTL13  | chr1  | + | 1.72E+08 | 1.72E+08 | 3327  |
| ENSG000001 | 208.668  | 64.45139 | 1.686    | 2.43E-13  | 1.44E-12  | DYRK4    | chr12 | + | 4671370  | 4723325  | 1816  |
| ENSG000001 | 1897.811 | 2407.579 | -0.3423  | 0.049415  | 0.088069  | ZNF207   | chr17 | + | 30677136 | 30708905 | 13781 |
| ENSG000001 | 3756.003 | 4249.897 | -0.17796 | 0.055236  | 0.096979  | UQCRC1   | chr3  | - | 48636435 | 48648409 | 1985  |
| ENSG000001 | 690.5168 | 451.2268 | 0.61413  | 7.37E-07  | 2.66E-06  | STARD3NL | chr7  | + | 38217824 | 38270272 | 3653  |
| ENSG000001 | 618.2486 | 3629.842 | -2.5511  | 2.92E-88  | 1.42E-86  | CD9      | chr12 | + | 6308881  | 6347425  | 1554  |
| ENSG000001 | 0        | 0.700845 | -0.87835 | 0.62047   | NA        | HHATL    | chr3  | - | 42734155 | 42744319 | 1865  |
| ENSG000001 | 2557.181 | 4887.276 | -0.93291 | 1.10E-10  | 5.40E-10  | NCAPD2   | chr12 | + | 6602522  | 6641121  | 5548  |
| ENSG000001 | 654.7241 | 222.8966 | 1.5543   | 2.31E-26  | 2.54E-25  | IFFO1    | chr12 | - | 6647541  | 6665239  | 3101  |
| ENSG000001 | 2.697468 | 10.15181 | -1.8246  | 0.025775  | 0.049611  | GIPR     | chr19 | + | 46171502 | 46186982 | 3289  |
| ENSG000001 | 83.36578 | 161.9461 | -0.94599 | 0.020735  | 0.04075   | PHF7     | chr3  | + | 52443510 | 52457657 | 2130  |
| ENSG000001 | 9.12859  | 50.11398 | -2.4158  | 1.71E-08  | 7.14E-08  | SEMA3G   | chr3  | - | 52467069 | 52479101 | 4899  |
| ENSG000001 | 4106.209 | 2233.844 | 0.87707  | 2.76E-12  | 1.52E-11  | NISCH    | chr3  | + | 52489134 | 52527087 | 5350  |
| ENSG000001 | 7.946847 | 18.5612  | -1.2009  | 0.034175  | 0.063788  | STAB1    | chr3  | + | 52529354 | 52558511 | 7928  |

|            |          |          |          |           |           |          |       |   |          |          |      |
|------------|----------|----------|----------|-----------|-----------|----------|-------|---|----------|----------|------|
| ENSG000001 | 132.2786 | 345.3018 | -1.3782  | 4.21E-11  | 2.14E-10  | FUZ      | chr19 | - | 50310126 | 50320633 | 1675 |
| ENSG000001 | 0.632843 | 2.08555  | -1.2591  | 0.4134    | 0.51826   | SLC6A13  | chr12 | - | 329789   | 372039   | 2185 |
| ENSG000001 | 2561.552 | 259.2456 | 3.2957   | 2.11E-75  | 8.30E-74  | IDS      | chrX  | - | 1.49E+08 | 1.49E+08 | 7619 |
| ENSG000001 | 1.794862 | 0.98329  | 0.63736  | 0.67462   | 0.75628   | PRSS3    | chr9  | + | 33750515 | 33799230 | 966  |
| ENSG000001 | 157.2513 | 214.6618 | -0.44579 | 0.06872   | 0.11724   | ZNF200   | chr16 | - | 3272325  | 3286221  | 4308 |
| ENSG000001 | 46.40162 | 15.71815 | 1.5345   | 0.000267  | 0.000719  | CD4      | chr12 | + | 6896024  | 6929974  | 3114 |
| ENSG000001 | 80.91639 | 26.9641  | 1.5694   | 4.48E-05  | 0.000133  | LRRC23   | chr12 | + | 6982733  | 7023407  | 1629 |
| ENSG000001 | 1.555988 | 2.901332 | -0.75477 | 0.54154   | 0.64212   | BTX      | chrX  | - | 1.01E+08 | 1.01E+08 | 2579 |
| ENSG000001 | 252.6479 | 21.11369 | 3.5611   | 3.87E-45  | 7.74E-44  | HFE      | chr6  | + | 26087509 | 26098571 | 5286 |
| ENSG000001 | 683.6796 | 331.5809 | 1.0416   | 1.55E-16  | 1.10E-15  | SCMH1    | chr1  | - | 41492872 | 41707826 | 3346 |
| ENSG000001 | 526.498  | 942.1767 | -0.83784 | 1.55E-06  | 5.44E-06  | FYN      | chr6  | - | 1.12E+08 | 1.12E+08 | 3628 |
| ENSG000001 | 615.0163 | 334.0665 | 0.87756  | 2.54E-05  | 7.76E-05  | HIVEP2   | chr6  | - | 1.43E+08 | 1.43E+08 | 9723 |
| ENSG000001 | 0        | 0.594029 | -0.81444 | 0.64499   | NA        | FMO1     | chr1  | + | 1.71E+08 | 1.71E+08 | 3130 |
| ENSG000001 | 868.0406 | 943.9306 | -0.1202  | 0.53246   | 0.63357   | TCEB3    | chr1  | + | 24069645 | 24088549 | 5154 |
| ENSG000001 | 1190.975 | 2873.664 | -1.2691  | 3.76E-29  | 4.64E-28  | LYPLA2   | chr1  | + | 24117460 | 24122029 | 1810 |
| ENSG000001 | 1234.331 | 543.9954 | 1.178    | 8.72E-08  | 3.42E-07  | CLCN6    | chr1  | + | 11866207 | 11903201 | 5583 |
| ENSG000001 | 20736.85 | 1300.127 | 3.9912   | 3.04E-278 | 1.24E-275 | MRC2     | chr17 | + | 60704762 | 60770958 | 5988 |
| ENSG000001 | 1.866827 | 0.594029 | 1.2154   | 0.42422   | 0.52954   | SLC6A7   | chr5  | + | 1.5E+08  | 1.5E+08  | 3739 |
| ENSG000001 | 4000.799 | 846.9886 | 2.2365   | 7.60E-81  | 3.22E-79  | TSPAN9   | chr12 | + | 3186521  | 3395730  | 4323 |
| ENSG000001 | 1112.844 | 499.8697 | 1.1525   | 7.56E-23  | 7.25E-22  | BTBD7    | chr14 | - | 93703896 | 93799438 | 8430 |
| ENSG000001 | 326.104  | 337.7586 | -0.05047 | 0.77732   | 0.83999   | APBA3    | chr19 | - | 3750817  | 3761697  | 4250 |
| ENSG000001 | 205.1972 | 332.7558 | -0.69534 | 5.28E-06  | 1.75E-05  | MKS1     | chr17 | - | 56282803 | 56296966 | 2392 |
| ENSG000001 | 78.47769 | 114.5434 | -0.5401  | 0.020661  | 0.040621  | ABHD5    | chr3  | + | 43731605 | 43775863 | 1690 |
| ENSG000001 | 3725.618 | 678.7407 | 2.4458   | 6.00E-24  | 6.01E-23  | KAL1     | chrX  | - | 8496915  | 8700227  | 6314 |
| ENSG000001 | 478.035  | 723.7932 | -0.59824 | 0.000452  | 0.001184  | AKAP8L   | chr19 | - | 15490861 | 15529952 | 2749 |
| ENSG000001 | 359.012  | 1289.45  | -1.8411  | 7.34E-49  | 1.63E-47  | MBTD1    | chr17 | - | 49254786 | 49337524 | 5382 |
| ENSG000001 | 705.197  | 1317.557 | -0.90154 | 5.31E-18  | 4.08E-17  | UTP18    | chr17 | + | 49337889 | 49375297 | 1894 |
| ENSG000001 | 1481.052 | 1135.774 | 0.38209  | 0.013415  | 0.027477  | RNF216   | chr7  | - | 5659678  | 5821370  | 5639 |
| ENSG000001 | 686.7267 | 1449.237 | -1.0767  | 1.03E-24  | 1.07E-23  | TTC19    | chr17 | + | 15902694 | 15948329 | 3075 |
| ENSG000001 | 9737.754 | 15865.29 | -0.70321 | 1.04E-07  | 4.07E-07  | PTBP1    | chr19 | + | 797075   | 812327   | 4661 |
| ENSG000001 | 112.8726 | 189.8609 | -0.74131 | 0.030172  | 0.057041  | DPF1     | chr19 | - | 38701646 | 38720354 | 2341 |
| ENSG000001 | 300.1448 | 589.4714 | -0.96791 | 0.00075   | 0.001898  | SYT7     | chr11 | - | 61282785 | 61348620 | 4854 |
| ENSG000001 | 795.9189 | 1314.989 | -0.72328 | 2.34E-08  | 9.61E-08  | LARS2    | chr3  | + | 45429998 | 45590913 | 4744 |
| ENSG000001 | 1671.454 | 1129.959 | 0.56298  | 0.014357  | 0.029198  | PIK3C2A  | chr11 | - | 17099277 | 17229530 | 8227 |
| ENSG000001 | 2462.48  | 254.3533 | 3.2694   | 2.92E-133 | 2.72E-131 | PLAUR    | chr19 | - | 44150247 | 44174699 | 1610 |
| ENSG000001 | 1534.985 | 1201.184 | 0.35386  | 0.020377  | 0.040119  | ANLN     | chr7  | + | 36429415 | 36493400 | 4787 |
| ENSG000001 | 2299.415 | 1478.949 | 0.63606  | 2.98E-08  | 1.21E-07  | WIZ      | chr19 | - | 15530792 | 15560762 | 6738 |
| ENSG000001 | 1069.196 | 639.753  | 0.74018  | 4.62E-11  | 2.35E-10  | RABGAP1  | chr9  | + | 1.26E+08 | 1.26E+08 | 4997 |
| ENSG000001 | 3599.287 | 0        | 12.845   | 4.52E-34  | 6.70E-33  | DCN      | chr12 | - | 91539025 | 91576900 | 2924 |
| ENSG000001 | 307.3722 | 342.613  | -0.15388 | 0.32536   | 0.42828   | QPCTL    | chr19 | + | 46195741 | 46207247 | 2310 |
| ENSG000001 | 1598.758 | 1831.34  | -0.19546 | 0.05383   | 0.094858  | PPP5C    | chr19 | + | 46850251 | 46896238 | 4675 |
| ENSG000001 | 327.1449 | 653.3041 | -0.99532 | 9.15E-11  | 4.54E-10  | CEP68    | chr2  | + | 65283500 | 65314138 | 5847 |
| ENSG000001 | 518.8596 | 806.014  | -0.63473 | 1.17E-05  | 3.72E-05  | MAP4K3   | chr2  | - | 39476407 | 39664453 | 4362 |
| ENSG000001 | 1.681007 | 12.80708 | -2.7569  | 0.001581  | 0.003802  | ZBTB32   | chr19 | + | 36195429 | 36207940 | 2068 |
| ENSG000001 | 10.66485 | 0        | 5.0372   | 5.18E-05  | 0.000153  | TYROBP   | chr19 | - | 36395303 | 36399197 | 615  |
| ENSG000001 | 217.4118 | 525.89   | -1.2697  | 1.53E-08  | 6.39E-08  | TMEM159  | chr16 | + | 21169698 | 21191937 | 2014 |
| ENSG000001 | 4.689314 | 109.0411 | -4.4835  | 6.70E-23  | 6.44E-22  | GABRA3   | chrX  | - | 1.51E+08 | 1.52E+08 | 3712 |
| ENSG000001 | 416.3896 | 681.1778 | -0.70795 | 7.32E-07  | 2.65E-06  | BRCA1    | chr17 | - | 41196312 | 41322290 | 7114 |
| ENSG000001 | 1542.661 | 556.4915 | 1.4683   | 1.71E-27  | 1.98E-26  | ERCC1    | chr19 | - | 45910591 | 45982086 | 3828 |
| ENSG000001 | 0        | 4.225344 | -3.3111  | 0.038939  | 0.071669  | CD22     | chr19 | + | 35810164 | 35838258 | 3268 |
| ENSG000001 | 221.0129 | 125.9135 | 0.8036   | 0.000505  | 0.001311  | SEMA3B   | chr3  | + | 50304990 | 50314977 | 3283 |
| ENSG000001 | 523.5932 | 192.7837 | 1.4407   | 1.61E-22  | 1.52E-21  | MBTPS2   | chrX  | + | 21857754 | 21903542 | 4457 |
| ENSG000001 | 196.1555 | 155.3129 | 0.3324   | 0.32394   | 0.42694   | PRICKLE3 | chrX  | - | 49031151 | 49042845 | 2814 |
| ENSG000001 | 0.290301 | 0.343138 | -0.00202 | 0.99909   | NA        | LTF      | chr3  | - | 46477136 | 46526724 | 2979 |
| ENSG000001 | 2820.29  | 3175.134 | -0.17083 | 0.20867   | 0.29864   | EXTL3    | chr8  | + | 28457986 | 28613116 | 8257 |
| ENSG000001 | 3280.549 | 2785.183 | 0.23594  | 0.040872  | 0.074766  | ELOVL5   | chr6  | - | 53132196 | 53213947 | 3070 |
| ENSG000001 | 2.967231 | 30.09697 | -3.2025  | 9.68E-06  | 3.11E-05  | ALOX5    | chr10 | + | 45869661 | 45941561 | 2504 |
| ENSG000001 | 1074.672 | 827.4025 | 0.37655  | 0.00034   | 0.000903  | KDM5D    | chrY  | - | 21865751 | 21906825 | 5579 |
| ENSG000001 | 922.5286 | 248.3589 | 1.8885   | 2.33E-31  | 3.14E-30  | CALCOCO1 | chr12 | - | 54104903 | 54121529 | 3888 |
| ENSG000001 | 399.6494 | 514.892  | -0.36462 | 0.030933  | 0.058272  | UBR7     | chr14 | + | 93673401 | 93695561 | 3694 |
| ENSG000001 | 1217.053 | 400.2045 | 1.6025   | 4.82E-21  | 4.26E-20  | MAP4K5   | chr14 | - | 50885219 | 51027844 | 4812 |
| ENSG000001 | 1659.497 | 448.3137 | 1.8856   | 1.51E-61  | 4.50E-60  | EHD3     | chr2  | + | 31456880 | 31492313 | 4636 |
| ENSG000001 | 2142.572 | 1852.314 | 0.20983  | 0.24588   | 0.34171   | PSMC4    | chr19 | + | 40476912 | 40487348 | 1623 |
| ENSG000001 | 1606.109 | 286.488  | 2.4818   | 2.62E-61  | 7.79E-60  | MAN2B2   | chr4  | + | 6576902  | 6625089  | 7719 |
| ENSG000001 | 0.36308  | 5.45382  | -3.2422  | 0.015422  | 0.031169  | SLC7A14  | chr3  | - | 1.7E+08  | 1.7E+08  | 5122 |

|                    |          |          |           |           |          |       |      |          |          |          |      |
|--------------------|----------|----------|-----------|-----------|----------|-------|------|----------|----------|----------|------|
| ENSG00000152.74301 | 206.7475 | -1.9585  | 4.75E-13  | 2.76E-12  | CLDN11   | chr3  | +    | 1.7E+08  | 1.71E+08 | 2169     |      |
| ENSG000001716.117  | 4035.648 | -1.2326  | 7.39E-40  | 1.29E-38  | SLC25A39 | chr17 | -    | 42396993 | 42402238 | 2217     |      |
| ENSG0000013366.834 | 267.2065 | 3.5359   | 2.38E-08  | 9.78E-08  | MVP      | chr16 | +    | 29831715 | 29859355 | 2865     |      |
| ENSG000001659.5932 | 545.7935 | 0.27308  | 0.038356  | 0.070717  | NUB1     | chr7  | +    | 1.51E+08 | 1.51E+08 | 3210     |      |
| ENSG000001671.321  | 563.132  | 1.5677   | 4.53E-25  | 4.74E-24  | PGM3     | chr6  | -    | 83870869 | 83903655 | 6107     |      |
| ENSG000001124.9537 | 87.94524 | 0.50525  | 0.075575  | 0.12722   | RWDD2A   | chr6  | +    | 83903098 | 83906382 | 2192     |      |
| ENSG000001329.2134 | 223.3839 | 0.55401  | 0.13713   | 0.21047   | CLK1     | chr2  | -    | 2.02E+08 | 2.02E+08 | 3208     |      |
| ENSG000001153.2267 | 202.5975 | -0.39831 | 0.15744   | 0.23667   | POLR3B   | chr12 | +    | 1.07E+08 | 1.07E+08 | 4273     |      |
| ENSG000001414.963  | 653.108  | -0.65265 | 0.000124  | 0.000348  | ANGEL1   | chr14 | -    | 77253588 | 77292589 | 4109     |      |
| ENSG000001545.4208 | 193.1811 | 1.4935   | 4.75E-17  | 3.48E-16  | RNF14    | chr5  | +    | 1.41E+08 | 1.41E+08 | 4235     |      |
| ENSG000001121.3425 | 44.12757 | 1.4542   | 2.17E-09  | 9.70E-09  | DNASE1L1 | chrX  | -    | 1.54E+08 | 1.54E+08 | 3008     |      |
| ENSG000001702.9136 | 1670.313 | -1.2468  | 6.73E-23  | 6.47E-22  | DDX11    | chr12 | +    | 31226779 | 31257725 | 4182     |      |
| ENSG000001299.7502 | 358.6142 | -0.25795 | 0.28448   | 0.38587   | HEBP1    | chr12 | -    | 13127798 | 13153207 | 2056     |      |
| ENSG0000014.875134 | 14.32532 | -1.4868  | 0.027525  | 0.052614  | GPRC5A   | chr12 | +    | 13043716 | 13070871 | 7362     |      |
| ENSG000001395.3733 | 5.765404 | 6.062    | 4.41E-58  | 1.22E-56  | MAMLD1   | chrX  | +    | 1.5E+08  | 1.5E+08  | 4854     |      |
| ENSG00000120.12221 | 7.82752  | 1.3076   | 0.05523   | 0.096979  | CD6      | chr11 | +    | 60739115 | 60787849 | 3252     |      |
| ENSG0000011480.072 | 3161.633 | -1.094   | 3.09E-30  | 3.97E-29  | TACC3    | chr4  | +    | 1723227  | 1746898  | 2781     |      |
| ENSG000001776.0004 | 295.2174 | 1.3941   | 1.21E-18  | 9.54E-18  | UFL1     | chr6  | +    | 96969471 | 97003152 | 4224     |      |
| ENSG000001639.9482 | 688.7326 | -0.10574 | 0.44479   | 0.55038   | POLA2    | chr11 | +    | 65029233 | 65073060 | 3744     |      |
| ENSG000001617.1042 | 772.8062 | -0.32475 | 0.015494  | 0.031288  | ZC3H3    | chr8  | -    | 1.45E+08 | 1.45E+08 | 3280     |      |
| ENSG0000013133.101 | 4233.976 | -0.43422 | 2.08E-06  | 7.21E-06  | CAPN1    | chr11 | +    | 64948037 | 64979477 | 3086     |      |
| ENSG0000014.035933 | 21.99903 | -2.3841  | 0.000131  | 0.000368  | ACPP     | chr3  | +    | 1.32E+08 | 1.32E+08 | 3125     |      |
| ENSG0000011689.372 | 2083.76  | -0.302   | 0.010833  | 0.0226    | MDH1     | chr2  | +    | 63815743 | 63834331 | 1650     |      |
| ENSG0000011206.175 | 1124.933 | 0.1011   | 0.5333    | 0.63427   | SLC30A9  | chr4  | +    | 41992489 | 42089551 | 3295     |      |
| ENSG000001402.2492 | 103.2273 | 1.9494   | 1.09E-15  | 7.43E-15  | MTMR11   | chr1  | -    | 1.5E+08  | 1.5E+08  | 3332     |      |
| ENSG000001548.7618 | 580.1409 | -0.07938 | 0.53117   | 0.6325    | COX15    | chr10 | -    | 1.01E+08 | 1.01E+08 | 2788     |      |
| ENSG00000147.17065 | 1964.756 | -5.3685  | 2.01E-188 | 3.81E-186 | CCDC88C  | chr14 | -    | 91737667 | 91884188 | 7474     |      |
| ENSG000001243.2168 | 11.49764 | 4.3605   | 1.22E-41  | 2.24E-40  | YAF2     | chr12 | -    | 42550906 | 42632151 | 5095     |      |
| ENSG0000011430.813 | 541.9098 | 1.3998   | 5.14E-32  | 7.09E-31  | ZMYND11  | chr10 | +    | 180405   | 300577   | 4393     |      |
| ENSG0000017.645381 | 9.480101 | -0.30432 | 0.6781    | 0.75893   | WAS      | chrX  | +    | 48534985 | 48549818 | 1849     |      |
| ENSG0000010        | 11.6199  | -5.0538  | 0.000109  | 0.000309  | DPEP1    | chr16 | +    | 89679716 | 89704839 | 1772     |      |
| ENSG000001535.9213 | 509.8537 | 0.07209  | 0.58158   | 0.67795   | BID      | chr22 | -    | 18216906 | 18257536 | 2493     |      |
| ENSG0000014896.424 | 7434.504 | -0.60096 | 0.000575  | 0.001479  | MATR3    | chr5  | +    | 1.39E+08 | 1.39E+08 | 7306     |      |
| ENSG0000015.092656 | 5.378559 | -0.0523  | 0.95001   | 0.9688    | NPC1L1   | chr7  | -    | 44552134 | 44580914 | 5048     |      |
| ENSG0000011522.412 | 1089.589 | 0.48031  | 0.038028  | 0.070182  | XYLT2    | chr17 | +    | 48423453 | 48440499 | 3507     |      |
| ENSG00000117.79222 | 12.8338  | 0.45906  | 0.36292   | 0.46707   | RGPD5    | chr2  | +    | 1.11E+08 | 1.11E+08 | 7253     |      |
| ENSG0000010.72616  | 0.640152 | 0.083249 | 0.96152   | NA        | STMN4    | chr8  | -    | 27092840 | 27115937 | 2288     |      |
| ENSG0000011983.479 | 1330.299 | 0.57618  | 4.94E-09  | 2.15E-08  | NUDCD3   | chr7  | -    | 44421969 | 44530479 | 5007     |      |
| ENSG00000111.62826 | 3.353702 | 1.7038   | 0.03895   | 0.07168   | ISL1     | chr5  | +    | 50678921 | 50690564 | 2755     |      |
| ENSG00000152.62378 | 220.8954 | -2.0583  | 9.12E-20  | 7.61E-19  | CHDH     | chr3  | -    | 53850387 | 53880417 | 3640     |      |
| ENSG0000012.137404 | 20.1441  | -3.1078  | 0.000166  | 0.00046   | IL20RA   | chr6  | -    | 1.37E+08 | 1.37E+08 | 3503     |      |
| ENSG0000010        | 0.36308  | 0        | 0.4146    | 0.81455   | NA       | CLCA1 | chr1 | +        | 86934051 | 86965972 | 3310 |
| ENSG0000011062.261 | 464.5729 | 1.1917   | 6.79E-20  | 5.69E-19  | GLT8D1   | chr3  | -    | 52728505 | 52740048 | 2320     |      |
| ENSG0000011384.904 | 1275.749 | 0.1189   | 0.26254   | 0.36072   | ATP2C1   | chr3  | +    | 1.31E+08 | 1.31E+08 | 5067     |      |
| ENSG00000110.04057 | 326.5108 | -4.9653  | 7.35E-55  | 1.89E-53  | SRCIN1   | chr17 | -    | 36686251 | 36762183 | 7058     |      |
| ENSG0000011.919068 | 2.307303 | -0.22067 | 0.84944   | 0.89425   | IGF1     | chr12 | -    | 1.03E+08 | 1.03E+08 | 7370     |      |
| ENSG00000164.42433 | 528.8121 | -3.0145  | 1.29E-23  | 1.28E-22  | SLC38A5  | chrX  | -    | 48316920 | 48328644 | 2662     |      |
| ENSG00000132.08706 | 9.304472 | 1.7461   | 0.001243  | 0.003037  | MAGIX    | chrX  | +    | 49019061 | 49024822 | 2991     |      |
| ENSG0000011836.909 | 2807.235 | -0.61111 | 2.65E-05  | 8.09E-05  | RALBP1   | chr18 | +    | 9475007  | 9538114  | 4368     |      |
| ENSG0000011024.463 | 683.2705 | 0.58203  | 0.001445  | 0.003499  | RUFY3    | chr4  | +    | 71569921 | 71673032 | 4233     |      |
| ENSG000001442.6733 | 114.8859 | 1.9403   | 2.72E-33  | 3.93E-32  | CNTN1    | chr12 | +    | 41086244 | 41466220 | 5557     |      |
| ENSG0000017.334542 | 3.420099 | 0.99155  | 0.26677   | 0.3655    | SLC11A1  | chr2  | +    | 2.19E+08 | 2.19E+08 | 5772     |      |
| ENSG0000016616.883 | 348.6359 | 4.242    | 0         | 0         | WWTR1    | chr3  | -    | 1.49E+08 | 1.49E+08 | 5030     |      |
| ENSG000001885.6586 | 667.3827 | 0.40789  | 0.00134   | 0.00326   | AGPS     | chr2  | +    | 1.78E+08 | 1.78E+08 | 7764     |      |
| ENSG0000010        | 1.66715  | -1.9695  | 0.25993   | NA        | ZNF806   | chr2  | +    | 1.33E+08 | 1.33E+08 | 1774     |      |
| ENSG000001205.6202 | 356.503  | -0.79197 | 2.06E-06  | 7.14E-06  | CXorf56  | chrX  | -    | 1.19E+08 | 1.19E+08 | 2372     |      |
| ENSG00000111.29346 | 404.8485 | -4.9273  | 5.33E-12  | 2.88E-11  | ATP1A2   | chr1  | +    | 1.6E+08  | 1.6E+08  | 5421     |      |
| ENSG000001395.5829 | 446.0854 | -0.17271 | 0.19458   | 0.28224   | TTC27    | chr2  | +    | 32853099 | 33046118 | 2876     |      |
| ENSG00000124.52221 | 57.96486 | -1.2179  | 0.00222   | 0.005212  | ZNF582   | chr19 | -    | 56887413 | 56904914 | 2824     |      |
| ENSG0000012.883288 | 0        | 2.9964   | 0.054348  | 0.095606  | VSIG2    | chr11 | -    | 1.25E+08 | 1.25E+08 | 1191     |      |
| ENSG0000013930.879 | 1282.537 | 1.6139   | 3.86E-49  | 8.61E-48  | PHLDB1   | chr11 | +    | 1.18E+08 | 1.19E+08 | 5945     |      |
| ENSG0000010.290301 | 0        | 0.4146   | 0.81455   | NA        | MARCO    | chr2  | +    | 1.2E+08  | 1.2E+08  | 1843     |      |
| ENSG0000018.018812 | 0        | 4.5898   | 0.000471  | 0.001228  | CYP24A1  | chr20 | -    | 52769988 | 52790512 | 3262     |      |
| ENSG000001124.7535 | 82.26133 | 0.59814  | 0.081538  | 0.13578   | PRDM11   | chr11 | +    | 45115564 | 45247734 | 3111     |      |
| ENSG00000112.0633  | 259.4393 | -4.3385  | 9.44E-24  | 9.40E-23  | SYT13    | chr11 | -    | 45261852 | 45307870 | 5144     |      |

|            |          |          |          |           |           |            |       |   |          |          |      |
|------------|----------|----------|----------|-----------|-----------|------------|-------|---|----------|----------|------|
| ENSG000001 | 1534.853 | 7.125803 | 7.7142   | 2.65E-117 | 1.96E-115 | SNAI2      | chr8  | - | 49830249 | 49834299 | 2204 |
| ENSG000001 | 77.96195 | 319.275  | -2.0285  | 4.01E-16  | 2.79E-15  | CD74       | chr5  | - | 1.5E+08  | 1.5E+08  | 1727 |
| ENSG000001 | 71.23727 | 2.901332 | 4.4734   | 5.54E-16  | 3.84E-15  | HGF        | chr7  | - | 81328322 | 81399754 | 5989 |
| ENSG000001 | 573.1222 | 456.5766 | 0.32761  | 0.010017  | 0.021062  | ZRANB1     | chr10 | + | 1.27E+08 | 1.27E+08 | 5695 |
| ENSG000001 | 803.5246 | 1028.353 | -0.35352 | 0.17532   | 0.25855   | NCDN       | chr1  | + | 36023074 | 36032875 | 3683 |
| ENSG000001 | 4774.915 | 345.0728 | 3.784    | 5.74E-191 | 1.15E-188 | GPR124     | chr8  | + | 37641709 | 37702414 | 6270 |
| ENSG000001 | 0.290301 | 0.937167 | -0.88973 | 0.60765   | NA        | CCT8L1P    | chr7  | + | 1.52E+08 | 1.52E+08 | 1674 |
| ENSG000001 | 841.6512 | 539.8082 | 0.63859  | 0.000641  | 0.001639  | ZFP64      | chr20 | - | 50668202 | 50820847 | 3264 |
| ENSG000001 | 298.5974 | 286.261  | 0.061005 | 0.68786   | 0.76727   | MNAT1      | chr14 | + | 61201460 | 61436671 | 2635 |
| ENSG000001 | 689.8605 | 276.3322 | 1.313    | 1.39E-06  | 4.90E-06  | SAMD4A     | chr14 | + | 55033815 | 55260033 | 6565 |
| ENSG000001 | 12.57455 | 47.00151 | -1.8663  | 0.000273  | 0.000735  | RUNX3      | chr1  | - | 25226002 | 25291612 | 4340 |
| ENSG000001 | 260.2451 | 334.7619 | -0.36202 | 0.041576  | 0.075807  | MRE11A     | chr11 | - | 94152895 | 94227074 | 2746 |
| ENSG000001 | 44.48256 | 30.98218 | 0.52028  | 0.12407   | 0.19414   | PLEKHB1    | chr11 | + | 73357223 | 73373864 | 2380 |
| ENSG000001 | 96.32361 | 222.8088 | -1.2085  | 6.75E-07  | 2.45E-06  | SERPINB1   | chr6  | - | 2832566  | 2842240  | 2619 |
| ENSG000001 | 0        | 2.96444  | -3.0301  | 0.051371  | 0.091078  | CYP3A43    | chr7  | + | 99425636 | 99463718 | 1848 |
| ENSG000001 | 1.411244 | 1.606458 | -0.17668 | 0.90324   | 0.93306   | SLC7A9     | chr19 | - | 33321415 | 33360672 | 1998 |
| ENSG000001 | 398.8772 | 443.6089 | -0.15363 | 0.32412   | 0.42702   | SPAST      | chr2  | + | 32288680 | 32382706 | 5117 |
| ENSG000001 | 88.73741 | 69.5604  | 0.3526   | 0.16423   | 0.245     | NRXN3      | chr14 | + | 78708734 | 80330762 | 6446 |
| ENSG000001 | 1135.993 | 312.4917 | 1.8557   | 1.52E-21  | 1.38E-20  | OSBPL5     | chr11 | - | 3108346  | 3187969  | 3889 |
| ENSG000001 | 836.8021 | 1465.232 | -0.80774 | 2.96E-13  | 1.74E-12  | AQR        | chr15 | - | 35147732 | 35262040 | 5945 |
| ENSG000001 | 109.651  | 48.00333 | 1.1838   | 1.08E-06  | 3.83E-06  | CPS1       | chr2  | + | 2.11E+08 | 2.12E+08 | 5821 |
| ENSG000001 | 0.36308  | 0        | 0.4146   | 0.81455   | NA        | C8B        | chr1  | - | 57394883 | 57431813 | 2379 |
| ENSG000001 | 1424.903 | 615.3067 | 1.21     | 1.26E-19  | 1.04E-18  | FHL1       | chrX  | + | 1.35E+08 | 1.35E+08 | 2888 |
| ENSG000001 | 942.6603 | 710.133  | 0.40813  | 0.000328  | 0.000873  | RTFDC1     | chr20 | + | 55043647 | 55093943 | 2193 |
| ENSG000001 | 8.134294 | 14.67329 | -0.8257  | 0.30119   | 0.40267   | GABRA1     | chr5  | + | 1.61E+08 | 1.61E+08 | 4273 |
| ENSG000001 | 20.33557 | 2320.21  | -6.8154  | 8.27E-175 | 1.34E-172 | NLRP2      | chr19 | + | 55464498 | 55512510 | 3744 |
| ENSG000001 | 416.0563 | 680.7345 | -0.7078  | 6.02E-05  | 0.000176  | SLC45A4    | chr8  | - | 1.42E+08 | 1.42E+08 | 7483 |
| ENSG000001 | 2420.473 | 2815.723 | -0.21797 | 0.017581  | 0.035132  | RNF10      | chr12 | + | 1.21E+08 | 1.21E+08 | 3825 |
| ENSG000001 | 238.327  | 290.1219 | -0.28545 | 0.12262   | 0.19232   | ZNF839     | chr14 | + | 1.03E+08 | 1.03E+08 | 3325 |
| ENSG000001 | 373.9272 | 319.1284 | 0.22824  | 0.39491   | 0.49945   | ZDHHC6     | chr10 | - | 1.14E+08 | 1.14E+08 | 2170 |
| ENSG000001 | 383.1971 | 191.3086 | 0.99744  | 5.31E-06  | 1.76E-05  | GRAMD1B    | chr11 | + | 1.23E+08 | 1.23E+08 | 7723 |
| ENSG000001 | 3060.598 | 1233.23  | 1.3096   | 1.49E-26  | 1.66E-25  | RNH1       | chr11 | - | 494512   | 507300   | 3281 |
| ENSG000001 | 1689.628 | 1371.575 | 0.30057  | 0.006214  | 0.013591  | NDUF51     | chr2  | - | 2.07E+08 | 2.07E+08 | 5211 |
| ENSG000001 | 989.8577 | 938.4684 | 0.077431 | 0.70776   | 0.7828    | RB1CC1     | chr8  | - | 53535016 | 53658403 | 6635 |
| ENSG000001 | 800.192  | 519.2514 | 0.62359  | 3.13E-08  | 1.27E-07  | ERP44      | chr9  | - | 1.03E+08 | 1.03E+08 | 4854 |
| ENSG000001 | 981.9224 | 575.2991 | 0.7683   | 7.07E-05  | 0.000205  | ALAS1      | chr3  | + | 52232102 | 52248343 | 2430 |
| ENSG000001 | 1.016461 | 3.129532 | -1.3525  | 0.30757   | 0.40929   | BIRC3      | chr11 | + | 1.02E+08 | 1.02E+08 | 5197 |
| ENSG000001 | 1528.264 | 508.715  | 1.5823   | 8.75E-14  | 5.29E-13  | AKAP11     | chr13 | + | 42846289 | 42897396 | 9913 |
| ENSG000001 | 173.0955 | 50.46108 | 1.7667   | 2.85E-10  | 1.37E-09  | GLRX2      | chr1  | - | 1.93E+08 | 1.93E+08 | 1131 |
| ENSG000001 | 55.53796 | 78.77753 | -0.49418 | 0.084558  | 0.14014   | SNAPC1     | chr14 | + | 62229075 | 62263146 | 2656 |
| ENSG000001 | 458.2876 | 298.612  | 0.6162   | 4.79E-05  | 0.000142  | DERA       | chr12 | + | 16064106 | 16190220 | 1709 |
| ENSG000001 | 2657.032 | 3239.944 | -0.28601 | 0.007796  | 0.016701  | STRAP      | chr12 | + | 16035325 | 16056412 | 1866 |
| ENSG000001 | 14.23241 | 5.707127 | 1.2845   | 0.054685  | 0.096115  | ABCC2      | chr10 | + | 1.02E+08 | 1.02E+08 | 5312 |
| ENSG000001 | 172.9794 | 254.8885 | -0.55459 | 0.039774  | 0.073012  | DEF6       | chr6  | + | 35265595 | 35289548 | 2262 |
| ENSG000001 | 1139.381 | 470.8014 | 1.2716   | 1.66E-14  | 1.06E-13  | PLEKHO1    | chr1  | + | 1.5E+08  | 1.5E+08  | 3743 |
| ENSG000001 | 406.268  | 258.1481 | 0.65032  | 0.000468  | 0.00122   | GCLM       | chr1  | - | 94350761 | 94374966 | 4857 |
| ENSG000001 | 641.9492 | 524.4512 | 0.29147  | 0.060392  | 0.10497   | UBR2       | chr6  | + | 42531800 | 42661242 | 7857 |
| ENSG000001 | 10268.75 | 265.4636 | 5.2512   | 1.20E-119 | 9.43E-118 | EHD2       | chr19 | + | 48216600 | 48246391 | 3585 |
| ENSG000001 | 582.7295 | 514.4607 | 0.18055  | 0.33152   | 0.43468   | DEPDC1     | chr1  | - | 68939835 | 68962904 | 5331 |
| ENSG000001 | 136.8019 | 137.7184 | -0.01156 | 0.95209   | 0.97008   | CCDC28A    | chr6  | + | 1.39E+08 | 1.39E+08 | 1496 |
| ENSG000001 | 23.69482 | 352.2846 | -3.8892  | 1.36E-40  | 2.44E-39  | RRAGD      | chr6  | - | 90074355 | 90121989 | 4900 |
| ENSG000001 | 249.5507 | 152.1822 | 0.71214  | 0.000461  | 0.001204  | HSF2       | chr6  | + | 1.23E+08 | 1.23E+08 | 2643 |
| ENSG000001 | 973.7648 | 1367.236 | -0.48808 | 0.01731   | 0.034636  | PHF20      | chr20 | + | 34359896 | 34538303 | 5922 |
| ENSG000001 | 5.290455 | 45.66527 | -3.0439  | 1.55E-08  | 6.49E-08  | HSD17B6    | chr12 | + | 57145945 | 57181574 | 1751 |
| ENSG000001 | 148.8251 | 293.4811 | -0.97692 | 9.82E-07  | 3.51E-06  | NR1H3      | chr11 | + | 47269851 | 47290396 | 2731 |
| ENSG000001 | 23.70615 | 8.080828 | 1.5006   | 0.006919  | 0.014995  | TYMP       | chr22 | - | 50964181 | 50968485 | 2049 |
| ENSG000001 | 1018.802 | 1199.877 | -0.23511 | 0.053524  | 0.09438   | NCAPH2     | chr22 | + | 50946645 | 50961901 | 2077 |
| ENSG000001 | 1126.699 | 839.8064 | 0.42412  | 3.81E-05  | 0.000114  | TOMM34     | chr20 | - | 43570771 | 43589127 | 2062 |
| ENSG000001 | 2346.043 | 1363.493 | 0.78224  | 1.07E-08  | 4.53E-08  | SEC63      | chr6  | - | 1.08E+08 | 1.08E+08 | 6411 |
| ENSG000001 | 2049.826 | 2112.417 | -0.04345 | 0.66025   | 0.74417   | KPNA6      | chr1  | + | 32573639 | 32642169 | 7378 |
| ENSG000001 | 36714.5  | 240.1909 | 7.2374   | 0         | 0         | VIM        | chr10 | + | 17270258 | 17279592 | 2666 |
| ENSG000001 | 33.79798 | 30.11625 | 0.16201  | 0.6694    | 0.75195   | RTEL1-TNFF | chr20 | + | 62290653 | 62330037 | 5751 |
| ENSG000001 | 99.74896 | 15.00274 | 2.6948   | 4.41E-13  | 2.57E-12  | FAS        | chr10 | + | 90750414 | 90775542 | 2563 |
| ENSG000001 | 128.0391 | 401.7454 | -1.6377  | 5.70E-08  | 2.27E-07  | RNASET2    | chr6  | - | 1.67E+08 | 1.67E+08 | 2445 |
| ENSG000001 | 7256.364 | 33.70218 | 7.7444   | 0         | 0         | CD44       | chr11 | + | 35160417 | 35253949 | 4589 |

|            |          |          |          |          |          |           |       |   |          |          |      |
|------------|----------|----------|----------|----------|----------|-----------|-------|---|----------|----------|------|
| ENSG000001 | 376.1129 | 302.939  | 0.30958  | 0.18245  | 0.26735  | KCNG1     | chr20 | - | 49620193 | 49639666 | 2211 |
| ENSG000001 | 694.046  | 613.196  | 0.17794  | 0.11729  | 0.18517  | AGPAT4    | chr6  | - | 1.62E+08 | 1.62E+08 | 7865 |
| ENSG000001 | 0.975385 | 0        | 1.2767   | 0.47406  | NA       | SLAMF7    | chr1  | + | 1.61E+08 | 1.61E+08 | 3542 |
| ENSG000001 | 435.4668 | 58.50076 | 2.8755   | 2.15E-24 | 2.21E-23 | BTN3A1    | chr6  | + | 26402465 | 26415444 | 3442 |
| ENSG000001 | 310.426  | 337.5145 | -0.11885 | 0.39838  | 0.50299  | MIPEP     | chr13 | - | 24304328 | 24463558 | 2400 |
| ENSG000001 | 12.33551 | 269.119  | -4.4424  | 5.31E-38 | 8.82E-37 | PRKCH     | chr14 | + | 61654277 | 62017694 | 3582 |
| ENSG000001 | 4.233731 | 1.309443 | 1.3893   | 0.29795  | 0.39985  | INSRR     | chr1  | - | 1.57E+08 | 1.57E+08 | 5101 |
| ENSG000001 | 284.53   | 241.4777 | 0.237    | 0.29871  | 0.40046  | IFNGR1    | chr6  | - | 1.38E+08 | 1.38E+08 | 2139 |
| ENSG000001 | 706.3004 | 336.5068 | 1.0676   | 1.97E-09 | 8.86E-09 | B4GALT7   | chr5  | + | 1.77E+08 | 1.77E+08 | 2653 |
| ENSG000001 | 9.615875 | 83.3403  | -3.0506  | 4.72E-14 | 2.91E-13 | SH2D2A    | chr1  | - | 1.57E+08 | 1.57E+08 | 1673 |
| ENSG000001 | 242.6844 | 141.3916 | 0.7797   | 0.000221 | 0.000602 | VRK2      | chr2  | + | 58134786 | 58387055 | 2446 |
| ENSG000001 | 20.76883 | 30.7427  | -0.56417 | 0.1537   | 0.23178  | TNFRSF1B  | chr1  | + | 12227060 | 12269285 | 3683 |
| ENSG000001 | 781.7651 | 497.9323 | 0.65085  | 0.000182 | 0.000502 | VEZT      | chr12 | + | 95611522 | 95696566 | 4562 |
| ENSG000001 | 496.6961 | 181.2006 | 1.4448   | 5.17E-08 | 2.06E-07 | POU2F2    | chr19 | - | 42590262 | 42700737 | 6901 |
| ENSG000001 | 1158.278 | 1016.194 | 0.18859  | 0.27651  | 0.37673  | BRD9      | chr5  | - | 850406   | 892939   | 4865 |
| ENSG000001 | 1609.871 | 716.0325 | 1.1679   | 1.55E-20 | 1.34E-19 | SNX1      | chr15 | + | 64386322 | 64438289 | 8119 |
| ENSG000001 | 248.0786 | 282.5576 | -0.18515 | 0.34142  | 0.44528  | TBPL1     | chr6  | + | 1.34E+08 | 1.34E+08 | 1295 |
| ENSG000001 | 441.9915 | 244.0377 | 0.85479  | 3.63E-06 | 1.22E-05 | ARNTL2    | chr12 | + | 27485787 | 27576241 | 4804 |
| ENSG000001 | 2721.401 | 2317.288 | 0.22659  | 0.67306  | 0.75516  | BCLAF1    | chr6  | - | 1.37E+08 | 1.37E+08 | 7263 |
| ENSG000001 | 1242.809 | 662.2581 | 0.9077   | 3.28E-12 | 1.80E-11 | SLC39A9   | chr14 | + | 69864732 | 69929105 | 5192 |
| ENSG000001 | 14.35743 | 241.3484 | -4.0156  | 5.43E-24 | 5.45E-23 | ANK1      | chr8  | - | 41510739 | 41754280 | 8366 |
| ENSG000001 | 4.19005  | 0.297015 | 2.8711   | 0.043928 | 0.079477 | IBSP      | chr4  | + | 88720733 | 88733074 | 1033 |
| ENSG000001 | 453.1118 | 284.3247 | 0.67048  | 7.68E-06 | 2.50E-05 | TFB1M     | chr6  | - | 1.56E+08 | 1.56E+08 | 1424 |
| ENSG000001 | 1121.215 | 735.6045 | 0.60785  | 2.92E-07 | 1.10E-06 | RABEP1    | chr17 | + | 5185558  | 5289129  | 5387 |
| ENSG000001 | 1615.679 | 6586.429 | -2.0245  | 2.62E-57 | 7.19E-56 | HMGB3     | chrX  | + | 1.5E+08  | 1.5E+08  | 3560 |
| ENSG000001 | 1114.379 | 2338.093 | -1.0677  | 2.00E-17 | 1.49E-16 | NUP160    | chr11 | - | 47799639 | 47870107 | 5376 |
| ENSG000001 | 622.8048 | 1006.485 | -0.6921  | 2.50E-08 | 1.03E-07 | BAK1      | chr6  | - | 33540329 | 33548019 | 2136 |
| ENSG000001 | 4.595998 | 0.715414 | 2.3119   | 0.070927 | 0.12052  | MUSK      | chr9  | + | 1.13E+08 | 1.14E+08 | 3303 |
| ENSG000001 | 13.08058 | 67.28472 | -2.3288  | 1.12E-09 | 5.15E-09 | IKZF2     | chr2  | - | 2.14E+08 | 2.14E+08 | 9405 |
| ENSG000001 | 4392.006 | 2439.409 | 0.84773  | 2.01E-13 | 1.19E-12 | GRN       | chr17 | + | 42422614 | 42430470 | 2148 |
| ENSG000001 | 162.5984 | 166.032  | -0.02905 | 0.93422  | 0.9569   | FAM13B    | chr5  | - | 1.37E+08 | 1.37E+08 | 5465 |
| ENSG000001 | 1737.342 | 348.9052 | 2.3064   | 2.03E-25 | 2.16E-24 | ARHGAP31  | chr3  | + | 1.19E+08 | 1.19E+08 | 9317 |
| ENSG000001 | 4.430716 | 12.05528 | -1.3936  | 0.072703 | 0.1231   | NR2E3     | chr15 | + | 72084977 | 72110600 | 2102 |
| ENSG000001 | 96.10846 | 170.7163 | -0.8222  | 0.007121 | 0.015391 | CENPQ     | chr6  | + | 49431091 | 49460820 | 1733 |
| ENSG000001 | 2529.809 | 2226.026 | 0.1848   | 0.09456  | 0.15408  | SARS      | chr1  | + | 1.1E+08  | 1.1E+08  | 1882 |
| ENSG000001 | 1439.247 | 1575.829 | -0.13025 | 0.32245  | 0.42537  | RANBP3    | chr19 | - | 5916150  | 5978153  | 3233 |
| ENSG000001 | 393.1998 | 182.2625 | 1.1085   | 4.59E-08 | 1.84E-07 | ARID4A    | chr14 | + | 58765103 | 58840605 | 5891 |
| ENSG000001 | 440.8645 | 435.076  | 0.018311 | 0.88991  | 0.92348  | TSSC1     | chr2  | - | 3192696  | 3381653  | 2932 |
| ENSG000001 | 1610.201 | 2350.269 | -0.54458 | 0.001189 | 0.002914 | PNPLA6    | chr19 | + | 7598890  | 7626650  | 4617 |
| ENSG000001 | 127.6282 | 49.76105 | 1.3595   | 4.37E-08 | 1.76E-07 | IFT88     | chr13 | + | 21140585 | 21265503 | 3931 |
| ENSG000001 | 299.7751 | 269.1288 | 0.15543  | 0.54571  | 0.64592  | ALG1      | chr16 | + | 5083703  | 5137380  | 2671 |
| ENSG000001 | 327.3544 | 464.8213 | -0.50273 | 0.000536 | 0.001384 | ZCCHC8    | chr12 | - | 1.23E+08 | 1.23E+08 | 4393 |
| ENSG000001 | 1240.6   | 1013.554 | 0.29095  | 0.11305  | 0.17935  | ABCF2     | chr7  | - | 1.51E+08 | 1.51E+08 | 3546 |
| ENSG000001 | 3232.178 | 570.3435 | 2.4956   | 1.86E-41 | 3.38E-40 | CHPF2     | chr7  | + | 1.51E+08 | 1.51E+08 | 3973 |
| ENSG000001 | 11.08955 | 19.23936 | -0.78645 | 0.14198  | 0.21646  | LRRC7     | chr1  | + | 70034081 | 70617628 | 6507 |
| ENSG000001 | 926.9976 | 361.5208 | 1.3564   | 1.88E-29 | 2.35E-28 | FUT8      | chr14 | + | 65877310 | 66210839 | 5166 |
| ENSG000001 | 1142.448 | 554.9209 | 1.0416   | 1.02E-20 | 8.87E-20 | UBA6      | chr4  | - | 68481479 | 68566897 | 6455 |
| ENSG000001 | 913.9969 | 462.1449 | 0.9794   | 2.43E-05 | 7.46E-05 | GAB2      | chr11 | - | 77926343 | 78129394 | 6092 |
| ENSG000001 | 639.272  | 522.9461 | 0.28854  | 0.03646  | 0.067578 | ATP6V0A1  | chr17 | + | 40610862 | 40674629 | 4652 |
| ENSG000001 | 391.5146 | 365.479  | 0.1002   | 0.06139  | 0.72069  | PIAS1     | chr15 | + | 68346517 | 68483096 | 2932 |
| ENSG000001 | 1689.738 | 1278.042 | 0.40106  | 0.063447 | 0.10951  | SLC4A7    | chr3  | - | 27414214 | 27525911 | 7757 |
| ENSG000001 | 792.6309 | 720.8369 | 0.13713  | 0.22871  | 0.32185  | APBA2     | chr15 | + | 29129629 | 29410518 | 4031 |
| ENSG000001 | 2756.679 | 1342.486 | 1.0307   | 0.0006   | 0.00154  | UHRF1     | chr19 | + | 4903092  | 4962165  | 4308 |
| ENSG000001 | 554.5251 | 808.4788 | -0.54272 | 6.40E-06 | 2.11E-05 | MAP2K3    | chr17 | + | 21187984 | 21218552 | 2401 |
| ENSG000001 | 4.148974 | 3.445948 | 0.25131  | 0.83151  | 0.88118  | EFCAB1    | chr8  | - | 49623348 | 49647870 | 2286 |
| ENSG000001 | 24713.42 | 7674.926 | 1.686    | 7.67E-74 | 2.94E-72 | TMSB10    | chr2  | + | 85132749 | 85133795 | 492  |
| ENSG000001 | 84.11573 | 78.63338 | 0.09603  | 0.71981  | 0.79279  | ASTE1     | chr3  | - | 1.31E+08 | 1.31E+08 | 2669 |
| ENSG000001 | 291.136  | 129.8659 | 1.1626   | 3.49E-09 | 1.54E-08 | RNF19A    | chr8  | - | 1.01E+08 | 1.01E+08 | 4330 |
| ENSG000001 | 127.6025 | 95.93113 | 0.41226  | 0.13737  | 0.21067  | PEX3      | chr6  | + | 1.44E+08 | 1.44E+08 | 1969 |
| ENSG000001 | 1441.723 | 534.7373 | 1.4296   | 2.60E-41 | 4.71E-40 | GABARAPL1 | chr16 | + | 75600249 | 75611779 | 2274 |
| ENSG000001 | 0        | 0.343138 | -0.41864 | 0.81278  | NA       | MYOC      | chr1  | - | 1.72E+08 | 1.72E+08 | 2083 |
| ENSG000001 | 439.7881 | 212.4991 | 1.043    | 5.74E-09 | 2.48E-08 | SH3YL1    | chr2  | - | 217730   | 266398   | 3540 |
| ENSG000001 | 493.4199 | 983.7172 | -0.9923  | 6.56E-08 | 2.60E-07 | FAM136A   | chr2  | - | 70523107 | 70529222 | 2398 |
| ENSG000001 | 7813.25  | 6525.287 | 0.25959  | 0.05201  | 0.092076 | VCL       | chr10 | + | 75757872 | 75879918 | 5482 |
| ENSG000001 | 147.5828 | 734.3402 | -2.3083  | 1.09E-40 | 1.94E-39 | DEPDC1B   | chr5  | - | 59892739 | 59996017 | 2499 |

|                    |          |          |           |           |         |       |   |          |          |       |
|--------------------|----------|----------|-----------|-----------|---------|-------|---|----------|----------|-------|
| ENSG0000016692325  | 7.472229 | -0.16646 | 0.82099   | 0.87413   | DAPK2   | chr15 | - | 64199235 | 64364232 | 4835  |
| ENSG000001635.5041 | 538.3516 | 0.23928  | 0.22365   | 0.31606   | NSMAF   | chr8  | - | 59496063 | 59572403 | 3569  |
| ENSG000001492.8228 | 1038.261 | -1.0733  | 1.37E-17  | 1.04E-16  | ADSS    | chr1  | - | 2.45E+08 | 2.45E+08 | 2780  |
| ENSG0000010923144  | 1.40169  | -0.41652 | 0.7848    | 0.84587   | STAP1   | chr4  | + | 68424446 | 68473055 | 1511  |
| ENSG00000112948.95 | 788.0218 | 4.0326   | 8.52E-196 | 1.81E-193 | TIMP2   | chr17 | - | 76849059 | 76921469 | 3652  |
| ENSG0000011203.692 | 1659.988 | -0.46253 | 0.000156  | 0.000433  | RFC1    | chr4  | - | 39289076 | 39367995 | 4886  |
| ENSG000001697.838  | 621.5081 | 0.16757  | 0.35918   | 0.46336   | TBC1D23 | chr3  | + | 99979844 | 1E+08    | 4054  |
| ENSG0000011477.062 | 1627.976 | -0.14004 | 0.23574   | 0.3297    | CUL3    | chr2  | - | 2.25E+08 | 2.25E+08 | 6741  |
| ENSG00000113.54993 | 12.85079 | 0.071595 | 0.89731   | 0.92875   | MYOM2   | chr8  | + | 1993155  | 2113475  | 5014  |
| ENSG00000115.79003 | 8.173074 | 0.90998  | 0.11727   | 0.18515   | CYP46A1 | chr14 | + | 1E+08    | 1E+08    | 6609  |
| ENSG000001611.8122 | 603.2559 | 0.021085 | 0.91744   | 0.94431   | ZZZ3    | chr1  | - | 78028101 | 78149104 | 4737  |
| ENSG00000113.28873 | 101.3433 | -2.8883  | 2.00E-14  | 1.26E-13  | USP2    | chr11 | - | 1.19E+08 | 1.19E+08 | 3732  |
| ENSG0000010        | 7.241612 | -4.2796  | 0.002714  | 0.006301  | CASR    | chr3  | + | 1.22E+08 | 1.22E+08 | 5009  |
| ENSG000001437.3477 | 256.8939 | 0.76316  | 0.001972  | 0.004671  | TUBG2   | chr17 | + | 40811323 | 40819024 | 1776  |
| ENSG000001324.2806 | 354.0159 | -0.12548 | 0.41263   | 0.5175    | RPL26L1 | chr5  | + | 1.72E+08 | 1.72E+08 | 742   |
| ENSG00000118.27772 | 545.9451 | -4.859   | 4.93E-58  | 1.36E-56  | FLT4    | chr5  | - | 1.8E+08  | 1.8E+08  | 5857  |
| ENSG0000011344.648 | 1983.835 | -0.55858 | 0.015675  | 0.031623  | NSUN2   | chr5  | - | 6599352  | 6633404  | 3558  |
| ENSG000001522.6502 | 477.5396 | 0.13085  | 0.3518    | 0.456     | FBXO42  | chr1  | - | 16573334 | 16678949 | 6202  |
| ENSG000001681.3493 | 344.0867 | 0.98442  | 4.03E-10  | 1.91E-09  | MFAP3   | chr5  | + | 1.53E+08 | 1.54E+08 | 5049  |
| ENSG000001241.4651 | 180.4641 | 0.41583  | 0.072497  | 0.12279   | MRI1    | chr19 | + | 13875346 | 13885096 | 3027  |
| ENSG000001179.4601 | 163.3532 | 0.13637  | 0.67221   | 0.75458   | METTL1  | chr12 | - | 58162254 | 58166576 | 2066  |
| ENSG000001126.5071 | 2.401965 | 4.8734   | 9.19E-05  | 0.000263  | HOXC8   | chr12 | + | 54402832 | 54407570 | 3371  |
| ENSG000001182.9998 | 86.85419 | 1.0737   | 9.83E-07  | 3.51E-06  | AGA     | chr4  | - | 1.78E+08 | 1.78E+08 | 2107  |
| ENSG000001418.0947 | 375.0553 | 0.15579  | 0.35345   | 0.45773   | PI4K2B  | chr4  | + | 25162263 | 25280714 | 3540  |
| ENSG0000011514.844 | 1290.458 | 0.2308   | 0.29992   | 0.40147   | BOD111  | chr4  | - | 13570362 | 13629347 | 10565 |
| ENSG000001635.3766 | 1128.984 | -0.82848 | 2.49E-11  | 1.29E-10  | MAT2B   | chr5  | + | 1.63E+08 | 1.63E+08 | 3409  |
| ENSG000001122.7788 | 12.311   | 3.268    | 5.93E-21  | 5.21E-20  | TLL1    | chr4  | + | 1.67E+08 | 1.67E+08 | 6708  |
| ENSG0000011379.57  | 1087.054 | 0.34329  | 0.001799  | 0.004288  | EDC4    | chr16 | + | 67906926 | 67918406 | 5267  |
| ENSG0000014473.346 | 1471.015 | 1.6034   | 1.63E-66  | 5.54E-65  | TRIO    | chr5  | + | 14143811 | 14532235 | 11100 |
| ENSG0000019627.74  | 3991.99  | 1.2679   | 1.86E-16  | 1.32E-15  | VCAN    | chr5  | + | 82767284 | 82878122 | 12625 |
| ENSG0000011002.686 | 459.0903 | 1.1242   | 8.53E-20  | 7.13E-19  | CLEC16A | chr16 | + | 11038345 | 11276046 | 6891  |
| ENSG000001112.8073 | 0        | 8.3079   | 2.05E-14  | 1.30E-13  | MSR1    | chr8  | - | 15965387 | 16424999 | 3572  |
| ENSG0000012.229907 | 5993.73  | -11.092  | 2.08E-105 | 1.30E-103 | CDH1    | chr16 | + | 68771128 | 68869445 | 4875  |
| ENSG0000011165.638 | 1517.196 | -0.37872 | 0.054219  | 0.095421  | SKIV2L2 | chr5  | + | 54603588 | 54721409 | 4192  |
| ENSG00000110.0312  | 10.70455 | -0.09133 | 0.88614   | 0.92043   | DNAH5   | chr5  | - | 13690440 | 13944652 | 15633 |
| ENSG0000011028.046 | 268.317  | 1.93     | 1.19E-17  | 9.02E-17  | ZFYVE16 | chr5  | + | 79703832 | 79775169 | 6773  |
| ENSG0000011229.432 | 225.3898 | 2.4351   | 3.44E-26  | 3.77E-25  | FAM65A  | chr16 | + | 67552321 | 67580691 | 4260  |
| ENSG0000010.290301 | 0        | 0.4146   | 0.81455   | NA        | C6      | chr5  | - | 41142336 | 41261540 | 3661  |
| ENSG0000012729.547 | 1742.584 | 0.64703  | 3.45E-07  | 1.29E-06  | RAI14   | chr5  | + | 34656342 | 34832732 | 5092  |
| ENSG0000016.234137 | 0.594029 | 2.8288   | 0.019584  | 0.038734  | SOX30   | chr5  | - | 1.57E+08 | 1.57E+08 | 3265  |
| ENSG0000011080.246 | 1224.942 | -0.18129 | 0.21035   | 0.3005    | PNKP    | chr19 | - | 50364461 | 50371166 | 2102  |
| ENSG0000010.995923 | 53.13919 | -5.3812  | 1.49E-10  | 7.29E-10  | BEST2   | chr19 | + | 12862516 | 12869272 | 2183  |
| ENSG000001382.6804 | 789.2575 | -1.0424  | 1.23E-10  | 6.02E-10  | PHLPP2  | chr16 | - | 71671738 | 71758604 | 8467  |
| ENSG000001902.2673 | 533.728  | 0.75641  | 9.83E-05  | 0.00028   | SPDL1   | chr5  | + | 1.69E+08 | 1.69E+08 | 2668  |
| ENSG000001409.6272 | 643.7521 | -0.65153 | 8.69E-06  | 2.81E-05  | STAU2   | chr8  | - | 74332604 | 74659943 | 4061  |
| ENSG000001454.1699 | 275.7324 | 0.71793  | 5.03E-06  | 1.67E-05  | PQLC2   | chr1  | + | 19638820 | 19655794 | 2153  |
| ENSG000001351.3339 | 261.023  | 0.42723  | 0.05697   | 0.099719  | CTNS    | chr17 | + | 3539762  | 3564836  | 2866  |
| ENSG000001305.7536 | 640.8466 | -1.0645  | 3.20E-09  | 1.41E-08  | RTN4R   | chr22 | - | 20228938 | 20270769 | 2157  |
| ENSG0000011229.526 | 1105.468 | 0.15344  | 0.22794   | 0.32098   | PHF23   | chr17 | - | 7138347  | 7143041  | 2037  |
| ENSG0000013.713929 | 1.684135 | 1.0185   | 0.35639   | 0.46069   | CDH10   | chr5  | - | 24487209 | 24645087 | 3438  |
| ENSG000001934.7368 | 658.7694 | 0.50337  | 0.001317  | 0.003208  | INPP4A  | chr2  | + | 99061317 | 99207496 | 6752  |
| ENSG000001156.3778 | 6.61274  | 4.5056   | 2.03E-29  | 2.54E-28  | RAB27B  | chr18 | + | 52385091 | 52562747 | 7281  |
| ENSG0000011854.111 | 2295.011 | -0.30682 | 0.037551  | 0.069381  | PSMA4   | chr15 | + | 78832747 | 78841604 | 2741  |
| ENSG0000010.342542 | 1.294874 | -1.342   | 0.40631   | NA        | MYO16   | chr13 | + | 1.09E+08 | 1.1E+08  | 6874  |
| ENSG000001770.8668 | 889.8115 | -0.20598 | 0.29616   | 0.39818   | LSG1    | chr3  | - | 1.94E+08 | 1.94E+08 | 3572  |
| ENSG00000183.96936 | 32.81771 | 1.346    | 9.28E-06  | 2.99E-05  | PARP3   | chr3  | + | 51976361 | 51982883 | 2472  |
| ENSG00000143933.73 | 158.7416 | 7.8237   | 2.17E-32  | 3.04E-31  | TNC     | chr9  | - | 1.18E+08 | 1.18E+08 | 7641  |
| ENSG000001215.0794 | 169.5312 | 0.34194  | 0.10075   | 0.16251   | THAP3   | chr1  | + | 6684926  | 6695646  | 2053  |
| ENSG000001328.4958 | 156.2362 | 1.066    | 4.02E-06  | 1.35E-05  | FAM65C  | chr20 | - | 49202645 | 49308065 | 4377  |
| ENSG000001511.4304 | 955.8485 | -0.90068 | 3.15E-12  | 1.73E-11  | TDP1    | chr14 | + | 90421283 | 90511106 | 3696  |
| ENSG000001219.6993 | 175.6645 | 0.32215  | 0.081725  | 0.13607   | AIFM2   | chr10 | - | 71857979 | 71892690 | 3240  |
| ENSG00000185.30001 | 85.29406 | 0.001678 | 0.99578   | 0.99763   | SPATA7  | chr14 | + | 88851268 | 88936694 | 3610  |
| ENSG000001426.7881 | 347.5089 | 0.29621  | 0.2017    | 0.29031   | MED17   | chr11 | + | 93517393 | 93547861 | 4874  |
| ENSG000001553.0493 | 269.6983 | 1.0336   | 3.78E-07  | 1.40E-06  | RETSAT  | chr2  | - | 85569211 | 85581743 | 3100  |
| ENSG0000012247.406 | 1704.027 | 0.39815  | 0.024395  | 0.047181  | CAPG    | chr2  | - | 85621871 | 85645555 | 1442  |

|            |          |          |          |           |           |          |       |   |          |          |       |
|------------|----------|----------|----------|-----------|-----------|----------|-------|---|----------|----------|-------|
| ENSG000001 | 1728.027 | 1410.681 | 0.29288  | 0.004573  | 0.010243  | AP2S1    | chr19 | - | 47341393 | 47354249 | 935   |
| ENSG000001 | 3.537482 | 4.213191 | -0.25641 | 0.81262   | 0.86828   | USH2A    | chr1  | - | 2.16E+08 | 2.17E+08 | 18955 |
| ENSG000001 | 0        | 0.640152 | -0.82869 | 0.63935   | NA        | ZBP      | chr7  | - | 49890017 | 50160925 | 1213  |
| ENSG000001 | 107.3373 | 0        | 8.2443   | 3.45E-14  | 2.14E-13  | TG       | chr8  | + | 1.34E+08 | 1.34E+08 | 8450  |
| ENSG000001 | 0.290301 | 10.40424 | -4.0942  | 0.001746  | 0.00417   | ADAM28   | chr8  | + | 24151553 | 24216531 | 7052  |
| ENSG000001 | 528.6901 | 497.7572 | 0.087998 | 0.6748    | 0.75638   | DCUN1D1  | chr3  | - | 1.83E+08 | 1.83E+08 | 7954  |
| ENSG000001 | 413.1861 | 1190.557 | -1.5179  | 1.74E-08  | 7.26E-08  | PHF15    | chr5  | + | 1.34E+08 | 1.34E+08 | 6463  |
| ENSG000001 | 6.306916 | 5339.551 | -9.6301  | 2.90E-152 | 3.39E-150 | ZIC2     | chr13 | + | 1.01E+08 | 1.01E+08 | 2974  |
| ENSG000001 | 1.359003 | 4.614605 | -1.5942  | 0.14808   | 0.22454   | LCP2     | chr5  | - | 1.7E+08  | 1.7E+08  | 4678  |
| ENSG000001 | 221.495  | 273.8853 | -0.30541 | 0.055125  | 0.096827  | TRIT1    | chr1  | - | 40306723 | 40349183 | 2112  |
| ENSG000001 | 3.007494 | 3.901607 | -0.3062  | 0.79398   | 0.85373   | ADRB1    | chr10 | + | 1.16E+08 | 1.16E+08 | 2862  |
| ENSG000001 | 2542.794 | 1173.851 | 1.1094   | 1.23E-05  | 3.91E-05  | CUL7     | chr6  | - | 43005355 | 43021683 | 5504  |
| ENSG000001 | 8172.168 | 7461.397 | 0.1312   | 0.15307   | 0.23098   | CTNNA1   | chr5  | + | 1.38E+08 | 1.38E+08 | 3756  |
| ENSG000001 | 582.9986 | 386.6671 | 0.59218  | 2.02E-05  | 6.27E-05  | PHKA2    | chrX  | - | 18910418 | 19002716 | 5559  |
| ENSG000001 | 364.204  | 438.2259 | -0.26413 | 0.17874   | 0.26269   | CNTLN    | chr9  | + | 17134980 | 17503921 | 5576  |
| ENSG000001 | 338.1706 | 13.20762 | 4.6373   | 2.43E-32  | 3.40E-31  | EPHA3    | chr3  | + | 89156674 | 89531284 | 5809  |
| ENSG000001 | 21168.1  | 7792.364 | 1.4367   | 1.26E-11  | 6.62E-11  | HSPA5    | chr9  | - | 1.28E+08 | 1.28E+08 | 3908  |
| ENSG000001 | 1513.811 | 2590.715 | -0.77447 | 1.16E-14  | 7.45E-14  | DSG2     | chr18 | + | 29078006 | 29128971 | 5831  |
| ENSG000001 | 177.3652 | 222.3239 | -0.32719 | 0.07146   | 0.12125   | GEMIN8   | chrX  | - | 14026398 | 14048012 | 1682  |
| ENSG000001 | 265.0561 | 367.1278 | -0.46799 | 0.014983  | 0.03036   | OFD1     | chrX  | + | 13752832 | 13787480 | 4259  |
| ENSG000001 | 30.39587 | 1480.876 | -5.5816  | 3.15E-170 | 4.64E-168 | GPM6B    | chrX  | - | 13789150 | 13956757 | 3957  |
| ENSG000001 | 0.36308  | 0        | 0.4146   | 0.81455   | NA        | MAGEC2   | chrX  | - | 1.41E+08 | 1.41E+08 | 1991  |
| ENSG000001 | 222.4251 | 703.7173 | -1.6566  | 8.56E-26  | 9.23E-25  | PREX2    | chr8  | + | 68864353 | 69149265 | 10750 |
| ENSG000001 | 667.9062 | 316.9377 | 1.0732   | 4.17E-15  | 2.75E-14  | WDR37    | chr10 | + | 1095478  | 1178237  | 4582  |
| ENSG000001 | 542.8739 | 465.522  | 0.22166  | 0.14204   | 0.21654   | YTHDC2   | chr5  | + | 1.13E+08 | 1.13E+08 | 6708  |
| ENSG000001 | 438.0471 | 856.5168 | -0.96664 | 3.03E-17  | 2.25E-16  | CTPS2    | chrX  | - | 16606126 | 16731059 | 4319  |
| ENSG000001 | 482.1768 | 790.5398 | -0.71304 | 3.34E-09  | 1.47E-08  | ATP6V1H  | chr8  | - | 54628117 | 54756118 | 2365  |
| ENSG000001 | 1945.52  | 1714.2   | 0.18237  | 0.21302   | 0.30364   | POLR2B   | chr4  | + | 57843888 | 57897334 | 4108  |
| ENSG000001 | 207.1714 | 127.3556 | 0.69775  | 0.019157  | 0.037971  | FAM214A  | chr15 | - | 52873514 | 53002014 | 4590  |
| ENSG000001 | 88.09438 | 10.40512 | 3.0341   | 2.70E-16  | 1.89E-15  | ARAP2    | chr4  | - | 36067620 | 36246131 | 7514  |
| ENSG000001 | 2891.023 | 1947.478 | 0.56625  | 0.057501  | 0.10056   | TPR      | chr1  | - | 1.86E+08 | 1.86E+08 | 7538  |
| ENSG000001 | 0.870904 | 12.09811 | -3.3159  | 0.00134   | 0.00326   | CP       | chr3  | - | 1.49E+08 | 1.49E+08 | 4676  |
| ENSG000001 | 720.2198 | 442.4578 | 0.70063  | 7.18E-07  | 2.60E-06  | KIAA0556 | chr16 | + | 27561454 | 27791690 | 6616  |
| ENSG000001 | 199.5709 | 182.9096 | 0.12484  | 0.51831   | 0.62101   | DTNBP1   | chr6  | - | 15523032 | 15663289 | 1880  |
| ENSG000001 | 1.08924  | 54.98177 | -5.4332  | 2.35E-11  | 1.21E-10  | XK       | chrX  | + | 37545012 | 37591383 | 5206  |
| ENSG000001 | 0.36308  | 50.87626 | -6.404   | 7.92E-10  | 3.69E-09  | ANO2     | chr12 | - | 5641035  | 6055398  | 3717  |
| ENSG000001 | 300.5563 | 142.7164 | 1.0722   | 4.49E-06  | 1.50E-05  | C12orf4  | chr12 | - | 4596894  | 4647674  | 3826  |
| ENSG000001 | 204.3117 | 22.3219  | 3.1885   | 1.49E-26  | 1.67E-25  | SCML1    | chrX  | + | 17755588 | 17773105 | 4615  |
| ENSG000001 | 1622.957 | 989.3171 | 0.71265  | 5.10E-08  | 2.04E-07  | WWC3     | chrX  | + | 9983602  | 10112518 | 6647  |
| ENSG000001 | 639.2839 | 15.95689 | 5.2804   | 2.40E-93  | 1.26E-91  | ARHGAP6  | chrX  | - | 11136239 | 11683821 | 6299  |
| ENSG000001 | 230.9679 | 200.4769 | 0.20106  | 0.23855   | 0.33319   | FAM184B  | chr4  | - | 17630929 | 17783135 | 6622  |
| ENSG000001 | 13168.65 | 7837.408 | 0.74807  | 2.58E-14  | 1.62E-13  | MAP4     | chr3  | - | 47892182 | 48130769 | 8920  |
| ENSG000001 | 977.4734 | 390.5955 | 1.3216   | 9.61E-18  | 7.30E-17  | GOPC     | chr6  | - | 1.18E+08 | 1.18E+08 | 4604  |
| ENSG000001 | 499.3542 | 2065.891 | -2.0458  | 8.70E-55  | 2.24E-53  | USP28    | chr11 | - | 1.14E+08 | 1.14E+08 | 4669  |
| ENSG000001 | 123.2384 | 182.2917 | -0.5597  | 0.010172  | 0.021357  | HDAC9    | chr7  | + | 18126572 | 19036993 | 4659  |
| ENSG000001 | 1560.963 | 1201.84  | 0.37692  | 0.000104  | 0.000297  | TSPAN17  | chr5  | + | 1.76E+08 | 1.76E+08 | 4445  |
| ENSG000001 | 205.1125 | 423.6452 | -1.0395  | 0.000379  | 0.000999  | NOP16    | chr5  | - | 1.76E+08 | 1.76E+08 | 1256  |
| ENSG000001 | 458.3423 | 230.8503 | 0.98824  | 7.10E-09  | 3.05E-08  | CC2D2A   | chr4  | + | 15471489 | 15603180 | 5249  |
| ENSG000001 | 657.3366 | 1397.415 | -1.0852  | 1.44E-08  | 6.02E-08  | RRM2B    | chr8  | - | 1.03E+08 | 1.03E+08 | 4931  |
| ENSG000001 | 304.168  | 56.77842 | 2.4155   | 1.05E-30  | 1.38E-29  | ZNF800   | chr7  | - | 1.27E+08 | 1.27E+08 | 4358  |
| ENSG000001 | 0.36308  | 0        | 0.4146   | 0.81455   | NA        | TNFRSF17 | chr16 | + | 12058964 | 12061925 | 994   |
| ENSG000001 | 458.5612 | 165.1284 | 1.4721   | 4.91E-21  | 4.34E-20  | SNX29    | chr16 | + | 12070594 | 12668146 | 8171  |
| ENSG000001 | 3.527296 | 313.197  | -6.3234  | 8.51E-42  | 1.56E-40  | LMO3     | chr12 | - | 16701307 | 16763528 | 3759  |
| ENSG000001 | 617.2437 | 438.8881 | 0.49188  | 0.000964  | 0.002399  | MRPS10   | chr6  | - | 42174539 | 42185603 | 2110  |
| ENSG000001 | 27.99033 | 193.3413 | -2.7819  | 5.95E-26  | 6.47E-25  | GUCA1A   | chr6  | + | 42123144 | 42147794 | 2233  |
| ENSG000001 | 1480.298 | 1565.053 | -0.07956 | 0.66382   | 0.74709   | RSF1     | chr11 | - | 77371041 | 77532063 | 11550 |
| ENSG000001 | 1198.626 | 788.7428 | 0.6027   | 4.46E-06  | 1.49E-05  | VPS13D   | chr1  | + | 12290124 | 12572099 | 16318 |
| ENSG000001 | 381.1844 | 436.9823 | -0.19598 | 0.19971   | 0.28827   | CELF2    | chr10 | + | 11047259 | 11378666 | 9233  |
| ENSG000001 | 2901.687 | 1244.223 | 1.2206   | 1.92E-36  | 3.04E-35  | FAM120A  | chr9  | + | 96214004 | 96328397 | 5118  |
| ENSG000001 | 1235.596 | 844.7279 | 0.54821  | 4.52E-05  | 0.000134  | R3HDM1   | chr2  | + | 1.36E+08 | 1.36E+08 | 4648  |
| ENSG000001 | 1444.174 | 255.2063 | 2.4956   | 3.39E-82  | 1.47E-80  | COL9A2   | chr1  | - | 40766159 | 40783488 | 2887  |
| ENSG000001 | 353.4473 | 210.0085 | 0.75012  | 0.001106  | 0.002726  | KITLG    | chr12 | - | 88886570 | 88974628 | 5191  |
| ENSG000001 | 115.1673 | 114.0375 | 0.01578  | 0.95492   | 0.97215   | ERCC8    | chr5  | - | 60169658 | 60240900 | 3424  |
| ENSG000001 | 1026.886 | 47.88268 | 4.4173   | 4.90E-141 | 4.92E-139 | ADAMTS6  | chr5  | - | 64444563 | 64777747 | 7311  |
| ENSG000001 | 4838.516 | 987.5331 | 2.2795   | 1.31E-17  | 9.87E-17  | H6PD     | chr1  | + | 9294834  | 9331396  | 9146  |

|            |          |          |          |           |           |          |       |   |          |          |       |
|------------|----------|----------|----------|-----------|-----------|----------|-------|---|----------|----------|-------|
| ENSG000001 | 1288.427 | 529.9251 | 1.2809   | 1.10E-31  | 1.49E-30  | VAMP3    | chr1  | + | 7831329  | 7841492  | 2205  |
| ENSG000001 | 82.62991 | 138.2506 | -0.73714 | 0.055412  | 0.097261  | PER3     | chr1  | + | 7844380  | 7905237  | 6279  |
| ENSG000001 | 0        | 0.343138 | -0.41864 | 0.81278   | NA        | TNFRSF9  | chr1  | - | 7979907  | 8000926  | 1923  |
| ENSG000001 | 2.302685 | 227.6959 | -6.4629  | 1.42E-32  | 1.99E-31  | EPN3     | chr17 | + | 48609904 | 48621111 | 4071  |
| ENSG000001 | 4.502681 | 1.043983 | 1.8416   | 0.13677   | 0.21002   | SRD5A2   | chr2  | - | 31747550 | 31806136 | 4647  |
| ENSG000001 | 19881.01 | 1945.759 | 3.351    | 0         | 0         | LTBP1    | chr2  | + | 33172039 | 33624576 | 6333  |
| ENSG000001 | 4149.599 | 1838.645 | 1.1735   | 3.56E-27  | 4.05E-26  | RCN1     | chr11 | + | 31833939 | 32127301 | 2653  |
| ENSG000001 | 583.7054 | 171.8975 | 1.7581   | 4.81E-22  | 4.43E-21  | ELN      | chr7  | + | 73442119 | 73484237 | 3781  |
| ENSG000001 | 497.1796 | 960.4077 | -0.94802 | 1.58E-09  | 7.16E-09  | RFC2     | chr7  | - | 73645829 | 73668774 | 1695  |
| ENSG000001 | 2877.081 | 2049.393 | 0.48884  | 9.02E-05  | 0.000259  | ARID1B   | chr6  | + | 1.57E+08 | 1.58E+08 | 8246  |
| ENSG000001 | 1862.357 | 1768.636 | 0.074386 | 0.66434   | 0.74753   | CLPTM1L  | chr5  | - | 1317859  | 1345214  | 3540  |
| ENSG000001 | 966.1746 | 1553.889 | -0.68528 | 8.54E-12  | 4.55E-11  | NEDD4L   | chr18 | + | 55711599 | 56068772 | 8436  |
| ENSG000001 | 7.406507 | 13.19963 | -0.80341 | 0.21342   | 0.30403   | FOXP3    | chrX  | - | 49106897 | 49121288 | 2382  |
| ENSG000001 | 262.0676 | 222.9499 | 0.23003  | 0.40402   | 0.50885   | PPP1R3F  | chrX  | + | 49126306 | 49157929 | 3421  |
| ENSG000001 | 1407.085 | 826.8602 | 0.76504  | 1.53E-07  | 5.88E-07  | HEXB     | chr5  | + | 73935848 | 74018472 | 2021  |
| ENSG000001 | 94.53666 | 128.7854 | -0.44048 | 0.041178  | 0.075226  | PTCD2    | chr5  | + | 71616194 | 71656052 | 2648  |
| ENSG000001 | 0.342542 | 12.52867 | -4.4304  | 0.000222  | 0.000604  | KIAA2022 | chrX  | - | 73952684 | 74145320 | 11759 |
| ENSG000001 | 518.3938 | 306.4398 | 0.75878  | 7.72E-06  | 2.52E-05  | JKAMP    | chr14 | + | 59951161 | 59972128 | 2302  |
| ENSG000001 | 2791.701 | 323.1039 | 3.1037   | 2.01E-92  | 1.04E-90  | DKK3     | chr11 | - | 11984653 | 12031316 | 2650  |
| ENSG000001 | 28.07085 | 445.8517 | -3.9659  | 1.07E-64  | 3.48E-63  | ARHGEF5  | chr7  | + | 1.44E+08 | 1.44E+08 | 5544  |
| ENSG000001 | 81.22723 | 1605.161 | -4.2995  | 8.45E-169 | 1.21E-166 | NFE2L3   | chr7  | + | 26191860 | 26226745 | 3686  |
| ENSG000001 | 395.272  | 403.2117 | -0.02964 | 0.82619   | 0.87763   | MCUR1    | chr6  | - | 13791020 | 13814800 | 1826  |
| ENSG000001 | 1607.472 | 808.2149 | 0.99154  | 9.36E-20  | 7.80E-19  | LIMA1    | chr12 | - | 50569571 | 50677329 | 3920  |
| ENSG000001 | 218.2582 | 422.9846 | -0.95121 | 5.27E-06  | 1.75E-05  | LETMD1   | chr12 | + | 51441745 | 51454207 | 2948  |
| ENSG000001 | 129.9002 | 160.0623 | -0.29789 | 0.15976   | 0.23938   | SLC4A8   | chr12 | + | 51785101 | 51902980 | 4395  |
| ENSG000001 | 18.91235 | 1350.196 | -6.121   | 9.45E-154 | 1.13E-151 | LAMC3    | chr9  | + | 1.34E+08 | 1.34E+08 | 6133  |
| ENSG000001 | 2.67693  | 3.411978 | -0.31187 | 0.76295   | 0.82798   | PTGER3   | chr1  | - | 71318036 | 71513491 | 6982  |
| ENSG000001 | 10.72647 | 0.357707 | 4.2127   | 0.000535  | 0.001382  | TNIP3    | chr4  | - | 1.22E+08 | 1.22E+08 | 2429  |
| ENSG000001 | 730.2822 | 748.4951 | -0.03488 | 0.78527   | 0.8462    | MAPK9    | chr5  | - | 1.8E+08  | 1.8E+08  | 4815  |
| ENSG000001 | 18.8729  | 293.3933 | -3.9362  | 1.75E-29  | 2.20E-28  | COL23A1  | chr5  | - | 1.78E+08 | 1.78E+08 | 3061  |
| ENSG000001 | 3794.56  | 2507.066 | 0.59762  | 1.02E-08  | 4.33E-08  | BCAR1    | chr16 | - | 75262928 | 75301951 | 4659  |
| ENSG000001 | 468.0507 | 337.7589 | 0.46946  | 0.000787  | 0.001984  | FAM160A2 | chr11 | - | 6232565  | 6255941  | 3481  |
| ENSG000001 | 1027.892 | 206.1464 | 2.3112   | 2.80E-27  | 3.21E-26  | HERPUD1  | chr16 | + | 56965960 | 56977798 | 2199  |
| ENSG000001 | 784.8629 | 331.3454 | 1.2365   | 4.41E-07  | 1.63E-06  | HOMER3   | chr19 | - | 19040010 | 19052070 | 1979  |
| ENSG000001 | 320.0375 | 550.609  | -0.7817  | 1.37E-09  | 6.23E-09  | RAD51    | chr15 | + | 40986972 | 41024354 | 2266  |
| ENSG000001 | 308.311  | 501.6303 | -0.70009 | 2.37E-05  | 7.28E-05  | POLQ     | chr3  | - | 1.21E+08 | 1.21E+08 | 8775  |
| ENSG000001 | 312.1672 | 699.3563 | -1.1609  | 3.88E-11  | 1.98E-10  | PIK3CB   | chr3  | - | 1.38E+08 | 1.39E+08 | 4747  |
| ENSG000001 | 484.0909 | 2355.284 | -2.2765  | 2.12E-38  | 3.59E-37  | CYBA     | chr16 | - | 88709691 | 88717560 | 1415  |
| ENSG000001 | 382.2364 | 729.0603 | -0.92955 | 9.24E-14  | 5.58E-13  | THOC3    | chr5  | - | 1.75E+08 | 1.75E+08 | 1796  |
| ENSG000001 | 737.9188 | 888.7355 | -0.26874 | 0.02045   | 0.040253  | HEBP2    | chr6  | + | 1.39E+08 | 1.39E+08 | 990   |
| ENSG000001 | 564.0262 | 472.8425 | 0.25442  | 0.10658   | 0.17038   | MPHOSPH5 | chr12 | - | 1.24E+08 | 1.24E+08 | 5799  |
| ENSG000001 | 867.3412 | 868.799  | -0.00147 | 0.99027   | 0.99495   | PLEKHA5  | chr12 | + | 19282648 | 19529334 | 6487  |
| ENSG000001 | 0        | 2208.262 | -12.197  | 2.28E-30  | 2.94E-29  | PRSS8    | chr16 | - | 31142756 | 31147083 | 1870  |
| ENSG000001 | 645.3686 | 691.8237 | -0.09942 | 0.43353   | 0.53893   | SIKE1    | chr1  | - | 1.15E+08 | 1.15E+08 | 5506  |
| ENSG000001 | 920.3885 | 1427.482 | -0.63045 | 0.004191  | 0.009434  | RRP12    | chr10 | - | 99116115 | 99161127 | 4399  |
| ENSG000001 | 209.5672 | 217.7715 | -0.05572 | 0.73474   | 0.8042    | FNIP2    | chr4  | + | 1.6E+08  | 1.6E+08  | 6925  |
| ENSG000001 | 4066.893 | 1618.51  | 1.3235   | 2.82E-08  | 1.15E-07  | MSMO1    | chr4  | + | 1.66E+08 | 1.66E+08 | 2269  |
| ENSG000001 | 1156.866 | 731.9665 | 0.65975  | 2.50E-08  | 1.03E-07  | TTC17    | chr11 | + | 43380482 | 43516483 | 4469  |
| ENSG000001 | 25.4376  | 3.959884 | 2.6      | 1.91E-05  | 5.94E-05  | ALX4     | chr11 | - | 44281994 | 44331716 | 5750  |
| ENSG000001 | 0.36308  | 44.73946 | -6.2245  | 3.51E-09  | 1.55E-08  | FSTL4    | chr5  | - | 1.33E+08 | 1.33E+08 | 5419  |
| ENSG000001 | 1306.446 | 2264.322 | -0.79168 | 1.92E-06  | 6.68E-06  | FOXN3    | chr14 | - | 89591215 | 90085493 | 7832  |
| ENSG000001 | 0        | 3.512346 | -3.2894  | 0.030314  | 0.057277  | METTL24  | chr6  | - | 1.11E+08 | 1.11E+08 | 1119  |
| ENSG000001 | 905.5214 | 693.9008 | 0.38321  | 0.007293  | 0.01572   | AKR7A2   | chr1  | - | 19630459 | 19638640 | 1362  |
| ENSG000001 | 909.5578 | 1290.015 | -0.50002 | 0.10915   | 0.17382   | MRT04    | chr1  | + | 19578033 | 19586622 | 2315  |
| ENSG000001 | 24.53076 | 90.80601 | -1.8522  | 1.91E-07  | 7.28E-07  | NNAT     | chr20 | + | 36149617 | 36152092 | 1294  |
| ENSG000001 | 282.9529 | 155.8344 | 0.85736  | 2.25E-06  | 7.78E-06  | USE1     | chr19 | + | 17326155 | 17330638 | 1776  |
| ENSG000001 | 6.763312 | 104.5974 | -3.8882  | 3.14E-14  | 1.96E-13  | MCF2L2   | chr3  | - | 1.83E+08 | 1.83E+08 | 7813  |
| ENSG000001 | 91.33635 | 108.3515 | -0.24187 | 0.32821   | 0.43126   | NRIP2    | chr12 | - | 2934514  | 2944710  | 2746  |
| ENSG000001 | 73.22733 | 24.38327 | 1.5634   | 1.66E-06  | 5.83E-06  | LAMA3    | chr18 | + | 21269407 | 21535030 | 10661 |
| ENSG000001 | 483.8956 | 496.9095 | -0.03758 | 0.8257    | 0.87718   | AP5M1    | chr14 | + | 57735627 | 57756797 | 3074  |
| ENSG000001 | 311.4303 | 386.6211 | -0.30988 | 0.16941   | 0.25125   | ANAPC4   | chr4  | + | 25378835 | 25420120 | 3807  |
| ENSG000001 | 1.669842 | 95.828   | -5.6214  | 4.23E-16  | 2.94E-15  | KCNQ1    | chr11 | + | 2465914  | 2870339  | 3245  |
| ENSG000001 | 958.3071 | 598.6911 | 0.67772  | 1.77E-08  | 7.36E-08  | TRAPPC3  | chr1  | - | 36602173 | 36615098 | 2428  |
| ENSG000001 | 3869.737 | 4315.752 | -0.157   | 0.32902   | 0.43217   | THRAP3   | chr1  | + | 36690017 | 36770958 | 4432  |
| ENSG000001 | 1116.565 | 771.1941 | 0.5331   | 2.51E-05  | 7.68E-05  | PHPT1    | chr9  | + | 1.4E+08  | 1.4E+08  | 1316  |

|            |          |          |          |           |           |          |       |   |          |          |       |
|------------|----------|----------|----------|-----------|-----------|----------|-------|---|----------|----------|-------|
| ENSG000001 | 1.213446 | 174.0045 | -6.7172  | 2.00E-19  | 1.64E-18  | ENTPD2   | chr9  | - | 1.4E+08  | 1.4E+08  | 2095  |
| ENSG000001 | 0.342542 | 13.24575 | -4.527   | 0.000136  | 0.000382  | LY75     | chr2  | - | 1.61E+08 | 1.61E+08 | 6886  |
| ENSG000001 | 817.2972 | 619.5796 | 0.39979  | 0.018989  | 0.037674  | ARID4B   | chr1  | - | 2.35E+08 | 2.35E+08 | 6067  |
| ENSG000001 | 315.0116 | 217.6739 | 0.52955  | 0.023766  | 0.046103  | OPN3     | chr1  | - | 2.42E+08 | 2.42E+08 | 2620  |
| ENSG000001 | 347.9579 | 117.3647 | 1.564    | 8.91E-19  | 7.06E-18  | SDCCAG8  | chr1  | + | 2.43E+08 | 2.44E+08 | 2567  |
| ENSG000001 | 95.78923 | 15.2018  | 2.6307   | 1.51E-14  | 9.63E-14  | PTPRN    | chr2  | - | 2.2E+08  | 2.2E+08  | 5099  |
| ENSG000001 | 246.67   | 15.08928 | 4.02     | 2.38E-44  | 4.68E-43  | HHAT     | chr1  | + | 2.11E+08 | 2.11E+08 | 3626  |
| ENSG000001 | 1920.531 | 3135.693 | -0.70541 | 0.000114  | 0.000323  | KIF1B    | chr1  | + | 10270863 | 10441661 | 10669 |
| ENSG000001 | 277.4935 | 276.7203 | 0.005719 | 0.97204   | 0.9846    | FOXC1    | chr6  | + | 1610681  | 1614127  | 3447  |
| ENSG000001 | 641.4046 | 516.6414 | 0.31246  | 0.012167  | 0.025125  | TBC1D22A | chr22 | + | 47158518 | 47571336 | 3787  |
| ENSG000001 | 878.1655 | 2794.157 | -1.6634  | 1.02E-14  | 6.56E-14  | SYNE2    | chr14 | + | 64319683 | 64693165 | 21878 |
| ENSG000001 | 47.70162 | 676.4321 | -3.8212  | 2.35E-92  | 1.21E-90  | PLEKHH1  | chr14 | + | 68000018 | 68056329 | 6604  |
| ENSG000001 | 1601.246 | 227.173  | 2.8134   | 2.56E-115 | 1.83E-113 | ATP9A    | chr20 | - | 50213053 | 50385173 | 8106  |
| ENSG000001 | 0.36308  | 0        | 0.4146   | 0.81455   | NA        | SPO11    | chr20 | + | 55904815 | 55919050 | 1834  |
| ENSG000001 | 0        | 0.640152 | -0.82869 | 0.63935   | NA        | CBLN4    | chr20 | - | 54572496 | 54580528 | 3024  |
| ENSG000001 | 0        | 3.711409 | -3.3594  | 0.025926  | 0.049862  | CHRD12   | chr11 | - | 74407474 | 74442430 | 1971  |
| ENSG000001 | 1913.114 | 529.5765 | 1.8512   | 1.55E-55  | 4.05E-54  | FAM168A  | chr11 | - | 73111532 | 73309234 | 7296  |
| ENSG000001 | 157.9906 | 105.5726 | 0.57814  | 0.005043  | 0.011228  | REL1     | chr11 | + | 73087309 | 73108519 | 4346  |
| ENSG000001 | 412.0151 | 238.6261 | 0.78775  | 3.73E-07  | 1.39E-06  | GALC     | chr14 | - | 88304164 | 88460009 | 3883  |
| ENSG000001 | 937.9303 | 1866.324 | -0.98667 | 0.000297  | 0.000797  | NOP58    | chr2  | + | 2.03E+08 | 2.03E+08 | 2046  |
| ENSG000001 | 3086.354 | 1928.451 | 0.67786  | 2.71E-12  | 1.49E-11  | SZRD1    | chr1  | + | 16679070 | 16724640 | 3636  |
| ENSG000001 | 13.30927 | 591.572  | -5.4044  | 2.69E-48  | 5.88E-47  | KCNH2    | chr7  | - | 1.51E+08 | 1.51E+08 | 4717  |
| ENSG000001 | 1308.537 | 1520.263 | -0.21558 | 0.071475  | 0.12126   | CUL1     | chr7  | + | 1.48E+08 | 1.48E+08 | 3064  |
| ENSG000001 | 335.1372 | 137.9968 | 1.2777   | 2.62E-14  | 1.65E-13  | FAM114A2 | chr5  | - | 1.53E+08 | 1.53E+08 | 4443  |
| ENSG000001 | 484.1689 | 1745.443 | -1.8472  | 1.44E-47  | 3.09E-46  | CYFIP2   | chr5  | + | 1.57E+08 | 1.57E+08 | 6791  |
| ENSG000001 | 1103.681 | 1034.144 | 0.094001 | 0.4463    | 0.55177   | TAB2     | chr6  | + | 1.5E+08  | 1.5E+08  | 4553  |
| ENSG000001 | 438.3086 | 267.1584 | 0.71394  | 3.93E-06  | 1.32E-05  | GINM1    | chr6  | + | 1.5E+08  | 1.5E+08  | 2024  |
| ENSG000001 | 1398.04  | 1141.255 | 0.29183  | 0.022193  | 0.04338   | EIF2AK2  | chr2  | - | 37326353 | 37384208 | 10042 |
| ENSG000001 | 1060.325 | 1357.257 | -0.35547 | 0.027981  | 0.05339   | USP36    | chr17 | - | 76783463 | 76837523 | 5885  |
| ENSG000001 | 1081.484 | 685.9272 | 0.6569   | 5.31E-09  | 2.30E-08  | MLL3     | chr7  | - | 1.52E+08 | 1.52E+08 | 17029 |
| ENSG000001 | 6.690533 | 77.37496 | -3.4871  | 1.60E-14  | 1.02E-13  | MCOLN3   | chr1  | - | 85483765 | 85514182 | 2953  |
| ENSG000001 | 16.26533 | 3.336716 | 2.2074   | 0.001322  | 0.003219  | CCDC85A  | chr2  | + | 56411258 | 56613308 | 3982  |
| ENSG000001 | 1759.126 | 1544.221 | 0.18784  | 0.12945   | 0.20099   | PUM2     | chr2  | - | 20448452 | 20551995 | 6117  |
| ENSG000001 | 751.202  | 843.5133 | -0.16716 | 0.14382   | 0.21887   | MRPL43   | chr10 | - | 1.03E+08 | 1.03E+08 | 2134  |
| ENSG000001 | 1.068702 | 2.353426 | -0.98534 | 0.45565   | 0.56095   | ITIH4    | chr3  | - | 52846991 | 52865495 | 3336  |
| ENSG000001 | 0        | 0.343138 | -0.41864 | 0.81278   | NA        | ITIH1    | chr3  | + | 52811603 | 52826078 | 2911  |
| ENSG000001 | 433.6259 | 341.1322 | 0.34593  | 0.006565  | 0.014281  | C4orf27  | chr4  | - | 1.71E+08 | 1.71E+08 | 1230  |
| ENSG000001 | 1745.57  | 1695.506 | 0.042049 | 0.78231   | 0.84401   | ZFR      | chr5  | - | 32354456 | 32444867 | 4738  |
| ENSG000001 | 184.2296 | 157.9395 | 0.22095  | 0.22956   | 0.32285   | ZNF280C  | chrX  | - | 1.29E+08 | 1.29E+08 | 4634  |
| ENSG000001 | 7.105041 | 56.20205 | -2.8812  | 2.56E-06  | 8.80E-06  | NPFFR2   | chr4  | + | 72897521 | 73013784 | 1922  |
| ENSG000001 | 12.31155 | 1027.107 | -6.3023  | 3.65E-66  | 1.23E-64  | PHF21B   | chr22 | - | 45277042 | 45405880 | 3671  |
| ENSG000001 | 41.16358 | 64.97346 | -0.64519 | 0.10797   | 0.17228   | TRAF1    | chr9  | - | 1.24E+08 | 1.24E+08 | 6324  |
| ENSG000001 | 1081.776 | 584.4799 | 0.88657  | 6.84E-08  | 2.70E-07  | RC3H2    | chr9  | - | 1.26E+08 | 1.26E+08 | 9248  |
| ENSG000001 | 1291.383 | 1435.739 | -0.15216 | 0.14656   | 0.22252   | PCGF2    | chr17 | - | 36890150 | 36906070 | 3062  |
| ENSG000001 | 60.91162 | 119.2673 | -0.96759 | 0.000334  | 0.000888  | IL17RB   | chr3  | + | 53880607 | 53899827 | 2822  |
| ENSG000001 | 269.8464 | 613.2798 | -1.1793  | 6.45E-07  | 2.34E-06  | TRAF3IP2 | chr6  | - | 1.12E+08 | 1.12E+08 | 5128  |
| ENSG000001 | 280.2273 | 1072.32  | -1.9318  | 1.51E-50  | 3.50E-49  | GYG2     | chrX  | + | 2746829  | 2800859  | 3393  |
| ENSG000001 | 8054.97  | 1142.915 | 2.8145   | 1.08E-152 | 1.27E-150 | DCBLD2   | chr3  | - | 98514785 | 98620533 | 6122  |
| ENSG000001 | 0.705622 | 0        | 0.8807   | 0.6196    | NA        | SERPINB3 | chr18 | - | 61322431 | 61329197 | 1777  |
| ENSG000001 | 882.3788 | 40.33841 | 4.4277   | 3.96E-66  | 1.33E-64  | SOAT1    | chr1  | + | 1.79E+08 | 1.79E+08 | 6835  |
| ENSG000001 | 5.870243 | 420.5221 | -6.0156  | 4.24E-58  | 1.18E-56  | PKP2     | chr12 | - | 32943679 | 33049774 | 4302  |
| ENSG000001 | 1.068702 | 7.527217 | -2.5411  | 0.023227  | 0.045189  | MSH4     | chr1  | + | 76262567 | 76378923 | 3266  |
| ENSG000001 | 0        | 9.750394 | -4.907   | 0.000103  | 0.000294  | F7       | chr13 | + | 1.14E+08 | 1.14E+08 | 3109  |
| ENSG000001 | 5402.697 | 5996.759 | -0.15031 | 0.12393   | 0.19397   | GDI2     | chr10 | - | 5807186  | 5884095  | 2499  |
| ENSG000001 | 123.4355 | 19.99848 | 2.6066   | 4.85E-15  | 3.18E-14  | PRDM1    | chr6  | + | 1.07E+08 | 1.07E+08 | 5164  |
| ENSG000001 | 465.5281 | 432.9097 | 0.10596  | 0.53781   | 0.63861   | ATG5     | chr6  | - | 1.07E+08 | 1.07E+08 | 3216  |
| ENSG000001 | 127.3548 | 63.0538  | 1.0051   | 0.000248  | 0.000672  | TMCC3    | chr12 | - | 94960900 | 95044338 | 5877  |
| ENSG000001 | 700.3887 | 962.204  | -0.45711 | 0.006698  | 0.014547  | PITHD1   | chr1  | + | 24104895 | 24114722 | 1603  |
| ENSG000001 | 623.9724 | 1845.474 | -1.5636  | 2.98E-54  | 7.58E-53  | MITA3    | chr2  | + | 42721709 | 42984087 | 5832  |
| ENSG000001 | 848.5484 | 928.8583 | -0.1309  | 0.27441   | 0.3743    | USP13    | chr3  | + | 1.79E+08 | 1.8E+08  | 8323  |
| ENSG000001 | 1410.293 | 373.2039 | 1.914    | 1.62E-33  | 2.35E-32  | ATP11B   | chr3  | + | 1.83E+08 | 1.83E+08 | 7325  |
| ENSG000001 | 2519.783 | 193.9887 | 3.6953   | 4.33E-188 | 8.01E-186 | LAMC2    | chr1  | + | 1.83E+08 | 1.83E+08 | 5147  |
| ENSG000001 | 704.2895 | 894.0912 | -0.34409 | 0.007448  | 0.016031  | CDK14    | chr7  | + | 90095738 | 90839905 | 5163  |
| ENSG000001 | 9369.624 | 2972.683 | 1.6532   | 4.60E-27  | 5.22E-26  | SEC61A1  | chr3  | + | 1.28E+08 | 1.28E+08 | 3635  |
| ENSG000001 | 1531.703 | 1200.608 | 0.35141  | 0.008814  | 0.018726  | PPP1R12A | chr12 | - | 80167343 | 80329240 | 5721  |

|            |          |          |          |           |           |          |       |   |          |          |       |
|------------|----------|----------|----------|-----------|-----------|----------|-------|---|----------|----------|-------|
| ENSG000001 | 5.549053 | 41.8827  | -2.8196  | 6.61E-06  | 2.17E-05  | RASGRF1  | chr15 | - | 79252289 | 79383115 | 6294  |
| ENSG000001 | 4.201215 | 5.702295 | -0.39547 | 0.67389   | 0.75577   | CAMK2B   | chr7  | - | 44256749 | 44374176 | 4447  |
| ENSG000001 | 1984.348 | 2237.152 | -0.17297 | 0.3014    | 0.40279   | CROCC    | chr1  | + | 17066768 | 17299474 | 6656  |
| ENSG000001 | 798.3182 | 1776.974 | -1.1535  | 1.98E-26  | 2.19E-25  | POLR3E   | chr16 | + | 22308730 | 22346424 | 4800  |
| ENSG000001 | 1594.677 | 626.6889 | 1.3433   | 1.14E-11  | 6.00E-11  | ATP2B4   | chr1  | + | 2.04E+08 | 2.04E+08 | 8968  |
| ENSG000001 | 2904.596 | 1683.628 | 0.78637  | 6.35E-17  | 4.63E-16  | ZC3H11A  | chr1  | + | 2.04E+08 | 2.04E+08 | 8404  |
| ENSG000001 | 266.3901 | 243.6538 | 0.12933  | 0.58689   | 0.68258   | RIOK2    | chr5  | - | 96496571 | 96518964 | 3922  |
| ENSG000001 | 276.0191 | 338.204  | -0.29255 | 0.049815  | 0.088673  | YIPF1    | chr1  | - | 54317392 | 54356407 | 1803  |
| ENSG000001 | 567.8451 | 1502.258 | -1.4017  | 2.48E-22  | 2.33E-21  | TMEM48   | chr1  | - | 54231133 | 54304533 | 5134  |
| ENSG000001 | 3.931452 | 5.661004 | -0.48958 | 0.5623    | 0.66064   | DGKG     | chr3  | - | 1.86E+08 | 1.86E+08 | 6054  |
| ENSG000001 | 1161.346 | 545.9149 | 1.0826   | 3.19E-05  | 9.64E-05  | FLYWCH1  | chr16 | + | 2961938  | 3001209  | 5141  |
| ENSG000001 | 524.3588 | 601.1001 | -0.19691 | 0.23084   | 0.32427   | UNKL     | chr16 | - | 1413206  | 1464752  | 5078  |
| ENSG000001 | 27.64697 | 29.86864 | -0.11366 | 0.75889   | 0.82479   | TBXAS1   | chr7  | + | 1.39E+08 | 1.4E+08  | 2367  |
| ENSG000001 | 117.7091 | 119.9691 | -0.03296 | 0.88577   | 0.92025   | PARP12   | chr7  | - | 1.4E+08  | 1.4E+08  | 3796  |
| ENSG000001 | 4284.724 | 2623.085 | 0.7077   | 1.91E-13  | 1.13E-12  | ALDH18A1 | chr10 | - | 97365696 | 97416463 | 3349  |
| ENSG000001 | 541.3246 | 488.2357 | 0.14709  | 0.35163   | 0.45596   | TARBP1   | chr1  | - | 2.35E+08 | 2.35E+08 | 5130  |
| ENSG000001 | 289.8121 | 291.9991 | -0.01101 | 0.93838   | 0.95938   | PET112   | chr4  | - | 1.53E+08 | 1.53E+08 | 6552  |
| ENSG000001 | 203.9092 | 52.06586 | 1.9638   | 1.22E-14  | 7.85E-14  | MXD1     | chr2  | + | 70124820 | 70170077 | 5587  |
| ENSG000001 | 508.332  | 349.3288 | 0.53989  | 0.005547  | 0.012238  | CDK17    | chr12 | - | 96672039 | 96794338 | 4157  |
| ENSG000001 | 127.8978 | 106.7693 | 0.26113  | 0.20128   | 0.29006   | DNAJC25  | chr9  | + | 1.14E+08 | 1.14E+08 | 2572  |
| ENSG000001 | 1467.766 | 15753.96 | -3.4138  | 3.26E-68  | 1.14E-66  | SLC2A3   | chr12 | - | 8071826  | 8088871  | 4414  |
| ENSG000001 | 108.8307 | 195.8756 | -0.83908 | 0.018238  | 0.03631   | PSD      | chr10 | - | 1.04E+08 | 1.04E+08 | 4183  |
| ENSG000001 | 833.3675 | 1362.389 | -0.70848 | 7.01E-09  | 3.01E-08  | CTDP1    | chr18 | + | 77439801 | 77514510 | 3753  |
| ENSG000001 | 2582.733 | 5554.785 | -1.1039  | 6.26E-23  | 6.03E-22  | YBX3     | chr12 | - | 10851683 | 10875911 | 6393  |
| ENSG000001 | 4.845223 | 27.98619 | -2.4367  | 6.72E-05  | 0.000195  | STYK1    | chr12 | - | 10771538 | 10826917 | 2995  |
| ENSG000001 | 15979.94 | 3010.615 | 2.4052   | 7.36E-83  | 3.24E-81  | WNK1     | chr12 | + | 861759   | 1020618  | 11232 |
| ENSG000001 | 1228.942 | 1668.879 | -0.43945 | 0.040597  | 0.074316  | CCAR1    | chr10 | + | 70480769 | 70552134 | 4683  |
| ENSG000001 | 1391.921 | 1291.739 | 0.10745  | 0.49649   | 0.60027   | OGFR     | chr20 | + | 61436187 | 61445352 | 4506  |
| ENSG000001 | 0.685084 | 7.269878 | -2.95    | 0.015321  | 0.030994  | GNA15    | chr19 | + | 3136191  | 3163767  | 2133  |
| ENSG000001 | 90.08948 | 191.2891 | -1.0813  | 0.000254  | 0.000687  | PIGV     | chr1  | + | 27113963 | 27124889 | 2713  |
| ENSG000001 | 2309.824 | 2693.903 | -0.22147 | 0.1884    | 0.27469   | PTPRU    | chr1  | + | 29563028 | 29653325 | 5579  |
| ENSG000001 | 743.7067 | 1272.126 | -0.77242 | 2.26E-06  | 7.79E-06  | SNRNP40  | chr1  | - | 31732417 | 31769662 | 1928  |
| ENSG000001 | 0.580602 | 21.4843  | -4.5494  | 1.00E-05  | 3.21E-05  | RIMBP2   | chr12 | - | 1.31E+08 | 1.31E+08 | 6321  |
| ENSG000001 | 55531.81 | 312.1178 | 7.4655   | 0         | 0         | COL11A1  | chr1  | - | 1.03E+08 | 1.04E+08 | 7327  |
| ENSG000001 | 1769.792 | 1802.784 | -0.02638 | 0.8787    | 0.91554   | QSER1    | chr11 | + | 32914724 | 33014862 | 9335  |
| ENSG000001 | 254.3722 | 101.1083 | 1.3256   | 3.83E-08  | 1.55E-07  | MPC1     | chr6  | - | 1.67E+08 | 1.67E+08 | 962   |
| ENSG000001 | 412.8039 | 302.9925 | 0.44418  | 0.003873  | 0.008766  | ACAA1    | chr3  | - | 38164201 | 38178733 | 4720  |
| ENSG000001 | 4959.315 | 4184.234 | 0.24475  | 0.1702    | 0.25234   | BCAT1    | chr12 | - | 24964295 | 25102393 | 8335  |
| ENSG000001 | 2809.657 | 1977.765 | 0.50575  | 2.16E-05  | 6.65E-05  | HDAC7    | chr12 | - | 48176505 | 48226915 | 6414  |
| ENSG000001 | 2310.076 | 354.1264 | 2.6932   | 5.03E-28  | 5.95E-27  | LZTS1    | chr8  | - | 20103676 | 20161474 | 5706  |
| ENSG000001 | 68.53467 | 0.700845 | 6.1932   | 1.66E-12  | 9.26E-12  | PRDM6    | chr5  | + | 1.22E+08 | 1.23E+08 | 3052  |
| ENSG000001 | 0        | 1.029414 | -1.1526  | 0.51496   | NA        | WNT8A    | chr5  | + | 1.37E+08 | 1.37E+08 | 1597  |
| ENSG000001 | 35.3763  | 83.62362 | -1.2322  | 0.000114  | 0.000323  | SPAG4    | chr20 | + | 34203814 | 34208971 | 1453  |
| ENSG000001 | 3040.164 | 2822.11  | 0.10757  | 0.34384   | 0.44786   | NCKAP1   | chr2  | - | 1.84E+08 | 1.84E+08 | 4989  |
| ENSG000001 | 491.8156 | 701.1018 | -0.50881 | 0.00063   | 0.001612  | MRPS35   | chr12 | + | 27863706 | 27909228 | 1888  |
| ENSG000001 | 113.4686 | 115.6151 | -0.02598 | 0.91117   | 0.93915   | GUCY1B3  | chr4  | + | 1.57E+08 | 1.57E+08 | 3124  |
| ENSG000001 | 1166.526 | 1424.588 | -0.28832 | 0.029036  | 0.055127  | SFSWAP   | chr12 | + | 1.32E+08 | 1.32E+08 | 5593  |
| ENSG000001 | 1638.399 | 1324.115 | 0.30662  | 0.007102  | 0.015356  | TNK2     | chr3  | - | 1.96E+08 | 1.96E+08 | 5940  |
| ENSG000001 | 1212.889 | 372.8346 | 1.7012   | 5.08E-43  | 9.69E-42  | MON2     | chr12 | + | 62860597 | 62991363 | 10382 |
| ENSG000001 | 215.2505 | 3962.501 | -4.1987  | 4.89E-244 | 1.57E-241 | CDH3     | chr16 | + | 68670092 | 68756519 | 3702  |
| ENSG000001 | 1036.475 | 1333.443 | -0.36238 | 0.009423  | 0.019892  | GPBP1    | chr5  | + | 56469775 | 56560506 | 4683  |
| ENSG000001 | 3.019472 | 21.138   | -2.6786  | 0.000548  | 0.001413  | DGAT2    | chr11 | + | 75470557 | 75512579 | 5926  |
| ENSG000001 | 64.78643 | 33.00778 | 0.96997  | 0.013312  | 0.027285  | ZNF112   | chr19 | - | 44830708 | 44871377 | 3654  |
| ENSG000001 | 2185.265 | 2739.86  | -0.32583 | 0.005515  | 0.012175  | CS       | chr12 | - | 56665483 | 56694176 | 3057  |
| ENSG000001 | 19.58367 | 3.008147 | 2.6076   | 0.000212  | 0.00058   | LTK      | chr15 | - | 41795836 | 41806085 | 3444  |
| ENSG000001 | 4.035933 | 2.993578 | 0.39194  | 0.67851   | 0.75928   | MRPS24   | chr7  | - | 43906157 | 43909492 | 1727  |
| ENSG000001 | 1030.434 | 440.9452 | 1.2216   | 3.35E-14  | 2.09E-13  | ELMO2    | chr20 | - | 44994688 | 45061704 | 4121  |
| ENSG000001 | 1218.879 | 1422.031 | -0.22219 | 0.036648  | 0.067881  | WAPAL    | chr10 | - | 88195013 | 88281572 | 6333  |
| ENSG000001 | 2432.912 | 698.2963 | 1.7984   | 5.57E-47  | 1.17E-45  | VMP1     | chr17 | + | 57784553 | 57919616 | 4325  |
| ENSG000001 | 918.9492 | 227.7824 | 2.0083   | 4.37E-57  | 1.19E-55  | APPBP2   | chr17 | - | 58520520 | 58603580 | 6468  |
| ENSG000001 | 1090.965 | 2774.723 | -1.3457  | 2.75E-32  | 3.83E-31  | POLD1    | chr19 | + | 50887461 | 50921273 | 3474  |
| ENSG000001 | 3.330311 | 15.7691  | -2.1661  | 0.001765  | 0.004214  | SEZ6     | chr17 | - | 27281919 | 27333458 | 4471  |
| ENSG000001 | 5888.391 | 11538.79 | -0.96942 | 8.76E-16  | 6.00E-15  | EIF4B    | chr12 | + | 53399942 | 53435993 | 4148  |
| ENSG000001 | 112.555  | 35.03606 | 1.6618   | 1.83E-05  | 5.69E-05  | SLC6A16  | chr19 | - | 49792895 | 49828482 | 2983  |
| ENSG000001 | 711.4776 | 930.2328 | -0.38576 | 0.006245  | 0.013652  | GLTSCR1  | chr19 | + | 48111453 | 48206533 | 5684  |

|                    |          |          |          |          |           |       |   |          |          |       |
|--------------------|----------|----------|----------|----------|-----------|-------|---|----------|----------|-------|
| ENSG000001518.8186 | 533.8033 | -0.04121 | 0.82782  | 0.87876  | SPHK2     | chr19 | + | 49122548 | 49133974 | 3092  |
| ENSG0000018154.541 | 11264.9  | -0.46576 | 1.46E-06 | 5.14E-06 | RPL18     | chr19 | - | 49118585 | 49122793 | 3844  |
| ENSG00000149.01613 | 334.4667 | -2.7563  | 5.96E-44 | 1.16E-42 | CA11      | chr19 | - | 49141199 | 49149569 | 1844  |
| ENSG0000011026.209 | 1206.464 | -0.23331 | 0.049465 | 0.088152 | ISOC2     | chr19 | - | 55964352 | 55973710 | 2283  |
| ENSG0000013940.362 | 4393.875 | -0.15659 | 0.40955  | 0.51444  | U2AF2     | chr19 | + | 56165512 | 56186081 | 3022  |
| ENSG0000014131.5   | 5429.943 | -0.39374 | 0.000265 | 0.000714 | EPN1      | chr19 | + | 56186592 | 56221224 | 2621  |
| ENSG000001836.1852 | 953.4956 | -0.18879 | 0.1653   | 0.2463   | MED29     | chr19 | + | 39881943 | 39891277 | 3653  |
| ENSG000001130.9909 | 65.00018 | 1.0011   | 0.005415 | 0.011979 | AHRR      | chr5  | + | 304291   | 438406   | 5661  |
| ENSG0000010        | 7.642154 | -4.5216  | 0.0006   | 0.001539 | GSC2      | chr22 | - | 19136089 | 19137796 | 1033  |
| ENSG0000011064.935 | 325.9088 | 1.7042   | 3.95E-31 | 5.29E-30 | ZNF275    | chrX  | + | 1.53E+08 | 1.53E+08 | 6418  |
| ENSG000001341.2497 | 411.3219 | -0.26716 | 0.098399 | 0.15928  | MTMR1     | chrX  | + | 1.5E+08  | 1.5E+08  | 4516  |
| ENSG0000014993.757 | 1708.391 | 1.5458   | 2.27E-45 | 4.59E-44 | GPC1      | chr2  | + | 2.41E+08 | 2.41E+08 | 3711  |
| ENSG000001152.9148 | 196.7741 | -0.36492 | 0.066586 | 0.11412  | ADCK1     | chr14 | + | 78266426 | 78401355 | 3560  |
| ENSG000001557.9585 | 416.024  | 0.42131  | 0.026989 | 0.051693 | HAGH      | chr16 | - | 1845621  | 1877195  | 1744  |
| ENSG0000011673.59  | 2085.366 | -0.31665 | 0.012893 | 0.026493 | RNF4      | chr4  | + | 2463947  | 2627047  | 4123  |
| ENSG000001219.9599 | 42.10184 | 2.3769   | 5.19E-18 | 3.98E-17 | CASP8     | chr2  | + | 2.02E+08 | 2.02E+08 | 2930  |
| ENSG000001592.2696 | 18.54892 | 4.7666   | 2.49E-10 | 1.20E-09 | LIMCH1    | chr4  | + | 41361624 | 41702061 | 6165  |
| ENSG000001452.1731 | 872.2392 | -0.94591 | 5.03E-09 | 2.19E-08 | ASUN      | chr12 | - | 27058114 | 27091259 | 2974  |
| ENSG0000011036.767 | 852.7697 | 0.28079  | 0.098526 | 0.15944  | TM7SF3    | chr12 | - | 27126128 | 27167367 | 2709  |
| ENSG0000010342542  | 15.11197 | -4.7278  | 4.40E-05 | 0.000131 | DLX3      | chr17 | - | 48067369 | 48072588 | 2602  |
| ENSG00000127.52358 | 10.52005 | 1.3309   | 0.014955 | 0.030308 | SPA17     | chr11 | + | 1.25E+08 | 1.25E+08 | 4949  |
| ENSG00000117.91724 | 15.74729 | 0.17668  | 0.7575   | 0.8237   | TSPAN32   | chr11 | + | 2323227  | 2339430  | 3325  |
| ENSG0000011.733248 | 1.485073 | 0.13263  | 0.93389  | 0.95662  | WISP2     | chr20 | + | 43343485 | 43357150 | 2759  |
| ENSG0000010        | 0.343138 | -0.41864 | 0.81278  | NA       | DMRT3     | chr9  | + | 976964   | 991731   | 2183  |
| ENSG00000191.33137 | 111.538  | -0.28623 | 0.36078  | 0.46493  | ST3GAL6   | chr3  | + | 98451080 | 98540045 | 3148  |
| ENSG0000015.084097 | 18.20108 | -1.7894  | 0.009371 | 0.019788 | ATP2C2    | chr16 | + | 84402133 | 84497793 | 3600  |
| ENSG000001270.5121 | 985.7758 | -1.8573  | 4.93E-16 | 3.42E-15 | NGFR      | chr17 | + | 47572655 | 47592379 | 3417  |
| ENSG000001608.6365 | 366.1778 | 0.73028  | 0.00046  | 0.001202 | CDON      | chr11 | - | 1.26E+08 | 1.26E+08 | 9138  |
| ENSG000001816.6712 | 558.4702 | 0.54777  | 0.000212 | 0.000578 | TAF2      | chr8  | - | 1.21E+08 | 1.21E+08 | 5048  |
| ENSG0000011985.555 | 1633.294 | 0.28115  | 0.007408 | 0.01595  | HIPK2     | chr7  | - | 1.39E+08 | 1.39E+08 | 15049 |
| ENSG0000011531.527 | 2433.858 | -0.66775 | 6.64E-12 | 3.55E-11 | TNPO3     | chr7  | - | 1.29E+08 | 1.29E+08 | 3771  |
| ENSG0000010        | 0.594029 | -0.81444 | 0.64499  | NA       | MEF2BNB-1 | chr19 | - | 19256376 | 19303400 | 1804  |
| ENSG000001742.3305 | 440.8469 | 0.75154  | 6.83E-09 | 2.94E-08 | RFXANK    | chr19 | + | 19303008 | 19312678 | 1391  |
| ENSG000001562.0539 | 922.7296 | -0.71324 | 0.00031  | 0.000829 | TMEM161A  | chr19 | + | 19229978 | 19249322 | 1930  |
| ENSG00000184.92062 | 571.3206 | -2.7477  | 3.29E-66 | 1.11E-64 | LPAR2     | chr19 | - | 19734477 | 19739739 | 2546  |
| ENSG0000011947.331 | 630.9609 | 1.6234   | 6.20E-25 | 6.46E-24 | CTSA      | chr20 | + | 44519591 | 44527459 | 2187  |
| ENSG0000011723.01  | 1807.043 | -0.06906 | 0.5794   | 0.67587  | SUGP2     | chr19 | - | 19101697 | 19144832 | 5565  |
| ENSG000001631.6177 | 188.5906 | 1.7409   | 4.64E-29 | 5.71E-28 | SLC12A2   | chr5  | + | 1.27E+08 | 1.28E+08 | 6885  |
| ENSG000001207.7585 | 151.1334 | 0.4562   | 0.006985 | 0.015128 | SNX24     | chr5  | + | 1.22E+08 | 1.22E+08 | 2158  |
| ENSG0000011.45232  | 29.66146 | -4.1977  | 2.93E-07 | 1.10E-06 | EYA2      | chr20 | + | 45523263 | 45817492 | 2702  |
| ENSG0000017276.819 | 7418.966 | -0.0278  | 0.75098  | 0.81794  | CNN2      | chr19 | + | 1026212  | 1039068  | 2548  |
| ENSG00000178.57638 | 542.7616 | -2.7677  | 1.08E-20 | 9.38E-20 | ABCA7     | chr19 | + | 1040102  | 1065571  | 6816  |
| ENSG000001916.812  | 106.0525 | 3.0998   | 6.75E-68 | 2.34E-66 | SNCAIP    | chr5  | + | 1.22E+08 | 1.22E+08 | 4986  |
| ENSG000001343.8254 | 666.2702 | -0.95052 | 4.49E-06 | 1.50E-05 | DDX20     | chr1  | + | 1.12E+08 | 1.12E+08 | 4332  |
| ENSG0000011390.324 | 732.894  | 0.92255  | 1.59E-17 | 1.20E-16 | BTBD1     | chr15 | - | 83685174 | 83736106 | 3297  |
| ENSG000001130.7921 | 269.6382 | -1.0407  | 6.46E-08 | 2.56E-07 | FAR2      | chr12 | + | 29302036 | 29493913 | 2095  |
| ENSG0000012.749709 | 7.630874 | -1.3912  | 0.14292  | 0.2177   | BCAS1     | chr20 | - | 52553316 | 52687304 | 6112  |
| ENSG0000010342542  | 0.297015 | -0.00202 | 0.99909  | NA       | POU1F1    | chr3  | - | 87308554 | 87325737 | 1491  |
| ENSG0000010.685084 | 0.357707 | 0.4822   | 0.78686  | NA       | CHI3L2    | chr1  | + | 1.12E+08 | 1.12E+08 | 2169  |
| ENSG0000012274.977 | 1538.165 | 0.56259  | 0.005594 | 0.012331 | SBNO2     | chr19 | - | 1107636  | 1174282  | 4922  |
| ENSG000001330.0585 | 442.7865 | -0.42152 | 0.007227 | 0.015596 | PMS1      | chr2  | + | 1.91E+08 | 1.91E+08 | 3225  |
| ENSG0000011768.174 | 1695.399 | 0.060476 | 0.70397  | 0.77988  | HMG20B    | chr19 | + | 3572775  | 3579086  | 2434  |
| ENSG00000115.62312 | 9.52052  | 0.71215  | 0.2297   | 0.32301  | CALCRL    | chr2  | - | 1.88E+08 | 1.88E+08 | 5223  |
| ENSG000001275.5003 | 379.3275 | -0.45893 | 0.001388 | 0.003369 | TAF11     | chr6  | - | 34845555 | 34855866 | 1580  |
| ENSG0000011031.248 | 1553.577 | -0.59065 | 5.23E-07 | 1.92E-06 | ANKS1A    | chr6  | + | 34857042 | 35059179 | 6336  |
| ENSG0000015395.368 | 5621.389 | -0.05913 | 0.61412  | 0.70605  | AP3D1     | chr19 | - | 2100988  | 2164464  | 5034  |
| ENSG000001465.8364 | 475.9832 | -0.03042 | 0.80089  | 0.85905  | ZNF76     | chr6  | + | 35226686 | 35263762 | 4651  |
| ENSG000001710.9993 | 416.5746 | 0.76753  | 0.000194 | 0.000532 | SLC9A3R2  | chr16 | + | 2075357  | 2089027  | 2194  |
| ENSG000001192.059  | 525.9411 | -1.4516  | 3.97E-24 | 4.01E-23 | NTHL1     | chr16 | - | 2089816  | 2097867  | 1067  |
| ENSG000001385.7553 | 792.3211 | -1.0365  | 3.95E-09 | 1.73E-08 | UHRF1BP1  | chr6  | + | 34759857 | 34850915 | 9570  |
| ENSG0000012087.693 | 1195.167 | 0.80368  | 3.06E-08 | 1.25E-07 | GNAI3     | chr1  | + | 1.1E+08  | 1.1E+08  | 3206  |
| ENSG0000014160.701 | 7531.582 | -0.85545 | 4.39E-19 | 3.53E-18 | IPO5      | chr13 | + | 98605912 | 98676551 | 6003  |
| ENSG0000011745.601 | 1562.723 | 0.15952  | 0.22864  | 0.32177  | OAT       | chr10 | - | 1.26E+08 | 1.26E+08 | 2048  |
| ENSG000001547.8171 | 842.7991 | -0.61981 | 0.000152 | 0.000424 | WDR3      | chr1  | + | 1.18E+08 | 1.19E+08 | 3858  |
| ENSG000001786.2729 | 473.102  | 0.73342  | 8.76E-07 | 3.14E-06 | PKN2      | chr1  | + | 89149905 | 89301938 | 6121  |

|            |          |          |          |           |           |          |       |   |          |          |       |
|------------|----------|----------|----------|-----------|-----------|----------|-------|---|----------|----------|-------|
| ENSG000001 | 947.1276 | 2000.656 | -1.0775  | 5.28E-23  | 5.10E-22  | WDR18    | chr19 | + | 983174   | 994569   | 1548  |
| ENSG000001 | 5226.347 | 501.078  | 3.373    | 1.72E-66  | 5.85E-65  | TRAM2    | chr6  | - | 52362200 | 52441713 | 6908  |
| ENSG000001 | 55.95426 | 162.2885 | -1.5192  | 7.53E-07  | 2.72E-06  | NTN1     | chr17 | + | 8924859  | 9147317  | 5954  |
| ENSG000001 | 1.555988 | 0        | 1.8901   | 0.28116   | NA        | GLP2R    | chr17 | + | 9725523  | 9795419  | 4572  |
| ENSG000001 | 439.6059 | 807.3631 | -0.87366 | 3.31E-05  | 9.99E-05  | MCM10    | chr10 | + | 13203554 | 13253104 | 4587  |
| ENSG000001 | 444.9523 | 202.4153 | 1.131    | 4.74E-08  | 1.90E-07  | DGKA     | chr12 | + | 56321103 | 56347811 | 5436  |
| ENSG000001 | 31.98356 | 1598.884 | -5.6187  | 3.40E-190 | 6.65E-188 | ERBB3    | chr12 | + | 56473641 | 56497289 | 5919  |
| ENSG000001 | 0.705622 | 1.370136 | -0.71417 | 0.6513    | 0.73678   | ROPN1    | chr3  | - | 1.24E+08 | 1.24E+08 | 2056  |
| ENSG000001 | 432.8939 | 4.989297 | 6.3663   | 1.45E-58  | 4.08E-57  | ANKRD44  | chr2  | - | 1.98E+08 | 1.98E+08 | 3686  |
| ENSG000001 | 2295.955 | 3396.944 | -0.56412 | 3.04E-06  | 1.03E-05  | KARS     | chr16 | - | 75661622 | 75682541 | 2171  |
| ENSG000001 | 790.6608 | 380.5647 | 1.0541   | 9.16E-13  | 5.22E-12  | ADAT1    | chr16 | - | 75630879 | 75657198 | 2768  |
| ENSG000001 | 1697.667 | 481.0731 | 1.8167   | 3.03E-41  | 5.48E-40  | PDIA5    | chr3  | + | 1.23E+08 | 1.23E+08 | 2232  |
| ENSG000001 | 140.0784 | 376.9946 | -1.4245  | 3.79E-13  | 2.22E-12  | TBC1D22B | chr6  | + | 37225548 | 37300746 | 3462  |
| ENSG000001 | 1177.426 | 1609.781 | -0.45073 | 0.000169  | 0.000467  | NDUFB4   | chr3  | + | 1.2E+08  | 1.2E+08  | 1426  |
| ENSG000001 | 1976.828 | 1815.887 | 0.12246  | 0.19331   | 0.28077   | SPEN     | chr1  | + | 16174359 | 16266955 | 12232 |
| ENSG000001 | 864.6302 | 550.8654 | 0.6485   | 1.99E-05  | 6.16E-05  | MYLK     | chr3  | - | 1.23E+08 | 1.24E+08 | 10027 |
| ENSG000001 | 845.634  | 987.7784 | -0.22234 | 0.40158   | 0.50634   | ZC3H15   | chr2  | + | 1.87E+08 | 1.87E+08 | 2138  |
| ENSG000001 | 602.1681 | 522.1555 | 0.20601  | 0.17195   | 0.25447   | MAP2K4   | chr17 | + | 11924141 | 12047147 | 3856  |
| ENSG000001 | 327.5727 | 249.0525 | 0.39313  | 0.146     | 0.22178   | TMEM206  | chr1  | - | 2.13E+08 | 2.13E+08 | 2475  |
| ENSG000001 | 4.637074 | 8.635181 | -0.85383 | 0.27176   | 0.37118   | SNAP91   | chr6  | - | 84262599 | 84419410 | 4726  |
| ENSG000001 | 1566.028 | 838.1268 | 0.901    | 2.13E-09  | 9.53E-09  | SLK      | chr10 | + | 1.06E+08 | 1.06E+08 | 7766  |
| ENSG000001 | 164.6967 | 112.4991 | 0.55264  | 0.007665  | 0.016454  | CYB5R4   | chr6  | + | 84569362 | 84670146 | 2255  |
| ENSG000001 | 8.64049  | 9.484933 | -0.12184 | 0.85283   | 0.89662   | COL17A1  | chr10 | - | 1.06E+08 | 1.06E+08 | 5734  |
| ENSG000001 | 14.37797 | 198.2304 | -3.7413  | 2.01E-25  | 2.14E-24  | GSTO2    | chr10 | + | 1.06E+08 | 1.06E+08 | 2694  |
| ENSG000001 | 201.1088 | 212.8963 | -0.08352 | 0.62972   | 0.71935   | SEC61A2  | chr10 | + | 12171636 | 12211960 | 2462  |
| ENSG000001 | 3.330311 | 503.2966 | -7.1246  | 5.42E-53  | 1.35E-51  | PRKCQ    | chr10 | - | 6469105  | 6622263  | 3285  |
| ENSG000001 | 53.88882 | 418.6642 | -2.9312  | 4.42E-35  | 6.73E-34  | TLE2     | chr19 | - | 2997636  | 3047633  | 2705  |
| ENSG000001 | 1168.903 | 752.086  | 0.63554  | 6.01E-08  | 2.39E-07  | ASB1     | chr2  | + | 2.39E+08 | 2.39E+08 | 6994  |
| ENSG000001 | 620.0134 | 534.7749 | 0.21321  | 0.1789    | 0.2629    | FAM107B  | chr10 | - | 14560556 | 14816896 | 3785  |
| ENSG000001 | 692.0211 | 96.95336 | 2.8278   | 3.48E-45  | 6.98E-44  | ME1      | chr6  | - | 83920108 | 84140797 | 3371  |
| ENSG000001 | 1722.868 | 2643.242 | -0.61651 | 1.91E-05  | 5.95E-05  | TBC1D1   | chr4  | + | 37892708 | 38140796 | 5700  |
| ENSG000001 | 1548.202 | 1109.724 | 0.47917  | 0.002205  | 0.00518   | CDK13    | chr7  | + | 39989636 | 40136733 | 7298  |
| ENSG000001 | 711.6447 | 1568.853 | -1.1381  | 8.49E-13  | 4.85E-12  | MTHFD2   | chr2  | + | 74425689 | 74444692 | 4456  |
| ENSG000001 | 266.1933 | 253.4154 | 0.070313 | 0.74802   | 0.81551   | SLC9A7   | chrX  | - | 46464753 | 46618490 | 3838  |
| ENSG000001 | 782.1947 | 378.8693 | 1.0417   | 9.64E-08  | 3.77E-07  | FOXJ2    | chr12 | + | 8185299  | 8208099  | 5523  |
| ENSG000001 | 16314.43 | 20616.81 | -0.33743 | 8.85E-05  | 0.000254  | YBX1     | chr1  | + | 43148098 | 43168020 | 1524  |
| ENSG000001 | 323.7771 | 237.0421 | 0.4446   | 0.19541   | 0.28332   | PDE4A    | chr19 | + | 10527449 | 10580305 | 4603  |
| ENSG000001 | 190.3113 | 518.5814 | -1.4393  | 1.96E-09  | 8.80E-09  | PPP2R5A  | chr1  | + | 2.12E+08 | 2.13E+08 | 3123  |
| ENSG000001 | 0.36308  | 87.0899  | -7.1313  | 1.88E-12  | 1.05E-11  | CTNNA2   | chr2  | + | 79412357 | 80875905 | 4349  |
| ENSG000001 | 2178.85  | 2593.257 | -0.25113 | 0.007491  | 0.016116  | ELAVL1   | chr19 | - | 8023463  | 8070543  | 6015  |
| ENSG000001 | 27.7429  | 21.97634 | 0.33407  | 0.47165   | 0.57635   | TIE1     | chr1  | + | 43766664 | 43788779 | 3882  |
| ENSG000001 | 1499.34  | 722.906  | 1.0505   | 8.44E-13  | 4.82E-12  | DIP2B    | chr12 | + | 50898768 | 51142450 | 8593  |
| ENSG000001 | 1600.414 | 3206.7   | -1.0022  | 2.09E-26  | 2.31E-25  | SMARCD1  | chr12 | + | 50478755 | 50494495 | 3658  |
| ENSG000001 | 1156.683 | 1376.588 | -0.25057 | 0.034522  | 0.064351  | KDM4A    | chr1  | + | 44115829 | 44171186 | 4474  |
| ENSG000001 | 727.2355 | 945.1982 | -0.37642 | 0.036623  | 0.067844  | NFYC     | chr1  | + | 41157320 | 41237275 | 2363  |
| ENSG000001 | 0.342542 | 5.376142 | -3.2233  | 0.016337  | 0.032847  | ZMYND12  | chr1  | - | 42896000 | 42921938 | 1775  |
| ENSG000001 | 210.7635 | 269.4772 | -0.35287 | 0.24991   | 0.34629   | SLC9A3   | chr5  | - | 473425   | 524447   | 2584  |
| ENSG000001 | 168.843  | 94.50628 | 0.83002  | 0.007236  | 0.01561   | NGEF     | chr2  | - | 2.34E+08 | 2.34E+08 | 3215  |
| ENSG000001 | 1792.076 | 1023.693 | 0.80328  | 0.004564  | 0.010224  | ASPM     | chr1  | - | 1.97E+08 | 1.97E+08 | 10887 |
| ENSG000001 | 0        | 0.297015 | -0.41864 | 0.81278   | NA        | CD84     | chr1  | - | 1.61E+08 | 1.61E+08 | 8181  |
| ENSG000001 | 1444.053 | 324.072  | 2.1542   | 9.48E-62  | 2.86E-60  | ELOVL1   | chr1  | - | 43829068 | 43833696 | 1477  |
| ENSG000001 | 7.915144 | 8.430413 | -0.07962 | 0.90722   | 0.93617   | SPI1     | chr11 | - | 47376411 | 47400127 | 1403  |
| ENSG000001 | 75.83165 | 112.7548 | -0.56269 | 0.024331  | 0.047077  | ZNRD1    | chr6  | + | 30026676 | 30032686 | 3672  |
| ENSG000001 | 5.414661 | 14.1691  | -1.3101  | 0.053063  | 0.09367   | MPPED2   | chr11 | - | 30406040 | 30608419 | 5591  |
| ENSG000001 | 50.68939 | 5.237772 | 3.1788   | 3.22E-08  | 1.31E-07  | CLDN18   | chr3  | + | 1.38E+08 | 1.38E+08 | 3520  |
| ENSG000001 | 332.3274 | 202.5693 | 0.71368  | 0.000743  | 0.001882  | ZBTB11   | chr3  | - | 1.01E+08 | 1.01E+08 | 6020  |
| ENSG000001 | 200.1139 | 332.3062 | -0.73093 | 1.76E-05  | 5.48E-05  | ATXN3    | chr14 | - | 92524896 | 92572965 | 6950  |
| ENSG000001 | 1044.998 | 447.4213 | 1.2231   | 1.42E-15  | 9.64E-15  | GOLGA5   | chr14 | + | 93260576 | 93306308 | 2969  |
| ENSG000001 | 20.35269 | 1674.972 | -6.313   | 9.00E-140 | 8.80E-138 | FGFR2    | chr10 | - | 1.23E+08 | 1.23E+08 | 4255  |
| ENSG000001 | 366.0694 | 494.6359 | -0.43103 | 0.037675  | 0.069593  | LRRRC40  | chr1  | - | 70610488 | 70671303 | 2884  |
| ENSG000001 | 307.2151 | 394.7658 | -0.35981 | 0.014905  | 0.030213  | ISOC1    | chr5  | + | 1.28E+08 | 1.28E+08 | 1940  |
| ENSG000001 | 691.0188 | 362.9066 | 0.9279   | 8.47E-08  | 3.32E-07  | EML1     | chr14 | + | 1E+08    | 1E+08    | 4535  |
| ENSG000001 | 192.4678 | 253.093  | -0.3894  | 0.049123  | 0.087632  | TRMT11   | chr6  | + | 1.26E+08 | 1.26E+08 | 2409  |
| ENSG000001 | 826.5807 | 1004.31  | -0.27976 | 0.052499  | 0.092802  | THUMPD1  | chr16 | - | 20744986 | 20753406 | 4122  |
| ENSG000001 | 412.8922 | 225.1313 | 0.87123  | 2.69E-09  | 1.20E-08  | MSANTD3  | chr9  | + | 1.03E+08 | 1.03E+08 | 1991  |

|            |          |          |          |           |           |          |       |   |          |          |       |
|------------|----------|----------|----------|-----------|-----------|----------|-------|---|----------|----------|-------|
| ENSG000001 | 19.19051 | 2472.109 | -6.9866  | 3.18E-203 | 7.13E-201 | KIF26A   | chr14 | + | 1.05E+08 | 1.05E+08 | 6714  |
| ENSG000001 | 659.8195 | 262.7304 | 1.3246   | 1.11E-15  | 7.56E-15  | ATG2B    | chr14 | - | 96747595 | 96830207 | 11628 |
| ENSG000001 | 1024.27  | 1994.16  | -0.96015 | 1.52E-15  | 1.02E-14  | ARFGEF1  | chr8  | - | 68085747 | 68255912 | 7225  |
| ENSG000001 | 158.2554 | 191.3398 | -0.27058 | 0.13512   | 0.20807   | ZFAT     | chr8  | - | 1.35E+08 | 1.36E+08 | 5472  |
| ENSG000001 | 577.3208 | 440.9494 | 0.38711  | 0.039893  | 0.073209  | MTFR1    | chr8  | + | 66556969 | 66683496 | 2640  |
| ENSG000001 | 58.35449 | 199.3359 | -1.7639  | 1.65E-11  | 8.62E-11  | STAG3    | chr7  | + | 99775186 | 99819111 | 4450  |
| ENSG000001 | 437.4394 | 345.915  | 0.33984  | 0.016492  | 0.033122  | FECH     | chr18 | - | 55215515 | 55254004 | 3853  |
| ENSG000001 | 882.4604 | 332.6891 | 1.4038   | 1.40E-16  | 9.96E-16  | MYO9A    | chr15 | - | 72114632 | 72410918 | 12409 |
| ENSG000001 | 1266.182 | 1491.035 | -0.23488 | 0.19076   | 0.27755   | DDX3Y    | chrY  | + | 15016019 | 15032390 | 4445  |
| ENSG000001 | 3054.71  | 2738.792 | 0.15729  | 0.21539   | 0.30642   | PFKP     | chr10 | + | 3109712  | 3179904  | 2769  |
| ENSG000001 | 2201.948 | 956.534  | 1.1955   | 2.67E-05  | 8.14E-05  | IDI1     | chr10 | - | 1085848  | 1095110  | 2301  |
| ENSG000001 | 432.051  | 2.338857 | 7.366    | 2.35E-44  | 4.61E-43  | SP100    | chr2  | + | 2.31E+08 | 2.31E+08 | 3882  |
| ENSG000001 | 2621.894 | 386.4112 | 2.7605   | 4.53E-129 | 4.03E-127 | KLF6     | chr10 | - | 3818188  | 3827473  | 4656  |
| ENSG000001 | 263.3036 | 411.4895 | -0.64344 | 0.000514  | 0.001333  | PPAP2A   | chr5  | - | 54720682 | 54830878 | 1597  |
| ENSG000001 | 911.6654 | 1188.887 | -0.38239 | 0.000557  | 0.001435  | NEO1     | chr15 | + | 73344051 | 73597547 | 7342  |
| ENSG000001 | 1947.775 | 1002.349 | 0.95816  | 2.83E-16  | 1.98E-15  | TRAM1    | chr8  | - | 71485677 | 71520622 | 3394  |
| ENSG000001 | 182.0715 | 314.2581 | -0.788   | 2.82E-06  | 9.63E-06  | PHKA1    | chrX  | - | 71798664 | 71934167 | 6173  |
| ENSG000001 | 1620.412 | 622.1735 | 1.3797   | 4.51E-38  | 7.53E-37  | TNFRSF1A | chr12 | - | 6437923  | 6451280  | 2223  |
| ENSG000001 | 259.6373 | 135.0695 | 0.94258  | 5.43E-08  | 2.16E-07  | CACNB1   | chr17 | - | 37329709 | 37353956 | 5308  |
| ENSG000001 | 686.7187 | 137.5074 | 2.3101   | 1.36E-27  | 1.58E-26  | EVI5     | chr1  | - | 92974253 | 93257961 | 7403  |
| ENSG000001 | 173.3156 | 116.2689 | 0.57597  | 0.002896  | 0.006692  | STOML1   | chr15 | - | 74275547 | 74286963 | 3060  |
| ENSG000001 | 32933.05 | 18552.05 | 0.82651  | 4.39E-08  | 1.76E-07  | PKM      | chr15 | - | 72491370 | 72524164 | 3016  |
| ENSG000001 | 681.4853 | 563.1886 | 0.27513  | 0.20866   | 0.29864   | DHX29    | chr5  | - | 54552073 | 54603550 | 4557  |
| ENSG000001 | 714.8955 | 1050.86  | -0.55112 | 0.077712  | 0.13025   | DNTTIP2  | chr1  | - | 94333373 | 94345474 | 4363  |
| ENSG000001 | 504.0642 | 503.4936 | 0.001357 | 0.9932    | 0.99643   | METTL22  | chr16 | + | 8715540  | 8740081  | 1672  |
| ENSG000001 | 2426.438 | 1087.516 | 1.1549   | 5.61E-10  | 2.64E-09  | TP53BP1  | chr15 | - | 43699407 | 43802926 | 6346  |
| ENSG000001 | 1873.943 | 939.5501 | 0.99573  | 1.18E-18  | 9.27E-18  | TRO      | chrX  | + | 54946895 | 54957864 | 4647  |
| ENSG000001 | 372.259  | 561.0405 | -0.58798 | 0.030865  | 0.058157  | RRP15    | chr1  | + | 2.18E+08 | 2.19E+08 | 7771  |
| ENSG000001 | 9287.135 | 6122.98  | 0.60072  | 6.19E-13  | 3.57E-12  | RHOA     | chr3  | - | 49396578 | 49450431 | 2031  |
| ENSG000001 | 1191.087 | 1235.139 | -0.0523  | 0.70276   | 0.77892   | DHX8     | chr17 | + | 41561233 | 41621831 | 6215  |
| ENSG000001 | 30.12855 | 12.15639 | 1.2849   | 0.012628  | 0.025993  | PMS2P4   | chr7  | - | 66752528 | 66767894 | 1052  |
| ENSG000001 | 11.41074 | 686.1255 | -5.8535  | 3.08E-76  | 1.23E-74  | PRKCZ    | chr1  | + | 1981909  | 2116834  | 2326  |
| ENSG000001 | 180.3752 | 148.854  | 0.27754  | 0.33776   | 0.44147   | ZFY      | chrY  | + | 2803112  | 2850547  | 5239  |
| ENSG000001 | 1318.436 | 1697.795 | -0.36427 | 0.000769  | 0.001941  | IARS2    | chr1  | + | 2.2E+08  | 2.2E+08  | 3557  |
| ENSG000001 | 387.9937 | 724.8295 | -0.89938 | 9.29E-10  | 4.30E-09  | SYT1     | chr12 | + | 79257773 | 79845788 | 4808  |
| ENSG000001 | 707.7917 | 11.09139 | 5.9415   | 8.08E-99  | 4.50E-97  | NAV3     | chr12 | + | 78224685 | 78606790 | 9821  |
| ENSG000001 | 862.9646 | 607.2129 | 0.50685  | 9.07E-05  | 0.00026   | IDH3G    | chrX  | - | 1.53E+08 | 1.53E+08 | 1712  |
| ENSG000001 | 566.535  | 483.0291 | 0.23018  | 0.082285  | 0.13685   | ROGDI    | chr16 | - | 4846969  | 4852951  | 2684  |
| ENSG000001 | 63.70575 | 7535.633 | -6.8701  | 0         | 0         | PDZD4    | chrX  | - | 1.53E+08 | 1.53E+08 | 3689  |
| ENSG000001 | 5.052394 | 7.440675 | -0.55009 | 0.4821    | 0.58639   | ATP2B3   | chrX  | + | 1.53E+08 | 1.53E+08 | 6742  |
| ENSG000001 | 1958.021 | 1069.829 | 0.87049  | 1.19E-06  | 4.24E-06  | ROCK1    | chr18 | - | 18529701 | 18691812 | 6650  |
| ENSG000001 | 2021.913 | 735.7642 | 1.4553   | 1.98E-28  | 2.38E-27  | CBFB     | chr16 | + | 67063019 | 67134961 | 3136  |
| ENSG000001 | 168.4808 | 285.2488 | -0.75486 | 0.000486  | 0.001265  | PDK3     | chrX  | + | 24483338 | 24557954 | 1921  |
| ENSG000001 | 918.622  | 891.4775 | 0.043808 | 0.77598   | 0.83917   | HYAL2    | chr3  | - | 50355221 | 50360337 | 4054  |
| ENSG000001 | 580.6445 | 643.8987 | -0.14957 | 0.32538   | 0.42829   | HDAC4    | chr2  | - | 2.4E+08  | 2.4E+08  | 8976  |
| ENSG000001 | 502.3286 | 165.274  | 1.6009   | 1.57E-21  | 1.42E-20  | RASSF1   | chr3  | - | 50367219 | 50378411 | 2060  |
| ENSG000001 | 110.6365 | 855.8522 | -2.9465  | 8.18E-72  | 3.02E-70  | FGFR3    | chr4  | + | 1795034  | 1810599  | 4293  |
| ENSG000001 | 118.8413 | 43.78772 | 1.4329   | 3.26E-08  | 1.32E-07  | IFI35    | chr17 | + | 41158742 | 41166473 | 1241  |
| ENSG000001 | 499.8379 | 403.7456 | 0.30756  | 0.018592  | 0.036967  | HEATR6   | chr17 | - | 58120555 | 58156292 | 3932  |
| ENSG000001 | 1125.496 | 1737.942 | -0.62648 | 1.36E-10  | 6.65E-10  | COASY    | chr17 | + | 40713485 | 40718295 | 2458  |
| ENSG000001 | 859.3628 | 1161.156 | -0.43117 | 0.15029   | 0.22748   | PLEKHH3  | chr17 | - | 40819932 | 40829048 | 4339  |
| ENSG000001 | 1505.507 | 356.2402 | 2.0769   | 4.97E-68  | 1.73E-66  | MEF2A    | chr15 | + | 1E+08    | 1E+08    | 5824  |
| ENSG000001 | 1549.298 | 1512.733 | 0.034523 | 0.75015   | 0.81726   | OTUD5    | chrX  | - | 48779305 | 48815648 | 2740  |
| ENSG000001 | 1338.063 | 1648.962 | -0.30044 | 0.010692  | 0.022331  | TFE3     | chrX  | - | 48886242 | 48901012 | 3415  |
| ENSG000001 | 394.6231 | 217.2863 | 0.8551   | 0.000352  | 0.000933  | TBC1D25  | chrX  | + | 48397845 | 48420997 | 4042  |
| ENSG000001 | 1471.728 | 998.1478 | 0.5598   | 0.000512  | 0.001327  | ACSL4    | chrX  | - | 1.09E+08 | 1.09E+08 | 5333  |
| ENSG000001 | 719.1674 | 437.2003 | 0.71749  | 3.60E-10  | 1.71E-09  | INPP5A   | chr10 | + | 1.34E+08 | 1.35E+08 | 2962  |
| ENSG000001 | 589.5295 | 423.1948 | 0.47736  | 0.000124  | 0.00035   | GPKOW    | chrX  | - | 48970334 | 48980151 | 1735  |
| ENSG000001 | 871.2607 | 1003.551 | -0.20239 | 0.094202  | 0.15365   | GRIPAP1  | chrX  | - | 48830134 | 48858675 | 3278  |
| ENSG000001 | 834.2318 | 599.5371 | 0.47696  | 0.000108  | 0.000307  | FTSJ1    | chrX  | + | 48334541 | 48344752 | 1986  |
| ENSG000001 | 1085.285 | 1030.645 | 0.07428  | 0.50799   | 0.61155   | PRR11    | chr17 | + | 57232860 | 57282066 | 2334  |
| ENSG000001 | 10.42419 | 13.6706  | -0.37211 | 0.54362   | 0.64403   | REEP1    | chr2  | - | 86441116 | 86565206 | 3857  |
| ENSG000001 | 680.4104 | 2401.32  | -1.8171  | 2.09E-48  | 4.57E-47  | ATP11A   | chr13 | + | 1.13E+08 | 1.14E+08 | 8858  |
| ENSG000001 | 2102.823 | 2079.671 | 0.016052 | 0.93997   | 0.96067   | POLR1A   | chr2  | - | 86247339 | 86333278 | 12749 |
| ENSG000001 | 4327.945 | 3458.229 | 0.32354  | 0.000189  | 0.000519  | LAPTM4A  | chr2  | - | 20232411 | 20251789 | 1765  |

|            |          |          |          |          |          |           |       |   |          |          |       |
|------------|----------|----------|----------|----------|----------|-----------|-------|---|----------|----------|-------|
| ENSG000001 | 460.8254 | 548.7357 | -0.25259 | 0.089907 | 0.14763  | TTC7A     | chr2  | + | 47143296 | 47303276 | 5157  |
| ENSG000001 | 1186.459 | 1403.948 | -0.24245 | 0.014733 | 0.029886 | IP6K2     | chr3  | - | 48725436 | 48777786 | 2490  |
| ENSG000001 | 0.36308  | 0.343138 | -0.0021  | 0.99905  | NA       | STON1-GTF | chr2  | + | 48757064 | 49003654 | 3824  |
| ENSG000001 | 386.2791 | 398.6248 | -0.0428  | 0.80806  | 0.86454  | SRBD1     | chr2  | - | 45615819 | 45839304 | 3681  |
| ENSG000001 | 3210.593 | 3283.583 | -0.0323  | 0.77141  | 0.83538  | CYFIP1    | chr15 | + | 22892005 | 23006016 | 6863  |
| ENSG000001 | 1007.527 | 780.9093 | 0.36767  | 0.013723 | 0.02803  | KIF2A     | chr5  | + | 61601989 | 61833076 | 3360  |
| ENSG000001 | 8.995011 | 284.1658 | -4.9235  | 1.65E-32 | 2.32E-31 | RASGRP2   | chr11 | - | 64494383 | 64512928 | 2983  |
| ENSG000001 | 1951.24  | 1843.112 | 0.082218 | 0.42299  | 0.52841  | PSME4     | chr2  | - | 54091204 | 54197977 | 7099  |
| ENSG000001 | 204.6208 | 98.91443 | 1.0428   | 5.89E-08 | 2.34E-07 | IFT80     | chr3  | - | 1.6E+08  | 1.6E+08  | 4306  |
| ENSG000001 | 780.2605 | 159.6617 | 2.2826   | 1.56E-29 | 1.96E-28 | SIRT2     | chr19 | - | 39369197 | 39390502 | 4734  |
| ENSG000001 | 1270.949 | 487.9798 | 1.3779   | 5.72E-23 | 5.52E-22 | ERLEC1    | chr2  | + | 54014181 | 54045956 | 2433  |
| ENSG000001 | 380.0471 | 99.88732 | 1.9177   | 8.05E-19 | 6.39E-18 | PPP2R5B   | chr11 | + | 64685025 | 64701945 | 2745  |
| ENSG000001 | 1.597063 | 129.1012 | -6.0674  | 1.46E-20 | 1.27E-19 | PYGM      | chr11 | - | 64513861 | 64527769 | 3198  |
| ENSG000001 | 328.475  | 3.339132 | 6.5112   | 2.67E-43 | 5.14E-42 | PITX1     | chr5  | - | 1.34E+08 | 1.34E+08 | 3216  |
| ENSG000001 | 0        | 0.343138 | -0.41864 | 0.81278  | NA       | TRPC7     | chr5  | - | 1.36E+08 | 1.36E+08 | 2987  |
| ENSG000001 | 314.5111 | 165.432  | 0.92393  | 7.62E-07 | 2.75E-06 | MAST4     | chr5  | + | 65892176 | 66465423 | 10733 |
| ENSG000001 | 289.8799 | 0        | 9.5605   | 5.06E-19 | 4.06E-18 | GPR116    | chr6  | - | 46820249 | 46922680 | 5810  |
| ENSG000001 | 658.109  | 1138.48  | -0.78787 | 0.000351 | 0.000931 | SDK2      | chr17 | - | 71330523 | 71640228 | 10723 |
| ENSG000001 | 911.5323 | 1332.384 | -0.54672 | 3.60E-06 | 1.21E-05 | NUP133    | chr1  | - | 2.3E+08  | 2.3E+08  | 4169  |
| ENSG000001 | 7145.019 | 7901.46  | -0.14509 | 0.068328 | 0.11665  | NUCKS1    | chr1  | - | 2.06E+08 | 2.06E+08 | 6496  |
| ENSG000001 | 2028.504 | 1211.908 | 0.74283  | 4.52E-08 | 1.81E-07 | VPS35     | chr16 | - | 46690054 | 46723430 | 6780  |
| ENSG000001 | 1073.652 | 2340.246 | -1.1229  | 7.63E-32 | 1.04E-30 | DNAJA2    | chr16 | - | 46989299 | 47007699 | 3097  |
| ENSG000001 | 281.4763 | 128.6223 | 1.1173   | 0.000989 | 0.002456 | BCL3      | chr19 | + | 45250962 | 45263301 | 2038  |
| ENSG000001 | 254.122  | 128.3123 | 0.97688  | 0.000552 | 0.001424 | KCNAB2    | chr1  | + | 6051526  | 6161253  | 4273  |
| ENSG000001 | 8.268851 | 0.357707 | 3.8541   | 0.002102 | 0.004957 | ABCC9     | chr12 | - | 21950335 | 22094336 | 8293  |
| ENSG000001 | 146.089  | 1177.312 | -3.0077  | 2.56E-76 | 1.03E-74 | GAL       | chr11 | + | 68451247 | 68458643 | 818   |
| ENSG000001 | 83.4049  | 50.30171 | 0.72647  | 0.019449 | 0.03849  | CLEC2D    | chr12 | + | 9809270  | 9848413  | 1855  |
| ENSG000001 | 157.9314 | 207.8185 | -0.39384 | 0.039803 | 0.073055 | FUNDC1    | chrX  | - | 44382885 | 44402247 | 1196  |
| ENSG000001 | 22.60656 | 28.30106 | -0.32507 | 0.44854  | 0.55396  | MAOB      | chrX  | - | 43625858 | 43741693 | 2566  |
| ENSG000001 | 106.1552 | 111.7887 | -0.07321 | 0.80787  | 0.86441  | RORA      | chr15 | - | 60780483 | 61521518 | 10844 |
| ENSG000001 | 34.12096 | 174.5392 | -2.3344  | 7.63E-13 | 4.37E-12 | DRD4      | chr11 | + | 637293   | 640706   | 1375  |
| ENSG000001 | 79.00588 | 52.37429 | 0.58769  | 0.030335 | 0.057308 | TGFBR3    | chr1  | - | 92145902 | 92371892 | 6416  |
| ENSG000001 | 27.06637 | 38.5993  | -0.50045 | 0.2808   | 0.38176  | KIAA1107  | chr1  | + | 92632542 | 92650280 | 4622  |
| ENSG000001 | 0.975385 | 2.261179 | -0.95883 | 0.50745  | 0.61101  | PLA2G10   | chr16 | - | 14766405 | 14788526 | 997   |
| ENSG000001 | 15.44928 | 29.28764 | -0.90795 | 0.11121  | 0.17679  | HES2      | chr1  | - | 6472478  | 6484730  | 4262  |
| ENSG000001 | 1342.801 | 2194.775 | -0.70878 | 2.33E-13 | 1.38E-12 | ATP1B3    | chr3  | + | 1.42E+08 | 1.42E+08 | 1951  |
| ENSG000001 | 618.1735 | 79.99136 | 2.9462   | 1.73E-54 | 4.41E-53 | NEDD4     | chr15 | - | 56119120 | 56285944 | 7235  |
| ENSG000001 | 87.18484 | 37.28334 | 1.2189   | 2.75E-05 | 8.37E-05 | PIGB      | chr15 | + | 55611158 | 55647846 | 2172  |
| ENSG000001 | 1629.32  | 1952.045 | -0.25947 | 0.19091  | 0.27771  | MAPK6     | chr15 | + | 52244303 | 52358462 | 4238  |
| ENSG000001 | 358.921  | 396.9924 | -0.14538 | 0.43909  | 0.54478  | GNB5      | chr15 | - | 52413117 | 52483566 | 3091  |
| ENSG000001 | 322.4176 | 53.80029 | 2.5743   | 1.90E-39 | 3.30E-38 | RAB27A    | chr15 | - | 55495164 | 55611311 | 3459  |
| ENSG000001 | 436.4085 | 1996.913 | -2.1904  | 5.69E-65 | 1.86E-63 | CECR5     | chr22 | - | 17618401 | 17646177 | 3614  |
| ENSG000001 | 1344.217 | 906.0498 | 0.5687   | 3.39E-05 | 0.000102 | UCFD1L    | chr22 | - | 19437464 | 19466738 | 5038  |
| ENSG000001 | 920.9182 | 963.5485 | -0.06518 | 0.54821  | 0.64828  | LRP6      | chr12 | - | 12268959 | 12419946 | 10020 |
| ENSG000001 | 0.342542 | 86.20127 | -7.1228  | 1.91E-12 | 1.06E-11 | GUCY2C    | chr12 | - | 14765576 | 14849519 | 3834  |
| ENSG000001 | 4.637074 | 53.81405 | -3.4614  | 5.92E-11 | 2.98E-10 | SCT       | chr11 | - | 626431   | 627143   | 366   |
| ENSG000001 | 2353.65  | 2636.643 | -0.16343 | 0.10946  | 0.17425  | PHRF1     | chr11 | + | 576486   | 612222   | 5523  |
| ENSG000001 | 1104.534 | 1002.297 | 0.14099  | 0.2563   | 0.35368  | IKBKAP    | chr9  | - | 1.12E+08 | 1.12E+08 | 5905  |
| ENSG000001 | 1163.183 | 114.222  | 3.346    | 7.41E-89 | 3.64E-87 | NUCB2     | chr11 | + | 17229700 | 17371521 | 3402  |
| ENSG000001 | 2616.952 | 1531.386 | 0.77183  | 5.39E-11 | 2.73E-10 | PFN2      | chr3  | - | 1.5E+08  | 1.5E+08  | 2261  |
| ENSG000001 | 260.735  | 69.19799 | 1.903    | 6.71E-21 | 5.89E-20 | PTPN3     | chr9  | - | 1.12E+08 | 1.12E+08 | 8765  |
| ENSG000001 | 48.77628 | 247.6481 | -2.3325  | 1.06E-29 | 1.34E-28 | SPTB      | chr14 | - | 65213002 | 65346601 | 10063 |
| ENSG000001 | 1.411244 | 0        | 1.7307   | 0.32696  | NA       | DAPP1     | chr4  | + | 1.01E+08 | 1.01E+08 | 2955  |
| ENSG000001 | 9.096887 | 2.324288 | 1.8473   | 0.034564 | 0.064416 | FGF10     | chr5  | - | 44303646 | 44389808 | 2193  |
| ENSG000001 | 640.2176 | 1427.971 | -1.1551  | 9.61E-23 | 9.17E-22 | SLC44A1   | chr9  | + | 1.08E+08 | 1.08E+08 | 10511 |
| ENSG000001 | 218.77   | 145.6681 | 0.58554  | 0.00063  | 0.001611 | TMEM260   | chr14 | + | 56955072 | 57117324 | 4264  |
| ENSG000001 | 1489.902 | 1052.215 | 0.50086  | 1.12E-06 | 3.98E-06 | SMG6      | chr17 | - | 1963133  | 2207065  | 6331  |
| ENSG000001 | 1554.408 | 1001.351 | 0.63355  | 0.00058  | 0.001492 | EXOC5     | chr14 | - | 57670518 | 57735726 | 7296  |
| ENSG000001 | 381.5726 | 250.2146 | 0.60727  | 0.00054  | 0.001394 | CLTCL1    | chr22 | - | 19166986 | 19279239 | 5513  |
| ENSG000001 | 1.774324 | 11.86508 | -2.5956  | 0.004874 | 0.010873 | FGF22     | chr19 | + | 639588   | 643703   | 1712  |
| ENSG000001 | 233.8353 | 190.862  | 0.29016  | 0.35402  | 0.45819  | FSTL3     | chr19 | + | 676392   | 683385   | 2501  |
| ENSG000001 | 2216.677 | 2428.489 | -0.13139 | 0.32818  | 0.43124  | DGCR2     | chr22 | - | 19023795 | 19109967 | 4814  |
| ENSG000001 | 1135.342 | 1721.116 | -0.59882 | 2.66E-06 | 9.12E-06 | RNF126    | chr19 | - | 647526   | 663209   | 2092  |
| ENSG000001 | 585.9817 | 361.3664 | 0.69516  | 0.002319 | 0.005429 | MNT       | chr17 | - | 2287354  | 2304412  | 4996  |
| ENSG000001 | 549.0778 | 709.0017 | -0.36813 | 0.00125  | 0.003054 | ZXDC      | chr3  | - | 1.26E+08 | 1.26E+08 | 4639  |

|            |          |          |          |           |           |           |       |   |          |          |      |
|------------|----------|----------|----------|-----------|-----------|-----------|-------|---|----------|----------|------|
| ENSG000001 | 591.6088 | 272.3052 | 1.1158   | 9.77E-13  | 5.55E-12  | JMJD6     | chr17 | - | 74708919 | 74722866 | 5298 |
| ENSG000001 | 253.8527 | 366.7277 | -0.53142 | 0.000187  | 0.000515  | POLB      | chr8  | + | 42195972 | 42229326 | 1341 |
| ENSG000001 | 0        | 0.700845 | -0.87835 | 0.62047   | NA        | ST6GALNAC | chr17 | - | 74620843 | 74639920 | 2657 |
| ENSG000001 | 983.886  | 183.8508 | 2.4141   | 3.83E-47  | 8.05E-46  | WIP1      | chr17 | - | 66417089 | 66453654 | 1886 |
| ENSG000001 | 0        | 5.741971 | -4.0379  | 0.004201  | 0.009456  | FRMPD1    | chr9  | + | 37650997 | 37746901 | 5465 |
| ENSG000001 | 1067.936 | 2044.557 | -0.93611 | 1.28E-21  | 1.16E-20  | GBA2      | chr9  | - | 35736863 | 35749983 | 3757 |
| ENSG000001 | 4249.206 | 2353.937 | 0.85022  | 8.38E-07  | 3.01E-06  | NDST1     | chr5  | + | 1.5E+08  | 1.5E+08  | 8030 |
| ENSG000001 | 776.0589 | 1855.972 | -1.256   | 8.62E-27  | 9.71E-26  | ASNS      | chr7  | - | 97481430 | 97501854 | 2356 |
| ENSG000001 | 285.3442 | 234.5319 | 0.28286  | 0.10216   | 0.16422   | AP3M2     | chr8  | + | 42010464 | 42029191 | 3669 |
| ENSG000001 | 0        | 1.652581 | -2.1974  | 0.1871    | NA        | CNGB1     | chr16 | - | 57917503 | 58005020 | 4364 |
| ENSG000001 | 9.845377 | 32.72547 | -1.6972  | 0.000554  | 0.001428  | ST6GALNAC | chr17 | - | 74559792 | 74583038 | 5654 |
| ENSG000001 | 2.67693  | 0        | 2.9076   | 0.061873  | 0.10715   | CHAT      | chr10 | + | 50817141 | 50901925 | 2528 |
| ENSG000001 | 9635.512 | 21303.95 | -1.1441  | 4.62E-40  | 8.13E-39  | PABPC1    | chr8  | - | 1.02E+08 | 1.02E+08 | 3485 |
| ENSG000001 | 56.75287 | 335.5291 | -2.5435  | 2.75E-14  | 1.72E-13  | TESK2     | chr1  | - | 45809555 | 45956872 | 3074 |
| ENSG000001 | 319.6561 | 403.8839 | -0.33722 | 0.03434   | 0.064047  | C16orf80  | chr16 | - | 58147496 | 58163354 | 1605 |
| ENSG000001 | 1209.269 | 1996.851 | -0.72278 | 6.75E-14  | 4.12E-13  | CSNK2A2   | chr16 | - | 58191811 | 58231824 | 4978 |
| ENSG000001 | 951.5034 | 221.5838 | 2.1002   | 4.83E-41  | 8.73E-40  | PTPN21    | chr14 | - | 88932122 | 89021077 | 6166 |
| ENSG000001 | 453.0798 | 414.0318 | 0.13032  | 0.30853   | 0.41023   | EIF2B3    | chr1  | - | 45316450 | 45452282 | 1659 |
| ENSG000001 | 12.44855 | 7.256181 | 0.71084  | 0.42589   | 0.53124   | CAMK2A    | chr5  | - | 1.5E+08  | 1.5E+08  | 5322 |
| ENSG000001 | 2016.5   | 5933.127 | -1.5554  | 5.62E-44  | 1.10E-42  | TCOF1     | chr5  | + | 1.5E+08  | 1.5E+08  | 5240 |
| ENSG000001 | 5078.997 | 3092.891 | 0.71526  | 1.39E-14  | 8.88E-14  | CDC42     | chr1  | + | 22379120 | 22419437 | 2254 |
| ENSG000001 | 509.0567 | 357.9332 | 0.50587  | 0.000117  | 0.00033   | OSBPL3    | chr7  | - | 24836158 | 25021253 | 6760 |
| ENSG000001 | 0        | 84.87566 | -7.8997  | 1.12E-12  | 6.36E-12  | EPHA8     | chr1  | + | 22890057 | 22930087 | 4943 |
| ENSG000001 | 0.580602 | 0        | 0.8036   | 0.6494    | NA        | SLC12A3   | chr16 | + | 56899119 | 56949762 | 5567 |
| ENSG000001 | 333.63   | 451.0163 | -0.43495 | 0.00473   | 0.010573  | RAD18     | chr3  | - | 8817088  | 9005457  | 5886 |
| ENSG000001 | 1488.255 | 616.9503 | 1.2689   | 2.01E-15  | 1.35E-14  | ATP2B1    | chr12 | - | 89981828 | 90103077 | 7032 |
| ENSG000001 | 0.580602 | 2.529055 | -1.6094  | 0.26827   | 0.36709   | TRPM5     | chr11 | - | 2425745  | 2444275  | 3932 |
| ENSG000001 | 1792.898 | 1660.593 | 0.11041  | 0.38424   | 0.48842   | NCK2      | chr2  | + | 1.06E+08 | 1.07E+08 | 2683 |
| ENSG000001 | 11660.09 | 3084.163 | 1.9166   | 2.57E-59  | 7.35E-58  | MAP4K4    | chr2  | + | 1.02E+08 | 1.03E+08 | 6958 |
| ENSG000001 | 241.3706 | 83.22475 | 1.5249   | 9.98E-09  | 4.24E-08  | MGAT4A    | chr2  | - | 99235569 | 99347589 | 8382 |
| ENSG000001 | 6629.363 | 9567.766 | -0.52884 | 1.03E-07  | 4.02E-07  | RPL31     | chr2  | + | 1.02E+08 | 1.02E+08 | 2328 |
| ENSG000001 | 8010.127 | 7251.339 | 0.14348  | 0.27509   | 0.37514   | WDR1      | chr4  | - | 10075963 | 10118573 | 4482 |
| ENSG000001 | 521.1306 | 301.6416 | 0.78909  | 9.10E-06  | 2.94E-05  | SNX13     | chr7  | - | 17832466 | 17980124 | 6816 |
| ENSG000001 | 0        | 1.577319 | -1.9089  | 0.27608   | NA        | MS4A12    | chr11 | + | 60260251 | 60274903 | 1167 |
| ENSG000001 | 798.3917 | 189.3392 | 2.0741   | 2.14E-42  | 4.00E-41  | ARHGAP10  | chr4  | + | 1.49E+08 | 1.49E+08 | 8188 |
| ENSG000001 | 1224.731 | 845.7062 | 0.53292  | 0.000345  | 0.000917  | RPS6KA2   | chr6  | - | 1.67E+08 | 1.67E+08 | 5992 |
| ENSG000001 | 199.6917 | 229.936  | -0.20013 | 0.59563   | 0.68992   | ING3      | chr7  | + | 1.21E+08 | 1.21E+08 | 3777 |
| ENSG000001 | 4255.912 | 276.3584 | 3.9283   | 7.01E-73  | 2.65E-71  | VASH1     | chr14 | + | 77228532 | 77249354 | 5724 |
| ENSG000001 | 671.7154 | 88.51408 | 2.9138   | 2.29E-45  | 4.61E-44  | LMCD1     | chr3  | + | 8543393  | 8609805  | 1851 |
| ENSG000001 | 1411.474 | 1363.78  | 0.049811 | 0.73135   | 0.80153   | WBSCR22   | chr7  | + | 73097355 | 73119491 | 3886 |
| ENSG000001 | 1925.602 | 443.5751 | 2.1163   | 5.29E-93  | 2.76E-91  | SEL1L     | chr14 | - | 81937893 | 82000205 | 7925 |
| ENSG000001 | 706.1569 | 856.1656 | -0.27719 | 0.084979  | 0.14066   | TRIP13    | chr5  | + | 892758   | 919472   | 2672 |
| ENSG000001 | 2759.261 | 1086.992 | 1.3432   | 1.35E-42  | 2.54E-41  | ATP6AP1   | chrX  | + | 1.54E+08 | 1.54E+08 | 4515 |
| ENSG000001 | 6981.881 | 7636.915 | -0.12926 | 0.16418   | 0.24495   | TCF3      | chr19 | - | 1609291  | 1652604  | 4723 |
| ENSG000001 | 8065.377 | 1804.893 | 2.158    | 2.69E-113 | 1.88E-111 | TRIB2     | chr2  | + | 12857015 | 12882860 | 4391 |
| ENSG000001 | 2799.317 | 6073.753 | -1.1168  | 7.27E-33  | 1.03E-31  | DAZAP1    | chr19 | + | 1407584  | 1435719  | 3940 |
| ENSG000001 | 1667.161 | 1669.013 | -0.00144 | 0.99351   | 0.99653   | MBD3      | chr19 | - | 1576639  | 1592882  | 2782 |
| ENSG000001 | 758.9516 | 1074.729 | -0.50046 | 0.002738  | 0.006353  | HLTF      | chr3  | - | 1.49E+08 | 1.49E+08 | 5317 |
| ENSG000001 | 1576.832 | 708.1349 | 1.1536   | 1.02E-24  | 1.05E-23  | FAM50A    | chrX  | + | 1.54E+08 | 1.54E+08 | 1470 |
| ENSG000001 | 517.1981 | 445.6883 | 0.21419  | 0.092322  | 0.15111   | FAM3A     | chrX  | - | 1.54E+08 | 1.54E+08 | 3997 |
| ENSG000001 | 3931.535 | 3941.575 | -0.00366 | 0.97467   | 0.98581   | CPSF1     | chr8  | - | 1.46E+08 | 1.46E+08 | 4510 |
| ENSG000001 | 4.305697 | 8.876335 | -0.99731 | 0.19783   | 0.28597   | MYO3B     | chr2  | + | 1.71E+08 | 1.72E+08 | 6084 |
| ENSG000001 | 1544.563 | 112.8674 | 3.7707   | 2.13E-119 | 1.64E-117 | CYBRD1    | chr2  | + | 1.72E+08 | 1.72E+08 | 4365 |
| ENSG000001 | 0        | 0.357707 | -0.41864 | 0.81278   | NA        | CDH19     | chr18 | - | 64168320 | 64271375 | 6341 |
| ENSG000001 | 695.4573 | 1695.461 | -1.2847  | 1.43E-33  | 2.08E-32  | PDCD2     | chr6  | - | 1.71E+08 | 1.71E+08 | 3378 |
| ENSG000001 | 181.4072 | 447.981  | -1.3013  | 2.43E-19  | 1.98E-18  | SLC6A15   | chr12 | - | 85253492 | 85307394 | 4229 |
| ENSG000001 | 2362.666 | 1604.92  | 0.55727  | 3.78E-05  | 0.000113  | RDH11     | chr14 | - | 68143518 | 68162531 | 4035 |
| ENSG000001 | 2240.741 | 758.5622 | 1.559    | 2.33E-29  | 2.90E-28  | PRKACA    | chr19 | - | 14202500 | 14228896 | 3105 |
| ENSG000001 | 966.7739 | 3684.641 | -1.9253  | 5.27E-30  | 6.72E-29  | LPHN1     | chr19 | - | 14260750 | 14316999 | 5658 |
| ENSG000001 | 0.342542 | 0        | 0.4146   | 0.81455   | NA        | SPP2      | chr2  | + | 2.35E+08 | 2.35E+08 | 1024 |
| ENSG000001 | 15659.55 | 5444.805 | 1.5232   | 1.17E-64  | 3.77E-63  | ACTN1     | chr14 | - | 69340860 | 69446157 | 4674 |
| ENSG000001 | 946.7927 | 752.4206 | 0.33163  | 0.036218  | 0.06717   | ZFYVE26   | chr14 | - | 68194091 | 68283307 | 9675 |
| ENSG000001 | 35.57149 | 167.8614 | -2.2238  | 2.05E-15  | 1.37E-14  | RPS6KA6   | chrX  | - | 83318984 | 83442933 | 2547 |
| ENSG000001 | 729.08   | 686.4268 | 0.086234 | 0.70453   | 0.78043   | EPN2      | chr17 | + | 19118928 | 19240028 | 4871 |
| ENSG000001 | 512.0629 | 344.9541 | 0.56712  | 0.003645  | 0.00829   | PTPN18    | chr2  | + | 1.31E+08 | 1.31E+08 | 3669 |

|            |          |          |          |           |           |          |       |   |          |          |       |
|------------|----------|----------|----------|-----------|-----------|----------|-------|---|----------|----------|-------|
| ENSG000001 | 148.6223 | 36.24506 | 2.0256   | 1.72E-15  | 1.16E-14  | LIMS2    | chr2  | - | 1.28E+08 | 1.28E+08 | 4807  |
| ENSG000001 | 0.632843 | 15.52721 | -4.0441  | 0.000262  | 0.000708  | ASIC4    | chr2  | + | 2.2E+08  | 2.2E+08  | 3340  |
| ENSG000001 | 2755.142 | 1230.267 | 1.157    | 4.00E-06  | 1.35E-05  | SPEG     | chr2  | + | 2.2E+08  | 2.2E+08  | 10782 |
| ENSG000001 | 23.67184 | 109.2685 | -2.1779  | 3.48E-11  | 1.78E-10  | LNx1     | chr4  | - | 54325468 | 54567572 | 3757  |
| ENSG000001 | 439.353  | 1358.849 | -1.6263  | 1.05E-28  | 1.27E-27  | ALDH3A2  | chr17 | + | 19551449 | 19580911 | 3928  |
| ENSG000001 | 935.5501 | 932.6469 | 0.003316 | 0.97897   | 0.98832   | TFRC     | chr3  | - | 1.96E+08 | 1.96E+08 | 5111  |
| ENSG000001 | 3926.517 | 2796.929 | 0.48724  | 0.042749  | 0.077668  | SREBF1   | chr17 | - | 17713713 | 17740325 | 4653  |
| ENSG000001 | 0        | 17.38127 | -5.7248  | 1.92E-06  | 6.69E-06  | TRPC5    | chrX  | - | 1.11E+08 | 1.11E+08 | 5839  |
| ENSG000001 | 4144.307 | 1463.476 | 1.5006   | 5.08E-64  | 1.62E-62  | AFF4     | chr5  | - | 1.32E+08 | 1.32E+08 | 9552  |
| ENSG000001 | 283.0051 | 447.6983 | -0.65987 | 0.000126  | 0.000354  | UBE2D1   | chr10 | + | 60094735 | 60129403 | 1549  |
| ENSG000001 | 495.7938 | 512.7985 | -0.0477  | 0.73817   | 0.80694   | MPP5     | chr14 | + | 67707826 | 67802536 | 5552  |
| ENSG000001 | 749.5375 | 312.989  | 1.2585   | 3.70E-25  | 3.90E-24  | RHOBTB1  | chr10 | - | 62629196 | 62761198 | 4473  |
| ENSG000001 | 1.597063 | 0        | 1.9181   | 0.27352   | NA        | ASAH2C   | chr10 | - | 48001603 | 48055018 | 2050  |
| ENSG000001 | 2859.488 | 3359.167 | -0.2319  | 0.034502  | 0.06432   | SMC1A    | chrX  | - | 53401070 | 53449677 | 9784  |
| ENSG000001 | 759.4307 | 1199.638 | -0.65761 | 6.53E-06  | 2.15E-05  | HSD17B10 | chrX  | - | 53458206 | 53461320 | 960   |
| ENSG000001 | 988.6155 | 1955.013 | -0.98163 | 4.15E-09  | 1.81E-08  | MARK2    | chr11 | + | 63606400 | 63678491 | 4728  |
| ENSG000001 | 387.2963 | 786.8645 | -1.0189  | 2.22E-07  | 8.43E-07  | HMMR     | chr5  | + | 1.63E+08 | 1.63E+08 | 3101  |
| ENSG000001 | 363.6186 | 533.8064 | -0.55273 | 0.000855  | 0.002144  | CHFR     | chr12 | - | 1.33E+08 | 1.33E+08 | 3258  |
| ENSG000001 | 100.5978 | 70.42485 | 0.50724  | 0.035367  | 0.065778  | TRHDE    | chr12 | + | 72481046 | 73059422 | 5618  |
| ENSG000001 | 1792.777 | 159.2191 | 3.4757   | 1.67E-40  | 2.98E-39  | P4HA2    | chr5  | - | 1.32E+08 | 1.32E+08 | 3349  |
| ENSG000001 | 0.653381 | 0        | 0.82678  | 0.64037   | NA        | FCGR2B   | chr1  | + | 1.62E+08 | 1.62E+08 | 4680  |
| ENSG000001 | 398.6111 | 279.1089 | 0.51088  | 0.001204  | 0.002949  | NFATC3   | chr16 | + | 68118654 | 68263162 | 6328  |
| ENSG000001 | 330.122  | 319.6835 | 0.046767 | 0.86788   | 0.90794   | TRNT1    | chr3  | + | 3168600  | 3192563  | 2276  |
| ENSG000001 | 3357.937 | 1536.841 | 1.126    | 6.19E-24  | 6.19E-23  | ACADVL   | chr17 | + | 7120444  | 7128592  | 2352  |
| ENSG000001 | 2062.943 | 583.8572 | 1.817    | 1.03E-38  | 1.76E-37  | STK10    | chr5  | - | 1.71E+08 | 1.72E+08 | 6060  |
| ENSG000001 | 1191.128 | 775.9195 | 0.61725  | 1.55E-07  | 5.97E-07  | FBXW11   | chr5  | - | 1.71E+08 | 1.71E+08 | 4539  |
| ENSG000001 | 78.58894 | 332.4149 | -2.068   | 6.24E-17  | 4.55E-16  | ACAP1    | chr17 | + | 7239848  | 7254797  | 4898  |
| ENSG000001 | 2078.061 | 3734.95  | -0.84487 | 4.39E-15  | 2.89E-14  | CRMP1    | chr4  | - | 5749811  | 5894785  | 3146  |
| ENSG000001 | 1796.646 | 235.6093 | 2.9242   | 8.21E-94  | 4.36E-92  | EVC      | chr4  | + | 5712924  | 5830772  | 7063  |
| ENSG000001 | 677.8683 | 376.9655 | 0.84351  | 0.00026   | 0.000703  | DERL2    | chr17 | - | 5374571  | 5390131  | 4209  |
| ENSG000001 | 4.232918 | 3.905639 | 0.12399  | 0.91358   | 0.941     | SIDT1    | chr3  | + | 1.13E+08 | 1.13E+08 | 5080  |
| ENSG000001 | 646.1214 | 387.5234 | 0.73674  | 1.56E-06  | 5.46E-06  | NDE1     | chr16 | + | 15737124 | 15820210 | 3936  |
| ENSG000001 | 16.78595 | 133.0547 | -2.963   | 4.39E-14  | 2.71E-13  | MRV1     | chr11 | - | 10594638 | 10715535 | 6208  |
| ENSG000001 | 11.3928  | 190.6733 | -4.0332  | 3.54E-26  | 3.88E-25  | TMEM38A  | chr19 | + | 16771938 | 16800840 | 2649  |
| ENSG000001 | 1826.65  | 609.0727 | 1.5825   | 4.89E-25  | 5.11E-24  | AP1M1    | chr19 | + | 16308389 | 16346160 | 2635  |
| ENSG000001 | 1227.776 | 362.2245 | 1.757    | 9.78E-23  | 9.32E-22  | PVR      | chr19 | + | 45147098 | 45166850 | 3325  |
| ENSG000001 | 166.6309 | 92.05073 | 0.85271  | 0.000123  | 0.000346  | IKBK     | chrX  | + | 1.54E+08 | 1.54E+08 | 5465  |
| ENSG000001 | 535.8825 | 513.4951 | 0.061327 | 0.63357   | 0.7224    | XRCC1    | chr19 | - | 44047192 | 44084625 | 2802  |
| ENSG000001 | 2322.153 | 1464.945 | 0.66413  | 5.37E-12  | 2.90E-11  | SCARB1   | chr12 | - | 1.25E+08 | 1.25E+08 | 5527  |
| ENSG000001 | 8.373333 | 15.68015 | -0.88181 | 0.21163   | 0.302     | CYP2W1   | chr7  | + | 1022835  | 1029276  | 2361  |
| ENSG000001 | 1954.161 | 4744.891 | -1.2758  | 5.88E-11  | 2.97E-10  | MCM2     | chr3  | + | 1.27E+08 | 1.27E+08 | 3619  |
| ENSG000001 | 1.524285 | 4.242329 | -1.2654  | 0.27035   | 0.36948   | MOV10L1  | chr22 | + | 50528308 | 50600119 | 3960  |
| ENSG000001 | 50.10537 | 284.1218 | -2.4915  | 1.83E-25  | 1.95E-24  | PANX2    | chr22 | + | 50609160 | 50618723 | 3051  |
| ENSG000001 | 620.5667 | 744.8066 | -0.26391 | 0.075151  | 0.12671   | SELO     | chr22 | + | 50639408 | 50656045 | 2315  |
| ENSG000001 | 2.023549 | 2.711133 | -0.37171 | 0.74884   | 0.81623   | TP63     | chr3  | + | 1.89E+08 | 1.9E+08  | 4909  |
| ENSG000001 | 226.668  | 10.38484 | 4.4239   | 1.75E-41  | 3.18E-40  | ALPK1    | chr4  | + | 1.13E+08 | 1.13E+08 | 5633  |
| ENSG000001 | 16.11896 | 1984.255 | -6.8604  | 4.49E-124 | 3.76E-122 | LLGL2    | chr17 | + | 73521161 | 73571289 | 3527  |
| ENSG000001 | 464.3742 | 109.9622 | 2.0674   | 1.66E-24  | 1.70E-23  | PDE8A    | chr15 | + | 85523671 | 85682376 | 4664  |
| ENSG000001 | 170.4007 | 125.3322 | 0.44063  | 0.018687  | 0.037133  | CLCN4    | chrX  | + | 10125024 | 10205700 | 6750  |
| ENSG000001 | 428.299  | 911.9732 | -1.0867  | 8.17E-15  | 5.30E-14  | NLE1     | chr17 | - | 33455772 | 33469334 | 5286  |
| ENSG000001 | 1654.245 | 2182.237 | -0.39852 | 0.035033  | 0.065201  | SDHA     | chr5  | + | 218356   | 256815   | 3001  |
| ENSG000001 | 650.1281 | 605.4065 | 0.10256  | 0.42056   | 0.52595   | SMARCE1  | chr17 | - | 38781214 | 38804760 | 5840  |
| ENSG000001 | 4.077009 | 3.47267  | 0.2191   | 0.82864   | 0.87932   | FNDC8    | chr17 | + | 33448598 | 33457751 | 1388  |
| ENSG000001 | 226.6204 | 272.8348 | -0.26634 | 0.39847   | 0.50307   | GSDMB    | chr17 | - | 38060848 | 38076107 | 4655  |
| ENSG000001 | 1215.102 | 720.0426 | 0.75508  | 3.63E-10  | 1.72E-09  | KDM5A    | chr12 | - | 389295   | 498620   | 10763 |
| ENSG000001 | 29.26295 | 95.5931  | -1.6791  | 4.24E-06  | 1.42E-05  | ADAM11   | chr17 | + | 42836399 | 42859214 | 4571  |
| ENSG000001 | 675.3895 | 273.0735 | 1.3067   | 1.98E-18  | 1.55E-17  | PPP2R3A  | chr3  | + | 1.36E+08 | 1.36E+08 | 6795  |
| ENSG000001 | 2490.621 | 1351.45  | 0.88173  | 1.10E-18  | 8.68E-18  | FERMT2   | chr14 | - | 53323986 | 53419153 | 6001  |
| ENSG000001 | 2.31385  | 0.343138 | 2.0527   | 0.17691   | 0.26046   | ABCB11   | chr2  | - | 1.7E+08  | 1.7E+08  | 4775  |
| ENSG000001 | 86.21304 | 0.937167 | 6.0957   | 3.47E-15  | 2.30E-14  | DHRS9    | chr2  | + | 1.7E+08  | 1.7E+08  | 2864  |
| ENSG000001 | 215.3533 | 19.49179 | 3.4441   | 1.29E-23  | 1.28E-22  | PTGS2    | chr1  | - | 1.87E+08 | 1.87E+08 | 4514  |
| ENSG000001 | 2609.205 | 3033.844 | -0.21736 | 0.12707   | 0.19802   | IGF2BP2  | chr3  | - | 1.85E+08 | 1.86E+08 | 3688  |
| ENSG000001 | 148.6144 | 115.2046 | 0.36804  | 0.069627  | 0.1186    | MAP3K13  | chr3  | + | 1.85E+08 | 1.85E+08 | 9876  |
| ENSG000001 | 472.4786 | 2150.157 | -2.1835  | 6.75E-55  | 1.74E-53  | ST6GAL1  | chr3  | + | 1.87E+08 | 1.87E+08 | 4893  |
| ENSG000001 | 0        | 0.357707 | -0.41864 | 0.81278   | NA        | TBX21    | chr17 | + | 45810610 | 45823485 | 2572  |

|            |          |          |          |           |           |           |       |   |          |          |       |
|------------|----------|----------|----------|-----------|-----------|-----------|-------|---|----------|----------|-------|
| ENSG000001 | 2.334388 | 2.261179 | 0.026806 | 0.98229   | 0.99011   | VDAC1P1   | chrX  | + | 80184999 | 80185846 | 848   |
| ENSG000001 | 360.0644 | 97.11698 | 1.8867   | 5.51E-24  | 5.53E-23  | FRY       | chr13 | + | 32605437 | 32870794 | 10735 |
| ENSG000001 | 3151.47  | 825.4988 | 1.9313   | 6.09E-83  | 2.69E-81  | PICALM    | chr11 | - | 85668727 | 85780924 | 3613  |
| ENSG000001 | 617.0481 | 296.5869 | 1.0553   | 1.44E-14  | 9.21E-14  | NSF       | chr17 | + | 44668035 | 44834830 | 3983  |
| ENSG000001 | 1174.816 | 1323.577 | -0.17223 | 0.13508   | 0.20805   | GLI2      | chr2  | + | 1.21E+08 | 1.22E+08 | 6799  |
| ENSG000001 | 1922.644 | 1294.037 | 0.57118  | 1.70E-09  | 7.68E-09  | CLASP1    | chr2  | - | 1.22E+08 | 1.22E+08 | 8090  |
| ENSG000001 | 1370.172 | 3060.151 | -1.1578  | 1.21E-26  | 1.36E-25  | MRPS34    | chr16 | - | 1821891  | 1823156  | 1040  |
| ENSG000001 | 5615.61  | 6850.506 | -0.2863  | 0.033444  | 0.06254   | NOTCH3    | chr19 | - | 15270444 | 15311792 | 8071  |
| ENSG000001 | 756.8078 | 1460.223 | -0.94674 | 1.24E-13  | 7.42E-13  | CLNS1A    | chr11 | - | 77225981 | 77348850 | 2993  |
| ENSG000001 | 1.016461 | 313.8808 | -7.9045  | 1.31E-27  | 1.52E-26  | PPP2R2C   | chr4  | - | 6322305  | 6565327  | 4538  |
| ENSG000001 | 2031.449 | 2077.855 | -0.03217 | 0.78161   | 0.84337   | TEAD2     | chr19 | - | 49843852 | 49865714 | 2440  |
| ENSG000001 | 346.8505 | 410.7381 | -0.24526 | 0.077534  | 0.13005   | EED       | chr11 | + | 85955586 | 85989855 | 2767  |
| ENSG000001 | 33.44346 | 16.44968 | 1.0141   | 0.02819   | 0.053726  | CDHR2     | chr5  | + | 1.76E+08 | 1.76E+08 | 4509  |
| ENSG000001 | 1.338465 | 149.8523 | -6.5357  | 6.03E-21  | 5.31E-20  | SNCB      | chr5  | - | 1.76E+08 | 1.76E+08 | 1383  |
| ENSG000001 | 924.8245 | 737.5094 | 0.32709  | 0.017883  | 0.035683  | TSG101    | chr11 | - | 18489883 | 18548779 | 2101  |
| ENSG000001 | 1017.583 | 580.9426 | 0.80734  | 1.24E-06  | 4.39E-06  | C17orf85  | chr17 | - | 3714460  | 3749545  | 4096  |
| ENSG000001 | 52.81481 | 1518.294 | -4.8345  | 1.36E-144 | 1.45E-142 | ATP2A3    | chr17 | - | 3827169  | 3867736  | 4799  |
| ENSG000001 | 489.5053 | 45.69032 | 3.4107   | 7.05E-65  | 2.30E-63  | CA12      | chr15 | - | 63613577 | 63674360 | 6413  |
| ENSG000001 | 1088.839 | 21.59762 | 5.6401   | 8.72E-145 | 9.39E-143 | MGLL      | chr3  | - | 1.27E+08 | 1.28E+08 | 4941  |
| ENSG000001 | 64.41912 | 50.10116 | 0.35492  | 0.40075   | 0.50543   | NTN4      | chr12 | - | 96051583 | 96184930 | 3615  |
| ENSG000001 | 420.5799 | 384.0998 | 0.13115  | 0.37372   | 0.47808   | BCS1L     | chr2  | + | 2.2E+08  | 2.2E+08  | 2015  |
| ENSG000001 | 1297.74  | 714.8814 | 0.8563   | 0.000796  | 0.002005  | NUAK1     | chr12 | - | 1.06E+08 | 1.07E+08 | 6828  |
| ENSG000001 | 816.8475 | 440.7385 | 0.88815  | 1.18E-09  | 5.40E-09  | DPP8      | chr15 | - | 65734801 | 65810042 | 8699  |
| ENSG000001 | 177.7815 | 169.4324 | 0.066342 | 0.71959   | 0.79258   | SLC24A1   | chr15 | + | 65903704 | 65953333 | 5768  |
| ENSG000001 | 3925.14  | 3093.183 | 0.34331  | 0.006461  | 0.014083  | ZNFS32    | chr18 | + | 56529832 | 56653712 | 6696  |
| ENSG000001 | 341.8949 | 55.72894 | 2.5974   | 2.73E-19  | 2.22E-18  | SCARF1    | chr17 | - | 1537152  | 1549041  | 3443  |
| ENSG000001 | 5873.371 | 1093.05  | 2.4227   | 4.85E-65  | 1.59E-63  | LMAN1     | chr18 | - | 56995055 | 57027194 | 5521  |
| ENSG000001 | 2996.69  | 2897.149 | 0.048595 | 0.59363   | 0.68829   | PTPLAD1   | chr15 | + | 65822756 | 65870687 | 3225  |
| ENSG000001 | 1.379541 | 15.40898 | -3.2858  | 0.000226  | 0.000613  | IPCEF1    | chr6  | - | 1.54E+08 | 1.55E+08 | 6689  |
| ENSG000001 | 1314.555 | 732.1862 | 0.84361  | 4.22E-12  | 2.30E-11  | ZZEF1     | chr17 | - | 3907739  | 4046314  | 11456 |
| ENSG000001 | 27773.04 | 42259.12 | -0.60462 | 1.56E-05  | 4.91E-05  | ENO1      | chr1  | - | 8921061  | 8939308  | 2266  |
| ENSG000001 | 10.46966 | 20.71624 | -0.94206 | 0.2171    | 0.30845   | SLC12A1   | chr15 | + | 48483861 | 48596275 | 8632  |
| ENSG000001 | 4227.256 | 1071.035 | 1.9797   | 7.82E-104 | 4.77E-102 | C19orf10  | chr19 | - | 4641386  | 4670382  | 1018  |
| ENSG000001 | 951.0201 | 862.8614 | 0.13995  | 0.32125   | 0.42405   | ANO8      | chr19 | - | 17434032 | 17445638 | 4618  |
| ENSG000001 | 116.8802 | 171.2873 | -0.54971 | 0.007276  | 0.015684  | TUBE1     | chr6  | - | 1.12E+08 | 1.12E+08 | 3610  |
| ENSG000001 | 418.0204 | 1358.443 | -1.6963  | 6.86E-29  | 8.36E-28  | ARHGEF10I | chr1  | + | 17866330 | 18024369 | 4585  |
| ENSG000001 | 0.290301 | 4.997418 | -3.1039  | 0.028112  | 0.053611  | TXK       | chr4  | - | 48068410 | 48136273 | 2914  |
| ENSG000001 | 0        | 28.85467 | -6.4034  | 5.33E-08  | 2.13E-07  | WSCD2     | chr12 | + | 1.09E+08 | 1.09E+08 | 4710  |
| ENSG000001 | 74.93499 | 1925.467 | -4.6586  | 4.59E-110 | 3.07E-108 | KCNQ2     | chr20 | - | 62037542 | 62103993 | 3275  |
| ENSG000001 | 4.055658 | 4.587883 | -0.14672 | 0.88514   | 0.91974   | TACR2     | chr10 | - | 71163659 | 71176623 | 2083  |
| ENSG000001 | 249.1924 | 334.6377 | -0.4246  | 0.009061  | 0.019191  | ACTR6     | chr12 | + | 1.01E+08 | 1.01E+08 | 2464  |
| ENSG000001 | 144.1855 | 261.6445 | -0.85441 | 0.000336  | 0.000894  | TIPIN     | chr15 | - | 66628544 | 66679084 | 1744  |
| ENSG000001 | 802.475  | 717.8236 | 0.16158  | 0.17524   | 0.25845   | SRI       | chr7  | - | 87834433 | 87856308 | 2010  |
| ENSG000001 | 3087.479 | 1676.836 | 0.87997  | 1.43E-22  | 1.35E-21  | EIF4G3    | chr1  | - | 21132963 | 21503377 | 6196  |
| ENSG000001 | 158.5856 | 355.0907 | -1.1603  | 1.02E-12  | 5.81E-12  | NUP37     | chr12 | - | 1.02E+08 | 1.03E+08 | 1286  |
| ENSG000001 | 3145.522 | 374.9453 | 3.058    | 7.23E-44  | 1.41E-42  | SEMA3A    | chr7  | - | 83587659 | 84122040 | 5659  |
| ENSG000001 | 1193.417 | 1162.242 | 0.038093 | 0.78653   | 0.84737   | GTSE1     | chr22 | + | 46692638 | 46726707 | 3112  |
| ENSG000001 | 9430.262 | 72.00103 | 6.8795   | 1.99E-39  | 3.45E-38  | SEMA3C    | chr7  | - | 80371854 | 80551675 | 5174  |
| ENSG000001 | 601.5396 | 336.4092 | 0.8375   | 6.62E-11  | 3.32E-10  | TTC38     | chr22 | + | 46663858 | 46689905 | 2610  |
| ENSG000001 | 397.5975 | 288.3705 | 0.46208  | 0.009516  | 0.020075  | ACAT1     | chr11 | + | 1.08E+08 | 1.08E+08 | 2258  |
| ENSG000001 | 804.418  | 796.8941 | 0.012846 | 0.94668   | 0.9661    | GRAMD4    | chr22 | + | 46971909 | 47075688 | 4484  |
| ENSG000001 | 515.2281 | 1272.479 | -1.3019  | 1.02E-20  | 8.86E-20  | CELSR1    | chr22 | - | 46756731 | 46933067 | 11389 |
| ENSG000001 | 1.286224 | 7.401    | -2.2614  | 0.029495  | 0.055937  | WNT8B     | chr10 | + | 1.02E+08 | 1.02E+08 | 2112  |
| ENSG000001 | 1503.24  | 1417.963 | 0.084537 | 0.6837    | 0.76377   | ZNFB38    | chr2  | + | 71503691 | 71662199 | 6821  |
| ENSG000001 | 228.8537 | 135.1877 | 0.75981  | 3.78E-05  | 0.000113  | SLC25A40  | chr7  | - | 87462883 | 87505672 | 4045  |
| ENSG000001 | 353.8718 | 431.9121 | -0.28691 | 0.056377  | 0.098827  | TIMM21    | chr18 | + | 71815746 | 71826197 | 2524  |
| ENSG000001 | 1.733248 | 5491.324 | -11.359  | 7.59E-88  | 3.64E-86  | ADD2      | chr2  | - | 70834750 | 70995357 | 5856  |
| ENSG000001 | 0        | 43.94562 | -7.0089  | 7.15E-10  | 3.34E-09  | FGF4      | chr11 | - | 69587797 | 69590171 | 1220  |
| ENSG000001 | 551.2642 | 534.6757 | 0.044822 | 0.70313   | 0.77919   | RASAL2    | chr1  | + | 1.78E+08 | 1.78E+08 | 10898 |
| ENSG000001 | 260.8414 | 59.72917 | 2.1196   | 1.03E-27  | 1.20E-26  | VPS9D1    | chr16 | - | 89773542 | 89787394 | 2791  |
| ENSG000001 | 273.4706 | 151.4182 | 0.84852  | 2.31E-07  | 8.75E-07  | ZNFB37A   | chr10 | + | 38383264 | 38412276 | 7027  |
| ENSG000001 | 1439.292 | 1203.202 | 0.25791  | 0.044416  | 0.080208  | MARK3     | chr14 | + | 1.04E+08 | 1.04E+08 | 3584  |
| ENSG000001 | 6779.504 | 6969.413 | -0.03977 | 0.64996   | 0.73586   | SLC25A3   | chr12 | + | 98987369 | 98995946 | 3236  |
| ENSG000001 | 3241.512 | 641.8403 | 2.3331   | 1.17E-65  | 3.90E-64  | FNDC3B    | chr3  | + | 1.72E+08 | 1.72E+08 | 7904  |
| ENSG000001 | 1689.315 | 161.753  | 3.374    | 1.20E-61  | 3.60E-60  | FOSL2     | chr2  | + | 28615315 | 28640179 | 6708  |

|            |          |          |          |           |           |          |       |   |          |          |       |
|------------|----------|----------|----------|-----------|-----------|----------|-------|---|----------|----------|-------|
| ENSG000001 | 0        | 15.392   | -5.5642  | 3.91E-06  | 1.32E-05  | CACNG5   | chr17 | + | 64831235 | 64881603 | 1311  |
| ENSG000001 | 53.28156 | 83.73861 | -0.65128 | 0.018546  | 0.036888  | CACNG4   | chr17 | + | 64961026 | 65029514 | 3380  |
| ENSG000001 | 1325.97  | 397.1629 | 1.7343   | 7.73E-17  | 5.61E-16  | FRYL     | chr4  | - | 48499378 | 48782339 | 11706 |
| ENSG000001 | 1196.481 | 501.1593 | 1.2525   | 3.51E-17  | 2.60E-16  | TMEM131  | chr2  | - | 98372799 | 98612388 | 7473  |
| ENSG000001 | 24078.24 | 21110.43 | 0.18959  | 0.098512  | 0.15944   | FSCN1    | chr7  | + | 5632439  | 5646286  | 2777  |
| ENSG000001 | 120397   | 79710.17 | 0.59414  | 7.92E-06  | 2.58E-05  | ACTB     | chr7  | - | 5566782  | 5603415  | 2245  |
| ENSG000001 | 81.95339 | 161.206  | -0.9763  | 3.87E-05  | 0.000116  | MOCOS    | chr18 | + | 33767482 | 33852120 | 6160  |
| ENSG000001 | 77.58527 | 14.83194 | 2.3628   | 4.56E-12  | 2.47E-11  | PLD1     | chr3  | - | 1.71E+08 | 1.72E+08 | 5855  |
| ENSG000001 | 1.628766 | 47.84401 | -4.6074  | 4.58E-09  | 2.00E-08  | ATP12A   | chr13 | + | 25254549 | 25285921 | 3732  |
| ENSG000001 | 647.898  | 1159.767 | -0.83916 | 1.45E-12  | 8.15E-12  | WDR62    | chr19 | + | 36545783 | 36596008 | 5971  |
| ENSG000001 | 1154.16  | 796.3755 | 0.53491  | 3.51E-07  | 1.31E-06  | DLG1     | chr3  | - | 1.97E+08 | 1.97E+08 | 5034  |
| ENSG000001 | 3516.321 | 2996.632 | 0.23064  | 0.007411  | 0.015956  | RAB7A    | chr3  | + | 1.28E+08 | 1.29E+08 | 2244  |
| ENSG000001 | 819.2416 | 190.3638 | 2.1042   | 1.02E-47  | 2.20E-46  | BCAP29   | chr7  | + | 1.07E+08 | 1.07E+08 | 5773  |
| ENSG000001 | 100.6893 | 48.61925 | 1.0398   | 0.000506  | 0.001314  | SEC31B   | chr10 | - | 1.02E+08 | 1.02E+08 | 5087  |
| ENSG000001 | 1358.176 | 2167.063 | -0.67404 | 1.23E-10  | 6.05E-10  | SART3    | chr12 | - | 1.09E+08 | 1.09E+08 | 4004  |
| ENSG000001 | 1.027626 | 1.370136 | -0.28959 | 0.85985   | 0.90178   | ARHGAP15 | chr2  | + | 1.44E+08 | 1.45E+08 | 2968  |
| ENSG000001 | 26.31886 | 10.82351 | 1.2568   | 0.010679  | 0.022309  | TUBA3D   | chr2  | + | 1.32E+08 | 1.32E+08 | 1546  |
| ENSG000001 | 0        | 3.353702 | -3.164   | 0.041754  | 0.07608   | PAX2     | chr10 | + | 1.02E+08 | 1.03E+08 | 4209  |
| ENSG000001 | 295.7277 | 797.9429 | -1.4319  | 9.83E-23  | 9.36E-22  | EXOSC7   | chr3  | + | 45016733 | 45077558 | 1647  |
| ENSG000001 | 732.2021 | 35.49568 | 4.3484   | 1.31E-113 | 9.17E-112 | KIFAP3   | chr1  | - | 1.7E+08  | 1.7E+08  | 4111  |
| ENSG000001 | 839.1083 | 406.4197 | 1.0444   | 1.90E-14  | 1.20E-13  | MKRN2    | chr3  | + | 12598513 | 12625212 | 2848  |
| ENSG000001 | 1653.03  | 3362.53  | -1.0211  | 3.05E-07  | 1.14E-06  | MCM6     | chr2  | - | 1.37E+08 | 1.37E+08 | 3736  |
| ENSG000001 | 404.7705 | 304.8919 | 0.40761  | 0.004909  | 0.010944  | REXO2    | chr11 | + | 1.14E+08 | 1.14E+08 | 1161  |
| ENSG000001 | 216.5419 | 328.6545 | -0.6006  | 4.13E-05  | 0.000123  | RBM7     | chr11 | + | 1.14E+08 | 1.14E+08 | 6725  |
| ENSG000001 | 744.9236 | 95.90052 | 2.9562   | 9.78E-63  | 3.05E-61  | RBMS2    | chr12 | + | 56915713 | 56984745 | 3147  |
| ENSG000001 | 2396.918 | 2324.354 | 0.043972 | 0.69434   | 0.77197   | BAZ2A    | chr12 | - | 56989380 | 57030600 | 8844  |
| ENSG000001 | 2428.628 | 1778.62  | 0.44833  | 0.004887  | 0.0109    | PTPN23   | chr3  | + | 47422501 | 47454931 | 5244  |
| ENSG000001 | 650.9427 | 703.5753 | -0.11132 | 0.54374   | 0.64414   | MLH1     | chr3  | + | 37034823 | 37107380 | 2752  |
| ENSG000001 | 571.4595 | 2771.836 | -2.2709  | 3.77E-32  | 5.23E-31  | UNG      | chr12 | + | 1.1E+08  | 1.1E+08  | 2234  |
| ENSG000001 | 11.23608 | 28.4346  | -1.3082  | 0.01741   | 0.034817  | FMO4     | chr1  | + | 1.71E+08 | 1.71E+08 | 2252  |
| ENSG000001 | 443.3256 | 149.3534 | 1.5678   | 3.95E-15  | 2.61E-14  | KLHL20   | chr1  | + | 1.74E+08 | 1.74E+08 | 3421  |
| ENSG000001 | 4.959078 | 14.28974 | -1.4819  | 0.024281  | 0.047002  | RGS11    | chr16 | - | 318300   | 325980   | 4294  |
| ENSG000001 | 37.14883 | 45.53738 | -0.29614 | 0.35185   | 0.456     | SLC46A1  | chr17 | - | 26721661 | 26734215 | 6487  |
| ENSG000001 | 470.2962 | 85.27539 | 2.4559   | 7.73E-51  | 1.81E-49  | PLXNA2   | chr1  | - | 2.08E+08 | 2.08E+08 | 11444 |
| ENSG000001 | 360.7317 | 489.6616 | -0.44025 | 0.003677  | 0.008357  | SPAG5    | chr17 | - | 26904592 | 26926297 | 4040  |
| ENSG000001 | 518.6054 | 311.7765 | 0.73315  | 2.04E-07  | 7.75E-07  | ANKRD13A | chr12 | + | 1.1E+08  | 1.1E+08  | 4148  |
| ENSG000001 | 27.51502 | 798.7481 | -4.8622  | 4.97E-86  | 2.32E-84  | TPD52    | chr8  | - | 80870571 | 81143467 | 3918  |
| ENSG000001 | 137.3151 | 302.3739 | -1.1344  | 1.30E-05  | 4.13E-05  | ACACB    | chr12 | + | 1.1E+08  | 1.1E+08  | 9360  |
| ENSG000001 | 1340.764 | 3305.876 | -1.3     | 4.38E-32  | 6.06E-31  | TRAF4    | chr17 | + | 27071002 | 27077974 | 2921  |
| ENSG000001 | 23.30957 | 9.856337 | 1.1914   | 0.11262   | 0.17878   | PAG1     | chr8  | - | 81882526 | 82024303 | 4387  |
| ENSG000001 | 194.7078 | 241.3388 | -0.30912 | 0.065258  | 0.11223   | GPATCH1  | chr19 | + | 33571786 | 33621448 | 3492  |
| ENSG000001 | 300.5984 | 335.6412 | -0.15859 | 0.28136   | 0.3824    | ICAM3    | chr19 | - | 10444452 | 10450499 | 2491  |
| ENSG000001 | 1134.039 | 1226.383 | -0.11359 | 0.31077   | 0.4127    | NT5C2    | chr10 | - | 1.05E+08 | 1.05E+08 | 5263  |
| ENSG000001 | 844.5237 | 572.838  | 0.55917  | 2.90E-06  | 9.89E-06  | MCAM     | chr11 | - | 1.19E+08 | 1.19E+08 | 4865  |
| ENSG000001 | 1950.898 | 4073.179 | -1.0609  | 3.42E-28  | 4.07E-27  | GPC4     | chrX  | - | 1.32E+08 | 1.33E+08 | 4960  |
| ENSG000001 | 65.29751 | 85.14152 | -0.37777 | 0.40651   | 0.51129   | MBNL3    | chrX  | - | 1.32E+08 | 1.32E+08 | 11294 |
| ENSG000001 | 2.064625 | 1231.228 | -9.0043  | 5.69E-54  | 1.44E-52  | CAMSAP3  | chr19 | + | 7660788  | 7683190  | 4179  |
| ENSG000001 | 25.48724 | 278.9844 | -3.426   | 5.21E-33  | 7.44E-32  | RAP1GAP  | chr1  | - | 21922708 | 21995801 | 4294  |
| ENSG000001 | 1134.276 | 2024.936 | -0.83511 | 5.37E-11  | 2.72E-10  | XAB2     | chr19 | - | 7684411  | 7694451  | 4555  |
| ENSG000001 | 2990.784 | 1863.633 | 0.68139  | 2.48E-07  | 9.36E-07  | ARHGEF1  | chr19 | + | 42387228 | 42434302 | 3439  |
| ENSG000001 | 9.398353 | 461.9083 | -5.556   | 7.94E-68  | 2.75E-66  | STXBP2   | chr19 | + | 7701767  | 7712759  | 1974  |
| ENSG000001 | 669.269  | 1107.907 | -0.72557 | 1.88E-06  | 6.56E-06  | MAP2K7   | chr19 | + | 7968728  | 7979363  | 3497  |
| ENSG000001 | 0        | 592.2629 | -10.499  | 1.01E-22  | 9.60E-22  | NMRK2    | chr19 | + | 3933101  | 3942414  | 1126  |
| ENSG000001 | 740.6094 | 728.0677 | 0.023857 | 0.86551   | 0.9064    | DGKD     | chr2  | + | 2.34E+08 | 2.34E+08 | 6297  |
| ENSG000001 | 407.2344 | 394.5509 | 0.046085 | 0.76793   | 0.83226   | CTTNBP2  | chr7  | - | 1.17E+08 | 1.18E+08 | 5970  |
| ENSG000001 | 0.342542 | 14.01132 | -4.5734  | 0.000134  | 0.000375  | ACTL6B   | chr7  | - | 1E+08    | 1E+08    | 1537  |
| ENSG000001 | 19.73004 | 4.706852 | 2.0154   | 0.001185  | 0.002907  | RARB     | chr3  | + | 25215823 | 25639423 | 3084  |
| ENSG000001 | 3837.315 | 4610.078 | -0.2644  | 0.023884  | 0.046302  | TOP2B    | chr3  | - | 25639475 | 25706398 | 5389  |
| ENSG000001 | 3938.665 | 2516.051 | 0.64606  | 1.19E-08  | 5.02E-08  | TM9SF3   | chr10 | - | 98277866 | 98347209 | 6141  |
| ENSG000001 | 830.5597 | 597.0515 | 0.47335  | 0.078376  | 0.13121   | NFKB2    | chr10 | + | 1.04E+08 | 1.04E+08 | 3101  |
| ENSG000001 | 388.8212 | 551.8627 | -0.50262 | 0.008951  | 0.018989  | UBE2T    | chr1  | - | 2.02E+08 | 2.02E+08 | 922   |
| ENSG000001 | 248.413  | 396.4561 | -0.67256 | 0.008716  | 0.018532  | PPP1R12B | chr1  | + | 2.02E+08 | 2.03E+08 | 11111 |
| ENSG000001 | 2915.71  | 1211.437 | 1.265    | 2.36E-15  | 1.58E-14  | DNAJC10  | chr2  | + | 1.84E+08 | 1.84E+08 | 5272  |
| ENSG000001 | 3822.976 | 3895.763 | -0.02708 | 0.76338   | 0.82823   | GTF3C1   | chr16 | - | 27470876 | 27561234 | 7018  |
| ENSG000001 | 1523.744 | 810.4871 | 0.90948  | 2.44E-12  | 1.35E-11  | IL4R     | chr16 | + | 27324989 | 27376099 | 3685  |

|            |          |          |          |           |           |           |       |   |          |          |      |
|------------|----------|----------|----------|-----------|-----------|-----------|-------|---|----------|----------|------|
| ENSG000001 | 860.0309 | 1034.063 | -0.26557 | 0.018819  | 0.037368  | USP33     | chr1  | - | 78161672 | 78225537 | 4502 |
| ENSG000001 | 265.6763 | 52.18658 | 2.3391   | 3.11E-27  | 3.56E-26  | PAK3      | chrX  | + | 1.1E+08  | 1.1E+08  | 2638 |
| ENSG000001 | 315.7787 | 112.1633 | 1.4888   | 2.81E-14  | 1.76E-13  | CAPN6     | chrX  | - | 1.1E+08  | 1.1E+08  | 3568 |
| ENSG000001 | 14.59549 | 42.24363 | -1.5074  | 0.000396  | 0.001043  | DCX       | chrX  | - | 1.1E+08  | 1.1E+08  | 9405 |
| ENSG000001 | 1272.259 | 2878.164 | -1.1759  | 1.78E-18  | 1.39E-17  | SNRPA     | chr19 | + | 41256542 | 41271294 | 1621 |
| ENSG000001 | 164.9269 | 812.1556 | -2.292   | 8.03E-50  | 1.83E-48  | EXOSC5    | chr19 | - | 41892279 | 41903384 | 1118 |
| ENSG000001 | 2595.148 | 1438.004 | 0.85128  | 1.16E-15  | 7.89E-15  | DYNC1I2   | chr2  | + | 1.73E+08 | 1.73E+08 | 2605 |
| ENSG000001 | 47.58516 | 6.702571 | 2.7919   | 1.97E-09  | 8.86E-09  | APBB1IP   | chr10 | + | 26727132 | 26856732 | 2771 |
| ENSG000001 | 893.6623 | 1033.355 | -0.20929 | 0.22709   | 0.32008   | LRCH4     | chr7  | - | 1E+08    | 1E+08    | 4754 |
| ENSG000001 | 216.0143 | 272.6418 | -0.33292 | 0.19106   | 0.27789   | FAM76B    | chr11 | - | 95502106 | 95523573 | 3952 |
| ENSG000001 | 448.8503 | 487.4701 | -0.11868 | 0.47142   | 0.57615   | SIRT6     | chr19 | - | 4174106  | 4182601  | 1641 |
| ENSG000001 | 2.13659  | 0        | 2.3216   | 0.17631   | 0.25974   | TYR       | chr11 | + | 88910620 | 89028927 | 2485 |
| ENSG000001 | 364.5553 | 471.3693 | -0.36975 | 0.027538  | 0.05263   | POLD3     | chr11 | + | 74204896 | 74380162 | 3821 |
| ENSG000001 | 53.59566 | 32.66236 | 0.69923  | 0.093981  | 0.15336   | ACTN2     | chr1  | + | 2.37E+08 | 2.37E+08 | 4863 |
| ENSG000001 | 4307.562 | 4638.117 | -0.10652 | 0.23992   | 0.33468   | CAPZB     | chr1  | - | 19665267 | 19812066 | 2068 |
| ENSG000001 | 335.1101 | 167.9838 | 0.99218  | 2.96E-08  | 1.21E-07  | GPR137B   | chr1  | + | 2.36E+08 | 2.36E+08 | 2039 |
| ENSG000001 | 29.98038 | 106.4066 | -1.8112  | 9.21E-07  | 3.30E-06  | NAALAD2   | chr11 | + | 89864683 | 89926062 | 3600 |
| ENSG000001 | 947.4257 | 2608.082 | -1.4588  | 1.35E-30  | 1.75E-29  | PHF17     | chr4  | + | 1.3E+08  | 1.3E+08  | 5771 |
| ENSG000001 | 342.6919 | 95.55261 | 1.8382   | 1.60E-26  | 1.78E-25  | SLC25A43  | chrX  | + | 1.19E+08 | 1.19E+08 | 2783 |
| ENSG000001 | 844.042  | 524.9059 | 0.68397  | 9.79E-08  | 3.82E-07  | UBE2A     | chrX  | + | 1.19E+08 | 1.19E+08 | 2643 |
| ENSG000001 | 8855.796 | 10323.45 | -0.22094 | 0.042533  | 0.077318  | FGFR1     | chr8  | - | 38268656 | 38326352 | 5900 |
| ENSG000001 | 0.342542 | 0.594029 | -0.38792 | 0.8278    | NA        | FKBP6     | chr7  | + | 72742167 | 72772634 | 1933 |
| ENSG000001 | 1416.326 | 1779.161 | -0.3285  | 0.007528  | 0.016184  | GTF2I     | chr7  | + | 74071994 | 74175026 | 4548 |
| ENSG000001 | 1.866827 | 4.850927 | -1.2181  | 0.24957   | 0.34591   | SMC1B     | chr22 | - | 45739944 | 45809500 | 4201 |
| ENSG000001 | 5081.071 | 6061.316 | -0.25416 | 0.006521  | 0.0142    | FBLN1     | chr22 | + | 45898118 | 45997015 | 2947 |
| ENSG000001 | 100.3364 | 1.029414 | 6.3031   | 1.37E-16  | 9.78E-16  | ITGA8     | chr10 | - | 15555948 | 15762124 | 6755 |
| ENSG000001 | 0.653381 | 1.043983 | -0.46504 | 0.7732    | NA        | CS7       | chr20 | + | 24929866 | 24940564 | 930  |
| ENSG000001 | 1070.895 | 28.54779 | 5.2214   | 7.64E-114 | 5.38E-112 | MAP2      | chr2  | + | 2.1E+08  | 2.1E+08  | 9711 |
| ENSG000001 | 465.4922 | 677.1649 | -0.53893 | 5.40E-06  | 1.79E-05  | PIAS2     | chr18 | - | 44388353 | 44500123 | 5909 |
| ENSG000001 | 249.7209 | 150.0675 | 0.73162  | 0.000273  | 0.000734  | AMPH      | chr7  | - | 38423305 | 38671167 | 3418 |
| ENSG000001 | 924.2151 | 809.6655 | 0.19075  | 0.13565   | 0.20879   | ARAF      | chrX  | + | 47420516 | 47431307 | 2458 |
| ENSG000001 | 281.5345 | 268.4496 | 0.066303 | 0.67613   | 0.75745   | MCCC1     | chr3  | - | 1.83E+08 | 1.83E+08 | 2874 |
| ENSG000001 | 1.503747 | 2.742687 | -0.68576 | 0.59326   | 0.68803   | LAMP3     | chr3  | - | 1.83E+08 | 1.83E+08 | 3375 |
| ENSG000001 | 1246.153 | 0        | 11.467   | 6.62E-27  | 7.49E-26  | FAP       | chr2  | - | 1.63E+08 | 1.63E+08 | 2780 |
| ENSG000001 | 11.8783  | 62.4977  | -2.3674  | 1.06E-09  | 4.87E-09  | NEBL      | chr10 | - | 21068902 | 21463116 | 9216 |
| ENSG000001 | 310.8798 | 289.4117 | 0.10484  | 0.52398   | 0.62626   | ACER3     | chr11 | + | 76571911 | 76737841 | 7378 |
| ENSG000001 | 1847.473 | 2554.771 | -0.46711 | 3.58E-05  | 0.000107  | UBE2K     | chr4  | + | 39699664 | 39784412 | 5245 |
| ENSG000001 | 639.3069 | 410.2017 | 0.6403   | 7.04E-05  | 0.000204  | PIK3C3    | chr18 | + | 39535171 | 39667794 | 9443 |
| ENSG000001 | 707.0658 | 689.1271 | 0.037908 | 0.87889   | 0.91569   | N4BP2     | chr4  | + | 40058446 | 40159872 | 9747 |
| ENSG000001 | 397.3695 | 279.6631 | 0.50675  | 0.000354  | 0.000938  | C12orf5   | chr12 | + | 4430371  | 4462338  | 1361 |
| ENSG000001 | 1287.652 | 383.9197 | 1.7432   | 1.75E-48  | 3.84E-47  | TULP3     | chr12 | + | 2986389  | 3050306  | 3076 |
| ENSG000001 | 1233.736 | 396.3141 | 1.6319   | 6.96E-13  | 4.00E-12  | SYNJ2     | chr6  | + | 1.58E+08 | 1.59E+08 | 7378 |
| ENSG000001 | 772.7835 | 2153.981 | -1.4782  | 5.50E-48  | 1.19E-46  | ADCY2     | chr5  | + | 7396321  | 7830194  | 9908 |
| ENSG000001 | 1611.823 | 1264.958 | 0.34953  | 0.001044  | 0.002582  | PPP2R5C   | chr14 | + | 1.02E+08 | 1.02E+08 | 4481 |
| ENSG000001 | 114.5664 | 108.4156 | 0.081231 | 0.70638   | 0.7818    | PMS2P1    | chr7  | - | 99918615 | 99939531 | 1044 |
| ENSG000001 | 0.342542 | 1.188058 | -0.99414 | 0.57407   | NA        | RBFOX1    | chr16 | + | 6069095  | 7763340  | 4099 |
| ENSG000001 | 12269.29 | 7383.033 | 0.73231  | 5.00E-19  | 4.01E-18  | GNB1      | chr1  | - | 1716729  | 1822495  | 3128 |
| ENSG000001 | 158.7303 | 3.385256 | 5.0497   | 6.47E-07  | 2.35E-06  | HOXA9     | chr7  | - | 27202054 | 27210117 | 2060 |
| ENSG000001 | 11.3902  | 2.711133 | 1.9861   | 0.011632  | 0.024099  | EDN1      | chr6  | + | 12290596 | 12297427 | 2033 |
| ENSG000001 | 627.9123 | 784.2178 | -0.32025 | 0.023175  | 0.045101  | MLLT10    | chr10 | + | 21823094 | 22032559 | 5126 |
| ENSG000001 | 14.37715 | 25.42316 | -0.78824 | 0.115     | 0.18215   | ZCWPW1    | chr7  | - | 99998449 | 1E+08    | 2356 |
| ENSG000001 | 1.814586 | 246.7792 | -6.7708  | 1.04E-30  | 1.36E-29  | ADCYAP1R1 | chr7  | + | 31092076 | 31151089 | 6487 |
| ENSG000001 | 1.733248 | 4.432528 | -1.2106  | 0.3109    | 0.41284   | FGF20     | chr8  | - | 16849678 | 16859690 | 1688 |
| ENSG000001 | 0.342542 | 0        | 0.4146   | 0.81455   | NA        | P2RY10    | chrX  | + | 78200829 | 78217451 | 1714 |
| ENSG000001 | 88.96528 | 393.3899 | -2.135   | 4.89E-32  | 6.75E-31  | ITM2A     | chrX  | - | 78615881 | 78623164 | 1698 |
| ENSG000001 | 2907.46  | 2661.467 | 0.12732  | 0.17252   | 0.25509   | NRD1      | chr1  | - | 52254863 | 52344477 | 3895 |
| ENSG000001 | 1212.965 | 1232.728 | -0.02274 | 0.8715    | 0.91019   | VDAC3     | chr8  | + | 42249142 | 42263415 | 1429 |
| ENSG000001 | 2123.456 | 1479.476 | 0.51987  | 0.016906  | 0.033875  | PCM1      | chr8  | + | 17780349 | 17885478 | 6820 |
| ENSG000001 | 497.481  | 1115.509 | -1.1587  | 1.03E-05  | 3.31E-05  | TNRC6C    | chr17 | + | 76000249 | 76104916 | 9740 |
| ENSG000001 | 909.2853 | 567.0736 | 0.67726  | 0.010264  | 0.021527  | CBFA2T2   | chr20 | + | 32077881 | 32237842 | 7803 |
| ENSG000001 | 6.640085 | 192.0899 | -4.8049  | 1.56E-35  | 2.41E-34  | DBC1      | chr9  | - | 1.22E+08 | 1.22E+08 | 3202 |
| ENSG000001 | 1157.117 | 524.602  | 1.1391   | 2.49E-14  | 1.57E-13  | ITCH      | chr20 | + | 32951041 | 33099198 | 6401 |
| ENSG000001 | 0.705622 | 5.125251 | -2.4883  | 0.043278  | 0.078512  | PKD2L2    | chr5  | + | 1.37E+08 | 1.37E+08 | 2333 |
| ENSG000001 | 880.2068 | 138.9954 | 2.658    | 6.37E-54  | 1.61E-52  | TP53INP2  | chr20 | + | 33292094 | 33301243 | 4184 |
| ENSG000001 | 3787.553 | 2060.259 | 0.87765  | 1.91E-17  | 1.43E-16  | SDF4      | chr1  | - | 1152288  | 1167411  | 3516 |

|            |          |          |          |           |           |          |       |   |          |          |       |
|------------|----------|----------|----------|-----------|-----------|----------|-------|---|----------|----------|-------|
| ENSG000001 | 40.6564  | 21.17439 | 0.92652  | 0.013918  | 0.028392  | MYH7B    | chr20 | + | 33563206 | 33590240 | 6293  |
| ENSG000001 | 5.693797 | 162.213  | -4.6822  | 4.95E-17  | 3.63E-16  | TP73     | chr1  | + | 3569084  | 3652765  | 5188  |
| ENSG000001 | 1173.299 | 580.2969 | 1.0137   | 5.72E-15  | 3.75E-14  | TOLLIP   | chr11 | - | 1295601  | 1330884  | 3666  |
| ENSG000001 | 25.04022 | 8.083244 | 1.5808   | 0.004118  | 0.009285  | UBE2D4   | chr7  | + | 43966037 | 43993166 | 1405  |
| ENSG000001 | 0.705622 | 3.541484 | -2.0057  | 0.12106   | 0.19019   | CLUL1    | chr18 | + | 596988   | 650334   | 2449  |
| ENSG000001 | 573.8724 | 618.7372 | -0.10696 | 0.56106   | 0.65963   | RUNX1T1  | chr8  | - | 92967203 | 93115514 | 7537  |
| ENSG000001 | 7.117019 | 2.139794 | 1.5219   | 0.1464    | 0.22231   | CDH17    | chr8  | - | 95139399 | 95229531 | 3693  |
| ENSG000001 | 302.2427 | 461.6978 | -0.6087  | 0.001886  | 0.00448   | THOC1    | chr18 | - | 214520   | 268050   | 2791  |
| ENSG000001 | 587.9568 | 47.12847 | 3.6328   | 1.13E-72  | 4.23E-71  | FKBP7    | chr2  | - | 1.79E+08 | 1.79E+08 | 2834  |
| ENSG000001 | 681.9232 | 252.3285 | 1.4299   | 1.30E-15  | 8.84E-15  | OSBPL6   | chr2  | + | 1.79E+08 | 1.79E+08 | 7055  |
| ENSG000001 | 2010.526 | 792.5536 | 1.341    | 2.25E-33  | 3.26E-32  | SLC1A3   | chr5  | + | 36606457 | 36688436 | 4170  |
| ENSG000001 | 5937.731 | 11515.67 | -0.95461 | 8.27E-17  | 5.99E-16  | XRCC5    | chr2  | + | 2.17E+08 | 2.17E+08 | 3761  |
| ENSG000001 | 36.38159 | 55.88496 | -0.61483 | 0.048553  | 0.086741  | LXN      | chr3  | - | 1.58E+08 | 1.58E+08 | 1116  |
| ENSG000001 | 3.008307 | 2.65044  | 0.15957  | 0.8768    | 0.91429   | SP140    | chr2  | + | 2.31E+08 | 2.31E+08 | 3246  |
| ENSG000001 | 227.8045 | 211.1111 | 0.10768  | 0.54572   | 0.64592   | MKNK1    | chr1  | - | 47023090 | 47082515 | 3408  |
| ENSG000001 | 4086.777 | 107.815  | 5.2347   | 0         | 0         | TNS1     | chr2  | - | 2.19E+08 | 2.19E+08 | 10331 |
| ENSG000001 | 1322.72  | 1636.259 | -0.30691 | 0.013261  | 0.02719   | REXO1    | chr19 | - | 1815248  | 1848452  | 4578  |
| ENSG000001 | 3015.947 | 1635.142 | 0.88201  | 1.28E-13  | 7.64E-13  | SAR1A    | chr10 | - | 71909960 | 71930279 | 3227  |
| ENSG000001 | 86.59919 | 127.6097 | -0.55692 | 0.021329  | 0.041825  | CDC14A   | chr1  | + | 1.01E+08 | 1.01E+08 | 4181  |
| ENSG000001 | 238.1639 | 130.2595 | 0.86269  | 0.002914  | 0.006728  | RAPGEF3  | chr12 | - | 48128455 | 48164823 | 5751  |
| ENSG000001 | 47.99453 | 14.5552  | 1.6799   | 0.000126  | 0.000354  | CEACAM1  | chr19 | - | 43011456 | 43065386 | 3519  |
| ENSG000001 | 431.5346 | 335.0218 | 0.36552  | 0.00809   | 0.017274  | SEN1     | chr12 | - | 48436681 | 48500091 | 4969  |
| ENSG000001 | 1.939605 | 21.88168 | -3.3039  | 1.39E-05  | 4.38E-05  | DUSP13   | chr10 | - | 76854190 | 76868976 | 1768  |
| ENSG000001 | 4851.417 | 1510.87  | 1.6806   | 5.12E-42  | 9.50E-41  | CIC      | chr19 | + | 42772689 | 42799949 | 8218  |
| ENSG000001 | 171.8095 | 171.1349 | -0.33835 | 0.16263   | 0.24302   | LIPE     | chr19 | - | 42905659 | 42931578 | 3813  |
| ENSG000001 | 10944.18 | 8640.111 | 0.34075  | 0.005113  | 0.011376  | FDFT1    | chr8  | + | 11653082 | 11696818 | 2176  |
| ENSG000001 | 426.1229 | 516.3931 | -0.27727 | 0.025819  | 0.049684  | PAFAH1B3 | chr19 | - | 42801185 | 42807698 | 1098  |
| ENSG000001 | 291.8547 | 124.4437 | 1.224    | 2.78E-07  | 1.05E-06  | OPHN1    | chrX  | - | 67262186 | 67653755 | 7879  |
| ENSG000001 | 1522.532 | 3012.017 | -0.98347 | 1.20E-22  | 1.14E-21  | KIF22    | chr16 | + | 29802040 | 29816706 | 2505  |
| ENSG000001 | 1.338465 | 0        | 1.8837   | 0.27037   | NA        | SCGN     | chr6  | + | 25652464 | 25702011 | 1447  |
| ENSG000001 | 536.525  | 761.9103 | -0.50559 | 1.18E-05  | 3.74E-05  | LRRRC16A | chr6  | + | 25279306 | 25620758 | 5431  |
| ENSG000001 | 926.4641 | 1926.181 | -1.0521  | 6.99E-07  | 2.53E-06  | PGM1     | chr1  | + | 64058947 | 64125916 | 2657  |
| ENSG000001 | 1956.122 | 1932.878 | 0.017484 | 0.93142   | 0.95487   | DDX1     | chr2  | + | 15731302 | 15771235 | 2817  |
| ENSG000001 | 4237.965 | 4152.258 | 0.029463 | 0.74051   | 0.80906   | DNM2     | chr19 | + | 10828755 | 10944164 | 5651  |
| ENSG000001 | 2680.024 | 2425.692 | 0.14409  | 0.17352   | 0.25633   | EPB41L2  | chr6  | - | 1.31E+08 | 1.31E+08 | 4457  |
| ENSG000001 | 461.5234 | 11.05172 | 5.3616   | 1.55E-73  | 5.92E-72  | RIMS1    | chr6  | + | 72596406 | 73112845 | 7055  |
| ENSG000001 | 1166.073 | 66.05463 | 4.1335   | 5.21E-157 | 6.60E-155 | MOXD1    | chr6  | - | 1.33E+08 | 1.33E+08 | 3059  |
| ENSG000001 | 817.5316 | 358.286  | 1.1885   | 1.87E-21  | 1.68E-20  | STX7     | chr6  | - | 1.33E+08 | 1.33E+08 | 3689  |
| ENSG000001 | 443.7115 | 280.2065 | 0.66224  | 0.000533  | 0.001377  | RABL2B   | chr22 | - | 51205929 | 51222091 | 2498  |
| ENSG000001 | 1223.435 | 1540.986 | -0.33211 | 0.002094  | 0.004942  | KEAP1    | chr19 | - | 10596796 | 10614417 | 2955  |
| ENSG000001 | 0.290301 | 3.662869 | -2.724   | 0.054179  | 0.095392  | DDX43    | chr6  | + | 74104471 | 74127292 | 2513  |
| ENSG000001 | 3.64115  | 2.200487 | 0.62106  | 0.58112   | 0.67759   | PTPRH    | chr19 | - | 55692616 | 55720874 | 3877  |
| ENSG000001 | 0.342542 | 0.297015 | -0.00202 | 0.99909   | NA        | DC1      | chr13 | - | 95089558 | 95131936 | 4568  |
| ENSG000001 | 1162.267 | 984.6359 | 0.23909  | 0.049723  | 0.088547  | SLC35C2  | chr20 | - | 44978167 | 44993043 | 2510  |
| ENSG000001 | 403.637  | 197.3752 | 1.0316   | 4.01E-06  | 1.35E-05  | CRYBG3   | chr3  | + | 97595819 | 97663810 | 4782  |
| ENSG000001 | 3.008307 | 9.514072 | -1.5886  | 0.044631  | 0.080537  | EPHA6    | chr3  | + | 96533425 | 97471304 | 3971  |
| ENSG000001 | 0        | 6.63543  | -4.2447  | 0.002253  | 0.005286  | SCTR     | chr2  | - | 1.2E+08  | 1.2E+08  | 2275  |
| ENSG000001 | 184.8736 | 180.5892 | 0.034629 | 0.85392   | 0.89735   | RFX3     | chr9  | - | 3218297  | 3526004  | 9307  |
| ENSG000001 | 973.6559 | 1438.083 | -0.55804 | 0.072452  | 0.12273   | RIF1     | chr2  | + | 1.52E+08 | 1.52E+08 | 10180 |
| ENSG000001 | 762.2802 | 670.1479 | 0.18563  | 0.23054   | 0.32392   | RAB21    | chr12 | + | 72148654 | 72184699 | 6180  |
| ENSG000001 | 32.31314 | 23.7601  | 0.43362  | 0.27635   | 0.3766    | SLC4A4   | chr4  | + | 72053003 | 72437804 | 7640  |
| ENSG000001 | 1617.587 | 227.3969 | 2.8238   | 1.69E-54  | 4.31E-53  | SMARCA2  | chr9  | + | 2015342  | 2193624  | 5867  |
| ENSG000001 | 0        | 1.012429 | -1.3162  | 0.46038   | NA        | RDH8     | chr19 | + | 10123925 | 10132955 | 1715  |
| ENSG000001 | 234.6297 | 347.8047 | -0.56409 | 0.045653  | 0.082149  | SESN1    | chr6  | - | 1.09E+08 | 1.09E+08 | 3509  |
| ENSG000001 | 105.7392 | 56.20803 | 0.90266  | 0.008505  | 0.018106  | MID2     | chrX  | + | 1.07E+08 | 1.07E+08 | 2876  |
| ENSG000001 | 167.092  | 49.72963 | 1.7326   | 3.07E-08  | 1.25E-07  | COL5A3   | chr19 | - | 10070237 | 10121147 | 6174  |
| ENSG000001 | 3515.344 | 2949.015 | 0.25249  | 0.25587   | 0.35319   | SRCAP    | chr16 | + | 30709530 | 30755602 | 10804 |
| ENSG000001 | 802.7968 | 823.7968 | -0.03569 | 0.89448   | 0.92676   | KIAA0020 | chr9  | - | 2720469  | 2844241  | 2321  |
| ENSG000001 | 3.257533 | 1.029414 | 1.3935   | 0.29878   | 0.40054   | CPB2     | chr13 | - | 46627321 | 46679211 | 1717  |
| ENSG000001 | 14.18278 | 133.3671 | -3.1931  | 2.06E-15  | 1.38E-14  | CHRNA3   | chr15 | - | 78885394 | 78913637 | 3202  |
| ENSG000001 | 4.762093 | 209.209  | -5.4102  | 1.16E-34  | 1.74E-33  | KCNN2    | chr5  | + | 1.14E+08 | 1.14E+08 | 3216  |
| ENSG000001 | 362.0925 | 324.1942 | 0.16095  | 0.32453   | 0.42746   | CNOT4    | chr7  | - | 1.35E+08 | 1.35E+08 | 4642  |
| ENSG000001 | 952.2888 | 637.8382 | 0.57773  | 2.48E-07  | 9.36E-07  | PSEN1    | chr14 | + | 73603126 | 73690399 | 6078  |
| ENSG000001 | 662.0055 | 680.4672 | -0.03993 | 0.84531   | 0.89157   | CPOX     | chr3  | - | 98239976 | 98312567 | 2825  |
| ENSG000001 | 461.7048 | 345.6618 | 0.41716  | 0.001548  | 0.003727  | CLDND1   | chr3  | - | 98216756 | 98241910 | 2818  |

|            |          |          |          |           |           |          |       |   |          |          |       |
|------------|----------|----------|----------|-----------|-----------|----------|-------|---|----------|----------|-------|
| ENSG000001 | 201.4798 | 22.54365 | 3.1523   | 2.53E-27  | 2.91E-26  | MOK      | chr14 | - | 1.03E+08 | 1.03E+08 | 3809  |
| ENSG000001 | 15864.62 | 29316.94 | -0.88389 | 1.94E-07  | 7.39E-07  | HSP90AA1 | chr14 | - | 1.03E+08 | 1.03E+08 | 3510  |
| ENSG000001 | 214.0491 | 189.3779 | 0.17554  | 0.45727   | 0.56257   | RBL1     | chr20 | - | 35624752 | 35724398 | 5684  |
| ENSG000001 | 1929.997 | 1104.091 | 0.80307  | 1.84E-05  | 5.72E-05  | DLGAP4   | chr20 | + | 34894258 | 35157040 | 5056  |
| ENSG000001 | 3.838135 | 430.148  | -6.6503  | 6.37E-45  | 1.27E-43  | IGSF9B   | chr11 | - | 1.34E+08 | 1.34E+08 | 7309  |
| ENSG000001 | 265.4064 | 137.883  | 0.93687  | 0.000609  | 0.001562  | CROCCP3  | chr1  | - | 16793931 | 16825752 | 5368  |
| ENSG000001 | 501.2785 | 628.1852 | -0.32415 | 0.0199    | 0.039303  | NDC80    | chr18 | + | 2571510  | 2616634  | 2172  |
| ENSG000001 | 305.0231 | 250.9644 | 0.28212  | 0.14713   | 0.22318   | AP4E1    | chr15 | + | 51200869 | 51298097 | 6758  |
| ENSG000001 | 292.0486 | 376.3239 | -0.36532 | 0.068322  | 0.11665   | RSBN1    | chr1  | - | 1.14E+08 | 1.14E+08 | 6621  |
| ENSG000001 | 525.2066 | 175.567  | 1.5731   | 2.21E-13  | 1.31E-12  | MAGI3    | chr1  | + | 1.14E+08 | 1.14E+08 | 6508  |
| ENSG000001 | 0.653381 | 4.914036 | -2.4985  | 0.040019  | 0.073429  | CXCL2    | chr4  | - | 74962752 | 74965010 | 1218  |
| ENSG000001 | 1.08924  | 7.018987 | -2.3668  | 0.05218   | 0.092338  | AFP      | chr4  | + | 74296855 | 74321891 | 2484  |
| ENSG000001 | 30.69554 | 38.39788 | -0.32009 | 0.44874   | 0.55412   | COL4A4   | chr2  | - | 2.28E+08 | 2.28E+08 | 9895  |
| ENSG000001 | 164.6897 | 332.3926 | -1.0084  | 3.85E-10  | 1.83E-09  | TCF7     | chr5  | + | 1.33E+08 | 1.33E+08 | 5340  |
| ENSG000001 | 326.3087 | 283.2739 | 0.20431  | 0.25449   | 0.35157   | OSTM1    | chr6  | - | 1.08E+08 | 1.08E+08 | 4467  |
| ENSG000001 | 10.78906 | 19.64561 | -0.83996 | 0.097306  | 0.15784   | CDH7     | chr18 | + | 63417488 | 63548638 | 3766  |
| ENSG000001 | 7.293466 | 0.98329  | 2.5828   | 0.01569   | 0.031651  | IMP2     | chr3  | - | 1.01E+08 | 1.01E+08 | 4157  |
| ENSG000001 | 1919.095 | 1935.671 | -0.01253 | 0.89297   | 0.92567   | PCNP     | chr3  | + | 1.01E+08 | 1.01E+08 | 2342  |
| ENSG000001 | 333.707  | 414.5434 | -0.31155 | 0.073096  | 0.12368   | EXD2     | chr14 | + | 69658228 | 69709075 | 3404  |
| ENSG000001 | 92.71352 | 172.1556 | -0.88907 | 5.21E-05  | 0.000154  | ARG2     | chr14 | + | 68086515 | 68118437 | 2045  |
| ENSG000001 | 582.0486 | 25.71447 | 4.5007   | 4.63E-78  | 1.90E-76  | MEF2C    | chr5  | - | 88013975 | 88199922 | 6458  |
| ENSG000001 | 14.70935 | 2.428687 | 2.4912   | 0.002219  | 0.005212  | PTPRC    | chr1  | + | 1.99E+08 | 1.99E+08 | 5321  |
| ENSG000001 | 0.36308  | 3.959884 | -2.8054  | 0.04439   | 0.080172  | CACNA1S  | chr1  | - | 2.01E+08 | 2.01E+08 | 6166  |
| ENSG000001 | 0.290301 | 3.784254 | -2.7255  | 0.058581  | 0.10232   | PKP1     | chr1  | + | 2.01E+08 | 2.01E+08 | 5447  |
| ENSG000001 | 484.0991 | 409.8249 | 0.23954  | 0.096518  | 0.15678   | UBA5     | chr3  | + | 1.32E+08 | 1.32E+08 | 3902  |
| ENSG000001 | 1307.483 | 269.4546 | 2.2765   | 3.79E-75  | 1.48E-73  | STK17B   | chr2  | - | 1.97E+08 | 1.97E+08 | 5287  |
| ENSG000001 | 444.8553 | 2247.047 | -2.3332  | 2.27E-53  | 5.67E-52  | CDC14B   | chr9  | - | 99252523 | 99382112 | 5589  |
| ENSG000001 | 204.5567 | 215.1928 | -0.07096 | 0.71281   | 0.78685   | ZNF510   | chr9  | - | 99518147 | 99540411 | 5616  |
| ENSG000001 | 3.049383 | 19.25547 | -2.5065  | 0.00353   | 0.008049  | LRP2     | chr2  | - | 1.7E+08  | 1.7E+08  | 15808 |
| ENSG000001 | 16.72352 | 23.96964 | -0.50057 | 0.29899   | 0.40071   | ZNF506   | chr19 | - | 19896648 | 19932560 | 4140  |
| ENSG000001 | 48.06568 | 51.47109 | -0.09846 | 0.77673   | 0.83956   | JMJD4    | chr1  | - | 2.28E+08 | 2.28E+08 | 3749  |
| ENSG000001 | 282.7295 | 257.6718 | 0.13366  | 0.50647   | 0.61002   | DUSP12   | chr1  | + | 1.62E+08 | 1.62E+08 | 1270  |
| ENSG000001 | 831.8603 | 2171.682 | -1.3827  | 4.78E-29  | 5.87E-28  | AACS     | chr12 | + | 1.26E+08 | 1.26E+08 | 6640  |
| ENSG000001 | 882.1058 | 883.8659 | -0.00287 | 0.97816   | 0.98786   | KIAA0141 | chr5  | + | 1.41E+08 | 1.41E+08 | 4970  |
| ENSG000001 | 342.958  | 371.5495 | -0.11332 | 0.46131   | 0.56652   | CADPS2   | chr7  | - | 1.22E+08 | 1.23E+08 | 6045  |
| ENSG000001 | 33.91363 | 38.16721 | -0.16652 | 0.77645   | 0.83939   | PCDHB4   | chr5  | + | 1.41E+08 | 1.41E+08 | 3621  |
| ENSG000001 | 7.188171 | 11.14967 | -0.58619 | 0.42516   | 0.53052   | PCDHA6   | chr5  | + | 1.4E+08  | 1.4E+08  | 5374  |
| ENSG000001 | 11.92973 | 3.636147 | 1.6016   | 0.072913  | 0.12341   | PCDHGA2  | chr5  | + | 1.41E+08 | 1.41E+08 | 4605  |
| ENSG000001 | 312.7662 | 185.4547 | 0.75226  | 1.35E-06  | 4.77E-06  | HSPB11   | chr1  | - | 54387234 | 54411975 | 915   |
| ENSG000001 | 299.1209 | 1582.306 | -2.3977  | 5.74E-52  | 1.38E-50  | PHLPP1   | chr18 | + | 60382672 | 60647666 | 6401  |
| ENSG000001 | 300.0265 | 167.4909 | 0.83767  | 0.000186  | 0.000512  | ATP8B1   | chr18 | - | 55313658 | 55470333 | 5935  |
| ENSG000001 | 4.242291 | 22.8318  | -2.3447  | 0.00017   | 0.00047   | IL12RB2  | chr1  | + | 67773047 | 67862583 | 4040  |
| ENSG000001 | 863.0999 | 154.8085 | 2.4697   | 4.89E-47  | 1.03E-45  | SMARCD3  | chr7  | - | 1.51E+08 | 1.51E+08 | 2415  |
| ENSG000001 | 444.8103 | 465.7335 | -0.06538 | 0.62009   | 0.71087   | WDR70    | chr5  | + | 37379314 | 37753537 | 5716  |
| ENSG000001 | 7.209522 | 0        | 4.4582   | 0.000675  | 0.001717  | FYB      | chr5  | - | 39105338 | 39274630 | 4750  |
| ENSG000001 | 51.97122 | 0.715414 | 5.8075   | 7.99E-11  | 3.98E-10  | MPP4     | chr2  | - | 2.03E+08 | 2.03E+08 | 2462  |
| ENSG000001 | 408.2329 | 506.245  | -0.31045 | 0.028153  | 0.053671  | STRADB   | chr2  | + | 2.02E+08 | 2.02E+08 | 2293  |
| ENSG000001 | 3745.754 | 2339.087 | 0.67623  | 0.006007  | 0.013172  | BZW1     | chr2  | + | 2.02E+08 | 2.02E+08 | 3383  |
| ENSG000001 | 0        | 1.71569  | -1.6656  | 0.35029   | NA        | PGR      | chr11 | - | 1.01E+08 | 1.01E+08 | 13748 |
| ENSG000001 | 4603.222 | 19.65534 | 7.8496   | 4.08E-269 | 1.56E-266 | C1QTNF3  | chr5  | - | 33987279 | 34124633 | 3424  |
| ENSG000001 | 554.8167 | 1011.677 | -0.86382 | 3.52E-07  | 1.31E-06  | ME2      | chr18 | + | 48405419 | 48474691 | 3164  |
| ENSG000001 | 442.1825 | 451.417  | -0.02983 | 0.81496   | 0.87017   | C5orf22  | chr5  | + | 31532373 | 31555165 | 3799  |
| ENSG000001 | 572.8697 | 739.003  | -0.36574 | 0.03429   | 0.063963  | CCNT2    | chr2  | + | 1.36E+08 | 1.36E+08 | 6917  |
| ENSG000001 | 178.6933 | 307.6676 | -0.78204 | 1.07E-05  | 3.40E-05  | FAM135A  | chr6  | + | 71122644 | 71270877 | 6415  |
| ENSG000001 | 211.2662 | 0        | 9.1438   | 1.92E-17  | 1.44E-16  | COL19A1  | chr6  | + | 70576463 | 70919679 | 6232  |
| ENSG000001 | 2098.859 | 594.2965 | 1.8183   | 3.67E-67  | 1.26E-65  | EPB41L3  | chr18 | - | 5392383  | 5630699  | 4908  |
| ENSG000001 | 72.35984 | 55.29987 | 0.3873   | 0.21729   | 0.30867   | COBL1    | chr2  | - | 1.66E+08 | 1.66E+08 | 9367  |
| ENSG000001 | 756.729  | 823.4072 | -0.12192 | 0.35993   | 0.46411   | DLG3     | chrX  | + | 69664711 | 69725337 | 6109  |
| ENSG000001 | 60.85751 | 9.24049  | 2.6938   | 2.72E-08  | 1.11E-07  | KCNK2    | chr1  | + | 2.15E+08 | 2.15E+08 | 3379  |
| ENSG000001 | 2255.781 | 109.2101 | 4.3605   | 6.23E-145 | 6.73E-143 | SERTAD4  | chr1  | + | 2.1E+08  | 2.1E+08  | 5219  |
| ENSG000001 | 318.4308 | 320.0479 | -0.00871 | 0.9632    | 0.97841   | TRAF5    | chr1  | + | 2.11E+08 | 2.12E+08 | 4958  |
| ENSG000001 | 488.8129 | 524.7697 | -0.10084 | 0.45884   | 0.56415   | MRPL22   | chr5  | + | 1.54E+08 | 1.54E+08 | 3176  |
| ENSG000001 | 527.3071 | 787.6901 | -0.57695 | 0.00098   | 0.002435  | GEMIN5   | chr5  | - | 1.54E+08 | 1.54E+08 | 5397  |
| ENSG000001 | 0        | 26.89051 | -6.3141  | 8.20E-08  | 3.22E-07  | OPRK1    | chr8  | - | 54138284 | 54164257 | 5014  |
| ENSG000001 | 7476.01  | 4694.898 | 0.67067  | 1.14E-09  | 5.25E-09  | NFE2L1   | chr17 | + | 46125691 | 46138849 | 4774  |

|            |          |          |          |           |           |          |       |   |          |          |       |
|------------|----------|----------|----------|-----------|-----------|----------|-------|---|----------|----------|-------|
| ENSG000001 | 1.733248 | 817.0372 | -8.6606  | 3.05E-46  | 6.29E-45  | SEMA5B   | chr3  | - | 1.23E+08 | 1.23E+08 | 4832  |
| ENSG000001 | 1782.911 | 1130.811 | 0.65542  | 4.48E-05  | 0.000133  | GSK3B    | chr3  | - | 1.2E+08  | 1.2E+08  | 7711  |
| ENSG000001 | 5014.157 | 8315.36  | -0.72885 | 4.12E-10  | 1.95E-09  | ITGB5    | chr3  | - | 1.24E+08 | 1.25E+08 | 4372  |
| ENSG000001 | 2031.896 | 1022.856 | 0.98948  | 1.38E-18  | 1.08E-17  | ERC1     | chr12 | + | 1099675  | 1605090  | 9451  |
| ENSG000001 | 2870.878 | 4485.476 | -0.64341 | 2.68E-14  | 1.68E-13  | XPO1     | chr2  | - | 61704984 | 61765761 | 6776  |
| ENSG000001 | 7.479285 | 1.935026 | 1.799    | 0.047523  | 0.08515   | C4orf6   | chr4  | + | 5526296  | 5529528  | 873   |
| ENSG000001 | 130.961  | 205.8325 | -0.64979 | 0.003234  | 0.007417  | RNF13    | chr3  | + | 1.5E+08  | 1.5E+08  | 2866  |
| ENSG000001 | 1.939605 | 79.98894 | -5.1632  | 2.36E-16  | 1.66E-15  | TRPM3    | chr9  | - | 73149949 | 74061820 | 6269  |
| ENSG000001 | 166.0121 | 463.4419 | -1.4762  | 7.83E-12  | 4.18E-11  | PALB2    | chr16 | - | 23614488 | 23652631 | 4003  |
| ENSG000001 | 152.4535 | 195.446  | -0.35334 | 0.090516  | 0.14847   | DOPEY1   | chr6  | + | 83777385 | 83881069 | 8210  |
| ENSG000001 | 590.3118 | 229.7374 | 1.3589   | 1.24E-13  | 7.45E-13  | LYRM2    | chr6  | - | 90277863 | 90348472 | 5353  |
| ENSG000001 | 276.8659 | 249.5193 | 0.14898  | 0.31129   | 0.41327   | BCKDHB   | chr6  | + | 80816364 | 81055987 | 3767  |
| ENSG000001 | 1400.183 | 714.4042 | 0.969    | 1.18E-12  | 6.69E-12  | KAT6A    | chr8  | - | 41786997 | 41909508 | 9285  |
| ENSG000001 | 668.8899 | 216.1205 | 1.6266   | 8.35E-30  | 1.06E-28  | ZCCHC6   | chr9  | - | 88902648 | 88969369 | 5724  |
| ENSG000001 | 746.5475 | 273.3913 | 1.4445   | 6.89E-16  | 4.75E-15  | ULK2     | chr17 | - | 19674142 | 19771249 | 6010  |
| ENSG000001 | 0        | 756.6198 | -10.819  | 4.50E-24  | 4.53E-23  | GRHL2    | chr8  | + | 1.03E+08 | 1.03E+08 | 5239  |
| ENSG000001 | 2677.088 | 2939.56  | -0.13452 | 0.36144   | 0.46562   | TNPO1    | chr5  | + | 72112139 | 72212560 | 11183 |
| ENSG000001 | 7208.295 | 1472.404 | 2.2899   | 1.30E-113 | 9.14E-112 | PLOD1    | chr1  | + | 11994262 | 12035595 | 2940  |
| ENSG000001 | 0.290301 | 10.86964 | -4.2855  | 0.00037   | 0.000977  | P2RX5    | chr17 | - | 3575493  | 3599698  | 2309  |
| ENSG000001 | 315.0846 | 214.602  | 0.55341  | 0.005398  | 0.011946  | ITGAE    | chr17 | - | 3617922  | 3704537  | 3858  |
| ENSG000001 | 1065.076 | 699.7817 | 0.60456  | 0.005143  | 0.011434  | DIS3     | chr13 | - | 73329540 | 73356234 | 7371  |
| ENSG000001 | 272.509  | 97.72619 | 1.4781   | 1.12E-09  | 5.15E-09  | PIBF1    | chr13 | + | 73356197 | 73590591 | 3146  |
| ENSG000001 | 240.6656 | 212.1063 | 0.18254  | 0.40289   | 0.50758   | TDRD3    | chr13 | + | 60970591 | 61148012 | 3019  |
| ENSG000001 | 157.3372 | 319.6189 | -1.0191  | 8.31E-10  | 3.86E-09  | NUFIP1   | chr13 | - | 45513384 | 45563618 | 3492  |
| ENSG000001 | 1230.24  | 558.8548 | 1.1357   | 4.73E-08  | 1.90E-07  | PDS5B    | chr13 | + | 33160564 | 33352157 | 7497  |
| ENSG000001 | 840.1031 | 424.5133 | 0.98384  | 8.05E-10  | 3.75E-09  | OXCT1    | chr5  | - | 41730167 | 41870621 | 3388  |
| ENSG000001 | 211.4997 | 98.78077 | 1.0976   | 3.99E-08  | 1.61E-07  | RRAGB    | chrX  | + | 55744172 | 55785207 | 2061  |
| ENSG000001 | 80.93865 | 0.297015 | 7.0217   | 7.52E-12  | 4.02E-11  | EPYC     | chr12 | - | 91357456 | 91398803 | 1539  |
| ENSG000001 | 336.3634 | 159.0108 | 1.0773   | 3.56E-06  | 1.20E-05  | CYLD     | chr16 | + | 50775961 | 50835846 | 8713  |
| ENSG000001 | 30.23996 | 151.2556 | -2.3106  | 6.31E-19  | 5.04E-18  | SLC27A5  | chr19 | - | 58990879 | 59023780 | 5032  |
| ENSG000001 | 227.2189 | 128.1489 | 0.81686  | 0.042499  | 0.077272  | ZNF324   | chr19 | + | 58978423 | 58984945 | 3795  |
| ENSG000001 | 65.94519 | 117.7661 | -0.82657 | 0.000582  | 0.001496  | ZNF671   | chr19 | - | 58231119 | 58238992 | 2903  |
| ENSG000001 | 66.31748 | 109.6204 | -0.71821 | 0.009485  | 0.020017  | ZNF416   | chr19 | - | 58082934 | 58090295 | 2561  |
| ENSG000001 | 101.1987 | 172.8246 | -0.77066 | 0.000778  | 0.001962  | ZNF586   | chr19 | + | 58281023 | 58331307 | 2265  |
| ENSG000001 | 87.75167 | 32.11767 | 1.4342   | 1.04E-06  | 3.70E-06  | ZNF446   | chr19 | + | 58985384 | 58992597 | 3922  |
| ENSG000001 | 17.27323 | 27.93287 | -0.6933  | 0.15056   | 0.22784   | ZNF8     | chr19 | + | 58790317 | 58807254 | 2211  |
| ENSG000001 | 183.2841 | 176.6537 | 0.050268 | 0.78321   | 0.84468   | ZNF264   | chr19 | + | 57702868 | 57724724 | 2673  |
| ENSG000001 | 6626.877 | 11824.45 | -0.83462 | 9.03E-17  | 6.52E-16  | RP55     | chr19 | + | 58897767 | 58906173 | 1747  |
| ENSG000001 | 16194.28 | 4257.184 | 1.9264   | 5.91E-100 | 3.34E-98  | FAT1     | chr4  | - | 1.88E+08 | 1.88E+08 | 14786 |
| ENSG000001 | 1130.19  | 1900.309 | -0.74851 | 8.13E-08  | 3.19E-07  | YTHDC1   | chr4  | - | 69176105 | 69215807 | 6232  |
| ENSG000001 | 501.6828 | 590.0663 | -0.23306 | 0.051206  | 0.090812  | CHMP2B   | chr3  | + | 87276421 | 87304698 | 2606  |
| ENSG000001 | 925.8814 | 135.123  | 2.7701   | 1.91E-82  | 8.36E-81  | SMAP2    | chr1  | + | 40810522 | 40888998 | 2939  |
| ENSG000001 | 549.2292 | 486.8812 | 0.1734   | 0.15026   | 0.22747   | PPIE     | chr1  | + | 40157854 | 40229586 | 4651  |
| ENSG000001 | 1001.189 | 617.8326 | 0.69238  | 0.013865  | 0.028299  | ZMPSTE24 | chr1  | + | 40723779 | 40759856 | 3108  |
| ENSG000001 | 1397.505 | 3046.845 | -1.1228  | 1.17E-15  | 7.97E-15  | STARD7   | chr2  | - | 96850597 | 96874563 | 3368  |
| ENSG000001 | 511.7836 | 1465.828 | -1.5129  | 1.63E-13  | 9.72E-13  | NOA1     | chr4  | - | 57829536 | 57844989 | 3415  |
| ENSG000001 | 1505.801 | 1696.153 | -0.1712  | 0.20991   | 0.29996   | REST     | chr4  | + | 57774075 | 57802010 | 7300  |
| ENSG000001 | 2.104887 | 4.36613  | -0.88492 | 0.44697   | 0.55245   | HAL      | chr12 | - | 96366440 | 96390143 | 3913  |
| ENSG000001 | 1615.807 | 502.6838 | 1.6813   | 8.00E-45  | 1.59E-43  | SSH1     | chr12 | - | 1.09E+08 | 1.09E+08 | 8538  |
| ENSG000001 | 8720.589 | 14339.28 | -0.71693 | 9.16E-16  | 6.27E-15  | GSTP1    | chr11 | + | 67351066 | 67354131 | 1681  |
| ENSG000001 | 5151.032 | 10605.68 | -1.0412  | 2.81E-30  | 3.60E-29  | APLP2    | chr11 | + | 1.3E+08  | 1.3E+08  | 3720  |
| ENSG000001 | 174.2454 | 393.5563 | -1.1706  | 5.44E-07  | 1.99E-06  | KIAA1467 | chr12 | + | 13197218 | 13295455 | 4808  |
| ENSG000001 | 0.632843 | 143.7656 | -7.2209  | 2.69E-17  | 1.99E-16  | SLCO1A2  | chr12 | - | 21417534 | 21572528 | 7682  |
| ENSG000001 | 1627.322 | 2272.162 | -0.48098 | 1.83E-06  | 6.39E-06  | WBP11    | chr12 | - | 14939410 | 14956474 | 2749  |
| ENSG000001 | 2746.314 | 2946.497 | -0.10107 | 0.33329   | 0.43665   | EIF3I    | chr1  | + | 32687529 | 32697205 | 1458  |
| ENSG000001 | 55.37366 | 1618.003 | -4.8441  | 1.38E-170 | 2.07E-168 | NKAIN1   | chr1  | - | 31652592 | 31712401 | 2589  |
| ENSG000001 | 4698.45  | 163.5828 | 4.8311   | 1.03E-232 | 3.10E-230 | COL16A1  | chr1  | - | 32117848 | 32169920 | 5736  |
| ENSG000001 | 2392.698 | 1742.635 | 0.45673  | 0.001269  | 0.003096  | TXLNA    | chr1  | + | 32645287 | 32663886 | 5012  |
| ENSG000001 | 0.653381 | 7.795093 | -3.1027  | 0.007794  | 0.016698  | APOB     | chr2  | - | 21224301 | 21266945 | 14121 |
| ENSG000001 | 465.6914 | 396.6669 | 0.22952  | 0.088318  | 0.14543   | NCOA1    | chr2  | + | 24714783 | 24993571 | 7405  |
| ENSG000001 | 811.5939 | 1258.506 | -0.63247 | 2.92E-08  | 1.19E-07  | AGBL5    | chr2  | + | 27265232 | 27293490 | 3261  |
| ENSG000001 | 465.0413 | 244.3522 | 0.92386  | 3.45E-05  | 0.000104  | EFR3B    | chr2  | + | 25264999 | 25378243 | 5162  |
| ENSG000001 | 2561.976 | 2008.698 | 0.3501   | 0.028479  | 0.0542    | KIF3C    | chr2  | - | 26149471 | 26205618 | 5462  |
| ENSG000001 | 2770.4   | 2347.207 | 0.23857  | 0.056972  | 0.099719  | RAB10    | chr2  | + | 26256976 | 26360323 | 3535  |
| ENSG000001 | 1.286224 | 3.853068 | -1.3837  | 0.23531   | 0.32914   | GCKR     | chr2  | + | 27719709 | 27746554 | 2186  |

|            |          |          |          |          |          |          |       |   |          |          |       |
|------------|----------|----------|----------|----------|----------|----------|-------|---|----------|----------|-------|
| ENSG000001 | 4035.191 | 2897.76  | 0.4773   | 4.17E-06 | 1.40E-05 | HADHA    | chr2  | - | 26413504 | 26467594 | 3037  |
| ENSG000001 | 162.276  | 92.44335 | 0.80677  | 0.000481 | 0.001252 | MAPRE3   | chr2  | + | 27193480 | 27250064 | 1892  |
| ENSG000001 | 4665.908 | 5725.702 | -0.29504 | 0.000423 | 0.00111  | CAD      | chr2  | + | 27440258 | 27466811 | 7265  |
| ENSG000001 | 2193.543 | 431.0902 | 2.3445   | 2.63E-73 | 1.00E-71 | CD59     | chr11 | - | 33719807 | 33757991 | 3716  |
| ENSG000001 | 778.6501 | 106.505  | 2.8527   | 2.41E-34 | 3.60E-33 | CD82     | chr11 | + | 44585977 | 44641913 | 2289  |
| ENSG000001 | 626.7573 | 228.3291 | 1.449    | 2.15E-09 | 9.64E-09 | BCORL1   | chrX  | + | 1.29E+08 | 1.29E+08 | 7127  |
| ENSG000001 | 2416.317 | 1379.414 | 0.80361  | 0.006346 | 0.013848 | ATRX     | chrX  | - | 76760356 | 77041702 | 11268 |
| ENSG000001 | 621.1899 | 699.8761 | -0.171   | 0.3298   | 0.43287  | TAF9     | chr5  | - | 68646811 | 68665840 | 1648  |
| ENSG000001 | 39.84809 | 0        | 6.9053   | 6.95E-10 | 3.25E-09 | FCN1     | chr9  | - | 1.38E+08 | 1.38E+08 | 1286  |
| ENSG000001 | 219.6861 | 211.1317 | 0.059089 | 0.79306  | 0.85287  | MYNN     | chr3  | + | 1.69E+08 | 1.7E+08  | 4999  |
| ENSG000001 | 307.0281 | 207.6008 | 0.56511  | 0.001059 | 0.002614 | MECOM    | chr3  | - | 1.69E+08 | 1.69E+08 | 5732  |
| ENSG000001 | 576.134  | 591.5125 | -0.03713 | 0.76246  | 0.82767  | SCAMP1   | chr5  | + | 77656339 | 77776562 | 6245  |
| ENSG000001 | 1048.161 | 1314.391 | -0.32618 | 0.005707 | 0.012559 | PREP     | chr6  | - | 1.06E+08 | 1.06E+08 | 2905  |
| ENSG000001 | 484.4906 | 324.6008 | 0.57681  | 0.000102 | 0.000292 | HACE1    | chr6  | - | 1.05E+08 | 1.05E+08 | 5318  |
| ENSG000001 | 871.1274 | 903.1058 | -0.05214 | 0.75534  | 0.82203  | SEH1L    | chr18 | + | 12947132 | 12987535 | 5206  |
| ENSG000001 | 485.8428 | 101.3536 | 2.2522   | 1.14E-32 | 1.61E-31 | WDR47    | chr1  | - | 1.1E+08  | 1.1E+08  | 4264  |
| ENSG000001 | 1707.816 | 1474.536 | 0.21154  | 0.05381  | 0.094832 | WDFY1    | chr2  | - | 2.25E+08 | 2.25E+08 | 4660  |
| ENSG000001 | 15.93477 | 52.7379  | -1.6783  | 0.00646  | 0.014083 | OVGP1    | chr1  | - | 1.12E+08 | 1.12E+08 | 2243  |
| ENSG000001 | 1053.946 | 639.3831 | 0.71868  | 0.000493 | 0.001283 | SLC25A24 | chr1  | - | 1.09E+08 | 1.09E+08 | 4271  |
| ENSG000001 | 1376.142 | 1086.278 | 0.34143  | 0.008562 | 0.018227 | MAP3K4   | chr6  | + | 1.61E+08 | 1.62E+08 | 5490  |
| ENSG000001 | 7.470726 | 13.50309 | -0.83927 | 0.2048   | 0.29404  | PILRA    | chr7  | + | 99965153 | 99997719 | 1313  |
| ENSG000001 | 112.7638 | 581.1901 | -2.3561  | 2.45E-26 | 2.70E-25 | IGSF9    | chr1  | - | 1.6E+08  | 1.6E+08  | 4205  |
| ENSG000001 | 3.847508 | 3.78667  | 0.037275 | 0.97396  | 0.98544  | ABCB1    | chr7  | - | 87133175 | 87342611 | 4645  |
| ENSG000001 | 513.1158 | 375.5783 | 0.4501   | 0.00245  | 0.005719 | ZNF213   | chr16 | + | 3179778  | 3192806  | 5889  |
| ENSG000001 | 954.6173 | 2015.102 | -1.076   | 3.61E-17 | 2.66E-16 | AKR1B1   | chr7  | - | 1.34E+08 | 1.34E+08 | 1930  |
| ENSG000001 | 1330.892 | 799.6437 | 0.73408  | 1.97E-09 | 8.86E-09 | CPNE3    | chr8  | + | 87497059 | 87573726 | 4864  |
| ENSG000001 | 573.2208 | 587.4766 | -0.03475 | 0.85412  | 0.89743  | RRN3     | chr16 | - | 15153879 | 15188174 | 3762  |
| ENSG000001 | 6174.811 | 4702.655 | 0.39245  | 0.001385 | 0.003362 | CTTN     | chr11 | + | 70244510 | 70282690 | 3272  |
| ENSG000001 | 58.66191 | 10.58719 | 2.4422   | 9.99E-10 | 4.60E-09 | WNT11    | chr11 | - | 75897369 | 75921780 | 1930  |
| ENSG000001 | 384.4707 | 743.1478 | -0.94845 | 2.08E-09 | 9.32E-09 | MTIF2    | chr2  | - | 55463731 | 55496483 | 2947  |
| ENSG000001 | 987.9012 | 489.9811 | 1.0096   | 4.72E-15 | 3.10E-14 | DDHD2    | chr8  | + | 38082736 | 38133076 | 4921  |
| ENSG000001 | 16.92988 | 74.87919 | -2.1171  | 1.16E-08 | 4.91E-08 | TTC39A   | chr1  | - | 51752930 | 51810788 | 6287  |
| ENSG000001 | 766.5114 | 585.4606 | 0.38863  | 0.002032 | 0.004805 | EPS15    | chr1  | - | 51819935 | 51985000 | 5225  |
| ENSG000001 | 302.5655 | 1233.148 | -2.0212  | 2.59E-26 | 2.85E-25 | ORC1     | chr1  | - | 52838501 | 52870131 | 3157  |
| ENSG000001 | 78.93571 | 68.40235 | 0.20621  | 0.39503  | 0.49956  | MGST2    | chr4  | + | 1.41E+08 | 1.41E+08 | 1780  |
| ENSG000001 | 1017.069 | 1834.875 | -0.84915 | 3.71E-11 | 1.90E-10 | CHERP    | chr19 | - | 16628700 | 16653341 | 4173  |
| ENSG000001 | 486.8146 | 524.6815 | -0.10845 | 0.44525  | 0.55073  | ATG16L1  | chr2  | + | 2.34E+08 | 2.34E+08 | 4208  |
| ENSG000001 | 497.6106 | 165.6187 | 1.5856   | 1.45E-21 | 1.31E-20 | USP40    | chr2  | - | 2.34E+08 | 2.34E+08 | 5692  |
| ENSG000001 | 1449.395 | 668.2191 | 1.1166   | 3.48E-24 | 3.52E-23 | POMGNT1  | chr1  | - | 46654354 | 46685977 | 3480  |
| ENSG000001 | 283.9162 | 678.8595 | -1.2567  | 3.00E-22 | 2.79E-21 | RAD54L   | chr1  | + | 46713360 | 46744145 | 3108  |
| ENSG000001 | 2769.344 | 1532.154 | 0.85191  | 1.16E-07 | 4.51E-07 | MAST2    | chr1  | + | 46252659 | 46501796 | 5738  |
| ENSG000001 | 3311.177 | 2433.554 | 0.44288  | 0.036046 | 0.066924 | DNAJA1   | chr9  | + | 33025209 | 33039905 | 2381  |
| ENSG000001 | 1570.647 | 501.7793 | 1.6417   | 1.47E-25 | 1.57E-24 | B4GALT1  | chr9  | - | 33104080 | 33167354 | 4201  |
| ENSG000001 | 973.6945 | 640.4497 | 0.60435  | 7.72E-07 | 2.78E-06 | CHMP5    | chr9  | + | 33264940 | 33281977 | 1707  |
| ENSG000001 | 814.4066 | 743.7522 | 0.13135  | 0.36027  | 0.46444  | NFX1     | chr9  | + | 33290509 | 33371155 | 4604  |
| ENSG000001 | 2.914991 | 2.794516 | 0.037666 | 0.97432  | 0.98556  | AQP6     | chr12 | + | 50360977 | 50370922 | 5129  |
| ENSG000001 | 745.62   | 693.1418 | 0.10589  | 0.38326  | 0.48735  | DIMT1    | chr5  | - | 61683081 | 61699766 | 2859  |
| ENSG000001 | 302.1253 | 733.3308 | -1.2768  | 3.20E-14 | 1.99E-13 | IPO11    | chr5  | + | 61699799 | 61924409 | 4356  |
| ENSG000001 | 0.290301 | 9.698565 | -4.1074  | 0.000863 | 0.002164 | FOLH1    | chr11 | - | 49168187 | 49230222 | 2697  |
| ENSG000001 | 2642.14  | 2074.858 | 0.34867  | 0.000211 | 0.000577 | EIF2AK1  | chr7  | - | 6061881  | 6098861  | 4463  |
| ENSG000001 | 0.342542 | 6.40314  | -3.4233  | 0.01092  | 0.022763 | NME8     | chr7  | + | 37888199 | 37940003 | 2312  |
| ENSG000001 | 123.8423 | 60.39114 | 1.0311   | 4.68E-05 | 0.000139 | EPDR1    | chr7  | + | 37723446 | 37991543 | 2599  |
| ENSG000001 | 1.919068 | 110.2048 | -5.6225  | 3.00E-20 | 2.55E-19 | SNX10    | chr7  | + | 26331541 | 26413949 | 2546  |
| ENSG000001 | 1413.279 | 15013.93 | -3.3989  | 1.25E-67 | 4.32E-66 | SEPHS1   | chr10 | - | 13359424 | 13390297 | 3273  |
| ENSG000001 | 1180.142 | 1602.697 | -0.44035 | 0.004854 | 0.010829 | MRPL28   | chr16 | - | 417384   | 420527   | 2229  |
| ENSG000001 | 5.031043 | 18.47541 | -1.7744  | 0.011728 | 0.024278 | HBQ1     | chr16 | + | 230452   | 231180   | 536   |
| ENSG000001 | 316.062  | 386.4814 | -0.2905  | 0.098926 | 0.15999  | ITPKC    | chr19 | + | 41223008 | 41246765 | 3385  |
| ENSG000001 | 44.5735  | 30.10342 | 0.54734  | 0.2732   | 0.37285  | FAT2     | chr5  | - | 1.51E+08 | 1.51E+08 | 14534 |
| ENSG000001 | 599.0585 | 618.0672 | -0.04512 | 0.79959  | 0.85803  | RBM22    | chr5  | - | 1.5E+08  | 1.5E+08  | 2342  |
| ENSG000001 | 3165.645 | 1921.024 | 0.71947  | 7.70E-07 | 2.78E-06 | TMED2    | chr12 | + | 1.24E+08 | 1.24E+08 | 2552  |
| ENSG000001 | 155.9174 | 71.19787 | 1.1181   | 0.000611 | 0.001565 | ERO1LB   | chr1  | - | 2.36E+08 | 2.36E+08 | 4567  |
| ENSG000001 | 843.0531 | 1583.801 | -0.90927 | 5.69E-20 | 4.79E-19 | ZFAND6   | chr15 | + | 80351910 | 80430735 | 2594  |
| ENSG000001 | 1.016461 | 3.755116 | -1.6271  | 0.18778  | 0.27384  | HSD17B2  | chr16 | + | 82068609 | 82132139 | 4210  |
| ENSG000001 | 210.6984 | 825.1784 | -1.9647  | 3.89E-28 | 4.64E-27 | TXLNG    | chrX  | + | 16804550 | 16862642 | 4401  |
| ENSG000001 | 50.95296 | 4.271467 | 3.4787   | 6.71E-10 | 3.14E-09 | PPEF1    | chrX  | + | 18694029 | 18846039 | 2890  |

|            |          |          |          |           |           |           |       |   |          |          |       |
|------------|----------|----------|----------|-----------|-----------|-----------|-------|---|----------|----------|-------|
| ENSG000001 | 28.30891 | 30.68281 | -0.11684 | 0.81399   | 0.86935   | LAT2      | chr7  | + | 73613982 | 73644161 | 2527  |
| ENSG000001 | 9071.008 | 8685.02  | 0.062694 | 0.46347   | 0.56852   | HUWE1     | chrX  | - | 53559057 | 53713673 | 14796 |
| ENSG000001 | 336.6448 | 392.5196 | -0.22025 | 0.21914   | 0.31082   | ZW10      | chr11 | - | 1.14E+08 | 1.14E+08 | 2992  |
| ENSG000001 | 84.53798 | 55.82185 | 0.59849  | 0.017901  | 0.035702  | ALG9      | chr11 | - | 1.12E+08 | 1.12E+08 | 4485  |
| ENSG000001 | 39.6983  | 126.8604 | -1.6531  | 7.17E-06  | 2.34E-05  | MYBPC2    | chr19 | + | 50936160 | 50969578 | 3593  |
| ENSG000001 | 409.5086 | 24.17763 | 4.0558   | 5.48E-44  | 1.07E-42  | NOX4      | chr11 | - | 89057524 | 89322779 | 4376  |
| ENSG000001 | 448.3377 | 169.6686 | 1.3986   | 2.07E-22  | 1.94E-21  | ACOX3     | chr4  | - | 8368009  | 8442450  | 2860  |
| ENSG000001 | 1194.208 | 974.483  | 0.29363  | 0.016584  | 0.033295  | MTMR2     | chr11 | - | 95566046 | 95658479 | 4787  |
| ENSG000001 | 619.2219 | 398.3033 | 0.63636  | 9.11E-06  | 2.94E-05  | PPP1R15A  | chr19 | + | 49375649 | 49379314 | 2378  |
| ENSG000001 | 505.4488 | 198.6581 | 1.3324   | 0.000224  | 0.000609  | HSD17B14  | chr19 | - | 49316274 | 49339935 | 1238  |
| ENSG000001 | 1558.576 | 2237.74  | -0.52152 | 2.23E-07  | 8.44E-07  | TRIP6     | chr7  | + | 1E+08    | 1E+08    | 1942  |
| ENSG000001 | 11.28653 | 110.2381 | -3.2637  | 1.60E-20  | 1.38E-19  | ACHE      | chr7  | - | 1E+08    | 1E+08    | 2956  |
| ENSG000001 | 18032.68 | 12187.78 | 0.56489  | 2.36E-10  | 1.14E-09  | FTL       | chr19 | + | 49468558 | 49470135 | 878   |
| ENSG000001 | 2363.015 | 3097.388 | -0.38841 | 0.12153   | 0.19089   | SRRT      | chr7  | + | 1E+08    | 1E+08    | 2963  |
| ENSG000001 | 1903.383 | 2555.114 | -0.4241  | 0.00903   | 0.01913   | BAX       | chr19 | + | 49458072 | 49465055 | 1358  |
| ENSG000001 | 262.8418 | 503.611  | -0.93584 | 9.82E-13  | 5.58E-12  | NLK       | chr17 | + | 26368763 | 26523407 | 4047  |
| ENSG000001 | 1032.554 | 909.8673 | 0.18191  | 0.10901   | 0.17366   | PIGS      | chr17 | - | 26880401 | 26898890 | 3088  |
| ENSG000001 | 14.96974 | 300.077  | -4.285   | 6.80E-47  | 1.42E-45  | ADAMTS2   | chr5  | - | 1.79E+08 | 1.79E+08 | 6754  |
| ENSG000001 | 0        | 17.10681 | -5.6635  | 3.66E-06  | 1.23E-05  | TMPRSS11  | chr4  | + | 69313167 | 69363322 | 2136  |
| ENSG000001 | 2641.943 | 2679.937 | -0.02058 | 0.83611   | 0.88505   | ATXN7L3   | chr17 | - | 42269173 | 42277481 | 3811  |
| ENSG000001 | 653.9081 | 772.441  | -0.24058 | 0.049796  | 0.088659  | PGS1      | chr17 | + | 76374721 | 76421195 | 3062  |
| ENSG000001 | 1405.037 | 1437.161 | -0.03214 | 0.83836   | 0.88651   | PSMC5     | chr17 | + | 61904512 | 61909379 | 2586  |
| ENSG000001 | 451.87   | 529.4478 | -0.22846 | 0.13271   | 0.20519   | UIMC1     | chr5  | - | 1.76E+08 | 1.76E+08 | 2604  |
| ENSG000001 | 2.407167 | 0        | 2.7149   | 0.089055  | 0.14641   | CETP      | chr16 | + | 56995762 | 57017757 | 1791  |
| ENSG000001 | 30778.24 | 1825.344 | 4.0727   | 0         | 0         | MMP2      | chr16 | + | 55423612 | 55540603 | 3741  |
| ENSG000001 | 0        | 0.640152 | -0.82869 | 0.63935   | NA        | MT3       | chr16 | + | 56622986 | 56625000 | 1550  |
| ENSG000001 | 510.9627 | 90.68316 | 2.4842   | 2.69E-31  | 3.61E-30  | LPCAT2    | chr16 | + | 55542910 | 55620582 | 5391  |
| ENSG000001 | 12.47863 | 659.1338 | -5.6526  | 2.79E-77  | 1.13E-75  | GNAO1     | chr16 | + | 56225302 | 56391356 | 5574  |
| ENSG000001 | 915.2567 | 671.5126 | 0.4468   | 0.000126  | 0.000355  | OGFOD1    | chr16 | + | 56485402 | 56513012 | 4647  |
| ENSG000001 | 1803.456 | 1125.694 | 0.67849  | 3.84E-06  | 1.29E-05  | SH3BP2    | chr4  | + | 2794750  | 2842825  | 9211  |
| ENSG000001 | 441.882  | 579.0463 | -0.38867 | 0.031089  | 0.058507  | NOP14     | chr4  | - | 2939660  | 2965112  | 3538  |
| ENSG000001 | 4720.056 | 3030.104 | 0.63902  | 6.67E-09  | 2.87E-08  | ADD1      | chr4  | + | 2845584  | 2931803  | 5179  |
| ENSG000001 | 117.9795 | 457.7525 | -1.9539  | 4.72E-29  | 5.80E-28  | L2HGDH    | chr14 | - | 50704281 | 50779266 | 3446  |
| ENSG000001 | 135.432  | 246.9625 | -0.85799 | 6.88E-05  | 0.0002    | TXNDC16   | chr14 | - | 52897308 | 53019240 | 4564  |
| ENSG000001 | 1468.402 | 2022.815 | -0.461   | 0.001821  | 0.004337  | C14orf166 | chr14 | + | 52456193 | 52471420 | 1080  |
| ENSG000001 | 1030.629 | 223.9173 | 2.1969   | 1.49E-55  | 3.89E-54  | NID2      | chr14 | - | 52471521 | 52535712 | 4811  |
| ENSG000001 | 409.2809 | 425.0335 | -0.05458 | 0.69147   | 0.76991   | GMCL1     | chr2  | + | 70056774 | 70108528 | 4191  |
| ENSG000001 | 5103.204 | 5798.808 | -0.18415 | 0.035094  | 0.065304  | SF3B2     | chr11 | + | 65818200 | 65836779 | 3932  |
| ENSG000001 | 1052.116 | 341.3726 | 1.6198   | 2.62E-35  | 4.02E-34  | KLHL42    | chr12 | + | 27932953 | 27955973 | 6703  |
| ENSG000001 | 35939.95 | 16046.7  | 1.1624   | 4.06E-28  | 4.82E-27  | GNAS      | chr20 | + | 57414773 | 57486247 | 4029  |
| ENSG000001 | 1683.865 | 1217.814 | 0.46757  | 9.14E-05  | 0.000262  | DNM1L     | chr12 | + | 32832134 | 32898486 | 4439  |
| ENSG000001 | 1038.19  | 0        | 11.229   | 7.47E-26  | 8.09E-25  | PTH1H     | chr12 | - | 28111017 | 28125638 | 1891  |
| ENSG000001 | 34.33571 | 2.431104 | 3.7015   | 1.93E-07  | 7.35E-07  | PHACTR3   | chr20 | + | 58152564 | 58422766 | 2728  |
| ENSG000001 | 580.2505 | 316.9508 | 0.87194  | 6.58E-06  | 2.16E-05  | ERGIC2    | chr12 | - | 29490285 | 29534122 | 5014  |
| ENSG000001 | 2.064625 | 904.9505 | -8.5961  | 4.10E-53  | 1.02E-51  | TFAP2C    | chr20 | + | 55204358 | 55214339 | 2866  |
| ENSG000001 | 923.2281 | 1773.429 | -0.94019 | 3.36E-14  | 2.09E-13  | AURKA     | chr20 | - | 54944445 | 54967393 | 2547  |
| ENSG000001 | 53.46559 | 1.652581 | 4.8179   | 1.40E-12  | 7.88E-12  | CASS4     | chr20 | + | 54987168 | 55034396 | 3155  |
| ENSG000001 | 196.841  | 147.3952 | 0.41813  | 0.017589  | 0.035144  | PIR       | chrX  | - | 15402921 | 15511687 | 1539  |
| ENSG000001 | 33.10531 | 32.15822 | 0.030741 | 0.94205   | 0.96246   | AAMDC     | chr11 | + | 77532155 | 77629478 | 726   |
| ENSG000001 | 97.49696 | 96.17262 | 0.016149 | 0.94817   | 0.96726   | RFX2      | chr19 | - | 5993175  | 6199583  | 3993  |
| ENSG000001 | 354.4401 | 539.1461 | -0.60574 | 9.29E-05  | 0.000266  | METTL2A   | chr17 | + | 60501228 | 60527454 | 2537  |
| ENSG000001 | 0.290301 | 19.797   | -5.0348  | 2.33E-05  | 7.16E-05  | SULT2B1   | chr19 | + | 49055332 | 49102682 | 1447  |
| ENSG000001 | 109.1268 | 227.6413 | -1.058   | 4.97E-07  | 1.82E-06  | ALG6      | chr1  | + | 63833261 | 63904233 | 3371  |
| ENSG000001 | 1223.189 | 1915.065 | -0.6454  | 3.68E-07  | 1.37E-06  | CNOT3     | chr19 | + | 54641444 | 54659419 | 4517  |
| ENSG000001 | 1.649304 | 14.39655 | -2.9485  | 0.000364  | 0.000962  | GP6       | chr19 | - | 55525073 | 55549632 | 2268  |
| ENSG000001 | 194.8798 | 397.6598 | -1.0263  | 7.41E-11  | 3.70E-10  | PTPN4     | chr2  | + | 1.21E+08 | 1.21E+08 | 10300 |
| ENSG000001 | 1040.709 | 2252.01  | -1.11    | 1.87E-08  | 7.76E-08  | DDX18     | chr2  | + | 1.19E+08 | 1.19E+08 | 5674  |
| ENSG000001 | 7316.32  | 11640.76 | -0.66926 | 2.47E-09  | 1.10E-08  | KHSRP     | chr19 | - | 6413359  | 6424805  | 2993  |
| ENSG000001 | 1917.603 | 757.1433 | 1.3396   | 1.78E-30  | 2.31E-29  | GNA11     | chr19 | + | 3094408  | 3124002  | 4147  |
| ENSG000001 | 740.9813 | 1522.544 | -1.0371  | 6.14E-13  | 3.54E-12  | ASAP3     | chr1  | - | 23755056 | 23810685 | 4050  |
| ENSG000001 | 366.2865 | 310.5408 | 0.23748  | 0.12073   | 0.18975   | EDEM2     | chr20 | - | 33703160 | 33865928 | 2408  |
| ENSG000001 | 282.496  | 27733.76 | -6.5992  | 9.36E-255 | 3.32E-252 | DNMT3B    | chr20 | + | 31350191 | 31397162 | 4336  |
| ENSG000001 | 2541.084 | 3783.809 | -0.57381 | 5.67E-08  | 2.26E-07  | TPX2      | chr20 | + | 30327074 | 30389608 | 3605  |
| ENSG000001 | 63.95921 | 75.68129 | -0.24357 | 0.50217   | 0.60564   | FER1L4    | chr20 | - | 34146507 | 34195484 | 5995  |
| ENSG000001 | 255.341  | 344.82   | -0.43099 | 0.004618  | 0.010341  | PDRG1     | chr20 | - | 30532758 | 30539895 | 1385  |

|            |          |          |          |          |          |           |       |   |          |          |       |
|------------|----------|----------|----------|----------|----------|-----------|-------|---|----------|----------|-------|
| ENSG000001 | 868.3041 | 591.233  | 0.55276  | 0.000777 | 0.00196  | EPB41L1   | chr20 | + | 34679426 | 34820721 | 6266  |
| ENSG000001 | 82.53595 | 30.16882 | 1.4477   | 1.08E-05 | 3.44E-05 | SLC15A1   | chr13 | - | 99336055 | 99404908 | 3106  |
| ENSG000001 | 879.9418 | 456.5356 | 0.94369  | 6.34E-08 | 2.51E-07 | DOCK9     | chr13 | - | 99445741 | 99738879 | 7549  |
| ENSG000001 | 1333.811 | 1593.774 | -0.25744 | 0.033494 | 0.062617 | ANKRD10   | chr13 | - | 1.12E+08 | 1.12E+08 | 2588  |
| ENSG000001 | 146.2963 | 168.4246 | -0.19778 | 0.36286  | 0.46703  | TGDS      | chr13 | - | 95226308 | 95248511 | 1902  |
| ENSG000001 | 13.34178 | 167.6649 | -3.6346  | 2.16E-28 | 2.59E-27 | DOCK3     | chr3  | + | 50712672 | 51421629 | 8755  |
| ENSG000001 | 291.2018 | 173.3707 | 0.73978  | 0.036165 | 0.067094 | C3orf18   | chr3  | - | 50595462 | 50608458 | 2655  |
| ENSG000001 | 472.4808 | 453.5628 | 0.057887 | 0.69415  | 0.77187  | COQ9      | chr16 | + | 57481337 | 57495187 | 1827  |
| ENSG000001 | 0.36308  | 1.294874 | -1.3442  | 0.40498  | NA       | TMEM40    | chr3  | - | 12775024 | 12810956 | 2308  |
| ENSG000001 | 89.72314 | 76.27518 | 0.23247  | 0.3823   | 0.48648  | KIF9      | chr3  | - | 47269516 | 47324941 | 3357  |
| ENSG000001 | 537.3714 | 207.149  | 1.3705   | 7.06E-09 | 3.03E-08 | ARHGAP28  | chr18 | + | 6729717  | 6915715  | 5492  |
| ENSG000001 | 742.6936 | 665.1321 | 0.15856  | 0.24972  | 0.34606  | CRLS1     | chr20 | + | 5986736  | 6020699  | 3958  |
| ENSG000001 | 146.89   | 132.6176 | 0.148    | 0.53793  | 0.6387   | PPP1R13B  | chr14 | - | 1.04E+08 | 1.04E+08 | 4958  |
| ENSG000001 | 1574.093 | 621.6883 | 1.3377   | 2.01E-18 | 1.57E-17 | ATRN      | chr20 | + | 3451687  | 3631769  | 8633  |
| ENSG000001 | 744.8836 | 232.7403 | 1.6753   | 1.00E-31 | 1.37E-30 | SMOX      | chr20 | + | 4101627  | 4168394  | 2233  |
| ENSG000001 | 2.697468 | 1.248751 | 0.90979  | 0.47205  | 0.57671  | SIGLEC1   | chr20 | - | 3667617  | 3687775  | 6720  |
| ENSG000001 | 3049.535 | 2427.966 | 0.32868  | 0.009276 | 0.01961  | FKBP1A    | chr20 | - | 1349622  | 1373806  | 1622  |
| ENSG000001 | 721.5379 | 636.0241 | 0.18204  | 0.19189  | 0.27897  | NSFL1C    | chr20 | - | 1422807  | 1448417  | 3799  |
| ENSG000001 | 93.31628 | 333.0313 | -1.8346  | 6.81E-24 | 6.80E-23 | SLC4A11   | chr20 | - | 3208063  | 3219887  | 3229  |
| ENSG000001 | 711.9895 | 231.0069 | 1.6177   | 7.81E-17 | 5.66E-16 | C20orf194 | chr20 | - | 3229951  | 3388272  | 6869  |
| ENSG000001 | 155.0138 | 91.41717 | 0.75803  | 0.007101 | 0.015355 | ZNF343    | chr20 | - | 2462463  | 2505348  | 3632  |
| ENSG000001 | 67.17127 | 25.82625 | 1.3588   | 6.39E-05 | 0.000186 | EBF4      | chr20 | + | 2673480  | 2740754  | 2910  |
| ENSG000001 | 2535.223 | 745.0185 | 1.765    | 4.84E-49 | 1.08E-47 | CPXM1     | chr20 | - | 2774715  | 2781283  | 2391  |
| ENSG000001 | 1516.104 | 685.0116 | 1.144    | 4.93E-20 | 4.16E-19 | MAVS      | chr20 | + | 3827487  | 3849280  | 4237  |
| ENSG000001 | 115.2841 | 1333.916 | -3.516   | 2.16E-53 | 5.40E-52 | PROSAP1P1 | chr20 | - | 3143263  | 3154192  | 5257  |
| ENSG000001 | 0        | 26.76738 | -6.3173  | 6.78E-08 | 2.68E-07 | F11       | chr4  | + | 1.87E+08 | 1.87E+08 | 3122  |
| ENSG000001 | 1710.007 | 2951.933 | -0.78658 | 2.03E-11 | 1.05E-10 | XRN2      | chr20 | + | 21283942 | 21370463 | 3435  |
| ENSG000001 | 146.6877 | 368.4112 | -1.3227  | 2.75E-09 | 1.22E-08 | PLK1S1    | chr20 | + | 21106624 | 21227260 | 3855  |
| ENSG000001 | 3140.423 | 2594.333 | 0.27515  | 0.087884 | 0.14485  | DYNLL1    | chr12 | + | 1.21E+08 | 1.21E+08 | 1376  |
| ENSG000001 | 2.935529 | 71.37907 | -4.4703  | 7.54E-15 | 4.90E-14 | TESC      | chr12 | - | 1.17E+08 | 1.18E+08 | 1057  |
| ENSG000001 | 1074.149 | 1911.909 | -0.82939 | 1.30E-05 | 4.11E-05 | SNX5      | chr20 | - | 17922241 | 17949623 | 3087  |
| ENSG000001 | 12540.84 | 16674.9  | -0.41056 | 0.000271 | 0.000729 | RPL6      | chr12 | - | 1.13E+08 | 1.13E+08 | 2008  |
| ENSG000001 | 0        | 0.297015 | -0.41864 | 0.81278  | NA       | SIRPG     | chr20 | - | 1609798  | 1638425  | 1732  |
| ENSG000001 | 454.1849 | 722.6384 | -0.6707  | 5.46E-07 | 2.00E-06 | MAPKAPK5  | chr12 | + | 1.12E+08 | 1.12E+08 | 2527  |
| ENSG000001 | 1.919068 | 6.688002 | -1.6432  | 0.077339 | 0.1298   | P2RX7     | chr12 | + | 1.22E+08 | 1.22E+08 | 3003  |
| ENSG000001 | 411.9058 | 859.9247 | -1.0573  | 1.26E-06 | 4.47E-06 | ESF1      | chr20 | - | 13694969 | 13765532 | 3216  |
| ENSG000001 | 407.2362 | 229.231  | 0.82672  | 3.28E-08 | 1.33E-07 | RBBP9     | chr20 | - | 18467184 | 18477887 | 3861  |
| ENSG000001 | 2555.56  | 1927.306 | 0.40653  | 0.000833 | 0.002093 | ANAPC5    | chr12 | - | 1.22E+08 | 1.22E+08 | 6149  |
| ENSG000001 | 493.1005 | 385.91   | 0.35396  | 0.044736 | 0.080701 | SLC23A2   | chr20 | - | 4833002  | 4990939  | 6962  |
| ENSG000001 | 294.0888 | 335.9944 | -0.19333 | 0.35413  | 0.45829  | SLC24A6   | chr12 | - | 1.14E+08 | 1.14E+08 | 3289  |
| ENSG000001 | 1505.185 | 1167.24  | 0.36651  | 0.004827 | 0.010775 | TMEM230   | chr20 | - | 5080486  | 5093749  | 1735  |
| ENSG000001 | 63.8531  | 99.82642 | -0.64158 | 0.010559 | 0.022087 | DZANK1    | chr20 | - | 18364011 | 18447829 | 3739  |
| ENSG000001 | 947.1852 | 3284.872 | -1.7913  | 5.47E-50 | 1.25E-48 | KDM2B     | chr12 | - | 1.22E+08 | 1.22E+08 | 6676  |
| ENSG000001 | 1.233984 | 2.338857 | -0.74373 | 0.56561  | 0.66349  | C20orf26  | chr20 | + | 20033158 | 20341346 | 4082  |
| ENSG000001 | 0        | 79.72986 | -7.7938  | 3.89E-12 | 2.12E-11 | LHX5      | chr12 | - | 1.14E+08 | 1.14E+08 | 2940  |
| ENSG000001 | 93.21001 | 130.7278 | -0.48947 | 0.021763 | 0.042607 | TASP1     | chr20 | - | 13246709 | 13619587 | 2352  |
| ENSG000001 | 8.112129 | 0.343138 | 3.8411   | 0.002132 | 0.005024 | OAS1      | chr12 | + | 1.13E+08 | 1.13E+08 | 1990  |
| ENSG000001 | 5972.706 | 6653.719 | -0.15567 | 0.099705 | 0.16105  | GCN1L1    | chr12 | - | 1.21E+08 | 1.21E+08 | 8675  |
| ENSG000001 | 21304.97 | 36800.79 | -0.78772 | 3.90E-12 | 2.12E-11 | RPLP0     | chr12 | - | 1.21E+08 | 1.21E+08 | 2591  |
| ENSG000001 | 3100.314 | 2375.817 | 0.38311  | 0.008566 | 0.018233 | PXN       | chr12 | - | 1.21E+08 | 1.21E+08 | 5457  |
| ENSG000001 | 20.43745 | 48.33438 | -1.2242  | 0.005427 | 0.012002 | SIRT4     | chr12 | + | 1.21E+08 | 1.21E+08 | 1217  |
| ENSG000001 | 1.89853  | 0.686276 | 1.0733   | 0.50166  | 0.60518  | RPH3A     | chr12 | + | 1.13E+08 | 1.13E+08 | 5188  |
| ENSG000001 | 203.4577 | 199.6547 | 0.026426 | 0.87988  | 0.91625  | KIF16B    | chr20 | - | 16252749 | 16554078 | 5261  |
| ENSG000001 | 376.9839 | 426.9514 | -0.17862 | 0.47766  | 0.58212  | TRMT6     | chr20 | - | 5917881  | 5931182  | 3025  |
| ENSG000001 | 87.34589 | 33.79772 | 1.3697   | 2.23E-06 | 7.71E-06 | CHGB      | chr20 | + | 5892076  | 5906007  | 2550  |
| ENSG000001 | 2315.431 | 5906.569 | -1.3497  | 3.25E-37 | 5.30E-36 | PEBP1     | chr12 | + | 1.19E+08 | 1.19E+08 | 1697  |
| ENSG000001 | 1.794862 | 56.6093  | -4.8419  | 3.46E-11 | 1.77E-10 | TBX5      | chr12 | - | 1.15E+08 | 1.15E+08 | 3825  |
| ENSG000001 | 453.02   | 513.3197 | -0.17948 | 0.23093  | 0.32435  | BRAP      | chr12 | - | 1.12E+08 | 1.12E+08 | 4026  |
| ENSG000001 | 1779.664 | 2291.166 | -0.36394 | 0.002885 | 0.006667 | ERP29     | chr12 | + | 1.12E+08 | 1.12E+08 | 1735  |
| ENSG000001 | 187.8983 | 349.9395 | -0.89303 | 0.001045 | 0.002583 | NOS1      | chr12 | - | 1.18E+08 | 1.18E+08 | 12158 |
| ENSG000001 | 7006.887 | 10732.85 | -0.61394 | 0.000132 | 0.00037  | FUS       | chr16 | + | 31191431 | 31203127 | 4920  |
| ENSG000001 | 380.2339 | 510.0223 | -0.42162 | 0.018686 | 0.037133 | IGBP1     | chrX  | + | 69353299 | 69386174 | 1862  |
| ENSG000001 | 1023.336 | 1053.977 | -0.04215 | 0.81629  | 0.87097  | FXD5      | chr19 | + | 35645633 | 35660786 | 1580  |
| ENSG000001 | 268.5662 | 374.4627 | -0.47805 | 0.00185  | 0.0044   | ZNF302    | chr19 | + | 35168544 | 35177302 | 3839  |
| ENSG000001 | 2063.821 | 7223.718 | -1.8003  | 7.15E-16 | 4.92E-15 | GRAMD1A   | chr19 | + | 35485688 | 35517375 | 2825  |

|            |          |          |          |           |           |           |       |   |          |          |       |
|------------|----------|----------|----------|-----------|-----------|-----------|-------|---|----------|----------|-------|
| ENSG000001 | 0.36308  | 3.916176 | -2.7962  | 0.045059  | 0.081189  | FXD3      | chr19 | + | 35606732 | 35615228 | 1467  |
| ENSG000001 | 271.3109 | 1007.151 | -1.8891  | 9.31E-37  | 1.50E-35  | HEPH      | chrX  | + | 65382391 | 65488709 | 6013  |
| ENSG000001 | 164.7263 | 1107.964 | -2.7416  | 2.52E-38  | 4.25E-37  | CDIP1     | chr16 | - | 4560676  | 4588829  | 3009  |
| ENSG000001 | 63.68342 | 15.55138 | 2.0236   | 3.05E-07  | 1.14E-06  | CMTM1     | chr16 | + | 66600294 | 66613040 | 1064  |
| ENSG000001 | 1.317927 | 25.45397 | -4.0184  | 1.23E-06  | 4.35E-06  | KCNH4     | chr17 | - | 40308913 | 40333296 | 3920  |
| ENSG000001 | 13407.19 | 10229.55 | 0.39005  | 7.02E-05  | 0.000204  | GANAB     | chr11 | - | 62392298 | 62414104 | 3906  |
| ENSG000001 | 751.9325 | 602.008  | 0.3195   | 0.025615  | 0.049338  | GMIP      | chr19 | - | 19740285 | 19754476 | 3538  |
| ENSG000001 | 210.8594 | 191.2409 | 0.14422  | 0.46093   | 0.56622   | RBM41     | chrX  | - | 1.06E+08 | 1.06E+08 | 3315  |
| ENSG000001 | 231.3591 | 387.0903 | -0.7419  | 4.40E-07  | 1.62E-06  | BIRC5     | chr17 | + | 76210267 | 76221717 | 2711  |
| ENSG000001 | 22.64763 | 29.48267 | -0.38583 | 0.3835    | 0.48763   | LAG3      | chr12 | + | 6881678  | 6887621  | 2587  |
| ENSG000001 | 4877.795 | 3644.119 | 0.42042  | 3.25E-06  | 1.10E-05  | MLF2      | chr12 | - | 6857170  | 6876641  | 1958  |
| ENSG000001 | 49.59575 | 71.83393 | -0.52879 | 0.1767    | 0.26025   | OTUB2     | chr14 | + | 94492675 | 94515276 | 3922  |
| ENSG000001 | 1881.824 | 2353.059 | -0.32164 | 0.016607  | 0.033335  | DDX24     | chr14 | - | 94517266 | 94547591 | 5573  |
| ENSG000001 | 65.56483 | 69.5136  | -0.08717 | 0.75614   | 0.82265   | ZBTB25    | chr14 | - | 64915824 | 64971931 | 2094  |
| ENSG000001 | 536.4314 | 312.4928 | 0.77906  | 1.47E-09  | 6.67E-09  | NECAP1    | chr12 | + | 8234807  | 8250367  | 3129  |
| ENSG000001 | 32.03482 | 956.2407 | -4.8846  | 2.29E-108 | 1.49E-106 | ARHGAP4   | chrX  | - | 1.53E+08 | 1.53E+08 | 3372  |
| ENSG000001 | 12.62418 | 276.8409 | -4.3861  | 2.76E-27  | 3.17E-26  | ANKRD24   | chr19 | + | 4183351  | 4224811  | 4026  |
| ENSG000001 | 382.9123 | 294.2015 | 0.37785  | 0.05334   | 0.094076  | DHX32     | chr10 | - | 1.28E+08 | 1.28E+08 | 3070  |
| ENSG000001 | 904.3623 | 620.963  | 0.54124  | 9.64E-05  | 0.000275  | RCOR1     | chr14 | + | 1.03E+08 | 1.03E+08 | 5754  |
| ENSG000001 | 1244.979 | 1154.784 | 0.10803  | 0.52307   | 0.6256    | GPATCH2L  | chr14 | + | 76618259 | 76720685 | 14007 |
| ENSG000001 | 12453.21 | 1785.023 | 2.7912   | 1.09E-35  | 1.70E-34  | LTBP4     | chr19 | + | 41098789 | 41135725 | 5142  |
| ENSG000001 | 399.7164 | 286.1596 | 0.47931  | 0.052643  | 0.092995  | BLVRB     | chr19 | - | 40953696 | 40971747 | 1392  |
| ENSG000001 | 1101.971 | 870.2342 | 0.3406   | 0.002767  | 0.006415  | SLC9A1    | chr1  | - | 27425306 | 27493472 | 4516  |
| ENSG000001 | 1064.86  | 810.9204 | 0.39316  | 0.005677  | 0.012501  | SPTLC1    | chr9  | - | 94794281 | 94877666 | 1894  |
| ENSG000001 | 2891.994 | 3204.534 | -0.14777 | 0.3031    | 0.40438   | PAPOLA    | chr14 | + | 96967770 | 97033448 | 4519  |
| ENSG000001 | 1443.789 | 1353.89  | 0.093029 | 0.32938   | 0.43252   | CCNK      | chr14 | + | 99947506 | 1E+08    | 5627  |
| ENSG000001 | 1144.763 | 558.2776 | 1.0339   | 6.02E-15  | 3.94E-14  | PCBP4     | chr3  | - | 51991470 | 52008032 | 2599  |
| ENSG000001 | 1.161205 | 0.715414 | 0.44309  | 0.80031   | NA        | RGS1      | chr1  | + | 1.93E+08 | 1.93E+08 | 2653  |
| ENSG000001 | 277.4064 | 428.4961 | -0.62482 | 0.006078  | 0.013319  | YPEL3     | chr16 | - | 30103635 | 30108236 | 1941  |
| ENSG000001 | 271.0217 | 354.2424 | -0.38212 | 0.030708  | 0.057897  | MRPS33    | chr7  | - | 1.41E+08 | 1.41E+08 | 853   |
| ENSG000001 | 486.5562 | 347.8383 | 0.48229  | 0.007234  | 0.015608  | NDUFB2    | chr7  | + | 1.4E+08  | 1.4E+08  | 1666  |
| ENSG000001 | 2844.491 | 3584.194 | -0.33307 | 0.007676  | 0.016477  | NUDC      | chr1  | + | 27226729 | 27273353 | 1800  |
| ENSG000001 | 1560.793 | 1619.296 | -0.05284 | 0.73511   | 0.80453   | MAEA      | chr4  | + | 1283639  | 1333935  | 5371  |
| ENSG000001 | 8.911067 | 66.06605 | -2.8049  | 3.65E-06  | 1.23E-05  | ICAM1     | chr19 | + | 10381511 | 10397291 | 3252  |
| ENSG000001 | 2689.29  | 3627.55  | -0.4316  | 9.76E-06  | 3.13E-05  | STRN4     | chr19 | - | 47222764 | 47250251 | 3628  |
| ENSG000001 | 7.696808 | 12.83051 | -0.69174 | 0.2998    | 0.4014    | IRAK3     | chr12 | + | 66582659 | 66648402 | 8663  |
| ENSG000001 | 96.57219 | 1.98115  | 5.4302   | 4.40E-19  | 3.53E-18  | LYZ       | chr12 | + | 69742121 | 69748014 | 1530  |
| ENSG000001 | 0        | 0.343138 | -0.41864 | 0.81278   | NA        | SI        | chr3  | - | 1.65E+08 | 1.65E+08 | 6011  |
| ENSG000001 | 530.3601 | 576.7901 | -0.11956 | 0.44882   | 0.55418   | MUL1      | chr1  | - | 20825943 | 20834654 | 2436  |
| ENSG000001 | 222.4482 | 610.1966 | -1.4501  | 1.99E-12  | 1.11E-11  | TFAP4     | chr16 | - | 4307187  | 4323076  | 6491  |
| ENSG000001 | 537.6204 | 618.8319 | -0.2032  | 0.29056   | 0.39221   | PDCD7     | chr15 | - | 65409717 | 65426174 | 2851  |
| ENSG000001 | 1192.545 | 1019.146 | 0.22548  | 0.049185  | 0.087724  | SPG21     | chr15 | - | 65255362 | 65282648 | 2059  |
| ENSG000001 | 0        | 1.485073 | -1.5064  | 0.39745   | NA        | FETUB     | chr3  | + | 1.86E+08 | 1.86E+08 | 1640  |
| ENSG000001 | 1828.735 | 958.132  | 0.92934  | 1.77E-05  | 5.52E-05  | DNAJB11   | chr3  | + | 1.86E+08 | 1.86E+08 | 4079  |
| ENSG000001 | 670.8211 | 272.4738 | 1.2995   | 2.49E-19  | 2.03E-18  | LEPREL1   | chr3  | - | 1.9E+08  | 1.9E+08  | 3509  |
| ENSG000001 | 3.132513 | 6.240464 | -0.89934 | 0.3306    | 0.43373   | THPO      | chr3  | - | 1.84E+08 | 1.84E+08 | 1855  |
| ENSG000001 | 106.2188 | 41.58307 | 1.3488   | 1.34E-05  | 4.24E-05  | CHRD      | chr3  | + | 1.84E+08 | 1.84E+08 | 4719  |
| ENSG000001 | 4.607163 | 12.9576  | -1.4178  | 0.062782  | 0.10852   | FLT3LG    | chr19 | + | 49977464 | 49990894 | 1421  |
| ENSG000001 | 1610.174 | 1341.491 | 0.26319  | 0.013109  | 0.026895  | RAB11FIP3 | chr16 | + | 475619   | 573011   | 4831  |
| ENSG000001 | 545.7364 | 311.4123 | 0.80821  | 1.30E-06  | 4.59E-06  | GNPTG     | chr16 | + | 1401924  | 1413352  | 2400  |
| ENSG000001 | 201.878  | 276.7736 | -0.44815 | 0.26622   | 0.36496   | ZNF268    | chr12 | + | 1.34E+08 | 1.34E+08 | 5756  |
| ENSG000001 | 5893.619 | 1301.987 | 2.1757   | 8.00E-82  | 3.45E-80  | GOLGA3    | chr12 | - | 1.33E+08 | 1.33E+08 | 9252  |
| ENSG000001 | 1905.544 | 3167.067 | -0.73165 | 2.39E-06  | 8.22E-06  | PABPC4    | chr1  | - | 40026488 | 40042462 | 3592  |
| ENSG000001 | 0        | 5.736266 | -4.0903  | 0.00285   | 0.006593  | CD209     | chr19 | - | 7804879  | 7812464  | 4280  |
| ENSG000001 | 13.30927 | 1647.498 | -6.8871  | 3.97E-113 | 2.76E-111 | CERS4     | chr19 | + | 8271620  | 8327305  | 2401  |
| ENSG000001 | 283.9561 | 220.1199 | 0.36649  | 0.093995  | 0.15337   | MCOLN1    | chr19 | + | 7587512  | 7598895  | 2253  |
| ENSG000001 | 1872.016 | 1637.469 | 0.19305  | 0.069577  | 0.11853   | USP48     | chr1  | - | 22004791 | 22110099 | 4595  |
| ENSG000001 | 690.5435 | 824.6632 | -0.2551  | 0.040158  | 0.073651  | EFNB1     | chrX  | + | 68048840 | 68061990 | 3314  |
| ENSG000001 | 885.4126 | 1059.365 | -0.2585  | 0.029985  | 0.056735  | PDPR      | chr16 | + | 70147529 | 70195203 | 7999  |
| ENSG000001 | 5341.394 | 6947.066 | -0.37868 | 0.007372  | 0.015877  | AARS      | chr16 | - | 70286198 | 70323446 | 3477  |
| ENSG000001 | 6094.154 | 3712.044 | 0.71416  | 1.38E-07  | 5.31E-07  | GLG1      | chr16 | - | 74485856 | 74641012 | 4748  |
| ENSG000001 | 783.443  | 960.233  | -0.29239 | 0.020149  | 0.039734  | KIF4A     | chrX  | + | 69509879 | 69640682 | 4348  |
| ENSG000001 | 1890.108 | 2488.431 | -0.3959  | 0.00901   | 0.019096  | TNRC6A    | chr16 | + | 24741016 | 24838953 | 8438  |
| ENSG000001 | 52.76771 | 13.99675 | 1.8943   | 1.34E-05  | 4.23E-05  | FCGBP     | chr19 | - | 40353963 | 40440533 | 16390 |
| ENSG000001 | 2382.586 | 1197.15  | 0.99064  | 9.35E-09  | 3.98E-08  | PLEKHG2   | chr19 | + | 39903225 | 39919054 | 7519  |

|            |          |          |          |           |           |          |       |   |          |          |       |
|------------|----------|----------|----------|-----------|-----------|----------|-------|---|----------|----------|-------|
| ENSG000001 | 25.96499 | 406.1789 | -3.9014  | 8.27E-17  | 5.99E-16  | DLL3     | chr19 | + | 39989535 | 39999121 | 2332  |
| ENSG000001 | 1261.251 | 978.8153 | 0.36493  | 0.003478  | 0.007939  | NAT14    | chr19 | + | 55996371 | 55998935 | 1536  |
| ENSG000001 | 443.2547 | 290.7278 | 0.60738  | 2.10E-05  | 6.47E-05  | PITPNM2  | chr12 | - | 1.23E+08 | 1.24E+08 | 6785  |
| ENSG000001 | 568.6301 | 374.8538 | 0.60165  | 1.44E-05  | 4.53E-05  | EXOC1    | chr4  | + | 56719782 | 56771200 | 3551  |
| ENSG000001 | 799.2828 | 888.7569 | -0.1526  | 0.20304   | 0.29188   | RBM27    | chr5  | + | 1.46E+08 | 1.46E+08 | 6451  |
| ENSG000001 | 1.027626 | 0        | 1.1491   | 0.51623   | NA        | POU4F3   | chr5  | + | 1.46E+08 | 1.46E+08 | 1182  |
| ENSG000001 | 1838.235 | 928.4235 | 0.98369  | 1.12E-07  | 4.37E-07  | OSBPL8   | chr12 | - | 76745577 | 76953589 | 7239  |
| ENSG000001 | 411.2914 | 921.8421 | -1.1611  | 1.01E-12  | 5.72E-12  | DTX2     | chr7  | + | 76090993 | 76135312 | 2769  |
| ENSG000001 | 8.837475 | 10.25862 | -0.18914 | 0.78042   | 0.84237   | NLRC4    | chr2  | - | 32449522 | 32490923 | 3581  |
| ENSG000001 | 259.9739 | 864.3896 | -1.7293  | 2.32E-24  | 2.37E-23  | PUS7     | chr7  | - | 1.05E+08 | 1.05E+08 | 3480  |
| ENSG000001 | 12.08466 | 0        | 5.2206   | 2.16E-05  | 6.65E-05  | LAMB4    | chr7  | - | 1.08E+08 | 1.08E+08 | 5858  |
| ENSG000001 | 77.50051 | 60.73838 | 0.3529   | 0.21488   | 0.30581   | NRCAM    | chr7  | - | 1.08E+08 | 1.08E+08 | 6659  |
| ENSG000001 | 15426.19 | 2751.133 | 2.4853   | 5.44E-134 | 5.10E-132 | LAMB1    | chr7  | - | 1.08E+08 | 1.08E+08 | 5766  |
| ENSG000001 | 14.00633 | 0.715414 | 3.9181   | 0.000193  | 0.000529  | SLC26A4  | chr7  | + | 1.07E+08 | 1.07E+08 | 4930  |
| ENSG000001 | 0        | 2.696564 | -2.9337  | 0.058159  | 0.10164   | SLC26A3  | chr7  | - | 1.07E+08 | 1.07E+08 | 2863  |
| ENSG000001 | 946.2439 | 732.7229 | 0.36868  | 0.028224  | 0.053774  | DLD      | chr7  | + | 1.08E+08 | 1.08E+08 | 3755  |
| ENSG000001 | 301.3249 | 213.5729 | 0.49347  | 0.004094  | 0.009235  | WDR7     | chr18 | + | 54318574 | 54698828 | 9074  |
| ENSG000001 | 977.0122 | 1020.878 | -0.06313 | 0.61661   | 0.70789   | TXNL1    | chr18 | - | 54264439 | 54318831 | 6894  |
| ENSG000001 | 18.09532 | 37.29321 | -1.0314  | 0.062556  | 0.10818   | ABCC6    | chr16 | - | 16242785 | 16317379 | 5747  |
| ENSG000001 | 1052.094 | 837.3788 | 0.32808  | 0.016643  | 0.033397  | CMTM6    | chr3  | - | 32522804 | 32544900 | 3863  |
| ENSG000001 | 1218.934 | 1291.509 | -0.084   | 0.46108   | 0.56629   | ITGA6    | chr2  | + | 1.73E+08 | 1.73E+08 | 5927  |
| ENSG000001 | 24.26442 | 23.40643 | 0.051735 | 0.89703   | 0.92858   | RAPGEF4  | chr2  | + | 1.74E+08 | 1.74E+08 | 4338  |
| ENSG000001 | 1509.713 | 475.7767 | 1.6608   | 2.42E-19  | 1.97E-18  | MLTK     | chr2  | + | 1.74E+08 | 1.74E+08 | 7179  |
| ENSG000001 | 0.653381 | 0.343138 | 0.51863  | 0.76794   | NA        | SMPX     | chrX  | - | 21724090 | 21776281 | 938   |
| ENSG000001 | 820.6093 | 927.1982 | -0.17551 | 0.18631   | 0.27207   | FH       | chr1  | - | 2.42E+08 | 2.42E+08 | 1797  |
| ENSG000001 | 2193.868 | 1227.134 | 0.83747  | 3.75E-18  | 2.89E-17  | SEL1L3   | chr4  | - | 25749055 | 25865382 | 4514  |
| ENSG000001 | 4.761279 | 0.951736 | 2.0038   | 0.091335  | 0.14963   | TF       | chr3  | + | 1.33E+08 | 1.33E+08 | 4602  |
| ENSG000001 | 2976.78  | 2507.418 | 0.24735  | 0.022548  | 0.04399   | CDV3     | chr3  | + | 1.33E+08 | 1.33E+08 | 3621  |
| ENSG000001 | 21.40942 | 46.01896 | -1.0737  | 0.021585  | 0.042273  | MYO15A   | chr17 | + | 18012020 | 18083116 | 11863 |
| ENSG000001 | 1054.769 | 1205.04  | -0.19133 | 0.092971  | 0.15198   | ALKBH5   | chr17 | + | 18086392 | 18113268 | 2748  |
| ENSG000001 | 0.290301 | 0        | 0.4146   | 0.81455   | NA        | APOH     | chr17 | - | 64208151 | 64252643 | 1176  |
| ENSG000001 | 1005.228 | 302.4532 | 1.7253   | 1.61E-21  | 1.45E-20  | NLRP1    | chr17 | - | 5402747  | 5522744  | 5480  |
| ENSG000001 | 188.4033 | 98.69288 | 0.92198  | 0.006875  | 0.014904  | PITPNM3  | chr17 | - | 6354584  | 6459814  | 7086  |
| ENSG000001 | 1119.141 | 1280.625 | -0.19356 | 0.075526  | 0.12719   | SPAG7    | chr17 | - | 4862521  | 4871167  | 1668  |
| ENSG000001 | 483.9864 | 840.9802 | -0.79573 | 7.57E-07  | 2.73E-06  | ORC6     | chr16 | + | 46723555 | 46732306 | 1833  |
| ENSG000001 | 2020.85  | 81.33169 | 4.6277   | 6.04E-220 | 1.60E-217 | ZFHx4    | chr8  | + | 77593454 | 77779521 | 14019 |
| ENSG000001 | 0.870904 | 6.531773 | -2.3501  | 0.074375  | 0.12557   | SLC17A6  | chr11 | + | 22359643 | 22401049 | 3949  |
| ENSG000001 | 1.95077  | 0        | 2.1837   | 0.20683   | 0.29652   | CPA1     | chr7  | + | 1.3E+08  | 1.3E+08  | 1931  |
| ENSG000001 | 406.3778 | 409.5908 | -0.00966 | 0.95512   | 0.97232   | ZC3HC1   | chr7  | - | 1.3E+08  | 1.3E+08  | 1972  |
| ENSG000001 | 15.20942 | 7.108817 | 1.0616   | 0.10931   | 0.17406   | ESR1     | chr6  | + | 1.52E+08 | 1.52E+08 | 6466  |
| ENSG000001 | 58.90519 | 65.82563 | -0.15865 | 0.59967   | 0.69368   | RGS17    | chr6  | - | 1.53E+08 | 1.53E+08 | 1636  |
| ENSG000001 | 10.48938 | 3.991438 | 1.3306   | 0.084501  | 0.14008   | ANGPT2   | chr8  | - | 6357172  | 6420930  | 5416  |
| ENSG000001 | 456.1547 | 518.0527 | -0.18292 | 0.4413    | 0.54717   | TMEM101  | chr17 | - | 42088556 | 42101314 | 1830  |
| ENSG000001 | 172.4985 | 715.4748 | -2.0445  | 1.22E-32  | 1.72E-31  | CD200    | chr3  | + | 1.12E+08 | 1.12E+08 | 2129  |
| ENSG000001 | 13560.42 | 190.2867 | 6.1317   | 5.45E-171 | 8.27E-169 | CCDC80   | chr3  | - | 1.12E+08 | 1.12E+08 | 4664  |
| ENSG000001 | 0.943682 | 0.700845 | 0.33849  | 0.83415   | NA        | CMA1     | chr14 | - | 24974559 | 24977471 | 937   |
| ENSG000001 | 783.8371 | 604.7171 | 0.37361  | 0.00846   | 0.018014  | PSME1    | chr14 | + | 24605367 | 24608176 | 1136  |
| ENSG000001 | 208.4719 | 148.5003 | 0.48767  | 0.087164  | 0.14386   | PPP2R3C  | chr14 | - | 35554673 | 35591723 | 1846  |
| ENSG000001 | 70.62497 | 156.4593 | -1.1424  | 4.60E-08  | 1.85E-07  | HAUS4    | chr14 | - | 23415437 | 23426370 | 1642  |
| ENSG000001 | 2.843026 | 1527.476 | -8.5516  | 1.28E-24  | 1.32E-23  | JPH4     | chr14 | - | 24037244 | 24048009 | 4386  |
| ENSG000001 | 0.290301 | 0.594029 | -0.38058 | 0.83094   | NA        | MYH7     | chr14 | - | 23881947 | 23904927 | 6087  |
| ENSG000001 | 0        | 0.357707 | -0.41864 | 0.81278   | NA        | CEBPE    | chr14 | - | 23586513 | 23588825 | 1554  |
| ENSG000001 | 1780.603 | 5390.769 | -1.5967  | 1.12E-49  | 2.54E-48  | SLC7A8   | chr14 | - | 23594504 | 23652883 | 4216  |
| ENSG000001 | 393.5183 | 395.3301 | -0.00589 | 0.97682   | 0.98684   | OSGEP    | chr14 | - | 20914570 | 20923264 | 3258  |
| ENSG000001 | 2629.283 | 900.9704 | 1.5395   | 7.44E-14  | 4.52E-13  | SLC22A17 | chr14 | - | 23815515 | 23822121 | 2409  |
| ENSG000001 | 417.4114 | 443.0977 | -0.08499 | 0.51674   | 0.61949   | RNF31    | chr14 | + | 24615892 | 24629870 | 3627  |
| ENSG000001 | 743.0806 | 558.0206 | 0.41335  | 0.021435  | 0.042003  | SCFD1    | chr14 | + | 31091318 | 31205018 | 2359  |
| ENSG000001 | 574.5655 | 660.4509 | -0.1996  | 0.2284    | 0.32149   | G2E3     | chr14 | + | 31028329 | 31089269 | 5804  |
| ENSG000001 | 2912.29  | 1576.04  | 0.88545  | 2.73E-19  | 2.22E-18  | HECTD1   | chr14 | - | 31569318 | 31677010 | 9134  |
| ENSG000001 | 8991.54  | 16649.59 | -0.88806 | 9.74E-18  | 7.39E-17  | HNRNPC   | chr14 | - | 21677295 | 21737653 | 4501  |
| ENSG000001 | 1.379541 | 19.88434 | -3.6462  | 2.23E-05  | 6.86E-05  | RPGRIP1  | chr14 | + | 21756098 | 21819460 | 3944  |
| ENSG000001 | 3358.43  | 6374.061 | -0.92268 | 1.08E-09  | 4.95E-09  | SUPT16H  | chr14 | - | 21819631 | 21852425 | 4684  |
| ENSG000001 | 1116.593 | 856.2816 | 0.38331  | 0.001363  | 0.003314  | TOX4     | chr14 | + | 21944756 | 21967319 | 4697  |
| ENSG000001 | 156.3387 | 259.5934 | -0.73069 | 1.49E-05  | 4.70E-05  | GEMIN2   | chr14 | + | 39583427 | 39606177 | 1476  |
| ENSG000001 | 14.88579 | 30.01192 | -0.98449 | 0.047252  | 0.08471   | TGM1     | chr14 | - | 24718320 | 24733638 | 2777  |

|            |          |          |          |           |           |           |       |   |          |          |       |
|------------|----------|----------|----------|-----------|-----------|-----------|-------|---|----------|----------|-------|
| ENSG000001 | 672.7576 | 412.6666 | 0.70431  | 4.04E-09  | 1.77E-08  | TINF2     | chr14 | - | 24708849 | 24711880 | 2168  |
| ENSG000001 | 0.36308  | 14.49122 | -4.6437  | 7.68E-05  | 0.000222  | DAZL      | chr3  | - | 16628299 | 16711813 | 3104  |
| ENSG000001 | 0        | 78.48863 | -7.8268  | 9.05E-13  | 5.16E-12  | TBL1Y     | chrY  | + | 6778727  | 6959724  | 2407  |
| ENSG000001 | 2082.816 | 13055.57 | -2.6466  | 2.02E-190 | 4.00E-188 | SEMA6A    | chr5  | - | 1.16E+08 | 1.16E+08 | 6878  |
| ENSG000001 | 599.3775 | 469.6752 | 0.35268  | 0.014631  | 0.029696  | TRPM7     | chr15 | - | 50844670 | 50979012 | 7263  |
| ENSG000001 | 687.5928 | 2356.599 | -1.7753  | 4.67E-66  | 1.56E-64  | TYRO3     | chr15 | + | 41849873 | 41871536 | 3949  |
| ENSG000001 | 362.6365 | 261.2831 | 0.47193  | 0.001003  | 0.002486  | WDR76     | chr15 | + | 44119161 | 44160617 | 3978  |
| ENSG000001 | 0.580602 | 2.232041 | -1.4553  | 0.32274   | 0.42568   | CAPN3     | chr15 | + | 42640301 | 42704516 | 3228  |
| ENSG000001 | 976.8489 | 479.8904 | 1.0252   | 2.25E-19  | 1.83E-18  | SNAP23    | chr15 | + | 42783431 | 42837547 | 2687  |
| ENSG000001 | 366.0881 | 174.2834 | 1.0636   | 0.000208  | 0.000569  | TBX15     | chr1  | - | 1.19E+08 | 1.2E+08  | 3504  |
| ENSG000001 | 3559.561 | 10433.42 | -1.5493  | 2.37E-32  | 3.31E-31  | PHGDH     | chr1  | + | 1.2E+08  | 1.2E+08  | 3180  |
| ENSG000001 | 764.8756 | 2871.556 | -1.9047  | 2.76E-35  | 4.22E-34  | COL9A3    | chr20 | + | 61447596 | 61472511 | 2485  |
| ENSG000001 | 2562.041 | 6039.716 | -1.2346  | 3.06E-14  | 1.91E-13  | EZR       | chr6  | - | 1.59E+08 | 1.59E+08 | 3096  |
| ENSG000001 | 4969.191 | 2312.569 | 1.1022   | 3.35E-15  | 2.22E-14  | MYL6      | chr12 | + | 56551945 | 56557280 | 1564  |
| ENSG000001 | 1486.034 | 3367.167 | -1.1791  | 4.28E-29  | 5.27E-28  | AGO1      | chr1  | + | 36335409 | 36395211 | 12790 |
| ENSG000001 | 19.50233 | 23.78199 | -0.27981 | 0.59156   | 0.68645   | TEKT2     | chr1  | + | 36549676 | 36553876 | 1738  |
| ENSG000001 | 828.6951 | 812.3171 | 0.028859 | 0.86914   | 0.90895   | CLSPN     | chr1  | - | 36185819 | 36235568 | 4769  |
| ENSG000001 | 247.6246 | 214.7293 | 0.20715  | 0.28763   | 0.3893    | RFFL      | chr17 | - | 33333009 | 33416338 | 7293  |
| ENSG000001 | 10.11514 | 178.1745 | -4.0875  | 9.39E-29  | 1.14E-27  | UNC13D    | chr17 | - | 73823306 | 73840798 | 4393  |
| ENSG000001 | 275.2618 | 199.3461 | 0.46305  | 0.040204  | 0.073719  | MFSD11    | chr17 | + | 74731947 | 74777531 | 3612  |
| ENSG000001 | 4667.165 | 4828.642 | -0.04902 | 0.69087   | 0.76952   | DPYSL2    | chr8  | + | 26371791 | 26515694 | 4603  |
| ENSG000001 | 563.4033 | 38.05703 | 3.8849   | 1.31E-85  | 6.07E-84  | TGFB2     | chr1  | + | 2.19E+08 | 2.19E+08 | 5053  |
| ENSG000001 | 297.311  | 199.2643 | 0.57559  | 0.001355  | 0.003295  | GPATCH2   | chr1  | - | 2.18E+08 | 2.18E+08 | 5851  |
| ENSG000001 | 1513.887 | 1965.08  | -0.3757  | 0.003084  | 0.007095  | NUP50     | chr22 | + | 45559722 | 45583892 | 5229  |
| ENSG000001 | 483.6015 | 552.4139 | -0.19056 | 0.34096   | 0.44489   | CDC45     | chr22 | + | 19466982 | 19508135 | 2090  |
| ENSG000001 | 55.0206  | 259.0342 | -2.2278  | 2.23E-24  | 2.28E-23  | COMT      | chr22 | + | 19929130 | 19957498 | 2437  |
| ENSG000001 | 13.61155 | 599.6581 | -5.4386  | 9.13E-88  | 4.37E-86  | CECR1     | chr22 | - | 17660194 | 17702879 | 3986  |
| ENSG000001 | 7.667711 | 2.185918 | 1.6303   | 0.089112  | 0.14649   | XXbac-B46 | chr22 | - | 18270418 | 18294263 | 4328  |
| ENSG000001 | 0.290301 | 0        | 0.4146   | 0.81455   | NA        | VNN3      | chr6  | - | 1.33E+08 | 1.33E+08 | 1761  |
| ENSG000001 | 861.3927 | 755.9491 | 0.18781  | 0.43646   | 0.54197   | ECHDC1    | chr6  | - | 1.28E+08 | 1.28E+08 | 2585  |
| ENSG000001 | 615.0407 | 311.2831 | 0.98067  | 8.97E-15  | 5.81E-14  | LRRFIP2   | chr3  | - | 37094117 | 37225180 | 3814  |
| ENSG000001 | 828.8159 | 499.7852 | 0.72958  | 3.27E-07  | 1.22E-06  | SEC22C    | chr3  | - | 42589461 | 42642572 | 5955  |
| ENSG000001 | 83.87083 | 33.09854 | 1.3288   | 3.29E-06  | 1.12E-05  | XYLB      | chr3  | + | 38388251 | 38462839 | 3664  |
| ENSG000001 | 1287.898 | 631.8793 | 1.0265   | 9.72E-22  | 8.86E-21  | HDAC6     | chrX  | + | 48659784 | 48683392 | 4832  |
| ENSG000001 | 0        | 100.199  | -8.0979  | 4.56E-13  | 2.65E-12  | GABRP     | chr5  | + | 1.7E+08  | 1.7E+08  | 3576  |
| ENSG000001 | 1458.356 | 1739.304 | -0.25232 | 0.38631   | 0.49053   | CDC6      | chr17 | + | 38443885 | 38459171 | 3072  |
| ENSG000001 | 135.6863 | 269.1121 | -0.98205 | 8.77E-08  | 3.44E-07  | UPRT      | chrX  | + | 74493920 | 74524435 | 2234  |
| ENSG000001 | 689.9422 | 831.3778 | -0.26878 | 0.040168  | 0.073664  | CDC23     | chr5  | - | 1.38E+08 | 1.38E+08 | 3153  |
| ENSG000001 | 1050.01  | 1494.658 | -0.50807 | 2.86E-06  | 9.76E-06  | AAAS      | chr12 | - | 53701240 | 53718648 | 2016  |
| ENSG000001 | 7010.555 | 6985.481 | 0.005148 | 0.9562    | 0.97309   | CBX5      | chr12 | - | 54624724 | 54673886 | 11528 |
| ENSG000001 | 1069.672 | 689.1579 | 0.63414  | 0.00025   | 0.000676  | SUCO      | chr1  | + | 1.73E+08 | 1.73E+08 | 5917  |
| ENSG000001 | 878.1376 | 4832.623 | -2.4573  | 1.98E-93  | 1.05E-91  | MSH2      | chr2  | + | 47630108 | 47789450 | 3628  |
| ENSG000001 | 232.5753 | 403.7944 | -0.79217 | 1.42E-06  | 5.02E-06  | MAP3K1    | chr5  | + | 56111401 | 56191979 | 7011  |
| ENSG000001 | 852.7039 | 973.3971 | -0.19039 | 0.15118   | 0.22868   | DHPS      | chr19 | - | 12786531 | 12792716 | 1363  |
| ENSG000001 | 247.0476 | 1084.897 | -2.1313  | 1.57E-50  | 3.64E-49  | HOOK2     | chr19 | - | 12873817 | 12983554 | 2603  |
| ENSG000001 | 0.290301 | 0.357707 | -0.00203 | 0.99908   | NA        | NXPE1     | chr11 | - | 1.14E+08 | 1.14E+08 | 2289  |
| ENSG000001 | 5108.854 | 2450.292 | 1.0592   | 1.10E-24  | 1.14E-23  | ARCN1     | chr11 | + | 1.18E+08 | 1.18E+08 | 4038  |
| ENSG000001 | 17.03338 | 563.4848 | -5.0258  | 1.34E-63  | 4.22E-62  | EPB41L4B  | chr9  | - | 1.12E+08 | 1.12E+08 | 5800  |
| ENSG000001 | 99.83877 | 198.5749 | -0.99179 | 4.24E-06  | 1.42E-05  | TMEM38B   | chr9  | + | 1.08E+08 | 1.09E+08 | 3956  |
| ENSG000001 | 619.9109 | 600.1059 | 0.047115 | 0.77384   | 0.83724   | PSMD5     | chr9  | - | 1.24E+08 | 1.24E+08 | 3443  |
| ENSG000001 | 6.079207 | 12.92605 | -1.0311  | 0.12631   | 0.19694   | PTGS1     | chr9  | + | 1.25E+08 | 1.25E+08 | 4964  |
| ENSG000001 | 2098.739 | 2415.94  | -0.20268 | 0.13436   | 0.20734   | NUP188    | chr9  | + | 1.32E+08 | 1.32E+08 | 5689  |
| ENSG000001 | 1078.176 | 391.5343 | 1.4508   | 8.52E-07  | 3.06E-06  | CRAT      | chr9  | - | 1.32E+08 | 1.32E+08 | 2763  |
| ENSG000001 | 31.62985 | 60.12588 | -0.91481 | 0.023699  | 0.045992  | SH2D3C    | chr9  | - | 1.31E+08 | 1.31E+08 | 3124  |
| ENSG000001 | 628.3374 | 431.041  | 0.54302  | 0.000112  | 0.000316  | NANS      | chr9  | + | 1.01E+08 | 1.01E+08 | 3027  |
| ENSG000001 | 187.2776 | 194.6766 | -0.05577 | 0.76881   | 0.83305   | TBC1D2    | chr9  | - | 1.01E+08 | 1.01E+08 | 3198  |
| ENSG000001 | 190.0631 | 879.3723 | -2.1962  | 1.34E-14  | 8.57E-14  | DFNB31    | chr9  | - | 1.17E+08 | 1.17E+08 | 3566  |
| ENSG000001 | 8.94277  | 3.823929 | 1.139    | 0.14516   | 0.22065   | PDE6C     | chr10 | + | 95372345 | 95425767 | 3307  |
| ENSG000001 | 351.7791 | 487.1012 | -0.46802 | 0.001691  | 0.00405   | CWF19L1   | chr10 | - | 1.02E+08 | 1.02E+08 | 2694  |
| ENSG000001 | 130.0249 | 174.1352 | -0.42073 | 0.075224  | 0.1268    | SEMA4G    | chr10 | + | 1.03E+08 | 1.03E+08 | 4656  |
| ENSG000001 | 1165.553 | 973.5476 | 0.25891  | 0.061443  | 0.10651   | BTAF1     | chr10 | + | 93683526 | 93790082 | 7250  |
| ENSG000001 | 174.7722 | 143.932  | 0.27955  | 0.26175   | 0.35993   | IKZF5     | chr10 | - | 1.25E+08 | 1.25E+08 | 4555  |
| ENSG000001 | 0        | 0.297015 | -0.41864 | 0.81278   | NA        | BLNK      | chr10 | - | 97951458 | 98031344 | 1784  |
| ENSG000001 | 40.56064 | 223.7018 | -2.4423  | 2.38E-24  | 2.43E-23  | TLL2      | chr10 | - | 98124363 | 98273675 | 6756  |
| ENSG000001 | 1.027626 | 101.7264 | -6.2557  | 3.97E-14  | 2.46E-13  | CYP26A1   | chr10 | + | 94833232 | 94837647 | 2245  |

|            |          |          |          |           |           |          |       |   |          |          |      |
|------------|----------|----------|----------|-----------|-----------|----------|-------|---|----------|----------|------|
| ENSG000001 | 0        | 10.84292 | -5.018   | 8.30E-05  | 0.000239  | TDRD1    | chr10 | + | 1.16E+08 | 1.16E+08 | 4510 |
| ENSG000001 | 323.0684 | 894.6309 | -1.4652  | 5.75E-23  | 5.54E-22  | SORBS1   | chr10 | - | 97071528 | 97321171 | 7354 |
| ENSG000001 | 3.693391 | 52.81304 | -3.7436  | 4.25E-10  | 2.01E-09  | CRTAC1   | chr10 | - | 99624757 | 99790585 | 2890 |
| ENSG000001 | 225.7137 | 594.1955 | -1.3919  | 1.50E-20  | 1.30E-19  | BAMBI    | chr10 | + | 28966271 | 28971868 | 1884 |
| ENSG000001 | 540.933  | 13.52337 | 5.2553   | 4.81E-62  | 1.47E-60  | IL11     | chr19 | - | 55875757 | 55881831 | 2281 |
| ENSG000001 | 0        | 98.14236 | -8.1297  | 8.04E-14  | 4.88E-13  | MYO3A    | chr10 | + | 26223196 | 26501456 | 5581 |
| ENSG000001 | 2038.674 | 2108.578 | -0.04844 | 0.6199    | 0.71075   | WAC      | chr10 | + | 28821422 | 28909928 | 4526 |
| ENSG000001 | 309.1821 | 183.1392 | 0.75454  | 9.55E-06  | 3.07E-05  | CREM     | chr10 | + | 35415719 | 35501886 | 2658 |
| ENSG000001 | 1359.467 | 1808.204 | -0.41074 | 0.000758  | 0.001915  | NUBP2    | chr16 | + | 1832902  | 1839192  | 2235 |
| ENSG000001 | 0        | 0.297015 | -0.41864 | 0.81278   | NA        | TPSD1    | chr16 | + | 1306060  | 1308532  | 963  |
| ENSG000001 | 0.290301 | 60.732   | -6.5584  | 1.82E-09  | 8.19E-09  | C19orf77 | chr19 | - | 3474405  | 3480540  | 908  |
| ENSG000001 | 474.6422 | 337.7652 | 0.49112  | 0.00196   | 0.004647  | HIVEP1   | chr6  | + | 12008995 | 12165232 | 9027 |
| ENSG000001 | 1.991846 | 0.98329  | 0.8324   | 0.53781   | 0.63861   | TREM2    | chr6  | - | 41126244 | 41130924 | 1044 |
| ENSG000001 | 0        | 0.357707 | -0.41864 | 0.81278   | NA        | KCNK16   | chr6  | - | 39282474 | 39290744 | 1272 |
| ENSG000001 | 513.5466 | 969.5981 | -0.91584 | 3.41E-16  | 2.39E-15  | FKBP5    | chr6  | - | 35541362 | 35696360 | 7384 |
| ENSG000001 | 965.6246 | 1916.709 | -0.98866 | 1.47E-16  | 1.05E-15  | SRPK1    | chr6  | - | 35800743 | 35889119 | 4762 |
| ENSG000001 | 986.6931 | 1093.992 | -0.14813 | 0.36116   | 0.46536   | BRPF3    | chr6  | + | 36164521 | 36200567 | 6052 |
| ENSG000001 | 226.6012 | 332.9293 | -0.55456 | 0.000462  | 0.001207  | MRPS18A  | chr6  | - | 43639040 | 43655528 | 1062 |
| ENSG000001 | 0        | 0.997859 | -1.5018  | 0.39072   | NA        | PGC      | chr6  | - | 41704449 | 41721847 | 1371 |
| ENSG000001 | 285.133  | 113.3926 | 1.327    | 2.00E-13  | 1.18E-12  | TMEM14A  | chr6  | + | 52535907 | 52551386 | 992  |
| ENSG000001 | 358.1557 | 102.6087 | 1.8031   | 2.25E-24  | 2.30E-23  | EFHC1    | chr6  | + | 52285106 | 52387892 | 5445 |
| ENSG000001 | 0        | 0.357707 | -0.41864 | 0.81278   | NA        | NCR2     | chr6  | + | 41303393 | 41318625 | 1154 |
| ENSG000001 | 24393.48 | 53926.83 | -1.1434  | 1.36E-25  | 1.45E-24  | HSP90AB1 | chr6  | + | 44214824 | 44221620 | 2674 |
| ENSG000001 | 3.454517 | 1.012429 | 1.4594   | 0.29061   | 0.39226   | MLN      | chr6  | - | 33762450 | 33771788 | 566  |
| ENSG000001 | 1114.268 | 1028.451 | 0.11597  | 0.45371   | 0.55916   | CDC5L    | chr6  | + | 44355262 | 44418163 | 6423 |
| ENSG000001 | 311.8939 | 2136.641 | -2.7723  | 9.01E-90  | 4.50E-88  | ITPR3    | chr6  | + | 33588522 | 33664351 | 9668 |
| ENSG000001 | 123.6703 | 104.8408 | 0.23987  | 0.29971   | 0.4013    | ZNFX184  | chr6  | - | 27418522 | 27440897 | 3101 |
| ENSG000001 | 3619.072 | 6614.201 | -0.8688  | 2.58E-11  | 1.33E-10  | DSP      | chr6  | + | 7541808  | 7586950  | 9796 |
| ENSG000001 | 517.6137 | 1207.195 | -1.2173  | 9.01E-10  | 4.17E-09  | SIRT1    | chr10 | + | 69644427 | 69678147 | 4094 |
| ENSG000001 | 2320.238 | 2833.956 | -0.28824 | 0.003871  | 0.008763  | HNRNP3   | chr10 | + | 70090931 | 70102948 | 3356 |
| ENSG000001 | 127.0405 | 173.1232 | -0.44269 | 0.098787  | 0.15983   | IFT74    | chr9  | + | 26947037 | 27062928 | 2163 |
| ENSG000001 | 283.9422 | 58.90688 | 2.2667   | 8.74E-24  | 8.71E-23  | JAK2     | chr9  | + | 4985033  | 5128183  | 5285 |
| ENSG000001 | 0.580602 | 0.654722 | -0.07721 | 0.96449   | NA        | IL12RB1  | chr19 | - | 18169805 | 18209759 | 2906 |
| ENSG000001 | 5560.042 | 3834.515 | 0.53553  | 5.63E-08  | 2.24E-07  | ABL1     | chr9  | + | 1.34E+08 | 1.34E+08 | 5766 |
| ENSG000001 | 1956.784 | 2797.498 | -0.51494 | 6.68E-07  | 2.42E-06  | ACOT7    | chr1  | - | 6324333  | 6454451  | 2429 |
| ENSG000001 | 1572.714 | 416.8727 | 1.9119   | 5.51E-37  | 8.92E-36  | SH3GLB1  | chr1  | + | 87170259 | 87213867 | 6371 |
| ENSG000001 | 199.1092 | 744.5042 | -1.8977  | 1.53E-30  | 1.98E-29  | CDC7     | chr1  | + | 91966408 | 91991321 | 3313 |
| ENSG000001 | 69.96124 | 223.1339 | -1.6708  | 1.65E-15  | 1.11E-14  | SYDE2    | chr1  | - | 85622556 | 85666729 | 5512 |
| ENSG000001 | 1290.464 | 595.906  | 1.1143   | 2.72E-22  | 2.54E-21  | PCSK5    | chr9  | + | 78505560 | 78977255 | 9538 |
| ENSG000001 | 21961    | 12738.26 | 0.78425  | 8.47E-07  | 3.04E-06  | SCD      | chr10 | + | 1.02E+08 | 1.02E+08 | 5362 |
| ENSG000001 | 180.5918 | 175.0732 | 0.042879 | 0.83251   | 0.88204   | TMED1    | chr19 | - | 10943114 | 10946994 | 1340 |
| ENSG000001 | 248.7027 | 1718.463 | -2.7844  | 8.10E-109 | 5.32E-107 | ABLIM1   | chr10 | - | 1.16E+08 | 1.16E+08 | 7606 |
| ENSG000001 | 375.1738 | 681.6492 | -0.85968 | 4.44E-06  | 1.48E-05  | ERMP1    | chr9  | - | 5765076  | 5833117  | 5376 |
| ENSG000001 | 995.5443 | 595.3919 | 0.74036  | 7.97E-06  | 2.59E-05  | RAB18    | chr10 | + | 27793197 | 27831143 | 4886 |
| ENSG000001 | 1764.979 | 5.069391 | 8.0189   | 4.34E-25  | 4.55E-24  | NRP1     | chr10 | - | 33466420 | 33625190 | 5882 |
| ENSG000001 | 1.887365 | 0.594029 | 1.1596   | 0.47015   | 0.57488   | HSD17B7P | chr10 | + | 38645305 | 38667433 | 1401 |
| ENSG000001 | 174.791  | 105.5577 | 0.72485  | 0.019101  | 0.037868  | PRTFDC1  | chr10 | - | 25137536 | 25241533 | 1944 |
| ENSG000001 | 13.00005 | 0.686276 | 3.7845   | 0.000553  | 0.001426  | PALMD    | chr1  | + | 1E+08    | 1E+08    | 5294 |
| ENSG000001 | 63.81121 | 152.9713 | -1.2543  | 7.51E-08  | 2.96E-07  | TSPAN15  | chr10 | + | 71211229 | 71267425 | 1698 |
| ENSG000001 | 1660.369 | 2236.843 | -0.42941 | 0.000329  | 0.000875  | H2AFY2   | chr10 | + | 71812552 | 71872036 | 1980 |
| ENSG000001 | 580.0669 | 381.0641 | 0.60586  | 1.22E-05  | 3.86E-05  | FAM21A   | chr10 | + | 51827648 | 51893269 | 4642 |
| ENSG000001 | 288.5492 | 259.8674 | 0.14959  | 0.58485   | 0.68066   | MAST3    | chr19 | + | 18208603 | 18262494 | 5888 |
| ENSG000001 | 283.0652 | 266.6992 | 0.083567 | 0.62641   | 0.71641   | MZF1     | chr19 | - | 59073298 | 59084942 | 3261 |
| ENSG000001 | 189.0395 | 338.2249 | -0.83675 | 0.000392  | 0.001032  | OCEL1    | chr19 | + | 17337013 | 17340028 | 1485 |
| ENSG000001 | 5663.072 | 2458.25  | 1.2023   | 5.39E-23  | 5.20E-22  | MYO9B    | chr19 | + | 17186591 | 17325346 | 7623 |
| ENSG000001 | 290.3141 | 297.2205 | -0.03396 | 0.90716   | 0.93617   | KCNK6    | chr19 | + | 38810484 | 38819660 | 2666 |
| ENSG000001 | 5.705775 | 21.65435 | -1.8476  | 0.012415  | 0.025593  | CATSPERG | chr19 | + | 38826415 | 38861589 | 3785 |
| ENSG000001 | 3388.545 | 2235.991 | 0.5997   | 5.17E-09  | 2.24E-08  | PSMD8    | chr19 | + | 38865176 | 38874464 | 1581 |
| ENSG000001 | 1848.106 | 3358.759 | -0.86093 | 2.94E-18  | 2.27E-17  | FBXL19   | chr16 | + | 30934376 | 30960104 | 3965 |
| ENSG000001 | 245.6249 | 235.0308 | 0.061121 | 0.78544   | 0.84634   | STX1B    | chr16 | - | 31000577 | 31021949 | 4664 |
| ENSG000001 | 122.3386 | 63.78533 | 0.93967  | 3.05E-05  | 9.24E-05  | HSD3B7   | chr16 | + | 30996519 | 31000473 | 2200 |
| ENSG000001 | 941.3198 | 1406.907 | -0.57808 | 0.000574  | 0.001476  | SETD1A   | chr16 | + | 30968615 | 30996437 | 6903 |
| ENSG000001 | 745.638  | 270.5711 | 1.4557   | 2.77E-14  | 1.73E-13  | BCL7C    | chr16 | - | 30844947 | 30906281 | 2409 |
| ENSG000001 | 0        | 4.351561 | -3.61    | 0.013975  | 0.028493  | MAGEB2   | chrX  | + | 30233677 | 30238206 | 1610 |
| ENSG000001 | 350.0286 | 534.2867 | -0.60677 | 0.013251  | 0.027173  | EFNA2    | chr19 | + | 1286153  | 1301430  | 2143 |

|            |          |          |          |          |          |          |       |   |          |          |       |
|------------|----------|----------|----------|----------|----------|----------|-------|---|----------|----------|-------|
| ENSG000001 | 3374.316 | 3314.749 | 0.02573  | 0.86605  | 0.90673  | CIRBP    | chr19 | + | 1259384  | 1274879  | 3528  |
| ENSG000001 | 1369.748 | 1514.579 | -0.14499 | 0.15321  | 0.23117  | ATP5D    | chr19 | + | 1241749  | 1244824  | 1587  |
| ENSG000001 | 750.4099 | 639.1544 | 0.23016  | 0.3377   | 0.44143  | C19orf26 | chr19 | - | 1228286  | 1238026  | 4261  |
| ENSG000001 | 45.42722 | 63.46401 | -0.47403 | 0.10287  | 0.1653   | PCDH11Y  | chrY  | + | 4868267  | 5610265  | 8240  |
| ENSG000001 | 0        | 1.949596 | -2.4359  | 0.13595  | 0.20899  | AMELY    | chrY  | - | 6733959  | 6742068  | 802   |
| ENSG000001 | 267.8455 | 244.8465 | 0.1291   | 0.41809  | 0.52333  | PRKY     | chrY  | + | 7142013  | 7249589  | 7218  |
| ENSG000001 | 2.572449 | 5.568757 | -1.0255  | 0.25987  | 0.35782  | IGFALS   | chr16 | - | 1840414  | 1844972  | 2136  |
| ENSG000001 | 7825.034 | 11549.22 | -0.55947 | 0.010589 | 0.022141 | HNRNPM   | chr19 | + | 8509651  | 8553998  | 2568  |
| ENSG000001 | 291.1883 | 256.8389 | 0.17901  | 0.41577  | 0.52088  | 2-Mar    | chr19 | + | 8478154  | 8503901  | 1667  |
| ENSG000001 | 1067.016 | 1351.171 | -0.34064 | 0.001187 | 0.002911 | NDUFB7   | chr19 | - | 14676890 | 14682874 | 531   |
| ENSG000001 | 1620.348 | 1397.463 | 0.2132   | 0.028111 | 0.053611 | TECR     | chr19 | + | 14627897 | 14676792 | 2899  |
| ENSG000001 | 1286.615 | 3159.519 | -1.2937  | 1.25E-19 | 1.03E-18 | TIMM13   | chr19 | - | 2425622  | 2427892  | 1973  |
| ENSG000001 | 1716.214 | 2649.076 | -0.62546 | 8.16E-07 | 2.93E-06 | CDC34    | chr19 | + | 531714   | 542087   | 1464  |
| ENSG000001 | 507.3384 | 626.4679 | -0.30354 | 0.061921 | 0.10721  | MTAP     | chr9  | + | 21802542 | 21932738 | 6122  |
| ENSG000001 | 1.608228 | 20.38129 | -3.4377  | 2.05E-05 | 6.33E-05 | C19orf21 | chr19 | + | 751126   | 764318   | 2871  |
| ENSG000001 | 2052.11  | 2204.783 | -0.10336 | 0.32417  | 0.42706  | CEP170B  | chr14 | + | 1.05E+08 | 1.05E+08 | 6784  |
| ENSG000001 | 3283.817 | 4646.365 | -0.50033 | 4.51E-07 | 1.66E-06 | POLR2E   | chr19 | - | 1086594  | 1095598  | 2441  |
| ENSG000001 | 1533.786 | 3839.975 | -1.3216  | 7.76E-19 | 6.17E-18 | POLRMT   | chr19 | - | 617223   | 633568   | 3800  |
| ENSG000001 | 32.70793 | 227.4964 | -2.7743  | 1.72E-18 | 1.35E-17 | HCN2     | chr19 | + | 589893   | 617159   | 3408  |
| ENSG000001 | 56.0285  | 42.21456 | 0.39611  | 0.44145  | 0.54726  | CDHR5    | chr11 | - | 616565   | 626078   | 3635  |
| ENSG000001 | 6.172523 | 4.259314 | 0.50497  | 0.54318  | 0.64365  | IZUMO4   | chr19 | + | 2096380  | 2099592  | 2144  |
| ENSG000001 | 328.7663 | 433.7671 | -0.39916 | 0.045082 | 0.081224 | RASSF7   | chr11 | + | 560404   | 564021   | 1928  |
| ENSG000001 | 687.7048 | 126.6747 | 2.4388   | 1.51E-48 | 3.32E-47 | GADD45B  | chr19 | + | 2476120  | 2478257  | 2007  |
| ENSG000001 | 955.0549 | 698.6263 | 0.44854  | 0.083402 | 0.13846  | PALM     | chr19 | + | 708953   | 748329   | 2740  |
| ENSG000001 | 11.54692 | 132.7061 | -3.4401  | 2.53E-10 | 1.22E-09 | MADCAM1  | chr19 | + | 489176   | 505347   | 1723  |
| ENSG000001 | 26.30509 | 1.340997 | 4.0658   | 5.93E-07 | 2.16E-06 | IGF2-AS  | chr11 | + | 2161731  | 2169894  | 2061  |
| ENSG000001 | 1258.613 | 3092.392 | -1.2956  | 9.74E-34 | 1.43E-32 | MKNK2    | chr19 | - | 2037470  | 2051243  | 4093  |
| ENSG000001 | 557.8369 | 1157.535 | -1.0499  | 6.76E-09 | 2.91E-08 | ARVCF    | chr22 | - | 19957419 | 20004331 | 4041  |
| ENSG000001 | 488.8437 | 552.3345 | -0.17595 | 0.18467  | 0.26998  | TRMT2A   | chr22 | - | 20099389 | 20104915 | 2964  |
| ENSG000001 | 2362.548 | 4764.268 | -1.0094  | 7.27E-09 | 3.12E-08 | RANBP1   | chr22 | + | 20103461 | 20114878 | 2177  |
| ENSG000001 | 1443.425 | 898.3944 | 0.68291  | 2.12E-06 | 7.35E-06 | ZDHHC8   | chr22 | + | 20116979 | 20135530 | 5046  |
| ENSG000001 | 790.2028 | 187.908  | 2.0616   | 7.44E-19 | 5.92E-18 | KLHL22   | chr22 | - | 20783528 | 20850170 | 2616  |
| ENSG000001 | 1943.833 | 1173.953 | 0.72677  | 9.52E-12 | 5.06E-11 | MED15    | chr22 | + | 20850200 | 20941919 | 4701  |
| ENSG000001 | 3.547834 | 2.65044  | 0.39542  | 0.69123  | 0.76974  | SERPIND1 | chr22 | + | 21128167 | 21142008 | 2437  |
| ENSG000001 | 329.0796 | 152.976  | 1.1037   | 1.79E-12 | 1.00E-11 | SNAP29   | chr22 | + | 21213271 | 21245502 | 4283  |
| ENSG000001 | 1588.705 | 3143.326 | -0.98355 | 2.39E-19 | 1.95E-18 | CRKL     | chr22 | + | 21271714 | 21308037 | 5325  |
| ENSG000001 | 1703.424 | 709.335  | 1.2615   | 2.27E-24 | 2.32E-23 | LZTR1    | chr22 | + | 21333751 | 21353327 | 4572  |
| ENSG000001 | 1283.02  | 196.2973 | 2.6911   | 2.78E-23 | 2.71E-22 | MMP11    | chr22 | + | 24110413 | 24126503 | 3823  |
| ENSG000001 | 0        | 2468.531 | -12.363  | 1.28E-31 | 1.74E-30 | CECR2    | chr22 | + | 17840837 | 18033845 | 5637  |
| ENSG000001 | 2308.873 | 2771.849 | -0.26328 | 0.007509 | 0.016148 | SMARCB1  | chr22 | + | 24129150 | 24176703 | 1728  |
| ENSG000001 | 4.770652 | 2.947455 | 0.64182  | 0.52085  | 0.62349  | P2RX6    | chr22 | + | 21364097 | 21383119 | 3687  |
| ENSG000001 | 128.6699 | 175.2664 | -0.44481 | 0.073675 | 0.12458  | DERL3    | chr22 | - | 24176690 | 24181315 | 3525  |
| ENSG000001 | 0        | 2.976593 | -2.7957  | 0.092852 | 0.15184  | SLC7A4   | chr22 | - | 21383007 | 21387129 | 2313  |
| ENSG000001 | 701.4287 | 787.492  | -0.16651 | 0.17117  | 0.25358  | BCL2L13  | chr22 | + | 18111621 | 18213388 | 4458  |
| ENSG000001 | 7.758422 | 32.39199 | -2.0061  | 9.33E-05 | 0.000267 | DDTL     | chr22 | + | 24309089 | 24314721 | 1545  |
| ENSG000001 | 5.166249 | 9.491381 | -0.84444 | 0.29135  | 0.39317  | DDT      | chr22 | - | 24313554 | 24322660 | 1048  |
| ENSG000001 | 0.36308  | 17.01302 | -4.8554  | 3.00E-05 | 9.08E-05 | GSTT2    | chr22 | + | 24322339 | 24326106 | 1094  |
| ENSG000001 | 0        | 1.903472 | -2.1599  | 0.21236  | NA       | OSM      | chr22 | - | 30658818 | 30662829 | 1854  |
| ENSG000001 | 3136.91  | 2827.173 | 0.14974  | 0.30375  | 0.40511  | CABIN1   | chr22 | + | 24407642 | 24574596 | 7480  |
| ENSG000001 | 191.8277 | 59.44443 | 1.6733   | 2.65E-09 | 1.18E-08 | TBC1D10A | chr22 | - | 30687979 | 30723035 | 5562  |
| ENSG000001 | 20.49906 | 27.94261 | -0.44749 | 0.36781  | 0.47243  | SUSD2    | chr22 | + | 24577227 | 24585078 | 4938  |
| ENSG000001 | 2686.106 | 3738.572 | -0.47616 | 0.000127 | 0.000356 | SF3A1    | chr22 | - | 30727979 | 30752936 | 4923  |
| ENSG000001 | 44.02193 | 0.700845 | 5.5666   | 1.27E-09 | 5.80E-09 | GGT5     | chr22 | - | 24615622 | 24641110 | 2494  |
| ENSG000001 | 428.6079 | 247.6087 | 0.78778  | 0.002998 | 0.006911 | RNF215   | chr22 | - | 30773835 | 30817760 | 1992  |
| ENSG000001 | 161.2532 | 26.93334 | 2.5628   | 1.85E-23 | 1.82E-22 | SEC14L2  | chr22 | + | 30792846 | 30821305 | 4381  |
| ENSG000001 | 0        | 0.594029 | -0.81444 | 0.64499  | NA       | SEC14L3  | chr22 | - | 30843946 | 30868036 | 2474  |
| ENSG000001 | 574.5644 | 559.0539 | 0.039673 | 0.76114  | 0.82669  | SPECC1L  | chr22 | + | 24666786 | 24813708 | 6756  |
| ENSG000001 | 933.9839 | 717.0578 | 0.38082  | 0.023515 | 0.045696 | PPIL2    | chr22 | + | 22006559 | 22052565 | 4213  |
| ENSG000001 | 0.923144 | 1.903472 | -0.79725 | 0.58941  | 0.6847   | UPB1     | chr22 | + | 24863206 | 24924358 | 3418  |
| ENSG000001 | 119.8259 | 290.7066 | -1.2626  | 0.001552 | 0.003737 | YPEL1    | chr22 | - | 22051833 | 22090123 | 4329  |
| ENSG000001 | 1431.135 | 2108.245 | -0.55739 | 0.001146 | 0.002818 | SNRPD3   | chr22 | + | 24951471 | 25005947 | 1763  |
| ENSG000001 | 1740.693 | 2893.945 | -0.73133 | 2.80E-05 | 8.52E-05 | PES1     | chr22 | - | 30972615 | 31003070 | 2760  |
| ENSG000001 | 2283.019 | 1598.699 | 0.51332  | 2.22E-07 | 8.40E-07 | MAPK1    | chr22 | - | 22108789 | 22221970 | 11022 |
| ENSG000001 | 11.85695 | 101.272  | -3.0356  | 8.45E-14 | 5.11E-13 | GGT1     | chr22 | + | 24979718 | 25024972 | 2632  |
| ENSG000001 | 0.685084 | 1214.111 | -10.171  | 1.53E-38 | 2.60E-37 | PRODH    | chr22 | - | 18900294 | 18924066 | 4676  |

|            |          |          |          |           |           |          |             |   |          |          |       |
|------------|----------|----------|----------|-----------|-----------|----------|-------------|---|----------|----------|-------|
| ENSG000001 | 1535.702 | 686.3807 | 1.157    | 1.69E-07  | 6.46E-07  | PPM1F    | chr22       | - | 22273793 | 22307209 | 5587  |
| ENSG000001 | 304.902  | 165.4128 | 0.87748  | 0.000261  | 0.000704  | SLC35E4  | chr22       | + | 31031639 | 31065003 | 2714  |
| ENSG000001 | 523.8905 | 623.6807 | -0.25083 | 0.10077   | 0.16252   | TOP3B    | chr22       | - | 22311397 | 22337213 | 4163  |
| ENSG000001 | 3.278071 | 4.73599  | -0.47923 | 0.61301   | 0.70507   | CRYBB3   | chr22       | + | 25595817 | 25603330 | 867   |
| ENSG000001 | 2.323223 | 0.357707 | 1.9274   | 0.23067   | 0.32409   | CYTH4    | chr22       | + | 37678068 | 37711382 | 3667  |
| ENSG000001 | 378.3587 | 443.7812 | -0.22913 | 0.097327  | 0.15786   | DGCR14   | chr22       | - | 19117792 | 19132197 | 5392  |
| ENSG000001 | 256.0442 | 192.3764 | 0.41286  | 0.038302  | 0.070629  | CRYBB2P1 | chr22       | + | 25844072 | 25916821 | 1560  |
| ENSG000001 | 7.374804 | 38.56942 | -2.3065  | 7.75E-05  | 0.000224  | MFNG     | chr22       | - | 37865101 | 37882439 | 2088  |
| ENSG000001 | 727.3025 | 731.8989 | -0.00997 | 0.94014   | 0.96075   | CARD10   | chr22       | - | 37886400 | 37915549 | 4113  |
| ENSG000001 | 174.1746 | 145.6236 | 0.25666  | 0.19916   | 0.28757   | LRP5L    | chr22       | - | 25747385 | 25801344 | 3605  |
| ENSG000001 | 4650.136 | 4489.815 | 0.0508   | 0.59953   | 0.69359   | SLC25A1  | chr22       | - | 19163095 | 19166343 | 1641  |
| ENSG000001 | 105.3768 | 638.7444 | -2.5939  | 1.47E-39  | 2.56E-38  | ADRBK2   | chr22       | + | 25960816 | 26125259 | 9101  |
| ENSG000001 | 988.4251 | 425.9411 | 1.2145   | 5.87E-20  | 4.93E-19  | PLA2G3   | chr22       | - | 31530795 | 31536593 | 2697  |
| ENSG000001 | 17.0549  | 1.782087 | 2.9471   | 0.001306  | 0.003183  | LGALS2   | chr22       | - | 37966255 | 37978623 | 589   |
| ENSG000001 | 1011.34  | 1276.211 | -0.33504 | 0.001242  | 0.003035  | GGA1     | chr22       | + | 38004481 | 38029571 | 3205  |
| ENSG000001 | 160.6528 | 258.7985 | -0.68626 | 0.004917  | 0.01096   | HIRA     | chr22       | - | 19318221 | 19435224 | 4053  |
| ENSG000001 | 125.3614 | 226.7947 | -0.85047 | 0.001123  | 0.002765  | SH3BP1   | chr22       | + | 38030661 | 38062939 | 3123  |
| ENSG000001 | 0.705622 | 20.37317 | -4.4821  | 5.12E-06  | 1.70E-05  | SEZ6L    | chr22       | + | 26565440 | 26779562 | 6532  |
| ENSG000001 | 31341.37 | 272.5118 | 6.8199   | 4.03E-225 | 1.16E-222 | LGALS1   | chr22       | + | 38071615 | 38075813 | 637   |
| ENSG000001 | 724.4114 | 907.4326 | -0.32442 | 0.053573  | 0.09446   | HPS4     | chr22       | - | 26839389 | 26879803 | 6136  |
| ENSG000001 | 272.2744 | 97.05387 | 1.4851   | 4.40E-12  | 2.39E-11  | PIK3IP1  | chr22       | - | 31677579 | 31688520 | 3030  |
| ENSG000001 | 188.3093 | 111.8072 | 0.74724  | 0.000905  | 0.00226   | SRRD     | chr22       | + | 26879843 | 26887899 | 1295  |
| ENSG000001 | 774.481  | 2993.432 | -1.9459  | 2.94E-31  | 3.95E-30  | PATZ1    | chr22       | - | 31721790 | 31742218 | 3781  |
| ENSG000001 | 301.6688 | 168.607  | 0.83233  | 2.83E-05  | 8.62E-05  | TRIOBP   | chr22       | + | 38093011 | 38172563 | 10129 |
| ENSG000001 | 1007.814 | 659.3034 | 0.61177  | 6.24E-06  | 2.06E-05  | TFIP11   | chr22       | - | 26887191 | 26908471 | 3586  |
| ENSG000001 | 507.6627 | 560.5395 | -0.14231 | 0.41238   | 0.51724   | GCAT     | chr22       | + | 38203912 | 38213183 | 1656  |
| ENSG000001 | 19.84308 | 12.48013 | 0.66072  | 0.26639   | 0.36512   | CRYBB1   | chr22       | - | 26995242 | 27014052 | 1102  |
| ENSG000001 | 372.2088 | 178.9165 | 1.0543   | 2.52E-10  | 1.21E-09  | ANKRD54  | chr22       | - | 38226862 | 38240438 | 2403  |
| ENSG000001 | 33.92137 | 86.19141 | -1.3304  | 7.45E-06  | 2.43E-05  | EIF3L    | chr22       | + | 38244875 | 38285414 | 3220  |
| ENSG000001 | 1337.14  | 1925.443 | -0.5247  | 6.27E-05  | 0.000183  | NHP2L1   | chr22       | - | 42069934 | 42086508 | 1670  |
| ENSG000001 | 1188.802 | 1135.499 | 0.065408 | 0.63048   | 0.71982   | MICALL1  | chr22       | + | 38301664 | 38338829 | 4710  |
| ENSG000001 | 896.9637 | 1186.638 | -0.40243 | 0.003451  | 0.007884  | POLR2F   | chr22       | + | 38348614 | 38437113 | 2106  |
| ENSG000001 | 4.523219 | 62.3749  | -3.6766  | 3.56E-11  | 1.82E-10  | SOX10    | chr22       | - | 38366693 | 38383429 | 2879  |
| ENSG000001 | 107.3611 | 108.6283 | -0.01644 | 0.93732   | 0.95862   | CDC134   | chr22       | + | 42196683 | 42222303 | 1270  |
| ENSG000001 | 314.525  | 346.0765 | -0.13905 | 0.46185   | 0.56694   | DEPDC5   | chr22       | + | 32149944 | 32303001 | 5410  |
| ENSG000001 | 194.8295 | 453.5366 | -1.215   | 2.44E-12  | 1.35E-11  | PICK1    | chr22       | + | 38452318 | 38471708 | 2531  |
| ENSG000001 | 1375.766 | 354.179  | 1.9537   | 1.14E-56  | 3.07E-55  | TTC28    | chr22       | - | 28374004 | 29075853 | 11793 |
| ENSG000001 | 3.838135 | 15.53278 | -1.9193  | 0.004628  | 0.010359  | SLC16A8  | chr22       | - | 38474141 | 38480100 | 1878  |
| ENSG000001 | 232.7604 | 475.966  | -1.0285  | 1.00E-11  | 5.30E-11  | CENPM    | chr22       | - | 42334725 | 42343168 | 1002  |
| ENSG000001 | 28.88096 | 810.8921 | -4.792   | 7.43E-116 | 5.37E-114 |          | 3-Sep chr22 | + | 42372276 | 42394225 | 4649  |
| ENSG000001 | 0.943682 | 1.430828 | -0.39163 | 0.81182   | 0.86764   | SLC5A1   | chr22       | + | 32439019 | 32509016 | 5061  |
| ENSG000001 | 0.290301 | 6.018711 | -3.434   | 0.008744  | 0.018588  | TPTEP1   | chr22       | + | 17082777 | 17179521 | 5725  |
| ENSG000001 | 2.749709 | 9.433978 | -1.6647  | 0.080627  | 0.13446   | SLC5A4   | chr22       | - | 32614465 | 32651328 | 2028  |
| ENSG000001 | 2146.657 | 93.12076 | 4.5128   | 1.44E-179 | 2.48E-177 | KDELRL3  | chr22       | + | 38864067 | 38879452 | 1728  |
| ENSG000001 | 12.9179  | 6.756815 | 0.87533  | 0.21132   | 0.30165   | CYP2D6   | chr22       | - | 42522501 | 42526908 | 2257  |
| ENSG000001 | 9434.845 | 7995.821 | 0.23851  | 0.005043  | 0.011228  | DDX17    | chr22       | - | 38879445 | 38903665 | 6441  |
| ENSG000001 | 9.69126  | 49.90271 | -2.3279  | 1.47E-06  | 5.17E-06  | DMC1     | chr22       | - | 38914954 | 38966291 | 2371  |
| ENSG000001 | 1429.514 | 1264.258 | 0.17725  | 0.12529   | 0.19573   | TCF20    | chr22       | - | 42556019 | 42739622 | 7410  |
| ENSG000001 | 109.4335 | 76.66364 | 0.51177  | 0.019589  | 0.038739  | HSCB     | chr22       | + | 29138019 | 29153503 | 1114  |
| ENSG000001 | 211.2985 | 139.9779 | 0.59399  | 0.000952  | 0.002371  | CBY1     | chr22       | + | 39052641 | 39069859 | 1269  |
| ENSG000001 | 884.4524 | 1474.141 | -0.73556 | 1.05E-06  | 3.75E-06  | TOMM22   | chr22       | + | 39077953 | 39080818 | 1432  |
| ENSG000001 | 6.234137 | 2.185918 | 1.3556   | 0.16393   | 0.24464   | RTDR1    | chr22       | - | 23401593 | 23487208 | 1291  |
| ENSG000001 | 2573.614 | 1970.45  | 0.38439  | 0.000734  | 0.001858  | XBP1     | chr22       | - | 29190543 | 29196585 | 2173  |
| ENSG000001 | 1798.384 | 2216.847 | -0.30136 | 0.004895  | 0.010914  | C22orf28 | chr22       | - | 32783569 | 32808242 | 2027  |
| ENSG000001 | 1721.909 | 678.4162 | 1.3399   | 4.46E-14  | 2.75E-13  | JOSD1    | chr22       | - | 39081548 | 39097561 | 3648  |
| ENSG000001 | 1654.667 | 1227.7   | 0.43005  | 4.63E-05  | 0.000137  | FBXO7    | chr22       | + | 32870663 | 32894818 | 6884  |
| ENSG000001 | 1437.828 | 2862.137 | -0.99104 | 4.81E-09  | 2.09E-08  | GTPBP1   | chr22       | + | 39101728 | 39134304 | 5126  |
| ENSG000001 | 2137.449 | 2833.868 | -0.40626 | 0.000174  | 0.000482  | POLDIP3  | chr22       | - | 42979727 | 43010968 | 3441  |
| ENSG000001 | 307.2067 | 39.00386 | 2.9611   | 1.36E-23  | 1.35E-22  | RAB36    | chr22       | + | 23487513 | 23506537 | 3828  |
| ENSG000001 | 13295.01 | 148.172  | 6.4779   | 0         | 0         | TIMP3    | chr22       | + | 33197687 | 33259030 | 4603  |
| ENSG000001 | 1578.513 | 1071.192 | 0.55811  | 5.28E-05  | 0.000156  | PPP6R2   | chr22       | + | 50781733 | 50883514 | 4030  |
| ENSG000001 | 4625.305 | 3086.182 | 0.58245  | 0.000145  | 0.000404  | SBF1     | chr22       | - | 50885184 | 50913454 | 6253  |
| ENSG000001 | 1229.085 | 465.4424 | 1.3995   | 6.47E-29  | 7.89E-28  | SUN2     | chr22       | - | 39130730 | 39190148 | 4055  |
| ENSG000001 | 5831.262 | 2326.974 | 1.3242   | 1.13E-35  | 1.77E-34  | CYB5R3   | chr22       | - | 43013846 | 43045574 | 3938  |
| ENSG000001 | 306.5046 | 232.279  | 0.39751  | 0.019375  | 0.038359  | DNAL4    | chr22       | - | 39174513 | 39190203 | 1504  |

|            |          |          |          |          |          |          |       |   |          |          |       |
|------------|----------|----------|----------|----------|----------|----------|-------|---|----------|----------|-------|
| ENSG000001 | 0.943682 | 3.24447  | -1.4995  | 0.23149  | 0.32499  | MIOX     | chr22 | + | 50925213 | 50929077 | 1658  |
| ENSG000001 | 2796.462 | 856.3992 | 1.7044   | 6.21E-43 | 1.18E-41 | LMF2     | chr22 | - | 50941376 | 50946135 | 2658  |
| ENSG000001 | 524.062  | 822.1043 | -0.64791 | 3.05E-05 | 9.23E-05 | RHBDD3   | chr22 | - | 29655841 | 29664198 | 1794  |
| ENSG000001 | 1492.914 | 1695.753 | -0.18351 | 0.087478 | 0.14427  | PACSIN2  | chr22 | - | 43231418 | 43411151 | 3249  |
| ENSG000001 | 204.9282 | 115.3522 | 0.82252  | 0.000868 | 0.002176 | TTL1     | chr22 | - | 43435522 | 43485434 | 1686  |
| ENSG000001 | 23.5271  | 26.43968 | -0.16852 | 0.67606  | 0.75745  | RASL10A  | chr22 | - | 29708922 | 29711745 | 1720  |
| ENSG000001 | 2213.081 | 2677.804 | -0.27471 | 0.003494 | 0.007973 | AP1B1    | chr22 | - | 29723669 | 29819168 | 4176  |
| ENSG000001 | 839.9998 | 893.2648 | -0.08772 | 0.44515  | 0.55066  | HMGXB4   | chr22 | + | 35653445 | 35691800 | 4216  |
| ENSG000001 | 640.3964 | 530.0233 | 0.27257  | 0.032059 | 0.060198 | TOM1     | chr22 | + | 35695268 | 35743985 | 2622  |
| ENSG000001 | 45.75004 | 141.0422 | -1.6165  | 4.55E-10 | 2.15E-09 | NEFH     | chr22 | + | 29876219 | 29887379 | 3783  |
| ENSG000001 | 2.334388 | 5.179496 | -1.0772  | 0.2567   | 0.35416  | CHKB     | chr22 | - | 51017378 | 51039884 | 2114  |
| ENSG000001 | 10.38572 | 25.03799 | -1.2569  | 0.015579 | 0.031442 | BIK      | chr22 | + | 43506754 | 43525718 | 953   |
| ENSG000001 | 300.1919 | 200.2332 | 0.58188  | 0.000292 | 0.000784 | HMOX1    | chr22 | + | 35776354 | 35790207 | 1822  |
| ENSG000001 | 291.1839 | 341.1928 | -0.22887 | 0.19678  | 0.28476  | MCAT     | chr22 | - | 43528886 | 43539400 | 1379  |
| ENSG000001 | 920.3167 | 919.3394 | 0.002019 | 0.99133  | 0.99536  | THOC5    | chr22 | - | 29901868 | 29951205 | 4753  |
| ENSG000001 | 2051.601 | 5980.219 | -1.5373  | 4.12E-12 | 2.24E-11 | MCM5     | chr22 | + | 35796056 | 35821423 | 4599  |
| ENSG000001 | 0        | 3.3343   | -2.9544  | 0.072797 | 0.12324  | AROBEC3H | chr22 | + | 39493229 | 39500072 | 1047  |
| ENSG000001 | 591.963  | 125.0781 | 2.2383   | 7.78E-47 | 1.62E-45 | ARSA     | chr22 | - | 51063446 | 51066607 | 2053  |
| ENSG000001 | 2167.636 | 250.8614 | 3.1021   | 2.99E-71 | 1.09E-69 | TSP0     | chr22 | + | 43547520 | 43559248 | 955   |
| ENSG000001 | 123.3986 | 62.26803 | 0.97713  | 0.007928 | 0.016958 | RASD2    | chr22 | + | 35936915 | 35950048 | 3412  |
| ENSG000001 | 1307.417 | 5166.063 | -1.9808  | 8.80E-97 | 4.83E-95 | TTL12    | chr22 | - | 43562628 | 43583139 | 3385  |
| ENSG000001 | 69.1649  | 248.8528 | -1.8305  | 1.68E-07 | 6.44E-07 | CBX7     | chr22 | - | 39516172 | 39548679 | 4081  |
| ENSG000001 | 332.6246 | 119.2197 | 1.4715   | 5.86E-08 | 2.33E-07 | PDGFB    | chr22 | - | 39619364 | 39640756 | 3497  |
| ENSG000001 | 0.632843 | 2.24661  | -1.4573  | 0.29805  | 0.39992  | ACR      | chr22 | + | 51176624 | 51183762 | 1433  |
| ENSG000001 | 8.495746 | 9.323873 | -0.12291 | 0.8449   | 0.89127  | CABP7    | chr22 | + | 30116073 | 30127828 | 3259  |
| ENSG000001 | 28673.43 | 47800.97 | -0.73666 | 3.75E-12 | 2.05E-11 | RPL3     | chr22 | - | 39708887 | 39716394 | 2108  |
| ENSG000001 | 134.0935 | 90.19514 | 0.56831  | 0.069417 | 0.11827  | ZMAT5    | chr22 | - | 30126945 | 30163000 | 2468  |
| ENSG000001 | 7204.915 | 2969.458 | 1.2776   | 4.44E-31 | 5.93E-30 | RBFOX2   | chr22 | - | 36134783 | 36424473 | 6932  |
| ENSG000001 | 653.6761 | 689.1094 | -0.07627 | 0.68554  | 0.7653   | SYNGR1   | chr22 | + | 39745930 | 39781593 | 4391  |
| ENSG000001 | 834.928  | 840.4498 | -0.00959 | 0.95236  | 0.97023  | TAB1     | chr22 | + | 39795746 | 39833065 | 3237  |
| ENSG000001 | 1130.256 | 828.96   | 0.44748  | 4.91E-05 | 0.000145 | ASCC2    | chr22 | - | 30184597 | 30234271 | 2823  |
| ENSG000001 | 1047.208 | 500.0254 | 1.0636   | 4.00E-09 | 1.75E-08 | MTMR3    | chr22 | + | 30279144 | 30426855 | 8906  |
| ENSG000001 | 1125.813 | 1249.692 | -0.15063 | 0.13971  | 0.21349  | SMCR7L   | chr22 | + | 39895437 | 39914137 | 5625  |
| ENSG000001 | 15.87218 | 0.654722 | 4.1219   | 6.44E-05 | 0.000188 | APOL4    | chr22 | - | 36585172 | 36600886 | 3414  |
| ENSG000001 | 0.290301 | 119.6632 | -7.567   | 3.20E-14 | 1.99E-13 | PNPLA5   | chr22 | - | 44275558 | 44287893 | 2539  |
| ENSG000001 | 4.055658 | 0.686276 | 2.1195   | 0.12047  | 0.18946  | APOL1    | chr22 | + | 36649056 | 36663576 | 3000  |
| ENSG000001 | 1249.969 | 495.5938 | 1.3325   | 8.52E-19 | 6.76E-18 | PNPLA3   | chr22 | + | 44319619 | 44360368 | 2805  |
| ENSG000001 | 31778.56 | 16566.62 | 0.9389   | 1.12E-18 | 8.84E-18 | MYH9     | chr22 | - | 36677327 | 36784063 | 7501  |
| ENSG000001 | 3.942617 | 79.19761 | -4.1841  | 2.80E-11 | 1.44E-10 | CACNA1I  | chr22 | + | 39966758 | 40085742 | 10015 |
| ENSG000001 | 787.8384 | 1180.144 | -0.58192 | 2.23E-07 | 8.45E-07 | SAMM50   | chr22 | + | 44351301 | 44406411 | 3248  |
| ENSG000001 | 905.8048 | 907.0227 | -0.00093 | 0.99421  | 0.99669  | TXN2     | chr22 | - | 36863083 | 36878077 | 1736  |
| ENSG000001 | 411.6884 | 494.5009 | -0.26337 | 0.055744 | 0.097787 | FOXRED2  | chr22 | - | 36883237 | 36903148 | 4967  |
| ENSG000001 | 9.346926 | 2.399549 | 1.8613   | 0.029619 | 0.056152 | GRAP2    | chr22 | + | 40297086 | 40369725 | 3893  |
| ENSG000001 | 2773.804 | 3968.355 | -0.5159  | 4.09E-05 | 0.000122 | EIF3D    | chr22 | - | 36906897 | 36925483 | 2155  |
| ENSG000001 | 1487.927 | 1426.408 | 0.060646 | 0.57938  | 0.67587  | TNRC6B   | chr22 | + | 40440821 | 40731811 | 18279 |
| ENSG000001 | 1683.619 | 1272.704 | 0.40268  | 0.003916 | 0.008858 | SGSM3    | chr22 | + | 40766595 | 40806122 | 4218  |
| ENSG000001 | 563.7712 | 356.085  | 0.66048  | 0.000134 | 0.000377 | IFT27    | chr22 | - | 37154246 | 37172300 | 6475  |
| ENSG000001 | 0        | 23.21548 | -6.1355  | 1.73E-07 | 6.61E-07 | PVALB    | chr22 | - | 37196728 | 37215523 | 595   |
| ENSG000001 | 2131.426 | 1589.331 | 0.4223   | 0.015464 | 0.031236 | KIAA0930 | chr22 | - | 45588114 | 45636650 | 6224  |
| ENSG000001 | 1.733248 | 0.357707 | 1.5335   | 0.35837  | 0.46266  | NCF4     | chr22 | + | 37257030 | 37274057 | 1641  |
| ENSG000001 | 1.649304 | 1.606458 | 0.019561 | 0.98823  | 0.99335  | CSF2RB   | chr22 | + | 37309670 | 37336491 | 4866  |
| ENSG000001 | 369.482  | 396.9033 | -0.10092 | 0.59268  | 0.68751  | SLC25A17 | chr22 | - | 41165634 | 41215403 | 2530  |
| ENSG000001 | 0        | 4.135513 | -3.561   | 0.015338 | 0.031019 | UPK3A    | chr22 | + | 45680863 | 45691755 | 1051  |
| ENSG000001 | 330.9824 | 333.8738 | -0.01271 | 0.93336  | 0.95629  | FAM118A  | chr22 | + | 45704849 | 45737836 | 3458  |
| ENSG000001 | 1033.029 | 476.2204 | 1.1166   | 2.45E-21 | 2.20E-20 | KCTD17   | chr22 | + | 37447779 | 37459430 | 1763  |
| ENSG000001 | 4432.896 | 4997.602 | -0.17286 | 0.067123 | 0.11494  | ST13     | chr22 | - | 41220539 | 41253026 | 3595  |
| ENSG000001 | 54.85548 | 13.15022 | 2.0323   | 3.83E-07 | 1.42E-06 | IL2RB    | chr22 | - | 37521878 | 37571094 | 4113  |
| ENSG000001 | 38.28852 | 26.14099 | 0.54507  | 0.1828   | 0.26772  | RBX1     | chr22 | + | 41347351 | 41369313 | 1871  |
| ENSG000001 | 2814.408 | 3450.328 | -0.29334 | 0.033952 | 0.063407 | EP300    | chr22 | + | 41487790 | 41576081 | 9585  |
| ENSG000001 | 425.9089 | 420.5598 | 0.018829 | 0.9347   | 0.95722  | L3MBTL2  | chr22 | + | 41601209 | 41627275 | 5875  |
| ENSG000001 | 4.99934  | 8.133399 | -0.63144 | 0.44217  | 0.54795  | CHADL    | chr22 | - | 41625517 | 41636938 | 2533  |
| ENSG000001 | 2863.937 | 4702.485 | -0.71439 | 3.98E-08 | 1.60E-07 | RANGAP1  | chr22 | - | 41641615 | 41682255 | 4222  |
| ENSG000001 | 3790.143 | 3221.012 | 0.23452  | 0.015733 | 0.031735 | ZC3H7B   | chr22 | + | 41697526 | 41756151 | 5909  |
| ENSG000001 | 487.7964 | 968.5206 | -0.98749 | 2.41E-10 | 1.16E-09 | PHF5A    | chr22 | - | 41855721 | 41864729 | 1086  |
| ENSG000001 | 1682.483 | 1513.825 | 0.15222  | 0.15824  | 0.23761  | ACO2     | chr22 | + | 41865129 | 41924993 | 2811  |

|            |          |          |          |          |          |           |       |   |          |          |       |
|------------|----------|----------|----------|----------|----------|-----------|-------|---|----------|----------|-------|
| ENSG000001 | 878.3651 | 515.3754 | 0.76458  | 0.007735 | 0.016595 | POLR3H    | chr22 | - | 41921808 | 41940610 | 4416  |
| ENSG000001 | 619.5907 | 846.3223 | -0.44876 | 0.006605 | 0.014358 | TRMU      | chr22 | + | 46726772 | 46753237 | 2933  |
| ENSG000001 | 368.7505 | 93.77145 | 1.965    | 2.19E-23 | 2.15E-22 | PMM1      | chr22 | - | 41972898 | 41985894 | 2538  |
| ENSG000001 | 729.2011 | 723.7704 | 0.010218 | 0.95232  | 0.97023  | DESI1     | chr22 | - | 41994032 | 42017100 | 3833  |
| ENSG000001 | 2252.814 | 1731.996 | 0.37927  | 2.84E-05 | 8.62E-05 | CERK      | chr22 | - | 47080308 | 47134158 | 4450  |
| ENSG000001 | 1063.351 | 1198.519 | -0.17239 | 0.24046  | 0.33533  | BRD1      | chr22 | - | 50166931 | 50221160 | 4614  |
| ENSG000001 | 1193.547 | 1205.009 | -0.01373 | 0.93235  | 0.95566  | ZBED4     | chr22 | + | 50247490 | 50282090 | 5257  |
| ENSG000001 | 2.624689 | 5.583326 | -1.0154  | 0.25771  | 0.35535  | MLC1      | chr22 | - | 50497820 | 50524331 | 3933  |
| ENSG000001 | 3.931452 | 3.602177 | 0.11453  | 0.90119  | 0.93178  | HDAC10    | chr22 | - | 50683612 | 50689834 | 2687  |
| ENSG000001 | 1.359003 | 21.45683 | -3.7855  | 3.36E-06 | 1.14E-05 | KCNK10    | chr14 | - | 88649113 | 88793251 | 4835  |
| ENSG000001 | 632.3267 | 721.8449 | -0.19046 | 0.14363  | 0.21861  | ABHD4     | chr14 | + | 23067146 | 23081265 | 2510  |
| ENSG000001 | 1159.554 | 541.3676 | 1.0946   | 8.07E-07 | 2.90E-06 | KHNYN     | chr14 | + | 24898492 | 24910540 | 6225  |
| ENSG000001 | 792.8582 | 885.8076 | -0.15913 | 0.25408  | 0.35113  | FKBP3     | chr14 | - | 45584803 | 45604522 | 1684  |
| ENSG000001 | 88.9868  | 126.7056 | -0.50602 | 0.027915 | 0.053268 | SDR39U1   | chr14 | - | 24908972 | 24912111 | 2336  |
| ENSG000001 | 0        | 1.248751 | -1.5848  | 0.37202  | NA       | CTSG      | chr14 | - | 25042728 | 25045466 | 1364  |
| ENSG000001 | 0        | 0.357707 | -0.41864 | 0.81278  | NA       | GZMB      | chr14 | - | 25100160 | 25103473 | 968   |
| ENSG000001 | 939.5155 | 795.0386 | 0.24064  | 0.1511   | 0.22858  | RBM23     | chr14 | - | 23369854 | 23388393 | 4240  |
| ENSG000001 | 345.3194 | 625.6045 | -0.85564 | 1.12E-09 | 5.13E-09 | PRMT5     | chr14 | - | 23389720 | 23398794 | 2531  |
| ENSG000001 | 659.9431 | 90.10691 | 2.8632   | 1.86E-69 | 6.60E-68 | COCH      | chr14 | + | 31343720 | 31364271 | 2688  |
| ENSG000001 | 74.80565 | 79.33664 | -0.08071 | 0.76583  | 0.83062  | AP4S1     | chr14 | + | 31494312 | 31562818 | 2256  |
| ENSG000001 | 134.3509 | 214.6118 | -0.67557 | 0.000876 | 0.002194 | POLE2     | chr14 | - | 50110273 | 50155140 | 1792  |
| ENSG000001 | 147.0371 | 149.4782 | -0.02405 | 0.92309  | 0.94824  | METTL21D  | chr14 | - | 50575350 | 50583318 | 1849  |
| ENSG000001 | 497.3904 | 197.7123 | 1.3286   | 5.73E-19 | 4.58E-18 | SOS2      | chr14 | - | 50583847 | 50698276 | 5489  |
| ENSG000001 | 61.2549  | 46.10798 | 0.40565  | 0.17237  | 0.25495  | CDKL1     | chr14 | - | 50796310 | 50883179 | 2982  |
| ENSG000001 | 2330.921 | 896.9174 | 1.3768   | 2.31E-27 | 2.67E-26 | NIN       | chr14 | - | 51186481 | 51297839 | 10293 |
| ENSG000001 | 866.3413 | 1832.038 | -1.0768  | 3.24E-07 | 1.21E-06 | PYGL      | chr14 | - | 51324609 | 51411454 | 3048  |
| ENSG000001 | 24.49132 | 69.27245 | -1.48    | 8.39E-05 | 0.000241 | TRIM9     | chr14 | - | 51441980 | 51562779 | 5284  |
| ENSG000001 | 862.6668 | 1087.313 | -0.33226 | 0.098816 | 0.15987  | PSMC6     | chr14 | + | 53173890 | 53195305 | 2939  |
| ENSG000001 | 530.8234 | 431.0256 | 0.29881  | 0.027503 | 0.052581 | GNPNAT1   | chr14 | - | 53241912 | 53258386 | 3860  |
| ENSG000001 | 421.0894 | 224.4861 | 0.9077   | 2.94E-10 | 1.41E-09 | DDHD1     | chr14 | - | 53510686 | 53620000 | 5603  |
| ENSG000001 | 367.3057 | 358.5933 | 0.035168 | 0.82022  | 0.8736   | CDKN3     | chr14 | + | 54863567 | 54886936 | 1070  |
| ENSG000001 | 769.2322 | 495.7739 | 0.63305  | 1.59E-07 | 6.11E-07 | CNIH      | chr14 | - | 54893654 | 54908149 | 1417  |
| ENSG000001 | 111.0014 | 113.1458 | -0.02648 | 0.89882  | 0.92983  | CGRFR1    | chr14 | + | 54976530 | 55005567 | 2309  |
| ENSG000001 | 795.4258 | 741.3454 | 0.10174  | 0.64745  | 0.73363  | ATP6V1D   | chr14 | - | 67761088 | 67826982 | 1845  |
| ENSG000001 | 3.733653 | 0        | 3.3902   | 0.023861 | 0.046265 | C14orf105 | chr14 | - | 57936019 | 57960585 | 3082  |
| ENSG000001 | 13.56786 | 5.889205 | 1.1713   | 0.12285  | 0.19261  | PLEK2     | chr14 | - | 67853700 | 67878917 | 1549  |
| ENSG000001 | 103.542  | 46.10301 | 1.1672   | 2.63E-05 | 8.05E-05 | PIGH      | chr14 | - | 68048672 | 68067004 | 1420  |
| ENSG000001 | 1014.571 | 1333.158 | -0.39258 | 0.020458 | 0.040265 | PSMA3     | chr14 | + | 58711549 | 58738730 | 1279  |
| ENSG000001 | 262.5734 | 343.1433 | -0.38518 | 0.019058 | 0.037793 | VT1B      | chr14 | - | 68113792 | 68141548 | 5351  |
| ENSG000001 | 102.1041 | 174.7354 | -0.77105 | 0.000524 | 0.001357 | TIMM9     | chr14 | - | 58875212 | 58894332 | 1336  |
| ENSG000001 | 174.083  | 443.4452 | -1.3439  | 1.75E-12 | 9.78E-12 | GSTZ1     | chr14 | + | 77787227 | 77797940 | 5356  |
| ENSG000001 | 458.5061 | 341.2592 | 0.42619  | 0.001136 | 0.002796 | KIAA0586  | chr14 | + | 58894103 | 59015216 | 5339  |
| ENSG000001 | 652.1984 | 599.4832 | 0.12046  | 0.51276  | 0.61586  | TMED8     | chr14 | - | 77801364 | 77843452 | 7784  |
| ENSG000001 | 43.65371 | 10.46493 | 2.0091   | 0.000782 | 0.001971 | SAMD15    | chr14 | + | 77843032 | 77857840 | 2564  |
| ENSG000001 | 1531.637 | 1691.402 | -0.14267 | 0.14345  | 0.21839  | AHSA1     | chr14 | + | 77924213 | 77935817 | 1402  |
| ENSG000001 | 605.0791 | 401.2732 | 0.59303  | 1.60E-06 | 5.61E-06 | DAAM1     | chr14 | + | 59655364 | 59838123 | 5806  |
| ENSG000001 | 1.608228 | 29.63481 | -3.9094  | 6.50E-06 | 2.14E-05 | ISM2      | chr14 | - | 77940740 | 77965210 | 3042  |
| ENSG000001 | 1536.854 | 1224.639 | 0.32701  | 0.0063   | 0.013761 | SPTLC2    | chr14 | - | 77972340 | 78083116 | 8170  |
| ENSG000001 | 585.3669 | 80.74175 | 2.847    | 3.36E-67 | 1.15E-65 | RIN3      | chr14 | + | 92980118 | 93155339 | 4079  |
| ENSG000001 | 515.7623 | 969.1063 | -0.90996 | 6.36E-12 | 3.41E-11 | LGMN      | chr14 | - | 93170152 | 93215047 | 2115  |
| ENSG000001 | 150.0711 | 179.9368 | -0.26062 | 0.14203  | 0.21654  | ALKBH1    | chr14 | - | 78138747 | 78174363 | 2594  |
| ENSG000001 | 606.2929 | 761.565  | -0.32805 | 0.016486 | 0.033114 | SNW1      | chr14 | - | 78183942 | 78227550 | 2163  |
| ENSG000001 | 1.597063 | 191.381  | -6.6338  | 1.73E-26 | 1.92E-25 | CHGA      | chr14 | + | 93389425 | 93401638 | 2063  |
| ENSG000001 | 773.7234 | 3341.082 | -2.108   | 6.56E-76 | 2.60E-74 | ITPK1     | chr14 | - | 93403259 | 93582665 | 6066  |
| ENSG000001 | 543.5535 | 458.3733 | 0.24488  | 0.088778 | 0.14609  | DHRS7     | chr14 | - | 60610838 | 60636574 | 2322  |
| ENSG000001 | 710.9912 | 652.0724 | 0.12403  | 0.43149  | 0.537    | PPM1A     | chr14 | + | 60712470 | 60765805 | 8184  |
| ENSG000001 | 1363.202 | 822.8347 | 0.72763  | 1.17E-12 | 6.62E-12 | SIX4      | chr14 | - | 61176246 | 61191066 | 6285  |
| ENSG000001 | 372.086  | 137.4588 | 1.4308   | 1.48E-15 | 9.99E-15 | GALNT16   | chr14 | + | 69725994 | 69821183 | 5548  |
| ENSG000001 | 0        | 2.855208 | -2.7373  | 0.10153  | 0.16346  | ASB2      | chr14 | - | 94400499 | 94443137 | 2842  |
| ENSG000001 | 266.2711 | 153.0392 | 0.79634  | 4.24E-06 | 1.42E-05 | CEP128    | chr14 | - | 80943330 | 81425861 | 4662  |
| ENSG000001 | 1002.555 | 1589.172 | -0.6634  | 6.61E-07 | 2.40E-06 | ERH       | chr14 | - | 69846848 | 69865344 | 1116  |
| ENSG000001 | 2530.838 | 1797.476 | 0.49246  | 0.012534 | 0.02582  | HIF1A     | chr14 | + | 62162231 | 62214976 | 3922  |
| ENSG000001 | 1055.12  | 105.168  | 3.307    | 1.92E-35 | 2.95E-34 | KIAA0247  | chr14 | + | 70078313 | 70181859 | 5388  |
| ENSG000001 | 2438.574 | 3070.086 | -0.33097 | 0.12566  | 0.19624  | SRSF5     | chr14 | + | 70193617 | 70238722 | 3044  |
| ENSG000001 | 0.923144 | 4.395268 | -1.9068  | 0.10774  | 0.17199  | SLC10A1   | chr14 | - | 70242134 | 70264006 | 2049  |

|            |          |          |          |           |          |          |       |   |          |          |       |
|------------|----------|----------|----------|-----------|----------|----------|-------|---|----------|----------|-------|
| ENSG000001 | 2961.817 | 2789.676 | 0.086388 | 0.55419   | 0.65351  | EIF5     | chr14 | + | 1.04E+08 | 1.04E+08 | 5945  |
| ENSG000001 | 0.342542 | 4.47053  | -2.9387  | 0.034804  | 0.06482  | SLC8A3   | chr14 | - | 70510934 | 70655787 | 5268  |
| ENSG000001 | 1534.803 | 1201.037 | 0.3536   | 0.000525  | 0.001359 | DICER1   | chr14 | - | 95552565 | 95624347 | 10331 |
| ENSG000001 | 789.4714 | 940.7363 | -0.25287 | 0.022341  | 0.043624 | ZFYVE21  | chr14 | + | 1.04E+08 | 1.04E+08 | 4453  |
| ENSG000001 | 1529.463 | 2712.344 | -0.82534 | 1.32E-10  | 6.45E-10 | MTHFD1   | chr14 | + | 64854749 | 64926725 | 3448  |
| ENSG000001 | 0        | 1.248751 | -1.5848  | 0.37202   | NA       | TCL1A    | chr14 | - | 96176304 | 96180533 | 1395  |
| ENSG000001 | 723.1162 | 755.0513 | -0.06187 | 0.57551   | 0.6723   | ZC3H14   | chr14 | + | 89029253 | 89079853 | 4194  |
| ENSG000001 | 964.6322 | 1790.171 | -0.88937 | 2.22E-06  | 7.66E-06 | TELO2    | chr16 | + | 1543345  | 1560458  | 3314  |
| ENSG000001 | 2102.649 | 910.4451 | 1.2062   | 5.60E-23  | 5.41E-22 | PCNX     | chr14 | + | 71374122 | 71582099 | 12919 |
| ENSG000001 | 1.431782 | 0.357707 | 1.3137   | 0.43706   | NA       | BDKRB1   | chr14 | + | 96722161 | 96735304 | 1687  |
| ENSG000001 | 284.2661 | 396.0245 | -0.47677 | 0.009524  | 0.020091 | GSKIP    | chr14 | + | 96829814 | 96853625 | 3834  |
| ENSG000001 | 328.633  | 809.7471 | -1.2981  | 3.68E-18  | 2.84E-17 | VRK1     | chr14 | + | 97263641 | 97398059 | 1745  |
| ENSG000001 | 2064.115 | 1540.492 | 0.42175  | 0.006337  | 0.013832 | PSMC1    | chr14 | + | 90722839 | 90738968 | 2246  |
| ENSG000001 | 9.078141 | 69.74106 | -2.8773  | 2.45E-09  | 1.09E-08 | PAPLN    | chr14 | + | 73704205 | 73741348 | 5912  |
| ENSG000001 | 19.11015 | 36.85769 | -0.9344  | 0.019229  | 0.0381   | RPS6KA5  | chr14 | - | 91336799 | 91526980 | 4202  |
| ENSG000001 | 1219.311 | 1738.355 | -0.51084 | 0.000185  | 0.000511 | SMEK1    | chr14 | - | 91923955 | 91976898 | 4108  |
| ENSG000001 | 78.47589 | 155.6081 | -0.98064 | 0.000517  | 0.001341 | C14orf93 | chr14 | - | 23456110 | 23479375 | 2361  |
| ENSG000001 | 2638.894 | 2464.957 | 0.098399 | 0.43512   | 0.54063  | PSMB5    | chr14 | - | 23485752 | 23504439 | 1294  |
| ENSG000001 | 2491.905 | 3069.763 | -0.30087 | 0.001396  | 0.003386 | YY1      | chr14 | + | 1.01E+08 | 1.01E+08 | 6697  |
| ENSG000001 | 4268.895 | 5286.259 | -0.30822 | 0.000688  | 0.001747 | ACIN1    | chr14 | - | 23527773 | 23564823 | 4935  |
| ENSG000001 | 567.575  | 1708.449 | -1.5881  | 1.35E-30  | 1.75E-29 | CCNB1IP1 | chr14 | - | 20779527 | 20801471 | 1631  |
| ENSG000001 | 1022.507 | 326.0582 | 1.6413   | 7.70E-10  | 3.59E-09 | TRIP11   | chr14 | - | 92432335 | 92507240 | 9996  |
| ENSG000001 | 3511.726 | 6162.882 | -0.80996 | 3.20E-08  | 1.30E-07 | APEX1    | chr14 | + | 20923350 | 20925927 | 1803  |
| ENSG000001 | 657.6198 | 1058.381 | -0.68436 | 0.000192  | 0.000528 | PABPN1   | chr14 | + | 23790498 | 23795394 | 2768  |
| ENSG000001 | 1937.902 | 1154.996 | 0.74193  | 0.006472  | 0.014101 | EF5      | chr14 | - | 23825611 | 23834961 | 3118  |
| ENSG000001 | 936.9944 | 635.5298 | 0.55926  | 0.005378  | 0.011905 | ARHGAP5  | chr14 | + | 32545320 | 32628934 | 9604  |
| ENSG000001 | 496.2615 | 543.051  | -0.12853 | 0.30958   | 0.41141  | CINP     | chr14 | - | 1.03E+08 | 1.03E+08 | 2346  |
| ENSG000001 | 25.07273 | 475.739  | -4.1964  | 1.51E-27  | 1.76E-26 | DHRS2    | chr14 | + | 24099324 | 24114848 | 5318  |
| ENSG000001 | 1145.564 | 837.1289 | 0.45235  | 0.00019   | 0.000523 | SRP54    | chr14 | + | 35451163 | 35498773 | 2327  |
| ENSG000001 | 1.524285 | 2.589748 | -0.62606 | 0.61925   | 0.71034  | CPNE6    | chr14 | + | 24540046 | 24547309 | 4540  |
| ENSG000001 | 2230.508 | 2151.359 | 0.051848 | 0.5823    | 0.6785   | CHD8     | chr14 | - | 21853353 | 21924285 | 8229  |
| ENSG000001 | 309.9151 | 990.1203 | -1.6703  | 2.40E-19  | 1.95E-18 | PCK2     | chr14 | + | 24563262 | 24579807 | 2505  |
| ENSG000001 | 0.870904 | 0.700845 | 0.24359  | 0.88646   | NA       | KIAA0391 | chr14 | + | 35591052 | 35743271 | 2615  |
| ENSG000001 | 734.4007 | 1042.819 | -0.50569 | 5.57E-05  | 0.000164 | DCAF11   | chr14 | + | 24583404 | 24594451 | 4299  |
| ENSG000001 | 29.78438 | 25.82867 | 0.19555  | 0.61082   | 0.70324  | PSMA6    | chr14 | + | 35747839 | 35786699 | 4730  |
| ENSG000001 | 293.789  | 339.0376 | -0.20583 | 0.1368    | 0.21005  | NFKBIA   | chr14 | - | 35870717 | 35873955 | 1558  |
| ENSG000001 | 217.2645 | 367.1237 | -0.75618 | 3.10E-06  | 1.05E-05 | EMC9     | chr14 | - | 24608174 | 24610797 | 953   |
| ENSG000001 | 851.8224 | 744.1277 | 0.1948   | 0.06591   | 0.11317  | PSME2    | chr14 | - | 24612574 | 24616779 | 2754  |
| ENSG000001 | 165.4063 | 130.4818 | 0.34074  | 0.072074  | 0.12217  | BRMS1L   | chr14 | + | 36295524 | 36401531 | 2657  |
| ENSG000001 | 77.31713 | 384.4844 | -2.3131  | 2.33E-37  | 3.81E-36 | REC8     | chr14 | + | 24641062 | 24649463 | 2717  |
| ENSG000001 | 86.38085 | 42.66444 | 1.0065   | 0.000525  | 0.001359 | TM9SF1   | chr14 | - | 24658349 | 24682679 | 2740  |
| ENSG000001 | 5733.432 | 983.0381 | 2.5413   | 1.79E-100 | 1.02E-98 | SEC23A   | chr14 | - | 39501123 | 39578850 | 4215  |
| ENSG000001 | 744.6915 | 1067.846 | -0.51842 | 6.36E-05  | 0.000186 | GMMPR2   | chr14 | + | 24701628 | 24708448 | 2160  |
| ENSG000001 | 1954.956 | 3553.047 | -0.86037 | 5.41E-10  | 2.55E-09 | PNN      | chr14 | + | 39644387 | 39652422 | 3576  |
| ENSG000001 | 509.6448 | 298.5795 | 0.77011  | 1.80E-09  | 8.11E-09 | RABGGTA  | chr14 | - | 24734744 | 24740945 | 2265  |
| ENSG000001 | 1914.923 | 498.8963 | 1.9274   | 2.01E-11  | 1.04E-10 | NFATC4   | chr14 | + | 24834879 | 24848810 | 5700  |
| ENSG000001 | 958.7633 | 2128.807 | -1.1491  | 2.89E-17  | 2.14E-16 | PLTP     | chr20 | - | 44527399 | 44540794 | 2255  |
| ENSG000001 | 821.0693 | 989.1624 | -0.26792 | 0.12542   | 0.19591  | PCIF1    | chr20 | + | 44563267 | 44576662 | 2747  |
| ENSG000001 | 811.7424 | 670.6364 | 0.27559  | 0.025108  | 0.048433 | GSS      | chr20 | - | 33516236 | 33543620 | 1919  |
| ENSG000001 | 67.13696 | 209.4261 | -1.634   | 3.45E-11  | 1.77E-10 | MMP9     | chr20 | + | 44637547 | 44645200 | 2336  |
| ENSG000001 | 0        | 0.640152 | -0.82869 | 0.63935   | NA       | VXS1     | chr20 | - | 25051521 | 25062996 | 2157  |
| ENSG000001 | 2582.367 | 1668.125 | 0.62992  | 2.09E-08  | 8.64E-08 | TRPC4AP  | chr20 | - | 33590207 | 33680674 | 3226  |
| ENSG000001 | 4191.648 | 1693.224 | 1.3063   | 2.34E-24  | 2.38E-23 | PYGB     | chr20 | + | 25228705 | 25278650 | 4134  |
| ENSG000001 | 937.4432 | 1760.152 | -0.90838 | 1.51E-14  | 9.61E-14 | ABHD12   | chr20 | - | 25275379 | 25371619 | 2117  |
| ENSG000001 | 328.5642 | 287.3281 | 0.1914   | 0.32616   | 0.42908  | PROCR    | chr20 | + | 33759876 | 33765165 | 1348  |
| ENSG000001 | 633.9572 | 1901.771 | -1.5832  | 9.80E-35  | 1.48E-33 | GIN51    | chr20 | + | 25388363 | 25433264 | 3249  |
| ENSG000001 | 859.1888 | 1461.42  | -0.76668 | 6.42E-11  | 3.23E-10 | NINL     | chr20 | - | 25433341 | 25566153 | 4969  |
| ENSG000001 | 96.23706 | 186.1986 | -0.94948 | 0.000211  | 0.000577 | CD40     | chr20 | + | 44746911 | 44758502 | 1733  |
| ENSG000001 | 527.3533 | 757.6853 | -0.52237 | 2.11E-05  | 6.50E-05 | UQC      | chr20 | - | 33890369 | 33999944 | 3638  |
| ENSG000001 | 1008.231 | 2279.256 | -1.1752  | 5.62E-26  | 6.12E-25 | ZMYND8   | chr20 | - | 45837859 | 45985567 | 5362  |
| ENSG000001 | 6.234137 | 9.6703   | -0.60458 | 0.45586   | 0.5611   | SGK2     | chr20 | + | 42187608 | 42216877 | 2395  |
| ENSG000001 | 431.1749 | 396.9458 | 0.12033  | 0.37071   | 0.4752   | IFT52    | chr20 | + | 42219571 | 42275936 | 1757  |
| ENSG000001 | 2170.721 | 5552.412 | -1.3524  | 5.86E-19  | 4.68E-18 | MYBL2    | chr20 | + | 42295754 | 42345136 | 2639  |
| ENSG000001 | 0        | 0.594029 | -0.81444 | 0.64499   | NA       | R3HDM1   | chr20 | + | 42965626 | 42979875 | 1377  |
| ENSG000001 | 0        | 3.636147 | -3.0614  | 0.062014  | 0.10732  | HNF4A    | chr20 | + | 42984340 | 43060030 | 3340  |

|                    |          |          |           |           |          |       |   |          |          |      |
|--------------------|----------|----------|-----------|-----------|----------|-------|---|----------|----------|------|
| ENSG000001688.3635 | 507.057  | 0.44012  | 0.000335  | 0.00089   | NDRG3    | chr20 | - | 35280169 | 35374481 | 2978 |
| ENSG0000013953782  | 4.054546 | -0.02654 | 0.9818    | 0.98993   | SLA2     | chr20 | - | 35240721 | 35274619 | 2757 |
| ENSG00000164.21634 | 110.0821 | -0.77159 | 0.023903  | 0.046326  | C20orf24 | chr20 | + | 35234137 | 35240960 | 1170 |
| ENSG000001117.3348 | 57.54903 | 1.0182   | 0.00207   | 0.004887  | NFATC2   | chr20 | - | 50003494 | 50179168 | 7525 |
| ENSG000001304.3862 | 1040.248 | -1.7635  | 2.21E-12  | 1.22E-11  | RIMS4    | chr20 | - | 43380449 | 43438979 | 5203 |
| ENSG000001415.1704 | 460.5411 | -0.15001 | 0.26286   | 0.36104   | PABPC1L  | chr20 | + | 43538703 | 43587676 | 2223 |
| ENSG000001775.6773 | 833.1251 | -0.1039  | 0.35439   | 0.45858   | STK4     | chr20 | + | 43595115 | 43708600 | 6342 |
| ENSG000001116.3938 | 2755.718 | -4.5532  | 1.88E-101 | 1.10E-99  | SALL4    | chr20 | - | 50400581 | 50419059 | 3497 |
| ENSG0000012267.4   | 3012.83  | -0.40926 | 0.006048  | 0.013257  | ADNP     | chr20 | - | 49505453 | 49547958 | 6234 |
| ENSG000001318.2005 | 545.2281 | -0.77752 | 2.79E-09  | 1.24E-08  | PFDN4    | chr20 | + | 52824386 | 52844591 | 1462 |
| ENSG00000197.83331 | 182.0381 | -0.89343 | 0.000256  | 0.000692  | DOK5     | chr20 | + | 53092136 | 53267710 | 1963 |
| ENSG000001413.1868 | 727.3196 | -0.81327 | 2.38E-08  | 9.79E-08  | CSTF1    | chr20 | + | 54967427 | 54979518 | 2383 |
| ENSG000001416.0717 | 1902.986 | -2.1862  | 9.90E-29  | 1.20E-27  | BMP7     | chr20 | - | 55743804 | 55841685 | 4013 |
| ENSG000001509.9302 | 563.4153 | -0.14288 | 0.4943    | 0.59813   | RAE1     | chr20 | + | 55926066 | 55954267 | 3251 |
| ENSG0000011613.111 | 1214.792 | 0.40852  | 0.0087    | 0.018503  | TPD52L2  | chr20 | + | 62496643 | 62522898 | 2362 |
| ENSG0000011898.015 | 1345.198 | 0.49614  | 0.000191  | 0.000524  | DNAJC5   | chr20 | + | 62526518 | 62567384 | 5287 |
| ENSG0000011417.008 | 916.1073 | 0.62867  | 0.00011   | 0.000311  | NELFCD   | chr20 | + | 57556263 | 57570188 | 3581 |
| ENSG0000011050.468 | 376.5934 | 1.4759   | 2.49E-24  | 1.54E-23  | CTS2     | chr20 | - | 57570240 | 57582302 | 1495 |
| ENSG0000012083.003 | 2597.779 | -0.31824 | 0.001177  | 0.002888  | PRPF6    | chr20 | + | 62612488 | 62664453 | 3044 |
| ENSG00000118.61349 | 2.635871 | 2.6866   | 0.000273  | 0.000735  | TUBB1    | chr20 | + | 57594309 | 57601709 | 3496 |
| ENSG000001679.8186 | 456.8118 | 0.5738   | 2.04E-06  | 7.09E-06  | SLMO2    | chr20 | - | 57608200 | 57617964 | 2626 |
| ENSG0000010685084  | 181.9627 | -7.5607  | 9.81E-20  | 8.17E-19  | HRH3     | chr20 | - | 60790026 | 60795323 | 2659 |
| ENSG000001557.7949 | 446.7133 | 0.3214   | 0.031351  | 0.05895   | GTPBP5   | chr20 | + | 60758085 | 60778624 | 2929 |
| ENSG0000014390.623 | 4682.21  | -0.09253 | 0.32323   | 0.42615   | PSMA7    | chr20 | - | 60711791 | 60718496 | 1023 |
| ENSG000001125.8699 | 328.6904 | -1.3851  | 3.40E-12  | 1.86E-11  | SLCO4A1  | chr20 | + | 61273797 | 61317137 | 3092 |
| ENSG0000011742.818 | 14.61589 | 6.8427   | 9.75E-168 | 1.37E-165 | NTSR1    | chr20 | + | 61340189 | 61394123 | 4132 |
| ENSG000001686.2787 | 677.1883 | 0.019305 | 0.91317   | 0.94066   | MRGBP    | chr20 | + | 61427805 | 61431945 | 1636 |
| ENSG000001373.781  | 617.0369 | -0.72072 | 0.00121   | 0.002963  | TCFL5    | chr20 | - | 61472467 | 61493115 | 2456 |
| ENSG0000012090.765 | 3252.124 | -0.6341  | 0.01128   | 0.02344   | DIDO1    | chr20 | - | 61509090 | 61569304 | 8544 |
| ENSG000001777.5734 | 1370.639 | -0.81748 | 8.90E-16  | 6.09E-15  | GID8     | chr20 | + | 61569471 | 61576996 | 1566 |
| ENSG0000015.7255   | 387.3641 | -5.9692  | 1.72E-56  | 4.62E-55  | SLC17A9  | chr20 | + | 61584052 | 61599949 | 3992 |
| ENSG0000010        | 2.292733 | -2.7     | 0.088315  | 0.14543   | BIRC7    | chr20 | + | 61867235 | 61871859 | 1368 |
| ENSG0000011306762  | 145.4037 | -6.5073  | 2.56E-21  | 2.29E-20  | NKAIN4   | chr20 | - | 61872136 | 61904046 | 1430 |
| ENSG0000014905.609 | 2417.13  | 1.0199   | 5.37E-21  | 4.74E-20  | ARFGAP1  | chr20 | + | 61904137 | 61921142 | 3467 |
| ENSG0000010        | 3.899191 | -3.4919  | 0.017349  | 0.034702  | AVP      | chr20 | - | 3063202  | 3065370  | 619  |
| ENSG0000010580602  | 17.97691 | -4.251   | 0.000133  | 0.000373  | COL20A1  | chr20 | + | 61924538 | 61966203 | 8097 |
| ENSG0000010        | 90.31504 | -7.9447  | 1.91E-12  | 1.06E-11  | CHRNA4   | chr20 | - | 61975420 | 62009753 | 5201 |
| ENSG00000135.04231 | 1148.425 | -5.0057  | 3.33E-85  | 1.53E-83  | EEF1A2   | chr20 | - | 62119366 | 62130505 | 1843 |
| ENSG00000115.69671 | 19.44413 | -0.31123 | 0.52027   | 0.62295   | PTK6     | chr20 | - | 62159778 | 62168723 | 2495 |
| ENSG000001703.5998 | 805.6046 | -0.19358 | 0.11605   | 0.18355   | GMEB2    | chr20 | - | 62218955 | 62258394 | 4559 |
| ENSG000001759.8969 | 1628.03  | -1.0979  | 2.09E-20  | 1.80E-19  | C20orf27 | chr20 | - | 3734155  | 3749034  | 1886 |
| ENSG0000018.246521 | 10.59531 | -0.36071 | 0.5912    | 0.68612   | SPEF1    | chr20 | - | 3758151  | 3762095  | 1925 |
| ENSG0000011717.473 | 633.8824 | 1.4368   | 2.82E-38  | 4.74E-37  | CDC25B   | chr20 | + | 3767578  | 3786762  | 3594 |
| ENSG00000180.87352 | 12.82165 | 2.6238   | 4.24E-13  | 2.47E-12  | ISM1     | chr20 | + | 13202418 | 13281298 | 2592 |
| ENSG000001609.2305 | 209.6054 | 1.5346   | 3.16E-13  | 1.85E-12  | RNF24    | chr20 | - | 3912068  | 3996229  | 3341 |
| ENSG000001747.1064 | 299.2324 | 1.3159   | 3.44E-11  | 1.76E-10  | ARFRP1   | chr20 | - | 62329996 | 62339355 | 2965 |
| ENSG000001191.403  | 197.493  | -0.04708 | 0.80325   | 0.86086   | NDUFAF5  | chr20 | + | 13765596 | 13799067 | 2409 |
| ENSG000001798.8669 | 199.3114 | 1.9979   | 7.34E-32  | 1.01E-30  | TRIB3    | chr20 | + | 361261   | 378203   | 2499 |
| ENSG00000131.50565 | 330.6416 | -3.3693  | 8.39E-34  | 1.23E-32  | RASSF2   | chr20 | - | 4760669  | 4804291  | 5427 |
| ENSG0000012253.534 | 3373.585 | -0.58168 | 4.08E-09  | 1.78E-08  | CSNK2A1  | chr20 | - | 459116   | 524482   | 4416 |
| ENSG0000010        | 326.3717 | -9.7073  | 2.16E-19  | 1.76E-18  | SLC52A3  | chr20 | - | 740724   | 749131   | 3060 |
| ENSG0000011.939605 | 3.085825 | -0.57129 | 0.6158    | 0.70735   | RPS10L   | chr20 | - | 820090   | 820620   | 531  |
| ENSG0000010        | 2.725702 | -2.8801  | 0.068833  | 0.11738   | ANGPT4   | chr20 | - | 853296   | 896977   | 1922 |
| ENSG0000010        | 60.43484 | -7.4732  | 1.34E-11  | 7.05E-11  | RSP04    | chr20 | - | 939095   | 982907   | 2707 |
| ENSG000001815.9079 | 1349.045 | -0.72575 | 2.67E-10  | 1.29E-09  | CDS2     | chr20 | + | 5107432  | 5178533  | 9298 |
| ENSG0000017.334542 | 14.44429 | -0.941   | 0.17167   | 0.25419   | PROKR2   | chr20 | - | 5282317  | 5297378  | 1771 |
| ENSG0000012463.233 | 1147.006 | 1.1015   | 1.41E-15  | 9.57E-15  | HM13     | chr20 | + | 30102231 | 30157370 | 1992 |
| ENSG000001406.3378 | 76.5109  | 2.3871   | 2.40E-14  | 1.51E-13  | SNPH     | chr20 | + | 1246960  | 1289972  | 5533 |
| ENSG00000121.41365 | 1.309443 | 3.7708   | 6.97E-06  | 2.28E-05  | MYLK2    | chr20 | + | 30407111 | 30422492 | 2956 |
| ENSG0000013.910914 | 0.343138 | 2.809    | 0.042402  | 0.077131  | SIRPB1   | chr20 | - | 1544167  | 1600707  | 3241 |
| ENSG0000011227.679 | 1227.079 | 0.000857 | 0.99341   | 0.99653   | SEC23B   | chr20 | + | 18488137 | 18542059 | 3411 |
| ENSG000001238.4652 | 667.3674 | -1.4776  | 9.92E-10  | 4.57E-09  | FERMT1   | chr20 | - | 6055492  | 6104191  | 5151 |
| ENSG0000010.36308  | 72.86576 | -6.8556  | 4.17E-11  | 2.13E-10  | XKR7     | chr20 | + | 30555805 | 30586256 | 2910 |
| ENSG0000010        | 2.711133 | -2.9254  | 0.060083  | 0.10456   | PDYN     | chr20 | - | 1959403  | 1974732  | 2555 |
| ENSG0000010.290301 | 146.9376 | -7.7703  | 3.92E-14  | 2.42E-13  | CCM2L    | chr20 | + | 30598245 | 30619984 | 2596 |

|            |          |          |          |           |           |          |       |   |          |          |       |
|------------|----------|----------|----------|-----------|-----------|----------|-------|---|----------|----------|-------|
| ENSG000001 | 101.0928 | 140.1008 | -0.46484 | 0.063933  | 0.11026   | PLCB4    | chr20 | + | 9049410  | 9461889  | 5833  |
| ENSG000001 | 1275.905 | 122.6637 | 3.35     | 4.35E-24  | 4.38E-23  | MYL9     | chr20 | + | 35169887 | 35178228 | 1199  |
| ENSG000001 | 8.019626 | 26.26728 | -1.6495  | 0.015496  | 0.031291  | HCK      | chr20 | + | 30639991 | 30689659 | 2217  |
| ENSG000001 | 2037.827 | 1357.77  | 0.58529  | 6.66E-06  | 2.18E-05  | TM9SF4   | chr20 | + | 30697309 | 30755061 | 4032  |
| ENSG000001 | 5.208303 | 14.28403 | -1.3918  | 0.040717  | 0.074512  | TLDC2    | chr20 | + | 35504524 | 35522638 | 2083  |
| ENSG000001 | 571.3187 | 586.2441 | -0.03632 | 0.83134   | 0.88112   | CRNKL1   | chr20 | - | 20015012 | 20036690 | 4406  |
| ENSG000001 | 1514.262 | 754.1729 | 1.0051   | 4.85E-15  | 3.18E-14  | POFUT1   | chr20 | + | 30795683 | 30826470 | 5235  |
| ENSG000001 | 265.2566 | 874.4715 | -1.7193  | 2.08E-31  | 2.81E-30  | SAMHD1   | chr20 | - | 35518632 | 35580246 | 4784  |
| ENSG000001 | 0.290301 | 11.31718 | -4.3271  | 0.000341  | 0.000906  | PAK7     | chr20 | - | 9518036  | 9819689  | 4780  |
| ENSG000001 | 1581.612 | 753.8248 | 1.0683   | 9.31E-16  | 6.37E-15  | KIF3B    | chr20 | + | 30865467 | 30922814 | 6103  |
| ENSG000001 | 26.57827 | 42.82309 | -0.6852  | 0.068636  | 0.11713   | MROH8    | chr20 | - | 35729629 | 35807991 | 3425  |
| ENSG000001 | 1683.391 | 4086.09  | -1.2736  | 8.20E-08  | 3.22E-07  | NOP56    | chr20 | + | 2632791  | 2639039  | 2400  |
| ENSG000001 | 602.4209 | 663.5227 | -0.13865 | 0.23378   | 0.32746   | MANBAL   | chr20 | + | 35918041 | 35945663 | 1915  |
| ENSG000001 | 905.5283 | 1453.215 | -0.68121 | 1.67E-10  | 8.13E-10  | IDH3B    | chr20 | - | 2639041  | 2644865  | 1620  |
| ENSG000001 | 2708.937 | 2916.747 | -0.10632 | 0.40239   | 0.50719   | MAPRE1   | chr20 | + | 31407699 | 31438211 | 2623  |
| ENSG000001 | 587.9369 | 872.3295 | -0.56815 | 2.42E-07  | 9.13E-07  | JAG1     | chr20 | - | 10618332 | 10654694 | 5987  |
| ENSG000001 | 351.7063 | 557.8124 | -0.66467 | 3.48E-06  | 1.17E-05  | CDK5RAP1 | chr20 | - | 31946645 | 31989367 | 2650  |
| ENSG000001 | 197.6819 | 183.9042 | 0.10501  | 0.67928   | 0.75991   | SNTA1    | chr20 | - | 31995761 | 32031698 | 2342  |
| ENSG000001 | 0        | 3.974453 | -3.4536  | 0.02133   | 0.041825  | OXT      | chr20 | + | 3052266  | 3053163  | 513   |
| ENSG000001 | 533.4092 | 970.3917 | -0.86156 | 1.32E-11  | 6.93E-11  | TTI1     | chr20 | - | 36611409 | 36661870 | 3958  |
| ENSG000001 | 1044.046 | 1556.457 | -0.57508 | 0.000179  | 0.000494  | E2F1     | chr20 | - | 32263489 | 32274210 | 2503  |
| ENSG000001 | 476.3154 | 566.579  | -0.24898 | 0.21304   | 0.30365   | RPRD1B   | chr20 | + | 36661948 | 36720768 | 3874  |
| ENSG000001 | 25.25953 | 34.99074 | -0.46342 | 0.26785   | 0.3666    | PXMP4    | chr20 | - | 32294512 | 32308125 | 1732  |
| ENSG000001 | 1354.543 | 1414.183 | -0.06206 | 0.55597   | 0.65501   | CHMP4B   | chr20 | + | 32399110 | 32442172 | 1646  |
| ENSG000001 | 0.290301 | 0        | 0.4146   | 0.81455   | NA        | BPI      | chr20 | + | 36888551 | 36965907 | 2857  |
| ENSG000001 | 0.685084 | 0        | 0.85004  | 0.63064   | NA        | CST9L    | chr20 | - | 23545369 | 23549386 | 959   |
| ENSG000001 | 0        | 4.112823 | -3.5428  | 0.015768  | 0.031795  | SLC32A1  | chr20 | + | 37353105 | 37358015 | 2574  |
| ENSG000001 | 2785.671 | 353.5946 | 2.9735   | 4.68E-139 | 4.50E-137 | CST3     | chr20 | - | 23608534 | 23619110 | 2095  |
| ENSG000001 | 3.444166 | 11.02587 | -1.5924  | 0.073788  | 0.12473   | ASIP     | chr20 | + | 32782375 | 32857150 | 610   |
| ENSG000001 | 0        | 0.686276 | -0.84936 | 0.6309    | NA        | CST4     | chr20 | - | 23666277 | 23669677 | 751   |
| ENSG000001 | 200.8682 | 281.8462 | -0.48722 | 0.015759  | 0.031783  | ACTR5    | chr20 | + | 37377085 | 37400834 | 2236  |
| ENSG000001 | 0        | 545.0863 | -10.391  | 2.71E-22  | 2.53E-21  | WFDC2    | chr20 | + | 44098346 | 44110172 | 818   |
| ENSG000001 | 1858.268 | 6001.353 | -1.6898  | 2.05E-62  | 6.34E-61  | AHCY     | chr20 | - | 32868074 | 32899608 | 2366  |
| ENSG000001 | 1.722083 | 528.8098 | -8.0403  | 2.52E-38  | 4.25E-37  | PPP1R16B | chr20 | + | 37434348 | 37551667 | 6251  |
| ENSG000001 | 664.5945 | 1445.667 | -1.1195  | 1.88E-17  | 1.41E-16  | FAM83D   | chr20 | + | 37554955 | 37581703 | 2429  |
| ENSG000001 | 0        | 8.185227 | -4.5383  | 0.000843  | 0.002118  | EPPIN    | chr20 | - | 44165625 | 44176391 | 4017  |
| ENSG000001 | 281.1471 | 481.6076 | -0.77439 | 8.90E-07  | 3.19E-06  | DHX35    | chr20 | + | 37590942 | 37668366 | 3325  |
| ENSG000001 | 564.1068 | 693.5553 | -0.29751 | 0.028417  | 0.054103  | DNTTIP1  | chr20 | + | 44420576 | 44440066 | 1290  |
| ENSG000001 | 286.6308 | 57.93264 | 2.2899   | 1.12E-22  | 1.07E-21  | MAP1LC3A | chr20 | + | 33134658 | 33148149 | 1574  |
| ENSG000001 | 302.9721 | 151.9491 | 0.99329  | 2.79E-07  | 1.05E-06  | SYNDIG1  | chr20 | + | 24449835 | 24647252 | 2522  |
| ENSG000001 | 442.1656 | 481.5737 | -0.121   | 0.39123   | 0.49571   | PIGU     | chr20 | - | 33148346 | 33264910 | 1632  |
| ENSG000001 | 2.085163 | 51.95764 | -4.5092  | 8.10E-11  | 4.03E-10  | TNNC2    | chr20 | - | 44451853 | 44462384 | 780   |
| ENSG000001 | 213.8901 | 387.5543 | -0.85494 | 1.91E-07  | 7.28E-07  | ACOT8    | chr20 | - | 44470360 | 44486045 | 3059  |
| ENSG000001 | 1608.338 | 1469.249 | 0.13038  | 0.23401   | 0.3277    | APMAP    | chr20 | - | 24943561 | 24973615 | 2430  |
| ENSG000001 | 4.345959 | 55.97567 | -3.5459  | 2.92E-11  | 1.51E-10  | CELF4    | chr18 | - | 34823010 | 35146000 | 4052  |
| ENSG000001 | 1707.056 | 2089.678 | -0.29061 | 0.21286   | 0.30344   | ZNF516   | chr18 | - | 74069644 | 74207146 | 8619  |
| ENSG000001 | 37.71069 | 6.721972 | 2.4314   | 2.07E-05  | 6.39E-05  | CDH20    | chr18 | + | 59000815 | 59223006 | 3882  |
| ENSG000001 | 818.5437 | 1576.896 | -0.94441 | 7.10E-16  | 4.89E-15  | ADNP2    | chr18 | + | 77866915 | 77905406 | 5393  |
| ENSG000001 | 85.53211 | 62.95336 | 0.44123  | 0.071714  | 0.1216    | RBFA     | chr18 | + | 77794358 | 77806397 | 1587  |
| ENSG000001 | 1780.658 | 1580.806 | 0.17158  | 0.23293   | 0.32651   | USP14    | chr18 | + | 158383   | 214622   | 4914  |
| ENSG000001 | 1534.761 | 1424.788 | 0.1071   | 0.30663   | 0.40816   | VAPA     | chr18 | + | 9913999  | 9960018  | 6815  |
| ENSG000001 | 209.7401 | 167.3839 | 0.32617  | 0.051486  | 0.091262  | METTL4   | chr18 | - | 2537524  | 2571508  | 5190  |
| ENSG000001 | 1473.431 | 284.2    | 2.3711   | 2.74E-79  | 1.14E-77  | LPIN2    | chr18 | - | 2916992  | 3013313  | 6229  |
| ENSG000001 | 1294.45  | 758.7546 | 0.77004  | 2.85E-06  | 9.74E-06  | SMCHD1   | chr18 | + | 2655737  | 2805015  | 8821  |
| ENSG000001 | 26.91902 | 22.54136 | 0.24352  | 0.63659   | 0.72482   | MYOM1    | chr18 | - | 3066805  | 3220106  | 5847  |
| ENSG000001 | 3408.471 | 1107.459 | 1.621    | 1.47E-59  | 4.25E-58  | MYL12A   | chr18 | + | 3247479  | 3256234  | 1229  |
| ENSG000001 | 88.31271 | 131.3654 | -0.56857 | 0.005738  | 0.012625  | CEP76    | chr18 | - | 12661832 | 12702776 | 3309  |
| ENSG000001 | 2.572449 | 79.4129  | -4.7893  | 4.15E-17  | 3.05E-16  | ST8SIA5  | chr18 | - | 44259081 | 44339220 | 2716  |
| ENSG000001 | 795.6172 | 604.6052 | 0.39598  | 0.000352  | 0.000932  | CEP192   | chr18 | + | 12991361 | 13125051 | 8635  |
| ENSG000001 | 800.7838 | 1377.038 | -0.78009 | 1.89E-09  | 8.53E-09  | RNMT     | chr18 | + | 13726659 | 13764557 | 6250  |
| ENSG000001 | 807.1532 | 1263.549 | -0.64374 | 0.003632  | 0.008266  | SMAD7    | chr18 | - | 46446223 | 46477081 | 3087  |
| ENSG000001 | 1266.362 | 139.1982 | 3.1586   | 3.95E-21  | 3.51E-20  | LIPG     | chr18 | + | 47087069 | 47119276 | 4161  |
| ENSG000001 | 231.0957 | 3009.634 | -3.6931  | 2.43E-106 | 1.54E-104 | LAMA1    | chr18 | - | 6941743  | 7117813  | 10374 |
| ENSG000001 | 61.60168 | 515.5201 | -3.0609  | 8.83E-57  | 2.39E-55  | RNF125   | chr18 | + | 29598335 | 29653176 | 6020  |
| ENSG000001 | 711.6832 | 756.522  | -0.08679 | 0.72857   | 0.79935   | ANKRD12  | chr18 | + | 9136226  | 9285206  | 10459 |

|            |          |          |          |           |           |           |       |   |          |          |      |
|------------|----------|----------|----------|-----------|-----------|-----------|-------|---|----------|----------|------|
| ENSG000001 | 0.290301 | 11.3827  | -4.3262  | 0.000365  | 0.000964  | NOL4      | chr18 | - | 31431064 | 31804916 | 3957 |
| ENSG000001 | 321.7415 | 617.7798 | -0.94097 | 7.57E-12  | 4.04E-11  | POLI      | chr18 | + | 51795774 | 51847636 | 6131 |
| ENSG000001 | 2559.041 | 1589.522 | 0.68552  | 3.72E-05  | 0.000112  | MIB1      | chr18 | + | 19284918 | 19450918 | 9576 |
| ENSG000001 | 489.9181 | 463.1874 | 0.080659 | 0.76251   | 0.82769   | RBBP8     | chr18 | + | 20378224 | 20606451 | 3293 |
| ENSG000001 | 503.9311 | 338.8902 | 0.57163  | 0.000179  | 0.000494  | RIOK3     | chr18 | + | 21032787 | 21066567 | 4038 |
| ENSG000001 | 392.1692 | 543.1645 | -0.46758 | 0.018642  | 0.037058  | CSTF2     | chrX  | + | 1E+08    | 1E+08    | 2305 |
| ENSG000001 | 0        | 1.340997 | -1.8899  | 0.26871   | NA        | H2BFM     | chrX  | + | 1.03E+08 | 1.03E+08 | 2162 |
| ENSG000001 | 16726.1  | 250.3328 | 6.0516   | 0         | 0         | MXRA5     | chrX  | - | 3226606  | 3264682  | 9793 |
| ENSG000001 | 6.22395  | 7.708551 | -0.27653 | 0.76888   | 0.83309   | VSIG1     | chrX  | + | 1.07E+08 | 1.07E+08 | 3236 |
| ENSG000001 | 720.9691 | 755.4307 | -0.06676 | 0.58219   | 0.67843   | PSMD10    | chrX  | - | 1.07E+08 | 1.07E+08 | 1546 |
| ENSG000001 | 121.2131 | 32.96495 | 1.8745   | 6.60E-10  | 3.09E-09  | ATG4A     | chrX  | + | 1.07E+08 | 1.07E+08 | 2501 |
| ENSG000001 | 212.6481 | 21.46891 | 3.2592   | 2.52E-14  | 1.58E-13  | STS       | chrX  | + | 7137497  | 7272851  | 6521 |
| ENSG000001 | 798.6687 | 1208.065 | -0.59627 | 1.42E-08  | 5.97E-08  | TBL1X     | chrX  | + | 9431335  | 9687780  | 5866 |
| ENSG000001 | 9.212533 | 231.4769 | -4.6111  | 1.82E-44  | 3.58E-43  | GPR143    | chrX  | - | 9693386  | 9754337  | 1762 |
| ENSG000001 | 2636.588 | 4232.333 | -0.682   | 7.47E-10  | 3.48E-09  | PGRMC1    | chrX  | + | 1.18E+08 | 1.18E+08 | 1911 |
| ENSG000001 | 439.8525 | 758.4428 | -0.78279 | 0.000106  | 0.000302  | POLA1     | chrX  | + | 24712036 | 25015103 | 5486 |
| ENSG000001 | 1356.771 | 1056.553 | 0.36017  | 0.000453  | 0.001184  | MID1      | chrX  | - | 10413350 | 10851773 | 6463 |
| ENSG000001 | 314.8239 | 381.2781 | -0.27626 | 0.060179  | 0.1047    | NKAP      | chrX  | - | 1.19E+08 | 1.19E+08 | 2345 |
| ENSG000001 | 0        | 4.317591 | -3.6334  | 0.012226  | 0.025232  | RHOXF1    | chrX  | - | 1.19E+08 | 1.19E+08 | 769  |
| ENSG000001 | 86.39446 | 158.2743 | -0.86704 | 0.000341  | 0.000905  | NXT2      | chrX  | + | 1.09E+08 | 1.09E+08 | 2692 |
| ENSG000001 | 1.161205 | 0.343138 | 0.97766  | 0.58067   | NA        | GUCY2F    | chrX  | - | 1.09E+08 | 1.09E+08 | 3714 |
| ENSG000001 | 15.1452  | 11.0687  | 0.44853  | 0.41173   | 0.51656   | RP3-32401 | chr20 | + | 30135307 | 30135852 | 546  |
| ENSG000001 | 427.0619 | 543.3779 | -0.34791 | 0.009509  | 0.020061  | ALG13     | chrX  | + | 1.11E+08 | 1.11E+08 | 4071 |
| ENSG000001 | 409.8811 | 643.2386 | -0.64952 | 3.04E-07  | 1.14E-06  | PRPS2     | chrX  | + | 12809474 | 12842341 | 2511 |
| ENSG000001 | 1.774324 | 1.606458 | 0.08589  | 0.95205   | 0.97008   | TLR8      | chrX  | + | 12924739 | 12941288 | 4216 |
| ENSG000001 | 174.9582 | 177.853  | -0.02181 | 0.91306   | 0.94058   | MOSPD1    | chrX  | - | 1.34E+08 | 1.34E+08 | 2364 |
| ENSG000001 | 378.9826 | 593.8231 | -0.64763 | 8.44E-07  | 3.03E-06  | AMMECR1   | chrX  | - | 1.09E+08 | 1.1E+08  | 5504 |
| ENSG000001 | 31.9706  | 270.7236 | -3.0624  | 5.52E-42  | 1.02E-40  | CHRD1     | chrX  | - | 1.1E+08  | 1.1E+08  | 3935 |
| ENSG000001 | 1570.833 | 465.0716 | 1.7543   | 1.38E-60  | 4.05E-59  | WDR13     | chrX  | + | 48448430 | 48463581 | 2612 |
| ENSG000001 | 229.4443 | 305.1354 | -0.41148 | 0.013291  | 0.027243  | SUV39H1   | chrX  | + | 48553945 | 48567403 | 2871 |
| ENSG000001 | 0        | 0.951736 | -1.2555  | 0.48145   | NA        | PAGE4     | chrX  | + | 49593863 | 49598576 | 1494 |
| ENSG000001 | 2338.988 | 110.0358 | 4.3979   | 7.87E-177 | 1.31E-174 | SRPX      | chrX  | - | 38008589 | 38080696 | 1874 |
| ENSG000001 | 1.794048 | 2.443257 | -0.31811 | 0.82664   | 0.87791   | GLRA2     | chrX  | + | 14547420 | 14749934 | 3216 |
| ENSG000001 | 1246.596 | 693.3146 | 0.84512  | 2.96E-14  | 1.85E-13  | XIAP      | chrX  | + | 1.23E+08 | 1.23E+08 | 8591 |
| ENSG000001 | 1116.495 | 1481.823 | -0.40623 | 0.085504  | 0.14146   | STAG2     | chrX  | + | 1.23E+08 | 1.24E+08 | 6045 |
| ENSG000001 | 924.4277 | 930.4376 | -0.00865 | 0.95144   | 0.96962   | ATP11C    | chrX  | - | 1.39E+08 | 1.39E+08 | 6924 |
| ENSG000001 | 13.27936 | 7.03114  | 0.89644  | 0.17657   | 0.26008   | MCF2      | chrX  | - | 1.39E+08 | 1.39E+08 | 3945 |
| ENSG000001 | 518.9142 | 324.2154 | 0.67804  | 2.48E-05  | 7.59E-05  | ABCD1     | chrX  | + | 1.53E+08 | 1.53E+08 | 3664 |
| ENSG000001 | 269.9527 | 254.349  | 0.08589  | 0.56536   | 0.66326   | CCDC22    | chrX  | + | 49091927 | 49106987 | 2319 |
| ENSG000001 | 0.685084 | 40.90345 | -5.3675  | 8.48E-08  | 3.33E-07  | CACNA1F   | chrX  | - | 49061523 | 49089833 | 6070 |
| ENSG000001 | 13.73315 | 41.99274 | -1.5735  | 0.000481  | 0.001251  | SYP       | chrX  | - | 49044269 | 49056718 | 2486 |
| ENSG000001 | 1154.884 | 53.77035 | 4.4169   | 3.63E-133 | 3.37E-131 | PLP2      | chrX  | + | 49028273 | 49031588 | 1079 |
| ENSG000001 | 0.342542 | 0        | 0.4146   | 0.81455   | NA        | BMX       | chrX  | + | 15482369 | 15574652 | 2598 |
| ENSG000001 | 0        | 0.343138 | -0.41864 | 0.81278   | NA        | LUZP4     | chrX  | + | 1.15E+08 | 1.15E+08 | 1701 |
| ENSG000001 | 5139.399 | 1733.147 | 1.5652   | 4.92E-21  | 4.35E-20  | PLS3      | chrX  | + | 1.15E+08 | 1.15E+08 | 3327 |
| ENSG000001 | 269.5537 | 297.6505 | -0.14398 | 0.33493   | 0.43849   | NAA10     | chrX  | - | 1.53E+08 | 1.53E+08 | 1772 |
| ENSG000001 | 4.460627 | 212.0673 | -5.4587  | 8.23E-22  | 7.52E-21  | REBP      | chrX  | - | 1.53E+08 | 1.53E+08 | 1388 |
| ENSG000001 | 910.1095 | 46.27797 | 4.2726   | 3.61E-64  | 1.15E-62  | ELF4      | chrX  | - | 1.29E+08 | 1.29E+08 | 4165 |
| ENSG000001 | 2354.48  | 928.3385 | 1.3418   | 8.17E-28  | 9.60E-27  | SMARCA1   | chrX  | - | 1.29E+08 | 1.29E+08 | 4099 |
| ENSG000001 | 3.257533 | 55.46744 | -3.9778  | 4.04E-13  | 2.36E-12  | MTMR8     | chrX  | - | 63444187 | 63615333 | 2639 |
| ENSG000001 | 4.42811  | 4.36613  | 0.03311  | 0.97522   | 0.98624   | ASB9      | chrX  | - | 15253410 | 15288589 | 1947 |
| ENSG000001 | 4.762093 | 42.96871 | -3.1174  | 6.70E-08  | 2.65E-07  | ZC3H12B   | chrX  | + | 64708615 | 64727767 | 7256 |
| ENSG000001 | 1789.93  | 2274.051 | -0.34515 | 0.000392  | 0.001033  | RBBP7     | chrX  | - | 16857406 | 16888537 | 4031 |
| ENSG000001 | 245.5505 | 124.4259 | 0.97425  | 8.82E-07  | 3.16E-06  | KCND1     | chrX  | - | 48818639 | 48827976 | 4437 |
| ENSG000001 | 0.72616  | 0.715414 | 0.009201 | 0.99586   | NA        | UBE2NL    | chrX  | + | 1.43E+08 | 1.43E+08 | 1183 |
| ENSG000001 | 200.5449 | 175.2776 | 0.19602  | 0.39148   | 0.49596   | SLC25A14  | chrX  | + | 1.29E+08 | 1.3E+08  | 1621 |
| ENSG000001 | 552.3444 | 601.4378 | -0.12387 | 0.33278   | 0.43609   | FMR1      | chrX  | + | 1.47E+08 | 1.47E+08 | 4333 |
| ENSG000001 | 153.7656 | 3682.126 | -4.5668  | 4.88E-121 | 3.86E-119 | PIM2      | chrX  | - | 48770459 | 48776301 | 2075 |
| ENSG000001 | 162.2337 | 221.5761 | -0.44918 | 0.011597  | 0.024035  | SCML2     | chrX  | - | 18257434 | 18372847 | 4200 |
| ENSG000001 | 843.4449 | 334.0496 | 1.3306   | 2.18E-08  | 9.01E-08  | SLC35A2   | chrX  | - | 48760459 | 48769235 | 2619 |
| ENSG000001 | 585.4946 | 813.9592 | -0.47426 | 3.22E-05  | 9.72E-05  | PQBP1     | chrX  | + | 48755195 | 48760420 | 1428 |
| ENSG000001 | 3.434793 | 1.684135 | 0.89575  | 0.44637   | 0.55183   | RS1       | chrX  | - | 18658030 | 18690229 | 2810 |
| ENSG000001 | 96.94441 | 157.2049 | -0.68958 | 0.05005   | 0.089039  | PCSK1N    | chrX  | - | 48689504 | 48694035 | 1050 |
| ENSG000001 | 919.6491 | 1039.623 | -0.17578 | 0.11396   | 0.18062   | EMD       | chrX  | + | 1.54E+08 | 1.54E+08 | 1379 |
| ENSG000001 | 212.6506 | 355.0639 | -0.7396  | 0.000648  | 0.001653  | TAZ       | chrX  | + | 1.54E+08 | 1.54E+08 | 2286 |

|            |          |          |          |           |           |           |       |   |          |          |      |
|------------|----------|----------|----------|-----------|-----------|-----------|-------|---|----------|----------|------|
| ENSG000001 | 1.08924  | 0.357707 | 0.88709  | 0.61692   | NA        | RAB40AL   | chrX  | + | 1.02E+08 | 1.02E+08 | 1029 |
| ENSG000001 | 4234.009 | 11155.43 | -1.3932  | 2.49E-12  | 1.37E-11  | PGK1      | chrX  | + | 77320685 | 77384793 | 4887 |
| ENSG000001 | 0        | 2.353426 | -2.7264  | 0.084821  | 0.14042   | GATA1     | chrX  | + | 48644962 | 48652718 | 1497 |
| ENSG000001 | 1658.087 | 738.092  | 1.1662   | 2.52E-15  | 1.69E-14  | MAGT1     | chrX  | - | 77081861 | 77151090 | 4047 |
| ENSG000001 | 1896.718 | 2566.924 | -0.43555 | 0.000146  | 0.000407  | SMS       | chrX  | + | 21958691 | 22025798 | 1837 |
| ENSG000001 | 38.27589 | 3.991438 | 3.1836   | 3.61E-08  | 1.46E-07  | PHEX      | chrX  | + | 22050559 | 22269427 | 6172 |
| ENSG000001 | 830.3121 | 785.8514 | 0.078933 | 0.58482   | 0.68066   | UBL4A     | chrX  | - | 1.54E+08 | 1.54E+08 | 2382 |
| ENSG000001 | 1731.128 | 299.5554 | 2.5296   | 2.36E-109 | 1.56E-107 | CD99L2    | chrX  | - | 1.5E+08  | 1.5E+08  | 4935 |
| ENSG000001 | 590.2658 | 209.7225 | 1.487    | 5.20E-08  | 2.08E-07  | EEA1      | chr12 | - | 93164413 | 93323107 | 9875 |
| ENSG000001 | 0        | 387.9781 | -9.9077  | 8.28E-20  | 6.92E-19  | GPR50     | chrX  | + | 1.5E+08  | 1.5E+08  | 1951 |
| ENSG000001 | 404.5385 | 178.5208 | 1.1742   | 2.60E-11  | 1.34E-10  | RP2       | chrX  | + | 46696375 | 46741793 | 3803 |
| ENSG000001 | 139.7478 | 469.5114 | -1.7447  | 3.21E-21  | 2.86E-20  | PHF16     | chrX  | + | 46771711 | 46920641 | 4931 |
| ENSG000001 | 2885.998 | 2811.544 | 0.037713 | 0.76159   | 0.82702   | CDK16     | chrX  | + | 47077259 | 47089396 | 3158 |
| ENSG000001 | 2937.753 | 2177.776 | 0.43141  | 0.000202  | 0.000553  | USP11     | chrX  | + | 47092089 | 47107727 | 3515 |
| ENSG000001 | 355.5019 | 645.9192 | -0.85905 | 6.00E-09  | 2.59E-08  | PCYT1B    | chrX  | - | 24576204 | 24690794 | 5307 |
| ENSG000001 | 0.685084 | 0.700845 | -0.01556 | 0.9928    | NA        | BRS3      | chrX  | + | 1.36E+08 | 1.36E+08 | 2833 |
| ENSG000001 | 1138.379 | 1370.049 | -0.26652 | 0.044849  | 0.080877  | HTATSF1   | chrX  | + | 1.36E+08 | 1.36E+08 | 3019 |
| ENSG000001 | 7123.49  | 323.5275 | 4.4571   | 3.82E-303 | 1.76E-300 | TIMP1     | chrX  | + | 47441712 | 47446188 | 1415 |
| ENSG000001 | 257.2496 | 273.803  | -0.08832 | 0.7571    | 0.8234    | KLHL4     | chrX  | + | 86772752 | 86925050 | 5818 |
| ENSG000001 | 13.96346 | 94.17428 | -2.7347  | 6.13E-15  | 4.01E-14  | GABRE     | chrX  | - | 1.51E+08 | 1.51E+08 | 6176 |
| ENSG000001 | 38.54133 | 379.6482 | -3.2826  | 4.66E-30  | 5.95E-29  | PCDH11X   | chrX  | + | 91034260 | 91878229 | 9176 |
| ENSG000001 | 2237.565 | 1390.637 | 0.68469  | 3.44E-06  | 1.16E-05  | FGD1      | chrX  | - | 54471887 | 54522599 | 4275 |
| ENSG000001 | 378.6191 | 529.5427 | -0.48187 | 0.001585  | 0.003809  | PIN4      | chrX  | + | 71401203 | 71522776 | 1780 |
| ENSG000001 | 149.8057 | 217.1346 | -0.53159 | 0.020009  | 0.039492  | PORCN     | chrX  | + | 48367350 | 48379202 | 2112 |
| ENSG000001 | 0.290301 | 0.297015 | -0.00202 | 0.99909   | NA        | ITIH6     | chrX  | - | 54775332 | 54824673 | 4968 |
| ENSG000001 | 7440.908 | 2410.847 | 1.6249   | 1.27E-59  | 3.67E-58  | MAGED2    | chrX  | + | 54834032 | 54842445 | 2189 |
| ENSG000001 | 2776.234 | 1686.013 | 0.71704  | 0.00085   | 0.002134  | RBM3      | chrX  | + | 48432837 | 48437454 | 2162 |
| ENSG000001 | 2.044087 | 178.0579 | -6.2888  | 1.35E-25  | 1.44E-24  | KLF8      | chrX  | + | 56258854 | 56314322 | 8964 |
| ENSG000001 | 3397.565 | 1.669566 | 10.681   | 2.15E-77  | 8.74E-76  | SRPX2     | chrX  | + | 99899215 | 99926296 | 2138 |
| ENSG000001 | 1027.696 | 3.443532 | 8.1387   | 1.36E-73  | 5.21E-72  | SYTL4     | chrX  | - | 99929488 | 99987110 | 4847 |
| ENSG000001 | 0.290301 | 61.48118 | -6.6539  | 1.64E-10  | 7.97E-10  | ZDHHC15   | chrX  | - | 74588262 | 74743337 | 6012 |
| ENSG000001 | 359.6417 | 180.8246 | 0.99264  | 3.29E-10  | 1.57E-09  | CENPI     | chrX  | + | 1E+08    | 1E+08    | 3262 |
| ENSG000001 | 375.1523 | 10.07655 | 5.1551   | 2.53E-55  | 6.57E-54  | DRP2      | chrX  | + | 1E+08    | 1.01E+08 | 7277 |
| ENSG000001 | 6.047504 | 1.713273 | 1.6876   | 0.098124  | 0.15885   | TAF7L     | chrX  | - | 1.01E+08 | 1.01E+08 | 2341 |
| ENSG000001 | 395.4654 | 499.1868 | -0.3328  | 0.24547   | 0.34129   | PBDC1     | chrX  | + | 75392771 | 75398039 | 1201 |
| ENSG000001 | 310.3267 | 356.2833 | -0.19762 | 0.28543   | 0.38685   | GLA       | chrX  | - | 1.01E+08 | 1.01E+08 | 1318 |
| ENSG000001 | 1250.355 | 327.6154 | 1.9301   | 1.58E-66  | 5.39E-65  | ARMCX3    | chrX  | + | 1.01E+08 | 1.01E+08 | 3730 |
| ENSG000001 | 665.5666 | 677.7762 | -0.02612 | 0.82465   | 0.87634   | BEX4      | chrX  | + | 1.02E+08 | 1.02E+08 | 1328 |
| ENSG000001 | 2.427705 | 7.321706 | -1.4957  | 0.12997   | 0.20174   | KIAA0226L | chr13 | - | 46916139 | 47012325 | 3975 |
| ENSG000001 | 338.5822 | 8.075122 | 5.362    | 4.24E-57  | 1.15E-55  | NALCN     | chr13 | - | 1.02E+08 | 1.02E+08 | 6816 |
| ENSG000001 | 810.3895 | 7.449539 | 6.7357   | 1.91E-91  | 9.73E-90  | FGF14     | chr13 | - | 1.02E+08 | 1.03E+08 | 3902 |
| ENSG000001 | 10.12533 | 0        | 4.938    | 9.55E-05  | 0.000273  | HTR2A     | chr13 | - | 47407513 | 47471169 | 3564 |
| ENSG000001 | 599.8821 | 239.1157 | 1.3259   | 3.43E-22  | 3.18E-21  | NDIFP2    | chr13 | + | 80055287 | 80130210 | 4625 |
| ENSG000001 | 6.089393 | 1.727843 | 1.6385   | 0.13683   | 0.21008   | TNFSF13B  | chr13 | + | 1.09E+08 | 1.09E+08 | 2582 |
| ENSG000001 | 1638.196 | 460.4921 | 1.8291   | 5.25E-35  | 7.97E-34  | FNDC3A    | chr13 | + | 49550048 | 49783915 | 6286 |
| ENSG000001 | 0        | 0.715414 | -0.84936 | 0.6309    | NA        | MLNR      | chr13 | + | 49794474 | 49796513 | 1390 |
| ENSG000001 | 71.50687 | 38.45683 | 0.88774  | 0.00319   | 0.007326  | CDADC1    | chr13 | + | 49822047 | 49867618 | 3383 |
| ENSG000001 | 135.5803 | 99.03186 | 0.44969  | 0.077728  | 0.13027   | CAB39L    | chr13 | - | 49882786 | 50018262 | 3676 |
| ENSG000001 | 172.8751 | 52.03901 | 1.7081   | 0.000155  | 0.000432  | KLF5      | chr13 | + | 73629114 | 73651676 | 3562 |
| ENSG000001 | 1401.996 | 2795.733 | -0.99502 | 1.36E-21  | 1.24E-20  | STK24     | chr13 | - | 99102455 | 99230194 | 4345 |
| ENSG000001 | 12.75776 | 84.56737 | -2.6634  | 2.31E-08  | 9.52E-08  | ACP5      | chr19 | - | 11685475 | 11689823 | 1699 |
| ENSG000001 | 1347.556 | 394.0087 | 1.7714   | 8.55E-30  | 1.08E-28  | DNAJC3    | chr13 | + | 96329393 | 96447243 | 5591 |
| ENSG000001 | 781.7497 | 225.1934 | 1.7939   | 3.90E-42  | 7.26E-41  | UGGT2     | chr13 | - | 96453834 | 96705736 | 4832 |
| ENSG000001 | 1116.733 | 1015.827 | 0.1371   | 0.24306   | 0.33844   | ARHGFE7   | chr13 | + | 1.12E+08 | 1.12E+08 | 5525 |
| ENSG000001 | 23.54682 | 4.120944 | 2.4017   | 0.000204  | 0.000558  | FGF9      | chr13 | + | 22245522 | 22278637 | 4220 |
| ENSG000001 | 3.963155 | 1.416259 | 1.3337   | 0.25785   | 0.35551   | SGCG      | chr13 | + | 23755091 | 23899304 | 1624 |
| ENSG000001 | 2326.748 | 819.6567 | 1.5039   | 1.43E-41  | 2.61E-40  | PARP4     | chr13 | - | 24995064 | 25086948 | 5474 |
| ENSG000001 | 987.2167 | 795.4681 | 0.31173  | 0.021954  | 0.04294   | SUPT20H   | chr13 | - | 37583449 | 37633850 | 3811 |
| ENSG000001 | 256.7838 | 370.3385 | -0.52623 | 0.001542  | 0.003716  | MRPS31    | chr13 | - | 41303432 | 41345309 | 1293 |
| ENSG000001 | 287.6754 | 377.2732 | -0.39319 | 0.023819  | 0.046195  | SLC25A15  | chr13 | + | 41363548 | 41384247 | 1586 |
| ENSG000001 | 1307.142 | 1250.406 | 0.063849 | 0.51614   | 0.61898   | KPNA3     | chr13 | - | 50273447 | 50367057 | 4470 |
| ENSG000001 | 915.4435 | 1111.507 | -0.27995 | 0.008872  | 0.018843  | FLT1      | chr13 | - | 28874489 | 29069265 | 7084 |
| ENSG000001 | 192.1261 | 2.399549 | 6.2073   | 4.27E-29  | 5.26E-28  | RGCC      | chr13 | + | 42031695 | 42045018 | 960  |
| ENSG000001 | 394.7951 | 476.3991 | -0.27192 | 0.072449  | 0.12273   | VWA8      | chr13 | - | 42140973 | 42535256 | 7147 |
| ENSG000001 | 267.6971 | 108.1551 | 1.2973   | 6.36E-06  | 2.09E-05  | DGKH      | chr13 | + | 42614176 | 42830714 | 4422 |

|            |          |          |          |           |           |          |       |   |          |          |       |
|------------|----------|----------|----------|-----------|-----------|----------|-------|---|----------|----------|-------|
| ENSG000001 | 841.63   | 146.0729 | 2.5197   | 6.25E-48  | 1.35E-46  | KATNAL1  | chr13 | - | 30776767 | 30881621 | 7551  |
| ENSG000001 | 478.8273 | 364.1395 | 0.39367  | 0.1588    | 0.23819   | INTS6    | chr13 | - | 51928213 | 52028400 | 3767  |
| ENSG000001 | 76.39073 | 109.5074 | -0.51471 | 0.084935  | 0.1406    | DHRS12   | chr13 | - | 52342129 | 52378293 | 1970  |
| ENSG000001 | 0.580602 | 16.02    | -4.1814  | 4.57E-05  | 0.000136  | MEDAG    | chr13 | + | 31480328 | 31499709 | 2374  |
| ENSG000001 | 3044.252 | 1486.343 | 1.0331   | 1.23E-15  | 8.35E-15  | TSC22D1  | chr13 | - | 45007655 | 45151283 | 4820  |
| ENSG000001 | 206.6485 | 91.38956 | 1.1695   | 1.71E-07  | 6.56E-07  | CLN5     | chr13 | + | 77564795 | 77576652 | 4064  |
| ENSG000001 | 0        | 3.526915 | -3.3414  | 0.025042  | 0.048329  | MSLN     | chr16 | + | 810762   | 818865   | 2418  |
| ENSG000001 | 2243.127 | 2485.111 | -0.1476  | 0.15155   | 0.22906   | MGRN1    | chr16 | + | 4666494  | 4740975  | 6425  |
| ENSG000001 | 722.5789 | 487.1938 | 0.56731  | 6.79E-05  | 0.000197  | ZNF629   | chr16 | - | 30789778 | 30798523 | 6079  |
| ENSG000001 | 335.34   | 7.039261 | 5.4785   | 8.75E-54  | 2.20E-52  | TRADD    | chr16 | - | 67188083 | 67194201 | 1877  |
| ENSG000001 | 18.07992 | 1.248751 | 3.548    | 4.90E-05  | 0.000145  | HSF4     | chr16 | + | 67197288 | 67203848 | 2604  |
| ENSG000001 | 284.3657 | 111.9674 | 1.3444   | 6.61E-15  | 4.32E-14  | CORO1A   | chr16 | + | 30194148 | 30200397 | 2891  |
| ENSG000001 | 959.6882 | 859.5764 | 0.15965  | 0.19982   | 0.28841   | MAPK3    | chr16 | - | 30125426 | 30134827 | 2567  |
| ENSG000001 | 25.12677 | 16.93776 | 0.55079  | 0.23861   | 0.33327   | GDPD3    | chr16 | - | 30116131 | 30125177 | 1397  |
| ENSG000001 | 47.56723 | 217.4463 | -2.1832  | 4.55E-17  | 3.34E-16  | ELMO3    | chr16 | + | 67233014 | 67237932 | 2531  |
| ENSG000001 | 734.6262 | 703.911  | 0.061854 | 0.60434   | 0.69763   | PHKB     | chr16 | + | 47495034 | 47735434 | 5603  |
| ENSG000001 | 208.0926 | 219.6887 | -0.07783 | 0.65531   | 0.74017   | LYRM1    | chr16 | + | 20911190 | 20936328 | 1695  |
| ENSG000001 | 389.1545 | 458.8175 | -0.23782 | 0.068138  | 0.1164    | NUTF2    | chr16 | + | 67880635 | 67906470 | 2321  |
| ENSG000001 | 1456.879 | 2343.716 | -0.68519 | 1.02E-10  | 5.05E-10  | NUP93    | chr16 | + | 56764017 | 56880792 | 2875  |
| ENSG000001 | 377.5233 | 440.7936 | -0.22433 | 0.11377   | 0.18035   | CENPT    | chr16 | - | 67862060 | 67881714 | 2957  |
| ENSG000001 | 20.73631 | 4.931021 | 1.9933   | 0.003338  | 0.007641  | TSNAXIP1 | chr16 | + | 67840668 | 67866051 | 2517  |
| ENSG000001 | 1325.1   | 533.6751 | 1.3077   | 9.20E-12  | 4.89E-11  | NFAT5    | chr16 | + | 69598997 | 69738569 | 14219 |
| ENSG000001 | 1319.549 | 686.1031 | 0.94206  | 1.14E-11  | 6.03E-11  | LONP2    | chr16 | + | 48278207 | 48397033 | 8199  |
| ENSG000001 | 830.7305 | 929.9745 | -0.16289 | 0.18307   | 0.26809   | N4BP1    | chr16 | - | 48572637 | 48654059 | 7106  |
| ENSG000001 | 57.38588 | 184.6964 | -1.6784  | 6.88E-13  | 3.95E-12  | CBLN1    | chr16 | - | 49311828 | 49315742 | 2435  |
| ENSG000001 | 372.1718 | 98.26226 | 1.9104   | 7.38E-21  | 6.46E-20  | ARL2BP   | chr16 | + | 57279010 | 57287516 | 2099  |
| ENSG000001 | 9.66893  | 41.80415 | -2.0854  | 8.01E-06  | 2.60E-05  | PLL      | chr16 | - | 57290004 | 57318599 | 1517  |
| ENSG000001 | 415.1774 | 1257.521 | -1.595   | 8.09E-29  | 9.83E-28  | ZNF423   | chr16 | - | 49521435 | 49891830 | 7660  |
| ENSG000001 | 0.342542 | 2.010288 | -1.8748  | 0.22334   | 0.31569   | CCL22    | chr16 | + | 57392684 | 57400102 | 2929  |
| ENSG000001 | 185.6942 | 352.0473 | -0.92023 | 7.99E-09  | 3.42E-08  | DHODH    | chr16 | + | 72042487 | 72058954 | 2209  |
| ENSG000001 | 0.342542 | 6.131232 | -3.4312  | 0.008764  | 0.018623  | CCL17    | chr16 | + | 57438679 | 57449974 | 615   |
| ENSG000001 | 1153.774 | 1897.035 | -0.7159  | 1.60E-06  | 5.62E-06  | CTCF     | chr16 | + | 67596310 | 67673086 | 3939  |
| ENSG000001 | 393.4859 | 617.3765 | -0.64863 | 6.88E-05  | 0.0002    | ACD      | chr16 | - | 67691415 | 67694713 | 2526  |
| ENSG000001 | 1120.952 | 1039.524 | 0.10921  | 0.49159   | 0.95556   | POLR2C   | chr16 | + | 57496299 | 57505922 | 2057  |
| ENSG000001 | 16.78774 | 162.6634 | -3.2639  | 1.99E-23  | 1.96E-22  | PARD6A   | chr16 | + | 67694849 | 67696681 | 1281  |
| ENSG000001 | 173.2357 | 219.6386 | -0.34119 | 0.076087  | 0.12797   | ZNF821   | chr16 | - | 71893583 | 71929239 | 1954  |
| ENSG000001 | 175.5659 | 3830.647 | -4.4331  | 1.71E-103 | 1.03E-101 | MMP15    | chr16 | + | 58059470 | 58080805 | 4250  |
| ENSG000001 | 1446.929 | 1224.367 | 0.24077  | 0.088653  | 0.1459    | USB1     | chr16 | + | 58033450 | 58055522 | 3888  |
| ENSG000001 | 1755.651 | 1226.557 | 0.51626  | 0.004884  | 0.010894  | CYB5B    | chr16 | + | 69458428 | 69500169 | 4358  |
| ENSG000001 | 37.99659 | 180.4197 | -2.2229  | 1.69E-09  | 7.63E-09  | CCDC113  | chr16 | + | 58265061 | 58317740 | 5272  |
| ENSG000001 | 588.1867 | 1044.736 | -0.82779 | 1.49E-09  | 6.79E-09  | NME3     | chr16 | - | 1820287  | 1821731  | 1069  |
| ENSG000001 | 637.6056 | 568.0199 | 0.16631  | 0.31124   | 0.41323   | NDRG4    | chr16 | + | 58496750 | 58547532 | 5116  |
| ENSG000001 | 991.5385 | 1186.301 | -0.2579  | 0.12388   | 0.19393   | PSMD7    | chr16 | + | 74330673 | 74340186 | 1670  |
| ENSG000001 | 141.5275 | 450.9109 | -1.6659  | 2.72E-13  | 1.60E-12  | SETD6    | chr16 | + | 58549383 | 58554431 | 2769  |
| ENSG000001 | 676.2154 | 550.3021 | 0.29634  | 0.15993   | 0.2396    | SLC38A7  | chr16 | - | 58699013 | 58719008 | 4549  |
| ENSG000001 | 1136.924 | 1325.189 | -0.22043 | 0.093825  | 0.15312   | VAC14    | chr16 | - | 70721342 | 70835064 | 3609  |
| ENSG000001 | 24.32783 | 1207.713 | -5.5854  | 2.68E-66  | 9.08E-65  | HAS3     | chr16 | + | 69139467 | 69152622 | 4220  |
| ENSG000001 | 280.6279 | 251.6192 | 0.15807  | 0.33191   | 0.43512   | TANGO6   | chr16 | + | 68877507 | 69119083 | 4816  |
| ENSG000001 | 901.0071 | 1119.808 | -0.31326 | 0.011037  | 0.022981  | COG4     | chr16 | - | 70514471 | 70557468 | 3488  |
| ENSG000001 | 28.43735 | 40.76017 | -0.52044 | 0.19579   | 0.28378   | SMPD3    | chr16 | - | 68392231 | 68482591 | 5450  |
| ENSG000001 | 164.0558 | 167.4268 | -0.03258 | 0.86417   | 0.90534   | SLC7A6OS | chr16 | - | 68318406 | 68344849 | 4180  |
| ENSG000001 | 628.5874 | 226.8091 | 1.4646   | 8.51E-19  | 6.75E-18  | SLC7A6   | chr16 | + | 68298433 | 68335722 | 6308  |
| ENSG000001 | 327.3832 | 124.7212 | 1.3877   | 9.54E-17  | 6.87E-16  | PLA2G15  | chr16 | + | 68279207 | 68294961 | 3121  |
| ENSG000001 | 11.93054 | 1300.624 | -6.739   | 5.43E-141 | 5.43E-139 | ESRP2    | chr16 | - | 68263014 | 68272005 | 3793  |
| ENSG000001 | 0        | 54.5214  | -7.3394  | 3.23E-11  | 1.66E-10  | FA2H     | chr16 | - | 74746853 | 74808729 | 2424  |
| ENSG000001 | 575.5706 | 947.7375 | -0.71909 | 1.20E-07  | 4.67E-07  | WDR59    | chr16 | - | 74907468 | 75034071 | 3695  |
| ENSG000001 | 1014.957 | 794.1858 | 0.35338  | 0.001293  | 0.003152  | MON1B    | chr16 | + | 77224732 | 77236302 | 6091  |
| ENSG000001 | 249.1564 | 175.7342 | 0.50173  | 0.003155  | 0.00725   | CMC2     | chr16 | - | 81009698 | 81053875 | 2087  |
| ENSG000001 | 824.7108 | 1507.096 | -0.86813 | 1.23E-08  | 5.16E-08  | AXIN1    | chr16 | - | 337440   | 402673   | 6340  |
| ENSG000001 | 471.066  | 511.9864 | -0.11996 | 0.31133   | 0.4133    | HCFC1R1  | chr16 | - | 3072621  | 3074287  | 1365  |
| ENSG000001 | 1202.068 | 807.2123 | 0.57427  | 1.51E-06  | 5.31E-06  | NPRL3    | chr16 | - | 134273   | 188859   | 3008  |
| ENSG000001 | 174.615  | 227.6628 | -0.38112 | 0.048623  | 0.086845  | MLYCD    | chr16 | + | 83932731 | 83949787 | 4489  |
| ENSG000001 | 730.5715 | 406.4988 | 0.8418   | 0.000137  | 0.000383  | MPG      | chr16 | + | 127006   | 135852   | 1205  |
| ENSG000001 | 8.622558 | 42.77691 | -2.2566  | 4.42E-05  | 0.000131  | NECAB2   | chr16 | + | 84002237 | 84036381 | 2064  |
| ENSG000001 | 474.8039 | 810.1082 | -0.77094 | 9.81E-07  | 3.51E-06  | HSDL1    | chr16 | - | 84155886 | 84178797 | 3519  |

|            |          |          |          |          |          |           |       |   |          |          |       |
|------------|----------|----------|----------|----------|----------|-----------|-------|---|----------|----------|-------|
| ENSG000001 | 871.0443 | 1308.589 | -0.58612 | 4.68E-07 | 1.72E-06 | TAF1C     | chr16 | - | 84211458 | 84220669 | 4637  |
| ENSG000001 | 141.1293 | 171.0182 | -0.27451 | 0.33058  | 0.43373  | NAGPA     | chr16 | - | 5074845  | 5084142  | 3286  |
| ENSG000001 | 42.56349 | 1.730259 | 4.4664   | 4.63E-10 | 2.19E-09 | WFDC1     | chr16 | + | 84328252 | 84363450 | 4177  |
| ENSG000001 | 0.653381 | 74.55473 | -6.3169  | 7.06E-13 | 4.05E-12 | SEC14L5   | chr16 | + | 5008318  | 5069159  | 6459  |
| ENSG000001 | 4629.718 | 2122.16  | 1.1245   | 2.04E-31 | 2.76E-30 | COTL1     | chr16 | - | 84599200 | 84651683 | 5330  |
| ENSG000001 | 1748.608 | 2775.829 | -0.66599 | 2.35E-12 | 1.30E-11 | USP10     | chr16 | + | 84733584 | 84813528 | 3070  |
| ENSG000001 | 13.85898 | 193.7389 | -3.7678  | 4.68E-25 | 4.90E-24 | CRISPLD2  | chr16 | + | 84853590 | 84954374 | 4584  |
| ENSG000001 | 2802.179 | 1735.573 | 0.69053  | 2.51E-09 | 1.12E-08 | TSC2      | chr16 | + | 2097466  | 2138716  | 6156  |
| ENSG000001 | 246.1021 | 313.788  | -0.34887 | 0.05065  | 0.089948 | ZNF500    | chr16 | - | 4798240  | 4817625  | 5880  |
| ENSG000001 | 0        | 1.40169  | -1.7271  | 0.32809  | NA       | RP11-723C | chr7  | - | 1.4E+08  | 1.4E+08  | 472   |
| ENSG000001 | 4120.099 | 6252.071 | -0.60109 | 2.47E-08 | 1.01E-07 | NME4      | chr16 | + | 446725   | 460367   | 1861  |
| ENSG000001 | 1520.341 | 2766.385 | -0.86179 | 1.34E-07 | 5.18E-07 | ABCC1     | chr16 | + | 16043434 | 16236931 | 6594  |
| ENSG000001 | 124.4975 | 120.9514 | 0.043719 | 0.84107  | 0.88841  | NOMO3     | chr16 | + | 16326352 | 16388668 | 4353  |
| ENSG000001 | 623.5492 | 186.9651 | 1.7292   | 2.05E-14 | 1.30E-13 | LMF1      | chr16 | - | 903634   | 1031318  | 3358  |
| ENSG000001 | 20.61211 | 2.745103 | 2.7054   | 0.003935 | 0.008896 | FOXF1     | chr16 | + | 86544133 | 86548076 | 2568  |
| ENSG000001 | 308.3177 | 356.7859 | -0.21097 | 0.18198  | 0.26679  | NARFL     | chr16 | - | 779753   | 791329   | 3212  |
| ENSG000001 | 284.1151 | 225.7634 | 0.32973  | 0.095493 | 0.15544  | MLTHFSD   | chr16 | - | 86563782 | 86588841 | 3623  |
| ENSG000001 | 1129.64  | 1005.662 | 0.16761  | 0.19031  | 0.27701  | CLCN7     | chr16 | - | 1494935  | 1525581  | 4720  |
| ENSG000001 | 231.5948 | 338.2317 | -0.54407 | 0.047805 | 0.085564 | HAGHL     | chr16 | + | 776936   | 785525   | 2199  |
| ENSG000001 | 445.1812 | 322.2137 | 0.46314  | 0.017703 | 0.035352 | FAM173A   | chr16 | + | 770581   | 772601   | 1686  |
| ENSG000001 | 5481.785 | 5943.218 | -0.11621 | 0.54435  | 0.64477  | SLC7A5    | chr16 | - | 87863629 | 87903094 | 4537  |
| ENSG000001 | 760.0083 | 466.3313 | 0.69966  | 0.009936 | 0.0209   | METRNL    | chr16 | + | 765115   | 769655   | 3325  |
| ENSG000001 | 617.0534 | 380.328  | 0.69691  | 6.58E-08 | 2.60E-07 | FBXO31    | chr16 | - | 87360593 | 87425748 | 5934  |
| ENSG000001 | 859.7439 | 595.3558 | 0.52746  | 0.005246 | 0.011641 | STUB1     | chr16 | + | 730224   | 732799   | 1853  |
| ENSG000001 | 30.67403 | 79.4219  | -1.3625  | 0.000166 | 0.000461 | RHBDL1    | chr16 | + | 725666   | 728268   | 1566  |
| ENSG000001 | 147.1019 | 150.1313 | -0.03081 | 0.89964  | 0.93053  | NUBP1     | chr16 | + | 10837643 | 10863208 | 1228  |
| ENSG000001 | 1519.661 | 2073.852 | -0.44794 | 0.000472 | 0.001229 | UBE2I     | chr16 | + | 1355548  | 1377019  | 3253  |
| ENSG000001 | 2.520208 | 1.355566 | 0.79979  | 0.5158   | 0.61867  | MEFV      | chr16 | - | 3292028  | 3306627  | 3710  |
| ENSG000001 | 2.656392 | 163.5447 | -5.8161  | 4.86E-28 | 5.75E-27 | CRYM      | chr16 | - | 21250195 | 21314404 | 1507  |
| ENSG000001 | 925.4058 | 661.3002 | 0.48341  | 0.001841 | 0.004379 | EEF2K     | chr16 | + | 22217603 | 22298554 | 5289  |
| ENSG000001 | 1847.372 | 2753.417 | -0.57489 | 1.17E-05 | 3.72E-05 | SOLH      | chr16 | + | 577717   | 604636   | 4744  |
| ENSG000001 | 3576.299 | 1201.531 | 1.5722   | 5.21E-53 | 1.30E-51 | PIEZO1    | chr16 | - | 88781751 | 88851619 | 8072  |
| ENSG000001 | 3455.684 | 3925.976 | -0.18419 | 0.067013 | 0.1148   | GSPT1     | chr16 | - | 11961985 | 12009939 | 7105  |
| ENSG000001 | 99.2523  | 141.7496 | -0.51058 | 0.029771 | 0.056388 | ZNF174    | chr16 | + | 3451235  | 3459370  | 2260  |
| ENSG000001 | 155.6441 | 102.8387 | 0.59141  | 0.003714 | 0.00843  | CLUAP1    | chr16 | + | 3550924  | 3589048  | 5126  |
| ENSG000001 | 2487.695 | 2028.904 | 0.29383  | 0.043411 | 0.078736 | UBFD1     | chr16 | + | 23568392 | 23585710 | 5110  |
| ENSG000001 | 2.427705 | 0.700845 | 1.4626   | 0.29515  | 0.39718  | PRSS33    | chr16 | - | 2833954  | 2837949  | 1755  |
| ENSG000001 | 709.0443 | 1101.885 | -0.63505 | 2.33E-08 | 9.58E-08 | EARS2     | chr16 | - | 23533335 | 23569052 | 3961  |
| ENSG000001 | 2233.585 | 2276.669 | -0.02758 | 0.80041  | 0.85869  | TCEB2     | chr16 | - | 2821415  | 2827298  | 997   |
| ENSG000001 | 1127.853 | 1869.324 | -0.72862 | 9.54E-12 | 5.07E-11 | GGA2      | chr16 | - | 23474863 | 23533316 | 5973  |
| ENSG000001 | 0        | 0.594029 | -0.81444 | 0.64499  | NA       | AQP8      | chr16 | + | 25227052 | 25240261 | 1359  |
| ENSG000001 | 268.2198 | 130.4785 | 1.0376   | 9.98E-10 | 4.60E-09 | CPPED1    | chr16 | - | 12756919 | 12897874 | 3010  |
| ENSG000001 | 460.1651 | 424.3515 | 0.11569  | 0.46093  | 0.56622  | USP31     | chr16 | - | 23072727 | 23160591 | 10699 |
| ENSG000001 | 822.6458 | 651.8936 | 0.33585  | 0.009276 | 0.01961  | HMOX2     | chr16 | + | 4524691  | 4560348  | 2147  |
| ENSG000001 | 840.4247 | 1292.773 | -0.62006 | 9.90E-08 | 3.87E-07 | DNAJA3    | chr16 | + | 4475806  | 4506776  | 3351  |
| ENSG000001 | 991.5974 | 1459.498 | -0.55677 | 1.24E-05 | 3.92E-05 | BFAR      | chr16 | + | 14726672 | 14763093 | 3039  |
| ENSG000001 | 558.6461 | 2299.107 | -2.0373  | 6.21E-55 | 1.60E-53 | SALL1     | chr16 | - | 51169886 | 51185278 | 5253  |
| ENSG000001 | 40.8705  | 366.2051 | -3.1462  | 6.43E-42 | 1.19E-40 | TOX3      | chr16 | - | 52471917 | 52581714 | 3414  |
| ENSG000001 | 0.290301 | 3.495361 | -2.632   | 0.070916 | 0.12051  | RRN3P2    | chr16 | + | 29086163 | 29128039 | 2132  |
| ENSG000001 | 920.1668 | 363.8186 | 1.3353   | 7.18E-14 | 4.37E-13 | RBL2      | chr16 | + | 53467889 | 53525561 | 4906  |
| ENSG000001 | 1047.102 | 2867.318 | -1.4514  | 1.53E-31 | 2.08E-30 | QPRT      | chr16 | + | 29690329 | 29710020 | 2343  |
| ENSG000001 | 4710.585 | 639.411  | 2.8767   | 1.20E-99 | 6.73E-98 | XYLT1     | chr16 | - | 17195626 | 17564738 | 9891  |
| ENSG000001 | 49.30545 | 170.1867 | -1.7797  | 3.64E-13 | 2.13E-12 | PYCARD    | chr16 | - | 31212806 | 31214771 | 1137  |
| ENSG000001 | 394.5589 | 141.7347 | 1.4747   | 1.20E-11 | 6.30E-11 | RPGRIP1L  | chr16 | - | 53631595 | 53737850 | 8195  |
| ENSG000001 | 871.4976 | 787.8619 | 0.14463  | 0.52088  | 0.6235   | MAZ       | chr16 | + | 29817427 | 29823649 | 2698  |
| ENSG000001 | 751.4125 | 454.8867 | 0.723    | 5.77E-09 | 2.49E-08 | STX4      | chr16 | + | 31044210 | 31054296 | 1588  |
| ENSG000001 | 1503.005 | 1811.993 | -0.26955 | 0.031771 | 0.059711 | CDIPT     | chr16 | - | 29869678 | 29875057 | 2353  |
| ENSG000001 | 1147.591 | 1194.897 | -0.05754 | 0.63402  | 0.72274  | BCKDK     | chr16 | + | 31117428 | 31124110 | 2558  |
| ENSG000001 | 446.9365 | 775.7462 | -0.79526 | 5.52E-09 | 2.39E-08 | KAT8      | chr16 | + | 31127075 | 31142714 | 2500  |
| ENSG000001 | 1894.734 | 1580.444 | 0.26166  | 0.0099   | 0.020826 | NOMO1     | chr16 | + | 14927538 | 14990017 | 4355  |
| ENSG000001 | 42.83325 | 9.778659 | 2.0811   | 0.00034  | 0.000902 | IL21R     | chr16 | + | 27413483 | 27462115 | 3365  |
| ENSG000001 | 27.29327 | 65.54485 | -1.254   | 0.000284 | 0.000764 | SYT17     | chr16 | + | 19179293 | 19279652 | 5092  |
| ENSG000001 | 3.444166 | 54.01546 | -3.8975  | 6.19E-11 | 3.12E-10 | TMC5      | chr16 | + | 19421818 | 19510435 | 4917  |
| ENSG000001 | 448.246  | 219.4521 | 1.03     | 2.19E-09 | 9.81E-09 | CCP110    | chr16 | + | 19535133 | 19564730 | 5549  |
| ENSG000001 | 1199.388 | 1224.869 | -0.0301  | 0.8251   | 0.87671  | C16orf62  | chr16 | + | 19566562 | 19718115 | 3855  |

|            |          |          |          |           |           |          |       |   |          |          |       |
|------------|----------|----------|----------|-----------|-----------|----------|-------|---|----------|----------|-------|
| ENSG000001 | 0        | 1.029414 | -1.1526  | 0.51496   | NA        | SLC6A2   | chr16 | + | 55689516 | 55740104 | 3551  |
| ENSG000001 | 2284.788 | 1606.631 | 0.5071   | 0.00222   | 0.005212  | RNF40    | chr16 | + | 30773066 | 30787628 | 5634  |
| ENSG000001 | 279.2278 | 916.9149 | -1.7127  | 4.03E-28  | 4.79E-27  | KNOP1    | chr16 | - | 19714902 | 19729557 | 4786  |
| ENSG000001 | 0.632843 | 0        | 0.81931  | 0.64303   | NA        | AQP9     | chr15 | + | 58430368 | 58478110 | 3034  |
| ENSG000001 | 686.636  | 591.0937 | 0.2166   | 0.099173  | 0.16031   | AAGAB    | chr15 | - | 67493371 | 67547533 | 2841  |
| ENSG000001 | 25.20729 | 13.72243 | 0.85796  | 0.10388   | 0.16662   | IQCH     | chr15 | + | 67547138 | 67794598 | 4208  |
| ENSG000001 | 100.6388 | 147.2804 | -0.54915 | 0.012339  | 0.025449  | LACTB    | chr15 | + | 63413999 | 63434260 | 2023  |
| ENSG000001 | 478.1369 | 164.7231 | 1.5341   | 3.71E-20  | 3.14E-19  | CORO2B   | chr15 | + | 68871308 | 69020145 | 3611  |
| ENSG000001 | 1476.734 | 1210.809 | 0.28569  | 0.034836  | 0.064869  | CSK      | chr15 | + | 75074398 | 75095539 | 2767  |
| ENSG000001 | 1603.366 | 757.8938 | 1.0797   | 3.54E-27  | 4.04E-26  | HERC1    | chr15 | - | 63900817 | 64126141 | 15137 |
| ENSG000001 | 421.993  | 194.3106 | 1.1166   | 1.92E-10  | 9.32E-10  | TRIP4    | chr15 | + | 64679947 | 64747502 | 2045  |
| ENSG000001 | 197.9533 | 226.7297 | -0.19585 | 0.34117   | 0.44509   | MTFMT    | chr15 | - | 65294845 | 65321977 | 1739  |
| ENSG000001 | 97.09085 | 223.2532 | -1.1987  | 6.78E-06  | 2.22E-05  | RASL12   | chr15 | - | 65345679 | 65369028 | 2636  |
| ENSG000001 | 2.967231 | 155.7303 | -5.5767  | 7.52E-25  | 7.81E-24  | AP3B2    | chr15 | - | 83328033 | 83378666 | 3736  |
| ENSG000001 | 29.72953 | 42.31802 | -0.50387 | 0.16071   | 0.24062   | ACSBG1   | chr15 | - | 78459810 | 78538030 | 6357  |
| ENSG000001 | 1616.952 | 517.4149 | 1.6397   | 4.11E-28  | 4.88E-27  | IGDCC4   | chr15 | - | 65673802 | 65715410 | 6508  |
| ENSG000001 | 1630.349 | 1839.084 | -0.17396 | 0.062484  | 0.10808   | RAB11A   | chr15 | + | 66018392 | 66184329 | 4930  |
| ENSG000001 | 61.14691 | 219.9518 | -1.8476  | 2.15E-15  | 1.44E-14  | CTSH     | chr15 | - | 79213400 | 79241916 | 2190  |
| ENSG000001 | 3.22583  | 8.553472 | -1.3203  | 0.12666   | 0.19743   | GOLGA8UP | chr15 | + | 31083776 | 31094062 | 1755  |
| ENSG000001 | 430.1073 | 284.6381 | 0.59318  | 0.007082  | 0.01532   | TTC23    | chr15 | - | 99676528 | 99791428 | 3849  |
| ENSG000001 | 6109.668 | 3490.288 | 0.80718  | 1.36E-16  | 9.73E-16  | CD276    | chr15 | + | 73976307 | 74006859 | 3469  |
| ENSG000001 | 254.4544 | 250.6587 | 0.019666 | 0.90136   | 0.93187   | FAH      | chr15 | + | 80444832 | 80479288 | 3427  |
| ENSG000001 | 98.16925 | 34.58685 | 1.4919   | 4.63E-05  | 0.000137  | KIAA1199 | chr15 | + | 81071684 | 81244117 | 7357  |
| ENSG000001 | 791.6557 | 1553.562 | -0.97063 | 7.51E-11  | 3.75E-10  | RPAP1    | chr15 | - | 41809374 | 41836467 | 5897  |
| ENSG000001 | 58.65417 | 235.9943 | -2.003   | 3.10E-24  | 3.15E-23  | HOMER2   | chr15 | - | 83509838 | 83654661 | 6201  |
| ENSG000001 | 3888.097 | 1195.903 | 1.6992   | 8.93E-66  | 2.98E-64  | EHD4     | chr15 | - | 42190950 | 42264776 | 3603  |
| ENSG000001 | 445.9231 | 373.2677 | 0.25698  | 0.24692   | 0.34289   | TMEM87A  | chr15 | - | 42502730 | 42565861 | 3109  |
| ENSG000001 | 2823.656 | 1766.482 | 0.67632  | 1.41E-12  | 7.93E-12  | ZNF106   | chr15 | - | 42705021 | 42783321 | 10460 |
| ENSG000001 | 247.2983 | 202.2406 | 0.2911   | 0.27692   | 0.37716   | CEP152   | chr15 | - | 49005125 | 49103343 | 5635  |
| ENSG000001 | 3.82697  | 2.543625 | 0.52248  | 0.62824   | 0.71802   | ATP8B4   | chr15 | - | 50150435 | 50475014 | 5783  |
| ENSG000001 | 187.3948 | 3.976869 | 5.4697   | 5.19E-34  | 7.66E-33  | OCA2     | chr15 | - | 28000021 | 28344504 | 3186  |
| ENSG000001 | 300.9537 | 236.9616 | 0.34243  | 0.034524  | 0.064351  | DTWD1    | chr15 | + | 49913177 | 49937333 | 2680  |
| ENSG000001 | 0.685084 | 0        | 0.85004  | 0.63064   | NA        | TGM5     | chr15 | - | 43524793 | 43559055 | 2767  |
| ENSG000001 | 131.0937 | 370.975  | -1.4964  | 7.19E-19  | 5.73E-18  | FAM189A1 | chr15 | - | 29412457 | 29862927 | 4705  |
| ENSG000001 | 538.3949 | 653.171  | -0.2781  | 0.035862  | 0.066613  | GABPB1   | chr15 | - | 50569389 | 50647605 | 3016  |
| ENSG000001 | 3289.49  | 2559.573 | 0.36182  | 0.000576  | 0.001482  | TJP1     | chr15 | - | 29991571 | 30261068 | 7950  |
| ENSG000001 | 224.9856 | 938.3729 | -2.0466  | 8.94E-13  | 5.10E-12  | BMF      | chr15 | - | 40380091 | 40401093 | 4687  |
| ENSG000001 | 364.528  | 181.4066 | 1.0027   | 0.00022   | 0.000599  | DMXL2    | chr15 | - | 51739908 | 51915030 | 10672 |
| ENSG000001 | 0.36308  | 617.6934 | -9.7363  | 7.21E-25  | 7.50E-24  | SCG3     | chr15 | + | 51973550 | 52013223 | 3310  |
| ENSG000001 | 150.8341 | 172.2657 | -0.19232 | 0.3018    | 0.40306   | DNAJC17  | chr15 | - | 41060067 | 41099675 | 1341  |
| ENSG000001 | 1294.508 | 1223.231 | 0.081598 | 0.64929   | 0.73524   | EIF3J    | chr15 | + | 44829255 | 44855227 | 2569  |
| ENSG000001 | 929.301  | 710.3591 | 0.38719  | 0.005473  | 0.012093  | SPG11    | chr15 | - | 44854894 | 44955876 | 7774  |
| ENSG000001 | 11.40039 | 95.16764 | -3.0084  | 3.86E-09  | 1.69E-08  | RHOV     | chr15 | - | 41164412 | 41166487 | 1705  |
| ENSG000001 | 1218.528 | 1118.633 | 0.12339  | 0.45538   | 0.56072   | VPS18    | chr15 | + | 41186628 | 41196173 | 3895  |
| ENSG000001 | 96.89501 | 295.5873 | -1.6047  | 5.81E-18  | 4.45E-17  | OIP5     | chr15 | - | 41601466 | 41624819 | 1236  |
| ENSG000001 | 150.8974 | 0.686276 | 7.2996   | 2.27E-18  | 1.77E-17  | SLC30A4  | chr15 | - | 45771809 | 45815005 | 7157  |
| ENSG000001 | 938.4052 | 404.3968 | 1.2119   | 4.65E-12  | 2.51E-11  | BLOC1S6  | chr15 | + | 45879321 | 45908197 | 4037  |
| ENSG000001 | 334.1517 | 924.5827 | -1.4656  | 1.05E-24  | 1.08E-23  | MYEF2    | chr15 | - | 48431625 | 48470714 | 5563  |
| ENSG000001 | 37.9701  | 53.59552 | -0.49931 | 0.10326   | 0.16583   | SGK3     | chr8  | + | 67624653 | 67774257 | 4135  |
| ENSG000001 | 211.3382 | 62.19666 | 1.7583   | 2.70E-12  | 1.49E-11  | PDGFRL   | chr8  | + | 17433942 | 17501580 | 1905  |
| ENSG000001 | 224.8339 | 223.3043 | 0.010473 | 0.96413   | 0.97904   | CSPP1    | chr8  | + | 67974661 | 68108498 | 4367  |
| ENSG000001 | 857.6276 | 416.1709 | 1.0409   | 2.22E-17  | 1.66E-16  | ZDHHC2   | chr8  | + | 17013538 | 17082308 | 6377  |
| ENSG000001 | 114.6717 | 111.5919 | 0.038866 | 0.89894   | 0.92993   | BRF2     | chr8  | - | 37700786 | 37707422 | 2603  |
| ENSG000001 | 358.4033 | 439.7372 | -0.29408 | 0.073717  | 0.12464   | TRIM35   | chr8  | - | 27142404 | 27168836 | 4229  |
| ENSG000001 | 267.7288 | 316.4178 | -0.23968 | 0.10357   | 0.16622   | ZFAND1   | chr8  | - | 82613569 | 82645138 | 2719  |
| ENSG000001 | 0.705622 | 0        | 0.8807   | 0.6196    | NA        | RP1      | chr8  | + | 55528627 | 55543394 | 7100  |
| ENSG000001 | 76.8609  | 162.1831 | -1.0688  | 0.000185  | 0.000511  | CA2      | chr8  | + | 86376081 | 86393722 | 1717  |
| ENSG000001 | 75.43409 | 1232.587 | -4.0157  | 1.46E-111 | 9.85E-110 | FZD3     | chr8  | + | 28351729 | 28431775 | 13726 |
| ENSG000001 | 288.6982 | 287.499  | 0.006961 | 0.97434   | 0.98556   | INTS9    | chr8  | - | 28625178 | 28747759 | 2759  |
| ENSG000001 | 281.9416 | 217.0228 | 0.37764  | 0.012946  | 0.026594  | RIPK2    | chr8  | + | 90769975 | 90803291 | 2584  |
| ENSG000001 | 74.18999 | 29.73014 | 1.3069   | 0.001513  | 0.003652  | EYA1     | chr8  | - | 72109668 | 72274467 | 4326  |
| ENSG000001 | 976.27   | 407.444  | 1.2546   | 1.63E-06  | 5.71E-06  | NBN      | chr8  | - | 90945564 | 91015456 | 4907  |
| ENSG000001 | 103.9802 | 20.13765 | 2.3432   | 8.39E-12  | 4.47E-11  | TRPA1    | chr8  | - | 72932152 | 72987852 | 5223  |
| ENSG000001 | 236.1212 | 12.90262 | 4.1377   | 1.21E-39  | 2.11E-38  | CPQ      | chr8  | + | 97657455 | 98161882 | 1947  |
| ENSG000001 | 530.7296 | 318.4338 | 0.73658  | 2.46E-08  | 1.01E-07  | DECR1    | chr8  | + | 91013633 | 91064320 | 1766  |

|            |          |          |          |           |           |           |       |   |          |          |       |
|------------|----------|----------|----------|-----------|-----------|-----------|-------|---|----------|----------|-------|
| ENSG000001 | 2.157128 | 234.8414 | -6.4872  | 7.93E-28  | 9.33E-27  | CALB1     | chr8  | - | 91070836 | 91107703 | 5392  |
| ENSG000001 | 2864.973 | 879.0371 | 1.703    | 7.05E-72  | 2.60E-70  | IMPAD1    | chr8  | - | 57870492 | 57906403 | 7199  |
| ENSG000001 | 766.0631 | 2311.082 | -1.591   | 1.23E-41  | 2.26E-40  | SFRP1     | chr8  | - | 41119481 | 41167016 | 4488  |
| ENSG000001 | 3712.573 | 10398.37 | -1.4849  | 2.42E-66  | 8.18E-65  | LAPTM4B   | chr8  | + | 98787285 | 98865241 | 3173  |
| ENSG000001 | 229.065  | 285.0923 | -0.31415 | 0.087534  | 0.14434   | UBE2W     | chr8  | - | 74692332 | 74791145 | 8426  |
| ENSG000001 | 256.8092 | 249.1362 | 0.046103 | 0.80119   | 0.85926   | POP1      | chr8  | + | 99129525 | 99172062 | 4719  |
| ENSG000001 | 138.8923 | 22.8124  | 2.586    | 9.28E-19  | 7.34E-18  | NIPAL2    | chr8  | - | 99202061 | 99306621 | 4581  |
| ENSG000001 | 523.325  | 465.2671 | 0.16782  | 0.26929   | 0.36828   | IKBKB     | chr8  | + | 42128820 | 42189973 | 5002  |
| ENSG000001 | 5321.474 | 63.47837 | 6.2403   | 8.70E-31  | 1.15E-29  | PLAT      | chr8  | - | 42032236 | 42065242 | 3462  |
| ENSG000001 | 43.28028 | 343.4353 | -2.9816  | 3.54E-49  | 7.90E-48  | JPH1      | chr8  | - | 75146935 | 75233563 | 4378  |
| ENSG000001 | 0.36308  | 1.744828 | -1.5647  | 0.34379   | 0.44781   | DKK4      | chr8  | - | 42231586 | 42234750 | 894   |
| ENSG000001 | 400.1465 | 174.9226 | 1.191    | 5.80E-08  | 2.30E-07  | STK3      | chr8  | - | 99413631 | 99955055 | 5333  |
| ENSG000001 | 48.05867 | 263.0768 | -2.4267  | 1.67E-13  | 9.96E-13  | GDAP1     | chr8  | + | 75233365 | 75401107 | 3666  |
| ENSG000001 | 2740.51  | 1141.621 | 1.2606   | 5.35E-19  | 4.29E-18  | RAB2A     | chr8  | + | 61429416 | 61536186 | 3848  |
| ENSG000001 | 3025.876 | 4889.768 | -0.68977 | 0.001206  | 0.002954  | EIF3E     | chr8  | - | 1.09E+08 | 1.09E+08 | 1990  |
| ENSG000001 | 318.4722 | 303.6606 | 0.070329 | 0.71462   | 0.78853   | EMC2      | chr8  | + | 1.09E+08 | 1.09E+08 | 2734  |
| ENSG000001 | 0        | 2638.346 | -12.446  | 5.11E-32  | 7.05E-31  | ESRP1     | chr8  | + | 95653302 | 95719694 | 3770  |
| ENSG000001 | 568.8861 | 0.343138 | 9.6627   | 3.44E-25  | 3.63E-24  | WISP1     | chr8  | + | 1.34E+08 | 1.34E+08 | 3844  |
| ENSG000001 | 1855.897 | 126.1302 | 3.8751   | 3.95E-151 | 4.53E-149 | NDRG1     | chr8  | - | 1.34E+08 | 1.34E+08 | 3983  |
| ENSG000001 | 122.3241 | 48.33593 | 1.3326   | 9.48E-08  | 3.71E-07  | ZC2HC1A   | chr8  | + | 79578282 | 79629935 | 1287  |
| ENSG000001 | 50.51971 | 29.76828 | 0.75557  | 0.020093  | 0.03963   | IL7       | chr8  | - | 79587978 | 79717758 | 2076  |
| ENSG000001 | 181.8087 | 133.5079 | 0.43907  | 0.070433  | 0.11979   | STMN2     | chr8  | + | 80523049 | 80578410 | 2223  |
| ENSG000001 | 615.1499 | 749.6714 | -0.28532 | 0.015116  | 0.030607  | ARMC1     | chr8  | - | 66514694 | 66546442 | 3029  |
| ENSG000001 | 1680.544 | 192.1324 | 3.1154   | 2.86E-40  | 5.06E-39  | TRPS1     | chr8  | - | 1.16E+08 | 1.17E+08 | 9990  |
| ENSG000001 | 28.48797 | 19.26205 | 0.55218  | 0.20697   | 0.29669   | SPAG1     | chr8  | + | 1.01E+08 | 1.01E+08 | 3852  |
| ENSG000001 | 406.0593 | 521.0161 | -0.35847 | 0.016859  | 0.033788  | CHAC1     | chr8  | + | 1.42E+08 | 1.42E+08 | 2488  |
| ENSG000001 | 42.92576 | 16.43269 | 1.3771   | 0.000642  | 0.00164   | NCALD     | chr8  | - | 1.03E+08 | 1.03E+08 | 3808  |
| ENSG000001 | 139.9862 | 79.54061 | 0.81784  | 0.000589  | 0.001513  | SNX16     | chr8  | - | 82711816 | 82755101 | 3452  |
| ENSG000001 | 2409.109 | 3578.788 | -0.57035 | 1.60E-07  | 6.14E-07  | UBR5      | chr8  | - | 1.03E+08 | 1.03E+08 | 10297 |
| ENSG000001 | 2.479132 | 164.2433 | -5.813   | 6.89E-24  | 6.88E-23  | GSDMD     | chr8  | + | 1.45E+08 | 1.45E+08 | 3462  |
| ENSG000001 | 1406.364 | 1057.076 | 0.41185  | 0.005214  | 0.011579  | TSTA3     | chr8  | - | 1.45E+08 | 1.45E+08 | 2220  |
| ENSG000001 | 383.7197 | 324.197  | 0.24273  | 0.3668    | 0.47138   | PYCR1     | chr8  | - | 1.45E+08 | 1.45E+08 | 2678  |
| ENSG000001 | 2338.087 | 2889.475 | -0.30497 | 0.031022  | 0.058399  | EEF1D     | chr8  | - | 1.45E+08 | 1.45E+08 | 3718  |
| ENSG000001 | 1.95077  | 0.297015 | 1.7404   | 0.28907   | 0.39061   | ANXA13    | chr8  | - | 1.25E+08 | 1.25E+08 | 1964  |
| ENSG000001 | 4022.055 | 2750.309 | 0.54625  | 0.016066  | 0.032344  | SQLE      | chr8  | + | 1.26E+08 | 1.26E+08 | 2961  |
| ENSG000001 | 277.5099 | 116.6686 | 1.247    | 4.04E-12  | 2.20E-11  | SH2D4A    | chr8  | + | 19171128 | 19253729 | 3352  |
| ENSG000001 | 792.0761 | 485.4124 | 0.70516  | 1.46E-09  | 6.65E-09  | INTS10    | chr8  | + | 19674651 | 19709594 | 2804  |
| ENSG000001 | 484.7687 | 308.7041 | 0.64914  | 0.003619  | 0.00824   | ERI1      | chr8  | + | 8859657  | 8974256  | 5033  |
| ENSG000001 | 1741.596 | 3293.679 | -0.91737 | 1.22E-08  | 5.15E-08  | SLC39A14  | chr8  | + | 22224762 | 22291642 | 4641  |
| ENSG000001 | 538.5425 | 691.1707 | -0.36103 | 0.007689  | 0.016499  | MTMR9     | chr8  | + | 11141925 | 11185646 | 7472  |
| ENSG000001 | 507.498  | 662.0037 | -0.38256 | 0.003313  | 0.007587  | LEPROTL1  | chr8  | + | 29952914 | 30034724 | 3173  |
| ENSG000001 | 153.5138 | 119.8677 | 0.35865  | 0.0927    | 0.15163   | DCTN6     | chr8  | + | 30013813 | 30041156 | 1127  |
| ENSG000001 | 514.4021 | 310.6993 | 0.7261   | 2.08E-05  | 6.43E-05  | R3HCC1    | chr8  | + | 23127633 | 23153792 | 1773  |
| ENSG000001 | 997.799  | 1744.66  | -0.80551 | 4.29E-12  | 2.33E-11  | GSR       | chr8  | - | 30535583 | 30585443 | 3114  |
| ENSG000001 | 359.4455 | 96.48823 | 1.8894   | 3.45E-19  | 2.78E-18  | TNFRSF10A | chr8  | - | 23047965 | 23082639 | 2714  |
| ENSG000001 | 81.55779 | 81.45192 | 0.003566 | 0.99388   | 0.99669   | UBXN8     | chr8  | + | 30589764 | 30624522 | 1623  |
| ENSG000001 | 1192.579 | 1085.172 | 0.13617  | 0.17379   | 0.25668   | PPP2CB    | chr8  | - | 30631973 | 30671830 | 2006  |
| ENSG000001 | 340.7813 | 689.8636 | -1.0173  | 3.98E-15  | 2.62E-14  | ERICH1    | chr8  | - | 564746   | 688106   | 3630  |
| ENSG000001 | 345.1655 | 1767.392 | -2.3535  | 1.40E-67  | 4.81E-66  | NEFM      | chr8  | + | 24770525 | 24776607 | 4020  |
| ENSG000001 | 1956.597 | 823.0877 | 1.2487   | 4.21E-33  | 6.04E-32  | TUSC3     | chr8  | + | 15274724 | 15624158 | 3683  |
| ENSG000001 | 655.241  | 1669.764 | -1.3466  | 1.03E-13  | 6.20E-13  | NEFL      | chr8  | - | 24808468 | 24814624 | 4083  |
| ENSG000001 | 1888.336 | 2874.934 | -0.60521 | 0.000369  | 0.000974  | ARHGEF10  | chr8  | + | 1772142  | 1906807  | 5648  |
| ENSG000001 | 359.008  | 558.7073 | -0.63576 | 0.000118  | 0.000335  | KLHDC4    | chr16 | - | 87730091 | 87799598 | 4572  |
| ENSG000001 | 2608.639 | 7153.638 | -1.4509  | 1.66E-13  | 9.88E-13  | MCM4      | chr8  | + | 48872745 | 48890720 | 4183  |
| ENSG000001 | 527.3095 | 296.1881 | 0.83066  | 4.07E-08  | 1.64E-07  | KCTD9     | chr8  | - | 25285366 | 25315992 | 3398  |
| ENSG000001 | 596.6809 | 737.2093 | -0.30464 | 0.024395  | 0.047181  | ASAH1     | chr8  | - | 17913934 | 17942494 | 2609  |
| ENSG000001 | 915.6496 | 811.2544 | 0.17465  | 0.41669   | 0.52181   | BNIP3L    | chr8  | + | 26240414 | 26363152 | 3610  |
| ENSG000001 | 954.9858 | 820.8063 | 0.21828  | 0.13774   | 0.21116   | MAN2B1    | chr19 | - | 12757325 | 12777556 | 3685  |
| ENSG000001 | 341.1413 | 12.22849 | 4.731    | 4.59E-40  | 8.09E-39  | KCNN4     | chr19 | - | 44270685 | 44285409 | 2240  |
| ENSG000001 | 0        | 28.15953 | -6.2848  | 3.00E-07  | 1.12E-06  | TULP2     | chr19 | - | 49384222 | 49401990 | 1754  |
| ENSG000001 | 4057.085 | 2417.242 | 0.7467   | 7.83E-13  | 4.48E-12  | NUCB1     | chr19 | + | 49403307 | 49426629 | 2668  |
| ENSG000001 | 2.903826 | 23.72372 | -2.8777  | 0.000122  | 0.000344  | DHDH      | chr19 | + | 49436939 | 49448226 | 1081  |
| ENSG000001 | 1350.285 | 1213.304 | 0.15426  | 0.14988   | 0.22692   | GYS1      | chr19 | - | 49471382 | 49496567 | 3574  |
| ENSG000001 | 1.597063 | 118.2251 | -5.9419  | 1.84E-19  | 1.51E-18  | MAP4K1    | chr19 | - | 39078281 | 39109522 | 2700  |
| ENSG000001 | 0        | 1.416259 | -1.7181  | 0.33141   | NA        | CGB2      | chr19 | + | 49535169 | 49536495 | 775   |

|            |          |          |          |          |          |          |       |   |          |          |      |
|------------|----------|----------|----------|----------|----------|----------|-------|---|----------|----------|------|
| ENSG000001 | 759.1604 | 638.8647 | 0.2486   | 0.14452  | 0.21982  | ECH1     | chr19 | - | 39306062 | 39322645 | 1411 |
| ENSG000001 | 4044.326 | 6820.083 | -0.75326 | 2.39E-18 | 1.85E-17 | HNRNPL   | chr19 | - | 39327028 | 39342987 | 3094 |
| ENSG000001 | 374.9268 | 474.7943 | -0.33901 | 0.063445 | 0.10951  | NFKBIB   | chr19 | + | 39390340 | 39399533 | 2203 |
| ENSG000001 | 1.338465 | 3.619162 | -1.281   | 0.25948  | 0.35738  | LHB      | chr19 | - | 49519237 | 49520338 | 514  |
| ENSG000001 | 0        | 0.357707 | -0.41864 | 0.81278  | NA       | CGB      | chr19 | - | 49526126 | 49527590 | 877  |
| ENSG000001 | 0.342542 | 380.3198 | -9.0736  | 7.21E-21 | 6.32E-20 | TUBB4A   | chr19 | - | 6494330  | 6502859  | 2552 |
| ENSG000001 | 9.044646 | 24.96589 | -1.4179  | 0.008949 | 0.018988 | SARS2    | chr19 | - | 39405906 | 39440495 | 2057 |
| ENSG000001 | 9.857355 | 4.819373 | 0.94009  | 0.31662  | 0.41928  | KCNA7    | chr19 | - | 49570675 | 49576198 | 4372 |
| ENSG000001 | 5638.923 | 8699.946 | -0.62495 | 3.29E-07 | 1.23E-06 | SNRNP70  | chr19 | + | 49588676 | 49611862 | 3221 |
| ENSG000001 | 2221.904 | 1703.822 | 0.38275  | 0.007456 | 0.016047 | CLPTM1   | chr19 | + | 45457842 | 45496599 | 2732 |
| ENSG000001 | 310.9399 | 154.6936 | 1.0007   | 1.48E-06 | 5.19E-06 | RELB     | chr19 | + | 45504688 | 45541452 | 2294 |
| ENSG000001 | 720.485  | 1182.961 | -0.71358 | 1.35E-07 | 5.22E-07 | CLASRP   | chr19 | + | 45542298 | 45574214 | 2769 |
| ENSG000001 | 107.5786 | 23.98918 | 2.1332   | 1.02E-09 | 4.71E-09 | LIN7B    | chr19 | + | 49617581 | 49621717 | 1057 |
| ENSG000001 | 1138.17  | 971.0275 | 0.22851  | 0.10194  | 0.164    | PPP1R37  | chr19 | + | 45594654 | 45651335 | 5943 |
| ENSG000001 | 1093.582 | 752.5688 | 0.53715  | 0.008886 | 0.018868 | FCGRT    | chr19 | + | 50010073 | 50029590 | 2681 |
| ENSG000001 | 753.3602 | 1789.542 | -1.2459  | 1.81E-27 | 2.10E-26 | PIH1D1   | chr19 | - | 49949555 | 49956754 | 1192 |
| ENSG000001 | 4.430716 | 2.604317 | 0.67858  | 0.50652  | 0.61004  | CKM      | chr19 | - | 45809672 | 45826235 | 1657 |
| ENSG000001 | 501.1968 | 756.3404 | -0.59396 | 4.41E-05 | 0.000131 | ARHGEF18 | chr19 | + | 7459999  | 7537363  | 5733 |
| ENSG000001 | 278.937  | 298.673  | -0.09872 | 0.64867  | 0.73464  | PPP1R13L | chr19 | - | 45882892 | 45909607 | 3118 |
| ENSG000001 | 13.0686  | 62.70106 | -2.2056  | 7.44E-06 | 2.43E-05 | PEX11G   | chr19 | - | 7541761  | 7562335  | 1345 |
| ENSG000001 | 1066.201 | 1744.498 | -0.70972 | 9.87E-10 | 4.55E-09 | ERCC2    | chr19 | - | 45853095 | 45874176 | 4153 |
| ENSG000001 | 1627.295 | 3035.038 | -0.89786 | 4.58E-10 | 2.16E-09 | DOT1L    | chr19 | + | 2164148  | 2232577  | 7436 |
| ENSG000001 | 1298.702 | 2544.489 | -0.96901 | 4.73E-18 | 3.64E-17 | PLEKHJ1  | chr19 | - | 2230093  | 2237703  | 2858 |
| ENSG000001 | 9.066976 | 47.55345 | -2.3174  | 7.47E-05 | 0.000216 | SLC17A7  | chr19 | - | 49932658 | 49945617 | 2973 |
| ENSG000001 | 873.0466 | 1703.096 | -0.96354 | 1.84E-18 | 1.43E-17 | RNASEH2A | chr19 | + | 12917394 | 12924452 | 1487 |
| ENSG000001 | 0.580602 | 86.00959 | -6.5141  | 1.82E-13 | 1.08E-12 | KLC3     | chr19 | + | 45836692 | 45854778 | 2006 |
| ENSG000001 | 291.4985 | 94.77998 | 1.6051   | 6.52E-09 | 2.81E-08 | CD37     | chr19 | + | 49838428 | 49846592 | 3172 |
| ENSG000001 | 1763.578 | 2687.902 | -0.60704 | 4.15E-07 | 1.53E-06 | SF3A2    | chr19 | + | 2236520  | 2248713  | 1981 |
| ENSG000001 | 140.4556 | 144.2223 | -0.03616 | 0.92102  | 0.94695  | AMH      | chr19 | + | 2248666  | 2252072  | 2465 |
| ENSG000001 | 31.09033 | 48.3368  | -0.62855 | 0.097006 | 0.15744  | DKKL1    | chr19 | + | 49865040 | 49878373 | 1222 |
| ENSG000001 | 25.62424 | 21.48926 | 0.24102  | 0.64292  | 0.72995  | LYL1     | chr19 | - | 13209847 | 13213975 | 1547 |
| ENSG000001 | 3977.941 | 4140.707 | -0.05777 | 0.51649  | 0.61921  | OAZ1     | chr19 | + | 2269519  | 2273487  | 2828 |
| ENSG000001 | 768.3863 | 1582.265 | -1.04    | 2.89E-12 | 1.59E-11 | TRMT1    | chr19 | - | 13215716 | 13228381 | 2579 |
| ENSG000001 | 1077.315 | 551.4254 | 0.96355  | 4.54E-12 | 2.46E-11 | STX10    | chr19 | - | 13254872 | 13261197 | 1241 |
| ENSG000001 | 0.580602 | 0.715414 | -0.13184 | 0.94086  | NA       | RETN     | chr19 | + | 7733930  | 7735334  | 514  |
| ENSG000001 | 0.342542 | 0.594029 | -0.38792 | 0.8278   | NA       | FCER2    | chr19 | - | 7753644  | 7767032  | 1910 |
| ENSG000001 | 654.9207 | 260.0985 | 1.3273   | 6.56E-17 | 4.77E-16 | DMPK     | chr19 | - | 46272975 | 46285810 | 3357 |
| ENSG000001 | 0        | 0.343138 | -0.41864 | 0.81278  | NA       | CLEC4M   | chr19 | + | 7828035  | 7834491  | 2989 |
| ENSG000001 | 0.653381 | 2.711133 | -1.6744  | 0.21561  | 0.30666  | RSPH6A   | chr19 | - | 46298968 | 46318577 | 2456 |
| ENSG000001 | 671.6362 | 737.2548 | -0.13293 | 0.30165  | 0.40297  | TBC1D17  | chr19 | + | 50380682 | 50392005 | 2831 |
| ENSG000001 | 8.932419 | 8.355152 | 0.080431 | 0.91061  | 0.93869  | IL4I1    | chr19 | - | 50392911 | 50432796 | 2407 |
| ENSG000001 | 7.156468 | 33.25148 | -2.1254  | 0.000141 | 0.000394 | TLE6     | chr19 | + | 2977444  | 2995177  | 2095 |
| ENSG000001 | 537.379  | 308.699  | 0.79834  | 1.68E-08 | 7.00E-08 | CCDC130  | chr19 | + | 13842574 | 13874110 | 1922 |
| ENSG000001 | 639.9579 | 655.1447 | -0.03456 | 0.81458  | 0.8698   | PTOV1    | chr19 | + | 50353992 | 50364001 | 1880 |
| ENSG000001 | 3392.387 | 2700.598 | 0.32838  | 0.003014 | 0.006945 | AES      | chr19 | - | 3052908  | 3063105  | 3274 |
| ENSG000001 | 18.18521 | 300.4028 | -4.0018  | 2.81E-25 | 2.97E-24 | NOVA2    | chr19 | - | 46436992 | 46476804 | 7803 |
| ENSG000001 | 2002.307 | 2989.533 | -0.57704 | 3.29E-05 | 9.94E-05 | SGTA     | chr19 | - | 2754712  | 2783369  | 2330 |
| ENSG000001 | 3.910914 | 0        | 3.5199   | 0.015173 | 0.030711 | LILRB1   | chr19 | + | 55085346 | 55148979 | 2960 |
| ENSG000001 | 911.0051 | 1381.741 | -0.59953 | 3.97E-05 | 0.000119 | MED25    | chr19 | + | 50321539 | 50342073 | 3339 |
| ENSG000001 | 2.49967  | 0        | 2.7866   | 0.07964  | 0.13296  | LILRA1   | chr19 | + | 55105047 | 55113555 | 2580 |
| ENSG000001 | 648.1454 | 636.08   | 0.027288 | 0.88814  | 0.92203  | SNAPC2   | chr19 | + | 7985201  | 7988135  | 1542 |
| ENSG000001 | 1425.113 | 1278.193 | 0.15732  | 0.19874  | 0.28713  | C19orf53 | chr19 | + | 13884982 | 13889276 | 873  |
| ENSG000001 | 813.9906 | 1629.442 | -0.99938 | 2.31E-11 | 1.20E-10 | TIMM44   | chr19 | - | 7991603  | 8008805  | 2227 |
| ENSG000001 | 193.4277 | 394.1058 | -1.0228  | 6.40E-07 | 2.33E-06 | CCDC61   | chr19 | + | 46498339 | 46524576 | 1825 |
| ENSG000001 | 540.5683 | 300.1079 | 0.845    | 1.65E-05 | 5.15E-05 | IL27RA   | chr19 | + | 14142560 | 14163743 | 2677 |
| ENSG000001 | 669.5957 | 792.7145 | -0.24249 | 0.041607 | 0.075859 | ASF1B    | chr19 | - | 14230321 | 14247768 | 2059 |
| ENSG000001 | 12.26371 | 601.02   | -5.5726  | 8.96E-64 | 2.85E-62 | TNNT1    | chr19 | - | 55644162 | 55660722 | 1163 |
| ENSG000001 | 324.6344 | 505.9608 | -0.63861 | 8.02E-05 | 0.000231 | VRK3     | chr19 | - | 50479724 | 50529203 | 2197 |
| ENSG000001 | 1048.323 | 1130.471 | -0.10789 | 0.60028  | 0.69432  | FAM32A   | chr19 | + | 16296191 | 16302857 | 1455 |
| ENSG000001 | 2913.082 | 2725.176 | 0.095951 | 0.43733  | 0.54288  | PPP6R1   | chr19 | - | 55741148 | 55770363 | 3961 |
| ENSG000001 | 89.57921 | 61.68279 | 0.53724  | 0.02468  | 0.047696 | C19orf44 | chr19 | + | 16607122 | 16632163 | 3427 |
| ENSG000001 | 112.5506 | 160.4797 | -0.50617 | 0.081712 | 0.13605  | MED26    | chr19 | - | 16685718 | 16739873 | 3871 |
| ENSG000001 | 244.0409 | 2033.885 | -3.0452  | 1.95E-36 | 3.10E-35 | OLFM2    | chr19 | - | 9964394  | 10047228 | 2019 |
| ENSG000001 | 0.72616  | 11.72671 | -3.605   | 0.001469 | 0.003553 | RASAL3   | chr19 | - | 15562438 | 15575377 | 4270 |
| ENSG000001 | 645.8615 | 902.6041 | -0.48099 | 0.011841 | 0.024495 | AKAP8    | chr19 | - | 15464196 | 15490612 | 3700 |

|            |          |          |          |           |           |          |       |   |          |          |      |
|------------|----------|----------|----------|-----------|-----------|----------|-------|---|----------|----------|------|
| ENSG000001 | 2.49967  | 427.5734 | -7.1881  | 2.48E-45  | 4.97E-44  | EPHX3    | chr19 | - | 15337730 | 15344246 | 1822 |
| ENSG000001 | 1044.923 | 988.1832 | 0.081345 | 0.51544   | 0.61832   | ILVBL    | chr19 | - | 15225795 | 15236596 | 4248 |
| ENSG000001 | 70.10517 | 97.30381 | -0.46736 | 0.05659   | 0.099164  | ZNF419   | chr19 | + | 57999079 | 58006048 | 5542 |
| ENSG000001 | 2009.607 | 192.5037 | 3.3776   | 4.79E-117 | 3.52E-115 | SYDE1    | chr19 | + | 15218214 | 15225799 | 3832 |
| ENSG000001 | 0        | 288.2983 | -9.5467  | 8.13E-19  | 6.46E-18  | SLC1A6   | chr19 | - | 15060846 | 15133802 | 3264 |
| ENSG000001 | 8.641304 | 27.18752 | -1.6194  | 0.005013  | 0.011164  | AURKC    | chr19 | + | 57742377 | 57746916 | 1610 |
| ENSG000001 | 431.1591 | 364.1871 | 0.24454  | 0.092914  | 0.15193   | POP4     | chr19 | + | 30094924 | 30108144 | 3385 |
| ENSG000001 | 159.7247 | 664.1643 | -2.0453  | 6.37E-24  | 6.38E-23  | CCNE1    | chr19 | + | 30302805 | 30315215 | 2043 |
| ENSG000001 | 814.1585 | 1048.134 | -0.36455 | 0.009041  | 0.019151  | URI1     | chr19 | + | 30414551 | 30506611 | 2540 |
| ENSG000001 | 714.3084 | 733.0657 | -0.03675 | 0.78458   | 0.84578   | PDCD5    | chr19 | + | 33071974 | 33078358 | 3463 |
| ENSG000001 | 529.5966 | 740.2185 | -0.48228 | 0.004985  | 0.011106  | ANKRD27  | chr19 | - | 33087913 | 33167028 | 4450 |
| ENSG000001 | 9042.558 | 15949.87 | -0.81805 | 1.55E-16  | 1.11E-15  | RPS16    | chr19 | - | 39923847 | 39926588 | 2389 |
| ENSG000001 | 1568.841 | 2920.056 | -0.89509 | 6.85E-16  | 4.72E-15  | TIMM50   | chr19 | + | 39971052 | 39984422 | 2576 |
| ENSG000001 | 2174.929 | 5172.816 | -1.2485  | 5.93E-29  | 7.24E-28  | FBL      | chr19 | - | 40325098 | 40337054 | 1400 |
| ENSG000001 | 477.6965 | 220.366  | 1.1139   | 1.95E-13  | 1.16E-12  | DYRK1B   | chr19 | - | 40315990 | 40324841 | 2724 |
| ENSG000001 | 4.273994 | 2.307303 | 0.81343  | 0.4112    | 0.51604   | CNTD2    | chr19 | - | 40728115 | 40732597 | 1817 |
| ENSG000001 | 4096.89  | 6803.612 | -0.73075 | 1.34E-08  | 5.61E-08  | GPI      | chr19 | + | 34850385 | 34893061 | 4000 |
| ENSG000001 | 3140.692 | 2651.663 | 0.24431  | 0.018965  | 0.037629  | AKT2     | chr19 | - | 40736224 | 40791443 | 5300 |
| ENSG000001 | 13754.04 | 4236.592 | 1.6975   | 1.53E-59  | 4.41E-58  | PLD3     | chr19 | + | 40854363 | 40886346 | 2180 |
| ENSG000001 | 186.4459 | 351.6006 | -0.90715 | 0.008135  | 0.017365  | PRX      | chr19 | - | 40899675 | 40919273 | 5502 |
| ENSG000001 | 944.8561 | 1220.224 | -0.36861 | 0.00294   | 0.006785  | PIAS4    | chr19 | + | 4007644  | 4039384  | 3159 |
| ENSG000001 | 1488.311 | 509.0421 | 1.5424   | 4.46E-15  | 2.93E-14  | NUMBL    | chr19 | - | 41172596 | 41196877 | 2775 |
| ENSG000001 | 0.290301 | 3.6483   | -2.7354  | 0.050876  | 0.090323  | EBI3     | chr19 | + | 4229495  | 4237528  | 1186 |
| ENSG000001 | 325.7476 | 650.6608 | -0.99489 | 1.04E-07  | 4.07E-07  | CCDC94   | chr19 | + | 4247076  | 4269087  | 1434 |
| ENSG000001 | 0.36308  | 42.96233 | -6.1332  | 1.25E-08  | 5.25E-08  | SHD      | chr19 | + | 4278598  | 4290721  | 2577 |
| ENSG000001 | 1890.571 | 1410.595 | 0.4219   | 2.71E-05  | 8.25E-05  | TBCB     | chr19 | + | 36605191 | 36616849 | 1473 |
| ENSG000001 | 601.0758 | 843.8868 | -0.48812 | 0.004112  | 0.009274  | FSD1     | chr19 | + | 4304597  | 4323840  | 1831 |
| ENSG000001 | 50.75777 | 85.78696 | -0.7569  | 0.012069  | 0.024942  | POLR2I   | chr19 | - | 36604612 | 36606248 | 993  |
| ENSG000001 | 1.048164 | 5.903774 | -2.1704  | 0.075299  | 0.12689   | OVOL3    | chr19 | + | 36602104 | 36604613 | 806  |
| ENSG000001 | 1049.634 | 300.9204 | 1.7951   | 6.18E-18  | 4.72E-17  | CLIP3    | chr19 | - | 36505562 | 36524245 | 3370 |
| ENSG000001 | 1.576526 | 269.4654 | -7.1109  | 4.71E-30  | 6.01E-29  | ZFR2     | chr19 | - | 3804022  | 3869030  | 4756 |
| ENSG000001 | 3285.992 | 5586.198 | -0.76461 | 3.07E-10  | 1.47E-09  | SLC1A5   | chr19 | - | 47278140 | 47291851 | 2882 |
| ENSG000001 | 914.9603 | 1304.399 | -0.50945 | 0.02983   | 0.056468  | PRKD2    | chr19 | - | 47177532 | 47220384 | 3321 |
| ENSG000001 | 2.096328 | 841.6202 | -8.4481  | 1.11E-44  | 2.20E-43  | TJP3     | chr19 | + | 3708107  | 3750811  | 3350 |
| ENSG000001 | 699.0245 | 235.5076 | 1.5601   | 9.87E-10  | 4.55E-09  | APLP1    | chr19 | + | 36358801 | 36370693 | 2495 |
| ENSG000001 | 663.3643 | 804.3726 | -0.27765 | 0.096545  | 0.15682   | CACTIN   | chr19 | - | 3610639  | 3626813  | 3612 |
| ENSG000001 | 1164.25  | 857.7747 | 0.44028  | 8.30E-05  | 0.000239  | CCDC9    | chr19 | + | 47759237 | 47775210 | 2093 |
| ENSG000001 | 6735.392 | 7857.559 | -0.22211 | 0.010618  | 0.022194  | HNRNPUL1 | chr19 | + | 41768401 | 41813503 | 3555 |
| ENSG000001 | 1495.29  | 928.2081 | 0.68649  | 5.18E-06  | 1.72E-05  | FZR1     | chr19 | + | 3506271  | 3538328  | 5212 |
| ENSG000001 | 180.007  | 804.506  | -2.1436  | 6.36E-12  | 3.41E-11  | BBC3     | chr19 | - | 47724081 | 47736023 | 1838 |
| ENSG000001 | 5871.591 | 282.7392 | 4.3707   | 0         | 0         | TGFB1    | chr19 | - | 41807492 | 41859816 | 2769 |
| ENSG000001 | 205.9683 | 134.9443 | 0.60859  | 0.009303  | 0.01966   | DENDN3   | chr8  | + | 1.42E+08 | 1.42E+08 | 5482 |
| ENSG000001 | 1021.055 | 1379.806 | -0.43343 | 6.95E-05  | 0.000202  | ATP5SL   | chr19 | - | 41937223 | 41946622 | 2317 |
| ENSG000001 | 0.342542 | 0        | 0.4146   | 0.81455   | NA        | CEACAM4  | chr19 | - | 42125344 | 42133442 | 1205 |
| ENSG000001 | 3281.134 | 1127.155 | 1.5389   | 1.02E-27  | 1.20E-26  | PLIN3    | chr19 | - | 4838353  | 4867780  | 2333 |
| ENSG000001 | 0        | 1079.725 | -11.249  | 2.46E-25  | 2.61E-24  | MYH14    | chr19 | + | 50691443 | 50813802 | 6910 |
| ENSG000001 | 513.8087 | 824.0848 | -0.68009 | 5.97E-07  | 2.17E-06  | MRPL4    | chr19 | + | 10362577 | 10370721 | 1620 |
| ENSG000001 | 1.161205 | 4.928605 | -1.7347  | 0.1538    | 0.23189   | CD79A    | chr19 | + | 42381190 | 42385439 | 1258 |
| ENSG000001 | 8424.949 | 16346.37 | -0.95552 | 8.49E-26  | 9.16E-25  | RPS19    | chr19 | + | 42363988 | 42376994 | 2359 |
| ENSG000001 | 3683.745 | 7843.229 | -1.0888  | 1.50E-16  | 1.07E-15  | GLTSCR2  | chr19 | + | 48248779 | 48260315 | 4185 |
| ENSG000001 | 0.36308  | 1.485073 | -1.2175  | 0.48794   | NA        | NKG7     | chr19 | - | 51874860 | 51875969 | 843  |
| ENSG000001 | 46.89152 | 43.5847  | 0.10047  | 0.84768   | 0.893     | ICAM5    | chr19 | + | 10400657 | 10407454 | 3000 |
| ENSG000001 | 45.82102 | 72.55591 | -0.66192 | 0.07591   | 0.12772   | ETFB     | chr19 | - | 51848423 | 51869672 | 3551 |
| ENSG000001 | 2.354926 | 1.684135 | 0.42139  | 0.7235    | 0.79545   | CD33     | chr19 | + | 51728320 | 51747115 | 4728 |
| ENSG000001 | 0        | 0.700845 | -0.87835 | 0.62047   | NA        | CRX      | chr19 | + | 48322703 | 48364769 | 4463 |
| ENSG000001 | 242.5457 | 290.0794 | -0.2554  | 0.096686  | 0.15699   | BABAM1   | chr19 | + | 17378159 | 17392058 | 1472 |
| ENSG000001 | 2660.729 | 503.5263 | 2.3986   | 6.52E-91  | 3.29E-89  | TYK2     | chr19 | - | 10461209 | 10491352 | 4347 |
| ENSG000001 | 0        | 0.343138 | -0.41864 | 0.81278   | NA        | SULT2A1  | chr19 | - | 48373723 | 48389654 | 1987 |
| ENSG000001 | 3282.366 | 2838.586 | 0.20962  | 0.083558  | 0.1387    | CDC37    | chr19 | - | 10501810 | 10530797 | 1608 |
| ENSG000001 | 919.4976 | 873.8964 | 0.073962 | 0.53389   | 0.63481   | NAPA     | chr19 | - | 47990894 | 48018497 | 3898 |
| ENSG000001 | 3223.433 | 1315.465 | 1.2909   | 3.50E-22  | 3.24E-21  | RABAC1   | chr19 | - | 42460833 | 42463542 | 821  |
| ENSG000001 | 3.46389  | 995.4598 | -7.9668  | 3.65E-66  | 1.23E-64  | ATP1A3   | chr19 | - | 42470734 | 42501649 | 3818 |
| ENSG000001 | 2327.752 | 311.8019 | 2.8947   | 2.76E-128 | 2.42E-126 | MEIS3    | chr19 | - | 47906316 | 47922780 | 2195 |
| ENSG000001 | 5647.441 | 6403.306 | -0.18108 | 0.14587   | 0.22161   | PTPRS    | chr19 | - | 5158506  | 5340814  | 7350 |
| ENSG000001 | 8.527449 | 97.66247 | -3.4682  | 9.19E-18  | 6.98E-17  | CNFN     | chr19 | - | 42891171 | 42894439 | 523  |

|            |          |          |          |           |           |            |       |   |          |          |       |
|------------|----------|----------|----------|-----------|-----------|------------|-------|---|----------|----------|-------|
| ENSG000001 | 4882.307 | 3653.147 | 0.41772  | 0.002166  | 0.005099  | MEGF8      | chr19 | + | 42829761 | 42882921 | 10966 |
| ENSG000001 | 3020.076 | 2474.882 | 0.28699  | 0.011148  | 0.023193  | KDEL1      | chr19 | - | 48885827 | 48894810 | 1594  |
| ENSG000001 | 1284.38  | 828.1374 | 0.63188  | 9.16E-05  | 0.000262  | CYTH2      | chr19 | + | 48972289 | 48985571 | 4652  |
| ENSG000001 | 1191.454 | 1903.218 | -0.67238 | 0.00518   | 0.01151   | GRWD1      | chr19 | + | 48949030 | 48960279 | 5571  |
| ENSG000001 | 269.6256 | 837.4107 | -1.5918  | 0.005369  | 0.011888  | GRIN2D     | chr19 | + | 48898132 | 48948188 | 5093  |
| ENSG000001 | 2.613524 | 3.426547 | -0.33083 | 0.77624   | 0.83922   | SYNGR4     | chr19 | + | 48867652 | 48879633 | 1000  |
| ENSG000001 | 26.31788 | 148.9711 | -2.4825  | 2.89E-15  | 1.93E-14  | CLEC11A    | chr19 | + | 51226586 | 51228974 | 1419  |
| ENSG000001 | 13.48653 | 39.31639 | -1.5124  | 0.002441  | 0.005698  | CCDC114    | chr19 | - | 48799714 | 48825130 | 3215  |
| ENSG000001 | 466.9486 | 158.1743 | 1.5564   | 2.18E-16  | 1.54E-15  | CARD8      | chr19 | - | 48684027 | 48759203 | 5263  |
| ENSG000001 | 1075.803 | 1686.16  | -0.64796 | 1.72E-09  | 7.76E-09  | LIG1       | chr19 | - | 48618702 | 48673860 | 4102  |
| ENSG000001 | 127.4403 | 102.5894 | 0.30905  | 0.18485   | 0.27023   | ZNF175     | chr19 | + | 52074551 | 52092991 | 3742  |
| ENSG000001 | 2.810509 | 4.363714 | -0.54932 | 0.58355   | 0.67961   | PLA2G4C    | chr19 | - | 48551100 | 48614074 | 2496  |
| ENSG000001 | 0.632843 | 0        | 0.81931  | 0.64303   | NA        | SIGLEC5    | chr19 | - | 52114781 | 52150151 | 2498  |
| ENSG000001 | 5.447177 | 12.8144  | -1.1816  | 0.14421   | 0.21939   | HAS1       | chr19 | - | 52216365 | 52227247 | 2110  |
| ENSG000001 | 43.80864 | 296.9175 | -2.7458  | 3.31E-24  | 3.36E-23  | RAB3D      | chr19 | - | 11432722 | 11456946 | 4273  |
| ENSG000001 | 18.58937 | 138.1871 | -2.8619  | 6.13E-13  | 3.53E-12  | DBP        | chr19 | - | 49133287 | 49140695 | 5756  |
| ENSG000001 | 33.59081 | 87.48158 | -1.3753  | 1.42E-06  | 5.02E-06  | TMEM205    | chr19 | - | 11453452 | 11457194 | 1310  |
| ENSG000001 | 103.4107 | 39.54297 | 1.3768   | 4.84E-06  | 1.61E-05  | CAPS       | chr19 | + | 5911718  | 5915888  | 3515  |
| ENSG000001 | 1013.674 | 200.7456 | 2.3319   | 6.08E-48  | 1.32E-46  | DKFZP761J  | chr19 | + | 11466062 | 11476374 | 2727  |
| ENSG000001 | 0.632843 | 126.2885 | -7.0087  | 2.38E-15  | 1.59E-14  | FAM83E     | chr19 | - | 49104067 | 49118111 | 1926  |
| ENSG000001 | 25.40769 | 188.1404 | -2.8429  | 2.85E-10  | 1.37E-09  | RASIP1     | chr19 | - | 49223844 | 49243978 | 3308  |
| ENSG000001 | 0.36308  | 0.297015 | -0.00205 | 0.99908   | NA        | THEG       | chr19 | - | 361750   | 376013   | 1633  |
| ENSG000001 | 0        | 3.991438 | -3.5538  | 0.013802  | 0.028182  | FGF21      | chr19 | + | 49258816 | 49261587 | 1312  |
| ENSG000001 | 640.9317 | 393.7119 | 0.69972  | 0.000994  | 0.002465  | BCAT2      | chr19 | - | 49298319 | 49314286 | 2254  |
| ENSG000001 | 860.7502 | 706.1219 | 0.28601  | 0.019317  | 0.038254  | MIER2      | chr19 | - | 305575   | 344798   | 2764  |
| ENSG000001 | 1314.672 | 331.665  | 1.9747   | 2.67E-13  | 1.57E-12  | PLEKHA4    | chr19 | - | 49340354 | 49371889 | 3088  |
| ENSG000001 | 4424.74  | 8354.212 | -0.9161  | 1.05E-21  | 9.54E-21  | PPP2R1A    | chr19 | + | 52693292 | 52730687 | 3281  |
| ENSG000001 | 2668     | 2260.593 | 0.2385   | 0.19013   | 0.27677   | TNPO2      | chr19 | - | 12810008 | 12834825 | 5122  |
| ENSG000001 | 154.2872 | 151.7984 | 0.028638 | 0.89545   | 0.92745   | WDR83OS    | chr19 | - | 12778885 | 12782170 | 2562  |
| ENSG000001 | 1.669842 | 1483.403 | -9.3323  | 8.45E-37  | 1.36E-35  | CACNG7     | chr19 | + | 54412589 | 54447195 | 2688  |
| ENSG000001 | 354.6451 | 783.6624 | -1.1417  | 1.75E-20  | 1.51E-19  | GCDH       | chr19 | + | 13001840 | 13025021 | 1956  |
| ENSG000001 | 0        | 0.297015 | -0.41864 | 0.81278   | NA        | LILRB5     | chr19 | - | 54754263 | 54761164 | 5545  |
| ENSG000001 | 0.290301 | 11.2589  | -4.3333  | 0.000301  | 0.000806  | KLF1       | chr19 | - | 12995237 | 12997995 | 1592  |
| ENSG000001 | 360.6416 | 311.2996 | 0.21072  | 0.30334   | 0.40464   | DNASE2     | chr19 | - | 12986025 | 12992282 | 1955  |
| ENSG000001 | 26.92163 | 430.5231 | -3.952   | 6.15E-23  | 5.93E-22  | MAST1      | chr19 | + | 12944765 | 12985765 | 4833  |
| ENSG000001 | 218.2263 | 174.2355 | 0.32206  | 0.052452  | 0.092725  | LENG1      | chr19 | - | 54658899 | 54663620 | 1542  |
| ENSG000001 | 665.1504 | 773.1918 | -0.21652 | 0.18032   | 0.26467   | PRPF31     | chr19 | + | 54618837 | 54635140 | 2126  |
| ENSG000001 | 423.2667 | 302.6357 | 0.48399  | 0.006246  | 0.013654  | TFT        | chr19 | - | 54610320 | 54619055 | 1205  |
| ENSG000001 | 166.4582 | 195.2978 | -0.22857 | 0.51485   | 0.61773   | JAK3       | chr19 | - | 17935589 | 17958880 | 5432  |
| ENSG000001 | 11561.24 | 20471.97 | -0.82355 | 2.02E-14  | 1.28E-13  | RPL18A     | chr19 | + | 17970685 | 17974962 | 1391  |
| ENSG000001 | 1.068702 | 55.0969  | -5.4063  | 1.67E-10  | 8.12E-10  | SLC5A5     | chr19 | + | 17982782 | 18005983 | 3576  |
| ENSG000001 | 0        | 314.4987 | -9.6543  | 4.03E-19  | 3.25E-18  | CTB-5212.8 | chr19 | + | 18062111 | 18109930 | 2657  |
| ENSG000001 | 107.5066 | 146.1702 | -0.44138 | 0.17235   | 0.25493   | ARRDC2     | chr19 | + | 18111941 | 18124911 | 3748  |
| ENSG000001 | 4.470978 | 6.284171 | -0.44825 | 0.57943   | 0.67587   | PIK3R2     | chr19 | + | 18263626 | 18281350 | 4335  |
| ENSG000001 | 56.90992 | 120.1345 | -1.0576  | 0.026823  | 0.051409  | RAB3A      | chr19 | - | 18307594 | 18314884 | 1528  |
| ENSG000001 | 1.681007 | 32.57494 | -4.0997  | 2.93E-08  | 1.20E-07  | PDE4C      | chr19 | - | 18318771 | 18366229 | 5979  |
| ENSG000001 | 1860.098 | 4309.038 | -1.2099  | 9.46E-17  | 6.82E-16  | ISYNA1     | chr19 | - | 18545198 | 18549111 | 2039  |
| ENSG000001 | 266.6254 | 301.9235 | -0.17665 | 0.28396   | 0.38527   | ELL        | chr19 | - | 18553473 | 18632937 | 4027  |
| ENSG000001 | 909.1094 | 543.3937 | 0.73872  | 0.001123  | 0.002765  | CRTC1      | chr19 | + | 18794487 | 18893004 | 6790  |
| ENSG000001 | 1669.764 | 1846.259 | -0.14496 | 0.31062   | 0.41255   | WBP7       | chr19 | + | 36208921 | 36229779 | 8469  |
| ENSG000001 | 103.1453 | 6.817508 | 3.8492   | 1.52E-21  | 1.38E-20  | COMP       | chr19 | - | 18893583 | 18902123 | 2707  |
| ENSG000001 | 0.36308  | 14.06557 | -4.5841  | 0.000117  | 0.00033   | UPK1A      | chr19 | + | 36157715 | 36169367 | 1223  |
| ENSG000001 | 1844.917 | 1157.241 | 0.67244  | 2.32E-09  | 1.04E-08  | COPE       | chr19 | - | 19010323 | 19030206 | 1770  |
| ENSG000001 | 705.5543 | 590.362  | 0.25665  | 0.29397   | 0.39595   | DDX49      | chr19 | + | 19030484 | 19039436 | 1882  |
| ENSG000001 | 21.95057 | 13.37929 | 0.69319  | 0.20515   | 0.29441   | ETV2       | chr19 | + | 36132647 | 36135773 | 1571  |
| ENSG000001 | 0        | 18.31193 | -5.7186  | 4.10E-06  | 1.37E-05  | ATP4A      | chr19 | - | 36040945 | 36054560 | 3709  |
| ENSG000001 | 662.0393 | 1149.11  | -0.79244 | 5.82E-05  | 0.000171  | ARMC6      | chr19 | + | 19144384 | 19170563 | 2488  |
| ENSG000001 | 601.8685 | 895.4809 | -0.57238 | 1.49E-07  | 5.74E-07  | TMEM147    | chr19 | + | 36036497 | 36038428 | 1783  |
| ENSG000001 | 0.705622 | 1.370136 | -0.71417 | 0.6513    | 0.73678   | GAPDHS     | chr19 | + | 36024314 | 36036218 | 1489  |
| ENSG000001 | 0        | 0.357707 | -0.41864 | 0.81278   | NA        | AC104537   | chr19 | + | 2538108  | 2538786  | 363   |
| ENSG000001 | 0        | 4.33216  | -3.5705  | 0.016455  | 0.033058  | MAG        | chr19 | + | 35783028 | 35804707 | 2426  |
| ENSG000001 | 105.5235 | 385.0354 | -1.8566  | 2.74E-12  | 1.51E-11  | TMEM59L    | chr19 | + | 18718240 | 18731849 | 1717  |
| ENSG000001 | 0.290301 | 0        | 0.4146   | 0.81455   | NA        | HAMP       | chr19 | + | 35771619 | 35776046 | 2624  |
| ENSG000001 | 1884.613 | 2328.497 | -0.3045  | 0.006645  | 0.014443  | USF2       | chr19 | + | 35759881 | 35770718 | 2742  |
| ENSG000001 | 25.00256 | 3560.302 | -7.1422  | 7.11E-248 | 2.41E-245 | LSR        | chr19 | + | 35739233 | 35758866 | 2480  |

|            |          |          |          |          |          |          |       |   |          |          |       |
|------------|----------|----------|----------|----------|----------|----------|-------|---|----------|----------|-------|
| ENSG000001 | 597.3166 | 666.8671 | -0.15865 | 0.34598  | 0.45002  | KXD1     | chr19 | + | 18668572 | 18680197 | 2738  |
| ENSG000001 | 5358.238 | 8304.553 | -0.63101 | 2.90E-05 | 8.82E-05 | FKBP8    | chr19 | - | 18642568 | 18654863 | 1774  |
| ENSG000001 | 552.8902 | 809.0139 | -0.54768 | 0.000242 | 0.000656 | SUGP1    | chr19 | - | 19386827 | 19432123 | 2425  |
| ENSG000001 | 0        | 245.8637 | -9.2471  | 1.47E-16 | 1.05E-15 | HPN      | chr19 | + | 35531410 | 35557475 | 2363  |
| ENSG000001 | 36.69504 | 71.59895 | -0.95749 | 0.00632  | 0.0138   | ZNF14    | chr19 | - | 19821280 | 19843906 | 2949  |
| ENSG000001 | 301.322  | 132.8057 | 1.1681   | 0.000687 | 0.001746 | SCN1B    | chr19 | + | 35521588 | 35531352 | 3460  |
| ENSG000001 | 0.36308  | 23.00018 | -5.2936  | 2.25E-06 | 7.75E-06 | PBX4     | chr19 | - | 19672516 | 19729725 | 1730  |
| ENSG000001 | 1934.197 | 1548.919 | 0.32034  | 0.003525 | 0.008038 | ERF      | chr19 | - | 42751724 | 42759309 | 2698  |
| ENSG000001 | 769.4439 | 802.1593 | -0.06058 | 0.61624  | 0.70766  | GSK3A    | chr19 | - | 42734338 | 42746777 | 3524  |
| ENSG000001 | 1693.195 | 2010.264 | -0.24695 | 0.1157   | 0.18306  | ATP13A1  | chr19 | - | 19756007 | 19774502 | 4729  |
| ENSG000001 | 279.9874 | 568.5622 | -1.0155  | 3.60E-07 | 1.34E-06 | ZNF574   | chr19 | + | 42572629 | 42585701 | 3598  |
| ENSG000001 | 4.180677 | 1408.072 | -8.2382  | 6.01E-81 | 2.55E-79 | GRIK5    | chr19 | - | 42502473 | 42573650 | 3493  |
| ENSG000001 | 1578.892 | 1257.831 | 0.32691  | 0.014373 | 0.029223 | SIPA1L3  | chr19 | + | 38397868 | 38699012 | 7987  |
| ENSG000001 | 87.17816 | 223.0816 | -1.3417  | 3.15E-06 | 1.07E-05 | ZNF85    | chr19 | + | 21106028 | 21133503 | 2652  |
| ENSG000001 | 133.2431 | 51.76402 | 1.362    | 4.68E-08 | 1.88E-07 | ETHE1    | chr19 | - | 44010871 | 44031396 | 1052  |
| ENSG000001 | 482.7932 | 433.3609 | 0.15445  | 0.45217  | 0.55762  | CADM4    | chr19 | - | 44126520 | 44143991 | 2178  |
| ENSG000001 | 739.8807 | 321.3589 | 1.1999   | 1.56E-08 | 6.51E-08 | SMG9     | chr19 | - | 44235301 | 44259142 | 2387  |
| ENSG000001 | 789.0743 | 1076.208 | -0.44797 | 0.001071 | 0.002643 | AVL9     | chr7  | + | 32535038 | 33078516 | 7937  |
| ENSG000001 | 13.94292 | 8.983151 | 0.61574  | 0.30065  | 0.40208  | RUNDC3B  | chr7  | + | 87256864 | 87461611 | 4099  |
| ENSG000001 | 21.50517 | 23.84423 | -0.15481 | 0.7313   | 0.80153  | C7orf63  | chr7  | + | 89874488 | 89940377 | 6966  |
| ENSG000001 | 181.4132 | 211.5091 | -0.21937 | 0.22944  | 0.32269  | GTPBP10  | chr7  | + | 89964537 | 90020769 | 7531  |
| ENSG000001 | 12.3664  | 11.83353 | 0.053917 | 0.93048  | 0.95402  | RASA4    | chr7  | - | 1.02E+08 | 1.02E+08 | 5605  |
| ENSG000001 | 3131.577 | 1099.895 | 1.508    | 7.48E-50 | 1.70E-48 | CDK6     | chr7  | - | 92234235 | 92465908 | 11612 |
| ENSG000001 | 706.6402 | 1029.56  | -0.54229 | 4.21E-07 | 1.56E-06 | PMPCB    | chr7  | + | 1.03E+08 | 1.03E+08 | 2472  |
| ENSG000001 | 323.3901 | 581.1083 | -0.83959 | 0.001958 | 0.004642 | DNAJC2   | chr7  | - | 1.03E+08 | 1.03E+08 | 3033  |
| ENSG000001 | 192.5575 | 68.07854 | 1.4895   | 6.47E-07 | 2.35E-06 | TFPI2    | chr7  | - | 93514709 | 93520303 | 2444  |
| ENSG000001 | 458.365  | 317.2481 | 0.53223  | 0.000127 | 0.000358 | BET1     | chr7  | - | 93592074 | 93633694 | 3586  |
| ENSG000001 | 620.174  | 1179.962 | -0.9273  | 8.99E-14 | 5.43E-13 | NAMPT    | chr7  | - | 1.06E+08 | 1.06E+08 | 4582  |
| ENSG000001 | 342.6549 | 503.8385 | -0.55377 | 0.004906 | 0.010938 | TWISTNB  | chr7  | - | 19735085 | 19748710 | 3942  |
| ENSG000001 | 1.048164 | 1.430828 | -0.3098  | 0.85037  | 0.89482  | PIK3CG   | chr7  | + | 1.07E+08 | 1.07E+08 | 5377  |
| ENSG000001 | 0.342542 | 0        | 0.4146   | 0.81455  | NA       | PON3     | chr7  | - | 94989256 | 95025680 | 2433  |
| ENSG000001 | 521.3184 | 215.8733 | 1.2695   | 1.13E-09 | 5.20E-09 | PON2     | chr7  | - | 95034175 | 95064510 | 1779  |
| ENSG000001 | 126.8498 | 40.44443 | 1.6472   | 1.17E-09 | 5.34E-09 | ITGB8    | chr7  | + | 20370325 | 20450419 | 5573  |
| ENSG000001 | 670.8734 | 395.4076 | 0.76084  | 6.75E-05 | 0.000196 | HBP1     | chr7  | + | 1.07E+08 | 1.07E+08 | 2829  |
| ENSG000001 | 85.55184 | 106.7104 | -0.31719 | 0.16178  | 0.24202  | DUS4L    | chr7  | + | 1.07E+08 | 1.07E+08 | 2280  |
| ENSG000001 | 163.7839 | 389.6377 | -1.2447  | 1.14E-11 | 6.00E-11 | SP4      | chr7  | + | 21467652 | 21554440 | 6126  |
| ENSG000001 | 374.8053 | 244.7146 | 0.61279  | 6.41E-05 | 0.000187 | WDR91    | chr7  | - | 1.35E+08 | 1.35E+08 | 4588  |
| ENSG000001 | 59.25791 | 179.1406 | -1.5941  | 5.14E-14 | 3.16E-13 | DNAH11   | chr7  | + | 21582833 | 21941457 | 14188 |
| ENSG000001 | 265.3219 | 323.5357 | -0.28427 | 0.05414  | 0.095336 | CBLL1    | chr7  | + | 1.07E+08 | 1.07E+08 | 2349  |
| ENSG000001 | 37.29455 | 4.489931 | 2.9362   | 8.08E-05 | 0.000233 | DLX5     | chr7  | - | 96649704 | 96654409 | 1688  |
| ENSG000001 | 2346.096 | 974.1151 | 1.2671   | 6.65E-35 | 1.01E-33 | MTPN     | chr7  | - | 1.36E+08 | 1.36E+08 | 3738  |
| ENSG000001 | 253.0899 | 41.73527 | 2.5899   | 4.27E-26 | 4.67E-25 | STEAP1B  | chr7  | - | 22459063 | 22672544 | 1515  |
| ENSG000001 | 346.9361 | 383.6447 | -0.1427  | 0.45502  | 0.56032  | PTN      | chr7  | - | 1.37E+08 | 1.37E+08 | 1614  |
| ENSG000001 | 261.8944 | 657.4893 | -1.3242  | 4.22E-11 | 2.15E-10 | MPP6     | chr7  | + | 24612887 | 24729159 | 3848  |
| ENSG000001 | 645.8502 | 71.83943 | 3.163    | 3.92E-86 | 1.83E-84 | DFNA5    | chr7  | - | 24737972 | 24809244 | 4182  |
| ENSG000001 | 1.669842 | 27.00531 | -3.8281  | 5.67E-07 | 2.07E-06 | ATP6VOA4 | chr7  | - | 1.38E+08 | 1.38E+08 | 3135  |
| ENSG000001 | 885.879  | 1196.145 | -0.43346 | 0.000127 | 0.000356 | ZC3HAV1  | chr7  | - | 1.39E+08 | 1.39E+08 | 7100  |
| ENSG000001 | 155.1947 | 136.7771 | 0.1842   | 0.35699  | 0.46134  | TTC26    | chr7  | + | 1.39E+08 | 1.39E+08 | 4299  |
| ENSG000001 | 4079.224 | 2583.881 | 0.65807  | 2.63E-10 | 1.26E-09 | OGDH     | chr7  | + | 44646171 | 44748665 | 4181  |
| ENSG000001 | 12.50177 | 32.18971 | -1.3333  | 0.010325 | 0.021648 | ADAP1    | chr7  | - | 937540   | 995043   | 2363  |
| ENSG000001 | 0.342542 | 0.297015 | -0.00202 | 0.99909  | NA       | TFEC     | chr7  | - | 1.16E+08 | 1.16E+08 | 6628  |
| ENSG000001 | 3461.338 | 2419.769 | 0.5158   | 3.08E-06 | 1.05E-05 | H2AFV    | chr7  | - | 44866390 | 44887682 | 3804  |
| ENSG000001 | 536.9594 | 29.16451 | 4.1873   | 4.86E-74 | 1.87E-72 | CAV2     | chr7  | + | 1.16E+08 | 1.16E+08 | 3301  |
| ENSG000001 | 2110.309 | 236.2314 | 3.0944   | 1.02E-09 | 4.69E-09 | CAV1     | chr7  | + | 1.16E+08 | 1.16E+08 | 2704  |
| ENSG000001 | 789.3752 | 315.2705 | 1.3216   | 8.77E-25 | 9.09E-24 | MET      | chr7  | + | 1.16E+08 | 1.16E+08 | 6635  |
| ENSG000001 | 13.32125 | 25.80114 | -0.9392  | 0.064131 | 0.11057  | RNF32    | chr7  | + | 1.56E+08 | 1.56E+08 | 2260  |
| ENSG000001 | 548.6276 | 613.8825 | -0.16156 | 0.35985  | 0.46403  | LMBR1    | chr7  | - | 1.56E+08 | 1.57E+08 | 4911  |
| ENSG000001 | 1.286224 | 0.98329  | 0.31096  | 0.83007  | 0.88026  | NHP2P1   | chr10 | + | 93976089 | 93976550 | 462   |
| ENSG000001 | 0.36308  | 0        | 0.4146   | 0.81455  | NA       | WNT2     | chr7  | - | 1.17E+08 | 1.17E+08 | 2907  |
| ENSG000001 | 34.42226 | 1.029414 | 4.7705   | 2.13E-08 | 8.80E-08 | HOXA1    | chr7  | - | 27132612 | 27135615 | 2517  |
| ENSG000001 | 2616.993 | 6410.898 | -1.2918  | 4.41E-38 | 7.36E-37 | DNAJB6   | chr7  | + | 1.57E+08 | 1.57E+08 | 7992  |
| ENSG000001 | 56.15352 | 0.686276 | 5.9135   | 3.38E-11 | 1.73E-10 | HOXA2    | chr7  | - | 27139721 | 27142430 | 2066  |
| ENSG000001 | 311.9693 | 1.372552 | 7.5772   | 8.92E-31 | 1.18E-29 | HOXA3    | chr7  | - | 27145803 | 27192200 | 3263  |
| ENSG000001 | 896.8992 | 209.1306 | 2.0947   | 2.67E-35 | 4.08E-34 | LFNG     | chr7  | + | 2552163  | 2568811  | 2377  |
| ENSG000001 | 53.42712 | 1.372552 | 5.0683   | 1.04E-11 | 5.52E-11 | HOXA5    | chr7  | - | 27180671 | 27183287 | 1657  |

|                    |          |          |           |           |          |      |   |          |          |      |
|--------------------|----------|----------|-----------|-----------|----------|------|---|----------|----------|------|
| ENSG00000111.12981 | 0        | 5.072    | 5.56E-05  | 0.000163  | HOXA6    | chr7 | - | 27185015 | 27192217 | 989  |
| ENSG0000011003.352 | 1421.32  | -0.50206 | 5.93E-05  | 0.000174  | BRAT1    | chr7 | - | 2577511  | 2595361  | 5360 |
| ENSG000001808.5246 | 202.2355 | 1.9942   | 2.82E-42  | 5.27E-41  | IQCE     | chr7 | + | 2598632  | 2654368  | 6844 |
| ENSG0000010        | 92.00964 | -8.0321  | 2.41E-13  | 1.42E-12  | VIPR2    | chr7 | - | 1.59E+08 | 1.59E+08 | 3944 |
| ENSG000001346.9738 | 249.2975 | 0.47745  | 0.000908  | 0.002266  | TSPAN12  | chr7 | - | 1.2E+08  | 1.2E+08  | 2796 |
| ENSG0000011159.077 | 1636.293 | -0.49626 | 0.001098  | 0.002706  | SSBP1    | chr7 | + | 1.41E+08 | 1.41E+08 | 2620 |
| ENSG000001676.4414 | 2.69898  | 7.8308   | 7.31E-56  | 1.93E-54  | HOXA13   | chr7 | - | 27233122 | 27239725 | 4376 |
| ENSG000001480.7675 | 1.043983 | 8.4992   | 5.31E-33  | 7.58E-32  | CPED1    | chr7 | + | 1.21E+08 | 1.21E+08 | 5340 |
| ENSG0000017.282301 | 4.025408 | 0.78079  | 0.4444    | 0.54995   | EVX1     | chr7 | + | 27282164 | 27290112 | 2712 |
| ENSG000001500.8743 | 588.2302 | -0.23103 | 0.10575   | 0.16929   | HIBADH   | chr7 | - | 27565061 | 27702614 | 1990 |
| ENSG0000011637.914 | 924.9478 | 0.82336  | 9.27E-07  | 3.32E-06  | TAX1BP1  | chr7 | + | 27778950 | 27880938 | 2890 |
| ENSG00000166.05709 | 469.3211 | -2.82    | 1.64E-49  | 3.69E-48  | CPVL     | chr7 | - | 29034847 | 29235067 | 2213 |
| ENSG00000154.67903 | 57.8371  | -0.08307 | 0.77294   | 0.83657   | CHN2     | chr7 | + | 29161956 | 29553944 | 3530 |
| ENSG0000011207.64  | 2103.456 | -0.79966 | 1.02E-13  | 6.17E-13  | GRB10    | chr7 | - | 50657760 | 50861159 | 5432 |
| ENSG000001247.3447 | 234.7456 | 0.075368 | 0.63929   | 0.72678   | ABHD11   | chr7 | - | 73150424 | 73153197 | 1562 |
| ENSG0000010.72616  | 628.6824 | -9.2136  | 5.85E-29  | 7.16E-28  | COBL     | chr7 | - | 51083909 | 51384515 | 7697 |
| ENSG0000011591.876 | 276.1125 | 2.5267   | 1.23E-86  | 5.81E-85  | FKBP14   | chr7 | - | 30050203 | 30066300 | 4960 |
| ENSG000001293.1277 | 481.4209 | -0.71649 | 2.65E-07  | 9.98E-07  | PLEKHA8  | chr7 | + | 30067020 | 30170096 | 3050 |
| ENSG000001265.2821 | 74.52646 | 1.8169   | 9.20E-11  | 4.56E-10  | STX1A    | chr7 | - | 73113536 | 73134002 | 2095 |
| ENSG000001274.2576 | 204.1935 | 0.42167  | 0.08482   | 0.14042   | NOD1     | chr7 | - | 30464143 | 30518400 | 4610 |
| ENSG0000013696.351 | 3095.805 | 0.25546  | 0.081798  | 0.13617   | GARS     | chr7 | + | 30634297 | 30673649 | 2634 |
| ENSG0000010.342542 | 13.28376 | -4.5437  | 0.000108  | 0.000306  | CRHR2    | chr7 | - | 30692200 | 30739745 | 2530 |
| ENSG00000192.08744 | 380.0785 | -2.0366  | 7.53E-19  | 5.99E-18  | EPHB6    | chr7 | + | 1.43E+08 | 1.43E+08 | 4406 |
| ENSG0000015.104635 | 2.217472 | 1.054    | 0.31983   | 0.42271   | FAM188B  | chr7 | + | 30811033 | 30932002 | 3573 |
| ENSG0000010.632843 | 13.13565 | -3.8746  | 0.000252  | 0.000682  | GHRHR    | chr7 | + | 30978284 | 31032869 | 1613 |
| ENSG00000112.82459 | 24.69888 | -0.93553 | 0.080622  | 0.13446   | NSUN5P2  | chr7 | - | 72418120 | 72425329 | 1789 |
| ENSG000001948.0587 | 674.7461 | 0.48953  | 0.007019  | 0.015193  | CASP2    | chr7 | + | 1.43E+08 | 1.43E+08 | 5769 |
| ENSG0000011316.898 | 1273.792 | 0.048823 | 0.66066   | 0.74456   | CHCHD2   | chr7 | - | 56169262 | 56174269 | 901  |
| ENSG0000017865.054 | 3161.435 | 1.3124   | 6.25E-18  | 4.77E-17  | HSPB1    | chr7 | + | 75931861 | 75933612 | 1455 |
| ENSG0000012907.805 | 641.9483 | 2.169    | 1.07E-19  | 8.89E-19  | NPTX2    | chr7 | + | 98246609 | 98259180 | 2700 |
| ENSG0000013173.794 | 3870.732 | -0.28596 | 0.02002   | 0.039509  | PDAP1    | chr7 | - | 98989671 | 99006452 | 2546 |
| ENSG000001412.5303 | 430.177  | -0.05949 | 0.6689    | 0.75148   | BUD31    | chr7 | + | 99006264 | 99017239 | 1139 |
| ENSG00000121.31512 | 37.45339 | -0.79735 | 0.068958  | 0.11757   | PTCD1    | chr7 | - | 99014362 | 99063820 | 5582 |
| ENSG00000116.82702 | 13.58319 | 0.29385  | 0.5758    | 0.67257   | CYP3A5   | chr7 | - | 99245817 | 99277621 | 3320 |
| ENSG0000012286.617 | 965.1998 | 1.239    | 6.75E-08  | 2.67E-07  | ZKSCAN1  | chr7 | + | 99613204 | 99639312 | 9418 |
| ENSG0000014046.539 | 9187.216 | -1.1814  | 1.95E-20  | 1.68E-19  | EIF3B    | chr7 | + | 2393721  | 2420380  | 3745 |
| ENSG0000011013.174 | 1140.654 | -0.17089 | 0.20164   | 0.2903    | SNX8     | chr7 | - | 2291405  | 2393953  | 4727 |
| ENSG000001437.5536 | 904.0212 | -1.0458  | 2.90E-14  | 1.81E-13  | NUDT1    | chr7 | + | 2281857  | 2290781  | 872  |
| ENSG000001111.6139 | 2665.919 | -4.5645  | 4.27E-154 | 5.17E-152 | PTPRZ1   | chr7 | + | 1.22E+08 | 1.22E+08 | 8175 |
| ENSG0000011024     | 1322.327 | -0.36834 | 0.01079   | 0.022517  | TAF6     | chr7 | - | 99704693 | 99717464 | 2727 |
| ENSG000001581.6772 | 802.3512 | -0.46321 | 0.000845  | 0.002122  | WASL     | chr7 | - | 1.23E+08 | 1.23E+08 | 4435 |
| ENSG0000010        | 0.357707 | -0.41864 | 0.81278   | NA        | SPAM1    | chr7 | + | 1.24E+08 | 1.24E+08 | 2349 |
| ENSG000001275.2282 | 451.1295 | -0.71085 | 0.000109  | 0.000309  | AIMP2    | chr7 | + | 6048876  | 6063465  | 1225 |
| ENSG0000015.290455 | 63.08623 | -3.4971  | 7.66E-11  | 3.82E-10  | TFR2     | chr7 | - | 1E+08    | 1E+08    | 3131 |
| ENSG0000010.290301 | 1.073121 | -0.88899 | 0.61676   | NA        | FSCN3    | chr7 | + | 1.27E+08 | 1.27E+08 | 2238 |
| ENSG000001434.1637 | 329.647  | 0.3957   | 0.018427  | 0.036669  | MOSPD3   | chr7 | + | 1E+08    | 1E+08    | 1191 |
| ENSG0000010.342542 | 0        | 0.4146   | 0.81455   | NA        | PAX4     | chr7 | - | 1.27E+08 | 1.27E+08 | 2010 |
| ENSG0000018070.583 | 560.5913 | 3.8412   | 2.43E-154 | 2.96E-152 | PCOLCE   | chr7 | + | 1E+08    | 1E+08    | 1702 |
| ENSG0000019.564448 | 31.42006 | -1.675   | 0.001724  | 0.004123  | FBXO24   | chr7 | + | 1E+08    | 1E+08    | 2276 |
| ENSG0000010        | 2.073397 | -2.2159  | 0.20168   | 0.2903    | PPP1R17  | chr7 | + | 31726329 | 31748069 | 2268 |
| ENSG000001616.3359 | 580.0555 | 0.087966 | 0.60448   | 0.69772   | RBM28    | chr7 | - | 1.28E+08 | 1.28E+08 | 2808 |
| ENSG000001526.7879 | 528.4161 | -0.00448 | 0.974     | 0.98544   | USP42    | chr7 | + | 6144515  | 6201195  | 5155 |
| ENSG0000012102.099 | 1659.927 | 0.34031  | 0.000701  | 0.001779  | IMPDH1   | chr7 | - | 1.28E+08 | 1.28E+08 | 2881 |
| ENSG000001128.9571 | 131.0456 | -0.02194 | 0.93587   | 0.95766   | AGFG2    | chr7 | + | 1E+08    | 1E+08    | 4796 |
| ENSG000001280.8609 | 572.4483 | -1.0239  | 1.15E-08  | 4.85E-08  | LSM5     | chr7 | - | 32524951 | 32534895 | 2251 |
| ENSG0000012594.706 | 22.1754  | 6.8703   | 4.66E-180 | 8.08E-178 | SERPINE1 | chr7 | + | 1.01E+08 | 1.01E+08 | 3190 |
| ENSG0000011270.014 | 842.8953 | 0.59021  | 5.00E-05  | 0.000148  | AP1S1    | chr7 | + | 1.01E+08 | 1.01E+08 | 1306 |
| ENSG0000010        | 5.741971 | -4.0379  | 0.004201  | 0.009456  | MOGAT3   | chr7 | - | 1.01E+08 | 1.01E+08 | 2132 |
| ENSG000001387.5461 | 982.1922 | -1.3393  | 2.20E-20  | 1.88E-19  | C1GALT1  | chr7 | + | 7196565  | 7288251  | 6208 |
| ENSG0000014759.948 | 1000.59  | 2.2476   | 2.18E-74  | 8.43E-73  | PLOD3    | chr7 | - | 1.01E+08 | 1.01E+08 | 2920 |
| ENSG000001229.1104 | 551.042  | -1.2619  | 1.98E-19  | 1.62E-18  | RPA3     | chr7 | - | 7676149  | 7758238  | 2020 |
| ENSG0000011312.704 | 903.0347 | 0.53923  | 1.59E-05  | 5.00E-05  | ZNHIT1   | chr7 | + | 1.01E+08 | 1.01E+08 | 3958 |
| ENSG00000182.7714  | 74.95856 | 0.14344  | 0.608     | 0.70076   | CLDN15   | chr7 | - | 1.01E+08 | 1.01E+08 | 2131 |
| ENSG0000010        | 0.297015 | -0.41864 | 0.81278   | NA        | NOBOX    | chr7 | - | 1.44E+08 | 1.44E+08 | 2076 |
| ENSG00000190.09901 | 320.2794 | -1.8241  | 2.25E-16  | 1.59E-15  | GLCCI1   | chr7 | + | 8008425  | 8133902  | 4743 |

|                    |          |          |           |           |          |      |   |          |          |       |
|--------------------|----------|----------|-----------|-----------|----------|------|---|----------|----------|-------|
| ENSG00000162.63184 | 0.297015 | 6.6811   | 1.19E-10  | 5.85E-10  | MYL10    | chr7 | - | 1.01E+08 | 1.01E+08 | 1009  |
| ENSG000001566.3602 | 997.9961 | -0.81523 | 7.38E-09  | 3.16E-08  | PHF14    | chr7 | + | 11013499 | 11209250 | 4276  |
| ENSG000001327.5769 | 381.5898 | -0.22108 | 0.17248   | 0.25507   | NRF1     | chr7 | + | 1.29E+08 | 1.29E+08 | 3528  |
| ENSG000001587.4538 | 338.6971 | 0.79374  | 1.81E-05  | 5.63E-05  | TMEM106E | chr7 | + | 12250867 | 12276886 | 6432  |
| ENSG000001740.8688 | 832.3482 | -0.16691 | 0.43415   | 0.53961   | EZH2     | chr7 | - | 1.49E+08 | 1.49E+08 | 3641  |
| ENSG000001305.0799 | 155.0154 | 0.97524  | 3.60E-07  | 1.34E-06  | CEP41    | chr7 | - | 1.3E+08  | 1.3E+08  | 3750  |
| ENSG000001302.9952 | 126.663  | 1.2378   | 0.005295  | 0.011741  | ZNF862   | chr7 | + | 1.5E+08  | 1.5E+08  | 6950  |
| ENSG00000114.00372 | 0.343138 | 4.6135   | 8.24E-05  | 0.000237  | SFRP4    | chr7 | - | 37945543 | 38065297 | 2957  |
| ENSG00000110710.54 | 1491.509 | 2.8405   | 5.59E-101 | 3.20E-99  | MEST     | chr7 | + | 1.3E+08  | 1.3E+08  | 2465  |
| ENSG0000012442.381 | 1.713273 | 10.216   | 3.81E-70  | 1.37E-68  | MEOX2    | chr7 | - | 15650837 | 15726437 | 2500  |
| ENSG000001374.8321 | 170.7092 | 1.1346   | 1.15E-12  | 6.50E-12  | ANKMY2   | chr7 | - | 16639401 | 16685442 | 2599  |
| ENSG0000010.342542 | 0.700845 | -0.57269 | 0.74414   | NA        | ACTR3C   | chr7 | - | 1.5E+08  | 1.5E+08  | 5697  |
| ENSG0000019.770806 | 51.67681 | -2.3434  | 1.32E-05  | 4.16E-05  | POU6F2   | chr7 | + | 39017598 | 39532694 | 5925  |
| ENSG000001284.4626 | 657.6334 | -1.2073  | 3.17E-22  | 2.94E-21  | TSPAN13  | chr7 | + | 16793160 | 16824161 | 2093  |
| ENSG00000173.63605 | 3785.959 | -5.6651  | 2.66E-199 | 5.71E-197 | RARRES2  | chr7 | - | 1.5E+08  | 1.5E+08  | 1905  |
| ENSG0000011.576526 | 0.700845 | 0.95778  | 0.51389   | 0.61691   | AGR2     | chr7 | - | 16831435 | 16873057 | 1778  |
| ENSG0000011134.746 | 129.1862 | 3.1244   | 1.87E-85  | 8.64E-84  | AHR      | chr7 | + | 17338246 | 17385776 | 6276  |
| ENSG0000011084.635 | 1721.904 | -0.66608 | 3.20E-08  | 1.30E-07  | CHCHD3   | chr7 | - | 1.32E+08 | 1.33E+08 | 1598  |
| ENSG0000010.975385 | 0.357707 | 0.92752  | 0.59066   | NA        | GIMAP2   | chr7 | + | 1.5E+08  | 1.5E+08  | 1449  |
| ENSG0000012.749709 | 7.956154 | -1.4367  | 0.12944   | 0.20099   | TMEM176E | chr7 | - | 1.5E+08  | 1.5E+08  | 1430  |
| ENSG0000011366.266 | 779.3261 | 0.8083   | 5.97E-08  | 2.37E-07  | GLI3     | chr7 | - | 42000548 | 42277469 | 8208  |
| ENSG00000146.54041 | 74.51572 | -0.67717 | 0.018428  | 0.036669  | PSMA2    | chr7 | - | 42956460 | 42971822 | 4251  |
| ENSG000001542.2048 | 783.4114 | -0.52907 | 0.00348   | 0.007944  | MRPL32   | chr7 | + | 42971799 | 42988557 | 2734  |
| ENSG000001838.9012 | 1160.061 | -0.46732 | 2.69E-05  | 8.21E-05  | COA1     | chr7 | - | 43648055 | 43769316 | 3223  |
| ENSG000001655.7064 | 312.1853 | 1.0706   | 1.83E-13  | 1.09E-12  | BLVRA    | chr7 | + | 43798279 | 43846939 | 1159  |
| ENSG000001531.801  | 471.0508 | 0.17477  | 0.26747   | 0.36622   | URGCP    | chr7 | - | 43915493 | 43966010 | 5658  |
| ENSG0000011940.722 | 986.4657 | 0.97507  | 2.83E-15  | 1.89E-14  | TMEM248  | chr7 | + | 66386212 | 66423538 | 4229  |
| ENSG00000192.63651 | 87.54456 | 0.086274 | 0.73028   | 0.80092   | STAG3L4  | chr7 | + | 66767608 | 66786513 | 2143  |
| ENSG0000011233.245 | 1914.53  | -0.63431 | 3.69E-09  | 1.62E-08  | RHEB     | chr7 | - | 1.51E+08 | 1.51E+08 | 2075  |
| ENSG000001206.1633 | 277.7855 | -0.42899 | 0.006698  | 0.014547  | PRKAG2   | chr7 | - | 1.51E+08 | 1.52E+08 | 3305  |
| ENSG00000136967.06 | 1360.707 | 4.7545   | 1.08E-209 | 2.58E-207 | AEBP1    | chr7 | + | 44143960 | 44154161 | 4081  |
| ENSG0000011984.076 | 3136.488 | -0.65967 | 3.17E-11  | 1.63E-10  | POLD2    | chr7 | - | 44154286 | 44163957 | 2158  |
| ENSG0000010.923144 | 4.977144 | -2.0336  | 0.10355   | 0.16621   | MYL7     | chr7 | - | 44178463 | 44180931 | 791   |
| ENSG00000140.39618 | 98.12638 | -1.2679  | 0.00605   | 0.001552  | GCK      | chr7 | - | 44183872 | 44237769 | 2729  |
| ENSG000001673.3619 | 513.3289 | 0.39045  | 0.087592  | 0.14442   | BCL7B    | chr7 | - | 72950686 | 72972332 | 1975  |
| ENSG0000015167.388 | 2317.484 | 1.1546   | 6.32E-13  | 3.64E-12  | YKT6     | chr7 | + | 44240567 | 44253893 | 2696  |
| ENSG0000011242.744 | 459.4509 | 1.4298   | 5.59E-11  | 2.82E-10  | TBL2     | chr7 | - | 72983990 | 72993121 | 2430  |
| ENSG0000010        | 0.343138 | -0.41864 | 0.81278   | NA        | GALNTL5  | chr7 | + | 1.52E+08 | 1.52E+08 | 2272  |
| ENSG0000015684.748 | 3003.533 | 0.91414  | 0.001766  | 0.004216  | CLIP2    | chr7 | + | 73703805 | 73820273 | 5563  |
| ENSG0000018552.298 | 9005.368 | -0.07438 | 0.40119   | 0.50594   | EIF4H    | chr7 | + | 73588575 | 73611431 | 2679  |
| ENSG000001931.5009 | 739.3559 | 0.33193  | 0.018343  | 0.036505  | LIMK1    | chr7 | + | 73497263 | 73536855 | 3374  |
| ENSG0000016.597217 | 14.03314 | -1.051   | 0.09595   | 0.16094   | SPATA6L  | chr9 | - | 4553386  | 4666674  | 4073  |
| ENSG00000111.55629 | 139.5181 | -3.5585  | 1.52E-23  | 1.50E-22  | SLC1A1   | chr9 | + | 4490444  | 4587469  | 3722  |
| ENSG00000113.97202 | 3.056687 | 2.0768   | 0.014312  | 0.029125  | LHX2     | chr9 | + | 1.27E+08 | 1.27E+08 | 2554  |
| ENSG000001452.2116 | 197.4651 | 1.193    | 3.43E-09  | 1.51E-08  | FKTN     | chr9 | + | 1.08E+08 | 1.08E+08 | 7364  |
| ENSG000001108.0956 | 51.40564 | 1.0616   | 0.000652  | 0.001663  | FSD1L    | chr9 | + | 1.08E+08 | 1.08E+08 | 7623  |
| ENSG000001276.8787 | 90.36975 | 1.6111   | 7.85E-14  | 4.77E-13  | CNTNAP3  | chr9 | - | 39072764 | 39288312 | 5064  |
| ENSG0000011814.003 | 2300.884 | -0.34292 | 0.000244  | 0.00066   | SPIN1    | chr9 | + | 91003334 | 91093609 | 4484  |
| ENSG000001172.1544 | 110.5642 | 0.63814  | 0.000987  | 0.00245   | NMRK1    | chr9 | - | 77675489 | 77703133 | 2050  |
| ENSG0000011028.049 | 1655.005 | -0.68609 | 4.67E-06  | 1.56E-05  | TMEM245  | chr9 | - | 1.12E+08 | 1.12E+08 | 7980  |
| ENSG00000145.60529 | 179.5071 | -1.9687  | 1.92E-16  | 1.36E-15  | PRUNE2   | chr9 | - | 79226292 | 79521003 | 12587 |
| ENSG000001345.7861 | 37.98103 | 3.1681   | 1.93E-49  | 4.35E-48  | MEGF9    | chr9 | - | 1.23E+08 | 1.23E+08 | 6298  |
| ENSG000001109.2405 | 251.6826 | -1.2055  | 1.83E-08  | 7.60E-08  | TRIM14   | chr9 | - | 1.01E+08 | 1.01E+08 | 4454  |
| ENSG000001450.963  | 1294.469 | -1.5181  | 1.18E-17  | 8.94E-17  | CORO2A   | chr9 | - | 1.01E+08 | 1.01E+08 | 5635  |
| ENSG0000011631.802 | 979.2142 | 0.73619  | 6.49E-10  | 3.04E-09  | TGFBR1   | chr9 | + | 1.02E+08 | 1.02E+08 | 6516  |
| ENSG0000012332.499 | 1133.291 | 1.0406   | 5.28E-17  | 3.86E-16  | SEC61B   | chr9 | + | 1.02E+08 | 1.02E+08 | 687   |
| ENSG00000175.37932 | 6.909755 | 3.39     | 2.15E-15  | 1.44E-14  | C5       | chr9 | - | 1.24E+08 | 1.24E+08 | 5462  |
| ENSG000001773.2522 | 4.49322  | 7.2923   | 6.83E-75  | 2.66E-73  | OGN      | chr9 | - | 95146249 | 95166978 | 2971  |
| ENSG00000168.10232 | 3.108515 | 4.2697   | 1.57E-13  | 9.37E-13  | ASPN     | chr9 | - | 95218487 | 95244788 | 2470  |
| ENSG00000131.00557 | 5.13982  | 2.545    | 2.77E-05  | 8.45E-05  | ECM2     | chr9 | - | 95256365 | 95298937 | 3253  |
| ENSG0000011078.648 | 868.2274 | 0.31116  | 0.21883   | 0.31047   | TLE4     | chr9 | + | 82186688 | 82341658 | 4845  |
| ENSG0000010        | 7.844505 | -4.574   | 0.000463  | 0.001209  | LHX6     | chr9 | - | 1.25E+08 | 1.25E+08 | 3587  |
| ENSG000001612.0794 | 903.531  | -0.56108 | 1.90E-06  | 6.61E-06  | PTGR1    | chr9 | - | 1.14E+08 | 1.14E+08 | 2298  |
| ENSG000001252.2512 | 81.08812 | 1.6312   | 2.74E-13  | 1.61E-12  | SUSD1    | chr9 | - | 1.15E+08 | 1.15E+08 | 3124  |
| ENSG0000010.923144 | 14.89021 | -3.6264  | 0.000113  | 0.000319  | AMBP     | chr9 | - | 1.17E+08 | 1.17E+08 | 1434  |

|                    |          |          |          |          |           |       |   |          |          |       |
|--------------------|----------|----------|----------|----------|-----------|-------|---|----------|----------|-------|
| ENSG000001612.4984 | 951.8121 | -0.63482 | 0.00021  | 0.000574 | AKNA      | chr9  | - | 1.17E+08 | 1.17E+08 | 7380  |
| ENSG0000010705622  | 0        | 0.8807   | 0.6196   | NA       | TNFSF8    | chr9  | - | 1.18E+08 | 1.18E+08 | 1906  |
| ENSG0000015481.635 | 946.0011 | 2.5283   | 8.16E-52 | 1.96E-50 | DNM1      | chr9  | + | 1.31E+08 | 1.31E+08 | 3286  |
| ENSG0000012109.049 | 94.04505 | 4.4561   | 6.90E-53 | 1.70E-51 | ENG       | chr9  | - | 1.31E+08 | 1.31E+08 | 3059  |
| ENSG00000193.6074  | 26.2325  | 1.8145   | 1.41E-09 | 6.45E-09 | AK1       | chr9  | - | 1.31E+08 | 1.31E+08 | 2266  |
| ENSG000001191.4391 | 249.6008 | -0.38161 | 0.030989 | 0.058351 | CDC37L1   | chr9  | + | 4679559  | 4708398  | 3502  |
| ENSG0000015455736  | 15.13057 | -1.3928  | 0.050601 | 0.089868 | RLN2      | chr9  | - | 5299868  | 5304969  | 1177  |
| ENSG0000010342542  | 1.188058 | -0.99414 | 0.57407  | NA       | RLN1      | chr9  | - | 5334969  | 5339873  | 1068  |
| ENSG000001184.1448 | 208.6427 | -0.18029 | 0.32291  | 0.42581  | PLGRKT    | chr9  | - | 5357973  | 5437878  | 932   |
| ENSG000001946.1834 | 857.1287 | 0.14241  | 0.38746  | 0.49156  | TBC1D13   | chr9  | + | 1.32E+08 | 1.32E+08 | 3906  |
| ENSG000001940.7678 | 378.0887 | 1.313    | 2.20E-28 | 2.64E-27 | KIAA1432  | chr9  | + | 5629025  | 5776557  | 6774  |
| ENSG000001252.7606 | 631.0435 | -1.3186  | 1.86E-17 | 1.39E-16 | KDM4C     | chr9  | + | 6720863  | 7175648  | 4655  |
| ENSG0000016939759  | 68.17972 | -3.2444  | 5.84E-13 | 3.37E-12 | DOCK8     | chr9  | + | 214854   | 465259   | 9277  |
| ENSG0000011263.462 | 747.7212 | 0.75525  | 1.14E-08 | 4.83E-08 | KANK1     | chr9  | + | 470291   | 746105   | 7193  |
| ENSG000001949.3264 | 510.5906 | 0.89322  | 1.16E-08 | 4.88E-08 | ELAVL2    | chr9  | - | 23690102 | 23826335 | 3805  |
| ENSG0000014074.74  | 1405.866 | 1.5328   | 7.50E-36 | 1.17E-34 | NCS1      | chr9  | + | 1.33E+08 | 1.33E+08 | 4991  |
| ENSG000001621.8281 | 223.6181 | 1.4698   | 4.67E-13 | 2.72E-12 | TESK1     | chr9  | + | 35605367 | 35610038 | 2421  |
| ENSG0000011681007  | 5.194065 | -1.4915  | 0.15199  | 0.22961  | KCNT1     | chr9  | + | 1.39E+08 | 1.39E+08 | 4830  |
| ENSG0000012987769  | 13.14539 | -2.048   | 0.005846 | 0.012842 | CA9       | chr9  | + | 35673853 | 35681156 | 1618  |
| ENSG0000012048.824 | 1984.801 | 0.045875 | 0.67605  | 0.75745  | FUBP3     | chr9  | + | 1.33E+08 | 1.34E+08 | 3124  |
| ENSG0000012044087  | 1.623443 | 0.26047  | 0.84116  | 0.88848  | TYRP1     | chr9  | + | 12685439 | 12710290 | 2851  |
| ENSG000001919.9935 | 419.9913 | 1.1303   | 1.80E-19 | 1.48E-18 | CREB3     | chr9  | + | 35732332 | 35737001 | 1832  |
| ENSG000001767.4773 | 526.2894 | 0.54318  | 0.000643 | 0.001643 | RGP1      | chr9  | + | 35749203 | 35758572 | 7018  |
| ENSG0000011499.468 | 905.1164 | 0.72775  | 5.47E-10 | 2.57E-09 | MPDZ      | chr9  | - | 13105703 | 13279589 | 7722  |
| ENSG0000010        | 1.935026 | -2.4284  | 0.13734  | 0.21062  | LHX3      | chr9  | - | 1.39E+08 | 1.39E+08 | 2403  |
| ENSG000001124.361  | 202.5736 | -0.70279 | 0.000231 | 0.000627 | DDX58     | chr9  | - | 32455300 | 32526322 | 4621  |
| ENSG0000012613.08  | 2760.958 | -0.07921 | 0.42638  | 0.53178  | EDF1      | chr9  | - | 1.4E+08  | 1.4E+08  | 809   |
| ENSG0000010290301  | 75.11466 | -6.9375  | 1.12E-11 | 5.94E-11 | PIP5K1B   | chr9  | + | 71320575 | 71624092 | 3335  |
| ENSG000001349.4319 | 3.259039 | 6.6037   | 2.57E-45 | 5.15E-44 | GLIS3     | chr9  | - | 3824127  | 4348392  | 6667  |
| ENSG000001531.2449 | 694.4224 | -0.38338 | 0.20996  | 0.29999  | BAG1      | chr9  | - | 33247818 | 33264761 | 3865  |
| ENSG0000011943.11  | 2321.074 | -0.2559  | 0.046975 | 0.084274 | RAPGEF1   | chr9  | - | 1.34E+08 | 1.35E+08 | 6256  |
| ENSG0000011158.573 | 791.7746 | 0.54671  | 0.014344 | 0.029184 | NPDC1     | chr9  | - | 1.4E+08  | 1.4E+08  | 2187  |
| ENSG000001273.9023 | 11.06225 | 4.5768   | 1.43E-46 | 2.97E-45 | APBA1     | chr9  | - | 72042446 | 72287222 | 6534  |
| ENSG0000012524.413 | 925.5982 | 1.4441   | 2.23E-14 | 1.41E-13 | SETX      | chr9  | - | 1.35E+08 | 1.35E+08 | 11103 |
| ENSG0000010        | 66.51029 | -7.6089  | 4.31E-12 | 2.34E-11 | SH3GL2    | chr9  | + | 17579080 | 17797127 | 2565  |
| ENSG00000124.74054 | 16.82208 | 0.53131  | 0.37301  | 0.47732  | PTGDS     | chr9  | + | 1.4E+08  | 1.4E+08  | 989   |
| ENSG0000011857.749 | 741.5156 | 1.3195   | 3.57E-09 | 1.57E-08 | ABCA2     | chr9  | - | 1.4E+08  | 1.4E+08  | 8154  |
| ENSG000001172.3189 | 109.0242 | 0.65571  | 0.00127  | 0.003099 | SHB       | chr9  | - | 37919131 | 38069210 | 2783  |
| ENSG0000012141.035 | 2217.499 | -0.05094 | 0.69358  | 0.77152  | UBE2R2    | chr9  | + | 33817565 | 33920402 | 4075  |
| ENSG000001291.6123 | 1076.582 | -1.88    | 3.69E-29 | 4.56E-28 | ABHD17B   | chr9  | - | 74477368 | 74525847 | 2614  |
| ENSG000001150.1781 | 283.1723 | -0.91232 | 3.49E-06 | 1.18E-05 | EXOSC3    | chr9  | - | 37766975 | 37801434 | 1625  |
| ENSG0000013102.015 | 2776.78  | 0.15945  | 0.2955   | 0.3975   | ZFAND5    | chr9  | - | 74966341 | 74980163 | 5728  |
| ENSG0000011415.115 | 1613.453 | -0.18912 | 0.18829  | 0.27454  | DVL1      | chr1  | - | 1270656  | 1284730  | 3239  |
| ENSG000001609.3726 | 4087.3   | -2.7413  | 8.95E-90 | 4.48E-88 | PDLIM1    | chr10 | - | 96997329 | 97050781 | 1452  |
| ENSG000001328.8116 | 843.5419 | -1.3538  | 1.67E-09 | 7.58E-09 | CCNJ      | chr10 | + | 97803151 | 97820627 | 4115  |
| ENSG0000010        | 0.98329  | -1.2878  | 0.47019  | NA       | DNTT      | chr10 | + | 98064085 | 98098321 | 2016  |
| ENSG000001145.8228 | 37.62312 | 1.91     | 0.000463 | 0.001209 | GATA3     | chr10 | + | 8095567  | 8117161  | 3078  |
| ENSG000001132.5943 | 551.1181 | -2.048   | 1.56E-20 | 1.35E-19 | ATRNL1    | chr10 | + | 1.17E+08 | 1.18E+08 | 8479  |
| ENSG000001532.6615 | 666.2697 | -0.32322 | 0.010149 | 0.021313 | HPS1      | chr10 | - | 1E+08    | 1E+08    | 3703  |
| ENSG000001178.4185 | 432.8387 | -1.2744  | 1.08E-09 | 4.96E-09 | PHYH      | chr10 | - | 13319796 | 13344412 | 1829  |
| ENSG00000160.36509 | 330.8303 | -2.4462  | 1.20E-25 | 1.28E-24 | RASSF4    | chr10 | + | 45454855 | 45490172 | 4350  |
| ENSG000001788.8499 | 652.1403 | 0.27384  | 0.080011 | 0.13353  | DNMBP     | chr10 | - | 1.02E+08 | 1.02E+08 | 6472  |
| ENSG000001233.4039 | 202.8617 | 0.20096  | 0.22776  | 0.32081  | RAB11FIP2 | chr10 | - | 1.2E+08  | 1.2E+08  | 6061  |
| ENSG000001556.8972 | 1156.521 | -1.0499  | 2.95E-06 | 1.00E-05 | CXCL12    | chr10 | - | 44793038 | 44881941 | 3532  |
| ENSG000001928.3245 | 702.2688 | 0.40203  | 0.001467 | 0.00355  | ERLIN1    | chr10 | - | 1.02E+08 | 1.02E+08 | 5792  |
| ENSG0000017531.197 | 9378.45  | -0.31608 | 0.003033 | 0.006984 | EIF3A     | chr10 | - | 1.21E+08 | 1.21E+08 | 5472  |
| ENSG0000010653381  | 2.309719 | -1.3949  | 0.3517   | 0.456    | PKD2L1    | chr10 | - | 1.02E+08 | 1.02E+08 | 3043  |
| ENSG000001396.9503 | 5.254758 | 6.1547   | 1.35E-56 | 3.65E-55 | CUBN      | chr10 | - | 16865963 | 17171830 | 11949 |
| ENSG000001167.8478 | 215.8837 | -0.36126 | 0.19717  | 0.28518  | TRDMT1    | chr10 | - | 17184253 | 17244053 | 8230  |
| ENSG0000010        | 2.497501 | -2.5327  | 0.1357   | 0.20884  | RBP3      | chr10 | - | 48381487 | 48390991 | 4276  |
| ENSG0000013.133327 | 2.278164 | 0.38095  | 0.73289  | 0.80267  | GDF10     | chr10 | - | 48425815 | 48438976 | 2458  |
| ENSG000001738.9884 | 866.4249 | -0.22868 | 0.11284  | 0.1791   | DDX50     | chr10 | + | 70661034 | 70706603 | 2538  |
| ENSG000001589.1378 | 734.3473 | -0.31752 | 0.009812 | 0.020654 | MAPK8     | chr10 | + | 49514698 | 49647403 | 5796  |
| ENSG0000011422.383 | 1000.456 | 0.50728  | 0.000866 | 0.002171 | SEC23IP   | chr10 | + | 1.22E+08 | 1.22E+08 | 4656  |
| ENSG000001379.7761 | 339.6011 | 0.16124  | 0.2407   | 0.33555  | ATE1      | chr10 | - | 1.23E+08 | 1.24E+08 | 4900  |

|                    |          |          |           |           |           |       |   |          |          |       |
|--------------------|----------|----------|-----------|-----------|-----------|-------|---|----------|----------|-------|
| ENSG000001349.2433 | 757.9796 | -1.117   | 4.07E-18  | 3.14E-17  | NSMCE4A   | chr10 | - | 1.24E+08 | 1.24E+08 | 2399  |
| ENSG000001546.3187 | 641.1554 | -0.2317  | 0.07581   | 0.12757   | PLEKHA1   | chr10 | + | 1.24E+08 | 1.24E+08 | 8619  |
| ENSG000001315.4559 | 1467.017 | -2.2151  | 1.66E-65  | 5.49E-64  | PALD1     | chr10 | + | 72238577 | 72328205 | 4555  |
| ENSG0000015407.783 | 3228.475 | 0.74326  | 6.73E-09  | 2.89E-08  | UNC5B     | chr10 | + | 72972327 | 73062621 | 6841  |
| ENSG000001187.0471 | 106.0768 | 0.81105  | 0.00127   | 0.003098  | CDH23     | chr10 | + | 73156691 | 73575702 | 10085 |
| ENSG00000113.25703 | 1.652581 | 2.8259   | 0.000814  | 0.002047  | C10orf54  | chr10 | - | 73507316 | 73533255 | 4689  |
| ENSG0000015.528515 | 279.207  | -5.5478  | 1.01E-32  | 1.43E-31  | SPOCK2    | chr10 | - | 73818793 | 73848790 | 5445  |
| ENSG0000011072.835 | 509.2381 | 1.0739   | 4.18E-19  | 3.36E-18  | MICU1     | chr10 | - | 74127098 | 74385899 | 2425  |
| ENSG0000011252.519 | 536.4673 | 1.2214   | 1.27E-21  | 1.15E-20  | PPP3CB    | chr10 | - | 75196186 | 75255782 | 3501  |
| ENSG000001905.5817 | 272.1805 | 1.7295   | 6.19E-22  | 5.68E-21  | CCSER2    | chr10 | + | 86088342 | 86278273 | 7664  |
| ENSG000001752.3742 | 2052.822 | -1.4469  | 4.33E-42  | 8.03E-41  | BMPR1A    | chr10 | + | 88516407 | 88684945 | 3605  |
| ENSG000001459.4898 | 375.1672 | 0.29111  | 0.029095  | 0.055227  | MINPP1    | chr10 | + | 89264632 | 89313217 | 2415  |
| ENSG000001290.2645 | 15.98998 | 4.1305   | 3.39E-24  | 3.43E-23  | ACTA2     | chr10 | - | 90694831 | 90751147 | 1756  |
| ENSG000001650.6764 | 247.9231 | 1.3898   | 8.87E-19  | 7.03E-18  | LIPA      | chr10 | - | 90973326 | 91174314 | 2782  |
| ENSG0000010.580602 | 1.012429 | -0.48451 | 0.77505   | NA        | TLX1      | chr10 | + | 1.03E+08 | 1.03E+08 | 3910  |
| ENSG000001316.1764 | 1056.362 | -1.7346  | 5.72E-21  | 5.04E-20  | C10orf2   | chr10 | + | 1.03E+08 | 1.03E+08 | 3175  |
| ENSG0000012665.881 | 3283.272 | -0.29992 | 0.084603  | 0.1402    | LZTS2     | chr10 | + | 1.03E+08 | 1.03E+08 | 5741  |
| ENSG0000012687.263 | 82.57715 | 5.0191   | 9.36E-273 | 3.75E-270 | SFXN3     | chr10 | + | 1.03E+08 | 1.03E+08 | 3095  |
| ENSG0000011209.146 | 249.2806 | 2.2728   | 1.12E-55  | 2.94E-54  | KAZALD1   | chr10 | + | 1.03E+08 | 1.03E+08 | 1913  |
| ENSG000001465.6797 | 1016.854 | -1.1247  | 1.63E-12  | 9.11E-12  | FBXW4     | chr10 | - | 1.03E+08 | 1.03E+08 | 3183  |
| ENSG0000010.72616  | 243.0612 | -7.5978  | 8.41E-14  | 5.09E-13  | FGF8      | chr10 | - | 1.04E+08 | 1.04E+08 | 1197  |
| ENSG000001556.674  | 1931.232 | -1.7938  | 1.30E-57  | 3.58E-56  | NPM3      | chr10 | - | 1.04E+08 | 1.04E+08 | 877   |
| ENSG0000011650.723 | 1496.973 | 0.14112  | 0.15166   | 0.22919   | TNKS2     | chr10 | + | 93558069 | 93625033 | 6157  |
| ENSG0000019.92932  | 7.340307 | 0.41885  | 0.57134   | 0.66851   | PITX3     | chr10 | - | 1.04E+08 | 1.04E+08 | 1391  |
| ENSG0000013377.328 | 1264.306 | 1.4163   | 8.46E-38  | 1.40E-36  | GBF1      | chr10 | + | 1.04E+08 | 1.04E+08 | 6403  |
| ENSG0000012861.722 | 814.9753 | 1.8088   | 1.68E-26  | 1.87E-25  | ARHGAP21  | chr10 | - | 24872538 | 25012597 | 7167  |
| ENSG00000132.33629 | 43.56442 | -0.42482 | 0.36156   | 0.46574   | CPEB3     | chr10 | - | 93806449 | 94050844 | 7664  |
| ENSG000001195.2636 | 335.5243 | -0.77759 | 0.001006  | 0.002493  | FBXL15    | chr10 | + | 1.04E+08 | 1.04E+08 | 2362  |
| ENSG0000011198.004 | 788.7237 | 0.60158  | 0.000496  | 0.001288  | CUEDC2    | chr10 | - | 1.04E+08 | 1.04E+08 | 1191  |
| ENSG000001691.6703 | 345.5442 | 0.99567  | 8.48E-05  | 0.000244  | SUFU      | chr10 | + | 1.04E+08 | 1.04E+08 | 5001  |
| ENSG000001356.5533 | 198.5431 | 0.84477  | 6.56E-06  | 2.15E-05  | ANKRD26   | chr10 | - | 27280843 | 27389421 | 6591  |
| ENSG000001388.1114 | 321.702  | 0.27007  | 0.11851   | 0.18697   | ACBD5     | chr10 | - | 27484146 | 27531059 | 3918  |
| ENSG000001160.3992 | 454.0205 | -1.4948  | 1.51E-09  | 6.86E-09  | LHPP      | chr10 | + | 1.26E+08 | 1.26E+08 | 1622  |
| ENSG0000011239.263 | 1104.783 | 0.16556  | 0.11343   | 0.17987   | LARP4B    | chr10 | - | 855484   | 977564   | 5640  |
| ENSG0000011385.335 | 1675.438 | -0.27349 | 0.10108   | 0.16298   | GTPBP4    | chr10 | + | 1034338  | 1065876  | 4696  |
| ENSG000001363.5736 | 381.3359 | -0.06707 | 0.70114   | 0.77763   | C10orf137 | chr10 | + | 1.27E+08 | 1.27E+08 | 4387  |
| ENSG000001682.8131 | 1025.101 | -0.58375 | 0.003313  | 0.007587  | BCCIP     | chr10 | + | 1.28E+08 | 1.28E+08 | 2338  |
| ENSG000001360.7129 | 524.9171 | -0.53884 | 0.000126  | 0.000355  | MTPAP     | chr10 | - | 30598730 | 30663377 | 5947  |
| ENSG00000111.30626 | 71.42861 | -2.5851  | 5.19E-06  | 1.72E-05  | NEURL     | chr10 | + | 1.05E+08 | 1.05E+08 | 4314  |
| ENSG0000014972.758 | 584.0881 | 3.0783   | 1.76E-47  | 3.76E-46  | SH3PXD2A  | chr10 | - | 1.05E+08 | 1.06E+08 | 11468 |
| ENSG0000011142.67  | 459.1232 | 1.314    | 6.77E-30  | 8.60E-29  | PITRM1    | chr10 | - | 3179920  | 3215003  | 3457  |
| ENSG000001324.7289 | 216.8451 | 0.57857  | 0.006294  | 0.013749  | OBFC1     | chr10 | - | 1.06E+08 | 1.06E+08 | 1417  |
| ENSG00000118.26834 | 152.2658 | -3.0276  | 1.34E-19  | 1.11E-18  | MAP3K8    | chr10 | + | 30722866 | 30750762 | 3096  |
| ENSG0000011525.613 | 11.9006  | 6.3997   | 1.15E-10  | 5.66E-10  | DKK1      | chr10 | + | 54074056 | 54077802 | 1790  |
| ENSG0000011481.025 | 74.81132 | 4.2867   | 2.45E-91  | 1.24E-89  | EBF3      | chr10 | - | 1.32E+08 | 1.32E+08 | 4375  |
| ENSG0000011132.006 | 1439.729 | -0.34656 | 0.002061  | 0.004867  | GLRX3     | chr10 | + | 1.32E+08 | 1.32E+08 | 1921  |
| ENSG00000178.40393 | 115.382  | -0.55487 | 0.011589  | 0.02402   | SORCS1    | chr10 | - | 1.08E+08 | 1.09E+08 | 7272  |
| ENSG0000011645.69  | 905.8264 | 0.86115  | 2.19E-12  | 1.22E-11  | FAM208B   | chr10 | + | 5726801  | 5805703  | 8626  |
| ENSG0000012162.668 | 870.2295 | 1.3126   | 7.39E-24  | 7.38E-23  | XPNPPE1   | chr10 | - | 1.12E+08 | 1.12E+08 | 4384  |
| ENSG0000011192.636 | 1737.872 | -0.54    | 0.038872  | 0.071565  | SMC3      | chr10 | + | 1.12E+08 | 1.12E+08 | 4114  |
| ENSG000001695.1229 | 264.7954 | 1.3923   | 8.33E-22  | 7.61E-21  | SHOC2     | chr10 | + | 1.13E+08 | 1.13E+08 | 3943  |
| ENSG000001471.61   | 1239.946 | -1.3894  | 6.80E-11  | 3.41E-10  | TFAM      | chr10 | + | 60144782 | 60158981 | 5414  |
| ENSG0000011299.309 | 1284.806 | 0.016288 | 0.9218    | 0.94748   | CCDC6     | chr10 | - | 61548521 | 61666414 | 5811  |
| ENSG000001707.3886 | 508.1942 | 0.47667  | 0.004158  | 0.00937   | CUL2      | chr10 | - | 35297479 | 35379570 | 4440  |
| ENSG0000011775.908 | 1202.027 | 0.56169  | 7.92E-06  | 2.58E-05  | CCNY      | chr10 | + | 35535953 | 35860852 | 3960  |
| ENSG0000014069.684 | 7276.706 | -0.83738 | 6.85E-11  | 3.44E-10  | UBE2S     | chr19 | - | 55912652 | 55919145 | 1009  |
| ENSG00000111552.84 | 14130.11 | -0.29028 | 0.003452  | 0.007886  | RPL28     | chr19 | + | 55896713 | 55914612 | 5620  |
| ENSG0000015872.914 | 2399.985 | 1.2896   | 3.77E-29  | 4.65E-28  | ZMIZ1     | chr10 | + | 80828792 | 81076276 | 7546  |
| ENSG00000186.14263 | 13.80823 | 2.5898   | 1.68E-11  | 8.78E-11  | DNAJC12   | chr10 | - | 69556427 | 69597924 | 1197  |
| ENSG000001831.9473 | 1479.546 | -0.82919 | 8.28E-10  | 3.85E-09  | PPIF      | chr10 | + | 81107225 | 81115093 | 2190  |
| ENSG000001121.9936 | 58.6729  | 1.0536   | 0.00089   | 0.002227  | PBLD      | chr10 | - | 70042417 | 70092684 | 2587  |
| ENSG0000012233.783 | 1891.239 | 0.23989  | 0.007967  | 0.017031  | TSPAN14   | chr10 | + | 82213922 | 82282387 | 5691  |
| ENSG0000011.991846 | 1.40169  | 0.44895  | 0.73066   | 0.80113   | LGI1      | chr10 | + | 95517566 | 95557916 | 2290  |
| ENSG000001294.2765 | 75.03698 | 1.9683   | 1.56E-22  | 1.48E-21  | TBC1D12   | chr10 | + | 96162261 | 96295687 | 5272  |
| ENSG0000010        | 0.654722 | -0.83442 | 0.63731   | NA        | CYP2C18   | chr10 | + | 96443251 | 96495947 | 2418  |

|            |          |          |          |          |          |          |       |   |          |          |       |
|------------|----------|----------|----------|----------|----------|----------|-------|---|----------|----------|-------|
| ENSG000001 | 0.653381 | 0.343138 | 0.51863  | 0.76794  | NA       | CRYBA1   | chr17 | + | 27573881 | 27581512 | 783   |
| ENSG000001 | 1439.486 | 2761.874 | -0.93955 | 3.24E-25 | 3.42E-24 | NUFIP2   | chr17 | - | 27582854 | 27621136 | 10850 |
| ENSG000001 | 1457.137 | 1550.906 | -0.08997 | 0.50818  | 0.61171  | GIT1     | chr17 | - | 27900487 | 27921072 | 3768  |
| ENSG000001 | 256.724  | 282.9075 | -0.1411  | 0.40842  | 0.51325  | TADA2A   | chr17 | + | 35766965 | 35839835 | 4253  |
| ENSG000001 | 858.4946 | 1026.716 | -0.25758 | 0.027721 | 0.052948 | AATF     | chr17 | + | 35306175 | 35414171 | 2141  |
| ENSG000001 | 202.6082 | 634.3229 | -1.6427  | 5.36E-20 | 4.52E-19 | DHRS11   | chr17 | + | 34948228 | 34957235 | 4505  |
| ENSG000001 | 235.6974 | 453.1967 | -0.93903 | 1.29E-10 | 6.33E-10 | ZNHIT3   | chr17 | + | 34842473 | 34855154 | 4421  |
| ENSG000001 | 1865.174 | 1074.096 | 0.79456  | 4.73E-07 | 1.74E-06 | MLLT6    | chr17 | + | 36861795 | 36886056 | 7578  |
| ENSG000001 | 1574.256 | 1795.516 | -0.18912 | 0.088625 | 0.14586  | PSMB3    | chr17 | + | 36908989 | 36920484 | 773   |
| ENSG000001 | 345.7379 | 286.5488 | 0.27073  | 0.25055  | 0.34709  | CWC25    | chr17 | - | 36957340 | 36981734 | 2581  |
| ENSG000001 | 8353.713 | 11981.14 | -0.5198  | 1.45E-07 | 5.58E-07 | RPL19    | chr17 | + | 37356536 | 37360980 | 1303  |
| ENSG000001 | 162.7664 | 129.7406 | 0.32479  | 0.17466  | 0.25778  | FBXL20   | chr17 | - | 37415384 | 37558776 | 2445  |
| ENSG000001 | 3.411649 | 61.56557 | -3.9877  | 2.73E-10 | 1.31E-09 | RUNDC3A  | chr17 | + | 42385781 | 42396039 | 3686  |
| ENSG000001 | 2287.089 | 2723.958 | -0.25124 | 0.21071  | 0.30092  | UBTF     | chr17 | - | 42282401 | 42298994 | 4997  |
| ENSG000001 | 0.685084 | 0.357707 | 0.4822   | 0.78686  | NA       | CSF3     | chr17 | + | 38171614 | 38174066 | 1673  |
| ENSG000001 | 3292.644 | 4940.436 | -0.58469 | 2.09E-08 | 8.64E-08 | PSMD3    | chr17 | + | 38137050 | 38154213 | 2888  |
| ENSG000001 | 2195.267 | 2651.591 | -0.27252 | 0.003549 | 0.00809  | CASC3    | chr17 | + | 38296571 | 38328436 | 4116  |
| ENSG000001 | 213.3187 | 330.4852 | -0.63341 | 0.000187 | 0.000516 | RAPGEFL1 | chr17 | + | 38333263 | 38351908 | 3727  |
| ENSG000001 | 18.76761 | 11.75256 | 0.66877  | 0.20034  | 0.289    | RGS9     | chr17 | + | 63133549 | 63223821 | 2387  |
| ENSG000001 | 0        | 103.0517 | -8.0702  | 2.16E-12 | 1.20E-11 | RNF43    | chr17 | - | 56429861 | 56494956 | 5575  |
| ENSG000001 | 61.38073 | 356.5881 | -2.5186  | 1.34E-16 | 9.59E-16 | WNT3     | chr17 | - | 44839872 | 44910520 | 3355  |
| ENSG000001 | 0        | 0.594029 | -0.81444 | 0.64499  | NA       | ASPA     | chr17 | + | 3375668  | 3406713  | 5431  |
| ENSG000001 | 138.9283 | 174.1818 | -0.32111 | 0.15422  | 0.23248  | RAD51C   | chr17 | + | 56769934 | 56811703 | 2077  |
| ENSG000001 | 29.91796 | 47.43931 | -0.66009 | 0.080659 | 0.13449  | 4-Sep    | chr17 | - | 56597611 | 56618179 | 3544  |
| ENSG000001 | 1194.159 | 623.5623 | 0.93565  | 9.99E-16 | 6.82E-15 | MTMR4    | chr17 | - | 56566898 | 56595266 | 5839  |
| ENSG000001 | 554.0118 | 1244.622 | -1.1667  | 1.74E-24 | 1.79E-23 | TRIM37   | chr17 | - | 57059999 | 57184282 | 4391  |
| ENSG000001 | 1.866827 | 6.238048 | -1.5647  | 0.10639  | 0.17014  | P2RX1    | chr17 | - | 3799886  | 3819794  | 2945  |
| ENSG000001 | 494.7052 | 674.6869 | -0.44565 | 0.006872 | 0.014899 | DHX40    | chr17 | + | 57642886 | 57685706 | 3724  |
| ENSG000001 | 88.62778 | 142.9876 | -0.68846 | 0.002302 | 0.005392 | TUBD1    | chr17 | - | 57936851 | 57970304 | 2472  |
| ENSG000001 | 6408.558 | 6023.061 | 0.089252 | 0.66706  | 0.74973  | KPNB1    | chr17 | + | 45726842 | 45762871 | 6139  |
| ENSG000001 | 418.818  | 196.8945 | 1.0874   | 7.75E-07 | 2.79E-06 | GOSR2    | chr17 | + | 45000483 | 45105003 | 2202  |
| ENSG000001 | 42.72975 | 53.8691  | -0.33016 | 0.27271  | 0.37225  | PNPO     | chr17 | + | 46018872 | 46025654 | 2397  |
| ENSG000001 | 481.7831 | 281.5711 | 0.77502  | 1.79E-06 | 6.27E-06 | RPS6KB1  | chr17 | + | 57970447 | 58027925 | 5375  |
| ENSG000001 | 117.2842 | 109.144  | 0.10237  | 0.70152  | 0.77787  | TRIM16L  | chr17 | + | 18601311 | 18639431 | 3189  |
| ENSG000001 | 3.382552 | 0.951736 | 1.5275   | 0.22389  | 0.31631  | ZNF29P   | chr17 | + | 15578790 | 15578957 | 168   |
| ENSG000001 | 682.7424 | 473.3891 | 0.52596  | 0.000209 | 0.000572 | CDK5RAP3 | chr17 | + | 46045176 | 46059140 | 2759  |
| ENSG000001 | 3296.486 | 3927.383 | -0.2524  | 0.003838 | 0.008695 | CBX1     | chr17 | - | 46147414 | 46178883 | 2422  |
| ENSG000001 | 285.2674 | 581.5689 | -1.0269  | 1.39E-14 | 8.88E-14 | RECQL5   | chr17 | - | 73622925 | 73663269 | 3710  |
| ENSG000001 | 173.7172 | 200.4016 | -0.20519 | 0.23773  | 0.33215  | PIGL     | chr17 | + | 16120523 | 16252115 | 1345  |
| ENSG000001 | 665.9059 | 624.6985 | 0.091441 | 0.6456   | 0.73235  | GALK1    | chr17 | - | 73747675 | 73761792 | 1866  |
| ENSG000001 | 338.2502 | 481.2839 | -0.5081  | 0.005243 | 0.011636 | INTS2    | chr17 | - | 59942731 | 60005377 | 5878  |
| ENSG000001 | 290.4766 | 94.56783 | 1.6081   | 7.81E-14 | 4.75E-13 | CAMTA2   | chr17 | - | 4871287  | 4890960  | 4777  |
| ENSG000001 | 1342.555 | 658.3755 | 1.0262   | 4.39E-09 | 1.91E-08 | MED13    | chr17 | - | 60019966 | 60142643 | 10465 |
| ENSG000001 | 18.97559 | 2.745103 | 2.5638   | 0.009546 | 0.020129 | HOXB6    | chr17 | - | 46671639 | 46682354 | 3434  |
| ENSG000001 | 49.93748 | 248.6672 | -2.3035  | 2.84E-26 | 3.12E-25 | ENO3     | chr17 | + | 4851387  | 4860426  | 1521  |
| ENSG000001 | 10443.71 | 13137.08 | -0.33052 | 0.00747  | 0.016074 | PFN1     | chr17 | - | 4848947  | 4852356  | 1291  |
| ENSG000001 | 622.1395 | 1827.271 | -1.5503  | 4.22E-30 | 5.40E-29 | RNF167   | chr17 | + | 4843303  | 4848517  | 1915  |
| ENSG000001 | 1311.753 | 1408.115 | -0.10246 | 0.35177  | 0.456    | SLC25A11 | chr17 | - | 4840425  | 4843546  | 2176  |
| ENSG000001 | 8.870805 | 110.8734 | -3.6059  | 9.22E-15 | 5.95E-14 | RASD1    | chr17 | - | 17397751 | 17399709 | 1746  |
| ENSG000001 | 6.204226 | 10.67628 | -0.74194 | 0.39103  | 0.49548  | CHRNE    | chr17 | - | 4801069  | 4806369  | 2455  |
| ENSG000001 | 3111.847 | 904.4803 | 1.7768   | 2.57E-20 | 2.20E-19 | RAI1     | chr17 | + | 17584787 | 17714767 | 7662  |
| ENSG000001 | 688.6739 | 967.9475 | -0.48993 | 0.002455 | 0.005729 | NUP88    | chr17 | - | 5264258  | 5323480  | 2916  |
| ENSG000001 | 1758.12  | 3919.267 | -1.1543  | 2.50E-15 | 1.67E-14 | C1QBP    | chr17 | - | 5336097  | 5352150  | 1169  |
| ENSG000001 | 0.36308  | 3.930745 | -2.8174  | 0.041384 | 0.075485 | SLC6A4   | chr17 | - | 28521337 | 28563020 | 6543  |
| ENSG000001 | 1074.945 | 1121.373 | -0.06102 | 0.54297  | 0.64351  | BLMH     | chr17 | - | 28575218 | 28619074 | 2360  |
| ENSG000001 | 2385.165 | 1404.798 | 0.76221  | 3.14E-07 | 1.18E-06 | CPD      | chr17 | + | 28705923 | 28797007 | 9394  |
| ENSG000001 | 1011.456 | 833.8134 | 0.2781   | 0.027354 | 0.052333 | GOSR1    | chr17 | + | 28804380 | 28854610 | 6039  |
| ENSG000001 | 884.1657 | 1031.185 | -0.22119 | 0.17344  | 0.25623  | CCDC47   | chr17 | - | 61822610 | 61853711 | 3466  |
| ENSG000001 | 68.59367 | 27.08944 | 1.3352   | 0.00029  | 0.000778 | MED31    | chr17 | - | 6546635  | 6554954  | 1654  |
| ENSG000001 | 679.1144 | 772.7701 | -0.18615 | 0.11044  | 0.17565  | DRG2     | chr17 | + | 17991200 | 18011285 | 5342  |
| ENSG000001 | 1539.236 | 1939.963 | -0.33303 | 0.041924 | 0.076361 | FTSJ3    | chr17 | - | 61896793 | 61907372 | 3559  |
| ENSG000001 | 420.4529 | 315.1435 | 0.4154   | 0.013334 | 0.027328 | AKAP10   | chr17 | - | 19807615 | 19881656 | 4072  |
| ENSG000001 | 1.576526 | 4.94559  | -1.4567  | 0.17508  | 0.25827  | ALDH3A1  | chr17 | - | 19641297 | 19652256 | 2144  |
| ENSG000001 | 1742.327 | 2738.968 | -0.65174 | 4.48E-07 | 1.65E-06 | SMARCD2  | chr17 | - | 61909444 | 61920425 | 2716  |
| ENSG000001 | 248.9966 | 802.0669 | -1.6851  | 1.03E-37 | 1.70E-36 | SYNGR2   | chr17 | + | 76164639 | 76169608 | 3036  |

|            |          |          |          |           |           |          |       |   |          |          |      |
|------------|----------|----------|----------|-----------|-----------|----------|-------|---|----------|----------|------|
| ENSG000001 | 176.2989 | 190.224  | -0.11057 | 0.64813   | 0.73416   | B9D1     | chr17 | - | 19240867 | 19281495 | 1353 |
| ENSG000001 | 787.0811 | 1061.488 | -0.43077 | 0.000974  | 0.002421  | UTP6     | chr17 | - | 30187923 | 30228784 | 4387 |
| ENSG000001 | 8980.875 | 5909.779 | 0.60106  | 0.012025  | 0.024859  | DDX5     | chr17 | - | 62495734 | 62504317 | 3558 |
| ENSG000001 | 209.9096 | 416.852  | -0.98595 | 9.15E-10  | 4.24E-09  | C17orf75 | chr17 | - | 30651584 | 30677042 | 1642 |
| ENSG000001 | 1149.888 | 474.5939 | 1.2711   | 1.27E-09  | 5.82E-09  | CYTH1    | chr17 | - | 76670130 | 76778379 | 4423 |
| ENSG000001 | 2308.921 | 2770.507 | -0.26235 | 0.090259  | 0.14813   | PSMD11   | chr17 | + | 30771279 | 30810336 | 4098 |
| ENSG000001 | 750.3128 | 740.7822 | 0.018241 | 0.87122   | 0.91007   | LGALS3BP | chr17 | - | 76967320 | 76976191 | 2405 |
| ENSG000001 | 238.9498 | 48.10765 | 2.2965   | 2.16E-15  | 1.45E-14  | ASIC2    | chr17 | - | 31340105 | 32501983 | 3443 |
| ENSG000001 | 13.37088 | 0        | 5.368    | 1.01E-05  | 3.22E-05  | CCL7     | chr17 | + | 32597240 | 32599261 | 810  |
| ENSG000001 | 296.1302 | 23.63463 | 3.6376   | 2.20E-51  | 5.23E-50  | CCL2     | chr17 | + | 32582237 | 32584222 | 996  |
| ENSG000001 | 0        | 0.343138 | -0.41864 | 0.81278   | NA        | CCL1     | chr17 | - | 32687347 | 32690250 | 592  |
| ENSG000001 | 67.24079 | 107.8984 | -0.67492 | 0.007298  | 0.015728  | PEX12    | chr17 | - | 33901814 | 33905882 | 2675 |
| ENSG000001 | 3.22583  | 1.903472 | 0.65563  | 0.57523   | 0.6721    | HNF1B    | chr17 | - | 36046434 | 36105237 | 3481 |
| ENSG000001 | 7.935682 | 57.36695 | -2.7996  | 3.30E-08  | 1.34E-07  | DHX58    | chr17 | - | 40253422 | 40264751 | 2617 |
| ENSG000001 | 505.8183 | 796.4285 | -0.65443 | 1.65E-07  | 6.33E-07  | KAT2A    | chr17 | - | 40265126 | 40273376 | 3109 |
| ENSG000001 | 454.9686 | 326.1075 | 0.47969  | 0.001481  | 0.00358   | RAB5C    | chr17 | - | 40276994 | 40307035 | 1771 |
| ENSG000001 | 528.768  | 350.3016 | 0.59293  | 9.94E-06  | 3.19E-05  | NAGLU    | chr17 | + | 40688190 | 40696467 | 2544 |
| ENSG000001 | 13.39321 | 13.08228 | 0.032104 | 0.95854   | 0.97496   | HSD17B1P | chr17 | + | 40698782 | 40700724 | 955  |
| ENSG000001 | 39.97906 | 27.60189 | 0.5174   | 0.22664   | 0.31956   | HSD17B1  | chr17 | + | 40701232 | 40707231 | 4982 |
| ENSG000001 | 663.4954 | 445.2805 | 0.57413  | 0.003713  | 0.008429  | MLX      | chr17 | + | 40719086 | 40725257 | 2586 |
| ENSG000001 | 1407.035 | 287.9506 | 2.2755   | 2.17E-17  | 1.62E-16  | CNTNAP1  | chr17 | + | 40834631 | 40851832 | 5276 |
| ENSG000001 | 23.58015 | 15.54406 | 0.59292  | 0.26696   | 0.36563   | ABI3     | chr17 | + | 47287589 | 47300587 | 2109 |
| ENSG000001 | 392.9376 | 337.1091 | 0.21872  | 0.4847    | 0.58873   | EZH1     | chr17 | - | 40852293 | 40897071 | 4623 |
| ENSG000001 | 0        | 8.516212 | -4.7134  | 0.000233  | 0.000632  | DLX4     | chr17 | + | 48046334 | 48052321 | 2032 |
| ENSG000001 | 3073.046 | 445.795  | 2.7697   | 3.82E-26  | 4.17E-25  | PPP1R9B  | chr17 | - | 48211104 | 48227991 | 4158 |
| ENSG000001 | 663285.1 | 700.2314 | 9.8749   | 0         | 0         | COL1A1   | chr17 | - | 48260650 | 48278993 | 6727 |
| ENSG000001 | 4.834058 | 3.480792 | 0.42646  | 0.64597   | 0.73254   | SGCA     | chr17 | + | 48241575 | 48253292 | 1432 |
| ENSG000001 | 624.4061 | 646.8361 | -0.0502  | 0.78288   | 0.84448   | MRPL27   | chr17 | - | 48445218 | 48450575 | 2441 |
| ENSG000001 | 6300.899 | 6763.686 | -0.10215 | 0.42409   | 0.52946   | VAT1     | chr17 | - | 41166622 | 41177140 | 2734 |
| ENSG000001 | 4466.307 | 1921.016 | 1.2164   | 3.37E-41  | 6.10E-40  | LRRC59   | chr17 | - | 48452420 | 48474914 | 2910 |
| ENSG000001 | 171.7075 | 1854.251 | -3.4305  | 1.17E-123 | 9.60E-122 | RND2     | chr17 | + | 41177258 | 41184057 | 4154 |
| ENSG000001 | 35.19806 | 35.08856 | 0.000987 | 0.9978    | 0.99894   | ALOX12   | chr17 | + | 6899384  | 6914055  | 2358 |
| ENSG000001 | 2004.483 | 2891.411 | -0.52751 | 0.001427  | 0.003458  | HDAC5    | chr17 | - | 42154114 | 42201070 | 5326 |
| ENSG000001 | 22.84201 | 2.66501  | 2.9855   | 1.62E-05  | 5.08E-05  | ABCC3    | chr17 | + | 48712138 | 48769613 | 5716 |
| ENSG000001 | 1912.983 | 2427.193 | -0.3429  | 0.003167  | 0.007277  | LUC7L3   | chr17 | + | 48796905 | 48833574 | 7040 |
| ENSG000001 | 0        | 0.594029 | -0.81444 | 0.64499   | NA        | PPY      | chr17 | - | 42018172 | 42019836 | 563  |
| ENSG000001 | 269.9432 | 847.3827 | -1.6451  | 2.05E-24  | 2.10E-23  | MPP2     | chr17 | - | 41952725 | 41987068 | 4414 |
| ENSG000001 | 999.1455 | 519.7954 | 0.94158  | 7.93E-17  | 5.75E-16  | SMURF2   | chr17 | - | 62538413 | 62658186 | 5892 |
| ENSG000001 | 617.1303 | 573.4335 | 0.10693  | 0.39596   | 0.5005    | DUSP3    | chr17 | - | 41843489 | 41856356 | 4110 |
| ENSG000001 | 0.36308  | 0.297015 | -0.00205 | 0.99908   | NA        | CACNG1   | chr17 | + | 65040706 | 65052909 | 1262 |
| ENSG000001 | 2604.186 | 3212.768 | -0.30224 | 0.037148  | 0.068724  | EFTUD2   | chr17 | - | 42927311 | 42977030 | 4548 |
| ENSG000001 | 0.923144 | 6.658863 | -2.485   | 0.023228  | 0.045189  | HLF      | chr17 | + | 53342373 | 53402426 | 5547 |
| ENSG000001 | 4.139601 | 7.123386 | -0.70151 | 0.4698    | 0.57455   | SLC16A6  | chr17 | - | 66263167 | 66287408 | 3807 |
| ENSG000001 | 5808.147 | 2077.658 | 1.4823   | 1.11E-58  | 3.13E-57  | PRKAR1A  | chr17 | + | 66409764 | 66547460 | 4256 |
| ENSG000001 | 432.044  | 439.5954 | -0.0259  | 0.86855   | 0.90849   | EFNB3    | chr17 | + | 7608520  | 7614696  | 3222 |
| ENSG000001 | 82.51355 | 59.53822 | 0.4691   | 0.15204   | 0.22966   | FAM20A   | chr17 | - | 66531254 | 66597530 | 3668 |
| ENSG000001 | 8669.806 | 12478.27 | -0.52495 | 3.18E-09  | 1.40E-08  | YWHAE    | chr17 | - | 1247566  | 1303672  | 2211 |
| ENSG000001 | 5.374398 | 5.813943 | -0.1018  | 0.90731   | 0.93617   | AC016292 | chr17 | - | 1761333  | 1761740  | 408  |
| ENSG000001 | 305.6417 | 413.3146 | -0.43362 | 0.042431  | 0.077177  | MMD      | chr17 | - | 53469974 | 53499353 | 2735 |
| ENSG000001 | 2.250445 | 3.365854 | -0.49745 | 0.66535   | 0.74853   | RANGRF   | chr17 | + | 8191815  | 8193410  | 1140 |
| ENSG000001 | 260.0826 | 334.7826 | -0.36489 | 0.017999  | 0.035878  | DPH1     | chr17 | + | 1933404  | 1946724  | 2607 |
| ENSG000001 | 125.3621 | 379.0297 | -1.5956  | 1.63E-18  | 1.28E-17  | MAP2K6   | chr17 | + | 67410839 | 67539472 | 3076 |
| ENSG000001 | 165.5451 | 220.8855 | -0.41373 | 0.016161  | 0.032514  | DHRS7B   | chr17 | + | 21026677 | 21096578 | 2175 |
| ENSG000001 | 2459.853 | 1372.975 | 0.84052  | 3.06E-16  | 2.15E-15  | WSB1     | chr17 | + | 25621102 | 25640657 | 4187 |
| ENSG000001 | 0        | 0.297015 | -0.41864 | 0.81278   | NA        | MYH1     | chr17 | - | 10395624 | 10421860 | 6024 |
| ENSG000001 | 1100.275 | 2132.257 | -0.95365 | 2.57E-22  | 2.40E-21  | SLC9A3R1 | chr17 | + | 72744791 | 72765492 | 1969 |
| ENSG000001 | 27.17762 | 42.35615 | -0.63606 | 0.11927   | 0.18793   | MYH3     | chr17 | - | 10531843 | 10560626 | 6037 |
| ENSG000001 | 545.1541 | 672.8755 | -0.30336 | 0.047989  | 0.085835  | NAT9     | chr17 | - | 72766686 | 72772506 | 1993 |
| ENSG000001 | 1271.056 | 439.7791 | 1.5271   | 3.50E-16  | 2.44E-15  | TMEM104  | chr17 | + | 72772622 | 72835918 | 4745 |
| ENSG000001 | 8.57969  | 10.01344 | -0.22193 | 0.75714   | 0.8234    | SEBOX    | chr17 | - | 26691290 | 26700110 | 2149 |
| ENSG000001 | 1506.153 | 383.0475 | 1.9707   | 4.45E-36  | 6.97E-35  | TNFAIP1  | chr17 | + | 26662628 | 26674035 | 3627 |
| ENSG000001 | 295.6533 | 129.5161 | 1.1916   | 5.71E-09  | 2.47E-08  | IFT20    | chr17 | - | 26655352 | 26662515 | 1485 |
| ENSG000001 | 1034.244 | 1457.319 | -0.49214 | 0.046517  | 0.083551  | TMEM97   | chr17 | + | 26646121 | 26655707 | 2564 |
| ENSG000001 | 1590.455 | 1092.998 | 0.53987  | 0.000102  | 0.000291  | CDR2L    | chr17 | + | 72983727 | 73001895 | 3536 |
| ENSG000001 | 857.2128 | 39.66429 | 4.4173   | 4.11E-93  | 2.15E-91  | PMP22    | chr17 | - | 15133095 | 15168643 | 1817 |

|                    |          |          |           |           |          |       |   |          |          |       |
|--------------------|----------|----------|-----------|-----------|----------|-------|---|----------|----------|-------|
| ENSG0000010580602  | 0        | 0.8036   | 0.6494    | NA        | FOXN1    | chr17 | + | 26833261 | 26865914 | 3436  |
| ENSG000001560.8912 | 798.6925 | -0.50864 | 0.001744  | 0.004168  | UNC119   | chr17 | - | 26873725 | 26879686 | 4189  |
| ENSG000001417.7139 | 821.376  | -0.97062 | 6.91E-05  | 0.000201  | ALDOC    | chr17 | - | 26900133 | 26904282 | 1982  |
| ENSG0000013261.923 | 2654.849 | 0.29646  | 0.10203   | 0.16412   | SUPT6H   | chr17 | + | 26989109 | 27029697 | 6518  |
| ENSG0000012737.395 | 2575.538 | 0.087936 | 0.52683   | 0.62862   | RAB34    | chr17 | - | 27041299 | 27045447 | 1736  |
| ENSG000001899.3159 | 939.9656 | -0.06363 | 0.66377   | 0.74709   | PHF12    | chr17 | - | 27232268 | 27278789 | 7679  |
| ENSG0000011057.646 | 1362.101 | -0.36484 | 0.002423  | 0.005659  | TMEM33   | chr4  | + | 41937137 | 41962589 | 7482  |
| ENSG0000010        | 1.920457 | -2.1803  | 0.20711   | 0.29682   | GABRA4   | chr4  | - | 46920917 | 46996424 | 11973 |
| ENSG0000012.738544 | 0.343138 | 2.2473   | 0.13479   | 0.20777   | GNRHR    | chr4  | - | 68605046 | 68620078 | 2164  |
| ENSG0000011299.472 | 430.8672 | 1.5883   | 2.94E-21  | 2.62E-20  | SLAIN2   | chr4  | + | 48343339 | 48428229 | 6299  |
| ENSG000001989.5507 | 1225.788 | -0.30764 | 0.019941  | 0.039368  | OCIAD1   | chr4  | + | 48807229 | 48863834 | 1916  |
| ENSG0000010.290301 | 0.343138 | -0.00202 | 0.99909   | NA        | CWH43    | chr4  | + | 48988264 | 49064098 | 2472  |
| ENSG000001465.3681 | 350.1045 | 0.41127  | 0.006359  | 0.013877  | DCUN1D4  | chr4  | + | 52709166 | 52783003 | 4840  |
| ENSG0000011090.188 | 1001.52  | 0.12245  | 0.26239   | 0.3606    | USP46    | chr4  | - | 53460340 | 53525502 | 4752  |
| ENSG0000010.632843 | 1.029414 | -0.43867 | 0.79644   | NA        | ODAM     | chr4  | + | 71062213 | 71070293 | 1319  |
| ENSG000001195.7485 | 115.8496 | 0.75718  | 0.000638  | 0.001632  | CHIC2    | chr4  | - | 54875956 | 54930857 | 1194  |
| ENSG0000012.334388 | 653.8007 | -7.9374  | 1.99E-47  | 4.23E-46  | NMU      | chr4  | - | 56461396 | 56502865 | 816   |
| ENSG0000011640.889 | 842.5945 | 0.95951  | 4.35E-10  | 2.06E-09  | KIAA1211 | chr4  | + | 57036361 | 57194791 | 4628  |
| ENSG000001319.0835 | 272.7132 | 0.22746  | 0.25689   | 0.35438   | LAMTOR3  | chr4  | - | 1.01E+08 | 1.01E+08 | 4226  |
| ENSG000001810.571  | 166.0156 | 2.2802   | 1.16E-48  | 2.57E-47  | NFKB1    | chr4  | + | 1.03E+08 | 1.04E+08 | 4085  |
| ENSG0000014.979616 | 0        | 3.891    | 0.005132  | 0.011411  | AREG     | chr4  | + | 75310851 | 75320726 | 1240  |
| ENSG000001866.0168 | 693.6281 | 0.31936  | 0.066366  | 0.11381   | MANBA    | chr4  | - | 1.04E+08 | 1.04E+08 | 7429  |
| ENSG0000014254.236 | 4824.047 | -0.18109 | 0.044898  | 0.080934  | UBE2D3   | chr4  | - | 1.04E+08 | 1.04E+08 | 4819  |
| ENSG0000017.250598 | 30.08872 | -2.0056  | 0.000139  | 0.00039   | MAPK10   | chr4  | - | 86936276 | 87515284 | 4107  |
| ENSG000001468.4627 | 473.243  | -0.01444 | 0.90579   | 0.93506   | ELF2     | chr4  | - | 1.4E+08  | 1.4E+08  | 4012  |
| ENSG000001460.4581 | 585.047  | -0.34584 | 0.007215  | 0.015571  | NDUFC1   | chr4  | - | 1.4E+08  | 1.4E+08  | 1257  |
| ENSG0000010        | 3.351285 | -3.2746  | 0.028086  | 0.053569  | UCP1     | chr4  | - | 1.41E+08 | 1.41E+08 | 1462  |
| ENSG0000011132.169 | 24.22375 | 5.5208   | 3.63E-103 | 2.18E-101 | TBC1D9   | chr4  | - | 1.42E+08 | 1.42E+08 | 5306  |
| ENSG000001364.0289 | 649.1543 | -0.83395 | 2.38E-06  | 8.19E-06  | ZNF330   | chr4  | + | 1.42E+08 | 1.42E+08 | 1899  |
| ENSG0000011046.083 | 11.36572 | 6.4977   | 3.38E-120 | 2.66E-118 | INPP4B   | chr4  | - | 1.43E+08 | 1.44E+08 | 8831  |
| ENSG000001212.9205 | 255.959  | -0.26631 | 0.16456   | 0.24541   | GAB1     | chr4  | + | 1.44E+08 | 1.44E+08 | 7981  |
| ENSG000001371.0324 | 153.6761 | 1.2706   | 4.21E-16  | 2.93E-15  | KLHL2    | chr4  | + | 1.66E+08 | 1.66E+08 | 3134  |
| ENSG0000011886.083 | 318.4192 | 2.5629   | 9.13E-77  | 3.67E-75  | CPE      | chr4  | + | 1.66E+08 | 1.66E+08 | 2421  |
| ENSG0000014340.402 | 5375.258 | -0.30821 | 0.002297  | 0.005382  | RPL34    | chr4  | + | 1.1E+08  | 1.1E+08  | 2627  |
| ENSG0000011268.216 | 1001.198 | 0.34019  | 0.027992  | 0.053407  | WFS1     | chr4  | + | 6271576  | 6304992  | 3655  |
| ENSG0000012.656392 | 0        | 2.8491   | 0.072291  | 0.12249   | ANXA10   | chr4  | + | 1.69E+08 | 1.69E+08 | 1417  |
| ENSG000001495.0468 | 544.3681 | -0.13657 | 0.42045   | 0.5259    | GRPEL1   | chr4  | - | 7060633  | 7069924  | 2775  |
| ENSG000001698.5193 | 702.2545 | -0.00748 | 0.97276   | 0.98486   | GAR1     | chr4  | + | 1.11E+08 | 1.11E+08 | 1224  |
| ENSG000001421.1226 | 424.1508 | -0.00767 | 0.96345   | 0.97847   | FRG1     | chr4  | + | 1.91E+08 | 1.91E+08 | 1074  |
| ENSG0000011110.636 | 817.7096 | 0.44108  | 0.002492  | 0.00581   | CLCN3    | chr4  | + | 1.71E+08 | 1.71E+08 | 6692  |
| ENSG000001776.6012 | 191.5411 | 2.0155   | 2.54E-24  | 2.59E-23  | AADAT    | chr4  | - | 1.71E+08 | 1.71E+08 | 2261  |
| ENSG000001845.3445 | 1339.683 | -0.66247 | 5.84E-05  | 0.000171  | GALNT7   | chr4  | + | 1.74E+08 | 1.74E+08 | 4307  |
| ENSG0000012553.872 | 3824.291 | -0.58144 | 0.000104  | 0.000297  | DHX15    | chr4  | - | 24519064 | 24586173 | 3028  |
| ENSG00000132.50915 | 100.0718 | -1.6093  | 7.66E-07  | 2.76E-06  | SOD3     | chr4  | + | 24791534 | 24802464 | 1526  |
| ENSG00000197.50454 | 98.10839 | -0.01068 | 0.96335   | 0.97842   | SEPSECS  | chr4  | - | 25121627 | 25162204 | 5496  |
| ENSG0000016.992    | 33.45545 | -2.2141  | 3.50E-05  | 0.000105  | CPZ      | chr4  | + | 8594387  | 8621488  | 3718  |
| ENSG000001747.1715 | 1106.334 | -0.56402 | 0.003672  | 0.008347  | TRIM2    | chr4  | + | 1.54E+08 | 1.54E+08 | 6735  |
| ENSG0000013.64115  | 2.07098  | 0.75026  | 0.48906   | 0.59308   | SLC2A9   | chr4  | - | 9772777  | 10056560 | 2175  |
| ENSG000001411.493  | 370.8539 | 0.14914  | 0.38616   | 0.49044   | FBXW7    | chr4  | - | 1.53E+08 | 1.53E+08 | 4977  |
| ENSG000001107.9997 | 113.7618 | -0.07746 | 0.74424   | 0.81222   | NEIL3    | chr4  | + | 1.78E+08 | 1.78E+08 | 2408  |
| ENSG000001147.3342 | 25.75985 | 2.4994   | 1.21E-20  | 1.05E-19  | TBC1D19  | chr4  | + | 26578059 | 26756973 | 2263  |
| ENSG0000010        | 0.357707 | -0.41864 | 0.81278   | NA        | CLNK     | chr4  | - | 10488019 | 10686489 | 5599  |
| ENSG0000014075.253 | 3479.746 | 0.22756  | 0.02016   | 0.039753  | WHSC1    | chr4  | + | 1873151  | 1983934  | 8568  |
| ENSG0000011219.992 | 1133.106 | 0.10582  | 0.29965   | 0.40127   | SH3D19   | chr4  | - | 1.52E+08 | 1.52E+08 | 5284  |
| ENSG000001730.3885 | 256.6103 | 1.507    | 2.01E-31  | 2.72E-30  | STIM2    | chr4  | + | 26859300 | 27027003 | 5178  |
| ENSG0000017.706181 | 1.577319 | 2.0489   | 0.047433  | 0.085008  | NKX3-2   | chr4  | - | 13542454 | 13546674 | 2801  |
| ENSG0000011048.966 | 1809.202 | -0.78504 | 7.12E-14  | 4.33E-13  | MFSD10   | chr4  | - | 2932288  | 2936586  | 2173  |
| ENSG00000173.41575 | 6.123111 | 3.553    | 4.23E-15  | 2.79E-14  | GLRB     | chr4  | + | 1.58E+08 | 1.58E+08 | 3126  |
| ENSG00000157.98285 | 15.17508 | 1.909    | 3.07E-07  | 1.15E-06  | BST1     | chr4  | + | 15704573 | 15739936 | 1993  |
| ENSG0000011046.124 | 747.3951 | 0.48427  | 0.001552  | 0.003737  | RAPGEF2  | chr4  | + | 1.6E+08  | 1.6E+08  | 6949  |
| ENSG0000013.475869 | 3.694423 | -0.09708 | 0.92241   | 0.94782   | HGFAC    | chr4  | + | 3443614  | 3451211  | 2148  |
| ENSG000001502.7027 | 338.127  | 0.56874  | 0.024426  | 0.047237  | SNX25    | chr4  | + | 1.86E+08 | 1.86E+08 | 3323  |
| ENSG00000151.81889 | 27.94094 | 0.87784  | 0.022002  | 0.043026  | LRP2BP   | chr4  | - | 1.86E+08 | 1.86E+08 | 5164  |
| ENSG000001262.6139 | 262.4509 | 0.002827 | 0.98768   | 0.99296   | UFSP2    | chr4  | - | 1.86E+08 | 1.86E+08 | 2348  |
| ENSG000001611.1089 | 260.2507 | 1.228    | 4.63E-12  | 2.51E-11  | KLF3     | chr4  | + | 38665817 | 38702663 | 5122  |

|                    |          |          |          |          |          |       |   |          |          |      |
|--------------------|----------|----------|----------|----------|----------|-------|---|----------|----------|------|
| ENSG000001372.0301 | 304.9925 | 0.28467  | 0.059827 | 0.10422  | KLHL5    | chr4  | + | 39046659 | 39128477 | 3425 |
| ENSG00000148.14522 | 192.2813 | -1.9878  | 4.30E-16 | 2.99E-15 | FAM149A  | chr4  | + | 1.87E+08 | 1.87E+08 | 2997 |
| ENSG000001820.6211 | 881.5322 | -0.10222 | 0.44052  | 0.54626  | NCAPG    | chr4  | + | 17812525 | 17846485 | 4661 |
| ENSG0000011987.66  | 1359.099 | 0.54801  | 3.34E-07 | 1.25E-06 | UGDH     | chr4  | - | 39500375 | 39529931 | 3216 |
| ENSG00000114.03445 | 46.33538 | -1.6961  | 0.000663 | 0.001689 | PPARGC1A | chr4  | - | 23756664 | 23905712 | 6318 |
| ENSG0000010        | 144.7255 | -8.6021  | 6.21E-15 | 4.06E-14 | DDX25    | chr11 | + | 1.26E+08 | 1.26E+08 | 2276 |
| ENSG0000012.334388 | 6.861215 | -1.4533  | 0.11662  | 0.18433  | CRYAB    | chr11 | - | 1.12E+08 | 1.12E+08 | 1119 |
| ENSG0000010        | 0.98329  | -1.2878  | 0.47019  | NA       | DBX1     | chr11 | - | 20177701 | 20182159 | 1380 |
| ENSG00000177.65209 | 459.7967 | -2.5651  | 2.04E-45 | 4.12E-44 | HTATIP2  | chr11 | + | 20385231 | 20405329 | 1748 |
| ENSG0000011899.371 | 3594.534 | -0.91912 | 1.71E-13 | 1.02E-12 | CTSC     | chr11 | - | 88026760 | 88070955 | 6125 |
| ENSG000001328.8675 | 445.3443 | -0.43532 | 0.001989 | 0.004709 | CCDC34   | chr11 | - | 27352374 | 27385415 | 2109 |
| ENSG0000010        | 5.355125 | -3.932   | 0.005847 | 0.012843 | ZBTB16   | chr11 | + | 1.14E+08 | 1.14E+08 | 4427 |
| ENSG000001131.2539 | 175.8015 | -0.42152 | 0.047649 | 0.085326 | ELP4     | chr11 | + | 31531297 | 31805546 | 1961 |
| ENSG000001763.3871 | 826.0062 | -0.11249 | 0.49069  | 0.59474  | ZNF259   | chr11 | - | 1.17E+08 | 1.17E+08 | 2645 |
| ENSG0000011082.376 | 1131.079 | -0.06262 | 0.6043   | 0.69761  | MTCH2    | chr11 | - | 47638867 | 47664175 | 2587 |
| ENSG0000011223.848 | 934.7292 | 0.38827  | 0.000587 | 0.001508 | FNBP4    | chr11 | - | 47738072 | 47788995 | 3969 |
| ENSG00000121.60803 | 26.93005 | -0.30866 | 0.45084  | 0.55652  | TECTA    | chr11 | + | 1.21E+08 | 1.21E+08 | 7426 |
| ENSG0000011004.897 | 1067.833 | -0.08682 | 0.70221  | 0.77846  | SC5D     | chr11 | + | 1.21E+08 | 1.21E+08 | 2456 |
| ENSG0000011.370168 | 0.343138 | 1.1145   | 0.52721  | NA       | CRTAM    | chr11 | + | 1.23E+08 | 1.23E+08 | 2469 |
| ENSG00000166.36809 | 30.57923 | 1.109    | 0.000785 | 0.001979 | C11orf63 | chr11 | + | 1.23E+08 | 1.23E+08 | 2910 |
| ENSG0000010.975385 | 741.0743 | -9.1076  | 2.75E-38 | 4.63E-37 | B3GAT1   | chr11 | - | 1.34E+08 | 1.34E+08 | 6160 |
| ENSG00000117882.11 | 18543.78 | -0.05229 | 0.72034  | 0.79312  | HSPA8    | chr11 | - | 1.23E+08 | 1.23E+08 | 2463 |
| ENSG0000010.36308  | 1.294874 | -1.3442  | 0.40498  | NA       | P2RX3    | chr11 | + | 57105848 | 57138073 | 1831 |
| ENSG000001262.861  | 383.1664 | -0.54277 | 0.006866 | 0.014888 | VWA5A    | chr11 | + | 1.24E+08 | 1.24E+08 | 4388 |
| ENSG000001218.6862 | 218.4093 | 0.002894 | 0.99104  | 0.99529  | DNAJC4   | chr11 | + | 63997750 | 64001758 | 1340 |
| ENSG000001159.8301 | 48.54224 | 1.7158   | 9.94E-13 | 5.64E-12 | SIAE     | chr11 | - | 1.25E+08 | 1.25E+08 | 5583 |
| ENSG000001357.4092 | 232.9434 | 0.61556  | 4.45E-05 | 0.000132 | SNX15    | chr11 | + | 64781654 | 64808044 | 4713 |
| ENSG00000187.72257 | 25.20953 | 1.7861   | 8.02E-09 | 3.43E-08 | LPXN     | chr11 | - | 58294344 | 58345693 | 2099 |
| ENSG00000155.5474  | 600.7842 | -3.4253  | 6.52E-42 | 1.20E-40 | DTX4     | chr11 | + | 58938903 | 58976060 | 5642 |
| ENSG000001816.5974 | 893.3325 | -0.12977 | 0.40179  | 0.50656  | ATG2A    | chr11 | - | 64662007 | 64684722 | 6376 |
| ENSG0000011890.133 | 1089.932 | 0.79325  | 8.96E-10 | 4.15E-09 | EHD1     | chr11 | - | 64619114 | 64655768 | 4551 |
| ENSG0000012151.347 | 1489.02  | 0.53029  | 1.21E-07 | 4.69E-07 | OSBP     | chr11 | - | 59341871 | 59383617 | 5083 |
| ENSG000001180.0886 | 514.4123 | -1.5122  | 4.56E-17 | 3.35E-16 | UNC93B1  | chr11 | - | 67758575 | 67772452 | 2315 |
| ENSG000001124.9067 | 249.8234 | -0.99725 | 1.18E-06 | 4.20E-06 | PUS3     | chr11 | - | 1.26E+08 | 1.26E+08 | 1843 |
| ENSG000001266.2234 | 291.4843 | -0.12918 | 0.37597  | 0.48003  | DCPS     | chr11 | + | 1.26E+08 | 1.26E+08 | 2467 |
| ENSG000001779.6624 | 913.1654 | -0.22799 | 0.049835 | 0.088696 | SUV420H1 | chr11 | - | 67922330 | 67981295 | 5837 |
| ENSG000001419.2444 | 916.7332 | -1.1276  | 2.66E-21 | 2.39E-20 | FOXRED1  | chr11 | + | 1.26E+08 | 1.26E+08 | 3045 |
| ENSG0000011460.96  | 1803.595 | -0.30326 | 0.026343 | 0.050565 | PPP6R3   | chr11 | + | 68228186 | 68382802 | 5119 |
| ENSG00000145.31401 | 138.1145 | -1.585   | 0.000409 | 0.001075 | NRXN2    | chr11 | - | 64373646 | 64490660 | 6621 |
| ENSG0000014.357937 | 0.937167 | 1.8774   | 0.11909  | 0.18769  | MS4A6A   | chr11 | - | 59939081 | 59952139 | 2416 |
| ENSG0000010.290301 | 0        | 0.4146   | 0.81455  | NA       | MS4A4A   | chr11 | + | 60048014 | 60076445 | 1676 |
| ENSG0000011246.413 | 227.4849 | 2.4458   | 5.43E-48 | 1.18E-46 | ST3GAL4  | chr11 | + | 1.26E+08 | 1.26E+08 | 1967 |
| ENSG0000011359.601 | 1930.465 | -0.50553 | 2.45E-05 | 7.49E-05 | CPT1A    | chr11 | - | 68522088 | 68611878 | 5232 |
| ENSG00000111373.72 | 5699.377 | 0.99448  | 9.39E-09 | 3.99E-08 | CCND1    | chr11 | + | 69455855 | 69469242 | 4307 |
| ENSG000001372.0466 | 726.4751 | -0.96216 | 5.53E-06 | 1.83E-05 | CCDC86   | chr11 | + | 60609544 | 60618554 | 1893 |
| ENSG0000011976.961 | 2725.988 | -0.46213 | 0.008977 | 0.019032 | PRPF19   | chr11 | - | 60658202 | 60674060 | 2157 |
| ENSG0000011687.095 | 916.7461 | 0.87944  | 3.89E-10 | 1.85E-09 | TMEM109  | chr11 | + | 60681346 | 60690915 | 2413 |
| ENSG0000010.632843 | 127.8909 | -7.0233  | 2.36E-15 | 1.58E-14 | CCKBR    | chr11 | + | 6280966  | 6293357  | 2138 |
| ENSG0000018.890529 | 8.386706 | 0.088472 | 0.8901   | 0.92361  | HPX      | chr11 | - | 6452279  | 6463847  | 1652 |
| ENSG000001590.8406 | 207.3666 | 1.5047   | 1.10E-14 | 7.08E-14 | TRIM3    | chr11 | - | 6469843  | 6495689  | 4419 |
| ENSG000001550.7042 | 703.7163 | -0.35223 | 0.035171 | 0.065428 | CHORDC1  | chr11 | - | 89934328 | 89956532 | 5361 |
| ENSG0000010        | 3.085825 | -3.0709  | 0.047974 | 0.085814 | FOLR1    | chr11 | + | 71900602 | 71907345 | 1331 |
| ENSG00000127.19139 | 55.82756 | -1.0341  | 0.001308 | 0.003188 | ANAPC15  | chr11 | - | 71817424 | 71823826 | 1481 |
| ENSG0000011.814586 | 0        | 2.063    | 0.23747  | NA       | FOLR3    | chr11 | + | 71825915 | 71850936 | 990  |
| ENSG000001592.3557 | 590.6419 | 0.004392 | 0.98056  | 0.98926  | PANX1    | chr11 | + | 93862094 | 93915138 | 2769 |
| ENSG0000012170.749 | 367.7827 | 2.5512   | 1.77E-31 | 2.40E-30 | ARHGEF17 | chr11 | + | 73019334 | 73080136 | 7853 |
| ENSG0000010.36308  | 4.553913 | -2.9954  | 0.029361 | 0.055698 | APOA5    | chr11 | - | 1.17E+08 | 1.17E+08 | 1929 |
| ENSG0000010        | 0.343138 | -0.41864 | 0.81278  | NA       | APOA4    | chr11 | - | 1.17E+08 | 1.17E+08 | 1470 |
| ENSG000001920.9857 | 347.7555 | 1.4019   | 1.36E-28 | 1.64E-27 | CEP164   | chr11 | + | 1.17E+08 | 1.17E+08 | 5690 |
| ENSG000001252.9206 | 391.6756 | -0.63007 | 0.000241 | 0.000652 | RNF141   | chr11 | - | 10533225 | 10562777 | 5818 |
| ENSG000001106.1161 | 41.12104 | 1.3661   | 8.07E-07 | 2.91E-06 | KIAA1377 | chr11 | + | 1.02E+08 | 1.02E+08 | 7039 |
| ENSG00000119216.25 | 12411.03 | 0.62863  | 0.002196 | 0.005162 | EIF4G2   | chr11 | - | 10818597 | 10830657 | 6769 |
| ENSG0000017.718159 | 1.591889 | 2.0624   | 0.031211 | 0.058719 | IL10RA   | chr11 | + | 1.18E+08 | 1.18E+08 | 5155 |
| ENSG0000014.762093 | 89.73545 | -4.1754  | 5.74E-16 | 3.96E-15 | GALNT18  | chr11 | - | 11292423 | 11643552 | 2504 |
| ENSG000001833.7092 | 370.7393 | 1.1685   | 2.48E-21 | 2.22E-20 | BIRC2    | chr11 | + | 1.02E+08 | 1.02E+08 | 4073 |

|            |          |          |          |           |           |           |       |   |          |          |       |
|------------|----------|----------|----------|-----------|-----------|-----------|-------|---|----------|----------|-------|
| ENSG000001 | 926.41   | 482.0249 | 0.94142  | 9.83E-09  | 4.17E-08  | UBE4A     | chr11 | + | 1.18E+08 | 1.18E+08 | 6103  |
| ENSG000001 | 1.866827 | 2.321872 | -0.24451 | 0.84938   | 0.89424   | UMMP12    | chr11 | - | 1.03E+08 | 1.03E+08 | 1873  |
| ENSG000001 | 2400.588 | 2181.86  | 0.13765  | 0.12391   | 0.19396   | DDX6      | chr11 | - | 1.19E+08 | 1.19E+08 | 4538  |
| ENSG000001 | 4.75272  | 4.738406 | 0.001918 | 0.99836   | 0.99926   | UPK2      | chr11 | + | 1.19E+08 | 1.19E+08 | 958   |
| ENSG000001 | 1789.903 | 1746.383 | 0.035252 | 0.78713   | 0.84775   | CBL       | chr11 | + | 1.19E+08 | 1.19E+08 | 11465 |
| ENSG000001 | 631.5437 | 2507.609 | -1.9868  | 5.62E-59  | 1.59E-57  | PVRL1     | chr11 | - | 1.19E+08 | 1.2E+08  | 5840  |
| ENSG000001 | 873.4845 | 298.9735 | 1.5464   | 2.84E-36  | 4.47E-35  | HIPK3     | chr11 | + | 33278218 | 33378569 | 7408  |
| ENSG000001 | 2246.977 | 82.80622 | 4.7551   | 5.42E-215 | 1.41E-212 | KIAA1549L | chr11 | + | 33563618 | 33695648 | 11678 |
| ENSG000001 | 324.4174 | 279.6385 | 0.21533  | 0.18947   | 0.27588   | FBXO3     | chr11 | - | 33762485 | 33796089 | 7410  |
| ENSG000001 | 395.6918 | 487.1866 | -0.29838 | 0.066358  | 0.11381   | PDHX      | chr11 | + | 34937376 | 35042138 | 2503  |
| ENSG000001 | 3.257533 | 9.966442 | -1.5183  | 0.058847  | 0.1027    | SLC1A2    | chr11 | - | 35272753 | 35441610 | 11696 |
| ENSG000001 | 376.1855 | 220.8317 | 0.7657   | 0.003569  | 0.008131  | COMMD9    | chr11 | - | 36295051 | 36310999 | 1745  |
| ENSG000001 | 2.624689 | 223.0013 | -6.2427  | 7.31E-30  | 9.27E-29  | SLC15A3   | chr11 | - | 60704556 | 60720002 | 4579  |
| ENSG000001 | 2.624689 | 9.153949 | -1.6971  | 0.042796  | 0.077724  | CD5       | chr11 | + | 60869867 | 60895324 | 3221  |
| ENSG000001 | 59.23754 | 58.13728 | 0.028744 | 0.92275   | 0.94806   | ACCS      | chr11 | + | 44087475 | 44105772 | 3373  |
| ENSG000001 | 5434.747 | 8976.836 | -0.72331 | 8.66E-14  | 5.24E-13  | MDK       | chr11 | + | 46402306 | 46405375 | 1339  |
| ENSG000001 | 805.7311 | 916.5299 | -0.18544 | 0.088033  | 0.14506   | AMBRA1    | chr11 | - | 46417964 | 46615675 | 5351  |
| ENSG000001 | 1027.257 | 832.0681 | 0.30302  | 0.065317  | 0.11231   | MADD      | chr11 | + | 47290712 | 47351582 | 6005  |
| ENSG000001 | 11.97162 | 6.47437  | 0.84048  | 0.19238   | 0.27958   | PTPMT1    | chr11 | + | 47586982 | 47595013 | 2272  |
| ENSG000001 | 622.4888 | 620.6481 | 0.004997 | 0.98467   | 0.99115   | NAA40     | chr11 | + | 63706431 | 63724800 | 4707  |
| ENSG000001 | 747.2998 | 1031.054 | -0.46401 | 0.000156  | 0.000433  | CARS      | chr11 | - | 3022152  | 3078843  | 5732  |
| ENSG000001 | 209.2066 | 117.19   | 0.82909  | 0.00829   | 0.017676  | SLC22A18  | chr11 | + | 2920951  | 2946476  | 2635  |
| ENSG000001 | 4148.095 | 2660.628 | 0.64049  | 7.44E-11  | 3.72E-10  | CD81      | chr11 | + | 2397407  | 2418649  | 5235  |
| ENSG000001 | 871.5572 | 538.6943 | 0.69288  | 4.28E-06  | 1.43E-05  | SLC35F2   | chr11 | - | 1.08E+08 | 1.08E+08 | 3331  |
| ENSG000001 | 1.555988 | 0        | 1.8901   | 0.28116   | NA        | C11orf21  | chr11 | - | 2316875  | 2324279  | 2956  |
| ENSG000001 | 13.33918 | 9.912197 | 0.42741  | 0.52735   | 0.62912   | ELMOD1    | chr11 | + | 1.07E+08 | 1.08E+08 | 2852  |
| ENSG000001 | 0        | 5.15439  | -3.8238  | 0.008575  | 0.01825   | CALCA     | chr11 | - | 14988214 | 14993900 | 1837  |
| ENSG000001 | 300.313  | 11.50005 | 4.6523   | 3.38E-38  | 5.67E-37  | SOX6      | chr11 | - | 15987995 | 16761138 | 8925  |
| ENSG000001 | 2459.041 | 2179.456 | 0.17395  | 0.33995   | 0.44385   | C11orf58  | chr11 | + | 16634679 | 16778428 | 4258  |
| ENSG000001 | 2351.951 | 1294.718 | 0.85957  | 5.23E-11  | 2.65E-10  | PITPNM1   | chr11 | - | 67259239 | 67273734 | 4225  |
| ENSG000001 | 3757.503 | 5308.278 | -0.49791 | 2.07E-06  | 7.17E-06  | RPS13     | chr11 | - | 17095936 | 17099334 | 777   |
| ENSG000001 | 1032.729 | 408.1418 | 1.3326   | 5.57E-09  | 2.41E-08  | AIP       | chr11 | + | 67250512 | 67258574 | 1221  |
| ENSG000001 | 1871.72  | 2011.508 | -0.1036  | 0.33477   | 0.4383    | NUP98     | chr11 | - | 3692313  | 3819022  | 6973  |
| ENSG000001 | 1209.322 | 1455.492 | -0.26659 | 0.010666  | 0.022284  | NDUFS8    | chr11 | + | 67798084 | 67804111 | 3072  |
| ENSG000001 | 1197.424 | 356.8272 | 1.7418   | 7.97E-27  | 8.99E-26  | TCIRG1    | chr11 | + | 67806483 | 67818362 | 2677  |
| ENSG000001 | 218.8428 | 563.134  | -1.3609  | 1.42E-14  | 9.10E-14  | CHKA      | chr11 | - | 67820326 | 67888911 | 2530  |
| ENSG000001 | 10.551   | 167.4174 | -3.9453  | 1.00E-25  | 1.08E-24  | EXPH5     | chr11 | - | 1.08E+08 | 1.08E+08 | 10187 |
| ENSG000001 | 539.718  | 365.461  | 0.56184  | 5.69E-05  | 0.000167  | HPS5      | chr11 | - | 18300223 | 18343745 | 4717  |
| ENSG000001 | 538.4453 | 292.2296 | 0.87912  | 7.69E-07  | 2.78E-06  | GTF2H1    | chr11 | + | 18343842 | 18388591 | 2982  |
| ENSG000001 | 2.407167 | 260.3854 | -6.6027  | 2.43E-28  | 2.91E-27  | PTPN5     | chr11 | - | 18749475 | 18814268 | 3871  |
| ENSG000001 | 5.612459 | 40.9746  | -2.8152  | 1.98E-08  | 8.20E-08  | VWF       | chr12 | - | 6058040  | 6233936  | 8838  |
| ENSG000001 | 64.43272 | 23.48082 | 1.448    | 5.71E-05  | 0.000168  | PSMD9     | chr12 | + | 1.22E+08 | 1.22E+08 | 3051  |
| ENSG000001 | 3892.609 | 480.8168 | 3.0116   | 4.73E-112 | 3.24E-110 | LEPREL2   | chr12 | + | 6937564  | 6949018  | 3226  |
| ENSG000001 | 1720.247 | 192.1258 | 3.1575   | 1.95E-128 | 1.71E-126 | PPFIBP1   | chr12 | + | 27676364 | 27848497 | 6001  |
| ENSG000001 | 335.5143 | 307.3171 | 0.12505  | 0.58137   | 0.67777   | PRPF40B   | chr12 | + | 49962001 | 50038449 | 3602  |
| ENSG000001 | 0        | 1.043983 | -1.3473  | 0.44976   | NA        | CD69      | chr12 | - | 9905082  | 9913497  | 1676  |
| ENSG000001 | 818.626  | 391.9039 | 1.062    | 7.58E-18  | 5.78E-17  | PRDM4     | chr12 | - | 1.08E+08 | 1.08E+08 | 4210  |
| ENSG000001 | 0.290301 | 0.686276 | -0.47648 | 0.78935   | NA        | CLEC2B    | chr12 | - | 10005583 | 10022735 | 1700  |
| ENSG000001 | 260.5164 | 542.3625 | -1.058   | 4.31E-10  | 2.04E-09  | COQ5      | chr12 | - | 1.21E+08 | 1.21E+08 | 1535  |
| ENSG000001 | 20.7782  | 2.66501  | 2.8464   | 5.55E-05  | 0.000163  | SELPLG    | chr12 | - | 1.09E+08 | 1.09E+08 | 2528  |
| ENSG000001 | 4692.573 | 2132.521 | 1.1373   | 5.20E-37  | 8.42E-36  | CORO1C    | chr12 | - | 1.09E+08 | 1.09E+08 | 3892  |
| ENSG000001 | 323.3195 | 107.5538 | 1.5749   | 5.19E-11  | 2.63E-10  | ASIC1     | chr12 | + | 50451331 | 50477394 | 4072  |
| ENSG000001 | 0        | 0.357707 | -0.41864 | 0.81278   | NA        | DAO       | chr12 | + | 1.09E+08 | 1.09E+08 | 2385  |
| ENSG000001 | 794.3572 | 729.0204 | 0.12357  | 0.34819   | 0.45248   | CAPRIN2   | chr12 | - | 30862486 | 30907885 | 6543  |
| ENSG000001 | 168.9891 | 161.3032 | 0.063198 | 0.78684   | 0.84755   | TSPAN11   | chr12 | + | 31079362 | 31149534 | 5505  |
| ENSG000001 | 2216.886 | 1147.5   | 0.94927  | 7.80E-16  | 5.35E-15  | KCTD10    | chr12 | - | 1.1E+08  | 1.1E+08  | 5355  |
| ENSG000001 | 606.7909 | 808.2195 | -0.41307 | 0.000299  | 0.000802  | SLC11A2   | chr12 | - | 51373184 | 51422349 | 4156  |
| ENSG000001 | 5376.088 | 8051.61  | -0.58194 | 6.22E-06  | 2.05E-05  | MLEC      | chr12 | + | 1.21E+08 | 1.21E+08 | 6626  |
| ENSG000001 | 1277.318 | 488.4992 | 1.377    | 6.77E-06  | 2.22E-05  | MVK       | chr12 | + | 1.1E+08  | 1.1E+08  | 4109  |
| ENSG000001 | 1255.666 | 607.3212 | 1.0472   | 5.30E-21  | 4.68E-20  | CSRNP2    | chr12 | - | 51454990 | 51477447 | 4469  |
| ENSG000001 | 913.1978 | 1192.753 | -0.38506 | 0.010966  | 0.022844  | CAMKK2    | chr12 | - | 1.22E+08 | 1.22E+08 | 5598  |
| ENSG000001 | 4.584833 | 1.234181 | 1.628    | 0.15466   | 0.233     | BIN2      | chr12 | - | 51674822 | 51718452 | 2781  |
| ENSG000001 | 10.99542 | 36.18108 | -1.6761  | 0.00037   | 0.000976  | IL23A     | chr12 | + | 56732663 | 56734193 | 1041  |
| ENSG000001 | 8060.08  | 13410.67 | -0.73389 | 3.93E-13  | 2.29E-12  | ATP5B     | chr12 | - | 57031959 | 57039798 | 1789  |
| ENSG000001 | 3182.97  | 6381.574 | -1.0029  | 3.83E-25  | 4.03E-24  | PTGES3    | chr12 | - | 57057127 | 57082159 | 2928  |

|            |          |          |          |           |           |          |       |   |          |          |      |
|------------|----------|----------|----------|-----------|-----------|----------|-------|---|----------|----------|------|
| ENSG000001 | 0        | 18.51092 | -5.7317  | 3.87E-06  | 1.30E-05  | SYT10    | chr12 | - | 33527173 | 33592754 | 4461 |
| ENSG000001 | 257.7272 | 517.8624 | -1.0035  | 1.22E-06  | 4.32E-06  | BCL7A    | chr12 | + | 1.22E+08 | 1.22E+08 | 6245 |
| ENSG000001 | 1102.422 | 1256.769 | -0.18816 | 0.20857   | 0.29855   | RSRC2    | chr12 | - | 1.23E+08 | 1.23E+08 | 3156 |
| ENSG000001 | 5.675864 | 13.39057 | -1.1919  | 0.088067  | 0.14509   | CYP27B1  | chr12 | - | 58156117 | 58161034 | 2540 |
| ENSG000001 | 0        | 2.041842 | -2.4837  | 0.12741   | 0.19837   | MYF6     | chr12 | + | 81101277 | 81103253 | 1465 |
| ENSG000001 | 0        | 0.686276 | -0.84936 | 0.6309    | NA        | MYF5     | chr12 | + | 81110691 | 81113452 | 1542 |
| ENSG000001 | 163.2997 | 134.0256 | 0.28284  | 0.15759   | 0.23685   | LIN7A    | chr12 | - | 81186299 | 81331704 | 6112 |
| ENSG000001 | 779.1531 | 4056.327 | -2.3775  | 1.30E-80  | 5.50E-79  | KRT18    | chr12 | + | 53342655 | 53346685 | 2088 |
| ENSG000001 | 67.81348 | 347.4255 | -2.347   | 2.64E-20  | 2.25E-19  | ACSS3    | chr12 | + | 81331594 | 81650533 | 4803 |
| ENSG000001 | 1649.922 | 98.75001 | 4.0543   | 1.10E-122 | 8.90E-121 | TENC1    | chr12 | + | 53440753 | 53458156 | 5010 |
| ENSG000001 | 184.842  | 300.0699 | -0.69361 | 0.001588  | 0.003816  | GLI1     | chr12 | + | 57853918 | 57866045 | 3613 |
| ENSG000001 | 228.2898 | 1028.096 | -2.1639  | 1.85E-26  | 2.05E-25  | PPM1H    | chr12 | - | 63037762 | 63328817 | 6353 |
| ENSG000001 | 1515.773 | 2259.164 | -0.57434 | 0.000186  | 0.000512  | METAP2   | chr12 | + | 95867296 | 95909615 | 3601 |
| ENSG000001 | 601.9733 | 1673.879 | -1.4739  | 1.15E-25  | 1.24E-24  | LTA4H    | chr12 | - | 96394606 | 96437298 | 6109 |
| ENSG000001 | 3139.527 | 389.9248 | 3.0049   | 3.01E-146 | 3.29E-144 | ELK3     | chr12 | + | 96588160 | 96663613 | 4205 |
| ENSG000001 | 0        | 13.65362 | -5.3564  | 1.56E-05  | 4.89E-05  | SLC6A12  | chr12 | - | 299243   | 323736   | 3571 |
| ENSG000001 | 675.9963 | 225.6782 | 1.5813   | 8.08E-23  | 7.73E-22  | WNT5B    | chr12 | + | 1639057  | 1756409  | 2303 |
| ENSG000001 | 375.8546 | 270.9562 | 0.46987  | 0.077533  | 0.13005   | MAGOHB   | chr12 | - | 10758612 | 10766222 | 2671 |
| ENSG000001 | 264.6702 | 109.2785 | 1.2592   | 0.001415  | 0.00343   | TRPV4    | chr12 | - | 1.1E+08  | 1.1E+08  | 3247 |
| ENSG000001 | 346.5679 | 299.0908 | 0.21193  | 0.51042   | 0.61375   | ITFG2    | chr12 | + | 2921788  | 2968957  | 2361 |
| ENSG000001 | 1484     | 1598.58  | -0.10698 | 0.44557   | 0.55103   | FOXM1    | chr12 | - | 2966847  | 2986206  | 3475 |
| ENSG000001 | 75.15773 | 41.27478 | 0.86481  | 0.004469  | 0.010028  | PRR4     | chr12 | - | 10977559 | 11324212 | 1555 |
| ENSG000001 | 0        | 43.67762 | -7.0416  | 2.45E-10  | 1.18E-09  | PRMT8    | chr12 | + | 3490515  | 3703139  | 5899 |
| ENSG000001 | 198.0835 | 172.8532 | 0.19805  | 0.28324   | 0.38446   | PARP11   | chr12 | - | 3900213  | 3982608  | 4424 |
| ENSG000001 | 1422.284 | 834.8302 | 0.76829  | 4.09E-09  | 1.79E-08  | ARPC3    | chr12 | - | 1.11E+08 | 1.11E+08 | 1098 |
| ENSG000001 | 304.3412 | 499.2749 | -0.71214 | 8.45E-07  | 3.04E-06  | GPN3     | chr12 | - | 1.11E+08 | 1.11E+08 | 1604 |
| ENSG000001 | 723.9312 | 504.4595 | 0.52002  | 0.002479  | 0.005781  | VPS29    | chr12 | - | 1.11E+08 | 1.11E+08 | 1523 |
| ENSG000001 | 0        | 0.343138 | -0.41864 | 0.81278   | NA        | FGF6     | chr12 | - | 4537321  | 4554780  | 743  |
| ENSG000001 | 229.1952 | 620.609  | -1.4327  | 1.06E-13  | 6.37E-13  | RAD51AP1 | chr12 | + | 4647950  | 4669214  | 2235 |
| ENSG000001 | 1.286224 | 361.0202 | -7.7863  | 4.25E-32  | 5.88E-31  | CUX2     | chr12 | + | 1.11E+08 | 1.12E+08 | 6844 |
| ENSG000001 | 4891.51  | 843.6871 | 2.5334   | 9.95E-158 | 1.29E-155 | SH2B3    | chr12 | + | 1.12E+08 | 1.12E+08 | 5406 |
| ENSG000001 | 11.74211 | 61.7218  | -2.3445  | 2.10E-06  | 7.26E-06  | AKAP3    | chr12 | - | 4724674  | 4758213  | 3318 |
| ENSG000001 | 32.58112 | 116.6217 | -1.8217  | 1.83E-10  | 8.90E-10  | MANSC1   | chr12 | - | 12482198 | 12503475 | 2623 |
| ENSG000001 | 205.1323 | 1.234181 | 6.9946   | 1.28E-25  | 1.37E-24  | KCNA1    | chr12 | + | 5019071  | 5040527  | 7976 |
| ENSG000001 | 202.9132 | 661.1747 | -1.6981  | 4.34E-15  | 2.85E-14  | DUSP16   | chr12 | - | 12628829 | 12715317 | 3568 |
| ENSG000001 | 413.5757 | 405.9256 | 0.025731 | 0.88548   | 0.92005   | CREBL2   | chr12 | + | 12764761 | 12798042 | 3754 |
| ENSG000001 | 359.4311 | 389.8933 | -0.11653 | 0.56083   | 0.65951   | ACAD10   | chr12 | + | 1.12E+08 | 1.12E+08 | 4071 |
| ENSG000001 | 827.9024 | 420.4221 | 0.97582  | 3.61E-14  | 2.24E-13  | ALDH2    | chr12 | + | 1.12E+08 | 1.12E+08 | 2018 |
| ENSG000001 | 623.679  | 620.9735 | 0.006005 | 0.97919   | 0.98841   | CDKN1B   | chr12 | + | 12867992 | 12875305 | 2657 |
| ENSG000001 | 0        | 0.357707 | -0.41864 | 0.81278   | NA        | GPRC5D   | chr12 | - | 13093709 | 13105081 | 1038 |
| ENSG000001 | 515.7632 | 661.2977 | -0.35868 | 0.012325  | 0.025421  | NAA25    | chr12 | - | 1.12E+08 | 1.13E+08 | 6003 |
| ENSG000001 | 6.410584 | 3.558469 | 0.79145  | 0.36952   | 0.47407   | GSG1     | chr12 | - | 13236494 | 13256619 | 2390 |
| ENSG000001 | 0.705622 | 1916.86  | -10.781  | 4.08E-43  | 7.80E-42  | SCNN1A   | chr12 | - | 6456009  | 6486896  | 3545 |
| ENSG000001 | 316.6585 | 86.97818 | 1.8538   | 1.88E-21  | 1.69E-20  | LTBR     | chr12 | + | 6484211  | 6500733  | 2323 |
| ENSG000001 | 22.72653 | 3.305162 | 2.6693   | 0.000226  | 0.000614  | OGFOD2   | chr12 | + | 1.23E+08 | 1.23E+08 | 2308 |
| ENSG000001 | 3060.021 | 1511.884 | 1.0159   | 1.02E-13  | 6.15E-13  | CDK2AP1  | chr12 | - | 1.24E+08 | 1.24E+08 | 1812 |
| ENSG000001 | 58.81961 | 5.687726 | 3.3112   | 1.28E-10  | 6.28E-10  | OAS3     | chr12 | + | 1.13E+08 | 1.13E+08 | 6719 |
| ENSG000001 | 31.27794 | 0        | 6.5652   | 8.38E-09  | 3.58E-08  | OAS2     | chr12 | + | 1.13E+08 | 1.13E+08 | 4734 |
| ENSG000001 | 1.576526 | 1.012429 | 0.53724  | 0.70496   | 0.78064   | ART4     | chr12 | - | 14978503 | 14996429 | 5129 |
| ENSG000001 | 732.1425 | 1.71569  | 8.5133   | 3.20E-46  | 6.58E-45  | MGP      | chr12 | - | 15034115 | 15038860 | 1405 |
| ENSG000001 | 0        | 176.0429 | -8.8711  | 5.57E-16  | 3.85E-15  | RASAL1   | chr12 | - | 1.14E+08 | 1.14E+08 | 3817 |
| ENSG000001 | 248.493  | 16.21255 | 3.9169   | 4.30E-24  | 4.34E-23  | ARHGDI1B | chr12 | - | 15094951 | 15114662 | 1256 |
| ENSG000001 | 491.0661 | 541.9592 | -0.14207 | 0.30754   | 0.40928   | GTF2H3   | chr12 | + | 1.24E+08 | 1.24E+08 | 3329 |
| ENSG000001 | 809.6822 | 851.484  | -0.07204 | 0.72707   | 0.79823   | EIF2B1   | chr12 | - | 1.24E+08 | 1.24E+08 | 2477 |
| ENSG000001 | 369.4586 | 577.8987 | -0.64347 | 0.000198  | 0.000544  | DDX55    | chr12 | + | 1.24E+08 | 1.24E+08 | 2767 |
| ENSG000001 | 2484.729 | 4508.962 | -0.85759 | 1.29E-06  | 4.55E-06  | SLC38A1  | chr12 | - | 46576846 | 46663800 | 8066 |
| ENSG000001 | 1.016461 | 0        | 1.3167   | 0.46021   | NA        | REGL     | chr12 | - | 18233803 | 18473041 | 1147 |
| ENSG000001 | 4.99078  | 0.594029 | 2.5016   | 0.051019  | 0.090544  | ENDOU    | chr12 | - | 48103517 | 48119350 | 2413 |
| ENSG000001 | 861.2727 | 824.4488 | 0.06237  | 0.58882   | 0.68423   | C12orf49 | chr12 | - | 1.17E+08 | 1.17E+08 | 2801 |
| ENSG000001 | 137.6909 | 7.146077 | 4.199    | 4.33E-28  | 5.13E-27  | VDR      | chr12 | - | 48235320 | 48336831 | 4773 |
| ENSG000001 | 111.4982 | 145.9402 | -0.369   | 0.6304    | 0.71982   | FZD10    | chr12 | + | 1.31E+08 | 1.31E+08 | 3282 |
| ENSG000001 | 395.5251 | 587.0754 | -0.56675 | 0.001563  | 0.003761  | RFC5     | chr12 | + | 1.18E+08 | 1.18E+08 | 2442 |
| ENSG000001 | 790.6894 | 390.7926 | 1.0129   | 5.40E-09  | 2.34E-08  | STX2     | chr12 | - | 1.31E+08 | 1.31E+08 | 3331 |
| ENSG000001 | 7.12737  | 6.189508 | 0.18746  | 0.84771   | 0.893     | GPR133   | chr12 | + | 1.31E+08 | 1.32E+08 | 7085 |
| ENSG000001 | 2353.55  | 1639.881 | 0.52118  | 3.38E-07  | 1.26E-06  | COPZ1    | chr12 | + | 54694986 | 54745633 | 1897 |

|                    |          |          |           |           |           |       |   |          |          |       |
|--------------------|----------|----------|-----------|-----------|-----------|-------|---|----------|----------|-------|
| ENSG00000132.30638 | 32.63973 | -0.02293 | 0.95484   | 0.97211   | TBC1D30   | chr12 | + | 65174589 | 65274812 | 7433  |
| ENSG0000013642.302 | 2728.689 | 0.4164   | 0.000345  | 0.000916  | CAND1     | chr12 | + | 67663061 | 67713731 | 11251 |
| ENSG000001269.3882 | 146.8328 | 0.87133  | 2.17E-06  | 7.50E-06  | RAB5B     | chr12 | + | 56367697 | 56388490 | 3362  |
| ENSG000001170.964  | 118.9678 | 0.52381  | 0.012503  | 0.025761  | MDM1      | chr12 | - | 68666223 | 68726161 | 2918  |
| ENSG000001765.0157 | 1263.106 | -0.72176 | 5.48E-06  | 1.81E-05  | NUP107    | chr12 | + | 69080514 | 69136785 | 3653  |
| ENSG0000011037.795 | 1112.461 | -0.09964 | 0.38186   | 0.486     | CNOT2     | chr12 | + | 70636774 | 70748773 | 4753  |
| ENSG0000011133.71  | 2083.844 | -0.87807 | 7.69E-16  | 5.28E-15  | TIMELESS  | chr12 | - | 56810903 | 56843187 | 4376  |
| ENSG0000011671.896 | 3038.395 | -0.86053 | 2.09E-13  | 1.24E-12  | CPSF6     | chr12 | + | 69633317 | 69668138 | 6616  |
| ENSG000001305.168  | 280.1401 | 0.12484  | 0.52874   | 0.63031   | KRR1      | chr12 | - | 75890684 | 75905416 | 4075  |
| ENSG0000011274.895 | 1452.233 | -0.1876  | 0.11965   | 0.1884    | MRPL51    | chr12 | - | 6601150  | 6603007  | 1136  |
| ENSG00000121925.9  | 30074.79 | -0.45514 | 0.001531  | 0.003692  | GAPDH     | chr12 | + | 6643093  | 6647537  | 1875  |
| ENSG000001732.461  | 1151.412 | -0.65084 | 0.000156  | 0.000433  | NOP2      | chr12 | - | 6666029  | 6677857  | 3038  |
| ENSG0000018401.972 | 6991.042 | 0.26502  | 0.001546  | 0.003723  | CHD4      | chr12 | - | 6679249  | 6716642  | 6580  |
| ENSG0000014.346772 | 28.88139 | -2.621   | 0.000367  | 0.000969  | ACRBP     | chr12 | - | 6747241  | 6756626  | 1933  |
| ENSG000001333.4607 | 284.4189 | 0.23014  | 0.24664   | 0.34258   | UHRF1BP1  | chr12 | - | 1E+08    | 1.01E+08 | 5168  |
| ENSG0000011242.581 | 534.8423 | 1.2157   | 1.06E-21  | 9.67E-21  | COPS7A    | chr12 | + | 6832907  | 6841041  | 2127  |
| ENSG000001355.2838 | 280.7353 | 0.33909  | 0.019604  | 0.038758  | ING4      | chr12 | - | 6759446  | 6772314  | 1709  |
| ENSG000001117.214  | 36.47252 | 1.6645   | 1.36E-09  | 6.22E-09  | GNB3      | chr12 | + | 6949118  | 6956557  | 2869  |
| ENSG000001435.4918 | 624.8616 | -0.51977 | 0.000218  | 0.000594  | CDCA3     | chr12 | - | 6953957  | 6961230  | 2917  |
| ENSG000001214.3216 | 252.4102 | -0.23782 | 0.17321   | 0.25598   | CHPT1     | chr12 | + | 1.02E+08 | 1.02E+08 | 4342  |
| ENSG0000012745.848 | 3171.423 | -0.20751 | 0.028045  | 0.053502  | USP5      | chr12 | + | 6961292  | 6975796  | 3181  |
| ENSG0000016829.135 | 10296.56 | -0.59144 | 1.23E-05  | 3.89E-05  | TP11      | chr12 | + | 6976283  | 6980112  | 1763  |
| ENSG000001735.1451 | 609.6605 | 0.27039  | 0.043478  | 0.078834  | GNPTAB    | chr12 | - | 1.02E+08 | 1.02E+08 | 5701  |
| ENSG000001128.8509 | 172.6955 | -0.42326 | 0.052701  | 0.093091  | SPSB2     | chr12 | - | 6980099  | 6998522  | 1496  |
| ENSG000001433.7046 | 1474.429 | -1.7595  | 8.68E-17  | 6.27E-16  | ENO2      | chr12 | + | 7022909  | 7032861  | 2827  |
| ENSG0000015415.298 | 2078.037 | 1.3804   | 3.49E-34  | 5.19E-33  | ATN1      | chr12 | + | 7033626  | 7051484  | 4293  |
| ENSG0000011802.136 | 623.7841 | 1.529    | 4.83E-39  | 8.30E-38  | C12orf57  | chr12 | + | 7052141  | 7055166  | 980   |
| ENSG00000119.60681 | 384.3853 | -4.2595  | 7.15E-50  | 1.63E-48  | PTPN6     | chr12 | + | 7055631  | 7070479  | 2412  |
| ENSG000001625.5692 | 730.636  | -0.22348 | 0.18583   | 0.27145   | LPCAT3    | chr12 | - | 7085348  | 7125814  | 2902  |
| ENSG000001391.1188 | 284.6208 | 0.45524  | 0.003229  | 0.007409  | NT5DC3    | chr12 | - | 1.04E+08 | 1.04E+08 | 7207  |
| ENSG0000010        | 3501.749 | -12.819  | 3.51E-34  | 5.21E-33  | NANOG     | chr12 | + | 7940390  | 7948655  | 2101  |
| ENSG0000011137.505 | 1939.332 | -0.76957 | 2.71E-12  | 1.49E-11  | SUDS3     | chr12 | + | 1.19E+08 | 1.19E+08 | 4897  |
| ENSG0000011399.121 | 422.2134 | 1.725    | 1.82E-24  | 1.87E-23  | GOLT1B    | chr12 | + | 21654715 | 21671342 | 3227  |
| ENSG0000011.068702 | 0        | 1.3672   | 0.44297   | NA        | GSY2      | chr12 | - | 21689123 | 21757781 | 3132  |
| ENSG0000017629.573 | 14918.26 | -0.96613 | 2.84E-14  | 1.78E-13  | LDHB      | chr12 | - | 21788276 | 21910791 | 1538  |
| ENSG000001378.4193 | 494.6549 | -0.38512 | 0.015673  | 0.031621  | PRKAB1    | chr12 | + | 1.2E+08  | 1.2E+08  | 4019  |
| ENSG000001407.8673 | 1300.09  | -1.6702  | 1.45E-35  | 2.25E-34  | CMAS      | chr12 | + | 22199108 | 22218608 | 1787  |
| ENSG000001199.4449 | 11.81567 | 4.0645   | 3.47E-36  | 5.46E-35  | HCFC2     | chr12 | + | 1.04E+08 | 1.04E+08 | 4071  |
| ENSG00000164.10909 | 7.639738 | 3.0315   | 6.66E-13  | 3.83E-12  | ST8SIA1   | chr12 | - | 22216707 | 22589975 | 2330  |
| ENSG0000015.404309 | 0.686276 | 2.5099   | 0.051991  | 0.092062  | CLEC4A    | chr12 | + | 8276228  | 8291203  | 1281  |
| ENSG000001576.0876 | 1089.502 | -0.91833 | 2.73E-15  | 1.82E-14  | C2CD5     | chr12 | - | 22601517 | 22697480 | 4436  |
| ENSG0000010.580602 | 1.326428 | -0.76629 | 0.64583   | 0.73251   | AICDA     | chr12 | - | 8754762  | 8765467  | 2819  |
| ENSG0000011249.275 | 1042.418 | 0.26115  | 0.094001  | 0.15337   | RAB35     | chr12 | - | 1.21E+08 | 1.21E+08 | 2945  |
| ENSG000001784.3764 | 8540.191 | -3.4399  | 2.37E-147 | 2.62E-145 | PHC1      | chr12 | + | 9066492  | 9094063  | 5174  |
| ENSG00000178.56147 | 134.1092 | -0.7722  | 0.001755  | 0.004192  | COX6A1    | chr12 | + | 1.21E+08 | 1.21E+08 | 767   |
| ENSG0000010.995923 | 2.401965 | -0.96117 | 0.52717   | 0.62897   | RFX4      | chr12 | + | 1.07E+08 | 1.07E+08 | 3955  |
| ENSG000001353.3035 | 216.0281 | 0.70607  | 7.07E-05  | 0.000205  | RIC8B     | chr12 | + | 1.07E+08 | 1.07E+08 | 5131  |
| ENSG0000013808.194 | 4646.606 | -0.28678 | 0.006545  | 0.014244  | SRSF9     | chr12 | - | 1.21E+08 | 1.21E+08 | 1704  |
| ENSG000001238.3308 | 418.3793 | -0.81012 | 2.81E-09  | 1.25E-08  | RP11-22B2 | chr12 | + | 9429831  | 9466684  | 3919  |
| ENSG000001521.1389 | 268.7082 | 0.95584  | 3.04E-10  | 1.46E-09  | FGFR1OP2  | chr12 | + | 27091316 | 27119583 | 2945  |
| ENSG0000010.342542 | 3.616746 | -2.6436  | 0.066568  | 0.1141    | KLRB1     | chr12 | - | 9747147  | 9760482  | 1448  |
| ENSG00000179994.87 | 116.5906 | 9.134    | 3.93E-50  | 9.04E-49  | COL12A1   | chr6  | - | 75794042 | 75915767 | 11723 |
| ENSG000001178.6925 | 31.73902 | 2.4568   | 1.44E-10  | 7.06E-10  | BTN3A3    | chr6  | + | 26440700 | 26453643 | 4547  |
| ENSG000001536.16   | 866.264  | -0.68957 | 3.58E-06  | 1.21E-05  | TDP2      | chr6  | - | 24650205 | 24667261 | 2120  |
| ENSG00000130.42822 | 4.957743 | 2.5355   | 2.15E-05  | 6.63E-05  | FRK       | chr6  | - | 1.16E+08 | 1.16E+08 | 2849  |
| ENSG0000011475.964 | 1252.241 | 0.23735  | 0.046367  | 0.083324  | DSE       | chr6  | + | 1.17E+08 | 1.17E+08 | 4255  |
| ENSG000001589.2057 | 479.1433 | 0.29786  | 0.040428  | 0.074054  | RWDD1     | chr6  | + | 1.17E+08 | 1.17E+08 | 5522  |
| ENSG0000012.883288 | 9.640289 | -1.6063  | 0.074435  | 0.12566   | RSPH4A    | chr6  | + | 1.17E+08 | 1.17E+08 | 2825  |
| ENSG00000115.84145 | 23.91062 | -0.59013 | 0.18218   | 0.26698   | MAK       | chr6  | - | 10762956 | 10838764 | 3984  |
| ENSG000001860.2781 | 1294.273 | -0.58916 | 2.37E-07  | 8.96E-07  | TMEM14C   | chr6  | + | 10723148 | 10731362 | 1177  |
| ENSG000001307.8478 | 599.18   | -0.9551  | 0.000181  | 0.0005    | PAK1IP1   | chr6  | + | 10694928 | 10710015 | 1800  |
| ENSG0000010.342542 | 1231.589 | -10.703  | 6.12E-32  | 8.41E-31  | GCNT2     | chr6  | + | 10492456 | 10629601 | 4525  |
| ENSG00000175.02382 | 96.74879 | -0.37008 | 0.13819   | 0.21164   | SMIM8     | chr6  | + | 88032306 | 88052043 | 2434  |
| ENSG0000011413.787 | 209.8395 | 2.7498   | 7.06E-70  | 2.52E-68  | NEDD9     | chr6  | - | 11183531 | 11382581 | 4934  |
| ENSG000001158.2175 | 65.60146 | 1.2646   | 4.56E-06  | 1.52E-05  | CEP85L    | chr6  | - | 1.19E+08 | 1.19E+08 | 7673  |

|            |          |          |          |           |           |         |      |   |          |          |       |
|------------|----------|----------|----------|-----------|-----------|---------|------|---|----------|----------|-------|
| ENSG000001 | 27.50142 | 4.167067 | 2.6185   | 1.13E-05  | 3.58E-05  | ADTRP   | chr6 | - | 11712287 | 11807279 | 1927  |
| ENSG000001 | 360.314  | 320.5062 | 0.17031  | 0.29478   | 0.39685   | ASF1A   | chr6 | + | 1.19E+08 | 1.19E+08 | 2362  |
| ENSG000001 | 184.6656 | 159.8889 | 0.2085   | 0.3547    | 0.45892   | MCM9    | chr6 | - | 1.19E+08 | 1.19E+08 | 7592  |
| ENSG000001 | 4.532592 | 116.3054 | -4.5757  | 2.22E-21  | 2.00E-20  | FAM184A | chr6 | - | 1.19E+08 | 1.19E+08 | 4141  |
| ENSG000001 | 503.2922 | 426.1453 | 0.24099  | 0.078824  | 0.13186   | RNGTT   | chr6 | - | 89319985 | 89673348 | 4434  |
| ENSG000001 | 1390.134 | 231.6583 | 2.5781   | 8.26E-73  | 3.11E-71  | MAN1A1  | chr6 | - | 1.19E+08 | 1.2E+08  | 5014  |
| ENSG000001 | 10.99623 | 2.012704 | 2.2662   | 0.016529  | 0.033192  | GABRR2  | chr6 | - | 89966927 | 90025018 | 1691  |
| ENSG000001 | 1925.109 | 592.1606 | 1.6974   | 1.14E-20  | 9.89E-20  | SERINC1 | chr6 | - | 1.23E+08 | 1.23E+08 | 3382  |
| ENSG000001 | 562.2877 | 721.5975 | -0.35809 | 0.004132  | 0.009314  | HDDC2   | chr6 | - | 1.26E+08 | 1.26E+08 | 1615  |
| ENSG000001 | 69.91414 | 227.6514 | -1.69    | 2.88E-11  | 1.48E-10  | TPD52L1 | chr6 | + | 1.25E+08 | 1.26E+08 | 2489  |
| ENSG000001 | 343.1326 | 228.7838 | 0.58087  | 0.003506  | 0.007997  | HINT3   | chr6 | + | 1.26E+08 | 1.26E+08 | 3311  |
| ENSG000001 | 162.4727 | 91.82751 | 0.81943  | 0.000765  | 0.00193   | NCOA7   | chr6 | + | 1.26E+08 | 1.26E+08 | 5521  |
| ENSG000001 | 22.53199 | 146.3633 | -2.6878  | 1.76E-21  | 1.59E-20  | FAM65B  | chr6 | - | 24797601 | 25042238 | 5471  |
| ENSG000001 | 4470.122 | 600.7327 | 2.8939   | 1.29E-165 | 1.77E-163 | SASH1   | chr6 | + | 1.49E+08 | 1.49E+08 | 7711  |
| ENSG000001 | 394.7385 | 670.8628 | -0.76337 | 1.60E-05  | 5.03E-05  | UST     | chr6 | + | 1.49E+08 | 1.49E+08 | 4198  |
| ENSG000001 | 43.00889 | 8.27989  | 2.3431   | 1.88E-07  | 7.17E-07  | ULBP1   | chr6 | + | 1.5E+08  | 1.5E+08  | 3140  |
| ENSG000001 | 453.2164 | 597.3982 | -0.39642 | 0.002996  | 0.006908  | FBXO5   | chr6 | - | 1.53E+08 | 1.53E+08 | 2600  |
| ENSG000001 | 248.5488 | 234.1747 | 0.086345 | 0.72726   | 0.79827   | MTRF1L  | chr6 | - | 1.53E+08 | 1.53E+08 | 3676  |
| ENSG000001 | 3437.161 | 510.0931 | 2.7469   | 5.63E-80  | 2.37E-78  | PPARD   | chr6 | + | 35310335 | 35395968 | 3774  |
| ENSG000001 | 0        | 0.297015 | -0.41864 | 0.81278   | NA        | OPRM1   | chr6 | + | 1.54E+08 | 1.55E+08 | 2594  |
| ENSG000001 | 293.3831 | 403.0718 | -0.45751 | 0.008236  | 0.017566  | FANCE   | chr6 | + | 35420138 | 35434880 | 2554  |
| ENSG000001 | 4.056471 | 92.36976 | -4.4478  | 9.27E-19  | 7.33E-18  | TULP1   | chr6 | - | 35465651 | 35480715 | 2162  |
| ENSG000001 | 0.36308  | 5.707127 | -3.3081  | 0.012973  | 0.026636  | SLC26A8 | chr6 | - | 35911291 | 35992645 | 3653  |
| ENSG000001 | 970.7153 | 777.0953 | 0.31977  | 0.006514  | 0.014186  | MAPK14  | chr6 | + | 35995488 | 36079013 | 4319  |
| ENSG000001 | 1569.723 | 810.2239 | 0.95247  | 8.24E-15  | 5.35E-14  | KCTD20  | chr6 | + | 36410544 | 36458920 | 5619  |
| ENSG000001 | 653.6163 | 269.5121 | 1.2763   | 2.78E-20  | 2.38E-19  | STK38   | chr6 | - | 36461669 | 36515247 | 3576  |
| ENSG000001 | 4554.352 | 8247.255 | -0.85431 | 3.61E-06  | 1.22E-05  | SRSF3   | chr6 | + | 36562145 | 36571209 | 2054  |
| ENSG000001 | 677.5396 | 1476.331 | -1.1226  | 9.80E-24  | 9.75E-23  | SOD2    | chr6 | - | 1.6E+08  | 1.6E+08  | 4302  |
| ENSG000001 | 817.0553 | 1055.367 | -0.36891 | 0.001872  | 0.004447  | MRPL18  | chr6 | + | 1.6E+08  | 1.6E+08  | 1075  |
| ENSG000001 | 2097.579 | 7355.126 | -1.8064  | 4.49E-31  | 5.99E-30  | MCM3    | chr6 | - | 52128807 | 52149679 | 3169  |
| ENSG000001 | 372.9217 | 565.2979 | -0.59878 | 3.46E-05  | 0.000104  | RNF8    | chr6 | + | 37321748 | 37362514 | 5631  |
| ENSG000001 | 110.9621 | 101.242  | 0.13396  | 0.58365   | 0.67961   | PHACTR1 | chr6 | + | 12717893 | 13288645 | 4784  |
| ENSG000001 | 1015.536 | 70.7269  | 3.8125   | 1.02E-40  | 1.83E-39  | MDGA1   | chr6 | - | 37598455 | 37667082 | 10736 |
| ENSG000001 | 710.63   | 287.4525 | 1.3034   | 1.16E-25  | 1.25E-24  | ICK     | chr6 | - | 52866077 | 52926600 | 6227  |
| ENSG000001 | 602.5394 | 318.4635 | 0.91742  | 4.36E-06  | 1.46E-05  | FBXO9   | chr6 | + | 52916789 | 52965671 | 4559  |
| ENSG000001 | 19.36696 | 110.314  | -2.4866  | 9.22E-14  | 5.57E-13  | CD83    | chr6 | + | 14117872 | 14137149 | 2471  |
| ENSG000001 | 1620.919 | 5847.244 | -1.8483  | 2.13E-43  | 4.10E-42  | MDN1    | chr6 | - | 90352218 | 90529442 | 18413 |
| ENSG000001 | 0        | 16.96932 | -5.7091  | 1.66E-06  | 5.83E-06  | GLP1R   | chr6 | + | 39016574 | 39055519 | 3105  |
| ENSG000001 | 243.939  | 107.9234 | 1.1757   | 3.53E-11  | 1.80E-10  | SAYSD1  | chr6 | - | 39071840 | 39082965 | 2020  |
| ENSG000001 | 77.78674 | 0.686276 | 6.3519   | 9.25E-13  | 5.27E-12  | BMP5    | chr6 | - | 55618443 | 55740362 | 3952  |
| ENSG000001 | 201.5959 | 102.0587 | 0.97068  | 0.000152  | 0.000422  | BACH2   | chr6 | - | 90636248 | 91006627 | 9113  |
| ENSG000001 | 138.1003 | 31.44355 | 2.1159   | 3.63E-16  | 2.53E-15  | RBM24   | chr6 | + | 17281577 | 17294106 | 2703  |
| ENSG000001 | 780.6068 | 211.857  | 1.8801   | 1.46E-41  | 2.65E-40  | CAP2    | chr6 | + | 17393447 | 17558023 | 3316  |
| ENSG000001 | 1.971308 | 0.640152 | 1.2774   | 0.36886   | 0.47345   | TREML2  | chr6 | - | 41158015 | 41168932 | 3302  |
| ENSG000001 | 494.5988 | 465.2848 | 0.089531 | 0.57903   | 0.67554   | ZNF451  | chr6 | + | 56951642 | 57035105 | 9478  |
| ENSG000001 | 457.7673 | 187.803  | 1.2852   | 5.65E-13  | 3.27E-12  | BAG2    | chr6 | + | 57037124 | 57049735 | 1755  |
| ENSG000001 | 876.0938 | 258.9029 | 1.7575   | 1.35E-37  | 2.22E-36  | RAB23   | chr6 | - | 57053607 | 57087078 | 2986  |
| ENSG000001 | 1.048164 | 11.49684 | -3.1338  | 0.003405  | 0.007786  | TSPO2   | chr6 | + | 41010293 | 41012076 | 958   |
| ENSG000001 | 18.60053 | 91.81938 | -2.2871  | 8.60E-11  | 4.27E-10  | GPR63   | chr6 | - | 97245888 | 97285353 | 2198  |
| ENSG000001 | 1.431782 | 64.75492 | -5.3451  | 1.94E-13  | 1.15E-12  | KHDRBS2 | chr6 | - | 62390139 | 62996132 | 2058  |
| ENSG000001 | 220.4329 | 133.5645 | 0.7175   | 0.001972  | 0.004671  | FBXL4   | chr6 | - | 99321334 | 99395849 | 3115  |
| ENSG000001 | 613.3793 | 1203.821 | -0.97005 | 1.43E-08  | 5.98E-08  | CCNC    | chr6 | - | 99990256 | 1E+08    | 2473  |
| ENSG000001 | 0.290301 | 1.730259 | -1.5626  | 0.35075   | 0.45521   | PRDM13  | chr6 | + | 1E+08    | 1E+08    | 3234  |
| ENSG000001 | 760.3984 | 1030.024 | -0.43651 | 0.017926  | 0.035746  | E2F3    | chr6 | + | 20402398 | 20493941 | 4744  |
| ENSG000001 | 1877.627 | 1517.675 | 0.30676  | 0.002775  | 0.00643   | PTP4A1  | chr6 | + | 64231666 | 64293492 | 5088  |
| ENSG000001 | 0        | 4.086101 | -3.3581  | 0.031766  | 0.059707  | SIM1    | chr6 | - | 1.01E+08 | 1.01E+08 | 8430  |
| ENSG000001 | 1252.186 | 1268.813 | -0.01884 | 0.87991   | 0.91625   | ASCC3   | chr6 | - | 1.01E+08 | 1.01E+08 | 8146  |
| ENSG000001 | 0        | 2.618886 | -2.6151  | 0.12026   | 0.18917   | HDGFL1  | chr6 | + | 22569678 | 22571892 | 2034  |
| ENSG000001 | 514.3871 | 50.2872  | 3.335    | 2.57E-64  | 8.25E-63  | BVES    | chr6 | - | 1.06E+08 | 1.06E+08 | 5567  |
| ENSG000001 | 0.943682 | 123.0775 | -6.5945  | 6.00E-18  | 4.60E-17  | COL9A1  | chr6 | - | 70924764 | 71012786 | 4761  |
| ENSG000001 | 599.593  | 287.7747 | 1.0579   | 2.20E-12  | 1.22E-11  | MED23   | chr6 | - | 1.32E+08 | 1.32E+08 | 5245  |
| ENSG000001 | 475.9151 | 356.2254 | 0.41762  | 0.002219  | 0.005212  | WASF1   | chr6 | - | 1.1E+08  | 1.11E+08 | 3220  |
| ENSG000001 | 25.60289 | 78.94255 | -1.6082  | 2.37E-07  | 8.95E-07  | GPLD1   | chr6 | - | 24424793 | 24495433 | 3489  |
| ENSG000001 | 174.0042 | 84.33339 | 1.0395   | 2.79E-07  | 1.05E-06  | ALDH5A1 | chr6 | + | 24495080 | 24537435 | 5248  |
| ENSG000001 | 2171.659 | 444.9272 | 2.2782   | 7.37E-26  | 7.98E-25  | AIM1    | chr6 | + | 1.07E+08 | 1.07E+08 | 7544  |

|                    |          |          |           |           |          |      |   |          |          |       |
|--------------------|----------|----------|-----------|-----------|----------|------|---|----------|----------|-------|
| ENSG0000013101624  | 0        | 3.0457   | 0.051816  | 0.09178   | VNN1     | chr6 | - | 1.33E+08 | 1.33E+08 | 3106  |
| ENSG0000010342542  | 0        | 0.4146   | 0.81455   | NA        | VNN2     | chr6 | - | 1.33E+08 | 1.33E+08 | 2118  |
| ENSG000001444.2264 | 776.9028 | -0.80533 | 1.97E-08  | 8.14E-08  | ACOT13   | chr6 | + | 24667263 | 24705293 | 4391  |
| ENSG000001136.1912 | 185.5519 | -0.4445  | 0.058746  | 0.10255   | SMAP1    | chr6 | + | 71377479 | 71571718 | 3333  |
| ENSG0000018155.454 | 13068.04 | -0.67946 | 4.12E-09  | 1.80E-08  | RPS12    | chr6 | + | 1.33E+08 | 1.33E+08 | 639   |
| ENSG0000012557.212 | 2137.928 | 0.25803  | 0.084448  | 0.14002   | C6orf62  | chr6 | - | 24705089 | 24721064 | 4134  |
| ENSG0000015.260544 | 8.97503  | -0.70751 | 0.43126   | 0.53679   | B3GAT2   | chr6 | - | 71566382 | 71666741 | 6565  |
| ENSG000001461.1778 | 1097.548 | -1.2485  | 4.85E-17  | 3.56E-16  | GMNN     | chr6 | + | 24775159 | 24786327 | 1262  |
| ENSG00000196.39199 | 1.355566 | 5.9149   | 3.71E-17  | 2.73E-16  | EYA4     | chr6 | + | 1.34E+08 | 1.34E+08 | 5699  |
| ENSG000001979.8917 | 250.2004 | 1.958    | 3.31E-14  | 2.06E-13  | SOBP     | chr6 | + | 1.08E+08 | 1.08E+08 | 5231  |
| ENSG0000010.290301 | 0.343138 | -0.00202 | 0.99909   | NA        | NR2E1    | chr6 | + | 1.08E+08 | 1.09E+08 | 3212  |
| ENSG0000012176.4   | 1061.035 | 1.0346   | 1.06E-19  | 8.79E-19  | SNX3     | chr6 | - | 1.09E+08 | 1.09E+08 | 1755  |
| ENSG0000011098.871 | 1091.84  | 0.010009 | 0.93356   | 0.95639   | HBS1L    | chr6 | - | 1.35E+08 | 1.35E+08 | 7163  |
| ENSG000001505.8205 | 69.87292 | 2.8442   | 1.92E-33  | 2.78E-32  | TRIM38   | chr6 | + | 25963030 | 25985348 | 3255  |
| ENSG00000189.5132  | 122.7935 | -0.45432 | 0.035999  | 0.066841  | PEX7     | chr6 | + | 1.37E+08 | 1.37E+08 | 1539  |
| ENSG000001202.9152 | 479.0964 | -1.2356  | 8.82E-12  | 4.69E-11  | ZBTB24   | chr6 | - | 1.1E+08  | 1.1E+08  | 5519  |
| ENSG000001242.5585 | 450.5126 | -0.89018 | 5.54E-07  | 2.02E-06  | FIG4     | chr6 | + | 1.1E+08  | 1.1E+08  | 3011  |
| ENSG000001697.8653 | 1158.993 | -0.73144 | 1.61E-09  | 7.32E-09  | PERP     | chr6 | - | 1.38E+08 | 1.38E+08 | 2009  |
| ENSG000001493.8541 | 1267.109 | -1.3582  | 1.67E-25  | 1.78E-24  | KIAA1244 | chr6 | + | 1.38E+08 | 1.39E+08 | 14877 |
| ENSG0000010.580602 | 326.9254 | -8.3612  | 2.78E-24  | 2.83E-23  | SLC16A10 | chr6 | + | 1.11E+08 | 1.12E+08 | 2508  |
| ENSG000001337.0276 | 173.7802 | 0.94381  | 0.014881  | 0.030165  | HECA     | chr6 | + | 1.39E+08 | 1.4E+08  | 5614  |
| ENSG000001734.5788 | 151.25   | 2.2709   | 3.86E-36  | 6.06E-35  | GPR126   | chr6 | + | 1.43E+08 | 1.43E+08 | 7026  |
| ENSG000001497.2066 | 547.8394 | -0.13889 | 0.60164   | 0.69517   | PHACTR2  | chr6 | + | 1.44E+08 | 1.44E+08 | 9531  |
| ENSG00000162.72955 | 79.85937 | -0.34132 | 0.34042   | 0.44436   | EPM2A    | chr6 | - | 1.46E+08 | 1.46E+08 | 3633  |
| ENSG0000014957.487 | 2532.092 | 0.96861  | 3.41E-29  | 4.22E-28  | SLC39A7  | chr6 | + | 33168222 | 33172216 | 2409  |
| ENSG0000010        | 0.297015 | -0.41864 | 0.81278   | NA        | CCR6     | chr6 | + | 1.68E+08 | 1.68E+08 | 4018  |
| ENSG0000010        | 7.754675 | -4.5564  | 0.000506  | 0.001313  | UNC93A   | chr6 | + | 1.68E+08 | 1.68E+08 | 2116  |
| ENSG0000010.290301 | 13.20762 | -4.4511  | 0.000392  | 0.001033  | SLC22A2  | chr6 | - | 1.61E+08 | 1.61E+08 | 3737  |
| ENSG000001777.3224 | 723.5125 | 0.10301  | 0.58598   | 0.68172   | PHF1     | chr6 | + | 33378176 | 33384230 | 2330  |
| ENSG0000011533.669 | 1857.76  | -0.27604 | 0.009142  | 0.019352  | CUTA     | chr6 | - | 33384219 | 33386094 | 1378  |
| ENSG00000112.42801 | 1.043983 | 3.3046   | 0.000765  | 0.001932  | PACRG    | chr6 | + | 1.63E+08 | 1.64E+08 | 1619  |
| ENSG0000013482.312 | 2104.018 | 0.72557  | 9.70E-09  | 4.12E-08  | QKI      | chr6 | + | 1.64E+08 | 1.64E+08 | 9463  |
| ENSG0000011.338465 | 5.644019 | -1.8922  | 0.066468  | 0.11396   | C6orf118 | chr6 | - | 1.66E+08 | 1.66E+08 | 1838  |
| ENSG000001476.1188 | 127.9876 | 1.8898   | 6.62E-32  | 9.08E-31  | PDE10A   | chr6 | - | 1.66E+08 | 1.66E+08 | 8233  |
| ENSG0000018150.37  | 1977.71  | 2.0393   | 9.36E-43  | 1.77E-41  | MDFI     | chr6 | + | 41604620 | 41621984 | 1629  |
| ENSG000001377.8601 | 26.05042 | 3.8277   | 7.10E-61  | 2.09E-59  | TFEB     | chr6 | - | 41651716 | 41703997 | 2595  |
| ENSG0000014.097547 | 54.31509 | -3.652   | 1.06E-09  | 4.86E-09  | SMOC2    | chr6 | + | 1.69E+08 | 1.69E+08 | 3150  |
| ENSG0000011319.9   | 831.052  | 0.66636  | 8.91E-08  | 3.49E-07  | CCND3    | chr6 | - | 41902671 | 42018095 | 2394  |
| ENSG000001542.3281 | 933.6244 | -0.78092 | 0.000174  | 0.000482  | BYSL     | chr6 | + | 41888926 | 41900784 | 2029  |
| ENSG000001817.6798 | 347.8154 | 1.2318   | 6.10E-21  | 5.36E-20  | FAM120B  | chr6 | + | 1.71E+08 | 1.71E+08 | 5155  |
| ENSG000001282.1161 | 356.9837 | -0.33917 | 0.02464   | 0.047625  | TBP      | chr6 | + | 1.71E+08 | 1.71E+08 | 1903  |
| ENSG00000115.33461 | 33.534   | -1.09    | 0.085094  | 0.14083   | GUCA1B   | chr6 | - | 42152139 | 42162654 | 1113  |
| ENSG000001154.6192 | 29.99648 | 2.3612   | 6.79E-20  | 5.69E-19  | PRPH2    | chr6 | - | 42664340 | 42690312 | 2974  |
| ENSG000001207.9321 | 216.1893 | -0.057   | 0.73471   | 0.8042    | GLTSCR1L | chr6 | + | 42749765 | 42836298 | 6530  |
| ENSG0000011412.451 | 1303.736 | 0.11534  | 0.35157   | 0.4559    | PPP2R5D  | chr6 | + | 42952237 | 42980080 | 3044  |
| ENSG000001433.4798 | 822.1878 | -0.92181 | 8.69E-09  | 3.71E-08  | MRPL2    | chr6 | - | 43021767 | 43027544 | 1588  |
| ENSG00000111111.95 | 4750.214 | 1.2242   | 1.88E-19  | 1.54E-18  | PTK7     | chr6 | + | 43044006 | 43129457 | 5282  |
| ENSG0000011390.192 | 2146.762 | -0.62564 | 1.64E-09  | 7.43E-09  | SRF      | chr6 | + | 43139037 | 43149243 | 4200  |
| ENSG000001658.8318 | 183.5483 | 1.8335   | 6.91E-14  | 4.21E-13  | CUL9     | chr6 | + | 43149913 | 43192325 | 8150  |
| ENSG000001245.3392 | 306.2166 | -0.31957 | 0.16787   | 0.24936   | NUDT3    | chr6 | - | 34255997 | 34360451 | 1364  |
| ENSG000001472.8206 | 675.3938 | -0.51335 | 0.014104  | 0.028727  | DNPH1    | chr6 | - | 43193367 | 43197222 | 834   |
| ENSG000001396.5037 | 676.6572 | -0.7704  | 4.55E-06  | 1.52E-05  | DUSP22   | chr6 | + | 291630   | 351355   | 3824  |
| ENSG000001574.9744 | 1142.954 | -0.99005 | 5.44E-19  | 4.36E-18  | EXOC2    | chr6 | - | 485133   | 693117   | 4449  |
| ENSG0000012004.506 | 1619.071 | 0.30821  | 0.012343  | 0.025454  | COX7A2   | chr6 | - | 75947391 | 75960039 | 914   |
| ENSG0000013207.24  | 1312.062 | 1.2878   | 1.24E-32  | 1.74E-31  | TMEM30A  | chr6 | - | 75962640 | 75994684 | 4594  |
| ENSG000001206.0645 | 473.781  | -1.1978  | 2.49E-14  | 1.57E-13  | GMDS     | chr6 | - | 1624041  | 2245926  | 1752  |
| ENSG0000011236.495 | 1093.783 | 0.17738  | 0.13756   | 0.21094   | SENP6    | chr6 | + | 76311225 | 76427997 | 6645  |
| ENSG0000015.217676 | 10.94248 | -1.0154  | 0.16526   | 0.24624   | IMPG1    | chr6 | - | 76630832 | 76782395 | 5795  |
| ENSG000001904.9404 | 719.8987 | 0.32929  | 0.037449  | 0.069222  | VEGFA    | chr6 | + | 43737921 | 43754224 | 12167 |
| ENSG0000011195.878 | 1242.607 | -0.05495 | 0.78853   | 0.84888   | PRPF4B   | chr6 | + | 4021501  | 4065217  | 6775  |
| ENSG000001381.0406 | 716.0839 | -0.90482 | 0.00027   | 0.000728  | TTK      | chr6 | + | 80713604 | 80752244 | 3725  |
| ENSG0000011673.163 | 3796.372 | -1.1801  | 2.56E-23  | 2.50E-22  | SLC29A1  | chr6 | + | 44187242 | 44201888 | 2485  |
| ENSG0000010.290301 | 3.276024 | -2.5813  | 0.071009  | 0.12063   | WISP3    | chr6 | + | 1.12E+08 | 1.12E+08 | 2512  |
| ENSG000001834.3136 | 214.5374 | 1.9566   | 3.60E-39  | 6.21E-38  | BTN2A1   | chr6 | + | 26458150 | 26476849 | 3113  |
| ENSG0000011138.476 | 25.89822 | 5.4452   | 3.77E-156 | 4.69E-154 | LAMA4    | chr6 | - | 1.12E+08 | 1.13E+08 | 6547  |

|                    |          |          |           |           |          |       |   |          |          |       |
|--------------------|----------|----------|-----------|-----------|----------|-------|---|----------|----------|-------|
| ENSG000001626.5222 | 106.5956 | 2.5425   | 1.86E-32  | 2.61E-31  | FAM46A   | chr6  | - | 82201156 | 82462491 | 5664  |
| ENSG0000013838135  | 4.380699 | -0.15546 | 0.8645    | 0.90562   | CLIC5    | chr6  | - | 45868045 | 46048132 | 2713  |
| ENSG0000011908.963 | 2806.167 | -0.55496 | 4.33E-05  | 0.000129  | FBRSL1   | chr12 | + | 1.33E+08 | 1.33E+08 | 5568  |
| ENSG0000010653381  | 103.8301 | -6.7872  | 1.83E-15  | 1.23E-14  | ENPP5    | chr6  | - | 46126924 | 46138708 | 3834  |
| ENSG0000010975385  | 0.297015 | 0.91901  | 0.59525   | NA        | LY86     | chr6  | + | 6588341  | 6655216  | 1197  |
| ENSG0000014927375  | 211.647  | -5.3296  | 9.07E-31  | 1.19E-29  | PRSS16   | chr6  | + | 27215480 | 27224403 | 3411  |
| ENSG0000013278071  | 0.357707 | 2.5639   | 0.070715  | 0.12022   | MEP1A    | chr6  | + | 46761127 | 46807515 | 2892  |
| ENSG0000011045.552 | 1.326428 | 9.277    | 1.41E-48  | 3.10E-47  | TBX18    | chr6  | - | 85444157 | 85474237 | 4408  |
| ENSG0000011810.352 | 482.7714 | 1.9063   | 8.98E-55  | 2.31E-53  | ERBB2IP  | chr5  | + | 65222303 | 65378377 | 8647  |
| ENSG0000011385.503 | 605.812  | 1.1924   | 5.23E-27  | 5.93E-26  | PCDHB2   | chr5  | + | 1.4E+08  | 1.4E+08  | 2736  |
| ENSG000001545.0065 | 310.7488 | 0.8084   | 3.49E-10  | 1.66E-09  | HARS2    | chr5  | + | 1.4E+08  | 1.4E+08  | 2483  |
| ENSG000001138.9917 | 238.1413 | -0.77486 | 1.67E-05  | 5.23E-05  | NUDT12   | chr5  | - | 1.03E+08 | 1.03E+08 | 3492  |
| ENSG000001143.8643 | 315.6993 | -1.1322  | 5.89E-13  | 3.40E-12  | CEP72    | chr5  | + | 612387   | 667283   | 2434  |
| ENSG0000011405.511 | 1499.481 | -0.093   | 0.52881   | 0.63034   | MAN2A1   | chr5  | + | 1.09E+08 | 1.09E+08 | 5599  |
| ENSG0000011449.251 | 587.3987 | 1.2993   | 1.03E-13  | 6.21E-13  | SEMA5A   | chr5  | - | 9035138  | 9546187  | 11762 |
| ENSG0000012987769  | 2.759672 | 0.10858  | 0.92909   | 0.95301   | C7       | chr5  | + | 40909354 | 40983041 | 4257  |
| ENSG0000011010.4   | 660.642  | 0.61153  | 0.000109  | 0.000309  | PAPD7    | chr5  | + | 6714718  | 6757161  | 3861  |
| ENSG0000012757419  | 12.69543 | 1.0908   | 0.023613  | 0.04586   | GHR      | chr5  | + | 42423879 | 42721979 | 4560  |
| ENSG00000110840.56 | 4458.046 | 1.2755   | 5.51E-07  | 2.01E-06  | HMGCS1   | chr5  | - | 43289497 | 43313614 | 3506  |
| ENSG0000014943.42  | 900.2025 | 2.4553   | 6.42E-140 | 6.33E-138 | DAP      | chr5  | - | 10679342 | 10761384 | 2339  |
| ENSG0000014107898  | 3.604593 | 0.18228  | 0.85835   | 0.90057   | NME5     | chr5  | - | 1.37E+08 | 1.37E+08 | 1193  |
| ENSG000001981.1607 | 1041.678 | -0.08587 | 0.61447   | 0.70632   | BRD8     | chr5  | - | 1.37E+08 | 1.38E+08 | 4388  |
| ENSG0000011398.192 | 1883.776 | -0.42924 | 0.002048  | 0.004839  | KIF20A   | chr5  | + | 1.38E+08 | 1.38E+08 | 3201  |
| ENSG0000011209.883 | 507.363  | 1.2522   | 1.66E-18  | 1.30E-17  | NNT      | chr5  | + | 43602794 | 43707507 | 6483  |
| ENSG000001790.9812 | 1118.704 | -0.50016 | 4.17E-06  | 1.40E-05  | MRPS30   | chr5  | + | 44809027 | 44820530 | 4331  |
| ENSG0000013333.96  | 6420.612 | -0.94345 | 6.51E-09  | 2.80E-08  | HSPA9    | chr5  | - | 1.38E+08 | 1.38E+08 | 3321  |
| ENSG000001899.5161 | 1535.587 | -0.77075 | 3.48E-11  | 1.78E-10  | MRPS27   | chr5  | - | 71515236 | 71616473 | 4435  |
| ENSG000001718.9522 | 476.5567 | 0.59406  | 3.55E-05  | 0.000107  | PFDN1    | chr5  | - | 1.4E+08  | 1.4E+08  | 1352  |
| ENSG000001584.659  | 38.2579  | 3.8968   | 1.84E-51  | 4.38E-50  | HBEGF    | chr5  | - | 1.4E+08  | 1.4E+08  | 2386  |
| ENSG0000010995923  | 3.336716 | -1.5216  | 0.20033   | 0.289     | SLC4A9   | chr5  | + | 1.4E+08  | 1.4E+08  | 3343  |
| ENSG0000013330.974 | 26.87178 | 6.9339   | 8.11E-245 | 2.64E-242 | LOX      | chr5  | - | 1.21E+08 | 1.21E+08 | 5102  |
| ENSG0000010995923  | 0        | 1.4959   | 0.39264   | NA        | GZMK     | chr5  | + | 54320081 | 54330398 | 1509  |
| ENSG0000010580602  | 7.439802 | -2.9736  | 0.022698  | 0.044246  | CDH9     | chr5  | - | 26880709 | 27121257 | 3079  |
| ENSG000001223.5762 | 134.3406 | 0.73002  | 0.000152  | 0.000424  | APBB3    | chr5  | - | 1.4E+08  | 1.4E+08  | 2801  |
| ENSG000001114.9947 | 276.8055 | -1.2619  | 1.40E-12  | 7.86E-12  | TMCO6    | chr5  | + | 1.4E+08  | 1.4E+08  | 1953  |
| ENSG00000170591.2  | 3724.772 | 4.2409   | 0         | 0         | SPARC    | chr5  | - | 1.51E+08 | 1.51E+08 | 3701  |
| ENSG0000011677.555 | 1442.771 | 0.21768  | 0.12796   | 0.19906   | IK       | chr5  | + | 1.4E+08  | 1.4E+08  | 1964  |
| ENSG0000015464.522 | 3522.385 | 0.63047  | 0.012487  | 0.025732  | HMGCR    | chr5  | + | 74632154 | 74657929 | 4585  |
| ENSG000001570.2359 | 1120.689 | -0.97428 | 1.50E-16  | 1.07E-15  | COL4A3BP | chr5  | - | 74664311 | 74807963 | 5651  |
| ENSG0000011402.829 | 898.1795 | 0.64154  | 0.00146   | 0.003533  | FAF2     | chr5  | + | 1.76E+08 | 1.76E+08 | 4515  |
| ENSG0000010        | 9.279293 | -2.3882  | NA        | NA        | HAND1    | chr5  | - | 1.54E+08 | 1.54E+08 | 1738  |
| ENSG000001119.2659 | 74.47134 | 0.67535  | 0.006966  | 0.01509   | PCDHB3   | chr5  | + | 1.4E+08  | 1.4E+08  | 3173  |
| ENSG000001123.3192 | 198.2254 | -0.6843  | 0.000237  | 0.000644  | PCDHB5   | chr5  | + | 1.41E+08 | 1.41E+08 | 2904  |
| ENSG00000117.65425 | 4.303021 | 1.9635   | 0.003541  | 0.008075  | PCDHB6   | chr5  | + | 1.41E+08 | 1.41E+08 | 3030  |
| ENSG00000123.91071 | 11.35518 | 1.064    | 0.064657  | 0.11136   | PCDHB7   | chr5  | + | 1.41E+08 | 1.41E+08 | 3715  |
| ENSG00000175.12072 | 49.50626 | 0.58893  | 0.061269  | 0.10629   | PDE8B    | chr5  | + | 76506274 | 76725632 | 5956  |
| ENSG000001139.1425 | 117.2877 | 0.24468  | 0.26012   | 0.35807   | CLK4     | chr5  | - | 1.78E+08 | 1.78E+08 | 3722  |
| ENSG000001377.9315 | 209.2443 | 0.84711  | 0.000205  | 0.000561  | PCDHB15  | chr5  | + | 1.41E+08 | 1.41E+08 | 2653  |
| ENSG0000010580602  | 12.04958 | -3.7718  | 0.000445  | 0.001164  | GRM6     | chr5  | - | 1.78E+08 | 1.78E+08 | 6143  |
| ENSG0000010653381  | 2.087966 | -1.2605  | 0.40489   | 0.50976   | ITK      | chr5  | + | 1.57E+08 | 1.57E+08 | 5869  |
| ENSG000001540.8884 | 1452.198 | -1.422   | 3.62E-24  | 3.66E-23  | RNF130   | chr5  | - | 1.79E+08 | 1.79E+08 | 9945  |
| ENSG000001140.648  | 174.6555 | -0.31049 | 0.11612   | 0.18363   | THG1L    | chr5  | + | 1.57E+08 | 1.57E+08 | 3107  |
| ENSG0000011250.782 | 281.9443 | 2.147    | 3.46E-56  | 9.20E-55  | ARSB     | chr5  | - | 78073032 | 78281910 | 5327  |
| ENSG0000012499.635 | 1334.342 | 0.90449  | 4.87E-10  | 2.30E-09  | CLINT1   | chr5  | - | 1.57E+08 | 1.57E+08 | 3987  |
| ENSG000001217.6101 | 217.4989 | 0.001759 | 0.99453   | 0.99685   | THBS4    | chr5  | + | 79287134 | 79379110 | 3222  |
| ENSG0000011229.372 | 981.4321 | 0.32474  | 0.003307  | 0.007576  | CNOT6    | chr5  | + | 1.8E+08  | 1.8E+08  | 6303  |
| ENSG0000010342542  | 0        | 0.4146   | 0.81455   | NA        | IL12B    | chr5  | - | 1.59E+08 | 1.59E+08 | 2761  |
| ENSG0000010        | 14.85866 | -5.5147  | 4.97E-06  | 1.65E-05  | BTNL8    | chr5  | + | 1.8E+08  | 1.8E+08  | 2229  |
| ENSG000001660.2147 | 820.9375 | -0.31293 | 0.083255  | 0.13825   | TTC1     | chr5  | + | 1.59E+08 | 1.59E+08 | 1467  |
| ENSG000001278.4861 | 275.0191 | 0.019862 | 0.9022    | 0.93242   | MSH3     | chr5  | + | 79950467 | 80172279 | 4092  |
| ENSG00000164.08358 | 258.7282 | -1.9828  | 4.26E-06  | 1.43E-05  | RASGRF2  | chr5  | + | 80256491 | 80525975 | 8167  |
| ENSG0000010        | 24.91735 | -6.2628  | 4.86E-08  | 1.95E-07  | GABRG2   | chr5  | + | 1.61E+08 | 1.62E+08 | 4056  |
| ENSG0000011370.952 | 2990.425 | -1.1234  | 6.00E-15  | 3.92E-14  | CCNG1    | chr5  | + | 1.63E+08 | 1.63E+08 | 2458  |
| ENSG00000174.59073 | 2274.584 | -4.92    | 5.88E-171 | 8.87E-169 | POLR3G   | chr5  | + | 89767565 | 89810370 | 3285  |
| ENSG0000011592.483 | 1772.769 | -0.15437 | 0.11323   | 0.17958   | DROSHA   | chr5  | - | 31400604 | 31532303 | 5305  |

|            |          |          |          |           |           |          |      |   |          |          |       |
|------------|----------|----------|----------|-----------|-----------|----------|------|---|----------|----------|-------|
| ENSG000001 | 49.36967 | 82.35821 | -0.71564 | 0.23791   | 0.33236   | CDH6     | chr5 | + | 31193857 | 31329253 | 8476  |
| ENSG000001 | 2958.449 | 4653.607 | -0.65283 | 2.22E-09  | 9.92E-09  | LMNB1    | chr5 | + | 1.26E+08 | 1.26E+08 | 3475  |
| ENSG000001 | 387.332  | 154.5757 | 1.3194   | 8.03E-07  | 2.89E-06  | ARRDC3   | chr5 | - | 90664541 | 90679176 | 4188  |
| ENSG000001 | 1802.302 | 1723.461 | 0.064283 | 0.51679   | 0.61952   | GOLPH3   | chr5 | - | 32124810 | 32174456 | 2721  |
| ENSG000001 | 1773.5   | 1666.917 | 0.089431 | 0.57616   | 0.67289   | SUB1     | chr5 | + | 32531739 | 32604185 | 4273  |
| ENSG000001 | 2071.964 | 0.715414 | 10.904   | 1.89E-45  | 3.82E-44  | NPR3     | chr5 | + | 32689176 | 32791819 | 7337  |
| ENSG000001 | 630.8115 | 146.3641 | 2.1036   | 8.01E-48  | 1.73E-46  | FAM172A  | chr5 | - | 92953775 | 93447404 | 4312  |
| ENSG000001 | 39.75217 | 44.97249 | -0.17578 | 0.56364   | 0.66171   | SLC27A6  | chr5 | + | 1.28E+08 | 1.28E+08 | 3219  |
| ENSG000001 | 2780.791 | 3649.231 | -0.39058 | 0.072411  | 0.12267   | TARS     | chr5 | + | 33440802 | 33469644 | 4314  |
| ENSG000001 | 0.290301 | 656.9352 | -9.862   | 2.29E-26  | 2.53E-25  | IRX4     | chr5 | - | 1877541  | 1887350  | 2538  |
| ENSG000001 | 605.1996 | 108.7919 | 2.4677   | 9.51E-55  | 2.44E-53  | LNPEP    | chr5 | + | 96271098 | 96373219 | 12752 |
| ENSG000001 | 609.9291 | 69.59262 | 3.1091   | 1.04E-21  | 9.46E-21  | PDE4D    | chr5 | - | 58264865 | 59817947 | 8232  |
| ENSG000001 | 457.1608 | 504.6143 | -0.14258 | 0.34983   | 0.45413   | RAD1     | chr5 | - | 34905369 | 34919094 | 5770  |
| ENSG000001 | 279.0723 | 521.8679 | -0.89871 | 4.03E-05  | 0.000121  | BRIX1    | chr5 | + | 34915481 | 34926101 | 2380  |
| ENSG000001 | 0        | 0.297015 | -0.41864 | 0.81278   | NA        | AGXT2    | chr5 | - | 34998206 | 35048198 | 2364  |
| ENSG000001 | 65.85016 | 37.89435 | 0.78888  | 0.025492  | 0.04912   | PRLR     | chr5 | - | 35048861 | 35230794 | 11680 |
| ENSG000001 | 918.5078 | 1154.72  | -0.32934 | 0.007504  | 0.016138  | SLC12A7  | chr5 | - | 1050499  | 1112150  | 5272  |
| ENSG000001 | 0.290301 | 0        | 0.4146   | 0.81455   | NA        | IL4      | chr5 | + | 1.32E+08 | 1.32E+08 | 616   |
| ENSG000001 | 468.6957 | 656.0205 | -0.48218 | 0.010354  | 0.0217    | RAD50    | chr5 | + | 1.32E+08 | 1.32E+08 | 6597  |
| ENSG000001 | 0        | 0.997859 | -1.5018  | 0.39072   | NA        | IL5      | chr5 | - | 1.32E+08 | 1.32E+08 | 905   |
| ENSG000001 | 157.1819 | 12.81111 | 3.6043   | 6.50E-28  | 7.67E-27  | ST8SIA4  | chr5 | - | 1E+08    | 1E+08    | 3585  |
| ENSG000001 | 761.9627 | 1102.433 | -0.53259 | 6.16E-06  | 2.03E-05  | GNPDA1   | chr5 | - | 1.41E+08 | 1.41E+08 | 2980  |
| ENSG000001 | 16.31937 | 20.25991 | -0.30584 | 0.54753   | 0.64754   | PCDH12   | chr5 | - | 1.41E+08 | 1.41E+08 | 6562  |
| ENSG000001 | 2617.015 | 2214.328 | 0.24101  | 0.061154  | 0.10611   | SKP1     | chr5 | - | 1.33E+08 | 1.34E+08 | 2033  |
| ENSG000001 | 1157.162 | 2418.73  | -1.0625  | 6.61E-20  | 5.54E-19  | NUP155   | chr5 | - | 37288239 | 37371283 | 8143  |
| ENSG000001 | 1366.632 | 1693.845 | -0.30869 | 0.10133   | 0.16322   | PPP2CA   | chr5 | - | 1.34E+08 | 1.34E+08 | 4649  |
| ENSG000001 | 1152.304 | 3.930745 | 8.0645   | 9.73E-83  | 4.27E-81  | FGF1     | chr5 | - | 1.42E+08 | 1.42E+08 | 3660  |
| ENSG000001 | 711.4542 | 203.3971 | 1.7974   | 6.56E-12  | 3.52E-11  | NR3C1    | chr5 | - | 1.43E+08 | 1.43E+08 | 7286  |
| ENSG000001 | 1167.004 | 491.092  | 1.2474   | 7.82E-29  | 9.52E-28  | C5orf15  | chr5 | - | 1.33E+08 | 1.33E+08 | 2350  |
| ENSG000001 | 483.6177 | 456.0538 | 0.084922 | 0.66461   | 0.7478    | PPWD1    | chr5 | + | 64859063 | 64883376 | 2166  |
| ENSG000001 | 517.5568 | 268.0496 | 0.94814  | 1.19E-07  | 4.62E-07  | LIFR     | chr5 | - | 38475065 | 38608456 | 10089 |
| ENSG000001 | 207.2883 | 121.1575 | 0.77303  | 0.008951  | 0.018989  | TRIM23   | chr5 | - | 64885507 | 64921802 | 4186  |
| ENSG000001 | 266.4693 | 185.2029 | 0.52328  | 0.001707  | 0.004084  | TRAPPC13 | chr5 | + | 64920543 | 64962060 | 5994  |
| ENSG000001 | 0.923144 | 0        | 1.223    | 0.49292   | NA        | C9       | chr5 | - | 39284364 | 39424970 | 2713  |
| ENSG000001 | 986.3225 | 528.8091 | 0.89822  | 1.74E-15  | 1.17E-14  | SEC24A   | chr5 | + | 1.34E+08 | 1.34E+08 | 6299  |
| ENSG000001 | 1086.489 | 425.4066 | 1.3509   | 2.97E-27  | 3.41E-26  | TXNDC15  | chr5 | + | 1.34E+08 | 1.34E+08 | 3548  |
| ENSG000001 | 161.7051 | 68.79168 | 1.2238   | 5.07E-05  | 0.00015   | TTC33    | chr5 | - | 40714577 | 40756077 | 2612  |
| ENSG000001 | 1716.033 | 1349.726 | 0.34567  | 0.069319  | 0.11813   | RARS     | chr5 | + | 1.68E+08 | 1.68E+08 | 2146  |
| ENSG000001 | 59.6399  | 1020.411 | -4.0841  | 1.07E-122 | 8.72E-121 | WWC1     | chr5 | + | 1.68E+08 | 1.68E+08 | 7130  |
| ENSG000001 | 2658.315 | 1090.68  | 1.2805   | 1.01E-08  | 4.30E-08  | H2AFY    | chr5 | - | 1.35E+08 | 1.35E+08 | 10982 |
| ENSG000001 | 1913.698 | 2127.765 | -0.15239 | 0.19127   | 0.27816   | TCERG1   | chr5 | + | 1.46E+08 | 1.46E+08 | 4654  |
| ENSG000001 | 9347.716 | 12772.23 | -0.44993 | 1.83E-06  | 6.38E-06  | DPYSL3   | chr5 | - | 1.47E+08 | 1.47E+08 | 5476  |
| ENSG000001 | 1323.747 | 912.4646 | 0.53545  | 9.41E-05  | 0.000269  | SMAD5    | chr5 | + | 1.35E+08 | 1.36E+08 | 7011  |
| ENSG000001 | 2164.473 | 1932.69  | 0.1629   | 0.11251   | 0.17863   | CSNK1A1  | chr5 | - | 1.49E+08 | 1.49E+08 | 6067  |
| ENSG000001 | 1639.281 | 763.8217 | 1.1013   | 2.79E-27  | 3.20E-26  | HMGXB3   | chr5 | + | 1.49E+08 | 1.49E+08 | 5275  |
| ENSG000001 | 3191.607 | 2515.471 | 0.34332  | 0.000327  | 0.000871  | ERGIC1   | chr5 | + | 1.72E+08 | 1.72E+08 | 5687  |
| ENSG000001 | 4334.938 | 116.8394 | 5.2055   | 0         | 0         | PDGFRB   | chr5 | - | 1.49E+08 | 1.5E+08  | 5717  |
| ENSG000001 | 1.701545 | 1.387121 | 0.24801  | 0.8566    | 0.89933   | CDX1     | chr5 | + | 1.5E+08  | 1.5E+08  | 1757  |
| ENSG000001 | 819.1681 | 457.7916 | 0.83753  | 1.89E-06  | 6.60E-06  | ATP6V0E1 | chr5 | + | 1.72E+08 | 1.72E+08 | 1433  |
| ENSG000001 | 144.5212 | 126.0282 | 0.19499  | 0.30809   | 0.40985   | BNIP1    | chr5 | + | 1.73E+08 | 1.73E+08 | 1339  |
| ENSG000001 | 114.0825 | 976.5563 | -3.0943  | 2.03E-106 | 1.29E-104 | STC2     | chr5 | - | 1.73E+08 | 1.73E+08 | 5353  |
| ENSG000001 | 235.6387 | 228.8336 | 0.04187  | 0.83251   | 0.88204   | CPEB4    | chr5 | + | 1.73E+08 | 1.73E+08 | 9483  |
| ENSG000001 | 645.4408 | 110.4348 | 2.539    | 2.20E-63  | 6.91E-62  | HRH2     | chr5 | + | 1.75E+08 | 1.75E+08 | 3095  |
| ENSG000001 | 10880.07 | 9505.347 | 0.19446  | 0.25845   | 0.35618   | DBN1     | chr5 | - | 1.77E+08 | 1.77E+08 | 3072  |
| ENSG000001 | 310.206  | 272.7502 | 0.18584  | 0.28693   | 0.38853   | ZNF346   | chr5 | + | 1.76E+08 | 1.77E+08 | 2774  |
| ENSG000001 | 9.472924 | 235.6315 | -4.5436  | 7.21E-21  | 6.31E-20  | UNC5A    | chr5 | + | 1.76E+08 | 1.76E+08 | 3812  |
| ENSG000001 | 39.66741 | 29.00103 | 0.45567  | 0.20492   | 0.29419   | EHHADH   | chr3 | - | 1.85E+08 | 1.85E+08 | 3850  |
| ENSG000001 | 148.2257 | 2.399549 | 5.8377   | 3.41E-25  | 3.60E-24  | CCNT3    | chr3 | - | 74311719 | 74570291 | 4948  |
| ENSG000001 | 2941.562 | 1776.829 | 0.72604  | 2.88E-05  | 8.74E-05  | SMC4     | chr3 | + | 1.6E+08  | 1.6E+08  | 5471  |
| ENSG000001 | 551.0642 | 386.9792 | 0.50974  | 0.001408  | 0.003413  | SELK     | chr3 | - | 53918437 | 53926015 | 1633  |
| ENSG000001 | 512.9721 | 364.5798 | 0.49302  | 0.000121  | 0.00034   | ACTR8    | chr3 | - | 53901093 | 53916229 | 3629  |
| ENSG000001 | 232.4935 | 132.5211 | 0.80799  | 7.85E-05  | 0.000227  | TBCCD1   | chr3 | - | 1.86E+08 | 1.86E+08 | 3058  |
| ENSG000001 | 806.0057 | 871.1018 | -0.11226 | 0.34704   | 0.45128   | TIMMDC1  | chr3 | + | 1.19E+08 | 1.19E+08 | 2394  |
| ENSG000001 | 276.3571 | 273.427  | 0.016889 | 0.93479   | 0.95728   | CRBN     | chr3 | - | 3190676  | 3221394  | 5628  |
| ENSG000001 | 0        | 0.297015 | -0.41864 | 0.81278   | NA        | HRG      | chr3 | + | 1.86E+08 | 1.86E+08 | 4272  |

|            |          |          |          |           |           |          |       |   |          |          |       |
|------------|----------|----------|----------|-----------|-----------|----------|-------|---|----------|----------|-------|
| ENSG000001 | 538.3892 | 120.6256 | 2.1395   | 7.69E-12  | 4.11E-11  | BCL6     | chr3  | - | 1.87E+08 | 1.87E+08 | 4178  |
| ENSG000001 | 13.77764 | 3.336716 | 1.9573   | 0.006854  | 0.014863  | HGD      | chr3  | - | 1.2E+08  | 1.2E+08  | 2005  |
| ENSG000001 | 0.632843 | 1.759397 | -1.0742  | 0.48445   | 0.58857   | CLDN16   | chr3  | + | 1.9E+08  | 1.9E+08  | 3273  |
| ENSG000001 | 69.59914 | 28.97593 | 1.2639   | 0.000139  | 0.000388  | ARL6     | chr3  | + | 97483365 | 97519953 | 1705  |
| ENSG000001 | 680.9302 | 180.2202 | 1.9147   | 7.00E-32  | 9.60E-31  | NPHP3    | chr3  | - | 1.32E+08 | 1.32E+08 | 7784  |
| ENSG000001 | 1.338465 | 6.488939 | -2.0857  | 0.041168  | 0.075221  | CD86     | chr3  | + | 1.22E+08 | 1.22E+08 | 2708  |
| ENSG000001 | 1182.476 | 2100.207 | -0.82683 | 4.51E-12  | 2.45E-11  | AMOTL2   | chr3  | - | 1.34E+08 | 1.34E+08 | 4521  |
| ENSG000001 | 276.456  | 216.6028 | 0.35131  | 0.019232  | 0.038104  | NIT2     | chr3  | + | 1E+08    | 1E+08    | 1655  |
| ENSG000001 | 261.2763 | 829.827  | -1.6591  | 2.23E-12  | 1.23E-11  | FAM162A  | chr3  | + | 1.22E+08 | 1.22E+08 | 3052  |
| ENSG000001 | 492.5998 | 287.2216 | 0.77703  | 9.68E-06  | 3.11E-05  | OGG1     | chr3  | + | 9791628  | 9829903  | 4977  |
| ENSG000001 | 1377.756 | 1059.226 | 0.37904  | 0.000352  | 0.000934  | KPNA1    | chr3  | - | 1.22E+08 | 1.22E+08 | 6830  |
| ENSG000001 | 736.6558 | 1219.026 | -0.72497 | 9.92E-07  | 3.55E-06  | PCCB     | chr3  | + | 1.36E+08 | 1.36E+08 | 6090  |
| ENSG000001 | 1362.896 | 1394.226 | -0.03326 | 0.76309   | 0.82803   | UBE3A    | chr15 | - | 25582381 | 25684128 | 5179  |
| ENSG000001 | 389.9354 | 507.0991 | -0.37772 | 0.06498   | 0.11181   | ARMC8    | chr3  | + | 1.38E+08 | 1.38E+08 | 4790  |
| ENSG000001 | 132.4579 | 323.1025 | -1.2826  | 1.31E-11  | 6.89E-11  | CEP70    | chr3  | - | 1.38E+08 | 1.38E+08 | 2732  |
| ENSG000001 | 0.975385 | 2.321872 | -0.98272 | 0.49682   | 0.6006    | RBP2     | chr3  | - | 1.39E+08 | 1.39E+08 | 694   |
| ENSG000001 | 729.4829 | 471.9551 | 0.628    | 6.71E-06  | 2.20E-05  | RBP1     | chr3  | - | 1.39E+08 | 1.39E+08 | 1935  |
| ENSG000001 | 865.622  | 958.7928 | -0.14708 | 0.23661   | 0.3307    | SLC25A36 | chr3  | + | 1.41E+08 | 1.41E+08 | 4638  |
| ENSG000001 | 0.705622 | 1.949596 | -1.2155  | 0.39167   | 0.49611   | GRK7     | chr3  | + | 1.41E+08 | 1.42E+08 | 3239  |
| ENSG000001 | 1057.096 | 919.2321 | 0.20201  | 0.053323  | 0.094054  | RNF7     | chr3  | + | 1.41E+08 | 1.41E+08 | 2763  |
| ENSG000001 | 628.8389 | 970.3869 | -0.62427 | 5.80E-05  | 0.00017   | TFDP2    | chr3  | - | 1.42E+08 | 1.42E+08 | 9911  |
| ENSG000001 | 751.0005 | 237.9674 | 1.6547   | 3.26E-18  | 2.52E-17  | XRN1     | chr3  | - | 1.42E+08 | 1.42E+08 | 10143 |
| ENSG000001 | 209.6685 | 20.05185 | 3.3733   | 6.43E-31  | 8.52E-30  | KAT2B    | chr3  | + | 20081515 | 20195896 | 4833  |
| ENSG000001 | 84.46341 | 35.8031  | 1.231    | 0.000423  | 0.001109  | BCHE     | chr3  | - | 1.65E+08 | 1.66E+08 | 2527  |
| ENSG000001 | 0        | 0.357707 | -0.41864 | 0.81278   | NA        | SERPINI2 | chr3  | - | 1.67E+08 | 1.67E+08 | 1837  |
| ENSG000001 | 433.5743 | 478.9317 | -0.142   | 0.444     | 0.54963   | PDCD10   | chr3  | - | 1.67E+08 | 1.67E+08 | 2067  |
| ENSG000001 | 0.290301 | 1.012429 | -0.95336 | 0.58114   | NA        | LRRC31   | chr3  | - | 1.7E+08  | 1.7E+08  | 2520  |
| ENSG000001 | 4192.324 | 250.0152 | 4.0646   | 3.65E-289 | 1.62E-286 | WNT5A    | chr3  | - | 55499743 | 55523973 | 6042  |
| ENSG000001 | 395.7542 | 322.7801 | 0.29492  | 0.19073   | 0.27753   | PFKFB4   | chr3  | - | 48555117 | 48599448 | 3586  |
| ENSG000001 | 163.6495 | 150.7663 | 0.1149   | 0.6983    | 0.77528   | COL7A1   | chr3  | - | 48601506 | 48632700 | 9276  |
| ENSG000001 | 338.5763 | 339.2985 | -0.00518 | 0.97211   | 0.9846    | FGF12    | chr3  | - | 1.92E+08 | 1.92E+08 | 3058  |
| ENSG000001 | 1239.365 | 849.3076 | 0.54485  | 1.28E-07  | 4.94E-07  | PRKAR2A  | chr3  | - | 48782030 | 48885279 | 6471  |
| ENSG000001 | 1206.78  | 393.3726 | 1.6143   | 2.65E-24  | 2.70E-23  | HES1     | chr3  | + | 1.94E+08 | 1.94E+08 | 1578  |
| ENSG000001 | 1178.677 | 630.9315 | 0.90119  | 3.14E-14  | 1.96E-13  | USP4     | chr3  | - | 49315264 | 49378145 | 3541  |
| ENSG000001 | 980.1581 | 609.8322 | 0.6821   | 9.21E-06  | 2.97E-05  | ACAP2    | chr3  | - | 1.95E+08 | 1.95E+08 | 7160  |
| ENSG000001 | 925.8994 | 1330.528 | -0.52109 | 0.003422  | 0.007821  | ECT2     | chr3  | + | 1.72E+08 | 1.73E+08 | 4363  |
| ENSG000001 | 0.290301 | 0.297015 | -0.00202 | 0.99909   | NA        | GNAT1    | chr3  | + | 50229045 | 50233949 | 2417  |
| ENSG000001 | 12322.63 | 5383.515 | 1.194    | 5.68E-45  | 1.13E-43  | GNAI2    | chr3  | + | 50263724 | 50296787 | 3886  |
| ENSG000001 | 2161.681 | 957.2944 | 1.1742   | 4.22E-23  | 4.09E-22  | TFG      | chr3  | + | 1E+08    | 1E+08    | 3271  |
| ENSG000001 | 887.2941 | 673.2817 | 0.39809  | 0.011853  | 0.024518  | USP9Y    | chrY  | + | 14813160 | 14972764 | 10036 |
| ENSG000001 | 37.40922 | 74.19776 | -0.98303 | 0.001224  | 0.002995  | HYAL1    | chr3  | - | 50337320 | 50349812 | 2517  |
| ENSG000001 | 519.9734 | 779.1329 | -0.58226 | 1.52E-06  | 5.33E-06  | TUSC2    | chr3  | - | 50357458 | 50365682 | 1691  |
| ENSG000001 | 191.4203 | 199.3964 | -0.05847 | 0.72476   | 0.79633   | NPRL2    | chr3  | - | 50384761 | 50388522 | 3113  |
| ENSG000001 | 7175.254 | 11948.36 | -0.73486 | 8.22E-11  | 4.09E-10  | RPL24    | chr3  | - | 1.01E+08 | 1.01E+08 | 1857  |
| ENSG000001 | 181.8244 | 86.62759 | 1.064    | 6.78E-05  | 0.000197  | CYB561D2 | chr3  | + | 50388126 | 50395891 | 1533  |
| ENSG000001 | 138.2937 | 52.86063 | 1.3775   | 1.50E-06  | 5.28E-06  | C3orf14  | chr3  | + | 62304648 | 62321888 | 3525  |
| ENSG000001 | 2039.074 | 3261.044 | -0.67641 | 3.26E-07  | 1.22E-06  | FXR1     | chr3  | + | 1.81E+08 | 1.81E+08 | 3277  |
| ENSG000001 | 1223.032 | 216.8158 | 2.488    | 1.51E-33  | 2.20E-32  | CBLB     | chr3  | - | 1.05E+08 | 1.06E+08 | 6780  |
| ENSG000001 | 1530.31  | 1413.912 | 0.11428  | 0.451     | 0.5566    | BBX      | chr3  | + | 1.07E+08 | 1.08E+08 | 8930  |
| ENSG000001 | 658.1505 | 292.0579 | 1.1711   | 2.23E-13  | 1.32E-12  | IFT57    | chr3  | - | 1.08E+08 | 1.08E+08 | 3203  |
| ENSG000001 | 1680.418 | 575.7303 | 1.5411   | 1.05E-19  | 8.71E-19  | GNB4     | chr3  | - | 1.79E+08 | 1.79E+08 | 3321  |
| ENSG000001 | 0.290301 | 0.951736 | -0.90191 | 0.60254   | NA        | HLA2     | chr3  | + | 1.08E+08 | 1.08E+08 | 2666  |
| ENSG000001 | 116.4322 | 85.30681 | 0.45028  | 0.065881  | 0.11314   | IQCG     | chr3  | - | 1.98E+08 | 1.98E+08 | 3250  |
| ENSG000001 | 497.7376 | 147.2048 | 1.7565   | 1.23E-17  | 9.26E-17  | GBE1     | chr3  | - | 81538850 | 81811312 | 3461  |
| ENSG000001 | 402.6259 | 738.4728 | -0.87129 | 9.68E-05  | 0.000277  | UMPS     | chr3  | + | 1.24E+08 | 1.24E+08 | 2658  |
| ENSG000001 | 1595.334 | 1585.512 | 0.008941 | 0.95362   | 0.97117   | NCBP2    | chr3  | - | 1.97E+08 | 1.97E+08 | 4161  |
| ENSG000001 | 379.4241 | 279.9712 | 0.44012  | 0.002569  | 0.005982  | SNX4     | chr3  | - | 1.25E+08 | 1.25E+08 | 2506  |
| ENSG000001 | 84.35991 | 184.3651 | -1.1191  | 7.08E-06  | 2.32E-05  | C3orf52  | chr3  | + | 1.12E+08 | 1.12E+08 | 3722  |
| ENSG000001 | 190.4883 | 98.10677 | 0.9498   | 6.92E-06  | 2.26E-05  | FRMD4B   | chr3  | - | 69219141 | 69591734 | 5261  |
| ENSG000001 | 485.6855 | 414.3877 | 0.22924  | 0.10809   | 0.17245   | SLC41A3  | chr3  | - | 1.26E+08 | 1.26E+08 | 3828  |
| ENSG000001 | 0.653381 | 0.98329  | -0.41986 | 0.79515   | NA        | ROPN1B   | chr3  | + | 1.26E+08 | 1.26E+08 | 2050  |
| ENSG000001 | 7749.669 | 3300.768 | 1.23     | 4.00E-28  | 4.75E-27  | PLXNA1   | chr3  | + | 1.27E+08 | 1.27E+08 | 9066  |
| ENSG000001 | 793.7071 | 869.1068 | -0.13023 | 0.22155   | 0.31368   | ATP6V1A  | chr3  | + | 1.13E+08 | 1.14E+08 | 4591  |
| ENSG000001 | 352.4967 | 159.7161 | 1.135    | 1.34E-05  | 4.23E-05  | ABTB1    | chr3  | + | 1.27E+08 | 1.27E+08 | 5061  |
| ENSG000001 | 265.4286 | 874.7171 | -1.7161  | 3.94E-23  | 3.83E-22  | PODXL2   | chr3  | + | 1.27E+08 | 1.27E+08 | 2186  |

|            |          |          |          |           |           |           |      |   |          |          |       |
|------------|----------|----------|----------|-----------|-----------|-----------|------|---|----------|----------|-------|
| ENSG000001 | 0.870904 | 4.380699 | -1.8962  | 0.13617   | 0.20926   | UPK1B     | chr3 | + | 1.19E+08 | 1.19E+08 | 2118  |
| ENSG000001 | 8.093218 | 86.21027 | -3.3655  | 1.73E-09  | 7.83E-09  | CSPG5     | chr3 | - | 47603729 | 47622282 | 4161  |
| ENSG000001 | 659.0218 | 461.7511 | 0.51132  | 0.03255   | 0.06103   | KLHL18    | chr3 | + | 47324407 | 47388306 | 4620  |
| ENSG000001 | 1239.768 | 2764.259 | -1.1553  | 5.46E-21  | 4.81E-20  | SCAP      | chr3 | - | 47455203 | 47518616 | 4394  |
| ENSG000001 | 0.290301 | 37.11683 | -5.8961  | 1.71E-07  | 6.55E-07  | EFCC1     | chr3 | + | 1.29E+08 | 1.29E+08 | 2691  |
| ENSG000001 | 0        | 58.85934 | -7.3131  | 4.37E-10  | 2.07E-09  | KIAA1257  | chr3 | - | 1.29E+08 | 1.29E+08 | 6034  |
| ENSG000001 | 77.78648 | 27.23922 | 1.5026   | 9.05E-07  | 3.24E-06  | NEK11     | chr3 | + | 1.31E+08 | 1.31E+08 | 2914  |
| ENSG000001 | 1467.203 | 2284.823 | -0.63792 | 1.55E-05  | 4.85E-05  | MRPL3     | chr3 | - | 1.31E+08 | 1.31E+08 | 1706  |
| ENSG000001 | 1092.916 | 20.6289  | 5.7119   | 1.41E-140 | 1.41E-138 | PLSCR4    | chr3 | - | 1.46E+08 | 1.46E+08 | 3303  |
| ENSG000001 | 344.5635 | 216.267  | 0.67051  | 0.000119  | 0.000337  | HEMK1     | chr3 | + | 50606583 | 50622366 | 6087  |
| ENSG000001 | 107.6992 | 35.30702 | 1.5989   | 6.28E-07  | 2.29E-06  | CISH      | chr3 | - | 50643921 | 50649262 | 5042  |
| ENSG000001 | 398.2738 | 1205.672 | -1.594   | 3.77E-38  | 6.32E-37  | MAPKAPK3  | chr3 | + | 50648951 | 50686720 | 2988  |
| ENSG000001 | 78.47092 | 518.7588 | -2.7127  | 1.42E-33  | 2.07E-32  | ACVR2B    | chr3 | + | 38495342 | 38524948 | 5370  |
| ENSG000001 | 578.7741 | 741.4964 | -0.35574 | 0.002669  | 0.006204  | WDR48     | chr3 | + | 39093489 | 39138155 | 4925  |
| ENSG000001 | 493.8326 | 508.4559 | -0.04216 | 0.77431   | 0.83767   | COMMD2    | chr3 | - | 1.49E+08 | 1.49E+08 | 3706  |
| ENSG000001 | 998.7928 | 682.1994 | 0.54879  | 0.001007  | 0.002494  | GORASP1   | chr3 | - | 39138150 | 39149854 | 3722  |
| ENSG000001 | 27.71796 | 23.22193 | 0.24596  | 0.5594    | 0.65812   | PEX5L     | chr3 | - | 1.8E+08  | 1.8E+08  | 9082  |
| ENSG000001 | 563.9353 | 1148.29  | -1.0231  | 5.57E-09  | 2.41E-08  | RRP9      | chr3 | - | 51967446 | 51975957 | 1578  |
| ENSG000001 | 713.5396 | 771.4541 | -0.1129  | 0.41819   | 0.52343   | ABCC5     | chr3 | - | 1.84E+08 | 1.84E+08 | 5921  |
| ENSG000001 | 220.8109 | 157.6758 | 0.48393  | 0.054613  | 0.096016  | ABHD14B   | chr3 | - | 52002526 | 52017425 | 2236  |
| ENSG000001 | 381.8969 | 1006.571 | -1.394   | 1.15E-21  | 1.04E-20  | EIF1B     | chr3 | + | 40351175 | 40353915 | 1010  |
| ENSG000001 | 0.975385 | 0.715414 | 0.31771  | 0.85093   | NA        | ABHD14A-7 | chr3 | + | 52009066 | 52023199 | 1836  |
| ENSG000001 | 109.6217 | 426.1698 | -1.9577  | 3.73E-29  | 4.60E-28  | ARHGEF26  | chr3 | + | 1.54E+08 | 1.54E+08 | 5254  |
| ENSG000001 | 257.1619 | 398.3473 | -0.62624 | 0.04043   | 0.074054  | KLHL24    | chr3 | + | 1.83E+08 | 1.83E+08 | 3848  |
| ENSG000001 | 302.7471 | 238.4634 | 0.34548  | 0.020855  | 0.040971  | PLCH1     | chr3 | - | 1.55E+08 | 1.55E+08 | 6413  |
| ENSG000001 | 0.36308  | 40.72942 | -6.094   | 9.86E-09  | 4.19E-08  | VIPR1     | chr3 | + | 42530791 | 42579059 | 3759  |
| ENSG000001 | 177.9443 | 36.41995 | 2.2606   | 1.59E-14  | 1.02E-13  | DNAH1     | chr3 | + | 52350335 | 52434507 | 13300 |
| ENSG000001 | 6286.647 | 2091.517 | 1.5848   | 1.50E-23  | 1.48E-22  | SSR3      | chr3 | - | 1.56E+08 | 1.56E+08 | 3716  |
| ENSG000001 | 483.3064 | 165.6077 | 1.5381   | 6.76E-20  | 5.67E-19  | ZBTB47    | chr3 | + | 42695176 | 42709072 | 5507  |
| ENSG000001 | 37.52145 | 10.76927 | 1.7863   | 8.11E-05  | 0.000234  | TNNC1     | chr3 | - | 52485118 | 52488086 | 727   |
| ENSG000001 | 2487.591 | 1351.908 | 0.87887  | 5.13E-12  | 2.77E-11  | NKTR      | chr3 | + | 42642106 | 42690227 | 7964  |
| ENSG000001 | 110.6589 | 259.226  | -1.2267  | 1.18E-12  | 6.64E-12  | CLCN2     | chr3 | - | 1.84E+08 | 1.84E+08 | 3290  |
| ENSG000001 | 3061.973 | 251.5795 | 3.6013   | 1.24E-162 | 1.67E-160 | FOXP1     | chr3 | - | 71003844 | 71633140 | 7114  |
| ENSG000001 | 11267.46 | 11635.14 | -0.04616 | 0.81565   | 0.87063   | EIF4G1    | chr3 | + | 1.84E+08 | 1.84E+08 | 5667  |
| ENSG000001 | 703.7592 | 720.9805 | -0.03388 | 0.81064   | 0.86665   | SPCS1     | chr3 | + | 52738971 | 52742182 | 1274  |
| ENSG000001 | 390.7639 | 449.7489 | -0.20291 | 0.24807   | 0.34428   | NEK4      | chr3 | - | 52744800 | 52804965 | 3722  |
| ENSG000001 | 556.5486 | 229.9369 | 1.2715   | 8.70E-18  | 6.62E-17  | SLC4A3    | chr2 | + | 2.2E+08  | 2.21E+08 | 4454  |
| ENSG000001 | 273.9701 | 555.0164 | -1.0127  | 0.000151  | 0.000422  | INO80D    | chr2 | - | 2.07E+08 | 2.07E+08 | 14136 |
| ENSG000001 | 3903.788 | 4324.089 | -0.14712 | 0.34516   | 0.44925   | EEF1B2    | chr2 | + | 2.07E+08 | 2.07E+08 | 1098  |
| ENSG000001 | 279.4102 | 359.1217 | -0.36029 | 0.026128  | 0.050195  | ADAM23    | chr2 | + | 2.07E+08 | 2.07E+08 | 6327  |
| ENSG000001 | 456.2557 | 490.8324 | -0.10492 | 0.4264    | 0.53178   | DGUOK     | chr2 | + | 74153953 | 74186088 | 1144  |
| ENSG000001 | 1254.053 | 812.7107 | 0.62443  | 4.10E-09  | 1.79E-08  | MOB1A     | chr2 | - | 74382165 | 74406025 | 2375  |
| ENSG000001 | 1090.814 | 883.5454 | 0.30419  | 0.007086  | 0.015325  | KANSL3    | chr2 | - | 97258907 | 97308524 | 5253  |
| ENSG000001 | 475.129  | 314.0723 | 0.59684  | 0.00011   | 0.000311  | LMAN2L    | chr2 | - | 97371666 | 97405801 | 2410  |
| ENSG000001 | 879.1121 | 975.3422 | -0.14946 | 0.30618   | 0.40776   | RTKN      | chr2 | - | 74652963 | 74669549 | 2646  |
| ENSG000001 | 1749.356 | 739.2834 | 1.241    | 7.07E-32  | 9.69E-31  | TTL       | chr2 | + | 1.13E+08 | 1.13E+08 | 5180  |
| ENSG000001 | 1.048164 | 3.694423 | -1.5996  | 0.18881   | 0.27515   | IL1A      | chr2 | - | 1.14E+08 | 1.14E+08 | 2124  |
| ENSG000001 | 25.83499 | 0        | 6.2706   | 7.76E-08  | 3.05E-07  | CCL20     | chr2 | + | 2.29E+08 | 2.29E+08 | 831   |
| ENSG000001 | 1425.876 | 817.1731 | 0.80212  | 1.40E-08  | 5.86E-08  | PIKFYVE   | chr2 | + | 2.09E+08 | 2.09E+08 | 9901  |
| ENSG000001 | 125.0241 | 46.09998 | 1.4191   | 2.32E-05  | 7.14E-05  | KCNIP3    | chr2 | + | 95963052 | 96051825 | 3658  |
| ENSG000001 | 619.808  | 548.5946 | 0.17705  | 0.17871   | 0.26266   | FAHD2A    | chr2 | + | 96068469 | 96082364 | 4757  |
| ENSG000001 | 11574.88 | 24845.78 | -1.0998  | 3.50E-12  | 1.91E-11  | NCL       | chr2 | - | 2.32E+08 | 2.32E+08 | 4034  |
| ENSG000001 | 1129.264 | 696.4781 | 0.69636  | 1.98E-11  | 1.03E-10  | ACTR1B    | chr2 | - | 98272431 | 98280570 | 2238  |
| ENSG000001 | 684.7738 | 193.4384 | 1.8203   | 4.68E-40  | 8.24E-39  | SLC35F5   | chr2 | - | 1.14E+08 | 1.15E+08 | 4412  |
| ENSG000001 | 0        | 2.370411 | -2.6458  | 0.10384   | 0.16657   | ZAP70     | chr2 | + | 98330023 | 98356325 | 3273  |
| ENSG000001 | 3613.084 | 1641.397 | 1.1369   | 1.92E-19  | 1.57E-18  | ACTR3     | chr2 | + | 1.15E+08 | 1.15E+08 | 6718  |
| ENSG000001 | 765.8791 | 357.5224 | 1.0952   | 4.87E-11  | 2.47E-10  | STEAP3    | chr2 | + | 1.2E+08  | 1.2E+08  | 4282  |
| ENSG000001 | 242.4947 | 591.7013 | -1.2832  | 2.30E-13  | 1.36E-12  | EPB41L5   | chr2 | + | 1.21E+08 | 1.21E+08 | 6628  |
| ENSG000001 | 0        | 150.9579 | -8.6761  | 2.15E-15  | 1.44E-14  | TFPC2L1   | chr2 | - | 1.22E+08 | 1.22E+08 | 9292  |
| ENSG000001 | 702.4248 | 784.8576 | -0.15871 | 0.2179    | 0.30936   | SF3B14    | chr2 | - | 24290454 | 24299313 | 770   |
| ENSG000001 | 1705.779 | 267.4155 | 2.6639   | 3.04E-33  | 4.39E-32  | TP53I3    | chr2 | - | 24300303 | 24308731 | 1998  |
| ENSG000001 | 76.20914 | 61.98302 | 0.2929   | 0.29468   | 0.39675   | DNAJC27   | chr2 | - | 25166505 | 25194963 | 4992  |
| ENSG000001 | 0.290301 | 59.21865 | -6.5977  | 3.35E-10  | 1.60E-09  | POMC      | chr2 | - | 25383722 | 25391772 | 1426  |
| ENSG000001 | 671.3977 | 135.3422 | 2.3056   | 1.51E-39  | 2.62E-38  | STAM2     | chr2 | - | 1.53E+08 | 1.53E+08 | 5701  |
| ENSG000001 | 4.750114 | 3.290593 | 0.50294  | 0.5906    | 0.68556   | OTOF      | chr2 | - | 26680071 | 26781566 | 7156  |

|                    |          |          |           |           |           |       |   |          |          |       |
|--------------------|----------|----------|-----------|-----------|-----------|-------|---|----------|----------|-------|
| ENSG000001584.3384 | 499.7382 | 0.22551  | 0.15177   | 0.22933   | GPD2      | chr2  | + | 1.57E+08 | 1.57E+08 | 6041  |
| ENSG000001214.1084 | 321.9764 | -0.58634 | 0.003771  | 0.008553  | CENPA     | chr2  | + | 26987157 | 27023935 | 1452  |
| ENSG0000012334388  | 4.320007 | -0.8192  | 0.40638   | 0.51119   | CYTIP     | chr2  | - | 1.58E+08 | 1.58E+08 | 2260  |
| ENSG000001831.8853 | 244.4361 | 1.7647   | 2.73E-46  | 5.65E-45  | ACVR1     | chr2  | - | 1.59E+08 | 1.59E+08 | 3045  |
| ENSG0000012620.288 | 329.5973 | 2.9875   | 6.20E-161 | 8.28E-159 | TANC1     | chr2  | + | 1.6E+08  | 1.6E+08  | 7586  |
| ENSG0000016567306  | 109.229  | -3.9863  | 3.56E-18  | 2.75E-17  | SLC30A3   | chr2  | - | 27476552 | 27498685 | 3448  |
| ENSG000001754.6267 | 536.0181 | 0.49387  | 5.55E-05  | 0.000163  | MPV17     | chr2  | - | 27532360 | 27548547 | 2011  |
| ENSG000001925.0633 | 1648.115 | -0.83178 | 1.26E-08  | 5.30E-08  | GTF3C2    | chr2  | - | 27548716 | 27579868 | 3992  |
| ENSG000001600.3624 | 640.2092 | -0.09314 | 0.47652   | 0.58104   | EIF2B4    | chr2  | - | 27587219 | 27593353 | 4293  |
| ENSG0000013653.161 | 2348.046 | 0.63758  | 1.66E-11  | 8.68E-11  | NRBP1     | chr2  | + | 27650657 | 27665126 | 2887  |
| ENSG0000019326388  | 1.355566 | 2.5852   | 0.005989  | 0.013134  | ITGB6     | chr2  | - | 1.61E+08 | 1.61E+08 | 4675  |
| ENSG000001465.0521 | 284.9358 | 0.70495  | 3.54E-05  | 0.000106  | FNDC4     | chr2  | - | 27714750 | 27718112 | 1657  |
| ENSG0000011369.242 | 26.00504 | 5.7091   | 2.97E-171 | 4.54E-169 | ITGA4     | chr2  | + | 1.82E+08 | 1.82E+08 | 4189  |
| ENSG0000011273.555 | 1054.954 | 0.27127  | 0.15976   | 0.23938   | PSMD14    | chr2  | + | 1.62E+08 | 1.62E+08 | 4890  |
| ENSG0000012323.636 | 1389.844 | 0.7414   | 5.89E-13  | 3.40E-12  | SNX17     | chr2  | + | 27593389 | 27599995 | 2044  |
| ENSG00000117.37592 | 13.09926 | 0.3881   | 0.47636   | 0.58094   | GPR75-ASB | chr2  | - | 53759810 | 54087170 | 2648  |
| ENSG0000012762.738 | 4926.734 | -0.83337 | 7.80E-11  | 3.89E-10  | PPM1G     | chr2  | - | 27604061 | 27632554 | 3752  |
| ENSG000001195077   | 0.654722 | 1.1954   | 0.43061   | 0.53612   | PDE1A     | chr2  | - | 1.83E+08 | 1.83E+08 | 4885  |
| ENSG000001122.3272 | 403.1725 | -1.7122  | 6.28E-11  | 3.16E-10  | REEP6     | chr19 | + | 1491165  | 1497926  | 1375  |
| ENSG00000154.15507 | 158.075  | -1.5324  | 1.07E-05  | 3.42E-05  | PCSK4     | chr19 | - | 1481427  | 1490751  | 2855  |
| ENSG0000011887365  | 0        | 2.1461   | 0.21553   | NA        | GCG       | chr2  | - | 1.63E+08 | 1.63E+08 | 1280  |
| ENSG000001180.4342 | 128.8765 | 0.47796  | 0.23199   | 0.32553   | APC2      | chr19 | + | 1446300  | 1473243  | 11650 |
| ENSG00000126.5398  | 20.90651 | 0.33771  | 0.4618    | 0.56691   | IFIH1     | chr2  | - | 1.63E+08 | 1.63E+08 | 3595  |
| ENSG0000017329.471 | 11498.73 | -0.64916 | 3.10E-11  | 1.59E-10  | RPS15     | chr19 | + | 1438358  | 1440583  | 1610  |
| ENSG00000144.71304 | 330.9901 | -2.8778  | 1.08E-45  | 2.19E-44  | GCA       | chr2  | + | 1.63E+08 | 1.63E+08 | 1992  |
| ENSG000001423.9973 | 223.8815 | 0.92004  | 2.85E-09  | 1.26E-08  | INO80B    | chr2  | + | 74682150 | 74688011 | 2040  |
| ENSG0000012418.657 | 1446.354 | 0.74053  | 1.78E-09  | 8.02E-09  | MOGS      | chr2  | - | 74688184 | 74692537 | 2895  |
| ENSG000001524.6609 | 420.5021 | 0.3187   | 0.007918  | 0.016937  | TTC31     | chr2  | + | 74710200 | 74722013 | 4025  |
| ENSG000001506.6858 | 730.632  | -0.52629 | 0.006027  | 0.013215  | NDUFS7    | chr19 | + | 1383526  | 1395583  | 3743  |
| ENSG000001191.7468 | 96.89421 | 0.98027  | 0.000971  | 0.002413  | PCGF1     | chr2  | - | 74732170 | 74735707 | 1792  |
| ENSG00000110.57072 | 130.595  | -3.5634  | 2.74E-22  | 2.56E-21  | GRB14     | chr2  | - | 1.65E+08 | 1.65E+08 | 2382  |
| ENSG000001262.2852 | 4.943174 | 5.6498   | 2.15E-44  | 4.24E-43  | CLIP4     | chr2  | + | 29320571 | 29412509 | 4293  |
| ENSG0000013257533  | 2.353426 | 0.4393   | 0.67154   | 0.75401   | TLX2      | chr2  | + | 74740590 | 74744274 | 2136  |
| ENSG00000114149.06 | 7169.522 | 0.98029  | 2.05E-32  | 2.87E-31  | SPTBN1    | chr2  | + | 54683422 | 54896812 | 9075  |
| ENSG000001936.7363 | 754.6677 | 0.31128  | 0.10703   | 0.17102   | AUP1      | chr2  | - | 74753772 | 74757066 | 1695  |
| ENSG0000019590.379 | 5304.421 | 0.85384  | 7.92E-20  | 6.62E-19  | RTN4      | chr2  | - | 55199325 | 55339757 | 4790  |
| ENSG000001252.9263 | 188.9226 | 0.41835  | 0.012269  | 0.025314  | HTRA2     | chr2  | + | 74756504 | 74760472 | 2367  |
| ENSG0000015548.087 | 67.01112 | 6.3464   | 1.19E-184 | 2.12E-182 | LOXL3     | chr2  | - | 74759541 | 74782817 | 3502  |
| ENSG0000012364.477 | 50.07914 | 5.5453   | 1.20E-224 | 3.37E-222 | DOK1      | chr2  | + | 74776153 | 74784681 | 2555  |
| ENSG0000013184754  | 263.2273 | -6.2002  | 4.88E-36  | 7.63E-35  | GALNT3    | chr2  | - | 1.67E+08 | 1.67E+08 | 3868  |
| ENSG000001383.3759 | 170.9941 | 1.1638   | 8.34E-13  | 4.76E-12  | POLE4     | chr2  | + | 75185619 | 75197255 | 1248  |
| ENSG0000011048164  | 0.98329  | 0.047263 | 0.97597   | 0.9865    | TACR1     | chr2  | - | 75276231 | 75426826 | 2318  |
| ENSG0000012982.706 | 1356.48  | 1.1327   | 4.91E-07  | 1.80E-06  | CCDC88A   | chr2  | - | 55514978 | 55647057 | 9811  |
| ENSG0000010290301  | 2.292733 | -2.0944  | 0.16266   | 0.24304   | ACADL     | chr2  | - | 2.11E+08 | 2.11E+08 | 2543  |
| ENSG000001499.7904 | 35.36295 | 3.8004   | 1.37E-38  | 2.32E-37  | EVA1A     | chr2  | - | 75696428 | 75796848 | 1815  |
| ENSG000001473.692  | 525.5607 | -0.14848 | 0.25187   | 0.34866   | MRPL19    | chr2  | + | 75873909 | 75917977 | 3479  |
| ENSG0000011101.1   | 634.5268 | 0.7936   | 1.29E-08  | 5.41E-08  | LANCL1    | chr2  | - | 2.11E+08 | 2.11E+08 | 4781  |
| ENSG000001611.1545 | 923.7541 | -0.5943  | 0.001015  | 0.002512  | WDR75     | chr2  | + | 1.9E+08  | 1.9E+08  | 4297  |
| ENSG000001295.5927 | 600.6778 | -1.0218  | 1.58E-12  | 8.82E-12  | EFEMP1    | chr2  | - | 56093102 | 56151274 | 3024  |
| ENSG0000010        | 15.24389 | -5.546   | 4.61E-06  | 1.54E-05  | REG1A     | chr2  | + | 79347488 | 79350545 | 901   |
| ENSG000001203.9881 | 171.3575 | 0.25161  | 0.15215   | 0.22979   | FANCL     | chr2  | - | 58386378 | 58468507 | 1698  |
| ENSG000001651401   | 5685.852 | 6.8303   | 0         | 0         | FN1       | chr2  | - | 2.16E+08 | 2.16E+08 | 9171  |
| ENSG0000011666.498 | 928.6244 | 0.84242  | 6.92E-14  | 4.22E-13  | STAT1     | chr2  | - | 1.92E+08 | 1.92E+08 | 4310  |
| ENSG0000013084.584 | 969.9766 | 1.6652   | 8.24E-22  | 7.53E-21  | GLS       | chr2  | + | 1.92E+08 | 1.92E+08 | 4834  |
| ENSG000001311.4908 | 379.976  | -0.28776 | 0.084242  | 0.13969   | PAPOLG    | chr2  | + | 60983365 | 61029220 | 6074  |
| ENSG0000011722083  | 0.654722 | 1.0716   | 0.46463   | 0.56959   | DNAH6     | chr2  | + | 84743579 | 85046713 | 12795 |
| ENSG00000171.31185 | 145.1697 | -1.0207  | 1.96E-05  | 6.07E-05  | PECR      | chr2  | - | 2.17E+08 | 2.17E+08 | 1853  |
| ENSG000001312.6645 | 279.7334 | 0.16133  | 0.25198   | 0.34875   | UNC50     | chr2  | + | 99225042 | 99234978 | 2172  |
| ENSG00000112287.99 | 11784.08 | 0.060301 | 0.73364   | 0.80325   | IGFBP2    | chr2  | + | 2.17E+08 | 2.18E+08 | 4414  |
| ENSG000001278.6582 | 131.7088 | 1.0732   | 1.93E-06  | 6.70E-06  | ELMOD3    | chr2  | + | 85581517 | 85618875 | 4761  |
| ENSG00000125899.04 | 151.7117 | 7.4      | 0         | 0         | IGFBP5    | chr2  | - | 2.18E+08 | 2.18E+08 | 6215  |
| ENSG0000013449.194 | 1609.475 | 1.0977   | 8.53E-11  | 4.24E-10  | USP34     | chr2  | - | 61414598 | 61697904 | 11357 |
| ENSG000001127.7626 | 426.5887 | -1.73    | 1.23E-11  | 6.46E-11  | EFHD1     | chr2  | + | 2.33E+08 | 2.34E+08 | 2259  |
| ENSG0000010342542  | 3.083409 | -2.3942  | 0.10777   | 0.17204   | KCNJ13    | chr2  | - | 2.34E+08 | 2.34E+08 | 2950  |
| ENSG0000013162.46  | 4952.843 | -0.64674 | 1.52E-10  | 7.45E-10  | CCT4      | chr2  | - | 62095224 | 62115939 | 2520  |

|            |          |          |          |           |           |          |      |   |          |          |       |
|------------|----------|----------|----------|-----------|-----------|----------|------|---|----------|----------|-------|
| ENSG000001 | 1241.895 | 407.0004 | 1.6093   | 2.18E-38  | 3.67E-37  | GGCX     | chr2 | - | 85774743 | 85788670 | 3222  |
| ENSG000001 | 0.36308  | 0        | 0.4146   | 0.81455   | NA        | NEU2     | chr2 | + | 2.34E+08 | 2.34E+08 | 1143  |
| ENSG000001 | 678.573  | 307.9575 | 1.1383   | 6.71E-18  | 5.12E-17  | EHBP1    | chr2 | + | 62900986 | 63273622 | 5165  |
| ENSG000001 | 1.016461 | 3.215331 | -1.4283  | 0.26602   | 0.36476   | OTX1     | chr2 | + | 63277192 | 63284971 | 2861  |
| ENSG000001 | 346.4156 | 205.537  | 0.75238  | 0.000676  | 0.00172   | TXNDC9   | chr2 | - | 99935445 | 99957165 | 1637  |
| ENSG000001 | 383.3519 | 232.0724 | 0.72445  | 4.47E-07  | 1.65E-06  | COQ10B   | chr2 | + | 1.98E+08 | 1.98E+08 | 2239  |
| ENSG000001 | 0        | 4.006007 | -3.5479  | 0.014348  | 0.029184  | GPLY     | chr2 | + | 85912298 | 85925977 | 2055  |
| ENSG000001 | 5354.872 | 5346.519 | 0.002373 | 0.9839    | 0.99083   | SF3B1    | chr2 | - | 1.98E+08 | 1.98E+08 | 4336  |
| ENSG000001 | 736.3209 | 44.80914 | 4.0058   | 1.73E-46  | 3.57E-45  | ST3GAL5  | chr2 | - | 86066267 | 86116137 | 3487  |
| ENSG000001 | 277.7738 | 619.2172 | -1.1517  | 3.00E-10  | 1.44E-09  | CHST10   | chr2 | - | 1.01E+08 | 1.01E+08 | 2837  |
| ENSG000001 | 401.4901 | 420.1124 | -0.06487 | 0.70491   | 0.78064   | PDCL3    | chr2 | + | 1.01E+08 | 1.01E+08 | 1337  |
| ENSG000001 | 188.162  | 382.7646 | -1.0218  | 4.48E-12  | 2.43E-11  | MOB4     | chr2 | + | 1.98E+08 | 1.98E+08 | 3986  |
| ENSG000001 | 136.3122 | 371.4694 | -1.4439  | 4.17E-21  | 3.70E-20  | HSPE1    | chr2 | + | 1.98E+08 | 1.98E+08 | 950   |
| ENSG000001 | 493.7451 | 694.112  | -0.48819 | 0.046632  | 0.083733  | KDM3A    | chr2 | + | 86667770 | 86719839 | 8741  |
| ENSG000001 | 389.5749 | 99.577   | 1.9526   | 9.39E-10  | 4.35E-09  | PLCD4    | chr2 | + | 2.19E+08 | 2.2E+08  | 4350  |
| ENSG000001 | 669.4809 | 165.342  | 2.0157   | 5.61E-44  | 1.10E-42  | CHMP3    | chr2 | - | 86730554 | 86948245 | 3171  |
| ENSG000001 | 611.7005 | 602.4781 | 0.022191 | 0.92806   | 0.95231   | ZNF142   | chr2 | - | 2.2E+08  | 2.2E+08  | 6034  |
| ENSG000001 | 0        | 0.343138 | -0.41864 | 0.81278   | NA        | SMYD1    | chr2 | + | 88367299 | 88412906 | 4433  |
| ENSG000001 | 145.2635 | 6.520493 | 4.4079   | 6.68E-30  | 8.50E-29  | IL1R1    | chr2 | + | 1.03E+08 | 1.03E+08 | 5143  |
| ENSG000001 | 0.72616  | 0.357707 | 0.52227  | 0.76959   | NA        | WNT6     | chr2 | + | 2.2E+08  | 2.2E+08  | 1703  |
| ENSG000001 | 0.995923 | 0        | 1.4959   | 0.39264   | NA        | IL1RL2   | chr2 | + | 1.03E+08 | 1.03E+08 | 2615  |
| ENSG000001 | 1.846289 | 2.087966 | -0.11197 | 0.9361    | 0.95778   | IL18R1   | chr2 | + | 1.03E+08 | 1.03E+08 | 3854  |
| ENSG000001 | 1.161205 | 0        | 1.2509   | 0.47995   | NA        | SLC9A2   | chr2 | + | 1.03E+08 | 1.03E+08 | 5410  |
| ENSG000001 | 456.718  | 282.1261 | 0.69483  | 0.000105  | 0.000299  | FHL2     | chr2 | - | 1.06E+08 | 1.06E+08 | 4881  |
| ENSG000001 | 198.9828 | 99.3766  | 0.99221  | 9.89E-06  | 3.17E-05  | MLPH     | chr2 | + | 2.38E+08 | 2.38E+08 | 3823  |
| ENSG000001 | 619.2339 | 511.3151 | 0.27776  | 0.046129  | 0.082952  | CNPPD1   | chr2 | - | 2.2E+08  | 2.2E+08  | 2073  |
| ENSG000001 | 1015.444 | 690.5533 | 0.55637  | 0.000281  | 0.000757  | UXS1     | chr2 | - | 1.07E+08 | 1.07E+08 | 2907  |
| ENSG000001 | 6.837069 | 6.179772 | 0.13528  | 0.86983   | 0.90945   | ABCB6    | chr2 | - | 2.2E+08  | 2.2E+08  | 3016  |
| ENSG000001 | 358.3263 | 332.9339 | 0.10831  | 0.4635    | 0.56852   | STK16    | chr2 | + | 2.2E+08  | 2.2E+08  | 2868  |
| ENSG000001 | 0        | 1.029414 | -1.1526  | 0.51496   | NA        | SLC5A7   | chr2 | + | 1.09E+08 | 1.09E+08 | 5152  |
| ENSG000001 | 23155.59 | 7361.886 | 1.6523   | 2.82E-82  | 1.23E-80  | HDLBP    | chr2 | - | 2.42E+08 | 2.42E+08 | 6372  |
| ENSG000001 | 852.351  | 690.2331 | 0.30456  | 0.011176  | 0.023243  | PPP1R7   | chr2 | + | 2.42E+08 | 2.42E+08 | 2386  |
| ENSG000001 | 527.1802 | 1636.408 | -1.6327  | 9.58E-31  | 1.26E-29  | PASK     | chr2 | - | 2.42E+08 | 2.42E+08 | 5174  |
| ENSG000001 | 3358.023 | 3281.318 | 0.03348  | 0.74918   | 0.81649   | STK25    | chr2 | - | 2.42E+08 | 2.42E+08 | 4619  |
| ENSG000001 | 8.330465 | 47.22722 | -2.4768  | 2.33E-08  | 9.58E-08  | TPO      | chr2 | + | 1377995  | 1547483  | 5391  |
| ENSG000001 | 6.80618  | 9.750394 | -0.52085 | 0.45463   | 0.55998   | PROC     | chr2 | + | 1.28E+08 | 1.28E+08 | 1853  |
| ENSG000001 | 464.514  | 737.676  | -0.66519 | 1.34E-05  | 4.24E-05  | ID2      | chr2 | + | 8818975  | 8824583  | 2041  |
| ENSG000001 | 260.3161 | 261.3516 | -0.0059  | 0.97682   | 0.98684   | TAF1B    | chr2 | + | 9983483  | 10074545 | 2387  |
| ENSG000001 | 630.091  | 339.0875 | 0.89065  | 3.67E-07  | 1.36E-06  | HPCAL1   | chr2 | + | 10443015 | 10567743 | 4781  |
| ENSG000001 | 1492.857 | 1896.322 | -0.34252 | 0.24688   | 0.34285   | ODC1     | chr2 | - | 10580094 | 10588630 | 2653  |
| ENSG000001 | 2455.576 | 1258.744 | 0.96348  | 1.70E-20  | 1.47E-19  | BIRC6    | chr2 | + | 32582096 | 32843966 | 15703 |
| ENSG000001 | 347.9509 | 446.3747 | -0.35739 | 0.04974   | 0.088572  | NOL10    | chr2 | - | 10710892 | 10830101 | 3333  |
| ENSG000001 | 1793.556 | 2277.658 | -0.34464 | 0.000216  | 0.000589  | PLEKHB2  | chr2 | + | 1.32E+08 | 1.32E+08 | 4307  |
| ENSG000001 | 2394.744 | 1660.9   | 0.52771  | 1.27E-07  | 4.91E-07  | GORASP2  | chr2 | + | 1.72E+08 | 1.72E+08 | 3173  |
| ENSG000001 | 720.2739 | 753.209  | -0.06561 | 0.57855   | 0.67504   | STRN     | chr2 | - | 37070783 | 37193615 | 8168  |
| ENSG000001 | 531.5204 | 2414.001 | -2.1766  | 2.01E-31  | 2.72E-30  | CEBPZ    | chr2 | - | 37428755 | 37458856 | 3463  |
| ENSG000001 | 1344.316 | 869.5834 | 0.62816  | 7.32E-07  | 2.65E-06  | PRKD3    | chr2 | - | 37477645 | 37551951 | 6111  |
| ENSG000001 | 275.0337 | 473.6102 | -0.78245 | 1.28E-05  | 4.07E-05  | DCAF17   | chr2 | + | 1.72E+08 | 1.72E+08 | 5828  |
| ENSG000001 | 89.21678 | 34.09956 | 1.379    | 1.49E-05  | 4.69E-05  | QPCT     | chr2 | + | 37571717 | 37600465 | 1739  |
| ENSG000001 | 960.0849 | 702.7919 | 0.4499   | 3.71E-05  | 0.000111  | RAB3GAP1 | chr2 | + | 1.36E+08 | 1.36E+08 | 4914  |
| ENSG000001 | 263.9927 | 138.7048 | 0.9278   | 4.25E-06  | 1.42E-05  | SLC25A12 | chr2 | - | 1.73E+08 | 1.73E+08 | 2979  |
| ENSG000001 | 38.88566 | 15.38629 | 1.3212   | 0.002464  | 0.005749  | RMDN2    | chr2 | + | 38150330 | 38294285 | 2280  |
| ENSG000001 | 1099.447 | 2.087966 | 8.8755   | 4.74E-59  | 1.35E-57  | DLX2     | chr2 | - | 1.73E+08 | 1.73E+08 | 2453  |
| ENSG000001 | 4.802355 | 2.416535 | 0.89686  | 0.43318   | 0.53858   | LCT      | chr2 | - | 1.37E+08 | 1.37E+08 | 6279  |
| ENSG000001 | 462.917  | 1247.121 | -1.427   | 1.30E-30  | 1.70E-29  | DARS     | chr2 | - | 1.37E+08 | 1.37E+08 | 2361  |
| ENSG000001 | 2228.462 | 4393.806 | -0.97623 | 1.15E-06  | 4.07E-06  | SRSF7    | chr2 | - | 38970741 | 38978636 | 2857  |
| ENSG000001 | 6338.862 | 1612.968 | 1.9706   | 4.70E-40  | 8.26E-39  | SDC1     | chr2 | - | 20400558 | 20425194 | 3291  |
| ENSG000001 | 89.60505 | 0.715414 | 6.5638   | 3.74E-14  | 2.32E-13  | PLCL1    | chr2 | + | 1.99E+08 | 1.99E+08 | 6665  |
| ENSG000001 | 772.7532 | 47.29678 | 4.0212   | 1.03E-116 | 7.54E-115 | SLC1A4   | chr2 | + | 65215611 | 65250999 | 5789  |
| ENSG000001 | 1010.031 | 582.6702 | 0.78941  | 0.001508  | 0.003639  | SOS1     | chr2 | - | 39208537 | 39351486 | 8517  |
| ENSG000001 | 3.660875 | 3.071256 | 0.2581   | 0.81853   | 0.87259   | KYNU     | chr2 | + | 1.44E+08 | 1.44E+08 | 1805  |
| ENSG000001 | 1932.212 | 117.7509 | 4.0214   | 5.43E-134 | 5.10E-132 | WIPF1    | chr2 | - | 1.75E+08 | 1.76E+08 | 4587  |
| ENSG000001 | 390.1138 | 719.1762 | -0.88135 | 2.40E-13  | 1.42E-12  | ORC2     | chr2 | - | 2.02E+08 | 2.02E+08 | 4312  |
| ENSG000001 | 1326.079 | 1381.356 | -0.05875 | 0.53901   | 0.63959   | COX7A2L  | chr2 | - | 42560686 | 42596150 | 3056  |
| ENSG000001 | 219.2653 | 396.0273 | -0.84618 | 0.00527   | 0.01169   | PNO1     | chr2 | + | 68384976 | 68403370 | 2286  |

|            |          |          |          |          |          |          |       |   |          |          |       |
|------------|----------|----------|----------|----------|----------|----------|-------|---|----------|----------|-------|
| ENSG000001 | 265.7018 | 529.9537 | -0.99154 | 1.56E-07 | 5.99E-07 | ORC4     | chr2  | - | 1.49E+08 | 1.49E+08 | 3091  |
| ENSG000001 | 4.564295 | 2.786395 | 0.67221  | 0.51636  | 0.61914  | PLEK     | chr2  | + | 68592305 | 68624585 | 2869  |
| ENSG000001 | 1535.763 | 1322.061 | 0.21582  | 0.32962  | 0.43268  | RND3     | chr2  | - | 1.51E+08 | 1.51E+08 | 2777  |
| ENSG000001 | 710.4378 | 244.7757 | 1.5368   | 1.43E-18 | 1.12E-17 | ATF2     | chr2  | - | 1.76E+08 | 1.76E+08 | 4176  |
| ENSG000001 | 541.2902 | 420.5286 | 0.36399  | 0.008445 | 0.017983 | THADA    | chr2  | - | 43393800 | 43823185 | 6939  |
| ENSG000001 | 530.038  | 173.6594 | 1.6028   | 3.33E-21 | 2.97E-20 | AAK1     | chr2  | - | 69688532 | 69901481 | 4499  |
| ENSG000001 | 1334.873 | 209.7083 | 2.6621   | 1.39E-44 | 2.74E-43 | TRAK2    | chr2  | - | 2.02E+08 | 2.02E+08 | 6510  |
| ENSG000001 | 131.7284 | 79.9363  | 0.71557  | 0.025962 | 0.049928 | C2orf42  | chr2  | - | 70377012 | 70475747 | 2581  |
| ENSG000001 | 1480.314 | 1231.041 | 0.26567  | 0.13307  | 0.20558  | TIA1     | chr2  | - | 70436576 | 70475792 | 4647  |
| ENSG000001 | 1539.755 | 940.6254 | 0.71019  | 2.02E-11 | 1.05E-10 | PCYOX1   | chr2  | + | 70484518 | 70508323 | 5345  |
| ENSG000001 | 0.342542 | 76.98657 | -6.9632  | 8.72E-12 | 4.65E-11 | KISS1R   | chr19 | + | 917287   | 921015   | 1680  |
| ENSG000001 | 543.5949 | 68.92353 | 2.9748   | 6.38E-69 | 2.25E-67 | EPAS1    | chr2  | + | 46520806 | 46613836 | 5160  |
| ENSG000001 | 1181.77  | 3374.11  | -1.511   | 4.92E-25 | 5.13E-24 | ARID3A   | chr19 | + | 925781   | 975939   | 5983  |
| ENSG000001 | 1546.303 | 2207.069 | -0.5125  | 1.32E-05 | 4.17E-05 | SUMO1    | chr2  | - | 2.03E+08 | 2.03E+08 | 1536  |
| ENSG000001 | 4.741555 | 22.89907 | -2.2012  | 0.001697 | 0.004063 | GRIN3B   | chr19 | + | 1000418  | 1009731  | 3281  |
| ENSG000001 | 4.264621 | 0.640152 | 2.2595   | 0.083866 | 0.13917  | VAX2     | chr2  | + | 71127720 | 71160576 | 1147  |
| ENSG000001 | 2.572449 | 0.357707 | 2.2292   | 0.13095  | 0.20289  | ATP6V1B1 | chr2  | + | 71163012 | 71192536 | 1905  |
| ENSG000001 | 626.5771 | 268.209  | 1.2239   | 7.04E-14 | 4.29E-13 | NFE2L2   | chr2  | - | 1.78E+08 | 1.78E+08 | 2853  |
| ENSG000001 | 1808.502 | 4217.358 | -1.221   | 1.48E-42 | 2.77E-41 | MSH6     | chr2  | + | 48010221 | 48034092 | 4328  |
| ENSG000001 | 245.7861 | 143.8085 | 0.76977  | 1.67E-05 | 5.22E-05 | PLEKHA3  | chr2  | + | 1.79E+08 | 1.79E+08 | 2784  |
| ENSG000001 | 233.7992 | 88.87756 | 1.3899   | 1.76E-13 | 1.05E-12 | SPR      | chr2  | + | 73114489 | 73119287 | 1480  |
| ENSG000001 | 749.1759 | 125.2009 | 2.5774   | 4.58E-33 | 6.55E-32 | EPHA4    | chr2  | - | 2.22E+08 | 2.22E+08 | 6346  |
| ENSG000001 | 105.5893 | 45.13832 | 1.2269   | 5.42E-05 | 0.00016  | PARD3B   | chr2  | + | 2.05E+08 | 2.06E+08 | 8174  |
| ENSG000001 | 631.4679 | 916.7703 | -0.53638 | 0.005522 | 0.012191 | FARSB    | chr2  | - | 2.23E+08 | 2.24E+08 | 3369  |
| ENSG000001 | 907.5323 | 758.4544 | 0.25929  | 0.13329  | 0.2059   | ALMS1    | chr2  | + | 73612886 | 73837920 | 12922 |
| ENSG000001 | 1314.103 | 1722.737 | -0.39    | 0.001535 | 0.003701 | BCL9     | chr1  | + | 1.47E+08 | 1.47E+08 | 6278  |
| ENSG000001 | 9163.979 | 6.176483 | 7.3894   | 1.09E-06 | 3.88E-06 | PRRX1    | chr1  | + | 1.71E+08 | 1.71E+08 | 4284  |
| ENSG000001 | 10986.72 | 10303.81 | 0.092105 | 0.72781  | 0.79868  | DHCR24   | chr1  | - | 55315306 | 55352891 | 4250  |
| ENSG000001 | 423.1933 | 292.7662 | 0.53094  | 0.000812 | 0.002044 | DNAJC16  | chr1  | + | 15853308 | 15918874 | 6299  |
| ENSG000001 | 22.53296 | 411.8805 | -4.1566  | 7.52E-43 | 1.43E-41 | MARK1    | chr1  | + | 2.21E+08 | 2.21E+08 | 5230  |
| ENSG000001 | 52.77634 | 88.86225 | -0.75312 | 0.009437 | 0.019921 | MORN1    | chr1  | - | 2252692  | 2323146  | 1907  |
| ENSG000001 | 762.3978 | 184.4318 | 2.0444   | 2.06E-38 | 3.48E-37 | GPX7     | chr1  | + | 53068044 | 53074723 | 1228  |
| ENSG000001 | 1133.089 | 2091.508 | -0.8832  | 1.36E-14 | 8.74E-14 | CACYBP   | chr1  | + | 1.75E+08 | 1.75E+08 | 2834  |
| ENSG000001 | 1064.054 | 507.8093 | 1.0673   | 6.37E-18 | 4.87E-17 | SCP2     | chr1  | + | 53392901 | 53517375 | 5204  |
| ENSG000001 | 2.427705 | 84.64886 | -5.0065  | 2.98E-15 | 1.98E-14 | TPSG1    | chr16 | - | 1271651  | 1275257  | 1108  |
| ENSG000001 | 20.09491 | 37.84011 | -0.8973  | 0.028429 | 0.054113 | PAPPA2   | chr1  | + | 1.76E+08 | 1.77E+08 | 9685  |
| ENSG000001 | 392.1094 | 775.9211 | -0.98413 | 6.61E-10 | 3.10E-09 | RALGPS2  | chr1  | + | 1.79E+08 | 1.79E+08 | 5834  |
| ENSG000001 | 25.11299 | 3.976869 | 2.5804   | 2.83E-05 | 8.62E-05 | ANGPTL1  | chr1  | - | 1.79E+08 | 1.79E+08 | 3348  |
| ENSG000001 | 649.6801 | 499.1133 | 0.37848  | 0.01006  | 0.02114  | CEP104   | chr1  | - | 3728645  | 3773778  | 6424  |
| ENSG000001 | 1431.624 | 1193.409 | 0.2617   | 0.013268 | 0.027201 | FAM20B   | chr1  | + | 1.79E+08 | 1.79E+08 | 5984  |
| ENSG000001 | 156.1546 | 191.246  | -0.28845 | 0.22612  | 0.31892  | TCEANC2  | chr1  | + | 54519260 | 54578192 | 4097  |
| ENSG000001 | 946.8273 | 1045.207 | -0.14199 | 0.1989   | 0.28723  | TMEM59   | chr1  | - | 54497347 | 54519177 | 2473  |
| ENSG000001 | 634.0301 | 525.9891 | 0.26933  | 0.09019  | 0.14804  | LRRC42   | chr1  | + | 54411750 | 54433841 | 2037  |
| ENSG000001 | 368.4448 | 498.507  | -0.43704 | 0.001188 | 0.002912 | WRAP73   | chr1  | - | 3547331  | 3569325  | 6089  |
| ENSG000001 | 0        | 0.686276 | -0.84936 | 0.6309   | NA       | NPHS2    | chr1  | - | 1.8E+08  | 1.8E+08  | 1855  |
| ENSG000001 | 1941.56  | 2466.881 | -0.34494 | 0.000314 | 0.000839 | MRPL37   | chr1  | + | 54649714 | 54691137 | 1582  |
| ENSG000001 | 2217.661 | 3902.178 | -0.81352 | 4.85E-07 | 1.78E-06 | ICMT     | chr1  | - | 6281253  | 6296032  | 4771  |
| ENSG000001 | 3877.089 | 5730.919 | -0.56322 | 4.39E-09 | 1.91E-08 | RPL22    | chr1  | - | 6241329  | 6269449  | 2279  |
| ENSG000001 | 1.161205 | 139.9346 | -6.4323  | 2.99E-18 | 2.32E-17 | CHD5     | chr1  | - | 6161853  | 6240183  | 9646  |
| ENSG000001 | 6786.572 | 3582.871 | 0.92073  | 6.11E-19 | 4.88E-18 | QSOX1    | chr1  | + | 1.8E+08  | 1.8E+08  | 9311  |
| ENSG000001 | 348.1013 | 359.6038 | -0.04588 | 0.80734  | 0.86399  | STXBP3   | chr1  | + | 1.09E+08 | 1.09E+08 | 2536  |
| ENSG000001 | 1002.939 | 1389.771 | -0.47033 | 0.000105 | 0.000299 | PHF13    | chr1  | + | 6673745  | 6684093  | 3681  |
| ENSG000001 | 2840.346 | 1012.555 | 1.4848   | 8.72E-18 | 6.64E-17 | ERRFI1   | chr1  | - | 8064464  | 8086368  | 3104  |
| ENSG000001 | 3084.971 | 2904.427 | 0.087201 | 0.46413  | 0.56915  | PARK7    | chr1  | + | 8014351  | 8045565  | 1088  |
| ENSG000001 | 37.68412 | 9.222762 | 1.9642   | 0.00037  | 0.000977 | KIAA1324 | chr1  | + | 1.1E+08  | 1.1E+08  | 5966  |
| ENSG000001 | 7.729324 | 19.66991 | -1.3156  | 0.03068  | 0.057853 | OPRD1    | chr1  | + | 29138654 | 29190208 | 1774  |
| ENSG000001 | 1687.685 | 583.2427 | 1.5301   | 6.38E-36 | 9.97E-35 | AMPD2    | chr1  | + | 1.1E+08  | 1.1E+08  | 3899  |
| ENSG000001 | 2145.527 | 2986.634 | -0.47664 | 1.36E-07 | 5.26E-07 | SRSF4    | chr1  | - | 29474255 | 29508499 | 2387  |
| ENSG000001 | 474.2709 | 585.8297 | -0.30417 | 0.020346 | 0.040077 | MECR     | chr1  | - | 29519385 | 29557454 | 2416  |
| ENSG000001 | 221.2085 | 345.1633 | -0.6381  | 0.031663 | 0.059524 | KCNC4    | chr1  | + | 1.11E+08 | 1.11E+08 | 7597  |
| ENSG000001 | 1408.666 | 238.4248 | 2.5578   | 1.91E-62 | 5.91E-61 | EDEM3    | chr1  | - | 1.85E+08 | 1.85E+08 | 6898  |
| ENSG000001 | 287.6621 | 428.3885 | -0.57045 | 0.03413  | 0.063715 | WDR77    | chr1  | - | 1.12E+08 | 1.12E+08 | 2576  |
| ENSG000001 | 1360.675 | 1815.106 | -0.41459 | 0.010644 | 0.022245 | ATP5F1   | chr1  | + | 1.12E+08 | 1.12E+08 | 3156  |
| ENSG000001 | 700.5859 | 407.5119 | 0.78115  | 1.06E-08 | 4.50E-08 | RAP1A    | chr1  | + | 1.12E+08 | 1.12E+08 | 5024  |
| ENSG000001 | 1566.168 | 1641.065 | -0.06752 | 0.49456  | 0.59835  | HDAC1    | chr1  | + | 32757687 | 32799236 | 2409  |

|            |          |          |          |           |           |           |      |   |          |          |       |
|------------|----------|----------|----------|-----------|-----------|-----------|------|---|----------|----------|-------|
| ENSG000001 | 2163.731 | 1302.417 | 0.73135  | 5.38E-06  | 1.78E-05  | CAPZA1    | chr1 | + | 1.13E+08 | 1.13E+08 | 3020  |
| ENSG000001 | 597.4119 | 632.4234 | -0.08296 | 0.50286   | 0.60632   | S100BPB   | chr1 | + | 33282368 | 33324476 | 4318  |
| ENSG000001 | 382.4046 | 450.2697 | -0.23429 | 0.44009   | 0.54583   | RNF19B    | chr1 | - | 33402046 | 33430286 | 2598  |
| ENSG000001 | 1131.562 | 707.0661 | 0.67728  | 1.09E-10  | 5.37E-10  | SCAMP3    | chr1 | - | 1.55E+08 | 1.55E+08 | 1537  |
| ENSG000001 | 480.8406 | 268.129  | 0.84212  | 5.26E-10  | 2.48E-09  | TRIM62    | chr1 | - | 33611003 | 33647660 | 3437  |
| ENSG000001 | 1564.777 | 507.9311 | 1.6208   | 5.15E-29  | 6.32E-28  | ASH1L     | chr1 | - | 1.55E+08 | 1.56E+08 | 11942 |
| ENSG000001 | 4.117271 | 413.5205 | -6.5041  | 5.74E-53  | 1.42E-51  | DLGAP3    | chr1 | - | 35331037 | 35395186 | 3856  |
| ENSG000001 | 8053.599 | 9931.104 | -0.30137 | 0.12879   | 0.20016   | SFPQ      | chr1 | - | 35641979 | 35658749 | 3747  |
| ENSG000001 | 444.7207 | 210.6656 | 1.0662   | 0.00325   | 0.007454  | RHO       | chr1 | + | 2.29E+08 | 2.29E+08 | 4372  |
| ENSG000001 | 1181.207 | 813.2385 | 0.53801  | 1.08E-05  | 3.45E-05  | GON4L     | chr1 | - | 1.56E+08 | 1.56E+08 | 7713  |
| ENSG000001 | 2337.881 | 1356.704 | 0.78353  | 4.30E-07  | 1.59E-06  | ARHGEF2   | chr1 | - | 1.56E+08 | 1.56E+08 | 4435  |
| ENSG000001 | 544.9322 | 436.4761 | 0.31958  | 0.011225  | 0.023335  | LAMTOR2   | chr1 | + | 1.56E+08 | 1.56E+08 | 868   |
| ENSG000001 | 1684.31  | 564.2718 | 1.5759   | 2.45E-36  | 3.86E-35  | MEF2D     | chr1 | - | 1.56E+08 | 1.56E+08 | 5965  |
| ENSG000001 | 1724.718 | 523.851  | 1.7182   | 1.37E-40  | 2.44E-39  | DOCK7     | chr1 | - | 62920399 | 63153969 | 7110  |
| ENSG000001 | 2699.064 | 2558.702 | 0.077145 | 0.63718   | 0.72542   | SRM       | chr1 | - | 11114641 | 11120081 | 1266  |
| ENSG000001 | 4.430716 | 1.995719 | 1.0335   | 0.32085   | 0.42365   | DLEU2L    | chr1 | + | 64014588 | 64015405 | 703   |
| ENSG000001 | 57.46901 | 1181.917 | -4.3416  | 1.35E-85  | 6.27E-84  | FBXO2     | chr1 | - | 11708424 | 11715842 | 1560  |
| ENSG000001 | 79.3869  | 83.736   | -0.07551 | 0.79558   | 0.85508   | FBXO6     | chr1 | + | 11724181 | 11734411 | 1520  |
| ENSG000001 | 283.2841 | 377.0654 | -0.41246 | 0.033892  | 0.063299  | C1orf21   | chr1 | + | 1.84E+08 | 1.85E+08 | 10265 |
| ENSG000001 | 127.0468 | 84.09942 | 0.59758  | 0.016676  | 0.033457  | SWT1      | chr1 | + | 1.85E+08 | 1.85E+08 | 3830  |
| ENSG000001 | 1427.356 | 5322.6   | -1.8968  | 1.38E-75  | 5.45E-74  | MAD2L2    | chr1 | - | 11734537 | 11751707 | 1860  |
| ENSG000001 | 30.42838 | 132.3732 | -2.1024  | 3.13E-09  | 1.38E-08  | DNAJC6    | chr1 | + | 65713902 | 65881552 | 5743  |
| ENSG000001 | 346.8391 | 88.85818 | 1.9506   | 7.22E-10  | 3.37E-09  | LEPR      | chr1 | + | 65886248 | 66107242 | 8227  |
| ENSG000001 | 3212.659 | 3533.321 | -0.13752 | 0.15515   | 0.23368   | IVNS1ABP  | chr1 | - | 1.85E+08 | 1.85E+08 | 4199  |
| ENSG000001 | 2200.674 | 2125.537 | 0.049759 | 0.67829   | 0.7591    | KIAA2013  | chr1 | - | 11979648 | 11986485 | 2815  |
| ENSG000001 | 2317.264 | 2201.951 | 0.073619 | 0.58868   | 0.68421   | MFN2      | chr1 | + | 12040238 | 12073571 | 4539  |
| ENSG000001 | 1967.84  | 14.34472 | 7.0756   | 4.05E-174 | 6.42E-172 | PRG4      | chr1 | + | 1.86E+08 | 1.86E+08 | 5044  |
| ENSG000001 | 792.312  | 1157.958 | -0.54686 | 1.71E-05  | 5.35E-05  | MIIP      | chr1 | + | 12079523 | 12092102 | 1709  |
| ENSG000001 | 1079.122 | 1311.757 | -0.28119 | 0.006587  | 0.014323  | SMG7      | chr1 | + | 1.83E+08 | 1.84E+08 | 5970  |
| ENSG000001 | 21.68081 | 3.144102 | 2.6935   | 0.000349  | 0.000926  | NCF2      | chr1 | - | 1.84E+08 | 1.84E+08 | 2276  |
| ENSG000001 | 1.306762 | 0        | 1.6479   | 0.35189   | NA        | PDC       | chr1 | - | 1.86E+08 | 1.86E+08 | 1242  |
| ENSG000001 | 511.1425 | 102.2362 | 2.3087   | 7.71E-15  | 5.01E-14  | SLC35D1   | chr1 | - | 67465015 | 67519782 | 6162  |
| ENSG000001 | 246.2485 | 13.45126 | 4.1832   | 2.37E-45  | 4.78E-44  | PLA2G4A   | chr1 | + | 1.87E+08 | 1.87E+08 | 2875  |
| ENSG000001 | 781.8072 | 455.3582 | 0.77603  | 0.001729  | 0.004135  | GADD45A   | chr1 | + | 68150744 | 68154021 | 1496  |
| ENSG000001 | 0        | 0.343138 | -0.41864 | 0.81278   | NA        | PRAMEF12  | chr1 | + | 12834984 | 12838049 | 1786  |
| ENSG000001 | 3324.039 | 106.8326 | 4.9484   | 2.15E-303 | 1.01E-300 | WLS       | chr1 | - | 68564142 | 68698803 | 2748  |
| ENSG000001 | 938.6599 | 455.5639 | 1.0427   | 9.72E-18  | 7.38E-17  | PRDM2     | chr1 | + | 14026693 | 14151574 | 7957  |
| ENSG000001 | 3670.295 | 175.3511 | 4.3783   | 5.98E-110 | 3.97E-108 | RGS2      | chr1 | + | 1.93E+08 | 1.93E+08 | 1344  |
| ENSG000001 | 1.286224 | 0        | 1.8436   | 0.2818    | NA        | RPE65     | chr1 | - | 68894505 | 68915642 | 2610  |
| ENSG000001 | 1075.426 | 694.7142 | 0.6306   | 8.18E-08  | 3.21E-07  | TROVE2    | chr1 | + | 1.93E+08 | 1.93E+08 | 7848  |
| ENSG000001 | 458.1655 | 411.8939 | 0.15435  | 0.42226   | 0.52769   | UCHL5     | chr1 | - | 1.93E+08 | 1.93E+08 | 1911  |
| ENSG000001 | 457.2367 | 560.6715 | -0.29188 | 0.24475   | 0.3405    | BCAS2     | chr1 | - | 1.15E+08 | 1.15E+08 | 1299  |
| ENSG000001 | 3069.283 | 3238.559 | -0.07722 | 0.53698   | 0.63784   | SRSF11    | chr1 | + | 70671365 | 70718735 | 4008  |
| ENSG000001 | 86.39364 | 247.4007 | -1.5127  | 6.52E-13  | 3.75E-12  | CTH       | chr1 | + | 70876901 | 70905534 | 2044  |
| ENSG000001 | 23.92448 | 84.70639 | -1.8086  | 2.08E-06  | 7.21E-06  | AGMAT     | chr1 | - | 15898848 | 15911605 | 2500  |
| ENSG000001 | 4580.336 | 927.5336 | 2.2985   | 5.85E-38  | 9.72E-37  | OLFML3    | chr1 | + | 1.15E+08 | 1.15E+08 | 2063  |
| ENSG000001 | 0.653381 | 0.357707 | 0.52032  | 0.76705   | NA        | TNNI3K    | chr1 | + | 74663937 | 75010112 | 3269  |
| ENSG000001 | 0        | 3.123085 | -3.0913  | 0.04724   | 0.084694  | CFHR3     | chr1 | + | 1.97E+08 | 1.97E+08 | 1965  |
| ENSG000001 | 1730.379 | 1279.765 | 0.43403  | 0.007757  | 0.016635  | PLEKHM2   | chr1 | + | 16010827 | 16061264 | 4122  |
| ENSG000001 | 451.8316 | 344.0843 | 0.39293  | 0.0067    | 0.014548  | CRYZ      | chr1 | - | 75171170 | 75199092 | 2899  |
| ENSG000001 | 1093.46  | 435.0107 | 1.3285   | 2.52E-19  | 2.05E-18  | PHTF1     | chr1 | - | 1.14E+08 | 1.14E+08 | 4314  |
| ENSG000001 | 743.573  | 548.7807 | 0.43617  | 0.003137  | 0.007213  | ZBTB17    | chr1 | - | 16268364 | 16302627 | 2770  |
| ENSG000001 | 92.54221 | 29.77311 | 1.6268   | 1.08E-07  | 4.20E-07  | CD58      | chr1 | - | 1.17E+08 | 1.17E+08 | 1328  |
| ENSG000001 | 24.81413 | 26.37577 | -0.0876  | 0.8734    | 0.91177   | TFAP2E    | chr1 | + | 36038971 | 36060929 | 2189  |
| ENSG000001 | 0        | 0.343138 | -0.41864 | 0.81278   | NA        | CD2       | chr1 | + | 1.17E+08 | 1.17E+08 | 1609  |
| ENSG000001 | 411.499  | 1063.816 | -1.3688  | 1.09E-25  | 1.17E-24  | TTF2      | chr1 | + | 1.18E+08 | 1.18E+08 | 4879  |
| ENSG000001 | 0        | 641.8463 | -10.604  | 3.63E-23  | 3.53E-22  | NR5A2     | chr1 | + | 2E+08    | 2E+08    | 5086  |
| ENSG000001 | 578.625  | 954.5674 | -0.72006 | 0.000809  | 0.002035  | KIF21B    | chr1 | - | 2.01E+08 | 2.01E+08 | 9895  |
| ENSG000001 | 1024.415 | 1382.803 | -0.43263 | 0.000679  | 0.001728  | TMEM9     | chr1 | - | 2.01E+08 | 2.01E+08 | 2892  |
| ENSG000001 | 632.1651 | 668.4023 | -0.07907 | 0.59662   | 0.691     | ADPRHL2   | chr1 | + | 36554476 | 36559533 | 1668  |
| ENSG000001 | 6780.952 | 2259.413 | 1.5822   | 8.36E-24  | 8.34E-23  | MAP7D1    | chr1 | + | 36621180 | 36646450 | 3456  |
| ENSG000001 | 161.8078 | 148.9763 | 0.12167  | 0.62782   | 0.71765   | WARS2     | chr1 | - | 1.2E+08  | 1.2E+08  | 2811  |
| ENSG000001 | 0        | 7.82752  | -4.4783  | 0.001025  | 0.002536  | HAO2      | chr1 | + | 1.2E+08  | 1.2E+08  | 1668  |
| ENSG000001 | 77.84549 | 201.512  | -1.3608  | 4.86E-05  | 0.000144  | RP11-268J | chr1 | + | 36789335 | 36794822 | 1838  |
| ENSG000001 | 74.54012 | 25.80839 | 1.5153   | 1.48E-06  | 5.20E-06  | OSCP1     | chr1 | - | 36881428 | 36916086 | 1463  |

|                    |          |          |           |           |           |      |   |          |          |       |
|--------------------|----------|----------|-----------|-----------|-----------|------|---|----------|----------|-------|
| ENSG000001114.52   | 1213.496 | -0.12237 | 0.41304   | 0.51789   | MRPS15    | chr1 | - | 36921319 | 36930038 | 2127  |
| ENSG00000199.0968  | 182.4852 | 0.12697  | 0.5274    | 0.62915   | EXOC8     | chr1 | - | 2.31E+08 | 2.31E+08 | 5100  |
| ENSG000001941.2181 | 614.5242 | 0.61485  | 1.86E-05  | 5.80E-05  | GNPAT     | chr1 | + | 2.31E+08 | 2.31E+08 | 2643  |
| ENSG000001267.5231 | 239.3729 | 0.1603   | 0.45582   | 0.5611    | TSNAX     | chr1 | + | 2.32E+08 | 2.32E+08 | 5629  |
| ENSG000001250.4709 | 491.5983 | -0.96768 | 1.50E-06  | 5.27E-06  | C1orf109  | chr1 | - | 38147242 | 38157914 | 2570  |
| ENSG000001496.9886 | 213.6342 | 1.2134   | 4.34E-10  | 2.06E-09  | RRAGC     | chr1 | - | 39303870 | 39325495 | 2732  |
| ENSG000001419.6945 | 552.0048 | -0.39328 | 0.010258  | 0.021516  | TBCE      | chr1 | + | 2.36E+08 | 2.36E+08 | 1980  |
| ENSG0000017170.041 | 1372.224 | 2.3795   | 9.97E-43  | 1.88E-41  | NID1      | chr1 | - | 2.36E+08 | 2.36E+08 | 5864  |
| ENSG000001356.7231 | 118.9742 | 1.5793   | 4.02E-12  | 2.19E-11  | LGALS8    | chr1 | + | 2.37E+08 | 2.37E+08 | 6420  |
| ENSG0000010        | 3.616746 | -3.3235  | 0.028216  | 0.053767  | HPCAL4    | chr1 | - | 40144320 | 40157361 | 4856  |
| ENSG0000011933.028 | 867.761  | 1.1551   | 4.44E-25  | 4.65E-24  | MTR       | chr1 | + | 2.37E+08 | 2.37E+08 | 10529 |
| ENSG000001104.8185 | 23.72775 | 2.1175   | 1.60E-08  | 6.68E-08  | BMP8B     | chr1 | - | 40222854 | 40254533 | 4822  |
| ENSG00000112.08466 | 799.1386 | -5.9789  | 6.36E-62  | 1.93E-60  | MYCL1     | chr1 | - | 40361098 | 40367928 | 3256  |
| ENSG0000011134.233 | 556.7606 | 1.0263   | 2.44E-16  | 1.72E-15  | SIPA1L2   | chr1 | - | 2.33E+08 | 2.33E+08 | 6690  |
| ENSG0000013.660875 | 0.594029 | 2.0519   | 0.14569   | 0.22138   | ZP4       | chr1 | - | 2.38E+08 | 2.38E+08 | 1799  |
| ENSG000001450.3127 | 408.8089 | 0.14135  | 0.4425    | 0.54821   | RLF       | chr1 | + | 40627045 | 40706593 | 6246  |
| ENSG0000018.879364 | 1.964165 | 2.0063   | 0.032156  | 0.060365  | KMO       | chr1 | + | 2.42E+08 | 2.42E+08 | 5261  |
| ENSG00000169.08275 | 57.20173 | 0.27176  | 0.31994   | 0.42277   | ZNF684    | chr1 | + | 40997233 | 41013841 | 2097  |
| ENSG0000016.774477 | 151.0446 | -4.4276  | 1.28E-21  | 1.16E-20  | KCNQ4     | chr1 | + | 41249684 | 41306124 | 4099  |
| ENSG000001218.8756 | 908.7118 | -2.0415  | 4.80E-14  | 2.96E-13  | RIMS3     | chr1 | - | 41086351 | 41131329 | 7235  |
| ENSG0000011175.859 | 290.0635 | 2.0128   | 4.26E-24  | 4.30E-23  | AKT3      | chr1 | - | 2.44E+08 | 2.44E+08 | 5127  |
| ENSG000001698.0204 | 545.2797 | 0.35715  | 0.006571  | 0.014291  | ETV3      | chr1 | - | 1.57E+08 | 1.57E+08 | 5254  |
| ENSG000001511.947  | 424.1653 | 0.2721   | 0.11095   | 0.1764    | ACADM     | chr1 | + | 76190036 | 76253260 | 2619  |
| ENSG000001368.2899 | 103.1486 | 1.8331   | 1.21E-27  | 1.41E-26  | ST6GALNAC | chr1 | + | 77333126 | 77531396 | 3751  |
| ENSG0000010        | 2.131673 | -2.2467  | 0.1949    | 0.28267   | SLAMF1    | chr1 | - | 1.61E+08 | 1.61E+08 | 4006  |
| ENSG0000013.568372 | 4.926189 | -0.42474 | 0.65674   | 0.74137   | CD48      | chr1 | - | 1.61E+08 | 1.61E+08 | 1793  |
| ENSG0000012175.338 | 1416.713 | 0.61823  | 7.14E-06  | 2.33E-05  | LPNH2     | chr1 | + | 81771845 | 82458120 | 6302  |
| ENSG0000012.914991 | 108.9385 | -5.0711  | 1.44E-19  | 1.19E-18  | PADI2     | chr1 | - | 17393256 | 17445948 | 4345  |
| ENSG000001840.3181 | 639.8759 | 0.39188  | 0.001242  | 0.003034  | SDHB      | chr1 | - | 17345217 | 17380665 | 1153  |
| ENSG0000016359.606 | 2113.919 | 1.5882   | 3.55E-58  | 9.89E-57  | MFAP2     | chr1 | - | 17300997 | 17307330 | 2371  |
| ENSG000001458.7808 | 522.631  | -0.18659 | 0.36143   | 0.46562   | RPF1      | chr1 | + | 84944942 | 84963473 | 1385  |
| ENSG0000013056.928 | 4176.484 | -0.44904 | 0.01338   | 0.027409  | KDM5B     | chr1 | - | 2.03E+08 | 2.03E+08 | 7438  |
| ENSG0000011507.572 | 461.085  | 1.7076   | 1.10E-44  | 2.18E-43  | UAP1      | chr1 | + | 1.63E+08 | 1.63E+08 | 2344  |
| ENSG0000010        | 7.062694 | -4.3984  | 0.000975  | 0.002423  | ACTL8     | chr1 | + | 18081808 | 18153558 | 1861  |
| ENSG000001151.9174 | 54.10865 | 1.4817   | 1.53E-07  | 5.86E-07  | CTBS      | chr1 | - | 85018804 | 85040163 | 3082  |
| ENSG000001830.512  | 7.546618 | 6.2946   | 6.99E-12  | 3.74E-11  | RGS4      | chr1 | + | 1.63E+08 | 1.63E+08 | 3774  |
| ENSG000001523.2874 | 763.188  | -0.54381 | 1.30E-05  | 4.11E-05  | KLHL12    | chr1 | - | 2.03E+08 | 2.03E+08 | 3359  |
| ENSG0000010        | 634.3763 | -10.556  | 1.95E-22  | 1.83E-21  | IGSF21    | chr1 | + | 18434240 | 18704977 | 1943  |
| ENSG000001440.8038 | 305.5495 | 0.52831  | 0.006118  | 0.0134    | SSX2IP    | chr1 | - | 85109390 | 85156486 | 5843  |
| ENSG000001490.0022 | 285.5852 | 0.77855  | 7.77E-07  | 2.80E-06  | ZNHIT6    | chr1 | - | 86115106 | 86174116 | 6080  |
| ENSG000001501.705  | 451.316  | 0.15188  | 0.20642   | 0.29607   | RBBP5     | chr1 | - | 2.05E+08 | 2.05E+08 | 4404  |
| ENSG000001335.4902 | 1.309443 | 7.682    | 7.38E-32  | 1.01E-30  | GBP3      | chr1 | - | 89472349 | 89488577 | 3678  |
| ENSG00000164.23411 | 0.343138 | 6.7221   | 5.76E-11  | 2.91E-10  | GBP1      | chr1 | - | 89518002 | 89531043 | 3035  |
| ENSG00000164.7914  | 28.9306  | 1.1514   | 0.002954  | 0.006815  | PINK1-AS  | chr1 | - | 20969150 | 20978686 | 4443  |
| ENSG00000141.59846 | 246.757  | -2.5308  | 2.94E-09  | 1.30E-08  | KIF17     | chr1 | - | 20990507 | 21044510 | 3969  |
| ENSG00000198.22329 | 94.93743 | 0.052195 | 0.82761   | 0.87864   | GPR89A    | chr1 | - | 1.46E+08 | 1.46E+08 | 2699  |
| ENSG00000111.7858  | 1078.035 | -6.4682  | 4.66E-73  | 1.76E-71  | CDK18     | chr1 | + | 2.05E+08 | 2.06E+08 | 3966  |
| ENSG000001225.3499 | 153.4143 | 0.54884  | 0.067066  | 0.11486   | RAB7L1    | chr1 | - | 2.06E+08 | 2.06E+08 | 3272  |
| ENSG00000123.00909 | 5.470805 | 2.0257   | 0.00174   | 0.004158  | CD160     | chr1 | - | 1.46E+08 | 1.46E+08 | 3389  |
| ENSG000001688.6595 | 785.0323 | -0.18147 | 0.79334   | 0.85312   | TXNIP     | chr1 | + | 1.45E+08 | 1.45E+08 | 2927  |
| ENSG0000011538.548 | 1806.18  | -0.2313  | 0.049638  | 0.088428  | ECE1      | chr1 | - | 21543740 | 21671997 | 5099  |
| ENSG000001433.9673 | 339.1992 | 0.35348  | 0.15964   | 0.23928   | HMGCL     | chr1 | - | 24128375 | 24165110 | 2151  |
| ENSG000001769.8797 | 292.4585 | 1.3935   | 4.19E-15  | 2.76E-14  | GALE      | chr1 | - | 24122089 | 24127271 | 2073  |
| ENSG0000011230.364 | 1434.244 | -0.22001 | 0.27045   | 0.36957   | ID3       | chr1 | - | 23884409 | 23886285 | 1251  |
| ENSG0000010        | 71.53422 | -7.6752  | 5.20E-12  | 2.80E-11  | CR2       | chr1 | + | 2.08E+08 | 2.08E+08 | 4240  |
| ENSG0000011745.671 | 1714.624 | 0.025726 | 0.80539   | 0.86232   | CD46      | chr1 | + | 2.08E+08 | 2.08E+08 | 7826  |
| ENSG000001759.1919 | 728.2722 | 0.060356 | 0.64406   | 0.73105   | PRPF3     | chr1 | + | 1.5E+08  | 1.5E+08  | 2595  |
| ENSG0000011572.25  | 1543.33  | 0.027174 | 0.80218   | 0.85998   | APH1A     | chr1 | - | 1.5E+08  | 1.5E+08  | 2353  |
| ENSG0000018440.095 | 820.1873 | 3.3585   | 1.46E-158 | 1.90E-156 | LEPRE1    | chr1 | - | 43212006 | 43232755 | 3001  |
| ENSG0000012035.115 | 4380.086 | -1.1023  | 1.79E-08  | 7.42E-08  | SLC2A1    | chr1 | - | 43391052 | 43424530 | 3318  |
| ENSG000001592.894  | 806.0047 | -0.44071 | 0.057795  | 0.10103   | EBNA1BP2  | chr1 | - | 43629846 | 43736607 | 1503  |
| ENSG0000011771.388 | 4116.817 | -1.2152  | 2.57E-29  | 3.19E-28  | CDC20     | chr1 | + | 43824626 | 43828874 | 1777  |
| ENSG0000012.250445 | 6.997169 | -1.4645  | 0.16552   | 0.24652   | MPL       | chr1 | + | 43803478 | 43818443 | 1950  |
| ENSG00000128.98544 | 141.4521 | -2.2618  | 4.95E-09  | 2.15E-08  | ARTN      | chr1 | + | 44398992 | 44402913 | 1943  |
| ENSG000001606.7649 | 411.3063 | 0.55843  | 1.41E-05  | 4.46E-05  | IPO13     | chr1 | + | 44412611 | 44433694 | 3894  |

|            |          |          |          |          |          |          |       |   |          |          |       |
|------------|----------|----------|----------|----------|----------|----------|-------|---|----------|----------|-------|
| ENSG000001 | 1031.869 | 1093.681 | -0.08366 | 0.53689  | 0.63775  | ATP6V0B  | chr1  | + | 44440159 | 44443967 | 2432  |
| ENSG000001 | 3393.649 | 2264.913 | 0.5821   | 0.00064  | 0.001635 | B4GALT2  | chr1  | + | 44444615 | 44456840 | 2629  |
| ENSG000001 | 920.0434 | 910.3132 | 0.015469 | 0.89432  | 0.92676  | ER13     | chr1  | - | 44686742 | 44820932 | 1684  |
| ENSG000001 | 52.4294  | 18.8031  | 1.4695   | 0.000167 | 0.000464 | PTCH2    | chr1  | - | 45285516 | 45308735 | 4298  |
| ENSG000001 | 2006.067 | 2571.96  | -0.35791 | 0.013827 | 0.028226 | AKR1A1   | chr1  | + | 46016215 | 46035721 | 1818  |
| ENSG000001 | 4250.114 | 9065.048 | -1.0919  | 1.81E-28 | 2.18E-27 | PRDX1    | chr1  | - | 45976708 | 45988719 | 1233  |
| ENSG000001 | 1157.948 | 421.7682 | 1.4551   | 3.79E-19 | 3.05E-18 | PIK3R3   | chr1  | - | 46505812 | 46642160 | 5609  |
| ENSG000001 | 7.946847 | 2.217472 | 1.6754   | 0.072582 | 0.12293  | TSPAN1   | chr1  | + | 46640745 | 46651630 | 1615  |
| ENSG000001 | 306.7729 | 118.7758 | 1.3619   | 7.69E-06 | 2.50E-05 | BLZF1    | chr1  | + | 1.69E+08 | 1.69E+08 | 2749  |
| ENSG000001 | 22.34356 | 35.74174 | -0.66967 | 0.12011  | 0.189    | CCDC181  | chr1  | - | 1.69E+08 | 1.69E+08 | 2035  |
| ENSG000001 | 242.3934 | 432.3523 | -0.83067 | 3.47E-07 | 1.29E-06 | SLC19A2  | chr1  | - | 1.69E+08 | 1.69E+08 | 3671  |
| ENSG000001 | 14.59891 | 154.8926 | -3.3894  | 1.10E-18 | 8.65E-18 | FAAH     | chr1  | + | 46859937 | 46879520 | 2094  |
| ENSG000001 | 383.0428 | 316.4484 | 0.27641  | 0.093817 | 0.15312  | NSUN4    | chr1  | + | 46805849 | 46830824 | 4344  |
| ENSG000001 | 558.995  | 297.3666 | 0.90773  | 7.16E-05 | 0.000207 | TMED5    | chr1  | - | 93615299 | 93646285 | 6104  |
| ENSG000001 | 0.685084 | 0        | 0.85004  | 0.63064  | NA       | MROH9    | chr1  | + | 1.71E+08 | 1.71E+08 | 3165  |
| ENSG000001 | 1574.31  | 1182.73  | 0.41265  | 0.000162 | 0.00045  | DR1      | chr1  | + | 93811445 | 93828149 | 3242  |
| ENSG000001 | 9023.873 | 3232.786 | 1.4796   | 1.42E-38 | 2.41E-37 | CNN3     | chr1  | - | 95362507 | 95392834 | 2165  |
| ENSG000001 | 5123.844 | 5754.492 | -0.16731 | 0.1      | 0.16148  | PRRC2C   | chr1  | + | 1.71E+08 | 1.72E+08 | 10366 |
| ENSG000001 | 274.6318 | 80.64205 | 1.7631   | 3.23E-15 | 2.14E-14 | F3       | chr1  | - | 94994781 | 95007356 | 2287  |
| ENSG000001 | 621.1486 | 430.5718 | 0.52842  | 0.000288 | 0.000773 | ABCD3    | chr1  | + | 94883933 | 94984222 | 4367  |
| ENSG000001 | 221.8031 | 183.6897 | 0.2704   | 0.18622  | 0.27195  | VAMP4    | chr1  | - | 1.72E+08 | 1.72E+08 | 5159  |
| ENSG000001 | 171.5881 | 316.3801 | -0.88253 | 1.35E-05 | 4.26E-05 | DPH5     | chr1  | - | 1.01E+08 | 1.01E+08 | 2159  |
| ENSG000001 | 0        | 0.715414 | -0.84936 | 0.6309   | NA       | FASLG    | chr1  | + | 1.73E+08 | 1.73E+08 | 1888  |
| ENSG000001 | 310.0287 | 678.5237 | -1.123   | 4.37E-05 | 0.00013  | PTBP2    | chr1  | + | 97187221 | 97280349 | 3069  |
| ENSG000001 | 69.67191 | 5.802663 | 3.4987   | 8.70E-14 | 5.26E-13 | TNFSF4   | chr1  | - | 1.73E+08 | 1.73E+08 | 3470  |
| ENSG000001 | 3083.02  | 3928.006 | -0.34902 | 0.002035 | 0.00481  | PRDX6    | chr1  | + | 1.73E+08 | 1.73E+08 | 1751  |
| ENSG000001 | 474.6989 | 638.8391 | -0.42615 | 0.025669 | 0.049431 | DARS2    | chr1  | + | 1.74E+08 | 1.74E+08 | 3506  |
| ENSG000001 | 0.632843 | 0.357707 | 0.4993   | 0.77637  | NA       | HSD11B1  | chr1  | + | 2.1E+08  | 2.1E+08  | 1477  |
| ENSG000001 | 2.447429 | 260.0866 | -6.4664  | 2.59E-30 | 3.33E-29 | IRF6     | chr1  | - | 2.1E+08  | 2.1E+08  | 4306  |
| ENSG000001 | 255.8743 | 317.8648 | -0.30941 | 0.34536  | 0.44944  | DIEXF    | chr1  | + | 2.1E+08  | 2.1E+08  | 8446  |
| ENSG000001 | 4.689314 | 12.75854 | -1.4062  | 0.036776 | 0.068087 | LPPR5    | chr1  | - | 99355806 | 99470588 | 4134  |
| ENSG000001 | 114.056  | 35.78766 | 1.6468   | 0.000417 | 0.001094 | LPPR4    | chr1  | + | 99729509 | 99775146 | 5369  |
| ENSG000001 | 2.790785 | 1.326428 | 0.88282  | 0.50191  | 0.60536  | SERPINC1 | chr1  | - | 1.74E+08 | 1.74E+08 | 1594  |
| ENSG000001 | 107.4534 | 389.1056 | -1.8569  | 2.90E-27 | 3.33E-26 | RCAN3    | chr1  | + | 24829387 | 24863506 | 2778  |
| ENSG000001 | 441.606  | 603.5713 | -0.44862 | 0.002761 | 0.006404 | SYF2     | chr1  | - | 25549170 | 25558993 | 1962  |
| ENSG000001 | 426.567  | 310.2554 | 0.45679  | 0.002634 | 0.006125 | C1orf63  | chr1  | - | 25568728 | 25664704 | 3034  |
| ENSG000001 | 317.0723 | 235.5441 | 0.42887  | 0.02004  | 0.039538 | SLC35A3  | chr1  | + | 1E+08    | 1E+08    | 5533  |
| ENSG000001 | 442.6464 | 414.4747 | 0.09602  | 0.62025  | 0.71102  | RCOR3    | chr1  | + | 2.11E+08 | 2.11E+08 | 4246  |
| ENSG000001 | 5981.568 | 7320.895 | -0.29105 | 0.008976 | 0.019032 | STMN1    | chr1  | - | 26210672 | 26233482 | 2947  |
| ENSG000001 | 337.808  | 180.4556 | 0.90417  | 1.34E-08 | 5.63E-08 | MTFR1L   | chr1  | + | 26145131 | 26159432 | 3262  |
| ENSG000001 | 35.08258 | 595.7224 | -4.058   | 1.50E-60 | 4.39E-59 | MAN1C1   | chr1  | + | 25943959 | 26112698 | 4641  |
| ENSG000001 | 322.994  | 382.9386 | -0.24385 | 0.24562  | 0.3414   | NEK2     | chr1  | - | 2.12E+08 | 2.12E+08 | 2131  |
| ENSG000001 | 282.4888 | 1447.013 | -2.3526  | 7.29E-44 | 1.42E-42 | RPS6KA1  | chr1  | + | 26856252 | 26901521 | 3202  |
| ENSG000001 | 1019.801 | 626.1272 | 0.70191  | 9.43E-05 | 0.00027  | DHDDS    | chr1  | + | 26758773 | 26797785 | 3338  |
| ENSG000001 | 299.1789 | 212.417  | 0.49602  | 0.004094 | 0.009235 | NENF     | chr1  | + | 2.13E+08 | 2.13E+08 | 942   |
| ENSG000001 | 399.8709 | 559.2177 | -0.48416 | 0.000128 | 0.000359 | NSL1     | chr1  | - | 2.13E+08 | 2.13E+08 | 2317  |
| ENSG000001 | 280.7186 | 53.86414 | 2.3806   | 5.69E-29 | 6.96E-28 | PROX1    | chr1  | + | 2.14E+08 | 2.14E+08 | 8498  |
| ENSG000001 | 3911.85  | 5029.748 | -0.36215 | 0.000538 | 0.00139  | ARID1A   | chr1  | + | 27022524 | 27108595 | 8577  |
| ENSG000001 | 3148.9   | 3540.109 | -0.16765 | 0.56707  | 0.6646   | CENPF    | chr1  | + | 2.15E+08 | 2.15E+08 | 10307 |
| ENSG000001 | 474.2685 | 805.9536 | -0.76231 | 1.40E-05 | 4.42E-05 | RPA2     | chr1  | - | 28218035 | 28241257 | 1752  |
| ENSG000001 | 624.497  | 571.3882 | 0.1285   | 0.35848  | 0.46278  | PPP1R8   | chr1  | + | 28157289 | 28178187 | 2651  |
| ENSG000001 | 511.2709 | 129.8394 | 1.9644   | 6.72E-14 | 4.10E-13 | STX12    | chr1  | + | 28099694 | 28150963 | 3079  |
| ENSG000001 | 68.24494 | 174.6565 | -1.3495  | 1.38E-06 | 4.88E-06 | 2-Mar    | chr1  | + | 2.21E+08 | 2.21E+08 | 2127  |
| ENSG000001 | 2.976604 | 5.753251 | -0.85486 | 0.41996  | 0.52543  | SLC5A9   | chr1  | + | 48688357 | 48714316 | 3769  |
| ENSG000001 | 1266.303 | 923.7101 | 0.45501  | 0.001629 | 0.003905 | OSBPL9   | chr1  | + | 52042851 | 52254889 | 4520  |
| ENSG000001 | 764.6202 | 1152.265 | -0.59109 | 5.99E-07 | 2.18E-06 | TXNDC12  | chr1  | - | 52485803 | 52521843 | 2396  |
| ENSG000001 | 2032.545 | 1255.219 | 0.69301  | 0.000616 | 0.001577 | ESYT2    | chr7  | - | 1.59E+08 | 1.59E+08 | 5960  |
| ENSG000001 | 63.60387 | 156.6832 | -1.2919  | 4.80E-07 | 1.76E-06 | CD3EAP   | chr19 | + | 45909467 | 45914024 | 3286  |
| ENSG000001 | 1065.622 | 833.3696 | 0.35402  | 0.087421 | 0.14421  | MESDC2   | chr15 | - | 81239667 | 81282219 | 4257  |
| ENSG000001 | 1678.642 | 2025.507 | -0.27078 | 0.013538 | 0.027694 | RCN2     | chr15 | + | 77223960 | 77242601 | 3936  |
| ENSG000001 | 1.524285 | 111.35   | -5.8735  | 5.83E-20 | 4.91E-19 | CHRNB4   | chr15 | - | 78916461 | 79012628 | 2623  |
| ENSG000001 | 9.233071 | 14.59246 | -0.64971 | 0.32424  | 0.42712  | MUC5B    | chr11 | + | 1244296  | 1283406  | 17924 |
| ENSG000001 | 1458.552 | 1143.319 | 0.35155  | 0.003293 | 0.007546 | CTSD     | chr11 | - | 1773982  | 1785222  | 2123  |
| ENSG000001 | 2.282147 | 16.25464 | -2.6754  | 0.000548 | 0.001414 | COLEC11  | chr2  | + | 3642426  | 3692048  | 1557  |
| ENSG000001 | 759.7472 | 255.1707 | 1.5672   | 3.83E-09 | 1.68E-08 | STAG1    | chr3  | - | 1.36E+08 | 1.36E+08 | 6053  |

|            |          |          |          |           |           |          |       |   |          |          |       |
|------------|----------|----------|----------|-----------|-----------|----------|-------|---|----------|----------|-------|
| ENSG000001 | 2132.702 | 3154.448 | -0.5634  | 0.001999  | 0.004731  | STK11    | chr19 | + | 1189406  | 1228428  | 3553  |
| ENSG000001 | 1650.421 | 1019.586 | 0.69389  | 1.61E-07  | 6.18E-07  | MLL      | chr11 | + | 1.18E+08 | 1.18E+08 | 16594 |
| ENSG000001 | 18.24601 | 4.957743 | 1.8216   | 0.003971  | 0.008973  | TREH     | chr11 | - | 1.19E+08 | 1.19E+08 | 2770  |
| ENSG000001 | 238.782  | 152.148  | 0.65077  | 0.00052   | 0.001345  | IFT46    | chr11 | - | 1.18E+08 | 1.18E+08 | 1819  |
| ENSG000001 | 58.26101 | 0        | 7.4186   | 1.92E-11  | 9.99E-11  | MMP8     | chr11 | - | 1.03E+08 | 1.03E+08 | 3056  |
| ENSG000001 | 0.72616  | 4.008423 | -2.0809  | 0.12185   | 0.19131   | APOA1    | chr11 | - | 1.17E+08 | 1.17E+08 | 1227  |
| ENSG000001 | 0        | 0.640152 | -0.82869 | 0.63935   | NA        | ZNF541   | chr19 | - | 48023942 | 48059113 | 4632  |
| ENSG000001 | 2.914991 | 101.8329 | -4.9818  | 1.47E-19  | 1.21E-18  | SLC8A2   | chr19 | - | 47931274 | 47975425 | 5234  |
| ENSG000001 | 195.6722 | 281.1804 | -0.52061 | 0.000669  | 0.001705  | KPTN     | chr19 | - | 47978401 | 47987525 | 1691  |
| ENSG000001 | 5366.868 | 8746.84  | -0.7038  | 5.43E-09  | 2.35E-08  | RPS25    | chr11 | - | 1.19E+08 | 1.19E+08 | 1462  |
| ENSG000001 | 677.2856 | 537.861  | 0.33244  | 0.11131   | 0.17691   | KIF14    | chr1  | - | 2.01E+08 | 2.01E+08 | 7274  |
| ENSG000001 | 23.48602 | 18.59276 | 0.32908  | 0.45289   | 0.55837   | TNNT2    | chr1  | - | 2.01E+08 | 2.01E+08 | 3014  |
| ENSG000001 | 164.5721 | 231.3021 | -0.49087 | 0.016828  | 0.033736  | DDX59    | chr1  | - | 2.01E+08 | 2.01E+08 | 2900  |
| ENSG000001 | 1136.35  | 572.7122 | 0.98854  | 3.42E-16  | 2.39E-15  | CAMSAP2  | chr1  | + | 2.01E+08 | 2.01E+08 | 7352  |
| ENSG000001 | 994.3955 | 471.5502 | 1.0744   | 2.53E-13  | 1.49E-12  | ATF6     | chr1  | + | 1.62E+08 | 1.62E+08 | 7496  |
| ENSG000001 | 0        | 45.69194 | -7.0917  | 2.09E-10  | 1.01E-09  | CRYGD    | chr2  | - | 2.09E+08 | 2.09E+08 | 619   |
| ENSG000001 | 32.12912 | 204.2967 | -2.6535  | 2.06E-28  | 2.48E-27  | MREG     | chr2  | - | 2.17E+08 | 2.17E+08 | 1314  |
| ENSG000001 | 391.0872 | 570.3841 | -0.54079 | 0.015995  | 0.032208  | FASTKD2  | chr2  | + | 2.08E+08 | 2.08E+08 | 4999  |
| ENSG000001 | 8688.431 | 548.2599 | 3.9796   | 1.99E-148 | 2.23E-146 | NRP2     | chr2  | + | 2.07E+08 | 2.07E+08 | 6662  |
| ENSG000001 | 640.9104 | 664.7614 | -0.05135 | 0.68649   | 0.76617   | CREB1    | chr2  | + | 2.08E+08 | 2.08E+08 | 7650  |
| ENSG000001 | 673.1759 | 373.867  | 0.84596  | 9.00E-06  | 2.90E-05  | KLF7     | chr2  | - | 2.08E+08 | 2.08E+08 | 8362  |
| ENSG000001 | 0.580602 | 0        | 0.8036   | 0.6494    | NA        | TTR      | chr18 | + | 29171689 | 29178974 | 957   |
| ENSG000001 | 463.5859 | 462.199  | 0.003976 | 0.98103   | 0.98953   | B4GALT6  | chr18 | - | 29202210 | 29265799 | 4427  |
| ENSG000001 | 180.3991 | 66.95782 | 1.4204   | 1.01E-09  | 4.65E-09  | C1orf54  | chr1  | + | 1.5E+08  | 1.5E+08  | 1251  |
| ENSG000001 | 21.5857  | 498.2407 | -4.5013  | 1.25E-72  | 4.69E-71  | CA14     | chr1  | + | 1.5E+08  | 1.5E+08  | 1788  |
| ENSG000001 | 1.068702 | 0        | 1.3672   | 0.44297   | NA        | CASC1    | chr12 | - | 25261354 | 25348096 | 2445  |
| ENSG000001 | 1.649304 | 1.355566 | 0.25027  | 0.84618   | 0.892     | LRMP     | chr12 | + | 25173936 | 25261268 | 2715  |
| ENSG000001 | 1.411244 | 2.65044  | -0.81232 | 0.51418   | 0.61717   | ATP10B   | chr5  | - | 1.6E+08  | 1.6E+08  | 7566  |
| ENSG000001 | 1316.491 | 1019.014 | 0.36881  | 0.044654  | 0.080572  | SPCS2    | chr11 | + | 74660292 | 74690076 | 2708  |
| ENSG000001 | 364.1007 | 184.7097 | 0.973    | 6.87E-05  | 0.0002    | USP35    | chr11 | + | 77899858 | 77925757 | 4216  |
| ENSG000001 | 231.0659 | 168.8657 | 0.45083  | 0.013776  | 0.028131  | ELOVL4   | chr6  | - | 80624529 | 80657297 | 3042  |
| ENSG000001 | 0.632843 | 120.7991 | -6.9656  | 1.31E-15  | 8.90E-15  | FILIP1   | chr6  | - | 76005626 | 76203496 | 4580  |
| ENSG000001 | 345.4253 | 311.058  | 0.15158  | 0.57743   | 0.67405   | CASP8AP2 | chr6  | + | 90539613 | 90584155 | 7344  |
| ENSG000001 | 294.945  | 508.9731 | -0.78456 | 3.45E-05  | 0.000104  | HMGN3    | chr6  | - | 79910962 | 79944406 | 872   |
| ENSG000001 | 62.80738 | 143.356  | -1.1929  | 4.84E-07  | 1.78E-06  | UBE3D    | chr6  | - | 83602117 | 83775560 | 3255  |
| ENSG000001 | 0        | 35.59679 | -6.7567  | 1.89E-09  | 8.50E-09  | CNR1     | chr6  | - | 88849583 | 88876078 | 8974  |
| ENSG000001 | 527.4334 | 436.9646 | 0.27215  | 0.042963  | 0.077992  | ANKRD13C | chr1  | - | 70726271 | 70820417 | 4069  |
| ENSG000001 | 174.5692 | 3.305162 | 5.6125   | 4.46E-31  | 5.95E-30  | SGIP1    | chr1  | + | 66999066 | 67213982 | 7273  |
| ENSG000001 | 896.1864 | 985.1193 | -0.13552 | 0.54623   | 0.64641   | PHF3     | chr6  | + | 64345725 | 64489229 | 8233  |
| ENSG000001 | 0.342542 | 0        | 0.4146   | 0.81455   | NA        | ZC2HC1B  | chr6  | + | 1.44E+08 | 1.44E+08 | 992   |
| ENSG000001 | 546.7109 | 20.43225 | 4.7175   | 3.98E-89  | 1.96E-87  | FLAGL1   | chr6  | - | 1.44E+08 | 1.44E+08 | 4430  |
| ENSG000001 | 327.4671 | 485.4024 | -0.56571 | 5.11E-05  | 0.000151  | FBXO30   | chr6  | - | 1.46E+08 | 1.46E+08 | 4376  |
| ENSG000001 | 140.2394 | 58.37193 | 1.2654   | 9.15E-08  | 3.58E-07  | TNFAIP3  | chr6  | + | 1.38E+08 | 1.38E+08 | 4432  |
| ENSG000001 | 99.48539 | 248.832  | -1.3163  | 2.67E-12  | 1.47E-11  | AKAP7    | chr6  | + | 1.31E+08 | 1.32E+08 | 2954  |
| ENSG000001 | 579.2987 | 88.83164 | 2.6808   | 1.92E-17  | 1.43E-16  | RAB32    | chr6  | + | 1.47E+08 | 1.47E+08 | 1217  |
| ENSG000001 | 43.63138 | 63.3151  | -0.52916 | 0.065753  | 0.11294   | MYB      | chr6  | + | 1.36E+08 | 1.36E+08 | 3672  |
| ENSG000001 | 1.733248 | 3.183777 | -0.78326 | 0.52852   | 0.63021   | ALDH8A1  | chr6  | - | 1.35E+08 | 1.35E+08 | 2558  |
| ENSG000001 | 1030.503 | 458.5388 | 1.1678   | 6.69E-22  | 6.14E-21  | SGK1     | chr6  | - | 1.34E+08 | 1.35E+08 | 5474  |
| ENSG000001 | 626.8387 | 437.4376 | 0.51686  | 0.00012   | 0.000339  | RNF146   | chr6  | + | 1.28E+08 | 1.28E+08 | 2369  |
| ENSG000001 | 0.580602 | 5.269327 | -2.5845  | 0.043707  | 0.079155  | ARG1     | chr6  | + | 1.32E+08 | 1.32E+08 | 1532  |
| ENSG000001 | 6184.234 | 462.3699 | 3.7387   | 2.20E-207 | 5.11E-205 | CTGF     | chr6  | - | 1.32E+08 | 1.32E+08 | 2339  |
| ENSG000001 | 20.58219 | 6.924324 | 1.5337   | 0.005617  | 0.012376  | TCF21    | chr6  | + | 1.34E+08 | 1.34E+08 | 4551  |
| ENSG000001 | 14.16982 | 26.44445 | -0.87493 | 0.086846  | 0.1434    | PMFBP1   | chr16 | - | 72146056 | 72210777 | 3935  |
| ENSG000001 | 1300.678 | 976.3381 | 0.41281  | 0.000762  | 0.001924  | FBXL5    | chr4  | - | 15606162 | 15683302 | 3385  |
| ENSG000001 | 778.4127 | 1318.055 | -0.75839 | 1.13E-10  | 5.56E-10  | MED28    | chr4  | + | 17616254 | 17627477 | 2394  |
| ENSG000001 | 78.93246 | 14.32203 | 2.4487   | 5.17E-09  | 2.24E-08  | SLC16A7  | chr12 | + | 59989848 | 60176395 | 4536  |
| ENSG000001 | 217.2091 | 130.664  | 0.72979  | 0.000795  | 0.002002  | TMEM5    | chr12 | + | 64173583 | 64203338 | 4531  |
| ENSG000001 | 118.3858 | 139.608  | -0.23346 | 0.29182   | 0.39368   | ZNF430   | chr19 | + | 21203426 | 21242856 | 3923  |
| ENSG000001 | 5.705775 | 532.0771 | -6.4935  | 5.34E-67  | 1.83E-65  | VAMP8    | chr2  | + | 85788685 | 85809154 | 805   |
| ENSG000001 | 326.9066 | 228.3511 | 0.51715  | 0.005419  | 0.011986  | DCLRE1B  | chr1  | + | 1.14E+08 | 1.14E+08 | 3940  |
| ENSG000001 | 4058.954 | 1836.933 | 1.1426   | 4.88E-17  | 3.58E-16  | MYL12B   | chr18 | + | 3261907  | 3278282  | 1249  |
| ENSG000001 | 1282.567 | 479.4715 | 1.4179   | 2.35E-26  | 2.59E-25  | FOXO3    | chr6  | + | 1.09E+08 | 1.09E+08 | 7341  |
| ENSG000001 | 67.45155 | 25.32521 | 1.4106   | 0.000136  | 0.000381  | ARMC2    | chr6  | + | 1.09E+08 | 1.09E+08 | 3241  |
| ENSG000001 | 0.290301 | 0.343138 | -0.00202 | 0.99909   | NA        | GHRH     | chr20 | - | 35879489 | 35890238 | 566   |
| ENSG000001 | 4247.77  | 3309.285 | 0.36007  | 0.001126  | 0.002772  | RPN2     | chr20 | + | 35806813 | 35870022 | 2511  |

|                    |          |          |           |           |           |       |   |          |          |       |
|--------------------|----------|----------|-----------|-----------|-----------|-------|---|----------|----------|-------|
| ENSG000001682.5786 | 1684.259 | -1.3008  | 7.51E-30  | 9.52E-29  | TGIF2     | chr20 | + | 35201891 | 35222560 | 3613  |
| ENSG0000010.36308  | 0.343138 | -0.0021  | 0.99905   | NA        | CASQ2     | chr1  | - | 1.16E+08 | 1.16E+08 | 2674  |
| ENSG00000129.41869 | 4.974728 | 2.5045   | 6.49E-06  | 2.13E-05  | OLFM3     | chr1  | - | 1.02E+08 | 1.02E+08 | 3255  |
| ENSG0000011859.445 | 564.3144 | 1.7177   | 1.64E-36  | 2.61E-35  | PKD2      | chr4  | + | 88928820 | 88998929 | 5056  |
| ENSG0000012.665765 | 75.22959 | -4.7011  | 2.59E-16  | 1.82E-15  | ABCG2     | chr4  | - | 89011416 | 89152474 | 4479  |
| ENSG0000012478.73  | 298.2704 | 3.0418   | 4.41E-35  | 6.72E-34  | SPP1      | chr4  | + | 88896819 | 88904562 | 1664  |
| ENSG00000121.95832 | 16.3583  | 0.42092  | 0.43554   | 0.54101   | FAM47E-ST | chr4  | + | 77172886 | 77232752 | 3420  |
| ENSG0000015308.545 | 3292.738 | 0.6881   | 8.35E-10  | 3.88E-09  | CCNI      | chr4  | - | 77968311 | 77997158 | 2772  |
| ENSG0000014.740741 | 2.041842 | 1.1193   | 0.29725   | 0.3992    | RARRES1   | chr3  | - | 1.58E+08 | 1.58E+08 | 1952  |
| ENSG000001394.9931 | 111.578  | 1.8172   | 1.70E-12  | 9.53E-12  | MFS1      | chr3  | + | 1.58E+08 | 1.59E+08 | 2423  |
| ENSG000001769.8324 | 1053.305 | -0.45248 | 4.69E-05  | 0.000139  | RAB3GAP2  | chr1  | - | 2.2E+08  | 2.2E+08  | 7257  |
| ENSG000001142.5465 | 196.1315 | -0.45677 | 0.03181   | 0.059777  | FAM86A    | chr16 | - | 5134305  | 5147809  | 2390  |
| ENSG00000164.90103 | 1254.105 | -4.2466  | 1.23E-66  | 4.20E-65  | PPL       | chr16 | - | 4932508  | 5010742  | 6238  |
| ENSG0000011984.122 | 1501.644 | 0.4011   | 0.000609  | 0.001562  | UBN1      | chr16 | + | 4896666  | 4932361  | 6336  |
| ENSG000001843.4214 | 248.5488 | 1.7616   | 6.31E-40  | 1.11E-38  | KLF12     | chr13 | - | 74260226 | 74708394 | 10637 |
| ENSG0000013.173589 | 3.2299   | -0.01789 | 0.98611   | 0.99179   | UCHL3     | chr13 | + | 76123619 | 76180085 | 844   |
| ENSG000001629.1299 | 45.86749 | 3.7636   | 3.01E-56  | 8.04E-55  | PCDH17    | chr13 | + | 58205944 | 58303445 | 7523  |
| ENSG000001569.0355 | 560.2648 | 0.022131 | 0.92953   | 0.95329   | HS1BP3    | chr2  | - | 20760208 | 20850849 | 4358  |
| ENSG000001266.6715 | 334.9399 | -0.32554 | 0.081513  | 0.13575   | C2orf43   | chr2  | - | 20883788 | 21022882 | 2903  |
| ENSG000001349.2087 | 294.8224 | 0.24436  | 0.24596   | 0.3418    | WDR35     | chr2  | - | 20110021 | 20189892 | 6960  |
| ENSG0000012005.982 | 4110.373 | -1.0331  | 1.14E-12  | 6.45E-12  | CCND2     | chr12 | + | 4382938  | 4414516  | 6480  |
| ENSG0000012.613524 | 6.359433 | -1.1694  | 0.23518   | 0.32906   | FGF23     | chr12 | - | 4477393  | 4488894  | 3018  |
| ENSG0000013.019472 | 1.638012 | 0.76761  | 0.50157   | 0.6051    | HIN1L     | chr12 | + | 3948625  | 3951691  | 3067  |
| ENSG000001405.8832 | 319.4962 | 0.34706  | 0.0494    | 0.088056  | ELL2      | chr5  | - | 95220802 | 95297775 | 6046  |
| ENSG00000115.97666 | 4.290868 | 1.795    | 0.019628  | 0.038804  | DNAH7     | chr2  | - | 1.97E+08 | 1.97E+08 | 12394 |
| ENSG000001270.8598 | 206.5283 | 0.39068  | 0.137     | 0.21031   | CYP20A1   | chr2  | + | 2.04E+08 | 2.04E+08 | 2636  |
| ENSG000001351.9221 | 319.9099 | 0.13917  | 0.3688    | 0.47342   | NDUFB3    | chr2  | + | 2.02E+08 | 2.02E+08 | 755   |
| ENSG000001726.9793 | 795.497  | -0.13083 | 0.31344   | 0.41571   | GTF3C3    | chr2  | - | 1.98E+08 | 1.98E+08 | 4282  |
| ENSG000001458.6325 | 456.5661 | 0.004439 | 0.97669   | 0.98684   | SATB2     | chr2  | - | 2E+08    | 2E+08    | 6194  |
| ENSG000001428.4077 | 325.1234 | 0.39818  | 0.016067  | 0.032344  | UBE2B     | chr5  | + | 1.34E+08 | 1.34E+08 | 2515  |
| ENSG0000010.995923 | 24.45041 | -4.3229  | 4.82E-07  | 1.77E-06  | TRPM6     | chr9  | - | 77337411 | 77503010 | 8437  |
| ENSG00000128.83809 | 153.5331 | -2.3926  | 4.26E-14  | 2.64E-13  | GDA       | chr9  | + | 74729511 | 74872109 | 5340  |
| ENSG00000125.38716 | 8.818932 | 1.4544   | 0.021927  | 0.042896  | KLF9      | chr9  | - | 72999503 | 73029540 | 5185  |
| ENSG000001217.0311 | 3176.959 | -3.8646  | 1.66E-210 | 4.01E-208 | TJP2      | chr9  | + | 71736224 | 71870124 | 4611  |
| ENSG00000114.08685 | 5.55822  | 1.3009   | 0.096847  | 0.15724   | C2orf40   | chr2  | + | 1.07E+08 | 1.07E+08 | 799   |
| ENSG000001898.2467 | 205.4394 | 2.1242   | 1.45E-55  | 3.79E-54  | ITGB1BP1  | chr2  | - | 9543604  | 9563676  | 4859  |
| ENSG000001658.3553 | 1416.536 | -1.1037  | 2.46E-20  | 2.10E-19  | CPSF3     | chr2  | + | 9563697  | 9613230  | 3157  |
| ENSG00000121.73305 | 17.32461 | 0.31589  | 0.53204   | 0.63323   | PIGZ      | chr3  | - | 1.97E+08 | 1.97E+08 | 2701  |
| ENSG0000011147.561 | 613.2294 | 0.90251  | 4.65E-14  | 2.87E-13  | SEN5      | chr3  | + | 1.97E+08 | 1.97E+08 | 6308  |
| ENSG000001734.5415 | 46.95431 | 3.9429   | 1.19E-37  | 1.96E-36  | CCDC92    | chr12 | - | 1.24E+08 | 1.24E+08 | 4883  |
| ENSG0000011876.393 | 1216.536 | 0.62431  | 2.75E-08  | 1.13E-07  | C1orf198  | chr1  | - | 2.31E+08 | 2.31E+08 | 3858  |
| ENSG0000012.520208 | 0        | 2.7948   | 0.078637  | 0.13159   | TRIM67    | chr1  | + | 2.31E+08 | 2.31E+08 | 9320  |
| ENSG0000011189.998 | 1803.853 | -0.59925 | 6.45E-06  | 2.12E-05  | HEATR1    | chr1  | - | 2.37E+08 | 2.37E+08 | 8447  |
| ENSG0000011161.675 | 2293.322 | -0.97953 | 5.56E-10  | 2.61E-09  | PTBP3     | chr9  | - | 1.15E+08 | 1.15E+08 | 7271  |
| ENSG0000012965.207 | 4130.758 | -0.47764 | 2.37E-05  | 7.27E-05  | RAD23B    | chr9  | + | 1.1E+08  | 1.1E+08  | 4119  |
| ENSG000001776.6269 | 381.4403 | 1.0248   | 1.13E-10  | 5.58E-10  | FKBP15    | chr9  | - | 1.16E+08 | 1.16E+08 | 8807  |
| ENSG000001890.727  | 998.6648 | -0.16436 | 0.338     | 0.44172   | CTNNA1    | chr9  | - | 1.12E+08 | 1.12E+08 | 2520  |
| ENSG000001139.6734 | 106.2602 | 0.39237  | 0.20163   | 0.2903    | FAM206A   | chr9  | + | 1.12E+08 | 1.12E+08 | 2121  |
| ENSG0000011642.645 | 1721.935 | -0.06789 | 0.48564   | 0.58962   | WDR34     | chr9  | - | 1.31E+08 | 1.31E+08 | 1755  |
| ENSG0000016705.461 | 19278.22 | -1.5221  | 3.75E-44  | 7.34E-43  | SET       | chr9  | + | 1.31E+08 | 1.31E+08 | 2915  |
| ENSG0000013726.111 | 5019.832 | -0.42962 | 0.000122  | 0.000343  | PPT2R4    | chr9  | + | 1.32E+08 | 1.32E+08 | 2824  |
| ENSG000001506.1084 | 425.4674 | 0.24853  | 0.063032  | 0.1089    | GLE1      | chr9  | + | 1.31E+08 | 1.31E+08 | 3321  |
| ENSG0000011279.866 | 749.8726 | 0.76937  | 1.05E-09  | 4.85E-09  | RAB14     | chr9  | - | 1.24E+08 | 1.24E+08 | 4145  |
| ENSG000001474.5547 | 263.9519 | 0.84545  | 0.000103  | 0.000293  | CNTRL     | chr9  | + | 1.24E+08 | 1.24E+08 | 7660  |
| ENSG000001474.3482 | 286.2177 | 0.72658  | 0.000106  | 0.000301  | TRIM32    | chr9  | + | 1.19E+08 | 1.19E+08 | 3717  |
| ENSG000001743.5243 | 476.7267 | 0.64064  | 2.87E-06  | 9.81E-06  | FBXW2     | chr9  | - | 1.24E+08 | 1.24E+08 | 2154  |
| ENSG0000011206.763 | 560.989  | 1.1029   | 5.71E-16  | 3.95E-15  | PHF19     | chr9  | - | 1.24E+08 | 1.24E+08 | 4241  |
| ENSG0000012422.799 | 596.3283 | 2.0212   | 6.79E-72  | 2.51E-70  | NEK6      | chr9  | + | 1.27E+08 | 1.27E+08 | 3619  |
| ENSG0000010        | 159.4143 | -8.7248  | 2.68E-15  | 1.79E-14  | BSPRY     | chr9  | + | 1.16E+08 | 1.16E+08 | 2339  |
| ENSG000001504.696  | 785.8523 | -0.63911 | 2.61E-07  | 9.83E-07  | PPP6C     | chr9  | - | 1.28E+08 | 1.28E+08 | 4349  |
| ENSG000001890.1232 | 876.2224 | 0.022516 | 0.82813   | 0.87889   | NDUFA8    | chr9  | - | 1.25E+08 | 1.25E+08 | 1000  |
| ENSG000001130.8319 | 189.8317 | -0.53205 | 0.087474  | 0.14427   | HDHD3     | chr9  | - | 1.16E+08 | 1.16E+08 | 1834  |
| ENSG0000010        | 0.297015 | -0.41864 | 0.81278   | NA        | LCN1P1    | chr9  | - | 1.36E+08 | 1.36E+08 | 540   |
| ENSG000001341.0929 | 136.3821 | 1.3213   | 2.97E-12  | 1.63E-11  | RBM18     | chr9  | - | 1.25E+08 | 1.25E+08 | 4974  |
| ENSG0000012.407167 | 0.297015 | 2.1142   | 0.16292   | 0.24337   | SLC46A2   | chr9  | - | 1.16E+08 | 1.16E+08 | 2502  |

|            |          |          |          |           |           |          |       |   |          |          |       |
|------------|----------|----------|----------|-----------|-----------|----------|-------|---|----------|----------|-------|
| ENSG000001 | 363.7174 | 297.4328 | 0.289    | 0.067033  | 0.11481   | HSDL2    | chr9  | + | 1.15E+08 | 1.15E+08 | 3350  |
| ENSG000001 | 1957.292 | 2399.354 | -0.2937  | 0.010656  | 0.022267  | MAPKAP1  | chr9  | - | 1.28E+08 | 1.28E+08 | 3395  |
| ENSG000001 | 17.22099 | 10.43909 | 0.69363  | 0.23652   | 0.33059   | NR4A3    | chr9  | + | 1.03E+08 | 1.03E+08 | 4982  |
| ENSG000001 | 339.2007 | 119.6947 | 1.4975   | 5.51E-17  | 4.03E-16  | INVS     | chr9  | + | 1.03E+08 | 1.03E+08 | 3709  |
| ENSG000001 | 43.36601 | 383.352  | -3.13    | 9.88E-32  | 1.35E-30  | GALNT12  | chr9  | + | 1.02E+08 | 1.02E+08 | 2735  |
| ENSG000001 | 349.4857 | 504.8013 | -0.52901 | 0.008117  | 0.01733   | DENND1A  | chr9  | - | 1.26E+08 | 1.27E+08 | 5010  |
| ENSG000001 | 605.8575 | 468.1644 | 0.37172  | 0.009025  | 0.019122  | ALG2     | chr9  | - | 1.02E+08 | 1.02E+08 | 2966  |
| ENSG000001 | 7.282301 | 3.784254 | 0.90374  | 0.29527   | 0.39728   | CSF3R    | chr1  | - | 36931644 | 36948879 | 6074  |
| ENSG000001 | 873.0931 | 662.5025 | 0.39698  | 0.000903  | 0.002256  | KDSR     | chr18 | - | 60994959 | 61034743 | 5447  |
| ENSG000001 | 747.7208 | 556.3893 | 0.42627  | 0.010954  | 0.022823  | VPS4B    | chr18 | - | 61056423 | 61089716 | 3324  |
| ENSG000001 | 4.637074 | 33.56623 | -2.7805  | 1.39E-06  | 4.92E-06  | ONECUT2  | chr18 | + | 55102917 | 55158530 | 16122 |
| ENSG000001 | 612.148  | 908.9044 | -0.5694  | 4.83E-06  | 1.61E-05  | C19orf25 | chr19 | - | 1461142  | 1479555  | 2584  |
| ENSG000001 | 460.9338 | 512.8314 | -0.15412 | 0.21397   | 0.30474   | ZBTB45   | chr19 | - | 59024897 | 59050278 | 2541  |
| ENSG000001 | 2277.648 | 2019.311 | 0.1733   | 0.11296   | 0.17926   | YLP1M1   | chr14 | + | 75230069 | 75304012 | 7017  |
| ENSG000001 | 161.1375 | 278.9271 | -0.78898 | 3.38E-05  | 0.000102  | DCAF4    | chr14 | + | 73393040 | 73426411 | 2896  |
| ENSG000001 | 22.86336 | 7.656723 | 1.5424   | 0.004688  | 0.010483  | PROX2    | chr14 | - | 75319736 | 75330537 | 3197  |
| ENSG000001 | 0        | 0.640152 | -0.82869 | 0.63935   | NA        | VSX2     | chr14 | + | 74706175 | 74729441 | 2995  |
| ENSG000001 | 742.4764 | 1010.122 | -0.44271 | 0.002395  | 0.005597  | FCF1     | chr14 | + | 75179847 | 75203394 | 2412  |
| ENSG000001 | 635.1889 | 78.95825 | 2.9817   | 1.78E-23  | 1.76E-22  | PGF      | chr14 | - | 75408537 | 75422487 | 3549  |
| ENSG000001 | 348.2265 | 106.8868 | 1.7014   | 1.83E-20  | 1.58E-19  | IFI27L2  | chr14 | - | 94594116 | 94596590 | 938   |
| ENSG000001 | 17.23135 | 3.763237 | 2.0664   | 0.004685  | 0.010479  | CCDC176  | chr14 | + | 74486056 | 74549566 | 3106  |
| ENSG000001 | 785.7213 | 1032.024 | -0.39409 | 0.000416  | 0.001093  | NEK9     | chr14 | - | 75548822 | 75594047 | 5544  |
| ENSG000001 | 123.9782 | 127.6244 | -0.04589 | 0.87543   | 0.91345   | ACYP1    | chr14 | - | 75519924 | 75536186 | 789   |
| ENSG000001 | 282.9007 | 149.9704 | 0.91284  | 8.00E-06  | 2.60E-05  | IFT43    | chr14 | + | 76368479 | 76550928 | 1765  |
| ENSG000001 | 1277.738 | 1104.019 | 0.21071  | 0.056111  | 0.098395  | NPC2     | chr14 | - | 74942895 | 74960880 | 1436  |
| ENSG000001 | 150.4745 | 77.55959 | 0.95182  | 1.03E-05  | 3.29E-05  | DNAL1    | chr14 | + | 74111578 | 74164463 | 2312  |
| ENSG000001 | 3240.98  | 8839.563 | -1.4439  | 6.77E-16  | 4.67E-15  | IRF2BPL  | chr14 | - | 77490888 | 77495034 | 4147  |
| ENSG000001 | 409.3679 | 267.5445 | 0.61399  | 0.000406  | 0.001066  | ACOT2    | chr14 | + | 74034324 | 74042357 | 1774  |
| ENSG000001 | 23873.71 | 69.18583 | 8.4088   | 0         | 0         | LTBP2    | chr14 | - | 74964873 | 75079306 | 8567  |
| ENSG000001 | 1210.924 | 857.8249 | 0.49699  | 7.09E-05  | 0.000206  | AREL1    | chr14 | - | 75119880 | 75179818 | 5456  |
| ENSG000001 | 205.3513 | 181.635  | 0.17539  | 0.3874    | 0.49154   | MLH3     | chr14 | - | 75480467 | 75518235 | 7896  |
| ENSG000001 | 701.1251 | 527.8862 | 0.40974  | 0.002802  | 0.006491  | TTL5     | chr14 | + | 76099968 | 76421421 | 4683  |
| ENSG000001 | 6.681161 | 111.9602 | -4.0276  | 4.29E-23  | 4.15E-22  | FLVCR2   | chr14 | + | 76044960 | 76129557 | 3629  |
| ENSG000001 | 426.34   | 803.1843 | -0.91265 | 4.77E-15  | 3.13E-14  | ABCD4    | chr14 | - | 74752126 | 74769759 | 3008  |
| ENSG000001 | 1679.41  | 2079.101 | -0.30767 | 0.004116  | 0.009282  | DLST     | chr14 | + | 75348594 | 75370448 | 2838  |
| ENSG000001 | 2.157942 | 61.53959 | -4.7459  | 1.37E-12  | 7.71E-12  | PPP4R4   | chr14 | + | 94612465 | 94746072 | 3868  |
| ENSG000001 | 387.5418 | 22.38829 | 4.1047   | 4.46E-65  | 1.47E-63  | TGFB3    | chr14 | - | 76424442 | 76449334 | 2708  |
| ENSG000001 | 3.672853 | 21.51108 | -2.4783  | 0.000128  | 0.00036   | ZC2HC1C  | chr14 | + | 75530873 | 75545126 | 2392  |
| ENSG000001 | 543.3119 | 1365.604 | -1.3274  | 1.07E-27  | 1.25E-26  | SLIRP    | chr14 | + | 78174414 | 78227447 | 865   |
| ENSG000001 | 2712.069 | 2982.845 | -0.13698 | 0.31395   | 0.41633   | RBM25    | chr14 | + | 73525144 | 73588122 | 6848  |
| ENSG000001 | 292.571  | 383.2224 | -0.38844 | 0.0798    | 0.13321   | ALDH6A1  | chr14 | - | 74523553 | 74551196 | 5499  |
| ENSG000001 | 248.0541 | 16.12198 | 3.911    | 4.08E-37  | 6.63E-36  | GPR68    | chr14 | - | 91698876 | 91720269 | 2859  |
| ENSG000001 | 1.411244 | 46.54746 | -4.7982  | 9.62E-09  | 4.09E-08  | ESRRB    | chr14 | + | 76776957 | 76968178 | 2713  |
| ENSG000001 | 470.3568 | 369.6015 | 0.34653  | 0.020013  | 0.039496  | EIF2B2   | chr14 | + | 75469614 | 75476292 | 1537  |
| ENSG000001 | 339.7668 | 241.8873 | 0.48869  | 0.029473  | 0.055905  | NRDE2    | chr14 | - | 90742580 | 90798481 | 5828  |
| ENSG000001 | 31.97402 | 21.59762 | 0.55663  | 0.16601   | 0.24715   | COQ6     | chr14 | + | 74416629 | 74430373 | 3119  |
| ENSG000001 | 17.71765 | 9.894469 | 0.80129  | 0.16776   | 0.24921   | ZNF410   | chr14 | + | 74353320 | 74399214 | 2601  |
| ENSG000001 | 784.8619 | 523.7127 | 0.58228  | 0.000813  | 0.002045  | RHOQ     | chr2  | + | 46768945 | 46810260 | 2975  |
| ENSG000001 | 56.56982 | 41.86552 | 0.43296  | 0.2173    | 0.30867   | GPR75    | chr2  | - | 54080050 | 54087126 | 2115  |
| ENSG000001 | 621.9336 | 418.0503 | 0.57373  | 0.000153  | 0.000426  | SUPT7L   | chr2  | - | 27873679 | 27886676 | 4488  |
| ENSG000001 | 699.9609 | 354.0942 | 0.97951  | 1.61E-10  | 7.84E-10  | KLHL29   | chr2  | + | 23608088 | 23931481 | 6385  |
| ENSG000001 | 1567.48  | 3739.503 | -1.2523  | 1.64E-17  | 1.23E-16  | DNMT3A   | chr2  | - | 25455845 | 25565459 | 4477  |
| ENSG000001 | 3338.646 | 956.9107 | 1.8013   | 8.62E-83  | 3.79E-81  | TMEM214  | chr2  | + | 27255778 | 27264563 | 2990  |
| ENSG000001 | 349.7642 | 299.3864 | 0.22481  | 0.14197   | 0.21646   | ATAD2B   | chr2  | - | 23971534 | 24149984 | 8103  |
| ENSG000001 | 22.60477 | 59.22584 | -1.3835  | 7.99E-05  | 0.00023   | FKBP1B   | chr2  | + | 24272571 | 24286551 | 1601  |
| ENSG000001 | 532.3636 | 819.8176 | -0.62161 | 2.27E-07  | 8.58E-07  | ATL2     | chr2  | - | 38522022 | 38604427 | 2868  |
| ENSG000001 | 878.9635 | 383.1771 | 1.1975   | 2.86E-15  | 1.91E-14  | YPEL5    | chr2  | + | 30369807 | 30383399 | 2560  |
| ENSG000001 | 2093.978 | 1407.465 | 0.57216  | 4.21E-05  | 0.000125  | FAM98A   | chr2  | - | 33808725 | 33824449 | 3546  |
| ENSG000001 | 801.6473 | 484.333  | 0.72414  | 1.73E-07  | 6.62E-07  | YIPF4    | chr2  | + | 32502979 | 32537002 | 7288  |
| ENSG000001 | 251.0886 | 274.2313 | -0.12831 | 0.50453   | 0.60789   | AFTPH    | chr2  | + | 64751465 | 64820139 | 4674  |
| ENSG000001 | 216.0983 | 316.226  | -0.54689 | 0.047681  | 0.085372  | LGALS1   | chr2  | + | 64681103 | 64688515 | 3539  |
| ENSG000001 | 308.3774 | 21.97318 | 3.7837   | 3.56E-51  | 8.43E-50  | CNRIP1   | chr2  | - | 68511303 | 68547183 | 1953  |
| ENSG000001 | 212.4575 | 361.2503 | -0.76256 | 1.39E-05  | 4.38E-05  | BCL11A   | chr2  | - | 60678302 | 60780702 | 5942  |
| ENSG000001 | 202.2527 | 159.5726 | 0.34028  | 0.092793  | 0.15177   | CRIP1    | chr2  | + | 46843555 | 46852881 | 1953  |
| ENSG000001 | 8.494933 | 2818.306 | -8.2563  | 2.97E-170 | 4.40E-168 | EPCAM    | chr2  | + | 47572297 | 47614740 | 1724  |

|            |          |          |          |           |           |          |       |   |          |          |       |
|------------|----------|----------|----------|-----------|-----------|----------|-------|---|----------|----------|-------|
| ENSG000001 | 809.2646 | 242.7805 | 1.7312   | 1.05E-30  | 1.38E-29  | SLC17A5  | chr6  | - | 74303102 | 74363878 | 3455  |
| ENSG000001 | 269.3201 | 96.00498 | 1.4867   | 1.61E-15  | 1.09E-14  | OGFRL1   | chr6  | + | 71998506 | 72011973 | 1711  |
| ENSG000001 | 598.9343 | 330.0126 | 0.85586  | 9.31E-09  | 3.97E-08  | FAM178A  | chr10 | + | 1.03E+08 | 1.03E+08 | 6894  |
| ENSG000001 | 755.2054 | 689.2941 | 0.13184  | 0.38896   | 0.49319   | IDE      | chr10 | - | 94211441 | 94333833 | 5877  |
| ENSG000001 | 5.092656 | 4.33216  | 0.23106  | 0.80517   | 0.86223   | ELOVL3   | chr10 | + | 1.04E+08 | 1.04E+08 | 1371  |
| ENSG000001 | 66.00004 | 10.8979  | 2.5535   | 1.72E-06  | 6.01E-06  | IFIT3    | chr10 | + | 91087651 | 91100728 | 2496  |
| ENSG000001 | 33.51803 | 1.058552 | 4.7513   | 1.10E-08  | 4.65E-08  | IFIT2    | chr10 | + | 91061712 | 91069033 | 3489  |
| ENSG000001 | 415.0712 | 394.1297 | 0.075205 | 0.76329   | 0.82821   | GPAM     | chr10 | - | 1.14E+08 | 1.14E+08 | 6369  |
| ENSG000001 | 224.8111 | 346.6848 | -0.6231  | 0.000254  | 0.000688  | CUTC     | chr10 | + | 1.01E+08 | 1.02E+08 | 1346  |
| ENSG000001 | 136.8698 | 17.82955 | 2.933    | 1.53E-20  | 1.33E-19  | PPP1R3C  | chr10 | - | 93388199 | 93392811 | 2524  |
| ENSG000001 | 161.0124 | 107.3692 | 0.58114  | 0.064595  | 0.11126   | PYROXD2  | chr10 | - | 1E+08    | 1E+08    | 2865  |
| ENSG000001 | 0.342542 | 26.86137 | -5.4937  | 8.92E-07  | 3.20E-06  | CNNM1    | chr10 | + | 1.01E+08 | 1.01E+08 | 5959  |
| ENSG000001 | 155.3366 | 292.8251 | -0.90925 | 0.001393  | 0.003381  | MXI1     | chr10 | + | 1.12E+08 | 1.12E+08 | 3470  |
| ENSG000001 | 377.1246 | 520.5347 | -0.46445 | 0.002455  | 0.005729  | SMNDC1   | chr10 | - | 1.12E+08 | 1.12E+08 | 2031  |
| ENSG000001 | 246.7092 | 116.7795 | 1.079    | 2.86E-09  | 1.26E-08  | C10orf88 | chr10 | - | 1.25E+08 | 1.25E+08 | 2991  |
| ENSG000001 | 519.8825 | 2739.082 | -2.3958  | 2.92E-102 | 1.73E-100 | HELLS    | chr10 | + | 96305547 | 96373662 | 4987  |
| ENSG000001 | 0        | 0.357707 | -0.41864 | 0.81278   | NA        | PRLHR    | chr10 | - | 1.2E+08  | 1.2E+08  | 1980  |
| ENSG000001 | 635.5883 | 555.9365 | 0.1935   | 0.13156   | 0.20374   | TCTN3    | chr10 | - | 97423153 | 97453900 | 2739  |
| ENSG000001 | 535.5509 | 604.4156 | -0.17266 | 0.22191   | 0.31407   | FAM45A   | chr10 | + | 1.21E+08 | 1.21E+08 | 2586  |
| ENSG000001 | 81.60922 | 143.8159 | -0.81182 | 0.005776  | 0.012697  | AVP1     | chr10 | - | 99437181 | 99447080 | 1457  |
| ENSG000001 | 1070.868 | 929.5048 | 0.20466  | 0.091884  | 0.15044   | WDR11    | chr10 | + | 1.23E+08 | 1.23E+08 | 4954  |
| ENSG000001 | 472.8477 | 330.7788 | 0.51597  | 0.000222  | 0.000603  | C10orf76 | chr10 | - | 1.04E+08 | 1.04E+08 | 4119  |
| ENSG000001 | 23.30183 | 52.88098 | -1.1819  | 0.002432  | 0.005677  | KCNIP2   | chr10 | - | 1.04E+08 | 1.04E+08 | 2617  |
| ENSG000001 | 20.64299 | 33.27337 | -0.67024 | 0.12894   | 0.20036   | CCDC147  | chr10 | + | 1.06E+08 | 1.06E+08 | 3313  |
| ENSG000001 | 666.6422 | 895.9229 | -0.42501 | 0.000221  | 0.000602  | GOT1     | chr10 | - | 1.01E+08 | 1.01E+08 | 1947  |
| ENSG000001 | 0        | 2.010288 | -2.4674  | 0.13027   | 0.202     | CPN1     | chr10 | - | 1.02E+08 | 1.02E+08 | 1863  |
| ENSG000001 | 2.987769 | 14.47752 | -2.1753  | 0.005066  | 0.011275  | C10orf95 | chr10 | - | 1.04E+08 | 1.04E+08 | 1469  |
| ENSG000001 | 31.15015 | 81.92988 | -1.3792  | 0.000321  | 0.000855  | SFRP5    | chr10 | - | 99526508 | 99531709 | 1836  |
| ENSG000001 | 992.1658 | 992.1286 | 0.000496 | 0.99614   | 0.99778   | GNA13    | chr17 | - | 63006833 | 63052957 | 4922  |
| ENSG000001 | 5.041229 | 1.372552 | 1.6016   | 0.20879   | 0.29877   | HOXB8    | chr17 | - | 46688739 | 46692478 | 1823  |
| ENSG000001 | 719.1711 | 962.6348 | -0.41979 | 0.001704  | 0.00408   | KANSL1   | chr17 | - | 44107282 | 44302733 | 9095  |
| ENSG000001 | 133.2425 | 0        | 8.533    | 3.25E-15  | 2.16E-14  | HOXB5    | chr17 | - | 46668619 | 46671323 | 2041  |
| ENSG000001 | 0.342542 | 33.49271 | -5.7969  | 1.26E-07  | 4.86E-07  | CRHR1    | chr17 | + | 43699267 | 43913194 | 2535  |
| ENSG000001 | 1369.239 | 19.74597 | 6.0863   | 3.74E-164 | 5.10E-162 | HOXB3    | chr17 | - | 46626232 | 46682274 | 4208  |
| ENSG000001 | 0        | 54.43956 | -7.3296  | 3.92E-11  | 2.00E-10  | HOXB1    | chr17 | - | 46605888 | 46608359 | 2020  |
| ENSG000001 | 202.3358 | 175.7294 | 0.20195  | 0.27207   | 0.3715    | DUSP1    | chr5  | - | 1.72E+08 | 1.72E+08 | 2019  |
| ENSG000001 | 1947.275 | 1816.771 | 0.10022  | 0.44296   | 0.54867   | PANK3    | chr5  | - | 1.68E+08 | 1.68E+08 | 10506 |
| ENSG000001 | 530.6737 | 8.922459 | 5.8456   | 1.40E-73  | 5.34E-72  | MSX2     | chr5  | + | 1.74E+08 | 1.74E+08 | 2241  |
| ENSG000001 | 615.4556 | 23.98501 | 4.6671   | 2.11E-83  | 9.37E-82  | TEK      | chr9  | + | 27109139 | 27230173 | 4760  |
| ENSG000001 | 99.9497  | 197.9751 | -0.97588 | 1.53E-05  | 4.81E-05  | RCL1     | chr9  | + | 4792869  | 4861064  | 2134  |
| ENSG000001 | 267.2698 | 498.7707 | -0.89921 | 9.59E-10  | 4.43E-09  | CAAP1    | chr9  | - | 26840683 | 26892802 | 2791  |
| ENSG000001 | 0        | 4.317591 | -3.6334  | 0.012226  | 0.025232  | EQTN     | chr9  | - | 27284656 | 27297137 | 1031  |
| ENSG000001 | 36.96994 | 1071.696 | -4.8289  | 7.00E-123 | 5.72E-121 | MOB3B    | chr9  | - | 27325207 | 27529779 | 6454  |
| ENSG000001 | 0.342542 | 0        | 0.4146   | 0.81455   | NA        | INSL6    | chr9  | - | 5163863  | 5185668  | 758   |
| ENSG000001 | 0.342542 | 0        | 0.4146   | 0.81455   | NA        | INSL4    | chr9  | + | 5231419  | 5235304  | 1952  |
| ENSG000001 | 12.72948 | 7.114522 | 0.79302  | 0.20995   | 0.29999   | MLANA    | chr9  | + | 5890802  | 5910606  | 2415  |
| ENSG000001 | 37.93758 | 0        | 6.8441   | 9.69E-10  | 4.48E-09  | CD274    | chr9  | + | 5450503  | 5470566  | 3644  |
| ENSG000001 | 0.290301 | 0        | 0.4146   | 0.81455   | NA        | IFNA8    | chr9  | + | 21409146 | 21410184 | 1039  |
| ENSG000001 | 4.554922 | 0        | 3.6431   | 0.013829  | 0.028227  | GRIA2    | chr4  | + | 1.58E+08 | 1.58E+08 | 5621  |
| ENSG000001 | 763.9491 | 1104.217 | -0.5313  | 3.66E-06  | 1.23E-05  | NUP43    | chr6  | - | 1.5E+08  | 1.5E+08  | 3874  |
| ENSG000001 | 1196.083 | 1818.981 | -0.60488 | 1.01E-08  | 4.29E-08  | MTHFD1L  | chr6  | + | 1.51E+08 | 1.51E+08 | 3604  |
| ENSG000001 | 685.1573 | 292.1413 | 1.223    | 2.34E-07  | 8.85E-07  | LRP11    | chr6  | - | 1.5E+08  | 1.5E+08  | 3260  |
| ENSG000001 | 9.60471  | 2.171348 | 1.9489   | 0.038529  | 0.071015  | CCDC170  | chr6  | + | 1.52E+08 | 1.52E+08 | 5304  |
| ENSG000001 | 1084.355 | 1091.974 | -0.0102  | 0.9213    | 0.94708   | PCMT1    | chr6  | + | 1.5E+08  | 1.5E+08  | 1984  |
| ENSG000001 | 239.7175 | 78.29602 | 1.6099   | 6.55E-13  | 3.77E-12  | PLEKHG1  | chr6  | + | 1.51E+08 | 1.51E+08 | 7237  |
| ENSG000001 | 28.63352 | 4.380699 | 2.6474   | 7.54E-06  | 2.46E-05  | MYCT1    | chr6  | + | 1.53E+08 | 1.53E+08 | 3030  |
| ENSG000001 | 0        | 1.340997 | -1.8899  | 0.26871   | NA        | CXorf21  | chrX  | - | 30576941 | 30595961 | 1855  |
| ENSG000001 | 209.943  | 262.8775 | -0.32144 | 0.056712  | 0.099349  | CYSTM1   | chr5  | + | 1.4E+08  | 1.4E+08  | 1334  |
| ENSG000001 | 656.9375 | 427.473  | 0.61934  | 5.43E-05  | 0.00016   | WDR55    | chr5  | + | 1.4E+08  | 1.4E+08  | 4080  |
| ENSG000001 | 1735.836 | 1870.182 | -0.10756 | 0.46862   | 0.57327   | ARAP3    | chr5  | - | 1.41E+08 | 1.41E+08 | 5250  |
| ENSG000001 | 9.553283 | 5.721697 | 0.71414  | 0.33434   | 0.43779   | PCDHB8   | chr5  | + | 1.41E+08 | 1.41E+08 | 2711  |
| ENSG000001 | 192.1406 | 43.01973 | 2.1416   | 5.33E-18  | 4.09E-17  | PCDHB10  | chr5  | + | 1.41E+08 | 1.41E+08 | 3274  |
| ENSG000001 | 118.1306 | 47.5858  | 1.2972   | 8.78E-06  | 2.84E-05  | PCDHB14  | chr5  | + | 1.41E+08 | 1.41E+08 | 2781  |
| ENSG000001 | 34.93783 | 12.5999  | 1.4547   | 0.000656  | 0.001673  | PCDHB12  | chr5  | + | 1.41E+08 | 1.41E+08 | 3406  |
| ENSG000001 | 0.705622 | 1.684135 | -1.0112  | 0.48979   | 0.59379   | SLC25A2  | chr5  | - | 1.41E+08 | 1.41E+08 | 1417  |

|            |          |          |          |           |           |          |       |   |          |          |      |
|------------|----------|----------|----------|-----------|-----------|----------|-------|---|----------|----------|------|
| ENSG000001 | 0.580602 | 16.17697 | -4.177   | 5.79E-05  | 0.00017   | TNN      | chr1  | + | 1.75E+08 | 1.75E+08 | 5008 |
| ENSG000001 | 338.4924 | 368.8617 | -0.12179 | 0.39541   | 0.49991   | MRPS14   | chr1  | - | 1.75E+08 | 1.75E+08 | 2115 |
| ENSG000001 | 218.2876 | 203.7472 | 0.10115  | 0.5873    | 0.68293   | CENPL    | chr1  | - | 1.74E+08 | 1.74E+08 | 2473 |
| ENSG000001 | 1.016461 | 0        | 1.3167   | 0.46021   | NA        | TNFSF18  | chr1  | - | 1.73E+08 | 1.73E+08 | 2008 |
| ENSG000001 | 8.268037 | 0.357707 | 3.7838   | 0.003682  | 0.008367  | SEC16B   | chr1  | - | 1.78E+08 | 1.78E+08 | 3985 |
| ENSG000001 | 247.5514 | 102.3872 | 1.264    | 1.02E-09  | 4.68E-09  | GORAB    | chr1  | + | 1.71E+08 | 1.71E+08 | 2467 |
| ENSG000001 | 0        | 0.343138 | -0.41864 | 0.81278   | NA        | GPR31    | chr6  | - | 1.68E+08 | 1.68E+08 | 2059 |
| ENSG000001 | 2310.975 | 1251.979 | 0.88141  | 5.47E-05  | 0.000161  | ACAT2    | chr6  | + | 1.6E+08  | 1.6E+08  | 3180 |
| ENSG000001 | 3064.776 | 4649.895 | -0.60068 | 6.46E-07  | 2.35E-06  | TCP1     | chr6  | - | 1.6E+08  | 1.6E+08  | 2499 |
| ENSG000001 | 0        | 5.49108  | -4.0179  | 0.003836  | 0.00869   | TTL2     | chr6  | + | 1.68E+08 | 1.68E+08 | 2680 |
| ENSG000001 | 1529.202 | 613.6393 | 1.316    | 6.36E-34  | 9.36E-33  | SNX19    | chr11 | - | 1.31E+08 | 1.31E+08 | 6535 |
| ENSG000001 | 11.71139 | 5.347004 | 1.0967   | 0.14059   | 0.21453   | KCNJ5    | chr11 | + | 1.29E+08 | 1.29E+08 | 5940 |
| ENSG000001 | 303.4912 | 193.6558 | 0.64825  | 0.002351  | 0.005501  | MSANTD2  | chr11 | - | 1.25E+08 | 1.25E+08 | 3086 |
| ENSG000001 | 0.342542 | 0.343138 | -0.00208 | 0.99906   | NA        | TP53AIP1 | chr11 | - | 1.29E+08 | 1.29E+08 | 2875 |
| ENSG000001 | 0        | 3.9623   | -3.5074  | 0.016856  | 0.033786  | TEX11    | chrX  | - | 69748790 | 70128581 | 3133 |
| ENSG000001 | 16.64976 | 4.660728 | 1.7738   | 0.006734  | 0.014615  | ARR3     | chrX  | + | 69488155 | 69501690 | 1298 |
| ENSG000001 | 519.0475 | 254.9016 | 1.0251   | 8.73E-09  | 3.72E-08  | PDZD11   | chrX  | - | 69506445 | 69510364 | 1043 |
| ENSG000001 | 126.914  | 28.92336 | 2.127    | 1.07E-15  | 7.27E-15  | SLC10A7  | chr4  | - | 1.47E+08 | 1.47E+08 | 3747 |
| ENSG000001 | 331.479  | 1001.027 | -1.5921  | 3.51E-29  | 4.33E-28  | NUDCD1   | chr8  | - | 1.1E+08  | 1.1E+08  | 4217 |
| ENSG000001 | 886.4392 | 1367.178 | -0.62345 | 0.000138  | 0.000386  | ENY2     | chr8  | + | 1.1E+08  | 1.1E+08  | 2966 |
| ENSG000001 | 369.3282 | 681.1785 | -0.88121 | 2.04E-09  | 9.16E-09  | MASTL    | chr10 | + | 27443753 | 27475853 | 3623 |
| ENSG000001 | 1045.837 | 711.5225 | 0.55429  | 0.000628  | 0.001606  | KIAA1217 | chr10 | + | 23983675 | 24836772 | 7383 |
| ENSG000001 | 0.342542 | 0.343138 | -0.00208 | 0.99906   | NA        | SEPT7P9  | chr10 | - | 38671997 | 38691844 | 743  |
| ENSG000001 | 0.653381 | 0        | 0.82678  | 0.64037   | NA        | MRC1     | chr10 | + | 18098352 | 18200091 | 5171 |
| ENSG000001 | 263.6827 | 407      | -0.62253 | 0.000136  | 0.000382  | PLXDC2   | chr10 | + | 20105168 | 20569286 | 2969 |
| ENSG000001 | 302.2368 | 270.1072 | 0.16166  | 0.54395   | 0.64433   | EPC1     | chr10 | - | 32556679 | 32667726 | 7386 |
| ENSG000001 | 0.653381 | 49.33317 | -5.6808  | 3.27E-09  | 1.44E-08  | IQSEC3   | chr12 | + | 175931   | 287626   | 7094 |
| ENSG000001 | 197.15   | 329.1685 | -0.73533 | 0.001455  | 0.003522  | CCDC77   | chr12 | + | 498439   | 551811   | 2371 |
| ENSG000001 | 285.4309 | 284.675  | 0.004055 | 0.98228   | 0.99011   | TAF12    | chr1  | - | 28915835 | 28969597 | 1359 |
| ENSG000001 | 243.5938 | 3.175656 | 6.2156   | 1.34E-35  | 2.09E-34  | ENOX1    | chr13 | - | 43787654 | 44361044 | 2982 |
| ENSG000001 | 0        | 73.2718  | -7.7261  | 2.31E-12  | 1.28E-11  | TNFSF11  | chr13 | + | 43136872 | 43182149 | 2198 |
| ENSG000001 | 93.90031 | 126.6458 | -0.43566 | 0.079329  | 0.13256   | MTRF1    | chr13 | - | 41790505 | 41837742 | 2185 |
| ENSG000001 | 8.227775 | 5.845498 | 0.46992  | 0.60776   | 0.70056   | SPG20OS  | chr13 | + | 36920568 | 36943738 | 566  |
| ENSG000001 | 2.781412 | 30.69732 | -3.3601  | 2.42E-06  | 8.34E-06  | SOHLH2   | chr13 | - | 36742345 | 36871979 | 2193 |
| ENSG000001 | 230.5655 | 201.3959 | 0.19827  | 0.29312   | 0.3951    | DNAJC15  | chr13 | + | 43597339 | 43683045 | 2538 |
| ENSG000001 | 894.9618 | 1959.246 | -1.13    | 1.67E-26  | 1.86E-25  | PROSER1  | chr13 | - | 39584002 | 39612252 | 5168 |
| ENSG000001 | 1282.561 | 636.743  | 1.01     | 3.14E-18  | 2.43E-17  | UFM1     | chr13 | + | 38923986 | 38937140 | 2534 |
| ENSG000001 | 301.4876 | 311.7398 | -0.04605 | 0.80278   | 0.86054   | WBP4     | chr13 | + | 41635410 | 41658137 | 2618 |
| ENSG000001 | 617.6911 | 208.5143 | 1.5587   | 3.54E-14  | 2.19E-13  | ELF1     | chr13 | - | 41506056 | 41635576 | 3566 |
| ENSG000001 | 269.5887 | 33.07102 | 3.0158   | 5.28E-39  | 9.06E-38  | SMAD9    | chr13 | - | 37418968 | 37494902 | 5592 |
| ENSG000001 | 2646.275 | 2028.24  | 0.38328  | 0.007595  | 0.016321  | HSPH1    | chr13 | - | 31710762 | 31736525 | 3612 |
| ENSG000001 | 188.2681 | 503.4796 | -1.4181  | 1.82E-16  | 1.29E-15  | KBTBD7   | chr13 | - | 41763969 | 41768702 | 4734 |
| ENSG000001 | 308.5363 | 197.8178 | 0.63854  | 0.021814  | 0.042696  | ALG5     | chr13 | - | 37523912 | 37574398 | 1154 |
| ENSG000001 | 483.8265 | 692.1725 | -0.51501 | 0.002301  | 0.00539   | EXOSC8   | chr13 | + | 37572953 | 37583750 | 2423 |
| ENSG000001 | 1742.051 | 2861.206 | -0.71405 | 3.25E-05  | 9.80E-05  | ETF1     | chr5  | - | 1.38E+08 | 1.38E+08 | 3874 |
| ENSG000001 | 67541.92 | 193.3957 | 8.3951   | 2.35E-190 | 4.63E-188 | TGFB1    | chr5  | + | 1.35E+08 | 1.35E+08 | 4661 |
| ENSG000001 | 955.9372 | 1434.376 | -0.58366 | 7.63E-05  | 0.00022   | FAM53C   | chr5  | + | 1.38E+08 | 1.38E+08 | 4375 |
| ENSG000001 | 380.2614 | 135.9575 | 1.477    | 4.11E-18  | 3.17E-17  | SIL1     | chr5  | - | 1.38E+08 | 1.39E+08 | 1923 |
| ENSG000001 | 462.1945 | 801.2955 | -0.79169 | 9.38E-08  | 3.67E-07  | PAIP2    | chr5  | + | 1.39E+08 | 1.39E+08 | 2294 |
| ENSG000001 | 0        | 4.303021 | -3.6613  | 0.010513  | 0.022005  | MYOT     | chr5  | + | 1.37E+08 | 1.37E+08 | 2337 |
| ENSG000001 | 2059.978 | 2881.003 | -0.48319 | 0.000445  | 0.001164  | KDM3B    | chr5  | + | 1.38E+08 | 1.38E+08 | 6813 |
| ENSG000001 | 1286.181 | 53.36403 | 4.5797   | 7.42E-121 | 5.85E-119 | EGR1     | chr5  | + | 1.38E+08 | 1.38E+08 | 3138 |
| ENSG000001 | 4137.123 | 2663.936 | 0.63403  | 8.05E-08  | 3.17E-07  | SERP1    | chr3  | - | 1.5E+08  | 1.5E+08  | 3934 |
| ENSG000001 | 47.47114 | 430.0136 | -3.1746  | 9.44E-54  | 2.37E-52  | PLS1     | chr3  | + | 1.42E+08 | 1.42E+08 | 3755 |
| ENSG000001 | 180.722  | 112.4889 | 0.67694  | 0.003678  | 0.008358  | ZFP30    | chr19 | - | 38104650 | 38183238 | 6090 |
| ENSG000001 | 287.1418 | 382.0421 | -0.41342 | 0.004357  | 0.00979   | NR2C1    | chr12 | - | 95415669 | 95467479 | 2499 |
| ENSG000001 | 887.3679 | 950.6616 | -0.09865 | 0.69296   | 0.77114   | UTP20    | chr12 | + | 1.02E+08 | 1.02E+08 | 9025 |
| ENSG000001 | 2579.39  | 2963.078 | -0.19959 | 0.24896   | 0.34527   | TMPO     | chr12 | + | 98909290 | 98944157 | 4242 |
| ENSG000001 | 1378.447 | 685.9984 | 1.0062   | 1.50E-21  | 1.35E-20  | ARL1     | chr12 | - | 1.02E+08 | 1.02E+08 | 3241 |
| ENSG000001 | 932.1987 | 65.59568 | 3.8266   | 1.27E-117 | 9.49E-116 | GLT8D2   | chr12 | - | 1.04E+08 | 1.04E+08 | 1880 |
| ENSG000001 | 91.37749 | 43.04646 | 1.0699   | 0.00065   | 0.001659  | MTERFD3  | chr12 | - | 1.07E+08 | 1.07E+08 | 3235 |
| ENSG000001 | 233.601  | 968.6177 | -2.047   | 2.88E-29  | 3.57E-28  | SOCS2    | chr12 | + | 93963590 | 93977263 | 3733 |
| ENSG000001 | 461.3362 | 734.9576 | -0.66895 | 2.26E-05  | 6.96E-05  | NFYB     | chr12 | - | 1.05E+08 | 1.05E+08 | 3512 |
| ENSG000001 | 146.4934 | 38.58466 | 1.9217   | 9.39E-13  | 5.35E-12  | CCDC53   | chr12 | - | 1.02E+08 | 1.02E+08 | 945  |
| ENSG000001 | 1242.263 | 405.4336 | 1.6079   | 2.13E-11  | 1.11E-10  | APAF1    | chr12 | + | 99038919 | 99129204 | 7055 |

|            |          |          |          |           |           |           |       |   |          |          |      |
|------------|----------|----------|----------|-----------|-----------|-----------|-------|---|----------|----------|------|
| ENSG000001 | 6719.07  | 304.7204 | 4.4591   | 0         | 0         | DUSP4     | chr8  | - | 29190581 | 29208185 | 5537 |
| ENSG000001 | 1251.658 | 2882.08  | -1.2026  | 9.60E-35  | 1.45E-33  | CLU       | chr8  | - | 27454434 | 27472548 | 3080 |
| ENSG000001 | 2610.4   | 1390.239 | 0.90585  | 6.50E-06  | 2.14E-05  | TNFRSF10B | chr8  | - | 22877646 | 22926692 | 4146 |
| ENSG000001 | 1739.977 | 1327.841 | 0.38896  | 0.025087  | 0.048398  | SORBS3    | chr8  | + | 22402499 | 22433301 | 3459 |
| ENSG000001 | 33.11127 | 95.67567 | -1.5143  | 1.58E-07  | 6.05E-07  | PTK2B     | chr8  | + | 27168999 | 27316903 | 4715 |
| ENSG000001 | 0        | 5.098529 | -3.8135  | 0.008753  | 0.018604  | ADRA1A    | chr8  | - | 26605667 | 26724790 | 2548 |
| ENSG000001 | 195.1045 | 43.13226 | 2.1555   | 1.16E-15  | 7.89E-15  | PPP3CC    | chr8  | + | 22298332 | 22398652 | 2189 |
| ENSG000001 | 302.2548 | 216.8206 | 0.47861  | 0.049017  | 0.087468  | PDLIM2    | chr8  | + | 22435792 | 22455538 | 4592 |
| ENSG000001 | 0.995923 | 150.609  | -6.8821  | 3.11E-20  | 2.65E-19  | EPHX2     | chr8  | + | 27348296 | 27403081 | 3140 |
| ENSG000001 | 314.3605 | 243.6641 | 0.36579  | 0.031066  | 0.058469  | RNF170    | chr8  | - | 42704780 | 42752433 | 4116 |
| ENSG000001 | 0.290301 | 4.711684 | -2.8292  | 0.067601  | 0.11562   | NPPB      | chr1  | - | 11917521 | 11918988 | 694  |
| ENSG000001 | 315.2036 | 599.0263 | -0.92281 | 9.30E-08  | 3.64E-07  | UBIAD1    | chr1  | + | 11333263 | 11356106 | 3646 |
| ENSG000001 | 2796.222 | 3062.001 | -0.13062 | 0.43008   | 0.53556   | TARDBP    | chr1  | + | 11072414 | 11085796 | 2748 |
| ENSG000001 | 45.62241 | 1133.226 | -4.6123  | 2.34E-107 | 1.51E-105 | TNFRSF8   | chr1  | + | 12123434 | 12204264 | 3686 |
| ENSG000001 | 685.747  | 610.4362 | 0.16847  | 0.15745   | 0.23667   | ZNFX706   | chr8  | - | 1.02E+08 | 1.02E+08 | 3502 |
| ENSG000001 | 861.0593 | 1868.219 | -1.117   | 6.77E-25  | 7.04E-24  | LYPLA1    | chr8  | - | 54958938 | 55014577 | 2574 |
| ENSG000001 | 625.2602 | 395.5639 | 0.65923  | 0.002512  | 0.005854  | CRISPLD1  | chr8  | + | 75896750 | 75946793 | 4287 |
| ENSG000001 | 580.8056 | 571.1775 | 0.024894 | 0.8773    | 0.91454   | COP55     | chr8  | - | 67955314 | 67996018 | 5691 |
| ENSG000001 | 648.43   | 303.8248 | 1.0897   | 5.29E-11  | 2.68E-10  | RDH10     | chr8  | + | 74206847 | 74237516 | 3949 |
| ENSG000001 | 1.431782 | 11.16182 | -2.6987  | 0.012885  | 0.026479  | EPX       | chr17 | + | 56270098 | 56282535 | 2708 |
| ENSG000001 | 226.5361 | 1401.326 | -2.6259  | 4.54E-68  | 1.58E-66  | AKAP1     | chr17 | + | 55162453 | 55198710 | 4089 |
| ENSG000001 | 372.6101 | 550.371  | -0.56093 | 1.65E-05  | 5.15E-05  | COIL      | chr17 | - | 55015548 | 55038415 | 2650 |
| ENSG000001 | 688.7815 | 852.2695 | -0.30699 | 0.006231  | 0.013625  | TRIM25    | chr17 | - | 54965270 | 54991399 | 5734 |
| ENSG000001 | 529.6121 | 415.6294 | 0.34953  | 0.004503  | 0.010097  | SCPEP1    | chr17 | + | 55055466 | 55084129 | 1942 |
| ENSG000001 | 742.516  | 262.9941 | 1.4934   | 4.85E-28  | 5.75E-27  | SPOP      | chr17 | - | 47676246 | 47755596 | 3088 |
| ENSG000001 | 3425.142 | 0.937167 | 11.231   | 3.56E-61  | 1.05E-59  | TBX2      | chr17 | + | 59477257 | 59486827 | 5218 |
| ENSG000001 | 877.1984 | 602.8953 | 0.54056  | 0.001878  | 0.004462  | SLC35B1   | chr17 | - | 47778305 | 47786376 | 2487 |
| ENSG000001 | 419.5433 | 4.117655 | 5.2167   | 0.000276  | 0.000743  | TBX4      | chr17 | + | 59529765 | 59562471 | 3398 |
| ENSG000001 | 1359.455 | 2490.29  | -0.87198 | 1.06E-11  | 5.62E-11  | DYNLL2    | chr17 | + | 56160776 | 56168592 | 2500 |
| ENSG000001 | 1.742621 | 19.91107 | -3.3616  | 4.42E-05  | 0.000132  | TEX14     | chr17 | - | 56634039 | 56769416 | 4927 |
| ENSG000001 | 87.6053  | 534.9284 | -2.602   | 1.53E-47  | 3.27E-46  | FAM117A   | chr17 | - | 47787694 | 47866542 | 2365 |
| ENSG000001 | 561.7167 | 945.0841 | -0.74947 | 2.46E-10  | 1.19E-09  | NCAPH     | chr2  | + | 97001525 | 97039583 | 2952 |
| ENSG000001 | 0.685084 | 811.0731 | -9.5634  | 2.34E-31  | 3.15E-30  | LRAT      | chr4  | + | 1.56E+08 | 1.56E+08 | 5002 |
| ENSG000001 | 1061.202 | 530.5004 | 0.9999   | 1.57E-17  | 1.18E-16  | KIAA0922  | chr4  | + | 1.54E+08 | 1.55E+08 | 5017 |
| ENSG000001 | 87.55745 | 324.1138 | -1.8806  | 2.64E-16  | 1.86E-15  | MND1      | chr4  | + | 1.54E+08 | 1.54E+08 | 968  |
| ENSG000001 | 48.55101 | 274.7602 | -2.4976  | 2.27E-29  | 2.84E-28  | TRIM6     | chr11 | + | 5617339  | 5634188  | 3403 |
| ENSG000001 | 2.73773  | 1.294874 | 0.93651  | 0.45732   | 0.56257   | ABCC11    | chr16 | - | 48200821 | 48281479 | 4862 |
| ENSG000001 | 214.1835 | 381.3932 | -0.83025 | 4.54E-07  | 1.67E-06  | PAPD5     | chr16 | + | 50186829 | 50269221 | 7842 |
| ENSG000001 | 497.85   | 75.42799 | 2.7039   | 9.64E-21  | 8.42E-20  | ADCY7     | chr16 | + | 50280048 | 50352046 | 6213 |
| ENSG000001 | 725.1688 | 396.2959 | 0.87131  | 3.32E-11  | 1.70E-10  | CEP89     | chr19 | - | 33369908 | 33462897 | 2903 |
| ENSG000001 | 939.4888 | 473.8846 | 0.98653  | 1.15E-14  | 7.37E-14  | TSHZ3     | chr19 | - | 31765851 | 31840453 | 5176 |
| ENSG000001 | 69.66596 | 468.1882 | -2.7316  | 6.42E-20  | 5.38E-19  | ECHDC2    | chr1  | - | 53361656 | 53392884 | 5817 |
| ENSG000001 | 10.88238 | 696.7078 | -5.9649  | 1.88E-98  | 1.04E-96  | PLBD1     | chr12 | - | 14656595 | 14721283 | 2426 |
| ENSG000001 | 7.708787 | 0        | 4.5373   | 0.000533  | 0.001377  | TAS2R10   | chr12 | - | 10977916 | 10978957 | 1042 |
| ENSG000001 | 6.878145 | 0        | 4.3828   | 0.000929  | 0.002316  | PRB2      | chr12 | - | 11544476 | 11653975 | 1427 |
| ENSG000001 | 94.80724 | 52.49642 | 0.85341  | 0.002062  | 0.00487   | PYROXD1   | chr12 | + | 21590549 | 21623300 | 3639 |
| ENSG000001 | 0.342542 | 1.355566 | -1.3789  | 0.3926    | NA        | IAPP      | chr12 | + | 21507893 | 21532912 | 2015 |
| ENSG000001 | 6.597217 | 8.59389  | -0.36774 | 0.60207   | 0.69555   | KCNJ8     | chr12 | - | 21917889 | 21928515 | 2389 |
| ENSG000001 | 1.628766 | 15.39112 | -3.026   | 0.000384  | 0.001011  | BCL2L14   | chr12 | + | 12202778 | 12364018 | 2039 |
| ENSG000001 | 0        | 0.357707 | -0.41864 | 0.81278   | NA        | RP11-408E | chr13 | + | 19756173 | 19761496 | 465  |
| ENSG000001 | 734.3516 | 1553.814 | -1.0767  | 1.93E-06  | 6.73E-06  | PSPC1     | chr13 | - | 20248896 | 20357142 | 2407 |
| ENSG000001 | 131.5782 | 195.1514 | -0.56505 | 0.006387  | 0.013935  | ZNFX549   | chr19 | + | 58038693 | 58068910 | 5505 |
| ENSG000001 | 16.55645 | 4.447097 | 1.7913   | 0.011984  | 0.024778  | A1BG      | chr19 | - | 58856544 | 58864865 | 2301 |
| ENSG000001 | 88.2066  | 286.8071 | -1.6916  | 1.16E-13  | 6.94E-13  | ZSCAN18   | chr19 | - | 58595205 | 58629794 | 5729 |
| ENSG000001 | 136.7086 | 177.713  | -0.37851 | 0.05327   | 0.093999  | ZNFX211   | chr19 | + | 58141761 | 58154147 | 2759 |
| ENSG000001 | 348.6882 | 212.5549 | 0.70976  | 1.94E-05  | 6.03E-05  | PDZRN3    | chr3  | - | 73431584 | 73674091 | 4248 |
| ENSG000001 | 29.83483 | 112.231  | -1.8838  | 1.18E-05  | 3.75E-05  | LHX4      | chr1  | + | 1.8E+08  | 1.8E+08  | 7083 |
| ENSG000001 | 466.0365 | 599.4527 | -0.36156 | 0.040653  | 0.074408  | RNF2      | chr1  | + | 1.85E+08 | 1.85E+08 | 3606 |
| ENSG000001 | 337.635  | 509.7909 | -0.59224 | 0.004002  | 0.009039  | TRMT1L    | chr1  | - | 1.85E+08 | 1.85E+08 | 4470 |
| ENSG000001 | 116.3612 | 66.87203 | 0.79742  | 0.000948  | 0.00236   | SEC22A    | chr3  | + | 1.23E+08 | 1.23E+08 | 4228 |
| ENSG000001 | 2.407167 | 0.715414 | 1.3984   | 0.33758   | 0.44132   | CSTA      | chr3  | + | 1.22E+08 | 1.22E+08 | 821  |
| ENSG000001 | 17.87356 | 12126.78 | -9.3519  | 0         | 0         | DPPA4     | chr3  | - | 1.09E+08 | 1.09E+08 | 3043 |
| ENSG000001 | 4.927375 | 3.38284  | 0.51778  | 0.56615   | 0.66403   | POPDC2    | chr3  | - | 1.19E+08 | 1.19E+08 | 1958 |
| ENSG000001 | 330.0055 | 315.3061 | 0.06537  | 0.66268   | 0.74615   | B4GALT4   | chr3  | - | 1.19E+08 | 1.19E+08 | 5794 |
| ENSG000001 | 1931.496 | 2734.33  | -0.50082 | 0.000388  | 0.001022  | NAA50     | chr3  | - | 1.13E+08 | 1.13E+08 | 3601 |

|            |          |          |          |          |          |          |       |   |          |          |       |
|------------|----------|----------|----------|----------|----------|----------|-------|---|----------|----------|-------|
| ENSG000001 | 0        | 0.654722 | -0.83442 | 0.63731  | NA       | CD80     | chr3  | - | 1.19E+08 | 1.19E+08 | 2725  |
| ENSG000001 | 260.4926 | 212.7695 | 0.29216  | 0.28248  | 0.38356  | KIF18A   | chr11 | - | 28042167 | 28129855 | 3568  |
| ENSG000001 | 1361.52  | 1686.894 | -0.30906 | 0.001005 | 0.002491 | DES12    | chr1  | + | 2.45E+08 | 2.45E+08 | 4208  |
| ENSG000001 | 442.9235 | 1051.73  | -1.2449  | 1.02E-16 | 7.35E-16 | MAPK8IP1 | chr11 | + | 45907202 | 45928016 | 3180  |
| ENSG000001 | 284.8719 | 430.5099 | -0.59264 | 0.003455 | 0.007892 | CRY2     | chr11 | + | 45868669 | 45904798 | 4203  |
| ENSG000001 | 285.9321 | 577.8177 | -1.0121  | 6.77E-07 | 2.45E-06 | PEX16    | chr11 | - | 45931220 | 45940363 | 1639  |
| ENSG000001 | 97.22703 | 41.44477 | 1.2223   | 0.000142 | 0.000398 | DEPDC7   | chr11 | + | 33037410 | 33055128 | 2012  |
| ENSG000001 | 251.6466 | 80.05467 | 1.6451   | 1.10E-14 | 7.08E-14 | CAT      | chr11 | + | 34460472 | 34493609 | 2302  |
| ENSG000001 | 424.5259 | 513.6302 | -0.27424 | 0.067763 | 0.11586  | PILRB    | chr7  | + | 99933702 | 99965454 | 4345  |
| ENSG000001 | 1482.339 | 1955.095 | -0.39825 | 0.007846 | 0.016799 | ZMYM2    | chr13 | + | 20532810 | 20665968 | 10199 |
| ENSG000001 | 14.29582 | 16.4247  | -0.19514 | 0.77295  | 0.83657  | GJA3     | chr13 | - | 20712394 | 20735188 | 5211  |
| ENSG000001 | 536.2176 | 471.4594 | 0.18617  | 0.34725  | 0.45142  | TBC1D15  | chr12 | + | 72233487 | 72320629 | 5785  |
| ENSG000001 | 1789.19  | 1166.375 | 0.61534  | 0.000518 | 0.001341 | BAI2     | chr1  | - | 32192718 | 32230494 | 5403  |
| ENSG000001 | 2.188831 | 8.461968 | -1.7636  | 0.061728 | 0.10694  | HCRTR1   | chr1  | + | 32083287 | 32098119 | 2001  |
| ENSG000001 | 355.664  | 487.6425 | -0.45409 | 0.000948 | 0.002361 | ZCCHC17  | chr1  | + | 31769842 | 31837783 | 1730  |
| ENSG000001 | 1037.224 | 107.1052 | 3.2732   | 1.35E-74 | 5.25E-73 | FABP3    | chr1  | - | 31838472 | 31849697 | 725   |
| ENSG000001 | 4528.24  | 5830.299 | -0.36444 | 0.00011  | 0.000311 | KHDRBS1  | chr1  | + | 32479430 | 32526451 | 2757  |
| ENSG000001 | 342.3206 | 338.8035 | 0.016821 | 0.92406  | 0.94888  | TMEM39B  | chr1  | + | 32537632 | 32568467 | 2087  |
| ENSG000001 | 1.431782 | 1.684135 | -0.21507 | 0.87716  | 0.91443  | CCR2     | chr3  | + | 46395225 | 46402419 | 2671  |
| ENSG000001 | 732.6279 | 397.1249 | 0.88024  | 1.11E-07 | 4.30E-07 | RNF115   | chr1  | + | 1.46E+08 | 1.46E+08 | 3560  |
| ENSG000001 | 308.9214 | 61.14953 | 2.3234   | 1.24E-15 | 8.40E-15 | POLR3GL  | chr1  | - | 1.45E+08 | 1.45E+08 | 1603  |
| ENSG000001 | 11.56746 | 1.416259 | 2.8494   | 0.002514 | 0.005857 | TNFSF10  | chr3  | - | 1.72E+08 | 1.72E+08 | 1953  |
| ENSG000001 | 350.4195 | 377.8359 | -0.10814 | 0.43959  | 0.54535  | ZNF639   | chr3  | + | 1.79E+08 | 1.79E+08 | 3016  |
| ENSG000001 | 3.206105 | 230.7097 | -6.1416  | 1.23E-34 | 1.85E-33 | SLITRK3  | chr3  | - | 1.65E+08 | 1.65E+08 | 4555  |
| ENSG000001 | 565.3669 | 173.5848 | 1.7008   | 1.24E-22 | 1.18E-21 | PIK3CA   | chr3  | + | 1.79E+08 | 1.79E+08 | 9093  |
| ENSG000001 | 2046.779 | 1728.735 | 0.24359  | 0.024103 | 0.046687 | PDS5A    | chr4  | - | 39824483 | 39979576 | 7176  |
| ENSG000001 | 0        | 0.343138 | -0.41864 | 0.81278  | NA       | TMEM156  | chr4  | - | 38968365 | 39034542 | 1935  |
| ENSG000001 | 57.284   | 163.0428 | -1.5035  | 1.17E-11 | 6.19E-11 | LIAS     | chr4  | + | 39460620 | 39479273 | 1775  |
| ENSG000001 | 0.342542 | 161.5507 | -7.9625  | 6.10E-16 | 4.21E-15 | CPXM2    | chr10 | - | 1.25E+08 | 1.26E+08 | 3554  |
| ENSG000001 | 108.2099 | 173.9177 | -0.67615 | 0.034262 | 0.063927 | TMEM54   | chr1  | - | 33360195 | 33367039 | 999   |
| ENSG000001 | 125.2169 | 49.38642 | 1.33     | 4.29E-07 | 1.58E-06 | ZSCAN20  | chr1  | + | 33938246 | 33962107 | 4316  |
| ENSG000001 | 1110.987 | 425.9785 | 1.382    | 8.54E-27 | 9.62E-26 | CSMD2    | chr1  | - | 33979609 | 34631443 | 13684 |
| ENSG000001 | 3.112789 | 23.0026  | -2.8183  | 3.52E-05 | 0.000106 | HPCA     | chr1  | + | 33351595 | 33364042 | 1468  |
| ENSG000001 | 179.3331 | 224.2442 | -0.32307 | 0.046318 | 0.083242 | LRIF1    | chr1  | - | 1.11E+08 | 1.12E+08 | 3475  |
| ENSG000001 | 536.6776 | 422.7208 | 0.34218  | 0.038822 | 0.071485 | LCC1     | chr1  | - | 1.09E+08 | 1.1E+08  | 4825  |
| ENSG000001 | 384.5936 | 265.5258 | 0.53091  | 0.075238 | 0.12681  | GPSM2    | chr1  | + | 1.09E+08 | 1.09E+08 | 3310  |
| ENSG000001 | 213.7059 | 159.1412 | 0.42444  | 0.014721 | 0.029869 | GTDC1    | chr2  | - | 1.45E+08 | 1.45E+08 | 2954  |
| ENSG000001 | 1.939605 | 17.21933 | -2.9642  | 0.000206 | 0.000564 | CXCR4    | chr2  | - | 1.37E+08 | 1.37E+08 | 1895  |
| ENSG000001 | 170.8475 | 176.4877 | -0.04772 | 0.77969  | 0.84184  | ZRANB3   | chr2  | - | 1.36E+08 | 1.36E+08 | 6820  |
| ENSG000001 | 257.8893 | 144.6532 | 0.83161  | 1.66E-05 | 5.19E-05 | ACVR2A   | chr2  | + | 1.49E+08 | 1.49E+08 | 5728  |
| ENSG000001 | 325.3914 | 74.41864 | 2.1258   | 1.04E-31 | 1.41E-30 | POLK     | chr5  | + | 74807581 | 74896969 | 5911  |
| ENSG000001 | 0        | 4.181636 | -3.6092  | 0.012592 | 0.025925 | SV2C     | chr5  | + | 75378997 | 75649764 | 7158  |
| ENSG000001 | 0        | 0.686276 | -0.84936 | 0.6309   | NA       | FLT3     | chr13 | - | 28577411 | 28674729 | 3848  |
| ENSG000001 | 5101.396 | 7345.284 | -0.5255  | 6.46E-09 | 2.78E-08 | RPL21    | chr13 | + | 27825446 | 27830828 | 815   |
| ENSG000001 | 226.5125 | 253.2864 | -0.1583  | 0.36446  | 0.46886  | MTIF3    | chr13 | - | 28009776 | 28024739 | 1104  |
| ENSG000001 | 837.327  | 692.1654 | 0.27381  | 0.036831 | 0.068178 | GTF3A    | chr13 | + | 27998681 | 28009958 | 1919  |
| ENSG000001 | 5.208303 | 35.56765 | -2.6924  | 1.05E-06 | 3.75E-06 | RASL11A  | chr13 | + | 27844464 | 27847827 | 1543  |
| ENSG000001 | 851.5152 | 539.272  | 0.65959  | 4.40E-06 | 1.47E-05 | UBL3     | chr13 | - | 30338508 | 30424821 | 4384  |
| ENSG000001 | 1323.003 | 783.3806 | 0.75613  | 5.61E-13 | 3.24E-12 | FYTTD1   | chr3  | + | 1.97E+08 | 1.98E+08 | 3654  |
| ENSG000001 | 293.9356 | 292.0707 | 0.010808 | 0.96336  | 0.97842  | MTERFD2  | chr2  | - | 2.42E+08 | 2.42E+08 | 4529  |
| ENSG000001 | 0.685084 | 1.545765 | -0.83233 | 0.6129   | 0.70502  | XPNPEP2  | chrX  | + | 1.29E+08 | 1.29E+08 | 3270  |
| ENSG000001 | 4.814334 | 0.654722 | 2.4269   | 0.052586 | 0.092907 | SASH3    | chrX  | + | 1.29E+08 | 1.29E+08 | 2626  |
| ENSG000001 | 906.4005 | 534.8016 | 0.75877  | 6.97E-07 | 2.52E-06 | OCR1     | chrX  | + | 1.29E+08 | 1.29E+08 | 5162  |
| ENSG000001 | 232.142  | 620.8415 | -1.4153  | 2.91E-22 | 2.71E-21 | MRPS2    | chr9  | + | 1.38E+08 | 1.38E+08 | 1640  |
| ENSG000001 | 0        | 8.126078 | -4.4052  | 0.002021 | 0.004779 | TBX22    | chrX  | + | 79270255 | 79287268 | 2351  |
| ENSG000001 | 1459.171 | 2.667426 | 8.9154   | 1.67E-71 | 6.14E-70 | FMOD     | chr1  | - | 2.03E+08 | 2.03E+08 | 3310  |
| ENSG000001 | 0        | 0.700845 | -0.87835 | 0.62047  | NA       | MYOG     | chr1  | - | 2.03E+08 | 2.03E+08 | 1528  |
| ENSG000001 | 0        | 0.343138 | -0.41864 | 0.81278  | NA       | LAX1     | chr1  | + | 2.04E+08 | 2.04E+08 | 3023  |
| ENSG000001 | 1768.442 | 1647.529 | 0.10221  | 0.34363  | 0.44763  | KIAA1191 | chr5  | - | 1.76E+08 | 1.76E+08 | 2991  |
| ENSG000001 | 8856.989 | 2889.562 | 1.6147   | 1.67E-54 | 4.27E-53 | COPA     | chr1  | - | 1.6E+08  | 1.6E+08  | 4789  |
| ENSG000001 | 0.923144 | 0.343138 | 0.88162  | 0.61011  | NA       | CD244    | chr1  | - | 1.61E+08 | 1.61E+08 | 2463  |
| ENSG000001 | 0        | 18.10709 | -5.7047  | 4.29E-06 | 1.44E-05 | HS3ST2   | chr16 | + | 22825498 | 22927659 | 2314  |
| ENSG000001 | 1483.178 | 1997.397 | -0.42862 | 0.000261 | 0.000705 | RBBP6    | chr16 | + | 24549014 | 24584184 | 6482  |
| ENSG000001 | 980.6072 | 602.0684 | 0.70278  | 8.89E-06 | 2.87E-05 | ZC3H7A   | chr16 | - | 11844442 | 11891123 | 3845  |
| ENSG000001 | 136.6649 | 278.3655 | -1.0215  | 0.000309 | 0.000826 | SERAC1   | chr6  | - | 1.59E+08 | 1.59E+08 | 4013  |

|            |          |          |          |           |           |          |       |   |          |          |       |
|------------|----------|----------|----------|-----------|-----------|----------|-------|---|----------|----------|-------|
| ENSG000001 | 1496.458 | 1860.52  | -0.31385 | 0.001357  | 0.003298  | ANXA11   | chr10 | - | 81910645 | 81965328 | 6965  |
| ENSG000001 | 12.70894 | 22.3754  | -0.81177 | 0.12275   | 0.19249   | LDB3     | chr10 | + | 88428206 | 88495825 | 5436  |
| ENSG000001 | 353.9103 | 395.7351 | -0.16039 | 0.25804   | 0.35569   | FAM35A   | chr10 | + | 88854953 | 88951225 | 3609  |
| ENSG000001 | 1384.564 | 991.786  | 0.48076  | 3.23E-05  | 9.75E-05  | FAM213A  | chr10 | + | 82167585 | 82192753 | 2058  |
| ENSG000001 | 242.018  | 438.3052 | -0.85587 | 1.72E-08  | 7.15E-08  | ZNF205   | chr16 | + | 3162561  | 3170518  | 2062  |
| ENSG000001 | 167.4813 | 180.6589 | -0.11316 | 0.57423   | 0.67131   | NAA60    | chr16 | + | 3493611  | 3536963  | 2735  |
| ENSG000001 | 9705.181 | 14198.32 | -0.54829 | 6.78E-07  | 2.46E-06  | RPL5     | chr1  | + | 93297582 | 93307481 | 1210  |
| ENSG000001 | 504.9222 | 153.9447 | 1.7121   | 2.22E-24  | 2.27E-23  | ODF2L    | chr1  | - | 86814344 | 86862023 | 5723  |
| ENSG000001 | 190.9578 | 0.686276 | 7.6241   | 3.13E-20  | 2.67E-19  | PTGFR    | chr1  | + | 78769568 | 79005434 | 4450  |
| ENSG000001 | 11.21375 | 2.292733 | 2.1579   | 0.007149  | 0.015444  | SPATA1   | chr1  | + | 84971974 | 85031877 | 1981  |
| ENSG000001 | 136.0161 | 120.6785 | 0.17312  | 0.56173   | 0.66018   | TRMT13   | chr1  | + | 1.01E+08 | 1.01E+08 | 3129  |
| ENSG000001 | 6.5039   | 2.431104 | 1.3191   | 0.19435   | 0.28201   | LRRC39   | chr1  | - | 1.01E+08 | 1.01E+08 | 1466  |
| ENSG000001 | 80.31362 | 29.84924 | 1.4145   | 2.14E-06  | 7.40E-06  | RWDD3    | chr1  | + | 95699711 | 95712781 | 1538  |
| ENSG000001 | 548.403  | 677.5611 | -0.3024  | 0.30496   | 0.40653   | ZNF644   | chr1  | - | 91380859 | 91487829 | 5698  |
| ENSG000001 | 148.6771 | 169.0509 | -0.18074 | 0.4109    | 0.51573   | CCDC18   | chr1  | + | 93645476 | 93744287 | 4867  |
| ENSG000001 | 146.9222 | 178.5359 | -0.27777 | 0.14661   | 0.22259   | RPAP2    | chr1  | + | 92764522 | 92853730 | 3110  |
| ENSG000001 | 938.6127 | 565.2859 | 0.73001  | 8.89E-10  | 4.12E-09  | PQLC1    | chr18 | - | 77662420 | 77711664 | 2887  |
| ENSG000001 | 499.6322 | 108.5287 | 2.1955   | 1.40E-23  | 1.38E-22  | NBPF14   | chr1  | - | 1.48E+08 | 1.48E+08 | 3689  |
| ENSG000001 | 272.3746 | 423.6275 | -0.63385 | 0.015869  | 0.031989  | BBS9     | chr7  | + | 33168856 | 33645680 | 4027  |
| ENSG000001 | 210.8765 | 218.5272 | -0.04784 | 0.77737   | 0.83999   | PMS2     | chr7  | - | 6012870  | 6048756  | 2855  |
| ENSG000001 | 1199.977 | 1263.606 | -0.07417 | 0.61853   | 0.70969   | ZMIZ2    | chr7  | + | 44788180 | 44809477 | 5141  |
| ENSG000001 | 0.290301 | 0.357707 | -0.00203 | 0.99908   | NA        | OCM      | chr7  | + | 5919458  | 5925993  | 695   |
| ENSG000001 | 2899.27  | 1442.703 | 1.0036   | 4.95E-06  | 1.65E-05  | 7-Sep    | chr7  | + | 35840542 | 35944917 | 6976  |
| ENSG000001 | 161.0101 | 260.7105 | -0.69175 | 0.004687  | 0.010482  | EEPDI    | chr7  | + | 36192758 | 36341152 | 4765  |
| ENSG000001 | 598.0313 | 1299.526 | -1.1177  | 2.11E-16  | 1.49E-15  | KLHL7    | chr7  | + | 23145353 | 23215040 | 3304  |
| ENSG000001 | 372.4729 | 268.8142 | 0.46683  | 0.074734  | 0.1261    | HERPUD2  | chr7  | - | 35672269 | 35735181 | 3057  |
| ENSG000001 | 2347.821 | 2525.187 | -0.10448 | 0.59436   | 0.68888   | CBX3     | chr7  | + | 26240782 | 26252976 | 2128  |
| ENSG000001 | 17265.04 | 22719.4  | -0.39556 | 0.00184   | 0.004377  | HNRNPA2B | chr7  | - | 26229547 | 26241149 | 6284  |
| ENSG000001 | 4.979616 | 327.0321 | -5.9666  | 3.99E-48  | 8.66E-47  | WIPF3    | chr7  | + | 29846102 | 29956682 | 4002  |
| ENSG000001 | 0        | 4.006007 | -3.5479  | 0.014348  | 0.029184  | NXPH1    | chr7  | + | 8473585  | 8792593  | 2921  |
| ENSG000001 | 10.77789 | 10.71583 | 0.013571 | 0.98502   | 0.99131   | NPY      | chr7  | + | 24323782 | 24331484 | 705   |
| ENSG000001 | 798.7142 | 1426.823 | -0.83476 | 1.14E-07  | 4.43E-07  | FAM126A  | chr7  | - | 22980878 | 23053749 | 6337  |
| ENSG000001 | 38.46594 | 0        | 6.8638   | 8.46E-10  | 3.93E-09  | HXA7     | chr7  | - | 27193335 | 27197555 | 2020  |
| ENSG000001 | 5351.616 | 8.515339 | 8.5976   | 2.17E-20  | 1.86E-19  | INHBA    | chr7  | - | 41724712 | 41742706 | 6064  |
| ENSG000001 | 4531.42  | 212.2845 | 4.4085   | 2.18E-193 | 4.55E-191 | FKBP9    | chr7  | + | 32997017 | 33046543 | 3462  |
| ENSG000001 | 212.2115 | 215.3004 | -0.0193  | 0.92245   | 0.94782   | NT5C3A   | chr7  | - | 33053742 | 33102409 | 1788  |
| ENSG000001 | 248.3867 | 165.8508 | 0.58106  | 0.027113  | 0.051908  | ARL4A    | chr7  | + | 12726481 | 12730559 | 3162  |
| ENSG000001 | 232.2679 | 252.0157 | -0.11504 | 0.5249    | 0.62696   | CCZ1     | chr7  | + | 5938356  | 5965605  | 2867  |
| ENSG000001 | 458.803  | 374.0991 | 0.29391  | 0.14953   | 0.22643   | POLM     | chr7  | - | 44111846 | 44122139 | 3218  |
| ENSG000001 | 0        | 5.661004 | -4.071   | 0.003071  | 0.007066  | RAMP3    | chr7  | + | 45197390 | 45225901 | 1323  |
| ENSG000001 | 515.0384 | 830.842  | -0.68835 | 2.48E-05  | 7.61E-05  | FTSJ2    | chr7  | - | 2273866  | 2281840  | 2511  |
| ENSG000001 | 766.5425 | 7.174342 | 6.0189   | 3.41E-08  | 1.38E-07  | TWIST1   | chr7  | - | 19060614 | 19157295 | 1666  |
| ENSG000001 | 1201.569 | 1298.211 | -0.11095 | 0.38286   | 0.48702   | SMU1     | chr9  | - | 33041762 | 33076665 | 7122  |
| ENSG000001 | 1343.365 | 58.31935 | 4.5192   | 5.06E-179 | 8.64E-177 | GLIPR2   | chr9  | + | 36136732 | 36163910 | 2702  |
| ENSG000001 | 137.5059 | 76.44833 | 0.84597  | 7.12E-05  | 0.000206  | SLC25A51 | chr9  | - | 37879400 | 37904350 | 1868  |
| ENSG000001 | 2765.778 | 2383.898 | 0.21444  | 0.04854   | 0.086726  | CLTA     | chr9  | + | 36190853 | 36304778 | 1890  |
| ENSG000001 | 393.6923 | 177.501  | 1.1463   | 3.23E-13  | 1.89E-12  | RECK     | chr9  | + | 36036430 | 36124448 | 4888  |
| ENSG000001 | 0.290301 | 2.338857 | -2.1125  | 0.15886   | 0.23827   | SPINK4   | chr9  | + | 33218363 | 33248565 | 533   |
| ENSG000001 | 0.580602 | 0        | 0.8036   | 0.6494    | NA        | OR2S2    | chr9  | - | 35957105 | 35958151 | 1047  |
| ENSG000001 | 1303.361 | 1315.477 | -0.0135  | 0.92102   | 0.94695   | ACO1     | chr9  | + | 32384618 | 32450834 | 3601  |
| ENSG000001 | 2.064625 | 6.815092 | -1.6033  | 0.10952   | 0.17432   | KIAA1045 | chr9  | + | 34957484 | 34982541 | 5718  |
| ENSG000001 | 2.261609 | 7.426106 | -1.5906  | 0.079127  | 0.13228   | DNAI1    | chr9  | + | 34457412 | 34520982 | 2499  |
| ENSG000001 | 758.1793 | 354.0928 | 1.093    | 2.15E-06  | 7.46E-06  | DCAF10   | chr9  | + | 37800499 | 37867663 | 7801  |
| ENSG000001 | 1.503747 | 1020.894 | -8.9889  | 9.45E-51  | 2.21E-49  | CNTRF    | chr9  | - | 34551430 | 34590121 | 2052  |
| ENSG000001 | 1114.461 | 789.448  | 0.4959   | 0.00926   | 0.019579  | KIAA1549 | chr7  | - | 1.39E+08 | 1.39E+08 | 12379 |
| ENSG000001 | 995.3485 | 2950.241 | -1.5666  | 3.71E-63  | 1.16E-61  | TRIM24   | chr7  | + | 1.38E+08 | 1.38E+08 | 8410  |
| ENSG000001 | 504.0448 | 422.7038 | 0.2542   | 0.17945   | 0.26353   | C7orf49  | chr7  | - | 1.35E+08 | 1.35E+08 | 2576  |
| ENSG000001 | 10186.93 | 3457.283 | 1.5542   | 9.15E-15  | 5.91E-14  | CALD1    | chr7  | + | 1.34E+08 | 1.35E+08 | 4544  |
| ENSG000001 | 0.36308  | 0.343138 | -0.0021  | 0.99905   | NA        | AKR1D1   | chr7  | + | 1.38E+08 | 1.38E+08 | 2347  |
| ENSG000001 | 61.95017 | 370.7653 | -2.5712  | 1.26E-41  | 2.31E-40  | NUDT10   | chrX  | + | 51075083 | 51080377 | 2001  |
| ENSG000001 | 0.342542 | 0        | 0.4146   | 0.81455   | NA        | SFTPA1   | chr10 | + | 81370695 | 81375196 | 2212  |
| ENSG000001 | 0        | 65.43938 | -7.517   | 3.58E-11  | 1.83E-10  | NEUROG3  | chr10 | - | 71331454 | 71332994 | 1376  |
| ENSG000001 | 1001.135 | 236.9407 | 2.0718   | 1.74E-36  | 2.77E-35  | PLAU     | chr10 | + | 75668935 | 75677255 | 2658  |
| ENSG000001 | 26.35977 | 9.750394 | 1.3898   | 0.006524  | 0.014205  | SRGN     | chr10 | + | 70847862 | 70864567 | 1208  |
| ENSG000001 | 755.634  | 281.21   | 1.4193   | 2.86E-09  | 1.27E-08  | CHST3    | chr10 | + | 73724123 | 73773322 | 6970  |

|            |          |          |          |           |           |          |       |   |          |          |       |
|------------|----------|----------|----------|-----------|-----------|----------|-------|---|----------|----------|-------|
| ENSG000001 | 2518.184 | 20.07857 | 6.9588   | 7.77E-222 | 2.11E-219 | BICC1    | chr10 | + | 60272900 | 60591195 | 5473  |
| ENSG000001 | 0        | 1.40169  | -1.7271  | 0.32809   | NA        | ARL4P    | chr10 | + | 62444263 | 62444967 | 705   |
| ENSG000001 | 232.7044 | 388.4667 | -0.73707 | 2.85E-05  | 8.68E-05  | CISD1    | chr10 | + | 60028818 | 60049346 | 2479  |
| ENSG000001 | 1338.815 | 8.562336 | 7.229    | 4.04E-122 | 3.24E-120 | EGR2     | chr10 | - | 64571756 | 64679660 | 2968  |
| ENSG000001 | 705.1183 | 664.9098 | 0.085279 | 0.60634   | 0.69954   | ECD      | chr10 | - | 74889913 | 74927853 | 3069  |
| ENSG000001 | 2125.409 | 948.5415 | 1.1607   | 1.13E-08  | 4.78E-08  | P4HA1    | chr10 | - | 74766975 | 74856732 | 2937  |
| ENSG000001 | 190.7632 | 74.59097 | 1.3391   | 0.000196  | 0.000539  | SLC25A16 | chr10 | - | 70242521 | 70287231 | 1766  |
| ENSG000001 | 973.2426 | 1225.757 | -0.33082 | 0.19767   | 0.28584   | ZWINT    | chr10 | - | 58116989 | 58121036 | 1961  |
| ENSG000001 | 710.3557 | 518.7048 | 0.45367  | 0.000397  | 0.001044  | VPS26A   | chr10 | + | 70883268 | 70932617 | 3229  |
| ENSG000001 | 863.3267 | 1027.436 | -0.24992 | 0.17122   | 0.25364   | RBM19    | chr12 | - | 1.14E+08 | 1.14E+08 | 4422  |
| ENSG000001 | 1348.129 | 1395.968 | -0.0509  | 0.66233   | 0.74597   | CIT      | chr12 | - | 1.2E+08  | 1.2E+08  | 8708  |
| ENSG000001 | 262.5968 | 185.0742 | 0.50534  | 0.001732  | 0.004141  | IFT81    | chr12 | + | 1.11E+08 | 1.11E+08 | 3108  |
| ENSG000001 | 115.3603 | 207.9243 | -0.84701 | 0.000679  | 0.001726  | ACADS    | chr12 | + | 1.21E+08 | 1.21E+08 | 1950  |
| ENSG000001 | 49.26617 | 61.92495 | -0.33023 | 0.36625   | 0.4709    | HVCN1    | chr12 | - | 1.11E+08 | 1.11E+08 | 2189  |
| ENSG000001 | 1.794862 | 2.278164 | -0.32555 | 0.80307   | 0.86078   | NME2P1   | chr12 | + | 1.21E+08 | 1.21E+08 | 693   |
| ENSG000001 | 1387.026 | 2818.028 | -1.0217  | 1.02E-22  | 9.67E-22  | DDX54    | chr12 | - | 1.14E+08 | 1.14E+08 | 4380  |
| ENSG000001 | 2006.064 | 918.5125 | 1.1243   | 1.13E-10  | 5.55E-10  | MED13L   | chr12 | - | 1.16E+08 | 1.17E+08 | 9530  |
| ENSG000001 | 504.7665 | 3.78667  | 6.9987   | 1.74E-56  | 4.66E-55  | CDKN2C   | chr1  | + | 51426417 | 51440305 | 2904  |
| ENSG000001 | 1058.094 | 710.4354 | 0.57284  | 1.41E-06  | 4.98E-06  | RNF11    | chr1  | + | 51701943 | 51739127 | 3084  |
| ENSG000001 | 886.5501 | 337.2701 | 1.3934   | 1.13E-30  | 1.48E-29  | RASSF8   | chr12 | + | 26111962 | 26232825 | 5510  |
| ENSG000001 | 223.7772 | 57.28437 | 1.9524   | 9.64E-19  | 7.61E-18  | BHLHE41  | chr12 | - | 26272959 | 26278060 | 3837  |
| ENSG000001 | 158.9471 | 7.501368 | 4.3373   | 2.30E-29  | 2.87E-28  | SSPN     | chr12 | + | 26274924 | 26452223 | 2788  |
| ENSG000001 | 1181.06  | 748.8472 | 0.65622  | 0.000195  | 0.000536  | ITPR2    | chr12 | - | 26490342 | 26986131 | 10511 |
| ENSG000001 | 141.9197 | 188.7978 | -0.41177 | 0.022232  | 0.043446  | CCDC91   | chr12 | + | 28286182 | 28732883 | 2738  |
| ENSG000001 | 25.30321 | 88.81667 | -1.7889  | 2.70E-06  | 9.26E-06  | NECAB1   | chr8  | + | 91803778 | 91971636 | 5289  |
| ENSG000001 | 614.2726 | 685.9923 | -0.15962 | 0.24838   | 0.34463   | WWP1     | chr8  | + | 87354967 | 87490649 | 4686  |
| ENSG000001 | 782.3383 | 464.4971 | 0.75032  | 7.27E-10  | 3.39E-09  | ACOT9    | chrX  | - | 23720370 | 23784592 | 3117  |
| ENSG000001 | 1527.578 | 1367.086 | 0.16039  | 0.20923   | 0.29919   | PRDX4    | chrX  | + | 23682379 | 23704516 | 1005  |
| ENSG000001 | 1676.959 | 2030.493 | -0.27515 | 0.11165   | 0.17735   | DDX39A   | chr19 | - | 14519631 | 14530192 | 1903  |
| ENSG000001 | 2667.399 | 4780.36  | -0.84003 | 1.28E-07  | 4.96E-07  | PKN1     | chr19 | + | 14543865 | 14582679 | 3518  |
| ENSG000001 | 3492.592 | 3145.934 | 0.1505   | 0.21109   | 0.30138   | C19orf43 | chr19 | - | 12841454 | 12845589 | 988   |
| ENSG000001 | 171.7178 | 86.65452 | 0.97946  | 1.46E-05  | 4.61E-05  | CD97     | chr19 | + | 14491313 | 14519537 | 3188  |
| ENSG000001 | 63.72212 | 82.22998 | -0.36912 | 0.17623   | 0.25966   | WDR83    | chr19 | + | 12777614 | 12786646 | 1480  |
| ENSG000001 | 2124.987 | 1509.937 | 0.49224  | 6.43E-06  | 2.11E-05  | GIPC1    | chr19 | - | 14588572 | 14606944 | 2071  |
| ENSG000001 | 0.72616  | 0        | 0.85004  | 0.63064   | NA        | ACTRT1   | chrX  | - | 1.27E+08 | 1.27E+08 | 1440  |
| ENSG000001 | 267.2776 | 96.13127 | 1.4708   | 4.28E-12  | 2.32E-11  | SPRYD7   | chr13 | - | 50486842 | 50510626 | 3086  |
| ENSG000001 | 595.9769 | 1425.908 | -1.2582  | 2.97E-32  | 4.14E-31  | EBPL     | chr13 | - | 50234859 | 50265611 | 1026  |
| ENSG000001 | 450.7974 | 234.9957 | 0.93814  | 8.00E-11  | 3.99E-10  | ATP7B    | chr13 | - | 52506809 | 52585630 | 6638  |
| ENSG000001 | 2845.244 | 2339.911 | 0.28181  | 0.093326  | 0.15249   | ZC3H13   | chr13 | - | 46528600 | 46626894 | 8018  |
| ENSG000001 | 0        | 9.298767 | -4.7445  | 0.000336  | 0.000892  | GUCY1B2  | chr13 | - | 51568647 | 51654998 | 2871  |
| ENSG000001 | 1379.479 | 2752.66  | -0.99566 | 3.64E-18  | 2.81E-17  | NLN      | chr5  | + | 65018023 | 65167553 | 8661  |
| ENSG000001 | 309.5782 | 277.4826 | 0.15831  | 0.33209   | 0.43531   | CENPK    | chr5  | - | 64813593 | 64858998 | 1734  |
| ENSG000001 | 651.2886 | 202.8888 | 1.675    | 2.79E-14  | 1.75E-13  | OPTN     | chr10 | + | 13141449 | 13180291 | 3521  |
| ENSG000001 | 2759.74  | 141.2672 | 4.2818   | 9.26E-203 | 2.06E-200 | ITIH5    | chr10 | - | 7601232  | 7708961  | 6945  |
| ENSG000001 | 273.2076 | 319.8271 | -0.22573 | 0.25007   | 0.3465    | ATF1     | chr12 | + | 51157493 | 51214905 | 2181  |
| ENSG000001 | 194.2797 | 246.2915 | -0.33956 | 0.098918  | 0.15999   | TSFM     | chr12 | + | 58176372 | 58201854 | 2192  |
| ENSG000001 | 0        | 0.343138 | -0.41864 | 0.81278   | NA        | NEUROD4  | chr12 | + | 55413729 | 55423798 | 3953  |
| ENSG000001 | 9.346112 | 20.64675 | -1.1066  | 0.044695  | 0.080633  | ARHGAP9  | chr12 | - | 57866038 | 57882597 | 2912  |
| ENSG000001 | 4.160953 | 3.945314 | 0.048542 | 0.95996   | 0.97606   | NCKAP1L  | chr12 | + | 54891495 | 54937726 | 4720  |
| ENSG000001 | 55.44546 | 6.583602 | 3.0152   | 3.19E-10  | 1.52E-09  | MMP19    | chr12 | - | 56229217 | 56236750 | 3840  |
| ENSG000001 | 1675.9   | 1255.372 | 0.41692  | 0.000351  | 0.000931  | PFDN5    | chr12 | + | 53689075 | 53693234 | 1980  |
| ENSG000001 | 1196.743 | 603.1685 | 0.98582  | 1.97E-08  | 8.16E-08  | SPATS2   | chr12 | + | 49760367 | 49921205 | 3318  |
| ENSG000001 | 79.27581 | 79.51314 | 6.21E-05 | 0.9998    | 0.99987   | ORMDL2   | chr12 | + | 56211703 | 56215663 | 2141  |
| ENSG000001 | 105.9747 | 516.4911 | -2.2673  | 5.64E-14  | 3.46E-13  | NR4A1    | chr12 | + | 52416616 | 52453291 | 4837  |
| ENSG000001 | 0.36308  | 26.53501 | -5.2658  | 1.68E-05  | 5.24E-05  | PDE1B    | chr12 | + | 54943134 | 54973023 | 4734  |
| ENSG000001 | 0.290301 | 0.594029 | -0.38058 | 0.83094   | NA        | HOXC13   | chr12 | + | 54332535 | 54340328 | 2437  |
| ENSG000001 | 491.2198 | 395.762  | 0.31144  | 0.01343   | 0.027503  | CDK2     | chr12 | + | 56360553 | 56366568 | 2598  |
| ENSG000001 | 35437.71 | 6715.087 | 2.397    | 5.63E-88  | 2.71E-86  | LRP1     | chr12 | + | 57522276 | 57607134 | 14897 |
| ENSG000001 | 56.12117 | 0.686276 | 5.9226   | 2.44E-11  | 1.26E-10  | HOXC11   | chr12 | + | 54366910 | 54371427 | 3261  |
| ENSG000001 | 498.7109 | 421.8854 | 0.23934  | 0.078274  | 0.13107   | C12orf44 | chr12 | + | 52463030 | 52471278 | 1439  |
| ENSG000001 | 3.629985 | 68.21557 | -4.1095  | 1.08E-11  | 5.70E-11  | NFE2     | chr12 | - | 54685895 | 54694905 | 1833  |
| ENSG000001 | 226.2841 | 328.7905 | -0.53523 | 0.001722  | 0.004118  | IKZF4    | chr12 | + | 56401443 | 56432219 | 5229  |
| ENSG000001 | 264.4987 | 326.3746 | -0.30148 | 0.034284  | 0.063958  | SMUG1    | chr12 | - | 54558529 | 54582778 | 2607  |
| ENSG000001 | 3019.61  | 3052.985 | -0.01556 | 0.89186   | 0.92499   | TUBA1B   | chr12 | - | 49521565 | 49525180 | 3198  |
| ENSG000001 | 98.52344 | 22.52438 | 2.0805   | 1.25E-05  | 3.98E-05  | METTL21B | chr12 | + | 58165275 | 58176324 | 2762  |

|            |          |          |          |           |           |          |       |   |          |          |      |
|------------|----------|----------|----------|-----------|-----------|----------|-------|---|----------|----------|------|
| ENSG000001 | 76.50882 | 56.97191 | 0.41873  | 0.10415   | 0.16699   | KBTBD4   | chr11 | - | 47593749 | 47600567 | 3079 |
| ENSG000001 | 180.7102 | 259.308  | -0.51792 | 0.049803  | 0.088665  | SARDH    | chr9  | - | 1.37E+08 | 1.37E+08 | 3344 |
| ENSG000001 | 11.00658 | 17.87896 | -0.67083 | 0.27971   | 0.38047   | DBH      | chr9  | + | 1.37E+08 | 1.37E+08 | 2763 |
| ENSG000001 | 327.8954 | 647.7374 | -0.98032 | 4.48E-14  | 2.77E-13  | ATPAF1   | chr1  | - | 47098409 | 47139539 | 4158 |
| ENSG000001 | 448.2616 | 666.645  | -0.57109 | 0.000973  | 0.002418  | STIL     | chr1  | - | 47715811 | 47779819 | 5225 |
| ENSG000001 | 927.933  | 1346.343 | -0.5362  | 3.30E-06  | 1.12E-05  | HJURP    | chr2  | - | 2.35E+08 | 2.35E+08 | 3050 |
| ENSG000001 | 87.42706 | 2.200487 | 5.0925   | 2.30E-17  | 1.71E-16  | COL10A1  | chr6  | - | 1.16E+08 | 1.16E+08 | 3498 |
| ENSG000001 | 1129.18  | 2080.633 | -0.87563 | 0.002621  | 0.006097  | AMD1     | chr6  | + | 1.11E+08 | 1.11E+08 | 3438 |
| ENSG000001 | 166.8016 | 356.1433 | -1.0885  | 1.30E-06  | 4.61E-06  | NDUFAF4  | chr6  | - | 97337189 | 97345757 | 2399 |
| ENSG000001 | 256.277  | 274.2563 | -0.09903 | 0.62462   | 0.71475   | USP45    | chr6  | - | 99880190 | 99969604 | 6255 |
| ENSG000001 | 39.99879 | 1021.612 | -4.6512  | 2.65E-137 | 2.51E-135 | PLP1     | chrX  | + | 1.03E+08 | 1.03E+08 | 3133 |
| ENSG000001 | 5692.019 | 2911.071 | 0.9668   | 2.61E-21  | 2.34E-20  | MORF4L2  | chrX  | - | 1.03E+08 | 1.03E+08 | 2749 |
| ENSG000001 | 0        | 0.700845 | -0.87835 | 0.62047   | NA        | H2BFWT   | chrX  | - | 1.03E+08 | 1.03E+08 | 894  |
| ENSG000001 | 42.1705  | 3.169208 | 3.5849   | 1.04E-09  | 4.78E-09  | RAB9B    | chrX  | - | 1.03E+08 | 1.03E+08 | 3748 |
| ENSG000001 | 175.5157 | 93.94193 | 0.90083  | 0.000683  | 0.001737  | NRK      | chrX  | + | 1.05E+08 | 1.05E+08 | 8064 |
| ENSG000001 | 561.2631 | 501.9781 | 0.15903  | 0.22863   | 0.32177   | FAM199X  | chrX  | + | 1.03E+08 | 1.03E+08 | 7457 |
| ENSG000001 | 1.866827 | 0.997859 | 0.77521  | 0.56179   | 0.66021   | ESX1     | chrX  | - | 1.03E+08 | 1.03E+08 | 1495 |
| ENSG000001 | 155.8977 | 290.8478 | -0.89797 | 1.32E-06  | 4.68E-06  | RAB9A    | chrX  | + | 13707244 | 13728625 | 2039 |
| ENSG000001 | 213.8905 | 222.31   | -0.05749 | 0.71766   | 0.7909    | METTL8   | chr2  | - | 1.72E+08 | 1.72E+08 | 2246 |
| ENSG000001 | 410.9979 | 299.746  | 0.45559  | 0.026227  | 0.050366  | TTC21B   | chr2  | - | 1.67E+08 | 1.67E+08 | 5482 |
| ENSG000001 | 70.25512 | 109.5621 | -0.6361  | 0.024993  | 0.048257  | NMI      | chr2  | - | 1.52E+08 | 1.52E+08 | 2094 |
| ENSG000001 | 382.2148 | 1.372552 | 7.8624   | 1.55E-33  | 2.26E-32  | TNFAIP6  | chr2  | + | 1.52E+08 | 1.52E+08 | 1422 |
| ENSG000001 | 1.576526 | 15.64289 | -3.0699  | 0.000311  | 0.000832  | ACVR1C   | chr2  | - | 1.58E+08 | 1.58E+08 | 3385 |
| ENSG000001 | 494.5982 | 342.6893 | 0.52879  | 0.02653   | 0.050892  | BAZ2B    | chr2  | - | 1.6E+08  | 1.6E+08  | 8289 |
| ENSG000001 | 670.8484 | 189.5446 | 1.8211   | 4.98E-22  | 4.58E-21  | SLC36A1  | chr5  | + | 1.51E+08 | 1.51E+08 | 5781 |
| ENSG000001 | 855.0854 | 323.9299 | 1.3977   | 1.79E-28  | 2.16E-27  | LPGAT1   | chr1  | - | 2.12E+08 | 2.12E+08 | 7782 |
| ENSG000001 | 23.24877 | 30.78715 | -0.3996  | 0.31388   | 0.41626   | BATF3    | chr1  | - | 2.13E+08 | 2.13E+08 | 2357 |
| ENSG000001 | 9.761433 | 2.872193 | 1.647    | 0.042534  | 0.077318  | GOS2     | chr1  | + | 2.1E+08  | 2.1E+08  | 866  |
| ENSG000001 | 5.943022 | 16.14467 | -1.3603  | 0.062112  | 0.10748   | KCNJ2    | chr17 | + | 68164814 | 68176189 | 5392 |
| ENSG000001 | 724.6509 | 458.9091 | 0.65631  | 1.72E-05  | 5.37E-05  | RAP2C    | chrX  | - | 1.31E+08 | 1.31E+08 | 3896 |
| ENSG000001 | 534.3592 | 688.6713 | -0.36392 | 0.080725  | 0.13456   | EXOSC9   | chr4  | + | 1.23E+08 | 1.23E+08 | 3882 |
| ENSG000001 | 446.7637 | 541.533  | -0.27699 | 0.22295   | 0.31533   | PLA2G12A | chr4  | - | 1.11E+08 | 1.11E+08 | 5226 |
| ENSG000001 | 107.5229 | 62.46132 | 0.78422  | 0.000762  | 0.001924  | B9D2     | chr19 | - | 41860326 | 41870078 | 1027 |
| ENSG000001 | 458.8008 | 873.5905 | -0.92888 | 1.63E-09  | 7.40E-09  | ADCK4    | chr19 | - | 41197434 | 41224112 | 2443 |
| ENSG000001 | 218.4157 | 434.1479 | -0.99032 | 1.12E-10  | 5.53E-10  | PFKFB2   | chr1  | + | 2.07E+08 | 2.07E+08 | 7094 |
| ENSG000001 | 25.65773 | 70.08816 | -1.4444  | 2.14E-05  | 6.60E-05  | ZNF137P  | chr19 | + | 53091758 | 53100660 | 1920 |
| ENSG000001 | 46.70472 | 103.6252 | -1.1461  | 4.86E-05  | 0.000144  | RAB38    | chr11 | - | 87846410 | 87908635 | 1465 |
| ENSG000001 | 0.290301 | 2.468363 | -2.0505  | 0.2029    | 0.29178   | GPR83    | chr11 | - | 94110477 | 94134585 | 4282 |
| ENSG000001 | 886.6646 | 972.3994 | -0.13297 | 0.33122   | 0.43437   | AGO2     | chr8  | - | 1.42E+08 | 1.42E+08 | 3572 |
| ENSG000001 | 2280.287 | 500.7596 | 2.182    | 6.90E-48  | 1.49E-46  | MXD4     | chr4  | - | 2249159  | 2264021  | 4228 |
| ENSG000001 | 46.59266 | 35.2942  | 0.3886   | 0.27752   | 0.37781   | PMS2P5   | chr7  | + | 74306894 | 74366314 | 1220 |
| ENSG000001 | 819.4122 | 2047.827 | -1.3191  | 2.58E-18  | 2.00E-17  | CKS2     | chr9  | + | 91926113 | 91931618 | 613  |
| ENSG000001 | 2.085163 | 5.865772 | -1.4015  | 0.15937   | 0.23891   | DAW1     | chr2  | + | 2.29E+08 | 2.29E+08 | 2476 |
| ENSG000001 | 3846.799 | 1412.275 | 1.4432   | 1.02E-19  | 8.49E-19  | ACSL3    | chr2  | + | 2.24E+08 | 2.24E+08 | 5679 |
| ENSG000001 | 7359.989 | 2812.304 | 1.3862   | 2.18E-26  | 2.41E-25  | CHPF     | chr2  | - | 2.2E+08  | 2.2E+08  | 3013 |
| ENSG000001 | 648.6494 | 1046.502 | -0.68908 | 2.04E-05  | 6.32E-05  | DNPEP    | chr2  | - | 2.2E+08  | 2.2E+08  | 2425 |
| ENSG000001 | 11.47414 | 14.40871 | -0.32112 | 0.57942   | 0.67587   | INHA     | chr2  | + | 2.2E+08  | 2.2E+08  | 1468 |
| ENSG000001 | 0        | 2.558194 | -2.582   | 0.12605   | 0.1967    | MOGAT1   | chr2  | + | 2.24E+08 | 2.24E+08 | 1048 |
| ENSG000001 | 3314.981 | 3603.734 | -0.12028 | 0.47593   | 0.5805    | OBSL1    | chr2  | - | 2.2E+08  | 2.2E+08  | 5841 |
| ENSG000001 | 0.290301 | 61.76463 | -6.6561  | 1.92E-10  | 9.31E-10  | FAM124B  | chr2  | - | 2.25E+08 | 2.25E+08 | 2594 |
| ENSG000001 | 2202.636 | 1116.334 | 0.97544  | 8.44E-05  | 0.000243  | SLC12A4  | chr16 | - | 67977377 | 68003504 | 4670 |
| ENSG000001 | 166.3366 | 159.4005 | 0.058553 | 0.79014   | 0.85039   | ENKD1    | chr16 | - | 67696848 | 67701168 | 1579 |
| ENSG000001 | 0        | 0.686276 | -0.84936 | 0.6309    | NA        | MC3R     | chr20 | + | 54823788 | 54824871 | 1084 |
| ENSG000001 | 10.72565 | 10.1081  | 0.082    | 0.89107   | 0.92445   | GCNT7    | chr20 | - | 55066548 | 55100981 | 2064 |
| ENSG000001 | 0        | 53.25338 | -7.2171  | 4.39E-10  | 2.08E-09  | CTCFL    | chr20 | - | 56071021 | 56100708 | 3996 |
| ENSG000001 | 0.36308  | 0.297015 | -0.00205 | 0.99908   | NA        | HMGB1P1  | chr20 | - | 56063448 | 56064083 | 636  |
| ENSG000001 | 792.6796 | 560.5149 | 0.49917  | 3.98E-05  | 0.000119  | FAM210B  | chr20 | + | 54933971 | 54943719 | 3046 |
| ENSG000001 | 2.604151 | 0        | 2.8487   | 0.070705  | 0.12022   | PI3      | chr20 | + | 43803517 | 43805185 | 577  |
| ENSG000001 | 1.161205 | 1.012429 | 0.16701  | 0.9195    | 0.94586   | FAM209A  | chr20 | + | 55092243 | 55101198 | 911  |
| ENSG000001 | 446.74   | 347.7128 | 0.36107  | 0.047023  | 0.084341  | SNX21    | chr20 | + | 44462449 | 44471914 | 3106 |
| ENSG000001 | 0        | 0.343138 | -0.41864 | 0.81278   | NA        | SLPI     | chr20 | - | 43880880 | 43883205 | 596  |
| ENSG000001 | 4.470978 | 4.198622 | 0.085788 | 0.92796   | 0.95224   | WFDC3    | chr20 | - | 44376583 | 44420571 | 1000 |
| ENSG000001 | 513.665  | 285.2104 | 0.84548  | 0.000188  | 0.000518  | TTPAL    | chr20 | + | 43104526 | 43123244 | 6234 |
| ENSG000001 | 2112.876 | 797.7052 | 1.4025   | 1.23E-21  | 1.11E-20  | PREX1    | chr20 | - | 47240790 | 47444420 | 6737 |
| ENSG000001 | 69.66336 | 82.52787 | -0.24646 | 0.32958   | 0.43268   | KCNS1    | chr20 | - | 43720951 | 43729753 | 4538 |

|            |          |          |          |          |          |           |       |   |          |          |       |
|------------|----------|----------|----------|----------|----------|-----------|-------|---|----------|----------|-------|
| ENSG000001 | 15.14618 | 10.21492 | 0.55855  | 0.344    | 0.44803  | SLC12A5   | chr20 | + | 44650329 | 44688789 | 6041  |
| ENSG000001 | 0.653381 | 18.02619 | -4.2932  | 3.03E-05 | 9.18E-05 | ARHGAP40  | chr20 | + | 37230577 | 37279678 | 2841  |
| ENSG000001 | 484.2084 | 1658.023 | -1.7734  | 3.54E-64 | 1.13E-62 | SDC4      | chr20 | - | 43953928 | 43977064 | 2613  |
| ENSG000001 | 1042.45  | 460.8637 | 1.1744   | 5.78E-13 | 3.33E-12 | NCOA3     | chr20 | + | 46130601 | 46285621 | 7939  |
| ENSG000001 | 1629.062 | 1140.328 | 0.5148   | 0.000107 | 0.000303 | PIGT      | chr20 | + | 44044707 | 44054884 | 2235  |
| ENSG000001 | 3.081086 | 50.61013 | -3.9265  | 2.84E-09 | 1.26E-08 | MATN4     | chr20 | - | 43922085 | 43937169 | 2282  |
| ENSG000001 | 891.3811 | 843.4605 | 0.07728  | 0.90129  | 0.93185  | NCOA5     | chr20 | - | 44689624 | 44718591 | 3220  |
| ENSG000001 | 833.9805 | 1027.572 | -0.30061 | 0.023582 | 0.045812 | VAPB      | chr20 | + | 56964178 | 57026157 | 7936  |
| ENSG000001 | 24.05546 | 235.1813 | -3.2611  | 9.32E-31 | 1.23E-29 | PARDB6B   | chr20 | + | 49348081 | 49373332 | 4615  |
| ENSG000001 | 2155.243 | 434.8904 | 2.308    | 2.48E-94 | 1.33E-92 | ATP5E     | chr20 | - | 57600522 | 57607437 | 3665  |
| ENSG000001 | 1395.975 | 1096.907 | 0.34727  | 0.006157 | 0.013479 | CHD6      | chr20 | - | 40030741 | 40247133 | 10818 |
| ENSG000001 | 3815.586 | 3491.003 | 0.12825  | 0.1303   | 0.20203  | PLCG1     | chr20 | + | 39765600 | 39825427 | 5493  |
| ENSG000001 | 21.18333 | 103.9474 | -2.2713  | 5.42E-14 | 3.33E-13 | TOX2      | chr20 | + | 42543492 | 42698256 | 2605  |
| ENSG000001 | 2812.796 | 3215.881 | -0.18852 | 0.73059  | 0.80108  | SRSF6     | chr20 | + | 42086568 | 42092245 | 3683  |
| ENSG000001 | 7.397134 | 112.1982 | -3.8278  | 7.54E-15 | 4.91E-14 | GDAP1L1   | chr20 | + | 42875887 | 42909013 | 2265  |
| ENSG000001 | 986.8276 | 660.0411 | 0.57822  | 2.54E-05 | 7.76E-05 | ARFGEF2   | chr20 | + | 47538427 | 47653230 | 8852  |
| ENSG000001 | 558.2097 | 382.7544 | 0.54212  | 0.023624 | 0.045871 | ZNFX1     | chr20 | - | 47854483 | 47894963 | 7371  |
| ENSG000001 | 46.52681 | 4.409837 | 3.3446   | 7.76E-10 | 3.62E-09 | EDN3      | chr20 | + | 57875482 | 57901047 | 2655  |
| ENSG000001 | 2022.266 | 4487.536 | -1.1462  | 8.53E-09 | 3.64E-08 | CSE1L     | chr20 | + | 47662849 | 47713489 | 3553  |
| ENSG000001 | 1044.785 | 238.5356 | 2.1247   | 3.80E-46 | 7.81E-45 | RAB22A    | chr20 | + | 56884752 | 56942563 | 8670  |
| ENSG000001 | 2333.949 | 921.0845 | 1.3366   | 7.79E-11 | 3.89E-10 | PTGIS     | chr20 | - | 48120411 | 48184683 | 5579  |
| ENSG000001 | 2657.112 | 2858.168 | -0.1051  | 0.29905  | 0.40075  | STAU1     | chr20 | - | 47729878 | 47804904 | 3534  |
| ENSG000001 | 13.08058 | 19.37773 | -0.54836 | 0.2665   | 0.3652   | CDH26     | chr20 | + | 58533471 | 58609066 | 3182  |
| ENSG000001 | 118.1862 | 141.9107 | -0.26089 | 0.35379  | 0.45797  | SNAI1     | chr20 | + | 48599536 | 48605423 | 1686  |
| ENSG000001 | 227.4159 | 359.4978 | -0.65785 | 0.005905 | 0.012958 | MOC53     | chr20 | + | 49575363 | 49577820 | 2458  |
| ENSG000001 | 975.459  | 1214.597 | -0.31609 | 0.072086 | 0.12218  | STX16     | chr20 | + | 57226328 | 57254582 | 4937  |
| ENSG000001 | 128.3371 | 99.26725 | 0.36977  | 0.14701  | 0.2231   | PPP4R1L   | chr20 | - | 56806188 | 56884495 | 3593  |
| ENSG000001 | 8999.555 | 1173.631 | 2.9331   | 1.52E-76 | 6.12E-75 | PMEPA1    | chr20 | - | 56223448 | 56286592 | 4845  |
| ENSG000001 | 1191.277 | 1559.068 | -0.3878  | 0.000168 | 0.000466 | RNF114    | chr20 | + | 48552948 | 48570429 | 2440  |
| ENSG000001 | 0        | 0.594029 | -0.81444 | 0.64499  | NA       | ANKRD60   | chr20 | - | 56793551 | 56803709 | 1038  |
| ENSG000001 | 781.9337 | 1153.175 | -0.55937 | 8.88E-05 | 0.000255 | DDX27     | chr20 | + | 47835884 | 47860614 | 4929  |
| ENSG000001 | 0        | 25.77368 | -6.2731  | 8.40E-08 | 3.30E-07 | RBPJL     | chr20 | + | 43935491 | 43945803 | 1830  |
| ENSG000001 | 0        | 15.03013 | -5.331   | 5.52E-05 | 0.000162 | SEMG1     | chr20 | + | 43835638 | 43838413 | 1662  |
| ENSG000001 | 160.7993 | 316.0414 | -0.9696  | 0.000176 | 0.000486 | BCAS4     | chr20 | + | 49411431 | 49493714 | 1498  |
| ENSG000001 | 1.741807 | 4.150082 | -1.0072  | 0.451    | 0.5566   | KCNK15    | chr20 | + | 43374421 | 43379675 | 1320  |
| ENSG000001 | 12.18914 | 7.683445 | 0.64864  | 0.31265  | 0.41482  | TP53TG5   | chr20 | - | 44002526 | 44036529 | 1051  |
| ENSG000001 | 0.653381 | 0        | 0.82678  | 0.64037  | NA       | ZBP1      | chr20 | - | 56178902 | 56195632 | 4213  |
| ENSG000001 | 21.57714 | 46.9069  | -1.1066  | 0.026859 | 0.051474 | NEURL2    | chr20 | - | 44517264 | 44519926 | 1278  |
| ENSG000001 | 0        | 0.297015 | -0.41864 | 0.81278  | NA       | MAGEA10   | chrX  | - | 1.51E+08 | 1.51E+08 | 2628  |
| ENSG000001 | 308.249  | 333.1213 | -0.11131 | 0.66075  | 0.74463  | MTRR      | chr5  | + | 7851299  | 7906138  | 3274  |
| ENSG000001 | 79.63514 | 110.9629 | -0.47294 | 0.15784  | 0.23715  | FASTKD3   | chr5  | - | 7859272  | 7869150  | 2402  |
| ENSG000001 | 1020.347 | 1252.275 | -0.29491 | 0.010528 | 0.022026 | PEPD      | chr19 | - | 33877856 | 34012700 | 1901  |
| ENSG000001 | 12.6884  | 1309.695 | -6.6443  | 1.22E-89 | 6.09E-88 | CHST8     | chr19 | + | 34112861 | 34264413 | 2478  |
| ENSG000001 | 291.3004 | 1348.626 | -2.2057  | 1.50E-50 | 3.49E-49 | IQSEC2    | chrX  | - | 53262058 | 53350522 | 6011  |
| ENSG000001 | 520.9888 | 336.9478 | 0.62937  | 5.43E-05 | 0.00016  | VAMP7     | chrX  | + | 1.55E+08 | 1.55E+08 | 2646  |
| ENSG000001 | 0        | 11.4491  | -5.1505  | 3.00E-05 | 9.08E-05 | IL9R      | chrX  | + | 1.55E+08 | 1.55E+08 | 2278  |
| ENSG000001 | 6.660623 | 17.23236 | -1.3283  | 0.052087 | 0.092199 | XG        | chrX  | + | 2670091  | 2734539  | 2887  |
| ENSG000001 | 635.3655 | 618.8256 | 0.039229 | 0.7963   | 0.85544  | STAMBP    | chr2  | + | 74056086 | 74100786 | 6691  |
| ENSG000001 | 1717.64  | 422.371  | 2.0171   | 1.16E-21 | 1.05E-20 | NAGK      | chr2  | + | 71291474 | 71306935 | 4388  |
| ENSG000001 | 167.4229 | 88.50542 | 0.90935  | 0.000256 | 0.000691 | MCEE      | chr2  | - | 71336814 | 71357369 | 836   |
| ENSG000001 | 14.43281 | 490.249  | -5.067   | 4.47E-62 | 1.37E-60 | PAIP2B    | chr2  | - | 71409869 | 71454213 | 6279  |
| ENSG000001 | 219.6087 | 195.0829 | 0.17282  | 0.32544  | 0.42834  | SNRNP27   | chr2  | + | 70120692 | 70132707 | 1802  |
| ENSG000001 | 620.1279 | 500.8141 | 0.30831  | 0.11141  | 0.17703  | MPHOSPH1  | chr2  | + | 71357444 | 71377231 | 2484  |
| ENSG000001 | 1.628766 | 4.539343 | -1.3385  | 0.19884  | 0.28721  | IL17C     | chr16 | + | 88704999 | 88706881 | 1044  |
| ENSG000001 | 0        | 0.357707 | -0.41864 | 0.81278  | NA       | RP11-663P | chr4  | + | 43900474 | 43901368 | 390   |
| ENSG000001 | 97.72998 | 421.7979 | -2.0992  | 1.02E-30 | 1.33E-29 | ATP8A1    | chr4  | - | 42410390 | 42659122 | 8270  |
| ENSG000001 | 5655.294 | 5446.535 | 0.054226 | 0.72467  | 0.79627  | USP22     | chr17 | - | 20902910 | 20947073 | 5216  |
| ENSG000001 | 1.016461 | 1.606458 | -0.52774 | 0.72443  | 0.79609  | POF1B     | chrX  | - | 84532402 | 84634748 | 3941  |
| ENSG000001 | 68.38308 | 401.9979 | -2.5345  | 1.71E-15 | 1.15E-14 | HIF3A     | chr19 | + | 46800303 | 46846690 | 5908  |
| ENSG000001 | 106.4148 | 121.0065 | -0.18635 | 0.36357  | 0.46784  | ZNFX576   | chr19 | + | 44100544 | 44105309 | 2566  |
| ENSG000001 | 247.7631 | 192.1213 | 0.36568  | 0.12858  | 0.19987  | ZNFX45    | chr19 | - | 44416781 | 44439430 | 3898  |
| ENSG000001 | 4.201215 | 78.26621 | -4.0854  | 3.54E-12 | 1.94E-11 | LYPD3     | chr19 | - | 43964939 | 43969812 | 1694  |
| ENSG000001 | 0        | 0.715414 | -0.84936 | 0.6309   | NA       | PSG8      | chr19 | - | 43256838 | 43359843 | 2478  |
| ENSG000001 | 6.099745 | 1.248751 | 2.0112   | 0.066517 | 0.11403  | NDP       | chrX  | - | 43808022 | 43832750 | 1833  |
| ENSG000001 | 2808.967 | 4821.768 | -0.77767 | 1.00E-05 | 3.21E-05 | USP9X     | chrX  | + | 40944888 | 41093672 | 10241 |

|            |          |          |          |          |          |           |      |   |          |          |       |
|------------|----------|----------|----------|----------|----------|-----------|------|---|----------|----------|-------|
| ENSG000001 | 86.86479 | 1.995719 | 5.2739   | 1.86E-17 | 1.39E-16 | F13A1     | chr6 | - | 6144318  | 6321246  | 3999  |
| ENSG000001 | 68.79515 | 1319.863 | -4.2309  | 3.49E-59 | 9.92E-58 | GRM4      | chr6 | - | 33989628 | 34123399 | 3879  |
| ENSG000001 | 563.7321 | 1026.099 | -0.86174 | 2.59E-06 | 8.90E-06 | TRERF1    | chr6 | - | 42192669 | 42419789 | 7646  |
| ENSG000001 | 31.84998 | 432.1721 | -3.7286  | 2.16E-29 | 2.70E-28 | PACSIN1   | chr6 | + | 34433916 | 34503006 | 4271  |
| ENSG000001 | 353.929  | 190.3568 | 0.89035  | 2.85E-07 | 1.07E-06 | BTN2A2    | chr6 | + | 26383324 | 26395102 | 3590  |
| ENSG000001 | 135.7623 | 257.0329 | -0.92042 | 1.12E-06 | 3.99E-06 | SIRT5     | chr6 | + | 13574826 | 13612524 | 2339  |
| ENSG000001 | 1.846289 | 0.997859 | 0.74341  | 0.59516  | 0.68957  | HIST1H4B  | chr6 | - | 26027124 | 26027480 | 357   |
| ENSG000001 | 275.4034 | 1478.46  | -2.4156  | 2.99E-30 | 3.84E-29 | MRS2      | chr6 | + | 24403153 | 24425810 | 3313  |
| ENSG000001 | 1003.99  | 911.35   | 0.13954  | 0.2158   | 0.30683  | WRNIP1    | chr6 | + | 2765648  | 2787186  | 3239  |
| ENSG000001 | 1163.046 | 936.549  | 0.31106  | 0.2408   | 0.33567  | RRP36     | chr6 | + | 42989383 | 42997335 | 1159  |
| ENSG000001 | 135.7585 | 32.5207  | 2.0506   | 1.70E-12 | 9.49E-12 | BTN2A3P   | chr6 | + | 26421619 | 26432611 | 2559  |
| ENSG000001 | 0.943682 | 1.387121 | -0.39048 | 0.80001  | 0.85834  | BTN1A1    | chr6 | + | 26501449 | 26510650 | 2895  |
| ENSG000001 | 966.0085 | 1444.955 | -0.57946 | 0.000109 | 0.00031  | SNRPC     | chr6 | + | 34725183 | 34741571 | 1054  |
| ENSG000001 | 1085.462 | 335.4015 | 1.6931   | 1.31E-47 | 2.81E-46 | SERPINB6  | chr6 | - | 2948393  | 2972090  | 3265  |
| ENSG000001 | 1134.738 | 2377.651 | -1.0659  | 9.54E-20 | 7.95E-19 | XPO5      | chr6 | - | 43490072 | 43543812 | 5360  |
| ENSG000001 | 760.1698 | 405.8619 | 0.90334  | 3.46E-11 | 1.77E-10 | ABCC10    | chr6 | + | 43395104 | 43418168 | 5088  |
| ENSG000001 | 0.36308  | 9.174966 | -3.9304  | 0.002117 | 0.004991 | HIST1H1D  | chr6 | - | 26234440 | 26235216 | 777   |
| ENSG000001 | 0        | 0.700845 | -0.87835 | 0.62047  | NA       | HIST1H4G  | chr6 | - | 26246886 | 26247259 | 374   |
| ENSG000001 | 930.6044 | 655.298  | 0.50365  | 0.022208 | 0.043401 | PEX6      | chr6 | - | 42931608 | 42946958 | 3478  |
| ENSG000001 | 306.6183 | 626.5063 | -1.0282  | 1.10E-12 | 6.24E-12 | NQO2      | chr6 | + | 2988221  | 3019996  | 1515  |
| ENSG000001 | 132.8337 | 39.48711 | 1.7397   | 1.86E-12 | 1.04E-11 | PRICKLE4  | chr6 | + | 41748087 | 41757879 | 3947  |
| ENSG000001 | 207.397  | 489.0692 | -1.2354  | 9.64E-13 | 5.48E-12 | OARD1     | chr6 | - | 41001366 | 41065526 | 3330  |
| ENSG000001 | 5.092656 | 90.6185  | -4.0203  | 1.13E-12 | 6.38E-12 | UNC5CL    | chr6 | - | 40994772 | 41006928 | 2986  |
| ENSG000001 | 658.545  | 718.4942 | -0.12635 | 0.39988  | 0.50458  | AARS2     | chr6 | - | 44267391 | 44281063 | 3854  |
| ENSG000001 | 0        | 0.640152 | -0.82869 | 0.63935  | NA       | HIST1H1A  | chr6 | - | 26017260 | 26018040 | 781   |
| ENSG000001 | 55.79321 | 132.4866 | -1.2409  | 4.16E-05 | 0.000124 | ZNF391    | chr6 | + | 27342394 | 27371683 | 4079  |
| ENSG000001 | 12.69696 | 37.1498  | -1.5158  | 0.000979 | 0.002433 | RPS10     | chr6 | - | 34385231 | 34393902 | 781   |
| ENSG000001 | 166.8768 | 439.854  | -1.3971  | 4.57E-22 | 4.22E-21 | MOCS1     | chr6 | - | 39867354 | 39902290 | 4256  |
| ENSG000001 | 16.73208 | 77.429   | -2.1598  | 3.61E-06 | 1.22E-05 | HIST1H2BJ | chr6 | - | 27094058 | 27100541 | 718   |
| ENSG000001 | 359.4518 | 544.1286 | -0.59528 | 0.000621 | 0.00159  | MED20     | chr6 | - | 41873092 | 41888877 | 2602  |
| ENSG000001 | 0        | 7.46894  | -4.3746  | 0.001629 | 0.003907 | OR2B6     | chr6 | + | 27925019 | 27925960 | 942   |
| ENSG000001 | 336.6764 | 504.9977 | -0.58214 | 0.000913 | 0.002278 | TBCC      | chr6 | - | 42712219 | 42714558 | 2137  |
| ENSG000001 | 3.942617 | 5.00145  | -0.30489 | 0.77721  | 0.83991  | SPDEF     | chr6 | - | 34505579 | 34524110 | 1895  |
| ENSG000001 | 0.632843 | 3.813392 | -2.0005  | 0.16832  | 0.24996  | TCP11     | chr6 | - | 35085848 | 35116387 | 2166  |
| ENSG000001 | 260.9311 | 371.3182 | -0.5057  | 0.026979 | 0.051679 | MAD2L1BP  | chr6 | + | 43597277 | 43608689 | 1517  |
| ENSG000001 | 4.108712 | 4.974728 | -0.27553 | 0.75432  | 0.82106  | HIST1H3B  | chr6 | - | 26031817 | 26032288 | 472   |
| ENSG000001 | 2.67693  | 16.42712 | -2.4984  | 0.001533 | 0.003696 | APOBEC2   | chr6 | + | 41021043 | 41032250 | 1151  |
| ENSG000001 | 2378.26  | 3524.485 | -0.56684 | 3.90E-09 | 1.71E-08 | KLHDC3    | chr6 | + | 42981951 | 42989036 | 1909  |
| ENSG000001 | 5.269917 | 13.57191 | -1.3215  | 0.051164 | 0.09077  | GNMT      | chr6 | + | 42928496 | 42931618 | 1072  |
| ENSG000001 | 0        | 1.043983 | -1.3473  | 0.44976  | NA       | DNAH8     | chr6 | + | 38683117 | 38998301 | 14215 |
| ENSG000001 | 58.54887 | 0        | 7.4351   | 1.49E-11 | 7.79E-11 | TREM1     | chr6 | - | 41235664 | 41254457 | 2048  |
| ENSG000001 | 701.1504 | 658.0985 | 0.092835 | 0.46297  | 0.5681   | MEA1      | chr6 | - | 42979832 | 42981706 | 1089  |
| ENSG000001 | 10.69656 | 10.40915 | 0.0385   | 0.95364  | 0.97117  | KLHL31    | chr6 | - | 53512699 | 53530506 | 5743  |
| ENSG000001 | 16.4743  | 124.39   | -2.8878  | 6.64E-17 | 4.84E-16 | COL21A1   | chr6 | - | 55921388 | 56258892 | 4339  |
| ENSG000001 | 6150.83  | 774.7756 | 2.8636   | 6.15E-05 | 0.00018  | CDKN1A    | chr6 | + | 36644305 | 36655116 | 2261  |
| ENSG000001 | 6421.262 | 12309.37 | -0.93645 | 1.91E-07 | 7.29E-07 | SOX4      | chr6 | + | 21593972 | 21598847 | 4876  |
| ENSG000001 | 2328.134 | 2353.68  | -0.01561 | 0.8619   | 0.9035   | GLO1      | chr6 | - | 38643701 | 38670917 | 2012  |
| ENSG000001 | 62.51365 | 9.107825 | 2.7232   | 3.60E-10 | 1.71E-09 | CPNE5     | chr6 | - | 36708552 | 36807778 | 3897  |
| ENSG000001 | 0        | 12.00916 | -5.1588  | 4.65E-05 | 0.000138 | KCNK17    | chr6 | - | 39266777 | 39282329 | 1706  |
| ENSG000001 | 1016.688 | 1361.559 | -0.42059 | 0.005201 | 0.011554 | RREB1     | chr6 | + | 7107830  | 7252213  | 9067  |
| ENSG000001 | 4099.022 | 1366.353 | 1.5843   | 9.96E-65 | 3.23E-63 | SSR1      | chr6 | - | 7268539  | 7347679  | 9669  |
| ENSG000001 | 276.9919 | 442.4826 | -0.67221 | 0.001664 | 0.003986 | RIOK1     | chr6 | + | 7389729  | 7418270  | 2810  |
| ENSG000001 | 110.5149 | 2.993578 | 5.0952   | 1.75E-22 | 1.64E-21 | NRN1      | chr6 | - | 5998232  | 6007200  | 1624  |
| ENSG000001 | 336.2858 | 138.4387 | 1.2798   | 9.29E-16 | 6.36E-15 | SLC35B3   | chr6 | - | 8413301  | 8435794  | 2137  |
| ENSG000001 | 79.27662 | 107.7316 | -0.43884 | 0.054664 | 0.096093 | RPP40     | chr6 | - | 4994966  | 5004297  | 1483  |
| ENSG000001 | 892.1005 | 137.1116 | 2.695    | 2.05E-62 | 6.34E-61 | ATXN1     | chr6 | - | 16299343 | 16761722 | 10602 |
| ENSG000001 | 1049.519 | 1683.063 | -0.67995 | 6.77E-06 | 2.22E-05 | NUP153    | chr6 | - | 17615269 | 17706656 | 5487  |
| ENSG000001 | 2105.777 | 3854.294 | -0.86922 | 1.12E-05 | 3.58E-05 | DEK       | chr6 | - | 18224099 | 18265054 | 3427  |
| ENSG000001 | 52.60406 | 139.5012 | -1.399   | 3.51E-07 | 1.31E-06 | EEF1E1    | chr6 | - | 8073593  | 8102811  | 1077  |
| ENSG000001 | 610.6636 | 9.637873 | 5.9482   | 5.56E-85 | 2.54E-83 | RUNX2     | chr6 | + | 45295894 | 45632086 | 5698  |
| ENSG000001 | 0.290301 | 0        | 0.4146   | 0.81455  | NA       | OPN5      | chr6 | + | 47749718 | 47800516 | 3500  |
| ENSG000001 | 1.701545 | 1.623443 | 0.036451 | 0.97807  | 0.98782  | GCM2      | chr6 | - | 10873456 | 10882174 | 2441  |
| ENSG000001 | 1716.833 | 1491.799 | 0.2026   | 0.059364 | 0.10353  | LRRFIP1   | chr2 | + | 2.39E+08 | 2.39E+08 | 4370  |
| ENSG000001 | 0.705622 | 1.012429 | -0.38881 | 0.80945  | NA       | AC105760  | chr2 | - | 2.38E+08 | 2.38E+08 | 2231  |
| ENSG000001 | 3.309773 | 226.4626 | -5.979   | 2.27E-33 | 3.29E-32 | RAB17     | chr2 | - | 2.38E+08 | 2.39E+08 | 3211  |

|            |          |          |          |           |           |           |       |   |          |          |       |
|------------|----------|----------|----------|-----------|-----------|-----------|-------|---|----------|----------|-------|
| ENSG000001 | 6.805366 | 55.83494 | -2.9708  | 6.73E-10  | 3.15E-09  | CXCL6     | chr4  | + | 74702214 | 74714781 | 1718  |
| ENSG000001 | 85.78973 | 0.357707 | 7.1073   | 2.14E-12  | 1.19E-11  | EREG      | chr4  | + | 75230860 | 75254468 | 4619  |
| ENSG000001 | 1.317927 | 0.357707 | 1.2439   | 0.46333   | NA        | RP11-467L | chr11 | - | 61513965 | 61525127 | 2466  |
| ENSG000001 | 194.3473 | 150.9134 | 0.36208  | 0.21942   | 0.31116   | MYRF      | chr11 | + | 61520114 | 61555990 | 5927  |
| ENSG000001 | 29024.04 | 929.8046 | 4.9522   | 1.25E-174 | 2.01E-172 | AHNAK     | chr11 | - | 62201016 | 62323707 | 18787 |
| ENSG000001 | 452.9775 | 392.8419 | 0.20634  | 0.13705   | 0.21038   | EMC3      | chr3  | - | 10004221 | 10052800 | 2777  |
| ENSG000001 | 5.623624 | 4.008423 | 0.45696  | 0.61623   | 0.70766   | SSUH2     | chr3  | - | 8661086  | 8786726  | 3219  |
| ENSG000001 | 0        | 0.297015 | -0.41864 | 0.81278   | NA        | WNT1      | chr12 | + | 49372398 | 49375459 | 1185  |
| ENSG000001 | 678.5579 | 5.21105  | 6.9233   | 2.40E-74  | 9.30E-73  | SH3TC1    | chr4  | + | 8183799  | 8242830  | 5829  |
| ENSG000001 | 3256.727 | 5432.593 | -0.73758 | 9.62E-12  | 5.11E-11  | CNOT1     | chr16 | - | 58553855 | 58663790 | 8471  |
| ENSG000001 | 14.04659 | 4.426823 | 1.6168   | 0.023275  | 0.045269  | LRRRC29   | chr16 | - | 67241042 | 67260951 | 1940  |
| ENSG000001 | 626.241  | 317.8175 | 0.97454  | 9.24E-06  | 2.98E-05  | BBS2      | chr16 | - | 56500748 | 56554195 | 6073  |
| ENSG000001 | 0.975385 | 271.0912 | -7.6744  | 2.70E-24  | 2.75E-23  | MT1G      | chr16 | - | 56700643 | 56701977 | 628   |
| ENSG000001 | 1944.976 | 282.8635 | 2.7793   | 1.30E-74  | 5.07E-73  | MT2A      | chr16 | + | 56642111 | 56643409 | 903   |
| ENSG000001 | 247.4499 | 238.9481 | 0.054061 | 0.75752   | 0.8237    | C16orf70  | chr16 | + | 67143861 | 67182442 | 2865  |
| ENSG000001 | 1352.091 | 2617.525 | -0.95134 | 6.93E-13  | 3.98E-12  | GOT2      | chr16 | - | 58741035 | 58768261 | 2462  |
| ENSG000001 | 729.6446 | 492.2195 | 0.56675  | 4.19E-06  | 1.40E-05  | DOK4      | chr16 | - | 57505863 | 57521239 | 2822  |
| ENSG000001 | 1.649304 | 7.097537 | -1.935   | 0.05057   | 0.089826  | GPR18     | chr13 | - | 99906968 | 99913998 | 1698  |
| ENSG000001 | 19.77111 | 94.49103 | -2.2299  | 5.67E-08  | 2.26E-07  | CLYBL     | chr13 | + | 1E+08    | 1.01E+08 | 5667  |
| ENSG000001 | 1223.203 | 869.6445 | 0.49052  | 0.006339  | 0.013835  | TMTC4     | chr13 | - | 1.01E+08 | 1.01E+08 | 3602  |
| ENSG000001 | 924.3674 | 676.5677 | 0.44975  | 1.88E-05  | 5.84E-05  | RAP2A     | chr13 | + | 98086476 | 98121382 | 5487  |
| ENSG000001 | 294.9536 | 146.7007 | 1.0067   | 1.67E-09  | 7.57E-09  | ABCC4     | chr13 | - | 95672083 | 95953687 | 5837  |
| ENSG000001 | 882.509  | 850.8743 | 0.053106 | 0.81964   | 0.87326   | EFNB2     | chr13 | - | 1.07E+08 | 1.07E+08 | 4461  |
| ENSG000001 | 0.995923 | 310.8662 | -7.8298  | 7.50E-24  | 7.48E-23  | SOX21     | chr13 | - | 95361886 | 95364389 | 2504  |
| ENSG000001 | 2801.881 | 1763.817 | 0.66711  | 1.30E-08  | 5.45E-08  | TM9SF2    | chr13 | + | 1E+08    | 1E+08    | 3430  |
| ENSG000001 | 219.1974 | 374.0356 | -0.77215 | 8.72E-07  | 3.13E-06  | C17orf53  | chr17 | + | 42219274 | 42239844 | 2725  |
| ENSG000001 | 0.342542 | 28.28408 | -5.5701  | 5.03E-07  | 1.85E-06  | KIF25     | chr6  | + | 1.68E+08 | 1.68E+08 | 1613  |
| ENSG000001 | 168.1714 | 49.13151 | 1.7604   | 1.64E-07  | 6.29E-07  | IRF1      | chr5  | - | 1.32E+08 | 1.32E+08 | 5153  |
| ENSG000001 | 297.9749 | 708.2167 | -1.2452  | 3.97E-11  | 2.03E-10  | UPF3B     | chrX  | - | 1.19E+08 | 1.19E+08 | 2378  |
| ENSG000001 | 109.7555 | 173.8803 | -0.65979 | 0.007524  | 0.016176  | RNF113A   | chrX  | - | 1.19E+08 | 1.19E+08 | 1295  |
| ENSG000001 | 3249.9   | 1131.516 | 1.5206   | 7.08E-35  | 1.07E-33  | 6-Sep     | chrX  | - | 1.19E+08 | 1.19E+08 | 4694  |
| ENSG000001 | 1.390706 | 0.997859 | 0.36103  | 0.80506   | 0.8622    | TMEM255A  | chrX  | - | 1.19E+08 | 1.19E+08 | 3425  |
| ENSG000001 | 713.3081 | 571.9276 | 0.31878  | 0.020879  | 0.041015  | NDUFA1    | chrX  | + | 1.19E+08 | 1.19E+08 | 766   |
| ENSG000001 | 1.814586 | 0        | 2.063    | 0.23747   | NA        | AMELX     | chrX  | + | 11311533 | 11318881 | 835   |
| ENSG000001 | 78.96839 | 119.4883 | -0.59602 | 0.012622  | 0.025983  | ATP5S     | chr14 | + | 50779044 | 50802276 | 2008  |
| ENSG000001 | 691.5034 | 196.9752 | 1.7932   | 8.25E-07  | 2.97E-06  | BMP4      | chr14 | - | 54416454 | 54425479 | 1917  |
| ENSG000001 | 2.604151 | 11.75739 | -2.031   | 0.016634  | 0.033382  | PTGER2    | chr14 | + | 52781023 | 52795324 | 2383  |
| ENSG000001 | 788.6878 | 571.0339 | 0.46601  | 3.86E-05  | 0.000116  | FAM193A   | chr4  | + | 2626988  | 2734292  | 4846  |
| ENSG000001 | 170.3622 | 47.61319 | 1.8315   | 3.72E-15  | 2.46E-14  | GRK4      | chr4  | + | 2965335  | 3042474  | 2202  |
| ENSG000001 | 1900.638 | 196.0619 | 3.2715   | 1.77E-97  | 9.76E-96  | SOX9      | chr17 | + | 70117161 | 70122561 | 3935  |
| ENSG000001 | 4.979616 | 12.92605 | -1.3334  | 0.041002  | 0.074946  | TEKT3     | chr17 | - | 15207128 | 15244958 | 1820  |
| ENSG000001 | 0        | 5.750835 | -4.0924  | 0.00284   | 0.006573  | MYH2      | chr17 | - | 10424465 | 10453274 | 6339  |
| ENSG000001 | 1121.618 | 276.8807 | 2.0161   | 5.54E-39  | 9.50E-38  | HS3ST3B1  | chr17 | + | 14204400 | 14252721 | 5367  |
| ENSG000001 | 50.3863  | 52.99424 | -0.06903 | 0.82145   | 0.87444   | SLC25A35  | chr17 | - | 8191081  | 8198661  | 2785  |
| ENSG000001 | 554.8209 | 962.6112 | -0.7918  | 0.000183  | 0.000505  | MRPS7     | chr17 | + | 73257755 | 73262454 | 1717  |
| ENSG000001 | 769.6396 | 1133.158 | -0.55681 | 3.83E-07  | 1.42E-06  | GGA3      | chr17 | - | 73232694 | 73258444 | 5142  |
| ENSG000001 | 139.1646 | 200.3043 | -0.52459 | 0.003292  | 0.007545  | ARMC7     | chr17 | + | 73106047 | 73126360 | 2126  |
| ENSG000001 | 788.5215 | 1011.444 | -0.35784 | 0.032351  | 0.060705  | NUP85     | chr17 | + | 73201754 | 73231853 | 2233  |
| ENSG000001 | 57.55295 | 123.954  | -1.0997  | 2.23E-06  | 7.70E-06  | SLC25A19  | chr17 | - | 73269073 | 73285591 | 2331  |
| ENSG000001 | 84.47539 | 282.0314 | -1.7325  | 3.21E-12  | 1.76E-11  | MIF4GD    | chr17 | - | 73262309 | 73267308 | 1531  |
| ENSG000001 | 372.3511 | 641.8839 | -0.78452 | 1.60E-09  | 7.25E-09  | NT5C      | chr17 | - | 73126320 | 73127890 | 1315  |
| ENSG000001 | 434.3482 | 248.3009 | 0.80568  | 0.000121  | 0.000342  | MSTO1     | chr1  | + | 1.56E+08 | 1.56E+08 | 2490  |
| ENSG000001 | 0.870904 | 25.70561 | -4.3978  | 7.84E-07  | 2.83E-06  | C1orf61   | chr1  | - | 1.56E+08 | 1.56E+08 | 2697  |
| ENSG000001 | 383.3516 | 651.3567 | -0.76294 | 0.000137  | 0.000385  | TTF1      | chr9  | - | 1.35E+08 | 1.35E+08 | 3052  |
| ENSG000001 | 992.3833 | 1580.175 | -0.66963 | 3.32E-06  | 1.12E-05  | GTF3C4    | chr9  | + | 1.36E+08 | 1.36E+08 | 9043  |
| ENSG000001 | 282.5634 | 498.4102 | -0.81563 | 1.59E-08  | 6.63E-08  | DDX31     | chr9  | - | 1.35E+08 | 1.36E+08 | 4577  |
| ENSG000001 | 1.503747 | 0.357707 | 1.4084   | 0.40178   | NA        | BARHL1    | chr9  | + | 1.35E+08 | 1.35E+08 | 2341  |
| ENSG000001 | 1781.006 | 1269.456 | 0.48777  | 1.40E-05  | 4.40E-05  | PPP1R12C  | chr19 | - | 55602281 | 55628927 | 4141  |
| ENSG000001 | 2956.065 | 2261.515 | 0.38598  | 0.000113  | 0.000321  | MBPAT7    | chr19 | - | 54677107 | 54693733 | 3039  |
| ENSG000001 | 0.580602 | 3.91376  | -2.1652  | 0.11376   | 0.18035   | SRMS      | chr20 | - | 62172163 | 62178857 | 1516  |
| ENSG000001 | 190.6992 | 74.91418 | 1.3283   | 0.000901  | 0.002252  | OPRL1     | chr20 | + | 62711526 | 62731996 | 3369  |
| ENSG000001 | 0        | 3.365854 | -3.2554  | 0.030524  | 0.057611  | LINC00029 | chr20 | - | 61665569 | 61668380 | 1631  |
| ENSG000001 | 1957.821 | 711.2245 | 1.4559   | 1.66E-13  | 9.91E-13  | SLC2A4R6  | chr20 | + | 62369623 | 62374858 | 1731  |
| ENSG000001 | 0        | 1.248751 | -1.5848  | 0.37202   | NA        | NPBWR2    | chr20 | - | 62737173 | 62738524 | 1352  |
| ENSG000001 | 14.5355  | 31.89437 | -1.1239  | 0.030156  | 0.05702   | C20orf195 | chr20 | + | 62184373 | 62188061 | 1137  |

|            |          |          |          |          |          |          |       |   |          |          |      |
|------------|----------|----------|----------|----------|----------|----------|-------|---|----------|----------|------|
| ENSG000001 | 0.923144 | 24.38488 | -4.3092  | 1.64E-06 | 5.75E-06 | BHLHE23  | chr20 | - | 61637331 | 61638387 | 1057 |
| ENSG000001 | 1949.713 | 1218.57  | 0.67656  | 3.40E-05 | 0.000102 | PPDPF    | chr20 | + | 62152077 | 62153559 | 868  |
| ENSG000001 | 1.048164 | 2.010288 | -0.7922  | 0.56301  | 0.66107  | IL1B     | chr2  | - | 1.14E+08 | 1.14E+08 | 1631 |
| ENSG000001 | 2.645227 | 0        | 2.909    | 0.060584 | 0.10527  | PLGLB2   | chr2  | + | 88047606 | 88058312 | 2077 |
| ENSG000001 | 0.975385 | 1.531196 | -0.50931 | 0.73826  | 0.80696  | IL37     | chr2  | + | 1.14E+08 | 1.14E+08 | 772  |
| ENSG000001 | 261.3355 | 301.678  | -0.20396 | 0.23225  | 0.32568  | CHCHD5   | chr2  | + | 1.13E+08 | 1.13E+08 | 3272 |
| ENSG000001 | 189.2512 | 42.17643 | 2.1527   | 8.96E-17 | 6.47E-16 | PAX8     | chr2  | - | 1.14E+08 | 1.14E+08 | 4084 |
| ENSG000001 | 205.712  | 117.1946 | 0.81153  | 0.000907 | 0.002265 | INSIG2   | chr2  | + | 1.19E+08 | 1.19E+08 | 3185 |
| ENSG000001 | 303.3995 | 709.544  | -1.2218  | 2.66E-12 | 1.47E-11 | POLR1B   | chr2  | + | 1.13E+08 | 1.13E+08 | 4558 |
| ENSG000001 | 1.991846 | 1.058552 | 0.78204  | 0.56251  | 0.66083  | HTR5BP   | chr2  | + | 1.19E+08 | 1.19E+08 | 1193 |
| ENSG000001 | 810.8669 | 371.3104 | 1.1222   | 3.46E-07 | 1.29E-06 | CCDC93   | chr2  | - | 1.19E+08 | 1.19E+08 | 6899 |
| ENSG000001 | 194.1092 | 33.5291  | 2.5185   | 7.13E-25 | 7.41E-24 | PSD4     | chr2  | + | 1.14E+08 | 1.14E+08 | 5600 |
| ENSG000001 | 1585.37  | 1240.362 | 0.35324  | 0.000367 | 0.000969 | SLC25A23 | chr19 | - | 6436090  | 6465214  | 3425 |
| ENSG000001 | 83.45909 | 67.6919  | 0.29815  | 0.26291  | 0.36108  | PSPN     | chr19 | - | 6375159  | 6379069  | 3911 |
| ENSG000001 | 2370.652 | 1945.052 | 0.28561  | 0.003017 | 0.00695  | GTF2F1   | chr19 | - | 6379580  | 6393992  | 2731 |
| ENSG000001 | 831.0303 | 1084.394 | -0.38309 | 0.047575 | 0.085219 | ALKBH7   | chr19 | + | 6372444  | 6375042  | 1110 |
| ENSG000001 | 1156.032 | 954.007  | 0.27697  | 0.01557  | 0.031426 | CLPP     | chr19 | + | 6361463  | 6368919  | 1346 |
| ENSG000001 | 215.3833 | 16.04913 | 3.7138   | 1.82E-40 | 3.24E-39 | TNFSF9   | chr19 | + | 6531010  | 6535931  | 1657 |
| ENSG000001 | 128.1249 | 22.77755 | 2.4812   | 6.95E-16 | 4.78E-15 | GRIA3    | chrX  | + | 1.22E+08 | 1.23E+08 | 5172 |
| ENSG000001 | 1180.788 | 873.6233 | 0.4336   | 0.054269 | 0.095494 | THOC2    | chrX  | - | 1.23E+08 | 1.23E+08 | 5609 |
| ENSG000001 | 1531.179 | 1137.38  | 0.42839  | 0.001491 | 0.003603 | MED1     | chr17 | - | 37560538 | 37607539 | 5844 |
| ENSG000001 | 7678.812 | 11682.45 | -0.60484 | 2.00E-09 | 8.96E-09 | RPL23    | chr17 | - | 37004118 | 37010096 | 3081 |
| ENSG000001 | 129.9351 | 213.7492 | -0.71707 | 3.84E-05 | 0.000115 | ATG4C    | chr1  | + | 63249806 | 63331184 | 2938 |
| ENSG000001 | 153.022  | 4.700404 | 4.8807   | 3.13E-27 | 3.59E-26 | CD70     | chr19 | - | 6583194  | 6604114  | 913  |
| ENSG000001 | 1.317927 | 121.6083 | -6.1173  | 2.84E-13 | 1.67E-12 | C3       | chr19 | - | 6677715  | 6730573  | 5263 |
| ENSG000001 | 9.387188 | 413.3658 | -5.3989  | 1.21E-67 | 4.18E-66 | SH2D3A   | chr19 | - | 6752171  | 6767599  | 3493 |
| ENSG000001 | 831.8442 | 1378.788 | -0.72706 | 0.00016  | 0.000443 | TRIP10   | chr19 | + | 6737936  | 6751537  | 2249 |
| ENSG000001 | 498.0846 | 659.6517 | -0.40463 | 0.022749 | 0.044321 | GPR108   | chr19 | - | 6729925  | 6737614  | 2057 |
| ENSG000001 | 0        | 0.700845 | -0.87835 | 0.62047  | NA       | TNFSF14  | chr19 | - | 6663148  | 6670599  | 2786 |
| ENSG000001 | 13.51644 | 15.69787 | -0.20771 | 0.68918  | 0.76837  | FOSB     | chr19 | + | 45971253 | 45978437 | 3775 |
| ENSG000001 | 743.7098 | 627.6702 | 0.2437   | 0.05285  | 0.09332  | OPA3     | chr19 | - | 46030685 | 46105470 | 7828 |
| ENSG000001 | 2224.934 | 3071.769 | -0.46475 | 1.96E-06 | 6.81E-06 | SNRPD2   | chr19 | - | 46190712 | 46195827 | 901  |
| ENSG000001 | 72.69473 | 309.9069 | -2.076   | 5.35E-14 | 3.28E-13 | RTN2     | chr19 | - | 45988547 | 46000319 | 2357 |
| ENSG000001 | 343.7332 | 385.319  | -0.16373 | 0.65166  | 0.73711  | EML2     | chr19 | - | 46110252 | 46148887 | 2791 |
| ENSG000001 | 1705.533 | 1934.456 | -0.18144 | 0.078832 | 0.13186  | VASP     | chr19 | + | 46009837 | 46030241 | 2305 |
| ENSG000001 | 2469.319 | 2438.998 | 0.017753 | 0.86735  | 0.90758  | SYMPK    | chr19 | - | 46318668 | 46366548 | 6537 |
| ENSG000001 | 318.553  | 196.2983 | 0.69569  | 4.51E-05 | 0.000134 | GPCPD1   | chr20 | - | 5525085  | 5591672  | 6649 |
| ENSG000001 | 12.84171 | 33.06457 | -1.3302  | 0.003455 | 0.007892 | SDCBP2   | chr20 | - | 1290619  | 1309883  | 1519 |
| ENSG000001 | 856.9899 | 961.1947 | -0.16518 | 0.19095  | 0.27776  | PANK2    | chr20 | + | 3869486  | 3907605  | 4815 |
| ENSG000001 | 0        | 1.966581 | -2.1968  | 0.20389  | 0.29293  | TGM3     | chr20 | + | 2276647  | 2321724  | 2642 |
| ENSG000001 | 2.302685 | 4.755391 | -0.93756 | 0.37292  | 0.47728  | GNRH2    | chr20 | + | 3024268  | 3026393  | 758  |
| ENSG000001 | 0        | 107.6639 | -7.1847  | NA       | NA       | FoxA2    | chr20 | - | 22561643 | 22566093 | 2422 |
| ENSG000001 | 0.685084 | 4.164651 | -2.0284  | 0.1698   | 0.25177  | FAM182A  | chr20 | + | 26035291 | 26073683 | 5070 |
| ENSG000001 | 7.023703 | 0        | 4.4076   | 0.000848 | 0.00213  | CD93     | chr20 | - | 23059986 | 23066977 | 6708 |
| ENSG000001 | 360.6429 | 289.5459 | 0.31541  | 0.10067  | 0.16241  | GZF1     | chr20 | + | 23342787 | 23353700 | 4835 |
| ENSG000001 | 109.3667 | 195.4066 | -0.83818 | 1.65E-05 | 5.17E-05 | NAPB     | chr20 | - | 23355159 | 23402125 | 3837 |
| ENSG000001 | 0        | 2.027273 | -2.4385  | 0.13903  | 0.2127   | NKX2-4   | chr20 | - | 21376005 | 21378666 | 2238 |
| ENSG000001 | 2620.83  | 1608.714 | 0.70265  | 1.16E-06 | 4.10E-06 | CENPB    | chr20 | - | 3764498  | 3767337  | 2840 |
| ENSG000001 | 1616.03  | 1204.596 | 0.42389  | 0.002467 | 0.005756 | PSMF1    | chr20 | + | 1093906  | 1149022  | 4290 |
| ENSG000001 | 0        | 0.594029 | -0.81444 | 0.64499  | NA       | NKX2-2   | chr20 | - | 21491648 | 21494664 | 2092 |
| ENSG000001 | 674.868  | 1195.014 | -0.82359 | 2.21E-09 | 9.89E-09 | DTD1     | chr20 | + | 18568537 | 18744561 | 2384 |
| ENSG000001 | 1498.07  | 863.8979 | 0.79329  | 1.98E-10 | 9.62E-10 | RBCK1    | chr20 | + | 388142   | 411610   | 2774 |
| ENSG000001 | 827.7553 | 168.6301 | 2.2909   | 5.28E-41 | 9.53E-40 | TMX4     | chr20 | - | 7957995  | 8000476  | 6169 |
| ENSG000001 | 1156.026 | 1838.878 | -0.66841 | 1.05E-05 | 3.36E-05 | STK35    | chr20 | + | 2082257  | 2157684  | 6685 |
| ENSG000001 | 2164.016 | 4069.919 | -0.91017 | 1.46E-16 | 1.04E-15 | SNRPB    | chr20 | - | 2442280  | 2451499  | 1450 |
| ENSG000001 | 1261.186 | 362.5729 | 1.7964   | 6.87E-57 | 1.86E-55 | NRSN2    | chr20 | + | 327527   | 335512   | 2088 |
| ENSG000001 | 329.8695 | 66.3507  | 2.2997   | 1.44E-15 | 9.74E-15 | AP5S1    | chr20 | + | 3801178  | 3805949  | 1848 |
| ENSG000001 | 13775.6  | 4697.004 | 1.5502   | 1.92E-35 | 2.96E-34 | RRBP1    | chr20 | - | 17594323 | 17662940 | 5041 |
| ENSG000001 | 211.5888 | 130.9439 | 0.64787  | 0.46054  | 0.56587  | BMP2     | chr20 | + | 6748311  | 6760927  | 3601 |
| ENSG000001 | 304.2071 | 327.8739 | -0.10791 | 0.67549  | 0.75698  | ZNF133   | chr20 | + | 18269121 | 18297640 | 4060 |
| ENSG000001 | 99.53877 | 9.900044 | 3.2704   | 8.30E-10 | 3.86E-09 | FLRT3    | chr20 | - | 14303634 | 14318262 | 4776 |
| ENSG000001 | 0.342542 | 258.6183 | -8.587   | 7.81E-19 | 6.21E-18 | OVOL2    | chr20 | - | 17937623 | 18039832 | 1555 |
| ENSG000001 | 0.923144 | 6.29874  | -2.4135  | 0.027748 | 0.052991 | PCSK2    | chr20 | + | 17206752 | 17465223 | 4740 |
| ENSG000001 | 0        | 0.357707 | -0.41864 | 0.81278  | NA       | GFRA4    | chr20 | - | 3639939  | 3644046  | 1427 |
| ENSG000001 | 394.0883 | 642.4271 | -0.70422 | 1.60E-07 | 6.14E-07 | MKKS     | chr20 | - | 10385832 | 10414870 | 2663 |

|            |          |          |          |          |          |           |       |   |          |          |      |
|------------|----------|----------|----------|----------|----------|-----------|-------|---|----------|----------|------|
| ENSG000001 | 127.0596 | 73.99621 | 0.77765  | 0.000271 | 0.000731 | BFSP1     | chr20 | - | 17474550 | 17549865 | 2207 |
| ENSG000001 | 3713.837 | 1885.487 | 0.97693  | 1.71E-18 | 1.34E-17 | DSTN      | chr20 | + | 17550508 | 17588887 | 1940 |
| ENSG000001 | 3.910914 | 19.11065 | -2.1895  | 0.001879 | 0.004463 | LAMP5     | chr20 | + | 9495008  | 9511171  | 2039 |
| ENSG000001 | 868.5652 | 995.8143 | -0.19625 | 0.30563  | 0.40717  | SNRPB2    | chr20 | + | 16710606 | 16722421 | 1665 |
| ENSG000001 | 477.1258 | 823.5411 | -0.78622 | 2.61E-07 | 9.83E-07 | MGME1     | chr20 | + | 17949556 | 17971765 | 2336 |
| ENSG000001 | 17.44708 | 13.08624 | 0.40716  | 0.54679  | 0.64697  | LRRN4     | chr20 | - | 6021424  | 6034695  | 2692 |
| ENSG000001 | 1431.26  | 378.2991 | 1.9178   | 1.52E-57 | 4.17E-56 | TBC1D20   | chr20 | - | 416124   | 443197   | 5195 |
| ENSG000001 | 853.1988 | 1048.837 | -0.297   | 0.03939  | 0.072421 | ITPA      | chr20 | + | 3189514  | 3204516  | 1185 |
| ENSG000001 | 0.342542 | 84.67591 | -7.0579  | 8.70E-12 | 4.64E-11 | TCF15     | chr20 | - | 584441   | 591042   | 1555 |
| ENSG000001 | 469.9539 | 511.642  | -0.12187 | 0.45171  | 0.55724  | MCM8      | chr20 | + | 5931298  | 5975852  | 3715 |
| ENSG000001 | 2.520208 | 83.31546 | -4.8174  | 6.62E-13 | 3.81E-12 | TMEM74B   | chr20 | - | 1161205  | 1166059  | 1730 |
| ENSG000001 | 70.43638 | 164.2173 | -1.2158  | 1.24E-05 | 3.93E-05 | FAM110A   | chr20 | + | 814358   | 826922   | 1856 |
| ENSG000001 | 565.5326 | 1251.215 | -1.1435  | 1.37E-22 | 1.29E-21 | MRPS26    | chr20 | + | 3026591  | 3028900  | 1127 |
| ENSG000001 | 0.705622 | 1.888903 | -1.1726  | 0.41692  | 0.52203  | S1PR4     | chr19 | + | 3172344  | 3180329  | 1594 |
| ENSG000001 | 3174.754 | 2999.288 | 0.081942 | 0.65131  | 0.73678  | NCLN      | chr19 | + | 3185561  | 3209573  | 4005 |
| ENSG000001 | 14.2743  | 12.24789 | 0.2002   | 0.72186  | 0.79426  | CITED1    | chrX  | - | 71521488 | 71527037 | 1231 |
| ENSG000001 | 3466.553 | 2959.156 | 0.22774  | 0.24348  | 0.33895  | HNRNPR    | chr1  | - | 23630264 | 23670829 | 7646 |
| ENSG000001 | 338.4334 | 17.57221 | 4.2491   | 9.85E-62 | 2.97E-60 | ZNF436    | chr1  | - | 23685941 | 23695935 | 4071 |
| ENSG000001 | 505.0247 | 294.4746 | 0.77706  | 1.88E-07 | 7.17E-07 | MAX       | chr14 | - | 65472892 | 65569413 | 3155 |
| ENSG000001 | 237.2152 | 212.5126 | 0.15922  | 0.34577  | 0.44987  | ARMCX5    | chrX  | + | 1.02E+08 | 1.02E+08 | 4640 |
| ENSG000001 | 8.059888 | 1.370136 | 2.3515   | 0.021472 | 0.042068 | GDF5      | chr20 | - | 34021145 | 34042568 | 2572 |
| ENSG000001 | 45.97433 | 449.7985 | -3.2719  | 1.28E-48 | 2.83E-47 | MMP24     | chr20 | + | 33814457 | 33864801 | 4412 |
| ENSG000001 | 316.5556 | 264.5402 | 0.25705  | 0.27708  | 0.37734  | NECAB3    | chr20 | - | 32244893 | 32262269 | 2142 |
| ENSG000001 | 464.4754 | 1655.103 | -1.8225  | 2.10E-11 | 1.09E-10 | ID1       | chr20 | + | 30193086 | 30194318 | 1222 |
| ENSG000001 | 4018.007 | 4903.889 | -0.28724 | 0.014516 | 0.029491 | RALY      | chr20 | + | 32581452 | 32696114 | 1817 |
| ENSG000001 | 1533.714 | 908.8607 | 0.75483  | 7.76E-10 | 3.62E-09 | DYNLRB1   | chr20 | + | 33104214 | 33128762 | 1464 |
| ENSG000001 | 2252.497 | 3627.602 | -0.6864  | 1.06E-08 | 4.49E-08 | EIF2S2    | chr20 | - | 32676104 | 32700138 | 2656 |
| ENSG000001 | 2946.731 | 2023.903 | 0.54181  | 1.16E-07 | 4.51E-07 | ERGIC3    | chr20 | + | 34129770 | 34145405 | 2848 |
| ENSG000001 | 781.7267 | 851.5085 | -0.1233  | 0.32034  | 0.42316  | ROMO1     | chr20 | + | 34287194 | 34288906 | 498  |
| ENSG000001 | 0.653381 | 1.623443 | -0.98662 | 0.5217   | 0.62424  | BPIFB9P   | chr20 | + | 31935526 | 31942250 | 1178 |
| ENSG000001 | 0.580602 | 0        | 0.8036   | 0.6494   | NA       | FAM83C    | chr20 | - | 33873534 | 33880204 | 3145 |
| ENSG000001 | 0.36308  | 0        | 0.4146   | 0.81455  | NA       | BPIFB1    | chr20 | + | 31861286 | 31897684 | 1933 |
| ENSG000001 | 836.8331 | 1063.117 | -0.34432 | 0.10072  | 0.16247  | CEP250    | chr20 | + | 34042985 | 34099804 | 8398 |
| ENSG000001 | 617.2144 | 835.7306 | -0.43628 | 0.000317 | 0.000846 | PLAGL2    | chr20 | - | 30780306 | 30795594 | 5705 |
| ENSG000001 | 324.769  | 147.9828 | 1.1328   | 6.28E-12 | 3.37E-11 | MMMP24-AS | chr20 | - | 33804634 | 33865934 | 1515 |
| ENSG000001 | 8.829729 | 58.59609 | -2.7078  | 2.37E-09 | 1.06E-08 | GRPR      | chrX  | + | 16141679 | 16171144 | 1929 |
| ENSG000001 | 3437.151 | 3437.317 | 2.22E-05 | 0.99983  | 0.99987  | KDM5C     | chrX  | - | 53220503 | 53254604 | 6096 |
| ENSG000001 | 875.483  | 115.742  | 2.917    | 1.87E-74 | 7.26E-73 | AMOT      | chrX  | - | 1.12E+08 | 1.12E+08 | 6945 |
| ENSG000001 | 614.3642 | 449.6635 | 0.44985  | 0.000162 | 0.000448 | TMEM115   | chr3  | - | 50392180 | 50397041 | 2197 |
| ENSG000001 | 2233.232 | 2117.643 | 0.076902 | 0.56895  | 0.66622  | PSMB2     | chr1  | - | 36067185 | 36107445 | 2701 |
| ENSG000001 | 328.3347 | 226.1996 | 0.53607  | 0.002907 | 0.006713 | AGO3      | chr1  | + | 36396319 | 36522063 | 3649 |
| ENSG000001 | 1143.47  | 1224.198 | -0.09741 | 0.47693  | 0.58143  | UROD      | chr1  | + | 45477819 | 45481247 | 1848 |
| ENSG000001 | 448.0703 | 65.92674 | 2.7581   | 6.76E-39 | 1.16E-37 | ST3GAL3   | chr1  | + | 44171495 | 44396831 | 2449 |
| ENSG000001 | 185.2497 | 94.14118 | 0.97592  | 1.78E-06 | 6.21E-06 | TMEM53    | chr1  | - | 45100910 | 45140227 | 2310 |
| ENSG000001 | 830.7453 | 1056.066 | -0.34576 | 0.001495 | 0.00361  | HECTD3    | chr1  | - | 45468212 | 45477001 | 3610 |
| ENSG000001 | 604.9003 | 404.7114 | 0.57717  | 3.71E-05 | 0.000111 | KLC1      | chr14 | + | 1.04E+08 | 1.04E+08 | 3250 |
| ENSG000001 | 794.1487 | 1167.214 | -0.55499 | 1.06E-07 | 4.14E-07 | XRCC3     | chr14 | - | 1.04E+08 | 1.04E+08 | 3668 |
| ENSG000001 | 550.0299 | 487.1772 | 0.17584  | 0.16322  | 0.24373  | TUBGCP3   | chr13 | - | 1.13E+08 | 1.13E+08 | 3893 |
| ENSG000001 | 212.636  | 549.9744 | -1.3679  | 1.27E-13 | 7.61E-13 | MCF2L     | chr13 | + | 1.14E+08 | 1.14E+08 | 6580 |
| ENSG000001 | 4.523219 | 10.44237 | -1.1442  | 0.15641  | 0.23533  | F10       | chr13 | + | 1.14E+08 | 1.14E+08 | 1517 |
| ENSG000001 | 520.5341 | 682.7446 | -0.39075 | 0.003999 | 0.009034 | PCID2     | chr13 | - | 1.14E+08 | 1.14E+08 | 4202 |
| ENSG000001 | 2.956066 | 12.01157 | -1.9224  | 0.014741 | 0.0299   | PROZ      | chr13 | + | 1.14E+08 | 1.14E+08 | 1551 |
| ENSG000001 | 0        | 0.297015 | -0.41864 | 0.81278  | NA       | SLURP1    | chr8  | - | 1.44E+08 | 1.44E+08 | 537  |
| ENSG000001 | 581.8049 | 444.4781 | 0.38653  | 0.039706 | 0.072903 | LRFN3     | chr19 | + | 36426260 | 36436669 | 3689 |
| ENSG000001 | 0.705622 | 1.935026 | -1.2095  | 0.39407  | 0.49851  | IGFLR1    | chr19 | - | 36230058 | 36233354 | 1195 |
| ENSG000001 | 5270.082 | 2185.559 | 1.2693   | 1.80E-39 | 3.13E-38 | CAPNS1    | chr19 | + | 36630477 | 36641255 | 1918 |
| ENSG000001 | 21.9412  | 90.55519 | -2.0248  | 8.57E-11 | 4.26E-10 | PDCD2L    | chr19 | + | 34895289 | 34917287 | 1386 |
| ENSG000001 | 2016.888 | 2071.36  | -0.03818 | 0.70791  | 0.78293  | RBM42     | chr19 | + | 36119932 | 36128588 | 1680 |
| ENSG000001 | 0.632843 | 101.5805 | -6.7273  | 2.51E-14 | 1.58E-13 | KIRREL2   | chr19 | + | 36346763 | 36358048 | 2942 |
| ENSG000001 | 1568.914 | 2741.357 | -0.80397 | 9.72E-11 | 4.81E-10 | UBA2      | chr19 | + | 34919264 | 34960853 | 2802 |
| ENSG000001 | 0.580602 | 0        | 0.8036   | 0.6494   | NA       | FFAR2     | chr19 | + | 35934809 | 35942667 | 2131 |
| ENSG000001 | 1.576526 | 9.238074 | -2.3054  | 0.01662  | 0.033356 | HCST      | chr19 | + | 36393382 | 36395279 | 613  |
| ENSG000001 | 0        | 0.297015 | -0.41864 | 0.81278  | NA       | FFAR1     | chr19 | + | 35842445 | 35843367 | 923  |
| ENSG000001 | 1859.267 | 2170.368 | -0.22258 | 0.045317 | 0.081593 | COX6B1    | chr19 | + | 36139125 | 36149763 | 667  |
| ENSG000001 | 685.7661 | 427.3312 | 0.68138  | 4.51E-06 | 1.51E-05 | THRA      | chr17 | + | 38214543 | 38250120 | 4895 |

|            |          |          |          |           |           |          |       |   |          |          |      |
|------------|----------|----------|----------|-----------|-----------|----------|-------|---|----------|----------|------|
| ENSG000001 | 0        | 4.974728 | -3.8898  | 0.005251  | 0.011651  | CCR7     | chr17 | - | 38710021 | 38721724 | 2173 |
| ENSG000001 | 101.9525 | 130.1979 | -0.35144 | 0.20447   | 0.29359   | NR1D1    | chr17 | - | 38249040 | 38256978 | 2772 |
| ENSG000001 | 1242.587 | 490.671  | 1.3364   | 7.76E-16  | 5.32E-15  | FRMD8    | chr11 | + | 65154070 | 65180996 | 3723 |
| ENSG000001 | 5543.979 | 3295.474 | 0.74967  | 1.52E-10  | 7.45E-10  | PRDX5    | chr11 | + | 64085560 | 64089283 | 893  |
| ENSG000001 | 661.9208 | 1500.548 | -1.1799  | 2.33E-24  | 2.38E-23  | BCL2L12  | chr19 | + | 50168823 | 50177173 | 1431 |
| ENSG000001 | 1261.013 | 1407.453 | -0.15849 | 0.12249   | 0.19217   | IRF3     | chr19 | - | 50162826 | 50169132 | 2874 |
| ENSG000001 | 3936.634 | 8652.762 | -1.1352  | 8.80E-33  | 1.25E-31  | PRMT1    | chr19 | + | 50179043 | 50192286 | 1686 |
| ENSG000001 | 1012.118 | 250.49   | 2.0038   | 3.03E-15  | 2.02E-14  | RRAS     | chr19 | - | 50138549 | 50143458 | 1044 |
| ENSG000001 | 5.011318 | 51.22678 | -3.2987  | 1.42E-10  | 6.96E-10  | PRRG2    | chr19 | + | 50083903 | 50094272 | 1583 |
| ENSG000001 | 3972.989 | 4183.741 | -0.07449 | 0.59251   | 0.68735   | SCAF1    | chr19 | + | 50145382 | 50161899 | 4306 |
| ENSG000001 | 1979.756 | 3244.444 | -0.7117  | 3.95E-08  | 1.60E-07  | PRR12    | chr19 | + | 50094900 | 50129696 | 6955 |
| ENSG000001 | 0.290301 | 24.8341  | -5.3808  | 2.58E-06  | 8.86E-06  | TSKS     | chr19 | - | 50243010 | 50266587 | 1883 |
| ENSG000001 | 4.709852 | 28.72684 | -2.5314  | 0.000173  | 0.000479  | FLRT1    | chr11 | + | 63870660 | 63886645 | 3949 |
| ENSG000001 | 223.9366 | 186.5676 | 0.26374  | 0.13096   | 0.20289   | ASL      | chr7  | + | 65540785 | 65558545 | 2143 |
| ENSG000001 | 393.0081 | 220.8278 | 0.83081  | 1.17E-05  | 3.71E-05  | SBDS     | chr7  | - | 66452664 | 66460588 | 1631 |
| ENSG000001 | 0.290301 | 0        | 0.4146   | 0.81455   | NA        | HTN1     | chr4  | + | 70916119 | 70924562 | 3723 |
| ENSG000001 | 206.9356 | 226.3788 | -0.12902 | 0.69405   | 0.77183   | STAT5A   | chr17 | + | 40439565 | 40463961 | 4301 |
| ENSG000001 | 258.0162 | 38.29919 | 2.7174   | 2.61E-16  | 1.83E-15  | WNK4     | chr17 | + | 40932696 | 40948954 | 4001 |
| ENSG000001 | 693.3098 | 438.6624 | 0.65995  | 8.11E-07  | 2.92E-06  | BECN1    | chr17 | - | 40962152 | 40985367 | 2504 |
| ENSG000001 | 1.068702 | 389.5615 | -8.2006  | 8.19E-30  | 1.04E-28  | PRKCG    | chr19 | + | 54382444 | 54410906 | 3133 |
| ENSG000001 | 412.4349 | 1298.629 | -1.6511  | 2.87E-26  | 3.15E-25  | TRAP1    | chr16 | - | 3701640  | 3767598  | 2309 |
| ENSG000001 | 928.3354 | 561.6625 | 0.722    | 0.000657  | 0.001675  | GLIS2    | chr16 | + | 4364762  | 4389598  | 4469 |
| ENSG000001 | 538.4208 | 477.1784 | 0.17395  | 0.47322   | 0.57787   | NSRP1    | chr17 | + | 28442539 | 28513493 | 2541 |
| ENSG000001 | 1611.832 | 1634.826 | -0.02011 | 0.87076   | 0.90978   | DNAJC8   | chr1  | - | 28525967 | 28559536 | 1600 |
| ENSG000001 | 1668.381 | 1001.942 | 0.73212  | 0.002227  | 0.005226  | AHDC1    | chr1  | - | 27860546 | 27930942 | 6438 |
| ENSG000001 | 217.5592 | 20.44353 | 3.3912   | 1.76E-25  | 1.87E-24  | IFI6     | chr1  | - | 27992572 | 27998729 | 841  |
| ENSG000001 | 0        | 34.88466 | -6.7301  | 2.31E-09  | 1.03E-08  | DACH2    | chrX  | + | 85403462 | 86087607 | 5582 |
| ENSG000001 | 750.3465 | 773.3291 | -0.04338 | 0.73365   | 0.80325   | ZNF384   | chr12 | - | 6775643  | 6798738  | 3286 |
| ENSG000001 | 20.23965 | 50.85679 | -1.3063  | 0.00142   | 0.00344   | EMG1     | chr12 | + | 7079944  | 7085781  | 1575 |
| ENSG000001 | 0        | 0.297015 | -0.41864 | 0.81278   | NA        | SSX1     | chrX  | + | 48114752 | 48126879 | 1298 |
| ENSG000001 | 240.97   | 162.7353 | 0.56565  | 0.000902  | 0.002254  | UXT      | chrX  | - | 47511197 | 47518560 | 894  |
| ENSG000001 | 9.450594 | 18.62834 | -0.94723 | 0.084515  | 0.14009   | CFP      | chrX  | - | 47483612 | 47489704 | 4040 |
| ENSG000001 | 1157.305 | 882.6518 | 0.38998  | 0.001189  | 0.002916  | ELK1     | chrX  | - | 47494920 | 47510003 | 2695 |
| ENSG000001 | 764.2729 | 1143.533 | -0.58007 | 3.06E-05  | 9.26E-05  | TIMM17B  | chrX  | - | 48750730 | 48755426 | 1528 |
| ENSG000001 | 1034.78  | 428.8195 | 1.2686   | 6.67E-23  | 6.41E-22  | PCNXL4   | chr14 | + | 60558629 | 60635851 | 4666 |
| ENSG000001 | 353.6911 | 401.5446 | -0.18178 | 0.45987   | 0.56514   | ATG14    | chr14 | - | 55833110 | 55878576 | 4742 |
| ENSG000001 | 3889.83  | 2413.779 | 0.68568  | 0.00355   | 0.008092  | KTN1     | chr14 | + | 56025790 | 56168244 | 6241 |
| ENSG000001 | 2228.184 | 9.182214 | 7.9      | 1.56E-149 | 1.78E-147 | SIX1     | chr14 | - | 61110132 | 61124977 | 3997 |
| ENSG000001 | 1518.798 | 0        | 11.725   | 4.33E-28  | 5.13E-27  | RHOJ     | chr14 | + | 63670832 | 63759937 | 3302 |
| ENSG000001 | 978.521  | 2100.989 | -1.0999  | 1.18E-11  | 6.23E-11  | DLGAP5   | chr14 | - | 55614830 | 55658396 | 2973 |
| ENSG000001 | 460.3714 | 82.42098 | 2.4713   | 4.18E-38  | 6.99E-37  | L3HYPDH  | chr14 | - | 59927081 | 59951148 | 1527 |
| ENSG000001 | 91.78842 | 855.755  | -3.1933  | 2.58E-21  | 2.31E-20  | HSPA2    | chr14 | + | 65002623 | 65009955 | 2767 |
| ENSG000001 | 609.6858 | 405.0804 | 0.5874   | 0.014339  | 0.029176  | ZBTB1    | chr14 | + | 64970430 | 65000408 | 4119 |
| ENSG000001 | 255.7743 | 412.2779 | -0.6863  | 8.58E-07  | 3.08E-06  | TRMT5    | chr14 | - | 61438169 | 61448076 | 5573 |
| ENSG000001 | 404.627  | 184.3592 | 1.1281   | 2.47E-07  | 9.31E-07  | SGPP1    | chr14 | - | 64150932 | 64194757 | 3312 |
| ENSG000001 | 625.7357 | 1541.323 | -1.2984  | 1.88E-24  | 1.93E-23  | PLEKHG3  | chr14 | + | 65170820 | 65213610 | 6989 |
| ENSG000001 | 0        | 6.030864 | -4.1385  | 0.002689  | 0.006248  | PZP      | chr12 | - | 9301436  | 9360966  | 4610 |
| ENSG000001 | 0.72616  | 1.98115  | -1.1614  | 0.43559   | 0.54105   | PRDM7    | chr16 | - | 90122974 | 90158480 | 2937 |
| ENSG000001 | 352.8662 | 459.4909 | -0.37873 | 0.045157  | 0.081335  | RHOT1    | chr17 | + | 30469473 | 30580393 | 3297 |
| ENSG000001 | 5.685237 | 2.24661  | 1.2123   | 0.20134   | 0.2901    | EVIA2    | chr17 | - | 29644578 | 29648902 | 1860 |
| ENSG000001 | 10.52011 | 3.541484 | 1.4638   | 0.063367  | 0.10941   | OMG      | chr17 | - | 29599031 | 29624557 | 2965 |
| ENSG000001 | 518.2222 | 461.6253 | 0.16579  | 0.39183   | 0.49626   | WDR60    | chr7  | + | 1.59E+08 | 1.59E+08 | 5410 |
| ENSG000001 | 16.07772 | 2912.145 | -7.4559  | 1.63E-172 | 2.55E-170 | AIF1L    | chr9  | + | 1.34E+08 | 1.34E+08 | 3515 |
| ENSG000001 | 45.76618 | 107.7878 | -1.22    | 0.002746  | 0.006371  | FAM78A   | chr9  | - | 1.34E+08 | 1.34E+08 | 4560 |
| ENSG000001 | 1288.75  | 1088.42  | 0.24354  | 0.06632   | 0.11377   | NUP214   | chr9  | + | 1.34E+08 | 1.34E+08 | 7600 |
| ENSG000001 | 0        | 7.656723 | -4.5386  | 0.00052   | 0.001345  | AVPR2    | chrX  | + | 1.53E+08 | 1.53E+08 | 1763 |
| ENSG000001 | 541.3371 | 253.1458 | 1.093    | 3.05E-13  | 1.79E-12  | SLC10A3  | chrX  | - | 1.54E+08 | 1.54E+08 | 2127 |
| ENSG000001 | 3717.695 | 3355.78  | 0.14752  | 0.2093    | 0.29925   | MAP2K2   | chr19 | - | 4090319  | 4124126  | 2926 |
| ENSG000001 | 1031.256 | 935.4062 | 0.14087  | 0.43968   | 0.54544   | HNRNP2H2 | chrX  | + | 1.01E+08 | 1.01E+08 | 2223 |
| ENSG000001 | 507.4019 | 458.1513 | 0.14718  | 0.26569   | 0.36443   | ARMCX1   | chrX  | + | 1.01E+08 | 1.01E+08 | 2141 |
| ENSG000001 | 343.1888 | 90.52525 | 1.918    | 5.93E-19  | 4.74E-18  | TMEM35   | chrX  | + | 1E+08    | 1E+08    | 2195 |
| ENSG000001 | 152.4621 | 259.198  | -0.7599  | 0.000803  | 0.002022  | TIMM8A   | chrX  | - | 1.01E+08 | 1.01E+08 | 1664 |
| ENSG000001 | 261.286  | 460.284  | -0.81247 | 7.24E-06  | 2.36E-05  | ZC4H2    | chrX  | - | 64136250 | 64254593 | 4147 |
| ENSG000001 | 10926.86 | 7394.285 | 0.56253  | 9.57E-05  | 0.000273  | CANX     | chr5  | + | 1.79E+08 | 1.79E+08 | 4260 |
| ENSG000001 | 2000.916 | 2139.058 | -0.09613 | 0.37114   | 0.47552   | CPSF3L   | chr1  | - | 1246965  | 1260071  | 3079 |

|            |          |          |          |           |           |         |       |   |          |          |       |
|------------|----------|----------|----------|-----------|-----------|---------|-------|---|----------|----------|-------|
| ENSG000001 | 0.36308  | 0        | 0.4146   | 0.81455   | NA        | RGS13   | chr1  | + | 1.93E+08 | 1.93E+08 | 5119  |
| ENSG000001 | 72.27265 | 88.51898 | -0.28704 | 0.2495    | 0.34585   | IPPK    | chr9  | - | 95375466 | 95432547 | 4401  |
| ENSG000001 | 80.8454  | 97.65435 | -0.27045 | 0.29963   | 0.40126   | ZNF484  | chr9  | - | 95607874 | 95640304 | 3180  |
| ENSG000001 | 25.70476 | 1.949596 | 3.5425   | 9.44E-07  | 3.38E-06  | OMD     | chr9  | - | 95176527 | 95186743 | 2449  |
| ENSG000001 | 1.265686 | 42.02349 | -4.7385  | 1.52E-09  | 6.91E-09  | FGD3    | chr9  | + | 95709733 | 95798518 | 4697  |
| ENSG000001 | 1350.28  | 12.36357 | 6.7468   | 6.04E-143 | 6.26E-141 | HIVEP3  | chr1  | - | 41972036 | 42501596 | 12319 |
| ENSG000001 | 463.6443 | 441.2505 | 0.071022 | 0.71035   | 0.78481   | PPCS    | chr1  | + | 42921788 | 42939056 | 1617  |
| ENSG000001 | 0.290301 | 0        | 0.4146   | 0.81455   | NA        | EDN2    | chr1  | - | 41944446 | 41950344 | 1241  |
| ENSG000001 | 27.81567 | 339.3724 | -3.5996  | 4.99E-38  | 8.32E-37  | BCL11B  | chr14 | - | 99635624 | 99737861 | 7603  |
| ENSG000001 | 2865.145 | 4567.088 | -0.67152 | 1.56E-07  | 6.00E-07  | COX7C   | chr5  | + | 85913721 | 85916779 | 1584  |
| ENSG000001 | 365.1974 | 820.1805 | -1.1647  | 1.20E-10  | 5.89E-10  | TRAF2   | chr9  | + | 1.4E+08  | 1.4E+08  | 2413  |
| ENSG000001 | 293.0167 | 326.4585 | -0.15586 | 0.42057   | 0.52595   | ABHD8   | chr19 | - | 17402940 | 17421045 | 2090  |
| ENSG000001 | 3.652315 | 40.43086 | -3.3529  | 3.86E-07  | 1.43E-06  | MASP1   | chr3  | - | 1.87E+08 | 1.87E+08 | 5982  |
| ENSG000001 | 15.87316 | 55.63333 | -1.7936  | 1.75E-06  | 6.12E-06  | HRASLS  | chr3  | + | 1.93E+08 | 1.93E+08 | 1066  |
| ENSG000001 | 47.12778 | 113.9219 | -1.2663  | 8.78E-07  | 3.15E-06  | HELB    | chr12 | + | 66696325 | 66737423 | 3586  |
| ENSG000001 | 1719.148 | 771.1744 | 1.1556   | 1.69E-17  | 1.27E-16  | RAP1B   | chr12 | + | 69004619 | 69054372 | 2129  |
| ENSG000001 | 42.0018  | 1.531196 | 4.4815   | 5.16E-10  | 2.43E-09  | TSPAN8  | chr12 | - | 71518865 | 71835678 | 1516  |
| ENSG000001 | 1.048164 | 0        | 1.348    | 0.44949   | NA        | BEST3   | chr12 | - | 70037140 | 70093256 | 3532  |
| ENSG000001 | 103.7285 | 501.9205 | -2.2677  | 5.82E-31  | 7.71E-30  | RAB3IP  | chr12 | + | 70132461 | 70216984 | 9646  |
| ENSG000001 | 17.41798 | 95.46205 | -2.4172  | 1.73E-08  | 7.19E-08  | PTPRB   | chr12 | - | 70910630 | 71031220 | 11332 |
| ENSG000001 | 1432.807 | 982.7676 | 0.54363  | 1.46E-07  | 5.62E-07  | DYRK2   | chr12 | + | 68042118 | 68059186 | 8912  |
| ENSG000001 | 122.2538 | 433.2792 | -1.8182  | 2.45E-30  | 3.16E-29  | YEATS4  | chr12 | + | 69753483 | 69784576 | 1434  |
| ENSG000001 | 1.555988 | 4.926189 | -1.4319  | 0.21898   | 0.31064   | TAS2R3  | chr7  | + | 1.41E+08 | 1.41E+08 | 1101  |
| ENSG000001 | 2.137404 | 7.671292 | -1.7331  | 0.07802   | 0.13068   | TAS2R4  | chr7  | + | 1.41E+08 | 1.41E+08 | 994   |
| ENSG000001 | 5.000153 | 14.18051 | -1.4569  | 0.039475  | 0.07255   | TAS2R5  | chr7  | + | 1.41E+08 | 1.41E+08 | 1150  |
| ENSG000001 | 0.290301 | 20.08186 | -5.1127  | 8.59E-06  | 2.78E-05  | CRYGN   | chr7  | - | 1.51E+08 | 1.51E+08 | 2367  |
| ENSG000001 | 0        | 15.33043 | -5.5325  | 5.79E-06  | 1.91E-05  | LRRRC61 | chr7  | + | 1.5E+08  | 1.5E+08  | 1877  |
| ENSG000001 | 330.0841 | 39.42897 | 3.0295   | 5.03E-23  | 4.86E-22  | IDUA    | chr4  | + | 980785   | 998316   | 2251  |
| ENSG000001 | 3194.477 | 650.5947 | 2.2923   | 3.59E-73  | 1.36E-71  | FGFRL1  | chr4  | + | 1003724  | 1020685  | 3639  |
| ENSG000001 | 256.7551 | 74.5368  | 1.7779   | 4.10E-15  | 2.71E-14  | TMEM175 | chr4  | + | 926175   | 952444   | 2236  |
| ENSG000001 | 81.58175 | 260.2657 | -1.6713  | 6.71E-16  | 4.63E-15  | AUNIP   | chr1  | - | 26158414 | 26185903 | 2116  |
| ENSG000001 | 1685.306 | 1640.294 | 0.039166 | 0.73221   | 0.80216   | PIN1    | chr19 | + | 9945933  | 9960358  | 4022  |
| ENSG000001 | 619.5403 | 535.6589 | 0.20985  | 0.17428   | 0.2573    | FBXL12  | chr19 | - | 9920943  | 9938492  | 1920  |
| ENSG000001 | 2651.785 | 1333.818 | 0.98995  | 1.52E-10  | 7.42E-10  | EMC1    | chr1  | - | 19542158 | 19578046 | 6664  |
| ENSG000001 | 0        | 2.529055 | -2.8037  | 0.077578  | 0.13005   | PLA2G5  | chr1  | + | 20354672 | 20417683 | 1871  |
| ENSG000001 | 5753.687 | 5856.879 | -0.02565 | 0.77815   | 0.8406    | UBR4    | chr1  | - | 19401000 | 19536770 | 15945 |
| ENSG000001 | 3474.643 | 1182.87  | 1.553    | 5.55E-49  | 1.23E-47  | HP1BP3  | chr1  | - | 21069154 | 21113816 | 4822  |
| ENSG000001 | 7.272928 | 58.06692 | -2.9499  | 1.54E-10  | 7.50E-10  | EMR2    | chr19 | - | 14843205 | 14889353 | 6767  |
| ENSG000001 | 1779.384 | 1866.943 | -0.06932 | 0.51414   | 0.61715   | SIN3B   | chr19 | + | 16940211 | 16991164 | 5129  |
| ENSG000001 | 1372.722 | 590.5321 | 1.2152   | 1.52E-17  | 1.15E-16  | SLC35E1 | chr19 | - | 16660642 | 16683193 | 5099  |
| ENSG000001 | 639.739  | 727.675  | -0.18509 | 0.23077   | 0.32421   | EPS15L1 | chr19 | - | 16466050 | 16582896 | 3915  |
| ENSG000001 | 227.1881 | 7.269878 | 4.9081   | 1.26E-37  | 2.08E-36  | KLF2    | chr19 | + | 16435628 | 16438685 | 2018  |
| ENSG000001 | 0        | 0.357707 | -0.41864 | 0.81278   | NA        | OR7C1   | chr19 | - | 14909958 | 14911023 | 1066  |
| ENSG000001 | 1.286224 | 3.823929 | -1.388   | 0.22205   | 0.31425   | F2RL3   | chr19 | + | 16999671 | 17003417 | 3473  |
| ENSG000001 | 10.60243 | 12.14994 | -0.18256 | 0.7707    | 0.83469   | UQCRL1  | chr19 | - | 1597171  | 1605480  | 1315  |
| ENSG000001 | 281.7096 | 584.1737 | -1.0481  | 3.65E-08  | 1.48E-07  | GFER    | chr16 | + | 2034208  | 2037750  | 2345  |
| ENSG000001 | 36.46195 | 676.5035 | -4.1864  | 2.03E-42  | 3.80E-41  | SYNGR3  | chr16 | + | 2039661  | 2044276  | 2051  |
| ENSG000001 | 441.9006 | 1490.908 | -1.7501  | 2.90E-34  | 4.31E-33  | PKMYT1  | chr16 | - | 3018025  | 3030540  | 2308  |
| ENSG000001 | 6.08858  | 108.3844 | -4.0243  | 5.18E-12  | 2.80E-11  | WFIKK1  | chr16 | + | 679239   | 684116   | 4878  |
| ENSG000001 | 324.6213 | 509.7498 | -0.6501  | 1.11E-05  | 3.53E-05  | WDR24   | chr16 | - | 734622   | 740444   | 3245  |
| ENSG000001 | 76.74021 | 685.5731 | -3.1216  | 4.41E-17  | 3.25E-16  | FBXL16  | chr16 | - | 742500   | 755829   | 3547  |
| ENSG000001 | 883.3921 | 1731.841 | -0.96978 | 8.12E-12  | 4.33E-11  | CHTF18  | chr16 | + | 838046   | 850737   | 4494  |
| ENSG000001 | 1.555988 | 4.78453  | -1.395   | 0.21818   | 0.30965   | GNG13   | chr16 | - | 848041   | 850733   | 984   |
| ENSG000001 | 16.14031 | 18.51824 | -0.17882 | 0.72255   | 0.7947    | TUBBP1  | chr8  | + | 30209389 | 30211034 | 1646  |
| ENSG000001 | 9239.321 | 4965.502 | 0.89525  | 1.81E-22  | 1.70E-21  | MACF1   | chr1  | + | 39546988 | 39952849 | 24828 |
| ENSG000001 | 7615.708 | 11311.92 | -0.57044 | 2.85E-11  | 1.47E-10  | SMARCA4 | chr19 | + | 11071598 | 11176071 | 5790  |
| ENSG000001 | 1357.03  | 2171.573 | -0.67568 | 0.00195   | 0.004626  | KDM4B   | chr19 | + | 4969125  | 5153606  | 5593  |
| ENSG000001 | 1.919068 | 12.43971 | -2.3876  | 0.031227  | 0.058731  | TICAM1  | chr19 | - | 4815944  | 4831716  | 2676  |
| ENSG000001 | 106.415  | 167.8582 | -0.65409 | 0.000659  | 0.001681  | GAN     | chr16 | + | 81348557 | 81413940 | 4695  |
| ENSG000001 | 27.53312 | 34.96059 | -0.33333 | 0.49456   | 0.59835   | METTL25 | chr12 | + | 82752276 | 82873015 | 2093  |
| ENSG000001 | 3.475055 | 0.715414 | 1.8961   | 0.17101   | 0.25338   | IL17B   | chr5  | - | 1.49E+08 | 1.49E+08 | 696   |
| ENSG000001 | 1.971308 | 2.232041 | -0.17172 | 0.88358   | 0.91879   | EMC6    | chr17 | + | 3572109  | 3572962  | 762   |
| ENSG000001 | 601.4367 | 1143.377 | -0.9258  | 7.13E-12  | 3.82E-11  | METTL16 | chr17 | - | 2319343  | 2415185  | 4271  |
| ENSG000001 | 197.4116 | 641.4446 | -1.695   | 3.72E-22  | 3.44E-21  | TUBA4A  | chr2  | - | 2.2E+08  | 2.2E+08  | 2499  |
| ENSG000001 | 0        | 10.42452 | -4.9119  | 0.00018   | 0.000496  | VIL1    | chr2  | + | 2.19E+08 | 2.19E+08 | 6531  |

|            |          |          |          |           |           |          |       |   |          |          |       |
|------------|----------|----------|----------|-----------|-----------|----------|-------|---|----------|----------|-------|
| ENSG000001 | 1267.816 | 2020.487 | -0.67138 | 9.94E-12  | 5.27E-11  | AAMP     | chr2  | - | 2.19E+08 | 2.19E+08 | 2270  |
| ENSG000001 | 848.3444 | 722.5572 | 0.23112  | 0.12593   | 0.19657   | PNKD     | chr2  | + | 2.19E+08 | 2.19E+08 | 3021  |
| ENSG000001 | 1317.877 | 8.965293 | 6.1966   | 3.40E-07  | 1.27E-06  | TNFRSF19 | chr13 | + | 24144509 | 24250232 | 4151  |
| ENSG000001 | 633.6573 | 218.1862 | 1.5358   | 2.72E-14  | 1.71E-13  | RNF6     | chr13 | - | 26706253 | 26796791 | 3867  |
| ENSG000001 | 1659.309 | 1506.61  | 0.13941  | 0.32524   | 0.42815   | ECHS1    | chr10 | - | 1.35E+08 | 1.35E+08 | 1617  |
| ENSG000001 | 0.342542 | 0        | 0.4146   | 0.81455   | NA        | ZNF835   | chr19 | - | 57174020 | 57183151 | 2779  |
| ENSG000001 | 1830.64  | 678.7225 | 1.4213   | 4.84E-06  | 1.61E-05  | AKAP9    | chr7  | + | 91570181 | 91739987 | 12475 |
| ENSG000001 | 1099.895 | 71.51979 | 3.9282   | 3.00E-112 | 2.07E-110 | GNG11    | chr7  | + | 93551011 | 93555831 | 964   |
| ENSG000001 | 1437.981 | 1386.376 | 0.05325  | 0.76604   | 0.83071   | SHFM1    | chr7  | - | 96110938 | 96339203 | 2773  |
| ENSG000001 | 1.233984 | 23.47195 | -3.9275  | 2.25E-06  | 7.77E-06  | GNGT1    | chr7  | + | 93220885 | 93540577 | 1943  |
| ENSG000001 | 2402.748 | 2731.549 | -0.18488 | 0.060756  | 0.10553   | HIP1     | chr7  | - | 75162621 | 75368280 | 8013  |
| ENSG000001 | 1077.611 | 1329.772 | -0.30339 | 0.026962  | 0.051651  | PTPN12   | chr7  | + | 77166592 | 77269388 | 3406  |
| ENSG000001 | 1249.557 | 2765.933 | -1.1453  | 4.96E-23  | 4.80E-22  | POR      | chr7  | + | 75528518 | 75616173 | 2532  |
| ENSG000001 | 27.09628 | 3.616746 | 2.8053   | 8.43E-06  | 2.73E-05  | FGL2     | chr7  | - | 76822688 | 76829143 | 4261  |
| ENSG000001 | 285.7581 | 257.4957 | 0.14955  | 0.36723   | 0.47183   | STYXL1   | chr7  | - | 75625656 | 75677322 | 1570  |
| ENSG000001 | 0.290301 | 1.012429 | -0.95336 | 0.58114   | NA        | STEAP4   | chr7  | - | 87905744 | 87936206 | 4451  |
| ENSG000001 | 1686.681 | 449.3319 | 1.9044   | 4.94E-35  | 7.50E-34  | GNAI1    | chr7  | + | 79763271 | 79848718 | 3347  |
| ENSG000001 | 110.0545 | 103.2046 | 0.092749 | 0.69235   | 0.77064   | PMS2P3   | chr7  | - | 75132254 | 75157478 | 1490  |
| ENSG000001 | 202.1753 | 477.0271 | -1.2349  | 9.43E-11  | 4.67E-10  | PEX1     | chr7  | - | 92116334 | 92157845 | 5333  |
| ENSG000001 | 101.448  | 138.2991 | -0.44198 | 0.20488   | 0.29414   | MTERF    | chr7  | - | 91500243 | 91510034 | 3882  |
| ENSG000001 | 588.7338 | 259.2923 | 1.1825   | 1.34E-15  | 9.11E-15  | SGCE     | chr7  | - | 94214542 | 94285521 | 1871  |
| ENSG000001 | 158.0702 | 119.2898 | 0.40567  | 0.092233  | 0.15098   | RBM48    | chr7  | + | 92158087 | 92167319 | 4093  |
| ENSG000001 | 373.6334 | 333.0593 | 0.16738  | 0.30846   | 0.4102    | CASD1    | chr7  | + | 94138531 | 94186331 | 3942  |
| ENSG000001 | 156.6031 | 147.4578 | 0.086921 | 0.81873   | 0.87259   | ZNF780B  | chr19 | - | 40534167 | 40562116 | 8665  |
| ENSG000001 | 94.22387 | 205.4381 | -1.1189  | 6.68E-05  | 0.000194  | LRFN1    | chr19 | - | 39797208 | 39805976 | 3381  |
| ENSG000001 | 156.4037 | 120.8268 | 0.37423  | 0.049168  | 0.0877    | ZFP36    | chr19 | + | 39897453 | 39900052 | 1786  |
| ENSG000001 | 237.1465 | 307.0992 | -0.37137 | 0.063072  | 0.10895   | SRD5A3   | chr4  | + | 56212276 | 56239263 | 4190  |
| ENSG000001 | 0.975385 | 11.92819 | -3.2944  | 0.000685  | 0.001741  | SPINK2   | chr4  | - | 57676026 | 57687908 | 763   |
| ENSG000001 | 1931.474 | 671.8582 | 1.5199   | 9.72E-20  | 8.10E-19  | RASL11B  | chr4  | + | 53728457 | 53733000 | 1993  |
| ENSG000001 | 2970.386 | 9379.542 | -1.6566  | 1.71E-36  | 2.72E-35  | PAICS    | chr4  | + | 57301907 | 57327534 | 3340  |
| ENSG000001 | 1029.291 | 2955.765 | -1.5192  | 1.07E-29  | 1.35E-28  | KDR      | chr4  | - | 55944644 | 55991756 | 5831  |
| ENSG000001 | 418.9373 | 1116.972 | -1.4135  | 3.67E-33  | 5.27E-32  | PPAT     | chr4  | - | 57259528 | 57301781 | 4043  |
| ENSG000001 | 1117.169 | 945.0627 | 0.24078  | 0.030068  | 0.056866  | TUBGCP6  | chr22 | - | 50656118 | 50683421 | 6053  |
| ENSG000001 | 245.9103 | 312.373  | -0.34379 | 0.19827   | 0.28652   | ADM2     | chr22 | + | 50919985 | 50924869 | 4276  |
| ENSG000001 | 698.3743 | 743.9767 | -0.09038 | 0.52499   | 0.62698   | DGCR6L   | chr22 | - | 20301799 | 20307603 | 1154  |
| ENSG000001 | 859.0957 | 970.4201 | -0.17434 | 0.5695    | 0.66669   | DGCR8    | chr22 | + | 20067755 | 20099400 | 4695  |
| ENSG000001 | 355.3788 | 205.7635 | 0.7832   | 0.005049  | 0.011241  | ASPHD2   | chr22 | + | 26825239 | 26840981 | 3357  |
| ENSG000001 | 1.016461 | 2.482932 | -1.0855  | 0.4287    | 0.53415   | VPREB3   | chr22 | - | 24094930 | 24096655 | 610   |
| ENSG000001 | 909.612  | 602.0761 | 0.59292  | 0.001481  | 0.00358   | SDF2L1   | chr22 | + | 21996550 | 21998587 | 865   |
| ENSG000001 | 1.701545 | 144.9999 | -6.2034  | 1.98E-20  | 1.70E-19  | GAL3ST1  | chr22 | - | 30950622 | 30970574 | 1908  |
| ENSG000001 | 2342.657 | 3658.132 | -0.64242 | 1.95E-08  | 8.07E-08  | YWHAH    | chr22 | + | 32340447 | 32353590 | 1879  |
| ENSG000001 | 0.685084 | 4.660728 | -2.3504  | 0.06642   | 0.11389   | RFPL2    | chr22 | - | 32586422 | 32600718 | 2410  |
| ENSG000001 | 2.551911 | 1.387121 | 0.77093  | 0.5524    | 0.65181   | C22orf24 | chr22 | - | 32329507 | 32341504 | 1247  |
| ENSG000001 | 2.085163 | 1.949596 | 0.054029 | 0.96473   | 0.97948   | POM121L9 | chr22 | + | 24647796 | 24661493 | 5018  |
| ENSG000001 | 117.3623 | 200.2118 | -0.76218 | 0.03261   | 0.061122  | GNAZ     | chr22 | + | 23412540 | 23467224 | 3340  |
| ENSG000001 | 312.2882 | 618.8139 | -0.98078 | 0.000423  | 0.00111   | MGAT3    | chr22 | + | 39853349 | 39888199 | 5062  |
| ENSG000001 | 17.03338 | 5.298465 | 1.5926   | 0.047641  | 0.085325  | ADORA2A  | chr22 | + | 24813847 | 24838328 | 2569  |
| ENSG000001 | 3804.999 | 5960.925 | -0.64604 | 9.63E-05  | 0.000275  | ATF4     | chr22 | + | 39915700 | 39918691 | 2019  |
| ENSG000001 | 16.08889 | 575.8562 | -5.1137  | 1.31E-51  | 3.14E-50  | A4GALT   | chr22 | - | 43088127 | 43117304 | 2321  |
| ENSG000001 | 0        | 0.357707 | -0.41864 | 0.81278   | NA        | RFPL3    | chr22 | + | 32750872 | 32757148 | 1488  |
| ENSG000001 | 1413.395 | 355.4078 | 1.9855   | 7.92E-29  | 9.63E-28  | CDC42EP1 | chr22 | + | 37956454 | 37965412 | 2181  |
| ENSG000001 | 4.49233  | 0.357707 | 2.9409   | 0.034885  | 0.064956  | APOL3    | chr22 | - | 36536372 | 36562225 | 3634  |
| ENSG000001 | 29.31861 | 34.94374 | -0.25488 | 0.51176   | 0.61491   | MCHR1    | chr22 | + | 41074754 | 41078818 | 2851  |
| ENSG000001 | 1103.78  | 1113.983 | -0.01348 | 0.94443   | 0.96428   | TPST2    | chr22 | - | 26921458 | 26992681 | 2188  |
| ENSG000001 | 7.645381 | 132.9575 | -4.0693  | 2.31E-21  | 2.08E-20  | BAIAP2L2 | chr22 | - | 38480896 | 38506677 | 2146  |
| ENSG000001 | 2302.458 | 1683.387 | 0.45102  | 0.000286  | 0.00077   | MPST     | chr22 | + | 37415676 | 37425863 | 5872  |
| ENSG000001 | 0.290301 | 9.540794 | -4.0366  | 0.001557  | 0.003746  | GALR3    | chr22 | + | 38219389 | 38221502 | 1157  |
| ENSG000001 | 505.9207 | 409.2615 | 0.30414  | 0.096697  | 0.157     | TST      | chr22 | - | 37406900 | 37415681 | 1797  |
| ENSG000001 | 0.72616  | 0        | 0.85004  | 0.63064   | NA        | APOL5    | chr22 | + | 36113919 | 36125530 | 1438  |
| ENSG000001 | 347.844  | 173.0961 | 1.0032   | 2.28E-07  | 8.62E-07  | APOL2    | chr22 | - | 36622256 | 36636000 | 2685  |
| ENSG000001 | 62.95807 | 22.46684 | 1.4716   | 2.46E-05  | 7.53E-05  | RAC2     | chr22 | - | 37621301 | 37640488 | 1482  |
| ENSG000001 | 366.2316 | 107.2624 | 1.7579   | 1.20E-07  | 4.67E-07  | LIF      | chr22 | - | 30636436 | 30642840 | 3969  |
| ENSG000001 | 204.5299 | 163.1632 | 0.3204   | 0.31985   | 0.42272   | C22orf23 | chr22 | - | 38339528 | 38349676 | 1560  |
| ENSG000001 | 3.838949 | 0.715414 | 1.9891   | 0.15123   | 0.22872   | APOBEC3A | chr22 | + | 39348746 | 39359188 | 1478  |
| ENSG000001 | 75.81094 | 88.38169 | -0.22042 | 0.57699   | 0.6737    | APOBEC3F | chr22 | + | 39436609 | 39449915 | 2694  |

|            |          |          |          |           |           |          |       |   |          |          |       |
|------------|----------|----------|----------|-----------|-----------|----------|-------|---|----------|----------|-------|
| ENSG000001 | 23.59987 | 15.70841 | 0.57374  | 0.20296   | 0.29183   | RIBC2    | chr22 | + | 45809572 | 45828376 | 1478  |
| ENSG000001 | 1.213446 | 0.640152 | 0.67875  | 0.66953   | NA        | KRT17    | chr17 | - | 39775689 | 39781094 | 1834  |
| ENSG000001 | 0        | 0.343138 | -0.41864 | 0.81278   | NA        | TBC1D27  | chr17 | - | 16826229 | 16838153 | 4838  |
| ENSG000001 | 1115.065 | 761.6402 | 0.54972  | 3.47E-05  | 0.000104  | EMC4     | chr15 | + | 34517200 | 34522357 | 2019  |
| ENSG000001 | 64.99637 | 26.9569  | 1.237    | 0.012542  | 0.02583   | RNF112   | chr17 | + | 19314438 | 19320589 | 3212  |
| ENSG000001 | 955.3327 | 2207.203 | -1.2064  | 3.01E-20  | 2.56E-19  | SPECC1   | chr17 | + | 19912657 | 20222339 | 8133  |
| ENSG000001 | 373.3447 | 0.640152 | 8.5496   | 3.34E-26  | 3.66E-25  | CPA4     | chr7  | + | 1.3E+08  | 1.3E+08  | 2797  |
| ENSG000001 | 1945.69  | 419.1106 | 2.214    | 5.17E-71  | 1.89E-69  | DOCK4    | chr7  | - | 1.11E+08 | 1.12E+08 | 7997  |
| ENSG000001 | 233.4493 | 256.2506 | -0.13235 | 0.62065   | 0.71141   | POT1     | chr7  | - | 1.24E+08 | 1.25E+08 | 4080  |
| ENSG000001 | 561.1265 | 490.4803 | 0.19441  | 0.13914   | 0.21281   | ATP6V1F  | chr7  | + | 1.29E+08 | 1.29E+08 | 711   |
| ENSG000001 | 347.4504 | 413.1825 | -0.24856 | 0.1942    | 0.28182   | NAA38    | chr7  | + | 1.18E+08 | 1.18E+08 | 4030  |
| ENSG000001 | 5.644162 | 141.0837 | -4.5688  | 4.04E-22  | 3.73E-21  | CDHR3    | chr7  | + | 1.06E+08 | 1.06E+08 | 6500  |
| ENSG000001 | 547.3057 | 534.0237 | 0.035427 | 0.85383   | 0.89735   | PRKRIP1  | chr7  | + | 1.02E+08 | 1.02E+08 | 3430  |
| ENSG000001 | 791.452  | 165.3218 | 2.253    | 2.96E-40  | 5.23E-39  | VGf      | chr7  | - | 1.01E+08 | 1.01E+08 | 2575  |
| ENSG000001 | 388.1055 | 23948.17 | -5.9419  | 0         | 0         | PODXL    | chr7  | - | 1.31E+08 | 1.31E+08 | 6170  |
| ENSG000001 | 124.0708 | 22.1899  | 2.3124   | 0.010812  | 0.022559  | FOXp2    | chr7  | + | 1.14E+08 | 1.14E+08 | 8301  |
| ENSG000001 | 199.1993 | 178.7482 | 0.15422  | 0.36327   | 0.46747   | STRIP2   | chr7  | + | 1.29E+08 | 1.29E+08 | 5115  |
| ENSG000001 | 405.5146 | 239.8415 | 0.75694  | 4.51E-06  | 1.51E-05  | RABL5    | chr7  | - | 1.01E+08 | 1.01E+08 | 1785  |
| ENSG000001 | 1075.745 | 692.9939 | 0.63348  | 0.000142  | 0.000397  | MKLN1    | chr7  | + | 1.31E+08 | 1.31E+08 | 11156 |
| ENSG000001 | 317.7857 | 126.5808 | 1.3264   | 1.49E-11  | 7.80E-11  | DNAJB9   | chr7  | + | 1.08E+08 | 1.08E+08 | 2715  |
| ENSG000001 | 6078.959 | 497.7632 | 3.5965   | 1.58E-59  | 4.55E-58  | FLNC     | chr7  | + | 1.28E+08 | 1.28E+08 | 9188  |
| ENSG000001 | 32.24297 | 494.8749 | -3.9171  | 8.67E-48  | 1.87E-46  | LRRC4    | chr7  | - | 1.28E+08 | 1.28E+08 | 3828  |
| ENSG000001 | 11922.02 | 3293.56  | 1.8543   | 2.90E-80  | 1.22E-78  | CALU     | chr7  | + | 1.28E+08 | 1.28E+08 | 4418  |
| ENSG000001 | 356.3692 | 408.8788 | -0.19813 | 0.43507   | 0.54059   | CCDC136  | chr7  | + | 1.28E+08 | 1.28E+08 | 4169  |
| ENSG000001 | 1896.387 | 2544.73  | -0.42348 | 6.34E-05  | 0.000185  | SMO      | chr7  | + | 1.29E+08 | 1.29E+08 | 3738  |
| ENSG000001 | 5.031043 | 27.80257 | -2.3435  | 0.000764  | 0.001929  | IRF5     | chr7  | + | 1.29E+08 | 1.29E+08 | 2786  |
| ENSG000001 | 3881.392 | 15.84591 | 7.6315   | 8.49E-29  | 1.03E-27  | LRRC17   | chr7  | + | 1.03E+08 | 1.03E+08 | 2002  |
| ENSG000001 | 1112.988 | 232.0481 | 2.2608   | 1.24E-75  | 4.88E-74  | KLHDC10  | chr7  | + | 1.3E+08  | 1.3E+08  | 4473  |
| ENSG000001 | 480.0592 | 655.302  | -0.44743 | 0.009224  | 0.019508  | NDUFA5   | chr7  | - | 1.23E+08 | 1.23E+08 | 5608  |
| ENSG000001 | 0        | 231.1002 | -9.2172  | 4.46E-17  | 3.29E-16  | FEZF1    | chr7  | - | 1.22E+08 | 1.22E+08 | 2099  |
| ENSG000001 | 196.4656 | 84.13104 | 1.216    | 5.69E-09  | 2.46E-08  | OPN1SW   | chr7  | - | 1.28E+08 | 1.28E+08 | 1096  |
| ENSG000001 | 497.4903 | 875.4498 | -0.81299 | 2.44E-07  | 9.19E-07  | MRPS12   | chr19 | + | 39421188 | 39423802 | 1220  |
| ENSG000001 | 6050.454 | 1216.275 | 2.311    | 5.70E-55  | 1.47E-53  | MYO1B    | chr2  | + | 1.92E+08 | 1.92E+08 | 5082  |
| ENSG000001 | 115.9796 | 2.745103 | 4.4865   | 0.000658  | 0.001677  | HOXD1    | chr2  | + | 1.77E+08 | 1.77E+08 | 2028  |
| ENSG000001 | 176.4341 | 1.372552 | 6.7682   | 1.80E-23  | 1.78E-22  | HOXD3    | chr2  | + | 1.77E+08 | 1.77E+08 | 4212  |
| ENSG000001 | 472.8297 | 571.954  | -0.27441 | 0.036428  | 0.067525  | MTX2     | chr2  | + | 1.77E+08 | 1.77E+08 | 1592  |
| ENSG000001 | 107.6709 | 5.378559 | 4.2724   | 2.99E-22  | 2.78E-21  | PDE11A   | chr2  | - | 1.78E+08 | 1.79E+08 | 4458  |
| ENSG000001 | 1373.227 | 361.5056 | 1.9205   | 3.06E-22  | 2.84E-21  | CHN1     | chr2  | - | 1.76E+08 | 1.76E+08 | 2447  |
| ENSG000001 | 22.25204 | 26.18704 | -0.22422 | 0.70853   | 0.78334   | GAD1     | chr2  | + | 1.72E+08 | 1.72E+08 | 3988  |
| ENSG000001 | 17.2844  | 30.35902 | -0.80187 | 0.069326  | 0.11813   | EIF2S2P4 | chr2  | + | 1.72E+08 | 1.72E+08 | 1342  |
| ENSG000001 | 77.79602 | 110.2438 | -0.49981 | 0.10022   | 0.16175   | OSGEPL1  | chr2  | - | 1.91E+08 | 1.91E+08 | 2216  |
| ENSG000001 | 522.5791 | 353.3982 | 0.56281  | 0.006837  | 0.01483   | ORMDL1   | chr2  | - | 1.91E+08 | 1.91E+08 | 2692  |
| ENSG000001 | 892.0317 | 848.1075 | 0.073191 | 0.72      | 0.79289   | HAT1     | chr2  | + | 1.73E+08 | 1.73E+08 | 3845  |
| ENSG000001 | 477.6738 | 9.264724 | 4.0442   | 0.010486  | 0.021951  | HOXD9    | chr2  | + | 1.77E+08 | 1.77E+08 | 2418  |
| ENSG000001 | 541.3784 | 2.745103 | 6.3322   | 1.12E-06  | 3.98E-06  | HOXD10   | chr2  | + | 1.77E+08 | 1.77E+08 | 1989  |
| ENSG000001 | 375.2734 | 2.401965 | 6.2047   | 5.37E-07  | 1.97E-06  | HOXD11   | chr2  | + | 1.77E+08 | 1.77E+08 | 1939  |
| ENSG000001 | 101.7777 | 3.10281  | 4.9467   | 2.35E-18  | 1.83E-17  | HOXD13   | chr2  | + | 1.77E+08 | 1.77E+08 | 2240  |
| ENSG000001 | 3398.546 | 2867.485 | 0.24488  | 0.006922  | 0.015     | HERC2    | chr15 | - | 28356186 | 28567298 | 15337 |
| ENSG000001 | 25.83239 | 153.613  | -2.5637  | 3.13E-22  | 2.91E-21  | SNRPN    | chr15 | + | 25068794 | 25223870 | 1904  |
| ENSG000001 | 8.350189 | 7.002001 | 0.25756  | 0.71608   | 0.78964   | PSMG2    | chr18 | + | 12702425 | 12725739 | 1686  |
| ENSG000001 | 1642.982 | 434.0571 | 1.9173   | 1.65E-64  | 5.31E-63  | TWSG1    | chr18 | + | 9334765  | 9402418  | 3756  |
| ENSG000001 | 142.7436 | 216.8463 | -0.60188 | 0.01514   | 0.030652  | ARHGAP22 | chr10 | - | 49654077 | 49864310 | 2764  |
| ENSG000001 | 1.45232  | 1.84278  | -0.27881 | 0.86137   | 0.9031    | WDFY4    | chr10 | + | 49892921 | 50191001 | 9962  |
| ENSG000001 | 2945.812 | 3224.812 | -0.13036 | 0.29213   | 0.39403   | EIF2AK4  | chr15 | + | 40226347 | 40327797 | 5499  |
| ENSG000001 | 41.6397  | 302.4986 | -2.834   | 2.68E-28  | 3.21E-27  | MYO5C    | chr15 | - | 52484519 | 52587995 | 6971  |
| ENSG000001 | 191.0796 | 3047.062 | -3.9903  | 1.08E-200 | 2.34E-198 | CGNL1    | chr15 | + | 57668165 | 57842925 | 7224  |
| ENSG000001 | 87.83659 | 109.2145 | -0.31457 | 0.26164   | 0.35979   | TMOD2    | chr15 | + | 52043758 | 52108565 | 9191  |
| ENSG000001 | 339.7351 | 163.553  | 1.0484   | 7.55E-06  | 2.46E-05  | TTBK2    | chr15 | - | 43030932 | 43213007 | 10905 |
| ENSG000001 | 0.72616  | 3.573038 | -1.9535  | 0.14631   | 0.22221   | ELL3     | chr15 | - | 44064798 | 44069741 | 2352  |
| ENSG000001 | 65.98015 | 25.15938 | 1.3698   | 2.47E-05  | 7.57E-05  | C15orf57 | chr15 | - | 40820882 | 40857256 | 6131  |
| ENSG000001 | 571.3126 | 675.3379 | -0.23962 | 0.33604   | 0.43971   | INO80    | chr15 | - | 41271078 | 41408552 | 6439  |
| ENSG000001 | 447.5518 | 829.4323 | -0.88844 | 4.06E-08  | 1.64E-07  | NARG2    | chr15 | - | 60711808 | 60771359 | 7209  |
| ENSG000001 | 0.36308  | 2.65044  | -2.2672  | 0.12181   | 0.19125   | DLL4     | chr15 | + | 41221538 | 41231237 | 3339  |
| ENSG000001 | 9.471132 | 1.280305 | 2.6286   | 0.006158  | 0.013479  | ALDH1A2  | chr15 | - | 58245622 | 58790065 | 4098  |
| ENSG000001 | 652.8228 | 859.9561 | -0.39628 | 0.00237   | 0.005542  | FAM63B   | chr15 | + | 59063391 | 59154099 | 9238  |

|                    |          |          |           |           |         |       |   |          |          |       |
|--------------------|----------|----------|-----------|-----------|---------|-------|---|----------|----------|-------|
| ENSG000001125.924  | 1323.562 | -0.23272 | 0.087204  | 0.14391   | IVD     | chr15 | + | 40697686 | 40728146 | 4665  |
| ENSG000001669.6365 | 881.5537 | -0.39657 | 0.002106  | 0.004965  | KNSTRN  | chr15 | + | 40674922 | 40686446 | 1899  |
| ENSG000001802.0681 | 1679.56  | -1.064   | 5.47E-10  | 2.57E-09  | DUT     | chr15 | + | 48623208 | 48635570 | 2147  |
| ENSG000001110.5015 | 513.2613 | -2.2045  | 1.93E-28  | 2.32E-27  | CHAC1   | chr15 | + | 41245160 | 41248710 | 1842  |
| ENSG000001414.5573 | 874.8279 | -1.0718  | 8.40E-06  | 2.72E-05  | CLN6    | chr15 | - | 68499330 | 68549549 | 2242  |
| ENSG0000012606.021 | 3010.769 | -0.20832 | 0.062906  | 0.10871   | ARPP19  | chr15 | - | 52839242 | 52862080 | 5362  |
| ENSG0000011024.492 | 371.6409 | 1.4577   | 1.87E-10  | 9.09E-10  | VPS13C  | chr15 | - | 62144588 | 62352672 | 13400 |
| ENSG00000197.50112 | 172.4284 | -0.82074 | 5.66E-05  | 0.000166  | CALML4  | chr15 | - | 68483043 | 68498417 | 4155  |
| ENSG0000011542.327 | 75.18823 | 4.3459   | 2.16E-104 | 1.33E-102 | ISLR    | chr15 | + | 74466012 | 74469213 | 2371  |
| ENSG00000153.2686  | 49.78783 | 0.092987 | 0.75028   | 0.81735   | THAP10  | chr15 | - | 71173681 | 71185124 | 2399  |
| ENSG0000011981.187 | 195.5987 | 3.3279   | 9.89E-64  | 3.14E-62  | LOXL1   | chr15 | + | 74218330 | 74244478 | 2786  |
| ENSG0000012.718006 | 8.920043 | -1.6394  | 0.047081  | 0.08444   | CCRL1   | chr3  | + | 1.32E+08 | 1.32E+08 | 1914  |
| ENSG000001441.3005 | 335.1866 | 0.39655  | 0.037552  | 0.069381  | ANAPC13 | chr3  | - | 1.34E+08 | 1.34E+08 | 1840  |
| ENSG000001464.3026 | 508.381  | -0.13105 | 0.31715   | 0.41985   | MBD4    | chr3  | - | 1.29E+08 | 1.29E+08 | 2478  |
| ENSG0000013028.658 | 1127.039 | 1.4245   | 3.35E-23  | 3.27E-22  | COPB1   | chr11 | - | 14464986 | 14521573 | 3481  |
| ENSG000001108.5591 | 106.8106 | 0.027163 | 0.89766   | 0.92894   | PSMA1   | chr11 | - | 14515329 | 14665181 | 1527  |
| ENSG0000011894.183 | 1135.847 | 0.73556  | 0.000273  | 0.000735  | SUMF2   | chr7  | + | 56131695 | 56148363 | 2052  |
| ENSG00000111503.03 | 273.4443 | 5.3882   | 0         | 0         | PALLD   | chr4  | + | 1.69E+08 | 1.7E+08  | 6435  |
| ENSG0000012304.715 | 1232.401 | 0.90115  | 9.00E-11  | 4.46E-10  | SPCS3   | chr4  | + | 1.77E+08 | 1.77E+08 | 4571  |
| ENSG00000146.69193 | 2.307303 | 4.1935   | 2.27E-11  | 1.17E-10  | BBOX1   | chr11 | + | 27062272 | 27149356 | 1886  |
| ENSG0000010.685084 | 0.891044 | -0.23714 | 0.89313   | NA        | MYOD1   | chr11 | + | 17741115 | 17743678 | 1801  |
| ENSG000001101.4051 | 161.2295 | -0.66767 | 0.01297   | 0.026634  | SERGEF  | chr11 | - | 17809595 | 18034709 | 1566  |
| ENSG00000115.147   | 4.443808 | 1.6862   | 0.03833   | 0.070675  | KCNC1   | chr11 | + | 17756359 | 17804602 | 6766  |
| ENSG0000012.592987 | 4.757807 | -0.73719 | 0.56174   | 0.66018   | TPH1    | chr11 | - | 18039111 | 18063973 | 5325  |
| ENSG0000011.338465 | 0.297015 | 1.3634   | 0.39966   | NA        | CSRP3   | chr11 | - | 19203578 | 19232120 | 1456  |
| ENSG000001284.1874 | 241.6345 | 0.23265  | 0.43577   | 0.54122   | E2F8    | chr11 | - | 19245610 | 19263167 | 3432  |
| ENSG0000011277.714 | 956.7631 | 0.41675  | 0.000146  | 0.000407  | DCTD    | chr4  | - | 1.84E+08 | 1.84E+08 | 1972  |
| ENSG00000128.39107 | 483.2135 | -4.0649  | 3.84E-72  | 1.43E-70  | SOX15   | chr17 | - | 7491496  | 7493488  | 1396  |
| ENSG000001707.8626 | 1761.486 | -1.3139  | 8.10E-31  | 1.07E-29  | FAM64A  | chr17 | + | 6347735  | 6354789  | 1948  |
| ENSG000001418.5404 | 702.8031 | -0.74753 | 8.23E-09  | 3.51E-08  | RPAIN   | chr17 | + | 5322961  | 5336196  | 3817  |
| ENSG0000015.466901 | 8.187643 | -0.54823 | 0.45492   | 0.56024   | USP6    | chr17 | + | 5019733  | 5078329  | 8464  |
| ENSG0000015.975539 | 11.95974 | -0.97125 | 0.12902   | 0.20044   | SHBG    | chr17 | + | 7517382  | 7536700  | 1382  |
| ENSG000001541.3959 | 1220.797 | -1.1708  | 2.24E-15  | 1.50E-14  | PLD2    | chr17 | + | 4710391  | 4726729  | 3503  |
| ENSG0000010        | 11.58673 | -5.0289  | 0.00014   | 0.000393  | AIPL1   | chr17 | - | 6297013  | 6338519  | 2964  |
| ENSG000001737.3663 | 789.5002 | -0.09817 | 0.45413   | 0.55948   | TXNDC17 | chr17 | + | 6544078  | 6547861  | 2219  |
| ENSG00000118.35987 | 1191.987 | -5.9627  | 5.68E-68  | 1.97E-66  | ATP1B2  | chr17 | + | 7549945  | 7561086  | 3153  |
| ENSG0000011466.426 | 828.4424 | 0.81945  | 0.001022  | 0.00253   | FXR2    | chr17 | - | 7494548  | 7518189  | 2957  |
| ENSG0000013712.474 | 3454.363 | 0.10364  | 0.38005   | 0.48404   | KIF1C   | chr17 | + | 4901243  | 4931696  | 7919  |
| ENSG000001771.713  | 705.0674 | 0.1306   | 0.53141   | 0.63273   | MPDU1   | chr17 | + | 7486847  | 7496107  | 1645  |
| ENSG000001796.4856 | 2.041842 | 8.4206   | 1.63E-52  | 3.99E-51  | MMP28   | chr17 | - | 34083268 | 34122711 | 2459  |
| ENSG000001122.4275 | 232.1145 | -0.91833 | 4.17E-05  | 0.000125  | MRM1    | chr17 | + | 34958001 | 34965407 | 1857  |
| ENSG0000011061.621 | 387.5012 | 1.4523   | 4.51E-24  | 4.54E-23  | PHF20L1 | chr8  | + | 1.34E+08 | 1.34E+08 | 7809  |
| ENSG0000014.285159 | 18.72542 | -2.0467  | 0.002239  | 0.005253  | LRRC6   | chr8  | - | 1.34E+08 | 1.34E+08 | 1734  |
| ENSG000001674.2201 | 761.4904 | -0.17458 | 0.21692   | 0.30822   | CCNT1   | chr12 | - | 49082247 | 49110681 | 6973  |
| ENSG000001116.2422 | 146.8616 | -0.33462 | 0.15269   | 0.23052   | PUS7L   | chr12 | - | 44122410 | 44152620 | 4364  |
| ENSG000001627.8825 | 739.1296 | -0.23471 | 0.18074   | 0.26525   | KRI1    | chr19 | - | 10663761 | 10676713 | 3744  |
| ENSG00000111683.59 | 19233.61 | -0.7182  | 2.56E-08  | 1.05E-07  | ILF3    | chr19 | + | 10764937 | 10803093 | 6119  |
| ENSG0000012248.527 | 3038.382 | -0.43363 | 6.66E-05  | 0.000194  | SLC44A2 | chr19 | + | 10713133 | 10755235 | 3784  |
| ENSG0000013.910914 | 2222.794 | -8.9938  | 2.58E-94  | 1.38E-92  | AP1M2   | chr19 | - | 10683347 | 10697991 | 1757  |
| ENSG000001296.9402 | 40.38132 | 2.8744   | 2.17E-36  | 3.43E-35  | CDKN2D  | chr19 | - | 10677138 | 10679735 | 1422  |
| ENSG000001229.9197 | 139.3727 | 0.72079  | 4.13E-05  | 0.000123  | MTUS1   | chr8  | - | 17501304 | 17658426 | 6256  |
| ENSG0000013.922079 | 11.683   | -1.4912  | 0.061967  | 0.10727   | KLK14   | chr19 | - | 51580752 | 51587502 | 1133  |
| ENSG0000010.705622 | 0.594029 | 0.11178  | 0.94848   | NA        | SIGLEC9 | chr19 | + | 51628165 | 51639908 | 1960  |
| ENSG0000010        | 63.5249  | -7.4741  | 5.29E-11  | 2.68E-10  | KLK10   | chr19 | - | 51515995 | 51523431 | 3111  |
| ENSG0000010        | 15.68659 | -5.5326  | 8.05E-06  | 2.61E-05  | KLK8    | chr19 | - | 51499263 | 51505967 | 1324  |
| ENSG000001304.758  | 579.3434 | -0.92251 | 2.48E-08  | 1.02E-07  | NGDN    | chr14 | + | 23938897 | 23979071 | 2763  |
| ENSG0000017.996482 | 2.543625 | 1.5142   | 0.10603   | 0.16967   | RIPK3   | chr14 | - | 24805227 | 24809251 | 1930  |
| ENSG00000137.68575 | 6.116663 | 2.545    | 1.12E-06  | 3.97E-06  | ADCY4   | chr14 | - | 24787555 | 24804299 | 5276  |
| ENSG000001528.1245 | 285.3152 | 0.88769  | 3.63E-09  | 1.60E-08  | RAB2B   | chr14 | - | 21927179 | 21945132 | 2928  |
| ENSG000001669.6108 | 307.7718 | 1.1167   | 4.72E-07  | 1.74E-06  | BCL2L2  | chr14 | + | 23767999 | 23780968 | 3605  |
| ENSG0000011172.163 | 800.7488 | 0.54974  | 4.43E-06  | 1.48E-05  | AJUBA   | chr14 | - | 23440383 | 23451851 | 4262  |
| ENSG000001130.1791 | 132.3076 | -0.02365 | 0.9037    | 0.93346   | DTD2    | chr14 | - | 31915242 | 31926716 | 2717  |
| ENSG000001335.2657 | 435.3889 | -0.37547 | 0.028165  | 0.053691  | PARP2   | chr14 | + | 20811741 | 20826064 | 1980  |
| ENSG000001476.6723 | 245.4051 | 0.9525   | 3.74E-06  | 1.26E-05  | HEATR5A | chr14 | - | 31760994 | 31889788 | 7840  |
| ENSG0000019.54391  | 32.99569 | -1.7422  | 0.002513  | 0.005856  | FOXA1   | chr14 | - | 38059189 | 38069245 | 2862  |

|            |          |          |          |           |           |          |       |   |          |          |       |
|------------|----------|----------|----------|-----------|-----------|----------|-------|---|----------|----------|-------|
| ENSG000001 | 1001.382 | 752.951  | 0.41101  | 0.000466  | 0.001217  | SNX6     | chr14 | - | 35030300 | 35099389 | 3398  |
| ENSG000001 | 226.7531 | 288.0146 | -0.3418  | 0.065268  | 0.11224   | EAPP     | chr14 | - | 34985135 | 35008916 | 1321  |
| ENSG000001 | 108.8347 | 346.7754 | -1.6645  | 2.56E-17  | 1.90E-16  | EGLN3    | chr14 | - | 34393437 | 34931980 | 2849  |
| ENSG000001 | 587.4057 | 764.5019 | -0.3783  | 0.058281  | 0.10182   | MIS18BP1 | chr14 | - | 45672393 | 45722743 | 4777  |
| ENSG000001 | 13.4642  | 15.95118 | -0.23634 | 0.64788   | 0.73398   | NRL      | chr14 | - | 24549316 | 24584223 | 2103  |
| ENSG000001 | 0.342542 | 6.442816 | -3.4828  | 0.008043  | 0.017182  | RNASE1   | chr14 | - | 21269387 | 21271437 | 1348  |
| ENSG000001 | 315.605  | 329.2304 | -0.05918 | 0.71806   | 0.79125   | NEDD8    | chr14 | - | 24686058 | 24701660 | 2300  |
| ENSG000001 | 2567.765 | 1159.335 | 1.1468   | 3.35E-28  | 3.99E-27  | DAD1     | chr14 | - | 23033805 | 23058175 | 731   |
| ENSG000001 | 1400.586 | 452.974  | 1.623    | 1.58E-16  | 1.12E-15  | TEP1     | chr14 | - | 20833826 | 20881588 | 10695 |
| ENSG000001 | 2.396002 | 126.1101 | -5.6039  | 6.81E-22  | 6.25E-21  | EPB41L4A | chr5  | - | 1.11E+08 | 1.12E+08 | 4707  |
| ENSG000001 | 40.88427 | 168.3163 | -2.0332  | 8.53E-18  | 6.49E-17  | CDO1     | chr5  | - | 1.15E+08 | 1.15E+08 | 1860  |
| ENSG000001 | 856.5474 | 808.3185 | 0.083792 | 0.56859   | 0.66592   | REEP5    | chr5  | - | 1.12E+08 | 1.12E+08 | 3318  |
| ENSG000001 | 640.7829 | 246.9159 | 1.372    | 5.84E-24  | 5.85E-23  | ITFG1    | chr16 | - | 47188298 | 47498060 | 3400  |
| ENSG000001 | 94.21726 | 67.34869 | 0.47803  | 0.1112    | 0.17678   | QRICH2   | chr17 | - | 74270130 | 74303761 | 5359  |
| ENSG000001 | 0        | 190.8504 | -9.0059  | 8.04E-17  | 5.82E-16  | FOXJ1    | chr17 | - | 74132414 | 74137380 | 2641  |
| ENSG000001 | 3043.238 | 1666.797 | 0.86661  | 4.88E-08  | 1.95E-07  | SEC14L1  | chr17 | + | 75082798 | 75213179 | 5437  |
| ENSG000001 | 613.7969 | 504.6051 | 0.28065  | 0.24912   | 0.34542   | RHBDF2   | chr17 | - | 74466973 | 74497872 | 3599  |
| ENSG000001 | 0.342542 | 6.110958 | -3.383   | 0.011197  | 0.023283  | AANAT    | chr17 | + | 74449433 | 74466199 | 1913  |
| ENSG000001 | 551.0697 | 121.1814 | 2.1784   | 9.70E-31  | 1.27E-29  | ARHGEF6  | chrX  | - | 1.36E+08 | 1.36E+08 | 6019  |
| ENSG000001 | 314.8372 | 376.3556 | -0.25583 | 0.136     | 0.20907   | MAP7D3   | chrX  | - | 1.35E+08 | 1.35E+08 | 4567  |
| ENSG000001 | 745.9098 | 651.7872 | 0.19395  | 0.08214   | 0.13664   | FGF13    | chrX  | - | 1.38E+08 | 1.38E+08 | 2676  |
| ENSG000001 | 905.8124 | 1431.554 | -0.65907 | 2.72E-10  | 1.31E-09  | ASH2L    | chr8  | + | 37962760 | 38001594 | 3090  |
| ENSG000001 | 170.9814 | 286.1626 | -0.73848 | 0.000252  | 0.000683  | TTI2     | chr8  | - | 33330904 | 33371119 | 2363  |
| ENSG000001 | 0.342542 | 0.297015 | -0.00202 | 0.99909   | NA        | ART1     | chr11 | + | 3666358  | 3685646  | 1312  |
| ENSG000001 | 11.20519 | 12.60144 | -0.15898 | 0.85931   | 0.90137   | CHRNA10  | chr11 | - | 3686817  | 3692614  | 1945  |
| ENSG000001 | 683.3297 | 1107.68  | -0.6946  | 0.000324  | 0.000864  | CDKN1C   | chr11 | - | 2904443  | 2907111  | 2051  |
| ENSG000001 | 111.737  | 174.5089 | -0.64038 | 0.000896  | 0.00224   | SGOL1    | chr3  | - | 20202085 | 20227784 | 2587  |
| ENSG000001 | 1530.509 | 1500.005 | 0.029415 | 0.80405   | 0.86145   | RPS4Y1   | chrY  | + | 2709527  | 2734997  | 998   |
| ENSG000001 | 0        | 0.357707 | -0.41864 | 0.81278   | NA        | VCY1B    | chrY  | + | 16168097 | 16168838 | 550   |
| ENSG000001 | 0        | 5.909479 | -4.1271  | 0.002657  | 0.006178  | CDH15    | chr16 | + | 89238175 | 89261900 | 2847  |
| ENSG000001 | 722.2256 | 1028.08  | -0.50816 | 0.000522  | 0.001351  | KLF16    | chr19 | - | 1852399  | 1863567  | 2888  |
| ENSG000001 | 3209.438 | 4359.354 | -0.44114 | 5.95E-05  | 0.000174  | TMEM8A   | chr16 | - | 420773   | 437113   | 3691  |
| ENSG000001 | 639.6085 | 693.3094 | -0.11585 | 0.52006   | 0.62279   | DOHH     | chr19 | - | 3490819  | 3500938  | 2031  |
| ENSG000001 | 1219.291 | 1117.976 | 0.12547  | 0.38218   | 0.48637   | MAU2     | chr19 | + | 19431490 | 19469564 | 4994  |
| ENSG000001 | 149.3357 | 234.9225 | -0.65226 | 0.007947  | 0.016995  | SHC2     | chr19 | - | 416583   | 460996   | 2650  |
| ENSG000001 | 69.42448 | 3035.738 | -5.4275  | 5.84E-122 | 4.66E-120 | LPPR3    | chr19 | - | 812518   | 821978   | 2357  |
| ENSG000001 | 1990.247 | 1727.493 | 0.20397  | 0.10641   | 0.17017   | ABHD17A  | chr19 | - | 1876809  | 1885546  | 5623  |
| ENSG000001 | 0        | 1.966581 | -2.1968  | 0.20389   | 0.29293   | LBP      | chr20 | + | 36974759 | 37005665 | 1961  |
| ENSG000001 | 4.75272  | 7.31929  | -0.6033  | 0.49902   | 0.60281   | SYT5     | chr19 | - | 55682567 | 55691809 | 3792  |
| ENSG000001 | 0        | 25.73562 | -6.1766  | 4.38E-07  | 1.62E-06  | TNNI3    | chr19 | - | 55663137 | 55669141 | 992   |
| ENSG000001 | 12.65328 | 69.15032 | -2.3832  | 2.34E-06  | 8.07E-06  | CBFA2T3  | chr16 | - | 88941266 | 89043612 | 4477  |
| ENSG000001 | 594.6712 | 397.9724 | 0.57846  | 0.000311  | 0.00083   | GAMT     | chr19 | - | 1397091  | 1401569  | 1327  |
| ENSG000001 | 220.7505 | 349.4708 | -0.66049 | 0.000618  | 0.001583  | HDHD1    | chrX  | - | 6966961  | 7066231  | 2140  |
| ENSG000001 | 213.9629 | 185.9563 | 0.20141  | 0.2976    | 0.39953   | C6orf70  | chr6  | + | 1.7E+08  | 1.7E+08  | 2206  |
| ENSG000001 | 735.0381 | 723.4128 | 0.023261 | 0.84253   | 0.8896    | PHF10    | chr6  | - | 1.7E+08  | 1.7E+08  | 4285  |
| ENSG000001 | 0.975385 | 102.4722 | -6.3239  | 7.56E-16  | 5.19E-15  | PRRG3    | chrX  | + | 1.51E+08 | 1.51E+08 | 5977  |
| ENSG000001 | 0.923144 | 27.81385 | -4.5063  | 2.01E-07  | 7.63E-07  | GALNT8   | chr12 | + | 4829507  | 4960277  | 2380  |
| ENSG000001 | 9.088327 | 7.108817 | 0.34099  | 0.63721   | 0.72542   | KCNA5    | chr12 | + | 5153085  | 5155949  | 2865  |
| ENSG000001 | 13.50706 | 30.12028 | -1.135   | 0.010706  | 0.022356  | EFCAB4B  | chr12 | - | 3715799  | 3873985  | 7554  |
| ENSG000001 | 4.232918 | 29.72631 | -2.668   | 0.000568  | 0.001461  | NXNL2    | chr9  | + | 91150016 | 91199189 | 1457  |
| ENSG000001 | 753.2623 | 214.2133 | 1.8049   | 2.30E-13  | 1.36E-12  | STAR28   | chrX  | + | 67867508 | 67945684 | 4864  |
| ENSG000001 | 0.653381 | 628.3151 | -9.2594  | 8.56E-31  | 1.13E-29  | FAM155B  | chrX  | + | 68725084 | 68752351 | 4013  |
| ENSG000001 | 8.922232 | 135.305  | -3.8807  | 1.12E-24  | 1.15E-23  | GDPD2    | chrX  | + | 69642881 | 69653240 | 2438  |
| ENSG000001 | 369.7744 | 778.3759 | -1.0729  | 1.65E-14  | 1.05E-13  | SAT1     | chrX  | + | 23801290 | 23804343 | 1135  |
| ENSG000001 | 682.6616 | 859.8764 | -0.33194 | 0.051599  | 0.091415  | GNL3L    | chrX  | + | 54556644 | 54587504 | 2357  |
| ENSG000001 | 2337.29  | 1341.274 | 0.80079  | 4.44E-11  | 2.26E-10  | SH3BP4   | chr2  | + | 2.36E+08 | 2.36E+08 | 5231  |
| ENSG000001 | 286.0997 | 150.0237 | 0.93246  | 1.03E-06  | 3.68E-06  | MOSPD2   | chrX  | + | 14891563 | 14940449 | 4163  |
| ENSG000001 | 737.0541 | 1135.395 | -0.62248 | 6.17E-05  | 0.00018   | DOCK6    | chr19 | - | 11309971 | 11373157 | 6358  |
| ENSG000001 | 547.7351 | 841.6259 | -0.61868 | 3.77E-08  | 1.52E-07  | ECSIT    | chr19 | - | 11616731 | 11639989 | 1700  |
| ENSG000001 | 2051.092 | 1069.788 | 0.93253  | 0.002088  | 0.004927  | LDLR     | chr19 | + | 11200038 | 11244492 | 5337  |
| ENSG000001 | 787.6862 | 925.6396 | -0.23203 | 0.12505   | 0.1954    | ELOF1    | chr19 | - | 11661962 | 11670051 | 2154  |
| ENSG000001 | 2.096328 | 6.145801 | -1.4322  | 0.17736   | 0.26101   | C19orf80 | chr19 | + | 11348178 | 11352619 | 872   |
| ENSG000001 | 6573.588 | 5943.44  | 0.14533  | 0.13408   | 0.207     | PRKCSH   | chr19 | + | 11546109 | 11561783 | 2262  |
| ENSG000001 | 79.75616 | 246.9482 | -1.6264  | 6.20E-16  | 4.28E-15  | CNN1     | chr19 | + | 11649532 | 11661138 | 1848  |
| ENSG000001 | 935.7293 | 959.7325 | -0.03664 | 0.85509   | 0.89806   | CDC16    | chr13 | + | 1.15E+08 | 1.15E+08 | 2211  |

|            |          |          |          |           |           |          |       |   |          |          |       |
|------------|----------|----------|----------|-----------|-----------|----------|-------|---|----------|----------|-------|
| ENSG000001 | 0        | 7113.118 | -13.745  | 8.00E-40  | 1.40E-38  | ZSCAN10  | chr16 | - | 3138891  | 3149318  | 2467  |
| ENSG000001 | 85.34646 | 67.83335 | 0.3301   | 0.30659   | 0.40813   | THEM6    | chr8  | + | 1.44E+08 | 1.44E+08 | 2279  |
| ENSG000001 | 9.803322 | 79.74074 | -2.9645  | 6.36E-08  | 2.52E-07  | EXOC3L2  | chr19 | - | 45715879 | 45737469 | 1719  |
| ENSG000001 | 2133.517 | 2920.609 | -0.45275 | 3.22E-06  | 1.09E-05  | PVRL2    | chr19 | + | 45349432 | 45392485 | 2466  |
| ENSG000001 | 89.41149 | 9469.74  | -6.7032  | 8.60E-267 | 3.18E-264 | APOE     | chr19 | + | 45409011 | 45412650 | 1208  |
| ENSG000001 | 1840.738 | 4108.611 | -1.1549  | 1.92E-09  | 8.64E-09  | TOMM40   | chr19 | + | 45393826 | 45406946 | 3415  |
| ENSG000001 | 34.29643 | 275.9327 | -2.9955  | 1.68E-36  | 2.67E-35  | APOC1    | chr19 | + | 45417504 | 45422606 | 689   |
| ENSG000001 | 66.7663  | 130.8394 | -0.96222 | 0.006545  | 0.014244  | GADD45G  | chr9  | + | 92219928 | 92221470 | 1065  |
| ENSG000001 | 206.3223 | 51.62565 | 1.9961   | 1.87E-19  | 1.53E-18  | LRCH2    | chrX  | - | 1.14E+08 | 1.14E+08 | 4923  |
| ENSG000001 | 77.72226 | 68.08755 | 0.1915   | 0.5049    | 0.60827   | DPP6     | chr7  | + | 1.54E+08 | 1.55E+08 | 4798  |
| ENSG000001 | 1722.338 | 2175.854 | -0.33705 | 0.000318  | 0.000849  | XPO7     | chr8  | + | 21777180 | 21864096 | 4889  |
| ENSG000001 | 1.338465 | 0.715414 | 0.69225  | 0.65865   | 0.74281   | ACE2     | chrX  | - | 15579156 | 15620271 | 3507  |
| ENSG000001 | 199.4958 | 138.2432 | 0.52257  | 0.11147   | 0.17712   | FAM98C   | chr19 | + | 38893775 | 38899728 | 4133  |
| ENSG000001 | 1425.693 | 1610.074 | -0.17471 | 0.42315   | 0.52855   | SAFB2    | chr19 | - | 5587010  | 5624057  | 3371  |
| ENSG000001 | 4085.384 | 5614.749 | -0.45815 | 1.04E-05  | 3.32E-05  | RPL36    | chr19 | + | 5674958  | 5691887  | 907   |
| ENSG000001 | 98.40103 | 84.18951 | 0.2186   | 0.60791   | 0.70069   | ATP8B3   | chr19 | - | 1782074  | 1812275  | 5237  |
| ENSG000001 | 0.36308  | 172.2852 | -8.0558  | 1.78E-16  | 1.26E-15  | NCAN     | chr19 | + | 19322838 | 19363042 | 6903  |
| ENSG000001 | 11.60772 | 9562.989 | -9.6035  | 1.93E-269 | 7.60E-267 | KIF1A    | chr2  | - | 2.42E+08 | 2.42E+08 | 9162  |
| ENSG000001 | 521.3562 | 1079.965 | -1.0491  | 6.66E-14  | 4.06E-13  | GTPBP3   | chr19 | + | 17445729 | 17453544 | 2917  |
| ENSG000001 | 0        | 8.841492 | -4.5834  | 0.000923  | 0.002302  | PLVAP    | chr19 | - | 17462257 | 17488159 | 2305  |
| ENSG000001 | 18.00975 | 451.217  | -4.6088  | 2.06E-51  | 4.91E-50  | BST2     | chr19 | - | 17513748 | 17516457 | 1019  |
| ENSG000001 | 519.6044 | 212.7113 | 1.2814   | 1.08E-07  | 4.19E-07  | SLC27A1  | chr19 | + | 17579578 | 17616977 | 4343  |
| ENSG000001 | 308.8199 | 1142.391 | -1.8828  | 1.34E-47  | 2.87E-46  | NSUN5    | chr7  | - | 72716514 | 72722864 | 2286  |
| ENSG000001 | 8.911881 | 196.9998 | -4.4226  | 3.20E-22  | 2.97E-21  | USHBP1   | chr19 | - | 17359985 | 17393595 | 3598  |
| ENSG000001 | 5948.15  | 1920.243 | 1.6285   | 1.08E-30  | 1.41E-29  | COLGALT1 | chr19 | + | 17666403 | 17693971 | 3704  |
| ENSG000001 | 1220.372 | 711.9085 | 0.77729  | 5.82E-10  | 2.74E-09  | DDA1     | chr19 | + | 17420327 | 17434110 | 4078  |
| ENSG000001 | 456.0632 | 854.4853 | -0.90527 | 1.45E-10  | 7.11E-10  | MRPL34   | chr19 | + | 17403418 | 17417652 | 968   |
| ENSG000001 | 611.7548 | 561.5865 | 0.12414  | 0.40088   | 0.50557   | PGLS     | chr19 | + | 17622438 | 17632097 | 1601  |
| ENSG000001 | 1574.739 | 2070.64  | -0.39425 | 0.000113  | 0.00032   | LSM7     | chr19 | - | 2321520  | 2328615  | 710   |
| ENSG000001 | 1210.546 | 490.5849 | 1.3003   | 2.75E-23  | 2.69E-22  | TULP4    | chr6  | + | 1.59E+08 | 1.59E+08 | 11123 |
| ENSG000001 | 1798.509 | 870.5019 | 1.0451   | 1.31E-14  | 8.39E-14  | SNX9     | chr6  | + | 1.58E+08 | 1.58E+08 | 4198  |
| ENSG000001 | 145.5066 | 241.3027 | -0.72814 | 0.000637  | 0.001629  | RTN4IP1  | chr6  | - | 1.07E+08 | 1.07E+08 | 2266  |
| ENSG000001 | 286.9854 | 349.5308 | -0.28322 | 0.061052  | 0.106     | QRS1     | chr6  | + | 1.07E+08 | 1.07E+08 | 4106  |
| ENSG000001 | 117.3872 | 117.5144 | -0.43766 | 0.024393  | 0.047181  | C6orf203 | chr6  | + | 1.07E+08 | 1.07E+08 | 1517  |
| ENSG000001 | 151.0414 | 67.36004 | 1.1594   | 1.19E-07  | 4.60E-07  | RSPH3    | chr6  | - | 1.59E+08 | 1.59E+08 | 3152  |
| ENSG000001 | 0        | 0.686276 | -0.84936 | 0.6309    | NA        | MAS1     | chr6  | + | 1.6E+08  | 1.6E+08  | 1135  |
| ENSG000001 | 8.289389 | 4.066699 | 0.98689  | 0.20884   | 0.29883   | ACSBG2   | chr19 | + | 6135258  | 6193112  | 2759  |
| ENSG000001 | 1095.736 | 777.5695 | 0.49485  | 0.000118  | 0.000334  | MLLT1    | chr19 | - | 6212966  | 6279959  | 1931  |
| ENSG000001 | 0        | 1.964165 | -2.2052  | 0.20143   | 0.2901    | FUT5     | chr19 | - | 5865837  | 5903798  | 2118  |
| ENSG000001 | 1575.076 | 3094.706 | -0.97375 | 7.54E-21  | 6.60E-20  | MLLT4    | chr6  | + | 1.68E+08 | 1.68E+08 | 7704  |
| ENSG000001 | 25780.29 | 8943.868 | 1.5261   | 7.60E-53  | 1.87E-51  | ACTN4    | chr19 | + | 39138289 | 39222223 | 4963  |
| ENSG000001 | 79.30914 | 193.9101 | -1.285   | 2.70E-10  | 1.30E-09  | STK33    | chr11 | - | 8413418  | 8615836  | 4677  |
| ENSG000001 | 1454.491 | 1259.028 | 0.20861  | 0.079625  | 0.13296   | NDUFA10  | chr2  | - | 2.41E+08 | 2.41E+08 | 4915  |
| ENSG000001 | 0.705622 | 7.486798 | -3.0577  | 0.007032  | 0.015218  | EPO      | chr7  | + | 1E+08    | 1E+08    | 1330  |
| ENSG000001 | 1219.78  | 356.0122 | 1.7709   | 2.10E-31  | 2.83E-30  | ARPC1B   | chr7  | + | 98971872 | 98992424 | 1715  |
| ENSG000001 | 0        | 76.92601 | -7.7648  | 3.35E-12  | 1.83E-11  | CACNG6   | chr19 | + | 54495542 | 54515923 | 1853  |
| ENSG000001 | 1080.756 | 481.462  | 1.1618   | 2.19E-07  | 8.31E-07  | ZSWIM6   | chr5  | + | 60628100 | 60841997 | 5501  |
| ENSG000001 | 44.27799 | 586.5813 | -3.7105  | 2.86E-47  | 6.04E-46  | FCHO1    | chr19 | + | 17858527 | 17899377 | 3214  |
| ENSG000001 | 1609.082 | 1537.024 | 0.065878 | 0.56037   | 0.65905   | UNC13A   | chr19 | - | 17712137 | 17799401 | 10101 |
| ENSG000001 | 1391.416 | 2476.09  | -0.82984 | 1.28E-07  | 4.94E-07  | MAP1S    | chr19 | + | 17830051 | 17845325 | 3419  |
| ENSG000001 | 0.36308  | 0        | 0.4146   | 0.81455   | NA        | KLHDC7B  | chr22 | + | 50986462 | 50989451 | 2990  |
| ENSG000001 | 397.5471 | 310.1751 | 0.3583   | 0.01388   | 0.02832   | SCO2     | chr22 | - | 50961997 | 50964868 | 1051  |
| ENSG000001 | 36301.15 | 5677.546 | 2.6751   | 2.18E-209 | 5.17E-207 | PXDN     | chr2  | - | 1635659  | 1748624  | 6808  |
| ENSG000001 | 2834.553 | 907.5232 | 1.6405   | 3.50E-40  | 6.19E-39  | SSBP4    | chr19 | + | 18529674 | 18545372 | 1694  |
| ENSG000001 | 282.3098 | 221.4863 | 0.32859  | 0.69965   | 0.77633   | GDF15    | chr19 | + | 18485541 | 18499987 | 1720  |
| ENSG000001 | 734.4806 | 821.054  | -0.16184 | 0.21166   | 0.30203   | PGPEP1   | chr19 | + | 18451397 | 18480760 | 7092  |
| ENSG000001 | 78.87475 | 11.29616 | 2.7455   | 1.37E-11  | 7.18E-11  | KIAA1683 | chr19 | - | 18367906 | 18385319 | 5521  |
| ENSG000001 | 1533.706 | 5635.626 | -1.8749  | 2.18E-47  | 4.62E-46  | LSM4     | chr19 | - | 18417040 | 18434084 | 1908  |
| ENSG000001 | 5404.279 | 3331.157 | 0.69593  | 0.000325  | 0.000867  | JUND     | chr19 | - | 18390563 | 18392432 | 1870  |
| ENSG000001 | 0        | 71.16477 | -7.5399  | 1.60E-10  | 7.79E-10  | HRC      | chr19 | - | 49654455 | 49658681 | 2385  |
| ENSG000001 | 531.8696 | 335.1844 | 0.66256  | 0.005893  | 0.012935  | TRPM4    | chr19 | + | 49660998 | 49715093 | 4109  |
| ENSG000001 | 2.282147 | 216.4248 | -6.3915  | 1.00E-31  | 1.37E-30  | SULT4A1  | chr22 | - | 44220389 | 44258398 | 2561  |
| ENSG000001 | 115.2513 | 133.4566 | -0.21043 | 0.41765   | 0.52288   | ZNF557   | chr19 | + | 7069455  | 7087979  | 5990  |
| ENSG000001 | 1.048164 | 231.5346 | -7.473   | 4.88E-24  | 4.90E-23  | CRB3     | chr19 | + | 6463788  | 6467232  | 1443  |
| ENSG000001 | 3.910914 | 533.8838 | -6.9688  | 5.88E-57  | 1.60E-55  | OLFM1    | chr9  | + | 1.38E+08 | 1.38E+08 | 2624  |

|            |          |          |          |          |          |          |       |   |          |          |       |
|------------|----------|----------|----------|----------|----------|----------|-------|---|----------|----------|-------|
| ENSG000001 | 1617.007 | 1351.873 | 0.25826  | 0.018756 | 0.037251 | CAMSAP1  | chr9  | - | 1.39E+08 | 1.39E+08 | 7696  |
| ENSG000001 | 711.7988 | 922.9109 | -0.37425 | 0.003743 | 0.008491 | UBAC1    | chr9  | - | 1.39E+08 | 1.39E+08 | 1867  |
| ENSG000001 | 255.4089 | 583.0535 | -1.1832  | 2.43E-05 | 7.46E-05 | ZBTB46   | chr20 | - | 62375019 | 62462597 | 5185  |
| ENSG000001 | 788.8795 | 750.4397 | 0.07094  | 0.79238  | 0.85239  | HELZ2    | chr20 | - | 62189439 | 62205592 | 8064  |
| ENSG000001 | 69.71299 | 105.469  | -0.59447 | 0.02402  | 0.04653  | SAMD10   | chr20 | - | 62605466 | 62611361 | 2181  |
| ENSG000001 | 414.8209 | 5.018435 | 6.3032   | 2.78E-56 | 7.42E-55 | LSP1     | chr11 | + | 1874200  | 1913497  | 2640  |
| ENSG000001 | 6.402024 | 0        | 4.2258   | 0.00197  | 0.004669 | TNNT3    | chr11 | + | 1940792  | 1959936  | 1246  |
| ENSG000001 | 4.201215 | 0        | 3.6275   | 0.011483 | 0.023828 | TNNI2    | chr11 | + | 1860219  | 1862910  | 745   |
| ENSG000001 | 1.576526 | 177.4405 | -6.4727  | 3.47E-20 | 2.94E-19 | H19      | chr11 | - | 2016406  | 2022700  | 2348  |
| ENSG000001 | 0.705622 | 0        | 0.8807   | 0.6196   | NA       | CYP2G1P  | chr19 | + | 41396731 | 41406413 | 2511  |
| ENSG000001 | 93863.45 | 595.8397 | 7.2867   | 0        | 0        | COL5A1   | chr9  | + | 1.38E+08 | 1.38E+08 | 8468  |
| ENSG000001 | 1522.55  | 1688.39  | -0.14934 | 0.11865  | 0.18715  | ATXN10   | chr22 | + | 46067678 | 46241187 | 3329  |
| ENSG000001 | 1911.69  | 1629.707 | 0.23028  | 0.019664 | 0.038872 | TUBGCP2  | chr10 | - | 1.35E+08 | 1.35E+08 | 3553  |
| ENSG000001 | 23.30876 | 19.42311 | 0.2558   | 0.57971  | 0.67609  | CALY     | chr10 | - | 1.35E+08 | 1.35E+08 | 920   |
| ENSG000001 | 9.368277 | 16.61973 | -0.81828 | 0.24862  | 0.34486  | CYP2E1   | chr10 | + | 1.35E+08 | 1.35E+08 | 7918  |
| ENSG000001 | 67.50958 | 35.33549 | 0.92189  | 0.01435  | 0.029187 | PNPLA7   | chr9  | - | 1.4E+08  | 1.4E+08  | 5308  |
| ENSG000001 | 0        | 0.297015 | -0.41864 | 0.81278  | NA       | HBZ      | chr16 | + | 202686   | 204502   | 755   |
| ENSG000001 | 3048.805 | 2614.619 | 0.22126  | 0.096202 | 0.15633  | PAK4     | chr19 | + | 39616410 | 39673456 | 5735  |
| ENSG000001 | 0.943682 | 5.661004 | -2.2476  | 0.047181 | 0.0846   | MXN1     | chr7  | - | 1.57E+08 | 1.57E+08 | 2174  |
| ENSG000001 | 30.6878  | 18.57007 | 0.71149  | 0.08307  | 0.13798  | ZNF337   | chr20 | - | 25654851 | 25677477 | 3613  |
| ENSG000001 | 532.9882 | 863.5613 | -0.69434 | 0.000377 | 0.000996 | CEP85    | chr1  | + | 26560691 | 26605299 | 3935  |
| ENSG000001 | 381.8602 | 659.23   | -0.78807 | 1.43E-07 | 5.50E-07 | TAF4     | chr20 | - | 60528525 | 60640866 | 4630  |
| ENSG000001 | 0        | 68.00275 | -7.5004  | 1.43E-10 | 6.98E-10 | GATA5    | chr20 | - | 61038553 | 61051026 | 2595  |
| ENSG000001 | 0        | 90.72202 | -8.0185  | 2.36E-13 | 1.39E-12 | RBBP8NL  | chr20 | - | 60985293 | 61002589 | 2793  |
| ENSG000001 | 1138.466 | 5352.981 | -2.2289  | 9.87E-51 | 2.30E-49 | LAMA5    | chr20 | - | 60883011 | 60942368 | 11426 |
| ENSG000001 | 773.7859 | 639.3221 | 0.27426  | 0.096651 | 0.15697  | OSBPL2   | chr20 | + | 60813580 | 60871268 | 3970  |
| ENSG000001 | 618.4126 | 837.0792 | -0.43548 | 0.002309 | 0.005407 | ADRM1    | chr20 | + | 60877149 | 60883918 | 1371  |
| ENSG000001 | 1063.771 | 1491.812 | -0.48633 | 0.001333 | 0.003245 | ASS1     | chr9  | + | 1.33E+08 | 1.33E+08 | 1973  |
| ENSG000001 | 2.261609 | 2.482932 | -0.13452 | 0.90891  | 0.9374   | PRDM12   | chr9  | + | 1.34E+08 | 1.34E+08 | 2476  |
| ENSG000001 | 690.5243 | 916.096  | -0.40633 | 0.02869  | 0.054567 | EXOSC2   | chr9  | + | 1.34E+08 | 1.34E+08 | 2766  |
| ENSG000001 | 437.5939 | 365.1141 | 0.2605   | 0.058805 | 0.10264  | POMT1    | chr9  | + | 1.34E+08 | 1.34E+08 | 3420  |
| ENSG000001 | 523.811  | 752.6757 | -0.52138 | 0.002714 | 0.006299 | UCK1     | chr9  | - | 1.34E+08 | 1.34E+08 | 2237  |
| ENSG000001 | 420.2663 | 243.5902 | 0.77983  | 0.011666 | 0.024168 | FIBCD1   | chr9  | - | 1.34E+08 | 1.34E+08 | 3253  |
| ENSG000001 | 9195.798 | 8323.186 | 0.14365  | 0.20916  | 0.29918  | PRRC2B   | chr9  | + | 1.34E+08 | 1.34E+08 | 11042 |
| ENSG000001 | 1133.504 | 1117.868 | 0.02004  | 0.98912  | 0.92931  | CHMP2A   | chr19 | - | 59062933 | 59066491 | 1178  |
| ENSG000001 | 1655.261 | 2128.253 | -0.36208 | 0.003312 | 0.007586 | UBE2M    | chr19 | - | 59067079 | 59070327 | 1508  |
| ENSG000001 | 9654.847 | 27966.66 | -1.5334  | 1.48E-71 | 5.45E-70 | TRIM28   | chr19 | + | 59055458 | 59062089 | 2960  |
| ENSG000001 | 588.0521 | 738.6654 | -0.32896 | 0.016879 | 0.033823 | C16orf13 | chr16 | - | 684429   | 686358   | 1710  |
| ENSG000001 | 1154.64  | 913.589  | 0.33713  | 0.034554 | 0.064403 | YIPF2    | chr19 | - | 11033444 | 11039357 | 1550  |
| ENSG000001 | 219.4973 | 687.5943 | -1.6415  | 4.89E-17 | 3.58E-16 | ATG4D    | chr19 | + | 10654571 | 10664094 | 1949  |
| ENSG000001 | 1732.174 | 3349.912 | -0.95079 | 1.77E-18 | 1.38E-17 | EIF2S3   | chrX  | + | 24072833 | 24096088 | 2858  |
| ENSG000001 | 428.6056 | 827.161  | -0.94697 | 1.94E-11 | 1.01E-10 | TMEM160  | chr19 | - | 47549165 | 47551888 | 663   |
| ENSG000001 | 1264.332 | 2211.294 | -0.80307 | 0.00051  | 0.001324 | ZC3H4    | chr19 | - | 47567444 | 47617009 | 6119  |
| ENSG000001 | 12.76811 | 97.30327 | -2.8479  | 4.63E-09 | 2.02E-08 | NPAS1    | chr19 | + | 47523077 | 47549033 | 2117  |
| ENSG000001 | 4.762093 | 8.298491 | -0.74569 | 0.41347  | 0.51831  | GMFG     | chr19 | - | 39818993 | 39833012 | 1028  |
| ENSG000001 | 451.449  | 510.6819 | -0.17826 | 0.39053  | 0.49492  | MAP3K10  | chr19 | + | 40697651 | 40721482 | 3436  |
| ENSG000001 | 1.846289 | 795.3272 | -8.4263  | 7.84E-52 | 1.89E-50 | ARHGEF16 | chr1  | + | 3370990  | 3397677  | 3061  |
| ENSG000001 | 1401.728 | 3681.743 | -1.3921  | 1.13E-43 | 2.18E-42 | LRRCA47  | chr1  | - | 3696784  | 3713068  | 2648  |
| ENSG000001 | 327.8062 | 969.14   | -1.5565  | 1.51E-10 | 7.38E-10 | SESN2    | chr1  | + | 28586038 | 28609002 | 3453  |
| ENSG000001 | 2.302685 | 266.2577 | -6.6783  | 4.59E-34 | 6.80E-33 | SMPDL3B  | chr1  | + | 28261504 | 28285668 | 1913  |
| ENSG000001 | 1363.418 | 1554.469 | -0.18851 | 0.085697 | 0.1417   | ATPIF1   | chr1  | + | 28562620 | 28573417 | 1855  |
| ENSG000001 | 291.3799 | 365.0642 | -0.32468 | 0.11526  | 0.18247  | MED18    | chr1  | + | 28655513 | 28662476 | 1831  |
| ENSG000001 | 262.3712 | 277.5849 | -0.08268 | 0.68362  | 0.76376  | THEMIS2  | chr1  | + | 28199055 | 28213196 | 2861  |
| ENSG000001 | 1062.539 | 442.3972 | 1.2634   | 2.22E-20 | 1.90E-19 | CLIP1    | chr12 | - | 1.23E+08 | 1.23E+08 | 5880  |
| ENSG000001 | 8.205445 | 5.794542 | 0.49229  | 0.52362  | 0.62598  | CCDC62   | chr12 | + | 1.23E+08 | 1.23E+08 | 3546  |
| ENSG000001 | 1266.276 | 1473.783 | -0.2185  | 0.1252   | 0.19561  | HIP1R    | chr12 | + | 1.23E+08 | 1.23E+08 | 4539  |
| ENSG000001 | 492.8308 | 802.7656 | -0.70279 | 6.55E-07 | 2.38E-06 | ZNF317   | chr19 | + | 9251056  | 9274100  | 4186  |
| ENSG000001 | 36.60768 | 94.4639  | -1.3475  | 0.000943 | 0.002348 | PPAN     | chr19 | + | 10216965 | 10225414 | 2412  |
| ENSG000001 | 2585.619 | 3547.684 | -0.45557 | 7.23E-06 | 2.36E-05 | EIF3G    | chr19 | - | 10225693 | 10230596 | 1522  |
| ENSG000001 | 1.681007 | 4.556329 | -1.3086  | 0.22431  | 0.31685  | ANGPTL6  | chr19 | - | 10203014 | 10213472 | 1900  |
| ENSG000001 | 38.01892 | 66.41562 | -0.79869 | 0.009079 | 0.019227 | C19orf66 | chr19 | + | 10196798 | 10203928 | 2140  |
| ENSG000001 | 3888.592 | 4763.521 | -0.29244 | 0.011167 | 0.023227 | DNMT1    | chr19 | - | 10244021 | 10341962 | 5408  |
| ENSG000001 | 169.6206 | 286.3963 | -0.75103 | 5.89E-06 | 1.94E-05 | ZNF426   | chr19 | - | 9638667  | 9649303  | 2402  |
| ENSG000001 | 1149.332 | 2662.042 | -1.2102  | 7.94E-28 | 9.33E-27 | SLC6A8   | chrX  | + | 1.53E+08 | 1.53E+08 | 3763  |
| ENSG000001 | 2.282147 | 42.06961 | -4.0398  | 1.28E-09 | 5.84E-09 | PNCK     | chrX  | - | 1.53E+08 | 1.53E+08 | 2143  |

|            |          |          |          |          |          |          |       |   |          |          |       |
|------------|----------|----------|----------|----------|----------|----------|-------|---|----------|----------|-------|
| ENSG000001 | 1076.849 | 2514.511 | -1.2204  | 1.93E-12 | 1.08E-11 | DKC1     | chrX  | + | 1.54E+08 | 1.54E+08 | 2577  |
| ENSG000001 | 2006.963 | 358.2158 | 2.4825   | 1.73E-93 | 9.17E-92 | PLXNA3   | chrX  | + | 1.54E+08 | 1.54E+08 | 6752  |
| ENSG000001 | 8.340816 | 142.5363 | -4.0204  | 5.84E-25 | 6.09E-24 | DUSP9    | chrX  | + | 1.53E+08 | 1.53E+08 | 2433  |
| ENSG000001 | 89.26577 | 260.4522 | -1.5387  | 3.53E-13 | 2.07E-12 | MPP1     | chrX  | - | 1.54E+08 | 1.54E+08 | 2378  |
| ENSG000001 | 172.0247 | 723.9004 | -2.0705  | 2.02E-36 | 3.20E-35 | ZNF331   | chr19 | + | 54024235 | 54083523 | 5042  |
| ENSG000001 | 403.5349 | 353.3803 | 0.19089  | 0.21515  | 0.30611  | ZNF236   | chr18 | + | 74534563 | 74682683 | 8206  |
| ENSG000001 | 12.92548 | 123.6159 | -3.2345  | 1.41E-14 | 9.01E-14 | SLC7A10  | chr19 | - | 33699571 | 33716756 | 1945  |
| ENSG000001 | 1255.762 | 2602.831 | -1.0497  | 4.60E-14 | 2.83E-13 | LRP3     | chr19 | + | 33668509 | 33698694 | 3278  |
| ENSG000001 | 478.0161 | 294.8155 | 0.69586  | 1.04E-07 | 4.04E-07 | C12orf65 | chr12 | + | 1.24E+08 | 1.24E+08 | 3733  |
| ENSG000001 | 620.3908 | 954.0711 | -0.61751 | 0.016981 | 0.034011 | NOL11    | chr17 | + | 65713949 | 65740647 | 2947  |
| ENSG000001 | 1724.647 | 2015.881 | -0.22464 | 0.023909 | 0.046332 | UBE4B    | chr1  | + | 10092890 | 10241297 | 5522  |
| ENSG000001 | 17.78024 | 246.6548 | -3.742   | 1.32E-23 | 1.31E-22 | CASZ1    | chr1  | - | 10696661 | 10856707 | 7936  |
| ENSG000001 | 11.50405 | 12.55136 | -0.12236 | 0.82781  | 0.87876  | PKDREJ   | chr22 | - | 46651560 | 46659219 | 7660  |
| ENSG000001 | 3.496407 | 0.594029 | 1.9735   | 0.16101  | 0.24104  | HSD17B3  | chr9  | - | 98997588 | 99064434 | 1135  |
| ENSG000001 | 3.423628 | 10.67299 | -1.5852  | 0.046635 | 0.083733 | NUTMF    | chr9  | - | 97077605 | 97090926 | 4195  |
| ENSG000001 | 667.9746 | 393.656  | 0.75918  | 0.000173 | 0.000479 | HABP4    | chr9  | + | 99212483 | 99253618 | 3150  |
| ENSG000001 | 1.317927 | 4.721421 | -1.6112  | 0.16422  | 0.245    | FBP2     | chr9  | - | 97321002 | 97356075 | 1305  |
| ENSG000001 | 322.5129 | 253.9762 | 0.34238  | 0.046462 | 0.083471 | SLC35D2  | chr9  | - | 99082988 | 99145992 | 1613  |
| ENSG000001 | 176.3699 | 91.89303 | 0.93339  | 3.49E-05 | 0.000105 | PRRG1    | chrX  | + | 37208528 | 37316548 | 4600  |
| ENSG000001 | 9516.823 | 10895.45 | -0.19494 | 0.11353  | 0.18002  | UBA1     | chrX  | + | 47050260 | 47074527 | 3559  |
| ENSG000001 | 0.36308  | 4.008423 | -2.7979  | 0.047188 | 0.084606 | RGN      | chrX  | + | 46937775 | 46952712 | 2235  |
| ENSG000001 | 5.612459 | 4.273883 | 0.36682  | 0.65243  | 0.7377   | POLN     | chr4  | - | 2073645  | 2243848  | 3978  |
| ENSG000001 | 817.1364 | 593.7318 | 0.46093  | 0.002048 | 0.004837 | TXLNG2P  | chrY  | + | 21729199 | 21768160 | 7299  |
| ENSG000001 | 0        | 0.357707 | -0.41864 | 0.81278  | NA       | TTY9B    | chrY  | - | 20743092 | 20752407 | 1637  |
| ENSG000001 | 464.4924 | 345.8604 | 0.42526  | 0.033481 | 0.062598 | PPIL4    | chr6  | - | 1.5E+08  | 1.5E+08  | 2232  |
| ENSG000001 | 101.1519 | 0        | 8.1588   | 7.39E-14 | 4.49E-13 | ULBP2    | chr6  | + | 1.5E+08  | 1.5E+08  | 1349  |
| ENSG000001 | 3010.9   | 3678.847 | -0.28882 | 0.001852 | 0.004404 | AKAP12   | chr6  | + | 1.52E+08 | 1.52E+08 | 8432  |
| ENSG000001 | 1848.986 | 82.16285 | 4.476    | 1.74E-84 | 7.91E-83 | SYNE1    | chr6  | - | 1.52E+08 | 1.53E+08 | 27748 |
| ENSG000001 | 96.67146 | 46.63715 | 1.0444   | 0.001207 | 0.002957 | ULBP3    | chr6  | - | 1.5E+08  | 1.5E+08  | 966   |
| ENSG000001 | 668.3752 | 409.3634 | 0.70626  | 1.98E-05 | 6.15E-05 | LATS1    | chr6  | - | 1.5E+08  | 1.5E+08  | 7517  |
| ENSG000001 | 82.73179 | 583.2235 | -2.8011  | 2.81E-22 | 2.62E-21 | EPS8L1   | chr19 | + | 55583388 | 55599291 | 2536  |
| ENSG000001 | 7.499823 | 0        | 4.5164   | 0.000541 | 0.001395 | LILRB2   | chr19 | - | 54777675 | 54785039 | 2819  |
| ENSG000001 | 747.3729 | 702.7348 | 0.089237 | 0.54904  | 0.64885  | AAR2     | chr20 | + | 34824381 | 34858840 | 2689  |
| ENSG000001 | 3.019472 | 1.606458 | 0.76898  | 0.52787  | 0.62953  | TTL9     | chr20 | + | 30458505 | 30532764 | 2623  |
| ENSG000001 | 2567.358 | 3191.164 | -0.31278 | 0.10193  | 0.16398  | RBM39    | chr20 | - | 34291531 | 34330234 | 4580  |
| ENSG000001 | 0.36308  | 0.343138 | -0.0021  | 0.99905  | NA       | COX4I2   | chr20 | + | 30225691 | 30232809 | 693   |
| ENSG000001 | 151.5773 | 257.6756 | -0.76635 | 0.000217 | 0.000591 | ZNF341   | chr20 | + | 32319463 | 32380075 | 3682  |
| ENSG000001 | 734.0392 | 511.7673 | 0.51874  | 0.000239 | 0.000648 | GGT7     | chr20 | - | 33432523 | 33460663 | 2642  |
| ENSG000001 | 2604.879 | 659.2465 | 1.9794   | 2.12E-41 | 3.85E-40 | ACSS2    | chr20 | + | 33459949 | 33515769 | 3065  |
| ENSG000001 | 215.6634 | 174.4559 | 0.30252  | 0.31566  | 0.41828  | EDA2R    | chrX  | - | 65815479 | 65859108 | 3418  |
| ENSG000001 | 460.1136 | 598.6266 | -0.3788  | 0.005896 | 0.01294  | ARHGEF9  | chrX  | - | 62854847 | 63005426 | 5413  |
| ENSG000001 | 97.96013 | 477.6086 | -2.2689  | 3.44E-13 | 2.01E-12 | C1QL1    | chr17 | - | 43037061 | 43045439 | 1295  |
| ENSG000001 | 6.54579  | 13.40514 | -1.0064  | 0.16602  | 0.24716  | GfAP     | chr17 | - | 42982376 | 42994305 | 3086  |
| ENSG000001 | 0.290301 | 4.63159  | -3.0749  | 0.022804 | 0.044422 | PYY      | chr17 | - | 42030106 | 42081837 | 1053  |
| ENSG000001 | 2.032922 | 2.012704 | 0.006919 | 0.99614  | 0.99778  | HIGD1B   | chr17 | + | 42923721 | 42927848 | 635   |
| ENSG000001 | 1295.173 | 1065.925 | 0.28104  | 0.043768 | 0.079248 | ATP6V1E1 | chr22 | - | 18074902 | 18111584 | 1402  |
| ENSG000001 | 107.9279 | 127.4104 | -0.23735 | 0.24462  | 0.34036  | ZNF227   | chr19 | + | 44711700 | 44741421 | 3043  |
| ENSG000001 | 388.6484 | 177.26   | 1.1266   | 1.17E-09 | 5.37E-09 | ZNF428   | chr19 | - | 44111371 | 44124026 | 1412  |
| ENSG000001 | 0.342542 | 1.485073 | -1.2139  | 0.48947  | NA       | TEX101   | chr19 | + | 43905648 | 43922763 | 1446  |
| ENSG000001 | 109.8095 | 226.4014 | -1.0372  | 9.77E-06 | 3.14E-05 | ZNF141   | chr4  | + | 331603   | 378653   | 2970  |
| ENSG000001 | 0        | 1.294874 | -1.8547  | 0.27869  | NA       | CCL25    | chr19 | + | 8117651  | 8127534  | 953   |
| ENSG000001 | 2809.8   | 3768.94  | -0.42336 | 7.74E-07 | 2.79E-06 | COX4I1   | chr16 | + | 85832239 | 85840650 | 3946  |
| ENSG000001 | 482.5908 | 607.3268 | -0.331   | 0.028754 | 0.054668 | EMC8     | chr16 | - | 85805364 | 85833214 | 1962  |
| ENSG000001 | 905.3892 | 2898.927 | -1.6774  | 3.39E-52 | 8.24E-51 | GSE1     | chr16 | + | 85645015 | 85709810 | 7495  |
| ENSG000001 | 412.8187 | 751.0348 | -0.86084 | 1.32E-05 | 4.18E-05 | GIN52    | chr16 | - | 85709804 | 85723679 | 2673  |
| ENSG000001 | 1727.723 | 1524.274 | 0.18091  | 0.19196  | 0.27905  | CHMP1A   | chr16 | - | 89710839 | 89724253 | 2483  |
| ENSG000001 | 1261.706 | 514.5955 | 1.2915   | 3.56E-11 | 1.82E-10 | SH3BGRL  | chrX  | + | 80457442 | 80554046 | 1923  |
| ENSG000001 | 641.7999 | 747.6249 | -0.21933 | 0.10873  | 0.17332  | COX7B    | chrX  | + | 77154935 | 77162870 | 2471  |
| ENSG000001 | 0        | 0.343138 | -0.41864 | 0.81278  | NA       | SLC34A1  | chr5  | + | 1.77E+08 | 1.77E+08 | 2916  |
| ENSG000001 | 20.10347 | 137.1515 | -2.7263  | 6.16E-11 | 3.10E-10 | F12      | chr5  | - | 1.77E+08 | 1.77E+08 | 2049  |
| ENSG000001 | 285.3798 | 320.4092 | -0.16641 | 0.57022  | 0.66741  | PRR7     | chr5  | + | 1.77E+08 | 1.77E+08 | 1476  |
| ENSG000001 | 812.8893 | 966.1873 | -0.24813 | 0.098521 | 0.15944  | NFATC1   | chr18 | + | 77155856 | 77289325 | 4642  |
| ENSG000001 | 1.213446 | 67.37944 | -5.4315  | 5.64E-14 | 3.46E-13 | IDO1     | chr8  | + | 39759794 | 39785963 | 2097  |
| ENSG000001 | 0.72616  | 0.297015 | 0.51367  | 0.77334  | NA       | GJA9     | chr1  | - | 39330175 | 39347289 | 2377  |
| ENSG000001 | 6983.45  | 3681.388 | 0.9227   | 2.06E-13 | 1.22E-12 | CAP1     | chr1  | + | 40505905 | 40538321 | 3105  |

|            |          |          |          |           |           |           |       |   |          |          |       |
|------------|----------|----------|----------|-----------|-----------|-----------|-------|---|----------|----------|-------|
| ENSG000001 | 1315.49  | 1704.334 | -0.37306 | 0.004166  | 0.009383  | PPT1      | chr1  | - | 40538379 | 40563375 | 2740  |
| ENSG000001 | 102.1153 | 2355.343 | -4.5104  | 4.76E-87  | 2.25E-85  | RAB11FIP4 | chr17 | + | 29718642 | 29865236 | 8629  |
| ENSG000001 | 1469.431 | 1187.106 | 0.30781  | 0.005395  | 0.011943  | RLIM      | chrX  | - | 73805052 | 73834452 | 8317  |
| ENSG000001 | 0        | 13.12994 | -5.2615  | 3.31E-05  | 9.99E-05  | CDX4      | chrX  | + | 72667090 | 72675081 | 1515  |
| ENSG000001 | 276.2657 | 608.6107 | -1.1363  | 7.22E-11  | 3.62E-10  | ABCB7     | chrX  | - | 74273115 | 74376567 | 2377  |
| ENSG000001 | 864.4896 | 475.2248 | 0.86019  | 1.68E-06  | 5.87E-06  | TRAF3     | chr14 | + | 1.03E+08 | 1.03E+08 | 7640  |
| ENSG000001 | 244.0325 | 404.0319 | -0.72345 | 3.33E-05  | 0.0001    | HAUS8     | chr19 | - | 17160539 | 17186435 | 3176  |
| ENSG000001 | 0.632843 | 0        | 0.81931  | 0.64303   | NA        | EMR3      | chr19 | - | 14729929 | 14800839 | 2254  |
| ENSG000001 | 580.4018 | 661.1839 | -0.18859 | 0.10402   | 0.16681   | MRPS25    | chr3  | - | 15083967 | 15106842 | 4586  |
| ENSG000001 | 321.7305 | 75.97099 | 2.0728   | 9.05E-22  | 8.26E-21  | SH3BP5    | chr3  | - | 15296360 | 15382875 | 2822  |
| ENSG000001 | 187.2592 | 476.6158 | -1.3451  | 4.93E-16  | 3.42E-15  | HACL1     | chr3  | - | 15602211 | 15643338 | 2266  |
| ENSG000001 | 833.5767 | 547.3053 | 0.60482  | 0.000455  | 0.001191  | TBC1D5    | chr3  | - | 17199899 | 18486309 | 6609  |
| ENSG000001 | 511.3883 | 205.9997 | 1.3064   | 2.41E-14  | 1.52E-13  | CAPN7     | chr3  | + | 15247659 | 15294425 | 4353  |
| ENSG000001 | 1139.47  | 88.39109 | 3.6861   | 6.17E-137 | 5.82E-135 | RFTN1     | chr3  | - | 16357352 | 16555533 | 2982  |
| ENSG000001 | 0.342542 | 1.66715  | -1.521   | 0.35886   | 0.46305   | C3orf20   | chr3  | + | 14716606 | 14814541 | 3326  |
| ENSG000001 | 1019.372 | 623.2319 | 0.70964  | 3.75E-11  | 1.92E-10  | ZFYVE20   | chr3  | - | 15111580 | 15140670 | 6678  |
| ENSG000001 | 9.149941 | 0.357707 | 3.9733   | 0.00147   | 0.003556  | GALNT15   | chr3  | + | 16216156 | 16273499 | 4669  |
| ENSG000001 | 1653.583 | 3787.141 | -1.1947  | 3.96E-26  | 4.32E-25  | SLC6A6    | chr3  | + | 14444076 | 14530857 | 6534  |
| ENSG000001 | 0.870904 | 80.09266 | -5.994   | 6.34E-14  | 3.88E-13  | KCNC3     | chr19 | - | 50815194 | 50836772 | 5447  |
| ENSG000001 | 0        | 5.405281 | -3.8633  | 0.008356  | 0.017804  | NAPSA     | chr19 | - | 50861734 | 50869087 | 3288  |
| ENSG000001 | 1.048164 | 5.758956 | -2.2122  | 0.05315   | 0.093809  | NAPSB     | chr19 | - | 50837053 | 50848024 | 1343  |
| ENSG000001 | 1147.306 | 1042.795 | 0.13695  | 0.25917   | 0.3571    | NR1H2     | chr19 | + | 50832910 | 50886239 | 2380  |
| ENSG000001 | 6.120282 | 155.482  | -4.5485  | 2.15E-18  | 1.67E-17  | LRRCA4B   | chr19 | - | 51020149 | 51071302 | 3019  |
| ENSG000001 | 2312.741 | 215.5251 | 3.4139   | 3.04E-82  | 1.32E-80  | PDLIM4    | chr5  | + | 1.32E+08 | 1.32E+08 | 2282  |
| ENSG000001 | 366.5842 | 219.1246 | 0.74116  | 1.05E-06  | 3.75E-06  | KIF3A     | chr5  | - | 1.32E+08 | 1.32E+08 | 6325  |
| ENSG000001 | 3589.575 | 2508.411 | 0.51666  | 7.67E-07  | 2.77E-06  | MGAT1     | chr5  | - | 1.8E+08  | 1.8E+08  | 3175  |
| ENSG000001 | 2450.859 | 2846.005 | -0.21594 | 0.036131  | 0.06704   | GFPT2     | chr5  | - | 1.8E+08  | 1.8E+08  | 3093  |
| ENSG000001 | 1296.889 | 1685.507 | -0.37761 | 0.005172  | 0.011495  | TUBG1     | chr17 | + | 40761694 | 40767252 | 1611  |
| ENSG000001 | 2076.756 | 2797.187 | -0.42715 | 0.10609   | 0.16974   | PSME3     | chr17 | + | 40976402 | 40995774 | 3144  |
| ENSG000001 | 8185.602 | 9964.589 | -0.28345 | 0.002199  | 0.005169  | RPL27     | chr17 | + | 41150290 | 41154976 | 1872  |
| ENSG000001 | 184.2621 | 194.6674 | -0.07851 | 0.75216   | 0.81897   | PSMC3IP   | chr17 | - | 40724333 | 40729849 | 1416  |
| ENSG000001 | 4.285159 | 110.7531 | -4.5495  | 9.33E-14  | 5.63E-13  | AOC3      | chr17 | + | 41003201 | 41010147 | 4026  |
| ENSG000001 | 16137.74 | 10021.22 | 0.68676  | 1.13E-09  | 5.16E-09  | ACLY      | chr17 | - | 40023161 | 40086795 | 4339  |
| ENSG000001 | 568.2448 | 1302.191 | -1.1946  | 5.01E-19  | 4.02E-18  | VPS25     | chr17 | + | 40925454 | 40931617 | 1101  |
| ENSG000001 | 40.25901 | 60.28185 | -0.57485 | 0.081508  | 0.13575   | RAMP2     | chr17 | + | 40910465 | 40915059 | 858   |
| ENSG000001 | 19.79344 | 156.8148 | -2.9615  | 4.63E-18  | 3.57E-17  | AOC2      | chr17 | + | 40996617 | 41002724 | 2657  |
| ENSG000001 | 7.915144 | 5.286312 | 0.55639  | 0.43784   | 0.54337   | RP11-798G | chr17 | + | 43580626 | 43612076 | 547   |
| ENSG000001 | 92.76918 | 108.8461 | -0.23363 | 0.36216   | 0.46634   | NDUFA2    | chr5  | - | 1.4E+08  | 1.4E+08  | 804   |
| ENSG000001 | 32.51176 | 40.13613 | -0.30389 | 0.36677   | 0.47137   | ANKHD1    | chr5  | + | 1.4E+08  | 1.4E+08  | 8319  |
| ENSG000001 | 3195.556 | 3298.217 | -0.04534 | 0.76173   | 0.82702   | DIAPH1    | chr5  | - | 1.41E+08 | 1.41E+08 | 5792  |
| ENSG000001 | 1163.702 | 738.9281 | 0.6542   | 5.46E-09  | 2.37E-08  | NDIFP1    | chr5  | + | 1.41E+08 | 1.42E+08 | 4164  |
| ENSG000001 | 1381.397 | 2200.076 | -0.67094 | 2.58E-08  | 1.06E-07  | UBE2D2    | chr5  | + | 1.39E+08 | 1.39E+08 | 2864  |
| ENSG000001 | 1132.827 | 1019.131 | 0.15262  | 0.28156   | 0.38258   | EXOC4     | chr7  | + | 1.33E+08 | 1.34E+08 | 4185  |
| ENSG000001 | 1163.203 | 788.7806 | 0.55826  | 0.000287  | 0.000771  | ACAP3     | chr1  | - | 1227756  | 1244989  | 5319  |
| ENSG000001 | 344.3671 | 214.7989 | 0.67862  | 3.48E-05  | 0.000105  | C1orf159  | chr1  | - | 1017198  | 1051741  | 3315  |
| ENSG000001 | 6297.984 | 42.39818 | 7.1905   | 0         | 0         | ANO1      | chr11 | + | 69924408 | 70035634 | 4790  |
| ENSG000001 | 830.6899 | 815.0502 | 0.026805 | 0.81703   | 0.87164   | PPFIA1    | chr11 | + | 70116806 | 70230509 | 5234  |
| ENSG000001 | 490.0399 | 5.554188 | 6.3749   | 1.32E-64  | 4.26E-63  | TMEM204   | chr16 | + | 1578689  | 1605581  | 1938  |
| ENSG000001 | 25.24918 | 140.5489 | -2.4565  | 7.56E-14  | 4.59E-13  | KREMEN2   | chr16 | + | 3013945  | 3018384  | 2339  |
| ENSG000001 | 417.5112 | 1243.083 | -1.5703  | 1.93E-29  | 2.41E-28  | THOC6     | chr16 | + | 3074028  | 3077756  | 1419  |
| ENSG000001 | 2179.395 | 3079.811 | -0.49853 | 1.46E-05  | 4.61E-05  | TRAF7     | chr16 | + | 2205699  | 2228130  | 3700  |
| ENSG000001 | 0.290301 | 93.54078 | -7.2245  | 1.14E-12  | 6.47E-12  | BARX1     | chr9  | - | 96713905 | 96717654 | 1532  |
| ENSG000001 | 288.2894 | 543.9363 | -0.91338 | 1.01E-05  | 3.23E-05  | NINJ1     | chr9  | - | 95883771 | 95896570 | 2026  |
| ENSG000001 | 524.7244 | 381.0214 | 0.46219  | 0.000396  | 0.001043  | NPHP4     | chr1  | - | 5922871  | 6052533  | 5548  |
| ENSG000001 | 14985.53 | 2003.876 | 2.8989   | 2.09E-121 | 1.66E-119 | MAP1B     | chr5  | + | 71403061 | 71505395 | 12034 |
| ENSG000001 | 0        | 0.297015 | -0.41864 | 0.81278   | NA        | RHOXF2    | chrX  | + | 1.19E+08 | 1.19E+08 | 1309  |
| ENSG000001 | 1632.057 | 215.4472 | 2.916    | 7.81E-105 | 4.82E-103 | IL13RA1   | chrX  | + | 1.18E+08 | 1.18E+08 | 4036  |
| ENSG000001 | 270.3089 | 295.1025 | -0.12514 | 0.48944   | 0.59346   | WDR44     | chrX  | + | 1.17E+08 | 1.18E+08 | 4111  |
| ENSG000001 | 19.83631 | 28.00962 | -0.48454 | 0.28462   | 0.38597   | CKMT2     | chr5  | + | 80529104 | 80562216 | 1637  |
| ENSG000001 | 185.6424 | 225.4524 | -0.28079 | 0.094419  | 0.15389   | ZCCHC9    | chr5  | + | 80597409 | 80609116 | 4606  |
| ENSG000001 | 0.653381 | 0        | 0.82678  | 0.64037   | NA        | KRT34     | chr17 | - | 39533902 | 39538655 | 1751  |
| ENSG000001 | 0.995923 | 6.045433 | -2.3006  | 0.041643  | 0.075919  | TNS4      | chr17 | - | 38632080 | 38657849 | 4067  |
| ENSG000001 | 3839.617 | 6633.699 | -0.78614 | 0.000121  | 0.000342  | TOP2A     | chr17 | - | 38544768 | 38574202 | 5758  |
| ENSG000001 | 849.2093 | 1222.591 | -0.52518 | 4.96E-05  | 0.000147  | STARD3    | chr17 | + | 37793318 | 37819737 | 3451  |
| ENSG000001 | 989.4031 | 393.7234 | 1.3283   | 7.57E-26  | 8.19E-25  | RARA      | chr17 | + | 38465444 | 38513094 | 2414  |

|            |          |          |          |           |           |           |       |   |          |          |      |
|------------|----------|----------|----------|-----------|-----------|-----------|-------|---|----------|----------|------|
| ENSG000001 | 0        | 609.947  | -10.483  | 7.87E-22  | 7.20E-21  | PPP1R1B   | chr17 | + | 37782993 | 37792879 | 2879 |
| ENSG000001 | 451.2321 | 611.1881 | -0.43681 | 0.026665  | 0.051128  | KHDRBS3   | chr8  | + | 1.36E+08 | 1.37E+08 | 5466 |
| ENSG000001 | 885.4815 | 1152.44  | -0.37882 | 0.012038  | 0.024882  | CHD1L     | chr1  | + | 1.47E+08 | 1.47E+08 | 2967 |
| ENSG000001 | 352.7608 | 168.9607 | 1.0562   | 4.15E-06  | 1.39E-05  | PEX11B    | chr1  | + | 1.46E+08 | 1.46E+08 | 1740 |
| ENSG000001 | 17.27323 | 25.55267 | -0.55948 | 0.20176   | 0.29039   | FMO5      | chr1  | - | 1.47E+08 | 1.47E+08 | 2632 |
| ENSG000001 | 1599.142 | 702.3781 | 1.1851   | 7.97E-19  | 6.33E-18  | PIAS3     | chr1  | + | 1.46E+08 | 1.46E+08 | 2901 |
| ENSG000001 | 389.8799 | 715.6257 | -0.87411 | 2.83E-05  | 8.61E-05  | PRKAB2    | chr1  | - | 1.47E+08 | 1.47E+08 | 5417 |
| ENSG000001 | 552.1292 | 731.8476 | -0.40465 | 0.014573  | 0.029583  | RBM8A     | chr1  | + | 1.46E+08 | 1.46E+08 | 2827 |
| ENSG000001 | 46.68337 | 114.2796 | -1.2873  | 2.73E-07  | 1.03E-06  | CLUHP3    | chr16 | + | 31711911 | 31721097 | 1907 |
| ENSG000001 | 1171.349 | 1319.353 | -0.17125 | 0.10358   | 0.16622   | PDHA1     | chrX  | + | 19362011 | 19379823 | 3484 |
| ENSG000001 | 1.701545 | 5.851203 | -1.6541  | 0.099091  | 0.16021   | RAI2      | chrX  | - | 17818169 | 17879457 | 2421 |
| ENSG000001 | 603.3508 | 1159.706 | -0.94194 | 1.64E-14  | 1.05E-13  | MCCC2     | chr5  | + | 70883115 | 70954531 | 3665 |
| ENSG000001 | 156.7576 | 254.7015 | -0.69411 | 0.005181  | 0.011512  | ZNF304    | chr19 | + | 57862675 | 57871266 | 4313 |
| ENSG000001 | 57.38588 | 64.21419 | -0.15968 | 0.6407    | 0.72778   | ZSCAN5A   | chr19 | - | 56732681 | 56879752 | 2450 |
| ENSG000001 | 11.72158 | 11.36572 | 0.053376 | 0.92556   | 0.95018   | ZNF132    | chr19 | - | 58944181 | 58951589 | 3031 |
| ENSG000001 | 914.4181 | 459.1069 | 0.99206  | 1.33E-09  | 6.08E-09  | VIMP      | chr15 | - | 1.02E+08 | 1.02E+08 | 2444 |
| ENSG000001 | 2058.593 | 1885.003 | 0.12668  | 0.23527   | 0.32913   | CHSY1     | chr15 | - | 1.02E+08 | 1.02E+08 | 4550 |
| ENSG000001 | 895.812  | 1581.12  | -0.81809 | 6.97E-12  | 3.73E-11  | SNRPA1    | chr15 | - | 1.02E+08 | 1.02E+08 | 2440 |
| ENSG000001 | 0.36308  | 0.357707 | -0.00212 | 0.99905   | NA        | KRT17P1   | chr17 | - | 16744057 | 16749197 | 1546 |
| ENSG000001 | 2742.54  | 3539.044 | -0.36746 | 5.51E-05  | 0.000162  | LLGL1     | chr17 | + | 18128901 | 18148189 | 6004 |
| ENSG000001 | 0        | 1.029414 | -1.1526  | 0.51496   | NA        | NROB2     | chr1  | - | 27237980 | 27240457 | 1156 |
| ENSG000001 | 0        | 31987.21 | -15.71   | 2.67E-56  | 7.13E-55  | LIN28A    | chr1  | + | 26737269 | 26756213 | 4008 |
| ENSG000001 | 105.377  | 139.6459 | -0.40057 | 0.15126   | 0.22877   | THAP1     | chr8  | - | 42691817 | 42698468 | 2161 |
| ENSG000001 | 119.1169 | 636.347  | -2.4064  | 7.27E-30  | 9.24E-29  | RHPN2     | chr19 | - | 33469499 | 33555794 | 3793 |
| ENSG000001 | 709.3368 | 259.6323 | 1.4468   | 5.39E-28  | 6.37E-27  | C19orf12  | chr19 | - | 30191721 | 30206364 | 2464 |
| ENSG000001 | 78.9331  | 90.41521 | -0.19569 | 0.3927    | 0.4971    | C19orf40  | chr19 | + | 33463115 | 33469128 | 2298 |
| ENSG000001 | 0.653381 | 15.55709 | -4.0884  | 9.92E-05  | 0.000283  | LRRC9     | chr14 | + | 60386431 | 60530277 | 4915 |
| ENSG000001 | 586.9184 | 304.251  | 0.94533  | 9.80E-12  | 5.20E-11  | ACTR10    | chr14 | + | 58666798 | 58701750 | 1815 |
| ENSG000001 | 10.51074 | 161.4642 | -3.9182  | 2.55E-23  | 2.50E-22  | ABHD12B   | chr14 | + | 51338878 | 51371688 | 2863 |
| ENSG000001 | 27.06718 | 214.9424 | -2.9829  | 1.55E-26  | 1.73E-25  | GCH1      | chr14 | - | 55308726 | 55369570 | 2943 |
| ENSG000001 | 680.3683 | 55.18902 | 3.6193   | 7.52E-89  | 3.69E-87  | LGALS3    | chr14 | + | 55590828 | 55612126 | 1729 |
| ENSG000001 | 0.36308  | 0        | 0.4146   | 0.81455   | NA        | UBE2L2    | chr12 | - | 20602589 | 20603017 | 429  |
| ENSG000001 | 125.3323 | 8.813227 | 3.7774   | 9.97E-25  | 1.03E-23  | PODNL1    | chr19 | - | 14042000 | 14064204 | 2744 |
| ENSG000001 | 2040.399 | 1528.173 | 0.41595  | 0.010343  | 0.021679  | DNAJB1    | chr19 | - | 14625582 | 14640582 | 2264 |
| ENSG000001 | 669.3971 | 2020.329 | -1.5917  | 1.05E-53  | 2.64E-52  | ZSWIM4    | chr19 | + | 13906274 | 13943044 | 4339 |
| ENSG000001 | 170.3346 | 211.9026 | -0.31403 | 0.07837   | 0.13121   | FBXW9     | chr19 | - | 12798867 | 12807457 | 1803 |
| ENSG000001 | 651.0784 | 544.3462 | 0.25653  | 0.21277   | 0.30333   | RFX1      | chr19 | - | 14072350 | 14117851 | 4332 |
| ENSG000001 | 1.265686 | 7.227786 | -2.2138  | 0.040811  | 0.074669  | ZNF20     | chr19 | - | 12203658 | 12251222 | 3061 |
| ENSG000001 | 22.10387 | 98.65152 | -2.1236  | 2.45E-09  | 1.09E-08  | C19orf57  | chr19 | - | 13993161 | 14017265 | 2513 |
| ENSG000001 | 1065.722 | 1665.331 | -0.6431  | 3.40E-10  | 1.62E-09  | DCAF15    | chr19 | + | 14063304 | 14072254 | 2271 |
| ENSG000001 | 751.6642 | 849.8276 | -0.17733 | 0.32397   | 0.42695   | CC2D1A    | chr19 | + | 14017014 | 14041692 | 3581 |
| ENSG000001 | 0.36308  | 18.13227 | -4.946   | 1.82E-05  | 5.67E-05  | RTBDN     | chr19 | - | 12936292 | 12946242 | 2076 |
| ENSG000001 | 182.3491 | 126.3544 | 0.52583  | 0.02993   | 0.056644  | MATN3     | chr2  | - | 20191872 | 20212455 | 2524 |
| ENSG000001 | 207.2851 | 214.3837 | -0.04757 | 0.773     | 0.83659   | TRIM21    | chr11 | - | 4406127  | 4414926  | 1924 |
| ENSG000001 | 59.84284 | 128.8195 | -1.0936  | 3.42E-05  | 0.000103  | SPATA6    | chr1  | - | 48761044 | 48937845 | 4973 |
| ENSG000001 | 2369.298 | 1142.983 | 1.0501   | 2.65E-16  | 1.86E-15  | LRRC41    | chr1  | - | 46726868 | 46769280 | 4455 |
| ENSG000001 | 5.632997 | 56.71282 | -3.2559  | 2.62E-09  | 1.17E-08  | LHX1      | chr17 | + | 35294084 | 35301917 | 4121 |
| ENSG000001 | 1.669842 | 0.951736 | 0.606    | 0.68558   | 0.7653    | GAS2L2    | chr17 | - | 34071530 | 34079897 | 3014 |
| ENSG000001 | 6.919221 | 21.70772 | -1.613   | 0.002998  | 0.006911  | CCT6B     | chr17 | - | 33254878 | 33308097 | 3353 |
| ENSG000001 | 6595.044 | 4630.856 | 0.50977  | 1.04E-07  | 4.07E-07  | ACACA     | chr17 | - | 35441923 | 35766909 | 9962 |
| ENSG000001 | 2593.394 | 3126.102 | -0.26927 | 0.009307  | 0.019667  | DHX30     | chr3  | + | 47844399 | 47891685 | 4115 |
| ENSG000001 | 1759.782 | 2081.797 | -0.24244 | 0.021235  | 0.041668  | RAF1      | chr3  | - | 12625100 | 12705725 | 3300 |
| ENSG000001 | 0        | 25.08486 | -6.2637  | 5.36E-08  | 2.14E-07  | SLC6A11   | chr3  | + | 10857885 | 10982419 | 4296 |
| ENSG000001 | 197.1934 | 3.976869 | 5.536    | 3.27E-33  | 4.71E-32  | PPARG     | chr3  | + | 12328867 | 12475855 | 2029 |
| ENSG000001 | 6.86698  | 3553.026 | -8.9197  | 9.03E-146 | 9.80E-144 | NUP210    | chr3  | - | 13357737 | 13461809 | 7191 |
| ENSG000001 | 2.956066 | 0        | 3.0292   | 0.050911  | 0.090374  | FCRLA     | chr1  | + | 1.62E+08 | 1.62E+08 | 2903 |
| ENSG000001 | 291.871  | 252.7877 | 0.20783  | 0.27365   | 0.37338   | HSD17B7   | chr1  | + | 1.63E+08 | 1.63E+08 | 2541 |
| ENSG000001 | 393.3391 | 600.1016 | -0.60767 | 0.00169   | 0.004049  | ENOSF1    | chr18 | - | 672543   | 712676   | 4121 |
| ENSG000001 | 0        | 1.638012 | -2.1885  | 0.18912   | NA        | LINC00470 | chr18 | - | 1254384  | 1408345  | 2031 |
| ENSG000001 | 71.37265 | 474.8485 | -2.7234  | 1.51E-50  | 3.50E-49  | EMILIN2   | chr18 | + | 2847028  | 2915991  | 5910 |
| ENSG000001 | 940.9837 | 692.3691 | 0.44168  | 0.019321  | 0.038258  | ARFIP2    | chr11 | - | 6496910  | 6502666  | 2543 |
| ENSG000001 | 813.2151 | 326.5947 | 1.3118   | 2.73E-12  | 1.50E-11  | TRIM5     | chr11 | - | 5684425  | 5959849  | 3399 |
| ENSG000001 | 2.749709 | 7.235907 | -1.3316  | 0.13213   | 0.20452   | CNGA4     | chr11 | + | 6255995  | 6265659  | 1863 |
| ENSG000001 | 323.6998 | 186.9623 | 0.79235  | 2.34E-06  | 8.06E-06  | TRIM22    | chr11 | + | 5710919  | 5758319  | 2989 |
| ENSG000001 | 287.6738 | 235.8598 | 0.28527  | 0.077282  | 0.12971   | RRP8      | chr11 | - | 6616305  | 6624850  | 6560 |

|                    |          |          |           |           |          |       |   |          |          |       |
|--------------------|----------|----------|-----------|-----------|----------|-------|---|----------|----------|-------|
| ENSG000001460.4322 | 357.4831 | 0.36346  | 0.20553   | 0.29494   | TIMM10B  | chr11 | + | 6502677  | 6505909  | 2840  |
| ENSG0000011328.773 | 540.0215 | 1.2679   | 0.020414  | 0.040185  | EFR3A    | chr8  | + | 1.33E+08 | 1.33E+08 | 5438  |
| ENSG0000010        | 1219.491 | -11.429  | 1.58E-26  | 1.76E-25  | HHLA1    | chr8  | - | 1.33E+08 | 1.33E+08 | 4105  |
| ENSG000001854.6058 | 1490.119 | -0.80082 | 6.05E-08  | 2.40E-07  | PTCD3    | chr2  | + | 86333305 | 86369280 | 6734  |
| ENSG0000011623.591 | 1632.613 | -0.00757 | 0.95315   | 0.97083   | IMMT     | chr2  | - | 86371055 | 86422893 | 3001  |
| ENSG000001611.9129 | 592.1133 | 0.047687 | 0.75809   | 0.82414   | MRPL35   | chr2  | + | 86426478 | 86440917 | 3727  |
| ENSG00000111.22492 | 67.55594 | -2.5632  | 7.85E-11  | 3.92E-10  | IQCA1    | chr2  | - | 2.37E+08 | 2.37E+08 | 3336  |
| ENSG000001357.5239 | 305.021  | 0.22936  | 0.26664   | 0.36533   | ILKAP    | chr2  | - | 2.39E+08 | 2.39E+08 | 2651  |
| ENSG000001109.8524 | 138.6263 | -0.3318  | 0.13345   | 0.20611   | PER2     | chr2  | - | 2.39E+08 | 2.39E+08 | 6385  |
| ENSG000001435.5433 | 9.357843 | 5.5046   | 4.47E-62  | 1.37E-60  | RAMP1    | chr2  | + | 2.39E+08 | 2.39E+08 | 910   |
| ENSG00000162.11308 | 138.5746 | -1.1505  | 1.33E-05  | 4.20E-05  | SCLY     | chr2  | + | 2.39E+08 | 2.39E+08 | 5668  |
| ENSG000001336.486  | 18.94805 | 4.1145   | 1.77E-51  | 4.22E-50  | PTPRE    | chr10 | + | 1.3E+08  | 1.3E+08  | 5736  |
| ENSG0000015406.612 | 11853.24 | -1.1305  | 9.10E-15  | 5.88E-14  | RAN      | chr12 | + | 1.31E+08 | 1.31E+08 | 2661  |
| ENSG000001836.176  | 384.4066 | 1.1205   | 3.36E-19  | 2.72E-18  | PRKAA1   | chr5  | - | 40759481 | 40798476 | 5088  |
| ENSG0000013.495593 | 3.169208 | 0.12452  | 0.90273   | 0.93273   | CARD6    | chr5  | + | 40841286 | 40860275 | 4221  |
| ENSG000001448.7815 | 1763.036 | -1.9691  | 1.40E-28  | 1.70E-27  | RAP1GAP2 | chr17 | + | 2680350  | 2941033  | 6661  |
| ENSG0000011914.568 | 2678.232 | -0.48299 | 0.004226  | 0.009508  | CLUH     | chr17 | - | 2592680  | 2615957  | 5242  |
| ENSG000001375.1849 | 439.2518 | -0.22633 | 0.085608  | 0.14161   | INPP5K   | chr17 | - | 1397865  | 1420182  | 3194  |
| ENSG0000011943.857 | 3361.448 | -0.78832 | 1.55E-06  | 5.44E-06  | MYBBP1A  | chr17 | - | 4442192  | 4458926  | 4807  |
| ENSG0000011910.612 | 2759.475 | -0.52995 | 1.74E-08  | 7.26E-08  | RPA1     | chr17 | + | 1732996  | 1803376  | 4340  |
| ENSG0000013363.306 | 284.216  | 3.5603   | 5.09E-158 | 6.62E-156 | SERPINF1 | chr17 | + | 1665253  | 1680868  | 1548  |
| ENSG0000011210.08  | 2821.882 | -1.2204  | 1.53E-24  | 1.58E-23  | UBE2G1   | chr17 | - | 4172554  | 4269923  | 3974  |
| ENSG000001295.1881 | 247.5609 | 0.2507   | 0.12746   | 0.19841   | EEFSEC   | chr3  | + | 1.28E+08 | 1.28E+08 | 2228  |
| ENSG000001484.2949 | 646.1611 | -0.41548 | 0.000454  | 0.001188  | TBC1D14  | chr4  | + | 6910969  | 7034845  | 4925  |
| ENSG000001209.1012 | 305.8931 | -0.54595 | 0.00033   | 0.000877  | TMEM128  | chr4  | - | 4237269  | 4249950  | 1737  |
| ENSG000001112.8904 | 196.1543 | -0.79485 | 0.000115  | 0.000325  | COQ3     | chr6  | - | 99817276 | 99842080 | 1335  |
| ENSG0000011655.411 | 2486.285 | -0.58606 | 7.10E-07  | 2.57E-06  | PNISR    | chr6  | - | 99845927 | 99873207 | 5112  |
| ENSG000001152.8371 | 22.66355 | 2.7074   | 1.73E-14  | 1.10E-13  | POPDC3   | chr6  | - | 1.06E+08 | 1.06E+08 | 1345  |
| ENSG0000011987.457 | 991.431  | 1.0025   | 1.12E-11  | 5.93E-11  | SEC61G   | chr7  | - | 54819943 | 54827667 | 1227  |
| ENSG000001311.5104 | 338.7284 | -0.11906 | 0.73044   | 0.80107   | LANCL2   | chr7  | + | 55433141 | 55501435 | 4353  |
| ENSG000001130.2818 | 180.5978 | -0.46632 | 0.055446  | 0.097314  | FIGNL1   | chr7  | - | 50511831 | 50518088 | 3700  |
| ENSG0000010        | 0.700845 | -0.87835 | 0.62047   | NA        | DDC      | chr7  | - | 50526134 | 50633154 | 2041  |
| ENSG0000012106.321 | 2401.212 | -0.18896 | 0.051204  | 0.090812  | GRSF1    | chr4  | - | 71681499 | 71705662 | 6666  |
| ENSG0000010.342542 | 0        | 0.4146   | 0.81455   | NA        | IGJ      | chr4  | - | 71521258 | 71547534 | 1438  |
| ENSG0000012774.392 | 1875.543 | 0.56459  | 2.95E-08  | 1.20E-07  | ANKRD17  | chr4  | - | 73939093 | 74124515 | 10784 |
| ENSG000001709.313  | 839.8203 | -0.24274 | 0.15061   | 0.22789   | UTP3     | chr4  | + | 71554196 | 71556267 | 2072  |
| ENSG00000118.49524 | 318.6053 | -4.0523  | 1.13E-26  | 1.27E-25  | ITGB4    | chr17 | + | 73717408 | 73753899 | 5919  |
| ENSG0000011950.135 | 1419.786 | 0.45726  | 0.000458  | 0.001198  | WBP2     | chr17 | - | 73841780 | 73852588 | 3718  |
| ENSG0000019019.634 | 10730.31 | -0.25039 | 0.002932  | 0.006768  | H3F3B    | chr17 | - | 73772515 | 73781974 | 2787  |
| ENSG000001813.5663 | 692.5189 | 0.23246  | 0.030246  | 0.057159  | UNK      | chr17 | + | 73780681 | 73821886 | 4049  |
| ENSG000001189.8033 | 63.8673  | 1.5493   | 6.49E-05  | 0.000189  | TRIM47   | chr17 | - | 73870242 | 73874656 | 2266  |
| ENSG0000011283.11  | 1095.81  | 0.22753  | 0.21651   | 0.30773   | ZRANB2   | chr1  | - | 71528974 | 71546980 | 3677  |
| ENSG0000010.36308  | 2.82607  | -2.318   | 0.11972   | 0.18847   | ANKRD20A | chr9  | - | 43064966 | 43133544 | 3964  |
| ENSG0000014652.062 | 9549.393 | -1.0362  | 4.45E-17  | 3.28E-16  | EIF5A    | chr17 | + | 7210318  | 7215774  | 1511  |
| ENSG0000011282.319 | 437.5094 | 1.542    | 1.82E-08  | 7.55E-08  | KDM6B    | chr17 | + | 7743222  | 7758114  | 6713  |
| ENSG0000011.503747 | 0        | 1.8221   | 0.30126   | NA        | CLEC10A  | chr17 | - | 6977856  | 6983626  | 1800  |
| ENSG0000010.580602 | 10.44641 | -3.4896  | 0.003656  | 0.008314  | SLC52A1  | chr17 | - | 4935895  | 4955304  | 2989  |
| ENSG0000010.290301 | 12.68086 | -4.4858  | 0.000178  | 0.000492  | GUCY2D   | chr17 | + | 7905912  | 7923657  | 3698  |
| ENSG0000015.35386  | 5.118803 | 0.040111 | 0.96226   | 0.97762   | GPS2     | chr17 | - | 7214643  | 7218883  | 1977  |
| ENSG0000016.048317 | 0.357707 | 3.4107   | 0.008943  | 0.018976  | XAF1     | chr17 | + | 6658766  | 6678966  | 3623  |
| ENSG0000011421.899 | 614.2237 | 1.2065   | 9.52E-09  | 4.05E-08  | DLG4     | chr17 | - | 7093209  | 7123021  | 3975  |
| ENSG000001134.2741 | 352.1941 | -1.3844  | 1.48E-13  | 8.86E-13  | HRSP12   | chr8  | - | 99114572 | 99129469 | 1057  |
| ENSG0000011025.309 | 269.1865 | 1.9277   | 5.14E-38  | 8.55E-37  | VPS13B   | chr8  | + | 1E+08    | 1.01E+08 | 14160 |
| ENSG0000010.342542 | 0.297015 | -0.00202 | 0.99909   | NA        | RGS22    | chr8  | - | 1.01E+08 | 1.01E+08 | 4296  |
| ENSG000001734.7958 | 256.6477 | 1.5142   | 3.97E-23  | 3.86E-22  | MATN2    | chr8  | + | 98881068 | 99048944 | 4109  |
| ENSG000001596.201  | 718.5151 | -0.26918 | 0.12237   | 0.19203   | REEP2    | chr5  | + | 1.38E+08 | 1.38E+08 | 2170  |
| ENSG000001102.1666 | 155.9227 | -0.61214 | 0.002734  | 0.006345  | PCBD2    | chr5  | + | 1.34E+08 | 1.34E+08 | 5621  |
| ENSG000001470.6873 | 347.5164 | 0.43758  | 0.002789  | 0.006463  | SDF2     | chr17 | - | 26975374 | 26989207 | 1568  |
| ENSG0000012147.25  | 3338.887 | -0.63626 | 1.52E-08  | 6.35E-08  | FLOT2    | chr17 | - | 27206353 | 27224697 | 2756  |
| ENSG000001685.6227 | 1021.46  | -0.57385 | 4.01E-06  | 1.35E-05  | ERAL1    | chr17 | + | 27181956 | 27188085 | 1925  |
| ENSG000001612.5596 | 978.1184 | -0.67365 | 5.47E-06  | 1.81E-05  | PRMT7    | chr16 | + | 68344877 | 68392466 | 4238  |
| ENSG000001510.4837 | 778.5276 | -0.60512 | 0.020632  | 0.040574  | NIP7     | chr16 | + | 69373333 | 69377014 | 2402  |
| ENSG000001493.8037 | 580.0554 | -0.23064 | 0.086263  | 0.14254   | TERF2    | chr16 | - | 69389464 | 69442474 | 2983  |
| ENSG0000011063.621 | 1090.499 | -0.03596 | 0.72767   | 0.79856   | VPS4A    | chr16 | + | 69333562 | 69358949 | 2329  |
| ENSG000001387.8468 | 243.304  | 0.67031  | 1.18E-05  | 3.74E-05  | MTSSL1L  | chr16 | - | 70695107 | 70719969 | 4992  |

|                    |          |          |           |           |           |       |   |          |          |      |
|--------------------|----------|----------|-----------|-----------|-----------|-------|---|----------|----------|------|
| ENSG0000013754296  | 174.8103 | -2.1959  | 1.22E-12  | 6.88E-12  | HSPA12B   | chr20 | + | 3713314  | 3733758  | 3151 |
| ENSG0000017314004  | 111.9547 | -3.8978  | 2.95E-22  | 2.75E-21  | ANKEF1    | chr20 | + | 10015689 | 10037410 | 3762 |
| ENSG000001666.004  | 285.542  | 1.2184   | 2.29E-12  | 1.27E-11  | PCED1A    | chr20 | - | 2815960  | 2821836  | 2016 |
| ENSG0000014.00552  | 8.028999 | 0.78858  | 0.1988    | 0.28717   | SNAP25    | chr20 | + | 10199478 | 10288066 | 2256 |
| ENSG0000011221.374 | 760.0669 | 0.68321  | 1.37E-09  | 6.25E-09  | BTBD3     | chr20 | + | 11871371 | 11907257 | 5137 |
| ENSG0000011982.449 | 4219.37  | -1.0878  | 2.63E-14  | 1.65E-13  | PCNA      | chr20 | - | 5095599  | 5107272  | 1359 |
| ENSG000001289.6656 | 239.3827 | 0.27433  | 0.15866   | 0.23805   | NXT1      | chr20 | + | 23331373 | 23335414 | 1123 |
| ENSG000001195.5317 | 215.5715 | -0.14058 | 0.55279   | 0.65214   | POLR3F    | chr20 | + | 18447771 | 18465287 | 2416 |
| ENSG0000011596.368 | 29.68818 | 5.7295   | 1.54E-189 | 2.94E-187 | RIN2      | chr20 | + | 19867165 | 19983101 | 4505 |
| ENSG0000011246.2   | 1165.763 | 0.096371 | 0.39154   | 0.49599   | PTPRA     | chr20 | + | 2844830  | 3019722  | 3725 |
| ENSG0000011066.214 | 991.4817 | 0.10542  | 0.40946   | 0.51441   | DAP3      | chr1  | + | 1.56E+08 | 1.56E+08 | 2089 |
| ENSG0000010.290301 | 36.89662 | -5.9614  | 3.56E-08  | 1.44E-07  | RHBG      | chr1  | + | 1.56E+08 | 1.56E+08 | 2425 |
| ENSG000001659.4642 | 691.4423 | -0.06903 | 0.63551   | 0.7239    | KIAA0907  | chr1  | - | 1.56E+08 | 1.56E+08 | 4499 |
| ENSG0000010.290301 | 10.18007 | -4.1287  | 0.001059  | 0.002615  | ATP1A4    | chr1  | + | 1.6E+08  | 1.6E+08  | 3916 |
| ENSG00000115135.92 | 8116.986 | 0.89719  | 1.35E-08  | 5.65E-08  | NES       | chr1  | - | 1.57E+08 | 1.57E+08 | 5558 |
| ENSG0000018.298762 | 75.78649 | -3.1478  | 2.65E-12  | 1.46E-11  | BCAN      | chr1  | + | 1.57E+08 | 1.57E+08 | 3461 |
| ENSG0000011246.989 | 1087.631 | 0.19715  | 0.051557  | 0.091361  | ARHGEF11  | chr1  | - | 1.57E+08 | 1.57E+08 | 6889 |
| ENSG0000016.660623 | 776.7809 | -6.7901  | 4.50E-65  | 1.48E-63  | RAB25     | chr1  | + | 1.56E+08 | 1.56E+08 | 1100 |
| ENSG00000111.9074  | 13.97332 | -0.22038 | 0.73743   | 0.80645   | HAPLN2    | chr1  | + | 1.57E+08 | 1.57E+08 | 1771 |
| ENSG000001479.5666 | 652.1198 | -0.44424 | 0.001154  | 0.002835  | DCAF8     | chr1  | - | 1.6E+08  | 1.6E+08  | 4106 |
| ENSG000001825.5028 | 347.4635 | 1.2461   | 5.07E-22  | 4.67E-21  | SYT11     | chr1  | + | 1.56E+08 | 1.56E+08 | 5240 |
| ENSG000001393.8423 | 409.9362 | -0.05673 | 0.7138    | 0.78777   | IGHMBP2   | chr11 | + | 68671310 | 68708070 | 3961 |
| ENSG0000010        | 0.594029 | -0.81444 | 0.64499   | NA        | ACY3      | chr11 | - | 67410026 | 67418130 | 1300 |
| ENSG0000010        | 12.99889 | -5.2899  | 2.09E-05  | 6.45E-05  | ALDH3B2   | chr11 | - | 67429633 | 67448671 | 2649 |
| ENSG00000116.02809 | 952.668  | -5.8607  | 3.66E-79  | 1.51E-77  | MTL5      | chr11 | - | 68474908 | 68519032 | 3495 |
| ENSG000001180.9303 | 164.4008 | 0.13926  | 0.45099   | 0.5566    | MMACHC    | chr1  | + | 45965725 | 45976739 | 2981 |
| ENSG000001481.8925 | 1155.447 | -1.258   | 2.46E-10  | 1.19E-09  | DPH2      | chr1  | + | 44435672 | 44439041 | 2472 |
| ENSG000001161.0212 | 198.2011 | -0.29363 | 0.52862   | 0.63026   | TOE1      | chr1  | + | 45805342 | 45809647 | 2389 |
| ENSG0000013376.044 | 12715.25 | -1.9107  | 3.23E-50  | 7.44E-49  | NASP      | chr1  | + | 46049518 | 46084566 | 3659 |
| ENSG000001137.8517 | 675.8722 | -2.2873  | 4.28E-32  | 5.92E-31  | MUTYH     | chr1  | - | 45794835 | 45806142 | 1929 |
| ENSG000001721.5238 | 822.2681 | -0.1885  | 0.085732  | 0.14175   | CTNBL1    | chr20 | + | 36322408 | 36500531 | 2990 |
| ENSG00000151.38401 | 116.3671 | -1.1711  | 0.000175  | 0.000484  | LPIN3     | chr20 | + | 39969560 | 39989222 | 4363 |
| ENSG00000164.21357 | 99.51625 | -0.62291 | 0.075651  | 0.12734   | ZSWIM3    | chr20 | + | 44486256 | 44507761 | 2773 |
| ENSG000001324.1796 | 1618.011 | -2.3139  | 9.96E-61  | 2.94E-59  | RBM38     | chr20 | + | 55966463 | 55984389 | 2382 |
| ENSG00000137.0102  | 27.84224 | 0.40253  | 0.39366   | 0.49809   | VSTM2L    | chr20 | + | 36531499 | 36573752 | 1959 |
| ENSG000001286.6528 | 429.526  | -0.58028 | 0.001572  | 0.003779  | C20orf111 | chr20 | - | 42825136 | 42839431 | 1616 |
| ENSG0000011403.539 | 816.7512 | 0.78112  | 6.61E-12  | 3.54E-11  | SERINC3   | chr20 | - | 43124862 | 43150750 | 4445 |
| ENSG000001239.0241 | 62.74718 | 1.9114   | 1.41E-11  | 7.41E-11  | PPP1R3D   | chr20 | - | 58511894 | 58515352 | 3459 |
| ENSG0000011.265686 | 0.357707 | 1.2256   | 0.46821   | NA        | RP11-445F | chr20 | - | 43285092 | 43324737 | 1416 |
| ENSG0000016.099745 | 4.020576 | 0.57983  | 0.50363   | 0.60711   | DMGDH     | chr5  | - | 78293438 | 78531861 | 3097 |
| ENSG0000010.36308  | 0        | 0.4146   | 0.81455   | NA        | BHMT2     | chr5  | + | 78365540 | 78385289 | 2050 |
| ENSG0000011748.892 | 974.7081 | 0.84324  | 1.32E-14  | 8.44E-14  | AP3B1     | chr5  | - | 77296349 | 77590579 | 5838 |
| ENSG000001203.9223 | 159.7391 | 0.34983  | 0.27426   | 0.37412   | ZBED3     | chr5  | - | 76367897 | 76383148 | 6172 |
| ENSG000001677.9971 | 995.0239 | -0.5524  | 0.000521  | 0.00135   | INADL     | chr1  | + | 62208149 | 62629592 | 8505 |
| ENSG0000011689.687 | 11.29616 | 7.1527   | 1.05E-154 | 1.29E-152 | KANK4     | chr1  | - | 62702651 | 62785085 | 4665 |
| ENSG0000010.705622 | 1.606458 | -0.92508 | 0.54769   | 0.64769   | ANGPTL3   | chr1  | + | 63063158 | 63071830 | 2805 |
| ENSG0000010        | 45.42319 | -7.069   | 3.17E-10  | 1.52E-09  | SYT4      | chr18 | - | 40847843 | 40857615 | 4110 |
| ENSG0000014.648238 | 5.113098 | -0.11991 | 0.89596   | 0.92783   | SLC14A2   | chr18 | + | 42792960 | 43263072 | 4167 |
| ENSG000001180.8643 | 345.2225 | -0.92873 | 3.54E-08  | 1.44E-07  | FBXO44    | chr1  | + | 11714432 | 11723384 | 3320 |
| ENSG000001123.5307 | 84.53258 | 0.54198  | 0.045776  | 0.082366  | RSG1      | chr1  | - | 16558195 | 16563657 | 1545 |
| ENSG000001130.6296 | 188.343  | -0.52758 | 0.004944  | 0.011018  | CASP9     | chr1  | - | 15817327 | 15853029 | 4463 |
| ENSG0000010.653381 | 1.188058 | -0.59047 | 0.72606   | NA        | NMUR2     | chr5  | - | 1.52E+08 | 1.52E+08 | 2073 |
| ENSG0000011105.641 | 877.3745 | 0.33405  | 0.003659  | 0.008319  | DCTN4     | chr5  | - | 1.5E+08  | 1.5E+08  | 4208 |
| ENSG0000010.290301 | 3.085825 | -2.4469  | 0.097936  | 0.15859   | PDE6A     | chr5  | - | 1.49E+08 | 1.49E+08 | 5706 |
| ENSG00000129.51299 | 87.4887  | -1.5465  | 1.66E-06  | 5.81E-06  | ATP8A2    | chr13 | + | 25946209 | 26599989 | 9575 |
| ENSG0000013.475055 | 8.547767 | -1.2029  | 0.14353   | 0.21849   | MTUS2     | chr13 | + | 29598748 | 30077892 | 4747 |
| ENSG000001187.2996 | 158.2121 | 0.24547  | 0.16214   | 0.24245   | ZMYM5     | chr13 | - | 20397622 | 20437776 | 3268 |
| ENSG000001234.5489 | 212.9124 | 0.13736  | 0.41191   | 0.51673   | USPL1     | chr13 | + | 31191830 | 31233686 | 3814 |
| ENSG000001783.0267 | 1043.396 | -0.41296 | 0.008901  | 0.018895  | XPO4      | chr13 | - | 21351469 | 21477187 | 9884 |
| ENSG0000010.36308  | 0        | 0.4146   | 0.81455   | NA        | TPTE2     | chr13 | - | 19997017 | 20110903 | 1793 |
| ENSG0000011683.527 | 1313.874 | 0.35711  | 0.070846  | 0.12043   | POMP      | chr13 | + | 29233241 | 29253062 | 1428 |
| ENSG000001425.4983 | 435.8464 | -0.03511 | 0.89749   | 0.9289    | CDK8      | chr13 | + | 26828276 | 26979375 | 3055 |
| ENSG0000011.628766 | 0        | 2.1781   | 0.19145   | NA        | ALOX5AP   | chr13 | + | 31309645 | 31338556 | 897  |
| ENSG000001183.7255 | 254.9947 | -0.47081 | 0.017277  | 0.034578  | HMGB1P5   | chr3  | + | 22423310 | 22424420 | 985  |
| ENSG000001488.5971 | 695.9894 | -0.51005 | 0.000199  | 0.000545  | WASF3     | chr13 | + | 27131840 | 27263085 | 4805 |

|            |          |          |          |           |           |          |       |   |          |           |       |
|------------|----------|----------|----------|-----------|-----------|----------|-------|---|----------|-----------|-------|
| ENSG000001 | 0.36308  | 0.357707 | -0.00212 | 0.99905   | NA        | RNF17    | chr13 | + | 25338290 | 25454059  | 5119  |
| ENSG000001 | 0        | 2.24661  | -2.6365  | 0.10117   | 0.16301   | GPR12    | chr13 | - | 27329341 | 27334922  | 4846  |
| ENSG000001 | 39.61517 | 124.2543 | -1.6304  | 1.38E-07  | 5.34E-07  | CHRM3    | chr1  | + | 2.4E+08  | 2.4E+08   | 8778  |
| ENSG000001 | 0.36308  | 0        | 0.4146   | 0.81455   | NA        | MYH8     | chr17 | - | 10293639 | 10325267  | 6041  |
| ENSG000001 | 7015.018 | 6895.417 | 0.02483  | 0.77774   | 0.8403    | MYH10    | chr17 | - | 8377523  | 8534079   | 7762  |
| ENSG000001 | 259.0278 | 281.628  | -0.11903 | 0.446     | 0.55143   | PEMT     | chr17 | - | 17408877 | 17495022  | 1050  |
| ENSG000001 | 333.6749 | 584.4629 | -0.80556 | 3.09E-06  | 1.05E-05  | SCO1     | chr17 | - | 10583654 | 10601692  | 1749  |
| ENSG000001 | 6864.175 | 3705.818 | 0.88846  | 1.45E-18  | 1.14E-17  | MPRIP    | chr17 | + | 16945859 | 17120993  | 10960 |
| ENSG000001 | 0        | 0.98329  | -1.2878  | 0.47019   | NA        | CHI3L1   | chr1  | - | 2.03E+08 | 2.03E+08  | 1920  |
| ENSG000001 | 480.2666 | 657.6318 | -0.45256 | 7.96E-05  | 0.00023   | PIK3C2B  | chr1  | - | 2.04E+08 | 2.04E+08  | 7686  |
| ENSG000001 | 655.253  | 512.7296 | 0.35358  | 0.044617  | 0.080517  | DSTYK    | chr1  | - | 2.05E+08 | 2.05E+08  | 7874  |
| ENSG000001 | 0.36308  | 0.951736 | -0.91212 | 0.59701   | NA        | CHIT1    | chr1  | - | 2.03E+08 | 2.03E+08  | 5607  |
| ENSG000001 | 857.3223 | 661.2491 | 0.37369  | 0.023967  | 0.046441  | SLC41A1  | chr1  | - | 2.06E+08 | 2.06E+08  | 4997  |
| ENSG000001 | 5.975539 | 25.58348 | -2.053   | 0.000386  | 0.001017  | LGR6     | chr1  | + | 2.02E+08 | 2.02E+08  | 3567  |
| ENSG000001 | 195.3802 | 377.9807 | -0.94826 | 9.74E-06  | 3.13E-05  | TMCC2    | chr1  | + | 2.05E+08 | 2.05E+08  | 3738  |
| ENSG000001 | 240.403  | 626.6492 | -1.3789  | 1.37E-21  | 1.24E-20  | DCLK1    | chr13 | - | 36345478 | 36705443  | 5703  |
| ENSG000001 | 528.9658 | 70.80513 | 2.8952   | 2.33E-35  | 3.58E-34  | CCNA1    | chr13 | + | 37005967 | 37017019  | 1962  |
| ENSG000001 | 791.8662 | 207.9102 | 1.9261   | 1.83E-40  | 3.25E-39  | COG6     | chr13 | + | 40229764 | 40365802  | 5257  |
| ENSG000001 | 1456.849 | 1304.197 | 0.15957  | 0.20073   | 0.28947   | SPG20    | chr13 | - | 36875775 | 36944317  | 4944  |
| ENSG000001 | 28.65227 | 22.75083 | 0.3318   | 0.45255   | 0.55803   | EPSTI1   | chr13 | - | 43460524 | 43566407  | 4603  |
| ENSG000001 | 24.47078 | 19.51368 | 0.33292  | 0.4539    | 0.5593    | TRPC4    | chr13 | - | 38210773 | 38444562  | 4059  |
| ENSG000001 | 79698.69 | 11.1682  | 11.727   | 6.86E-34  | 1.01E-32  | POSTN    | chr13 | - | 38136720 | 38172981  | 3373  |
| ENSG000001 | 204.2285 | 144.1825 | 0.49772  | 0.035816  | 0.066542  | RFXAP    | chr13 | + | 37393361 | 37403241  | 2304  |
| ENSG000001 | 22641.01 | 14967.77 | 0.59646  | 6.71E-07  | 2.43E-06  | TPT1     | chr13 | - | 45911008 | 45915505  | 1851  |
| ENSG000001 | 486.4925 | 385.4617 | 0.33304  | 0.054044  | 0.095188  | KIAA1704 | chr13 | + | 45563687 | 45607746  | 4294  |
| ENSG000001 | 25.29286 | 0.343138 | 5.4354   | 8.24E-07  | 2.96E-06  | KL       | chr13 | + | 33590207 | 33640282  | 5006  |
| ENSG000001 | 336.5635 | 698.653  | -1.0475  | 3.36E-05  | 0.000101  | RFC3     | chr13 | + | 34392186 | 34540695  | 2402  |
| ENSG000001 | 1605.241 | 46.82333 | 5.0943   | 7.85E-154 | 9.45E-152 | STARD13  | chr13 | - | 33677272 | 33924767  | 5917  |
| ENSG000001 | 7.158095 | 106.4878 | -3.8774  | 6.83E-21  | 5.98E-20  | IRS4     | chrX  | - | 1.08E+08 | 1.08E+08  | 3940  |
| ENSG000001 | 570.3604 | 90.81079 | 2.6485   | 1.38E-40  | 2.47E-39  | MORC4    | chrX  | - | 1.06E+08 | 1.06E+08  | 3834  |
| ENSG000001 | 14.75042 | 206.1449 | -3.7715  | 3.62E-33  | 5.20E-32  | BEX2     | chrX  | - | 1.03E+08 | 1.03E+08  | 1077  |
| ENSG000001 | 25.9257  | 10.32985 | 1.283    | 0.011037  | 0.022981  | RNF128   | chrX  | + | 1.06E+08 | 1.06E+08  | 2817  |
| ENSG000001 | 458.401  | 68.70581 | 2.7364   | 2.22E-49  | 4.98E-48  | TBC1D8B  | chrX  | + | 1.06E+08 | 1.06E+08  | 5717  |
| ENSG000001 | 1209.739 | 760.3636 | 0.66994  | 8.41E-11  | 4.18E-10  | TCEAL4   | chrX  | + | 1.03E+08 | 1.03E+08  | 1571  |
| ENSG000001 | 0        | 0.700845 | -0.87835 | 0.62047   | NA        | TEX13A   | chrX  | - | 1.04E+08 | 1.04E+08  | 1379  |
| ENSG000001 | 162.5779 | 324.7728 | -0.99485 | 1.38E-07  | 5.31E-07  | BEX1     | chrX  | - | 1.02E+08 | 1.02E+08  | 864   |
| ENSG000001 | 277.2736 | 295.1627 | -0.09131 | 0.53202   | 0.63323   | FAM104A  | chr17 | - | 71203492 | 71232892  | 2865  |
| ENSG000001 | 485.3938 | 212.8475 | 1.1873   | 6.38E-12  | 3.42E-11  | SLC39A11 | chr17 | - | 70642088 | 71088851  | 2752  |
| ENSG000001 | 1354.446 | 531.7664 | 1.3477   | 3.64E-36  | 5.72E-35  | EPHB2    | chr1  | + | 23037332 | 23241818  | 4641  |
| ENSG000001 | 2142.432 | 3818.528 | -0.8331  | 7.97E-15  | 5.17E-14  | SRRM1    | chr1  | + | 24958207 | 24999758  | 4011  |
| ENSG000001 | 2214.953 | 2387.268 | -0.1078  | 0.60711   | 0.70004   | BTBD2    | chr19 | - | 1985447  | 2034880   | 2753  |
| ENSG000001 | 2.935529 | 8.542934 | -1.4294  | 0.11656   | 0.18426   | PRAM1    | chr19 | - | 8554940  | 8567996   | 2667  |
| ENSG000001 | 178.705  | 558.1691 | -1.6315  | 3.51E-08  | 1.42E-07  | SUV420H2 | chr19 | + | 55851221 | 55859488  | 2308  |
| ENSG000001 | 195.9684 | 346.5642 | -0.81938 | 7.43E-08  | 2.93E-07  | ZNF414   | chr19 | - | 8575462  | 8579048   | 1400  |
| ENSG000001 | 1.722083 | 114.9305 | -5.8946  | 1.79E-19  | 1.47E-18  | PDE6B    | chr4  | + | 619373   | 664571    | 3280  |
| ENSG000001 | 1162.441 | 1594.817 | -0.45528 | 0.000191  | 0.000525  | HSPBP1   | chr19 | - | 55773599 | 55791749  | 1768  |
| ENSG000001 | 4532.471 | 3897.914 | 0.21723  | 0.094062  | 0.15346   | CSNK1G2  | chr19 | + | 1941188  | 1981337   | 2878  |
| ENSG000001 | 283.7895 | 236.1534 | 0.26694  | 0.20739   | 0.29715   | ANKRD32  | chr5  | + | 93954052 | 94075141  | 5905  |
| ENSG000001 | 1771.722 | 3462.351 | -0.96514 | 5.29E-13  | 3.07E-12  | CNDP2    | chr18 | + | 72163051 | 72188366  | 4523  |
| ENSG000001 | 275.0051 | 462.0453 | -0.74427 | 0.013868  | 0.028303  | MACROD1  | chr11 | - | 63766030 | 63933578  | 1205  |
| ENSG000001 | 376.0422 | 884.0486 | -1.2309  | 1.24E-16  | 8.88E-16  | WDR74    | chr11 | - | 62599814 | 62609281  | 1736  |
| ENSG000001 | 0        | 5.782389 | -4.0736  | 0.003307  | 0.007576  | LGALS12  | chr11 | + | 63273556 | 63284246  | 1816  |
| ENSG000001 | 1685.204 | 3422.615 | -1.0214  | 1.62E-20  | 1.39E-19  | RTN3     | chr11 | + | 63448918 | 63527363  | 4937  |
| ENSG000001 | 0        | 6.734125 | -4.3392  | 0.00115   | 0.002827  | RARRES3  | chr11 | + | 63304281 | 63313934  | 938   |
| ENSG000001 | 0        | 0.654722 | -0.83442 | 0.63731   | NA        | HRASLS2  | chr11 | - | 63320242 | 63330855  | 742   |
| ENSG000001 | 58.06419 | 34.96321 | 0.71924  | 0.050598  | 0.089868  | MYH11    | chr16 | - | 15796992 | 15950890  | 6921  |
| ENSG000001 | 402.6701 | 536.7873 | -0.41323 | 0.002661  | 0.006186  | FOPNL    | chr16 | - | 15959577 | 15982482  | 2275  |
| ENSG000001 | 495.7133 | 248.5219 | 0.99415  | 8.21E-07  | 2.95E-06  | MED10    | chr5  | - | 6371994  | 6378707   | 1141  |
| ENSG000001 | 845.0467 | 301.9157 | 1.481    | 3.80E-20  | 3.22E-19  | PDZD2    | chr5  | + | 31639517 | 312111037 | 11704 |
| ENSG000001 | 923.6522 | 1058.911 | -0.19721 | 0.051075  | 0.090624  | MORC2    | chr22 | - | 31322596 | 31364284  | 4469  |
| ENSG000001 | 367.6562 | 1660.504 | -2.1705  | 3.54E-37  | 5.77E-36  | LARGE    | chr22 | - | 33668847 | 34318829  | 4409  |
| ENSG000001 | 0        | 1.591889 | -2.1342  | 0.20414   | NA        | GSTT2B   | chr22 | - | 24299601 | 24303373  | 1099  |
| ENSG000001 | 0.580602 | 12.26246 | -3.7906  | 0.000498  | 0.001295  | MYO18B   | chr22 | + | 26138111 | 26427007  | 8565  |
| ENSG000001 | 127.7859 | 193.4475 | -0.59637 | 0.005883  | 0.012916  | SLC2A11  | chr22 | + | 24198890 | 24228496  | 3219  |
| ENSG000001 | 790.4385 | 193.8466 | 2.017    | 3.51E-17  | 2.59E-16  | C1QTNF6  | chr22 | - | 37576207 | 37595425  | 5003  |

|            |          |          |          |           |           |           |       |   |          |          |       |
|------------|----------|----------|----------|-----------|-----------|-----------|-------|---|----------|----------|-------|
| ENSG000001 | 3.495593 | 877.033  | -7.7971  | 4.62E-70  | 1.66E-68  | FAM83F    | chr22 | + | 40390953 | 40426043 | 2071  |
| ENSG000001 | 0.580602 | 5.474094 | -2.4902  | 0.082256  | 0.13681   | SEC14L4   | chr22 | - | 30884900 | 30901698 | 2575  |
| ENSG000001 | 8.153204 | 12.34659 | -0.57219 | 0.34414   | 0.44811   | ZDHHC8P1  | chr22 | - | 23732793 | 23744913 | 2382  |
| ENSG000001 | 1.233984 | 0.594029 | 0.68982  | 0.67984   | NA        | GIMAP6    | chr7  | - | 1.5E+08  | 1.5E+08  | 3440  |
| ENSG000001 | 3.713929 | 3.855484 | -0.07258 | 0.94071   | 0.96125   | GIMAP4    | chr7  | + | 1.5E+08  | 1.5E+08  | 2058  |
| ENSG000001 | 271.9628 | 244.3141 | 0.15405  | 0.45031   | 0.55595   | ADCK2     | chr7  | + | 1.4E+08  | 1.4E+08  | 2377  |
| ENSG000001 | 1308.709 | 2701.349 | -1.0446  | 4.04E-19  | 3.25E-18  | MKRN1     | chr7  | - | 1.4E+08  | 1.4E+08  | 3467  |
| ENSG000001 | 2181.671 | 2137.715 | 0.029099 | 0.88636   | 0.92058   | AGAP3     | chr7  | + | 1.51E+08 | 1.51E+08 | 3751  |
| ENSG000001 | 358.6911 | 305.2855 | 0.22991  | 0.14029   | 0.21421   | KRBA1     | chr7  | + | 1.49E+08 | 1.49E+08 | 4019  |
| ENSG000001 | 201.4831 | 116.3467 | 0.78669  | 0.000321  | 0.000856  | ZNF767    | chr7  | - | 1.49E+08 | 1.49E+08 | 3520  |
| ENSG000001 | 164.5649 | 499.2577 | -1.5967  | 1.64E-24  | 1.69E-23  | ACTR3B    | chr7  | + | 1.52E+08 | 1.53E+08 | 5543  |
| ENSG000001 | 32.83115 | 292.5631 | -3.1184  | 1.64E-16  | 1.16E-15  | NTS       | chr12 | + | 86268073 | 86276770 | 1237  |
| ENSG000001 | 648.9123 | 387.0613 | 0.74301  | 2.51E-06  | 8.61E-06  | BTG1      | chr12 | - | 92536286 | 92539673 | 2448  |
| ENSG000001 | 38.38298 | 12.26804 | 1.6213   | 0.002879  | 0.006656  | LRRIQ1    | chr12 | + | 85430092 | 85657002 | 5394  |
| ENSG000001 | 282.0862 | 149.7268 | 0.90984  | 3.75E-08  | 1.52E-07  | C12orf29  | chr12 | + | 88427623 | 88443937 | 3079  |
| ENSG000001 | 966.5327 | 1428.025 | -0.56283 | 2.88E-07  | 1.08E-06  | ATP13A3   | chr3  | - | 1.94E+08 | 1.94E+08 | 7720  |
| ENSG000001 | 0.290301 | 1.294874 | -1.3421  | 0.40775   | NA        | SFTPD     | chr10 | - | 81697496 | 81742927 | 1281  |
| ENSG000001 | 0        | 30.737   | -6.558   | 6.89E-09  | 2.96E-08  | DYDC2     | chr10 | + | 82104501 | 82127829 | 2254  |
| ENSG000001 | 212.4332 | 324.5075 | -0.60812 | 0.000108  | 0.000308  | TMEM254   | chr10 | + | 81838402 | 81852313 | 2074  |
| ENSG000001 | 331.3567 | 358.9933 | -0.11392 | 0.40193   | 0.50666   | TMTC1     | chr12 | - | 29653773 | 29937692 | 8805  |
| ENSG000001 | 1033.563 | 1415.873 | -0.45333 | 0.004419  | 0.00992   | KRAS      | chr12 | - | 25357723 | 25403870 | 5765  |
| ENSG000001 | 829.1063 | 1054.198 | -0.34662 | 0.003382  | 0.007736  | IP08      | chr12 | - | 30781922 | 30848920 | 5325  |
| ENSG000001 | 2186.619 | 4371.68  | -0.99867 | 1.40E-27  | 1.63E-26  | LARS      | chr5  | - | 1.45E+08 | 1.46E+08 | 4766  |
| ENSG000001 | 21.86744 | 137.4798 | -2.6351  | 2.25E-16  | 1.59E-15  | SPINK5    | chr5  | + | 1.47E+08 | 1.48E+08 | 3656  |
| ENSG000001 | 266.703  | 184.8223 | 0.52973  | 0.028643  | 0.054486  | IMPA1     | chr8  | - | 82570196 | 82598928 | 2690  |
| ENSG000001 | 202.5749 | 202.9262 | -0.00089 | 0.99681   | 0.99826   | LRRC1     | chr8  | + | 86019382 | 86058311 | 4493  |
| ENSG000001 | 188.9707 | 340.9175 | -0.84864 | 1.73E-05  | 5.40E-05  | E2F5      | chr8  | + | 86089460 | 86129387 | 5036  |
| ENSG000001 | 0.943682 | 0        | 1.2438   | 0.48556   | NA        | CA1       | chr8  | - | 86239837 | 86291243 | 2785  |
| ENSG000001 | 272.4591 | 427.1734 | -0.6461  | 0.003792  | 0.008596  | CCDC59    | chr12 | - | 82617460 | 82752584 | 2101  |
| ENSG000001 | 1130.306 | 786.6627 | 0.52215  | 1.98E-06  | 6.89E-06  | SWAP70    | chr11 | + | 9685624  | 9774538  | 4882  |
| ENSG000001 | 112.4633 | 88.73328 | 0.34176  | 0.27058   | 0.36971   | ARNTL     | chr11 | + | 13298199 | 13408813 | 3862  |
| ENSG000001 | 28.0288  | 4.071532 | 2.6255   | 0.001905  | 0.004522  | LYVE1     | chr11 | - | 10578513 | 10633236 | 3273  |
| ENSG000001 | 39.10995 | 78.91757 | -1.0063  | 0.000269  | 0.000725  | AMPD3     | chr11 | + | 10329860 | 10529126 | 3994  |
| ENSG000001 | 91.0744  | 2.324288 | 5.147    | 8.24E-19  | 6.53E-18  | MICALCL   | chr11 | + | 12297627 | 12380691 | 3044  |
| ENSG000001 | 566.936  | 491.3513 | 0.20509  | 0.26897   | 0.36791   | SBF2      | chr11 | - | 9800214  | 10315754 | 7439  |
| ENSG000001 | 4423.952 | 27.03841 | 7.1684   | 4.51E-37  | 7.33E-36  | MICAL2    | chr11 | + | 12115543 | 12285334 | 6307  |
| ENSG000001 | 318.378  | 2556.834 | -3.003   | 3.89E-157 | 4.95E-155 | RRAS2     | chr11 | - | 14299472 | 14386052 | 2358  |
| ENSG000001 | 1604.494 | 3821.369 | -1.251   | 3.41E-34  | 5.07E-33  | HSD17B4   | chr5  | + | 1.19E+08 | 1.19E+08 | 5540  |
| ENSG000001 | 836.1413 | 423.3141 | 0.97768  | 2.04E-05  | 6.31E-05  | ZFC3H1    | chr12 | - | 72003252 | 72061505 | 7597  |
| ENSG000001 | 22.7804  | 94.04935 | -2.002   | 3.02E-05  | 9.16E-05  | TEX15     | chr8  | - | 30689060 | 30748122 | 10187 |
| ENSG000001 | 2393.126 | 1380.698 | 0.79334  | 3.82E-16  | 2.66E-15  | TMEM66    | chr8  | - | 29920528 | 29940723 | 2154  |
| ENSG000001 | 216.0213 | 489.1595 | -1.1716  | 3.54E-05  | 0.000106  | RNF122    | chr8  | - | 33405273 | 33424643 | 1868  |
| ENSG000001 | 0.705622 | 41.93608 | -5.5104  | 1.53E-09  | 6.96E-09  | DUSP26    | chr8  | - | 33448856 | 33457624 | 1829  |
| ENSG000001 | 1477.21  | 1798.696 | -0.28349 | 0.042282  | 0.076953  | DPF2      | chr11 | + | 65101225 | 65120720 | 4840  |
| ENSG000001 | 1187.264 | 1454.535 | -0.29267 | 0.026454  | 0.05077   | MEN1      | chr11 | - | 64570982 | 64578766 | 3162  |
| ENSG000001 | 1091.016 | 897.127  | 0.28218  | 0.066732  | 0.11435   | C14orf1   | chr14 | - | 76116134 | 76127532 | 2633  |
| ENSG000001 | 4.408386 | 14.71055 | -1.677   | 0.026232  | 0.050369  | GSC       | chr14 | - | 95234553 | 95236562 | 1259  |
| ENSG000001 | 175.3579 | 315.5721 | -0.84514 | 9.94E-07  | 3.55E-06  | C14orf159 | chr14 | + | 91526677 | 91691976 | 3075  |
| ENSG000001 | 6.575865 | 74.79165 | -3.392   | 1.68E-10  | 8.20E-10  | UNC79     | chr14 | + | 93799565 | 94174222 | 9100  |
| ENSG000001 | 998.1371 | 636.0611 | 0.64886  | 2.90E-05  | 8.81E-05  | NUMB      | chr14 | - | 73741815 | 73930348 | 5172  |
| ENSG000001 | 0.290301 | 5.194065 | -3.2256  | 0.016315  | 0.032809  | CATSPERB  | chr14 | - | 92047040 | 92247051 | 3623  |
| ENSG000001 | 0        | 5425.384 | -13.368  | 5.02E-37  | 8.13E-36  | VRTN      | chr14 | + | 74769772 | 74826711 | 3466  |
| ENSG000001 | 53.9118  | 67.3883  | -0.31715 | 0.24758   | 0.34367   | COX16     | chr14 | - | 70791798 | 70826448 | 1717  |
| ENSG000001 | 73.74713 | 1260.247 | -4.0838  | 4.29E-101 | 2.48E-99  | TTC9      | chr14 | + | 71108504 | 71142077 | 5217  |
| ENSG000001 | 268.746  | 289.1767 | -0.10479 | 0.6308    | 0.72011   | MED6      | chr14 | - | 71047974 | 71067384 | 1995  |
| ENSG000001 | 1304.433 | 1185.108 | 0.13838  | 0.42467   | 0.53002   | EIF2S1    | chr14 | + | 67826714 | 67853233 | 4485  |
| ENSG000001 | 0.290301 | 1.416259 | -1.3215  | 0.43596   | NA        | ADAM20    | chr14 | - | 70989075 | 71001732 | 2795  |
| ENSG000001 | 14946.69 | 1022.566 | 3.8662   | 0         | 0         | LOXL2     | chr8  | - | 23154702 | 23282841 | 3549  |
| ENSG000001 | 589.527  | 629.4684 | -0.09427 | 0.39889   | 0.50353   | ELP3      | chr8  | + | 27947190 | 28048673 | 3452  |
| ENSG000001 | 2.229907 | 1.012429 | 0.96118  | 0.47649   | 0.58104   | PEBP4     | chr8  | - | 22570769 | 22857513 | 890   |
| ENSG000001 | 1374.034 | 458.1887 | 1.5824   | 3.70E-44  | 7.25E-43  | CTIF      | chr18 | + | 46065417 | 46389588 | 5750  |
| ENSG000001 | 0        | 6.244496 | -4.1148  | 0.003631  | 0.008264  | MRO       | chr18 | - | 48324574 | 48351772 | 2129  |
| ENSG000001 | 497.0134 | 410.4729 | 0.27453  | 0.089988  | 0.14775   | MBD2      | chr18 | - | 51679079 | 51751158 | 4080  |
| ENSG000001 | 302.3051 | 104.6837 | 1.5303   | 4.85E-14  | 2.98E-13  | IER3IP1   | chr18 | - | 44681413 | 44702745 | 1481  |
| ENSG000001 | 232.2128 | 224.0677 | 0.048768 | 0.76588   | 0.83062   | MRPS36    | chr5  | + | 68513587 | 68525956 | 1286  |

|            |          |          |          |           |           |           |       |   |          |          |       |
|------------|----------|----------|----------|-----------|-----------|-----------|-------|---|----------|----------|-------|
| ENSG000001 | 2094.726 | 4062.859 | -0.95457 | 2.42E-19  | 1.97E-18  | CCNB1     | chr5  | + | 68462837 | 68474072 | 2169  |
| ENSG000001 | 348.0107 | 773.2447 | -1.149   | 2.58E-16  | 1.81E-15  | CDK7      | chr5  | + | 68530668 | 68573250 | 1455  |
| ENSG000001 | 1.016461 | 0.715414 | 0.34797  | 0.83671   | NA        | CD180     | chr5  | - | 66478103 | 66492627 | 2726  |
| ENSG000001 | 48.83014 | 42.9712  | 0.1743   | 0.61897   | 0.7101    | IRAK2     | chr3  | + | 10206549 | 10285427 | 3483  |
| ENSG000001 | 23.06393 | 8.585026 | 1.3634   | 0.026578  | 0.050976  | CAMK1     | chr3  | - | 9799026  | 9811676  | 1488  |
| ENSG000001 | 401.8093 | 612.37   | -0.606   | 2.58E-05  | 7.89E-05  | THUMPD3   | chr3  | + | 9404526  | 9428475  | 3961  |
| ENSG000001 | 1254.34  | 1080.588 | 0.21444  | 0.12688   | 0.19772   | VHL       | chr3  | + | 10182692 | 10193904 | 3737  |
| ENSG000001 | 3324.221 | 105.298  | 4.9749   | 2.68E-211 | 6.54E-209 | BHLHE40   | chr3  | + | 5020801  | 5027008  | 3473  |
| ENSG000001 | 927.3788 | 562.7747 | 0.71926  | 5.12E-05  | 0.000151  | ARL8B     | chr3  | + | 5163905  | 5222596  | 3005  |
| ENSG000001 | 1941.705 | 375.6797 | 2.3627   | 1.43E-36  | 2.28E-35  | EDEM1     | chr3  | + | 5229331  | 5261642  | 6146  |
| ENSG000001 | 0.975385 | 0        | 1.2767   | 0.47406   | NA        | CNTN6     | chr3  | + | 1134260  | 1445901  | 4513  |
| ENSG000001 | 0        | 2.771825 | -2.8976  | 0.066963  | 0.11472   | CHL1      | chr3  | + | 238279   | 451090   | 8013  |
| ENSG000001 | 398.1918 | 10.7935  | 4.9521   | 1.22E-10  | 5.97E-10  | MEIS2     | chr15 | - | 37181409 | 37393504 | 4818  |
| ENSG000001 | 14.52353 | 159.1291 | -3.4321  | 2.06E-30  | 2.67E-29  | ATPBD4    | chr15 | - | 35509546 | 35838394 | 3438  |
| ENSG000001 | 513.0307 | 294.4504 | 0.79892  | 7.02E-09  | 3.01E-08  | KATNBL1   | chr15 | - | 34432875 | 34502297 | 2723  |
| ENSG000001 | 685.3206 | 429.4071 | 0.6742   | 2.30E-05  | 7.07E-05  | EMC7      | chr15 | - | 34376218 | 34394149 | 1155  |
| ENSG000001 | 0        | 9.200072 | -4.8135  | 0.000163  | 0.000452  | TRPM1     | chr15 | - | 31293264 | 31453476 | 5715  |
| ENSG000001 | 32.27288 | 20.82963 | 0.61487  | 0.15222   | 0.22988   | GNAT2     | chr1  | - | 1.1E+08  | 1.1E+08  | 1339  |
| ENSG000001 | 0        | 42.22739 | -6.9929  | 3.68E-10  | 1.75E-09  | GSTM1     | chr1  | + | 1.1E+08  | 1.1E+08  | 1161  |
| ENSG000001 | 979.5814 | 1379.398 | -0.49287 | 0.000725  | 0.001837  | PRPF38B   | chr1  | + | 1.09E+08 | 1.09E+08 | 3728  |
| ENSG000001 | 174.4729 | 130.7917 | 0.41609  | 0.038264  | 0.070574  | TSPAN2    | chr1  | - | 1.16E+08 | 1.16E+08 | 3177  |
| ENSG000001 | 0.36308  | 0        | 0.4146   | 0.81455   | NA        | TSHB      | chr1  | + | 1.16E+08 | 1.16E+08 | 578   |
| ENSG000001 | 0        | 2.589748 | -2.8794  | 0.06476   | 0.11148   | GSTM5     | chr1  | + | 1.1E+08  | 1.1E+08  | 4370  |
| ENSG000001 | 554.7245 | 17.02189 | 5.0121   | 1.50E-87  | 7.17E-86  | GSTM3     | chr1  | - | 1.1E+08  | 1.1E+08  | 4128  |
| ENSG000001 | 164.3088 | 1150.664 | -2.7987  | 5.69E-74  | 2.18E-72  | SYT6      | chr1  | - | 1.15E+08 | 1.15E+08 | 4453  |
| ENSG000001 | 111.7368 | 241.3372 | -1.1095  | 4.40E-08  | 1.77E-07  | VAV3      | chr1  | - | 1.08E+08 | 1.09E+08 | 4990  |
| ENSG000001 | 454.6304 | 1166.54  | -1.3567  | 1.94E-26  | 2.14E-25  | PSRC1     | chr1  | - | 1.1E+08  | 1.1E+08  | 1870  |
| ENSG000001 | 0.580602 | 0        | 0.8036   | 0.6494    | NA        | HMGCS2    | chr1  | - | 1.2E+08  | 1.2E+08  | 2428  |
| ENSG000001 | 6.099745 | 0        | 4.1772   | 0.002224  | 0.00522   | PTPN22    | chr1  | - | 1.14E+08 | 1.14E+08 | 3654  |
| ENSG000001 | 1669.778 | 1354.005 | 0.30212  | 0.010247  | 0.021495  | SORT1     | chr1  | - | 1.1E+08  | 1.1E+08  | 7028  |
| ENSG000001 | 16.06916 | 7.31929  | 1.0714   | 0.098917  | 0.15999   | WNT2B     | chr1  | + | 1.13E+08 | 1.13E+08 | 3818  |
| ENSG000001 | 10927.32 | 1217.461 | 3.1637   | 7.32E-228 | 2.15E-225 | PTGFRN    | chr1  | + | 1.17E+08 | 1.18E+08 | 6178  |
| ENSG000001 | 338.8072 | 278.3673 | 0.28238  | 0.068531  | 0.11696   | LAMTOR5   | chr1  | - | 1.11E+08 | 1.11E+08 | 1830  |
| ENSG000001 | 0.36308  | 0        | 0.4146   | 0.81455   | NA        | ADAM30    | chr1  | - | 1.2E+08  | 1.2E+08  | 2963  |
| ENSG000001 | 5367.22  | 1654.245 | 1.6961   | 2.59E-41  | 4.71E-40  | NOTCH2    | chr1  | - | 1.2E+08  | 1.21E+08 | 11389 |
| ENSG000001 | 116.5102 | 174.8797 | -0.58587 | 0.002808  | 0.006503  | TRIM45    | chr1  | - | 1.18E+08 | 1.18E+08 | 3515  |
| ENSG000001 | 320.7298 | 326.5578 | -0.02752 | 0.86014   | 0.90193   | CEPT1     | chr1  | + | 1.12E+08 | 1.12E+08 | 5300  |
| ENSG000001 | 37.09919 | 16.10009 | 1.1764   | 0.011507  | 0.023873  | CD101     | chr1  | + | 1.18E+08 | 1.18E+08 | 3547  |
| ENSG000001 | 0        | 2.414118 | -2.7105  | 0.090717  | 0.14874   | VTCN1     | chr1  | - | 1.18E+08 | 1.18E+08 | 2612  |
| ENSG000001 | 78.22072 | 10.28776 | 2.8919   | 6.23E-13  | 3.59E-12  | NGF       | chr1  | - | 1.16E+08 | 1.16E+08 | 1047  |
| ENSG000001 | 265.8227 | 91.83132 | 1.5207   | 1.19E-06  | 4.22E-06  | AP4B1     | chr1  | - | 1.14E+08 | 1.14E+08 | 2818  |
| ENSG000001 | 539.426  | 364.0346 | 0.56492  | 2.01E-05  | 6.22E-05  | NAPG      | chr18 | + | 10525902 | 10552758 | 3860  |
| ENSG000001 | 600.402  | 317.921  | 0.91382  | 3.55E-10  | 1.69E-09  | SPIRE1    | chr18 | - | 12446511 | 12658133 | 5665  |
| ENSG000001 | 884.4212 | 779.1527 | 0.18321  | 0.13259   | 0.20503   | PPHLN1    | chr12 | + | 42632249 | 42853517 | 5975  |
| ENSG000001 | 864.3156 | 353.3443 | 1.2893   | 1.55E-27  | 1.80E-26  | FKBP11    | chr12 | - | 49315301 | 49320257 | 4957  |
| ENSG000001 | 3801.018 | 4011.93  | -0.07775 | 0.56297   | 0.66106   | ARF3      | chr12 | - | 49297286 | 49351334 | 4105  |
| ENSG000001 | 591.1744 | 364.2434 | 0.69685  | 0.000198  | 0.000543  | TMEM106C  | chr12 | + | 48357352 | 48362661 | 1515  |
| ENSG000001 | 3938.602 | 4455.487 | -0.17748 | 0.26742   | 0.36617   | SLC38A2   | chr12 | - | 46751972 | 46766650 | 4888  |
| ENSG000001 | 114.0303 | 160.9057 | -0.49735 | 0.011695  | 0.024216  | PLEKHA8P1 | chr12 | - | 45566847 | 45609824 | 1839  |
| ENSG000001 | 6152.456 | 7553.807 | -0.29571 | 0.007242  | 0.015622  | YWHAQ     | chr2  | - | 9724101  | 9771143  | 2216  |
| ENSG000001 | 1841.931 | 835.0629 | 1.1409   | 2.87E-23  | 2.81E-22  | KIDINS220 | chr2  | - | 8865408  | 8977760  | 7361  |
| ENSG000001 | 3.22583  | 64.54538 | -4.1939  | 5.33E-14  | 3.27E-13  | GRHL1     | chr2  | + | 10085341 | 10142411 | 5400  |
| ENSG000001 | 2111.685 | 538.2077 | 1.9699   | 9.17E-40  | 1.60E-38  | ROCK2     | chr2  | - | 11319887 | 11488456 | 8292  |
| ENSG000001 | 11.63168 | 1.043983 | 3.1673   | 0.002397  | 0.005599  | RSAD2     | chr2  | + | 7005937  | 7038370  | 3519  |
| ENSG000001 | 1.379541 | 1567.767 | -9.8393  | 4.95E-54  | 1.26E-52  | MYCN      | chr2  | + | 16080686 | 16087129 | 2602  |
| ENSG000001 | 2334.316 | 383.4826 | 2.6031   | 1.09E-102 | 6.50E-101 | LPIN1     | chr2  | + | 11817721 | 11967535 | 5432  |
| ENSG000001 | 23.72831 | 11.76955 | 0.98704  | 0.070402  | 0.11976   | CMPK2     | chr2  | - | 6980701  | 7006766  | 2884  |
| ENSG000001 | 366.402  | 155.0454 | 1.2402   | 1.12E-11  | 5.90E-11  | IAH1      | chr2  | + | 9613787  | 9636672  | 2793  |
| ENSG000001 | 9616.389 | 10865.23 | -0.17551 | 0.39324   | 0.49766   | LDHA      | chr11 | + | 18415935 | 18429972 | 2416  |
| ENSG000001 | 0        | 0.357707 | -0.41864 | 0.81278   | NA        | SAA2      | chr11 | - | 18260770 | 18270190 | 1022  |
| ENSG000001 | 3.10081  | 1.684135 | 0.79519  | 0.50477   | 0.60815   | ANO3      | chr11 | + | 26210829 | 26684835 | 6642  |
| ENSG000001 | 924.9686 | 56.63838 | 4.0283   | 1.27E-100 | 7.27E-99  | IL6ST     | chr5  | - | 55230923 | 55290821 | 9057  |
| ENSG000001 | 551.884  | 307.7009 | 0.83423  | 0.023111  | 0.04499   | FST       | chr5  | + | 52776239 | 52782964 | 2538  |
| ENSG000001 | 0        | 0.343138 | -0.41864 | 0.81278   | NA        | CFHR4     | chr1  | + | 1.97E+08 | 1.97E+08 | 2178  |
| ENSG000001 | 3942.777 | 1698.621 | 1.213    | 6.79E-26  | 7.38E-25  | NAV1      | chr1  | + | 2.02E+08 | 2.02E+08 | 13091 |

|            |          |          |          |           |           |          |       |   |          |          |      |
|------------|----------|----------|----------|-----------|-----------|----------|-------|---|----------|----------|------|
| ENSG000001 | 889.1016 | 715.9453 | 0.31261  | 0.075067  | 0.12658   | CDC73    | chr1  | + | 1.93E+08 | 1.93E+08 | 4969 |
| ENSG000001 | 1364.089 | 726.1076 | 0.90764  | 1.12E-06  | 3.97E-06  | TIMM17A  | chr1  | + | 2.02E+08 | 2.02E+08 | 2523 |
| ENSG000001 | 0.995923 | 0.343138 | 1.0212   | 0.53809   | NA        | CRB1     | chr1  | + | 1.97E+08 | 1.97E+08 | 9023 |
| ENSG000001 | 3.008307 | 28.89267 | -3.1514  | 4.20E-06  | 1.41E-05  | ERN2     | chr16 | - | 23701647 | 23724821 | 3549 |
| ENSG000001 | 315.1687 | 668.7181 | -1.0832  | 5.45E-12  | 2.93E-11  | RPS15A   | chr16 | - | 18792617 | 18801705 | 3828 |
| ENSG000001 | 0        | 2.66501  | -2.877   | 0.067583  | 0.11559   | RAX      | chr18 | - | 56934267 | 56941318 | 3197 |
| ENSG000001 | 2066.775 | 3227.989 | -0.6422  | 8.96E-07  | 3.21E-06  | NARS     | chr18 | - | 55267888 | 55289445 | 3099 |
| ENSG000001 | 1.016461 | 0        | 1.3167   | 0.46021   | NA        | GRP      | chr18 | + | 56887400 | 56898006 | 848  |
| ENSG000001 | 402.0468 | 366.5361 | 0.13392  | 0.55452   | 0.65384   | KIAA1468 | chr18 | + | 59854491 | 59974355 | 5579 |
| ENSG000001 | 1476.028 | 756.3362 | 0.9633   | 3.56E-15  | 2.35E-14  | FBXO18   | chr10 | + | 5931535  | 5979556  | 3702 |
| ENSG000001 | 1049.218 | 1779.355 | -0.76137 | 1.76E-11  | 9.17E-11  | RBM17    | chr10 | + | 6130950  | 6159420  | 3751 |
| ENSG000001 | 0        | 4.288452 | -3.6677  | 0.010057  | 0.021136  | IL2RA    | chr10 | - | 6052652  | 6104288  | 3176 |
| ENSG000001 | 106.4971 | 180.7844 | -0.76114 | 0.000246  | 0.000665  | ANKRD16  | chr10 | - | 5903580  | 5931869  | 2738 |
| ENSG000001 | 38.81011 | 326.7736 | -3.048   | 2.60E-17  | 1.93E-16  | ECHDC3   | chr10 | + | 11784365 | 11806069 | 1767 |
| ENSG000001 | 2.31385  | 40.28269 | -3.9417  | 5.66E-08  | 2.25E-07  | IL15RA   | chr10 | - | 5990855  | 6020150  | 1705 |
| ENSG000001 | 377.3514 | 320.3372 | 0.23807  | 0.11867   | 0.18716   | CCNH     | chr5  | - | 86687311 | 86708836 | 2391 |
| ENSG000001 | 0        | 0.937167 | -1.2408  | 0.48662   | NA        | HRH4     | chr18 | + | 22040593 | 22059921 | 3668 |
| ENSG000001 | 259.3082 | 148.1309 | 0.80201  | 4.97E-06  | 1.65E-05  | TMEM241  | chr18 | - | 20777108 | 21017925 | 2941 |
| ENSG000001 | 288.7245 | 441.7886 | -0.61185 | 0.008736  | 0.018573  | KCTD1    | chr18 | - | 24034874 | 24237365 | 4590 |
| ENSG000001 | 833.3971 | 582.7846 | 0.51508  | 0.003287  | 0.007534  | CABLES1  | chr18 | + | 20714528 | 20840431 | 5002 |
| ENSG000001 | 72.96017 | 67.02335 | 0.11986  | 0.62398   | 0.7143    | DOCK2    | chr5  | + | 1.69E+08 | 1.7E+08  | 6097 |
| ENSG000001 | 13712.74 | 13.11383 | 9.9701   | 0         | 0         | EMP1     | chr12 | + | 13349650 | 13369708 | 2756 |
| ENSG000001 | 157.1264 | 26.82727 | 2.5464   | 6.17E-20  | 5.18E-19  | SOX5     | chr12 | - | 23682440 | 24103966 | 6969 |
| ENSG000001 | 99.04855 | 3.742963 | 4.6428   | 6.21E-18  | 4.75E-17  | RERG     | chr12 | - | 15260717 | 15501609 | 2264 |
| ENSG000001 | 0        | 5.033005 | -3.8413  | 0.007252  | 0.015639  | SLCO1B1  | chr12 | + | 21284136 | 21392180 | 2229 |
| ENSG000001 | 0.36308  | 0.594029 | -0.39069 | 0.82661   | NA        | KLRD1    | chr12 | + | 10378657 | 10469850 | 3261 |
| ENSG000001 | 2.375464 | 10.26346 | -1.9952  | 0.022598  | 0.044075  | C12orf39 | chr12 | + | 21679241 | 21690311 | 1845 |
| ENSG000001 | 2.282147 | 2.399549 | -0.04351 | 0.969     | 0.98264   | PRH2     | chr12 | + | 11081835 | 11084940 | 673  |
| ENSG000001 | 412.6911 | 1327.141 | -1.6832  | 1.19E-36  | 1.91E-35  | LRP4     | chr11 | - | 46878419 | 46940193 | 8076 |
| ENSG000001 | 0        | 0.715414 | -0.84936 | 0.6309    | NA        | MYBPC3   | chr11 | - | 47352957 | 47374253 | 4217 |
| ENSG000001 | 423.5015 | 1177.351 | -1.4643  | 2.12E-06  | 7.35E-06  | DDB2     | chr11 | + | 47236493 | 47260767 | 1846 |
| ENSG000001 | 491.726  | 256.919  | 0.93599  | 1.13E-06  | 4.03E-06  | ACP2     | chr11 | - | 47260853 | 47270457 | 2203 |
| ENSG000001 | 0        | 1.280305 | -1.6305  | 0.35731   | NA        | USP26    | chrX  | - | 1.32E+08 | 1.32E+08 | 3665 |
| ENSG000001 | 4396.463 | 1130.607 | 1.9577   | 1.39E-81  | 5.96E-80  | FAM127A  | chrX  | + | 1.34E+08 | 1.34E+08 | 1236 |
| ENSG000001 | 35.15617 | 47.26771 | -0.42102 | 0.29457   | 0.39664   | RAB33A   | chrX  | + | 1.29E+08 | 1.29E+08 | 1258 |
| ENSG000001 | 0        | 826.2366 | -10.93   | 1.75E-24  | 1.80E-23  | SOX3     | chrX  | - | 1.4E+08  | 1.4E+08  | 2074 |
| ENSG000001 | 320.2753 | 422.6712 | -0.40126 | 0.010215  | 0.021434  | RBMX2    | chrX  | + | 1.3E+08  | 1.3E+08  | 1528 |
| ENSG000001 | 480.3385 | 1617.24  | -1.7488  | 4.26E-56  | 1.13E-54  | MST4     | chrX  | + | 1.31E+08 | 1.31E+08 | 3288 |
| ENSG000001 | 20.37746 | 4.510205 | 2.0678   | 0.002551  | 0.005942  | PIWIL4   | chr11 | + | 94277006 | 94354587 | 3759 |
| ENSG000001 | 0        | 0.357707 | -0.41864 | 0.81278   | NA        | MTNR1B   | chr11 | + | 92702886 | 92718232 | 1565 |
| ENSG000001 | 2141.079 | 1935.494 | 0.14552  | 0.27471   | 0.37467   | PUM1     | chr1  | - | 31404353 | 31538838 | 5375 |
| ENSG000001 | 231.5142 | 49.77904 | 2.1906   | 1.33E-09  | 6.08E-09  | SPOCD1   | chr1  | - | 32256023 | 32281652 | 3960 |
| ENSG000001 | 2102.034 | 3786.123 | -0.84817 | 8.29E-21  | 7.25E-20  | YARS     | chr1  | - | 33240840 | 33283754 | 3238 |
| ENSG000001 | 2971.559 | 303.8502 | 3.2876   | 6.65E-169 | 9.55E-167 | PHC2     | chr1  | - | 33789224 | 33896653 | 3870 |
| ENSG000001 | 828.8297 | 1266.665 | -0.61101 | 4.68E-06  | 1.56E-05  | CDCA8    | chr1  | + | 38158090 | 38175391 | 2469 |
| ENSG000001 | 1384.323 | 1480.105 | -0.09606 | 0.54459   | 0.64491   | GNL2     | chr1  | - | 38032417 | 38061536 | 2409 |
| ENSG000001 | 445.1538 | 440.8305 | 0.013425 | 0.94992   | 0.9688    | AGO4     | chr1  | + | 36273773 | 36323491 | 7116 |
| ENSG000001 | 0        | 570.2953 | -10.432  | 3.42E-22  | 3.17E-21  | HOOK1    | chr1  | + | 60280458 | 60342050 | 5857 |
| ENSG000001 | 3.455331 | 8.700706 | -1.2733  | 0.13605   | 0.2091    | CYP2J2   | chr1  | - | 60358980 | 60392462 | 2549 |
| ENSG000001 | 818.8042 | 1570.719 | -0.93832 | 7.23E-13  | 4.15E-12  | BTF3L4   | chr1  | + | 52521797 | 52556388 | 4703 |
| ENSG000001 | 1223.949 | 803.3425 | 0.60595  | 8.45E-05  | 0.000243  | ZCCHC11  | chr1  | - | 52873954 | 53019159 | 5858 |
| ENSG000001 | 758.4555 | 927.1499 | -0.28859 | 0.087442  | 0.14424   | PRPF38A  | chr1  | + | 52870236 | 52883992 | 2755 |
| ENSG000001 | 409.7065 | 812.3678 | -0.98645 | 3.02E-12  | 1.66E-11  | DSC2     | chr18 | - | 28645940 | 28682378 | 5124 |
| ENSG000001 | 0.342542 | 0        | 0.4146   | 0.81455   | NA        | DSG3     | chr18 | + | 29027758 | 29058665 | 5525 |
| ENSG000001 | 158.9802 | 711.7184 | -2.1608  | 5.65E-41  | 1.02E-39  | RNF138   | chr18 | + | 29671818 | 29711524 | 3570 |
| ENSG000001 | 1184.016 | 1687.829 | -0.51125 | 1.32E-05  | 4.19E-05  | ELP2     | chr18 | + | 33709407 | 33757909 | 5849 |
| ENSG000001 | 0        | 0.594029 | -0.81444 | 0.64499   | NA        | DSG1     | chr18 | + | 28898052 | 28936992 | 5045 |
| ENSG000001 | 612.5369 | 114.4967 | 2.409    | 7.09E-28  | 8.35E-27  | DSC3     | chr18 | - | 28569974 | 28622781 | 6978 |
| ENSG000001 | 2.209369 | 0.297015 | 2.0276   | 0.1839    | 0.2691    | DSC1     | chr18 | - | 28709199 | 28742819 | 4271 |
| ENSG000001 | 218.7601 | 171.7181 | 0.35005  | 0.19885   | 0.28721   | DTNA     | chr18 | + | 32073254 | 32471808 | 6522 |
| ENSG000001 | 834.714  | 67.62234 | 3.605    | 6.50E-76  | 2.58E-74  | FHOD3    | chr18 | + | 33877677 | 34360018 | 4967 |
| ENSG000001 | 2176.664 | 1359.204 | 0.67903  | 8.77E-09  | 3.74E-08  | TPGS2    | chr18 | - | 34359987 | 34409158 | 4030 |
| ENSG000001 | 310.0186 | 83.5977  | 1.8871   | 3.05E-25  | 3.23E-24  | DAGLA    | chr11 | + | 61447905 | 61514473 | 5757 |
| ENSG000001 | 331.9671 | 109.0362 | 1.5999   | 3.16E-14  | 1.97E-13  | SLC43A3  | chr11 | - | 57174427 | 57195053 | 2619 |
| ENSG000001 | 499.1528 | 690.2774 | -0.46574 | 0.003742  | 0.008491  | TIMM10   | chr11 | - | 57295936 | 57298276 | 680  |

|            |          |          |          |           |           |          |       |   |          |          |       |
|------------|----------|----------|----------|-----------|-----------|----------|-------|---|----------|----------|-------|
| ENSG000001 | 0.653381 | 0.715414 | -0.06256 | 0.97108   | NA        | GIF      | chr11 | - | 59596741 | 59612974 | 1623  |
| ENSG000001 | 472.7545 | 714.1383 | -0.59238 | 0.005552  | 0.012248  | DHX34    | chr19 | + | 47852538 | 47885961 | 4372  |
| ENSG000001 | 0.36308  | 8.740381 | -3.8516  | 0.003006  | 0.006927  | APLN     | chr11 | - | 57001051 | 57004709 | 1726  |
| ENSG000001 | 22179.77 | 7472.474 | 1.5649   | 1.13E-15  | 7.70E-15  | FADS2    | chr11 | + | 61560452 | 61634826 | 5073  |
| ENSG000001 | 27.36702 | 32.65504 | -0.24802 | 0.51443   | 0.61741   | TMEM258  | chr11 | - | 61556435 | 61560274 | 1692  |
| ENSG000001 | 2.302685 | 0.297015 | 2.0728   | 0.17182   | 0.25433   | C5AR2    | chr19 | + | 47835404 | 47846606 | 2768  |
| ENSG000001 | 1648.827 | 999.9165 | 0.72078  | 1.23E-10  | 6.05E-10  | TMEM165  | chr4  | + | 56262124 | 56292339 | 1928  |
| ENSG000001 | 786.7217 | 420.6986 | 0.90298  | 1.18E-11  | 6.20E-11  | CLOCK    | chr4  | - | 56294070 | 56413305 | 10304 |
| ENSG000001 | 725.3524 | 37.45964 | 4.1225   | 5.69E-10  | 2.68E-09  | PDGFRA   | chr4  | + | 55095264 | 55164414 | 6576  |
| ENSG000001 | 43.28109 | 27.49253 | 0.64485  | 0.064748  | 0.11148   | GGACT    | chr13 | - | 1.01E+08 | 1.01E+08 | 1431  |
| ENSG000001 | 58947    | 5286.018 | 3.4752   | 8.80E-190 | 1.71E-187 | COL4A2   | chr13 | + | 1.11E+08 | 1.11E+08 | 6281  |
| ENSG000001 | 5.269917 | 223.4197 | -5.3338  | 3.58E-38  | 6.00E-37  | CLDN10   | chr13 | + | 96085858 | 96232013 | 2656  |
| ENSG000001 | 2139.287 | 707.0423 | 1.5943   | 6.27E-34  | 9.23E-33  | DZIP1    | chr13 | - | 96230457 | 96296957 | 7068  |
| ENSG000001 | 811.7764 | 832.3364 | -0.03622 | 0.78407   | 0.84539   | UBAC2    | chr13 | + | 99853028 | 1E+08    | 2525  |
| ENSG000001 | 1487.557 | 1936.952 | -0.3809  | 0.002295  | 0.005379  | ARGLU1   | chr13 | - | 1.07E+08 | 1.07E+08 | 3390  |
| ENSG000001 | 370.0994 | 89.16813 | 2.0439   | 1.17E-30  | 1.53E-29  | BIVM     | chr13 | + | 1.03E+08 | 1.03E+08 | 3857  |
| ENSG000001 | 180.8703 | 126.6075 | 0.51688  | 0.010417  | 0.021817  | ERCC5    | chr13 | + | 1.03E+08 | 1.04E+08 | 5076  |
| ENSG000001 | 904.4002 | 1009.442 | -0.15788 | 0.32958   | 0.43268   | TPP2     | chr13 | + | 1.03E+08 | 1.03E+08 | 4660  |
| ENSG000001 | 767.598  | 461.4667 | 0.73313  | 5.64E-07  | 2.06E-06  | KDEL1    | chr13 | - | 1.03E+08 | 1.03E+08 | 2083  |
| ENSG000001 | 850.6754 | 728.2596 | 0.22361  | 0.053265  | 0.093999  | CARS2    | chr13 | - | 1.11E+08 | 1.11E+08 | 3516  |
| ENSG000001 | 892.0772 | 510.1585 | 0.8044   | 1.12E-06  | 3.97E-06  | ARHGAP32 | chr11 | - | 1.29E+08 | 1.29E+08 | 10111 |
| ENSG000001 | 4991.214 | 2051.425 | 1.2813   | 3.74E-21  | 3.32E-20  | STT3A    | chr11 | + | 1.25E+08 | 1.25E+08 | 4558  |
| ENSG000001 | 0        | 302.5897 | -9.6187  | 3.32E-19  | 2.68E-18  | ADAMTS8  | chr11 | - | 1.3E+08  | 1.3E+08  | 4010  |
| ENSG000001 | 6.690533 | 20.09227 | -1.5222  | 0.032987  | 0.061741  | ACRV1    | chr11 | - | 1.26E+08 | 1.26E+08 | 2212  |
| ENSG000001 | 1102.528 | 798.4798 | 0.46458  | 0.010683  | 0.022315  | ETS1     | chr11 | - | 1.28E+08 | 1.28E+08 | 5123  |
| ENSG000001 | 7.552064 | 12.31504 | -0.67957 | 0.27044   | 0.36957   | SLC37A2  | chr11 | + | 1.25E+08 | 1.25E+08 | 4654  |
| ENSG000001 | 3.362014 | 17.5285  | -2.2993  | 0.001144  | 0.002815  | KLB      | chr4  | + | 39408473 | 39453156 | 6082  |
| ENSG000001 | 998.6619 | 439.6037 | 1.183    | 4.50E-20  | 3.80E-19  | TMED7    | chr5  | - | 1.15E+08 | 1.15E+08 | 3757  |
| ENSG000001 | 938.1834 | 354.6413 | 1.3939   | 8.41E-06  | 2.73E-05  | APC      | chr5  | + | 1.12E+08 | 1.12E+08 | 11025 |
| ENSG000001 | 2351.662 | 1805.683 | 0.38089  | 0.005459  | 0.012067  | NREP     | chr5  | - | 1.11E+08 | 1.11E+08 | 3564  |
| ENSG000001 | 639.1964 | 733.9657 | -0.1986  | 0.12281   | 0.19257   | WDR36    | chr5  | + | 1.1E+08  | 1.1E+08  | 7048  |
| ENSG000001 | 438.709  | 206.3376 | 1.0872   | 5.81E-14  | 3.56E-13  | OSTF1    | chr9  | + | 77703459 | 77762181 | 1319  |
| ENSG000001 | 273.4145 | 187.4869 | 0.5423   | 0.002364  | 0.005528  | RFK      | chr9  | - | 79000433 | 79009433 | 2684  |
| ENSG000001 | 2069.136 | 2258.93  | -0.12692 | 0.17828   | 0.26214   | UBQLN1   | chr9  | - | 86274878 | 86323118 | 6055  |
| ENSG000001 | 430.4978 | 411.1843 | 0.066893 | 0.6922    | 0.77062   | NAA35    | chr9  | + | 88556061 | 88637213 | 2649  |
| ENSG000001 | 189.3413 | 320.1865 | -0.7555  | 0.000333  | 0.000885  | C9orf40  | chr9  | - | 77561497 | 77567802 | 2327  |
| ENSG000001 | 4381.5   | 10.55718 | 8.2184   | 3.32E-24  | 3.36E-23  | ANXA1    | chr9  | + | 75766673 | 75785309 | 2209  |
| ENSG000001 | 1064.258 | 274.5053 | 1.9539   | 4.46E-55  | 1.15E-53  | CTSL1    | chr9  | + | 90340434 | 90346308 | 2177  |
| ENSG000001 | 2967.517 | 1187.875 | 1.3119   | 9.30E-06  | 2.99E-05  | TMEM2    | chr9  | - | 74298282 | 74431606 | 6523  |
| ENSG000001 | 263.8436 | 737.372  | -1.4806  | 4.68E-25  | 4.90E-24  | AGTPBP1  | chr9  | - | 88161455 | 88356944 | 4393  |
| ENSG000001 | 3378.059 | 2530.238 | 0.41659  | 0.000746  | 0.001887  | GOLM1    | chr9  | - | 88641061 | 88715088 | 3046  |
| ENSG000001 | 4.335607 | 299.3865 | -5.9927  | 7.20E-32  | 9.86E-31  | FAM189A2 | chr9  | + | 71939488 | 72007371 | 2423  |
| ENSG000001 | 1315.931 | 3840.935 | -1.5415  | 6.12E-20  | 5.15E-19  | PSAT1    | chr9  | + | 80912059 | 80945009 | 2188  |
| ENSG000001 | 291.2296 | 549.1166 | -0.91036 | 1.16E-09  | 5.30E-09  | ISCA1    | chr9  | - | 88879461 | 88897676 | 1958  |
| ENSG000001 | 12439.83 | 1060.08  | 3.54     | 1.43E-61  | 4.28E-60  | ADAM19   | chr5  | - | 1.57E+08 | 1.57E+08 | 6481  |
| ENSG000001 | 6.122888 | 1.888903 | 1.4838   | 0.17751   | 0.26116   | HAVCR2   | chr5  | - | 1.57E+08 | 1.57E+08 | 2907  |
| ENSG000001 | 507.7498 | 956.1863 | -0.91152 | 2.63E-09  | 1.17E-08  | CCNJL    | chr5  | - | 1.6E+08  | 1.6E+08  | 3442  |
| ENSG000001 | 450.624  | 318.3847 | 0.49984  | 0.001298  | 0.003164  | TAOK3    | chr12 | - | 1.19E+08 | 1.19E+08 | 4384  |
| ENSG000001 | 204.2481 | 117.606  | 0.79254  | 0.000854  | 0.002144  | USP30    | chr12 | + | 1.09E+08 | 1.1E+08  | 3742  |
| ENSG000001 | 1.628766 | 6.388571 | -1.7836  | 0.077443  | 0.12995   | SDS      | chr12 | - | 1.14E+08 | 1.14E+08 | 1606  |
| ENSG000001 | 104.6791 | 1515.115 | -3.8422  | 2.01E-108 | 1.31E-106 | MSI1     | chr12 | - | 1.21E+08 | 1.21E+08 | 2975  |
| ENSG000001 | 22.53973 | 34.2809  | -0.5881  | 0.15199   | 0.22961   | HNF1A    | chr12 | + | 1.21E+08 | 1.21E+08 | 4026  |
| ENSG000001 | 902.4134 | 1415.168 | -0.64798 | 2.27E-06  | 7.84E-06  | FBXO21   | chr12 | - | 1.18E+08 | 1.18E+08 | 4687  |
| ENSG000001 | 1036.947 | 47.16633 | 4.3412   | 3.46E-14  | 2.15E-13  | TBX3     | chr12 | - | 1.15E+08 | 1.15E+08 | 4723  |
| ENSG000001 | 0.685084 | 0        | 0.85004  | 0.63064   | NA        | OASL     | chr12 | - | 1.21E+08 | 1.21E+08 | 2085  |
| ENSG000001 | 1.814586 | 111.0984 | -5.6387  | 2.08E-19  | 1.70E-18  | HRK      | chr12 | - | 1.17E+08 | 1.17E+08 | 5789  |
| ENSG000001 | 80.35551 | 433.9828 | -2.4265  | 4.95E-35  | 7.51E-34  | RNFT2    | chr12 | + | 1.17E+08 | 1.17E+08 | 3882  |
| ENSG000001 | 212.7029 | 179.9322 | 0.24081  | 0.2577    | 0.35535   | P2RX4    | chr12 | + | 1.22E+08 | 1.22E+08 | 4658  |
| ENSG000001 | 16.27731 | 321.1534 | -4.2852  | 9.66E-52  | 2.32E-50  | CCDC64   | chr12 | + | 1.2E+08  | 1.21E+08 | 3055  |
| ENSG000001 | 6.741961 | 174.5894 | -4.6005  | 7.41E-26  | 8.03E-25  | DTX1     | chr12 | + | 1.13E+08 | 1.14E+08 | 3455  |
| ENSG000001 | 697.5677 | 653.0939 | 0.09561  | 0.43311   | 0.53851   | TRAFD1   | chr12 | + | 1.13E+08 | 1.13E+08 | 3178  |
| ENSG000001 | 849.7812 | 863.3133 | -0.02225 | 0.91389   | 0.94125   | DMTF1    | chr7  | + | 86781677 | 86825653 | 4460  |
| ENSG000001 | 263.1816 | 245.6334 | 0.097357 | 0.63917   | 0.72668   | TMEM243  | chr7  | - | 86825478 | 86849903 | 1273  |
| ENSG000001 | 42.47099 | 14.69927 | 1.4852   | 0.00152   | 0.003668  | CCDC146  | chr7  | + | 76751751 | 76958850 | 3333  |
| ENSG000001 | 211.3625 | 199.526  | 0.082998 | 0.6837    | 0.76377   | TMEM60   | chr7  | - | 77423045 | 77427897 | 1023  |

|            |          |          |          |           |           |          |       |   |          |          |       |
|------------|----------|----------|----------|-----------|-----------|----------|-------|---|----------|----------|-------|
| ENSG000001 | 1457.789 | 1552.402 | -0.09048 | 0.56761   | 0.66506   | POM121C  | chr7  | - | 75046066 | 75115548 | 5839  |
| ENSG000001 | 53.44603 | 0.700845 | 5.8517   | 5.08E-11  | 2.58E-10  | CD36     | chr7  | + | 79998891 | 80308593 | 6179  |
| ENSG000001 | 402.2098 | 151.791  | 1.4036   | 1.82E-10  | 8.86E-10  | PNPLA8   | chr7  | - | 1.08E+08 | 1.08E+08 | 4268  |
| ENSG000001 | 228.5879 | 310.948  | -0.44501 | 0.003229  | 0.007408  | HILPDA   | chr7  | + | 1.28E+08 | 1.28E+08 | 1370  |
| ENSG000001 | 0        | 2.058828 | -1.8947  | 0.28782   | 0.38931   | FAM71F1  | chr7  | + | 1.28E+08 | 1.28E+08 | 1818  |
| ENSG000001 | 396.4632 | 249.9383 | 0.66603  | 2.76E-05  | 8.41E-05  | RINT1    | chr7  | + | 1.05E+08 | 1.05E+08 | 2976  |
| ENSG000001 | 927.9646 | 905.8239 | 0.034272 | 0.8397    | 0.8875    | SRPK2    | chr7  | - | 1.05E+08 | 1.05E+08 | 3700  |
| ENSG000001 | 3.060548 | 116.1119 | -5.1655  | 9.81E-23  | 9.35E-22  | KCP      | chr7  | - | 1.29E+08 | 1.29E+08 | 5108  |
| ENSG000001 | 1301.225 | 1036.121 | 0.32912  | 0.00212   | 0.004997  | TES      | chr7  | + | 1.16E+08 | 1.16E+08 | 2782  |
| ENSG000001 | 1505.913 | 339.579  | 2.1469   | 7.25E-64  | 2.31E-62  | MDFIC    | chr7  | + | 1.15E+08 | 1.15E+08 | 4598  |
| ENSG000001 | 237.0091 | 299.8191 | -0.33798 | 0.036115  | 0.067021  | MT01     | chr6  | + | 74171301 | 74218959 | 10857 |
| ENSG000001 | 24.1821  | 47.31463 | -0.9692  | 0.010669  | 0.022289  | BAI3     | chr6  | + | 69345259 | 70099403 | 6010  |
| ENSG000001 | 142.769  | 92.64322 | 0.6211   | 0.004267  | 0.009594  | ANKRD6   | chr6  | + | 90142889 | 90343553 | 5258  |
| ENSG000001 | 17.86321 | 7.15823  | 1.2686   | 0.038632  | 0.071178  | HTR1B    | chr6  | - | 78171948 | 78173490 | 1543  |
| ENSG000001 | 70.2517  | 75.58327 | -0.10251 | 0.68118   | 0.76164   | KHDC1    | chr6  | - | 73951037 | 74020088 | 2053  |
| ENSG000001 | 249.9492 | 108.6709 | 1.1941   | 0.000419  | 0.001101  | KIAA1009 | chr6  | - | 84833960 | 84937353 | 5156  |
| ENSG000001 | 3905.194 | 4551.488 | -0.22019 | 0.26947   | 0.36849   | SYNCRIP  | chr6  | - | 86267696 | 86353510 | 6443  |
| ENSG000001 | 597.5636 | 246.864  | 1.2723   | 1.65E-15  | 1.11E-14  | SNX14    | chr6  | - | 86215214 | 86303874 | 3615  |
| ENSG000001 | 3140.177 | 3.853068 | 9.4957   | 2.89E-118 | 2.19E-116 | NT5E     | chr6  | + | 86159809 | 86205500 | 3548  |
| ENSG000001 | 16.48367 | 109.5275 | -2.7129  | 2.25E-18  | 1.75E-17  | MRAP2    | chr6  | + | 84743475 | 84800600 | 2153  |
| ENSG000001 | 644.9937 | 226.6689 | 1.5061   | 1.11E-17  | 8.39E-17  | EPHA7    | chr6  | - | 93949738 | 94129265 | 6588  |
| ENSG000001 | 895.2794 | 1377.841 | -0.62093 | 0.000467  | 0.001218  | AKIRIN2  | chr6  | - | 88384790 | 88411927 | 1662  |
| ENSG000001 | 277.7626 | 471.4618 | -0.75931 | 0.000316  | 0.000844  | ORC3     | chr6  | + | 88299839 | 88377169 | 2512  |
| ENSG000001 | 81.65453 | 60.64204 | 0.42733  | 0.20248   | 0.29128   | LCA5     | chr6  | - | 80194708 | 80247147 | 4719  |
| ENSG000001 | 1351.281 | 851.9057 | 0.66569  | 6.39E-08  | 2.53E-07  | MAP3K7   | chr6  | - | 91223292 | 91296764 | 4911  |
| ENSG000001 | 388.7716 | 32.6122  | 3.5492   | 3.33E-51  | 7.88E-50  | PRR5L    | chr11 | + | 36317838 | 36486754 | 3930  |
| ENSG000001 | 90.84375 | 18.23505 | 2.2815   | 6.58E-11  | 3.31E-10  | LMO2     | chr11 | - | 33880122 | 33913836 | 2294  |
| ENSG000001 | 914.7759 | 500.7768 | 0.86504  | 0.000196  | 0.000537  | PHF21A   | chr11 | - | 45950871 | 46142985 | 8954  |
| ENSG000001 | 986.748  | 2142.344 | -1.1153  | 1.49E-10  | 7.29E-10  | NAT10    | chr11 | + | 34127149 | 34169217 | 4002  |
| ENSG000001 | 0        | 0.594029 | -0.81444 | 0.64499   | NA        | EHF      | chr11 | + | 34642640 | 34682604 | 3150  |
| ENSG000001 | 10.99542 | 50.5738  | -2.1449  | 7.49E-05  | 0.000217  | PRRG4    | chr11 | + | 32851489 | 32879669 | 5530  |
| ENSG000001 | 5981.371 | 6502.852 | -0.12034 | 0.27833   | 0.3788    | CAPRIN1  | chr11 | + | 34073230 | 34122703 | 4108  |
| ENSG000001 | 1934.309 | 2949.948 | -0.60741 | 3.01E-06  | 1.02E-05  | ATP5G2   | chr12 | - | 54026510 | 54071192 | 1976  |
| ENSG000001 | 358.042  | 299.3065 | 0.25706  | 0.097023  | 0.15745   | DNAJC14  | chr12 | - | 56214744 | 56224608 | 3416  |
| ENSG000001 | 11968.02 | 3061.444 | 1.9655   | 8.13E-102 | 4.79E-100 | CD63     | chr12 | - | 56119107 | 56123491 | 1233  |
| ENSG000001 | 1.379541 | 3.495361 | -1.1737  | 0.3536    | 0.45776   | PRPH     | chr12 | + | 49687035 | 49692465 | 3241  |
| ENSG000001 | 63.03427 | 41.66733 | 0.58836  | 0.047953  | 0.085802  | AVIL     | chr12 | - | 58191159 | 58212487 | 2939  |
| ENSG000001 | 1.753786 | 0.937167 | 0.66042  | 0.65879   | 0.74287   | AMHR2    | chr12 | + | 53817639 | 53825318 | 2162  |
| ENSG000001 | 1404.184 | 370.0276 | 1.9188   | 5.18E-23  | 5.01E-22  | GDF11    | chr12 | + | 56137064 | 56150911 | 3731  |
| ENSG000001 | 36.5168  | 197.8558 | -2.427   | 2.53E-14  | 1.59E-13  | GLS2     | chr12 | - | 56864736 | 56882198 | 2694  |
| ENSG000001 | 684.2076 | 719.0417 | -0.07237 | 0.59401   | 0.68863   | ITGA7    | chr12 | - | 56078352 | 56109827 | 4348  |
| ENSG000001 | 0        | 0.98329  | -1.2878  | 0.47019   | NA        | TESPA1   | chr12 | - | 55341802 | 55378530 | 4188  |
| ENSG000001 | 26.33842 | 21.67617 | 0.27385  | 0.5103    | 0.61366   | FAM186B  | chr12 | - | 49976668 | 49999422 | 3088  |
| ENSG000001 | 9.639019 | 8.250752 | 0.21157  | 0.75585   | 0.82246   | RDH5     | chr12 | + | 56114151 | 56118489 | 1419  |
| ENSG000001 | 228.5642 | 17.73327 | 3.6594   | 8.16E-36  | 1.27E-34  | AGAP2    | chr12 | - | 58118980 | 58135940 | 4464  |
| ENSG000001 | 11.76444 | 18.43982 | -0.63709 | 0.24015   | 0.33497   | BLOC1S1  | chr12 | + | 56109820 | 56113871 | 1229  |
| ENSG000001 | 1266.557 | 1022.235 | 0.30907  | 0.064533  | 0.11117   | CDK4     | chr12 | - | 58141510 | 58149796 | 2076  |
| ENSG000001 | 0        | 303.8683 | -9.6254  | 3.04E-19  | 2.46E-18  | PPP1R1A  | chr12 | - | 54969171 | 54982443 | 2491  |
| ENSG000001 | 600.6327 | 680.8108 | -0.18046 | 0.10687   | 0.17079   | TROAP    | chr12 | + | 49717019 | 49725514 | 2771  |
| ENSG000001 | 331.1542 | 168.5048 | 0.97176  | 7.96E-10  | 3.71E-09  | TSPAN31  | chr12 | + | 58131796 | 58143994 | 3434  |
| ENSG000001 | 100.2167 | 3.198346 | 4.821    | 4.42E-20  | 3.74E-19  | B4GALNT1 | chr12 | - | 58017193 | 58027138 | 5580  |
| ENSG000001 | 708.3716 | 887.054  | -0.32479 | 0.007942  | 0.016985  | TFCP2    | chr12 | - | 51487446 | 51566926 | 3562  |
| ENSG000001 | 96.65678 | 122.9757 | -0.34842 | 0.19348   | 0.28097   | COQ10A   | chr12 | + | 56660642 | 56664750 | 1652  |
| ENSG000001 | 78.39472 | 2.185918 | 4.94     | 4.96E-16  | 3.44E-15  | FAIM2    | chr12 | - | 50260679 | 50298000 | 4654  |
| ENSG000001 | 436.9527 | 604.2199 | -0.46656 | 0.024181  | 0.046827  | PAN2     | chr12 | - | 56710007 | 56727837 | 5372  |
| ENSG000001 | 640.0136 | 1389.224 | -1.117   | 8.86E-26  | 9.54E-25  | ESPL1    | chr12 | + | 53662083 | 53687427 | 6662  |
| ENSG000001 | 1.08924  | 0.654722 | 0.45819  | 0.7871    | NA        | KRT121P  | chr12 | - | 52644250 | 52652651 | 1769  |
| ENSG000001 | 4.096733 | 147.859  | -5.0347  | 3.08E-28  | 3.68E-27  | KRT7     | chr12 | + | 52626304 | 52645970 | 1754  |
| ENSG000001 | 65.59653 | 154.7476 | -1.2325  | 1.92E-06  | 6.68E-06  | ZC3H10   | chr12 | + | 56511943 | 56516278 | 2208  |
| ENSG000001 | 23335.72 | 42589.65 | -0.86731 | 3.29E-19  | 2.66E-18  | HNRNPA1  | chr12 | + | 54673977 | 54680872 | 4121  |
| ENSG000001 | 9.999493 | 2.993578 | 1.6624   | 0.033821  | 0.063181  | SLC26A10 | chr12 | + | 58013310 | 58019934 | 2515  |
| ENSG000001 | 453.0828 | 895.037  | -0.97939 | 3.46E-07  | 1.29E-06  | ACVR1B   | chr12 | + | 52345451 | 52390862 | 4563  |
| ENSG000001 | 2442.159 | 1112.937 | 1.1335   | 2.18E-27  | 2.52E-26  | OS9      | chr12 | + | 58087738 | 58115340 | 3870  |
| ENSG000001 | 0.36308  | 2.416535 | -1.9112  | 0.2422    | 0.33744   | MIP      | chr12 | - | 56843286 | 56862950 | 2599  |
| ENSG000001 | 15.05531 | 9.407256 | 0.63628  | 0.32753   | 0.43053   | KCNH3    | chr12 | + | 49932940 | 49952091 | 3867  |

|            |          |          |          |           |           |           |       |   |          |          |       |
|------------|----------|----------|----------|-----------|-----------|-----------|-------|---|----------|----------|-------|
| ENSG000001 | 349.92   | 523.5165 | -0.57649 | 0.060148  | 0.10466   | LTV1      | chr6  | + | 1.44E+08 | 1.44E+08 | 1847  |
| ENSG000001 | 4.93854  | 1604.453 | -8.2437  | 3.75E-102 | 2.22E-100 | MAP7      | chr6  | - | 1.37E+08 | 1.37E+08 | 3841  |
| ENSG000001 | 3356.452 | 1086.628 | 1.6249   | 4.24E-32  | 5.88E-31  | CD164     | chr6  | - | 1.1E+08  | 1.1E+08  | 4963  |
| ENSG000001 | 96.98302 | 75.54688 | 0.35297  | 0.2282    | 0.32126   | LACE1     | chr6  | + | 1.09E+08 | 1.09E+08 | 4755  |
| ENSG000001 | 846.4667 | 1050.358 | -0.31122 | 0.052375  | 0.092609  | NHSL1     | chr6  | - | 1.39E+08 | 1.39E+08 | 7500  |
| ENSG000001 | 516.7193 | 180.7178 | 1.5151   | 1.32E-16  | 9.41E-16  | AH1       | chr6  | - | 1.36E+08 | 1.36E+08 | 5921  |
| ENSG000001 | 0.923144 | 450.995  | -8.402   | 9.79E-31  | 1.29E-29  | HEY2      | chr6  | + | 1.26E+08 | 1.26E+08 | 2678  |
| ENSG000001 | 67.70321 | 197.2851 | -1.5406  | 4.80E-13  | 2.79E-12  | PKIB      | chr6  | + | 1.23E+08 | 1.23E+08 | 1875  |
| ENSG000001 | 1.016461 | 0        | 1.3167   | 0.46021   | NA        | NMBR      | chr6  | - | 1.42E+08 | 1.42E+08 | 1354  |
| ENSG000001 | 87.98036 | 91.00924 | -0.05035 | 0.82023   | 0.8736    | SMPD2     | chr6  | + | 1.1E+08  | 1.1E+08  | 1645  |
| ENSG000001 | 2451.28  | 1516.265 | 0.69235  | 1.49E-13  | 8.94E-13  | MICAL1    | chr6  | - | 1.1E+08  | 1.1E+08  | 4381  |
| ENSG000001 | 650.2777 | 1271.703 | -0.96685 | 2.03E-16  | 1.44E-15  | REPS1     | chr6  | - | 1.39E+08 | 1.39E+08 | 6069  |
| ENSG000001 | 5.250192 | 1.591889 | 1.4917   | 0.18429   | 0.26961   | STX11     | chr6  | + | 1.44E+08 | 1.45E+08 | 1926  |
| ENSG000001 | 3.847508 | 104.4073 | -4.5624  | 1.88E-11  | 9.80E-11  | TEC       | chr4  | - | 48137800 | 48271881 | 3687  |
| ENSG000001 | 269.6803 | 112.3722 | 1.2564   | 7.63E-13  | 4.37E-12  | PRADC1    | chr2  | - | 73455134 | 73460366 | 1083  |
| ENSG000001 | 1844.144 | 94.15174 | 4.2783   | 6.49E-85  | 2.96E-83  | SEMA4F    | chr2  | + | 74881355 | 74909186 | 4312  |
| ENSG000001 | 5728.299 | 7264.782 | -0.34254 | 0.000119  | 0.000336  | CCT7      | chr2  | + | 73460548 | 73480149 | 2031  |
| ENSG000001 | 0.290301 | 0.686276 | -0.47648 | 0.78935   | NA        | EGR4      | chr2  | - | 73518058 | 73520833 | 2372  |
| ENSG000001 | 973.2763 | 275.1646 | 1.8111   | 5.69E-11  | 2.88E-10  | RAB11FIP5 | chr2  | - | 73300510 | 73383849 | 4342  |
| ENSG000001 | 584.6447 | 1037.241 | -0.82464 | 6.22E-06  | 2.05E-05  | SMYD5     | chr2  | + | 73441350 | 73454365 | 2593  |
| ENSG000001 | 31.17166 | 550.8904 | -4.1153  | 4.10E-69  | 1.45E-67  | DYSF      | chr2  | + | 71680852 | 71913898 | 6796  |
| ENSG000001 | 271.8904 | 108.1759 | 1.3215   | 1.22E-08  | 5.13E-08  | CCDC142   | chr2  | - | 74699113 | 74710535 | 3406  |
| ENSG000001 | 0.342542 | 12.9002  | -4.4445  | 0.000272  | 0.000731  | EMX1      | chr2  | + | 73143389 | 73162020 | 2188  |
| ENSG000001 | 355.7782 | 795.9787 | -1.1581  | 2.87E-13  | 1.69E-12  | KCNMB4    | chr12 | + | 70760056 | 70828072 | 4731  |
| ENSG000001 | 450.518  | 234.091  | 0.94082  | 0.000698  | 0.001772  | USP15     | chr12 | + | 62654119 | 62811211 | 4748  |
| ENSG000001 | 2814.723 | 736.6268 | 1.9332   | 1.96E-76  | 7.86E-75  | GNS       | chr12 | - | 65107225 | 65153227 | 5122  |
| ENSG000001 | 1.681007 | 3.039702 | -0.75706 | 0.50883   | 0.61225   | CPM       | chr12 | - | 69235977 | 69365350 | 6655  |
| ENSG000001 | 1032.362 | 1082.614 | -0.06947 | 0.56091   | 0.65952   | MDM2      | chr12 | + | 69201956 | 69239214 | 7381  |
| ENSG000001 | 1021.722 | 1181.614 | -0.20903 | 0.38611   | 0.49043   | KLHL36    | chr16 | + | 84682131 | 84701292 | 6488  |
| ENSG000001 | 0.290301 | 5.497527 | -3.249   | 0.017813  | 0.035555  | BCMO1     | chr16 | + | 81272053 | 81324747 | 2670  |
| ENSG000001 | 381.1884 | 347.2792 | 0.13577  | 0.47134   | 0.57614   | MPHOSPH6  | chr16 | - | 82181403 | 82203831 | 1103  |
| ENSG000001 | 4.398199 | 1.949596 | 1.0597   | 0.32658   | 0.4295    | CHST5     | chr16 | - | 75562433 | 75569145 | 3245  |
| ENSG000001 | 466.4496 | 195.3867 | 1.2473   | 7.91E-08  | 3.11E-07  | KIAA0513  | chr16 | + | 85061375 | 85127836 | 7772  |
| ENSG000001 | 2750.528 | 1222.612 | 1.1678   | 5.69E-16  | 3.94E-15  | DYNC1L1L2 | chr16 | - | 66754796 | 66785701 | 4515  |
| ENSG000001 | 33.97263 | 0.654722 | 5.2162   | 2.14E-08  | 8.83E-08  | FBXL8     | chr16 | + | 67193834 | 67198473 | 1658  |
| ENSG000001 | 2536.258 | 800.4027 | 1.6625   | 2.61E-65  | 8.62E-64  | FHOD1     | chr16 | - | 67263290 | 67281561 | 4321  |
| ENSG000001 | 525.4446 | 280.4702 | 0.90112  | 1.40E-07  | 5.38E-07  | CCDC102A  | chr16 | - | 57546090 | 57570511 | 2463  |
| ENSG000001 | 141.4607 | 131.6563 | 0.10198  | 0.77227   | 0.83602   | SLC9A5    | chr16 | + | 67271586 | 67306093 | 4617  |
| ENSG000001 | 9.015549 | 0.357707 | 3.9817   | 0.001253  | 0.003059  | AGT       | chr1  | - | 2.31E+08 | 2.31E+08 | 2291  |
| ENSG000001 | 65.77477 | 149.4872 | -1.182   | 2.71E-07  | 1.02E-06  | ZNF670    | chr1  | - | 2.47E+08 | 2.47E+08 | 2751  |
| ENSG000001 | 583.2536 | 1228.694 | -1.0728  | 1.16E-10  | 5.69E-10  | PCNXL2    | chr1  | - | 2.33E+08 | 2.33E+08 | 6817  |
| ENSG000001 | 296.2485 | 246.3254 | 0.26456  | 0.30897   | 0.41076   | KCNK1     | chr1  | + | 2.34E+08 | 2.34E+08 | 2161  |
| ENSG000001 | 320.3075 | 725.9688 | -1.1733  | 1.45E-05  | 4.56E-05  | URB2      | chr1  | + | 2.3E+08  | 2.3E+08  | 5613  |
| ENSG000001 | 621.3624 | 613.2565 | 0.018985 | 0.94341   | 0.9634    | EGLN1     | chr1  | - | 2.31E+08 | 2.32E+08 | 7097  |
| ENSG000001 | 3.423628 | 1.920457 | 0.70507  | 0.54503   | 0.64532   | CAPN9     | chr1  | + | 2.31E+08 | 2.31E+08 | 2484  |
| ENSG000001 | 394.7896 | 516.6068 | -0.38632 | 0.03819   | 0.070453  | COG2      | chr1  | + | 2.31E+08 | 2.31E+08 | 7836  |
| ENSG000001 | 280.7343 | 261.7939 | 0.10108  | 0.51317   | 0.61624   | ABCB10    | chr1  | - | 2.3E+08  | 2.3E+08  | 3857  |
| ENSG000001 | 246.5259 | 520.4819 | -1.077   | 5.92E-09  | 2.56E-08  | NTPCR     | chr1  | + | 2.33E+08 | 2.33E+08 | 8705  |
| ENSG000001 | 547.9692 | 492.7455 | 0.15313  | 0.47837   | 0.58275   | TAF5L     | chr1  | - | 2.3E+08  | 2.3E+08  | 4062  |
| ENSG000001 | 3608.462 | 4800.491 | -0.41131 | 1.22E-05  | 3.88E-05  | GLUL      | chr1  | - | 1.82E+08 | 1.82E+08 | 6132  |
| ENSG000001 | 604.3659 | 790.4017 | -0.3869  | 0.001157  | 0.002844  | STX6      | chr1  | - | 1.81E+08 | 1.81E+08 | 4851  |
| ENSG000001 | 1.722083 | 1.372552 | 0.25081  | 0.86695   | 0.90732   | RGS8      | chr1  | - | 1.83E+08 | 1.83E+08 | 1432  |
| ENSG000001 | 209.0633 | 25.48224 | 3.0206   | 6.12E-32  | 8.41E-31  | RNASEL    | chr1  | - | 1.83E+08 | 1.83E+08 | 4238  |
| ENSG000001 | 3520.151 | 4853.555 | -0.46165 | 0.032757  | 0.06137   | DHX9      | chr1  | + | 1.83E+08 | 1.83E+08 | 4240  |
| ENSG000001 | 304.8246 | 76.08022 | 1.9949   | 3.61E-21  | 3.21E-20  | KIAA1614  | chr1  | + | 1.81E+08 | 1.81E+08 | 9654  |
| ENSG000001 | 898.088  | 479.2574 | 0.90226  | 0.000825  | 0.002075  | CEP350    | chr1  | + | 1.8E+08  | 1.8E+08  | 13491 |
| ENSG000001 | 70.79367 | 19.02002 | 1.8845   | 1.72E-08  | 7.15E-08  | NPL       | chr1  | + | 1.83E+08 | 1.83E+08 | 2418  |
| ENSG000001 | 2072.914 | 150.6096 | 3.7778   | 1.52E-139 | 1.48E-137 | FAM129A   | chr1  | - | 1.85E+08 | 1.85E+08 | 6928  |
| ENSG000001 | 429.7824 | 243.5271 | 0.81993  | 3.66E-08  | 1.48E-07  | PIGC      | chr1  | - | 1.72E+08 | 1.72E+08 | 2630  |
| ENSG000001 | 763.8962 | 946.2392 | -0.30843 | 0.003333  | 0.00763   | ACBD6     | chr1  | - | 1.8E+08  | 1.8E+08  | 1670  |
| ENSG000001 | 14048.45 | 4164.582 | 1.7517   | 1.15E-41  | 2.11E-40  | LAMC1     | chr1  | + | 1.83E+08 | 1.83E+08 | 7889  |
| ENSG000001 | 446.8349 | 392.2081 | 0.18819  | 0.25293   | 0.34982   | RC3H1     | chr1  | - | 1.74E+08 | 1.74E+08 | 11261 |
| ENSG000001 | 1.411244 | 0.343138 | 1.3153   | 0.43451   | NA        | GPR55     | chr2  | - | 2.32E+08 | 2.32E+08 | 3828  |
| ENSG000001 | 101.8591 | 31.02024 | 1.6899   | 1.64E-05  | 5.13E-05  | SP110     | chr2  | - | 2.31E+08 | 2.31E+08 | 2725  |
| ENSG000001 | 351.6658 | 612.3334 | -0.79738 | 3.24E-07  | 1.21E-06  | MRPL44    | chr2  | + | 2.25E+08 | 2.25E+08 | 1748  |

|                   |          |          |           |           |          |       |   |          |          |      |
|-------------------|----------|----------|-----------|-----------|----------|-------|---|----------|----------|------|
| ENSG000001649304  | 5.033005 | -1.4472  | 0.17231   | 0.2549    | CHRNA    | chr2  | + | 2.33E+08 | 2.33E+08 | 3022 |
| ENSG0000012484563 | 3.451653 | 5.995    | 2.80E-38  | 4.71E-37  | PAX3     | chr2  | - | 2.23E+08 | 2.23E+08 | 3610 |
| ENSG0000016728559 | 17.16026 | 5.2841   | 3.91E-94  | 2.08E-92  | DOCK10   | chr2  | - | 2.26E+08 | 2.26E+08 | 7288 |
| ENSG0000015946462 | 1054.333 | -0.8245  | 1.17E-12  | 6.62E-12  | TTL4     | chr2  | + | 2.2E+08  | 2.2E+08  | 4967 |
| ENSG0000011882555 | 248.5598 | -0.39665 | 0.07755   | 0.13005   | USP37    | chr2  | - | 2.19E+08 | 2.19E+08 | 8032 |
| ENSG0000012427705 | 5.113098 | -0.9881  | 0.34562   | 0.44971   | HTR2B    | chr2  | - | 2.32E+08 | 2.32E+08 | 2246 |
| ENSG0000011839134 | 7897.818 | 1.2185   | 2.55E-32  | 3.56E-31  | ITM2C    | chr2  | + | 2.32E+08 | 2.32E+08 | 2078 |
| ENSG0000018217424 | 51.82484 | -2.6394  | 3.35E-08  | 1.36E-07  | SLC19A3  | chr2  | - | 2.29E+08 | 2.29E+08 | 3517 |
| ENSG000001163964  | 1420.42  | 3.5261   | 1.20E-242 | 3.80E-240 | SERPINE2 | chr2  | - | 2.25E+08 | 2.25E+08 | 5989 |
| ENSG0000011008457 | 671.5627 | 0.58582  | 0.000343  | 0.00091   | DNAJB2   | chr2  | + | 2.2E+08  | 2.2E+08  | 4487 |
| ENSG0000015408692 | 469.0272 | 0.20424  | 0.38404   | 0.48822   | TMBIM1   | chr2  | - | 2.19E+08 | 2.19E+08 | 2936 |
| ENSG0000015718906 | 283.9245 | -2.2862  | 7.90E-11  | 3.94E-10  | CYP27A1  | chr2  | + | 2.2E+08  | 2.2E+08  | 2566 |
| ENSG0000011844228 | 1367.366 | 0.43102  | 0.000128  | 0.000361  | EIF4E2   | chr2  | + | 2.33E+08 | 2.33E+08 | 3525 |
| ENSG0000011111785 | 596.6405 | 0.89643  | 7.24E-14  | 4.40E-13  | ARMC9    | chr2  | + | 2.32E+08 | 2.32E+08 | 5758 |
| ENSG0000018663587 | 941.0094 | -0.12008 | 0.33735   | 0.44107   | CAB39    | chr2  | + | 2.32E+08 | 2.32E+08 | 3826 |
| ENSG0000011177586 | 1634.779 | -0.47234 | 9.87E-06  | 3.17E-05  | COX5B    | chr2  | + | 98262503 | 98264846 | 738  |
| ENSG0000015081846 | 466.9682 | 0.12178  | 0.46523   | 0.57001   | REV1     | chr2  | - | 1E+08    | 1E+08    | 4751 |
| ENSG000001117268  | 43.22283 | -1.9229  | 6.74E-06  | 2.21E-05  | TSGA10   | chr2  | - | 99613724 | 99771427 | 3878 |
| ENSG0000011934431 | 216.962  | -0.16341 | 0.32277   | 0.42568   | MFSN9    | chr2  | - | 1.03E+08 | 1.03E+08 | 4049 |
| ENSG0000011114082 | 713.8842 | 0.64125  | 9.25E-08  | 3.62E-07  | TMEM127  | chr2  | - | 96916312 | 96931732 | 4208 |
| ENSG0000011431782 | 0.700845 | 0.75326  | 0.63313   | 0.72196   | EDAR     | chr2  | - | 1.1E+08  | 1.1E+08  | 4323 |
| ENSG0000015751226 | 498.3569 | 0.20619  | 0.19382   | 0.28133   | TGFBAP1  | chr2  | - | 1.06E+08 | 1.06E+08 | 5979 |
| ENSG0000016860905 | 740.7549 | -0.10926 | 0.69263   | 0.77084   | GCC2     | chr2  | + | 1.09E+08 | 1.09E+08 | 6772 |
| ENSG000001183762  | 509.2424 | -1.4666  | 9.40E-19  | 7.43E-18  | MRPS9    | chr2  | + | 1.06E+08 | 1.06E+08 | 1500 |
| ENSG0000011016461 | 3.901607 | -1.6746  | 0.18313   | 0.26816   | GPR45    | chr2  | + | 1.06E+08 | 1.06E+08 | 1725 |
| ENSG0000012476981 | 263.3459 | -0.08873 | 0.57829   | 0.67483   | C2orf49  | chr2  | + | 1.06E+08 | 1.06E+08 | 4768 |
| ENSG0000012614057 | 73.93069 | 1.8157   | 3.12E-22  | 2.90E-21  | ANKRD36  | chr2  | + | 97779233 | 97930258 | 6269 |
| ENSG0000013057535 | 318.8136 | -0.05938 | 0.82296   | 0.87519   | EPC2     | chr2  | + | 1.49E+08 | 1.5E+08  | 3642 |
| ENSG0000011397203 | 491.5447 | -1.8111  | 9.65E-25  | 9.99E-24  | ARHGEF4  | chr2  | + | 1.32E+08 | 1.32E+08 | 4788 |
| ENSG0000011161119 | 983.8355 | 0.2392   | 0.027379  | 0.052371  | ISCU     | chr12 | + | 1.09E+08 | 1.09E+08 | 3685 |
| ENSG0000011651737 | 142.3794 | 3.5222   | 1.74E-75  | 6.83E-74  | ALDH1L2  | chr12 | - | 1.05E+08 | 1.05E+08 | 7547 |
| ENSG0000013454517 | 2.589748 | 0.37485  | 0.74252   | 0.81078   | STAB2    | chr12 | + | 1.04E+08 | 1.04E+08 | 8251 |
| ENSG0000011733248 | 819.37   | -8.6712  | 2.51E-47  | 5.33E-46  | USP44    | chr12 | - | 95910336 | 95945266 | 4022 |
| ENSG0000011275147 | 451.1736 | 1.496    | 4.53E-15  | 2.98E-14  | SCYL2    | chr12 | + | 1.01E+08 | 1.01E+08 | 5779 |
| ENSG0000011118687 | 2379.47  | 2.231    | 1.39E-111 | 9.43E-110 | CKAP4    | chr12 | - | 1.07E+08 | 1.07E+08 | 3093 |
| ENSG0000011951542 | 80.46817 | 4.591    | 1.86E-228 | 5.53E-226 | PLXNC1   | chr12 | + | 94542499 | 94701451 | 7346 |
| ENSG0000018025674 | 299.7012 | 1.4191   | 2.79E-28  | 3.33E-27  | APPL2    | chr12 | - | 1.06E+08 | 1.06E+08 | 3239 |
| ENSG0000019234723 | 903.4382 | 0.032018 | 0.86856   | 0.90849   | PWP1     | chr12 | + | 1.08E+08 | 1.08E+08 | 2621 |
| ENSG0000017841428 | 116.5677 | -0.56688 | 0.050734  | 0.090091  | DRAM1    | chr12 | + | 1.02E+08 | 1.02E+08 | 3519 |
| ENSG0000018144947 | 562.9788 | 0.53199  | 0.015917  | 0.032075  | KIAA1033 | chr12 | + | 1.06E+08 | 1.06E+08 | 5819 |
| ENSG0000011535994 | 7.426106 | 4.2949   | 7.30E-30  | 9.27E-29  | SLLC41A2 | chr12 | - | 1.05E+08 | 1.05E+08 | 4449 |
| ENSG0000011275753 | 87.36094 | 0.54665  | 0.021833  | 0.042727  | VILL     | chr3  | + | 38029550 | 38048679 | 4439 |
| ENSG0000011962843 | 5633.26  | -1.5194  | 6.66E-35  | 1.01E-33  | FLNB     | chr3  | + | 57994127 | 58157982 | 9537 |
| ENSG0000012891783 | 523.4583 | -0.85521 | 6.66E-07  | 2.42E-06  | NEK3     | chr13 | - | 52706775 | 52733996 | 3255 |
| ENSG0000010       | 36.09346 | -5.1596  | NA        | NA        | PCDH8    | chr13 | - | 53418109 | 53422775 | 4003 |
| ENSG0000016764102 | 307.5357 | 1.1365   | 1.19E-14  | 7.61E-14  | VPS36    | chr13 | - | 52986737 | 53024763 | 4417 |
| ENSG0000012496108 | 391.2344 | -0.64786 | 0.00066   | 0.001682  | RNASEH2B | chr13 | + | 51483814 | 51544592 | 1629 |
| ENSG0000011304958 | 1104.668 | 0.24054  | 0.1447    | 0.22004   | CKAP2    | chr13 | + | 53029564 | 53050763 | 3629 |
| ENSG0000010       | 1327.572 | -11.547  | 3.20E-27  | 3.65E-26  | LECT1    | chr13 | - | 53277399 | 53313947 | 1444 |
| ENSG0000018939124 | 1015.913 | -0.18443 | 0.2012    | 0.29      | TBC1D4   | chr13 | - | 75858808 | 76056250 | 6364 |
| ENSG0000011614443 | 6.75111  | 4.5438   | 1.48E-29  | 1.85E-28  | THSD1    | chr13 | - | 52951305 | 52980629 | 3186 |
| ENSG0000011671029 | 181.1481 | -0.11382 | 0.62556   | 0.71563   | BORA     | chr13 | + | 73302061 | 73330336 | 2759 |
| ENSG0000017258844 | 224.6662 | 1.6786   | 7.17E-08  | 2.83E-07  | LRCH1    | chr13 | + | 47127303 | 47327175 | 4710 |
| ENSG0000015710932 | 633.9418 | -0.14917 | 0.47208   | 0.57671   | SUCLA2   | chr13 | - | 48510622 | 48612125 | 2164 |
| ENSG0000016098988 | 695.9935 | -0.19089 | 0.16311   | 0.24359   | RCBTB1   | chr13 | - | 50106082 | 50159719 | 4025 |
| ENSG0000012706993 | 283.9141 | -0.06673 | 0.67635   | 0.7576    | MED4     | chr13 | - | 48627459 | 48669267 | 2022 |
| ENSG000001119922  | 81.19815 | 0.56146  | 0.009021  | 0.019114  | PHF11    | chr13 | + | 50069746 | 50103123 | 1626 |
| ENSG0000012125693 | 49.63818 | -1.2186  | 0.001821  | 0.004337  | RPL13AP2 | chr13 | - | 55014839 | 55015450 | 612  |
| ENSG0000015786104 | 242.6451 | 1.251    | 1.32E-19  | 1.09E-18  | COG3     | chr13 | + | 46039060 | 46110765 | 4498 |
| ENSG0000012210944 | 359.4375 | 2.6175   | 6.10E-99  | 3.41E-97  | LMO7     | chr13 | + | 76194570 | 76434004 | 8128 |
| ENSG0000017260949 | 0.700845 | 2.9931   | 0.01037   | 0.021729  | SCEL     | chr13 | + | 78109809 | 78219398 | 3096 |
| ENSG0000012836884 | 1984.578 | 0.51521  | 1.66E-05  | 5.18E-05  | ITM2B    | chr13 | + | 48807294 | 48837063 | 1876 |
| ENSG0000012802262 | 1317.653 | 1.0871   | 1.29E-16  | 9.26E-16  | SPRY2    | chr13 | - | 80910111 | 80915086 | 2708 |
| ENSG0000012665958 | 616.8597 | -1.2062  | 2.48E-10  | 1.20E-09  | NUDT15   | chr13 | + | 48611703 | 48621358 | 2098 |
| ENSG0000010290301 | 210.1421 | -8.3256  | 9.97E-18  | 7.56E-17  | EDNRB    | chr13 | - | 78469616 | 78493903 | 4471 |

|            |          |          |          |           |           |          |       |   |          |          |       |
|------------|----------|----------|----------|-----------|-----------|----------|-------|---|----------|----------|-------|
| ENSG000001 | 286.4092 | 150.0446 | 0.93418  | 1.37E-06  | 4.83E-06  | RCBTB2   | chr13 | - | 49063095 | 49107369 | 3232  |
| ENSG000001 | 183.8352 | 57.02119 | 1.6839   | 2.27E-11  | 1.18E-10  | LCP1     | chr13 | - | 46700055 | 46786006 | 3944  |
| ENSG000001 | 182.1472 | 113.7788 | 0.67502  | 0.000672  | 0.00171   | SETDB2   | chr13 | + | 50018429 | 50069138 | 6183  |
| ENSG000001 | 5775.715 | 3733.792 | 0.62891  | 3.05E-11  | 1.57E-10  | SCRN1    | chr7  | - | 29959719 | 30029905 | 5275  |
| ENSG000001 | 7.905771 | 8.250752 | -0.06022 | 0.92982   | 0.95355   | C7orf25  | chr7  | - | 42948325 | 42951904 | 2451  |
| ENSG000001 | 1499.082 | 1561.678 | -0.05846 | 0.56752   | 0.66499   | TNS3     | chr7  | - | 47314752 | 47622156 | 7625  |
| ENSG000001 | 22.56288 | 10.76927 | 1.0581   | 0.036482  | 0.067614  | SPDYE1   | chr7  | + | 44040488 | 44049721 | 2649  |
| ENSG000001 | 544.7368 | 295.2575 | 0.88007  | 1.66E-09  | 7.53E-09  | CHST12   | chr7  | + | 2443223  | 2474242  | 2103  |
| ENSG000001 | 1099.369 | 2637.153 | -1.2613  | 1.19E-29  | 1.50E-28  | IGF2BP3  | chr7  | - | 23349828 | 23510086 | 4250  |
| ENSG000001 | 206.6532 | 10.25533 | 4.3161   | 5.14E-31  | 6.84E-30  | GNPMB    | chr7  | + | 23275586 | 23314727 | 2862  |
| ENSG000001 | 461.4155 | 120.9734 | 1.9242   | 1.14E-31  | 1.55E-30  | RAPGEF5  | chr7  | - | 22157856 | 22396763 | 6621  |
| ENSG000001 | 5165.378 | 4855.492 | 0.089138 | 0.33898   | 0.44289   | RAC1     | chr7  | + | 6414154  | 6443608  | 2323  |
| ENSG000001 | 6312.597 | 1107.226 | 2.5098   | 1.20E-168 | 1.70E-166 | KDELRL2  | chr7  | - | 6485584  | 6523873  | 2884  |
| ENSG000001 | 276.9643 | 321.8045 | -0.21737 | 0.23146   | 0.32499   | NUPL2    | chr7  | + | 23221446 | 23240630 | 2529  |
| ENSG000001 | 0.72616  | 1.012429 | -0.3368  | 0.84185   | NA        | IL6      | chr7  | + | 22765503 | 22771621 | 1527  |
| ENSG000001 | 145.5291 | 261.5171 | -0.84489 | 1.40E-06  | 4.93E-06  | ZDHHC4   | chr7  | + | 6617065  | 6629005  | 1942  |
| ENSG000001 | 7.397947 | 1.234181 | 2.2704   | 0.032399  | 0.06078   | AOAH     | chr7  | - | 36552456 | 36764154 | 2396  |
| ENSG000001 | 816.1837 | 1052.052 | -0.36561 | 0.001642  | 0.003935  | BZW2     | chr7  | + | 16685756 | 16746148 | 2101  |
| ENSG000001 | 14.95001 | 23.5634  | -0.64122 | 0.20061   | 0.28932   | DGKB     | chr7  | - | 14184674 | 15014402 | 6917  |
| ENSG000001 | 979.3899 | 2133.691 | -1.1219  | 1.20E-29  | 1.51E-28  | TBRG4    | chr7  | - | 45139699 | 45151646 | 3409  |
| ENSG000001 | 1126.676 | 1113.169 | 0.017677 | 0.91729   | 0.94419   | DDX56    | chr7  | - | 44605016 | 44614650 | 3028  |
| ENSG000001 | 217.4001 | 252.9715 | -0.21806 | 0.23188   | 0.32543   | HUS1     | chr7  | - | 47735328 | 48019178 | 2935  |
| ENSG000001 | 396.0491 | 128.2403 | 1.6131   | 4.63E-08  | 1.86E-07  | NACAD    | chr7  | - | 45120037 | 45128513 | 4780  |
| ENSG000001 | 2506.512 | 783.1301 | 1.6703   | 2.26E-11  | 1.17E-10  | DBNL     | chr7  | + | 44084239 | 44109055 | 9618  |
| ENSG000001 | 1204.006 | 547.5924 | 1.1343   | 4.28E-20  | 3.62E-19  | CCM2     | chr7  | + | 45039074 | 45116068 | 5304  |
| ENSG000001 | 8.57969  | 8.727428 | -0.01771 | 0.97875   | 0.98819   | MYO1G    | chr7  | - | 45002261 | 45018697 | 5672  |
| ENSG000001 | 17814.62 | 8447.88  | 1.0746   | 6.81E-14  | 4.15E-13  | TTYH3    | chr7  | + | 2671585  | 2704436  | 4840  |
| ENSG000001 | 0        | 6.564201 | -4.2763  | 0.001644  | 0.00394   | MMD2     | chr7  | - | 4945620  | 4998844  | 2415  |
| ENSG000001 | 255.4078 | 212.7706 | 0.26442  | 0.10326   | 0.16583   | TTC5     | chr14 | - | 20724717 | 20774153 | 5014  |
| ENSG000001 | 0        | 0.343138 | -0.41864 | 0.81278   | NA        | NKX2-8   | chr14 | - | 37049784 | 37051812 | 1261  |
| ENSG000001 | 31.74273 | 526.137  | -4.031   | 1.72E-48  | 3.77E-47  | ZFXH2    | chr14 | - | 23990125 | 24025401 | 8855  |
| ENSG000001 | 1.370168 | 6.459801 | -1.9776  | 0.092594  | 0.1515    | MTHFS    | chr15 | - | 80125927 | 80189721 | 907   |
| ENSG000001 | 1893.832 | 3991.737 | -1.0736  | 1.18E-11  | 6.21E-11  | ADAMTS7  | chr15 | - | 79051545 | 79103773 | 5490  |
| ENSG000001 | 176.3461 | 671.894  | -1.9259  | 7.08E-26  | 7.69E-25  | ABHD17C  | chr15 | + | 80972025 | 81047962 | 2435  |
| ENSG000001 | 1411.425 | 1742.987 | -0.30435 | 0.002534  | 0.005902  | IREB2    | chr15 | + | 78729773 | 78793798 | 6354  |
| ENSG000001 | 36.57858 | 139.9555 | -1.9252  | 2.15E-11  | 1.11E-10  | ALPK3    | chr15 | + | 85359911 | 85416713 | 10917 |
| ENSG000001 | 117.9875 | 94.60974 | 0.31673  | 0.15307   | 0.23098   | TM6SF1   | chr15 | + | 83776159 | 83813606 | 2074  |
| ENSG000001 | 101.0243 | 622.9937 | -2.6203  | 1.24E-49  | 2.80E-48  | CIB2     | chr15 | - | 78396948 | 78423886 | 1598  |
| ENSG000001 | 484.9514 | 293.8842 | 0.71986  | 6.69E-05  | 0.000195  | CALCOCO2 | chr17 | + | 46908350 | 46943884 | 3682  |
| ENSG000001 | 660.7267 | 640.9202 | 0.043932 | 0.72562   | 0.797     | RSAD1    | chr17 | + | 48556161 | 48563336 | 2528  |
| ENSG000001 | 2483.918 | 2859.799 | -0.20294 | 0.0436    | 0.078985  | NMT1     | chr17 | + | 43128978 | 43186384 | 4999  |
| ENSG000001 | 5.507977 | 31.88068 | -2.4074  | 0.00157   | 0.003775  | MYCBPAP  | chr17 | + | 48585745 | 48608862 | 3186  |
| ENSG000001 | 3198.208 | 4263.324 | -0.41301 | 0.065036  | 0.11189   | SRSF1    | chr17 | - | 56080854 | 56084707 | 2983  |
| ENSG000001 | 642.5646 | 803.0143 | -0.32147 | 0.003111  | 0.007156  | VEZF1    | chr17 | - | 56048910 | 56065620 | 3946  |
| ENSG000001 | 23.74722 | 2.321872 | 3.2051   | 1.33E-05  | 4.21E-05  | CHAD     | chr17 | - | 48541857 | 48546327 | 1789  |
| ENSG000001 | 386.886  | 474.4056 | -0.29352 | 0.055874  | 0.098002  | TACO1    | chr17 | + | 61678231 | 61685725 | 2304  |
| ENSG000001 | 611.2865 | 277.4547 | 1.136    | 9.34E-12  | 4.97E-11  | TEX2     | chr17 | - | 62224587 | 62340661 | 5232  |
| ENSG000001 | 3078.445 | 2714.593 | 0.18124  | 0.1744    | 0.25745   | DCAF7    | chr17 | + | 61627822 | 61671639 | 6351  |
| ENSG000001 | 0        | 13.96762 | -5.4246  | 7.99E-06  | 2.60E-05  | GH2      | chr17 | - | 61957578 | 61959295 | 1138  |
| ENSG000001 | 0        | 0.686276 | -0.84936 | 0.6309    | NA        | CSH1     | chr17 | - | 61972275 | 61974021 | 1586  |
| ENSG000001 | 934.4438 | 1167.854 | -0.32072 | 0.027321  | 0.052278  | LIMD2    | chr17 | - | 61773262 | 61778532 | 3193  |
| ENSG000001 | 313.7779 | 312.2279 | 0.007662 | 0.96732   | 0.98142   | BRIP1    | chr17 | - | 59758627 | 59940882 | 6048  |
| ENSG000001 | 579.1142 | 4705.209 | -3.0191  | 6.22E-168 | 8.78E-166 | KAT7     | chr17 | + | 47865917 | 47906458 | 3996  |
| ENSG000001 | 0        | 0.700845 | -0.87835 | 0.62047   | NA        | RTP4     | chr3  | + | 1.87E+08 | 1.87E+08 | 1554  |
| ENSG000001 | 968.8165 | 1200.024 | -0.30815 | 0.015461  | 0.031233  | ACTL6A   | chr3  | + | 1.79E+08 | 1.79E+08 | 1901  |
| ENSG000001 | 564.635  | 782.616  | -0.46914 | 0.000126  | 0.000355  | NDUF85   | chr3  | + | 1.79E+08 | 1.79E+08 | 4046  |
| ENSG000001 | 472.8205 | 629.9084 | -0.41186 | 0.055208  | 0.096959  | MRPL47   | chr3  | - | 1.79E+08 | 1.79E+08 | 1370  |
| ENSG000001 | 3168.254 | 3817.135 | -0.26751 | 0.27121   | 0.37049   | TRA2B    | chr3  | - | 1.86E+08 | 1.86E+08 | 4485  |
| ENSG000001 | 18.8729  | 7.308753 | 1.3064   | 0.074229  | 0.12538   | SCN2A    | chr2  | + | 1.66E+08 | 1.66E+08 | 8792  |
| ENSG000001 | 0.290301 | 0.686276 | -0.47648 | 0.78935   | NA        | TBR1     | chr2  | + | 1.62E+08 | 1.62E+08 | 7185  |
| ENSG000001 | 1228.378 | 1041.878 | 0.23773  | 0.13508   | 0.20805   | 7-Mar    | chr2  | + | 1.61E+08 | 1.61E+08 | 3743  |
| ENSG000001 | 0.290301 | 5.347004 | -3.2735  | 0.013489  | 0.027607  | ERMN     | chr2  | - | 1.58E+08 | 1.58E+08 | 3793  |
| ENSG000001 | 265.8619 | 1.029414 | 7.6745   | 2.72E-26  | 2.99E-25  | GALNT5   | chr2  | + | 1.58E+08 | 1.58E+08 | 6171  |
| ENSG000001 | 0.36308  | 0.654722 | -0.52647 | 0.7643    | NA        | SCN7A    | chr2  | - | 1.67E+08 | 1.67E+08 | 7183  |
| ENSG000001 | 567.6054 | 117.5411 | 2.2696   | 1.78E-45  | 3.60E-44  | TANK     | chr2  | + | 1.62E+08 | 1.62E+08 | 2171  |

|            |          |          |          |           |           |           |       |   |          |          |       |
|------------|----------|----------|----------|-----------|-----------|-----------|-------|---|----------|----------|-------|
| ENSG000001 | 0        | 0.297015 | -0.41864 | 0.81278   | NA        | BLK       | chr8  | + | 11351510 | 11422113 | 2606  |
| ENSG000001 | 26.52522 | 24.17434 | 0.13654  | 0.81572   | 0.87067   | GATA4     | chr8  | + | 11534468 | 11617511 | 3414  |
| ENSG000001 | 2014.659 | 2475.683 | -0.29611 | 0.15234   | 0.23004   | SKIL      | chr3  | + | 1.7E+08  | 1.7E+08  | 7182  |
| ENSG000001 | 2879.509 | 3465.535 | -0.26674 | 0.028268  | 0.05385   | EPRS      | chr1  | - | 2.2E+08  | 2.2E+08  | 5014  |
| ENSG000001 | 1258.556 | 12.52947 | 6.4583   | 1.17E-27  | 1.37E-26  | HLX       | chr1  | + | 2.21E+08 | 2.21E+08 | 3323  |
| ENSG000001 | 512.7159 | 339.6592 | 0.59281  | 2.18E-05  | 6.71E-05  | VPS45     | chr1  | + | 1.5E+08  | 1.5E+08  | 2790  |
| ENSG000001 | 0.290301 | 0        | 0.4146   | 0.81455   | NA        | IL10      | chr1  | - | 2.07E+08 | 2.07E+08 | 1630  |
| ENSG000001 | 906.5921 | 1026.992 | -0.17935 | 0.13519   | 0.20817   | KCTD3     | chr1  | + | 2.16E+08 | 2.16E+08 | 3931  |
| ENSG000001 | 674.4067 | 275.3018 | 1.2911   | 3.36E-24  | 3.41E-23  | RPS6KC1   | chr1  | + | 2.13E+08 | 2.13E+08 | 5490  |
| ENSG000001 | 62.79377 | 21.33303 | 1.539    | 6.96E-06  | 2.27E-05  | RASSF5    | chr1  | + | 2.07E+08 | 2.07E+08 | 4499  |
| ENSG000001 | 285.0294 | 274.7212 | 0.052758 | 0.78818   | 0.84859   | CBWD2     | chr2  | + | 1.14E+08 | 1.14E+08 | 3305  |
| ENSG000001 | 0        | 2.131673 | -2.2467  | 0.1949    | 0.28267   | IL36G     | chr2  | + | 1.14E+08 | 1.14E+08 | 1195  |
| ENSG000001 | 0.342542 | 0        | 0.4146   | 0.81455   | NA        | IL1RN     | chr2  | + | 1.14E+08 | 1.14E+08 | 1922  |
| ENSG000001 | 0        | 0.357707 | -0.41864 | 0.81278   | NA        | CFC1      | chr2  | - | 1.31E+08 | 1.31E+08 | 1046  |
| ENSG000001 | 2044.477 | 2476.385 | -0.2758  | 0.075663  | 0.12735   | SMPD4     | chr2  | - | 1.31E+08 | 1.31E+08 | 4896  |
| ENSG000001 | 1231.402 | 2306.849 | -0.9049  | 7.47E-22  | 6.84E-21  | WDR33     | chr2  | - | 1.28E+08 | 1.29E+08 | 9471  |
| ENSG000001 | 376.5252 | 369.3353 | 0.026637 | 0.85151   | 0.89557   | CCDC115   | chr2  | - | 1.31E+08 | 1.31E+08 | 3562  |
| ENSG000001 | 1027.227 | 1068.789 | -0.05703 | 0.60057   | 0.69445   | SAP130    | chr2  | - | 1.29E+08 | 1.29E+08 | 4173  |
| ENSG000001 | 2678.742 | 1005.172 | 1.4125   | 1.54E-38  | 2.60E-37  | BIN1      | chr2  | - | 1.28E+08 | 1.28E+08 | 5141  |
| ENSG000001 | 857.1739 | 1133.715 | -0.40224 | 0.006456  | 0.014075  | IMP4      | chr2  | + | 1.31E+08 | 1.31E+08 | 2379  |
| ENSG000001 | 1210.314 | 2472.117 | -1.0293  | 2.02E-24  | 2.07E-23  | HS6ST1    | chr2  | - | 1.29E+08 | 1.29E+08 | 3932  |
| ENSG000001 | 4490.567 | 2265.584 | 0.9855   | 2.41E-11  | 1.25E-10  | UGGT1     | chr2  | + | 1.29E+08 | 1.29E+08 | 10930 |
| ENSG000001 | 995.3462 | 424.8745 | 1.2267   | 9.26E-20  | 7.72E-19  | GYPC      | chr2  | + | 1.27E+08 | 1.27E+08 | 1805  |
| ENSG000001 | 391.1568 | 343.6855 | 0.18573  | 0.17885   | 0.26285   | STAM      | chr10 | + | 17686124 | 17757913 | 2972  |
| ENSG000001 | 0        | 79.94026 | -7.7476  | 1.51E-11  | 7.91E-11  | GAD2      | chr10 | + | 26505236 | 26593487 | 5858  |
| ENSG000001 | 809.6647 | 567.8191 | 0.51036  | 0.000527  | 0.001362  | ABI1      | chr10 | - | 27035522 | 27150016 | 3728  |
| ENSG000001 | 3289.344 | 2314.968 | 0.50652  | 6.82E-05  | 0.000198  | YME1L1    | chr10 | - | 27399383 | 27444195 | 3994  |
| ENSG000001 | 531.013  | 206.0453 | 1.3644   | 7.94E-15  | 5.16E-14  | DNAJC1    | chr10 | - | 22045466 | 22292698 | 2106  |
| ENSG000001 | 349.2873 | 111.2771 | 1.6454   | 2.41E-20  | 2.06E-19  | NIPSNAP3A | chr9  | + | 1.08E+08 | 1.08E+08 | 1633  |
| ENSG000001 | 2140.922 | 3350.876 | -0.64468 | 0.000205  | 0.000561  | LRRC8A    | chr9  | + | 1.32E+08 | 1.32E+08 | 4619  |
| ENSG000001 | 9.18083  | 4.746527 | 0.88139  | 0.26607   | 0.3648    | FRRS1L    | chr9  | - | 1.12E+08 | 1.12E+08 | 1603  |
| ENSG000001 | 1390.22  | 1856.273 | -0.41711 | 0.000158  | 0.000438  | CDK9      | chr9  | + | 1.31E+08 | 1.31E+08 | 2700  |
| ENSG000001 | 1860     | 1742.319 | 0.094447 | 0.33753   | 0.44128   | TXN       | chr9  | - | 1.13E+08 | 1.13E+08 | 869   |
| ENSG000001 | 1485.709 | 341.1771 | 2.1147   | 7.50E-24  | 7.48E-23  | ODF2      | chr9  | + | 1.31E+08 | 1.31E+08 | 3707  |
| ENSG000001 | 2146.728 | 3236.593 | -0.59169 | 1.57E-08  | 6.57E-08  | KIAA0368  | chr9  | - | 1.14E+08 | 1.14E+08 | 7391  |
| ENSG000001 | 762.2357 | 378.8518 | 1.0081   | 1.46E-17  | 1.10E-16  | TOR1B     | chr9  | + | 1.33E+08 | 1.33E+08 | 2769  |
| ENSG000001 | 733.5441 | 672.5812 | 0.1255   | 0.48028   | 0.58449   | C9orf78   | chr9  | - | 1.33E+08 | 1.33E+08 | 2390  |
| ENSG000001 | 1113.906 | 966.6944 | 0.2037   | 0.48309   | 0.58727   | SMC2      | chr9  | + | 1.07E+08 | 1.07E+08 | 5976  |
| ENSG000001 | 176.0569 | 109.168  | 0.68727  | 0.022109  | 0.043218  | KLF4      | chr9  | - | 1.1E+08  | 1.1E+08  | 2813  |
| ENSG000001 | 1122.289 | 650.5275 | 0.78703  | 7.05E-11  | 3.53E-10  | TOR1A     | chr9  | - | 1.33E+08 | 1.33E+08 | 2076  |
| ENSG000001 | 76.49186 | 369.3124 | -2.2615  | 1.21E-17  | 9.16E-17  | RALGPS1   | chr9  | + | 1.3E+08  | 1.3E+08  | 6336  |
| ENSG000001 | 16110.02 | 1874.551 | 3.0998   | 1.79E-162 | 2.40E-160 | FAM129B   | chr9  | - | 1.3E+08  | 1.3E+08  | 3957  |
| ENSG000001 | 423.3764 | 387.5479 | 0.12712  | 0.45139   | 0.55694   | ST6GALNA  | chr9  | - | 1.31E+08 | 1.31E+08 | 1691  |
| ENSG000001 | 1.233984 | 12.28515 | -2.9705  | 0.003551  | 0.008095  | TMOD1     | chr9  | + | 1E+08    | 1E+08    | 3259  |
| ENSG000001 | 2869.266 | 1770.446 | 0.6953   | 3.88E-07  | 1.44E-06  | DAB2IP    | chr9  | + | 1.24E+08 | 1.25E+08 | 6784  |
| ENSG000001 | 1220.453 | 893.7893 | 0.44727  | 0.054702  | 0.096131  | STXBP1    | chr9  | + | 1.3E+08  | 1.3E+08  | 3909  |
| ENSG000001 | 100.9873 | 431.5771 | -2.0884  | 8.15E-33  | 1.16E-31  | SLC2A8    | chr9  | + | 1.3E+08  | 1.3E+08  | 2172  |
| ENSG000001 | 2097.041 | 119.4963 | 4.1233   | 1.73E-114 | 1.23E-112 | ANGPTL2   | chr9  | - | 1.3E+08  | 1.3E+08  | 3707  |
| ENSG000001 | 1645.173 | 1147.878 | 0.51871  | 9.56E-05  | 0.000273  | CDK5RAP2  | chr9  | - | 1.23E+08 | 1.23E+08 | 6235  |
| ENSG000001 | 63.03616 | 65.66685 | -0.04826 | 0.88832   | 0.92217   | ZFP37     | chr9  | - | 1.16E+08 | 1.16E+08 | 6266  |
| ENSG000001 | 1.628766 | 0        | 2.1781   | 0.19145   | NA        | SLC31A2   | chr9  | + | 1.16E+08 | 1.16E+08 | 1785  |
| ENSG000001 | 1169.96  | 1172.102 | -0.00241 | 0.98186   | 0.98993   | SLC31A1   | chr9  | + | 1.16E+08 | 1.16E+08 | 4744  |
| ENSG000001 | 265.4818 | 0.686276 | 8.0719   | 7.77E-23  | 7.44E-22  | TLR4      | chr9  | + | 1.2E+08  | 1.2E+08  | 4844  |
| ENSG000001 | 318.8213 | 166.9234 | 0.93246  | 7.89E-09  | 3.38E-08  | ZNF189    | chr9  | + | 1.04E+08 | 1.04E+08 | 3134  |
| ENSG000001 | 0.632843 | 0.715414 | -0.08242 | 0.96193   | NA        | ALDOB     | chr9  | - | 1.04E+08 | 1.04E+08 | 2451  |
| ENSG000001 | 219.1527 | 171.9979 | 0.34661  | 0.10546   | 0.16884   | STX17     | chr9  | + | 1.03E+08 | 1.03E+08 | 2708  |
| ENSG000001 | 853.1317 | 852.5137 | 0.001438 | 0.9935    | 0.99653   | PRPF4     | chr9  | + | 1.16E+08 | 1.16E+08 | 3212  |
| ENSG000001 | 1207.368 | 1418.634 | -0.23181 | 0.036912  | 0.068317  | FPGS      | chr9  | + | 1.31E+08 | 1.31E+08 | 2339  |
| ENSG000001 | 758.014  | 543.628  | 0.47772  | 0.017926  | 0.035746  | USP20     | chr9  | + | 1.33E+08 | 1.33E+08 | 4458  |
| ENSG000001 | 1.338465 | 4.039977 | -1.3835  | 0.25322   | 0.35016   | BAAT      | chr9  | - | 1.04E+08 | 1.04E+08 | 3377  |
| ENSG000001 | 2.967231 | 16.04913 | -2.3378  | 0.000986  | 0.002449  | KIF12     | chr9  | - | 1.17E+08 | 1.17E+08 | 2564  |
| ENSG000001 | 1051.907 | 1611.315 | -0.61337 | 0.000858  | 0.002151  | ATP6V1G1  | chr9  | + | 1.17E+08 | 1.17E+08 | 1080  |
| ENSG000001 | 636.0633 | 1198.664 | -0.91213 | 3.04E-09  | 1.34E-08  | TEX10     | chr9  | - | 1.03E+08 | 1.03E+08 | 4457  |
| ENSG000001 | 26.14999 | 133.3226 | -2.3229  | 4.13E-10  | 1.96E-09  | GARNL3    | chr9  | + | 1.3E+08  | 1.3E+08  | 4816  |
| ENSG000001 | 300.6467 | 561.6952 | -0.89727 | 6.97E-08  | 2.75E-07  | MRPL50    | chr9  | - | 1.04E+08 | 1.04E+08 | 3332  |

|                    |          |          |           |           |          |      |   |          |          |      |
|--------------------|----------|----------|-----------|-----------|----------|------|---|----------|----------|------|
| ENSG000001691.8919 | 666.1153 | 0.056544 | 0.68964   | 0.76864   | DPM2     | chr9 | - | 1.31E+08 | 1.31E+08 | 1662 |
| ENSG0000010632843  | 3.80936  | -2.1386  | 0.10333   | 0.16593   | WDR38    | chr9 | + | 1.28E+08 | 1.28E+08 | 1252 |
| ENSG000001387.7087 | 298.9119 | 0.37432  | 0.016318  | 0.032813  | TSTD2    | chr9 | - | 1E+08    | 1E+08    | 4320 |
| ENSG000001351.1812 | 19.6869  | 4.144    | 1.68E-56  | 4.51E-55  | GABBR2   | chr9 | - | 1.01E+08 | 1.01E+08 | 5761 |
| ENSG0000012518.064 | 2027.704 | 0.31232  | 0.027505  | 0.052581  | PSMB7    | chr9 | - | 1.27E+08 | 1.27E+08 | 988  |
| ENSG0000010        | 17.01873 | -5.5821  | 1.11E-05  | 3.55E-05  | NR5A1    | chr9 | - | 1.27E+08 | 1.27E+08 | 3104 |
| ENSG00000173.49293 | 87.95463 | -0.25431 | 0.52619   | 0.628     | C9orf156 | chr9 | - | 1.01E+08 | 1.01E+08 | 2971 |
| ENSG000001619.6833 | 491.2109 | 0.3349   | 0.008705  | 0.018511  | RABEPK   | chr9 | + | 1.28E+08 | 1.28E+08 | 2450 |
| ENSG000001332.1501 | 188.3367 | 0.81351  | 2.07E-06  | 7.19E-06  | GOLGA1   | chr9 | - | 1.28E+08 | 1.28E+08 | 4801 |
| ENSG000001136.7371 | 72.9676  | 0.90038  | 0.000169  | 0.000469  | XPA      | chr9 | - | 1E+08    | 1E+08    | 1584 |
| ENSG0000011077.756 | 961.3921 | 0.16471  | 0.33687   | 0.44065   | NCBP1    | chr9 | + | 1E+08    | 1E+08    | 5178 |
| ENSG0000012172.347 | 2794.389 | -0.36255 | 0.000267  | 0.000719  | ANP32B   | chr9 | + | 1.01E+08 | 1.01E+08 | 1463 |
| ENSG0000010        | 0.297015 | -0.41864 | 0.81278   | NA        | OR1L4    | chr9 | + | 1.25E+08 | 1.25E+08 | 936  |
| ENSG000001653.9292 | 441.22   | 0.56771  | 2.21E-06  | 7.63E-06  | PDCL     | chr9 | - | 1.26E+08 | 1.26E+08 | 2813 |
| ENSG0000016861.644 | 10653.77 | -0.63426 | 7.38E-11  | 3.69E-10  | RPL35    | chr9 | - | 1.28E+08 | 1.28E+08 | 785  |
| ENSG00000115.69671 | 927.2937 | -5.8681  | 1.69E-110 | 1.14E-108 | CTSL2    | chr9 | - | 99794940 | 99801925 | 1546 |
| ENSG00000119.58367 | 337.7956 | -4.0632  | 4.82E-54  | 1.22E-52  | LMX1B    | chr9 | + | 1.29E+08 | 1.29E+08 | 5809 |
| ENSG000001903.446  | 955.058  | -0.07985 | 0.69796   | 0.77494   | ARPC5L   | chr9 | + | 1.28E+08 | 1.28E+08 | 2498 |
| ENSG00000183.12911 | 155.6725 | -0.89704 | 0.000851  | 0.002137  | ENPP2    | chr8 | - | 1.21E+08 | 1.21E+08 | 3647 |
| ENSG000001205.1757 | 733.3777 | -1.8323  | 1.17E-20  | 1.02E-19  | DSCC1    | chr8 | - | 1.21E+08 | 1.21E+08 | 2314 |
| ENSG0000011027.575 | 586.5545 | 0.80714  | 2.56E-08  | 1.05E-07  | DERL1    | chr8 | - | 1.24E+08 | 1.24E+08 | 5513 |
| ENSG000001800.1325 | 1939.372 | -1.2737  | 1.19E-13  | 7.16E-13  | MYC      | chr8 | + | 1.29E+08 | 1.29E+08 | 2345 |
| ENSG000001118.0654 | 15.15809 | 2.9361   | 3.25E-21  | 2.90E-20  | NOV      | chr8 | + | 1.2E+08  | 1.2E+08  | 2522 |
| ENSG00000197.15442 | 0        | 8.1124   | 8.87E-14  | 5.36E-13  | IL33     | chr9 | + | 6215805  | 6257983  | 2641 |
| ENSG000001320.5934 | 584.8796 | -0.86617 | 4.39E-12  | 2.38E-11  | C9orf123 | chr9 | - | 7796490  | 7888380  | 2755 |
| ENSG000001652.7033 | 447.7434 | 0.54438  | 0.000264  | 0.000712  | RANBP6   | chr9 | - | 6011043  | 6015618  | 4576 |
| ENSG000001293.1056 | 528.8695 | -0.85051 | 1.80E-07  | 6.88E-07  | POLR1E   | chr9 | + | 37485932 | 37503694 | 2229 |
| ENSG000001699.6203 | 879.608  | -0.32993 | 0.014452  | 0.029368  | PLAA     | chr9 | - | 26904081 | 26947461 | 4234 |
| ENSG000001307.5992 | 56.04609 | 2.4486   | 3.24E-28  | 3.86E-27  | IL11RA   | chr9 | + | 34650699 | 34661889 | 3008 |
| ENSG0000011249.801 | 1402.337 | -0.16549 | 0.16173   | 0.24195   | UBAP2    | chr9 | - | 33921691 | 34048947 | 4572 |
| ENSG000001549.2972 | 558.9056 | -0.02503 | 0.87018   | 0.90956   | APTX     | chr9 | - | 32972604 | 33025166 | 2106 |
| ENSG000001447.6756 | 933.9501 | -1.0609  | 1.60E-19  | 1.31E-18  | RNF38    | chr9 | - | 36336393 | 36487545 | 5254 |
| ENSG00000115195.44 | 3470.161 | 2.1291   | 2.30E-122 | 1.85E-120 | TLN1     | chr9 | - | 35696945 | 35732392 | 8823 |
| ENSG000001036308   | 35.88661 | -5.9043  | 4.87E-08  | 1.95E-07  | SIT1     | chr9 | - | 35649292 | 35650937 | 1231 |
| ENSG0000010        | 0.297015 | -0.41864 | 0.81278   | NA        | IFNA21   | chr9 | - | 21165636 | 21166659 | 1024 |
| ENSG000001382.7774 | 678.1261 | -0.82281 | 4.82E-07  | 1.77E-06  | DNAJB5   | chr9 | + | 34989638 | 34998897 | 5228 |
| ENSG00000110.28124 | 5.064559 | 0.98907  | 0.16378   | 0.24444   | SPAG8    | chr9 | - | 35808042 | 35812269 | 2481 |
| ENSG000001862.5177 | 303.1114 | 1.5075   | 6.24E-32  | 8.57E-31  | DCTN3    | chr9 | - | 34613548 | 34620515 | 3877 |
| ENSG0000012.967231 | 25.75831 | -2.944   | 0.000319  | 0.000851  | CD72     | chr9 | - | 35609530 | 35646807 | 2035 |
| ENSG000001402.1189 | 232.3124 | 0.7869   | 0.001367  | 0.00332   | TMEM8B   | chr9 | + | 35814448 | 35854844 | 3713 |
| ENSG0000011193.821 | 1158.832 | 0.042954 | 0.68007   | 0.76065   | GRHPR    | chr9 | + | 37422663 | 37436987 | 4762 |
| ENSG000001740.9425 | 1232.343 | -0.73317 | 4.96E-13  | 2.88E-12  | ALDH1B1  | chr9 | + | 38392661 | 38398658 | 3066 |
| ENSG000001148.0021 | 145.4002 | 0.027959 | 0.885     | 0.91968   | HINT2    | chr9 | - | 35812957 | 35815351 | 2167 |
| ENSG00000167.55668 | 332.0867 | -2.2943  | 1.41E-32  | 1.99E-31  | ARHGEF39 | chr9 | - | 35658872 | 35675863 | 4498 |
| ENSG0000014.503495 | 386.9985 | -6.3891  | 1.31E-48  | 2.89E-47  | IGFBPL1  | chr9 | - | 38408991 | 38424444 | 1093 |
| ENSG000001547.6472 | 376.8828 | 0.5385   | 0.00382   | 0.008657  | DENND4C  | chr9 | + | 19230433 | 19374139 | 7161 |
| ENSG00000112863.86 | 18365.74 | -0.51311 | 5.40E-06  | 1.79E-05  | RPS6     | chr9 | - | 19375713 | 19380252 | 1387 |
| ENSG0000011529.977 | 1918.571 | -0.32625 | 0.000423  | 0.001109  | CNPY3    | chr6 | + | 42896938 | 42907025 | 1704 |
| ENSG0000011400.537 | 1963.573 | -0.4865  | 0.002542  | 0.00592   | FOXP4    | chr6 | + | 41514164 | 41570122 | 5948 |
| ENSG000001444.7622 | 919.5929 | -1.0444  | 2.33E-08  | 9.59E-08  | PPIL1    | chr6 | - | 36822603 | 36842800 | 1739 |
| ENSG000001469.8396 | 427.3197 | 0.13618  | 0.28336   | 0.3846    | KLC4     | chr6 | + | 43008515 | 43042837 | 3604 |
| ENSG0000011040.972 | 770.0813 | 0.43408  | 0.003666  | 0.008334  | KIF13A   | chr6 | - | 17759414 | 17987854 | 6924 |
| ENSG000001233.8803 | 178.3401 | 0.39366  | 0.026206  | 0.050329  | ZSCAN9   | chr6 | + | 28192664 | 28201260 | 2062 |
| ENSG000001749.109  | 2125.353 | -1.497   | 2.66E-09  | 1.18E-08  | PIM1     | chr6 | + | 37137979 | 37143202 | 2650 |
| ENSG000001104.154  | 8.359984 | 3.5946   | 3.58E-17  | 2.64E-16  | GMPR     | chr6 | + | 16238811 | 16295780 | 1515 |
| ENSG000001962.0917 | 976.2581 | -0.02077 | 0.85714   | 0.89967   | FTSJD2   | chr6 | + | 37400995 | 37450603 | 4033 |
| ENSG000001184.1825 | 14.1748  | 3.6698   | 1.17E-34  | 1.76E-33  | TFAP2A   | chr6 | - | 10393419 | 10419892 | 3317 |
| ENSG0000010342542  | 13.62374 | -4.4777  | 0.000309  | 0.000826  | SLC22A7  | chr6 | + | 43263432 | 43273276 | 2555 |
| ENSG0000012481.44  | 1402.711 | 0.82281  | 1.52E-12  | 8.55E-12  | YIPF3    | chr6 | - | 43479565 | 43484728 | 1674 |
| ENSG000001225.5421 | 365.0822 | -0.69264 | 1.58E-05  | 4.95E-05  | TMEM14B  | chr6 | + | 10747992 | 10930656 | 1589 |
| ENSG000001794.0921 | 1159.685 | -0.54549 | 0.000374  | 0.000987  | TMEM63B  | chr6 | + | 44094651 | 44123256 | 3318 |
| ENSG000001164.4959 | 80.43823 | 1.0284   | 2.67E-06  | 9.16E-06  | FRS3     | chr6 | - | 41737914 | 41754280 | 2174 |
| ENSG000001507.2996 | 608.2572 | -0.26068 | 0.10162   | 0.16357   | TJAP1    | chr6 | + | 43445261 | 43474294 | 3468 |
| ENSG0000016.898683 | 42.57214 | -2.5688  | 3.44E-07  | 1.28E-06  | CAPN11   | chr6 | + | 44126548 | 44152139 | 2728 |
| ENSG0000013.963155 | 0        | 3.5323   | 0.014827  | 0.030063  | TINAG    | chr6 | + | 54172657 | 54254950 | 1754 |

|            |          |          |          |           |           |           |       |   |          |          |       |
|------------|----------|----------|----------|-----------|-----------|-----------|-------|---|----------|----------|-------|
| ENSG000001 | 0.685084 | 0.98329  | -0.35409 | 0.8342    | NA        | HCRT2     | chr6  | + | 55039050 | 55147418 | 1837  |
| ENSG000001 | 0.342542 | 0        | 0.4146   | 0.81455   | NA        | HIST1H2AB | chr6  | - | 26033320 | 26033796 | 477   |
| ENSG000001 | 2.177666 | 37.50596 | -3.8942  | 7.17E-09  | 3.08E-08  | KIAA0319  | chr6  | - | 24544332 | 24646383 | 6896  |
| ENSG000001 | 0.705622 | 15.71083 | -4.0961  | 7.43E-05  | 0.000215  | IRF4      | chr6  | + | 391739   | 411447   | 5331  |
| ENSG000001 | 74.48543 | 1984.803 | -4.7147  | 1.93E-91  | 9.80E-90  | SLC22A23  | chr6  | - | 3269196  | 3457256  | 6641  |
| ENSG000001 | 1652.361 | 1882.738 | -0.18735 | 0.40738   | 0.51211   | TUBB2A    | chr6  | - | 3153903  | 3157760  | 1595  |
| ENSG000001 | 226.615  | 262.478  | -0.21255 | 0.28525   | 0.38665   | LRRC1     | chr6  | + | 53659295 | 53788919 | 3180  |
| ENSG000001 | 0.290301 | 0.357707 | -0.00203 | 0.99908   | NA        | GCM1      | chr6  | - | 52991762 | 53013627 | 2765  |
| ENSG000001 | 1.286224 | 1.623443 | -0.27274 | 0.84252   | 0.8896    | FOXF2     | chr6  | + | 1390069  | 1395832  | 2187  |
| ENSG000001 | 202.9604 | 243.5799 | -0.26129 | 0.1018    | 0.16382   | BPHL      | chr6  | + | 3118608  | 3153812  | 3723  |
| ENSG000001 | 708.9371 | 330.7441 | 1.0925   | 0.000312  | 0.000835  | RIPK1     | chr6  | + | 3064225  | 3115421  | 4160  |
| ENSG000001 | 1492.417 | 11692.09 | -2.9671  | 5.76E-178 | 9.70E-176 | TUBB2B    | chr6  | - | 3224495  | 3231964  | 2020  |
| ENSG000001 | 775.4219 | 661.7741 | 0.228    | 0.073545  | 0.12439   | MNF1      | chr6  | - | 33665345 | 33679504 | 507   |
| ENSG000001 | 5886.125 | 48959.32 | -3.0546  | 5.38E-289 | 2.35E-286 | HMGAI     | chr6  | + | 34204650 | 34214008 | 2159  |
| ENSG000001 | 399.4657 | 166.1052 | 1.2661   | 1.04E-16  | 7.50E-16  | TCF19     | chr6  | + | 31126319 | 31134936 | 3290  |
| ENSG000001 | 3204.451 | 2685.142 | 0.2546   | 0.058331  | 0.1019    | FLOT1     | chr6  | - | 30695486 | 30710510 | 1912  |
| ENSG000001 | 1807.92  | 2112.065 | -0.22331 | 0.38112   | 0.48522   | IER3      | chr6  | - | 30710976 | 30712331 | 1350  |
| ENSG000001 | 1073.188 | 1714.235 | -0.67537 | 1.29E-11  | 6.77E-11  | MDC1      | chr6  | - | 30667584 | 30685666 | 7576  |
| ENSG000001 | 218.9561 | 138.166  | 0.65995  | 0.002173  | 0.005113  | PGBD1     | chr6  | + | 28249314 | 28270326 | 3114  |
| ENSG000001 | 438.5914 | 249.0441 | 0.81525  | 5.65E-08  | 2.25E-07  | ATAT1     | chr6  | + | 30594619 | 30614600 | 2646  |
| ENSG000001 | 277.986  | 379.9401 | -0.44962 | 0.006625  | 0.014399  | TPMT      | chr6  | - | 18128542 | 18155305 | 3181  |
| ENSG000001 | 15.25987 | 71.15154 | -2.2093  | 1.07E-07  | 4.16E-07  | RNF144B   | chr6  | + | 18368779 | 18469105 | 5036  |
| ENSG000001 | 521.0841 | 522.7926 | -0.00341 | 0.98228   | 0.99011   | NRM       | chr6  | - | 30655824 | 30659197 | 1755  |
| ENSG000001 | 4926.103 | 4289.761 | 0.19937  | 0.019939  | 0.039366  | MTCH1     | chr6  | - | 36935917 | 36954074 | 2057  |
| ENSG000001 | 726.9649 | 1426.212 | -0.9702  | 2.14E-09  | 9.57E-09  | VARS2     | chr6  | + | 30876019 | 30894236 | 6054  |
| ENSG000001 | 462.619  | 557.9429 | -0.27064 | 0.024133  | 0.046741  | TAF8      | chr6  | + | 42018251 | 42055199 | 6680  |
| ENSG000001 | 630.6927 | 321.711  | 0.96801  | 1.03E-08  | 4.36E-08  | FAM8A1    | chr6  | + | 17600586 | 17611950 | 4677  |
| ENSG000001 | 3.733653 | 8.729844 | -1.1204  | 0.17344   | 0.25623   | C6orf52   | chr6  | - | 10671651 | 10695030 | 682   |
| ENSG000001 | 0        | 0.640152 | -0.82869 | 0.63935   | NA        | FGFBP1    | chr4  | - | 15937192 | 15940363 | 1359  |
| ENSG000001 | 2.717192 | 1.326428 | 0.84765  | 0.55066   | 0.65041   | FGFBP2    | chr4  | - | 15961866 | 15970932 | 1168  |
| ENSG000001 | 307.2383 | 60.24143 | 2.3468   | 1.33E-30  | 1.73E-29  | CPEB2     | chr4  | + | 15004298 | 15071777 | 6878  |
| ENSG000001 | 23.89278 | 831.5257 | -5.1112  | 1.86E-122 | 1.50E-120 | FHDC1     | chr4  | + | 1.54E+08 | 1.54E+08 | 6583  |
| ENSG000001 | 6.007242 | 14.45966 | -1.2359  | 0.052552  | 0.092862  | TLR2      | chr4  | + | 1.55E+08 | 1.55E+08 | 4200  |
| ENSG000001 | 1.774324 | 4.675298 | -1.2691  | 0.2652    | 0.36379   | MGARP     | chr4  | - | 1.4E+08  | 1.4E+08  | 1339  |
| ENSG000001 | 11.48433 | 0        | 5.1203   | 4.11E-05  | 0.000123  | TTC29     | chr4  | - | 1.48E+08 | 1.48E+08 | 2226  |
| ENSG000001 | 10.98507 | 24.66162 | -1.1445  | 0.030437  | 0.057487  | MYO7A     | chr11 | + | 76839310 | 76926284 | 7462  |
| ENSG000001 | 387.6571 | 116.2439 | 1.7299   | 1.32E-14  | 8.45E-14  | FCHSD2    | chr11 | - | 72547790 | 72853306 | 4509  |
| ENSG000001 | 267.8077 | 1689.042 | -2.6498  | 1.16E-49  | 2.63E-48  | ARRB1     | chr11 | - | 74975226 | 75062873 | 3336  |
| ENSG000001 | 4.773258 | 1.888903 | 1.1636   | 0.28247   | 0.38356   | SLCO2B1   | chr11 | + | 74811608 | 74917594 | 5875  |
| ENSG000001 | 650.0536 | 591.6556 | 0.13567  | 0.26723   | 0.36593   | PRKRIR    | chr11 | - | 76061000 | 76092015 | 6795  |
| ENSG000001 | 210.0493 | 87.48715 | 1.2605   | 3.15E-11  | 1.62E-10  | ANKRD42   | chr11 | + | 82904781 | 82971736 | 4066  |
| ENSG000001 | 114.181  | 123.7815 | -0.11281 | 0.59966   | 0.69368   | IL18BP    | chr11 | + | 71709587 | 71716761 | 4080  |
| ENSG000001 | 3606.39  | 2598.627 | 0.47257  | 1.50E-07  | 5.77E-07  | NUMA1     | chr11 | - | 71713910 | 71791739 | 7343  |
| ENSG000001 | 688.2558 | 521.8947 | 0.39907  | 0.002019  | 0.004776  | CCDC90B   | chr11 | - | 82970139 | 82997450 | 4014  |
| ENSG000001 | 390.4422 | 54.36343 | 2.8319   | 1.46E-26  | 1.63E-25  | SYTL2     | chr11 | - | 85405267 | 85522184 | 6314  |
| ENSG000001 | 293.3024 | 113.9186 | 1.3626   | 2.51E-12  | 1.39E-11  | RAB30     | chr11 | - | 82684175 | 82782965 | 9929  |
| ENSG000001 | 1099.364 | 1022.743 | 0.10381  | 0.44761   | 0.55306   | CREBZF    | chr11 | - | 85370752 | 85393951 | 4329  |
| ENSG000001 | 78.03506 | 21.71987 | 1.8248   | 3.90E-07  | 1.45E-06  | LRRC32    | chr11 | - | 76368568 | 76381791 | 4311  |
| ENSG000001 | 784.9627 | 789.7279 | -0.00799 | 0.95047   | 0.96907   | PRCP      | chr11 | - | 82534544 | 82681626 | 7072  |
| ENSG000001 | 225.9365 | 620.167  | -1.4537  | 2.81E-15  | 1.88E-14  | NARS2     | chr11 | - | 78147007 | 78285919 | 2519  |
| ENSG000001 | 492.3744 | 340.6551 | 0.53081  | 0.005206  | 0.011563  | RNF121    | chr11 | + | 71639747 | 71708643 | 2625  |
| ENSG000001 | 540.8869 | 938.5614 | -0.79323 | 1.91E-06  | 6.67E-06  | MRPL15    | chr8  | + | 55047770 | 55060461 | 1147  |
| ENSG000001 | 151.1194 | 17.56979 | 3.0846   | 2.51E-22  | 2.35E-21  | PI15      | chr8  | + | 75736772 | 75767264 | 6732  |
| ENSG000001 | 0.72616  | 3.290593 | -1.8482  | 0.17157   | 0.25407   | TTPA      | chr8  | - | 63961112 | 63998612 | 2338  |
| ENSG000001 | 667.8027 | 327.8117 | 1.0263   | 2.43E-11  | 1.25E-10  | GGH       | chr8  | - | 63927638 | 63951730 | 1607  |
| ENSG000001 | 45.13594 | 181.5967 | -2.0006  | 5.54E-17  | 4.05E-16  | SLCO5A1   | chr8  | - | 70584568 | 70747299 | 3790  |
| ENSG000001 | 2658.959 | 335.8457 | 2.9695   | 3.64E-32  | 5.06E-31  | SULF1     | chr8  | + | 70378859 | 70573150 | 5710  |
| ENSG000001 | 405.9398 | 683.0773 | -0.74863 | 1.02E-07  | 3.98E-07  | TGS1      | chr8  | + | 56685701 | 56738007 | 3782  |
| ENSG000001 | 1849.91  | 1322.921 | 0.48314  | 0.003423  | 0.007825  | SDCBP     | chr8  | + | 59465483 | 59495419 | 3589  |
| ENSG000001 | 360.0407 | 198.1167 | 0.86273  | 8.73E-07  | 3.13E-06  | NEK1      | chr4  | - | 1.7E+08  | 1.71E+08 | 5653  |
| ENSG000001 | 176.4253 | 98.81971 | 0.83444  | 0.00061   | 0.001563  | DDX60     | chr4  | - | 1.69E+08 | 1.69E+08 | 6071  |
| ENSG000001 | 0.685084 | 0        | 0.85004  | 0.63064   | NA        | NXPE4     | chr11 | - | 1.14E+08 | 1.14E+08 | 1822  |
| ENSG000001 | 222.5459 | 2722.094 | -3.6018  | 7.21E-91  | 3.63E-89  | SORL1     | chr11 | + | 1.21E+08 | 1.22E+08 | 10904 |
| ENSG000001 | 0        | 17.56006 | -5.7632  | 1.11E-06  | 3.94E-06  | TMPPRS4   | chr11 | + | 1.18E+08 | 1.18E+08 | 5550  |
| ENSG000001 | 417.3421 | 519.9783 | -0.31442 | 0.087922  | 0.14489   | BUD13     | chr11 | - | 1.17E+08 | 1.17E+08 | 2196  |

|            |          |          |          |          |          |          |       |   |          |          |       |
|------------|----------|----------|----------|----------|----------|----------|-------|---|----------|----------|-------|
| ENSG000001 | 0        | 51.25263 | -7.2547  | 6.08E-11 | 3.06E-10 | TRPC6    | chr11 | - | 1.01E+08 | 1.02E+08 | 4612  |
| ENSG000001 | 0.975385 | 0        | 1.2767   | 0.47406  | NA       | MMP7     | chr11 | - | 1.02E+08 | 1.02E+08 | 1323  |
| ENSG000001 | 30.98568 | 11.39653 | 1.3834   | 0.016402 | 0.032967 | C11orf70 | chr11 | + | 1.02E+08 | 1.02E+08 | 2193  |
| ENSG000001 | 713.4733 | 1367.651 | -0.93805 | 8.14E-14 | 4.94E-13 | DCUN1D5  | chr11 | - | 1.03E+08 | 1.03E+08 | 1535  |
| ENSG000001 | 2893.523 | 2484.89  | 0.21953  | 0.015088 | 0.030554 | YAP1     | chr11 | + | 1.02E+08 | 1.02E+08 | 5386  |
| ENSG000001 | 6.213599 | 0.357707 | 3.4621   | 0.007498 | 0.016127 | TRIM29   | chr11 | - | 1.2E+08  | 1.2E+08  | 3328  |
| ENSG000001 | 229.3781 | 869.2381 | -1.9188  | 1.08E-36 | 1.73E-35 | SLC37A4  | chr11 | - | 1.19E+08 | 1.19E+08 | 5862  |
| ENSG000001 | 0        | 0.297015 | -0.41864 | 0.81278  | NA       | BTG4     | chr11 | - | 1.11E+08 | 1.11E+08 | 1394  |
| ENSG000001 | 2.085163 | 3.959884 | -0.85673 | 0.4316   | 0.53711  | POU2F3   | chr11 | + | 1.2E+08  | 1.2E+08  | 3013  |
| ENSG000001 | 1792.54  | 1104.943 | 0.69776  | 6.68E-07 | 2.42E-06 | RDX      | chr11 | - | 1.1E+08  | 1.1E+08  | 4491  |
| ENSG000001 | 679.6474 | 1530.115 | -1.1667  | 3.15E-08 | 1.28E-07 | PPP2R1B  | chr11 | - | 1.12E+08 | 1.12E+08 | 5587  |
| ENSG000001 | 190.5531 | 298.818  | -0.64409 | 0.00053  | 0.00137  | FDX1     | chr11 | + | 1.1E+08  | 1.1E+08  | 3206  |
| ENSG000001 | 23.23761 | 82.51229 | -1.8141  | 1.08E-07 | 4.20E-07 | C11orf1  | chr11 | + | 1.12E+08 | 1.12E+08 | 2885  |
| ENSG000001 | 337.0414 | 74.47612 | 2.1722   | 1.18E-19 | 9.80E-19 | FXD6     | chr11 | - | 1.18E+08 | 1.18E+08 | 2171  |
| ENSG000001 | 4.906837 | 2.324288 | 0.99424  | 0.3083   | 0.41004  | ARHGAP20 | chr11 | - | 1.1E+08  | 1.11E+08 | 6189  |
| ENSG000001 | 8.121502 | 1.073121 | 2.6247   | 0.021383 | 0.041917 | FXD2     | chr11 | - | 1.18E+08 | 1.18E+08 | 1567  |
| ENSG000001 | 2406.991 | 0.343138 | 11.602   | 9.46E-39 | 1.61E-37 | MMP13    | chr11 | - | 1.03E+08 | 1.03E+08 | 2716  |
| ENSG000001 | 4.886299 | 35.71743 | -2.7959  | 1.93E-07 | 7.34E-07 | TMPRSS13 | chr11 | - | 1.18E+08 | 1.18E+08 | 3269  |
| ENSG000001 | 6.172523 | 0        | 4.2146   | 0.001788 | 0.004265 | CASP1    | chr11 | - | 1.05E+08 | 1.05E+08 | 2001  |
| ENSG000001 | 219.6438 | 136.4669 | 0.68283  | 0.042392 | 0.077123 | ALKBH8   | chr11 | - | 1.07E+08 | 1.07E+08 | 4079  |
| ENSG000001 | 301.5709 | 313.1154 | -0.0536  | 0.78028  | 0.84228  | MAP2K5   | chr15 | + | 67835047 | 68099461 | 2347  |
| ENSG000001 | 6.42077  | 0.700845 | 2.7745   | 0.0231   | 0.044975 | SQRDL    | chr15 | + | 45923346 | 45983492 | 2003  |
| ENSG000001 | 763.9136 | 648.7132 | 0.23613  | 0.21453  | 0.30546  | CTDSPL2  | chr15 | + | 44719432 | 44821236 | 6828  |
| ENSG000001 | 1376.666 | 1706.358 | -0.30829 | 0.1816   | 0.26633  | SLTM     | chr15 | - | 59171244 | 59225852 | 4147  |
| ENSG000001 | 23195.81 | 390.3765 | 5.7642   | 2.10E-28 | 2.52E-27 | THBS1    | chr15 | + | 39873280 | 39891667 | 7775  |
| ENSG000001 | 797.2404 | 206.273  | 1.948    | 9.56E-52 | 2.29E-50 | MAPKBP1  | chr15 | + | 42066632 | 42120053 | 7232  |
| ENSG000001 | 954.1596 | 1661.608 | -0.79911 | 1.47E-08 | 6.17E-08 | NUSAP1   | chr15 | + | 41624892 | 41673248 | 2409  |
| ENSG000001 | 281.2234 | 215.6562 | 0.37969  | 0.049022 | 0.087471 | NDUFAF1  | chr15 | - | 41679551 | 41694717 | 1585  |
| ENSG000001 | 858.332  | 1108.732 | -0.36779 | 0.01235  | 0.025465 | KIF23    | chr15 | + | 69706585 | 69740764 | 3610  |
| ENSG000001 | 1351.336 | 3.650716 | 8.4053   | 3.44E-84 | 1.55E-82 | ITGA11   | chr15 | - | 68594050 | 68724501 | 5013  |
| ENSG000001 | 820.5045 | 430.033  | 0.92881  | 0.000241 | 0.000654 | CASC5    | chr15 | + | 40886218 | 40956540 | 9573  |
| ENSG000001 | 434.5963 | 428.07   | 0.022965 | 0.9094   | 0.93772  | HAUS2    | chr15 | + | 42841008 | 42862192 | 3949  |
| ENSG000001 | 1715.171 | 2308.397 | -0.42843 | 5.65E-05 | 0.000166 | RTF1     | chr15 | + | 41700606 | 41775761 | 5021  |
| ENSG000001 | 370.5856 | 269.7796 | 0.45601  | 0.043201 | 0.07839  | PARP6    | chr15 | - | 72533522 | 72565340 | 3657  |
| ENSG000001 | 14665.03 | 18918.02 | -0.36717 | 2.38E-05 | 7.30E-05 | RPLP1    | chr15 | + | 69745123 | 69748255 | 1962  |
| ENSG000001 | 7.386782 | 137.9719 | -4.1949  | 3.88E-27 | 4.41E-26 | PAQR5    | chr15 | + | 69591286 | 69700119 | 5480  |
| ENSG000001 | 70.0984  | 88.33665 | -0.32704 | 0.37414  | 0.47837  | LRRC49   | chr15 | + | 71145578 | 71342414 | 3061  |
| ENSG000001 | 682.6006 | 613.4839 | 0.15435  | 0.19857  | 0.28691  | TUBGCP4  | chr15 | + | 43661419 | 43699293 | 4379  |
| ENSG000001 | 592.4899 | 652.8439 | -0.1393  | 0.36068  | 0.46483  | RMDN3    | chr15 | - | 41028082 | 41048049 | 3138  |
| ENSG000001 | 157.7037 | 8.801074 | 4.104    | 6.74E-29 | 8.22E-28 | ITPKA    | chr15 | + | 41785591 | 41795747 | 1822  |
| ENSG000001 | 840.3802 | 562.2649 | 0.57965  | 0.001073 | 0.002648 | UACA     | chr15 | - | 70946893 | 71055932 | 6939  |
| ENSG000001 | 226.6014 | 306.5969 | -0.43445 | 0.078233 | 0.13102  | SMAD6    | chr15 | + | 66994566 | 67074338 | 2987  |
| ENSG000001 | 47.41809 | 249.5779 | -2.3841  | 6.75E-19 | 5.38E-18 | PLCB2    | chr15 | - | 40570377 | 40600136 | 4643  |
| ENSG000001 | 57.85344 | 26.33528 | 1.1159   | 0.00137  | 0.003328 | TMEM62   | chr15 | + | 43415477 | 43477344 | 2771  |
| ENSG000001 | 1.89853  | 54.52544 | -4.6199  | 2.82E-12 | 1.55E-11 | PAK6     | chr15 | + | 40509629 | 40569688 | 4215  |
| ENSG000001 | 2374.505 | 1402.9   | 0.75875  | 1.69E-08 | 7.04E-08 | ADAM10   | chr15 | - | 58887403 | 59042177 | 5034  |
| ENSG000001 | 63.52735 | 20.60875 | 1.5866   | 0.000293 | 0.000785 | DUOX1    | chr15 | + | 45422131 | 45457774 | 5738  |
| ENSG000001 | 2.842212 | 2.840639 | -0.001   | 0.99928  | 0.99973  | SLC28A2  | chr15 | + | 45544428 | 45568149 | 2464  |
| ENSG000001 | 357.5873 | 437.3907 | -0.2891  | 0.18755  | 0.27359  | STRA6    | chr15 | - | 74471807 | 74504608 | 2887  |
| ENSG000001 | 0.290301 | 2.635871 | -2.2835  | 0.1205   | 0.18946  | CYP19A1  | chr15 | - | 51500254 | 51630807 | 4417  |
| ENSG000001 | 336.7276 | 273.097  | 0.30355  | 0.077824 | 0.13041  | ZNF280D  | chr15 | - | 56922379 | 57210769 | 4902  |
| ENSG000001 | 10.85067 | 24.67532 | -1.1518  | 0.029807 | 0.056438 | SEMA6D   | chr15 | + | 47476298 | 48066420 | 6099  |
| ENSG000001 | 1.306762 | 22.80353 | -3.8705  | 3.61E-06 | 1.22E-05 | BCL2L10  | chr15 | - | 52401460 | 52404972 | 1249  |
| ENSG000001 | 890.3393 | 1722.946 | -0.95033 | 4.87E-17 | 3.57E-16 | RSL24D1  | chr15 | - | 55473004 | 55489265 | 2015  |
| ENSG000001 | 393.3575 | 30.32833 | 3.6809   | 9.39E-63 | 2.93E-61 | SPTBN5   | chr15 | - | 42140345 | 42186275 | 11722 |
| ENSG000001 | 1.016461 | 0.654722 | 0.43895  | 0.7858   | NA       | GCOM1    | chr15 | + | 57884106 | 58006943 | 3156  |
| ENSG000001 | 186.9356 | 365.2267 | -0.96297 | 2.68E-06 | 9.19E-06 | GCHFR    | chr15 | + | 41056218 | 41059906 | 785   |
| ENSG000001 | 457.3065 | 256.5419 | 0.82966  | 6.23E-05 | 0.000182 | BCAR3    | chr1  | - | 94027347 | 94312706 | 3217  |
| ENSG000001 | 206.1056 | 56.56876 | 1.8602   | 2.36E-10 | 1.14E-09 | TLL7     | chr1  | - | 84330711 | 84464833 | 8452  |
| ENSG000001 | 1600.573 | 2389.474 | -0.57723 | 1.06E-06 | 3.79E-06 | FNBP1L   | chr1  | + | 93913688 | 94020218 | 5341  |
| ENSG000001 | 235.2888 | 350.5716 | -0.57374 | 0.000157 | 0.000436 | CCBL2    | chr1  | - | 89401456 | 89458636 | 2070  |
| ENSG000001 | 241.8595 | 137.6803 | 0.8121   | 6.52E-06 | 2.14E-05 | GTF2B    | chr1  | - | 89318615 | 89357627 | 1351  |
| ENSG000001 | 0.36308  | 1.416259 | -1.3043  | 0.44028  | NA       | BRDT     | chr1  | + | 92414928 | 92479983 | 3696  |
| ENSG000001 | 670.6815 | 954.5217 | -0.50718 | 0.010313 | 0.021623 | RABGGTB  | chr1  | + | 76251879 | 76260764 | 3863  |
| ENSG000001 | 185.2984 | 0        | 8.9717   | 8.02E-17 | 5.81E-16 | IFI44L   | chr1  | + | 79085607 | 79108484 | 5152  |

|            |          |          |          |           |           |           |       |   |          |          |       |
|------------|----------|----------|----------|-----------|-----------|-----------|-------|---|----------|----------|-------|
| ENSG000001 | 0.290301 | 34.50997 | -5.8795  | 5.10E-08  | 2.04E-07  | GIPC2     | chr1  | + | 78445226 | 78604133 | 3847  |
| ENSG000001 | 888.3247 | 65.92029 | 3.7445   | 4.35E-101 | 2.51E-99  | ARHGAP29  | chr1  | - | 94614544 | 94740624 | 8480  |
| ENSG000001 | 323.1304 | 0        | 9.7007   | 1.55E-19  | 1.27E-18  | IFI44     | chr1  | + | 79115481 | 79129763 | 1687  |
| ENSG000001 | 33.34419 | 50.71849 | -0.60461 | 0.073014  | 0.12357   | SLC44A5   | chr1  | - | 75667816 | 76076801 | 4406  |
| ENSG000001 | 65.12897 | 111.5886 | -0.76875 | 0.010931  | 0.022784  | RP11-122C | chr1  | - | 97144430 | 97145176 | 747   |
| ENSG000001 | 1.286224 | 0.343138 | 1.3346   | 0.40921   | NA        | CLCA2     | chr1  | + | 86889769 | 86922241 | 4025  |
| ENSG000001 | 0        | 1.188058 | -1.268   | 0.47398   | NA        | DNASE2B   | chr1  | + | 84864215 | 84880701 | 1269  |
| ENSG000001 | 292.8161 | 349.642  | -0.25678 | 0.073525  | 0.12436   | DBT       | chr1  | - | 1.01E+08 | 1.01E+08 | 3538  |
| ENSG000001 | 700.8468 | 467.2567 | 0.58355  | 5.97E-07  | 2.17E-06  | RTCA      | chr1  | + | 1.01E+08 | 1.01E+08 | 2535  |
| ENSG000001 | 571.451  | 403.0027 | 0.50228  | 0.000105  | 0.000298  | IFT172    | chr2  | - | 27667238 | 27712656 | 5565  |
| ENSG000001 | 1098.076 | 985.2629 | 0.15659  | 0.1568    | 0.23583   | EPT1      | chr2  | + | 26531415 | 26618759 | 8101  |
| ENSG000001 | 11.40992 | 80.79512 | -2.76    | 1.14E-11  | 6.00E-11  | CGREF1    | chr2  | - | 27321757 | 27341995 | 1902  |
| ENSG000001 | 1590.924 | 701.7156 | 1.1805   | 2.43E-29  | 3.02E-28  | HADHB     | chr2  | + | 26466038 | 26513336 | 2883  |
| ENSG000001 | 31.69147 | 122.7983 | -1.9371  | 4.74E-13  | 2.75E-12  | KHK       | chr2  | + | 27309615 | 27323640 | 2411  |
| ENSG000001 | 1018.583 | 612.1588 | 0.7325   | 3.55E-08  | 1.44E-07  | ADCY3     | chr2  | - | 25042038 | 25142708 | 5050  |
| ENSG000001 | 808.6043 | 1592.666 | -0.97716 | 4.24E-15  | 2.79E-14  | PPM1B     | chr2  | + | 44395108 | 44471523 | 3877  |
| ENSG000001 | 372.1362 | 686.637  | -0.88163 | 2.03E-06  | 7.04E-06  | PNPT1     | chr2  | - | 55861400 | 55921045 | 4411  |
| ENSG000001 | 146.543  | 66.7546  | 1.1323   | 2.44E-07  | 9.19E-07  | DYNC2L1   | chr2  | + | 44001178 | 44037149 | 2903  |
| ENSG000001 | 0        | 2.370411 | -2.6458  | 0.10384   | 0.16657   | LHCGR     | chr2  | - | 48859428 | 48982880 | 3044  |
| ENSG000001 | 1102.666 | 917.3578 | 0.26495  | 0.010103  | 0.021223  | SMEK2     | chr2  | - | 55774428 | 55846015 | 5242  |
| ENSG000001 | 176.073  | 203.4023 | -0.20951 | 0.24277   | 0.33811   | THUMP2    | chr2  | - | 39963200 | 40006407 | 3148  |
| ENSG000001 | 654.336  | 71.49871 | 3.1887   | 1.90E-81  | 8.11E-80  | CYP1B1    | chr2  | - | 38294116 | 38337044 | 5247  |
| ENSG000001 | 0        | 0.98329  | -1.2878  | 0.47019   | NA        | SULT6B1   | chr2  | - | 37394963 | 37423741 | 1027  |
| ENSG000001 | 3954.597 | 1715.606 | 1.2042   | 1.01E-34  | 1.53E-33  | RAB1A     | chr2  | - | 65297835 | 65357240 | 2447  |
| ENSG000001 | 9879.725 | 3487.685 | 1.5015   | 3.03E-72  | 1.13E-70  | ACTR2     | chr2  | + | 65454887 | 65498387 | 3861  |
| ENSG000001 | 1415.441 | 1000.058 | 0.50004  | 5.58E-05  | 0.000164  | PREB      | chr2  | - | 27353624 | 27357543 | 3057  |
| ENSG000001 | 707.9965 | 1850.211 | -1.3796  | 1.26E-08  | 5.29E-08  | SLC5A6    | chr2  | - | 27422455 | 27435826 | 3231  |
| ENSG000001 | 1.048164 | 0.357707 | 0.98599  | 0.56649   | NA        | ABCG5     | chr2  | - | 44039611 | 44066004 | 3033  |
| ENSG000001 | 660.0181 | 375.1318 | 0.81441  | 2.31E-06  | 7.97E-06  | PREPL     | chr2  | - | 44543420 | 44589001 | 6273  |
| ENSG000001 | 2.67693  | 2.24661  | 0.2047   | 0.85394   | 0.89735   | SLC3A1    | chr2  | + | 44502599 | 44548633 | 2989  |
| ENSG000001 | 31186.17 | 179.7591 | 7.421    | 0         | 0         | EMILIN1   | chr2  | + | 27301435 | 27309271 | 3938  |
| ENSG000001 | 949.1167 | 652.1863 | 0.53958  | 2.88E-06  | 9.82E-06  | FBXO11    | chr2  | - | 48016455 | 48132932 | 4055  |
| ENSG000001 | 0.290301 | 200.1521 | -8.2552  | 2.60E-17  | 1.93E-16  | SIX3      | chr2  | + | 45168902 | 45173216 | 2658  |
| ENSG000001 | 474.0657 | 664.6569 | -0.48499 | 0.000941  | 0.002345  | ATRAID    | chr2  | + | 27434895 | 27440046 | 1240  |
| ENSG000001 | 462.5248 | 376.0997 | 0.29865  | 0.11557   | 0.18289   | CENPO     | chr2  | + | 25016005 | 25045245 | 4386  |
| ENSG000001 | 1820.974 | 4288.602 | -1.2341  | 2.09E-22  | 1.97E-21  | LRPPRC    | chr2  | - | 44113647 | 44223144 | 6335  |
| ENSG000001 | 1.265686 | 23.05509 | -3.8153  | 6.27E-05  | 0.000183  | TRIM54    | chr2  | + | 27505260 | 27530307 | 2027  |
| ENSG000001 | 160.9425 | 463.0285 | -1.5205  | 2.26E-17  | 1.68E-16  | DTNB      | chr2  | - | 25600067 | 25896503 | 2474  |
| ENSG000001 | 3821.893 | 2071.685 | 0.88292  | 8.98E-23  | 8.58E-22  | ACTR1A    | chr10 | - | 1.04E+08 | 1.04E+08 | 3519  |
| ENSG000001 | 21.31691 | 142.791  | -2.7103  | 1.63E-19  | 1.34E-18  | TMEM180   | chr10 | + | 1.04E+08 | 1.04E+08 | 2834  |
| ENSG000001 | 0        | 7.365413 | -4.4619  | 0.000807  | 0.002031  | CYP2C8    | chr10 | - | 96796530 | 96829254 | 2117  |
| ENSG000001 | 3433.371 | 18.37255 | 7.5177   | 1.40E-192 | 2.90E-190 | MYOF      | chr10 | - | 95066186 | 95242074 | 6842  |
| ENSG000001 | 1245.955 | 17.78993 | 6.0775   | 8.14E-140 | 7.99E-138 | LOXL4     | chr10 | - | 1E+08    | 1E+08    | 3653  |
| ENSG000001 | 132.2275 | 26.1718  | 2.3141   | 3.46E-17  | 2.56E-16  | STAMBPL1  | chr10 | + | 90639491 | 90734910 | 4184  |
| ENSG000001 | 49.89901 | 0.343138 | 6.3767   | 9.91E-10  | 4.57E-09  | CH25H     | chr10 | - | 90965694 | 90967071 | 1378  |
| ENSG000001 | 638.2568 | 555.6761 | 0.19845  | 0.11307   | 0.17936   | ATAD1     | chr10 | - | 89511269 | 89601100 | 4640  |
| ENSG000001 | 1.555988 | 1.012429 | 0.50169  | 0.73771   | 0.80658   | BTBD16    | chr10 | + | 1.24E+08 | 1.24E+08 | 1851  |
| ENSG000001 | 1338.664 | 1451.453 | -0.11583 | 0.48311   | 0.58727   | KIF11     | chr10 | + | 94353043 | 94415150 | 4858  |
| ENSG000001 | 0        | 8.123662 | -4.5369  | 0.000791  | 0.001994  | CUZD1     | chr10 | - | 1.25E+08 | 1.25E+08 | 2903  |
| ENSG000001 | 538.001  | 755.4435 | -0.4872  | 0.04411   | 0.079742  | TACC2     | chr10 | + | 1.24E+08 | 1.24E+08 | 9673  |
| ENSG000001 | 404.0855 | 1010.664 | -1.3204  | 7.15E-15  | 4.66E-14  | DUSP5     | chr10 | + | 1.12E+08 | 1.12E+08 | 2557  |
| ENSG000001 | 73.5631  | 104.5535 | -0.50503 | 0.085072  | 0.1408    | CALHM2    | chr10 | - | 1.05E+08 | 1.05E+08 | 2026  |
| ENSG000001 | 745.8004 | 416.8426 | 0.83717  | 2.06E-12  | 1.15E-11  | ARL3      | chr10 | - | 1.04E+08 | 1.04E+08 | 1017  |
| ENSG000001 | 736.4591 | 327.9853 | 1.1647   | 2.51E-16  | 1.77E-15  | CEP55     | chr10 | + | 95256389 | 95288849 | 2638  |
| ENSG000001 | 700.1028 | 865.066  | -0.30269 | 0.29174   | 0.39359   | KIF20B    | chr10 | + | 91461367 | 91534700 | 6520  |
| ENSG000001 | 294.4968 | 309.8387 | -0.07459 | 0.66657   | 0.74943   | ENTPD1    | chr10 | + | 97471536 | 97637023 | 12589 |
| ENSG000001 | 110.9422 | 99.12061 | 0.1619   | 0.53021   | 0.63163   | EXOC6     | chr10 | + | 94590935 | 94819250 | 3567  |
| ENSG000001 | 351.9835 | 9.369996 | 5.2042   | 4.06E-60  | 1.18E-58  | PLCE1     | chr10 | + | 95753746 | 96088149 | 7992  |
| ENSG000001 | 1.233984 | 10.05627 | -2.7152  | 0.005613  | 0.01237   | RBP4      | chr10 | - | 95351444 | 95361501 | 1314  |
| ENSG000001 | 300.2879 | 399.9035 | -0.41152 | 0.03017   | 0.057041  | DBR1      | chr3  | - | 1.38E+08 | 1.38E+08 | 2666  |
| ENSG000001 | 1554.736 | 529.1517 | 1.5533   | 3.93E-23  | 3.82E-22  | DNAJC13   | chr3  | + | 1.32E+08 | 1.32E+08 | 7730  |
| ENSG000001 | 14.33771 | 3.010564 | 2.1413   | 0.006091  | 0.013345  | GPR87     | chr3  | - | 1.51E+08 | 1.51E+08 | 1608  |
| ENSG000001 | 1012.307 | 619.1643 | 0.70867  | 1.06E-09  | 4.90E-09  | ANXA7     | chr10 | - | 75135203 | 75173834 | 2174  |
| ENSG000001 | 380.3036 | 301.5381 | 0.33638  | 0.020837  | 0.040942  | FAM149B1  | chr10 | + | 74927924 | 75004262 | 5408  |
| ENSG000001 | 1727.243 | 1630.909 | 0.083036 | 0.37978   | 0.48381   | NCOA4     | chr10 | + | 51565108 | 51590734 | 3735  |

|                    |          |          |           |           |           |       |   |          |          |      |
|--------------------|----------|----------|-----------|-----------|-----------|-------|---|----------|----------|------|
| ENSG000001638.5113 | 661.697  | -0.05096 | 0.77715   | 0.83989   | TIMM23    | chr10 | - | 51592080 | 51623365 | 1682 |
| ENSG000001334.8769 | 411.0412 | -0.29378 | 0.061484  | 0.10657   | ASCC1     | chr10 | - | 73856278 | 73976892 | 2422 |
| ENSG0000010        | 1.485073 | -1.5064  | 0.39745   | NA        | PLA2G12B  | chr10 | - | 74694928 | 74714536 | 1128 |
| ENSG000001620.3251 | 4.928605 | 6.882    | 1.63E-70  | 5.95E-69  | ZNF365    | chr10 | + | 64133951 | 64431771 | 4173 |
| ENSG0000010.342542 | 1.234181 | -1.1862  | 0.48567   | NA        | OIT3      | chr10 | + | 74653339 | 74692791 | 2365 |
| ENSG000001801.1804 | 108.1769 | 2.8745   | 4.08E-30  | 5.22E-29  | ADAMTS14  | chr10 | + | 72432559 | 72522197 | 5269 |
| ENSG0000017290.647 | 10339.34 | -0.50344 | 7.99E-06  | 2.60E-05  | RPS24     | chr10 | + | 79793518 | 79816570 | 2814 |
| ENSG000001166.3416 | 1602.538 | -3.2603  | 4.77E-105 | 2.97E-103 | TET1      | chr10 | + | 70320413 | 70454239 | 9288 |
| ENSG000001252.2384 | 658.1706 | -1.3811  | 2.11E-23  | 2.07E-22  | DNA2      | chr10 | - | 70173821 | 70231879 | 4416 |
| ENSG00000113.41375 | 0.343138 | 4.5531   | 0.000109  | 0.000308  | MYPN      | chr10 | + | 69865912 | 69971774 | 6013 |
| ENSG0000014.81352  | 61.21344 | -3.5688  | 1.03E-12  | 5.86E-12  | AOX1      | chr2  | + | 2.01E+08 | 2.02E+08 | 5070 |
| ENSG0000011059.166 | 2443.184 | -1.205   | 1.15E-29  | 1.45E-28  | ATIC      | chr2  | + | 2.16E+08 | 2.16E+08 | 2275 |
| ENSG000001506.5779 | 352.4777 | 0.52287  | 0.001555  | 0.003743  | SMARCAL1  | chr2  | + | 2.17E+08 | 2.17E+08 | 3271 |
| ENSG000001407.9839 | 520.8837 | -0.35132 | 0.005574  | 0.012292  | BARD1     | chr2  | - | 2.16E+08 | 2.16E+08 | 5499 |
| ENSG0000018.455484 | 3.899191 | 1.0381   | 0.19441   | 0.28206   | STAT4     | chr2  | - | 1.92E+08 | 1.92E+08 | 2822 |
| ENSG0000010.290301 | 0        | 0.4146   | 0.81455   | NA        | MSTN      | chr2  | - | 1.91E+08 | 1.91E+08 | 2822 |
| ENSG000001101.0988 | 55.59781 | 0.8556   | 0.004083  | 0.009213  | ALS2CR8   | chr2  | + | 2.04E+08 | 2.04E+08 | 5934 |
| ENSG000001449.356  | 543.2636 | -0.27179 | 0.24639   | 0.34229   | ASNSD1    | chr2  | + | 1.91E+08 | 1.91E+08 | 2450 |
| ENSG000001327.2572 | 444.7649 | -0.44163 | 0.002454  | 0.005728  | METTL5    | chr2  | - | 1.71E+08 | 1.71E+08 | 1370 |
| ENSG0000011088.474 | 2170.264 | -0.99321 | 9.41E-10  | 4.35E-09  | SSB       | chr2  | + | 1.71E+08 | 1.71E+08 | 2463 |
| ENSG000001630.1144 | 520.9282 | 0.27472  | 0.018114  | 0.036084  | NAB1      | chr2  | + | 1.92E+08 | 1.92E+08 | 4358 |
| ENSG0000014.233731 | 0.297015 | 2.7301   | 0.074375  | 0.12557   | CDK15     | chr2  | + | 2.03E+08 | 2.03E+08 | 3659 |
| ENSG0000011219.562 | 1935.645 | -0.66341 | 0.003217  | 0.007384  | PPIG      | chr2  | + | 1.7E+08  | 1.7E+08  | 6368 |
| ENSG000001202.8439 | 453.3512 | -1.1593  | 6.38E-15  | 4.17E-14  | FASTKD1   | chr2  | - | 1.7E+08  | 1.7E+08  | 2967 |
| ENSG0000018.267059 | 22.25234 | -1.3943  | 0.012971  | 0.026634  | MDH1B     | chr2  | - | 2.08E+08 | 2.08E+08 | 2553 |
| ENSG000001515.865  | 92.03543 | 2.4799   | 9.21E-39  | 1.57E-37  | HECW2     | chr2  | - | 1.97E+08 | 1.97E+08 | 6926 |
| ENSG0000012306.119 | 4775.028 | -1.0479  | 4.39E-11  | 2.23E-10  | IDH1      | chr2  | - | 2.09E+08 | 2.09E+08 | 2441 |
| ENSG000001943.6303 | 1285.157 | -0.44549 | 1.57E-05  | 4.91E-05  | OLA1      | chr2  | - | 1.75E+08 | 1.75E+08 | 4417 |
| ENSG000001374.3877 | 339.5245 | 0.14308  | 0.44225   | 0.54799   | CIR1      | chr2  | - | 1.75E+08 | 1.75E+08 | 1921 |
| ENSG0000011279.501 | 136.8281 | 3.2241   | 3.83E-116 | 2.77E-114 | SSFA2     | chr2  | + | 1.83E+08 | 1.83E+08 | 6473 |
| ENSG0000013428.443 | 0.343138 | 12.08    | 9.80E-43  | 1.85E-41  | CHRNA1    | chr2  | - | 1.76E+08 | 1.76E+08 | 1984 |
| ENSG000001207.5369 | 713.9774 | -1.7769  | 4.31E-38  | 7.21E-37  | FAM117B   | chr2  | + | 2.03E+08 | 2.04E+08 | 5772 |
| ENSG000001409.8819 | 918.5992 | -1.1622  | 2.92E-19  | 2.37E-18  | WDR12     | chr2  | - | 2.04E+08 | 2.04E+08 | 2282 |
| ENSG0000011706.062 | 1679.42  | 0.022583 | 0.87151   | 0.91019   | ABI2      | chr2  | + | 2.04E+08 | 2.04E+08 | 6659 |
| ENSG0000015103.238 | 729.6291 | 2.8044   | 1.61E-201 | 3.55E-199 | ITGAV     | chr2  | + | 1.87E+08 | 1.88E+08 | 7030 |
| ENSG000001127.9742 | 6.692834 | 4.1803   | 4.83E-17  | 3.54E-16  | SLC40A1   | chr2  | - | 1.9E+08  | 1.9E+08  | 3442 |
| ENSG000001397.9234 | 536.3871 | -0.42853 | 0.001614  | 0.003872  | SLC35A5   | chr3  | + | 1.12E+08 | 1.12E+08 | 4399 |
| ENSG000001141.4676 | 193.1566 | -0.4456  | 0.050113  | 0.089125  | DIRC2     | chr3  | + | 1.23E+08 | 1.23E+08 | 3596 |
| ENSG000001395.9457 | 98.67396 | 1.9997   | 6.66E-17  | 4.85E-16  | SENPF     | chr3  | - | 1.01E+08 | 1.01E+08 | 4945 |
| ENSG0000013.04001  | 0        | 3.1035   | 0.041741  | 0.076064  | GUCA1C    | chr3  | - | 1.09E+08 | 1.09E+08 | 982  |
| ENSG000001285.8046 | 390.5849 | -0.44782 | 0.00181   | 0.004311  | COX17     | chr3  | - | 1.19E+08 | 1.19E+08 | 684  |
| ENSG000001107.415  | 45.79639 | 1.2146   | 6.42E-06  | 2.11E-05  | PARP9     | chr3  | - | 1.22E+08 | 1.22E+08 | 6769 |
| ENSG00000153.14538 | 77.90743 | -0.54343 | 0.054774  | 0.096238  | MNS1      | chr15 | - | 56713742 | 56757335 | 2023 |
| ENSG000001657.3517 | 695.0844 | -0.07919 | 0.62957   | 0.71921   | USP8      | chr15 | + | 50716577 | 50793280 | 5848 |
| ENSG0000011056.707 | 526.6941 | 1.002    | 1.57E-09  | 7.14E-09  | SECISBP2L | chr15 | - | 49280673 | 49338760 | 7176 |
| ENSG0000011394.237 | 886.3951 | 0.65276  | 5.34E-11  | 2.70E-10  | TMOD3     | chr15 | + | 52121825 | 52239492 | 4668 |
| ENSG000001304.4016 | 154.5687 | 0.97067  | 0.000394  | 0.001037  | SPPL2A    | chr15 | - | 50999506 | 51058005 | 2329 |
| ENSG000001594.4808 | 157.5867 | 1.9117   | 6.51E-40  | 1.14E-38  | GLCE      | chr15 | + | 69452923 | 69564556 | 5037 |
| ENSG000001386.8392 | 608.5973 | -0.65231 | 6.05E-05  | 0.000177  | SHF       | chr15 | - | 45459412 | 45493373 | 2500 |
| ENSG000001170.7311 | 304.1688 | -0.83436 | 2.95E-05  | 8.94E-05  | APH1B     | chr15 | + | 63568217 | 63601325 | 4189 |
| ENSG000001566.3899 | 529.6241 | 0.096696 | 0.43683   | 0.54231   | VWA9      | chr15 | - | 65871091 | 65903627 | 2615 |
| ENSG00000117986.03 | 0.686276 | 13.877   | 3.65E-79  | 1.51E-77  | CILP      | chr15 | - | 65488337 | 65503826 | 4454 |
| ENSG000001237.5343 | 139.4803 | 0.76619  | 6.14E-05  | 0.000179  | PARP16    | chr15 | - | 65526798 | 65592956 | 2731 |
| ENSG00000191.77921 | 233.1899 | -1.3393  | 8.48E-11  | 4.22E-10  | PPCDC     | chr15 | + | 75315896 | 75409803 | 2250 |
| ENSG0000010        | 569.126  | -10.409  | 9.22E-22  | 8.41E-21  | HCN4      | chr15 | - | 73612200 | 73661605 | 7228 |
| ENSG0000018039.161 | 679.2165 | 3.5555   | 1.54E-85  | 7.11E-84  | SEMA7A    | chr15 | - | 74701630 | 74726808 | 3885 |
| ENSG000001668.1755 | 827.3429 | -0.30676 | 0.014206  | 0.028927  | UBL7      | chr15 | - | 74738318 | 74753523 | 1720 |
| ENSG000001330.6901 | 27.6552  | 3.5687   | 2.43E-44  | 4.76E-43  | ARHGAP24  | chr4  | + | 86396267 | 86923823 | 4661 |
| ENSG000001254.66   | 236.1423 | 0.10906  | 0.51799   | 0.62074   | FAM13A    | chr4  | - | 89647106 | 90032549 | 5858 |
| ENSG000001346.5708 | 31.57467 | 3.4349   | 6.10E-42  | 1.13E-40  | HERC3     | chr4  | + | 89442199 | 89629693 | 4974 |
| ENSG00000126.60321 | 95.57456 | -1.8295  | 1.36E-06  | 4.81E-06  | HERC6     | chr4  | + | 89299891 | 89364263 | 3781 |
| ENSG0000015.799092 | 172.2027 | -4.8589  | 1.71E-29  | 2.14E-28  | HERC5     | chr4  | + | 89378268 | 89427314 | 3513 |
| ENSG0000011281.673 | 249.0864 | 2.3511   | 4.26E-18  | 3.28E-17  | PCDH10    | chr4  | + | 1.34E+08 | 1.34E+08 | 5366 |
| ENSG0000010.923144 | 0        | 1.223    | 0.49292   | NA        | NDST4     | chr4  | - | 1.16E+08 | 1.16E+08 | 3351 |
| ENSG000001226.4179 | 507.0727 | -1.1611  | 7.33E-10  | 3.42E-09  | C4orf21   | chr4  | - | 1.13E+08 | 1.14E+08 | 6652 |

|            |          |          |          |           |           |           |       |   |          |          |       |
|------------|----------|----------|----------|-----------|-----------|-----------|-------|---|----------|----------|-------|
| ENSG000001 | 358.9401 | 363.4407 | -0.01723 | 0.93727   | 0.95862   | AP1AR     | chr4  | + | 1.13E+08 | 1.13E+08 | 2902  |
| ENSG000001 | 563.0472 | 438.2033 | 0.36252  | 0.025529  | 0.049187  | COPS4     | chr4  | + | 83955600 | 83996971 | 2273  |
| ENSG000001 | 6990.184 | 13543.1  | -0.95263 | 2.42E-11  | 1.25E-10  | HNRNPD    | chr4  | - | 83273651 | 83295656 | 4597  |
| ENSG000001 | 0.705622 | 50.89574 | -5.765   | 2.31E-10  | 1.12E-09  | PRKG2     | chr4  | - | 82009837 | 82136218 | 3431  |
| ENSG000001 | 17.39825 | 31.87235 | -0.85892 | 0.085174  | 0.14093   | RASGEF1B  | chr4  | - | 82347547 | 82393082 | 6323  |
| ENSG000001 | 6887.456 | 1664.387 | 2.0477   | 4.11E-90  | 2.06E-88  | SEC31A    | chr4  | - | 83739814 | 83822319 | 4278  |
| ENSG000001 | 879.8598 | 0        | 11.014   | 6.32E-25  | 6.58E-24  | FGF5      | chr4  | + | 81187753 | 81257834 | 5234  |
| ENSG000001 | 21.77412 | 4.634006 | 2.1468   | 0.00161   | 0.003866  | AGPAT9    | chr4  | + | 84457067 | 84527028 | 2631  |
| ENSG000001 | 81.38053 | 1166.781 | -3.8248  | 9.36E-62  | 2.83E-60  | FGF2      | chr4  | + | 1.24E+08 | 1.24E+08 | 6775  |
| ENSG000001 | 283.7389 | 197.615  | 0.5223   | 0.001564  | 0.003762  | BBS7      | chr4  | - | 1.23E+08 | 1.23E+08 | 3752  |
| ENSG000001 | 1319.524 | 533.695  | 1.3033   | 4.26E-11  | 2.17E-10  | KIAA1109  | chr4  | + | 1.23E+08 | 1.23E+08 | 15896 |
| ENSG000001 | 296.0023 | 10.82023 | 4.7508   | 3.98E-44  | 7.78E-43  | BMPR1B    | chr4  | + | 95679119 | 96079599 | 5567  |
| ENSG000001 | 650.1576 | 342.7304 | 0.92275  | 9.95E-12  | 5.28E-11  | RAP1GDS1  | chr4  | + | 99182535 | 99365012 | 3681  |
| ENSG000001 | 377.3995 | 534.5122 | -0.50271 | 0.000121  | 0.000341  | LARP1B    | chr4  | + | 1.29E+08 | 1.29E+08 | 4891  |
| ENSG000001 | 8.330465 | 0.343138 | 3.8737   | 0.001871  | 0.004445  | MMRN1     | chr4  | + | 90800683 | 90875780 | 5217  |
| ENSG000001 | 81.20669 | 498.3824 | -2.6091  | 6.40E-33  | 9.12E-32  | PDE5A     | chr4  | - | 1.2E+08  | 1.21E+08 | 7154  |
| ENSG000001 | 178.73   | 508.9364 | -1.5093  | 1.69E-22  | 1.60E-21  | PRDM5     | chr4  | - | 1.22E+08 | 1.22E+08 | 5330  |
| ENSG000001 | 43.84132 | 5.300881 | 2.9869   | 5.81E-09  | 2.51E-08  | TRPC3     | chr4  | - | 1.23E+08 | 1.23E+08 | 3675  |
| ENSG000001 | 125.6835 | 99.35472 | 0.33665  | 0.15226   | 0.22993   | NAAA      | chr4  | - | 76831809 | 76862204 | 1897  |
| ENSG000001 | 532.658  | 889.7724 | -0.73871 | 1.60E-06  | 5.61E-06  | NUP54     | chr4  | - | 77035812 | 77069668 | 2367  |
| ENSG000001 | 191.5324 | 139.1193 | 0.45834  | 0.017292  | 0.034606  | BMP2K     | chr4  | + | 79697496 | 79837526 | 6902  |
| ENSG000001 | 3117.994 | 5397.231 | -0.78987 | 1.97E-06  | 6.85E-06  | G3BP2     | chr4  | - | 76567966 | 76649709 | 4883  |
| ENSG000001 | 7128.267 | 2673.808 | 1.4135   | 5.08E-38  | 8.46E-37  | 11-Sep    | chr4  | + | 77870856 | 77961537 | 5593  |
| ENSG000001 | 869.7888 | 3370.892 | -1.9515  | 9.89E-65  | 3.21E-63  | FRAS1     | chr4  | + | 78978724 | 79465423 | 12479 |
| ENSG000001 | 2589.016 | 844.4931 | 1.6127   | 3.27E-25  | 3.45E-24  | SCARB2    | chr4  | - | 77079890 | 77135046 | 4763  |
| ENSG000001 | 711.5392 | 231.9529 | 1.6119   | 1.05E-15  | 7.17E-15  | CCNG2     | chr4  | + | 78078304 | 78354542 | 5526  |
| ENSG000001 | 418.6563 | 393.8657 | 0.086812 | 0.74224   | 0.81051   | CNOT6L    | chr4  | - | 78634541 | 78740769 | 8843  |
| ENSG000001 | 2431.824 | 3136.586 | -0.3658  | 0.063721  | 0.10996   | USO1      | chr4  | + | 76649777 | 76735382 | 3589  |
| ENSG000001 | 3.910914 | 5.240188 | -0.39592 | 0.63842   | 0.72627   | CDKL2     | chr4  | - | 76503215 | 76555900 | 3383  |
| ENSG000001 | 516.408  | 2011.359 | -1.9553  | 5.79E-24  | 5.80E-23  | SHROOM3   | chr4  | + | 77356253 | 77704406 | 11020 |
| ENSG000001 | 114.7257 | 168.8476 | -0.55246 | 0.079293  | 0.13252   | ANXA3     | chr4  | + | 79472673 | 79531597 | 2924  |
| ENSG000001 | 484.1499 | 379.0297 | 0.35216  | 0.007778  | 0.016668  | PPA2      | chr4  | - | 1.06E+08 | 1.06E+08 | 1684  |
| ENSG000001 | 981.8999 | 635.1198 | 0.62362  | 0.061812  | 0.10707   | CENPE     | chr4  | - | 1.04E+08 | 1.04E+08 | 8612  |
| ENSG000001 | 195.2379 | 303.9967 | -0.63617 | 9.13E-05  | 0.000262  | GSTCD     | chr4  | + | 1.07E+08 | 1.07E+08 | 4273  |
| ENSG000001 | 113.0457 | 81.29839 | 0.47762  | 0.050119  | 0.08913   | INTS12    | chr4  | - | 1.07E+08 | 1.07E+08 | 1975  |
| ENSG000001 | 12.55996 | 5.006282 | 1.2781   | 0.097017  | 0.15745   | ENPEP     | chr4  | + | 1.11E+08 | 1.11E+08 | 6943  |
| ENSG000001 | 319.8672 | 393.0075 | -0.29565 | 0.16718   | 0.24853   | CASP6     | chr4  | - | 1.11E+08 | 1.11E+08 | 1548  |
| ENSG000001 | 970.3117 | 18.85976 | 5.6553   | 7.13E-105 | 4.41E-103 | LEF1      | chr4  | - | 1.09E+08 | 1.09E+08 | 3477  |
| ENSG000001 | 523.5115 | 715.7576 | -0.45086 | 0.000216  | 0.000589  | HADH      | chr4  | + | 1.09E+08 | 1.09E+08 | 2044  |
| ENSG000001 | 36.35845 | 42.83511 | -0.23076 | 0.48857   | 0.59264   | EGF       | chr4  | + | 1.11E+08 | 1.11E+08 | 4880  |
| ENSG000001 | 3083.607 | 1612.581 | 0.93414  | 1.03E-15  | 7.00E-15  | PAPSS1    | chr4  | - | 1.09E+08 | 1.09E+08 | 2731  |
| ENSG000001 | 798.0679 | 436.8817 | 0.86664  | 2.09E-05  | 6.45E-05  | SEC24B    | chr4  | + | 1.1E+08  | 1.1E+08  | 5083  |
| ENSG000001 | 0.685084 | 0        | 0.85004  | 0.63064   | NA        | C4orf17   | chr4  | + | 1E+08    | 1E+08    | 2542  |
| ENSG000001 | 2107.241 | 1760.127 | 0.2591   | 0.013479  | 0.027588  | PPP3CA    | chr4  | - | 1.02E+08 | 1.02E+08 | 4685  |
| ENSG000001 | 333.5563 | 498.5659 | -0.57779 | 0.010564  | 0.022094  | SLC39A8   | chr4  | - | 1.03E+08 | 1.03E+08 | 4032  |
| ENSG000001 | 0        | 2.370411 | -2.6458  | 0.10384   | 0.16657   | MTTP      | chr4  | + | 1E+08    | 1.01E+08 | 4092  |
| ENSG000001 | 76131.52 | 2761.511 | 4.7824   | 0         | 0         | FBN2      | chr5  | - | 1.28E+08 | 1.28E+08 | 11132 |
| ENSG000001 | 3933.279 | 1339.379 | 1.5515   | 4.33E-27  | 4.92E-26  | MAPK8IP3  | chr16 | + | 1756184  | 1820318  | 5661  |
| ENSG000001 | 1785.253 | 187.8861 | 3.2294   | 4.87E-34  | 7.20E-33  | RGS3      | chr9  | + | 1.16E+08 | 1.16E+08 | 4591  |
| ENSG000001 | 1628.871 | 1442.875 | 0.1748   | 0.25027   | 0.34676   | GUCD1     | chr22 | - | 24936406 | 24951903 | 3613  |
| ENSG000001 | 0        | 2.07098  | -2.4602  | 0.13507   | 0.20805   | TLL8      | chr22 | - | 50453552 | 50495364 | 2549  |
| ENSG000001 | 624.5747 | 399.792  | 0.64349  | 1.98E-06  | 6.87E-06  | RNF185    | chr22 | + | 31556168 | 31602999 | 3165  |
| ENSG000001 | 1.971308 | 97.68488 | -5.4238  | 9.22E-17  | 6.65E-16  | KIAA1644  | chr22 | - | 44639547 | 44708731 | 6751  |
| ENSG000001 | 17.40681 | 3.899191 | 2.0683   | 0.001789  | 0.004265  | PARVG     | chr22 | + | 44568836 | 44615413 | 5069  |
| ENSG000001 | 240.2361 | 552.7406 | -1.1997  | 4.66E-12  | 2.52E-11  | B4GALNT3  | chr12 | + | 569530   | 672675   | 5068  |
| ENSG000001 | 0        | 0.343138 | -0.41864 | 0.81278   | NA        | PDE6H     | chr12 | + | 15125956 | 15134799 | 747   |
| ENSG000001 | 1.866827 | 1.058552 | 0.70905  | 0.61206   | 0.70442   | ERP27     | chr12 | - | 15066969 | 15092016 | 2096  |
| ENSG000001 | 499.4204 | 155.179  | 1.6818   | 9.93E-24  | 9.87E-23  | ETV6      | chr12 | + | 11802788 | 12044558 | 2211  |
| ENSG000001 | 1429.817 | 1624.707 | -0.18409 | 0.16276   | 0.24315   | GABARAPL1 | chr12 | + | 10365057 | 10375727 | 3214  |
| ENSG000001 | 160.1735 | 1026.12  | -2.6678  | 9.03E-33  | 1.28E-31  | KIF21A    | chr12 | - | 39687030 | 39837192 | 6643  |
| ENSG000001 | 204.4812 | 63.55713 | 1.6809   | 3.86E-17  | 2.85E-16  | CPNE8     | chr12 | - | 39040624 | 39301232 | 3489  |
| ENSG000001 | 426.2116 | 804.0286 | -0.91314 | 1.65E-09  | 7.47E-09  | YARS2     | chr12 | - | 32880424 | 32908836 | 2122  |
| ENSG000001 | 47.10725 | 552.6159 | -3.5285  | 1.04E-33  | 1.53E-32  | FGD4      | chr12 | + | 32552463 | 32798984 | 8242  |
| ENSG000001 | 45.04441 | 44.38013 | 0.016301 | 0.95941   | 0.97558   | ALG10     | chr12 | + | 34175216 | 34182629 | 2393  |
| ENSG000001 | 1.016461 | 0.343138 | 0.95782  | 0.57832   | NA        | PIK3C2G   | chr12 | + | 18400548 | 18801348 | 4840  |

|                    |          |          |           |           |          |       |   |          |          |       |
|--------------------|----------|----------|-----------|-----------|----------|-------|---|----------|----------|-------|
| ENSG000001612.9315 | 6138.958 | -3.3219  | 6.42E-247 | 2.12E-244 | FAM60A   | chr12 | - | 31433518 | 31479992 | 3163  |
| ENSG0000010        | 0.343138 | -0.41864 | 0.81278   | NA        | PLCZ1    | chr12 | - | 18836103 | 18890991 | 2148  |
| ENSG000001559.404  | 835.3814 | -0.57856 | 0.000352  | 0.000932  | AEBP2    | chr12 | + | 19556979 | 19873735 | 3620  |
| ENSG0000010.290301 | 0        | 0.4146   | 0.81455   | NA        | SLCO1C1  | chr12 | + | 20848289 | 20906320 | 3466  |
| ENSG00000126.43271 | 17.4427  | 0.6014   | 0.17069   | 0.25299   | METTL20  | chr12 | + | 31800094 | 31826048 | 6128  |
| ENSG000001743.7745 | 895.0784 | -0.26739 | 0.026177  | 0.050281  | ETNK1    | chr12 | + | 22778009 | 22843599 | 7159  |
| ENSG000001639.1347 | 592.4075 | 0.11005  | 0.34757   | 0.45178   | ZCRB1    | chr12 | - | 42705880 | 42719920 | 1827  |
| ENSG000001232.1846 | 10.86152 | 4.4091   | 6.50E-42  | 1.20E-40  | TMEM117  | chr12 | + | 44229770 | 44783545 | 2758  |
| ENSG000001304.1655 | 65.93847 | 1.9856   | 0.063197  | 0.10915   | PRICKLE1 | chr12 | - | 42852140 | 42984157 | 4253  |
| ENSG000001216.4332 | 199.3813 | 0.11565  | 0.60259   | 0.69604   | C1RL     | chr12 | - | 7242183  | 7261869  | 3394  |
| ENSG000001142.1828 | 145.2213 | -0.02617 | 0.90236   | 0.93256   | NDUFA9   | chr12 | + | 4714110  | 4798454  | 3334  |
| ENSG0000011963.193 | 700.2015 | 1.4833   | 1.37E-16  | 9.78E-16  | CLSTN3   | chr12 | + | 7282294  | 7311541  | 4296  |
| ENSG00000116.76199 | 29.45669 | -0.78996 | 0.073023  | 0.12357   | KLRG1    | chr12 | + | 9102640  | 9163356  | 1335  |
| ENSG000001120.2713 | 113.6647 | 0.081273 | 0.74156   | 0.80991   | VAMP1    | chr12 | - | 6571403  | 6580153  | 3449  |
| ENSG00000136.46652 | 37.25024 | -0.03036 | 0.93586   | 0.95766   | TAPBPL   | chr12 | + | 6560856  | 6575683  | 2344  |
| ENSG0000011.576526 | 3.259039 | -0.90375 | 0.43527   | 0.54073   | CD27     | chr12 | + | 6554033  | 6560884  | 1338  |
| ENSG00000139.49699 | 25.92091 | 0.5914   | 0.11933   | 0.18797   | RBP5     | chr12 | - | 7276280  | 7281538  | 1012  |
| ENSG000001673.8565 | 673.688  | -1.0499  | 1.20E-16  | 8.59E-16  | PEX5     | chr12 | + | 7341281  | 7371170  | 3252  |
| ENSG000001420.0597 | 120.5978 | 1.7949   | 7.00E-31  | 9.26E-30  | PIANP    | chr12 | - | 6802958  | 6809966  | 2695  |
| ENSG00000112.92565 | 76.50103 | -2.5226  | 1.97E-11  | 1.03E-10  | SLC38A4  | chr12 | - | 47158546 | 47226191 | 3789  |
| ENSG000001657.6962 | 148.6131 | 2.1406   | 1.09E-38  | 1.86E-37  | AMIGO2   | chr12 | - | 47469490 | 47473734 | 3763  |
| ENSG0000011343.722 | 761.5758 | 0.81797  | 3.08E-06  | 1.05E-05  | SCAF11   | chr12 | - | 46312914 | 46385903 | 5296  |
| ENSG0000012699.268 | 288.4102 | 3.2135   | 1.94E-43  | 3.74E-42  | COL2A1   | chr12 | - | 48366748 | 48398269 | 5071  |
| ENSG00000140.92698 | 5.04999  | 2.9584   | 4.42E-08  | 1.78E-07  | PPFIA2   | chr12 | - | 81652045 | 82153332 | 5405  |
| ENSG000001121.1987 | 151.0902 | -0.31543 | 0.1955    | 0.28342   | LLPH     | chr12 | - | 66516842 | 66524548 | 1239  |
| ENSG00000146.35876 | 98.48375 | -1.0785  | 9.58E-05  | 0.000274  | RPL14P1  | chr12 | + | 63359095 | 63359764 | 670   |
| ENSG0000011523.58  | 162.436  | 3.2197   | 5.32E-110 | 3.54E-108 | LRIG3    | chr12 | - | 59265931 | 59314303 | 4070  |
| ENSG00000152.22125 | 57.184   | -0.13389 | 0.65828   | 0.74249   | 9-Mar    | chr12 | + | 58148881 | 58154190 | 2982  |
| ENSG00000168.86776 | 80.69797 | -0.22543 | 0.48238   | 0.58664   | INHBE    | chr12 | + | 57846106 | 57853063 | 2429  |
| ENSG000001729.937  | 20.42171 | 5.152    | 9.39E-109 | 6.15E-107 | GLIPR1   | chr12 | + | 75874460 | 75897633 | 5877  |
| ENSG0000010.685084 | 3.526915 | -1.9658  | 0.14667   | 0.22265   | TPH2     | chr12 | + | 72332626 | 72580398 | 2992  |
| ENSG0000011922.88  | 336.1501 | 2.5133   | 6.46E-83  | 2.85E-81  | PHLDA1   | chr12 | - | 76419227 | 76427712 | 8069  |
| ENSG000001227.5116 | 91.84758 | 1.3059   | 5.50E-12  | 2.96E-11  | TMEM19   | chr12 | + | 72079867 | 72097836 | 4666  |
| ENSG000001216.4095 | 18.57007 | 3.526    | 3.92E-38  | 6.56E-37  | LGR5     | chr12 | + | 71833550 | 71980090 | 4611  |
| ENSG0000010.342542 | 1.012429 | -0.95691 | 0.57869   | NA        | PTPRQ    | chr12 | + | 80799774 | 81074013 | 7201  |
| ENSG0000019251.054 | 2483.754 | 1.8924   | 5.18E-26  | 5.64E-25  | DUSP6    | chr12 | - | 89741009 | 89747048 | 4400  |
| ENSG000001448.2181 | 264.5757 | 0.75625  | 7.07E-05  | 0.000205  | POC1B    | chr12 | - | 89813495 | 89919801 | 5840  |
| ENSG000001814.6031 | 406.049  | 1.0027   | 1.14E-06  | 4.07E-06  | TMTCC3   | chr12 | + | 88536073 | 88593664 | 7203  |
| ENSG0000012703.106 | 2.416535 | 9.9546   | 2.54E-83  | 1.13E-81  | LUM      | chr12 | - | 91496406 | 91505608 | 3008  |
| ENSG00000114.38653 | 0        | 5.4553   | 7.84E-06  | 2.55E-05  | KERA     | chr12 | - | 91444268 | 91451760 | 2162  |
| ENSG000001974.2224 | 1935.481 | -0.98901 | 6.98E-16  | 4.81E-15  | SNRPF    | chr12 | + | 96252706 | 96297606 | 1389  |
| ENSG0000014.273994 | 9.794101 | -1.1465  | 0.12079   | 0.18984   | AMDHD1   | chr12 | + | 96337071 | 96362370 | 2136  |
| ENSG000001576.8782 | 344.3197 | 0.74511  | 2.52E-05  | 7.72E-05  | NEDD1    | chr12 | + | 97301001 | 97347129 | 3620  |
| ENSG0000015.644162 | 6.552048 | -0.21251 | 0.78343   | 0.84489   | SYCP3    | chr12 | - | 1.02E+08 | 1.02E+08 | 3690  |
| ENSG0000010        | 1.40169  | -1.7271  | 0.32809   | NA        | ASCL1    | chr12 | + | 1.03E+08 | 1.03E+08 | 2472  |
| ENSG000001526.1572 | 218.2401 | 1.2659   | 5.05E-10  | 2.38E-09  | GAS2L3   | chr12 | + | 1.01E+08 | 1.01E+08 | 3948  |
| ENSG000001310.581  | 1965.183 | -2.6573  | 2.47E-62  | 7.60E-61  | TMEM132E | chr12 | + | 1.26E+08 | 1.26E+08 | 10906 |
| ENSG000001440.8403 | 477.9729 | -0.11759 | 0.42943   | 0.53486   | SLC15A4  | chr12 | - | 1.29E+08 | 1.29E+08 | 2776  |
| ENSG000001809.8897 | 1126.035 | -0.47291 | 0.062407  | 0.10796   | TDG      | chr12 | + | 1.04E+08 | 1.04E+08 | 3251  |
| ENSG000001328.3862 | 536.205  | -0.70487 | 4.17E-05  | 0.000124  | C12orf52 | chr12 | + | 1.14E+08 | 1.14E+08 | 2053  |
| ENSG00000137.8014  | 14.91935 | 1.3247   | 0.00162   | 0.003887  | SDSL     | chr12 | + | 1.14E+08 | 1.14E+08 | 1449  |
| ENSG000001743.4462 | 333.9661 | 1.151    | 2.16E-07  | 8.18E-07  | MMAB     | chr12 | - | 1.1E+08  | 1.1E+08  | 2725  |
| ENSG000001744.5601 | 515.564  | 0.52839  | 0.009809  | 0.020649  | GLTP     | chr12 | - | 1.1E+08  | 1.1E+08  | 2356  |
| ENSG000001344.6642 | 151.3698 | 1.1831   | 2.96E-10  | 1.42E-09  | GIT2     | chr12 | - | 1.1E+08  | 1.1E+08  | 5471  |
| ENSG000001589.0535 | 122.659  | 2.2628   | 1.62E-50  | 3.75E-49  | TCHP     | chr12 | + | 1.1E+08  | 1.1E+08  | 3428  |
| ENSG00000187.69601 | 102.411  | -0.21814 | 0.67237   | 0.75473   | FAM222A  | chr12 | + | 1.1E+08  | 1.1E+08  | 3294  |
| ENSG0000010        | 7.218922 | -4.4095  | 0.001056  | 0.002608  | FOXN4    | chr12 | - | 1.1E+08  | 1.1E+08  | 3350  |
| ENSG000001964.6182 | 894.2961 | 0.10898  | 0.35645   | 0.46074   | NUPL1    | chr13 | + | 25875662 | 25923938 | 6360  |
| ENSG000001700.4241 | 215.7734 | 1.6937   | 5.74E-34  | 8.47E-33  | MTMR6    | chr13 | - | 25802307 | 25862147 | 5659  |
| ENSG000001137.9794 | 5.395544 | 4.6251   | 7.28E-26  | 7.90E-25  | SLC46A3  | chr13 | - | 29274201 | 29293107 | 3178  |
| ENSG0000012086.599 | 2058.13  | 0.019793 | 0.89285   | 0.92559   | SLC7A1   | chr13 | - | 30083547 | 30169825 | 7347  |
| ENSG0000010        | 1.372552 | -1.3974  | 0.43145   | NA        | PDX1     | chr13 | + | 28494157 | 28500368 | 2501  |
| ENSG000001219.8363 | 284.8061 | -0.37364 | 0.011876  | 0.024564  | LNK2     | chr13 | - | 28120050 | 28194541 | 4625  |
| ENSG000001412.1798 | 362.6213 | 0.1857   | 0.24526   | 0.34105   | SUOX     | chr12 | + | 56390964 | 56400425 | 2860  |
| ENSG000001109.0423 | 71.64037 | 0.60373  | 0.007998  | 0.017095  | CCDC65   | chr12 | + | 49297893 | 49325623 | 2084  |

|            |          |          |          |           |           |          |       |   |          |          |       |
|------------|----------|----------|----------|-----------|-----------|----------|-------|---|----------|----------|-------|
| ENSG000001 | 4.854596 | 5.635155 | -0.21046 | 0.82227   | 0.87483   | SLC39A5  | chr12 | + | 56623833 | 56631630 | 2031  |
| ENSG000001 | 726.2832 | 1108.145 | -0.608   | 3.25E-06  | 1.10E-05  | TARBP2   | chr12 | + | 53894705 | 53900215 | 1867  |
| ENSG000001 | 5.281082 | 32.87042 | -2.5213  | 0.00064   | 0.001635  | RDH16    | chr12 | - | 57345219 | 57353158 | 3198  |
| ENSG000001 | 1.846289 | 0.700845 | 1.1017   | 0.46803   | 0.57278   | DHH      | chr12 | - | 49483204 | 49488602 | 1936  |
| ENSG000001 | 5.385563 | 3.336716 | 0.63581  | 0.4992    | 0.60295   | ACVRL1   | chr12 | + | 52300692 | 52317145 | 4121  |
| ENSG000001 | 1.608228 | 0.594029 | 0.97576  | 0.54887   | 0.64874   | GPR84    | chr12 | - | 54756229 | 54758271 | 2041  |
| ENSG000001 | 16.25417 | 4.738406 | 1.733    | 0.009258  | 0.019577  | NPFF     | chr12 | - | 53900472 | 53902004 | 1406  |
| ENSG000001 | 625.494  | 410.6285 | 0.6079   | 2.43E-06  | 8.36E-06  | NABP2    | chr12 | + | 56615799 | 56623638 | 1775  |
| ENSG000001 | 6.161358 | 32.75789 | -2.3212  | 0.000347  | 0.00092   | N4BP2L1  | chr13 | - | 32974861 | 33002315 | 3046  |
| ENSG000001 | 2167.898 | 1157.832 | 0.9036   | 1.07E-17  | 8.10E-17  | SMARCC2  | chr12 | - | 56556767 | 56583351 | 4271  |
| ENSG000001 | 246.3231 | 221.2547 | 0.15561  | 0.63459   | 0.72319   | BRCA2    | chr13 | + | 32889611 | 32973805 | 10984 |
| ENSG000001 | 344.0302 | 404.6026 | -0.23224 | 0.39377   | 0.49817   | KANSL2   | chr12 | - | 49047184 | 49076021 | 2714  |
| ENSG000001 | 882.3886 | 516.3012 | 0.77241  | 2.73E-09  | 1.21E-08  | CERS5    | chr12 | - | 50523575 | 50561288 | 2998  |
| ENSG000001 | 618.0054 | 293.4687 | 1.0662   | 0.000202  | 0.000552  | MAP3K12  | chr12 | - | 53874274 | 53893847 | 5627  |
| ENSG000001 | 5.975539 | 3.763237 | 0.59341  | 0.5089    | 0.61231   | ITGB7    | chr12 | - | 53585102 | 53601091 | 2867  |
| ENSG000001 | 194.8139 | 282.3192 | -0.53616 | 0.001117  | 0.002751  | GALNT6   | chr12 | - | 51745031 | 51786651 | 5207  |
| ENSG000001 | 376.891  | 67.7777  | 2.4596   | 4.26E-34  | 6.32E-33  | CSAD     | chr12 | - | 53551447 | 53575135 | 2645  |
| ENSG000001 | 410.4336 | 651.0477 | -0.66232 | 0.01162   | 0.024079  | LMBR1L   | chr12 | - | 49490919 | 49504683 | 2800  |
| ENSG000001 | 492.4928 | 603.0372 | -0.28949 | 0.067032  | 0.11481   | C12orf10 | chr12 | + | 53693470 | 53700961 | 1369  |
| ENSG000001 | 3946.952 | 2313.831 | 0.77008  | 1.23E-12  | 6.94E-12  | ESYT1    | chr12 | + | 56512034 | 56538455 | 4388  |
| ENSG000001 | 7043.227 | 7728.573 | -0.13375 | 0.21981   | 0.31164   | TMBIM6   | chr12 | + | 50101508 | 50158717 | 3254  |
| ENSG000001 | 4524.292 | 1001.434 | 2.1697   | 3.88E-34  | 5.76E-33  | ANKRD52  | chr12 | - | 56631591 | 56652175 | 8688  |
| ENSG000001 | 643.6483 | 428.4327 | 0.58536  | 1.77E-05  | 5.52E-05  | ZNF740   | chr12 | + | 53574484 | 53584596 | 4249  |
| ENSG000001 | 624.332  | 488.4869 | 0.35389  | 0.006906  | 0.014971  | WDFY2    | chr13 | + | 52158644 | 52336171 | 3649  |
| ENSG000001 | 104.4789 | 112.5143 | -0.10218 | 0.73173   | 0.80187   | HNRNPA1L | chr13 | + | 53191605 | 53217919 | 2365  |
| ENSG000001 | 278.756  | 50.95307 | 2.4465   | 3.30E-22  | 3.06E-21  | LPAR6    | chr13 | - | 48963707 | 49018840 | 3004  |
| ENSG000001 | 901.1927 | 628.8774 | 0.5197   | 3.68E-05  | 0.000111  | ESD      | chr13 | - | 47345391 | 47371367 | 1192  |
| ENSG000001 | 772.2704 | 247.0393 | 1.6417   | 7.09E-23  | 6.81E-22  | RB1      | chr13 | + | 48877887 | 49056122 | 4840  |
| ENSG000001 | 1170.175 | 1238.711 | -0.08167 | 0.45192   | 0.55736   | SBNO1    | chr12 | - | 1.24E+08 | 1.24E+08 | 10981 |
| ENSG000001 | 10.85067 | 18.95288 | -0.79198 | 0.12358   | 0.19364   | MORN3    | chr12 | - | 1.22E+08 | 1.22E+08 | 1427  |
| ENSG000001 | 1051.923 | 871.5256 | 0.27069  | 0.21263   | 0.30317   | SETD1B   | chr12 | + | 1.22E+08 | 1.22E+08 | 8195  |
| ENSG000001 | 145.8374 | 250.4018 | -0.77574 | 0.001125  | 0.00277   | VPS33A   | chr12 | - | 1.23E+08 | 1.23E+08 | 4586  |
| ENSG000001 | 731.0292 | 452.1551 | 0.69187  | 4.51E-07  | 1.66E-06  | VPS37B   | chr12 | - | 1.23E+08 | 1.23E+08 | 3021  |
| ENSG000001 | 4.834058 | 14.24361 | -1.4942  | 0.026666  | 0.051128  | RHOF     | chr12 | - | 1.22E+08 | 1.22E+08 | 3005  |
| ENSG000001 | 1544.473 | 1670.075 | -0.11221 | 0.57375   | 0.67088   | DENR     | chr12 | + | 1.23E+08 | 1.23E+08 | 2769  |
| ENSG000001 | 606.5968 | 457.851  | 0.40593  | 0.000844  | 0.002119  | DIAPH3   | chr13 | - | 60239717 | 60738121 | 4804  |
| ENSG000001 | 8.278224 | 529.2036 | -5.9562  | 2.56E-75  | 1.00E-73  | SLAIN1   | chr13 | + | 78272023 | 78338377 | 2637  |
| ENSG000001 | 966.3079 | 1053.655 | -0.12491 | 0.25104   | 0.3477    | RBM26    | chr13 | - | 79885962 | 79980612 | 4132  |
| ENSG000001 | 0.653381 | 78.70628 | -6.3928  | 2.97E-13  | 1.74E-12  | SRRM4    | chr12 | + | 1.19E+08 | 1.2E+08  | 8477  |
| ENSG000001 | 1.048164 | 0        | 1.348    | 0.44949   | NA        | METTL21C | chr13 | - | 1.03E+08 | 1.03E+08 | 1088  |
| ENSG000001 | 695.3051 | 22.74996 | 4.7482   | 3.68E-12  | 2.01E-11  | MBNL2    | chr13 | + | 97873688 | 98046374 | 4669  |
| ENSG000001 | 2.967231 | 1.387121 | 0.96195  | 0.44041   | 0.54617   | RNF113B  | chr13 | - | 98828039 | 98829519 | 1376  |
| ENSG000001 | 0.290301 | 1352.78  | -10.834  | 6.30E-33  | 8.98E-32  | ZIC5     | chr13 | - | 1.01E+08 | 1.01E+08 | 4639  |
| ENSG000001 | 273.2772 | 157.2806 | 0.79692  | 1.05E-05  | 3.36E-05  | ABHD13   | chr13 | + | 1.09E+08 | 1.09E+08 | 5338  |
| ENSG000001 | 38.94206 | 142.8609 | -1.8601  | 5.06E-10  | 2.38E-09  | RAB20    | chr13 | - | 1.11E+08 | 1.11E+08 | 1514  |
| ENSG000001 | 11.53576 | 574.802  | -5.604   | 3.25E-86  | 1.52E-84  | GRTP1    | chr13 | - | 1.14E+08 | 1.14E+08 | 1446  |
| ENSG000001 | 1497.617 | 1908.883 | -0.34972 | 0.003306  | 0.007575  | CUL4A    | chr13 | + | 1.14E+08 | 1.14E+08 | 3724  |
| ENSG000001 | 4.221753 | 3.212915 | 0.34932  | 0.74087   | 0.80934   | TTC6     | chr14 | + | 38065052 | 38510647 | 5833  |
| ENSG000001 | 1539.932 | 150.9067 | 3.3454   | 5.46E-72  | 2.02E-70  | SSTR1    | chr14 | + | 38677204 | 38682272 | 4295  |
| ENSG000001 | 474.0083 | 641.9412 | -0.43606 | 0.000443  | 0.001161  | CDH24    | chr14 | - | 23516271 | 23526747 | 3552  |
| ENSG000001 | 4.607163 | 57.78447 | -3.5552  | 1.86E-10  | 9.06E-10  | REM2     | chr14 | + | 23352374 | 23356895 | 1923  |
| ENSG000001 | 18.47552 | 7.267462 | 1.3108   | 0.01843   | 0.03667   | CBLN3    | chr14 | - | 24895738 | 24900160 | 2346  |
| ENSG000001 | 60.13917 | 65.87168 | -0.12945 | 0.63299   | 0.72194   | TSSK4    | chr14 | + | 24674903 | 24677568 | 1394  |
| ENSG000001 | 51.91123 | 167.0075 | -1.6826  | 5.42E-12  | 2.92E-11  | NOVA1    | chr14 | - | 26912299 | 27066960 | 6575  |
| ENSG000001 | 0.653381 | 2.679579 | -1.5787  | 0.28228   | 0.38339   | FITM1    | chr14 | + | 24600484 | 24602058 | 1194  |
| ENSG000001 | 0.923144 | 4.378283 | -1.8892  | 0.11982   | 0.1886    | MDGA2    | chr14 | - | 47308826 | 48144157 | 5239  |
| ENSG000001 | 670.9199 | 975.6493 | -0.53832 | 0.006506  | 0.014175  | TMX1     | chr14 | + | 51706880 | 51722759 | 2490  |
| ENSG000001 | 2081.984 | 328.0887 | 2.6644   | 4.29E-112 | 2.95E-110 | FRMD6    | chr14 | + | 51955818 | 52197445 | 5123  |
| ENSG000001 | 219.3233 | 303.8636 | -0.46982 | 0.007963  | 0.017024  | PELI2    | chr14 | + | 56584532 | 56768244 | 5909  |
| ENSG000001 | 10.00968 | 22.58178 | -1.1497  | 0.052333  | 0.092555  | RTN1     | chr14 | - | 60062694 | 60337684 | 3435  |
| ENSG000001 | 1315.121 | 194.2056 | 2.756    | 2.18E-95  | 1.17E-93  | C14orf37 | chr14 | - | 58466453 | 58764857 | 6495  |
| ENSG000001 | 0.632843 | 6.671016 | -2.9234  | 0.012155  | 0.025105  | SYT16    | chr14 | + | 62453803 | 62568431 | 3219  |
| ENSG000001 | 96.80088 | 28.38599 | 1.7569   | 5.09E-09  | 2.21E-08  | SLC38A6  | chr14 | + | 61447832 | 61550451 | 2787  |
| ENSG000001 | 588.9114 | 529.8381 | 0.15199  | 0.25654   | 0.35398   | NAA30    | chr14 | + | 57857262 | 57882635 | 7644  |
| ENSG000001 | 2.894453 | 0.640152 | 1.7742   | 0.18883   | 0.27515   | ADAM21   | chr14 | + | 70918874 | 70926622 | 2658  |

|            |          |          |          |          |          |           |       |   |          |          |       |
|------------|----------|----------|----------|----------|----------|-----------|-------|---|----------|----------|-------|
| ENSG000001 | 0.653381 | 17.83693 | -4.2768  | 4.18E-05 | 0.000125 | RDH12     | chr14 | + | 68168603 | 68201169 | 1879  |
| ENSG000001 | 1276.251 | 786.7732 | 0.69802  | 3.85E-09 | 1.69E-08 | DCAF5     | chr14 | - | 69517598 | 69619867 | 5953  |
| ENSG000001 | 3317.546 | 1452.017 | 1.1898   | 1.80E-13 | 1.07E-12 | RAB15     | chr14 | - | 65412532 | 65439494 | 3515  |
| ENSG000001 | 89.56984 | 258.3049 | -1.524   | 2.39E-17 | 1.78E-16 | WDR89     | chr14 | - | 64063757 | 64108579 | 2993  |
| ENSG000001 | 4.108712 | 15.70029 | -1.8822  | 0.006546 | 0.014244 | ESR2      | chr14 | - | 64550950 | 64804830 | 5458  |
| ENSG000001 | 0        | 26.85237 | -6.3684  | 2.44E-08 | 1.00E-07 | KCNH5     | chr14 | - | 63173287 | 63568755 | 4175  |
| ENSG000001 | 8.76551  | 338.2123 | -5.2102  | 8.76E-59 | 2.47E-57 | STON2     | chr14 | - | 81727000 | 81902809 | 4302  |
| ENSG000001 | 66.13941 | 88.28669 | -0.40916 | 0.11125  | 0.17683  | EFCAB11   | chr14 | - | 90261013 | 90421121 | 3095  |
| ENSG000001 | 0.653381 | 0        | 0.82678  | 0.64037  | NA       | GPR65     | chr14 | + | 88471468 | 88478419 | 1786  |
| ENSG000001 | 61.92107 | 144.2366 | -1.2166  | 2.88E-07 | 1.08E-06 | PTGR2     | chr14 | + | 74318547 | 74353530 | 4859  |
| ENSG000001 | 277.5338 | 407.691  | -0.55326 | 0.01941  | 0.038422 | JDP2      | chr14 | + | 75894419 | 75940814 | 5401  |
| ENSG000001 | 50.91531 | 98.53008 | -0.95081 | 0.001479 | 0.003576 | AK7       | chr14 | + | 96858448 | 96955764 | 3300  |
| ENSG000001 | 1.08924  | 3.587607 | -1.4873  | 0.25773  | 0.35536  | SLC24A4   | chr14 | + | 92788925 | 92962596 | 4747  |
| ENSG000001 | 7556.84  | 185.1131 | 5.3448   | 0        | 0        | FBLN5     | chr14 | - | 92335756 | 92414331 | 2423  |
| ENSG000001 | 0        | 0.951736 | -1.2555  | 0.48145  | NA       | SERPINA10 | chr14 | - | 94749650 | 94759608 | 2526  |
| ENSG000001 | 189.7539 | 92.9734  | 1.0236   | 1.32E-07 | 5.10E-07 | C14orf79  | chr14 | + | 1.05E+08 | 1.05E+08 | 2503  |
| ENSG000001 | 1389.47  | 1357.488 | 0.033887 | 0.8185   | 0.87259  | WARS      | chr14 | - | 1.01E+08 | 1.01E+08 | 3092  |
| ENSG000001 | 0        | 0.654722 | -0.83442 | 0.63731  | NA       | SLC25A47  | chr14 | + | 1.01E+08 | 1.01E+08 | 1738  |
| ENSG000001 | 396.3709 | 367.3223 | 0.10973  | 0.49007  | 0.5941   | WDR20     | chr14 | + | 1.03E+08 | 1.03E+08 | 3060  |
| ENSG000001 | 1105.979 | 1073.548 | 0.042692 | 0.74495  | 0.81283  | NIPA2     | chr15 | - | 23004684 | 23034427 | 3233  |
| ENSG000001 | 760.1788 | 448.357  | 0.75992  | 7.59E-08 | 2.99E-07 | HERC2P2   | chr15 | - | 23282281 | 23378228 | 5970  |
| ENSG000001 | 376.152  | 217.4114 | 0.78823  | 0.000129 | 0.000363 | SLC12A6   | chr15 | - | 34525460 | 34630261 | 5407  |
| ENSG000001 | 0.290301 | 0.297015 | -0.00202 | 0.99909  | NA       | DUOXA1    | chr15 | - | 45409569 | 45422136 | 2684  |
| ENSG000001 | 650.5924 | 802.3119 | -0.30153 | 0.04244  | 0.077181 | MFAP1     | chr15 | - | 44096690 | 44117000 | 2155  |
| ENSG000001 | 3100.496 | 1076.896 | 1.5216   | 1.72E-16 | 1.22E-15 | TCF12     | chr15 | + | 57210821 | 57591479 | 6061  |
| ENSG000001 | 307.2791 | 709.8883 | -1.2038  | 6.36E-17 | 4.63E-16 | SORD      | chr15 | + | 45315302 | 45369383 | 4909  |
| ENSG000001 | 7434.863 | 4366.745 | 0.76704  | 1.01E-10 | 4.99E-10 | SERF2     | chr15 | + | 44069285 | 44094787 | 2792  |
| ENSG000001 | 345.309  | 532.2645 | -0.62298 | 2.87E-05 | 8.72E-05 | ZSCAN29   | chr15 | - | 43650370 | 43663223 | 5595  |
| ENSG000001 | 0.580602 | 0        | 0.8036   | 0.6494   | NA       | DUOXA2    | chr15 | + | 45406519 | 45410619 | 1760  |
| ENSG000001 | 0.943682 | 0        | 1.2438   | 0.48556  | NA       | DUOX2     | chr15 | - | 45384848 | 45406542 | 6641  |
| ENSG000001 | 27.80288 | 36.53154 | -0.38475 | 0.2895   | 0.39111  | LYSMD2    | chr15 | - | 52015208 | 52043782 | 1759  |
| ENSG000001 | 0.290301 | 66.24228 | -6.7627  | 5.56E-11 | 2.81E-10 | SLC27A2   | chr15 | + | 50474393 | 50528592 | 2394  |
| ENSG000001 | 198.9216 | 1.029414 | 7.2621   | 7.55E-23 | 7.24E-22 | FGF7      | chr15 | + | 49715293 | 49780972 | 5467  |
| ENSG000001 | 1.503747 | 0        | 1.8221   | 0.30126  | NA       | HDC       | chr15 | - | 50534144 | 50558223 | 2705  |
| ENSG000001 | 1.068702 | 1.98115  | -0.76697 | 0.57552  | 0.6723   | GCNT3     | chr15 | + | 59887074 | 59932438 | 3034  |
| ENSG000001 | 770.3688 | 451.2225 | 0.77168  | 6.54E-07 | 2.38E-06 | BNIP2     | chr15 | - | 59951345 | 59981733 | 6325  |
| ENSG000001 | 904.6216 | 740.3686 | 0.2881   | 0.008894 | 0.018884 | GTF2A2    | chr15 | - | 59930261 | 59949740 | 1582  |
| ENSG000001 | 3495.513 | 2752.794 | 0.34419  | 0.034196 | 0.063818 | SRP14     | chr15 | - | 40327940 | 40331389 | 1077  |
| ENSG000001 | 495.586  | 1351.549 | -1.4447  | 3.31E-31 | 4.44E-30 | BAHD1     | chr15 | + | 40731920 | 40760441 | 4698  |
| ENSG000001 | 21.41023 | 15.07155 | 0.48697  | 0.374    | 0.47834  | DISP2     | chr15 | + | 40650436 | 40663257 | 5031  |
| ENSG000001 | 551.6589 | 339.3973 | 0.69792  | 3.60E-06 | 1.21E-05 | CDAN1     | chr15 | - | 43015757 | 43029324 | 4637  |
| ENSG000001 | 1476.19  | 2712.839 | -0.87649 | 7.69E-15 | 5.00E-14 | TLE3      | chr15 | - | 70340129 | 70390515 | 7809  |
| ENSG000001 | 2350.228 | 3518.709 | -0.58161 | 1.62E-08 | 6.76E-08 | ANP32A    | chr15 | - | 69070874 | 69113236 | 3711  |
| ENSG000001 | 829.507  | 1190.853 | -0.51993 | 0.003307 | 0.007576 | COMMD4    | chr15 | + | 75628232 | 75634268 | 4204  |
| ENSG000001 | 917.0784 | 481.6336 | 0.92815  | 1.49E-14 | 9.54E-14 | UBE2Q2    | chr15 | + | 76135622 | 76193419 | 3130  |
| ENSG000001 | 3.568372 | 9.840224 | -1.3872  | 0.066919 | 0.11466  | PSTPIP1   | chr15 | + | 77285700 | 77329673 | 1962  |
| ENSG000001 | 1294.033 | 854.2929 | 0.59842  | 2.25E-09 | 1.01E-08 | ETFA      | chr15 | - | 76507696 | 76603813 | 2287  |
| ENSG000001 | 55.78025 | 0.357707 | 6.5266   | 2.89E-10 | 1.39E-09 | BCL2A1    | chr15 | - | 80253231 | 80263788 | 1033  |
| ENSG000001 | 998.3729 | 1266.942 | -0.34259 | 0.081968 | 0.13639  | HMG20A    | chr15 | + | 77712754 | 77777949 | 4112  |
| ENSG000001 | 159.0558 | 242.5351 | -0.60675 | 0.006435 | 0.014032 | SCAPER    | chr15 | - | 76640526 | 77197785 | 5438  |
| ENSG000001 | 2345.366 | 1577.793 | 0.57168  | 6.26E-08 | 2.48E-07 | TSPAN3    | chr15 | - | 77336359 | 77376326 | 3854  |
| ENSG000001 | 391.8381 | 451.8656 | -0.20451 | 0.29896  | 0.40069  | WDR61     | chr15 | - | 78570177 | 78592136 | 3629  |
| ENSG000001 | 670.7804 | 493.7303 | 0.44155  | 0.00067  | 0.001705 | NCOA2     | chr8  | - | 71021997 | 71316040 | 8447  |
| ENSG000001 | 50.32794 | 203.6213 | -2.0044  | 4.23E-09 | 1.85E-08 | NEIL1     | chr15 | + | 75639296 | 75647592 | 3271  |
| ENSG000001 | 1192.598 | 791.1617 | 0.59121  | 6.17E-07 | 2.25E-06 | MAN2C1    | chr15 | - | 75648133 | 75660971 | 4820  |
| ENSG000001 | 24.48357 | 72.26441 | -1.5581  | 8.79E-06 | 2.84E-05 | DNAJA4    | chr15 | + | 78556428 | 78574538 | 3245  |
| ENSG000001 | 2066.621 | 1641.48  | 0.33124  | 0.061951 | 0.10725  | MESDC1    | chr15 | + | 81293295 | 81296342 | 3048  |
| ENSG000001 | 18440.64 | 1763.667 | 3.3775   | 5.95E-76 | 2.37E-74 | TPM1      | chr15 | + | 63334831 | 63364114 | 2855  |
| ENSG000001 | 2949.571 | 4338.636 | -0.55596 | 6.00E-05 | 0.000176 | IGF1R     | chr15 | + | 99192200 | 99507759 | 11803 |
| ENSG000001 | 286.9579 | 183.8399 | 0.61983  | 0.34258  | 0.44649  | ARRDC4    | chr15 | + | 98462784 | 98517068 | 4072  |
| ENSG000001 | 307.2269 | 2423.587 | -2.9719  | 1.49E-58 | 4.17E-57 | PIF1      | chr15 | - | 65107831 | 65117867 | 2687  |
| ENSG000001 | 334.186  | 220.3161 | 0.59846  | 0.002067 | 0.00488  | USP3      | chr15 | + | 63796793 | 63886839 | 5499  |
| ENSG000001 | 0.653381 | 85.28915 | -6.5117  | 5.24E-14 | 3.22E-13 | CYP11A1   | chr15 | - | 74630100 | 74660081 | 2001  |
| ENSG000001 | 398.4983 | 696.8061 | -0.80502 | 9.93E-08 | 3.88E-07 | BBS4      | chr15 | + | 72978527 | 73030817 | 2490  |
| ENSG000001 | 1378.597 | 1164.365 | 0.24267  | 0.23693  | 0.33109  | PML       | chr15 | + | 74287014 | 74340153 | 5393  |

|            |          |          |          |           |           |          |       |   |          |          |       |
|------------|----------|----------|----------|-----------|-----------|----------|-------|---|----------|----------|-------|
| ENSG000001 | 0.580602 | 0.343138 | 0.37443  | 0.8337    | NA        | CYP1A1   | chr15 | - | 75011883 | 75017951 | 2685  |
| ENSG000001 | 42.51223 | 37.28817 | 0.19112  | 0.61641   | 0.70778   | ADAMTS17 | chr15 | - | 1.01E+08 | 1.01E+08 | 6207  |
| ENSG000001 | 139.205  | 101.1698 | 0.45988  | 0.039717  | 0.072919  | LINS     | chr15 | - | 1.01E+08 | 1.01E+08 | 4821  |
| ENSG000001 | 510.7395 | 670.8762 | -0.39359 | 0.000943  | 0.002349  | ULK3     | chr15 | - | 75128457 | 75135687 | 2951  |
| ENSG000001 | 0        | 11.48797 | -2.5289  | 0.15577   | 0.23448   | GOLGA6D  | chr15 | + | 75575176 | 75586816 | 2123  |
| ENSG000001 | 23.77616 | 97.06762 | -2.023   | 1.73E-09  | 7.83E-09  | PCSK6    | chr15 | - | 1.02E+08 | 1.02E+08 | 4407  |
| ENSG000001 | 0.342542 | 12.67845 | -4.4039  | 0.000354  | 0.000938  | CCDC33   | chr15 | + | 74509613 | 74628813 | 3085  |
| ENSG000001 | 0.36308  | 0        | 0.4146   | 0.81455   | NA        | CELF6    | chr15 | - | 72559087 | 72612470 | 3345  |
| ENSG000001 | 1118.7   | 689.0843 | 0.69863  | 1.81E-11  | 9.42E-11  | SCAMP2   | chr15 | - | 75136071 | 75165706 | 3162  |
| ENSG000001 | 1399.4   | 671.4941 | 1.0568   | 3.82E-10  | 1.81E-09  | HAPLN3   | chr15 | - | 89420519 | 89438857 | 3071  |
| ENSG000001 | 0.36308  | 5.147942 | -3.156   | 0.020482  | 0.040303  | RHCG     | chr15 | - | 89998680 | 90039844 | 1982  |
| ENSG000001 | 1873.491 | 1411.252 | 0.4076   | 0.004761  | 0.010636  | POLG     | chr15 | - | 89859534 | 89878092 | 4502  |
| ENSG000001 | 4.875948 | 1.058552 | 1.9164   | 0.11932   | 0.18797   | RLBP1    | chr15 | - | 89753100 | 89764982 | 1810  |
| ENSG000001 | 1050.49  | 1425.305 | -0.43928 | 0.001962  | 0.00465   | FANCI    | chr15 | + | 89787180 | 89860492 | 4743  |
| ENSG000001 | 5312.533 | 555.7478 | 3.2511   | 2.95E-119 | 2.27E-117 | ABHD2    | chr15 | + | 89630690 | 89745591 | 8735  |
| ENSG000001 | 1.390706 | 4.05213  | -1.3703  | 0.24553   | 0.34135   | WDR93    | chr15 | + | 90234028 | 90286869 | 2409  |
| ENSG000001 | 441.7233 | 967.1681 | -1.1275  | 1.36E-12  | 7.67E-12  | TICRR    | chr15 | + | 90118713 | 90174287 | 6771  |
| ENSG000001 | 48.22558 | 295.7524 | -2.6031  | 7.65E-31  | 1.01E-29  | NTRK3    | chr15 | - | 88402982 | 88799999 | 19984 |
| ENSG000001 | 106.66   | 113.3215 | -0.08621 | 0.7199    | 0.79285   | DET1     | chr15 | - | 89054790 | 89089906 | 2315  |
| ENSG000001 | 2542.286 | 4652.547 | -0.87007 | 5.21E-08  | 2.08E-07  | MFE8     | chr15 | - | 89441916 | 89456642 | 1987  |
| ENSG000001 | 822.539  | 672.7381 | 0.2888   | 0.069763  | 0.11881   | ZN710    | chr15 | + | 90544624 | 90625438 | 4617  |
| ENSG000001 | 1742.422 | 2288.466 | -0.3929  | 0.007149  | 0.015444  | UNC45A   | chr15 | + | 91473410 | 91497323 | 4002  |
| ENSG000001 | 429.403  | 80.77163 | 2.4056   | 2.29E-45  | 4.61E-44  | ST8SIA2  | chr15 | + | 92937058 | 93011958 | 5708  |
| ENSG000001 | 362.1053 | 77.38557 | 2.22     | 4.47E-24  | 4.50E-23  | MCTP2    | chr15 | + | 94774767 | 95023632 | 4493  |
| ENSG000001 | 6365.902 | 2036.292 | 1.6412   | 1.04E-27  | 1.22E-26  | FURIN    | chr15 | + | 91411822 | 91426688 | 4244  |
| ENSG000001 | 5743.167 | 3410.327 | 0.75129  | 3.10E-14  | 1.94E-13  | IQGAP1   | chr15 | + | 90931450 | 91045475 | 7233  |
| ENSG000001 | 704.7561 | 196.5027 | 1.8314   | 7.11E-12  | 3.81E-11  | CRTC3    | chr15 | + | 91073157 | 91188577 | 5209  |
| ENSG000001 | 212.2459 | 510.7502 | -1.2606  | 4.14E-13  | 2.41E-12  | EFTUD1   | chr15 | - | 82422571 | 82555104 | 3675  |
| ENSG000001 | 6.483362 | 159.8185 | -4.5467  | 6.75E-30  | 8.59E-29  | SH3GL3   | chr15 | + | 84115980 | 84287495 | 2012  |
| ENSG000001 | 1923.425 | 2128.862 | -0.14592 | 0.19706   | 0.28506   | SEC11A   | chr15 | - | 85212775 | 85259947 | 3626  |
| ENSG000001 | 0.36308  | 0.937167 | -0.90039 | 0.60194   | NA        | 12-Sep   | chr16 | - | 4827670  | 4838522  | 1469  |
| ENSG000001 | 997.8971 | 1203.337 | -0.26913 | 0.053579  | 0.094465  | GLYR1    | chr16 | - | 4853204  | 4897343  | 3772  |
| ENSG000001 | 260.6286 | 208.7791 | 0.32012  | 0.18105   | 0.26562   | PMM2     | chr16 | + | 8882680  | 8943188  | 5409  |
| ENSG000001 | 1.390706 | 4.438975 | -1.4663  | 0.22666   | 0.31957   | SLCSA2   | chr16 | + | 31494323 | 31502181 | 2467  |
| ENSG000001 | 4.462419 | 0        | 3.5622   | 0.018082  | 0.036033  | ITGAX    | chr16 | + | 31366455 | 31394318 | 4703  |
| ENSG000001 | 2223.398 | 79.08521 | 4.7929   | 3.11E-130 | 2.81E-128 | TGFB11i  | chr16 | + | 31482906 | 31489281 | 4973  |
| ENSG000001 | 999.6159 | 420.0051 | 1.2458   | 8.09E-10  | 3.76E-09  | C16orf58 | chr16 | - | 31500792 | 31520630 | 2793  |
| ENSG000001 | 357.4213 | 456.8448 | -0.35246 | 0.041735  | 0.076064  | ARMC5    | chr16 | + | 31469401 | 31478487 | 4844  |
| ENSG000001 | 598.3056 | 817.0936 | -0.44767 | 0.004783  | 0.010684  | PARN     | chr16 | - | 14529558 | 14726585 | 3078  |
| ENSG000001 | 687.575  | 377.9614 | 0.86278  | 9.65E-11  | 4.78E-10  | FTO      | chr16 | + | 53737875 | 54155853 | 11766 |
| ENSG000001 | 1986.361 | 2280.711 | -0.19892 | 0.058189  | 0.10168   | UQCRC2   | chr16 | + | 21963981 | 21994981 | 2615  |
| ENSG000001 | 1202.534 | 673.6061 | 0.83455  | 1.19E-10  | 5.85E-10  | CDR2     | chr16 | - | 22357257 | 22448486 | 2702  |
| ENSG000001 | 29.42472 | 6.133648 | 2.1716   | 0.000456  | 0.001194  | IGSF6    | chr16 | - | 21652609 | 21663981 | 1184  |
| ENSG000001 | 858.9658 | 831.8451 | 0.045889 | 0.71842   | 0.7915    | ARHGAP17 | chr16 | - | 24930706 | 25026987 | 4966  |
| ENSG000001 | 2.334388 | 12.31504 | -2.2786  | 0.004362  | 0.0098    | MYLK3    | chr16 | - | 46740891 | 46824319 | 3301  |
| ENSG000001 | 0        | 0.686276 | -0.84936 | 0.6309    | NA        | ABCC12   | chr16 | - | 48116884 | 48189929 | 5168  |
| ENSG000001 | 270.1748 | 125.8632 | 1.0964   | 3.80E-08  | 1.53E-07  | NKD1     | chr16 | + | 50582241 | 50670647 | 4592  |
| ENSG000001 | 1913.414 | 1495.426 | 0.35512  | 0.002398  | 0.005601  | DHX38    | chr16 | + | 72127461 | 72146811 | 4608  |
| ENSG000001 | 138.0182 | 84.63665 | 0.70559  | 0.016805  | 0.033694  | TXNL4B   | chr16 | - | 72078188 | 72128330 | 2556  |
| ENSG000001 | 5.072932 | 538.9738 | -6.6739  | 9.74E-60  | 2.83E-58  | MARVELD3 | chr16 | + | 71660064 | 71676017 | 2912  |
| ENSG000001 | 0.632843 | 46.27139 | -5.6625  | 3.38E-10  | 1.61E-09  | CHST4    | chr16 | + | 71559136 | 71572649 | 2412  |
| ENSG000001 | 3962.795 | 374.178  | 3.4028   | 2.02E-204 | 4.58E-202 | ZFH3     | chr16 | - | 72816784 | 73093597 | 16064 |
| ENSG000001 | 30.28185 | 2.757256 | 3.3685   | 3.56E-07  | 1.32E-06  | CLEC18B  | chr16 | - | 74442529 | 74455368 | 1865  |
| ENSG000001 | 1940.947 | 473.8574 | 2.032    | 2.25E-62  | 6.94E-61  | CPNE2    | chr16 | + | 57126449 | 57181878 | 3446  |
| ENSG000001 | 739.4988 | 22.72257 | 4.9996   | 5.08E-108 | 3.29E-106 | NLRC5    | chr16 | + | 57023397 | 57117443 | 6886  |
| ENSG000001 | 687.8019 | 1477.468 | -1.1015  | 3.40E-24  | 3.44E-23  | KATNB1   | chr16 | + | 57769642 | 57791162 | 3854  |
| ENSG000001 | 1232.479 | 257.4066 | 2.2556   | 4.00E-59  | 1.14E-57  | KIFC3    | chr16 | - | 57792129 | 57896957 | 3427  |
| ENSG000001 | 3.82697  | 8.242631 | -1.007   | 0.2665    | 0.3652    | ADAMTS18 | chr16 | - | 77281710 | 77469011 | 5913  |
| ENSG000001 | 1.960143 | 16.0386  | -2.8441  | 0.000677  | 0.001722  | NUDT7    | chr16 | + | 77756411 | 77776157 | 1096  |
| ENSG000001 | 67.25016 | 171.268  | -1.3392  | 1.35E-07  | 5.21E-07  | GCSH     | chr16 | - | 81115566 | 81130008 | 1552  |
| ENSG000001 | 1359.609 | 653.1681 | 1.0551   | 1.89E-09  | 8.51E-09  | CMTM3    | chr16 | + | 66637777 | 66647795 | 2330  |
| ENSG000001 | 2.645227 | 0.715414 | 1.5538   | 0.26985   | 0.36895   | CMTM2    | chr16 | + | 66613351 | 66622178 | 1054  |
| ENSG000001 | 16475.03 | 200.1085 | 6.3595   | 0         | 0         | CDH11    | chr16 | - | 64977656 | 65160015 | 6874  |
| ENSG000001 | 174.1403 | 32.87196 | 2.3903   | 4.45E-20  | 3.76E-19  | NOL3     | chr16 | + | 67204057 | 67209643 | 1885  |
| ENSG000001 | 1762.442 | 924.4331 | 0.93008  | 5.52E-14  | 3.39E-13  | MAP1LC3B | chr16 | + | 87417601 | 87438385 | 3085  |

|            |          |          |          |           |           |          |       |   |          |          |       |
|------------|----------|----------|----------|-----------|-----------|----------|-------|---|----------|----------|-------|
| ENSG000001 | 3045.698 | 1133.685 | 1.4248   | 4.69E-50  | 1.08E-48  | MBTPS1   | chr16 | - | 84087368 | 84150511 | 4338  |
| ENSG000001 | 548.1486 | 8.126078 | 5.7284   | 4.54E-12  | 2.46E-11  | CDH13    | chr16 | + | 82660408 | 83830204 | 4001  |
| ENSG000001 | 1410.182 | 805.9724 | 0.80501  | 6.13E-08  | 2.43E-07  | ZCCHC14  | chr16 | - | 87439852 | 87525651 | 7102  |
| ENSG000001 | 445.5015 | 296.8883 | 0.58386  | 0.001544  | 0.003718  | TLDC1    | chr16 | - | 84511681 | 84587639 | 3392  |
| ENSG000001 | 0        | 5.505649 | -3.9886  | 0.004644  | 0.010392  | ADAD2    | chr16 | + | 84224744 | 84230774 | 2558  |
| ENSG000001 | 91.01955 | 23.53755 | 1.9318   | 2.03E-07  | 7.70E-07  | OSGIN1   | chr16 | + | 83981887 | 83999937 | 2391  |
| ENSG000001 | 3.672853 | 9.574764 | -1.3269  | 0.078955  | 0.13203   | IRF8     | chr16 | + | 85932409 | 85956215 | 3030  |
| ENSG000001 | 2352.925 | 3079.602 | -0.38762 | 0.000995  | 0.002468  | RHOT2    | chr16 | + | 718086   | 724174   | 4361  |
| ENSG000001 | 1.370168 | 14.96306 | -3.1565  | 0.001867  | 0.004437  | RPL3L    | chr16 | - | 1993975  | 2007607  | 2182  |
| ENSG000001 | 191.9188 | 192.6339 | -0.00565 | 0.97208   | 0.9846    | ZSCAN32  | chr16 | - | 3432085  | 3451065  | 3169  |
| ENSG000001 | 26004.19 | 40618.1  | -0.64294 | 7.93E-13  | 4.53E-12  | RPS2     | chr16 | - | 2012053  | 2014861  | 1548  |
| ENSG000001 | 981.064  | 1426.162 | -0.53926 | 7.51E-07  | 2.71E-06  | NDUFB10  | chr16 | + | 2009509  | 2011976  | 958   |
| ENSG000001 | 643.5952 | 454.6047 | 0.50092  | 0.000515  | 0.001334  | PDPK1    | chr16 | + | 2587965  | 2653189  | 7241  |
| ENSG000001 | 25.50101 | 23.66947 | 0.10178  | 0.82086   | 0.87406   | TIGD7    | chr16 | - | 3348832  | 3355729  | 3612  |
| ENSG000001 | 1213.913 | 1466.058 | -0.27246 | 0.013462  | 0.02756   | DEF8     | chr16 | + | 90014333 | 90034468 | 4450  |
| ENSG000001 | 2313.965 | 1004.565 | 1.2017   | 4.76E-13  | 2.76E-12  | TCF25    | chr16 | + | 89940000 | 89977792 | 2233  |
| ENSG000001 | 911.9669 | 313.0942 | 1.54     | 1.01E-30  | 1.32E-29  | GALNS    | chr16 | - | 88880142 | 88923378 | 5682  |
| ENSG000001 | 68.41918 | 139.6041 | -1.0248  | 2.44E-05  | 7.48E-05  | GAS8     | chr16 | + | 90086037 | 90111383 | 3856  |
| ENSG000001 | 225.6499 | 423.3517 | -0.90549 | 2.80E-10  | 1.34E-09  | MED9     | chr17 | + | 17380300 | 17396540 | 3351  |
| ENSG000001 | 2897.678 | 2261.23  | 0.35766  | 0.000251  | 0.000678  | NCOR1    | chr17 | - | 15932471 | 16121499 | 10720 |
| ENSG000001 | 9.264774 | 4.380699 | 1.039    | 0.16898   | 0.25071   | CDRT15P1 | chr17 | + | 13927802 | 13928991 | 768   |
| ENSG000001 | 894.6586 | 1070.352 | -0.25762 | 0.19707   | 0.28506   | COPS3    | chr17 | - | 17150141 | 17184607 | 1692  |
| ENSG000001 | 205.6653 | 251.4659 | -0.28954 | 0.18943   | 0.27587   | GID4     | chr17 | + | 17942606 | 17971718 | 4237  |
| ENSG000001 | 192.1193 | 50.76703 | 1.9169   | 1.94E-17  | 1.45E-16  | ZNF287   | chr17 | - | 16454701 | 16472520 | 3373  |
| ENSG000001 | 1.359003 | 12.5999  | -3.0204  | 0.00069   | 0.001752  | MYOCD    | chr17 | + | 12569207 | 12672266 | 8466  |
| ENSG000001 | 747.0442 | 895.754  | -0.2613  | 0.035535  | 0.066055  | KSR1     | chr17 | + | 25783670 | 25953461 | 7234  |
| ENSG000001 | 625.0097 | 1118.172 | -0.83696 | 8.07E-07  | 2.91E-06  | CIRH1A   | chr16 | + | 69165194 | 69202941 | 4183  |
| ENSG000001 | 471.3324 | 388.3892 | 0.27816  | 0.079204  | 0.13239   | RANBP10  | chr16 | - | 67757005 | 67840555 | 5305  |
| ENSG000001 | 0.342542 | 30.40527 | -5.6788  | 2.34E-07  | 8.84E-07  | DPEP3    | chr16 | - | 68009566 | 68014732 | 2018  |
| ENSG000001 | 706.3908 | 475.8971 | 0.56792  | 0.000312  | 0.000833  | GFOD2    | chr16 | - | 67708434 | 67753324 | 2951  |
| ENSG000001 | 397.6899 | 961.1055 | -1.2696  | 1.14E-22  | 1.08E-21  | NOB1     | chr16 | - | 69775770 | 69788843 | 1734  |
| ENSG000001 | 346.5534 | 602.2138 | -0.79606 | 1.16E-10  | 5.70E-10  | PRPSAP2  | chr17 | + | 18743398 | 18834581 | 1910  |
| ENSG000001 | 944.2991 | 1319.957 | -0.48246 | 0.000229  | 0.000622  | MYO19    | chr17 | - | 34851477 | 34899284 | 5763  |
| ENSG000001 | 543.5693 | 645.5649 | -0.24679 | 0.31951   | 0.42245   | DDX52    | chr17 | - | 35969787 | 36003493 | 6359  |
| ENSG000001 | 375.3874 | 692.5438 | -0.88046 | 7.90E-05  | 0.000228  | RASL10B  | chr17 | + | 34058668 | 34070540 | 3205  |
| ENSG000001 | 0        | 0.937167 | -1.2408  | 0.48662   | NA        | UNC45B   | chr17 | + | 33474836 | 33516364 | 5679  |
| ENSG000001 | 177.3081 | 213.2301 | -0.2621  | 0.3059    | 0.40743   | PCTP     | chr17 | + | 53828340 | 53920191 | 3932  |
| ENSG000001 | 84.08819 | 600.3503 | -2.8275  | 3.63E-43  | 6.95E-42  | TOM1L1   | chr17 | + | 52976748 | 53039310 | 2500  |
| ENSG000001 | 249.4957 | 351.2028 | -0.49208 | 0.002008  | 0.00475   | C17orf80 | chr17 | + | 71228372 | 71245091 | 3635  |
| ENSG000001 | 266.1737 | 204.0833 | 0.3795   | 0.04612   | 0.082941  | TOB1     | chr17 | - | 48939584 | 48945339 | 2229  |
| ENSG000001 | 1265.617 | 790.445  | 0.67892  | 6.83E-11  | 3.42E-10  | VPSS3    | chr17 | - | 411908   | 624957   | 13106 |
| ENSG000001 | 0.36308  | 0        | 0.4146   | 0.81455   | NA        | SPATA22  | chr17 | - | 3343313  | 3417146  | 1704  |
| ENSG000001 | 975.4989 | 578.086  | 0.75257  | 3.68E-08  | 1.49E-07  | SGSM2    | chr17 | + | 2240792  | 2284352  | 4863  |
| ENSG000001 | 1016.266 | 1261.365 | -0.31145 | 0.002109  | 0.004973  | NPEPPS   | chr17 | + | 45600306 | 45700642 | 5074  |
| ENSG000001 | 0.36308  | 0.594029 | -0.39069 | 0.82661   | NA        | SKAP1    | chr17 | - | 46210802 | 46507637 | 1687  |
| ENSG000001 | 13.17487 | 7.489215 | 0.78564  | 0.24061   | 0.33547   | LRRC46   | chr17 | + | 45908993 | 45915079 | 2239  |
| ENSG000001 | 580.6435 | 547.5539 | 0.08431  | 0.65677   | 0.74137   | SCRN2    | chr17 | - | 45915058 | 45918699 | 1779  |
| ENSG000001 | 483.9065 | 268.3897 | 0.84884  | 7.59E-07  | 2.74E-06  | SSH2     | chr17 | - | 27952956 | 28257294 | 9327  |
| ENSG000001 | 3.309773 | 450.2162 | -6.9717  | 5.11E-52  | 1.24E-50  | RHBDL3   | chr17 | + | 30593195 | 30651680 | 4661  |
| ENSG000001 | 93.84627 | 113.5822 | -0.28013 | 0.23831   | 0.33289   | ARSG     | chr17 | + | 66255323 | 66418872 | 4642  |
| ENSG000001 | 9.439429 | 0.343138 | 4.0534   | 0.000968  | 0.002406  | ABCA8    | chr17 | - | 66863433 | 66951533 | 5677  |
| ENSG000001 | 1931.802 | 1980.631 | -0.03539 | 0.74548   | 0.81326   | G6PC3    | chr17 | + | 42148103 | 42153709 | 3027  |
| ENSG000001 | 9325.812 | 5913.445 | 0.65681  | 7.99E-13  | 4.56E-12  | CLTC     | chr17 | + | 57697219 | 57773671 | 7760  |
| ENSG000001 | 0        | 1.713273 | -2.2094  | 0.18675   | NA        | C17orf64 | chr17 | + | 58469790 | 58508782 | 950   |
| ENSG000001 | 365.861  | 277.3593 | 0.39785  | 0.027096  | 0.05188   | BCAS3    | chr17 | + | 58754814 | 59470199 | 4556  |
| ENSG000001 | 355.1295 | 351.7714 | 0.014742 | 0.94404   | 0.96396   | PTRH2    | chr17 | - | 57751997 | 57784987 | 4114  |
| ENSG000001 | 1631.168 | 1147.096 | 0.50763  | 0.000141  | 0.000396  | SS18     | chr18 | - | 23596578 | 23671181 | 3053  |
| ENSG000001 | 8.714083 | 400.3864 | -5.4913  | 1.75E-58  | 4.88E-57  | TAF4B    | chr18 | + | 23805900 | 23971649 | 5260  |
| ENSG000001 | 669.4189 | 1465.034 | -1.1284  | 2.29E-20  | 1.96E-19  | AFG3L2   | chr18 | - | 12328943 | 12377313 | 3367  |
| ENSG000001 | 61.85009 | 75.09934 | -0.2796  | 0.28841   | 0.38997   | SLMO1    | chr18 | + | 12407895 | 12432237 | 2001  |
| ENSG000001 | 429.2844 | 2325.675 | -2.4356  | 2.07E-104 | 1.27E-102 | IMPA2    | chr18 | + | 11981024 | 12030876 | 1616  |
| ENSG000001 | 32.32594 | 526.7883 | -4.0116  | 1.38E-49  | 3.12E-48  | GNAL     | chr18 | + | 11688955 | 11885684 | 6535  |
| ENSG000001 | 1681.601 | 745.5454 | 1.1725   | 7.97E-31  | 1.05E-29  | SLC39A6  | chr18 | - | 33688495 | 33709348 | 3543  |
| ENSG000001 | 995.8471 | 1782.11  | -0.83915 | 1.05E-16  | 7.51E-16  | RPRD1A   | chr18 | - | 33564350 | 33647539 | 4438  |
| ENSG000001 | 167.9615 | 275.6219 | -0.71209 | 0.001994  | 0.00472   | C18orf21 | chr18 | + | 33552046 | 33559241 | 1581  |

|                    |          |          |           |           |           |       |   |          |          |       |
|--------------------|----------|----------|-----------|-----------|-----------|-------|---|----------|----------|-------|
| ENSG0000013204.481 | 990.4008 | 1.6899   | 1.74E-19  | 1.43E-18  | GALNT1    | chr18 | + | 33161081 | 33291798 | 3847  |
| ENSG000001117.7111 | 32.8825  | 1.8173   | 4.05E-09  | 1.77E-08  | ASXL3     | chr18 | + | 31158579 | 31331156 | 11344 |
| ENSG0000010        | 2.401965 | -2.0937  | 0.23902   | 0.33362   | ADCYAP1   | chr18 | + | 904944   | 912173   | 3346  |
| ENSG0000012.323223 | 0.594029 | 1.3938   | 0.37547   | 0.47961   | MEP1B     | chr18 | + | 29765032 | 29800367 | 2312  |
| ENSG0000010        | 0.297015 | -0.41864 | 0.81278   | NA        | SLC25A52  | chr18 | - | 29339525 | 29340843 | 1319  |
| ENSG000001427.5837 | 116.1541 | 1.873    | 5.52E-20  | 4.65E-19  | GAREM     | chr18 | - | 29704840 | 30050447 | 7033  |
| ENSG000001227.7351 | 507.3638 | -1.1503  | 1.29E-08  | 5.43E-08  | ESCO1     | chr18 | - | 19109242 | 19180845 | 4773  |
| ENSG000001590.5344 | 1258.463 | -1.0885  | 7.88E-08  | 3.10E-07  | OSBPL1A   | chr18 | - | 21742008 | 21977844 | 4195  |
| ENSG00000174.88275 | 13.97486 | 2.3924   | 2.97E-08  | 1.21E-07  | GATA6     | chr18 | + | 19749404 | 19782491 | 3770  |
| ENSG00000146.4     | 8.230478 | 2.4438   | 3.75E-05  | 0.000112  | GREB1L    | chr18 | + | 18822203 | 19102947 | 6318  |
| ENSG000001256.6572 | 117.4303 | 1.1205   | 1.72E-09  | 7.76E-09  | C18orf8   | chr18 | + | 21083473 | 21111746 | 2162  |
| ENSG0000012205.178 | 4168.729 | -0.9179  | 3.58E-25  | 3.77E-24  | PELP1     | chr17 | - | 4574679  | 4607632  | 4105  |
| ENSG0000011236.012 | 585.3451 | 1.0767   | 6.66E-12  | 3.57E-11  | NPC1      | chr18 | - | 21086307 | 21166862 | 5157  |
| ENSG0000019.12859  | 1.698704 | 2.2824   | 0.011179  | 0.023248  | SLC14A1   | chr18 | + | 43304092 | 43332485 | 3971  |
| ENSG000001191.1721 | 1185.574 | -2.6267  | 1.38E-52  | 3.39E-51  | ARRB2     | chr17 | + | 4613784  | 4624794  | 1895  |
| ENSG0000010.975385 | 29.6963  | -4.5881  | 1.00E-07  | 3.92E-07  | SLC13A5   | chr17 | - | 6588032  | 6616886  | 5360  |
| ENSG0000010.36308  | 5.520218 | -3.1965  | 0.020931  | 0.041112  | ZMYND15   | chr17 | + | 4643319  | 4649411  | 2411  |
| ENSG000001355.9373 | 628.9945 | -0.81816 | 1.67E-08  | 6.94E-08  | WRAP53    | chr17 | + | 7589389  | 7606820  | 4011  |
| ENSG0000011473.824 | 1767.693 | -0.26227 | 0.070374  | 0.11973   | MINK1     | chr17 | + | 4736683  | 4801356  | 5299  |
| ENSG000001578.6488 | 531.6011 | 0.12135  | 0.51127   | 0.6144    | SAT2      | chr17 | - | 7529552  | 7531194  | 1563  |
| ENSG000001114.6715 | 147.1948 | -0.35829 | 0.29657   | 0.39867   | ASGR1     | chr17 | - | 7076750  | 7082883  | 2083  |
| ENSG0000015.36242  | 142.7702 | -4.6054  | 1.75E-21  | 1.58E-20  | PIK3R5    | chr17 | - | 8782233  | 8869029  | 4488  |
| ENSG0000011774.643 | 2423.763 | -0.44876 | 0.001398  | 0.003393  | TP53      | chr17 | - | 7565097  | 7590856  | 2653  |
| ENSG000001166.0369 | 180.7594 | -0.12346 | 0.60122   | 0.69482   | CCDC40    | chr17 | + | 78010435 | 78074412 | 4294  |
| ENSG0000015472.495 | 2298.452 | 1.2502   | 1.40E-26  | 1.56E-25  | ARHGDI2A  | chr17 | - | 79825597 | 79829282 | 1906  |
| ENSG000001367.1516 | 1482.728 | -2.0075  | 1.71E-22  | 1.61E-21  | TMC6      | chr17 | - | 76106539 | 76128488 | 5268  |
| ENSG000001750.9622 | 1050.585 | -0.48223 | 0.020275  | 0.039946  | SLC16A3   | chr17 | + | 80186273 | 80219005 | 4830  |
| ENSG0000011.016461 | 13.15351 | -3.3983  | 0.000623  | 0.001595  | CARD14    | chr17 | + | 78143791 | 78183130 | 4537  |
| ENSG00000174.36735 | 148.3631 | -0.98537 | 7.20E-05  | 0.000209  | TTYH2     | chr17 | + | 72209653 | 72258155 | 3661  |
| ENSG000001167.1985 | 57.83389 | 1.518    | 1.53E-07  | 5.88E-07  | RAB40B    | chr17 | - | 80612849 | 80656604 | 3859  |
| ENSG0000011353.72  | 2539.111 | -0.90562 | 5.84E-09  | 2.52E-08  | EIF4A3    | chr17 | - | 78109013 | 78120982 | 3593  |
| ENSG0000012827.133 | 2521.038 | 0.16512  | 0.22162   | 0.31377   | CSNK1D    | chr17 | - | 80196899 | 80231607 | 6094  |
| ENSG0000011271.823 | 1777.895 | -0.48294 | 3.14E-06  | 1.07E-05  | ANAPC11   | chr17 | + | 79848666 | 79858867 | 2136  |
| ENSG0000012090.127 | 4736.084 | -1.1791  | 3.97E-25  | 4.17E-24  | TBCD      | chr17 | + | 80709940 | 80900724 | 4094  |
| ENSG000001736.1894 | 513.3739 | 0.5186   | 0.000179  | 0.000493  | FN3KRP    | chr17 | + | 80674559 | 80688204 | 1849  |
| ENSG000001812.4832 | 1337.512 | -0.71803 | 8.53E-07  | 3.06E-06  | NARF      | chr17 | + | 80416056 | 80446143 | 2598  |
| ENSG0000011079.837 | 995.0125 | 0.1173   | 0.30467   | 0.40618   | RPTOR     | chr17 | + | 78518619 | 78940171 | 6408  |
| ENSG0000012244.464 | 1405.387 | 0.67504  | 1.81E-10  | 8.78E-10  | FOXK2     | chr17 | + | 80477589 | 80602538 | 5265  |
| ENSG000001867.9966 | 1250.51  | -0.52588 | 0.002098  | 0.004948  | TRIM65    | chr17 | - | 73876416 | 73893084 | 3439  |
| ENSG000001161.9391 | 43.28835 | 1.8941   | 1.20E-16  | 8.63E-16  | CBX8      | chr17 | - | 77765931 | 77775482 | 3791  |
| ENSG0000019.740895 | 16.46995 | -0.73362 | 0.17537   | 0.2586    | SECTM1    | chr17 | - | 80278900 | 80291950 | 2235  |
| ENSG000001142.7399 | 215.1999 | -0.59091 | 0.016106  | 0.032413  | TRNF157   | chr17 | - | 74138534 | 74236454 | 4955  |
| ENSG000001483.9029 | 724.1304 | -0.58093 | 1.07E-05  | 3.43E-05  | AZI1      | chr17 | - | 79163393 | 79196799 | 3673  |
| ENSG0000014.345959 | 16.97415 | -1.8478  | 0.011199  | 0.023285  | ZNF750    | chr17 | - | 80787311 | 80798454 | 3713  |
| ENSG0000011253.733 | 1980.194 | -0.65844 | 2.71E-09  | 1.21E-08  | WDR45B    | chr17 | - | 80572438 | 80606429 | 2587  |
| ENSG000001465.2637 | 87.02968 | 2.3985   | 7.69E-13  | 4.41E-12  | CBX4      | chr17 | - | 77806955 | 77813228 | 2664  |
| ENSG0000012.229907 | 175.5136 | -6.0648  | 2.16E-23  | 2.12E-22  | RNF165    | chr18 | + | 43906772 | 44043103 | 7596  |
| ENSG000001507.672  | 537.6029 | -0.08235 | 0.5009    | 0.60456   | DYM       | chr18 | - | 46570039 | 46987717 | 2703  |
| ENSG0000013.52811  | 241.9348 | -6.0475  | 3.69E-32  | 5.12E-31  | MAPK4     | chr18 | + | 48086448 | 48258194 | 4770  |
| ENSG00000136.55885 | 27.56692 | 0.40371  | 0.35878   | 0.46305   | ELAC1     | chr18 | + | 48494361 | 48514491 | 2235  |
| ENSG0000011338.797 | 958.9183 | 0.48137  | 2.39E-05  | 7.32E-05  | MBD1      | chr18 | - | 47793252 | 47808144 | 4905  |
| ENSG000001935.4808 | 1045.025 | -0.16051 | 0.18032   | 0.26467   | SMAD4     | chr18 | + | 48494410 | 48611415 | 8769  |
| ENSG0000018.120688 | 58.56125 | -2.7539  | 8.57E-08  | 3.36E-07  | TNFRSF11A | chr18 | + | 59992520 | 60058516 | 8138  |
| ENSG000001224.3067 | 350.7697 | -0.64299 | 0.002298  | 0.005384  | ZCCHC2    | chr18 | + | 60190240 | 60254942 | 5959  |
| ENSG0000015.415474 | 3.855484 | 0.43205  | 0.63496   | 0.72344   | FBXO15    | chr18 | - | 71740588 | 71815100 | 3187  |
| ENSG0000010.580602 | 0.297015 | 0.36801  | 0.83644   | NA        | CBLN2     | chr18 | - | 70203915 | 70305756 | 3336  |
| ENSG000001850.1933 | 2449.612 | -1.5256  | 2.49E-40  | 4.41E-39  | PMAIP1    | chr18 | + | 57567180 | 57571538 | 1948  |
| ENSG0000014236.449 | 861.2604 | 2.2926   | 4.81E-43  | 9.19E-42  | LEPREL4   | chr17 | - | 39958199 | 39968856 | 2791  |
| ENSG000001823.917  | 924.4409 | -0.16524 | 0.12165   | 0.19107   | NT5C3B    | chr17 | - | 39981335 | 39992523 | 1729  |
| ENSG000001904.2737 | 731.5912 | 0.30439  | 0.01939   | 0.038385  | FAM134C   | chr17 | - | 40731531 | 40762641 | 4149  |
| ENSG0000012848.548 | 1733.688 | 0.71566  | 3.37E-14  | 2.10E-13  | PIP4K2B   | chr17 | - | 36921942 | 36956379 | 5734  |
| ENSG000001507.4082 | 5999.769 | -3.5587  | 7.24E-152 | 8.38E-150 | ERBB2     | chr17 | + | 37844167 | 37886679 | 4930  |
| ENSG0000010.580602 | 1052.038 | -9.9526  | 2.93E-35  | 4.48E-34  | GRB7      | chr17 | + | 37894180 | 37903544 | 2243  |
| ENSG000001153.6406 | 194.8505 | -0.33646 | 0.12574   | 0.19636   | MIEN1     | chr17 | - | 37884749 | 37887040 | 1999  |
| ENSG0000010        | 83.11303 | -7.8999  | 5.98E-13  | 3.45E-12  | PNMT      | chr17 | + | 37824234 | 37826728 | 1253  |

|            |          |          |          |           |           |            |       |   |          |          |       |
|------------|----------|----------|----------|-----------|-----------|------------|-------|---|----------|----------|-------|
| ENSG000001 | 7.677084 | 8.572072 | -0.15076 | 0.87148   | 0.91019   | ARL5C      | chr17 | - | 37313147 | 37324102 | 2777  |
| ENSG000001 | 14.99109 | 126.4396 | -3.0552  | 7.55E-17  | 5.48E-16  | STAC2      | chr17 | - | 37366789 | 37382125 | 3362  |
| ENSG000001 | 2825.584 | 2591.78  | 0.12419  | 0.45917   | 0.5644    | IGFBP4     | chr17 | + | 38599702 | 38613983 | 2200  |
| ENSG000001 | 20190.86 | 3456.888 | 2.544    | 9.97E-124 | 8.26E-122 | FKBP10     | chr17 | + | 39968932 | 39979465 | 2826  |
| ENSG000001 | 1170.183 | 1059.97  | 0.14284  | 0.3406    | 0.44458   | TXNL4A     | chr18 | - | 77732867 | 77793949 | 1448  |
| ENSG000001 | 28.26009 | 361.5388 | -3.6665  | 1.88E-46  | 3.90E-45  | CACNA1A    | chr19 | - | 13317256 | 13734804 | 8392  |
| ENSG000001 | 73.57924 | 98.16854 | -0.41036 | 0.36689   | 0.47147   | CTB-5506.1 | chr19 | + | 14183348 | 14185874 | 2187  |
| ENSG000001 | 1484.965 | 2327.422 | -0.64632 | 0.000829  | 0.002083  | SAMD1      | chr19 | - | 14198652 | 14201848 | 2164  |
| ENSG000001 | 2810.72  | 3298.809 | -0.23072 | 0.05977   | 0.10415   | BRD4       | chr19 | - | 15347647 | 15443356 | 5852  |
| ENSG000001 | 288.4923 | 456.3815 | -0.65933 | 6.93E-05  | 0.000201  | SLC39A3    | chr19 | - | 2732202  | 2740150  | 2940  |
| ENSG000001 | 3561.91  | 113.8863 | 4.9521   | 4.58E-186 | 8.29E-184 | NFIC       | chr19 | + | 3359561  | 3469215  | 8068  |
| ENSG000001 | 282.9231 | 90.035   | 1.6382   | 1.09E-11  | 5.75E-11  | TPGS1      | chr19 | + | 507299   | 519654   | 2873  |
| ENSG000001 | 16.79369 | 991.1336 | -5.8345  | 1.29E-126 | 1.11E-124 | PPAP2C     | chr19 | - | 281043   | 291393   | 1262  |
| ENSG000001 | 453.7955 | 336.8036 | 0.42998  | 0.025313  | 0.048803  | PRDM15     | chr21 | - | 43218385 | 43299591 | 7072  |
| ENSG000001 | 4155.898 | 4507.752 | -0.11704 | 0.37632   | 0.48035   | PFKL       | chr21 | + | 45719934 | 45747259 | 6007  |
| ENSG000001 | 2.635854 | 5.92888  | -1.0453  | 0.3414    | 0.44528   | FEM1A      | chr19 | + | 4791728  | 4795571  | 3844  |
| ENSG000001 | 1.597063 | 23.25436 | -3.5516  | 0.000139  | 0.000389  | VAV1       | chr19 | + | 6772725  | 6857377  | 2825  |
| ENSG000001 | 726.2669 | 602.7915 | 0.26759  | 0.13001   | 0.20179   | MVB12A     | chr19 | + | 17516531 | 17544533 | 2216  |
| ENSG000001 | 0        | 0.640152 | -0.82869 | 0.63935   | NA        | CIB3       | chr19 | - | 16272179 | 16284336 | 711   |
| ENSG000001 | 0        | 0.357707 | -0.41864 | 0.81278   | NA        | MED26      | chr19 | - | 16589878 | 16739015 | 2567  |
| ENSG000001 | 3339.885 | 2360.421 | 0.50068  | 7.91E-07  | 2.85E-06  | SH3GL1     | chr19 | - | 4360367  | 4400544  | 2516  |
| ENSG000001 | 327.7987 | 556.9195 | -0.76151 | 0.000154  | 0.00043   | DUS3L      | chr19 | - | 5784843  | 5791249  | 2301  |
| ENSG000001 | 1513.834 | 1035.629 | 0.54687  | 0.00073   | 0.001848  | DPP9       | chr19 | - | 4675236  | 4724685  | 4295  |
| ENSG000001 | 921.8873 | 848.2893 | 0.11962  | 0.35349   | 0.45773   | CCDC97     | chr19 | + | 41816094 | 41830788 | 3322  |
| ENSG000001 | 65.36638 | 30.83253 | 1.074    | 0.001486  | 0.003591  | TMEM91     | chr19 | + | 41856816 | 41889988 | 1843  |
| ENSG000001 | 109.8933 | 139.7571 | -0.34525 | 0.20224   | 0.29099   | ZFP14      | chr19 | - | 36827162 | 36870101 | 5682  |
| ENSG000001 | 382.8183 | 335.7158 | 0.18939  | 0.3603    | 0.46446   | SIRT3      | chr11 | - | 215458   | 236931   | 2627  |
| ENSG000001 | 2595.881 | 4843.154 | -0.89876 | 1.20E-18  | 9.47E-18  | IFITM3     | chr11 | - | 319669   | 327537   | 808   |
| ENSG000001 | 380.817  | 659.5565 | -0.79167 | 1.72E-05  | 5.38E-05  | ATHL1      | chr11 | + | 289135   | 296107   | 4418  |
| ENSG000001 | 161.7978 | 335.3613 | -1.0486  | 3.80E-10  | 1.81E-09  | HUNK       | chr21 | + | 33245628 | 33416946 | 7385  |
| ENSG000001 | 93602.74 | 10222.59 | 3.1909   | 2.41E-148 | 2.68E-146 | COL6A1     | chr21 | + | 47401651 | 47424964 | 4238  |
| ENSG000001 | 579.9026 | 173.638  | 1.7374   | 8.52E-26  | 9.19E-25  | IFNAR1     | chr21 | + | 34696734 | 34732168 | 6139  |
| ENSG000001 | 1805.312 | 1706.562 | 0.081592 | 0.51729   | 0.62002   | SOD1       | chr21 | + | 33031935 | 33041244 | 1746  |
| ENSG000001 | 79408.37 | 3072.337 | 4.6833   | 1.76E-212 | 4.38E-210 | COL6A2     | chr21 | + | 47518011 | 47552763 | 3461  |
| ENSG000001 | 170.2659 | 320.9461 | -0.91493 | 7.52E-08  | 2.96E-07  | SIK1       | chr21 | - | 44834395 | 44847008 | 4712  |
| ENSG000001 | 0.580602 | 2.497501 | -1.4998  | 0.33946   | 0.44333   | DNMT3L     | chr21 | - | 45666222 | 45682099 | 1706  |
| ENSG000001 | 0.632843 | 6.267186 | -2.8331  | 0.016828  | 0.033736  | TRPM2      | chr21 | + | 45770046 | 45862964 | 6221  |
| ENSG000001 | 2228.611 | 1247.635 | 0.83535  | 7.04E-10  | 3.29E-09  | SCYL1      | chr11 | + | 65292548 | 65306175 | 2715  |
| ENSG000001 | 439.6055 | 147.358  | 1.5718   | 2.51E-20  | 2.15E-19  | TMEM50B    | chr21 | - | 34804792 | 34852318 | 3062  |
| ENSG000001 | 16478.75 | 15634.82 | 0.07583  | 0.49634   | 0.60012   | APP        | chr21 | - | 27252861 | 27543446 | 3578  |
| ENSG000001 | 421.329  | 327.0954 | 0.36295  | 0.070032  | 0.11926   | DOPEY2     | chr21 | + | 37529080 | 37666572 | 7685  |
| ENSG000001 | 1335.486 | 1615.361 | -0.27406 | 0.045891  | 0.082545  | URB1       | chr21 | - | 33683329 | 33765335 | 10832 |
| ENSG000001 | 4429.467 | 2447.567 | 0.85451  | 2.23E-10  | 1.08E-09  | AKT1       | chr14 | - | 1.05E+08 | 1.05E+08 | 8396  |
| ENSG000001 | 0.290301 | 0        | 0.4146   | 0.81455   | NA        | IL19       | chr1  | + | 2.07E+08 | 2.07E+08 | 1473  |
| ENSG000001 | 2021.701 | 43.4656  | 5.5297   | 3.33E-213 | 8.46E-211 | EMP3       | chr19 | + | 48824766 | 48833810 | 876   |
| ENSG000001 | 3848.504 | 5170.304 | -0.42544 | 2.39E-05  | 7.32E-05  | SAE1       | chr19 | + | 47616531 | 47713886 | 2306  |
| ENSG000001 | 6.181896 | 0.594029 | 2.8064   | 0.022518  | 0.043945  | NTN5       | chr19 | - | 49164664 | 49176338 | 2426  |
| ENSG000001 | 32.58633 | 378.7578 | -3.5205  | 3.29E-32  | 4.57E-31  | LMTK3      | chr19 | - | 48988528 | 49016446 | 5113  |
| ENSG000001 | 79.00849 | 191.1414 | -1.2706  | 6.46E-09  | 2.78E-08  | GEMIN7     | chr19 | + | 45582453 | 45594782 | 1657  |
| ENSG000001 | 0.290301 | 336.0109 | -8.9024  | 1.02E-19  | 8.48E-19  | CBLC       | chr19 | + | 45281126 | 45303891 | 1579  |
| ENSG000001 | 1350.656 | 756.1422 | 0.8353   | 1.19E-08  | 5.01E-08  | WTIP       | chr19 | + | 34971874 | 34997258 | 7714  |
| ENSG000001 | 589.2425 | 245.4232 | 1.26     | 6.86E-10  | 3.21E-09  | ADAMTS10   | chr19 | - | 8645126  | 8675620  | 4230  |
| ENSG000001 | 0        | 22.8124  | -6.1411  | 1.03E-07  | 4.03E-07  | SLC6A3     | chr5  | - | 1392909  | 1445545  | 3932  |
| ENSG000001 | 1275.942 | 474.6575 | 1.4221   | 7.71E-15  | 5.01E-14  | RNPEPL1    | chr2  | + | 2.42E+08 | 2.42E+08 | 3944  |
| ENSG000001 | 718.4013 | 809.4013 | -0.17212 | 0.2609    | 0.35889   | CAPN10     | chr2  | + | 2.42E+08 | 2.42E+08 | 4406  |
| ENSG000001 | 10.48759 | 62.5457  | -2.525   | 4.54E-07  | 1.67E-06  | MYO1F      | chr19 | - | 8585674  | 8642461  | 4303  |
| ENSG000001 | 134.5407 | 116.3554 | 0.20841  | 0.37913   | 0.48326   | ERVK3-1    | chr19 | + | 58816715 | 58827023 | 3889  |
| ENSG000001 | 1.576526 | 147.8693 | -6.2655  | 1.12E-22  | 1.06E-21  | NLRP12     | chr19 | - | 54296857 | 54327648 | 3801  |
| ENSG000001 | 2.209369 | 323.791  | -6.9596  | 6.56E-37  | 1.06E-35  | CACNG8     | chr19 | + | 54466294 | 54493469 | 8747  |
| ENSG000001 | 629.4032 | 1799.648 | -1.5113  | 6.10E-18  | 4.66E-17  | ZNF787     | chr19 | - | 56598732 | 56632649 | 1928  |
| ENSG000001 | 445.2522 | 491.1993 | -0.14264 | 0.34066   | 0.44459   | C19orf52   | chr19 | + | 11039409 | 11044211 | 1425  |
| ENSG000001 | 0        | 2042.635 | -12.114  | 3.14E-30  | 4.03E-29  | FBN3       | chr19 | - | 8130286  | 8214730  | 9362  |
| ENSG000001 | 2887.813 | 5027.829 | -0.79901 | 1.70E-11  | 8.87E-11  | CARM1      | chr19 | + | 10982189 | 11033453 | 3032  |
| ENSG000001 | 795.9226 | 330.9625 | 1.2591   | 4.08E-08  | 1.64E-07  | EVI5L      | chr19 | + | 7895119  | 7929862  | 3855  |
| ENSG000001 | 1.233984 | 21.00929 | -3.7747  | 6.83E-06  | 2.24E-05  | SLC47A1    | chr17 | + | 19398698 | 19482347 | 3280  |

|            |          |          |          |           |           |           |       |   |          |          |       |
|------------|----------|----------|----------|-----------|-----------|-----------|-------|---|----------|----------|-------|
| ENSG000001 | 2082.423 | 2504.933 | -0.26595 | 0.007169  | 0.015484  | PSMB6     | chr17 | + | 4699439  | 4701790  | 844   |
| ENSG000001 | 0        | 0.297015 | -0.41864 | 0.81278   | NA        | GPR32     | chr19 | + | 51273721 | 51274989 | 1269  |
| ENSG000001 | 0.943682 | 28.04614 | -4.521   | 1.50E-07  | 5.77E-07  | SIGLEC10  | chr19 | - | 51913275 | 51921057 | 3109  |
| ENSG000001 | 8.225983 | 10.58961 | -0.35261 | 0.5749    | 0.67183   | ACPT      | chr19 | + | 51293672 | 51298481 | 1347  |
| ENSG000001 | 0        | 0.357707 | -0.41864 | 0.81278   | NA        | KLK3      | chr19 | + | 51358171 | 51364020 | 2702  |
| ENSG000001 | 184.2794 | 136.2415 | 0.4361   | 0.012762  | 0.026254  | ZNF473    | chr19 | + | 50528971 | 50556671 | 4828  |
| ENSG000001 | 7.375617 | 126.9632 | -4.0541  | 1.01E-18  | 8.00E-18  | FAM71E1   | chr19 | - | 50970042 | 50980010 | 1281  |
| ENSG000001 | 16187.64 | 19612.22 | -0.27651 | 0.019714  | 0.03896   | RPS11     | chr19 | + | 49999622 | 50002946 | 1133  |
| ENSG000001 | 1.774324 | 1.888903 | -0.11796 | 0.92936   | 0.95316   | PTH2      | chr19 | - | 49925671 | 49926698 | 459   |
| ENSG000001 | 19406.53 | 35849.24 | -0.88444 | 2.86E-14  | 1.79E-13  | RPL13A    | chr19 | + | 49990811 | 49995565 | 2312  |
| ENSG000001 | 212.0944 | 361.818  | -0.76873 | 1.00E-05  | 3.21E-05  | CTU1      | chr19 | - | 51600863 | 51611627 | 2087  |
| ENSG000001 | 1305.246 | 1500.524 | -0.20053 | 0.06261   | 0.10826   | NOSIP     | chr19 | - | 50058968 | 50093519 | 2615  |
| ENSG000001 | 0.290301 | 1260.973 | -10.739  | 3.00E-32  | 4.17E-31  | IGLON5    | chr19 | + | 51815102 | 51833608 | 2606  |
| ENSG000001 | 5091.719 | 382.4985 | 3.7118   | 1.19E-41  | 2.18E-40  | RCN3      | chr19 | + | 50030875 | 50050219 | 1859  |
| ENSG000001 | 169.5509 | 306.0891 | -0.84748 | 0.001269  | 0.003097  | ZNF614    | chr19 | - | 52516018 | 52533493 | 4818  |
| ENSG000001 | 0.342542 | 1.577319 | -1.4728  | 0.37548   | 0.47961   | SLC2A5    | chr1  | - | 9095166  | 9148537  | 4165  |
| ENSG000001 | 3502.982 | 3630.912 | -0.05156 | 0.60777   | 0.70056   | RERE      | chr1  | - | 8412457  | 8877702  | 8026  |
| ENSG000001 | 0        | 8.124535 | -4.5293  | 0.000869  | 0.002179  | MMEL1     | chr1  | - | 2522078  | 2564481  | 2902  |
| ENSG000001 | 0        | 1.903472 | -2.1599  | 0.21236   | NA        | C1orf222  | chr1  | - | 1853396  | 1935276  | 4710  |
| ENSG000001 | 714.1637 | 48.33935 | 3.8365   | 3.30E-25  | 3.49E-24  | PRDM16    | chr1  | + | 2985732  | 3355185  | 8721  |
| ENSG000001 | 0        | 0.297015 | -0.41864 | 0.81278   | NA        | CELA2A    | chr1  | + | 15783223 | 15798586 | 919   |
| ENSG000001 | 0.342542 | 28.52778 | -5.5051  | 1.82E-06  | 6.35E-06  | PADI3     | chr1  | + | 17575593 | 17610728 | 3189  |
| ENSG000001 | 16.14211 | 18.04485 | -0.15196 | 0.76774   | 0.83211   | FHAD1     | chr1  | + | 15573768 | 15726858 | 5090  |
| ENSG000001 | 1.649304 | 2.514486 | -0.53593 | 0.67249   | 0.75476   | PADI1     | chr1  | + | 17531621 | 17572500 | 3846  |
| ENSG000001 | 4411.529 | 1191.005 | 1.8859   | 1.31E-39  | 2.27E-38  | EPHA2     | chr1  | - | 16450832 | 16482582 | 3964  |
| ENSG000001 | 193.8731 | 1919.742 | -3.2991  | 1.11E-108 | 7.26E-107 | ARHGEF19  | chr1  | - | 16524349 | 16539140 | 3029  |
| ENSG000001 | 1778.201 | 1121.803 | 0.66368  | 8.96E-11  | 4.45E-10  | EFHD2     | chr1  | + | 15736391 | 15756839 | 2419  |
| ENSG000001 | 471.8642 | 678.8337 | -0.52266 | 0.010212  | 0.021431  | PEX14     | chr1  | + | 10532345 | 10690815 | 1985  |
| ENSG000001 | 6690.565 | 6181.242 | 0.11424  | 0.31399   | 0.41636   | PGD       | chr1  | + | 10458649 | 10480201 | 1959  |
| ENSG000001 | 6.089393 | 3.541484 | 0.70641  | 0.4255    | 0.53086   | MYOM3     | chr1  | - | 24382525 | 24438665 | 5809  |
| ENSG000001 | 3675.42  | 570.9867 | 2.681    | 5.21E-62  | 1.59E-60  | SH3BGR13  | chr1  | + | 26605667 | 26608007 | 1655  |
| ENSG000001 | 6.919221 | 290.8501 | -5.3368  | 1.98E-47  | 4.22E-46  | CNKSR1    | chr1  | + | 26503894 | 26516377 | 2673  |
| ENSG000001 | 6875.878 | 11445.48 | -0.73447 | 9.18E-14  | 5.55E-13  | RPL11     | chr1  | + | 24018269 | 24022915 | 994   |
| ENSG000001 | 0        | 3.708992 | -3.4192  | 0.020234  | 0.039879  | IL22RA1   | chr1  | - | 24446261 | 24469611 | 2798  |
| ENSG000001 | 0.290301 | 0.951736 | -0.90191 | 0.60254   | NA        | ZNF593    | chr1  | + | 26496362 | 26498551 | 1885  |
| ENSG000001 | 698.5778 | 246.5653 | 1.4987   | 4.16E-25  | 4.37E-24  | C1orf216  | chr1  | - | 36179476 | 36185073 | 3218  |
| ENSG000001 | 873.6104 | 1750.497 | -1.0016  | 4.80E-19  | 3.85E-18  | KIAA0319L | chr1  | - | 35899091 | 36023551 | 4789  |
| ENSG000001 | 440.7456 | 266.2919 | 0.71959  | 0.024323  | 0.047065  | EVA1B     | chr1  | - | 36787632 | 36789755 | 1054  |
| ENSG000001 | 7.137557 | 63.25353 | -3.1132  | 9.77E-11  | 4.83E-10  | C1orf94   | chr1  | + | 34632484 | 34684732 | 2287  |
| ENSG000001 | 0.290301 | 2.027273 | -1.8784  | 0.22992   | 0.32325   | DMRTA2    | chr1  | - | 50883222 | 50889172 | 3137  |
| ENSG000001 | 377.9851 | 580.6971 | -0.61738 | 0.000751  | 0.001898  | PLK4      | chr4  | + | 1.29E+08 | 1.29E+08 | 3841  |
| ENSG000001 | 907.6685 | 299.8336 | 1.5902   | 1.22E-11  | 6.43E-11  | MAP3K6    | chr1  | - | 27681675 | 27693383 | 4309  |
| ENSG000001 | 2.49967  | 8.24592  | -1.5566  | 0.10725   | 0.17133   | FCN3      | chr1  | - | 27695603 | 27701315 | 1030  |
| ENSG000001 | 515.1378 | 545.0335 | -0.08025 | 0.56949   | 0.66669   | GPN2      | chr1  | - | 27205773 | 27216788 | 1529  |
| ENSG000001 | 166.537  | 162.7251 | 0.032375 | 0.91809   | 0.94474   | SYTL1     | chr1  | + | 27668513 | 27680421 | 2681  |
| ENSG000001 | 1074.104 | 938.584  | 0.19364  | 0.21712   | 0.30847   | WDTC1     | chr1  | + | 27561007 | 27635110 | 5149  |
| ENSG000001 | 224.8954 | 206.13   | 0.12327  | 0.66885   | 0.75148   | NBPF3     | chr1  | + | 21766621 | 21811498 | 4401  |
| ENSG000001 | 11624.05 | 4329.514 | 1.4204   | 5.12E-13  | 2.97E-12  | HSPG2     | chr1  | - | 22148738 | 22263790 | 14327 |
| ENSG000001 | 206.8539 | 321.5828 | -0.63664 | 7.08E-05  | 0.000205  | ITGB3BP   | chr1  | - | 63906441 | 64059392 | 1285  |
| ENSG000001 | 6561.638 | 13914.78 | -1.0836  | 7.46E-27  | 8.42E-26  | SERBP1    | chr1  | - | 67873493 | 67896098 | 6676  |
| ENSG000001 | 294.7907 | 205.4944 | 0.51771  | 0.003889  | 0.0088    | BCL10     | chr1  | - | 85731931 | 85742773 | 2819  |
| ENSG000001 | 2982.963 | 510.8653 | 2.5381   | 1.25E-40  | 2.24E-39  | CYR61     | chr1  | + | 86046444 | 86049645 | 2290  |
| ENSG000001 | 497.6555 | 287.3503 | 0.79244  | 1.57E-07  | 6.03E-07  | PRKACB    | chr1  | + | 84543745 | 84704181 | 4513  |
| ENSG000001 | 351.3984 | 229.4008 | 0.61616  | 0.000184  | 0.000508  | PIGK      | chr1  | - | 77554675 | 77685115 | 4596  |
| ENSG000001 | 0.290301 | 155.6243 | -7.8898  | 3.33E-15  | 2.21E-14  | TINAGL1   | chr1  | + | 32042116 | 32053288 | 4759  |
| ENSG000001 | 437.4623 | 17.37073 | 4.6197   | 8.30E-68  | 2.87E-66  | ADC       | chr1  | + | 33546705 | 33586131 | 5848  |
| ENSG000001 | 9955.567 | 13781.26 | -0.46875 | 7.22E-07  | 2.61E-06  | RPS8      | chr1  | + | 45240923 | 45244451 | 1115  |
| ENSG000001 | 1050.829 | 1971.319 | -0.90577 | 2.98E-08  | 1.21E-07  | KIF2C     | chr1  | + | 45205490 | 45233439 | 2955  |
| ENSG000001 | 3911.206 | 11443.86 | -1.5467  | 9.78E-31  | 1.28E-29  | PTPRF     | chr1  | + | 43990858 | 44089343 | 7727  |
| ENSG000001 | 6.805366 | 43.18241 | -2.5985  | 5.24E-07  | 1.92E-06  | BEST4     | chr1  | - | 45249257 | 45253377 | 2047  |
| ENSG000001 | 238.0159 | 39.28155 | 2.5865   | 1.04E-19  | 8.68E-19  | MOB3C     | chr1  | - | 47073387 | 47082563 | 5725  |
| ENSG000001 | 0        | 0.997859 | -1.5018  | 0.39072   | NA        | CYP4B1    | chr1  | + | 47223510 | 47285085 | 2171  |
| ENSG000001 | 0.342542 | 1.606458 | -1.4884  | 0.37005   | 0.4745    | TMEM61    | chr1  | + | 55446465 | 55457966 | 1097  |
| ENSG000001 | 0        | 1.727843 | -1.9772  | 0.25933   | NA        | DMRTB1    | chr1  | + | 53925072 | 53933161 | 1910  |
| ENSG000001 | 1383.936 | 2132.277 | -0.62302 | 1.40E-07  | 5.38E-07  | LMO4      | chr1  | + | 87794151 | 87812788 | 3587  |

|            |          |          |          |           |           |           |      |   |          |          |       |
|------------|----------|----------|----------|-----------|-----------|-----------|------|---|----------|----------|-------|
| ENSG000001 | 0        | 78.47648 | -7.8311  | 7.86E-13  | 4.50E-12  | SYPL2     | chr1 | + | 1.1E+08  | 1.1E+08  | 3624  |
| ENSG000001 | 0        | 0.343138 | -0.41864 | 0.81278   | NA        | BARHL2    | chr1 | - | 91177096 | 91182794 | 1979  |
| ENSG000001 | 795.3909 | 1588.489 | -0.99739 | 1.18E-16  | 8.48E-16  | MTF2      | chr1 | + | 93544792 | 93604638 | 4125  |
| ENSG000001 | 61.69932 | 53.60934 | 0.2015   | 0.50448   | 0.60786   | SLC44A3   | chr1 | + | 95285898 | 95360802 | 2388  |
| ENSG000001 | 1071.003 | 1488.526 | -0.47406 | 0.001189  | 0.002915  | IGSF3     | chr1 | - | 1.17E+08 | 1.17E+08 | 7254  |
| ENSG000001 | 575.9993 | 572.3816 | 0.007813 | 0.94909   | 0.96807   | ZNFB697   | chr1 | - | 1.2E+08  | 1.2E+08  | 5041  |
| ENSG000001 | 567.3453 | 312.6715 | 0.86055  | 7.89E-09  | 3.38E-08  | CTTNBP2NI | chr1 | + | 1.13E+08 | 1.13E+08 | 5897  |
| ENSG000001 | 152.4433 | 94.20838 | 0.69059  | 0.001311  | 0.003193  | STRIP1    | chr1 | + | 1.11E+08 | 1.11E+08 | 3363  |
| ENSG000001 | 0        | 0.686276 | -0.84936 | 0.6309    | NA        | KCNA10    | chr1 | - | 1.11E+08 | 1.11E+08 | 1959  |
| ENSG000001 | 1537.866 | 1637.159 | -0.08969 | 0.5813    | 0.67772   | PSMA5     | chr1 | - | 1.1E+08  | 1.1E+08  | 3729  |
| ENSG000001 | 0.290301 | 0.686276 | -0.47648 | 0.78935   | NA        | FNDC7     | chr1 | + | 1.09E+08 | 1.09E+08 | 3332  |
| ENSG000001 | 7.158095 | 9.116689 | -0.34127 | 0.63978   | 0.7271    | C1orf162  | chr1 | + | 1.12E+08 | 1.12E+08 | 2308  |
| ENSG000001 | 4.273994 | 12.26562 | -1.4411  | 0.054643  | 0.096062  | CD53      | chr1 | + | 1.11E+08 | 1.11E+08 | 1505  |
| ENSG000001 | 0        | 0.357707 | -0.41864 | 0.81278   | NA        | PROK1     | chr1 | + | 1.11E+08 | 1.11E+08 | 1338  |
| ENSG000001 | 887.3007 | 1138.862 | -0.35967 | 0.005438  | 0.012024  | CELSR2    | chr1 | + | 1.1E+08  | 1.1E+08  | 10534 |
| ENSG000001 | 2800.83  | 4.478651 | 9.1307   | 5.29E-124 | 4.41E-122 | ITGA10    | chr1 | + | 1.46E+08 | 1.46E+08 | 5269  |
| ENSG000001 | 0        | 3.339132 | -2.9125  | 0.079913  | 0.13339   | GJA5      | chr1 | - | 1.47E+08 | 1.47E+08 | 3177  |
| ENSG000001 | 1105.42  | 341.0298 | 1.691    | 1.98E-20  | 1.70E-19  | GPR161    | chr1 | - | 1.68E+08 | 1.68E+08 | 2676  |
| ENSG000001 | 761.2907 | 1168.211 | -0.6166  | 1.26E-06  | 4.47E-06  | ALDH9A1   | chr1 | - | 1.66E+08 | 1.66E+08 | 2696  |
| ENSG000001 | 845.6892 | 794.6617 | 0.089247 | 0.50039   | 0.60403   | ATP1B1    | chr1 | + | 1.69E+08 | 1.69E+08 | 2608  |
| ENSG000001 | 584.7874 | 286.7648 | 1.0254   | 1.31E-09  | 5.97E-09  | TIPRL     | chr1 | + | 1.68E+08 | 1.68E+08 | 1630  |
| ENSG000001 | 190.5735 | 124.7332 | 0.61474  | 0.003472  | 0.007928  | NME7      | chr1 | - | 1.69E+08 | 1.69E+08 | 4298  |
| ENSG000001 | 1165.038 | 1031.468 | 0.1756   | 0.11158   | 0.17726   | POGK      | chr1 | + | 1.67E+08 | 1.67E+08 | 6254  |
| ENSG000001 | 163.4202 | 162.2741 | 0.010642 | 0.96135   | 0.977     | MPC2      | chr1 | - | 1.68E+08 | 1.68E+08 | 2177  |
| ENSG000001 | 366.8747 | 334.9    | 0.13147  | 0.42392   | 0.5294    | CREG1     | chr1 | - | 1.67E+08 | 1.68E+08 | 1974  |
| ENSG000001 | 774.9936 | 222.8246 | 1.7965   | 1.54E-42  | 2.88E-41  | DCAF6     | chr1 | + | 1.68E+08 | 1.68E+08 | 3349  |
| ENSG000001 | 8.76551  | 2.65044  | 1.6349   | 0.046229  | 0.083112  | GPA33     | chr1 | - | 1.67E+08 | 1.67E+08 | 2802  |
| ENSG000001 | 0        | 0.640152 | -0.82869 | 0.63935   | NA        | RXRG      | chr1 | - | 1.65E+08 | 1.65E+08 | 2036  |
| ENSG000001 | 49.42549 | 13.38171 | 1.8481   | 1.33E-05  | 4.19E-05  | TBX19     | chr1 | + | 1.68E+08 | 1.68E+08 | 2822  |
| ENSG000001 | 1092.613 | 1744.207 | -0.67406 | 4.04E-12  | 2.20E-11  | UCK2      | chr1 | + | 1.66E+08 | 1.66E+08 | 4669  |
| ENSG000001 | 759.4248 | 554.6167 | 0.45175  | 0.05283   | 0.093291  | TMCO1     | chr1 | - | 1.66E+08 | 1.66E+08 | 2224  |
| ENSG000001 | 0.870904 | 6.673433 | -2.4857  | 0.031107  | 0.058531  | XCL1      | chr1 | + | 1.69E+08 | 1.69E+08 | 1367  |
| ENSG000001 | 0        | 1.029414 | -1.1526  | 0.51496   | NA        | XCL2      | chr1 | - | 1.69E+08 | 1.69E+08 | 565   |
| ENSG000001 | 440.2234 | 2357.318 | -2.4186  | 2.57E-101 | 1.49E-99  | POU2F1    | chr1 | + | 1.67E+08 | 1.67E+08 | 14332 |
| ENSG000001 | 1.722083 | 0.997859 | 0.63405  | 0.63972   | 0.72707   | MAEL      | chr1 | + | 1.67E+08 | 1.67E+08 | 2355  |
| ENSG000001 | 64.49092 | 1.98115  | 4.8514   | 2.81E-14  | 1.76E-13  | ILDR2     | chr1 | - | 1.67E+08 | 1.67E+08 | 2572  |
| ENSG000001 | 15.19663 | 0        | 5.5539   | 3.71E-06  | 1.25E-05  | DPT       | chr1 | - | 1.69E+08 | 1.69E+08 | 1786  |
| ENSG000001 | 798.1959 | 801.5646 | -0.00646 | 0.95889   | 0.97518   | MGST3     | chr1 | + | 1.66E+08 | 1.66E+08 | 2456  |
| ENSG000001 | 2.354926 | 2.38498  | -0.01321 | 0.99069   | 0.9952    | ADCY10    | chr1 | - | 1.68E+08 | 1.68E+08 | 5055  |
| ENSG000001 | 710.8101 | 727.1301 | -0.03306 | 0.77138   | 0.83538   | RFWD2     | chr1 | - | 1.76E+08 | 1.76E+08 | 3033  |
| ENSG000001 | 0.72616  | 3.556053 | -1.9111  | 0.16756   | 0.24899   | PVRL4     | chr1 | - | 1.61E+08 | 1.61E+08 | 3502  |
| ENSG000001 | 748.7466 | 472.5457 | 0.6642   | 0.0001    | 0.000285  | UFC1      | chr1 | + | 1.61E+08 | 1.61E+08 | 1114  |
| ENSG000001 | 238.4486 | 393.8153 | -0.72244 | 0.000264  | 0.000713  | PPOX      | chr1 | + | 1.61E+08 | 1.61E+08 | 2471  |
| ENSG000001 | 4.262829 | 3.083409 | 0.43462  | 0.68532   | 0.76508   | FCGR2A    | chr1 | + | 1.61E+08 | 1.61E+08 | 2412  |
| ENSG000001 | 366.7739 | 448.2063 | -0.2868  | 0.09641   | 0.15664   | NUF2      | chr1 | + | 1.63E+08 | 1.63E+08 | 1969  |
| ENSG000001 | 259.6331 | 58.50452 | 2.1347   | 3.15E-10  | 1.51E-09  | RGS5      | chr1 | - | 1.63E+08 | 1.63E+08 | 5862  |
| ENSG000001 | 1124.32  | 933.984  | 0.26794  | 0.055526  | 0.097419  | SDHC      | chr1 | + | 1.61E+08 | 1.61E+08 | 1420  |
| ENSG000001 | 1593.733 | 930.5993 | 0.7748   | 9.64E-11  | 4.77E-10  | PFDN2     | chr1 | - | 1.61E+08 | 1.61E+08 | 677   |
| ENSG000001 | 5.799092 | 34.18711 | -2.5106  | 3.16E-05  | 9.54E-05  | NR113     | chr1 | - | 1.61E+08 | 1.61E+08 | 1473  |
| ENSG000001 | 526.4174 | 461.1194 | 0.19029  | 0.25195   | 0.34875   | USP21     | chr1 | + | 1.61E+08 | 1.61E+08 | 2514  |
| ENSG000001 | 0        | 0.343138 | -0.41864 | 0.81278   | NA        | F13B      | chr1 | - | 1.97E+08 | 1.97E+08 | 2217  |
| ENSG000001 | 1580.591 | 2109.677 | -0.41574 | 0.00074   | 0.001872  | PRCC      | chr1 | + | 1.57E+08 | 1.57E+08 | 2103  |
| ENSG000001 | 0        | 2.012704 | -2.1825  | 0.20921   | 0.29918   | FCRL5     | chr1 | - | 1.57E+08 | 1.58E+08 | 5390  |
| ENSG000001 | 157.9161 | 406.6409 | -1.3614  | 5.90E-11  | 2.97E-10  | RRNAD1    | chr1 | + | 1.57E+08 | 1.57E+08 | 2254  |
| ENSG000001 | 574.4878 | 298.5861 | 0.94216  | 2.58E-12  | 1.42E-11  | MRPL24    | chr1 | - | 1.57E+08 | 1.57E+08 | 990   |
| ENSG000001 | 305.2348 | 213.0182 | 0.51706  | 0.035463  | 0.065936  | PIGM      | chr1 | - | 1.6E+08  | 1.6E+08  | 4322  |
| ENSG000001 | 1.991846 | 12.09167 | -2.4526  | 0.003876  | 0.008773  | CASQ1     | chr1 | + | 1.6E+08  | 1.6E+08  | 1956  |
| ENSG000001 | 721.8684 | 892.3771 | -0.30462 | 0.096679  | 0.15699   | ISG20L2   | chr1 | - | 1.57E+08 | 1.57E+08 | 3303  |
| ENSG000001 | 2582.755 | 1721.272 | 0.5847   | 0.000142  | 0.000396  | CRABP2    | chr1 | - | 1.57E+08 | 1.57E+08 | 992   |
| ENSG000001 | 5332.452 | 7892.167 | -0.56523 | 8.37E-12  | 4.46E-11  | HDGF      | chr1 | - | 1.57E+08 | 1.57E+08 | 2380  |
| ENSG000001 | 1833.054 | 572.132  | 1.6761   | 4.54E-32  | 6.27E-31  | ABL2      | chr1 | - | 1.79E+08 | 1.79E+08 | 12144 |
| ENSG000001 | 725.3328 | 977.5405 | -0.43019 | 0.000199  | 0.000546  | XPR1      | chr1 | + | 1.81E+08 | 1.81E+08 | 8474  |
| ENSG000001 | 3262.955 | 272.8836 | 3.5547   | 5.26E-32  | 7.24E-31  | RGS16     | chr1 | - | 1.83E+08 | 1.83E+08 | 2427  |
| ENSG000001 | 811.5069 | 311.4184 | 1.3793   | 1.38E-12  | 7.79E-12  | TOR1AIP1  | chr1 | + | 1.8E+08  | 1.8E+08  | 3044  |
| ENSG000001 | 0.36308  | 3.276024 | -2.5557  | 0.072895  | 0.12339   | FAM163A   | chr1 | + | 1.8E+08  | 1.8E+08  | 2909  |

|            |          |          |          |           |           |          |      |          |          |          |       |
|------------|----------|----------|----------|-----------|-----------|----------|------|----------|----------|----------|-------|
| ENSG000001 | 2660.602 | 537.7266 | 2.3054   | 1.28E-96  | 7.02E-95  | HMCN1    | chr1 | +        | 1.86E+08 | 1.86E+08 | 18208 |
| ENSG000001 | 364.8625 | 49.7407  | 2.858    | 4.46E-20  | 3.77E-19  | RGL1     | chr1 | +        | 1.84E+08 | 1.84E+08 | 5113  |
| ENSG000001 | 62.22352 | 82.71968 | -0.4071  | 0.15162   | 0.22916   | LYPLAL1  | chr1 | +        | 2.19E+08 | 2.19E+08 | 2169  |
| ENSG000001 | 1811.407 | 1.920457 | 9.5835   | 1.21E-69  | 4.31E-68  | LHX9     | chr1 | +        | 1.98E+08 | 1.98E+08 | 7413  |
| ENSG000001 | 203.9366 | 507.4998 | -1.3112  | 7.31E-15  | 4.76E-14  | PRUNE    | chr1 | +        | 1.51E+08 | 1.51E+08 | 2997  |
| ENSG000001 | 0.923144 | 4.020576 | -1.7807  | 0.14518   | 0.22067   | RORC     | chr1 | -        | 1.52E+08 | 1.52E+08 | 4141  |
| ENSG000001 | 287.8219 | 171.0742 | 0.74897  | 9.14E-06  | 2.95E-05  | TUFT1    | chr1 | +        | 1.52E+08 | 1.52E+08 | 3111  |
| ENSG000001 | 1299.733 | 1598.785 | -0.29765 | 0.050909  | 0.090374  | SF3B4    | chr1 | -        | 1.5E+08  | 1.5E+08  | 2085  |
| ENSG000001 | 2442.347 | 11.94759 | 7.6369   | 1.32E-180 | 2.31E-178 | ECM1     | chr1 | +        | 1.5E+08  | 1.5E+08  | 3066  |
| ENSG000001 | 716.407  | 1818.713 | -1.3427  | 7.58E-26  | 8.20E-25  | ZNF687   | chr1 | +        | 1.51E+08 | 1.51E+08 | 5378  |
| ENSG000001 | 454.8279 | 841.7064 | -0.88573 | 1.63E-08  | 6.82E-08  | TARS2    | chr1 | +        | 1.5E+08  | 1.5E+08  | 2729  |
| ENSG000001 | 11.76444 | 2805.322 | -7.8446  | 5.06E-192 | 1.03E-189 | CGN      | chr1 | +        | 1.51E+08 | 1.52E+08 | 5091  |
| ENSG000001 | 1066.785 | 1340.569 | -0.32904 | 0.004893  | 0.01091   | SNX27    | chr1 | +        | 1.52E+08 | 1.52E+08 | 7197  |
| ENSG000001 | 525.8741 | 620.5604 | -0.23822 | 0.077996  | 0.13066   | SETDB1   | chr1 | +        | 1.51E+08 | 1.51E+08 | 4437  |
| ENSG000001 | 55.47121 | 125.5193 | -1.1748  | 1.89E-05  | 5.87E-05  | ADAMTSL4 | chr1 | +        | 1.51E+08 | 1.51E+08 | 4197  |
| ENSG000001 | 4573.854 | 6257.202 | -0.4516  | 2.84E-05  | 8.64E-05  | MCL1     | chr1 | -        | 1.51E+08 | 1.51E+08 | 3932  |
| ENSG000001 | 255.7696 | 175.8677 | 0.54185  | 0.002269  | 0.005323  | CTS      | chr1 | -        | 1.51E+08 | 1.51E+08 | 1692  |
| ENSG000001 | 658.1612 | 848.7271 | -0.36599 | 0.011672  | 0.024174  | RF5      | chr1 | -        | 1.51E+08 | 1.51E+08 | 3576  |
| ENSG000001 | 1242.892 | 642.6152 | 0.95134  | 4.29E-18  | 3.30E-17  | PI4KB    | chr1 | -        | 1.51E+08 | 1.51E+08 | 3983  |
| ENSG000001 | 1827.661 | 1269.87  | 0.52514  | 5.06E-08  | 2.02E-07  | PIP5K1A  | chr1 | +        | 1.51E+08 | 1.51E+08 | 3767  |
| ENSG000001 | 2152.2   | 2637.039 | -0.29237 | 0.076052  | 0.12793   | ANP32E   | chr1 | -        | 1.5E+08  | 1.5E+08  | 3453  |
| ENSG000001 | 222.7433 | 257.7573 | -0.21031 | 0.43653   | 0.54202   | FAM63A   | chr1 | -        | 1.51E+08 | 1.51E+08 | 2817  |
| ENSG000001 | 59.92906 | 103.0023 | -0.78108 | 0.010332  | 0.02166   | ANXA9    | chr1 | +        | 1.51E+08 | 1.51E+08 | 1826  |
| ENSG000001 | 120.3688 | 265.2957 | -1.1331  | 4.07E-08  | 1.64E-07  | SELENBP1 | chr1 | -        | 1.51E+08 | 1.51E+08 | 2840  |
| ENSG000001 | 1112.893 | 1633.146 | -0.55274 | 7.00E-06  | 2.29E-05  | CERS2    | chr1 | -        | 1.51E+08 | 1.51E+08 | 2505  |
| ENSG000001 | 1608.543 | 3283.803 | -1.0277  | 3.53E-14  | 2.19E-13  | ENSA     | chr1 | -        | 1.51E+08 | 1.51E+08 | 2818  |
| ENSG000001 | 408.794  | 22.25563 | 4.1708   | 1.52E-68  | 5.37E-67  | AC027612 | chr2 | -        | 91823266 | 91847975 | 1104  |
| ENSG000001 | 295.3982 | 639.8724 | -1.1106  | 3.62E-06  | 1.22E-05  | SEMA6C   | chr1 | -        | 1.51E+08 | 1.51E+08 | 5262  |
| ENSG000001 | 379.3375 | 426.6834 | -0.1686  | 0.25117   | 0.34785   | MRPL9    | chr1 | -        | 1.52E+08 | 1.52E+08 | 1296  |
| ENSG000001 | 896.6192 | 641.991  | 0.48074  | 0.007592  | 0.016315  | ARNT     | chr1 | -        | 1.51E+08 | 1.51E+08 | 4887  |
| ENSG000001 | 1641.656 | 1402.154 | 0.227    | 0.055525  | 0.097419  | POGZ     | chr1 | -        | 1.51E+08 | 1.51E+08 | 6626  |
| ENSG000001 | 66.49556 | 83.30323 | -0.32851 | 0.24238   | 0.33766   | C1orf56  | chr1 | +        | 1.51E+08 | 1.51E+08 | 2096  |
| ENSG000001 | 3.112789 | 6.442816 | -1.0031  | 0.28458   | 0.38594   | OAZ3     | chr1 | +        | 1.52E+08 | 1.52E+08 | 3790  |
| ENSG000001 | 332.5166 | 516.7103 | -0.63576 | 4.38E-05  | 0.00013   | GOLPH3L  | chr1 | -        | 1.51E+08 | 1.51E+08 | 2999  |
| ENSG000001 | 173.3651 | 48.11585 | 1.8353   | 4.64E-15  | 3.04E-14  | GABPB2   | chr1 | +        | 1.51E+08 | 1.51E+08 | 8964  |
| ENSG000001 | 323.2424 | 96.50173 | 1.7402   | 1.95E-14  | 1.24E-13  | IKBKE    | chr1 | +        | 2.07E+08 | 2.07E+08 | 3269  |
| ENSG000001 | 182.3852 | 82.24771 | 1.149    | 3.21E-08  | 1.31E-07  | SYT14    | chr1 | +        | 2.1E+08  | 2.1E+08  | 5189  |
| ENSG000001 | 37.92739 | 0.951736 | 4.943    | 2.27E-09  | 1.01E-08  | KCNH1    | chr1 | -        | 2.11E+08 | 2.11E+08 | 3102  |
| ENSG000001 | 530.3561 | 986.3166 | -0.8918  | 3.06E-06  | 1.04E-05  | DTL      | chr1 | +        | 2.12E+08 | 2.12E+08 | 4573  |
| ENSG000001 | 340.5085 | 67.14306 | 2.3413   | 2.27E-32  | 3.17E-31  | DYRK3    | chr1 | +        | 2.07E+08 | 2.07E+08 | 2329  |
| ENSG000001 | 714.874  | 633.6448 | 0.1751   | 0.15729   | 0.23649   | EIF2D    | chr1 | -        | 2.07E+08 | 2.07E+08 | 2094  |
| ENSG000001 | 313.3924 | 294.9064 | 0.088585 | 0.7834    | INTS7     | chr1     | -    | 2.12E+08 | 2.12E+08 | 4447     |       |
| ENSG000001 | 454.316  | 3988.398 | -3.1301  | 1.39E-126 | 1.19E-124 | VASH2    | chr1 | +        | 2.13E+08 | 2.13E+08 | 4224  |
| ENSG000001 | 84.19365 | 90.35438 | -0.0982  | 0.68529   | 0.76508   | TAF1A    | chr1 | -        | 2.23E+08 | 2.23E+08 | 1911  |
| ENSG000001 | 469.635  | 146.5523 | 1.6678   | 1.24E-07  | 4.82E-07  | SMYD2    | chr1 | +        | 2.14E+08 | 2.15E+08 | 4732  |
| ENSG000001 | 104.7767 | 29.66072 | 1.7924   | 1.75E-08  | 7.26E-08  | SUSD4    | chr1 | -        | 2.23E+08 | 2.24E+08 | 3480  |
| ENSG000001 | 74.3997  | 23.73009 | 1.6221   | 0.000232  | 0.000631  | DUSP10   | chr1 | -        | 2.22E+08 | 2.22E+08 | 2676  |
| ENSG000001 | 2.656392 | 0.594029 | 1.6379   | 0.2594    | 0.35733   | HHIPL2   | chr1 | -        | 2.23E+08 | 2.23E+08 | 2575  |
| ENSG000001 | 925.8418 | 922.8617 | 0.0054   | 0.96051   | 0.97641   | TP53BP2  | chr1 | -        | 2.24E+08 | 2.24E+08 | 4741  |
| ENSG000001 | 2569.501 | 1190.349 | 1.1096   | 2.84E-24  | 2.88E-23  | ATP8B2   | chr1 | +        | 1.54E+08 | 1.54E+08 | 5861  |
| ENSG000001 | 1325.744 | 663.8155 | 0.9952   | 3.04E-08  | 1.24E-07  | ADAM15   | chr1 | +        | 1.55E+08 | 1.55E+08 | 4508  |
| ENSG000001 | 1231.185 | 1107.014 | 0.15335  | 0.24623   | 0.34211   | JTB      | chr1 | -        | 1.54E+08 | 1.54E+08 | 1287  |
| ENSG000001 | 3978.136 | 1569.767 | 1.3408   | 1.01E-37  | 1.66E-36  | RAB13    | chr1 | -        | 1.54E+08 | 1.54E+08 | 2123  |
| ENSG000001 | 25.03426 | 0        | 6.254    | 5.86E-08  | 2.33E-07  | S100A8   | chr1 | -        | 1.53E+08 | 1.53E+08 | 717   |
| ENSG000001 | 10016.18 | 8926.864 | 0.16593  | 0.20953   | 0.29951   | TPM3     | chr1 | -        | 1.54E+08 | 1.54E+08 | 4041  |
| ENSG000001 | 4.637074 | 9.000136 | -0.90595 | 0.26182   | 0.35999   | NUP210L  | chr1 | -        | 1.54E+08 | 1.54E+08 | 5889  |
| ENSG000001 | 452.7996 | 322.1155 | 0.4904   | 0.000631  | 0.001614  | SNAPIN   | chr1 | +        | 1.54E+08 | 1.54E+08 | 1205  |
| ENSG000001 | 394.3853 | 937.861  | -1.2476  | 1.15E-20  | 9.96E-20  | SLC27A3  | chr1 | +        | 1.54E+08 | 1.54E+08 | 4504  |
| ENSG000001 | 4314.458 | 3598.66  | 0.26141  | 0.062494  | 0.10809   | UBAP2L   | chr1 | +        | 1.54E+08 | 1.54E+08 | 3988  |
| ENSG000001 | 2209.373 | 3582.089 | -0.69621 | 4.30E-10  | 2.04E-09  | SLC39A1  | chr1 | -        | 1.54E+08 | 1.54E+08 | 2723  |
| ENSG000001 | 853.6511 | 968.0006 | -0.18049 | 0.1544    | 0.23272   | HAX1     | chr1 | +        | 1.54E+08 | 1.54E+08 | 1284  |
| ENSG000001 | 85.87205 | 494.4517 | -2.5179  | 1.89E-45  | 3.82E-44  | CREB3L4  | chr1 | +        | 1.54E+08 | 1.54E+08 | 1752  |
| ENSG000001 | 19.44153 | 94.32017 | -2.2534  | 3.69E-09  | 1.62E-08  | EFNA3    | chr1 | +        | 1.55E+08 | 1.55E+08 | 1782  |
| ENSG000001 | 0.342542 | 0        | 0.4146   | 0.81455   | NA        | AQP10    | chr1 | +        | 1.54E+08 | 1.54E+08 | 2262  |
| ENSG000001 | 54.76217 | 30.25469 | 0.84984  | 0.032278  | 0.060572  | KCNN3    | chr1 | -        | 1.55E+08 | 1.55E+08 | 2962  |

|            |          |          |          |           |           |          |      |   |          |          |       |
|------------|----------|----------|----------|-----------|-----------|----------|------|---|----------|----------|-------|
| ENSG000001 | 1930.065 | 2082.929 | -0.10967 | 0.44765   | 0.55306   | C1orf43  | chr1 | - | 1.54E+08 | 1.54E+08 | 1708  |
| ENSG000001 | 930.4634 | 620.1017 | 0.58297  | 0.001703  | 0.004077  | GATAD2B  | chr1 | - | 1.54E+08 | 1.54E+08 | 7478  |
| ENSG000001 | 4320.296 | 5485.392 | -0.34375 | 0.01599   | 0.032205  | ILF2     | chr1 | - | 1.54E+08 | 1.54E+08 | 1659  |
| ENSG000001 | 623.6538 | 322.1957 | 0.95075  | 2.75E-09  | 1.22E-08  | RIT1     | chr1 | - | 1.56E+08 | 1.56E+08 | 3445  |
| ENSG000001 | 1334.588 | 1351.586 | -0.01833 | 0.85319   | 0.89683   | INTS3    | chr1 | + | 1.54E+08 | 1.54E+08 | 5741  |
| ENSG000001 | 0.342542 | 18.28688 | -4.9579  | 1.97E-05  | 6.10E-05  | PKLR     | chr1 | - | 1.55E+08 | 1.55E+08 | 2479  |
| ENSG000001 | 113.5629 | 91.91243 | 0.30461  | 0.16889   | 0.2506    | HCN3     | chr1 | + | 1.55E+08 | 1.55E+08 | 3718  |
| ENSG000001 | 0        | 2.217472 | -2.3847  | 0.1626    | 0.243     | FLG      | chr1 | - | 1.52E+08 | 1.52E+08 | 12747 |
| ENSG000001 | 0.943682 | 9.328705 | -2.8938  | 0.009493  | 0.020032  | ACTA1    | chr1 | - | 2.3E+08  | 2.3E+08  | 1491  |
| ENSG000001 | 180.1386 | 149.2768 | 0.26992  | 0.14708   | 0.22316   | C1orf131 | chr1 | - | 2.31E+08 | 2.31E+08 | 2657  |
| ENSG000001 | 6079.44  | 1849.984 | 1.7146   | 2.26E-55  | 5.87E-54  | GALNT2   | chr1 | + | 2.3E+08  | 2.3E+08  | 4454  |
| ENSG000001 | 274.0968 | 105.8815 | 1.3682   | 2.79E-10  | 1.34E-09  | TTC13    | chr1 | - | 2.31E+08 | 2.31E+08 | 3253  |
| ENSG000001 | 663.549  | 262.1844 | 1.3391   | 5.58E-17  | 4.08E-16  | SCCPDH   | chr1 | + | 2.47E+08 | 2.47E+08 | 2503  |
| ENSG000001 | 211.0963 | 9.574764 | 4.4227   | 1.88E-41  | 3.42E-40  | LYST     | chr1 | - | 2.36E+08 | 2.36E+08 | 13480 |
| ENSG000001 | 69.66156 | 705.8579 | -3.3271  | 1.57E-42  | 2.94E-41  | MLK4     | chr1 | + | 2.33E+08 | 2.34E+08 | 5809  |
| ENSG000001 | 5264.711 | 634.1805 | 3.0498   | 6.43E-101 | 3.68E-99  | CEP170   | chr1 | - | 2.43E+08 | 2.43E+08 | 6828  |
| ENSG000001 | 1195.746 | 1588.663 | -0.40928 | 0.000207  | 0.000567  | ACP1     | chr2 | + | 264140   | 278283   | 1552  |
| ENSG000001 | 703.9004 | 739.4794 | -0.07248 | 0.56738   | 0.6649    | SNAP47   | chr1 | + | 2.28E+08 | 2.28E+08 | 2403  |
| ENSG000001 | 3017.602 | 4102.633 | -0.44261 | 3.94E-05  | 0.000118  | SRP9     | chr1 | + | 2.26E+08 | 2.26E+08 | 1596  |
| ENSG000001 | 310.9492 | 478.8521 | -0.61936 | 0.011801  | 0.024414  | NVL      | chr1 | - | 2.24E+08 | 2.25E+08 | 3123  |
| ENSG000001 | 592.7077 | 541.1518 | 0.13147  | 0.52944   | 0.63084   | SDE2     | chr1 | - | 2.26E+08 | 2.26E+08 | 3975  |
| ENSG000001 | 1145.32  | 394.1612 | 1.5361   | 2.03E-30  | 2.62E-29  | DEGS1    | chr1 | + | 2.24E+08 | 2.24E+08 | 2101  |
| ENSG000001 | 480.4535 | 580.6693 | -0.27199 | 0.059666  | 0.10401   | FBXO28   | chr1 | + | 2.24E+08 | 2.24E+08 | 5451  |
| ENSG000001 | 9811.118 | 5583.973 | 0.81244  | 9.69E-15  | 6.25E-14  | ARF1     | chr1 | + | 2.28E+08 | 2.28E+08 | 2006  |
| ENSG000001 | 0.36308  | 112.7973 | -7.3224  | 8.13E-12  | 4.34E-11  | LEFTY2   | chr1 | - | 2.26E+08 | 2.26E+08 | 2287  |
| ENSG000001 | 637.3059 | 868.5987 | -0.4458  | 6.23E-05  | 0.000182  | CNIH4    | chr1 | + | 2.25E+08 | 2.25E+08 | 4125  |
| ENSG000001 | 1274.584 | 754.6097 | 0.75097  | 0.008899  | 0.018892  | ITPKB    | chr1 | - | 2.27E+08 | 2.27E+08 | 6150  |
| ENSG000001 | 2941.999 | 1318.176 | 1.1576   | 4.52E-26  | 4.93E-25  | GUK1     | chr1 | + | 2.28E+08 | 2.28E+08 | 2549  |
| ENSG000001 | 1763.498 | 596.1983 | 1.5628   | 2.48E-51  | 5.89E-50  | CDC42BPA | chr1 | - | 2.27E+08 | 2.28E+08 | 10855 |
| ENSG000001 | 1355.371 | 107.234  | 3.6506   | 2.18E-148 | 2.43E-146 | CNIH3    | chr1 | + | 2.25E+08 | 2.25E+08 | 2558  |
| ENSG000001 | 497.5097 | 721.9039 | -0.53733 | 1.63E-05  | 5.10E-05  | C1orf35  | chr1 | - | 2.28E+08 | 2.28E+08 | 3554  |
| ENSG000001 | 971.8247 | 293.4844 | 1.7224   | 1.03E-21  | 9.40E-21  | MBOAT2   | chr2 | - | 8992820  | 9143942  | 7751  |
| ENSG000001 | 3536.577 | 12957.04 | -1.8721  | 6.80E-96  | 3.69E-94  | PARP1    | chr1 | - | 2.27E+08 | 2.27E+08 | 3958  |
| ENSG000001 | 97.33005 | 307.9227 | -1.6569  | 1.38E-19  | 1.14E-18  | PSEN2    | chr1 | + | 2.27E+08 | 2.27E+08 | 2465  |
| ENSG000001 | 145.4948 | 254.4985 | -0.80227 | 0.001256  | 0.003066  | PYCR2    | chr1 | - | 2.26E+08 | 2.26E+08 | 3149  |
| ENSG000001 | 1100.349 | 1392.179 | -0.33818 | 0.059061  | 0.10304   | LBR      | chr1 | - | 2.26E+08 | 2.26E+08 | 3774  |
| ENSG000001 | 141.5213 | 70.14818 | 1.0013   | 0.000992  | 0.002461  | WNT9A    | chr1 | - | 2.28E+08 | 2.28E+08 | 3971  |
| ENSG000001 | 471.0752 | 979.0059 | -1.0547  | 4.70E-21  | 4.16E-20  | EPHX1    | chr1 | + | 2.26E+08 | 2.26E+08 | 1776  |
| ENSG000001 | 9.66893  | 3258.644 | -8.3493  | 8.76E-164 | 1.19E-161 | SOX13    | chr1 | + | 2.04E+08 | 2.04E+08 | 3579  |
| ENSG000001 | 75.96425 | 329.9815 | -2.1046  | 2.18E-14  | 1.37E-13  | ETNK2    | chr1 | - | 2.04E+08 | 2.04E+08 | 2486  |
| ENSG000001 | 50.43919 | 193.5447 | -1.9133  | 1.17E-05  | 3.72E-05  | PPFIA4   | chr1 | + | 2.03E+08 | 2.03E+08 | 6434  |
| ENSG000001 | 1.338465 | 601.2    | -8.5038  | 1.05E-39  | 1.83E-38  | PLEKHA6  | chr1 | - | 2.04E+08 | 2.04E+08 | 5091  |
| ENSG000001 | 9.854749 | 7.90923  | 0.30849  | 0.72077   | 0.79337   | PTPN7    | chr1 | - | 2.02E+08 | 2.02E+08 | 3765  |
| ENSG000001 | 3.278071 | 641.3333 | -7.4705  | 5.10E-58  | 1.41E-56  | SYT2     | chr1 | - | 2.03E+08 | 2.03E+08 | 7614  |
| ENSG000001 | 722.308  | 648.0074 | 0.15547  | 0.541     | 0.64155   | ARL8A    | chr1 | - | 2.02E+08 | 2.02E+08 | 1793  |
| ENSG000001 | 0.923144 | 0.686276 | 0.30412  | 0.8576    | NA        | OSR1     | chr2 | - | 19551246 | 19558414 | 4175  |
| ENSG000001 | 55.84203 | 39.24206 | 0.49377  | 0.30657   | 0.40813   | GDF7     | chr2 | + | 20866424 | 20873418 | 4162  |
| ENSG000001 | 6385.563 | 4563.445 | 0.48442  | 1.01E-05  | 3.24E-05  | PDIA6    | chr2 | - | 10923517 | 10978103 | 2682  |
| ENSG000001 | 2486.545 | 473.1151 | 2.392    | 4.70E-88  | 2.27E-86  | RHOB     | chr2 | + | 20646835 | 20649200 | 2366  |
| ENSG000001 | 26.64926 | 23.62006 | 0.17484  | 0.66341   | 0.74676   | ATP6V1C2 | chr2 | + | 10861775 | 10925236 | 3102  |
| ENSG000001 | 892.4376 | 911.2425 | -0.02946 | 0.80479   | 0.86198   | HNRPLL   | chr2 | - | 38789120 | 38830728 | 4173  |
| ENSG000001 | 147.6119 | 320.3519 | -1.114   | 9.44E-12  | 5.01E-11  | GALM     | chr2 | + | 38893052 | 38968379 | 2484  |
| ENSG000001 | 60.92352 | 200.2891 | -1.7055  | 1.02E-15  | 6.99E-15  | CAMKMT   | chr2 | + | 44589089 | 44999731 | 1495  |
| ENSG000001 | 0        | 0.357707 | -0.41864 | 0.81278   | NA        | ABCG8    | chr2 | + | 44066103 | 44105605 | 2665  |
| ENSG000001 | 1231.65  | 1534.647 | -0.31693 | 0.000882  | 0.002208  | EML4     | chr2 | + | 42396490 | 42559688 | 5549  |
| ENSG000001 | 4818.234 | 3878.664 | 0.31262  | 0.025852  | 0.04974   | CALM2    | chr2 | - | 47272677 | 47403740 | 4502  |
| ENSG000001 | 42.85216 | 89.38002 | -1.0467  | 0.000661  | 0.001683  | CHAC2    | chr2 | + | 53994929 | 54002333 | 1321  |
| ENSG000001 | 5176.624 | 9947.92  | -0.94119 | 8.48E-15  | 5.50E-14  | RPS27A   | chr2 | + | 55459039 | 55462989 | 1159  |
| ENSG000001 | 105.1981 | 56.21756 | 0.90699  | 0.000713  | 0.001807  | WDPCP    | chr2 | - | 63348518 | 64054977 | 5408  |
| ENSG000001 | 464.5399 | 263.6756 | 0.81386  | 2.07E-06  | 7.18E-06  | VPSS4    | chr2 | - | 64120035 | 64246206 | 3594  |
| ENSG000001 | 871.9525 | 682.6245 | 0.35183  | 0.00621   | 0.013585  | ASXL2    | chr2 | - | 25960557 | 26101385 | 8943  |
| ENSG000001 | 253.1392 | 347.1556 | -0.45243 | 0.028777  | 0.054704  | ETAA1    | chr2 | + | 67624451 | 67637677 | 3418  |
| ENSG000001 | 1008.219 | 1389.588 | -0.46245 | 2.29E-05  | 7.04E-05  | SNRPG    | chr2 | - | 70508494 | 70520903 | 1093  |
| ENSG000001 | 0.653381 | 2.324288 | -1.4709  | 0.29307   | 0.39506   | ABHD1    | chr2 | + | 27346682 | 27353680 | 1400  |
| ENSG000001 | 191.212  | 25.38912 | 2.8925   | 2.12E-18  | 1.65E-17  | MEIS1    | chr2 | + | 66660584 | 66801001 | 5111  |

|            |          |          |          |           |          |           |      |   |          |          |       |
|------------|----------|----------|----------|-----------|----------|-----------|------|---|----------|----------|-------|
| ENSG000001 | 0.923144 | 1.577319 | -0.58301 | 0.69738   | 0.7744   | TRIM43B   | chr2 | - | 96142715 | 96150479 | 1668  |
| ENSG000001 | 2.769433 | 0        | 2.6985   | 0.10714   | 0.17116  | TRIM43    | chr2 | + | 96257766 | 96265526 | 1682  |
| ENSG000001 | 1363.241 | 1170.451 | 0.22021  | 0.032373  | 0.06074  | CIAO1     | chr2 | + | 96931870 | 96939087 | 3588  |
| ENSG000001 | 284.2584 | 198.5389 | 0.51282  | 0.048621  | 0.086845 | ZNF514    | chr2 | - | 95813075 | 95831158 | 5593  |
| ENSG000001 | 6366.845 | 8262.663 | -0.37562 | 0.000208  | 0.000569 | SNRNP200  | chr2 | - | 96940074 | 96971297 | 7165  |
| ENSG000001 | 761.0615 | 1073.087 | -0.4949  | 4.82E-05  | 0.000143 | MRPS5     | chr2 | - | 95752952 | 95815179 | 3680  |
| ENSG000001 | 16.24561 | 9.032564 | 0.80813  | 0.16651   | 0.24767  | ANKRD53   | chr2 | + | 71205510 | 71212626 | 2182  |
| ENSG000001 | 301.4276 | 311.5085 | -0.04659 | 0.7751    | 0.83841  | TPRKB     | chr2 | - | 73956231 | 73964527 | 819   |
| ENSG000001 | 0.36308  | 0        | 0.4146   | 0.81455   | NA       | NAT8      | chr2 | - | 73867959 | 73869520 | 947   |
| ENSG000001 | 516.0889 | 691.0776 | -0.42041 | 0.00039   | 0.001027 | EXOC6B    | chr2 | - | 72403113 | 73053170 | 5918  |
| ENSG000001 | 609.9648 | 492.0016 | 0.30948  | 0.025635  | 0.049373 | SFXN5     | chr2 | - | 73169165 | 73302747 | 4140  |
| ENSG000001 | 1041.403 | 397.7049 | 1.3813   | 5.08E-07  | 1.86E-06 | TEX261    | chr2 | - | 71213068 | 71222075 | 3579  |
| ENSG000001 | 1.681007 | 9.306888 | -2.3037  | 0.012116  | 0.025031 | DQX1      | chr2 | - | 74745258 | 74753463 | 2689  |
| ENSG000001 | 307.1083 | 203.3933 | 0.59336  | 0.002868  | 0.006633 | DUSP11    | chr2 | - | 73989311 | 74007284 | 2175  |
| ENSG000001 | 3545.545 | 682.627  | 2.3749   | 9.71E-100 | 5.47E-98 | ST6GAL2   | chr2 | - | 1.07E+08 | 1.08E+08 | 7275  |
| ENSG000001 | 81.87124 | 42.03557 | 0.95126  | 0.00054   | 0.001394 | NPHP1     | chr2 | - | 1.11E+08 | 1.11E+08 | 10006 |
| ENSG000001 | 24.35855 | 12.36928 | 0.9456   | 0.052241  | 0.092419 | MALL      | chr2 | - | 1.11E+08 | 1.11E+08 | 3061  |
| ENSG000001 | 24.47159 | 81.49449 | -1.7184  | 1.11E-05  | 3.54E-05 | THNSL2    | chr2 | + | 88469835 | 88486146 | 3649  |
| ENSG000001 | 1566.195 | 412.3422 | 1.9225   | 7.28E-58  | 2.01E-56 | RALB      | chr2 | + | 1.21E+08 | 1.21E+08 | 2344  |
| ENSG000001 | 1.359003 | 60.87197 | -5.27    | 5.03E-13  | 2.92E-12 | C1QL2     | chr2 | - | 1.2E+08  | 1.2E+08  | 2043  |
| ENSG000001 | 125.5346 | 395.0364 | -1.6464  | 4.53E-17  | 3.33E-16 | TMEM177   | chr2 | + | 1.2E+08  | 1.2E+08  | 1738  |
| ENSG000001 | 0.290301 | 0.297015 | -0.00202 | 0.99909   | NA       | NT5DC4    | chr2 | + | 1.13E+08 | 1.14E+08 | 2448  |
| ENSG000001 | 165.7471 | 76.32782 | 1.1125   | 1.98E-07  | 7.54E-07 | RABL2A    | chr2 | + | 1.14E+08 | 1.14E+08 | 2904  |
| ENSG000001 | 4930.302 | 881.6017 | 2.4648   | 1.84E-15  | 1.24E-14 | SLC20A1   | chr2 | + | 1.13E+08 | 1.13E+08 | 3381  |
| ENSG000001 | 0.36308  | 0        | 0.4146   | 0.81455   | NA       | RP11-143N | chr9 | - | 52452    | 73323    | 343   |
| ENSG000001 | 19.88595 | 6.849062 | 1.4917   | 0.008595  | 0.018292 | FBLN7     | chr2 | + | 1.13E+08 | 1.13E+08 | 4598  |
| ENSG000001 | 3.588096 | 8.784089 | -1.1517  | 0.23971   | 0.33442  | RP11-395L | chr2 | + | 1.14E+08 | 1.14E+08 | 768   |
| ENSG000001 | 51.11066 | 75.48686 | -0.55531 | 0.046117  | 0.082941 | ZC3H8     | chr2 | - | 1.13E+08 | 1.13E+08 | 1813  |
| ENSG000001 | 22.08936 | 40.8071  | -0.88342 | 0.036156  | 0.067082 | LIPT1     | chr2 | + | 99771418 | 99779620 | 1543  |
| ENSG000001 | 0        | 0.343138 | -0.41864 | 0.81278   | NA       | TRIM43CP  | chr2 | - | 97691718 | 97697373 | 1028  |
| ENSG000001 | 0.653381 | 0.686276 | -0.0351  | 0.98379   | NA       | CNGA3     | chr2 | + | 98962618 | 99015064 | 3841  |
| ENSG000001 | 206.4161 | 476.2401 | -1.2033  | 1.31E-08  | 5.51E-08 | FAHD2B    | chr2 | - | 97749320 | 97760619 | 1388  |
| ENSG000001 | 12.23021 | 7.829936 | 0.6143   | 0.32034   | 0.42316  | LYG1      | chr2 | - | 99900701 | 99921205 | 1038  |
| ENSG000001 | 4362.381 | 48.03321 | 6.5003   | 0         | 0        | AFF3      | chr2 | - | 1E+08    | 1.01E+08 | 8135  |
| ENSG000001 | 2398.963 | 1444.667 | 0.7313   | 2.17E-14  | 1.37E-13 | UBXN4     | chr2 | + | 1.36E+08 | 1.37E+08 | 4006  |
| ENSG000001 | 11.05964 | 10.88333 | 0.024548 | 0.97406   | 0.98544  | NXPH2     | chr2 | - | 1.39E+08 | 1.4E+08  | 1052  |
| ENSG000001 | 324.6148 | 130.3272 | 1.3139   | 5.60E-16  | 3.87E-15 | SPOPL     | chr2 | + | 1.39E+08 | 1.39E+08 | 6025  |
| ENSG000001 | 0        | 44.34207 | -7.0507  | 2.88E-10  | 1.38E-09 | THSD7B    | chr2 | + | 1.38E+08 | 1.38E+08 | 6111  |
| ENSG000001 | 6.525252 | 0.937167 | 2.4117   | 0.035157  | 0.065406 | GPR17     | chr2 | + | 1.28E+08 | 1.28E+08 | 2598  |
| ENSG000001 | 584.4275 | 852.3411 | -0.54389 | 2.52E-06  | 8.65E-06 | POLR2D    | chr2 | - | 1.29E+08 | 1.29E+08 | 2327  |
| ENSG000001 | 786.2234 | 524.0375 | 0.58506  | 1.69E-07  | 6.45E-07 | AMMECR1   | chr2 | - | 1.29E+08 | 1.29E+08 | 4658  |
| ENSG000001 | 11.46298 | 198.4318 | -4.077   | 4.44E-39  | 7.65E-38 | GALNT13   | chr2 | + | 1.55E+08 | 1.55E+08 | 5536  |
| ENSG000001 | 685.4955 | 1337.699 | -0.96231 | 4.67E-17  | 3.43E-16 | PKP4      | chr2 | + | 1.59E+08 | 1.6E+08  | 5777  |
| ENSG000001 | 0.580602 | 9.072982 | -3.3654  | 0.002969  | 0.006848 | SCN1A     | chr2 | - | 1.67E+08 | 1.67E+08 | 8133  |
| ENSG000001 | 0        | 4.63159  | -3.7851  | 0.007148  | 0.015444 | SLC4A10   | chr2 | + | 1.62E+08 | 1.63E+08 | 5710  |
| ENSG000001 | 199.3636 | 86.6051  | 1.1949   | 2.84E-09  | 1.26E-08 | SCRN3     | chr2 | + | 1.75E+08 | 1.75E+08 | 3037  |
| ENSG000001 | 525.4363 | 164.65   | 1.672    | 8.49E-26  | 9.16E-25 | KIAA1715  | chr2 | - | 1.77E+08 | 1.77E+08 | 7610  |
| ENSG000001 | 6.161358 | 30.54035 | -2.2475  | 2.38E-05  | 7.31E-05 | ZNF385B   | chr2 | - | 1.8E+08  | 1.81E+08 | 3288  |
| ENSG000001 | 223.6933 | 14.89746 | 3.8744   | 3.35E-30  | 4.29E-29 | TMEFF2    | chr2 | - | 1.93E+08 | 1.93E+08 | 3364  |
| ENSG000001 | 417.4609 | 1395.681 | -1.7387  | 2.25E-35  | 3.46E-34 | CDCA7     | chr2 | + | 1.74E+08 | 1.74E+08 | 3176  |
| ENSG000001 | 2675.674 | 2.355842 | 9.9455   | 2.40E-84  | 1.08E-82 | DLX1      | chr2 | + | 1.73E+08 | 1.73E+08 | 2640  |
| ENSG000001 | 685.1991 | 305.452  | 1.1635   | 5.80E-20  | 4.88E-19 | UBR3      | chr2 | + | 1.71E+08 | 1.71E+08 | 8005  |
| ENSG000001 | 5.634789 | 23.38299 | -1.971   | 0.0061    | 0.013361 | PHOSPHO2  | chr2 | + | 1.71E+08 | 1.71E+08 | 1125  |
| ENSG000001 | 193.86   | 731.3063 | -1.9086  | 3.48E-19  | 2.81E-18 | GULP1     | chr2 | + | 1.89E+08 | 1.89E+08 | 7427  |
| ENSG000001 | 264.2993 | 366.5078 | -0.46864 | 0.039075  | 0.071885 | FAM171B   | chr2 | + | 1.88E+08 | 1.88E+08 | 5819  |
| ENSG000001 | 5124.609 | 16766.7  | -1.7082  | 5.73E-46  | 1.17E-44 | HSPD1     | chr2 | - | 1.98E+08 | 1.98E+08 | 2455  |
| ENSG000001 | 99.92541 | 247.5849 | -1.3     | 2.21E-09  | 9.89E-09 | CCDC150   | chr2 | + | 1.98E+08 | 1.98E+08 | 3685  |
| ENSG000001 | 236.9296 | 624.0596 | -1.3934  | 1.82E-17  | 1.36E-16 | METTL21A  | chr2 | - | 2.08E+08 | 2.08E+08 | 4805  |
| ENSG000001 | 5.778554 | 1.773966 | 1.5456   | 0.16348   | 0.24406  | UNC80     | chr2 | + | 2.11E+08 | 2.11E+08 | 13562 |
| ENSG000001 | 4.253456 | 7.905198 | -0.84758 | 0.27317   | 0.37284  | PTH2R     | chr2 | + | 2.09E+08 | 2.1E+08  | 2713  |
| ENSG000001 | 0.290301 | 27.50226 | -5.5663  | 4.22E-07  | 1.56E-06 | CPO       | chr2 | + | 2.08E+08 | 2.08E+08 | 1209  |
| ENSG000001 | 327.4987 | 53.39317 | 2.6101   | 2.33E-39  | 4.04E-38 | NBEAL1    | chr2 | + | 2.04E+08 | 2.04E+08 | 10938 |
| ENSG000001 | 229.9951 | 184.0336 | 0.3215   | 0.046817  | 0.084022 | KANSL1L   | chr2 | - | 2.11E+08 | 2.11E+08 | 4754  |
| ENSG000001 | 182.2513 | 202.0468 | -0.15008 | 0.3964    | 0.5009   | SPAG16    | chr2 | + | 2.14E+08 | 2.15E+08 | 4751  |
| ENSG000001 | 24.36214 | 3.723561 | 2.6159   | 0.000173  | 0.00048  | ABCA12    | chr2 | - | 2.16E+08 | 2.16E+08 | 9100  |

|            |          |          |          |          |          |          |      |   |          |          |       |
|------------|----------|----------|----------|----------|----------|----------|------|---|----------|----------|-------|
| ENSG000001 | 326.6195 | 186.8908 | 0.8051   | 0.000341 | 0.000904 | SUMF1    | chr3 | - | 3742498  | 4508965  | 3150  |
| ENSG000001 | 0.290301 | 0        | 0.4146   | 0.81455  | NA       | NYAP2    | chr2 | + | 2.26E+08 | 2.27E+08 | 4828  |
| ENSG000001 | 421.0343 | 282.8834 | 0.57216  | 0.001924 | 0.004565 | RHBDD1   | chr2 | + | 2.28E+08 | 2.28E+08 | 5151  |
| ENSG000001 | 169.6712 | 34.29701 | 2.2876   | 2.17E-11 | 1.13E-10 | CXCR7    | chr2 | + | 2.37E+08 | 2.37E+08 | 2203  |
| ENSG000001 | 37.5454  | 1.340997 | 4.5782   | 1.81E-09 | 8.14E-09 | TRPM8    | chr2 | + | 2.35E+08 | 2.35E+08 | 5621  |
| ENSG000001 | 335.5023 | 1448.209 | -2.1066  | 5.44E-52 | 1.32E-50 | HES6     | chr2 | - | 2.39E+08 | 2.39E+08 | 1600  |
| ENSG000001 | 0.290301 | 11.52194 | -4.3389  | 0.000368 | 0.000972 | ESPNL    | chr2 | + | 2.39E+08 | 2.39E+08 | 4836  |
| ENSG000001 | 177.732  | 83.27651 | 1.0844   | 2.89E-06 | 9.86E-06 | ANKMY1   | chr2 | - | 2.41E+08 | 2.42E+08 | 4640  |
| ENSG000001 | 960.9664 | 1041.185 | -0.11502 | 0.30848  | 0.4102   | COPS7B   | chr2 | + | 2.33E+08 | 2.33E+08 | 3299  |
| ENSG000001 | 386.8986 | 327.1719 | 0.24254  | 0.10592  | 0.16952  | DIS3L2   | chr2 | + | 2.33E+08 | 2.33E+08 | 4671  |
| ENSG000001 | 1.338465 | 45.95665 | -4.8695  | 9.87E-11 | 4.88E-10 | CPNE9    | chr3 | + | 9745491  | 9771592  | 2068  |
| ENSG000001 | 565.8859 | 1511.692 | -1.4154  | 3.16E-26 | 3.47E-25 | FANCD2   | chr3 | + | 10068098 | 10143614 | 5219  |
| ENSG000001 | 217.8907 | 255.0466 | -0.22577 | 0.21923  | 0.31092  | TAMM41   | chr3 | - | 11831916 | 11888393 | 2768  |
| ENSG000001 | 1126.99  | 524.1186 | 1.1037   | 1.76E-18 | 1.37E-17 | VGLL4    | chr3 | - | 11597544 | 11762220 | 3725  |
| ENSG000001 | 877.3737 | 1107.55  | -0.33549 | 0.001012 | 0.002507 | RAB5A    | chr3 | + | 19988571 | 20026667 | 2536  |
| ENSG000001 | 1271.103 | 1021.439 | 0.31486  | 0.006251 | 0.013663 | FAM134A  | chr2 | + | 2.2E+08  | 2.2E+08  | 4618  |
| ENSG000001 | 1133.061 | 285.07   | 1.988    | 3.13E-55 | 8.11E-54 | CTDSP1   | chr2 | + | 2.19E+08 | 2.19E+08 | 2638  |
| ENSG000001 | 1100.437 | 1296.347 | -0.23561 | 0.22761  | 0.32065  | RQCD1    | chr2 | + | 2.19E+08 | 2.19E+08 | 4079  |
| ENSG000001 | 266.1927 | 26.37657 | 3.3067   | 1.44E-40 | 2.58E-39 | 4-Mar    | chr2 | - | 2.17E+08 | 2.17E+08 | 4447  |
| ENSG000001 | 522.3944 | 518.5907 | 0.010829 | 0.94793  | 0.96709  | STK11IP  | chr2 | + | 2.2E+08  | 2.2E+08  | 3615  |
| ENSG000001 | 1107.179 | 565.9014 | 0.96773  | 9.42E-19 | 7.45E-18 | GMPPA    | chr2 | + | 2.2E+08  | 2.2E+08  | 4942  |
| ENSG000001 | 5.871871 | 222.3437 | -5.1659  | 3.91E-23 | 3.81E-22 | GRIP2    | chr3 | - | 14530619 | 14583588 | 7751  |
| ENSG000001 | 277.204  | 370.3896 | -0.4164  | 0.007886 | 0.016879 | EAFF1    | chr3 | + | 15468862 | 15484120 | 4690  |
| ENSG000001 | 0        | 7.03114  | -4.4148  | 0.000825 | 0.002075 | CNTN4    | chr3 | + | 2140497  | 3099645  | 5198  |
| ENSG000001 | 766.8556 | 1101.316 | -0.52102 | 4.96E-05 | 0.000147 | DYNC1L11 | chr3 | - | 32567463 | 32612366 | 4791  |
| ENSG000001 | 526.9864 | 115.3164 | 2.1851   | 1.80E-38 | 3.04E-37 | RBMS3    | chr3 | + | 29322473 | 30051886 | 8208  |
| ENSG000001 | 2.914991 | 2.995994 | -0.02795 | 0.98106  | 0.98953  | GADL1    | chr3 | - | 30767692 | 30936257 | 4509  |
| ENSG000001 | 552.2173 | 1148.613 | -1.0546  | 6.46E-11 | 3.25E-10 | OSBPL10  | chr3 | - | 31699382 | 32119072 | 7723  |
| ENSG000001 | 238.7016 | 364.6511 | -0.60855 | 0.000137 | 0.000385 | GTDC2    | chr3 | - | 43120724 | 43147568 | 2544  |
| ENSG000001 | 0.342542 | 3.259039 | -2.5103  | 0.084665 | 0.14027  | CCBP2    | chr3 | + | 42846244 | 42949597 | 3605  |
| ENSG000001 | 0        | 76.66364 | -7.8012  | 9.64E-13 | 5.48E-12 | FAM198A  | chr3 | + | 43020759 | 43101703 | 3121  |
| ENSG000001 | 666.3648 | 225.5623 | 1.5603   | 1.38E-19 | 1.14E-18 | CSRN1P   | chr3 | - | 39183346 | 39196053 | 3148  |
| ENSG000001 | 452.687  | 688.6061 | -0.60316 | 0.000493 | 0.001282 | SLC25A38 | chr3 | + | 39424839 | 39438842 | 2123  |
| ENSG000001 | 47.96022 | 126.8286 | -1.4002  | 1.42E-08 | 5.95E-08 | ITGA9    | chr3 | + | 37493606 | 37865005 | 7889  |
| ENSG000001 | 1.048164 | 0.343138 | 0.98412  | 0.56751  | NA       | SLC22A14 | chr3 | + | 38323785 | 38360066 | 2277  |
| ENSG000001 | 2306.94  | 1108.663 | 1.051    | 0.000205 | 0.000562 | GOLGA4   | chr3 | + | 37284668 | 37408242 | 7772  |
| ENSG000001 | 1002.333 | 620.8392 | 0.6898   | 1.24E-06 | 4.40E-06 | CTDSPL   | chr3 | + | 37903451 | 38025960 | 4640  |
| ENSG000001 | 114.7967 | 144.3723 | -0.32716 | 0.16035  | 0.24013  | STAC     | chr3 | + | 36421836 | 36589499 | 3227  |
| ENSG000001 | 1265.761 | 1028.673 | 0.29774  | 0.15511  | 0.23363  | IQSEC1   | chr3 | - | 12938719 | 13114617 | 5279  |
| ENSG000001 | 391.4317 | 427.9658 | -0.12867 | 0.49603  | 0.5999   | CAND2    | chr3 | + | 12837971 | 12913415 | 4573  |
| ENSG000001 | 6174.563 | 8080.051 | -0.38745 | 0.001055 | 0.002605 | RPL32    | chr3 | - | 12875984 | 12883087 | 2117  |
| ENSG000001 | 2594.287 | 1912.37  | 0.43989  | 1.74E-05 | 5.45E-05 | P1PRG    | chr3 | + | 61547243 | 62283288 | 9021  |
| ENSG000001 | 8974.819 | 3363.672 | 1.4151   | 1.37E-53 | 4.33E-52 | IL17RD   | chr3 | - | 57124010 | 57204334 | 8720  |
| ENSG000001 | 291.0892 | 346.9823 | -0.25255 | 0.1422   | 0.21675  | SHQ1     | chr3 | - | 72798428 | 72911065 | 4024  |
| ENSG000001 | 234.2885 | 425.0817 | -0.8596  | 1.57E-07 | 6.04E-07 | SLC25A26 | chr3 | + | 66119285 | 66438530 | 3869  |
| ENSG000001 | 775.8212 | 687.242  | 0.17546  | 0.12899  | 0.20042  | UBA3     | chr3 | - | 69103881 | 69129559 | 2154  |
| ENSG000001 | 1426.972 | 492.6969 | 1.5326   | 2.97E-29 | 3.68E-28 | ARL6IP5  | chr3 | + | 69134095 | 69155217 | 2101  |
| ENSG000001 | 802.8902 | 241.5401 | 1.7315   | 5.12E-21 | 4.52E-20 | TMF1     | chr3 | - | 69068978 | 69101484 | 6886  |
| ENSG000001 | 769.5718 | 2051.043 | -1.4123  | 1.12E-29 | 1.42E-28 | LRIG1    | chr3 | - | 66429221 | 66551687 | 5283  |
| ENSG000001 | 0.975385 | 0.297015 | 0.91901  | 0.59525  | NA       | LRTM1    | chr3 | - | 54952264 | 55001115 | 1423  |
| ENSG000001 | 1037.252 | 939.5356 | 0.1429   | 0.181    | 0.26558  | LIMD1    | chr3 | + | 45596886 | 45727830 | 11331 |
| ENSG000001 | 170.745  | 195.8936 | -0.19651 | 0.37631  | 0.48035  | ZNF660   | chr3 | + | 44619715 | 44641186 | 5834  |
| ENSG000001 | 167.5443 | 85.78529 | 0.95886  | 4.86E-05 | 0.000144 | NFKBIZ   | chr3 | + | 1.02E+08 | 1.02E+08 | 3923  |
| ENSG000001 | 9988.127 | 22.97742 | 8.5498   | 1.78E-54 | 4.55E-53 | COL8A1   | chr3 | + | 99357319 | 99518070 | 5705  |
| ENSG000001 | 817.3798 | 333.2475 | 1.2899   | 5.73E-18 | 4.39E-17 | NXPE3    | chr3 | + | 1.01E+08 | 1.02E+08 | 8152  |
| ENSG000001 | 0        | 1.669566 | -1.94    | 0.2691   | NA       | GPR128   | chr3 | + | 1E+08    | 1E+08    | 3140  |
| ENSG000001 | 300.8888 | 7.484382 | 5.2546   | 2.82E-47 | 5.97E-46 | MYH15    | chr3 | - | 1.08E+08 | 1.08E+08 | 7074  |
| ENSG000001 | 1350.639 | 962.5064 | 0.48831  | 0.003478 | 0.007939 | PHLDB2   | chr3 | + | 1.11E+08 | 1.12E+08 | 6127  |
| ENSG000001 | 530.4261 | 266.36   | 0.9907   | 1.78E-12 | 9.92E-12 | ABHD10   | chr3 | + | 1.12E+08 | 1.12E+08 | 2590  |
| ENSG000001 | 148.8361 | 34.53985 | 2.1025   | 4.03E-13 | 2.35E-12 | TAGLN3   | chr3 | + | 1.12E+08 | 1.12E+08 | 1488  |
| ENSG000001 | 7.282301 | 0        | 4.4688   | 0.000653 | 0.001665 | PLA1A    | chr3 | + | 1.19E+08 | 1.19E+08 | 1786  |
| ENSG000001 | 520.1934 | 236.8826 | 1.1334   | 9.08E-09 | 3.87E-08 | RABL3    | chr3 | - | 1.2E+08  | 1.2E+08  | 3883  |
| ENSG000001 | 42.76227 | 60.64123 | -0.49946 | 0.078871 | 0.13192  | ADPRH    | chr3 | + | 1.19E+08 | 1.19E+08 | 4546  |
| ENSG000001 | 0.36308  | 24.09673 | -5.3523  | 1.61E-06 | 5.66E-06 | IGSF11   | chr3 | - | 1.19E+08 | 1.19E+08 | 3558  |
| ENSG000001 | 464.6122 | 589.1777 | -0.34095 | 0.079381 | 0.13262  | ATG3     | chr3 | - | 1.12E+08 | 1.12E+08 | 3010  |

|            |          |          |          |           |           |          |      |   |          |          |       |
|------------|----------|----------|----------|-----------|-----------|----------|------|---|----------|----------|-------|
| ENSG000001 | 0        | 3.06884  | -3.0961  | 0.043807  | 0.079295  | NR1I2    | chr3 | + | 1.19E+08 | 1.2E+08  | 4417  |
| ENSG000001 | 1397.411 | 108.3531 | 3.6857   | 1.89E-124 | 1.60E-122 | BOC      | chr3 | + | 1.13E+08 | 1.13E+08 | 5750  |
| ENSG000001 | 946.193  | 558.5024 | 0.75942  | 9.12E-06  | 2.94E-05  | SRPRB    | chr3 | + | 1.34E+08 | 1.34E+08 | 2016  |
| ENSG000001 | 94.48784 | 218.5995 | -1.2062  | 3.08E-08  | 1.26E-07  | TMEM108  | chr3 | + | 1.33E+08 | 1.33E+08 | 4833  |
| ENSG000001 | 123.0948 | 0.640152 | 7.0206   | 9.88E-17  | 7.11E-16  | AGTR1    | chr3 | + | 1.48E+08 | 1.48E+08 | 2412  |
| ENSG000001 | 40.71818 | 197.1249 | -2.2622  | 3.01E-17  | 2.23E-16  | MED12L   | chr3 | + | 1.51E+08 | 1.51E+08 | 10744 |
| ENSG000001 | 890.167  | 994.3469 | -0.15848 | 0.23482   | 0.32865   | EIF2A    | chr3 | + | 1.5E+08  | 1.5E+08  | 2198  |
| ENSG000001 | 0.290301 | 19.36403 | -5.0248  | 2.05E-05  | 6.33E-05  | ALDH1L1  | chr3 | - | 1.26E+08 | 1.26E+08 | 4604  |
| ENSG000001 | 421.2306 | 370.1039 | 0.18786  | 0.1661    | 0.24723   | OSBPL11  | chr3 | - | 1.25E+08 | 1.25E+08 | 4191  |
| ENSG000001 | 142.8287 | 135.3643 | 0.072947 | 0.72318   | 0.79524   | TRPC1    | chr3 | + | 1.42E+08 | 1.43E+08 | 4324  |
| ENSG000001 | 70.54103 | 52.65358 | 0.4132   | 0.16578   | 0.24686   | NCEH1    | chr3 | - | 1.72E+08 | 1.72E+08 | 4687  |
| ENSG000001 | 0.632843 | 0.343138 | 0.49756  | 0.77728   | NA        | SPATA16  | chr3 | - | 1.73E+08 | 1.73E+08 | 2106  |
| ENSG000001 | 0.342542 | 5.76782  | -3.3094  | 0.013388  | 0.027423  | FAM86B2  | chr8 | - | 12282913 | 12293915 | 1268  |
| ENSG000001 | 3176.204 | 827.5449 | 1.9388   | 5.28E-96  | 2.87E-94  | LPP      | chr3 | + | 1.88E+08 | 1.89E+08 | 18278 |
| ENSG000001 | 393.3104 | 197.0456 | 0.99305  | 1.33E-09  | 6.05E-09  | TMEM44   | chr3 | - | 1.94E+08 | 1.94E+08 | 2490  |
| ENSG000001 | 676.3891 | 393.0317 | 0.78172  | 2.80E-07  | 1.05E-06  | KIAA0226 | chr3 | - | 1.97E+08 | 1.97E+08 | 6955  |
| ENSG000001 | 59.67584 | 574.2819 | -3.2652  | 2.79E-61  | 8.30E-60  | AMT      | chr3 | - | 49454211 | 49460186 | 3272  |
| ENSG000001 | 203.4912 | 102.5932 | 0.98341  | 0.000833  | 0.002094  | TCTA     | chr3 | + | 49449639 | 49453908 | 2146  |
| ENSG000001 | 167.4866 | 95.02578 | 0.81388  | 4.34E-05  | 0.000129  | NICN1    | chr3 | - | 49460379 | 49466759 | 2616  |
| ENSG000001 | 1.866827 | 0        | 2.3484   | 0.15622   | NA        | UCN2     | chr3 | - | 48599160 | 48601206 | 1481  |
| ENSG000001 | 646.9313 | 720.1828 | -0.15377 | 0.39873   | 0.50335   | VPRBP    | chr3 | - | 51433298 | 51534010 | 4529  |
| ENSG000001 | 2557.683 | 1028.652 | 1.3129   | 2.21E-24  | 2.26E-23  | MANF     | chr3 | + | 51422478 | 51426828 | 1509  |
| ENSG000001 | 0        | 1.995719 | -2.4883  | 0.12386   | 0.19391   | AC062028 | chr2 | - | 11239977 | 11272947 | 1635  |
| ENSG000001 | 38.39056 | 38.99574 | -0.01539 | 0.97155   | 0.98431   | CCDC39   | chr3 | - | 1.8E+08  | 1.81E+08 | 4451  |
| ENSG000001 | 5.415474 | 55.79996 | -3.3147  | 2.07E-10  | 1.00E-09  | STXBP5L  | chr3 | + | 1.21E+08 | 1.21E+08 | 9496  |
| ENSG000001 | 27.81225 | 61.96041 | -1.142   | 0.000396  | 0.001042  | EF2      | chr3 | + | 1.22E+08 | 1.22E+08 | 992   |
| ENSG000001 | 0        | 49.0555  | -7.1159  | 7.07E-10  | 3.30E-09  | ILDR1    | chr3 | - | 1.22E+08 | 1.22E+08 | 2659  |
| ENSG000001 | 3.173589 | 3.616746 | -0.15814 | 0.88037   | 0.91661   | TM4SF19  | chr3 | - | 1.96E+08 | 1.96E+08 | 1582  |
| ENSG000001 | 0.290301 | 37.64917 | -5.9988  | 2.14E-08  | 8.82E-08  | MUC4     | chr3 | - | 1.95E+08 | 1.96E+08 | 17110 |
| ENSG000001 | 613.632  | 279.1928 | 1.1355   | 1.32E-17  | 9.97E-17  | SLIT2    | chr4 | + | 20254883 | 20622184 | 6390  |
| ENSG000001 | 746.2155 | 768.3069 | -0.04139 | 0.793     | 0.85287   | EIF2B5   | chr3 | + | 1.84E+08 | 1.84E+08 | 3460  |
| ENSG000001 | 0        | 0.297015 | -0.41864 | 0.81278   | NA        | AHSG     | chr3 | + | 1.86E+08 | 1.86E+08 | 1711  |
| ENSG000001 | 53.77839 | 203.3052 | -1.8999  | 2.87E-13  | 1.68E-12  | ECE2     | chr3 | + | 1.84E+08 | 1.84E+08 | 3445  |
| ENSG000001 | 10.15622 | 41.49753 | -1.9849  | 0.000251  | 0.000678  | VWA5B2   | chr3 | + | 1.84E+08 | 1.84E+08 | 4120  |
| ENSG000001 | 916.9617 | 725.25   | 0.33687  | 0.032108  | 0.06028   | DGKQ     | chr4 | - | 952675   | 980683   | 4636  |
| ENSG000001 | 586.3601 | 637.5344 | -0.1206  | 0.32219   | 0.4251    | FIP1L1   | chr4 | + | 54243810 | 55161439 | 3180  |
| ENSG000001 | 53.02215 | 16.7961  | 1.6397   | 9.68E-06  | 3.11E-05  | SLC26A1  | chr4 | - | 972861   | 987228   | 3660  |
| ENSG000001 | 324.2696 | 922.5971 | -1.5015  | 2.68E-10  | 1.29E-09  | LYAR     | chr4 | - | 4269428  | 4291896  | 1569  |
| ENSG000001 | 247.703  | 207.3248 | 0.25777  | 0.17306   | 0.2558    | CENPC1   | chr4 | - | 68337521 | 68411324 | 3885  |
| ENSG000001 | 58.51122 | 0.640152 | 5.9863   | 1.23E-11  | 6.49E-11  | EPHA5    | chr4 | - | 66185281 | 66536213 | 8266  |
| ENSG000001 | 26.67917 | 3.359407 | 2.7902   | 0.000313  | 0.000837  | CORIN    | chr4 | - | 47596015 | 47840123 | 5378  |
| ENSG000001 | 713.3406 | 29.55948 | 4.5692   | 3.89E-99  | 2.18E-97  | ATP10D   | chr4 | + | 47487305 | 47595503 | 6655  |
| ENSG000001 | 1025.452 | 851.1971 | 0.26847  | 0.01359   | 0.02779   | OCIAD2   | chr4 | - | 48887036 | 48908954 | 1886  |
| ENSG000001 | 34.8565  | 76.34648 | -1.1262  | 0.0001    | 0.000286  | SLC10A4  | chr4 | + | 48485360 | 48491213 | 1790  |
| ENSG000001 | 0        | 0.357707 | -0.41864 | 0.81278   | NA        | SLC10A6  | chr4 | - | 87744621 | 87770416 | 1502  |
| ENSG000001 | 366.6078 | 169.9243 | 1.1069   | 3.75E-13  | 2.19E-12  | SCD5     | chr4 | - | 83550692 | 83720010 | 3101  |
| ENSG000001 | 15.8628  | 12.10382 | 0.36574  | 0.50188   | 0.60535   | PLAC8    | chr4 | - | 84011201 | 84058228 | 2253  |
| ENSG000001 | 709.1868 | 1270.463 | -0.84056 | 4.11E-13  | 2.40E-12  | ENOPH1   | chr4 | + | 83351715 | 83382244 | 2025  |
| ENSG000001 | 0        | 2.073397 | -2.2159  | 0.20168   | 0.2903    | GC       | chr4 | - | 72607410 | 72669758 | 1972  |
| ENSG000001 | 77.93979 | 41.90761 | 0.88699  | 0.013625  | 0.027851  | TRMT10A  | chr4 | - | 1E+08    | 1E+08    | 3694  |
| ENSG000001 | 400.6609 | 152.7293 | 1.3884   | 8.08E-19  | 6.41E-18  | KLHL8    | chr4 | - | 88081255 | 88141760 | 5621  |
| ENSG000001 | 507.4755 | 44.44164 | 3.494    | 4.94E-37  | 8.01E-36  | SNCA     | chr4 | - | 90645250 | 90759466 | 3173  |
| ENSG000001 | 0.342542 | 0        | 0.4146   | 0.81455   | NA        | PYURF    | chr4 | - | 89442136 | 89444964 | 1361  |
| ENSG000001 | 425.725  | 214.908  | 0.98543  | 5.78E-11  | 2.92E-10  | TBCK     | chr4 | - | 1.07E+08 | 1.07E+08 | 5383  |
| ENSG000001 | 1413.133 | 403.3885 | 1.8028   | 1.83E-22  | 1.72E-21  | CAMK2D   | chr4 | - | 1.14E+08 | 1.15E+08 | 5947  |
| ENSG000001 | 264.2886 | 230.5361 | 0.19657  | 0.41036   | 0.51519   | CISD2    | chr4 | + | 1.04E+08 | 1.04E+08 | 2327  |
| ENSG000001 | 11.07936 | 80.75948 | -2.826   | 1.06E-14  | 6.79E-14  | DDIT4L   | chr4 | - | 1.01E+08 | 1.01E+08 | 2604  |
| ENSG000001 | 313.8874 | 540.8929 | -0.77846 | 0.011277  | 0.023436  | ANK2     | chr4 | + | 1.14E+08 | 1.14E+08 | 14196 |
| ENSG000001 | 82.72502 | 24.60335 | 1.7373   | 1.95E-08  | 8.06E-08  | TIFA     | chr4 | - | 1.13E+08 | 1.13E+08 | 3072  |
| ENSG000001 | 204.5585 | 176.5566 | 0.21148  | 0.24807   | 0.34428   | SPATA5   | chr4 | + | 1.24E+08 | 1.24E+08 | 3341  |
| ENSG000001 | 0.290301 | 0.297015 | -0.00202 | 0.99909   | NA        | FABP2    | chr4 | - | 1.2E+08  | 1.2E+08  | 2478  |
| ENSG000001 | 1211.792 | 2205.69  | -0.86331 | 2.33E-17  | 1.74E-16  | CCNA2    | chr4 | - | 1.23E+08 | 1.23E+08 | 2797  |
| ENSG000001 | 336.6735 | 363.6351 | -0.11    | 0.46789   | 0.5727    | METTL14  | chr4 | + | 1.2E+08  | 1.2E+08  | 3887  |
| ENSG000001 | 885.9687 | 373.5541 | 1.2417   | 2.33E-07  | 8.83E-07  | USP53    | chr4 | + | 1.2E+08  | 1.2E+08  | 6072  |
| ENSG000001 | 1441.676 | 203.584  | 2.814    | 2.06E-50  | 4.75E-49  | SETD7    | chr4 | - | 1.4E+08  | 1.4E+08  | 7365  |

|            |          |          |          |           |           |          |      |   |          |          |       |
|------------|----------|----------|----------|-----------|-----------|----------|------|---|----------|----------|-------|
| ENSG000001 | 241.8058 | 367.8277 | -0.6046  | 2.85E-05  | 8.66E-05  | NAF1     | chr4 | - | 1.64E+08 | 1.64E+08 | 2329  |
| ENSG000001 | 130.497  | 81.98554 | 0.66966  | 0.001863  | 0.004429  | 1-Mar    | chr4 | - | 1.64E+08 | 1.65E+08 | 5877  |
| ENSG000001 | 19.29678 | 13283.68 | -9.4023  | 0         | 0         | SFRP2    | chr4 | - | 1.55E+08 | 1.55E+08 | 2032  |
| ENSG000001 | 3056.359 | 4632.564 | -0.59921 | 2.68E-07  | 1.01E-06  | RPS3A    | chr4 | + | 1.52E+08 | 1.52E+08 | 1526  |
| ENSG000001 | 12.6567  | 123.534  | -3.2708  | 9.73E-23  | 9.29E-22  | RNF175   | chr4 | - | 1.55E+08 | 1.55E+08 | 3203  |
| ENSG000001 | 1286.866 | 82.52357 | 3.9548   | 2.77E-76  | 1.11E-74  | PDGFC    | chr4 | - | 1.58E+08 | 1.58E+08 | 4165  |
| ENSG000001 | 272.8362 | 591.1011 | -1.1138  | 5.94E-12  | 3.19E-11  | CBR4     | chr4 | - | 1.7E+08  | 1.7E+08  | 3443  |
| ENSG000001 | 0        | 3.085825 | -3.0709  | 0.047974  | 0.085814  | GLRA3    | chr4 | - | 1.76E+08 | 1.76E+08 | 8770  |
| ENSG000001 | 192.0908 | 119.143  | 0.68087  | 0.02587   | 0.049771  | CYP4V2   | chr4 | + | 1.87E+08 | 1.87E+08 | 8646  |
| ENSG000001 | 1.939605 | 1.638012 | 0.21411  | 0.86025   | 0.90201   | ROPN1L   | chr5 | + | 10441636 | 10472141 | 1291  |
| ENSG000001 | 1455.712 | 2807.73  | -0.94666 | 5.55E-17  | 4.05E-16  | NDUFS6   | chr5 | + | 1801514  | 1816719  | 1082  |
| ENSG000001 | 1820.277 | 1169.264 | 0.63793  | 8.54E-11  | 4.24E-10  | 6-Mar    | chr5 | + | 10353815 | 10435491 | 4734  |
| ENSG000001 | 231.5905 | 322.5653 | -0.47485 | 0.10726   | 0.17133   | NKD2     | chr5 | + | 1008944  | 1039058  | 2155  |
| ENSG000001 | 18.80868 | 0.700845 | 4.3769   | 8.55E-06  | 2.77E-05  | CDH18    | chr5 | - | 19473060 | 20575982 | 3542  |
| ENSG000001 | 48.67277 | 544.8783 | -3.4631  | 4.93E-68  | 1.72E-66  | ADAMTS16 | chr5 | + | 5140443  | 5320417  | 4979  |
| ENSG000001 | 271.3128 | 400.5667 | -0.55905 | 9.58E-05  | 0.000274  | SRD5A1   | chr5 | - | 6633456  | 6669675  | 2308  |
| ENSG000001 | 4818.185 | 5080.357 | -0.07641 | 0.44552   | 0.55101   | MYO10    | chr5 | + | 16665395 | 16936372 | 8038  |
| ENSG000001 | 9.689468 | 116.5546 | -3.5677  | 2.02E-23  | 1.98E-22  | FAM105A  | chr5 | + | 14581884 | 14615116 | 3597  |
| ENSG000001 | 5408.992 | 7283.789 | -0.42882 | 8.06E-05  | 0.000232  | RPL37    | chr5 | - | 40825364 | 40835437 | 7686  |
| ENSG000001 | 950.1379 | 1015.26  | -0.09501 | 0.57771   | 0.67421   | SKP2     | chr5 | + | 36152091 | 36184421 | 3759  |
| ENSG000001 | 702.1701 | 46.76424 | 3.8913   | 3.23E-74  | 1.25E-72  | OSMR     | chr5 | + | 38845960 | 38945698 | 5539  |
| ENSG000001 | 0        | 53.21928 | -7.2798  | 8.57E-11  | 4.26E-10  | UGT3A1   | chr5 | - | 35951112 | 36001130 | 5122  |
| ENSG000001 | 1328.518 | 268.9453 | 2.3027   | 1.29E-57  | 3.54E-56  | PLK2     | chr5 | - | 57749809 | 57756087 | 2960  |
| ENSG000001 | 1.89853  | 182.0621 | -6.3414  | 1.91E-27  | 2.21E-26  | FAM159B  | chr5 | + | 63986135 | 64013917 | 847   |
| ENSG000001 | 47.78442 | 0.343138 | 6.2727   | 4.40E-09  | 1.92E-08  | GZMA     | chr5 | + | 54398476 | 54406080 | 894   |
| ENSG000001 | 494.2993 | 229.6587 | 1.1028   | 2.71E-06  | 9.29E-06  | PIK3R1   | chr5 | + | 67511548 | 67597649 | 7011  |
| ENSG000001 | 2835.882 | 203.2638 | 3.7994   | 1.59E-169 | 2.31E-167 | HAPLN1   | chr5 | - | 82933624 | 83017432 | 5607  |
| ENSG000001 | 1239.809 | 991.4419 | 0.32137  | 0.042906  | 0.077896  | LHFPL2   | chr5 | - | 77781038 | 78065844 | 5043  |
| ENSG000001 | 268.615  | 269.6831 | -0.00627 | 0.97383   | 0.98544   | SSBP2    | chr5 | - | 80708840 | 81047616 | 8780  |
| ENSG000001 | 0        | 9.369996 | -4.8446  | 0.000134  | 0.000376  | BHMT     | chr5 | + | 78407602 | 78428108 | 2497  |
| ENSG000001 | 1.411244 | 3.443532 | -1.1232  | 0.3677    | 0.47235   | ANKRD31  | chr5 | - | 74364100 | 74532703 | 6036  |
| ENSG000001 | 249.5579 | 1946.532 | -2.9565  | 3.07E-70  | 1.11E-68  | IQGAP2   | chr5 | + | 75699074 | 76003957 | 5844  |
| ENSG000001 | 4.169512 | 2.338857 | 0.77628  | 0.44139   | 0.54722   | CRHBP    | chr5 | + | 76248538 | 76276983 | 1980  |
| ENSG000001 | 2168.538 | 645.4169 | 1.745    | 1.51E-32  | 2.12E-31  | RASA1    | chr5 | + | 86563705 | 86687748 | 4979  |
| ENSG000001 | 5.197138 | 3.10281  | 0.67646  | 0.54707   | 0.6472    | LIX1     | chr5 | - | 96427574 | 96478576 | 4023  |
| ENSG000001 | 23.28985 | 63.93256 | -1.4459  | 3.00E-05  | 9.08E-05  | GIN1     | chr5 | - | 1.02E+08 | 1.02E+08 | 3325  |
| ENSG000001 | 1029.774 | 343.8136 | 1.5804   | 2.90E-18  | 2.25E-17  | PPIP5K2  | chr5 | + | 1.02E+08 | 1.03E+08 | 5817  |
| ENSG000001 | 2713.284 | 769.786  | 1.816    | 1.81E-51  | 4.33E-50  | PAM      | chr5 | + | 1.02E+08 | 1.02E+08 | 5432  |
| ENSG000001 | 953.7641 | 542.996  | 0.80816  | 0.005989  | 0.013133  | BDP1     | chr5 | + | 70751442 | 70863649 | 11073 |
| ENSG000001 | 101.3933 | 154.4829 | -0.60415 | 0.003196  | 0.007338  | GTF2H2   | chr5 | - | 70330784 | 70363516 | 2077  |
| ENSG000001 | 730.0268 | 411.3541 | 0.82565  | 2.08E-09  | 9.33E-09  | SLC30A5  | chr5 | + | 68389473 | 68426896 | 4360  |
| ENSG000001 | 4869.776 | 6978.147 | -0.51833 | 2.80E-06  | 9.56E-06  | BTF3     | chr5 | + | 72794233 | 72801460 | 1237  |
| ENSG000001 | 443.4486 | 80.20923 | 2.4575   | 1.53E-25  | 1.63E-24  | FBXL17   | chr5 | - | 1.07E+08 | 1.08E+08 | 5188  |
| ENSG000001 | 6.941551 | 1.309443 | 2.1459   | 0.048136  | 0.086072  | SPATA9   | chr5 | - | 94987885 | 95034415 | 2169  |
| ENSG000001 | 0        | 7.45766  | -4.5027  | 0.00061   | 0.001564  | TSLP     | chr5 | + | 1.1E+08  | 1.1E+08  | 2621  |
| ENSG000001 | 171.3956 | 221.8812 | -0.37275 | 0.030057  | 0.056851  | TNFAIP8  | chr5 | + | 1.19E+08 | 1.19E+08 | 3591  |
| ENSG000001 | 498.2672 | 358.3466 | 0.47486  | 0.000538  | 0.001389  | FEM1C    | chr5 | - | 1.15E+08 | 1.15E+08 | 5813  |
| ENSG000001 | 285.8594 | 313.5024 | -0.1312  | 0.50129   | 0.60491   | COMMD10  | chr5 | + | 1.15E+08 | 1.16E+08 | 1469  |
| ENSG000001 | 706.996  | 424.8309 | 0.7344   | 1.18E-08  | 4.96E-08  | ATG12    | chr5 | - | 1.15E+08 | 1.15E+08 | 4333  |
| ENSG000001 | 1270.17  | 497.1423 | 1.3515   | 2.02E-16  | 1.43E-15  | MEGF10   | chr5 | + | 1.27E+08 | 1.27E+08 | 7594  |
| ENSG000001 | 17.33664 | 704.863  | -5.3345  | 1.10E-104 | 6.79E-103 | ADAMTS19 | chr5 | + | 1.29E+08 | 1.29E+08 | 5234  |
| ENSG000001 | 1257.406 | 441.9497 | 1.5076   | 5.40E-31  | 7.17E-30  | YIPF5    | chr5 | - | 1.44E+08 | 1.44E+08 | 3147  |
| ENSG000001 | 160.9357 | 350.9739 | -1.1223  | 1.21E-11  | 6.37E-11  | ARHGAP26 | chr5 | + | 1.42E+08 | 1.43E+08 | 9200  |
| ENSG000001 | 70.06491 | 1.730259 | 5.1894   | 8.53E-15  | 5.53E-14  | CXCL14   | chr5 | - | 1.35E+08 | 1.35E+08 | 1971  |
| ENSG000001 | 1.555988 | 4.175931 | -1.158   | 0.38264   | 0.48679   | LECT2    | chr5 | - | 1.35E+08 | 1.35E+08 | 1077  |
| ENSG000001 | 0        | 9.251028 | -4.7666  | 0.000274  | 0.000738  | SLC25A48 | chr5 | + | 1.35E+08 | 1.35E+08 | 2062  |
| ENSG000001 | 1831.978 | 2595.471 | -0.50129 | 0.003566  | 0.008125  | DDX46    | chr5 | + | 1.34E+08 | 1.34E+08 | 5689  |
| ENSG000001 | 0        | 0.715414 | -0.84936 | 0.6309    | NA        | IL9      | chr5 | - | 1.35E+08 | 1.35E+08 | 591   |
| ENSG000001 | 0.342542 | 0        | 0.4146   | 0.81455   | NA        | TIMD4    | chr5 | - | 1.56E+08 | 1.56E+08 | 1369  |
| ENSG000001 | 619.1019 | 536.9247 | 0.20473  | 0.1534    | 0.23136   | RNF145   | chr5 | - | 1.59E+08 | 1.59E+08 | 3613  |
| ENSG000001 | 33.90083 | 6.361849 | 2.374    | 4.85E-06  | 1.61E-05  | C1QTNF2  | chr5 | - | 1.6E+08  | 1.6E+08  | 2414  |
| ENSG000001 | 34.48046 | 25.37617 | 0.4439   | 0.31664   | 0.41929   | GABRB2   | chr5 | - | 1.61E+08 | 1.61E+08 | 7385  |
| ENSG000001 | 634.8585 | 422.9379 | 0.58552  | 0.000149  | 0.000414  | FBXO38   | chr5 | + | 1.48E+08 | 1.48E+08 | 4424  |
| ENSG000001 | 183.5737 | 174.0697 | 0.076612 | 0.75063   | 0.81767   | PCYOX1L  | chr5 | + | 1.49E+08 | 1.49E+08 | 4887  |
| ENSG000001 | 0.653381 | 1.280305 | -0.72001 | 0.64696   | 0.73318   | GLRA1    | chr5 | - | 1.51E+08 | 1.51E+08 | 1803  |

|            |          |          |          |           |           |          |      |   |          |          |       |
|------------|----------|----------|----------|-----------|-----------|----------|------|---|----------|----------|-------|
| ENSG000001 | 942.6314 | 853.499  | 0.14354  | 0.43764   | 0.54315   | TNIP1    | chr5 | - | 1.5E+08  | 1.5E+08  | 3268  |
| ENSG000001 | 3662.883 | 6518.694 | -0.83036 | 2.03E-09  | 9.11E-09  | G3BP1    | chr5 | + | 1.51E+08 | 1.51E+08 | 10240 |
| ENSG000001 | 162.2936 | 116.2274 | 0.48048  | 0.056778  | 0.099451  | ZNF300   | chr5 | - | 1.5E+08  | 1.5E+08  | 4155  |
| ENSG000001 | 12.96754 | 2684.069 | -7.6544  | 1.56E-156 | 1.96E-154 | N4BP3    | chr5 | + | 1.78E+08 | 1.78E+08 | 6080  |
| ENSG000001 | 628.4946 | 1062.14  | -0.75527 | 5.64E-07  | 2.06E-06  | NHP2     | chr5 | - | 1.78E+08 | 1.78E+08 | 865   |
| ENSG000001 | 402.6205 | 1542.349 | -1.9348  | 1.05E-45  | 2.14E-44  | RMND5B   | chr5 | + | 1.78E+08 | 1.78E+08 | 4250  |
| ENSG000001 | 967.8864 | 1805.366 | -0.89861 | 1.87E-19  | 1.53E-18  | BOD1     | chr5 | - | 1.73E+08 | 1.73E+08 | 1562  |
| ENSG000001 | 0.290301 | 34.83438 | -5.8644  | 8.52E-08  | 3.34E-07  | CPLX2    | chr5 | + | 1.75E+08 | 1.75E+08 | 5023  |
| ENSG000001 | 141.6653 | 26.75771 | 2.3913   | 6.53E-20  | 5.48E-19  | TENM2    | chr5 | + | 1.67E+08 | 1.68E+08 | 9427  |
| ENSG000001 | 3.422814 | 6.849062 | -0.9099  | 0.30526   | 0.40686   | KCNMB1   | chr5 | - | 1.7E+08  | 1.7E+08  | 1733  |
| ENSG000001 | 3.019472 | 73.63126 | -4.5133  | 3.43E-16  | 2.40E-15  | FAM50B   | chr6 | + | 3849620  | 3851551  | 1932  |
| ENSG000001 | 6.527044 | 4.129808 | 0.60929  | 0.53448   | 0.63539   | MYLK4    | chr6 | - | 2663863  | 2751200  | 5798  |
| ENSG000001 | 7.012538 | 4.378283 | 0.64417  | 0.43947   | 0.54523   | C6ORF50  | chr6 | + | 3982909  | 3984372  | 1464  |
| ENSG000001 | 1.649304 | 4.899467 | -1.425   | 0.17478   | 0.25791   | FAM217A  | chr6 | - | 4049668  | 4087578  | 2265  |
| ENSG000001 | 342.8792 | 489.7479 | -0.51553 | 0.000157  | 0.000438  | TBC1D7   | chr6 | - | 13275081 | 13328776 | 1544  |
| ENSG000001 | 233.0529 | 194.5987 | 0.25889  | 0.23011   | 0.32347   | FARS2    | chr6 | + | 5261277  | 5771813  | 1692  |
| ENSG000001 | 130.1403 | 194.9722 | -0.58423 | 0.015272  | 0.030899  | GFOD1    | chr6 | - | 13358062 | 13487894 | 8751  |
| ENSG000001 | 275.1803 | 342.8745 | -0.31465 | 0.04475   | 0.080722  | CDKAL1   | chr6 | + | 20534688 | 21232635 | 3272  |
| ENSG000001 | 12.42638 | 3.91376  | 1.584    | 0.042064  | 0.076606  | PCDHB18  | chr5 | + | 1.41E+08 | 1.41E+08 | 3164  |
| ENSG000001 | 26.37012 | 12.28274 | 1.0481   | 0.11493   | 0.18206   | PSD2     | chr5 | + | 1.39E+08 | 1.39E+08 | 4513  |
| ENSG000001 | 3.713929 | 2.278164 | 0.62046  | 0.54856   | 0.64859   | LRRTM2   | chr5 | - | 1.38E+08 | 1.38E+08 | 2216  |
| ENSG000001 | 1021.278 | 1112.08  | -0.12231 | 0.47692   | 0.58143   | ZMAT2    | chr5 | + | 1.4E+08  | 1.4E+08  | 1634  |
| ENSG000001 | 2.987769 | 24.82752 | -2.9562  | 5.41E-06  | 1.79E-05  | GFRA3    | chr5 | - | 1.38E+08 | 1.38E+08 | 2039  |
| ENSG000001 | 53.13682 | 275.6821 | -2.3684  | 1.91E-29  | 2.39E-28  | KLHL3    | chr5 | - | 1.37E+08 | 1.37E+08 | 6981  |
| ENSG000001 | 5.290455 | 1.949596 | 1.3086   | 0.18085   | 0.26537   | DCDC2    | chr6 | - | 24171984 | 24358280 | 4707  |
| ENSG000001 | 23.05016 | 18.34516 | 0.31677  | 0.56289   | 0.661     | TRIM7    | chr5 | - | 1.81E+08 | 1.81E+08 | 4357  |
| ENSG000001 | 643.9545 | 790.234  | -0.29499 | 0.062941  | 0.10876   | TRIM41   | chr5 | + | 1.81E+08 | 1.81E+08 | 7015  |
| ENSG000001 | 194.5014 | 236.5916 | -0.28295 | 0.067986  | 0.1162    | HIGD2A   | chr5 | + | 1.76E+08 | 1.76E+08 | 668   |
| ENSG000001 | 813.6519 | 933.6907 | -0.19842 | 0.11684   | 0.18459   | FAM193B  | chr5 | - | 1.77E+08 | 1.77E+08 | 4604  |
| ENSG000001 | 274.5731 | 60.99168 | 2.1611   | 1.14E-20  | 9.87E-20  | PLA2G7   | chr6 | - | 46671938 | 46703430 | 1882  |
| ENSG000001 | 4192.092 | 1416.625 | 1.5632   | 6.66E-41  | 1.20E-39  | TNFRSF21 | chr6 | - | 47199268 | 47277641 | 3595  |
| ENSG000001 | 690.6319 | 4658.771 | -2.7506  | 1.96E-132 | 1.81E-130 | RNF44    | chr5 | - | 1.76E+08 | 1.76E+08 | 4155  |
| ENSG000001 | 433.2158 | 264.1648 | 0.71409  | 3.72E-06  | 1.25E-05  | MUT      | chr6 | - | 49398073 | 49430904 | 3749  |
| ENSG000001 | 1.068702 | 23.39756 | -4.2202  | 2.23E-06  | 7.71E-06  | RASGEF1C | chr5 | - | 1.8E+08  | 1.8E+08  | 2395  |
| ENSG000001 | 27.0843  | 117.3714 | -2.0574  | 0.000308  | 0.000823  | DOK3     | chr5 | - | 1.77E+08 | 1.77E+08 | 2292  |
| ENSG000001 | 585.6385 | 782.0667 | -0.41551 | 0.007084  | 0.015322  | ABT1     | chr6 | + | 26597180 | 26600278 | 2255  |
| ENSG000001 | 3307.499 | 1003.503 | 1.7127   | 7.99E-13  | 4.57E-12  | PPP1R18  | chr6 | - | 30644166 | 30655672 | 4599  |
| ENSG000001 | 2363.643 | 62.9161  | 5.2266   | 3.41E-227 | 9.93E-225 | DAAM2    | chr6 | + | 39760142 | 39872648 | 6221  |
| ENSG000001 | 215.2505 | 313.1903 | -0.53993 | 0.000539  | 0.001393  | PRIM2    | chr6 | + | 57179603 | 57513375 | 2290  |
| ENSG000001 | 19.38073 | 0.297015 | 5.0663   | 9.32E-06  | 3.00E-05  | MLIP     | chr6 | + | 53794780 | 54131078 | 5743  |
| ENSG000001 | 7.241225 | 0.654722 | 3.0407   | 0.007191  | 0.015527  | HMGCLL1  | chr6 | - | 55299167 | 55444012 | 2532  |
| ENSG000001 | 0        | 4.351561 | -3.61    | 0.013975  | 0.028493  | LGSN     | chr6 | - | 63985856 | 64029882 | 5213  |
| ENSG000001 | 2.67693  | 2.918317 | -0.12784 | 0.90483   | 0.93427   | FGD2     | chr6 | + | 36973422 | 36996846 | 5771  |
| ENSG000001 | 233.9395 | 138.5553 | 0.75321  | 1.68E-05  | 5.26E-05  | SCUBE3   | chr6 | + | 35182190 | 35220856 | 7356  |
| ENSG000001 | 15.45784 | 41.99993 | -1.4204  | 0.000368  | 0.000973  | ANO7     | chr2 | + | 2.42E+08 | 2.42E+08 | 4128  |
| ENSG000001 | 0.975385 | 216.0471 | -7.3728  | 7.62E-23  | 7.30E-22  | CRIP3    | chr6 | - | 43267448 | 43276535 | 962   |
| ENSG000001 | 0.290301 | 12.2859  | -4.454   | 0.000176  | 0.000486  | TBKB1    | chr6 | + | 43211418 | 43255997 | 6932  |
| ENSG000001 | 1.608228 | 7.622753 | -2.0268  | 0.045097  | 0.081244  | TCTE1    | chr6 | - | 44246480 | 44265458 | 3067  |
| ENSG000001 | 2455.591 | 2495.123 | -0.02285 | 0.88608   | 0.92043   | RPL7L1   | chr6 | + | 42847356 | 42857663 | 4476  |
| ENSG000001 | 221.6194 | 210.0463 | 0.075268 | 0.76626   | 0.83091   | NFKBIE   | chr6 | - | 44225903 | 44233500 | 2556  |
| ENSG000001 | 28.11193 | 21.10557 | 0.41708  | 0.31475   | 0.41731   | CYP39A1  | chr6 | - | 46517541 | 46620523 | 2176  |
| ENSG000001 | 5879.562 | 771.3581 | 2.9225   | 2.88E-60  | 8.41E-59  | TPBG     | chr6 | + | 83072923 | 83080545 | 6484  |
| ENSG000001 | 39.31549 | 62.37806 | -0.65701 | 0.041054  | 0.075035  | IRAK1BP1 | chr6 | + | 79577189 | 79608320 | 1157  |
| ENSG000001 | 906.3577 | 843.723  | 0.1035   | 0.69435   | 0.77197   | PHIP     | chr6 | - | 79650263 | 79787953 | 5781  |
| ENSG000001 | 338.7018 | 78.38336 | 2.1085   | 3.99E-24  | 4.02E-23  | PRSS35   | chr6 | + | 84222194 | 84235423 | 2604  |
| ENSG000001 | 395.3768 | 450.0488 | -0.18566 | 0.36407   | 0.46841   | MMS22L   | chr6 | - | 97590037 | 97731093 | 8643  |
| ENSG000001 | 92.62518 | 186.2292 | -1.0028  | 3.32E-07  | 1.24E-06  | FAXC     | chr6 | - | 99728536 | 99797938 | 2017  |
| ENSG000001 | 71.43182 | 6.330295 | 3.447    | 9.71E-14  | 5.85E-13  | GABRR1   | chr6 | - | 89887220 | 89940997 | 3110  |
| ENSG000001 | 490.8588 | 343.2596 | 0.51281  | 0.048931  | 0.087346  | PNRC1    | chr6 | + | 89790470 | 89794879 | 2065  |
| ENSG000001 | 116.5343 | 120.6965 | -0.04646 | 0.82629   | 0.87768   | PM20D2   | chr6 | + | 89855769 | 89875284 | 4708  |
| ENSG000001 | 733.1642 | 548.4287 | 0.4187   | 0.000657  | 0.001676  | RARS2    | chr6 | - | 88224096 | 88299721 | 1818  |
| ENSG000001 | 31.95088 | 0        | 6.6058   | 5.08E-09  | 2.21E-08  | SCML4    | chr6 | - | 1.08E+08 | 1.08E+08 | 4297  |
| ENSG000001 | 114.7196 | 54.09408 | 1.0764   | 0.000362  | 0.000958  | C6orf170 | chr6 | - | 1.21E+08 | 1.22E+08 | 5323  |
| ENSG000001 | 1.628766 | 7.6106   | -2.0487  | 0.028169  | 0.053692  | CLVS2    | chr6 | + | 1.23E+08 | 1.23E+08 | 3025  |
| ENSG000001 | 0        | 2.713549 | -2.8246  | 0.079182  | 0.13236   | GPR6     | chr6 | + | 1.1E+08  | 1.1E+08  | 1711  |

|            |          |          |          |           |           |            |       |   |          |          |       |
|------------|----------|----------|----------|-----------|-----------|------------|-------|---|----------|----------|-------|
| ENSG000001 | 631.435  | 113.9423 | 2.4594   | 1.07E-29  | 1.35E-28  | RNF217     | chr6  | + | 1.25E+08 | 1.25E+08 | 11325 |
| ENSG000001 | 69.51177 | 1.029414 | 5.7836   | 2.05E-13  | 1.22E-12  | RSP03      | chr6  | + | 1.27E+08 | 1.28E+08 | 2697  |
| ENSG000001 | 699.9697 | 79.9549  | 3.1176   | 2.11E-37  | 3.46E-36  | ARHGAP18   | chr6  | - | 1.3E+08  | 1.3E+08  | 4462  |
| ENSG000001 | 379.8435 | 1034.567 | -1.4431  | 4.03E-26  | 4.40E-25  | ABRACL     | chr6  | + | 1.39E+08 | 1.39E+08 | 845   |
| ENSG000001 | 1.016461 | 0        | 1.3167   | 0.46021   | NA        | TAAR1      | chr6  | - | 1.33E+08 | 1.33E+08 | 1020  |
| ENSG000001 | 189.296  | 486.0704 | -1.3543  | 4.72E-15  | 3.09E-14  | SLC18B1    | chr6  | - | 1.33E+08 | 1.33E+08 | 2368  |
| ENSG000001 | 61.89035 | 125.8986 | -1.0161  | 1.61E-05  | 5.06E-05  | MTFR2      | chr6  | - | 1.37E+08 | 1.37E+08 | 1793  |
| ENSG000001 | 45.33194 | 92.79139 | -1.0269  | 0.002423  | 0.005659  | SLC2A12    | chr6  | - | 1.34E+08 | 1.34E+08 | 4468  |
| ENSG000001 | 290.9796 | 423.7699 | -0.53981 | 0.000179  | 0.000493  | SHPRH      | chr6  | - | 1.46E+08 | 1.46E+08 | 11660 |
| ENSG000001 | 297.2125 | 248.4499 | 0.25906  | 0.11482   | 0.18189   | AIG1       | chr6  | + | 1.43E+08 | 1.44E+08 | 3393  |
| ENSG000001 | 999.2567 | 556.4004 | 0.84353  | 5.12E-14  | 3.15E-13  | DYNLT1     | chr6  | - | 1.59E+08 | 1.59E+08 | 2891  |
| ENSG000001 | 556.1503 | 209.7949 | 1.4066   | 2.91E-24  | 2.96E-23  | TIAM2      | chr6  | + | 1.55E+08 | 1.56E+08 | 6981  |
| ENSG000001 | 1266.817 | 709.9187 | 0.83424  | 1.53E-12  | 8.58E-12  | TMEM181    | chr6  | + | 1.59E+08 | 1.59E+08 | 5390  |
| ENSG000001 | 0.342542 | 2.742687 | -2.2654  | 0.12841   | 0.19963   | PNLDC1     | chr6  | + | 1.6E+08  | 1.6E+08  | 1921  |
| ENSG000001 | 826.039  | 1027.052 | -0.31309 | 0.099489  | 0.16079   | WTAP       | chr6  | + | 1.6E+08  | 1.6E+08  | 3656  |
| ENSG000001 | 1301.9   | 1286.717 | 0.017612 | 0.88625   | 0.9205    | ZMYM4      | chr1  | + | 35734568 | 35887659 | 6994  |
| ENSG000001 | 0.290301 | 0        | 0.4146   | 0.81455   | NA        | VIP        | chr6  | + | 1.53E+08 | 1.53E+08 | 1584  |
| ENSG000001 | 424.9017 | 1078.984 | -1.3408  | 3.36E-13  | 1.97E-12  | C6orf211   | chr6  | + | 1.52E+08 | 1.52E+08 | 2576  |
| ENSG000001 | 6.193875 | 143.0886 | -4.4409  | 4.43E-15  | 2.91E-14  | SLC22A3    | chr6  | + | 1.61E+08 | 1.61E+08 | 5627  |
| ENSG000001 | 9.636413 | 454.6116 | -5.4811  | 2.35E-55  | 6.11E-54  | VWDE       | chr7  | - | 12370511 | 12443567 | 5936  |
| ENSG000001 | 2837.77  | 2958.326 | -0.06023 | 0.55768   | 0.65661   | GNA12      | chr7  | - | 2767746  | 2883958  | 4378  |
| ENSG000001 | 1940.341 | 1227.408 | 0.66021  | 7.48E-09  | 3.21E-08  | C7orf50    | chr7  | - | 1036622  | 1177896  | 2621  |
| ENSG000001 | 47.45142 | 427.9604 | -3.1654  | 4.58E-35  | 6.96E-34  | SDK1       | chr7  | + | 3341080  | 4308632  | 10397 |
| ENSG000001 | 143.235  | 131.9215 | 0.11553  | 0.56458   | 0.66256   | WASH2P     | chr2  | + | 1.14E+08 | 1.14E+08 | 2800  |
| ENSG000001 | 247.7086 | 228.4724 | 0.11924  | 0.53732   | 0.63818   | CCZ1B      | chr7  | - | 6836440  | 6866401  | 2885  |
| ENSG000001 | 767.7758 | 560.7257 | 0.45153  | 0.000539  | 0.001393  | C7orf26    | chr7  | + | 6629648  | 6648357  | 2182  |
| ENSG000001 | 366.1025 | 376.7958 | -0.04084 | 0.81032   | 0.86634   | RBK1       | chr7  | + | 5023349  | 5112854  | 6551  |
| ENSG000001 | 278.3766 | 32.82651 | 3.0644   | 4.07E-21  | 3.61E-20  | CREB5      | chr7  | + | 28338940 | 28865511 | 8532  |
| ENSG000001 | 4266.289 | 195.3906 | 4.4363   | 3.04E-155 | 3.75E-153 | EGFR       | chr7  | + | 55086714 | 55324313 | 9821  |
| ENSG000001 | 955.0905 | 2260.018 | -1.2401  | 2.21E-19  | 1.81E-18  | CDCA5      | chr11 | - | 64833772 | 64851636 | 2587  |
| ENSG000001 | 6005.526 | 107.6641 | 5.7589   | 1.02E-75  | 4.04E-74  | IGFBP3     | chr7  | - | 45951949 | 45961473 | 2262  |
| ENSG000001 | 1521.759 | 1400.145 | 0.11944  | 0.3713    | 0.47568   | PURB       | chr7  | - | 44915896 | 44924960 | 9065  |
| ENSG000001 | 8.76551  | 10.92791 | -0.30025 | 0.63873   | 0.72643   | AC004453   | chr7  | + | 44507441 | 44507939 | 499   |
| ENSG000001 | 0        | 0.98329  | -1.2878  | 0.47019   | NA        | IGFBP1     | chr7  | + | 45927956 | 45933267 | 1653  |
| ENSG000001 | 47.41744 | 382.5226 | -2.9847  | 5.63E-25  | 5.87E-24  | SRCRB4D    | chr7  | - | 76018651 | 76039012 | 2801  |
| ENSG000001 | 3511.516 | 5389.941 | -0.61753 | 3.85E-09  | 1.69E-08  | MDH2       | chr7  | + | 75677369 | 75696826 | 2209  |
| ENSG000001 | 314.2327 | 222.2142 | 0.50037  | 0.00908   | 0.019227  | POMZP3     | chr7  | - | 76239303 | 76256578 | 1587  |
| ENSG000001 | 5.467715 | 0.951736 | 2.1748   | 0.059788  | 0.10417   | AC006014   | chr7  | - | 75021229 | 75024708 | 980   |
| ENSG000001 | 751.2338 | 656.6106 | 0.19399  | 0.11941   | 0.18806   | GBAS       | chr7  | + | 56019486 | 56067874 | 4255  |
| ENSG000001 | 4409.263 | 7100.362 | -0.68596 | 8.85E-06  | 2.86E-05  | CCT6A      | chr7  | + | 56119323 | 56131682 | 2719  |
| ENSG000001 | 382.5081 | 715.4255 | -0.90225 | 1.79E-08  | 7.42E-08  | PSPH       | chr7  | - | 56078744 | 56119297 | 2178  |
| ENSG000001 | 0        | 2.200487 | -2.3588  | 0.16874   | 0.25044   | TRIM50     | chr7  | - | 72726535 | 72742085 | 2047  |
| ENSG000001 | 133.6073 | 331.7025 | -1.3032  | 3.92E-08  | 1.58E-07  | ZNF92      | chr7  | + | 64838712 | 64866038 | 3210  |
| ENSG000001 | 133.4999 | 979.6621 | -2.8683  | 3.63E-55  | 9.39E-54  | ATXN7L1    | chr7  | - | 1.05E+08 | 1.06E+08 | 5417  |
| ENSG000001 | 436.2608 | 220.1896 | 0.985    | 6.87E-12  | 3.68E-11  | TMEM168    | chr7  | - | 1.12E+08 | 1.12E+08 | 4189  |
| ENSG000001 | 179.0865 | 275.8844 | -0.62356 | 0.000767  | 0.001937  | C7orf43    | chr7  | - | 99752043 | 99756338 | 2520  |
| ENSG000001 | 714.7777 | 881.0082 | -0.30108 | 0.033     | 0.061759  | SLC12A9    | chr7  | + | 1E+08    | 1E+08    | 4462  |
| ENSG000001 | 957.0744 | 2992.857 | -1.6423  | 1.27E-35  | 1.98E-34  | GIGYF1     | chr7  | - | 1E+08    | 1E+08    | 6530  |
| ENSG000001 | 167.4211 | 181.8461 | -0.11934 | 0.55306   | 0.65243   | TRIM4      | chr7  | - | 99474581 | 99517223 | 3383  |
| ENSG000001 | 968.1326 | 1902.425 | -0.97118 | 1.51E-06  | 5.30E-06  | MEPCE      | chr7  | + | 1E+08    | 1E+08    | 3022  |
| ENSG000001 | 0.290301 | 5.505649 | -3.2823  | 0.015409  | 0.03115   | ZAN        | chr7  | + | 1E+08    | 1E+08    | 8834  |
| ENSG000001 | 234.2983 | 272.0927 | -0.21523 | 0.26039   | 0.35837   | TMEM209    | chr7  | - | 1.3E+08  | 1.3E+08  | 3545  |
| ENSG000001 | 20.31324 | 30.11383 | -0.56642 | 0.16184   | 0.24209   | AGBL3      | chr7  | + | 1.35E+08 | 1.35E+08 | 3767  |
| ENSG000001 | 0        | 0.357707 | -0.41864 | 0.81278   | NA        | STRA8      | chr7  | + | 1.35E+08 | 1.35E+08 | 993   |
| ENSG000001 | 247.0157 | 69.56785 | 1.8186   | 3.40E-16  | 2.38E-15  | ZC3HAV1L   | chr7  | - | 1.39E+08 | 1.39E+08 | 1753  |
| ENSG000001 | 118.7694 | 129.0372 | -0.11946 | 0.57541   | 0.67227   | TMEM140    | chr7  | + | 1.35E+08 | 1.35E+08 | 1680  |
| ENSG000001 | 769.903  | 798.7176 | -0.05269 | 0.63518   | 0.72362   | TLK2       | chr17 | + | 60536019 | 60692842 | 3608  |
| ENSG000001 | 26.51487 | 5058.096 | -7.5443  | 1.15E-287 | 4.93E-285 | EPHA1      | chr7  | - | 1.43E+08 | 1.43E+08 | 3363  |
| ENSG000001 | 649.3762 | 1033.544 | -0.66911 | 9.08E-06  | 2.93E-05  | NOM1       | chr7  | + | 1.57E+08 | 1.57E+08 | 6077  |
| ENSG000001 | 0        | 8.681304 | -4.7033  | 0.000296  | 0.000793  | CNPY1      | chr7  | - | 1.55E+08 | 1.55E+08 | 2378  |
| ENSG000001 | 1060.559 | 1369.159 | -0.36786 | 0.000291  | 0.000781  | NCAPG2     | chr7  | - | 1.58E+08 | 1.58E+08 | 5253  |
| ENSG000001 | 52.03641 | 1385.487 | -4.7236  | 7.76E-160 | 1.02E-157 | NLGN4X     | chrX  | - | 5758678  | 6146904  | 5870  |
| ENSG000001 | 1021.134 | 781.1183 | 0.38647  | 0.009205  | 0.019474  | SHROOM2    | chrX  | + | 9754496  | 9917483  | 7447  |
| ENSG000001 | 0        | 43.72132 | -7.0414  | 2.52E-10  | 1.21E-09  | RAB19      | chr7  | + | 1.4E+08  | 1.4E+08  | 1093  |
| ENSG000001 | 519.1311 | 504.6489 | 0.039584 | 0.78719   | 0.84778   | C7orf55-LL | chr7  | + | 1.39E+08 | 1.39E+08 | 2837  |

|                    |          |          |          |          |          |      |   |          |          |       |
|--------------------|----------|----------|----------|----------|----------|------|---|----------|----------|-------|
| ENSG000001193.475  | 485.0445 | 1.2959   | 1.11E-22 | 1.05E-21 | DENND2A  | chr7 | - | 1.4E+08  | 1.4E+08  | 3735  |
| ENSG0000013455331  | 22.5648  | -2.6256  | 0.000285 | 0.000766 | TMEM27   | chrX | - | 15645441 | 15683154 | 1578  |
| ENSG0000011339.779 | 508.9924 | 1.3931   | 1.11E-18 | 8.75E-18 | SH3KBP1  | chrX | - | 19552093 | 19905719 | 4731  |
| ENSG000001371.3395 | 396.0572 | -0.09038 | 0.53052  | 0.63191  | TMEM47   | chrX | - | 34645181 | 34675405 | 4054  |
| ENSG00000114.41904 | 12.62662 | 0.19114  | 0.72718  | 0.79827  | LANCL3   | chrX | + | 37430822 | 37543716 | 10298 |
| ENSG000001323.1089 | 7.033556 | 5.4765   | 1.20E-50 | 2.78E-49 | SYTL5    | chrX | + | 37865835 | 37988072 | 4828  |
| ENSG000001579.6851 | 895.1602 | -0.62663 | 1.23E-05 | 3.90E-05 | CASK     | chrX | - | 41374187 | 41782716 | 8298  |
| ENSG000001338.6989 | 944.54   | -1.4754  | 1.06E-15 | 7.26E-15 | KDM6A    | chrX | + | 44732757 | 44971847 | 5438  |
| ENSG00000117.40681 | 30.81467 | -0.81108 | 0.048433 | 0.08656  | SPIN2A   | chrX | - | 57160963 | 57164058 | 2468  |
| ENSG00000117536.69 | 3917.118 | 2.1606   | 1.19E-88 | 5.81E-87 | MSN      | chrX | + | 64887537 | 64961791 | 3942  |
| ENSG0000010        | 0.343138 | -0.41864 | 0.81278  | NA       | AKAP4    | chrX | - | 49955406 | 49965664 | 2886  |
| ENSG0000010.705622 | 2.232041 | -1.39    | 0.32012  | 0.42293  | CCNB3    | chrX | + | 49967364 | 50094909 | 4693  |
| ENSG000001378.6686 | 172.3869 | 1.1352   | 7.11E-14 | 4.33E-13 | HDAC8    | chrX | - | 71549366 | 71792953 | 2338  |
| ENSG0000011198.151 | 1306.653 | -0.12511 | 0.26654  | 0.36524  | SLC16A2  | chrX | + | 73641085 | 73753752 | 4363  |
| ENSG0000011.919068 | 20.70341 | -3.2397  | 2.33E-05 | 7.17E-05 | ZNF157   | chrX | + | 47229982 | 47273704 | 2318  |
| ENSG00000159.59606 | 84.26948 | -0.49634 | 0.10543  | 0.16882  | ZNF182   | chrX | - | 47834250 | 47863377 | 3586  |
| ENSG000001168.5606 | 446.4654 | -1.4032  | 5.84E-17 | 4.26E-16 | CHST7    | chrX | + | 46433219 | 46457843 | 2289  |
| ENSG000001138.3565 | 100.3216 | 0.46359  | 0.064921 | 0.11173  | KRBOX4   | chrX | + | 46306292 | 46356857 | 2774  |
| ENSG0000011362.803 | 1395.015 | -0.03318 | 0.74316  | 0.81125  | NDUFB11  | chrX | - | 47001615 | 47004903 | 1388  |
| ENSG000001147.187  | 79.05111 | 0.89354  | 5.86E-05 | 0.000172 | ZNF41    | chrX | - | 47305278 | 47342345 | 4531  |
| ENSG0000017.125578 | 3.694423 | 0.90436  | 0.28602  | 0.3875   | RAB41    | chrX | + | 69501943 | 69504852 | 1074  |
| ENSG0000011641.959 | 2025.98  | -0.30275 | 0.014571 | 0.029583 | ZMYM3    | chrX | - | 70459474 | 70474996 | 6067  |
| ENSG000001832.9606 | 718.8792 | 0.21178  | 0.071249 | 0.12093  | TAF1     | chrX | + | 70586114 | 70752224 | 7708  |
| ENSG0000016550.002 | 8319.265 | -0.34452 | 0.002306 | 0.005401 | NONO     | chrX | + | 70503042 | 70521018 | 3215  |
| ENSG000001236.0092 | 392.7554 | -0.73409 | 1.24E-07 | 4.79E-07 | CCDC120  | chrX | + | 48911101 | 48927509 | 3973  |
| ENSG0000014.627701 | 58.74575 | -3.5731  | 1.73E-10 | 8.43E-10 | LPAR4    | chrX | + | 78003206 | 78012591 | 2611  |
| ENSG0000011216.441 | 1304.639 | -0.10006 | 0.48119  | 0.58549  | EBP      | chrX | + | 48379546 | 48387104 | 1775  |
| ENSG0000010        | 1.012429 | -1.3162  | 0.46038  | NA       | AWAT2    | chrX | - | 69260392 | 69269788 | 2124  |
| ENSG0000012653.605 | 1627.923 | 0.70397  | 7.77E-11 | 3.88E-10 | OGT      | chrX | + | 70752933 | 70795747 | 7243  |
| ENSG0000011079.629 | 1440.655 | -0.41591 | 3.58E-05 | 0.000108 | SNX12    | chrX | - | 70279094 | 70288273 | 2376  |
| ENSG00000114.97055 | 33.50553 | -1.145   | 0.01127  | 0.023425 | ITGB1BP2 | chrX | + | 70521584 | 70525221 | 1439  |
| ENSG0000010.36308  | 4.095838 | -2.7686  | 0.055344 | 0.097163 | IL2RG    | chrX | - | 70327254 | 70331958 | 2035  |
| ENSG00000118.65196 | 19.82694 | -0.09154 | 0.84184  | 0.88903  | ACRC     | chrX | + | 70798261 | 70833433 | 3213  |
| ENSG000001334.6598 | 314.9399 | 0.090291 | 0.58332  | 0.6794   | ZNF711   | chrX | + | 84498997 | 84528368 | 4844  |
| ENSG000001203.6944 | 579.0046 | -1.5034  | 2.92E-22 | 2.72E-21 | DIAPH2   | chrX | + | 95939662 | 96859996 | 9333  |
| ENSG0000010.705622 | 0.343138 | 0.57395  | 0.74355  | NA       | RIPPLY1  | chrX | - | 1.06E+08 | 1.06E+08 | 1172  |
| ENSG000001721.7632 | 2009.486 | -1.4755  | 7.46E-46 | 1.52E-44 | PRPS1    | chrX | + | 1.07E+08 | 1.07E+08 | 2073  |
| ENSG00000119.29336 | 91.38937 | -2.2019  | 1.87E-08 | 7.73E-08 | CXorf57  | chrX | + | 1.06E+08 | 1.06E+08 | 3861  |
| ENSG00000115.95531 | 150.6849 | -3.225   | 4.67E-27 | 5.30E-26 | FRMPD3   | chrX | + | 1.07E+08 | 1.07E+08 | 7155  |
| ENSG0000010        | 43.84196 | -7.0387  | 3.06E-10 | 1.46E-09 | HTR2C    | chrX | + | 1.14E+08 | 1.14E+08 | 4751  |
| ENSG0000011145.852 | 284.4598 | 2.0066   | 5.05E-39 | 8.67E-38 | DOCK11   | chrX | + | 1.18E+08 | 1.18E+08 | 6664  |
| ENSG000001130.7725 | 273.0454 | -1.0592  | 7.01E-10 | 3.28E-09 | IGSF1    | chrX | - | 1.3E+08  | 1.31E+08 | 5180  |
| ENSG0000010        | 3.619162 | -3.3807  | 0.022552 | 0.04399  | ARHGAP36 | chrX | + | 1.3E+08  | 1.3E+08  | 3083  |
| ENSG00000141.21484 | 575.1817 | -3.7857  | 8.79E-82 | 3.79E-80 | GPC3     | chrX | - | 1.33E+08 | 1.33E+08 | 2568  |
| ENSG0000013585.63  | 6118.731 | -0.7701  | 4.33E-11 | 2.20E-10 | RBMX     | chrX | - | 1.36E+08 | 1.36E+08 | 4887  |
| ENSG000001227.5031 | 238.8073 | -0.07033 | 0.6667   | 0.74943  | MCPH1    | chr8 | + | 6264113  | 6501144  | 3158  |
| ENSG000001713.5846 | 1740     | -1.2838  | 4.66E-21 | 4.13E-20 | MFHAS1   | chr8 | - | 8640864  | 8751155  | 6414  |
| ENSG00000171.05985 | 182.4943 | -1.3587  | 6.41E-11 | 3.22E-10 | FBXO25   | chr8 | + | 356428   | 421225   | 2360  |
| ENSG0000010        | 0.937167 | -1.2408  | 0.48662  | NA       | FATE1    | chrX | + | 1.51E+08 | 1.51E+08 | 1072  |
| ENSG0000010        | 14.93963 | -5.419   | 2.02E-05 | 6.27E-05 | MAGEA4   | chrX | + | 1.51E+08 | 1.51E+08 | 1773  |
| ENSG000001348.6394 | 261.6272 | 0.41131  | 0.005746 | 0.012639 | FAM58A   | chrX | - | 1.53E+08 | 1.53E+08 | 1303  |
| ENSG000001948.6006 | 570.6246 | 0.73193  | 0.000132 | 0.00037  | NSDHL    | chrX | + | 1.52E+08 | 1.52E+08 | 1929  |
| ENSG0000013183.432 | 297.8987 | 3.3989   | 1.01E-39 | 1.76E-38 | ZNF185   | chrX | + | 1.52E+08 | 1.52E+08 | 4421  |
| ENSG000001728.1461 | 304.3249 | 1.2568   | 4.80E-10 | 2.26E-09 | CETN2    | chrX | - | 1.52E+08 | 1.52E+08 | 1454  |
| ENSG00000119.33786 | 401.5537 | -4.3629  | 1.67E-59 | 4.79E-58 | GABRQ    | chrX | + | 1.52E+08 | 1.52E+08 | 6174  |
| ENSG00000117020.44 | 16958.72 | 0.005303 | 0.95872  | 0.97505  | RPL10    | chrX | + | 1.54E+08 | 1.54E+08 | 2318  |
| ENSG00000159.73306 | 8.576905 | 2.7562   | 5.50E-11 | 2.78E-10 | CSGALNAC | chr8 | - | 19261672 | 19615540 | 4232  |
| ENSG0000011247.484 | 1220.94  | 0.031083 | 0.81857  | 0.87259  | ATP6V1B2 | chr8 | + | 20054878 | 20084330 | 6907  |
| ENSG000001726.5083 | 855.8039 | -0.23611 | 0.027036 | 0.051773 | CCDC25   | chr8 | - | 27590835 | 27630170 | 3619  |
| ENSG000001296.3699 | 190.5679 | 0.63475  | 0.004259 | 0.009577 | HMBBOX1  | chr8 | + | 28747911 | 28922281 | 4082  |
| ENSG0000010        | 0.357707 | -0.41864 | 0.81278  | NA       | CHRNA3   | chr8 | + | 42552519 | 42592550 | 2294  |
| ENSG0000010.36308  | 0.700845 | -0.575   | 0.7429   | NA       | CHRNA6   | chr8 | - | 42607763 | 42651535 | 2400  |
| ENSG00000113.16452 | 15.96172 | -0.27721 | 0.61269  | 0.70493  | GNRH1    | chr8 | - | 25276776 | 25282170 | 1760  |
| ENSG000001738.2505 | 193.9367 | 1.9271   | 1.71E-30 | 2.22E-29 | BIN3     | chr8 | - | 22477931 | 22526661 | 3589  |
| ENSG0000013.144492 | 6.102094 | -0.89545 | 0.38941  | 0.49368  | DOK2     | chr8 | - | 21766384 | 21771371 | 1936  |

|            |          |          |          |           |           |           |      |   |          |          |       |
|------------|----------|----------|----------|-----------|-----------|-----------|------|---|----------|----------|-------|
| ENSG000001 | 820.4201 | 649.7169 | 0.33465  | 0.22625   | 0.31908   | SLC25A37  | chr8 | + | 23386318 | 23432976 | 4823  |
| ENSG000001 | 1022.636 | 710.8703 | 0.52333  | 0.000473  | 0.001232  | CHMP7     | chr8 | + | 23101150 | 23119512 | 3403  |
| ENSG000001 | 444.0996 | 407.06   | 0.12302  | 0.42829   | 0.53369   | DOCK5     | chr8 | + | 25042238 | 25275598 | 10075 |
| ENSG000001 | 4.326234 | 45.42244 | -3.327   | 2.11E-10  | 1.02E-09  | STAR      | chr8 | - | 38001167 | 38008783 | 3448  |
| ENSG000001 | 584.4728 | 420.5142 | 0.47455  | 8.43E-05  | 0.000242  | PROSC     | chr8 | + | 37620111 | 37637283 | 2556  |
| ENSG000001 | 863.62   | 1025.143 | -0.2473  | 0.055232  | 0.096979  | ERLIN2    | chr8 | + | 37594117 | 37616619 | 6073  |
| ENSG000001 | 2.645227 | 78.63271 | -4.7672  | 6.39E-17  | 4.66E-16  | SNTG1     | chr8 | + | 50822349 | 51706678 | 3504  |
| ENSG000001 | 4.056471 | 2.606733 | 0.5562   | 0.61076   | 0.70321   | PXDNL     | chr8 | - | 52232138 | 52722005 | 4805  |
| ENSG000001 | 0.36308  | 0.951736 | -0.91212 | 0.59701   | NA        | ST18      | chr8 | - | 53023399 | 53373519 | 6187  |
| ENSG000001 | 56.7686  | 18.51991 | 1.5863   | 3.05E-05  | 9.23E-05  | RGS20     | chr8 | + | 54764368 | 54871863 | 2104  |
| ENSG000001 | 1394.619 | 269.0199 | 2.3703   | 1.68E-65  | 5.55E-64  | TACC1     | chr8 | + | 38585704 | 38710546 | 7838  |
| ENSG000001 | 868.5798 | 658.9417 | 0.39739  | 0.008255  | 0.017601  | GOLGA7    | chr8 | + | 41347915 | 41368499 | 2027  |
| ENSG000001 | 918.6058 | 667.0147 | 0.4599   | 0.003025  | 0.006969  | PPAPDC1B  | chr8 | - | 38120648 | 38126761 | 2185  |
| ENSG000001 | 223.8846 | 607.2477 | -1.4337  | 9.35E-12  | 4.97E-11  | GIN54     | chr8 | + | 41386725 | 41402565 | 3873  |
| ENSG000001 | 1256.986 | 806.9936 | 0.63738  | 5.96E-05  | 0.000174  | WHSC1L1   | chr8 | - | 38132544 | 38239790 | 5431  |
| ENSG000001 | 0.290301 | 2.621302 | -2.2519  | 0.13211   | 0.2045    | CRH       | chr8 | - | 67088620 | 67090960 | 1540  |
| ENSG000001 | 1.286224 | 4.196206 | -1.5087  | 0.17672   | 0.26026   | TRIM55    | chr8 | + | 67039131 | 67087720 | 2912  |
| ENSG000001 | 15.03135 | 26.61531 | -0.81349 | 0.075332  | 0.12693   | ADHFE1    | chr8 | + | 67342420 | 67383836 | 2229  |
| ENSG000001 | 32.92724 | 95.51138 | -1.5224  | 7.59E-07  | 2.74E-06  | MRPS28    | chr8 | - | 80830952 | 80942524 | 850   |
| ENSG000001 | 30.41559 | 53.09541 | -0.79074 | 0.023475  | 0.045622  | LACTB2    | chr8 | - | 71547553 | 71581409 | 1508  |
| ENSG000001 | 0        | 2532.156 | -11.881  | 1.79E-23  | 1.77E-22  | PRDM14    | chr8 | - | 70963886 | 70983928 | 2344  |
| ENSG000001 | 434.1535 | 7414.722 | -4.0852  | 1.08E-137 | 1.03E-135 | TERF1     | chr8 | + | 73921099 | 73960357 | 3598  |
| ENSG000001 | 11521.62 | 15450.25 | -0.42256 | 0.003224  | 0.007398  | RPL7      | chr8 | - | 74202506 | 74208024 | 1526  |
| ENSG000001 | 5.467715 | 4.006007 | 0.40993  | 0.63826   | 0.72626   | SLC26A7   | chr8 | + | 92221722 | 92410378 | 5263  |
| ENSG000001 | 0        | 3.319731 | -3.1951  | 0.03702   | 0.068503  | PSKH2     | chr8 | - | 87060602 | 87100850 | 1322  |
| ENSG000001 | 1.774324 | 0        | 2.0349   | 0.24308   | NA        | ATP6VOD2  | chr8 | + | 86999552 | 87166457 | 2446  |
| ENSG000001 | 0        | 4.36613  | -3.6495  | 0.011668  | 0.024168  | SYBU      | chr8 | - | 1.11E+08 | 1.11E+08 | 3435  |
| ENSG000001 | 0.870904 | 6.549631 | -2.4577  | 0.035457  | 0.065929  | DPYS      | chr8 | - | 1.05E+08 | 1.05E+08 | 2127  |
| ENSG000001 | 2870.622 | 1300.414 | 1.1419   | 5.82E-33  | 8.30E-32  | MTDH      | chr8 | + | 98656407 | 98740998 | 6177  |
| ENSG000001 | 1066.517 | 194.3779 | 2.4536   | 7.31E-79  | 3.01E-77  | LRP12     | chr8 | - | 1.06E+08 | 1.06E+08 | 5008  |
| ENSG000001 | 129.102  | 190.0343 | -0.55234 | 0.006337  | 0.013832  | EBAG9     | chr8 | + | 1.11E+08 | 1.11E+08 | 2379  |
| ENSG000001 | 17.17731 | 0.654722 | 4.2566   | 2.35E-05  | 7.20E-05  | RSPO2     | chr8 | - | 1.09E+08 | 1.09E+08 | 3111  |
| ENSG000001 | 485.8551 | 517.6471 | -0.09066 | 0.5693    | 0.66654   | POLR2K    | chr8 | + | 1.01E+08 | 1.01E+08 | 1021  |
| ENSG000001 | 0.290301 | 946.1002 | -10.35   | 1.68E-29  | 2.11E-28  | MAL2      | chr8 | + | 1.2E+08  | 1.2E+08  | 2819  |
| ENSG000001 | 2414.033 | 2819.839 | -0.22358 | 0.059817  | 0.10421   | EIF3H     | chr8 | - | 1.18E+08 | 1.18E+08 | 3959  |
| ENSG000001 | 217.2282 | 149.8576 | 0.53529  | 0.020379  | 0.040119  | UTP23     | chr8 | + | 1.18E+08 | 1.18E+08 | 3693  |
| ENSG000001 | 501.7992 | 810.9248 | -0.68989 | 3.89E-07  | 1.44E-06  | NDUFB9    | chr8 | + | 1.26E+08 | 1.26E+08 | 1319  |
| ENSG000001 | 151.264  | 219.4513 | -0.53439 | 0.00387   | 0.008761  | TATDN1    | chr8 | - | 1.26E+08 | 1.26E+08 | 2016  |
| ENSG000001 | 0        | 0.343138 | -0.41864 | 0.81278   | NA        | FAM83A    | chr8 | + | 1.24E+08 | 1.24E+08 | 5393  |
| ENSG000001 | 1.95077  | 0.343138 | 1.7118   | 0.29586   | 0.39793   | GSDMC     | chr8 | - | 1.31E+08 | 1.31E+08 | 2714  |
| ENSG000001 | 3.734467 | 2.263595 | 0.61879  | 0.58878   | 0.68423   | FAM135B   | chr8 | - | 1.39E+08 | 1.4E+08  | 6962  |
| ENSG000001 | 232.7521 | 272.0521 | -0.22417 | 0.30282   | 0.40409   | ZNF7      | chr8 | + | 1.46E+08 | 1.46E+08 | 5641  |
| ENSG000001 | 450.2571 | 555.8116 | -0.30356 | 0.025363  | 0.048892  | ARHGAP39  | chr8 | - | 1.46E+08 | 1.46E+08 | 4697  |
| ENSG000001 | 17.96948 | 73.27368 | -2.0085  | 1.08E-06  | 3.85E-06  | SLC39A4   | chr8 | - | 1.46E+08 | 1.46E+08 | 2778  |
| ENSG000001 | 189.7391 | 264.6286 | -0.47809 | 0.084756  | 0.1404    | NAPRT1    | chr8 | - | 1.45E+08 | 1.45E+08 | 1965  |
| ENSG000001 | 146.8522 | 388.9717 | -1.3924  | 2.91E-05  | 8.83E-05  | VLDLR     | chr9 | + | 2621834  | 2654480  | 3590  |
| ENSG000001 | 232.6764 | 350.7937 | -0.59144 | 7.89E-05  | 0.000228  | AK3       | chr9 | - | 4711155  | 4742043  | 2736  |
| ENSG000001 | 1860.369 | 597.3605 | 1.6367   | 2.41E-29  | 3.01E-28  | UHRF2     | chr9 | + | 6413151  | 6507054  | 3723  |
| ENSG000001 | 217.4513 | 207.658  | 0.06507  | 0.80185   | 0.85978   | NFIB      | chr9 | - | 14081842 | 14398982 | 8198  |
| ENSG000001 | 0        | 22.36553 | -5.843   | 7.84E-06  | 2.55E-05  | CER1      | chr9 | - | 14719722 | 14722715 | 1215  |
| ENSG000001 | 459.6078 | 764.9603 | -0.73304 | 0.000108  | 0.000308  | PLIN2     | chr9 | - | 19108373 | 19149288 | 1972  |
| ENSG000001 | 621.0097 | 904.5036 | -0.54073 | 0.002096  | 0.004945  | HAUS6     | chr9 | - | 19053141 | 19103117 | 6536  |
| ENSG000001 | 386.3032 | 5.816359 | 5.6607   | 1.20E-10  | 5.92E-10  | CDKN2B    | chr9 | - | 22002902 | 22009362 | 3911  |
| ENSG000001 | 328.3528 | 4.943174 | 5.972    | 1.40E-50  | 3.25E-49  | CDKN2A    | chr9 | - | 21967751 | 21995300 | 1283  |
| ENSG000001 | 107.2642 | 237.6599 | -1.1452  | 2.07E-08  | 8.54E-08  | C9orf72   | chr9 | - | 27546544 | 27573864 | 4808  |
| ENSG000001 | 0.580602 | 1.935026 | -1.2792  | 0.39216   | 0.4965    | IFNK      | chr9 | + | 27524312 | 27526496 | 1140  |
| ENSG000001 | 352.203  | 410.6923 | -0.22131 | 0.34297   | 0.44694   | ZCCHC7    | chr9 | + | 37120536 | 37358146 | 2793  |
| ENSG000001 | 150.9179 | 121.8894 | 0.30961  | 0.11981   | 0.18858   | FBXO10    | chr9 | - | 37510889 | 37588871 | 4575  |
| ENSG000001 | 0        | 1.029414 | -1.1526  | 0.51496   | NA        | SPATA31A3 | chr9 | + | 40700291 | 40706537 | 4223  |
| ENSG000001 | 1797.788 | 1612.515 | 0.15704  | 0.14917   | 0.22594   | SIGMAR1   | chr9 | - | 34634719 | 34637806 | 1743  |
| ENSG000001 | 76.39317 | 53.69334 | 0.50867  | 0.099751  | 0.16111   | CBWD5     | chr9 | - | 70432004 | 70497240 | 3326  |
| ENSG000001 | 1482.145 | 846.2964 | 0.80774  | 5.69E-09  | 2.46E-08  | CEP78     | chr9 | + | 80850978 | 80894606 | 11198 |
| ENSG000001 | 110.9595 | 0.343138 | 7.4627   | 6.71E-14  | 4.09E-13  | NTRK2     | chr9 | + | 87283466 | 87638505 | 8226  |
| ENSG000001 | 21.88798 | 17.5949  | 0.29963  | 0.52527   | 0.62722   | IDNK      | chr9 | + | 86237964 | 86259045 | 1623  |
| ENSG000001 | 391.1351 | 211.3855 | 0.88281  | 7.59E-08  | 2.99E-07  | SHC3      | chr9 | - | 91628060 | 91793682 | 2394  |

|            |          |           |          |           |           |          |       |   |          |          |       |
|------------|----------|-----------|----------|-----------|-----------|----------|-------|---|----------|----------|-------|
| ENSG000001 | 164.4977 | 394.585   | -1.2593  | 8.62E-13  | 4.92E-12  | AUH      | chr9  | - | 93976097 | 94124195 | 1577  |
| ENSG000001 | 1268.732 | 807.7744  | 0.65005  | 9.63E-07  | 3.45E-06  | HIATL1   | chr9  | + | 97136833 | 97223324 | 3420  |
| ENSG000001 | 565.9334 | 150.022   | 1.9101   | 1.93E-23  | 1.90E-22  | C9orf3   | chr9  | + | 97488983 | 97849441 | 2941  |
| ENSG000001 | 0        | 21.68262  | -6.0493  | 2.34E-07  | 8.83E-07  | LPPR1    | chr9  | + | 1.04E+08 | 1.04E+08 | 2495  |
| ENSG000001 | 0        | 0.343138  | -0.41864 | 0.81278   | NA        | OR13C4   | chr9  | - | 1.07E+08 | 1.07E+08 | 957   |
| ENSG000001 | 1190.021 | 1458.525  | -0.2927  | 0.031808  | 0.059777  | ZNF462   | chr9  | + | 1.1E+08  | 1.1E+08  | 10414 |
| ENSG000001 | 562.7244 | 250.2087  | 1.1676   | 3.54E-15  | 2.34E-14  | INIP     | chr9  | - | 1.15E+08 | 1.15E+08 | 4233  |
| ENSG000001 | 816.7545 | 614.6175  | 0.40829  | 0.002227  | 0.005227  | UGCG     | chr9  | + | 1.15E+08 | 1.15E+08 | 4007  |
| ENSG000001 | 664.917  | 512.3126  | 0.37402  | 0.12677   | 0.19758   | SNX30    | chr9  | + | 1.16E+08 | 1.16E+08 | 7622  |
| ENSG000001 | 190.7855 | 679.9788  | -1.8315  | 4.99E-28  | 5.91E-27  | STOM     | chr9  | - | 1.24E+08 | 1.24E+08 | 3010  |
| ENSG000001 | 16436.24 | 1207.864  | 3.7536   | 2.46E-73  | 9.37E-72  | GSN      | chr9  | + | 1.24E+08 | 1.24E+08 | 6454  |
| ENSG000001 | 182.0657 | 332.134   | -0.86425 | 2.34E-05  | 7.17E-05  | MRRF     | chr9  | + | 1.25E+08 | 1.25E+08 | 1947  |
| ENSG000001 | 10.75817 | 3743.811  | -8.4134  | 2.30E-188 | 4.32E-186 | NR6A1    | chr9  | - | 1.27E+08 | 1.28E+08 | 7031  |
| ENSG000001 | 6.08858  | 84.13029  | -3.7042  | 7.09E-17  | 5.15E-16  | CRB2     | chr9  | + | 1.26E+08 | 1.26E+08 | 5550  |
| ENSG000001 | 512.5514 | 269.636   | 0.92499  | 1.02E-07  | 3.97E-07  | ALAD     | chr9  | - | 1.16E+08 | 1.16E+08 | 3247  |
| ENSG000001 | 376.0118 | 360.9204  | 0.058791 | 0.71329   | 0.78728   | ASTN2    | chr9  | - | 1.19E+08 | 1.2E+08  | 4747  |
| ENSG000001 | 17.83069 | 19.60519  | -0.13275 | 0.78377   | 0.84514   | WDR31    | chr9  | - | 1.16E+08 | 1.16E+08 | 4878  |
| ENSG000001 | 640.1898 | 733.8864  | -0.19621 | 0.35196   | 0.45607   | POLE3    | chr9  | - | 1.16E+08 | 1.16E+08 | 2396  |
| ENSG000001 | 10241.18 | 4205.47   | 1.2833   | 3.49E-50  | 8.03E-49  | SURF4    | chr9  | - | 1.36E+08 | 1.36E+08 | 2984  |
| ENSG000001 | 195.6807 | 69.77261  | 1.4781   | 4.63E-10  | 2.19E-09  | GBGT1    | chr9  | - | 1.36E+08 | 1.36E+08 | 2948  |
| ENSG000001 | 360.194  | 483.2667  | -0.42107 | 0.003249  | 0.007451  | SURF1    | chr9  | - | 1.36E+08 | 1.36E+08 | 1093  |
| ENSG000001 | 99.93739 | 254.9267  | -1.3437  | 9.80E-09  | 4.16E-08  | SURF2    | chr9  | + | 1.36E+08 | 1.36E+08 | 842   |
| ENSG000001 | 913.157  | 2381.34   | -1.3806  | 1.53E-23  | 1.51E-22  | SURF6    | chr9  | - | 1.36E+08 | 1.36E+08 | 2505  |
| ENSG000001 | 1024.579 | 1491.427  | -0.53953 | 0.0097    | 0.020442  | MED22    | chr9  | - | 1.36E+08 | 1.36E+08 | 4380  |
| ENSG000001 | 587.772  | 948.6005  | -0.68947 | 6.56E-07  | 2.38E-06  | REXO4    | chr9  | - | 1.36E+08 | 1.36E+08 | 2360  |
| ENSG000001 | 13750.97 | 21288.33  | -0.62999 | 5.24E-10  | 2.47E-09  | RPL7A    | chr9  | + | 1.36E+08 | 1.36E+08 | 1164  |
| ENSG000001 | 1447.119 | 1979.728  | -0.45155 | 1.84E-05  | 5.73E-05  | GTF3C5   | chr9  | + | 1.36E+08 | 1.36E+08 | 2404  |
| ENSG000001 | 432.3681 | 330.2172  | 0.38774  | 0.019185  | 0.038019  | ASB6     | chr9  | - | 1.32E+08 | 1.32E+08 | 2330  |
| ENSG000001 | 949.1119 | 1660.216  | -0.80493 | 2.13E-10  | 1.03E-09  | PTGES2   | chr9  | - | 1.31E+08 | 1.31E+08 | 2331  |
| ENSG000001 | 1043.888 | 994.964   | 0.069239 | 0.5956    | 0.68992   | NTMT1    | chr9  | + | 1.32E+08 | 1.32E+08 | 1487  |
| ENSG000001 | 2915.266 | 1484.413  | 0.97287  | 1.15E-24  | 1.19E-23  | CIZ1     | chr9  | - | 1.31E+08 | 1.31E+08 | 3154  |
| ENSG000001 | 410.5793 | 314.3128  | 0.38501  | 0.010378  | 0.021744  | SLC25A25 | chr9  | + | 1.31E+08 | 1.31E+08 | 3714  |
| ENSG000001 | 1008.553 | 1044.356  | -0.05011 | 0.67305   | 0.75516   | SH3GLB2  | chr9  | - | 1.32E+08 | 1.32E+08 | 4828  |
| ENSG000001 | 539.4473 | 622.5523  | -0.20696 | 0.17339   | 0.25619   | FAM73B   | chr9  | + | 1.32E+08 | 1.32E+08 | 4345  |
| ENSG000001 | 4.854596 | 7.501368  | -0.59314 | 0.44431   | 0.54992   | PTGES    | chr9  | - | 1.33E+08 | 1.33E+08 | 1868  |
| ENSG000001 | 0        | 4.074821  | -3.5087  | 0.018597  | 0.036975  | LCN2     | chr9  | + | 1.31E+08 | 1.31E+08 | 1109  |
| ENSG000001 | 388.375  | 494.4012  | -0.34822 | 0.005601  | 0.012344  | LRSAM1   | chr9  | + | 1.3E+08  | 1.3E+08  | 3376  |
| ENSG000001 | 3.516131 | 389.205   | -6.6266  | 6.33E-43  | 1.20E-41  | HMCN2    | chr9  | + | 1.33E+08 | 1.33E+08 | 4802  |
| ENSG000001 | 3179.826 | 1519.461  | 1.0645   | 1.84E-21  | 1.66E-20  | GPR107   | chr9  | + | 1.33E+08 | 1.33E+08 | 7353  |
| ENSG000001 | 315.816  | 380.4381  | -0.26712 | 0.076637  | 0.12881   | C9orf142 | chr9  | + | 1.4E+08  | 1.4E+08  | 958   |
| ENSG000001 | 680.6855 | 577.6658  | 0.23525  | 0.32932   | 0.43246   | INPP5E   | chr9  | - | 1.39E+08 | 1.39E+08 | 3394  |
| ENSG000001 | 4983.371 | 2149.6    | 1.2119   | 4.25E-31  | 5.67E-30  | SEC16A   | chr9  | - | 1.39E+08 | 1.39E+08 | 8806  |
| ENSG000001 | 392.9734 | 553.6193  | -0.49292 | 0.01057   | 0.022105  | WDR85    | chr9  | - | 1.4E+08  | 1.4E+08  | 1847  |
| ENSG000001 | 3414.026 | 3890.99   | -0.18806 | 0.37833   | 0.48251   | NOTCH1   | chr9  | - | 1.39E+08 | 1.39E+08 | 9371  |
| ENSG000001 | 3.516131 | 437.9726  | -6.8053  | 1.02E-50  | 2.38E-49  | CACNA1B  | chr9  | + | 1.41E+08 | 1.41E+08 | 9796  |
| ENSG000001 | 1317.733 | 945.8182  | 0.47733  | 0.000116  | 0.000329  | NACC2    | chr9  | - | 1.39E+08 | 1.39E+08 | 6802  |
| ENSG000001 | 45.97791 | 206.6417  | -2.1477  | 1.24E-10  | 6.08E-10  | PROSER2  | chr10 | + | 11865338 | 11914276 | 3333  |
| ENSG000001 | 459.6198 | 532.3247  | -0.2113  | 0.094907  | 0.1546    | USP6NL   | chr10 | - | 11502509 | 11653753 | 4811  |
| ENSG000001 | 83.1102  | 3.870053  | 4.3023   | 7.05E-17  | 5.12E-16  | COMMD3   | chr10 | + | 22604903 | 22609235 | 2290  |
| ENSG000001 | 314.6904 | 226.9846  | 0.47027  | 0.007819  | 0.016745  | MSRB2    | chr10 | + | 23384435 | 23410942 | 1803  |
| ENSG000001 | 97.57488 | 133.696   | -0.44939 | 0.1079    | 0.17217   | PDSS1    | chr10 | + | 26986588 | 27035727 | 1626  |
| ENSG000001 | 1863.505 | 1273.08   | 0.54911  | 8.71E-08  | 3.41E-07  | FAM171A1 | chr10 | - | 15253642 | 15413061 | 3952  |
| ENSG000001 | 262.8058 | 147.3692  | 0.83126  | 4.20E-05  | 0.000125  | FAM188A  | chr10 | - | 15820169 | 15902519 | 2452  |
| ENSG000001 | 0.342542 | 0.343138  | -0.00208 | 0.99906   | NA        | SLC39A12 | chr10 | + | 18240768 | 18332221 | 2808  |
| ENSG000001 | 0.290301 | 0.343138  | -0.00202 | 0.99909   | NA        | TMEM236  | chr10 | + | 17794251 | 17842867 | 5464  |
| ENSG000001 | 1884.899 | 721.619   | 1.3838   | 2.07E-26  | 2.29E-25  | RSU1     | chr10 | - | 16632610 | 16859527 | 3919  |
| ENSG000001 | 21.21422 | 61.71373  | -1.5098  | 0.000852  | 0.002137  | ST8SIA6  | chr10 | - | 17360382 | 17496329 | 2276  |
| ENSG000001 | 1366.472 | 5.428.973 | 0.040235 | 0.71524   | 0.78901   | PARD3    | chr10 | - | 34398488 | 35104253 | 6005  |
| ENSG000001 | 2068.629 | 5.424682  | 8.513    | 9.14E-118 | 6.85E-116 | ZEB1     | chr10 | + | 31607424 | 31818742 | 6267  |
| ENSG000001 | 10.78906 | 9.231626  | 0.22032  | 0.71247   | 0.78655   | FAM13C   | chr10 | - | 61005890 | 61122939 | 3456  |
| ENSG000001 | 472.1178 | 386.6451  | 0.28856  | 0.02978   | 0.056399  | NRBF2    | chr10 | + | 64893050 | 64914783 | 1850  |
| ENSG000001 | 0.342542 | 0.594029  | -0.38792 | 0.8278    | NA        | A1CF     | chr10 | - | 52566322 | 52645435 | 2230  |
| ENSG000001 | 48.91165 | 110.035   | -1.16    | 3.16E-06  | 1.07E-05  | CDHR1    | chr10 | + | 85954410 | 85979377 | 5428  |
| ENSG000001 | 0        | 1.577319  | -1.9089  | 0.27608   | NA        | LRIT1    | chr10 | - | 85991349 | 86001217 | 2228  |
| ENSG000001 | 0        | 1.531196  | -1.8455  | 0.29475   | NA        | RGR      | chr10 | + | 86004809 | 86019716 | 2502  |

|            |          |          |          |           |           |          |       |   |          |          |       |
|------------|----------|----------|----------|-----------|-----------|----------|-------|---|----------|----------|-------|
| ENSG000001 | 1054.254 | 1239.179 | -0.23272 | 0.093294  | 0.15245   | POLR3A   | chr10 | - | 79734907 | 79789303 | 6640  |
| ENSG000001 | 949.2223 | 448.1553 | 1.079    | 9.67E-08  | 3.78E-07  | HERC4    | chr10 | - | 69681665 | 69835105 | 6391  |
| ENSG000001 | 1.048164 | 1.545765 | -0.46155 | 0.76176   | 0.82702   | C10orf11 | chr10 | + | 77360998 | 78319925 | 3923  |
| ENSG000001 | 618.6192 | 712.7629 | -0.20524 | 0.082999  | 0.13788   | CAMK2G   | chr10 | - | 75572259 | 75634343 | 3908  |
| ENSG000001 | 4.721017 | 2.855208 | 0.63013  | 0.55696   | 0.65599   | ADIRF    | chr10 | + | 88727949 | 88730672 | 917   |
| ENSG000001 | 1606.523 | 1663.387 | -0.04987 | 0.62427   | 0.7145    | GLUD1    | chr10 | - | 88810243 | 88854623 | 3039  |
| ENSG000001 | 297.0434 | 10.99257 | 4.3257   | 2.29E-05  | 7.05E-05  | ANKRD1   | chr10 | - | 92671853 | 92681033 | 1979  |
| ENSG000001 | 74.4605  | 540.1121 | -2.8476  | 1.58E-55  | 4.13E-54  | HTR7     | chr10 | - | 92500578 | 92617671 | 3344  |
| ENSG000001 | 352.5106 | 609.5919 | -0.78679 | 0.000222  | 0.000603  | RPP30    | chr10 | + | 92631473 | 92668312 | 4272  |
| ENSG000001 | 432.8855 | 312.5661 | 0.46722  | 0.018204  | 0.036251  | FRA10AC1 | chr10 | - | 95427640 | 95462329 | 4780  |
| ENSG000001 | 2522.347 | 1426.11  | 0.82221  | 5.33E-13  | 3.08E-12  | ADD3     | chr10 | + | 1.12E+08 | 1.12E+08 | 4337  |
| ENSG000001 | 14.4721  | 0        | 5.4641   | 6.69E-06  | 2.19E-05  | VAX1     | chr10 | - | 1.19E+08 | 1.19E+08 | 4494  |
| ENSG000001 | 765.3691 | 547.9959 | 0.48071  | 0.027296  | 0.052233  | DNAJB12  | chr10 | - | 74092588 | 74114988 | 4360  |
| ENSG000001 | 4684.228 | 7740.516 | -0.72423 | 5.37E-19  | 4.30E-18  | EIF4EBP2 | chr10 | + | 72164135 | 72188374 | 7257  |
| ENSG000001 | 0.342542 | 0        | 0.4146   | 0.81455   | NA        | PLEKHS1  | chr10 | + | 1.16E+08 | 1.16E+08 | 3403  |
| ENSG000001 | 617.9542 | 667.5553 | -0.11063 | 0.57418   | 0.6713    | TCF7L2   | chr10 | + | 1.15E+08 | 1.15E+08 | 4073  |
| ENSG000001 | 6393.635 | 4790.685 | 0.41598  | 0.002054  | 0.004852  | MKI67    | chr10 | - | 1.3E+08  | 1.3E+08  | 12678 |
| ENSG000001 | 2.665765 | 0.594029 | 1.6495   | 0.25167   | 0.34844   | CYP17A1  | chr10 | - | 1.05E+08 | 1.05E+08 | 2230  |
| ENSG000001 | 177.4849 | 1315.356 | -2.8807  | 4.64E-70  | 1.67E-68  | INA      | chr10 | + | 1.05E+08 | 1.05E+08 | 3231  |
| ENSG000001 | 148.0982 | 161.9698 | -0.13017 | 0.48405   | 0.58818   | FUOM     | chr10 | - | 1.35E+08 | 1.35E+08 | 867   |
| ENSG000001 | 178.5598 | 47.65214 | 1.8858   | 4.30E-07  | 1.59E-06  | LRRC27   | chr10 | + | 1.34E+08 | 1.34E+08 | 8147  |
| ENSG000001 | 41.36121 | 43.05766 | -0.06052 | 0.8804    | 0.91661   | MTG1     | chr10 | + | 1.35E+08 | 1.35E+08 | 2730  |
| ENSG000001 | 1.660469 | 21.85341 | -3.4579  | 0.000132  | 0.000372  | NKX6-2   | chr10 | - | 1.35E+08 | 1.35E+08 | 1061  |
| ENSG000001 | 87.14971 | 55.81386 | 0.63646  | 0.015995  | 0.032208  | PAOX     | chr10 | + | 1.35E+08 | 1.35E+08 | 1858  |
| ENSG000001 | 1661.844 | 970.8653 | 0.77488  | 5.67E-12  | 3.05E-11  | GSTO1    | chr10 | + | 1.06E+08 | 1.06E+08 | 1052  |
| ENSG000001 | 145.0933 | 300.9089 | -1.0519  | 6.77E-09  | 2.91E-08  | TAF5     | chr10 | + | 1.05E+08 | 1.05E+08 | 3268  |
| ENSG000001 | 1656.734 | 2351.022 | -0.50348 | 0.008482  | 0.018059  | PPRC1    | chr10 | + | 1.04E+08 | 1.04E+08 | 5330  |
| ENSG000001 | 1742.826 | 402.8436 | 2.1088   | 4.42E-33  | 6.33E-32  | ITPRIP   | chr10 | - | 1.06E+08 | 1.06E+08 | 4362  |
| ENSG000001 | 127.2863 | 592.723  | -2.2109  | 5.14E-22  | 4.73E-21  | CNNM2    | chr10 | + | 1.05E+08 | 1.05E+08 | 4053  |
| ENSG000001 | 1853.774 | 3047.544 | -0.71603 | 3.10E-07  | 1.16E-06  | PDCD11   | chr10 | + | 1.05E+08 | 1.05E+08 | 6453  |
| ENSG000001 | 7111.116 | 5.378559 | 10.281   | 9.32E-179 | 1.58E-176 | ADAM12   | chr10 | - | 1.28E+08 | 1.28E+08 | 7938  |
| ENSG000001 | 359.7428 | 234.5005 | 0.61487  | 0.000304  | 0.000814  | RGS10    | chr10 | - | 1.21E+08 | 1.21E+08 | 852   |
| ENSG000001 | 521.7233 | 249.7433 | 1.0615   | 1.38E-13  | 8.28E-13  | BTBD10   | chr11 | - | 13409548 | 13484844 | 2504  |
| ENSG000001 | 1042.786 | 644.5081 | 0.69171  | 0.002272  | 0.005328  | ADM      | chr11 | + | 10326227 | 10328944 | 1889  |
| ENSG000001 | 290.2581 | 13.01588 | 4.4593   | 9.59E-53  | 2.35E-51  | GAS2     | chr11 | + | 22647188 | 22834601 | 2286  |
| ENSG000001 | 3.40309  | 51.21866 | -3.8481  | 6.59E-12  | 3.53E-11  | SLC5A12  | chr11 | - | 26688566 | 26744974 | 6250  |
| ENSG000001 | 398.5913 | 556.6778 | -0.48064 | 0.002061  | 0.004867  | LIN7C    | chr11 | - | 27516123 | 27528320 | 4688  |
| ENSG000001 | 415.7858 | 1.591889 | 7.7263   | 6.69E-38  | 1.11E-36  | LRRC4C   | chr11 | - | 40135753 | 41481323 | 4054  |
| ENSG000001 | 130.0114 | 142.4892 | -0.12838 | 0.52916   | 0.63066   | IMMP1L   | chr11 | - | 31453948 | 31531192 | 1067  |
| ENSG000001 | 228.5685 | 461.2571 | -1.0097  | 7.20E-12  | 3.85E-11  | PGAP2    | chr11 | + | 3818954  | 3847601  | 2062  |
| ENSG000001 | 186.5262 | 285.7684 | -0.61241 | 0.000773  | 0.001951  | TUT1     | chr11 | - | 62342517 | 62359649 | 3363  |
| ENSG000001 | 0        | 0.297015 | -0.41864 | 0.81278   | NA        | SCGB1A1  | chr11 | + | 62172575 | 62190667 | 466   |
| ENSG000001 | 0.975385 | 0.357707 | 0.92752  | 0.59066   | NA        | SYT8     | chr11 | + | 1848709  | 1858751  | 3534  |
| ENSG000001 | 31.71021 | 26.49708 | 0.25843  | 0.52757   | 0.62926   | ZNF214   | chr11 | - | 7020549  | 7041599  | 2681  |
| ENSG000001 | 61.73363 | 170.0222 | -1.4521  | 2.17E-09  | 9.70E-09  | ZNF215   | chr11 | + | 6947635  | 7005863  | 3448  |
| ENSG000001 | 1447.144 | 1305.002 | 0.14952  | 0.14539   | 0.22097   | HSD17B12 | chr11 | + | 43577986 | 43878167 | 4292  |
| ENSG000001 | 176.4619 | 253.4823 | -0.51975 | 0.001576  | 0.003789  | APIP     | chr11 | - | 34874641 | 34938046 | 4583  |
| ENSG000001 | 174.898  | 51.13366 | 1.7615   | 1.34E-12  | 7.54E-12  | PAMR1    | chr11 | - | 35453370 | 35551848 | 3143  |
| ENSG000001 | 2070.204 | 3607.95  | -0.79996 | 3.31E-08  | 1.34E-07  | DGKZ     | chr11 | + | 46354455 | 46402104 | 5737  |
| ENSG000001 | 1181.854 | 2153.591 | -0.864   | 3.87E-11  | 1.97E-10  | EIF3M    | chr11 | + | 32605344 | 32627808 | 5051  |
| ENSG000001 | 4943.073 | 5094.514 | -0.04364 | 0.70655   | 0.7819    | TNKS1BP1 | chr11 | - | 57067112 | 57092426 | 5952  |
| ENSG000001 | 3.330311 | 722.8121 | -7.6442  | 1.75E-63  | 5.51E-62  | SERPING1 | chr11 | + | 57364860 | 57382326 | 2231  |
| ENSG000001 | 2986.645 | 5286.037 | -0.8227  | 3.70E-13  | 2.17E-12  | SSRP1    | chr11 | - | 57093459 | 57103351 | 6296  |
| ENSG000001 | 213.6561 | 447.9216 | -1.0661  | 9.64E-11  | 4.77E-10  | SLC43A1  | chr11 | - | 57252007 | 57283259 | 2598  |
| ENSG000001 | 230.0346 | 476.4807 | -1.0476  | 1.57E-07  | 6.02E-07  | PTPRJ    | chr11 | + | 48002113 | 48189670 | 5122  |
| ENSG000001 | 649.6185 | 385.6305 | 0.75152  | 7.65E-09  | 3.28E-08  | C11orf49 | chr11 | + | 46958240 | 47185936 | 2141  |
| ENSG000001 | 1197.537 | 1325.652 | -0.1461  | 0.38566   | 0.48992   | ARFGAP2  | chr11 | - | 47185848 | 47198676 | 2976  |
| ENSG000001 | 2175.849 | 3830.47  | -0.81542 | 1.09E-14  | 7.02E-14  | CELFI1   | chr11 | - | 47487496 | 47587121 | 7666  |
| ENSG000001 | 404.7802 | 491.8794 | -0.28062 | 0.027646  | 0.052816  | C11orf73 | chr11 | + | 86013253 | 86056969 | 1694  |
| ENSG000001 | 5.685237 | 4.259314 | 0.38036  | 0.65114   | 0.73678   | CCDC81   | chr11 | + | 86085778 | 86134151 | 2636  |
| ENSG000001 | 501.9041 | 493.5193 | 0.02476  | 0.89757   | 0.9289    | SESN3    | chr11 | - | 94898704 | 94965705 | 9531  |
| ENSG000001 | 1007.66  | 116.7271 | 3.0992   | 9.05E-49  | 2.00E-47  | ENDOD1   | chr11 | + | 94822974 | 94865809 | 4687  |
| ENSG000001 | 452.212  | 159.3264 | 1.5016   | 8.27E-13  | 4.72E-12  | CCDC82   | chr11 | - | 96085933 | 96123087 | 3745  |
| ENSG000001 | 35.62471 | 21.50054 | 0.72238  | 0.069747  | 0.1188    | KLHL35   | chr11 | - | 75133438 | 75141674 | 2497  |
| ENSG000001 | 2119.107 | 397.6904 | 2.412    | 4.05E-103 | 2.43E-101 | TENM4    | chr11 | - | 78363876 | 79151992 | 14000 |

|            |          |          |          |           |           |           |       |   |          |          |       |
|------------|----------|----------|----------|-----------|-----------|-----------|-------|---|----------|----------|-------|
| ENSG000001 | 36732.67 | 12492.65 | 1.5548   | 1.21E-60  | 3.55E-59  | SERPINH1  | chr11 | + | 75273101 | 75283828 | 3391  |
| ENSG000001 | 1033.072 | 876.0535 | 0.23683  | 0.055037  | 0.096679  | CAPN5     | chr11 | + | 76777979 | 76837201 | 4397  |
| ENSG000001 | 446.992  | 394.7867 | 0.17917  | 0.19585   | 0.28385   | INTS4     | chr11 | - | 77589766 | 77705724 | 3459  |
| ENSG000001 | 2096.399 | 3721.482 | -0.82712 | 2.07E-12  | 1.15E-11  | PAK1      | chr11 | - | 77032752 | 77185680 | 3737  |
| ENSG000001 | 20521.08 | 34543.91 | -0.75075 | 1.02E-14  | 6.56E-14  | RPS3      | chr11 | + | 75110530 | 75133324 | 2097  |
| ENSG000001 | 262.2997 | 74.00179 | 1.824    | 5.18E-18  | 3.98E-17  | ZC3H12C   | chr11 | + | 1.1E+08  | 1.1E+08  | 9542  |
| ENSG000001 | 75.32382 | 90.18372 | -0.2549  | 0.28697   | 0.38857   | TTC12     | chr11 | + | 1.13E+08 | 1.13E+08 | 2985  |
| ENSG000001 | 3368.763 | 120.2262 | 4.8031   | 1.12E-185 | 2.02E-183 | NCAM1     | chr11 | + | 1.13E+08 | 1.13E+08 | 5837  |
| ENSG000001 | 9.979769 | 5.972588 | 0.7107   | 0.29035   | 0.39195   | DRD2      | chr11 | - | 1.13E+08 | 1.13E+08 | 2789  |
| ENSG000001 | 0        | 0.343138 | -0.41864 | 0.81278   | NA        | HTR3B     | chr11 | + | 1.14E+08 | 1.14E+08 | 2011  |
| ENSG000001 | 301.5209 | 294.6511 | 0.034342 | 0.91064   | 0.93869   | NPAT      | chr11 | - | 1.08E+08 | 1.08E+08 | 6117  |
| ENSG000001 | 1564.971 | 645.5044 | 1.2767   | 8.81E-27  | 9.92E-26  | ATM       | chr11 | + | 1.08E+08 | 1.08E+08 | 13147 |
| ENSG000001 | 304.0196 | 345.2455 | -0.18191 | 0.27064   | 0.36977   | AASDHPPT  | chr11 | + | 1.06E+08 | 1.06E+08 | 5145  |
| ENSG000001 | 1.359003 | 214.6702 | -7.0615  | 1.60E-26  | 1.78E-25  | GLB1L2    | chr11 | + | 1.34E+08 | 1.34E+08 | 5621  |
| ENSG000001 | 33.09236 | 34.2194  | -0.04808 | 0.8958    | 0.9277    | SLX4IP    | chr20 | + | 10415951 | 10617477 | 1407  |
| ENSG000001 | 1154.087 | 1064.861 | 0.11648  | 0.469     | 0.5737    | LAMTOR1   | chr11 | - | 71796941 | 71814433 | 1346  |
| ENSG000001 | 902.1993 | 2.367995 | 8.4069   | 7.45E-59  | 2.11E-57  | P4HA3     | chr11 | - | 73946846 | 74022702 | 2627  |
| ENSG000001 | 13.16534 | 46.38875 | -1.809   | 1.22E-05  | 3.87E-05  | GRIK4     | chr11 | + | 1.2E+08  | 1.21E+08 | 5802  |
| ENSG000001 | 2.085163 | 1264.152 | -9.079   | 4.85E-62  | 1.48E-60  | ST14      | chr11 | + | 1.3E+08  | 1.3E+08  | 3539  |
| ENSG000001 | 6384.868 | 4835.892 | 0.40065  | 8.28E-05  | 0.000238  | HYOU1     | chr11 | - | 1.19E+08 | 1.19E+08 | 4530  |
| ENSG000001 | 0.36308  | 0        | 0.4146   | 0.81455   | NA        | C20orf78  | chr20 | - | 18790372 | 18810797 | 606   |
| ENSG000001 | 230.3497 | 98.89832 | 1.2123   | 3.10E-08  | 1.26E-07  | ADAM33    | chr20 | - | 3648612  | 3662893  | 3677  |
| ENSG000001 | 0        | 0.715414 | -0.84936 | 0.6309    | NA        | SLC22A8   | chr11 | - | 62756626 | 62783311 | 7578  |
| ENSG000001 | 216.5017 | 344.5611 | -0.67027 | 9.94E-05  | 0.000284  | CSRP2BP   | chr20 | + | 18118499 | 18169031 | 3927  |
| ENSG000001 | 367.4574 | 778.6689 | -1.0825  | 2.44E-13  | 1.44E-12  | DAK       | chr11 | + | 61100682 | 61120767 | 4696  |
| ENSG000001 | 2821.2   | 2906.851 | -0.04304 | 0.64427   | 0.73125   | MTA2      | chr11 | - | 62360686 | 62369312 | 3058  |
| ENSG000001 | 294.3096 | 250.1315 | 0.23582  | 0.21064   | 0.30086   | TMEM138   | chr11 | + | 61129473 | 61136981 | 2839  |
| ENSG000001 | 6628.244 | 2504.087 | 1.4013   | 1.34E-16  | 9.59E-16  | FADS1     | chr11 | - | 61567099 | 61596790 | 4523  |
| ENSG000001 | 1.213446 | 4.33216  | -1.5357  | 0.21088   | 0.30111   | TMC2      | chr20 | + | 2517253  | 2622430  | 3169  |
| ENSG000001 | 32.45096 | 14.88377 | 1.0894   | 0.016491  | 0.033122  | ROM1      | chr11 | + | 62379194 | 62382592 | 1878  |
| ENSG000001 | 957.1279 | 638.318  | 0.58237  | 0.000223  | 0.000607  | EML3      | chr11 | - | 62369690 | 62380237 | 3665  |
| ENSG000001 | 1723.528 | 2825.02  | -0.71233 | 7.32E-10  | 3.42E-09  | INCENP    | chr11 | + | 61891445 | 61920635 | 3964  |
| ENSG000001 | 1.45232  | 0.98329  | 0.37038  | 0.82168   | 0.8745    | ZP1       | chr11 | + | 60635035 | 60643166 | 1954  |
| ENSG000001 | 0        | 0.640152 | -0.82869 | 0.63935   | NA        | MS4A3     | chr11 | + | 59824060 | 59838601 | 1613  |
| ENSG000001 | 436.6611 | 8.150384 | 5.7183   | 6.76E-61  | 2.00E-59  | PLCH2     | chr1  | + | 2357419  | 2436969  | 6986  |
| ENSG000001 | 184.8959 | 263.7727 | -0.51265 | 0.003953  | 0.008934  | FRG1B     | chr20 | + | 29611857 | 29634010 | 1029  |
| ENSG000001 | 1287.977 | 1576.113 | -0.29026 | 0.13606   | 0.20911   | CPSF7     | chr11 | - | 61170121 | 61197503 | 3687  |
| ENSG000001 | 842.5453 | 509.1066 | 0.72467  | 2.57E-05  | 7.86E-05  | B3GAT3    | chr11 | - | 62382768 | 62389647 | 2056  |
| ENSG000001 | 1514.279 | 1952.291 | -0.36597 | 0.000127  | 0.000357  | E124      | chr11 | + | 1.25E+08 | 1.25E+08 | 2447  |
| ENSG000001 | 68.63638 | 35.26177 | 0.94646  | 0.002969  | 0.006849  | CCDC15    | chr11 | + | 1.25E+08 | 1.25E+08 | 3924  |
| ENSG000001 | 699.1804 | 1158.595 | -0.72655 | 5.59E-06  | 1.85E-05  | CHEK1     | chr11 | + | 1.25E+08 | 1.26E+08 | 3502  |
| ENSG000001 | 190.0937 | 577.1561 | -1.601   | 2.50E-25  | 2.65E-24  | FEZ1      | chr11 | + | 1.25E+08 | 1.25E+08 | 1926  |
| ENSG000001 | 2.229907 | 0.686276 | 1.3489   | 0.35859   | 0.46287   | ESAM      | chr11 | - | 1.25E+08 | 1.25E+08 | 2336  |
| ENSG000001 | 124.5924 | 17.0721  | 2.8223   | 2.38E-17  | 1.77E-16  | KIRREL3   | chr11 | - | 1.26E+08 | 1.27E+08 | 3808  |
| ENSG000001 | 0.975385 | 9.920318 | -3.0156  | 0.00336   | 0.007688  | MPZL2     | chr11 | - | 1.18E+08 | 1.18E+08 | 2620  |
| ENSG000001 | 0.580602 | 2.65044  | -1.6799  | 0.23362   | 0.32727   | SCN2B     | chr11 | - | 1.18E+08 | 1.18E+08 | 5826  |
| ENSG000001 | 653.5974 | 413.2834 | 0.66014  | 7.38E-07  | 2.67E-06  | SIDT2     | chr11 | + | 1.17E+08 | 1.17E+08 | 4406  |
| ENSG000001 | 467.7192 | 197.0146 | 1.2468   | 5.16E-17  | 3.78E-16  | TMEM25    | chr11 | + | 1.18E+08 | 1.18E+08 | 3241  |
| ENSG000001 | 3105.719 | 256.8304 | 3.5686   | 1.34E-29  | 1.69E-28  | TAGLN     | chr11 | + | 1.17E+08 | 1.17E+08 | 3298  |
| ENSG000001 | 273.5323 | 14.75668 | 4.1779   | 6.31E-49  | 1.40E-47  | JPH2      | chr20 | - | 42740335 | 42816218 | 4787  |
| ENSG000001 | 128.4932 | 43.88493 | 1.5285   | 1.74E-06  | 6.08E-06  | DUSP15    | chr20 | - | 30435440 | 30458550 | 1732  |
| ENSG000001 | 595.8937 | 756.5727 | -0.34337 | 0.006467  | 0.014093  | COMMD7    | chr20 | - | 31290493 | 31331814 | 1907  |
| ENSG000001 | 1.306762 | 0.297015 | 1.2542   | 0.45876   | NA        | C20orf144 | chr20 | + | 32250090 | 32251720 | 571   |
| ENSG000001 | 40.45877 | 4.320007 | 3.1538   | 1.20E-08  | 5.05E-08  | KIAA1755  | chr20 | - | 36838890 | 36889174 | 6429  |
| ENSG000001 | 8.995011 | 27.3833  | -1.5842  | 0.001225  | 0.002995  | SPATA25   | chr20 | - | 44515128 | 44516274 | 757   |
| ENSG000001 | 0        | 3.071256 | -3.0413  | 0.052188  | 0.092339  | OCSTAMP   | chr20 | - | 45169585 | 45179213 | 2043  |
| ENSG000001 | 366.3482 | 361.5848 | 0.017961 | 0.89769   | 0.92894   | DSN1      | chr20 | - | 35380194 | 35402230 | 2447  |
| ENSG000001 | 3594.109 | 1550.282 | 1.2083   | 2.44E-08  | 1.00E-07  | SOGA1     | chr20 | - | 35405845 | 35492089 | 14371 |
| ENSG000001 | 1.939605 | 1.248751 | 0.50699  | 0.70611   | 0.78157   | CNBD2     | chr20 | + | 34556512 | 34618622 | 2531  |
| ENSG000001 | 0.580602 | 0        | 0.8036   | 0.6494    | NA        | SPINT4    | chr20 | + | 44350990 | 44354469 | 512   |
| ENSG000001 | 0        | 3.276024 | -3.2377  | 0.030989  | 0.058351  | CDH22     | chr20 | - | 44802372 | 44937137 | 3661  |
| ENSG000001 | 0        | 0.715414 | -0.84936 | 0.6309    | NA        | LINC00266 | chr20 | + | 62921738 | 62944485 | 928   |
| ENSG000001 | 1102.005 | 1541.414 | -0.48423 | 1.01E-06  | 3.59E-06  | LSM14B    | chr20 | + | 60697517 | 60710434 | 2594  |
| ENSG000001 | 1291.19  | 1569.798 | -0.28089 | 0.096456  | 0.1567    | YTHDF1    | chr20 | - | 61826781 | 61847586 | 3301  |
| ENSG000001 | 455.442  | 229.7103 | 0.98265  | 8.99E-10  | 4.16E-09  | CABLES2   | chr20 | - | 60963688 | 60982341 | 3785  |

|            |          |          |          |           |           |          |       |   |          |          |      |
|------------|----------|----------|----------|-----------|-----------|----------|-------|---|----------|----------|------|
| ENSG000001 | 334.3849 | 313.1142 | 0.095291 | 0.59746   | 0.69176   | ORAOV1   | chr11 | - | 69467844 | 69490184 | 3776 |
| ENSG000001 | 0.342542 | 7.235907 | -3.6813  | 0.003642  | 0.008285  | GPHA2    | chr11 | - | 64701943 | 64703360 | 747  |
| ENSG000001 | 0        | 0.343138 | -0.41864 | 0.81278   | NA        | SLC22A9  | chr11 | + | 63137261 | 63177766 | 2343 |
| ENSG000001 | 316.0811 | 365.8037 | -0.20903 | 0.33954   | 0.44339   | TRPT1    | chr11 | - | 63991271 | 63993726 | 1809 |
| ENSG000001 | 391.3377 | 348.638  | 0.16511  | 0.38292   | 0.48704   | NUDT22   | chr11 | + | 63993413 | 63998158 | 2055 |
| ENSG000001 | 45.04181 | 52.98859 | -0.23332 | 0.44766   | 0.55306   | FERMT3   | chr11 | + | 63974150 | 63991354 | 2489 |
| ENSG000001 | 1729.243 | 2368.398 | -0.45299 | 0.00059   | 0.001515  | PLCB3    | chr11 | + | 64018995 | 64036622 | 4469 |
| ENSG000001 | 894.7167 | 918.5811 | -0.03724 | 0.84265   | 0.88966   | MRPL49   | chr11 | + | 64889655 | 64894843 | 2526 |
| ENSG000001 | 581.3225 | 208.545  | 1.4715   | 1.74E-11  | 9.07E-11  | CDC42EP2 | chr11 | + | 65082289 | 65089900 | 2128 |
| ENSG000001 | 1277.683 | 2173.362 | -0.7655  | 7.18E-12  | 3.84E-11  | FAU      | chr11 | - | 64888100 | 64889945 | 1484 |
| ENSG000001 | 593.0858 | 849.3125 | -0.5174  | 7.77E-06  | 2.53E-05  | TM7SF2   | chr11 | + | 64879317 | 64883856 | 2094 |
| ENSG000001 | 2060.592 | 2505.737 | -0.28163 | 0.009346  | 0.019739  | VPSS1    | chr11 | + | 64856796 | 64879332 | 2714 |
| ENSG000001 | 9.251817 | 66.52257 | -2.7738  | 1.51E-06  | 5.31E-06  | TBX6     | chr16 | - | 30097114 | 30103208 | 2162 |
| ENSG000001 | 2234.563 | 2728.426 | -0.28772 | 0.007793  | 0.016698  | PPP4C    | chr16 | + | 30087299 | 30096698 | 1490 |
| ENSG000001 | 15984.95 | 21903.97 | -0.45368 | 0.001853  | 0.004406  | ALDOA    | chr16 | + | 30064411 | 30081778 | 2534 |
| ENSG000001 | 6.048317 | 335.929  | -5.7189  | 2.19E-36  | 3.45E-35  | FAM57B   | chr16 | - | 30035748 | 30064299 | 2313 |
| ENSG000001 | 9.30585  | 89.3796  | -3.2091  | 7.69E-11  | 3.84E-10  | DOC2A    | chr16 | - | 30016830 | 30034591 | 3749 |
| ENSG000001 | 252.0862 | 426.1544 | -0.75584 | 7.70E-07  | 2.78E-06  | HIRIP3   | chr16 | - | 30003645 | 30007757 | 3385 |
| ENSG000001 | 1997.194 | 1228.78  | 0.69935  | 4.66E-08  | 1.87E-07  | TAOK2    | chr16 | + | 29984962 | 30003582 | 5169 |
| ENSG000001 | 885.1291 | 659.4916 | 0.4249   | 0.000356  | 0.000942  | TMEM219  | chr16 | + | 29952206 | 29984373 | 1292 |
| ENSG000001 | 9255.422 | 3433.812 | 1.4292   | 4.90E-51  | 1.15E-49  | HMGA2    | chr12 | + | 66217911 | 66360075 | 8094 |
| ENSG000001 | 0.632843 | 1.309443 | -0.75604 | 0.63051   | 0.71982   | MMP3     | chr11 | - | 1.03E+08 | 1.03E+08 | 2016 |
| ENSG000001 | 65.72165 | 89.26998 | -0.42978 | 0.15296   | 0.23083   | CNKSRR2  | chrX  | + | 21392536 | 21672813 | 5668 |
| ENSG000001 | 0.342542 | 1.759397 | -1.5695  | 0.34259   | 0.44649   | CNTN5    | chr11 | + | 98891683 | 1E+08    | 6258 |
| ENSG000001 | 1.286224 | 0.715414 | 0.65982  | 0.67411   | 0.75592   | KLRF1    | chr12 | + | 9980077  | 9997606  | 1244 |
| ENSG000001 | 6.327454 | 0.686276 | 2.7599   | 0.02502   | 0.048302  | CLEC1A   | chr12 | - | 10222153 | 10264226 | 2685 |
| ENSG000001 | 1961.749 | 34.94777 | 5.7927   | 4.24E-213 | 1.07E-210 | MKX      | chr10 | - | 27961803 | 28034989 | 3847 |
| ENSG000001 | 69.28569 | 169.1799 | -1.2817  | 5.72E-09  | 2.47E-08  | MPP7     | chr10 | - | 28339922 | 28623415 | 5080 |
| ENSG000001 | 2.37465  | 0.997859 | 1.0365   | 0.46164   | 0.56683   | C10orf68 | chr10 | + | 32832297 | 33171802 | 2729 |
| ENSG000001 | 2.334388 | 3.930745 | -0.69947 | 0.48106   | 0.58536   | GRIN2B   | chr12 | - | 13714144 | 14133053 | 6238 |
| ENSG000001 | 24670.22 | 6392.478 | 1.9465   | 2.61E-68  | 9.16E-67  | ITGB1    | chr10 | - | 33189247 | 33294720 | 3784 |
| ENSG000001 | 0        | 0.715414 | -0.84936 | 0.6309    | NA        | ANXA8L1  | chr10 | - | 47011753 | 47174093 | 1954 |
| ENSG000001 | 4.326234 | 7.325738 | -0.72228 | 0.36663   | 0.47127   | PCDH15   | chr10 | - | 55562531 | 57387702 | 9258 |
| ENSG000001 | 86.04947 | 24.31204 | 1.8082   | 7.42E-09  | 3.18E-08  | CTF1     | chr16 | + | 30907928 | 30914881 | 1664 |
| ENSG000001 | 615.5691 | 491.4038 | 0.32496  | 0.07943   | 0.13268   | CWC15    | chr11 | - | 94695787 | 94706776 | 1575 |
| ENSG000001 | 1.649304 | 2.200487 | -0.36853 | 0.77622   | 0.83922   | FCGR1A   | chr1  | + | 1.5E+08  | 1.5E+08  | 2180 |
| ENSG000001 | 986.3929 | 43.18154 | 4.5002   | 3.95E-144 | 4.19E-142 | ARID5B   | chr10 | + | 63661059 | 63856703 | 7891 |
| ENSG000001 | 1.161205 | 0        | 1.2509   | 0.47995   | NA        | KLHL1    | chr13 | - | 70274726 | 70682591 | 4115 |
| ENSG000001 | 0.943682 | 69.50957 | -5.8019  | 1.54E-13  | 9.19E-13  | CDH8     | chr16 | - | 61681146 | 62070939 | 9721 |
| ENSG000001 | 282.866  | 481.4907 | -0.76852 | 7.98E-08  | 3.14E-07  | DCUN1D2  | chr13 | - | 1.14E+08 | 1.14E+08 | 3164 |
| ENSG000001 | 1762.042 | 869.0952 | 1.018    | 9.87E-21  | 8.61E-20  | TMCO3    | chr13 | + | 1.14E+08 | 1.14E+08 | 3050 |
| ENSG000001 | 206.8928 | 166.7988 | 0.30837  | 0.071503  | 0.1213    | TMEM218  | chr11 | - | 1.25E+08 | 1.25E+08 | 4547 |
| ENSG000001 | 115.1343 | 62.01471 | 0.88001  | 0.001541  | 0.003714  | TIRAP    | chr11 | + | 1.26E+08 | 1.26E+08 | 2245 |
| ENSG000001 | 63.00869 | 28.04527 | 1.1575   | 0.000922  | 0.002301  | N6AMT2   | chr13 | - | 21302870 | 21348097 | 1042 |
| ENSG000001 | 1014.745 | 565.3558 | 0.8418   | 3.53E-06  | 1.19E-05  | LATS2    | chr13 | - | 21547171 | 21635686 | 5511 |
| ENSG000001 | 1587.542 | 2376.726 | -0.58199 | 5.50E-10  | 2.59E-09  | SAP18    | chr13 | + | 21714653 | 21723221 | 2298 |
| ENSG000001 | 805.1743 | 352.349  | 1.1904   | 1.85E-10  | 9.01E-10  | LPHN3    | chr4  | + | 62066976 | 62938184 | 6767 |
| ENSG000001 | 105.5337 | 63.90677 | 0.71646  | 0.003691  | 0.008383  | KIAA1328 | chr18 | + | 34409069 | 34812135 | 5881 |
| ENSG000001 | 19.72246 | 1534.929 | -6.2551  | 2.87E-167 | 4.00E-165 | FAM124A  | chr13 | + | 51796503 | 51858377 | 4761 |
| ENSG000001 | 19.83452 | 4.400973 | 2.0406   | 0.007264  | 0.015662  | CTAGE5   | chr14 | + | 39734488 | 39856156 | 3860 |
| ENSG000001 | 3.682226 | 26.94133 | -2.763   | 8.64E-05  | 0.000248  | HNMT     | chr2  | + | 1.39E+08 | 1.39E+08 | 3291 |
| ENSG000001 | 270.0545 | 14.95903 | 4.1309   | 1.47E-46  | 3.05E-45  | LYPD1    | chr2  | - | 1.33E+08 | 1.33E+08 | 1891 |
| ENSG000001 | 9.471132 | 17.55764 | -0.86514 | 0.10001   | 0.16148   | LYPD6B   | chr2  | + | 1.5E+08  | 1.5E+08  | 1719 |
| ENSG000001 | 1118.518 | 394.7492 | 1.496    | 1.95E-10  | 9.48E-10  | PDCD4    | chr10 | + | 1.13E+08 | 1.13E+08 | 3654 |
| ENSG000001 | 7.873255 | 53.25385 | -2.6424  | 4.94E-05  | 0.000146  | ADRA2A   | chr10 | + | 1.13E+08 | 1.13E+08 | 3869 |
| ENSG000001 | 3.920287 | 61.80659 | -3.8742  | 1.39E-12  | 7.80E-12  | GPM6A    | chr4  | - | 1.77E+08 | 1.77E+08 | 2854 |
| ENSG000001 | 13.47438 | 28.09388 | -1.0383  | 0.080271  | 0.13394   | WDR17    | chr4  | + | 1.77E+08 | 1.77E+08 | 7397 |
| ENSG000001 | 2.104887 | 0.686276 | 1.1705   | 0.46792   | 0.57271   | SPATA4   | chr4  | - | 1.77E+08 | 1.77E+08 | 2115 |
| ENSG000001 | 335.3765 | 21.5378  | 3.9275   | 5.24E-50  | 1.20E-48  | VEGFC    | chr4  | - | 1.78E+08 | 1.78E+08 | 2067 |
| ENSG000001 | 53.71644 | 10.29018 | 2.3534   | 8.87E-09  | 3.78E-08  | CCDC102B | chr18 | + | 66382446 | 66722426 | 2711 |
| ENSG000001 | 0.653381 | 0        | 0.82678  | 0.64037   | NA        | CD226    | chr18 | - | 67498394 | 67629039 | 2638 |
| ENSG000001 | 0.342542 | 0.297015 | -0.00202 | 0.99909   | NA        | CNDP1    | chr18 | + | 72201675 | 72254448 | 4111 |
| ENSG000001 | 13.32043 | 5.874636 | 1.1426   | 0.14292   | 0.2177    | FSIP1    | chr15 | - | 39892232 | 40075031 | 2805 |
| ENSG000001 | 75.00956 | 84.20637 | -0.16148 | 0.62395   | 0.71429   | DLG2     | chr11 | - | 83166055 | 85338966 | 7890 |
| ENSG000001 | 1.359003 | 0        | 1.8987   | 0.26617   | NA        | RGS18    | chr1  | + | 1.92E+08 | 1.92E+08 | 2150 |

|            |          |          |          |           |           |          |       |   |          |          |       |
|------------|----------|----------|----------|-----------|-----------|----------|-------|---|----------|----------|-------|
| ENSG000001 | 2930.981 | 146.8147 | 4.3063   | 7.37E-99  | 4.11E-97  | PRSS23   | chr11 | + | 86502101 | 86663952 | 5323  |
| ENSG000001 | 572.1008 | 895.7245 | -0.64547 | 1.33E-08  | 5.58E-08  | MTMR12   | chr5  | - | 32227100 | 32313115 | 5187  |
| ENSG000001 | 5.257938 | 23.17897 | -2.0224  | 0.002429  | 0.005672  | PPP1R1C  | chr2  | + | 1.83E+08 | 1.83E+08 | 3004  |
| ENSG000001 | 3954.776 | 7886.784 | -0.99453 | 7.51E-15  | 4.89E-14  | CCT5     | chr5  | + | 10250033 | 10266524 | 3675  |
| ENSG000001 | 176.7726 | 79.89824 | 1.142    | 2.37E-05  | 7.27E-05  | FAM173B  | chr5  | - | 10226442 | 10250009 | 1928  |
| ENSG000001 | 2357.441 | 1110.555 | 1.0856   | 4.42E-29  | 5.44E-28  | DOCK1    | chr10 | + | 1.29E+08 | 1.29E+08 | 6797  |
| ENSG000001 | 647.1845 | 421.1644 | 0.61844  | 1.72E-05  | 5.37E-05  | DIXDC1   | chr11 | + | 1.12E+08 | 1.12E+08 | 5896  |
| ENSG000001 | 772.5343 | 1488.639 | -0.94474 | 3.70E-12  | 2.02E-11  | DLAT     | chr11 | + | 1.12E+08 | 1.12E+08 | 4458  |
| ENSG000001 | 4.180677 | 1.995719 | 0.98276  | 0.33708   | 0.44088   | PIH1D2   | chr11 | - | 1.12E+08 | 1.12E+08 | 1838  |
| ENSG000001 | 556.0038 | 469.639  | 0.2428   | 0.1019    | 0.16396   | C11orf57 | chr11 | + | 1.12E+08 | 1.12E+08 | 3739  |
| ENSG000001 | 665.1662 | 910.4709 | -0.45068 | 0.03356   | 0.062731  | TIMM8B   | chr11 | - | 1.12E+08 | 1.12E+08 | 1155  |
| ENSG000001 | 0.632843 | 3.054271 | -1.8492  | 0.16239   | 0.24276   | IL18     | chr11 | - | 1.12E+08 | 1.12E+08 | 1697  |
| ENSG000001 | 348.2114 | 172.3423 | 1.0152   | 2.45E-09  | 1.09E-08  | PTS      | chr11 | + | 1.12E+08 | 1.12E+08 | 1069  |
| ENSG000001 | 938.4058 | 760.4734 | 0.30239  | 0.017881  | 0.035682  | PIP4K2A  | chr10 | - | 22823778 | 23003484 | 3802  |
| ENSG000001 | 0.290301 | 5.332435 | -3.2712  | 0.013538  | 0.027694  | C2orf50  | chr2  | + | 11273179 | 11286916 | 2684  |
| ENSG000001 | 522.4481 | 1273.971 | -1.2825  | 5.53E-12  | 2.98E-11  | FREM2    | chr13 | + | 39261266 | 39460074 | 14876 |
| ENSG000001 | 181.2017 | 1069.739 | -2.5542  | 3.08E-42  | 5.75E-41  | FOXO1    | chr13 | - | 41129804 | 41240734 | 5735  |
| ENSG000001 | 1927.707 | 614.9593 | 1.6474   | 3.67E-47  | 7.74E-46  | CRIM1    | chr2  | + | 36583069 | 36778278 | 5912  |
| ENSG000001 | 4513.689 | 787.7903 | 2.5166   | 1.33E-116 | 9.66E-115 | SEC24D   | chr4  | - | 1.2E+08  | 1.2E+08  | 4065  |
| ENSG000001 | 344.2196 | 110.3449 | 1.6345   | 2.33E-21  | 2.09E-20  | ABCB9    | chr12 | - | 1.23E+08 | 1.23E+08 | 6051  |
| ENSG000001 | 180.5996 | 99.08281 | 0.86109  | 3.86E-05  | 0.000116  | RILPL2   | chr12 | - | 1.24E+08 | 1.24E+08 | 1435  |
| ENSG000001 | 966.259  | 1544.19  | -0.67318 | 0.004291  | 0.009645  | DHX37    | chr12 | - | 1.25E+08 | 1.25E+08 | 4550  |
| ENSG000001 | 12678.62 | 8508.666 | 0.575    | 3.89E-08  | 1.57E-07  | UBC      | chr12 | - | 1.25E+08 | 1.25E+08 | 3745  |
| ENSG000001 | 398.5905 | 88.49965 | 2.1643   | 8.94E-27  | 1.01E-25  | ITPR1    | chr3  | + | 4535032  | 4889524  | 10197 |
| ENSG000001 | 28.0332  | 13.49665 | 1.0157   | 0.044926  | 0.080979  | PRSS53   | chr16 | - | 31094746 | 31100949 | 5489  |
| ENSG000001 | 315.9214 | 258.5358 | 0.28677  | 0.40584   | 0.51067   | SLC7A11  | chr4  | - | 1.39E+08 | 1.39E+08 | 9645  |
| ENSG000001 | 237.4177 | 421.0712 | -0.82351 | 6.81E-08  | 2.69E-07  | CCRN4L   | chr4  | + | 1.4E+08  | 1.4E+08  | 1767  |
| ENSG000001 | 13.12345 | 2.855208 | 2.0482   | 0.013529  | 0.027681  | ENKUR    | chr10 | - | 25270908 | 25305089 | 3382  |
| ENSG000001 | 2.261609 | 7.279615 | -1.5472  | 0.099115  | 0.16023   | GPR158   | chr10 | + | 25463991 | 25891155 | 6959  |
| ENSG000001 | 18.22629 | 2.278164 | 2.8437   | 0.000138  | 0.000388  | CACNA2D4 | chr12 | - | 1901123  | 2028002  | 5936  |
| ENSG000001 | 213.3512 | 307.0733 | -0.52145 | 0.085862  | 0.14192   | DCP1B    | chr12 | - | 2055220  | 2113701  | 2086  |
| ENSG000001 | 305.8275 | 57.74889 | 2.3931   | 1.31E-30  | 1.71E-29  | CACNA1C  | chr12 | + | 2079952  | 2802108  | 8425  |
| ENSG000001 | 66.33802 | 95.63767 | -0.52707 | 0.042975  | 0.078008  | KCNA6    | chr12 | + | 4918342  | 4960277  | 5977  |
| ENSG000001 | 25.26988 | 126.9809 | -2.2899  | 3.04E-09  | 1.34E-08  | THRB     | chr3  | - | 24158651 | 24536773 | 7459  |
| ENSG000001 | 256.9447 | 288.9829 | -0.17029 | 0.30065   | 0.40208   | NGLY1    | chr3  | - | 25760435 | 25831530 | 3196  |
| ENSG000001 | 69.59718 | 26.61122 | 1.3761   | 4.13E-05  | 0.000123  | OXSM     | chr3  | + | 25824408 | 25836025 | 1519  |
| ENSG000001 | 432.3366 | 105.4478 | 2.0338   | 4.57E-33  | 6.55E-32  | UEVLD    | chr11 | - | 18551156 | 18610294 | 4156  |
| ENSG000001 | 24.96744 | 38.29993 | -0.60543 | 0.15657   | 0.23552   | TMEM86A  | chr11 | + | 18714669 | 18726332 | 3595  |
| ENSG000001 | 103.1265 | 279.8266 | -1.4358  | 8.93E-17  | 6.45E-16  | C12orf45 | chr12 | + | 1.05E+08 | 1.05E+08 | 1131  |
| ENSG000001 | 2491.843 | 187.6448 | 3.7234   | 4.31E-188 | 8.01E-186 | C12orf23 | chr12 | + | 1.07E+08 | 1.07E+08 | 3362  |
| ENSG000001 | 1218.789 | 260.8209 | 2.2227   | 4.97E-66  | 1.66E-64  | BTBD11   | chr12 | + | 1.08E+08 | 1.08E+08 | 5767  |
| ENSG000001 | 816.047  | 473.1407 | 0.78604  | 2.99E-09  | 1.32E-08  | UBE3B    | chr12 | + | 1.1E+08  | 1.1E+08  | 5722  |
| ENSG000001 | 1060.077 | 997.8892 | 0.087785 | 0.50151   | 0.60506   | ANK3     | chr10 | - | 61788159 | 62493248 | 14771 |
| ENSG000001 | 118.2939 | 411.1224 | -1.7962  | 3.78E-30  | 4.84E-29  | IPMK     | chr10 | - | 59951278 | 60027694 | 6133  |
| ENSG000001 | 11.31661 | 9.854793 | 0.20464  | 0.76718   | 0.83162   | RAD9B    | chr12 | + | 1.11E+08 | 1.11E+08 | 2843  |
| ENSG000001 | 1077.932 | 714.8653 | 0.59243  | 5.46E-07  | 2.00E-06  | PLBD2    | chr12 | + | 1.14E+08 | 1.14E+08 | 2573  |
| ENSG000001 | 3766.918 | 1627.54  | 1.2095   | 1.12E-23  | 1.11E-22  | DLG5     | chr10 | - | 79550549 | 79686378 | 7415  |
| ENSG000001 | 0        | 15.78126 | -5.612   | 2.62E-06  | 9.00E-06  | MAT1A    | chr10 | - | 82031576 | 82049440 | 3410  |
| ENSG000001 | 259.3734 | 245.1669 | 0.080367 | 0.63451   | 0.72313   | SLC2A13  | chr12 | - | 40148823 | 40499891 | 7003  |
| ENSG000001 | 729.7088 | 336.7896 | 1.1136   | 8.01E-18  | 6.10E-17  | GXYLT1   | chr12 | - | 42475647 | 42538681 | 7497  |
| ENSG000001 | 1341.105 | 378.8658 | 1.8215   | 4.57E-27  | 5.19E-26  | TWTF1    | chr12 | - | 44187526 | 44200178 | 3320  |
| ENSG000001 | 2006.786 | 570.142  | 1.8113   | 5.20E-29  | 6.38E-28  | DIP2C    | chr10 | - | 320130   | 735683   | 7894  |
| ENSG000001 | 874.5567 | 1260.899 | -0.52636 | 0.000231  | 0.000628  | EIF4E    | chr4  | - | 99792835 | 99851788 | 11523 |
| ENSG000001 | 485.8841 | 1372.257 | -1.497   | 8.07E-45  | 1.60E-43  | MAGI1    | chr3  | - | 65339200 | 66024509 | 7415  |
| ENSG000001 | 169.7567 | 100.2173 | 0.76056  | 8.93E-05  | 0.000256  | TEX30    | chr13 | - | 1.03E+08 | 1.03E+08 | 1689  |
| ENSG000001 | 674.4149 | 466.4604 | 0.53163  | 0.000285  | 0.000765  | CSNK1G3  | chr5  | + | 1.23E+08 | 1.23E+08 | 4462  |
| ENSG000001 | 0.653381 | 1.043983 | -0.46504 | 0.7732    | NA        | AGAP11   | chr10 | + | 88728247 | 88784489 | 4560  |
| ENSG000001 | 181.6016 | 240.9021 | -0.403   | 0.13415   | 0.20709   | SRFBP1   | chr5  | + | 1.21E+08 | 1.21E+08 | 2855  |
| ENSG000001 | 103.3132 | 5.334851 | 4.2117   | 3.20E-20  | 2.72E-19  | AKAP6    | chr14 | + | 32798479 | 33300567 | 8686  |
| ENSG000001 | 104.8759 | 106.712  | -0.02384 | 0.92187   | 0.94749   | NPAS3    | chr14 | + | 33404139 | 34273382 | 5847  |
| ENSG000001 | 819.5048 | 413.318  | 0.98609  | 5.48E-15  | 3.59E-14  | FAM177A1 | chr14 | + | 35514113 | 35582336 | 3395  |
| ENSG000001 | 249.1121 | 218.5675 | 0.18944  | 0.30828   | 0.41004   | MBIP     | chr14 | - | 36767770 | 36789882 | 1642  |
| ENSG000001 | 114.0167 | 111.8492 | 0.028456 | 0.90772   | 0.93646   | MIPOL1   | chr14 | + | 37667118 | 38021566 | 7434  |
| ENSG000001 | 2209.179 | 829.0491 | 1.4133   | 1.16E-37  | 1.92E-36  | EXT2     | chr11 | + | 44117099 | 44266979 | 3454  |
| ENSG000001 | 329.6012 | 299.3036 | 0.13873  | 0.39855   | 0.50316   | TMEM18   | chr2  | - | 667335   | 677439   | 2762  |

|            |          |          |          |           |           |          |       |   |          |          |       |
|------------|----------|----------|----------|-----------|-----------|----------|-------|---|----------|----------|-------|
| ENSG000001 | 0        | 0.297015 | -0.41864 | 0.81278   | NA        | ALLC     | chr2  | + | 3705785  | 3750261  | 1869  |
| ENSG000001 | 0.72616  | 18.15093 | -4.2592  | 4.83E-05  | 0.000143  | KCTD14   | chr11 | - | 77726761 | 77757237 | 1691  |
| ENSG000001 | 0.290301 | 0.700845 | -0.56655 | 0.74739   | NA        | THRSP    | chr11 | + | 77774907 | 77779397 | 1174  |
| ENSG000001 | 63.57038 | 61.51521 | 0.046668 | 0.8831    | 0.91853   | NDUFC2   | chr11 | - | 77779350 | 77791265 | 2518  |
| ENSG000001 | 197.7161 | 9.637873 | 4.3251   | 3.07E-38  | 5.15E-37  | ME3      | chr11 | - | 86152150 | 86383678 | 2311  |
| ENSG000001 | 3.019472 | 0        | 3.075    | 0.045462  | 0.081831  | MSGN1    | chr2  | + | 17997763 | 17998368 | 606   |
| ENSG000001 | 2294.667 | 303.3446 | 2.9165   | 5.91E-160 | 7.80E-158 | ADAMTS12 | chr5  | - | 33523640 | 33892297 | 8774  |
| ENSG000001 | 161.7715 | 204.321  | -0.33426 | 0.093452  | 0.15263   | NUBPL    | chr14 | + | 31959162 | 32330430 | 5032  |
| ENSG000001 | 1977.754 | 162.9928 | 3.5939   | 1.91E-93  | 1.01E-91  | NEK7     | chr1  | + | 1.98E+08 | 1.98E+08 | 4149  |
| ENSG000001 | 605.889  | 171.6348 | 1.8143   | 1.91E-14  | 1.21E-13  | FER      | chr5  | + | 1.08E+08 | 1.09E+08 | 12119 |
| ENSG000001 | 416.8536 | 349.5648 | 0.25506  | 0.072977  | 0.12351   | VIPAS39  | chr14 | - | 77893018 | 77924295 | 2934  |
| ENSG000001 | 1726.601 | 622.5851 | 1.4707   | 9.89E-37  | 1.59E-35  | ANKRD50  | chr4  | - | 1.26E+08 | 1.26E+08 | 8794  |
| ENSG000001 | 713.5767 | 668.8164 | 0.093496 | 0.71212   | 0.78631   | UPF2     | chr10 | - | 11962021 | 12085169 | 5569  |
| ENSG000001 | 877.7256 | 1314.581 | -0.58104 | 8.01E-05  | 0.000231  | CDC123   | chr10 | + | 12237964 | 12292588 | 1542  |
| ENSG000001 | 304.17   | 146.4044 | 1.0541   | 3.67E-08  | 1.48E-07  | SCLT1    | chr4  | - | 1.3E+08  | 1.3E+08  | 3673  |
| ENSG000001 | 7.894606 | 25.96462 | -1.683   | 0.001005  | 0.002491  | CCDC3    | chr10 | - | 12938627 | 13141652 | 3180  |
| ENSG000001 | 49.06062 | 28.82782 | 0.76298  | 0.036691  | 0.067949  | C4orf33  | chr4  | + | 1.3E+08  | 1.3E+08  | 2862  |
| ENSG000001 | 2600.802 | 361.7821 | 2.8426   | 1.24E-152 | 1.46E-150 | FRMD4A   | chr10 | - | 13685706 | 14504141 | 6815  |
| ENSG000001 | 4.677336 | 8.644045 | -0.79475 | 0.37443   | 0.47868   | PTPRO    | chr12 | + | 15475331 | 15750333 | 5301  |
| ENSG000001 | 1180.716 | 147.4527 | 2.9958   | 1.39E-102 | 8.29E-101 | EPS8     | chr12 | - | 15773092 | 16035263 | 4061  |
| ENSG000001 | 349.6354 | 1298.462 | -1.8887  | 4.66E-31  | 6.20E-30  | ACAD8    | chr11 | + | 1.34E+08 | 1.34E+08 | 3315  |
| ENSG000001 | 366.0515 | 708.5243 | -0.94965 | 4.39E-08  | 1.77E-07  | THYN1    | chr11 | - | 1.34E+08 | 1.34E+08 | 1299  |
| ENSG000001 | 1148.852 | 815.5884 | 0.49387  | 6.30E-06  | 2.07E-05  | VPS26B   | chr11 | + | 1.34E+08 | 1.34E+08 | 3691  |
| ENSG000001 | 951.809  | 1399.336 | -0.55553 | 2.42E-06  | 8.34E-06  | NCAPD3   | chr11 | - | 1.34E+08 | 1.34E+08 | 5531  |
| ENSG000001 | 371.7124 | 185.041  | 1.0029   | 1.52E-07  | 5.86E-07  | VTI1A    | chr10 | + | 1.14E+08 | 1.15E+08 | 4131  |
| ENSG000001 | 372.716  | 478.105  | -0.35922 | 0.016942  | 0.033941  | QDPR     | chr4  | - | 17461884 | 17513857 | 1648  |
| ENSG000001 | 668.7347 | 314.2575 | 1.0856   | 7.39E-08  | 2.91E-07  | FAM160B1 | chr10 | + | 1.17E+08 | 1.17E+08 | 5806  |
| ENSG000001 | 100.1404 | 19.16893 | 2.364    | 2.77E-13  | 1.63E-12  | ANO4     | chr12 | + | 1.01E+08 | 1.02E+08 | 3909  |
| ENSG000001 | 31.34974 | 44.76865 | -0.51603 | 0.19146   | 0.27842   | TEX9     | chr15 | + | 56536207 | 56738195 | 4440  |
| ENSG000001 | 450.1371 | 710.2939 | -0.655   | 0.004801  | 0.01072   | QTRTD1   | chr3  | + | 1.14E+08 | 1.14E+08 | 4023  |
| ENSG000001 | 76.62961 | 65.76977 | 0.22118  | 0.38567   | 0.48992   | MMAA     | chr4  | + | 1.47E+08 | 1.47E+08 | 7068  |
| ENSG000001 | 1350.156 | 822.6028 | 0.71377  | 1.91E-07  | 7.28E-07  | ZNF827   | chr4  | - | 1.47E+08 | 1.47E+08 | 7463  |
| ENSG000001 | 0.685084 | 0        | 0.85004  | 0.63064   | NA        | POU4F2   | chr4  | + | 1.48E+08 | 1.48E+08 | 3144  |
| ENSG000001 | 1780.762 | 26.94146 | 6.0074   | 2.98E-192 | 6.11E-190 | EDNRA    | chr4  | + | 1.48E+08 | 1.48E+08 | 4135  |
| ENSG000001 | 9.969582 | 23.3352  | -1.181   | 0.036808  | 0.068142  | NR3C2    | chr4  | - | 1.49E+08 | 1.49E+08 | 5909  |
| ENSG000001 | 0.290301 | 0        | 0.4146   | 0.81455   | NA        | AKR1C6P  | chr10 | - | 4914093  | 4934167  | 983   |
| ENSG000001 | 6.930386 | 6.07054  | 0.1655   | 0.82966   | 0.88009   | AKR1C2   | chr10 | - | 5029967  | 5060223  | 3381  |
| ENSG000001 | 117.4403 | 628.1293 | -2.4118  | 2.70E-47  | 5.72E-46  | DPYSL4   | chr10 | + | 1.34E+08 | 1.34E+08 | 2729  |
| ENSG000001 | 0.342542 | 1322.408 | -10.793  | 1.98E-32  | 2.78E-31  | VENTX    | chr10 | + | 1.35E+08 | 1.35E+08 | 2911  |
| ENSG000001 | 23.86189 | 73.82562 | -1.6168  | 0.000111  | 0.000315  | ADAM8    | chr10 | - | 1.35E+08 | 1.35E+08 | 3279  |
| ENSG000001 | 1.939605 | 5.033005 | -1.2319  | 0.23461   | 0.32843   | ITIH2    | chr10 | + | 7745232  | 7791483  | 3193  |
| ENSG000001 | 234.5669 | 254.1506 | -0.11556 | 0.55926   | 0.65803   | KIN      | chr10 | - | 7795188  | 7829990  | 2081  |
| ENSG000001 | 62.6293  | 58.35178 | 0.097527 | 0.7206    | 0.7933    | PIGF     | chr2  | - | 46808076 | 46844258 | 3454  |
| ENSG000001 | 33.45462 | 22.49195 | 0.55996  | 0.1555    | 0.23411   | ANKAR    | chr2  | + | 1.91E+08 | 1.91E+08 | 4410  |
| ENSG000001 | 226.0334 | 28.454   | 2.9755   | 2.76E-32  | 3.85E-31  | INPP1    | chr2  | + | 1.91E+08 | 1.91E+08 | 2162  |
| ENSG000001 | 70.98984 | 113.0634 | -0.66964 | 0.004716  | 0.010544  | MFSD6    | chr2  | + | 1.91E+08 | 1.91E+08 | 4797  |
| ENSG000001 | 1103.559 | 628.8221 | 0.80995  | 5.68E-09  | 2.46E-08  | RNF144A  | chr2  | + | 7057523  | 7208417  | 5743  |
| ENSG000001 | 1223.136 | 420.8975 | 1.534    | 2.91E-15  | 1.94E-14  | ASAP2    | chr2  | + | 9346894  | 9545812  | 5712  |
| ENSG000001 | 762.6327 | 366.7861 | 1.0548   | 2.49E-13  | 1.47E-12  | ADAM17   | chr2  | - | 9628615  | 9695921  | 4349  |
| ENSG000001 | 968.8452 | 6.828788 | 7.1183   | 5.18E-92  | 2.65E-90  | FLI1     | chr11 | + | 1.29E+08 | 1.29E+08 | 5370  |
| ENSG000001 | 0.342542 | 3.711409 | -2.6724  | 0.062966  | 0.1088    | KCNJ1    | chr11 | - | 1.29E+08 | 1.29E+08 | 4074  |
| ENSG000001 | 3.350849 | 5.828512 | -0.73685 | 0.42784   | 0.53316   | TMEM45B  | chr11 | + | 1.3E+08  | 1.3E+08  | 2234  |
| ENSG000001 | 1365.323 | 1806.239 | -0.40327 | 0.001457  | 0.003526  | WWC2     | chr4  | + | 1.84E+08 | 1.84E+08 | 8826  |
| ENSG000001 | 526.6983 | 1224.692 | -1.2117  | 1.18E-07  | 4.57E-07  | MLF1IP   | chr4  | - | 1.86E+08 | 1.86E+08 | 1998  |
| ENSG000001 | 540.7668 | 254.7855 | 1.0825   | 1.71E-10  | 8.31E-10  | ACSL1    | chr4  | - | 1.86E+08 | 1.86E+08 | 3948  |
| ENSG000001 | 353.3623 | 843.8534 | -1.2535  | 1.67E-19  | 1.37E-18  | SLC25A4  | chr4  | + | 1.86E+08 | 1.86E+08 | 1666  |
| ENSG000001 | 53.38344 | 45.85461 | 0.22323  | 0.51285   | 0.61594   | AMN1     | chr12 | - | 31824071 | 31882108 | 2110  |
| ENSG000001 | 722.4327 | 587.7039 | 0.29733  | 0.016864  | 0.033796  | BICD1    | chr12 | + | 32259769 | 32536567 | 8811  |
| ENSG000001 | 675.96   | 1205.828 | -0.83504 | 5.58E-12  | 3.00E-11  | SAV1     | chr14 | - | 51098776 | 51135049 | 3063  |
| ENSG000001 | 11.19403 | 56.94855 | -2.318   | 3.43E-06  | 1.16E-05  | CCDC122  | chr13 | - | 44398045 | 44453827 | 3467  |
| ENSG000001 | 23.99645 | 15.38871 | 0.63561  | 0.18268   | 0.26759   | SERP2    | chr13 | + | 44947801 | 44971850 | 962   |
| ENSG000001 | 2053.953 | 862.9285 | 1.2479   | 7.38E-12  | 3.95E-11  | NBAS     | chr2  | - | 15307032 | 15701454 | 7281  |
| ENSG000001 | 69.27632 | 71.22359 | -0.03596 | 0.88951   | 0.9231    | ZNF385D  | chr3  | - | 21459915 | 22414812 | 4498  |
| ENSG000001 | 1.753786 | 2.073397 | -0.19746 | 0.89137   | 0.92458   | TDO2     | chr4  | + | 1.57E+08 | 1.57E+08 | 3139  |
| ENSG000001 | 365.9187 | 673.6633 | -0.87766 | 9.38E-09  | 3.99E-08  | GUF1     | chr4  | + | 44680444 | 44702943 | 4449  |

|                    |          |          |           |           |          |       |   |          |          |       |
|--------------------|----------|----------|-----------|-----------|----------|-------|---|----------|----------|-------|
| ENSG00000111.12044 | 0.997859 | 3.1981   | 0.000888  | 0.002224  | SLC35F4  | chr14 | - | 58030640 | 58448912 | 2700  |
| ENSG0000011.628766 | 13.27564 | -2.8098  | 0.001373  | 0.003334  | GABRA2   | chr4  | - | 46250444 | 46477247 | 5812  |
| ENSG0000013420.524 | 461.158  | 2.8725   | 5.93E-23  | 5.72E-22  | SACS     | chr13 | - | 23902965 | 24007841 | 15639 |
| ENSG0000011.669842 | 4.556329 | -1.2975  | 0.24945   | 0.3458    | PABPC3   | chr13 | + | 25670300 | 25673389 | 3090  |
| ENSG000001547.8451 | 498.3818 | 0.13717  | 0.37725   | 0.48137   | CENPJ    | chr13 | - | 25457171 | 25497018 | 4347  |
| ENSG00000165.2077  | 14.20394 | 2.1753   | 4.99E-09  | 2.17E-08  | FBXO4    | chr5  | + | 41925356 | 41941845 | 1731  |
| ENSG000001118.5698 | 75.80509 | 0.64135  | 0.034994  | 0.065133  | C5orf28  | chr5  | - | 43444354 | 43483995 | 2950  |
| ENSG0000011.89853  | 18.92778 | -3.1089  | 6.69E-05  | 0.000195  | CCL28    | chr5  | - | 43376747 | 43412493 | 3126  |
| ENSG000001530.3563 | 376.8823 | 0.49285  | 0.003696  | 0.008394  | PARP8    | chr5  | + | 49961733 | 50142356 | 7177  |
| ENSG0000012939.489 | 208.8295 | 3.8081   | 1.24E-103 | 7.58E-102 | GFRA1    | chr10 | - | 1.18E+08 | 1.18E+08 | 9216  |
| ENSG0000011110.917 | 1068.362 | 0.055804 | 0.69692   | 0.77397   | CACUL1   | chr10 | - | 1.2E+08  | 1.21E+08 | 6733  |
| ENSG0000015867.365 | 1394.868 | 2.0568   | 5.77E-11  | 2.91E-10  | DST      | chr6  | - | 56322785 | 56819426 | 24269 |
| ENSG000001206.9401 | 28.8158  | 2.8139   | 1.74E-24  | 1.78E-23  | BEND6    | chr6  | + | 56819773 | 56892140 | 3497  |
| ENSG0000011048.547 | 1041.756 | 0.009673 | 0.93565   | 0.95758   | TIAL1    | chr10 | - | 1.21E+08 | 1.21E+08 | 2321  |
| ENSG0000012251.183 | 649.7706 | 1.7865   | 3.61E-19  | 2.91E-18  | BAG3     | chr10 | + | 1.21E+08 | 1.21E+08 | 2571  |
| ENSG0000010.975385 | 383.1169 | -8.1918  | 2.39E-30  | 3.08E-29  | GLT1D1   | chr12 | + | 1.29E+08 | 1.29E+08 | 3010  |
| ENSG00000116.62067 | 380.0406 | -4.5192  | 1.69E-61  | 5.04E-60  | TMEM132C | chr12 | - | 1.3E+08  | 1.3E+08  | 5776  |
| ENSG0000010        | 5.758956 | -4.0861  | 0.00314   | 0.007219  | RBM46    | chr4  | + | 1.56E+08 | 1.56E+08 | 3626  |
| ENSG00000177.11754 | 14.05986 | 2.4363   | 6.75E-11  | 3.39E-10  | SCHIP1   | chr3  | + | 1.6E+08  | 1.6E+08  | 5949  |
| ENSG000001862.535  | 17.73327 | 5.5719   | 4.05E-123 | 3.32E-121 | LIX1L    | chr1  | + | 1.45E+08 | 1.46E+08 | 3979  |
| ENSG0000013.444166 | 0        | 3.2454   | 0.032803  | 0.061439  | MCHR2    | chr6  | - | 1E+08    | 1E+08    | 2368  |
| ENSG00000129.25683 | 8.499227 | 1.7305   | 0.001075  | 0.002652  | NBPF11   | chr1  | - | 1.46E+08 | 1.46E+08 | 5642  |
| ENSG000001393.3784 | 1.372552 | 7.9017   | 7.91E-34  | 1.16E-32  | KCNE4    | chr2  | + | 2.24E+08 | 2.24E+08 | 3291  |
| ENSG00000130.05495 | 204.6463 | -2.7657  | 4.27E-28  | 5.06E-27  | AP1S3    | chr2  | - | 2.25E+08 | 2.25E+08 | 2515  |
| ENSG000001391.6647 | 1105.798 | -1.4944  | 8.28E-37  | 1.33E-35  | RABGAP1L | chr1  | + | 1.74E+08 | 1.75E+08 | 6821  |
| ENSG000001124.7377 | 107.3998 | 0.212    | 0.36361   | 0.46786   | CCDC74B  | chr2  | - | 1.31E+08 | 1.31E+08 | 3385  |
| ENSG000001192.044  | 72.4385  | 1.3929   | 9.07E-06  | 2.93E-05  | TMEM56   | chr1  | + | 95582894 | 95663163 | 6822  |
| ENSG000001183.2105 | 112.0632 | 0.70168  | 0.00147   | 0.003556  | MZT2B    | chr2  | + | 1.31E+08 | 1.31E+08 | 933   |
| ENSG0000011.317927 | 0.951736 | 0.33945  | 0.82592   | 0.87738   | TUBA3E   | chr2  | - | 1.31E+08 | 1.31E+08 | 1540  |
| ENSG00000130.53466 | 75.32909 | -1.2927  | 0.000219  | 0.000596  | ASTN1    | chr1  | - | 1.77E+08 | 1.77E+08 | 7122  |
| ENSG0000014209.863 | 2441.501 | 0.785    | 2.28E-09  | 1.02E-08  | FAM168B  | chr2  | - | 1.32E+08 | 1.32E+08 | 5285  |
| ENSG0000011957.86  | 725.4794 | 1.4302   | 1.59E-26  | 1.77E-25  | PTPN14   | chr1  | - | 2.15E+08 | 2.15E+08 | 5552  |
| ENSG000001377.2294 | 487.1536 | -0.36743 | 0.016276  | 0.032733  | AC093838 | chr2  | + | 1.32E+08 | 1.32E+08 | 3785  |
| ENSG0000011954.697 | 1124.068 | 0.7973   | 3.38E-15  | 2.24E-14  | MGAT5    | chr2  | + | 1.35E+08 | 1.35E+08 | 8252  |
| ENSG00000161.35743 | 8.637597 | 2.7865   | 4.61E-10  | 2.18E-09  | TMEM163  | chr2  | - | 1.35E+08 | 1.35E+08 | 5078  |
| ENSG000001279.7191 | 85.17663 | 1.7118   | 2.87E-19  | 2.33E-18  | GPATCH11 | chr2  | + | 37311594 | 37326387 | 3906  |
| ENSG00000171.06776 | 112.1796 | -0.65103 | 0.007069  | 0.015295  | HSPB8    | chr12 | + | 1.2E+08  | 1.2E+08  | 2150  |
| ENSG000001109.6237 | 160.1828 | -0.54526 | 0.005364  | 0.011877  | GEMIN6   | chr2  | + | 38978676 | 39009598 | 1210  |
| ENSG00000148.25826 | 190.7218 | -1.9686  | 4.44E-14  | 2.74E-13  | TMEM178A | chr2  | + | 39892122 | 39945103 | 1662  |
| ENSG0000010.342542 | 9.544753 | -3.8157  | 0.00577   | 0.012685  | POU4F1   | chr13 | - | 79173227 | 79177673 | 3795  |
| ENSG000001148.3723 | 195.2549 | -0.39274 | 0.19944   | 0.28792   | RNF219   | chr13 | - | 79188426 | 79233314 | 3529  |
| ENSG0000011.233984 | 0        | 1.5686   | 0.37707   | NA        | CYSLTR2  | chr13 | + | 49280951 | 49283498 | 2548  |
| ENSG0000012.749709 | 588.507  | -7.6301  | 3.87E-51  | 9.12E-50  | GRID2    | chr4  | + | 93225550 | 94695707 | 5340  |
| ENSG0000011.068702 | 12.9196  | -3.3622  | 0.000598  | 0.001534  | ARL11    | chr13 | + | 50202435 | 50208008 | 3760  |
| ENSG0000010        | 10.04982 | -4.9019  | 0.000146  | 0.000408  | RIT2     | chr18 | - | 40323192 | 40695657 | 1156  |
| ENSG000001497.3403 | 178.4067 | 1.4737   | 3.08E-13  | 1.81E-12  | SETBP1   | chr18 | + | 42260138 | 42648475 | 9899  |
| ENSG000001266.1917 | 242.0712 | 0.13757  | 0.39507   | 0.49958   | ARL14EP  | chr11 | + | 30344598 | 30359774 | 3417  |
| ENSG000001785.5407 | 530.9456 | 0.56551  | 1.38E-05  | 4.37E-05  | EPG5     | chr18 | - | 43427574 | 43547240 | 12633 |
| ENSG000001129.8699 | 53.63352 | 1.2742   | 5.67E-08  | 2.26E-07  | PSTPIP2  | chr18 | - | 43563502 | 43652238 | 3000  |
| ENSG0000017165.89  | 10442.85 | -0.54274 | 8.19E-07  | 2.94E-06  | ATP5A1   | chr18 | - | 43664110 | 43684300 | 4547  |
| ENSG000001449.2311 | 706.6674 | -0.65207 | 7.36E-07  | 2.66E-06  | HAUS1    | chr18 | + | 43684298 | 43708299 | 1125  |
| ENSG000001327.7909 | 491.3684 | -0.58321 | 0.000151  | 0.000422  | C18orf25 | chr18 | + | 43753519 | 43846949 | 5454  |
| ENSG000001197.3616 | 344.1541 | -0.80117 | 1.17E-07  | 4.54E-07  | SPC25    | chr2  | - | 1.7E+08  | 1.7E+08  | 1354  |
| ENSG0000010        | 0.297015 | -0.41864 | 0.81278   | NA        | G6PC2    | chr2  | + | 1.7E+08  | 1.7E+08  | 2913  |
| ENSG000001148.6058 | 239.3314 | -0.68239 | 0.00416   | 0.009371  | PDK1     | chr2  | + | 1.73E+08 | 1.73E+08 | 2987  |
| ENSG0000010        | 0.343138 | -0.41864 | 0.81278   | NA        | PTH      | chr11 | - | 13513602 | 13517728 | 813   |
| ENSG000001219.8482 | 350.1216 | -0.66845 | 0.000109  | 0.000308  | SPON1    | chr11 | + | 13983914 | 14289646 | 5372  |
| ENSG000001127.7566 | 278.9037 | -1.1227  | 7.64E-09  | 3.27E-08  | PDE3B    | chr11 | + | 14665269 | 14892350 | 5521  |
| ENSG000001797.7984 | 4342.345 | -2.4413  | 8.45E-107 | 5.39E-105 | TCF7L1   | chr2  | + | 85360533 | 85537511 | 2968  |
| ENSG0000013714.3   | 1664.282 | 1.1571   | 1.34E-19  | 1.10E-18  | TGOLN2   | chr2  | - | 85545147 | 85555548 | 6489  |
| ENSG0000010.975385 | 2.840639 | -1.2904  | 0.32963   | 0.43268   | SH2D6    | chr2  | + | 85645844 | 85664152 | 1975  |
| ENSG00000111.32761 | 9.078687 | 0.2949   | 0.64798   | 0.73403   | KCNK13   | chr14 | + | 90528109 | 90652201 | 2522  |
| ENSG0000011140.525 | 694.6029 | 0.71315  | 9.38E-05  | 0.000268  | UHMK1    | chr1  | + | 1.62E+08 | 1.62E+08 | 8478  |
| ENSG000001113.8977 | 186.3855 | -0.70837 | 0.001991  | 0.004714  | ATG10    | chr5  | + | 81267844 | 81572676 | 3033  |
| ENSG000001167.4317 | 139.1434 | 0.26663  | 0.3003    | 0.40185   | POC5     | chr5  | - | 74969949 | 75013313 | 2229  |

|            |          |          |          |           |           |           |       |   |          |          |       |
|------------|----------|----------|----------|-----------|-----------|-----------|-------|---|----------|----------|-------|
| ENSG000001 | 1450.442 | 260.4602 | 2.4733   | 2.96E-68  | 1.04E-66  | SPOCK1    | chr5  | - | 1.36E+08 | 1.37E+08 | 4846  |
| ENSG000001 | 35.78127 | 3.665285 | 3.1929   | 1.08E-07  | 4.20E-07  | FAM151B   | chr5  | + | 79783788 | 79838382 | 2185  |
| ENSG000001 | 221.6972 | 374.8327 | -0.75673 | 1.32E-06  | 4.68E-06  | TADA1     | chr1  | - | 1.67E+08 | 1.67E+08 | 2539  |
| ENSG000001 | 97.60837 | 14.95091 | 2.6884   | 9.07E-16  | 6.21E-15  | GUCY1A2   | chr11 | - | 1.07E+08 | 1.07E+08 | 5795  |
| ENSG000001 | 196.7957 | 394.6592 | -0.99922 | 4.56E-07  | 1.68E-06  | CWF19L2   | chr11 | - | 1.07E+08 | 1.07E+08 | 3278  |
| ENSG000001 | 348.6803 | 511.2894 | -0.55066 | 0.000714  | 0.00181   | JMY       | chr5  | + | 78532012 | 78623038 | 9042  |
| ENSG000001 | 700.0855 | 897.5683 | -0.35773 | 0.002008  | 0.004751  | HOMER1    | chr5  | - | 78668459 | 78810040 | 5881  |
| ENSG000001 | 92.24832 | 135.5566 | -0.54654 | 0.056262  | 0.098638  | XRCC4     | chr5  | + | 82373317 | 82649606 | 1696  |
| ENSG000001 | 0        | 3.137654 | -3.0959  | 0.046868  | 0.084094  | BOLL      | chr2  | - | 1.99E+08 | 1.99E+08 | 3135  |
| ENSG000001 | 12.89557 | 16.18905 | -0.31679 | 0.67044   | 0.75302   | ZNF547    | chr19 | + | 57874845 | 57890933 | 2739  |
| ENSG000001 | 61.34226 | 72.03043 | -0.23299 | 0.40248   | 0.50728   | ZNF773    | chr19 | + | 58011283 | 58029772 | 5832  |
| ENSG000001 | 182.4999 | 293.5719 | -0.68246 | 0.002408  | 0.005625  | ZNF776    | chr19 | + | 58258164 | 58269527 | 5292  |
| ENSG000001 | 80.73913 | 224.7096 | -1.4744  | 5.04E-14  | 3.10E-13  | ZNF256    | chr19 | - | 58452201 | 58459043 | 2172  |
| ENSG000001 | 246.0942 | 306.4016 | -0.31444 | 0.18633   | 0.27208   | SUV39H2   | chr10 | + | 14920819 | 14946314 | 3087  |
| ENSG000001 | 308.7384 | 138.9468 | 1.1502   | 1.17E-09  | 5.37E-09  | DCLRE1C   | chr10 | - | 14939358 | 14996431 | 3674  |
| ENSG000001 | 0        | 0.594029 | -0.81444 | 0.64499   | NA        | OLAH      | chr10 | + | 15074226 | 15115851 | 1767  |
| ENSG000001 | 62.36566 | 110.5423 | -0.81532 | 0.000753  | 0.001903  | RPP38     | chr10 | + | 15139179 | 15181817 | 1457  |
| ENSG000001 | 331.3231 | 276.1201 | 0.26158  | 0.10055   | 0.16226   | NMT2      | chr10 | - | 15144583 | 15210692 | 2907  |
| ENSG000001 | 0        | 4.286036 | -3.3269  | 0.037899  | 0.069958  | ZSCAN1    | chr19 | + | 58545400 | 58565999 | 2054  |
| ENSG000001 | 151.049  | 209.1152 | -0.46687 | 0.013055  | 0.026791  | ZNF837    | chr19 | - | 58878985 | 58892427 | 2038  |
| ENSG000001 | 561.7585 | 495.0263 | 0.18167  | 0.19159   | 0.27854   | USP12     | chr13 | - | 27640293 | 27746033 | 4497  |
| ENSG000001 | 4.87432  | 6.445232 | -0.35376 | 0.70466   | 0.78051   | ARL5B-AS1 | chr10 | - | 18940195 | 18948196 | 689   |
| ENSG000001 | 1111.595 | 524.4359 | 1.082    | 2.21E-15  | 1.48E-14  | CCDC50    | chr3  | + | 1.91E+08 | 1.91E+08 | 8429  |
| ENSG000001 | 841.6173 | 118.2466 | 2.8243   | 4.81E-37  | 7.80E-36  | CAMK4     | chr5  | + | 1.11E+08 | 1.11E+08 | 12240 |
| ENSG000001 | 12.17797 | 211.5097 | -4.0847  | 1.34E-37  | 2.20E-36  | TRIM36    | chr5  | - | 1.14E+08 | 1.15E+08 | 4218  |
| ENSG000001 | 1398.83  | 1771.856 | -0.33797 | 0.30802   | 0.40978   | ZFP36L2   | chr2  | - | 43449541 | 43453748 | 3696  |
| ENSG000001 | 576.3806 | 533.16   | 0.11096  | 0.39531   | 0.49983   | PAN3      | chr13 | + | 28712643 | 28869475 | 4940  |
| ENSG000001 | 276.8746 | 142.0904 | 0.95746  | 0.000347  | 0.00092   | PLEKHH2   | chr2  | + | 43864412 | 43995126 | 6981  |
| ENSG000001 | 1497.246 | 1862.654 | -0.31463 | 0.032027  | 0.060143  | PFKM      | chr12 | + | 48498922 | 48540187 | 3579  |
| ENSG000001 | 1419.706 | 1769.974 | -0.31698 | 0.01059   | 0.022141  | TMEM123   | chr11 | - | 1.02E+08 | 1.02E+08 | 3579  |
| ENSG000001 | 3.953782 | 222.3174 | -5.7046  | 1.00E-32  | 1.42E-31  | GRIA4     | chr11 | + | 1.05E+08 | 1.06E+08 | 5621  |
| ENSG000001 | 56.23844 | 16.78798 | 1.7343   | 2.66E-06  | 9.11E-06  | IGSF10    | chr3  | - | 1.51E+08 | 1.51E+08 | 11067 |
| ENSG000001 | 46.67399 | 6.29874  | 2.8382   | 2.23E-09  | 9.96E-09  | SPEF2     | chr5  | + | 35617946 | 35814713 | 6246  |
| ENSG000001 | 3.681413 | 8.576905 | -1.1094  | 0.19888   | 0.28721   | SPARCL1   | chr4  | - | 88394487 | 88452213 | 2994  |
| ENSG000001 | 3.951176 | 2.947455 | 0.40424  | 0.70356   | 0.77953   | DMP1      | chr4  | + | 88571459 | 88585513 | 2682  |
| ENSG000001 | 0        | 1.698704 | -2.2257  | 0.18075   | NA        | MEPE      | chr4  | + | 88742563 | 88767969 | 2226  |
| ENSG000001 | 1622.338 | 140.5679 | 3.5236   | 1.67E-119 | 1.29E-117 | MBNL1     | chr3  | + | 1.52E+08 | 1.52E+08 | 6422  |
| ENSG000001 | 0.36308  | 0        | 0.4146   | 0.81455   | NA        | CAPSL     | chr5  | - | 35904397 | 35938881 | 1004  |
| ENSG000001 | 1201.952 | 192.4658 | 2.6364   | 2.53E-70  | 9.15E-69  | NADKD1    | chr5  | - | 36192694 | 36242381 | 3614  |
| ENSG000001 | 141.6242 | 66.83482 | 1.075    | 1.24E-06  | 4.38E-06  | GPD1L     | chr3  | + | 32147181 | 32210205 | 4060  |
| ENSG000001 | 3894.77  | 9808.66  | -1.33    | 1.49E-18  | 1.16E-17  | GJA1      | chr6  | + | 1.22E+08 | 1.22E+08 | 3037  |
| ENSG000001 | 3.76617  | 2.962024 | 0.29838  | 0.76971   | 0.83373   | CCNO      | chr5  | - | 54526980 | 54529508 | 1726  |
| ENSG000001 | 0        | 2.24661  | -2.6365  | 0.10117   | 0.16301   | DDX4      | chr5  | + | 55033845 | 55112985 | 2884  |
| ENSG000001 | 480.1461 | 434.9007 | 0.14235  | 0.41063   | 0.51547   | SLC30A6   | chr2  | + | 32390933 | 32449448 | 5089  |
| ENSG000001 | 543.014  | 425.5989 | 0.35061  | 0.007245  | 0.015627  | PELO      | chr5  | + | 52083774 | 52099880 | 4349  |
| ENSG000001 | 64.05864 | 4.49322  | 3.7262   | 1.48E-13  | 8.83E-13  | RASGRP3   | chr2  | + | 33661391 | 33789817 | 4807  |
| ENSG000001 | 722.5681 | 330.4784 | 1.1268   | 2.23E-13  | 1.32E-12  | SAR1B     | chr5  | - | 1.34E+08 | 1.34E+08 | 6682  |
| ENSG000001 | 2.085163 | 2.232041 | -0.12272 | 0.9189    | 0.94537   | CATSPER3  | chr5  | + | 1.34E+08 | 1.34E+08 | 1362  |
| ENSG000001 | 19.78407 | 11.42641 | 0.78362  | 0.1271    | 0.19804   | FAM21B    | chr10 | + | 47894023 | 47949412 | 4231  |
| ENSG000001 | 625.8532 | 205.1504 | 1.6089   | 5.06E-29  | 6.21E-28  | GPR180    | chr13 | + | 95254157 | 95286899 | 8822  |
| ENSG000001 | 17.49076 | 10.07084 | 0.78575  | 0.14122   | 0.21541   | TCTEX1D1  | chr1  | + | 67218142 | 67244470 | 2001  |
| ENSG000001 | 26.97126 | 11.73396 | 1.1678   | 0.022655  | 0.04417   | WDR78     | chr1  | - | 67278568 | 67390570 | 4206  |
| ENSG000001 | 0        | 0.686276 | -0.84936 | 0.6309    | NA        | ANKRD22   | chr10 | - | 90581889 | 90611575 | 1596  |
| ENSG000001 | 5831.956 | 3139.518 | 0.89264  | 1.24E-22  | 1.17E-21  | FARP1     | chr13 | + | 98794816 | 99102027 | 8209  |
| ENSG000001 | 215.9726 | 55.83079 | 1.9465   | 2.08E-13  | 1.23E-12  | IFIT5     | chr10 | + | 91174343 | 91180758 | 4015  |
| ENSG000001 | 0        | 202.8184 | -9.0739  | 6.62E-17  | 4.82E-16  | SLC16A12  | chr10 | - | 91190051 | 91316398 | 4622  |
| ENSG000001 | 172.9131 | 352.4851 | -1.0271  | 2.55E-11  | 1.32E-10  | PANK1     | chr10 | - | 91342745 | 91405215 | 3367  |
| ENSG000001 | 707.9992 | 3.054271 | 7.7462   | 1.61E-60  | 4.71E-59  | PRDM8     | chr4  | + | 81105033 | 81125483 | 4095  |
| ENSG000001 | 4.93854  | 14.8878  | -1.5282  | 0.027909  | 0.053261  | BMP3      | chr4  | + | 81952119 | 81978685 | 5734  |
| ENSG000001 | 4440.718 | 4460.109 | -0.00621 | 0.98015   | 0.98907   | HNRPDL    | chr4  | - | 83343717 | 83351294 | 3781  |
| ENSG000001 | 54.4924  | 87.10521 | -0.66966 | 0.009658  | 0.020356  | HHEX      | chr10 | + | 94447945 | 94455403 | 3490  |
| ENSG000001 | 2591.108 | 1847.991 | 0.48661  | 0.009208  | 0.019479  | UTRN      | chr6  | + | 1.45E+08 | 1.45E+08 | 12339 |
| ENSG000001 | 12.44692 | 6.78837  | 0.83966  | 0.2208    | 0.31281   | GRM1      | chr6  | + | 1.46E+08 | 1.47E+08 | 6939  |
| ENSG000001 | 1278.419 | 914.8104 | 0.4827   | 0.000153  | 0.000427  | PTPRK     | chr6  | - | 1.28E+08 | 1.29E+08 | 6188  |
| ENSG000001 | 574.4379 | 627.6422 | -0.12866 | 0.37243   | 0.4769    | GGPS1     | chr1  | + | 2.35E+08 | 2.36E+08 | 2895  |

|            |          |          |          |           |           |           |       |   |          |          |       |
|------------|----------|----------|----------|-----------|-----------|-----------|-------|---|----------|----------|-------|
| ENSG000001 | 105.3044 | 88.42909 | 0.25182  | 0.35342   | 0.45773   | ZNF117    | chr7  | - | 64438360 | 64467062 | 2874  |
| ENSG000001 | 1.794048 | 0.654722 | 1.1029   | 0.47589   | 0.58049   | PART1     | chr5  | + | 59783540 | 59843484 | 2316  |
| ENSG000001 | 21.54804 | 88.67515 | -2.0347  | 2.21E-09  | 9.88E-09  | RAB3C     | chr5  | + | 57878048 | 58155213 | 8888  |
| ENSG000001 | 0        | 0.686276 | -0.84936 | 0.6309    | NA        | IFLTD1    | chr12 | - | 25562241 | 25801513 | 1729  |
| ENSG000001 | 17.58245 | 419.0362 | -4.5171  | 2.05E-47  | 4.36E-46  | MARVELD2  | chr5  | + | 68710939 | 68740157 | 4376  |
| ENSG000001 | 286.6599 | 346.2426 | -0.27061 | 0.084071  | 0.13947   | RAD17     | chr5  | + | 68665120 | 68710628 | 3233  |
| ENSG000001 | 358.2371 | 300.141  | 0.25516  | 0.17561   | 0.25886   | MED21     | chr12 | + | 27175479 | 27219276 | 1753  |
| ENSG000001 | 3437.531 | 465.0208 | 2.8812   | 6.92E-69  | 2.44E-67  | PLOD2     | chr3  | - | 1.46E+08 | 1.46E+08 | 3835  |
| ENSG000001 | 1297.175 | 16.67304 | 6.2844   | 4.91E-142 | 5.02E-140 | STK32B    | chr4  | + | 5053169  | 5502725  | 3582  |
| ENSG000001 | 0.342542 | 1.920457 | -1.7057  | 0.29613   | 0.39817   | NRSN1     | chr6  | + | 24126350 | 24155128 | 2354  |
| ENSG000001 | 0        | 69.09701 | -7.5815  | 2.90E-11  | 1.49E-10  | JAKMIP1   | chr4  | - | 6027926  | 6202318  | 2975  |
| ENSG000001 | 2750.61  | 1069.764 | 1.3601   | 9.12E-20  | 7.61E-19  | ZIC1      | chr3  | + | 1.47E+08 | 1.47E+08 | 5241  |
| ENSG000001 | 1776.982 | 1266.15  | 0.48844  | 1.12E-06  | 3.97E-06  | GPR125    | chr4  | - | 22346694 | 22517677 | 4557  |
| ENSG000001 | 1.359003 | 0        | 1.8987   | 0.26617   | NA        | CPB1      | chr3  | + | 1.49E+08 | 1.49E+08 | 3574  |
| ENSG000001 | 522.0395 | 428.9608 | 0.2828   | 0.03586   | 0.066612  | SREK1IP1  | chr5  | - | 64016338 | 64064512 | 4509  |
| ENSG000001 | 101.8678 | 257.6567 | -1.33    | 1.32E-12  | 7.43E-12  | LGI2      | chr4  | - | 25000469 | 25032501 | 6428  |
| ENSG000001 | 747.2671 | 777.3217 | -0.05582 | 0.73861   | 0.80727   | CWC27     | chr5  | + | 64064757 | 64314590 | 2103  |
| ENSG000001 | 9.980747 | 1.949596 | 2.1577   | 0.026404  | 0.050678  | MR1       | chr1  | + | 1.81E+08 | 1.81E+08 | 7704  |
| ENSG000001 | 99.58645 | 91.07543 | 0.13111  | 0.6459    | 0.73253   | SRP19     | chr5  | + | 1.12E+08 | 1.12E+08 | 2841  |
| ENSG000001 | 278.0936 | 1004.193 | -1.8509  | 7.39E-33  | 1.05E-31  | CENPH     | chr5  | + | 68485375 | 68506184 | 1389  |
| ENSG000001 | 475.0712 | 1307.957 | -1.4582  | 3.02E-27  | 3.47E-26  | CDYL      | chr6  | + | 4706393  | 4955785  | 3419  |
| ENSG000001 | 608.7979 | 1903.654 | -1.642   | 9.27E-27  | 1.04E-25  | CARHSP1   | chr16 | - | 8946799  | 8962866  | 3026  |
| ENSG000001 | 1.048164 | 4.288452 | -1.8134  | 0.12353   | 0.19357   | TEK5      | chr16 | - | 10721358 | 10788802 | 1612  |
| ENSG000001 | 18.6769  | 9.721256 | 0.89968  | 0.15878   | 0.23817   | BANK1     | chr4  | + | 1.02E+08 | 1.03E+08 | 3544  |
| ENSG000001 | 451.8211 | 146.7542 | 1.6215   | 1.65E-24  | 1.70E-23  | TXNDC11   | chr16 | - | 11772936 | 11836734 | 3178  |
| ENSG000001 | 1386.693 | 90.87873 | 3.9233   | 7.93E-77  | 3.20E-75  | DAB2      | chr5  | - | 39371780 | 39462402 | 4534  |
| ENSG000001 | 8.475209 | 2.07098  | 1.9199   | 0.036068  | 0.066958  | ACMSD     | chr2  | + | 1.36E+08 | 1.36E+08 | 1936  |
| ENSG000001 | 2.842212 | 78.9232  | -4.6259  | 1.24E-16  | 8.87E-16  | ACOXL     | chr2  | + | 1.11E+08 | 1.12E+08 | 2714  |
| ENSG000001 | 410.2939 | 442.1864 | -0.10938 | 0.40185   | 0.50661   | BCL2L11   | chr2  | + | 1.12E+08 | 1.12E+08 | 5086  |
| ENSG000001 | 899.0868 | 1776.764 | -0.98137 | 3.21E-21  | 2.86E-20  | ANAPC1    | chr2  | - | 1.13E+08 | 1.13E+08 | 8259  |
| ENSG000001 | 1689.996 | 349.7851 | 2.2712   | 3.32E-96  | 1.81E-94  | CAST      | chr5  | + | 95865525 | 96115299 | 4629  |
| ENSG000001 | 650.7703 | 382.2832 | 0.76685  | 2.49E-08  | 1.02E-07  | SCOC      | chr4  | + | 1.41E+08 | 1.41E+08 | 2193  |
| ENSG000001 | 48.55296 | 60.20175 | -0.30283 | 0.36478   | 0.4692    | CLGN      | chr4  | - | 1.41E+08 | 1.41E+08 | 3043  |
| ENSG000001 | 132.4671 | 314.2211 | -1.2415  | 3.29E-08  | 1.34E-07  | CETN3     | chr5  | - | 89688078 | 89705603 | 2432  |
| ENSG000001 | 1853.441 | 3437.96  | -0.88976 | 7.41E-10  | 3.46E-09  | SMARCA5   | chr4  | + | 1.44E+08 | 1.44E+08 | 7923  |
| ENSG000001 | 12.6858  | 57.5895  | -2.1471  | 5.37E-07  | 1.97E-06  | SYCP2L    | chr6  | + | 10748027 | 10979553 | 3130  |
| ENSG000001 | 24.31324 | 20.79969 | 0.23061  | 0.62321   | 0.71358   | BMP6      | chr6  | + | 7727030  | 7881655  | 2780  |
| ENSG000001 | 5.45655  | 2.010288 | 1.3061   | 0.20163   | 0.2903    | RGPD3     | chr2  | - | 1.07E+08 | 1.07E+08 | 5594  |
| ENSG000001 | 498.4868 | 761.2342 | -0.61062 | 8.65E-05  | 0.000248  | RASSF3    | chr12 | + | 65004293 | 65091347 | 3492  |
| ENSG000001 | 7342.565 | 10061.62 | -0.45296 | 0.028115  | 0.053611  | HNRNPU    | chr1  | - | 2.45E+08 | 2.45E+08 | 5940  |
| ENSG000001 | 2810.114 | 2269.302 | 0.30662  | 0.28511   | 0.38648   | RANBP2    | chr2  | + | 1.09E+08 | 1.09E+08 | 11711 |
| ENSG000001 | 1225.657 | 961.661  | 0.35019  | 0.026269  | 0.050435  | AHCTF1    | chr1  | - | 2.47E+08 | 2.47E+08 | 8751  |
| ENSG000001 | 185.7721 | 149.0642 | 0.31541  | 0.24835   | 0.3446    | MERTK     | chr2  | + | 1.13E+08 | 1.13E+08 | 3954  |
| ENSG000001 | 1559.086 | 235.5227 | 2.7206   | 3.55E-66  | 1.20E-64  | TMEM87B   | chr2  | + | 1.13E+08 | 1.13E+08 | 5212  |
| ENSG000001 | 5.766575 | 12.03662 | -0.97799 | 0.26087   | 0.35889   | PTPRR     | chr12 | - | 71031853 | 71314623 | 3529  |
| ENSG000001 | 32.1975  | 15.47209 | 1.0425   | 0.017363  | 0.034727  | NR4A2     | chr2  | - | 1.57E+08 | 1.57E+08 | 3472  |
| ENSG000001 | 3.350849 | 7.051414 | -1.0171  | 0.26186   | 0.36001   | CCDC148   | chr2  | - | 1.59E+08 | 1.59E+08 | 3122  |
| ENSG000001 | 239.224  | 42.12943 | 2.4994   | 5.05E-31  | 6.71E-30  | PLA2R1    | chr2  | - | 1.61E+08 | 1.61E+08 | 8526  |
| ENSG000001 | 1608.84  | 1478.108 | 0.12224  | 0.22246   | 0.31471   | RBMS1     | chr2  | - | 1.61E+08 | 1.61E+08 | 4273  |
| ENSG000001 | 4.253456 | 1.029414 | 1.7557   | 0.1669    | 0.2482    | SCN3A     | chr2  | - | 1.66E+08 | 1.66E+08 | 9123  |
| ENSG000001 | 0        | 1.920457 | -2.1803  | 0.20711   | 0.29682   | FEZF2     | chr3  | - | 62355356 | 62359999 | 2074  |
| ENSG000001 | 1.608228 | 1.964165 | -0.22788 | 0.87084   | 0.90983   | CD96      | chr3  | + | 1.11E+08 | 1.11E+08 | 4324  |
| ENSG000001 | 60.8747  | 69.87789 | -0.19885 | 0.59985   | 0.69386   | SLC25A27  | chr6  | + | 46620678 | 46645930 | 2963  |
| ENSG000001 | 168.6996 | 0        | 8.8397   | 2.94E-16  | 2.06E-15  | GPR110    | chr6  | - | 46965440 | 47010099 | 9130  |
| ENSG000001 | 0        | 0.997859 | -1.5018  | 0.39072   | NA        | FRMD1     | chr6  | - | 1.68E+08 | 1.68E+08 | 4677  |
| ENSG000001 | 510.726  | 1002.662 | -0.97103 | 5.62E-14  | 3.44E-13  | FAM49B    | chr8  | - | 1.31E+08 | 1.31E+08 | 4552  |
| ENSG000001 | 2085.892 | 727.6361 | 1.5171   | 9.11E-46  | 1.86E-44  | ASAP1     | chr8  | - | 1.31E+08 | 1.31E+08 | 6042  |
| ENSG000001 | 517.0099 | 683.0337 | -0.40104 | 0.001723  | 0.004122  | TRAPPC8   | chr18 | - | 29409136 | 29533099 | 6226  |
| ENSG000001 | 20.13598 | 61.9222  | -1.5968  | 0.000158  | 0.000439  | LINC00467 | chr1  | + | 2.12E+08 | 2.12E+08 | 711   |
| ENSG000001 | 209.1294 | 223.2803 | -0.09235 | 0.58182   | 0.67817   | INO80C    | chr18 | - | 33032194 | 33077955 | 3245  |
| ENSG000001 | 2462.79  | 6669.418 | -1.4358  | 1.06E-32  | 1.49E-31  | LPCAT1    | chr5  | - | 1456595  | 1524092  | 5610  |
| ENSG000001 | 449.4064 | 1077.345 | -1.2608  | 6.42E-23  | 6.18E-22  | PLEKHG4B  | chr5  | + | 140373   | 190085   | 11513 |
| ENSG000001 | 713.022  | 881.0488 | -0.30468 | 0.009786  | 0.020604  | NMRAL1    | chr16 | - | 4511681  | 4545764  | 1719  |
| ENSG000001 | 616.4497 | 1165.649 | -0.9173  | 1.77E-16  | 1.26E-15  | UBALD1    | chr16 | - | 4658884  | 4665028  | 2641  |
| ENSG000001 | 2.157128 | 7.313585 | -1.5864  | 0.089784  | 0.14744   | C16orf89  | chr16 | - | 5094123  | 5116111  | 1872  |

|            |          |          |          |           |           |           |       |   |          |          |      |
|------------|----------|----------|----------|-----------|-----------|-----------|-------|---|----------|----------|------|
| ENSG000001 | 43.63659 | 91.78702 | -1.0733  | 0.000224  | 0.00061   | TMEM251   | chr14 | + | 93651296 | 93653434 | 1303 |
| ENSG000001 | 500.8649 | 619.1422 | -0.30588 | 0.024624  | 0.047597  | ING1      | chr13 | + | 1.11E+08 | 1.11E+08 | 2870 |
| ENSG000001 | 7.241225 | 1.684135 | 1.951    | 0.041357  | 0.075452  | TEX29     | chr13 | + | 1.12E+08 | 1.12E+08 | 835  |
| ENSG000001 | 19.61618 | 15.42026 | 0.34909  | 0.48154   | 0.58585   | ADPRHL1   | chr13 | - | 1.14E+08 | 1.14E+08 | 1872 |
| ENSG000001 | 466.9675 | 375.5572 | 0.31382  | 0.01482   | 0.030052  | CMTM7     | chr3  | + | 32433163 | 32524559 | 2066 |
| ENSG000001 | 211.473  | 55.53699 | 1.9243   | 3.77E-19  | 3.04E-18  | FBXL2     | chr3  | + | 33318517 | 33445154 | 3847 |
| ENSG000001 | 1492.804 | 903.4394 | 0.72252  | 0.000223  | 0.000605  | UBP1      | chr3  | - | 33429828 | 33482863 | 7394 |
| ENSG000001 | 514.3693 | 1687.968 | -1.7136  | 1.27E-58  | 3.56E-57  | RMND5A    | chr2  | + | 86947296 | 87005164 | 6301 |
| ENSG000001 | 0.36308  | 4.602452 | -3.0046  | 0.028935  | 0.054974  | CD8A      | chr2  | - | 87011729 | 87035519 | 3048 |
| ENSG000001 | 457.5501 | 422.5901 | 0.11341  | 0.41276   | 0.51758   | RPIA      | chr2  | + | 88991162 | 89050452 | 1848 |
| ENSG000001 | 327.5304 | 405.1899 | -0.3053  | 0.067923  | 0.1161    | TUBGCP5   | chr15 | + | 22833395 | 22873892 | 3849 |
| ENSG000001 | 0.72616  | 4.035145 | -2.058   | 0.13436   | 0.20734   | GOLGA8I   | chr15 | + | 23255242 | 23268823 | 5264 |
| ENSG000001 | 757.1841 | 725.3489 | 0.061658 | 0.57877   | 0.67526   | PTPRD     | chr9  | - | 8314246  | 10612723 | 9911 |
| ENSG000001 | 229.9231 | 6.907338 | 4.9937   | 4.41E-39  | 7.61E-38  | LURAP1L   | chr9  | + | 12775020 | 12822130 | 1753 |
| ENSG000001 | 284.8504 | 112.2064 | 1.3351   | 5.30E-11  | 2.68E-10  | CNKSR3    | chr6  | - | 1.55E+08 | 1.55E+08 | 3268 |
| ENSG000001 | 234.8991 | 658.6306 | -1.4879  | 4.47E-25  | 4.68E-24  | GTF2E1    | chr3  | + | 1.2E+08  | 1.21E+08 | 3012 |
| ENSG000001 | 641.4003 | 588.9766 | 0.12342  | 0.38319   | 0.48729   | CFDP1     | chr16 | - | 75327596 | 75467383 | 1275 |
| ENSG000001 | 1003.19  | 1131.792 | -0.1737  | 0.08727   | 0.14401   | ZDHHC7    | chr16 | - | 85007787 | 85045141 | 3442 |
| ENSG000001 | 0.290301 | 0.654722 | -0.51764 | 0.76892   | NA        | FAM92B    | chr16 | - | 85131965 | 85146114 | 1897 |
| ENSG000001 | 35.05087 | 34.72763 | 0.021433 | 0.95675   | 0.97356   | C7orf31   | chr7  | - | 25174316 | 25219975 | 3357 |
| ENSG000001 | 0.995923 | 0        | 1.4959   | 0.39264   | NA        | TMPRSS11I | chr4  | - | 68686594 | 68749750 | 2817 |
| ENSG000001 | 228.3859 | 106.6918 | 1.0925   | 8.13E-09  | 3.47E-08  | JAZF1     | chr7  | - | 27870192 | 28220362 | 3125 |
| ENSG000001 | 1315.307 | 1942.748 | -0.56191 | 3.81E-05  | 0.000114  | CMIP      | chr16 | + | 81478775 | 81745367 | 4357 |
| ENSG000001 | 29.63963 | 0.343138 | 5.6541   | 2.02E-07  | 7.67E-07  | SPHKAP    | chr2  | - | 2.29E+08 | 2.29E+08 | 6917 |
| ENSG000001 | 0.685084 | 0.686276 | -0.00148 | 0.99933   | NA        | KCNJ16    | chr17 | + | 68049570 | 68131749 | 4014 |
| ENSG000001 | 70.96214 | 28.9833  | 1.2722   | 0.000363  | 0.00096   | PID1      | chr2  | - | 2.3E+08  | 2.3E+08  | 2745 |
| ENSG000001 | 4789.564 | 2243.217 | 1.0936   | 3.05E-33  | 4.39E-32  | TRIP12    | chr2  | - | 2.31E+08 | 2.31E+08 | 9874 |
| ENSG000001 | 111.136  | 112.1352 | -0.0146  | 0.95456   | 0.97191   | FBXO36    | chr2  | + | 2.31E+08 | 2.31E+08 | 3120 |
| ENSG000001 | 690.7994 | 874.261  | -0.33933 | 0.007211  | 0.015564  | CEBPG     | chr19 | + | 33864236 | 33873591 | 4108 |
| ENSG000001 | 1925.333 | 1415.981 | 0.44165  | 0.047154  | 0.084558  | KCTD15    | chr19 | + | 34286838 | 34306666 | 4916 |
| ENSG000001 | 113.085  | 76.92997 | 0.55247  | 0.014846  | 0.030099  | ZNF599    | chr19 | - | 35248979 | 35264134 | 3397 |
| ENSG000001 | 14.10723 | 61.90139 | -2.1099  | 4.91E-06  | 1.63E-05  | MCOLN2    | chr1  | - | 85391268 | 85462796 | 2869 |
| ENSG000001 | 1.068702 | 147.0776 | -6.7381  | 5.01E-16  | 3.47E-15  | LGI4      | chr19 | - | 35615417 | 35633355 | 2891 |
| ENSG000001 | 1326.437 | 497.9504 | 1.412    | 4.31E-25  | 4.52E-24  | DDAH1     | chr1  | - | 85784164 | 86043933 | 3920 |
| ENSG000001 | 1419.708 | 730.256  | 0.95493  | 0.000169  | 0.000467  | SREK1     | chr5  | + | 65435799 | 65479443 | 9353 |
| ENSG000001 | 916.0001 | 761.3227 | 0.26739  | 0.091421  | 0.14976   | CHD1      | chr5  | - | 98190908 | 98262240 | 5918 |
| ENSG000001 | 0        | 0.357707 | -0.41864 | 0.81278   | NA        | CLCA3P    | chr1  | + | 87099956 | 87121059 | 3412 |
| ENSG000001 | 0        | 0.594029 | -0.81444 | 0.64499   | NA        | ANKFN1    | chr17 | + | 54188319 | 54589020 | 3840 |
| ENSG000001 | 124.725  | 196.4644 | -0.65625 | 0.000413  | 0.001085  | DGKE      | chr17 | + | 54911460 | 54946036 | 7768 |
| ENSG000001 | 964.2997 | 519.3072 | 0.89158  | 8.00E-14  | 4.86E-13  | HS2ST1    | chr1  | + | 87380331 | 87602334 | 6736 |
| ENSG000001 | 1226.462 | 1349.32  | -0.13735 | 0.20391   | 0.29294   | MSI2      | chr17 | + | 55333212 | 55762046 | 7612 |
| ENSG000001 | 671.3353 | 468.0783 | 0.52049  | 0.002382  | 0.005568  | CACNA2D1  | chr7  | - | 81575760 | 82073114 | 7563 |
| ENSG000001 | 187.4347 | 181.6582 | 0.044411 | 0.79986   | 0.85824   | ZUFSP     | chr6  | - | 1.17E+08 | 1.17E+08 | 2195 |
| ENSG000001 | 1074.84  | 132.4453 | 3.0065   | 6.98E-53  | 1.72E-51  | HS3ST3A1  | chr17 | - | 13399006 | 13505244 | 2527 |
| ENSG000001 | 35.40442 | 83.13163 | -1.2249  | 0.000206  | 0.000565  | GDPD1     | chr17 | + | 57297828 | 57353328 | 1821 |
| ENSG000001 | 1221.456 | 1288.638 | -0.07693 | 0.58949   | 0.68476   | NUS1      | chr6  | + | 1.18E+08 | 1.18E+08 | 4676 |
| ENSG000001 | 80.16709 | 34.33421 | 1.2195   | 0.001222  | 0.002989  | SEMA3D    | chr7  | - | 84624869 | 84816171 | 6265 |
| ENSG000001 | 975.6102 | 1202.221 | -0.30149 | 0.010097  | 0.021214  | PPP2R5E   | chr14 | - | 63838075 | 64010092 | 6659 |
| ENSG000001 | 1.027626 | 1.073121 | -0.03196 | 0.98538   | 0.99147   | GRAP      | chr17 | - | 18923986 | 18950950 | 2651 |
| ENSG000001 | 0.632843 | 4.196206 | -2.2856  | 0.070977  | 0.12059   | SLC5A10   | chr17 | + | 18853658 | 18925908 | 4436 |
| ENSG000001 | 279.4443 | 85.04397 | 1.7098   | 1.99E-16  | 1.41E-15  | AK5       | chr1  | + | 77747736 | 78025651 | 3929 |
| ENSG000001 | 251.8338 | 684.7419 | -1.4392  | 7.52E-16  | 5.17E-15  | C17orf103 | chr17 | - | 21142183 | 21156722 | 4925 |
| ENSG000001 | 107.9169 | 123.109  | -0.1875  | 0.36497   | 0.46937   | CABYR     | chr18 | + | 21718942 | 21741567 | 2250 |
| ENSG000001 | 410.82   | 631.8942 | -0.61943 | 1.82E-05  | 5.67E-05  | IMPACT    | chr18 | + | 22006580 | 22033499 | 3792 |
| ENSG000001 | 16.59752 | 40.72862 | -1.2795  | 0.004991  | 0.011119  | ANKRD29   | chr18 | - | 21178890 | 21242849 | 3597 |
| ENSG000001 | 118.3598 | 193.8589 | -0.70465 | 0.049037  | 0.087491  | C6orf57   | chr6  | + | 71276620 | 71299272 | 1196 |
| ENSG000001 | 0        | 166.4838 | -8.815   | 4.95E-16  | 3.43E-15  | CHST9     | chr18 | - | 24495595 | 24765281 | 2238 |
| ENSG000001 | 2675.783 | 4598.247 | -0.77841 | 0.000222  | 0.000603  | THY1      | chr11 | - | 1.19E+08 | 1.19E+08 | 3554 |
| ENSG000001 | 2.023549 | 9.217057 | -2.055   | 0.021958  | 0.042944  | DNAAF1    | chr16 | + | 84178865 | 84212373 | 4708 |
| ENSG000001 | 29.59514 | 82.64938 | -1.464   | 6.09E-05  | 0.000178  | C16orf74  | chr16 | - | 85723690 | 85784735 | 1237 |
| ENSG000001 | 323.8396 | 186.5934 | 0.79354  | 1.81E-07  | 6.89E-07  | TBCEL     | chr11 | + | 1.21E+08 | 1.21E+08 | 5142 |
| ENSG000001 | 42.34857 | 1452.675 | -5.083   | 4.99E-92  | 2.56E-90  | JPH3      | chr16 | + | 87635441 | 87731762 | 4023 |
| ENSG000001 | 2840.953 | 360.4268 | 2.9732   | 1.43E-103 | 8.68E-102 | ANKH      | chr5  | - | 14704910 | 14871887 | 8203 |
| ENSG000001 | 663.2442 | 302.1575 | 1.1317   | 8.81E-18  | 6.70E-17  | FAM105B   | chr5  | + | 14664773 | 14699820 | 7800 |
| ENSG000001 | 1747.94  | 400.42   | 2.1177   | 2.01E-22  | 1.89E-21  | UBASH3B   | chr11 | + | 1.23E+08 | 1.23E+08 | 6912 |

|            |          |          |          |           |           |          |       |   |          |          |       |
|------------|----------|----------|----------|-----------|-----------|----------|-------|---|----------|----------|-------|
| ENSG000001 | 19.87739 | 2.65044  | 2.7905   | 5.90E-05  | 0.000173  | ROBO4    | chr11 | - | 1.25E+08 | 1.25E+08 | 4710  |
| ENSG000001 | 242.4854 | 148.5769 | 0.70184  | 0.00049   | 0.001275  | ROBO3    | chr11 | + | 1.25E+08 | 1.25E+08 | 4569  |
| ENSG000001 | 1.370168 | 0.297015 | 1.1469   | 0.51585   | NA        | PANX3    | chr11 | + | 1.24E+08 | 1.24E+08 | 1667  |
| ENSG000001 | 618.4517 | 366.2805 | 0.75329  | 8.79E-08  | 3.44E-07  | TBRG1    | chr11 | + | 1.24E+08 | 1.25E+08 | 4461  |
| ENSG000001 | 115.5017 | 2.788811 | 5.2983   | 1.54E-21  | 1.39E-20  | NRGN     | chr11 | + | 1.25E+08 | 1.25E+08 | 1971  |
| ENSG000001 | 37.27124 | 20.90893 | 0.82469  | 0.036707  | 0.067974  | FAM134B  | chr5  | - | 16473147 | 16617167 | 3268  |
| ENSG000001 | 0.632843 | 0.343138 | 0.49756  | 0.77728   | NA        | CDH12    | chr5  | - | 21750782 | 22853731 | 4164  |
| ENSG000001 | 0        | 0.357707 | -0.41864 | 0.81278   | NA        | GPR15    | chr3  | + | 98250743 | 98251960 | 1218  |
| ENSG000001 | 1129.641 | 1331.994 | -0.23751 | 0.01714   | 0.034312  | TOMM70A  | chr3  | - | 1E+08    | 1E+08    | 4409  |
| ENSG000001 | 538.9551 | 6.721972 | 6.2809   | 1.57E-69  | 5.58E-68  | ABI3BP   | chr3  | - | 1E+08    | 1.01E+08 | 6783  |
| ENSG000001 | 648.5667 | 34.47909 | 4.2148   | 2.94E-52  | 7.16E-51  | ANGPT1   | chr8  | - | 1.08E+08 | 1.09E+08 | 4353  |
| ENSG000001 | 420.2549 | 1096.639 | -1.3827  | 2.02E-20  | 1.73E-19  | PITPNC1  | chr17 | + | 65373575 | 65693372 | 6182  |
| ENSG000001 | 724.5531 | 342.1522 | 1.0796   | 1.47E-07  | 5.66E-07  | CC2D1B   | chr1  | - | 52811395 | 52831865 | 5638  |
| ENSG000001 | 0        | 6.595755 | -4.3227  | 0.001173  | 0.00288   | CERS3    | chr15 | - | 1.01E+08 | 1.01E+08 | 3894  |
| ENSG000001 | 1009.64  | 745.1713 | 0.43639  | 0.000426  | 0.001118  | PRKCA    | chr17 | + | 64298754 | 64806861 | 8751  |
| ENSG000001 | 481.9552 | 131.4814 | 1.8656   | 4.54E-22  | 4.19E-21  | LRRK1    | chr15 | + | 1.01E+08 | 1.02E+08 | 7701  |
| ENSG000001 | 204.4613 | 33.16159 | 2.6187   | 3.27E-19  | 2.65E-18  | CEP112   | chr17 | - | 63631656 | 64188202 | 3517  |
| ENSG000001 | 5.177414 | 6.883905 | -0.40427 | 0.67848   | 0.75928   | GAL3ST2  | chr2  | + | 2.43E+08 | 2.43E+08 | 1370  |
| ENSG000001 | 0.580602 | 2.307303 | -1.4899  | 0.30821   | 0.40999   | ABCA9    | chr17 | - | 66970629 | 67057205 | 6514  |
| ENSG000001 | 0.943682 | 0        | 1.2438   | 0.48556   | NA        | ABCA10   | chr17 | - | 67143355 | 67240987 | 6362  |
| ENSG000001 | 68.87379 | 14.1691  | 2.2702   | 1.60E-09  | 7.25E-09  | ABCA5    | chr17 | - | 67240452 | 67323385 | 8220  |
| ENSG000001 | 1.846289 | 1.416259 | 0.33993  | 0.8153    | 0.87038   | ENPP3    | chr6  | + | 1.32E+08 | 1.32E+08 | 3413  |
| ENSG000001 | 5.653535 | 6.537479 | -0.20888 | 0.79109   | 0.85123   | C4orf19  | chr4  | + | 37455563 | 37625117 | 1949  |
| ENSG000001 | 6719.374 | 5656.018 | 0.24821  | 0.092622  | 0.15153   | UCHL1    | chr4  | + | 41258430 | 41270472 | 1578  |
| ENSG000001 | 1736.974 | 858.176  | 1.0159   | 9.39E-16  | 6.42E-15  | MIA3     | chr1  | + | 2.23E+08 | 2.23E+08 | 8142  |
| ENSG000001 | 198.7017 | 54.39593 | 1.8629   | 1.87E-16  | 1.33E-15  | DISP1    | chr1  | + | 2.23E+08 | 2.23E+08 | 4762  |
| ENSG000001 | 205.1569 | 1364.53  | -2.7304  | 2.77E-89  | 1.37E-87  | TNIK     | chr3  | - | 1.71E+08 | 1.71E+08 | 6970  |
| ENSG000001 | 0.36308  | 17.47426 | -4.9105  | 1.84E-05  | 5.74E-05  | TDH      | chr8  | + | 11197146 | 11225961 | 1442  |
| ENSG000001 | 2.229907 | 9.323873 | -1.9113  | 0.024851  | 0.048007  | FAM167A  | chr8  | - | 11278972 | 11332224 | 4094  |
| ENSG000001 | 407.712  | 401.6132 | 0.022067 | 0.88317   | 0.91853   | NEIL2    | chr8  | + | 11627148 | 11644855 | 2671  |
| ENSG000001 | 0        | 0.357707 | -0.41864 | 0.81278   | NA        | PGM5     | chr9  | + | 70971815 | 71145977 | 4032  |
| ENSG000001 | 0        | 3.025133 | -3.0821  | 0.044886  | 0.080924  | WNT3A    | chr1  | + | 2.28E+08 | 2.28E+08 | 2932  |
| ENSG000001 | 936.5353 | 1160.613 | -0.30918 | 0.08578   | 0.14181   | OBSCN    | chr1  | + | 2.28E+08 | 2.29E+08 | 26927 |
| ENSG000001 | 407.8939 | 910.3931 | -1.1557  | 6.14E-14  | 3.75E-13  | LONRF1   | chr8  | - | 12579403 | 12613582 | 3594  |
| ENSG000001 | 499.8863 | 577.9589 | -0.20756 | 0.15237   | 0.23007   | TRIM11   | chr1  | - | 2.29E+08 | 2.29E+08 | 5774  |
| ENSG000001 | 3843.767 | 5148.65  | -0.42134 | 1.00E-05  | 3.21E-05  | ENAH     | chr1  | - | 2.26E+08 | 2.26E+08 | 7167  |
| ENSG000001 | 264.8457 | 199.1752 | 0.40556  | 0.25214   | 0.34895   | CCSAP    | chr1  | - | 2.29E+08 | 2.29E+08 | 5157  |
| ENSG000001 | 624.1989 | 338.2406 | 0.88168  | 3.15E-10  | 1.50E-09  | SH3RF1   | chr4  | - | 1.7E+08  | 1.7E+08  | 5272  |
| ENSG000001 | 6.765104 | 0.297015 | 3.5705   | 0.006334  | 0.013827  | GBP5     | chr1  | - | 89724633 | 89738544 | 4699  |
| ENSG000001 | 1565.93  | 2259.17  | -0.52878 | 2.87E-07  | 1.08E-06  | BUB3     | chr10 | + | 1.25E+08 | 1.25E+08 | 2731  |
| ENSG000001 | 0        | 1.234181 | -1.5727  | 0.37581   | NA        | GPR26    | chr10 | + | 1.25E+08 | 1.25E+08 | 7514  |
| ENSG000001 | 7.479285 | 7.129091 | 0.062411 | 0.9291    | 0.95301   | CCDC173  | chr2  | - | 1.71E+08 | 1.71E+08 | 2181  |
| ENSG000001 | 1.774324 | 0.343138 | 1.5777   | 0.34013   | 0.44403   | MMP21    | chr10 | - | 1.27E+08 | 1.27E+08 | 1919  |
| ENSG000001 | 11.9417  | 8.245047 | 0.51904  | 0.49757   | 0.60135   | C10orf90 | chr10 | - | 1.28E+08 | 1.28E+08 | 3076  |
| ENSG000001 | 86.76349 | 78.28715 | 0.14884  | 0.57595   | 0.67271   | FAM69A   | chr1  | - | 93307724 | 93427057 | 2574  |
| ENSG000001 | 2041.342 | 2684.697 | -0.39444 | 0.000484  | 0.001259  | ATP5G3   | chr2  | - | 1.76E+08 | 1.76E+08 | 5484  |
| ENSG000001 | 7.418485 | 26.26076 | -1.7929  | 0.001177  | 0.002889  | CNTNAP3B | chr9  | + | 43684902 | 43924049 | 7939  |
| ENSG000001 | 0.290301 | 2.932886 | -2.4318  | 0.093564  | 0.15276   | FAM27C   | chr9  | + | 44990314 | 44991483 | 616   |
| ENSG000001 | 49.86568 | 31.7834  | 0.64913  | 0.0663    | 0.11374   | MAGED4   | chrX  | + | 51927919 | 51935364 | 3015  |
| ENSG000001 | 54.86665 | 90.87893 | -0.71934 | 0.00778   | 0.016672  | SRSF12   | chr6  | - | 89805678 | 89827800 | 3599  |
| ENSG000001 | 538.7948 | 33.88277 | 3.9639   | 1.67E-79  | 6.97E-78  | PDLIM3   | chr4  | - | 1.86E+08 | 1.86E+08 | 5137  |
| ENSG000001 | 239.0978 | 128.4414 | 0.89532  | 9.10E-06  | 2.93E-05  | SORBS2   | chr4  | - | 1.87E+08 | 1.87E+08 | 6050  |
| ENSG000001 | 926.7579 | 945.6963 | -0.02857 | 0.83748   | 0.88597   | TCEB1    | chr8  | - | 74851404 | 74884522 | 2780  |
| ENSG000001 | 3.060548 | 0        | 3.11     | 0.041268  | 0.07534   | LY96     | chr8  | + | 74903587 | 74941322 | 607   |
| ENSG000001 | 65.10681 | 8.11883  | 2.98     | 6.60E-12  | 3.54E-11  | CEP170P1 | chr4  | + | 1.19E+08 | 1.19E+08 | 4587  |
| ENSG000001 | 0        | 0.297015 | -0.41864 | 0.81278   | NA        | PSMA8    | chr18 | + | 23713816 | 23773319 | 1876  |
| ENSG000001 | 6.597217 | 48.06556 | -2.8096  | 1.72E-08  | 7.17E-08  | TMSB4Y   | chrY  | + | 15815447 | 15817904 | 1669  |
| ENSG000001 | 111.5176 | 2213.586 | -4.3015  | 1.20E-129 | 1.08E-127 | CXADR    | chr21 | + | 18884700 | 18965897 | 6254  |
| ENSG000001 | 487.412  | 292.8806 | 0.73272  | 2.63E-07  | 9.88E-07  | BTG3     | chr21 | - | 18965971 | 18985265 | 1485  |
| ENSG000001 | 181.7233 | 369.2152 | -1.0194  | 6.12E-10  | 2.88E-09  | C21orf91 | chr21 | - | 19161284 | 19191703 | 5433  |
| ENSG000001 | 0        | 33.35427 | -6.6451  | 6.16E-09  | 2.66E-08  | CHODL    | chr21 | + | 19273580 | 19639690 | 2548  |
| ENSG000001 | 0.342542 | 0        | 0.4146   | 0.81455   | NA        | TMPRSS15 | chr21 | - | 19641433 | 19858197 | 3947  |
| ENSG000001 | 48.29241 | 15.19851 | 1.6531   | 9.72E-05  | 0.000278  | NCAM2    | chr21 | + | 22370633 | 22915650 | 8135  |
| ENSG000001 | 0        | 16.89405 | -5.7035  | 1.73E-06  | 6.04E-06  | L3MBTL4  | chr18 | - | 5954705  | 6415236  | 4534  |
| ENSG000001 | 52.01506 | 4.646159 | 3.4182   | 1.39E-11  | 7.31E-11  | PDE1C    | chr7  | - | 31790793 | 32338941 | 8852  |

|            |          |          |          |          |          |           |       |   |          |          |      |
|------------|----------|----------|----------|----------|----------|-----------|-------|---|----------|----------|------|
| ENSG000001 | 5.145711 | 3.823929 | 0.36528  | 0.69342  | 0.77146  | RABGEF1   | chr7  | + | 66205720 | 66276451 | 3733 |
| ENSG000001 | 301.0713 | 472.1225 | -0.6466  | 3.06E-05 | 9.28E-05 | MRPL39    | chr21 | - | 26957968 | 26979829 | 1199 |
| ENSG000001 | 218.802  | 81.35921 | 1.423    | 7.08E-13 | 4.06E-12 | JAM2      | chr21 | + | 27011584 | 27089874 | 4337 |
| ENSG000001 | 359.7847 | 408.3898 | -0.18087 | 0.25439  | 0.35145  | ATP5J     | chr21 | - | 27088815 | 27107984 | 1179 |
| ENSG000001 | 600.0324 | 465.778  | 0.36526  | 0.10527  | 0.16858  | GABPA     | chr21 | + | 27106881 | 27144771 | 5120 |
| ENSG000001 | 667.8438 | 630.3012 | 0.083157 | 0.78524  | 0.8462   | ADAMTS1   | chr21 | - | 28208606 | 28217728 | 4718 |
| ENSG000001 | 675.248  | 15.77951 | 4.9762   | 3.32E-07 | 1.24E-06 | ADAMTS5   | chr21 | - | 28290231 | 28338832 | 9056 |
| ENSG000001 | 132.7791 | 220.9177 | -0.73132 | 0.001107 | 0.002727 | TSEN2     | chr3  | + | 12525931 | 12581122 | 3918 |
| ENSG000001 | 38.09251 | 368.4601 | -3.2593  | 2.42E-33 | 3.49E-32 | SLFN13    | chr17 | - | 33762115 | 33775856 | 8469 |
| ENSG000001 | 0        | 1.888903 | -2.3653  | 0.15293  | NA       | WNT7A     | chr3  | - | 13857755 | 13921618 | 4041 |
| ENSG000001 | 715.958  | 870.394  | -0.28135 | 0.14058  | 0.21453  | XPC       | chr3  | - | 14186647 | 14220283 | 3832 |
| ENSG000001 | 7.655732 | 0.997859 | 2.6529   | 0.01258  | 0.025902 | C17orf50  | chr17 | + | 34087916 | 34092098 | 1018 |
| ENSG000001 | 298.2269 | 325.8656 | -0.12718 | 0.39903  | 0.50368  | CCDC174   | chr3  | + | 14693271 | 14714166 | 2942 |
| ENSG000001 | 8.568525 | 1089.179 | -6.9243  | 2.40E-88 | 1.17E-86 | FGD5      | chr3  | + | 14860469 | 14975895 | 5720 |
| ENSG000001 | 351.2582 | 359.2905 | -0.03556 | 0.83608  | 0.88505  | FLCN      | chr17 | - | 17115526 | 17140502 | 3638 |
| ENSG000001 | 625.1212 | 299.6441 | 1.0589   | 3.54E-08 | 1.44E-07 | DPH3      | chr3  | - | 16299485 | 16306479 | 3131 |
| ENSG000001 | 193.4806 | 293.4631 | -0.60246 | 0.001143 | 0.002812 | OXNAD1    | chr3  | + | 16306706 | 16378822 | 3929 |
| ENSG000001 | 59.22956 | 53.84238 | 0.13753  | 0.65761  | 0.74209  | PLCL2     | chr3  | + | 16844159 | 17132086 | 4153 |
| ENSG000001 | 938.5008 | 1256.051 | -0.41959 | 0.001469 | 0.003553 | CXXC1     | chr18 | - | 47808713 | 47814674 | 2936 |
| ENSG000001 | 225.4111 | 306.8458 | -0.44455 | 0.003783 | 0.008578 | SKA1      | chr18 | + | 47901365 | 47920543 | 2905 |
| ENSG000001 | 1735.561 | 1317.82  | 0.3969   | 0.008941 | 0.018975 | PPP4R1    | chr18 | - | 9546789  | 9615238  | 3925 |
| ENSG000001 | 314.6098 | 182.3582 | 0.78728  | 3.40E-06 | 1.15E-05 | APCDD1    | chr18 | + | 10454625 | 10488698 | 2562 |
| ENSG000001 | 50.27407 | 327.1396 | -2.6948  | 1.61E-34 | 2.41E-33 | PIEZO2    | chr18 | - | 10666480 | 11148587 | 9356 |
| ENSG000001 | 0.943682 | 1.949596 | -0.84081 | 0.53965  | 0.64023  | CCDC144B  | chr17 | - | 18431900 | 18528930 | 8682 |
| ENSG000001 | 153.2541 | 173.9693 | -0.18529 | 0.31858  | 0.42147  | MPPE1     | chr18 | - | 11882621 | 11909222 | 4236 |
| ENSG000001 | 11.14179 | 5.300881 | 1.0204   | 0.14634  | 0.22225  | CCDC144C  | chr17 | + | 20224477 | 20306870 | 5227 |
| ENSG000001 | 118.4354 | 258.5775 | -1.1195  | 2.27E-08 | 9.34E-08 | USP43     | chr17 | + | 9548015  | 9633001  | 3624 |
| ENSG000001 | 82.56911 | 260.1576 | -1.6546  | 8.92E-14 | 5.39E-13 | RAB6B     | chr3  | - | 1.34E+08 | 1.34E+08 | 5526 |
| ENSG000001 | 97.57407 | 191.9622 | -0.96818 | 1.47E-06 | 5.17E-06 | EME1      | chr17 | + | 48450581 | 48458844 | 2354 |
| ENSG000001 | 212.7114 | 161.3846 | 0.39818  | 0.043127 | 0.078273 | EPHB1     | chr3  | + | 1.34E+08 | 1.35E+08 | 4672 |
| ENSG000001 | 47.07896 | 50.43698 | -0.10873 | 0.76631  | 0.83093  | ACSS1     | chr20 | - | 24986868 | 25039616 | 4877 |
| ENSG000001 | 806.435  | 638.7063 | 0.33619  | 0.005734 | 0.012619 | ANKRD40   | chr17 | - | 48770551 | 48785285 | 4184 |
| ENSG000001 | 169.2799 | 237.417  | -0.48467 | 0.005505 | 0.01216  | ZNF18     | chr17 | - | 11880762 | 11900827 | 2767 |
| ENSG000001 | 3.423628 | 14.09142 | -1.9741  | 0.007187 | 0.01552  | CA10      | chr17 | - | 49707674 | 50237377 | 3189 |
| ENSG000001 | 1820.923 | 1325.549 | 0.45757  | 0.004288 | 0.009639 | VOPP1     | chr7  | - | 55503749 | 55640681 | 2962 |
| ENSG000001 | 102.1998 | 63.7198  | 0.68025  | 0.007424 | 0.015982 | APOOL     | chrX  | + | 84258832 | 84343069 | 1279 |
| ENSG000001 | 1044.978 | 0        | 11.237   | 7.09E-26 | 7.70E-25 | DKK2      | chr4  | - | 1.08E+08 | 1.08E+08 | 3638 |
| ENSG000001 | 138.5048 | 65.3045  | 1.0752   | 4.86E-05 | 0.000144 | CYP2U1    | chr4  | + | 1.09E+08 | 1.09E+08 | 4944 |
| ENSG000001 | 0.975385 | 1.949596 | -0.8169  | 0.55115  | 0.65079  | RSPH10B   | chr7  | - | 5965181  | 6010314  | 3222 |
| ENSG000001 | 593.9088 | 449.6983 | 0.40022  | 0.025363 | 0.048892 | FBXL18    | chr7  | - | 5470966  | 5553429  | 3498 |
| ENSG000001 | 0        | 2.635871 | -2.911   | 0.060379 | 0.10495  | CNTNAP5   | chr2  | + | 1.25E+08 | 1.26E+08 | 5284 |
| ENSG000001 | 20.50942 | 168.1401 | -3.0059  | 5.88E-22 | 5.40E-21 | PROM2     | chr2  | + | 95940201 | 95957056 | 4728 |
| ENSG000001 | 0        | 0.891044 | -1.0625  | 0.54819  | NA       | UNC93B2   | chr7  | - | 6895116  | 6899461  | 730  |
| ENSG000001 | 24.57347 | 37.09959 | -0.57854 | 0.18724  | 0.27328  | AK9       | chr6  | - | 1.1E+08  | 1.1E+08  | 6326 |
| ENSG000001 | 668.4889 | 408.2938 | 0.71089  | 1.37E-08 | 5.74E-08 | KLF10     | chr8  | - | 1.04E+08 | 1.04E+08 | 3659 |
| ENSG000001 | 29.76384 | 58.96447 | -0.98463 | 0.003268 | 0.007492 | PTPRN2    | chr7  | - | 1.57E+08 | 1.58E+08 | 4723 |
| ENSG000001 | 1967.389 | 4079.975 | -1.05    | 2.49E-10 | 1.20E-09 | AZIN1     | chr8  | - | 1.04E+08 | 1.04E+08 | 4721 |
| ENSG000001 | 458.4921 | 522.7548 | -0.1881  | 0.40568  | 0.51049  | ATP6V1C1  | chr8  | + | 1.04E+08 | 1.04E+08 | 5612 |
| ENSG000001 | 183.2731 | 182.5049 | 0.006154 | 0.97245  | 0.98479  | TMEM55A   | chr8  | - | 92006024 | 92053292 | 2970 |
| ENSG000001 | 243.5014 | 279.9633 | -0.19896 | 0.55349  | 0.65287  | OTUD6B    | chr8  | + | 92082424 | 92099323 | 3298 |
| ENSG000001 | 768.4462 | 168.9737 | 2.1706   | 3.49E-14 | 2.17E-13 | CDK19     | chr6  | - | 1.11E+08 | 1.11E+08 | 6246 |
| ENSG000001 | 844.2378 | 642.9982 | 0.39229  | 0.033711 | 0.062996 | GTF3C6    | chr6  | + | 1.11E+08 | 1.11E+08 | 952  |
| ENSG000001 | 15605.82 | 5703.029 | 1.4502   | 3.06E-28 | 3.66E-27 | MARCKS    | chr6  | + | 1.14E+08 | 1.14E+08 | 4273 |
| ENSG000001 | 76.96359 | 135.9414 | -0.82026 | 0.000434 | 0.001138 | TTC39B    | chr9  | - | 15170843 | 15307358 | 3260 |
| ENSG000001 | 614.1147 | 1133.193 | -0.88243 | 5.09E-09 | 2.21E-08 | AGPAT5    | chr8  | + | 6565878  | 6617184  | 3682 |
| ENSG000001 | 1285.44  | 1985.052 | -0.626   | 6.51E-07 | 2.37E-06 | MMS19     | chr10 | - | 99218081 | 99258551 | 3797 |
| ENSG000001 | 565.7299 | 530.1445 | 0.093934 | 0.43345  | 0.53886  | PI4K2A    | chr10 | + | 99344131 | 99436191 | 4189 |
| ENSG000001 | 4250.294 | 989.5308 | 2.1008   | 7.61E-85 | 3.47E-83 | MARVELD1  | chr10 | + | 99472930 | 99477907 | 3219 |
| ENSG000001 | 561.4019 | 502.6596 | 0.15909  | 0.33777  | 0.44147  | ZFYVE27   | chr10 | + | 99496878 | 99520664 | 3047 |
| ENSG000001 | 1.991846 | 1.370136 | 0.46339  | 0.72647  | 0.79772  | GOLGA7B   | chr10 | + | 99609996 | 99631337 | 2894 |
| ENSG000001 | 0        | 3.945314 | -3.5337  | 0.014733 | 0.029886 | GPR78     | chr4  | + | 8560452  | 8621486  | 4944 |
| ENSG000001 | 181.9571 | 247.2507 | -0.43895 | 0.007296 | 0.015726 | TRMT44    | chr4  | + | 8437867  | 8495258  | 4157 |
| ENSG000001 | 0        | 0.357707 | -0.41864 | 0.81278  | NA       | RP11-195B | chr9  | + | 67968793 | 67987998 | 1017 |
| ENSG000001 | 372.2356 | 206.2301 | 0.84948  | 6.77E-09 | 2.91E-08 | SLC25A28  | chr10 | - | 1.01E+08 | 1.01E+08 | 1448 |
| ENSG000001 | 1517.852 | 461.5454 | 1.7137   | 7.42E-18 | 5.66E-17 | HSPA13    | chr21 | - | 15743436 | 15755805 | 3986 |

|            |          |          |          |           |           |          |       |   |          |          |        |
|------------|----------|----------|----------|-----------|-----------|----------|-------|---|----------|----------|--------|
| ENSG000001 | 1.338465 | 1.995719 | -0.50035 | 0.68752   | 0.76705   | SAMSN1   | chr21 | - | 15857549 | 15955723 | 2185   |
| ENSG000001 | 346.4848 | 630.2648 | -0.86238 | 1.39E-10  | 6.81E-10  | USP25    | chr21 | + | 17102344 | 17252377 | 5216   |
| ENSG000001 | 473.0466 | 161.7247 | 1.5408   | 9.29E-10  | 4.30E-09  | GRAMD3   | chr5  | + | 1.26E+08 | 1.26E+08 | 3175   |
| ENSG000001 | 189.3722 | 248.9292 | -0.39163 | 0.046701  | 0.083845  | ZCCHC10  | chr5  | - | 1.32E+08 | 1.32E+08 | 2178   |
| ENSG000001 | 245.2395 | 381.9226 | -0.63939 | 0.000264  | 0.000713  | C16orf87 | chr16 | - | 46830519 | 46865323 | 6640   |
| ENSG000001 | 1157.214 | 1351.432 | -0.22392 | 0.04004   | 0.073463  | MOV10    | chr1  | + | 1.13E+08 | 1.13E+08 | 4689   |
| ENSG000001 | 2680.397 | 501.6704 | 2.4145   | 9.43E-116 | 6.80E-114 | RHOC     | chr1  | - | 1.13E+08 | 1.13E+08 | 2199   |
| ENSG000001 | 90.27025 | 254.1731 | -1.4841  | 3.31E-08  | 1.34E-07  | PPM1J    | chr1  | - | 1.13E+08 | 1.13E+08 | 2474   |
| ENSG000001 | 1572.299 | 977.2841 | 0.68542  | 2.20E-05  | 6.78E-05  | DBI      | chr2  | + | 1.2E+08  | 1.2E+08  | 842    |
| ENSG000001 | 1543.448 | 5637.729 | -1.8655  | 2.03E-34  | 3.03E-33  | SLC16A1  | chr1  | - | 1.13E+08 | 1.13E+08 | 4374   |
| ENSG000001 | 295.5464 | 300.7846 | -0.02402 | 0.88179   | 0.9177    | HEATR3   | chr16 | + | 50099852 | 50140298 | 3560   |
| ENSG000001 | 3.693391 | 2.635871 | 0.43545  | 0.65762   | 0.74209   | TRIM74   | chr7  | - | 72430016 | 72439997 | 1350   |
| ENSG000001 | 270.7754 | 530.7112 | -0.96882 | 1.04E-06  | 3.72E-06  | MKI67IP  | chr2  | - | 1.22E+08 | 1.22E+08 | 1734   |
| ENSG000001 | 1380.552 | 1650.75  | -0.25732 | 0.01438   | 0.029234  | OXA1L    | chr14 | + | 23235731 | 23241007 | 1750   |
| ENSG000001 | 40.93733 | 72.83493 | -0.83321 | 0.007764  | 0.016645  | SLC7A7   | chr14 | - | 23242431 | 23299029 | 3017   |
| ENSG000001 | 7500.754 | 9934.326 | -0.4051  | 1.05E-05  | 3.35E-05  | LARP1    | chr5  | + | 1.54E+08 | 1.54E+08 | 6595   |
| ENSG000001 | 819.1274 | 782.0263 | 0.066982 | 0.72651   | 0.79772   | CNOT8    | chr5  | + | 1.54E+08 | 1.54E+08 | 2708   |
| ENSG000001 | 51.21856 | 2.711133 | 4.1371   | 6.25E-12  | 3.36E-11  | GRIA1    | chr5  | + | 1.53E+08 | 1.53E+08 | 5708   |
| ENSG000001 | 4.524033 | 44.3606  | -3.2458  | 2.91E-08  | 1.19E-07  | LRGUK    | chr7  | + | 1.34E+08 | 1.34E+08 | 3163   |
| ENSG000001 | 63.49679 | 85.10942 | -0.41896 | 0.1079    | 0.17217   | SETD9    | chr5  | + | 56205087 | 56221359 | 1619   |
| ENSG000001 | 477.7698 | 366.6714 | 0.38132  | 0.055829  | 0.09793   | MIER3    | chr5  | - | 56215429 | 56267502 | 5240   |
| ENSG000001 | 1844.049 | 4378.861 | -1.2465  | 5.70E-30  | 7.26E-29  | NUP205   | chr7  | + | 1.35E+08 | 1.35E+08 | 6266   |
| ENSG000001 | 213.9386 | 315.1731 | -0.5595  | 0.002766  | 0.006413  | ZKSCAN2  | chr16 | - | 25247322 | 25269252 | 7523   |
| ENSG000001 | 113.0951 | 134.7733 | -0.25133 | 0.25548   | 0.3528    | C9orf85  | chr9  | + | 74526426 | 74600970 | 3321   |
| ENSG000001 | 17.29377 | 56.67906 | -1.6988  | 3.41E-05  | 0.000103  | PIK3AP1  | chr10 | - | 98353069 | 98480271 | 4803   |
| ENSG000001 | 133.0128 | 91.17171 | 0.54508  | 0.039418  | 0.072468  | RBM45    | chr2  | + | 1.79E+08 | 1.79E+08 | 1992   |
| ENSG000001 | 126.724  | 101.4676 | 0.32347  | 0.1904    | 0.27711   | C10orf12 | chr10 | + | 98741041 | 98745582 | 4542   |
| ENSG000001 | 136.3429 | 125.2324 | 0.12522  | 0.63183   | 0.72096   | TTN      | chr2  | - | 1.79E+08 | 1.8E+08  | 109224 |
| ENSG000001 | 0.342542 | 0        | 0.4146   | 0.81455   | NA        | VSIG4    | chrX  | - | 65241580 | 65259967 | 2190   |
| ENSG000001 | 10327.17 | 7673.169 | 0.42834  | 9.94E-08  | 3.88E-07  | PDIA4    | chr7  | - | 1.49E+08 | 1.49E+08 | 2903   |
| ENSG000001 | 89.29649 | 153.523  | -0.77756 | 0.002985  | 0.006883  | KDM8     | chr16 | + | 27214807 | 27233089 | 2458   |
| ENSG000001 | 0.705622 | 2.38498  | -1.4471  | 0.30024   | 0.4018    | PDZD9    | chr16 | - | 21995186 | 22012433 | 1331   |
| ENSG000001 | 0        | 2.711133 | -2.9254  | 0.060083  | 0.10456   | OTOA     | chr16 | + | 21689835 | 21772050 | 4635   |
| ENSG000001 | 273.3281 | 119.0401 | 1.1919   | 5.93E-06  | 1.96E-05  | KCTD18   | chr2  | - | 2.01E+08 | 2.01E+08 | 2940   |
| ENSG000001 | 124.3773 | 69.90837 | 0.82613  | 0.002931  | 0.006765  | FAM126B  | chr2  | - | 2.02E+08 | 2.02E+08 | 4778   |
| ENSG000001 | 7.343101 | 1.012429 | 2.5585   | 0.021375  | 0.041904  | ALS2CR12 | chr2  | - | 2.02E+08 | 2.02E+08 | 2075   |
| ENSG000001 | 2.354926 | 0.715414 | 1.3929   | 0.33335   | 0.43665   | ALS2CR11 | chr2  | - | 2.02E+08 | 2.02E+08 | 5512   |
| ENSG000001 | 850.1547 | 467.9244 | 0.85981  | 8.13E-06  | 2.64E-05  | TMEM237  | chr2  | - | 2.02E+08 | 2.03E+08 | 5592   |
| ENSG000001 | 1598.15  | 2058.471 | -0.36435 | 0.005005  | 0.011149  | FZD7     | chr2  | + | 2.03E+08 | 2.03E+08 | 3851   |
| ENSG000001 | 39.81378 | 18.27305 | 1.1137   | 0.003488  | 0.007959  | SPAG17   | chr1  | - | 1.18E+08 | 1.19E+08 | 6924   |
| ENSG000001 | 5.975539 | 47.80426 | -2.9544  | 9.47E-10  | 4.38E-09  | DEPTOR   | chr8  | + | 1.21E+08 | 1.21E+08 | 2569   |
| ENSG000001 | 123.646  | 60.36436 | 1.0332   | 0.000118  | 0.000334  | FMN2     | chr1  | + | 2.4E+08  | 2.41E+08 | 6434   |
| ENSG000001 | 1014.121 | 988.6568 | 0.037411 | 0.77792   | 0.84046   | RNF20    | chr9  | + | 1.04E+08 | 1.04E+08 | 3936   |
| ENSG000001 | 145.7295 | 409.9142 | -1.4919  | 2.06E-18  | 1.60E-17  | PPARGC1B | chr5  | + | 1.49E+08 | 1.49E+08 | 10568  |
| ENSG000001 | 212.1573 | 295.7268 | -0.47977 | 0.002541  | 0.005919  | ELMO1    | chr7  | - | 36893961 | 37488852 | 4022   |
| ENSG000001 | 701.4858 | 286.6952 | 1.2881   | 2.23E-14  | 1.41E-13  | SLC26A2  | chr5  | + | 1.49E+08 | 1.49E+08 | 8080   |
| ENSG000001 | 313.6688 | 194.1808 | 0.68648  | 0.01365   | 0.027892  | LSM11    | chr5  | + | 1.57E+08 | 1.57E+08 | 6584   |
| ENSG000001 | 140.4199 | 131.3468 | 0.094978 | 0.67422   | 0.75593   | MED7     | chr5  | - | 1.57E+08 | 1.57E+08 | 2402   |
| ENSG000001 | 1.370168 | 0.594029 | 0.69531  | 0.69069   | 0.76943   | FAM154A  | chr9  | - | 18927656 | 19033251 | 2099   |
| ENSG000001 | 1658.673 | 726.2538 | 1.1903   | 2.23E-17  | 1.66E-16  | RRAGA    | chr9  | + | 19049372 | 19051019 | 1648   |
| ENSG000001 | 0        | 51.5714  | -7.2515  | 7.32E-11  | 3.66E-10  | SLC24A2  | chr9  | - | 19515978 | 19786926 | 2221   |
| ENSG000001 | 339.5593 | 407.4466 | -0.2628  | 0.079567  | 0.13287   | ACPL2    | chr3  | + | 1.41E+08 | 1.41E+08 | 4158   |
| ENSG000001 | 92.8471  | 81.90624 | 0.18089  | 0.43495   | 0.54047   | ADCY8    | chr8  | - | 1.32E+08 | 1.32E+08 | 5938   |
| ENSG000001 | 278.3343 | 271.9936 | 0.031806 | 0.88473   | 0.91958   | RASA2    | chr3  | + | 1.41E+08 | 1.41E+08 | 5614   |
| ENSG000001 | 230.693  | 197.5251 | 0.22568  | 0.18739   | 0.27341   | RMND1    | chr6  | - | 1.52E+08 | 1.52E+08 | 1854   |
| ENSG000001 | 36.44337 | 19.48206 | 0.87865  | 0.16448   | 0.24534   | SLA      | chr8  | - | 1.34E+08 | 1.34E+08 | 3447   |
| ENSG000001 | 72.84713 | 53.11239 | 0.44713  | 0.10819   | 0.17257   | TMBIM4   | chr12 | - | 66517709 | 66563852 | 2952   |
| ENSG000001 | 814.5149 | 739.2819 | 0.1408   | 0.26203   | 0.36017   | VBP1     | chrX  | + | 1.54E+08 | 1.54E+08 | 1686   |
| ENSG000001 | 11.47235 | 126.8952 | -3.4238  | 3.36E-18  | 2.60E-17  | RAB39B   | chrX  | - | 1.54E+08 | 1.54E+08 | 3505   |
| ENSG000001 | 3.350849 | 5.271743 | -0.62393 | 0.47458   | 0.57905   | CLIC2    | chrX  | - | 1.55E+08 | 1.55E+08 | 2655   |
| ENSG000001 | 416.6132 | 184.817  | 1.1685   | 2.60E-12  | 1.43E-11  | AFF2     | chrX  | + | 1.48E+08 | 1.48E+08 | 13746  |
| ENSG000001 | 108.1987 | 50.46257 | 1.0935   | 0.004349  | 0.009773  | MICU3    | chr8  | + | 16884747 | 16980153 | 3992   |
| ENSG000001 | 56.70275 | 168.5187 | -1.5563  | 2.16E-08  | 8.92E-08  | GRIP1    | chr12 | - | 66741211 | 67197966 | 5216   |
| ENSG000001 | 452.0397 | 363.7093 | 0.31283  | 0.058816  | 0.10265   | VPS37A   | chr8  | + | 17104080 | 17159936 | 4906   |
| ENSG000001 | 80.5388  | 282.24   | -1.8077  | 7.71E-15  | 5.01E-14  | KIF5A    | chr12 | + | 57943781 | 57980415 | 5824   |

|            |          |          |          |           |           |          |       |   |          |          |       |
|------------|----------|----------|----------|-----------|-----------|----------|-------|---|----------|----------|-------|
| ENSG000001 | 189.9851 | 91.35895 | 1.0491   | 3.32E-06  | 1.12E-05  | TMEM185A | chrX  | - | 1.49E+08 | 1.49E+08 | 3665  |
| ENSG000001 | 2.976604 | 2.307303 | 0.31613  | 0.793     | 0.85287   | NAT2     | chr8  | + | 18248755 | 18258728 | 1322  |
| ENSG000001 | 0.580602 | 0.700845 | -0.12342 | 0.94316   | NA        | MAGEA8   | chrX  | + | 1.49E+08 | 1.49E+08 | 2112  |
| ENSG000001 | 1794.05  | 574.7069 | 1.6399   | 2.87E-35  | 4.39E-34  | PSD3     | chr8  | - | 18384811 | 18942240 | 11693 |
| ENSG000001 | 310.5048 | 521.2936 | -0.74792 | 1.91E-07  | 7.28E-07  | C9orf41  | chr9  | - | 77595936 | 77643339 | 4130  |
| ENSG000001 | 371.1083 | 730.1138 | -0.97395 | 9.52E-14  | 5.74E-13  | MCU      | chr10 | + | 74451889 | 74647452 | 3224  |
| ENSG000001 | 964.5833 | 450.0378 | 1.0966   | 4.00E-11  | 2.04E-10  | ELMSAN1  | chr14 | - | 74181825 | 74256988 | 8091  |
| ENSG000001 | 3.362014 | 4.821789 | -0.49996 | 0.59894   | 0.693     | TTC18    | chr10 | - | 75013517 | 75118617 | 6686  |
| ENSG000001 | 138.6639 | 600.6663 | -2.1069  | 3.39E-37  | 5.52E-36  | GNA14    | chr9  | - | 80037995 | 80263223 | 2482  |
| ENSG000001 | 105.9301 | 9.041428 | 3.5225   | 3.74E-21  | 3.32E-20  | FAM161B  | chr14 | - | 74398204 | 74417117 | 4078  |
| ENSG000001 | 1769.757 | 1267.102 | 0.48113  | 7.02E-05  | 0.000204  | GNAQ     | chr9  | - | 80331003 | 80646374 | 6539  |
| ENSG000001 | 6.825904 | 2.370411 | 1.4232   | 0.13657   | 0.20982   | WIF1     | chr12 | - | 65444406 | 65515346 | 2238  |
| ENSG000001 | 0        | 0.343138 | -0.41864 | 0.81278   | NA        | UGT2B4   | chr4  | - | 70345883 | 70391732 | 2103  |
| ENSG000001 | 0.653381 | 6.503508 | -2.8749  | 0.014852  | 0.030109  | GPR61    | chr1  | + | 1.1E+08  | 1.1E+08  | 4921  |
| ENSG000001 | 2255.774 | 226.7457 | 3.3112   | 5.57E-114 | 3.94E-112 | MMMP16   | chr8  | - | 89044237 | 89340254 | 11558 |
| ENSG000001 | 247.6973 | 320.2182 | -0.36859 | 0.016443  | 0.033035  | ADK      | chr10 | + | 75910960 | 76469061 | 2083  |
| ENSG000001 | 1495.145 | 45.66038 | 5.0284   | 1.90E-175 | 3.11E-173 | KCNMA1   | chr10 | - | 78629359 | 79398353 | 11397 |
| ENSG000001 | 0.36308  | 0.654722 | -0.52647 | 0.7643    | NA        | BATF     | chr14 | + | 75988768 | 76013358 | 980   |
| ENSG000001 | 285.5377 | 247.8993 | 0.20214  | 0.32778   | 0.43081   | DKC      | chr4  | + | 71858255 | 71896631 | 2716  |
| ENSG000001 | 597.9054 | 86.98375 | 2.7721   | 3.02E-56  | 8.05E-55  | ADAMTS3  | chr4  | - | 73146686 | 73434516 | 5822  |
| ENSG000001 | 0        | 1.545765 | -1.8556  | 0.29195   | NA        | ALX3     | chr1  | - | 1.11E+08 | 1.11E+08 | 1859  |
| ENSG000001 | 693.4865 | 236.7802 | 1.5454   | 2.55E-23  | 2.50E-22  | DPY19L4  | chr8  | + | 95731931 | 95806064 | 6197  |
| ENSG000001 | 114.9288 | 147.2179 | -0.35092 | 0.10169   | 0.16367   | NDUFAF6  | chr8  | + | 95907995 | 96128683 | 2549  |
| ENSG000001 | 181.6845 | 295.5974 | -0.7002  | 0.003414  | 0.007804  | DRAM2    | chr1  | - | 1.12E+08 | 1.12E+08 | 2246  |
| ENSG000001 | 52.87464 | 42.99779 | 0.29808  | 0.33204   | 0.43526   | C8orf37  | chr8  | - | 96257147 | 96281429 | 3334  |
| ENSG000001 | 0        | 0.297015 | -0.41864 | 0.81278   | NA        | PPEF2    | chr4  | - | 76781020 | 76823724 | 4160  |
| ENSG000001 | 0        | 1.280305 | -1.6305  | 0.35731   | NA        | C15orf26 | chr15 | + | 81299374 | 81441516 | 1631  |
| ENSG000001 | 230.5741 | 30.07819 | 2.9364   | 2.82E-26  | 3.10E-25  | ADAMTSL3 | chr15 | + | 84322838 | 84708594 | 7336  |
| ENSG000001 | 0        | 1.40169  | -1.7271  | 0.32809   | NA        | ART3     | chr4  | + | 76932337 | 77033955 | 1577  |
| ENSG000001 | 0        | 1.545765 | -1.8556  | 0.29195   | NA        | SLC28A1  | chr15 | + | 85427885 | 85518876 | 2750  |
| ENSG000001 | 125.6474 | 92.84806 | 0.43211  | 0.091044  | 0.14921   | WHAMM    | chr15 | + | 83478380 | 83503611 | 3852  |
| ENSG000001 | 0        | 0.357707 | -0.41864 | 0.81278   | NA        | CXCL13   | chr4  | + | 78432907 | 78532988 | 1203  |
| ENSG000001 | 126.5902 | 137.1282 | -0.11231 | 0.70558   | 0.78117   | N6AMT1   | chr21 | - | 30244513 | 30257693 | 4865  |
| ENSG000001 | 157.5685 | 26.74797 | 2.544    | 3.57E-21  | 3.18E-20  | RWDD2B   | chr21 | - | 30376705 | 30391699 | 3094  |
| ENSG000001 | 551.6081 | 428.4531 | 0.36295  | 0.1911    | 0.27794   | USP16    | chr21 | + | 30396950 | 30426809 | 3835  |
| ENSG000001 | 2852.249 | 4308.357 | -0.59383 | 7.40E-05  | 0.000214  | CCT8     | chr21 | - | 30428126 | 30446118 | 2005  |
| ENSG000001 | 24.07502 | 0.297015 | 5.3417   | 2.63E-06  | 9.02E-06  | MAP3K7CL | chr21 | + | 30449792 | 30548210 | 2093  |
| ENSG000001 | 778.9041 | 512.3818 | 0.60335  | 1.06E-05  | 3.38E-05  | BACH1    | chr21 | + | 30566392 | 31003071 | 5769  |
| ENSG000001 | 1.649304 | 35.77329 | -4.241   | 6.25E-09  | 2.69E-08  | TSPAN7   | chrX  | + | 38420623 | 38548169 | 1909  |
| ENSG000001 | 781.5653 | 692.9968 | 0.1733   | 0.22649   | 0.3194    | TIAM1    | chr21 | - | 32490734 | 32932290 | 7200  |
| ENSG000001 | 878.8211 | 1166.998 | -0.40797 | 0.008304  | 0.017699  | SCAF4    | chr21 | - | 33043346 | 33104388 | 4193  |
| ENSG000001 | 132.0235 | 111.091  | 0.24997  | 0.25428   | 0.35133   | RPGR     | chrX  | - | 38128416 | 38186817 | 4767  |
| ENSG000001 | 145.5674 | 59.52044 | 1.2817   | 2.88E-06  | 9.83E-06  | CDK20    | chr9  | - | 90581356 | 90589668 | 5503  |
| ENSG000001 | 170.9771 | 267.3151 | -0.64522 | 0.000512  | 0.001327  | PCGF6    | chr10 | - | 1.05E+08 | 1.05E+08 | 2230  |
| ENSG000001 | 749.0182 | 1057.723 | -0.49599 | 0.042694  | 0.077585  | ANKRD9   | chr14 | - | 1.03E+08 | 1.03E+08 | 1645  |
| ENSG000001 | 50.07708 | 122.2409 | -1.2838  | 1.35E-05  | 4.28E-05  | SFR1     | chr10 | + | 1.06E+08 | 1.06E+08 | 1583  |
| ENSG000001 | 3.931452 | 35.74824 | -3.0909  | 3.51E-07  | 1.31E-06  | SORCS3   | chr10 | + | 1.06E+08 | 1.07E+08 | 5757  |
| ENSG000001 | 173.661  | 215.4962 | -0.30826 | 0.18495   | 0.27034   | SFXN2    | chr10 | + | 1.04E+08 | 1.04E+08 | 2568  |
| ENSG000001 | 839.2    | 750.3532 | 0.16158  | 0.18391   | 0.2691    | C14orf2  | chr14 | - | 1.04E+08 | 1.04E+08 | 1659  |
| ENSG000001 | 0        | 1.355566 | -1.9006  | 0.26573   | NA        | FUT6     | chr19 | - | 5830621  | 5839742  | 3137  |
| ENSG000001 | 0        | 0.297015 | -0.41864 | 0.81278   | NA        | TDRD9    | chr14 | + | 1.04E+08 | 1.05E+08 | 4782  |
| ENSG000001 | 263.5372 | 48.565   | 2.428    | 1.74E-21  | 1.57E-20  | FGF18    | chr5  | + | 1.71E+08 | 1.71E+08 | 1986  |
| ENSG000001 | 197.3961 | 4136.903 | -4.3764  | 1.74E-181 | 3.05E-179 | PCDH1    | chr5  | - | 1.41E+08 | 1.41E+08 | 4530  |
| ENSG000001 | 16.78595 | 17.58919 | -0.07375 | 0.8786    | 0.91547   | SH3RF2   | chr5  | + | 1.45E+08 | 1.45E+08 | 5607  |
| ENSG000001 | 409.4643 | 3.696839 | 6.6899   | 1.07E-46  | 2.24E-45  | GDF6     | chr8  | - | 97154562 | 97173020 | 3697  |
| ENSG000001 | 1173.055 | 1280.709 | -0.12556 | 0.34596   | 0.45002   | UQCRB    | chr8  | - | 97238148 | 97247862 | 5575  |
| ENSG000001 | 184.8275 | 197.1571 | -0.09299 | 0.6213    | 0.71186   | MTERFD1  | chr8  | - | 97251626 | 97273838 | 1529  |
| ENSG000001 | 1111.894 | 1063.758 | 0.064256 | 0.69677   | 0.77397   | PTDSS1   | chr8  | + | 97273943 | 97349223 | 5177  |
| ENSG000001 | 49.59494 | 650.0995 | -3.6953  | 1.72E-89  | 8.54E-88  | PPP2R2B  | chr5  | - | 1.46E+08 | 1.46E+08 | 3477  |
| ENSG000001 | 443.6164 | 916.375  | -1.0441  | 2.96E-09  | 1.31E-08  | RPL30    | chr8  | - | 99037079 | 99058697 | 1129  |
| ENSG000001 | 3.266906 | 0.700845 | 1.7881   | 0.21149   | 0.30186   | KCNS2    | chr8  | + | 99439250 | 99445076 | 5219  |
| ENSG000001 | 106.4732 | 62.4979  | 0.75782  | 0.038729  | 0.07133   | FAM122C  | chrX  | + | 1.34E+08 | 1.34E+08 | 2483  |
| ENSG000001 | 328.1974 | 511.0876 | -0.638   | 0.001326  | 0.003228  | SUPV3L1  | chr10 | + | 70939988 | 70968855 | 2484  |
| ENSG000001 | 357.3492 | 362.3762 | -0.02159 | 0.90041   | 0.93109   | FAM122B  | chrX  | - | 1.34E+08 | 1.34E+08 | 4246  |
| ENSG000001 | 126531.6 | 169159.4 | -0.41839 | 0.000604  | 0.00155   | EEF1A1   | chr6  | - | 74225473 | 74233520 | 4441  |

|            |          |          |          |           |           |           |       |   |          |          |       |
|------------|----------|----------|----------|-----------|-----------|-----------|-------|---|----------|----------|-------|
| ENSG000001 | 40.33537 | 3.054271 | 3.6393   | 1.18E-09  | 5.40E-09  | FBXO43    | chr8  | - | 1.01E+08 | 1.01E+08 | 3082  |
| ENSG000001 | 0        | 1.248751 | -1.5848  | 0.37202   | NA        | HKDC1     | chr10 | + | 70980059 | 71027315 | 3689  |
| ENSG000001 | 3135.375 | 7618.862 | -1.2788  | 5.38E-18  | 4.12E-17  | HK1       | chr10 | + | 71029740 | 71161638 | 3992  |
| ENSG000001 | 333.658  | 788.0935 | -1.2368  | 1.35E-11  | 7.07E-11  | TYSND1    | chr10 | - | 71897737 | 71906432 | 3644  |
| ENSG000001 | 713.4839 | 821.6124 | -0.20299 | 0.10821   | 0.17259   | PHF6      | chrX  | + | 1.34E+08 | 1.34E+08 | 4759  |
| ENSG000001 | 1414.192 | 83.78474 | 4.0621   | 4.21E-140 | 4.18E-138 | CD109     | chr6  | + | 74405508 | 74538040 | 9401  |
| ENSG000001 | 3.112789 | 24.68928 | -2.8546  | 0.000474  | 0.001234  | LRFN2     | chr6  | - | 40359325 | 40555204 | 3270  |
| ENSG000001 | 3.008307 | 643.5328 | -7.5479  | 1.92E-40  | 3.41E-39  | NODAL     | chr10 | - | 72192071 | 72207707 | 1665  |
| ENSG000001 | 321.0651 | 771.2335 | -1.2617  | 7.78E-22  | 7.12E-21  | UBE2L6    | chr11 | - | 57319129 | 57335757 | 1573  |
| ENSG000001 | 1950.86  | 1730.51  | 0.17284  | 0.20052   | 0.28924   | ZDHC5     | chr11 | + | 57435219 | 57468659 | 4666  |
| ENSG000001 | 307.845  | 255.2441 | 0.26992  | 0.088955  | 0.14629   | MED19     | chr11 | - | 57471186 | 57479693 | 1515  |
| ENSG000001 | 1653.404 | 946.9553 | 0.80341  | 3.02E-15  | 2.01E-14  | ZFAND3    | chr6  | + | 37787275 | 38122400 | 3366  |
| ENSG000001 | 1188.914 | 1036.6   | 0.19779  | 0.16562   | 0.24666   | NPTN      | chr15 | - | 73852355 | 73926475 | 2817  |
| ENSG000001 | 894.9511 | 529.7014 | 0.7561   | 2.20E-07  | 8.35E-07  | KAT6B     | chr10 | + | 76585340 | 76792380 | 8287  |
| ENSG000001 | 925.7477 | 463.885  | 0.99233  | 1.57E-05  | 4.92E-05  | SAMD8     | chr10 | + | 76859344 | 76941881 | 6782  |
| ENSG000001 | 277.324  | 825.2433 | -1.5728  | 2.03E-26  | 2.24E-25  | RAB11FIP1 | chr8  | - | 37716136 | 37756985 | 7811  |
| ENSG000001 | 215.4825 | 413.2739 | -0.93841 | 8.51E-06  | 2.76E-05  | UNC5D     | chr8  | + | 35092975 | 35654068 | 8662  |
| ENSG000001 | 28.35097 | 5.332435 | 2.3574   | 4.36E-05  | 0.00013   | GLYATL2   | chr11 | - | 58601542 | 58671688 | 1636  |
| ENSG000001 | 339.9501 | 369.8527 | -0.11958 | 0.75952   | 0.82529   | UTP14A    | chrX  | + | 1.29E+08 | 1.29E+08 | 2488  |
| ENSG000001 | 780.3156 | 1040.068 | -0.41375 | 0.000774  | 0.001953  | AIFM1     | chrX  | - | 1.29E+08 | 1.29E+08 | 2260  |
| ENSG000001 | 11.67113 | 205.9332 | -4.0885  | 6.22E-33  | 8.87E-32  | MAPK13    | chr6  | + | 36095586 | 36107842 | 2052  |
| ENSG000001 | 420.4009 | 585.9861 | -0.47867 | 0.000586  | 0.001505  | BAG4      | chr8  | + | 38034051 | 38070819 | 4453  |
| ENSG000001 | 18.70502 | 0.297015 | 5.0268   | 1.04E-05  | 3.32E-05  | IGKV1OR-2 | chr9  | - | 69777099 | 69777953 | 350   |
| ENSG000001 | 160.5739 | 257.9836 | -0.68283 | 7.30E-05  | 0.000211  | WDR67     | chr8  | + | 1.24E+08 | 1.24E+08 | 3502  |
| ENSG000001 | 290.4775 | 197.7802 | 0.55282  | 0.000516  | 0.001336  | WDYHV1    | chr8  | + | 1.24E+08 | 1.24E+08 | 1491  |
| ENSG000001 | 970.1576 | 597.2807 | 0.69789  | 0.001801  | 0.004293  | ATAD2     | chr8  | - | 1.24E+08 | 1.24E+08 | 5565  |
| ENSG000001 | 458.8234 | 21.48355 | 4.3945   | 7.21E-67  | 2.46E-65  | FBXO32    | chr8  | - | 1.25E+08 | 1.25E+08 | 6744  |
| ENSG000001 | 250.9985 | 195.6874 | 0.35836  | 0.024144  | 0.046759  | NSMCE2    | chr8  | + | 1.26E+08 | 1.26E+08 | 1195  |
| ENSG000001 | 295.7689 | 525.74   | -0.82732 | 5.34E-09  | 2.32E-08  | ZNF689    | chr16 | - | 30613879 | 30635333 | 3547  |
| ENSG000001 | 503.6235 | 241.9891 | 1.0526   | 1.59E-07  | 6.11E-07  | PRR14     | chr16 | + | 30662038 | 30667761 | 2316  |
| ENSG000001 | 2206.782 | 512.4856 | 2.0995   | 1.27E-27  | 1.48E-26  | FBR5      | chr16 | + | 30669752 | 30682135 | 5200  |
| ENSG000001 | 96.48727 | 44.75718 | 1.1077   | 2.59E-05  | 7.90E-05  | FRRS1     | chr1  | - | 1E+08    | 1E+08    | 2706  |
| ENSG000001 | 291.2372 | 336.5758 | -0.20724 | 0.2651    | 0.36368   | PHKG2     | chr16 | + | 30759591 | 30772490 | 5532  |
| ENSG000001 | 906.7139 | 769.3384 | 0.23733  | 0.040367  | 0.073962  | HIAT1     | chr1  | + | 1.01E+08 | 1.01E+08 | 2777  |
| ENSG000001 | 102.0756 | 171.2666 | -0.73984 | 0.005955  | 0.013063  | SASS6     | chr1  | - | 1.01E+08 | 1.01E+08 | 3972  |
| ENSG000001 | 0        | 0.715414 | -0.84936 | 0.6309    | NA        | COX6A2    | chr16 | - | 31439052 | 31439967 | 714   |
| ENSG000001 | 0.342542 | 0        | 0.4146   | 0.81455   | NA        | GPR112    | chrX  | + | 1.35E+08 | 1.36E+08 | 9931  |
| ENSG000001 | 41.52714 | 1707.177 | -5.3466  | 4.72E-93  | 2.47E-91  | ZIC3      | chrX  | + | 1.37E+08 | 1.37E+08 | 3469  |
| ENSG000001 | 383.6154 | 471.5355 | -0.29716 | 0.028993  | 0.055057  | MALSU1    | chr7  | + | 23338358 | 23351348 | 3044  |
| ENSG000001 | 585.6723 | 520.2131 | 0.16974  | 0.18377   | 0.26896   | VPS8      | chr3  | + | 1.85E+08 | 1.85E+08 | 5047  |
| ENSG000001 | 155.0282 | 77.1759  | 1.0036   | 4.47E-06  | 1.49E-05  | GALK2     | chr15 | + | 49447853 | 49660066 | 3222  |
| ENSG000001 | 0        | 167.491  | -8.8238  | 4.85E-16  | 3.37E-15  | LHFPL4    | chr3  | - | 9543481  | 9595486  | 1444  |
| ENSG000001 | 57.1197  | 5539.527 | -6.5751  | 2.27E-213 | 5.83E-211 | B3GNT7    | chr2  | + | 2.32E+08 | 2.32E+08 | 3706  |
| ENSG000001 | 0.342542 | 15.67686 | -4.7768  | 3.57E-05  | 0.000107  | MPV17L    | chr16 | + | 15489611 | 15503458 | 2153  |
| ENSG000001 | 832.7714 | 2308.903 | -1.4689  | 2.50E-22  | 2.34E-21  | BUB1B     | chr15 | + | 40453224 | 40513337 | 3725  |
| ENSG000001 | 283.7005 | 262.3873 | 0.11188  | 0.52622   | 0.628     | PDE6D     | chr2  | - | 2.33E+08 | 2.33E+08 | 1175  |
| ENSG000001 | 3316.74  | 5581.298 | -0.75002 | 1.79E-10  | 8.72E-10  | EIF4A2    | chr3  | + | 1.87E+08 | 1.87E+08 | 5327  |
| ENSG000001 | 747.9554 | 913.8188 | -0.28718 | 0.26592   | 0.36468   | BRPF1     | chr3  | + | 9773413  | 9789702  | 4736  |
| ENSG000001 | 597.0741 | 1067.667 | -0.8365  | 9.76E-07  | 3.49E-06  | RPUSD3    | chr3  | - | 9879533  | 9886286  | 2491  |
| ENSG000001 | 0        | 0.686276 | -0.84936 | 0.6309    | NA        | SST       | chr3  | - | 1.87E+08 | 1.87E+08 | 618   |
| ENSG000001 | 1072.497 | 815.1294 | 0.39469  | 0.057555  | 0.10063   | TATDN2    | chr3  | + | 10289707 | 10327480 | 5342  |
| ENSG000001 | 9.625248 | 11.88207 | -0.28373 | 0.64767   | 0.73382   | GHRL      | chr3  | - | 10327359 | 10334631 | 1425  |
| ENSG000001 | 4709.905 | 1948.338 | 1.2727   | 6.18E-50  | 1.41E-48  | SEC13     | chr3  | - | 10334815 | 10362862 | 2374  |
| ENSG000001 | 0.632843 | 2.010288 | -1.3036  | 0.35892   | 0.46308   | FAM92A1P  | chr15 | + | 41455360 | 41456572 | 890   |
| ENSG000001 | 414.4894 | 139.1856 | 1.5731   | 4.43E-25  | 4.64E-24  | EXO2      | chr3  | + | 38537618 | 38583652 | 2792  |
| ENSG000001 | 771.4454 | 350.906  | 1.1361   | 8.37E-17  | 6.06E-16  | NTAN1     | chr16 | - | 15131710 | 15149921 | 2398  |
| ENSG000001 | 0.36308  | 0        | 0.4146   | 0.81455   | NA        | SHCBP1L   | chr1  | - | 1.83E+08 | 1.83E+08 | 2540  |
| ENSG000001 | 13.89068 | 309.8232 | -4.4562  | 9.94E-55  | 2.54E-53  | NMNAT2    | chr1  | - | 1.83E+08 | 1.83E+08 | 5663  |
| ENSG000001 | 376.4184 | 474.1162 | -0.33039 | 0.016677  | 0.033458  | ZFYVE9    | chr1  | + | 52608046 | 52812358 | 4914  |
| ENSG000001 | 2.386629 | 10.77739 | -2.0731  | 0.013813  | 0.028202  | ATP2B2    | chr3  | - | 10365707 | 10749716 | 9101  |
| ENSG000001 | 0.653381 | 4.288452 | -2.3159  | 0.060695  | 0.10544   | SLC6A1    | chr3  | + | 11034410 | 11080933 | 4502  |
| ENSG000001 | 2422.607 | 1826.716 | 0.40699  | 0.000214  | 0.000583  | SMG1      | chr16 | - | 18816175 | 18937776 | 16115 |
| ENSG000001 | 397.991  | 249.3969 | 0.67535  | 6.43E-06  | 2.11E-05  | FCHO2     | chr5  | + | 72251808 | 72386349 | 4981  |
| ENSG000001 | 412.5413 | 3443.325 | -3.0572  | 5.06E-126 | 4.31E-124 | RBPMS     | chr8  | + | 30241944 | 30429778 | 3110  |
| ENSG000001 | 45.57856 | 68.42424 | -0.57854 | 0.091554  | 0.14994   | TMEM171   | chr5  | + | 72416119 | 72427644 | 1535  |

|            |          |          |          |           |           |           |       |   |          |          |       |
|------------|----------|----------|----------|-----------|-----------|-----------|-------|---|----------|----------|-------|
| ENSG000001 | 0.72616  | 0        | 0.85004  | 0.63064   | NA        | C8A       | chr1  | + | 57320479 | 57383894 | 2356  |
| ENSG000001 | 80.90523 | 91.95654 | -0.18055 | 0.70557   | 0.78117   | TIMP4     | chr3  | - | 12194551 | 12200851 | 1650  |
| ENSG000001 | 20.52139 | 141.1184 | -2.7674  | 2.24E-20  | 1.92E-19  | SYN2      | chr3  | + | 12045876 | 12232900 | 3897  |
| ENSG000001 | 80.65617 | 30.1341  | 1.4063   | 1.36E-06  | 4.79E-06  | NRG1      | chr8  | + | 31496902 | 32622548 | 3127  |
| ENSG000001 | 285.712  | 214.1026 | 0.4162   | 0.043212  | 0.078404  | C1orf27   | chr1  | + | 1.86E+08 | 1.86E+08 | 3823  |
| ENSG000001 | 171.9934 | 306.6595 | -0.83465 | 2.52E-07  | 9.48E-07  | CPT2      | chr1  | + | 53662101 | 53679869 | 3094  |
| ENSG000001 | 1332.667 | 564.7303 | 1.2376   | 1.05E-27  | 1.22E-26  | NECAP2    | chr1  | + | 16767167 | 16786573 | 4619  |
| ENSG000001 | 1242.301 | 884.1859 | 0.48975  | 1.49E-06  | 5.24E-06  | LRP8      | chr1  | - | 53711217 | 53793742 | 4467  |
| ENSG000001 | 1.359003 | 2.543625 | -0.81016 | 0.51042   | 0.61375   | CDCP2     | chr1  | - | 54598747 | 54619443 | 2723  |
| ENSG000001 | 259.1863 | 471.5028 | -0.86065 | 8.15E-08  | 3.20E-07  | PAXIP1    | chr7  | - | 1.55E+08 | 1.55E+08 | 5515  |
| ENSG000001 | 401.1212 | 298.4674 | 0.42351  | 0.019019  | 0.037725  | STEAP2    | chr7  | + | 89796904 | 89867451 | 6873  |
| ENSG000001 | 1440.186 | 3163.804 | -1.134   | 8.17E-22  | 7.47E-21  | SSBP3     | chr1  | - | 54691105 | 54879152 | 2913  |
| ENSG000001 | 400.9138 | 513.1485 | -0.35595 | 0.003693  | 0.008388  | CLDN12    | chr7  | + | 90013035 | 90142716 | 3587  |
| ENSG000001 | 57491.24 | 3122.782 | 4.1978   | 4.22E-296 | 1.91E-293 | MMP14     | chr14 | + | 23305766 | 23318236 | 3732  |
| ENSG000001 | 3268.538 | 97.7782  | 5.0516   | 3.02E-247 | 1.01E-244 | FZD1      | chr7  | + | 90893783 | 90898123 | 4341  |
| ENSG000001 | 563.1424 | 673.5715 | -0.25791 | 0.029249  | 0.055506  | GATAD1    | chr7  | + | 92076767 | 92088150 | 3361  |
| ENSG000001 | 0        | 113.639  | -8.2617  | 1.44E-13  | 8.62E-13  | SUSD3     | chr9  | + | 95820989 | 95847420 | 1195  |
| ENSG000001 | 3.797873 | 16.94663 | -2.0952  | 0.0037    | 0.008402  | RP11-66N2 | chr14 | + | 23980969 | 24029987 | 2524  |
| ENSG000001 | 7.667711 | 7.094248 | 0.10995  | 0.88916   | 0.92285   | TMED6     | chr16 | - | 69377151 | 69385712 | 938   |
| ENSG000001 | 13.32043 | 1.698704 | 2.8125   | 0.000998  | 0.002475  | CLEC18A   | chr16 | + | 69984810 | 69998141 | 3194  |
| ENSG000001 | 158.4384 | 91.63723 | 0.78717  | 5.85E-05  | 0.000171  | DHRS4     | chr14 | + | 24422795 | 24438488 | 1443  |
| ENSG000001 | 1.971308 | 1.40169  | 0.43614  | 0.74202   | 0.81035   | CLEC18C   | chr16 | + | 70207225 | 70221264 | 3660  |
| ENSG000001 | 3.495593 | 11.15208 | -1.5753  | 0.034596  | 0.064471  | ARMC12    | chr6  | + | 35704809 | 35716856 | 1254  |
| ENSG000001 | 181.318  | 262.1514 | -0.53171 | 0.001256  | 0.003067  | DDX19B    | chr16 | + | 70323566 | 70369186 | 3386  |
| ENSG000001 | 2716.778 | 1767.307 | 0.61879  | 0.000276  | 0.000742  | ST3GAL2   | chr16 | - | 70413338 | 70473140 | 5345  |
| ENSG000001 | 256.8104 | 233.8013 | 0.13522  | 0.47342   | 0.57796   | FUK       | chr16 | + | 70488324 | 70514177 | 4439  |
| ENSG000001 | 4.326234 | 156.6212 | -5.1091  | 1.33E-30  | 1.73E-29  | IL34      | chr16 | + | 70613798 | 70694585 | 1779  |
| ENSG000001 | 313.3356 | 214.4217 | 0.54806  | 0.000511  | 0.001325  | DHRS1     | chr14 | - | 24759804 | 24769039 | 2660  |
| ENSG000001 | 54.52834 | 15.75857 | 1.7761   | 4.53E-06  | 1.51E-05  | CACNA1D   | chr3  | + | 53528683 | 53846490 | 7721  |
| ENSG000001 | 134.11   | 194.4498 | -0.53371 | 0.036205  | 0.067151  | ARSE      | chrX  | - | 2852699  | 2886286  | 2158  |
| ENSG000001 | 5.851333 | 804.512  | -7.0832  | 2.27E-82  | 9.88E-81  | KIT       | chr4  | + | 55524085 | 55606881 | 5186  |
| ENSG000001 | 2.064625 | 29.86952 | -3.7191  | 5.88E-07  | 2.14E-06  | HYDIN     | chr16 | - | 70841281 | 71264625 | 15719 |
| ENSG000001 | 171.0617 | 246.9572 | -0.52945 | 0.013612  | 0.027831  | AASDH     | chr4  | - | 57204456 | 57253666 | 3590  |
| ENSG000001 | 15.34479 | 30.31531 | -0.96844 | 0.042685  | 0.077574  | ZNF19     | chr16 | - | 71498453 | 71598992 | 3213  |
| ENSG000001 | 12.24138 | 130.5408 | -3.3906  | 2.88E-25  | 3.04E-24  | CACNA2D3  | chr3  | + | 54156574 | 55108584 | 3675  |
| ENSG000001 | 525.5267 | 281.1116 | 0.90147  | 1.55E-11  | 8.12E-11  | RNF111    | chr15 | + | 59157374 | 59389618 | 5913  |
| ENSG000001 | 717.7736 | 1491.287 | -1.0536  | 7.62E-17  | 5.53E-16  | CCNB2     | chr15 | + | 59397277 | 59417244 | 1556  |
| ENSG000001 | 6.14082  | 3.792375 | 0.63289  | 0.48273   | 0.58695   | FAM81A    | chr15 | + | 59664892 | 59815748 | 3465  |
| ENSG000001 | 980.9232 | 748.1135 | 0.39109  | 0.007423  | 0.01598   | MYO1E     | chr15 | - | 59427113 | 59665099 | 6193  |
| ENSG000001 | 820.0222 | 705.4111 | 0.21668  | 0.049821  | 0.088677  | APPL1     | chr3  | + | 57261765 | 57307496 | 6058  |
| ENSG000001 | 126.7152 | 17.83438 | 2.8107   | 1.00E-15  | 6.84E-15  | MUM1L1    | chrX  | + | 1.05E+08 | 1.05E+08 | 4308  |
| ENSG000001 | 123.4964 | 212.2983 | -0.77847 | 0.001224  | 0.002995  | AFAP1L1   | chr5  | + | 1.49E+08 | 1.49E+08 | 4177  |
| ENSG000001 | 545.9326 | 312.7276 | 0.80354  | 2.92E-09  | 1.29E-08  | TSC22D3   | chrX  | - | 1.07E+08 | 1.07E+08 | 2266  |
| ENSG000001 | 714.2736 | 1011.741 | -0.50228 | 4.84E-06  | 1.61E-05  | DSCR3     | chr21 | - | 38595721 | 38640262 | 5648  |
| ENSG000001 | 911.7962 | 926.6652 | -0.02297 | 0.85052   | 0.89488   | DYRK1A    | chr21 | + | 38739236 | 38887680 | 6384  |
| ENSG000001 | 30.90271 | 3.650716 | 2.9828   | 2.46E-06  | 8.45E-06  | KCNJ6     | chr21 | - | 38996789 | 39288749 | 2534  |
| ENSG000001 | 46.17554 | 0        | 7.1072   | 1.67E-10  | 8.13E-10  | KCNJ15    | chr21 | + | 39529128 | 39673748 | 2914  |
| ENSG000001 | 57.57609 | 30.64958 | 0.89999  | 0.006984  | 0.015127  | ERG       | chr21 | - | 39751949 | 40033704 | 5034  |
| ENSG000001 | 254.6249 | 1304.289 | -2.3493  | 1.91E-27  | 2.21E-26  | ETS2      | chr21 | + | 40177231 | 40196879 | 3936  |
| ENSG000001 | 18.76842 | 1562.502 | -6.3743  | 2.83E-170 | 4.21E-168 | TSPAN18   | chr11 | + | 44748015 | 44953972 | 4229  |
| ENSG000001 | 18.75384 | 8.767103 | 1.0645   | 0.059646  | 0.10398   | LCA5L     | chr21 | - | 40777770 | 40817731 | 2564  |
| ENSG000001 | 2356.889 | 942.9406 | 1.3208   | 1.61E-27  | 1.87E-26  | SLC35B2   | chr6  | - | 44221833 | 44225291 | 2043  |
| ENSG000001 | 533.1021 | 462.8154 | 0.20266  | 0.14608   | 0.22188   | TMEM164   | chrX  | + | 1.09E+08 | 1.09E+08 | 5567  |
| ENSG000001 | 44.69494 | 53.22653 | -0.25924 | 0.43978   | 0.5455    | MX1       | chr21 | + | 42792231 | 42831141 | 3470  |
| ENSG000001 | 3008.26  | 247.4859 | 3.586    | 1.04E-49  | 2.36E-48  | CREB3L1   | chr11 | + | 46299212 | 46342972 | 2687  |
| ENSG000001 | 388.0881 | 493.2602 | -0.34596 | 0.1091    | 0.17375   | C2CD2     | chr21 | - | 43305221 | 43373999 | 6345  |
| ENSG000001 | 424.7996 | 281.0656 | 0.59348  | 1.65E-05  | 5.15E-05  | TAB3      | chrX  | - | 30845559 | 30993201 | 7987  |
| ENSG000001 | 4203.072 | 1613.383 | 1.3788   | 3.69E-21  | 3.28E-20  | SLC38A10  | chr17 | - | 79218800 | 79269347 | 4300  |
| ENSG000001 | 3.080272 | 3.679854 | -0.20024 | 0.84534   | 0.89157   | C9orf43   | chr9  | + | 1.16E+08 | 1.16E+08 | 2130  |
| ENSG000001 | 6.878145 | 0.297015 | 3.6279   | 0.00464   | 0.010383  | PALM2-AK1 | chr9  | + | 1.13E+08 | 1.13E+08 | 7507  |
| ENSG000001 | 3146.132 | 1065.289 | 1.561    | 3.40E-49  | 7.61E-48  | ZNF618    | chr9  | + | 1.17E+08 | 1.17E+08 | 9109  |
| ENSG000001 | 190.3995 | 5.76782  | 5.0087   | 3.32E-35  | 5.06E-34  | DGKI      | chr7  | - | 1.37E+08 | 1.38E+08 | 5148  |
| ENSG000001 | 193.926  | 259.2268 | -0.41823 | 0.011957  | 0.024724  | C9orf91   | chr9  | + | 1.17E+08 | 1.17E+08 | 4578  |
| ENSG000001 | 1.555988 | 30.7176  | -4.0382  | 6.14E-08  | 2.44E-07  | SVOPL     | chr7  | - | 1.38E+08 | 1.38E+08 | 5761  |
| ENSG000001 | 32.58551 | 142.5718 | -2.1164  | 1.60E-14  | 1.02E-13  | SNX22     | chr15 | + | 64443914 | 64449680 | 3713  |

|            |          |          |          |           |           |          |       |   |          |          |       |
|------------|----------|----------|----------|-----------|-----------|----------|-------|---|----------|----------|-------|
| ENSG000001 | 441.7951 | 842.1457 | -0.9295  | 4.99E-11  | 2.53E-10  | UBN2     | chr7  | + | 1.39E+08 | 1.39E+08 | 14443 |
| ENSG000001 | 221.1551 | 180.6484 | 0.291    | 0.16698   | 0.24828   | BRAF     | chr7  | - | 1.4E+08  | 1.41E+08 | 2480  |
| ENSG000001 | 1.8154   | 22.35828 | -3.3609  | 0.000729  | 0.001846  | SLC34A2  | chr4  | + | 25656923 | 25680370 | 4122  |
| ENSG000001 | 1638.726 | 46.89215 | 5.1192   | 1.40E-172 | 2.21E-170 | ACAN     | chr15 | + | 89346674 | 89418585 | 8840  |
| ENSG000001 | 170.0992 | 257.6104 | -0.59596 | 0.000541  | 0.001395  | PSMG3    | chr7  | - | 1606966  | 1610641  | 1391  |
| ENSG000001 | 1.306762 | 254.7833 | -7.2886  | 5.22E-27  | 5.91E-26  | CABP1    | chr12 | + | 1.21E+08 | 1.21E+08 | 3048  |
| ENSG000001 | 430.4046 | 232.8704 | 0.88467  | 1.26E-07  | 4.90E-07  | WDR19    | chr4  | + | 39184024 | 39287430 | 4520  |
| ENSG000001 | 967.2887 | 744.4311 | 0.37799  | 0.000504  | 0.001309  | SLC37A3  | chr7  | - | 1.4E+08  | 1.4E+08  | 3488  |
| ENSG000001 | 235.0088 | 313.2861 | -0.41356 | 0.023148  | 0.045055  | AP3S2    | chr15 | - | 90373831 | 90437574 | 5891  |
| ENSG000001 | 1912.67  | 860.1661 | 1.1499   | 2.92E-14  | 1.82E-13  | FMNL2    | chr2  | + | 1.53E+08 | 1.54E+08 | 5575  |
| ENSG000001 | 0        | 0.297015 | -0.41864 | 0.81278   | NA        | RPS4Y2   | chrY  | + | 22918050 | 22942918 | 792   |
| ENSG000001 | 492.0492 | 990.2941 | -1.0048  | 8.81E-06  | 2.85E-05  | GAREML   | chr2  | + | 26395960 | 26412532 | 5138  |
| ENSG000001 | 624.2597 | 753.2521 | -0.27032 | 0.03563   | 0.066217  | SPPL3    | chr12 | - | 1.21E+08 | 1.21E+08 | 4148  |
| ENSG000001 | 3.330311 | 900.6436 | -7.9583  | 1.89E-69  | 6.72E-68  | DPYSL5   | chr2  | + | 27070615 | 27173219 | 5209  |
| ENSG000001 | 5.996077 | 2.725702 | 1.0643   | 0.25816   | 0.35581   | DRC1     | chr2  | + | 26624784 | 26679579 | 2491  |
| ENSG000001 | 191.2749 | 208.7406 | -0.12467 | 0.53979   | 0.64036   | RAB28    | chr4  | - | 13362978 | 13485989 | 1810  |
| ENSG000001 | 601.3276 | 1130.81  | -0.91063 | 3.08E-15  | 2.05E-14  | FAM213B  | chr1  | + | 2517930  | 2522908  | 2765  |
| ENSG000001 | 1.701545 | 0.594029 | 1.0895   | 0.47458   | 0.57905   | TNFRSF14 | chr1  | + | 2487078  | 2496821  | 4255  |
| ENSG000001 | 694.4038 | 595.1648 | 0.22118  | 0.2419    | 0.33703   | PANK4    | chr1  | - | 2439972  | 2458039  | 2649  |
| ENSG000001 | 8.413595 | 50.8351  | -2.539   | 7.24E-08  | 2.85E-07  | MEGF11   | chr15 | - | 66187417 | 66546085 | 6163  |
| ENSG000001 | 306.6922 | 332.6286 | -0.11665 | 0.58592   | 0.68168   | C12orf43 | chr12 | - | 1.21E+08 | 1.21E+08 | 2533  |
| ENSG000001 | 864.2848 | 710.3914 | 0.28225  | 0.15711   | 0.23624   | PEX10    | chr1  | - | 2336236  | 2345236  | 2038  |
| ENSG000001 | 1735.707 | 751.09   | 1.2065   | 1.86E-13  | 1.10E-12  | RER1     | chr1  | + | 2323267  | 2335190  | 2469  |
| ENSG000001 | 99.98726 | 537.4211 | -2.4163  | 6.59E-23  | 6.33E-22  | RADIL    | chr7  | - | 4836686  | 4923350  | 5669  |
| ENSG000001 | 3732.51  | 2882.482 | 0.37231  | 0.00035   | 0.000927  | SKI      | chr1  | + | 2160134  | 2241558  | 5613  |
| ENSG000001 | 1451.882 | 1558.417 | -0.10224 | 0.27753   | 0.37781   | WIPI2    | chr7  | + | 5229819  | 5273457  | 4476  |
| ENSG000001 | 468.8212 | 593.9047 | -0.33896 | 0.012251  | 0.025279  | LDLRAP1  | chr1  | + | 25870071 | 25895377 | 4670  |
| ENSG000001 | 966.9818 | 1154.268 | -0.25589 | 0.023801  | 0.046169  | AGAP1    | chr2  | + | 2.36E+08 | 2.37E+08 | 6138  |
| ENSG000001 | 16.15311 | 382.9866 | -4.5649  | 2.02E-63  | 6.35E-62  | KRTCAP3  | chr2  | + | 27665233 | 27669348 | 956   |
| ENSG000001 | 41.26789 | 25.1391  | 0.70709  | 0.043462  | 0.078817  | ANKRD61  | chr7  | + | 6071007  | 6076017  | 1257  |
| ENSG000001 | 150.9962 | 235.1324 | -0.63478 | 0.00202   | 0.004778  | PAFAH2   | chr1  | - | 26286258 | 26324648 | 3581  |
| ENSG000001 | 241.8321 | 23.02045 | 3.3526   | 3.17E-24  | 3.22E-23  | EXTL1    | chr1  | + | 26346375 | 26362955 | 4015  |
| ENSG000001 | 0.36308  | 6.473497 | -3.0616  | 0.046549  | 0.083602  | SLC30A2  | chr1  | - | 26363743 | 26372624 | 3097  |
| ENSG000001 | 152.5775 | 154.7078 | -0.01659 | 0.93567   | 0.95758   | BRE      | chr2  | + | 28112808 | 28561768 | 1852  |
| ENSG000001 | 0.36308  | 2.024857 | -1.7472  | 0.2845    | 0.38587   | TRIM63   | chr1  | - | 26377795 | 26394927 | 1770  |
| ENSG000001 | 25.12595 | 36.3592  | -0.52251 | 0.18396   | 0.26914   | WDR66    | chr12 | + | 1.22E+08 | 1.22E+08 | 4675  |
| ENSG000001 | 1254.656 | 1042.197 | 0.26819  | 0.033259  | 0.062222  | MRPL17   | chr11 | - | 6702013  | 6704632  | 1969  |
| ENSG000001 | 35.49529 | 66.19857 | -0.88002 | 0.011632  | 0.024099  | DUSP2    | chr2  | - | 96808905 | 96811179 | 1688  |
| ENSG000001 | 0.943682 | 30.13485 | -4.6164  | 6.45E-08  | 2.56E-07  | GRHL3    | chr1  | + | 24645812 | 24690972 | 2869  |
| ENSG000001 | 257.8047 | 175.8547 | 0.55157  | 0.00301   | 0.006936  | UBXN11   | chr1  | - | 26607819 | 26644854 | 2646  |
| ENSG000001 | 1.286224 | 0.357707 | 1.3361   | 0.4083    | NA        | NLRP14   | chr11 | + | 7041677  | 7092539  | 3628  |
| ENSG000001 | 372.1454 | 139.7417 | 1.4101   | 3.07E-15  | 2.04E-14  | PTPDC1   | chr9  | + | 96793076 | 96872138 | 4517  |
| ENSG000001 | 52.88678 | 83.05791 | -0.6481  | 0.010203  | 0.021414  | GALNT14  | chr2  | - | 31133333 | 31378068 | 2733  |
| ENSG000001 | 215.5228 | 153.0765 | 0.49342  | 0.004753  | 0.010622  | NCK1     | chr3  | + | 1.37E+08 | 1.37E+08 | 2403  |
| ENSG000001 | 0.632843 | 7.379983 | -3.0651  | 0.008146  | 0.017387  | HPD      | chr12 | - | 1.22E+08 | 1.22E+08 | 1709  |
| ENSG000001 | 98.71457 | 460.0902 | -2.2132  | 5.08E-27  | 5.76E-26  | RHPN1    | chr8  | + | 1.44E+08 | 1.44E+08 | 3683  |
| ENSG000001 | 531.8182 | 570.0138 | -0.10101 | 0.40615   | 0.51096   | TPRG1L   | chr1  | + | 3541566  | 3546691  | 2414  |
| ENSG000001 | 17.82213 | 8.058137 | 1.125    | 0.043883  | 0.079415  | LRRRC43  | chr12 | + | 1.23E+08 | 1.23E+08 | 2028  |
| ENSG000001 | 168.6202 | 63.10401 | 1.4055   | 2.02E-09  | 9.05E-09  | AAED1    | chr9  | - | 99401859 | 99417585 | 2863  |
| ENSG000001 | 84.40522 | 46.78366 | 0.84903  | 0.010578  | 0.022121  | XDH      | chr2  | - | 31557187 | 31637581 | 5688  |
| ENSG000001 | 290.8335 | 360.8677 | -0.30945 | 0.088826  | 0.14612   | XKR8     | chr1  | + | 28285973 | 28294607 | 2692  |
| ENSG000001 | 281.3096 | 402.1094 | -0.51421 | 0.001597  | 0.003834  | CNNM4    | chr2  | + | 97426639 | 97477628 | 4800  |
| ENSG000001 | 635.1776 | 562.347  | 0.17504  | 0.19613   | 0.28417   | EYA3     | chr1  | - | 28296855 | 28415207 | 6085  |
| ENSG000001 | 388.3058 | 70.88857 | 2.4455   | 1.07E-41  | 1.96E-40  | DZIP1L   | chr3  | - | 1.38E+08 | 1.38E+08 | 3493  |
| ENSG000001 | 373.8353 | 440.9951 | -0.23855 | 0.067623  | 0.11564   | TMSB15A  | chrX  | - | 1.02E+08 | 1.02E+08 | 685   |
| ENSG000001 | 335.7699 | 203.9204 | 0.7168   | 2.41E-06  | 8.32E-06  | FANCC    | chr9  | - | 97861336 | 98079991 | 4585  |
| ENSG000001 | 1097.151 | 223.4828 | 2.2888   | 2.86E-47  | 6.03E-46  | MRAS     | chr3  | + | 1.38E+08 | 1.38E+08 | 4538  |
| ENSG000001 | 3393.328 | 3598.689 | -0.08463 | 0.57193   | 0.669     | WASF2    | chr1  | - | 27730730 | 27816669 | 5666  |
| ENSG000001 | 111.0999 | 108.1996 | 0.032362 | 0.89257   | 0.92537   | ABHD3    | chr18 | - | 19230858 | 19284766 | 2080  |
| ENSG000001 | 2.592987 | 101.4806 | -5.1381  | 1.07E-20  | 9.30E-20  | ESYT3    | chr3  | + | 1.38E+08 | 1.38E+08 | 4620  |
| ENSG000001 | 74.23621 | 106.584  | -0.51932 | 0.060622  | 0.10533   | FAIM     | chr3  | + | 1.38E+08 | 1.38E+08 | 3161  |
| ENSG000001 | 73.25471 | 2916.912 | -5.2983  | 5.33E-111 | 3.60E-109 | FAM46B   | chr1  | - | 27331511 | 27339327 | 2368  |
| ENSG000001 | 320.3604 | 8.671568 | 5.1652   | 1.12E-49  | 2.54E-48  | CLSTN2   | chr3  | + | 1.4E+08  | 1.4E+08  | 4882  |
| ENSG000001 | 84.53024 | 25.57449 | 1.7122   | 4.86E-08  | 1.95E-07  | COLEC12  | chr18 | - | 319361   | 500722   | 4719  |
| ENSG000001 | 68.84469 | 80.06595 | -0.21852 | 0.39989   | 0.50458   | RNF207   | chr1  | + | 6265535  | 6281359  | 3924  |

|            |          |          |          |           |           |           |       |   |          |          |       |
|------------|----------|----------|----------|-----------|-----------|-----------|-------|---|----------|----------|-------|
| ENSG000001 | 1062.546 | 765.0388 | 0.47382  | 1.38E-05  | 4.35E-05  | CUL4B     | chrX  | - | 1.2E+08  | 1.2E+08  | 4902  |
| ENSG000001 | 1004.682 | 883.0029 | 0.18496  | 0.44838   | 0.55386   | GPR153    | chr1  | - | 6307406  | 6321035  | 4082  |
| ENSG000001 | 38.19439 | 255.2502 | -2.7262  | 4.05E-23  | 3.94E-22  | SLC13A3   | chr20 | - | 45186463 | 45304714 | 4017  |
| ENSG000001 | 393.9868 | 323.0026 | 0.28497  | 0.075333  | 0.12693   | GPRASP2   | chrX  | + | 1.02E+08 | 1.02E+08 | 4729  |
| ENSG000001 | 8.725248 | 0.98329  | 2.8304   | 0.006406  | 0.013973  | RHBDL2    | chr1  | - | 39351479 | 39407471 | 2129  |
| ENSG000001 | 2167.884 | 1274.187 | 0.76362  | 0.000944  | 0.002352  | AUTS2     | chr7  | + | 69063905 | 70258054 | 6173  |
| ENSG000001 | 1030.919 | 108.1533 | 3.246    | 9.24E-118 | 6.90E-116 | SHROOM4   | chrX  | - | 50334647 | 50557302 | 9556  |
| ENSG000001 | 125.0932 | 72.64602 | 0.77502  | 0.076783  | 0.12903   | HIST1H2BC | chr6  | + | 26158349 | 26171577 | 789   |
| ENSG000001 | 222.5028 | 378.7383 | -0.76631 | 3.21E-06  | 1.09E-05  | CDC25C    | chr5  | - | 1.38E+08 | 1.38E+08 | 2128  |
| ENSG000001 | 26.02758 | 32.44208 | -0.30877 | 0.56671   | 0.66443   | HIST1H4H  | chr6  | - | 26281283 | 26285762 | 1034  |
| ENSG000001 | 220.8177 | 238.1349 | -0.10964 | 0.53346   | 0.63436   | MITD1     | chr2  | - | 99777890 | 99797521 | 3270  |
| ENSG000001 | 2518.693 | 3534.941 | -0.48738 | 0.012878  | 0.026469  | EIF5B     | chr2  | + | 99953816 | 1E+08    | 4716  |
| ENSG000001 | 8.413595 | 18.18893 | -1.077   | 0.068431  | 0.11681   | RIBC1     | chrX  | + | 53449639 | 53458059 | 1949  |
| ENSG000001 | 241.178  | 116.8848 | 1.0442   | 1.75E-09  | 7.92E-09  | TMSB15B   | chrX  | + | 1.03E+08 | 1.03E+08 | 2279  |
| ENSG000001 | 0        | 1.545765 | -1.8556  | 0.29195   | NA        | C2orf62   | chr2  | + | 2.19E+08 | 2.19E+08 | 2383  |
| ENSG000001 | 944.2721 | 1251.93  | -0.40641 | 0.002223  | 0.005218  | CNOT11    | chr2  | + | 1.02E+08 | 1.02E+08 | 2599  |
| ENSG000001 | 0.653381 | 46.8906  | -5.6113  | 5.10E-09  | 2.21E-08  | KCNB1     | chr20 | - | 47984946 | 48099184 | 7318  |
| ENSG000001 | 17.73819 | 289.3221 | -4.0025  | 7.79E-48  | 1.68E-46  | TSPAN33   | chr7  | + | 1.29E+08 | 1.29E+08 | 1883  |
| ENSG000001 | 3.028032 | 2.765378 | 0.11256  | 0.92928   | 0.95316   | NRG2      | chr5  | - | 1.39E+08 | 1.39E+08 | 3723  |
| ENSG000001 | 296.966  | 669.95   | -1.1703  | 1.09E-08  | 4.59E-08  | AHCYL2    | chr7  | + | 1.29E+08 | 1.29E+08 | 5056  |
| ENSG000001 | 2070.243 | 2261.894 | -0.1281  | 0.17923   | 0.26329   | B4GALT5   | chr20 | - | 48249482 | 48330415 | 4722  |
| ENSG000001 | 3.101624 | 87.84748 | -4.7219  | 9.14E-15  | 5.91E-14  | CD1D      | chr1  | + | 1.58E+08 | 1.58E+08 | 2253  |
| ENSG000001 | 275.6272 | 426.4972 | -0.62572 | 0.00013   | 0.000365  | SPATA2    | chr20 | - | 48519928 | 48532080 | 4138  |
| ENSG000001 | 1.027626 | 0        | 1.1491   | 0.51623   | NA        | CD1C      | chr1  | + | 1.58E+08 | 1.58E+08 | 1435  |
| ENSG000001 | 2.366091 | 0.297015 | 2.0628   | 0.18261   | 0.26753   | SNX29P1   | chr16 | + | 21391313 | 21403412 | 1209  |
| ENSG000001 | 40.13676 | 104.5608 | -1.3684  | 2.70E-06  | 9.24E-06  | FAM86C1   | chr11 | + | 71498556 | 71512282 | 2110  |
| ENSG000001 | 0.36308  | 0        | 0.4146   | 0.81455   | NA        | CD1B      | chr1  | - | 1.58E+08 | 1.58E+08 | 1395  |
| ENSG000001 | 4.750114 | 36.96048 | -2.8538  | 2.63E-07  | 9.89E-07  | DNAH3     | chr16 | - | 20944433 | 21170762 | 12394 |
| ENSG000001 | 0.36308  | 0        | 0.4146   | 0.81455   | NA        | CD1E      | chr1  | + | 1.58E+08 | 1.58E+08 | 1820  |
| ENSG000001 | 10.96371 | 4.709268 | 1.1761   | 0.12103   | 0.19016   | CPA2      | chr7  | + | 1.3E+08  | 1.3E+08  | 1366  |
| ENSG000001 | 5.632997 | 3.025133 | 0.8413   | 0.35145   | 0.45577   | NCF1      | chr7  | + | 74188309 | 74203659 | 2354  |
| ENSG000001 | 9.056625 | 0        | 4.7838   | 0.00018   | 0.000498  | CPA5      | chr7  | + | 1.3E+08  | 1.3E+08  | 2573  |
| ENSG000001 | 887.3252 | 887.1508 | 0.000861 | 0.99594   | 0.99774   | TSR2      | chrX  | + | 54466834 | 54471920 | 1534  |
| ENSG000001 | 123.403  | 292.9589 | -1.2395  | 2.41E-12  | 1.33E-11  | PPP1R9A   | chr7  | + | 94536514 | 94925727 | 10219 |
| ENSG000001 | 1603.836 | 2189.631 | -0.44913 | 8.29E-05  | 0.000239  | ZC3H18    | chr16 | + | 88636789 | 88698374 | 4654  |
| ENSG000001 | 282.2499 | 204.8091 | 0.45867  | 0.006476  | 0.014109  | ZFAND2B   | chr2  | + | 2.2E+08  | 2.2E+08  | 2021  |
| ENSG000001 | 0.580602 | 0        | 0.8036   | 0.6494    | NA        | POM121L2  | chr6  | - | 27253682 | 27279949 | 3108  |
| ENSG000001 | 452.3622 | 151.4692 | 1.5747   | 3.67E-20  | 3.11E-19  | GDPD5     | chr11 | - | 75145685 | 75236948 | 4150  |
| ENSG000001 | 95.55296 | 29.54485 | 1.6898   | 1.02E-06  | 3.63E-06  | DYNC1I1   | chr7  | + | 95401866 | 95739634 | 2950  |
| ENSG000001 | 5.612459 | 6.413677 | -0.19802 | 0.79786   | 0.85677   | PFKFB1    | chrX  | - | 54959394 | 55024967 | 1929  |
| ENSG000001 | 0.36308  | 3.556053 | -2.6256  | 0.068851  | 0.1174    | ALAS2     | chrX  | - | 55035488 | 55057497 | 2027  |
| ENSG000001 | 1207.836 | 982.8314 | 0.29651  | 0.040556  | 0.074247  | TMED4     | chr7  | - | 44617493 | 44621886 | 2322  |
| ENSG000001 | 894.4739 | 1099.094 | -0.29712 | 0.013348  | 0.027351  | PPP1R15B  | chr1  | - | 2.04E+08 | 2.04E+08 | 5227  |
| ENSG000001 | 249.8808 | 334.1523 | -0.42022 | 0.022248  | 0.043456  | COPG2     | chr7  | - | 1.3E+08  | 1.3E+08  | 895   |
| ENSG000001 | 616.4435 | 390.1626 | 0.65845  | 6.68E-06  | 2.19E-05  | C11orf30  | chr11 | + | 76155967 | 76264069 | 6848  |
| ENSG000001 | 1055.982 | 754.9104 | 0.48416  | 9.41E-06  | 3.03E-05  | AGPAT6    | chr8  | + | 41434706 | 41482520 | 6298  |
| ENSG000001 | 5.71694  | 3.78667  | 0.56133  | 0.54582   | 0.64597   | PKD1L1    | chr7  | - | 47814250 | 47988088 | 9092  |
| ENSG000001 | 150.0565 | 167.8959 | -0.15882 | 0.52581   | 0.62768   | ZSCAN12   | chr6  | - | 28346732 | 28367511 | 5495  |
| ENSG000001 | 6643.172 | 1169.559 | 2.4996   | 3.24E-43  | 6.22E-42  | TAGLN2    | chr1  | - | 1.6E+08  | 1.6E+08  | 1604  |
| ENSG000001 | 1307.65  | 693.3406 | 0.91133  | 4.48E-05  | 0.000133  | ELK4      | chr1  | - | 2.06E+08 | 2.06E+08 | 10239 |
| ENSG000001 | 4.378475 | 0        | 3.6655   | 0.010694  | 0.022333  | SLAMF8    | chr1  | + | 1.6E+08  | 1.6E+08  | 2996  |
| ENSG000001 | 371.5951 | 418.5896 | -0.17208 | 0.4591    | 0.56438   | SLC45A3   | chr1  | - | 2.06E+08 | 2.06E+08 | 3341  |
| ENSG000001 | 260.0148 | 370.5694 | -0.51019 | 0.001006  | 0.002493  | DUSP23    | chr1  | + | 1.6E+08  | 1.6E+08  | 756   |
| ENSG000001 | 461.894  | 427.6187 | 0.11017  | 0.55505   | 0.65431   | RNF166    | chr16 | - | 88762903 | 88772829 | 2419  |
| ENSG000001 | 188.727  | 63.59861 | 1.5494   | 5.89E-07  | 2.15E-06  | NBL1      | chr1  | + | 19967048 | 19984945 | 2172  |
| ENSG000001 | 0.653381 | 15.61133 | -4.0981  | 9.29E-05  | 0.000266  | HTR6      | chr1  | + | 19991780 | 20006055 | 1984  |
| ENSG000001 | 0        | 50.78972 | -7.2459  | 5.91E-11  | 2.98E-10  | ITLN2     | chr1  | - | 1.61E+08 | 1.61E+08 | 1151  |
| ENSG000001 | 0.290301 | 2936.722 | -11.875  | 7.00E-41  | 1.26E-39  | F11R      | chr1  | - | 1.61E+08 | 1.61E+08 | 4835  |
| ENSG000001 | 566.5942 | 791.5907 | -0.48109 | 0.000729  | 0.001846  | USF1      | chr1  | - | 1.61E+08 | 1.61E+08 | 1807  |
| ENSG000001 | 332.5312 | 254.9078 | 0.38245  | 0.055523  | 0.097419  | SPATA2L   | chr16 | - | 89762751 | 89768113 | 2335  |
| ENSG000001 | 291.2618 | 340.6742 | -0.22446 | 0.21679   | 0.30808   | NIT1      | chr1  | + | 1.61E+08 | 1.61E+08 | 2081  |
| ENSG000001 | 240.0047 | 206.2356 | 0.21701  | 0.20632   | 0.29595   | DEDD      | chr1  | - | 1.61E+08 | 1.61E+08 | 2452  |
| ENSG000001 | 258.9148 | 91.43897 | 1.4916   | 2.54E-11  | 1.31E-10  | ZNF276    | chr16 | + | 89786808 | 89807311 | 4589  |
| ENSG000001 | 2.282147 | 37.49052 | -3.8805  | 4.08E-09  | 1.79E-08  | NPM2      | chr8  | + | 21881636 | 21894408 | 1874  |
| ENSG000001 | 10.71449 | 145.4853 | -3.7139  | 3.21E-26  | 3.52E-25  | EDA       | chrX  | + | 68835911 | 69259319 | 5278  |

|            |          |          |          |           |           |          |       |   |          |          |      |
|------------|----------|----------|----------|-----------|-----------|----------|-------|---|----------|----------|------|
| ENSG000001 | 1.991846 | 16.8341  | -2.9233  | 0.000181  | 0.0005    | FGF17    | chr8  | + | 21899909 | 21906320 | 2578 |
| ENSG000001 | 0        | 24.04658 | -6.2157  | 6.48E-08  | 2.57E-07  | VWA5B1   | chr1  | + | 20617412 | 20681387 | 4397 |
| ENSG000001 | 162.2636 | 330.8196 | -1.0239  | 1.61E-07  | 6.18E-07  | CDA      | chr1  | + | 20915441 | 20945401 | 963  |
| ENSG000001 | 478.4073 | 587.1716 | -0.29575 | 0.128     | 0.19906   | PINK1    | chr1  | + | 20959948 | 20978004 | 3821 |
| ENSG000001 | 818.5483 | 641.2096 | 0.35257  | 0.005499  | 0.012146  | B4GALT3  | chr1  | - | 1.61E+08 | 1.61E+08 | 3178 |
| ENSG000001 | 31.0389  | 93.80275 | -1.583   | 3.61E-07  | 1.34E-06  | EPB49    | chr8  | + | 21906506 | 21940038 | 2772 |
| ENSG000001 | 1204.45  | 82.43569 | 3.8461   | 3.33E-48  | 7.25E-47  | ADAMTS4  | chr1  | - | 1.61E+08 | 1.61E+08 | 4333 |
| ENSG000001 | 898.3507 | 426.8441 | 1.0713   | 6.31E-13  | 3.63E-12  | FAM160B2 | chr8  | + | 21946670 | 21962409 | 4245 |
| ENSG000001 | 1448.871 | 1711.267 | -0.2397  | 0.11438   | 0.18124   | NDUF52   | chr1  | + | 1.61E+08 | 1.61E+08 | 2064 |
| ENSG000001 | 0.342542 | 2.010288 | -1.8748  | 0.22334   | 0.31569   | SLC5A11  | chr16 | + | 24857162 | 24922949 | 2745 |
| ENSG000001 | 11.09052 | 2.817949 | 1.8727   | 0.040049  | 0.07347   | FCER1G   | chr1  | + | 1.61E+08 | 1.61E+08 | 591  |
| ENSG000001 | 0        | 0.343138 | -0.41864 | 0.81278   | NA        | APOA2    | chr1  | - | 1.61E+08 | 1.61E+08 | 927  |
| ENSG000001 | 186.8217 | 256.017  | -0.45406 | 0.006382  | 0.013925  | TOMM40L  | chr1  | + | 1.61E+08 | 1.61E+08 | 2708 |
| ENSG000001 | 11.90658 | 34.53099 | -1.4771  | 0.005884  | 0.012918  | MPZ      | chr1  | - | 1.61E+08 | 1.61E+08 | 1955 |
| ENSG000001 | 0.685084 | 4.675298 | -2.3313  | 0.074037  | 0.12511   | WFDC8    | chr20 | - | 44179792 | 44207965 | 1268 |
| ENSG000001 | 2092.164 | 2665.188 | -0.34856 | 0.012199  | 0.025188  | KIAA1967 | chr8  | + | 22462145 | 22479027 | 4853 |
| ENSG000001 | 0        | 6.817508 | -4.3703  | 0.001009  | 0.002499  | WNT9B    | chr17 | + | 44910567 | 44964096 | 2654 |
| ENSG000001 | 578.6119 | 1011.833 | -0.80311 | 0.00012   | 0.000338  | CACHD1   | chr1  | + | 64936428 | 65158741 | 5547 |
| ENSG000001 | 425.3805 | 515.1395 | -0.27671 | 0.06642   | 0.11389   | CDC42SE2 | chr5  | + | 1.31E+08 | 1.31E+08 | 4352 |
| ENSG000001 | 48.9647  | 71.25756 | -0.53654 | 0.041881  | 0.076307  | RAPGEF6  | chr5  | - | 1.31E+08 | 1.31E+08 | 8357 |
| ENSG000001 | 597.2919 | 1616.868 | -1.4355  | 1.67E-28  | 2.01E-27  | EPB41    | chr1  | + | 29213603 | 29446553 | 5930 |
| ENSG000001 | 335.4524 | 985.3366 | -1.552   | 1.39E-33  | 2.02E-32  | MIS18A   | chr21 | - | 33640530 | 33651380 | 1575 |
| ENSG000001 | 449.1781 | 506.4906 | -0.17235 | 0.35414   | 0.45829   | ALG8     | chr11 | - | 77811982 | 77850706 | 1677 |
| ENSG000001 | 2182.98  | 1407.121 | 0.63272  | 1.18E-08  | 4.96E-08  | FBXW5    | chr9  | - | 1.4E+08  | 1.4E+08  | 2392 |
| ENSG000001 | 54.89737 | 179.0378 | -1.6986  | 5.57E-13  | 3.22E-12  | C21orf59 | chr21 | - | 33964389 | 33985176 | 2503 |
| ENSG000001 | 191.2817 | 67.30331 | 1.4996   | 1.26E-09  | 5.74E-09  | SYNJ1    | chr21 | - | 34001069 | 34100359 | 7094 |
| ENSG000001 | 599.6109 | 760.8039 | -0.34389 | 0.003352  | 0.00767   | PAXBP1   | chr21 | - | 34106210 | 34144169 | 3995 |
| ENSG000001 | 157.1892 | 88.37511 | 0.82506  | 0.004012  | 0.009058  | IFNAR2   | chr21 | + | 34602206 | 34637980 | 4284 |
| ENSG000001 | 554.137  | 1318.115 | -1.2475  | 3.35E-20  | 2.85E-19  | MRPL10   | chr17 | - | 45900638 | 45908900 | 2013 |
| ENSG000001 | 0        | 0.297015 | -0.41864 | 0.81278   | NA        | DMRTC1   | chrX  | - | 72091859 | 72163653 | 1524 |
| ENSG000001 | 767.3042 | 325.3781 | 1.2321   | 8.18E-08  | 3.21E-07  | IFNGR2   | chr21 | + | 34775202 | 34851655 | 2221 |
| ENSG000001 | 1250.574 | 2596.868 | -1.0528  | 4.65E-24  | 4.67E-23  | GART     | chr21 | - | 34876238 | 34915797 | 3571 |
| ENSG000001 | 6057.035 | 5429.843 | 0.15764  | 0.097679  | 0.1583    | SON      | chr21 | + | 34914924 | 34949812 | 8813 |
| ENSG000001 | 253.9228 | 286.4337 | -0.17584 | 0.26822   | 0.36705   | DONSON   | chr21 | - | 34947783 | 34961014 | 2332 |
| ENSG000001 | 1725.929 | 1135.034 | 0.60489  | 1.50E-07  | 5.76E-07  | SV2A     | chr1  | - | 1.5E+08  | 1.5E+08  | 4416 |
| ENSG000001 | 0        | 335.2726 | -9.73    | 2.63E-19  | 2.13E-18  | LAD1     | chr1  | - | 2.01E+08 | 2.01E+08 | 2906 |
| ENSG000001 | 419.4803 | 411.2798 | 0.029118 | 0.91998   | 0.94624   | STC1     | chr8  | - | 23699428 | 23712320 | 3883 |
| ENSG000001 | 47.7881  | 26.83056 | 0.82894  | 0.033425  | 0.062508  | TNNI1    | chr1  | - | 2.01E+08 | 2.01E+08 | 5413 |
| ENSG000001 | 28.33026 | 40.06087 | -0.49527 | 0.15036   | 0.22756   | CSRP1    | chr1  | - | 2.01E+08 | 2.01E+08 | 8475 |
| ENSG000001 | 44.75395 | 265.1289 | -2.5653  | 6.45E-29  | 7.88E-28  | PRAC     | chr17 | - | 46799084 | 46799884 | 383  |
| ENSG000001 | 207.2566 | 104.3755 | 0.98716  | 6.24E-08  | 2.47E-07  | HOXB13   | chr17 | - | 46802125 | 46806540 | 3467 |
| ENSG000001 | 1.317927 | 1.638012 | -0.25975 | 0.84991   | 0.89459   | KCNE2    | chr21 | + | 35736323 | 35743440 | 803  |
| ENSG000001 | 913.708  | 1179.159 | -0.36695 | 0.004128  | 0.009305  | ATP5G1   | chr17 | + | 46970127 | 46973233 | 2214 |
| ENSG000001 | 697.596  | 125.4155 | 2.4712   | 5.07E-51  | 1.19E-49  | RCAN1    | chr21 | - | 35885440 | 35987441 | 2816 |
| ENSG000001 | 3075.433 | 1701.585 | 0.85297  | 8.04E-10  | 3.74E-09  | UBE2Z    | chr17 | + | 46985731 | 47006418 | 4250 |
| ENSG000001 | 32.01168 | 75.65699 | -1.2271  | 0.000385  | 0.001014  | C1orf51  | chr1  | + | 1.5E+08  | 1.5E+08  | 1803 |
| ENSG000001 | 376.4693 | 323.205  | 0.21765  | 0.22885   | 0.32199   | SNF8     | chr17 | - | 47006678 | 47022479 | 2319 |
| ENSG000001 | 2.354926 | 108.3608 | -5.3482  | 3.10E-16  | 2.17E-15  | CLIC6    | chr21 | + | 36041688 | 36090525 | 3860 |
| ENSG000001 | 73.34314 | 136.6049 | -0.88743 | 0.002378  | 0.005559  | CCDC24   | chr1  | + | 44457031 | 44462200 | 2654 |
| ENSG000001 | 3823.85  | 31.0753  | 6.9246   | 5.46E-306 | 2.61E-303 | RUNX1    | chr21 | - | 36160098 | 37357047 | 7274 |
| ENSG000001 | 2581.312 | 9206.339 | -1.8328  | 1.07E-61  | 3.24E-60  | IGF2BP1  | chr17 | + | 47074774 | 47133012 | 8274 |
| ENSG000001 | 0.653381 | 3.619162 | -2.0731  | 0.10708   | 0.17109   | GIP      | chr17 | - | 47035916 | 47045958 | 716  |
| ENSG000001 | 172.8884 | 1083.04  | -2.6383  | 1.99E-41  | 3.61E-40  | CBR1     | chr21 | + | 37442239 | 37445464 | 1924 |
| ENSG000001 | 93.83023 | 223.3655 | -1.2443  | 6.41E-09  | 2.76E-08  | CBR3     | chr21 | + | 37507210 | 37518864 | 1169 |
| ENSG000001 | 80.38396 | 62.6824  | 0.35649  | 0.3208    | 0.42362   | C2orf81  | chr2  | - | 74641304 | 74648718 | 2407 |
| ENSG000001 | 0.36308  | 53.67407 | -6.4749  | 4.87E-10  | 2.30E-09  | TUBBP5   | chr9  | + | 1.41E+08 | 1.41E+08 | 1735 |
| ENSG000001 | 0.290301 | 1.326428 | -1.262   | 0.45814   | NA        | GJD2     | chr15 | - | 35043233 | 35047166 | 2889 |
| ENSG000001 | 0.580602 | 110.3584 | -6.843   | 9.37E-15  | 6.05E-14  | ACTC1    | chr15 | - | 35080297 | 35088340 | 4106 |
| ENSG000001 | 362.3851 | 235.519  | 0.62295  | 0.000385  | 0.001014  | MORC3    | chr21 | + | 37692487 | 37758446 | 4246 |
| ENSG000001 | 309.6968 | 529.9089 | -0.77213 | 1.22E-07  | 4.74E-07  | CHAF1B   | chr21 | + | 37757676 | 37789125 | 2292 |
| ENSG000001 | 11.00479 | 0.594029 | 3.6109   | 0.001313  | 0.003198  | CLDN14   | chr21 | - | 37832919 | 37948867 | 1942 |
| ENSG000001 | 128.4366 | 3.428963 | 5.1542   | 1.29E-23  | 1.28E-22  | SIM2     | chr21 | + | 38071433 | 38122218 | 4442 |
| ENSG000001 | 416.4573 | 199.6051 | 1.0612   | 2.06E-13  | 1.22E-12  | HLCS     | chr21 | - | 38123493 | 38362536 | 6466 |
| ENSG000001 | 0        | 53.87172 | -7.1451  | 2.67E-09  | 1.19E-08  | GOLGA6A  | chr15 | - | 74362198 | 74374891 | 3176 |
| ENSG000001 | 0.290301 | 73.60857 | -6.9141  | 1.26E-11  | 6.62E-11  | SCUBE1   | chr22 | - | 43599229 | 43739394 | 3868 |

|            |          |          |          |           |           |          |       |   |          |          |       |
|------------|----------|----------|----------|-----------|-----------|----------|-------|---|----------|----------|-------|
| ENSG000001 | 43.06113 | 266.2144 | -2.6106  | 2.78E-25  | 2.94E-24  | ARHGAP27 | chr17 | - | 43471275 | 43511787 | 4754  |
| ENSG000001 | 927.4655 | 474.6451 | 0.96167  | 0.00036   | 0.000952  | ADPGK    | chr15 | - | 73043710 | 73078187 | 4576  |
| ENSG000001 | 9401.895 | 3539.247 | 1.4074   | 1.54E-27  | 1.79E-26  | PTMS     | chr12 | + | 6874682  | 6880116  | 1139  |
| ENSG000001 | 0        | 0.997859 | -1.5018  | 0.39072   | NA        | PLA2G4D  | chr15 | - | 42359207 | 42386752 | 3584  |
| ENSG000001 | 0.342542 | 0.297015 | -0.00202 | 0.99909   | NA        | PADI4    | chr1  | + | 17634690 | 17690499 | 2267  |
| ENSG000001 | 1248.47  | 1228.202 | 0.023912 | 0.83277   | 0.88216   | ADIPOR1  | chr1  | - | 2.03E+08 | 2.03E+08 | 2177  |
| ENSG000001 | 281.2515 | 188.8835 | 0.5768   | 0.001761  | 0.004205  | CYB5R1   | chr1  | - | 2.03E+08 | 2.03E+08 | 3033  |
| ENSG000001 | 2320.523 | 2559.25  | -0.14101 | 0.22029   | 0.31218   | PSMD4    | chr1  | + | 1.51E+08 | 1.51E+08 | 1350  |
| ENSG000001 | 4203.998 | 2601.164 | 0.6913   | 4.17E-06  | 1.40E-05  | ATP13A2  | chr1  | - | 17312453 | 17338423 | 3981  |
| ENSG000001 | 59.26566 | 98.45414 | -0.72305 | 0.072185  | 0.12234   | M1AP     | chr2  | - | 74785010 | 74875465 | 2543  |
| ENSG000001 | 2985.647 | 3549.471 | -0.24917 | 0.034379  | 0.064111  | PSMB4    | chr1  | + | 1.51E+08 | 1.51E+08 | 2067  |
| ENSG000001 | 4.700479 | 7.639738 | -0.67182 | 0.39722   | 0.50174   | IRX6     | chr16 | + | 55357672 | 55364672 | 3128  |
| ENSG000001 | 100.8737 | 140.7457 | -0.45187 | 0.59208   | 0.68695   | BTG2     | chr1  | + | 2.03E+08 | 2.03E+08 | 2712  |
| ENSG000001 | 1176.044 | 2388.009 | -1.0187  | 6.21E-08  | 2.46E-07  | HK2      | chr2  | + | 75061108 | 75120486 | 5772  |
| ENSG000001 | 86.0595  | 80.65998 | 0.092267 | 0.71009   | 0.78467   | C1R      | chr12 | - | 7187513  | 7245203  | 2112  |
| ENSG000001 | 0        | 3.198346 | -3.1449  | 0.041263  | 0.075338  | CELF3    | chr1  | - | 1.52E+08 | 1.52E+08 | 3246  |
| ENSG000001 | 86.61712 | 395.2418 | -2.1787  | 8.29E-29  | 1.01E-27  | ALDH4A1  | chr1  | - | 19197926 | 19229275 | 3363  |
| ENSG000001 | 800.9087 | 171.6022 | 2.2115   | 1.15E-19  | 9.57E-19  | STARD9   | chr15 | + | 42867857 | 43013179 | 15567 |
| ENSG000001 | 90.46128 | 159.3476 | -0.81341 | 3.28E-05  | 9.88E-05  | THEM4    | chr1  | - | 1.52E+08 | 1.52E+08 | 2406  |
| ENSG000001 | 1.306762 | 9.328705 | -2.5373  | 0.018142  | 0.036132  | TCHH     | chr1  | - | 1.52E+08 | 1.52E+08 | 6900  |
| ENSG000001 | 779.0516 | 346.6911 | 1.1678   | 3.09E-22  | 2.87E-21  | UBR1     | chr15 | - | 43235095 | 43398311 | 7761  |
| ENSG000001 | 1128.802 | 725.7179 | 0.63511  | 4.67E-05  | 0.000138  | AMFR     | chr16 | - | 56395364 | 56459450 | 3600  |
| ENSG000001 | 631.8714 | 143.8163 | 2.1295   | 1.72E-25  | 1.83E-24  | MED8     | chr1  | - | 43849588 | 43855479 | 1924  |
| ENSG000001 | 32.21045 | 17.2995  | 0.88158  | 0.096261  | 0.15642   | RGL4     | chr22 | + | 24030323 | 24041363 | 3779  |
| ENSG000001 | 5.508791 | 1.920457 | 1.3329   | 0.22027   | 0.31217   | ISL2     | chr15 | + | 76629065 | 76634817 | 1881  |
| ENSG000001 | 1066.285 | 378.4485 | 1.4939   | 2.91E-34  | 4.34E-33  | RSPRY1   | chr16 | + | 57220049 | 57274387 | 3586  |
| ENSG000001 | 20.52816 | 26.58691 | -0.36123 | 0.39693   | 0.50145   | CCDC17   | chr1  | - | 46085716 | 46089729 | 2988  |
| ENSG000001 | 1264.206 | 1469.653 | -0.21687 | 0.17921   | 0.26328   | GPBP1L1  | chr1  | - | 46092976 | 46153785 | 3736  |
| ENSG000001 | 652.1328 | 1234.714 | -0.9181  | 4.23E-07  | 1.56E-06  | NAE1     | chr16 | - | 66836778 | 66907159 | 1909  |
| ENSG000001 | 192.1824 | 451.3366 | -1.2267  | 1.27E-11  | 6.67E-11  | TMEM69   | chr1  | + | 46152886 | 46160115 | 2439  |
| ENSG000001 | 0.705622 | 97.65769 | -6.6893  | 8.78E-15  | 5.68E-14  | GPR114   | chr16 | + | 57576333 | 57625593 | 4768  |
| ENSG000001 | 1.597063 | 1.638012 | -0.02308 | 0.98611   | 0.99179   | CCDC135  | chr16 | + | 57728705 | 57765717 | 3041  |
| ENSG000001 | 110.4705 | 68.99322 | 0.67364  | 0.003644  | 0.008289  | ACE      | chr17 | + | 61554422 | 61599205 | 4858  |
| ENSG000001 | 6.741961 | 11.31476 | -0.7004  | 0.3493    | 0.45354   | TEPP     | chr16 | + | 58010339 | 58022020 | 2360  |
| ENSG000001 | 0        | 0.98329  | -1.2878  | 0.47019   | NA        | UROC1    | chr3  | - | 1.26E+08 | 1.26E+08 | 3149  |
| ENSG000001 | 1112.268 | 952.6476 | 0.22276  | 0.042242  | 0.076895  | EFCAB14  | chr1  | - | 47124366 | 47184824 | 5767  |
| ENSG000001 | 686.3177 | 85.65028 | 2.9787   | 4.70E-24  | 4.72E-23  | SPON2    | chr4  | - | 1160720  | 1202750  | 1869  |
| ENSG000001 | 350.9182 | 549.58   | -0.64458 | 0.001072  | 0.002644  | CHCHD6   | chr3  | + | 1.26E+08 | 1.27E+08 | 1159  |
| ENSG000001 | 3799.359 | 3206.39  | 0.2445   | 0.017646  | 0.035247  | CTBP1    | chr4  | - | 1205236  | 1243741  | 4250  |
| ENSG000001 | 0.580602 | 1.012429 | -0.48451 | 0.77505   | NA        | LRR36    | chr16 | + | 67360701 | 67419106 | 2395  |
| ENSG000001 | 3.289235 | 573.8246 | -7.3029  | 7.76E-52  | 1.87E-50  | ANKRD18C | chr9  | - | 99918852 | 99983517 | 2980  |
| ENSG000001 | 61.34903 | 5.704711 | 3.3823   | 4.46E-13  | 2.60E-12  | TPPP3    | chr16 | - | 67423712 | 67427438 | 1736  |
| ENSG000001 | 365.495  | 91.9133  | 1.9823   | 2.19E-21  | 1.97E-20  | ZDHHC1   | chr16 | - | 67428322 | 67450736 | 2047  |
| ENSG000001 | 1324.75  | 669.5787 | 0.98286  | 4.34E-09  | 1.89E-08  | ATP6VOD1 | chr16 | - | 67471917 | 67515140 | 3390  |
| ENSG000001 | 2.749709 | 0.343138 | 2.2662   | 0.12866   | 0.19996   | AGRP     | chr16 | - | 67516474 | 67517716 | 764   |
| ENSG000001 | 34.62879 | 76.24308 | -1.1246  | 0.007146  | 0.015444  | ZFYVE28  | chr4  | - | 2271309  | 2420390  | 4131  |
| ENSG000001 | 73.24868 | 630.5885 | -3.092   | 2.29E-35  | 3.52E-34  | RLTPR    | chr16 | + | 67678822 | 67691472 | 4687  |
| ENSG000001 | 22.25204 | 34.00497 | -0.59423 | 0.26876   | 0.36768   | C16orf86 | chr16 | + | 67700719 | 67702661 | 1719  |
| ENSG000001 | 574.7975 | 1219.594 | -1.0826  | 1.86E-09  | 8.37E-09  | FAM131B  | chr7  | - | 1.43E+08 | 1.43E+08 | 5856  |
| ENSG000001 | 1175.083 | 594.8163 | 0.98078  | 1.29E-16  | 9.21E-16  | RGS12    | chr4  | + | 3294755  | 3441640  | 6240  |
| ENSG000001 | 938.0343 | 788.8333 | 0.24976  | 0.14893   | 0.22566   | PSKH1    | chr16 | + | 67927175 | 67963581 | 3481  |
| ENSG000001 | 6476.575 | 3602.607 | 0.84535  | 1.60E-14  | 1.02E-13  | ZYX      | chr7  | + | 1.43E+08 | 1.43E+08 | 2493  |
| ENSG000001 | 3463.743 | 1682.93  | 1.0379   | 1.18E-07  | 4.57E-07  | ABR      | chr17 | - | 906758   | 1132315  | 5595  |
| ENSG000001 | 0.975385 | 2.08555  | -0.82557 | 0.5828    | 0.67889   | FAM115D  | chr7  | + | 1.43E+08 | 1.44E+08 | 2600  |
| ENSG000001 | 1.338465 | 5.583326 | -1.8811  | 0.068511  | 0.11693   | LYPD5    | chr19 | - | 44300081 | 44331358 | 2499  |
| ENSG000001 | 557.0889 | 861.8283 | -0.62898 | 0.000151  | 0.00042   | CCDC117  | chr22 | + | 29168662 | 29185283 | 3985  |
| ENSG000001 | 64.60656 | 48.57708 | 0.41009  | 0.13354   | 0.20624   | ZNF230   | chr19 | + | 44507100 | 44518078 | 4115  |
| ENSG000001 | 15.51864 | 14.45483 | 0.10498  | 0.84358   | 0.8902    | CCDC107  | chr9  | + | 35658301 | 35661508 | 1324  |
| ENSG000001 | 38.11745 | 31.16184 | 0.28738  | 0.45266   | 0.55814   | ZNF222   | chr19 | + | 44529494 | 44537265 | 1598  |
| ENSG000001 | 714.8213 | 265.683  | 1.4197   | 1.27E-08  | 5.32E-08  | NPR2     | chr9  | + | 35792151 | 35809729 | 3686  |
| ENSG000001 | 1.722083 | 3.855484 | -1.0611  | 0.3514    | 0.45573   | ZNF890P  | chr7  | - | 5160870  | 5184177  | 1352  |
| ENSG000001 | 83.39715 | 36.51039 | 1.1831   | 0.002073  | 0.004892  | ZNF221   | chr19 | + | 44455375 | 44471861 | 2535  |
| ENSG000001 | 18.05164 | 27.2125  | -0.58961 | 0.17778   | 0.26151   | ZNF233   | chr19 | + | 44754318 | 44779470 | 2938  |
| ENSG000001 | 36.75584 | 32.92043 | 0.15343  | 0.75772   | 0.82388   | ZNF235   | chr19 | - | 44732882 | 44809199 | 4219  |
| ENSG000001 | 1138.028 | 117.6723 | 3.2665   | 7.49E-114 | 5.29E-112 | GNE      | chr9  | - | 36214438 | 36277053 | 5298  |

|            |          |          |          |           |           |           |       |   |          |          |       |
|------------|----------|----------|----------|-----------|-----------|-----------|-------|---|----------|----------|-------|
| ENSG000001 | 15.55115 | 18.51508 | -0.25588 | 0.61016   | 0.70278   | TNFRSF13C | chr22 | - | 42321045 | 42322822 | 926   |
| ENSG000001 | 3046.673 | 2250.874 | 0.43642  | 8.87E-06  | 2.87E-05  | ARHGAP35  | chr19 | + | 47421933 | 47508334 | 8889  |
| ENSG000001 | 64.43028 | 0.357707 | 6.7211   | 6.36E-11  | 3.20E-10  | PTGIR     | chr19 | - | 47123725 | 47128375 | 2107  |
| ENSG000001 | 6957.318 | 6535.521 | 0.090236 | 0.35908   | 0.46326   | CALM3     | chr19 | + | 47104331 | 47114050 | 2536  |
| ENSG000001 | 1092.333 | 1778.719 | -0.70276 | 1.97E-08  | 8.16E-08  | DFFA      | chr1  | - | 10516579 | 10532583 | 6032  |
| ENSG000001 | 271.7244 | 251.5031 | 0.10975  | 0.56142   | 0.65987   | CCDC28B   | chr1  | + | 32665987 | 32670988 | 1415  |
| ENSG000001 | 39.07825 | 64.62937 | -0.71701 | 0.015756  | 0.031779  | IQCC      | chr1  | + | 32671236 | 32674288 | 2293  |
| ENSG000001 | 70.78071 | 45.8983  | 0.61469  | 0.086186  | 0.14243   | TMEM234   | chr1  | - | 32680073 | 32687972 | 2736  |
| ENSG000001 | 1194.844 | 783.9443 | 0.60778  | 2.80E-05  | 8.52E-05  | BSDC1     | chr1  | - | 32830704 | 32860332 | 4599  |
| ENSG000001 | 5.788905 | 11.70885 | -0.9584  | 0.1737    | 0.25657   | ZBTB8A    | chr1  | + | 33005028 | 33066591 | 1943  |
| ENSG000001 | 1093.534 | 1257.851 | -0.20068 | 0.44396   | 0.5496    | ATAD3B    | chr1  | + | 1407143  | 1433228  | 4314  |
| ENSG000001 | 2199.851 | 2514.837 | -0.19272 | 0.056934  | 0.099681  | SSU72     | chr1  | - | 1477053  | 1510249  | 2679  |
| ENSG000001 | 1300.365 | 1448.521 | -0.15563 | 0.24673   | 0.34266   | UBE2J2    | chr1  | - | 1189289  | 1209265  | 2455  |
| ENSG000001 | 954.6817 | 386.8785 | 1.3014   | 3.60E-20  | 3.06E-19  | ZNF362    | chr1  | + | 33722146 | 33766320 | 3106  |
| ENSG000001 | 38.39479 | 38.06589 | 0.013639 | 0.97151   | 0.98431   | FNDC5     | chr1  | - | 33327869 | 33338083 | 2732  |
| ENSG000001 | 21.57633 | 304.2457 | -3.7908  | 8.90E-43  | 1.68E-41  | CPAMD8    | chr19 | - | 17003758 | 17137625 | 5992  |
| ENSG000001 | 1329.99  | 4021.952 | -1.5942  | 3.53E-36  | 5.56E-35  | NR2F6     | chr19 | - | 17342692 | 17356749 | 2404  |
| ENSG000001 | 31.77704 | 286.0431 | -3.1568  | 1.21E-25  | 1.29E-24  | ANKLE1    | chr19 | + | 17392454 | 17398455 | 3218  |
| ENSG000001 | 200.6337 | 537.709  | -1.4173  | 9.01E-12  | 4.80E-11  | CCDC58    | chr3  | - | 1.22E+08 | 1.22E+08 | 769   |
| ENSG000001 | 397.9438 | 785.9873 | -0.98    | 3.37E-12  | 1.84E-11  | VMA21     | chrX  | + | 1.51E+08 | 1.51E+08 | 4717  |
| ENSG000001 | 820.3469 | 181.1969 | 2.1767   | 2.95E-46  | 6.08E-45  | KALRN     | chr3  | + | 1.24E+08 | 1.24E+08 | 10806 |
| ENSG000001 | 102.9023 | 333.1895 | -1.6779  | 2.08E-07  | 7.92E-07  | CILP2     | chr19 | + | 19649057 | 19657468 | 4234  |
| ENSG000001 | 34.43001 | 76.69291 | -1.1485  | 0.00022   | 0.0006    | FAM86C2P  | chr11 | - | 67559119 | 67572807 | 2496  |
| ENSG000001 | 0.653381 | 116.4706 | -6.9091  | 3.48E-15  | 2.31E-14  | ABCG1     | chr21 | + | 43619799 | 43717354 | 3475  |
| ENSG000001 | 0        | 11.63601 | -5.1097  | 5.79E-05  | 0.00017   | TFF3      | chr21 | - | 43731777 | 43735761 | 1109  |
| ENSG000001 | 0        | 0.297015 | -0.41864 | 0.81278   | NA        | TFF1      | chr21 | - | 43782391 | 43786703 | 551   |
| ENSG000001 | 0.975385 | 2.696564 | -1.2229  | 0.34335   | 0.44734   | TMPRSS3   | chr21 | - | 43791999 | 43816955 | 3193  |
| ENSG000001 | 4.148974 | 0        | 3.5961   | 0.012954  | 0.026606  | UBASH3A   | chr21 | + | 43824008 | 43867791 | 2754  |
| ENSG000001 | 31.32406 | 1.280305 | 4.2874   | 3.63E-07  | 1.35E-06  | RSPH1     | chr21 | - | 43892596 | 43916464 | 2880  |
| ENSG000001 | 2245.2   | 811.7565 | 1.4663   | 2.40E-44  | 4.71E-43  | SLC37A1   | chr21 | + | 43916128 | 44001550 | 3664  |
| ENSG000001 | 22.50982 | 497.1593 | -4.422   | 6.40E-75  | 2.50E-73  | PDE9A     | chr21 | + | 44073746 | 44195619 | 3412  |
| ENSG000001 | 414.1195 | 678.4491 | -0.70842 | 0.003217  | 0.007384  | WDR4      | chr21 | - | 44263204 | 44299678 | 2205  |
| ENSG000001 | 297.1464 | 429.9791 | -0.5313  | 0.001173  | 0.00288   | NDUFV3    | chr21 | + | 44299754 | 44329783 | 2029  |
| ENSG000001 | 376.5074 | 479.3513 | -0.34752 | 0.016777  | 0.033647  | PKNOX1    | chr21 | + | 44394620 | 44454172 | 5483  |
| ENSG000001 | 1610.581 | 9010.879 | -2.4816  | 3.24E-107 | 2.08E-105 | CBS       | chr21 | - | 44473301 | 44497053 | 2656  |
| ENSG000001 | 2381.871 | 3550.758 | -0.57553 | 8.19E-09  | 3.50E-08  | U2AF1     | chr21 | - | 44513066 | 44527697 | 4694  |
| ENSG000001 | 0        | 1.012429 | -1.3162  | 0.46038   | NA        | CRYAA     | chr21 | + | 44589118 | 44592915 | 1139  |
| ENSG000001 | 15.09134 | 18.22935 | -0.24795 | 0.65574   | 0.74054   | HSF2BP    | chr21 | - | 44949072 | 45079374 | 1899  |
| ENSG000001 | 1284.352 | 2441.016 | -0.92386 | 8.59E-07  | 3.08E-06  | RRP1B     | chr21 | + | 45079429 | 45115958 | 5088  |
| ENSG000001 | 3824.038 | 2378.174 | 0.6847   | 2.17E-14  | 1.37E-13  | PDXK      | chr21 | + | 45138975 | 45182188 | 7366  |
| ENSG000001 | 2565.976 | 1102.44  | 1.2181   | 1.79E-33  | 2.59E-32  | G6PD      | chrX  | - | 1.54E+08 | 1.54E+08 | 2631  |
| ENSG000001 | 1276.932 | 1227.72  | 0.056944 | 0.60369   | 0.69701   | CSTB      | chr21 | - | 45192393 | 45196326 | 2163  |
| ENSG000001 | 777.4585 | 1429.512 | -0.87504 | 0.00011   | 0.000313  | RSP1      | chr21 | + | 45209394 | 45225174 | 3022  |
| ENSG000001 | 1322.387 | 347.5883 | 1.9219   | 5.73E-28  | 6.76E-27  | AGPAT3    | chr21 | + | 45285067 | 45406417 | 5767  |
| ENSG000001 | 1359.232 | 959.4447 | 0.50207  | 8.01E-05  | 0.000231  | TRAPPC10  | chr21 | + | 45432200 | 45526433 | 6976  |
| ENSG000001 | 77.88755 | 7.792677 | 3.2977   | 2.51E-15  | 1.68E-14  | GAB3      | chrX  | - | 1.54E+08 | 1.54E+08 | 4718  |
| ENSG000001 | 1061.118 | 1526.274 | -0.52354 | 0.000414  | 0.001089  | C21orf33  | chr21 | + | 45553487 | 45565605 | 1674  |
| ENSG000001 | 81.91329 | 391.4324 | -2.2516  | 1.13E-38  | 1.92E-37  | ICOSLG    | chr21 | - | 45642874 | 45660849 | 7080  |
| ENSG000001 | 51.40952 | 45.28333 | 0.17976  | 0.58179   | 0.67816   | C21orf2   | chr21 | - | 45748827 | 45759285 | 4532  |
| ENSG000001 | 18.91154 | 71.76726 | -1.8778  | 7.95E-05  | 0.000229  | ZNF66     | chr19 | + | 20959110 | 20991922 | 1745  |
| ENSG000001 | 69.54592 | 107.5722 | -0.62888 | 0.008758  | 0.018612  | LRRC3     | chr21 | + | 45875369 | 45878739 | 2529  |
| ENSG000001 | 55.21326 | 12.2252  | 2.1379   | 5.12E-07  | 1.88E-06  | ITGB2     | chr21 | - | 46305868 | 46351904 | 4781  |
| ENSG000001 | 368.027  | 765.7032 | -1.0553  | 4.29E-15  | 2.83E-14  | FAM207A   | chr21 | + | 46359925 | 46396904 | 927   |
| ENSG000001 | 1286.827 | 550.7175 | 1.2195   | 2.66E-08  | 1.09E-07  | RALGDS    | chr9  | - | 1.36E+08 | 1.36E+08 | 5817  |
| ENSG000001 | 46.23895 | 55.93692 | -0.2812  | 0.39629   | 0.5008    | FTCD      | chr21 | - | 47556176 | 47575481 | 1955  |
| ENSG000001 | 787.2995 | 762.7706 | 0.045982 | 0.70371   | 0.77966   | SPATC1L   | chr21 | - | 47581062 | 47604390 | 2303  |
| ENSG000001 | 4851.31  | 3152.589 | 0.61976  | 0.003378  | 0.007726  | LSS       | chr21 | - | 47608055 | 47648738 | 4936  |
| ENSG000001 | 1005.272 | 1031.731 | -0.03796 | 0.77215   | 0.83593   | VAV2      | chr9  | - | 1.37E+08 | 1.37E+08 | 5101  |
| ENSG000001 | 1831.453 | 1327.158 | 0.46419  | 9.37E-06  | 3.02E-05  | MCM3AP    | chr21 | - | 47655047 | 47706211 | 6333  |
| ENSG000001 | 365.3474 | 454.1871 | -0.31346 | 0.072062  | 0.12216   | C21orf58  | chr21 | - | 47720095 | 47743789 | 2975  |
| ENSG000001 | 1503.877 | 1251.965 | 0.26408  | 0.023699  | 0.045992  | PCNT      | chr21 | + | 47744036 | 47865682 | 10560 |
| ENSG000001 | 1271.192 | 569.1517 | 1.1542   | 4.23E-07  | 1.56E-06  | DIP2A     | chr21 | + | 47878812 | 47989926 | 7293  |
| ENSG000001 | 9.970396 | 0        | 4.9274   | 9.48E-05  | 0.000271  | S100B     | chr21 | - | 48018875 | 48025121 | 971   |
| ENSG000001 | 2138.707 | 805.0932 | 1.4086   | 4.00E-46  | 8.22E-45  | PRMT2     | chr21 | + | 48055079 | 48085036 | 4031  |
| ENSG000001 | 3.713929 | 12.50282 | -1.6704  | 0.039385  | 0.072418  | CLDND2    | chr19 | - | 51870352 | 51872257 | 974   |

|            |          |          |          |           |           |           |       |   |          |          |       |
|------------|----------|----------|----------|-----------|-----------|-----------|-------|---|----------|----------|-------|
| ENSG000001 | 93.92175 | 150.5437 | -0.67455 | 0.045294  | 0.081559  | ADAMTS13  | chr9  | + | 1.36E+08 | 1.36E+08 | 4934  |
| ENSG000001 | 583.8046 | 863.7862 | -0.56407 | 0.001624  | 0.003895  | CACFD1    | chr9  | + | 1.36E+08 | 1.36E+08 | 2794  |
| ENSG000001 | 565.1395 | 247.4713 | 1.1821   | 0.000179  | 0.000494  | SLC2A6    | chr9  | - | 1.36E+08 | 1.36E+08 | 3417  |
| ENSG000001 | 195.4718 | 477.275  | -1.2829  | 8.80E-10  | 4.08E-09  | ZNF761    | chr19 | + | 53935227 | 53961515 | 4206  |
| ENSG000001 | 48.61181 | 99.19924 | -1.0237  | 0.000128  | 0.000359  | C9orf116  | chr9  | - | 1.38E+08 | 1.38E+08 | 1278  |
| ENSG000001 | 1.286224 | 0.297015 | 1.3298   | 0.41218   | NA        | LCN1      | chr9  | + | 1.38E+08 | 1.38E+08 | 776   |
| ENSG000001 | 187.044  | 422.2046 | -1.1691  | 4.35E-10  | 2.06E-09  | ZNF714    | chr19 | + | 21264965 | 21308073 | 6809  |
| ENSG000001 | 2346.288 | 507.5921 | 2.205    | 1.36E-81  | 5.84E-80  | GPSM1     | chr9  | + | 1.39E+08 | 1.39E+08 | 3633  |
| ENSG000001 | 404.967  | 326.1537 | 0.31192  | 0.074325  | 0.12551   | C19orf47  | chr19 | - | 40825443 | 40854434 | 3628  |
| ENSG000001 | 6.556955 | 4.89705  | 0.37351  | 0.65873   | 0.74286   | HIPK4     | chr19 | - | 40885178 | 40896094 | 2452  |
| ENSG000001 | 53.8801  | 21.4244  | 1.3232   | 0.000578  | 0.001488  | C9orf117  | chr9  | + | 1.3E+08  | 1.3E+08  | 2708  |
| ENSG000001 | 170.6678 | 220.7861 | -0.36894 | 0.027705  | 0.052922  | TOR2A     | chr9  | - | 1.3E+08  | 1.3E+08  | 3496  |
| ENSG000001 | 914.8516 | 668.8067 | 0.45018  | 0.034599  | 0.064471  | ST6GALNAC | chr9  | - | 1.31E+08 | 1.31E+08 | 2460  |
| ENSG000001 | 2022.113 | 1590.063 | 0.34628  | 0.006422  | 0.014005  | SHKBP1    | chr19 | + | 41082757 | 41097305 | 2363  |
| ENSG000001 | 107.5977 | 224.0896 | -1.0523  | 2.09E-06  | 7.26E-06  | RDH13     | chr19 | - | 55550476 | 55582659 | 3022  |
| ENSG000001 | 910.8574 | 742.5133 | 0.29464  | 0.011385  | 0.023641  | ZER1      | chr9  | - | 1.31E+08 | 1.32E+08 | 4259  |
| ENSG000001 | 201.7147 | 429.0608 | -1.0868  | 7.89E-10  | 3.68E-09  | ZDHHC12   | chr9  | - | 1.31E+08 | 1.31E+08 | 2536  |
| ENSG000001 | 351.9022 | 1171.946 | -1.73    | 8.70E-18  | 6.62E-17  | PKN3      | chr9  | + | 1.31E+08 | 1.31E+08 | 3375  |
| ENSG000001 | 23.94323 | 51.76186 | -1.0981  | 0.025647  | 0.049391  | SPTBN4    | chr19 | + | 40972148 | 41082370 | 8676  |
| ENSG000001 | 331.859  | 472.7515 | -0.50966 | 0.013102  | 0.026884  | BRSK1     | chr19 | + | 55793440 | 55823901 | 3079  |
| ENSG000001 | 6.837069 | 20.01472 | -1.4962  | 0.020932  | 0.041112  | COX6B2    | chr19 | - | 55860674 | 55866182 | 2083  |
| ENSG000001 | 0.580602 | 0.297015 | 0.36801  | 0.83644   | NA        | TMEM190   | chr19 | + | 55888204 | 55889612 | 593   |
| ENSG000001 | 0        | 0.594029 | -0.81444 | 0.64499   | NA        | NLRP4     | chr19 | + | 56347944 | 56393220 | 3670  |
| ENSG000001 | 16.11978 | 104.1062 | -2.6297  | 1.33E-07  | 5.12E-07  | PPAPDC3   | chr9  | + | 1.34E+08 | 1.34E+08 | 2095  |
| ENSG000001 | 2387.957 | 1446.907 | 0.72179  | 3.23E-08  | 1.31E-07  | TAOK1     | chr17 | + | 27717482 | 27878922 | 12407 |
| ENSG000001 | 199.6452 | 180.292  | 0.14621  | 0.45344   | 0.55891   | MED27     | chr9  | - | 1.35E+08 | 1.35E+08 | 1431  |
| ENSG000001 | 517.7269 | 830.2116 | -0.67985 | 0.000318  | 0.000849  | DEDD2     | chr19 | - | 42702750 | 42724292 | 1894  |
| ENSG000001 | 690.7348 | 654.6717 | 0.076244 | 0.55194   | 0.65143   | SIK3      | chr11 | - | 1.17E+08 | 1.17E+08 | 6331  |
| ENSG000001 | 1.286224 | 20.66045 | -3.7406  | 6.30E-06  | 2.07E-05  | MPZL3     | chr11 | - | 1.18E+08 | 1.18E+08 | 3964  |
| ENSG000001 | 5.363233 | 0        | 3.9856   | 0.003995  | 0.009027  | AMICA1    | chr11 | - | 1.18E+08 | 1.18E+08 | 5610  |
| ENSG000001 | 73.21021 | 234.3305 | -1.6781  | 3.98E-17  | 2.93E-16  | NEK8      | chr17 | + | 27052915 | 27070473 | 3581  |
| ENSG000001 | 83.30221 | 239.3533 | -1.5131  | 2.79E-08  | 1.14E-07  | TLCD1     | chr17 | - | 27051366 | 27054953 | 1017  |
| ENSG000001 | 1275.062 | 891.4177 | 0.51462  | 0.021012  | 0.041256  | PCSK7     | chr11 | - | 1.17E+08 | 1.17E+08 | 9347  |
| ENSG000001 | 2389.252 | 3576.082 | -0.58126 | 9.97E-08  | 3.89E-07  | SAFB      | chr19 | + | 5623046  | 5668489  | 3471  |
| ENSG000001 | 11.40992 | 21.30543 | -0.85773 | 0.16193   | 0.2422    | S100A1    | chr1  | + | 1.54E+08 | 1.54E+08 | 2619  |
| ENSG000001 | 1051.583 | 1391.88  | -0.40476 | 0.000301  | 0.000805  | CHTOP     | chr1  | + | 1.54E+08 | 1.54E+08 | 2553  |
| ENSG000001 | 451.7246 | 519.5379 | -0.20199 | 0.30937   | 0.4112    | ZBTB7B    | chr1  | + | 1.55E+08 | 1.55E+08 | 3594  |
| ENSG000001 | 589.5943 | 1155.946 | -0.96916 | 2.31E-15  | 1.54E-14  | FLAD1     | chr1  | + | 1.55E+08 | 1.55E+08 | 2656  |
| ENSG000001 | 8855.976 | 3960.72  | 1.1602   | 4.59E-40  | 8.09E-39  | SHC1      | chr1  | - | 1.55E+08 | 1.55E+08 | 3481  |
| ENSG000001 | 573.956  | 397.3534 | 0.53062  | 0.00091   | 0.002271  | VPS11     | chr11 | + | 1.19E+08 | 1.19E+08 | 3387  |
| ENSG000001 | 408.388  | 629.8903 | -0.62194 | 0.012673  | 0.026079  | NLRX1     | chr11 | + | 1.19E+08 | 1.19E+08 | 4092  |
| ENSG000001 | 5259.198 | 7165.153 | -0.44568 | 8.48E-06  | 2.75E-05  | ADAR      | chr1  | - | 1.55E+08 | 1.55E+08 | 6620  |
| ENSG000001 | 22.10648 | 105.1639 | -2.2258  | 2.74E-12  | 1.50E-11  | IL6R      | chr1  | + | 1.54E+08 | 1.54E+08 | 5914  |
| ENSG000001 | 875.2867 | 738.9613 | 0.2441   | 0.14908   | 0.22584   | UBE2Q1    | chr1  | - | 1.55E+08 | 1.55E+08 | 3210  |
| ENSG000001 | 5.124359 | 33.21261 | -2.5992  | 1.40E-05  | 4.40E-05  | CHRN2     | chr1  | + | 1.55E+08 | 1.55E+08 | 5867  |
| ENSG000001 | 571.0794 | 351.1657 | 0.70089  | 1.86E-08  | 7.73E-08  | CRTC2     | chr1  | - | 1.54E+08 | 1.54E+08 | 2644  |
| ENSG000001 | 531.4216 | 616.2877 | -0.2137  | 0.13604   | 0.2091    | ANO10     | chr3  | - | 43396351 | 43733086 | 3212  |
| ENSG000001 | 359.1816 | 156.3821 | 1.1937   | 3.37E-06  | 1.14E-05  | FDPS      | chr1  | + | 1.55E+08 | 1.55E+08 | 2017  |
| ENSG000001 | 868.2858 | 834.6194 | 0.056868 | 0.6692    | 0.75176   | RUSC1     | chr1  | + | 1.55E+08 | 1.55E+08 | 3403  |
| ENSG000001 | 141.3759 | 38.2148  | 1.8824   | 8.14E-11  | 4.05E-10  | GBAP1     | chr1  | - | 1.55E+08 | 1.55E+08 | 2918  |
| ENSG000001 | 979.3449 | 732.5239 | 0.41781  | 0.010366  | 0.021724  | FAM189B   | chr1  | - | 1.55E+08 | 1.55E+08 | 3082  |
| ENSG000001 | 42.76487 | 113.4185 | -1.3992  | 1.52E-05  | 4.78E-05  | PAQR6     | chr1  | - | 1.56E+08 | 1.56E+08 | 2117  |
| ENSG000001 | 217.7016 | 555.7189 | -1.3467  | 9.90E-20  | 8.23E-19  | PMF1      | chr1  | + | 1.56E+08 | 1.56E+08 | 1068  |
| ENSG000001 | 572.1951 | 643.5409 | -0.16827 | 0.47753   | 0.58202   | SLC25A44  | chr1  | + | 1.56E+08 | 1.56E+08 | 6952  |
| ENSG000001 | 15950.75 | 922.4846 | 4.1065   | 6.36E-269 | 2.39E-266 | LMNA      | chr1  | + | 1.56E+08 | 1.56E+08 | 3190  |
| ENSG000001 | 0        | 0.343138 | -0.41864 | 0.81278   | NA        | CCR5      | chr3  | + | 46411633 | 46417697 | 3637  |
| ENSG000001 | 434.139  | 1487.568 | -1.7742  | 4.69E-33  | 6.71E-32  | NBEAL2    | chr3  | + | 47021173 | 47051193 | 8827  |
| ENSG000001 | 563.3588 | 792.8544 | -0.49257 | 2.92E-05  | 8.85E-05  | CCDC12    | chr3  | - | 46963216 | 47023500 | 2412  |
| ENSG000001 | 12.4906  | 180.8766 | -3.8257  | 1.23E-33  | 1.79E-32  | PTH1R     | chr3  | + | 46919236 | 46945287 | 2123  |
| ENSG000001 | 1255.299 | 1189.61  | 0.07734  | 0.51771   | 0.62046   | UBQLN4    | chr1  | - | 1.56E+08 | 1.56E+08 | 3576  |
| ENSG000001 | 0.995923 | 1.98115  | -0.83762 | 0.52247   | 0.62504   | MYL3      | chr3  | - | 46899362 | 46923659 | 1012  |
| ENSG000001 | 135.9912 | 260.977  | -0.93675 | 0.000314  | 0.000838  | PPP1R35   | chr7  | - | 1E+08    | 1E+08    | 1031  |
| ENSG000001 | 575.4867 | 1175.421 | -1.0229  | 0.000526  | 0.001362  | GPATCH4   | chr1  | - | 1.57E+08 | 1.57E+08 | 2464  |
| ENSG000001 | 225.4349 | 174.3332 | 0.37062  | 0.065501  | 0.11258   | AC004166  | chr7  | - | 74112305 | 74306731 | 1340  |
| ENSG000001 | 1.887365 | 2.24661  | -0.20776 | 0.8695    | 0.90924   | LRRC71    | chr1  | + | 1.57E+08 | 1.57E+08 | 1959  |

|            |          |          |          |           |           |           |       |   |          |          |       |
|------------|----------|----------|----------|-----------|-----------|-----------|-------|---|----------|----------|-------|
| ENSG000001 | 0        | 4.049714 | -3.2232  | 0.046581  | 0.083647  | AZGP1     | chr7  | - | 99564343 | 99573780 | 2027  |
| ENSG000001 | 69.96286 | 1967.302 | -4.8076  | 1.81E-141 | 1.83E-139 | FGFR4     | chr5  | + | 1.77E+08 | 1.77E+08 | 3122  |
| ENSG000001 | 0        | 0.951736 | -1.2555  | 0.48145   | NA        | CYP3A4    | chr7  | - | 99354604 | 99381888 | 2318  |
| ENSG000001 | 7.04424  | 4.692283 | 0.55668  | 0.47025   | 0.57498   | CYP3A7    | chr7  | - | 99302660 | 99332819 | 2314  |
| ENSG000001 | 2050.525 | 5235.952 | -1.3511  | 4.16E-36  | 6.53E-35  | NACC1     | chr19 | + | 13228917 | 13251955 | 4445  |
| ENSG000001 | 5.000153 | 0.297015 | 3.1686   | 0.018207  | 0.036255  | HK3       | chr5  | - | 1.76E+08 | 1.76E+08 | 3066  |
| ENSG000001 | 1.814586 | 1.638012 | 0.14761  | 0.91253   | 0.9402    | LY6K      | chr8  | + | 1.44E+08 | 1.44E+08 | 2724  |
| ENSG000001 | 806.6133 | 1255.962 | -0.63734 | 9.21E-06  | 2.97E-05  | IER2      | chr19 | + | 13261229 | 13265722 | 2934  |
| ENSG000001 | 269.003  | 363.8577 | -0.43443 | 0.008834  | 0.018765  | ZNF394    | chr7  | - | 99084142 | 99097947 | 2179  |
| ENSG000001 | 601.1915 | 1066.183 | -0.82514 | 8.43E-12  | 4.49E-11  | CPSF4     | chr7  | + | 99036545 | 99054994 | 1738  |
| ENSG000001 | 938.2726 | 1529.412 | -0.70332 | 6.84E-06  | 2.24E-05  | LY6E      | chr8  | + | 1.44E+08 | 1.44E+08 | 1419  |
| ENSG000001 | 1567.272 | 733.1159 | 1.0945   | 9.81E-15  | 6.32E-14  | VPS28     | chr8  | - | 1.46E+08 | 1.46E+08 | 2337  |
| ENSG000001 | 620.5264 | 1862.943 | -1.5827  | 3.22E-31  | 4.32E-30  | TONSL     | chr8  | - | 1.46E+08 | 1.46E+08 | 6600  |
| ENSG000001 | 6.774477 | 28.9768  | -2.0567  | 0.000371  | 0.00098   | PTGER1    | chr19 | - | 14583278 | 14586174 | 1421  |
| ENSG000001 | 1309.752 | 1172.372 | 0.15897  | 0.21252   | 0.30308   | MUM1      | chr19 | + | 1285890  | 1378430  | 4170  |
| ENSG000001 | 721.6709 | 1803.235 | -1.3188  | 9.28E-24  | 9.24E-23  | RECQL4    | chr8  | - | 1.46E+08 | 1.46E+08 | 3897  |
| ENSG000001 | 495.6106 | 428.585  | 0.20963  | 0.22114   | 0.31316   | LRRCL14   | chr8  | + | 1.46E+08 | 1.46E+08 | 5323  |
| ENSG000001 | 271.7136 | 179.6757 | 0.5942   | 0.01998   | 0.039439  | ZNF333    | chr19 | + | 14800613 | 14844558 | 4672  |
| ENSG000001 | 80.47972 | 2333.062 | -4.8477  | 6.97E-224 | 1.91E-221 | COL26A1   | chr7  | + | 1.01E+08 | 1.01E+08 | 3032  |
| ENSG000001 | 300.6544 | 413.729  | -0.45923 | 0.040769  | 0.074597  | PPP1R16A  | chr8  | + | 1.46E+08 | 1.46E+08 | 4311  |
| ENSG000001 | 0        | 2178.455 | -12.198  | 1.11E-30  | 1.45E-29  | FOXH1     | chr8  | - | 1.46E+08 | 1.46E+08 | 2503  |
| ENSG000001 | 3401.448 | 608.0681 | 2.4783   | 9.23E-57  | 2.49E-55  | ORAI2     | chr7  | + | 1.02E+08 | 1.02E+08 | 10769 |
| ENSG000001 | 230.0704 | 349.8455 | -0.60212 | 0.004637  | 0.010379  | ALKBH4    | chr7  | - | 1.02E+08 | 1.02E+08 | 2105  |
| ENSG000001 | 69.32693 | 309.2768 | -2.1304  | 2.22E-08  | 9.14E-08  | SH2B2     | chr7  | + | 1.02E+08 | 1.02E+08 | 2061  |
| ENSG000001 | 270.8973 | 303.5889 | -0.16145 | 0.29356   | 0.3956    | C5orf45   | chr5  | - | 1.79E+08 | 1.79E+08 | 4145  |
| ENSG000001 | 2515.453 | 989.4958 | 1.3445   | 3.12E-29  | 3.86E-28  | SQSTM1    | chr5  | + | 1.79E+08 | 1.79E+08 | 2986  |
| ENSG000001 | 1780.516 | 2043.407 | -0.19863 | 0.059457  | 0.10368   | MGAT4B    | chr5  | - | 1.79E+08 | 1.79E+08 | 3027  |
| ENSG000001 | 21788.12 | 40110.49 | -0.87974 | 1.36E-18  | 1.07E-17  | RPL8      | chr8  | - | 1.46E+08 | 1.46E+08 | 1041  |
| ENSG000001 | 1681.233 | 1819.582 | -0.11416 | 0.31943   | 0.42236   | MAML1     | chr5  | + | 1.79E+08 | 1.79E+08 | 6559  |
| ENSG000001 | 929.5926 | 1051.766 | -0.178   | 0.13885   | 0.21251   | LRWD1     | chr7  | + | 1.02E+08 | 1.02E+08 | 5491  |
| ENSG000001 | 23.31813 | 12.311   | 0.89655  | 0.082093  | 0.13659   | FBXL13    | chr7  | - | 1.02E+08 | 1.03E+08 | 3032  |
| ENSG000001 | 178.3636 | 92.59871 | 0.93873  | 6.95E-06  | 2.27E-05  | NAPEPLD   | chr7  | - | 1.03E+08 | 1.03E+08 | 4988  |
| ENSG000001 | 1.08924  | 0.357707 | 0.88709  | 0.61692   | NA        | SCGB3A1   | chr5  | - | 1.8E+08  | 1.8E+08  | 714   |
| ENSG000001 | 1609.459 | 1185.516 | 0.44004  | 0.029229  | 0.055476  | PSMC2     | chr7  | + | 1.03E+08 | 1.03E+08 | 3054  |
| ENSG000001 | 4.315069 | 131.1221 | -4.8294  | 5.56E-21  | 4.90E-20  | CELF5     | chr19 | + | 3224701  | 3297074  | 4268  |
| ENSG000001 | 1442.568 | 679.7067 | 1.0836   | 2.13E-17  | 1.59E-16  | MFS12     | chr19 | - | 3538259  | 3574288  | 2124  |
| ENSG000001 | 0        | 0.343138 | -0.41864 | 0.81278   | NA        | AC008103  | chr22 | + | 18837631 | 18848562 | 5920  |
| ENSG000001 | 1.451506 | 7.311169 | -1.9955  | 0.077634  | 0.13013   | XXBAC-B44 | chr22 | + | 20287283 | 20300739 | 1240  |
| ENSG000001 | 3.693391 | 9.248611 | -1.2739  | 0.095074  | 0.15482   | USP41     | chr22 | - | 20704868 | 20745048 | 1427  |
| ENSG000001 | 14.89517 | 8.873919 | 0.72991  | 0.20745   | 0.29722   | TUBA3FP   | chr22 | - | 21357184 | 21368581 | 1974  |
| ENSG000001 | 478.2634 | 774.0066 | -0.69418 | 1.15E-06  | 4.10E-06  | YDJC      | chr22 | - | 21982378 | 21984353 | 1613  |
| ENSG000001 | 10.52965 | 2.857624 | 1.7208   | 0.071522  | 0.12132   | CDC116    | chr22 | + | 21987007 | 21991616 | 2260  |
| ENSG000001 | 3745.911 | 2023.724 | 0.88741  | 1.74E-19  | 1.43E-18  | DVL3      | chr3  | + | 1.84E+08 | 1.84E+08 | 5254  |
| ENSG000001 | 8767.318 | 6995.845 | 0.32543  | 0.002614  | 0.006081  | AP2M1     | chr3  | + | 1.84E+08 | 1.84E+08 | 2091  |
| ENSG000001 | 827.5473 | 702.1073 | 0.23639  | 0.11905   | 0.18764   | ABCF3     | chr3  | + | 1.84E+08 | 1.84E+08 | 2844  |
| ENSG000001 | 1253.317 | 356.5832 | 1.809    | 2.99E-29  | 3.70E-28  | PCYT1A    | chr3  | - | 1.96E+08 | 1.96E+08 | 5597  |
| ENSG000001 | 99.81839 | 114.8624 | -0.20269 | 0.38532   | 0.48959   | FBXO27    | chr19 | - | 39481354 | 39523425 | 2330  |
| ENSG000001 | 0        | 1635.38  | -11.825  | 9.75E-29  | 1.18E-27  | DMKN      | chr19 | - | 35988122 | 36004560 | 2811  |
| ENSG000001 | 10.02084 | 26.48339 | -1.3859  | 0.006324  | 0.013807  | U2AF1L4   | chr19 | - | 36233428 | 36236346 | 2582  |
| ENSG000001 | 113.5003 | 328.5955 | -1.5293  | 3.53E-20  | 2.99E-19  | BDH1      | chr3  | - | 1.97E+08 | 1.97E+08 | 3546  |
| ENSG000001 | 0        | 22.66845 | -5.9423  | 2.71E-06  | 9.27E-06  | NPHS1     | chr19 | - | 36316866 | 36360189 | 4276  |
| ENSG000001 | 113.6105 | 171.3036 | -0.58933 | 0.030541  | 0.057622  | THAP8     | chr19 | - | 36525887 | 36545664 | 1825  |
| ENSG000001 | 10.08425 | 22.13095 | -1.1224  | 0.030219  | 0.05712   | COX7A1    | chr19 | - | 36641824 | 36643771 | 762   |
| ENSG000001 | 64.19466 | 50.85049 | 0.33043  | 0.43759   | 0.54314   | ZNF382    | chr19 | + | 37095719 | 37119499 | 3865  |
| ENSG000001 | 341.619  | 348.5068 | -0.02999 | 0.8574    | 0.89986   | DUSP14    | chr17 | + | 35849937 | 35873603 | 2207  |
| ENSG000001 | 27.06637 | 67.66686 | -1.3036  | 0.002847  | 0.006588  | LRRCS6    | chr11 | + | 537527   | 554916   | 2769  |
| ENSG000001 | 246.7989 | 32.2731  | 2.9122   | 8.43E-23  | 8.06E-22  | PLXDC1    | chr17 | - | 37219556 | 37310647 | 6252  |
| ENSG000001 | 105.6023 | 413.9852 | -1.9597  | 4.24E-18  | 3.27E-17  | PGAP3     | chr17 | - | 37827375 | 37853050 | 3028  |
| ENSG000001 | 0        | 10.82755 | -4.9799  | 0.000119  | 0.000336  | IKZF3     | chr17 | - | 37921198 | 38020441 | 2437  |
| ENSG000001 | 21.93859 | 23.55937 | -0.0909  | 0.83265   | 0.88212   | GRIN2C    | chr17 | - | 72838162 | 72857627 | 6516  |
| ENSG000001 | 341.3271 | 762.1759 | -1.1504  | 0.000229  | 0.000622  | FDXR      | chr17 | - | 72858619 | 72869156 | 2482  |
| ENSG000001 | 1053.215 | 1067.137 | -0.01834 | 0.91859   | 0.94517   | SAP30BP   | chr17 | + | 73663196 | 73704142 | 2786  |
| ENSG000001 | 712.739  | 553.8643 | 0.36318  | 0.002184  | 0.005138  | ACOX1     | chr17 | - | 73937588 | 73975515 | 7751  |
| ENSG000001 | 685.5675 | 691.0185 | -0.01224 | 0.94198   | 0.96246   | PRPSAP1   | chr17 | - | 74305567 | 74380602 | 3660  |
| ENSG000001 | 155.6947 | 59.13527 | 1.3832   | 3.22E-07  | 1.20E-06  | CYGB      | chr17 | - | 74523438 | 74547257 | 2158  |

|            |          |          |          |           |           |            |       |   |          |          |       |
|------------|----------|----------|----------|-----------|-----------|------------|-------|---|----------|----------|-------|
| ENSG000001 | 1153.33  | 1989.787 | -0.76707 | 0.16899   | 0.25071   | SRSF2      | chr17 | - | 74730197 | 74733456 | 2885  |
| ENSG000001 | 54.03845 | 249.5787 | -2.1953  | 2.04E-14  | 1.29E-13  | ZNF577     | chr19 | - | 52359055 | 52394203 | 3148  |
| ENSG000001 | 150.1672 | 277.2394 | -0.88239 | 1.71E-05  | 5.34E-05  | TMEM143    | chr19 | - | 48835613 | 48867494 | 2560  |
| ENSG000001 | 2.604151 | 2.932886 | -0.15558 | 0.88283   | 0.91846   | CCL5       | chr17 | - | 34198495 | 34207797 | 1365  |
| ENSG000001 | 0        | 0.686276 | -0.84936 | 0.6309    | NA        | CCL16      | chr17 | - | 34303529 | 34308532 | 1634  |
| ENSG000001 | 0.290301 | 3.399825 | -2.519   | 0.095891  | 0.15604   | KLHL10     | chr17 | + | 39991937 | 40004636 | 2057  |
| ENSG000001 | 0        | 1.188058 | -1.268   | 0.47398   | NA        | CCDC155    | chr19 | + | 49891475 | 49921251 | 2378  |
| ENSG000001 | 0        | 1.606458 | -1.9287  | 0.27074   | NA        | HCRT       | chr17 | - | 40336078 | 40337470 | 577   |
| ENSG000001 | 541.0048 | 879.2181 | -0.69828 | 5.73E-08  | 2.28E-07  | ALDH16A1   | chr19 | + | 49956426 | 49974305 | 3995  |
| ENSG000001 | 6487.614 | 612.4936 | 3.4005   | 1.58E-143 | 1.65E-141 | ITGA5      | chr12 | - | 54789045 | 54813244 | 4996  |
| ENSG000001 | 0.632843 | 1.234181 | -0.70218 | 0.65868   | NA        | SIGLEC11   | chr19 | - | 50452242 | 50464429 | 3173  |
| ENSG000001 | 141.4433 | 341.8595 | -1.2664  | 1.45E-06  | 5.09E-06  | ZNF385A    | chr12 | - | 54762917 | 54785082 | 2494  |
| ENSG000001 | 0        | 5.903774 | -3.991   | 0.005856  | 0.012859  | SIGLEC16   | chr19 | + | 50472857 | 50479071 | 2510  |
| ENSG000001 | 152.1673 | 129.407  | 0.22833  | 0.25795   | 0.3556    | MPP3       | chr17 | - | 41878167 | 41910538 | 2996  |
| ENSG000001 | 0        | 0.715414 | -0.84936 | 0.6309    | NA        | CD300LG    | chr17 | + | 41924516 | 41940997 | 2758  |
| ENSG000001 | 0        | 7.637322 | -4.4795  | 0.000855  | 0.002144  | IZUMO2     | chr19 | - | 50655805 | 50666452 | 893   |
| ENSG000001 | 38.30066 | 112.1046 | -1.5259  | 0.000749  | 0.001894  | NAGS       | chr17 | + | 42081914 | 42086431 | 2182  |
| ENSG000001 | 599.0251 | 792.8573 | -0.404   | 0.001841  | 0.00438   | LSM12      | chr17 | - | 42112003 | 42144987 | 2484  |
| ENSG000001 | 24.92978 | 25.29607 | -0.01672 | 0.96901   | 0.98264   | ASB16      | chr17 | + | 42247815 | 42256451 | 2139  |
| ENSG000001 | 725.9986 | 912.3519 | -0.32848 | 0.040476  | 0.074118  | EMC10      | chr19 | + | 50979657 | 50986608 | 2178  |
| ENSG000001 | 383.5842 | 30.94089 | 3.6184   | 2.97E-45  | 5.96E-44  | JOSD2      | chr19 | - | 51009255 | 51014610 | 996   |
| ENSG000001 | 6.399419 | 47.15438 | -2.8023  | 2.57E-08  | 1.05E-07  | SHANK1     | chr19 | - | 51165084 | 51222707 | 6643  |
| ENSG000001 | 1081.953 | 1371.138 | -0.34082 | 0.083041  | 0.13794   | FAM171A2   | chr17 | - | 42430583 | 42441243 | 3160  |
| ENSG000001 | 434.461  | 662.4694 | -0.6084  | 8.22E-06  | 2.67E-05  | DBF4B      | chr17 | + | 42785976 | 42829632 | 2998  |
| ENSG000001 | 803.3407 | 529.373  | 0.59964  | 0.000267  | 0.000719  | PLCD3      | chr17 | - | 43186335 | 43210721 | 6106  |
| ENSG000001 | 3749.15  | 396.8252 | 3.2376   | 2.62E-175 | 4.26E-173 | FMNL3      | chr12 | - | 50031724 | 50101948 | 11192 |
| ENSG000001 | 1.971308 | 23.50438 | -3.41    | 4.44E-06  | 1.48E-05  | AQP5       | chr12 | + | 50355653 | 50359464 | 1450  |
| ENSG000001 | 1196.799 | 1141.728 | 0.067938 | 0.59827   | 0.69232   | RACGAP1    | chr12 | - | 50370706 | 50426919 | 3307  |
| ENSG000001 | 602.8219 | 725.7994 | -0.2666  | 0.13277   | 0.20526   | LARP4      | chr12 | + | 50786166 | 50873787 | 6427  |
| ENSG000001 | 589.6875 | 137.9398 | 2.0368   | 0.000528  | 0.001366  | GRASP      | chr12 | + | 52400724 | 52409673 | 1933  |
| ENSG000001 | 1545     | 1464.562 | 0.077433 | 0.50174   | 0.60525   | RAVER1     | chr19 | - | 10426888 | 10444316 | 4693  |
| ENSG000001 | 5.778554 | 26.86453 | -2.1841  | 0.000103  | 0.000293  | SYCE2      | chr19 | - | 13009600 | 13030090 | 1231  |
| ENSG000001 | 515.2267 | 675.1683 | -0.38893 | 0.000768  | 0.001939  | SPC24      | chr19 | - | 11242196 | 11266484 | 2315  |
| ENSG000001 | 0        | 0.297015 | -0.41864 | 0.81278   | NA        | IP6K3      | chr6  | - | 33689444 | 33714762 | 2822  |
| ENSG000001 | 1989.967 | 1230.949 | 0.6915   | 8.68E-10  | 4.03E-09  | LEMD2      | chr6  | - | 33738979 | 33756913 | 4870  |
| ENSG000001 | 0.290301 | 12.35471 | -4.459   | 0.000185  | 0.000511  | ALOX15     | chr17 | - | 4534197  | 4545589  | 2784  |
| ENSG000001 | 0.72616  | 0.654722 | 0.069147 | 0.96802   | NA        | TREML1     | chr6  | - | 41117080 | 41122075 | 1194  |
| ENSG000001 | 205.0112 | 139.3689 | 0.55056  | 0.11379   | 0.18037   | ADCY10P1   | chr6  | + | 41068761 | 41108571 | 4567  |
| ENSG000001 | 78.62666 | 91.26503 | -0.21594 | 0.41853   | 0.5238    | ZNF653     | chr19 | - | 11594242 | 11616738 | 2240  |
| ENSG000001 | 37.49056 | 57.60394 | -0.61459 | 0.03696   | 0.068401  | MED11      | chr17 | + | 4634723  | 4636905  | 833   |
| ENSG000001 | 13.29036 | 48.13606 | -1.8335  | 0.000302  | 0.000809  | CXCL16     | chr17 | - | 4636821  | 4643217  | 2222  |
| ENSG000001 | 5.374398 | 1.294874 | 1.83     | 0.08233   | 0.13689   | SCIMP      | chr17 | - | 5112256  | 5138155  | 2383  |
| ENSG000001 | 4.564295 | 3.792375 | 0.23111  | 0.80758   | 0.86414   | RNAASEK-C1 | chr17 | + | 6915954  | 6920839  | 1856  |
| ENSG000001 | 1.431782 | 148.1158 | -6.4318  | 4.95E-17  | 3.62E-16  | BCL6B      | chr17 | + | 6926339  | 6933609  | 3555  |
| ENSG000001 | 0.705622 | 0.357707 | 0.57557  | 0.74268   | NA        | ASGR2      | chr17 | - | 7004641  | 7019019  | 1454  |
| ENSG000001 | 14.32654 | 42.78087 | -1.5615  | 0.000158  | 0.000438  | TNFSF13    | chr17 | + | 7461609  | 7464925  | 2036  |
| ENSG000001 | 429.8836 | 614.4712 | -0.51504 | 0.002387  | 0.005579  | SENP3      | chr17 | + | 7465192  | 7475287  | 2612  |
| ENSG000001 | 12.24056 | 203.456  | -3.993   | 1.55E-26  | 1.73E-25  | FGF11      | chr17 | + | 7341592  | 7349285  | 5553  |
| ENSG000001 | 72.48209 | 143.0022 | -0.97731 | 0.00122   | 0.002985  | EIF4A1     | chr17 | + | 7476024  | 7482323  | 1756  |
| ENSG000001 | 104.8478 | 246.6727 | -1.228   | 1.78E-09  | 8.05E-09  | RPL26      | chr17 | - | 8280838  | 8286531  | 1002  |
| ENSG000001 | 0.705622 | 0        | 0.8807   | 0.6196    | NA        | CCDC42     | chr17 | - | 8633252  | 8648537  | 1374  |
| ENSG000001 | 130.109  | 276.8675 | -1.0848  | 3.21E-09  | 1.42E-08  | POLR3K     | chr16 | - | 96407    | 103628   | 1392  |
| ENSG000001 | 480.0319 | 594.8856 | -0.30785 | 0.093401  | 0.1526    | SNRNP25    | chr16 | + | 103010   | 107669   | 1905  |
| ENSG000001 | 0.580602 | 31.83771 | -5.0968  | 3.03E-07  | 1.14E-06  | C16orf11   | chr16 | + | 610422   | 615528   | 2216  |
| ENSG000001 | 469.6791 | 598.2976 | -0.34856 | 0.006789  | 0.014728  | WDR90      | chr16 | + | 699311   | 717833   | 5589  |
| ENSG000001 | 561.6652 | 513.3549 | 0.13032  | 0.42414   | 0.52947   | JMJD8      | chr16 | - | 731671   | 734529   | 2205  |
| ENSG000001 | 23.4328  | 73.03091 | -1.6225  | 7.95E-05  | 0.000229  | CCDC78     | chr16 | - | 772582   | 776954   | 3458  |
| ENSG000001 | 0        | 0.297015 | -0.41864 | 0.81278   | NA        | MSLN       | chr16 | - | 819428   | 833370   | 3162  |
| ENSG000001 | 0        | 21.11698 | -5.9643  | 7.25E-07  | 2.62E-06  | SSTR5      | chr16 | + | 1122756  | 1131454  | 2674  |
| ENSG000001 | 5.269917 | 13.83891 | -1.3322  | 0.070501  | 0.11989   | SPSB3      | chr16 | - | 1826713  | 1843701  | 2316  |
| ENSG000001 | 0.943682 | 29.94398 | -4.473   | 1.15E-05  | 3.67E-05  | MEIOB      | chr16 | - | 1883984  | 1934295  | 1884  |
| ENSG000001 | 0        | 10.69085 | -4.8029  | 0.000555  | 0.001431  | HS3ST6     | chr16 | - | 1961464  | 1968441  | 1273  |
| ENSG000001 | 206.6506 | 706.0748 | -1.7658  | 1.28E-30  | 1.67E-29  | C16orf59   | chr16 | + | 2510081  | 2514964  | 2156  |
| ENSG000001 | 832.6536 | 1433.364 | -0.78225 | 1.88E-10  | 9.15E-10  | CCNF       | chr16 | + | 2479395  | 2508855  | 4283  |
| ENSG000001 | 350.4593 | 244.819  | 0.51461  | 0.001276  | 0.003112  | TBC1D24    | chr16 | + | 2525147  | 2555735  | 6578  |

|            |          |          |          |           |           |          |       |   |          |          |       |
|------------|----------|----------|----------|-----------|-----------|----------|-------|---|----------|----------|-------|
| ENSG000001 | 72.98764 | 161.8817 | -1.1418  | 4.47E-05  | 0.000133  | AMDHD2   | chr16 | + | 2570358  | 2581423  | 3273  |
| ENSG000001 | 36.45274 | 10.39055 | 1.7716   | 0.0001    | 0.000286  | NTN3     | chr16 | + | 2521500  | 2524146  | 1986  |
| ENSG000001 | 1.016461 | 396.9253 | -8.2358  | 1.93E-30  | 2.50E-29  | CCDC64B  | chr16 | - | 3077683  | 3086927  | 3519  |
| ENSG000001 | 154.1137 | 276.8381 | -0.84071 | 0.000102  | 0.00029   | PAQR4    | chr16 | + | 3019246  | 3023490  | 2793  |
| ENSG000001 | 307.0685 | 250.8322 | 0.29073  | 0.15445   | 0.23279   | FLYWCH2  | chr16 | + | 2933187  | 2949383  | 1036  |
| ENSG000001 | 130.787  | 222.8112 | -0.76225 | 0.026927  | 0.051592  | ZNF75A   | chr16 | + | 3355406  | 3368852  | 3989  |
| ENSG000001 | 404.2295 | 419.8231 | -0.05482 | 0.81887   | 0.8727    | ADCY9    | chr16 | - | 4003388  | 4166186  | 7725  |
| ENSG000001 | 1.213446 | 1055.431 | -9.2887  | 3.65E-47  | 7.69E-46  | SHANK2   | chr11 | - | 70313961 | 70963623 | 8987  |
| ENSG000001 | 445.0426 | 324.396  | 0.45566  | 0.000541  | 0.001396  | CLPB     | chr11 | - | 72003469 | 72145692 | 3240  |
| ENSG000001 | 144.0392 | 138.973  | 0.047834 | 0.83495   | 0.88406   | NEU3     | chr11 | + | 74699179 | 74729938 | 3519  |
| ENSG000001 | 397.6682 | 208.9509 | 0.92688  | 5.40E-11  | 2.73E-10  | CYB561A3 | chr11 | - | 61116217 | 61129771 | 4094  |
| ENSG000001 | 33.15658 | 34.49956 | -0.06056 | 0.92454   | 0.94929   | PPP1R32  | chr11 | + | 61248592 | 61258403 | 1535  |
| ENSG000001 | 9.688654 | 218.8913 | -4.4352  | 1.45E-37  | 2.38E-36  | ASRGL1   | chr11 | + | 62104920 | 62160882 | 2268  |
| ENSG000001 | 2.366091 | 3.573038 | -0.54951 | 0.61532   | 0.70714   | GNG3     | chr11 | + | 62475130 | 62476673 | 882   |
| ENSG000001 | 1647.928 | 2164.878 | -0.3932  | 0.000795  | 0.002002  | UBXN1    | chr11 | - | 62443970 | 62446567 | 2073  |
| ENSG000001 | 183.5873 | 310.5777 | -0.75515 | 0.000137  | 0.000385  | C11orf48 | chr11 | - | 62430287 | 62439727 | 2915  |
| ENSG000001 | 412.178  | 325.8238 | 0.33811  | 0.067157  | 0.11499   | TTC9C    | chr11 | + | 62495541 | 62507765 | 1833  |
| ENSG000001 | 327.4492 | 376.1194 | -0.1993  | 0.2687    | 0.36762   | TAF6L    | chr11 | + | 62538775 | 62554814 | 2116  |
| ENSG000001 | 1017.449 | 711.3912 | 0.5141   | 0.036096  | 0.067001  | NXF1     | chr11 | - | 62559595 | 62573774 | 4128  |
| ENSG000001 | 661.7909 | 374.677  | 0.81797  | 2.61E-06  | 8.96E-06  | STX5     | chr11 | - | 62574369 | 62599560 | 1794  |
| ENSG000001 | 47.58255 | 12.42111 | 1.8824   | 0.000146  | 0.000407  | SLC25A45 | chr11 | - | 65142663 | 65151172 | 7118  |
| ENSG000001 | 9042.05  | 13034.05 | -0.52725 | 2.14E-10  | 1.04E-09  | RPL29    | chr3  | - | 52027616 | 52029958 | 880   |
| ENSG000001 | 79.76652 | 2.932886 | 4.6328   | 1.64E-17  | 1.23E-16  | ITIH3    | chr3  | + | 52828784 | 52843025 | 3007  |
| ENSG000001 | 680.176  | 504.4813 | 0.42923  | 0.002013  | 0.004763  | DCP1A    | chr3  | - | 53317448 | 53381637 | 5998  |
| ENSG000001 | 970.1093 | 488.9229 | 0.98862  | 2.96E-15  | 1.97E-14  | SYVN1    | chr11 | - | 64889252 | 64902004 | 4547  |
| ENSG000001 | 54.57455 | 43.37187 | 0.32146  | 0.44347   | 0.54907   | ZFPL1    | chr11 | + | 64851695 | 64855870 | 1369  |
| ENSG000001 | 1362.81  | 339.4987 | 1.9973   | 2.24E-21  | 2.01E-20  | RPS6KA4  | chr11 | + | 64126620 | 64139687 | 3121  |
| ENSG000001 | 4042.392 | 2119.121 | 0.92926  | 2.60E-07  | 9.77E-07  | LRP5     | chr11 | + | 68080077 | 68216743 | 5159  |
| ENSG000001 | 295.6775 | 438.9064 | -0.56864 | 7.96E-05  | 0.00023   | TPCN2    | chr11 | + | 68816365 | 68858072 | 4376  |
| ENSG000001 | 0.975385 | 809.1362 | -9.1962  | 1.36E-36  | 2.17E-35  | FGF19    | chr11 | - | 69513000 | 69519410 | 2447  |
| ENSG000001 | 0        | 1.012429 | -1.3162  | 0.46038   | NA        | CYP4A22  | chr1  | + | 47603107 | 47615413 | 2535  |
| ENSG000001 | 0        | 10.30716 | -4.9919  | 6.52E-05  | 0.00019   | TAL1     | chr1  | - | 47681962 | 47697892 | 5008  |
| ENSG000001 | 1451.114 | 527.82   | 1.4587   | 4.07E-37  | 6.63E-36  | CMPK1    | chr1  | + | 47799469 | 47844511 | 2930  |
| ENSG000001 | 12.7492  | 88.25601 | -2.7585  | 2.53E-15  | 1.69E-14  | BEND5    | chr1  | - | 49193195 | 49242641 | 1716  |
| ENSG000001 | 1.431782 | 27.67715 | -4.0838  | 1.68E-06  | 5.89E-06  | ELAVL4   | chr1  | + | 50513686 | 50669458 | 3966  |
| ENSG000001 | 307.1408 | 433.4004 | -0.49624 | 0.001487  | 0.003593  | SELR1    | chr1  | - | 53152508 | 53164038 | 1620  |
| ENSG000001 | 854.9058 | 467.6247 | 0.86716  | 1.89E-06  | 6.59E-06  | ZYG11B   | chr1  | + | 53192126 | 53293014 | 8093  |
| ENSG000001 | 5.84196  | 0.297015 | 3.3288   | 0.014428  | 0.029326  | SLC1A7   | chr1  | - | 53552855 | 53608289 | 2637  |
| ENSG000001 | 525.6693 | 445.6331 | 0.23751  | 0.058977  | 0.1029    | C1orf123 | chr1  | - | 53679771 | 53686289 | 1912  |
| ENSG000001 | 428.2289 | 593.3617 | -0.46777 | 0.018935  | 0.037579  | MAGOH    | chr1  | - | 53692564 | 53704282 | 756   |
| ENSG000001 | 40.35673 | 85.75844 | -1.0856  | 0.000311  | 0.000832  | ACOT11   | chr1  | + | 55007930 | 55104865 | 6369  |
| ENSG000001 | 1.608228 | 6.968031 | -1.9043  | 0.062634  | 0.10829   | FAM151A  | chr1  | - | 55074855 | 55089229 | 2005  |
| ENSG000001 | 99.95197 | 229.4237 | -1.1939  | 1.39E-07  | 5.37E-07  | PARS2    | chr1  | - | 55222571 | 55230187 | 2347  |
| ENSG000001 | 1.628766 | 2.65044  | -0.61379 | 0.59089   | 0.6858    | C1orf177 | chr1  | + | 55271736 | 55307925 | 1777  |
| ENSG000001 | 0        | 21.26334 | -5.9977  | 4.20E-07  | 1.55E-06  | BSND     | chr1  | + | 55464606 | 55476556 | 3472  |
| ENSG000001 | 1323.957 | 1490.071 | -0.17055 | 0.11771   | 0.18578   | USP24    | chr1  | - | 55532032 | 55680786 | 10549 |
| ENSG000001 | 733.1479 | 893.4348 | -0.28422 | 0.02777   | 0.053025  | PPAP2B   | chr1  | - | 56960419 | 57110974 | 3292  |
| ENSG000001 | 851.1108 | 916.2948 | -0.10594 | 0.6431    | 0.73012   | NOL9     | chr1  | - | 6581407  | 6614595  | 6649  |
| ENSG000001 | 30.82317 | 161.4375 | -2.3661  | 1.06E-10  | 5.22E-10  | PRKAA2   | chr1  | + | 57110995 | 57181008 | 9347  |
| ENSG000001 | 984.3329 | 1125.296 | -0.1917  | 0.46268   | 0.5678    | KLHL21   | chr1  | - | 6650784  | 6674667  | 6445  |
| ENSG000001 | 4.00423  | 143.3196 | -5.0813  | 1.38E-26  | 1.55E-25  | ZSWIM5   | chr1  | - | 45482071 | 45771881 | 5819  |
| ENSG000001 | 598.9217 | 671.9911 | -0.16668 | 0.15958   | 0.23922   | GMEB1    | chr1  | + | 28995244 | 29045865 | 6410  |
| ENSG000001 | 71.62945 | 31.60864 | 1.1715   | 0.000106  | 0.0003    | SLC45A1  | chr1  | + | 8377886  | 8404227  | 2784  |
| ENSG000001 | 5433.893 | 2568.853 | 1.079    | 2.12E-14  | 1.34E-13  | SEPN1    | chr1  | + | 26126667 | 26144713 | 4332  |
| ENSG000001 | 100.2345 | 4208.408 | -5.3727  | 3.68E-124 | 3.10E-122 | AK4      | chr1  | + | 65613232 | 65697828 | 6998  |
| ENSG000001 | 1943.361 | 864.8146 | 1.165    | 5.99E-11  | 3.02E-10  | JAK1     | chr1  | - | 65298912 | 65432187 | 5047  |
| ENSG000001 | 389.0036 | 583.9595 | -0.58534 | 3.89E-06  | 1.31E-05  | RAVER2   | chr1  | + | 65210778 | 65298915 | 4398  |
| ENSG000001 | 1.991846 | 0        | 2.4814   | 0.12503   | 0.19536   | CTRC     | chr1  | + | 15764935 | 15775737 | 3147  |
| ENSG000001 | 413.4359 | 229.3687 | 0.84831  | 4.92E-09  | 2.14E-08  | LZIC     | chr1  | - | 9982173  | 10003465 | 2281  |
| ENSG000001 | 0.342542 | 21.51752 | -5.2218  | 2.94E-06  | 1.00E-05  | RBP7     | chr1  | + | 10057264 | 10076078 | 861   |
| ENSG000001 | 0        | 0.594029 | -0.81444 | 0.64499   | NA        | KNCN     | chr1  | - | 47011316 | 47017199 | 2320  |
| ENSG000001 | 2790.796 | 1835.821 | 0.60336  | 5.58E-07  | 2.04E-06  | FBLIM1   | chr1  | + | 16083102 | 16113089 | 3695  |
| ENSG000001 | 0.685084 | 3.587607 | -1.9987  | 0.13418   | 0.20712   | TMEM82   | chr1  | + | 16068917 | 16074477 | 1520  |
| ENSG000001 | 10.0629  | 4.152498 | 1.1953   | 0.13278   | 0.20526   | SLC25A34 | chr1  | + | 16062900 | 16067891 | 2986  |
| ENSG000001 | 23.21626 | 22.65946 | 0.034448 | 0.93366   | 0.95644   | AKR7A3   | chr1  | - | 19609052 | 19615744 | 1710  |

|            |          |          |          |          |          |          |      |   |          |          |      |
|------------|----------|----------|----------|----------|----------|----------|------|---|----------|----------|------|
| ENSG000001 | 3563.098 | 1032.459 | 1.7788   | 3.58E-13 | 2.09E-12 | DRAXIN   | chr1 | + | 11751786 | 11785914 | 7346 |
| ENSG000001 | 1.774324 | 1946.733 | -9.8753  | 4.50E-61 | 1.33E-59 | PDPN     | chr1 | + | 13909960 | 13944452 | 3104 |
| ENSG000001 | 0        | 0.997859 | -1.5018  | 0.39072  | NA       | LRRC38   | chr1 | - | 13801445 | 13840543 | 2209 |
| ENSG000001 | 49.28556 | 257.9432 | -2.384   | 1.27E-19 | 1.05E-18 | DHRS3    | chr1 | - | 12627939 | 12677737 | 1723 |
| ENSG000001 | 8.786861 | 3.867637 | 1.0821   | 0.24045  | 0.33533  | MATN1    | chr1 | - | 31184124 | 31196434 | 3832 |
| ENSG000001 | 141.1927 | 6.907338 | 4.2945   | 5.91E-28 | 6.97E-27 | LAPTM5   | chr1 | - | 31205316 | 31230667 | 2223 |
| ENSG000001 | 7116.757 | 1764.824 | 2.0088   | 2.43E-51 | 5.77E-50 | SDC3     | chr1 | - | 31342314 | 31381608 | 6392 |
| ENSG000001 | 730.9447 | 484.4893 | 0.59336  | 5.39E-05 | 0.000159 | PEF1     | chr1 | - | 32095463 | 32110497 | 1629 |
| ENSG000001 | 327.5236 | 339.6145 | -0.05207 | 0.79144  | 0.85153  | SYNC     | chr1 | - | 33145507 | 33169197 | 3413 |
| ENSG000001 | 1645.084 | 2370.728 | -0.52633 | 4.96E-05 | 0.000147 | RBBP4    | chr1 | + | 33116743 | 33146258 | 2385 |
| ENSG000001 | 935.3095 | 2414.012 | -1.3661  | 9.51E-25 | 9.85E-24 | KIAA1522 | chr1 | + | 33207486 | 33240571 | 5438 |
| ENSG000001 | 7.35508  | 6.47437  | 0.15863  | 0.82694  | 0.87805  | TSSK3    | chr1 | + | 32817122 | 32829913 | 1368 |
| ENSG000001 | 96.09867 | 249.3392 | -1.3707  | 1.29E-07 | 4.99E-07 | TMCO4    | chr1 | - | 20008706 | 20126438 | 2974 |
| ENSG000001 | 0        | 32.53036 | -6.6235  | 5.46E-09 | 2.37E-08 | UBXN10   | chr1 | + | 20512578 | 20522541 | 5571 |
| ENSG000001 | 126.8616 | 231.3867 | -0.86395 | 0.001954 | 0.004633 | CAMK2N1  | chr1 | - | 20808884 | 20812713 | 2336 |
| ENSG000001 | 63.30159 | 5391.328 | -6.3983  | 0        | 0        | ALPL     | chr1 | + | 21835858 | 21904905 | 2589 |
| ENSG000001 | 0.705622 | 6.829661 | -2.8395  | 0.021953 | 0.04294  | WNT4     | chr1 | - | 22446461 | 22470462 | 1182 |
| ENSG000001 | 0        | 0.594029 | -0.81444 | 0.64499  | NA       | TLL10    | chr1 | + | 1109264  | 1133315  | 2283 |
| ENSG000001 | 40.94687 | 53.54469 | -0.38407 | 0.35494  | 0.45921  | SCNN1D   | chr1 | + | 1215816  | 1227409  | 3475 |
| ENSG000001 | 1221.271 | 205.1888 | 2.5637   | 1.44E-41 | 2.62E-40 | MXRA8    | chr1 | - | 1288069  | 1297157  | 2625 |
| ENSG000001 | 888.1139 | 1060.49  | -0.25602 | 0.057316 | 0.10028  | C1orf86  | chr1 | - | 2115903  | 2144159  | 3576 |
| ENSG000001 | 457.7957 | 546.8256 | -0.25624 | 0.15973  | 0.23938  | MEGF6    | chr1 | - | 3406484  | 3528059  | 5455 |
| ENSG000001 | 1.794048 | 18.6656  | -3.0901  | 0.000339 | 0.0009   | CCDC27   | chr1 | + | 3668962  | 3688209  | 2252 |
| ENSG000001 | 0.580602 | 0.297015 | 0.36801  | 0.83644  | NA       | IL23R    | chr1 | + | 67632083 | 67725662 | 2912 |
| ENSG000001 | 13.15515 | 1.012429 | 3.4086   | 0.000431 | 0.00113  | DIRAS3   | chr1 | - | 68511645 | 68517314 | 1973 |
| ENSG000001 | 1.306762 | 0.715414 | 0.62012  | 0.70732  | 0.78242  | C1orf87  | chr1 | - | 60452941 | 60539442 | 3012 |
| ENSG000001 | 513.8271 | 210.8942 | 1.2807   | 2.00E-11 | 1.04E-10 | NFIA     | chr1 | + | 61330931 | 61928465 | 9487 |
| ENSG000001 | 44.13146 | 75.88183 | -0.78057 | 0.005414 | 0.011978 | OMA1     | chr1 | - | 58881056 | 59012474 | 2105 |
| ENSG000001 | 746.3548 | 1931.382 | -1.3697  | 2.45E-25 | 2.60E-24 | MYSM1    | chr1 | - | 59120411 | 59165764 | 7793 |
| ENSG000001 | 262.5293 | 127.7998 | 1.0359   | 2.42E-09 | 1.08E-08 | TM2D1    | chr1 | - | 62146719 | 62191095 | 1250 |
| ENSG000001 | 1447.506 | 1112.237 | 0.37887  | 0.11304  | 0.17935  | USP1     | chr1 | + | 62901968 | 62917475 | 3996 |
| ENSG000001 | 2037.112 | 2570.01  | -0.3343  | 0.048466 | 0.086613 | FUBP1    | chr1 | - | 78409740 | 78444794 | 2524 |
| ENSG000001 | 177.5384 | 59.14796 | 1.5783   | 1.49E-07 | 5.73E-07 | NEXN     | chr1 | + | 78354198 | 78409580 | 3195 |
| ENSG000001 | 219.7268 | 105.855  | 1.048    | 0.000173 | 0.000478 | DNAJB4   | chr1 | + | 78444859 | 78483648 | 2988 |
| ENSG000001 | 625.3163 | 2.681995 | 7.7186   | 5.74E-54 | 1.45E-52 | ELTD1    | chr1 | - | 79355449 | 79472403 | 3527 |
| ENSG000001 | 2.188831 | 7.58475  | -1.6     | 0.13171  | 0.20394  | LRRIQ3   | chr1 | - | 74491699 | 74663871 | 4524 |
| ENSG000001 | 0        | 0.343138 | -0.41864 | 0.81278  | NA       | LRRC53   | chr1 | - | 74935562 | 74978298 | 3859 |
| ENSG000001 | 297.7141 | 382.678  | -0.35897 | 0.16486  | 0.24575  | TYW3     | chr1 | + | 75198836 | 75232362 | 3430 |
| ENSG000001 | 10.81897 | 3.789086 | 1.3913   | 0.1708   | 0.25313  | LHX8     | chr1 | + | 75594119 | 75627218 | 2373 |
| ENSG000001 | 545.5877 | 216.8197 | 1.3275   | 1.41E-19 | 1.17E-18 | SNX7     | chr1 | + | 99127236 | 99226056 | 1742 |
| ENSG000001 | 98.41848 | 3.290593 | 4.7923   | 7.74E-21 | 6.77E-20 | B3GALT2  | chr1 | - | 1.93E+08 | 1.93E+08 | 3274 |
| ENSG000001 | 190.0895 | 33.70298 | 2.4742   | 1.23E-12 | 6.91E-12 | NTNG1    | chr1 | + | 1.08E+08 | 1.08E+08 | 4703 |
| ENSG000001 | 617.4805 | 839.6268 | -0.44169 | 0.074189 | 0.12533  | FAM102B  | chr1 | + | 1.09E+08 | 1.09E+08 | 8333 |
| ENSG000001 | 57.84325 | 87.49111 | -0.58995 | 0.039821 | 0.073081 | HENMT1   | chr1 | - | 1.09E+08 | 1.09E+08 | 1874 |
| ENSG000001 | 1.846289 | 0.997859 | 0.74341  | 0.59516  | 0.68957  | AKNAD1   | chr1 | - | 1.09E+08 | 1.1E+08  | 3053 |
| ENSG000001 | 339.5748 | 415.2745 | -0.28937 | 0.12271  | 0.19245  | C1orf52  | chr1 | - | 85715639 | 85725355 | 3388 |
| ENSG000001 | 21.13191 | 0.654722 | 4.5574   | 2.56E-06 | 8.78E-06 | WDR63    | chr1 | + | 85464830 | 85598821 | 3477 |
| ENSG000001 | 55.67659 | 0        | 7.361    | 2.74E-11 | 1.41E-10 | GBP2     | chr1 | - | 89571815 | 89616139 | 3687 |
| ENSG000001 | 179.8684 | 286.6335 | -0.66545 | 0.037459 | 0.069227 | ATXN7L2  | chr1 | + | 1.1E+08  | 1.1E+08  | 4375 |
| ENSG000001 | 37.13783 | 0.686276 | 5.3397   | 6.65E-09 | 2.86E-08 | GBP4     | chr1 | - | 89646831 | 89664615 | 6127 |
| ENSG000001 | 380.1621 | 416.4718 | -0.12979 | 0.59153  | 0.68644  | ZNF326   | chr1 | + | 90460671 | 90494097 | 2729 |
| ENSG000001 | 2.572449 | 24.31037 | -3.0791  | 1.42E-05 | 4.47E-05 | HFM1     | chr1 | - | 91726323 | 91870426 | 4931 |
| ENSG000001 | 0.290301 | 2.056411 | -1.914   | 0.21479  | 0.3057   | FAM5C    | chr1 | - | 1.9E+08  | 1.9E+08  | 2889 |
| ENSG000001 | 20.11724 | 7.288479 | 1.4282   | 0.039103 | 0.071926 | GFI1     | chr1 | - | 92940319 | 92952433 | 2855 |
| ENSG000001 | 74.00654 | 92.00059 | -0.31245 | 0.21157  | 0.30194  | KCNT2    | chr1 | - | 1.96E+08 | 1.97E+08 | 5883 |
| ENSG000001 | 447.2693 | 494.6046 | -0.14312 | 0.39471  | 0.49923  | AGL      | chr1 | + | 1E+08    | 1E+08    | 7446 |
| ENSG000001 | 608.6382 | 0        | 10.529   | 7.98E-23 | 7.63E-22 | VCAM1    | chr1 | + | 1.01E+08 | 1.01E+08 | 3865 |
| ENSG000001 | 859.3968 | 557.9045 | 0.62347  | 1.49E-06 | 5.24E-06 | EXTL2    | chr1 | - | 1.01E+08 | 1.01E+08 | 3985 |
| ENSG000001 | 868.8742 | 372.0996 | 1.2226   | 1.36E-18 | 1.07E-17 | SLC30A7  | chr1 | + | 1.01E+08 | 1.01E+08 | 7898 |
| ENSG000001 | 0.342542 | 0        | 0.4146   | 0.81455  | NA       | DNAJA1P5 | chr1 | + | 1.02E+08 | 1.02E+08 | 943  |
| ENSG000001 | 608.7014 | 1204.735 | -0.98295 | 6.47E-10 | 3.03E-09 | ZNF281   | chr1 | - | 2E+08    | 2E+08    | 3132 |
| ENSG000001 | 3621.967 | 1321.353 | 1.4536   | 5.08E-50 | 1.17E-48 | ARPC5    | chr1 | - | 1.84E+08 | 1.84E+08 | 2985 |
| ENSG000001 | 0.705622 | 36.02418 | -5.2891  | 1.31E-08 | 5.50E-08 | CADM3    | chr1 | + | 1.59E+08 | 1.59E+08 | 3745 |
| ENSG000001 | 49.77383 | 3.025133 | 3.9398   | 2.26E-11 | 1.17E-10 | NLRP3    | chr1 | + | 2.48E+08 | 2.48E+08 | 4318 |
| ENSG000001 | 1659.884 | 2346.598 | -0.499   | 5.24E-08 | 2.09E-07 | ZNF496   | chr1 | - | 2.47E+08 | 2.47E+08 | 9243 |

|                    |          |          |           |           |          |      |   |          |          |       |
|--------------------|----------|----------|-----------|-----------|----------|------|---|----------|----------|-------|
| ENSG0000011148352  | 40.13297 | -1.7799  | 4.54E-05  | 0.000135  | TRIM58   | chr1 | + | 2.48E+08 | 2.48E+08 | 3225  |
| ENSG0000011027626  | 6.624893 | -2.3532  | 0.048871  | 0.087246  | KCNJ9    | chr1 | + | 1.6E+08  | 1.6E+08  | 4170  |
| ENSG000001886.3645 | 2370.372 | -1.4169  | 2.67E-26  | 2.93E-25  | IGSF8    | chr1 | - | 1.6E+08  | 1.6E+08  | 2366  |
| ENSG0000011895.431 | 1.652581 | 9.8607   | 5.01E-65  | 1.64E-63  | DDR2     | chr1 | + | 1.63E+08 | 1.63E+08 | 3207  |
| ENSG0000013837.497 | 1158.07  | 1.7195   | 3.36E-11  | 1.72E-10  | PEA15    | chr1 | + | 1.6E+08  | 1.6E+08  | 2694  |
| ENSG000001429.399  | 640.4404 | -0.57564 | 8.07E-05  | 0.000233  | PEX19    | chr1 | - | 1.6E+08  | 1.6E+08  | 3661  |
| ENSG0000011555.735 | 929.7419 | 0.74129  | 5.37E-05  | 0.000158  | NCSTN    | chr1 | + | 1.6E+08  | 1.6E+08  | 3031  |
| ENSG0000011526.14  | 2635.167 | -0.78733 | 2.89E-15  | 1.92E-14  | VANGL2   | chr1 | + | 1.6E+08  | 1.6E+08  | 5340  |
| ENSG0000010        | 0.357707 | -0.41864 | 0.81278   | NA        | SLAMF6   | chr1 | - | 1.6E+08  | 1.6E+08  | 2743  |
| ENSG0000012587.048 | 177.7042 | 3.854    | 1.80E-121 | 1.43E-119 | OLFML2B  | chr1 | - | 1.62E+08 | 1.62E+08 | 3160  |
| ENSG00000136.30621 | 5.286312 | 2.7187   | 2.43E-07  | 9.17E-07  | FCRLB    | chr1 | + | 1.62E+08 | 1.62E+08 | 1989  |
| ENSG0000010        | 1.058552 | -1.361   | 0.4451    | NA        | SLC9C2   | chr1 | - | 1.73E+08 | 1.74E+08 | 4428  |
| ENSG00000111.12044 | 108.1397 | -3.2378  | 1.11E-16  | 7.96E-16  | KLHDC9   | chr1 | + | 1.61E+08 | 1.61E+08 | 1333  |
| ENSG00000165.97494 | 83.01515 | -0.32883 | 0.35802   | 0.46235   | C1orf74  | chr1 | - | 2.1E+08  | 2.1E+08  | 1576  |
| ENSG000001254.9311 | 1201.386 | -2.2329  | 1.90E-64  | 6.12E-63  | FLVCR1   | chr1 | + | 2.13E+08 | 2.13E+08 | 5939  |
| ENSG00000193.36331 | 302.4699 | -1.6873  | 2.15E-12  | 1.19E-11  | ATF3     | chr1 | + | 2.13E+08 | 2.13E+08 | 2117  |
| ENSG000001346.3786 | 700.1765 | -1.0153  | 4.95E-17  | 3.62E-16  | RBM15    | chr1 | + | 1.11E+08 | 1.11E+08 | 4244  |
| ENSG0000011.286224 | 22.0606  | -3.8096  | 1.08E-05  | 3.45E-05  | DENND2D  | chr1 | - | 1.12E+08 | 1.12E+08 | 3207  |
| ENSG0000010.36308  | 0.686276 | -0.48701 | 0.78478   | NA        | AXDND1   | chr1 | + | 1.79E+08 | 1.8E+08  | 3642  |
| ENSG0000010        | 21.67375 | -6.0328  | 3.29E-07  | 1.23E-06  | TDRD5    | chr1 | + | 1.8E+08  | 1.8E+08  | 3678  |
| ENSG0000012089.885 | 572.7364 | 1.8541   | 5.55E-10  | 2.61E-09  | IER5     | chr1 | + | 1.81E+08 | 1.81E+08 | 2340  |
| ENSG0000011688.455 | 62.72282 | 4.7345   | 9.02E-119 | 6.86E-117 | SNED1    | chr2 | + | 2.42E+08 | 2.42E+08 | 8174  |
| ENSG000001394.1578 | 260.8138 | 0.59334  | 2.77E-05  | 8.43E-05  | BPNT1    | chr1 | - | 2.2E+08  | 2.2E+08  | 2737  |
| ENSG0000014.128436 | 14.63691 | -1.7237  | 0.016053  | 0.032321  | SPATA17  | chr1 | + | 2.18E+08 | 2.18E+08 | 5818  |
| ENSG0000016.628106 | 489.8642 | -6.0851  | 2.21E-53  | 5.54E-52  | C1orf115 | chr1 | + | 2.21E+08 | 2.21E+08 | 3413  |
| ENSG000001480.6442 | 363.8002 | 0.40222  | 0.011673  | 0.024174  | BROX     | chr1 | + | 2.23E+08 | 2.23E+08 | 4124  |
| ENSG0000011.286224 | 0        | 1.8436   | 0.2818    | NA        | NBPf8    | chr1 | + | 1.44E+08 | 1.44E+08 | 11691 |
| ENSG00000191.27896 | 221.3131 | -1.2721  | 4.12E-07  | 1.52E-06  | ACP6     | chr1 | - | 1.47E+08 | 1.47E+08 | 1788  |
| ENSG0000010        | 0.686276 | -0.84936 | 0.6309    | NA        | MT2P1    | chr4 | + | 69242041 | 69242226 | 186   |
| ENSG0000010        | 0.357707 | -0.41864 | 0.81278   | NA        | WDR64    | chr1 | + | 2.42E+08 | 2.42E+08 | 4371  |
| ENSG0000013607.47  | 50.92635 | 6.1259   | 2.85E-146 | 3.12E-144 | KIF26B   | chr1 | + | 2.45E+08 | 2.46E+08 | 12113 |
| ENSG000001237.9593 | 364.2751 | -0.61095 | 0.006204  | 0.013572  | TFB2M    | chr1 | - | 2.47E+08 | 2.47E+08 | 1848  |
| ENSG000001420.3275 | 254.8759 | 0.7222   | 1.31E-06  | 4.65E-06  | CNST     | chr1 | + | 2.47E+08 | 2.47E+08 | 5126  |
| ENSG000001233.4425 | 288.3344 | -0.30379 | 0.05631   | 0.098715  | PPP1R21  | chr2 | + | 48667737 | 48742525 | 3208  |
| ENSG000001230.8321 | 20.36431 | 3.9486   | 9.56E-49  | 2.11E-47  | KLHDC8A  | chr1 | - | 2.05E+08 | 2.05E+08 | 3177  |
| ENSG00000114.0157  | 7.987708 | 0.77375  | 0.29226   | 0.39416   | PM20D1   | chr1 | - | 2.06E+08 | 2.06E+08 | 2152  |
| ENSG000001172.8293 | 262.875  | -0.59993 | 0.002171  | 0.005109  | PKDCC    | chr2 | + | 42275160 | 42285668 | 2502  |
| ENSG00000179.98641 | 43.81853 | 0.85665  | 0.009847  | 0.020723  | OXER1    | chr2 | - | 42989642 | 42991401 | 1760  |
| ENSG000001385.5522 | 72.99278 | 2.3892   | 1.07E-34  | 1.61E-33  | HAAO     | chr2 | - | 42994229 | 43019733 | 1522  |
| ENSG000001372.0449 | 417.3305 | -0.16423 | 0.20765   | 0.29743   | B3GALNT2 | chr1 | - | 2.36E+08 | 2.36E+08 | 3034  |
| ENSG0000018.536009 | 1.874334 | 1.9754   | 0.045838  | 0.082464  | C1orf147 | chr1 | - | 2.07E+08 | 2.07E+08 | 2096  |
| ENSG0000011998.297 | 1158.574 | 0.78606  | 1.65E-12  | 9.25E-12  | MAPKAPK2 | chr1 | + | 2.07E+08 | 2.07E+08 | 2961  |
| ENSG0000010.342542 | 0        | 0.4146   | 0.81455   | NA        | IL20     | chr1 | + | 2.07E+08 | 2.07E+08 | 1553  |
| ENSG0000010.342542 | 0        | 0.4146   | 0.81455   | NA        | IL24     | chr1 | + | 2.07E+08 | 2.07E+08 | 1819  |
| ENSG0000010        | 1.698704 | -2.2257  | 0.18075   | NA        | FAIM3    | chr1 | - | 2.07E+08 | 2.07E+08 | 1950  |
| ENSG0000010.290301 | 0.594029 | -0.38058 | 0.83094   | NA        | PIGR     | chr1 | - | 2.07E+08 | 2.07E+08 | 4279  |
| ENSG0000015345.951 | 693.1149 | 2.9435   | 1.38E-160 | 1.83E-158 | CAPN2    | chr1 | + | 2.24E+08 | 2.24E+08 | 4130  |
| ENSG000001408.8082 | 313.9009 | 0.38013  | 0.020837  | 0.040942  | MRPL55   | chr1 | - | 2.28E+08 | 2.28E+08 | 1423  |
| ENSG00000113.7254  | 7.206769 | 0.88919  | 0.14546   | 0.22104   | C1orf145 | chr1 | - | 2.28E+08 | 2.28E+08 | 2893  |
| ENSG0000011965.179 | 1173.075 | 0.74298  | 7.48E-11  | 3.74E-10  | WDR26    | chr1 | - | 2.25E+08 | 2.25E+08 | 6872  |
| ENSG00000146.66201 | 23.96723 | 0.95968  | 0.014552  | 0.029552  | REL      | chr2 | + | 61108656 | 61150645 | 3155  |
| ENSG00000179.6507  | 35.3322  | 1.1629   | 7.20E-05  | 0.000208  | PUS10    | chr2 | - | 61167357 | 61245394 | 6366  |
| ENSG000001396.9548 | 260.8138 | 0.60476  | 7.59E-06  | 2.47E-05  | PEX13    | chr2 | + | 61244360 | 61276394 | 1739  |
| ENSG000001454.8536 | 198.4494 | 1.1957   | 9.22E-13  | 5.26E-12  | KIAA1841 | chr2 | + | 61293006 | 61391960 | 4516  |
| ENSG00000142.64581 | 26.35388 | 0.68997  | 0.050055  | 0.089041  | TRIM17   | chr1 | - | 2.29E+08 | 2.29E+08 | 2652  |
| ENSG000001193.1733 | 25.40785 | 2.8984   | 9.95E-27  | 1.12E-25  | RFTN2    | chr2 | - | 1.98E+08 | 1.99E+08 | 3251  |
| ENSG000001144.2129 | 30.97003 | 2.2105   | 2.07E-14  | 1.31E-13  | DISC1    | chr1 | + | 2.32E+08 | 2.32E+08 | 7059  |
| ENSG0000010.36308  | 0        | 0.4146   | 0.81455   | NA        | AC007364 | chr2 | - | 1.51E+08 | 1.51E+08 | 1832  |
| ENSG0000010        | 30.22951 | -6.5049  | 1.51E-08  | 6.33E-08  | CAPN13   | chr2 | - | 30945637 | 31043408 | 2683  |
| ENSG0000018.901694 | 22.01756 | -1.2495  | 0.076836  | 0.12911   | LRRMT1   | chr2 | - | 80515483 | 80531874 | 4023  |
| ENSG000001117.0447 | 154.3596 | -0.39769 | 0.21068   | 0.3009    | MEMO1    | chr2 | - | 32092878 | 32236299 | 1756  |
| ENSG000001506.5959 | 822.4963 | -0.69886 | 1.13E-08  | 4.79E-08  | DPY30    | chr2 | - | 32092878 | 32264881 | 1519  |
| ENSG000001169.899  | 222.0315 | -0.38497 | 0.032761  | 0.06137   | TYW5     | chr2 | - | 2.01E+08 | 2.01E+08 | 6525  |
| ENSG000001109.2692 | 205.5986 | -0.90633 | 0.000117  | 0.00033   | C2orf47  | chr2 | + | 2.01E+08 | 2.01E+08 | 1495  |
| ENSG0000010        | 10.06843 | -4.9407  | 9.18E-05  | 0.000263  | KCNF1    | chr2 | + | 11052063 | 11054350 | 2288  |

|            |          |          |          |           |           |           |      |   |          |          |       |
|------------|----------|----------|----------|-----------|-----------|-----------|------|---|----------|----------|-------|
| ENSG000001 | 175.7477 | 185.3877 | -0.07664 | 0.72349   | 0.79545   | PQLC3     | chr2 | + | 11295324 | 11319000 | 1830  |
| ENSG000001 | 1445.28  | 933.8618 | 0.62926  | 3.67E-05  | 0.00011   | ARL5A     | chr2 | - | 1.53E+08 | 1.53E+08 | 5326  |
| ENSG000001 | 1257.455 | 33.50157 | 5.2164   | 6.62E-142 | 6.74E-140 | FAM84A    | chr2 | + | 14772810 | 14790933 | 6355  |
| ENSG000001 | 4.656798 | 2.309719 | 0.90695  | 0.42715   | 0.53254   | KCNJ3     | chr2 | + | 1.56E+08 | 1.56E+08 | 5021  |
| ENSG000001 | 0        | 2.041842 | -2.4837  | 0.12741   | 0.19837   | NEUROD1   | chr2 | - | 1.83E+08 | 1.83E+08 | 2852  |
| ENSG000001 | 73.23931 | 32.41388 | 1.1667   | 0.000177  | 0.00049   | CLHC1     | chr2 | - | 55401927 | 55459699 | 2248  |
| ENSG000001 | 30.47965 | 32.63235 | -0.10203 | 0.78613   | 0.84701   | PRORS1P   | chr2 | + | 55509455 | 55511658 | 2154  |
| ENSG000001 | 56.26673 | 33.86733 | 0.72378  | 0.048785  | 0.087117  | FRZB      | chr2 | - | 1.84E+08 | 1.84E+08 | 3162  |
| ENSG000001 | 30.92244 | 51.34017 | -0.7232  | 0.079298  | 0.13252   | DUSP19    | chr2 | + | 1.84E+08 | 1.84E+08 | 5176  |
| ENSG000001 | 345.0239 | 227.5624 | 0.59932  | 0.000213  | 0.000581  | CCDC104   | chr2 | + | 55746740 | 55773015 | 2048  |
| ENSG000001 | 171.2011 | 315.2705 | -0.87631 | 0.000705  | 0.00179   | NUP35     | chr2 | + | 1.84E+08 | 1.84E+08 | 2828  |
| ENSG000001 | 101.1965 | 204.4687 | -1.0059  | 2.87E-05  | 8.71E-05  | CCDC138   | chr2 | + | 1.09E+08 | 1.09E+08 | 2383  |
| ENSG000001 | 7.842365 | 84.41461 | -3.3385  | 3.10E-09  | 1.37E-08  | C2orf48   | chr2 | + | 10281509 | 10351851 | 1897  |
| ENSG000001 | 0.72616  | 0        | 0.85004  | 0.63064   | NA        | ZSWIM2    | chr2 | - | 1.88E+08 | 1.88E+08 | 2091  |
| ENSG000001 | 123.0306 | 624.5445 | -2.3331  | 3.99E-47  | 8.38E-46  | FBXO41    | chr2 | - | 73481810 | 73511559 | 7336  |
| ENSG000001 | 367.4062 | 8.469216 | 5.1095   | 1.95E-09  | 8.78E-09  | ACTG2     | chr2 | + | 74119441 | 74146992 | 2064  |
| ENSG000001 | 163.247  | 352.5992 | -1.1087  | 1.28E-11  | 6.72E-11  | C2orf44   | chr2 | - | 24252210 | 24272445 | 3817  |
| ENSG000001 | 818.2669 | 1009.045 | -0.30113 | 0.065996  | 0.11331   | SMC6      | chr2 | - | 17845079 | 17981509 | 5233  |
| ENSG000001 | 116.2902 | 981.0607 | -3.0679  | 2.57E-84  | 1.16E-82  | VSNL1     | chr2 | + | 17720393 | 17838285 | 2725  |
| ENSG000001 | 265.9208 | 187.7151 | 0.499    | 0.003601  | 0.0082    | CCDC74A   | chr2 | + | 1.32E+08 | 1.32E+08 | 2809  |
| ENSG000001 | 3245.433 | 6307.128 | -0.95752 | 7.73E-20  | 6.47E-19  | H3F3A     | chr1 | + | 2.26E+08 | 2.26E+08 | 1863  |
| ENSG000001 | 0        | 2.976593 | -2.7957  | 0.092852  | 0.15184   | ANKRD30B  | chr2 | - | 1.33E+08 | 1.33E+08 | 3253  |
| ENSG000001 | 103.302  | 899.7213 | -3.1149  | 5.35E-70  | 1.92E-68  | ADCK3     | chr1 | + | 2.27E+08 | 2.27E+08 | 5523  |
| ENSG000001 | 55.4369  | 64.01689 | -0.20346 | 0.62197   | 0.71246   | SLC16A14  | chr2 | - | 2.31E+08 | 2.31E+08 | 4390  |
| ENSG000001 | 0        | 0.343138 | -0.41864 | 0.81278   | NA        | TEKT4     | chr2 | + | 95537178 | 95542574 | 2212  |
| ENSG000001 | 103.2499 | 4.351561 | 4.4968   | 1.10E-20  | 9.58E-20  | EN1       | chr2 | - | 1.2E+08  | 1.2E+08  | 2457  |
| ENSG000001 | 88.02918 | 57.10309 | 0.61466  | 0.04005   | 0.07347   | ZNF2      | chr2 | + | 95831177 | 95850065 | 3888  |
| ENSG000001 | 2633.619 | 348.7665 | 2.912    | 6.87E-130 | 6.17E-128 | SGCB      | chr4 | - | 52886872 | 52904648 | 4431  |
| ENSG000001 | 299.7915 | 76.17979 | 1.9653   | 1.30E-14  | 8.33E-14  | SPATA18   | chr4 | + | 52917497 | 52963458 | 4396  |
| ENSG000001 | 18.29907 | 25.12782 | -0.46027 | 0.30855   | 0.41024   | NOSTRIN   | chr2 | + | 1.7E+08  | 1.7E+08  | 2537  |
| ENSG000001 | 0.580602 | 5.637571 | -2.6383  | 0.046455  | 0.083465  | PCDP1     | chr2 | + | 1.2E+08  | 1.2E+08  | 3294  |
| ENSG000001 | 3.133327 | 0.343138 | 2.4263   | 0.1002    | 0.16174   | CCDC140   | chr2 | + | 2.23E+08 | 2.23E+08 | 1699  |
| ENSG000001 | 2.86275  | 10.96672 | -1.7901  | 0.042256  | 0.076915  | SGPP2     | chr2 | + | 2.23E+08 | 2.23E+08 | 3336  |
| ENSG000001 | 1.701545 | 5.069391 | -1.3904  | 0.23513   | 0.32903   | INHBB     | chr2 | + | 1.21E+08 | 1.21E+08 | 3204  |
| ENSG000001 | 0.870904 | 3.945314 | -1.768   | 0.16861   | 0.25032   | XIRP2     | chr2 | + | 1.68E+08 | 1.68E+08 | 12675 |
| ENSG000001 | 136.8226 | 20.31731 | 2.7383   | 8.23E-19  | 6.53E-18  | BBS5      | chr2 | + | 1.7E+08  | 1.7E+08  | 3475  |
| ENSG000001 | 804.3255 | 864.9364 | -0.104   | 0.6742    | 0.75593   | SMARCAD1  | chr4 | + | 95128762 | 95212443 | 5017  |
| ENSG000001 | 0        | 1.773966 | -2.0065  | 0.25182   | NA        | HPGDS     | chr4 | - | 95219686 | 95264027 | 1636  |
| ENSG000001 | 3282.761 | 745.1806 | 2.1376   | 6.15E-115 | 4.39E-113 | PDLIM5    | chr4 | + | 95373037 | 95589377 | 6083  |
| ENSG000001 | 706.1365 | 463.9121 | 0.60445  | 2.03E-06  | 7.06E-06  | OTUD7B    | chr1 | - | 1.5E+08  | 1.5E+08  | 6352  |
| ENSG000001 | 0.653381 | 1.340997 | -0.79074 | 0.59756   | 0.69176   | STPG2     | chr4 | - | 98105244 | 99064391 | 4203  |
| ENSG000001 | 0        | 0.594029 | -0.81444 | 0.64499   | NA        | NEURL3    | chr2 | - | 97163383 | 97173846 | 1710  |
| ENSG000001 | 1092.106 | 964.544  | 0.17814  | 0.097947  | 0.15859   | RPRD2     | chr1 | + | 1.5E+08  | 1.5E+08  | 7605  |
| ENSG000001 | 8.487187 | 7.579045 | 0.14237  | 0.83763   | 0.88597   | ANKRD23   | chr2 | - | 97490263 | 97523671 | 2597  |
| ENSG000001 | 72.5345  | 2.529055 | 4.6546   | 7.37E-16  | 5.07E-15  | CTSS      | chr1 | - | 1.51E+08 | 1.51E+08 | 4107  |
| ENSG000001 | 2103.014 | 7.598447 | 8.0436   | 2.49E-137 | 2.37E-135 | MSX1      | chr4 | + | 4861393  | 4865663  | 1939  |
| ENSG000001 | 179.4665 | 145.1631 | 0.30525  | 0.10259   | 0.16488   | PACRGL    | chr4 | + | 20697905 | 20754530 | 2073  |
| ENSG000001 | 5.144897 | 67.0112  | -3.6144  | 1.01E-14  | 6.49E-14  | BNIP1     | chr1 | + | 1.51E+08 | 1.51E+08 | 2336  |
| ENSG000001 | 2.012384 | 0        | 2.4635   | 0.13092   | 0.20286   | C1QTNF7   | chr4 | + | 15341442 | 15447790 | 4516  |
| ENSG000001 | 1.411244 | 3.183777 | -1.0555  | 0.39126   | 0.49571   | TNFAIP8L2 | chr1 | + | 1.51E+08 | 1.51E+08 | 1178  |
| ENSG000001 | 166.2404 | 124.4429 | 0.41525  | 0.056879  | 0.099599  | LYSMD1    | chr1 | - | 1.51E+08 | 1.51E+08 | 2479  |
| ENSG000001 | 525.669  | 473.0016 | 0.15243  | 0.27649   | 0.37672   | SCNM1     | chr1 | + | 1.51E+08 | 1.51E+08 | 2016  |
| ENSG000001 | 1021.025 | 1412.282 | -0.46674 | 4.31E-05  | 0.000128  | VPS72     | chr1 | - | 1.51E+08 | 1.51E+08 | 4267  |
| ENSG000001 | 1016.752 | 889.1839 | 0.19323  | 0.19625   | 0.2843    | ERCC3     | chr2 | - | 1.28E+08 | 1.28E+08 | 4018  |
| ENSG000001 | 758.9863 | 443.3186 | 0.77147  | 0.000903  | 0.002255  | RNF149    | chr2 | - | 1.02E+08 | 1.02E+08 | 2458  |
| ENSG000001 | 1115.527 | 1543.302 | -0.4675  | 3.22E-06  | 1.09E-05  | IWS1      | chr2 | - | 1.28E+08 | 1.28E+08 | 2958  |
| ENSG000001 | 175.4204 | 345.1475 | -0.97272 | 6.74E-07  | 2.44E-06  | BOLA3     | chr2 | - | 74362525 | 74375121 | 2982  |
| ENSG000001 | 1465.412 | 322.5919 | 2.1814   | 1.85E-70  | 6.74E-69  | CDC42EP3  | chr2 | - | 37869032 | 37965611 | 5700  |
| ENSG000001 | 5041.41  | 637.9399 | 2.9758   | 1.92E-62  | 5.96E-61  | S100A11   | chr1 | - | 1.52E+08 | 1.52E+08 | 594   |
| ENSG000001 | 514.0439 | 548.0318 | -0.09211 | 0.5995    | 0.69359   | DHX57     | chr2 | - | 39024871 | 39103075 | 5518  |
| ENSG000001 | 0.36308  | 0        | 0.4146   | 0.81455   | NA        | SPRR2D    | chr1 | - | 1.53E+08 | 1.53E+08 | 800   |
| ENSG000001 | 0.632843 | 22.70075 | -4.6333  | 3.59E-06  | 1.21E-05  | ARHGAP25  | chr2 | + | 68906733 | 69053965 | 2979  |
| ENSG000001 | 57.41163 | 0.700845 | 5.951    | 1.67E-11  | 8.70E-11  | S100A9    | chr1 | + | 1.53E+08 | 1.53E+08 | 577   |
| ENSG000001 | 3.10081  | 0        | 3.0786   | 0.048272  | 0.086284  | S100A12   | chr1 | - | 1.53E+08 | 1.53E+08 | 516   |
| ENSG000001 | 8.649863 | 10.7741  | -0.28865 | 0.69605   | 0.77339   | TGFA      | chr2 | - | 70674412 | 70781325 | 4310  |

|            |          |          |          |           |           |          |      |   |          |          |       |
|------------|----------|----------|----------|-----------|-----------|----------|------|---|----------|----------|-------|
| ENSG000001 | 0        | 1.340997 | -1.8899  | 0.26871   | NA        | TDRD10   | chr1 | + | 1.54E+08 | 1.55E+08 | 2331  |
| ENSG000001 | 801.5158 | 732.3251 | 0.12923  | 0.34081   | 0.44476   | CCNYL1   | chr2 | + | 2.09E+08 | 2.09E+08 | 3767  |
| ENSG000001 | 263.877  | 3112.614 | -3.5554  | 1.82E-217 | 4.78E-215 | FZD5     | chr2 | - | 2.09E+08 | 2.09E+08 | 6708  |
| ENSG000001 | 859.5908 | 1127.196 | -0.39029 | 0.012027  | 0.024862  | DCAF16   | chr4 | - | 17802278 | 17812381 | 4548  |
| ENSG000001 | 0.342542 | 1.370136 | -1.2729  | 0.45239   | NA        | C1orf189 | chr1 | - | 1.54E+08 | 1.54E+08 | 387   |
| ENSG000001 | 0        | 9.170934 | -4.8236  | 0.000142  | 0.000398  | NPPC     | chr2 | - | 2.33E+08 | 2.33E+08 | 1051  |
| ENSG000001 | 307.7918 | 145.0101 | 1.0841   | 3.12E-11  | 1.60E-10  | GNPDA2   | chr4 | - | 44703885 | 44728612 | 5382  |
| ENSG000001 | 0        | 7.131508 | -4.3997  | 0.001071  | 0.002642  | ALPP     | chr2 | + | 2.33E+08 | 2.33E+08 | 2971  |
| ENSG000001 | 0        | 4.242329 | -3.6422  | 0.011122  | 0.023147  | GABRG1   | chr4 | - | 46037786 | 46126098 | 6785  |
| ENSG000001 | 0        | 66.99837 | -7.593   | 8.80E-12  | 4.68E-11  | ALPPL2   | chr2 | + | 2.33E+08 | 2.33E+08 | 2493  |
| ENSG000001 | 0.342542 | 1.309443 | -1.2504  | 0.45877   | NA        | GABRB1   | chr4 | + | 46995740 | 47428461 | 2143  |
| ENSG000001 | 442.5113 | 424.9848 | 0.057383 | 0.66117   | 0.74497   | PAQR3    | chr4 | - | 79808281 | 79860592 | 9811  |
| ENSG000001 | 48.52982 | 74.4696  | -0.60728 | 0.03892   | 0.071644  | NIPAL1   | chr4 | + | 47916159 | 48042188 | 5298  |
| ENSG000001 | 3341.492 | 167.888  | 4.3057   | 2.40E-142 | 2.47E-140 | ANTXR2   | chr4 | - | 80822303 | 81046608 | 8273  |
| ENSG000001 | 101.7725 | 99.45563 | 0.037304 | 0.89345   | 0.92608   | HELQ     | chr4 | - | 84328496 | 84377009 | 3579  |
| ENSG000001 | 89.71777 | 117.274  | -0.38257 | 0.13823   | 0.21169   | MRPS18C  | chr4 | + | 84377085 | 84390888 | 2482  |
| ENSG000001 | 1682.001 | 1124.889 | 0.58016  | 1.70E-08  | 7.08E-08  | CGGBP1   | chr3 | - | 88101094 | 88199035 | 5298  |
| ENSG000001 | 149.7113 | 138.8563 | 0.10699  | 0.66621   | 0.74916   | FAM175A  | chr4 | - | 84382092 | 84444501 | 2869  |
| ENSG000001 | 85.21174 | 14.54949 | 2.5244   | 1.78E-13  | 1.06E-12  | GPR155   | chr2 | - | 1.75E+08 | 1.75E+08 | 6730  |
| ENSG000001 | 443.0984 | 509.1912 | -0.19992 | 0.13891   | 0.21256   | PMVK     | chr1 | - | 1.55E+08 | 1.55E+08 | 1280  |
| ENSG000001 | 1784.872 | 946.8864 | 0.91089  | 3.64E-05  | 0.000109  | PBXIP1   | chr1 | - | 1.55E+08 | 1.55E+08 | 3212  |
| ENSG000001 | 27.07232 | 85.30124 | -1.6304  | 6.16E-07  | 2.24E-06  | CLDN1    | chr3 | - | 1.9E+08  | 1.9E+08  | 3481  |
| ENSG000001 | 884.253  | 970.2061 | -0.13378 | 0.24464   | 0.34037   | PYGO2    | chr1 | - | 1.55E+08 | 1.55E+08 | 3146  |
| ENSG000001 | 1210.519 | 1017.063 | 0.25064  | 0.03001   | 0.056778  | HIPK1    | chr1 | + | 1.14E+08 | 1.15E+08 | 8157  |
| ENSG000001 | 0.36308  | 1.029414 | -0.84272 | 0.63492   | NA        | LENEP    | chr1 | + | 1.55E+08 | 1.55E+08 | 649   |
| ENSG000001 | 8.143832 | 16.84551 | -1.0149  | 0.109     | 0.17366   | DCST2    | chr1 | - | 1.55E+08 | 1.55E+08 | 2494  |
| ENSG000001 | 6.036339 | 7.844505 | -0.34842 | 0.64745   | 0.73363   | DCST1    | chr1 | + | 1.55E+08 | 1.55E+08 | 2279  |
| ENSG000001 | 198999.1 | 50.16078 | 11.9     | 0         | 0         | COL6A3   | chr2 | - | 2.38E+08 | 2.38E+08 | 10749 |
| ENSG000001 | 230.1269 | 1157.337 | -2.3221  | 7.38E-33  | 1.05E-31  | C1orf106 | chr1 | + | 2.01E+08 | 2.01E+08 | 4298  |
| ENSG000001 | 60.65539 | 2.713549 | 4.374    | 3.89E-13  | 2.27E-12  | AC017048 | chr2 | - | 1.77E+08 | 1.78E+08 | 1407  |
| ENSG000001 | 447.062  | 403.3755 | 0.14982  | 0.30143   | 0.40279   | YY1AP1   | chr1 | - | 1.56E+08 | 1.56E+08 | 2927  |
| ENSG000001 | 30.80002 | 214.5321 | -2.7696  | 3.60E-15  | 2.38E-14  | KBTBD8   | chr3 | + | 67048727 | 67061634 | 4684  |
| ENSG000001 | 0        | 73.57781 | -7.7467  | 1.45E-12  | 8.11E-12  | FAM19A4  | chr3 | - | 68780917 | 68981761 | 2292  |
| ENSG000001 | 738.6931 | 255.1111 | 1.5295   | 3.02E-13  | 1.77E-12  | EOGT     | chr3 | - | 69024365 | 69063112 | 4731  |
| ENSG000001 | 2.967231 | 0        | 3.0796   | 0.043507  | 0.078876  | LMOD3    | chr3 | - | 69156023 | 69172183 | 4086  |
| ENSG000001 | 943.824  | 1126.42  | -0.25556 | 0.035605  | 0.066179  | APOA1BP  | chr1 | + | 1.57E+08 | 1.57E+08 | 1125  |
| ENSG000001 | 616.3683 | 105.2657 | 2.545    | 5.81E-54  | 1.47E-52  | NBPF10   | chr1 | + | 1.45E+08 | 1.45E+08 | 10697 |
| ENSG000001 | 311.6231 | 227.2027 | 0.45622  | 0.008016  | 0.017128  | POGLUT1  | chr3 | + | 1.19E+08 | 1.19E+08 | 3598  |
| ENSG000001 | 7.903165 | 72.90934 | -3.117   | 3.14E-11  | 1.61E-10  | SLC22A15 | chr1 | + | 1.17E+08 | 1.17E+08 | 4720  |
| ENSG000001 | 12.09582 | 0        | 5.23     | 1.92E-05  | 5.96E-05  | CCKAR    | chr4 | - | 26483022 | 26492084 | 1720  |
| ENSG000001 | 10.4585  | 3.353702 | 1.5379   | 0.076186  | 0.12812   | IGFN1    | chr1 | + | 2.01E+08 | 2.01E+08 | 11810 |
| ENSG000001 | 3507.686 | 5846.712 | -0.73594 | 1.83E-08  | 7.58E-08  | ATP1A1   | chr1 | + | 1.17E+08 | 1.17E+08 | 3763  |
| ENSG000001 | 21.33827 | 56.83025 | -1.3987  | 5.46E-05  | 0.000161  | SLC15A2  | chr3 | + | 1.22E+08 | 1.22E+08 | 5673  |
| ENSG000001 | 30.51233 | 245.5749 | -2.9999  | 1.72E-31  | 2.33E-30  | EIF4E3   | chr3 | - | 71728440 | 71803924 | 6205  |
| ENSG000001 | 0        | 8.856934 | -4.7449  | 0.000237  | 0.000644  | PROK2    | chr3 | - | 71820807 | 71834357 | 1549  |
| ENSG000001 | 0        | 0.686276 | -0.84936 | 0.6309    | NA        | C3orf30  | chr3 | + | 1.19E+08 | 1.19E+08 | 1858  |
| ENSG000001 | 965.4943 | 525.2835 | 0.8757   | 7.96E-11  | 3.97E-10  | LRRCS8   | chr3 | - | 1.2E+08  | 1.2E+08  | 7903  |
| ENSG000001 | 27847.08 | 6233.753 | 2.1581   | 8.74E-123 | 7.12E-121 | FSTL1    | chr3 | - | 1.2E+08  | 1.2E+08  | 5943  |
| ENSG000001 | 4.668776 | 31.09316 | -2.6587  | 2.22E-05  | 6.84E-05  | LMOD1    | chr1 | - | 2.02E+08 | 2.02E+08 | 3970  |
| ENSG000001 | 0.72616  | 69.93106 | -6.2132  | 2.17E-12  | 1.20E-11  | ELF3     | chr1 | + | 2.02E+08 | 2.02E+08 | 4994  |
| ENSG000001 | 0        | 1.652581 | -2.1974  | 0.1871    | NA        | PDCL2    | chr4 | - | 56422692 | 56458379 | 861   |
| ENSG000001 | 1103.695 | 1693.698 | -0.6165  | 3.41E-09  | 1.50E-08  | TMEM183A | chr1 | + | 2.03E+08 | 2.03E+08 | 3019  |
| ENSG000001 | 37.71745 | 47.35754 | -0.3223  | 0.4476    | 0.55306   | TMEM169  | chr2 | + | 2.17E+08 | 2.17E+08 | 3460  |
| ENSG000001 | 1395.544 | 3.818224 | 8.4443   | 1.51E-83  | 6.74E-82  | IGFBP7   | chr4 | - | 57896939 | 57976551 | 1427  |
| ENSG000001 | 376.6589 | 154.1844 | 1.2855   | 7.91E-15  | 5.14E-14  | TRIM46   | chr1 | + | 1.55E+08 | 1.55E+08 | 3318  |
| ENSG000001 | 1078.683 | 707.0364 | 0.60938  | 8.56E-06  | 2.77E-05  | KRTCAP2  | chr1 | - | 1.55E+08 | 1.55E+08 | 3264  |
| ENSG000001 | 5592.306 | 2578.743 | 1.1161   | 6.38E-27  | 7.22E-26  | ARPC2    | chr2 | + | 2.19E+08 | 2.19E+08 | 2226  |
| ENSG000001 | 1.597063 | 13.31531 | -2.8348  | 0.001084  | 0.002674  | TSACC    | chr1 | + | 1.56E+08 | 1.56E+08 | 751   |
| ENSG000001 | 4177.398 | 8023.292 | -0.94045 | 3.46E-16  | 2.42E-15  | CCT3     | chr1 | - | 1.56E+08 | 1.56E+08 | 2150  |
| ENSG000001 | 72.14909 | 42.39973 | 0.76081  | 0.008078  | 0.01725   | TMEM79   | chr1 | + | 1.56E+08 | 1.56E+08 | 2442  |
| ENSG000001 | 4131.726 | 1777.209 | 1.2165   | 7.41E-28  | 8.73E-27  | SSR2     | chr1 | - | 1.56E+08 | 1.56E+08 | 5166  |
| ENSG000001 | 490.0768 | 338.7323 | 0.5319   | 0.006448  | 0.014059  | RNF25    | chr2 | - | 2.2E+08  | 2.2E+08  | 1914  |
| ENSG000001 | 445.1619 | 391.5173 | 0.18521  | 0.4199    | 0.52538   | STK36    | chr2 | + | 2.2E+08  | 2.2E+08  | 4933  |
| ENSG000001 | 7.719951 | 59.54239 | -2.8922  | 8.67E-08  | 3.40E-07  | ADORA1   | chr1 | + | 2.03E+08 | 2.03E+08 | 3407  |
| ENSG000001 | 2025.798 | 962.8738 | 1.0707   | 1.40E-09  | 6.40E-09  | SRGAP2   | chr1 | + | 2.07E+08 | 2.07E+08 | 5967  |

|            |          |          |          |           |           |          |       |   |          |          |       |
|------------|----------|----------|----------|-----------|-----------|----------|-------|---|----------|----------|-------|
| ENSG000001 | 23.83956 | 4.472946 | 2.3387   | 0.00076   | 0.00192   | NEK10    | chr3  | - | 27151576 | 27410951 | 4250  |
| ENSG000001 | 2.572449 | 23.4508  | -2.9766  | 0.000431  | 0.001129  | CCDC141  | chr2  | - | 1.8E+08  | 1.8E+08  | 9127  |
| ENSG000001 | 0        | 0.654722 | -0.83442 | 0.63731   | NA        | FEV      | chr2  | - | 2.2E+08  | 2.2E+08  | 1879  |
| ENSG000001 | 1.370168 | 2.621302 | -0.76818 | 0.58538   | 0.68111   | IHH      | chr2  | - | 2.2E+08  | 2.2E+08  | 2019  |
| ENSG000001 | 437.4366 | 336.9524 | 0.37641  | 0.082827  | 0.13764   | KIAA1524 | chr3  | - | 1.08E+08 | 1.08E+08 | 4075  |
| ENSG000001 | 0        | 62.6691  | -7.3855  | 3.23E-10  | 1.54E-09  | EOMES    | chr3  | - | 27757440 | 27764206 | 3386  |
| ENSG000001 | 363.543  | 500.0796 | -0.45593 | 0.089963  | 0.14772   | CWC22    | chr2  | - | 1.81E+08 | 1.81E+08 | 3280  |
| ENSG000001 | 372.8617 | 169.4428 | 1.1341   | 4.53E-14  | 2.79E-13  | AZI2     | chr3  | - | 28356494 | 28390618 | 4706  |
| ENSG000001 | 1445.082 | 191.6727 | 2.9075   | 6.45E-84  | 2.89E-82  | TGFBR2   | chr3  | + | 30647994 | 30735634 | 4621  |
| ENSG000001 | 0        | 0.654722 | -0.83442 | 0.63731   | NA        | RETNLB   | chr3  | - | 1.08E+08 | 1.08E+08 | 676   |
| ENSG000001 | 436.9671 | 867.377  | -0.98773 | 3.25E-09  | 1.43E-08  | ANKZF1   | chr2  | + | 2.2E+08  | 2.2E+08  | 3245  |
| ENSG000001 | 185.5732 | 282.9669 | -0.60968 | 0.001644  | 0.003939  | HDAC11   | chr3  | + | 13521224 | 13547916 | 2960  |
| ENSG000001 | 1087.835 | 1208.148 | -0.15133 | 0.30793   | 0.40971   | FBLN2    | chr3  | + | 13573824 | 13679922 | 4318  |
| ENSG000001 | 123.5098 | 65.14424 | 0.91106  | 0.000378  | 0.000998  | GLB1L    | chr2  | - | 2.2E+08  | 2.2E+08  | 2745  |
| ENSG000001 | 3925.165 | 2167.877 | 0.8559   | 5.20E-20  | 4.39E-19  | STT3B    | chr3  | + | 31574130 | 31679112 | 4246  |
| ENSG000001 | 146.1909 | 341.6104 | -1.2247  | 5.92E-14  | 3.62E-13  | CHCHD4   | chr3  | - | 14153580 | 14166370 | 1600  |
| ENSG000001 | 0.36308  | 269.2442 | -8.6329  | 5.50E-19  | 4.41E-18  | DPPA2    | chr3  | - | 1.09E+08 | 1.09E+08 | 1383  |
| ENSG000001 | 5.124359 | 308.3379 | -5.803   | 1.58E-49  | 3.57E-48  | NFASC    | chr1  | + | 2.05E+08 | 2.05E+08 | 10654 |
| ENSG000001 | 417.5072 | 443.8552 | -0.08659 | 0.70337   | 0.77936   | SGOL2    | chr2  | + | 2.01E+08 | 2.01E+08 | 4214  |
| ENSG000001 | 264.6605 | 58.0498  | 2.1882   | 7.24E-23  | 6.95E-22  | SERPINI1 | chr3  | + | 1.67E+08 | 1.68E+08 | 1907  |
| ENSG000001 | 889.6973 | 852.2164 | 0.061199 | 0.59427   | 0.68881   | CLASP2   | chr3  | - | 33537737 | 33759848 | 7282  |
| ENSG000001 | 567.4063 | 495.8113 | 0.19473  | 0.22177   | 0.31393   | SUCLG1   | chr2  | - | 84650647 | 84687169 | 1765  |
| ENSG000001 | 52.04318 | 128.5947 | -1.2921  | 0.0002    | 0.000549  | NUAK2    | chr1  | - | 2.05E+08 | 2.05E+08 | 3405  |
| ENSG000001 | 1057.492 | 1875.133 | -0.82579 | 2.74E-14  | 1.72E-13  | PRKCI    | chr3  | + | 1.7E+08  | 1.7E+08  | 4950  |
| ENSG000001 | 9.535351 | 0.343138 | 4.0216   | 0.001335  | 0.00325   | MNDA     | chr1  | + | 1.59E+08 | 1.59E+08 | 1752  |
| ENSG000001 | 1075.03  | 22.35828 | 5.554    | 2.50E-64  | 8.02E-63  | IFI16    | chr1  | + | 1.59E+08 | 1.59E+08 | 4138  |
| ENSG000001 | 0        | 17.26633 | -5.7316  | 1.51E-06  | 5.31E-06  | AIM2     | chr1  | - | 1.59E+08 | 1.59E+08 | 1529  |
| ENSG000001 | 5.114008 | 11.47582 | -1.1217  | 0.16239   | 0.24276   | EFHB     | chr3  | - | 19920964 | 19988517 | 2823  |
| ENSG000001 | 101.7821 | 32.23181 | 1.6439   | 1.83E-08  | 7.61E-08  | EIF5A2   | chr3  | - | 1.71E+08 | 1.71E+08 | 5593  |
| ENSG000001 | 428.7657 | 508.3542 | -0.24395 | 0.30007   | 0.40166   | RPL22L1  | chr3  | - | 1.71E+08 | 1.71E+08 | 2190  |
| ENSG000001 | 48.07505 | 424.21   | -3.1272  | 8.46E-37  | 1.36E-35  | PPM1L    | chr3  | + | 1.6E+08  | 1.61E+08 | 10934 |
| ENSG000001 | 111.1572 | 47.68288 | 1.2067   | 3.38E-06  | 1.14E-05  | ICA1L    | chr2  | - | 2.04E+08 | 2.04E+08 | 5173  |
| ENSG000001 | 877.8929 | 1373.843 | -0.64583 | 3.64E-10  | 1.73E-09  | SNHG16   | chr17 | + | 74553848 | 74561430 | 3607  |
| ENSG000001 | 16.25677 | 0        | 5.6521   | 1.97E-06  | 6.87E-06  | CTLA4    | chr2  | + | 2.05E+08 | 2.05E+08 | 1977  |
| ENSG000001 | 730.2086 | 786.8543 | -0.10673 | 0.52575   | 0.62766   | RYBP     | chr3  | - | 72423744 | 72496069 | 4744  |
| ENSG000001 | 783.3621 | 799.1355 | -0.02806 | 0.90207   | 0.93238   | PPP4R2   | chr3  | + | 73045936 | 73118350 | 4984  |
| ENSG000001 | 0.72616  | 2.171348 | -1.1873  | 0.45392   | 0.5593    | CD200R1  | chr3  | - | 1.13E+08 | 1.13E+08 | 3679  |
| ENSG000001 | 311.5435 | 287.7898 | 0.11559  | 0.48474   | 0.58873   | GTPBP8   | chr3  | + | 1.13E+08 | 1.13E+08 | 1787  |
| ENSG000001 | 549.6361 | 602.9656 | -0.13294 | 0.246     | 0.34183   | C3orf17  | chr3  | - | 1.13E+08 | 1.13E+08 | 4992  |
| ENSG000001 | 377.3692 | 198.0093 | 0.92683  | 6.75E-10  | 3.16E-09  | SPICE1   | chr3  | - | 1.13E+08 | 1.13E+08 | 5417  |
| ENSG000001 | 0        | 0.640152 | -0.82869 | 0.63935   | NA        | FAM86KP  | chr4  | + | 9155022  | 9167177  | 987   |
| ENSG000001 | 36.92112 | 22.20467 | 0.71567  | 0.1389    | 0.21256   | KIAA1407 | chr3  | - | 1.14E+08 | 1.14E+08 | 3976  |
| ENSG000001 | 152.4158 | 134.5467 | 0.18011  | 0.36122   | 0.46537   | CADPS    | chr3  | - | 62384022 | 62861054 | 5471  |
| ENSG000001 | 38.24923 | 6.782665 | 2.4415   | 2.34E-05  | 7.20E-05  | NKX6-1   | chr4  | - | 85413140 | 85419603 | 2628  |
| ENSG000001 | 67.75562 | 427.0896 | -2.6425  | 3.77E-33  | 5.40E-32  | CDS1     | chr4  | + | 85504132 | 85572491 | 4461  |
| ENSG000001 | 1423.904 | 851.0275 | 0.74156  | 2.42E-08  | 9.93E-08  | WDFY3    | chr4  | - | 85590704 | 85887544 | 14255 |
| ENSG000001 | 419.4147 | 606.6753 | -0.53239 | 0.001827  | 0.004349  | COX18    | chr4  | - | 73921797 | 73935472 | 3128  |
| ENSG000001 | 1626.689 | 1530.382 | 0.088156 | 0.52328   | 0.62577   | PTPN13   | chr4  | + | 87515468 | 87736324 | 8573  |
| ENSG000001 | 0.342542 | 12.98433 | -4.4873  | 0.000169  | 0.000467  | SYNPR    | chr3  | + | 63213991 | 63602597 | 2709  |
| ENSG000001 | 5.290455 | 3.025133 | 0.75526  | 0.41123   | 0.51604   | C3orf49  | chr3  | + | 63805038 | 63834312 | 1292  |
| ENSG000001 | 25.95741 | 75.26604 | -1.5305  | 6.32E-06  | 2.08E-05  | C4orf36  | chr4  | - | 87797358 | 87857354 | 2306  |
| ENSG000001 | 334.6651 | 493.6404 | -0.56008 | 6.17E-05  | 0.00018   | THOC7    | chr3  | - | 63819546 | 63849579 | 990   |
| ENSG000001 | 554.1918 | 405.1577 | 0.45163  | 0.000895  | 0.002239  | ATXN7    | chr3  | + | 63850233 | 63989138 | 7285  |
| ENSG000001 | 1162.858 | 1371.536 | -0.23752 | 0.064765  | 0.11148   | PSMD6    | chr3  | - | 63996225 | 64009658 | 4583  |
| ENSG000001 | 292.7546 | 19.30247 | 3.9096   | 2.70E-53  | 6.74E-52  | PRICKLE2 | chr3  | - | 64079543 | 64431152 | 8305  |
| ENSG000001 | 4119.362 | 129.4427 | 4.9803   | 4.81E-207 | 1.10E-204 | ADAMTS9  | chr3  | - | 64501333 | 64673676 | 7464  |
| ENSG000001 | 371.7809 | 120.4158 | 1.62     | 1.94E-23  | 1.91E-22  | PPM1K    | chr4  | - | 89183315 | 89205921 | 2962  |
| ENSG000001 | 0.705622 | 0.951736 | -0.34312 | 0.83184   | NA        | FAM194A  | chr3  | - | 1.5E+08  | 1.5E+08  | 2052  |
| ENSG000001 | 1784.903 | 2605.388 | -0.54483 | 3.89E-08  | 1.57E-07  | GMPS     | chr3  | + | 1.56E+08 | 1.56E+08 | 5393  |
| ENSG000001 | 616.8822 | 83.16399 | 2.8776   | 1.39E-58  | 3.91E-57  | TIPARP   | chr3  | + | 1.56E+08 | 1.56E+08 | 4181  |
| ENSG000001 | 725.0161 | 730.6687 | -0.0116  | 0.93175   | 0.95517   | CCNL1    | chr3  | - | 1.57E+08 | 1.57E+08 | 4799  |
| ENSG000001 | 104.0371 | 4.587883 | 4.406    | 6.66E-19  | 5.32E-18  | PTX3     | chr3  | + | 1.57E+08 | 1.57E+08 | 1940  |
| ENSG000001 | 5.458342 | 25.35273 | -2.1601  | 0.000794  | 0.002     | HESX1    | chr3  | - | 57231944 | 57260549 | 876   |
| ENSG000001 | 1.649304 | 17.29863 | -3.1851  | 0.000131  | 0.000369  | DCLK3    | chr3  | - | 36753913 | 36781352 | 5344  |
| ENSG000001 | 945.5472 | 892.9353 | 0.082183 | 0.47063   | 0.57541   | SLMAP    | chr3  | + | 57741177 | 57914895 | 6749  |

|            |          |          |          |           |           |          |      |   |          |          |      |
|------------|----------|----------|----------|-----------|-----------|----------|------|---|----------|----------|------|
| ENSG000001 | 3674.055 | 5595.188 | -0.60633 | 2.46E-12  | 1.36E-11  | RPL9     | chr4 | - | 39455744 | 39460568 | 2153 |
| ENSG000001 | 231.6716 | 468.5968 | -1.0092  | 0.000271  | 0.000729  | SMIM14   | chr4 | - | 39552541 | 39640710 | 1892 |
| ENSG000001 | 13.53877 | 9.718839 | 0.45368  | 0.43681   | 0.54231   | RPP14    | chr3 | + | 58291974 | 58305816 | 3379 |
| ENSG000001 | 98.24431 | 75.0063  | 0.38332  | 0.23179   | 0.32534   | ABHD6    | chr3 | + | 58223233 | 58281420 | 2482 |
| ENSG000001 | 31.43368 | 96.88071 | -1.6193  | 8.01E-09  | 3.43E-08  | C3orf67  | chr3 | - | 58703092 | 59035810 | 4108 |
| ENSG000001 | 36.5058  | 2451.122 | -6.0535  | 4.51E-250 | 1.55E-247 | RBM47    | chr4 | - | 40425272 | 40632892 | 4951 |
| ENSG000001 | 1799.582 | 733.0396 | 1.294    | 4.00E-31  | 5.35E-30  | APBB2    | chr4 | - | 40812044 | 41218731 | 8972 |
| ENSG000001 | 60.42165 | 139.0751 | -1.189   | 0.00046   | 0.001203  | IL17RE   | chr3 | + | 9944296  | 9958086  | 2808 |
| ENSG000001 | 727.2162 | 262.6745 | 1.4652   | 1.30E-22  | 1.22E-21  | IL17RC   | chr3 | + | 9958758  | 9975314  | 2621 |
| ENSG000001 | 618.245  | 294.7584 | 1.064    | 4.23E-09  | 1.85E-08  | CRELD1   | chr3 | + | 9975506  | 9987097  | 2696 |
| ENSG000001 | 163.9928 | 249.5396 | -0.60432 | 0.002883  | 0.006663  | PRRT3    | chr3 | - | 9987226  | 9994078  | 3761 |
| ENSG000001 | 1.649304 | 6.378834 | -1.7645  | 0.089435  | 0.14698   | FANCD2OS | chr3 | - | 10123001 | 10149915 | 1055 |
| ENSG000001 | 863.3603 | 153.1526 | 2.4867   | 5.50E-60  | 1.60E-58  | PCOLCE2  | chr3 | - | 1.43E+08 | 1.43E+08 | 2021 |
| ENSG000001 | 1398.622 | 1692.072 | -0.27351 | 0.2122    | 0.30274   | U2SURP   | chr3 | + | 1.43E+08 | 1.43E+08 | 7420 |
| ENSG000001 | 604.228  | 1080.947 | -0.83798 | 6.69E-15  | 4.37E-14  | MTMR14   | chr3 | + | 9691117  | 9744077  | 2494 |
| ENSG000001 | 227.6523 | 116.2518 | 0.96697  | 2.73E-05  | 8.31E-05  | TTC14    | chr3 | + | 1.8E+08  | 1.8E+08  | 7052 |
| ENSG000001 | 0        | 33.40838 | -6.5737  | 2.78E-08  | 1.14E-07  | CXCL3    | chr4 | - | 74902306 | 74904524 | 1641 |
| ENSG000001 | 0.943682 | 100.6258 | -6.2575  | 5.73E-14  | 3.51E-13  | CXCL5    | chr4 | - | 74861359 | 74864496 | 2538 |
| ENSG000001 | 0        | 0.343138 | -0.41864 | 0.81278   | NA        | PPBP     | chr4 | - | 74852755 | 74853914 | 715  |
| ENSG000001 | 0.342542 | 6.748694 | -3.5639  | 0.005628  | 0.012399  | PF4      | chr4 | - | 74846794 | 74847841 | 604  |
| ENSG000001 | 51.78279 | 73.18768 | -0.49377 | 0.10164   | 0.1636    | MTHFD2L  | chr4 | + | 74979891 | 75168816 | 3181 |
| ENSG000001 | 3.330311 | 7.345139 | -1.077   | 0.20061   | 0.28932   | CXCL1    | chr4 | + | 74735110 | 74736959 | 1097 |
| ENSG000001 | 145.7128 | 255.2122 | -0.80576 | 0.000851  | 0.002137  | RCHY1    | chr4 | - | 76404247 | 76439974 | 4686 |
| ENSG000001 | 0.705622 | 0        | 0.8807   | 0.6196    | NA        | PLSCR2   | chr3 | - | 1.46E+08 | 1.46E+08 | 1441 |
| ENSG000001 | 0        | 0.357707 | -0.41864 | 0.81278   | NA        | CCDC158  | chr4 | - | 77234154 | 77343021 | 3663 |
| ENSG000001 | 402.3577 | 483.7025 | -0.26446 | 0.052508  | 0.09281   | GYG1     | chr3 | + | 1.49E+08 | 1.49E+08 | 2052 |
| ENSG000001 | 542.2635 | 772.4983 | -0.51009 | 0.003818  | 0.008654  | HPS3     | chr3 | + | 1.49E+08 | 1.49E+08 | 4665 |
| ENSG000001 | 10.21864 | 8.215909 | 0.29692  | 0.72506   | 0.79654   | TM4SF18  | chr3 | - | 1.49E+08 | 1.49E+08 | 3852 |
| ENSG000001 | 909.9408 | 745.8649 | 0.28708  | 0.095899  | 0.15604   | TOPBP1   | chr3 | - | 1.33E+08 | 1.33E+08 | 5378 |
| ENSG000001 | 1339.415 | 960.2659 | 0.47925  | 8.43E-06  | 2.73E-05  | RYK      | chr3 | - | 1.34E+08 | 1.34E+08 | 5270 |
| ENSG000001 | 316.1684 | 223.6132 | 0.49612  | 0.009034  | 0.019137  | SNRK     | chr3 | + | 43328004 | 43466256 | 5183 |
| ENSG000001 | 0        | 0.594029 | -0.81444 | 0.64499   | NA        | TCF23    | chr2 | + | 27371872 | 27376378 | 1418 |
| ENSG000001 | 0        | 1.294874 | -1.8547  | 0.27869   | NA        | DNAJC5G  | chr2 | + | 27498289 | 27504367 | 2008 |
| ENSG000001 | 4.802355 | 5.135789 | -0.09079 | 0.92103   | 0.94695   | UCN      | chr2 | - | 27530268 | 27531313 | 795  |
| ENSG000001 | 666.7277 | 564.3073 | 0.23943  | 0.097646  | 0.15828   | ZNF513   | chr2 | - | 27600098 | 27603657 | 2139 |
| ENSG000001 | 530.6605 | 533.3555 | -0.00681 | 0.9614    | 0.977     | SLC4A1AP | chr2 | + | 27886338 | 27917840 | 2959 |
| ENSG000001 | 14.04561 | 3.772101 | 1.8118   | 0.023338  | 0.045371  | PLB1     | chr2 | + | 28680012 | 28866654 | 5115 |
| ENSG000001 | 11.1924  | 5.799374 | 0.91996  | 0.24261   | 0.33792   | SPDYA    | chr2 | + | 29005383 | 29073477 | 2081 |
| ENSG000001 | 555.94   | 1101.929 | -0.98506 | 4.82E-14  | 2.97E-13  | KIAA1143 | chr3 | - | 44779153 | 44803154 | 5120 |
| ENSG000001 | 475.1083 | 472.0937 | 0.010629 | 0.96191   | 0.97743   | KIF15    | chr3 | + | 44803209 | 44914868 | 4842 |
| ENSG000001 | 0.705622 | 0.297015 | 0.56864  | 0.74638   | NA        | TGM4     | chr3 | + | 44916100 | 44956482 | 3388 |
| ENSG000001 | 675.2134 | 1531.681 | -1.1781  | 3.98E-10  | 1.89E-09  | WDR43    | chr2 | + | 29117509 | 29171088 | 3533 |
| ENSG000001 | 847.0772 | 1079.095 | -0.34876 | 0.014042  | 0.028613  | ZDHHC3   | chr3 | - | 44956749 | 45017677 | 3226 |
| ENSG000001 | 129.0999 | 355.9861 | -1.4598  | 7.68E-13  | 4.40E-12  | CDCP1    | chr3 | - | 45123770 | 45187914 | 6006 |
| ENSG000001 | 0        | 0.343138 | -0.41864 | 0.81278   | NA        | CLEC3B   | chr3 | + | 45043040 | 45077563 | 936  |
| ENSG000001 | 0        | 12.65576 | -5.2379  | 3.00E-05  | 9.09E-05  | SLC6A20  | chr3 | - | 45796942 | 45838027 | 5423 |
| ENSG000001 | 243.3221 | 153.3149 | 0.66775  | 0.001838  | 0.004375  | LZTF1    | chr3 | - | 45864808 | 45957534 | 4073 |
| ENSG000001 | 841.3823 | 387.1571 | 1.1155   | 4.12E-07  | 1.52E-06  | FYCO1    | chr3 | - | 45959396 | 46037316 | 8504 |
| ENSG000001 | 0.705622 | 0        | 0.8807   | 0.6196    | NA        | CCR1     | chr3 | - | 46243200 | 46249887 | 2731 |
| ENSG000001 | 0        | 2.399549 | -2.7165  | 0.088838  | 0.14612   | RTP3     | chr3 | + | 46538981 | 46542439 | 1321 |
| ENSG000001 | 3.455331 | 77.03108 | -4.4285  | 9.43E-17  | 6.80E-16  | LRRC2    | chr3 | - | 46556913 | 46621589 | 5100 |
| ENSG000001 | 522.3414 | 703.3226 | -0.42871 | 0.003425  | 0.007827  | ELP6     | chr3 | - | 47537130 | 47555251 | 1401 |
| ENSG000001 | 0        | 1.280305 | -1.6305  | 0.35731   | NA        | FBXO40   | chr3 | + | 1.21E+08 | 1.21E+08 | 5926 |
| ENSG000001 | 158.9623 | 125.9571 | 0.33183  | 0.15602   | 0.2348    | DTX3L    | chr3 | + | 1.22E+08 | 1.22E+08 | 5868 |
| ENSG000001 | 648.5442 | 193.3654 | 1.7417   | 5.45E-14  | 3.34E-13  | ZNF148   | chr3 | - | 1.25E+08 | 1.25E+08 | 9651 |
| ENSG000001 | 2.531373 | 37.29066 | -3.7016  | 1.50E-08  | 6.28E-08  | NMNAT3   | chr3 | - | 1.39E+08 | 1.39E+08 | 2454 |
| ENSG000001 | 626.8632 | 560.8182 | 0.16018  | 0.28361   | 0.38488   | SMIM12   | chr1 | - | 35178338 | 35325417 | 3454 |
| ENSG000001 | 325.3846 | 218.1501 | 0.57663  | 0.000188  | 0.000518  | ZMYM6    | chr1 | - | 35447134 | 35497569 | 6241 |
| ENSG000001 | 564.3328 | 428.8227 | 0.39576  | 0.009142  | 0.019352  | TPRA1    | chr3 | - | 1.27E+08 | 1.27E+08 | 1933 |
| ENSG000001 | 1443.738 | 1541.002 | -0.0936  | 0.57213   | 0.6692    | YEATS2   | chr3 | + | 1.83E+08 | 1.84E+08 | 6506 |
| ENSG000001 | 0        | 241.6977 | -9.3139  | 6.53E-18  | 4.98E-17  | GRIK3    | chr1 | - | 37261128 | 37499730 | 9101 |
| ENSG000001 | 156.6504 | 173.3209 | -0.14488 | 0.4537    | 0.55916   | ZC3H12A  | chr1 | + | 37940153 | 37949980 | 2684 |
| ENSG000001 | 733.5765 | 465.0421 | 0.65818  | 6.84E-07  | 2.48E-06  | MEAF6    | chr1 | - | 37958176 | 37980375 | 2147 |
| ENSG000001 | 356.6771 | 316.4738 | 0.17201  | 0.22561   | 0.31837   | SNIP1    | chr1 | - | 38002142 | 38019903 | 2471 |
| ENSG000001 | 133.9597 | 174.3286 | -0.38034 | 0.093151  | 0.15225   | DNALI1   | chr1 | + | 38022520 | 38032458 | 3539 |

|            |          |          |          |          |          |         |      |   |          |          |       |
|------------|----------|----------|----------|----------|----------|---------|------|---|----------|----------|-------|
| ENSG000001 | 704.5948 | 970.1069 | -0.46027 | 2.41E-05 | 7.39E-05 | POLR2H  | chr3 | + | 1.84E+08 | 1.84E+08 | 1802  |
| ENSG000001 | 0.580602 | 141.9231 | -7.1805  | 3.63E-16 | 2.53E-15 | KLF15   | chr3 | - | 1.26E+08 | 1.26E+08 | 2574  |
| ENSG000001 | 1.649304 | 8.326014 | -2.1674  | 0.017857 | 0.035639 | CCDC37  | chr3 | + | 1.26E+08 | 1.26E+08 | 2089  |
| ENSG000001 | 45.38614 | 260.7987 | -2.5069  | 8.01E-22 | 7.33E-21 | CAMK2N2 | chr3 | - | 1.84E+08 | 1.84E+08 | 1362  |
| ENSG000001 | 0.342542 | 2.012704 | -1.7068  | 0.30191  | 0.40315  | LIPH    | chr3 | - | 1.85E+08 | 1.85E+08 | 4026  |
| ENSG000001 | 270.3931 | 218.0409 | 0.31092  | 0.04127  | 0.07534  | TMEM41A | chr3 | - | 1.85E+08 | 1.85E+08 | 4921  |
| ENSG000001 | 5220.92  | 2782.957 | 0.90699  | 5.78E-17 | 4.22E-16 | RPN1    | chr3 | - | 1.28E+08 | 1.28E+08 | 2310  |
| ENSG000001 | 753.46   | 743.5072 | 0.01956  | 0.93257  | 0.95577  | SENP2   | chr3 | + | 1.85E+08 | 1.85E+08 | 5717  |
| ENSG000001 | 8.455484 | 31.83442 | -1.8875  | 0.000296 | 0.000793 | HEYL    | chr1 | - | 40089825 | 40105617 | 3661  |
| ENSG000001 | 654.9045 | 567.8302 | 0.20555  | 0.11211  | 0.17803  | IFT122  | chr3 | + | 1.29E+08 | 1.29E+08 | 4532  |
| ENSG000001 | 17.27405 | 20.6346  | -0.26732 | 0.58536  | 0.68111  | C3orf65 | chr3 | + | 1.85E+08 | 1.85E+08 | 1924  |
| ENSG000001 | 424.9667 | 988.0813 | -1.2158  | 3.25E-27 | 3.71E-26 | RFC4    | chr3 | - | 1.87E+08 | 1.87E+08 | 1448  |
| ENSG000001 | 144.8979 | 687.5023 | -2.2391  | 4.40E-35 | 6.71E-34 | RPL39L  | chr3 | - | 1.87E+08 | 1.87E+08 | 756   |
| ENSG000001 | 1552.819 | 1701.616 | -0.13155 | 0.19811  | 0.28635  | BAP1    | chr3 | - | 52435029 | 52444366 | 3937  |
| ENSG000001 | 6951.051 | 28279.6  | -2.0215  | 7.40E-50 | 1.69E-48 | TKT     | chr3 | - | 53258723 | 53290068 | 7286  |
| ENSG000001 | 534.7202 | 478.3938 | 0.15964  | 0.3552   | 0.45944  | PRKCD   | chr3 | + | 53190025 | 53226733 | 2810  |
| ENSG000001 | 444.5597 | 416.7349 | 0.093467 | 0.46473  | 0.56969  | RFT1    | chr3 | - | 53122499 | 53164478 | 5108  |
| ENSG000001 | 121.0077 | 291.7905 | -1.2664  | 4.93E-12 | 2.66E-11 | SFMBT1  | chr3 | - | 52937588 | 53080766 | 4548  |
| ENSG000001 | 1396.459 | 2532.206 | -0.85556 | 3.19E-05 | 9.65E-05 | GNL3    | chr3 | + | 52715172 | 52728508 | 2118  |
| ENSG000001 | 1553.134 | 986.3233 | 0.65356  | 0.000302 | 0.000809 | PBRM1   | chr3 | - | 52579368 | 52719933 | 7523  |
| ENSG000001 | 381.6853 | 425.7236 | -0.1591  | 0.42442  | 0.52974  | UVSSA   | chr4 | + | 1341054  | 1381837  | 4819  |
| ENSG000001 | 1444.13  | 601.4063 | 1.2619   | 1.41E-19 | 1.17E-18 | FAM208A | chr3 | - | 56654161 | 56717265 | 7119  |
| ENSG000001 | 723.0297 | 85.3297  | 3.0686   | 1.60E-46 | 3.33E-45 | ARHGEF3 | chr3 | - | 56761446 | 57113357 | 3992  |
| ENSG000001 | 854.1549 | 816.1038 | 0.065486 | 0.59473  | 0.68917  | SLBP    | chr4 | - | 1694527  | 1714282  | 1977  |
| ENSG000001 | 1921.218 | 1419.463 | 0.43617  | 9.73E-05 | 0.000278 | LRPAP1  | chr4 | - | 3508103  | 3534286  | 7819  |
| ENSG000001 | 0        | 69.32508 | -7.6521  | 4.27E-12 | 2.32E-11 | ZDHHC19 | chr3 | - | 1.96E+08 | 1.96E+08 | 1813  |
| ENSG000001 | 67.13019 | 45.48568 | 0.54895  | 0.084462 | 0.14002  | SLC51A  | chr3 | + | 1.96E+08 | 1.96E+08 | 1463  |
| ENSG000001 | 1541.025 | 1916.768 | -0.3139  | 0.11892  | 0.18747  | UBXN7   | chr3 | - | 1.96E+08 | 1.96E+08 | 10568 |
| ENSG000001 | 960.0879 | 1893.525 | -0.97836 | 5.45E-13 | 3.15E-12 | RNF168  | chr3 | - | 1.96E+08 | 1.96E+08 | 5347  |
| ENSG000001 | 286.3713 | 172.961  | 0.72086  | 0.000641 | 0.001639 | PIGX    | chr3 | + | 1.96E+08 | 1.96E+08 | 3057  |
| ENSG000001 | 56.23665 | 205.477  | -1.863   | 3.64E-12 | 1.99E-11 | MF12    | chr3 | - | 1.97E+08 | 1.97E+08 | 3963  |
| ENSG000001 | 0.653381 | 0.357707 | 0.52032  | 0.76705  | NA       | OTOP1   | chr4 | - | 4190530  | 4228616  | 1864  |
| ENSG000001 | 3.298608 | 1.669566 | 0.85306  | 0.48246  | 0.58671  | S100P   | chr4 | + | 6694796  | 6698897  | 1279  |
| ENSG000001 | 3.910914 | 41.47967 | -3.3081  | 1.29E-08 | 5.41E-08 | ABLIM2  | chr4 | - | 7967039  | 8160559  | 3587  |
| ENSG000001 | 98.62223 | 57.01729 | 0.78191  | 0.003711 | 0.008425 | EXO5    | chr1 | + | 40974413 | 40982228 | 2567  |
| ENSG000001 | 0.632843 | 102.9968 | -6.7068  | 1.98E-13 | 1.17E-12 | CLDN19  | chr1 | - | 43198764 | 43205925 | 3517  |
| ENSG000001 | 140.8039 | 126.9126 | 0.15379  | 0.44817  | 0.55364  | C1orf50 | chr1 | + | 43232940 | 43263968 | 1558  |
| ENSG000001 | 71.17729 | 26.92764 | 1.3935   | 5.43E-06 | 1.80E-05 | ERMAP   | chr1 | + | 43282795 | 43310660 | 3949  |
| ENSG000001 | 99.78425 | 245.7324 | -1.2927  | 2.16E-12 | 1.20E-11 | ZNF691  | chr1 | + | 43312280 | 43318148 | 1935  |
| ENSG000001 | 509.5056 | 508.7673 | 0.003766 | 0.98233  | 0.99011  | AIMP1   | chr4 | + | 1.07E+08 | 1.07E+08 | 2586  |
| ENSG000001 | 426.9836 | 1.043983 | 8.3348   | 1.31E-31 | 1.79E-30 | SGMS2   | chr4 | + | 1.09E+08 | 1.09E+08 | 6149  |
| ENSG000001 | 887.5475 | 1528.573 | -0.78374 | 9.09E-11 | 4.50E-10 | MTAP1   | chr4 | + | 99916771 | 99983964 | 2791  |
| ENSG000001 | 862.4193 | 337.7108 | 1.3506   | 6.32E-12 | 3.39E-11 | DNAJB14 | chr4 | - | 1.01E+08 | 1.01E+08 | 6463  |
| ENSG000001 | 3010.919 | 4232.852 | -0.48949 | 0.02704  | 0.051777 | H2AFZ   | chr4 | - | 1.01E+08 | 1.01E+08 | 1880  |
| ENSG000001 | 0.342542 | 0        | 0.4146   | 0.81455  | NA       | EMCN    | chr4 | - | 1.01E+08 | 1.02E+08 | 4037  |
| ENSG000001 | 8.019626 | 5.17708  | 0.57626  | 0.52868  | 0.63027  | SLC9B1  | chr4 | - | 1.04E+08 | 1.04E+08 | 1879  |
| ENSG000001 | 281.2233 | 81.08817 | 1.7826   | 1.33E-17 | 1.00E-16 | SLC9B2  | chr4 | - | 1.04E+08 | 1.04E+08 | 3126  |
| ENSG000001 | 167.5591 | 180.1294 | -0.10283 | 0.59701  | 0.69135  | BDH2    | chr4 | - | 1.04E+08 | 1.04E+08 | 2781  |
| ENSG000001 | 785.8332 | 872.1216 | -0.14944 | 0.24295  | 0.33834  | PGRMC2  | chr4 | - | 1.29E+08 | 1.29E+08 | 3785  |
| ENSG000001 | 420.048  | 1863.985 | -2.1429  | 6.63E-28 | 7.82E-27 | CDC25A  | chr3 | - | 48198636 | 48229892 | 3783  |
| ENSG000001 | 0.995923 | 0        | 1.4959   | 0.39264  | NA       | CAMP    | chr3 | + | 48264837 | 48266981 | 745   |
| ENSG000001 | 190.2236 | 1824.737 | -3.2549  | 8.75E-97 | 4.81E-95 | ZNF589  | chr3 | + | 48282590 | 48340743 | 4703  |
| ENSG000001 | 1.338465 | 15.48095 | -3.3008  | 0.000194 | 0.000532 | FBXW12  | chr3 | + | 48413709 | 48442666 | 2188  |
| ENSG000001 | 1173.431 | 2663.039 | -1.1811  | 4.20E-24 | 4.24E-23 | PLXNB1  | chr3 | - | 48445261 | 48471594 | 7308  |
| ENSG000001 | 216.6081 | 382.0734 | -0.81553 | 4.88E-08 | 1.95E-07 | CCDC51  | chr3 | - | 48473574 | 48481866 | 1560  |
| ENSG000001 | 186.4371 | 239.5326 | -0.3628  | 0.034919 | 0.065013 | ATRIP   | chr3 | + | 48488114 | 48507115 | 2721  |
| ENSG000001 | 2747.847 | 2138.234 | 0.36172  | 0.000359 | 0.000949 | SHISA5  | chr3 | - | 48509197 | 48542259 | 2369  |
| ENSG000001 | 834.5217 | 1308.339 | -0.64747 | 1.97E-05 | 6.12E-05 | SPRY1   | chr4 | + | 1.24E+08 | 1.24E+08 | 2504  |
| ENSG000001 | 67.73728 | 120.5098 | -0.82672 | 0.001962 | 0.00465  | BSN     | chr3 | + | 49591922 | 49708978 | 15955 |
| ENSG000001 | 1919.953 | 4128.014 | -1.1034  | 1.31E-28 | 1.59E-27 | APEH    | chr3 | + | 49711435 | 49721396 | 3220  |
| ENSG000001 | 139.9887 | 140.7493 | -0.00828 | 0.96472  | 0.97948  | INTU    | chr4 | + | 1.29E+08 | 1.29E+08 | 5740  |
| ENSG000001 | 784.7477 | 503.0985 | 0.63874  | 0.00014  | 0.000391 | RNF123  | chr3 | + | 49726932 | 49758962 | 5882  |
| ENSG000001 | 59.79646 | 116.4389 | -0.95728 | 0.001175 | 0.002884 | HSPA4L  | chr4 | + | 1.29E+08 | 1.29E+08 | 4128  |
| ENSG000001 | 189.8328 | 153.6824 | 0.30766  | 0.14414  | 0.21929  | MFSB8   | chr4 | - | 1.29E+08 | 1.29E+08 | 4510  |
| ENSG000001 | 165.591  | 295.2365 | -0.83634 | 1.86E-05 | 5.80E-05 | C4orf29 | chr4 | + | 1.29E+08 | 1.29E+08 | 5450  |

|            |          |          |          |          |          |          |      |   |          |          |       |
|------------|----------|----------|----------|----------|----------|----------|------|---|----------|----------|-------|
| ENSG000001 | 0        | 1318.893 | -11.537  | 3.78E-27 | 4.30E-26 | CAMKV    | chr3 | - | 49895421 | 49907655 | 3314  |
| ENSG000001 | 310.1036 | 200.4071 | 0.62891  | 0.000233 | 0.000633 | MON1A    | chr3 | - | 49946302 | 49967606 | 2527  |
| ENSG000001 | 2.914991 | 67.5358  | -4.3869  | 2.27E-13 | 1.34E-12 | MST1R    | chr3 | - | 49924435 | 49941299 | 4683  |
| ENSG000001 | 640.04   | 463.7135 | 0.46471  | 6.25E-05 | 0.000182 | RAD54L2  | chr3 | + | 51575160 | 51697610 | 5129  |
| ENSG000001 | 458.0068 | 223.954  | 1.0265   | 2.40E-06 | 8.26E-06 | TEX264   | chr3 | + | 51696709 | 51738339 | 3937  |
| ENSG000001 | 27.80109 | 185.3641 | -2.7192  | 2.20E-28 | 2.63E-27 | GRM2     | chr3 | + | 51741086 | 51752629 | 6550  |
| ENSG000001 | 1817.974 | 430.384  | 2.0735   | 5.34E-35 | 8.10E-34 | DUSP7    | chr3 | - | 52082935 | 52090566 | 3340  |
| ENSG000001 | 283.6405 | 465.9215 | -0.71423 | 2.98E-06 | 1.02E-05 | POC1A    | chr3 | - | 52109269 | 52188706 | 1999  |
| ENSG000001 | 346.8247 | 64.52356 | 2.4093   | 2.83E-23 | 2.76E-22 | PPM1M    | chr3 | + | 52279841 | 52284613 | 2429  |
| ENSG000001 | 1.048164 | 11.2969  | -3.1339  | 0.002577 | 0.006    | AGXT2L1  | chr4 | - | 1.1E+08  | 1.1E+08  | 2099  |
| ENSG000001 | 3758.998 | 2492.48  | 0.59216  | 3.58E-07 | 1.33E-06 | WDR82    | chr3 | - | 52288437 | 52322036 | 4333  |
| ENSG000001 | 395.0757 | 630.531  | -0.67213 | 0.001359 | 0.003304 | PITX2    | chr4 | - | 1.12E+08 | 1.12E+08 | 3359  |
| ENSG000001 | 1140.728 | 902.5871 | 0.33812  | 0.022764 | 0.044347 | C4orf3   | chr4 | - | 1.2E+08  | 1.2E+08  | 2327  |
| ENSG000001 | 85.36006 | 267.1605 | -1.6433  | 4.98E-14 | 3.06E-13 | PRSS12   | chr4 | - | 1.19E+08 | 1.19E+08 | 4809  |
| ENSG000001 | 206.0809 | 6.811803 | 4.8932   | 7.70E-37 | 1.24E-35 | NDST3    | chr4 | + | 1.19E+08 | 1.19E+08 | 5961  |
| ENSG000001 | 3292.703 | 4612.592 | -0.48567 | 6.17E-05 | 0.00018  | HMGB2    | chr4 | - | 1.74E+08 | 1.74E+08 | 1889  |
| ENSG000001 | 392.5229 | 335.6696 | 0.22467  | 0.12917  | 0.20067  | SAP30    | chr4 | + | 1.74E+08 | 1.74E+08 | 1108  |
| ENSG000001 | 362.6069 | 1.545765 | 7.5333   | 1.64E-35 | 2.53E-34 | SCRG1    | chr4 | - | 1.74E+08 | 1.74E+08 | 1642  |
| ENSG000001 | 868.8893 | 5.054822 | 6.6996   | 1.41E-10 | 6.92E-10 | HAND2    | chr4 | - | 1.74E+08 | 1.74E+08 | 2780  |
| ENSG000001 | 733.3929 | 1389.423 | -0.92003 | 5.38E-10 | 2.53E-09 | MAD2L1   | chr4 | - | 1.21E+08 | 1.21E+08 | 1654  |
| ENSG000001 | 10689.93 | 2832.321 | 1.9142   | 6.20E-57 | 1.68E-55 | ANXA5    | chr4 | - | 1.23E+08 | 1.23E+08 | 1762  |
| ENSG000001 | 22.02498 | 8.186771 | 1.3583   | 0.085889 | 0.14195  | TMEM155  | chr4 | - | 1.23E+08 | 1.23E+08 | 2389  |
| ENSG000001 | 279.2705 | 166.9056 | 0.74364  | 8.63E-06 | 2.79E-05 | MAP9     | chr4 | - | 1.56E+08 | 1.56E+08 | 7333  |
| ENSG000001 | 41.55143 | 1.71569  | 4.398    | 1.07E-08 | 4.52E-08 | GUCY1A3  | chr4 | + | 1.57E+08 | 1.57E+08 | 4400  |
| ENSG000001 | 183.3381 | 90.51061 | 1.0188   | 2.78E-06 | 9.49E-06 | FBXO8    | chr4 | - | 1.75E+08 | 1.75E+08 | 2577  |
| ENSG000001 | 212.2938 | 202.4143 | 0.069738 | 0.69133  | 0.76982  | CEP44    | chr4 | + | 1.75E+08 | 1.75E+08 | 4534  |
| ENSG000001 | 0.36308  | 34.619   | -5.6812  | 1.26E-06 | 4.47E-06 | HPGD     | chr4 | - | 1.75E+08 | 1.75E+08 | 3027  |
| ENSG000001 | 32.96057 | 38.44716 | -0.22338 | 0.54063  | 0.64114  | TMEM144  | chr4 | + | 1.59E+08 | 1.59E+08 | 4872  |
| ENSG000001 | 1759.114 | 2.995994 | 9.04     | 2.32E-84 | 1.05E-82 | FAM198B  | chr4 | - | 1.59E+08 | 1.59E+08 | 4985  |
| ENSG000001 | 4.657611 | 43.57563 | -3.1626  | 2.92E-09 | 1.29E-08 | NPY1R    | chr4 | - | 1.64E+08 | 1.64E+08 | 3029  |
| ENSG000001 | 0.705622 | 5.45382  | -2.5835  | 0.032814 | 0.06145  | NPYSR    | chr4 | + | 1.64E+08 | 1.64E+08 | 3183  |
| ENSG000001 | 978.228  | 1811.189 | -0.88613 | 3.35E-07 | 1.25E-06 | NAA15    | chr4 | + | 1.4E+08  | 1.4E+08  | 6222  |
| ENSG000001 | 5.217676 | 25.67244 | -2.234   | 7.27E-05 | 0.000211 | IL15     | chr4 | + | 1.43E+08 | 1.43E+08 | 6026  |
| ENSG000001 | 3.64115  | 319.4498 | -6.3357  | 1.16E-38 | 1.97E-37 | FAM160A1 | chr4 | + | 1.52E+08 | 1.53E+08 | 4576  |
| ENSG000001 | 500.003  | 503.8829 | -0.01225 | 0.92451  | 0.94929  | ARFIP1   | chr4 | + | 1.54E+08 | 1.54E+08 | 3424  |
| ENSG000001 | 1282.894 | 1325.155 | -0.0463  | 0.74655  | 0.81427  | KIAA0947 | chr5 | + | 5420777  | 5490347  | 7927  |
| ENSG000001 | 373.0404 | 5.424682 | 6.0583   | 8.39E-54 | 2.11E-52 | HHIP     | chr4 | + | 1.46E+08 | 1.46E+08 | 10072 |
| ENSG000001 | 57.81318 | 57.79984 | -0.00433 | 0.98742  | 0.99279  | ANAPC10  | chr4 | - | 1.46E+08 | 1.46E+08 | 1025  |
| ENSG000001 | 914.9891 | 1190.377 | -0.37793 | 0.052885 | 0.093375 | ABCE1    | chr4 | + | 1.46E+08 | 1.46E+08 | 3921  |
| ENSG000001 | 763.6858 | 1058.012 | -0.46936 | 1.69E-05 | 5.29E-05 | OTUD4    | chr4 | - | 1.46E+08 | 1.46E+08 | 7069  |
| ENSG000001 | 288.5081 | 622.3376 | -1.1066  | 4.77E-17 | 3.50E-16 | LSM6     | chr4 | + | 1.47E+08 | 1.47E+08 | 1352  |
| ENSG000001 | 530.1305 | 622.2838 | -0.2301  | 0.10341  | 0.16605  | TMEM184C | chr4 | + | 1.49E+08 | 1.49E+08 | 4178  |
| ENSG000001 | 137.9829 | 142.5314 | -0.04794 | 0.82932  | 0.87981  | PRMT10   | chr4 | - | 1.49E+08 | 1.49E+08 | 3528  |
| ENSG000001 | 357.1437 | 185.2848 | 0.94272  | 6.55E-05 | 0.000191 | ITGA2    | chr5 | + | 52285156 | 52390609 | 7869  |
| ENSG000001 | 428.4442 | 166.2847 | 1.3639   | 2.86E-12 | 1.57E-11 | MOCSS2   | chr5 | - | 52391509 | 52405893 | 3568  |
| ENSG000001 | 2.427705 | 1.355566 | 0.71405  | 0.56662  | 0.66435  | SLC45A2  | chr5 | - | 33944721 | 33984835 | 2723  |
| ENSG000001 | 2063.153 | 1055.905 | 0.96577  | 1.05E-15 | 7.19E-15 | EDIL3    | chr5 | - | 83236373 | 83680611 | 4727  |
| ENSG000001 | 203.6729 | 161.7828 | 0.33043  | 0.051998 | 0.092065 | TMEM161E | chr5 | - | 87485450 | 87565293 | 7608  |
| ENSG000001 | 3.008307 | 131.4667 | -5.3489  | 4.08E-25 | 4.29E-24 | ELOVL7   | chr5 | - | 60047618 | 60140216 | 4165  |
| ENSG000001 | 277.0005 | 292.4062 | -0.078   | 0.61425  | 0.70614  | NDUFAF2  | chr5 | + | 60240956 | 60448853 | 708   |
| ENSG000001 | 4.088174 | 0.343138 | 2.8253   | 0.043983 | 0.079543 | ZNF474   | chr5 | + | 1.21E+08 | 1.22E+08 | 1964  |
| ENSG000001 | 171.0226 | 77.74166 | 1.1323   | 1.19E-06 | 4.21E-06 | LMBRD2   | chr5 | - | 36098514 | 36152063 | 8185  |
| ENSG000001 | 194.8764 | 0.357707 | 8.2192   | 2.68E-17 | 1.99E-16 | RANBP3L  | chr5 | - | 36248536 | 36302216 | 3104  |
| ENSG000001 | 1464.102 | 940.4631 | 0.63683  | 0.004499 | 0.01009  | NIPBL    | chr5 | + | 36876861 | 37066515 | 10435 |
| ENSG000001 | 37.07622 | 14.35688 | 1.3584   | 0.001642 | 0.003935 | RNF180   | chr5 | + | 63461671 | 63668696 | 4906  |
| ENSG000001 | 11.17447 | 936.8064 | -6.3395  | 2.55E-95 | 1.37E-93 | GPR98    | chr5 | + | 89825161 | 90460038 | 19338 |
| ENSG000001 | 603.028  | 325.2801 | 0.89018  | 4.48E-07 | 1.65E-06 | SLC25A46 | chr5 | + | 1.1E+08  | 1.1E+08  | 6232  |
| ENSG000001 | 1600.061 | 531.2621 | 1.5871   | 7.99E-17 | 5.79E-16 | STARD4   | chr5 | - | 1.11E+08 | 1.11E+08 | 4606  |
| ENSG000001 | 259.3669 | 288.4677 | -0.15116 | 0.49903  | 0.60281  | PGGT1B   | chr5 | - | 1.15E+08 | 1.15E+08 | 2727  |
| ENSG000001 | 640.5387 | 2.324288 | 7.9243   | 5.54E-52 | 1.34E-50 | F2RL2    | chr5 | - | 75911307 | 75919259 | 3429  |
| ENSG000001 | 191.9049 | 264.7768 | -0.46279 | 0.005346 | 0.011843 | CCDC112  | chr5 | - | 1.15E+08 | 1.15E+08 | 2566  |
| ENSG000001 | 11.47316 | 78.15334 | -2.7135  | 5.34E-07 | 1.95E-06 | ANKRD33B | chr5 | + | 10564442 | 10650308 | 1591  |
| ENSG000001 | 351.8781 | 518.0722 | -0.55671 | 0.004757 | 0.010627 | CMBL     | chr5 | - | 10275987 | 10308138 | 2335  |
| ENSG000001 | 0.632843 | 4.334576 | -2.3375  | 0.058629 | 0.10239  | C5orf63  | chr5 | - | 1.26E+08 | 1.26E+08 | 5680  |
| ENSG000001 | 2407.549 | 1160.186 | 1.0524   | 2.96E-19 | 2.40E-18 | PRRC1    | chr5 | + | 1.27E+08 | 1.27E+08 | 5504  |

|                    |          |          |           |           |          |      |   |          |          |       |
|--------------------|----------|----------|-----------|-----------|----------|------|---|----------|----------|-------|
| ENSG000001511.3517 | 991.3744 | -0.95366 | 1.08E-09  | 4.97E-09  | F2RL1    | chr5 | + | 76114758 | 76131140 | 2914  |
| ENSG000001540.0066 | 448.8531 | 0.26744  | 0.085614  | 0.14161   | AGGF1    | chr5 | + | 76325076 | 76361059 | 4509  |
| ENSG000001956.7073 | 469.3099 | 1.0261   | 1.48E-18  | 1.16E-17  | WDR41    | chr5 | - | 76721795 | 76916436 | 3958  |
| ENSG0000010        | 4.317591 | -3.6334  | 0.012226  | 0.025232  | PRDM9    | chr5 | + | 23507264 | 23528706 | 3691  |
| ENSG000001481.0532 | 370.0675 | 0.37916  | 0.007023  | 0.015199  | NDUFS4   | chr5 | + | 52856463 | 52979168 | 833   |
| ENSG0000010        | 852.8181 | -10.926  | 9.94E-24  | 9.87E-23  | SCGB3A2  | chr5 | + | 1.47E+08 | 1.47E+08 | 672   |
| ENSG0000010        | 14.9922  | -5.4371  | 1.62E-05  | 5.09E-05  | SPINK1   | chr5 | - | 1.47E+08 | 1.47E+08 | 1188  |
| ENSG0000010        | 0.357707 | -0.41864 | 0.81278   | NA        | HTR4     | chr5 | - | 1.48E+08 | 1.48E+08 | 3082  |
| ENSG00000125.51976 | 0.343138 | 5.4503   | 7.35E-07  | 2.66E-06  | ESM1     | chr5 | - | 54273692 | 54318499 | 2169  |
| ENSG000001189.1744 | 467.4531 | -1.299   | 6.04E-14  | 3.70E-13  | GRPEL2   | chr5 | + | 1.49E+08 | 1.49E+08 | 4109  |
| ENSG0000010.995923 | 0.297015 | 1.0163   | 0.54122   | NA        | CDC20B   | chr5 | - | 54408799 | 54469005 | 3070  |
| ENSG000001214.6629 | 171.1835 | 0.32787  | 0.075766  | 0.12751   | ARSK     | chr5 | + | 94890778 | 94940768 | 3354  |
| ENSG0000012564.903 | 523.3034 | 2.2878   | 5.79E-53  | 1.43E-51  | RHOBTB3  | chr5 | + | 95049226 | 95160087 | 5537  |
| ENSG0000013109.2   | 524.2496 | 2.5663   | 8.32E-144 | 8.80E-142 | GPX8     | chr5 | + | 54455946 | 54462899 | 3422  |
| ENSG00000168.33084 | 39.87725 | 0.76761  | 0.019707  | 0.038949  | TIGD6    | chr5 | - | 1.49E+08 | 1.49E+08 | 4006  |
| ENSG0000010        | 0.343138 | -0.41864 | 0.81278   | NA        | SPZ1     | chr5 | + | 79615444 | 79617661 | 1872  |
| ENSG000001175.2884 | 580.2976 | -1.7261  | 5.56E-28  | 6.57E-27  | SERINC5  | chr5 | - | 79407050 | 79551898 | 2767  |
| ENSG0000010        | 2.232041 | -2.63    | 0.10215   | 0.16421   | ENPP6    | chr4 | - | 1.85E+08 | 1.85E+08 | 3936  |
| ENSG0000010        | 1.98115  | -2.4527  | 0.13291   | 0.20539   | CAGE1    | chr6 | - | 7326889  | 7389976  | 3284  |
| ENSG000001811.6749 | 2272.043 | -1.4786  | 1.54E-10  | 7.50E-10  | CASP3    | chr4 | - | 1.86E+08 | 1.86E+08 | 2673  |
| ENSG000001128.0967 | 148.1517 | -0.20465 | 0.36743   | 0.47206   | CCDC111  | chr4 | + | 1.86E+08 | 1.86E+08 | 2289  |
| ENSG000001744.3656 | 310.9074 | 1.2593   | 1.96E-22  | 1.84E-21  | ERAP1    | chr5 | - | 96096521 | 96143803 | 5488  |
| ENSG00000127.16825 | 0.715414 | 4.8916   | 2.49E-07  | 9.40E-07  | ERAP2    | chr5 | + | 96211643 | 96255420 | 5705  |
| ENSG00000191.09477 | 33.9385  | 1.4182   | 9.71E-06  | 3.12E-05  | CMYA5    | chr5 | + | 78985700 | 79096063 | 12847 |
| ENSG000001315.193  | 46.1443  | 2.7691   | 8.88E-38  | 1.47E-36  | EGFLAM   | chr5 | + | 38258511 | 38465123 | 4411  |
| ENSG000001639.2752 | 672.5576 | -0.07225 | 0.67102   | 0.75363   | KIAA1430 | chr4 | - | 1.86E+08 | 1.86E+08 | 4852  |
| ENSG0000010        | 0.297015 | -0.41864 | 0.81278   | NA        | TMEM174  | chr5 | + | 72469022 | 72470970 | 1759  |
| ENSG000001475.1945 | 295.889  | 0.68372  | 0.001032  | 0.002553  | RICTOR   | chr5 | - | 38938021 | 39074510 | 9543  |
| ENSG000001560.642  | 408.6216 | 0.45585  | 0.00656   | 0.01427   | PAPD4    | chr5 | + | 78907943 | 78982471 | 3523  |
| ENSG000001474.9998 | 4.796683 | 6.5823   | 1.10E-56  | 2.98E-55  | EBF1     | chr5 | - | 1.58E+08 | 1.59E+08 | 5250  |
| ENSG000001161.0576 | 178.8859 | -0.15184 | 0.61898   | 0.7101    | ANKRA2   | chr5 | - | 72848160 | 72861511 | 2063  |
| ENSG000001473.7297 | 333.9992 | 0.50247  | 0.044209  | 0.079899  | UBLCP1   | chr5 | + | 1.59E+08 | 1.59E+08 | 2388  |
| ENSG000001273.0279 | 376.5117 | -0.46132 | 0.02332   | 0.045339  | UTP15    | chr5 | + | 72861268 | 72877794 | 3687  |
| ENSG0000011.722083 | 22.31632 | -3.5501  | 5.49E-06  | 1.82E-05  | TLR3     | chr4 | + | 1.87E+08 | 1.87E+08 | 3047  |
| ENSG0000013.983692 | 150.3786 | -5.0893  | 2.17E-17  | 1.62E-16  | KLKB1    | chr4 | + | 1.87E+08 | 1.87E+08 | 2363  |
| ENSG000001657.1342 | 710.7741 | -0.11177 | 0.50275   | 0.60623   | NSA2     | chr5 | + | 74062817 | 74072737 | 1393  |
| ENSG000001331.0386 | 387.5047 | -0.22729 | 0.10602   | 0.16967   | GFM2     | chr5 | - | 74017029 | 74063196 | 3249  |
| ENSG0000010        | 694.6814 | -10.685  | 3.90E-23  | 3.80E-22  | TERT     | chr5 | - | 1253262  | 1295184  | 4018  |
| ENSG0000010        | 1.652581 | -2.1974  | 0.1871    | NA        | SLC6A18  | chr5 | + | 1225470  | 1246304  | 2121  |
| ENSG000001223.9588 | 271.7951 | -0.2801  | 0.084003  | 0.13937   | CCDC127  | chr5 | - | 204872   | 218330   | 1456  |
| ENSG0000011.555988 | 19.85104 | -3.2403  | 0.003173  | 0.007288  | FOXQ1    | chr6 | + | 1312675  | 1314992  | 2318  |
| ENSG0000012.032922 | 3.085825 | -0.52002 | 0.67326   | 0.75534   | C6orf195 | chr6 | - | 2622147  | 2634837  | 2434  |
| ENSG0000010        | 0.686276 | -0.84936 | 0.6309    | NA        | GPR111   | chr6 | + | 47624172 | 47665533 | 5126  |
| ENSG0000010        | 19.62217 | -5.9268  | 4.08E-07  | 1.51E-06  | ACSL6    | chr5 | - | 1.31E+08 | 1.31E+08 | 6539  |
| ENSG0000010        | 0.357707 | -0.41864 | 0.81278   | NA        | IL3      | chr5 | + | 1.31E+08 | 1.31E+08 | 1050  |
| ENSG0000010        | 0.357707 | -0.41864 | 0.81278   | NA        | CSF2     | chr5 | + | 1.31E+08 | 1.31E+08 | 783   |
| ENSG0000011928.464 | 813.0304 | 1.2446   | 4.98E-35  | 7.56E-34  | 8-Sep    | chr5 | - | 1.32E+08 | 1.32E+08 | 4390  |
| ENSG000001117.9269 | 142.0494 | -0.26458 | 0.51355   | 0.6166    | SHROOM1  | chr5 | - | 1.32E+08 | 1.32E+08 | 4019  |
| ENSG0000013.10081  | 3.633731 | -0.18287 | 0.85742   | 0.89986   | GDF9     | chr5 | - | 1.32E+08 | 1.32E+08 | 2640  |
| ENSG000001398.0729 | 258.9878 | 0.6205   | 0.000356  | 0.000943  | UOCRQ    | chr5 | + | 1.32E+08 | 1.32E+08 | 874   |
| ENSG00000111.65996 | 16.26518 | -0.45942 | 0.3903    | 0.49467   | LEAP2    | chr5 | + | 1.32E+08 | 1.32E+08 | 2207  |
| ENSG0000012.229907 | 17.11735 | -2.7167  | 0.002556  | 0.005952  | GJB7     | chr6 | - | 87992696 | 88038996 | 2281  |
| ENSG00000128.53165 | 24.18737 | 0.23304  | 0.58767   | 0.68323   | SLC35A1  | chr6 | + | 88180341 | 88222054 | 1851  |
| ENSG0000016.669996 | 2.232041 | 1.4329   | 0.12685   | 0.1977    | GRIK2    | chr6 | + | 1.02E+08 | 1.03E+08 | 4921  |
| ENSG00000145.13952 | 155.9428 | -1.7771  | 6.22E-10  | 2.92E-09  | MB21D1   | chr6 | - | 74123238 | 74161999 | 3182  |
| ENSG00000133.3314  | 11.59633 | 1.5053   | 0.004508  | 0.010107  | FABP7    | chr6 | + | 1.23E+08 | 1.23E+08 | 2086  |
| ENSG0000010.290301 | 5.702295 | -3.2685  | 0.01915   | 0.037961  | TLX3     | chr5 | + | 1.71E+08 | 1.71E+08 | 1493  |
| ENSG0000016.86698  | 0.594029 | 2.97     | 0.012163  | 0.025119  | TXLNB    | chr6 | - | 1.4E+08  | 1.4E+08  | 4753  |
| ENSG000001492.1858 | 833.6456 | -0.75773 | 2.21E-07  | 8.38E-07  | CITED2   | chr6 | - | 1.4E+08  | 1.4E+08  | 1905  |
| ENSG00000112.84171 | 8.253168 | 0.61937  | 0.36938   | 0.47396   | T        | chr6 | - | 1.67E+08 | 1.67E+08 | 2436  |
| ENSG00000169.18186 | 66.82014 | 0.052884 | 0.88204   | 0.91786   | CREBRF   | chr5 | + | 1.72E+08 | 1.73E+08 | 7788  |
| ENSG000001905.3116 | 225.793  | 2.0021   | 1.13E-50  | 2.64E-49  | DCBLD1   | chr6 | + | 1.18E+08 | 1.18E+08 | 3626  |
| ENSG0000011518.614 | 1336.527 | 0.18387  | 0.076343  | 0.12835   | SFXN1    | chr5 | + | 1.75E+08 | 1.75E+08 | 4231  |
| ENSG00000161.49459 | 20.05588 | 1.611    | 4.50E-05  | 0.000134  | SAMD3    | chr6 | - | 1.3E+08  | 1.31E+08 | 3690  |
| ENSG0000011354.54  | 316.7582 | 2.0904   | 1.72E-31  | 2.33E-30  | TMEM200A | chr6 | + | 1.31E+08 | 1.31E+08 | 5017  |

|            |          |          |          |           |           |           |      |   |          |          |       |
|------------|----------|----------|----------|-----------|-----------|-----------|------|---|----------|----------|-------|
| ENSG000001 | 3.992252 | 176.6678 | -5.271   | 5.77E-22  | 5.30E-21  | DACT2     | chr6 | - | 1.69E+08 | 1.69E+08 | 2942  |
| ENSG000001 | 214.8181 | 209.3969 | 0.034105 | 0.83762   | 0.88597   | PDSS2     | chr6 | - | 1.07E+08 | 1.08E+08 | 3540  |
| ENSG000001 | 466.586  | 111.0829 | 2.0667   | 5.36E-24  | 5.38E-23  | STXBP5    | chr6 | + | 1.48E+08 | 1.48E+08 | 4431  |
| ENSG000001 | 289.8513 | 0.297015 | 8.7546   | 5.50E-20  | 4.64E-19  | IL31RA    | chr5 | + | 55147207 | 55218678 | 2903  |
| ENSG000001 | 0        | 0.357707 | -0.41864 | 0.81278   | NA        | ANKRD55   | chr5 | - | 55395507 | 55529186 | 2500  |
| ENSG000001 | 2.656392 | 0        | 2.8491   | 0.072291  | 0.12249   | RAET1E    | chr6 | - | 1.5E+08  | 1.5E+08  | 2099  |
| ENSG000001 | 2.116866 | 0.700845 | 1.2277   | 0.41463   | 0.51964   | PI16      | chr6 | + | 36922209 | 36932613 | 2190  |
| ENSG000001 | 0.36308  | 0.297015 | -0.00205 | 0.99908   | NA        | TBX20     | chr7 | - | 35242042 | 35293758 | 1871  |
| ENSG000001 | 226.3085 | 517.2606 | -1.1861  | 5.23E-07  | 1.92E-06  | DAGLB     | chr7 | - | 6448757  | 6523821  | 2897  |
| ENSG000001 | 24.87852 | 3.290593 | 2.8115   | 2.02E-05  | 6.27E-05  | KIAA0895  | chr7 | - | 36363830 | 36429734 | 4241  |
| ENSG000001 | 524.5425 | 313.9982 | 0.73704  | 3.20E-07  | 1.19E-06  | STK17A    | chr7 | + | 43622357 | 43666385 | 3368  |
| ENSG000001 | 914.2647 | 1091.332 | -0.25389 | 0.304     | 0.40536   | TRA2A     | chr7 | - | 23544399 | 23571660 | 1845  |
| ENSG000001 | 0        | 0.594029 | -0.81444 | 0.64499   | NA        | FAM183B   | chr7 | - | 38724946 | 38726637 | 1595  |
| ENSG000001 | 9686.773 | 812.1957 | 3.5741   | 0         | 0         | GALNT10   | chr5 | + | 1.54E+08 | 1.54E+08 | 5961  |
| ENSG000001 | 411.1397 | 329.2152 | 0.31757  | 0.1664    | 0.24762   | SAP30L    | chr5 | + | 1.54E+08 | 1.54E+08 | 1486  |
| ENSG000001 | 8601.066 | 12013.37 | -0.48154 | 7.51E-06  | 2.45E-05  | RPS14     | chr5 | - | 1.5E+08  | 1.5E+08  | 3119  |
| ENSG000001 | 175.6678 | 38.82514 | 2.1626   | 3.14E-15  | 2.08E-14  | HCN1      | chr5 | - | 45259349 | 45696253 | 5405  |
| ENSG000001 | 73.4772  | 198.0197 | -1.4271  | 1.57E-08  | 6.56E-08  | MYO23     | chr5 | + | 1.5E+08  | 1.5E+08  | 3445  |
| ENSG000001 | 839.8438 | 294.8555 | 1.5046   | 5.27E-21  | 4.65E-20  | COG5      | chr7 | - | 1.07E+08 | 1.07E+08 | 5418  |
| ENSG000001 | 147.717  | 65.39669 | 1.1698   | 1.31E-05  | 4.14E-05  | C7orf60   | chr7 | - | 1.12E+08 | 1.13E+08 | 3981  |
| ENSG000001 | 125.7167 | 5.208634 | 4.5067   | 4.16E-25  | 4.37E-24  | GPR85     | chr7 | - | 1.13E+08 | 1.13E+08 | 4933  |
| ENSG000001 | 677.1261 | 547.3945 | 0.30708  | 0.11842   | 0.18685   | SLU7      | chr5 | - | 1.6E+08  | 1.6E+08  | 3793  |
| ENSG000001 | 251.5344 | 165.2805 | 0.6056   | 0.000236  | 0.00064   | RP9       | chr7 | - | 33134409 | 33149013 | 1121  |
| ENSG000001 | 853.3901 | 1682.985 | -0.97742 | 2.02E-09  | 9.07E-09  | PTTG1     | chr5 | + | 1.6E+08  | 1.6E+08  | 1070  |
| ENSG000001 | 529.1514 | 833.8545 | -0.65343 | 0.006388  | 0.013936  | CAMLG     | chr5 | + | 1.34E+08 | 1.34E+08 | 2218  |
| ENSG000001 | 0.290301 | 18.16624 | -5.002   | 1.10E-05  | 3.52E-05  | FBXL21    | chr5 | + | 1.35E+08 | 1.35E+08 | 1742  |
| ENSG000001 | 4.00423  | 18.93993 | -2.1681  | 0.00122   | 0.002985  | BMPER     | chr7 | + | 33944523 | 34195484 | 5031  |
| ENSG000001 | 57.63094 | 174.0893 | -1.5894  | 3.78E-08  | 1.53E-07  | RELL2     | chr5 | + | 1.41E+08 | 1.41E+08 | 2520  |
| ENSG000001 | 0        | 0.343138 | -0.41864 | 0.81278   | NA        | SMAD5-AS1 | chr5 | - | 1.35E+08 | 1.35E+08 | 1816  |
| ENSG000001 | 0        | 1080.023 | -11.266  | 1.06E-25  | 1.14E-24  | KCNK5     | chr6 | - | 39156749 | 39197226 | 3756  |
| ENSG000001 | 6.151985 | 9.323873 | -0.56404 | 0.41956   | 0.52498   | KIF6      | chr6 | - | 39297766 | 39693181 | 9082  |
| ENSG000001 | 324.7165 | 322.3726 | 0.010248 | 0.94485   | 0.96451   | ZNF12     | chr7 | - | 6728064  | 6746554  | 5051  |
| ENSG000001 | 582.8531 | 599.5598 | -0.04046 | 0.80877   | 0.86508   | SLC29A4   | chr7 | + | 5314000  | 5343696  | 2880  |
| ENSG000001 | 353.0616 | 38.18895 | 3.2017   | 3.58E-51  | 8.46E-50  | STEAP1    | chr7 | + | 89783689 | 89794143 | 1313  |
| ENSG000001 | 806.9879 | 1861.161 | -1.2043  | 4.14E-31  | 5.53E-30  | CDC47L    | chr7 | - | 21940518 | 21985702 | 3066  |
| ENSG000001 | 0.290301 | 2117.893 | -11.411  | 1.86E-36  | 2.96E-35  | SP8       | chr7 | - | 20823906 | 20826505 | 1714  |
| ENSG000001 | 223.6091 | 512.1667 | -1.1947  | 4.72E-17  | 3.46E-16  | MIOS      | chr7 | + | 7606503  | 7648560  | 3453  |
| ENSG000001 | 331.5424 | 696.4088 | -1.0677  | 7.15E-08  | 2.82E-07  | KIAA1324L | chr7 | - | 86506222 | 86689015 | 6841  |
| ENSG000001 | 142.6821 | 518.2497 | -1.8528  | 3.78E-26  | 4.13E-25  | USP49     | chr6 | - | 41757634 | 41863099 | 9034  |
| ENSG000001 | 26.00965 | 23.94621 | 0.11507  | 0.78302   | 0.84456   | INTS4L1   | chr7 | + | 64601603 | 64694600 | 2550  |
| ENSG000001 | 18.92254 | 6.223479 | 1.5519   | 0.006784  | 0.014719  | SYTL3     | chr6 | + | 1.59E+08 | 1.59E+08 | 2292  |
| ENSG000001 | 2.323223 | 9.629009 | -1.9085  | 0.042437  | 0.077181  | IQUB      | chr7 | - | 1.23E+08 | 1.23E+08 | 3428  |
| ENSG000001 | 156.1375 | 47.56781 | 1.7118   | 1.79E-09  | 8.06E-09  | HEY1      | chr8 | - | 80676245 | 80680098 | 2296  |
| ENSG000001 | 487.6674 | 200.116  | 1.2814   | 1.80E-14  | 1.15E-13  | ZNF704    | chr8 | - | 81540686 | 81787016 | 14386 |
| ENSG000001 | 755.5482 | 720.605  | 0.068423 | 0.79189   | 0.85194   | FABP5     | chr8 | + | 82192598 | 82197012 | 986   |
| ENSG000001 | 0        | 8.550183 | -4.6331  | 0.000514  | 0.001333  | SHH       | chr7 | - | 1.56E+08 | 1.56E+08 | 4454  |
| ENSG000001 | 4.978802 | 1.294874 | 1.7197   | 0.13032   | 0.20203   | TAGAP     | chr6 | - | 1.59E+08 | 1.59E+08 | 3887  |
| ENSG000001 | 233678   | 1731.253 | 7.0719   | 0         | 0         | COL1A2    | chr7 | + | 94023873 | 94060544 | 5993  |
| ENSG000001 | 2169.908 | 26.80625 | 6.3198   | 7.88E-212 | 1.95E-209 | FNDC1     | chr6 | + | 1.6E+08  | 1.6E+08  | 6552  |
| ENSG000001 | 0.943682 | 52.98859 | -5.4208  | 1.49E-11  | 7.81E-11  | CHMP4C    | chr8 | + | 82644669 | 82671750 | 1866  |
| ENSG000001 | 31.88152 | 46.21802 | -0.5332  | 0.19689   | 0.28487   | SLC13A4   | chr7 | - | 1.35E+08 | 1.35E+08 | 7186  |
| ENSG000001 | 730.49   | 599.2629 | 0.28456  | 0.064745  | 0.11148   | BRI3      | chr7 | + | 97881691 | 97937162 | 819   |
| ENSG000001 | 629.4195 | 1036.897 | -0.71906 | 2.59E-08  | 1.06E-07  | LMTK2     | chr7 | + | 97736197 | 97838945 | 8946  |
| ENSG000001 | 5887.128 | 1530.099 | 1.9418   | 2.88E-59  | 8.21E-58  | CTSB      | chr8 | - | 11700033 | 11726957 | 3875  |
| ENSG000001 | 6.960297 | 39.46664 | -2.3857  | 0.001589  | 0.003817  | SOX17     | chr8 | + | 55370495 | 55373448 | 2342  |
| ENSG000001 | 1890.756 | 54.35773 | 5.0977   | 7.29E-82  | 3.15E-80  | DLC1      | chr8 | - | 12940870 | 13373167 | 7447  |
| ENSG000001 | 267.5767 | 947.1152 | -1.8165  | 1.43E-19  | 1.18E-18  | ADCY1     | chr7 | + | 45613739 | 45762715 | 12503 |
| ENSG000001 | 40.19919 | 10.66487 | 1.8922   | 9.38E-06  | 3.02E-05  | C8orf48   | chr8 | + | 13424352 | 13425796 | 1445  |
| ENSG000001 | 0.632843 | 3.24447  | -1.9457  | 0.13673   | 0.21      | SUN3      | chr7 | - | 48026745 | 48068716 | 1456  |
| ENSG000001 | 0.975385 | 11.5786  | -3.24    | 0.001245  | 0.003041  | C7orf57   | chr7 | + | 48075108 | 48100901 | 2125  |
| ENSG000001 | 26.71169 | 19.9823  | 0.40262  | 0.38601   | 0.49034   | HNF4G     | chr8 | + | 76320149 | 76479078 | 4209  |
| ENSG000001 | 380.636  | 374.8249 | 0.020484 | 0.90244   | 0.93259   | PEX2      | chr8 | - | 77892494 | 77913280 | 4386  |
| ENSG000001 | 2522.295 | 2824.635 | -0.16298 | 0.121     | 0.19014   | RAD21     | chr8 | - | 1.18E+08 | 1.18E+08 | 3749  |
| ENSG000001 | 0.685084 | 0        | 0.85004  | 0.63064   | NA        | SLC30A8   | chr8 | + | 1.18E+08 | 1.18E+08 | 5430  |
| ENSG000001 | 118.6751 | 112.6804 | 0.078176 | 0.70275   | 0.77892   | MED30     | chr8 | + | 1.19E+08 | 1.19E+08 | 985   |

|                    |          |          |           |           |           |       |   |          |          |       |
|--------------------|----------|----------|-----------|-----------|-----------|-------|---|----------|----------|-------|
| ENSG00000130.33148 | 13.86234 | 1.1049   | 0.059869  | 0.10426   | TNFRSF11B | chr8  | - | 1.2E+08  | 1.2E+08  | 2402  |
| ENSG00000110.40625 | 77.50198 | -2.8707  | 5.44E-12  | 2.93E-11  | SBSPO1    | chr8  | - | 73976775 | 74036323 | 3801  |
| ENSG00000122.53973 | 14.35613 | 0.62639  | 0.27282   | 0.37238   | PHKG1     | chr7  | - | 56148440 | 56160689 | 1717  |
| ENSG00000133.10776 | 3.80936  | 2.9645   | 1.45E-05  | 4.55E-05  | EN2       | chr7  | + | 1.55E+08 | 1.55E+08 | 3395  |
| ENSG0000010        | 3.071256 | -3.0413  | 0.052188  | 0.092339  | KCNV1     | chr8  | - | 1.11E+08 | 1.11E+08 | 6979  |
| ENSG00000113.48653 | 0.297015 | 4.579    | 0.0001    | 0.000285  | CSMD3     | chr8  | - | 1.13E+08 | 1.14E+08 | 13212 |
| ENSG000001600.6671 | 999.4417 | -0.73461 | 4.64E-10  | 2.19E-09  | KIAA0146  | chr8  | + | 48173167 | 48648868 | 3988  |
| ENSG000001154.6235 | 228.3048 | -0.55583 | 0.040297  | 0.073873  | ORC5      | chr7  | - | 1.04E+08 | 1.04E+08 | 2043  |
| ENSG000001791.0288 | 1434.107 | -0.85626 | 1.41E-12  | 7.92E-12  | HEATR2    | chr7  | + | 766338   | 829190   | 3410  |
| ENSG000001726.0801 | 236.3277 | 1.618    | 7.47E-37  | 1.20E-35  | OSGIN2    | chr8  | + | 90914087 | 90940116 | 4266  |
| ENSG0000011.359003 | 0        | 1.8987   | 0.26617   | NA        | DEFB1     | chr8  | - | 6728097  | 6735544  | 478   |
| ENSG0000014176.144 | 2020.09  | 1.0469   | 1.93E-21  | 1.74E-20  | SUN1      | chr7  | + | 855528   | 936072   | 4514  |
| ENSG000001522.1363 | 188.3229 | 1.469    | 5.20E-22  | 4.78E-21  | OXR1      | chr8  | + | 1.07E+08 | 1.08E+08 | 4550  |
| ENSG0000013.942617 | 60.24881 | -3.8431  | 4.72E-13  | 2.74E-12  | TMEM74    | chr8  | - | 1.1E+08  | 1.1E+08  | 1741  |
| ENSG00000123.32155 | 23.83939 | -0.03603 | 0.93111   | 0.9546    | FAM86FP   | chr12 | - | 8385108  | 8395544  | 969   |
| ENSG0000015.144897 | 6.746278 | -0.35087 | 0.67154   | 0.75401   | GPR146    | chr7  | + | 1084212  | 1098897  | 1966  |
| ENSG000001502.4314 | 35.37825 | 3.8051   | 2.24E-43  | 4.31E-42  | GPFR      | chr7  | + | 1121844  | 1133451  | 2971  |
| ENSG0000010        | 2.56061  | -2.5899  | 0.12437   | 0.19452   | UNCX      | chr7  | + | 1272543  | 1276954  | 2048  |
| ENSG0000014.366497 | 4.334576 | 0.036541 | 0.96796   | 0.98191   | TMEM184A  | chr7  | - | 1585796  | 1600457  | 2843  |
| ENSG0000016.660623 | 60.6033  | -3.1268  | 1.25E-09  | 5.72E-09  | NOS3      | chr7  | + | 1.51E+08 | 1.51E+08 | 4388  |
| ENSG000001526.0322 | 118.4872 | 2.1459   | 2.84E-46  | 5.85E-45  | MICALL2   | chr7  | - | 1468101  | 1499138  | 5248  |
| ENSG0000013.818411 | 10.77169 | -1.4392  | 0.074853  | 0.12629   | CA3       | chr8  | + | 86285665 | 86361269 | 1753  |
| ENSG0000015744.708 | 6485.504 | -0.17485 | 0.056972  | 0.099719  | INTS1     | chr7  | - | 1509913  | 1545489  | 7485  |
| ENSG000001355.0399 | 268.2915 | 0.40576  | 0.015412  | 0.031155  | CDK5      | chr7  | - | 1.51E+08 | 1.51E+08 | 1758  |
| ENSG0000012741.651 | 2006.769 | 0.44993  | 1.54E-05  | 4.82E-05  | SLC4A2    | chr7  | + | 1.51E+08 | 1.51E+08 | 4925  |
| ENSG0000011464.088 | 564.2859 | 1.3741   | 9.55E-24  | 9.50E-23  | FASTK     | chr7  | - | 1.51E+08 | 1.51E+08 | 3011  |
| ENSG000001815.6269 | 1125.345 | -0.46306 | 0.001715  | 0.004103  | TMUB1     | chr7  | - | 1.51E+08 | 1.51E+08 | 1563  |
| ENSG0000012.104887 | 3.373976 | -0.56131 | 0.66809   | 0.75083   | C7orf55   | chr7  | + | 1.39E+08 | 1.39E+08 | 1210  |
| ENSG0000011.048164 | 4.775666 | -1.9493  | 0.10118   | 0.16302   | GBX1      | chr7  | - | 1.51E+08 | 1.51E+08 | 1092  |
| ENSG000001928.8662 | 869.6147 | 0.09536  | 0.61798   | 0.70912   | PHAX      | chr5  | + | 1.26E+08 | 1.26E+08 | 4288  |
| ENSG0000011830.362 | 2759.92  | -0.59197 | 4.16E-08  | 1.67E-07  | ALDH7A1   | chr5  | - | 1.26E+08 | 1.26E+08 | 4964  |
| ENSG0000012000.778 | 1125.026 | 0.8281   | 1.04E-05  | 3.33E-05  | FOXK1     | chr7  | + | 4683388  | 4811074  | 11181 |
| ENSG000001877.6712 | 909.6174 | -0.05059 | 0.72363   | 0.79549   | COX6C     | chr8  | - | 1.01E+08 | 1.01E+08 | 828   |
| ENSG00000155.86159 | 2.087966 | 4.6283   | 1.44E-12  | 8.10E-12  | OSR2      | chr8  | + | 99956631 | 99964332 | 1838  |
| ENSG00000111048.44 | 10005.98 | 0.1429   | 0.14059   | 0.21453   | YWHAZ     | chr8  | - | 1.02E+08 | 1.02E+08 | 5248  |
| ENSG00000168.68439 | 17.57624 | 1.9534   | 9.96E-07  | 3.56E-06  | BAALC     | chr8  | + | 1.04E+08 | 1.04E+08 | 2831  |
| ENSG000001431.358  | 245.047  | 0.81469  | 2.40E-08  | 9.86E-08  | FZD6      | chr8  | + | 1.04E+08 | 1.04E+08 | 3788  |
| ENSG0000011188.753 | 53.57524 | 4.4679   | 3.13E-156 | 3.92E-154 | CTHRC1    | chr8  | + | 1.04E+08 | 1.04E+08 | 1271  |
| ENSG000001508.2158 | 230.2004 | 1.1414   | 1.25E-12  | 7.02E-12  | SLC25A32  | chr8  | - | 1.04E+08 | 1.04E+08 | 2891  |
| ENSG000001947.4801 | 1035.853 | -0.12778 | 0.46774   | 0.57255   | DCAF13    | chr8  | + | 1.04E+08 | 1.04E+08 | 5300  |
| ENSG000001144.629  | 0        | 8.6354   | 1.58E-15  | 1.07E-14  | DCSTAMP   | chr8  | + | 1.05E+08 | 1.05E+08 | 1953  |
| ENSG000001587.7965 | 308.2945 | 0.92695  | 0.000153  | 0.000425  | TP53INP1  | chr8  | - | 95938200 | 95961639 | 5638  |
| ENSG000001673.7267 | 786.9865 | -0.22291 | 0.13042   | 0.20217   | INTS8     | chr8  | + | 95825539 | 95893974 | 4633  |
| ENSG0000011400.694 | 894.6149 | 0.6465   | 3.73E-09  | 1.64E-08  | KIAA1429  | chr8  | - | 95499921 | 95565757 | 6528  |
| ENSG00000133.40418 | 82.24126 | -1.2874  | 7.55E-06  | 2.46E-05  | FREM1     | chr9  | - | 14734664 | 14910993 | 10089 |
| ENSG0000011408.61  | 60.5175  | 4.5182   | 4.04E-71  | 1.48E-69  | GEM       | chr8  | - | 95261481 | 95274578 | 2208  |
| ENSG000001928.8495 | 240.5004 | 1.946    | 7.34E-50  | 1.67E-48  | PDP1      | chr8  | + | 94870035 | 94938294 | 4358  |
| ENSG000001173.021  | 132.309  | 0.38857  | 0.059943  | 0.10437   | TMEM67    | chr8  | + | 94767072 | 94831462 | 4651  |
| ENSG000001658.2922 | 597.2917 | 0.14072  | 0.40565   | 0.51047   | KIAA0196  | chr8  | - | 1.26E+08 | 1.26E+08 | 4187  |
| ENSG000001155.6064 | 292.9819 | -0.91234 | 1.66E-06  | 5.82E-06  | RPP25L    | chr9  | - | 34610483 | 34612101 | 1092  |
| ENSG000001631.1309 | 432.9232 | 0.54316  | 2.06E-05  | 6.37E-05  | FAM219A   | chr9  | - | 34398182 | 34458568 | 3644  |
| ENSG0000017.117019 | 20.35457 | -1.4976  | 0.008689  | 0.018482  | C9orf24   | chr9  | - | 34379017 | 34397830 | 1151  |
| ENSG000001773.657  | 667.1186 | 0.21224  | 0.31049   | 0.41244   | SNAPC3    | chr9  | + | 15422702 | 15465951 | 5680  |
| ENSG000001541.885  | 519.198  | 0.061812 | 0.78258   | 0.84427   | KIAA1161  | chr9  | - | 34366668 | 34376851 | 6398  |
| ENSG000001250.6155 | 183.5942 | 0.44663  | 0.020755  | 0.040787  | NUDT2     | chr9  | + | 34329504 | 34343709 | 1073  |
| ENSG000001929.8758 | 212.5923 | 2.1208   | 5.00E-32  | 6.89E-31  | TMEM65    | chr8  | - | 1.25E+08 | 1.25E+08 | 3228  |
| ENSG0000011913.765 | 6885.602 | -1.8439  | 3.50E-36  | 5.51E-35  | PSIP1     | chr9  | - | 15464064 | 15511017 | 3391  |
| ENSG00000160.53893 | 53.44735 | 0.18586  | 0.55576   | 0.65486   | CCDC171   | chr9  | + | 15552895 | 16061661 | 6512  |
| ENSG000001745.9857 | 677.9338 | 0.13789  | 0.22227   | 0.3145    | UBAP1     | chr9  | + | 34179003 | 34252521 | 2898  |
| ENSG000001331.6148 | 5.376142 | 5.8903   | 2.00E-49  | 4.50E-48  | DIRAS2    | chr9  | - | 93372114 | 93405386 | 4385  |
| ENSG0000015.447177 | 220.6428 | -5.3027  | 1.17E-36  | 1.87E-35  | SYK       | chr9  | + | 93564069 | 93660831 | 5005  |
| ENSG00000118.4456  | 12.55136 | 0.54355  | 0.28232   | 0.38343   | NIPSNAP3E | chr9  | + | 1.08E+08 | 1.08E+08 | 1752  |
| ENSG000001928.537  | 203.033  | 2.1877   | 8.19E-26  | 8.85E-25  | ABCA1     | chr9  | - | 1.08E+08 | 1.08E+08 | 10494 |
| ENSG000001218.3011 | 189.6266 | 0.20395  | 0.2471    | 0.3431    | NFIL3     | chr9  | - | 94171327 | 94186144 | 2085  |
| ENSG000001102.1869 | 68.25753 | 0.57373  | 0.024187  | 0.046835  | LETM2     | chr8  | + | 38243725 | 38267045 | 2745  |

|                    |          |          |           |           |           |       |   |          |          |       |
|--------------------|----------|----------|-----------|-----------|-----------|-------|---|----------|----------|-------|
| ENSG000001698.0153 | 711.9931 | -0.02859 | 0.79921   | 0.85778   | METTL2B   | chr7  | + | 1.28E+08 | 1.28E+08 | 5743  |
| ENSG000001140.5184 | 277.2122 | -0.9752  | 4.63E-06  | 1.54E-05  | FXN       | chr9  | + | 71650175 | 71715094 | 2608  |
| ENSG0000010870904  | 118.3359 | -6.5394  | 3.79E-17  | 2.79E-16  | ZMAT4     | chr8  | - | 40388109 | 40755352 | 2466  |
| ENSG0000010        | 0.594029 | -0.81444 | 0.64499   | NA        | NKX6-3    | chr8  | - | 41502697 | 41508855 | 1698  |
| ENSG0000010975385  | 0        | 1.2767   | 0.47406   | NA        | TMEM71    | chr8  | - | 1.34E+08 | 1.34E+08 | 1993  |
| ENSG000001149.5794 | 99.26315 | 0.59118  | 0.00315   | 0.007241  | MAMDC2    | chr9  | + | 72658497 | 72841886 | 3616  |
| ENSG0000011306762  | 1.309443 | -0.00339 | 0.99817   | 0.99912   | PRSS37    | chr7  | - | 1.42E+08 | 1.42E+08 | 1834  |
| ENSG0000010        | 0.297015 | -0.41864 | 0.81278   | NA        | CPA6      | chr8  | - | 68334360 | 68658620 | 1861  |
| ENSG0000015250192  | 16.36313 | -1.6027  | 0.02759   | 0.052718  | C8orf34   | chr8  | + | 69242957 | 69731257 | 3652  |
| ENSG0000014346772  | 0.357707 | 2.9484   | 0.030717  | 0.05791   | TMC1      | chr9  | + | 75136717 | 75451267 | 3201  |
| ENSG00000117.9258  | 28.73886 | -0.66661 | 0.10428   | 0.16719   | ALDH1A1   | chr9  | - | 75515578 | 75695358 | 2107  |
| ENSG000001382.9624 | 142.1397 | 1.4251   | 2.25E-18  | 1.75E-17  | KDM1B     | chr6  | + | 18155560 | 18224084 | 4574  |
| ENSG0000011671.83  | 215.8509 | 2.9511   | 2.23E-127 | 1.94E-125 | HGSNAT    | chr8  | + | 42995556 | 43057998 | 5249  |
| ENSG00000167.0676  | 157.2049 | -1.2274  | 6.14E-06  | 2.02E-05  | RASEF     | chr9  | - | 85594500 | 85678092 | 5576  |
| ENSG0000016.26584  | 68.61693 | -3.37    | 7.57E-10  | 3.53E-09  | GKAP1     | chr9  | - | 86354336 | 86444431 | 1778  |
| ENSG00000160.05506 | 53.13919 | 0.17101  | 0.65445   | 0.73944   | KIF27     | chr9  | - | 86451613 | 86536342 | 4653  |
| ENSG00000129.74167 | 316.4176 | -3.3795  | 2.63E-33  | 3.79E-32  | C9orf64   | chr9  | - | 86553226 | 86571901 | 2443  |
| ENSG0000017418.448 | 9993.367 | -0.42903 | 0.004212  | 0.009479  | HNRNP     | chr9  | - | 86582998 | 86595569 | 2942  |
| ENSG00000111.59656 | 25.90393 | -1.1276  | 0.022199  | 0.043388  | RP11-213C | chr9  | + | 88430881 | 88464426 | 1656  |
| ENSG000001523.5782 | 27.88253 | 4.2235   | 3.06E-51  | 7.26E-50  | SVEP1     | chr9  | - | 1.13E+08 | 1.13E+08 | 12341 |
| ENSG0000010        | 19.07347 | -5.7832  | 2.72E-06  | 9.32E-06  | TRPV6     | chr7  | - | 1.43E+08 | 1.43E+08 | 10425 |
| ENSG000001697.0766 | 1508.46  | -1.1116  | 1.19E-12  | 6.73E-12  | ANKS6     | chr9  | - | 1.01E+08 | 1.02E+08 | 7164  |
| ENSG0000010975385  | 145.6656 | -6.837   | 5.33E-20  | 4.50E-19  | FBP1      | chr9  | - | 97365415 | 97402531 | 1487  |
| ENSG000001230.6244 | 356.2646 | -0.62684 | 0.000261  | 0.000704  | TMEM246   | chr9  | - | 1.04E+08 | 1.04E+08 | 5070  |
| ENSG000001187.4444 | 30.29336 | 2.5943   | 2.24E-08  | 9.22E-08  | ZHX1      | chr8  | - | 1.24E+08 | 1.24E+08 | 5108  |
| ENSG0000010342542  | 0        | 0.4146   | 0.81455   | NA        | CXorf22   | chrX  | + | 35937851 | 36008269 | 3608  |
| ENSG00000120.0333  | 3.039702 | 2.6308   | 0.000148  | 0.000412  | CYBB      | chrX  | + | 37639264 | 37672714 | 4324  |
| ENSG000001380.6263 | 52.44143 | 2.8546   | 2.55E-49  | 5.70E-48  | DYNLT3    | chrX  | - | 37696010 | 37706890 | 2217  |
| ENSG00000146.74498 | 134.3487 | -1.5174  | 2.57E-07  | 9.69E-07  | WBSCR27   | chr7  | - | 73248920 | 73256865 | 941   |
| ENSG0000011289.639 | 3334.718 | -1.3688  | 1.33E-29  | 1.67E-28  | MID1IP1   | chrX  | + | 38660685 | 38665790 | 2536  |
| ENSG0000010975385  | 0.594029 | 0.4404   | 0.79523   | NA        | NCF1C     | chr7  | - | 74572445 | 74587848 | 1427  |
| ENSG00000114.61603 | 5.627034 | 1.3312   | 0.048116  | 0.08605   | C9orf84   | chr9  | - | 1.14E+08 | 1.15E+08 | 5060  |
| ENSG0000010705622  | 0        | 0.8807   | 0.6196    | NA        | CXorf58   | chrX  | + | 23925918 | 23957624 | 1752  |
| ENSG000001169.9842 | 787.3156 | -2.2059  | 7.35E-29  | 8.95E-28  | KIAA1958  | chr9  | + | 1.15E+08 | 1.15E+08 | 11775 |
| ENSG0000015.1766   | 180.4996 | -5.0303  | 3.06E-32  | 4.25E-31  | PTCHD1    | chrX  | + | 23352133 | 23422489 | 13714 |
| ENSG0000010        | 2.443257 | -2.43    | 0.15738   | 0.2366    | RNF183    | chr9  | - | 1.16E+08 | 1.16E+08 | 2312  |
| ENSG0000011415.776 | 85.49385 | 4.0418   | 8.29E-166 | 1.14E-163 | PCDH19    | chrX  | - | 99546642 | 99665271 | 9756  |
| ENSG00000193.09379 | 103.6011 | -0.1582  | 0.55758   | 0.65655   | PIGA      | chrX  | - | 15337573 | 15353676 | 3590  |
| ENSG0000012.946693 | 0.594029 | 1.7808   | 0.21045   | 0.30061   | FIGF      | chrX  | - | 15363713 | 15402498 | 2037  |
| ENSG0000010290301  | 0        | 0.4146   | 0.81455   | NA        | OR1K1     | chr9  | + | 1.26E+08 | 1.26E+08 | 1026  |
| ENSG000001351.0455 | 1372.824 | -1.9652  | 3.46E-52  | 8.42E-51  | STRBP     | chr9  | - | 1.26E+08 | 1.26E+08 | 6290  |
| ENSG0000014.148974 | 438.5749 | -6.5393  | 7.27E-35  | 1.10E-33  | CLDN3     | chr7  | - | 73183328 | 73184600 | 1273  |
| ENSG0000011102.321 | 656.1373 | 0.74723  | 7.23E-08  | 2.85E-07  | GAPVD1    | chr9  | + | 1.28E+08 | 1.28E+08 | 8923  |
| ENSG000001970.6742 | 329.0144 | 1.5527   | 2.76E-10  | 1.32E-09  | C9orf89   | chr9  | + | 95858500 | 95875565 | 2690  |
| ENSG0000012.770247 | 3664.85  | -10.214  | 1.27E-92  | 6.61E-91  | WNK2      | chr9  | + | 95947198 | 96082854 | 7792  |
| ENSG000001454.7001 | 50.60361 | 3.1489   | 2.84E-53  | 7.07E-52  | ATP7A     | chrX  | + | 77166194 | 77305892 | 8483  |
| ENSG000001163.0783 | 261.3542 | -0.6765  | 0.000113  | 0.000319  | ZNF367    | chr9  | - | 99148223 | 99180611 | 3646  |
| ENSG000001378.5084 | 510.6631 | -0.43049 | 0.001244  | 0.003039  | NLGN4Y    | chrY  | + | 16634518 | 16957530 | 6617  |
| ENSG00000183.22006 | 67.56226 | 0.30229  | 0.22766   | 0.32071   | HDX       | chrX  | - | 83572882 | 83757487 | 6200  |
| ENSG000001517.5726 | 515.9511 | 0.004845 | 0.97428   | 0.98556   | NDUFB6    | chr9  | - | 32552997 | 32573160 | 1366  |
| ENSG0000012.73773  | 1.294874 | 0.93651  | 0.45732   | 0.56257   | AQP7      | chr9  | - | 33384765 | 33402643 | 1668  |
| ENSG0000011419.631 | 1449.766 | -0.02995 | 0.89851   | 0.9296    | NOL6      | chr9  | - | 33461439 | 33473928 | 4741  |
| ENSG000001124.2078 | 18.03915 | 2.7711   | 7.28E-20  | 6.10E-19  | AQP3      | chr9  | - | 33441152 | 33447609 | 2911  |
| ENSG000001154.9857 | 139.1429 | 0.15317  | 0.42938   | 0.53486   | TRMT10B   | chr9  | + | 37753804 | 37778969 | 2281  |
| ENSG00000111750.1  | 8511.473 | 0.46473  | 8.27E-05  | 0.000238  | VCP       | chr9  | - | 35056061 | 35073246 | 4370  |
| ENSG000001637.6474 | 627.4715 | 0.023939 | 0.87046   | 0.90963   | PIGO      | chr9  | - | 35088685 | 35096591 | 6655  |
| ENSG0000011827.052 | 2978.559 | -0.70464 | 4.25E-13  | 2.47E-12  | STOML2    | chr9  | - | 35099888 | 35103154 | 1278  |
| ENSG000001448.4409 | 907.4174 | -1.0136  | 2.17E-11  | 1.13E-10  | BRWD3     | chrX  | - | 79926353 | 80065187 | 11381 |
| ENSG000001654.5874 | 542.5139 | 0.2707   | 0.022962  | 0.044718  | SLITRK5   | chr13 | + | 88324870 | 88331868 | 4444  |
| ENSG000001730.3382 | 826.2208 | -0.17767 | 0.11875   | 0.18725   | MELK      | chr9  | + | 36572859 | 36677678 | 2347  |
| ENSG0000012.407167 | 1.949596 | 0.24097  | 0.83623   | 0.88507   | ARMC3     | chr10 | + | 23216953 | 23326518 | 2811  |
| ENSG000001185.8601 | 271.1556 | -0.54015 | 0.12857   | 0.19987   | OTUD1     | chr10 | + | 23728198 | 23731308 | 3111  |
| ENSG000001507.5317 | 649.8856 | -0.35463 | 0.013973  | 0.028493  | ARHGAP12  | chr10 | - | 32094365 | 32217742 | 4914  |
| ENSG0000011172.553 | 1505.206 | -0.35915 | 0.060847  | 0.10567   | FAT3      | chr11 | + | 92085262 | 92629618 | 19126 |
| ENSG0000010705622  | 6.846646 | -2.9254  | 0.011389  | 0.023647  | CCDC67    | chr11 | + | 93063137 | 93171653 | 2784  |

|                    |          |          |          |          |          |       |   |          |          |       |
|--------------------|----------|----------|----------|----------|----------|-------|---|----------|----------|-------|
| ENSG000001462.2918 | 112.826  | 2.0285   | 1.46E-19 | 1.20E-18 | HECTD2   | chr10 | + | 93170096 | 93274586 | 5368  |
| ENSG0000010995923  | 1988.568 | -10.477  | 3.91E-52 | 9.49E-51 | SLC7A3   | chrX  | - | 70145432 | 70150975 | 2236  |
| ENSG000001210.2726 | 250.1846 | -0.24993 | 0.12401  | 0.19408  | FBXO33   | chr14 | - | 39866873 | 39901704 | 3853  |
| ENSG000001357.404  | 152.8401 | 1.2244   | 2.16E-14 | 1.36E-13 | DDX26B   | chrX  | + | 1.35E+08 | 1.35E+08 | 6791  |
| ENSG0000010        | 0.343138 | -0.41864 | 0.81278  | NA       | GPR101   | chrX  | - | 1.36E+08 | 1.36E+08 | 1527  |
| ENSG0000017.220687 | 3.022717 | 1.1843   | 0.1798   | 0.26397  | CLDN2    | chrX  | + | 1.06E+08 | 1.06E+08 | 3150  |
| ENSG000001812.9121 | 169.1278 | 2.2625   | 1.38E-44 | 2.73E-43 | LRFN5    | chr14 | + | 42076773 | 42373752 | 4253  |
| ENSG00000135.86196 | 293.6011 | -3.0019  | 5.22E-23 | 5.05E-22 | ZNF488   | chr10 | + | 48355024 | 48373866 | 3561  |
| ENSG000001643.7483 | 676.7671 | -0.07276 | 0.57548  | 0.6723   | SPTSSA   | chr14 | - | 34901995 | 34931562 | 2777  |
| ENSG000001456.8781 | 466.2863 | -0.02935 | 0.80952  | 0.86576  | WRN      | chr8  | + | 30891317 | 31031285 | 5215  |
| ENSG000001378.3799 | 419.7667 | -0.15115 | 0.27352  | 0.37323  | 8-Mar    | chr10 | - | 45950035 | 46090354 | 5021  |
| ENSG00000131.22553 | 2.872193 | 3.2897   | 2.67E-07 | 1.00E-06 | TSHR     | chr14 | + | 81421333 | 81612646 | 4566  |
| ENSG000001640.4871 | 207.3127 | 1.6276   | 3.29E-27 | 3.75E-26 | CFL2     | chr14 | - | 35179593 | 35184029 | 3131  |
| ENSG000001697.5854 | 711.3045 | -0.02767 | 0.85043  | 0.89482  | SUGT1    | chr13 | + | 53226844 | 53262433 | 1663  |
| ENSG000001816.2662 | 976.3142 | -0.25831 | 0.02358  | 0.045812 | GTFA2A1  | chr14 | - | 81641796 | 81687721 | 6306  |
| ENSG0000012354.064 | 243.3146 | 3.2664   | 2.35E-93 | 1.24E-91 | ZCCHC24  | chr10 | - | 81142081 | 81205383 | 4933  |
| ENSG000001523.1253 | 709.3348 | -0.4384  | 0.013112 | 0.026898 | PGM2L1   | chr11 | - | 74041363 | 74109518 | 8515  |
| ENSG00000159.82458 | 6.943725 | 3.0204   | 1.84E-07 | 7.02E-07 | PHYHIP1  | chr10 | + | 60936350 | 61007534 | 3578  |
| ENSG000001410.5445 | 120.9919 | 1.7616   | 1.94E-26 | 2.15E-25 | SLC16A9  | chr10 | - | 61410523 | 61495760 | 4174  |
| ENSG0000010        | 0.640152 | -0.82869 | 0.63935  | NA       | FOLR2    | chr11 | + | 71927645 | 71932994 | 1242  |
| ENSG0000015407.253 | 2390.524 | 1.1758   | 1.42E-18 | 1.11E-17 | INPPL1   | chr11 | + | 71934745 | 71950149 | 4733  |
| ENSG0000011.359003 | 18.87849 | -3.5494  | 0.000105 | 0.000299 | PHOX2A   | chr11 | - | 71950121 | 71956708 | 1699  |
| ENSG0000012.572449 | 0.297015 | 2.245    | 0.12938  | 0.2009   | MBL2     | chr10 | - | 54525140 | 54531460 | 3569  |
| ENSG00000150.40504 | 4.478651 | 3.3851   | 7.31E-11 | 3.66E-10 | GJB2     | chr13 | - | 20761609 | 20767037 | 2309  |
| ENSG000001121.877  | 52.8356  | 1.2047   | 2.94E-06 | 1.00E-05 | CRYL1    | chr13 | - | 20977806 | 21099996 | 1581  |
| ENSG0000011156.577 | 348.7397 | 1.726    | 5.69E-45 | 1.13E-43 | REEP3    | chr10 | + | 65281123 | 65384883 | 5205  |
| ENSG0000013.205292 | 0.700845 | 1.8789   | 0.15017  | 0.22736  | HEPACAM  | chr11 | - | 1.25E+08 | 1.25E+08 | 3602  |
| ENSG000001303.65   | 621.8128 | -1.0318  | 8.78E-12 | 4.67E-11 | SKA3     | chr13 | - | 21727734 | 21750741 | 2919  |
| ENSG000001507.933  | 418.8659 | 0.2776   | 0.17943  | 0.26352  | MICU2    | chr13 | - | 22066836 | 22178353 | 1920  |
| ENSG000001174.774  | 329.0417 | -0.90923 | 1.07E-05 | 3.40E-05 | C11orf82 | chr11 | + | 82611017 | 82669319 | 3533  |
| ENSG000001738.0262 | 693.1763 | 0.091    | 0.50854  | 0.61199  | PCF11    | chr11 | + | 82868030 | 82898493 | 7677  |
| ENSG000001228.9819 | 35.04572 | 2.6892   | 1.42E-31 | 1.92E-30 | PKNOX2   | chr11 | + | 1.25E+08 | 1.25E+08 | 4531  |
| ENSG0000010        | 0.343138 | -0.41864 | 0.81278  | NA       | RPL10L   | chr14 | - | 47120222 | 47121028 | 807   |
| ENSG00000180.48314 | 172.9324 | -1.1007  | 3.31E-05 | 9.97E-05 | LRR1     | chr14 | + | 50065415 | 50081390 | 1886  |
| ENSG0000012220.995 | 1864.88  | 0.25201  | 0.082861 | 0.13769  | RPL36AL  | chr14 | - | 50085237 | 50087403 | 746   |
| ENSG000001307.846  | 744.7054 | -1.2722  | 1.72E-17 | 1.29E-16 | DNAAF2   | chr14 | - | 50091892 | 50101948 | 2963  |
| ENSG00000150.64571 | 8.873919 | 2.4723   | 4.53E-09 | 1.98E-08 | C10orf10 | chr10 | - | 45466429 | 45474258 | 2120  |
| ENSG0000015.290455 | 15.40086 | -1.4899  | 0.019004 | 0.037701 | C10orf25 | chr10 | - | 45493146 | 45496336 | 3078  |
| ENSG000001121.0682 | 225.7712 | -0.89658 | 0.00024  | 0.000651 | ZNF22    | chr10 | + | 45495923 | 45500774 | 2551  |
| ENSG000001591.798  | 817.4902 | -0.4669  | 0.0002   | 0.000548 | KLHDC2   | chr14 | + | 50234326 | 50249909 | 2320  |
| ENSG00000132.77133 | 60.76341 | -0.88174 | 0.006256 | 0.013671 | EML5     | chr14 | - | 89078775 | 89259096 | 9570  |
| ENSG000001885.9714 | 587.7242 | 0.59198  | 0.001151 | 0.00283  | NEMF     | chr14 | - | 50249997 | 50319921 | 5038  |
| ENSG000001352.7957 | 727.6037 | -1.0426  | 1.89E-12 | 1.06E-11 | RPUSD4   | chr11 | - | 1.26E+08 | 1.26E+08 | 2508  |
| ENSG0000012481.68  | 1774.588 | 0.48302  | 0.000198 | 0.000543 | ARF6     | chr14 | + | 50359810 | 50361490 | 1583  |
| ENSG000001248.9902 | 152.8967 | 0.70148  | 5.61E-05 | 0.000165 | TTC8     | chr14 | + | 89290497 | 89344335 | 2226  |
| ENSG00000117.55156 | 78.42961 | -2.1327  | 5.79E-10 | 2.72E-09 | TMEM63C  | chr14 | + | 77582911 | 77725838 | 5334  |
| ENSG0000010        | 7.082968 | -4.4023  | 0.00101  | 0.002502 | NGB      | chr14 | - | 77731826 | 77737655 | 1884  |
| ENSG0000016.026966 | 6.024416 | -0.00086 | 0.99921  | 0.99973  | NOXRED1  | chr14 | - | 77860364 | 77889860 | 2023  |
| ENSG0000010.632843 | 6.862758 | -2.5343  | 0.098466 | 0.15938  | CDX2     | chr13 | - | 28536274 | 28545276 | 4053  |
| ENSG0000010        | 18.01484 | -5.7186  | 3.30E-06 | 1.12E-05 | AMER2    | chr13 | - | 25735822 | 25746426 | 10055 |
| ENSG00000172.99008 | 28.00646 | 1.3685   | 7.57E-06 | 2.47E-05 | AKR1E2   | chr10 | + | 4828821  | 4890254  | 1655  |
| ENSG000001388.9516 | 291.769  | 0.4144   | 0.011271 | 0.023425 | KBTBD6   | chr13 | - | 41701705 | 41706882 | 5178  |
| ENSG0000010        | 0.98329  | -1.2878  | 0.47019  | NA       | SSX3     | chrX  | - | 48205863 | 48216142 | 1232  |
| ENSG0000010        | 202.2976 | -8.4826  | NA       | NA       | OTX2     | chr14 | - | 57267425 | 57277197 | 2199  |
| ENSG0000011.649304 | 66.90587 | -5.1249  | 9.46E-14 | 5.70E-13 | FAAH2    | chrX  | + | 57313139 | 57515629 | 1983  |
| ENSG0000010.36308  | 1.029414 | -0.84272 | 0.63492  | NA       | DRGX     | chr10 | - | 50572237 | 50603497 | 2727  |
| ENSG000001543.8599 | 811      | -0.57535 | 9.41E-06 | 3.03E-05 | NUDT5    | chr10 | - | 12207324 | 12238143 | 3433  |
| ENSG000001890.3032 | 375.3126 | 1.2404   | 3.09E-06 | 1.05E-05 | DACT1    | chr14 | + | 59100685 | 59115039 | 3734  |
| ENSG0000010        | 4.752975 | -3.7925  | 0.007493 | 0.016119 | OXGR1    | chr13 | - | 97637973 | 97646984 | 2285  |
| ENSG0000010        | 2.618886 | -2.6151  | 0.12026  | 0.18917  | UCMA     | chr10 | - | 13263767 | 13276334 | 826   |
| ENSG00000116.20372 | 169.2569 | -3.3324  | 9.91E-17 | 7.13E-16 | BEND7    | chr10 | - | 13480484 | 13570974 | 6524  |
| ENSG0000011672.66  | 1899.851 | -0.18343 | 0.076209 | 0.12815  | ATP5C1   | chr10 | + | 7830092  | 7849778  | 1163  |
| ENSG00000180.30662 | 43.79484 | 0.87024  | 0.028119 | 0.053616 | PRPF18   | chr10 | + | 13628927 | 13672868 | 1717  |
| ENSG000001243.8393 | 302.3304 | -0.30874 | 0.14934  | 0.22618  | TAF3     | chr10 | + | 7860467  | 8058590  | 4872  |
| ENSG00000120.38521 | 8.101844 | 1.3055   | 0.027634 | 0.052798 | VSTM4    | chr10 | - | 50226490 | 50323554 | 2192  |

|            |          |          |          |           |           |           |       |   |          |          |       |
|------------|----------|----------|----------|-----------|-----------|-----------|-------|---|----------|----------|-------|
| ENSG000001 | 2138.609 | 3221.826 | -0.59076 | 1.26E-10  | 6.19E-10  | VDAC2     | chr10 | + | 76969912 | 76991206 | 1581  |
| ENSG000001 | 72.20989 | 365.5551 | -2.3351  | 7.32E-35  | 1.10E-33  | COMTD1    | chr10 | - | 76993727 | 76995788 | 1094  |
| ENSG000001 | 74.15227 | 159.2298 | -1.0981  | 2.28E-05  | 7.01E-05  | SLC18A2   | chr10 | + | 1.19E+08 | 1.19E+08 | 4125  |
| ENSG000001 | 678.9563 | 634.501  | 0.096723 | 0.45541   | 0.56074   | PDZD8     | chr10 | - | 1.19E+08 | 1.19E+08 | 6484  |
| ENSG000001 | 753.6805 | 16.36468 | 5.2847   | 3.73E-13  | 2.18E-12  | ZNF503    | chr10 | - | 77157588 | 77161664 | 3347  |
| ENSG000001 | 40.77898 | 12.60802 | 1.6556   | 0.000168  | 0.000466  | DACH1     | chr13 | - | 72012098 | 72441330 | 5239  |
| ENSG000001 | 385.1932 | 299.3289 | 0.36352  | 0.006143  | 0.01345   | FAM175B   | chr10 | + | 1.26E+08 | 1.27E+08 | 2992  |
| ENSG000001 | 937.558  | 964.6599 | -0.04215 | 0.72361   | 0.79549   | QSOX2     | chr9  | - | 1.39E+08 | 1.39E+08 | 4530  |
| ENSG000001 | 446.6071 | 258.3889 | 0.78782  | 1.60E-05  | 5.02E-05  | FAM204A   | chr10 | - | 1.2E+08  | 1.2E+08  | 5930  |
| ENSG000001 | 2825.904 | 3652.505 | -0.36949 | 0.010544  | 0.022059  | NSD1      | chr5  | + | 1.77E+08 | 1.77E+08 | 12892 |
| ENSG000001 | 1462.148 | 2085.195 | -0.51136 | 1.43E-05  | 4.51E-05  | PRDX3     | chr10 | - | 1.21E+08 | 1.21E+08 | 2277  |
| ENSG000001 | 214.6459 | 169.6564 | 0.33984  | 0.061917  | 0.10721   | ENOX2     | chrX  | - | 1.3E+08  | 1.3E+08  | 4184  |
| ENSG000001 | 2091.7   | 2042.585 | 0.034435 | 0.75829   | 0.82425   | GHITM     | chr10 | + | 85899196 | 85913001 | 2128  |
| ENSG000001 | 663.8162 | 932.8571 | -0.48832 | 0.031146  | 0.058601  | SNAPC4    | chr9  | - | 1.39E+08 | 1.39E+08 | 5010  |
| ENSG000001 | 1442.051 | 1509.905 | -0.0661  | 0.62446   | 0.71467   | PMPCA     | chr9  | + | 1.39E+08 | 1.39E+08 | 3341  |
| ENSG000001 | 865.6059 | 1502.515 | -0.79359 | 5.98E-06  | 1.97E-05  | SDCCAG3   | chr9  | - | 1.39E+08 | 1.39E+08 | 2314  |
| ENSG000001 | 1.742621 | 0        | 1.9826   | 0.25789   | NA        | FRMD7     | chrX  | - | 1.31E+08 | 1.31E+08 | 3198  |
| ENSG000001 | 4.532592 | 9.832103 | -1.0448  | 0.17948   | 0.26353   | AK8       | chr9  | - | 1.36E+08 | 1.36E+08 | 2465  |
| ENSG000001 | 37.33302 | 12.30859 | 1.5661   | 0.000518  | 0.001343  | C9orf9    | chr9  | + | 1.36E+08 | 1.36E+08 | 2536  |
| ENSG000001 | 1225.9   | 825.6139 | 0.57014  | 7.32E-06  | 2.39E-05  | TSC1      | chr9  | - | 1.36E+08 | 1.36E+08 | 8604  |
| ENSG000001 | 0.580602 | 0.640152 | -0.06311 | 0.97099   | NA        | GFI1B     | chr9  | + | 1.36E+08 | 1.36E+08 | 2449  |
| ENSG000001 | 286.6478 | 398.3877 | -0.47358 | 0.008753  | 0.018604  | HPRT1     | chrX  | + | 1.34E+08 | 1.34E+08 | 1407  |
| ENSG000001 | 103.3783 | 103.9248 | -0.00415 | 0.98895   | 0.99392   | LOH12CR1  | chr12 | + | 12510013 | 12619840 | 2052  |
| ENSG000001 | 168.7197 | 326.4616 | -0.95097 | 8.76E-08  | 3.43E-07  | FAM69B    | chr9  | + | 1.4E+08  | 1.4E+08  | 2410  |
| ENSG000001 | 653.8013 | 1196.486 | -0.87076 | 7.85E-13  | 4.49E-12  | ZMYND19   | chr9  | - | 1.4E+08  | 1.4E+08  | 1375  |
| ENSG000001 | 6.172523 | 32.48673 | -2.3223  | 5.08E-05  | 0.00015   | STOX1     | chr10 | + | 70587298 | 70655188 | 3377  |
| ENSG000001 | 14.64936 | 374.5499 | -4.6676  | 4.68E-47  | 9.83E-46  | RET       | chr10 | + | 43572475 | 43625799 | 5659  |
| ENSG000001 | 2237.019 | 5351.522 | -1.2548  | 2.32E-11  | 1.20E-10  | DDX21     | chr10 | + | 70715884 | 70744829 | 4711  |
| ENSG000001 | 1637.669 | 1919.842 | -0.22867 | 0.1559    | 0.23465   | BMS1      | chr10 | + | 43278249 | 43326856 | 4224  |
| ENSG000001 | 213.7992 | 275.9343 | -0.36748 | 0.13798   | 0.21141   | STK32C    | chr10 | - | 1.34E+08 | 1.34E+08 | 2086  |
| ENSG000001 | 8147.736 | 74.75217 | 6.7497   | 0         | 0         | KIAA1462  | chr10 | - | 30301729 | 30404423 | 9265  |
| ENSG000001 | 571.0728 | 610.5031 | -0.09473 | 0.48778   | 0.59179   | FUNDC2    | chrX  | + | 1.54E+08 | 1.54E+08 | 6455  |
| ENSG000001 | 589.5331 | 714.7698 | -0.27716 | 0.034719  | 0.064676  | TMEM55B   | chr14 | - | 20925878 | 20929771 | 3453  |
| ENSG000001 | 223.4349 | 314.3692 | -0.4918  | 0.02143   | 0.041995  | METTL17   | chr14 | + | 21457929 | 21465189 | 2887  |
| ENSG000001 | 2.137404 | 0.297015 | 1.8293   | 0.26324   | 0.3614    | SLC39A2   | chr14 | + | 21467414 | 21470030 | 1379  |
| ENSG000001 | 175.3613 | 429.9137 | -1.2885  | 9.37E-12  | 4.98E-11  | NDRG2     | chr14 | - | 21484922 | 21539031 | 2880  |
| ENSG000001 | 2.80195  | 0.715414 | 1.4773   | 0.34084   | 0.44478   | RNASE7    | chr14 | + | 21510385 | 21512393 | 1498  |
| ENSG000001 | 8510.216 | 2502.835 | 1.7633   | 8.60E-49  | 1.91E-47  | ARHGEF40  | chr14 | + | 21538429 | 21558399 | 5919  |
| ENSG000001 | 1383.336 | 2205.982 | -0.67171 | 0.000208  | 0.000569  | NSMF      | chr9  | - | 1.4E+08  | 1.4E+08  | 3646  |
| ENSG000001 | 312.8136 | 2643.673 | -3.0711  | 1.21E-65  | 4.03E-64  | ZNF219    | chr14 | - | 21558205 | 21572881 | 3071  |
| ENSG000001 | 0        | 0.594029 | -0.81444 | 0.64499   | NA        | C12orf50  | chr12 | - | 88373816 | 88427814 | 3889  |
| ENSG000001 | 388.6224 | 52.84539 | 2.8598   | 1.22E-42  | 2.29E-41  | CASP7     | chr10 | + | 1.15E+08 | 1.15E+08 | 2694  |
| ENSG000001 | 9.335761 | 6.746278 | 0.44962  | 0.55882   | 0.65767   | PPP1R36   | chr14 | + | 65016620 | 65056098 | 1686  |
| ENSG000001 | 0.580602 | 19.25319 | -4.4076  | 2.34E-05  | 7.19E-05  | BTNL9     | chr5  | + | 1.8E+08  | 1.8E+08  | 3500  |
| ENSG000001 | 381.3654 | 271.5178 | 0.49064  | 0.037345  | 0.069035  | C10orf118 | chr10 | - | 1.16E+08 | 1.16E+08 | 7245  |
| ENSG000001 | 2.789971 | 56.3795  | -4.1497  | 1.03E-12  | 5.85E-12  | VWA2      | chr10 | + | 1.16E+08 | 1.16E+08 | 2946  |
| ENSG000001 | 730.0533 | 913.2218 | -0.32304 | 0.009914  | 0.020855  | METTL3    | chr14 | - | 21966277 | 21979517 | 2523  |
| ENSG000001 | 467.2157 | 7203.318 | -3.9391  | 8.55E-144 | 9.00E-142 | SALL2     | chr14 | - | 21989232 | 22005350 | 4925  |
| ENSG000001 | 1.451506 | 4.386404 | -1.2851  | 0.33919   | 0.44315   | PRAP1     | chr10 | + | 1.35E+08 | 1.35E+08 | 971   |
| ENSG000001 | 348.0516 | 419.1414 | -0.26778 | 0.14358   | 0.21855   | TRUB1     | chr10 | + | 1.17E+08 | 1.17E+08 | 3403  |
| ENSG000001 | 3.391111 | 0.997859 | 1.5297   | 0.22175   | 0.31393   | FAM194B   | chr13 | - | 46108657 | 46189874 | 2421  |
| ENSG000001 | 548.0894 | 348.9625 | 0.64902  | 0.001092  | 0.002693  | ZFYVE1    | chr14 | - | 73436159 | 73493920 | 4485  |
| ENSG000001 | 0        | 1.058552 | -1.361   | 0.4451    | NA        | PNLIPRP2  | chr10 | + | 1.18E+08 | 1.18E+08 | 1481  |
| ENSG000001 | 0.632843 | 115.8084 | -6.9421  | 2.36E-16  | 1.66E-15  | C10orf82  | chr10 | - | 1.18E+08 | 1.18E+08 | 1791  |
| ENSG000001 | 301.3307 | 93.53924 | 1.6747   | 1.16E-08  | 4.91E-08  | HSPA12A   | chr10 | - | 1.18E+08 | 1.19E+08 | 5722  |
| ENSG000001 | 0.580602 | 1.309443 | -0.76283 | 0.64523   | NA        | FAM35BP   | chr10 | + | 46897592 | 46939143 | 3337  |
| ENSG000001 | 105.8122 | 357.2307 | -1.7456  | 1.42E-14  | 9.10E-14  | FRAT1     | chr10 | + | 99079022 | 99081672 | 2651  |
| ENSG000001 | 1856.586 | 840.8723 | 1.1399   | 1.44E-11  | 7.53E-11  | UBTD1     | chr10 | + | 99258625 | 99330966 | 1706  |
| ENSG000001 | 0.72616  | 0.357707 | 0.52227  | 0.76959   | NA        | ANKRD2    | chr10 | + | 99332198 | 99343641 | 1484  |
| ENSG000001 | 689.1165 | 560.644  | 0.29725  | 0.047114  | 0.084493  | E2F7      | chr12 | - | 77415027 | 77459360 | 5740  |
| ENSG000001 | 193.8359 | 336.5169 | -0.79441 | 2.26E-05  | 6.97E-05  | ARHGAP42  | chr11 | + | 1.01E+08 | 1.01E+08 | 5685  |
| ENSG000001 | 134.7367 | 274.7152 | -1.0251  | 6.68E-08  | 2.64E-07  | ISCA2     | chr14 | + | 74960423 | 74963809 | 2626  |
| ENSG000001 | 18.90021 | 12.96573 | 0.51913  | 0.33086   | 0.43402   | OTOGL     | chr12 | + | 80603233 | 80772870 | 8083  |
| ENSG000001 | 13.0395  | 1722.765 | -6.9977  | 9.99E-167 | 1.39E-164 | GYLTL1B   | chr11 | + | 45943172 | 45950647 | 2528  |
| ENSG000001 | 449.6954 | 1332.69  | -1.5647  | 1.66E-26  | 1.84E-25  | PACSIN3   | chr11 | - | 47199076 | 47207994 | 2009  |

|            |          |          |          |           |           |           |       |   |          |          |       |
|------------|----------|----------|----------|-----------|-----------|-----------|-------|---|----------|----------|-------|
| ENSG000001 | 763.2851 | 350.8642 | 1.1183   | 9.95E-13  | 5.65E-12  | TTC7B     | chr14 | - | 91006932 | 91282823 | 3484  |
| ENSG000001 | 2166.383 | 583.7146 | 1.8886   | 3.81E-45  | 7.63E-44  | SLC39A13  | chr11 | + | 47428683 | 47438047 | 3553  |
| ENSG000001 | 3080.948 | 2682.887 | 0.19951  | 0.16695   | 0.24825   | PSMC3     | chr11 | - | 47440320 | 47447993 | 1544  |
| ENSG000001 | 4.512054 | 3.823929 | 0.21315  | 0.81563   | 0.87063   | RAPSN     | chr11 | - | 47459308 | 47470730 | 1671  |
| ENSG000001 | 0.975385 | 27.46185 | -4.4601  | 5.41E-07  | 1.98E-06  | AGBL2     | chr11 | - | 47681143 | 47736941 | 3577  |
| ENSG000001 | 7.583767 | 400.7249 | -5.6688  | 8.66E-58  | 2.39E-56  | TC2N      | chr14 | - | 92246095 | 92333880 | 5146  |
| ENSG000001 | 1192.906 | 1773.516 | -0.57103 | 6.04E-08  | 2.40E-07  | CPSF2     | chr14 | + | 92588281 | 92630755 | 5301  |
| ENSG000001 | 7.116206 | 1.638012 | 1.9535   | 0.039362  | 0.072381  | SMCO2     | chr12 | + | 27619743 | 27655118 | 1272  |
| ENSG000001 | 292.2978 | 298.4818 | -0.0307  | 0.8581    | 0.9004    | MOAP1     | chr14 | - | 93648541 | 93651273 | 2529  |
| ENSG000001 | 238.9435 | 230.9363 | 0.048816 | 0.79447   | 0.85419   | IFI27L1   | chr14 | + | 94547628 | 94570192 | 828   |
| ENSG000001 | 19.33884 | 16.68204 | 0.20401  | 0.76595   | 0.83065   | IFI27     | chr14 | + | 94571182 | 94583033 | 2430  |
| ENSG000001 | 0        | 0.357707 | -0.41864 | 0.81278   | NA        | SERPINA12 | chr14 | - | 94953611 | 94984181 | 2061  |
| ENSG000001 | 105.777  | 140.4053 | -0.40802 | 0.061402  | 0.10645   | CLMN      | chr14 | - | 95654735 | 95786243 | 6289  |
| ENSG000001 | 348.3731 | 0.686276 | 8.4551   | 1.28E-25  | 1.37E-24  | PDZRN4    | chr12 | + | 41582250 | 41968392 | 3411  |
| ENSG000001 | 0        | 0.686276 | -0.84936 | 0.6309    | NA        | SLC6A5    | chr11 | + | 20620946 | 20680831 | 7084  |
| ENSG000001 | 1.048164 | 4.461666 | -1.7463  | 0.19781   | 0.28597   | CCDC38    | chr12 | - | 96260826 | 96336752 | 2599  |
| ENSG000001 | 1.016461 | 13.48765 | -3.4024  | 0.000819  | 0.002061  | NELL1     | chr11 | + | 20691117 | 21597227 | 3329  |
| ENSG000001 | 68.43956 | 144.213  | -1.0733  | 7.30E-06  | 2.38E-05  | PTER      | chr10 | + | 16478942 | 16555736 | 3777  |
| ENSG000001 | 3.983692 | 41.12916 | -3.292   | 2.45E-09  | 1.09E-08  | C1QL3     | chr10 | - | 16555742 | 16564004 | 2493  |
| ENSG000001 | 41.72429 | 82.35144 | -0.97581 | 0.001806  | 0.004304  | CACNB2    | chr10 | + | 18429606 | 18830798 | 4464  |
| ENSG000001 | 160.3541 | 112.8141 | 0.50351  | 0.028601  | 0.05442   | PTPLA     | chr10 | - | 17631958 | 17659376 | 1310  |
| ENSG000001 | 1722.258 | 1241.719 | 0.47172  | 0.001825  | 0.004344  | ARL5B     | chr10 | + | 18948334 | 18970568 | 7196  |
| ENSG000001 | 274.5875 | 417.9221 | -0.6039  | 1.35E-05  | 4.27E-05  | SMCO4     | chr11 | - | 93211638 | 93276674 | 1104  |
| ENSG000001 | 407.8785 | 226.6036 | 0.84693  | 0.000347  | 0.00092   | KIAA1731  | chr11 | + | 93394805 | 93463522 | 8055  |
| ENSG000001 | 0        | 0.343138 | -0.41864 | 0.81278   | NA        | KCNC2     | chr12 | - | 75433857 | 75603648 | 5625  |
| ENSG000001 | 874.822  | 1208.321 | -0.4645  | 0.011511  | 0.023877  | TAF1D     | chr11 | - | 93463114 | 93517557 | 4358  |
| ENSG000001 | 414.0854 | 498.6669 | -0.26706 | 0.20866   | 0.29864   | ABTB2     | chr11 | - | 34172535 | 34379555 | 4902  |
| ENSG000001 | 232.9573 | 272.2261 | -0.22258 | 0.28225   | 0.38336   | R3HCC1L   | chr10 | + | 99894387 | 1E+08    | 3418  |
| ENSG000001 | 5306.309 | 1698.667 | 1.6425   | 2.18E-81  | 9.29E-80  | AMOTL1    | chr11 | + | 94439597 | 94609918 | 8970  |
| ENSG000001 | 13534.44 | 257.1686 | 5.7138   | 0         | 0         | HTRA1     | chr10 | + | 1.24E+08 | 1.24E+08 | 2120  |
| ENSG000001 | 0.342542 | 0        | 0.4146   | 0.81455   | NA        | LIPC      | chr15 | + | 58702768 | 58861151 | 2968  |
| ENSG000001 | 774.301  | 792.0837 | -0.03171 | 0.8504    | 0.89482   | CEP57     | chr11 | + | 95523129 | 95565857 | 3178  |
| ENSG000001 | 64.57053 | 50.99369 | 0.33395  | 0.3472    | 0.45142   | TCP11L2   | chr12 | + | 1.07E+08 | 1.07E+08 | 3198  |
| ENSG000001 | 0        | 0.640152 | -0.82869 | 0.63935   | NA        | PASD1     | chrX  | + | 1.51E+08 | 1.51E+08 | 4098  |
| ENSG000001 | 2909.334 | 1151.909 | 1.3354   | 1.37E-46  | 2.84E-45  | SPRED1    | chr15 | + | 38544527 | 38649450 | 7780  |
| ENSG000001 | 629.1625 | 3402.533 | -2.4333  | 9.81E-84  | 4.38E-82  | GPR176    | chr15 | - | 40091233 | 40213093 | 3844  |
| ENSG000001 | 2518.457 | 947.4723 | 1.4083   | 3.47E-33  | 4.99E-32  | JAM3      | chr11 | + | 1.34E+08 | 1.34E+08 | 3912  |
| ENSG000001 | 0.290301 | 0.297015 | -0.00202 | 0.99909   | NA        | IL25      | chr14 | + | 23842018 | 23845612 | 1315  |
| ENSG000001 | 0        | 2624.929 | -12.42   | 1.54E-31  | 2.09E-30  | GLB1L3    | chr11 | + | 1.34E+08 | 1.34E+08 | 3862  |
| ENSG000001 | 531.2203 | 59.30177 | 3.1554   | 1.73E-44  | 3.41E-43  | ADAMTS15  | chr11 | + | 1.3E+08  | 1.3E+08  | 5669  |
| ENSG000001 | 0        | 2.087966 | -2.2641  | 0.18897   | 0.27528   | SVOP      | chr12 | - | 1.09E+08 | 1.09E+08 | 3104  |
| ENSG000001 | 1510.349 | 2188.89  | -0.53474 | 1.10E-07  | 4.29E-07  | GPT2      | chr16 | + | 46918290 | 46965209 | 4228  |
| ENSG000001 | 16.26354 | 55.68281 | -1.7347  | 0.000795  | 0.002003  | AMN       | chr14 | + | 1.03E+08 | 1.03E+08 | 2772  |
| ENSG000001 | 392.2997 | 381.5507 | 0.04077  | 0.79539   | 0.85499   | RAB8B     | chr15 | + | 63481668 | 63559981 | 4943  |
| ENSG000001 | 884.2812 | 110.947  | 2.9892   | 1.05E-84  | 4.76E-83  | IKBIP     | chr12 | - | 99007183 | 99038891 | 3189  |
| ENSG000001 | 254.8759 | 545.9517 | -1.0984  | 6.62E-14  | 4.04E-13  | RPUSD2    | chr15 | + | 40861499 | 40866659 | 1875  |
| ENSG000001 | 825.704  | 753.992  | 0.13118  | 0.24411   | 0.33973   | HIF1AN    | chr10 | + | 1.02E+08 | 1.02E+08 | 3019  |
| ENSG000001 | 17.96688 | 18.22048 | -0.02385 | 0.9594    | 0.97558   | NDUFB8    | chr10 | - | 1.02E+08 | 1.02E+08 | 1234  |
| ENSG000001 | 402.0622 | 263.4507 | 0.60775  | 0.002174  | 0.005116  | ZFYVE19   | chr15 | + | 41099284 | 41106767 | 2913  |
| ENSG000001 | 0.632843 | 1.012429 | -0.45981 | 0.7761    | NA        | PPP1R14D  | chr15 | - | 41107650 | 41120907 | 750   |
| ENSG000001 | 134.704  | 2988.598 | -4.4658  | 5.06E-238 | 1.57E-235 | SPINT1    | chr15 | + | 41136216 | 41150405 | 3056  |
| ENSG000001 | 36267.01 | 110.7233 | 8.3169   | 5.08E-238 | 1.57E-235 | FBN1      | chr15 | - | 48700503 | 48938046 | 11756 |
| ENSG000001 | 4.346772 | 2.058828 | 0.92493  | 0.46615   | 0.57089   | AVPR1A    | chr12 | - | 63539014 | 63544722 | 1525  |
| ENSG000001 | 8.413595 | 29.4009  | -1.7428  | 0.003951  | 0.008931  | DEPDC4    | chr12 | - | 1.01E+08 | 1.01E+08 | 2337  |
| ENSG000001 | 0.36308  | 2.367995 | -2.0754  | 0.17115   | 0.25357   | LRTM2     | chr12 | + | 1929433  | 1945918  | 3986  |
| ENSG000001 | 928.225  | 1672.087 | -0.84818 | 1.23E-13  | 7.36E-13  | BRD7      | chr16 | - | 50347398 | 50402845 | 5370  |
| ENSG000001 | 132.8459 | 9924.616 | -6.2107  | 0         | 0         | CKB       | chr14 | - | 1.04E+08 | 1.04E+08 | 1709  |
| ENSG000001 | 249.4881 | 485.3545 | -0.94976 | 0.006514  | 0.014186  | TRMT61A   | chr14 | + | 1.04E+08 | 1.04E+08 | 3229  |
| ENSG000001 | 503.7379 | 420.9578 | 0.25826  | 0.032966  | 0.061708  | BTRC      | chr10 | + | 1.03E+08 | 1.03E+08 | 6134  |
| ENSG000001 | 296.3647 | 466.2801 | -0.65249 | 0.000748  | 0.001891  | POLL      | chr10 | - | 1.03E+08 | 1.03E+08 | 2914  |
| ENSG000001 | 729.3004 | 873.8714 | -0.26051 | 0.10478   | 0.16787   | BAG5      | chr14 | - | 1.04E+08 | 1.04E+08 | 4867  |
| ENSG000001 | 282.6584 | 276.0809 | 0.036044 | 0.81607   | 0.8708    | DPCD      | chr10 | + | 1.03E+08 | 1.03E+08 | 1499  |
| ENSG000001 | 517.2121 | 247.6348 | 1.0563   | 5.72E-05  | 0.000168  | LARP6     | chr15 | - | 71123863 | 71146498 | 2075  |
| ENSG000001 | 1325.637 | 2146.003 | -0.69427 | 1.58E-09  | 7.17E-09  | API5      | chr11 | + | 43333513 | 43366079 | 3714  |
| ENSG000001 | 0        | 24.07256 | -6.134   | 3.31E-07  | 1.24E-06  | ASPG      | chr14 | + | 1.05E+08 | 1.05E+08 | 2157  |

|            |          |          |          |           |           |          |       |   |          |          |       |
|------------|----------|----------|----------|-----------|-----------|----------|-------|---|----------|----------|-------|
| ENSG000001 | 262.113  | 248.604  | 0.077321 | 0.68868   | 0.76789   | ZNF319   | chr16 | - | 58028572 | 58034357 | 4221  |
| ENSG000001 | 791.2216 | 609.5846 | 0.37392  | 0.12971   | 0.20139   | HPS6     | chr10 | + | 1.04E+08 | 1.04E+08 | 2646  |
| ENSG000001 | 14.84472 | 41.05464 | -1.4288  | 0.001366  | 0.00332   | SENP8    | chr15 | + | 72406599 | 72433311 | 1834  |
| ENSG000001 | 1941.845 | 4160     | -1.0965  | 2.82E-10  | 1.36E-09  | NOLC1    | chr10 | + | 1.04E+08 | 1.04E+08 | 3966  |
| ENSG000001 | 209.5818 | 131.4026 | 0.67102  | 0.00771   | 0.016543  | ALKBH3   | chr11 | + | 43902361 | 43941816 | 1557  |
| ENSG000001 | 683.3846 | 708.0025 | -0.04965 | 0.82377   | 0.87567   | COPS2    | chr15 | - | 49398268 | 49447858 | 4061  |
| ENSG000001 | 12.28245 | 3250.937 | -8.0157  | 8.51E-208 | 2.00E-205 | GABRB3   | chr15 | - | 26788693 | 27184686 | 5934  |
| ENSG000001 | 0        | 0.343138 | -0.41864 | 0.81278   | NA        | SPIC     | chr12 | + | 1.02E+08 | 1.02E+08 | 1132  |
| ENSG000001 | 2.729171 | 1.652581 | 0.61866  | 0.60334   | 0.69671   | TBATA    | chr10 | - | 72530995 | 72545157 | 1583  |
| ENSG000001 | 1390.432 | 1308.846 | 0.086937 | 0.42944   | 0.53486   | SGPL1    | chr10 | + | 72575717 | 72640930 | 5745  |
| ENSG000001 | 493.9309 | 293.8772 | 0.74878  | 1.22E-06  | 4.32E-06  | FRS2     | chr12 | + | 69864129 | 69973562 | 6861  |
| ENSG000001 | 2992.29  | 5023.419 | -0.74575 | 3.63E-06  | 1.22E-05  | CCT2     | chr12 | + | 69979114 | 69995350 | 2189  |
| ENSG000001 | 249.0038 | 334.2549 | -0.42625 | 0.004636  | 0.010377  | PCBD1    | chr10 | - | 72642037 | 72648541 | 1006  |
| ENSG000001 | 1022.416 | 1046.29  | -0.0333  | 0.84719   | 0.89284   | ARIH1    | chr15 | + | 72766667 | 72879692 | 6047  |
| ENSG000001 | 11.72337 | 5.436835 | 1.0742   | 0.152     | 0.22961   | C16orf71 | chr16 | + | 4784273  | 4799397  | 3705  |
| ENSG000001 | 1148.184 | 179.5387 | 2.6699   | 3.07E-57  | 8.39E-56  | CLMP     | chr11 | - | 1.23E+08 | 1.23E+08 | 2610  |
| ENSG000001 | 15.03216 | 3.47267  | 2.0418   | 0.007093  | 0.01534   | SCN3B    | chr11 | - | 1.23E+08 | 1.24E+08 | 6061  |
| ENSG000001 | 516.0321 | 624.6136 | -0.2755  | 0.025546  | 0.049212  | COX11    | chr17 | - | 53029263 | 53046146 | 3244  |
| ENSG000001 | 213.9497 | 561.5793 | -1.3811  | 1.02E-05  | 3.28E-05  | ZNF202   | chr11 | - | 1.24E+08 | 1.24E+08 | 4130  |
| ENSG000001 | 29.85634 | 47.19399 | -0.65103 | 0.048248  | 0.086254  | FAM227B  | chr15 | - | 49619159 | 49913128 | 2204  |
| ENSG000001 | 129.1217 | 125.077  | 0.045685 | 0.87156   | 0.9102    | STXBP4   | chr17 | + | 53046088 | 53241646 | 6243  |
| ENSG000001 | 194.3835 | 669.9176 | -1.7787  | 2.67E-34  | 3.98E-33  | CYR1     | chr21 | - | 27838528 | 27945603 | 3101  |
| ENSG000001 | 629.9761 | 384.3723 | 0.71237  | 4.66E-05  | 0.000138  | CUL5     | chr11 | + | 1.08E+08 | 1.08E+08 | 6351  |
| ENSG000001 | 0.290301 | 10.88904 | -4.2429  | 0.000619  | 0.001585  | MYRFL    | chr12 | + | 70219084 | 70352877 | 3465  |
| ENSG000001 | 1825.953 | 660.2161 | 1.4659   | 4.15E-42  | 7.71E-41  | WBP1L    | chr10 | + | 1.05E+08 | 1.05E+08 | 4104  |
| ENSG000001 | 126.2844 | 37.94531 | 1.7206   | 2.79E-07  | 1.05E-06  | C10orf32 | chr10 | + | 1.05E+08 | 1.05E+08 | 2422  |
| ENSG000001 | 0.36308  | 1.98115  | -1.8644  | 0.22572   | 0.31845   | C2       | chr6  | + | 31865562 | 31913449 | 2850  |
| ENSG000001 | 201.5929 | 305.5021 | -0.59627 | 0.040662  | 0.074418  | PLEKHF1  | chr19 | + | 30155963 | 30166364 | 2084  |
| ENSG000001 | 66.44943 | 5.802663 | 3.428    | 5.68E-12  | 3.05E-11  | TMEM100  | chr17 | - | 53796988 | 53809482 | 1962  |
| ENSG000001 | 441.4484 | 677.6878 | -0.61716 | 1.11E-05  | 3.54E-05  | ANAPC16  | chr10 | + | 73975787 | 73995618 | 3195  |
| ENSG000001 | 673.1473 | 82.76177 | 3.0126   | 8.72E-59  | 2.46E-57  | SMPD1    | chr11 | + | 6411655  | 6416228  | 2452  |
| ENSG000001 | 799.7738 | 765.1585 | 0.063265 | 0.66392   | 0.74714   | APBB1    | chr11 | - | 6416355  | 6440644  | 2642  |
| ENSG000001 | 17.72882 | 26.03988 | -0.54621 | 0.20672   | 0.29649   | SYNPO2L  | chr10 | - | 75404639 | 75415830 | 4921  |
| ENSG000001 | 88.15762 | 81.66912 | 0.11031  | 0.63268   | 0.72172   | NUDT13   | chr10 | + | 74870217 | 74891586 | 2140  |
| ENSG000001 | 5.208303 | 7.997445 | -0.57929 | 0.45173   | 0.55725   | C11orf65 | chr11 | - | 1.08E+08 | 1.08E+08 | 2683  |
| ENSG000001 | 1612.828 | 634.7199 | 1.3432   | 2.79E-25  | 2.96E-24  | TRIM44   | chr11 | + | 35684353 | 35829775 | 3182  |
| ENSG000001 | 21.03859 | 10.8405  | 0.93432  | 0.059405  | 0.10359   | ILK      | chr11 | + | 6624961  | 6632102  | 2074  |
| ENSG000001 | 1471.499 | 1544.602 | -0.06985 | 0.49942   | 0.60319   | TAF10    | chr11 | - | 6627526  | 6633898  | 5393  |
| ENSG000001 | 1331.189 | 748.0412 | 0.83096  | 1.67E-14  | 1.06E-13  | TPP1     | chr11 | - | 6634000  | 6640692  | 3536  |
| ENSG000001 | 6610.569 | 948.8595 | 2.7959   | 1.05E-88  | 5.12E-87  | DCHS1    | chr11 | - | 6642556  | 6677085  | 10763 |
| ENSG000001 | 900.9556 | 492.9363 | 0.8694   | 6.20E-15  | 4.05E-14  | NETO1    | chr18 | - | 70409549 | 70535381 | 3058  |
| ENSG000001 | 77.86522 | 56.6661  | 0.45119  | 0.20342   | 0.29233   | MSS51    | chr10 | - | 75183339 | 75193319 | 2421  |
| ENSG000001 | 217.0728 | 984.1953 | -2.1741  | 1.52E-45  | 3.08E-44  | CYB5A    | chr18 | - | 71920530 | 71959251 | 5913  |
| ENSG000001 | 167.0102 | 530.6859 | -1.6677  | 1.37E-29  | 1.72E-28  | USP54    | chr10 | - | 75257296 | 75385711 | 6247  |
| ENSG000001 | 38.24484 | 38.2101  | -0.00268 | 0.99495   | 0.99714   | RAG1     | chr11 | + | 36532259 | 36614706 | 6564  |
| ENSG000001 | 125.0976 | 96.70824 | 0.37191  | 0.064966  | 0.11179   | C11orf74 | chr11 | + | 36616051 | 36694823 | 930   |
| ENSG000001 | 27.35749 | 26.29319 | 0.047942 | 0.90302   | 0.93288   | WDR88    | chr19 | + | 33622996 | 33666701 | 1835  |
| ENSG000001 | 0.342542 | 0.343138 | -0.00208 | 0.99906   | NA        | OR10A5   | chr11 | + | 6866883  | 6867936  | 1054  |
| ENSG000001 | 0        | 0.654722 | -0.83442 | 0.63731   | NA        | OR2D2    | chr11 | - | 6912721  | 6913830  | 1110  |
| ENSG000001 | 329.9138 | 339.463  | -0.03982 | 0.82205   | 0.87475   | ATP9B    | chr18 | + | 76829285 | 77138283 | 7353  |
| ENSG000001 | 262.0411 | 187.9848 | 0.47696  | 0.038858  | 0.071545  | PPFIBP2  | chr11 | + | 7534529  | 7678358  | 3557  |
| ENSG000001 | 296.4119 | 451.4139 | -0.60585 | 3.59E-06  | 1.21E-05  | CYB5R2   | chr11 | - | 7686331  | 7698453  | 7463  |
| ENSG000001 | 1583.609 | 0        | 11.777   | 2.57E-28  | 3.07E-27  | SERPINB7 | chr18 | + | 61420169 | 61472604 | 2203  |
| ENSG000001 | 930.1245 | 526.1924 | 0.81957  | 1.08E-05  | 3.44E-05  | KIAA0355 | chr19 | + | 34745457 | 34846491 | 6702  |
| ENSG000001 | 203.6256 | 15.93574 | 3.6326   | 5.03E-17  | 3.68E-16  | SERPINB8 | chr18 | + | 61637159 | 61672278 | 3477  |
| ENSG000001 | 769.4119 | 783.1719 | -0.02604 | 0.8567    | 0.89936   | TUB      | chr11 | + | 8040791  | 8127659  | 6420  |
| ENSG000001 | 1.161205 | 82.01306 | -5.7114  | 1.27E-15  | 8.61E-15  | RIC3     | chr11 | - | 8127597  | 8190602  | 5272  |
| ENSG000001 | 0.290301 | 6.313309 | -3.5001  | 0.007265  | 0.015662  | LMO1     | chr11 | - | 8245851  | 8290263  | 1279  |
| ENSG000001 | 0        | 0.343138 | -0.41864 | 0.81278   | NA        | OR5P1P   | chr11 | - | 7794437  | 7795361  | 925   |
| ENSG000001 | 269.6164 | 174.6806 | 0.62502  | 0.000116  | 0.00033   | IDH3A    | chr15 | + | 78423840 | 78464291 | 4128  |
| ENSG000001 | 1.887365 | 217.9171 | -6.5919  | 2.51E-29  | 3.12E-28  | WDR72    | chr15 | - | 53805938 | 54055075 | 7507  |
| ENSG000001 | 1917.986 | 3491.126 | -0.86277 | 3.36E-14  | 2.09E-13  | CRABP1   | chr15 | + | 78632666 | 78640572 | 772   |
| ENSG000001 | 2.613524 | 3.930745 | -0.52964 | 0.6235    | 0.71388   | PLD4     | chr14 | + | 1.05E+08 | 1.05E+08 | 2007  |
| ENSG000001 | 52.69738 | 70.27588 | -0.41043 | 0.16862   | 0.25032   | ZMAT1    | chrX  | - | 1.01E+08 | 1.01E+08 | 5754  |
| ENSG000001 | 133.322  | 56.76801 | 1.2244   | 3.03E-07  | 1.13E-06  | XRR1A    | chr11 | - | 74518784 | 74660245 | 5681  |

|                    |          |          |           |           |           |       |   |          |          |       |
|--------------------|----------|----------|-----------|-----------|-----------|-------|---|----------|----------|-------|
| ENSG00000165.14014 | 89.29113 | -0.45593 | 0.068023  | 0.11624   | TRIM66    | chr11 | - | 8633584  | 8693413  | 10083 |
| ENSG000001306.6026 | 268.105  | 0.19246  | 0.43299   | 0.53842   | RNF169    | chr11 | + | 74459913 | 74553458 | 7823  |
| ENSG00000110469.86 | 14480.7  | -0.46736 | 4.24E-05  | 0.000126  | RPL27A    | chr11 | + | 8703958  | 8736306  | 4916  |
| ENSG0000011578.577 | 373.4783 | 2.0755   | 1.13E-61  | 3.40E-60  | ST5       | chr11 | - | 8714898  | 8932498  | 4545  |
| ENSG000001287.773  | 31.91539 | 3.1496   | 1.04E-27  | 1.22E-26  | CDYL2     | chr16 | - | 80637609 | 80838226 | 2353  |
| ENSG000001285.1963 | 35.94093 | 2.9332   | 8.05E-11  | 4.01E-10  | TMEM130   | chr7  | - | 98444111 | 98468394 | 3891  |
| ENSG00000113.04969 | 138.1255 | -3.3866  | 1.20E-22  | 1.14E-21  | PRTG      | chr15 | - | 55903744 | 56035288 | 11967 |
| ENSG000001357.3767 | 382.4382 | -0.09594 | 0.57662   | 0.67333   | CENPN     | chr16 | + | 81040103 | 81066719 | 2481  |
| ENSG000001442.1137 | 243.6592 | 0.8571   | 5.60E-09  | 2.43E-08  | AKIP1     | chr11 | + | 8932686  | 8941631  | 1421  |
| ENSG0000011036.967 | 1066.138 | -0.03986 | 0.79885   | 0.8575    | ATMIN     | chr16 | + | 81069452 | 81080963 | 5343  |
| ENSG00000128.08283 | 17.69198 | 0.64957  | 0.16133   | 0.24142   | C16orf46  | chr16 | - | 81087102 | 81110872 | 1857  |
| ENSG000001626.7548 | 448.0952 | 0.48216  | 0.039579  | 0.072714  | TMEM41B   | chr11 | - | 9302201  | 9336327  | 3968  |
| ENSG0000010.975385 | 40.85571 | -5.0062  | 8.93E-09  | 3.81E-08  | DKFZP686J | chr16 | - | 81134480 | 81253975 | 7379  |
| ENSG000001476.1139 | 394.8409 | 0.26966  | 0.27577   | 0.37592   | LEO1      | chr15 | - | 52230222 | 52264003 | 2193  |
| ENSG000001265.402  | 346.3307 | -0.38313 | 0.028046  | 0.053502  | ZNF143    | chr11 | + | 9481866  | 9550071  | 2947  |
| ENSG0000011372.453 | 333.4072 | 2.0388   | 1.55E-47  | 3.32E-46  | TMX3      | chr18 | - | 66340925 | 66382535 | 4927  |
| ENSG00000114399.76 | 108.9042 | 7.0374   | 0         | 0         | MFAP4     | chr17 | - | 19286755 | 19290553 | 1932  |
| ENSG000001903.2371 | 2253.711 | -1.3184  | 3.70E-42  | 6.89E-41  | WEE1      | chr11 | + | 9595228  | 9615004  | 5187  |
| ENSG000001732.2032 | 658.27   | 0.15414  | 0.28734   | 0.38898   | MAPK7     | chr17 | + | 19281034 | 19286857 | 4533  |
| ENSG0000013.444166 | 361.8191 | -6.6332  | 7.89E-41  | 1.41E-39  | FAM86GP   | chr11 | - | 3431582  | 3443726  | 971   |
| ENSG0000013.52811  | 111.4926 | -4.9455  | 1.08E-20  | 9.36E-20  | PRKCB     | chr16 | + | 23847322 | 24231932 | 7969  |
| ENSG0000011948.761 | 1543.369 | 0.33602  | 0.001966  | 0.004659  | HDGFRP3   | chr15 | - | 83784320 | 83876770 | 2422  |
| ENSG000001427.7347 | 286.8992 | 0.57363  | 0.01711   | 0.034259  | NDST2     | chr10 | - | 75556272 | 75571589 | 5818  |
| ENSG0000014254.952 | 12107.45 | -1.5065  | 3.44E-29  | 4.24E-28  | MCM7      | chr7  | - | 99690351 | 99699563 | 2957  |
| ENSG0000010        | 1.029414 | -1.1526  | 0.51496   | NA        | CLEC3A    | chr16 | + | 78056412 | 78100658 | 1971  |
| ENSG0000010        | 0.640152 | -0.82869 | 0.63935   | NA        | CCDC68    | chr18 | - | 52568740 | 52626739 | 4132  |
| ENSG0000011.628766 | 0.343138 | 1.6246   | 0.30143   | 0.40279   | CLEC4E    | chr12 | - | 8685901  | 8693559  | 2159  |
| ENSG000001495.6702 | 960.9251 | -0.95231 | 4.73E-08  | 1.90E-07  | ZNF3      | chr7  | - | 99661656 | 99680171 | 3473  |
| ENSG0000010        | 2.621302 | -2.8604  | 0.069395  | 0.11824   | CLEC4D    | chr12 | + | 8662071  | 8674962  | 1936  |
| ENSG00000194.57692 | 180.9065 | -0.92802 | 3.27E-05  | 9.86E-05  | ZSCAN21   | chr7  | + | 99647390 | 99662661 | 2005  |
| ENSG0000011188.757 | 1460.055 | -0.29674 | 0.010281  | 0.021558  | RIMKLB    | chr12 | + | 8834196  | 8935691  | 5830  |
| ENSG0000013.640337 | 128.057  | -4.9402  | 2.49E-23  | 2.44E-22  | A2ML1     | chr12 | + | 8975068  | 9039597  | 5274  |
| ENSG00000152.05516 | 2.618886 | 4.1696   | 7.72E-12  | 4.12E-11  | BEAN1     | chr16 | + | 66461200 | 66527432 | 2929  |
| ENSG000001148.361  | 70.82224 | 1.0587   | 0.00065   | 0.001659  | TK2       | chr16 | - | 66541906 | 66586447 | 5114  |
| ENSG0000011965.826 | 766.8388 | 1.3574   | 8.43E-36  | 1.32E-34  | TMED3     | chr15 | + | 79603404 | 79704334 | 1483  |
| ENSG0000010        | 1.759397 | -2.0294  | 0.24451   | NA        | SLC38A8   | chr16 | - | 84043272 | 84076241 | 1308  |
| ENSG000001244.6657 | 310.6437 | -0.34712 | 0.032532  | 0.061011  | SEC11C    | chr18 | + | 56806709 | 56826068 | 1202  |
| ENSG0000010        | 0.343138 | -0.41864 | 0.81278   | NA        | CPLX4     | chr18 | - | 56942388 | 56985881 | 1966  |
| ENSG0000010.290301 | 19.18591 | -5.0449  | 1.30E-05  | 4.11E-05  | GALR1     | chr18 | + | 74962505 | 74980858 | 1050  |
| ENSG000001312.5149 | 323.4052 | -0.04677 | 0.77238   | 0.8361    | TMEM135   | chr11 | + | 86748886 | 87034800 | 3938  |
| ENSG00000119.29858 | 41.9879  | -1.1087  | 0.018652  | 0.037075  | IQCD      | chr12 | - | 1.14E+08 | 1.14E+08 | 1872  |
| ENSG0000011362.878 | 448.415  | 1.6008   | 1.76E-29  | 2.20E-28  | NDEL1     | chr17 | + | 8316449  | 8393729  | 3927  |
| ENSG000001415.9794 | 1589.03  | -1.9303  | 1.64E-43  | 3.16E-42  | CENPV     | chr17 | - | 16245848 | 16256970 | 1770  |
| ENSG0000012.427705 | 1.309443 | 0.72743  | 0.5777    | 0.67421   | RRAD      | chr16 | - | 66955582 | 66959547 | 1569  |
| ENSG000001870.5952 | 525.1735 | 0.72699  | 6.49E-07  | 2.36E-06  | FAM96B    | chr16 | - | 66965959 | 66968326 | 718   |
| ENSG0000013.226643 | 4.037561 | -0.30891 | 0.78497   | 0.84599   | WDR16     | chr17 | + | 9479944  | 9546776  | 2266  |
| ENSG00000120583.44 | 11582.67 | 0.82808  | 5.00E-08  | 2.00E-07  | HSP90B1   | chr12 | + | 1.04E+08 | 1.04E+08 | 3032  |
| ENSG0000015.871057 | 0.343138 | 3.3751   | 0.010004  | 0.021036  | MC4R      | chr18 | - | 58038564 | 58040001 | 1438  |
| ENSG000001760.4276 | 1019.553 | -0.42305 | 4.69E-05  | 0.000139  | BLCAP     | chr20 | - | 36130816 | 36156333 | 2205  |
| ENSG0000014.378475 | 13.82596 | -1.5996  | 0.023247  | 0.04522   | CHRFAM7A  | chr15 | - | 30653443 | 30686052 | 2794  |
| ENSG000001105.693  | 54.58526 | 0.95113  | 0.000121  | 0.000342  | SPDYE6    | chr7  | - | 1.02E+08 | 1.02E+08 | 3145  |
| ENSG00000151.90797 | 172.141  | -1.7142  | 8.04E-14  | 4.88E-13  | ATF7IP2   | chr16 | + | 10420291 | 10577495 | 3665  |
| ENSG00000110.17675 | 2.263595 | 2.0109   | 0.022247  | 0.043456  | MMP10     | chr11 | - | 1.03E+08 | 1.03E+08 | 1758  |
| ENSG00000113.05067 | 37.94538 | -1.509   | 0.000472  | 0.001231  | TVP23A    | chr16 | - | 10854776 | 10912651 | 3677  |
| ENSG0000013354.872 | 2441.579 | 0.45811  | 0.000363  | 0.000959  | NGFRAP1   | chrX  | + | 1.03E+08 | 1.03E+08 | 921   |
| ENSG00000113.35295 | 7.922183 | 0.72435  | 0.23543   | 0.32929   | TMPPRSS5  | chr11 | - | 1.14E+08 | 1.14E+08 | 2232  |
| ENSG000001644.9807 | 248.5003 | 1.3738   | 9.40E-25  | 9.74E-24  | COG1      | chr17 | + | 71189129 | 71204646 | 4051  |
| ENSG00000110.8413  | 397.4837 | -5.1508  | 1.91E-56  | 5.11E-55  | PLEKHA7   | chr11 | - | 16799842 | 17035990 | 4804  |
| ENSG000001107.248  | 167.3054 | -0.64281 | 0.000981  | 0.002438  | ZNF606    | chr19 | - | 58488421 | 58514717 | 4248  |
| ENSG00000147.55166 | 38.17284 | 0.31347  | 0.34736   | 0.45155   | ZCCHC18   | chrX  | + | 1.03E+08 | 1.03E+08 | 1248  |
| ENSG0000015246.698 | 595.5477 | 3.1359   | 4.47E-140 | 4.43E-138 | B2M       | chr15 | + | 45003675 | 45011075 | 2329  |
| ENSG0000011033.042 | 1143.571 | -0.14597 | 0.35508   | 0.45932   | ZNF592    | chr15 | + | 85291866 | 85349659 | 7861  |
| ENSG0000011893.357 | 422.3817 | 2.1588   | 7.97E-53  | 1.96E-51  | CASC4     | chr15 | + | 44580927 | 44707956 | 3962  |
| ENSG0000010        | 84.20784 | -7.9226  | 4.18E-13  | 2.44E-12  | HTR3A     | chr11 | + | 1.14E+08 | 1.14E+08 | 2432  |
| ENSG0000012636.985 | 1.029414 | 10.867   | 5.16E-57  | 1.40E-55  | NNMT      | chr11 | + | 1.14E+08 | 1.14E+08 | 1867  |

|            |          |          |          |           |           |            |       |   |          |          |       |
|------------|----------|----------|----------|-----------|-----------|------------|-------|---|----------|----------|-------|
| ENSG000001 | 0        | 2.947455 | -3.0782  | 0.043573  | 0.078942  | ACSM1      | chr16 | - | 20634559 | 20710212 | 2147  |
| ENSG000001 | 1617.805 | 1408.445 | 0.19987  | 0.18206   | 0.26684   | AP1G1      | chr16 | - | 71762913 | 71843104 | 6959  |
| ENSG000001 | 2385.104 | 246.1998 | 3.2658   | 1.92E-68  | 6.75E-67  | SLFN5      | chr17 | + | 33570055 | 33600674 | 10591 |
| ENSG000001 | 43.54246 | 35.99746 | 0.2671   | 0.44717   | 0.55262   | CATSPER2   | chr15 | - | 43920701 | 43960316 | 5071  |
| ENSG000001 | 0        | 14.27275 | -5.4485  | 7.97E-06  | 2.59E-05  | STRCP1     | chr15 | - | 43991686 | 44010382 | 5328  |
| ENSG000001 | 0.290301 | 0        | 0.4146   | 0.81455   | NA        | AC004696   | chr19 | + | 56988619 | 57012035 | 1521  |
| ENSG000001 | 396.3152 | 119.0552 | 1.7332   | 2.64E-27  | 3.04E-26  | C16orf45   | chr16 | + | 15528152 | 15718885 | 2404  |
| ENSG000001 | 1166.585 | 482.4505 | 1.2719   | 3.49E-27  | 3.99E-26  | KIAA0430   | chr16 | - | 15688243 | 15737023 | 7743  |
| ENSG000001 | 274.3384 | 449.9252 | -0.71169 | 0.000108  | 0.000308  | SAAL1      | chr11 | - | 18091482 | 18127638 | 1582  |
| ENSG000001 | 30.97468 | 119.7948 | -1.9299  | 8.79E-11  | 4.36E-10  | YPEL4      | chr11 | - | 57412560 | 57417417 | 4000  |
| ENSG000001 | 1536.844 | 774.1261 | 0.9876   | 1.33E-16  | 9.50E-16  | PPIB       | chr15 | - | 64448011 | 64455404 | 1208  |
| ENSG000001 | 0        | 1.248751 | -1.5848  | 0.37202   | NA        | LDHC       | chr11 | + | 18433854 | 18473605 | 2041  |
| ENSG000001 | 390.842  | 731.6242 | -0.90537 | 1.38E-12  | 7.78E-12  | FAM96A     | chr15 | - | 64364758 | 64386217 | 1536  |
| ENSG000001 | 5.653535 | 2.872193 | 0.88242  | 0.33949   | 0.44334   | LDHAL6A    | chr11 | + | 18477371 | 18501147 | 2526  |
| ENSG000001 | 379.3519 | 260.1021 | 0.54287  | 0.004067  | 0.009178  | FAM111A    | chr11 | + | 58910221 | 58922512 | 6189  |
| ENSG000001 | 417.0299 | 161.0615 | 1.3707   | 7.84E-14  | 4.76E-13  | KIAA0101   | chr15 | - | 64657193 | 64679886 | 1511  |
| ENSG000001 | 725.1847 | 609.8402 | 0.24883  | 0.075538  | 0.12719   | KIF7       | chr15 | - | 90152020 | 90198682 | 4551  |
| ENSG000001 | 25.22945 | 72.43775 | -1.5029  | 0.000839  | 0.002107  | LDHD       | chr16 | - | 75145758 | 75150669 | 2067  |
| ENSG000001 | 0        | 5.777557 | -3.724   | 0.017622  | 0.035204  | PLIN1      | chr15 | - | 90207596 | 90222658 | 2953  |
| ENSG000001 | 63.03444 | 40.33452 | 0.63177  | 0.16158   | 0.24178   | PEX11A     | chr15 | - | 90220995 | 90234014 | 2740  |
| ENSG000001 | 252.2646 | 679.0535 | -1.4243  | 1.20E-17  | 9.10E-17  | TMEM170A   | chr16 | - | 75476952 | 75499395 | 4959  |
| ENSG000001 | 16.6703  | 16.2725  | 0.031309 | 0.95715   | 0.97393   | MESP1      | chr15 | - | 90291892 | 90294541 | 2369  |
| ENSG000001 | 3600.742 | 44.86326 | 6.3107   | 0         | 0         | ANPEP      | chr15 | - | 90328120 | 90358633 | 3678  |
| ENSG000001 | 0        | 15.29559 | -5.4168  | 2.54E-05  | 7.76E-05  | SCNN1G     | chr16 | + | 23194036 | 23228204 | 3507  |
| ENSG000001 | 210.9522 | 4177.115 | -4.3032  | 7.27E-201 | 1.59E-198 | RBPMS2     | chr15 | - | 65032091 | 65067786 | 2008  |
| ENSG000001 | 1874.128 | 1174.113 | 0.67476  | 2.36E-10  | 1.14E-09  | NAV2       | chr11 | + | 19372271 | 20143144 | 11000 |
| ENSG000001 | 98.39297 | 88.58378 | 0.15168  | 0.60155   | 0.6951    | ANKDD1A    | chr15 | + | 65204101 | 65251042 | 3113  |
| ENSG000001 | 4.181491 | 79.26877 | -4.1983  | 6.92E-15  | 4.51E-14  | GLYATL1    | chr11 | + | 58672871 | 58811000 | 2281  |
| ENSG000001 | 389.3957 | 466.9478 | -0.26313 | 0.083351  | 0.13839   | C18orf54   | chr18 | + | 51884287 | 51911588 | 5237  |
| ENSG000001 | 1299.245 | 1079.534 | 0.26692  | 0.10143   | 0.16335   | DCTN5      | chr16 | + | 23652713 | 23681195 | 3430  |
| ENSG000001 | 1505.47  | 307.4632 | 2.2892   | 1.25E-89  | 6.20E-88  | TERF2IP    | chr16 | + | 75681684 | 75795051 | 2118  |
| ENSG000001 | 1714.617 | 3487.911 | -1.0233  | 3.49E-23  | 3.40E-22  | PLK1       | chr16 | + | 23688977 | 23701688 | 4135  |
| ENSG000001 | 1068.588 | 1043.328 | 0.034267 | 0.78834   | 0.84872   | CLPX       | chr15 | - | 65440557 | 65477680 | 4695  |
| ENSG000001 | 1.338465 | 12.51094 | -2.9576  | 0.003004  | 0.006924  | GPR182     | chr12 | + | 57388230 | 57390468 | 1694  |
| ENSG000001 | 335.9432 | 973.5704 | -1.534   | 3.74E-34  | 5.55E-33  | ZBTB39     | chr12 | - | 57392618 | 57400230 | 6170  |
| ENSG000001 | 0        | 1.416259 | -1.7181  | 0.33141   | NA        | CACNG2     | chr22 | - | 36959968 | 37099603 | 2384  |
| ENSG000001 | 21.82474 | 22.88692 | -0.0669  | 0.8934    | 0.92607   | TAC3       | chr12 | - | 57403784 | 57422667 | 1237  |
| ENSG000001 | 1.306762 | 5.522634 | -1.8643  | 0.08462   | 0.14022   | MYO1A      | chr12 | - | 57422301 | 57444982 | 3658  |
| ENSG000001 | 0        | 11.53651 | -5.1031  | 5.78E-05  | 0.000169  | CHP2       | chr16 | + | 23765948 | 23770272 | 2382  |
| ENSG000001 | 594.9854 | 935.6753 | -0.65244 | 3.08E-05  | 9.33E-05  | TMEM194A   | chr12 | - | 57449426 | 57481846 | 5590  |
| ENSG000001 | 0        | 0.343138 | -0.41864 | 0.81278   | NA        | OR4D6      | chr11 | + | 59224411 | 59225464 | 1054  |
| ENSG000001 | 1656.75  | 420.309  | 1.9754   | 4.01E-47  | 8.43E-46  | NAB2       | chr12 | + | 57482677 | 57489259 | 2711  |
| ENSG000001 | 1586.579 | 1022.412 | 0.63326  | 4.68E-10  | 2.21E-09  | VPS39      | chr15 | - | 42450899 | 42500514 | 4844  |
| ENSG000001 | 1760.388 | 1021.124 | 0.78454  | 2.35E-13  | 1.39E-12  | STAT6      | chr12 | - | 57489191 | 57525922 | 4034  |
| ENSG000001 | 768.6235 | 583.5471 | 0.39736  | 0.001697  | 0.004062  | PATL1      | chr11 | - | 59404189 | 59436453 | 4072  |
| ENSG000001 | 69.3583  | 71.38229 | -0.0474  | 0.8659    | 0.90664   | XRCC6BP1   | chr12 | + | 58335324 | 58351052 | 1245  |
| ENSG000001 | 64.26679 | 105.4022 | -0.69767 | 0.2022    | 0.29094   | ELFN2      | chr22 | - | 37764000 | 37823505 | 8360  |
| ENSG000001 | 429.0244 | 1044.629 | -1.2822  | 2.27E-19  | 1.85E-18  | STX3       | chr11 | + | 59480929 | 59573354 | 6363  |
| ENSG000001 | 468.4773 | 746.6866 | -0.67099 | 0.000162  | 0.00045   | MRPL16     | chr11 | - | 59573608 | 59578345 | 1182  |
| ENSG000001 | 557.3386 | 434.3949 | 0.35915  | 0.018101  | 0.036066  | PIP4K2C    | chr12 | + | 57984957 | 57997198 | 2924  |
| ENSG000001 | 308.7504 | 281.229  | 0.13452  | 0.37622   | 0.48027   | MTMR10     | chr15 | - | 31231144 | 31283810 | 5679  |
| ENSG000001 | 4518.542 | 4530.564 | -0.0038  | 0.97859   | 0.98817   | YWHAB      | chr20 | + | 43514317 | 43537173 | 3109  |
| ENSG000001 | 0        | 0.937167 | -1.2408  | 0.48662   | NA        | RP13-491L1 | chr10 | - | 1.35E+08 | 1.35E+08 | 674   |
| ENSG000001 | 0.923144 | 0        | 1.223    | 0.49292   | NA        | C15orf48   | chr15 | + | 45722727 | 45740959 | 875   |
| ENSG000001 | 100.3707 | 197.0777 | -0.97317 | 1.56E-06  | 5.48E-06  | SCG5       | chr15 | + | 32933877 | 32989299 | 1238  |
| ENSG000001 | 9945.111 | 8.921586 | 6.6709   | 2.23E-05  | 6.86E-05  | GREM1      | chr15 | + | 33010175 | 33026870 | 4168  |
| ENSG000001 | 56.81644 | 165.7424 | -1.5176  | 0.001241  | 0.003032  | NYAP1      | chr7  | + | 1E+08    | 1E+08    | 3584  |
| ENSG000001 | 907.4648 | 661.5818 | 0.45358  | 0.056999  | 0.099752  | TSC22D4    | chr7  | - | 1E+08    | 1E+08    | 2383  |
| ENSG000001 | 3.008307 | 2.979009 | 0.005469 | 0.99569   | 0.99763   | MS4A7      | chr11 | + | 60145955 | 60163424 | 2871  |
| ENSG000001 | 0        | 0.357707 | -0.41864 | 0.81278   | NA        | MS4A14     | chr11 | + | 60146003 | 60185161 | 2997  |
| ENSG000001 | 374.1058 | 698.0113 | -0.89769 | 1.31E-11  | 6.87E-11  | DIS3L      | chr15 | + | 66585555 | 66626236 | 3763  |
| ENSG000001 | 295.8914 | 306.857  | -0.05344 | 0.73454   | 0.80409   | CCNDBP1    | chr15 | + | 43477316 | 43487396 | 2746  |
| ENSG000001 | 3.496407 | 7.068399 | -0.98103 | 0.28288   | 0.38403   | EPB42      | chr15 | - | 43398423 | 43513481 | 4553  |
| ENSG000001 | 1448.103 | 1168.859 | 0.30854  | 0.008073  | 0.017242  | SMAD3      | chr15 | + | 67356101 | 67487533 | 6247  |
| ENSG000001 | 0        | 0.357707 | -0.41864 | 0.81278   | NA        | MS4A8      | chr11 | + | 60467047 | 60483284 | 1353  |

|            |          |          |          |           |           |           |       |   |          |          |       |
|------------|----------|----------|----------|-----------|-----------|-----------|-------|---|----------|----------|-------|
| ENSG000001 | 6.825904 | 1.234181 | 2.1796   | 0.037645  | 0.069542  | CCDC178   | chr18 | - | 30517366 | 31021065 | 3391  |
| ENSG000001 | 0        | 2.431104 | -2.4718  | 0.14705   | 0.22313   | MS4A15    | chr11 | + | 60524426 | 60544205 | 2110  |
| ENSG000001 | 3115.104 | 32.98669 | 6.3141   | 1.50E-20  | 1.30E-19  | MAP1A     | chr15 | + | 43803156 | 43823818 | 10553 |
| ENSG000001 | 471.6884 | 478.6044 | -0.02157 | 0.90424   | 0.93383   | RCCD1     | chr15 | + | 91498100 | 91506349 | 3157  |
| ENSG000001 | 127.3876 | 113.3247 | 0.16619  | 0.42946   | 0.53486   | AKTIP     | chr16 | - | 53525291 | 53538323 | 2133  |
| ENSG000001 | 788.853  | 734.1923 | 0.10434  | 0.42938   | 0.53486   | MAPRE2    | chr18 | + | 32556892 | 32723434 | 4323  |
| ENSG000001 | 32.27109 | 59.10117 | -0.86674 | 0.007441  | 0.016016  | EVA1C     | chr21 | + | 33784314 | 33887707 | 2492  |
| ENSG000001 | 0        | 2.401965 | -2.0937  | 0.23902   | 0.33362   | TCP10L2   | chr6  | + | 1.68E+08 | 1.68E+08 | 2185  |
| ENSG000001 | 2980.206 | 4598.808 | -0.62517 | 4.51E-10  | 2.13E-09  | MARS      | chr12 | + | 57869228 | 57911352 | 3592  |
| ENSG000001 | 667.5639 | 247.5259 | 1.4304   | 1.78E-23  | 1.76E-22  | MBD6      | chr12 | + | 57914493 | 57923931 | 4282  |
| ENSG000001 | 367.3145 | 102.6621 | 1.8368   | 3.10E-18  | 2.40E-17  | CNPY4     | chr7  | + | 99717236 | 99723134 | 1502  |
| ENSG000001 | 8557.944 | 5311.761 | 0.68739  | 1.21E-08  | 5.08E-08  | PDIA3     | chr15 | + | 44038590 | 44065477 | 3727  |
| ENSG000001 | 2101.498 | 3050.117 | -0.53669 | 1.97E-05  | 6.11E-05  | NUDT21    | chr16 | - | 56463045 | 56486111 | 4436  |
| ENSG000001 | 7.136743 | 3.198346 | 1.0707   | 0.2183    | 0.3098    | NAT16     | chr7  | - | 1.01E+08 | 1.01E+08 | 2935  |
| ENSG000001 | 13.85042 | 8.640013 | 0.65259  | 0.29333   | 0.39536   | NKX3-1    | chr8  | - | 23536206 | 23540440 | 3271  |
| ENSG000001 | 0        | 152.1639 | -8.6109  | 2.39E-14  | 1.50E-13  | SGSM1     | chr22 | + | 25202236 | 25323545 | 6643  |
| ENSG000001 | 0        | 2.901332 | -3.0081  | 0.053293  | 0.094014  | RP11-93B1 | chr20 | - | 61272071 | 61274656 | 1933  |
| ENSG000001 | 106.7841 | 15.75454 | 2.7296   | 3.01E-16  | 2.11E-15  | DUSP18    | chr22 | - | 31048038 | 31063877 | 2920  |
| ENSG000001 | 174.7328 | 443.3358 | -1.3371  | 2.31E-10  | 1.12E-09  | TEF       | chr22 | + | 41763337 | 41795330 | 4394  |
| ENSG000001 | 10.96453 | 3.50993  | 1.5166   | 0.084816  | 0.14042   | MEI1      | chr22 | + | 42095503 | 42195460 | 4020  |
| ENSG000001 | 886.4077 | 735.0897 | 0.26865  | 0.24799   | 0.3442    | PBX3      | chr9  | + | 1.29E+08 | 1.29E+08 | 2902  |
| ENSG000001 | 1.016461 | 1.669566 | -0.55298 | 0.71602   | 0.78964   | GNGT2     | chr17 | - | 47280153 | 47287936 | 918   |
| ENSG000001 | 1215.926 | 2126.508 | -0.80503 | 1.55E-11  | 8.09E-11  | PHB       | chr17 | - | 47481414 | 47492246 | 1832  |
| ENSG000001 | 873.9436 | 1568.092 | -0.84103 | 1.35E-06  | 4.75E-06  | SNRPD1    | chr18 | + | 19192228 | 19210344 | 1768  |
| ENSG000001 | 0        | 0.343138 | -0.41864 | 0.81278   | NA        | TTC16     | chr9  | + | 1.3E+08  | 1.3E+08  | 5139  |
| ENSG000001 | 564.2334 | 152.8208 | 1.8791   | 5.28E-29  | 6.46E-28  | SAMD14    | chr17 | - | 48187404 | 48207246 | 4425  |
| ENSG000001 | 42.67311 | 85.97872 | -0.99599 | 0.00322   | 0.00739   | PIP5KL1   | chr9  | - | 1.31E+08 | 1.31E+08 | 2198  |
| ENSG000001 | 34.78551 | 152.1095 | -2.1118  | 5.08E-12  | 2.74E-11  | TMEM92    | chr17 | + | 48348767 | 48358844 | 2765  |
| ENSG000001 | 615.1995 | 1380.633 | -1.1651  | 2.57E-20  | 2.20E-19  | FAM102A   | chr9  | - | 1.31E+08 | 1.31E+08 | 4316  |
| ENSG000001 | 662.1834 | 185.1368 | 1.8325   | 4.25E-23  | 4.12E-22  | ACSF2     | chr17 | + | 48503519 | 48552206 | 2251  |
| ENSG000001 | 3487.543 | 1353.936 | 1.3608   | 4.11E-12  | 2.24E-11  | GOLGA2    | chr9  | - | 1.31E+08 | 1.31E+08 | 4260  |
| ENSG000001 | 572.6748 | 593.0517 | -0.0497  | 0.8231    | 0.87527   | TRUB2     | chr9  | - | 1.31E+08 | 1.31E+08 | 1777  |
| ENSG000001 | 454.2743 | 440.6579 | 0.044612 | 0.81112   | 0.86704   | COQ4      | chr9  | + | 1.31E+08 | 1.31E+08 | 3127  |
| ENSG000001 | 723.2655 | 611.2971 | 0.24207  | 0.14403   | 0.21916   | SLC27A4   | chr9  | + | 1.31E+08 | 1.31E+08 | 2781  |
| ENSG000001 | 1045.09  | 1073.604 | -0.03814 | 0.84004   | 0.88775   | URM1      | chr9  | + | 1.31E+08 | 1.31E+08 | 3045  |
| ENSG000001 | 5629.412 | 367.9333 | 3.9243   | 5.88E-108 | 3.80E-106 | CERCAM    | chr9  | + | 1.31E+08 | 1.31E+08 | 5197  |
| ENSG000001 | 479.524  | 716.8514 | -0.57805 | 0.00022   | 0.000598  | DOLPP1    | chr9  | + | 1.32E+08 | 1.32E+08 | 2177  |
| ENSG000001 | 216.1277 | 258.0107 | -0.25574 | 0.21032   | 0.30047   | ENDOG     | chr9  | + | 1.32E+08 | 1.32E+08 | 1172  |
| ENSG000001 | 0        | 0.357707 | -0.41864 | 0.81278   | NA        | TBC1D21   | chr15 | + | 74165949 | 74181555 | 1207  |
| ENSG000001 | 108.1849 | 296.4061 | -1.4476  | 9.13E-11  | 4.53E-10  | PRRX2     | chr9  | + | 1.32E+08 | 1.32E+08 | 1233  |
| ENSG000001 | 612.2178 | 1316.485 | -1.1025  | 6.10E-23  | 5.87E-22  | C15orf39  | chr15 | + | 75487984 | 75504510 | 4517  |
| ENSG000001 | 391.8009 | 1305.156 | -1.7301  | 1.23E-16  | 8.81E-16  | ISLR2     | chr15 | + | 74392652 | 74430881 | 4817  |
| ENSG000001 | 666.0093 | 483.6177 | 0.4604   | 0.018865  | 0.037449  | SP2       | chr17 | + | 45973516 | 46006323 | 3112  |
| ENSG000001 | 0.870904 | 4.522358 | -1.8231  | 0.20903   | 0.29906   | PRR15L    | chr17 | - | 46029333 | 46035244 | 1519  |
| ENSG000001 | 264.4887 | 271.3465 | -0.03504 | 0.85844   | 0.90057   | COQ7      | chr16 | + | 19078921 | 19091417 | 2657  |
| ENSG000001 | 326.8998 | 3949.408 | -3.5859  | 2.53E-109 | 1.67E-107 | GPRC5B    | chr16 | - | 19868616 | 19897489 | 4610  |
| ENSG000001 | 1847.826 | 1125.242 | 0.71441  | 3.92E-07  | 1.45E-06  | CRK       | chr17 | - | 1323983  | 1366456  | 3880  |
| ENSG000001 | 0        | 1.294874 | -1.8547  | 0.27869   | NA        | C16orf92  | chr16 | + | 30034655 | 30039057 | 895   |
| ENSG000001 | 0        | 21.52652 | -5.9092  | 2.26E-06  | 7.78E-06  | GOLGA6C   | chr15 | + | 75550940 | 75562540 | 2082  |
| ENSG000001 | 622.2753 | 779.8269 | -0.32457 | 0.14035   | 0.21424   | FBXO22    | chr15 | + | 76196200 | 76227609 | 3483  |
| ENSG000001 | 1385.55  | 399.2926 | 1.7891   | 1.18E-20  | 1.02E-19  | TBC1D2B   | chr15 | - | 78276378 | 78370066 | 6086  |
| ENSG000001 | 1.286224 | 17.78671 | -3.4766  | 0.000209  | 0.00057   | NOD2      | chr16 | + | 50727514 | 50766988 | 4486  |
| ENSG000001 | 2.282147 | 0.297015 | 2.0825   | 0.16536   | 0.24634   | SNX20     | chr16 | - | 50700211 | 50715264 | 3304  |
| ENSG000001 | 0        | 52.05875 | -7.2682  | 6.53E-11  | 3.28E-10  | LOXHD1    | chr18 | - | 44056935 | 44236996 | 6848  |
| ENSG000001 | 33.1001  | 133.9458 | -1.9922  | 3.10E-08  | 1.26E-07  | KATNAL2   | chr18 | + | 44497455 | 44627658 | 1877  |
| ENSG000001 | 219.2556 | 299.5376 | -0.44893 | 0.010439  | 0.021862  | HDHD2     | chr18 | - | 44633774 | 44676891 | 3229  |
| ENSG000001 | 1.814586 | 1.058552 | 0.63682  | 0.6726    | 0.75482   | C17orf78  | chr17 | + | 35732928 | 35749662 | 1862  |
| ENSG000001 | 192.604  | 411.2464 | -1.0888  | 6.97E-07  | 2.52E-06  | ZNF91     | chr19 | - | 23487793 | 23578362 | 5489  |
| ENSG000001 | 13704.31 | 89.40183 | 7.2362   | 3.35E-269 | 1.30E-266 | IGF2      | chr11 | - | 2150342  | 2170833  | 5585  |
| ENSG000001 | 304.6493 | 299.7286 | 0.023206 | 0.87633   | 0.91412   | RNF214    | chr11 | + | 1.17E+08 | 1.17E+08 | 2846  |
| ENSG000001 | 1299.545 | 1601.031 | -0.29989 | 0.11861   | 0.18709   | CDK12     | chr17 | + | 37617764 | 37721160 | 7734  |
| ENSG000001 | 0.632843 | 0.357707 | 0.4993   | 0.77637   | NA        | DPEP2     | chr16 | - | 68021297 | 68034489 | 2248  |
| ENSG000001 | 202.9571 | 226.4034 | -0.15727 | 0.31915   | 0.42203   | DUS2L     | chr16 | + | 68021649 | 68113223 | 2310  |
| ENSG000001 | 345.2474 | 386.8453 | -0.16221 | 0.45012   | 0.55574   | POP5      | chr12 | - | 1.21E+08 | 1.21E+08 | 913   |
| ENSG000001 | 308.7869 | 746.7495 | -1.2694  | 2.29E-08  | 9.45E-08  | ENGASE    | chr17 | + | 77071021 | 77084681 | 4626  |

|            |          |          |          |           |           |          |       |   |          |          |       |
|------------|----------|----------|----------|-----------|-----------|----------|-------|---|----------|----------|-------|
| ENSG000001 | 2.055252 | 333.78   | -6.4461  | 1.66E-08  | 6.94E-08  | RBFOX3   | chr17 | - | 77085427 | 77613550 | 3072  |
| ENSG000001 | 476.847  | 506.6396 | -0.08521 | 0.63299   | 0.72194   | ATP5L    | chr11 | + | 1.18E+08 | 1.18E+08 | 1582  |
| ENSG000001 | 0        | 0.937167 | -1.2408  | 0.48662   | NA        | CD3D     | chr11 | - | 1.18E+08 | 1.18E+08 | 861   |
| ENSG000001 | 5399     | 5333.337 | 0.017616 | 0.87509   | 0.91322   | TBC1D16  | chr17 | - | 77906142 | 78009647 | 10936 |
| ENSG000001 | 114.3084 | 97.55638 | 0.22517  | 0.33107   | 0.43425   | ENTHD2   | chr17 | - | 79202077 | 79212891 | 3642  |
| ENSG000001 | 46.54995 | 227.7484 | -2.278   | 1.07E-22  | 1.01E-21  | MYO5B    | chr18 | - | 47349183 | 47721463 | 9505  |
| ENSG000001 | 8.75695  | 149.8838 | -4.0549  | 3.04E-21  | 2.72E-20  | ART5     | chr11 | - | 3659733  | 3663546  | 1504  |
| ENSG000001 | 682.1672 | 1369.288 | -1.0044  | 5.88E-14  | 3.60E-13  | ACAA2    | chr18 | - | 47309869 | 47340330 | 2018  |
| ENSG000001 | 1025.501 | 428.4588 | 1.2545   | 1.92E-09  | 8.63E-09  | STIM1    | chr11 | + | 3875757  | 4114439  | 4038  |
| ENSG000001 | 1709.379 | 1477.098 | 0.21071  | 0.065553  | 0.11264   | RRM1     | chr11 | + | 4115937  | 4160106  | 3166  |
| ENSG000001 | 223.0751 | 156.0232 | 0.51459  | 0.004563  | 0.010223  | TRIM68   | chr11 | - | 4619902  | 4629489  | 3352  |
| ENSG000001 | 0        | 0.343138 | -0.41864 | 0.81278   | NA        | AC104389 | chr11 | - | 5326206  | 5526882  | 1163  |
| ENSG000001 | 185.539  | 355.9219 | -0.93371 | 0.000673  | 0.001715  | FN3K     | chr17 | + | 80693451 | 80709073 | 2515  |
| ENSG000001 | 235.2401 | 175.4059 | 0.41993  | 0.071148  | 0.12081   | PRRT2    | chr16 | + | 29823177 | 29827201 | 3000  |
| ENSG000001 | 15.57006 | 23.57152 | -0.56955 | 0.28081   | 0.38176   | ZNF23    | chr16 | - | 71481500 | 71496998 | 3242  |
| ENSG000001 | 1111.442 | 725.4356 | 0.61428  | 1.80E-07  | 6.89E-07  | IRGQ     | chr19 | - | 44088521 | 44100287 | 9685  |
| ENSG000001 | 283.5573 | 183.9483 | 0.62408  | 0.001972  | 0.004671  | ZNF226   | chr19 | + | 44669226 | 44682534 | 5972  |
| ENSG000001 | 60.87291 | 80.12087 | -0.39233 | 0.15255   | 0.23033   | ZNF229   | chr19 | - | 44921685 | 44952766 | 5387  |
| ENSG000001 | 87.46235 | 132.7288 | -0.59456 | 0.059775  | 0.10416   | ZNF180   | chr19 | - | 44979854 | 45004576 | 3270  |
| ENSG000001 | 666.705  | 1521.856 | -1.1888  | 7.76E-16  | 5.33E-15  | PPP2R3B  | chrX  | - | 294698   | 347690   | 5802  |
| ENSG000001 | 398.489  | 366.1078 | 0.12291  | 0.38486   | 0.48908   | ZNF668   | chr16 | - | 31072164 | 31085641 | 2865  |
| ENSG000001 | 758.1931 | 1196.115 | -0.65691 | 1.79E-08  | 7.44E-08  | ZNF646   | chr16 | + | 31085743 | 31095517 | 8118  |
| ENSG000001 | 33.37166 | 29.07555 | 0.19758  | 0.60301   | 0.69637   | VKORC1   | chr16 | - | 31102163 | 31107301 | 1077  |
| ENSG000001 | 7.85353  | 1.416259 | 2.2861   | 0.027161  | 0.051991  | GNG8     | chr19 | - | 47137333 | 47137942 | 216   |
| ENSG000001 | 0.923144 | 5.89491  | -2.3221  | 0.037514  | 0.069321  | LPO      | chr17 | + | 56295909 | 56345879 | 3371  |
| ENSG000001 | 0.36308  | 19.05728 | -5.0474  | 7.96E-06  | 2.59E-05  | CA4      | chr17 | + | 58227297 | 58248260 | 1154  |
| ENSG000001 | 388.3229 | 440.3327 | -0.18011 | 0.26163   | 0.35979   | SMG8     | chr17 | + | 57286761 | 57292608 | 3477  |
| ENSG000001 | 22722.92 | 8298.559 | 1.4514   | 2.72E-30  | 3.50E-29  | TPM4     | chr19 | + | 16177831 | 16213813 | 2672  |
| ENSG000001 | 214.9706 | 269.7775 | -0.32806 | 0.035186  | 0.06545   | RAB8A    | chr19 | + | 16222439 | 16245044 | 2827  |
| ENSG000001 | 2944.78  | 3950.051 | -0.42281 | 0.002341  | 0.005479  | GPX4     | chr19 | + | 1103936  | 1106787  | 1159  |
| ENSG000001 | 2665.186 | 7582.19  | -1.5056  | 1.95E-25  | 2.08E-24  | MIDN     | chr19 | + | 1248552  | 1259142  | 3790  |
| ENSG000001 | 2.697468 | 5.99931  | -1.061   | 0.29165   | 0.39349   | JSRP1    | chr19 | - | 2252252  | 2269758  | 1137  |
| ENSG000001 | 4.875134 | 5.687726 | -0.19847 | 0.81934   | 0.87305   | FAM129C  | chr19 | + | 17634110 | 17664648 | 5115  |
| ENSG000001 | 255.4434 | 387.006  | -0.59689 | 0.011126  | 0.023154  | KLHL26   | chr19 | + | 18747775 | 18781309 | 3192  |
| ENSG000001 | 2153.6   | 4065.849 | -0.91561 | 1.04E-12  | 5.90E-12  | GATAD2A  | chr19 | + | 19496639 | 19619740 | 5776  |
| ENSG000001 | 4942.79  | 2129.599 | 1.2116   | 9.06E-11  | 4.49E-10  | MVD      | chr16 | - | 88718343 | 88729569 | 2352  |
| ENSG000001 | 773.8691 | 4407.579 | -2.5037  | 8.15E-47  | 1.70E-45  | CDT1     | chr16 | + | 88869621 | 88875666 | 3240  |
| ENSG000001 | 514.2847 | 651.3884 | -0.33948 | 0.020939  | 0.041122  | TRAPPC2L | chr16 | + | 88922628 | 88929094 | 3102  |
| ENSG000001 | 5632.334 | 4676.582 | 0.26796  | 0.020376  | 0.040119  | ANKRD11  | chr16 | - | 89334038 | 89556969 | 9301  |
| ENSG000001 | 165.5126 | 147.7552 | 0.16462  | 0.3829    | 0.48704   | C16orf55 | chr16 | + | 89724210 | 89737680 | 3339  |
| ENSG000001 | 10.52867 | 14.65389 | -0.46189 | 0.41189   | 0.51673   | SGK494   | chr17 | - | 26934982 | 26941218 | 2975  |
| ENSG000001 | 86.32526 | 363.4447 | -2.0672  | 1.05E-21  | 9.57E-21  | PROCA1   | chr17 | - | 27030215 | 27038872 | 3168  |
| ENSG000001 | 16817.65 | 24690.17 | -0.55347 | 9.71E-08  | 3.79E-07  | RPL13    | chr16 | + | 89627065 | 89630950 | 2385  |
| ENSG000001 | 134.6453 | 88.66884 | 0.59907  | 0.022941  | 0.04468   | ZNF641   | chr12 | - | 48733791 | 48745197 | 4872  |
| ENSG000001 | 944.0751 | 85.83309 | 3.4411   | 7.54E-77  | 3.05E-75  | CACNB3   | chr12 | + | 49207577 | 49222724 | 4029  |
| ENSG000001 | 72.47044 | 265.4745 | -1.8634  | 8.92E-19  | 7.06E-18  | DHRS13   | chr17 | - | 27224799 | 27230089 | 2037  |
| ENSG000001 | 1104.344 | 800.0333 | 0.46314  | 0.029704  | 0.056282  | TP53I13  | chr17 | + | 27893070 | 27900175 | 2468  |
| ENSG000001 | 3885.657 | 2962.233 | 0.39071  | 0.005355  | 0.01186   | MLL2     | chr12 | - | 49412758 | 49453557 | 19419 |
| ENSG000001 | 127.4869 | 67.31312 | 0.91625  | 0.000137  | 0.000385  | CORO6    | chr17 | - | 27941774 | 27949925 | 4069  |
| ENSG000001 | 34.63897 | 105.5492 | -1.5962  | 1.91E-06  | 6.66E-06  | RHEBL1   | chr12 | - | 49458468 | 49463808 | 1261  |
| ENSG000001 | 24004.66 | 4647.394 | 2.365    | 6.93E-59  | 1.96E-57  | TUBA1A   | chr12 | - | 49578579 | 49583107 | 1915  |
| ENSG000001 | 2837.65  | 2868.404 | -0.01514 | 0.89523   | 0.92726   | TUBA1C   | chr12 | + | 49582519 | 49667114 | 1800  |
| ENSG000001 | 7.447583 | 43.62499 | -2.4832  | 7.94E-07  | 2.86E-06  | ZNF610   | chr19 | + | 52839498 | 52871031 | 2723  |
| ENSG000001 | 0.580602 | 6.007431 | -2.6052  | 0.067657  | 0.11569   | ZNF528   | chr19 | + | 52901102 | 52921665 | 4809  |
| ENSG000001 | 73.2728  | 144.2539 | -0.96553 | 0.010938  | 0.022794  | ZNF701   | chr19 | + | 53059075 | 53090427 | 5538  |
| ENSG000001 | 671.0732 | 347.4723 | 0.94905  | 3.62E-10  | 1.72E-09  | SERTAD3  | chr19 | - | 40946751 | 40950612 | 1734  |
| ENSG000001 | 1960.621 | 866.4016 | 1.1752   | 3.15E-14  | 1.97E-13  | NCKAP5L  | chr12 | - | 50184929 | 50222533 | 4900  |
| ENSG000001 | 87.03228 | 60.29822 | 0.52143  | 0.091172  | 0.14941   | RAB4B    | chr19 | + | 41284121 | 41302847 | 1982  |
| ENSG000001 | 0        | 0.297015 | -0.41864 | 0.81278   | NA        | AQP2     | chr12 | + | 50344524 | 50352664 | 4174  |
| ENSG000001 | 2.012384 | 4.772377 | -1.0853  | 0.36496   | 0.46937   | GPD1     | chr12 | + | 50497602 | 50505102 | 3082  |
| ENSG000001 | 393.6426 | 223.3964 | 0.81294  | 6.85E-05  | 0.000199  | C19orf55 | chr19 | + | 36249044 | 36261930 | 3607  |
| ENSG000001 | 1.359003 | 3895.095 | -11.124  | 2.21E-72  | 8.27E-71  | CYP2S1   | chr19 | + | 41698954 | 41713444 | 2782  |
| ENSG000001 | 4307.846 | 447.0465 | 3.2629   | 5.59E-131 | 5.11E-129 | AXL      | chr19 | + | 41725108 | 41767671 | 4737  |
| ENSG000001 | 43.5295  | 86.11534 | -0.978   | 0.000223  | 0.000606  | NFKBID   | chr19 | - | 36378555 | 36393185 | 1834  |
| ENSG000001 | 20.42629 | 123.6466 | -2.5711  | 1.42E-12  | 7.96E-12  | TMC4     | chr19 | - | 54663846 | 54676944 | 2412  |

|            |          |          |          |           |           |          |       |   |          |          |       |
|------------|----------|----------|----------|-----------|-----------|----------|-------|---|----------|----------|-------|
| ENSG000001 | 8.403243 | 9.214641 | -0.13921 | 0.83635   | 0.88515   | ANKRD33  | chr12 | + | 52281744 | 52285448 | 3319  |
| ENSG000001 | 1.431782 | 4.349145 | -1.4526  | 0.20932   | 0.29927   | LAIR1    | chr19 | - | 54865362 | 54882165 | 2606  |
| ENSG000001 | 26.00027 | 704.2435 | -4.7492  | 3.42E-87  | 1.63E-85  | TTYH1    | chr19 | + | 54926393 | 54948080 | 3679  |
| ENSG000001 | 4433.827 | 2460.832 | 0.84827  | 3.31E-12  | 1.81E-11  | LENG8    | chr19 | + | 54960065 | 54973217 | 5790  |
| ENSG000001 | 1873.513 | 101.5659 | 4.1065   | 2.22E-14  | 1.40E-13  | CDC42EP5 | chr19 | - | 54976210 | 54984411 | 864   |
| ENSG000001 | 4.056471 | 70.60297 | -4.0552  | 2.68E-14  | 1.68E-13  | TMEM145  | chr19 | + | 42817477 | 42829214 | 2011  |
| ENSG000001 | 491.9636 | 481.1635 | 0.032962 | 0.81168   | 0.86754   | ZNF526   | chr19 | + | 42724423 | 42732353 | 4023  |
| ENSG000001 | 540.0254 | 295.999  | 0.86409  | 6.85E-07  | 2.48E-06  | TRAPPC9  | chr8  | - | 1.41E+08 | 1.41E+08 | 29517 |
| ENSG000001 | 0        | 64.06146 | -7.5355  | 1.28E-11  | 6.73E-11  | NLRP7    | chr19 | - | 55434877 | 55477680 | 3826  |
| ENSG000001 | 1399.724 | 1707.297 | -0.28518 | 0.16838   | 0.25002   | ZNF146   | chr19 | + | 36705504 | 36729676 | 3780  |
| ENSG000001 | 117.8162 | 83.94305 | 0.48707  | 0.13685   | 0.21009   | ZNF283   | chr19 | + | 44331444 | 44353307 | 2851  |
| ENSG000001 | 22.69645 | 473.3821 | -4.3453  | 4.36E-56  | 1.16E-54  | PPP1R14A | chr19 | - | 38741877 | 38747231 | 949   |
| ENSG000001 | 25.42546 | 2812.409 | -6.7781  | 4.37E-195 | 9.20E-193 | SPINT2   | chr19 | + | 38734675 | 38783254 | 3807  |
| ENSG000001 | 0        | 1.606458 | -1.9287  | 0.27074   | NA        | C19orf33 | chr19 | + | 38794801 | 38795649 | 520   |
| ENSG000001 | 1519.046 | 1418.769 | 0.098156 | 0.5641    | 0.66212   | YIF1B    | chr19 | - | 38795753 | 38807913 | 1917  |
| ENSG000001 | 4.378475 | 19.42311 | -2.0953  | 0.001441  | 0.003489  | DNAAF3   | chr19 | - | 55670031 | 55678090 | 2228  |
| ENSG000001 | 1.338465 | 2.185918 | -0.62939 | 0.62205   | 0.71249   | PSCA     | chr8  | + | 1.44E+08 | 1.44E+08 | 1020  |
| ENSG000001 | 1.233984 | 735.6158 | -8.7654  | 2.29E-39  | 3.97E-38  | ATCAY    | chr19 | + | 38798862 | 3928077  | 5070  |
| ENSG000001 | 1917.675 | 1618.955 | 0.2439   | 0.099383  | 0.16064   | DAPK3    | chr19 | - | 3958451  | 3971121  | 2257  |
| ENSG000001 | 56035.69 | 84029.73 | -0.58363 | 3.54E-05  | 0.000106  | EEF2     | chr19 | - | 3976054  | 3985467  | 3164  |
| ENSG000001 | 5.217676 | 17.87251 | -1.7055  | 0.013691  | 0.027973  | TMIGD2   | chr19 | - | 4292229  | 4302428  | 1262  |
| ENSG000001 | 960.1272 | 3733.095 | -1.9557  | 2.13E-41  | 3.86E-40  | CHAF1A   | chr19 | + | 4402659  | 4445015  | 3339  |
| ENSG000001 | 2132.577 | 1071.93  | 0.99148  | 1.16E-14  | 7.42E-14  | UBXN6    | chr19 | - | 4444996  | 4457819  | 4598  |
| ENSG000001 | 2472.842 | 3287.1   | -0.4103  | 0.000405  | 0.001065  | HDGFRP2  | chr19 | + | 4472284  | 4502223  | 3115  |
| ENSG000001 | 46.88133 | 55.28387 | -0.24063 | 0.52659   | 0.62836   | PLIN4    | chr19 | - | 4502204  | 4517716  | 6341  |
| ENSG000001 | 279.0789 | 3089.383 | -3.4469  | 1.14E-35  | 1.78E-34  | SEMA6B   | chr19 | - | 4542600  | 4559820  | 3986  |
| ENSG000001 | 969.8388 | 1595.79  | -0.71655 | 3.88E-05  | 0.000116  | ZNF444   | chr19 | + | 56643968 | 56672262 | 5565  |
| ENSG000001 | 1811.956 | 3233.534 | -0.83492 | 2.25E-17  | 1.68E-16  | NXN      | chr17 | - | 702553   | 883010   | 3036  |
| ENSG000001 | 812.1098 | 506.7251 | 0.67943  | 1.41E-07  | 5.45E-07  | FAM57A   | chr17 | + | 635652   | 646206   | 2406  |
| ENSG000001 | 842.9397 | 886.1555 | -0.07146 | 0.66528   | 0.74848   | GLOD4    | chr17 | - | 660337   | 685581   | 2737  |
| ENSG000001 | 330.2984 | 1496.673 | -2.1764  | 1.04E-47  | 2.22E-46  | MFSB3    | chr8  | + | 1.46E+08 | 1.46E+08 | 1548  |
| ENSG000001 | 9.668116 | 6.615156 | 0.52684  | 0.49409   | 0.59796   | GPT      | chr8  | + | 1.46E+08 | 1.46E+08 | 1885  |
| ENSG000001 | 204.0131 | 372.6403 | -0.86553 | 0.000267  | 0.000721  | KIFC2    | chr8  | + | 1.46E+08 | 1.46E+08 | 3646  |
| ENSG000001 | 138.8609 | 342.7631 | -1.2971  | 1.36E-13  | 8.13E-13  | SLC43A2  | chr17 | - | 1477673  | 1532180  | 3254  |
| ENSG000001 | 84.83668 | 189.3137 | -1.1555  | 2.00E-06  | 6.95E-06  | RILP     | chr17 | - | 1549444  | 1553371  | 1771  |
| ENSG000001 | 4.584833 | 22.17553 | -2.1902  | 0.001092  | 0.002691  | SERPINF2 | chr17 | + | 1646130  | 1658562  | 2284  |
| ENSG000001 | 769.8126 | 483.0949 | 0.67105  | 0.000202  | 0.000553  | WDR81    | chr17 | + | 1619817  | 1641893  | 6733  |
| ENSG000001 | 100.3579 | 41.03617 | 1.2736   | 2.06E-05  | 6.37E-05  | SRR      | chr17 | + | 2206677  | 2228554  | 2728  |
| ENSG000001 | 895.6762 | 1465.909 | -0.70725 | 0.003071  | 0.007066  | TSR1     | chr17 | - | 2225951  | 2240801  | 5034  |
| ENSG000001 | 17.17136 | 21.69477 | -0.3331  | 0.55191   | 0.65142   | TRPV3    | chr17 | - | 3413796  | 3461289  | 5050  |
| ENSG000001 | 80.89341 | 106.2315 | -0.38878 | 0.31169   | 0.41374   | HSD11B1L | chr19 | + | 5680615  | 5688533  | 1884  |
| ENSG000001 | 186.9878 | 156.2706 | 0.25955  | 0.13467   | 0.20767   | CYB5D2   | chr17 | + | 4046462  | 4090605  | 1910  |
| ENSG000001 | 0        | 3.662869 | -3.392   | 0.022082  | 0.043169  | GGT6     | chr17 | - | 4460222  | 4464113  | 2534  |
| ENSG000001 | 906.8766 | 2295.129 | -1.3347  | 1.34E-10  | 6.59E-10  | C19orf48 | chr19 | - | 51300961 | 51308186 | 1844  |
| ENSG000001 | 0        | 11.05172 | -5.0881  | 4.23E-05  | 0.000126  | KLK1     | chr19 | - | 51322404 | 51327043 | 1854  |
| ENSG000001 | 0        | 2.918317 | -3.0219  | 0.051534  | 0.091339  | KLK4     | chr19 | - | 51409608 | 51413994 | 1347  |
| ENSG000001 | 0        | 0.654722 | -0.83442 | 0.63731   | NA        | KLK2     | chr19 | + | 51364824 | 51383823 | 3019  |
| ENSG000001 | 0        | 3.526915 | -3.3414  | 0.025042  | 0.048329  | KLK5     | chr19 | - | 51446559 | 51456349 | 1563  |
| ENSG000001 | 0        | 3.662869 | -3.392   | 0.022082  | 0.043169  | KLK6     | chr19 | - | 51461887 | 51472929 | 1708  |
| ENSG000001 | 0        | 0.343138 | -0.41864 | 0.81278   | NA        | KLK11    | chr19 | - | 51525472 | 51531295 | 1542  |
| ENSG000001 | 0        | 21.96989 | -6.0825  | 1.58E-07  | 6.05E-07  | KLK13    | chr19 | - | 51559463 | 51568371 | 1614  |
| ENSG000001 | 4.906837 | 10.41968 | -1.0452  | 0.13443   | 0.2074    | AC018755 | chr19 | - | 52095036 | 52097633 | 1701  |
| ENSG000001 | 471.9091 | 335.527  | 0.49151  | 0.005329  | 0.011807  | ZNF83    | chr19 | - | 53097313 | 53193749 | 4442  |
| ENSG000001 | 43.65631 | 4.821789 | 3.079    | 7.08E-09  | 3.04E-08  | KRT80    | chr12 | - | 52562780 | 52585784 | 3894  |
| ENSG000001 | 2.604151 | 0        | 2.8487   | 0.070705  | 0.12022   | KRT1     | chr12 | - | 53068520 | 53074191 | 2451  |
| ENSG000001 | 1.233984 | 0        | 1.5686   | 0.37707   | NA        | ACER1    | chr19 | - | 6306153  | 6333640  | 1445  |
| ENSG000001 | 1326.131 | 1964.04  | -0.56542 | 5.14E-07  | 1.88E-06  | OTUB1    | chr11 | + | 63753325 | 63769283 | 2493  |
| ENSG000001 | 733.4779 | 2643.398 | -1.847   | 1.28E-63  | 4.05E-62  | RCOR2    | chr11 | - | 63678693 | 63684316 | 2604  |
| ENSG000001 | 79.2415  | 59.14742 | 0.41651  | 0.20248   | 0.29128   | ANGPTL4  | chr19 | + | 8428173  | 8439257  | 1879  |
| ENSG000001 | 0        | 0.715414 | -0.84936 | 0.6309    | NA        | NDUFA7   | chr19 | - | 8373167  | 8386263  | 580   |
| ENSG000001 | 687.4091 | 1205.97  | -0.80853 | 2.41E-07  | 9.09E-07  | CD320    | chr19 | - | 8367011  | 8373240  | 1729  |
| ENSG000001 | 1038.431 | 152.0001 | 2.7661   | 5.41E-43  | 1.03E-41  | SPRYD3   | chr12 | - | 53458388 | 53473204 | 2644  |
| ENSG000001 | 245.5717 | 29.34746 | 3.0483   | 8.94E-38  | 1.48E-36  | IGFBP6   | chr12 | + | 53491220 | 53496129 | 1177  |
| ENSG000001 | 1.286224 | 0.343138 | 1.3346   | 0.40921   | NA        | SOAT2    | chr12 | + | 53497302 | 53518322 | 2044  |
| ENSG000001 | 0        | 29.77156 | -6.4949  | 1.47E-08  | 6.14E-08  | ZNF558   | chr19 | - | 8920380  | 8943004  | 3498  |

|            |          |          |          |          |          |           |       |   |          |          |       |
|------------|----------|----------|----------|----------|----------|-----------|-------|---|----------|----------|-------|
| ENSG000001 | 1958.367 | 2547.677 | -0.37932 | 0.000313 | 0.000836 | NDUFV1    | chr11 | + | 67374323 | 67380006 | 1748  |
| ENSG000001 | 1782.844 | 909.9196 | 0.97001  | 3.25E-19 | 2.63E-18 | CDK2AP2   | chr11 | - | 67273968 | 67276120 | 1692  |
| ENSG000001 | 0        | 0.951736 | -1.2555  | 0.48145  | NA       | C3P1      | chr19 | + | 10148479 | 10184811 | 4612  |
| ENSG000001 | 273.6209 | 161.9572 | 0.74829  | 0.048946 | 0.087361 | NUDT8     | chr11 | - | 67395409 | 67397401 | 1465  |
| ENSG000001 | 44.73178 | 124.3158 | -1.3783  | 0.11687  | 0.18463  | TBX10     | chr11 | - | 67398774 | 67407031 | 1548  |
| ENSG000001 | 1354.031 | 2211.313 | -0.70664 | 3.47E-10 | 1.65E-09 | PRDX2     | chr19 | - | 12907634 | 12912694 | 1717  |
| ENSG000001 | 117.757  | 360.4795 | -1.6091  | 1.89E-12 | 1.05E-11 | ZNF232    | chr17 | - | 5008836  | 5026411  | 2384  |
| ENSG000001 | 274.4526 | 431.6488 | -0.65111 | 0.001387 | 0.003366 | MIS12     | chr17 | + | 5389605  | 5394134  | 2505  |
| ENSG000001 | 1.286224 | 0.343138 | 1.3346   | 0.40921  | NA       | CD300C    | chr17 | - | 72537247 | 72542282 | 1517  |
| ENSG000001 | 0.995923 | 3.518794 | -1.5048  | 0.25616  | 0.35352  | CD300A    | chr17 | + | 72462555 | 72480933 | 1856  |
| ENSG000001 | 11.22492 | 619.945  | -5.7243  | 5.06E-52 | 1.23E-50 | HID1      | chr17 | - | 72946838 | 72969261 | 3271  |
| ENSG000001 | 254.0281 | 368.0499 | -0.53259 | 0.001656 | 0.003968 | ICT1      | chr17 | + | 73008765 | 73017356 | 890   |
| ENSG000001 | 371.7571 | 898.8355 | -1.271   | 1.20E-14 | 7.69E-14 | ATP5H     | chr17 | - | 73034958 | 73043080 | 2191  |
| ENSG000001 | 20.69784 | 58.40435 | -1.4774  | 8.81E-05 | 0.000253 | TMEM88    | chr17 | + | 7758383  | 7759417  | 875   |
| ENSG000001 | 0.653381 | 20.29388 | -4.5035  | 4.25E-06 | 1.42E-05 | EVPL      | chr17 | - | 74000583 | 74023533 | 6614  |
| ENSG000001 | 2389.382 | 2071.398 | 0.20613  | 0.032611 | 0.061122 | SRP68     | chr17 | - | 74035184 | 74068734 | 2649  |
| ENSG000001 | 244.5247 | 467.6183 | -0.93143 | 8.19E-06 | 2.66E-05 | MGAT5B    | chr17 | + | 74864538 | 74946475 | 4492  |
| ENSG000001 | 6.504714 | 22.37218 | -1.7342  | 0.011133 | 0.023165 | TMC8      | chr17 | + | 76126851 | 76139049 | 4411  |
| ENSG000001 | 1665.831 | 1771.846 | -0.08852 | 0.60657  | 0.69964  | TK1       | chr17 | - | 76170160 | 76183314 | 1681  |
| ENSG000001 | 175.106  | 272.6388 | -0.63725 | 0.019693 | 0.038925 | TMEM68    | chr8  | - | 56608983 | 56685966 | 2588  |
| ENSG000001 | 62.57445 | 33.11627 | 0.91586  | 0.004686 | 0.010481 | RP11-25K1 | chr8  | + | 60031599 | 60033905 | 1106  |
| ENSG000001 | 0        | 1.043983 | -1.3473  | 0.44976  | NA       | GSDMA     | chr17 | + | 38119226 | 38134019 | 2164  |
| ENSG000001 | 0.36308  | 0        | 0.4146   | 0.81455  | NA       | KRT24     | chr17 | - | 38854243 | 38860002 | 1881  |
| ENSG000001 | 75.98062 | 54.47428 | 0.48043  | 0.16078  | 0.24072  | TMEM99    | chr17 | + | 38975358 | 38992522 | 2058  |
| ENSG000001 | 68.31031 | 239.2205 | -1.7988  | 1.42E-14 | 9.07E-14 | GHDC      | chr17 | - | 40340817 | 40346531 | 2650  |
| ENSG000001 | 753.8716 | 1250.067 | -0.72801 | 9.32E-07 | 3.34E-06 | ITFG3     | chr16 | + | 284545   | 319942   | 3213  |
| ENSG000001 | 0.290301 | 0.357707 | -0.00203 | 0.99908  | NA       | SOST      | chr17 | - | 41831099 | 41836156 | 2300  |
| ENSG000001 | 12.20886 | 23.5789  | -0.92135 | 0.12422  | 0.19431  | PRR25     | chr16 | + | 855443   | 863861   | 1209  |
| ENSG000001 | 1035.471 | 1046.627 | -0.01552 | 0.91193  | 0.93967  | ZNF598    | chr16 | - | 2047655  | 2059824  | 4457  |
| ENSG000001 | 46.88035 | 86.89654 | -0.8888  | 0.003762 | 0.008532 | RAB26     | chr16 | + | 2190804  | 2204166  | 1922  |
| ENSG000001 | 1038.873 | 1625.69  | -0.64546 | 2.42E-09 | 1.08E-08 | MLST8     | chr16 | + | 2254249  | 2259417  | 2116  |
| ENSG000001 | 556.3941 | 720.8894 | -0.37271 | 0.014455 | 0.029372 | E4F1      | chr16 | + | 2273567  | 2285743  | 5931  |
| ENSG000001 | 5.778554 | 5.980709 | -0.07308 | 0.93539  | 0.95756  | DNASE1L2  | chr16 | + | 2285817  | 2288712  | 2194  |
| ENSG000001 | 605.4885 | 1274.625 | -1.0719  | 6.28E-15 | 4.10E-14 | ECI1      | chr16 | - | 2289396  | 2302301  | 1541  |
| ENSG000001 | 17.89671 | 250.7517 | -3.7687  | 9.75E-23 | 9.30E-22 | CASKIN1   | chr16 | - | 2227184  | 2246526  | 5756  |
| ENSG000001 | 54.42044 | 529.7039 | -3.2566  | 4.19E-25 | 4.40E-24 | ABCA3     | chr16 | - | 2325882  | 2390747  | 6609  |
| ENSG000001 | 1077.202 | 756.503  | 0.50869  | 0.013342 | 0.027342 | KCTD5     | chr16 | + | 2732476  | 2759031  | 2482  |
| ENSG000001 | 12717.31 | 15208.34 | -0.2577  | 0.055954 | 0.098134 | SRRM2     | chr16 | + | 2802330  | 2822539  | 9353  |
| ENSG000001 | 46.65843 | 34.69842 | 0.42429  | 0.30229  | 0.40358  | ZNF597    | chr16 | - | 3486104  | 3493542  | 1831  |
| ENSG000001 | 18.9628  | 27.13569 | -0.50968 | 0.2543   | 0.35134  | NLR3      | chr16 | - | 3589033  | 3627401  | 6603  |
| ENSG000001 | 49.39795 | 74.09887 | -0.57592 | 0.07554  | 0.12719  | SDHAF2    | chr11 | + | 61197514 | 61215001 | 2033  |
| ENSG000001 | 6617.433 | 7692.257 | -0.21694 | 0.013516 | 0.027659 | DDB1      | chr11 | - | 61066923 | 61110068 | 4506  |
| ENSG000001 | 590.897  | 496.0787 | 0.25157  | 0.081852 | 0.13624  | VPS37C    | chr11 | - | 60897728 | 60929089 | 2865  |
| ENSG000001 | 20.96402 | 289.888  | -3.7643  | 6.55E-42 | 1.21E-40 | VWCE      | chr11 | - | 61025762 | 61062896 | 3640  |
| ENSG000001 | 209.0576 | 226.8571 | -0.11674 | 0.74504  | 0.81289  | RAB31L1   | chr11 | - | 61664773 | 61687741 | 2284  |
| ENSG000001 | 15.6351  | 4.836358 | 1.6119   | 0.015525 | 0.031343 | BEST1     | chr11 | + | 61717293 | 61732987 | 5772  |
| ENSG000001 | 2083.242 | 2050.421 | 0.022816 | 0.90084  | 0.93145  | FTH1      | chr11 | - | 61727190 | 61735132 | 1229  |
| ENSG000001 | 22.324   | 15.27135 | 0.55305  | 0.28141  | 0.38241  | BSC12     | chr11 | - | 62457747 | 62477317 | 2038  |
| ENSG000001 | 1121.06  | 841.7064 | 0.41326  | 0.013609 | 0.027828 | POLR2G    | chr11 | + | 62529016 | 62534182 | 1556  |
| ENSG000001 | 3021.343 | 5510.559 | -0.86554 | 4.48E-10 | 2.12E-09 | SLC3A2    | chr11 | + | 62623518 | 62656352 | 2397  |
| ENSG000001 | 0        | 131.5891 | -8.4937  | 9.57E-15 | 6.18E-14 | HRASLS5   | chr11 | - | 63228876 | 63258666 | 3032  |
| ENSG000001 | 1398.154 | 2442.592 | -0.80391 | 4.72E-12 | 2.55E-11 | C11orf84  | chr11 | + | 63580860 | 63595190 | 2024  |
| ENSG000001 | 105.8531 | 104.3353 | 0.018993 | 0.95181  | 0.96991  | ATG16L2   | chr11 | + | 72525353 | 72554719 | 4577  |
| ENSG000001 | 972.7191 | 378.047  | 1.3608   | 1.62E-16 | 1.16E-15 | C2CD3     | chr11 | - | 73723763 | 73882255 | 7289  |
| ENSG000001 | 151.1329 | 394.7571 | -1.3678  | 0.000792 | 0.001996 | TRANK1    | chr3  | - | 36868311 | 36986548 | 10481 |
| ENSG000001 | 42.70563 | 28.04943 | 0.59114  | 0.17925  | 0.2633   | TTC21A    | chr3  | + | 39149152 | 39180394 | 4258  |
| ENSG000001 | 11197.3  | 26078.72 | -1.2184  | 2.83E-26 | 3.11E-25 | RPSA      | chr3  | + | 39448180 | 39454033 | 2058  |
| ENSG000001 | 0.685084 | 9.68158  | -3.4104  | 0.002071 | 0.004887 | ENTPD3    | chr3  | + | 40428647 | 40470110 | 2819  |
| ENSG000001 | 7558.84  | 7256.107 | 0.058945 | 0.55474  | 0.65403  | CTNBNB1   | chr3  | + | 41236328 | 41301587 | 3729  |
| ENSG000001 | 131.7111 | 153.6606 | -0.22261 | 0.27202  | 0.37146  | ULK4      | chr3  | - | 41288090 | 42003922 | 4613  |
| ENSG000001 | 438.2817 | 308.3286 | 0.50445  | 0.004962 | 0.011056 | FADD      | chr11 | + | 70049269 | 70053496 | 1841  |
| ENSG000001 | 5509.771 | 375.5424 | 3.8618   | 2.33E-87 | 1.11E-85 | LTBP3     | chr11 | - | 65306276 | 65326401 | 4443  |
| ENSG000001 | 1.016461 | 31.10457 | -4.5067  | 6.90E-06 | 2.26E-05 | NAALADL1  | chr11 | - | 64812290 | 64826021 | 2699  |
| ENSG000001 | 339.1747 | 408.708  | -0.26796 | 0.21329  | 0.3039   | SAC3D1    | chr11 | + | 64808373 | 64812300 | 1566  |
| ENSG000001 | 0.290301 | 21.45126 | -5.1337  | 1.62E-05 | 5.08E-05 | BATF2     | chr11 | - | 64755415 | 64764517 | 2569  |

|            |          |          |          |           |           |           |       |   |          |          |       |
|------------|----------|----------|----------|-----------|-----------|-----------|-------|---|----------|----------|-------|
| ENSG000001 | 1.431782 | 1.340997 | 0.050967 | 0.97132   | 0.98421   | SLC22A11  | chr11 | + | 64323098 | 64340347 | 3860  |
| ENSG000001 | 4055.666 | 5305.388 | -0.38627 | 0.050366  | 0.089497  | SF1       | chr11 | - | 64532078 | 64546258 | 3470  |
| ENSG000001 | 673.8244 | 509.9274 | 0.40014  | 0.051191  | 0.090797  | MAP4K2    | chr11 | - | 64556290 | 64570713 | 3169  |
| ENSG000001 | 16.33811 | 295.1826 | -4.1304  | 5.36E-32  | 7.37E-31  | CCDC88B   | chr11 | + | 64107695 | 64125006 | 5235  |
| ENSG000001 | 1656.207 | 743.7269 | 1.1511   | 6.09E-08  | 2.42E-07  | SCARA3    | chr8  | + | 27491385 | 27534293 | 3510  |
| ENSG000001 | 517.3981 | 165.6826 | 1.6421   | 1.81E-17  | 1.36E-16  | PBK       | chr8  | - | 27667137 | 27695612 | 2118  |
| ENSG000001 | 7.064778 | 2.786395 | 1.2548   | 0.19455   | 0.28221   | SCARA5    | chr8  | - | 27727399 | 27850244 | 4026  |
| ENSG000001 | 10.42598 | 1.058552 | 3.0612   | 0.002279  | 0.005343  | PNOC      | chr8  | + | 28174503 | 28200872 | 1310  |
| ENSG000001 | 2429.545 | 1925.434 | 0.33517  | 0.000184  | 0.000507  | COPS6     | chr7  | + | 99686577 | 99689823 | 1432  |
| ENSG000001 | 2209.557 | 2397.05  | -0.1175  | 0.29677   | 0.39879   | PAFAH1B2  | chr11 | + | 1.17E+08 | 1.17E+08 | 4195  |
| ENSG000001 | 591.1277 | 370.1017 | 0.67487  | 1.67E-07  | 6.38E-07  | ANKS3     | chr16 | - | 4746513  | 4784379  | 3098  |
| ENSG000001 | 673.6064 | 739.5824 | -0.13406 | 0.38458   | 0.4888    | NUDT16L1  | chr16 | + | 4743695  | 4745860  | 2040  |
| ENSG000001 | 197.0967 | 171.0691 | 0.20386  | 0.41758   | 0.52282   | KIAA1586  | chr6  | + | 56911347 | 56920023 | 2933  |
| ENSG000001 | 315.962  | 296.0725 | 0.091469 | 0.57156   | 0.6687    | RAB4A     | chr1  | + | 2.29E+08 | 2.29E+08 | 2966  |
| ENSG000001 | 1.431782 | 4.210775 | -1.3823  | 0.26178   | 0.35994   | OR1F1     | chr16 | + | 3254247  | 3255188  | 942   |
| ENSG000001 | 0.342542 | 2.292733 | -2.0751  | 0.16535   | 0.24634   | OR2W6P    | chr6  | + | 27905243 | 27906181 | 939   |
| ENSG000001 | 0        | 3.774517 | -2.6958  | 0.1237    | 0.19381   | OR2B2     | chr6  | - | 27878963 | 27880174 | 1212  |
| ENSG000001 | 3.028845 | 101.9302 | -4.918   | 2.65E-14  | 1.66E-13  | KCNJ4     | chr22 | - | 38822332 | 38851205 | 2065  |
| ENSG000001 | 3903.79  | 3571.547 | 0.12804  | 0.23921   | 0.33384   | SETD5     | chr3  | + | 9439299  | 9520924  | 6866  |
| ENSG000001 | 1783.744 | 186.2072 | 3.2554   | 1.64E-101 | 9.60E-100 | VASN      | chr16 | + | 4421849  | 4433529  | 2806  |
| ENSG000001 | 16.45278 | 43.17658 | -1.3736  | 0.002831  | 0.006554  | FAM83B    | chr6  | + | 54711569 | 54806820 | 3167  |
| ENSG000001 | 1.701545 | 0.594029 | 1.0895   | 0.47458   | 0.57905   | HIST3H3   | chr1  | - | 2.29E+08 | 2.29E+08 | 481   |
| ENSG000001 | 55.29134 | 216.1953 | -1.9507  | 2.01E-12  | 1.12E-11  | THAP9     | chr4  | + | 83821837 | 83841122 | 3808  |
| ENSG000001 | 2958.332 | 2798.193 | 0.08035  | 0.42318   | 0.52855   | RNF187    | chr1  | + | 2.29E+08 | 2.29E+08 | 3017  |
| ENSG000001 | 2645.31  | 1029.802 | 1.3577   | 6.41E-16  | 4.43E-15  | HOOK3     | chr8  | + | 42752075 | 42885682 | 14398 |
| ENSG000001 | 1573.487 | 1508.289 | 0.061239 | 0.67417   | 0.75593   | MAPK11P11 | chr14 | + | 55518349 | 55532931 | 2501  |
| ENSG000001 | 69.40973 | 303.9756 | -2.1068  | 2.37E-08  | 9.73E-08  | DDIT4     | chr10 | + | 74033678 | 74035794 | 1748  |
| ENSG000001 | 2035.044 | 3068.793 | -0.59192 | 4.37E-07  | 1.61E-06  | RBPJ      | chr4  | + | 26165077 | 26436541 | 5549  |
| ENSG000001 | 227.7529 | 192.2357 | 0.24281  | 0.16505   | 0.246     | LMBRD1    | chr6  | - | 70385694 | 70507003 | 2209  |
| ENSG000001 | 147.4464 | 173.2659 | -0.23365 | 0.20512   | 0.29439   | ZCCHC4    | chr4  | + | 25314407 | 25372005 | 2785  |
| ENSG000001 | 0        | 2.185918 | -2.5615  | 0.11691   | 0.18465   | PTGDR     | chr14 | + | 52734431 | 52743442 | 2942  |
| ENSG000001 | 236.7987 | 684.8027 | -1.5304  | 6.22E-21  | 5.46E-20  | TTC39C    | chr18 | + | 21572737 | 21715574 | 4117  |
| ENSG000001 | 108.6679 | 75.99663 | 0.51756  | 0.10535   | 0.1687    | GLYCTK    | chr3  | + | 52321105 | 52329272 | 3622  |
| ENSG000001 | 0.653381 | 2.711133 | -1.6744  | 0.21561   | 0.30666   | HIST1H2BI | chr6  | + | 26273144 | 26273622 | 479   |
| ENSG000001 | 5.197138 | 972.885  | -7.4436  | 1.48E-85  | 6.83E-84  | GNG4      | chr1  | - | 2.36E+08 | 2.36E+08 | 5104  |
| ENSG000001 | 1174.214 | 659.3315 | 0.83092  | 6.40E-14  | 3.91E-13  | UBTD2     | chr5  | - | 1.72E+08 | 1.72E+08 | 3301  |
| ENSG000001 | 106.1247 | 54.23641 | 0.97053  | 0.000205  | 0.000562  | POLR2J3   | chr7  | - | 1.02E+08 | 1.02E+08 | 2553  |
| ENSG000001 | 1230.693 | 856.2471 | 0.52303  | 1.05E-05  | 3.36E-05  | NKIRAS2   | chr17 | + | 40163400 | 40177659 | 4213  |
| ENSG000001 | 719.3043 | 874.5661 | -0.28094 | 0.14863   | 0.22528   | DNAJC7    | chr17 | - | 40128451 | 40173394 | 2564  |
| ENSG000001 | 0.685084 | 0.640152 | 0.044759 | 0.97934   | NA        | C14orf183 | chr14 | - | 50550369 | 50559361 | 975   |
| ENSG000001 | 5.84196  | 17.59248 | -1.5505  | 0.027477  | 0.052539  | KCNV2     | chr9  | + | 2717502  | 2730037  | 2186  |
| ENSG000001 | 1417.357 | 669.751  | 1.0786   | 1.23E-10  | 6.02E-10  | IRF2BP2   | chr1  | - | 2.35E+08 | 2.35E+08 | 4663  |
| ENSG000001 | 0.290301 | 1.340997 | -1.3722  | 0.39656   | NA        | PTF1A     | chr10 | + | 23481256 | 23483181 | 1537  |
| ENSG000001 | 10562.8  | 6904.792 | 0.61279  | 2.41E-10  | 1.16E-09  | NT5DC2    | chr3  | - | 52558386 | 52569070 | 2047  |
| ENSG000001 | 127.8935 | 168.7218 | -0.40225 | 0.042499  | 0.077272  | SMIM4     | chr3  | + | 52568029 | 52613253 | 1770  |
| ENSG000001 | 12.6884  | 19.12039 | -0.58883 | 0.23606   | 0.33008   | HIST1H2AE | chr6  | + | 26217165 | 26217711 | 547   |
| ENSG000001 | 110.6196 | 145.7144 | -0.39858 | 0.054147  | 0.095341  | COA6      | chr1  | + | 2.35E+08 | 2.35E+08 | 1013  |
| ENSG000001 | 46.79739 | 1572.28  | -5.0534  | 1.47E-189 | 2.82E-187 | KIF5C     | chr2  | + | 1.5E+08  | 1.5E+08  | 6931  |
| ENSG000001 | 7.644567 | 4.654281 | 0.65165  | 0.46599   | 0.57077   | MGAT2     | chr14 | + | 50087489 | 50090198 | 2710  |
| ENSG000001 | 271.9778 | 39.24347 | 2.7788   | 1.57E-31  | 2.12E-30  | BMI1      | chr10 | + | 22610140 | 22620413 | 3428  |
| ENSG000001 | 551.7592 | 871.7496 | -0.65871 | 5.42E-08  | 2.16E-07  | THAP11    | chr16 | + | 67876213 | 67878097 | 1885  |
| ENSG000001 | 1086.192 | 1113.828 | -0.03568 | 0.80458   | 0.86187   | MMADHC    | chr2  | - | 1.5E+08  | 1.5E+08  | 1726  |
| ENSG000001 | 1230.791 | 1898.683 | -0.62451 | 2.90E-09  | 1.28E-08  | PDHB      | chr3  | - | 58413357 | 58419584 | 4459  |
| ENSG000001 | 827.0416 | 159.9079 | 2.3612   | 2.03E-37  | 3.33E-36  | PXK       | chr3  | + | 58318607 | 58411748 | 2823  |
| ENSG000001 | 9.191995 | 18.58389 | -0.99239 | 0.10344   | 0.16608   | HIST1H1E  | chr6  | + | 26156559 | 26157343 | 785   |
| ENSG000001 | 329.4344 | 232.3179 | 0.50189  | 0.038662  | 0.071217  | PCMTD1    | chr8  | - | 52730140 | 52811735 | 4252  |
| ENSG000001 | 98.80789 | 136.4276 | -0.46152 | 0.028257  | 0.053832  | KCTD6     | chr3  | + | 58477841 | 58488087 | 2425  |
| ENSG000001 | 369.3499 | 635.4421 | -0.78137 | 7.11E-05  | 0.000206  | MPLKIP    | chr7  | - | 40172342 | 40174258 | 948   |
| ENSG000001 | 35.43612 | 11.13751 | 1.6339   | 0.000321  | 0.000855  | ACOX2     | chr3  | - | 58490863 | 58523046 | 2426  |
| ENSG000001 | 1.338465 | 31.28497 | -4.2159  | 4.89E-06  | 1.63E-05  | FAM107A   | chr3  | - | 58549844 | 58613337 | 3465  |
| ENSG000001 | 267.8674 | 128.6126 | 1.0479   | 0.001438  | 0.003483  | IRF2      | chr4  | - | 1.85E+08 | 1.85E+08 | 2303  |
| ENSG000001 | 0        | 1.326428 | -1.6486  | 0.3523    | NA        | MOBP      | chr3  | + | 39508689 | 39570970 | 5675  |
| ENSG000001 | 3.963155 | 0.297015 | 2.843    | 0.040472  | 0.074115  | CX3CR1    | chr3  | - | 39304985 | 39323226 | 3255  |
| ENSG000001 | 3.547834 | 0.357707 | 2.6654   | 0.059075  | 0.10305   | XIRP1     | chr3  | - | 39224701 | 39234087 | 6460  |
| ENSG000001 | 3.092251 | 0.343138 | 2.4146   | 0.10191   | 0.16396   | INSM2     | chr14 | + | 36003248 | 36006260 | 3013  |

|            |          |          |          |           |           |            |       |   |          |          |       |
|------------|----------|----------|----------|-----------|-----------|------------|-------|---|----------|----------|-------|
| ENSG000001 | 0.923144 | 5.809111 | -2.2478  | 0.060802  | 0.1056    | DEGS2      | chr14 | - | 1.01E+08 | 1.01E+08 | 1890  |
| ENSG000001 | 0.580602 | 5.704711 | -2.7158  | 0.027131  | 0.051939  | SCN11A     | chr3  | - | 38887260 | 38992052 | 6500  |
| ENSG000001 | 0        | 0.357707 | -0.41864 | 0.81278   | NA        | RP11-158I1 | chr16 | - | 86365450 | 86383289 | 2678  |
| ENSG000001 | 5174.702 | 1760.586 | 1.5521   | 2.05E-20  | 1.76E-19  | ARF4       | chr3  | - | 57557090 | 57583947 | 1660  |
| ENSG000001 | 9069.46  | 5587.616 | 0.69834  | 4.65E-13  | 2.70E-12  | 2-Sep      | chr2  | + | 2.42E+08 | 2.42E+08 | 3701  |
| ENSG000001 | 1012.618 | 26.59745 | 5.2235   | 7.22E-119 | 5.52E-117 | FILIP1L    | chr3  | - | 99548985 | 99833357 | 4219  |
| ENSG000001 | 223.2488 | 172.167  | 0.37182  | 0.02723   | 0.052115  | MFSD2A     | chr1  | + | 40420802 | 40435638 | 2432  |
| ENSG000001 | 1107.877 | 1259.005 | -0.18408 | 0.20918   | 0.29918   | DTYMK      | chr2  | - | 2.43E+08 | 2.43E+08 | 1232  |
| ENSG000001 | 257.0673 | 241.7757 | 0.086255 | 0.76705   | 0.83155   | TAP1       | chr6  | - | 32812986 | 32821755 | 2959  |
| ENSG000001 | 388.9891 | 825.6065 | -1.0813  | 2.54E-06  | 8.72E-06  | ING5       | chr2  | + | 2.43E+08 | 2.43E+08 | 5196  |
| ENSG000001 | 1347.013 | 1417.214 | -0.07365 | 0.55002   | 0.64978   | ATG4B      | chr2  | + | 2.43E+08 | 2.43E+08 | 3294  |
| ENSG000001 | 29.78438 | 3.650716 | 2.9292   | 4.02E-06  | 1.35E-05  | BDKRB2     | chr14 | + | 96671016 | 96710666 | 6845  |
| ENSG000001 | 4.823707 | 17.713   | -1.8206  | 0.011444  | 0.023754  | MLKL       | chr16 | - | 74705753 | 74734858 | 3882  |
| ENSG000001 | 24.66002 | 2.353426 | 3.2656   | 2.63E-06  | 9.02E-06  | CMAHP      | chr6  | - | 25081548 | 25166793 | 2264  |
| ENSG000001 | 1386.645 | 2696.088 | -0.95785 | 1.03E-14  | 6.61E-14  | RFWD3      | chr16 | - | 74655292 | 74700779 | 4957  |
| ENSG000001 | 0.705622 | 12.33773 | -3.7585  | 0.000407  | 0.001068  | MTNR1A     | chr4  | - | 1.87E+08 | 1.87E+08 | 1289  |
| ENSG000001 | 0.290301 | 0        | 0.4146   | 0.81455   | NA        | KCNG4      | chr16 | - | 84255823 | 84273356 | 2199  |
| ENSG000001 | 0.653381 | 31.76803 | -5.1257  | 4.56E-08  | 1.83E-07  | RHOH       | chr4  | + | 40192673 | 40246281 | 1999  |
| ENSG000001 | 14.63657 | 0        | 5.5027   | 4.71E-06  | 1.57E-05  | KLHL30     | chr2  | + | 2.39E+08 | 2.39E+08 | 3726  |
| ENSG000001 | 629.3849 | 304.0924 | 1.0486   | 2.17E-15  | 1.45E-14  | COG7       | chr16 | - | 23399814 | 23464501 | 2926  |
| ENSG000001 | 324.0161 | 374.6589 | -0.21134 | 0.13725   | 0.21062   | CDC40      | chr6  | + | 1.11E+08 | 1.11E+08 | 3927  |
| ENSG000001 | 4749.333 | 6898.893 | -0.53834 | 2.00E-10  | 9.72E-10  | STIP1      | chr11 | + | 63952744 | 63972015 | 2743  |
| ENSG000001 | 0.290301 | 125.3986 | -7.6362  | 1.29E-14  | 8.27E-14  | SCNN1B     | chr16 | + | 23289552 | 23392620 | 2597  |
| ENSG000001 | 13.71342 | 20.34974 | -0.55674 | 0.26808   | 0.3669    | HR         | chr8  | - | 21971928 | 21990897 | 6336  |
| ENSG000001 | 4.273994 | 2.171348 | 0.84528  | 0.43626   | 0.54174   | TXNDC2     | chr18 | + | 9885763  | 9889272  | 1873  |
| ENSG000001 | 3534.385 | 1427.167 | 1.3074   | 6.31E-48  | 1.37E-46  | RAB31      | chr18 | + | 9708162  | 9862548  | 4055  |
| ENSG000001 | 920.2002 | 822.3413 | 0.16166  | 0.17771   | 0.26142   | REEP4      | chr8  | - | 21995533 | 21999464 | 1710  |
| ENSG000001 | 12.33388 | 215.7732 | -4.0527  | 9.97E-19  | 7.88E-18  | TNXB       | chr6  | - | 32008931 | 32083111 | 13132 |
| ENSG000001 | 0.653381 | 10.30233 | -3.4978  | 0.001789  | 0.004265  | LGI3       | chr8  | - | 22004338 | 22014597 | 4420  |
| ENSG000001 | 0.290301 | 0        | 0.4146   | 0.81455   | NA        | SFTPC      | chr8  | + | 22014426 | 22021992 | 1046  |
| ENSG000001 | 2659.241 | 226.992  | 3.5415   | 1.60E-117 | 1.19E-115 | BMP1       | chr8  | + | 22022249 | 22069839 | 4333  |
| ENSG000001 | 3870.594 | 3582.747 | 0.11121  | 0.28888   | 0.39048   | ATXN2L     | chr16 | + | 28834356 | 28848558 | 4574  |
| ENSG000001 | 8.608787 | 168.3902 | -4.1941  | 9.46E-20  | 7.88E-19  | PHYHIP     | chr8  | - | 22077222 | 22089854 | 3200  |
| ENSG000001 | 17.35376 | 4.539343 | 1.86     | 0.004666  | 0.010439  | CCDC110    | chr4  | - | 1.86E+08 | 1.86E+08 | 2898  |
| ENSG000001 | 1306.61  | 985.0635 | 0.40639  | 0.008737  | 0.018574  | POLR3D     | chr8  | + | 22102617 | 22109485 | 2866  |
| ENSG000001 | 1001.686 | 1698.84  | -0.75965 | 5.21E-05  | 0.000154  | FEN1       | chr11 | + | 61560109 | 61564716 | 2296  |
| ENSG000001 | 16.4725  | 0.343138 | 4.8284   | 3.03E-05  | 9.18E-05  | SDPR       | chr2  | - | 1.93E+08 | 1.93E+08 | 3229  |
| ENSG000001 | 1547.508 | 1991.728 | -0.36337 | 0.047882  | 0.085693  | SOGA2      | chr18 | + | 8705659  | 8832776  | 6093  |
| ENSG000001 | 10.83013 | 943.0889 | -6.394   | 1.59E-97  | 8.83E-96  | GBX2       | chr2  | - | 2.37E+08 | 2.37E+08 | 2123  |
| ENSG000001 | 0.36308  | 13.79124 | -4.5179  | 0.000205  | 0.000562  | HFE2       | chr1  | + | 1.45E+08 | 1.45E+08 | 2128  |
| ENSG000001 | 36.99985 | 32.89781 | 0.17493  | 0.63438   | 0.72301   | HEXIM2     | chr17 | + | 43238067 | 43247407 | 1528  |
| ENSG000001 | 406.174  | 431.796  | -0.08767 | 0.66817   | 0.75085   | FNTA       | chr8  | + | 42889337 | 42940931 | 7327  |
| ENSG000001 | 1059.239 | 741.7594 | 0.51252  | 0.000161  | 0.000446  | SERINC2    | chr1  | + | 31882412 | 31907525 | 2807  |
| ENSG000001 | 728.9    | 672.2117 | 0.11652  | 0.50445   | 0.60786   | TRAPPC11   | chr4  | + | 1.85E+08 | 1.85E+08 | 4552  |
| ENSG000001 | 0        | 9.10212  | -4.7911  | 0.00018   | 0.000497  | CHRM1      | chr11 | - | 62676151 | 62689279 | 2964  |
| ENSG000001 | 92802.36 | 70.12723 | 8.1779   | 3.37E-09  | 1.48E-08  | COL3A1     | chr2  | + | 1.9E+08  | 1.9E+08  | 5543  |
| ENSG000001 | 0        | 123.2369 | -8.4339  | 6.92E-15  | 4.51E-14  | GFRA2      | chr8  | - | 21547915 | 21669869 | 4921  |
| ENSG000001 | 251.4404 | 240.7991 | 0.061868 | 0.69181   | 0.77025   | ING2       | chr4  | + | 1.84E+08 | 1.84E+08 | 1189  |
| ENSG000001 | 224.0297 | 332.0378 | -0.56464 | 0.005279  | 0.011708  | CDKN2AIP   | chr4  | + | 1.84E+08 | 1.84E+08 | 2721  |
| ENSG000001 | 302.1297 | 458.8305 | -0.6026  | 3.03E-05  | 9.19E-05  | SNRNP48    | chr6  | + | 7590432  | 7612200  | 4173  |
| ENSG000001 | 261.7575 | 366.4105 | -0.4831  | 0.000702  | 0.001782  | TMEM223    | chr11 | - | 62539101 | 62559493 | 1288  |
| ENSG000001 | 946.9432 | 631.1107 | 0.58503  | 0.000203  | 0.000557  | SLC20A2    | chr8  | - | 42273993 | 42397069 | 3657  |
| ENSG000001 | 0.580602 | 0        | 0.8036   | 0.6494    | NA        | DYNLRB2    | chr16 | + | 80574631 | 80584657 | 971   |
| ENSG000001 | 614.2851 | 377.6288 | 0.70152  | 1.27E-07  | 4.92E-07  | TMUB2      | chr17 | + | 42264338 | 42269099 | 2418  |
| ENSG000001 | 0        | 0.686276 | -0.84936 | 0.6309    | NA        | ADAM29     | chr4  | + | 1.76E+08 | 1.76E+08 | 3325  |
| ENSG000001 | 2865.251 | 1947.21  | 0.55671  | 1.29E-07  | 4.98E-07  | STAT3      | chr17 | - | 40465342 | 40540586 | 5047  |
| ENSG000001 | 177.2846 | 249.1203 | -0.48862 | 0.006069  | 0.0133    | ZSWIM1     | chr20 | + | 44509866 | 44513905 | 2769  |
| ENSG000001 | 434.823  | 58.42697 | 2.8847   | 8.28E-42  | 1.52E-40  | NBPF9      | chr1  | + | 1.45E+08 | 1.45E+08 | 3680  |
| ENSG000001 | 3356.108 | 368.6954 | 3.1768   | 2.25E-59  | 6.44E-58  | ADAM9      | chr8  | + | 38854388 | 38962663 | 3839  |
| ENSG000001 | 0        | 0.297015 | -0.41864 | 0.81278   | NA        | ADAM18     | chr8  | + | 39442008 | 39587583 | 2388  |
| ENSG000001 | 80.42927 | 9.476069 | 3.0037   | 9.91E-12  | 5.26E-11  | GDNF       | chr5  | - | 37812779 | 37839788 | 3810  |
| ENSG000001 | 0        | 6.191924 | -4.2168  | 0.001828  | 0.004351  | DPCR1      | chr6  | + | 30908749 | 30921998 | 5314  |
| ENSG000001 | 0        | 1.280305 | -1.6305  | 0.35731   | NA        | WFDC13     | chr20 | + | 44330655 | 44337456 | 1372  |
| ENSG000001 | 320.491  | 503.7224 | -0.64852 | 0.01731   | 0.034636  | AXIN2      | chr17 | - | 63524681 | 63557765 | 4259  |
| ENSG000001 | 2224.934 | 3015.531 | -0.43786 | 0.000795  | 0.002003  | NDUF55     | chr1  | + | 39491990 | 39500308 | 548   |

|            |          |          |          |           |           |          |       |   |          |          |       |
|------------|----------|----------|----------|-----------|-----------|----------|-------|---|----------|----------|-------|
| ENSG000001 | 45.12559 | 70.43533 | -0.64224 | 0.02491   | 0.04811   | ZNF30    | chr19 | + | 35417807 | 35436074 | 2651  |
| ENSG000001 | 13.64325 | 246.3879 | -4.1522  | 3.58E-40  | 6.32E-39  | UGT3A2   | chr5  | - | 36035119 | 36071460 | 2355  |
| ENSG000001 | 63.38896 | 908.9266 | -3.8387  | 6.52E-105 | 4.04E-103 | FAM84B   | chr8  | - | 1.28E+08 | 1.28E+08 | 5404  |
| ENSG000001 | 933.3549 | 47.58734 | 4.277    | 4.05E-129 | 3.61E-127 | LDLRAD4  | chr18 | + | 13217497 | 13652754 | 8686  |
| ENSG000001 | 0.705622 | 9.098961 | -3.0959  | 0.018585  | 0.03696   | KCTD19   | chr16 | - | 67323331 | 67360666 | 4913  |
| ENSG000001 | 121.9677 | 25.02745 | 2.2674   | 8.34E-16  | 5.72E-15  | SLC16A4  | chr1  | - | 1.11E+08 | 1.11E+08 | 2632  |
| ENSG000001 | 216.6791 | 0.343138 | 8.3656   | 4.67E-18  | 3.59E-17  | IL7R     | chr5  | + | 35852797 | 35879705 | 4626  |
| ENSG000001 | 415.5745 | 390.5504 | 0.091368 | 0.63834   | 0.72627   | TMEM208  | chr16 | + | 67261006 | 67263181 | 1525  |
| ENSG000001 | 22.3324  | 1.280305 | 3.8256   | 8.77E-06  | 2.84E-05  | LRP1B    | chr2  | - | 1.41E+08 | 1.43E+08 | 16535 |
| ENSG000001 | 2772.461 | 2652.573 | 0.063444 | 0.5626    | 0.66087   | AHCYL1   | chr1  | + | 1.11E+08 | 1.11E+08 | 4015  |
| ENSG000001 | 1021.502 | 935.1777 | 0.12757  | 0.32509   | 0.42801   | DNAIC21  | chr5  | + | 34929698 | 34959069 | 6208  |
| ENSG000001 | 998.5099 | 412.5629 | 1.2732   | 2.65E-23  | 2.60E-22  | PKIG     | chr20 | + | 43160426 | 43252888 | 1489  |
| ENSG000001 | 0.923144 | 17.05103 | -3.8008  | 5.64E-05  | 0.000165  | NPNT     | chr4  | + | 1.07E+08 | 1.07E+08 | 4598  |
| ENSG000001 | 1.866827 | 29.97392 | -3.7517  | 1.30E-06  | 4.60E-06  | CA7      | chr16 | + | 66878282 | 66888056 | 1713  |
| ENSG000001 | 2.531373 | 5.848787 | -1.0846  | 0.28718   | 0.38884   | FAM178B  | chr2  | - | 97541620 | 97684175 | 2877  |
| ENSG000001 | 1748.238 | 2655.968 | -0.60233 | 2.74E-06  | 9.37E-06  | SEMA4C   | chr2  | - | 97525453 | 97536494 | 3776  |
| ENSG000001 | 253.6713 | 856.2181 | -1.7507  | 1.43E-26  | 1.60E-25  | CNNM3    | chr2  | + | 97481982 | 97499648 | 3447  |
| ENSG000001 | 356.4077 | 173.283  | 1.0374   | 9.40E-09  | 4.00E-08  | GSTM4    | chr1  | + | 1.1E+08  | 1.1E+08  | 3990  |
| ENSG000001 | 529.0292 | 17.58107 | 4.9081   | 2.27E-79  | 9.44E-78  | TET2     | chr4  | + | 1.06E+08 | 1.06E+08 | 10166 |
| ENSG000001 | 96.10023 | 14.40542 | 2.7251   | 1.90E-15  | 1.28E-14  | CXXC4    | chr4  | - | 1.05E+08 | 1.05E+08 | 5565  |
| ENSG000001 | 281.3121 | 113.5772 | 1.3075   | 5.77E-14  | 3.53E-13  | TCTN2    | chr12 | + | 1.24E+08 | 1.24E+08 | 2918  |
| ENSG000001 | 134.8512 | 27.93362 | 2.252    | 9.55E-17  | 6.88E-16  | SHOX2    | chr3  | - | 1.58E+08 | 1.58E+08 | 4078  |
| ENSG000001 | 154.2542 | 188.9272 | -0.29142 | 0.16251   | 0.24291   | PPIP5K1  | chr15 | - | 43825660 | 43882430 | 5697  |
| ENSG000001 | 1467.265 | 552.9465 | 1.4068   | 2.14E-35  | 3.30E-34  | TSPAN5   | chr4  | - | 99391518 | 99579780 | 4062  |
| ENSG000001 | 154.6039 | 57.09833 | 1.4172   | 0.000167  | 0.000462  | ABHD15   | chr17 | - | 27887565 | 27894155 | 3592  |
| ENSG000001 | 350.0198 | 334.3304 | 0.066238 | 0.78308   | 0.84458   | ZBTB5    | chr9  | - | 37438111 | 37465396 | 4627  |
| ENSG000001 | 198.7658 | 274.4658 | -0.4641  | 0.005544  | 0.012233  | CHTF8    | chr16 | - | 69151913 | 69166487 | 2903  |
| ENSG000001 | 96.2012  | 147.9446 | -0.61965 | 0.008376  | 0.017843  | ADAL     | chr15 | + | 43622872 | 43646096 | 3593  |
| ENSG000001 | 200.0088 | 290.2008 | -0.53076 | 0.14033   | 0.21424   | LCMT2    | chr15 | - | 43619974 | 43622803 | 2830  |
| ENSG000001 | 1390.823 | 544.2685 | 1.3475   | 1.46E-09  | 6.64E-09  | SNTB2    | chr16 | + | 69221032 | 69342955 | 9789  |
| ENSG000001 | 4.979616 | 4.144377 | 0.26102  | 0.77674   | 0.83956   | IL12A    | chr3  | + | 1.6E+08  | 1.6E+08  | 1909  |
| ENSG000001 | 511.272  | 614.1565 | -0.26306 | 0.17458   | 0.25769   | ZNF507   | chr19 | + | 32836500 | 32878571 | 7636  |
| ENSG000001 | 618.1865 | 379.6031 | 0.70208  | 0.000644  | 0.001644  | STX18    | chr4  | - | 4417469  | 4544073  | 3497  |
| ENSG000001 | 21.50534 | 966.4679 | -5.4566  | 1.24E-126 | 1.08E-124 | NSG1     | chr4  | + | 4349867  | 4420785  | 4172  |
| ENSG000001 | 67.91201 | 85.61591 | -0.33352 | 0.33045   | 0.43362   | ZBTB49   | chr4  | + | 4291924  | 4323513  | 2889  |
| ENSG000001 | 555.8743 | 690.3341 | -0.31189 | 0.049757  | 0.088596  | GFM1     | chr3  | + | 1.58E+08 | 1.58E+08 | 3721  |
| ENSG000001 | 0.290301 | 2.82607  | -2.348   | 0.11624   | 0.1838    | OR13J1   | chr9  | - | 35869375 | 35870461 | 1087  |
| ENSG000001 | 0        | 3.10281  | -2.7506  | 0.10408   | 0.16689   | HTR1E    | chr6  | + | 87647024 | 87726401 | 2039  |
| ENSG000001 | 512.4342 | 5.393128 | 6.5187   | 7.06E-66  | 2.36E-64  | FSTL5    | chr4  | - | 1.62E+08 | 1.63E+08 | 4831  |
| ENSG000001 | 4.148974 | 2.292733 | 0.78994  | 0.42714   | 0.53254   | TPTE2P5  | chr13 | - | 41396432 | 41495890 | 746   |
| ENSG000001 | 825.3781 | 874.6457 | -0.0833  | 0.6661    | 0.74914   | DDX19A   | chr16 | + | 70380732 | 70407286 | 5007  |
| ENSG000001 | 44.99119 | 27.70783 | 0.68335  | 0.065237  | 0.1122    | ATOX8    | chr2  | + | 85978467 | 86015189 | 3099  |
| ENSG000001 | 0        | 37.61836 | -6.8089  | 1.97E-09  | 8.84E-09  | SOX14    | chr3  | + | 1.37E+08 | 1.37E+08 | 818   |
| ENSG000001 | 78.83025 | 106.2424 | -0.42806 | 0.14177   | 0.21622   | ANKRD49  | chr11 | + | 94226795 | 94232749 | 3002  |
| ENSG000001 | 1.359003 | 7.221338 | -2.2333  | 0.023276  | 0.045269  | SFTPB    | chr2  | - | 85884437 | 85895864 | 3664  |
| ENSG000001 | 1211.276 | 1935.951 | -0.67575 | 1.78E-11  | 9.26E-11  | USP39    | chr2  | + | 85829979 | 85876403 | 2177  |
| ENSG000001 | 787.1847 | 939.2267 | -0.25468 | 0.017559  | 0.035095  | TNIP2    | chr4  | - | 2743375  | 2758103  | 2006  |
| ENSG000001 | 580.8616 | 892.9346 | -0.6206  | 9.71E-06  | 3.12E-05  | C2orf68  | chr2  | - | 85833777 | 85839189 | 2837  |
| ENSG000001 | 185.961  | 272.7117 | -0.55028 | 0.012041  | 0.024885  | TMEM150A | chr2  | - | 85825671 | 85830319 | 2323  |
| ENSG000001 | 679.4271 | 653.8988 | 0.056213 | 0.7318    | 0.80191   | RNF181   | chr2  | + | 85822848 | 85824736 | 844   |
| ENSG000001 | 39.88575 | 57.43402 | -0.51979 | 0.076964  | 0.12925   | VAMP5    | chr2  | + | 85811531 | 85820535 | 689   |
| ENSG000001 | 0        | 0.594029 | -0.81444 | 0.64499   | NA        | BTNL3    | chr5  | + | 1.8E+08  | 1.8E+08  | 2440  |
| ENSG000001 | 366.9243 | 124.2283 | 1.5597   | 1.05E-19  | 8.73E-19  | LRRC28   | chr15 | + | 99791567 | 99930934 | 5971  |
| ENSG000001 | 2637.261 | 3827.851 | -0.52541 | 0.32005   | 0.42289   | MAT2A    | chr2  | + | 85766288 | 85772403 | 2819  |
| ENSG000001 | 1.338465 | 163.6608 | -6.6469  | 6.19E-21  | 5.43E-20  | ENHO     | chr9  | - | 34521038 | 34523039 | 1082  |
| ENSG000001 | 379.8746 | 465.811  | -0.29273 | 0.049807  | 0.088665  | ZNF608   | chr5  | - | 1.24E+08 | 1.24E+08 | 5958  |
| ENSG000001 | 102.9519 | 15.90506 | 2.6753   | 2.86E-17  | 2.12E-16  | SLC35G2  | chr3  | + | 1.37E+08 | 1.37E+08 | 2837  |
| ENSG000001 | 61.38334 | 425.4934 | -2.7595  | 2.59E-12  | 1.43E-11  | INPP5D   | chr2  | + | 2.34E+08 | 2.34E+08 | 4728  |
| ENSG000001 | 1641.712 | 1439.873 | 0.18843  | 0.11602   | 0.18352   | LETM1    | chr4  | - | 1813206  | 1857974  | 5462  |
| ENSG000001 | 1.939605 | 0        | 2.4257   | 0.13778   | 0.21116   | CTRB1    | chr16 | + | 75252898 | 75258822 | 858   |
| ENSG000001 | 0        | 0.357707 | -0.41864 | 0.81278   | NA        | CTRB2    | chr16 | - | 75237994 | 75241083 | 2248  |
| ENSG000001 | 868.1298 | 1324.571 | -0.60821 | 2.54E-05  | 7.77E-05  | TMEM129  | chr4  | - | 1717679  | 1723085  | 2810  |
| ENSG000001 | 427.8928 | 65.67181 | 2.6999   | 5.59E-49  | 1.24E-47  | PPIC     | chr5  | - | 1.22E+08 | 1.22E+08 | 1380  |
| ENSG000001 | 99.36281 | 107.8417 | -0.11737 | 0.66287   | 0.74633   | SPRY3    | chrX  | + | 1.55E+08 | 1.55E+08 | 9019  |
| ENSG000001 | 383.1455 | 233.3164 | 0.71549  | 3.38E-06  | 1.15E-05  | CEP120   | chr5  | - | 1.23E+08 | 1.23E+08 | 4900  |

|            |          |          |          |           |           |           |       |   |          |          |       |
|------------|----------|----------|----------|-----------|-----------|-----------|-------|---|----------|----------|-------|
| ENSG000001 | 142.6432 | 61.22955 | 1.2203   | 4.48E-07  | 1.65E-06  | STXBP6    | chr14 | - | 25278862 | 25519503 | 4132  |
| ENSG000001 | 0.36308  | 0        | 0.4146   | 0.81455   | NA        | TM4SF20   | chr2  | - | 2.28E+08 | 2.28E+08 | 2296  |
| ENSG000001 | 776.9798 | 824.9461 | -0.08633 | 0.41517   | 0.52025   | MFF       | chr2  | + | 2.28E+08 | 2.28E+08 | 3524  |
| ENSG000001 | 6.224764 | 4.273883 | 0.51195  | 0.52745   | 0.62915   | GRM5      | chr11 | - | 88237744 | 88799113 | 8023  |
| ENSG000001 | 27.253   | 25.80926 | 0.069812 | 0.8749    | 0.91309   | LGALS9    | chr17 | + | 25956824 | 25976586 | 3114  |
| ENSG000001 | 48.62216 | 75.96064 | -0.63965 | 0.10361   | 0.16626   | JMJD7-PLA | chr15 | + | 42120283 | 42140353 | 7227  |
| ENSG000001 | 3.051175 | 43.88238 | -3.7447  | 3.67E-09  | 1.61E-08  | CPLX1     | chr4  | - | 778745   | 819986   | 2181  |
| ENSG000001 | 850.6717 | 35.38329 | 4.5447   | 5.84E-61  | 1.73E-59  | PXDC1     | chr6  | - | 3722848  | 3752260  | 2190  |
| ENSG000001 | 0.632843 | 0        | 0.81931  | 0.64303   | NA        | SIGLEC7   | chr19 | + | 51645556 | 51656783 | 1754  |
| ENSG000001 | 0        | 0.640152 | -0.82869 | 0.63935   | NA        | NTSR2     | chr2  | - | 11798304 | 11810290 | 1569  |
| ENSG000001 | 281.8055 | 233.4614 | 0.269    | 0.11744   | 0.18538   | E2F6      | chr2  | - | 11584501 | 11606297 | 3296  |
| ENSG000001 | 992.5805 | 1285.736 | -0.37379 | 0.00151   | 0.003643  | FEM1B     | chr15 | + | 68570141 | 68588203 | 7122  |
| ENSG000001 | 189.1415 | 59.77932 | 1.6597   | 5.99E-15  | 3.92E-14  | COMMD8    | chr4  | - | 47452885 | 47465736 | 1397  |
| ENSG000001 | 15.77805 | 32.45752 | -1.0222  | 0.026913  | 0.05157   | ATP5I     | chr4  | - | 666225   | 668127   | 496   |
| ENSG000001 | 986.7086 | 1661.359 | -0.75013 | 6.92E-11  | 3.47E-10  | UQCRCF51  | chr19 | - | 29698173 | 29704448 | 1530  |
| ENSG000001 | 11.23608 | 64.3584  | -2.4841  | 2.19E-08  | 9.02E-08  | MFSDF7    | chr4  | - | 675618   | 683230   | 2123  |
| ENSG000001 | 4.305697 | 14.81495 | -1.7235  | 0.009703  | 0.020447  | COL4A3    | chr2  | + | 2.28E+08 | 2.28E+08 | 8097  |
| ENSG000001 | 1188.167 | 1340.58  | -0.17381 | 0.28668   | 0.38827   | MAP2K1    | chr15 | + | 66679155 | 66784650 | 3410  |
| ENSG000001 | 0        | 13.14539 | -5.341   | 1.23E-05  | 3.89E-05  | KLK7      | chr19 | - | 51479729 | 51487355 | 1975  |
| ENSG000001 | 5575.319 | 7474.443 | -0.42188 | 0.014528  | 0.029512  | HNRNPH1   | chr5  | - | 1.79E+08 | 1.79E+08 | 5564  |
| ENSG000001 | 1079.752 | 1104.329 | -0.03235 | 0.87971   | 0.91625   | IRS1      | chr2  | - | 2.28E+08 | 2.28E+08 | 5981  |
| ENSG000001 | 1327.776 | 755.2414 | 0.8121   | 3.89E-09  | 1.71E-08  | MECP2     | chrX  | - | 1.53E+08 | 1.53E+08 | 10505 |
| ENSG000001 | 0        | 9.361132 | -4.8357  | 0.000155  | 0.000432  | VCX3A     | chrX  | - | 6451659  | 6453159  | 995   |
| ENSG000001 | 705.3702 | 1218.719 | -0.78795 | 1.12E-13  | 6.75E-13  | UPF3A     | chr13 | + | 1.15E+08 | 1.15E+08 | 2378  |
| ENSG000001 | 2.096328 | 6.671016 | -1.5429  | 0.13509   | 0.20805   | ZBBX      | chr3  | - | 1.67E+08 | 1.67E+08 | 3250  |
| ENSG000001 | 0.995923 | 0        | 1.4959   | 0.39264   | NA        | ACTBL2    | chr5  | - | 56775846 | 56778636 | 2791  |
| ENSG000001 | 651.3299 | 619.5357 | 0.073143 | 0.60417   | 0.69752   | ROR2      | chr9  | - | 94325373 | 94712444 | 4360  |
| ENSG000001 | 0.705622 | 1.370136 | -0.71417 | 0.6513    | 0.73678   | BRD7P3    | chr6  | + | 1.19E+08 | 1.19E+08 | 1477  |
| ENSG000001 | 398.5312 | 629.2933 | -0.6587  | 1.91E-05  | 5.95E-05  | AR        | chrX  | + | 66764465 | 66950461 | 10065 |
| ENSG000001 | 326.2534 | 242.0629 | 0.43238  | 0.027409  | 0.052425  | DHRX      | chrX  | - | 2137557  | 2420846  | 2571  |
| ENSG000001 | 2.914991 | 0.654722 | 1.7883   | 0.17637   | 0.25981   | C8orf46   | chr8  | + | 67372238 | 67430759 | 3513  |
| ENSG000001 | 92.31515 | 94.20362 | -0.03048 | 0.91011   | 0.93826   | HSPBAP1   | chr3  | - | 1.22E+08 | 1.23E+08 | 2986  |
| ENSG000001 | 1064.35  | 1782.411 | -0.74062 | 0.002181  | 0.00513   | ASMTL     | chrX  | - | 1522032  | 1572655  | 2048  |
| ENSG000001 | 13864.76 | 19331.6  | -0.47907 | 1.36E-05  | 4.31E-05  | SLC25A6   | chrX  | - | 1505045  | 1511617  | 2062  |
| ENSG000001 | 934.1085 | 503.4383 | 0.88892  | 9.76E-10  | 4.51E-09  | CHST14    | chr15 | + | 40763160 | 40765353 | 2194  |
| ENSG000001 | 3.568372 | 201.5805 | -5.6912  | 5.30E-32  | 7.29E-31  | PARM1     | chr4  | + | 75858305 | 75975325 | 5011  |
| ENSG000001 | 565.0124 | 183.7328 | 1.6119   | 2.39E-10  | 1.16E-09  | CSNK1G1   | chr15 | - | 64457716 | 64648442 | 8107  |
| ENSG000001 | 126.2734 | 94.77422 | 0.40831  | 0.13359   | 0.2063    | FAM110B   | chr8  | + | 58907068 | 59116838 | 3438  |
| ENSG000001 | 1149.701 | 140.1609 | 3.0302   | 7.70E-112 | 5.27E-110 | ARMC4     | chr10 | - | 28064115 | 28287977 | 3572  |
| ENSG000001 | 125.7405 | 74.2941  | 0.75178  | 0.001495  | 0.00361   | AFAP1L2   | chr10 | - | 1.16E+08 | 1.16E+08 | 3964  |
| ENSG000001 | 181.491  | 248.2585 | -0.45145 | 0.018037  | 0.03595   | ZNF354A   | chr5  | - | 1.78E+08 | 1.78E+08 | 2484  |
| ENSG000001 | 342.4972 | 224.2356 | 0.60941  | 0.02366   | 0.045928  | ATF5      | chr19 | + | 50431959 | 50437192 | 2069  |
| ENSG000001 | 777.8673 | 906.8816 | -0.22    | 0.14855   | 0.22518   | UBE2V2    | chr8  | + | 48920960 | 48977268 | 4373  |
| ENSG000001 | 252.3345 | 298.6937 | -0.24352 | 0.097362  | 0.1579    | ZBTB43    | chr9  | + | 1.3E+08  | 1.3E+08  | 5965  |
| ENSG000001 | 533.457  | 554.6784 | -0.05649 | 0.80465   | 0.8619    | CPT1C     | chr19 | + | 50194155 | 50216988 | 2950  |
| ENSG000001 | 2780.399 | 3824.399 | -0.45928 | 1.95E-05  | 6.04E-05  | PCSK9     | chr1  | + | 55505221 | 55530525 | 3891  |
| ENSG000001 | 2330.026 | 2408.51  | -0.04778 | 0.61597   | 0.70752   | XPO6      | chr16 | - | 28109300 | 28223241 | 4422  |
| ENSG000001 | 10.63315 | 3.097978 | 1.6674   | 0.071545  | 0.12135   | GSG1L     | chr16 | - | 27798850 | 28074830 | 4976  |
| ENSG000001 | 945.6198 | 1530.571 | -0.69269 | 0.000155  | 0.000431  | MN1       | chr22 | - | 28144265 | 28197486 | 7556  |
| ENSG000001 | 587.7006 | 567.0011 | 0.052862 | 0.67873   | 0.75949   | APEX2     | chrX  | + | 55026790 | 55035490 | 3245  |
| ENSG000001 | 259.9703 | 371.314  | -0.51397 | 0.000178  | 0.000491  | NSMCE1    | chr16 | - | 27236312 | 27280115 | 1853  |
| ENSG000001 | 53.7858  | 29.70758 | 0.84952  | 0.008962  | 0.019005  | CCDC126   | chr7  | + | 23636998 | 23684327 | 2473  |
| ENSG000001 | 0        | 0.640152 | -0.82869 | 0.63935   | NA        | IL13      | chr5  | + | 1.32E+08 | 1.32E+08 | 1562  |
| ENSG000001 | 18.02849 | 17.84492 | 0.015242 | 0.97681   | 0.98684   | 61E3.4    | chr16 | - | 29495010 | 29517320 | 2676  |
| ENSG000001 | 1853.63  | 2127.187 | -0.1986  | 0.10003   | 0.1615    | RAB3B     | chr1  | - | 52373628 | 52456436 | 12844 |
| ENSG000001 | 0        | 0.594029 | -0.81444 | 0.64499   | NA        | OR6F1     | chr1  | - | 2.48E+08 | 2.48E+08 | 1061  |
| ENSG000001 | 1676.677 | 1572.278 | 0.09285  | 0.52344   | 0.62586   | CD2BP2    | chr16 | - | 30362087 | 30366682 | 3421  |
| ENSG000001 | 0        | 4.723837 | -3.7766  | 0.008022  | 0.017139  | RSP01     | chr1  | - | 38076951 | 38100595 | 2985  |
| ENSG000001 | 365.6381 | 1464.745 | -1.9845  | 2.18E-09  | 9.78E-09  | RGS14     | chr5  | + | 1.77E+08 | 1.77E+08 | 2415  |
| ENSG000001 | 1812.908 | 1141.796 | 0.66649  | 1.17E-10  | 5.75E-10  | TBC1D10B  | chr16 | - | 30368423 | 30381585 | 4614  |
| ENSG000001 | 2674.718 | 3488.266 | -0.38301 | 4.05E-05  | 0.000121  | LMAN2     | chr5  | - | 1.77E+08 | 1.77E+08 | 1800  |
| ENSG000001 | 0.290301 | 0        | 0.4146   | 0.81455   | NA        | GCSAML    | chr1  | + | 2.48E+08 | 2.48E+08 | 4130  |
| ENSG000001 | 54.28148 | 76.17185 | -0.48471 | 0.2629    | 0.36108   | RAB24     | chr5  | - | 1.77E+08 | 1.77E+08 | 1820  |
| ENSG000001 | 1452.208 | 2503.248 | -0.78435 | 7.79E-09  | 3.34E-08  | PRELID1   | chr5  | + | 1.77E+08 | 1.77E+08 | 1261  |
| ENSG000001 | 194.5947 | 109.6155 | 0.82437  | 0.002672  | 0.006209  | THBS3     | chr1  | - | 1.55E+08 | 1.55E+08 | 4208  |

|            |          |          |          |           |           |          |       |   |          |          |      |
|------------|----------|----------|----------|-----------|-----------|----------|-------|---|----------|----------|------|
| ENSG000001 | 102.2736 | 75.56957 | 0.43328  | 0.086429  | 0.1428    | CA5B     | chrX  | + | 15706953 | 15805747 | 6050 |
| ENSG000001 | 347.4969 | 240.0034 | 0.5349   | 0.000942  | 0.002348  | SLC50A1  | chr1  | + | 1.55E+08 | 1.55E+08 | 1300 |
| ENSG000001 | 8.930791 | 82.37649 | -3.1255  | 2.72E-11  | 1.40E-10  | EFNA1    | chr1  | + | 1.55E+08 | 1.55E+08 | 1926 |
| ENSG000001 | 0.290301 | 0.654722 | -0.51764 | 0.76892   | NA        | CXCL10   | chr4  | - | 76942273 | 76944650 | 1173 |
| ENSG000001 | 94.50659 | 110.2379 | -0.21858 | 0.40541   | 0.51025   | NPIPL3   | chr16 | - | 21413558 | 21459888 | 3501 |
| ENSG000001 | 54.52752 | 1.043983 | 5.443    | 7.45E-12  | 3.98E-11  | SH3TC2   | chr5  | - | 1.48E+08 | 1.48E+08 | 7324 |
| ENSG000001 | 0.36308  | 1.280305 | -1.2352  | 0.46421   | NA        | CXCL11   | chr4  | - | 76954835 | 76962568 | 1606 |
| ENSG000001 | 180.8789 | 170.2344 | 0.086729 | 0.61562   | 0.70724   | ZRSR2    | chrX  | + | 15808595 | 15841383 | 1491 |
| ENSG000001 | 658.9847 | 525.806  | 0.32652  | 0.070414  | 0.11977   | NMD3     | chr3  | + | 1.61E+08 | 1.61E+08 | 3061 |
| ENSG000001 | 4.273994 | 3.6483   | 0.21553  | 0.80793   | 0.86444   | ADRB2    | chr5  | + | 1.48E+08 | 1.48E+08 | 2041 |
| ENSG000001 | 190.3688 | 41.4835  | 2.1803   | 6.18E-10  | 2.90E-09  | B3GALNT1 | chr3  | - | 1.61E+08 | 1.61E+08 | 3606 |
| ENSG000001 | 391.8185 | 313.9933 | 0.31794  | 0.043919  | 0.079468  | GPRIN1   | chr5  | - | 1.76E+08 | 1.76E+08 | 4211 |
| ENSG000001 | 263.7462 | 84.67874 | 1.6321   | 1.72E-09  | 7.78E-09  | KCNAB1   | chr3  | + | 1.56E+08 | 1.56E+08 | 4086 |
| ENSG000001 | 337.2706 | 230.6384 | 0.54419  | 0.12391   | 0.19396   | MRPL1    | chr4  | + | 78783674 | 78873944 | 1490 |
| ENSG000001 | 0        | 7.022276 | -4.3773  | 0.001176  | 0.002887  | SHE      | chr1  | - | 1.54E+08 | 1.54E+08 | 6855 |
| ENSG000001 | 8.414408 | 1.888903 | 1.9543   | 0.03595   | 0.066764  | NROB1    | chrX  | - | 30322323 | 30327715 | 2021 |
| ENSG000001 | 461.8492 | 496.0809 | -0.10204 | 0.48271   | 0.58695   | PGM2     | chr4  | + | 37828255 | 37864558 | 3264 |
| ENSG000001 | 0.653381 | 18.83882 | -4.3325  | 3.93E-05  | 0.000118  | STK32A   | chr5  | + | 1.47E+08 | 1.47E+08 | 5393 |
| ENSG000001 | 1.576526 | 0.654722 | 0.99964  | 0.49628   | 0.60008   | IL1RAPL1 | chrX  | + | 28605516 | 29974840 | 3667 |
| ENSG000001 | 0        | 0.891044 | -1.0625  | 0.54819   | NA        | P2RY12   | chr3  | - | 1.51E+08 | 1.51E+08 | 1766 |
| ENSG000001 | 8.434946 | 29.05045 | -1.7653  | 0.000458  | 0.001197  | C22orf15 | chr22 | + | 24105208 | 24108048 | 2021 |
| ENSG000001 | 173.694  | 18.14925 | 3.2337   | 1.74E-28  | 2.09E-27  | KIAA1024 | chr15 | + | 79724858 | 79764632 | 6732 |
| ENSG000001 | 0        | 0.700845 | -0.87835 | 0.62047   | NA        | UMOD     | chr16 | - | 20344374 | 20367623 | 2408 |
| ENSG000001 | 0        | 0.297015 | -0.41864 | 0.81278   | NA        | GP2      | chr16 | - | 20320894 | 20339130 | 3406 |
| ENSG000001 | 607.5833 | 325.8173 | 0.89704  | 8.89E-10  | 4.12E-09  | SLC33A1  | chr3  | - | 1.56E+08 | 1.56E+08 | 3725 |
| ENSG000001 | 114.4954 | 133.5683 | -0.21877 | 0.32393   | 0.42694   | SNUPN    | chr15 | - | 75890424 | 75918810 | 1931 |
| ENSG000001 | 84.02853 | 107.8814 | -0.35529 | 0.18609   | 0.27178   | CRADD    | chr12 | + | 94071151 | 94288616 | 1470 |
| ENSG000001 | 1191.135 | 1790.299 | -0.58739 | 1.85E-09  | 8.35E-09  | SIN3A    | chr15 | - | 75661720 | 75748183 | 6737 |
| ENSG000001 | 299.1165 | 112.1067 | 1.4155   | 6.68E-16  | 4.60E-15  | ARL13B   | chr3  | + | 93698983 | 93774512 | 3906 |
| ENSG000001 | 1.016461 | 1.340997 | -0.32508 | 0.82218   | 0.87482   | RNASE2   | chr14 | + | 21423611 | 21424595 | 755  |
| ENSG000001 | 3007.62  | 2363.513 | 0.347    | 0.010603  | 0.022164  | PTK2     | chr8  | - | 1.42E+08 | 1.42E+08 | 4955 |
| ENSG000001 | 1.774324 | 0.951736 | 0.65979  | 0.65895   | 0.74291   | RSPH10B2 | chr7  | + | 6793740  | 6838996  | 3220 |
| ENSG000001 | 5.488253 | 39.33418 | -2.8113  | 1.82E-07  | 6.95E-07  | PTAFR    | chr1  | - | 28473677 | 28520447 | 4491 |
| ENSG000001 | 1230.59  | 1186.354 | 0.052604 | 0.74526   | 0.81305   | PTPN9    | chr15 | - | 75759462 | 75871630 | 3943 |
| ENSG000001 | 1.649304 | 0.343138 | 1.6347   | 0.29819   | 0.40002   | RNASE6   | chr14 | + | 21249210 | 21250626 | 1061 |
| ENSG000001 | 2.044087 | 296.5015 | -7.0252  | 1.41E-34  | 2.11E-33  | NPR1     | chr1  | + | 1.54E+08 | 1.54E+08 | 4236 |
| ENSG000001 | 5.382958 | 3.2299   | 0.68675  | 0.45356   | 0.55902   | KCNK9    | chr8  | - | 1.41E+08 | 1.41E+08 | 3276 |
| ENSG000001 | 3.983692 | 0        | 3.5462   | 0.014052  | 0.028626  | IL8      | chr4  | + | 74606223 | 74609433 | 1705 |
| ENSG000001 | 42.6004  | 99.89498 | -1.2162  | 0.002604  | 0.00606   | SCN9A    | chr2  | - | 1.67E+08 | 1.67E+08 | 9787 |
| ENSG000001 | 0        | 3.2299   | -3.2154  | 0.032806  | 0.061439  | RASSF6   | chr4  | - | 74437267 | 74486348 | 5994 |
| ENSG000001 | 11187.02 | 99.80548 | 6.7956   | 0         | 0         | COL22A1  | chr8  | - | 1.4E+08  | 1.4E+08  | 6346 |
| ENSG000001 | 1417.114 | 1082.412 | 0.3883   | 0.000271  | 0.000729  | SDC2     | chr8  | + | 97505579 | 97624000 | 3751 |
| ENSG000001 | 0        | 1.309443 | -1.6539  | 0.35008   | NA        | DC52     | chr1  | + | 26644448 | 26647014 | 581  |
| ENSG000001 | 466.2782 | 367.2666 | 0.3442   | 0.022616  | 0.044103  | MMGT1    | chrX  | - | 1.35E+08 | 1.35E+08 | 3738 |
| ENSG000001 | 598.6169 | 571.1903 | 0.068072 | 0.73615   | 0.80534   | TM2D2    | chr8  | - | 38846327 | 38854343 | 3435 |
| ENSG000001 | 0.290301 | 4.112823 | -2.8658  | 0.041276  | 0.075344  | HTRA4    | chr8  | + | 38831683 | 38846181 | 2095 |
| ENSG000001 | 270.5627 | 133.9067 | 1.0125   | 2.49E-06  | 8.58E-06  | PLEKHA2  | chr8  | + | 38758753 | 38831428 | 5638 |
| ENSG000001 | 9129.64  | 5929.914 | 0.62218  | 6.75E-13  | 3.88E-12  | CLIC4    | chr1  | + | 25071848 | 25170815 | 4346 |
| ENSG000001 | 3.257533 | 2.010288 | 0.63717  | 0.55523   | 0.65442   | GPR183   | chr13 | - | 99946784 | 99959659 | 1700 |
| ENSG000001 | 2349.123 | 1409.811 | 0.7353   | 2.74E-08  | 1.12E-07  | CCDC8    | chr19 | - | 46913629 | 46916841 | 3213 |
| ENSG000001 | 218.9447 | 232.4158 | -0.08699 | 0.67929   | 0.75991   | METTL15  | chr11 | + | 28129795 | 28355054 | 4416 |
| ENSG000001 | 0        | 1.623443 | -1.9406  | 0.26756   | NA        | ZNF280A  | chr22 | - | 22868060 | 22874613 | 2148 |
| ENSG000001 | 0        | 1.280305 | -1.6305  | 0.35731   | NA        | MUC15    | chr11 | - | 26580580 | 26593780 | 3252 |
| ENSG000001 | 0.685084 | 0        | 0.85004  | 0.63064   | NA        | CXorf48  | chrX  | - | 1.34E+08 | 1.34E+08 | 1728 |
| ENSG000001 | 356.1314 | 5.50236  | 5.9851   | 2.74E-50  | 6.32E-49  | ZEB2     | chr2  | - | 1.45E+08 | 1.45E+08 | 6280 |
| ENSG000001 | 2041.738 | 4651.724 | -1.1857  | 2.07E-14  | 1.31E-13  | PCBP1    | chr2  | + | 70314585 | 70316332 | 1748 |
| ENSG000001 | 1928.569 | 2097.115 | -0.12044 | 0.32603   | 0.42896   | HINT1    | chr5  | - | 1.3E+08  | 1.31E+08 | 1081 |
| ENSG000001 | 135.1033 | 166.8343 | -0.29995 | 0.25357   | 0.35055   | DTWD2    | chr5  | - | 1.18E+08 | 1.18E+08 | 4365 |
| ENSG000001 | 8.600228 | 0.594029 | 3.29     | 0.003617  | 0.008234  | CLIC3    | chr9  | - | 1.4E+08  | 1.4E+08  | 1017 |
| ENSG000001 | 425.1108 | 469.296  | -0.14167 | 0.2692    | 0.36819   | INO80E   | chr16 | + | 30006615 | 30017114 | 4469 |
| ENSG000001 | 361.5996 | 2.338857 | 7.1103   | 2.06E-40  | 3.67E-39  | BNC1     | chr15 | - | 83924655 | 83953466 | 4610 |
| ENSG000001 | 176.2707 | 162.2539 | 0.11776  | 0.50141   | 0.60501   | DFFB     | chr1  | + | 3773845  | 3801993  | 3152 |
| ENSG000001 | 313.5621 | 319.8672 | -0.02785 | 0.85439   | 0.89764   | NFU1     | chr2  | - | 69622882 | 69664760 | 1467 |
| ENSG000001 | 7106.471 | 807.012  | 3.1347   | 9.86E-143 | 1.02E-140 | ANTXR1   | chr2  | + | 69240310 | 69476459 | 5859 |
| ENSG000001 | 0.975385 | 0        | 1.2767   | 0.47406   | NA        | GKN1     | chr2  | + | 69201705 | 69208106 | 814  |

|            |          |          |          |           |           |          |       |   |          |          |       |
|------------|----------|----------|----------|-----------|-----------|----------|-------|---|----------|----------|-------|
| ENSG000001 | 346.4691 | 294.6889 | 0.23451  | 0.18166   | 0.26637   | CKAP2L   | chr2  | - | 1.13E+08 | 1.14E+08 | 4737  |
| ENSG000001 | 126.2349 | 126.6991 | -0.00284 | 0.98906   | 0.99398   | C15orf40 | chr15 | - | 83657193 | 83680393 | 1881  |
| ENSG000001 | 22.013   | 30.75485 | -0.48485 | 0.25934   | 0.35728   | FAM103A1 | chr15 | + | 83654959 | 83659809 | 1568  |
| ENSG000001 | 0        | 53.08487 | -7.3073  | 3.68E-11  | 1.88E-10  | PROKR1   | chr2  | + | 68870721 | 68882708 | 1602  |
| ENSG000001 | 37.84426 | 45.3302  | -0.25803 | 0.40069   | 0.50538   | APLF     | chr2  | + | 68694693 | 68858004 | 3906  |
| ENSG000001 | 16.36981 | 22.61978 | -0.45343 | 0.32266   | 0.4256    | BOLA2B   | chr16 | - | 30204255 | 30205627 | 1012  |
| ENSG000001 | 72.20752 | 48.55768 | 0.56484  | 0.049279  | 0.087846  | RGPD8    | chr2  | - | 1.13E+08 | 1.13E+08 | 5576  |
| ENSG000001 | 449.7463 | 2128.568 | -2.2405  | 8.52E-73  | 3.20E-71  | HIC2     | chr22 | + | 21771693 | 21805752 | 6940  |
| ENSG000001 | 1758.486 | 1884.195 | -0.09915 | 0.49203   | 0.59598   | LUZP1    | chr1  | - | 23410516 | 23504301 | 8898  |
| ENSG000001 | 198.9377 | 331.7138 | -0.73613 | 3.22E-05  | 9.73E-05  | HEXDC    | chr17 | + | 80376194 | 80400521 | 2285  |
| ENSG000001 | 0.36308  | 1.234181 | -1.1893  | 0.48408   | NA        | BCRP2    | chr22 | + | 21457305 | 21476574 | 1842  |
| ENSG000001 | 911.03   | 1379.056 | -0.5967  | 6.42E-06  | 2.11E-05  | BUB1     | chr2  | - | 1.11E+08 | 1.11E+08 | 3532  |
| ENSG000001 | 14.24341 | 17.5479  | -0.30253 | 0.61258   | 0.70485   | SPNS1    | chr16 | + | 28985542 | 28995869 | 2253  |
| ENSG000001 | 452.9281 | 828.5384 | -0.8697  | 2.69E-08  | 1.10E-07  | LRRC45   | chr17 | + | 79981178 | 79989027 | 2701  |
| ENSG000001 | 48.74636 | 142.3597 | -1.5364  | 2.76E-09  | 1.23E-08  | CHRNA5   | chr15 | + | 78857862 | 78887611 | 3623  |
| ENSG000001 | 683.4946 | 947.0877 | -0.46943 | 0.001273  | 0.003106  | STRA13   | chr17 | - | 79976578 | 79981983 | 894   |
| ENSG000001 | 793.8389 | 765.9898 | 0.050961 | 0.71692   | 0.79028   | AGPAT2   | chr9  | - | 1.4E+08  | 1.4E+08  | 1512  |
| ENSG000001 | 759.5122 | 1192.197 | -0.64947 | 2.14E-05  | 6.61E-05  | ASPSR1   | chr17 | + | 79934683 | 79975282 | 5503  |
| ENSG000001 | 50449.72 | 44376.28 | 0.18496  | 0.026628  | 0.051064  | ASPN     | chr17 | - | 80036214 | 80056208 | 8560  |
| ENSG000001 | 3169.232 | 6419.396 | -1.0173  | 4.84E-22  | 4.46E-21  | CNBP     | chr3  | - | 1.29E+08 | 1.29E+08 | 1664  |
| ENSG000001 | 362.4441 | 142.2877 | 1.3464   | 4.60E-12  | 2.49E-11  | MT1E     | chr16 | + | 56659387 | 56661024 | 729   |
| ENSG000001 | 883.1971 | 1539.446 | -0.80034 | 1.45E-09  | 6.59E-09  | DUS1L    | chr17 | - | 80015382 | 80023763 | 4456  |
| ENSG000001 | 2332.318 | 2945.323 | -0.3362  | 0.000332  | 0.000883  | GPS1     | chr17 | + | 80008567 | 80015346 | 4076  |
| ENSG000001 | 529.6055 | 444.4301 | 0.25195  | 0.1002    | 0.16174   | RFNG     | chr17 | - | 80005778 | 80009707 | 3107  |
| ENSG000001 | 719.7957 | 941.3048 | -0.38575 | 0.016214  | 0.03262   | DCXR     | chr17 | - | 79993012 | 79995608 | 1251  |
| ENSG000001 | 104.5368 | 96.64922 | 0.10953  | 0.61283   | 0.70497   | ZNF32    | chr10 | - | 44139307 | 44144304 | 1201  |
| ENSG000001 | 337.0629 | 516.7262 | -0.6143  | 0.006125  | 0.013414  | LDB2     | chr4  | - | 16503164 | 16900432 | 2718  |
| ENSG000001 | 458.4588 | 1685.172 | -1.8764  | 3.04E-65  | 1.00E-63  | RAC3     | chr17 | + | 79989500 | 79992080 | 1090  |
| ENSG000001 | 48.55036 | 60.54731 | -0.30833 | 0.32722   | 0.43024   | NRG4     | chr15 | - | 76228310 | 76352136 | 3406  |
| ENSG000001 | 2741.286 | 803.1841 | 1.7691   | 6.81E-50  | 1.56E-48  | LIMS1    | chr2  | + | 1.09E+08 | 1.09E+08 | 4392  |
| ENSG000001 | 26.24429 | 261.2176 | -3.2864  | 4.07E-42  | 7.57E-41  | C15orf27 | chr15 | + | 76352178 | 76521462 | 2520  |
| ENSG000001 | 201.3141 | 152.3471 | 0.40355  | 0.071709  | 0.1216    | NLGN1    | chr3  | + | 1.73E+08 | 1.74E+08 | 8242  |
| ENSG000001 | 266.4475 | 104.2201 | 1.3497   | 3.67E-14  | 2.27E-13  | TAPT1    | chr4  | - | 16162128 | 16229033 | 4591  |
| ENSG000001 | 1874.056 | 5926.492 | -1.6577  | 2.01E-26  | 2.22E-25  | UGP2     | chr2  | + | 64068074 | 64118696 | 4397  |
| ENSG000001 | 0        | 0.297015 | -0.41864 | 0.81278   | NA        | TAS2R1   | chr5  | - | 9629109  | 9630463  | 1355  |
| ENSG000001 | 203.1385 | 3207.465 | -3.9751  | 3.49E-234 | 1.07E-231 | LINGO1   | chr15 | - | 77905369 | 78113242 | 3055  |
| ENSG000001 | 3069.219 | 6207.981 | -1.0142  | 1.63E-10  | 7.97E-10  | HNRNPF   | chr10 | - | 43881065 | 43904614 | 2755  |
| ENSG000001 | 201.2007 | 165.2966 | 0.28632  | 0.17291   | 0.25561   | BTD      | chr3  | + | 15642848 | 15687329 | 2138  |
| ENSG000001 | 987.1874 | 92.44577 | 3.407    | 3.00E-110 | 2.01E-108 | CSGALNAC | chr10 | + | 43633934 | 43680756 | 3730  |
| ENSG000001 | 10.14684 | 53.46352 | -2.3453  | 2.53E-06  | 8.69E-06  | TACR3    | chr4  | - | 1.05E+08 | 1.05E+08 | 5190  |
| ENSG000001 | 2613.783 | 81.70436 | 4.7979   | 8.33E-12  | 4.44E-11  | PCDH7    | chr4  | + | 30722037 | 31148422 | 6763  |
| ENSG000001 | 5799.717 | 3093.601 | 0.90524  | 1.90E-10  | 9.23E-10  | ROBO1    | chr3  | - | 78646390 | 79816965 | 7510  |
| ENSG000001 | 4.221753 | 275.4608 | -5.8936  | 9.08E-33  | 1.29E-31  | ONECUT1  | chr15 | - | 53049186 | 53083273 | 2092  |
| ENSG000001 | 445.9576 | 367.7465 | 0.27867  | 0.044809  | 0.080822  | AVEN     | chr15 | - | 34158428 | 34331377 | 1605  |
| ENSG000001 | 4.119877 | 900.3455 | -7.4994  | 9.64E-29  | 1.17E-27  | P2RY1    | chr3  | + | 1.53E+08 | 1.53E+08 | 3106  |
| ENSG000001 | 45.28427 | 236.3634 | -2.3726  | 5.81E-26  | 6.31E-25  | CTNND2   | chr5  | - | 10971952 | 11904155 | 5481  |
| ENSG000001 | 543.0746 | 392.0065 | 0.46728  | 0.002981  | 0.006874  | TRIM56   | chr7  | + | 1.01E+08 | 1.01E+08 | 3613  |
| ENSG000001 | 0.580602 | 0        | 0.8036   | 0.6494    | NA        | MUC17    | chr7  | + | 1.01E+08 | 1.01E+08 | 14241 |
| ENSG000001 | 0        | 0.700845 | -0.87835 | 0.62047   | NA        | AHSP     | chr16 | + | 31539185 | 31540124 | 524   |
| ENSG000001 | 5.031856 | 11.5721  | -1.131   | 0.17956   | 0.26363   | WNT10B   | chr12 | - | 49359123 | 49365546 | 2274  |
| ENSG000001 | 3.682226 | 14.83194 | -1.9344  | 0.008175  | 0.017447  | CALML6   | chr1  | + | 1846266  | 1848735  | 1882  |
| ENSG000001 | 11.59916 | 72.44091 | -2.6056  | 8.47E-09  | 3.61E-08  | REPS2    | chrX  | + | 16964814 | 17171395 | 7945  |
| ENSG000001 | 0        | 304.4193 | -9.6229  | 3.51E-19  | 2.83E-18  | MUC3A    | chr7  | + | 1.01E+08 | 1.01E+08 | 4238  |
| ENSG000001 | 1144.33  | 857.5951 | 0.41484  | 0.000326  | 0.000869  | SYAP1    | chrX  | + | 16737755 | 16783459 | 6129  |
| ENSG000001 | 9.201368 | 5.695847 | 0.63694  | 0.43188   | 0.53739   | ITGAM    | chr16 | + | 31271311 | 31344213 | 4718  |
| ENSG000001 | 0        | 16.08156 | -5.476   | 2.22E-05  | 6.83E-05  | PYDC1    | chr16 | - | 31227283 | 31228680 | 813   |
| ENSG000001 | 794.2255 | 238.8399 | 1.729    | 4.73E-33  | 6.76E-32  | TPST1    | chr7  | + | 65670186 | 65885530 | 2116  |
| ENSG000001 | 1424.769 | 626.7059 | 1.1835   | 2.44E-19  | 1.98E-18  | TOR1AIP2 | chr1  | - | 1.8E+08  | 1.8E+08  | 7905  |
| ENSG000001 | 0.36308  | 1.545765 | -1.432   | 0.39306   | 0.49747   | S100G    | chrX  | + | 16668281 | 16672793 | 455   |
| ENSG000001 | 1191.099 | 2.401965 | 7.6075   | 6.50E-10  | 3.05E-09  | TM4SF1   | chr3  | - | 1.49E+08 | 1.49E+08 | 3115  |
| ENSG000001 | 701.2688 | 664.0198 | 0.077753 | 0.72655   | 0.79773   | OTUD3    | chr1  | + | 20209006 | 20239438 | 6397  |
| ENSG000001 | 4.700479 | 86.56147 | -4.1249  | 7.86E-15  | 5.11E-14  | OTUD7A   | chr15 | - | 31775329 | 32162992 | 3431  |
| ENSG000001 | 660.6363 | 938.2564 | -0.50532 | 1.26E-05  | 4.00E-05  | GUSB     | chr7  | - | 65425671 | 65447301 | 2555  |
| ENSG000001 | 1752.953 | 2592.483 | -0.56372 | 3.08E-06  | 1.05E-05  | BRD3     | chr9  | - | 1.37E+08 | 1.37E+08 | 5652  |
| ENSG000001 | 1518.103 | 1254.83  | 0.27312  | 0.31209   | 0.41416   | KLF13    | chr15 | + | 31619058 | 31727868 | 6825  |

|            |          |          |          |           |           |           |       |   |          |          |       |
|------------|----------|----------|----------|-----------|-----------|-----------|-------|---|----------|----------|-------|
| ENSG000001 | 1.338465 | 54.94296 | -5.1292  | 1.88E-12  | 1.05E-11  | FRMPD4    | chrX  | + | 12156585 | 12742642 | 8465  |
| ENSG000001 | 93.13463 | 0.297015 | 7.2274   | 7.02E-13  | 4.03E-12  | ZFPM2     | chr8  | + | 1.06E+08 | 1.07E+08 | 4700  |
| ENSG000001 | 278.6066 | 140.8278 | 0.98047  | 4.14E-08  | 1.67E-07  | ZNF764    | chr16 | - | 30565085 | 30569819 | 2970  |
| ENSG000001 | 44.77726 | 90.83831 | -1.0136  | 0.001027  | 0.00254   | ZNF747    | chr16 | - | 30537244 | 30546668 | 3936  |
| ENSG000001 | 667.7518 | 625.3953 | 0.093421 | 0.5933    | 0.68804   | ZNF768    | chr16 | - | 30535325 | 30538142 | 2312  |
| ENSG000001 | 6.277005 | 5.08396  | 0.28924  | 0.75444   | 0.82116   | TAS1R3    | chr1  | + | 1266694  | 1270686  | 3433  |
| ENSG000001 | 128.7681 | 170.4481 | -0.40066 | 0.14505   | 0.22051   | TMEM42    | chr3  | + | 44903361 | 44907162 | 3071  |
| ENSG000001 | 612.084  | 340.3731 | 0.84551  | 2.59E-09  | 1.15E-08  | MAP3K2    | chr2  | - | 1.28E+08 | 1.28E+08 | 10992 |
| ENSG000001 | 113.1113 | 236.7782 | -1.0617  | 4.21E-05  | 0.000125  | PUSL1     | chr1  | + | 1243947  | 1247057  | 1783  |
| ENSG000001 | 1440.027 | 1538.05  | -0.09463 | 0.38873   | 0.49295   | SF3B5     | chr6  | - | 1.44E+08 | 1.44E+08 | 737   |
| ENSG000001 | 175.2621 | 227.8741 | -0.37585 | 0.19236   | 0.27957   | ZNF35     | chr3  | + | 44690219 | 44702283 | 2661  |
| ENSG000001 | 1.390706 | 21.22621 | -3.7325  | 1.37E-05  | 4.32E-05  | TIGD4     | chr4  | - | 1.54E+08 | 1.54E+08 | 2472  |
| ENSG000001 | 577.2215 | 202.1977 | 1.506    | 1.87E-15  | 1.26E-14  | IFFO2     | chr1  | - | 19230775 | 19283180 | 6188  |
| ENSG000001 | 3383.891 | 2757.029 | 0.29455  | 0.11683   | 0.18459   | NLGN2     | chr17 | + | 7308193  | 7323179  | 4642  |
| ENSG000001 | 22.56369 | 0        | 6.1189   | 1.19E-07  | 4.63E-07  | MYO7B     | chr2  | + | 1.28E+08 | 1.28E+08 | 6718  |
| ENSG000001 | 10854.46 | 2389.222 | 2.1824   | 1.03E-141 | 1.04E-139 | CHD3      | chr17 | + | 7788124  | 7816078  | 7356  |
| ENSG000001 | 400.063  | 27.12837 | 3.8539   | 3.73E-58  | 1.04E-56  | TMEM154   | chr4  | - | 1.54E+08 | 1.54E+08 | 10698 |
| ENSG000001 | 1.628766 | 23.82966 | -3.6674  | 1.54E-06  | 5.39E-06  | MYRIP     | chr3  | + | 39850405 | 40301812 | 5077  |
| ENSG000001 | 5399.757 | 461.3427 | 3.5449   | 2.43E-139 | 2.35E-137 | ALCAM     | chr3  | + | 1.05E+08 | 1.05E+08 | 4701  |
| ENSG000001 | 5656.419 | 5304.06  | 0.092635 | 0.50813   | 0.61168   | YWHAG     | chr7  | - | 75956116 | 75988348 | 3745  |
| ENSG000001 | 1144.067 | 940.4341 | 0.28296  | 0.04426   | 0.079979  | UBE2E3    | chr2  | + | 1.82E+08 | 1.82E+08 | 1570  |
| ENSG000001 | 1005.938 | 829.6173 | 0.27701  | 0.041886  | 0.076309  | CNTR0B    | chr17 | + | 7835419  | 7853236  | 3769  |
| ENSG000001 | 831.1452 | 433.4696 | 0.93817  | 3.39E-10  | 1.62E-09  | TRAPP1    | chr17 | - | 7833663  | 7835441  | 811   |
| ENSG000001 | 3.661688 | 0        | 3.386    | 0.022371  | 0.043672  | ZPLD1     | chr3  | + | 1.02E+08 | 1.02E+08 | 3619  |
| ENSG000001 | 186.3063 | 60.51347 | 1.6111   | 2.80E-08  | 1.14E-07  | KCNAB3    | chr17 | - | 7825177  | 7833121  | 2458  |
| ENSG000001 | 0        | 0.686276 | -0.84936 | 0.6309    | NA        | SERPINA9  | chr14 | - | 94929054 | 94946026 | 1755  |
| ENSG000001 | 0        | 1.40169  | -1.7271  | 0.32809   | NA        | FAM153A   | chr5  | - | 1.77E+08 | 1.77E+08 | 4499  |
| ENSG000001 | 1.048164 | 2.543625 | -1.1012  | 0.40949   | 0.51441   | GPR37L1   | chr1  | + | 2.02E+08 | 2.02E+08 | 2508  |
| ENSG000001 | 369.1237 | 218.6407 | 0.75324  | 0.000331  | 0.00088   | SIMC1     | chr5  | + | 1.76E+08 | 1.76E+08 | 3572  |
| ENSG000001 | 348.1871 | 260.4508 | 0.41615  | 0.0709    | 0.1205    | TMEM192   | chr4  | - | 1.66E+08 | 1.66E+08 | 4542  |
| ENSG000001 | 197.2306 | 363.1381 | -0.87638 | 1.87E-05  | 5.81E-05  | RP11-423H | chr5  | + | 1.77E+08 | 1.77E+08 | 1570  |
| ENSG000001 | 12.20968 | 4.242329 | 1.4548   | 0.036194  | 0.067137  | NSG2      | chr5  | + | 1.73E+08 | 1.74E+08 | 2452  |
| ENSG000001 | 58.68506 | 43.87023 | 0.41748  | 0.14366   | 0.21864   | AC018720  | chr7  | + | 75123401 | 75133628 | 2667  |
| ENSG000001 | 89.28647 | 133.4948 | -0.5748  | 0.007838  | 0.016782  | ZNF778    | chr16 | + | 89284118 | 89295363 | 2915  |
| ENSG000001 | 1026.091 | 654.274  | 0.64445  | 0.026476  | 0.050808  | NIPA1     | chr15 | - | 23043277 | 23100005 | 7613  |
| ENSG000001 | 0.995923 | 0.357707 | 1.0227   | 0.53712   | NA        | FOXD4     | chr9  | - | 116237   | 118417   | 2181  |
| ENSG000001 | 0        | 0.343138 | -0.41864 | 0.81278   | NA        | GPR25     | chr1  | + | 2.01E+08 | 2.01E+08 | 1224  |
| ENSG000001 | 756.4095 | 1288.025 | -0.76818 | 4.78E-13  | 2.77E-12  | UBE2E1    | chr3  | + | 23847394 | 23932807 | 1511  |
| ENSG000001 | 8428.919 | 11118.21 | -0.39907 | 0.000385  | 0.001014  | HNRNP3A   | chr2  | + | 1.78E+08 | 1.78E+08 | 5688  |
| ENSG000001 | 982.2518 | 595.8799 | 0.71899  | 5.24E-07  | 1.92E-06  | SIK2      | chr11 | + | 1.11E+08 | 1.12E+08 | 9678  |
| ENSG000001 | 238.64   | 104.1158 | 1.1923   | 7.42E-09  | 3.18E-08  | RNF150    | chr4  | - | 1.42E+08 | 1.42E+08 | 4535  |
| ENSG000001 | 2.624689 | 4.256898 | -0.6426  | 0.51009   | 0.61346   | CDC144A   | chr17 | + | 16592851 | 16707767 | 8912  |
| ENSG000001 | 11.63087 | 19.01116 | -0.6995  | 0.19532   | 0.28322   | RP11-262H | chr9  | + | 66553273 | 66555928 | 2541  |
| ENSG000001 | 0        | 0.343138 | -0.41864 | 0.81278   | NA        | VGLL2     | chr6  | + | 1.18E+08 | 1.18E+08 | 2212  |
| ENSG000001 | 9.410332 | 0.343138 | 4.0314   | 0.001113  | 0.002743  | HOXD4     | chr2  | + | 1.77E+08 | 1.77E+08 | 1464  |
| ENSG000001 | 118.3461 | 193.4945 | -0.70813 | 0.004721  | 0.010554  | CHRN1     | chr17 | + | 7348380  | 7361026  | 2557  |
| ENSG000001 | 10.19811 | 2.401965 | 1.8638   | 0.094288  | 0.15377   | HOXD12    | chr2  | + | 1.77E+08 | 1.77E+08 | 1805  |
| ENSG000001 | 0.342542 | 0        | 0.4146   | 0.81455   | NA        | GYPA      | chr4  | - | 1.45E+08 | 1.45E+08 | 2659  |
| ENSG000001 | 504.832  | 283.1786 | 0.8317   | 4.43E-08  | 1.78E-07  | USP38     | chr4  | + | 1.44E+08 | 1.44E+08 | 7009  |
| ENSG000001 | 205.432  | 593.6781 | -1.5186  | 1.97E-06  | 6.86E-06  | SLC16A5   | chr17 | + | 73083822 | 73102257 | 2051  |
| ENSG000001 | 151.3248 | 120.5128 | 0.32954  | 0.080679  | 0.1345    | NANP      | chr20 | - | 25593571 | 25604811 | 3964  |
| ENSG000001 | 0.290301 | 1.370136 | -1.2908  | 0.44733   | NA        | ANKK1     | chr11 | + | 1.13E+08 | 1.13E+08 | 2543  |
| ENSG000001 | 39.73163 | 2.445673 | 3.9332   | 2.36E-09  | 1.05E-08  | ADRA1B    | chr5  | + | 1.59E+08 | 1.59E+08 | 1738  |
| ENSG000001 | 70.22    | 66.52398 | 0.081309 | 0.74922   | 0.81649   | ADPRM     | chr17 | + | 10600911 | 10614550 | 1277  |
| ENSG000001 | 0.36308  | 32.30304 | -5.7752  | 9.34E-08  | 3.65E-07  | FABP6     | chr5  | + | 1.6E+08  | 1.6E+08  | 769   |
| ENSG000001 | 377.7557 | 934.7919 | -1.3049  | 1.07E-12  | 6.09E-12  | PWWP2A    | chr5  | - | 1.59E+08 | 1.6E+08  | 3991  |
| ENSG000001 | 0.943682 | 0.686276 | 0.31965  | 0.85031   | NA        | USP50     | chr15 | - | 50792759 | 50838905 | 1386  |
| ENSG000001 | 1619.883 | 607.5231 | 1.4133   | 2.48E-18  | 1.93E-17  | USP47     | chr11 | + | 11862970 | 11980870 | 7775  |
| ENSG000001 | 2084.722 | 1336.387 | 0.6412   | 4.21E-09  | 1.84E-08  | PDCD6IP   | chr3  | + | 33839844 | 33911194 | 6161  |
| ENSG000001 | 343.5666 | 661.8337 | -0.94428 | 4.05E-14  | 2.51E-13  | ZNF212    | chr7  | + | 1.49E+08 | 1.49E+08 | 2810  |
| ENSG000001 | 3.693391 | 1.387121 | 1.248    | 0.29626   | 0.3983    | MRAP      | chr21 | + | 33664124 | 33687095 | 1000  |
| ENSG000001 | 171.477  | 194.8288 | -0.18581 | 0.32732   | 0.43034   | FAM161A   | chr2  | - | 62051989 | 62081278 | 4027  |
| ENSG000001 | 1131.017 | 1314.946 | -0.21729 | 0.078003  | 0.13066   | ZNF282    | chr7  | + | 1.49E+08 | 1.49E+08 | 3721  |
| ENSG000001 | 1598.398 | 897.1932 | 0.83191  | 8.49E-10  | 3.94E-09  | GLB1      | chr3  | - | 33038100 | 33138722 | 2616  |
| ENSG000001 | 95.929   | 76.55024 | 0.32544  | 0.22176   | 0.31393   | C14orf142 | chr14 | - | 93669239 | 93673439 | 1154  |

|            |          |          |          |          |          |           |       |   |          |          |       |
|------------|----------|----------|----------|----------|----------|-----------|-------|---|----------|----------|-------|
| ENSG000001 | 115.118  | 135.0544 | -0.22713 | 0.38736  | 0.49151  | FAXDC2    | chr5  | - | 1.54E+08 | 1.54E+08 | 3817  |
| ENSG000001 | 4090.948 | 2346.513 | 0.8006   | 1.14E-08 | 4.80E-08 | CRTAP     | chr3  | + | 33155471 | 33185153 | 2518  |
| ENSG000001 | 11.90723 | 1.531196 | 2.4961   | 0.045184 | 0.081373 | CNGB3     | chr8  | - | 87566205 | 87755903 | 4347  |
| ENSG000001 | 71.40777 | 0        | 7.6939   | 2.54E-12 | 1.40E-11 | SLN       | chr11 | - | 1.08E+08 | 1.08E+08 | 906   |
| ENSG000001 | 609.1397 | 726.2774 | -0.25319 | 0.0503   | 0.089408 | ELP5      | chr17 | + | 7154735  | 7163259  | 2209  |
| ENSG000001 | 73.26759 | 116.0456 | -0.65751 | 0.015866 | 0.031984 | CMTM8     | chr3  | + | 32280171 | 32411817 | 1174  |
| ENSG000001 | 12.33388 | 9.721256 | 0.32905  | 0.58791  | 0.68348  | GABARAP   | chr17 | - | 7143333  | 7146089  | 1634  |
| ENSG000001 | 378.4217 | 222.1537 | 0.76882  | 4.38E-07 | 1.62E-06 | STX8      | chr17 | - | 9153789  | 9479908  | 1245  |
| ENSG000001 | 820.6467 | 1328.583 | -0.69372 | 5.47E-08 | 2.18E-07 | CDK1      | chr10 | + | 62538089 | 62554610 | 1948  |
| ENSG000001 | 2409.018 | 2066.138 | 0.22101  | 0.15795  | 0.23728  | UBB       | chr17 | + | 16284112 | 16286059 | 1225  |
| ENSG000001 | 425.1229 | 541.3592 | -0.34692 | 0.045176 | 0.081363 | NFRKB     | chr11 | - | 1.3E+08  | 1.3E+08  | 5093  |
| ENSG000001 | 456.5139 | 0.297015 | 9.3674   | 2.02E-23 | 1.99E-22 | FABP4     | chr8  | - | 82390654 | 82395498 | 941   |
| ENSG000001 | 0        | 1.606458 | -1.9287  | 0.27074  | NA       | FRMPD2    | chr10 | - | 49364601 | 49482941 | 4997  |
| ENSG000001 | 330.3453 | 301.1772 | 0.13457  | 0.34583  | 0.44991  | PRDM10    | chr11 | - | 1.3E+08  | 1.3E+08  | 6322  |
| ENSG000001 | 313.7149 | 435.0783 | -0.47197 | 0.000479 | 0.001248 | B3GNT2    | chr2  | + | 62423248 | 62451866 | 2763  |
| ENSG000001 | 80.2855  | 183.7266 | -1.1854  | 1.99E-06 | 6.90E-06 | FOS       | chr14 | + | 75745477 | 75748933 | 2158  |
| ENSG000001 | 4483.825 | 2350.078 | 0.93137  | 4.48E-20 | 3.79E-19 | TMED10    | chr14 | - | 75598173 | 75643334 | 4127  |
| ENSG000001 | 0.975385 | 16.20207 | -3.7333  | 5.02E-05 | 0.000148 | OR2A20P   | chr7  | - | 1.44E+08 | 1.44E+08 | 2913  |
| ENSG000001 | 257.2305 | 240.2816 | 0.09947  | 0.68833  | 0.76763  | SETMAR    | chr3  | + | 4344988  | 4359251  | 2443  |
| ENSG000001 | 349.2165 | 206.3271 | 0.75826  | 3.24E-06 | 1.10E-05 | SMAD1     | chr4  | + | 1.46E+08 | 1.46E+08 | 3293  |
| ENSG000001 | 0        | 0.686276 | -0.84936 | 0.6309   | NA       | CST5      | chr20 | - | 23856572 | 23860387 | 756   |
| ENSG000001 | 0.290301 | 0.297015 | -0.00202 | 0.99909  | NA       | CST2      | chr20 | - | 23804406 | 23807368 | 748   |
| ENSG000001 | 1.451506 | 0        | 1.4786   | 0.40599  | NA       | EMX2      | chr10 | + | 1.19E+08 | 1.19E+08 | 2896  |
| ENSG000001 | 0.342542 | 114.3883 | -6.9467  | NA       | NA       | CST1      | chr20 | - | 23728190 | 23731905 | 760   |
| ENSG000001 | 109.0745 | 2.558194 | 5.2329   | 1.62E-20 | 1.40E-19 | SP7       | chr12 | - | 53720362 | 53739099 | 3148  |
| ENSG000001 | 26.77526 | 1.355566 | 4.097    | 2.48E-07 | 9.36E-07 | FAM115C   | chr7  | + | 1.43E+08 | 1.43E+08 | 5568  |
| ENSG000001 | 198.6151 | 21.92619 | 3.164    | 1.41E-30 | 1.83E-29 | SEMA3E    | chr7  | - | 82993222 | 83278326 | 6476  |
| ENSG000001 | 0.72616  | 75.26436 | -6.3328  | 3.14E-13 | 1.84E-12 | LRRN2     | chr1  | - | 2.05E+08 | 2.05E+08 | 5036  |
| ENSG000001 | 228.7337 | 803.9531 | -1.7957  | 1.52E-07 | 5.84E-07 | SLC30A1   | chr1  | - | 2.12E+08 | 2.12E+08 | 5474  |
| ENSG000001 | 308.1596 | 3.512346 | 6.3007   | 1.51E-43 | 2.92E-42 | DCLK2     | chr4  | + | 1.51E+08 | 1.51E+08 | 4265  |
| ENSG000001 | 60.82083 | 1.043983 | 5.5974   | 1.49E-12 | 8.38E-12 | ZNF804A   | chr2  | + | 1.85E+08 | 1.86E+08 | 4690  |
| ENSG000001 | 0        | 0.640152 | -0.82869 | 0.63935  | NA       | CTA-313A1 | chr7  | - | 1.02E+08 | 1.02E+08 | 331   |
| ENSG000001 | 7.022889 | 368.145  | -5.6118  | 5.33E-49 | 1.19E-47 | GPRC5C    | chr17 | + | 72420990 | 72447792 | 2988  |
| ENSG000001 | 71.93173 | 38.08858 | 0.91727  | 0.001715 | 0.004103 | TMEM182   | chr2  | + | 1.03E+08 | 1.03E+08 | 3593  |
| ENSG000001 | 0        | 12.29402 | -5.2409  | 2.17E-05 | 6.70E-05 | VSTM2A    | chr7  | + | 54610018 | 54638773 | 3401  |
| ENSG000001 | 582.1049 | 16860.01 | -4.8509  | 0        | 0        | KRT8      | chr12 | - | 53290977 | 53343738 | 2862  |
| ENSG000001 | 0.653381 | 0        | 0.82678  | 0.64037  | NA       | KRT78     | chr12 | - | 53231588 | 53242876 | 2554  |
| ENSG000001 | 99.01945 | 57.91082 | 0.76234  | 0.017617 | 0.035198 | ADORA2B   | chr17 | + | 15848231 | 15879060 | 1875  |
| ENSG000001 | 0        | 0.654722 | -0.83442 | 0.63731  | NA       | SDR9C7    | chr12 | - | 57316938 | 57328189 | 1765  |
| ENSG000001 | 76.37101 | 196.5226 | -1.3548  | 1.21E-08 | 5.09E-08 | MGMT      | chr10 | + | 1.31E+08 | 1.32E+08 | 1759  |
| ENSG000001 | 17.14822 | 16.16481 | 0.091    | 0.85403  | 0.89741  | METTL7B   | chr12 | + | 56075330 | 56078395 | 1506  |
| ENSG000001 | 1.286224 | 1.326428 | -0.02638 | 0.98517  | 0.99139  | KRT86     | chr12 | + | 52643084 | 52702947 | 2091  |
| ENSG000001 | 1511.884 | 839.8679 | 0.84553  | 2.29E-05 | 7.04E-05 | HARS      | chr5  | - | 1.4E+08  | 1.4E+08  | 3494  |
| ENSG000001 | 193.866  | 363.107  | -0.90354 | 1.39E-08 | 5.85E-08 | NFXL1     | chr4  | - | 47849257 | 47916653 | 3865  |
| ENSG000001 | 592.1005 | 293.2869 | 1.01     | 6.79E-13 | 3.90E-12 | DENND5B   | chr12 | - | 31535157 | 31744031 | 9470  |
| ENSG000001 | 18.80868 | 2.056411 | 3.0705   | 5.39E-05 | 0.000159 | CD14      | chr5  | - | 1.4E+08  | 1.4E+08  | 1886  |
| ENSG000001 | 371.7828 | 261.5889 | 0.50822  | 0.001612 | 0.003869 | DNAJC18   | chr5  | - | 1.39E+08 | 1.39E+08 | 5103  |
| ENSG000001 | 36.61965 | 95.26855 | -1.3745  | 1.94E-07 | 7.39E-07 | SPATA24   | chr5  | - | 1.39E+08 | 1.39E+08 | 909   |
| ENSG000001 | 1398.038 | 900.7198 | 0.63334  | 2.60E-09 | 1.16E-08 | RALGAPB   | chr20 | + | 37101459 | 37207504 | 8661  |
| ENSG000001 | 316.1336 | 873.8008 | -1.4647  | 9.80E-34 | 1.44E-32 | WIBG      | chr12 | + | 56295197 | 56326402 | 1226  |
| ENSG000001 | 0        | 2.618886 | -2.6151  | 0.12026  | 0.18917  | MZB1      | chr5  | - | 1.39E+08 | 1.39E+08 | 1887  |
| ENSG000001 | 0.290301 | 0        | 0.4146   | 0.81455  | NA       | KRT4      | chr12 | - | 53200333 | 53208335 | 2576  |
| ENSG000001 | 7.272114 | 7.593614 | -0.04542 | 0.95555  | 0.97258  | SLC23A1   | chr5  | - | 1.39E+08 | 1.39E+08 | 2303  |
| ENSG000001 | 465.5    | 25.73475 | 4.17     | 5.37E-72 | 1.99E-70 | NPAS2     | chr2  | + | 1.01E+08 | 1.02E+08 | 7983  |
| ENSG000001 | 0.36308  | 1.828211 | -1.6223  | 0.32801  | 0.43105  | KISS1     | chr1  | - | 2.04E+08 | 2.04E+08 | 709   |
| ENSG000001 | 134.6182 | 11.94034 | 3.4629   | 2.29E-22 | 2.15E-21 | LONRF2    | chr2  | - | 1.01E+08 | 1.01E+08 | 13912 |
| ENSG000001 | 396.2354 | 488.7978 | -0.30143 | 0.034449 | 0.064231 | NUDT9     | chr4  | + | 88343734 | 88380606 | 2458  |
| ENSG000001 | 2.967231 | 1.485073 | 0.78703  | 0.55943  | 0.65813  | HSD17B13  | chr4  | - | 88224941 | 88244058 | 2397  |
| ENSG000001 | 1013.917 | 1950.935 | -0.94256 | 2.18E-11 | 1.13E-10 | PA2G4     | chr12 | + | 56498103 | 56507691 | 2577  |
| ENSG000001 | 1820.663 | 1891.174 | -0.05452 | 0.71185  | 0.78615  | ELOVL6    | chr4  | - | 1.11E+08 | 1.11E+08 | 6454  |
| ENSG000001 | 2845.432 | 1157.941 | 1.2922   | 6.78E-09 | 2.91E-08 | PFKFB3    | chr10 | + | 6186881  | 6277495  | 4483  |
| ENSG000001 | 35.61354 | 60.4519  | -0.75395 | 0.016091 | 0.032387 | TMC7      | chr16 | + | 18995256 | 19075264 | 4499  |
| ENSG000001 | 1287     | 2093.333 | -0.70009 | 1.09E-05 | 3.48E-05 | ARL6IP1   | chr16 | - | 18802991 | 18813000 | 2407  |
| ENSG000001 | 870.3899 | 336.6058 | 1.3641   | 1.63E-09 | 7.39E-09 | SERPINB9  | chr6  | - | 2887500  | 2903514  | 4118  |
| ENSG000001 | 300.5095 | 107.1579 | 1.4826   | 3.94E-16 | 2.75E-15 | SMAGP     | chr12 | - | 51638342 | 51664674 | 2350  |

|            |          |          |          |           |           |           |       |   |          |          |       |
|------------|----------|----------|----------|-----------|-----------|-----------|-------|---|----------|----------|-------|
| ENSG000001 | 34.84712 | 245.48   | -2.7996  | 2.46E-24  | 2.50E-23  | IRX1      | chr5  | + | 3596168  | 3601517  | 1858  |
| ENSG000001 | 7056.622 | 986.052  | 2.8332   | 2.28E-62  | 7.03E-61  | CDH2      | chr18 | - | 25530930 | 25757410 | 4332  |
| ENSG000001 | 117.9669 | 2391.516 | -4.3289  | 4.64E-152 | 5.40E-150 | IRX2      | chr5  | - | 2745959  | 2752969  | 2630  |
| ENSG000001 | 2380.33  | 630.6164 | 1.914    | 5.08E-47  | 1.07E-45  | EMB       | chr5  | - | 49692026 | 49739082 | 4281  |
| ENSG000001 | 135.998  | 27.28702 | 2.2912   | 1.48E-15  | 9.99E-15  | SIX2      | chr2  | - | 45232300 | 45236569 | 2205  |
| ENSG000001 | 40.00995 | 280.7398 | -2.7871  | 1.84E-21  | 1.66E-20  | DLGAP1    | chr18 | - | 3496030  | 4455335  | 6683  |
| ENSG000001 | 2273.288 | 587.6955 | 1.9481   | 3.33E-43  | 6.39E-42  | STAT2     | chr12 | - | 56735381 | 56753939 | 3278  |
| ENSG000001 | 429.2944 | 789.9003 | -0.87923 | 2.72E-09  | 1.21E-08  | NUDCD2    | chr5  | - | 1.63E+08 | 1.63E+08 | 1043  |
| ENSG000001 | 0.290301 | 0.594029 | -0.38058 | 0.83094   | NA        | LINC00266 | chr6  | - | 131910   | 144885   | 727   |
| ENSG000001 | 1262.419 | 1049.581 | 0.26519  | 0.18757   | 0.27359   | IRF2BP1   | chr19 | - | 46386866 | 46389376 | 2511  |
| ENSG000001 | 3528.622 | 7731.314 | -1.1311  | 7.38E-41  | 1.32E-39  | HSPA4     | chr5  | + | 1.32E+08 | 1.32E+08 | 4825  |
| ENSG000001 | 0.705622 | 361.4448 | -8.5108  | 5.44E-26  | 5.92E-25  | FOXA3     | chr19 | + | 46367247 | 46377055 | 1989  |
| ENSG000001 | 4.814334 | 3.351285 | 0.47343  | 0.61399   | 0.70597   | SLC26A5   | chr7  | - | 1.03E+08 | 1.03E+08 | 2689  |
| ENSG000001 | 0.342542 | 6.024416 | -3.376   | 0.01156   | 0.023966  | SCRT1     | chr8  | - | 1.46E+08 | 1.46E+08 | 1282  |
| ENSG000001 | 261.7115 | 208.6772 | 0.32615  | 0.11907   | 0.18766   | COMMD5    | chr8  | - | 1.46E+08 | 1.46E+08 | 1573  |
| ENSG000001 | 585.2282 | 12.22037 | 5.5412   | 6.49E-76  | 2.58E-74  | SGCD      | chr5  | + | 1.55E+08 | 1.56E+08 | 9755  |
| ENSG000001 | 0.290301 | 6.420125 | -3.5145  | 0.007111  | 0.015375  | GTSF1     | chr12 | - | 54849734 | 54867386 | 1621  |
| ENSG000001 | 39.24532 | 1.684135 | 4.3647   | 1.14E-09  | 5.25E-09  | DPY19L2P2 | chr7  | - | 1.03E+08 | 1.03E+08 | 4078  |
| ENSG000001 | 138.4284 | 189.0981 | -0.44709 | 0.012359  | 0.025483  | ZNF16     | chr8  | - | 1.46E+08 | 1.46E+08 | 2616  |
| ENSG000001 | 686.2341 | 596.828  | 0.20009  | 0.093509  | 0.15268   | ARMC10    | chr7  | + | 1.03E+08 | 1.03E+08 | 2629  |
| ENSG000001 | 491.0496 | 669.8627 | -0.44668 | 0.000221  | 0.000602  | RNF34     | chr12 | + | 1.22E+08 | 1.22E+08 | 2066  |
| ENSG000001 | 38.1234  | 26.17422 | 0.53201  | 0.13759   | 0.21097   | ACYP2     | chr2  | + | 54342540 | 54532437 | 1913  |
| ENSG000001 | 628.9689 | 1782.507 | -1.5005  | 1.69E-24  | 1.74E-23  | TRABD     | chr22 | + | 50624344 | 50638027 | 2404  |
| ENSG000001 | 47.34873 | 96.34329 | -1.0248  | 0.000168  | 0.000465  | TMEM133   | chr11 | + | 1.01E+08 | 1.01E+08 | 1853  |
| ENSG000001 | 380.7537 | 156.8616 | 1.2735   | 2.68E-14  | 1.68E-13  | ATF7      | chr12 | - | 53901640 | 54020199 | 6680  |
| ENSG000001 | 10.08425 | 6.883905 | 0.49627  | 0.55199   | 0.65145   | RASA4B    | chr7  | - | 1.02E+08 | 1.02E+08 | 3569  |
| ENSG000001 | 453.0908 | 325.2787 | 0.47903  | 0.000931  | 0.00232   | SOC56     | chr18 | + | 67956137 | 67997436 | 5848  |
| ENSG000001 | 35.86277 | 142.6648 | -1.9731  | 1.18E-12  | 6.65E-12  | MURC      | chr9  | + | 1.03E+08 | 1.03E+08 | 2615  |
| ENSG000001 | 15.05449 | 392.6446 | -4.6592  | 1.09E-33  | 1.59E-32  | ZNF296    | chr19 | - | 45574758 | 45579846 | 1744  |
| ENSG000001 | 0.290301 | 0.343138 | -0.00202 | 0.99909   | NA        | OR5E1P    | chr11 | + | 7870247  | 7871182  | 927   |
| ENSG000001 | 21.60884 | 15.78434 | 0.3149   | 0.84803   | 0.89326   | HOXB9     | chr17 | - | 46698518 | 46703839 | 2705  |
| ENSG000001 | 0.705622 | 102.9587 | -6.7313  | 2.35E-14  | 1.48E-13  | TTL6      | chr17 | - | 46839597 | 46894576 | 4440  |
| ENSG000001 | 355.5555 | 488.3603 | -0.45752 | 0.005473  | 0.012094  | BOP1      | chr8  | - | 1.45E+08 | 1.46E+08 | 2336  |
| ENSG000001 | 463.2446 | 165.8644 | 1.4694   | 3.42E-06  | 1.16E-05  | POLH      | chr6  | + | 43543887 | 43586701 | 3540  |
| ENSG000001 | 0.705622 | 33.90782 | -5.21    | 1.96E-08  | 8.10E-08  | SYT9      | chr11 | + | 7260099  | 7490273  | 3955  |
| ENSG000001 | 26.70231 | 620.8198 | -4.5255  | 1.77E-66  | 6.02E-65  | KCNS3     | chr2  | + | 18059114 | 18542882 | 2397  |
| ENSG000001 | 0.290301 | 1.043983 | -0.98014 | 0.57012   | NA        | RBMXL2    | chr11 | + | 7110165  | 7112379  | 2215  |
| ENSG000001 | 5052.948 | 2013.259 | 1.326    | 5.60E-21  | 4.93E-20  | KIF5B     | chr10 | - | 32297938 | 32345359 | 5877  |
| ENSG000001 | 53.74489 | 228.0009 | -2.0674  | 6.93E-20  | 5.81E-19  | GPR37     | chr7  | - | 1.24E+08 | 1.24E+08 | 3021  |
| ENSG000001 | 2466.633 | 793.8902 | 1.6326   | 1.42E-36  | 2.26E-35  | AKAP13    | chr15 | + | 85923802 | 86292586 | 13215 |
| ENSG000001 | 0.290301 | 0        | 0.4146   | 0.81455   | NA        | TPD52L3   | chr9  | + | 6328349  | 6331900  | 2572  |
| ENSG000001 | 1018.48  | 1466.76  | -0.52589 | 1.09E-06  | 3.87E-06  | CDC4A     | chr14 | - | 1.05E+08 | 1.05E+08 | 2513  |
| ENSG000001 | 0        | 0.343138 | -0.41864 | 0.81278   | NA        | OR10A4    | chr11 | + | 6897856  | 6898850  | 995   |
| ENSG000001 | 0        | 2.263595 | -2.408   | 0.15804   | 0.23738   | SDR16C5   | chr8  | - | 57212569 | 57233335 | 2399  |
| ENSG000001 | 0        | 0.357707 | -0.41864 | 0.81278   | NA        | DYDC1     | chr10 | - | 82095861 | 82116511 | 1169  |
| ENSG000001 | 0.342542 | 0.343138 | -0.00208 | 0.99906   | NA        | OR10A2    | chr11 | + | 6890924  | 6891976  | 1053  |
| ENSG000001 | 272.2914 | 436.443  | -0.67751 | 0.00054   | 0.001395  | CHCHD7    | chr8  | + | 57124245 | 57131357 | 3157  |
| ENSG000001 | 219.8638 | 94.57261 | 1.2124   | 5.99E-09  | 2.59E-08  | HTRA3     | chr4  | + | 8271492  | 8308838  | 2541  |
| ENSG000001 | 221.3186 | 198.4696 | 0.15807  | 0.34201   | 0.44595   | FOXN2     | chr2  | + | 48541776 | 48606433 | 5408  |
| ENSG000001 | 0        | 0.297015 | -0.41864 | 0.81278   | NA        | LMOD2     | chr7  | + | 1.23E+08 | 1.23E+08 | 2346  |
| ENSG000001 | 0        | 0.98329  | -1.2878  | 0.47019   | NA        | FSHR      | chr2  | - | 49189296 | 49381676 | 2784  |
| ENSG000001 | 0        | 0.357707 | -0.41864 | 0.81278   | NA        | CELP      | chr9  | + | 1.36E+08 | 1.36E+08 | 1249  |
| ENSG000001 | 1108.296 | 1415.521 | -0.35281 | 0.019431  | 0.038457  | USP32     | chr17 | - | 58256455 | 58499831 | 5171  |
| ENSG000001 | 15.5408  | 42.77288 | -1.4538  | 0.000897  | 0.002242  | CEL       | chr9  | + | 1.36E+08 | 1.36E+08 | 2384  |
| ENSG000001 | 220.4989 | 346.3484 | -0.64928 | 0.003402  | 0.00778   | PPM1D     | chr17 | + | 58677544 | 58741849 | 2996  |
| ENSG000001 | 2.032922 | 222.2051 | -6.593   | 3.25E-27  | 3.71E-26  | GPR27     | chr3  | + | 71803201 | 71805647 | 2447  |
| ENSG000001 | 271.978  | 386.4595 | -0.50636 | 0.001531  | 0.003693  | AC093323  | chr4  | + | 6675178  | 6677774  | 2311  |
| ENSG000001 | 0        | 1.073121 | -1.1788  | 0.50551   | NA        | PSG6      | chr19 | - | 43406231 | 43423715 | 2321  |
| ENSG000001 | 687.6081 | 622.3065 | 0.14341  | 0.36995   | 0.47445   | KBTBD2    | chr7  | - | 32907784 | 32933743 | 3745  |
| ENSG000001 | 393.9979 | 138.8827 | 1.4996   | 2.78E-09  | 1.23E-08  | MINA      | chr3  | - | 97663086 | 97691301 | 2923  |
| ENSG000001 | 340.3815 | 762.0421 | -1.1621  | 6.11E-21  | 5.36E-20  | TRIAP1    | chr12 | - | 1.21E+08 | 1.21E+08 | 1182  |
| ENSG000001 | 557.3025 | 932.3978 | -0.74102 | 1.72E-06  | 6.01E-06  | LSM3      | chr3  | + | 14219858 | 14242619 | 3815  |
| ENSG000001 | 1.971308 | 0        | 2.4428   | 0.13467   | 0.20767   | LILRA3    | chr19 | - | 54799854 | 54809952 | 1880  |
| ENSG000001 | 958.9475 | 567.3099 | 0.75613  | 1.66E-11  | 8.68E-11  | KIAA0232  | chr4  | + | 6783102  | 6885897  | 7841  |
| ENSG000001 | 59.54317 | 143.1861 | -1.2523  | 2.39E-07  | 9.03E-07  | MTSS1     | chr8  | - | 1.26E+08 | 1.26E+08 | 4944  |

|            |          |          |          |           |           |           |       |   |          |          |       |
|------------|----------|----------|----------|-----------|-----------|-----------|-------|---|----------|----------|-------|
| ENSG000001 | 1357.595 | 622.9463 | 1.1215   | 6.42E-10  | 3.01E-09  | TMEM43    | chr3  | + | 14166440 | 14185179 | 3341  |
| ENSG000001 | 348.4954 | 339.4818 | 0.038739 | 0.80394   | 0.86137   | RNF139    | chr8  | + | 1.25E+08 | 1.26E+08 | 2637  |
| ENSG000001 | 11716.02 | 20558.22 | -0.81048 | 3.04E-14  | 1.90E-13  | RPS9      | chr19 | + | 54704610 | 54752862 | 2384  |
| ENSG000001 | 0.290301 | 0        | 0.4146   | 0.81455   | NA        | PLA2G1B   | chr12 | - | 1.21E+08 | 1.21E+08 | 565   |
| ENSG000001 | 1419.901 | 21.24965 | 6.0449   | 7.85E-170 | 1.15E-167 | CYTL1     | chr4  | - | 5016313  | 5021199  | 1003  |
| ENSG000001 | 1137.879 | 619.9078 | 0.8748   | 8.29E-12  | 4.42E-11  | TSEN34    | chr19 | + | 54693789 | 54697585 | 2372  |
| ENSG000001 | 0        | 7.70043  | -4.5518  | 0.000476  | 0.001239  | TRH       | chr3  | + | 1.3E+08  | 1.3E+08  | 1978  |
| ENSG000001 | 609.7663 | 204.1689 | 1.5748   | 1.25E-27  | 1.46E-26  | GSTA4     | chr6  | - | 52842751 | 52860176 | 1693  |
| ENSG000001 | 372.1451 | 274.434  | 0.44037  | 0.002293  | 0.005375  | MSANTD4   | chr11 | - | 1.06E+08 | 1.06E+08 | 4087  |
| ENSG000001 | 538.6417 | 987.8407 | -0.87298 | 7.06E-11  | 3.54E-10  | NDUFA3    | chr19 | + | 54606036 | 54612564 | 963   |
| ENSG000001 | 7.718159 | 67.61355 | -3.0587  | 1.30E-07  | 5.02E-07  | OSCAR     | chr19 | - | 54597933 | 54606000 | 2055  |
| ENSG000001 | 219.9906 | 332.4765 | -0.59102 | 0.063253  | 0.10924   | PAQR8     | chr6  | + | 52226219 | 52272575 | 4738  |
| ENSG000001 | 41.26194 | 43.64935 | -0.08831 | 0.81343   | 0.86888   | NUDT6     | chr4  | - | 1.24E+08 | 1.24E+08 | 5306  |
| ENSG000001 | 257.0604 | 94.64075 | 1.4258   | 3.28E-05  | 9.90E-05  | TPT1-AS1  | chr13 | + | 45915480 | 45965872 | 2869  |
| ENSG000001 | 1475.419 | 209.7771 | 2.813    | 4.97E-101 | 2.86E-99  | TANC2     | chr17 | + | 61086917 | 61505060 | 11721 |
| ENSG000001 | 0        | 99.68106 | -8.1109  | 2.63E-13  | 1.55E-12  | TEX13B    | chrX  | - | 1.07E+08 | 1.07E+08 | 1248  |
| ENSG000001 | 2.282147 | 11.82379 | -2.2398  | 0.005192  | 0.011534  | PKHD1     | chr6  | - | 51480098 | 51952423 | 16282 |
| ENSG000001 | 0        | 0.715414 | -0.84936 | 0.6309    | NA        | NCBP2L    | chrX  | + | 1.07E+08 | 1.07E+08 | 462   |
| ENSG000001 | 224.7816 | 129.3415 | 0.79229  | 8.17E-06  | 2.65E-05  | DNAJC24   | chr11 | + | 31391387 | 31453396 | 2745  |
| ENSG000001 | 225.431  | 566.1277 | -1.3207  | 7.40E-07  | 2.67E-06  | ZNF160    | chr19 | - | 53569859 | 53606689 | 4688  |
| ENSG000001 | 5.943022 | 97.35317 | -3.915   | 1.64E-17  | 1.23E-16  | ZNF415    | chr19 | - | 53611132 | 53636330 | 2630  |
| ENSG000001 | 2720.639 | 684.298  | 1.9824   | 7.73E-17  | 5.61E-16  | PRKCDBP   | chr11 | - | 6340176  | 6341877  | 1174  |
| ENSG000001 | 1.649304 | 1.043983 | 0.55572  | 0.69121   | 0.76974   | DCDC1     | chr11 | - | 30851916 | 31391357 | 5352  |
| ENSG000001 | 1017.153 | 523.2779 | 0.92364  | 0.16933   | 0.25114   | HAS2      | chr8  | - | 1.23E+08 | 1.23E+08 | 4190  |
| ENSG000001 | 176.0799 | 56.29047 | 1.6373   | 3.93E-12  | 2.14E-11  | PDGFD     | chr11 | - | 1.04E+08 | 1.04E+08 | 4052  |
| ENSG000001 | 0.975385 | 4.617021 | -1.952   | 0.095641  | 0.15566   | PLAC1     | chrX  | - | 1.34E+08 | 1.34E+08 | 1138  |
| ENSG000001 | 2.023549 | 0.686276 | 1.1955   | 0.42985   | 0.53531   | DDI1      | chr11 | + | 1.04E+08 | 1.04E+08 | 2615  |
| ENSG000001 | 206.9116 | 67.67573 | 1.6      | 4.41E-07  | 1.63E-06  | S1PR1     | chr1  | + | 1.02E+08 | 1.02E+08 | 2909  |
| ENSG000001 | 30.8094  | 207.3928 | -2.73    | 1.85E-23  | 1.82E-22  | HS6ST2    | chrX  | - | 1.32E+08 | 1.32E+08 | 4441  |
| ENSG000001 | 322.8704 | 25.78254 | 3.6184   | 4.23E-52  | 1.03E-50  | PYGO1     | chr15 | - | 55831088 | 55881145 | 8488  |
| ENSG000001 | 9.139755 | 12.14753 | -0.39652 | 0.51485   | 0.61773   | LRRCE     | chr19 | + | 7953390  | 7966901  | 3595  |
| ENSG000001 | 282.35   | 264.6716 | 0.093044 | 0.53319   | 0.63423   | PKIA      | chr8  | + | 79428374 | 79517502 | 4163  |
| ENSG000001 | 81.39961 | 213.2252 | -1.3768  | 9.25E-07  | 3.31E-06  | XKR6      | chr8  | - | 10753555 | 11058875 | 3382  |
| ENSG000001 | 185.641  | 400.397  | -1.1068  | 1.24E-12  | 6.99E-12  | TSNARE1   | chr8  | - | 1.43E+08 | 1.43E+08 | 2100  |
| ENSG000001 | 0        | 0.297015 | -0.41864 | 0.81278   | NA        | FPR2      | chr19 | + | 52255279 | 52273779 | 2621  |
| ENSG000001 | 2.697468 | 0        | 2.9287   | 0.058655  | 0.10242   | FPR1      | chr19 | - | 52248425 | 52307363 | 1965  |
| ENSG000001 | 0.290301 | 1.340997 | -1.3722  | 0.39656   | NA        | OR13H1    | chrX  | + | 1.31E+08 | 1.31E+08 | 1081  |
| ENSG000001 | 539.3736 | 289.2776 | 0.89624  | 1.84E-09  | 8.29E-09  | FEZ2      | chr2  | - | 36778570 | 36873230 | 4495  |
| ENSG000001 | 1.016461 | 6.223479 | -2.3545  | 0.031961  | 0.060023  | SOX7      | chr8  | - | 10581278 | 10697357 | 3216  |
| ENSG000001 | 1274.037 | 557.873  | 1.1909   | 3.39E-21  | 3.01E-20  | C11orf24  | chr11 | - | 68028803 | 68039469 | 2063  |
| ENSG000001 | 6.089393 | 27.82842 | -2.1506  | 0.000223  | 0.000606  | FAM86JP   | chr3  | + | 1.26E+08 | 1.26E+08 | 2012  |
| ENSG000001 | 52.23242 | 1.043983 | 5.383    | 1.39E-11  | 7.30E-11  | ALK       | chr2  | - | 29415640 | 30144432 | 6220  |
| ENSG000001 | 205.5919 | 393.3168 | -0.931   | 0.000115  | 0.000326  | CCBL1     | chr9  | - | 1.32E+08 | 1.32E+08 | 2490  |
| ENSG000001 | 98.27357 | 119.2931 | -0.27636 | 0.26464   | 0.3631    | MTM1      | chrX  | + | 1.5E+08  | 1.5E+08  | 3593  |
| ENSG000001 | 0        | 0.891044 | -1.0625  | 0.54819   | NA        | SIGLEC17P | chr19 | + | 51670585 | 51676780 | 2160  |
| ENSG000001 | 173.3841 | 305.4204 | -0.81749 | 2.37E-07  | 8.95E-07  | TRMT61B   | chr2  | - | 29072687 | 29093167 | 1836  |
| ENSG000001 | 18.14332 | 830.674  | -5.4584  | 7.60E-62  | 2.30E-60  | INSR      | chr19 | - | 7112266  | 7294045  | 8954  |
| ENSG000001 | 855.8853 | 524.5246 | 0.7058   | 1.92E-09  | 8.63E-09  | MFN1      | chr3  | + | 1.79E+08 | 1.79E+08 | 5224  |
| ENSG000001 | 2.085163 | 0.654722 | 1.2991   | 0.36806   | 0.4727    | GIMAP8    | chr7  | + | 1.5E+08  | 1.5E+08  | 4184  |
| ENSG000001 | 8.412616 | 104.2543 | -3.5849  | 2.67E-14  | 1.67E-13  | NRTN      | chr19 | + | 5823813  | 5828335  | 1109  |
| ENSG000001 | 16.09247 | 17.11172 | -0.08055 | 0.89481   | 0.92699   | KCNMB3    | chr3  | - | 1.79E+08 | 1.79E+08 | 2055  |
| ENSG000001 | 0.290301 | 4.986881 | -3.0988  | 0.027483  | 0.052547  | FUT3      | chr19 | - | 5842899  | 5851485  | 2584  |
| ENSG000001 | 1.753786 | 202.3295 | -6.6981  | 1.67E-26  | 1.86E-25  | KCNG3     | chr2  | - | 42669157 | 42721237 | 3824  |
| ENSG000001 | 1.919068 | 0        | 2.4151   | 0.13977   | 0.21349   | HSFX2     | chrX  | - | 1.49E+08 | 1.49E+08 | 1966  |
| ENSG000001 | 209.4779 | 256.2525 | -0.28827 | 0.14255   | 0.21719   | ATP6V0E2  | chr7  | + | 1.5E+08  | 1.5E+08  | 2722  |
| ENSG000001 | 208.0086 | 58.72889 | 1.8189   | 3.54E-17  | 2.62E-16  | PRKCE     | chr2  | + | 45878484 | 46415129 | 5650  |
| ENSG000001 | 393.2125 | 480.8748 | -0.29083 | 0.028221  | 0.053773  | JAGN1     | chr3  | + | 9932238  | 9936033  | 1693  |
| ENSG000001 | 0        | 1.964165 | -2.2052  | 0.20143   | 0.2901    | RLN3      | chr19 | + | 14138960 | 14141854 | 580   |
| ENSG000001 | 1415.831 | 1431.843 | -0.01605 | 0.87806   | 0.91499   | TADA3     | chr3  | - | 9821544  | 9834695  | 2554  |
| ENSG000001 | 291.5352 | 297.2263 | -0.02635 | 0.85411   | 0.89743   | SOCSS5    | chr2  | + | 46926091 | 46990268 | 4771  |
| ENSG000001 | 169.4099 | 133.2099 | 0.34745  | 0.066333  | 0.11378   | C1GALT1C1 | chrX  | - | 1.2E+08  | 1.2E+08  | 1613  |
| ENSG000001 | 1128.183 | 1012.865 | 0.15523  | 0.30965   | 0.41149   | C9orf16   | chr9  | + | 1.31E+08 | 1.31E+08 | 1570  |
| ENSG000001 | 178.7158 | 213.8823 | -0.25827 | 0.36877   | 0.4734    | MORN4     | chr10 | - | 99374310 | 99393344 | 2323  |
| ENSG000001 | 407.6086 | 929.6711 | -1.1846  | 1.09E-07  | 4.25E-07  | ZNF672    | chr1  | + | 2.49E+08 | 2.49E+08 | 2989  |
| ENSG000001 | 301.8966 | 358.5222 | -0.24757 | 0.3362    | 0.43988   | ZNF692    | chr1  | - | 2.49E+08 | 2.49E+08 | 2704  |

|            |          |          |          |           |           |          |       |   |          |          |       |
|------------|----------|----------|----------|-----------|-----------|----------|-------|---|----------|----------|-------|
| ENSG000001 | 207.9915 | 221.1052 | -0.08947 | 0.69996   | 0.77656   | NAIF1    | chr9  | - | 1.31E+08 | 1.31E+08 | 3399  |
| ENSG000001 | 6.234137 | 17.68715 | -1.4633  | 0.013585  | 0.027783  | RBKS     | chr2  | - | 28004231 | 28113965 | 2151  |
| ENSG000001 | 20.7491  | 6.079404 | 1.7292   | 0.00371   | 0.008424  | GRIK1    | chr21 | - | 30909254 | 31312351 | 3624  |
| ENSG000001 | 0        | 1.372552 | -1.3974  | 0.43145   | NA        | MUC7     | chr4  | + | 71296209 | 71348714 | 2540  |
| ENSG000001 | 237.155  | 271.4055 | -0.19231 | 0.3255    | 0.42838   | TMEM126A | chr11 | + | 85359011 | 85367591 | 739   |
| ENSG000001 | 357.8886 | 415.4802 | -0.21493 | 0.15779   | 0.23709   | TMEM126E | chr11 | + | 85339629 | 85347580 | 1388  |
| ENSG000001 | 2123.205 | 899.8951 | 1.2346   | 3.46E-10  | 1.65E-09  | TRIM8    | chr10 | + | 1.04E+08 | 1.04E+08 | 2742  |
| ENSG000001 | 1062.34  | 788.605  | 0.42644  | 0.19216   | 0.27931   | NETO2    | chr16 | - | 47111614 | 47177908 | 7481  |
| ENSG000001 | 45.12396 | 11.84078 | 1.8967   | 2.65E-05  | 8.09E-05  | CLDN20   | chr6  | + | 1.56E+08 | 1.56E+08 | 1209  |
| ENSG000001 | 21.80681 | 481.3381 | -4.4307  | 2.79E-63  | 8.76E-62  | CDC42BPG | chr11 | - | 64590859 | 64612041 | 5742  |
| ENSG000001 | 1032.306 | 1191.98  | -0.20746 | 0.087921  | 0.14489   | SCAND1   | chr20 | - | 34541539 | 34547394 | 1727  |
| ENSG000001 | 586.8834 | 87.85056 | 2.7318   | 1.58E-58  | 4.42E-57  | JUNB     | chr19 | + | 12902310 | 12904124 | 1815  |
| ENSG000001 | 48.64612 | 285.8396 | -2.5515  | 7.70E-27  | 8.69E-26  | C10orf35 | chr10 | + | 71390007 | 71393352 | 1062  |
| ENSG000001 | 5.144897 | 217.3326 | -5.2974  | 3.27E-37  | 5.33E-36  | TMEM37   | chr2  | + | 1.2E+08  | 1.2E+08  | 1688  |
| ENSG000001 | 0        | 0.357707 | -0.41864 | 0.81278   | NA        | UGT2B7   | chr4  | + | 69917081 | 69978705 | 1887  |
| ENSG000001 | 1.068702 | 8.628733 | -2.758   | 0.010881  | 0.022693  | LRG1     | chr19 | - | 4536421  | 4540486  | 3036  |
| ENSG000001 | 733.5931 | 315.0032 | 1.2177   | 6.19E-20  | 5.20E-19  | SHCBP1   | chr16 | - | 46614466 | 46655538 | 3461  |
| ENSG000001 | 238.7184 | 9.972889 | 4.5701   | 5.78E-36  | 9.04E-35  | SOSTDC1  | chr7  | - | 16501106 | 16570205 | 2411  |
| ENSG000001 | 18.26655 | 72.54444 | -1.9632  | 2.71E-07  | 1.02E-06  | NPTX1    | chr17 | - | 78440948 | 78451643 | 5122  |
| ENSG000001 | 697.12   | 889.0299 | -0.34903 | 0.004415  | 0.009913  | FAM98B   | chr15 | + | 38746328 | 38779911 | 4388  |
| ENSG000001 | 1942.742 | 1791.425 | 0.11608  | 0.68632   | 0.76602   | BAHCC1   | chr17 | + | 79373540 | 79433357 | 10341 |
| ENSG000001 | 1.846289 | 33.46028 | -3.9322  | 2.53E-08  | 1.04E-07  | ZNF439   | chr19 | + | 11959541 | 11994565 | 2622  |
| ENSG000001 | 141.1459 | 108.5588 | 0.37515  | 0.15841   | 0.23774   | ZNF440   | chr19 | + | 11925099 | 11946016 | 4189  |
| ENSG000001 | 2032.768 | 2539.397 | -0.32036 | 0.038045  | 0.070208  | GAA      | chr17 | + | 78075355 | 78093678 | 3626  |
| ENSG000001 | 1897.11  | 696.1341 | 1.4452   | 5.15E-42  | 9.53E-41  | CANT1    | chr17 | - | 76987799 | 77005949 | 3534  |
| ENSG000001 | 40.9357  | 0.997859 | 5.0486   | 5.31E-10  | 2.50E-09  | KCNK3    | chr2  | + | 26915619 | 26956288 | 6162  |
| ENSG000001 | 964.585  | 613.7704 | 0.65084  | 0.000753  | 0.001903  | ZDHHC16  | chr10 | + | 99205927 | 99217127 | 1959  |
| ENSG000001 | 1325.83  | 525.2244 | 1.3331   | 3.39E-18  | 2.62E-17  | CHST11   | chr12 | + | 1.05E+08 | 1.05E+08 | 5709  |
| ENSG000001 | 437.0112 | 500.786  | -0.1953  | 0.25552   | 0.35281   | EXOSC1   | chr10 | - | 99195899 | 99205774 | 2113  |
| ENSG000001 | 3992.336 | 10373.78 | -1.3757  | 2.89E-26  | 3.17E-25  | PGAM1    | chr10 | + | 99185917 | 99193198 | 1830  |
| ENSG000001 | 629.0371 | 3252.367 | -2.3684  | 2.42E-77  | 9.82E-76  | CHD7     | chr8  | + | 61591337 | 61779465 | 10446 |
| ENSG000001 | 242.3992 | 185.1576 | 0.38686  | 0.036716  | 0.067987  | ESCO2    | chr8  | + | 27629466 | 27670157 | 3922  |
| ENSG000001 | 22.21177 | 2003.328 | -6.4807  | 3.55E-207 | 8.18E-205 | KRT19    | chr17 | - | 39679869 | 39684560 | 1390  |
| ENSG000001 | 2.044087 | 0        | 2.4801   | 0.12801   | 0.19906   | KRT15    | chr17 | - | 39669995 | 39678781 | 5237  |
| ENSG000001 | 18.60828 | 11.39169 | 0.67094  | 0.34841   | 0.45264   | LURAP1   | chr1  | + | 46669006 | 46686933 | 1854  |
| ENSG000001 | 556.9818 | 411.3897 | 0.43599  | 0.011164  | 0.023223  | CLCN5    | chrX  | + | 49687225 | 49863892 | 10108 |
| ENSG000001 | 9.864936 | 91.89719 | -3.1681  | 1.37E-09  | 6.26E-09  | TPPP     | chr5  | - | 660883   | 693510   | 5116  |
| ENSG000001 | 9.534537 | 8.761398 | 0.12628  | 0.85106   | 0.89525   | KCND3    | chr1  | - | 1.12E+08 | 1.13E+08 | 7396  |
| ENSG000001 | 14.2743  | 90.4606  | -2.6277  | 1.94E-09  | 8.71E-09  | APLN     | chrX  | - | 1.29E+08 | 1.29E+08 | 3220  |
| ENSG000001 | 0        | 0.343138 | -0.41864 | 0.81278   | NA        | KRT13    | chr17 | - | 39657233 | 39661957 | 1835  |
| ENSG000001 | 143.3446 | 0.343138 | 7.8081   | 2.12E-15  | 1.42E-14  | PDE7B    | chr6  | + | 1.36E+08 | 1.37E+08 | 5390  |
| ENSG000001 | 299.3919 | 402.7526 | -0.42783 | 0.013064  | 0.026806  | MRPL36   | chr5  | - | 1798500  | 1801480  | 793   |
| ENSG000001 | 306.3715 | 1036.935 | -1.7492  | 2.07E-11  | 1.07E-10  | ZNF581   | chr19 | + | 56146825 | 56156988 | 1324  |
| ENSG000001 | 46.60619 | 52.51831 | -0.1663  | 0.62293   | 0.71332   | NAT1     | chr8  | + | 18027986 | 18081198 | 2332  |
| ENSG000001 | 0.290301 | 0        | 0.4146   | 0.81455   | NA        | KRT20    | chr17 | - | 39032193 | 39041479 | 1737  |
| ENSG000001 | 0        | 0.297015 | -0.41864 | 0.81278   | NA        | GLOD5    | chrX  | + | 48620154 | 48632064 | 735   |
| ENSG000001 | 21.48643 | 109.2135 | -2.3336  | 4.09E-11  | 2.09E-10  | KSR2     | chr12 | - | 1.18E+08 | 1.18E+08 | 17008 |
| ENSG000001 | 124.9411 | 53.86098 | 1.211    | 4.03E-07  | 1.49E-06  | ZNF524   | chr19 | + | 56111388 | 56114504 | 1260  |
| ENSG000001 | 1075.119 | 749.9538 | 0.51924  | 4.29E-06  | 1.44E-05  | MCC      | chr5  | - | 1.12E+08 | 1.13E+08 | 29630 |
| ENSG000001 | 139.0107 | 120.394  | 0.20536  | 0.29515   | 0.39718   | ZBTB26   | chr9  | - | 1.26E+08 | 1.26E+08 | 4443  |
| ENSG000001 | 2.500484 | 4.986881 | -0.89957 | 0.44234   | 0.54804   | CDK5R2   | chr2  | + | 2.2E+08  | 2.2E+08  | 2500  |
| ENSG000001 | 552.7369 | 944.2879 | -0.77074 | 0.000107  | 0.000303  | DSEL     | chr18 | - | 65173819 | 65184217 | 9531  |
| ENSG000001 | 283.3612 | 440.6358 | -0.63363 | 0.009707  | 0.020453  | POLR1C   | chr6  | + | 43477440 | 43497323 | 1882  |
| ENSG000001 | 2181.177 | 517.8204 | 2.0735   | 2.89E-80  | 1.22E-78  | ASXL1    | chr20 | + | 30946155 | 31027122 | 7031  |
| ENSG000001 | 15.86199 | 10.5459  | 0.56946  | 0.32908   | 0.43222   | DLK2     | chr6  | - | 43418090 | 43424370 | 2038  |
| ENSG000001 | 366.1509 | 673.5365 | -0.87783 | 8.47E-07  | 3.04E-06  | ZNF562   | chr19 | - | 9759330  | 9785776  | 5706  |
| ENSG000001 | 1070.1   | 595.0173 | 0.84366  | 8.49E-05  | 0.000244  | ZNF318   | chr6  | - | 43299513 | 43337181 | 8006  |
| ENSG000001 | 411.4733 | 534.1323 | -0.3762  | 0.014477  | 0.029415  | ZNF561   | chr19 | - | 9715356  | 9732075  | 4693  |
| ENSG000001 | 6.908056 | 8.911179 | -0.36201 | 0.63858   | 0.72638   | MAP1LC3B | chr12 | + | 1.17E+08 | 1.17E+08 | 832   |
| ENSG000001 | 1376.873 | 982.4021 | 0.48637  | 2.20E-05  | 6.78E-05  | WIPF2    | chr17 | + | 38375556 | 38440388 | 7474  |
| ENSG000001 | 82.76782 | 0        | 7.8935   | 5.76E-13  | 3.33E-12  | HOPX     | chr4  | - | 57514155 | 57548065 | 3203  |
| ENSG000001 | 0        | 0.640152 | -0.82869 | 0.63935   | NA        | SSX6     | chrX  | + | 47967365 | 47980073 | 1461  |
| ENSG000001 | 443.0385 | 45.34073 | 3.2734   | 5.73E-60  | 1.67E-58  | LRRRC8C  | chr1  | + | 90098631 | 90398809 | 7218  |
| ENSG000001 | 0.653381 | 0        | 0.82678  | 0.64037   | NA        | SPACA5   | chrX  | + | 47863734 | 47869126 | 732   |
| ENSG000001 | 1398.507 | 2568.326 | -0.87444 | 1.17E-06  | 4.14E-06  | RSL1D1   | chr16 | - | 11929056 | 11945442 | 4134  |

|            |          |          |          |          |          |           |       |   |          |          |       |
|------------|----------|----------|----------|----------|----------|-----------|-------|---|----------|----------|-------|
| ENSG000001 | 407.6666 | 547.9694 | -0.4275  | 0.001012 | 0.002507 | LRRC8D    | chr1  | + | 90286573 | 90402170 | 3950  |
| ENSG000001 | 0.342542 | 0        | 0.4146   | 0.81455  | NA       | OR1L8     | chr9  | - | 1.25E+08 | 1.25E+08 | 1061  |
| ENSG000001 | 361.3065 | 447.8657 | -0.30824 | 0.08335  | 0.13839  | PPID      | chr4  | - | 1.6E+08  | 1.6E+08  | 1823  |
| ENSG000001 | 358.7551 | 16.81067 | 4.3884   | 3.01E-64 | 9.64E-63 | COL24A1   | chr1  | - | 86194916 | 86622626 | 6825  |
| ENSG000001 | 157.6489 | 98.42473 | 0.67797  | 0.001223 | 0.002991 | ETFDH     | chr4  | + | 1.6E+08  | 1.6E+08  | 3282  |
| ENSG000001 | 0        | 5.811527 | -4.0779  | 0.003281 | 0.007521 | RXFP1     | chr4  | + | 1.59E+08 | 1.6E+08  | 3842  |
| ENSG000001 | 60.58342 | 639.8041 | -3.3925  | 2.21E-59 | 6.35E-58 | LPAR3     | chr1  | - | 85277285 | 85358896 | 3345  |
| ENSG000001 | 390.0769 | 7.451955 | 5.6826   | 4.38E-59 | 1.24E-57 | PTGER4    | chr5  | + | 40679600 | 40693837 | 3848  |
| ENSG000001 | 1195.577 | 2115.898 | -0.82179 | 1.03E-08 | 4.36E-08 | TBCA      | chr5  | - | 76986991 | 77164604 | 2301  |
| ENSG000001 | 0.685084 | 0.297015 | 0.4735   | 0.79064  | NA       | NEUROD2   | chr17 | - | 37759789 | 37766030 | 6242  |
| ENSG000001 | 4.750114 | 15.31673 | -1.6029  | 0.021206 | 0.041617 | MAP6      | chr11 | - | 75297963 | 75380165 | 4329  |
| ENSG000001 | 0        | 17.1287  | -5.7111  | 1.74E-06 | 6.08E-06 | OTP       | chr5  | - | 76924538 | 76935513 | 3668  |
| ENSG000001 | 0.36308  | 807.1002 | -10.103  | 2.98E-27 | 3.42E-26 | ECEL1     | chr2  | - | 2.33E+08 | 2.33E+08 | 2965  |
| ENSG000001 | 1023.401 | 1325.923 | -0.3721  | 0.054474 | 0.095807 | BCL2L1    | chr20 | - | 30252255 | 30311792 | 2610  |
| ENSG000001 | 1.265686 | 0        | 1.6147   | 0.36215  | NA       | FGG       | chr4  | - | 1.56E+08 | 1.56E+08 | 2031  |
| ENSG000001 | 0        | 0.343138 | -0.41864 | 0.81278  | NA       | FGA       | chr4  | - | 1.56E+08 | 1.56E+08 | 3678  |
| ENSG000001 | 0        | 0.343138 | -0.41864 | 0.81278  | NA       | OR2AT4    | chr11 | - | 74799758 | 74800799 | 1042  |
| ENSG000001 | 0        | 0.357707 | -0.41864 | 0.81278  | NA       | FGB       | chr4  | + | 1.55E+08 | 1.55E+08 | 1975  |
| ENSG000001 | 701.565  | 791.0985 | -0.17274 | 0.28637  | 0.38789  | PLRG1     | chr4  | - | 1.55E+08 | 1.55E+08 | 3351  |
| ENSG000001 | 188.4641 | 56.29047 | 1.7326   | 3.04E-14 | 1.90E-13 | ZNF584    | chr19 | + | 58912871 | 58929694 | 2709  |
| ENSG000001 | 15.04512 | 4.351561 | 1.704    | 0.027373 | 0.052366 | DSCAM     | chr21 | - | 41382926 | 42219065 | 8552  |
| ENSG000001 | 0        | 3.037286 | -2.8072  | 0.091979 | 0.15057  | DNAI2     | chr17 | + | 72270386 | 72311023 | 2475  |
| ENSG000001 | 0        | 9.430689 | -4.8438  | 0.000142 | 0.000398 | NMUR1     | chr2  | - | 2.32E+08 | 2.32E+08 | 3298  |
| ENSG000001 | 4340.955 | 4101.908 | 0.081646 | 0.46493  | 0.5697   | CLSTN1    | chr1  | - | 9789084  | 9884584  | 5221  |
| ENSG000001 | 4528.825 | 3572.18  | 0.34156  | 0.035768 | 0.066467 | CXXC5     | chr5  | + | 1.39E+08 | 1.39E+08 | 2658  |
| ENSG000001 | 280.2347 | 471.4003 | -0.74854 | 3.66E-08 | 1.48E-07 | ZNF274    | chr19 | + | 58694396 | 58724928 | 4852  |
| ENSG000001 | 570.4614 | 647.9255 | -0.18293 | 0.5086   | 0.61204  | PIK3CD    | chr1  | + | 9711790  | 9789172  | 5483  |
| ENSG000001 | 0.36308  | 0        | 0.4146   | 0.81455  | NA       | PTCRA     | chr6  | + | 42883727 | 42893573 | 1080  |
| ENSG000001 | 301.5536 | 388.2746 | -0.3655  | 0.015458 | 0.03123  | SLC25A33  | chr1  | + | 9599541  | 9642831  | 1448  |
| ENSG000001 | 1530.44  | 411.1893 | 1.8952   | 8.83E-48 | 1.90E-46 | ENC1      | chr5  | - | 73923234 | 73937249 | 5517  |
| ENSG000001 | 783.7359 | 136.1317 | 2.5105   | 8.97E-24 | 8.93E-23 | SPSB1     | chr1  | + | 9352939  | 9429591  | 3120  |
| ENSG000001 | 1.068702 | 2.872193 | -1.2472  | 0.33939  | 0.44332  | P2RY6     | chr11 | + | 72975550 | 73009662 | 2398  |
| ENSG000001 | 2381.449 | 3268.53  | -0.45597 | 0.000309 | 0.000827 | BPTF      | chr17 | + | 65821640 | 65980494 | 11292 |
| ENSG000001 | 0.290301 | 1.280305 | -1.2436  | 0.46304  | NA       | S100Z     | chr5  | + | 76145826 | 76217475 | 1468  |
| ENSG000001 | 122.1263 | 544.5695 | -2.1492  | 4.11E-23 | 3.99E-22 | ZIK1      | chr19 | + | 58089824 | 58105145 | 4181  |
| ENSG000001 | 2.926156 | 4.417959 | -0.53578 | 0.63196  | 0.72107  | GPR82     | chrX  | + | 41583408 | 41589388 | 3349  |
| ENSG000001 | 12.86224 | 0        | 5.3052   | 1.52E-05 | 4.79E-05 | RP11-443P | chr3  | + | 1.86E+08 | 1.86E+08 | 1789  |
| ENSG000001 | 4.264621 | 1.591889 | 1.2377   | 0.27794  | 0.37834  | GPR34     | chrX  | + | 41548226 | 41556526 | 1924  |
| ENSG000001 | 0        | 3.008147 | -3.0982  | 0.042083 | 0.076635 | SHANK2-AS | chr11 | + | 70708895 | 70711220 | 1683  |
| ENSG000001 | 1978.974 | 910.4233 | 1.1146   | 3.27E-06 | 1.11E-05 | PLEKHG5   | chr1  | - | 6526152  | 6580121  | 5221  |
| ENSG000001 | 1493.948 | 1860.866 | -0.31624 | 0.043618 | 0.079012 | ATF7IP    | chr12 | + | 14518610 | 14651697 | 4847  |
| ENSG000001 | 11.55629 | 10.31287 | 0.14619  | 0.80878  | 0.86508  | C20orf201 | chr20 | - | 62714733 | 62715712 | 868   |
| ENSG000001 | 577.127  | 355.437  | 0.69602  | 0.0012   | 0.00294  | RGS19     | chr20 | - | 62704534 | 62711323 | 1593  |
| ENSG000001 | 651.6033 | 656.9288 | -0.01207 | 0.95389  | 0.97138  | TCEA2     | chr20 | + | 62681189 | 62703700 | 2357  |
| ENSG000001 | 12.0761  | 169.7139 | -3.8009  | 2.74E-32 | 3.82E-31 | ANO5      | chr11 | + | 22214722 | 22304903 | 6651  |
| ENSG000001 | 803.6957 | 966.7809 | -0.2652  | 0.042832 | 0.077778 | HDAC3     | chr5  | - | 1.41E+08 | 1.41E+08 | 1959  |
| ENSG000001 | 8.350189 | 5.407697 | 0.6199   | 0.4027   | 0.50744  | C1orf111  | chr1  | - | 1.62E+08 | 1.62E+08 | 1189  |
| ENSG000001 | 180.5868 | 198.0397 | -0.12947 | 0.55656  | 0.65568  | GPHN      | chr14 | + | 66974125 | 67648520 | 4297  |
| ENSG000001 | 3463.169 | 318.7988 | 3.4149   | 2.08E-27 | 2.40E-26 | VAT1L     | chr16 | + | 77822427 | 78014004 | 3825  |
| ENSG000001 | 215.3689 | 207.5043 | 0.052049 | 0.81516  | 0.87031  | TMEM51    | chr1  | + | 15479028 | 15546976 | 1942  |
| ENSG000001 | 663.7285 | 818.6612 | -0.30267 | 0.042283 | 0.076953 | CAMTA1    | chr1  | + | 6845384  | 7829766  | 8444  |
| ENSG000001 | 0.290301 | 0.686276 | -0.47648 | 0.78935  | NA       | LGALS4    | chr19 | - | 39292311 | 39304004 | 1535  |
| ENSG000001 | 47.77    | 156.8835 | -1.7079  | 1.76E-10 | 8.57E-10 | LRRC34    | chr3  | - | 1.7E+08  | 1.7E+08  | 3787  |
| ENSG000001 | 0.36308  | 21.96506 | -5.2344  | 2.94E-06 | 1.00E-05 | PAH       | chr12 | - | 1.03E+08 | 1.03E+08 | 4122  |
| ENSG000001 | 193.2744 | 304.3284 | -0.65205 | 0.001056 | 0.002608 | SPATA5L1  | chr15 | + | 45694529 | 45713617 | 2570  |
| ENSG000001 | 14.77356 | 149.1353 | -3.3214  | 2.52E-22 | 2.36E-21 | GATM      | chr15 | - | 45653322 | 45694525 | 3911  |
| ENSG000001 | 0        | 0.654722 | -0.83442 | 0.63731  | NA       | SYCE1     | chr10 | - | 1.35E+08 | 1.35E+08 | 2479  |
| ENSG000001 | 0        | 0.357707 | -0.41864 | 0.81278  | NA       | NXNL1     | chr19 | - | 17566234 | 17571763 | 946   |
| ENSG000001 | 5.726313 | 26.66472 | -2.1697  | 0.000524 | 0.001356 | RASGRP4   | chr19 | - | 38899695 | 38916945 | 3313  |
| ENSG000001 | 5.955001 | 13.67543 | -1.159   | 0.071439 | 0.12122  | NHLH1     | chr1  | + | 1.6E+08  | 1.6E+08  | 2563  |
| ENSG000001 | 35.45584 | 69.27721 | -0.95888 | 0.001852 | 0.004404 | SLFN1     | chr1  | - | 41481269 | 41488909 | 4310  |
| ENSG000001 | 222.9064 | 73.53988 | 1.5906   | 2.95E-10 | 1.42E-09 | BCL2      | chr18 | - | 60790579 | 60987361 | 7461  |
| ENSG000001 | 441.8709 | 626.3169 | -0.50266 | 2.85E-05 | 8.65E-05 | RHNO1     | chr12 | + | 2985424  | 2998626  | 1870  |
| ENSG000001 | 1001.223 | 1216.821 | -0.28026 | 0.15272  | 0.23054  | CTPS1     | chr1  | + | 41445007 | 41478235 | 3199  |
| ENSG000001 | 0        | 5992.248 | -13.492  | 1.18E-37 | 1.94E-36 | UTF1      | chr10 | + | 1.35E+08 | 1.35E+08 | 1157  |

|            |          |          |          |           |           |           |       |   |          |          |       |
|------------|----------|----------|----------|-----------|-----------|-----------|-------|---|----------|----------|-------|
| ENSG000001 | 3.713929 | 802.084  | -7.626   | 2.08E-53  | 5.22E-52  | KNDC1     | chr10 | + | 1.35E+08 | 1.35E+08 | 6793  |
| ENSG000001 | 0        | 1.280305 | -1.6305  | 0.35731   | NA        | WDR87     | chr19 | - | 38375463 | 38397317 | 9009  |
| ENSG000001 | 53.58466 | 93.13595 | -0.79477 | 0.003872  | 0.008766  | METTL18   | chr1  | - | 1.7E+08  | 1.7E+08  | 1521  |
| ENSG000001 | 16.04104 | 21.82911 | -0.4404  | 0.39453   | 0.49904   | TTC40     | chr10 | - | 1.35E+08 | 1.35E+08 | 8278  |
| ENSG000001 | 1731.415 | 87.1896  | 4.2791   | 2.19E-50  | 5.06E-49  | COL8A2    | chr1  | - | 36560837 | 36590821 | 4670  |
| ENSG000001 | 328.2114 | 650.1975 | -0.97944 | 0.001151  | 0.002829  | PWWP2B    | chr10 | + | 1.34E+08 | 1.34E+08 | 2651  |
| ENSG000001 | 0        | 3.633731 | -3.4088  | 0.020168  | 0.039758  | PCDHB1    | chr5  | + | 1.4E+08  | 1.4E+08  | 2534  |
| ENSG000001 | 4.169512 | 3.380424 | 0.29497  | 0.76933   | 0.83346   | ZNF540    | chr19 | + | 38042308 | 38104998 | 3147  |
| ENSG000001 | 3.22583  | 2.012704 | 0.59937  | 0.62209   | 0.71249   | ANGPTL7   | chr1  | + | 11249398 | 11256038 | 2238  |
| ENSG000001 | 646.6624 | 506.3448 | 0.35305  | 0.002812  | 0.006512  | FBXL14    | chr12 | - | 1675159  | 1703331  | 2111  |
| ENSG000001 | 868.7364 | 806.3398 | 0.10745  | 0.4748    | 0.5793    | EXOSC10   | chr1  | - | 11126675 | 11159938 | 3334  |
| ENSG000001 | 68.89254 | 51.12232 | 0.42921  | 0.11871   | 0.18719   | ZNF570    | chr19 | + | 37958487 | 37976260 | 2247  |
| ENSG000001 | 140.5315 | 7.53937  | 4.2038   | 1.11E-25  | 1.19E-24  | NINJ2     | chr12 | - | 673462   | 772945   | 1252  |
| ENSG000001 | 273.6129 | 160.5883 | 0.76865  | 1.89E-05  | 5.88E-05  | MLLT3     | chr9  | - | 20341663 | 20622542 | 6772  |
| ENSG000001 | 5.447177 | 13.27248 | -1.2397  | 0.11139   | 0.17702   | FAM90A1   | chr12 | - | 8373856  | 8380214  | 2513  |
| ENSG000001 | 2961.429 | 2974.18  | -0.00607 | 0.98073   | 0.98936   | RRM2      | chr2  | + | 10262455 | 10271545 | 3673  |
| ENSG000001 | 1626.44  | 1161.454 | 0.48551  | 2.80E-06  | 9.56E-06  | TRAPPC12  | chr2  | + | 3383446  | 3488865  | 3401  |
| ENSG000001 | 3303.297 | 4993.005 | -0.59523 | 4.86E-09  | 2.11E-08  | RPS21     | chr20 | + | 60962172 | 60963576 | 1002  |
| ENSG000001 | 236.0991 | 0        | 9.2911   | 5.25E-18  | 4.03E-17  | C3AR1     | chr12 | - | 8210898  | 8219067  | 2088  |
| ENSG000001 | 288.1738 | 460.352  | -0.67318 | 0.000469  | 0.001223  | RNMTL1    | chr17 | + | 685513   | 695749   | 1809  |
| ENSG000001 | 1763.018 | 812.2885 | 1.1176   | 6.65E-24  | 6.65E-23  | PTEN      | chr10 | + | 89622870 | 89731687 | 9027  |
| ENSG000001 | 4919.295 | 7796.21  | -0.66366 | 4.47E-12  | 2.42E-11  | RPS7      | chr2  | + | 3622795  | 3628509  | 5429  |
| ENSG000001 | 16.46232 | 0.686276 | 4.1735   | 4.45E-05  | 0.000132  | PRND      | chr20 | + | 4702556  | 4709106  | 3980  |
| ENSG000001 | 505.7476 | 627.9257 | -0.31138 | 0.11286   | 0.17913   | RNASEH1   | chr2  | - | 3592383  | 3606206  | 2120  |
| ENSG000001 | 2916.493 | 288.5408 | 3.3325   | 5.95E-124 | 4.95E-122 | PRNP      | chr20 | + | 4666882  | 4682236  | 2657  |
| ENSG000001 | 4.532592 | 0.686276 | 2.2982   | 0.077953  | 0.1306    | KLF17     | chr1  | + | 44584522 | 44600812 | 3131  |
| ENSG000001 | 85.59552 | 4.928605 | 4.043    | 4.61E-19  | 3.70E-18  | ADRA1D    | chr20 | - | 4201329  | 4229721  | 2677  |
| ENSG000001 | 401.8842 | 281.7101 | 0.50969  | 0.012202  | 0.025193  | FRMD5     | chr15 | - | 44162962 | 44487450 | 5011  |
| ENSG000001 | 0        | 34.0956  | -6.6741  | 5.00E-09  | 2.17E-08  | AQP4      | chr18 | - | 24432002 | 24445782 | 5274  |
| ENSG000001 | 128.2559 | 0.937167 | 6.6592   | 5.99E-19  | 4.79E-18  | MIR31HG   | chr9  | - | 21455641 | 21559668 | 745   |
| ENSG000001 | 1.628766 | 0.297015 | 1.6275   | 0.30182   | 0.40306   | CYP4F11   | chr19 | - | 16023182 | 16045677 | 2872  |
| ENSG000001 | 923.441  | 755.5208 | 0.28957  | 0.006239  | 0.013642  | TLN2      | chr15 | + | 62682725 | 63136830 | 11880 |
| ENSG000001 | 0.705622 | 0        | 0.8807   | 0.6196    | NA        | LGALS9C   | chr17 | + | 18380051 | 18398259 | 2947  |
| ENSG000001 | 544.1586 | 300.5474 | 0.8552   | 1.92E-07  | 7.31E-07  | TVP23B    | chr17 | + | 18684308 | 18710027 | 3298  |
| ENSG000001 | 0.36308  | 0.891044 | -0.73478 | 0.67953   | NA        | FBXW10    | chr17 | + | 18647326 | 18682662 | 3456  |
| ENSG000001 | 1284.258 | 1608.937 | -0.32441 | 0.074561  | 0.12585   | ZNF217    | chr20 | - | 52183604 | 52226446 | 5796  |
| ENSG000001 | 119.6161 | 62.86602 | 0.92049  | 0.000384  | 0.001011  | SRGAP2C   | chr1  | + | 1.21E+08 | 1.21E+08 | 969   |
| ENSG000001 | 1369.278 | 15.2406  | 6.4529   | 3.85E-124 | 3.23E-122 | SCG2      | chr2  | - | 2.24E+08 | 2.24E+08 | 2576  |
| ENSG000001 | 340.2312 | 302.1871 | 0.17312  | 0.26203   | 0.36017   | ATPAF2    | chr17 | - | 17880723 | 17942523 | 1737  |
| ENSG000001 | 0        | 40.6024  | -6.8549  | 4.07E-09  | 1.78E-08  | CYP4F22   | chr19 | + | 15619304 | 15663127 | 2640  |
| ENSG000001 | 0        | 606.7209 | -10.282  | 1.06E-18  | 8.36E-18  | FOXB1     | chr15 | + | 60296421 | 60353929 | 1672  |
| ENSG000001 | 332.9536 | 502.6619 | -0.59164 | 0.000596  | 0.001529  | PPIH      | chr1  | + | 43124096 | 43142429 | 1311  |
| ENSG000001 | 61.04422 | 30.62044 | 0.97963  | 0.007265  | 0.015662  | LRRC48    | chr17 | + | 17876127 | 17920203 | 5805  |
| ENSG000001 | 14.89435 | 66.05866 | -2.0964  | 3.98E-07  | 1.48E-06  | ZNF57     | chr19 | + | 2900896  | 2918474  | 2003  |
| ENSG000001 | 37.89569 | 46.8136  | -0.29454 | 0.36994   | 0.47445   | C20orf196 | chr20 | + | 5731039  | 5844558  | 1154  |
| ENSG000001 | 1500.419 | 1891.332 | -0.3318  | 0.21559   | 0.30666   | JMJD1C    | chr10 | - | 64926981 | 65225722 | 8666  |
| ENSG000001 | 4.015395 | 1.98115  | 0.91413  | 0.38444   | 0.48864   | LDHAL6B   | chr15 | + | 59499042 | 59500705 | 1664  |
| ENSG000001 | 3072.841 | 102.1008 | 4.8934   | 4.68E-177 | 7.83E-175 | SYNPO     | chr5  | + | 1.5E+08  | 1.5E+08  | 7063  |
| ENSG000001 | 0        | 0.640152 | -0.82869 | 0.63935   | NA        | MAL       | chr2  | + | 95691422 | 95719737 | 1108  |
| ENSG000001 | 108.94   | 134.6431 | -0.30412 | 0.17225   | 0.25484   | ZNF554    | chr19 | + | 2819872  | 2835771  | 4029  |
| ENSG000001 | 179.9147 | 194.0608 | -0.10859 | 0.53635   | 0.63736   | RAB33B    | chr4  | + | 1.4E+08  | 1.4E+08  | 4562  |
| ENSG000001 | 1502.811 | 2389.796 | -0.66826 | 2.56E-08  | 1.05E-07  | THOP1     | chr19 | + | 2785458  | 2813599  | 2977  |
| ENSG000001 | 1192.639 | 341.1057 | 1.8007   | 1.61E-17  | 1.21E-16  | GAP43     | chr3  | + | 1.15E+08 | 1.15E+08 | 1901  |
| ENSG000001 | 74.37239 | 20.20734 | 1.842    | 1.22E-06  | 4.32E-06  | EPHX4     | chr1  | + | 92495539 | 92529093 | 1437  |
| ENSG000001 | 4392     | 1237.011 | 1.8255   | 2.49E-48  | 5.46E-47  | LAMB2     | chr3  | - | 49158547 | 49170551 | 5674  |
| ENSG000001 | 1243.843 | 1923.639 | -0.62832 | 1.65E-09  | 7.46E-09  | USP19     | chr3  | - | 49145479 | 49158371 | 4719  |
| ENSG000001 | 3429.54  | 4865.748 | -0.50413 | 1.83E-07  | 6.97E-07  | QARS      | chr3  | - | 49133365 | 49142553 | 2763  |
| ENSG000001 | 937.9493 | 1056.803 | -0.17149 | 0.29095   | 0.3927    | ORMDL3    | chr17 | - | 38077294 | 38083854 | 2230  |
| ENSG000001 | 0.342542 | 0        | 0.4146   | 0.81455   | NA        | SERF1A    | chr5  | + | 70196492 | 70214357 | 1889  |
| ENSG000001 | 250.3321 | 322.3906 | -0.36628 | 0.018065  | 0.036002  | KLF11     | chr2  | + | 10182976 | 10194963 | 4033  |
| ENSG000001 | 575.6207 | 0.343138 | 9.6785   | 2.66E-25  | 2.81E-24  | LRRC15    | chr3  | - | 1.94E+08 | 1.94E+08 | 5883  |
| ENSG000001 | 119.6343 | 218.6071 | -0.86397 | 0.000293  | 0.000786  | SMN1      | chr5  | + | 70220768 | 70249769 | 1550  |
| ENSG000001 | 318.7762 | 271.1395 | 0.23245  | 0.10826   | 0.17265   | EIF2AK3   | chr2  | - | 88856259 | 88927094 | 4646  |
| ENSG000001 | 0        | 5.938617 | -4.0204  | 0.005231  | 0.011612  | TEX37     | chr2  | + | 88824169 | 88829102 | 795   |
| ENSG000001 | 1055.929 | 207.7817 | 2.338    | 5.09E-47  | 1.07E-45  | MOB3A     | chr19 | - | 2071037  | 2096672  | 3391  |

|            |          |          |          |          |          |         |       |   |          |          |      |
|------------|----------|----------|----------|----------|----------|---------|-------|---|----------|----------|------|
| ENSG000001 | 323.2342 | 120.076  | 1.4213   | 1.17E-10 | 5.76E-10 | KRCC1   | chr2  | - | 88326724 | 88355248 | 1753 |
| ENSG000001 | 328.6132 | 243.2617 | 0.43456  | 0.002911 | 0.006723 | NME6    | chr3  | - | 48334754 | 48343175 | 2004 |
| ENSG000001 | 2200.794 | 3287.7   | -0.57762 | 0.000442 | 0.001159 | CYCS    | chr7  | - | 25159710 | 25164980 | 4098 |
| ENSG000001 | 0        | 5.407697 | -3.9989  | 0.00387  | 0.008761 | CD8B    | chr2  | - | 87042462 | 87089047 | 1417 |
| ENSG000001 | 62.37168 | 76.31963 | -0.28903 | 0.31901  | 0.42192  | SLFN12  | chr17 | - | 33738079 | 33760302 | 2539 |
| ENSG000001 | 21.58928 | 33.32104 | -0.6118  | 0.14048  | 0.21439  | CALB2   | chr16 | + | 71392616 | 71424341 | 1466 |
| ENSG000001 | 18.97315 | 6.001726 | 1.623    | 0.008006 | 0.017109 | SLC9C1  | chr3  | - | 1.12E+08 | 1.12E+08 | 4172 |
| ENSG000001 | 7.645381 | 0        | 4.5361   | 0.000509 | 0.001322 | CCL11   | chr17 | + | 32612687 | 32615353 | 1079 |
| ENSG000001 | 14.40788 | 10.88662 | 0.39425  | 0.48877  | 0.59282  | FRMD3   | chr9  | - | 85857905 | 86153461 | 5297 |
| ENSG000001 | 686.5128 | 275.3157 | 1.3147   | 2.89E-21 | 2.58E-20 | SNTB1   | chr8  | - | 1.22E+08 | 1.22E+08 | 5164 |
| ENSG000001 | 152.0233 | 153.0319 | -0.00899 | 0.96371  | 0.9787   | MTBP    | chr8  | + | 1.21E+08 | 1.22E+08 | 3375 |
| ENSG000001 | 112.1781 | 144.8894 | -0.36196 | 0.16333  | 0.24388  | TEFM    | chr17 | - | 29224354 | 29233838 | 2109 |
| ENSG000001 | 365.5969 | 419.5936 | -0.19701 | 0.28006  | 0.38091  | MRPL13  | chr8  | - | 1.21E+08 | 1.21E+08 | 2368 |
| ENSG000001 | 970.0149 | 209.4754 | 2.2069   | 4.15E-43 | 7.93E-42 | MALT1   | chr18 | + | 56338618 | 56417371 | 5030 |
| ENSG000001 | 90.34645 | 47.9192  | 0.90205  | 0.000906 | 0.002262 | ISG20   | chr15 | + | 89179384 | 89199714 | 5634 |
| ENSG000001 | 123.7404 | 316.4578 | -1.3505  | 2.17E-13 | 1.28E-12 | MBOAT1  | chr6  | - | 20100935 | 20212670 | 3219 |
| ENSG000001 | 306.6155 | 108.3255 | 1.4874   | 1.20E-05 | 3.83E-05 | ID4     | chr6  | + | 19837617 | 19840915 | 2344 |
| ENSG000001 | 1.8154   | 1.66715  | 0.07511  | 0.96199  | 0.97747  | GPR22   | chr7  | + | 1.07E+08 | 1.07E+08 | 2936 |
| ENSG000001 | 4.088174 | 4.273883 | -0.07738 | 0.93245  | 0.95568  | CXCR6   | chr3  | + | 45982425 | 45989845 | 2805 |
| ENSG000001 | 247.2647 | 429.3882 | -0.79363 | 0.00066  | 0.001683 | CEBPB   | chr20 | + | 48807376 | 48809212 | 1837 |
| ENSG000001 | 2.032922 | 25.26062 | -3.4341  | 5.86E-05 | 0.000172 | AZU1    | chr19 | + | 825097   | 832017   | 1713 |
| ENSG000001 | 0        | 1.684135 | -2.1921  | 0.19067  | NA       | TPSAB1  | chr16 | + | 1290697  | 1292555  | 1357 |
| ENSG000001 | 0        | 8.284722 | -4.5222  | 0.001018 | 0.00252  | ATOH1   | chr4  | + | 94750042 | 94751221 | 1180 |
| ENSG000001 | 1557.904 | 1454.712 | 0.098507 | 0.42617  | 0.53156  | PAIP1   | chr5  | - | 43526369 | 43557860 | 2782 |
| ENSG000001 | 6.193061 | 1.638012 | 1.7596   | 0.069179 | 0.11793  | CLEC7A  | chr12 | - | 10269376 | 10282857 | 3725 |
| ENSG000001 | 60.51146 | 82.59519 | -0.45245 | 0.18158  | 0.26632  | C5orf34 | chr5  | - | 43486803 | 43515247 | 2507 |
| ENSG000001 | 8.744158 | 176.9291 | -4.2243  | 7.46E-19 | 5.93E-18 | C1QTNF4 | chr11 | - | 47611216 | 47616211 | 1664 |
| ENSG000001 | 18.80608 | 27.81223 | -0.55295 | 0.20081  | 0.28951  | SERHL   | chr22 | + | 42896585 | 42908566 | 1712 |
| ENSG000001 | 520.0434 | 108.002  | 2.2633   | 2.52E-47 | 5.34E-46 | NEGR1   | chr1  | - | 71868625 | 72748417 | 5809 |
| ENSG000001 | 399.6821 | 513.1075 | -0.35918 | 0.036357 | 0.067412 | ZNF131  | chr5  | + | 43065278 | 43192123 | 3340 |
| ENSG000001 | 4.99934  | 14.051   | -1.4006  | 0.054337 | 0.095601 | MACROD2 | chr20 | + | 13976015 | 16033842 | 4994 |
| ENSG000001 | 781.9708 | 699.7392 | 0.16077  | 0.17718  | 0.26079  | DPAGT1  | chr11 | - | 1.19E+08 | 1.19E+08 | 3274 |
| ENSG000001 | 5148.465 | 10557.74 | -1.0347  | 3.48E-16 | 2.43E-15 | BSG     | chr19 | + | 571297   | 583493   | 2143 |
| ENSG000001 | 249.0228 | 430.1035 | -0.78706 | 1.81E-08 | 7.50E-08 | HINFP   | chr11 | + | 1.19E+08 | 1.19E+08 | 3486 |
| ENSG000001 | 503.7278 | 236.8628 | 1.0853   | 1.63E-13 | 9.71E-13 | CERS6   | chr2  | + | 1.69E+08 | 1.7E+08  | 7214 |
| ENSG000001 | 73.6213  | 9.099704 | 2.9896   | 2.73E-12 | 1.50E-11 | SPTLC3  | chr20 | + | 12989627 | 13147411 | 3830 |
| ENSG000001 | 630.3539 | 520.7875 | 0.27585  | 0.02817  | 0.053692 | COPRS   | chr17 | - | 30178883 | 30186356 | 1062 |
| ENSG000001 | 339.4678 | 363.7313 | -0.0985  | 0.65508  | 0.73998  | TP53RK  | chr20 | - | 45313004 | 45318418 | 3515 |
| ENSG000001 | 16.59752 | 65.89591 | -1.9673  | 1.78E-06 | 6.21E-06 | B3GALT1 | chr2  | + | 1.69E+08 | 1.69E+08 | 2168 |
| ENSG000001 | 2.572449 | 0        | 2.8674   | 0.066043 | 0.11336  | CLEC12A | chr12 | + | 10103915 | 10148293 | 1681 |
| ENSG000001 | 294.9501 | 240.1565 | 0.29578  | 0.04092  | 0.074817 | BPGM    | chr7  | + | 1.34E+08 | 1.34E+08 | 2051 |
| ENSG000001 | 706.8242 | 1393.799 | -0.97734 | 1.68E-13 | 1.00E-12 | POP7    | chr7  | + | 1E+08    | 1E+08    | 927  |
| ENSG000001 | 56.46452 | 12.35471 | 2.1537   | 3.19E-08 | 1.30E-07 | ALG14   | chr1  | - | 95448297 | 95538501 | 1033 |
| ENSG000001 | 787.8415 | 821.1673 | -0.0605  | 0.68761  | 0.76711  | SUCLG2  | chr3  | - | 67410884 | 67705038 | 2352 |
| ENSG000001 | 156.295  | 27.12757 | 2.5117   | 1.52E-17 | 1.14E-16 | STARD5  | chr15 | - | 81601394 | 81616524 | 4871 |
| ENSG000001 | 347.3857 | 7.849338 | 5.3999   | 5.57E-51 | 1.31E-49 | CSDC2   | chr22 | + | 41956767 | 41973745 | 2777 |
| ENSG000001 | 65.509   | 82.2373  | -0.32869 | 0.22492  | 0.31753  | RCAN2   | chr6  | - | 46188475 | 46459709 | 3327 |
| ENSG000001 | 38.09088 | 1.698704 | 4.3256   | 1.25E-09 | 5.72E-09 | IL16    | chr15 | + | 81451916 | 81605104 | 8321 |
| ENSG000001 | 18.8095  | 39.21695 | -1.0411  | 0.070239 | 0.11954  | ABCG4   | chr11 | + | 1.19E+08 | 1.19E+08 | 3849 |
| ENSG000001 | 5203.288 | 3067.179 | 0.7617   | 9.54E-10 | 4.41E-09 | GNB2    | chr7  | + | 1E+08    | 1E+08    | 1878 |
| ENSG000001 | 9.990934 | 4.035145 | 1.2431   | 0.12419  | 0.1943   | CCDC11  | chr18 | - | 47753563 | 47792892 | 1851 |
| ENSG000001 | 152.4627 | 448.9097 | -1.5552  | 1.15E-15 | 7.79E-15 | FAM195A | chr16 | + | 691813   | 698474   | 1728 |
| ENSG000001 | 0.653381 | 3.570622 | -1.9519  | 0.16856  | 0.25027  | PDZD3   | chr11 | + | 1.19E+08 | 1.19E+08 | 2996 |
| ENSG000001 | 220.9573 | 66.47061 | 1.7272   | 2.09E-17 | 1.56E-16 | C2CD2L  | chr11 | + | 1.19E+08 | 1.19E+08 | 5931 |
| ENSG000001 | 373.3877 | 305.7239 | 0.29002  | 0.046572 | 0.083636 | ARNT2   | chr15 | + | 80696692 | 80890278 | 6690 |
| ENSG000001 | 2728.515 | 741.9113 | 1.8758   | 1.06E-62 | 3.29E-61 | GNG12   | chr1  | - | 68167149 | 68299150 | 4404 |
| ENSG000001 | 17.70909 | 60.74663 | -1.7535  | 0.000284 | 0.000763 | PRSS27  | chr16 | - | 2762419  | 2770552  | 3579 |
| ENSG000001 | 2.551911 | 0.686276 | 1.5235   | 0.28955  | 0.39111  | MYO22   | chr4  | + | 1.2E+08  | 1.2E+08  | 2597 |
| ENSG000001 | 857.7979 | 10.80807 | 6.0662   | 1.72E-18 | 1.35E-17 | SYNPO2  | chr4  | + | 1.2E+08  | 1.2E+08  | 7295 |
| ENSG000001 | 1.608228 | 3.38284  | -0.917   | 0.43988  | 0.54561  | DNAJB7  | chr22 | - | 41255553 | 41258130 | 2578 |
| ENSG000001 | 268.6681 | 469.2875 | -0.80301 | 1.67E-05 | 5.24E-05 | CLP1    | chr11 | + | 57416465 | 57429340 | 2435 |
| ENSG000001 | 0.72616  | 0        | 0.85004  | 0.63064  | NA       | INSL5   | chr1  | - | 67263424 | 67266939 | 715  |
| ENSG000001 | 1.027626 | 0.357707 | 0.84252  | 0.63507  | NA       | TTC36   | chr11 | + | 1.18E+08 | 1.18E+08 | 1009 |
| ENSG000001 | 24.05464 | 18.56765 | 0.37714  | 0.42762  | 0.53297  | RSPH9   | chr6  | + | 43612783 | 43640336 | 2586 |
| ENSG000001 | 862.2311 | 667.6503 | 0.36882  | 0.021042 | 0.04131  | MYEOV2  | chr2  | - | 2.41E+08 | 2.41E+08 | 922  |

|            |          |          |          |           |           |           |       |   |          |          |      |
|------------|----------|----------|----------|-----------|-----------|-----------|-------|---|----------|----------|------|
| ENSG000001 | 1382.142 | 974.301  | 0.50379  | 0.000995  | 0.002468  | GTPBP2    | chr6  | - | 43573053 | 43596899 | 2933 |
| ENSG000001 | 103.9727 | 136.4714 | -0.38734 | 0.10625   | 0.16997   | FGGY      | chr1  | + | 59762310 | 60233347 | 2485 |
| ENSG000001 | 382.5889 | 98.27125 | 1.9459   | 8.57E-14  | 5.19E-13  | IL17D     | chr13 | + | 21276266 | 21297237 | 1861 |
| ENSG000001 | 0.685084 | 0        | 0.85004  | 0.63064   | NA        | PRSS30P   | chr16 | - | 2889569  | 2892745  | 2881 |
| ENSG000001 | 0        | 30.35747 | -6.5236  | 1.15E-08  | 4.86E-08  | FUT9      | chr6  | + | 96463860 | 96653420 | 2715 |
| ENSG000001 | 108.4692 | 28.28408 | 1.9214   | 1.47E-09  | 6.68E-09  | TCEAL1    | chrX  | + | 1.03E+08 | 1.03E+08 | 1201 |
| ENSG000001 | 1396.197 | 1322.384 | 0.078482 | 0.58124   | 0.67769   | ZNF24     | chr18 | - | 32912176 | 32925446 | 7419 |
| ENSG000001 | 255.7964 | 80.88811 | 1.6571   | 7.04E-17  | 5.12E-16  | MANEA     | chr6  | + | 96025419 | 96057333 | 4575 |
| ENSG000001 | 19.33786 | 21.24803 | -0.14381 | 0.75782   | 0.82396   | RAB40A    | chrX  | - | 1.03E+08 | 1.03E+08 | 3126 |
| ENSG000001 | 0        | 0.594029 | -0.81444 | 0.64499   | NA        | C2orf54   | chr2  | - | 2.42E+08 | 2.42E+08 | 2017 |
| ENSG000001 | 1313.063 | 1760.675 | -0.42285 | 4.52E-05  | 0.000134  | AFF1      | chr4  | + | 87856154 | 88062206 | 9390 |
| ENSG000001 | 0        | 0.654722 | -0.83442 | 0.63731   | NA        | ACOT12    | chr5  | - | 80625824 | 80689998 | 2086 |
| ENSG000001 | 1193.346 | 904.0169 | 0.401    | 0.001767  | 0.004217  | FIBP      | chr11 | - | 65651212 | 65656010 | 1378 |
| ENSG000001 | 31.34036 | 29.47542 | 0.082174 | 0.88416   | 0.91919   | CARNS1    | chr11 | + | 67182439 | 67193078 | 5065 |
| ENSG000001 | 398.9112 | 471.6726 | -0.24023 | 0.25615   | 0.35352   | BANP      | chr16 | + | 87982850 | 88110924 | 2438 |
| ENSG000001 | 3099.227 | 3258.686 | -0.0722  | 0.43797   | 0.54348   | PPP1CA    | chr11 | - | 67165654 | 67188654 | 1677 |
| ENSG000001 | 5543.625 | 6896.47  | -0.3143  | 0.056661  | 0.099282  | HCFC1     | chrX  | - | 1.53E+08 | 1.53E+08 | 8869 |
| ENSG000001 | 4.854596 | 5.819648 | -0.24939 | 0.75587   | 0.82246   | CTSW      | chr11 | + | 65647280 | 65651212 | 1341 |
| ENSG000001 | 45.82461 | 2.024857 | 4.3437   | 2.31E-10  | 1.12E-09  | NIPAL4    | chr5  | + | 1.57E+08 | 1.57E+08 | 3274 |
| ENSG000001 | 0        | 0.297015 | -0.41864 | 0.81278   | NA        | MUCL1     | chr12 | + | 55224303 | 55252177 | 590  |
| ENSG000001 | 6.992    | 148.962  | -4.3726  | 1.15E-29  | 1.45E-28  | SNTG2     | chr2  | + | 946554   | 1371385  | 1888 |
| ENSG000001 | 4.709852 | 3.397409 | 0.44234  | 0.62904   | 0.71871   | FNDC9     | chr5  | - | 1.57E+08 | 1.57E+08 | 2125 |
| ENSG000001 | 101.8489 | 63.58311 | 0.67409  | 0.007959  | 0.017017  | PDE3A     | chr12 | + | 20522179 | 20837315 | 7576 |
| ENSG000001 | 13.07202 | 63.50946 | -2.2616  | 6.34E-08  | 2.51E-07  | RASGRP1   | chr15 | - | 38780304 | 38857776 | 5023 |
| ENSG000001 | 0.72616  | 3.336716 | -1.8606  | 0.16881   | 0.25053   | KLHL6     | chr3  | - | 1.83E+08 | 1.83E+08 | 6298 |
| ENSG000001 | 450.1891 | 678.917  | -0.59179 | 0.000223  | 0.000606  | CHCHD1    | chr10 | + | 75541805 | 75543410 | 1202 |
| ENSG000001 | 880.0683 | 836.0875 | 0.073596 | 0.52444   | 0.6266    | MRPL52    | chr14 | + | 23299088 | 23304246 | 2020 |
| ENSG000001 | 41.12331 | 13.55808 | 1.5903   | 0.00051   | 0.001323  | SMPDL3A   | chr6  | + | 1.23E+08 | 1.23E+08 | 1851 |
| ENSG000001 | 8.207237 | 50.70472 | -2.5732  | 2.32E-07  | 8.79E-07  | RND1      | chr12 | - | 49250928 | 49259681 | 2136 |
| ENSG000001 | 185.6948 | 345.4539 | -0.8959  | 1.23E-08  | 5.17E-08  | RAD9A     | chr11 | + | 67159176 | 67165881 | 2119 |
| ENSG000001 | 2396.463 | 125.6237 | 4.24     | 4.14E-102 | 2.45E-100 | EFEMP2    | chr11 | - | 65633912 | 65641063 | 2277 |
| ENSG000001 | 0        | 2.529055 | -2.8037  | 0.077578  | 0.13005   | OR10AD1   | chr12 | - | 48596081 | 48597170 | 1090 |
| ENSG000001 | 3.008307 | 4.989297 | -0.68599 | 0.44872   | 0.55412   | AGAP5     | chr10 | - | 75434033 | 75457639 | 2430 |
| ENSG000001 | 1.555988 | 0.343138 | 1.4615   | 0.37966   | NA        | C17orf66  | chr17 | - | 34181955 | 34195895 | 2608 |
| ENSG000001 | 3768.121 | 4772.351 | -0.34052 | 0.003934  | 0.008896  | TAF15     | chr17 | + | 34136459 | 34191619 | 2191 |
| ENSG000001 | 578.1861 | 394.0792 | 0.55266  | 8.57E-05  | 0.000246  | FAM21C    | chr10 | + | 46222648 | 46288409 | 4636 |
| ENSG000001 | 438.1947 | 419.8017 | 0.061978 | 0.77149   | 0.83544   | TMEM134   | chr11 | - | 67231824 | 67236743 | 1866 |
| ENSG000001 | 1813.028 | 493.9136 | 1.8614   | 1.74E-09  | 7.85E-09  | ZMAT3     | chr3  | - | 1.79E+08 | 1.79E+08 | 9406 |
| ENSG000001 | 94.629   | 141.9941 | -0.58351 | 0.009355  | 0.019756  | ZFAND4    | chr10 | - | 46111043 | 46168228 | 3265 |
| ENSG000001 | 0.36308  | 0.654722 | -0.52647 | 0.7643    | NA        | THEMIS    | chr6  | - | 1.28E+08 | 1.28E+08 | 4101 |
| ENSG000001 | 0        | 1.606458 | -1.9287  | 0.27074   | NA        | MOS       | chr8  | - | 57025501 | 57026541 | 1041 |
| ENSG000001 | 214.8962 | 894.3864 | -2.0538  | 4.55E-51  | 1.07E-49  | ZNF738    | chr19 | + | 21541732 | 21562104 | 2442 |
| ENSG000001 | 0.342542 | 0        | 0.4146   | 0.81455   | NA        | MS4A10    | chr11 | + | 60552821 | 60568778 | 2296 |
| ENSG000001 | 1238.239 | 24.16555 | 5.6603   | 8.13E-155 | 9.99E-153 | SLFN11    | chr17 | - | 33677324 | 33700720 | 5030 |
| ENSG000001 | 0.653381 | 1.058552 | -0.47534 | 0.76821   | NA        | FAM71D    | chr14 | + | 67656110 | 67695267 | 2136 |
| ENSG000001 | 2654.741 | 1938.201 | 0.45299  | 0.001387  | 0.003366  | CORO1B    | chr11 | - | 67205519 | 67211292 | 1954 |
| ENSG000001 | 141.749  | 335.334  | -1.2364  | 2.49E-06  | 8.57E-06  | FUT10     | chr8  | - | 33228342 | 33330940 | 3825 |
| ENSG000001 | 441.4734 | 770.2064 | -0.80053 | 2.98E-05  | 9.05E-05  | LRRC20    | chr10 | - | 72058729 | 72142382 | 3414 |
| ENSG000001 | 542.0127 | 338.4852 | 0.67606  | 1.83E-06  | 6.39E-06  | MUS81     | chr11 | + | 65624597 | 65635124 | 3420 |
| ENSG000001 | 113.6963 | 95.6944  | 0.24458  | 0.39233   | 0.49669   | PURG      | chr8  | - | 30853321 | 30891231 | 2875 |
| ENSG000001 | 4.73039  | 8.167369 | -0.74702 | 0.3639    | 0.46822   | TMEM217   | chr6  | - | 37179956 | 37225931 | 1546 |
| ENSG000001 | 0        | 0.357707 | -0.41864 | 0.81278   | NA        | OR4D9     | chr11 | + | 59282386 | 59283330 | 945  |
| ENSG000001 | 0        | 0.357707 | -0.41864 | 0.81278   | NA        | RP11-344H | chr1  | + | 27306656 | 27307466 | 497  |
| ENSG000001 | 68.84983 | 51.12554 | 0.42856  | 0.13296   | 0.20544   | ZNF596    | chr8  | + | 182137   | 197342   | 2868 |
| ENSG000001 | 0.995923 | 2.38498  | -1.0573  | 0.41273   | 0.51758   | COL6A5    | chr3  | + | 1.3E+08  | 1.3E+08  | 9226 |
| ENSG000001 | 10248.91 | 7291.996 | 0.49079  | 1.86E-06  | 6.49E-06  | CFL1      | chr11 | - | 65590493 | 65629497 | 1752 |
| ENSG000001 | 557.8228 | 361.3106 | 0.62454  | 0.000188  | 0.000517  | TMCC1     | chr3  | - | 1.29E+08 | 1.3E+08  | 5992 |
| ENSG000001 | 302.3994 | 416.2671 | -0.46133 | 0.000722  | 0.00183   | NAA16     | chr13 | + | 41885341 | 41951166 | 4347 |
| ENSG000001 | 3.806432 | 5.880341 | -0.57461 | 0.50244   | 0.60591   | EFCAB12   | chr3  | - | 1.29E+08 | 1.29E+08 | 5607 |
| ENSG000001 | 1070.748 | 1055.204 | 0.021301 | 0.83147   | 0.88117   | FAM192A   | chr16 | - | 57186378 | 57220028 | 2848 |
| ENSG000001 | 94.82696 | 98.40646 | -0.05577 | 0.87039   | 0.90959   | RAB43     | chr3  | - | 1.29E+08 | 1.29E+08 | 4467 |
| ENSG000001 | 0        | 7.484382 | -4.3436  | 0.002078  | 0.004903  | FADS6     | chr17 | - | 72873428 | 72889708 | 2100 |
| ENSG000001 | 151.0577 | 173.5294 | -0.19829 | 0.42238   | 0.52781   | CBWD1     | chr9  | - | 121041   | 188979   | 3652 |
| ENSG000001 | 39.48338 | 1.029414 | 4.9748   | 2.53E-09  | 1.13E-08  | HOXC5     | chr12 | + | 54379629 | 54429145 | 1805 |
| ENSG000001 | 0.995923 | 115.7747 | -6.4619  | 1.22E-15  | 8.26E-15  | RAB37     | chr17 | + | 72666717 | 72743474 | 3804 |

|            |          |          |          |           |           |           |       |   |          |          |       |
|------------|----------|----------|----------|-----------|-----------|-----------|-------|---|----------|----------|-------|
| ENSG000001 | 804.6828 | 2199.481 | -1.4494  | 1.27E-36  | 2.03E-35  | DCP2      | chr5  | + | 1.12E+08 | 1.12E+08 | 8947  |
| ENSG000001 | 25.88284 | 15.43738 | 0.70782  | 0.23035   | 0.32371   | SNX32     | chr11 | + | 65601112 | 65624367 | 2416  |
| ENSG000001 | 3768.019 | 5837.543 | -0.63054 | 5.82E-07  | 2.12E-06  | RPL38     | chr17 | + | 72199721 | 72206794 | 2450  |
| ENSG000001 | 2.479946 | 5.661004 | -1.1101  | 0.28687   | 0.38848   | CYP7B1    | chr8  | - | 65500320 | 65711318 | 2202  |
| ENSG000001 | 0        | 147.033  | -8.6348  | 3.63E-15  | 2.40E-14  | OVOL1     | chr11 | + | 65554493 | 65564690 | 3034  |
| ENSG000001 | 972.24   | 947.4924 | 0.036713 | 0.85561   | 0.89842   | RARG      | chr12 | - | 53604354 | 53626764 | 2959  |
| ENSG000001 | 27.01674 | 4.290868 | 2.5542   | 0.000119  | 0.000336  | CES4A     | chr16 | + | 67022492 | 67043661 | 3419  |
| ENSG000001 | 1.555988 | 46.57008 | -4.6333  | 4.26E-11  | 2.17E-10  | CES3      | chr16 | + | 66995140 | 67009051 | 3834  |
| ENSG000001 | 287.6207 | 589.8413 | -1.0327  | 1.21E-06  | 4.30E-06  | SSH3      | chr11 | + | 67070919 | 67080078 | 2990  |
| ENSG000001 | 906.367  | 425.7823 | 1.0875   | 3.94E-13  | 2.30E-12  | CES2      | chr16 | + | 66968347 | 66978999 | 3927  |
| ENSG000001 | 212.3782 | 317.9423 | -0.58164 | 0.012634  | 0.026004  | PDP2      | chr16 | + | 66912492 | 66929657 | 4002  |
| ENSG000001 | 1104.387 | 1025.189 | 0.10766  | 0.48234   | 0.58662   | SP3       | chr2  | - | 1.75E+08 | 1.75E+08 | 6359  |
| ENSG000001 | 577.5022 | 508.7344 | 0.18325  | 0.16169   | 0.24192   | DMXL1     | chr5  | + | 1.18E+08 | 1.19E+08 | 11072 |
| ENSG000001 | 191.7545 | 74.57876 | 1.3543   | 7.79E-06  | 2.54E-05  | METAP1D   | chr2  | + | 1.73E+08 | 1.73E+08 | 3419  |
| ENSG000001 | 556.7967 | 428.3434 | 0.37804  | 0.002843  | 0.00658   | ZNF621    | chr3  | + | 40566369 | 40616176 | 6378  |
| ENSG000001 | 426.5277 | 1001.943 | -1.2283  | 1.10E-11  | 5.82E-11  | EGFL7     | chr9  | + | 1.4E+08  | 1.4E+08  | 2125  |
| ENSG000001 | 875.4429 | 576.746  | 0.60243  | 4.35E-06  | 1.46E-05  | NADSYN1   | chr11 | + | 71164155 | 71235153 | 3616  |
| ENSG000001 | 5775.989 | 3388.235 | 0.76644  | 0.000847  | 0.002128  | DHCR7     | chr11 | - | 71139239 | 71163914 | 2666  |
| ENSG000001 | 0        | 1.248751 | -1.5848  | 0.37202   | NA        | AP002387. | chr11 | - | 71093647 | 71134469 | 2162  |
| ENSG000001 | 2.261609 | 1.073121 | 0.88871  | 0.53671   | 0.63767   | AQPEP     | chr5  | + | 1.15E+08 | 1.15E+08 | 4581  |
| ENSG000001 | 0.342542 | 0.686276 | -0.48412 | 0.78604   | NA        | COX6B1P3  | chr22 | + | 40965290 | 40965899 | 260   |
| ENSG000001 | 368.0559 | 422.2062 | -0.19639 | 0.17148   | 0.25399   | NBEA      | chr13 | + | 35516424 | 36247159 | 11119 |
| ENSG000001 | 405.0051 | 291.9899 | 0.4726   | 0.009159  | 0.019384  | RNASEH2C  | chr11 | - | 65482367 | 65488418 | 2794  |
| ENSG000001 | 33.44948 | 12.64119 | 1.3709   | 0.00821   | 0.017516  | MYEOV     | chr11 | + | 69061605 | 69182494 | 2468  |
| ENSG000001 | 888.6756 | 409.3362 | 1.1136   | 1.16E-07  | 4.49E-07  | ANKRD13D  | chr11 | + | 67056018 | 67069956 | 2881  |
| ENSG000001 | 47.20154 | 73.56982 | -0.63767 | 0.028522  | 0.054279  | MRGPRF    | chr11 | - | 68771863 | 68780877 | 2295  |
| ENSG000001 | 943.9568 | 462.3477 | 1.0282   | 4.66E-09  | 2.03E-08  | MYD88     | chr3  | + | 38179969 | 38184513 | 3314  |
| ENSG000001 | 0        | 0.357707 | -0.41864 | 0.81278   | NA        | MRGPRD    | chr11 | - | 68747490 | 68748455 | 966   |
| ENSG000001 | 1206.87  | 1302.475 | -0.11005 | 0.31559   | 0.41821   | OXSRI     | chr3  | + | 38206580 | 38296979 | 4553  |
| ENSG000001 | 4.253456 | 3.769685 | 0.18084  | 0.84597   | 0.89198   | SLC22A13  | chr3  | + | 38307303 | 38319806 | 2555  |
| ENSG000001 | 656.1533 | 817.4332 | -0.31588 | 0.008247  | 0.017587  | PHF8      | chrX  | - | 53963109 | 54075391 | 6062  |
| ENSG000001 | 154.9308 | 167.9083 | -0.11415 | 0.52897   | 0.63046   | LCLAT1    | chr2  | + | 30670092 | 30867091 | 5060  |
| ENSG000001 | 2.718006 | 7.613016 | -1.3951  | 0.13227   | 0.2047    | ADH6      | chr4  | - | 1E+08    | 1E+08    | 3337  |
| ENSG000001 | 486.7465 | 10.9643  | 5.4378   | 8.31E-73  | 3.13E-71  | AC068491. | chr2  | - | 1.12E+08 | 1.12E+08 | 1587  |
| ENSG000001 | 4.741555 | 3.039702 | 0.59313  | 0.52771   | 0.62939   | FRG2C     | chr3  | + | 75713481 | 75716371 | 2078  |
| ENSG000001 | 6.815553 | 0.891044 | 2.4676   | 0.038952  | 0.07168   | UNC93B3   | chr3  | - | 75668657 | 75673000 | 687   |
| ENSG000001 | 26.13646 | 44.79041 | -0.77425 | 0.060228  | 0.10476   | AC007318. | chr2  | + | 65432137 | 65433396 | 1260  |
| ENSG000001 | 280.2253 | 343.4942 | -0.29202 | 0.10758   | 0.1718    | KAT5      | chr11 | + | 65479467 | 65487075 | 2296  |
| ENSG000001 | 1365.388 | 37.8685  | 5.1535   | 1.90E-157 | 2.43E-155 | SH3RF3    | chr2  | + | 1.1E+08  | 1.1E+08  | 3128  |
| ENSG000001 | 811.1368 | 80.21493 | 3.3239   | 1.48E-47  | 3.17E-46  | GXYLT2    | chr3  | + | 72937224 | 73047289 | 3260  |
| ENSG000001 | 1.286224 | 2.757256 | -0.92327 | 0.44839   | 0.55386   | HPSE2     | chr10 | - | 1E+08    | 1.01E+08 | 2295  |
| ENSG000001 | 664.0167 | 993.0477 | -0.57903 | 0.002217  | 0.005208  | CAKAD     | chr17 | - | 43100708 | 43138473 | 2045  |
| ENSG000001 | 13.63127 | 0        | 5.393    | 9.16E-06  | 2.95E-05  | ARPP21    | chr3  | + | 35680437 | 35835988 | 3433  |
| ENSG000001 | 512.8007 | 429.5629 | 0.25626  | 0.038545  | 0.071034  | TADA2B    | chr4  | + | 7043626  | 7058368  | 3818  |
| ENSG000001 | 54.27309 | 5.677989 | 3.1889   | 3.17E-09  | 1.40E-08  | CCDC96    | chr4  | - | 7042579  | 7044728  | 2150  |
| ENSG000001 | 2512.106 | 2459.162 | 0.030507 | 0.81858   | 0.87259   | ADRBK1    | chr11 | + | 67033881 | 67054027 | 4493  |
| ENSG000001 | 1617.507 | 483.1877 | 1.7414   | 9.93E-43  | 1.87E-41  | RELA      | chr11 | - | 65421067 | 65430565 | 3183  |
| ENSG000001 | 262.7762 | 147.8266 | 0.82802  | 5.40E-05  | 0.000159  | EVC2      | chr4  | - | 5544499  | 5711275  | 4828  |
| ENSG000001 | 73.17867 | 218.5805 | -1.5693  | 7.90E-13  | 4.52E-12  | ZNF680    | chr7  | - | 63980262 | 64023484 | 3022  |
| ENSG000001 | 1676.316 | 963.3486 | 0.79748  | 6.04E-08  | 2.40E-07  | HECTD4    | chr12 | - | 1.13E+08 | 1.13E+08 | 15405 |
| ENSG000001 | 492.5073 | 2226.298 | -2.1729  | 3.61E-62  | 1.11E-60  | FAM222B   | chr17 | - | 27082996 | 27182250 | 4197  |
| ENSG000001 | 2033.789 | 562.9876 | 1.8503   | 6.02E-41  | 1.08E-39  | BNC2      | chr9  | - | 16409501 | 16870841 | 12844 |
| ENSG000001 | 3.008307 | 6.162786 | -0.98424 | 0.2631    | 0.36125   | 1-Dec     | chr9  | + | 1.18E+08 | 1.18E+08 | 2656  |
| ENSG000001 | 5.601294 | 1.355566 | 1.8626   | 0.077209  | 0.12962   | RXFP4     | chr1  | + | 1.56E+08 | 1.56E+08 | 1146  |
| ENSG000001 | 17.62434 | 32.66236 | -0.87157 | 0.06032   | 0.1049    | HPSE      | chr4  | - | 84213614 | 84256306 | 4652  |
| ENSG000001 | 188.6166 | 239.3479 | -0.34263 | 0.054087  | 0.095256  | COQ2      | chr4  | - | 84182689 | 84206067 | 1641  |
| ENSG000001 | 1.628766 | 1.744828 | -0.05897 | 0.96454   | 0.97938   | C10orf131 | chr10 | + | 97667360 | 97698480 | 1241  |
| ENSG000001 | 0        | 10.86722 | -5.0431  | 6.30E-05  | 0.000184  | CCDC63    | chr12 | + | 1.11E+08 | 1.11E+08 | 1993  |
| ENSG000001 | 5.60048  | 0.357707 | 3.2649   | 0.016138  | 0.032474  | HSPA6     | chr1  | + | 1.61E+08 | 1.61E+08 | 2646  |
| ENSG000001 | 1854.1   | 2591.703 | -0.48252 | 0.000299  | 0.0008    | TRMT112   | chr11 | - | 64083932 | 64085556 | 1106  |
| ENSG000001 | 230.4987 | 5.50236  | 5.3513   | 3.27E-35  | 4.99E-34  | LRRN3     | chr7  | + | 1.11E+08 | 1.11E+08 | 3725  |
| ENSG000001 | 2127.738 | 1573.259 | 0.43498  | 0.006261  | 0.013681  | KDM2A     | chr11 | + | 66886740 | 67025141 | 6511  |
| ENSG000001 | 0        | 10.71911 | -5.0315  | 6.42E-05  | 0.000187  | C10orf129 | chr10 | + | 96953957 | 96988685 | 2307  |
| ENSG000001 | 215.5802 | 183.9772 | 0.22677  | 0.31225   | 0.41432   | ADCK5     | chr8  | + | 1.46E+08 | 1.46E+08 | 2027  |
| ENSG000001 | 531.6921 | 761.4375 | -0.51734 | 6.95E-05  | 0.000202  | MRP63     | chr13 | + | 21750784 | 21753223 | 2246  |

|            |          |          |          |           |           |           |       |   |          |          |       |
|------------|----------|----------|----------|-----------|-----------|-----------|-------|---|----------|----------|-------|
| ENSG000001 | 304.5335 | 322.4573 | -0.08168 | 0.65848   | 0.74269   | NOC3L     | chr10 | - | 96075004 | 96122716 | 3455  |
| ENSG000001 | 639.5286 | 1189.239 | -0.8926  | 3.07E-07  | 1.15E-06  | ESRRA     | chr11 | + | 64073044 | 64084215 | 2283  |
| ENSG000001 | 417.2683 | 197.9983 | 1.0702   | 1.35E-06  | 4.76E-06  | RHOD      | chr11 | + | 66824289 | 66839484 | 1129  |
| ENSG000001 | 197.4396 | 111.0732 | 0.82977  | 6.40E-05  | 0.000187  | ADAMTS20  | chr12 | - | 43747669 | 43945724 | 6076  |
| ENSG000001 | 414.8533 | 222.9646 | 0.89584  | 6.51E-10  | 3.05E-09  | COMMD1    | chr2  | + | 62115859 | 62374382 | 911   |
| ENSG000001 | 554.2254 | 226.1098 | 1.2894   | 3.43E-16  | 2.40E-15  | RAPH1     | chr2  | - | 2.04E+08 | 2.04E+08 | 9808  |
| ENSG000001 | 426.539  | 431.3945 | -0.01734 | 0.89376   | 0.92637   | MTX1      | chr1  | + | 1.55E+08 | 1.55E+08 | 2579  |
| ENSG000001 | 37.97784 | 525.9281 | -3.775   | 6.64E-74  | 2.55E-72  | ADCY5     | chr3  | - | 1.23E+08 | 1.23E+08 | 7311  |
| ENSG000001 | 624.7284 | 420.5905 | 0.56907  | 6.64E-05  | 0.000193  | PARP14    | chr3  | + | 1.22E+08 | 1.22E+08 | 8437  |
| ENSG000001 | 0        | 1.029414 | -1.1526  | 0.51496   | NA        | CYSLTR1   | chrX  | - | 77526961 | 77583048 | 3034  |
| ENSG000001 | 1.265686 | 5.989573 | -1.9704  | 0.074011  | 0.12508   | PARP15    | chr3  | + | 1.22E+08 | 1.22E+08 | 4439  |
| ENSG000001 | 1138.448 | 2653.152 | -1.2194  | 5.72E-31  | 7.58E-30  | CKS1B     | chr1  | + | 1.55E+08 | 1.55E+08 | 1166  |
| ENSG000001 | 0.342542 | 0.640152 | -0.50911 | 0.77219   | NA        | ABCD2     | chr12 | - | 39943835 | 40013553 | 6238  |
| ENSG000001 | 519.6939 | 397.7534 | 0.38312  | 0.044948  | 0.081006  | AHSA2     | chr2  | + | 61404553 | 61414686 | 2922  |
| ENSG000001 | 67.08056 | 5.522634 | 3.52     | 3.45E-14  | 2.14E-13  | ABLM13    | chr5  | + | 1.49E+08 | 1.49E+08 | 4569  |
| ENSG000001 | 0.36308  | 0        | 0.4146   | 0.81455   | NA        | MAB21L3   | chr1  | + | 1.17E+08 | 1.17E+08 | 3229  |
| ENSG000001 | 0.342542 | 21.78386 | -5.0892  | 2.37E-05  | 7.27E-05  | RP11-683L | chr18 | - | 47225    | 73545    | 1931  |
| ENSG000001 | 237.8726 | 192.484  | 0.30486  | 0.16901   | 0.25072   | KIAA1919  | chr6  | + | 1.12E+08 | 1.12E+08 | 5958  |
| ENSG000001 | 815.743  | 533.2215 | 0.61257  | 2.38E-08  | 9.77E-08  | VANGL1    | chr1  | + | 1.16E+08 | 1.16E+08 | 8691  |
| ENSG000001 | 932.0387 | 208.7196 | 2.1533   | 1.10E-55  | 2.88E-54  | GLRX      | chr5  | - | 95087023 | 95158709 | 3407  |
| ENSG000001 | 508.321  | 847.9788 | -0.73777 | 1.10E-10  | 5.44E-10  | IQCB1     | chr3  | - | 1.21E+08 | 1.22E+08 | 2594  |
| ENSG000001 | 49.43145 | 405.8859 | -3.0052  | 1.15E-16  | 8.25E-16  | SYT12     | chr11 | + | 66774249 | 66818334 | 6028  |
| ENSG000001 | 3238.369 | 966.8605 | 1.7311   | 2.85E-08  | 1.16E-07  | GOLGB1    | chr3  | - | 1.21E+08 | 1.21E+08 | 11198 |
| ENSG000001 | 0        | 0.700845 | -0.87835 | 0.62047   | NA        | TERF1P1   | chr21 | + | 15148407 | 15149587 | 1181  |
| ENSG000001 | 0        | 0.594029 | -0.81444 | 0.64499   | NA        | C11orf86  | chr11 | + | 66742748 | 66744475 | 1187  |
| ENSG000001 | 0.705622 | 0.594029 | 0.11178  | 0.94848   | NA        | LIPM      | chr10 | + | 90562487 | 90580303 | 1452  |
| ENSG000001 | 0.36308  | 0.343138 | -0.0021  | 0.99905   | NA        | GPR151    | chr5  | - | 1.46E+08 | 1.46E+08 | 3088  |
| ENSG000001 | 85.27531 | 0.700845 | 6.5073   | 3.74E-14  | 2.31E-13  | DMRT2     | chr9  | + | 1050354  | 1057552  | 2459  |
| ENSG000001 | 16.94088 | 219.3651 | -3.6832  | 1.05E-27  | 1.23E-26  | ZNF483    | chr9  | + | 1.14E+08 | 1.14E+08 | 3655  |
| ENSG000001 | 3.547834 | 5.595479 | -0.58609 | 0.58226   | 0.67848   | PLAC8L1   | chr5  | - | 1.45E+08 | 1.45E+08 | 638   |
| ENSG000001 | 1.068702 | 32.98764 | -4.7229  | 1.86E-08  | 7.71E-08  | SLC2A14   | chr12 | - | 7965108  | 8043744  | 4125  |
| ENSG000001 | 516.2366 | 613.1808 | -0.24651 | 0.10937   | 0.17413   | GPR137    | chr11 | + | 64037534 | 64056972 | 1843  |
| ENSG000001 | 5.984912 | 46.57653 | -2.9059  | 1.81E-08  | 7.51E-08  | SNCG      | chr10 | + | 88718375 | 88723017 | 794   |
| ENSG000001 | 6.556141 | 35.52078 | -2.3884  | 2.49E-06  | 8.56E-06  | MMRN2     | chr10 | - | 88695297 | 88729238 | 4127  |
| ENSG000001 | 1136.282 | 1246.319 | -0.13361 | 0.30251   | 0.40375   | MZT2A     | chr2  | - | 1.32E+08 | 1.32E+08 | 2826  |
| ENSG000001 | 2061.023 | 1185.543 | 0.79632  | 6.28E-07  | 2.28E-06  | TNKS      | chr8  | + | 9413424  | 9639856  | 9620  |
| ENSG000001 | 158.7296 | 68.12641 | 1.2108   | 2.89E-07  | 1.08E-06  | ZNF449    | chrX  | + | 1.34E+08 | 1.34E+08 | 3773  |
| ENSG000001 | 221.3204 | 313.8795 | -0.50268 | 0.022397  | 0.043718  | ZBTB21    | chr21 | - | 43406940 | 43430496 | 7449  |
| ENSG000001 | 454.1786 | 501.4606 | -0.14294 | 0.37965   | 0.48369   | PPP1R3B   | chr8  | - | 8993765  | 9009084  | 5548  |
| ENSG000001 | 12.29362 | 81.51376 | -2.7081  | 8.92E-14  | 5.39E-13  | FAM86B3P  | chr8  | + | 8086117  | 8102387  | 2829  |
| ENSG000001 | 32.21387 | 1430.34  | -5.4556  | 1.56E-119 | 1.22E-117 | STOX2     | chr4  | + | 1.85E+08 | 1.85E+08 | 10458 |
| ENSG000001 | 1295.667 | 1625.566 | -0.32663 | 0.068163  | 0.11644   | MAP3K11   | chr11 | - | 65365226 | 65382853 | 5605  |
| ENSG000001 | 1216.528 | 991.6737 | 0.29531  | 0.03628   | 0.067275  | TRIB1     | chr8  | + | 1.26E+08 | 1.26E+08 | 3635  |
| ENSG000001 | 2.229907 | 12.24789 | -2.2966  | 0.005746  | 0.012639  | KCNK7     | chr11 | - | 65360326 | 65363467 | 1563  |
| ENSG000001 | 0.36308  | 0        | 0.4146   | 0.81455   | NA        | C1QB      | chr1  | + | 22979255 | 22988031 | 1254  |
| ENSG000001 | 0.705622 | 0        | 0.8807   | 0.6196    | NA        | C1QA      | chr1  | + | 22962999 | 22966101 | 1143  |
| ENSG000001 | 32.58633 | 46.03762 | -0.49933 | 0.20269   | 0.29151   | NDNF      | chr4  | - | 1.22E+08 | 1.22E+08 | 2885  |
| ENSG000001 | 1.722083 | 1.188058 | 0.36823  | 0.80592   | 0.86274   | IQCF1     | chr3  | - | 51928892 | 51937351 | 745   |
| ENSG000001 | 4.657611 | 3.9623   | 0.21139  | 0.81452   | 0.86978   | GLIPR1L1  | chr12 | + | 75728419 | 75764340 | 1132  |
| ENSG000001 | 2611.425 | 3958.72  | -0.5997  | 8.51E-10  | 3.95E-09  | DAG1      | chr3  | + | 49506146 | 49573048 | 5826  |
| ENSG000001 | 0        | 239.3199 | -9.3033  | 6.56E-18  | 5.01E-17  | INSM1     | chr20 | + | 20348765 | 20351590 | 2826  |
| ENSG000001 | 25.02489 | 267.8753 | -3.4064  | 1.67E-32  | 2.34E-31  | DAB1      | chr1  | - | 57460451 | 59012406 | 5298  |
| ENSG000001 | 139.7394 | 138.6246 | 0.012208 | 0.96306   | 0.97831   | ARV1      | chr1  | + | 2.31E+08 | 2.31E+08 | 1335  |
| ENSG000001 | 804.5505 | 413.7169 | 0.95692  | 2.19E-09  | 9.78E-09  | NAA20     | chr20 | + | 19997760 | 20014299 | 1604  |
| ENSG000001 | 0.943682 | 1.309443 | -0.34533 | 0.8211    | 0.87421   | CCDC36    | chr3  | + | 49235861 | 49295537 | 2843  |
| ENSG000001 | 3.76617  | 0.343138 | 2.7163   | 0.054678  | 0.09611   | SAA1      | chr11 | + | 18287721 | 18291524 | 675   |
| ENSG000001 | 51.04049 | 50.6723  | 0.010651 | 0.9739    | 0.98544   | MINOS1    | chr1  | + | 19923477 | 19956314 | 3712  |
| ENSG000001 | 1713.894 | 150.5607 | 3.4913   | 1.15E-61  | 3.47E-60  | EHBP1L1   | chr11 | + | 65343509 | 65360121 | 5185  |
| ENSG000001 | 111.3517 | 63.58398 | 0.79918  | 0.010811  | 0.022559  | THAP2     | chr12 | + | 72056789 | 72074419 | 5719  |
| ENSG000001 | 28.03059 | 0.654722 | 4.9565   | 1.30E-07  | 5.01E-07  | TMEM196   | chr7  | - | 19758933 | 19813221 | 4054  |
| ENSG000001 | 1075.67  | 2064.709 | -0.93962 | 1.20E-16  | 8.59E-16  | RNF26     | chr11 | + | 1.19E+08 | 1.19E+08 | 2787  |
| ENSG000001 | 5076.147 | 6507.993 | -0.35827 | 0.00021   | 0.000572  | PPP1R14B  | chr11 | - | 64011956 | 64014413 | 982   |
| ENSG000001 | 391.7112 | 606.2909 | -0.62942 | 4.41E-06  | 1.48E-05  | SSSCA1    | chr11 | + | 65337901 | 65341413 | 1077  |
| ENSG000001 | 4551.945 | 7575.731 | -0.73422 | 1.65E-13  | 9.82E-13  | SMARCC1   | chr3  | - | 47626762 | 47823596 | 6375  |
| ENSG000001 | 152.5622 | 186.5746 | -0.28989 | 0.15026   | 0.22747   | ZNF417    | chr19 | - | 58411664 | 58427978 | 3597  |

|            |          |          |          |           |           |           |       |   |          |          |       |
|------------|----------|----------|----------|-----------|-----------|-----------|-------|---|----------|----------|-------|
| ENSG000001 | 924.5359 | 338.7312 | 1.4453   | 6.03E-19  | 4.82E-18  | PTPRM     | chr18 | + | 7566780  | 8406859  | 6095  |
| ENSG000001 | 861.2526 | 820.6333 | 0.068619 | 0.60813   | 0.70088   | FKBP2     | chr11 | + | 64008475 | 64011604 | 1002  |
| ENSG000001 | 1302.452 | 327.4948 | 1.99     | 3.58E-46  | 7.36E-45  | VEGFB     | chr11 | + | 64002010 | 64006259 | 1374  |
| ENSG000001 | 2169.745 | 1155.466 | 0.90574  | 2.14E-05  | 6.61E-05  | PEAK1     | chr15 | - | 77400471 | 77712486 | 11715 |
| ENSG000001 | 3575.735 | 189.8841 | 4.2274   | 2.87E-176 | 4.74E-174 | TNFRSF10C | chr8  | - | 22993101 | 23021543 | 3538  |
| ENSG000001 | 39.3137  | 82.24475 | -1.0488  | 0.011539  | 0.023927  | MST1      | chr3  | - | 49721380 | 49726934 | 4152  |
| ENSG000001 | 26.43092 | 85.84613 | -1.6648  | 0.000773  | 0.001951  | TNFRSF10C | chr8  | + | 22941868 | 22974950 | 1718  |
| ENSG000001 | 871.8488 | 559.0258 | 0.64045  | 1.66E-08  | 6.94E-08  | MOB1B     | chr4  | + | 71768043 | 71888166 | 6963  |
| ENSG000001 | 678.3956 | 735.6394 | -0.1161  | 0.37412   | 0.47837   | ZNF622    | chr5  | - | 16451628 | 16465901 | 1699  |
| ENSG000001 | 6482.582 | 267.2951 | 4.5832   | 9.21E-112 | 6.29E-110 | CSPG4     | chr15 | - | 75966663 | 76005189 | 8290  |
| ENSG000001 | 852.1846 | 803.4028 | 0.084719 | 0.49142   | 0.59538   | SNX33     | chr15 | + | 75940247 | 75954642 | 8008  |
| ENSG000001 | 99.821   | 34.05994 | 1.5291   | 4.88E-05  | 0.000144  | NABP1     | chr2  | + | 1.93E+08 | 1.93E+08 | 3387  |
| ENSG000001 | 143.9209 | 50.32923 | 1.5091   | 4.73E-10  | 2.23E-09  | NUDT18    | chr8  | - | 21964383 | 21966932 | 1756  |
| ENSG000001 | 6.857607 | 68.12877 | -3.2496  | 3.37E-13  | 1.97E-12  | GPR113    | chr2  | - | 26531041 | 26569685 | 4012  |
| ENSG000001 | 2859.308 | 2362.706 | 0.27493  | 0.003448  | 0.007878  | CHD2      | chr15 | + | 93425937 | 93571237 | 9857  |
| ENSG000001 | 696.2723 | 519.8603 | 0.42074  | 0.014535  | 0.02952   | CCDC106   | chr19 | + | 56152428 | 56164527 | 2162  |
| ENSG000001 | 0.72616  | 1.66715  | -0.87257 | 0.59055   | 0.68554   | CCR9      | chr3  | + | 45927996 | 45944667 | 2567  |
| ENSG000001 | 224.4381 | 172.4898 | 0.37757  | 0.020974  | 0.041188  | CCDC41    | chr12 | - | 94700225 | 94853764 | 3183  |
| ENSG000001 | 2.064625 | 0        | 2.4902   | 0.12625   | 0.19686   | SULT1B1   | chr4  | - | 70592566 | 70653679 | 1429  |
| ENSG000001 | 1439.814 | 1198.871 | 0.26331  | 0.09754   | 0.15813   | NUDT4     | chr12 | + | 93771659 | 93797024 | 4855  |
| ENSG000001 | 512.9514 | 388.395  | 0.40063  | 0.001586  | 0.00381   | PC        | chr11 | - | 66615704 | 66725847 | 4192  |
| ENSG000001 | 0        | 0.343138 | -0.41864 | 0.81278   | NA        | UGT2A1    | chr4  | - | 70454135 | 70518965 | 2595  |
| ENSG000001 | 96.50601 | 129.968  | -0.42902 | 0.11928   | 0.18793   | SCAI      | chr9  | - | 1.28E+08 | 1.28E+08 | 2586  |
| ENSG000001 | 0        | 5.451404 | -3.9255  | 0.006197  | 0.013561  | GPRC6A    | chr6  | - | 1.17E+08 | 1.17E+08 | 2860  |
| ENSG000001 | 151.0557 | 39.02018 | 1.9362   | 2.63E-14  | 1.65E-13  | NMNAT1    | chr1  | + | 10003486 | 10045559 | 3781  |
| ENSG000001 | 839.124  | 890.2454 | -0.0858  | 0.6193    | 0.71037   | LRFN4     | chr11 | + | 66624118 | 66627946 | 2431  |
| ENSG000001 | 0.290301 | 0        | 0.4146   | 0.81455   | NA        | BET3L     | chr6  | - | 1.17E+08 | 1.17E+08 | 2421  |
| ENSG000001 | 0.36308  | 0.997859 | -1.0294  | 0.53423   | NA        | APOBEC4   | chr1  | - | 1.84E+08 | 1.84E+08 | 2648  |
| ENSG000001 | 584.6371 | 715.5643 | -0.29088 | 0.032561  | 0.061046  | SLC19A1   | chr21 | - | 46913486 | 46964325 | 3811  |
| ENSG000001 | 34.87027 | 6.892769 | 2.2807   | 1.08E-05  | 3.46E-05  | HSPB7     | chr1  | - | 16340523 | 16346089 | 2892  |
| ENSG000001 | 246.9129 | 508.1765 | -1.0389  | 3.90E-09  | 1.71E-08  | RCE1      | chr11 | + | 66610306 | 66614017 | 2719  |
| ENSG000001 | 1708.348 | 3543.458 | -1.0522  | 5.18E-31  | 6.88E-30  | UQCRH     | chr1  | + | 46769303 | 46782448 | 687   |
| ENSG000001 | 0.36308  | 3.495361 | -2.5972  | 0.073789  | 0.12473   | TAS1R1    | chr1  | + | 6615241  | 6639817  | 2892  |
| ENSG000001 | 0        | 1412.474 | -11.609  | 3.06E-27  | 3.51E-26  | HES3      | chr1  | + | 6304252  | 6305638  | 697   |
| ENSG000001 | 923.661  | 1962.469 | -1.0838  | 8.50E-09  | 3.63E-08  | EIF1AX    | chrX  | - | 20142636 | 20159962 | 4427  |
| ENSG000001 | 13.72459 | 6.140096 | 1.1394   | 0.084161  | 0.13958   | SPDYE2L   | chr7  | + | 1.02E+08 | 1.02E+08 | 1742  |
| ENSG000001 | 108.2131 | 89.00465 | 0.27524  | 0.2303    | 0.32369   | CXorf23   | chrX  | - | 19930978 | 19988416 | 6528  |
| ENSG000001 | 2688.045 | 3231.545 | -0.26528 | 0.028295  | 0.053889  | PSMD1     | chr2  | + | 2.32E+08 | 2.32E+08 | 3326  |
| ENSG000001 | 773.6591 | 172.1256 | 2.166    | 5.39E-51  | 1.26E-49  | GPR64     | chrX  | - | 19007427 | 19140755 | 5788  |
| ENSG000001 | 0.342542 | 0        | 0.4146   | 0.81455   | NA        | MUC13     | chr3  | - | 1.25E+08 | 1.25E+08 | 2876  |
| ENSG000001 | 214.6152 | 26.14495 | 3.0066   | 2.04E-13  | 1.21E-12  | SUSD5     | chr3  | - | 33191537 | 33260707 | 5005  |
| ENSG000001 | 988.0539 | 360.0319 | 1.451    | 1.16E-10  | 5.73E-10  | HEG1      | chr3  | - | 1.25E+08 | 1.25E+08 | 9156  |
| ENSG000001 | 0.705622 | 0        | 0.8807   | 0.6196    | NA        | WFIKN2    | chr17 | + | 48912011 | 48919709 | 3588  |
| ENSG000001 | 185.5439 | 160.1951 | 0.20912  | 0.25324   | 0.35018   | C11orf80  | chr11 | + | 66511922 | 66610987 | 2323  |
| ENSG000001 | 2827.538 | 5379.798 | -0.9271  | 3.38E-15  | 2.24E-14  | TOMM20    | chr1  | - | 2.35E+08 | 2.35E+08 | 3387  |
| ENSG000001 | 1.89853  | 1.073121 | 0.6292   | 0.69032   | 0.76915   | AP000769  | chr11 | + | 65222728 | 65234028 | 693   |
| ENSG000001 | 0.705622 | 0.640152 | 0.062329 | 0.97007   | NA        | C1orf100  | chr1  | + | 2.45E+08 | 2.45E+08 | 841   |
| ENSG000001 | 790.4318 | 1071.233 | -0.43841 | 0.000287  | 0.00077   | AGFG1     | chr2  | + | 2.28E+08 | 2.28E+08 | 4122  |
| ENSG000001 | 873.3462 | 1455.637 | -0.73593 | 4.25E-06  | 1.42E-05  | STAT5B    | chr17 | - | 40351186 | 40428725 | 5103  |
| ENSG000001 | 0.342542 | 3.322147 | -2.5604  | 0.073563  | 0.1244    | CD7       | chr17 | - | 80272744 | 80275478 | 2021  |
| ENSG000001 | 0.290301 | 1.058552 | -0.99174 | 0.56536   | NA        | TOPAZ1    | chr3  | + | 44283378 | 44373590 | 5334  |
| ENSG000001 | 2531.177 | 1496.054 | 0.75817  | 1.65E-15  | 1.11E-14  | CNP       | chr17 | + | 40118759 | 40127194 | 2660  |
| ENSG000001 | 3070.88  | 4072.454 | -0.40651 | 8.65E-05  | 0.000248  | JUP       | chr17 | - | 39775692 | 39943183 | 3497  |
| ENSG000001 | 10.13568 | 171.3375 | -4.0346  | 2.21E-31  | 2.99E-30  | HAP1      | chr17 | - | 39873994 | 39890896 | 5683  |
| ENSG000001 | 0.580602 | 40.35876 | -5.4736  | 3.19E-09  | 1.41E-08  | TDRD12    | chr19 | + | 33210659 | 33320483 | 3934  |
| ENSG000001 | 0        | 0.343138 | -0.41864 | 0.81278   | NA        | CCDC13-AS | chr3  | + | 42774067 | 42788260 | 2049  |
| ENSG000001 | 5261.554 | 4292.991 | 0.29319  | 0.032523  | 0.060999  | EIF1      | chr17 | + | 39845137 | 39848920 | 2330  |
| ENSG000001 | 384.6017 | 148.2952 | 1.3712   | 1.41E-14  | 9.02E-14  | ENDOV     | chr17 | + | 78388965 | 78411886 | 2815  |
| ENSG000001 | 3378.16  | 2120.526 | 0.67018  | 2.33E-05  | 7.16E-05  | RNF213    | chr17 | + | 78234665 | 78372586 | 21055 |
| ENSG000001 | 7.479285 | 31.86524 | -2.0384  | 0.000151  | 0.00042   | TIGD3     | chr11 | + | 65122238 | 65125084 | 2012  |
| ENSG000001 | 0.72616  | 68.13548 | -6.139   | 1.87E-11  | 9.77E-11  | KCNH6     | chr17 | + | 61600695 | 61626338 | 3821  |
| ENSG000001 | 0.923144 | 5.332435 | -2.1818  | 0.053713  | 0.094674  | 10-Mar    | chr17 | - | 60778675 | 60885705 | 3338  |
| ENSG000001 | 434.8585 | 151.4943 | 1.5184   | 9.64E-20  | 8.03E-19  | PLK3      | chr1  | + | 45265897 | 45271662 | 2492  |
| ENSG000001 | 3896.155 | 910.5328 | 2.0957   | 6.93E-88  | 3.33E-86  | NET1      | chr10 | + | 5454514  | 5500426  | 3402  |
| ENSG000001 | 1077.341 | 309.0614 | 1.7996   | 9.29E-55  | 2.38E-53  | DPY19L1   | chr7  | - | 34968488 | 35077883 | 4870  |

|            |          |          |          |           |           |           |       |   |          |          |       |
|------------|----------|----------|----------|-----------|-----------|-----------|-------|---|----------|----------|-------|
| ENSG000001 | 0        | 3.541484 | -3.3453  | 0.024862  | 0.048023  | RP11-89N1 | chr7  | + | 33765593 | 33768068 | 1058  |
| ENSG000001 | 2.717192 | 2.575179 | 0.085514 | 0.94403   | 0.96396   | AC142401. | chr15 | - | 89002948 | 89054752 | 598   |
| ENSG000001 | 8.922232 | 12.21064 | -0.44284 | 0.45092   | 0.55658   | PHOSPHO1  | chr17 | - | 47300724 | 47308128 | 2173  |
| ENSG000001 | 367.8593 | 368.3958 | -0.00194 | 0.9886    | 0.9936    | ZNF791    | chr19 | + | 12721732 | 12742735 | 4554  |
| ENSG000001 | 9.12859  | 48.56513 | -2.3323  | 0.000205  | 0.000561  | TUBB8     | chr10 | - | 92828    | 120103   | 1968  |
| ENSG000001 | 375.1515 | 203.3166 | 0.88184  | 6.57E-08  | 2.60E-07  | PHC3      | chr3  | - | 1.7E+08  | 1.7E+08  | 5030  |
| ENSG000001 | 2.718006 | 588.1495 | -7.6317  | 3.77E-51  | 8.90E-50  | GPR160    | chr3  | + | 1.7E+08  | 1.7E+08  | 2039  |
| ENSG000001 | 836.4931 | 5058.964 | -2.5928  | 4.15E-117 | 3.06E-115 | CBX2      | chr17 | + | 77751931 | 77761782 | 4644  |
| ENSG000001 | 2486.136 | 2460.612 | 0.014697 | 0.89448   | 0.92676   | SPTBN2    | chr11 | - | 66452719 | 66496697 | 8128  |
| ENSG000001 | 4035.367 | 813.5168 | 2.3082   | 1.15E-123 | 9.53E-122 | GOLIM4    | chr3  | - | 1.68E+08 | 1.68E+08 | 4373  |
| ENSG000001 | 400.1929 | 282.0409 | 0.50291  | 0.060681  | 0.10543   | RBM4B     | chr11 | - | 66432469 | 66445392 | 2339  |
| ENSG000001 | 722.1801 | 744.6691 | -0.04337 | 0.73729   | 0.80637   | USMG5     | chr10 | - | 1.05E+08 | 1.05E+08 | 789   |
| ENSG000001 | 862.987  | 79.03338 | 3.434    | 2.18E-62  | 6.73E-61  | HOXB2     | chr17 | - | 46618256 | 46623441 | 2652  |
| ENSG000001 | 96.68604 | 46.50369 | 1.0497   | 2.71E-05  | 8.25E-05  | C1QTNF1   | chr17 | + | 77018896 | 77045870 | 3100  |
| ENSG000001 | 95.65679 | 166.4963 | -0.79436 | 0.000555  | 0.00143   | 3-Mar     | chr5  | - | 1.26E+08 | 1.26E+08 | 4196  |
| ENSG000001 | 17.7408  | 43.32307 | -1.2743  | 0.002503  | 0.005834  | SWSAP1    | chr19 | + | 11485361 | 11487627 | 1684  |
| ENSG000001 | 55.35654 | 147.881  | -1.3947  | 0.001201  | 0.002941  | SLCO4C1   | chr5  | - | 1.02E+08 | 1.02E+08 | 5334  |
| ENSG000001 | 84.4696  | 84.94742 | -0.00795 | 0.9837    | 0.99083   | RBM4      | chr11 | + | 66384097 | 66434153 | 2321  |
| ENSG000001 | 1.359003 | 55.60097 | -5.1437  | 1.77E-12  | 9.86E-12  | PIFO      | chr1  | + | 1.12E+08 | 1.12E+08 | 3774  |
| ENSG000001 | 1005.359 | 482.9082 | 1.057    | 9.66E-16  | 6.60E-15  | XXYLT1    | chr3  | - | 1.95E+08 | 1.95E+08 | 2727  |
| ENSG000001 | 548.2429 | 423.5484 | 0.37086  | 0.020079  | 0.039605  | UBXN2A    | chr2  | + | 24150155 | 24227779 | 6066  |
| ENSG000001 | 0        | 1.591889 | -2.1342  | 0.20414   | NA        | RAX2      | chr19 | - | 3769087  | 3772233  | 2428  |
| ENSG000001 | 0.342542 | 0        | 0.4146   | 0.81455   | NA        | LRRC63    | chr13 | + | 46786083 | 46851501 | 2327  |
| ENSG000001 | 17.3743  | 43.19202 | -1.2798  | 0.002706  | 0.006285  | TCAP      | chr17 | + | 37820440 | 37822808 | 2123  |
| ENSG000001 | 616.8794 | 458.1985 | 0.42753  | 0.005208  | 0.011566  | CCS       | chr11 | + | 66360292 | 66373490 | 1430  |
| ENSG000001 | 9.657765 | 172.3872 | -4.1282  | 1.73E-30  | 2.25E-29  | LRRC33    | chr3  | + | 1.96E+08 | 1.96E+08 | 2564  |
| ENSG000001 | 43.58435 | 26.70997 | 0.68829  | 0.080414  | 0.13415   | CEP19     | chr3  | - | 1.96E+08 | 1.96E+08 | 2201  |
| ENSG000001 | 178.4203 | 231.8498 | -0.37503 | 0.023729  | 0.046035  | KLHL15    | chrX  | - | 24001837 | 24045303 | 6272  |
| ENSG000001 | 445.0965 | 546.0372 | -0.29494 | 0.047747  | 0.08547   | FBXO45    | chr3  | + | 1.96E+08 | 1.96E+08 | 5899  |
| ENSG000001 | 0        | 5.116387 | -3.5863  | 0.02273   | 0.044298  | SPERT     | chr13 | + | 46276446 | 46288694 | 1842  |
| ENSG000001 | 0.36308  | 1.531196 | -1.4241  | 0.39588   | NA        | FAM46D    | chrX  | + | 79591003 | 79700810 | 3106  |
| ENSG000001 | 1443.371 | 1061.094 | 0.44384  | 1.67E-05  | 5.24E-05  | GNG5      | chr1  | - | 84964008 | 84972248 | 920   |
| ENSG000001 | 137.4676 | 66.92936 | 1.0353   | 0.0001    | 0.000286  | FAM3C2    | chrX  | + | 23093875 | 23094884 | 681   |
| ENSG000001 | 176.0295 | 77.80161 | 1.1699   | 4.33E-07  | 1.60E-06  | SLC25A30  | chr13 | - | 45967451 | 45992590 | 6041  |
| ENSG000001 | 12.03421 | 7.503784 | 0.65649  | 0.30548   | 0.40705   | C9orf131  | chr9  | + | 35041092 | 35045988 | 3409  |
| ENSG000001 | 4.055658 | 4.098254 | 0.018892 | 0.98466   | 0.99115   | CD34      | chr1  | - | 2.08E+08 | 2.08E+08 | 2874  |
| ENSG000001 | 0.342542 | 89.60197 | -7.168   | 1.50E-12  | 8.44E-12  | CTSF      | chr11 | - | 66330934 | 66336312 | 2035  |
| ENSG000001 | 3.22583  | 0.951736 | 1.4843   | 0.23634   | 0.33037   | PIK3R6    | chr17 | - | 8706041  | 8770994  | 3391  |
| ENSG000001 | 122.2459 | 112.191  | 0.11844  | 0.59386   | 0.68849   | TBC1D3    | chr17 | - | 36337717 | 36421858 | 5098  |
| ENSG000001 | 1094.2   | 5.205345 | 7.1795   | 1.95E-15  | 1.31E-14  | MSRB3     | chr12 | + | 65672423 | 65882024 | 4417  |
| ENSG000001 | 530.5591 | 1025.246 | -0.9483  | 7.26E-11  | 3.63E-10  | MRPL45    | chr17 | + | 36452989 | 36479101 | 1705  |
| ENSG000001 | 683.5366 | 734.0831 | -0.10239 | 0.51096   | 0.61415   | LEMED3    | chr12 | + | 65563351 | 65642107 | 4764  |
| ENSG000001 | 155.5019 | 195.142  | -0.32726 | 0.073435  | 0.12423   | C16orf91  | chr16 | - | 1469745  | 1479345  | 1071  |
| ENSG000001 | 199.5915 | 292.3592 | -0.54851 | 0.052805  | 0.093255  | SOCS7     | chr17 | + | 36508111 | 36556019 | 2051  |
| ENSG000001 | 3.858673 | 0        | 3.4921   | 0.016684  | 0.033465  | TLR1      | chr4  | - | 38792298 | 38858438 | 2847  |
| ENSG000001 | 35.12789 | 1.234181 | 4.4909   | 1.05E-08  | 4.46E-08  | TLR6      | chr4  | - | 38825336 | 38858438 | 5879  |
| ENSG000001 | 202.502  | 69.79194 | 1.5242   | 9.69E-10  | 4.48E-09  | FAM174A   | chr5  | + | 99871009 | 99922445 | 1356  |
| ENSG000001 | 1170.101 | 400.272  | 1.5469   | 4.37E-38  | 7.29E-37  | RGMB      | chr5  | + | 98104354 | 98134347 | 4580  |
| ENSG000001 | 30.02244 | 46.54585 | -0.62738 | 0.11954   | 0.18824   | FAM53A    | chr4  | - | 1619642  | 1686029  | 2802  |
| ENSG000001 | 0.580602 | 3.010564 | -1.8049  | 0.20946   | 0.29945   | KIAA1239  | chr4  | + | 37245842 | 37451087 | 8325  |
| ENSG000001 | 256.6323 | 141.7705 | 0.85369  | 3.31E-06  | 1.12E-05  | CYB561D1  | chr1  | + | 1.1E+08  | 1.1E+08  | 5077  |
| ENSG000001 | 334.1822 | 217.3921 | 0.61733  | 0.012281  | 0.025334  | ZDHHC24   | chr11 | - | 66288108 | 66313709 | 1941  |
| ENSG000001 | 58.81008 | 3.959884 | 3.8059   | 2.21E-13  | 1.31E-12  | RP11-23P1 | chr15 | + | 42184991 | 42189585 | 2900  |
| ENSG000001 | 251.1103 | 459.8877 | -0.86696 | 0.001227  | 0.002999  | TRMT10C   | chr3  | + | 1.01E+08 | 1.01E+08 | 1819  |
| ENSG000001 | 0        | 0.343138 | -0.41864 | 0.81278   | NA        | SELP      | chr1  | - | 1.7E+08  | 1.7E+08  | 3142  |
| ENSG000001 | 562.6319 | 614.4983 | -0.12757 | 0.29912   | 0.40079   | CTU2      | chr16 | + | 88772871 | 88781794 | 1905  |
| ENSG000001 | 37.91867 | 21.71826 | 0.77805  | 0.065538  | 0.11262   | AGAP8     | chr10 | - | 51224681 | 51371321 | 2803  |
| ENSG000001 | 948.9857 | 746.7268 | 0.34612  | 0.002769  | 0.006419  | MGA       | chr15 | + | 41913422 | 42062141 | 12042 |
| ENSG000001 | 71.23051 | 176.0963 | -1.2945  | 0.000159  | 0.000441  | C12orf66  | chr12 | - | 64580096 | 64616076 | 2698  |
| ENSG000001 | 3.40309  | 2.543625 | 0.34771  | 0.74277   | 0.81095   | ARL13A    | chrX  | + | 1E+08    | 1E+08    | 1535  |
| ENSG000001 | 0.290301 | 0.715414 | -0.50514 | 0.77701   | NA        | SNX31     | chr8  | - | 1.02E+08 | 1.02E+08 | 2451  |
| ENSG000001 | 862.9148 | 648.902  | 0.41059  | 0.030054  | 0.056851  | PIGG      | chr4  | + | 492989   | 533985   | 3519  |
| ENSG000001 | 8542.288 | 9324.565 | -0.1263  | 0.13554   | 0.20866   | PRPF8     | chr17 | - | 1553923  | 1588176  | 7445  |
| ENSG000001 | 1572.463 | 147.4869 | 3.398    | 1.83E-55  | 4.76E-54  | ADCY6     | chr12 | - | 49159975 | 49182820 | 6464  |
| ENSG000001 | 1.649304 | 0        | 2.1906   | 0.18857   | NA        | REP15     | chr12 | + | 27849428 | 27850566 | 1139  |

|            |          |          |          |           |           |           |       |   |          |          |       |
|------------|----------|----------|----------|-----------|-----------|-----------|-------|---|----------|----------|-------|
| ENSG000001 | 1655.575 | 1401.197 | 0.24055  | 0.012854  | 0.026421  | PITPNA    | chr17 | - | 1421012  | 1466110  | 3912  |
| ENSG000001 | 2117.329 | 2293.857 | -0.11509 | 0.43972   | 0.54546   | DDX23     | chr12 | - | 49223840 | 49246625 | 2832  |
| ENSG000001 | 0        | 0.343138 | -0.41864 | 0.81278   | NA        | ZNF80     | chr3  | - | 1.14E+08 | 1.14E+08 | 2939  |
| ENSG000001 | 94.21531 | 152.6354 | -0.69632 | 0.002202  | 0.005175  | ZNHIT2    | chr11 | - | 64883875 | 64885170 | 1296  |
| ENSG000001 | 3.609448 | 0        | 3.3159   | 0.028634  | 0.054474  | EVX2      | chr2  | - | 1.77E+08 | 1.77E+08 | 4203  |
| ENSG000001 | 1634.065 | 686.099  | 1.2444   | 2.20E-06  | 7.62E-06  | ZBTB4     | chr17 | - | 7362685  | 7387582  | 5956  |
| ENSG000001 | 19.17095 | 213.6791 | -3.4389  | 1.80E-24  | 1.85E-23  | TNK1      | chr17 | + | 7283853  | 7293093  | 3122  |
| ENSG000001 | 660.8547 | 111.7676 | 2.5571   | 7.45E-65  | 2.42E-63  | ZHX3      | chr20 | - | 39807088 | 39946312 | 10030 |
| ENSG000001 | 1288.515 | 1074.375 | 0.26     | 0.39921   | 0.50388   | PHLDA3    | chr1  | - | 2.01E+08 | 2.01E+08 | 1531  |
| ENSG000001 | 20.12482 | 13.33559 | 0.57248  | 0.26084   | 0.35888   | SLC16A11  | chr17 | - | 6944949  | 6947242  | 1803  |
| ENSG000001 | 227.7249 | 80.39699 | 1.492    | 9.87E-13  | 5.61E-12  | SLC16A13  | chr17 | + | 6939394  | 6943440  | 1748  |
| ENSG000001 | 64.42254 | 1.370136 | 5.3477   | 1.03E-13  | 6.20E-13  | GLIS1     | chr1  | - | 53971910 | 54199877 | 2812  |
| ENSG000001 | 68.67322 | 22.67557 | 1.5826   | 4.58E-05  | 0.000136  | CHRNA9    | chr4  | + | 40337346 | 40357234 | 2276  |
| ENSG000001 | 74.20613 | 6.206494 | 3.5091   | 4.13E-15  | 2.72E-14  | PODN      | chr1  | + | 53527854 | 53551174 | 3287  |
| ENSG000001 | 56.74529 | 36.52589 | 0.62144  | 0.10767   | 0.17189   | STAG3L3   | chr7  | - | 72440227 | 72476445 | 2137  |
| ENSG000001 | 0        | 0.951736 | -1.2555  | 0.48145   | NA        | SLC6A19   | chr5  | + | 1201710  | 1225232  | 5174  |
| ENSG000001 | 80.64077 | 121.1189 | -0.57757 | 0.025162  | 0.048522  | SNHG11    | chr20 | + | 37075221 | 37079564 | 2652  |
| ENSG000001 | 0        | 1.531196 | -1.8455  | 0.29475   | NA        | PMS2P2    | chr7  | - | 74880905 | 74988262 | 1071  |
| ENSG000001 | 22.08855 | 28.38357 | -0.35727 | 0.41268   | 0.51755   | C11orf45  | chr11 | - | 1.29E+08 | 1.29E+08 | 3624  |
| ENSG000001 | 220.0084 | 570.1555 | -1.37    | 3.70E-17  | 2.73E-16  | EXO1      | chr1  | + | 2.42E+08 | 2.42E+08 | 3473  |
| ENSG000001 | 334.9002 | 265.9408 | 0.3312   | 0.030531  | 0.05762   | RALGAPA1  | chr14 | - | 36007558 | 36278510 | 8004  |
| ENSG000001 | 703.0072 | 848.566  | -0.27073 | 0.051225  | 0.090838  | WBSR16    | chr7  | - | 74441226 | 74490064 | 2345  |
| ENSG000001 | 1.338465 | 7.6106   | -2.3103  | 0.018141  | 0.036132  | C20orf166 | chr20 | - | 61141550 | 61148733 | 2585  |
| ENSG000001 | 231.6187 | 83.06832 | 1.4768   | 1.13E-12  | 6.42E-12  | LIG4      | chr13 | - | 1.09E+08 | 1.09E+08 | 4103  |
| ENSG000001 | 0        | 0.343138 | -0.41864 | 0.81278   | NA        | C20orf166 | chr20 | + | 61147660 | 61167971 | 1220  |
| ENSG000001 | 2.07579  | 2.307303 | -0.14429 | 0.91145   | 0.93941   | TRHR      | chr8  | + | 1.1E+08  | 1.1E+08  | 1660  |
| ENSG000001 | 54.45572 | 29.80137 | 0.86026  | 0.05256   | 0.092869  | GTF2IRD2B | chr7  | + | 74508364 | 74565623 | 3545  |
| ENSG000001 | 1.286224 | 0        | 1.8436   | 0.2818    | NA        | ABRA      | chr8  | - | 1.08E+08 | 1.08E+08 | 2755  |
| ENSG000001 | 5902.73  | 4871.316 | 0.27678  | 0.019474  | 0.038527  | ATP2A2    | chr12 | + | 1.11E+08 | 1.11E+08 | 8229  |
| ENSG000001 | 395.2001 | 552.8162 | -0.4823  | 0.011462  | 0.023788  | ZWILCH    | chr15 | + | 66797297 | 66842115 | 3609  |
| ENSG000001 | 22639.09 | 33846.18 | -0.57964 | 4.31E-08  | 1.73E-07  | RPL4      | chr15 | - | 66790355 | 66816870 | 2767  |
| ENSG000001 | 191.5348 | 230.8195 | -0.26906 | 0.13253   | 0.20497   | SNAPC5    | chr15 | - | 66782644 | 66790151 | 1741  |
| ENSG000001 | 1.068702 | 2.08555  | -0.75481 | 0.6154    | 0.70715   | STARDB    | chr18 | - | 51850728 | 51884334 | 1135  |
| ENSG000001 | 0.290301 | 0        | 0.4146   | 0.81455   | NA        | GOLGA6L2  | chr15 | - | 23684645 | 23692381 | 3030  |
| ENSG000001 | 0        | 0.357707 | -0.41864 | 0.81278   | NA        | VWC2L     | chr2  | + | 2.15E+08 | 2.15E+08 | 4610  |
| ENSG000001 | 69.47395 | 166.9246 | -1.2507  | 0.001268  | 0.003094  | C12orf76  | chr12 | - | 1.1E+08  | 1.11E+08 | 2204  |
| ENSG000001 | 13.52679 | 9.606318 | 0.49035  | 0.39763   | 0.50217   | ZCCHC12   | chrX  | + | 1.18E+08 | 1.18E+08 | 2231  |
| ENSG000001 | 17.1791  | 2057.809 | -6.8545  | 2.51E-171 | 3.86E-169 | CNTNAP2   | chr7  | + | 1.46E+08 | 1.48E+08 | 9894  |
| ENSG000001 | 12.24994 | 3.916176 | 1.5693   | 0.033052  | 0.061849  | GALNTL6   | chr4  | + | 1.73E+08 | 1.74E+08 | 3922  |
| ENSG000001 | 28.88014 | 40.24785 | -0.4653  | 0.25732   | 0.3549    | LINGO2    | chr9  | - | 27948076 | 28670283 | 3044  |
| ENSG000001 | 8.620766 | 10.19793 | -0.24072 | 0.69967   | 0.77633   | BBS1      | chr11 | + | 66278077 | 66301098 | 3585  |
| ENSG000001 | 242.8801 | 41.92225 | 2.5288   | 2.55E-29  | 3.17E-28  | DENND4A   | chr15 | - | 65950384 | 66084631 | 7172  |
| ENSG000001 | 38.67409 | 3266.787 | -6.3789  | 3.96E-251 | 1.38E-248 | IGDCC3    | chr15 | - | 65619465 | 65670378 | 4479  |
| ENSG000001 | 18.27772 | 41.91177 | -1.1817  | 0.002166  | 0.005099  | GCSAM     | chr3  | - | 1.12E+08 | 1.12E+08 | 3336  |
| ENSG000001 | 238.0482 | 29.78929 | 2.9954   | 8.54E-35  | 1.29E-33  | ANKRD36C  | chr2  | - | 96514587 | 96657541 | 5428  |
| ENSG000001 | 1.919068 | 1.309443 | 0.46697  | 0.7243    | 0.79602   | SLC26A9   | chr1  | - | 2.06E+08 | 2.06E+08 | 4799  |
| ENSG000001 | 24.05888 | 18.68259 | 0.34931  | 0.44185   | 0.54765   | MFSD4     | chr1  | + | 2.06E+08 | 2.06E+08 | 4095  |
| ENSG000001 | 117.9583 | 136.4026 | -0.21    | 0.3246    | 0.42754   | PELI3     | chr11 | + | 66234216 | 66244808 | 2783  |
| ENSG000001 | 2.67693  | 5.303297 | -0.9185  | 0.33331   | 0.43665   | TTC9B     | chr19 | - | 40721965 | 40724306 | 2323  |
| ENSG000001 | 7.180425 | 10.29259 | -0.51183 | 0.47832   | 0.58271   | MYO1H     | chr12 | + | 1.1E+08  | 1.1E+08  | 4364  |
| ENSG000001 | 36.51517 | 68.16138 | -0.89659 | 0.012145  | 0.025088  | TMEM81    | chr1  | - | 2.05E+08 | 2.05E+08 | 1388  |
| ENSG000001 | 528.9    | 1435.283 | -1.4364  | 2.88E-21  | 2.58E-20  | MRPL11    | chr11 | - | 66202546 | 66234209 | 2209  |
| ENSG000001 | 0        | 0.343138 | -0.41864 | 0.81278   | NA        | KLK15     | chr19 | - | 51328545 | 51340469 | 1419  |
| ENSG000001 | 7.003165 | 25.24921 | -1.8184  | 0.000756  | 0.00191   | IL20RB    | chr3  | + | 1.37E+08 | 1.37E+08 | 2047  |
| ENSG000001 | 0        | 50.88358 | -7.2323  | 8.79E-11  | 4.36E-10  | GOLT1A    | chr1  | - | 2.04E+08 | 2.04E+08 | 883   |
| ENSG000001 | 0.653381 | 0.297015 | 0.51304  | 0.77085   | NA        | RP11-209A | chr6  | + | 27179023 | 27179692 | 670   |
| ENSG000001 | 1650.068 | 4172.664 | -1.3349  | 7.04E-14  | 4.29E-13  | AKIRIN1   | chr1  | + | 39456895 | 39471731 | 2741  |
| ENSG000001 | 0.290301 | 2.217472 | -1.9238  | 0.23385   | 0.32753   | NPAS4     | chr11 | + | 66188475 | 66194178 | 3303  |
| ENSG000001 | 466.9606 | 602.5084 | -0.36749 | 0.001974  | 0.004675  | MSL2      | chr3  | - | 1.36E+08 | 1.36E+08 | 4692  |
| ENSG000001 | 64.86435 | 42.44195 | 0.59877  | 0.098956  | 0.16002   | ZNF497    | chr19 | - | 58865723 | 58874214 | 3468  |
| ENSG000001 | 38.22348 | 0.715414 | 5.3485   | 1.20E-08  | 5.07E-08  | KLF14     | chr7  | - | 1.3E+08  | 1.3E+08  | 1488  |
| ENSG000001 | 60.38481 | 36.14228 | 0.7381   | 0.012706  | 0.026144  | TRAM1L1   | chr4  | - | 1.18E+08 | 1.18E+08 | 2019  |
| ENSG000001 | 95.78442 | 18.57739 | 2.3226   | 2.16E-06  | 7.49E-06  | CMKLR1    | chr12 | - | 1.09E+08 | 1.09E+08 | 5283  |
| ENSG000001 | 387.6749 | 451.45   | -0.21903 | 0.21938   | 0.31111   | ANGEL2    | chr1  | - | 2.13E+08 | 2.13E+08 | 4649  |
| ENSG000001 | 4.979616 | 753.0402 | -7.1643  | 6.39E-77  | 2.59E-75  | UGT8      | chr4  | + | 1.16E+08 | 1.16E+08 | 4084  |

|            |          |          |          |           |           |           |       |   |          |          |      |
|------------|----------|----------|----------|-----------|-----------|-----------|-------|---|----------|----------|------|
| ENSG000001 | 0        | 1.294874 | -1.8547  | 0.27869   | NA        | KY        | chr3  | - | 1.34E+08 | 1.34E+08 | 4043 |
| ENSG000001 | 83.83334 | 53.43526 | 0.64591  | 0.025767  | 0.049599  | IQCK      | chr16 | + | 19727778 | 19868907 | 2600 |
| ENSG000001 | 12.59248 | 66.58542 | -2.3557  | 3.99E-09  | 1.75E-08  | SLCO2A1   | chr3  | - | 1.34E+08 | 1.34E+08 | 4223 |
| ENSG000001 | 269.027  | 310.4955 | -0.20639 | 0.15261   | 0.2304    | ZNF266    | chr19 | - | 9523272  | 9546254  | 4401 |
| ENSG000001 | 466.7823 | 490.1509 | -0.06968 | 0.71477   | 0.78863   | SLC29A2   | chr11 | - | 66129992 | 66139685 | 2514 |
| ENSG000001 | 16.23444 | 721.9752 | -5.4545  | 2.31E-100 | 1.31E-98  | BRSK2     | chr11 | + | 1411129  | 1483919  | 4089 |
| ENSG000001 | 0.290301 | 0        | 0.4146   | 0.81455   | NA        | FAM47DP   | chrX  | - | 37400330 | 37404515 | 3290 |
| ENSG000001 | 1.08924  | 1.40169  | -0.26784 | 0.8691    | 0.90895   | GRIK1-AS1 | chr21 | + | 31120494 | 31136321 | 818  |
| ENSG000001 | 641.4974 | 782.017  | -0.28549 | 0.073968  | 0.12502   | B3GNT1    | chr11 | - | 66112843 | 66115163 | 2072 |
| ENSG000001 | 2411.482 | 2272.811 | 0.085414 | 0.61556   | 0.70721   | TMEM167A  | chr5  | - | 82348665 | 82373682 | 4630 |
| ENSG000001 | 0        | 1.903472 | -2.1599  | 0.21236   | NA        | LEP       | chr7  | + | 1.28E+08 | 1.28E+08 | 3420 |
| ENSG000001 | 4401.353 | 2608.462 | 0.75383  | 1.88E-11  | 9.78E-11  | SH3PXD2B  | chr5  | - | 1.72E+08 | 1.72E+08 | 7777 |
| ENSG000001 | 1.681007 | 1.294874 | 0.29761  | 0.82009   | 0.87355   | RP11-79L9 | chr3  | - | 1.38E+08 | 1.38E+08 | 504  |
| ENSG000001 | 269.093  | 1064.452 | -1.9296  | 0.000916  | 0.002286  | KIAA1551  | chr12 | + | 32112304 | 32146039 | 6228 |
| ENSG000001 | 313.6512 | 1081.758 | -1.783   | 2.94E-33  | 4.24E-32  | LARP7     | chr4  | + | 1.14E+08 | 1.14E+08 | 2332 |
| ENSG000001 | 251.2871 | 1518.356 | -2.591   | 3.86E-76  | 1.54E-74  | FGFBP3    | chr10 | - | 93666346 | 93669240 | 2545 |
| ENSG000001 | 337.5183 | 424.3289 | -0.32826 | 0.045893  | 0.082545  | NR1D2     | chr3  | + | 23986751 | 24022109 | 5258 |
| ENSG000001 | 30.94558 | 26.28024 | 0.2348   | 0.58364   | 0.67961   | PABPC5    | chrX  | + | 90689594 | 90693583 | 3221 |
| ENSG000001 | 657.0618 | 770.6681 | -0.22879 | 0.31673   | 0.41938   | BRMS1     | chr11 | - | 66104804 | 66112596 | 1817 |
| ENSG000001 | 11773.12 | 16201.78 | -0.46028 | 6.59E-07  | 2.39E-06  | RPL15     | chr3  | + | 23958036 | 23965183 | 2730 |
| ENSG000001 | 95.67619 | 10.57504 | 3.1407   | 5.93E-17  | 4.33E-16  | C4orf32   | chr4  | + | 1.13E+08 | 1.13E+08 | 2726 |
| ENSG000001 | 783.5659 | 435.7245 | 0.84508  | 4.52E-06  | 1.51E-05  | HRAS      | chr11 | - | 532242   | 537287   | 1233 |
| ENSG000001 | 0.342542 | 2.324288 | -2.0579  | 0.17538   | 0.2586    | WDR49     | chr3  | - | 1.67E+08 | 1.67E+08 | 2594 |
| ENSG000001 | 2547.349 | 1953.435 | 0.38271  | 0.009018  | 0.01911   | SRP72     | chr4  | + | 57333081 | 57369839 | 3983 |
| ENSG000001 | 0.72616  | 5.47651  | -2.5551  | 0.040249  | 0.073796  | PCP2      | chr19 | - | 7696497  | 7698634  | 776  |
| ENSG000001 | 322.316  | 80.58002 | 1.9834   | 1.39E-11  | 7.31E-11  | RIN1      | chr11 | - | 66097713 | 66104311 | 4416 |
| ENSG000001 | 0.975385 | 0.891044 | 0.066016 | 0.96851   | NA        | C4orf26   | chr4  | + | 76481258 | 76491095 | 1874 |
| ENSG000001 | 109.5961 | 96.67507 | 0.18162  | 0.40258   | 0.50738   | THAP6     | chr4  | + | 76439156 | 76475683 | 3549 |
| ENSG000001 | 288.3675 | 185.545  | 0.637    | 0.00352   | 0.008029  | CEP135    | chr4  | + | 56815037 | 56899529 | 5562 |
| ENSG000001 | 1693.773 | 362.377  | 2.2218   | 9.43E-92  | 4.81E-90  | FZD4      | chr11 | - | 86656721 | 86666433 | 7383 |
| ENSG000001 | 1140.296 | 103.296  | 3.455    | 4.87E-102 | 2.88E-100 | CD248     | chr11 | - | 66081958 | 66084515 | 2558 |
| ENSG000001 | 1.794862 | 2.353426 | -0.35825 | 0.78048   | 0.84237   | BTC       | chr4  | - | 75669969 | 75719896 | 2816 |
| ENSG000001 | 8.092404 | 9.618471 | -0.24972 | 0.70919   | 0.78392   | PZK1      | chr1  | + | 1.46E+08 | 1.46E+08 | 2084 |
| ENSG000001 | 2.116866 | 0.357707 | 1.7968   | 0.26904   | 0.36798   | EMR1      | chr19 | + | 6887577  | 6940470  | 3128 |
| ENSG000001 | 410.5995 | 309.7136 | 0.40713  | 0.005492  | 0.012132  | DENND6A   | chr3  | - | 57611184 | 57678816 | 4655 |
| ENSG000001 | 426.6812 | 444.7095 | -0.05986 | 0.75677   | 0.82315   | PDE12     | chr3  | + | 57542003 | 57547684 | 3886 |
| ENSG000001 | 159.4866 | 270.5743 | -0.75789 | 0.000649  | 0.001657  | GLMN      | chr1  | - | 92711959 | 92764544 | 1995 |
| ENSG000001 | 1.774324 | 0.297015 | 1.601    | 0.33424   | 0.43769   | DNAH12    | chr3  | - | 57327727 | 57530071 | 9542 |
| ENSG000001 | 2338.406 | 950.5178 | 1.2981   | 4.30E-39  | 7.42E-38  | YIF1A     | chr11 | - | 66052051 | 66056641 | 1124 |
| ENSG000001 | 88.81793 | 151.788  | -0.76622 | 0.00031   | 0.000829  | CNIH2     | chr11 | + | 66045661 | 66052772 | 1524 |
| ENSG000001 | 1.08924  | 8.867471 | -2.7119  | 0.019902  | 0.039303  | NLRP6     | chr11 | + | 278365   | 285359   | 2936 |
| ENSG000001 | 77.04493 | 111.269  | -0.52624 | 0.09061   | 0.1486    | NDUFA11   | chr19 | - | 5891287  | 5904017  | 2406 |
| ENSG000001 | 280.7618 | 237.6936 | 0.24141  | 0.17497   | 0.25813   | RSRC1     | chr3  | + | 1.58E+08 | 1.58E+08 | 2411 |
| ENSG000001 | 0.870904 | 0.594029 | 0.31055  | 0.86063   | NA        | CATSPERD  | chr19 | + | 5720688  | 5778745  | 2516 |
| ENSG000001 | 0.342542 | 4.386404 | -2.8792  | 0.044475  | 0.080295  | C3orf55   | chr3  | + | 1.57E+08 | 1.57E+08 | 1484 |
| ENSG000001 | 1758.197 | 1130.322 | 0.637    | 8.18E-11  | 4.07E-10  | RAB1B     | chr11 | + | 66036004 | 66044963 | 2007 |
| ENSG000001 | 5.342695 | 2.292733 | 1.118    | 0.23111   | 0.32458   | METTL15P1 | chr3  | - | 1.56E+08 | 1.56E+08 | 1045 |
| ENSG000001 | 712.5379 | 1119.713 | -0.65208 | 3.85E-09  | 1.69E-08  | PTDSS2    | chr11 | + | 448268   | 491393   | 3128 |
| ENSG000001 | 651.9355 | 295.5142 | 1.1375   | 8.14E-12  | 4.34E-11  | C19orf70  | chr19 | - | 5678432  | 5680907  | 896  |
| ENSG000001 | 49.73454 | 43.36845 | 0.19366  | 0.52549   | 0.62745   | C3orf33   | chr3  | - | 1.55E+08 | 1.56E+08 | 1931 |
| ENSG000001 | 1112.449 | 1606.669 | -0.52871 | 0.005508  | 0.012162  | SEZ6L2    | chr16 | - | 29882480 | 29910868 | 3801 |
| ENSG000001 | 303.8449 | 330.7372 | -0.12342 | 0.50696   | 0.61049   | ASPHD1    | chr16 | + | 29911696 | 29931185 | 1732 |
| ENSG000001 | 544.5754 | 173.704  | 1.6407   | 2.34E-17  | 1.74E-16  | KCTD13    | chr16 | - | 29916333 | 29938356 | 2528 |
| ENSG000001 | 0.342542 | 3.466222 | -2.5888  | 0.074921  | 0.12637   | P2RY14    | chr3  | - | 1.51E+08 | 1.51E+08 | 2513 |
| ENSG000001 | 13.73575 | 32.82987 | -1.2282  | 0.013042  | 0.026767  | AMZ1      | chr7  | + | 2719156  | 2804759  | 5516 |
| ENSG000001 | 0        | 1.964165 | -2.2052  | 0.20143   | 0.2901    | GPR171    | chr3  | - | 1.51E+08 | 1.51E+08 | 1786 |
| ENSG000001 | 0        | 28.00163 | -6.3842  | 4.24E-08  | 1.71E-07  | CD164L2   | chr1  | - | 27705666 | 27709870 | 1457 |
| ENSG000001 | 5.995263 | 267.1744 | -5.3546  | 4.11E-36  | 6.45E-35  | FUT1      | chr19 | - | 49251268 | 49258647 | 4246 |
| ENSG000001 | 1106.608 | 1361.052 | -0.29764 | 0.088221  | 0.14532   | DHX36     | chr3  | - | 1.54E+08 | 1.54E+08 | 6733 |
| ENSG000001 | 562.4771 | 102.4364 | 2.4491   | 3.26E-48  | 7.10E-47  | ZIC4      | chr3  | - | 1.47E+08 | 1.47E+08 | 4331 |
| ENSG000001 | 87.86732 | 66.95379 | 0.38558  | 0.11408   | 0.18081   | AC026271  | chr17 | + | 18553508 | 18554855 | 1348 |
| ENSG000001 | 773.2242 | 461.2445 | 0.74397  | 3.02E-10  | 1.45E-09  | FBXW8     | chr12 | + | 1.17E+08 | 1.17E+08 | 4648 |
| ENSG000001 | 0        | 0.297015 | -0.41864 | 0.81278   | NA        | ZG16      | chr16 | + | 29789561 | 29793096 | 1934 |
| ENSG000001 | 864.137  | 664.0106 | 0.37875  | 0.014405  | 0.02928   | KLC2      | chr11 | + | 66024765 | 66035331 | 3755 |
| ENSG000001 | 4.668776 | 2.353426 | 0.91426  | 0.34437   | 0.44831   | SLC22A1   | chr6  | + | 1.61E+08 | 1.61E+08 | 1948 |

|            |          |          |          |          |          |           |       |   |          |          |      |
|------------|----------|----------|----------|----------|----------|-----------|-------|---|----------|----------|------|
| ENSG000001 | 1349.79  | 3865.627 | -1.5171  | 1.12E-63 | 3.56E-62 | CTBP2     | chr10 | - | 1.27E+08 | 1.27E+08 | 3669 |
| ENSG000001 | 5426.35  | 779.1033 | 2.7873   | 2.87E-33 | 4.14E-32 | CHST2     | chr3  | + | 1.43E+08 | 1.43E+08 | 3526 |
| ENSG000001 | 205.4962 | 161.7345 | 0.34172  | 0.11525  | 0.18246  | ZDHH14    | chr6  | + | 1.58E+08 | 1.58E+08 | 7380 |
| ENSG000001 | 603.132  | 379.5708 | 0.66707  | 0.000936 | 0.002333 | ATR       | chr3  | - | 1.42E+08 | 1.42E+08 | 8249 |
| ENSG000001 | 1977.427 | 3351.229 | -0.75985 | 2.71E-13 | 1.59E-12 | C1orf76-A | chr17 | + | 16342136 | 16381992 | 1662 |
| ENSG000001 | 1088.489 | 2171.086 | -0.99513 | 3.23E-21 | 2.88E-20 | UBE2C     | chr20 | + | 44441215 | 44445596 | 1446 |
| ENSG000001 | 265.7583 | 127.0999 | 1.0572   | 2.96E-05 | 8.97E-05 | GK5       | chr3  | - | 1.42E+08 | 1.42E+08 | 4479 |
| ENSG000001 | 438.3573 | 395.9915 | 0.1476   | 0.3054   | 0.40696  | VCIPI1    | chr8  | - | 67540722 | 67579452 | 9942 |
| ENSG000001 | 0.290301 | 52.15099 | -6.4439  | 7.31E-10 | 3.41E-09 | RTP1      | chr3  | + | 1.87E+08 | 1.87E+08 | 2217 |
| ENSG000001 | 0.923144 | 27.77585 | -4.5018  | 2.66E-07 | 1.00E-06 | DES       | chr2  | + | 2.2E+08  | 2.2E+08  | 2248 |
| ENSG000001 | 138.3411 | 74.46155 | 0.89391  | 0.001051 | 0.002598 | PDIK1L    | chr1  | + | 26437664 | 26452034 | 4279 |
| ENSG000001 | 42.52837 | 911.7149 | -4.3952  | 1.41E-82 | 6.19E-81 | SPSB4     | chr3  | + | 1.41E+08 | 1.41E+08 | 2908 |
| ENSG000001 | 1.048164 | 0.297015 | 0.97802  | 0.57083  | NA       | RAG2      | chr11 | - | 36597124 | 36619829 | 2388 |
| ENSG000001 | 250.4941 | 140.423  | 0.83392  | 5.83E-06 | 1.93E-05 | TRAF6     | chr11 | - | 36508577 | 36531822 | 4627 |
| ENSG000001 | 121.751  | 70.5543  | 0.78667  | 0.00115  | 0.002827 | ZNF654    | chr3  | + | 88188254 | 88193815 | 4966 |
| ENSG000001 | 120.2062 | 61.26278 | 0.96429  | 5.20E-05 | 0.000153 | TVP23C    | chr17 | - | 15341205 | 15466909 | 2989 |
| ENSG000001 | 356.7428 | 351.642  | 0.021578 | 0.91184  | 0.93966  | MRPS22    | chr3  | + | 1.39E+08 | 1.39E+08 | 2160 |
| ENSG000001 | 2356.801 | 966.3572 | 1.2842   | 1.07E-26 | 1.20E-25 | PACS1     | chr11 | + | 65837834 | 66012218 | 4392 |
| ENSG000001 | 7605.244 | 11118.03 | -0.54687 | 0.000142 | 0.000398 | MARCKSL1  | chr1  | - | 32799433 | 32801980 | 1699 |
| ENSG000001 | 1315.968 | 1346.522 | -0.03353 | 0.77378  | 0.83723  | SH3BP5L   | chr1  | - | 2.49E+08 | 2.49E+08 | 4122 |
| ENSG000001 | 0        | 0.343138 | -0.41864 | 0.81278  | NA       | OR2T1     | chr1  | + | 2.49E+08 | 2.49E+08 | 1110 |
| ENSG000001 | 2.282147 | 4.317591 | -0.83283 | 0.40605  | 0.51086  | TMEM51-A  | chr1  | - | 15442448 | 15478960 | 2962 |
| ENSG000001 | 77.52023 | 23.89767 | 1.6861   | 1.47E-06 | 5.17E-06 | YPEL2     | chr17 | + | 57409050 | 57479090 | 5217 |
| ENSG000001 | 14.92947 | 92.13654 | -2.6032  | 3.92E-13 | 2.29E-12 | CADM2     | chr3  | + | 85008132 | 86123579 | 9488 |
| ENSG000001 | 0        | 2.139794 | -2.2809  | 0.18733  | 0.27337  | ABO       | chr9  | - | 1.36E+08 | 1.36E+08 | 1076 |
| ENSG000001 | 6668.031 | 5496.155 | 0.27865  | 0.01178  | 0.02438  | PSMD2     | chr3  | + | 1.84E+08 | 1.84E+08 | 3449 |
| ENSG000001 | 0        | 0.997859 | -1.5018  | 0.39072  | NA       | FAM182B   | chr20 | - | 25744102 | 25848861 | 1681 |
| ENSG000001 | 23.18716 | 151.0834 | -2.6832  | 4.73E-15 | 3.10E-14 | PPM1E     | chr17 | + | 56833230 | 57058983 | 2988 |
| ENSG000001 | 441.061  | 328.9286 | 0.42055  | 0.094543 | 0.15406  | FAM131A   | chr3  | + | 1.84E+08 | 1.84E+08 | 3677 |
| ENSG000001 | 2919.82  | 1643.476 | 0.82841  | 5.31E-09 | 2.30E-08 | CSRP2     | chr12 | - | 77252495 | 77272840 | 5078 |
| ENSG000001 | 0.342542 | 7.265046 | -3.6643  | 0.004242 | 0.009542 | INHBC     | chr12 | + | 57828527 | 57845842 | 1992 |
| ENSG000001 | 553.8384 | 791.7073 | -0.51412 | 0.000355 | 0.00094  | PARL      | chr3  | - | 1.84E+08 | 1.84E+08 | 1414 |
| ENSG000001 | 69.3557  | 14.96144 | 2.1758   | 1.43E-08 | 5.99E-08 | DDIT3     | chr12 | - | 57910371 | 57914300 | 1151 |
| ENSG000001 | 338.3327 | 654.1455 | -0.94983 | 2.09E-08 | 8.62E-08 | PCCA      | chr13 | + | 1.01E+08 | 1.01E+08 | 2491 |
| ENSG000001 | 0        | 1.029414 | -1.1526  | 0.51496  | NA       | HIGD2B    | chr15 | - | 72968124 | 72978490 | 1116 |
| ENSG000001 | 1632.702 | 1295.278 | 0.33373  | 0.00544  | 0.012028 | DCTN2     | chr12 | - | 57923885 | 57941114 | 2061 |
| ENSG000001 | 4.959078 | 0.343138 | 3.1377   | 0.019067 | 0.037807 | NPPA      | chr1  | - | 11905766 | 11908402 | 855  |
| ENSG000001 | 262.6286 | 452.9301 | -0.78236 | 5.59E-05 | 0.000164 | ZNF408    | chr11 | + | 46722368 | 46727462 | 2442 |
| ENSG000001 | 4769.165 | 3214.817 | 0.5682   | 1.94E-05 | 6.01E-05 | CTDSP2    | chr12 | - | 58213710 | 58240522 | 4795 |
| ENSG000001 | 4132.339 | 4084.857 | 0.016677 | 0.91303  | 0.94058  | CKAP5     | chr11 | - | 46764598 | 46867847 | 7121 |
| ENSG000001 | 2690.385 | 1445.778 | 0.89553  | 1.94E-14 | 1.23E-13 | ARHGAP1   | chr11 | - | 46698630 | 46722165 | 3375 |
| ENSG000001 | 1526.458 | 1903.946 | -0.31855 | 0.00121  | 0.002963 | MED16     | chr19 | - | 867961   | 893218   | 3121 |
| ENSG000001 | 1384.575 | 1293.676 | 0.098057 | 0.44509  | 0.55061  | ATG13     | chr11 | + | 46638826 | 46696368 | 4728 |
| ENSG000001 | 91.20277 | 388.6619 | -2.0798  | 2.27E-16 | 1.60E-15 | GAL3ST3   | chr11 | - | 65809423 | 65816651 | 2133 |
| ENSG000001 | 0.290301 | 6.177355 | -3.4818  | 0.007462 | 0.016059 | C1orf127  | chr1  | - | 11006528 | 11042094 | 2761 |
| ENSG000001 | 786.6261 | 36.88454 | 4.2709   | 9.99E-12 | 5.29E-11 | CHST1     | chr11 | - | 45670427 | 45687172 | 2718 |
| ENSG000001 | 517.7128 | 256.437  | 1.0125   | 1.27E-12 | 7.17E-12 | GOLGA8A   | chr15 | - | 34671269 | 34880704 | 6478 |
| ENSG000001 | 0.36308  | 1.698704 | -1.6626  | 0.28864  | 0.39018  | VWA3A     | chr16 | + | 22103859 | 22168287 | 4659 |
| ENSG000001 | 1963.451 | 1225.166 | 0.6801   | 1.05E-10 | 5.21E-10 | TP53I11   | chr11 | - | 44907454 | 44972840 | 3703 |
| ENSG000001 | 59.93795 | 46.67931 | 0.36128  | 0.23179  | 0.32534  | APITD1    | chr1  | + | 10490159 | 10512210 | 1469 |
| ENSG000001 | 476.8172 | 380.9807 | 0.32318  | 0.087643 | 0.14449  | DOLK      | chr9  | - | 1.32E+08 | 1.32E+08 | 2090 |
| ENSG000001 | 11.08017 | 110.8912 | -3.3009  | 8.93E-18 | 6.79E-17 | PHYHD1    | chr9  | + | 1.32E+08 | 1.32E+08 | 2133 |
| ENSG000001 | 3.818411 | 0.891044 | 1.6587   | 0.22325  | 0.31569  | CATSPER1  | chr11 | - | 65784223 | 65793988 | 2619 |
| ENSG000001 | 86.31752 | 38.93592 | 1.1409   | 0.000194 | 0.000533 | CCNE2     | chr8  | - | 95891998 | 95908906 | 3330 |
| ENSG000001 | 678.1237 | 301.6637 | 1.1666   | 1.81E-20 | 1.56E-19 | AGXT2L2   | chr5  | - | 1.78E+08 | 1.78E+08 | 2780 |
| ENSG000001 | 0        | 0.654722 | -0.83442 | 0.63731  | NA       | ANKS4B    | chr16 | + | 21244986 | 21263750 | 2936 |
| ENSG000001 | 0        | 4.380699 | -3.6717  | 0.010523 | 0.022019 | CST6      | chr11 | + | 65779312 | 65780976 | 759  |
| ENSG000001 | 7.572602 | 69.06681 | -3.1419  | 2.10E-13 | 1.25E-12 | GRAMD2    | chr15 | - | 72452148 | 72490126 | 3281 |
| ENSG000001 | 101.0464 | 267.1659 | -1.402   | 2.01E-12 | 1.12E-11 | ZNF519    | chr18 | - | 14057456 | 14132489 | 6497 |
| ENSG000001 | 196.4444 | 167.9657 | 0.22866  | 0.22966  | 0.32297  | LSM1      | chr8  | - | 38020839 | 38034248 | 1568 |
| ENSG000001 | 0        | 0.343138 | -0.41864 | 0.81278  | NA       | ISX       | chr22 | + | 35462129 | 35483380 | 3384 |
| ENSG000001 | 2766.793 | 2901.403 | -0.06818 | 0.49793  | 0.60168  | BANF1     | chr11 | + | 65769550 | 65771620 | 1155 |
| ENSG000001 | 0.342542 | 0.343138 | -0.00208 | 0.99906  | NA       | APOF      | chr12 | - | 56754353 | 56756607 | 1715 |
| ENSG000001 | 16.87764 | 70.89905 | -2.0372  | 4.24E-08 | 1.71E-07 | CHRNA7    | chr15 | + | 32322691 | 32464722 | 5669 |
| ENSG000001 | 405.2248 | 179.7863 | 1.1686   | 2.70E-09 | 1.20E-08 | TMEM9B    | chr11 | - | 8968841  | 8986558  | 2083 |

|            |          |          |          |          |          |           |       |   |          |          |       |
|------------|----------|----------|----------|----------|----------|-----------|-------|---|----------|----------|-------|
| ENSG000001 | 251.454  | 98.24998 | 1.3506   | 1.82E-14 | 1.16E-13 | NRIP3     | chr11 | - | 9002123  | 9025596  | 3809  |
| ENSG000001 | 234.3924 | 502.5326 | -1.0983  | 4.26E-11 | 2.17E-10 | PTPN2     | chr18 | - | 12785477 | 12929642 | 3390  |
| ENSG000001 | 25.82122 | 32.18239 | -0.31579 | 0.38806  | 0.49217  | SCUBE2    | chr11 | - | 9041071  | 9159661  | 4683  |
| ENSG000001 | 442.8086 | 344.3479 | 0.36104  | 0.13487  | 0.20788  | EIF1AD    | chr11 | - | 65764016 | 65769647 | 2887  |
| ENSG000001 | 1295.154 | 975.3168 | 0.40867  | 0.000356 | 0.000942 | SMAD2     | chr18 | - | 45357922 | 45457515 | 12075 |
| ENSG000001 | 3649.952 | 4138.499 | -0.18099 | 0.045557 | 0.081989 | EIF3F     | chr11 | + | 7991798  | 8023409  | 7540  |
| ENSG000001 | 182.969  | 16.09284 | 3.4774   | 1.29E-31 | 1.75E-30 | ZNF25     | chr10 | - | 38238500 | 38265561 | 4139  |
| ENSG000001 | 1482.064 | 171.8733 | 3.0982   | 4.40E-62 | 1.35E-60 | ARL10     | chr5  | + | 1.76E+08 | 1.76E+08 | 10845 |
| ENSG000001 | 678.8412 | 504.9033 | 0.4273   | 0.002756 | 0.006394 | CLTB      | chr5  | - | 1.76E+08 | 1.76E+08 | 1489  |
| ENSG000001 | 80.63628 | 217.4289 | -1.4285  | 4.46E-10 | 2.11E-09 | PCSK1     | chr5  | - | 95726119 | 95769847 | 5086  |
| ENSG000001 | 0.923144 | 61.44405 | -5.6311  | 9.92E-13 | 5.64E-12 | LPL       | chr8  | + | 19759228 | 19824769 | 3846  |
| ENSG000001 | 1.991846 | 10.65601 | -2.2837  | 0.007482 | 0.016098 | RFESD     | chr5  | + | 94982458 | 94993786 | 2788  |
| ENSG000001 | 976.3718 | 708.2106 | 0.46231  | 0.002629 | 0.006114 | CCDC14    | chr3  | - | 1.24E+08 | 1.24E+08 | 7917  |
| ENSG000001 | 24.67974 | 20.26561 | 0.26914  | 0.58604  | 0.68175  | TBC1D10C  | chr11 | + | 67171386 | 67177560 | 4480  |
| ENSG000001 | 2179.98  | 2194.786 | -0.00969 | 0.93239  | 0.95567  | SART1     | chr11 | + | 65729160 | 65747299 | 3293  |
| ENSG000001 | 431.8978 | 499.3679 | -0.20863 | 0.097474 | 0.15803  | PPP2R2D   | chr10 | + | 1.34E+08 | 1.34E+08 | 5133  |
| ENSG000001 | 187.5351 | 117.4958 | 0.67459  | 0.000198 | 0.000543 | MCTP1     | chr5  | - | 94039446 | 94620279 | 5396  |
| ENSG000001 | 43.09104 | 26.21068 | 0.70481  | 0.11512  | 0.18228  | POLD4     | chr11 | - | 67118248 | 67124443 | 1793  |
| ENSG000001 | 1.213446 | 1.188058 | 0.015729 | 0.99231  | 0.99582  | OR52W1    | chr11 | + | 6220376  | 6221489  | 1114  |
| ENSG000001 | 5.685237 | 5.892494 | -0.05406 | 0.95578  | 0.97274  | LRRC25    | chr19 | - | 18501954 | 18508427 | 2415  |
| ENSG000001 | 1.411244 | 93.83202 | -5.8866  | 2.34E-17 | 1.74E-16 | DPP10     | chr2  | + | 1.15E+08 | 1.17E+08 | 6278  |
| ENSG000001 | 105.7608 | 23.5505  | 2.1458   | 2.25E-12 | 1.25E-11 | CLCF1     | chr11 | - | 67131639 | 67141648 | 1844  |
| ENSG000001 | 0.36308  | 0.297015 | -0.00205 | 0.99908  | NA       | RP11-395L | chr2  | - | 1.14E+08 | 1.14E+08 | 698   |
| ENSG000001 | 0.580602 | 36.82614 | -5.3499  | 7.32E-09 | 3.14E-08 | TSGA10IP  | chr11 | + | 65712916 | 65727434 | 1925  |
| ENSG000001 | 0        | 0.357707 | -0.41864 | 0.81278  | NA       | GPR152    | chr11 | - | 67218772 | 67220200 | 1429  |
| ENSG000001 | 4.387848 | 1.744828 | 1.1893   | 0.30322  | 0.40449  | UBQLNL    | chr11 | - | 5535623  | 5537935  | 2313  |
| ENSG000001 | 10.15703 | 37.07454 | -1.8447  | 0.000314 | 0.000838 | LIPT2     | chr11 | - | 74202757 | 74204778 | 1018  |
| ENSG000001 | 13.70486 | 39.38675 | -1.5123  | 0.000253 | 0.000683 | KCNE3     | chr11 | - | 74165886 | 74178774 | 3143  |
| ENSG000001 | 0.342542 | 0.640152 | -0.50911 | 0.77219  | NA       | CABP4     | chr11 | + | 67219877 | 67226699 | 1426  |
| ENSG000001 | 84.01239 | 73.49209 | 0.19266  | 0.54976  | 0.64954  | ALG10B    | chr12 | + | 38710380 | 38717784 | 3111  |
| ENSG000001 | 4108.268 | 2043.849 | 1.0059   | 1.91E-15 | 1.29E-14 | DRAP1     | chr11 | + | 65686728 | 65689032 | 989   |
| ENSG000001 | 0.342542 | 2.353426 | -2.0975  | 0.16058  | 0.24045  | LONRF3    | chrX  | + | 1.18E+08 | 1.18E+08 | 3973  |
| ENSG000001 | 25.67387 | 8.170658 | 1.6021   | 0.004928 | 0.010983 | UCP3      | chr11 | - | 73711326 | 73720480 | 2623  |
| ENSG000001 | 901.5533 | 1032.847 | -0.19536 | 0.12748  | 0.19844  | UCP2      | chr11 | - | 73685712 | 73694352 | 2113  |
| ENSG000001 | 922.143  | 560.68   | 0.71468  | 0.001925 | 0.004568 | C11orf68  | chr11 | - | 65684279 | 65686588 | 1619  |
| ENSG000001 | 308.6402 | 570.3336 | -0.88488 | 5.29E-08 | 2.11E-07 | PAAF1     | chr11 | + | 73587744 | 73638790 | 2020  |
| ENSG000001 | 317.2253 | 232.5499 | 0.44907  | 0.003969 | 0.008968 | MRPL48    | chr11 | + | 73498361 | 73576178 | 1922  |
| ENSG000001 | 1965.629 | 1251.525 | 0.65061  | 4.05E-09 | 1.77E-08 | RAB6A     | chr11 | - | 73386938 | 73472182 | 3134  |
| ENSG000001 | 0.36308  | 18.91562 | -5.0327  | 8.80E-06 | 2.85E-05 | P2RY2     | chr11 | + | 72929343 | 72947397 | 2660  |
| ENSG000001 | 534.2462 | 164.8497 | 1.6757   | 1.26E-05 | 4.00E-05 | FOSL1     | chr11 | - | 65659520 | 65668044 | 1669  |
| ENSG000001 | 225.1575 | 133.3717 | 0.75328  | 9.25E-06 | 2.98E-05 | ERCC4     | chr16 | + | 14014014 | 14046202 | 6758  |
| ENSG000001 | 198.8235 | 71.32799 | 1.4739   | 3.66E-11 | 1.87E-10 | C7orf10   | chr7  | + | 40174575 | 40900362 | 1719  |
| ENSG000001 | 1552.378 | 2066.81  | -0.41247 | 0.00928  | 0.019615 | CCDC85B   | chr11 | + | 65657875 | 65659105 | 1231  |
| ENSG000001 | 3.485242 | 2.604317 | 0.34343  | 0.77987  | 0.84197  | RP11-276H | chr16 | - | 12180603 | 12184159 | 1974  |
| ENSG000001 | 317.4659 | 327.7269 | -0.04696 | 0.79854  | 0.85732  | TMEM70    | chr8  | + | 74884672 | 74895018 | 2018  |
| ENSG000001 | 35.56888 | 25.59309 | 0.4785   | 0.24574  | 0.34154  | LINC00476 | chr9  | - | 98521513 | 98638259 | 2825  |
| ENSG000001 | 445.8332 | 460.4336 | -0.04601 | 0.71405  | 0.78801  | RPS6KB2   | chr11 | + | 67195931 | 67202872 | 5528  |
| ENSG000001 | 444.7478 | 1608.387 | -1.851   | 1.19E-27 | 1.39E-26 | RMI2      | chr16 | + | 11343476 | 11445619 | 1865  |
| ENSG000001 | 0        | 0.343138 | -0.41864 | 0.81278  | NA       | PRM1      | chr16 | - | 11374693 | 11375207 | 424   |
| ENSG000001 | 0.580602 | 1.058552 | -0.51948 | 0.75894  | NA       | DRD5P2    | chr1  | + | 1.49E+08 | 1.49E+08 | 2012  |
| ENSG000001 | 850.4519 | 117.0088 | 2.8488   | 1.20E-36 | 1.93E-35 | TOM1L2    | chr17 | - | 17746828 | 17875736 | 5592  |
| ENSG000001 | 0.36308  | 0.297015 | -0.00205 | 0.99908  | NA       | TEX26     | chr13 | + | 31506840 | 31549639 | 1478  |
| ENSG000001 | 39.01663 | 57.70592 | -0.55741 | 0.059678 | 0.10402  | ZNF77     | chr19 | - | 2933216  | 2944969  | 2002  |
| ENSG000001 | 10.78987 | 38.12268 | -1.8087  | 0.000109 | 0.000309 | GPR156    | chr3  | - | 1.2E+08  | 1.2E+08  | 4442  |
| ENSG000001 | 0        | 0.297015 | -0.41864 | 0.81278  | NA       | LINC00521 | chr14 | + | 94463616 | 94478040 | 1937  |
| ENSG000001 | 130.4523 | 165.5746 | -0.34529 | 0.14045  | 0.21438  | LINC00116 | chr2  | - | 1.11E+08 | 1.11E+08 | 2051  |
| ENSG000001 | 0.290301 | 396.7373 | -9.1778  | 3.56E-22 | 3.29E-21 | C1orf172  | chr1  | - | 27276053 | 27286897 | 1793  |
| ENSG000001 | 150.0378 | 141.4931 | 0.083514 | 0.65727  | 0.74187  | B3GNTL1   | chr17 | - | 80900031 | 81009686 | 3324  |
| ENSG000001 | 0.290301 | 0.686276 | -0.47648 | 0.78935  | NA       | RBMXL3    | chrX  | + | 1.14E+08 | 1.14E+08 | 3469  |
| ENSG000001 | 1170.017 | 1309.284 | -0.16177 | 0.19596  | 0.28399  | MLXIP     | chr12 | + | 1.23E+08 | 1.23E+08 | 5799  |
| ENSG000001 | 0.685084 | 0        | 0.85004  | 0.63064  | NA       | C11orf44  | chr11 | + | 1.31E+08 | 1.31E+08 | 3547  |
| ENSG000001 | 9.378629 | 21.08455 | -1.1564  | 0.024729 | 0.047783 | BAK1P1    | chr20 | - | 31276723 | 31278816 | 2094  |
| ENSG000001 | 48.49372 | 31.19581 | 0.64025  | 0.087087 | 0.14377  | RWDD4P2   | chr7  | - | 39894093 | 39894655 | 563   |
| ENSG000001 | 1141.936 | 3.590024 | 8.1655   | 2.66E-78 | 1.09E-76 | NR2F1     | chr5  | + | 92919043 | 92930321 | 3732  |
| ENSG000001 | 9.036087 | 0        | 4.7866   | 0.000172 | 0.000476 | C15orf54  | chr15 | + | 39542885 | 39547046 | 3078  |

|            |          |          |          |          |          |            |       |   |          |          |      |
|------------|----------|----------|----------|----------|----------|------------|-------|---|----------|----------|------|
| ENSG000001 | 0.580602 | 0        | 0.8036   | 0.6494   | NA       | EIF3KP1    | chr5  | + | 1.02E+08 | 1.02E+08 | 656  |
| ENSG000001 | 1661.363 | 2529.016 | -0.60557 | 5.54E-07 | 2.03E-06 | AURKAIP1   | chr1  | - | 1309110  | 1310875  | 1072 |
| ENSG000001 | 81.2882  | 13.07737 | 2.583    | 5.43E-08 | 2.17E-07 | TLL11      | chr9  | - | 1.25E+08 | 1.25E+08 | 3250 |
| ENSG000001 | 0        | 12.96331 | -5.315   | 1.52E-05 | 4.78E-05 | EIF4E1B    | chr5  | + | 1.76E+08 | 1.76E+08 | 2836 |
| ENSG000001 | 29.32537 | 40.08839 | -0.44408 | 0.23407  | 0.32775  | TOMM5      | chr9  | - | 37582643 | 37592639 | 3071 |
| ENSG000001 | 2.656392 | 8.978319 | -1.6416  | 0.065128 | 0.11204  | AC112229   | chr2  | - | 1.11E+08 | 1.11E+08 | 2443 |
| ENSG000001 | 0        | 3.06884  | -3.0961  | 0.043807 | 0.079295 | RP11-121N  | chr11 | + | 1.3E+08  | 1.3E+08  | 669  |
| ENSG000001 | 243.6973 | 252.4137 | -0.04869 | 0.82294  | 0.87519  | SLC35E3    | chr12 | + | 69139886 | 69187744 | 5014 |
| ENSG000001 | 0        | 180.119  | -8.9364  | 1.14E-16 | 8.18E-16 | PRIMA1     | chr14 | - | 94184644 | 94254827 | 3711 |
| ENSG000001 | 55.77765 | 66.37836 | -0.24866 | 0.38042  | 0.48446  | ZNF169     | chr9  | + | 97021593 | 97063736 | 2716 |
| ENSG000001 | 1157.653 | 2517.367 | -1.119   | 1.91E-18 | 1.49E-17 | RUVBL1     | chr3  | - | 1.28E+08 | 1.28E+08 | 4062 |
| ENSG000001 | 14.37797 | 227.5974 | -3.9388  | 7.52E-28 | 8.85E-27 | SFN        | chr1  | + | 27189633 | 27190947 | 1315 |
| ENSG000001 | 0.36308  | 0.997859 | -1.0294  | 0.53423  | NA       | OR52B3P    | chr11 | + | 4399512  | 4400457  | 942  |
| ENSG000001 | 149.7557 | 41.81053 | 1.831    | 1.15E-11 | 6.09E-11 | MSRA       | chr8  | + | 9911778  | 10286401 | 1706 |
| ENSG000001 | 1.431782 | 0.700845 | 0.75326  | 0.63313  | 0.72196  | CCDC168    | chr13 | - | 1.03E+08 | 1.03E+08 | 7359 |
| ENSG000001 | 410.4773 | 432.9997 | -0.07843 | 0.64681  | 0.73305  | CTDNBP1    | chr17 | - | 7146910  | 7155810  | 1724 |
| ENSG000001 | 2861.024 | 5130.583 | -0.84192 | 1.66E-22 | 1.56E-21 | ETV4       | chr17 | - | 41605212 | 41656988 | 2429 |
| ENSG000001 | 0.653381 | 0.640152 | 0.01046  | 0.99499  | NA       | FAM172BP   | chr3  | + | 1.01E+08 | 1.01E+08 | 2295 |
| ENSG000001 | 430.1082 | 200.6524 | 1.0996   | 5.74E-15 | 3.76E-14 | SWI5       | chr9  | + | 1.31E+08 | 1.31E+08 | 1048 |
| ENSG000001 | 1.027626 | 0.357707 | 0.84252  | 0.63507  | NA       | GAPT       | chr5  | + | 57787262 | 57792917 | 3016 |
| ENSG000001 | 1073.104 | 386.5977 | 1.4701   | 1.28E-33 | 1.87E-32 | BAIAP2     | chr17 | + | 79008948 | 79091232 | 3689 |
| ENSG000001 | 0        | 36.51535 | -6.7797  | 2.09E-09 | 9.37E-09 | CALCB      | chr11 | + | 14926543 | 15103888 | 2258 |
| ENSG000001 | 38.57817 | 43.43652 | -0.17042 | 0.64526  | 0.732    | AC004840   | chr7  | + | 2477398  | 2487485  | 2067 |
| ENSG000001 | 13.269   | 18.08856 | -0.4439  | 0.37847  | 0.48262  | CREG2      | chr2  | - | 1.02E+08 | 1.02E+08 | 3187 |
| ENSG000001 | 0        | 0.715414 | -0.84936 | 0.6309   | NA       | WBSCR28    | chr7  | + | 73275489 | 73280223 | 961  |
| ENSG000001 | 213.9056 | 0.686276 | 7.7775   | 4.67E-21 | 4.13E-20 | HOXD8      | chr2  | + | 1.77E+08 | 1.77E+08 | 2583 |
| ENSG000001 | 2.31385  | 4.646159 | -0.92148 | 0.35106  | 0.45542  | RPL7AP66   | chr18 | - | 36914836 | 36915639 | 804  |
| ENSG000001 | 205.7333 | 78.44727 | 1.3864   | 8.74E-10 | 4.06E-09 | ZDHHC21    | chr9  | - | 14615530 | 14693469 | 4699 |
| ENSG000001 | 1.317927 | 55.84151 | -5.1075  | 1.35E-10 | 6.62E-10 | TSPEAR     | chr21 | - | 45917775 | 46131495 | 3967 |
| ENSG000001 | 125.751  | 115.3544 | 0.1249   | 0.54472  | 0.64502  | PLEKHF2    | chr8  | + | 96146032 | 96168912 | 2881 |
| ENSG000001 | 281.1953 | 157.7835 | 0.82851  | 0.001336 | 0.003252 | CTD-2369P  | chr19 | - | 10332111 | 10333870 | 1760 |
| ENSG000001 | 1259.396 | 5.863356 | 7.641    | 2.31E-92 | 1.19E-90 | A2M        | chr12 | - | 9220260  | 9268825  | 4844 |
| ENSG000001 | 109.5389 | 191.1379 | -0.7952  | 0.024302 | 0.047028 | ARL4D      | chr17 | + | 41476327 | 41478505 | 1612 |
| ENSG000001 | 47.90439 | 14.5989  | 1.6753   | 0.000237 | 0.000643 | AC127496   | chr17 | + | 78977135 | 78978932 | 1798 |
| ENSG000001 | 1.701545 | 5.003866 | -1.4347  | 0.15846  | 0.23782  | DOK7       | chr4  | + | 3465033  | 3503200  | 2562 |
| ENSG000001 | 97.90544 | 1839.515 | -4.2045  | 9.53E-53 | 2.34E-51 | LRRN1      | chr3  | + | 3841121  | 3889387  | 3823 |
| ENSG000001 | 1027.553 | 2517.4   | -1.2911  | 2.68E-31 | 3.60E-30 | UBE2O      | chr17 | - | 74385532 | 74449288 | 5436 |
| ENSG000001 | 83.35005 | 38.22225 | 1.1097   | 0.002048 | 0.004837 | ORAI3      | chr16 | + | 30960387 | 30967782 | 2206 |
| ENSG000001 | 0.685084 | 0        | 0.85004  | 0.63064  | NA       | KLHL38     | chr8  | - | 1.25E+08 | 1.25E+08 | 1982 |
| ENSG000001 | 0.290301 | 0        | 0.4146   | 0.81455  | NA       | RP11-544L  | chr6  | + | 1.14E+08 | 1.14E+08 | 2255 |
| ENSG000001 | 858.8081 | 1442.455 | -0.74671 | 8.13E-09 | 3.47E-08 | UNC119B    | chr12 | + | 1.21E+08 | 1.21E+08 | 4404 |
| ENSG000001 | 24.12147 | 47.70074 | -0.97595 | 0.019126 | 0.037915 | DENND2C    | chr1  | - | 1.15E+08 | 1.15E+08 | 6163 |
| ENSG000001 | 2.479132 | 8.411812 | -1.5901  | 0.1051   | 0.16833  | PLEKHD1    | chr14 | + | 69951409 | 69995215 | 3999 |
| ENSG000001 | 0        | 0.686276 | -0.84936 | 0.6309   | NA       | FAM220BP   | chr9  | + | 38527094 | 38527909 | 816  |
| ENSG000001 | 0        | 0.357707 | -0.41864 | 0.81278  | NA       | ASCL3      | chr11 | - | 8959119  | 8964580  | 650  |
| ENSG000001 | 6726.915 | 5235.574 | 0.36129  | 0.0052   | 0.011552 | TUBB6      | chr18 | + | 12307668 | 12344319 | 2163 |
| ENSG000001 | 301.2579 | 182.2149 | 0.72677  | 0.000131 | 0.000367 | LYSMD3     | chr5  | - | 89811428 | 89825401 | 4259 |
| ENSG000001 | 1490.316 | 630.338  | 1.2378   | 5.40E-13 | 3.12E-12 | B3GALT6    | chr1  | + | 1167629  | 1170421  | 2793 |
| ENSG000001 | 55.23991 | 142.319  | -1.354   | 2.81E-06 | 9.61E-06 | ZNF613     | chr19 | + | 52430400 | 52452012 | 2710 |
| ENSG000001 | 2.935529 | 2.529055 | 0.17591  | 0.8696   | 0.90927  | C11orf16   | chr11 | - | 8941623  | 8954553  | 1908 |
| ENSG000001 | 0.342542 | 0        | 0.4146   | 0.81455  | NA       | CHDC2      | chrX  | + | 36053913 | 36163187 | 1958 |
| ENSG000001 | 0        | 0.343138 | -0.41864 | 0.81278  | NA       | RP11-146I3 | chr14 | - | 73396320 | 73396638 | 319  |
| ENSG000001 | 226.7821 | 2.056411 | 6.6372   | 3.80E-30 | 4.86E-29 | NUPR1      | chr16 | - | 28548606 | 28550495 | 914  |
| ENSG000001 | 913.6423 | 491.298  | 0.89518  | 2.20E-09 | 9.85E-09 | JAKMIP2    | chr5  | - | 1.47E+08 | 1.47E+08 | 6001 |
| ENSG000001 | 4.524033 | 2.353426 | 0.84192  | 0.42511  | 0.53049  | RPL23P2    | chr21 | - | 30369934 | 30370354 | 421  |
| ENSG000001 | 95.53079 | 103.0167 | -0.10528 | 0.63527  | 0.72366  | MBLAC2     | chr5  | - | 89754020 | 89770585 | 4280 |
| ENSG000001 | 587.3345 | 1072.769 | -0.86652 | 3.91E-06 | 1.31E-05 | TPRN       | chr9  | - | 1.4E+08  | 1.4E+08  | 3350 |
| ENSG000001 | 5.60048  | 46.62265 | -2.9422  | 2.85E-08 | 1.17E-07 | KCNE1L     | chrX  | - | 1.09E+08 | 1.09E+08 | 1465 |
| ENSG000001 | 0        | 1.355566 | -1.9006  | 0.26573  | NA       | ZNF683     | chr1  | - | 26688125 | 26701013 | 1712 |
| ENSG000001 | 1693.139 | 1487.633 | 0.18646  | 0.24118  | 0.33617  | SLC35A4    | chr5  | + | 1.4E+08  | 1.4E+08  | 3617 |
| ENSG000001 | 0        | 393.0033 | -9.9492  | 2.59E-20 | 2.22E-19 | AIM1L      | chr1  | - | 26648350 | 26680621 | 2523 |
| ENSG000001 | 1210.594 | 860.8459 | 0.49171  | 0.000314 | 0.000839 | IP6K1      | chr3  | - | 49761727 | 49823975 | 4456 |
| ENSG000001 | 1190.853 | 1598.721 | -0.42452 | 0.000198 | 0.000542 | SSNA1      | chr9  | + | 1.4E+08  | 1.4E+08  | 1170 |
| ENSG000001 | 646.4703 | 784.468  | -0.27891 | 0.051545 | 0.091345 | CSTF3      | chr11 | - | 33098734 | 33183917 | 2797 |
| ENSG000001 | 1439.955 | 1506.883 | -0.065   | 0.5664   | 0.66418  | YES1       | chr18 | - | 721588   | 812547   | 4639 |

|            |          |          |          |           |          |           |       |   |          |          |      |
|------------|----------|----------|----------|-----------|----------|-----------|-------|---|----------|----------|------|
| ENSG000001 | 288.5784 | 185.7242 | 0.63467  | 0.000658  | 0.001677 | CHMP6     | chr17 | + | 78965398 | 78983317 | 1664 |
| ENSG000001 | 0.632843 | 0        | 0.81931  | 0.64303   | NA       | AQP7P4    | chr9  | + | 67032331 | 67048373 | 1042 |
| ENSG000001 | 69.92676 | 166.2663 | -1.2448  | 2.44E-06  | 8.38E-06 | DLEU1     | chr13 | + | 50656307 | 51297372 | 2440 |
| ENSG000001 | 45.06577 | 27.68031 | 0.69242  | 0.039431  | 0.072481 | UFSP1     | chr7  | - | 1E+08    | 1E+08    | 994  |
| ENSG000001 | 0.290301 | 0        | 0.4146   | 0.81455   | NA       | AL445665  | chr9  | + | 69650263 | 69660358 | 966  |
| ENSG000001 | 0        | 6.8782   | -4.3912  | 0.000889  | 0.002226 | MC5R      | chr18 | + | 13824154 | 13826861 | 1319 |
| ENSG000001 | 972.5422 | 442.7046 | 1.1348   | 2.11E-14  | 1.33E-13 | TMEM39A   | chr3  | - | 1.19E+08 | 1.19E+08 | 4393 |
| ENSG000001 | 375.0879 | 199.3748 | 0.90643  | 4.05E-05  | 0.000121 | TCP11L1   | chr11 | + | 33060963 | 33127489 | 3390 |
| ENSG000001 | 3.547834 | 12.7294  | -1.7532  | 0.01535   | 0.031039 | GPX2      | chr14 | - | 65405870 | 65409531 | 1134 |
| ENSG000001 | 689.0386 | 274.5458 | 1.3244   | 1.65E-20  | 1.42E-19 | CCDC57    | chr17 | - | 80059336 | 80170706 | 5379 |
| ENSG000001 | 0.342542 | 1.949596 | -1.8486  | 0.23038   | 0.32372  | HSF5      | chr17 | - | 56497528 | 56565745 | 4094 |
| ENSG000001 | 17.57649 | 20.19518 | -0.20459 | 0.72761   | 0.79854  | FOXG1     | chr14 | + | 29235050 | 29238870 | 2754 |
| ENSG000001 | 1156.065 | 72.21271 | 3.9761   | 1.34E-59  | 3.88E-58 | SPHK1     | chr17 | + | 74372665 | 74383941 | 2502 |
| ENSG000001 | 352.944  | 2058.324 | -2.5322  | 1.48E-26  | 1.66E-25 | BNIP3     | chr10 | - | 1.34E+08 | 1.34E+08 | 1607 |
| ENSG000001 | 0        | 0.357707 | -0.41864 | 0.81278   | NA       | ENTHD1    | chr22 | - | 40139049 | 40289868 | 2710 |
| ENSG000001 | 184.6751 | 113.851  | 0.69146  | 0.026003  | 0.049994 | MYPOP     | chr19 | - | 46393278 | 46405862 | 1890 |
| ENSG000001 | 111.5521 | 1.40169  | 6.1268   | 4.68E-19  | 3.76E-18 | CIDEA     | chr18 | + | 12254318 | 12277594 | 1808 |
| ENSG000001 | 0        | 116.3575 | -8.2511  | 3.78E-13  | 2.21E-12 | LRRTM4    | chr2  | - | 76974845 | 77820445 | 3616 |
| ENSG000001 | 247.4542 | 465.6678 | -0.91031 | 1.12E-09  | 5.13E-09 | ATAD5     | chr17 | + | 29158988 | 29222887 | 6869 |
| ENSG000001 | 134.6134 | 272.6725 | -1.0102  | 3.09E-05  | 9.34E-05 | SMIM19    | chr8  | + | 42396298 | 42408151 | 1466 |
| ENSG000001 | 48.77628 | 25.08244 | 0.95866  | 0.005851  | 0.012849 | ZNF404    | chr19 | - | 44376515 | 44405537 | 1851 |
| ENSG000001 | 346.0762 | 364.5185 | -0.07576 | 0.6926    | 0.77084  | RTTN      | chr18 | - | 67671029 | 67873181 | 7326 |
| ENSG000001 | 1.576526 | 1.638012 | -0.0314  | 0.98016   | 0.98907  | C10orf111 | chr10 | - | 15137384 | 15139318 | 1714 |
| ENSG000001 | 8.260292 | 61.84956 | -2.8644  | 8.44E-08  | 3.31E-07 | ACBD7     | chr10 | - | 15119522 | 15130775 | 1322 |
| ENSG000001 | 1147.577 | 897.5207 | 0.35355  | 0.051712  | 0.091602 | ANAPC2    | chr9  | - | 1.4E+08  | 1.4E+08  | 2632 |
| ENSG000001 | 0.290301 | 0.297015 | -0.00202 | 0.99909   | NA       | HMGB4     | chr1  | + | 34326076 | 34330392 | 2505 |
| ENSG000001 | 274.077  | 277.0027 | -0.01612 | 0.936     | 0.95772  | ZBTB8OS   | chr1  | - | 33065773 | 33116504 | 1601 |
| ENSG000001 | 2.998934 | 0.654722 | 1.7796   | 0.19444   | 0.28208  | CYCSP34   | chr13 | - | 41437735 | 41438038 | 304  |
| ENSG000001 | 113.5422 | 86.03122 | 0.3993   | 0.057412  | 0.10043  | SLC35G1   | chr10 | + | 95653730 | 95715819 | 3490 |
| ENSG000001 | 123.9767 | 66.87437 | 0.88758  | 0.000357  | 0.000945 | SLC25A53  | chrX  | - | 1.03E+08 | 1.03E+08 | 6224 |
| ENSG000001 | 0.923144 | 0        | 1.223    | 0.49292   | NA       | IDSP1     | chrX  | + | 1.49E+08 | 1.49E+08 | 376  |
| ENSG000001 | 11.01677 | 105.7942 | -3.237   | 1.72E-16  | 1.22E-15 | ZNF135    | chr19 | + | 58570607 | 58597677 | 3349 |
| ENSG000001 | 0        | 1.043983 | -1.3473  | 0.44976   | NA       | FOXR1     | chr11 | + | 1.19E+08 | 1.19E+08 | 1159 |
| ENSG000001 | 223.3063 | 337.4437 | -0.59423 | 0.000491  | 0.001277 | COX8A     | chr11 | + | 63742079 | 63744015 | 507  |
| ENSG000001 | 0        | 0.654722 | -0.83442 | 0.63731   | NA       | RPL37AP8  | chr11 | - | 1.12E+08 | 1.12E+08 | 276  |
| ENSG000001 | 2.789971 | 1.935026 | 0.4765   | 0.67924   | 0.75991  | AC110781  | chr7  | + | 1878222  | 1889567  | 4481 |
| ENSG000001 | 0        | 0.715414 | -0.84936 | 0.6309    | NA       | AC097359  | chr3  | - | 37283303 | 37285686 | 2383 |
| ENSG000001 | 2.500484 | 22.59877 | -3.0843  | 6.28E-05  | 0.000183 | TAC4      | chr17 | - | 47915671 | 47925379 | 675  |
| ENSG000001 | 285.3935 | 926.7954 | -1.6954  | 1.64E-35  | 2.54E-34 | ZSCAN2    | chr15 | + | 85144217 | 85171027 | 3813 |
| ENSG000001 | 1.991846 | 5.079128 | -1.2292  | 0.22098   | 0.31301  | PRR18     | chr6  | - | 1.67E+08 | 1.67E+08 | 2704 |
| ENSG000001 | 1.939605 | 22.24509 | -3.3285  | 1.30E-05  | 4.13E-05 | B3GNT4    | chr12 | + | 1.23E+08 | 1.23E+08 | 2938 |
| ENSG000001 | 86.18712 | 84.18831 | 0.035478 | 0.90181   | 0.93217  | CDC26     | chr9  | - | 1.16E+08 | 1.16E+08 | 872  |
| ENSG000001 | 3.133327 | 755.8125 | -7.8404  | 2.86E-61  | 8.48E-60 | HSD11B2   | chr16 | + | 67464555 | 67471456 | 1900 |
| ENSG000001 | 340.8747 | 352.027  | -0.04692 | 0.73304   | 0.80275  | CRLF3     | chr17 | - | 29096406 | 29151794 | 2957 |
| ENSG000001 | 1638.409 | 1641.392 | -0.00237 | 0.98552   | 0.99153  | RNPEP     | chr1  | + | 2.02E+08 | 2.02E+08 | 2427 |
| ENSG000001 | 0        | 0.640152 | -0.82869 | 0.63935   | NA       | CEACAM20  | chr19 | - | 45005729 | 45033811 | 2120 |
| ENSG000001 | 405.863  | 385.6915 | 0.073204 | 0.65883   | 0.74287  | EID2      | chr19 | - | 40028890 | 40030870 | 1981 |
| ENSG000001 | 23.46548 | 89.53632 | -1.9111  | 3.01E-10  | 1.44E-09 | DMRTA1    | chr9  | + | 22446840 | 22452472 | 2302 |
| ENSG000001 | 31.54754 | 15.35474 | 1.0262   | 0.016477  | 0.033099 | EID2B     | chr19 | - | 40021630 | 40023494 | 1865 |
| ENSG000001 | 0        | 21.17364 | -5.9903  | 5.00E-07  | 1.83E-06 | GJC3      | chr7  | - | 99520892 | 99527243 | 1116 |
| ENSG000001 | 684.2706 | 165.1031 | 2.0489   | 1.11E-25  | 1.19E-24 | RIMS2     | chr8  | + | 1.05E+08 | 1.05E+08 | 8002 |
| ENSG000001 | 990.6032 | 1636.793 | -0.72354 | 7.17E-11  | 3.59E-10 | KCMF1     | chr2  | + | 85198216 | 85282560 | 3533 |
| ENSG000001 | 114.1561 | 57.02441 | 0.99237  | 0.002766  | 0.006413 | DNAJC30   | chr7  | - | 73096601 | 73097783 | 1183 |
| ENSG000001 | 99.2748  | 173.947  | -0.80016 | 0.005957  | 0.013065 | SPRYD4    | chr12 | + | 56862301 | 56864763 | 2101 |
| ENSG000001 | 141.613  | 226.5092 | -0.66662 | 0.14346   | 0.2184   | VPS37D    | chr7  | + | 73082155 | 73086442 | 1624 |
| ENSG000001 | 84.14483 | 6.330295 | 3.6843   | 6.22E-18  | 4.76E-17 | CLEC14A   | chr14 | - | 38723308 | 38725574 | 2267 |
| ENSG000001 | 272.1856 | 4.288452 | 5.8942   | 9.42E-42  | 1.73E-40 | SYNE3     | chr14 | - | 95883831 | 95942173 | 5493 |
| ENSG000001 | 603.529  | 755.6062 | -0.32301 | 0.041259  | 0.075338 | CLK2      | chr1  | - | 1.55E+08 | 1.55E+08 | 2702 |
| ENSG000001 | 707.8661 | 754.74   | -0.09318 | 0.60273   | 0.69617  | LPCAT4    | chr15 | - | 34651106 | 34659479 | 1975 |
| ENSG000001 | 1139.371 | 135.9947 | 3.0593   | 2.09E-101 | 1.21E-99 | SLCO3A1   | chr15 | + | 92396925 | 92715665 | 5115 |
| ENSG000001 | 82.9485  | 9.361132 | 3.0872   | 3.00E-15  | 1.99E-14 | ZNF575    | chr19 | + | 44029649 | 44040282 | 2285 |
| ENSG000001 | 130.9396 | 117.3816 | 0.15735  | 0.42652   | 0.53189  | WDR25     | chr14 | + | 1.01E+08 | 1.01E+08 | 2123 |
| ENSG000001 | 167.327  | 248.8565 | -0.572   | 0.001366  | 0.003319 | CCDC101   | chr16 | + | 28565236 | 28603111 | 1153 |
| ENSG000001 | 2.261609 | 1220.301 | -8.8329  | 3.18E-62  | 9.77E-61 | PLA2G16   | chr11 | - | 63340667 | 63384355 | 2594 |
| ENSG000001 | 33.10352 | 493.5835 | -3.8863  | 1.49E-60  | 4.38E-59 | DIRAS1    | chr19 | - | 2714565  | 2721416  | 3424 |

|            |          |          |          |          |          |           |       |   |          |          |       |
|------------|----------|----------|----------|----------|----------|-----------|-------|---|----------|----------|-------|
| ENSG000001 | 1.597063 | 0.891044 | 0.57831  | 0.71912  | 0.79217  | OR10AC1P  | chr7  | - | 1.43E+08 | 1.43E+08 | 669   |
| ENSG000001 | 99.5263  | 210.608  | -1.0709  | 0.003733 | 0.008471 | PHLDB3    | chr19 | - | 43979106 | 44009087 | 2591  |
| ENSG000001 | 105.0396 | 380.1679 | -1.8463  | 1.49E-21 | 1.35E-20 | PRR15     | chr7  | + | 29603427 | 29606911 | 1678  |
| ENSG000001 | 53.53739 | 380.0495 | -2.8132  | 6.60E-24 | 6.60E-23 | GNG7      | chr19 | - | 2511217  | 2702707  | 4208  |
| ENSG000001 | 587.3766 | 401.1221 | 0.54745  | 4.10E-05 | 0.000122 | KIAA2018  | chr3  | - | 1.13E+08 | 1.13E+08 | 13708 |
| ENSG000001 | 9.439429 | 8.19006  | 0.19777  | 0.76211  | 0.82733  | CNTD1     | chr17 | + | 40950810 | 40963605 | 2657  |
| ENSG000001 | 0        | 0.297015 | -0.41864 | 0.81278  | NA       | DCAF4L2   | chr8  | - | 88882973 | 88886296 | 3324  |
| ENSG000001 | 1.971308 | 0        | 2.4428   | 0.13467  | 0.20767  | CNBD1     | chr8  | + | 87878670 | 88627447 | 1594  |
| ENSG000001 | 73.62732 | 140.6726 | -0.93287 | 0.000656 | 0.001674 | CTD-2368P | chr19 | + | 58513429 | 58522600 | 6438  |
| ENSG000001 | 198.2505 | 528.1614 | -1.4065  | 3.73E-07 | 1.39E-06 | KBTBD11   | chr8  | + | 1922044  | 1955102  | 6710  |
| ENSG000001 | 558.88   | 206.4091 | 1.4323   | 5.62E-14 | 3.45E-13 | B3GNT5    | chr3  | + | 1.83E+08 | 1.83E+08 | 4123  |
| ENSG000001 | 0.36308  | 0.343138 | -0.0021  | 0.99905  | NA       | MAP3K19   | chr2  | - | 1.36E+08 | 1.36E+08 | 4377  |
| ENSG000001 | 8712.025 | 9714.649 | -0.157   | 0.13241  | 0.20486  | LMNB2     | chr19 | - | 2427636  | 2456994  | 4671  |
| ENSG000001 | 356.1419 | 370.317  | -0.05516 | 0.68952  | 0.76857  | RMDN1     | chr8  | - | 87480486 | 87526586 | 3063  |
| ENSG000001 | 1184.188 | 1165.197 | 0.02347  | 0.82086  | 0.87406  | MEX3C     | chr18 | - | 48700920 | 48744674 | 3850  |
| ENSG000001 | 0        | 0.297015 | -0.41864 | 0.81278  | NA       | HORMAD2   | chr22 | + | 30476163 | 30573064 | 2187  |
| ENSG000001 | 372.3991 | 58.27981 | 2.6606   | 2.37E-35 | 3.63E-34 | RNF152    | chr18 | - | 59475296 | 59561480 | 9501  |
| ENSG000001 | 0        | 34.14494 | -6.692   | 3.50E-09 | 1.54E-08 | NANOGP1   | chr12 | + | 8045172  | 8051499  | 915   |
| ENSG000001 | 1818.117 | 797.4134 | 1.1871   | 2.02E-27 | 2.33E-26 | MYO1D     | chr17 | - | 30819540 | 31204195 | 5563  |
| ENSG000001 | 21.41023 | 0        | 6.0439   | 2.07E-07 | 7.86E-07 | C20orf197 | chr20 | + | 58630980 | 58648008 | 2732  |
| ENSG000001 | 190.7013 | 15.25766 | 3.5919   | 7.78E-17 | 5.64E-16 | FOXL1     | chr16 | + | 86609974 | 86615303 | 3189  |
| ENSG000001 | 2.624689 | 0        | 2.9014   | 0.06135  | 0.10638  | TGIF2LY   | chrY  | + | 3447082  | 3448082  | 905   |
| ENSG000001 | 24.42114 | 16.50312 | 0.56289  | 0.23955  | 0.33421  | LRR37A    | chr17 | + | 44370099 | 44415160 | 5177  |
| ENSG000001 | 402.3945 | 5.332435 | 6.173    | 3.94E-57 | 1.08E-55 | FOXC2     | chr16 | + | 86600857 | 86602539 | 1683  |
| ENSG000001 | 115.856  | 75.96367 | 0.60407  | 0.006307 | 0.013773 | BDNF      | chr11 | - | 27676440 | 27743605 | 4766  |
| ENSG000001 | 162.1574 | 147.7171 | 0.13427  | 0.54171  | 0.64223  | SCAND2P   | chr15 | + | 85174682 | 85185695 | 3961  |
| ENSG000001 | 22.73932 | 26.67433 | -0.21732 | 0.59782  | 0.692    | CCDC121   | chr2  | - | 27848506 | 27851879 | 2342  |
| ENSG000001 | 487.875  | 471.6959 | 0.048889 | 0.74363  | 0.81167  | ACSF3     | chr16 | + | 89154783 | 89222254 | 7020  |
| ENSG000001 | 0        | 1.234181 | -1.5727  | 0.37581  | NA       | OR10AB1P  | chr11 | + | 7749632  | 7750935  | 1020  |
| ENSG000001 | 1988.844 | 1463.423 | 0.44276  | 0.000584 | 0.001501 | BOK       | chr2  | + | 2.42E+08 | 2.43E+08 | 2650  |
| ENSG000001 | 11.64024 | 6.815092 | 0.72939  | 0.30036  | 0.40189  | ZNF843    | chr16 | - | 31445569 | 31454346 | 2161  |
| ENSG000001 | 37.23196 | 56.17311 | -0.59013 | 0.047534 | 0.085165 | TTY14     | chrY  | - | 21034387 | 21239302 | 1495  |
| ENSG000001 | 87.68068 | 87.30192 | 0.001407 | 0.99531  | 0.99735  | C8orf59   | chr8  | - | 86126311 | 86132650 | 853   |
| ENSG000001 | 6.712863 | 0.654722 | 2.9172   | 0.011906 | 0.024624 | PFN4      | chr2  | - | 24338241 | 24346347 | 974   |
| ENSG000001 | 0        | 0.715414 | -0.84936 | 0.6309   | NA       | MAGEB6    | chrX  | + | 26210557 | 26213763 | 1949  |
| ENSG000001 | 220.0323 | 346.2109 | -0.65389 | 0.000467 | 0.001219 | CDK5R1    | chr17 | + | 30813637 | 30818274 | 4325  |
| ENSG000001 | 0.290301 | 3.305162 | -2.5891  | 0.070163 | 0.11942  | C15orf56  | chr15 | - | 40542865 | 40545170 | 2129  |
| ENSG000001 | 0.36308  | 1.248751 | -1.1986  | 0.48045  | NA       | LINC00303 | chr1  | - | 2.04E+08 | 2.04E+08 | 1891  |
| ENSG000001 | 2.894453 | 2.292733 | 0.30763  | 0.77609  | 0.83919  | ZNF285B   | chr19 | + | 44971858 | 44977444 | 1767  |
| ENSG000001 | 0        | 244.4874 | -9.3076  | 1.32E-17 | 9.94E-17 | TCERG1L   | chr10 | - | 1.33E+08 | 1.33E+08 | 4394  |
| ENSG000001 | 3.713929 | 14.6976  | -1.9116  | 0.008846 | 0.01879  | NCKAP5    | chr2  | - | 1.33E+08 | 1.34E+08 | 7592  |
| ENSG000001 | 0        | 0.343138 | -0.41864 | 0.81278  | NA       | MAGEB18   | chrX  | + | 26156460 | 26158852 | 1811  |
| ENSG000001 | 566.6789 | 483.3336 | 0.22735  | 0.17009  | 0.25218  | RUFY1     | chr5  | + | 1.79E+08 | 1.79E+08 | 2771  |
| ENSG000001 | 5118.335 | 2623.087 | 0.96326  | 2.21E-15 | 1.48E-14 | BASP1     | chr5  | + | 17217669 | 17276943 | 1878  |
| ENSG000001 | 86.27465 | 24.49008 | 1.7922   | 2.08E-08 | 8.62E-08 | LRR37A3   | chr17 | - | 62850430 | 62915598 | 5665  |
| ENSG000001 | 0.290301 | 0        | 0.4146   | 0.81455  | NA       | AC009951  | chr2  | - | 1.45E+08 | 1.45E+08 | 2966  |
| ENSG000001 | 15.02279 | 1.188058 | 3.273    | 0.000606 | 0.001555 | FKBP9L    | chr7  | - | 55748767 | 55780945 | 2451  |
| ENSG000001 | 297.5564 | 1426.343 | -2.2512  | 4.01E-25 | 4.22E-24 | VSIG10    | chr12 | - | 1.19E+08 | 1.19E+08 | 4946  |
| ENSG000001 | 0        | 0.343138 | -0.41864 | 0.81278  | NA       | MIR7-3HG  | chr19 | + | 4769117  | 4772545  | 879   |
| ENSG000001 | 51.67594 | 6.407972 | 2.9661   | 2.79E-09 | 1.24E-08 | IRX5      | chr16 | + | 54964774 | 54968397 | 2401  |
| ENSG000001 | 972.562  | 740.9913 | 0.39054  | 0.055456 | 0.097323 | METRNL    | chr17 | + | 81037567 | 81052864 | 1900  |
| ENSG000001 | 1081.903 | 444.2659 | 1.2818   | 2.49E-16 | 1.75E-15 | FAM91A1   | chr8  | + | 1.25E+08 | 1.25E+08 | 5511  |
| ENSG000001 | 1.742621 | 2.543625 | -0.49191 | 0.70552  | 0.78117  | CTC-298B1 | chr5  | - | 1.08E+08 | 1.08E+08 | 1146  |
| ENSG000001 | 1736.108 | 1005.635 | 0.78645  | 2.93E-08 | 1.20E-07 | WSB2      | chr12 | - | 1.18E+08 | 1.19E+08 | 2646  |
| ENSG000001 | 1.213446 | 42.26552 | -4.7376  | 7.35E-09 | 3.15E-08 | GRIN1     | chr9  | + | 1.4E+08  | 1.4E+08  | 5142  |
| ENSG000001 | 6157.417 | 4710.33  | 0.38582  | 0.002814 | 0.006516 | SOX11     | chr2  | + | 5832799  | 5841516  | 8718  |
| ENSG000001 | 757.204  | 678.973  | 0.15749  | 0.31726  | 0.41995  | TYMS      | chr18 | + | 657604   | 673578   | 1662  |
| ENSG000001 | 10.36339 | 12.93975 | -0.30441 | 0.67245  | 0.75474  | PXMP2     | chr12 | + | 1.33E+08 | 1.33E+08 | 1050  |
| ENSG000001 | 14.35824 | 31.47752 | -1.1265  | 0.010413 | 0.021815 | TCEANC    | chrX  | + | 13671225 | 13700083 | 2988  |
| ENSG000001 | 2042.389 | 1475.909 | 0.46854  | 1.94E-06 | 6.76E-06 | PNMA1     | chr14 | - | 74178494 | 74181128 | 2635  |
| ENSG000001 | 2.718006 | 0.686276 | 1.5956   | 0.26037  | 0.35837  | C8orf4    | chr8  | + | 40010989 | 40012821 | 1833  |
| ENSG000001 | 101.2136 | 26.3369  | 1.9279   | 1.06E-09 | 4.89E-09 | MAMSTR    | chr19 | - | 49215999 | 49222978 | 1837  |
| ENSG000001 | 3.672853 | 69.08573 | -4.0909  | 7.99E-10 | 3.72E-09 | C18orf56  | chr18 | - | 641320   | 658340   | 844   |
| ENSG000001 | 2182.838 | 1160.65  | 0.91053  | 1.88E-14 | 1.19E-13 | ANKLE2    | chr12 | - | 1.33E+08 | 1.33E+08 | 10890 |
| ENSG000001 | 2.987769 | 2.993578 | -0.00389 | 0.99687  | 0.99826  | C8G       | chr9  | + | 1.4E+08  | 1.4E+08  | 855   |

|            |          |          |          |           |           |           |       |   |          |          |       |
|------------|----------|----------|----------|-----------|-----------|-----------|-------|---|----------|----------|-------|
| ENSG000001 | 18.23566 | 47.5801  | -1.3691  | 0.001449  | 0.003508  | FUT2      | chr19 | + | 49199228 | 49209207 | 3111  |
| ENSG000001 | 4.451254 | 1.355566 | 1.5271   | 0.17186   | 0.25437   | EFCAB5    | chr17 | + | 28256218 | 28435470 | 5132  |
| ENSG000001 | 8.580504 | 20.58432 | -1.2178  | 0.095284  | 0.15513   | GCNT4     | chr5  | - | 74323289 | 74326724 | 3436  |
| ENSG000001 | 5.145711 | 9.696149 | -0.8902  | 0.23327   | 0.32693   | TOB2P1    | chr6  | - | 28185421 | 28186655 | 1142  |
| ENSG000001 | 0.36308  | 3.054271 | -2.4434  | 0.090836  | 0.14891   | MUC20     | chr3  | + | 1.95E+08 | 1.95E+08 | 6193  |
| ENSG000001 | 945.6038 | 1609.941 | -0.76686 | 3.12E-08  | 1.27E-07  | THAP4     | chr2  | - | 2.43E+08 | 2.43E+08 | 2367  |
| ENSG000001 | 845.2663 | 1017.771 | -0.26769 | 0.036837  | 0.068185  | NFATC2IP  | chr16 | + | 28962128 | 28978418 | 4569  |
| ENSG000001 | 0        | 7.362125 | -4.3847  | 0.001415  | 0.00343   | LY6H      | chr8  | - | 1.44E+08 | 1.44E+08 | 1591  |
| ENSG000001 | 1663.088 | 3.587607 | 8.7036   | 8.88E-92  | 4.54E-90  | FIBIN     | chr11 | + | 27015628 | 27018630 | 3003  |
| ENSG000001 | 24.12049 | 5.926464 | 1.9645   | 0.000474  | 0.001235  | FAM89B    | chr11 | + | 65339820 | 65341669 | 1409  |
| ENSG000001 | 347.784  | 885.5562 | -1.3473  | 4.09E-23  | 3.97E-22  | SHMT1     | chr17 | - | 18231187 | 18266856 | 2756  |
| ENSG000001 | 504.3586 | 286.0117 | 0.81323  | 0.001327  | 0.00323   | DPP7      | chr9  | - | 1.4E+08  | 1.4E+08  | 1590  |
| ENSG000001 | 0        | 0.343138 | -0.41864 | 0.81278   | NA        | TRIM60    | chr4  | + | 1.66E+08 | 1.66E+08 | 1888  |
| ENSG000001 | 0.36308  | 0        | 0.4146   | 0.81455   | NA        | AP000679  | chr11 | + | 1.2E+08  | 1.2E+08  | 2081  |
| ENSG000001 | 2228.832 | 2044.511 | 0.12462  | 0.18351   | 0.26867   | SEC24C    | chr10 | + | 75504120 | 75531919 | 4668  |
| ENSG000001 | 0.632843 | 0        | 0.81931  | 0.64303   | NA        | FMR1NB    | chrX  | + | 1.47E+08 | 1.47E+08 | 1021  |
| ENSG000001 | 364.8044 | 320.6445 | 0.18718  | 0.31232   | 0.4144    | SMCR8     | chr17 | + | 18218624 | 18226517 | 3427  |
| ENSG000001 | 0        | 2.414118 | -2.7105  | 0.090717  | 0.14874   | HCG4      | chr6  | - | 29758816 | 29760850 | 2033  |
| ENSG000001 | 561.9557 | 340.2513 | 0.72354  | 1.17E-05  | 3.72E-05  | MTHFR     | chr1  | - | 11845780 | 11866977 | 7057  |
| ENSG000001 | 2.520208 | 4.242329 | -0.66886 | 0.50394   | 0.60739   | C19orf18  | chr19 | - | 58469805 | 58485902 | 915   |
| ENSG000001 | 927.3468 | 1436.349 | -0.62923 | 0.00178   | 0.004246  | DEAF1     | chr11 | - | 644233   | 706715   | 2500  |
| ENSG000001 | 511.0854 | 451.2029 | 0.17882  | 0.20123   | 0.29002   | MTX3      | chr5  | - | 79275584 | 79287082 | 4799  |
| ENSG000001 | 192.9661 | 165.9945 | 0.21584  | 0.26685   | 0.36556   | TMEM80    | chr11 | + | 695616   | 705028   | 2047  |
| ENSG000001 | 157.4538 | 188.0146 | -0.25192 | 0.26408   | 0.36239   | SIX5      | chr19 | - | 46268043 | 46272141 | 2975  |
| ENSG000001 | 386.0302 | 739.2975 | -0.93527 | 3.31E-08  | 1.34E-07  | FBXO46    | chr19 | - | 46213887 | 46234162 | 3001  |
| ENSG000001 | 618.8454 | 324.1937 | 0.93022  | 5.73E-12  | 3.08E-11  | ZDHHC13   | chr11 | + | 19138646 | 19197969 | 6304  |
| ENSG000001 | 178.3258 | 250.7983 | -0.48942 | 0.056153  | 0.098461  | SLC38A9   | chr5  | - | 54921673 | 55069022 | 4032  |
| ENSG000001 | 14.16126 | 81.56801 | -2.5184  | 4.82E-12  | 2.60E-11  | ACER2     | chr9  | + | 19408925 | 19452018 | 2238  |
| ENSG000001 | 407.3037 | 344.2268 | 0.24123  | 0.45206   | 0.55751   | WDR73     | chr15 | - | 85185999 | 85197574 | 5071  |
| ENSG000001 | 1608.469 | 3018.277 | -0.90632 | 9.46E-10  | 4.37E-09  | POLE      | chr12 | - | 1.33E+08 | 1.33E+08 | 8011  |
| ENSG000001 | 416.7556 | 179.6338 | 1.2069   | 6.30E-08  | 2.50E-07  | FAM109B   | chr22 | + | 42470255 | 42475445 | 2335  |
| ENSG000001 | 3.330311 | 28.03727 | -2.9804  | 5.50E-06  | 1.82E-05  | SCN4B     | chr11 | - | 1.18E+08 | 1.18E+08 | 4484  |
| ENSG000001 | 1.597063 | 6.564201 | -1.8259  | 0.081601  | 0.13588   | DSCAML1   | chr11 | - | 1.17E+08 | 1.18E+08 | 6899  |
| ENSG000001 | 673.2755 | 425.0866 | 0.6607   | 0.001444  | 0.003497  | RHOG      | chr11 | - | 3848208  | 3862213  | 1319  |
| ENSG000001 | 98.74032 | 645.8344 | -2.6972  | 3.32E-26  | 3.64E-25  | EPS8L2    | chr11 | + | 694438   | 727727   | 3844  |
| ENSG000001 | 4.947913 | 1930.185 | -8.505   | 7.77E-107 | 4.97E-105 | ZDHHC22   | chr14 | - | 77597613 | 77609077 | 3408  |
| ENSG000001 | 0        | 1.430828 | -1.4414  | 0.41759   | NA        | MRVI1-AS1 | chr11 | + | 10562819 | 10621479 | 829   |
| ENSG000001 | 2615.866 | 1302.155 | 1.0057   | 2.11E-25  | 2.24E-24  | ANO6      | chr12 | + | 45609770 | 45834187 | 5975  |
| ENSG000001 | 339.2143 | 422.762  | -0.31738 | 0.079443  | 0.13268   | ZBTB34    | chr9  | + | 1.3E+08  | 1.3E+08  | 6564  |
| ENSG000001 | 146.293  | 8.348704 | 4.0564   | 1.52E-28  | 1.83E-27  | RP1-163G9 | chr1  | - | 2976179  | 2985001  | 4247  |
| ENSG000001 | 0        | 0.891044 | -1.0625  | 0.54819   | NA        | FAM9B     | chrX  | - | 8992273  | 9132680  | 3592  |
| ENSG000001 | 7.935682 | 5.941033 | 0.39729  | 0.57493   | 0.67184   | NUDT4P1   | chr1  | - | 1.45E+08 | 1.45E+08 | 543   |
| ENSG000001 | 206.0413 | 260.9636 | -0.34077 | 0.033105  | 0.061943  | FAM210A   | chr18 | - | 13663346 | 13726662 | 4340  |
| ENSG000001 | 2013.256 | 4050.676 | -1.0078  | 4.98E-29  | 6.11E-28  | TALDO1    | chr11 | + | 747329   | 765024   | 1346  |
| ENSG000001 | 1434.983 | 2373.548 | -0.72503 | 1.08E-08  | 4.56E-08  | ULK1      | chr12 | + | 1.32E+08 | 1.32E+08 | 5310  |
| ENSG000001 | 11.53494 | 5.407697 | 1.0709   | 0.12673   | 0.19753   | NAP1L4P1  | chr1  | - | 1.17E+08 | 1.17E+08 | 1157  |
| ENSG000001 | 0        | 94.48993 | -7.9446  | 6.18E-12  | 3.32E-11  | RIMKLA    | chr1  | + | 42846466 | 42880850 | 1510  |
| ENSG000001 | 2.366091 | 1.995719 | 0.2072   | 0.86209   | 0.90363   | CLVS1     | chr8  | + | 61969717 | 62414204 | 3622  |
| ENSG000001 | 1294.583 | 365.0951 | 1.8191   | 4.75E-18  | 3.65E-17  | RPS6KA3   | chrX  | - | 20168029 | 20285523 | 7918  |
| ENSG000001 | 89.95599 | 19.87232 | 2.1255   | 2.93E-06  | 1.00E-05  | B3GNT8    | chr19 | - | 41931264 | 41934635 | 1874  |
| ENSG000001 | 392.2072 | 1273.709 | -1.6925  | 1.56E-13  | 9.33E-13  | PUS1      | chr12 | + | 1.32E+08 | 1.32E+08 | 2151  |
| ENSG000001 | 0.342542 | 0        | 0.4146   | 0.81455   | NA        | PCNPP5    | chr13 | - | 48902220 | 48902700 | 481   |
| ENSG000001 | 2396.581 | 418.5323 | 2.5106   | 1.01E-32  | 1.44E-31  | CHD9      | chr16 | + | 53088945 | 53363062 | 13110 |
| ENSG000001 | 1.411244 | 18.95201 | -3.5223  | 0.000136  | 0.00038   | SPACA4    | chr19 | + | 49110000 | 49110970 | 971   |
| ENSG000001 | 0        | 0.357707 | -0.41864 | 0.81278   | NA        | OR2T33    | chr1  | - | 2.48E+08 | 2.48E+08 | 1066  |
| ENSG000001 | 1043.924 | 1177.53  | -0.17369 | 0.25198   | 0.34875   | PDDC1     | chr11 | - | 767220   | 777488   | 4357  |
| ENSG000001 | 14.18098 | 0.700845 | 3.9758   | 9.48E-05  | 0.000271  | C10orf85  | chr10 | + | 1.22E+08 | 1.22E+08 | 1909  |
| ENSG000001 | 97.55597 | 94.27472 | 0.048825 | 0.82145   | 0.87444   | AP006621  | chr11 | + | 780117   | 780755   | 636   |
| ENSG000001 | 0.290301 | 42.64504 | -6.1621  | 7.71E-09  | 3.30E-08  | TRIM72    | chr16 | + | 31225342 | 31236510 | 2152  |
| ENSG000001 | 2168.609 | 1124.509 | 0.94614  | 9.33E-21  | 8.14E-20  | MAN1B1    | chr9  | + | 1.4E+08  | 1.4E+08  | 5048  |
| ENSG000001 | 0.36308  | 8.781672 | -3.9457  | 0.001489  | 0.003597  | KCNA3     | chr1  | - | 1.11E+08 | 1.11E+08 | 3346  |
| ENSG000001 | 2700.052 | 376.0415 | 2.8348   | 3.17E-43  | 6.08E-42  | FZD8      | chr10 | - | 35927177 | 35930362 | 3186  |
| ENSG000001 | 0.580602 | 0.297015 | 0.36801  | 0.83644   | NA        | FBXO39    | chr17 | + | 6679542  | 6700420  | 1677  |
| ENSG000001 | 0.995923 | 9.539921 | -2.9313  | 0.005461  | 0.012071  | KCNA2     | chr1  | - | 1.11E+08 | 1.11E+08 | 3446  |
| ENSG000001 | 906.709  | 997.3181 | -0.13665 | 0.32034   | 0.42316   | TOP3A     | chr17 | - | 18174742 | 18218321 | 4056  |

|                    |          |          |           |           |           |       |   |          |          |       |
|--------------------|----------|----------|-----------|-----------|-----------|-------|---|----------|----------|-------|
| ENSG000001666.6255 | 1088.017 | -0.70478 | 4.88E-05  | 0.000144  | CASKIN2   | chr17 | - | 73496342 | 73511664 | 5015  |
| ENSG0000010        | 0.357707 | -0.41864 | 0.81278   | NA        | OR7E125P  | chr8  | - | 7104248  | 7105874  | 954   |
| ENSG000001624.8064 | 122.4414 | 2.3467   | 6.45E-44  | 1.26E-42  | ZBTB38    | chr3  | + | 1.41E+08 | 1.41E+08 | 7683  |
| ENSG0000010.290301 | 6.030864 | -3.4143  | 0.010191  | 0.021391  | C8orf31   | chr8  | + | 1.44E+08 | 1.44E+08 | 1875  |
| ENSG00000175.38608 | 37.65246 | 0.98803  | 0.00071   | 0.001802  | DLGAP1-AS | chr18 | + | 3593730  | 3598350  | 1966  |
| ENSG0000012.738544 | 15.03671 | -2.3671  | 0.002246  | 0.005268  | AC024940. | chr12 | + | 31477250 | 31478879 | 1630  |
| ENSG0000010.290301 | 0        | 0.4146   | 0.81455   | NA        | RPL13AP3  | chr14 | + | 56232895 | 56234435 | 1473  |
| ENSG000001395.016  | 538.7505 | -0.44772 | 0.00046   | 0.001202  | CCDC71    | chr3  | - | 49199968 | 49203754 | 1781  |
| ENSG0000010        | 0.343138 | -0.41864 | 0.81278   | NA        | C10orf71  | chr10 | + | 50507187 | 50535537 | 5230  |
| ENSG0000012.426891 | 107.4034 | -5.1983  | 6.49E-16  | 4.48E-15  | RP11-551L | chr12 | - | 31264586 | 31359088 | 4427  |
| ENSG00000198.56722 | 2.24661  | 5.2635   | 2.54E-19  | 2.06E-18  | LRRN4CL   | chr11 | - | 62453874 | 62457371 | 2585  |
| ENSG0000010        | 0.98329  | -1.2878  | 0.47019   | NA        | RP1-6209. | chr17 | + | 47325601 | 47336024 | 2317  |
| ENSG000001538.1392 | 467.7463 | 0.20193  | 0.38639   | 0.49056   | TIMM22    | chr17 | + | 900357   | 905407   | 1690  |
| ENSG0000011305.508 | 6.999585 | 7.4867   | 1.07E-111 | 7.28E-110 | HIC1      | chr17 | + | 1957448  | 1962980  | 3156  |
| ENSG000001273.6585 | 610.6236 | -1.1509  | 2.11E-05  | 6.52E-05  | PPFIA3    | chr19 | + | 49622646 | 49654283 | 4733  |
| ENSG000001969.9681 | 1359.666 | -0.48651 | 0.001035  | 0.00256   | MAGEF1    | chr3  | - | 1.84E+08 | 1.84E+08 | 1681  |
| ENSG0000010        | 2.370411 | -2.6458  | 0.10384   | 0.16657   | UMODL1    | chr21 | + | 43483068 | 43563105 | 5442  |
| ENSG00000125.55146 | 59.688   | -1.2208  | 0.00071   | 0.001801  | RP11-218A | chr12 | + | 740057   | 772872   | 2338  |
| ENSG000001165.7258 | 0.715414 | 7.4264   | 4.31E-19  | 3.46E-18  | SAMD9L    | chr7  | - | 92759368 | 92777682 | 7134  |
| ENSG000001642.4909 | 1112.831 | -0.79133 | 2.16E-12  | 1.20E-11  | ZFAS1     | chr20 | + | 47894715 | 47905797 | 1075  |
| ENSG0000010.705622 | 2.482932 | -1.5048  | 0.2876    | 0.38929   | AC006001. | chr7  | - | 66021832 | 66022349 | 516   |
| ENSG000001742.4984 | 2263.494 | -1.6055  | 2.88E-32  | 4.01E-31  | PAWR      | chr12 | - | 79968759 | 80084877 | 9129  |
| ENSG0000011628.353 | 1768.007 | -0.11863 | 0.40979   | 0.51462   | TGIF1     | chr18 | + | 3411606  | 3459976  | 3030  |
| ENSG000001218.5331 | 262.0394 | -0.26075 | 0.25514   | 0.35237   | SMCR7     | chr17 | + | 18163848 | 18169866 | 3364  |
| ENSG000001144.5274 | 41.41724 | 1.7885   | 4.59E-09  | 2.00E-08  | NAP1L5    | chr4  | - | 89617066 | 89619386 | 2321  |
| ENSG0000010.632843 | 3.445948 | -1.8506  | 0.21471   | 0.30569   | RP4-597J3 | chr1  | - | 64254392 | 64254975 | 584   |
| ENSG0000012.592987 | 0        | 2.8438   | 0.071235  | 0.12092   | NIM1      | chr5  | + | 43192173 | 43280952 | 2929  |
| ENSG0000011.576526 | 33.51298 | -4.1171  | 5.00E-07  | 1.83E-06  | CD19      | chr16 | + | 28943260 | 28950667 | 2322  |
| ENSG00000111.00479 | 21.99662 | -0.96495 | 0.076907  | 0.12916   | C8orf47   | chr8  | + | 99076539 | 99105838 | 1761  |
| ENSG0000010        | 0.297015 | -0.41864 | 0.81278   | NA        | OR2T8     | chr1  | + | 2.48E+08 | 2.48E+08 | 939   |
| ENSG000001384.1527 | 204.4717 | 0.90572  | 7.79E-06  | 2.54E-05  | NR2C2     | chr3  | + | 14989091 | 15095107 | 3308  |
| ENSG0000010        | 1.949596 | -2.4359  | 0.13595   | 0.20899   | GPR4      | chr19 | - | 46093022 | 46105466 | 3048  |
| ENSG00000114.8549  | 35.05788 | -1.2249  | 0.004828  | 0.010778  | ACOT4     | chr14 | + | 74058410 | 74063200 | 2362  |
| ENSG0000010        | 33.25611 | -5.2723  | NA        | NA        | OLIG3     | chr6  | - | 1.38E+08 | 1.38E+08 | 2196  |
| ENSG00000118792.07 | 954.5906 | 4.2907   | 2.10E-174 | 3.36E-172 | PTRF      | chr17 | - | 40554470 | 40575535 | 3828  |
| ENSG000001820.5624 | 1318.346 | -0.68295 | 3.28E-08  | 1.33E-07  | ARIH2     | chr3  | + | 48956254 | 49023815 | 4933  |
| ENSG00000124.43989 | 13.1284  | 0.87263  | 0.095028  | 0.15476   | RBM44     | chr2  | + | 2.39E+08 | 2.39E+08 | 5358  |
| ENSG000001420.4177 | 339.4099 | 0.30938  | 0.019219  | 0.038085  | ZBTB33    | chrX  | + | 1.19E+08 | 1.19E+08 | 5211  |
| ENSG0000010.653381 | 0        | 0.82678  | 0.64037   | NA        | ZBED2     | chr3  | - | 1.11E+08 | 1.11E+08 | 2311  |
| ENSG0000010.36308  | 1.903472 | -1.6912  | 0.30152   | 0.40282   | VCX2      | chrX  | - | 8137989  | 8139308  | 811   |
| ENSG00000158.71334 | 22.47812 | 1.3835   | 0.000118  | 0.000334  | IRX3      | chr16 | - | 54317216 | 54320675 | 2601  |
| ENSG0000010        | 75.94815 | -7.7471  | 3.79E-12  | 2.07E-11  | ST8SIA3   | chr18 | + | 55018044 | 55038962 | 11833 |
| ENSG0000010        | 462.2951 | -10.151  | 6.04E-21  | 5.31E-20  | RPRM      | chr2  | - | 1.54E+08 | 1.54E+08 | 1471  |
| ENSG000001795.1328 | 913.2803 | -0.19897 | 0.14477   | 0.22013   | SLC25A22  | chr11 | - | 790475   | 798316   | 2894  |
| ENSG000001799.3709 | 392.998  | 1.0235   | 5.03E-13  | 2.92E-12  | RABEP2    | chr16 | - | 28915742 | 28947847 | 2821  |
| ENSG0000010        | 203.458  | -9.0534  | 1.61E-16  | 1.14E-15  | NHLH2     | chr1  | - | 1.16E+08 | 1.16E+08 | 7226  |
| ENSG000001612.5166 | 310.5399 | 0.98066  | 4.73E-10  | 2.23E-09  | ATOX1     | chr5  | - | 1.51E+08 | 1.51E+08 | 4341  |
| ENSG0000010        | 1.591889 | -2.1342  | 0.20414   | NA        | FAM187B   | chr19 | - | 35715703 | 35719632 | 1184  |
| ENSG0000011626.323 | 1495     | 0.12176  | 0.34209   | 0.44599   | TBL1XR1   | chr3  | - | 1.77E+08 | 1.77E+08 | 7948  |
| ENSG00000136.41167 | 96.96242 | -1.3979  | 5.57E-07  | 2.04E-06  | SAMD12    | chr8  | - | 1.19E+08 | 1.2E+08  | 8866  |
| ENSG0000014.430716 | 0.686276 | 2.2428   | 0.090235  | 0.1481    | CD163     | chr12 | - | 7623409  | 7656489  | 5312  |
| ENSG0000015.455736 | 6.03328  | -0.12009 | 0.87962   | 0.91622   | C18orf32  | chr18 | - | 47008028 | 47013622 | 1128  |
| ENSG000001419.7948 | 733.5829 | -0.80255 | 0.000242  | 0.000655  | PIDD      | chr11 | - | 799179   | 809753   | 4496  |
| ENSG00000120.84935 | 3.867637 | 2.3075   | 0.002043  | 0.004827  | ZNF491    | chr19 | + | 11908482 | 11920437 | 2471  |
| ENSG0000016903.601 | 10673.53 | -0.62805 | 2.05E-10  | 9.95E-10  | RPLP2     | chr11 | + | 809647   | 812880   | 781   |
| ENSG000001114.7387 | 374.3879 | -1.7025  | 1.98E-22  | 1.86E-21  | GSG2      | chr17 | + | 3627211  | 3630067  | 2857  |
| ENSG0000013854.605 | 503.5881 | 2.934    | 7.69E-149 | 8.66E-147 | JUN       | chr1  | - | 59246465 | 59249785 | 3321  |
| ENSG000001911.7689 | 939.576  | -0.04294 | 0.82174   | 0.8745    | CSTF2T    | chr10 | - | 53455247 | 53459355 | 4109  |
| ENSG00000173.63148 | 697.6352 | -3.2361  | 4.43E-84  | 1.98E-82  | PGBD5     | chr1  | - | 2.3E+08  | 2.31E+08 | 3443  |
| ENSG0000010.290301 | 0        | 0.4146   | 0.81455   | NA        | C12orf54  | chr12 | + | 48876286 | 48890295 | 887   |
| ENSG000001635.2959 | 171.9715 | 1.8793   | 1.57E-16  | 1.11E-15  | GBA       | chr1  | - | 1.55E+08 | 1.55E+08 | 2400  |
| ENSG0000016.26584  | 7.503784 | -0.25682 | 0.71733   | 0.79066   | CASC2     | chr10 | + | 1.2E+08  | 1.2E+08  | 3268  |
| ENSG000001646.3324 | 349.7669 | 0.88319  | 2.59E-05  | 7.91E-05  | ACAD9     | chr3  | + | 1.29E+08 | 1.29E+08 | 2454  |
| ENSG000001231.874  | 421.8043 | -0.86352 | 6.44E-08  | 2.55E-07  | IL17RA    | chr22 | + | 17565844 | 17596583 | 8607  |
| ENSG000001474.2999 | 752.0414 | -0.66349 | 2.08E-06  | 7.21E-06  | PNPLA2    | chr11 | + | 818902   | 825573   | 2726  |

|            |          |          |          |           |           |           |       |   |          |          |      |
|------------|----------|----------|----------|-----------|-----------|-----------|-------|---|----------|----------|------|
| ENSG000001 | 0.870904 | 1.043983 | -0.13638 | 0.93492   | 0.95734   | MBOAT4    | chr8  | - | 29989340 | 30002202 | 1512 |
| ENSG000001 | 667.4617 | 1221.584 | -0.87063 | 6.30E-15  | 4.11E-14  | AGTRAP    | chr1  | + | 11796141 | 11814859 | 1116 |
| ENSG000001 | 69.21291 | 2.681995 | 4.5793   | 1.52E-15  | 1.03E-14  | CD163L1   | chr12 | - | 7499281  | 7632493  | 4615 |
| ENSG000001 | 30.353   | 614.461  | -4.2953  | 1.90E-35  | 2.93E-34  | SRRM3     | chr7  | + | 75831216 | 75916605 | 3614 |
| ENSG000001 | 238.2297 | 127.0542 | 0.90591  | 5.49E-06  | 1.82E-05  | THAP5     | chr7  | - | 1.08E+08 | 1.08E+08 | 3306 |
| ENSG000001 | 19.44234 | 551.0178 | -4.809   | 3.55E-62  | 1.09E-60  | EFCAB4A   | chr11 | + | 826144   | 831991   | 2440 |
| ENSG000001 | 2.188831 | 2.073397 | 0.085816 | 0.95138   | 0.96962   | SUMO4     | chr6  | + | 1.5E+08  | 1.5E+08  | 683  |
| ENSG000001 | 11.3585  | 19.67233 | -0.76449 | 0.14223   | 0.21676   | DNAJC28   | chr21 | - | 34860497 | 34864027 | 1625 |
| ENSG000001 | 51.69208 | 11.13751 | 2.1782   | 7.06E-08  | 2.79E-07  | NAALADL2  | chr3  | + | 1.74E+08 | 1.76E+08 | 4953 |
| ENSG000001 | 3598.285 | 1440.787 | 1.3183   | 7.57E-26  | 8.19E-25  | CD151     | chr11 | + | 832843   | 839831   | 1803 |
| ENSG000001 | 0.36308  | 0.700845 | -0.575   | 0.7429    | NA        | RP11-16K1 | chr15 | + | 79271231 | 79278268 | 1900 |
| ENSG000001 | 905.4829 | 951.3716 | -0.07127 | 0.54448   | 0.64483   | POLR2L    | chr11 | - | 837356   | 842545   | 892  |
| ENSG000001 | 2255.822 | 1489.8   | 0.59716  | 5.30E-05  | 0.000156  | FAM20C    | chr7  | + | 192969   | 300711   | 2751 |
| ENSG000001 | 419.3471 | 389.7351 | 0.1054   | 0.7025    | 0.77873   | PVRL3     | chr3  | + | 1.11E+08 | 1.11E+08 | 3664 |
| ENSG000001 | 3.838949 | 1.043983 | 1.6018   | 0.20999   | 0.30002   | SLC35G5   | chr8  | + | 11188397 | 11189717 | 1321 |
| ENSG000001 | 26.06963 | 26.4607  | -0.01626 | 0.96701   | 0.98123   | ANXA2R    | chr5  | - | 43039335 | 43043272 | 2234 |
| ENSG000001 | 4.273994 | 1.043983 | 1.8086   | 0.12459   | 0.19479   | AC105206  | chr8  | + | 22026851 | 22029223 | 2368 |
| ENSG000001 | 1298.545 | 1370.022 | -0.07655 | 0.4684    | 0.57315   | KIAA0195  | chr17 | + | 73437240 | 73496171 | 5632 |
| ENSG000001 | 3917.477 | 3997.719 | -0.02934 | 0.79881   | 0.8575    | FLII      | chr17 | - | 18148150 | 18162230 | 4338 |
| ENSG000001 | 3613.053 | 3315.655 | 0.12366  | 0.31887   | 0.42176   | SOX12     | chr20 | + | 306207   | 310865   | 4627 |
| ENSG000001 | 7023.948 | 12256.84 | -0.80225 | 1.04E-10  | 5.15E-10  | HNRNPAP0  | chr5  | - | 1.37E+08 | 1.37E+08 | 2965 |
| ENSG000001 | 1.048164 | 1.698704 | -0.58067 | 0.67797   | 0.75882   | RP11-474P | chr9  | - | 1.28E+08 | 1.28E+08 | 547  |
| ENSG000001 | 119.9932 | 99.97533 | 0.26378  | 0.28832   | 0.38991   | CTD-2201E | chr5  | - | 43014516 | 43067521 | 2388 |
| ENSG000001 | 2.998934 | 0.297015 | 2.3963   | 0.10882   | 0.17341   | FAM87B    | chr1  | + | 752751   | 755214   | 1944 |
| ENSG000001 | 120.6755 | 197.3695 | -0.70777 | 0.004349  | 0.009773  | ZCCHC3    | chr20 | + | 277737   | 280965   | 3229 |
| ENSG000001 | 0.653381 | 0        | 0.82678  | 0.64037   | NA        | CDKN2AIP1 | chr1  | - | 2.27E+08 | 2.27E+08 | 302  |
| ENSG000001 | 0        | 2.855208 | -2.7373  | 0.10153   | 0.16346   | RPS2P2    | chr14 | - | 74844521 | 74845121 | 601  |
| ENSG000001 | 2.375464 | 4.464082 | -0.8538  | 0.40986   | 0.51465   | RP5-1061F | chr1  | - | 2.29E+08 | 2.29E+08 | 868  |
| ENSG000001 | 5.653535 | 70.27527 | -3.5575  | 8.32E-11  | 4.14E-10  | MYOZ1     | chr10 | - | 75391412 | 75401515 | 1541 |
| ENSG000001 | 0        | 0.297015 | -0.41864 | 0.81278   | NA        | TMEM78    | chr1  | + | 2.29E+08 | 2.29E+08 | 2175 |
| ENSG000001 | 0.290301 | 0        | 0.4146   | 0.81455   | NA        | RP11-606P | chr4  | + | 1.65E+08 | 1.65E+08 | 657  |
| ENSG000001 | 0        | 3.290593 | -3.2571  | 0.028994  | 0.055057  | KCNJ10    | chr1  | - | 1.6E+08  | 1.6E+08  | 5293 |
| ENSG000001 | 1093.689 | 83.77246 | 3.7012   | 5.33E-130 | 4.81E-128 | AC108142  | chr4  | - | 1.83E+08 | 1.83E+08 | 2260 |
| ENSG000001 | 1482.005 | 1205.31  | 0.29836  | 0.003819  | 0.008655  | CHID1     | chr11 | - | 867357   | 915058   | 3537 |
| ENSG000001 | 169.7308 | 32.06671 | 2.3827   | 2.83E-20  | 2.41E-19  | PCDHB9    | chr5  | + | 1.41E+08 | 1.41E+08 | 4217 |
| ENSG000001 | 13.16452 | 222.6351 | -4.0439  | 1.03E-33  | 1.50E-32  | ZNF620    | chr3  | + | 40547483 | 40560227 | 3291 |
| ENSG000001 | 252.7175 | 602.3098 | -1.2465  | 1.34E-08  | 5.63E-08  | ZNF518A   | chr10 | + | 97889472 | 97965044 | 8284 |
| ENSG000001 | 113.023  | 127.8867 | -0.17942 | 0.60458   | 0.69777   | TMEM187   | chrX  | + | 1.53E+08 | 1.53E+08 | 1880 |
| ENSG000001 | 8.672193 | 16.57677 | -0.8953  | 0.11634   | 0.18395   | CACYBPP2  | chr2  | - | 1.84E+08 | 1.84E+08 | 678  |
| ENSG000001 | 126.0415 | 138.051  | -0.12667 | 0.53216   | 0.63332   | CCDC23    | chr1  | - | 43272723 | 43282954 | 708  |
| ENSG000001 | 27.85512 | 29.39929 | -0.07943 | 0.84515   | 0.89145   | ZNF619    | chr3  | + | 40518604 | 40531727 | 4153 |
| ENSG000001 | 5.798278 | 19.2879  | -1.6681  | 0.004734  | 0.01058   | C12orf68  | chr12 | + | 48577366 | 48579709 | 2344 |
| ENSG000001 | 820.8725 | 646.02   | 0.34576  | 0.001353  | 0.00329   | AP3S1     | chr5  | + | 1.15E+08 | 1.15E+08 | 1730 |
| ENSG000001 | 1573.797 | 1340.846 | 0.23113  | 0.025712  | 0.049506  | GRB2      | chr17 | - | 73314157 | 73401790 | 3729 |
| ENSG000001 | 230.3291 | 38.38883 | 2.5721   | 1.91E-14  | 1.21E-13  | ZBTB41    | chr1  | - | 1.97E+08 | 1.97E+08 | 3779 |
| ENSG000001 | 1820.584 | 2090.697 | -0.19886 | 0.22243   | 0.31468   | UBE2N     | chr12 | - | 93799449 | 93836038 | 3671 |
| ENSG000001 | 0.290301 | 0.297015 | -0.00202 | 0.99909   | NA        | SPATA31C2 | chr9  | - | 90744220 | 90753361 | 3777 |
| ENSG000001 | 439.4832 | 888.5136 | -1.0146  | 3.87E-14  | 2.40E-13  | ARL6IP6   | chr2  | + | 1.54E+08 | 1.54E+08 | 2805 |
| ENSG000001 | 159.6501 | 170.9028 | -0.10198 | 0.61271   | 0.70493   | ZNF354C   | chr5  | + | 1.78E+08 | 1.79E+08 | 5411 |
| ENSG000001 | 117.7281 | 91.67858 | 0.35844  | 0.17197   | 0.25448   | MAMDC4    | chr9  | + | 1.4E+08  | 1.4E+08  | 4110 |
| ENSG000001 | 31.2975  | 40.32143 | -0.36151 | 0.37104   | 0.47549   | CENPBD1   | chr16 | - | 90036206 | 90038942 | 2737 |
| ENSG000001 | 1.774324 | 0.951736 | 0.65979  | 0.65895   | 0.74291   | ODF3      | chr11 | + | 196738   | 200261   | 3053 |
| ENSG000001 | 918.5236 | 358.392  | 1.3571   | 4.33E-27  | 4.92E-26  | BET1L     | chr11 | - | 167784   | 207428   | 2916 |
| ENSG000001 | 6654.892 | 10418.83 | -0.64568 | 1.68E-06  | 5.88E-06  | RPS27     | chr1  | + | 1.54E+08 | 1.54E+08 | 625  |
| ENSG000001 | 3033.753 | 1340.903 | 1.1758   | 2.05E-13  | 1.21E-12  | RIC8A     | chr11 | + | 207511   | 215113   | 3703 |
| ENSG000001 | 381.0814 | 1053.19  | -1.462   | 8.92E-19  | 7.06E-18  | IMP3      | chr15 | - | 75931426 | 75941047 | 2028 |
| ENSG000001 | 292.4838 | 88.83386 | 1.7129   | 6.05E-21  | 5.32E-20  | ASB8      | chr12 | - | 48541571 | 48574996 | 2615 |
| ENSG000001 | 0        | 8.072706 | -4.6042  | 0.000421  | 0.001104  | LCN15     | chr9  | - | 1.4E+08  | 1.4E+08  | 2885 |
| ENSG000001 | 8.227775 | 10.14294 | -0.29416 | 0.72224   | 0.79444   | ODF3B     | chr22 | - | 50968139 | 50971009 | 1722 |
| ENSG000001 | 95.58564 | 29.03588 | 1.7078   | 8.75E-10  | 4.06E-09  | DPY19L2   | chr12 | - | 63952693 | 64062719 | 4060 |
| ENSG000001 | 1.991846 | 1.669566 | 0.21381  | 0.87033   | 0.90959   | SPATA31E1 | chr9  | + | 90497741 | 90503814 | 4478 |
| ENSG000001 | 2.209369 | 3.24447  | -0.48512 | 0.64966   | 0.73559   | ZNRF3-AS1 | chr22 | - | 29420987 | 29427464 | 2170 |
| ENSG000001 | 0.36308  | 0        | 0.4146   | 0.81455   | NA        | C2orf73   | chr2  | + | 54557171 | 54610879 | 1921 |
| ENSG000001 | 2.717192 | 3.526915 | -0.31046 | 0.7869    | 0.84758   | GPR150    | chr5  | + | 94955782 | 94957846 | 2065 |
| ENSG000001 | 0        | 0.640152 | -0.82869 | 0.63935   | NA        | TSPYL6    | chr2  | - | 54480315 | 54483409 | 3095 |

|                    |          |          |           |          |           |       |   |          |          |       |
|--------------------|----------|----------|-----------|----------|-----------|-------|---|----------|----------|-------|
| ENSG000001228.5745 | 215.3643 | 0.084354 | 0.77182   | 0.83564  | FAM211B   | chr22 | - | 24981588 | 24989175 | 2943  |
| ENSG000001675.0063 | 547.0554 | 0.30283  | 0.17233   | 0.25492  | DMAP1     | chr1  | + | 44679127 | 44686353 | 4552  |
| ENSG0000019595.852 | 20.88952 | 8.8149   | 0         | 0        | ADAMTSL1  | chr9  | + | 18473892 | 18910948 | 8030  |
| ENSG000001369.3773 | 1.71569  | 7.554    | 4.75E-36  | 7.44E-35 | FAM26E    | chr6  | + | 1.17E+08 | 1.17E+08 | 9784  |
| ENSG0000012187.711 | 6000.601 | -1.4536  | 1.80E-26  | 2.00E-25 | IMPDPH2   | chr3  | - | 49061758 | 49066841 | 1643  |
| ENSG00000116.83738 | 130.0951 | -2.9302  | 1.38E-19  | 1.14E-18 | ALS2CL    | chr3  | - | 46710487 | 46735194 | 6593  |
| ENSG000001167.4403 | 199.0249 | -0.24866 | 0.2282    | 0.32126  | MLF1      | chr3  | + | 1.58E+08 | 1.58E+08 | 3048  |
| ENSG0000010        | 0.654722 | -0.83442 | 0.63731   | NA       | PRSS42    | chr3  | - | 46871032 | 46875585 | 1280  |
| ENSG000001540.761  | 240.2391 | 1.1683   | 1.17E-17  | 8.86E-17 | NDUFAF3   | chr3  | + | 49057892 | 49060928 | 2012  |
| ENSG000001267.5402 | 403.3778 | -0.59238 | 0.000555  | 0.00143  | C2orf69   | chr2  | + | 2.01E+08 | 2.01E+08 | 3728  |
| ENSG00000138.2921  | 25.21765 | 0.58719  | 0.12499   | 0.19535  | GRAMD1C   | chr3  | + | 1.14E+08 | 1.14E+08 | 4177  |
| ENSG00000127.05618 | 397.7135 | -3.8506  | 7.72E-52  | 1.86E-50 | STAP2     | chr19 | - | 4324040  | 4342783  | 2043  |
| ENSG0000012.229907 | 9.540794 | -1.9236  | 0.038218  | 0.0705   | ULK4P3    | chr15 | + | 30395923 | 30423960 | 1158  |
| ENSG0000017.04424  | 1.713273 | 1.893    | 0.05106   | 0.090605 | TWF1P1    | chr17 | - | 27530441 | 27531492 | 1050  |
| ENSG0000010        | 1.40169  | -1.7271  | 0.32809   | NA       | HTR3C     | chr3  | + | 1.84E+08 | 1.84E+08 | 1697  |
| ENSG00000126.54657 | 134.8273 | -2.3173  | 2.84E-09  | 1.26E-08 | TSSK6     | chr19 | - | 19623222 | 19627004 | 2513  |
| ENSG00000196.75026 | 169.6729 | -0.8054  | 0.0095    | 0.020044 | BOLA1     | chr1  | + | 1.5E+08  | 1.5E+08  | 1096  |
| ENSG0000011898.017 | 584.4294 | 1.6982   | 2.95E-57  | 8.08E-56 | PDE4DIP   | chr1  | - | 1.45E+08 | 1.45E+08 | 8824  |
| ENSG000001558.4915 | 773.4603 | -0.46853 | 0.000549  | 0.001415 | DDX10     | chr11 | + | 1.09E+08 | 1.09E+08 | 6707  |
| ENSG0000010.36308  | 0.343138 | -0.0021  | 0.99905   | NA       | RP11-998E | chr14 | + | 21576202 | 21584862 | 358   |
| ENSG0000015.861684 | 1.280305 | 1.9455   | 0.072798  | 0.12324  | GOLGA8Q   | chr15 | + | 30844183 | 30854704 | 1899  |
| ENSG0000010.632843 | 1.309443 | -0.75604 | 0.63051   | 0.71982  | PPP1R42   | chr8  | - | 67876334 | 67968839 | 1282  |
| ENSG00000118.82841 | 28.97847 | -0.60988 | 0.19218   | 0.27933  | NDUFV2    | chr18 | + | 9102628  | 9134343  | 942   |
| ENSG0000011.774324 | 1.98115  | -0.16276 | 0.90045   | 0.93109  | RP1-232L2 | chrX  | - | 1.01E+08 | 1.01E+08 | 1570  |
| ENSG000001502.2419 | 525.4243 | -0.06529 | 0.70251   | 0.77873  | DALRD3    | chr3  | - | 49052921 | 49059726 | 2987  |
| ENSG00000117.99002 | 195.7601 | -3.4293  | 3.02E-30  | 3.88E-29 | ZNF114    | chr19 | + | 48675575 | 48790865 | 2478  |
| ENSG0000010.36308  | 54.80056 | -6.5087  | 3.33E-10  | 1.59E-09 | AC140481  | chr2  | - | 1.31E+08 | 1.31E+08 | 3992  |
| ENSG000001491.7798 | 395.1677 | 0.31359  | 0.18342   | 0.26856  | ZNF518B   | chr4  | - | 10441498 | 10459034 | 6894  |
| ENSG0000010        | 5.750835 | -4.0924  | 0.00284   | 0.006573 | AMER3     | chr2  | + | 1.32E+08 | 1.32E+08 | 6172  |
| ENSG0000010.342542 | 0        | 0.4146   | 0.81455   | NA       | SPINK6    | chr5  | + | 1.48E+08 | 1.48E+08 | 686   |
| ENSG000001215.1553 | 157.1964 | 0.45303  | 0.048976  | 0.087408 | LCORL     | chr4  | - | 17844839 | 18023499 | 5009  |
| ENSG000001454.3806 | 613.1345 | -0.43212 | 0.014961  | 0.030318 | PARD6G    | chr18 | - | 77915115 | 78005429 | 3868  |
| ENSG0000013.112789 | 49.86638 | -3.9325  | 8.68E-11  | 4.31E-10 | ZNF454    | chr5  | + | 1.78E+08 | 1.78E+08 | 2332  |
| ENSG000001991.7436 | 1001.545 | -0.01388 | 0.91902   | 0.94545  | SH2B1     | chr16 | + | 28857921 | 28885526 | 6043  |
| ENSG0000012.738544 | 2.757256 | -0.0085  | 0.99401   | 0.99669  | ZC3H12D   | chr6  | - | 1.5E+08  | 1.5E+08  | 3046  |
| ENSG0000012.085163 | 0.937167 | 0.89024  | 0.52421   | 0.62641  | VN1R1     | chr19 | - | 57966542 | 57967854 | 1313  |
| ENSG0000011914.484 | 338.2097 | 2.4979   | 6.23E-100 | 3.52E-98 | KDEL2     | chr11 | - | 1.08E+08 | 1.08E+08 | 4374  |
| ENSG00000147996.6  | 8398.79  | 2.5088   | 1.66E-48  | 3.65E-47 | PLEC      | chr8  | - | 1.45E+08 | 1.45E+08 | 15249 |
| ENSG0000010.72616  | 1.874334 | -1.0193  | 0.52499   | 0.62698  | SH2D4B    | chr10 | + | 82297658 | 82406316 | 3983  |
| ENSG0000012.407167 | 11.94034 | -2.198   | 0.009816  | 0.020661 | RNF212    | chr4  | - | 1050038  | 1107350  | 2332  |
| ENSG0000016.16315  | 22.47496 | -1.7886  | 0.009482  | 0.020013 | PRSS36    | chr16 | - | 31150246 | 31161415 | 2840  |
| ENSG00000192.33471 | 179.6246 | -0.95872 | 1.02E-05  | 3.28E-05 | SHF543    | chr19 | + | 57831877 | 57842144 | 3659  |
| ENSG00000122.30346 | 246.3697 | -3.4305  | 3.64E-33  | 5.23E-32 | TMEM151E  | chr6  | + | 44238203 | 44346694 | 4895  |
| ENSG000001672.6084 | 416.2159 | 0.6892   | 0.001569  | 0.003773 | GALNT11   | chr7  | + | 1.52E+08 | 1.52E+08 | 3863  |
| ENSG00000118.54748 | 19.91677 | -0.1012  | 0.82828   | 0.87901  | SLITRK1   | chr13 | - | 84451344 | 84456528 | 5185  |
| ENSG0000013685.576 | 3758.959 | -0.02832 | 0.83935   | 0.88732  | WDR6      | chr3  | + | 49044495 | 49053386 | 4401  |
| ENSG000001300.2331 | 362.7079 | -0.27019 | 0.3263    | 0.42918  | GEN1      | chr2  | + | 17935125 | 17966632 | 6367  |
| ENSG00000122.49091 | 36.96061 | -0.71298 | 0.12403   | 0.1941   | TMPRSS9   | chr19 | + | 2389769  | 2426237  | 3331  |
| ENSG00000120.04088 | 42.16428 | -1.0601  | 0.007524  | 0.016176 | AQP11     | chr11 | + | 77300436 | 77321400 | 2152  |
| ENSG000001524.5365 | 627.5501 | -0.25821 | 0.043325  | 0.078592 | TMEM11    | chr17 | - | 21100593 | 21117937 | 2095  |
| ENSG000001101.6356 | 105.2465 | -0.0535  | 0.84327   | 0.89005  | ZNF354B   | chr5  | + | 1.78E+08 | 1.78E+08 | 2802  |
| ENSG0000016.492735 | 17.94133 | -1.398   | 0.064444  | 0.11106  | KCNG2     | chr18 | + | 77623668 | 77660184 | 1538  |
| ENSG00000197.14074 | 452.2971 | -2.1984  | 2.15E-12  | 1.19E-11 | SHISA3    | chr4  | + | 42399856 | 42404504 | 1971  |
| ENSG0000010        | 0.357707 | -0.41864 | 0.81278   | NA       | OR2D3     | chr11 | + | 6942205  | 6943264  | 1060  |
| ENSG000001145.7732 | 71.4873  | 1.0284   | 1.59E-05  | 4.98E-05 | ZFAND2A   | chr7  | - | 1191707  | 1200395  | 1084  |
| ENSG000001107.9331 | 45.41841 | 1.2379   | 1.82E-06  | 6.36E-06 | PLEKHM3   | chr2  | - | 2.09E+08 | 2.09E+08 | 3689  |
| ENSG00000114.85409 | 8.729844 | 0.76129  | 0.19284   | 0.28013  | ZNF223    | chr19 | + | 44555520 | 44572144 | 2418  |
| ENSG0000011.068702 | 6.857926 | -2.385   | 0.041496  | 0.075679 | HTR1A     | chr5  | - | 63256183 | 63258334 | 1598  |
| ENSG0000010        | 0.297015 | -0.41864 | 0.81278   | NA       | C1orf65   | chr1  | + | 2.24E+08 | 2.24E+08 | 2098  |
| ENSG000001347.2083 | 381.3878 | -0.13489 | 0.58465   | 0.68049  | FAM220A   | chr7  | - | 6369040  | 6388612  | 2214  |
| ENSG00000118.5064  | 4.395268 | 2.0258   | 0.001555  | 0.003743 | DNAJC22   | chr12 | + | 49740700 | 49751309 | 2628  |
| ENSG0000010        | 0.686276 | -0.84936 | 0.6309    | NA       | NEUROG2   | chr4  | - | 1.13E+08 | 1.13E+08 | 2287  |
| ENSG00000138.10205 | 11.37384 | 1.7081   | 0.000125  | 0.000353 | CTD-2373F | chr17 | - | 76866992 | 76899299 | 2090  |
| ENSG000001262.7776 | 1581.525 | -2.5694  | 9.20E-17  | 6.64E-16 | BEND3     | chr6  | - | 1.07E+08 | 1.07E+08 | 6644  |
| ENSG0000012.116866 | 2.416535 | -0.16046 | 0.90986   | 0.93808  | RP11-567A | chr18 | - | 77398928 | 77439745 | 1111  |

|            |          |          |          |           |           |            |       |   |          |          |       |
|------------|----------|----------|----------|-----------|-----------|------------|-------|---|----------|----------|-------|
| ENSG000001 | 237.9754 | 476.6137 | -0.9984  | 2.52E-12  | 1.39E-11  | NT5DC1     | chr6  | + | 1.16E+08 | 1.17E+08 | 3118  |
| ENSG000001 | 3.475055 | 10.20035 | -1.4494  | 0.064662  | 0.11136   | RPS3AP5    | chr10 | + | 86320199 | 86321019 | 786   |
| ENSG000001 | 1.991846 | 4.899467 | -1.1939  | 0.23676   | 0.33088   | AC006111.1 | chr16 | + | 3725411  | 3727060  | 1649  |
| ENSG000001 | 38.16529 | 22.09369 | 0.78127  | 0.053968  | 0.095068  | LINC00843  | chr10 | + | 51732523 | 51741813 | 562   |
| ENSG000001 | 140.9349 | 4145.594 | -4.8739  | 0         | 0         | GLDC       | chr9  | - | 6532464  | 6645650  | 3767  |
| ENSG000001 | 232.4896 | 231.2025 | 0.008479 | 0.95538   | 0.97246   | COX14      | chr12 | + | 50505762 | 50559203 | 739   |
| ENSG000001 | 13.87014 | 26.50924 | -0.92137 | 0.03596   | 0.066778  | H3F3AP6    | chr4  | - | 1.41E+08 | 1.41E+08 | 411   |
| ENSG000001 | 4.659403 | 23.07544 | -2.2114  | 0.002489  | 0.005803  | MCMD2      | chr8  | + | 67782984 | 67834283 | 5096  |
| ENSG000001 | 0        | 0.343138 | -0.41864 | 0.81278   | NA        | TUBAL3     | chr10 | - | 5435061  | 5446793  | 1798  |
| ENSG000001 | 20.98716 | 20.87737 | 0.00292  | 0.99462   | 0.99686   | CTD-2192J  | chr19 | - | 12754089 | 12754733 | 645   |
| ENSG000001 | 224.376  | 260.0228 | -0.212   | 0.42043   | 0.5259    | P4HTM      | chr3  | + | 49027319 | 49044587 | 5285  |
| ENSG000001 | 534.6671 | 475.2518 | 0.16866  | 0.18683   | 0.27271   | DTX3       | chr12 | + | 57998405 | 58003587 | 3199  |
| ENSG000001 | 95.05981 | 103.8179 | -0.12169 | 0.61282   | 0.70497   | KLHL11     | chr17 | - | 40009797 | 40021684 | 2383  |
| ENSG000001 | 677.1927 | 762.2924 | -0.17028 | 0.26867   | 0.3676    | CTXN1      | chr19 | - | 7989372  | 7991051  | 1272  |
| ENSG000001 | 203.3567 | 81.68207 | 1.3117   | 1.60E-11  | 8.36E-11  | SLC25A20   | chr3  | - | 48894369 | 48936426 | 1879  |
| ENSG000001 | 0.653381 | 187.0016 | -7.5864  | 2.01E-19  | 1.64E-18  | CA8        | chr8  | - | 61099906 | 61193971 | 3812  |
| ENSG000001 | 668.617  | 325.2562 | 1.0384   | 3.24E-16  | 2.27E-15  | EPM2AIP1   | chr3  | - | 37027357 | 37034795 | 7439  |
| ENSG000001 | 7.084503 | 24.8631  | -1.7473  | 0.001598  | 0.003837  | ERBB4      | chr2  | - | 2.12E+08 | 2.13E+08 | 12132 |
| ENSG000001 | 576.4627 | 115.5295 | 2.3049   | 1.60E-22  | 1.51E-21  | MAF        | chr16 | - | 79619740 | 79634611 | 6384  |
| ENSG000001 | 1204.577 | 652.6033 | 0.88262  | 1.50E-11  | 7.88E-11  | CTNNBIP1   | chr1  | - | 9908334  | 9970394  | 3000  |
| ENSG000001 | 2.250445 | 1.043983 | 0.8999   | 0.534     | 0.63491   | PSAPL1     | chr4  | - | 7432022  | 7436700  | 4679  |
| ENSG000001 | 0.36308  | 0        | 0.4146   | 0.81455   | NA        | OTOS       | chr2  | - | 2.41E+08 | 2.41E+08 | 642   |
| ENSG000001 | 1290.691 | 995.5539 | 0.37437  | 0.006045  | 0.013251  | GTPBP6     | chrX  | - | 220025   | 230886   | 2016  |
| ENSG000001 | 158.5542 | 50.0582  | 1.649    | 2.63E-08  | 1.08E-07  | ERN1       | chr17 | - | 62120353 | 62207504 | 4025  |
| ENSG000001 | 4.761279 | 2.263595 | 0.96103  | 0.37656   | 0.48058   | GPR35      | chr2  | + | 2.42E+08 | 2.42E+08 | 2249  |
| ENSG000001 | 4.781817 | 5.087249 | -0.08552 | 0.92365   | 0.94857   | ACTG1P1    | chr3  | + | 1.39E+08 | 1.39E+08 | 1129  |
| ENSG000001 | 0.632843 | 4.478651 | -2.3796  | 0.056795  | 0.099473  | RP11-455C  | chr4  | - | 1.2E+08  | 1.2E+08  | 2097  |
| ENSG000001 | 2.86275  | 4.867912 | -0.69805 | 0.45497   | 0.56028   | AL513477.  | chr1  | + | 2316811  | 2319922  | 3110  |
| ENSG000001 | 0        | 0.594029 | -0.81444 | 0.64499   | NA        | C10orf53   | chr10 | + | 50887697 | 50918307 | 2415  |
| ENSG000001 | 2.334388 | 2.728118 | -0.19323 | 0.86338   | 0.90467   | ARMC10P1   | chr3  | - | 94225610 | 94226464 | 855   |
| ENSG000001 | 213.4779 | 82.8792  | 1.3538   | 6.01E-06  | 1.98E-05  | CSRN3      | chr2  | + | 1.66E+08 | 1.67E+08 | 11788 |
| ENSG000001 | 47.77098 | 30.22393 | 0.65384  | 0.045326  | 0.081599  | ZNF713     | chr7  | + | 55955169 | 56009918 | 3550  |
| ENSG000001 | 60.04227 | 56.98239 | 0.079627 | 0.77392   | 0.83729   | PARP10     | chr8  | - | 1.45E+08 | 1.45E+08 | 3497  |
| ENSG000001 | 0        | 3.679854 | -3.4118  | 0.020515  | 0.040357  | DYNAP      | chr18 | + | 52254988 | 52266724 | 2027  |
| ENSG000001 | 704.285  | 577.537  | 0.28558  | 0.099035  | 0.16013   | SUZ12      | chr17 | + | 30264037 | 30328064 | 4491  |
| ENSG000001 | 128.6392 | 84.42718 | 0.60187  | 0.011249  | 0.023383  | NSUN3      | chr3  | + | 93781760 | 93847389 | 3289  |
| ENSG000001 | 1503.889 | 309.8576 | 2.2758   | 3.03E-51  | 7.18E-50  | KCTD12     | chr13 | - | 77454312 | 77460540 | 6214  |
| ENSG000001 | 124.0658 | 74.50855 | 0.73297  | 0.02142   | 0.04198   | DHFR1      | chr3  | - | 93766680 | 93782233 | 4038  |
| ENSG000001 | 77.40205 | 1580.47  | -4.3469  | 9.99E-158 | 1.29E-155 | RPP25      | chr15 | - | 75246757 | 75249805 | 3049  |
| ENSG000001 | 1567.765 | 1017.677 | 0.6234   | 4.51E-07  | 1.66E-06  | GRINA      | chr8  | + | 1.45E+08 | 1.45E+08 | 1968  |
| ENSG000001 | 0.943682 | 0        | 1.2438   | 0.48556   | NA        | C5orf64    | chr5  | + | 60933535 | 61047590 | 2970  |
| ENSG000001 | 0        | 0.654722 | -0.83442 | 0.63731   | NA        | GLULP4     | chr9  | + | 34917172 | 34918293 | 1122  |
| ENSG000001 | 2.572449 | 19.97901 | -2.7969  | 0.000205  | 0.00056   | THBD       | chr20 | - | 23026270 | 23030378 | 4109  |
| ENSG000001 | 0        | 0.357707 | -0.41864 | 0.81278   | NA        | GP5        | chr3  | - | 1.94E+08 | 1.94E+08 | 3534  |
| ENSG000001 | 822.0579 | 1761.166 | -1.0985  | 1.07E-22  | 1.02E-21  | COX5A      | chr15 | - | 75212132 | 75230509 | 1268  |
| ENSG000001 | 1.649304 | 4.22776  | -1.2354  | 0.23904   | 0.33364   | STX19      | chr3  | - | 93733213 | 93747454 | 1158  |
| ENSG000001 | 154.9438 | 168.7447 | -0.12398 | 0.63379   | 0.72255   | FAM132B    | chr2  | + | 2.39E+08 | 2.39E+08 | 2307  |
| ENSG000001 | 508.2745 | 466.6038 | 0.1222   | 0.37902   | 0.48314   | FAM219B    | chr15 | - | 75192328 | 75199462 | 4706  |
| ENSG000001 | 314.1622 | 647.9362 | -1.0426  | 3.06E-11  | 1.58E-10  | ZHX2       | chr8  | + | 1.24E+08 | 1.24E+08 | 4622  |
| ENSG000001 | 4.170326 | 0.715414 | 2.1015   | 0.1248    | 0.19507   | CPN2       | chr3  | - | 1.94E+08 | 1.94E+08 | 3028  |
| ENSG000001 | 86.3815  | 206.4099 | -1.254   | 1.33E-08  | 5.56E-08  | CPNE7      | chr16 | + | 89642176 | 89663654 | 2657  |
| ENSG000001 | 0.342542 | 13.44394 | -4.4547  | 0.00033   | 0.000879  | C5orf46    | chr5  | - | 1.47E+08 | 1.47E+08 | 573   |
| ENSG000001 | 1.265686 | 0        | 1.6147   | 0.36215   | NA        | CD300LB    | chr17 | - | 72517313 | 72527613 | 2286  |
| ENSG000001 | 1.608228 | 1.66715  | -0.03103 | 0.98267   | 0.99021   | GDPD4      | chr11 | - | 76927603 | 77012732 | 2533  |
| ENSG000001 | 436.9349 | 619.6711 | -0.50245 | 0.000532  | 0.001375  | MPI        | chr15 | + | 75182346 | 75191798 | 3066  |
| ENSG000001 | 10.3532  | 7.204353 | 0.50579  | 0.45653   | 0.56183   | ADORA2A-7  | chr22 | - | 24825178 | 24891042 | 2568  |
| ENSG000001 | 2.810509 | 3.394993 | -0.21373 | 0.85976   | 0.90176   | TRIM73     | chr7  | + | 75024337 | 75040279 | 3875  |
| ENSG000001 | 477.7135 | 628.9207 | -0.39567 | 0.052045  | 0.092132  | OPLAH      | chr8  | - | 1.45E+08 | 1.45E+08 | 4033  |
| ENSG000001 | 12.85368 | 152.3005 | -3.5372  | 7.86E-26  | 8.49E-25  | TMEM52     | chr1  | - | 1849029  | 1850712  | 1118  |
| ENSG000001 | 1.669842 | 11.6393  | -2.6165  | 0.004233  | 0.009523  | TMEM139    | chr7  | + | 1.43E+08 | 1.43E+08 | 2383  |
| ENSG000001 | 32.23441 | 30.06213 | 0.088675 | 0.83393   | 0.8832    | EFCAB13    | chr17 | + | 45400656 | 45518678 | 3931  |
| ENSG000001 | 1055.846 | 50.88834 | 4.3595   | 2.00E-77  | 8.15E-76  | MSC        | chr8  | - | 72753784 | 72756703 | 2023  |
| ENSG000001 | 53.91261 | 15.17266 | 1.8085   | 7.71E-07  | 2.78E-06  | APOLD1     | chr12 | + | 12878865 | 12944400 | 4646  |
| ENSG000001 | 70.55994 | 155.5287 | -1.1307  | 3.54E-06  | 1.20E-05  | FAM101A    | chr12 | + | 1.25E+08 | 1.25E+08 | 2148  |
| ENSG000001 | 166.5021 | 211.0275 | -0.33789 | 0.078168  | 0.13092   | EXOSC4     | chr8  | + | 1.45E+08 | 1.45E+08 | 1065  |

|            |          |          |          |          |          |           |       |   |          |          |      |
|------------|----------|----------|----------|----------|----------|-----------|-------|---|----------|----------|------|
| ENSG000001 | 1091.818 | 1008.178 | 0.11505  | 0.29836  | 0.4002   | DPY19L3   | chr19 | + | 32896655 | 32976801 | 6015 |
| ENSG000001 | 882.7356 | 833.8416 | 0.081875 | 0.49971  | 0.60339  | TAF7      | chr5  | - | 1.41E+08 | 1.41E+08 | 2274 |
| ENSG000001 | 63.37421 | 85.46404 | -0.43432 | 0.12652  | 0.19724  | ZNF852    | chr3  | - | 44540462 | 44552128 | 3535 |
| ENSG000001 | 0        | 0.343138 | -0.41864 | 0.81278  | NA       | FOXE1     | chr9  | + | 1.01E+08 | 1.01E+08 | 3451 |
| ENSG000001 | 1750.721 | 4084.305 | -1.2188  | 2.62E-11 | 1.35E-10 | PFAS      | chr17 | + | 8150936  | 8173809  | 5371 |
| ENSG000001 | 62.92833 | 31.13196 | 1.0055   | 0.001813 | 0.004318 | HYI       | chr1  | - | 43916824 | 43919660 | 2173 |
| ENSG000001 | 1476.97  | 1062.012 | 0.47553  | 4.49E-05 | 0.000133 | C17orf62  | chr17 | - | 80400465 | 80408705 | 4327 |
| ENSG000001 | 0        | 0.357707 | -0.41864 | 0.81278  | NA       | TPRX1     | chr19 | - | 48304500 | 48322308 | 2059 |
| ENSG000001 | 0.632843 | 0        | 0.81931  | 0.64303  | NA       | LGALS7B   | chr19 | + | 39279851 | 39282389 | 532  |
| ENSG000001 | 70.62074 | 142.0165 | -0.99631 | 3.19E-05 | 9.64E-05 | ZNF552    | chr19 | - | 58315209 | 58326281 | 2352 |
| ENSG000001 | 8.766323 | 125.4053 | -3.8032  | 8.82E-19 | 6.99E-18 | LINC00086 | chrX  | + | 1.35E+08 | 1.35E+08 | 2913 |
| ENSG000001 | 2283.443 | 2415.202 | -0.08102 | 0.46347  | 0.56852  | GAK       | chr4  | - | 843064   | 926161   | 4442 |
| ENSG000001 | 1127.527 | 806.8008 | 0.48178  | 0.000332 | 0.000883 | ZBTB7A    | chr19 | - | 4044362  | 4066943  | 5422 |
| ENSG000001 | 3733.495 | 5660.639 | -0.59969 | 1.49E-09 | 6.75E-09 | TUFM      | chr16 | - | 28853732 | 28857729 | 2071 |
| ENSG000001 | 2.551911 | 0.715414 | 1.498    | 0.29758  | 0.39953  | C1orf173  | chr1  | - | 75033795 | 75139422 | 7159 |
| ENSG000001 | 201.1871 | 411.8713 | -1.0279  | 1.71E-07 | 6.55E-07 | RMI1      | chr9  | + | 86595626 | 86618985 | 3416 |
| ENSG000001 | 174.9367 | 288.5121 | -0.72239 | 5.62E-05 | 0.000165 | CTC1      | chr17 | - | 8130191  | 8151362  | 4797 |
| ENSG000001 | 8.516284 | 19.98962 | -1.1942  | 0.049628 | 0.088417 | AC097658  | chr4  | - | 1.44E+08 | 1.44E+08 | 2552 |
| ENSG000001 | 535.3574 | 257.7184 | 1.0509   | 3.11E-07 | 1.17E-06 | FBXO34    | chr14 | + | 55738021 | 55828636 | 3464 |
| ENSG000001 | 6.26584  | 3.619162 | 0.74187  | 0.37394  | 0.47829  | LINC00324 | chr17 | - | 8123960  | 8127361  | 2082 |
| ENSG000001 | 1855.09  | 2461.718 | -0.40715 | 0.000577 | 0.001485 | SEPW1     | chr19 | + | 48281829 | 48287943 | 2503 |
| ENSG000001 | 1470.038 | 2573.541 | -0.80668 | 7.38E-13 | 4.23E-12 | EIF3K     | chr19 | + | 39109735 | 39127595 | 1327 |
| ENSG000001 | 863.5422 | 834.7485 | 0.049182 | 0.72056  | 0.7933   | MRFAP1L1  | chr4  | - | 6709428  | 6711607  | 2127 |
| ENSG000001 | 1043.089 | 673.2894 | 0.63082  | 1.75E-07 | 6.69E-07 | SNX18     | chr5  | + | 53813589 | 53842415 | 5375 |
| ENSG000001 | 0.290301 | 5.551772 | -3.3168  | 0.012766 | 0.026258 | EXD1      | chr15 | - | 41474923 | 41522941 | 2942 |
| ENSG000001 | 915.198  | 2579.683 | -1.494   | 3.09E-42 | 5.76E-41 | AURKB     | chr17 | - | 8108056  | 8113918  | 1249 |
| ENSG000001 | 9.274147 | 10.46581 | -0.17779 | 0.76828  | 0.83251  | C14orf39  | chr14 | - | 60863187 | 60982261 | 2813 |
| ENSG000001 | 5946.254 | 5563.776 | 0.095831 | 0.46187  | 0.56694  | MRFAP1    | chr4  | + | 6641818  | 6644472  | 2049 |
| ENSG000001 | 246.5634 | 238.9374 | 0.045552 | 0.84277  | 0.88975  | C3orf38   | chr3  | + | 88198893 | 88207118 | 2633 |
| ENSG000001 | 0        | 340.4031 | -9.7138  | 9.31E-19 | 7.37E-18 | KLHDC7A   | chr1  | + | 18807424 | 18812478 | 5055 |
| ENSG000001 | 116.1874 | 91.2326  | 0.34752  | 0.10818  | 0.17257  | TMEM107   | chr17 | - | 8076555  | 8079717  | 2358 |
| ENSG000001 | 0.632843 | 1.40169  | -0.81226 | 0.60442  | 0.69769  | LLOXNC01  | chrX  | + | 1E+08    | 1E+08    | 778  |
| ENSG000001 | 3.64115  | 2.635871 | 0.42293  | 0.66614  | 0.74915  | AP001885  | chr11 | - | 66963391 | 66964638 | 1248 |
| ENSG000001 | 282.9305 | 807.6373 | -1.5049  | 4.01E-09 | 1.76E-08 | RRS1      | chr8  | + | 67341263 | 67342966 | 1704 |
| ENSG000001 | 22.41813 | 43.27707 | -0.9426  | 0.010554 | 0.022077 | EXOCL1    | chr16 | - | 67218269 | 67224107 | 2510 |
| ENSG000001 | 2.604151 | 1205.845 | -8.627   | 9.80E-59 | 2.76E-57 | TRIML2    | chr4  | - | 1.89E+08 | 1.89E+08 | 1639 |
| ENSG000001 | 5484.206 | 13719.06 | -1.3205  | 3.99E-19 | 3.22E-18 | RCC2      | chr1  | - | 17733256 | 17766220 | 4087 |
| ENSG000001 | 5.476274 | 13.6326  | -1.2549  | 0.079409 | 0.13266  | IGSF22    | chr11 | - | 18725852 | 18747777 | 4284 |
| ENSG000001 | 5.891595 | 0.343138 | 3.3621   | 0.011013 | 0.022933 | C9orf50   | chr9  | - | 1.32E+08 | 1.32E+08 | 1620 |
| ENSG000001 | 0        | 4.225344 | -3.3111  | 0.038939 | 0.071669 | ZFP42     | chr4  | + | 1.89E+08 | 1.89E+08 | 2651 |
| ENSG000001 | 0.290301 | 2.278164 | -2.0711  | 0.17214  | 0.25471  | AC012074  | chr2  | - | 25592818 | 25593185 | 366  |
| ENSG000001 | 0        | 5.101818 | -3.8074  | 0.009321 | 0.019693 | AC020907  | chr19 | + | 35596873 | 35598141 | 1269 |
| ENSG000001 | 1.359003 | 0        | 1.8987   | 0.26617  | NA       | CCDC89    | chr11 | - | 85394893 | 85397320 | 2428 |
| ENSG000001 | 6.649458 | 5.413402 | 0.25989  | 0.78681  | 0.84755  | C9orf106  | chr9  | + | 1.32E+08 | 1.32E+08 | 3145 |
| ENSG000001 | 4.616536 | 8.01443  | -0.7561  | 0.31203  | 0.4141   | FAM133A   | chrX  | + | 92929012 | 92967273 | 3416 |
| ENSG000001 | 361.8679 | 413.6193 | -0.19266 | 0.26294  | 0.3611   | DPM3      | chr1  | - | 1.55E+08 | 1.55E+08 | 517  |
| ENSG000001 | 0        | 0.357707 | -0.41864 | 0.81278  | NA       | C12orf42  | chr12 | - | 1.04E+08 | 1.04E+08 | 2090 |
| ENSG000001 | 2393.507 | 3870.17  | -0.6926  | 5.42E-12 | 2.92E-11 | CYC1      | chr8  | + | 1.45E+08 | 1.45E+08 | 1832 |
| ENSG000001 | 503.8028 | 845.5919 | -0.74497 | 2.55E-05 | 7.81E-05 | PER1      | chr17 | - | 8043790  | 8059824  | 4707 |
| ENSG000001 | 3.278071 | 5.07268  | -0.59856 | 0.51731  | 0.62002  | HTR1F     | chr3  | + | 88039846 | 88042919 | 3074 |
| ENSG000001 | 2.032922 | 5.782389 | -1.363   | 0.20505  | 0.29435  | RP11-349N | chrX  | + | 1.23E+08 | 1.23E+08 | 400  |
| ENSG000001 | 338.7237 | 100.3761 | 1.7443   | 1.18E-11 | 6.21E-11 | TMTC2     | chr12 | + | 83080659 | 83528649 | 6211 |
| ENSG000001 | 64.80713 | 36.40861 | 0.82085  | 0.03399  | 0.063473 | HES7      | chr17 | - | 8023908  | 8027410  | 1674 |
| ENSG000001 | 1682.892 | 2146.49  | -0.35025 | 0.010188 | 0.021388 | FARSA     | chr19 | - | 13033293 | 13044851 | 2057 |
| ENSG000001 | 742.0495 | 360.0898 | 1.0427   | 3.44E-15 | 2.28E-14 | SPTY2D1   | chr11 | - | 18627948 | 18656338 | 5754 |
| ENSG000001 | 0.36308  | 0        | 0.4146   | 0.81455  | NA       | RP11-458F | chr7  | + | 66379568 | 66379930 | 363  |
| ENSG000001 | 2.064625 | 0.937167 | 0.88954  | 0.51638  | 0.61915  | C10orf67  | chr10 | - | 23556124 | 23633774 | 2799 |
| ENSG000001 | 2688.496 | 3127.113 | -0.21791 | 0.057058 | 0.099849 | SAMD4B    | chr19 | + | 39833036 | 39876350 | 4519 |
| ENSG000001 | 0        | 1.888903 | -2.3653  | 0.15293  | NA       | LINC00670 | chr17 | + | 12453099 | 12546171 | 2953 |
| ENSG000001 | 0        | 0.357707 | -0.41864 | 0.81278  | NA       | MTUS2-AS1 | chr13 | - | 30050652 | 30061887 | 1114 |
| ENSG000001 | 1.524285 | 0.343138 | 1.4176   | 0.39874  | NA       | GIMAP7    | chr7  | + | 1.5E+08  | 1.5E+08  | 1256 |
| ENSG000001 | 1.016461 | 3.921881 | -1.5611  | 0.28037  | 0.38124  | ALOXE3    | chr17 | - | 7999218  | 8022365  | 3362 |
| ENSG000001 | 935.9963 | 999.7203 | -0.09458 | 0.37684  | 0.48089  | EDC3      | chr15 | - | 74922899 | 74988633 | 3763 |
| ENSG000001 | 274.8468 | 138.9824 | 0.98455  | 1.42E-06 | 5.01E-06 | TCAIM     | chr3  | + | 44379611 | 44450943 | 3687 |
| ENSG000001 | 0        | 0.654722 | -0.83442 | 0.63731  | NA       | RP11-480N | chr6  | + | 43331217 | 43331957 | 741  |

|            |          |          |          |           |           |           |       |   |          |          |       |
|------------|----------|----------|----------|-----------|-----------|-----------|-------|---|----------|----------|-------|
| ENSG000001 | 54.01195 | 112.2404 | -1.0542  | 0.000706  | 0.001793  | FUCA1     | chr1  | - | 24171567 | 24194784 | 2047  |
| ENSG000001 | 0.290301 | 2.800964 | -2.1414  | 0.18767   | 0.2737    | PXT1      | chr6  | - | 36358328 | 36410666 | 2108  |
| ENSG000001 | 72.8209  | 35.90354 | 1.0167   | 0.005669  | 0.012485  | GGN       | chr19 | - | 38874905 | 38878722 | 2239  |
| ENSG000001 | 0        | 299.0216 | -9.5998  | 4.43E-19  | 3.56E-18  | TMEM125   | chr1  | + | 43735665 | 43739673 | 1850  |
| ENSG000001 | 1364.263 | 1731.781 | -0.34403 | 0.001401  | 0.003398  | ZNF664    | chr12 | + | 1.24E+08 | 1.24E+08 | 5108  |
| ENSG000001 | 0        | 0.715414 | -0.84936 | 0.6309    | NA        | SIGLEC1   | chr19 | + | 51749603 | 51772584 | 1708  |
| ENSG000001 | 26817.49 | 11493.44 | 1.22     | 1.06E-14  | 6.80E-14  | CALR      | chr19 | + | 13049392 | 13055303 | 1903  |
| ENSG000001 | 0.72616  | 2.918317 | -1.6583  | 0.24127   | 0.33624   | LINC00311 | chr16 | + | 85316564 | 85319569 | 1566  |
| ENSG000001 | 14318.84 | 2982.821 | 2.2614   | 1.56E-118 | 1.18E-116 | MAGED1    | chrX  | + | 51546103 | 51645453 | 5418  |
| ENSG000001 | 57.68816 | 81.34397 | -0.49426 | 0.14137   | 0.21563   | RP11-111N | chr11 | + | 76092357 | 76125663 | 5363  |
| ENSG000001 | 554.7252 | 359.4056 | 0.62532  | 0.001468  | 0.003552  | LDLRAD3   | chr11 | + | 35965531 | 36253686 | 3798  |
| ENSG000001 | 653.5261 | 589.3591 | 0.1477   | 0.2927    | 0.3946    | CDH4      | chr20 | + | 59827482 | 60515673 | 6511  |
| ENSG000001 | 0.290301 | 0        | 0.4146   | 0.81455   | NA        | RP11-429E | chr20 | - | 60292562 | 60294804 | 2000  |
| ENSG000001 | 25.87265 | 0.357707 | 5.4706   | 6.24E-07  | 2.27E-06  | SMCO3     | chr12 | - | 14957584 | 14967116 | 2104  |
| ENSG000001 | 1807.957 | 1716.137 | 0.074961 | 0.63043   | 0.71982   | RAD23A    | chr19 | + | 13056669 | 13064456 | 1746  |
| ENSG000001 | 0.36308  | 0        | 0.4146   | 0.81455   | NA        | C2orf71   | chr2  | - | 29283842 | 29297127 | 7044  |
| ENSG000001 | 1085.854 | 1657.626 | -0.61029 | 9.75E-08  | 3.81E-07  | GADD45G   | chr19 | - | 13064972 | 13068050 | 743   |
| ENSG000001 | 0        | 0.343138 | -0.41864 | 0.81278   | NA        | MEIS3P1   | chr17 | + | 15690066 | 15690888 | 823   |
| ENSG000001 | 1.306762 | 2.024857 | -0.49603 | 0.72949   | 0.80013   | DAND5     | chr19 | + | 13075973 | 13085567 | 1868  |
| ENSG000001 | 3.983692 | 42.51238 | -3.3211  | 6.87E-08  | 2.71E-07  | TMEM151A  | chr11 | + | 66059341 | 66064135 | 2562  |
| ENSG000001 | 98.87064 | 680.8221 | -2.7708  | 1.17E-63  | 3.71E-62  | C17orf96  | chr17 | - | 36827961 | 36831187 | 3227  |
| ENSG000001 | 2732.194 | 2503.204 | 0.12639  | 0.17684   | 0.26041   | PTPN11    | chr12 | + | 1.13E+08 | 1.13E+08 | 6101  |
| ENSG000001 | 13.37267 | 15.05127 | -0.16659 | 0.75595   | 0.82251   | CTGLF12P  | chr10 | - | 49217898 | 49239743 | 2485  |
| ENSG000001 | 37.97947 | 511.1972 | -3.7369  | 3.14E-44  | 6.16E-43  | NSUN7     | chr4  | + | 40751914 | 40812002 | 3698  |
| ENSG000001 | 7.118811 | 0        | 4.3089   | 0.001955  | 0.004635  | ZCCHC5    | chrX  | - | 77911566 | 77914825 | 2648  |
| ENSG000001 | 158.637  | 71.27138 | 1.1468   | 6.83E-08  | 2.70E-07  | FAM156B   | chrX  | + | 52920336 | 52937587 | 2946  |
| ENSG000001 | 94.03561 | 1414.577 | -3.8949  | 2.84E-79  | 1.18E-77  | WSCD1     | chr17 | + | 5675554  | 6027747  | 5884  |
| ENSG000001 | 1.774324 | 69.93052 | -5.1486  | 7.14E-13  | 4.10E-12  | RAB39A    | chr11 | + | 1.08E+08 | 1.08E+08 | 1830  |
| ENSG000001 | 768.2132 | 502.6735 | 0.60984  | 0.00401   | 0.009057  | CLK3      | chr15 | + | 74890841 | 74932057 | 3787  |
| ENSG000001 | 1.390706 | 0        | 1.6954   | 0.33813   | NA        | GS1-124K5 | chr7  | - | 65970142 | 65971210 | 1069  |
| ENSG000001 | 5.964374 | 88.49146 | -3.8384  | 1.55E-18  | 1.21E-17  | HLA-DQB1  | chr6  | - | 32627244 | 32636160 | 4644  |
| ENSG000001 | 0.632843 | 18.38141 | -4.27    | 8.46E-05  | 0.000243  | GATA2     | chr3  | - | 1.28E+08 | 1.28E+08 | 3367  |
| ENSG000001 | 327.1206 | 4117.953 | -3.649   | 4.61E-220 | 1.24E-217 | ARID3B    | chr15 | + | 74833518 | 74890472 | 4271  |
| ENSG000001 | 4.761279 | 1.652581 | 1.3908   | 0.18646   | 0.27223   | HMGN2P4   | chr15 | + | 45803334 | 45878488 | 1923  |
| ENSG000001 | 0.36308  | 1.698704 | -1.6626  | 0.28864   | 0.39018   | TMEM31    | chrX  | + | 1.03E+08 | 1.03E+08 | 728   |
| ENSG000001 | 1726.718 | 1723.165 | 0.002646 | 0.98001   | 0.98903   | PACS2     | chr14 | + | 1.06E+08 | 1.06E+08 | 6332  |
| ENSG000001 | 556.8706 | 435.2301 | 0.35578  | 0.012854  | 0.026421  | ELMOD2    | chr4  | + | 1.41E+08 | 1.41E+08 | 4409  |
| ENSG000001 | 393.8019 | 0.297015 | 9.1687   | 2.98E-22  | 2.77E-21  | EGR3      | chr8  | - | 22545172 | 22550815 | 4336  |
| ENSG000001 | 5.020691 | 10.3557  | -0.99877 | 0.19635   | 0.2844    | C1orf101  | chr1  | + | 2.45E+08 | 2.45E+08 | 3333  |
| ENSG000001 | 13.24586 | 3.870053 | 1.6874   | 0.019565  | 0.0387    | GPC5      | chr13 | + | 92050929 | 93519490 | 2889  |
| ENSG000001 | 330.2136 | 837.0928 | -1.3389  | 6.10E-19  | 4.87E-18  | VWA1      | chr1  | + | 1370241  | 1378262  | 4511  |
| ENSG000001 | 107.4057 | 85.7109  | 0.31831  | 0.22551   | 0.31827   | LINC00174 | chr7  | - | 65841031 | 65866325 | 4702  |
| ENSG000001 | 0.36308  | 0.297015 | -0.00205 | 0.99908   | NA        | DNAJB8    | chr3  | - | 1.28E+08 | 1.28E+08 | 3365  |
| ENSG000001 | 583.9902 | 1175.791 | -1.007   | 2.42E-12  | 1.34E-11  | GEMIN4    | chr17 | - | 647654   | 657239   | 4729  |
| ENSG000001 | 0        | 0.357707 | -0.41864 | 0.81278   | NA        | OR6W1P    | chr7  | - | 1.43E+08 | 1.43E+08 | 1100  |
| ENSG000001 | 0.290301 | 0.357707 | -0.00203 | 0.99908   | NA        | AC073072  | chr7  | - | 22765014 | 22767239 | 1364  |
| ENSG000001 | 777.3417 | 263.9837 | 1.5517   | 2.39E-13  | 1.41E-12  | FJX1      | chr11 | + | 35639735 | 35642419 | 2685  |
| ENSG000001 | 0.653381 | 0        | 0.82678  | 0.64037   | NA        | RP11-113A | chr9  | - | 35991333 | 35992282 | 950   |
| ENSG000001 | 0        | 1.234181 | -1.5727  | 0.37581   | NA        | RP5-1027C | chr20 | - | 19222946 | 19265240 | 1789  |
| ENSG000001 | 0.36308  | 0        | 0.4146   | 0.81455   | NA        | RP11-380B | chr1  | + | 1.81E+08 | 1.81E+08 | 259   |
| ENSG000001 | 145.231  | 64.98708 | 1.1603   | 4.39E-07  | 1.62E-06  | KLHL28    | chr14 | - | 45397672 | 45511525 | 2395  |
| ENSG000001 | 368.4792 | 316.8066 | 0.21731  | 0.1298    | 0.20151   | ZBTB18    | chr1  | + | 2.44E+08 | 2.44E+08 | 3851  |
| ENSG000001 | 1.722083 | 0        | 2.21     | 0.18654   | NA        | AL109806  | chr20 | + | 55097413 | 55097855 | 441   |
| ENSG000001 | 58.55246 | 52.20202 | 0.16347  | 0.68502   | 0.76499   | C14orf28  | chr14 | + | 45366498 | 45376460 | 3498  |
| ENSG000001 | 0        | 7.362997 | -4.3178  | 0.002291  | 0.005371  | ALOX12B   | chr17 | - | 7975954  | 7991021  | 2502  |
| ENSG000001 | 0        | 0.715414 | -0.84936 | 0.6309    | NA        | SLC17A8   | chr12 | + | 1.01E+08 | 1.01E+08 | 3983  |
| ENSG000001 | 103.3825 | 151.637  | -0.54894 | 0.063352  | 0.10939   | RP11-151N | chr15 | - | 44819455 | 44829121 | 2863  |
| ENSG000001 | 1391.245 | 847.8304 | 0.71316  | 8.22E-09  | 3.51E-08  | SHARPIN   | chr8  | - | 1.45E+08 | 1.45E+08 | 1765  |
| ENSG000001 | 21.44356 | 1.430828 | 3.6984   | 3.45E-05  | 0.000104  | LBX2      | chr2  | - | 74724644 | 74730443 | 1452  |
| ENSG000001 | 308.525  | 216.7878 | 0.50356  | 0.13018   | 0.202     | DNHD1     | chr11 | + | 6518490  | 6614988  | 14862 |
| ENSG000001 | 10.27007 | 107.9955 | -3.3631  | 6.37E-20  | 5.35E-19  | SLITRK4   | chrX  | - | 1.43E+08 | 1.43E+08 | 8555  |
| ENSG000001 | 10.85149 | 26.43801 | -1.2702  | 0.014016  | 0.028567  | HTR1D     | chr1  | - | 23516993 | 23521222 | 2835  |
| ENSG000001 | 545.4475 | 482.7632 | 0.17628  | 0.33393   | 0.43736   | GCC1      | chr7  | - | 1.27E+08 | 1.27E+08 | 4149  |
| ENSG000001 | 0.943682 | 8.992888 | -2.8768  | 0.007153  | 0.015452  | LSMEM2    | chr3  | + | 50316458 | 50325545 | 1494  |
| ENSG000001 | 1.866827 | 3.351285 | -0.71898 | 0.51264   | 0.61574   | RNF151    | chr16 | + | 2016824  | 2018976  | 853   |

|            |          |          |          |          |          |           |       |   |          |          |       |
|------------|----------|----------|----------|----------|----------|-----------|-------|---|----------|----------|-------|
| ENSG000001 | 13.28017 | 13.41971 | -0.01178 | 0.98339  | 0.99079  | CIITA     | chr16 | + | 10971055 | 11026079 | 9438  |
| ENSG000001 | 217.0216 | 317.7709 | -0.54677 | 0.064135 | 0.11057  | ZFPM1     | chr16 | + | 88519725 | 88601572 | 3528  |
| ENSG000001 | 0        | 2.681995 | -2.9147  | 0.061147 | 0.10611  | ALOX15B   | chr17 | + | 7942335  | 7952452  | 2944  |
| ENSG000001 | 4.721017 | 4.05213  | 0.20562  | 0.81817  | 0.87233  | PLD6      | chr17 | - | 17104309 | 17109629 | 2560  |
| ENSG000001 | 4.834872 | 30.71189 | -2.6265  | 9.32E-06 | 3.00E-05 | GRM8      | chr7  | - | 1.26E+08 | 1.27E+08 | 4057  |
| ENSG000001 | 866.5822 | 445.2587 | 0.9591   | 5.65E-11 | 2.85E-10 | CDC42EP4  | chr17 | - | 71279763 | 71308314 | 3272  |
| ENSG000001 | 23.5297  | 55.07408 | -1.2146  | 0.000862 | 0.002162 | DGKZP1    | chr13 | + | 44542560 | 44545335 | 2776  |
| ENSG000001 | 152.7241 | 253.1618 | -0.72582 | 0.014213 | 0.028939 | ZBTB42    | chr14 | + | 1.05E+08 | 1.05E+08 | 3800  |
| ENSG000001 | 41.00848 | 71.05515 | -0.78007 | 0.018615 | 0.037008 | LACC1     | chr13 | + | 44453420 | 44468068 | 4262  |
| ENSG000001 | 2219.418 | 2613.99  | -0.23596 | 0.094324 | 0.15382  | MAF1      | chr8  | + | 1.45E+08 | 1.45E+08 | 1754  |
| ENSG000001 | 0.290301 | 2.200487 | -1.9038  | 0.24135  | 0.33635  | TPPP2     | chr14 | + | 21492268 | 21504435 | 1696  |
| ENSG000001 | 0        | 12.36357 | -5.2559  | 1.77E-05 | 5.53E-05 | RPRML     | chr17 | - | 45055523 | 45056614 | 1092  |
| ENSG000001 | 0.342542 | 0        | 0.4146   | 0.81455  | NA       | ARL14     | chr3  | + | 1.6E+08  | 1.6E+08  | 1286  |
| ENSG000001 | 39.5159  | 46.04245 | -0.22305 | 0.5102   | 0.61357  | KIAA1875  | chr8  | + | 1.45E+08 | 1.45E+08 | 7119  |
| ENSG000001 | 47.45158 | 110.4752 | -1.215   | 6.44E-07 | 2.34E-06 | PCED1B    | chr12 | + | 47473386 | 47630443 | 2328  |
| ENSG000001 | 57.96746 | 193.9493 | -1.7297  | 3.25E-11 | 1.67E-10 | RP11-169K | chr1  | - | 16160560 | 16174642 | 2468  |
| ENSG000001 | 181.886  | 86.04196 | 1.0694   | 0.000359 | 0.000949 | APOBEC3B  | chr22 | + | 39378352 | 39388809 | 1844  |
| ENSG000001 | 0.290301 | 0        | 0.4146   | 0.81455  | NA       | SYCN      | chr19 | - | 39693471 | 39694906 | 573   |
| ENSG000001 | 9.252796 | 600.8338 | -5.9284  | 1.42E-62 | 4.42E-61 | PIPOX     | chr17 | + | 27277531 | 27384234 | 2410  |
| ENSG000001 | 2.955253 | 3.806944 | -0.2877  | 0.8306   | 0.88058  | ATP8B5P   | chr9  | + | 35406752 | 35483026 | 3962  |
| ENSG000001 | 79.11053 | 1.591889 | 5.3803   | 3.06E-16 | 2.15E-15 | FOX51     | chr20 | - | 30432103 | 30433420 | 1318  |
| ENSG000001 | 0        | 6.047849 | -4.1822  | 0.001994 | 0.00472  | ATOH7     | chr10 | - | 69990386 | 69991871 | 1486  |
| ENSG000001 | 42.7828  | 4.008423 | 3.3372   | 2.99E-09 | 1.32E-08 | CDH5      | chr16 | + | 66400533 | 66438686 | 4117  |
| ENSG000001 | 0        | 68.98181 | -7.6593  | 2.77E-12 | 1.52E-11 | LRR3B     | chr3  | + | 26664297 | 26752267 | 1696  |
| ENSG000001 | 0        | 0.640152 | -0.82869 | 0.63935  | NA       | OR7E22P   | chr3  | - | 75405667 | 75406654 | 988   |
| ENSG000001 | 0.342542 | 10.00532 | -4.0818  | 0.001145 | 0.002817 | FAM216B   | chr13 | + | 43355686 | 43365683 | 3300  |
| ENSG000001 | 3.58891  | 0        | 3.3667   | 0.02318  | 0.045107 | MRGPRX4   | chr11 | + | 18194384 | 18195827 | 1444  |
| ENSG000001 | 118.4791 | 204.3613 | -0.78149 | 3.92E-05 | 0.000117 | PCBP1-AS1 | chr2  | - | 70189395 | 70315978 | 2451  |
| ENSG000001 | 1758.066 | 1265.78  | 0.47396  | 0.0014   | 0.003396 | MYADM     | chr19 | + | 54369477 | 54379691 | 3186  |
| ENSG000001 | 230.3189 | 153.0644 | 0.58683  | 0.002102 | 0.004957 | MROH1     | chr8  | + | 1.45E+08 | 1.45E+08 | 5832  |
| ENSG000001 | 883.3005 | 208.0125 | 2.0744   | 5.18E-16 | 3.59E-15 | SERTAD2   | chr2  | - | 64858755 | 64977449 | 5549  |
| ENSG000001 | 3182.818 | 3511.835 | -0.14163 | 0.18516  | 0.27062  | RBM15B    | chr3  | + | 51428731 | 51435330 | 6600  |
| ENSG000001 | 238.4274 | 31.4751  | 2.9028   | 4.46E-35 | 6.79E-34 | AKAP5     | chr14 | + | 64932217 | 64936425 | 2601  |
| ENSG000001 | 3.081086 | 15.81207 | -2.2596  | 0.005885 | 0.012919 | NKPD1     | chr19 | - | 45653008 | 45663408 | 4687  |
| ENSG000001 | 80.7503  | 25.57294 | 1.6386   | 2.23E-06 | 7.70E-06 | GIPC3     | chr19 | + | 3585551  | 3593539  | 4335  |
| ENSG000001 | 43.67245 | 17.37315 | 1.3096   | 0.000713 | 0.001808 | AC025335  | chr17 | - | 7816642  | 7819271  | 2529  |
| ENSG000001 | 1417.488 | 553.3905 | 1.3477   | 2.11E-06 | 7.30E-06 | CITED4    | chr1  | - | 41326729 | 41328018 | 1290  |
| ENSG000001 | 4.616536 | 0.297015 | 3.064    | 0.023466 | 0.045609 | ABCA13    | chr7  | + | 48211055 | 48687092 | 17184 |
| ENSG000001 | 0        | 0.343138 | -0.41864 | 0.81278  | NA       | NLRP11    | chr19 | - | 56296770 | 56348166 | 4034  |
| ENSG000001 | 284.4719 | 272.5243 | 0.061509 | 0.74393  | 0.81193  | TIGD5     | chr8  | + | 1.45E+08 | 1.45E+08 | 2412  |
| ENSG000001 | 2240.965 | 1713.851 | 0.38627  | 5.58E-05 | 0.000164 | PDXDC1    | chr16 | + | 15068448 | 15233196 | 4828  |
| ENSG000001 | 83.74263 | 992.3346 | -3.5519  | 6.25E-56 | 1.66E-54 | PHC1P1    | chr12 | - | 55804263 | 55808633 | 3553  |
| ENSG000001 | 1.286224 | 1.280305 | 0.001078 | 0.99939  | 0.99973  | C1orf194  | chr1  | - | 1.1E+08  | 1.1E+08  | 956   |
| ENSG000001 | 145.3279 | 356.1316 | -1.2894  | 4.85E-14 | 2.98E-13 | ZNF154    | chr19 | - | 58208735 | 58220579 | 5687  |
| ENSG000001 | 557.5485 | 290.7701 | 0.93537  | 2.19E-06 | 7.57E-06 | R3HDM2    | chr12 | - | 57643392 | 57824788 | 4372  |
| ENSG000001 | 0        | 34.20812 | -6.6583  | 7.82E-09 | 3.35E-08 | B3GNT3    | chr19 | + | 17905637 | 17923891 | 2226  |
| ENSG000001 | 0        | 0.357707 | -0.41864 | 0.81278  | NA       | ITLN1     | chr1  | - | 1.61E+08 | 1.61E+08 | 1183  |
| ENSG000001 | 0        | 125.8436 | -8.4432  | 1.04E-14 | 6.67E-14 | NRXN1     | chr2  | - | 50145643 | 51259674 | 7578  |
| ENSG000001 | 764.7287 | 1153.548 | -0.59199 | 1.11E-06 | 3.94E-06 | SEPHS2    | chr16 | - | 30454952 | 30457502 | 2551  |
| ENSG000001 | 4.36731  | 5.125251 | -0.21161 | 0.8119   | 0.8677   | GPBAR1    | chr2  | + | 2.19E+08 | 2.19E+08 | 2003  |
| ENSG000001 | 274.7988 | 288.7369 | -0.07176 | 0.77     | 0.83401  | ZNF784    | chr19 | - | 56132108 | 56135967 | 2021  |
| ENSG000001 | 0        | 6.364265 | -4.132   | 0.003641 | 0.008285 | ZNF648    | chr1  | - | 1.82E+08 | 1.82E+08 | 3649  |
| ENSG000001 | 575.4416 | 588.3902 | -0.03261 | 0.78124  | 0.84305  | C14orf119 | chr14 | + | 23563974 | 23569665 | 3654  |
| ENSG000001 | 0        | 0.937167 | -1.2408  | 0.48662  | NA       | CCR8      | chr3  | + | 39371197 | 39375171 | 1253  |
| ENSG000001 | 3.350849 | 3.458101 | -0.03053 | 0.97595  | 0.9865   | LINC00652 | chr20 | - | 18768295 | 18774979 | 1713  |
| ENSG000001 | 0        | 0.937167 | -1.2408  | 0.48662  | NA       | GOLGA8J   | chr15 | + | 30375158 | 30385702 | 2199  |
| ENSG000001 | 218.8165 | 151.0881 | 0.53335  | 0.005073 | 0.01129  | BBS10     | chr12 | - | 76738254 | 76742222 | 3595  |
| ENSG000001 | 492.7251 | 579.2773 | -0.23156 | 0.16657  | 0.24775  | FIZ1      | chr19 | - | 56102746 | 56113336 | 4686  |
| ENSG000001 | 2858.791 | 3272.763 | -0.19458 | 0.22379  | 0.31618  | PUF60     | chr8  | - | 1.45E+08 | 1.45E+08 | 2412  |
| ENSG000001 | 4633.592 | 37.41372 | 6.9272   | 0        | 0        | SSC5D     | chr19 | + | 55999771 | 56030465 | 4845  |
| ENSG000001 | 439.5751 | 621.0729 | -0.4968  | 0.003589 | 0.008175 | DCTPP1    | chr16 | - | 30434940 | 30441396 | 1222  |
| ENSG000001 | 421.3978 | 196.4418 | 1.0969   | 1.92E-11 | 1.00E-10 | ZNF771    | chr16 | + | 30418618 | 30440920 | 2371  |
| ENSG000001 | 42.48827 | 74.16459 | -0.78884 | 0.011132 | 0.023164 | PPP1R14BI | chr4  | - | 1.4E+08  | 1.4E+08  | 445   |
| ENSG000001 | 37.46227 | 15.2269  | 1.263    | 0.003775 | 0.00856  | RP11-1319 | chr5  | - | 69390202 | 69424261 | 3544  |
| ENSG000001 | 150.24   | 185.2647 | -0.30424 | 0.15139  | 0.22884  | CRIPAK    | chr4  | + | 1385340  | 1389780  | 4441  |

|            |          |          |          |           |           |           |       |   |          |          |      |
|------------|----------|----------|----------|-----------|-----------|-----------|-------|---|----------|----------|------|
| ENSG000001 | 1211.707 | 201.1876 | 2.5782   | 3.59E-26  | 3.93E-25  | TSHZ1     | chr18 | + | 72922710 | 73001905 | 7080 |
| ENSG000001 | 65.52017 | 63.82171 | 0.037481 | 0.89246   | 0.9253    | PSTK      | chr10 | + | 1.25E+08 | 1.25E+08 | 3538 |
| ENSG000001 | 0        | 0.357707 | -0.41864 | 0.81278   | NA        | AC005488. | chr7  | - | 72333321 | 72341076 | 1064 |
| ENSG000001 | 673.8775 | 457.1312 | 0.55803  | 0.003411  | 0.007798  | SOCS4     | chr14 | + | 55493948 | 55516206 | 6779 |
| ENSG000001 | 648.8508 | 388.6981 | 0.73597  | 0.000922  | 0.0023    | ZADH2     | chr18 | - | 72907063 | 72921303 | 7732 |
| ENSG000001 | 15.49891 | 9.874195 | 0.63066  | 0.2596    | 0.35753   | RP11-756P | chr4  | + | 1.9E+08  | 1.9E+08  | 1143 |
| ENSG000001 | 1.048164 | 0.686276 | 0.40054  | 0.81245   | NA        | AC079741. | chr7  | - | 1.12E+08 | 1.12E+08 | 212  |
| ENSG000001 | 684.4818 | 1124.305 | -0.71275 | 0.002163  | 0.005092  | ZNF48     | chr16 | + | 30389427 | 30411429 | 3234 |
| ENSG000001 | 0        | 0.297015 | -0.41864 | 0.81278   | NA        | OR1R1P    | chr17 | + | 3289224  | 3290132  | 904  |
| ENSG000001 | 209.0404 | 7.472229 | 4.7375   | 5.38E-40  | 9.44E-39  | C3orf80   | chr3  | + | 1.6E+08  | 1.6E+08  | 2577 |
| ENSG000001 | 0        | 2.058828 | -1.8947  | 0.28782   | 0.38931   | NKX2-6    | chr8  | - | 23559964 | 23564111 | 906  |
| ENSG000001 | 2.044087 | 4.553913 | -1.0711  | 0.3029    | 0.40418   | TMEM150E  | chr19 | - | 55824169 | 55845416 | 1197 |
| ENSG000001 | 7.758422 | 1.638012 | 2.0645   | 0.030774  | 0.058008  | C10orf91  | chr10 | + | 1.34E+08 | 1.34E+08 | 1846 |
| ENSG000001 | 10.97488 | 109.0631 | -3.2601  | 7.63E-17  | 5.54E-16  | ANKRD18A  | chr9  | - | 38540564 | 38620657 | 4041 |
| ENSG000001 | 0        | 0.357707 | -0.41864 | 0.81278   | NA        | WFDC11    | chr20 | - | 44277202 | 44298909 | 642  |
| ENSG000001 | 12.40666 | 17.09956 | -0.44292 | 0.3898    | 0.49409   | TMEM86B   | chr19 | - | 55738007 | 55741647 | 3061 |
| ENSG000001 | 14.34447 | 5.522634 | 1.3108   | 0.070386  | 0.11974   | 1-Sep     | chr16 | - | 30389454 | 30407312 | 2738 |
| ENSG000001 | 268.0902 | 305.0243 | -0.18408 | 0.35344   | 0.45773   | TRNAU1AP  | chr1  | + | 28879597 | 28905051 | 2040 |
| ENSG000001 | 1053.178 | 593.1198 | 0.82778  | 6.15E-07  | 2.24E-06  | EXOC3     | chr5  | + | 443273   | 472052   | 5748 |
| ENSG000001 | 28.95194 | 4.775666 | 2.4961   | 2.53E-05  | 7.74E-05  | TDRD6     | chr6  | + | 46655612 | 46672056 | 8887 |
| ENSG000001 | 0.975385 | 0.640152 | 0.42301  | 0.79383   | NA        | C12orf40  | chr12 | + | 40019969 | 40302102 | 3061 |
| ENSG000001 | 0.72616  | 0        | 0.85004  | 0.63064   | NA        | CSNK1A1L  | chr13 | - | 37677398 | 37679803 | 2406 |
| ENSG000001 | 1.555988 | 0.343138 | 1.4615   | 0.37966   | NA        | ACTA2-AS1 | chr10 | + | 90692428 | 90700368 | 2422 |
| ENSG000001 | 0.580602 | 0.937167 | -0.42674 | 0.8018    | NA        | AC079753. | chr2  | + | 1.14E+08 | 1.14E+08 | 795  |
| ENSG000001 | 106.2668 | 465.8643 | -2.1154  | 5.72E-12  | 3.08E-11  | LYNX1     | chr8  | - | 1.44E+08 | 1.44E+08 | 4706 |
| ENSG000001 | 6.597217 | 0.715414 | 2.8221   | 0.01888   | 0.037477  | TH        | chr11 | - | 2185159  | 2193107  | 1910 |
| ENSG000001 | 1.068702 | 11.7437  | -3.2216  | 0.001218  | 0.002982  | AC018865. | chr2  | - | 1.31E+08 | 1.31E+08 | 3793 |
| ENSG000001 | 1563.321 | 1222.332 | 0.35409  | 0.004104  | 0.009257  | MED14     | chrX  | - | 40507558 | 40595110 | 7984 |
| ENSG000001 | 427.2132 | 272.1559 | 0.64963  | 0.000417  | 0.001096  | FAHD1     | chr16 | + | 1876968  | 1890208  | 1964 |
| ENSG000001 | 5.27929  | 2.027273 | 1.2409   | 0.26014   | 0.35808   | HMGB1P14  | chr14 | + | 58751491 | 58752116 | 591  |
| ENSG000001 | 47.37285 | 1062.076 | -4.4806  | 9.38E-102 | 5.51E-100 | C8orf42   | chr8  | - | 439803   | 495781   | 3395 |
| ENSG000001 | 1082.279 | 2655.178 | -1.2933  | 1.06E-25  | 1.14E-24  | RCC1      | chr1  | + | 28832455 | 28865812 | 2844 |
| ENSG000001 | 6.492735 | 3.679854 | 0.77365  | 0.38637   | 0.49056   | MYLPF     | chr16 | + | 30382255 | 30389312 | 682  |
| ENSG000001 | 1.960143 | 4.259314 | -0.99653 | 0.37155   | 0.47595   | F2        | chr11 | + | 46740730 | 46761056 | 2023 |
| ENSG000001 | 0        | 1.058552 | -1.361   | 0.4451    | NA        | FAM71C    | chr12 | + | 1E+08    | 1E+08    | 1796 |
| ENSG000001 | 0        | 1.759397 | -2.0294  | 0.24451   | NA        | RP11-179B | chr10 | - | 59972302 | 59972797 | 496  |
| ENSG000001 | 672.8785 | 571.0964 | 0.23597  | 0.054325  | 0.095585  | PRKRA     | chr2  | - | 1.79E+08 | 1.79E+08 | 1851 |
| ENSG000001 | 432.1406 | 220.3999 | 0.96993  | 2.51E-10  | 1.21E-09  | HERC2P3   | chr15 | - | 20587869 | 20711433 | 4383 |
| ENSG000001 | 82.0375  | 385.7398 | -2.2184  | 4.14E-14  | 2.56E-13  | ZNRF2     | chr7  | + | 30323923 | 30452118 | 3460 |
| ENSG000001 | 0.870904 | 1.043983 | -0.13638 | 0.93492   | 0.95734   | RRH       | chr4  | + | 1.11E+08 | 1.11E+08 | 1455 |
| ENSG000001 | 0.995923 | 0        | 1.4959   | 0.39264   | NA        | SLC9A4    | chr2  | + | 1.03E+08 | 1.03E+08 | 4138 |
| ENSG000001 | 65.23085 | 101.9071 | -0.63759 | 0.011059  | 0.023023  | ZNF816    | chr19 | - | 53430388 | 53466164 | 2697 |
| ENSG000001 | 422.0178 | 618.4765 | -0.55252 | 8.49E-05  | 0.000244  | FGD6      | chr12 | - | 95470525 | 95611258 | 9288 |
| ENSG000001 | 0        | 10.79767 | -4.8985  | 0.000271  | 0.000731  | GPR144    | chr9  | + | 1.27E+08 | 1.27E+08 | 2892 |
| ENSG000001 | 0        | 3.037286 | -2.8072  | 0.091979  | 0.15057   | GPR139    | chr16 | - | 20042807 | 20085239 | 1613 |
| ENSG000001 | 1.919068 | 4.120944 | -0.99217 | 0.35132   | 0.4557    | CTD-2568A | chr19 | + | 51320937 | 51322134 | 936  |
| ENSG000001 | 0        | 38.66401 | -6.8582  | 1.21E-09  | 5.53E-09  | PLD5      | chr1  | - | 2.42E+08 | 2.43E+08 | 2830 |
| ENSG000001 | 1216.878 | 2861.983 | -1.2324  | 1.31E-32  | 1.85E-31  | OAZ2      | chr15 | - | 64979772 | 64995480 | 7102 |
| ENSG000001 | 0.705622 | 0.686276 | 0.017556 | 0.99188   | NA        | PNPLA1    | chr6  | + | 36210980 | 36276372 | 2478 |
| ENSG000001 | 41.90588 | 3.979285 | 3.2711   | 1.44E-06  | 5.06E-06  | ALX1      | chr12 | + | 85673885 | 85695562 | 1445 |
| ENSG000001 | 201.9747 | 259.6152 | -0.36005 | 0.021275  | 0.041729  | CCDC43    | chr17 | - | 42750437 | 42767147 | 2082 |
| ENSG000001 | 32.89717 | 1.058552 | 4.7178   | 1.78E-08  | 7.40E-08  | KCTD4     | chr13 | - | 45766988 | 45775175 | 2115 |
| ENSG000001 | 11.16151 | 20.6912  | -0.85851 | 0.13478   | 0.20777   | C17orf104 | chr17 | + | 42733762 | 42767676 | 4328 |
| ENSG000001 | 1889.715 | 546.6477 | 1.7874   | 1.50E-34  | 2.24E-33  | FZD2      | chr17 | + | 42634925 | 42636907 | 1983 |
| ENSG000001 | 0.36308  | 0.297015 | -0.00205 | 0.99908   | NA        | AL035460. | chr20 | + | 2677351  | 2677781  | 414  |
| ENSG000001 | 43.81899 | 67.3495  | -0.61348 | 0.027     | 0.051707  | TIGD2     | chr4  | + | 90033968 | 90036050 | 2083 |
| ENSG000001 | 0.290301 | 1.294874 | -1.3421  | 0.40775   | NA        | CCDC129   | chr7  | + | 31553704 | 31698334 | 4544 |
| ENSG000001 | 539.2523 | 21.75788 | 4.6224   | 9.31E-80  | 3.90E-78  | HCLS1     | chr3  | - | 1.21E+08 | 1.21E+08 | 2710 |
| ENSG000001 | 137.4792 | 166.6025 | -0.27403 | 0.47454   | 0.57905   | C7orf41   | chr7  | + | 30174426 | 30202378 | 5937 |
| ENSG000001 | 1591.952 | 1492.452 | 0.09308  | 0.52169   | 0.62424   | ZNF609    | chr15 | + | 64752941 | 64978264 | 8743 |
| ENSG000001 | 2476.75  | 1522.661 | 0.70081  | 7.10E-10  | 3.32E-09  | PAK2      | chr3  | + | 1.96E+08 | 1.97E+08 | 6139 |
| ENSG000001 | 142.7692 | 183.7954 | -0.36138 | 0.10226   | 0.16437   | CCDC66    | chr3  | + | 56591189 | 56655846 | 3120 |
| ENSG000001 | 0        | 0.357707 | -0.41864 | 0.81278   | NA        | DEFB124   | chr20 | - | 30053309 | 30064560 | 571  |
| ENSG000001 | 84.51403 | 250.3617 | -1.5576  | 4.39E-16  | 3.05E-15  | AC034193. | chr3  | + | 10028577 | 10048674 | 2882 |
| ENSG000001 | 0.580602 | 0        | 0.8036   | 0.6494    | NA        | ATP5EP2   | chr13 | + | 28519343 | 28519727 | 385  |

|            |          |          |          |           |           |           |       |   |          |          |      |
|------------|----------|----------|----------|-----------|-----------|-----------|-------|---|----------|----------|------|
| ENSG000001 | 1647.647 | 1160.572 | 0.50547  | 1.01E-06  | 3.62E-06  | MCFD2     | chr2  | - | 47129009 | 47168994 | 4210 |
| ENSG000001 | 4.657611 | 7.679413 | -0.69833 | 0.39307   | 0.49747   | LINC00304 | chr16 | + | 89225554 | 89230653 | 2243 |
| ENSG000001 | 58.64838 | 75.03282 | -0.34942 | 0.27042   | 0.36955   | HARBI1    | chr11 | - | 46624411 | 46639459 | 1967 |
| ENSG000001 | 12.56338 | 16.32346 | -0.36877 | 0.46798   | 0.57275   | C11orf71  | chr11 | - | 1.14E+08 | 1.14E+08 | 1441 |
| ENSG000001 | 0        | 0.594029 | -0.81444 | 0.64499   | NA        | CYP8B1    | chr3  | - | 42897497 | 42917633 | 3950 |
| ENSG000001 | 0        | 0.357707 | -0.41864 | 0.81278   | NA        | TPRXL     | chr3  | + | 13978756 | 14124311 | 2350 |
| ENSG000001 | 898.0127 | 24.3023  | 5.1808   | 6.41E-125 | 5.43E-123 | SERTM1    | chr13 | + | 37248049 | 37271976 | 3207 |
| ENSG000001 | 865.8656 | 335.954  | 1.3608   | 1.92E-13  | 1.14E-12  | GAS1      | chr9  | - | 89559279 | 89562104 | 2826 |
| ENSG000001 | 51.31963 | 1486.745 | -4.8416  | 8.32E-131 | 7.59E-129 | HMHA1     | chr19 | + | 1065922  | 1086627  | 4264 |
| ENSG000001 | 0        | 3.740547 | -3.4124  | 0.021268  | 0.04172   | CTD-3064H | chr19 | - | 38036372 | 38040073 | 3267 |
| ENSG000001 | 30.1028  | 67.13749 | -1.1475  | 0.001584  | 0.003807  | ZNF571    | chr19 | - | 38045684 | 38085673 | 3844 |
| ENSG000001 | 4.387848 | 2.07098  | 0.98286  | 0.3678    | 0.47243   | GLIPR1L2  | chr12 | + | 75784850 | 75826468 | 2609 |
| ENSG000001 | 238.3503 | 121.5545 | 0.96737  | 1.49E-07  | 5.75E-07  | FAM73A    | chr1  | + | 78245309 | 78344106 | 5288 |
| ENSG000001 | 4.273994 | 5.274159 | -0.28189 | 0.76352   | 0.82835   | KCNE1     | chr21 | - | 35818988 | 35884573 | 3320 |
| ENSG000001 | 10.0312  | 11.38599 | -0.17605 | 0.7738    | 0.83723   | PRR26     | chr10 | + | 695888   | 709947   | 2249 |
| ENSG000001 | 444.0834 | 182.8228 | 1.2803   | 4.71E-17  | 3.46E-16  | NRIP1     | chr21 | - | 16333556 | 16437321 | 7671 |
| ENSG000001 | 0        | 0.951736 | -1.2555  | 0.48145   | NA        | ZSCAN4    | chr19 | + | 58180303 | 58190520 | 2246 |
| ENSG000001 | 4.523219 | 28.03244 | -2.5242  | 0.0002    | 0.00055   | BHLHA15   | chr7  | + | 97841566 | 97842271 | 706  |
| ENSG000001 | 133.6416 | 153.1985 | -0.19415 | 0.36932   | 0.47392   | RNF182    | chr6  | + | 13924677 | 13980533 | 3706 |
| ENSG000001 | 1.628766 | 0.715414 | 0.93656  | 0.53818   | 0.63889   | C9orf139  | chr9  | + | 1.4E+08  | 1.4E+08  | 3815 |
| ENSG000001 | 123.2188 | 147.9076 | -0.26337 | 0.22237   | 0.31463   | TSPYL5    | chr8  | - | 98285717 | 98290176 | 4460 |
| ENSG000001 | 0.580602 | 1.591889 | -1.0408  | 0.50029   | 0.60396   | FUT7      | chr9  | - | 1.4E+08  | 1.4E+08  | 2584 |
| ENSG000001 | 151.0198 | 348.172  | -1.194   | 0.000292  | 0.000784  | HIST1H2AC | chr6  | + | 26124373 | 26139344 | 1668 |
| ENSG000001 | 17.62694 | 37.16283 | -1.0697  | 0.0082    | 0.017497  | EIF2S3L   | chr12 | + | 10658201 | 10675734 | 2142 |
| ENSG000001 | 30.21005 | 42.76555 | -0.49742 | 0.14877   | 0.22544   | SRP9P1    | chr10 | - | 93565803 | 93567253 | 959  |
| ENSG000001 | 143.0269 | 372.4952 | -1.3782  | 3.95E-12  | 2.15E-11  | SKIDA1    | chr10 | - | 21802407 | 21814611 | 6598 |
| ENSG000001 | 33.89227 | 12.55619 | 1.4089   | 0.001761  | 0.004205  | HIST1H2BC | chr6  | - | 26115101 | 26124154 | 659  |
| ENSG000001 | 15.01081 | 10.37356 | 0.51305  | 0.36053   | 0.46469   | ZBTB12P1  | chr4  | - | 39771701 | 39773000 | 1260 |
| ENSG000001 | 182.1221 | 468.3666 | -1.3578  | 3.66E-10  | 1.74E-09  | MB21D2    | chr3  | - | 1.93E+08 | 1.93E+08 | 3368 |
| ENSG000001 | 0        | 4.36613  | -3.6495  | 0.011668  | 0.024168  | GSX2      | chr4  | + | 54965690 | 54968672 | 1812 |
| ENSG000001 | 24.21299 | 31.73157 | -0.38481 | 0.35048   | 0.45489   | SSTR2     | chr17 | + | 71161151 | 71167185 | 2096 |
| ENSG000001 | 75.21062 | 69.39127 | 0.11436  | 0.6942    | 0.77189   | ZNF594    | chr17 | - | 5082831  | 5095178  | 4862 |
| ENSG000001 | 165.6376 | 75.43678 | 1.1318   | 4.01E-08  | 1.62E-07  | PCGF5     | chr10 | + | 92979908 | 93044088 | 7018 |
| ENSG000001 | 3.733653 | 7.131508 | -0.85099 | 0.3394    | 0.44332   | SLC47A2   | chr17 | - | 19581601 | 19622292 | 3114 |
| ENSG000001 | 3.765356 | 1.326428 | 1.3037   | 0.29396   | 0.39595   | PRF1      | chr10 | - | 72357104 | 72362531 | 2533 |
| ENSG000001 | 145.0785 | 5.583326 | 4.6283   | 8.92E-30  | 1.13E-28  | MAB21L1   | chr13 | - | 36047926 | 36050832 | 2907 |
| ENSG000001 | 0        | 0.343138 | -0.41864 | 0.81278   | NA        | RPL21P8   | chr14 | - | 65934525 | 65935059 | 535  |
| ENSG000001 | 146.5274 | 270.3523 | -0.88201 | 1.15E-06  | 4.10E-06  | YOD1      | chr1  | - | 2.07E+08 | 2.07E+08 | 6291 |
| ENSG000001 | 672.6696 | 26.64673 | 4.6356   | 8.99E-53  | 2.21E-51  | AC007362  | chr2  | + | 2.07E+08 | 2.07E+08 | 1886 |
| ENSG000001 | 4.148974 | 0.343138 | 2.8824   | 0.037174  | 0.068758  | EXOC5P1   | chr4  | + | 63682544 | 63684512 | 1969 |
| ENSG000001 | 534.9164 | 1444.332 | -1.4268  | 1.05E-09  | 4.83E-09  | TMEM64    | chr8  | - | 91634223 | 91803860 | 4997 |
| ENSG000001 | 0        | 0.686276 | -0.84936 | 0.6309    | NA        | C3orf22   | chr3  | - | 1.26E+08 | 1.26E+08 | 1781 |
| ENSG000001 | 3.910914 | 3.123085 | 0.27463  | 0.78465   | 0.84579   | RP11-290F | chr4  | - | 1.85E+08 | 1.85E+08 | 2153 |
| ENSG000001 | 4.305697 | 10.50307 | -1.2349  | 0.11587   | 0.1833    | CHRM4     | chr11 | - | 46406640 | 46408107 | 1468 |
| ENSG000001 | 1142.047 | 182.5603 | 2.6214   | 2.55E-15  | 1.70E-14  | SHISA2    | chr13 | - | 26618735 | 26625169 | 2860 |
| ENSG000001 | 28.77729 | 57.33136 | -0.98729 | 0.01242   | 0.025602  | S1PR5     | chr19 | - | 10623623 | 10628607 | 2191 |
| ENSG000001 | 82.87931 | 86.89647 | -0.07214 | 0.79451   | 0.85419   | CTD-2547E | chr16 | - | 21458004 | 21531765 | 4262 |
| ENSG000001 | 66.1883  | 119.945  | -0.84594 | 0.053636  | 0.094558  | GPR157    | chr1  | - | 9160364  | 9189229  | 5265 |
| ENSG000001 | 6.047504 | 2.041842 | 1.4654   | 0.1347    | 0.20771   | PIPSL     | chr10 | - | 95717948 | 95721297 | 3350 |
| ENSG000001 | 0.705622 | 66.69001 | -6.1592  | 3.04E-12  | 1.67E-11  | CHST13    | chr3  | + | 1.26E+08 | 1.26E+08 | 1789 |
| ENSG000001 | 39.20066 | 41.088   | -0.07079 | 0.86151   | 0.90319   | WDFY3-AS2 | chr4  | + | 85887538 | 85932430 | 6434 |
| ENSG000001 | 705.3459 | 475.1633 | 0.5688   | 0.000173  | 0.00048   | SRSF8     | chr11 | + | 94800056 | 94804388 | 4331 |
| ENSG000001 | 457.4126 | 230.5633 | 0.98473  | 7.50E-06  | 2.45E-05  | SLC36A4   | chr11 | - | 92877341 | 92931130 | 6008 |
| ENSG000001 | 578.2337 | 452.7117 | 0.35323  | 0.014438  | 0.029343  | ZDHHC20   | chr13 | - | 21950263 | 22033509 | 1869 |
| ENSG000001 | 0        | 0.297015 | -0.41864 | 0.81278   | NA        | ANKRD30B  | chr18 | + | 14728271 | 14852737 | 4359 |
| ENSG000001 | 0.705622 | 0.343138 | 0.57395  | 0.74355   | NA        | OR51E1    | chr11 | + | 4664650  | 4676718  | 3612 |
| ENSG000001 | 0.632843 | 17.16838 | -4.2746  | 1.76E-05  | 5.49E-05  | ZFP3      | chr17 | + | 4981543  | 4999669  | 5206 |
| ENSG000001 | 1013.665 | 110      | 3.1965   | 8.34E-78  | 3.41E-76  | ARSJ      | chr4  | - | 1.15E+08 | 1.15E+08 | 4657 |
| ENSG000001 | 0        | 0.343138 | -0.41864 | 0.81278   | NA        | RP11-467C | chr13 | - | 26437388 | 26437805 | 418  |
| ENSG000001 | 176.3143 | 3.10281  | 5.3541   | 3.85E-08  | 1.55E-07  | HOXC9     | chr12 | + | 54388679 | 54397121 | 1516 |
| ENSG000001 | 4.523219 | 44.4133  | -3.2033  | 1.72E-09  | 7.78E-09  | MAP3K15   | chrX  | - | 19378174 | 19533379 | 4697 |
| ENSG000001 | 558.2587 | 1746.942 | -1.6444  | 7.67E-44  | 1.49E-42  | PPA1      | chr10 | - | 71962587 | 71993667 | 1294 |
| ENSG000001 | 25.97713 | 4.460793 | 2.3381   | 0.017717  | 0.035377  | HOXC10    | chr12 | + | 54378849 | 54384063 | 1936 |
| ENSG000001 | 228.9235 | 403.9132 | -0.82013 | 3.67E-07  | 1.36E-06  | PSMG4     | chr6  | + | 3231637  | 3303607  | 4603 |
| ENSG000001 | 0        | 3.414394 | -3.1826  | 0.040436  | 0.074054  | BHLHE22   | chr8  | + | 65492814 | 65496181 | 3368 |

|            |          |          |          |           |           |                         |       |   |          |          |       |
|------------|----------|----------|----------|-----------|-----------|-------------------------|-------|---|----------|----------|-------|
| ENSG000001 | 84.94728 | 140.7008 | -0.72282 | 0.001543  | 0.003716  | MAP6D1                  | chr3  | - | 1.84E+08 | 1.84E+08 | 2111  |
| ENSG000001 | 12.25336 | 12.16364 | 0.006981 | 0.9925    | 0.99592   | CSNK1G2- <del>AS1</del> | chr19 | - | 1952530  | 1954585  | 1288  |
| ENSG000001 | 39.878   | 88.78102 | -1.145   | 0.000874  | 0.002191  | ZNF443                  | chr19 | - | 12540521 | 12551926 | 2663  |
| ENSG000001 | 1.939605 | 0.357707 | 1.8442   | 0.23163   | 0.32515   | C12orf36                | chr12 | - | 13524023 | 13540101 | 2750  |
| ENSG000001 | 80.30848 | 60.14918 | 0.41417  | 0.12057   | 0.18952   | PDIA3P                  | chr1  | + | 1.47E+08 | 1.47E+08 | 1510  |
| ENSG000001 | 0        | 3.380424 | -3.2006  | 0.037457  | 0.069227  | CXCR2                   | chr2  | + | 2.19E+08 | 2.19E+08 | 2879  |
| ENSG000001 | 162.9649 | 4.721421 | 5.0536   | 4.52E-31  | 6.01E-30  | GREM2                   | chr1  | - | 2.41E+08 | 2.41E+08 | 4170  |
| ENSG000001 | 5.466901 | 6.646711 | -0.25276 | 0.78667   | 0.84748   | C11orf42                | chr11 | + | 6226796  | 6232362  | 1142  |
| ENSG000001 | 2204.504 | 1269.05  | 0.79615  | 1.99E-15  | 1.34E-14  | SSR4                    | chrX  | + | 1.53E+08 | 1.53E+08 | 2482  |
| ENSG000001 | 23.8808  | 10.03687 | 1.2322   | 0.018529  | 0.036857  | CAPS2                   | chr12 | - | 75669759 | 75784708 | 3831  |
| ENSG000001 | 51.87871 | 154.81   | -1.573   | 5.09E-11  | 2.58E-10  | ZNF792                  | chr19 | - | 35447258 | 35454953 | 3888  |
| ENSG000001 | 741.1572 | 343.2864 | 1.1086   | 8.31E-14  | 5.04E-13  | CUEDC1                  | chr17 | - | 55938604 | 56032684 | 3621  |
| ENSG000001 | 2765.274 | 4365.954 | -0.65806 | 5.74E-07  | 2.10E-06  | SCRIB                   | chr8  | - | 1.45E+08 | 1.45E+08 | 5218  |
| ENSG000001 | 728.7794 | 1132.582 | -0.63515 | 3.52E-06  | 1.19E-05  | KCTD2                   | chr17 | + | 73028670 | 73061984 | 3635  |
| ENSG000001 | 390.0753 | 278.3957 | 0.48436  | 0.001594  | 0.003827  | D2HGDH                  | chr2  | + | 2.43E+08 | 2.43E+08 | 4549  |
| ENSG000001 | 0        | 0.297015 | -0.41864 | 0.81278   | NA        | AC111177.1              | chr11 | + | 6149840  | 6150706  | 867   |
| ENSG000001 | 123.4099 | 36.0654  | 1.7592   | 1.71E-10  | 8.35E-10  | OXTR                    | chr3  | - | 8792094  | 8811314  | 4364  |
| ENSG000001 | 347.433  | 192.9203 | 0.84801  | 1.60E-07  | 6.13E-07  | FTSJD1                  | chr16 | - | 71315292 | 71323618 | 4869  |
| ENSG000001 | 0        | 2.886762 | -3.0352  | 0.04862   | 0.086845  | OR56B4                  | chr11 | + | 6128914  | 6130065  | 1152  |
| ENSG000001 | 4.854596 | 2578.049 | -8.9158  | 1.19E-112 | 8.22E-111 | FAM83H                  | chr8  | - | 1.45E+08 | 1.45E+08 | 5654  |
| ENSG000001 | 6.421749 | 18.49568 | -1.4456  | 0.058172  | 0.10165   | GPR62                   | chr3  | + | 51989330 | 51991509 | 2180  |
| ENSG000001 | 0        | 0.700845 | -0.87835 | 0.62047   | NA        | OR56A1                  | chr11 | - | 6047901  | 6048971  | 1071  |
| ENSG000001 | 3.028845 | 5.461941 | -0.80629 | 0.39781   | 0.50232   | ZNF572                  | chr8  | + | 1.26E+08 | 1.26E+08 | 3275  |
| ENSG000001 | 23.86108 | 22.35674 | 0.09401  | 0.82025   | 0.8736    | ST20                    | chr15 | - | 80191182 | 80216044 | 1004  |
| ENSG000001 | 1187.43  | 1060.827 | 0.16231  | 0.1565    | 0.23544   | PITPNB                  | chr22 | - | 28247657 | 28316122 | 2926  |
| ENSG000001 | 1217.91  | 768.3935 | 0.66395  | 1.92E-05  | 5.96E-05  | TCEAL8                  | chrX  | - | 1.03E+08 | 1.03E+08 | 1222  |
| ENSG000001 | 203.4005 | 123.6026 | 0.71557  | 0.001325  | 0.003225  | LRRCS7                  | chr15 | - | 42834720 | 42841000 | 2649  |
| ENSG000001 | 0        | 3.06884  | -3.0961  | 0.043807  | 0.079295  | OR52N2                  | chr11 | + | 5841544  | 5842578  | 1035  |
| ENSG000001 | 1015.862 | 1240.317 | -0.28763 | 0.008814  | 0.018726  | MRPL14                  | chr6  | - | 44081194 | 44095194 | 956   |
| ENSG000001 | 90.54685 | 52.70293 | 0.77229  | 0.007766  | 0.016648  | GPR137C                 | chr14 | + | 53019866 | 53104431 | 5410  |
| ENSG000001 | 0.290301 | 0        | 0.4146   | 0.81455   | NA        | C1orf105                | chr1  | + | 1.72E+08 | 1.72E+08 | 985   |
| ENSG000001 | 126.925  | 37.68563 | 1.7423   | 1.62E-11  | 8.48E-11  | BBS12                   | chr4  | + | 1.24E+08 | 1.24E+08 | 3431  |
| ENSG000001 | 103.4269 | 152.2324 | -0.55826 | 0.013734  | 0.028051  | ZFP82                   | chr19 | - | 36874022 | 36909558 | 5718  |
| ENSG000001 | 0        | 0.343138 | -0.41864 | 0.81278   | NA        | C17orf47                | chr17 | - | 56618948 | 56621729 | 2123  |
| ENSG000001 | 7.499823 | 4.412253 | 0.73654  | 0.37558   | 0.47963   | LSMEM1                  | chr7  | + | 1.12E+08 | 1.12E+08 | 1870  |
| ENSG000001 | 0        | 0.297015 | -0.41864 | 0.81278   | NA        | OR56B2P                 | chr11 | + | 5786326  | 5787279  | 954   |
| ENSG000001 | 1924.38  | 491.1634 | 1.9663   | 2.37E-29  | 2.95E-28  | NQO1                    | chr16 | - | 69740899 | 69760854 | 2912  |
| ENSG000001 | 714.2977 | 3414.526 | -2.2519  | 2.75E-38  | 4.62E-37  | AEN                     | chr15 | + | 89164527 | 89175513 | 5039  |
| ENSG000001 | 896.7723 | 650.8959 | 0.46063  | 0.056711  | 0.099349  | FKRP                    | chr19 | + | 47249303 | 47280245 | 3332  |
| ENSG000001 | 49.67293 | 58.42463 | -0.23516 | 0.44276   | 0.54851   | RPH3AL                  | chr17 | - | 62293    | 236045   | 2809  |
| ENSG000001 | 189.2787 | 158.4844 | 0.25468  | 0.3296    | 0.43268   | SLC25A42                | chr19 | + | 19174808 | 19223697 | 3120  |
| ENSG000001 | 1.379541 | 0        | 1.686    | 0.34092   | NA        | FCRL6                   | chr1  | + | 1.6E+08  | 1.6E+08  | 1997  |
| ENSG000001 | 114.1982 | 180.0699 | -0.6573  | 0.00366   | 0.008321  | METTL23                 | chr17 | + | 74722912 | 74730018 | 1184  |
| ENSG000001 | 141.7921 | 7.484382 | 4.1714   | 3.83E-24  | 3.87E-23  | ANKRD34A                | chr1  | + | 1.45E+08 | 1.45E+08 | 3611  |
| ENSG000001 | 296.6998 | 405.2826 | -0.44937 | 0.002878  | 0.006654  | SLC26A11                | chr17 | + | 78193498 | 78227299 | 2885  |
| ENSG000001 | 1105.264 | 974.7946 | 0.18114  | 0.3255    | 0.42838   | HIGD1A                  | chr3  | - | 42798669 | 42846023 | 1373  |
| ENSG000001 | 0.290301 | 4.424406 | -2.9732  | 0.032071  | 0.060216  | CHRM2                   | chr7  | + | 1.37E+08 | 1.37E+08 | 5918  |
| ENSG000001 | 0        | 1.012429 | -1.3162  | 0.46038   | NA        | OR52N4                  | chr11 | + | 5775923  | 5776959  | 1037  |
| ENSG000001 | 27.25219 | 108.9531 | -1.9837  | 2.10E-09  | 9.40E-09  | MAPK15                  | chr8  | + | 1.45E+08 | 1.45E+08 | 2240  |
| ENSG000001 | 2130.536 | 3573.159 | -0.74531 | 1.65E-12  | 9.25E-12  | EHMT1                   | chr9  | + | 1.41E+08 | 1.41E+08 | 7842  |
| ENSG000001 | 10.37455 | 15.93178 | -0.60923 | 0.28511   | 0.38648   | RP11-429J1.1            | chr8  | + | 1.45E+08 | 1.45E+08 | 1963  |
| ENSG000001 | 0        | 0.343138 | -0.41864 | 0.81278   | NA        | SDCCAG3P                | chr1  | - | 1.75E+08 | 1.75E+08 | 1023  |
| ENSG000001 | 3620.668 | 552.1932 | 2.7092   | 6.67E-97  | 3.68E-95  | F2R                     | chr5  | + | 76011868 | 76031606 | 3821  |
| ENSG000001 | 0        | 1.964165 | -2.2052  | 0.20143   | 0.2901    | HLA-V                   | chr6  | + | 29758731 | 29765588 | 4814  |
| ENSG000001 | 306.578  | 295.469  | 0.054002 | 0.81524   | 0.87035   | ZNF707                  | chr8  | + | 1.45E+08 | 1.45E+08 | 3031  |
| ENSG000001 | 0        | 2.786395 | -2.852   | 0.075949  | 0.12778   | MUC16                   | chr19 | - | 8959520  | 9092018  | 43816 |
| ENSG000001 | 10167.57 | 27861.53 | -1.4527  | 1.95E-34  | 2.91E-33  | NPM1                    | chr5  | + | 1.71E+08 | 1.71E+08 | 1758  |
| ENSG000001 | 801.2279 | 1122.273 | -0.48476 | 1.51E-05  | 4.74E-05  | PJA1                    | chrX  | - | 68380694 | 68385636 | 2755  |
| ENSG000001 | 714.76   | 1869.836 | -1.3845  | 8.60E-17  | 6.22E-16  | DHTKD1                  | chr10 | + | 12110971 | 12165224 | 5159  |
| ENSG000001 | 3.019472 | 2.355842 | 0.30723  | 0.80534   | 0.86232   | PENK                    | chr8  | - | 57349233 | 57359293 | 1199  |
| ENSG000001 | 0        | 0.594029 | -0.81444 | 0.64499   | NA        | HIST3H2BA               | chr1  | - | 2.29E+08 | 2.29E+08 | 524   |
| ENSG000001 | 10.86184 | 2.102535 | 2.2497   | 0.011491  | 0.023842  | HECW1-IT1               | chr7  | + | 43157495 | 43202786 | 1839  |
| ENSG000001 | 0        | 1.280305 | -1.6305  | 0.35731   | NA        | C4orf50                 | chr4  | - | 5958845  | 5991545  | 4557  |
| ENSG000001 | 40.02095 | 163.0979 | -2.0213  | 5.44E-16  | 3.76E-15  | HIST3H2A                | chr1  | - | 2.29E+08 | 2.29E+08 | 496   |
| ENSG000001 | 827.6912 | 727.4756 | 0.18579  | 0.2835    | 0.38477   | ZNF746                  | chr7  | - | 1.49E+08 | 1.49E+08 | 5051  |

|                    |          |          |           |           |           |       |   |          |          |      |
|--------------------|----------|----------|-----------|-----------|-----------|-------|---|----------|----------|------|
| ENSG0000015987.464 | 6052.351 | -0.01554 | 0.85488   | 0.89799   | POLR2A    | chr17 | + | 7387685  | 7417933  | 6749 |
| ENSG00000110.94578 | 4.755391 | 1.1508   | 0.14636   | 0.22226   | RP4-682C2 | chr1  | - | 76209103 | 76210461 | 1354 |
| ENSG0000010        | 31.59977 | -6.5739  | 9.38E-09  | 3.99E-08  | TMEM132C  | chr12 | + | 1.29E+08 | 1.29E+08 | 4947 |
| ENSG0000014.077009 | 9.039011 | -1.0992  | 0.17435   | 0.25738   | SLC25A41  | chr19 | - | 6426048  | 6433790  | 1630 |
| ENSG0000010        | 0.357707 | -0.41864 | 0.81278   | NA        | RP11-145N | chr3  | + | 1.79E+08 | 1.79E+08 | 983  |
| ENSG000001175.3125 | 109.1537 | 0.67905  | 0.000861  | 0.002159  | TMEM136   | chr11 | + | 1.2E+08  | 1.2E+08  | 4143 |
| ENSG000001195.5617 | 1764.513 | -3.1561  | 3.69E-35  | 5.63E-34  | FRAT2     | chr10 | - | 99092255 | 99094458 | 2204 |
| ENSG00000191.71922 | 231.5939 | -1.325   | 0.000147  | 0.00041   | TMEM102   | chr17 | + | 7338762  | 7340998  | 1973 |
| ENSG0000011.503747 | 153.9533 | -6.2985  | 8.39E-20  | 7.02E-19  | TMEM132E  | chr17 | + | 32907768 | 32966337 | 4369 |
| ENSG000001182.2327 | 117.2336 | 0.63327  | 0.000674  | 0.001715  | ZNF322    | chr6  | - | 26636518 | 26659980 | 2910 |
| ENSG00000116.64137 | 22.2038  | -0.40278 | 0.42257   | 0.52797   | NME9      | chr3  | - | 1.38E+08 | 1.38E+08 | 2133 |
| ENSG0000010        | 0.343138 | -0.41864 | 0.81278   | NA        | SPEM1     | chr17 | + | 7323679  | 7324951  | 982  |
| ENSG0000016.286378 | 11.78411 | -0.87109 | 0.18393   | 0.26911   | HEPHL1    | chr11 | + | 93754527 | 93846917 | 5345 |
| ENSG000001143.2134 | 279.5619 | -0.95538 | 0.007861  | 0.016828  | FAM211A   | chr17 | - | 16344891 | 16395467 | 3157 |
| ENSG0000011.016461 | 8.097813 | -2.7208  | 0.010136  | 0.021289  | OFCC1     | chr6  | - | 9596343  | 10211841 | 2877 |
| ENSG0000010        | 1.073121 | -1.1788  | 0.50551   | NA        | CTAGE10P  | chr13 | + | 50464727 | 50467134 | 2408 |
| ENSG0000010        | 7.639738 | -4.5488  | 0.000464  | 0.001213  | CCDC108   | chr2  | - | 2.2E+08  | 2.2E+08  | 5953 |
| ENSG000001690.8879 | 20.58277 | 5.0528   | 7.29E-109 | 4.80E-107 | DDX60L    | chr4  | - | 1.69E+08 | 1.69E+08 | 6781 |
| ENSG0000013.309773 | 164.949  | -5.5231  | 9.93E-27  | 1.12E-25  | SYNE4     | chr19 | - | 36494209 | 36499695 | 2339 |
| ENSG000001913.84   | 594.6958 | 0.61915  | 0.000198  | 0.000543  | OGFOD3    | chr17 | - | 80347099 | 80376513 | 4287 |
| ENSG000001104.2208 | 101.5599 | 0.040782 | 0.86278   | 0.90419   | XXYac-YRM | chr9  | - | 14511    | 29739    | 1837 |
| ENSG0000010.580602 | 14.6596  | -4.028   | 0.000177  | 0.000489  | UTS2R     | chr17 | + | 80332153 | 80333462 | 1310 |
| ENSG0000019.285312 | 97.8115  | -3.3544  | 5.33E-15  | 3.49E-14  | AATK      | chr17 | - | 79091095 | 79139877 | 5257 |
| ENSG0000015.621832 | 12.396   | -1.0812  | 0.1894    | 0.27586   | DDN       | chr12 | - | 49388932 | 49393092 | 3749 |
| ENSG0000010        | 0.343138 | -0.41864 | 0.81278   | NA        | SAGE1     | chrX  | + | 1.35E+08 | 1.35E+08 | 3045 |
| ENSG000001102.8139 | 22.65859 | 2.1696   | 1.29E-11  | 6.77E-11  | ZNF467    | chr7  | - | 1.49E+08 | 1.49E+08 | 2553 |
| ENSG000001554.5148 | 6335.882 | -3.5018  | 5.74E-62  | 1.74E-60  | SOX2      | chr3  | + | 1.81E+08 | 1.81E+08 | 2500 |
| ENSG000001107.3969 | 249.0956 | -1.2063  | 1.13E-07  | 4.41E-07  | ZNF678    | chr1  | + | 2.28E+08 | 2.28E+08 | 3052 |
| ENSG000001651.4961 | 130.0689 | 2.3246   | 2.60E-48  | 5.68E-47  | TMEM45A   | chr3  | + | 1E+08    | 1E+08    | 4615 |
| ENSG0000011302.54  | 1150.621 | 0.17797  | 0.19781   | 0.28597   | RAP2B     | chr3  | + | 1.53E+08 | 1.53E+08 | 6237 |
| ENSG000001361.1206 | 531.2225 | -0.55118 | 0.11508   | 0.18226   | ZBTB2     | chr6  | - | 1.52E+08 | 1.52E+08 | 3090 |
| ENSG000001217.9927 | 232.9904 | -0.09821 | 0.58211   | 0.67838   | RNF135    | chr17 | + | 29295803 | 29326929 | 2892 |
| ENSG0000010        | 0.343138 | -0.41864 | 0.81278   | NA        | OR6T1     | chr11 | - | 1.24E+08 | 1.24E+08 | 1089 |
| ENSG00000145.58736 | 177.2553 | -1.9443  | 2.95E-08  | 1.21E-07  | ACBD4     | chr17 | + | 43209967 | 43221548 | 2241 |
| ENSG0000010        | 0.343138 | -0.41864 | 0.81278   | NA        | OR8D4     | chr11 | + | 1.24E+08 | 1.24E+08 | 1075 |
| ENSG000001323.9964 | 263.1363 | 0.30074  | 0.097676  | 0.1583    | SGSH      | chr17 | - | 78180515 | 78194722 | 5562 |
| ENSG0000015.580756 | 17.7373  | -1.6097  | 0.010103  | 0.021223  | RPL24P4   | chr6  | - | 42924083 | 42924503 | 421  |
| ENSG000001111.6708 | 3.6483   | 4.83     | 4.66E-21  | 4.13E-20  | MAB21L2   | chr4  | + | 1.52E+08 | 1.52E+08 | 2767 |
| ENSG00000167.03704 | 61.94335 | 0.11625  | 0.6833    | 0.76352   | FANCB     | chrX  | - | 14861529 | 14891191 | 3008 |
| ENSG0000011552.562 | 1249.527 | 0.31282  | 0.050301  | 0.089408  | SETD2     | chr3  | - | 47057919 | 47205457 | 8172 |
| ENSG000001212.626  | 22.06785 | 3.248    | 5.95E-37  | 9.61E-36  | C6orf223  | chr6  | + | 43968317 | 43973695 | 3581 |
| ENSG0000010.290301 | 10.94087 | -4.2471  | 0.000641  | 0.001638  | TMIE      | chr3  | + | 46742823 | 46752376 | 1824 |
| ENSG0000013539.492 | 3540.92  | -0.00055 | 0.99701   | 0.99834   | MEX3D     | chr19 | - | 1554668  | 1568057  | 2850 |
| ENSG000001521.7153 | 795.9199 | -0.60726 | 0.000486  | 0.001265  | MRPS23    | chr17 | - | 55916842 | 55927417 | 921  |
| ENSG000001111.1683 | 16.52823 | 2.7271   | 2.56E-18  | 1.99E-17  | GPR135    | chr14 | - | 59895740 | 59932060 | 4578 |
| ENSG0000010.290301 | 0        | 0.4146   | 0.81455   | NA        | SLX1B     | chr16 | + | 29465822 | 29469540 | 1558 |
| ENSG0000010.36308  | 0.343138 | -0.0021  | 0.99905   | NA        | ANKRD62   | chr18 | + | 12093848 | 12129748 | 4520 |
| ENSG0000010        | 0.357707 | -0.41864 | 0.81278   | NA        | P2RY13    | chr3  | - | 1.51E+08 | 1.51E+08 | 2764 |
| ENSG0000014.262829 | 0.343138 | 2.8567   | 0.04423   | 0.079931  | TNFSF15   | chr9  | - | 1.18E+08 | 1.18E+08 | 2789 |
| ENSG000001209.8743 | 271.3077 | -0.36831 | 0.074785  | 0.12618   | ZFP41     | chr8  | + | 1.44E+08 | 1.44E+08 | 4797 |
| ENSG0000011674.524 | 150.2989 | 3.4683   | 1.07E-95  | 5.81E-94  | PHLDA2    | chr11 | - | 2949503  | 2950685  | 955  |
| ENSG00000125.21829 | 24.99261 | 0.012465 | 0.97568   | 0.9865    | ATG9B     | chr7  | - | 1.51E+08 | 1.51E+08 | 4571 |
| ENSG000001137.5293 | 0        | 8.5648   | 3.49E-15  | 2.31E-14  | GPR88     | chr1  | + | 1.01E+08 | 1.01E+08 | 3491 |
| ENSG000001402.7472 | 668.3152 | -0.73023 | 2.72E-05  | 8.28E-05  | HKR1      | chr19 | + | 37803739 | 37860267 | 3472 |
| ENSG000001271.443  | 297.4081 | -0.13106 | 0.63893   | 0.72652   | PLAG1     | chr8  | - | 57073463 | 57123883 | 7322 |
| ENSG000001781.6531 | 738.8321 | 0.082025 | 0.47559   | 0.58018   | YIPF6     | chrX  | + | 67718165 | 67757127 | 6741 |
| ENSG0000010        | 0.357707 | -0.41864 | 0.81278   | NA        | OR5T2     | chr11 | - | 55999490 | 56000737 | 1248 |
| ENSG00000146.81792 | 6.062418 | 2.9104   | 2.80E-09  | 1.24E-08  | ZBTB20    | chr3  | - | 1.14E+08 | 1.15E+08 | 3740 |
| ENSG0000010.36308  | 0        | 0.4146   | 0.81455   | NA        | OR2Z1     | chr19 | + | 8841316  | 8842371  | 1056 |
| ENSG0000013.350849 | 1.698704 | 0.88455  | 0.42016   | 0.52563   | FDX1P1    | chr20 | - | 33063729 | 33064279 | 551  |
| ENSG000001459.1182 | 611.0655 | -0.41189 | 0.008303  | 0.017699  | C3orf58   | chr3  | + | 1.44E+08 | 1.44E+08 | 4346 |
| ENSG000001249.4546 | 243.7436 | 0.030856 | 0.8711    | 0.91003   | C5orf30   | chr5  | + | 1.03E+08 | 1.03E+08 | 3049 |
| ENSG00000137.55396 | 101.6152 | -1.4278  | 2.97E-06  | 1.01E-05  | AMIGO1    | chr1  | - | 1.1E+08  | 1.1E+08  | 5088 |
| ENSG000001108.0812 | 118.2501 | -0.12684 | 0.55862   | 0.65756   | GPR3      | chr1  | + | 27719148 | 27722318 | 2115 |
| ENSG0000011.431782 | 16.27492 | -3.3308  | 0.000215  | 0.000587  | ODF3L2    | chr19 | - | 463346   | 474983   | 1604 |

|                    |          |          |          |          |           |       |   |          |          |       |
|--------------------|----------|----------|----------|----------|-----------|-------|---|----------|----------|-------|
| ENSG000001554.5361 | 333.0613 | 0.73391  | 4.76E-06 | 1.59E-05 | SIAH2     | chr3  | - | 1.5E+08  | 1.5E+08  | 2517  |
| ENSG0000016807.682 | 2161.482 | 1.6535   | 7.09E-46 | 1.45E-44 | COPG1     | chr3  | + | 1.29E+08 | 1.29E+08 | 3231  |
| ENSG000001280.8607 | 322.7454 | -0.20029 | 0.31995  | 0.42277  | BAI1      | chr8  | + | 1.44E+08 | 1.44E+08 | 6241  |
| ENSG00000111.76265 | 31.44516 | -1.386   | 0.005836 | 0.012823 | LINC00471 | chr2  | - | 2.32E+08 | 2.32E+08 | 1282  |
| ENSG0000015.040416 | 4.210775 | 0.2457   | 0.79896  | 0.85758  | CLF2-AS1  | chr10 | - | 11358797 | 11361847 | 2468  |
| ENSG00000131.94069 | 12.47281 | 1.3427   | 0.006543 | 0.014242 | SLC9A9    | chr3  | - | 1.43E+08 | 1.44E+08 | 3627  |
| ENSG000001632.8014 | 560.3161 | 0.17538  | 0.24533  | 0.34113  | LSM10     | chr1  | - | 36856839 | 36863493 | 1006  |
| ENSG0000010.36308  | 0.715414 | -0.51558 | 0.77246  | NA       | KCTD9P2   | chrX  | + | 1.05E+08 | 1.05E+08 | 1013  |
| ENSG000001127.825  | 72.52168 | 0.8135   | 0.000246 | 0.000665 | RELL1     | chr4  | - | 37592422 | 37687998 | 1350  |
| ENSG000001739.1423 | 542.137  | 0.44685  | 0.002345 | 0.005488 | RFX7      | chr15 | - | 56379478 | 56535483 | 7194  |
| ENSG0000011046.54  | 429.7545 | 1.2801   | 1.94E-16 | 1.38E-15 | SLC35C1   | chr11 | + | 45825623 | 45834566 | 4171  |
| ENSG0000010        | 1.073121 | -1.1788  | 0.50551  | NA       | TIGIT     | chr3  | + | 1.14E+08 | 1.14E+08 | 3710  |
| ENSG000001840.7355 | 875.4729 | -0.05758 | 0.65809  | 0.74245  | RNF41     | chr12 | - | 56598285 | 56615717 | 3270  |
| ENSG0000011.681007 | 80.96357 | -5.3846  | 6.90E-15 | 4.50E-14 | SLC2A4    | chr17 | + | 7184986  | 7191576  | 3426  |
| ENSG000001304.3332 | 604.1049 | -0.98409 | 7.60E-05 | 0.00022  | IBA57     | chr1  | + | 2.28E+08 | 2.28E+08 | 9815  |
| ENSG0000010.653381 | 1067.281 | -10      | 2.43E-37 | 3.98E-36 | CLDN7     | chr17 | - | 7163222  | 7167302  | 1923  |
| ENSG000001191.6696 | 314.0404 | -0.71243 | 1.01E-05 | 3.23E-05 | ZNF329    | chr19 | - | 58637619 | 58666477 | 3410  |
| ENSG000001122.4979 | 760.6024 | -2.6301  | 3.09E-66 | 1.04E-64 | ZNF101    | chr19 | + | 19779605 | 19794318 | 4627  |
| ENSG0000011138.835 | 235.0614 | 2.2708   | 9.63E-58 | 2.65E-56 | C5orf24   | chr5  | + | 1.34E+08 | 1.34E+08 | 5065  |
| ENSG0000010        | 0.997859 | -1.5018  | 0.39072  | NA       | AP003774  | chr11 | + | 64216546 | 64219126 | 2337  |
| ENSG0000011156.425 | 859.6319 | 0.42658  | 0.005659 | 0.012465 | ADO       | chr10 | + | 64564516 | 64568238 | 3723  |
| ENSG000001552.5433 | 847.706  | -0.61586 | 0.000109 | 0.00031  | COA4      | chr11 | - | 73583712 | 73588033 | 1038  |
| ENSG000001701.0239 | 467.7058 | 0.58367  | 2.90E-06 | 9.89E-06 | PRKAG1    | chr12 | - | 49396057 | 49412980 | 2071  |
| ENSG000001170.6062 | 280.1748 | -0.7105  | 0.007245 | 0.015627 | GIN3      | chr16 | + | 58328984 | 58440048 | 3202  |
| ENSG0000010        | 1.326428 | -1.6486  | 0.3523   | NA       | NEUROG1   | chr5  | - | 1.35E+08 | 1.35E+08 | 1649  |
| ENSG000001396.7406 | 107.2736 | 1.8829   | 3.95E-28 | 4.69E-27 | CCDC149   | chr4  | - | 24807739 | 24981826 | 5604  |
| ENSG000001621.5443 | 467.8567 | 0.4093   | 0.01867  | 0.037109 | MRPS11    | chr15 | + | 89010684 | 89022222 | 2002  |
| ENSG0000010.705622 | 0.357707 | 0.57557  | 0.74268  | NA       | RP11-651P | chr3  | + | 1.5E+08  | 1.5E+08  | 403   |
| ENSG000001930.056  | 1426.709 | -0.61552 | 4.48E-05 | 0.000133 | SNRPE     | chr1  | + | 2.04E+08 | 2.04E+08 | 967   |
| ENSG000001549.0274 | 420.5147 | 0.38539  | 0.011702 | 0.024227 | RTKN2     | chr10 | - | 63942794 | 64028466 | 6641  |
| ENSG000001657.253  | 515.8709 | 0.34746  | 0.077235 | 0.12965  | PNMAL1    | chr19 | - | 46969748 | 46974820 | 3689  |
| ENSG000001106.527  | 237.5396 | -1.1485  | 1.94E-05 | 6.03E-05 | CHST15    | chr10 | - | 1.26E+08 | 1.26E+08 | 4810  |
| ENSG0000010.290301 | 40.71821 | -5.869   | 1.11E-06 | 3.97E-06 | USH1G     | chr17 | - | 72912176 | 72919351 | 3561  |
| ENSG0000010.705622 | 5.528339 | -2.4276  | 0.08179  | 0.13616  | TRPC2     | chr11 | + | 3631131  | 3658789  | 3173  |
| ENSG0000010        | 27.39612 | -6.2737  | 2.20E-07 | 8.34E-07 | MGAT4C    | chr12 | - | 86372516 | 87232681 | 3193  |
| ENSG0000010        | 0.343138 | -0.41864 | 0.81278  | NA       | TRIM49B   | chr11 | + | 49050504 | 49059579 | 1437  |
| ENSG0000013773.498 | 1428.527 | 1.3981   | 3.68E-16 | 2.57E-15 | IDH2      | chr15 | - | 90626277 | 90645736 | 2694  |
| ENSG0000019.18083  | 14.31962 | -0.60908 | 0.32478  | 0.42767  | Z83851.3  | chr22 | + | 42665759 | 42671202 | 1242  |
| ENSG0000010        | 1.387121 | -1.6961  | 0.33794  | NA       | OR52A1    | chr11 | - | 5172239  | 5207612  | 1779  |
| ENSG0000011.048164 | 0        | 1.348    | 0.44949  | NA       | PTCHD3    | chr10 | - | 27687116 | 27703297 | 2529  |
| ENSG0000012774.688 | 2915.48  | -0.07148 | 0.57324  | 0.67038  | TMEM259   | chr19 | - | 1006168  | 1021117  | 5098  |
| ENSG000001412.5807 | 311.6803 | 0.40523  | 0.00566  | 0.012465 | WRB       | chr21 | + | 40752170 | 40800454 | 1616  |
| ENSG0000018436.652 | 4345.759 | 0.95594  | 2.82E-16 | 1.98E-15 | TNRC18    | chr7  | - | 5346421  | 5465045  | 10572 |
| ENSG000001106.6    | 78.93227 | 0.42899  | 0.15334  | 0.2313   | FAM181B   | chr11 | - | 82443053 | 82444906 | 1854  |
| ENSG00000137.8538  | 416.5029 | -3.4327  | 1.38E-45 | 2.80E-44 | TMEM30B   | chr14 | - | 61744088 | 61748558 | 4471  |
| ENSG0000011.338465 | 2.010288 | -0.50274 | 0.6905   | 0.76928  | DEXI      | chr16 | - | 11022748 | 11036317 | 1561  |
| ENSG0000012.67693  | 3.414394 | -0.30912 | 0.77918  | 0.84153  | RP11-69E1 | chr1  | - | 39987952 | 40011859 | 2241  |
| ENSG000001852.3597 | 902.3815 | -0.08141 | 0.54302  | 0.64354  | NOP10     | chr15 | - | 34633917 | 34635378 | 551   |
| ENSG000001235.2118 | 71.51583 | 1.7059   | 1.75E-15 | 1.18E-14 | FAM89A    | chr1  | - | 2.31E+08 | 2.31E+08 | 1576  |
| ENSG000001668.2046 | 10.55564 | 5.9411   | 7.71E-93 | 4.02E-91 | KCNIP1    | chr5  | + | 1.7E+08  | 1.7E+08  | 2014  |
| ENSG000001151.0628 | 386.5425 | -1.35    | 3.52E-14 | 2.18E-13 | TDRKH     | chr1  | - | 1.52E+08 | 1.52E+08 | 3093  |
| ENSG000001115.2052 | 327.1192 | -1.4942  | 1.01E-06 | 3.60E-06 | ZNF708    | chr19 | - | 21473962 | 21512227 | 4004  |
| ENSG0000011482.735 | 2028.073 | -0.45091 | 6.51E-05 | 0.00019  | IST1      | chr16 | + | 71919136 | 71962913 | 2654  |
| ENSG000001348.5623 | 239.0652 | 0.54384  | 0.011453 | 0.02377  | ERCC6L2   | chr9  | + | 98637983 | 98776842 | 4564  |
| ENSG0000011460.465 | 1376.732 | 0.084799 | 0.58417  | 0.68004  | MRPL41    | chr9  | + | 1.4E+08  | 1.4E+08  | 1262  |
| ENSG0000014781.304 | 734.244  | 2.6984   | 4.11E-73 | 1.55E-71 | CREB3L2   | chr7  | - | 1.38E+08 | 1.38E+08 | 7412  |
| ENSG0000011.370168 | 5.955602 | -1.8631  | 0.11725  | 0.18514  | P2RY8     | chrX  | - | 1581465  | 1656000  | 4198  |
| ENSG000001104.5705 | 75.27263 | 0.46831  | 0.22931  | 0.32256  | TP53TG1   | chr7  | - | 86954541 | 86974831 | 855   |
| ENSG000001245.2928 | 10.8979  | 4.4563   | 2.77E-28 | 3.31E-27 | UNC5C     | chr4  | - | 96083655 | 96470357 | 9875  |
| ENSG0000010        | 0.343138 | -0.41864 | 0.81278  | NA       | MIRGPRG   | chr11 | - | 3239174  | 3240043  | 870   |
| ENSG000001223.4391 | 866.4361 | -1.9496  | 3.15E-35 | 4.81E-34 | TSEN54    | chr17 | + | 73512141 | 73520820 | 1944  |
| ENSG000001451.4063 | 1062.588 | -1.232   | 1.98E-23 | 1.95E-22 | RGMA      | chr15 | - | 93586636 | 93632433 | 3216  |
| ENSG0000010        | 9.779532 | -4.909   | 0.000104 | 0.000295 | ASB18     | chr2  | - | 2.37E+08 | 2.37E+08 | 3627  |
| ENSG000001283.6158 | 4.744111 | 5.766    | 6.46E-44 | 1.26E-42 | UBA7      | chr3  | - | 49842640 | 49851379 | 3299  |
| ENSG0000011200.189 | 1859.254 | -0.63057 | 2.60E-08 | 1.06E-07 | MRPS16    | chr10 | - | 75006510 | 75012451 | 2634  |

|            |          |          |          |           |           |           |       |   |          |          |       |
|------------|----------|----------|----------|-----------|-----------|-----------|-------|---|----------|----------|-------|
| ENSG000001 | 4.63626  | 10.08541 | -1.0257  | 0.20288   | 0.29177   | FAM159A   | chr1  | + | 53099016 | 53135355 | 1992  |
| ENSG000001 | 39.98085 | 54.21788 | -0.43173 | 0.19685   | 0.28484   | RAD51B    | chr14 | + | 68286496 | 69196935 | 2596  |
| ENSG000001 | 0        | 2.414118 | -2.7105  | 0.090717  | 0.14874   | CRYGB     | chr2  | - | 2.09E+08 | 2.09E+08 | 641   |
| ENSG000001 | 1203.126 | 645.2806 | 0.89797  | 4.06E-14  | 2.51E-13  | LDOC1     | chrX  | - | 1.4E+08  | 1.4E+08  | 1370  |
| ENSG000001 | 9.014735 | 6.108542 | 0.55841  | 0.44306   | 0.54873   | ARL6IP4   | chr12 | + | 1.23E+08 | 1.23E+08 | 1782  |
| ENSG000001 | 1888.865 | 714.6195 | 1.4004   | 4.60E-23  | 4.46E-22  | EXT1      | chr8  | - | 1.19E+08 | 1.19E+08 | 8270  |
| ENSG000001 | 3866.151 | 5044.256 | -0.38321 | 0.000202  | 0.000555  | SHMT2     | chr12 | + | 57623110 | 57628718 | 3416  |
| ENSG000001 | 324.8919 | 318.7247 | 0.02646  | 0.87618   | 0.91404   | MOB2      | chr11 | - | 1490687  | 1522477  | 3174  |
| ENSG000001 | 0.580602 | 2.217472 | -1.3687  | 0.38505   | 0.48929   | HIST2H4B  | chr1  | - | 1.5E+08  | 1.5E+08  | 1696  |
| ENSG000001 | 96.33136 | 85.15218 | 0.17589  | 0.63031   | 0.71982   | HHIPL1    | chr14 | + | 1E+08    | 1E+08    | 7390  |
| ENSG000001 | 1586.561 | 923.467  | 0.78046  | 4.16E-14  | 2.57E-13  | ATP6AP2   | chrX  | + | 40440146 | 40465889 | 2093  |
| ENSG000001 | 4.077009 | 25.32614 | -2.5673  | 0.000129  | 0.000364  | ZAR1      | chr4  | + | 48492269 | 48496406 | 1460  |
| ENSG000001 | 183.2757 | 202.8769 | -0.14489 | 0.50129   | 0.60491   | CYB5D1    | chr17 | + | 7761064  | 7765600  | 3509  |
| ENSG000001 | 0        | 0.357707 | -0.41864 | 0.81278   | NA        | FAM153B   | chr5  | + | 1.75E+08 | 1.76E+08 | 4330  |
| ENSG000001 | 344.9056 | 316.691  | 0.12233  | 0.4714    | 0.57615   | BACE2     | chr21 | + | 42539728 | 42648524 | 2993  |
| ENSG000001 | 350.9699 | 583.6164 | -0.73252 | 3.63E-07  | 1.35E-06  | UBE2E2    | chr3  | + | 23244511 | 23633284 | 2748  |
| ENSG000001 | 377.4309 | 44.61162 | 3.0576   | 5.50E-42  | 1.02E-40  | SYNM      | chr15 | + | 99638420 | 99675798 | 7393  |
| ENSG000001 | 9.502835 | 0.297015 | 4.0857   | 0.000889  | 0.002226  | KCNA4     | chr11 | - | 30031288 | 30038570 | 4172  |
| ENSG000001 | 187.267  | 9.467948 | 4.2536   | 6.92E-37  | 1.12E-35  | GABRG3    | chr15 | + | 27216429 | 27778373 | 2004  |
| ENSG000001 | 3.008307 | 1.058552 | 1.3105   | 0.30234   | 0.40359   | C22orf26  | chr22 | - | 46445358 | 46450024 | 2817  |
| ENSG000001 | 3.64115  | 1.995719 | 0.7883   | 0.44495   | 0.55046   | NLRP10    | chr11 | - | 7980971  | 7986973  | 2350  |
| ENSG000001 | 141.0376 | 354.5299 | -1.327   | 1.69E-14  | 1.08E-13  | FIGN      | chr2  | - | 1.64E+08 | 1.65E+08 | 9536  |
| ENSG000001 | 1.027626 | 5.035421 | -1.9854  | 0.10694   | 0.17088   | IZUMO1    | chr19 | - | 49244109 | 49250166 | 2218  |
| ENSG000001 | 1418.501 | 1253.086 | 0.17802  | 0.20509   | 0.29437   | B4GALNT4  | chr11 | + | 369796   | 382116   | 3444  |
| ENSG000001 | 958.4453 | 1964.776 | -1.0343  | 2.31E-17  | 1.72E-16  | AP1S2     | chrX  | - | 15843929 | 15873054 | 3492  |
| ENSG000001 | 645.4506 | 1002.616 | -0.63314 | 1.36E-05  | 4.31E-05  | C8orf33   | chr8  | + | 1.46E+08 | 1.46E+08 | 2677  |
| ENSG000001 | 3.10081  | 3.740547 | -0.21073 | 0.83958   | 0.88742   | DCAF4L1   | chr4  | + | 41983713 | 41988476 | 4764  |
| ENSG000001 | 187.7271 | 75.38333 | 1.3131   | 5.49E-11  | 2.77E-10  | LINC00085 | chr19 | + | 52196593 | 52215640 | 1960  |
| ENSG000001 | 159.5705 | 96.92013 | 0.71975  | 0.003166  | 0.007274  | ZSCAN22   | chr19 | + | 58838385 | 58853698 | 4629  |
| ENSG000001 | 737.5585 | 1703.992 | -1.2067  | 1.29E-30  | 1.68E-29  | SGK223    | chr8  | - | 8175258  | 8244008  | 4891  |
| ENSG000001 | 30.43597 | 25.52836 | 0.24941  | 0.52746   | 0.62915   | KCNJ14    | chr19 | + | 48958766 | 48969367 | 3120  |
| ENSG000001 | 178.0941 | 344.3265 | -0.94988 | 1.38E-06  | 4.86E-06  | FBXL6     | chr8  | - | 1.46E+08 | 1.46E+08 | 3108  |
| ENSG000001 | 31.43287 | 63.79016 | -1.0088  | 0.000966  | 0.002402  | C1S       | chr12 | + | 7096351  | 7178336  | 3076  |
| ENSG000001 | 33.38005 | 22.56883 | 0.55404  | 0.29864   | 0.40041   | GLTPD2    | chr17 | + | 4692254  | 4693685  | 1023  |
| ENSG000001 | 3.609448 | 1.652581 | 0.99986  | 0.37554   | 0.47961   | ACT079354 | chr2  | + | 2.03E+08 | 2.03E+08 | 5135  |
| ENSG000001 | 0.36308  | 0        | 0.4146   | 0.81455   | NA        | LIPF      | chr10 | + | 90424198 | 90438571 | 1470  |
| ENSG000001 | 0.36308  | 0.357707 | -0.00212 | 0.99905   | NA        | RP11-39K2 | chr9  | - | 5084999  | 5086112  | 1114  |
| ENSG000001 | 25.77159 | 32.26094 | -0.32667 | 0.44578   | 0.55121   | KBTBD3    | chr11 | - | 1.06E+08 | 1.06E+08 | 3751  |
| ENSG000001 | 203.9931 | 198.3411 | 0.039887 | 0.80177   | 0.85977   | YBEY      | chr21 | + | 47706251 | 47717665 | 1402  |
| ENSG000001 | 0.653381 | 0.640152 | 0.01046  | 0.99499   | NA        | FAM87A    | chr8  | - | 325931   | 333174   | 4013  |
| ENSG000001 | 4.553943 | 5.415818 | -0.25741 | 0.79956   | 0.85803   | FAM27A    | chr9  | + | 45727107 | 45728274 | 616   |
| ENSG000001 | 1072.618 | 1735.033 | -0.69336 | 5.86E-10  | 2.76E-09  | CLN8      | chr8  | + | 1703944  | 1734738  | 7113  |
| ENSG000001 | 3.019472 | 1.294874 | 1.0471   | 0.37733   | 0.48143   | RP5-1142A | chr16 | + | 88809175 | 88812156 | 2137  |
| ENSG000001 | 1543.823 | 3642.664 | -1.2376  | 2.01E-36  | 3.19E-35  | PLCXD1    | chrX  | + | 192989   | 220023   | 5507  |
| ENSG000001 | 563.5479 | 111.5275 | 2.3227   | 2.95E-20  | 2.51E-19  | NXPH4     | chr12 | + | 57610578 | 57620232 | 2007  |
| ENSG000001 | 0.342542 | 0        | 0.4146   | 0.81455   | NA        | CTD-2503C | chr5  | - | 74286014 | 74286462 | 449   |
| ENSG000001 | 11.1426  | 78.13186 | -2.7812  | 5.73E-08  | 2.28E-07  | CACNB4    | chr2  | - | 1.53E+08 | 1.53E+08 | 8055  |
| ENSG000001 | 0        | 0.594029 | -0.81444 | 0.64499   | NA        | IFNL1     | chr19 | + | 39786965 | 39789313 | 857   |
| ENSG000001 | 7.084503 | 2.901332 | 1.1954   | 0.17702   | 0.26061   | DNM1P46   | chr15 | - | 1E+08    | 1E+08    | 3831  |
| ENSG000001 | 357.3817 | 302.6374 | 0.23916  | 0.1061    | 0.16976   | TRAPPC6B  | chr14 | - | 39617015 | 39639736 | 4533  |
| ENSG000001 | 1.338465 | 2.414118 | -0.72177 | 0.56228   | 0.66064   | RP1-86D1  | chr6  | - | 1.29E+08 | 1.29E+08 | 1904  |
| ENSG000001 | 27.41829 | 15.90747 | 0.77314  | 0.077242  | 0.12965   | PGBD4     | chr15 | + | 34394274 | 34396591 | 2318  |
| ENSG000001 | 4089.384 | 2337.171 | 0.80595  | 1.23E-09  | 5.63E-09  | NPLOC4    | chr17 | - | 79523913 | 79615495 | 5538  |
| ENSG000001 | 0        | 0.343138 | -0.41864 | 0.81278   | NA        | KCNK4     | chr11 | + | 64058774 | 64067503 | 1723  |
| ENSG000001 | 2.624689 | 18.06345 | -2.6475  | 0.00039   | 0.001028  | TEX19     | chr17 | + | 80317123 | 80321652 | 1936  |
| ENSG000001 | 861.9179 | 17.16596 | 5.6225   | 6.35E-119 | 4.87E-117 | TSHZ2     | chr20 | + | 51588946 | 52111869 | 12187 |
| ENSG000001 | 10.0312  | 22.61501 | -1.1417  | 0.05226   | 0.092445  | CAPN12    | chr19 | - | 39220827 | 39260544 | 2762  |
| ENSG000001 | 1608.565 | 1001.615 | 0.68197  | 0.00015   | 0.000417  | EXOC7     | chr17 | - | 74077098 | 74117657 | 4751  |
| ENSG000001 | 0.36308  | 0        | 0.4146   | 0.81455   | NA        | OR2B8P    | chr6  | - | 28021006 | 28021943 | 938   |
| ENSG000001 | 3726.697 | 9852.203 | -1.4016  | 8.66E-49  | 1.92E-47  | KPNA2     | chr17 | + | 66031635 | 66042958 | 2456  |
| ENSG000001 | 10.56037 | 10.99914 | -0.0684  | 0.90862   | 0.9372    | WASH6P    | chrX  | + | 1.55E+08 | 1.55E+08 | 4244  |
| ENSG000001 | 0.943682 | 3.307578 | -1.4984  | 0.24706   | 0.34307   | NCF1B     | chr7  | + | 72634611 | 72649979 | 1516  |
| ENSG000001 | 6.379694 | 20.78512 | -1.6701  | 0.004665  | 0.010437  | XKRX      | chrX  | - | 1E+08    | 1E+08    | 2851  |
| ENSG000001 | 17384.87 | 55.97076 | 8.2649   | 0         | 0         | BGN       | chrX  | + | 1.53E+08 | 1.53E+08 | 2402  |
| ENSG000001 | 418.496  | 731.5024 | -0.80466 | 1.07E-08  | 4.55E-08  | ORA1      | chr12 | + | 1.22E+08 | 1.22E+08 | 2139  |

|            |          |          |          |           |           |           |       |   |          |          |       |
|------------|----------|----------|----------|-----------|-----------|-----------|-------|---|----------|----------|-------|
| ENSG000001 | 0.580602 | 0.297015 | 0.36801  | 0.83644   | NA        | ABHD17AP  | chr22 | - | 22469236 | 22472374 | 900   |
| ENSG000001 | 583.1959 | 239.0577 | 1.2832   | 1.10E-11  | 5.80E-11  | CEP97     | chr3  | + | 1.01E+08 | 1.01E+08 | 8361  |
| ENSG000001 | 36.04598 | 27.1737  | 0.4104   | 0.31533   | 0.41792   | LHFPL1    | chrX  | - | 1.12E+08 | 1.12E+08 | 1675  |
| ENSG000001 | 253.718  | 128.4925 | 0.97918  | 1.95E-08  | 8.08E-08  | FES       | chr15 | + | 91426925 | 91439006 | 2829  |
| ENSG000001 | 1350.112 | 2113.18  | -0.6458  | 3.02E-09  | 1.33E-08  | GLRX5     | chr14 | + | 95999840 | 96011061 | 1863  |
| ENSG000001 | 98.74048 | 115.8811 | -0.22543 | 0.37267   | 0.47707   | FAM104B   | chrX  | - | 55169535 | 55187743 | 1229  |
| ENSG000001 | 0.685084 | 0.997859 | -0.39711 | 0.8057    | NA        | TBPL2     | chr14 | - | 55880259 | 55923444 | 2037  |
| ENSG000001 | 1.161205 | 0.951736 | 0.21393  | 0.89713   | 0.9286    | CAV3      | chr3  | + | 8775486  | 8883492  | 1431  |
| ENSG000001 | 2458.754 | 751.2066 | 1.7067   | 3.76E-32  | 5.22E-31  | MXRA7     | chr17 | - | 74668633 | 74707098 | 5661  |
| ENSG000001 | 766.1808 | 780.6348 | -0.0259  | 0.87765   | 0.9148    | LIMK2     | chr22 | + | 31608225 | 31676066 | 3670  |
| ENSG000001 | 547.4286 | 308.1485 | 0.82834  | 6.28E-10  | 2.95E-09  | MFSD5     | chr12 | + | 53645035 | 53648189 | 2038  |
| ENSG000001 | 0.632843 | 2.56061  | -1.5598  | 0.28722   | 0.38887   | RNASE10   | chr14 | + | 20973696 | 20979328 | 1172  |
| ENSG000001 | 551.2908 | 278.2682 | 0.98305  | 1.41E-05  | 4.44E-05  | ADI1      | chr2  | - | 3501690  | 3523507  | 3870  |
| ENSG000001 | 338.4099 | 232.4131 | 0.54293  | 0.000471  | 0.001228  | RWDD4     | chr4  | - | 1.85E+08 | 1.85E+08 | 2641  |
| ENSG000001 | 3.16503  | 0.654722 | 1.7702   | 0.22105   | 0.31306   | SPNS3     | chr17 | + | 4336983  | 4391503  | 2133  |
| ENSG000001 | 0.72616  | 0        | 0.85004  | 0.63064   | NA        | OR4C2P    | chr11 | + | 48441762 | 48442825 | 1064  |
| ENSG000001 | 0        | 7.143661 | -4.4212  | 0.000906  | 0.002262  | CLEC4G    | chr19 | - | 7793843  | 7798792  | 1360  |
| ENSG000001 | 241.1186 | 837.6326 | -1.7923  | 9.23E-21  | 8.07E-20  | SATB1     | chr3  | - | 18386864 | 18487080 | 7825  |
| ENSG000001 | 0        | 0.357707 | -0.41864 | 0.81278   | NA        | RP3-341D1 | chrX  | + | 1E+08    | 1E+08    | 946   |
| ENSG000001 | 15.2078  | 103.0491 | -2.7205  | 1.07E-14  | 6.91E-14  | NXPH3     | chr17 | + | 47653220 | 47661189 | 5194  |
| ENSG000001 | 17.46166 | 4.602452 | 1.8405   | 0.007215  | 0.015571  | CSF1R     | chr5  | - | 1.49E+08 | 1.49E+08 | 3989  |
| ENSG000001 | 1475.535 | 417.3037 | 1.8062   | 5.30E-08  | 2.12E-07  | EPHB3     | chr3  | + | 1.84E+08 | 1.84E+08 | 4236  |
| ENSG000001 | 0        | 2.696564 | -2.9337  | 0.058159  | 0.10164   | VCX       | chrX  | + | 7810303  | 7812184  | 967   |
| ENSG000001 | 77.86603 | 20.20325 | 1.9249   | 2.26E-07  | 8.55E-07  | ACTL10    | chr20 | + | 32254304 | 32256331 | 2028  |
| ENSG000001 | 4.906837 | 0        | 3.8718   | 0.005465  | 0.012077  | EPGN      | chr4  | + | 75174190 | 75181024 | 1196  |
| ENSG000001 | 2.085163 | 1.012429 | 0.8372   | 0.54898   | 0.64881   | LINC00334 | chr21 | + | 46654255 | 46678645 | 589   |
| ENSG000001 | 28.33287 | 34.55697 | -0.28751 | 0.55245   | 0.65184   | C2orf82   | chr2  | + | 2.34E+08 | 2.34E+08 | 2782  |
| ENSG000001 | 0        | 148.8126 | -8.6409  | 4.41E-15  | 2.90E-14  | HS3ST4    | chr16 | + | 25703347 | 26149009 | 3203  |
| ENSG000001 | 1449.697 | 1322.023 | 0.13288  | 0.29918   | 0.40084   | TRAK1     | chr3  | + | 42055294 | 42267381 | 5536  |
| ENSG000001 | 1.701545 | 3.411978 | -0.89949 | 0.42028   | 0.52575   | HIST1H2AJ | chr6  | - | 27782112 | 27782607 | 496   |
| ENSG000001 | 16.85791 | 19.12281 | -0.18201 | 0.70162   | 0.77792   | TSPAN10   | chr17 | + | 79604197 | 79615779 | 1896  |
| ENSG000001 | 186.9701 | 206.2633 | -0.14079 | 0.41283   | 0.51765   | PLCB1     | chr20 | + | 8112824  | 8949003  | 7295  |
| ENSG000001 | 0        | 0.297015 | -0.41864 | 0.81278   | NA        | RP11-123C | chr15 | + | 58978610 | 58978816 | 207   |
| ENSG000001 | 713.9719 | 649.1338 | 0.13784  | 0.31622   | 0.41896   | SKA2      | chr17 | - | 57187312 | 57232630 | 2798  |
| ENSG000001 | 1.939605 | 7.004418 | -1.6684  | 0.10632   | 0.17007   | RXFP3     | chr5  | + | 33936491 | 33939023 | 2533  |
| ENSG000001 | 339.081  | 714.3447 | -1.0729  | 1.01E-18  | 7.99E-18  | NDN       | chr15 | - | 23930565 | 23932450 | 1886  |
| ENSG000001 | 0        | 28.77766 | -6.4312  | 2.75E-08  | 1.13E-07  | CCDC172   | chr10 | + | 1.18E+08 | 1.18E+08 | 1699  |
| ENSG000001 | 24.93834 | 14.68786 | 0.75768  | 0.094118  | 0.15353   | FAM156A   | chrX  | - | 52976462 | 53024651 | 2945  |
| ENSG000001 | 0        | 3.183777 | -3.1728  | 0.037267  | 0.068902  | AC073871  | chr7  | - | 1.56E+08 | 1.56E+08 | 766   |
| ENSG000001 | 2999.93  | 150.8816 | 4.3085   | 7.87E-182 | 1.39E-179 | NTM       | chr11 | + | 1.31E+08 | 1.32E+08 | 3190  |
| ENSG000001 | 9392.179 | 360.5688 | 4.6991   | 1.98E-283 | 8.20E-281 | TTC3      | chr21 | + | 38445526 | 38575413 | 10363 |
| ENSG000001 | 6.649458 | 28.70972 | -2.0736  | 6.21E-05  | 0.000181  | KCNB2     | chr8  | + | 73449626 | 73850584 | 3582  |
| ENSG000001 | 1.048164 | 8.988856 | -2.8434  | 0.006909  | 0.014975  | PPP1R27   | chr17 | - | 79791368 | 79792926 | 1443  |
| ENSG000001 | 97.50129 | 59.46854 | 0.71154  | 0.007762  | 0.016642  | BRICD5    | chr16 | - | 2259254  | 2261951  | 1913  |
| ENSG000001 | 1.597063 | 42.35931 | -4.4943  | 2.25E-10  | 1.09E-09  | GALR2     | chr17 | + | 74070875 | 74073622 | 1364  |
| ENSG000001 | 0        | 1.012429 | -1.3162  | 0.46038   | NA        | RESP18    | chr2  | - | 2.2E+08  | 2.2E+08  | 866   |
| ENSG000001 | 41.41247 | 21.01091 | 0.96425  | 0.026764  | 0.0513    | IGIP      | chr5  | + | 1.4E+08  | 1.4E+08  | 2871  |
| ENSG000001 | 3832.844 | 842.1675 | 2.1828   | 3.59E-51  | 8.47E-50  | TSKU      | chr11 | + | 76493295 | 76509198 | 3554  |
| ENSG000001 | 19612.16 | 2171.556 | 3.1718   | 2.09E-155 | 2.59E-153 | ANXA2     | chr15 | - | 60639333 | 60695082 | 3528  |
| ENSG000001 | 0        | 0.357707 | -0.41864 | 0.81278   | NA        | SEPHS1P1  | chr7  | - | 64312775 | 64313732 | 958   |
| ENSG000001 | 17.19964 | 5.727402 | 1.5127   | 0.020472  | 0.04029   | RGS6      | chr14 | + | 72399156 | 73030654 | 3105  |
| ENSG000001 | 317.8556 | 0.686276 | 8.3291   | 8.72E-25  | 9.05E-24  | HOXB4     | chr17 | - | 46652875 | 46657473 | 3757  |
| ENSG000001 | 3.495593 | 9.976178 | -1.4103  | 0.074724  | 0.12609   | SLC35D3   | chr6  | + | 1.37E+08 | 1.37E+08 | 2359  |
| ENSG000001 | 394.8619 | 132.1061 | 1.5734   | 3.98E-21  | 3.53E-20  | PAQR7     | chr1  | - | 26187701 | 26197744 | 3297  |
| ENSG000001 | 1100.898 | 19.9208  | 5.7665   | 1.58E-126 | 1.36E-124 | PAPPA     | chr9  | + | 1.19E+08 | 1.19E+08 | 10959 |
| ENSG000001 | 1.048164 | 165.5507 | -6.9323  | 9.06E-18  | 6.89E-17  | MAFA      | chr8  | - | 1.45E+08 | 1.45E+08 | 2347  |
| ENSG000001 | 658.1993 | 574.1506 | 0.19684  | 0.16113   | 0.24119   | NGRN      | chr15 | + | 90808891 | 90816463 | 2784  |
| ENSG000001 | 6.971462 | 7.919767 | -0.18092 | 0.79983   | 0.85824   | GRID1     | chr10 | - | 87359312 | 88126250 | 5834  |
| ENSG000001 | 0.342542 | 0.686276 | -0.48412 | 0.78604   | NA        | HCAR2     | chr12 | - | 1.23E+08 | 1.23E+08 | 2051  |
| ENSG000001 | 5.217676 | 9.066534 | -0.76352 | 0.30797   | 0.40974   | CCDC87    | chr11 | - | 66357640 | 66360554 | 2915  |
| ENSG000001 | 0.705622 | 57.01723 | -5.945   | 1.96E-11  | 1.02E-10  | C1orf116  | chr1  | - | 2.07E+08 | 2.07E+08 | 5493  |
| ENSG000001 | 118.3222 | 133.1015 | -0.17064 | 0.42377   | 0.52925   | TMEM198E  | chr12 | + | 56223529 | 56230030 | 2787  |
| ENSG000001 | 0.685084 | 8.299292 | -3.1169  | 0.010034  | 0.021096  | MAGEB17   | chrX  | + | 16185604 | 16189587 | 1434  |
| ENSG000001 | 2886.703 | 234.3258 | 3.6103   | 6.97E-70  | 2.50E-68  | CRIP2     | chr14 | + | 1.06E+08 | 1.06E+08 | 1976  |
| ENSG000001 | 151.5415 | 363.4028 | -1.2562  | 8.87E-09  | 3.78E-08  | DDX28     | chr16 | - | 68055179 | 68057770 | 2592  |

|            |          |          |          |          |          |           |       |   |          |          |       |
|------------|----------|----------|----------|----------|----------|-----------|-------|---|----------|----------|-------|
| ENSG000001 | 1609.813 | 686.7588 | 1.2267   | 1.77E-23 | 1.74E-22 | ACBD3     | chr1  | - | 2.26E+08 | 2.26E+08 | 3573  |
| ENSG000001 | 1207.508 | 878.0317 | 0.45906  | 0.00041  | 0.001078 | C16orf72  | chr16 | + | 9185505  | 9215497  | 5953  |
| ENSG000001 | 32.31314 | 0.357707 | 5.7775   | 8.35E-08 | 3.28E-07 | PLCXD3    | chr5  | - | 41307056 | 41510730 | 7704  |
| ENSG000001 | 163.6099 | 269.5253 | -0.72106 | 0.002373 | 0.005548 | RRP7B     | chr22 | - | 42951229 | 42978044 | 2375  |
| ENSG000001 | 0        | 0.297015 | -0.41864 | 0.81278  | NA       | GPIHBP1   | chr8  | + | 1.44E+08 | 1.44E+08 | 2281  |
| ENSG000001 | 7.116206 | 2.07098  | 1.674    | 0.079931 | 0.13341  | VMO1      | chr17 | - | 4688580  | 4689728  | 766   |
| ENSG000001 | 549.6739 | 578.9198 | -0.07574 | 0.54524  | 0.64551  | ALG12     | chr22 | - | 50296867 | 50312106 | 2360  |
| ENSG000001 | 0.72616  | 824.4289 | -9.6271  | 1.35E-33 | 1.97E-32 | LCK       | chr1  | + | 32716840 | 32751766 | 2166  |
| ENSG000001 | 7.612864 | 3.556053 | 1.0252   | 0.24825  | 0.34448  | GALNT9    | chr12 | - | 1.33E+08 | 1.33E+08 | 2410  |
| ENSG000001 | 17261.15 | 6269.427 | 1.4589   | 2.73E-27 | 3.14E-26 | COL18A1   | chr21 | + | 46825052 | 46933634 | 6607  |
| ENSG000001 | 1800.179 | 1926.537 | -0.09803 | 0.31635  | 0.41904  | RBM10     | chrX  | + | 47004268 | 47046212 | 3747  |
| ENSG000001 | 36.50499 | 98.86764 | -1.4214  | 4.70E-05 | 0.000139 | RP11-181C | chr1  | - | 2113233  | 2115828  | 2260  |
| ENSG000001 | 0        | 4.880065 | -3.5199  | 0.02591  | 0.049838 | GPR97     | chr16 | + | 57702099 | 57723975 | 2728  |
| ENSG000001 | 0        | 0.594029 | -0.81444 | 0.64499  | NA       | RP11-558C | chrX  | + | 3635190  | 3635641  | 452   |
| ENSG000001 | 11.98197 | 12.40083 | -0.04648 | 0.93522  | 0.95756  | GLUD2     | chrX  | + | 1.2E+08  | 1.2E+08  | 2333  |
| ENSG000001 | 0        | 0.297015 | -0.41864 | 0.81278  | NA       | TMEM95    | chr17 | + | 7258442  | 7260538  | 1191  |
| ENSG000001 | 6263.823 | 8603.999 | -0.4573  | 0.000102 | 0.000291 | RPL35A    | chr3  | + | 1.98E+08 | 1.98E+08 | 1437  |
| ENSG000001 | 251.3348 | 23.4647  | 3.4025   | 7.97E-39 | 1.36E-37 | RGS7      | chr1  | - | 2.41E+08 | 2.42E+08 | 2494  |
| ENSG000001 | 7.458748 | 13.2716  | -0.79608 | 0.19689  | 0.28487  | SLC25A18  | chr22 | + | 18043139 | 18073647 | 2454  |
| ENSG000001 | 172.1457 | 470.6498 | -1.4436  | 7.83E-09 | 3.35E-08 | ZNF721    | chr4  | - | 419604   | 492945   | 4492  |
| ENSG000001 | 155.6648 | 82.32243 | 0.90987  | 0.005786 | 0.012716 | LENG9     | chr19 | - | 54972981 | 54974894 | 1914  |
| ENSG000001 | 6.442287 | 33.135   | -2.2857  | 7.86E-05 | 0.000227 | C21orf90  | chr21 | + | 45937099 | 45945835 | 2422  |
| ENSG000001 | 618.8802 | 62.64427 | 3.2968   | 6.13E-69 | 2.17E-67 | TCEAL7    | chrX  | + | 1.03E+08 | 1.03E+08 | 1177  |
| ENSG000001 | 278.0151 | 325.004  | -0.22429 | 0.23364  | 0.32728  | C11orf54  | chr11 | + | 93474757 | 93497915 | 4094  |
| ENSG000001 | 294.1667 | 295.0394 | -0.00298 | 0.98524  | 0.99141  | CEP63     | chr3  | + | 1.34E+08 | 1.34E+08 | 5778  |
| ENSG000001 | 0        | 3.175656 | -2.858   | 0.085499 | 0.14146  | WFDC10B   | chr20 | - | 44313292 | 44333658 | 630   |
| ENSG000001 | 4029.032 | 1350.808 | 1.5757   | 5.02E-63 | 1.57E-61 | SRPR      | chr11 | - | 1.26E+08 | 1.26E+08 | 3069  |
| ENSG000001 | 0        | 0.297015 | -0.41864 | 0.81278  | NA       | OTOP3     | chr17 | + | 72931814 | 72946087 | 2516  |
| ENSG000001 | 4973.964 | 5224.587 | -0.07072 | 0.68284  | 0.7631   | EWSR1     | chr22 | + | 29663998 | 29696515 | 7285  |
| ENSG000001 | 11.42272 | 0.297015 | 4.3315   | 0.000335 | 0.000891 | ODF3L1    | chr15 | + | 76016318 | 76020029 | 1196  |
| ENSG000001 | 624.3807 | 618.9366 | 0.012821 | 0.94274  | 0.96298  | HMGN4     | chr6  | + | 26538633 | 26546482 | 1225  |
| ENSG000001 | 298.1049 | 495.2138 | -0.73214 | 1.64E-08 | 6.82E-08 | SPATA13   | chr13 | + | 24553839 | 24895169 | 8603  |
| ENSG000001 | 2356.735 | 2170.77  | 0.11832  | 0.36179  | 0.46601  | GJC1      | chr17 | - | 42875816 | 42908184 | 7640  |
| ENSG000001 | 0.342542 | 5.709544 | -3.1832  | 0.025    | 0.048267 | SOX1      | chr13 | + | 1.13E+08 | 1.13E+08 | 4108  |
| ENSG000001 | 392.9867 | 485.3506 | -0.3039  | 0.053249 | 0.093978 | NCOT10    | chr3  | + | 32726637 | 32815367 | 2815  |
| ENSG000001 | 1606.212 | 2772.792 | -0.78651 | 2.51E-08 | 1.03E-07 | MTA1      | chr14 | + | 1.06E+08 | 1.06E+08 | 2876  |
| ENSG000001 | 0        | 0.594029 | -0.81444 | 0.64499  | NA       | ZNF662    | chr3  | + | 42947223 | 42960825 | 5629  |
| ENSG000001 | 1282.126 | 579.6995 | 1.1434   | 8.48E-15 | 5.49E-14 | CADM1     | chr11 | - | 1.15E+08 | 1.15E+08 | 4223  |
| ENSG000001 | 303.6326 | 759.2853 | -1.3199  | 9.76E-21 | 8.51E-20 | ZNF320    | chr19 | - | 53367043 | 53400946 | 6448  |
| ENSG000001 | 9.512207 | 21.38399 | -1.1435  | 0.027563 | 0.052671 | C12orf60  | chr12 | + | 14956506 | 15059520 | 2870  |
| ENSG000001 | 3010.167 | 1793.37  | 0.74524  | 1.46E-05 | 4.61E-05 | PYCR1     | chr17 | - | 79890260 | 79900288 | 1890  |
| ENSG000001 | 700.4643 | 360.2266 | 0.9593   | 9.88E-11 | 4.88E-10 | LSMD1     | chr17 | - | 7760003  | 7788556  | 999   |
| ENSG000001 | 0        | 1.606458 | -1.9287  | 0.27074  | NA       | IQCA1P1   | chr7  | - | 1.51E+08 | 1.51E+08 | 2456  |
| ENSG000001 | 4.782631 | 46.80399 | -3.2485  | 1.94E-09 | 8.73E-09 | SPNS2     | chr17 | + | 4402133  | 4442330  | 3447  |
| ENSG000001 | 0.290301 | 1.326428 | -1.262   | 0.45814  | NA       | C19orf59  | chr19 | + | 7741514  | 7744712  | 1730  |
| ENSG000001 | 1750.609 | 1128.916 | 0.63213  | 1.47E-07 | 5.66E-07 | AP2A2     | chr11 | + | 924894   | 1012239  | 4575  |
| ENSG000001 | 373.8647 | 26.73744 | 3.8006   | 2.14E-61 | 6.39E-60 | SLC8A1    | chr2  | - | 40339286 | 40838193 | 6111  |
| ENSG000001 | 0        | 0.357707 | -0.41864 | 0.81278  | NA       | OR1G1     | chr17 | - | 3029878  | 3030875  | 998   |
| ENSG000001 | 11.08873 | 57.451   | -2.337   | 3.43E-09 | 1.51E-08 | SLC25A21  | chr14 | - | 37147636 | 37642071 | 2785  |
| ENSG000001 | 0        | 0.357707 | -0.41864 | 0.81278  | NA       | OTOP2     | chr17 | + | 72920370 | 72930007 | 2147  |
| ENSG000001 | 1.379541 | 4.006007 | -1.3681  | 0.24545  | 0.34128  | PCP4      | chr21 | + | 41239243 | 41301322 | 706   |
| ENSG000001 | 119.862  | 155.4671 | -0.3748  | 0.053842 | 0.094872 | ABAT      | chr16 | + | 8768422  | 8878432  | 5586  |
| ENSG000001 | 52.04335 | 114.2855 | -1.1232  | 0.000161 | 0.000446 | SLC25A10  | chr17 | + | 79670404 | 79688042 | 1946  |
| ENSG000001 | 533.4293 | 449.0238 | 0.24699  | 0.14035  | 0.21424  | CAMK1D    | chr10 | + | 12391481 | 12877545 | 8154  |
| ENSG000001 | 4.419551 | 1.485073 | 1.2878   | 0.30937  | 0.4112   | RGPD6     | chr2  | - | 1.11E+08 | 1.11E+08 | 7165  |
| ENSG000001 | 5.675864 | 0.700845 | 2.6274   | 0.031441 | 0.059114 | FAM133CP  | chr10 | + | 60475314 | 60476017 | 704   |
| ENSG000001 | 212.1069 | 258.0054 | -0.28282 | 0.088186 | 0.14527  | LYSMD4    | chr15 | - | 1E+08    | 1E+08    | 3042  |
| ENSG000001 | 0        | 0.297015 | -0.41864 | 0.81278  | NA       | WBP2NL    | chr22 | + | 42394729 | 42454460 | 3403  |
| ENSG000001 | 4.595998 | 18.65587 | -1.9573  | 0.001822 | 0.004339 | IGSF5     | chr21 | + | 41117334 | 41174023 | 2066  |
| ENSG000001 | 0        | 0.891044 | -1.0625  | 0.54819  | NA       | NKX2-5    | chr5  | - | 1.73E+08 | 1.73E+08 | 1709  |
| ENSG000001 | 253.0821 | 404.81   | -0.67357 | 4.48E-05 | 0.000133 | AFMID     | chr17 | + | 76183398 | 76203782 | 1730  |
| ENSG000001 | 0        | 1.40169  | -1.7271  | 0.32809  | NA       | GATSL1    | chr7  | + | 74379083 | 74438803 | 990   |
| ENSG000001 | 2516.825 | 519.1849 | 2.2709   | 4.34E-42 | 8.05E-41 | GAS6      | chr13 | - | 1.15E+08 | 1.15E+08 | 2632  |
| ENSG000001 | 1.317927 | 2.66501  | -0.85247 | 0.51113  | 0.6143   | FREM3     | chr4  | - | 1.44E+08 | 1.45E+08 | 6729  |
| ENSG000001 | 42.32641 | 56.18608 | -0.40013 | 0.28918  | 0.39071  | NEB       | chr2  | - | 1.52E+08 | 1.53E+08 | 26202 |

|            |          |          |          |          |          |           |       |   |          |          |       |
|------------|----------|----------|----------|----------|----------|-----------|-------|---|----------|----------|-------|
| ENSG000001 | 120.529  | 40.35963 | 1.5558   | 6.26E-05 | 0.000183 | BEGAIN    | chr14 | - | 1.01E+08 | 1.01E+08 | 5811  |
| ENSG000001 | 1002.131 | 740.3889 | 0.43637  | 0.003221 | 0.007391 | GPC6      | chr13 | + | 93879095 | 95059655 | 6467  |
| ENSG000001 | 21.31773 | 9.764963 | 1.0945   | 0.031876 | 0.059885 | ARHGEF37  | chr5  | + | 1.49E+08 | 1.49E+08 | 4968  |
| ENSG000001 | 614.0645 | 30.30819 | 4.2914   | 7.08E-38 | 1.17E-36 | FAM43B    | chr1  | + | 20878932 | 20881512 | 2581  |
| ENSG000001 | 26.6905  | 3.38284  | 2.8984   | 1.05E-05 | 3.36E-05 | CSMD1     | chr8  | - | 2792875  | 4852494  | 12134 |
| ENSG000001 | 0        | 1.058552 | -1.361   | 0.4451   | NA       | OR2A3P    | chr7  | + | 1.44E+08 | 1.44E+08 | 953   |
| ENSG000001 | 0        | 2.146242 | -1.9426  | 0.27559  | 0.3757   | CALHM3    | chr10 | - | 1.05E+08 | 1.05E+08 | 1652  |
| ENSG000001 | 1.669842 | 3.480792 | -0.94164 | 0.43275  | 0.53821  | PTGDR2    | chr11 | - | 60618413 | 60623444 | 2895  |
| ENSG000001 | 281.8783 | 103.7638 | 1.4335   | 6.50E-11 | 3.27E-10 | CEP57L1   | chr6  | + | 1.09E+08 | 1.09E+08 | 3832  |
| ENSG000001 | 3.060548 | 23.85564 | -2.8771  | 3.43E-05 | 0.000103 | DSCR6     | chr21 | + | 38378450 | 38391959 | 2235  |
| ENSG000001 | 0.943682 | 0.654722 | 0.38398  | 0.81258  | NA       | ANKRD20A  | chr9  | + | 42368303 | 42411410 | 3511  |
| ENSG000001 | 2.334388 | 82.90982 | -4.9917  | 2.31E-15 | 1.54E-14 | GPR19     | chr12 | - | 12813825 | 12849141 | 1751  |
| ENSG000001 | 0.923144 | 2.575179 | -1.2062  | 0.36088  | 0.46504  | GJD3      | chr17 | - | 38517235 | 38520067 | 891   |
| ENSG000001 | 1.608228 | 0.297015 | 1.5081   | 0.36518  | NA       | RP11-863K | chr8  | - | 37592279 | 37594944 | 2086  |
| ENSG000001 | 240.0347 | 118.5245 | 1.0146   | 1.30E-08 | 5.48E-08 | RABIF     | chr1  | - | 2.03E+08 | 2.03E+08 | 2430  |
| ENSG000001 | 675.6101 | 1.652581 | 8.4087   | 8.50E-46 | 1.73E-44 | TMEM119   | chr12 | - | 1.09E+08 | 1.09E+08 | 2707  |
| ENSG000001 | 233.4691 | 346.3241 | -0.56964 | 0.00252  | 0.005871 | FANCF     | chr11 | - | 22644079 | 22647387 | 3309  |
| ENSG000001 | 69.15904 | 234.497  | -1.7449  | 3.46E-14 | 2.15E-13 | CALN1     | chr7  | - | 71244476 | 71912136 | 9459  |
| ENSG000001 | 0.653381 | 0        | 0.82678  | 0.64037  | NA       | RP11-49C9 | chrX  | + | 1.49E+08 | 1.49E+08 | 2143  |
| ENSG000001 | 288.763  | 233.3764 | 0.30602  | 0.096905 | 0.15731  | SMDT1     | chr22 | + | 42475695 | 42520105 | 1567  |
| ENSG000001 | 196.9175 | 297.032  | -0.58976 | 0.018028 | 0.035935 | C2CD4C    | chr19 | - | 405445   | 409139   | 3091  |
| ENSG000001 | 1982.72  | 396.9391 | 2.3151   | 1.42E-61 | 4.25E-60 | CHST6     | chr16 | - | 75510949 | 75529282 | 2958  |
| ENSG000001 | 7.314004 | 27.51925 | -1.8782  | 0.000234 | 0.000635 | HSP90AB3I | chr4  | + | 88812995 | 88815167 | 2173  |
| ENSG000001 | 0        | 4.259314 | -3.6209  | 0.012522 | 0.025796 | POTEC     | chr18 | - | 14507338 | 14543584 | 6556  |
| ENSG000001 | 2229.101 | 3241.094 | -0.53968 | 2.33E-08 | 9.61E-08 | RUVBL2    | chr19 | + | 49496705 | 49519252 | 2488  |
| ENSG000001 | 26.93956 | 32.64288 | -0.27451 | 0.46614  | 0.57089  | GDPGP1    | chr15 | + | 90777040 | 90785315 | 1595  |
| ENSG000001 | 2.520208 | 8.19006  | -1.5636  | 0.076569 | 0.12871  | CTNNA3    | chr10 | - | 67679719 | 69455927 | 3232  |
| ENSG000001 | 1.068702 | 1.012429 | 0.040791 | 0.97924  | 0.98842  | RP5-1120P | chr6  | - | 44056979 | 44057433 | 455   |
| ENSG000001 | 0        | 0.654722 | -0.83442 | 0.63731  | NA       | WT1-AS    | chr11 | + | 32457064 | 32480315 | 3828  |
| ENSG000001 | 0.705622 | 0.297015 | 0.56864  | 0.74638  | NA       | RIMBP3C   | chr22 | - | 21899646 | 21905750 | 5784  |
| ENSG000001 | 42.48973 | 1492.888 | -5.112   | 3.59E-84 | 1.61E-82 | FLJ22184  | chr19 | - | 7933605  | 7939326  | 4518  |
| ENSG000001 | 39.75315 | 19.21418 | 1.0244   | 0.085649 | 0.14163  | C21orf67  | chr21 | - | 46352729 | 46359828 | 2303  |
| ENSG000001 | 5448.286 | 2741.304 | 0.99032  | 5.81E-30 | 7.41E-29 | PTTG1IP   | chr21 | - | 46269500 | 46293752 | 2760  |
| ENSG000001 | 1365.945 | 1952.628 | -0.51453 | 2.29E-06 | 7.90E-06 | DDX41     | chr5  | - | 1.77E+08 | 1.77E+08 | 2949  |
| ENSG000001 | 52.90552 | 40.59917 | 0.36952  | 0.30341  | 0.40468  | ABHD16B   | chr20 | + | 62492566 | 62494341 | 1776  |
| ENSG000001 | 0        | 4.081268 | -3.5173  | 0.017331 | 0.034672 | CCDC60    | chr12 | + | 1.2E+08  | 1.2E+08  | 2450  |
| ENSG000001 | 4.451254 | 2.353426 | 0.83321  | 0.40986  | 0.51465  | PLGLB1    | chr2  | - | 87229682 | 87248975 | 2081  |
| ENSG000001 | 1765.91  | 474.1868 | 1.8943   | 1.43E-43 | 2.77E-42 | DAZAP2    | chr12 | + | 51632076 | 51665146 | 2450  |
| ENSG000001 | 6.640085 | 57.87752 | -3.0812  | 1.23E-11 | 6.47E-11 | CCBE1     | chr18 | - | 57101149 | 57364612 | 3250  |
| ENSG000001 | 1979.611 | 1221.285 | 0.69633  | 6.21E-07 | 2.26E-06 | 15-Sep    | chr1  | - | 87328132 | 87380107 | 1777  |
| ENSG000001 | 6.971462 | 22.74284 | -1.6736  | 0.002892 | 0.006683 | RP11-556K | chr1  | - | 1.02E+08 | 1.02E+08 | 880   |
| ENSG000001 | 24.66002 | 248.508  | -3.3215  | 1.42E-30 | 1.85E-29 | CECR6     | chr22 | - | 17597189 | 17602257 | 4954  |
| ENSG000001 | 478.4306 | 422.5018 | 0.17758  | 0.22106  | 0.31306  | ZNF623    | chr8  | + | 1.45E+08 | 1.45E+08 | 3947  |
| ENSG000001 | 0        | 17.76811 | -5.7475  | 1.84E-06 | 6.42E-06 | EPHA10    | chr1  | - | 38179552 | 38230805 | 5425  |
| ENSG000001 | 75.6345  | 76.94608 | -0.02496 | 0.91749  | 0.94432  | CCDC125   | chr5  | - | 68576002 | 68628636 | 4198  |
| ENSG000001 | 0.342542 | 0.686276 | -0.48412 | 0.78604  | NA       | C15orf60  | chr15 | + | 73735499 | 73852355 | 927   |
| ENSG000001 | 945.34   | 1506.742 | -0.67077 | 3.58E-05 | 0.000107 | BCOR      | chrX  | - | 39909068 | 40036582 | 6390  |
| ENSG000001 | 347.0143 | 112.407  | 1.6224   | 2.50E-19 | 2.03E-18 | JRKL      | chr11 | + | 96123153 | 96240738 | 3570  |
| ENSG000001 | 3.246368 | 0.594029 | 1.9096   | 0.17251  | 0.25509  | C10orf107 | chr10 | + | 63422719 | 63526524 | 1685  |
| ENSG000001 | 0        | 2.401965 | -2.0937  | 0.23902  | 0.33362  | GBP6      | chr1  | + | 89829617 | 89852020 | 2987  |
| ENSG000001 | 527.4891 | 309.4708 | 0.76951  | 6.92E-08 | 2.73E-07 | KIAA2026  | chr9  | - | 5881596  | 6007901  | 6988  |
| ENSG000001 | 2.604151 | 2.947455 | -0.15957 | 0.87991  | 0.91625  | OVCH2     | chr11 | - | 7710669  | 7727968  | 1764  |
| ENSG000001 | 0        | 53.83923 | -7.1835  | 1.15E-09 | 5.27E-09 | SYNDIG1L  | chr14 | - | 74872596 | 74892805 | 2607  |
| ENSG000001 | 1063.022 | 647.6392 | 0.71484  | 9.51E-10 | 4.40E-09 | FHL3      | chr1  | - | 38462442 | 38471278 | 1647  |
| ENSG000001 | 1.794862 | 2.353426 | -0.35825 | 0.78048  | 0.84237  | PMCH      | chr12 | - | 1.03E+08 | 1.03E+08 | 766   |
| ENSG000001 | 1.555988 | 6.313309 | -1.7922  | 0.083241 | 0.13824  | TMEM89    | chr3  | - | 48658192 | 48659288 | 662   |
| ENSG000001 | 146.7503 | 55.83326 | 1.3855   | 9.93E-10 | 4.58E-09 | C19orf71  | chr19 | + | 3539152  | 3544028  | 674   |
| ENSG000001 | 44.35835 | 25.09385 | 0.80369  | 0.045791 | 0.082386 | CCDC159   | chr19 | + | 11455360 | 11465620 | 1408  |
| ENSG000001 | 45.19934 | 72.22057 | -0.67095 | 0.014262 | 0.029032 | RPS7P1    | chr17 | + | 26794814 | 26795460 | 647   |
| ENSG000001 | 144.4851 | 605.1356 | -2.0624  | 2.39E-45 | 4.80E-44 | RIPK4     | chr21 | - | 43159529 | 43187266 | 4017  |
| ENSG000001 | 0.36308  | 1.280305 | -1.2352  | 0.46421  | NA       | LRIT3     | chr4  | + | 1.11E+08 | 1.11E+08 | 3781  |
| ENSG000001 | 83.03065 | 69.61551 | 0.25155  | 0.29961  | 0.40126  | NP1P      | chr16 | + | 15016659 | 15045915 | 5343  |
| ENSG000001 | 1775.537 | 2809.555 | -0.66102 | 2.28E-06 | 7.85E-06 | SF3A3     | chr1  | - | 38422647 | 38456593 | 3673  |
| ENSG000001 | 0        | 0.357707 | -0.41864 | 0.81278  | NA       | ZBTB8OSP1 | chr4  | + | 1.52E+08 | 1.52E+08 | 498   |
| ENSG000001 | 40.6789  | 29.41057 | 0.46399  | 0.21238  | 0.30293  | AC004967. | chr7  | - | 97595402 | 97596335 | 934   |

|            |          |          |          |           |           |           |       |   |          |          |       |
|------------|----------|----------|----------|-----------|-----------|-----------|-------|---|----------|----------|-------|
| ENSG000001 | 47.2546  | 47.46516 | -0.00909 | 0.97672   | 0.98684   | GRIN2A    | chr16 | - | 9852376  | 10276611 | 9335  |
| ENSG000001 | 353.9441 | 198.384  | 0.8331   | 6.24E-07  | 2.27E-06  | RP11-958N | chr16 | + | 15005408 | 15029565 | 6830  |
| ENSG000001 | 0        | 2.401965 | -2.0937  | 0.23902   | 0.33362   | PRHoxNB   | chr13 | - | 28552243 | 28562774 | 522   |
| ENSG000001 | 0        | 0.937167 | -1.2408  | 0.48662   | NA        | SSTR3     | chr22 | - | 37600278 | 37608362 | 4099  |
| ENSG000001 | 264.009  | 221.8379 | 0.25083  | 0.20826   | 0.29821   | GTF2H2C   | chr5  | + | 68856035 | 68890550 | 2952  |
| ENSG000001 | 196.2327 | 144.7069 | 0.43287  | 0.050006  | 0.088973  | ASB7      | chr15 | + | 1.01E+08 | 1.01E+08 | 4985  |
| ENSG000001 | 3.22583  | 16.39556 | -2.2176  | 0.004842  | 0.010804  | SH2D7     | chr15 | + | 78370150 | 78397251 | 2750  |
| ENSG000001 | 7.117019 | 6.284171 | 0.15853  | 0.82874   | 0.87939   | TREX2     | chrX  | - | 1.53E+08 | 1.53E+08 | 2262  |
| ENSG000001 | 163.2149 | 2.102535 | 6.1678   | 8.22E-26  | 8.88E-25  | GPR132    | chr14 | - | 1.06E+08 | 1.06E+08 | 3658  |
| ENSG000001 | 2.914991 | 22.44583 | -2.8223  | 3.34E-05  | 0.000101  | MX2       | chr21 | + | 42733870 | 42781317 | 4064  |
| ENSG000001 | 2951.914 | 2560.19  | 0.20488  | 0.089064  | 0.14642   | EP400     | chr12 | + | 1.32E+08 | 1.33E+08 | 12376 |
| ENSG000001 | 814.8914 | 217.566  | 1.9013   | 2.51E-39  | 4.34E-38  | MEX3B     | chr15 | - | 82334119 | 82338482 | 4333  |
| ENSG000001 | 1.649304 | 1.652581 | -0.00384 | 0.99754   | 0.99872   | AL132868  | chr4  | - | 1961768  | 1962113  | 342   |
| ENSG000001 | 416.7355 | 466.201  | -0.16181 | 0.3304    | 0.43358   | PI4KAP2   | chr22 | - | 21827289 | 21871822 | 3872  |
| ENSG000001 | 9.139755 | 49.00031 | -2.3774  | 8.74E-08  | 3.43E-07  | FAM46C    | chr1  | + | 1.18E+08 | 1.18E+08 | 5751  |
| ENSG000001 | 302.3547 | 337.2041 | -0.15819 | 0.42415   | 0.52947   | COA5      | chr2  | - | 99215773 | 99224978 | 1754  |
| ENSG000001 | 766.3409 | 656.7556 | 0.22274  | 0.14046   | 0.21438   | UTP11L    | chr1  | + | 38474930 | 38490496 | 2019  |
| ENSG000001 | 497.0425 | 532.9431 | -0.09939 | 0.60926   | 0.70201   | PSMG1     | chr21 | - | 40546695 | 40555777 | 2154  |
| ENSG000001 | 998.5307 | 1275.66  | -0.35284 | 0.024229  | 0.046908  | PRR14L    | chr22 | - | 32072242 | 32146126 | 10826 |
| ENSG000001 | 28.31649 | 17.09312 | 0.7147   | 0.14469   | 0.22004   | COL18A1-A | chr21 | - | 46839631 | 46844985 | 3425  |
| ENSG000001 | 2.500484 | 3.24447  | -0.36412 | 0.75681   | 0.82315   | HIST2H2AA | chr1  | - | 1.5E+08  | 1.5E+08  | 974   |
| ENSG000001 | 0        | 1.84278  | -2.0842  | 0.23234   | NA        | FOLR4     | chr11 | + | 94038759 | 94040887 | 805   |
| ENSG000001 | 8.672193 | 13.48524 | -0.59801 | 0.34923   | 0.45347   | AC131971  | chr11 | + | 3011093  | 3012563  | 1471  |
| ENSG000001 | 77.94223 | 109.55   | -0.49222 | 0.060755  | 0.10553   | SERHL2    | chr22 | + | 42949623 | 42970388 | 2096  |
| ENSG000001 | 34.16025 | 141.0797 | -2.0277  | 1.62E-09  | 7.33E-09  | PCBP3     | chr21 | + | 47063608 | 47362368 | 2202  |
| ENSG000001 | 1.576526 | 0.951736 | 0.58024  | 0.68286   | 0.7631    | PGPEP1L   | chr15 | - | 99511459 | 99551024 | 1483  |
| ENSG000001 | 927.9419 | 1083.683 | -0.22374 | 0.033217  | 0.062147  | SETD3     | chr14 | - | 99864083 | 99947216 | 2878  |
| ENSG000001 | 97.81375 | 17.9559  | 2.3933   | 1.03E-07  | 4.02E-07  | TNFAIP8L3 | chr15 | - | 51348795 | 51397473 | 2262  |
| ENSG000001 | 330.1658 | 744.6723 | -1.1708  | 1.35E-10  | 6.63E-10  | ZNRF3     | chr22 | + | 29279580 | 29453475 | 6851  |
| ENSG000001 | 1093.085 | 433.7152 | 1.3293   | 5.04E-13  | 2.92E-12  | FBXL7     | chr5  | + | 15500305 | 15939900 | 4562  |
| ENSG000001 | 191.3134 | 98.47582 | 0.95156  | 9.55E-06  | 3.07E-05  | TANGO2    | chr22 | + | 20004537 | 20053449 | 3109  |
| ENSG000001 | 2.177666 | 2.949871 | -0.35094 | 0.79354   | 0.8533    | HIST2H3D  | chr1  | - | 1.5E+08  | 1.5E+08  | 411   |
| ENSG000001 | 22.33256 | 30.9613  | -0.45984 | 0.37872   | 0.48283   | RP11-347C | chr16 | - | 30234230 | 30346695 | 5504  |
| ENSG000001 | 117.9439 | 241.9253 | -1.031   | 4.55E-06  | 1.52E-05  | SFXN4     | chr10 | - | 1.21E+08 | 1.21E+08 | 1363  |
| ENSG000001 | 25.5112  | 78.74066 | -1.5837  | 0.008416  | 0.017927  | FAM167B   | chr1  | + | 32712834 | 32714457 | 936   |
| ENSG000001 | 342.3198 | 421.9901 | -0.30012 | 0.071069  | 0.12072   | MRPL54    | chr19 | + | 3762662  | 3768573  | 626   |
| ENSG000001 | 46.64148 | 32.31519 | 0.51939  | 0.14643   | 0.22234   | ZNF438    | chr10 | - | 31133563 | 31320866 | 3418  |
| ENSG000001 | 670.1143 | 1187.187 | -0.8249  | 8.69E-11  | 4.31E-10  | C3orf37   | chr3  | + | 1.29E+08 | 1.29E+08 | 2515  |
| ENSG000001 | 79.36571 | 105.5466 | -0.40401 | 0.097188  | 0.15768   | DGCR6     | chr22 | + | 18893541 | 18901751 | 3245  |
| ENSG000001 | 0.342542 | 0        | 0.4146   | 0.81455   | NA        | GOLGA8G   | chr15 | - | 28764757 | 28778160 | 6093  |
| ENSG000001 | 2.345553 | 2.589748 | -0.13312 | 0.91547   | 0.94267   | RP111     | chr8  | - | 10463859 | 10569697 | 7973  |
| ENSG000001 | 0.290301 | 0        | 0.4146   | 0.81455   | NA        | C15orf32  | chr15 | + | 93014884 | 93044347 | 1749  |
| ENSG000001 | 8.805772 | 0        | 4.7091   | 0.000328  | 0.000874  | C11orf88  | chr11 | + | 1.11E+08 | 1.11E+08 | 3099  |
| ENSG000001 | 73.05528 | 168.6202 | -1.1991  | 2.92E-05  | 8.87E-05  | ZNF530    | chr19 | + | 58111253 | 58124090 | 4367  |
| ENSG000001 | 382.644  | 507.3043 | -0.40532 | 0.005327  | 0.011804  | NDUFB1    | chr14 | - | 92582466 | 92588261 | 1333  |
| ENSG000001 | 0        | 11.09542 | -5.0615  | 6.10E-05  | 0.000178  | 11-Mar    | chr5  | - | 16067248 | 16180871 | 1741  |
| ENSG000001 | 316.9796 | 467.6728 | -0.55876 | 0.001894  | 0.004497  | KLHL25    | chr15 | - | 86302554 | 86338261 | 3758  |
| ENSG000001 | 3.609448 | 1.340997 | 1.2593   | 0.2824    | 0.38351   | PP13439   | chr3  | - | 1.72E+08 | 1.72E+08 | 2906  |
| ENSG000001 | 0.36308  | 0        | 0.4146   | 0.81455   | NA        | FAM19A1   | chr3  | + | 68053359 | 68594776 | 2014  |
| ENSG000001 | 0        | 0.715414 | -0.84936 | 0.6309    | NA        | RP11-44N1 | chr8  | - | 97080957 | 97081909 | 953   |
| ENSG000001 | 165.4139 | 241.0791 | -0.54476 | 0.005643  | 0.01243   | TRMT12    | chr8  | + | 1.25E+08 | 1.25E+08 | 2215  |
| ENSG000001 | 105.7194 | 80.83957 | 0.38492  | 0.094135  | 0.15355   | GUSBP1    | chr5  | + | 21341942 | 21544886 | 1305  |
| ENSG000001 | 0        | 0.343138 | -0.41864 | 0.81278   | NA        | PSG9      | chr19 | - | 43715943 | 43773682 | 2830  |
| ENSG000001 | 6.173337 | 6.393403 | -0.05655 | 0.94645   | 0.96595   | GPR1      | chr2  | - | 2.07E+08 | 2.07E+08 | 2295  |
| ENSG000001 | 9.523372 | 3.573038 | 1.3355   | 0.079007  | 0.13211   | BMP8A     | chr1  | + | 39957318 | 39991607 | 1692  |
| ENSG000001 | 1560.427 | 2098.08  | -0.42601 | 0.009733  | 0.020505  | ALYREF    | chr17 | - | 79845713 | 79849462 | 1095  |
| ENSG000001 | 3048.388 | 700.4345 | 2.117    | 5.95E-39  | 1.02E-37  | FAM101B   | chr17 | - | 289769   | 295730   | 3621  |
| ENSG000001 | 6.411397 | 45.78914 | -2.8001  | 3.58E-08  | 1.45E-07  | EFHC2     | chrX  | - | 44007128 | 44202923 | 3251  |
| ENSG000001 | 12.9197  | 22.25804 | -0.76982 | 0.23007   | 0.32343   | NOG       | chr17 | + | 54671060 | 54672951 | 1892  |
| ENSG000001 | 537.9638 | 667.8331 | -0.31019 | 0.078926  | 0.13199   | UPP1      | chr7  | + | 48128225 | 48148330 | 2782  |
| ENSG000001 | 97.4497  | 21.46495 | 2.1537   | 1.13E-11  | 5.98E-11  | OPCML     | chr11 | - | 1.32E+08 | 1.33E+08 | 6833  |
| ENSG000001 | 116.3706 | 83.47793 | 0.47946  | 0.035853  | 0.066604  | TRIM52    | chr5  | - | 1.81E+08 | 1.81E+08 | 3467  |
| ENSG000001 | 1094.469 | 18.42438 | 5.8592   | 4.40E-126 | 3.76E-124 | LHFP      | chr13 | - | 39917029 | 40177665 | 2110  |
| ENSG000001 | 1012.292 | 1400.023 | -0.46645 | 0.01895   | 0.037607  | CMTM4     | chr16 | - | 66648653 | 66730610 | 7026  |
| ENSG000001 | 1359.766 | 996.478  | 0.44737  | 2.09E-05  | 6.45E-05  | TMEM50A   | chr1  | + | 25664408 | 25688852 | 2683  |

|            |          |          |          |          |          |           |       |   |          |          |       |
|------------|----------|----------|----------|----------|----------|-----------|-------|---|----------|----------|-------|
| ENSG000001 | 0.870904 | 6.018711 | -2.3373  | 0.048792 | 0.087125 | NPBWR1    | chr8  | + | 53850991 | 53853677 | 2687  |
| ENSG000001 | 0        | 3.694423 | -3.4244  | 0.019592 | 0.038739 | ASCL2     | chr11 | - | 2289725  | 2292182  | 1852  |
| ENSG000001 | 361.0158 | 218.6388 | 0.72209  | 7.30E-05 | 0.000211 | TBK1      | chr12 | + | 64845660 | 64895888 | 3256  |
| ENSG000001 | 2534.677 | 525.7931 | 2.2599   | 2.21E-25 | 2.35E-24 | CBX6      | chr22 | - | 39257455 | 39268319 | 6122  |
| ENSG000001 | 2.366091 | 521.5112 | -7.6306  | 2.50E-46 | 5.17E-45 | MACC1     | chr7  | - | 20174278 | 20257027 | 9159  |
| ENSG000001 | 3.289235 | 0        | 3.1681   | 0.03967  | 0.072843 | MRC11L1   | chr10 | + | 17851362 | 17953178 | 5171  |
| ENSG000001 | 1168.893 | 1830.545 | -0.64606 | 1.52E-10 | 7.43E-10 | TBL3      | chr16 | + | 2022038  | 2032934  | 6803  |
| ENSG000001 | 2.749709 | 2.307303 | 0.20659  | 0.85435  | 0.89763  | PAPL      | chr19 | + | 39574553 | 39602133 | 2966  |
| ENSG000001 | 119.3189 | 205.4188 | -0.77722 | 0.024243 | 0.046932 | KREMEN1   | chr22 | + | 29469066 | 29564321 | 6182  |
| ENSG000001 | 214.1996 | 399.0578 | -0.89564 | 4.90E-07 | 1.80E-06 | TRAIP     | chr3  | - | 49866034 | 49894007 | 2026  |
| ENSG000001 | 245.0307 | 1168.816 | -2.251   | 8.47E-43 | 1.61E-41 | CHEK2     | chr22 | - | 29083731 | 29138410 | 2560  |
| ENSG000001 | 4.689314 | 99.86677 | -4.33    | 1.36E-16 | 9.72E-16 | FOXL2     | chr3  | - | 1.39E+08 | 1.39E+08 | 2917  |
| ENSG000001 | 1.576526 | 20.44199 | -3.4563  | 1.30E-05 | 4.13E-05 | AIFM3     | chr22 | + | 21319396 | 21335649 | 2850  |
| ENSG000001 | 5.850519 | 3.152223 | 0.79902  | 0.42408  | 0.52946  | KCTD16    | chr5  | + | 1.44E+08 | 1.44E+08 | 5646  |
| ENSG000001 | 27.31218 | 156.5676 | -2.4858  | 2.30E-16 | 1.62E-15 | B3GALT5   | chr21 | + | 40928369 | 41034816 | 2922  |
| ENSG000001 | 1522.354 | 36.50636 | 5.3589   | 1.26E-89 | 6.25E-88 | ZNF703    | chr8  | + | 37553269 | 37557537 | 3347  |
| ENSG000001 | 12.4589  | 44.16644 | -1.796   | 1.95E-05 | 6.06E-05 | SCL35F3   | chr1  | + | 2.34E+08 | 2.34E+08 | 2891  |
| ENSG000001 | 0.342542 | 60.8233  | -6.6502  | 1.09E-10 | 5.37E-10 | KCTD8     | chr4  | - | 44175926 | 44450824 | 2587  |
| ENSG000001 | 0        | 3.633731 | -3.4088  | 0.020168 | 0.039758 | C9orf66   | chr9  | - | 213108   | 215893   | 2786  |
| ENSG000001 | 4.201215 | 2.979009 | 0.46715  | 0.61954  | 0.71057  | TUBA8     | chr22 | + | 18593097 | 18614498 | 2018  |
| ENSG000001 | 0.632843 | 3.158671 | -1.7425  | 0.24558  | 0.34138  | TCEB3C    | chr18 | - | 44554573 | 44556449 | 1877  |
| ENSG000001 | 31.11428 | 21.39043 | 0.53231  | 0.20555  | 0.29495  | PKD1P1    | chr16 | - | 15457516 | 15474904 | 1053  |
| ENSG000001 | 28.56588 | 208.3621 | -2.8208  | 6.58E-14 | 4.02E-13 | EMILIN3   | chr20 | - | 39988606 | 39995467 | 3796  |
| ENSG000001 | 8.589063 | 3.054271 | 1.423    | 0.083306 | 0.13833  | OLFML1    | chr11 | + | 7506619  | 7532608  | 2792  |
| ENSG000001 | 0.342542 | 13.84865 | -4.6058  | 7.91E-05 | 0.000228 | FAM162B   | chr6  | - | 1.17E+08 | 1.17E+08 | 1033  |
| ENSG000001 | 540.6097 | 607.4571 | -0.1679  | 0.39094  | 0.49539  | RBM12B    | chr8  | - | 94741584 | 94753245 | 7269  |
| ENSG000001 | 0        | 4.035145 | -3.4597  | 0.0215   | 0.042119 | CCR4      | chr3  | + | 32993066 | 32997841 | 3095  |
| ENSG000001 | 138.9037 | 231.6054 | -0.73174 | 0.000181 | 0.0005   | LIN9      | chr1  | - | 2.26E+08 | 2.26E+08 | 3567  |
| ENSG000001 | 537.7604 | 120.8148 | 2.148    | 6.05E-46 | 1.24E-44 | BTBD9     | chr6  | - | 38136227 | 38607924 | 8525  |
| ENSG000001 | 85.99023 | 178.4286 | -1.0441  | 0.000142 | 0.000398 | NUDT14    | chr14 | - | 1.06E+08 | 1.06E+08 | 1042  |
| ENSG000001 | 16.21651 | 13.71269 | 0.22108  | 0.68814  | 0.76746  | ANKRD45   | chr1  | - | 1.74E+08 | 1.74E+08 | 1824  |
| ENSG000001 | 5.736665 | 15.55709 | -1.3612  | 0.058731 | 0.10253  | MAATS1    | chr3  | + | 1.19E+08 | 1.19E+08 | 4433  |
| ENSG000001 | 4.543757 | 54.68488 | -3.5029  | 4.52E-12 | 2.45E-11 | PNMA3     | chrX  | + | 1.52E+08 | 1.52E+08 | 3751  |
| ENSG000001 | 9.91555  | 2.367995 | 1.9491   | 0.028716 | 0.054614 | GPR39     | chr2  | + | 1.33E+08 | 1.33E+08 | 2784  |
| ENSG000001 | 0.342542 | 8.608459 | -3.9261  | 0.00152  | 0.003668 | FAM3B     | chr21 | + | 42676139 | 42729358 | 2742  |
| ENSG000001 | 49.95206 | 251.1384 | -2.3234  | 2.37E-25 | 2.52E-24 | ZNF730    | chr19 | + | 23258012 | 23330021 | 2374  |
| ENSG000001 | 4129.424 | 1187.706 | 1.7958   | 2.55E-49 | 5.72E-48 | KIRREL    | chr1  | + | 1.58E+08 | 1.58E+08 | 6870  |
| ENSG000001 | 1178.852 | 949.952  | 0.31012  | 0.011578 | 0.024    | IQGAP3    | chr1  | - | 1.56E+08 | 1.57E+08 | 5988  |
| ENSG000001 | 0        | 0.654722 | -0.83442 | 0.63731  | NA       | CNGA2     | chrX  | + | 1.51E+08 | 1.51E+08 | 2834  |
| ENSG000001 | 1094.228 | 1335.598 | -0.28664 | 0.051287 | 0.090936 | TOB2      | chr22 | - | 41829496 | 41843027 | 4561  |
| ENSG000001 | 0        | 405.6769 | -9.9946  | 1.51E-20 | 1.31E-19 | SCN5A     | chr3  | - | 38589548 | 38691164 | 8504  |
| ENSG000001 | 198.3252 | 344.6735 | -0.79082 | 0.006689 | 0.014531 | ARSI      | chr5  | - | 1.5E+08  | 1.5E+08  | 3161  |
| ENSG000001 | 231.3396 | 314.5727 | -0.44125 | 0.004823 | 0.010767 | UTY       | chrY  | - | 15360259 | 15592553 | 6529  |
| ENSG000001 | 1.919068 | 3.085825 | -0.57908 | 0.61084  | 0.70324  | PKD1P1    | chr16 | + | 16411301 | 16444447 | 4514  |
| ENSG000001 | 53.47415 | 93.94554 | -0.80648 | 0.014289 | 0.029085 | TTC32     | chr2  | - | 20096404 | 20101747 | 822   |
| ENSG000001 | 0        | 12.56264 | -5.2316  | 2.90E-05 | 8.81E-05 | LRRC55    | chr11 | + | 56949221 | 56959191 | 5410  |
| ENSG000001 | 0.685084 | 0        | 0.85004  | 0.63064  | NA       | RPL21P132 | chrX  | + | 1.01E+08 | 1.01E+08 | 462   |
| ENSG000001 | 3.879211 | 7.515937 | -0.89123 | 0.29498  | 0.39703  | DNAH2     | chr17 | + | 7620672  | 7737062  | 14955 |
| ENSG000001 | 0        | 0.343138 | -0.41864 | 0.81278  | NA       | SH2D1A    | chrX  | + | 1.23E+08 | 1.24E+08 | 2450  |
| ENSG000001 | 1.628766 | 3.853068 | -1.1062  | 0.32502  | 0.42794  | SDR42E2   | chr16 | + | 22177618 | 22203075 | 2528  |
| ENSG000001 | 20.62327 | 0        | 5.9962   | 2.52E-07 | 9.49E-07 | DUSP5P1   | chr1  | + | 2.29E+08 | 2.29E+08 | 2463  |
| ENSG000001 | 127.9476 | 30.32988 | 2.0689   | 2.30E-12 | 1.27E-11 | HTR7P1    | chr12 | + | 13152812 | 13157764 | 4411  |
| ENSG000001 | 0        | 0.357707 | -0.41864 | 0.81278  | NA       | TRBV21OR1 | chr9  | + | 33629119 | 33629584 | 367   |
| ENSG000001 | 0.36308  | 1.029414 | -0.84272 | 0.63492  | NA       | HIST2H4A  | chr1  | + | 1.5E+08  | 1.5E+08  | 1696  |
| ENSG000001 | 394.3097 | 1304.274 | -1.7248  | 1.01E-38 | 1.72E-37 | PRKX      | chrX  | - | 3522411  | 3631649  | 6031  |
| ENSG000001 | 1075.029 | 373.5546 | 1.5202   | 3.22E-22 | 2.98E-21 | SETD8     | chr12 | + | 1.24E+08 | 1.24E+08 | 3140  |
| ENSG000001 | 0        | 48.8596  | -7.1428  | 3.27E-10 | 1.56E-09 | KCNH8     | chr3  | + | 19189946 | 19577138 | 5137  |
| ENSG000001 | 1879.615 | 343.0297 | 2.4459   | 3.93E-43 | 7.52E-42 | SMTN      | chr22 | + | 31460091 | 31500610 | 5080  |
| ENSG000001 | 84.64516 | 140.3537 | -0.71902 | 0.035498 | 0.065991 | NPW       | chr16 | + | 2059927  | 2070756  | 1015  |
| ENSG000001 | 12.52133 | 17.00732 | -0.43984 | 0.43309  | 0.53851  | PP2D1     | chr3  | - | 20021453 | 20053822 | 2151  |
| ENSG000001 | 579.4398 | 504.8744 | 0.19872  | 0.29431  | 0.39635  | COA3      | chr17 | - | 40947165 | 40950722 | 1374  |
| ENSG000001 | 0        | 0.297015 | -0.41864 | 0.81278  | NA       | MAGEA13P  | chrX  | + | 1.38E+08 | 1.38E+08 | 1026  |
| ENSG000001 | 137.9934 | 158.0511 | -0.19198 | 0.35946  | 0.46359  | ST6GALNA4 | chr1  | + | 76540404 | 77100286 | 6861  |
| ENSG000001 | 3333.081 | 2609.222 | 0.35253  | 0.003742 | 0.008491 | PTP4A2    | chr1  | - | 32372022 | 32410457 | 3929  |
| ENSG000001 | 90915.24 | 72899.78 | 0.31836  | 0.001745 | 0.004168 | ACTG1     | chr17 | - | 79476997 | 79490873 | 2256  |

|            |          |          |          |          |          |           |       |   |          |          |       |
|------------|----------|----------|----------|----------|----------|-----------|-------|---|----------|----------|-------|
| ENSG000001 | 0.685084 | 126.5622 | -7.0507  | 1.11E-16 | 7.94E-16 | TMPRSS2   | chr21 | - | 42836478 | 42903043 | 3240  |
| ENSG000001 | 2511.486 | 1217.602 | 1.0433   | 2.19E-16 | 1.55E-15 | DENND5A   | chr11 | - | 9160372  | 9286937  | 5031  |
| ENSG000001 | 0        | 0.343138 | -0.41864 | 0.81278  | NA       | TMEM236   | chr10 | + | 18041218 | 18089855 | 5465  |
| ENSG000001 | 36.20613 | 38.32491 | -0.07787 | 0.81871  | 0.87259  | DIABLO    | chr12 | - | 1.23E+08 | 1.23E+08 | 2569  |
| ENSG000001 | 0        | 0.686276 | -0.84936 | 0.6309   | NA       | OR7E87P   | chr11 | + | 71304500 | 71305428 | 929   |
| ENSG000001 | 381.3154 | 491.2841 | -0.36523 | 0.029322 | 0.055628 | VPS33B    | chr15 | - | 91541646 | 91565833 | 2767  |
| ENSG000001 | 1417.102 | 420.4743 | 1.7478   | 2.75E-30 | 3.53E-29 | TBX1      | chr22 | + | 19744226 | 19771116 | 2082  |
| ENSG000001 | 0.995923 | 21.13397 | -4.0955  | 6.09E-06 | 2.01E-05 | ADAP2     | chr17 | + | 29233362 | 29286340 | 2934  |
| ENSG000001 | 92.1568  | 116.8694 | -0.33892 | 0.16742  | 0.24883  | RP5-821D1 | chr22 | - | 42227219 | 42230669 | 2989  |
| ENSG000001 | 707.6815 | 805.5254 | -0.18651 | 0.11523  | 0.18244  | UQCR10    | chr22 | + | 30163358 | 30166402 | 916   |
| ENSG000001 | 238.339  | 126.1343 | 0.9144   | 4.73E-07 | 1.74E-06 | FAM120C   | chrX  | - | 54094757 | 54209714 | 8057  |
| ENSG000001 | 0.290301 | 0.343138 | -0.00202 | 0.99909  | NA       | CTD-2372A | chr5  | - | 73099121 | 73099424 | 304   |
| ENSG000001 | 3.455331 | 6.29874  | -0.83115 | 0.35275  | 0.45702  | RP11-67F2 | chr3  | + | 1.6E+08  | 1.6E+08  | 1969  |
| ENSG000001 | 5.145711 | 0        | 3.8801   | 0.00619  | 0.013548 | TREML3P   | chr6  | - | 41176292 | 41190382 | 1224  |
| ENSG000001 | 0.36308  | 0        | 0.4146   | 0.81455  | NA       | TRIML1    | chr4  | + | 1.89E+08 | 1.89E+08 | 1797  |
| ENSG000001 | 525.2922 | 697.8307 | -0.40906 | 0.002161 | 0.00509  | EIF3C     | chr16 | + | 28699879 | 28747051 | 3957  |
| ENSG000001 | 1.503747 | 1.966581 | -0.28348 | 0.84395  | 0.89045  | RP11-3661 | chr10 | - | 94356609 | 94357044 | 436   |
| ENSG000001 | 0.943682 | 27.38658 | -4.4707  | 4.48E-07 | 1.65E-06 | CLDN5     | chr22 | - | 19510547 | 19515068 | 2548  |
| ENSG000001 | 2171.02  | 3806.752 | -0.80829 | 2.53E-06 | 8.69E-06 | NIPSNAP1  | chr22 | - | 29950797 | 29977326 | 2237  |
| ENSG000001 | 3.246368 | 10.86964 | -1.6483  | 0.034088 | 0.063646 | CNTN2     | chr1  | + | 2.05E+08 | 2.05E+08 | 8141  |
| ENSG000001 | 95.30373 | 69.93516 | 0.44668  | 0.075561 | 0.12721  | LRTOMT    | chr11 | + | 71791382 | 71821828 | 3822  |
| ENSG000001 | 22.53973 | 88.5449  | -1.9425  | 5.75E-09 | 2.48E-08 | KCNQ3     | chr8  | - | 1.33E+08 | 1.33E+08 | 11441 |
| ENSG000001 | 7.334542 | 513.8253 | -6.0669  | 6.33E-53 | 1.56E-51 | ADRA2C    | chr4  | + | 3768075  | 3770251  | 2127  |
| ENSG000001 | 113.3793 | 198.4188 | -0.8088  | 5.51E-05 | 0.000162 | NR2C2AP   | chr19 | - | 19312218 | 19314220 | 1565  |
| ENSG000001 | 17.35555 | 56.66207 | -1.6691  | 0.000373 | 0.000985 | FAM132A   | chr1  | - | 1177826  | 1182102  | 1036  |
| ENSG000001 | 1051.024 | 448.8951 | 1.224    | 8.29E-11 | 4.13E-10 | CRELD2    | chr22 | + | 50311815 | 50321188 | 2622  |
| ENSG000001 | 340.4168 | 213.1032 | 0.67688  | 0.000333 | 0.000886 | SCFD2     | chr4  | - | 53739149 | 54232242 | 3176  |
| ENSG000001 | 113.1484 | 113.6919 | -0.0041  | 0.98755  | 0.99288  | UBE2F     | chr2  | + | 2.39E+08 | 2.39E+08 | 2009  |
| ENSG000001 | 34.94737 | 89.51866 | -1.3318  | 0.001375 | 0.00334  | KCNJ12    | chr17 | + | 21279509 | 21323179 | 5420  |
| ENSG000001 | 475.5574 | 183.8032 | 1.3627   | 2.92E-10 | 1.40E-09 | GPR173    | chrX  | + | 53078273 | 53109797 | 4485  |
| ENSG000001 | 502.4585 | 365.9897 | 0.45684  | 0.001753 | 0.004187 | PPP1R2    | chr3  | - | 1.95E+08 | 1.95E+08 | 3452  |
| ENSG000001 | 662.8019 | 306.3261 | 1.1121   | 7.16E-16 | 4.93E-15 | TSPYL2    | chrX  | + | 53111549 | 53117722 | 4178  |
| ENSG000001 | 21.54723 | 8.248336 | 1.3506   | 0.0104   | 0.021789 | GOLGA6L4  | chr15 | + | 84904525 | 84914120 | 4563  |
| ENSG000001 | 1176.165 | 1508.779 | -0.35871 | 0.030404 | 0.057434 | PGP       | chr16 | - | 2261998  | 2264808  | 2727  |
| ENSG000001 | 178.4989 | 140.2304 | 0.3474   | 0.075489 | 0.12715  | C22orf46  | chr22 | + | 42084943 | 42094140 | 4975  |
| ENSG000001 | 308.1686 | 249.4538 | 0.30311  | 0.06456  | 0.11121  | SNRNP35   | chr12 | + | 1.24E+08 | 1.24E+08 | 2161  |
| ENSG000001 | 1159.909 | 1276.354 | -0.13719 | 0.27516  | 0.37522  | IRAK1     | chrX  | - | 1.53E+08 | 1.53E+08 | 3666  |
| ENSG000001 | 336.677  | 586.8237 | -0.79747 | 4.53E-06 | 1.51E-05 | CMSS1     | chr3  | + | 99536678 | 99897447 | 2145  |
| ENSG000001 | 0.632843 | 12.00916 | -3.7341  | 0.000612 | 0.001568 | OLIG1     | chr21 | + | 34442450 | 34444726 | 2277  |
| ENSG000001 | 0        | 3.025133 | -3.0821  | 0.044886 | 0.080924 | C11orf72  | chr11 | - | 67370351 | 67374177 | 2431  |
| ENSG000001 | 150.7269 | 4.489931 | 4.6117   | 6.33E-06 | 2.08E-05 | PCDH9     | chr13 | - | 66876967 | 67804468 | 6226  |
| ENSG000001 | 52.06714 | 30.03857 | 0.7829   | 0.018702 | 0.037154 | ACOT1     | chr14 | + | 74003818 | 74010498 | 1713  |
| ENSG000001 | 7426.031 | 117.4078 | 5.9642   | 0        | 0        | OAF       | chr11 | + | 1.2E+08  | 1.2E+08  | 2525  |
| ENSG000001 | 114.348  | 119.0701 | -0.05669 | 0.87436  | 0.91257  | ALDH1A3   | chr15 | + | 1.01E+08 | 1.01E+08 | 3924  |
| ENSG000001 | 56.84977 | 6.20891  | 3.1252   | 2.08E-11 | 1.08E-10 | CDR1      | chrX  | - | 1.4E+08  | 1.4E+08  | 1299  |
| ENSG000001 | 16.20453 | 14.35359 | 0.17965  | 0.76257  | 0.82772  | HIST2H2AC | chr1  | + | 1.5E+08  | 1.5E+08  | 437   |
| ENSG000001 | 6.938945 | 399.2901 | -5.7033  | 5.36E-32 | 7.37E-31 | KCNK12    | chr2  | - | 47747910 | 47798078 | 2037  |
| ENSG000001 | 0.342542 | 0        | 0.4146   | 0.81455  | NA       | HIST2H2AB | chr1  | - | 1.5E+08  | 1.5E+08  | 448   |
| ENSG000001 | 384.6321 | 222.3319 | 0.78849  | 3.00E-07 | 1.12E-06 | POU6F1    | chr12 | - | 51580719 | 51611477 | 5157  |
| ENSG000001 | 2.467967 | 4.066699 | -0.60746 | 0.58914  | 0.68451  | LINC00315 | chr21 | - | 46720160 | 46725172 | 2323  |
| ENSG000001 | 396.5866 | 252.9425 | 0.64686  | 2.29E-05 | 7.05E-05 | TM2D3     | chr15 | - | 1.02E+08 | 1.02E+08 | 3102  |
| ENSG000001 | 902.3408 | 679.7532 | 0.40794  | 0.005569 | 0.012285 | TSSC4     | chr11 | + | 2421718  | 2425106  | 1686  |
| ENSG000001 | 0.342542 | 27.5265  | -5.5462  | 4.87E-07 | 1.79E-06 | TACSTD2   | chr1  | - | 59041099 | 59043166 | 2068  |
| ENSG000001 | 0        | 0.357707 | -0.41864 | 0.81278  | NA       | CLECL1    | chr12 | - | 9868456  | 9885895  | 1069  |
| ENSG000001 | 1.286224 | 23.68471 | -3.8779  | 1.69E-05 | 5.27E-05 | SIX6      | chr14 | + | 60975669 | 60979568 | 2787  |
| ENSG000001 | 0        | 0.640152 | -0.82869 | 0.63935  | NA       | DRD5P1    | chr2  | - | 91872473 | 91874507 | 1438  |
| ENSG000001 | 122.8197 | 40.56178 | 1.5897   | 1.90E-08 | 7.89E-08 | PRKD1     | chr14 | - | 30045687 | 30661104 | 3726  |
| ENSG000001 | 10.28042 | 12.07468 | -0.21932 | 0.72207  | 0.79438  | CCSER1    | chr4  | + | 91048686 | 92523064 | 5847  |
| ENSG000001 | 21.17217 | 217.918  | -3.3369  | 1.89E-35 | 2.91E-34 | ZDHHC23   | chr3  | + | 1.14E+08 | 1.14E+08 | 5280  |
| ENSG000001 | 1.649304 | 12.66146 | -2.6659  | 0.009952 | 0.02093  | MROH7     | chr1  | + | 55107459 | 55207981 | 5951  |
| ENSG000001 | 314.4866 | 148.9393 | 1.0765   | 2.16E-11 | 1.12E-10 | AC002055  | chr22 | + | 51195376 | 51239737 | 2987  |
| ENSG000001 | 0        | 0.357707 | -0.41864 | 0.81278  | NA       | OR51J1    | chr11 | + | 5423827  | 5424777  | 951   |
| ENSG000001 | 7.975131 | 19.32757 | -1.2009  | 0.08195  | 0.13637  | SRPK3     | chrX  | + | 1.53E+08 | 1.53E+08 | 4479  |
| ENSG000001 | 0        | 537.5397 | -10.337  | 1.59E-21 | 1.44E-20 | GDF3      | chr12 | - | 7842378  | 7848372  | 1239  |
| ENSG000001 | 351.2555 | 66.8163  | 2.3772   | 3.40E-23 | 3.31E-22 | SLIT3     | chr5  | - | 1.68E+08 | 1.69E+08 | 9706  |

|            |          |          |          |          |          |           |       |   |          |          |      |
|------------|----------|----------|----------|----------|----------|-----------|-------|---|----------|----------|------|
| ENSG000001 | 10.98686 | 10.7741  | 0.029809 | 0.96289  | 0.97819  | HIST1H2AK | chr6  | - | 27805658 | 27806117 | 460  |
| ENSG000001 | 257.4632 | 183.5246 | 0.48713  | 0.002707 | 0.006286 | EFNA5     | chr5  | - | 1.07E+08 | 1.07E+08 | 5335 |
| ENSG000001 | 0.342542 | 0.357707 | -0.0021  | 0.99906  | NA       | HIST1H1B  | chr6  | - | 27834570 | 27835359 | 790  |
| ENSG000001 | 5.560218 | 9.122394 | -0.68112 | 0.37605  | 0.48008  | SPATA32   | chr17 | - | 43331760 | 43339479 | 1907 |
| ENSG000001 | 1.669842 | 98.06972 | -5.6328  | 3.52E-15 | 2.33E-14 | PKP3      | chr11 | + | 392614   | 404908   | 2809 |
| ENSG000001 | 3.983692 | 25.66432 | -2.6135  | 1.38E-05 | 4.35E-05 | MAP7D2    | chrX  | - | 20024831 | 20135035 | 3930 |
| ENSG000001 | 192.16   | 147.9536 | 0.37634  | 0.037233 | 0.068861 | CSF1      | chr1  | + | 1.1E+08  | 1.1E+08  | 4210 |
| ENSG000001 | 3.371387 | 0.297015 | 2.5938   | 0.07088  | 0.12048  | COLEC10   | chr8  | + | 1.2E+08  | 1.2E+08  | 1266 |
| ENSG000001 | 93.14302 | 110.0881 | -0.23814 | 0.54868  | 0.64871  | ACTRT3    | chr3  | - | 1.69E+08 | 1.69E+08 | 2005 |
| ENSG000001 | 287.6516 | 454.8852 | -0.6563  | 0.040883 | 0.074766 | PLA2G6    | chr22 | - | 38507502 | 38601697 | 3271 |
| ENSG000001 | 774.3953 | 204.9054 | 1.9128   | 3.06E-43 | 5.88E-42 | MAML2     | chr11 | - | 95709762 | 96076382 | 7106 |
| ENSG000001 | 0        | 4.386404 | -3.573   | 0.017269 | 0.034564 | PABPC1L2E | chrX  | + | 72223352 | 72225551 | 2200 |
| ENSG000001 | 1.317927 | 0        | 1.6383   | 0.35541  | NA       | A3GALT2   | chr1  | - | 33772367 | 33778491 | 1000 |
| ENSG000001 | 569.3571 | 505.467  | 0.17059  | 0.22009  | 0.31195  | SS18L1    | chr20 | + | 60718822 | 60757540 | 4493 |
| ENSG000001 | 0.290301 | 125.4866 | -7.6313  | 1.59E-14 | 1.01E-13 | KCND2     | chr7  | + | 1.2E+08  | 1.2E+08  | 5331 |
| ENSG000001 | 1.027626 | 8.026583 | -2.6382  | 0.019904 | 0.039304 | RP11-44M1 | chr7  | + | 1E+08    | 1E+08    | 1006 |
| ENSG000001 | 416.725  | 1037.457 | -1.3152  | 2.30E-22 | 2.16E-21 | TOP1MT    | chr8  | - | 1.44E+08 | 1.44E+08 | 2029 |
| ENSG000001 | 5903.079 | 2290.134 | 1.3649   | 6.88E-41 | 1.24E-39 | COPB2     | chr3  | - | 1.39E+08 | 1.39E+08 | 3524 |
| ENSG000001 | 1.991846 | 0.357707 | 1.8858   | 0.21623  | 0.30738  | LRRC19    | chr9  | - | 26993134 | 27005691 | 3609 |
| ENSG000001 | 443.4046 | 343.2646 | 0.36846  | 0.021653 | 0.042399 | THAP7     | chr22 | - | 21353393 | 21356485 | 1957 |
| ENSG000001 | 13.8197  | 10.35899 | 0.39462  | 0.51778  | 0.62051  | AP001062  | chr21 | + | 45751117 | 45755734 | 4354 |
| ENSG000001 | 870.609  | 1172.522 | -0.42868 | 0.001281 | 0.003124 | KNTC1     | chr12 | + | 1.23E+08 | 1.23E+08 | 6975 |
| ENSG000001 | 22.49849 | 25.57053 | -0.18288 | 0.75081  | 0.81782  | CCR10     | chr17 | - | 40830907 | 40835935 | 1942 |
| ENSG000001 | 0.72616  | 12.24789 | -3.7199  | 0.000591 | 0.001517 | NCMAP     | chr1  | + | 24882602 | 24935819 | 4063 |
| ENSG000001 | 0        | 0.357707 | -0.41864 | 0.81278  | NA       | BP1FC     | chr22 | - | 32809834 | 32860471 | 2091 |
| ENSG000001 | 486.7393 | 676.8869 | -0.47612 | 0.000229 | 0.000621 | WDR27     | chr6  | - | 1.7E+08  | 1.7E+08  | 3511 |
| ENSG000001 | 121.6786 | 54.08502 | 1.1659   | 0.000323 | 0.000861 | TXNRD2    | chr22 | - | 19863040 | 19929341 | 3130 |
| ENSG000001 | 0        | 0.700845 | -0.87835 | 0.62047  | NA       | C1QTNF8   | chr16 | - | 1140005  | 1146244  | 1627 |
| ENSG000001 | 0        | 0.297015 | -0.41864 | 0.81278  | NA       | OR56A3    | chr11 | + | 5968570  | 5969591  | 1022 |
| ENSG000001 | 144.1264 | 1121.422 | -2.9472  | 2.21E-49 | 4.95E-48 | FOXO4     | chrX  | + | 70316047 | 70323385 | 3301 |
| ENSG000001 | 9.140568 | 4.039977 | 1.0974   | 0.2234   | 0.31576  | POU3F2    | chr6  | + | 99282580 | 99286660 | 4081 |
| ENSG000001 | 185.1123 | 727.9476 | -1.971   | 6.57E-22 | 6.03E-21 | PTP4A3    | chr8  | + | 1.42E+08 | 1.42E+08 | 1866 |
| ENSG000001 | 2.209369 | 0.640152 | 1.433    | 0.30634  | 0.40788  | FOXO4L1   | chr2  | + | 1.14E+08 | 1.14E+08 | 2068 |
| ENSG000001 | 93.47994 | 48.55043 | 0.93906  | 0.001844 | 0.004386 | TMEM255E  | chr13 | + | 1.14E+08 | 1.15E+08 | 1031 |
| ENSG000001 | 192.2801 | 263.5314 | -0.45385 | 0.006656 | 0.014464 | PROS1     | chr3  | - | 93591881 | 93692910 | 3556 |
| ENSG000001 | 0.342542 | 0        | 0.4146   | 0.81455  | NA       | GAST      | chr17 | + | 39868578 | 39872221 | 470  |
| ENSG000001 | 0.705622 | 27.13482 | -4.9023  | 2.00E-07 | 7.60E-07 | NUTM1     | chr15 | + | 34635516 | 34649938 | 4102 |
| ENSG000001 | 38.25959 | 78.81646 | -1.0389  | 0.000355 | 0.000939 | HDHC3     | chr15 | - | 91474148 | 91475799 | 1220 |
| ENSG000001 | 0        | 78.41095 | -7.8227  | 1.00E-12 | 5.70E-12 | BEX5      | chrX  | - | 1.01E+08 | 1.01E+08 | 860  |
| ENSG000001 | 173.3258 | 100.995  | 0.78061  | 9.27E-05 | 0.000265 | ZFP1      | chr16 | + | 75182390 | 75206134 | 3250 |
| ENSG000001 | 44.52445 | 41.64705 | 0.094763 | 0.77615  | 0.83922  | CEND1     | chr11 | - | 787104   | 790123   | 1649 |
| ENSG000001 | 0        | 0.297015 | -0.41864 | 0.81278  | NA       | C6orf58   | chr6  | + | 1.28E+08 | 1.28E+08 | 1200 |
| ENSG000001 | 84.1251  | 17.7176  | -0.48564 | 0.054772 | 0.096238 | DUSP8     | chr11 | - | 1575274  | 1593150  | 4480 |
| ENSG000001 | 12.43755 | 13.00131 | -0.04574 | 0.93806  | 0.95911  | AC132872  | chr17 | + | 80206943 | 80209703 | 2759 |
| ENSG000001 | 596.5924 | 399.9978 | 0.57623  | 2.16E-06 | 7.49E-06 | SOC3      | chr17 | - | 76352864 | 76356158 | 2729 |
| ENSG000001 | 0        | 0.686276 | -0.84936 | 0.6309   | NA       | C17orf74  | chr17 | + | 7328934  | 7330887  | 1651 |
| ENSG000001 | 467.0208 | 5.784805 | 6.2939   | 8.07E-60 | 2.34E-58 | SLITRK6   | chr13 | - | 86366925 | 86373623 | 4318 |
| ENSG000001 | 0        | 0.357707 | -0.41864 | 0.81278  | NA       | AC132216  | chr11 | + | 33902189 | 33903338 | 1150 |
| ENSG000001 | 0        | 9.955161 | -4.9158  | 0.000117 | 0.000331 | PIWIL3    | chr22 | - | 25115001 | 25170687 | 3504 |
| ENSG000001 | 65.54087 | 4.943174 | 3.6593   | 1.04E-14 | 6.70E-14 | LPAR5     | chr12 | - | 6728001  | 6745613  | 3171 |
| ENSG000001 | 2308.32  | 3121.408 | -0.43495 | 9.57E-05 | 0.000274 | XPOT      | chr12 | + | 64798130 | 64844907 | 6414 |
| ENSG000001 | 714.826  | 7.957769 | 6.4868   | 3.01E-83 | 1.34E-81 | TMEM173   | chr5  | - | 1.39E+08 | 1.39E+08 | 3200 |
| ENSG000001 | 1014.347 | 45.0597  | 4.3793   | 9.03E-15 | 5.84E-14 | PDE4B     | chr1  | + | 66258197 | 66840259 | 4546 |
| ENSG000001 | 10.10479 | 9.700981 | 0.052231 | 0.94056  | 0.96114  | AF207550  | chrX  | + | 48797263 | 48798079 | 813  |
| ENSG000001 | 10.98686 | 2.382564 | 2.0682   | 0.021931 | 0.042901 | FAM19A3   | chr1  | + | 1.13E+08 | 1.13E+08 | 1282 |
| ENSG000001 | 657.9355 | 2336.03  | -1.827   | 1.54E-58 | 4.32E-57 | SNN       | chr16 | + | 11762270 | 11773015 | 3312 |
| ENSG000001 | 0        | 23.55453 | -6.1506  | 1.57E-07 | 6.03E-07 | KCNH7     | chr2  | - | 1.63E+08 | 1.64E+08 | 4113 |
| ENSG000001 | 3.994857 | 2.947455 | 0.39323  | 0.69215  | 0.77059  | RPL7P26   | chr6  | - | 17531130 | 17531883 | 754  |
| ENSG000001 | 2.935529 | 1269.148 | -8.5829  | 3.85E-75 | 1.51E-73 | NELL2     | chr12 | - | 44902058 | 45315631 | 3612 |
| ENSG000001 | 24.11968 | 26.88722 | -0.1604  | 0.68385  | 0.76386  | AC004166  | chr7  | - | 74320406 | 74331163 | 2819 |
| ENSG000001 | 0        | 6.549631 | -4.299   | 0.001366 | 0.00332  | ZNF840    | chr20 | + | 45113100 | 45121279 | 1996 |
| ENSG000001 | 27.73948 | 11.70402 | 1.2276   | 0.01636  | 0.032889 | KRBA2     | chr17 | - | 8271955  | 8280029  | 2562 |
| ENSG000001 | 1241.621 | 937.9477 | 0.40398  | 0.009013 | 0.0191   | MED12     | chrX  | + | 70338406 | 70362303 | 6977 |
| ENSG000001 | 80.56106 | 442.6826 | -2.4449  | 1.41E-25 | 1.50E-24 | ZNF93     | chr19 | + | 20011722 | 20046384 | 2648 |
| ENSG000001 | 9915.482 | 10270.8  | -0.05073 | 0.61625  | 0.70766  | 9-Sep     | chr17 | + | 75276651 | 75496678 | 4453 |

|            |          |          |          |           |           |           |       |   |          |          |       |
|------------|----------|----------|----------|-----------|-----------|-----------|-------|---|----------|----------|-------|
| ENSG000001 | 0        | 0.297015 | -0.41864 | 0.81278   | NA        | PRSS55    | chr8  | + | 10383056 | 10411676 | 2374  |
| ENSG000001 | 393.6121 | 806.8457 | -1.0326  | 2.15E-11  | 1.12E-10  | CDCA2     | chr8  | + | 25316513 | 25365436 | 3731  |
| ENSG000001 | 0        | 14.13512 | -5.4281  | 8.71E-06  | 2.82E-05  | OR7E14P   | chr11 | + | 17035545 | 17074583 | 1012  |
| ENSG000001 | 0.580602 | 22.70558 | -4.6745  | 1.62E-06  | 5.68E-06  | RALYL     | chr8  | + | 85095022 | 85834079 | 2701  |
| ENSG000001 | 241.6911 | 511.7573 | -1.082   | 1.16E-12  | 6.56E-12  | AMER1     | chrX  | - | 63404997 | 63425624 | 8443  |
| ENSG000001 | 817.6047 | 488.4791 | 0.74289  | 4.81E-07  | 1.77E-06  | ZBTB40    | chr1  | + | 22778344 | 22857650 | 8992  |
| ENSG000001 | 59.53868 | 93.12211 | -0.64223 | 0.06568   | 0.11283   | HIST2H2BE | chr1  | - | 1.5E+08  | 1.5E+08  | 2223  |
| ENSG000001 | 16.98212 | 0        | 5.7175   | 1.37E-06  | 4.84E-06  | C11orf89  | chr11 | - | 1910375  | 1912084  | 1710  |
| ENSG000001 | 3.382552 | 12033.04 | -11.633  | 4.98E-149 | 5.64E-147 | CLDN6     | chr16 | - | 3064713  | 3070072  | 1739  |
| ENSG000001 | 1343.796 | 478.068  | 1.4857   | 1.82E-14  | 1.16E-13  | 5-Sep     | chr22 | + | 19701987 | 19712295 | 4113  |
| ENSG000001 | 246.8907 | 262.8775 | -0.08792 | 0.60451   | 0.69773   | EIF4ENIF1 | chr22 | - | 31835349 | 31892094 | 3695  |
| ENSG000001 | 0        | 3.322147 | -3.2429  | 0.031225  | 0.058731  | LRRRC26   | chr9  | - | 1.4E+08  | 1.4E+08  | 1209  |
| ENSG000001 | 61.3919  | 57.85799 | 0.090198 | 0.75587   | 0.82246   | RNLS      | chr10 | - | 90033621 | 90344287 | 3385  |
| ENSG000001 | 1.991846 | 2.073397 | -0.03775 | 0.97687   | 0.98684   | APOBR     | chr16 | + | 28505970 | 28510291 | 3792  |
| ENSG000001 | 0        | 132.5124 | -8.5094  | 6.87E-15  | 4.48E-14  | FAM110C   | chr2  | - | 38814    | 46870    | 3760  |
| ENSG000001 | 0        | 0.997859 | -1.5018  | 0.39072   | NA        | DDX53     | chrX  | + | 23018087 | 23020204 | 2118  |
| ENSG000001 | 1092.558 | 553.6024 | 0.97786  | 9.79E-10  | 4.52E-09  | ATL3      | chr11 | - | 63391559 | 63439393 | 7135  |
| ENSG000001 | 622.3212 | 511.3631 | 0.28281  | 0.017031  | 0.034103  | NDUFA12   | chr12 | - | 95290831 | 95397546 | 813   |
| ENSG000001 | 0        | 3.867637 | -3.1827  | 0.049272  | 0.08784   | RP11-480I | chr1  | + | 2.03E+08 | 2.03E+08 | 2810  |
| ENSG000001 | 0        | 1.340997 | -1.8899  | 0.26871   | NA        | RPS17     | chr15 | - | 82821158 | 82824972 | 1922  |
| ENSG000001 | 32.64631 | 28.59479 | 0.19568  | 0.58837   | 0.68391   | SMIM10    | chrX  | + | 1.34E+08 | 1.34E+08 | 1534  |
| ENSG000001 | 9.966977 | 19.87951 | -0.94174 | 0.12021   | 0.18914   | TCTE3     | chr6  | - | 1.7E+08  | 1.7E+08  | 769   |
| ENSG000001 | 1434.144 | 1763.505 | -0.29783 | 0.06448   | 0.11109   | UBE2G2    | chr21 | - | 46188955 | 46221934 | 4340  |
| ENSG000001 | 44.72339 | 49.19467 | -0.13759 | 0.70103   | 0.77757   | SATL1     | chrX  | - | 84347293 | 84364054 | 2224  |
| ENSG000001 | 122.6389 | 241.9783 | -0.98102 | 1.96E-07  | 7.46E-07  | OSBP2     | chr22 | + | 31089769 | 31303811 | 4340  |
| ENSG000001 | 0        | 0.700845 | -0.87835 | 0.62047   | NA        | UNC93B5   | chr11 | - | 67479173 | 67483476 | 699   |
| ENSG000001 | 24.25505 | 125.1695 | -2.3494  | 3.63E-15  | 2.40E-14  | C21orf88  | chr21 | - | 40969074 | 40984748 | 1357  |
| ENSG000001 | 0.290301 | 0.715414 | -0.50514 | 0.77701   | NA        | TUSC5     | chr17 | + | 1182957  | 1204281  | 3596  |
| ENSG000001 | 2.282147 | 1.684135 | 0.39537  | 0.73964   | 0.80829   | HIST1H2AH | chr6  | + | 27114861 | 27115317 | 457   |
| ENSG000001 | 8.744972 | 2.414118 | 1.7691   | 0.044052  | 0.079656  | ZBTB7C    | chr18 | - | 45553044 | 45937123 | 4949  |
| ENSG000001 | 150.3485 | 249.4213 | -0.7303  | 7.51E-06  | 2.45E-05  | APOO      | chrX  | - | 23851470 | 23926057 | 1118  |
| ENSG000001 | 76.96245 | 3.114963 | 4.5452   | 3.97E-15  | 2.62E-14  | PRR16     | chr5  | + | 1.2E+08  | 1.2E+08  | 1826  |
| ENSG000001 | 4418.022 | 2215.968 | 0.99445  | 4.75E-21  | 4.20E-20  | TMED9     | chr5  | + | 1.77E+08 | 1.77E+08 | 1473  |
| ENSG000001 | 0        | 16.55092 | -5.6702  | 2.18E-06  | 7.54E-06  | U52111.12 | chrX  | + | 1.53E+08 | 1.53E+08 | 315   |
| ENSG000001 | 5.020691 | 5.110682 | -0.01885 | 0.98249   | 0.99015   | DRD1      | chr5  | - | 1.75E+08 | 1.75E+08 | 4054  |
| ENSG000001 | 0.580602 | 0        | 0.8036   | 0.6494    | NA        | LINC00308 | chr21 | + | 23470936 | 23488847 | 727   |
| ENSG000001 | 124.0393 | 176.8619 | -0.50951 | 0.043156  | 0.07832   | TMEM186   | chr16 | - | 8874241  | 8891505  | 1448  |
| ENSG000001 | 0        | 2.382564 | -2.4485  | 0.15134   | 0.22879   | SDR42E1   | chr16 | - | 82031221 | 82045093 | 2805  |
| ENSG000001 | 1350.845 | 1444.092 | -0.09649 | 0.46761   | 0.57244   | RBM33     | chr7  | + | 1.55E+08 | 1.56E+08 | 10149 |
| ENSG000001 | 2607.194 | 1385.641 | 0.9107   | 5.94E-20  | 4.99E-19  | ARMCX2    | chrX  | - | 1.01E+08 | 1.01E+08 | 2762  |
| ENSG000001 | 104.0678 | 246.5645 | -1.2286  | 0.000871  | 0.002183  | PIGW      | chr17 | + | 34890847 | 34895159 | 2333  |
| ENSG000001 | 725.6832 | 166.5703 | 2.1136   | 1.40E-17  | 1.05E-16  | BTBD6     | chr14 | + | 1.06E+08 | 1.06E+08 | 2195  |
| ENSG000001 | 0.705622 | 43.45828 | -5.5685  | 6.42E-10  | 3.01E-09  | SRY       | chrY  | - | 2654896  | 2655740  | 845   |
| ENSG000001 | 1642.569 | 3999.822 | -1.2812  | 1.43E-14  | 9.13E-14  | H1FX      | chr3  | - | 1.29E+08 | 1.29E+08 | 1506  |
| ENSG000001 | 114.4712 | 65.09886 | 0.80396  | 0.001508  | 0.003639  | RBM43     | chr2  | - | 1.52E+08 | 1.52E+08 | 4192  |
| ENSG000001 | 1773.222 | 1504.823 | 0.23695  | 0.042729  | 0.077641  | SUMO3     | chr21 | - | 46225532 | 46238694 | 1807  |
| ENSG000001 | 55.10731 | 99.86463 | -0.85243 | 0.002601  | 0.006053  | IMMP2L    | chr7  | - | 1.1E+08  | 1.11E+08 | 1519  |
| ENSG000001 | 1.701545 | 233.2008 | -6.9034  | 1.44E-28  | 1.74E-27  | TCEAL2    | chrX  | + | 1.01E+08 | 1.01E+08 | 1100  |
| ENSG000001 | 0.870904 | 0        | 1.046    | 0.5544    | NA        | AC129778  | chr9  | - | 42845768 | 42859085 | 960   |
| ENSG000001 | 6.899497 | 56.48403 | -2.9852  | 1.45E-07  | 5.57E-07  | CLCNKB    | chr1  | + | 16370272 | 16383803 | 2567  |
| ENSG000001 | 45.4264  | 289.3932 | -2.6415  | 1.25E-13  | 7.51E-13  | JAG2      | chr14 | - | 1.06E+08 | 1.06E+08 | 5835  |
| ENSG000001 | 28.74298 | 103.8512 | -1.8364  | 3.82E-09  | 1.68E-08  | FMNL1     | chr17 | + | 43298811 | 43324687 | 4919  |
| ENSG000001 | 47.27171 | 21.59849 | 1.1142   | 0.004252  | 0.009562  | NUTM2A    | chr10 | + | 88985205 | 88996665 | 3974  |
| ENSG000001 | 55.78286 | 84.56642 | -0.60191 | 0.01766   | 0.035269  | PTRHD1    | chr2  | - | 25012855 | 25016251 | 1014  |
| ENSG000001 | 1.213446 | 9.672716 | -2.6709  | 0.007676  | 0.016477  | LCN12     | chr9  | + | 1.4E+08  | 1.4E+08  | 1804  |
| ENSG000001 | 0.72616  | 1.294874 | -0.65816 | 0.67471   | 0.75631   | OR6A2     | chr11 | - | 6815756  | 6817128  | 1373  |
| ENSG000001 | 0.632843 | 0        | 0.81931  | 0.64303   | NA        | WT1       | chr11 | - | 32409321 | 32457176 | 3122  |
| ENSG000001 | 51.75467 | 62.78927 | -0.28027 | 0.41308   | 0.51791   | ZFP90     | chr16 | + | 68563993 | 68609975 | 4664  |
| ENSG000001 | 116.9743 | 53.75503 | 1.1072   | 0.000334  | 0.000887  | FAM227A   | chr22 | - | 38974125 | 39052634 | 10322 |
| ENSG000001 | 5.165435 | 12.311   | -1.1984  | 0.087864  | 0.14483   | MUC6      | chr11 | - | 1012821  | 1036706  | 8006  |
| ENSG000001 | 2.085163 | 0        | 2.4626   | 0.13461   | 0.20763   | AL772307  | chr9  | - | 42128839 | 42129419 | 581   |
| ENSG000001 | 529.5738 | 862.4828 | -0.70202 | 9.20E-07  | 3.30E-06  | NOC4L     | chr12 | + | 1.33E+08 | 1.33E+08 | 1632  |
| ENSG000001 | 83.59251 | 131.6566 | -0.649   | 0.008953  | 0.01899   | USP18     | chr22 | + | 18632666 | 18660164 | 2129  |
| ENSG000001 | 1006.406 | 1162.851 | -0.20823 | 0.072361  | 0.1226    | NDUFA6    | chr22 | - | 42481529 | 42486959 | 1256  |
| ENSG000001 | 5.644162 | 0        | 4.0624   | 0.003148  | 0.007236  | CHRM5     | chr15 | + | 34260921 | 34357291 | 3043  |

|                    |          |          |           |           |            |       |   |          |          |       |
|--------------------|----------|----------|-----------|-----------|------------|-------|---|----------|----------|-------|
| ENSG000001150.801  | 106.1689 | 3.4325   | 3.03E-107 | 1.95E-105 | SORCS2     | chr4  | + | 7194265  | 7744554  | 6152  |
| ENSG000001248.5315 | 69.97497 | 1.8153   | 1.04E-10  | 5.12E-10  | TMEM121    | chr14 | + | 1.06E+08 | 1.06E+08 | 1532  |
| ENSG000001194.7999 | 14.11411 | 3.7493   | 3.64E-31  | 4.88E-30  | TMEM106A   | chr17 | + | 41363854 | 41372061 | 3267  |
| ENSG000001713.0976 | 1121.245 | -0.65042 | 0.00089   | 0.002227  | SIVA1      | chr14 | + | 1.05E+08 | 1.05E+08 | 4142  |
| ENSG0000011524285  | 0        | 1.8365   | 0.29722   | NA        | TTY13      | chrY  | - | 23745486 | 23756552 | 659   |
| ENSG000001422.5278 | 685.6257 | -0.69794 | 1.19E-07  | 4.63E-07  | BRI3BP     | chr12 | + | 1.25E+08 | 1.26E+08 | 6648  |
| ENSG00000175.20368 | 1.029414 | 5.8855   | 7.48E-14  | 4.54E-13  | IFNE       | chr9  | - | 21480841 | 21482312 | 1472  |
| ENSG0000010        | 0.357707 | -0.41864 | 0.81278   | NA        | SLC22A10   | chr11 | + | 62905339 | 63137190 | 2234  |
| ENSG0000011440.002 | 577.094  | 1.3153   | 8.36E-14  | 5.06E-13  | DGAT1      | chr8  | - | 1.46E+08 | 1.46E+08 | 2004  |
| ENSG0000010        | 1.591889 | -2.1342  | 0.20414   | NA        | RFX6       | chr6  | + | 1.17E+08 | 1.17E+08 | 3460  |
| ENSG00000139.23155 | 188.6724 | -2.2446  | 6.49E-19  | 5.18E-18  | ROBO2      | chr3  | + | 75955846 | 77699115 | 9570  |
| ENSG0000011003.391 | 660.1588 | 0.60401  | 5.37E-06  | 1.78E-05  | AP3M1      | chr10 | - | 75881524 | 75910821 | 3613  |
| ENSG00000117.98742 | 15.75615 | 0.1953   | 0.70647   | 0.78187   | F8         | chrX  | - | 1.54E+08 | 1.54E+08 | 9059  |
| ENSG00000136.47328 | 40.96245 | -0.16499 | 0.63243   | 0.72149   | CA13       | chr8  | + | 86132816 | 86196302 | 3815  |
| ENSG000001187.5558 | 170.5855 | 0.13967  | 0.49856   | 0.60239   | UBOX5      | chr20 | - | 3088219  | 3140842  | 4631  |
| ENSG0000012.572449 | 2.696564 | -0.04081 | 0.96914   | 0.98264   | RP11-111C  | chr9  | + | 40293025 | 40339528 | 3601  |
| ENSG000001643.1771 | 98.74371 | 2.696    | 5.13E-46  | 1.05E-44  | MAFF       | chr22 | + | 38597889 | 38612518 | 2490  |
| ENSG000001790.3369 | 585.659  | 0.43267  | 0.000421  | 0.001106  | BRF1       | chr14 | - | 1.06E+08 | 1.06E+08 | 18259 |
| ENSG0000010.870904 | 2.185918 | -0.99633 | 0.50071   | 0.6044    | LRRCL14B   | chr5  | + | 191626   | 195468   | 1573  |
| ENSG0000010        | 0.715414 | -0.84936 | 0.6309    | NA        | RP11-1821C | chr1  | - | 65450291 | 65451770 | 1480  |
| ENSG000001391.1009 | 1394.184 | -1.8292  | 4.89E-26  | 5.33E-25  | SEMA4B     | chr15 | + | 90703836 | 90772911 | 3807  |
| ENSG0000010.342542 | 1.058552 | -0.99235 | 0.56407   | NA        | MROH2A     | chr2  | + | 2.35E+08 | 2.35E+08 | 5361  |
| ENSG0000013.704556 | 5.788094 | -0.61434 | 0.5108    | 0.61399   | AC004980   | chr7  | - | 76163011 | 76170884 | 882   |
| ENSG000001451.0643 | 159.0707 | 1.5033   | 9.68E-21  | 8.45E-20  | CIB1       | chr15 | - | 90773207 | 90777279 | 1247  |
| ENSG0000010.923144 | 4.867912 | -2.0598  | 0.07584   | 0.12762   | RP11-435B  | chr1  | - | 1.43E+08 | 1.43E+08 | 1789  |
| ENSG0000015.705775 | 20.026   | -1.7781  | 0.002382  | 0.005568  | ANKS1B     | chr12 | - | 99120235 | 1E+08    | 3885  |
| ENSG000001810.0717 | 2115.221 | -1.382   | 4.65E-18  | 3.58E-17  | NELFA      | chr4  | - | 1984441  | 2043630  | 3343  |
| ENSG0000011.741807 | 73.46442 | -5.0487  | 9.96E-14  | 6.00E-13  | SLC24A3    | chr20 | + | 19193290 | 19703581 | 3929  |
| ENSG0000016.77285  | 0        | 4.1961   | 0.003345  | 0.007655  | SGCZ       | chr8  | - | 13947373 | 15095848 | 2234  |
| ENSG0000019.12003  | 17.4711  | -0.92716 | 0.13161   | 0.20381   | EFCAB10    | chr7  | - | 1.05E+08 | 1.05E+08 | 1550  |
| ENSG0000014.773258 | 8.636854 | -0.81309 | 0.39727   | 0.50176   | C5orf47    | chr5  | + | 1.73E+08 | 1.73E+08 | 2522  |
| ENSG0000015.342695 | 15.40086 | -1.4829  | 0.019253  | 0.038135  | AC000068   | chr22 | + | 19435416 | 19437628 | 2097  |
| ENSG000001481.4227 | 357.1652 | 0.43099  | 0.006197  | 0.013561  | GTF2H5     | chr6  | + | 1.59E+08 | 1.59E+08 | 2125  |
| ENSG0000013260.68  | 232.6524 | 3.8019   | 3.49E-103 | 2.10E-101 | FLRT2      | chr14 | + | 85996488 | 86095034 | 7943  |
| ENSG000001532.2803 | 682.9658 | -0.35889 | 0.042225  | 0.076882  | INTS5      | chr11 | - | 62414320 | 62420774 | 3285  |
| ENSG0000011206.487 | 680.7365 | 0.82491  | 2.59E-10  | 1.25E-09  | RPS27L     | chr15 | - | 63418071 | 63450220 | 2944  |
| ENSG0000016.318081 | 155.7263 | -4.5702  | 1.41E-27  | 1.64E-26  | MANEAL     | chr1  | + | 38259474 | 38266809 | 2685  |
| ENSG00000174.63613 | 143.001  | -0.92706 | 0.007952  | 0.017005  | ADSSL1     | chr14 | + | 1.05E+08 | 1.05E+08 | 2600  |
| ENSG0000014.584833 | 37.42754 | -2.9455  | 5.33E-07  | 1.95E-06  | ANO9       | chr11 | - | 417933   | 442011   | 5487  |
| ENSG000001555.5707 | 745.9898 | -0.4245  | 0.000211  | 0.000577  | FAF1       | chr1  | - | 50905150 | 51425935 | 4367  |
| ENSG0000012.718006 | 3.313283 | -0.27709 | 0.82417   | 0.87602   | MYADML2    | chr17 | - | 79897521 | 79905109 | 2452  |
| ENSG0000011600.748 | 72.41902 | 4.4466   | 2.60E-130 | 2.36E-128 | FAM43A     | chr3  | + | 1.94E+08 | 1.94E+08 | 3141  |
| ENSG000001430.2673 | 428.7801 | 0.003745 | 0.98253   | 0.99015   | NDNL2      | chr15 | - | 29560353 | 29562033 | 1681  |
| ENSG0000012327.81  | 1755.644 | 0.40625  | 8.82E-05  | 0.000253  | HSF1       | chr8  | + | 1.46E+08 | 1.46E+08 | 3451  |
| ENSG000001733.1171 | 608.8509 | 0.26848  | 0.028916  | 0.054947  | C6orf120   | chr6  | + | 1.7E+08  | 1.7E+08  | 4145  |
| ENSG00000145.54865 | 34.50997 | 0.39542  | 0.25976   | 0.35769   | TBC1D3F    | chr17 | + | 36283971 | 36294915 | 3389  |
| ENSG000001195.3031 | 185.754  | 0.073273 | 0.72055   | 0.7933    | PURA       | chr5  | + | 1.39E+08 | 1.39E+08 | 2614  |
| ENSG0000010.72616  | 4.022992 | -2.1055  | 0.1113    | 0.17691   | HIST1H2BL  | chr6  | - | 27775257 | 27775709 | 453   |
| ENSG00000186.71386 | 116.7869 | -0.42867 | 0.056976  | 0.099719  | INPP5J     | chr22 | + | 31518717 | 31530682 | 3347  |
| ENSG0000010.36308  | 2.575179 | -2.2111  | 0.13803   | 0.21143   | NPY2R      | chr4  | + | 1.56E+08 | 1.56E+08 | 3626  |
| ENSG00000112.98808 | 143.7935 | -3.4281  | 1.63E-16  | 1.16E-15  | MIXL1      | chr1  | + | 2.26E+08 | 2.26E+08 | 2005  |
| ENSG0000010        | 30.10584 | -6.4862  | 2.29E-08  | 9.45E-08  | MFS6L      | chr17 | - | 8700436  | 8702667  | 2232  |
| ENSG000001185.7719 | 152.8605 | 0.2793   | 0.20095   | 0.28968   | LRRCL37B   | chr17 | + | 30334891 | 30380523 | 3162  |
| ENSG0000010        | 0.297015 | -0.41864 | 0.81278   | NA        | AP001324   | chr11 | - | 74409389 | 74409869 | 480   |
| ENSG000001486.1684 | 665.5388 | -0.45196 | 0.013175  | 0.027022  | DDX51      | chr12 | - | 1.33E+08 | 1.33E+08 | 4718  |
| ENSG0000011190.84  | 629.5363 | 0.9196   | 7.98E-15  | 5.18E-14  | NOMO2      | chr16 | - | 18511182 | 18573533 | 4352  |
| ENSG0000010.870904 | 3.570622 | -1.5296  | 0.30377   | 0.40512   | LINC00482  | chr17 | - | 79277571 | 79283048 | 2023  |
| ENSG0000012.935529 | 3.137654 | -0.10408 | 0.92208   | 0.94757   | LINC00313  | chr21 | - | 44881974 | 44899414 | 967   |
| ENSG000001256.287  | 757.7158 | -1.5616  | 2.33E-17  | 1.74E-16  | SIGIRR     | chr11 | - | 405716   | 417455   | 1867  |
| ENSG000001458.2829 | 264.1575 | 0.78977  | 0.000433  | 0.001136  | NRBP2      | chr8  | - | 1.45E+08 | 1.45E+08 | 3877  |
| ENSG0000010        | 2.382564 | -2.4485  | 0.15134   | 0.22879   | PRSS57     | chr19 | - | 685521   | 695460   | 1077  |
| ENSG000001298.6801 | 388.5333 | -0.37781 | 0.025081  | 0.048389  | IFITM2     | chr11 | + | 307631   | 315272   | 659   |
| ENSG0000010        | 0.715414 | -0.84936 | 0.6309    | NA        | WASIR1     | chrX  | - | 1.55E+08 | 1.55E+08 | 1054  |
| ENSG000001840.5312 | 270.129  | 1.6321   | 2.27E-27  | 2.62E-26  | TNFAIP2    | chr14 | + | 1.04E+08 | 1.04E+08 | 4683  |
| ENSG0000011004.638 | 829.777  | 0.27565  | 0.013134  | 0.026942  | ZNF445     | chr3  | - | 44481262 | 44519162 | 10243 |

|            |          |          |          |           |           |           |       |   |          |          |       |
|------------|----------|----------|----------|-----------|-----------|-----------|-------|---|----------|----------|-------|
| ENSG000001 | 72.99701 | 109.168  | -0.57254 | 0.079444  | 0.13268   | PGBD2     | chr1  | + | 2.49E+08 | 2.49E+08 | 2879  |
| ENSG000001 | 2030.496 | 408.9092 | 2.3084   | 4.93E-41  | 8.90E-40  | WBP5      | chrX  | + | 1.03E+08 | 1.03E+08 | 1096  |
| ENSG000001 | 2075.059 | 1952.114 | 0.088639 | 0.46489   | 0.5697    | RAB11B    | chr19 | + | 8454865  | 8469318  | 1751  |
| ENSG000001 | 268.6853 | 512.7299 | -0.92907 | 2.08E-09  | 9.33E-09  | PRMT3     | chr11 | + | 20409076 | 20530840 | 4159  |
| ENSG000001 | 16.17462 | 68.77388 | -2.0686  | 1.93E-08  | 8.00E-08  | GP1BA     | chr17 | + | 4835592  | 4838325  | 2501  |
| ENSG000001 | 335.3472 | 332.3807 | 0.014027 | 0.94733   | 0.96672   | PRPF39    | chr14 | + | 45553302 | 45585485 | 3507  |
| ENSG000001 | 0        | 0.343138 | -0.41864 | 0.81278   | NA        | MAGEA11   | chrX  | + | 1.49E+08 | 1.49E+08 | 3370  |
| ENSG000001 | 17.45987 | 10.34201 | 0.71773  | 0.22443   | 0.31699   | PPIL6     | chr6  | - | 1.1E+08  | 1.1E+08  | 4031  |
| ENSG000001 | 542.5832 | 1394.213 | -1.356   | 2.32E-09  | 1.04E-08  | ZNF74     | chr22 | + | 20748405 | 20762745 | 3879  |
| ENSG000001 | 25.80924 | 21.48422 | 0.26274  | 0.6807    | 0.76125   | KIAA0825  | chr5  | - | 93488671 | 93954309 | 5751  |
| ENSG000001 | 1113.507 | 760.2597 | 0.54973  | 0.000457  | 0.001195  | UBALD2    | chr17 | + | 74261283 | 74267375 | 1588  |
| ENSG000001 | 7.325169 | 12.30288 | -0.72646 | 0.25862   | 0.35639   | CDNF      | chr10 | - | 14861249 | 14880574 | 1492  |
| ENSG000001 | 6.338619 | 52.35347 | -2.9602  | 2.06E-06  | 7.15E-06  | NOTUM     | chr17 | - | 79910388 | 79919716 | 2324  |
| ENSG000001 | 4.096733 | 0.343138 | 2.8432   | 0.042841  | 0.077783  | KLHL33    | chr14 | - | 20896970 | 20903801 | 1863  |
| ENSG000001 | 0        | 24.02959 | -6.2063  | 7.78E-08  | 3.06E-07  | RBM11     | chr21 | + | 15588451 | 15600693 | 1992  |
| ENSG000001 | 164.2023 | 2903.11  | -4.1332  | 1.52E-94  | 8.18E-93  | WBSCR17   | chr7  | + | 70597155 | 71178585 | 3884  |
| ENSG000001 | 1077.545 | 6256.154 | -2.535   | 1.27E-144 | 1.36E-142 | CD24P4    | chrY  | - | 21154353 | 21154595 | 243   |
| ENSG000001 | 78.04697 | 72.44649 | 0.11104  | 0.71202   | 0.7863    | ZBTB37    | chr1  | + | 1.74E+08 | 1.74E+08 | 2940  |
| ENSG000001 | 32.96913 | 148.1796 | -2.1586  | 9.12E-15  | 5.90E-14  | IL3RA     | chrX  | + | 1455509  | 1501578  | 1706  |
| ENSG000001 | 751.4455 | 1549.707 | -1.0402  | 8.42E-07  | 3.02E-06  | CCDC137   | chr17 | + | 79633394 | 79640934 | 2468  |
| ENSG000001 | 0.36308  | 1.903472 | -1.6912  | 0.30152   | 0.40282   | RGPD2     | chr2  | - | 88055474 | 88285309 | 6931  |
| ENSG000001 | 299.7231 | 175.1248 | 0.7745   | 3.04E-06  | 1.04E-05  | ARL15     | chr5  | - | 53179775 | 53606412 | 3248  |
| ENSG000001 | 0.342542 | 34.02276 | -5.8516  | 5.36E-08  | 2.14E-07  | C12orf56  | chr12 | - | 64660217 | 64784972 | 3242  |
| ENSG000001 | 848.6513 | 923.6224 | -0.12194 | 0.36116   | 0.46536   | CDK10     | chr16 | + | 89747145 | 89762772 | 3344  |
| ENSG000001 | 2.229907 | 1.029414 | 0.90231  | 0.533     | 0.63407   | TMEM105   | chr17 | - | 79285074 | 79304474 | 3317  |
| ENSG000001 | 316.22   | 785.7557 | -1.3052  | 1.50E-06  | 5.27E-06  | SOC51     | chr16 | - | 11348262 | 11350036 | 1225  |
| ENSG000001 | 192.4114 | 1072.17  | -2.4692  | 1.03E-42  | 1.94E-41  | TCN2      | chr22 | + | 31002825 | 31023265 | 2535  |
| ENSG000001 | 2187.128 | 677.3782 | 1.6888   | 1.53E-32  | 2.16E-31  | GAS2L1    | chr22 | + | 29702572 | 29708774 | 3381  |
| ENSG000001 | 841.8059 | 760.728  | 0.14578  | 0.4177    | 0.52293   | ATP6V0A2  | chr12 | + | 1.24E+08 | 1.24E+08 | 5789  |
| ENSG000001 | 32.24199 | 9.111857 | 1.7421   | 0.021367  | 0.041893  | PARK2     | chr6  | - | 1.62E+08 | 1.63E+08 | 4180  |
| ENSG000001 | 242.0989 | 351.4281 | -0.53659 | 0.003256  | 0.007467  | C14orf80  | chr14 | + | 1.06E+08 | 1.06E+08 | 4437  |
| ENSG000001 | 0        | 6.811803 | -4.2935  | 0.001739  | 0.004157  | HS6ST3    | chr13 | + | 96743093 | 97485671 | 1659  |
| ENSG000001 | 2213.886 | 1912.487 | 0.21124  | 0.048498  | 0.086662  | HGS       | chr17 | + | 79650356 | 79670168 | 2970  |
| ENSG000001 | 541.6449 | 257.8704 | 1.0579   | 0.004892  | 0.010909  | TNFAIP8L1 | chr19 | + | 4639530  | 4655580  | 3845  |
| ENSG000001 | 111.1907 | 74.34821 | 0.57819  | 0.011521  | 0.023893  | RAD51D    | chr17 | - | 33426811 | 33448541 | 2404  |
| ENSG000001 | 555.4183 | 81.35122 | 2.7573   | 1.82E-42  | 3.41E-41  | MAPK11    | chr22 | - | 50702142 | 50709196 | 2431  |
| ENSG000001 | 57.55637 | 31.12143 | 0.87922  | 0.005292  | 0.011735  | SP140L    | chr2  | + | 2.31E+08 | 2.31E+08 | 3591  |
| ENSG000001 | 0.705622 | 0.715414 | -0.00991 | 0.99541   | NA        | MRPL30    | chr2  | + | 99771461 | 99814089 | 2605  |
| ENSG000001 | 200.0752 | 195.476  | 0.033174 | 0.86417   | 0.90534   | TARSL2    | chr15 | - | 1.02E+08 | 1.02E+08 | 3610  |
| ENSG000001 | 308.4348 | 217.4978 | 0.50405  | 0.001943  | 0.004609  | SMYD3     | chr1  | - | 2.46E+08 | 2.47E+08 | 1863  |
| ENSG000001 | 75.69807 | 598.4555 | -2.9567  | 1.39E-20  | 1.20E-19  | METTL7A   | chr12 | + | 51317255 | 51326300 | 4076  |
| ENSG000001 | 0        | 0.343138 | -0.41864 | 0.81278   | NA        | LINC00158 | chr21 | - | 26758133 | 26804013 | 1476  |
| ENSG000001 | 4.73039  | 169.0512 | -5.1083  | 1.25E-30  | 1.63E-29  | IFNL1     | chr1  | - | 24480647 | 24514449 | 4549  |
| ENSG000001 | 18.98415 | 68.95267 | -1.8516  | 5.04E-08  | 2.01E-07  | SH3BGR    | chr21 | + | 40817781 | 40887433 | 1251  |
| ENSG000001 | 56.39354 | 316.835  | -2.472   | 9.78E-18  | 7.42E-17  | FAM174B   | chr15 | - | 93160673 | 93353114 | 2792  |
| ENSG000001 | 0        | 1.248751 | -1.5848  | 0.37202   | NA        | FAM47A    | chrX  | - | 34147869 | 34150447 | 2579  |
| ENSG000001 | 207.3921 | 259.4078 | -0.32248 | 0.21986   | 0.3117    | C19orf68  | chr19 | + | 48673949 | 48700877 | 2277  |
| ENSG000001 | 0.685084 | 0.297015 | 0.4735   | 0.79064   | NA        | KPNA7     | chr7  | - | 98771197 | 98805129 | 1725  |
| ENSG000001 | 66.07861 | 52.41229 | 0.33556  | 0.24028   | 0.33514   | TMEM179E  | chr11 | + | 62554887 | 62557877 | 1023  |
| ENSG000001 | 300.3291 | 36.32355 | 3.0332   | 1.26E-22  | 1.19E-21  | GPRIN3    | chr4  | - | 90165429 | 90229161 | 6352  |
| ENSG000001 | 148.4964 | 228.58   | -0.61851 | 0.009151  | 0.019368  | PARPBP    | chr12 | + | 1.03E+08 | 1.03E+08 | 3189  |
| ENSG000001 | 34.29985 | 46.51268 | -0.44469 | 0.26822   | 0.36705   | STAC3     | chr12 | - | 57637236 | 57644976 | 1656  |
| ENSG000001 | 160.6957 | 1607.461 | -3.3191  | 1.09E-115 | 7.81E-114 | ROR1      | chr1  | + | 64239693 | 64647181 | 5832  |
| ENSG000001 | 352.6019 | 179.3759 | 0.97216  | 2.44E-07  | 9.21E-07  | SDHAP1    | chr3  | - | 1.96E+08 | 1.96E+08 | 2491  |
| ENSG000001 | 1.317927 | 0.686276 | 0.64816  | 0.69683   | 0.77397   | RP11-504P | chr1  | + | 2.24E+08 | 2.24E+08 | 1881  |
| ENSG000001 | 19.77372 | 21.26422 | -0.10874 | 0.81343   | 0.86888   | MUC1      | chr1  | - | 1.55E+08 | 1.55E+08 | 1811  |
| ENSG000001 | 1839.87  | 1273.967 | 0.5298   | 0.000178  | 0.000491  | C17orf70  | chr17 | - | 79506911 | 79520987 | 3822  |
| ENSG000001 | 257.9059 | 309.1571 | -0.26061 | 0.12289   | 0.19265   | IRF7      | chr11 | - | 612553   | 615999   | 2051  |
| ENSG000001 | 144.5666 | 229.5269 | -0.66418 | 0.025303  | 0.048786  | L3MBTL1   | chr20 | + | 42136320 | 42179590 | 4322  |
| ENSG000001 | 259.1544 | 260.8991 | -0.00839 | 0.96931   | 0.98274   | BRCC3     | chrX  | + | 1.54E+08 | 1.54E+08 | 2846  |
| ENSG000001 | 1.359003 | 14.30189 | -3.1808  | 0.000482  | 0.001255  | SV2B      | chr15 | + | 91643180 | 91844539 | 11279 |
| ENSG000001 | 7.427045 | 23.82811 | -1.6247  | 0.007119  | 0.015388  | FAM131C   | chr1  | - | 16384264 | 16400127 | 1695  |
| ENSG000001 | 11.451   | 81.29636 | -2.7513  | 1.77E-07  | 6.78E-07  | C11orf35  | chr11 | - | 554855   | 560779   | 2084  |
| ENSG000001 | 1.286224 | 0.357707 | 1.3361   | 0.4083    | NA        | C1orf227  | chr1  | - | 2.13E+08 | 2.13E+08 | 506   |
| ENSG000001 | 1.45232  | 100.0685 | -5.9645  | 1.99E-17  | 1.49E-16  | PDE6G     | chr17 | - | 79617489 | 79630142 | 1505  |

|            |          |          |          |          |          |           |       |   |          |          |       |
|------------|----------|----------|----------|----------|----------|-----------|-------|---|----------|----------|-------|
| ENSG000001 | 621.216  | 276.1107 | 1.1699   | 7.23E-11 | 3.62E-10 | PRKG1     | chr10 | + | 52750945 | 54058110 | 6928  |
| ENSG000001 | 6767.594 | 4.772377 | 9.7296   | 2.62E-27 | 3.02E-26 | NR2F2     | chr15 | + | 96869167 | 96883492 | 5275  |
| ENSG000001 | 0        | 1.073121 | -1.1788  | 0.50551  | NA       | NXF2      | chrX  | + | 1.01E+08 | 1.02E+08 | 3959  |
| ENSG000001 | 39.56472 | 55.05461 | -0.46339 | 0.15874  | 0.23814  | DLK1      | chr14 | + | 1.01E+08 | 1.01E+08 | 1700  |
| ENSG000001 | 66.14543 | 10.22707 | 2.6539   | 1.50E-10 | 7.34E-10 | TLCD2     | chr17 | - | 1611064  | 1613732  | 991   |
| ENSG000001 | 137.7285 | 22.71686 | 2.5869   | 5.09E-18 | 3.91E-17 | LSAMP     | chr3  | - | 1.16E+08 | 1.18E+08 | 1740  |
| ENSG000001 | 4426.147 | 256.5228 | 4.0745   | 4.49E-37 | 7.29E-36 | AHNAK2    | chr14 | - | 1.05E+08 | 1.05E+08 | 18335 |
| ENSG000001 | 2204.2   | 264.3158 | 3.0533   | 5.65E-89 | 2.78E-87 | OLFML2A   | chr9  | + | 1.28E+08 | 1.28E+08 | 6425  |
| ENSG000001 | 1774.044 | 1960.584 | -0.14386 | 0.17389  | 0.25681  | SP1       | chr12 | + | 53773960 | 53810230 | 7603  |
| ENSG000001 | 0        | 0.700845 | -0.87835 | 0.62047  | NA       | SPATA8    | chr15 | + | 97326619 | 97328845 | 1386  |
| ENSG000001 | 471.5553 | 404.6467 | 0.21975  | 0.13669  | 0.20997  | WASH3P    | chr15 | + | 1.03E+08 | 1.03E+08 | 1721  |
| ENSG000001 | 3.173589 | 2.66501  | 0.24291  | 0.82333  | 0.87538  | ACTBP7    | chr15 | - | 44281259 | 44282382 | 1124  |
| ENSG000001 | 253.5733 | 257.7134 | -0.02378 | 0.878    | 0.91499  | MRPL40    | chr22 | + | 19419425 | 19423598 | 1387  |
| ENSG000001 | 0        | 3.884622 | -3.5041  | 0.016263 | 0.032712 | DBX2      | chr12 | - | 45408455 | 45444882 | 2806  |
| ENSG000001 | 515.8312 | 26.5716  | 4.2426   | 6.97E-72 | 2.58E-70 | FAM212A   | chr3  | + | 49840687 | 49842463 | 1040  |
| ENSG000001 | 1.016461 | 9.976178 | -3.0058  | 0.003405 | 0.007785 | PDIA2     | chr16 | + | 333152   | 337215   | 1956  |
| ENSG000001 | 1564.416 | 971.6533 | 0.68555  | 2.36E-08 | 9.73E-08 | PCGF3     | chr4  | + | 699537   | 764428   | 5685  |
| ENSG000001 | 176.5816 | 75.69653 | 1.2206   | 2.72E-09 | 1.21E-08 | LMLN      | chr3  | + | 1.98E+08 | 1.98E+08 | 7043  |
| ENSG000001 | 14998.01 | 5068.571 | 1.5642   | 1.61E-65 | 5.34E-64 | P4HB      | chr17 | - | 79801035 | 79818570 | 2603  |
| ENSG000001 | 1682.698 | 1625.517 | 0.050248 | 0.67281  | 0.75501  | PSMD13    | chr11 | + | 236546   | 252983   | 2200  |
| ENSG000001 | 585.7568 | 2526.091 | -2.1059  | 1.75E-81 | 7.47E-80 | PBX1      | chr1  | + | 1.65E+08 | 1.65E+08 | 11321 |
| ENSG000001 | 0.685084 | 0.654722 | 0.030656 | 0.98584  | NA       | AC017079  | chr2  | + | 1.29E+08 | 1.29E+08 | 415   |
| ENSG000001 | 55.12345 | 15.55709 | 1.8002   | 3.67E-05 | 0.00011  | NDUFA4L2  | chr12 | - | 57628686 | 57634498 | 1200  |
| ENSG000001 | 108.1704 | 5.644019 | 4.2035   | 2.71E-23 | 2.66E-22 | SHC4      | chr15 | - | 49115932 | 49255641 | 4558  |
| ENSG000001 | 0        | 0.357707 | -0.41864 | 0.81278  | NA       | FTH1P14   | chrX  | + | 34165153 | 34165703 | 551   |
| ENSG000001 | 13.6937  | 0        | 5.3961   | 8.70E-06 | 2.82E-05 | KRT79     | chr12 | + | 53215194 | 53228079 | 2068  |
| ENSG000001 | 26.57827 | 57.62093 | -1.1047  | 0.000634 | 0.001621 | CTD-2287C | chr5  | - | 1.15E+08 | 1.15E+08 | 375   |
| ENSG000001 | 4236.447 | 2452.81  | 0.7873   | 7.49E-10 | 3.49E-09 | ZFP36L1   | chr14 | - | 69254377 | 69263190 | 3190  |
| ENSG000001 | 2400.143 | 2205.542 | 0.12214  | 0.37082  | 0.47531  | UBE2L3    | chr22 | + | 21903736 | 21978323 | 3451  |
| ENSG000001 | 26.48495 | 13.56379 | 0.95149  | 0.042348 | 0.077053 | NTF3      | chr12 | + | 5541278  | 5630702  | 1167  |
| ENSG000001 | 852.5954 | 796.4081 | 0.098687 | 0.60504  | 0.69824  | BRWD1     | chr21 | - | 40556102 | 40693485 | 12929 |
| ENSG000001 | 7.552064 | 1120.581 | -7.1277  | 3.23E-79 | 1.34E-77 | PMEL      | chr12 | - | 56347889 | 56367101 | 2757  |
| ENSG000001 | 2.334388 | 53.87239 | -4.3956  | 2.79E-12 | 1.53E-11 | SYN3      | chr22 | - | 32908539 | 33454358 | 3126  |
| ENSG000001 | 6.878145 | 376.5179 | -5.6677  | 1.52E-33 | 2.21E-32 | POU3F1    | chr1  | - | 38509523 | 38512450 | 2928  |
| ENSG000001 | 68.24951 | 124.8631 | -0.8584  | 0.047543 | 0.085175 | SNAI3     | chr16 | - | 88744090 | 88752901 | 1732  |
| ENSG000001 | 121.0837 | 1000.766 | -3.044   | 3.98E-74 | 1.54E-72 | ZBTB3     | chr11 | - | 62515791 | 62521660 | 2978  |
| ENSG000001 | 2.49967  | 4.660728 | -0.79262 | 0.42286  | 0.5283   | LYG2      | chr2  | - | 99858709 | 99871745 | 878   |
| ENSG000001 | 355.0799 | 207.2467 | 0.77333  | 2.53E-07 | 9.53E-07 | EP400NL   | chr12 | + | 1.33E+08 | 1.33E+08 | 3935  |
| ENSG000001 | 0        | 5.848787 | -4.1122  | 0.002814 | 0.006516 | PRAME     | chr22 | - | 22890123 | 22901768 | 2831  |
| ENSG000001 | 5.591921 | 4.928605 | 0.16992  | 0.83068  | 0.8806   | C6orf201  | chr6  | + | 4079440  | 4131185  | 2496  |
| ENSG000001 | 276.0496 | 51.80786 | 2.3997   | 1.32E-26 | 1.48E-25 | MYBL1     | chr8  | - | 67474410 | 67526482 | 5192  |
| ENSG000001 | 0.653381 | 3.394993 | -1.8632  | 0.1966   | 0.28458  | RP11-645C | chr16 | - | 21890659 | 21930477 | 4131  |
| ENSG000001 | 162.2764 | 117.9798 | 0.45603  | 0.01927  | 0.038163 | C16orf52  | chr16 | + | 22018959 | 22098855 | 4360  |
| ENSG000001 | 962.1261 | 1116.734 | -0.21406 | 0.062278 | 0.10775  | DRG1      | chr22 | + | 31795509 | 31924726 | 1746  |
| ENSG000001 | 1644.514 | 1053.025 | 0.64234  | 3.24E-06 | 1.10E-05 | ANKFY1    | chr17 | - | 4067201  | 4167274  | 7418  |
| ENSG000001 | 1593.469 | 1403.467 | 0.18294  | 0.20853  | 0.29851  | YTHDF3    | chr8  | + | 64081112 | 64125346 | 5162  |
| ENSG000001 | 215.3779 | 345.797  | -0.68258 | 0.000112 | 0.000317 | ZNF696    | chr8  | + | 1.44E+08 | 1.44E+08 | 2795  |
| ENSG000001 | 24.33639 | 46.92866 | -0.93184 | 0.025785 | 0.049623 | ADARB2    | chr10 | - | 1228073  | 1779670  | 3606  |
| ENSG000001 | 0        | 121.6523 | -8.417   | 7.82E-15 | 5.08E-14 | NRG3      | chr10 | + | 83635070 | 84746935 | 3530  |
| ENSG000001 | 0.632843 | 1.995719 | -1.3071  | 0.35187  | 0.456    | SRL       | chr16 | - | 4239375  | 4292081  | 5587  |
| ENSG000001 | 219.2438 | 8.966166 | 4.5761   | 8.74E-43 | 1.66E-41 | C11orf87  | chr11 | + | 1.09E+08 | 1.09E+08 | 5884  |
| ENSG000001 | 35.00645 | 20.60949 | 0.7513   | 0.091493 | 0.14987  | IFIT1     | chr10 | + | 91152303 | 91163745 | 2769  |
| ENSG000001 | 177.0989 | 148.7145 | 0.24908  | 0.21977  | 0.31161  | CXorf38   | chrX  | - | 40488285 | 40506819 | 2783  |
| ENSG000001 | 1.016461 | 1.355566 | -0.33317 | 0.81779  | 0.87209  | CLDN24    | chr4  | - | 1.84E+08 | 1.84E+08 | 663   |
| ENSG000001 | 116.2122 | 27.79283 | 2.0408   | 3.01E-12 | 1.65E-11 | KCNQ5     | chr6  | + | 73331520 | 73908574 | 6688  |
| ENSG000001 | 15.49891 | 9.511656 | 0.68104  | 0.23589  | 0.32987  | ADAMTSL5  | chr19 | - | 1505017  | 1513603  | 2851  |
| ENSG000001 | 22.37787 | 16.53306 | 0.42312  | 0.37736  | 0.48145  | KCNIP4    | chr4  | - | 20730239 | 21950422 | 2481  |
| ENSG000001 | 0        | 0.343138 | -0.41864 | 0.81278  | NA       | SPATA31Aε | chr9  | - | 43624507 | 43630730 | 4209  |
| ENSG000001 | 6468.188 | 6531.186 | -0.01387 | 0.91672  | 0.94372  | MORF4L1   | chr15 | + | 79102829 | 79190475 | 2359  |
| ENSG000001 | 1.016461 | 0        | 1.3167   | 0.46021  | NA       | NLRP9     | chr19 | - | 56219798 | 56249768 | 3484  |
| ENSG000001 | 121.5293 | 186.3038 | -0.61567 | 0.00115  | 0.002828 | WDR53     | chr3  | - | 1.96E+08 | 1.96E+08 | 1671  |
| ENSG000001 | 1437.87  | 568.2763 | 1.3362   | 7.70E-21 | 6.74E-20 | DMWD      | chr19 | - | 46286205 | 46296060 | 3305  |
| ENSG000001 | 1295.336 | 999.0128 | 0.37464  | 0.000954 | 0.002375 | SLC52A2   | chr8  | + | 1.46E+08 | 1.46E+08 | 2147  |
| ENSG000001 | 106.4279 | 64.95566 | 0.70705  | 0.005888 | 0.012925 | PIGP      | chr21 | - | 38435146 | 38445470 | 3437  |
| ENSG000001 | 3.40309  | 26.3806  | -2.8753  | 1.47E-05 | 4.62E-05 | IKZF1     | chr7  | + | 50343720 | 50472799 | 6189  |

|            |          |          |          |           |           |            |       |   |          |          |       |
|------------|----------|----------|----------|-----------|-----------|------------|-------|---|----------|----------|-------|
| ENSG000001 | 1851.736 | 549.3881 | 1.7478   | 6.81E-19  | 5.43E-18  | PCYT2      | chr17 | - | 79858841 | 79869340 | 5147  |
| ENSG000001 | 7.685643 | 1609.887 | -7.5989  | 3.16E-96  | 1.73E-94  | NAT8L      | chr4  | + | 2061239  | 2070816  | 5870  |
| ENSG000001 | 0        | 11.90388 | -5.0973  | 8.35E-05  | 0.00024   | NPAP1      | chr15 | + | 24920541 | 24928593 | 8053  |
| ENSG000001 | 2136.225 | 2173.959 | -0.0248  | 0.83049   | 0.88055   | BCAP31     | chrX  | - | 1.53E+08 | 1.53E+08 | 1810  |
| ENSG000001 | 45.88443 | 37.56907 | 0.28331  | 0.35834   | 0.46266   | ARL17A     | chr17 | - | 44594068 | 44657088 | 3945  |
| ENSG000001 | 48.58027 | 69.51676 | -0.50722 | 0.078378  | 0.13121   | RPL12P4    | chr20 | + | 53691155 | 53691685 | 529   |
| ENSG000001 | 5.809443 | 5.194065 | 0.15302  | 0.85114   | 0.8953    | CECR5-AS1  | chr22 | + | 17640274 | 17646335 | 616   |
| ENSG000001 | 248.3039 | 329.6134 | -0.40639 | 0.14492   | 0.22034   | GNB1L      | chr22 | - | 19770747 | 19842462 | 6706  |
| ENSG000001 | 6.121096 | 11.8675  | -0.94093 | 0.15584   | 0.23457   | RP4-592A1  | chr1  | - | 59096513 | 59097202 | 690   |
| ENSG000001 | 107.7441 | 180.9106 | -0.74501 | 0.00028   | 0.000752  | DNAH14     | chr1  | + | 2.25E+08 | 2.26E+08 | 13788 |
| ENSG000001 | 0        | 111.8882 | -8.3012  | 2.25E-14  | 1.42E-13  | RP1-46F2.2 | chr12 | + | 1.11E+08 | 1.11E+08 | 705   |
| ENSG000001 | 5.809443 | 2.604317 | 1.0692   | 0.25452   | 0.35158   | EVI2B      | chr17 | - | 29630784 | 29641130 | 1999  |
| ENSG000001 | 0        | 0.686276 | -0.84936 | 0.6309    | NA        | TMEM210    | chr9  | - | 1.4E+08  | 1.4E+08  | 873   |
| ENSG000001 | 105.5386 | 94.36045 | 0.15577  | 0.57736   | 0.67403   | G1E3.4     | chr16 | - | 21845890 | 21892148 | 3807  |
| ENSG000001 | 15.02279 | 89.51846 | -2.5623  | 4.71E-14  | 2.90E-13  | ZNFX829    | chr19 | - | 37379026 | 37407193 | 4977  |
| ENSG000001 | 105.6888 | 151.6101 | -0.5155  | 0.047443  | 0.085018  | THNSL1     | chr10 | + | 25305587 | 25315593 | 3788  |
| ENSG000001 | 272.7014 | 146.2017 | 0.89226  | 0.002301  | 0.00539   | TRIM69     | chr15 | + | 45021186 | 45060027 | 5691  |
| ENSG000001 | 15.69508 | 14.19749 | 0.14139  | 0.80572   | 0.8626    | ATP6VOC    | chr16 | + | 2563871  | 2570219  | 1175  |
| ENSG000001 | 35.89268 | 2271.911 | -5.9474  | 1.05E-116 | 7.66E-115 | IFITM1     | chr11 | + | 313506   | 315272   | 855   |
| ENSG000001 | 0.290301 | 0        | 0.4146   | 0.81455   | NA        | PRSS38     | chr1  | + | 2.28E+08 | 2.28E+08 | 1267  |
| ENSG000001 | 5243.792 | 3038.391 | 0.78649  | 7.04E-11  | 3.53E-10  | LAMP1      | chr13 | + | 1.14E+08 | 1.14E+08 | 5242  |
| ENSG000001 | 0        | 1.029414 | -1.1526  | 0.51496   | NA        | TAS2R60    | chr7  | + | 1.43E+08 | 1.43E+08 | 957   |
| ENSG000001 | 206.342  | 251.7844 | -0.28489 | 0.082523  | 0.13716   | SGK196     | chr8  | + | 42948658 | 42978577 | 1865  |
| ENSG000001 | 0.685084 | 1.40169  | -0.7101  | 0.66663   | 0.74943   | OR11N1P    | chrX  | - | 1.3E+08  | 1.3E+08  | 853   |
| ENSG000001 | 0.870904 | 88.68675 | -6.1321  | 1.87E-14  | 1.19E-13  | C16orf54   | chr16 | - | 29753784 | 29757327 | 2585  |
| ENSG000001 | 270.2209 | 277.9306 | -0.04023 | 0.82329   | 0.87538   | KLHDC8B    | chr3  | + | 49209044 | 49213917 | 1957  |
| ENSG000001 | 1.701545 | 56.29234 | -4.8099  | 1.06E-09  | 4.86E-09  | KLHL34     | chrX  | - | 21673609 | 21676448 | 2840  |
| ENSG000001 | 206.1297 | 750.6632 | -1.8608  | 9.19E-28  | 1.08E-26  | SETD4      | chr21 | - | 37406839 | 37451687 | 4272  |
| ENSG000001 | 843.8364 | 1026.096 | -0.28094 | 0.14118   | 0.21537   | PTCH1      | chr9  | - | 98205262 | 98279339 | 10631 |
| ENSG000001 | 32.6565  | 16.06941 | 0.99095  | 0.039308  | 0.072288  | RTN4RL1    | chr17 | - | 1839299  | 1928178  | 1836  |
| ENSG000001 | 0.290301 | 0        | 0.4146   | 0.81455   | NA        | OR4C46     | chr11 | + | 51515282 | 51516211 | 930   |
| ENSG000001 | 410.8764 | 590.1557 | -0.52202 | 0.004368  | 0.009813  | PAGR1      | chr16 | + | 29827285 | 29831759 | 2011  |
| ENSG000001 | 0.290301 | 1.788535 | -1.4409  | 0.41004   | 0.51484   | CALHM1     | chr10 | - | 1.05E+08 | 1.05E+08 | 3053  |
| ENSG000001 | 0        | 0.654722 | -0.83442 | 0.63731   | NA        | KRTAP5-5   | chr11 | + | 1651033  | 1652160  | 1128  |
| ENSG000001 | 4.399013 | 8.922459 | -0.98413 | 0.20788   | 0.29769   | NKAIN3     | chr8  | + | 63161150 | 63912211 | 1988  |
| ENSG000001 | 0        | 0.297015 | -0.41864 | 0.81278   | NA        | NXF2B      | chrX  | - | 1.02E+08 | 1.02E+08 | 3959  |
| ENSG000001 | 136.7758 | 158.5417 | -0.21338 | 0.31478   | 0.41732   | RNPC3      | chr1  | + | 1.04E+08 | 1.04E+08 | 3658  |
| ENSG000001 | 19.70787 | 30.73371 | -0.61343 | 0.20446   | 0.29359   | ZNF267     | chr16 | + | 31885079 | 31928668 | 3307  |
| ENSG000001 | 1687.618 | 1506.831 | 0.16259  | 0.52327   | 0.62577   | IRS2       | chr13 | - | 1.1E+08  | 1.1E+08  | 6999  |
| ENSG000001 | 2.572449 | 0.297015 | 2.245    | 0.12938   | 0.2009    | C7orf61    | chr7  | - | 1E+08    | 1E+08    | 1004  |
| ENSG000001 | 0.290301 | 0        | 0.4146   | 0.81455   | NA        | FAM186A    | chr12 | - | 50720013 | 50790405 | 8200  |
| ENSG000001 | 92.66388 | 0        | 8.0454   | 1.67E-13  | 9.96E-13  | SHOX       | chrX  | + | 585079   | 620146   | 3757  |
| ENSG000001 | 0        | 0.343138 | -0.41864 | 0.81278   | NA        | LCE3A      | chr1  | - | 1.53E+08 | 1.53E+08 | 270   |
| ENSG000001 | 1567.835 | 1151.943 | 0.44363  | 0.001013  | 0.002508  | BICD2      | chr9  | - | 95473645 | 95527094 | 6427  |
| ENSG000001 | 23.27885 | 5.410113 | 2.054    | 0.001265  | 0.003088  | CCIN       | chr9  | + | 36169389 | 36171329 | 1941  |
| ENSG000001 | 161.8988 | 111.0927 | 0.53992  | 0.012851  | 0.026418  | TMLHE      | chrX  | - | 1.55E+08 | 1.55E+08 | 2832  |
| ENSG000001 | 0        | 0.357707 | -0.41864 | 0.81278   | NA        | GRK1       | chr13 | + | 1.14E+08 | 1.14E+08 | 2101  |
| ENSG000001 | 0        | 4.602452 | -3.728   | 0.009576  | 0.020191  | SLITRK2    | chrX  | + | 1.45E+08 | 1.45E+08 | 7672  |
| ENSG000001 | 25.83239 | 127.377  | -2.2797  | 3.25E-10  | 1.55E-09  | SDHAP3     | chr5  | - | 1568637  | 1594735  | 1026  |
| ENSG000001 | 3.640337 | 8.737965 | -1.1379  | 0.22899   | 0.32217   | PLK5       | chr19 | + | 1524073  | 1535455  | 2106  |
| ENSG000001 | 2682.578 | 570.1069 | 2.2312   | 1.00E-95  | 5.42E-94  | RASA3      | chr13 | - | 1.15E+08 | 1.15E+08 | 4191  |
| ENSG000001 | 5.124359 | 10.41968 | -0.9715  | 0.16977   | 0.25175   | F8A3       | chrX  | - | 1.55E+08 | 1.55E+08 | 1701  |
| ENSG000001 | 804.045  | 713.4296 | 0.17194  | 0.1431    | 0.21794   | LRCH3      | chr3  | + | 1.98E+08 | 1.98E+08 | 7394  |
| ENSG000001 | 2.447429 | 26.79014 | -3.224   | 3.13E-05  | 9.47E-05  | LEMD1      | chr1  | - | 2.05E+08 | 2.05E+08 | 929   |
| ENSG000001 | 0        | 0.686276 | -0.84936 | 0.6309    | NA        | RPS4XP21   | chr19 | - | 34583445 | 34584215 | 771   |
| ENSG000001 | 15.37389 | 0.937167 | 3.6671   | 8.05E-05  | 0.000232  | ATP4B      | chr13 | - | 1.14E+08 | 1.14E+08 | 1488  |
| ENSG000001 | 4.337399 | 19.54121 | -2.0967  | 0.0021    | 0.004952  | NDUFA13    | chr19 | + | 19626545 | 19639863 | 1166  |
| ENSG000001 | 98.86713 | 149.7127 | -0.59485 | 0.038638  | 0.071183  | ZNF566     | chr19 | - | 36936021 | 36980804 | 5253  |
| ENSG000001 | 2.790785 | 6.493771 | -1.0952  | 0.34228   | 0.44618   | AC084219   | chr19 | - | 44609616 | 44617298 | 3199  |
| ENSG000001 | 159.2081 | 181.1702 | -0.18718 | 0.33079   | 0.43395   | ZNF529     | chr19 | - | 37025676 | 37096178 | 5238  |
| ENSG000001 | 26.65961 | 15.91963 | 0.73958  | 0.087121  | 0.14381   | ZNF284     | chr19 | + | 44576297 | 44593766 | 4351  |
| ENSG000001 | 0        | 0.357707 | -0.41864 | 0.81278   | NA        | HTR3E      | chr3  | + | 1.84E+08 | 1.84E+08 | 2139  |
| ENSG000001 | 2.903826 | 61.05801 | -4.2504  | 3.31E-13  | 1.94E-12  | DLEU7      | chr13 | - | 51285144 | 51418075 | 2291  |
| ENSG000001 | 0.685084 | 1.713273 | -0.99869 | 0.51558   | 0.61846   | TAL2       | chr9  | + | 1.08E+08 | 1.08E+08 | 630   |
| ENSG000001 | 16.3056  | 2.307303 | 2.6813   | 0.000606  | 0.001555  | MATN1-AS1  | chr1  | + | 31191351 | 31199674 | 3925  |

|            |          |          |          |          |          |           |       |   |          |          |       |
|------------|----------|----------|----------|----------|----------|-----------|-------|---|----------|----------|-------|
| ENSG000001 | 1238.667 | 1005.93  | 0.29944  | 0.010202 | 0.021413 | AIDA      | chr1  | - | 2.23E+08 | 2.23E+08 | 4050  |
| ENSG000001 | 63.09182 | 140.5559 | -1.1459  | 9.05E-07 | 3.24E-06 | C15orf41  | chr15 | + | 36871812 | 37102449 | 5843  |
| ENSG000001 | 1.08924  | 0        | 1.1858   | 0.50299  | NA       | CD300LF   | chr17 | - | 72690452 | 72709117 | 1825  |
| ENSG000001 | 42.01638 | 111.4535 | -1.4008  | 1.23E-07 | 4.78E-07 | RP11-887P | chr12 | - | 94034598 | 94035362 | 765   |
| ENSG000001 | 0.342542 | 0        | 0.4146   | 0.81455  | NA       | RP11-698N | chr11 | - | 35881799 | 35883048 | 1250  |
| ENSG000001 | 13.39402 | 19.81882 | -0.56351 | 0.25274  | 0.3497   | GSAP      | chr7  | - | 76940068 | 77045717 | 3458  |
| ENSG000001 | 1.524285 | 5.918343 | -1.6591  | 0.16367  | 0.24431  | AGBL4     | chr1  | - | 48998527 | 50489585 | 3938  |
| ENSG000001 | 0        | 1.638012 | -2.1885  | 0.18912  | NA       | ARGFX     | chr3  | + | 1.21E+08 | 1.21E+08 | 992   |
| ENSG000001 | 165.9829 | 178.9595 | -0.10778 | 0.69474  | 0.77231  | CYP2R1    | chr11 | - | 14899553 | 14913798 | 2325  |
| ENSG000001 | 0.705622 | 2.200487 | -1.2984  | 0.38637  | 0.49056  | LRRC70    | chr5  | + | 61874562 | 61877275 | 2249  |
| ENSG000001 | 100.2433 | 315.9404 | -1.6501  | 1.16E-19 | 9.66E-19 | ANKRD46   | chr8  | - | 1.02E+08 | 1.02E+08 | 3270  |
| ENSG000001 | 3921.12  | 1307.553 | 1.5812   | 2.07E-27 | 2.39E-26 | PIP5K1C   | chr19 | - | 3630181  | 3700477  | 5080  |
| ENSG000001 | 0.290301 | 2.979009 | -2.446   | 0.091618 | 0.15003  | CYP4F2    | chr19 | - | 15988834 | 16008930 | 2406  |
| ENSG000001 | 3.693391 | 0.357707 | 2.7171   | 0.052141 | 0.092282 | TEX38     | chr1  | + | 47134527 | 47139266 | 1003  |
| ENSG000001 | 209.5712 | 209.3925 | 0.003488 | 0.98614  | 0.99179  | ZBTB6     | chr9  | - | 1.26E+08 | 1.26E+08 | 4106  |
| ENSG000001 | 88.22698 | 33.93534 | 1.369    | 7.91E-07 | 2.85E-06 | C2orf76   | chr2  | - | 1.2E+08  | 1.2E+08  | 1150  |
| ENSG000001 | 2.738544 | 0.640152 | 1.6683   | 0.22793  | 0.32098  | TAS2R42   | chr12 | - | 11338599 | 11339543 | 945   |
| ENSG000001 | 453.9779 | 407.713  | 0.15483  | 0.4961   | 0.59992  | POLR3C    | chr1  | - | 1.46E+08 | 1.46E+08 | 1851  |
| ENSG000001 | 0.290301 | 0.715414 | -0.50514 | 0.77701  | NA       | C2orf53   | chr2  | - | 27359723 | 27362278 | 2001  |
| ENSG000001 | 96.62329 | 94.86236 | 0.019624 | 0.9401   | 0.96075  | WVOX      | chr16 | + | 78133310 | 79246564 | 2482  |
| ENSG000001 | 0        | 0.654722 | -0.83442 | 0.63731  | NA       | CYP4Z1    | chr1  | + | 47533160 | 47583991 | 1906  |
| ENSG000001 | 110.122  | 71.00338 | 0.63248  | 0.007794 | 0.016698 | CIDECP    | chr3  | - | 10055932 | 10068049 | 1784  |
| ENSG000001 | 172.4121 | 278.08   | -0.69045 | 0.000501 | 0.001302 | CCDC84    | chr11 | + | 1.19E+08 | 1.19E+08 | 1781  |
| ENSG000001 | 2177.703 | 2182.847 | -0.0035  | 0.97669  | 0.98684  | BCL9L     | chr11 | - | 1.19E+08 | 1.19E+08 | 10005 |
| ENSG000001 | 756.3718 | 1564.781 | -1.0476  | 7.60E-16 | 5.22E-15 | POLR1D    | chr13 | + | 28194903 | 28241548 | 1945  |
| ENSG000001 | 920.7627 | 1381.757 | -0.58495 | 2.24E-06 | 7.73E-06 | KIF18B    | chr17 | - | 43002077 | 43025082 | 4217  |
| ENSG000001 | 601.6347 | 823.263  | -0.45203 | 0.00462  | 0.010344 | ZNRF1     | chr16 | + | 75032928 | 75144892 | 5331  |
| ENSG000001 | 0        | 0.686276 | -0.84936 | 0.6309   | NA       | FFAR4     | chr10 | + | 95326422 | 95364237 | 3653  |
| ENSG000001 | 566.9248 | 1898.094 | -1.7403  | 2.24E-32 | 3.14E-31 | SAPCD2    | chr9  | - | 1.4E+08  | 1.4E+08  | 3843  |
| ENSG000001 | 102.5545 | 45.38531 | 1.164    | 4.79E-05 | 0.000142 | EDARADD   | chr1  | + | 2.37E+08 | 2.37E+08 | 3097  |
| ENSG000001 | 3.443352 | 3.717114 | -0.10383 | 0.92264  | 0.94798  | SLC51B    | chr15 | + | 65337708 | 65345734 | 940   |
| ENSG000001 | 38.17499 | 516.4784 | -3.7222  | 1.18E-44 | 2.34E-43 | 1-Mar     | chr1  | + | 2.21E+08 | 2.21E+08 | 2707  |
| ENSG000001 | 14.73249 | 37.36679 | -1.3215  | 0.009727 | 0.020493 | SOWAHB    | chr4  | - | 77816082 | 77819002 | 2921  |
| ENSG000001 | 505.5467 | 466.6034 | 0.11446  | 0.53336  | 0.63427  | BLOC1S4   | chr4  | + | 6717842  | 6719387  | 1546  |
| ENSG000001 | 43.54906 | 150.6527 | -1.7885  | 5.98E-12 | 3.21E-11 | ZNFX49    | chr19 | + | 57946697 | 57956853 | 2587  |
| ENSG000001 | 0.36308  | 2.635871 | -2.2626  | 0.12261  | 0.19232  | KLHL32    | chr6  | + | 97372605 | 97588630 | 3698  |
| ENSG000001 | 0        | 1.188058 | -1.268   | 0.47398  | NA       | FAM86MP   | chr4  | + | 9694119  | 9704578  | 885   |
| ENSG000001 | 21.23558 | 32.26423 | -0.59095 | 0.25592  | 0.35323  | AC016757  | chr2  | - | 2.39E+08 | 2.39E+08 | 1888  |
| ENSG000001 | 588.3936 | 300.8611 | 0.96541  | 4.63E-08 | 1.86E-07 | MKL2      | chr16 | + | 14165178 | 14360630 | 8799  |
| ENSG000001 | 0        | 3.183777 | -3.1728  | 0.037267 | 0.068902 | BTLA      | chr3  | - | 1.12E+08 | 1.12E+08 | 3213  |
| ENSG000001 | 31.68291 | 51.78664 | -0.69741 | 0.12407  | 0.19414  | ZNFX17    | chr19 | + | 57922531 | 57933307 | 2750  |
| ENSG000001 | 134.9705 | 86.85425 | 0.6353   | 0.006511 | 0.014183 | NBPF12    | chr1  | + | 1.46E+08 | 1.46E+08 | 12455 |
| ENSG000001 | 50.34326 | 63.54833 | -0.33403 | 0.39991  | 0.50459  | KDM4D     | chr11 | + | 94706845 | 94732682 | 2978  |
| ENSG000001 | 2.354926 | 10.7353  | -2.04    | 0.026561 | 0.050947 | GPAT2     | chr2  | - | 96687694 | 96705199 | 4407  |
| ENSG000001 | 576.9089 | 539.9564 | 0.094868 | 0.50766  | 0.61121  | TOR3A     | chr1  | + | 1.79E+08 | 1.79E+08 | 2724  |
| ENSG000001 | 0        | 1.949596 | -2.4359  | 0.13595  | 0.20899  | PABPC1L2  | chrX  | - | 72297115 | 72299351 | 2237  |
| ENSG000001 | 21.85823 | 470.456  | -4.3825  | 2.45E-59 | 7.00E-58 | GABRA5    | chr15 | + | 27111510 | 27194354 | 3251  |
| ENSG000001 | 1980.445 | 5435.06  | -1.4551  | 7.69E-39 | 1.31E-37 | PPP1CC    | chr12 | - | 1.11E+08 | 1.11E+08 | 2797  |
| ENSG000001 | 84.6586  | 87.08668 | -0.04117 | 0.89038  | 0.92385  | ZNFX55    | chr19 | + | 2841433  | 2860482  | 8557  |
| ENSG000001 | 15.93396 | 86.55757 | -2.396   | 2.97E-07 | 1.11E-06 | MST1P2    | chr1  | + | 16972069 | 16976914 | 2368  |
| ENSG000001 | 183.0556 | 376.5271 | -1.0358  | 1.06E-05 | 3.38E-05 | NAP1L3    | chrX  | - | 92925929 | 92928567 | 2639  |
| ENSG000001 | 220.2322 | 214.4523 | 0.041672 | 0.83452  | 0.88368  | CA5BP1    | chrX  | + | 15693055 | 15721847 | 1264  |
| ENSG000001 | 95.00064 | 66.03361 | 0.52098  | 0.031226 | 0.058731 | PRELID2   | chr5  | - | 1.45E+08 | 1.45E+08 | 2140  |
| ENSG000001 | 847.4351 | 195.4264 | 2.106    | 1.37E-20 | 1.19E-19 | BACE1     | chr11 | - | 1.17E+08 | 1.17E+08 | 9924  |
| ENSG000001 | 1.608228 | 1.248751 | 0.27398  | 0.85253  | 0.89637  | RP13-608F | chr15 | + | 82804003 | 82810874 | 1776  |
| ENSG000001 | 1.359003 | 1.66715  | -0.25092 | 0.85492  | 0.898    | RGX9BP    | chr19 | + | 33166313 | 33169206 | 2894  |
| ENSG000001 | 0        | 2.117104 | -2.2796  | 0.18565  | 0.27129  | RP11-140K | chr6  | + | 34683390 | 34683717 | 328   |
| ENSG000001 | 0.290301 | 0.640152 | -0.50256 | 0.77558  | NA       | SLC36A3   | chr5  | - | 1.51E+08 | 1.51E+08 | 3558  |
| ENSG000001 | 0.290301 | 1.995719 | -1.903   | 0.2133   | 0.3039   | SLC36A2   | chr5  | - | 1.51E+08 | 1.51E+08 | 3421  |
| ENSG000001 | 10037.58 | 991.0148 | 3.3273   | 2.15E-49 | 4.84E-48 | THBS2     | chr6  | - | 1.7E+08  | 1.7E+08  | 5811  |
| ENSG000001 | 1381.589 | 1551.637 | -0.16725 | 0.2061   | 0.2957   | RXRA      | chr9  | + | 1.37E+08 | 1.37E+08 | 5770  |
| ENSG000001 | 15.0862  | 15.91721 | -0.08078 | 0.88449  | 0.91938  | ANKRD37   | chr4  | + | 1.86E+08 | 1.86E+08 | 1444  |
| ENSG000001 | 51.80789 | 8.978319 | 2.4922   | 7.58E-08 | 2.99E-07 | C9orf47   | chr9  | + | 91605778 | 91611055 | 4837  |
| ENSG000001 | 38.60034 | 49.10559 | -0.34717 | 0.26615  | 0.36489  | NUDT17    | chr1  | - | 1.46E+08 | 1.46E+08 | 2342  |
| ENSG000001 | 0        | 2.401965 | -2.0937  | 0.23902  | 0.33362  | KIAA1024L | chr5  | + | 1.29E+08 | 1.29E+08 | 2354  |

|            |          |          |          |          |          |           |       |   |          |          |       |
|------------|----------|----------|----------|----------|----------|-----------|-------|---|----------|----------|-------|
| ENSG000001 | 0        | 0.343138 | -0.41864 | 0.81278  | NA       | LINC00643 | chr14 | + | 62584197 | 62596352 | 1962  |
| ENSG000001 | 243.0005 | 120.6276 | 1.0111   | 1.03E-06 | 3.67E-06 | ZNF75D    | chrX  | - | 1.34E+08 | 1.34E+08 | 5592  |
| ENSG000001 | 0        | 19.0791  | -5.8435  | 1.09E-06 | 3.89E-06 | CYP4X1    | chr1  | + | 47427036 | 47516423 | 2357  |
| ENSG000001 | 832.7575 | 355.7236 | 1.2219   | 3.13E-08 | 1.27E-07 | KRT10     | chr17 | - | 38974369 | 38978847 | 2124  |
| ENSG000001 | 11.64024 | 3.152223 | 1.7393   | 0.042569 | 0.077371 | GOLGA8R   | chr15 | - | 30695943 | 30706463 | 3062  |
| ENSG000001 | 7.055405 | 0        | 4.3914   | 0.001001 | 0.002482 | CD300E    | chr17 | - | 72606026 | 72619897 | 3501  |
| ENSG000001 | 10.97569 | 15.35641 | -0.48709 | 0.40972  | 0.51457  | CCDC30    | chr1  | + | 42929001 | 43120335 | 6827  |
| ENSG000001 | 206.2437 | 312.2039 | -0.59648 | 7.51E-05 | 0.000217 | NKRF      | chrX  | - | 1.19E+08 | 1.19E+08 | 3741  |
| ENSG000001 | 1.597063 | 9.200072 | -2.3074  | 0.015478 | 0.031262 | GLDN      | chr15 | + | 51633826 | 51700210 | 4971  |
| ENSG000001 | 2017.208 | 1228.96  | 0.71336  | 4.52E-05 | 0.000134 | KPNA4     | chr3  | - | 1.6E+08  | 1.6E+08  | 8981  |
| ENSG000001 | 0        | 136.15   | -8.5545  | 3.60E-15 | 2.38E-14 | TRDN      | chr6  | - | 1.24E+08 | 1.24E+08 | 4746  |
| ENSG000001 | 0.685084 | 0.343138 | 0.48017  | 0.78775  | NA       | KRT3      | chr12 | - | 53183469 | 53189901 | 2319  |
| ENSG000001 | 57.03477 | 146.6612 | -1.3589  | 6.79E-10 | 3.18E-09 | ZNF501    | chr3  | + | 44771088 | 44778575 | 3099  |
| ENSG000001 | 353.2953 | 285.9746 | 0.30528  | 0.037291 | 0.068942 | ZNF197    | chr3  | + | 44626380 | 44689963 | 4299  |
| ENSG000001 | 11.34056 | 10.82023 | 0.068358 | 0.92111  | 0.94697  | SPATA12   | chr3  | + | 57094469 | 57109460 | 2413  |
| ENSG000001 | 0        | 1.294874 | -1.8547  | 0.27869  | NA       | TMPRSS12  | chr12 | + | 51236703 | 51281667 | 3336  |
| ENSG000001 | 1.681007 | 0        | 2.1857   | 0.19206  | NA       | FAM228A   | chr2  | + | 24397938 | 24423718 | 1774  |
| ENSG000001 | 0.580602 | 271.3849 | -8.1193  | 3.11E-23 | 3.04E-22 | NAP1L2    | chrX  | - | 72432135 | 72434684 | 2550  |
| ENSG000001 | 15.27022 | 0.654722 | 4.0917   | 5.48E-05 | 0.000161 | AQP7P1    | chr9  | - | 67272038 | 67289492 | 1375  |
| ENSG000001 | 1021.806 | 701.5265 | 0.54208  | 0.000327 | 0.00087  | RPS23     | chr5  | - | 81569177 | 81574396 | 3437  |
| ENSG000001 | 528.1229 | 74.49699 | 2.8164   | 1.56E-28 | 1.88E-27 | GNG2      | chr14 | + | 52292913 | 52446060 | 3729  |
| ENSG000001 | 603.6904 | 49.70935 | 3.5865   | 4.79E-64 | 1.53E-62 | BTN3A2    | chr6  | + | 26365387 | 26378546 | 3017  |
| ENSG000001 | 1.681007 | 2.117104 | -0.26379 | 0.84299  | 0.88985  | AKAP14    | chrX  | + | 1.19E+08 | 1.19E+08 | 977   |
| ENSG000001 | 62.22254 | 55.10798 | 0.17642  | 0.59667  | 0.69101  | PCLO      | chr7  | - | 82387442 | 82792246 | 17144 |
| ENSG000001 | 0        | 0.654722 | -0.83442 | 0.63731  | NA       | KLK12     | chr19 | - | 51532348 | 51538486 | 1170  |
| ENSG000001 | 1.08924  | 72.65837 | -5.8412  | 9.39E-14 | 5.67E-13 | RGSTBP    | chr5  | + | 63802084 | 63908139 | 4160  |
| ENSG000001 | 5520.378 | 1240.669 | 2.1131   | 1.33E-05 | 4.19E-05 | INSIG1    | chr7  | + | 1.55E+08 | 1.55E+08 | 3010  |
| ENSG000001 | 1.027626 | 11.31314 | -3.1403  | 0.003033 | 0.006984 | ANKRD20A  | chr18 | + | 14179096 | 14249455 | 3410  |
| ENSG000001 | 0.290301 | 3.010564 | -2.4075  | 0.10691  | 0.17085  | MYT1L     | chr2  | - | 1792885  | 2335032  | 7063  |
| ENSG000001 | 11.77382 | 197.0511 | -4.026   | 1.29E-35 | 2.00E-34 | C5orf38   | chr5  | + | 2752245  | 2755508  | 1441  |
| ENSG000001 | 6.701698 | 8.871503 | -0.39772 | 0.5829   | 0.67895  | ZNF396    | chr18 | - | 32946661 | 32957301 | 2788  |
| ENSG000001 | 589.2775 | 520.0534 | 0.18079  | 0.37247  | 0.47691  | TMEM222   | chr1  | + | 27648651 | 27662891 | 2861  |
| ENSG000001 | 1.669842 | 18.49406 | -3.259   | 0.000198 | 0.000542 | CLCNKA    | chr1  | + | 16345370 | 16360545 | 3060  |
| ENSG000001 | 14.43877 | 20.95505 | -0.51223 | 0.29364  | 0.39568  | ARHGAP30  | chr1  | - | 1.61E+08 | 1.61E+08 | 4857  |
| ENSG000001 | 1475.144 | 1163.8   | 0.34227  | 0.003519 | 0.008027 | 10-Sep    | chr2  | - | 1.1E+08  | 1.1E+08  | 3091  |
| ENSG000001 | 3.40309  | 24.7013  | -2.7946  | 1.21E-05 | 3.83E-05 | FAM86B1   | chr8  | - | 12039605 | 12051642 | 2394  |
| ENSG000001 | 0        | 0.891044 | -1.0625  | 0.54819  | NA       | CYP4F3    | chr19 | + | 15751707 | 15773634 | 5050  |
| ENSG000001 | 192.8749 | 163.6154 | 0.23318  | 0.48384  | 0.58794  | XKR5      | chr8  | - | 6666038  | 6693166  | 4894  |
| ENSG000001 | 294.999  | 428.3539 | -0.53702 | 8.80E-05 | 0.000252 | SMYD4     | chr17 | - | 1682779  | 1733928  | 4384  |
| ENSG000001 | 0        | 3.273608 | -2.9384  | 0.074324 | 0.12551  | CROCCP5   | chr1  | + | 21760811 | 21764051 | 830   |
| ENSG000001 | 52.97072 | 3.336716 | 3.8982   | 2.03E-12 | 1.13E-11 | FOXO2     | chr1  | + | 47901689 | 47906363 | 4675  |
| ENSG000001 | 1599.731 | 1582.05  | 0.016392 | 0.87353  | 0.91187  | GPATCH8   | chr17 | - | 42472652 | 42580798 | 8109  |
| ENSG000001 | 95.08042 | 69.79047 | 0.43861  | 0.17948  | 0.26353  | CEACAM19  | chr19 | + | 45165545 | 45187631 | 3278  |
| ENSG000001 | 2769.705 | 1190.746 | 1.2164   | 6.74E-27 | 7.62E-26 | NF2       | chr22 | + | 29999545 | 30094587 | 6025  |
| ENSG000001 | 393.5269 | 134.9137 | 1.5325   | 3.47E-07 | 1.29E-06 | C6orf1    | chr6  | - | 34214157 | 34217247 | 1487  |
| ENSG000001 | 0.653381 | 16.60033 | -4.1277  | 0.000169 | 0.000468 | SPATC1    | chr8  | + | 1.45E+08 | 1.45E+08 | 1954  |
| ENSG000001 | 3010.647 | 2531.386 | 0.24954  | 0.052983 | 0.093542 | UBE2H     | chr7  | - | 1.29E+08 | 1.3E+08  | 5151  |
| ENSG000001 | 416.5175 | 31.67638 | 3.3774   | 0.001    | 0.00248  | MIR22HG   | chr17 | - | 1614805  | 1620468  | 2626  |
| ENSG000001 | 55.10471 | 492.6604 | -3.1448  | 1.93E-59 | 5.55E-58 | HPDL      | chr1  | + | 45792545 | 45794347 | 1803  |
| ENSG000001 | 34.94721 | 71.19055 | -1.0175  | 0.003776 | 0.008563 | KTN1-AS1  | chr14 | - | 55965996 | 56046828 | 2185  |
| ENSG000001 | 222.2495 | 289.114  | -0.3776  | 0.023587 | 0.045819 | KATNA1    | chr6  | - | 1.5E+08  | 1.5E+08  | 1894  |
| ENSG000001 | 16.64895 | 17.68627 | -0.0797  | 0.88685  | 0.92093  | FSD2      | chr15 | - | 83424114 | 83474822 | 6418  |
| ENSG000001 | 1578.514 | 1654.87  | -0.06811 | 0.65642  | 0.74115  | ARAP1     | chr11 | - | 72396114 | 72504644 | 5767  |
| ENSG000001 | 227.0347 | 142.6097 | 0.66969  | 0.00042  | 0.001102 | KIF24     | chr9  | - | 34252379 | 34329198 | 6226  |
| ENSG000001 | 7.624843 | 96.59424 | -3.6255  | 1.92E-19 | 1.57E-18 | PDE2A     | chr11 | - | 72287185 | 72385635 | 4315  |
| ENSG000001 | 3.786708 | 4.256898 | -0.17879 | 0.85163  | 0.89565  | SPDYEP9   | chr7  | - | 76651635 | 76661674 | 2884  |
| ENSG000001 | 2.843026 | 170.8511 | -5.8524  | 1.87E-26 | 2.07E-25 | LRRC16B   | chr14 | + | 24521206 | 24538937 | 4597  |
| ENSG000001 | 0.342542 | 0.297015 | -0.00202 | 0.99909  | NA       | PRG2      | chr11 | - | 57154267 | 57158130 | 1424  |
| ENSG000001 | 471.7559 | 224.8951 | 1.0654   | 2.37E-07 | 8.96E-07 | PRR5      | chr22 | + | 45064593 | 45133561 | 2279  |
| ENSG000001 | 1013.698 | 521.7017 | 0.95683  | 4.36E-11 | 2.22E-10 | ZFP91     | chr11 | + | 58346584 | 58388515 | 5220  |
| ENSG000001 | 181.6611 | 478.7526 | -1.3937  | 7.24E-10 | 3.38E-09 | C17orf58  | chr17 | - | 65987217 | 65989765 | 1654  |
| ENSG000001 | 12.94619 | 14.31075 | -0.13022 | 0.80939  | 0.86565  | BCDIN3D   | chr12 | - | 50231573 | 50236912 | 1502  |
| ENSG000001 | 0        | 3.276024 | -3.2377  | 0.030989 | 0.058351 | MAGEE2    | chrX  | - | 75002823 | 75005079 | 2257  |
| ENSG000001 | 487.303  | 137.7639 | 1.8134   | 4.76E-25 | 4.97E-24 | CYP27C1   | chr2  | - | 1.28E+08 | 1.28E+08 | 4401  |
| ENSG000001 | 265.291  | 247.9371 | 0.097692 | 0.52107  | 0.62363  | LYRM7     | chr5  | + | 1.31E+08 | 1.31E+08 | 6351  |

|            |          |          |          |          |          |           |       |   |          |          |       |
|------------|----------|----------|----------|----------|----------|-----------|-------|---|----------|----------|-------|
| ENSG000001 | 11.2241  | 18.49648 | -0.69739 | 0.26432  | 0.36268  | DTX2P1    | chr7  | + | 76607934 | 76673092 | 1652  |
| ENSG000001 | 1.576526 | 9.401551 | -2.3466  | 0.011482 | 0.023827 | CCDC42B   | chr12 | + | 1.14E+08 | 1.14E+08 | 1514  |
| ENSG000001 | 0.342542 | 0        | 0.4146   | 0.81455  | NA       | CCDC73    | chr11 | - | 32623792 | 32816204 | 4381  |
| ENSG000001 | 3.298608 | 58.46934 | -3.9464  | 2.55E-07 | 9.60E-07 | MST1L     | chr1  | - | 17081405 | 17096732 | 4377  |
| ENSG000001 | 2474.104 | 4793.909 | -0.95346 | 2.49E-21 | 2.23E-20 | BCR       | chr22 | + | 23521891 | 23660224 | 7082  |
| ENSG000001 | 0        | 9.450963 | -4.8348  | 0.000168 | 0.000466 | MPPED1    | chr22 | + | 43807202 | 43902800 | 2729  |
| ENSG000001 | 0.342542 | 0.715414 | -0.51272 | 0.77372  | NA       | TP1P3     | chr6  | + | 1.16E+08 | 1.16E+08 | 740   |
| ENSG000001 | 18.79931 | 9.514072 | 0.9541   | 0.080931 | 0.13485  | FSCN2     | chr17 | + | 79495422 | 79504156 | 1665  |
| ENSG000001 | 0        | 46.22291 | -7.1065  | 2.11E-10 | 1.02E-09 | FOXI2     | chr10 | + | 1.3E+08  | 1.3E+08  | 3217  |
| ENSG000001 | 298.1133 | 303.6696 | -0.0268  | 0.90763  | 0.93642  | SPIN4     | chrX  | - | 62567107 | 62571223 | 4117  |
| ENSG000001 | 70.58275 | 324.8993 | -2.2005  | 1.16E-24 | 1.20E-23 | ZNF732    | chr4  | - | 264464   | 299110   | 2193  |
| ENSG000001 | 66.32783 | 63.2319  | 0.064413 | 0.83296  | 0.88233  | SPIN2B    | chrX  | - | 57144984 | 57147980 | 1258  |
| ENSG000001 | 0.290301 | 0.343138 | -0.00202 | 0.99909  | NA       | FOXE3     | chr1  | + | 47881744 | 47883723 | 1980  |
| ENSG000001 | 70.27322 | 22.8982  | 1.5991   | 4.62E-06 | 1.54E-05 | HYAL3     | chr3  | - | 50330262 | 50336899 | 1942  |
| ENSG000001 | 2.665765 | 210.5521 | -6.1455  | 6.89E-27 | 7.79E-26 | VSIG10L   | chr19 | - | 51834790 | 51845378 | 3397  |
| ENSG000001 | 275.8166 | 617.9706 | -1.1614  | 1.38E-09 | 6.27E-09 | ZNF397    | chr18 | + | 32820994 | 32847097 | 2637  |
| ENSG000001 | 255.5674 | 150.236  | 0.76061  | 0.004596 | 0.010293 | ZSCAN30   | chr18 | - | 32831032 | 32870196 | 4323  |
| ENSG000001 | 623.3296 | 587.8734 | 0.084436 | 0.51204  | 0.61518  | TPCN1     | chr12 | + | 1.14E+08 | 1.14E+08 | 5345  |
| ENSG000001 | 0.342542 | 1.234181 | -1.1862  | 0.48567  | NA       | LILRB4    | chr19 | + | 55155340 | 55181810 | 4002  |
| ENSG000001 | 0.685084 | 0        | 0.85004  | 0.63064  | NA       | C2orf27B  | chr2  | - | 1.33E+08 | 1.33E+08 | 1325  |
| ENSG000001 | 2.012384 | 2.010288 | -0.00137 | 0.99908  | 0.99973  | TNFRSF4   | chr1  | - | 1146706  | 1149518  | 1707  |
| ENSG000001 | 0        | 0.297015 | -0.41864 | 0.81278  | NA       | KRT17P2   | chr17 | + | 18330175 | 18335162 | 1314  |
| ENSG000001 | 677.4069 | 699.5582 | -0.04629 | 0.76481  | 0.8296   | HEXIM1    | chr17 | + | 43224684 | 43229468 | 4785  |
| ENSG000001 | 0.653381 | 126.8604 | -7.0263  | 9.63E-16 | 6.58E-15 | SELV      | chr19 | + | 40005753 | 40011326 | 1704  |
| ENSG000001 | 2.842212 | 8.886072 | -1.5087  | 0.094481 | 0.15398  | LINC00846 | chr21 | - | 33944548 | 33948191 | 1778  |
| ENSG000001 | 0        | 0.297015 | -0.41864 | 0.81278  | NA       | KRT14     | chr17 | - | 39738531 | 39743173 | 1662  |
| ENSG000001 | 29.1583  | 279.9567 | -3.2432  | 3.77E-38 | 6.31E-37 | TRABD2A   | chr2  | - | 85048774 | 85134132 | 3895  |
| ENSG000001 | 25.4376  | 47.11886 | -0.88252 | 0.034352 | 0.064066 | PDZD7     | chr10 | - | 1.03E+08 | 1.03E+08 | 4306  |
| ENSG000001 | 1958.077 | 696.4072 | 1.4889   | 5.44E-39 | 9.32E-38 | POFUT2    | chr21 | - | 46683843 | 46707813 | 4825  |
| ENSG000001 | 19.74976 | 3.154639 | 2.4922   | 0.000902 | 0.002254 | QRFPR     | chr4  | - | 1.22E+08 | 1.22E+08 | 1708  |
| ENSG000001 | 55.19721 | 108.2271 | -0.95997 | 0.003069 | 0.007063 | MAPT      | chr17 | + | 43971748 | 44105700 | 6816  |
| ENSG000001 | 207.6203 | 402.4447 | -0.95159 | 4.76E-07 | 1.75E-06 | ERCC6L    | chrX  | - | 71424510 | 71458897 | 4341  |
| ENSG000001 | 0        | 0.357707 | -0.41864 | 0.81278  | NA       | OR13F1    | chr9  | + | 1.07E+08 | 1.07E+08 | 1093  |
| ENSG000001 | 34.46513 | 20.72926 | 0.71555  | 0.084213 | 0.13966  | TMEM17    | chr2  | - | 62727356 | 62739029 | 2460  |
| ENSG000001 | 1.048164 | 6.968031 | -2.4777  | 0.023708 | 0.046006 | TNFRSF18  | chr1  | - | 1138888  | 1142071  | 1179  |
| ENSG000001 | 0.342542 | 1.248751 | -1.1955  | 0.48202  | NA       | FGF3      | chr11 | - | 69624992 | 69633792 | 892   |
| ENSG000001 | 22.99711 | 8.363273 | 1.4122   | 0.015894 | 0.032033 | C1QL4     | chr12 | - | 49726200 | 49730971 | 2065  |
| ENSG000001 | 105.9327 | 145.5811 | -0.45966 | 0.11497  | 0.18211  | RTN4RL2   | chr11 | + | 57228022 | 57245007 | 2203  |
| ENSG000001 | 733.3952 | 373.5068 | 0.97332  | 6.30E-10 | 2.95E-09 | ZDHHC17   | chr12 | + | 77157368 | 77247476 | 5259  |
| ENSG000001 | 0        | 5.113098 | -3.8411  | 0.007652 | 0.016431 | SERPINA11 | chr14 | - | 94908801 | 94919127 | 1476  |
| ENSG000001 | 4.169512 | 2.292733 | 0.79204  | 0.4313   | 0.53681  | P2RY4     | chrX  | - | 69478016 | 69479654 | 1639  |
| ENSG000001 | 223.9939 | 471.2808 | -1.0704  | 2.47E-09 | 1.10E-08 | ZNF395    | chr8  | - | 28203102 | 28260218 | 4808  |
| ENSG000001 | 3.661688 | 3.336716 | 0.12227  | 0.89842  | 0.92958  | ZACN      | chr17 | + | 74068042 | 74079747 | 2651  |
| ENSG000001 | 0        | 1.294874 | -1.8547  | 0.27869  | NA       | CHCHD2P9  | chr9  | + | 82006219 | 82006674 | 456   |
| ENSG000001 | 328.5179 | 143.5061 | 1.1831   | 0.00044  | 0.001152 | PPARA     | chr22 | + | 46546424 | 46639653 | 10048 |
| ENSG000001 | 2.604151 | 5.600312 | -1.0141  | 0.28648  | 0.38801  | TMEM232   | chr5  | - | 1.1E+08  | 1.1E+08  | 4217  |
| ENSG000001 | 0.705622 | 0.700845 | 0.003311 | 0.99841  | NA       | C14orf23  | chr14 | + | 29241910 | 29282493 | 1575  |
| ENSG000001 | 0        | 2.324288 | -2.6717  | 0.096097 | 0.15624  | KRTAP13-4 | chr21 | + | 31802572 | 31803216 | 645   |
| ENSG000001 | 0.72616  | 8.438535 | -3.1756  | 0.005917 | 0.012982 | FAM183A   | chr1  | + | 43610824 | 43622067 | 530   |
| ENSG000001 | 9.451407 | 5.568757 | 0.71652  | 0.31213  | 0.41418  | EFCAB6    | chr22 | - | 43924624 | 44208217 | 5120  |
| ENSG000001 | 27.12798 | 188.5905 | -2.7461  | 1.83E-08 | 7.60E-08 | KANK3     | chr19 | - | 8387468  | 8408146  | 2787  |
| ENSG000001 | 23.74543 | 137.9372 | -2.5153  | 1.76E-12 | 9.81E-12 | EMID1     | chr22 | + | 29601840 | 29655586 | 2173  |
| ENSG000001 | 0.342542 | 0.343138 | -0.00208 | 0.99906  | NA       | ACTL7A    | chr9  | + | 1.12E+08 | 1.12E+08 | 1433  |
| ENSG000001 | 8.941956 | 11.18693 | -0.30791 | 0.67581  | 0.75727  | PKD1L3    | chr16 | - | 71963441 | 72033877 | 5195  |
| ENSG000001 | 12.55401 | 13.74345 | -0.12242 | 0.85522  | 0.89816  | RHD       | chr1  | + | 25598884 | 25656936 | 2930  |
| ENSG000001 | 28.49734 | 0        | 6.448    | 1.46E-08 | 6.13E-08 | C17orf82  | chr17 | + | 59489112 | 59490641 | 1530  |
| ENSG000001 | 2.31385  | 446.0671 | -7.376   | 1.21E-36 | 1.94E-35 | ESPN      | chr1  | + | 6484848  | 6521430  | 3531  |
| ENSG000001 | 0        | 5.116387 | -3.5863  | 0.02273  | 0.044298 | PNLIPRP1  | chr10 | + | 1.18E+08 | 1.18E+08 | 3415  |
| ENSG000001 | 0.342542 | 1.638012 | -1.6301  | 0.29933  | 0.40091  | GPR141    | chr7  | + | 37723399 | 37873390 | 1270  |
| ENSG000001 | 10.17757 | 8.139104 | 0.29308  | 0.71757  | 0.79086  | TMPRSS6   | chr22 | - | 37461476 | 37505603 | 3260  |
| ENSG000001 | 0        | 0.297015 | -0.41864 | 0.81278  | NA       | CYP4A11   | chr1  | - | 47394849 | 47407156 | 2530  |
| ENSG000001 | 156.7555 | 201.1637 | -0.35769 | 0.073489 | 0.12431  | TMEM216   | chr11 | + | 61159159 | 61166335 | 1955  |
| ENSG000001 | 814.8855 | 896.0003 | -0.1369  | 0.37175  | 0.47613  | RPS19BP1  | chr22 | - | 39925098 | 39928860 | 2801  |
| ENSG000001 | 0.342542 | 0        | 0.4146   | 0.81455  | NA       | TMPRSS11  | chr4  | - | 68775103 | 68829858 | 3247  |
| ENSG000001 | 11.71139 | 0.997859 | 3.2372   | 0.001405 | 0.003408 | RP11-187C | chr9  | + | 45562979 | 45563576 | 598   |

|                    |          |          |          |          |           |       |   |          |          |       |
|--------------------|----------|----------|----------|----------|-----------|-------|---|----------|----------|-------|
| ENSG0000016495341  | 3.428963 | 0.8557   | 0.36812  | 0.47275  | AP003068  | chr11 | - | 64852451 | 64856847 | 4129  |
| ENSG000001178.6129 | 40.33687 | 2.1324   | 7.24E-19 | 5.77E-18 | C3orf70   | chr3  | - | 1.85E+08 | 1.85E+08 | 5901  |
| ENSG0000015401.41  | 1519.835 | 1.8283   | 1.87E-70 | 6.79E-69 | TEAD1     | chr11 | + | 12695969 | 12966298 | 9430  |
| ENSG000001402.3207 | 391.4078 | 0.038936 | 0.87025  | 0.90956  | PLCD1     | chr3  | - | 38048987 | 38071253 | 3271  |
| ENSG0000010.290301 | 3.884622 | -2.8234  | 0.042837 | 0.077782 | CCK       | chr3  | - | 42299317 | 42307699 | 1527  |
| ENSG000001446.3626 | 153.4238 | 1.5323   | 1.74E-09 | 7.85E-09 | ENTPD5    | chr14 | - | 74424713 | 74486102 | 5842  |
| ENSG00000133.68152 | 6.20891  | 2.3777   | 5.70E-06 | 1.88E-05 | MITF      | chr3  | + | 69788586 | 70017488 | 4814  |
| ENSG00000115.87218 | 37.49073 | -1.1917  | 0.10496  | 0.16814  | HEATR4    | chr14 | - | 73945189 | 74025651 | 3523  |
| ENSG0000016266.641 | 11176.74 | -0.83407 | 1.41E-17 | 1.06E-16 | NAP1L1    | chr12 | - | 76438670 | 76478813 | 5202  |
| ENSG0000012.738544 | 0        | 2.8799   | 0.068861 | 0.11741  | LILRA5    | chr19 | - | 54818353 | 54824409 | 1365  |
| ENSG000001191.7859 | 267.0675 | -0.47712 | 0.053916 | 0.094983 | CMC1      | chr3  | + | 28283075 | 28366633 | 6033  |
| ENSG0000010        | 6.269602 | -4.2487  | 0.001526 | 0.00368  | SLIT1     | chr10 | - | 98757795 | 98945677 | 7925  |
| ENSG00000190.56813 | 93.32869 | -0.04186 | 0.86743  | 0.90758  | LYPD6     | chr2  | + | 1.5E+08  | 1.5E+08  | 4071  |
| ENSG00000137.6397  | 26.26808 | 0.5142   | 0.19636  | 0.2844   | AKR1C1    | chr10 | + | 4934796  | 5025475  | 6705  |
| ENSG0000012.032108 | 91.08771 | -4.8057  | 1.84E-05 | 5.73E-05 | VSTM2B    | chr19 | + | 30017406 | 30055386 | 1488  |
| ENSG0000010        | 532.734  | -10.336  | 1.12E-21 | 1.02E-20 | FOXO3     | chr1  | + | 63788730 | 63790797 | 2068  |
| ENSG0000010.342542 | 4.761096 | -3.0496  | 0.026734 | 0.05125  | SPATA21   | chr1  | - | 16713612 | 16763919 | 3619  |
| ENSG000001792.6688 | 1188.338 | -0.5828  | 0.000352 | 0.000932 | MRPS21    | chr1  | + | 1.5E+08  | 1.5E+08  | 1463  |
| ENSG000001548.2412 | 1216.47  | -1.1485  | 1.11E-22 | 1.05E-21 | RNF220    | chr1  | + | 44870866 | 45117396 | 3835  |
| ENSG0000010.342542 | 0        | 0.4146   | 0.81455  | NA       | ANGPTL5   | chr11 | - | 1.02E+08 | 1.02E+08 | 2368  |
| ENSG000001545.0441 | 172.1845 | 1.6599   | 3.20E-21 | 2.85E-20 | KIAA1598  | chr10 | - | 1.19E+08 | 1.19E+08 | 3941  |
| ENSG0000011.95077  | 0        | 2.1837   | 0.20683  | 0.29652  | H1FNT     | chr12 | + | 48722763 | 48724062 | 1300  |
| ENSG0000010        | 3.169208 | -3.1358  | 0.041917 | 0.076354 | KRTAP12-1 | chr21 | - | 46101491 | 46102078 | 588   |
| ENSG0000010.632843 | 2.010288 | -1.3036  | 0.35892  | 0.46308  | CTD-2600C | chr16 | + | 57832098 | 57850850 | 1309  |
| ENSG0000010.685084 | 0.997859 | -0.39711 | 0.8057   | NA       | RP11-195F | chr9  | - | 34664160 | 34666109 | 1525  |
| ENSG00000149.05541 | 22.87396 | 1.077    | 0.02883  | 0.054795 | ZNF546    | chr19 | + | 40490041 | 40523514 | 4553  |
| ENSG000001767.5694 | 414.8681 | 0.88363  | 0.0003   | 0.000803 | TSPYL4    | chr6  | - | 1.17E+08 | 1.17E+08 | 4111  |
| ENSG0000017.075943 | 28.2395  | -1.9669  | 0.000207 | 0.000567 | MT1X      | chr16 | + | 56716336 | 56718108 | 1727  |
| ENSG000001210.2274 | 189.4778 | 0.14959  | 0.4635   | 0.56852  | GCNT1     | chr9  | + | 79034752 | 79122332 | 5972  |
| ENSG0000012.302685 | 1.995719 | 0.18507  | 0.87152  | 0.91019  | RP11-161L | chr8  | + | 18578415 | 18591915 | 2054  |
| ENSG0000011348.188 | 475.8963 | 1.5002   | 5.05E-24 | 5.07E-23 | SESTD1    | chr2  | - | 1.8E+08  | 1.8E+08  | 10615 |
| ENSG0000011256.883 | 881.5675 | 0.51066  | 0.000212 | 0.000579 | FNBP1     | chr9  | - | 1.33E+08 | 1.33E+08 | 5398  |
| ENSG000001689.5822 | 419.3337 | 0.71164  | 0.043559 | 0.078942 | DYNC2H1   | chr11 | + | 1.03E+08 | 1.03E+08 | 13678 |
| ENSG0000010.342542 | 0        | 0.4146   | 0.81455  | NA       | KRT12     | chr17 | - | 39017555 | 39023462 | 1867  |
| ENSG00000159.86843 | 27.94174 | 1.0786   | 0.001402 | 0.003401 | MAGED4B   | chrX  | - | 51804923 | 51812368 | 3230  |
| ENSG00000195.52647 | 1217.475 | -3.6643  | 7.28E-77 | 2.95E-75 | BCAM      | chr19 | + | 45312328 | 45324673 | 2686  |
| ENSG000001419.1867 | 496.7441 | -0.24388 | 0.063781 | 0.11005  | RSBN1L    | chr7  | + | 77325760 | 77409008 | 3091  |
| ENSG00000121.70053 | 739.1232 | -5.0334  | 2.75E-48 | 6.01E-47 | WDR86     | chr7  | - | 1.51E+08 | 1.51E+08 | 2023  |
| ENSG00000163.71773 | 277.6864 | -2.1111  | 5.35E-13 | 3.09E-12 | EPOR      | chr19 | - | 11488236 | 11495018 | 2133  |
| ENSG0000010        | 2.635871 | -2.911   | 0.060379 | 0.10495  | FAM9C     | chrX  | - | 13053737 | 13062801 | 5858  |
| ENSG0000010.705622 | 0        | 0.8807   | 0.6196   | NA       | CIDEA     | chr3  | - | 9908398  | 9921938  | 1277  |
| ENSG000001338.2291 | 6.269602 | 5.6881   | 1.24E-53 | 3.12E-52 | DCC       | chr18 | + | 49866542 | 51057784 | 5721  |
| ENSG000001277.7763 | 315.4383 | -0.18202 | 0.36236  | 0.46653  | TAF9B     | chrX  | - | 77385245 | 77395203 | 2713  |
| ENSG00000177.1305  | 45.74302 | 0.7418   | 0.015326 | 0.030999 | PCDHB13   | chr5  | + | 1.41E+08 | 1.41E+08 | 3485  |
| ENSG000001148.5503 | 459.3654 | -1.6222  | 4.16E-24 | 4.19E-23 | MAGI2     | chr7  | - | 77646393 | 79082890 | 6861  |
| ENSG00000154.6611  | 19.2936  | 1.4803   | 2.72E-05 | 8.30E-05 | LUZP2     | chr11 | + | 24518516 | 25104150 | 5016  |
| ENSG0000010.342542 | 2.696564 | -2.2809  | 0.11978  | 0.18856  | LHFPL3    | chr7  | + | 1.04E+08 | 1.05E+08 | 3174  |
| ENSG0000011597.062 | 1346.775 | 0.24543  | 0.027664 | 0.052847 | CHP1      | chr15 | + | 41523037 | 41574043 | 3284  |
| ENSG0000013.983692 | 116.5798 | -4.7577  | 5.36E-18 | 4.11E-17 | RDM1      | chr17 | - | 34245070 | 34257777 | 1535  |
| ENSG0000010        | 5.474094 | -3.6857  | 0.018341 | 0.036505 | FPR3      | chr19 | + | 52298416 | 52329442 | 2620  |
| ENSG0000010.36308  | 0.343138 | -0.0021  | 0.99905  | NA       | HIST1H1T  | chr6  | - | 26107640 | 26108364 | 725   |
| ENSG000001177.3783 | 10.5265  | 4.0338   | 7.97E-34 | 1.17E-32 | C11orf96  | chr11 | + | 43946892 | 43965888 | 1834  |
| ENSG0000011.068702 | 153.6814 | -6.8037  | 1.72E-16 | 1.22E-15 | KCNJ11    | chr11 | - | 17407406 | 17410878 | 2801  |
| ENSG0000011.649304 | 8.156089 | -2.1314  | 0.024984 | 0.048243 | CDHR4     | chr3  | - | 49828165 | 49837268 | 2476  |
| ENSG00000173252.88 | 3674.686 | 4.3136   | 0        | 0        | COL4A1    | chr13 | - | 1.11E+08 | 1.11E+08 | 6524  |
| ENSG0000010        | 0.343138 | -0.41864 | 0.81278  | NA       | PLEKHG7   | chr12 | + | 93115281 | 93166231 | 3584  |
| ENSG0000010.580602 | 22.11638 | -4.6304  | 2.65E-06 | 9.07E-06 | GJA4      | chr1  | + | 35258599 | 35261348 | 1622  |
| ENSG00000119823.23 | 43872.97 | -1.1451  | 9.27E-26 | 9.98E-25 | PTMA      | chr2  | + | 2.33E+08 | 2.33E+08 | 1635  |
| ENSG0000010.342542 | 0        | 0.4146   | 0.81455  | NA       | CXorf27   | chrX  | + | 37850070 | 37850569 | 500   |
| ENSG000001302.9174 | 555.4754 | -0.87171 | 8.22E-06 | 2.67E-05 | HSPA14    | chr10 | + | 14880163 | 14913740 | 1904  |
| ENSG000001296.4171 | 375.9827 | -0.34165 | 0.025116 | 0.048442 | SIRT7     | chr17 | - | 79869815 | 79879199 | 3445  |
| ENSG0000010        | 0.297015 | -0.41864 | 0.81278  | NA       | C4orf40   | chr4  | + | 70999333 | 71042516 | 4784  |
| ENSG00000128.60101 | 42.8004  | -0.57347 | 0.11952  | 0.18822  | CTC-471F3 | chr19 | - | 40448563 | 40449634 | 976   |
| ENSG000001791.536  | 760.5884 | 0.05696  | 0.81796  | 0.87219  | IFT140    | chr16 | - | 1560428  | 1662111  | 5270  |
| ENSG0000010.632843 | 0.700845 | -0.06767 | 0.96753  | NA       | TPM3P7    | chr2  | - | 26032794 | 26033525 | 732   |

|                    |          |          |           |           |           |       |   |          |          |       |
|--------------------|----------|----------|-----------|-----------|-----------|-------|---|----------|----------|-------|
| ENSG000001364.6973 | 19.0783  | 4.2472   | 1.28E-60  | 3.75E-59  | AGMO      | chr7  | - | 15239943 | 15601640 | 2475  |
| ENSG000001576526   | 67.42502 | -5.0944  | 5.97E-11  | 3.01E-10  | SBK2      | chr19 | - | 56041100 | 56048456 | 1085  |
| ENSG0000010.290301 | 4.731958 | -2.9151  | 0.052535  | 0.092845  | CYP26C1   | chr10 | + | 94821021 | 94828454 | 1569  |
| ENSG0000010.38392  | 57.07155 | -2.4051  | 1.68E-05  | 5.24E-05  | TLR5      | chr1  | - | 2.23E+08 | 2.23E+08 | 4088  |
| ENSG0000012182.207 | 4431.091 | -1.0212  | 4.96E-27  | 5.63E-26  | USP7      | chr16 | - | 8985951  | 9058371  | 5412  |
| ENSG00000128.27028 | 4.600036 | 2.5333   | 2.10E-05  | 6.50E-05  | NANOS3    | chr19 | + | 13972877 | 13991571 | 776   |
| ENSG00000113.79818 | 28.82137 | -1.0544  | 0.027468  | 0.052529  | NHLRC1    | chr6  | - | 18120718 | 18122851 | 2134  |
| ENSG0000010        | 15.72943 | -5.6039  | 2.72E-06  | 9.31E-06  | DPPA3     | chr12 | + | 7864050  | 7870155  | 1079  |
| ENSG00000115.147   | 40.7205  | -1.4026  | 0.002096  | 0.004945  | PLEKHN1   | chr1  | + | 901877   | 911245   | 2455  |
| ENSG0000010        | 0.951736 | -1.2555  | 0.48145   | NA        | TERF1P2   | chr18 | - | 14377545 | 14378756 | 1212  |
| ENSG0000010.923144 | 111.7086 | -6.4727  | 1.04E-17  | 7.87E-17  | ZNF385C   | chr17 | - | 40177594 | 40217383 | 2085  |
| ENSG000001371.5454 | 198.0936 | 0.90351  | 2.23E-08  | 9.19E-08  | MAGEH1    | chrX  | + | 55478538 | 55479998 | 1461  |
| ENSG0000011223.333 | 898.6286 | 0.44383  | 0.017556  | 0.03509   | TET3      | chr2  | + | 74229840 | 74335303 | 10983 |
| ENSG000001286.085  | 467.9277 | -0.70689 | 0.000469  | 0.001223  | ZNF286A   | chr17 | + | 15602891 | 15640874 | 5616  |
| ENSG000001448.4723 | 290.2836 | 0.62497  | 4.50E-05  | 0.000134  | ISG15     | chr1  | + | 948803   | 949920   | 711   |
| ENSG000001323.7815 | 225.2419 | 0.51784  | 0.11726   | 0.18514   | EXD3      | chr9  | - | 1.4E+08  | 1.4E+08  | 2932  |
| ENSG00000119.98105 | 0        | 5.9399   | 4.10E-07  | 1.52E-06  | TMEM8C    | chr9  | - | 1.36E+08 | 1.36E+08 | 818   |
| ENSG0000010        | 1.355566 | -1.9006  | 0.26573   | NA        | TCL6      | chr14 | + | 96116835 | 96146170 | 4232  |
| ENSG00000138.07035 | 26.18879 | 0.53345  | 0.14297   | 0.21775   | C17orf97  | chr17 | + | 260118   | 273510   | 1839  |
| ENSG00000199.66346 | 146.4044 | -0.55136 | 0.01177   | 0.024362  | ZKSCAN4   | chr6  | - | 28212401 | 28227011 | 2375  |
| ENSG0000011.286224 | 1.340997 | -0.03274 | 0.98046   | 0.98924   | RGPD1     | chr2  | + | 87135076 | 87241104 | 6697  |
| ENSG000001135.8077 | 86.93845 | 0.64395  | 0.004622  | 0.010347  | DHRS4L2   | chr14 | + | 24439148 | 24475617 | 1370  |
| ENSG000001518.3466 | 47.23454 | 3.4386   | 1.38E-55  | 3.61E-54  | SAMD11    | chr1  | + | 860260   | 879955   | 2551  |
| ENSG0000012.448243 | 6.177355 | -1.2619  | 0.19991   | 0.28852   | C1orf170  | chr1  | - | 910579   | 917497   | 3064  |
| ENSG00000196.10544 | 28.65474 | 1.7242   | 6.60E-09  | 2.84E-08  | VMAC      | chr19 | + | 5904869  | 5910864  | 2254  |
| ENSG00000190.57155 | 140.5681 | -0.63478 | 0.006572  | 0.014293  | TMSB4XP8  | chr4  | - | 91759652 | 91760263 | 565   |
| ENSG0000010.290301 | 0        | 0.4146   | 0.81455   | NA        | C5orf52   | chr5  | + | 1.57E+08 | 1.57E+08 | 686   |
| ENSG00000132.18975 | 1.545765 | 4.0934   | 6.23E-08  | 2.47E-07  | WHAMMP3   | chr15 | - | 23187728 | 23208737 | 3649  |
| ENSG00000121.04715 | 131.2893 | -2.6089  | 1.67E-18  | 1.31E-17  | ERC2      | chr3  | - | 55542336 | 56502391 | 6138  |
| ENSG000001266.1805 | 89.45857 | 1.568    | 3.62E-16  | 2.52E-15  | B3GALT1   | chr13 | + | 31774073 | 31906413 | 4254  |
| ENSG0000016443.182 | 3996.598 | 0.68868  | 4.37E-12  | 2.37E-11  | SPRY4     | chr5  | - | 1.42E+08 | 1.42E+08 | 4938  |
| ENSG0000010.290301 | 0.715414 | -0.50514 | 0.77701   | NA        | ERAS      | chrX  | + | 48687283 | 48688548 | 1266  |
| ENSG0000013.443352 | 1.652581 | 0.95854  | 0.39362   | 0.49805   | RP11-687A | chr11 | + | 1.25E+08 | 1.25E+08 | 3338  |
| ENSG000001146.4975 | 13.66986 | 3.3533   | 2.76E-17  | 2.05E-16  | TRPV2     | chr17 | + | 16318856 | 16340317 | 2808  |
| ENSG0000010.342542 | 0        | 0.4146   | 0.81455   | NA        | ATMTN     | chr4  | + | 71384257 | 71398459 | 1037  |
| ENSG0000010        | 5.941033 | -4.1676  | 0.002037  | 0.004815  | CXorf67   | chrX  | + | 51149767 | 51151687 | 1921  |
| ENSG0000011.742621 | 7.097537 | -1.8506  | 0.088239  | 0.14534   | RP11-723C | chr3  | - | 1.29E+08 | 1.29E+08 | 2291  |
| ENSG00000128.77387 | 22.12612 | 0.37951  | 0.3728    | 0.47717   | C2orf88   | chr2  | + | 1.91E+08 | 1.91E+08 | 4035  |
| ENSG000001750.3423 | 1003.383 | -0.41918 | 0.000294  | 0.000789  | TMEM203   | chr9  | - | 1.4E+08  | 1.4E+08  | 1557  |
| ENSG00000136.06815 | 1.058552 | 4.8513   | 5.10E-09  | 2.21E-08  | SLC18A3   | chr10 | + | 50818347 | 50820765 | 2419  |
| ENSG0000010.685084 | 0.343138 | 0.48017  | 0.78775   | NA        | KBTBD12   | chr3  | + | 1.28E+08 | 1.28E+08 | 5727  |
| ENSG000001380.4654 | 264.4517 | 0.52284  | 0.002849  | 0.00659   | THSD4     | chr15 | + | 71389291 | 72075722 | 9200  |
| ENSG0000012.032108 | 4.273883 | -0.87419 | 0.48929   | 0.5933    | DNAJB13   | chr11 | + | 73661364 | 73681411 | 1875  |
| ENSG0000010        | 27.40115 | -6.358   | 4.85E-08  | 1.94E-07  | GABRD     | chr1  | + | 1950780  | 1962192  | 1913  |
| ENSG0000011474.04  | 2986.693 | -1.0178  | 1.26E-22  | 1.19E-21  | TCEA1     | chr8  | - | 54879112 | 54935089 | 2966  |
| ENSG0000011.390706 | 1.294874 | 0.055822 | 0.96861   | 0.98241   | NHEJ1     | chr2  | - | 2.2E+08  | 2.2E+08  | 2113  |
| ENSG000001652.3381 | 680.2891 | -0.06084 | 0.61411   | 0.70605   | FANCA     | chr16 | - | 89803957 | 89883065 | 5451  |
| ENSG000001746.6141 | 1590.517 | -1.0902  | 9.69E-21  | 8.45E-20  | SECISBP2  | chr9  | + | 91933421 | 91974557 | 5405  |
| ENSG0000010        | 0.594029 | -0.81444 | 0.64499   | NA        | OR52B6    | chr11 | + | 5602107  | 5603114  | 1008  |
| ENSG0000011.233984 | 0.594029 | 0.68982  | 0.67984   | NA        | C9orf153  | chr9  | - | 88835180 | 88874572 | 1845  |
| ENSG0000010.943682 | 0        | 1.2438   | 0.48556   | NA        | ADH1A     | chr4  | - | 1E+08    | 1E+08    | 1499  |
| ENSG0000011.359003 | 0.357707 | 1.3815   | 0.39154   | NA        | RP11-527B | chr6  | + | 34991299 | 34991608 | 310   |
| ENSG0000010        | 0.297015 | -0.41864 | 0.81278   | NA        | OR2B7P    | chr6  | + | 28014212 | 28015145 | 934   |
| ENSG000001313.77   | 1291.732 | -2.037   | 2.98E-50  | 6.88E-49  | SEMA4D    | chr9  | - | 91975702 | 92113045 | 5684  |
| ENSG00000188.79144 | 2083.398 | -4.5402  | 1.70E-139 | 1.65E-137 | LIN28B    | chr6  | + | 1.05E+08 | 1.06E+08 | 5505  |
| ENSG0000010.870904 | 3.916176 | -1.7519  | 0.17862   | 0.26257   | FAM69C    | chr18 | - | 72102963 | 72125179 | 2013  |
| ENSG00000157.67283 | 52.72066 | 0.12774  | 0.68805   | 0.76743   | DNAH17    | chr17 | - | 76419778 | 76573476 | 13792 |
| ENSG0000011189.251 | 1641.27  | -0.4637  | 0.000613  | 0.00157   | MCRS1     | chr12 | - | 49950327 | 49961936 | 2450  |
| ENSG0000010.632843 | 0.715414 | -0.08242 | 0.96193   | NA        | TMEM72    | chr10 | + | 45406648 | 45432450 | 3009  |
| ENSG00000113.50625 | 0.640152 | 3.9193   | 0.000175  | 0.000483  | SCXB      | chr8  | + | 1.45E+08 | 1.45E+08 | 606   |
| ENSG000001163.8514 | 145.1006 | 0.17681  | 0.43104   | 0.53657   | FANCM     | chr14 | + | 45605143 | 45670093 | 7111  |
| ENSG000001315.7908 | 75.16883 | 2.0651   | 1.40E-25  | 1.50E-24  | ZNF70     | chr22 | - | 24083769 | 24093279 | 4020  |
| ENSG000001196.9037 | 106.0005 | 0.89225  | 5.31E-05  | 0.000156  | CARD9     | chr9  | - | 1.39E+08 | 1.39E+08 | 4574  |
| ENSG000001277.6238 | 25.22336 | 3.4224   | 4.57E-32  | 6.31E-31  | PEAR1     | chr1  | + | 1.57E+08 | 1.57E+08 | 4970  |
| ENSG000001123.8525 | 102.9601 | 0.26416  | 0.19547   | 0.2834    | ZFP69B    | chr1  | + | 40915774 | 40929390 | 2382  |

|            |          |          |          |          |          |           |       |   |          |          |      |
|------------|----------|----------|----------|----------|----------|-----------|-------|---|----------|----------|------|
| ENSG000001 | 2.302685 | 145.546  | -5.8147  | 5.64E-24 | 5.65E-23 | SOWAHD    | chrX  | + | 1.19E+08 | 1.19E+08 | 1589 |
| ENSG000001 | 0        | 0.357707 | -0.41864 | 0.81278  | NA       | AP000867  | chr11 | - | 71292956 | 71318487 | 3516 |
| ENSG000001 | 0        | 2.08555  | -2.222   | 0.20032  | 0.289    | RP11-24M: | chr15 | + | 76067894 | 76079239 | 2071 |
| ENSG000001 | 144.5605 | 74.51747 | 0.95075  | 5.06E-05 | 0.000149 | ZFP69     | chr1  | + | 40942887 | 40962015 | 2871 |
| ENSG000001 | 0        | 4.982849 | -3.546   | 0.024886 | 0.048065 | HELT      | chr4  | + | 1.86E+08 | 1.86E+08 | 1099 |
| ENSG000001 | 0        | 5.04999  | -3.9028  | 0.00513  | 0.01141  | ZCCHC16   | chrX  | + | 1.12E+08 | 1.12E+08 | 2747 |
| ENSG000001 | 30.82138 | 41.00932 | -0.40799 | 0.25749  | 0.35511  | TMEM220   | chr17 | - | 10602332 | 10633633 | 3106 |
| ENSG000001 | 0.342542 | 7.902782 | -3.6673  | 0.00654  | 0.014237 | C2orf78   | chr2  | + | 74011316 | 74044274 | 3045 |
| ENSG000001 | 238.7346 | 436.0202 | -0.86879 | 3.46E-09 | 1.52E-08 | HIST1H1C  | chr6  | - | 26055968 | 26056699 | 732  |
| ENSG000001 | 0        | 0.357707 | -0.41864 | 0.81278  | NA       | PLSCR3    | chr17 | - | 7293046  | 7307416  | 2557 |
| ENSG000001 | 1730.736 | 2095.287 | -0.27531 | 0.021318 | 0.041809 | EIF4EBP1  | chr8  | + | 37887859 | 37917883 | 1020 |
| ENSG000001 | 1.774324 | 23.6929  | -3.6003  | 7.20E-06 | 2.35E-05 | P2RX2     | chr12 | + | 1.33E+08 | 1.33E+08 | 1867 |
| ENSG000001 | 50.72607 | 106.7945 | -1.0689  | 4.65E-05 | 0.000138 | CCDC157   | chr22 | + | 30752624 | 30774647 | 4789 |
| ENSG000001 | 3.879211 | 0.343138 | 2.7794   | 0.047285 | 0.084757 | TTC24     | chr1  | + | 1.57E+08 | 1.57E+08 | 2005 |
| ENSG000001 | 235.2299 | 286.0667 | -0.27946 | 0.13904  | 0.2127   | FAM122A   | chr9  | + | 71394964 | 71398609 | 3646 |
| ENSG000001 | 623.8903 | 1054.602 | -0.75695 | 5.62E-07 | 2.05E-06 | PALM3     | chr19 | - | 14164177 | 14169971 | 2262 |
| ENSG000001 | 0.290301 | 0        | 0.4146   | 0.81455  | NA       | C1orf168  | chr1  | - | 57184477 | 57285369 | 3135 |
| ENSG000001 | 0.290301 | 0        | 0.4146   | 0.81455  | NA       | CXXC1P1   | chrX  | + | 47566590 | 47612855 | 1897 |
| ENSG000001 | 6.378881 | 25.71373 | -1.9394  | 0.000495 | 0.001287 | SHISA7    | chr19 | - | 55940107 | 55954230 | 6033 |
| ENSG000001 | 1.794862 | 2.087966 | -0.18389 | 0.8985   | 0.9296   | AC097382  | chr4  | + | 6997068  | 7000685  | 591  |
| ENSG000001 | 3.745632 | 2.324288 | 0.61032  | 0.56466  | 0.66259  | DMBT1     | chr10 | + | 1.24E+08 | 1.24E+08 | 7686 |
| ENSG000001 | 0.632843 | 1.966581 | -1.2259  | 0.41897  | 0.52432  | CLEC17A   | chr19 | + | 14693896 | 14721969 | 2065 |
| ENSG000001 | 0        | 0.715414 | -0.84936 | 0.6309   | NA       | LCN10     | chr9  | - | 1.4E+08  | 1.4E+08  | 3262 |
| ENSG000001 | 4.346772 | 4.066699 | 0.094228 | 0.91628  | 0.94331  | LDLRAD2   | chr1  | + | 22138758 | 22151714 | 4012 |
| ENSG000001 | 6.463638 | 0        | 4.2525   | 0.001691 | 0.004049 | C2orf66   | chr2  | - | 1.98E+08 | 1.98E+08 | 1669 |
| ENSG000001 | 0.342542 | 1.387121 | -1.2841  | 0.44822  | NA       | OVCH1     | chr12 | - | 29565407 | 29650619 | 3405 |
| ENSG000001 | 186.9586 | 143.2597 | 0.38252  | 0.040435 | 0.074054 | ARHGAP11  | chr15 | + | 30916697 | 31060329 | 2043 |
| ENSG000001 | 1.411244 | 5.271743 | -1.7451  | 0.10942  | 0.1742   | HS6ST1P1  | chr1  | + | 21754796 | 21756030 | 1234 |
| ENSG000001 | 125.0676 | 147.5264 | -0.24011 | 0.21115  | 0.30143  | PMS2CL    | chr7  | + | 6749759  | 6793493  | 3327 |
| ENSG000001 | 1144.223 | 1063.222 | 0.1057   | 0.42191  | 0.52745  | CYHR1     | chr8  | - | 1.46E+08 | 1.46E+08 | 6158 |
| ENSG000001 | 1068.161 | 383.8206 | 1.4767   | 1.21E-29 | 1.52E-28 | COL14A1   | chr8  | + | 1.21E+08 | 1.21E+08 | 6466 |
| ENSG000001 | 52.84554 | 24.15098 | 1.1159   | 0.001591 | 0.003822 | DNER      | chr2  | - | 2.3E+08  | 2.31E+08 | 3260 |
| ENSG000001 | 0.290301 | 0.891044 | -0.7342  | 0.68015  | NA       | CPSF4L    | chr17 | - | 71244588 | 71258491 | 1275 |
| ENSG000001 | 358.3975 | 515.6012 | -0.52262 | 0.015929 | 0.032096 | KLHL17    | chr1  | + | 895967   | 901095   | 2560 |
| ENSG000001 | 0.342542 | 1.043983 | -0.98163 | 0.56849  | NA       | AC008079  | chr22 | - | 18660805 | 18688682 | 1859 |
| ENSG000001 | 0        | 1.727843 | -1.9772  | 0.25933  | NA       | PLA2G2C   | chr1  | - | 20487746 | 20503917 | 3249 |
| ENSG000001 | 6.649458 | 74.20031 | -3.4223  | 3.80E-12 | 2.07E-11 | ANKRD19P  | chr9  | + | 95571670 | 95650975 | 2370 |
| ENSG000001 | 38.33057 | 44.24821 | -0.21092 | 0.51714  | 0.6199   | ZSCAN23   | chr6  | - | 28399707 | 28411279 | 3126 |
| ENSG000001 | 6.515065 | 9.265597 | -0.48124 | 0.50499  | 0.60835  | HIST1H2BC | chr6  | - | 26216428 | 26216872 | 445  |
| ENSG000001 | 25.81862 | 193.8206 | -2.8816  | 3.31E-19 | 2.68E-18 | RINL      | chr19 | - | 39358470 | 39368919 | 3021 |
| ENSG000001 | 0.36308  | 0        | 0.4146   | 0.81455  | NA       | C17orf99  | chr17 | + | 76142434 | 76162258 | 2404 |
| ENSG000001 | 0        | 3.526915 | -3.3414  | 0.025042 | 0.048329 | AC093393  | chr2  | + | 33861569 | 33862492 | 924  |
| ENSG000001 | 0.705622 | 0.654722 | 0.048733 | 0.97658  | NA       | OR7D2     | chr19 | + | 9296279  | 9299493  | 3215 |
| ENSG000001 | 3.858673 | 8.978319 | -1.1395  | 0.14905  | 0.22582  | TPRG1     | chr3  | + | 1.89E+08 | 1.89E+08 | 5479 |
| ENSG000001 | 0.705622 | 32.22852 | -5.1466  | 2.67E-08 | 1.09E-07 | RP11-43F1 | chr5  | - | 1599035  | 1634120  | 2338 |
| ENSG000001 | 10.18694 | 0        | 4.906    | 0.000143 | 0.0004   | C1orf204  | chr1  | - | 1.6E+08  | 1.6E+08  | 2501 |
| ENSG000001 | 120.8125 | 48.54707 | 1.3099   | 3.76E-06 | 1.26E-05 | MORN2     | chr2  | + | 39103103 | 39156213 | 919  |
| ENSG000001 | 0        | 1.248751 | -1.5848  | 0.37202  | NA       | CXXC11    | chr2  | + | 2.43E+08 | 2.43E+08 | 2602 |
| ENSG000001 | 0        | 10.22949 | -4.9869  | 6.47E-05 | 0.000189 | MEIS3P2   | chr17 | + | 20492371 | 20494013 | 1643 |
| ENSG000001 | 43.56976 | 0.686276 | 5.5681   | 7.24E-10 | 3.38E-09 | S100A3    | chr1  | - | 1.54E+08 | 1.54E+08 | 856  |
| ENSG000001 | 1546.733 | 806.888  | 0.93748  | 4.32E-16 | 3.00E-15 | UBQLN2    | chrX  | + | 56590026 | 56593443 | 3418 |
| ENSG000001 | 343.2537 | 166.7224 | 1.03     | 0.004395 | 0.009869 | RILPL1    | chr12 | - | 1.24E+08 | 1.24E+08 | 2608 |
| ENSG000001 | 0        | 0.700845 | -0.87835 | 0.62047  | NA       | CTSL3P    | chr9  | + | 90387368 | 90401799 | 788  |
| ENSG000001 | 2.044087 | 2.041842 | -0.0009  | 0.9994   | 0.99973  | C19orf67  | chr19 | - | 14192431 | 14196687 | 1427 |
| ENSG000001 | 19.69075 | 27.18014 | -0.45057 | 0.33826  | 0.44204  | ZNF490    | chr19 | - | 12688775 | 12750912 | 4237 |
| ENSG000001 | 4.75272  | 16.01758 | -1.697   | 0.018797 | 0.03733  | CLCN1     | chr7  | + | 1.43E+08 | 1.43E+08 | 3172 |
| ENSG000001 | 0.36308  | 0.640152 | -0.51156 | 0.77091  | NA       | NWD1      | chr19 | + | 16830787 | 16928774 | 8393 |
| ENSG000001 | 4586.094 | 598.8863 | 2.9261   | 9.93E-43 | 1.87E-41 | ARL4C     | chr2  | - | 2.35E+08 | 2.35E+08 | 4013 |
| ENSG000001 | 0        | 0.640152 | -0.82869 | 0.63935  | NA       | RNF133    | chr7  | - | 1.22E+08 | 1.22E+08 | 1445 |
| ENSG000001 | 3.745632 | 31.67907 | -2.9949  | 6.11E-06 | 2.02E-05 | TMEM221   | chr19 | - | 17546318 | 17559376 | 1930 |
| ENSG000001 | 1.233984 | 0        | 1.5686   | 0.37707  | NA       | TREML4    | chr6  | + | 41196062 | 41206620 | 2304 |
| ENSG000001 | 122.4335 | 96.59102 | 0.33769  | 0.15095  | 0.22838  | RAB42     | chr1  | + | 28918712 | 28921955 | 1950 |
| ENSG000001 | 898.5714 | 4.989297 | 7.4094   | 5.77E-82 | 2.50E-80 | WNT7B     | chr22 | - | 46316242 | 46373009 | 3919 |
| ENSG000001 | 1253.374 | 1511.505 | -0.26946 | 0.10464  | 0.1677   | C11orf95  | chr11 | - | 63527364 | 63536113 | 5582 |
| ENSG000001 | 0        | 0.594029 | -0.81444 | 0.64499  | NA       | SCGB1C1   | chr11 | + | 193080   | 194573   | 431  |

|            |          |          |          |           |           |           |       |   |          |          |       |
|------------|----------|----------|----------|-----------|-----------|-----------|-------|---|----------|----------|-------|
| ENSG000001 | 0        | 7.409121 | -4.401   | 0.00134   | 0.003259  | PRSS45    | chr3  | - | 46783582 | 46854048 | 3128  |
| ENSG000001 | 0        | 0.640152 | -0.82869 | 0.63935   | NA        | PLA2G4E   | chr15 | - | 42273780 | 42343388 | 5266  |
| ENSG000001 | 22.79417 | 27.69971 | -0.27888 | 0.53051   | 0.63191   | GPR89B    | chr1  | + | 1.47E+08 | 1.47E+08 | 2701  |
| ENSG000001 | 11.21375 | 17.13441 | -0.59794 | 0.29116   | 0.39294   | MESP2     | chr15 | + | 90303822 | 90321982 | 1552  |
| ENSG000001 | 0        | 0.297015 | -0.41864 | 0.81278   | NA        | FAM25A    | chr10 | + | 88780063 | 88784487 | 345   |
| ENSG000001 | 0        | 0.343138 | -0.41864 | 0.81278   | NA        | ALOX15P2  | chr9  | + | 95675438 | 95683842 | 1897  |
| ENSG000001 | 17.61578 | 15.7432  | 0.1604   | 0.82631   | 0.87768   | EYS       | chr6  | - | 64429876 | 66417118 | 10589 |
| ENSG000001 | 6.225578 | 1681.015 | -8.0492  | 3.78E-105 | 2.35E-103 | C6orf132  | chr6  | - | 42068856 | 42110357 | 6210  |
| ENSG000001 | 0.342542 | 0        | 0.4146   | 0.81455   | NA        | DAZ1      | chrY  | - | 25275502 | 25345241 | 4421  |
| ENSG000001 | 0.342542 | 0.640152 | -0.50911 | 0.77219   | NA        | OR2AG2    | chr11 | - | 6789218  | 6790286  | 1069  |
| ENSG000001 | 852.8384 | 451.8576 | 0.91496  | 4.46E-12  | 2.42E-11  | MAPK12    | chr22 | - | 50683879 | 50700254 | 6248  |
| ENSG000001 | 0.870904 | 4.349145 | -1.8951  | 0.13252   | 0.20497   | TMEM215   | chr9  | + | 32783497 | 32787397 | 3581  |
| ENSG000001 | 48.61262 | 55.78956 | -0.20515 | 0.49392   | 0.59782   | NUTMG     | chr9  | + | 99690592 | 99702535 | 2851  |
| ENSG000001 | 485.1363 | 521.456  | -0.10367 | 0.39999   | 0.50463   | COL4A5    | chrX  | + | 1.08E+08 | 1.08E+08 | 6483  |
| ENSG000001 | 0        | 1.888903 | -2.3653  | 0.15293   | NA        | KRTAP10-6 | chr21 | - | 46011149 | 46012386 | 1238  |
| ENSG000001 | 23380.5  | 7587.622 | 1.6214   | 6.94E-37  | 1.12E-35  | AGRN      | chr1  | + | 955503   | 991496   | 7323  |
| ENSG000001 | 133.5309 | 143.2858 | -0.10666 | 0.67747   | 0.75844   | NHS       | chrX  | + | 17393543 | 17754114 | 8761  |
| ENSG000001 | 0        | 29.58707 | -6.4612  | 2.69E-08  | 1.10E-07  | OTOG      | chr11 | + | 17568920 | 17668697 | 9953  |
| ENSG000001 | 1.286224 | 0        | 1.8436   | 0.2818    | NA        | FAM166A   | chr9  | - | 1.4E+08  | 1.4E+08  | 1720  |
| ENSG000001 | 65.29686 | 61.60907 | 0.083436 | 0.77837   | 0.8408    | TMPPE     | chr3  | - | 33131913 | 33138293 | 3962  |
| ENSG000001 | 36.62821 | 185.7872 | -2.327   | 3.86E-20  | 3.27E-19  | ZNF626    | chr19 | - | 20802867 | 20844402 | 5963  |
| ENSG000001 | 0.580602 | 73.60474 | -6.2407  | 4.23E-11  | 2.15E-10  | SMTNL2    | chr17 | + | 4487294  | 4511614  | 2280  |
| ENSG000001 | 176.2499 | 247.7612 | -0.48438 | 0.267     | 0.36564   | ZC3H6     | chr2  | + | 1.13E+08 | 1.13E+08 | 11540 |
| ENSG000001 | 77.945   | 144.1476 | -0.88939 | 0.000292  | 0.000783  | LINC00265 | chr7  | + | 39773231 | 39832691 | 3049  |
| ENSG000001 | 690.4924 | 1161.932 | -0.74971 | 3.16E-10  | 1.51E-09  | LAMTOR4   | chr7  | + | 99746530 | 99753567 | 730   |
| ENSG000001 | 196.3269 | 858.8692 | -2.12    | 2.54E-25  | 2.69E-24  | PRKAR1B   | chr7  | - | 588834   | 767287   | 2553  |
| ENSG000001 | 20.15392 | 6.05597  | 1.6581   | 0.009683  | 0.020407  | NUTM2B    | chr10 | + | 81462983 | 81474437 | 3970  |
| ENSG000001 | 57.55441 | 111.9142 | -0.95893 | 0.001574  | 0.003784  | HNRNPU-A' | chr1  | - | 2.45E+08 | 2.45E+08 | 5007  |
| ENSG000001 | 598.7688 | 33.3826  | 4.1516   | 1.98E-92  | 1.02E-90  | NCR3LG1   | chr11 | + | 17373273 | 17398888 | 6438  |
| ENSG000001 | 169.2984 | 119.5142 | 0.49723  | 0.013368  | 0.027388  | DCUN1D3   | chr16 | - | 20869396 | 20911706 | 3013  |
| ENSG000001 | 47.79412 | 226.8474 | -2.2366  | 6.15E-21  | 5.40E-20  | ZNF793    | chr19 | + | 37997841 | 38039664 | 6712  |
| ENSG000001 | 6936.354 | 5964.952 | 0.21751  | 0.075521  | 0.12719   | TUBB4B    | chr9  | + | 1.4E+08  | 1.4E+08  | 2035  |
| ENSG000001 | 52.09803 | 46.04232 | 0.18015  | 0.5516    | 0.65123   | AGAP4     | chr10 | - | 46321042 | 46349323 | 2439  |
| ENSG000001 | 100.2063 | 125.1317 | -0.31836 | 0.25385   | 0.35088   | CTD-2228K | chr5  | - | 466239   | 473213   | 1876  |
| ENSG000001 | 449.3048 | 407.2776 | 0.14229  | 0.32624   | 0.42914   | COMMD6    | chr13 | - | 76099350 | 76123575 | 1793  |
| ENSG000001 | 0        | 42.40556 | -6.9355  | 1.79E-09  | 8.09E-09  | PLA2G2A   | chr1  | - | 20301925 | 20306932 | 1306  |
| ENSG000001 | 0.580602 | 5.877925 | -2.6936  | 0.039736  | 0.072947  | IL17REL   | chr22 | - | 50432942 | 50451088 | 3668  |
| ENSG000001 | 6.608382 | 13.37929 | -0.98333 | 0.15517   | 0.23368   | AGPHD1    | chr15 | + | 78799906 | 78829714 | 2180  |
| ENSG000001 | 58.8743  | 23.66377 | 1.3061   | 0.000147  | 0.00041   | C15orf62  | chr15 | + | 41062159 | 41064643 | 2485  |
| ENSG000001 | 0.342542 | 0        | 0.4146   | 0.81455   | NA        | FAM25C    | chr10 | - | 49199649 | 49207818 | 301   |
| ENSG000001 | 1.016461 | 4.460793 | -1.586   | 0.30673   | 0.40826   | FAM230A   | chr22 | + | 20692438 | 20716938 | 8854  |
| ENSG000001 | 0        | 2.24661  | -2.6365  | 0.10117   | 0.16301   | RUFY4     | chr2  | + | 2.19E+08 | 2.19E+08 | 3568  |
| ENSG000001 | 65.71976 | 46.45595 | 0.48961  | 0.11343   | 0.17987   | ZNF383    | chr19 | + | 37708828 | 37734828 | 2268  |
| ENSG000001 | 44.02535 | 96.30567 | -1.1062  | 0.031918  | 0.059955  | HES4      | chr1  | - | 934342   | 935552   | 1040  |
| ENSG000001 | 103.6711 | 177.3616 | -0.77402 | 0.000498  | 0.001293  | ZNF669    | chr1  | - | 2.47E+08 | 2.47E+08 | 1951  |
| ENSG000001 | 13.40258 | 4.112823 | 1.6592   | 0.019959  | 0.039401  | C19orf35  | chr19 | - | 2274631  | 2282181  | 2564  |
| ENSG000001 | 0.923144 | 2.324288 | -1.0627  | 0.43135   | 0.53685   | LRR1Q4    | chr3  | + | 1.7E+08  | 1.7E+08  | 1827  |
| ENSG000001 | 228.7331 | 123.1091 | 0.8899   | 5.48E-06  | 1.81E-05  | CENPP     | chr9  | + | 95087766 | 95382815 | 8766  |
| ENSG000001 | 486.0503 | 534.1213 | -0.13596 | 0.25877   | 0.35658   | PLSCR1    | chr3  | - | 1.46E+08 | 1.46E+08 | 2233  |
| ENSG000001 | 135.3582 | 55.58795 | 1.2807   | 9.83E-08  | 3.84E-07  | C3orf62   | chr3  | - | 49306035 | 49315342 | 4235  |
| ENSG000001 | 10.86102 | 5.125251 | 1.0562   | 0.16838   | 0.25002   | ENO4      | chr10 | + | 1.19E+08 | 1.19E+08 | 2779  |
| ENSG000001 | 91.60774 | 137.5629 | -0.57974 | 0.024292  | 0.047016  | ZNF559    | chr19 | + | 9434448  | 9461838  | 3042  |
| ENSG000001 | 473.3184 | 6469.769 | -3.7643  | 1.50E-119 | 1.17E-117 | SBK1      | chr16 | + | 28303840 | 28335170 | 4992  |
| ENSG000001 | 3.059734 | 23.7787  | -2.7765  | 0.000104  | 0.000296  | SLC38A3   | chr3  | + | 50242679 | 50258411 | 2470  |
| ENSG000001 | 439.7327 | 560.9363 | -0.35061 | 0.016973  | 0.034     | GTF2F2    | chr13 | + | 45694650 | 45858237 | 1432  |
| ENSG000001 | 443.4553 | 319.5668 | 0.47308  | 0.000375  | 0.000989  | FAM92A1   | chr8  | + | 94710789 | 94743755 | 4241  |
| ENSG000001 | 978.0225 | 748.7133 | 0.3847   | 0.001735  | 0.004148  | FOCAD     | chr9  | + | 20658308 | 20995954 | 6096  |
| ENSG000001 | 4.242291 | 7.501368 | -0.7773  | 0.34206   | 0.44599   | AC092171  | chr7  | + | 5459477  | 5462753  | 753   |
| ENSG000001 | 23.45692 | 57.60965 | -1.2883  | 0.00013   | 0.000365  | PRR19     | chr19 | + | 42806250 | 42814973 | 1956  |
| ENSG000001 | 17.94715 | 27.03291 | -0.58271 | 0.25517   | 0.35238   | ZP3       | chr7  | + | 76026835 | 76071388 | 1846  |
| ENSG000001 | 1.265686 | 0.98329  | 0.28495  | 0.85202   | 0.89596   | H3F3C     | chr12 | - | 31944123 | 31945175 | 1053  |
| ENSG000001 | 2.261609 | 26.98517 | -3.4129  | 1.39E-06  | 4.90E-06  | AC018892  | chr2  | + | 97746835 | 97748986 | 1056  |
| ENSG000001 | 0.632843 | 1.340997 | -0.8078  | 0.58998   | 0.68516   | RP11-152F | chr15 | + | 82751614 | 82769399 | 4809  |
| ENSG000001 | 10.71709 | 37.54397 | -1.7911  | 5.31E-05  | 0.000156  | JAKMIP3   | chr10 | + | 1.34E+08 | 1.34E+08 | 6626  |
| ENSG000001 | 0        | 0.343138 | -0.41864 | 0.81278   | NA        | PPP3R2    | chr9  | - | 1.04E+08 | 1.04E+08 | 3387  |

|            |          |          |          |           |           |           |       |   |          |          |      |
|------------|----------|----------|----------|-----------|-----------|-----------|-------|---|----------|----------|------|
| ENSG000001 | 0.290301 | 0.654722 | -0.51764 | 0.76892   | NA        | GOLGA6L3  | chr15 | + | 85783703 | 85790410 | 1679 |
| ENSG000001 | 0        | 1.326428 | -1.6486  | 0.3523    | NA        | PDCD1     | chr2  | - | 2.43E+08 | 2.43E+08 | 2114 |
| ENSG000001 | 1.338465 | 0.700845 | 0.74183  | 0.61989   | 0.71075   | GPR21     | chr9  | + | 1.26E+08 | 1.26E+08 | 1170 |
| ENSG000001 | 14.61684 | 3.025133 | 2.1784   | 0.00327   | 0.007497  | TCTEX1D4  | chr1  | - | 45271585 | 45272957 | 1262 |
| ENSG000001 | 0        | 0.594029 | -0.81444 | 0.64499   | NA        | ANKRD36P  | chrY  | + | 28555962 | 28566682 | 659  |
| ENSG000001 | 7.087108 | 0.297015 | 3.6212   | 0.005843  | 0.012837  | SELL      | chr1  | - | 1.7E+08  | 1.7E+08  | 2436 |
| ENSG000001 | 384.4149 | 195.5025 | 0.9752   | 8.89E-06  | 2.87E-05  | CHM       | chrX  | - | 85116185 | 85302566 | 5442 |
| ENSG000001 | 0        | 0.951736 | -1.2555  | 0.48145   | NA        | NANOS2    | chr19 | - | 46416475 | 46418036 | 1562 |
| ENSG000001 | 123.1152 | 169.9576 | -0.46468 | 0.015445  | 0.031205  | BLOC1S5   | chr6  | - | 8013800  | 8064647  | 2684 |
| ENSG000001 | 3.76617  | 4.167067 | -0.16521 | 0.86158   | 0.90321   | SRP72P2   | chr6  | - | 1.59E+08 | 1.59E+08 | 1979 |
| ENSG000001 | 224.0403 | 6.301156 | 5.0956   | 4.73E-40  | 8.31E-39  | CERKL     | chr2  | - | 1.82E+08 | 1.83E+08 | 3208 |
| ENSG000001 | 0.342542 | 10.23593 | -4.1261  | 0.000878  | 0.0022    | WASF4P    | chrX  | + | 47657325 | 47664188 | 1878 |
| ENSG000001 | 8.362168 | 39.98635 | -2.2208  | 6.72E-06  | 2.20E-05  | SLC24A5   | chr15 | + | 48413169 | 48434869 | 2984 |
| ENSG000001 | 0        | 0.686276 | -0.84936 | 0.6309    | NA        | AC003003  | chr16 | + | 19316203 | 19322269 | 2381 |
| ENSG000001 | 1844.764 | 203.4263 | 3.1625   | 9.39E-34  | 1.38E-32  | IER5L     | chr9  | - | 1.32E+08 | 1.32E+08 | 2706 |
| ENSG000001 | 2971.669 | 5003.61  | -0.75053 | 1.21E-08  | 5.11E-08  | H2AFX     | chr11 | - | 1.19E+08 | 1.19E+08 | 1614 |
| ENSG000001 | 0.685084 | 7.201937 | -2.7361  | 0.049948  | 0.088884  | INSC      | chr11 | + | 15133970 | 15268754 | 2954 |
| ENSG000001 | 1.866827 | 15.29404 | -2.8158  | 0.000487  | 0.001267  | SERPINA5  | chr14 | + | 95027779 | 95059457 | 2312 |
| ENSG000001 | 145.1419 | 881.0308 | -2.5985  | 7.97E-65  | 2.59E-63  | C19orf54  | chr19 | - | 41246761 | 41257458 | 2753 |
| ENSG000001 | 64.85514 | 49.71734 | 0.38936  | 0.22732   | 0.32037   | LCTL      | chr15 | - | 66839517 | 66858317 | 3147 |
| ENSG000001 | 0        | 20.95834 | -5.9898  | 4.05E-07  | 1.50E-06  | NCCRP1    | chr19 | + | 39687601 | 39692524 | 1978 |
| ENSG000001 | 0        | 3.039702 | -3.1087  | 0.041329  | 0.075412  | KRTDAP    | chr19 | - | 35978226 | 35986460 | 491  |
| ENSG000001 | 0        | 1.248751 | -1.5848  | 0.37202   | NA        | C22orf34  | chr22 | - | 49808176 | 50051190 | 2816 |
| ENSG000001 | 0        | 0.951736 | -1.2555  | 0.48145   | NA        | RP1-273G1 | chr8  | - | 33827079 | 33827397 | 318  |
| ENSG000001 | 2781.424 | 87.40948 | 4.9823   | 3.92E-262 | 1.43E-259 | COL25A1   | chr4  | - | 1.1E+08  | 1.1E+08  | 4630 |
| ENSG000001 | 380.1927 | 908.1024 | -1.2538  | 3.89E-12  | 2.12E-11  | FAM83G    | chr17 | - | 18872102 | 18908117 | 5266 |
| ENSG000001 | 5.488253 | 21.59607 | -1.9227  | 0.005574  | 0.012292  | C9orf171  | chr9  | + | 1.35E+08 | 1.35E+08 | 1818 |
| ENSG000001 | 2031.005 | 2422.543 | -0.25344 | 0.19601   | 0.28403   | SRSF10    | chr1  | - | 24291294 | 24307417 | 3957 |
| ENSG000001 | 0        | 3.305162 | -3.2461  | 0.030518  | 0.057606  | HBA2      | chr16 | + | 222846   | 223709   | 640  |
| ENSG000001 | 35.94313 | 36.29931 | -0.01581 | 0.96492   | 0.97964   | DUSP28    | chr2  | + | 2.41E+08 | 2.42E+08 | 3461 |
| ENSG000001 | 106.2214 | 16.8431  | 2.6049   | 6.15E-09  | 2.65E-08  | C15orf52  | chr15 | - | 40623653 | 40633168 | 5021 |
| ENSG000001 | 1780.244 | 1217.924 | 0.54653  | 0.002135  | 0.00503   | NBR1      | chr17 | + | 41322498 | 41363708 | 4973 |
| ENSG000001 | 245.7227 | 556.9376 | -1.177   | 8.99E-15  | 5.82E-14  | RALGAPA2  | chr20 | - | 20370196 | 20693266 | 8769 |
| ENSG000001 | 421.6845 | 594.5503 | -0.49398 | 0.00541   | 0.01197   | NDOR1     | chr9  | + | 1.4E+08  | 1.4E+08  | 2497 |
| ENSG000001 | 3.910914 | 58.75245 | -3.8077  | 2.38E-12  | 1.32E-11  | FBLL1     | chr5  | + | 1.68E+08 | 1.68E+08 | 1519 |
| ENSG000001 | 1.45232  | 1.577319 | -0.11532 | 0.94216   | 0.96249   | NKAIN2    | chr6  | + | 1.24E+08 | 1.25E+08 | 3115 |
| ENSG000001 | 0.36308  | 0        | 0.4146   | 0.81455   | NA        | KRTAP1-1  | chr17 | - | 39196811 | 39197713 | 903  |
| ENSG000001 | 6.28817  | 32.37421 | -2.2883  | 0.000275  | 0.00074   | PAQR9     | chr3  | - | 1.43E+08 | 1.43E+08 | 2103 |
| ENSG000001 | 6.535603 | 0        | 4.3091   | 0.001214  | 0.002971  | C12orf55  | chr12 | + | 96883349 | 97040905 | 2756 |
| ENSG000001 | 15.28139 | 19.37128 | -0.34423 | 0.46168   | 0.56683   | NPIPP1    | chr16 | - | 15198178 | 15225458 | 2902 |
| ENSG000001 | 3.081086 | 4.654281 | -0.57129 | 0.5892    | 0.68455   | CLN3      | chr16 | - | 28477983 | 28506896 | 3081 |
| ENSG000001 | 78.98551 | 291.2703 | -1.8688  | 3.29E-11  | 1.69E-10  | FAM72B    | chr1  | + | 1.21E+08 | 1.21E+08 | 2374 |
| ENSG000001 | 13.19623 | 13.07899 | 0.018347 | 0.97281   | 0.98486   | ASAH2     | chr10 | - | 51944621 | 52008370 | 4797 |
| ENSG000001 | 1926.838 | 3066.923 | -0.66986 | 4.11E-11  | 2.09E-10  | SUMO2     | chr17 | - | 73163408 | 73179078 | 1463 |
| ENSG000001 | 128.2771 | 225.3204 | -0.81321 | 2.29E-05  | 7.04E-05  | NANOS1    | chr10 | + | 1.21E+08 | 1.21E+08 | 4627 |
| ENSG000001 | 0        | 0.686276 | -0.84936 | 0.6309    | NA        | HMX3      | chr10 | + | 1.25E+08 | 1.25E+08 | 1173 |
| ENSG000001 | 66.92302 | 2.742687 | 4.5232   | 4.12E-15  | 2.72E-14  | IGFL3     | chr19 | - | 46623328 | 46627931 | 662  |
| ENSG000001 | 2.302685 | 2.679579 | -0.18457 | 0.88001   | 0.91631   | GOLGA8M   | chr15 | - | 28947100 | 28983530 | 1899 |
| ENSG000001 | 0.923144 | 2.901332 | -1.3549  | 0.29913   | 0.4008    | ZNF177    | chr19 | + | 9435021  | 9493293  | 2429 |
| ENSG000001 | 1322.538 | 854.6071 | 0.62971  | 2.68E-06  | 9.19E-06  | LDOC1L    | chr22 | - | 44888452 | 44894178 | 5495 |
| ENSG000001 | 268.0235 | 2.324288 | 6.676    | 2.14E-33  | 3.10E-32  | DPYD      | chr1  | - | 97543299 | 98386605 | 4412 |
| ENSG000001 | 3300.881 | 122.3355 | 4.7407   | 4.38E-149 | 4.98E-147 | S100A16   | chr1  | - | 1.54E+08 | 1.54E+08 | 1146 |
| ENSG000001 | 861.1312 | 1300.221 | -0.5935  | 4.73E-08  | 1.90E-07  | PTAR1     | chr9  | - | 72324438 | 72374875 | 9876 |
| ENSG000001 | 0        | 0.686276 | -0.84936 | 0.6309    | NA        | CC2D2B    | chr10 | + | 97733786 | 97792441 | 2467 |
| ENSG000001 | 0        | 1.043983 | -1.3473  | 0.44976   | NA        | RNASE9    | chr14 | - | 21024252 | 21029090 | 2703 |
| ENSG000001 | 27.56384 | 31.488   | -0.18847 | 0.62387   | 0.71424   | FAM154B   | chr15 | + | 82555151 | 82577271 | 3134 |
| ENSG000001 | 6.454265 | 3.083409 | 0.98351  | 0.32165   | 0.42452   | LINC00319 | chr21 | + | 44866481 | 44873773 | 3507 |
| ENSG000001 | 8.744972 | 0.715414 | 3.245    | 0.004148  | 0.009348  | HILS1     | chr17 | - | 48248789 | 48258539 | 1219 |
| ENSG000001 | 15.70527 | 5.208634 | 1.5279   | 0.02055   | 0.04042   | RHCE      | chr1  | - | 25688740 | 25756683 | 1810 |
| ENSG000001 | 0        | 2.058828 | -1.8947  | 0.28782   | 0.38931   | C2orf80   | chr2  | - | 2.09E+08 | 2.09E+08 | 1238 |
| ENSG000001 | 0        | 1.995719 | -2.4883  | 0.12386   | 0.19391   | IDO2      | chr8  | + | 39792133 | 39873910 | 4264 |
| ENSG000001 | 359.1338 | 222.5545 | 0.6871   | 0.00054   | 0.001394  | PARVB     | chr22 | + | 44395091 | 44565106 | 1706 |
| ENSG000001 | 78.93392 | 99.54325 | -0.33298 | 0.20847   | 0.29845   | TEKT4P2   | chr21 | - | 9907190  | 9968585  | 2180 |
| ENSG000001 | 34.61941 | 0        | 6.6969   | 4.00E-09  | 1.75E-08  | SCXA      | chr8  | + | 1.45E+08 | 1.45E+08 | 999  |
| ENSG000001 | 2.894453 | 9.871779 | -1.66    | 0.038419  | 0.070828  | SLC4A5    | chr2  | - | 74443369 | 74570541 | 6576 |

|                    |          |          |          |          |           |       |   |          |          |       |
|--------------------|----------|----------|----------|----------|-----------|-------|---|----------|----------|-------|
| ENSG000001703.2821 | 323.3419 | 1.1205   | 2.06E-11 | 1.07E-10 | UROS      | chr10 | - | 1.27E+08 | 1.28E+08 | 1556  |
| ENSG0000010        | 0.343138 | -0.41864 | 0.81278  | NA       | RP11-451K | chr11 | - | 5988407  | 5989724  | 940   |
| ENSG0000010.995923 | 4.495636 | -1.9074  | 0.10764  | 0.17188  | CTB-161K2 | chr7  | + | 91763918 | 91810039 | 2957  |
| ENSG0000011001.15  | 668.9929 | 0.58106  | 0.000182 | 0.000501 | ZDHHC9    | chrX  | - | 1.29E+08 | 1.29E+08 | 4569  |
| ENSG0000010        | 4.443808 | -3.5281  | 0.020694 | 0.040677 | C7orf29   | chr7  | + | 1.5E+08  | 1.5E+08  | 2871  |
| ENSG0000015.394936 | 2.69898  | 0.89009  | 0.42523  | 0.53056  | QRFP      | chr9  | - | 1.34E+08 | 1.34E+08 | 411   |
| ENSG0000013.495593 | 1.248751 | 1.2634   | 0.29894  | 0.40069  | DUPD1     | chr10 | - | 76797594 | 76818272 | 663   |
| ENSG0000010        | 8.903057 | -4.7662  | 0.000198 | 0.000543 | AL391005  | chr10 | - | 1.3E+08  | 1.3E+08  | 645   |
| ENSG000001558.7373 | 348.2156 | 0.68156  | 3.75E-05 | 0.000113 | SMIM15    | chr5  | - | 60453536 | 60458301 | 2889  |
| ENSG0000010        | 1.073121 | -1.1788  | 0.50551  | NA       | OSTN      | chr3  | + | 1.91E+08 | 1.91E+08 | 3134  |
| ENSG00000145.98614 | 170.7031 | -1.8814  | 9.23E-09 | 3.93E-08 | VWC2      | chr7  | + | 49813257 | 49952138 | 1891  |
| ENSG00000117.64487 | 170.4822 | -3.2403  | 7.46E-23 | 7.15E-22 | FAM221A   | chr7  | + | 23719749 | 23742868 | 4154  |
| ENSG000001660.991  | 663.2088 | -0.00606 | 0.97158  | 0.98431  | TMEM120E  | chr12 | + | 1.22E+08 | 1.22E+08 | 7461  |
| ENSG00000129.61909 | 22.39474 | 0.40347  | 0.37051  | 0.47505  | FSIP2     | chr2  | + | 1.87E+08 | 1.87E+08 | 21054 |
| ENSG0000018.932419 | 7.532922 | 0.21536  | 0.76682  | 0.8314   | RBM34     | chr1  | - | 2.35E+08 | 2.35E+08 | 2054  |
| ENSG0000015.446363 | 56.10692 | -3.2446  | 1.29E-07 | 5.00E-07 | NOXA1     | chr9  | + | 1.4E+08  | 1.4E+08  | 1678  |
| ENSG00000129.82041 | 105.8169 | -1.7936  | 2.73E-07 | 1.03E-06 | TMEM198   | chr2  | + | 2.2E+08  | 2.2E+08  | 2393  |
| ENSG0000013.382552 | 0.997859 | 1.521    | 0.20681  | 0.29652  | BCL2L15   | chr1  | - | 1.14E+08 | 1.14E+08 | 4041  |
| ENSG000001100.9926 | 84.36669 | 0.25838  | 0.4459   | 0.55134  | FZD9      | chr7  | + | 72848109 | 72850450 | 2342  |
| ENSG000001235.1838 | 39.63522 | 2.5586   | 1.28E-27 | 1.49E-26 | SPRED3    | chr19 | + | 38879061 | 38886881 | 1539  |
| ENSG0000010        | 4.351561 | -3.61    | 0.013975 | 0.028493 | OPTC      | chr1  | + | 2.03E+08 | 2.03E+08 | 1359  |
| ENSG0000011.431782 | 2.367995 | -0.63155 | 0.63436  | 0.72301  | C11orf34  | chr11 | - | 1.12E+08 | 1.12E+08 | 1541  |
| ENSG0000010        | 1.012429 | -1.3162  | 0.46038  | NA       | ADRB3     | chr8  | - | 37820516 | 37824483 | 2943  |
| ENSG00000119.73102 | 13.88262 | 0.50063  | 0.35589  | 0.46019  | SKOR1     | chr15 | + | 68112042 | 68126899 | 3675  |
| ENSG0000010        | 9.551331 | -4.8323  | 0.000196 | 0.000538 | CATSPER4  | chr1  | + | 26517052 | 26529459 | 1912  |
| ENSG0000010.685084 | 6.564201 | -2.8233  | 0.020649 | 0.040602 | PRELP     | chr1  | + | 2.03E+08 | 2.03E+08 | 5747  |
| ENSG0000010.290301 | 0.343138 | -0.00202 | 0.99909  | NA       | PLA2G2E   | chr1  | - | 20246502 | 20250110 | 785   |
| ENSG00000190.51254 | 104.3382 | -0.20529 | 0.34595  | 0.45002  | ZNF548    | chr19 | + | 57901218 | 57912786 | 3381  |
| ENSG000001324.6661 | 296.026  | 0.13498  | 0.36232  | 0.46653  | MTF1      | chr1  | - | 38275239 | 38325292 | 7972  |
| ENSG0000010.72616  | 0        | 0.85004  | 0.63064  | NA       | TMCO2     | chr1  | + | 40711619 | 40717363 | 739   |
| ENSG0000017.002351 | 51.77469 | -2.8039  | 3.27E-08 | 1.33E-07 | ZNF322P1  | chr9  | - | 99959537 | 99961910 | 2374  |
| ENSG000001885.2593 | 54.9925  | 3.9818   | 6.51E-56 | 1.72E-54 | SHISA6    | chr17 | + | 11144580 | 11467380 | 7575  |
| ENSG000001608.4047 | 790.2895 | -0.37578 | 0.014019 | 0.028569 | TMEM201   | chr1  | + | 9648932  | 9674935  | 3851  |
| ENSG000001290.6316 | 269.556  | 0.10655  | 0.56037  | 0.65905  | NHLRC3    | chr13 | + | 39612443 | 39624246 | 3549  |
| ENSG0000010        | 17.60538 | -5.6976  | 3.20E-06 | 1.09E-05 | HMX2      | chr10 | + | 1.25E+08 | 1.25E+08 | 1628  |
| ENSG0000010        | 0.937167 | -1.2408  | 0.48662  | NA       | SNTN      | chr3  | + | 63638344 | 63664696 | 3746  |
| ENSG00000112.41701 | 105.7611 | -3.03    | 7.63E-16 | 5.24E-15 | ZDHHC11   | chr5  | - | 710471   | 851101   | 3923  |
| ENSG0000012.520208 | 5.037837 | -0.87949 | 0.40283  | 0.50755  | FAM26F    | chr6  | + | 1.17E+08 | 1.17E+08 | 1109  |
| ENSG0000010        | 0.343138 | -0.41864 | 0.81278  | NA       | CNR2      | chr1  | - | 24197016 | 24285549 | 5350  |
| ENSG0000016.588658 | 20.90093 | -1.5838  | 0.061736 | 0.10695  | CTD-3014A | chr17 | - | 41447213 | 41466567 | 2890  |
| ENSG000001638.4566 | 666.0453 | -0.06162 | 0.70742  | 0.78249  | SLX4      | chr16 | - | 3631182  | 3661599  | 7307  |
| ENSG0000010.705622 | 5.819648 | -2.7028  | 0.022244 | 0.043455 | GLRA4     | chrX  | - | 1.03E+08 | 1.03E+08 | 1837  |
| ENSG0000010        | 1.294874 | -1.8547  | 0.27869  | NA       | DPPA3P2   | chr14 | + | 36840370 | 36841588 | 1219  |
| ENSG0000014.326234 | 21.79514 | -2.2599  | 0.000517 | 0.00134  | ENTPD8    | chr9  | - | 1.4E+08  | 1.4E+08  | 2836  |
| ENSG0000018012.73  | 12202.03 | -0.606   | 2.16E-07 | 8.20E-07 | RPL14     | chr3  | + | 40498783 | 40503861 | 966   |
| ENSG0000010        | 1676.831 | -11.839  | 1.69E-28 | 2.03E-27 | BEND4     | chr4  | - | 42112955 | 42154895 | 8765  |
| ENSG00000150.13528 | 166.5306 | -1.7189  | 1.02E-07 | 3.98E-07 | RPSAP47   | chr8  | + | 81471105 | 81471992 | 888   |
| ENSG0000011.161205 | 38.17929 | -4.6186  | 8.43E-09 | 3.60E-08 | FAM78B    | chr1  | - | 1.66E+08 | 1.66E+08 | 4399  |
| ENSG0000010.705622 | 45.79392 | -5.6172  | 8.66E-10 | 4.02E-09 | ZNF563    | chr19 | - | 12428291 | 12444534 | 2754  |
| ENSG0000018.661028 | 1.638012 | 2.2257   | 0.016156 | 0.032507 | TMC3      | chr15 | - | 81623558 | 81666554 | 4644  |
| ENSG0000010.995923 | 1.713273 | -0.63548 | 0.63896  | 0.72652  | RPL10AP2  | chr8  | + | 48068741 | 48069394 | 654   |
| ENSG00000148.65565 | 84.34084 | -0.78587 | 0.043704 | 0.079155 | FBF1      | chr17 | - | 73905655 | 73937221 | 4825  |
| ENSG0000010.36308  | 322.9536 | -8.8775  | 3.15E-20 | 2.68E-19 | KLRG2     | chr7  | - | 1.39E+08 | 1.39E+08 | 2197  |
| ENSG0000010        | 14.80609 | -5.4889  | 7.33E-06 | 2.39E-05 | ASTL      | chr2  | - | 96789589 | 96804175 | 1296  |
| ENSG0000010.36308  | 2.65044  | -2.2672  | 0.12181  | 0.19125  | GPR179    | chr17 | - | 36481413 | 36499730 | 7980  |
| ENSG0000011988.64  | 1370.214 | 0.53643  | 4.08E-06 | 1.37E-05 | MSL1      | chr17 | + | 38278551 | 38293040 | 3424  |
| ENSG00000113.79818 | 215.3861 | -3.9344  | 1.37E-24 | 1.42E-23 | CTD-3088C | chr16 | - | 11453702 | 11617444 | 7627  |
| ENSG0000015.829981 | 5.926464 | -0.01654 | 0.98253  | 0.99015  | LRRK2     | chr12 | + | 40590546 | 40763087 | 9158  |
| ENSG0000010.870904 | 0.343138 | 0.71634  | 0.68735  | NA       | BSX       | chr11 | - | 1.23E+08 | 1.23E+08 | 830   |
| ENSG0000010.923144 | 8.348704 | -2.8032  | 0.00836  | 0.017812 | GJB3      | chr1  | + | 35246790 | 35251970 | 2217  |
| ENSG00000144.27701 | 19.7306  | 1.1512   | 0.008011 | 0.017119 | FAM196A   | chr10 | - | 1.29E+08 | 1.29E+08 | 4403  |
| ENSG000001340.8372 | 366.9804 | -0.10622 | 0.47982  | 0.58402  | TRMT2B    | chrX  | - | 1E+08    | 1E+08    | 3421  |
| ENSG000001110.3736 | 41.25134 | 1.4069   | 4.43E-07 | 1.63E-06 | PTPLAD2   | chr9  | - | 20995306 | 21031635 | 4161  |
| ENSG000001199.8425 | 129.254  | 0.62761  | 0.000303 | 0.000811 | C1orf192  | chr1  | - | 1.61E+08 | 1.61E+08 | 774   |
| ENSG0000010.36308  | 5.698263 | -3.2881  | 0.01503  | 0.030445 | USP32P1   | chr17 | + | 16689803 | 16719854 | 3846  |

|            |          |          |          |          |          |           |       |   |          |          |       |
|------------|----------|----------|----------|----------|----------|-----------|-------|---|----------|----------|-------|
| ENSG000001 | 0        | 13.69329 | -5.3854  | 1.13E-05 | 3.60E-05 | NYX       | chrX  | + | 41306687 | 41334963 | 2713  |
| ENSG000001 | 484.7384 | 601.6434 | -0.31037 | 0.078679 | 0.13165  | FAM120AC  | chr9  | - | 96208776 | 96215874 | 2771  |
| ENSG000001 | 3.672853 | 0.700845 | 2.0519   | 0.10814  | 0.17252  | UTS2B     | chr3  | - | 1.91E+08 | 1.91E+08 | 2395  |
| ENSG000001 | 4.512054 | 1.935026 | 1.1045   | 0.27708  | 0.37734  | C9orf152  | chr9  | - | 1.13E+08 | 1.13E+08 | 2717  |
| ENSG000001 | 448.4023 | 134.1115 | 1.7354   | 5.54E-29 | 6.78E-28 | AAK1      | chr2  | - | 69686414 | 69693664 | 3657  |
| ENSG000001 | 2197.681 | 3975.471 | -0.85411 | 2.10E-17 | 1.57E-16 | NOC2L     | chr1  | - | 879584   | 894689   | 4201  |
| ENSG000001 | 10.02003 | 9.589333 | 0.069778 | 0.9099   | 0.93809  | MSANTD1   | chr4  | + | 3246096  | 3273465  | 3164  |
| ENSG000001 | 0        | 8.78812  | -4.7138  | 0.000291 | 0.000781 | AADACL3   | chr1  | + | 12776118 | 12788726 | 3832  |
| ENSG000001 | 11.00658 | 44.99351 | -1.987   | 3.54E-06 | 1.20E-05 | DHFRP1    | chr18 | - | 23749724 | 23751313 | 1474  |
| ENSG000001 | 2012.4   | 2809.162 | -0.48066 | 0.000151 | 0.000421 | NELFB     | chr9  | + | 1.4E+08  | 1.4E+08  | 2698  |
| ENSG000001 | 2.023549 | 3.443532 | -0.67278 | 0.56008  | 0.6588   | HIST1H4D  | chr6  | - | 26188938 | 26189304 | 367   |
| ENSG000001 | 0        | 0.951736 | -1.2555  | 0.48145  | NA       | SLC15A5   | chr12 | - | 16341419 | 16430619 | 2923  |
| ENSG000001 | 6.109931 | 4.775666 | 0.30575  | 0.72861  | 0.79935  | LIPI      | chr21 | - | 15481134 | 15583166 | 1652  |
| ENSG000001 | 32.40727 | 4.629174 | 2.725    | 5.29E-06 | 1.75E-05 | LRRC66    | chr4  | - | 52859868 | 52883786 | 3327  |
| ENSG000001 | 801.1661 | 494.2728 | 0.69394  | 0.010049 | 0.021122 | ZNF292    | chr6  | + | 87862551 | 87973914 | 10610 |
| ENSG000001 | 1.960143 | 10.05386 | -2.1844  | 0.016094 | 0.032392 | HUS1B     | chr6  | - | 655939   | 656963   | 1025  |
| ENSG000001 | 127.0706 | 30.40843 | 2.0512   | 2.03E-15 | 1.36E-14 | KCTD21    | chr11 | - | 77882295 | 77899868 | 3585  |
| ENSG000001 | 0.72616  | 2.635871 | -1.5453  | 0.27238  | 0.37188  | SBSN      | chr19 | - | 36014269 | 36019253 | 1945  |
| ENSG000001 | 103.6001 | 135.5932 | -0.38312 | 0.060975 | 0.10588  | ADAT2     | chr6  | - | 1.44E+08 | 1.44E+08 | 2065  |
| ENSG000001 | 1.733248 | 1.280305 | 0.31774  | 0.83004  | 0.88026  | AC138783  | chr7  | - | 74702428 | 74714647 | 905   |
| ENSG000001 | 3.081086 | 5.782389 | -0.85052 | 0.36623  | 0.4709   | FAM35DP   | chr10 | + | 47379727 | 47420712 | 2712  |
| ENSG000001 | 0        | 0.343138 | -0.41864 | 0.81278  | NA       | MAGEB16   | chrX  | + | 35816459 | 35821852 | 1818  |
| ENSG000001 | 0.36308  | 0        | 0.4146   | 0.81455  | NA       | VHLL      | chr1  | - | 1.56E+08 | 1.56E+08 | 1014  |
| ENSG000001 | 73.66237 | 133.6951 | -0.84853 | 0.007541 | 0.016207 | ZNF567    | chr19 | + | 37178514 | 37218603 | 3734  |
| ENSG000001 | 1369.305 | 2436.721 | -0.83026 | 4.66E-11 | 2.37E-10 | NDUFA4    | chr7  | - | 10971578 | 10979883 | 2130  |
| ENSG000001 | 2.531373 | 10.03929 | -1.8296  | 0.036649 | 0.067881 | ANKDD1B   | chr5  | + | 74907284 | 74967671 | 2569  |
| ENSG000001 | 153.1849 | 170.3365 | -0.15487 | 0.47745  | 0.58195  | ALKBH2    | chr12 | - | 1.1E+08  | 1.1E+08  | 1159  |
| ENSG000001 | 125.406  | 27.57833 | 2.168    | 1.11E-13 | 6.69E-13 | RNFT1     | chr17 | - | 58029601 | 58042122 | 2101  |
| ENSG000001 | 0.290301 | 2.915901 | -2.2715  | 0.14941  | 0.22627  | RNF222    | chr17 | - | 8294022  | 8301144  | 3062  |
| ENSG000001 | 0.36308  | 0        | 0.4146   | 0.81455  | NA       | CGB5      | chr19 | + | 49547141 | 49548568 | 841   |
| ENSG000001 | 1.068702 | 15.27061 | -3.6038  | 0.000151 | 0.000422 | RELN      | chr7  | - | 1.03E+08 | 1.04E+08 | 11571 |
| ENSG000001 | 183.1232 | 228.7767 | -0.30916 | 0.64146  | 0.72843  | FAM111B   | chr11 | + | 58874658 | 58894883 | 3488  |
| ENSG000001 | 5.217676 | 0        | 3.962    | 0.004162 | 0.009375 | APOD      | chr3  | - | 1.95E+08 | 1.95E+08 | 1210  |
| ENSG000001 | 6282.212 | 7572.024 | -0.26887 | 0.10444  | 0.16741  | H1FO      | chr22 | + | 38201114 | 38203442 | 2329  |
| ENSG000001 | 1194.099 | 938.1298 | 0.34701  | 0.002881 | 0.006658 | LITAF     | chr16 | - | 11641853 | 11730237 | 2357  |
| ENSG000001 | 0.290301 | 0.715414 | -0.50514 | 0.77701  | NA       | VSTM1     | chr19 | - | 54544079 | 54567207 | 1041  |
| ENSG000001 | 278.6771 | 172.0165 | 0.69327  | 0.000449 | 0.001175 | TMEM120A  | chr7  | - | 75616155 | 75623977 | 1456  |
| ENSG000001 | 774.6781 | 822.9576 | -0.08637 | 0.45138  | 0.55694  | ARID2     | chr12 | + | 46123448 | 46301823 | 8642  |
| ENSG000001 | 3.071713 | 9.68158  | -1.5731  | 0.064516 | 0.11115  | RIMKLBP1  | chr21 | + | 37422512 | 37423675 | 1164  |
| ENSG000001 | 3877.414 | 4888.858 | -0.33393 | 0.003061 | 0.007046 | SF3B3     | chr16 | + | 70557691 | 70608820 | 6969  |
| ENSG000001 | 0.705622 | 4.091806 | -2.0809  | 0.1366   | 0.20984  | PRSS48    | chr4  | + | 1.52E+08 | 1.52E+08 | 989   |
| ENSG000001 | 0        | 5.644019 | -4.0878  | 0.002692 | 0.006253 | IL1RAPL2  | chrX  | + | 1.04E+08 | 1.05E+08 | 2985  |
| ENSG000001 | 212.8777 | 115.373  | 0.88081  | 0.000112 | 0.000317 | BLOC1S3   | chr19 | + | 45682003 | 45685059 | 2601  |
| ENSG000001 | 7.117019 | 48.37976 | -2.7105  | 2.62E-06 | 9.00E-06 | SP6       | chr17 | - | 45922279 | 45933240 | 3848  |
| ENSG000001 | 1.027626 | 4.836358 | -1.9291  | 0.12413  | 0.19421  | ANKRD34B  | chr5  | - | 79852574 | 79866307 | 3938  |
| ENSG000001 | 70.99824 | 31.68873 | 1.1536   | 8.79E-05 | 0.000252 | PLAC9     | chr10 | + | 81891477 | 81905115 | 785   |
| ENSG000001 | 0.36308  | 0.594029 | -0.39069 | 0.82661  | NA       | NKAPL     | chr6  | + | 28227098 | 28228736 | 1639  |
| ENSG000001 | 47.25199 | 15.4114  | 1.5927   | 3.30E-05 | 9.96E-05 | UBE2Q2P1  | chr15 | - | 85070012 | 85114447 | 2150  |
| ENSG000001 | 25.64136 | 635.2891 | -4.5887  | 9.12E-51 | 2.13E-49 | CLDN4     | chr7  | + | 73213872 | 73247014 | 4163  |
| ENSG000001 | 42.84458 | 66.21978 | -0.62085 | 0.064124 | 0.11057  | ZNF573    | chr19 | - | 38226734 | 38307940 | 2516  |
| ENSG000001 | 0        | 0.297015 | -0.41864 | 0.81278  | NA       | RP11-77G2 | chrX  | + | 40767237 | 40767644 | 408   |
| ENSG000001 | 8.661842 | 1.903472 | 1.9835   | 0.038112 | 0.070326 | CRYM-AS1  | chr16 | + | 21312170 | 21329912 | 2028  |
| ENSG000001 | 0        | 0.297015 | -0.41864 | 0.81278  | NA       | GRAPL     | chr17 | + | 19030782 | 19062489 | 1308  |
| ENSG000001 | 0.36308  | 6.581186 | -3.5485  | 0.005594 | 0.012331 | FAM47E    | chr4  | + | 77135193 | 77232282 | 6249  |
| ENSG000001 | 3179.708 | 3840.103 | -0.27173 | 0.028322 | 0.053931 | HN1       | chr17 | - | 73131343 | 73164376 | 2289  |
| ENSG000001 | 80.06179 | 58.8251  | 0.44453  | 0.15193  | 0.22954  | ZNF527    | chr19 | + | 37861963 | 37883968 | 5333  |
| ENSG000001 | 0.290301 | 0.700845 | -0.56655 | 0.74739  | NA       | TNRC18P3  | chr7  | + | 57059595 | 57076856 | 2691  |
| ENSG000001 | 0.653381 | 4.660728 | -2.4186  | 0.049216 | 0.087766 | ZAR1L     | chr13 | - | 32877837 | 32889481 | 1564  |
| ENSG000001 | 0.342542 | 4.790235 | -3.0546  | 0.026509 | 0.050855 | KRTAP10-1 | chr21 | + | 46117087 | 46117959 | 873   |
| ENSG000001 | 1581.888 | 380.6564 | 2.0542   | 8.15E-70 | 2.91E-68 | S100A13   | chr1  | - | 1.54E+08 | 1.54E+08 | 2184  |
| ENSG000001 | 298.7523 | 626.8639 | -1.0652  | 1.25E-07 | 4.86E-07 | ZNF33A    | chr10 | + | 38299578 | 38354016 | 6117  |
| ENSG000001 | 1522.565 | 372.8519 | 2.0266   | 1.51E-52 | 3.68E-51 | PCDH18    | chr4  | - | 1.38E+08 | 1.38E+08 | 5906  |
| ENSG000001 | 24.16075 | 70.20062 | -1.527   | 4.36E-06 | 1.46E-05 | ZNF600    | chr19 | - | 53267448 | 53290044 | 3829  |
| ENSG000001 | 9.949858 | 8.055721 | 0.29512  | 0.68742  | 0.76697  | BTBD8     | chr1  | + | 92545862 | 92613393 | 1616  |
| ENSG000001 | 1.027626 | 0        | 1.1491   | 0.51623  | NA       | RP11-129B | chr3  | - | 64064037 | 64073039 | 2129  |

|                    |          |          |          |          |           |       |   |          |          |       |
|--------------------|----------|----------|----------|----------|-----------|-------|---|----------|----------|-------|
| ENSG00000127.44062 | 4.438975 | 2.5661   | 4.78E-05 | 0.000142 | DPY19L2P1 | chr7  | - | 35119601 | 35225934 | 3914  |
| ENSG00000116.37837 | 100.6415 | -2.5782  | 1.58E-13 | 9.43E-13 | MAOA      | chrX  | + | 43515467 | 43606068 | 4015  |
| ENSG000001854.9996 | 235.1843 | 1.8586   | 5.74E-46 | 1.17E-44 | AC016683  | chr2  | + | 1.14E+08 | 1.14E+08 | 2687  |
| ENSG00000145.02388 | 17.63861 | 1.3285   | 0.000903 | 0.002257 | C15orf61  | chr15 | + | 67813406 | 67819628 | 1400  |
| ENSG00000149.6933  | 54.23567 | -0.13269 | 0.67398  | 0.75584  | AC069277  | chr3  | + | 6532166  | 6777816  | 1083  |
| ENSG0000010.290301 | 0.343138 | -0.00202 | 0.99909  | NA       | NUGGC     | chr8  | - | 27879481 | 27941388 | 3887  |
| ENSG0000011801.252 | 1500.545 | 0.26316  | 0.091784 | 0.15028  | TSPYL1    | chr6  | - | 1.17E+08 | 1.17E+08 | 3326  |
| ENSG0000011147.532 | 1710.204 | -0.57409 | 4.33E-06 | 1.45E-05 | PNRC2     | chr1  | + | 24285599 | 24289952 | 2416  |
| ENSG0000011.89853  | 0.937167 | 0.78516  | 0.59301  | 0.68781  | C22orf43  | chr22 | - | 23950639 | 23974508 | 1300  |
| ENSG0000010        | 0.343138 | -0.41864 | 0.81278  | NA       | AL450307  | chr10 | - | 1.34E+08 | 1.34E+08 | 3384  |
| ENSG0000010.290301 | 0.343138 | -0.00202 | 0.99909  | NA       | GJB5      | chr1  | + | 35220648 | 35224113 | 1355  |
| ENSG00000119.09899 | 26.73502 | -0.47405 | 0.26074  | 0.35876  | FHIT      | chr3  | - | 59735036 | 61237133 | 3063  |
| ENSG0000013.910914 | 60.47452 | -3.8503  | 5.43E-13 | 3.14E-12 | FAM150B   | chr2  | - | 279558   | 288851   | 1389  |
| ENSG00000193.91678 | 104.9784 | -0.15719 | 0.49886  | 0.60272  | ZKSCAN3   | chr6  | + | 28317691 | 28334531 | 2340  |
| ENSG000001899.0025 | 982.3788 | -0.12735 | 0.51219  | 0.61533  | RRP7A     | chr22 | - | 42905974 | 42915808 | 3801  |
| ENSG000001294.9494 | 217.3137 | 0.43643  | 0.025697 | 0.04948  | LIN54     | chr4  | - | 83831126 | 83934079 | 6127  |
| ENSG0000010        | 0.700845 | -0.87835 | 0.62047  | NA       | RP11-797F | chr7  | - | 64348905 | 64350478 | 1062  |
| ENSG000001460.4149 | 796.0473 | -0.78769 | 8.85E-05 | 0.000254 | FAM53B    | chr10 | - | 1.26E+08 | 1.26E+08 | 5431  |
| ENSG0000012.935529 | 0        | 3.0687   | 0.044324 | 0.08007  | FAM180A   | chr7  | - | 1.35E+08 | 1.35E+08 | 1800  |
| ENSG0000010        | 0.594029 | -0.81444 | 0.64499  | NA       | C6orf222  | chr6  | - | 36283534 | 36304662 | 3736  |
| ENSG0000012.479946 | 9.248611 | -1.8039  | 0.050796 | 0.090188 | S100A14   | chr1  | - | 1.54E+08 | 1.54E+08 | 1218  |
| ENSG000001308.1043 | 363.9775 | -0.24033 | 0.24657  | 0.34252  | KAZN      | chr1  | + | 14925200 | 15444539 | 6030  |
| ENSG0000011946.18  | 1500.003 | 0.37566  | 7.90E-05 | 0.000228 | SLC35E2B  | chr1  | - | 1592939  | 1624167  | 6261  |
| ENSG0000016241.388 | 11376.43 | -0.86471 | 2.28E-09 | 1.02E-08 | RPS2P46   | chr17 | - | 19349246 | 19350169 | 923   |
| ENSG0000010        | 2.353426 | -2.7264  | 0.084821 | 0.14042  | FAM90A27  | chr19 | + | 53784808 | 53788200 | 1383  |
| ENSG0000012.894453 | 26.72287 | -3.0676  | 3.13E-06 | 1.06E-05 | FAM179A   | chr2  | + | 29179477 | 29284239 | 12691 |
| ENSG00000190.21784 | 73.03394 | 0.3047   | 0.22365  | 0.31606  | TMEM194E  | chr2  | - | 1.91E+08 | 1.91E+08 | 6168  |
| ENSG0000010.653381 | 14.71458 | -4.0389  | 8.11E-05 | 0.000234 | ALG1L     | chr3  | - | 1.26E+08 | 1.26E+08 | 805   |
| ENSG00000110.34204 | 1.058552 | 3.0527   | 0.002342 | 0.005481 | KIAA0408  | chr6  | - | 1.28E+08 | 1.28E+08 | 6580  |
| ENSG000001249.9016 | 574.9061 | -1.1976  | 9.95E-12 | 5.28E-11 | GSPT2     | chrX  | + | 51486481 | 51489324 | 2844  |
| ENSG0000010.290301 | 1.591889 | -1.5998  | 0.31468  | NA       | TBC1D28   | chr17 | - | 18538319 | 18565263 | 2789  |
| ENSG00000117.77169 | 17.66613 | -0.00185 | 0.99724  | 0.99846  | C8orf76   | chr8  | - | 1.24E+08 | 1.24E+08 | 1342  |
| ENSG0000011.338465 | 2.07098  | -0.52304 | 0.68526  | 0.76508  | CXCL17    | chr19 | - | 42932440 | 42947200 | 1172  |
| ENSG0000013.423628 | 161.1498 | -5.4836  | 5.48E-27 | 6.20E-26 | OR7E12P   | chr11 | - | 3412010  | 3412982  | 973   |
| ENSG0000010        | 1.606458 | -1.9287  | 0.27074  | NA       | OTUD6A    | chrX  | + | 69282341 | 69284029 | 1689  |
| ENSG0000018431.54  | 10275.63 | -0.28484 | 0.044609 | 0.080508 | HMGB1     | chr13 | - | 31032884 | 31191734 | 4199  |
| ENSG00000170.60183 | 57.58709 | 0.2884   | 0.35702  | 0.46136  | MMP23B    | chr1  | + | 1567474  | 1570639  | 1531  |
| ENSG00000163.31601 | 330.0671 | -2.3806  | 3.49E-23 | 3.40E-22 | SH2D5     | chr1  | - | 21046225 | 21059330 | 3705  |
| ENSG0000011.774324 | 2.872193 | -0.63794 | 0.60754  | 0.70043  | RP11-168C | chr15 | - | 1.01E+08 | 1.01E+08 | 2072  |
| ENSG0000010        | 3.215331 | -3.1634  | 0.039142 | 0.071993 | ZFP92     | chrX  | + | 1.53E+08 | 1.53E+08 | 1253  |
| ENSG00000117.73819 | 10.51193 | 0.73493  | 0.16298  | 0.24343  | USP32P3   | chr17 | + | 20318860 | 20334321 | 1174  |
| ENSG0000010        | 10.25533 | -4.8889  | 0.000187 | 0.000514 | NCR1      | chr19 | + | 55417508 | 55427508 | 1612  |
| ENSG000001218.7107 | 67.91278 | 1.6784   | 1.54E-12 | 8.64E-12 | RASSF10   | chr11 | + | 13030696 | 13032647 | 1848  |
| ENSG0000010        | 0.297015 | -0.41864 | 0.81278  | NA       | GJB4      | chr1  | + | 35225342 | 35229325 | 2840  |
| ENSG0000010        | 0.357707 | -0.41864 | 0.81278  | NA       | OR2L13    | chr1  | + | 2.48E+08 | 2.48E+08 | 1883  |
| ENSG000001560.5617 | 535.1513 | 0.067844 | 0.6168   | 0.70803  | BLOC1S2   | chr10 | - | 1.02E+08 | 1.02E+08 | 2024  |
| ENSG00000131.59961 | 3.351285 | 3.1225   | 2.98E-06 | 1.01E-05 | SYCP2     | chr20 | - | 58438618 | 58508710 | 5567  |
| ENSG00000184.93855 | 455.0205 | -2.4121  | 3.19E-27 | 3.65E-26 | ZNF724P   | chr19 | - | 23404401 | 23433192 | 2764  |
| ENSG000001771.1015 | 100.7564 | 2.9292   | 2.50E-64 | 8.02E-63 | IL1RAP    | chr3  | + | 1.9E+08  | 1.9E+08  | 4778  |
| ENSG0000012.842212 | 19.39955 | -2.6056  | 0.000562 | 0.001447 | PTPRT     | chr20 | - | 40701392 | 41818610 | 12755 |
| ENSG0000010        | 468.8549 | -10.169  | 5.29E-21 | 4.67E-20 | PAX5      | chr9  | - | 36833272 | 37034103 | 8536  |
| ENSG0000010.36308  | 0        | 0.4146   | 0.81455  | NA       | AC079610  | chr2  | - | 2.14E+08 | 2.14E+08 | 1727  |
| ENSG0000018.340816 | 80.35893 | -3.1997  | 3.02E-14 | 1.88E-13 | SPOCK3    | chr4  | - | 1.68E+08 | 1.68E+08 | 2986  |
| ENSG00000157.34047 | 35.465   | 0.67558  | 0.10755  | 0.17177  | ZNF699    | chr19 | - | 9404951  | 9420514  | 3358  |
| ENSG0000011.971308 | 1.234181 | 0.52965  | 0.69367  | 0.77158  | RP3-391O2 | chr6  | - | 34544035 | 34544433 | 399   |
| ENSG00000198.31979 | 44.21095 | 1.1472   | 8.93E-06 | 2.88E-05 | TDRD7     | chr9  | + | 1E+08    | 1E+08    | 3834  |
| ENSG00000113.85898 | 8.784089 | 0.6292   | 0.28955  | 0.39111  | C16orf93  | chr16 | - | 30768744 | 30774031 | 2114  |
| ENSG000001788.8932 | 295.2332 | 1.4128   | 2.21E-21 | 1.99E-20 | KIAA0895L | chr16 | - | 67209505 | 67217943 | 3550  |
| ENSG00000112.53347 | 18.58222 | -0.55227 | 0.33372  | 0.43712  | HLA-DRB1  | chr6  | - | 32546546 | 32557625 | 1229  |
| ENSG0000010        | 0.357707 | -0.41864 | 0.81278  | NA       | VN1R2     | chr19 | + | 53761545 | 53765090 | 1311  |
| ENSG00000111.01595 | 55.04837 | -2.2607  | 3.12E-05 | 9.45E-05 | MYT1      | chr20 | + | 62783144 | 62873604 | 5614  |
| ENSG0000015.260544 | 0        | 3.9043   | 0.006095 | 0.013352 | SERPINA3  | chr14 | + | 95058395 | 95090983 | 3067  |
| ENSG0000010.72616  | 0.640152 | 0.083249 | 0.96152  | NA       | AC005831  | chr12 | - | 3797876  | 3799650  | 1774  |
| ENSG00000110.43617 | 26.55294 | -1.3335  | 0.007255 | 0.015646 | AKR1C3    | chr10 | + | 5077546  | 5149878  | 1807  |
| ENSG0000012772.448 | 2013.142 | 0.46116  | 0.000265 | 0.000714 | SPATS2L   | chr2  | + | 2.01E+08 | 2.01E+08 | 2698  |

|            |          |          |          |           |           |           |       |   |          |          |       |
|------------|----------|----------|----------|-----------|-----------|-----------|-------|---|----------|----------|-------|
| ENSG000001 | 210.0989 | 148.3211 | 0.49935  | 0.007051  | 0.015258  | ZNF250    | chr8  | - | 1.46E+08 | 1.46E+08 | 6364  |
| ENSG000001 | 61.59484 | 94.95704 | -0.61576 | 0.044287  | 0.080016  | WDSUB1    | chr2  | - | 1.6E+08  | 1.6E+08  | 1920  |
| ENSG000001 | 72.68022 | 68.55126 | 0.085036 | 0.73073   | 0.80117   | ZNF79     | chr9  | + | 1.3E+08  | 1.3E+08  | 2078  |
| ENSG000001 | 1040.068 | 49.26256 | 4.3936   | 8.80E-118 | 6.61E-116 | S100A4    | chr1  | - | 1.54E+08 | 1.54E+08 | 755   |
| ENSG000001 | 137.3701 | 117.7833 | 0.22087  | 0.3963    | 0.5008    | PLEKHG4   | chr16 | + | 67311413 | 67323402 | 6949  |
| ENSG000001 | 1798.777 | 292.552  | 2.6107   | 2.53E-29  | 3.14E-28  | FAT4      | chr4  | + | 1.26E+08 | 1.26E+08 | 16123 |
| ENSG000001 | 0        | 12.71887 | -5.2869  | 1.65E-05  | 5.16E-05  | C11orf92  | chr11 | - | 1.11E+08 | 1.11E+08 | 5496  |
| ENSG000001 | 0        | 17.03571 | -5.6502  | 4.51E-06  | 1.51E-05  | KIF19     | chr17 | + | 72322349 | 72351959 | 3643  |
| ENSG000001 | 10.88238 | 249.5433 | -4.485   | 5.65E-46  | 1.16E-44  | ZNF681    | chr19 | - | 23921997 | 23941693 | 6497  |
| ENSG000001 | 0.653381 | 1.188058 | -0.59047 | 0.72606   | NA        | HIST1H4A  | chr6  | + | 26021907 | 26022278 | 372   |
| ENSG000001 | 147.1397 | 165.4236 | -0.16683 | 0.45146   | 0.55699   | ACADSB    | chr10 | + | 1.25E+08 | 1.25E+08 | 5859  |
| ENSG000001 | 675.9835 | 614.268  | 0.13884  | 0.31711   | 0.41982   | STK40     | chr1  | - | 36805225 | 36851497 | 4837  |
| ENSG000001 | 0.290301 | 0.594029 | -0.38058 | 0.83094   | NA        | RPS2P4    | chr14 | - | 1.05E+08 | 1.05E+08 | 891   |
| ENSG000001 | 447.231  | 1254.683 | -1.4836  | 3.81E-13  | 2.23E-12  | TMEM63A   | chr1  | - | 2.26E+08 | 2.26E+08 | 5407  |
| ENSG000001 | 17.03257 | 231.1224 | -3.7349  | 5.38E-41  | 9.71E-40  | SEMA4A    | chr1  | + | 1.56E+08 | 1.56E+08 | 3300  |
| ENSG000001 | 0.342542 | 1.340997 | -1.3704  | 0.39575   | NA        | AC034229  | chr5  | + | 10201621 | 10201960 | 337   |
| ENSG000001 | 13.47536 | 1.949596 | 2.6217   | 0.00112   | 0.002757  | HRCT1     | chr9  | + | 35906189 | 35907138 | 950   |
| ENSG000001 | 1014.764 | 999.9748 | 0.020563 | 0.84896   | 0.89401   | MPHOSPH8  | chr13 | + | 20207788 | 20247599 | 4235  |
| ENSG000001 | 291.0925 | 219.1502 | 0.40935  | 0.043242  | 0.078452  | RNF216P1  | chr7  | + | 5013619  | 5080306  | 3632  |
| ENSG000001 | 1466.777 | 2455.415 | -0.74278 | 8.82E-11  | 4.38E-10  | EEF1A1P5  | chr9  | + | 1.36E+08 | 1.36E+08 | 1676  |
| ENSG000001 | 7.261763 | 1047.316 | -7.1025  | 3.50E-88  | 1.70E-86  | GREB1     | chr2  | + | 11674242 | 11782914 | 8484  |
| ENSG000001 | 1.048164 | 0.715414 | 0.37283  | 0.82507   | NA        | SIRPB2    | chr20 | - | 1451386  | 1472233  | 2642  |
| ENSG000001 | 254.3543 | 526.4634 | -1.0469  | 4.06E-11  | 2.07E-10  | ZNF766    | chr19 | + | 52772824 | 52795977 | 2975  |
| ENSG000001 | 1.016461 | 469.9102 | -8.4604  | 1.21E-31  | 1.65E-30  | RYR1      | chr19 | + | 38924339 | 39078204 | 15377 |
| ENSG000001 | 122.9934 | 115.1076 | 0.090877 | 0.672     | 0.75438   | SRGAP3    | chr3  | - | 9022275  | 9404737  | 8656  |
| ENSG000001 | 0.580602 | 0        | 0.8036   | 0.6494    | NA        | HIST1H2BB | chr6  | - | 26043455 | 26043885 | 431   |
| ENSG000001 | 551.7435 | 316.9318 | 0.79976  | 1.71E-09  | 7.73E-09  | FAM217B   | chr20 | + | 58508819 | 58523735 | 5152  |
| ENSG000001 | 0.342542 | 0.297015 | -0.00202 | 0.99909   | NA        | SULT1C3   | chr2  | + | 1.09E+08 | 1.09E+08 | 915   |
| ENSG000001 | 45372.46 | 53794.14 | -0.24534 | 0.040271  | 0.073831  | TUBB      | chr6  | + | 30687978 | 30693203 | 2903  |
| ENSG000001 | 286.5101 | 274.2334 | 0.063507 | 0.67363   | 0.75563   | LCOR      | chr10 | + | 98592017 | 98740800 | 7777  |
| ENSG000001 | 3624.267 | 3307.592 | 0.13182  | 0.31449   | 0.41701   | SUPT5H    | chr19 | + | 39926796 | 39967310 | 3902  |
| ENSG000001 | 499.5738 | 428.6885 | 0.21936  | 0.218     | 0.30947   | XPNPEP3   | chr22 | + | 41253081 | 41368585 | 7988  |
| ENSG000001 | 130.3    | 284.2758 | -1.1133  | 0.001541  | 0.003715  | ZNF107    | chr7  | + | 64126511 | 64171404 | 6094  |
| ENSG000001 | 12836.13 | 17354.34 | -0.43451 | 0.000583  | 0.001499  | PPIA      | chr7  | + | 44836279 | 44864163 | 2238  |
| ENSG000001 | 2.31385  | 2.010288 | 0.18299  | 0.87628   | 0.91411   | ZNF471    | chr19 | + | 57019212 | 57041590 | 6287  |
| ENSG000001 | 0.36308  | 0        | 0.4146   | 0.81455   | NA        | OR10J3    | chr1  | - | 1.59E+08 | 1.59E+08 | 990   |
| ENSG000001 | 42.5035  | 71.00505 | -0.74327 | 0.013262  | 0.02719   | ZNF836    | chr19 | - | 52657117 | 52674896 | 3333  |
| ENSG000001 | 43.71451 | 205.3307 | -2.2141  | 2.11E-19  | 1.73E-18  | ZNF493    | chr19 | + | 21579921 | 21610375 | 5023  |
| ENSG000001 | 0.342542 | 0        | 0.4146   | 0.81455   | NA        | AC090519  | chr15 | - | 44595115 | 44595293 | 177   |
| ENSG000001 | 37.68494 | 11.33899 | 1.7022   | 0.000993  | 0.002464  | GTF2IRD2  | chr7  | - | 74210483 | 74267847 | 3558  |
| ENSG000001 | 1.524285 | 8.028999 | -2.1316  | 0.033292  | 0.062277  | GRM7      | chr3  | + | 6811688  | 7783215  | 4236  |
| ENSG000001 | 100.5489 | 204.6752 | -1.0164  | 6.95E-06  | 2.27E-05  | SUPT3H    | chr6  | - | 44777054 | 45345690 | 2389  |
| ENSG000001 | 0        | 1.606458 | -1.9287  | 0.27074   | NA        | BECN1P1   | chr1  | + | 2.42E+08 | 2.42E+08 | 1323  |
| ENSG000001 | 292.9713 | 568.7434 | -0.95273 | 9.89E-10  | 4.56E-09  | NIF3L1    | chr2  | + | 2.02E+08 | 2.02E+08 | 1680  |
| ENSG000001 | 123.5957 | 94.16965 | 0.38838  | 0.16576   | 0.24684   | AC005154  | chr7  | - | 30555925 | 30634425 | 4034  |
| ENSG000001 | 31.96204 | 108.0499 | -1.7458  | 2.11E-08  | 8.71E-08  | ATP2A1    | chr16 | + | 28889726 | 28915830 | 3536  |
| ENSG000001 | 3931.282 | 4648.274 | -0.2413  | 0.059164  | 0.1032    | IARS      | chr9  | - | 94972489 | 95056038 | 4656  |
| ENSG000001 | 148.3309 | 150.6966 | -0.02581 | 0.92209   | 0.94757   | HIATL2    | chr9  | - | 99708327 | 99775862 | 786   |
| ENSG000001 | 1530.425 | 1696.209 | -0.14844 | 0.27421   | 0.37407   | POM121    | chr7  | + | 72349936 | 72421979 | 7011  |
| ENSG000001 | 328.9606 | 1470.192 | -2.158   | 4.70E-58  | 1.30E-56  | ZBTB44    | chr11 | - | 1.3E+08  | 1.3E+08  | 9315  |
| ENSG000001 | 5.229655 | 14.10108 | -1.3429  | 0.14581   | 0.22153   | HIST1H2BC | chr6  | + | 27861203 | 27861669 | 467   |
| ENSG000001 | 0        | 3.414394 | -3.1826  | 0.040436  | 0.074054  | STK31     | chr7  | + | 23749786 | 23872132 | 3732  |
| ENSG000001 | 10.37455 | 8.551055 | 0.2476   | 0.75884   | 0.82477   | CGB7      | chr19 | - | 49557531 | 49562117 | 3386  |
| ENSG000001 | 85.20074 | 324.6284 | -1.9244  | 6.89E-23  | 6.61E-22  | NLGN3     | chrX  | + | 70364681 | 70391051 | 3913  |
| ENSG000001 | 0.290301 | 0        | 0.4146   | 0.81455   | NA        | ADH7      | chr4  | - | 1E+08    | 1E+08    | 2516  |
| ENSG000001 | 100.8546 | 114.3078 | -0.17802 | 0.44552   | 0.55101   | ZKSCAN7   | chr3  | + | 44596685 | 44635665 | 3477  |
| ENSG000001 | 96.45377 | 213.0888 | -1.1399  | 2.40E-09  | 1.07E-08  | CD55      | chr1  | + | 2.07E+08 | 2.08E+08 | 2760  |
| ENSG000001 | 1.866827 | 41.79845 | -4.2458  | 5.20E-10  | 2.45E-09  | CPNE4     | chr3  | - | 1.31E+08 | 1.32E+08 | 5431  |
| ENSG000001 | 11.6197  | 6.997169 | 0.70207  | 0.32867   | 0.4318    | AC021860  | chr4  | - | 38628029 | 38666430 | 1896  |
| ENSG000001 | 60.61692 | 26.53509 | 1.1856   | 0.000971  | 0.002413  | ZNF565    | chr19 | - | 36673188 | 36737159 | 2519  |
| ENSG000001 | 24.30631 | 42.10371 | -0.78174 | 0.14294   | 0.21771   | NTNG2     | chr9  | + | 1.35E+08 | 1.35E+08 | 4792  |
| ENSG000001 | 0        | 28.61593 | -6.3466  | 1.32E-07  | 5.10E-07  | ELAVL3    | chr19 | - | 11562141 | 11591861 | 4729  |
| ENSG000001 | 1097.162 | 1673.21  | -0.6077  | 1.90E-05  | 5.89E-05  | WDR5      | chr9  | + | 1.37E+08 | 1.37E+08 | 3151  |
| ENSG000001 | 3041.069 | 4614.884 | -0.60107 | 3.61E-10  | 1.72E-09  | LONP1     | chr19 | - | 5691845  | 5720583  | 3236  |
| ENSG000001 | 11.1607  | 21.09268 | -0.88697 | 0.10292   | 0.16535   | C9orf163  | chr9  | + | 1.39E+08 | 1.39E+08 | 2572  |

|                    |          |          |          |          |           |       |   |          |          |       |
|--------------------|----------|----------|----------|----------|-----------|-------|---|----------|----------|-------|
| ENSG0000013740.364 | 2375.935 | 0.65425  | 3.30E-12 | 1.81E-11 | TRRAP     | chr7  | + | 98475556 | 98610866 | 12677 |
| ENSG000001222.4116 | 799.0643 | -1.8426  | 8.99E-39 | 1.53E-37 | NUDT11    | chrX  | - | 51232863 | 51239448 | 2385  |
| ENSG000001283.8367 | 138.8289 | 1.0292   | 3.53E-07 | 1.31E-06 | SRGAP2B   | chr1  | + | 1.44E+08 | 1.44E+08 | 1334  |
| ENSG000001204.2588 | 179.5066 | 0.18546  | 0.41635  | 0.52145  | FUT4      | chr11 | + | 94277017 | 94283063 | 6047  |
| ENSG000001275.0505 | 583.6196 | -1.0785  | 0.000152 | 0.000423 | ASB13     | chr10 | - | 5680830  | 5708558  | 2780  |
| ENSG0000010943682  | 11.71127 | -3.256   | 0.001285 | 0.003133 | HIST1H2BM | chr6  | + | 27782822 | 27783267 | 446   |
| ENSG0000014077009  | 348.0872 | -6.3584  | 1.09E-48 | 2.41E-47 | SLC35F1   | chr6  | + | 1.18E+08 | 1.19E+08 | 4852  |
| ENSG00000144.95468 | 70.36577 | -0.6401  | 0.066243 | 0.11367  | ZNF34     | chr8  | - | 1.46E+08 | 1.46E+08 | 2056  |
| ENSG0000016.294937 | 1.684135 | 1.7155   | 0.11967  | 0.18841  | ZNF781    | chr19 | - | 38158652 | 38183223 | 3147  |
| ENSG000001191.3639 | 235.3053 | -0.297   | 0.19363  | 0.28111  | ZNF140    | chr12 | + | 1.34E+08 | 1.34E+08 | 3550  |
| ENSG00000135.91403 | 25.43457 | 0.48484  | 0.28531  | 0.38671  | INCA1     | chr17 | - | 4891425  | 4900905  | 1552  |
| ENSG00000121.28521 | 23.51653 | -0.13781 | 0.78109  | 0.84292  | ZNF774    | chr15 | + | 90895477 | 90909324 | 3202  |
| ENSG0000011147.107 | 823.9706 | 0.47716  | 4.19E-05 | 0.000125 | PTPN1     | chr20 | + | 49126891 | 49201299 | 3529  |
| ENSG0000010.290301 | 0.357707 | -0.00203 | 0.99908  | NA       | BX255923  | chr9  | + | 69252845 | 69254032 | 1188  |
| ENSG0000011318.129 | 1362.468 | -0.04777 | 0.6964   | 0.77367  | EVL       | chr14 | + | 1E+08    | 1.01E+08 | 3704  |
| ENSG0000010        | 0.343138 | -0.41864 | 0.81278  | NA       | SPANXD    | chrX  | - | 1.41E+08 | 1.41E+08 | 682   |
| ENSG00000142.25444 | 53.37222 | -0.33592 | 0.32228  | 0.42519  | THEM5     | chr1  | - | 1.52E+08 | 1.52E+08 | 2503  |
| ENSG0000010        | 0.357707 | -0.41864 | 0.81278  | NA       | NOXO1     | chr16 | - | 2028918  | 2034193  | 1618  |
| ENSG00000131.80532 | 51.20242 | -0.67732 | 0.032943 | 0.061672 | ZNF658    | chr9  | - | 40760700 | 40836415 | 4155  |
| ENSG0000013587.676 | 4165.582 | -0.21516 | 0.064699 | 0.11142  | EPHB4     | chr7  | - | 1E+08    | 1E+08    | 5058  |
| ENSG0000010.290301 | 41.33398 | -6.1081  | 1.45E-08 | 6.06E-08 | PRTN3     | chr19 | + | 840974   | 848180   | 1041  |
| ENSG000001123.0012 | 256.6842 | -1.0543  | 0.000119 | 0.000337 | ZNF765    | chr19 | + | 53893046 | 53930574 | 4569  |
| ENSG000001100.0806 | 159.4582 | -0.66691 | 0.033842 | 0.063211 | ZNF124    | chr1  | - | 2.47E+08 | 2.47E+08 | 2243  |
| ENSG0000015554.183 | 9377.951 | -0.75483 | 1.04E-10 | 5.15E-10 | XRCC6     | chr22 | + | 42017123 | 42060044 | 2709  |
| ENSG00000123.99645 | 1.545765 | 3.6722   | 5.08E-06 | 1.68E-05 | S100A5    | chr1  | - | 1.54E+08 | 1.54E+08 | 710   |
| ENSG0000015.240006 | 26.52709 | -2.2534  | 0.000675 | 0.001719 | LINC00176 | chr20 | + | 62665697 | 62671315 | 4303  |
| ENSG000001405.658  | 1204.065 | -1.5625  | 2.43E-10 | 1.17E-09 | PPP1R26   | chr9  | + | 1.38E+08 | 1.38E+08 | 4932  |
| ENSG0000011487.271 | 894.4722 | 0.73282  | 1.32E-08 | 5.54E-08 | TSC22D2   | chr3  | + | 1.5E+08  | 1.5E+08  | 4839  |
| ENSG0000013.725094 | 6.800523 | -0.83059 | 0.34922  | 0.45347  | CRYBA4    | chr22 | + | 27017928 | 27026636 | 811   |
| ENSG0000011.71271  | 2.436809 | -0.39245 | 0.80247  | 0.86026  | ASMT      | chrX  | + | 1733894  | 1761974  | 1388  |
| ENSG00000130.68959 | 25.1011  | 0.27587  | 0.51859  | 0.62125  | NPIPL2    | chr16 | + | 74411776 | 74425978 | 1428  |
| ENSG00000196.24407 | 109.9571 | -0.19085 | 0.47071  | 0.57549  | ZNF569    | chr19 | - | 37902057 | 37960177 | 4061  |
| ENSG000001361.0102 | 360.1482 | 0.001905 | 0.9894   | 0.99424  | ARMCX4    | chrX  | + | 1.01E+08 | 1.01E+08 | 7420  |
| ENSG000001213.4008 | 298.9304 | -0.48413 | 0.019176 | 0.038005 | YRDC      | chr1  | - | 38268616 | 38273857 | 1826  |
| ENSG000001533.243  | 616.5229 | -0.20837 | 0.10903  | 0.17368  | ZNF777    | chr7  | - | 1.49E+08 | 1.49E+08 | 3233  |
| ENSG000001508.3824 | 656.2028 | -0.36906 | 0.002469 | 0.005759 | PIK3R4    | chr3  | - | 1.3E+08  | 1.3E+08  | 5015  |
| ENSG000001514.199  | 1640.07  | -1.6697  | 4.27E-28 | 5.06E-27 | ZNF775    | chr7  | + | 1.5E+08  | 1.5E+08  | 2582  |
| ENSG000001276.0646 | 262.8339 | 0.06918  | 0.67329  | 0.75534  | ZNF605    | chr12 | - | 1.33E+08 | 1.34E+08 | 6215  |
| ENSG000001139.4643 | 118.3559 | 0.23686  | 0.29799  | 0.39988  | TRAPPC2   | chrX  | - | 13730363 | 13752754 | 3108  |
| ENSG000001346.1557 | 1.234181 | 7.7291   | 2.60E-32 | 3.63E-31 | RFX8      | chr2  | - | 1.02E+08 | 1.02E+08 | 1948  |
| ENSG000001598.1104 | 519.8796 | 0.20208  | 0.12744  | 0.1984   | MYL6B     | chr12 | + | 56546040 | 56551771 | 1305  |
| ENSG00000138.98395 | 35.53938 | 0.12847  | 0.70773  | 0.7828   | ZNF799    | chr19 | - | 12500830 | 12512085 | 4076  |
| ENSG0000018.164369 | 13.36956 | -0.69218 | 0.24746  | 0.34355  | FGF16     | chrX  | + | 76709648 | 76712769 | 1106  |
| ENSG000001140.8055 | 199.6675 | -0.50024 | 0.067842 | 0.11597  | SIAH1     | chr16 | - | 48390275 | 48482313 | 3352  |
| ENSG000001194.0568 | 252.9904 | -0.38353 | 0.0284   | 0.054075 | C20orf96  | chr20 | - | 251504   | 271390   | 1575  |
| ENSG0000010        | 19.51368 | -5.8984  | 5.75E-07 | 2.10E-06 | ESRRG     | chr1  | - | 2.17E+08 | 2.17E+08 | 5532  |
| ENSG0000011.048164 | 2.324288 | -0.97505 | 0.47014  | 0.57488  | IPO4      | chr14 | - | 24649425 | 24658170 | 3646  |
| ENSG00000114344.91 | 8061.964 | 0.82978  | 3.44E-08 | 1.39E-07 | NCOR2     | chr12 | - | 1.25E+08 | 1.25E+08 | 8708  |
| ENSG00000114.69997 | 32.04886 | -1.1039  | 0.009603 | 0.020246 | SULT1A1   | chr16 | - | 28616903 | 28634946 | 7948  |
| ENSG00000159.48481 | 17.08096 | 1.7752   | 1.27E-06 | 4.50E-06 | ARL9      | chr4  | + | 57371509 | 57390614 | 1258  |
| ENSG0000011923.208 | 2624.454 | -0.4472  | 0.0076   | 0.016325 | PRPF40A   | chr2  | - | 1.54E+08 | 1.54E+08 | 8048  |
| ENSG000001153.1126 | 133.1199 | 0.19922  | 0.35181  | 0.456    | GDAP2     | chr1  | - | 1.18E+08 | 1.18E+08 | 2898  |
| ENSG000001544.9668 | 135.1838 | 2.0069   | 1.12E-37 | 1.84E-36 | TCEAL3    | chrX  | + | 1.03E+08 | 1.03E+08 | 1221  |
| ENSG000001624.9802 | 916.9947 | -0.55268 | 9.07E-05 | 0.00026  | ANAPC7    | chr12 | - | 1.11E+08 | 1.11E+08 | 3045  |
| ENSG00000135.93115 | 27.49656 | 0.3919   | 0.33253  | 0.43584  | TPK1      | chr7  | - | 1.44E+08 | 1.45E+08 | 4429  |
| ENSG000001507.0511 | 339.9319 | 0.57566  | 0.002373 | 0.005548 | SLC6A9    | chr1  | - | 44457172 | 44497139 | 3130  |
| ENSG0000012223.574 | 838.9148 | 1.4052   | 2.69E-40 | 4.76E-39 | AFAP1     | chr4  | - | 7760441  | 7941653  | 7768  |
| ENSG0000015806.436 | 8426.096 | -0.5361  | 0.000534 | 0.001381 | NACA      | chr12 | - | 57106212 | 57125412 | 6629  |
| ENSG0000010.72616  | 0.297015 | 0.51367  | 0.77334  | NA       | HIST1H3C  | chr6  | + | 26045639 | 26046097 | 459   |
| ENSG0000010.580602 | 0.715414 | -0.13184 | 0.94086  | NA       | C1orf186  | chr1  | - | 2.06E+08 | 2.06E+08 | 1665  |
| ENSG000001907.0124 | 1080.994 | -0.25313 | 0.097739 | 0.15837  | MYO18A    | chr17 | - | 27400528 | 27507430 | 7597  |
| ENSG0000010        | 143.3351 | -8.6281  | 1.82E-15 | 1.22E-14 | SPTSSB    | chr3  | - | 1.61E+08 | 1.61E+08 | 3103  |
| ENSG000001221.3556 | 202.1952 | 0.12843  | 0.50927  | 0.61265  | C17orf59  | chr17 | - | 8091652  | 8093564  | 1913  |
| ENSG000001500.5139 | 449.8238 | 0.15283  | 0.53332  | 0.63427  | MAN2A2    | chr15 | + | 91445448 | 91465814 | 6268  |
| ENSG0000011020.264 | 182.5718 | 2.4816   | 4.69E-54 | 1.19E-52 | MME       | chr3  | + | 1.55E+08 | 1.55E+08 | 5622  |

|            |          |          |          |           |           |           |       |   |          |          |       |
|------------|----------|----------|----------|-----------|-----------|-----------|-------|---|----------|----------|-------|
| ENSG000001 | 43.28786 | 148.8463 | -1.766   | 2.38E-07  | 8.99E-07  | FAM72A    | chr1  | + | 2.06E+08 | 2.06E+08 | 2398  |
| ENSG000001 | 0        | 2.07098  | -2.4602  | 0.13507   | 0.20805   | LINC00238 | chr14 | + | 66953072 | 66965271 | 1142  |
| ENSG000001 | 392.2057 | 1756.792 | -2.1601  | 1.66E-51  | 3.97E-50  | CACNA1H   | chr16 | + | 1203241  | 1271771  | 8084  |
| ENSG000001 | 11.53576 | 9.202488 | 0.31296  | 0.59351   | 0.68821   | LINC00610 | chr11 | - | 36290834 | 36294971 | 2738  |
| ENSG000001 | 5725.445 | 617.9904 | 3.2068   | 2.65E-143 | 2.75E-141 | SULF2     | chr20 | - | 46285092 | 46415360 | 4915  |
| ENSG000001 | 1.016461 | 1.623443 | -0.53732 | 0.71959   | 0.79258   | HBG2      | chr11 | - | 5274420  | 5667019  | 1772  |
| ENSG000001 | 509.2347 | 250.3268 | 1.0248   | 2.30E-11  | 1.19E-10  | LAMA2     | chr6  | + | 1.29E+08 | 1.3E+08  | 9640  |
| ENSG000001 | 6678.408 | 3500.11  | 0.93066  | 2.20E-11  | 1.14E-10  | PLXNB2    | chr22 | - | 50713408 | 50746056 | 6383  |
| ENSG000001 | 0        | 578.1286 | -10.443  | 4.11E-22  | 3.80E-21  | AJAP1     | chr1  | + | 4714792  | 4843850  | 2922  |
| ENSG000001 | 220.7621 | 456.9024 | -1.0474  | 2.91E-08  | 1.19E-07  | XRCC2     | chr7  | - | 1.52E+08 | 1.52E+08 | 4728  |
| ENSG000001 | 842.6305 | 1191.731 | -0.49999 | 0.000819  | 0.002061  | MYO6      | chr6  | + | 76458909 | 76629254 | 8665  |
| ENSG000001 | 1323.072 | 798.4895 | 0.72686  | 1.24E-06  | 4.39E-06  | MKL1      | chr22 | - | 40806285 | 41032706 | 4505  |
| ENSG000001 | 3292.864 | 5239.599 | -0.6695  | 2.81E-10  | 1.35E-09  | HDAC2     | chr6  | - | 1.14E+08 | 1.14E+08 | 9874  |
| ENSG000001 | 3.414255 | 3.633731 | -0.09548 | 0.92626   | 0.95082   | ANKRD20A  | chr13 | - | 24513696 | 24520921 | 2796  |
| ENSG000001 | 45.81939 | 62.55852 | -0.4438  | 0.13648   | 0.2097    | ZNF782    | chr9  | - | 99578754 | 99637905 | 4213  |
| ENSG000001 | 0.342542 | 3.976869 | -2.8262  | 0.04093   | 0.074831  | POTEF     | chr2  | - | 1.31E+08 | 1.31E+08 | 4031  |
| ENSG000001 | 158.9168 | 67.11002 | 1.2323   | 3.95E-07  | 1.46E-06  | ZNF846    | chr19 | - | 9862669  | 9903856  | 2016  |
| ENSG000001 | 2689.777 | 0.357707 | 11.753   | 5.12E-40  | 8.99E-39  | MMP1      | chr11 | - | 1.03E+08 | 1.03E+08 | 1970  |
| ENSG000001 | 0        | 0.357707 | -0.41864 | 0.81278   | NA        | UGT2B15   | chr4  | - | 69512348 | 69536346 | 2077  |
| ENSG000001 | 31.78299 | 15.79824 | 0.99216  | 0.022317  | 0.043584  | RIMBP3    | chr22 | - | 20456003 | 20461786 | 5784  |
| ENSG000001 | 8539.562 | 1861.626 | 2.1965   | 4.93E-138 | 4.73E-136 | TCF4      | chr18 | - | 52889562 | 53332018 | 8332  |
| ENSG000001 | 156.8617 | 393.6164 | -1.3245  | 1.72E-16  | 1.22E-15  | WNK3      | chrX  | - | 54219256 | 54385075 | 11341 |
| ENSG000001 | 117.1944 | 268.3728 | -1.1878  | 1.06E-07  | 4.12E-07  | ACN9      | chr7  | + | 96745902 | 96811075 | 2060  |
| ENSG000001 | 725.8635 | 1.370136 | 8.7628   | 1.05E-42  | 1.98E-41  | HRH1      | chr3  | + | 11178779 | 11305243 | 4711  |
| ENSG000001 | 3802.445 | 4839.901 | -0.3477  | 0.001768  | 0.004221  | RABL6     | chr9  | + | 1.4E+08  | 1.4E+08  | 3949  |
| ENSG000001 | 84.39324 | 95.5929  | -0.17513 | 0.50364   | 0.60711   | ZNF136    | chr19 | + | 12273879 | 12300064 | 3579  |
| ENSG000001 | 9.656951 | 17.56334 | -0.83469 | 0.14236   | 0.21695   | GOLGA6L9  | chr15 | + | 83098710 | 83108085 | 6545  |
| ENSG000001 | 396.4376 | 520.0235 | -0.39078 | 0.001371  | 0.003331  | ZKSCAN5   | chr7  | + | 99102274 | 99132323 | 5626  |
| ENSG000001 | 0        | 0.640152 | -0.82869 | 0.63935   | NA        | ZNF502    | chr3  | + | 44754135 | 44765323 | 3270  |
| ENSG000001 | 702.297  | 611.3227 | 0.20075  | 0.16117   | 0.24121   | TRAPPC4   | chr11 | + | 1.19E+08 | 1.19E+08 | 1924  |
| ENSG000001 | 74.73368 | 95.8162  | -0.35247 | 0.24658   | 0.34252   | AC004057  | chr4  | - | 1.14E+08 | 1.14E+08 | 442   |
| ENSG000001 | 71.9592  | 59.89829 | 0.2706   | 0.33986   | 0.44376   | TTC30B    | chr2  | - | 1.78E+08 | 1.78E+08 | 2770  |
| ENSG000001 | 2.987769 | 6.206494 | -0.99413 | 0.26217   | 0.36034   | SLC30A10  | chr1  | - | 2.2E+08  | 2.2E+08  | 3650  |
| ENSG000001 | 1020.783 | 717.3322 | 0.50832  | 2.37E-05  | 7.26E-05  | TECPR2    | chr14 | + | 1.03E+08 | 1.03E+08 | 8686  |
| ENSG000001 | 0.632843 | 1.012429 | -0.45981 | 0.7761    | NA        | TLR7      | chrX  | + | 12885202 | 12908499 | 5011  |
| ENSG000001 | 0.36308  | 1.66715  | -1.5237  | 0.35755   | 0.46184   | FAM180B   | chr11 | + | 47608198 | 47610746 | 1435  |
| ENSG000001 | 18.02931 | 79.57732 | -2.1085  | 1.47E-05  | 4.63E-05  | LINC00173 | chr12 | + | 1.17E+08 | 1.17E+08 | 1597  |
| ENSG000001 | 263.4085 | 392.606  | -0.57382 | 0.002357  | 0.005514  | ZFP62     | chr5  | - | 1.8E+08  | 1.8E+08  | 4020  |
| ENSG000001 | 6.181896 | 2.338857 | 1.3076   | 0.16198   | 0.24226   | Z98881.1  | chr16 | + | 653555   | 653904   | 348   |
| ENSG000001 | 101.7759 | 133.1555 | -0.38461 | 0.1325    | 0.20494   | ERI2      | chr16 | - | 20791515 | 20911671 | 3846  |
| ENSG000001 | 715.5645 | 2387.155 | -1.7354  | 2.98E-43  | 5.73E-42  | TOMM7     | chr7  | - | 22852251 | 22862470 | 778   |
| ENSG000001 | 1.45232  | 25.09056 | -3.9475  | 3.17E-06  | 1.08E-05  | HSH2D     | chr19 | + | 16244838 | 16269386 | 2474  |
| ENSG000001 | 8.100964 | 3.633731 | 1.1009   | 0.16608   | 0.24721   | TRPV1     | chr17 | - | 3468738  | 3500392  | 4170  |
| ENSG000001 | 90.70529 | 245.0354 | -1.4229  | 9.59E-09  | 4.08E-08  | ZNF33B    | chr10 | - | 43069633 | 43134016 | 5945  |
| ENSG000001 | 54.09248 | 27.58806 | 0.95645  | 0.00424   | 0.009539  | PDXDC2P   | chr16 | - | 70010200 | 70099851 | 4184  |
| ENSG000001 | 921.4295 | 916.6771 | 0.007598 | 0.97238   | 0.98479   | ZNF512B   | chr20 | - | 62588055 | 62680113 | 5926  |
| ENSG000001 | 655.6139 | 757.5487 | -0.20847 | 0.21168   | 0.30204   | AMZ2      | chr17 | + | 66243715 | 66253297 | 2402  |
| ENSG000001 | 123.8003 | 467.385  | -1.9107  | 1.18E-26  | 1.33E-25  | ZNF431    | chr19 | + | 21324827 | 21373034 | 3843  |
| ENSG000001 | 0        | 9.900917 | -4.927   | 9.33E-05  | 0.000267  | FAM150A   | chr8  | - | 53446597 | 53478067 | 1217  |
| ENSG000001 | 2260.369 | 694.5693 | 1.6985   | 1.16E-24  | 1.20E-23  | NF1       | chr17 | + | 29421945 | 29709134 | 12425 |
| ENSG000001 | 936.2629 | 823.4418 | 0.18372  | 0.15875   | 0.23815   | VKORC1L1  | chr7  | + | 65338254 | 65424550 | 5899  |
| ENSG000001 | 99.20609 | 211.382  | -1.0913  | 3.07E-09  | 1.36E-08  | ZNF418    | chr19 | - | 58433252 | 58446761 | 3694  |
| ENSG000001 | 349.8818 | 2329.243 | -2.7303  | 1.38E-112 | 9.57E-111 | DAPK1     | chr9  | + | 90112143 | 90323548 | 6012  |
| ENSG000001 | 1.338465 | 3.319731 | -1.1507  | 0.33166   | 0.43484   | HLA-DQA1  | chr6  | + | 32595956 | 32614839 | 5450  |
| ENSG000001 | 5451.749 | 977.3247 | 2.4764   | 8.54E-106 | 5.36E-104 | COL27A1   | chr9  | + | 1.17E+08 | 1.17E+08 | 7790  |
| ENSG000001 | 32.39888 | 21.02386 | 0.61503  | 0.12462   | 0.1948    | CXorf24   | chrX  | + | 47342970 | 47344207 | 1238  |
| ENSG000001 | 712.2935 | 883.2043 | -0.30918 | 0.068818  | 0.11738   | GM2A      | chr5  | + | 1.51E+08 | 1.51E+08 | 3896  |
| ENSG000001 | 10.95515 | 11.54376 | -0.07815 | 0.89865   | 0.92971   | HIST1H2AI | chr6  | + | 27775899 | 27776429 | 531   |
| ENSG000001 | 0        | 31.21367 | -6.5759  | 6.35E-09  | 2.74E-08  | CLPSL2    | chr6  | + | 35744371 | 35747329 | 532   |
| ENSG000001 | 62.59499 | 5.865772 | 3.3435   | 2.53E-13  | 1.49E-12  | S100A2    | chr1  | - | 1.54E+08 | 1.54E+08 | 998   |
| ENSG000001 | 221.476  | 391.7123 | -0.81585 | 0.004466  | 0.010021  | RP4-564F2 | chr20 | - | 37049235 | 37063996 | 2138  |
| ENSG000001 | 138.4813 | 105.1249 | 0.39556  | 0.048813  | 0.087152  | ZNF700    | chr19 | + | 12035883 | 12061588 | 3113  |
| ENSG000001 | 0        | 108.9618 | -8.2619  | 3.35E-14  | 2.09E-13  | POU3F4    | chrX  | + | 82763269 | 82764775 | 1507  |
| ENSG000001 | 0        | 2.872193 | -2.9981  | 0.054193  | 0.095403  | OR14A16   | chr1  | - | 2.48E+08 | 2.48E+08 | 930   |
| ENSG000001 | 0.290301 | 0.951736 | -0.90191 | 0.60254   | NA        | ANKRD20A  | chr9  | + | 67926761 | 67969840 | 3511  |

|                    |          |          |          |          |           |       |   |          |          |       |
|--------------------|----------|----------|----------|----------|-----------|-------|---|----------|----------|-------|
| ENSG000001609.481  | 273.8314 | 2.5506   | 2.93E-85 | 1.35E-83 | CD47      | chr3  | - | 1.08E+08 | 1.08E+08 | 6796  |
| ENSG000001955.0394 | 3212.487 | -1.7482  | 3.65E-48 | 7.94E-47 | TLE1      | chr9  | - | 84198598 | 84304220 | 3893  |
| ENSG000001468.0356 | 246.0515 | 0.92608  | 6.80E-10 | 3.18E-09 | MAML3     | chr4  | - | 1.41E+08 | 1.41E+08 | 6844  |
| ENSG00000180.42846 | 77.5951  | 0.055233 | 0.82332  | 0.87538  | HIST1H2AC | chr6  | + | 27100832 | 27103070 | 2239  |
| ENSG000001630.8321 | 455.0403 | 0.46984  | 0.000166 | 0.00046  | STRN3     | chr14 | - | 31363005 | 31495607 | 3970  |
| ENSG00000134.86668 | 105.5292 | -1.5707  | 0.000762 | 0.001924 | ZNF239    | chr10 | - | 44051792 | 44070066 | 2389  |
| ENSG0000011.649304 | 2.886762 | -0.72828 | 0.52246  | 0.62504  | CTB-134H2 | chr16 | + | 29049923 | 29064047 | 1350  |
| ENSG000001227.6751 | 186.5827 | 0.2879   | 0.11008  | 0.17513  | CTBP1-AS1 | chr4  | + | 1243088  | 1282079  | 5652  |
| ENSG0000017.677084 | 16.23933 | -1.0658  | 0.068837 | 0.11738  | CHRNA     | chr2  | + | 2.33E+08 | 2.33E+08 | 2262  |
| ENSG00000126.93279 | 76.55353 | -1.4998  | 3.58E-06 | 1.21E-05 | ZSCAN16   | chr6  | + | 28092338 | 28097860 | 1328  |
| ENSG0000011706.697 | 264.0324 | 2.6882   | 1.95E-71 | 7.16E-70 | MVB12B    | chr9  | + | 1.29E+08 | 1.29E+08 | 4819  |
| ENSG0000012352.895 | 2233.573 | 0.074743 | 0.51605  | 0.61891  | C6orf106  | chr6  | - | 34555065 | 34664636 | 4418  |
| ENSG000001314.4459 | 296.3666 | 0.083789 | 0.75294  | 0.81973  | ADA       | chr20 | - | 43248163 | 43280874 | 1770  |
| ENSG000001606.1925 | 540.4215 | 0.16615  | 0.17226  | 0.25484  | ARID5A    | chr2  | + | 97202480 | 97218375 | 3079  |
| ENSG0000010        | 2.073397 | -2.2159  | 0.20168  | 0.2903   | PATE2     | chr11 | - | 1.26E+08 | 1.26E+08 | 1657  |
| ENSG000001430.131  | 455.7585 | -0.08573 | 0.55191  | 0.65142  | PPTC7     | chr12 | - | 1.11E+08 | 1.11E+08 | 6926  |
| ENSG0000012.427705 | 2.857624 | -0.23409 | 0.84745  | 0.89291  | TOMM20L   | chr14 | + | 58862634 | 58875419 | 620   |
| ENSG0000012.894453 | 0.640152 | 1.7742   | 0.18883  | 0.27515  | RGPD4     | chr2  | + | 1.08E+08 | 1.09E+08 | 5464  |
| ENSG000001505.008  | 466.5421 | 0.11344  | 0.35624  | 0.46052  | NHLRC2    | chr10 | + | 1.16E+08 | 1.16E+08 | 11051 |
| ENSG000001122.7135 | 67.46767 | 0.85846  | 0.002416 | 0.005642 | ZFP28     | chr19 | + | 57050317 | 57068169 | 4086  |
| ENSG000001393.182  | 13.6383  | 4.7663   | 2.89E-37 | 4.72E-36 | KIAA1211L | chr2  | - | 99410309 | 99552722 | 3907  |
| ENSG00000115.24969 | 25.71615 | -0.74812 | 0.085115 | 0.14086  | CBWD3     | chr9  | + | 70856397 | 70914929 | 2195  |
| ENSG000001524.0027 | 284.8387 | 0.87631  | 6.88E-06 | 2.25E-05 | SCN8A     | chr12 | + | 51984050 | 52203558 | 8466  |
| ENSG00000182.98118 | 5.461941 | 3.8321   | 1.59E-17 | 1.20E-16 | LAMB3     | chr1  | - | 2.1E+08  | 2.1E+08  | 4305  |
| ENSG0000010.72616  | 2.69898  | -1.3899  | 0.38248  | 0.48666  | HIST3H2BB | chr1  | + | 2.29E+08 | 2.29E+08 | 452   |
| ENSG000001116.481  | 209.3337 | -0.83761 | 0.001691 | 0.00405  | KPNA5     | chr6  | + | 1.17E+08 | 1.17E+08 | 5089  |
| ENSG00000199.10258 | 21.89222 | 2.1662   | 1.56E-13 | 9.34E-13 | ANKRD36B  | chr2  | - | 98108978 | 98206428 | 5986  |
| ENSG0000013189.329 | 1094.366 | 1.5411   | 2.60E-39 | 4.49E-38 | ARHGEF12  | chr11 | + | 1.2E+08  | 1.2E+08  | 9660  |
| ENSG0000012.956066 | 1.043983 | 1.288    | 0.32196  | 0.42489  | HCAR1     | chr12 | - | 1.23E+08 | 1.23E+08 | 3612  |
| ENSG000001177.4062 | 194.202  | -0.12816 | 0.6452   | 0.732    | ZNF252P   | chr8  | - | 1.46E+08 | 1.46E+08 | 5210  |
| ENSG0000015592.998 | 947.5195 | 2.5562   | 2.19E-55 | 5.70E-54 | PDLIM7    | chr5  | - | 1.77E+08 | 1.77E+08 | 1904  |
| ENSG00000163002.58 | 33635.86 | 0.90491  | 1.71E-26 | 1.90E-25 | FLNA      | chrX  | - | 1.54E+08 | 1.54E+08 | 8486  |
| ENSG00000141.33725 | 25.60362 | 0.69072  | 0.057535 | 0.1006   | TMEM26    | chr10 | - | 63166401 | 63213208 | 5151  |
| ENSG0000010.290301 | 2.056411 | -1.914   | 0.21479  | 0.3057   | RPS26P11  | chrX  | + | 71264395 | 71264742 | 348   |
| ENSG0000018.214818 | 5.347004 | 0.59323  | 0.44854  | 0.55396  | RIMBP3B   | chr22 | + | 21737663 | 21743446 | 5784  |
| ENSG000001522.1591 | 296.4028 | 0.81421  | 4.19E-06 | 1.40E-05 | SRGAP1    | chr12 | + | 64238073 | 64541613 | 8943  |
| ENSG0000011398.245 | 738.2847 | 0.92065  | 2.30E-11 | 1.19E-10 | FAM3C     | chr7  | - | 1.21E+08 | 1.21E+08 | 2508  |
| ENSG000001459.4496 | 538.7811 | -0.22819 | 0.13905  | 0.2127   | NOP9      | chr14 | + | 24769068 | 24778330 | 6033  |
| ENSG0000010        | 0.700845 | -0.87835 | 0.62047  | NA       | OR2T4     | chr1  | + | 2.49E+08 | 2.49E+08 | 1047  |
| ENSG000001709.7527 | 1685.652 | -1.2456  | 1.10E-15 | 7.51E-15 | SLC39A10  | chr2  | + | 1.96E+08 | 1.97E+08 | 5432  |
| ENSG0000012.883288 | 2.087966 | 0.42742  | 0.72828  | 0.79917  | RP11-425L | chr4  | - | 1.41E+08 | 1.41E+08 | 1985  |
| ENSG000001188.0001 | 2.38498  | 6.1785   | 2.57E-29 | 3.19E-28 | CASP4     | chr11 | - | 1.05E+08 | 1.05E+08 | 4745  |
| ENSG00000133.1155  | 0        | 6.6421   | 4.74E-09 | 2.06E-08 | AL117340  | chr10 | - | 31650356 | 31652937 | 2582  |
| ENSG0000013700.266 | 3670.808 | 0.011386 | 0.92357  | 0.94853  | AP2A1     | chr19 | + | 50270225 | 50310370 | 3388  |
| ENSG000001471.3924 | 117.5872 | 2.0016   | 1.25E-34 | 1.88E-33 | PCDHB16   | chr5  | + | 1.41E+08 | 1.41E+08 | 4814  |
| ENSG00000128.98544 | 17.53246 | 0.69834  | 0.32612  | 0.42905  | HIST1H3E  | chr6  | + | 26225383 | 26225844 | 462   |
| ENSG00000164.54495 | 107.6013 | -0.73038 | 0.001583 | 0.003805 | ZNF585A   | chr19 | - | 37597636 | 37663643 | 6547  |
| ENSG000001613.2271 | 171.2768 | 1.8346   | 3.20E-31 | 4.30E-30 | FUT11     | chr10 | + | 75532049 | 75538821 | 2408  |
| ENSG0000010.580602 | 0.343138 | 0.37443  | 0.8337   | NA       | NXF4      | chrX  | + | 1.02E+08 | 1.02E+08 | 3617  |
| ENSG000001123.6838 | 159.4003 | -0.36489 | 0.10466  | 0.16771  | LINC00087 | chrX  | - | 1.34E+08 | 1.34E+08 | 2696  |
| ENSG000001374.7918 | 70.60854 | 2.4001   | 1.81E-40 | 3.22E-39 | ANXA4     | chr2  | + | 69947923 | 70053596 | 4418  |
| ENSG000001337.6327 | 906.3441 | -1.4223  | 5.25E-23 | 5.07E-22 | LAGE3     | chrX  | - | 1.54E+08 | 1.54E+08 | 949   |
| ENSG00000112.25254 | 0.297015 | 4.4385   | 0.0002   | 0.000549 | AL360004  | chr9  | - | 1.33E+08 | 1.33E+08 | 3258  |
| ENSG000001135.5424 | 63.67515 | 1.0838   | 0.000614 | 0.001572 | WDR5B     | chr3  | - | 1.22E+08 | 1.22E+08 | 4168  |
| ENSG0000010        | 6.16037  | -4.1471  | 0.002907 | 0.006713 | LCA10     | chrX  | + | 1.53E+08 | 1.53E+08 | 1391  |
| ENSG00000137.12927 | 42.18301 | -0.18136 | 0.74892  | 0.81627  | FAM163B   | chr9  | - | 1.36E+08 | 1.36E+08 | 811   |
| ENSG0000013.350849 | 1.949596 | 0.68598  | 0.52151  | 0.62413  | A-575C2.4 | chr16 | + | 28763108 | 28784128 | 2123  |
| ENSG000001106.5811 | 77.63478 | 0.45609  | 0.049226 | 0.087778 | WDR45     | chrX  | - | 48929385 | 48958108 | 3079  |
| ENSG0000012992.862 | 1823.917 | 0.71382  | 1.16E-15 | 7.90E-15 | METTL9    | chr16 | + | 21608539 | 21668794 | 5603  |
| ENSG00000152.1255  | 222.6984 | -2.0758  | 5.36E-18 | 4.11E-17 | ZNF138    | chr7  | + | 64254766 | 64294054 | 2582  |
| ENSG00000111.18205 | 147.3198 | -3.6824  | 2.42E-26 | 2.67E-25 | ZNF429    | chr19 | + | 21679484 | 21739072 | 2233  |
| ENSG000001152.9079 | 172.9648 | -0.1788  | 0.37088  | 0.47534  | ZNF470    | chr19 | + | 57078880 | 57100279 | 7151  |
| ENSG000001286.7839 | 112.9403 | 1.3402   | 1.19E-13 | 7.16E-13 | SERTAD1   | chr19 | - | 40927499 | 40931932 | 2114  |
| ENSG00000179.03147 | 257.6519 | -1.6907  | 1.22E-06 | 4.33E-06 | ZNF100    | chr19 | - | 21905568 | 21950430 | 5745  |
| ENSG000001477.7447 | 347.3023 | 0.46008  | 0.000349 | 0.000927 | CXorf40B  | chrX  | - | 1.49E+08 | 1.49E+08 | 1653  |

|                    |          |          |           |           |           |       |   |          |          |       |
|--------------------|----------|----------|-----------|-----------|-----------|-------|---|----------|----------|-------|
| ENSG000001391.6906 | 2500.925 | -2.6732  | 3.88E-103 | 2.33E-101 | ZNF398    | chr7  | + | 1.49E+08 | 1.49E+08 | 5427  |
| ENSG000001283.9112 | 526.2637 | -0.88382 | 0.001454  | 0.003519  | ZSCAN25   | chr7  | + | 99214569 | 99230030 | 5722  |
| ENSG0000017681.375 | 1616.192 | 2.2477   | 1.58E-143 | 1.65E-141 | ANXA6     | chr5  | - | 1.5E+08  | 1.51E+08 | 2593  |
| ENSG00000158.77658 | 13.38574 | 2.105    | 5.95E-06  | 1.96E-05  | ZNF441    | chr19 | + | 11877815 | 11894893 | 4356  |
| ENSG000001995.8811 | 874.2606 | 0.18806  | 0.35384   | 0.45802   | GMFB      | chr14 | - | 54941202 | 54955914 | 6721  |
| ENSG00000154.52655 | 10.04499 | 2.3854   | 7.63E-08  | 3.00E-07  | SIGLEC15  | chr18 | + | 43405477 | 43424045 | 2580  |
| ENSG00000111.4219  | 0.594029 | 3.6905   | 0.000653  | 0.001666  | Z73979.1  | chr22 | - | 33210035 | 33210372 | 333   |
| ENSG00000134.26652 | 59.83901 | -0.78709 | 0.082391  | 0.13698   | ZNF420    | chr19 | + | 37498759 | 37621216 | 3535  |
| ENSG0000011.359003 | 15.04886 | -3.2642  | 0.000227  | 0.000616  | ZNF763    | chr19 | + | 12035890 | 12091196 | 2621  |
| ENSG000001236.1189 | 336.2306 | -0.50961 | 0.010866  | 0.022663  | ZMYM1     | chr1  | + | 35525387 | 35581460 | 4203  |
| ENSG0000010        | 0.640152 | -0.82869 | 0.63935   | NA        | DTHD1     | chr4  | + | 36283244 | 36347378 | 4335  |
| ENSG00000110.95255 | 18.19134 | -0.70687 | 0.24514   | 0.34094   | HIST1H4C  | chr6  | + | 26104104 | 26104518 | 415   |
| ENSG000001237.102  | 108.2609 | 1.1295   | 1.52E-09  | 6.92E-09  | RP5-874C2 | chr6  | + | 28234788 | 28245974 | 2808  |
| ENSG0000011421.891 | 945.8214 | 0.58755  | 3.86E-07  | 1.43E-06  | MAFG      | chr17 | - | 79876146 | 79885590 | 5040  |
| ENSG0000010        | 0.654722 | -0.83442 | 0.63731   | NA        | RP11-132C | chr1  | - | 2.48E+08 | 2.48E+08 | 963   |
| ENSG000001396.0002 | 612.3299 | -0.62695 | 0.000423  | 0.001109  | ARRDC1    | chr9  | + | 1.41E+08 | 1.41E+08 | 3185  |
| ENSG0000010.995923 | 0.686276 | 0.39213  | 0.8081    | NA        | AC010243. | chr5  | + | 87514708 | 87515080 | 369   |
| ENSG000001949.945  | 663.8091 | 0.51498  | 0.004394  | 0.009869  | KIAA1671  | chr22 | + | 25348697 | 25593415 | 10490 |
| ENSG0000016202.164 | 2775.816 | 1.1589   | 2.31E-29  | 2.88E-28  | IGF2R     | chr6  | + | 1.6E+08  | 1.61E+08 | 9091  |
| ENSG0000010        | 0.297015 | -0.41864 | 0.81278   | NA        | LCE1C     | chr1  | - | 1.53E+08 | 1.53E+08 | 695   |
| ENSG0000010        | 2.024857 | -2.2291  | 0.19662   | 0.28458   | NPSR1-AS1 | chr7  | - | 34386124 | 34911194 | 4740  |
| ENSG000001150.3682 | 166.1672 | -0.14508 | 0.65392   | 0.73897   | GAL3ST4   | chr7  | - | 99756867 | 99766373 | 3162  |
| ENSG0000010        | 0.98329  | -1.2878  | 0.47019   | NA        | RP11-573C | chr3  | - | 1.86E+08 | 1.86E+08 | 770   |
| ENSG00000114768.45 | 8334.014 | 0.82439  | 9.58E-11  | 4.74E-10  | DYNC1H1   | chr14 | + | 1.02E+08 | 1.03E+08 | 14333 |
| ENSG00000136.99569 | 4.346729 | 2.9923   | 3.46E-06  | 1.17E-05  | SLC6A17   | chr1  | + | 1.11E+08 | 1.11E+08 | 6427  |
| ENSG0000011861.673 | 2441.345 | -0.39038 | 0.001046  | 0.002585  | PCBP2     | chr12 | + | 53835525 | 53874946 | 3167  |
| ENSG000001610.9676 | 572.7225 | 0.09219  | 0.50184   | 0.60534   | ZGPAT     | chr20 | + | 62338794 | 62370456 | 4232  |
| ENSG0000011296.965 | 2469.497 | -0.92807 | 4.07E-12  | 2.22E-11  | SLC25A29  | chr14 | - | 1.01E+08 | 1.01E+08 | 5169  |
| ENSG000001892.2216 | 470.599  | 0.9228   | 7.32E-15  | 4.77E-14  | PGAP1     | chr2  | - | 1.98E+08 | 1.98E+08 | 8942  |
| ENSG0000011039.078 | 1108.843 | -0.09416 | 0.43883   | 0.54452   | SRC       | chr20 | + | 35973088 | 36034453 | 4631  |
| ENSG00000138.96358 | 181.9478 | -2.2016  | 4.44E-16  | 3.08E-15  | ZNF682    | chr19 | - | 20107867 | 20150315 | 3769  |
| ENSG000001132.0881 | 175.6774 | -0.41052 | 0.060287  | 0.10485   | ZNF772    | chr19 | - | 57978031 | 57988938 | 5419  |
| ENSG0000012527.725 | 1730.3   | 0.54544  | 0.003151  | 0.007242  | PCNXL3    | chr11 | + | 65383244 | 65404910 | 7105  |
| ENSG0000016.378881 | 1.029414 | 2.314    | 0.051696  | 0.091581  | ADAM32    | chr8  | + | 38964509 | 39142430 | 6871  |
| ENSG0000015.704962 | 3.818224 | 0.5464   | 0.60553   | 0.69874   | ACSL5     | chr10 | + | 1.14E+08 | 1.14E+08 | 3380  |
| ENSG00000114.121   | 30.03622 | -1.0521  | 0.14439   | 0.21964   | AL133458. | chr6  | - | 1.67E+08 | 1.67E+08 | 2298  |
| ENSG000001206.6443 | 466.0886 | -1.1702  | 1.34E-15  | 9.11E-15  | LRRC8B    | chr1  | + | 89990395 | 90063423 | 7593  |
| ENSG0000013.434793 | 9.214641 | -1.357   | 0.11662   | 0.18433   | RP11-452C | chr11 | + | 17249817 | 17250698 | 882   |
| ENSG000001985.0021 | 384.5183 | 1.3547   | 1.85E-23  | 1.82E-22  | ABC8      | chr7  | + | 1.51E+08 | 1.51E+08 | 4683  |
| ENSG0000018.869991 | 24.70284 | -1.4357  | 0.011551  | 0.023949  | HIST1H3J  | chr6  | - | 27858093 | 27860884 | 522   |
| ENSG0000017483.891 | 5707.617 | 0.3905   | 0.000866  | 0.00217   | SND1      | chr7  | + | 1.27E+08 | 1.28E+08 | 3476  |
| ENSG000001164.8165 | 84.22737 | 0.96277  | 6.82E-06  | 2.23E-05  | ZNF785    | chr16 | - | 30585061 | 30597092 | 3282  |
| ENSG0000010        | 3.993854 | -3.4305  | 0.023622  | 0.045871  | SULT1A2   | chr16 | - | 28603264 | 28608430 | 1991  |
| ENSG00000116.61904 | 9.938176 | 0.70894  | 0.24919   | 0.34549   | NEK5      | chr13 | - | 52611093 | 52703214 | 2918  |
| ENSG0000011035.609 | 1169.178 | -0.1743  | 0.37165   | 0.47605   | PSMD12    | chr17 | - | 65334032 | 65362743 | 4406  |
| ENSG0000010        | 0.357707 | -0.41864 | 0.81278   | NA        | OR2B4P    | chr6  | + | 29258488 | 29259430 | 943   |
| ENSG0000010        | 14.39414 | -5.4644  | 6.95E-06  | 2.27E-05  | GPR123    | chr10 | + | 1.35E+08 | 1.35E+08 | 4283  |
| ENSG00000118.33077 | 9.329578 | 0.92995  | 0.10953   | 0.17433   | BX936347. | chrX  | - | 1.54E+08 | 1.54E+08 | 255   |
| ENSG0000011.431782 | 123.5853 | -6.1911  | 4.64E-16  | 3.22E-15  | PIWIL2    | chr8  | + | 22132810 | 22215076 | 5128  |
| ENSG00000190.12371 | 6.685586 | 3.7053   | 5.80E-17  | 4.23E-16  | FLJ27365  | chr22 | + | 46449749 | 46509808 | 4560  |
| ENSG0000012497.419 | 583.0886 | 2.0919   | 7.81E-28  | 9.20E-27  | C20orf112 | chr20 | - | 31030862 | 31172876 | 5991  |
| ENSG00000111.25662 | 36.759   | -1.6868  | 0.000141  | 0.000394  | C9orf169  | chr9  | + | 1.4E+08  | 1.4E+08  | 1297  |
| ENSG00000136.68143 | 6.413677 | 2.4399   | 3.46E-06  | 1.17E-05  | SLC22A4   | chr5  | + | 1.32E+08 | 1.32E+08 | 2201  |
| ENSG0000010        | 0.297015 | -0.41864 | 0.81278   | NA        | KB-1592A4 | chr22 | - | 21468896 | 21478740 | 4833  |
| ENSG0000010.995923 | 0.297015 | 1.0163   | 0.54122   | NA        | ZSCAN5B   | chr19 | - | 56700939 | 56709289 | 2059  |
| ENSG0000012107.189 | 617.5631 | 1.7683   | 7.37E-48  | 1.59E-46  | ENTPD4    | chr8  | - | 23243296 | 23315208 | 5861  |
| ENSG000001215.5461 | 240.2624 | -0.15441 | 0.38671   | 0.49095   | C1D       | chr2  | - | 68268262 | 68338080 | 2233  |
| ENSG0000013401.197 | 2193.784 | 0.63258  | 4.45E-10  | 2.11E-09  | TBC1D9B   | chr5  | - | 1.79E+08 | 1.79E+08 | 5173  |
| ENSG0000013.112789 | 20.72597 | -2.6347  | 0.000544  | 0.001402  | HIST1H4J  | chr6  | + | 27791884 | 27792257 | 374   |
| ENSG0000010.290301 | 0        | 0.4146   | 0.81455   | NA        | SLC2A7    | chr1  | - | 9063359  | 9086404  | 1539  |
| ENSG00000161.24715 | 42.31077 | 0.52594  | 0.072674  | 0.12306   | FAM110D   | chr1  | + | 26485511 | 26489119 | 1524  |
| ENSG00000118.11244 | 1.029414 | 3.8481   | 3.76E-05  | 0.000113  | SERPINA1  | chr14 | - | 94843084 | 94857030 | 3532  |
| ENSG0000010        | 0.357707 | -0.41864 | 0.81278   | NA        | LINC00336 | chr6  | - | 33553883 | 33561115 | 2107  |
| ENSG0000010.290301 | 4.320007 | -2.9641  | 0.031099  | 0.058521  | TPSB2     | chr16 | - | 1277272  | 1280214  | 1211  |
| ENSG0000014989.108 | 974.5028 | 2.353    | 3.24E-91  | 1.64E-89  | KANK2     | chr19 | - | 11274943 | 11308467 | 5231  |

|            |          |          |          |           |           |           |       |   |          |          |       |
|------------|----------|----------|----------|-----------|-----------|-----------|-------|---|----------|----------|-------|
| ENSG000001 | 24.77387 | 52.4043  | -1.082   | 0.002471  | 0.005763  | EIF4BP6   | chr7  | + | 1.04E+08 | 1.04E+08 | 1828  |
| ENSG000001 | 20.72515 | 209.3646 | -3.2655  | 4.40E-11  | 2.24E-10  | C6orf141  | chr6  | + | 49518113 | 49529620 | 1820  |
| ENSG000001 | 747.3403 | 567.4068 | 0.39577  | 0.041683  | 0.075986  | GTF2E2    | chr8  | - | 30435835 | 30515768 | 1762  |
| ENSG000001 | 67.06002 | 101.3083 | -0.59615 | 0.012076  | 0.024954  | RAD54B    | chr8  | - | 95384188 | 95487337 | 3068  |
| ENSG000001 | 5.923298 | 86.87366 | -3.8087  | 3.19E-17  | 2.36E-16  | ZNF165    | chr6  | + | 28048753 | 28057341 | 2107  |
| ENSG000001 | 689.7736 | 1151.573 | -0.73837 | 1.49E-07  | 5.74E-07  | SYNGAP1   | chr6  | + | 33387847 | 33421466 | 5916  |
| ENSG000001 | 6.132261 | 10.16067 | -0.70306 | 0.3433    | 0.44731   | RP11-589F | chr5  | - | 70070478 | 70074135 | 3658  |
| ENSG000001 | 9.084908 | 12.86777 | -0.46508 | 0.50677   | 0.61029   | RAMP2-AS1 | chr17 | - | 40905932 | 40913275 | 3118  |
| ENSG000001 | 318.9877 | 70.1416  | 2.1768   | 2.40E-30  | 3.09E-29  | FITM2     | chr20 | - | 42931478 | 42939809 | 4597  |
| ENSG000001 | 358.602  | 716.9705 | -0.9983  | 1.12E-12  | 6.35E-12  | BLM       | chr15 | + | 91260558 | 91358859 | 4555  |
| ENSG000001 | 366.4    | 46.17344 | 2.9824   | 1.32E-38  | 2.25E-37  | RP11-366L | chr12 | - | 66245120 | 66275947 | 4617  |
| ENSG000001 | 215.1855 | 233.9951 | -0.11805 | 0.53643   | 0.63743   | ZNF720    | chr16 | + | 31724550 | 31806190 | 5994  |
| ENSG000001 | 0        | 1.043983 | -1.3473  | 0.44976   | NA        | GATA3-AS1 | chr10 | - | 8092413  | 8095447  | 2214  |
| ENSG000001 | 568.5832 | 986.6619 | -0.79283 | 1.61E-07  | 6.15E-07  | DDI2      | chr1  | + | 15943995 | 15995539 | 10625 |
| ENSG000001 | 0        | 7.074847 | -4.3997  | 0.000973  | 0.002419  | AC060834. | chr7  | + | 9765870  | 9767915  | 2032  |
| ENSG000001 | 1280.536 | 558.2475 | 1.1954   | 4.35E-24  | 4.38E-23  | SVIL      | chr10 | - | 29746267 | 30025710 | 7994  |
| ENSG000001 | 0        | 7.501368 | -4.4919  | 0.000694  | 0.001763  | C17orf102 | chr17 | - | 32901142 | 32906388 | 3997  |
| ENSG000001 | 935.1462 | 1414.102 | -0.59606 | 1.28E-09  | 5.86E-09  | TRIM33    | chr1  | - | 1.15E+08 | 1.15E+08 | 8339  |
| ENSG000001 | 3885.628 | 704.5679 | 2.4609   | 2.47E-106 | 1.56E-104 | LRP10     | chr14 | + | 23340822 | 23350789 | 6886  |
| ENSG000001 | 686.5747 | 725.9132 | -0.0798  | 0.5643    | 0.66232   | PELI1     | chr2  | - | 64319786 | 64371588 | 3750  |
| ENSG000001 | 3.672853 | 11.53893 | -1.5891  | 0.029854  | 0.056505  | ZNF833P   | chr19 | + | 11750591 | 11797382 | 3381  |
| ENSG000001 | 0.995923 | 0        | 1.4959   | 0.39264   | NA        | AC032027. | chr8  | + | 57868647 | 57868875 | 228   |
| ENSG000001 | 734.7858 | 579.8527 | 0.34086  | 0.024706  | 0.047741  | ZNF655    | chr7  | + | 99156029 | 99205433 | 4886  |
| ENSG000001 | 443.4891 | 664.038  | -0.5798  | 0.003308  | 0.007578  | MRPL21    | chr11 | - | 68658744 | 68671303 | 2283  |
| ENSG000001 | 632.8315 | 557.3534 | 0.18178  | 0.45416   | 0.55948   | UAP1L1    | chr9  | + | 1.4E+08  | 1.4E+08  | 4412  |
| ENSG000001 | 1.306762 | 9.275334 | -2.5744  | 0.009765  | 0.020566  | BNIP3P1   | chr14 | + | 28733596 | 28735180 | 1585  |
| ENSG000001 | 0.36308  | 0        | 0.4146   | 0.81455   | NA        | ZNF98     | chr19 | - | 22573821 | 22715287 | 2338  |
| ENSG000001 | 2.229907 | 7.374278 | -1.5795  | 0.080753  | 0.13459   | FBXL22    | chr15 | + | 63889552 | 63894627 | 1526  |
| ENSG000001 | 167.4095 | 306.7669 | -0.86901 | 4.49E-07  | 1.65E-06  | ZNF786    | chr7  | - | 1.49E+08 | 1.49E+08 | 3144  |
| ENSG000001 | 136.7962 | 236.9048 | -0.78592 | 1.82E-05  | 5.66E-05  | ZNF517    | chr8  | + | 1.46E+08 | 1.46E+08 | 3191  |
| ENSG000001 | 75.28356 | 360.562  | -2.2463  | 1.21E-19  | 1.01E-18  | ZNF675    | chr19 | - | 23708433 | 23870022 | 4227  |
| ENSG000001 | 77.42512 | 80.20049 | -0.05029 | 0.90495   | 0.93432   | SLC22A5   | chr5  | + | 1.32E+08 | 1.32E+08 | 10435 |
| ENSG000001 | 0.342542 | 0        | 0.4146   | 0.81455   | NA        | OR8S1     | chr12 | + | 48901137 | 48923680 | 2209  |
| ENSG000001 | 1288.652 | 54.14021 | 4.5599   | 3.57E-100 | 2.02E-98  | DACT3     | chr19 | - | 47150869 | 47164395 | 3085  |
| ENSG000001 | 777.9037 | 377.9036 | 1.0388   | 6.72E-13  | 3.86E-12  | ADARB1    | chr21 | + | 46493768 | 46646478 | 7027  |
| ENSG000001 | 12.77235 | 49.59105 | -1.9324  | 3.90E-05  | 0.000117  | ZNF860    | chr3  | + | 32023263 | 32033120 | 3098  |
| ENSG000001 | 2647.832 | 3407.924 | -0.36385 | 0.00012   | 0.000338  | HTT       | chr4  | + | 3076408  | 3245676  | 14438 |
| ENSG000001 | 16.92988 | 1.387121 | 3.4144   | 9.63E-05  | 0.000275  | C5AR1     | chr19 | + | 47793280 | 47825323 | 2311  |
| ENSG000001 | 0.943682 | 7.812078 | -2.6343  | 0.023282  | 0.045276  | DIO3      | chr14 | + | 1.02E+08 | 1.02E+08 | 2102  |
| ENSG000001 | 0        | 134.0379 | -8.5388  | 3.80E-15  | 2.51E-14  | CYP2B6    | chr19 | + | 41497204 | 41524303 | 3054  |
| ENSG000001 | 3.652315 | 10.93429 | -1.359   | 0.2716    | 0.37099   | HIST1H3D  | chr6  | - | 26197068 | 26199521 | 865   |
| ENSG000001 | 29.8966  | 18.70199 | 0.66834  | 0.10766   | 0.17189   | DCHS2     | chr4  | - | 1.55E+08 | 1.55E+08 | 8912  |
| ENSG000001 | 0        | 0.343138 | -0.41864 | 0.81278   | NA        | GOLGA6L1  | chr15 | + | 22736246 | 22746002 | 3822  |
| ENSG000001 | 596.9183 | 56.13673 | 3.4007   | 7.39E-80  | 3.10E-78  | VEPH1     | chr3  | - | 1.57E+08 | 1.57E+08 | 4202  |
| ENSG000001 | 0        | 0.357707 | -0.41864 | 0.81278   | NA        | FABP12    | chr8  | - | 82437216 | 82443613 | 551   |
| ENSG000001 | 63.228   | 126.1729 | -0.98573 | 7.14E-05  | 0.000207  | SHPK      | chr17 | - | 3511556  | 3539616  | 3838  |
| ENSG000001 | 0.632843 | 0.686276 | -0.05496 | 0.97464   | NA        | GGT3P     | chr22 | - | 18761178 | 18830912 | 2340  |
| ENSG000001 | 391.8209 | 145.132  | 1.4205   | 1.64E-06  | 5.76E-06  | IPP       | chr1  | - | 46159996 | 46216322 | 3113  |
| ENSG000001 | 0        | 0.357707 | -0.41864 | 0.81278   | NA        | OPALIN    | chr10 | - | 98102973 | 98119092 | 3629  |
| ENSG000001 | 0        | 0.654722 | -0.83442 | 0.63731   | NA        | OR13G1    | chr1  | - | 2.48E+08 | 2.48E+08 | 1046  |
| ENSG000001 | 325.2972 | 19.59062 | 4.0212   | 6.75E-56  | 1.78E-54  | MAP3K5    | chr6  | - | 1.37E+08 | 1.37E+08 | 5197  |
| ENSG000001 | 203.6559 | 830.1843 | -2.0246  | 5.79E-43  | 1.10E-41  | OGDHL     | chr10 | - | 50942689 | 50970425 | 3704  |
| ENSG000001 | 2.386629 | 0        | 2.6941   | 0.092956  | 0.15198   | C16orf47  | chr16 | - | 73160536 | 73178346 | 1308  |
| ENSG000001 | 0        | 12.67516 | -5.2965  | 1.39E-05  | 4.38E-05  | CYP2F1    | chr19 | + | 41620337 | 41634271 | 2080  |
| ENSG000001 | 912.5673 | 270.4421 | 1.7516   | 7.53E-32  | 1.03E-30  | GSTK1     | chr7  | + | 1.43E+08 | 1.43E+08 | 2692  |
| ENSG000001 | 5559.602 | 10947.45 | -0.97573 | 2.19E-10  | 1.06E-09  | HNRNPAB   | chr5  | + | 1.78E+08 | 1.78E+08 | 1796  |
| ENSG000001 | 0        | 0.686276 | -0.84936 | 0.6309    | NA        | OR2L5     | chr1  | + | 2.48E+08 | 2.48E+08 | 939   |
| ENSG000001 | 782.772  | 990.8593 | -0.33924 | 0.003823  | 0.008663  | STMN3     | chr20 | - | 62271061 | 62284780 | 2255  |
| ENSG000001 | 13.11228 | 23.45168 | -0.81516 | 0.11258   | 0.17872   | STMN1H2BH | chr6  | + | 26251879 | 26252303 | 425   |
| ENSG000001 | 486.4491 | 4062.345 | -3.0547  | 7.75E-80  | 3.25E-78  | PDGFA     | chr7  | - | 536895   | 559933   | 2305  |
| ENSG000001 | 0.290301 | 38.18083 | -6.0099  | 2.16E-08  | 8.93E-08  | AC005276. | chr7  | + | 1.26E+08 | 1.26E+08 | 837   |
| ENSG000001 | 1.814586 | 0.640152 | 1.1259   | 0.46666   | 0.57145   | GYPE      | chr4  | - | 1.45E+08 | 1.45E+08 | 1684  |
| ENSG000001 | 2072.562 | 152.5693 | 3.7485   | 9.16E-89  | 4.48E-87  | COL13A1   | chr10 | + | 71561644 | 71724031 | 3136  |
| ENSG000001 | 2.645227 | 20.49381 | -2.829   | 0.000115  | 0.000325  | SPN       | chr16 | + | 29674300 | 29682187 | 6854  |
| ENSG000001 | 11.89884 | 75.38495 | -2.6377  | 5.67E-13  | 3.27E-12  | ZNF695    | chr1  | - | 2.47E+08 | 2.47E+08 | 3340  |

|            |          |          |          |           |           |           |       |   |          |          |       |
|------------|----------|----------|----------|-----------|-----------|-----------|-------|---|----------|----------|-------|
| ENSG000001 | 0        | 0.343138 | -0.41864 | 0.81278   | NA        | ADAM3A    | chr8  | - | 39308564 | 39380371 | 2627  |
| ENSG000001 | 31.4869  | 14.403   | 1.1176   | 0.015416  | 0.031159  | PCDHB11   | chr5  | + | 1.41E+08 | 1.41E+08 | 3271  |
| ENSG000001 | 394.6609 | 509.9605 | -0.36856 | 0.011157  | 0.02321   | ZNF628    | chr19 | + | 55987699 | 55995854 | 3847  |
| ENSG000001 | 795.569  | 251.8552 | 1.6521   | 4.29E-13  | 2.50E-12  | SLC2A10   | chr20 | + | 45338126 | 45364965 | 4368  |
| ENSG000001 | 1.503747 | 51.2527  | -4.753   | 1.72E-10  | 8.38E-10  | ZNF665    | chr19 | - | 53662466 | 53696639 | 2352  |
| ENSG000001 | 222.3225 | 443.7404 | -0.99335 | 3.28E-06  | 1.11E-05  | RPF2      | chr6  | + | 1.11E+08 | 1.11E+08 | 1531  |
| ENSG000001 | 1.390706 | 1.430828 | -0.02403 | 0.98818   | 0.99335   | AL627171. | chr14 | - | 50300810 | 50311552 | 60    |
| ENSG000001 | 0.290301 | 1.372552 | -1.154   | 0.51326   | NA        | SLC28A3   | chr9  | - | 86890372 | 86955672 | 4887  |
| ENSG000001 | 0        | 0.640152 | -0.82869 | 0.63935   | NA        | FAM177B   | chr1  | + | 2.23E+08 | 2.23E+08 | 1994  |
| ENSG000001 | 1088.611 | 957.018  | 0.18489  | 0.2966    | 0.39867   | MIB2      | chr1  | + | 1550795  | 1565990  | 4247  |
| ENSG000001 | 1711.802 | 974.1684 | 0.81167  | 6.88E-08  | 2.72E-07  | MYO5A     | chr15 | - | 52599480 | 52821247 | 12225 |
| ENSG000001 | 14.19313 | 5.415818 | 1.3027   | 0.10937   | 0.17413   | C5orf56   | chr5  | + | 1.32E+08 | 1.32E+08 | 2025  |
| ENSG000001 | 0.995923 | 3.137654 | -1.4325  | 0.25485   | 0.35199   | GZMM      | chr19 | + | 544034   | 549919   | 912   |
| ENSG000001 | 437.6017 | 235.0693 | 0.89509  | 2.42E-09  | 1.08E-08  | ATG7      | chr3  | + | 11313995 | 11599139 | 4959  |
| ENSG000001 | 0        | 0.343138 | -0.41864 | 0.81278   | NA        | PRAMEF24  | chr22 | - | 22345496 | 22398332 | 3038  |
| ENSG000001 | 8.972681 | 0        | 4.748    | 0.000244  | 0.000661  | RP11-460N | chr9  | + | 69830288 | 69848759 | 3275  |
| ENSG000001 | 1467.597 | 1727.715 | -0.2353  | 0.02973   | 0.056323  | SIPA111   | chr14 | + | 71787166 | 72207946 | 7831  |
| ENSG000001 | 82.71321 | 54.34564 | 0.60807  | 0.039645  | 0.072813  | TTC30A    | chr2  | - | 1.78E+08 | 1.78E+08 | 4669  |
| ENSG000001 | 76.43702 | 25.78825 | 1.5387   | 3.13E-05  | 9.48E-05  | SSPO      | chr7  | + | 1.49E+08 | 1.5E+08  | 15583 |
| ENSG000001 | 0        | 8.996977 | -4.5702  | 0.001172  | 0.002878  | ELANE     | chr19 | + | 851014   | 856242   | 1023  |
| ENSG000001 | 885.7172 | 619.0015 | 0.51534  | 0.001059  | 0.002614  | RAB40C    | chr16 | + | 639357   | 679272   | 2717  |
| ENSG000001 | 358.1545 | 279.539  | 0.35663  | 0.035454  | 0.065928  | PIGN      | chr18 | - | 59710800 | 59854351 | 5501  |
| ENSG000001 | 15.9254  | 376.8456 | -4.5476  | 7.27E-65  | 2.37E-63  | COL4A6    | chrX  | - | 1.07E+08 | 1.08E+08 | 6700  |
| ENSG000001 | 59.66288 | 23.4404  | 1.3305   | 0.000101  | 0.000288  | ZNF624    | chr17 | - | 16524051 | 16557170 | 4241  |
| ENSG000001 | 52.07505 | 67.79953 | -0.37186 | 0.32278   | 0.42568   | HHLA3     | chr1  | + | 70820488 | 70851022 | 898   |
| ENSG000001 | 9.895012 | 0        | 4.9011   | 0.000126  | 0.000354  | HOXA4     | chr7  | - | 27168126 | 27170418 | 1747  |
| ENSG000001 | 446.935  | 660.747  | -0.56238 | 0.000319  | 0.00085   | TOPORS    | chr9  | - | 32540542 | 32552551 | 4098  |
| ENSG000001 | 8.196886 | 1.340997 | 2.3785   | 0.018225  | 0.036288  | BCO2      | chr11 | + | 1.12E+08 | 1.12E+08 | 2930  |
| ENSG000001 | 11.98278 | 13.40997 | -0.15724 | 0.78973   | 0.84998   | GPX1P1    | chrX  | - | 13396854 | 13397459 | 606   |
| ENSG000001 | 5.414661 | 9.399135 | -0.73785 | 0.30703   | 0.40864   | KCNMB2    | chr3  | + | 1.78E+08 | 1.79E+08 | 2552  |
| ENSG000001 | 0.580602 | 0.654722 | -0.07721 | 0.96449   | NA        | AC107218. | chr2  | - | 2.15E+08 | 2.16E+08 | 543   |
| ENSG000001 | 1116.96  | 928.039  | 0.26689  | 0.015116  | 0.030607  | ENTPD6    | chr20 | + | 25176329 | 25207365 | 2766  |
| ENSG000001 | 0.923144 | 72.4044  | -5.8494  | 2.05E-13  | 1.22E-12  | DMBX1     | chr1  | + | 46972668 | 46979898 | 2882  |
| ENSG000001 | 0        | 0.343138 | -0.41864 | 0.81278   | NA        | KLKP1     | chr19 | - | 51385352 | 51399654 | 1532  |
| ENSG000001 | 3765.171 | 723.8985 | 2.3769   | 8.62E-117 | 6.32E-115 | ENPP1     | chr6  | + | 1.32E+08 | 1.32E+08 | 7442  |
| ENSG000001 | 0        | 0.891044 | -1.0625  | 0.54819   | NA        | C13orf35  | chr13 | + | 1.13E+08 | 1.13E+08 | 2241  |
| ENSG000001 | 14.77356 | 3.757532 | 1.8827   | 0.018692  | 0.03714   | CCDC154   | chr16 | - | 1484384  | 1494557  | 2564  |
| ENSG000001 | 1571.243 | 854.7859 | 0.87654  | 2.18E-06  | 7.55E-06  | FAR1      | chr11 | + | 13690217 | 13753893 | 5820  |
| ENSG000001 | 543.4203 | 119.1968 | 2.1878   | 1.20E-35  | 1.87E-34  | C5orf42   | chr5  | - | 37106330 | 37249530 | 11250 |
| ENSG000001 | 2.551911 | 22.35512 | -2.9641  | 5.71E-05  | 0.000168  | AC022532. | chr10 | + | 72194585 | 72196314 | 1730  |
| ENSG000001 | 276.359  | 164.7528 | 0.74642  | 7.43E-05  | 0.000215  | ZNF841    | chr19 | - | 52567719 | 52599018 | 3876  |
| ENSG000001 | 332.8585 | 2.606733 | 6.8254   | 4.37E-41  | 7.91E-40  | MYFAP5    | chr12 | - | 8789942  | 8815484  | 2845  |
| ENSG000001 | 0        | 2.474811 | -2.4918  | 0.14342   | 0.21836   | MYH6      | chr14 | - | 23851199 | 23877486 | 5941  |
| ENSG000001 | 1.068702 | 0        | 1.3672   | 0.44297   | NA        | VN1R5     | chr1  | + | 2.47E+08 | 2.47E+08 | 1072  |
| ENSG000001 | 84.50367 | 86.11696 | -0.02181 | 0.92887   | 0.9529    | ZNF615    | chr19 | - | 52494585 | 52511483 | 4122  |
| ENSG000001 | 120.5681 | 45.04292 | 1.411    | 2.57E-06  | 8.82E-06  | CXorf40A  | chrX  | + | 1.49E+08 | 1.49E+08 | 2411  |
| ENSG000001 | 1059.321 | 1072.302 | -0.01764 | 0.87011   | 0.90954   | CDC42SE1  | chr1  | - | 1.51E+08 | 1.51E+08 | 3181  |
| ENSG000001 | 29.75267 | 0.594029 | 5.0461   | 8.30E-08  | 3.26E-07  | MPEG1     | chr11 | - | 58975983 | 58980424 | 4442  |
| ENSG000001 | 556.9895 | 0        | 10.417   | 2.03E-22  | 1.91E-21  | SERPINB2  | chr18 | + | 61538926 | 61571124 | 2155  |
| ENSG000001 | 93.97569 | 65.26066 | 0.51936  | 0.065768  | 0.11296   | DPP4      | chr2  | - | 1.63E+08 | 1.63E+08 | 3904  |
| ENSG000001 | 38.97458 | 0        | 6.8795   | 7.78E-10  | 3.62E-09  | PDCD1LG2  | chr9  | + | 5510545  | 5571282  | 2363  |
| ENSG000001 | 13.99516 | 28.27105 | -1.0029  | 0.026505  | 0.050852  | ZNF433    | chr19 | - | 12125547 | 12146556 | 2322  |
| ENSG000001 | 63.4051  | 8.369721 | 2.89     | 8.80E-12  | 4.68E-11  | DNAH10    | chr12 | + | 1.24E+08 | 1.24E+08 | 14166 |
| ENSG000001 | 37.00506 | 18.45513 | 0.99803  | 0.012846  | 0.026414  | RP4-724E1 | chr20 | + | 52169309 | 52191847 | 1947  |
| ENSG000001 | 16.94186 | 9.168518 | 0.85316  | 0.15129   | 0.22879   | TBC1D3    | chr17 | - | 36337711 | 36358166 | 3389  |
| ENSG000001 | 0.36308  | 0        | 0.4146   | 0.81455   | NA        | CBX3P7    | chr11 | - | 89026913 | 89027414 | 502   |
| ENSG000001 | 10906.54 | 6458.696 | 0.75555  | 9.92E-19  | 7.84E-18  | SPTAN1    | chr9  | + | 1.31E+08 | 1.31E+08 | 7872  |
| ENSG000001 | 112.058  | 232.1416 | -1.0503  | 5.24E-06  | 1.74E-05  | NMB       | chr15 | - | 85198360 | 85201794 | 1017  |
| ENSG000001 | 2.500484 | 5.690142 | -1.1064  | 0.29138   | 0.39318   | HIST1H2BE | chr6  | + | 26183958 | 26184454 | 497   |
| ENSG000001 | 14.71114 | 39.19164 | -1.3847  | 0.002797  | 0.006479  | ZNF595    | chr4  | + | 53179    | 88099    | 2908  |
| ENSG000001 | 3498.904 | 211.1787 | 4.0458   | 4.87E-169 | 7.03E-167 | PARVA     | chr11 | + | 12398732 | 12552348 | 4458  |
| ENSG000001 | 372.2648 | 185.1239 | 1.0024   | 3.54E-07  | 1.32E-06  | KLHL14    | chr18 | - | 30252634 | 30353025 | 4312  |
| ENSG000001 | 3245.683 | 181.7768 | 4.1406   | 1.56E-80  | 6.58E-79  | FAM114A1  | chr4  | + | 38869298 | 38947360 | 4050  |
| ENSG000001 | 688.7913 | 560.9344 | 0.29653  | 0.045506  | 0.081904  | RPE       | chr2  | + | 2.11E+08 | 2.11E+08 | 2569  |
| ENSG000001 | 86.3361  | 119.1144 | -0.46781 | 0.055412  | 0.097261  | ZNF460    | chr19 | + | 57791419 | 57804937 | 3350  |

|            |          |          |          |          |          |           |       |   |          |          |      |
|------------|----------|----------|----------|----------|----------|-----------|-------|---|----------|----------|------|
| ENSG000001 | 0        | 97.47387 | -8.1226  | 8.21E-14 | 4.97E-13 | CR1L      | chr1  | + | 2.08E+08 | 2.08E+08 | 1788 |
| ENSG000001 | 2.520208 | 4.677714 | -0.79121 | 0.4209   | 0.52628  | HSPB9     | chr17 | + | 40274756 | 40275371 | 616  |
| ENSG000001 | 1190.983 | 463.5382 | 1.3593   | 4.08E-22 | 3.77E-21 | PHF2      | chr9  | + | 96338689 | 96441869 | 5565 |
| ENSG000001 | 0.653381 | 1.545765 | -0.93073 | 0.5518   | 0.65135  | AL022341. | chr16 | - | 691039   | 691688   | 648  |
| ENSG000001 | 2466.265 | 3437.742 | -0.4779  | 0.004011 | 0.009057 | RPS26     | chr12 | + | 56435637 | 56438116 | 1204 |
| ENSG000001 | 0.72616  | 0        | 0.85004  | 0.63064  | NA       | C14orf178 | chr14 | + | 78227173 | 78236085 | 642  |
| ENSG000001 | 54.67145 | 114.3048 | -1.0553  | 2.53E-05 | 7.75E-05 | PTMAP2    | chr5  | + | 1.18E+08 | 1.18E+08 | 327  |
| ENSG000001 | 11996.84 | 9320.945 | 0.36376  | 0.001622 | 0.003889 | PSAP      | chr10 | - | 73576055 | 73611126 | 2866 |
| ENSG000001 | 2742.647 | 841.7732 | 1.7029   | 9.84E-45 | 1.95E-43 | S100A10   | chr1  | - | 1.52E+08 | 1.52E+08 | 1202 |
| ENSG000001 | 3.475869 | 9.892053 | -1.4344  | 0.11653  | 0.18422  | WDR96     | chr10 | - | 1.06E+08 | 1.06E+08 | 5365 |
| ENSG000001 | 12278.65 | 15308.76 | -0.31778 | 0.007598 | 0.016324 | RPL37A    | chr2  | + | 2.17E+08 | 2.17E+08 | 3112 |
| ENSG000001 | 204.7099 | 6.130359 | 4.3046   | 0.000631 | 0.001614 | HOXC6     | chr12 | + | 54384408 | 54424607 | 2943 |
| ENSG000001 | 120.5896 | 80.1114  | 0.58294  | 0.10789  | 0.17217  | TXNRD3    | chr3  | - | 1.26E+08 | 1.26E+08 | 2950 |
| ENSG000001 | 9.047252 | 27.61807 | -1.5635  | 0.016798 | 0.033683 | CFD       | chr19 | + | 859453   | 863569   | 1330 |
| ENSG000001 | 7.749862 | 16.02087 | -1.0111  | 0.18542  | 0.27099  | C9orf173  | chr9  | + | 1.4E+08  | 1.4E+08  | 1206 |
| ENSG000001 | 66.24552 | 4.127392 | 3.953    | 8.45E-14 | 5.11E-13 | MAP1LC3C  | chr1  | - | 2.42E+08 | 2.42E+08 | 1182 |
| ENSG000001 | 1303.397 | 1592.293 | -0.28836 | 0.039623 | 0.072785 | MCMBP     | chr10 | - | 1.22E+08 | 1.22E+08 | 4113 |
| ENSG000001 | 112.817  | 149.9384 | -0.40445 | 0.30301  | 0.40429  | EME2      | chr16 | + | 1823208  | 1831709  | 5613 |
| ENSG000001 | 30.29041 | 0.640152 | 5.0631   | 6.59E-08 | 2.61E-07 | KLHDC1    | chr14 | + | 50159823 | 50219870 | 2691 |
| ENSG000001 | 164.0489 | 95.55423 | 0.77766  | 0.000663 | 0.00169  | ZNF81     | chrX  | + | 47696301 | 47861960 | 7933 |
| ENSG000001 | 660.4758 | 296.8619 | 1.1512   | 4.22E-11 | 2.15E-10 | TAF13     | chr1  | - | 1.1E+08  | 1.1E+08  | 1076 |
| ENSG000001 | 129.3228 | 103.5661 | 0.31939  | 0.19318  | 0.28059  | ZNF780A   | chr19 | - | 40575059 | 40596845 | 7500 |
| ENSG000001 | 1794.757 | 1924.211 | -0.10012 | 0.48132  | 0.58561  | ATAD3A    | chr1  | + | 1447531  | 1470067  | 2612 |
| ENSG000001 | 386.3038 | 394.0903 | -0.02873 | 0.88338  | 0.91869  | FAM118B   | chr11 | + | 1.26E+08 | 1.26E+08 | 2402 |
| ENSG000001 | 75.36041 | 62.68233 | 0.25591  | 0.37109  | 0.47551  | ZNF461    | chr19 | - | 37128094 | 37157755 | 3326 |
| ENSG000001 | 31.84044 | 10.83808 | 1.5168   | 0.001563 | 0.003761 | CTC-301O7 | chr19 | - | 49834874 | 49843865 | 573  |
| ENSG000001 | 21.96353 | 2.399549 | 3.0764   | 3.90E-05 | 0.000117 | AC122129. | chr17 | + | 17761583 | 17762295 | 710  |
| ENSG000001 | 26.04991 | 18.44385 | 0.48715  | 0.31108  | 0.41304  | CCDC180   | chr9  | + | 1E+08    | 1E+08    | 7884 |
| ENSG000001 | 224.0826 | 315.2809 | -0.49262 | 0.001481 | 0.00358  | SLC9A8    | chr20 | + | 48429250 | 48508779 | 6303 |
| ENSG000001 | 79.3578  | 396.4676 | -2.3143  | 5.80E-31 | 7.70E-30 | OCLN      | chr5  | + | 68788119 | 68853931 | 6438 |
| ENSG000001 | 0.705622 | 0.357707 | 0.57557  | 0.74268  | NA       | AC061975. | chr17 | - | 26529824 | 26530831 | 150  |
| ENSG000001 | 5.995263 | 0        | 4.1392   | 0.002678 | 0.006223 | C4orf122  | chr4  | + | 81256874 | 81884910 | 3349 |
| ENSG000001 | 7.842365 | 5.407697 | 0.52747  | 0.47302  | 0.57768  | AC011385. | chr5  | - | 1.38E+08 | 1.38E+08 | 1363 |
| ENSG000001 | 23.74462 | 46.47119 | -0.94397 | 0.071646 | 0.1215   | HIST4H4   | chr12 | - | 14920933 | 14924065 | 1918 |
| ENSG000001 | 0        | 9.248611 | -4.8302  | 0.000142 | 0.000396 | CYP2A13   | chr19 | + | 41594377 | 41602100 | 1739 |
| ENSG000001 | 69.7429  | 136.5214 | -0.96507 | 2.27E-05 | 6.99E-05 | ZNF181    | chr19 | + | 35225060 | 35233777 | 3589 |
| ENSG000001 | 1.233984 | 2.414118 | -0.76598 | 0.56349  | 0.66157  | AL358813. | chr1  | + | 1.5E+08  | 1.5E+08  | 486  |
| ENSG000001 | 2.012384 | 2.370411 | -0.20462 | 0.866    | 0.90671  | HIST1H2BF | chr6  | + | 26199748 | 26200942 | 1195 |
| ENSG000001 | 4.616536 | 133.6947 | -4.7825  | 2.33E-27 | 2.69E-26 | SLC22A20  | chr11 | + | 64981311 | 65010228 | 3196 |
| ENSG000001 | 8.225983 | 15.26007 | -0.86064 | 0.17903  | 0.26306  | POM121L6  | chr6  | + | 26864126 | 26865739 | 1614 |
| ENSG000001 | 56.8611  | 548.6898 | -3.26    | 6.52E-62 | 1.98E-60 | FAM212B   | chr1  | - | 1.12E+08 | 1.12E+08 | 5980 |
| ENSG000001 | 50.85206 | 78.27084 | -0.61454 | 0.021522 | 0.042159 | ZNF44     | chr19 | - | 12335501 | 12405702 | 3236 |
| ENSG000001 | 1536.301 | 1444.955 | 0.088787 | 0.3796   | 0.48366  | GPAA1     | chr8  | + | 1.45E+08 | 1.45E+08 | 2078 |
| ENSG000001 | 983.1428 | 13.59701 | 6.0886   | 1.89E-92 | 9.79E-91 | ADAMTSL2  | chr9  | + | 1.36E+08 | 1.36E+08 | 4270 |
| ENSG000001 | 328.1667 | 201.1169 | 0.70434  | 7.81E-06 | 2.54E-05 | SGTB      | chr5  | - | 64961755 | 65018862 | 5469 |
| ENSG000001 | 49.64718 | 50.81228 | -0.02646 | 0.93357  | 0.95639  | ZNF790    | chr19 | - | 37308330 | 37341689 | 3037 |
| ENSG000001 | 5.2374   | 26.7998  | -2.2369  | 0.000482 | 0.001254 | PRB3      | chr12 | - | 11418857 | 11422739 | 1153 |
| ENSG000001 | 426.1182 | 116.4858 | 1.8667   | 1.66E-25 | 1.77E-24 | FAM49A    | chr2  | - | 16730727 | 16847599 | 4670 |
| ENSG000001 | 6601.555 | 2626.497 | 1.3273   | 5.86E-20 | 4.93E-19 | MYO1C     | chr17 | - | 1367392  | 1396106  | 5145 |
| ENSG000001 | 0        | 0.686276 | -0.84936 | 0.6309   | NA       | MDS2      | chr1  | + | 23907985 | 23967058 | 1781 |
| ENSG000001 | 1.359003 | 0        | 1.8987   | 0.26617  | NA       | OR7E13P   | chr11 | - | 86543582 | 86544491 | 910  |
| ENSG000001 | 123.1503 | 64.66106 | 0.92094  | 5.44E-05 | 0.00016  | NKIRAS1   | chr3  | - | 23933151 | 23988082 | 2391 |
| ENSG000001 | 0        | 0.343138 | -0.41864 | 0.81278  | NA       | UGT2B17   | chr4  | - | 69402902 | 69434245 | 2077 |
| ENSG000001 | 1.286224 | 0        | 1.8436   | 0.2818   | NA       | MEIG1     | chr10 | + | 15001438 | 15030049 | 625  |
| ENSG000001 | 544.1792 | 331.9198 | 0.70875  | 0.004584 | 0.010267 | KIF13B    | chr8  | - | 28924796 | 29120641 | 8745 |
| ENSG000001 | 1.555988 | 1.280305 | 0.22804  | 0.87543  | 0.91345  | NRAP      | chr10 | - | 1.15E+08 | 1.15E+08 | 5600 |
| ENSG000001 | 2227.34  | 3739.04  | -0.74658 | 1.17E-13 | 7.05E-13 | ADH5      | chr4  | - | 99992132 | 1E+08    | 2612 |
| ENSG000001 | 0        | 0.297015 | -0.41864 | 0.81278  | NA       | SLC22A6   | chr11 | - | 62703857 | 62752455 | 2151 |
| ENSG000001 | 628.2326 | 1240.064 | -0.97354 | 0.001506 | 0.003637 | HIST1H2BK | chr6  | - | 27106073 | 27114619 | 820  |
| ENSG000001 | 261.1682 | 1284.225 | -2.2946  | 8.78E-68 | 3.03E-66 | TEAD4     | chr12 | + | 3068496  | 3149839  | 1690 |
| ENSG000001 | 1727.456 | 1794.065 | -0.05507 | 0.60069  | 0.69453  | SPG7      | chr16 | + | 89557325 | 89624176 | 3076 |
| ENSG000001 | 8.643096 | 7.924599 | 0.1157   | 0.87659  | 0.91427  | HIST1H4K  | chr6  | - | 27798952 | 27799305 | 354  |
| ENSG000001 | 0.36308  | 0.343138 | -0.0021  | 0.99905  | NA       | HRNR      | chr1  | - | 1.52E+08 | 1.52E+08 | 9623 |
| ENSG000001 | 5.798278 | 0        | 4.1149   | 0.0026   | 0.006052 | IFNA1     | chr9  | + | 21440440 | 21441315 | 876  |
| ENSG000001 | 0        | 6.407972 | -4.2326  | 0.001926 | 0.004568 | HES5      | chr1  | - | 2460184  | 2461684  | 1306 |

|                    |          |           |           |           |           |       |   |          |          |       |
|--------------------|----------|-----------|-----------|-----------|-----------|-------|---|----------|----------|-------|
| ENSG00000143.34547 | 14.61589 | 1.5337    | 0.00036   | 0.000952  | C2orf27A  | chr2  | + | 1.32E+08 | 1.33E+08 | 1331  |
| ENSG00000131.37125 | 352.4534 | -3.4706   | 7.48E-56  | 1.97E-54  | ZNF677    | chr19 | - | 53731577 | 53758151 | 8731  |
| ENSG0000011083.009 | 734.8443 | 0.55772   | 0.00239   | 0.005585  | ERO1L     | chr14 | - | 53106634 | 53162618 | 5285  |
| ENSG000001146.5456 | 144.1134 | 0.026363  | 0.90656   | 0.93567   | F8A1      | chrX  | + | 1.54E+08 | 1.54E+08 | 1701  |
| ENSG00000123.44397 | 34.23639 | -0.53946  | 0.16689   | 0.24819   | ZNF823    | chr19 | - | 11832080 | 11849824 | 2423  |
| ENSG0000015.124359 | 8.654582 | -0.70474  | 0.33861   | 0.44245   | AP001597  | chr21 | + | 27765954 | 27941571 | 3412  |
| ENSG0000013.164216 | 119.71   | -5.0786   | 1.17E-22  | 1.11E-21  | ZNF311    | chr6  | - | 28962562 | 28973093 | 3027  |
| ENSG00000140.40555 | 152.6101 | -1.9047   | 1.70E-12  | 9.52E-12  | ZNF347    | chr19 | - | 53627325 | 53662328 | 4553  |
| ENSG0000010        | 0.594029 | -0.81444  | 0.64499   | NA        | OR5H2     | chr3  | + | 98001732 | 98002676 | 945   |
| ENSG00000167.76662 | 189.9327 | -1.4787   | 1.94E-07  | 7.40E-07  | PLCG2     | chr16 | + | 81772702 | 81991899 | 4308  |
| ENSG000001604.3317 | 348.8598 | 0.78947   | 4.52E-06  | 1.51E-05  | FCHSD1    | chr5  | - | 1.41E+08 | 1.41E+08 | 4320  |
| ENSG000001353.3137 | 353.2566 | -7.49E-05 | 0.99972   | 0.99987   | ZNF71     | chr19 | + | 57106632 | 57137849 | 5428  |
| ENSG0000010.36308  | 0        | 0.4146    | 0.81455   | NA        | AADACL2   | chr3  | + | 1.51E+08 | 1.51E+08 | 4848  |
| ENSG0000015690.569 | 103.0499 | 5.776     | 0         | 0         | S100A6    | chr1  | - | 1.54E+08 | 1.54E+08 | 673   |
| ENSG0000018640.309 | 14424.47 | -0.73837  | 6.28E-09  | 2.71E-08  | RPL12     | chr9  | - | 1.3E+08  | 1.3E+08  | 2275  |
| ENSG000001725.7907 | 13.92391 | 5.6773    | 1.77E-106 | 1.13E-104 | DNM3      | chr1  | + | 1.72E+08 | 1.72E+08 | 7643  |
| ENSG000001228.685  | 2022.107 | -3.1404   | 8.23E-128 | 7.18E-126 | ZNF121    | chr19 | - | 9671029  | 9695209  | 2407  |
| ENSG0000012376.423 | 1278.849 | 0.89222   | 2.85E-09  | 1.26E-08  | MPZL1     | chr1  | + | 1.68E+08 | 1.68E+08 | 5010  |
| ENSG000001897.0484 | 584.6081 | 0.61622   | 0.009136  | 0.019342  | VPS13A    | chr9  | + | 79792269 | 80036457 | 15320 |
| ENSG000001148.7882 | 443.0386 | -1.5641   | 3.49E-08  | 1.41E-07  | MBP       | chr18 | - | 74690783 | 74845639 | 9797  |
| ENSG0000011694.662 | 1600.261 | 0.082554  | 0.46377   | 0.56879   | AKAP17A   | chrX  | + | 1710486  | 1721407  | 3232  |
| ENSG00000138.00955 | 23.10538 | 0.7032    | 0.067303  | 0.11521   | ELOVL2    | chr6  | - | 10980992 | 11044547 | 3997  |
| ENSG0000013.745632 | 0.98329  | 1.64      | 0.18435   | 0.26967   | LEKR1     | chr3  | + | 1.57E+08 | 1.57E+08 | 2881  |
| ENSG0000011317.807 | 828.356  | 0.66806   | 4.50E-05  | 0.000134  | C1orf122  | chr1  | + | 38272651 | 38275126 | 2229  |
| ENSG000001154.0086 | 305.5324 | -0.98442  | 5.56E-05  | 0.000163  | SNHG12    | chr1  | - | 28905050 | 28909495 | 1903  |
| ENSG0000013.620613 | 24.76441 | -2.6897   | 1.07E-05  | 3.40E-05  | PCDH20    | chr13 | - | 61983818 | 62002220 | 6347  |
| ENSG0000016.576679 | 16.53306 | -1.2895   | 0.034986  | 0.065124  | KEL       | chr7  | - | 1.43E+08 | 1.43E+08 | 2812  |
| ENSG000001636.3843 | 457.2258 | 0.47468   | 0.09458   | 0.1541    | NOL8      | chr9  | - | 95059640 | 95087918 | 4598  |
| ENSG000001138.2802 | 91.9448  | 0.58501   | 0.03549   | 0.06598   | IRAK4     | chr12 | + | 44152747 | 44183346 | 4147  |
| ENSG0000014.854596 | 118.6451 | -4.5055   | 2.46E-20  | 2.10E-19  | CCDC151   | chr19 | - | 11531272 | 11546603 | 2448  |
| ENSG0000010.72616  | 20.42742 | -4.4788   | 5.58E-06  | 1.85E-05  | DLGAP2    | chr8  | + | 1449532  | 1656642  | 10132 |
| ENSG000001555.54   | 991.7317 | -0.83405  | 9.63E-13  | 5.48E-12  | MRPL42    | chr12 | + | 93861264 | 93897545 | 3138  |
| ENSG000001570.5567 | 152.6499 | 1.9003    | 6.25E-37  | 1.01E-35  | ENTPD7    | chr10 | + | 1.01E+08 | 1.01E+08 | 3550  |
| ENSG0000010.705622 | 0.700845 | 0.003311  | 0.99841   | NA        | FCGR1B    | chr1  | - | 1.21E+08 | 1.21E+08 | 1044  |
| ENSG000001745.2578 | 602.8185 | 0.30534   | 0.10452   | 0.16753   | ZNF335    | chr20 | - | 44577292 | 44600833 | 4430  |
| ENSG0000010        | 0.357707 | -0.41864  | 0.81278   | NA        | TUBA3C    | chr13 | - | 19747910 | 19755992 | 1551  |
| ENSG0000018264.46  | 8967.089 | -0.11746  | 0.36265   | 0.4668    | RPS4X     | chrX  | - | 71475529 | 71497150 | 1820  |
| ENSG00000126.25969 | 15.44054 | 0.74184   | 0.11878   | 0.18728   | AGAP9     | chr10 | + | 48189612 | 48237508 | 2410  |
| ENSG00000172.7239  | 246.675  | -1.7532   | 1.46E-12  | 8.22E-12  | ZNF273    | chr7  | + | 64330550 | 64391344 | 3757  |
| ENSG000001576.5485 | 629.2212 | -0.12512  | 0.59206   | 0.68695   | ZNF84     | chr12 | + | 1.34E+08 | 1.34E+08 | 7162  |
| ENSG000001344.2044 | 409.8324 | -0.24977  | 0.31627   | 0.419     | MAK16     | chr8  | + | 33342268 | 33358778 | 3991  |
| ENSG0000010.290301 | 0        | 0.4146    | 0.81455   | NA        | FCFG67    | chr19 | - | 56950694 | 56989434 | 5250  |
| ENSG0000010        | 2.353426 | -2.7264   | 0.084821  | 0.14042   | AVPR1B    | chr1  | + | 2.06E+08 | 2.06E+08 | 2237  |
| ENSG0000011059.79  | 302.8098 | 1.8049    | 6.94E-45  | 1.38E-43  | SIRPA     | chr20 | + | 1875154  | 1920543  | 3996  |
| ENSG000001920.1037 | 1925.849 | -1.0644   | 1.09E-15  | 7.45E-15  | GRK6      | chr5  | + | 1.77E+08 | 1.77E+08 | 2939  |
| ENSG00000199.08188 | 428.3807 | -2.1052   | 3.17E-21  | 2.83E-20  | PRIM1     | chr12 | - | 57125406 | 57146157 | 1393  |
| ENSG000001791.5631 | 539.6227 | 0.55059   | 0.001475  | 0.003568  | 5-Mar     | chr10 | + | 94050920 | 94113721 | 3926  |
| ENSG0000010.36308  | 0        | 0.4146    | 0.81455   | NA        | 61E3.4    | chr16 | - | 30234258 | 30265831 | 3584  |
| ENSG00000112.79191 | 0        | 5.2011    | 4.79E-05  | 0.000142  | AKR1B10   | chr7  | + | 1.34E+08 | 1.34E+08 | 1590  |
| ENSG00000113.80674 | 48.80125 | -1.7984   | 8.10E-06  | 2.63E-05  | SULT1C4   | chr2  | + | 1.09E+08 | 1.09E+08 | 1860  |
| ENSG0000011.213446 | 0        | 1.5515    | 0.38249   | NA        | CYP2A7    | chr19 | - | 41381344 | 41388657 | 2281  |
| ENSG000001247.9429 | 293.3077 | -0.24249  | 0.11297   | 0.17927   | ZBTB14    | chr18 | - | 5289018  | 5297052  | 3528  |
| ENSG000001277.6778 | 854.3764 | -1.6181   | 6.65E-31  | 8.81E-30  | CD2AP     | chr6  | + | 47445525 | 47594999 | 5412  |
| ENSG0000010.685084 | 37.24292 | -5.3502   | 5.64E-09  | 2.44E-08  | NUP62CL   | chrX  | - | 1.06E+08 | 1.06E+08 | 1755  |
| ENSG000001340.7267 | 501.3481 | -0.55556  | 0.009184  | 0.019433  | SFI1      | chr22 | + | 31884674 | 32014572 | 5250  |
| ENSG0000010        | 1.043983 | -1.3473   | 0.44976   | NA        | TMPPRSS11 | chr4  | - | 68918916 | 68995598 | 2088  |
| ENSG00000174.62676 | 476.7995 | -2.6585   | 6.98E-31  | 9.24E-30  | ZNF649    | chr19 | - | 52392477 | 52408293 | 3197  |
| ENSG0000011.379541 | 1.638012 | -0.22577  | 0.86933   | 0.90911   | ADH4      | chr4  | - | 1E+08    | 1E+08    | 2151  |
| ENSG0000010.290301 | 0.937167 | -0.88973  | 0.60765   | NA        | AL138751  | chr9  | - | 74576256 | 74576469 | 210   |
| ENSG000001183.0096 | 127.4834 | 0.52015   | 0.044666  | 0.080588  | ZNF248    | chr10 | - | 38091751 | 38147034 | 5141  |
| ENSG00000118.39157 | 17.46539 | 0.072435  | 0.87804   | 0.91499   | SNX29P2   | chr16 | + | 29262829 | 29519817 | 6046  |
| ENSG0000011289.247 | 11.96545 | 6.6823    | 3.09E-118 | 2.33E-116 | CHSY3     | chr5  | + | 1.29E+08 | 1.3E+08  | 3850  |
| ENSG000001306.0184 | 159.1313 | 0.93259   | 0.006593  | 0.014334  | TOR4A     | chr9  | + | 1.4E+08  | 1.4E+08  | 4148  |
| ENSG0000012775.405 | 82.4469  | 5.0635    | 3.50E-284 | 1.47E-281 | LPAR1     | chr9  | - | 1.14E+08 | 1.14E+08 | 3637  |
| ENSG0000012.86275  | 2.102535 | 0.42198   | 0.72425   | 0.79599   | MB        | chr22 | - | 36002811 | 36033998 | 1197  |

|            |          |          |           |          |          |            |       |   |          |          |       |
|------------|----------|----------|-----------|----------|----------|------------|-------|---|----------|----------|-------|
| ENSG000001 | 0        | 0.297015 | -0.41864  | 0.81278  | NA       | OR2L3      | chr1  | + | 2.48E+08 | 2.48E+08 | 939   |
| ENSG000001 | 410.0321 | 320.7538 | 0.35357   | 0.043475 | 0.078834 | HIBCH      | chr2  | - | 1.91E+08 | 1.91E+08 | 3383  |
| ENSG000001 | 195.5669 | 606.6852 | -1.6202   | 1.37E-07 | 5.31E-07 | ZNF544     | chr19 | + | 58739960 | 58788815 | 4109  |
| ENSG000001 | 3.008307 | 13.70383 | -2.0925   | 0.008423 | 0.017938 | TMEM229E   | chr14 | - | 67913801 | 68000456 | 4068  |
| ENSG000001 | 0.290301 | 0.343138 | -0.00202  | 0.99909  | NA       | RP11-267J1 | chr12 | + | 12264097 | 12264423 | 327   |
| ENSG000001 | 639.8061 | 582.8405 | 0.13268   | 0.32586  | 0.42877  | SOWAHC     | chr2  | + | 1.1E+08  | 1.1E+08  | 4653  |
| ENSG000001 | 439.334  | 1847.297 | -2.0696   | 4.25E-51 | 1.00E-49 | ZNF770     | chr15 | - | 35270542 | 35280488 | 5439  |
| ENSG000001 | 26.72301 | 26.33206 | 0.022677  | 0.96323  | 0.97841  | AC135178   | chr17 | - | 8261731  | 8263538  | 1808  |
| ENSG000001 | 33.85185 | 113.7026 | -1.745    | 1.04E-07 | 4.05E-07 | ZNF876P    | chr4  | + | 206399   | 249774   | 2598  |
| ENSG000001 | 1.649304 | 3.022717 | -0.76373  | 0.5108   | 0.61399  | A-575C2.4  | chr16 | - | 28353876 | 28374829 | 2016  |
| ENSG000001 | 118.0114 | 518.645  | -2.1243   | 2.64E-17 | 1.96E-16 | HMG5       | chrX  | - | 80369200 | 80457441 | 2126  |
| ENSG000001 | 580.7744 | 424.4307 | 0.45306   | 0.007206 | 0.015557 | MIER1      | chr1  | + | 67390578 | 67454302 | 4978  |
| ENSG000001 | 1349.432 | 420.4753 | 1.6814    | 8.16E-50 | 1.85E-48 | MAN1A2     | chr1  | + | 1.18E+08 | 1.18E+08 | 8576  |
| ENSG000001 | 320.9866 | 161.6331 | 0.98704   | 1.01E-06 | 3.61E-06 | SVIP       | chr11 | - | 22835345 | 22851845 | 4541  |
| ENSG000001 | 238.9822 | 199.1782 | 0.25992   | 0.25287  | 0.34981  | ZNF251     | chr8  | - | 1.46E+08 | 1.46E+08 | 2807  |
| ENSG000001 | 592.4551 | 780.4918 | -0.39753  | 0.001285 | 0.003133 | DDRKG1     | chr20 | - | 3170996  | 3185331  | 1306  |
| ENSG000001 | 1554.895 | 1288.644 | 0.27016   | 0.20101  | 0.28974  | TFDP1      | chr13 | + | 1.14E+08 | 1.14E+08 | 2648  |
| ENSG000001 | 0        | 0.594029 | -0.81444  | 0.64499  | NA       | CLEC4C     | chr12 | - | 7882011  | 7904201  | 1314  |
| ENSG000001 | 62.45041 | 251.0899 | -1.996    | 2.96E-21 | 2.64E-20 | ZNF607     | chr19 | - | 38187264 | 38210691 | 4364  |
| ENSG000001 | 38.17646 | 182.4002 | -2.2491   | 3.61E-19 | 2.91E-18 | ZNF334     | chr20 | - | 45129701 | 45142198 | 3487  |
| ENSG000001 | 170.1959 | 124.3254 | 0.45382   | 0.029487 | 0.055927 | HSD17B11   | chr4  | - | 88257762 | 88312538 | 1885  |
| ENSG000001 | 1083.717 | 309.3543 | 1.8058    | 5.40E-37 | 8.73E-36 | SZT2       | chr1  | + | 43855553 | 43918321 | 12281 |
| ENSG000001 | 9.947252 | 18.81122 | -0.88349  | 0.12029  | 0.18921  | SULT1C2    | chr2  | + | 1.09E+08 | 1.09E+08 | 6366  |
| ENSG000001 | 91.32444 | 92.17473 | -0.01822  | 0.94451  | 0.96429  | ZXDA       | chrX  | - | 57931864 | 57937067 | 5204  |
| ENSG000001 | 25.90419 | 148.322  | -2.5132   | 9.99E-16 | 6.82E-15 | RPS6KL1    | chr14 | - | 75370657 | 75390099 | 5456  |
| ENSG000001 | 0.705622 | 18.6736  | -4.3173   | 2.65E-05 | 8.09E-05 | CACNA1E    | chr1  | + | 1.81E+08 | 1.82E+08 | 16170 |
| ENSG000001 | 1778.223 | 1982.683 | -0.1567   | 0.18574  | 0.27136  | QRICH1     | chr3  | - | 49067140 | 49131796 | 3549  |
| ENSG000001 | 27.60752 | 97.016   | -1.8003   | 6.42E-06 | 2.11E-05 | MLLT4-AS1  | chr6  | - | 1.68E+08 | 1.68E+08 | 2238  |
| ENSG000001 | 1.359003 | 13.66174 | -3.1099   | 0.00079  | 0.00199  | CSF2RA     | chrX  | + | 1387693  | 1429274  | 2291  |
| ENSG000001 | 7.137557 | 12.7043  | -0.81619  | 0.2097   | 0.29973  | FKBP1C     | chr6  | + | 63921351 | 63922929 | 1579  |
| ENSG000001 | 2732.555 | 2877.281 | -0.07422  | 0.68465  | 0.76465  | DDX42      | chr17 | + | 61850963 | 61896677 | 4337  |
| ENSG000001 | 10.10479 | 6.9826   | 0.50586   | 0.47687  | 0.58143  | RP11-98J2  | chr5  | + | 69171098 | 69274436 | 633   |
| ENSG000001 | 335.6313 | 637.6531 | -0.92505  | 5.37E-10 | 2.53E-09 | RPL23A     | chr17 | + | 27046411 | 27051377 | 1562  |
| ENSG000001 | 102.6624 | 251.4486 | -1.2894   | 3.19E-11 | 1.64E-10 | SLC29A3    | chr10 | + | 73079015 | 73123142 | 2257  |
| ENSG000001 | 0.290301 | 2.07098  | -1.8977   | 0.2248   | 0.3174   | CTC-490E2  | chr19 | - | 41414377 | 41416754 | 660   |
| ENSG000001 | 486.412  | 674.416  | -0.47008  | 0.00732  | 0.015771 | STYX       | chr14 | + | 53196898 | 53241716 | 4857  |
| ENSG000001 | 1805.452 | 1923.882 | -0.0909   | 0.47892  | 0.58322  | UBL5       | chr19 | + | 9938568  | 9940791  | 1450  |
| ENSG000001 | 771.9608 | 772.0484 | -9.51E-05 | 0.99946  | 0.99974  | HELZ       | chr17 | - | 65066554 | 65242105 | 13810 |
| ENSG000001 | 28.30973 | 71.0293  | -1.3116   | 0.000126 | 0.000354 | TMEM116    | chr12 | - | 1.12E+08 | 1.12E+08 | 3640  |
| ENSG000001 | 602.665  | 691.4422 | -0.19722  | 0.12798  | 0.19906  | UCKL1      | chr20 | - | 62571186 | 62587769 | 1954  |
| ENSG000001 | 4.128436 | 1172.972 | -7.9928   | 3.02E-86 | 1.42E-84 | CARD11     | chr7  | - | 2945775  | 3083579  | 4366  |
| ENSG000001 | 20.22849 | 73.61407 | -1.8341   | 3.13E-06 | 1.06E-05 | ZNF485     | chr10 | + | 44101855 | 44113351 | 2054  |
| ENSG000001 | 371.7973 | 520.2022 | -0.48187  | 0.031015 | 0.05839  | SDAD1      | chr4  | - | 76862103 | 76912115 | 3080  |
| ENSG000001 | 0.72616  | 0        | 0.85004   | 0.63064  | NA       | SPDYE8P    | chr7  | - | 72490260 | 72500313 | 2818  |
| ENSG000001 | 11.51603 | 2.027273 | 2.3464    | 0.007985 | 0.017068 | RP11-381C  | chr9  | + | 66960613 | 66964189 | 885   |
| ENSG000001 | 439.7618 | 247.3909 | 0.82852   | 3.37E-09 | 1.49E-08 | ZKSCAN8    | chr6  | + | 28109716 | 28124089 | 4215  |
| ENSG000001 | 555.1677 | 369.5407 | 0.58394   | 0.006787 | 0.014725 | FAM109A    | chr12 | - | 1.12E+08 | 1.12E+08 | 3256  |
| ENSG000001 | 0.290301 | 0        | 0.4146    | 0.81455  | NA       | TMEM239    | chr20 | + | 2795614  | 2800930  | 3892  |
| ENSG000001 | 98.67708 | 118.9776 | -0.26637  | 0.20422  | 0.29333  | HYLS1      | chr11 | + | 1.26E+08 | 1.26E+08 | 2061  |
| ENSG000001 | 20.85017 | 0.640152 | 4.5407    | 3.23E-06 | 1.10E-05 | MYL4       | chr17 | + | 45277812 | 45301045 | 920   |
| ENSG000001 | 16.89818 | 63.50851 | -1.88     | 9.42E-07 | 3.37E-06 | HIST1H4I   | chr6  | + | 27107076 | 27108418 | 1343  |
| ENSG000001 | 2.282147 | 22.74358 | -3.1661   | 7.51E-06 | 2.45E-05 | ZNF442     | chr19 | - | 12460185 | 12476719 | 2797  |
| ENSG000001 | 82.1855  | 469.1987 | -2.5096   | 2.16E-35 | 3.33E-34 | ZNF813     | chr19 | + | 53970989 | 54006950 | 6151  |
| ENSG000001 | 99.54863 | 3.042118 | 4.9194    | 5.93E-18 | 4.54E-17 | HOXC4      | chr12 | + | 54410715 | 54449814 | 1666  |
| ENSG000001 | 101.5869 | 24.05303 | 2.0726    | 2.05E-11 | 1.07E-10 | DCAF12L2   | chrX  | - | 1.25E+08 | 1.25E+08 | 1652  |
| ENSG000001 | 666.2123 | 1261.542 | -0.91874  | 5.22E-08 | 2.08E-07 | PIM3       | chr22 | + | 50354161 | 50357728 | 2369  |
| ENSG000001 | 1387.612 | 1867.445 | -0.42763  | 3.88E-05 | 0.000116 | ASNA1      | chr19 | + | 12847953 | 12859137 | 1368  |
| ENSG000001 | 0        | 1.340997 | -1.8899   | 0.26871  | NA       | RP11-544A  | chr1  | + | 1.61E+08 | 1.61E+08 | 2136  |
| ENSG000001 | 3162.68  | 1118.678 | 1.4982    | 2.60E-48 | 5.68E-47 | ASPH       | chr8  | - | 62413116 | 62627155 | 5153  |
| ENSG000001 | 2.282147 | 2.010288 | 0.17288   | 0.8799   | 0.91625  | HIST1H3A   | chr6  | + | 26020718 | 26021186 | 469   |
| ENSG000001 | 2404.949 | 743.7746 | 1.6896    | 2.92E-27 | 3.35E-26 | SPRED2     | chr2  | - | 65537985 | 65659771 | 4097  |
| ENSG000001 | 771.8734 | 1091.738 | -0.5      | 2.79E-05 | 8.50E-05 | WWP2       | chr16 | + | 69796209 | 69975644 | 4515  |
| ENSG000001 | 0        | 0.343138 | -0.41864  | 0.81278  | NA       | HIST1H2AL  | chr6  | + | 27833034 | 27833606 | 573   |
| ENSG000001 | 2752.496 | 1923.876 | 0.51591   | 0.000202 | 0.000552 | GFPT1      | chr2  | - | 69546905 | 69614382 | 8695  |
| ENSG000001 | 389.1177 | 277.2898 | 0.48546   | 0.039055 | 0.071854 | UVRAG      | chr11 | + | 75526212 | 75854239 | 4123  |

|            |          |          |          |           |           |            |       |   |          |          |       |
|------------|----------|----------|----------|-----------|-----------|------------|-------|---|----------|----------|-------|
| ENSG000001 | 0.943682 | 3.039702 | -1.3999  | 0.27034   | 0.36948   | TPTE2P3    | chr13 | + | 53063128 | 53161222 | 2610  |
| ENSG000001 | 0        | 0.594029 | -0.81444 | 0.64499   | NA        | AC092291   | chr16 | - | 14548061 | 14548155 | 90    |
| ENSG000001 | 125.5935 | 163.6955 | -0.37652 | 0.23214   | 0.32556   | ZNF26      | chr12 | + | 1.34E+08 | 1.34E+08 | 4853  |
| ENSG000001 | 0.36308  | 0.343138 | -0.0021  | 0.99905   | NA        | TMEM207    | chr3  | - | 1.9E+08  | 1.9E+08  | 1448  |
| ENSG000001 | 480.6014 | 226.4189 | 1.0824   | 1.97E-09  | 8.85E-09  | ITSN2      | chr2  | - | 24425733 | 24583583 | 6300  |
| ENSG000001 | 5.580756 | 3.512346 | 0.60526  | 0.50143   | 0.60501   | NTRK1      | chr1  | + | 1.57E+08 | 1.57E+08 | 3052  |
| ENSG000001 | 38.38363 | 28.45554 | 0.42636  | 0.29254   | 0.3944    | BZW1P2     | chr3  | - | 1.16E+08 | 1.16E+08 | 826   |
| ENSG000001 | 3516.974 | 4034.406 | -0.19806 | 0.023978  | 0.046456  | MGEA5      | chr10 | - | 1.04E+08 | 1.04E+08 | 5146  |
| ENSG000001 | 0.290301 | 0.343138 | -0.00202 | 0.99909   | NA        | TATDN2P1   | chrX  | + | 44143162 | 44145492 | 2331  |
| ENSG000001 | 3.112789 | 2.292733 | 0.3711   | 0.73329   | 0.80297   | CTD-2173L  | chr9  | - | 39443804 | 39464526 | 4037  |
| ENSG000001 | 28.57688 | 231.0477 | -2.9879  | 7.05E-29  | 8.59E-28  | MT1F       | chr16 | + | 56691606 | 56694610 | 1573  |
| ENSG000001 | 1356.897 | 379.6218 | 1.8326   | 1.03E-26  | 1.16E-25  | FAM115A    | chr7  | - | 1.44E+08 | 1.44E+08 | 5733  |
| ENSG000001 | 43.65892 | 86.2431  | -0.9735  | 0.007661  | 0.016448  | ZNF69      | chr19 | + | 11998599 | 12025144 | 2010  |
| ENSG000001 | 2132.711 | 2386.956 | -0.16225 | 0.24382   | 0.33938   | TXNRD1     | chr12 | + | 1.05E+08 | 1.05E+08 | 3974  |
| ENSG000001 | 115.9264 | 1410.1   | -3.5897  | 3.94E-65  | 1.30E-63  | NRARP      | chr9  | - | 1.4E+08  | 1.4E+08  | 2621  |
| ENSG000001 | 74.26791 | 15.37655 | 2.2505   | 1.44E-08  | 6.02E-08  | ZNF583     | chr19 | + | 56909335 | 56947404 | 4916  |
| ENSG000001 | 0        | 0.357707 | -0.41864 | 0.81278   | NA        | F8A2       | chrX  | + | 1.55E+08 | 1.55E+08 | 1701  |
| ENSG000001 | 37.19349 | 55.32665 | -0.57304 | 0.081368  | 0.13553   | ZNF568     | chr19 | + | 37407231 | 37489602 | 3774  |
| ENSG000001 | 0.36308  | 0        | 0.4146   | 0.81455   | NA        | C9orf141   | chr9  | + | 1.4E+08  | 1.4E+08  | 978   |
| ENSG000001 | 186.117  | 333.855  | -0.83815 | 3.68E-06  | 1.24E-05  | ZXDB       | chrX  | + | 57618269 | 57623906 | 5638  |
| ENSG000001 | 140.779  | 319.1538 | -1.1676  | 0.001536  | 0.003702  | ZNF480     | chr19 | + | 52800430 | 52829175 | 4738  |
| ENSG000001 | 622.8985 | 587.0265 | 0.085751 | 0.44848   | 0.55394   | ZNF587     | chr19 | + | 58361225 | 58376480 | 6882  |
| ENSG000001 | 9157.728 | 1173.449 | 2.961    | 1.63E-153 | 1.94E-151 | TPM2       | chr9  | - | 35681989 | 35691017 | 2147  |
| ENSG000001 | 105.1441 | 303.4977 | -1.5254  | 9.38E-13  | 5.34E-12  | FLVCR1-AS1 | chr1  | - | 2.13E+08 | 2.13E+08 | 2525  |
| ENSG000001 | 0        | 0.700845 | -0.87835 | 0.62047   | NA        | RTP2       | chr3  | - | 1.87E+08 | 1.87E+08 | 1346  |
| ENSG000001 | 108.2036 | 132.3125 | -0.28805 | 0.23619   | 0.3302    | ZNF280B    | chr22 | - | 22838767 | 22863505 | 5726  |
| ENSG000001 | 212.2004 | 476.732  | -1.1628  | 5.17E-14  | 3.18E-13  | SH3BGRL2   | chr6  | + | 80341000 | 80413372 | 4649  |
| ENSG000001 | 103.9441 | 319.4845 | -1.6187  | 9.10E-17  | 6.57E-16  | ZNF808     | chr19 | + | 53030905 | 53067717 | 4233  |
| ENSG000001 | 44.31051 | 233.0485 | -2.3906  | 6.24E-23  | 6.01E-22  | ANKRD35    | chr1  | + | 1.46E+08 | 1.46E+08 | 3342  |
| ENSG000001 | 0        | 1.043983 | -1.3473  | 0.44976   | NA        | B3GNT6     | chr11 | + | 76745385 | 76753096 | 2639  |
| ENSG000001 | 0        | 1.248751 | -1.5848  | 0.37202   | NA        | RP11-208N1 | chr3  | - | 1.87E+08 | 1.87E+08 | 2674  |
| ENSG000001 | 1566.02  | 3045.078 | -0.95701 | 1.77E-08  | 7.35E-08  | YTHDF2     | chr1  | + | 29063133 | 29096287 | 2925  |
| ENSG000001 | 46.274   | 54.93813 | -0.23956 | 0.45868   | 0.564     | NBR2       | chr17 | + | 41277627 | 41305688 | 1344  |
| ENSG000001 | 438.6648 | 486.8032 | -0.14984 | 0.40987   | 0.51465   | TMA16      | chr4  | + | 1.64E+08 | 1.64E+08 | 1978  |
| ENSG000001 | 10.551   | 0        | 5.0188   | 5.89E-05  | 0.000173  | HLA-DRB5   | chr6  | - | 32485120 | 32498064 | 1260  |
| ENSG000001 | 185.8618 | 63.48831 | 1.5489   | 9.59E-13  | 5.46E-12  | ATL1       | chr14 | + | 50999227 | 51099786 | 2853  |
| ENSG000001 | 2.032108 | 11.8675  | -2.2508  | 0.026698  | 0.051185  | CNGA1      | chr4  | - | 47937994 | 48018689 | 2867  |
| ENSG000001 | 186.446  | 271.4375 | -0.53999 | 0.014783  | 0.029979  | MAFK       | chr7  | + | 1570350  | 1582679  | 3368  |
| ENSG000001 | 4.253456 | 12.36357 | -1.4708  | 0.033696  | 0.062971  | HIST1H4E   | chr6  | + | 26204858 | 26206266 | 1409  |
| ENSG000001 | 16.28766 | 8.603627 | 0.88882  | 0.19508   | 0.28291   | C1orf228   | chr1  | + | 45140364 | 45191263 | 2113  |
| ENSG000001 | 270.0926 | 642.4853 | -1.247   | 1.16E-13  | 6.96E-13  | ZNF43      | chr19 | - | 21987752 | 22034927 | 5584  |
| ENSG000001 | 429.0144 | 436.8703 | -0.02475 | 0.89139   | 0.92458   | GPN1       | chr2  | + | 27851114 | 27874375 | 2496  |
| ENSG000001 | 5.063559 | 0.343138 | 3.1298   | 0.021331  | 0.041825  | PLN        | chr6  | + | 1.19E+08 | 1.19E+08 | 2001  |
| ENSG000001 | 12.33388 | 8.579321 | 0.51164  | 0.40855   | 0.51339   | C2CD4A     | chr15 | + | 62359176 | 62363116 | 3445  |
| ENSG000001 | 123.1377 | 226.943  | -0.87451 | 2.49E-05  | 7.63E-05  | ZNF28      | chr19 | - | 53300662 | 53360853 | 5171  |
| ENSG000001 | 1363.123 | 0        | 11.585   | 1.86E-27  | 2.15E-26  | ITGBL1     | chr13 | + | 1.02E+08 | 1.02E+08 | 2494  |
| ENSG000001 | 130.986  | 184.4251 | -0.4871  | 0.018588  | 0.036963  | ZNF511     | chr10 | + | 1.35E+08 | 1.35E+08 | 2004  |
| ENSG000001 | 0.342542 | 17.43471 | -4.5473  | 0.000759  | 0.001918  | C20orf203  | chr20 | - | 31220661 | 31239680 | 3456  |
| ENSG000001 | 244.212  | 211.5342 | 0.20736  | 0.17626   | 0.25969   | ZNF627     | chr19 | + | 11670189 | 11729950 | 2840  |
| ENSG000001 | 9.046438 | 2.947455 | 1.5228   | 0.069279  | 0.11807   | KCNRG      | chr13 | + | 50589390 | 50595058 | 1623  |
| ENSG000001 | 585.8787 | 1315.036 | -1.164   | 8.48E-17  | 6.13E-16  | WDHD1      | chr14 | - | 55405668 | 55493823 | 5996  |
| ENSG000001 | 212.2655 | 185.5655 | 0.19316  | 0.29382   | 0.39587   | ZNF789     | chr7  | + | 99070464 | 99101273 | 4253  |
| ENSG000001 | 4311.186 | 4839.992 | -0.16667 | 0.11172   | 0.17746   | CTNND1     | chr11 | + | 57520715 | 57587018 | 6553  |
| ENSG000001 | 1238.904 | 1272.98  | -0.03918 | 0.77626   | 0.83922   | DDX39B     | chr6  | - | 31497996 | 31510225 | 5158  |
| ENSG000001 | 16.14292 | 8.928164 | 0.81071  | 0.18947   | 0.27588   | SLC34A3    | chr9  | + | 1.4E+08  | 1.4E+08  | 2162  |
| ENSG000001 | 0        | 1.340997 | -1.8899  | 0.26871   | NA        | RD3        | chr1  | - | 2.12E+08 | 2.12E+08 | 4266  |
| ENSG000001 | 0.342542 | 0.343138 | -0.00208 | 0.99906   | NA        | SPANXC     | chrX  | - | 1.4E+08  | 1.4E+08  | 387   |
| ENSG000001 | 14.68025 | 126.1674 | -3.0871  | 2.30E-20  | 1.97E-19  | ARC        | chr8  | - | 1.44E+08 | 1.44E+08 | 3948  |
| ENSG000001 | 9.843585 | 21.65106 | -1.1037  | 0.054387  | 0.095668  | AC073343   | chr7  | + | 6713376  | 6715991  | 1170  |
| ENSG000001 | 1173.263 | 615.331  | 0.92969  | 2.67E-14  | 1.67E-13  | NUDT16     | chr3  | + | 1.31E+08 | 1.31E+08 | 6117  |
| ENSG000001 | 726.0965 | 973.6738 | -0.42178 | 0.000398  | 0.001047  | TLK1       | chr2  | - | 1.72E+08 | 1.72E+08 | 5730  |
| ENSG000001 | 911.246  | 1845.559 | -1.0168  | 3.13E-19  | 2.54E-18  | LRBA       | chr4  | - | 1.51E+08 | 1.52E+08 | 10313 |
| ENSG000001 | 8.870805 | 15.76186 | -0.80953 | 0.25174   | 0.34852   | C3orf35    | chr3  | + | 37427760 | 37476988 | 1859  |
| ENSG000001 | 0        | 4.424406 | -3.6617  | 0.011399  | 0.023663  | ZNF536     | chr19 | + | 30719197 | 31204445 | 4945  |
| ENSG000001 | 949.2701 | 1601.438 | -0.75272 | 3.27E-05  | 9.86E-05  | MMP17      | chr12 | + | 1.32E+08 | 1.32E+08 | 2411  |

|            |          |          |          |           |           |           |       |   |          |          |       |
|------------|----------|----------|----------|-----------|-----------|-----------|-------|---|----------|----------|-------|
| ENSG000001 | 987.6139 | 823.102  | 0.26291  | 0.050383  | 0.08952   | BAZ1A     | chr14 | - | 35221937 | 35344853 | 6010  |
| ENSG000001 | 0        | 0.343138 | -0.41864 | 0.81278   | NA        | AKR1C4    | chr10 | + | 5237425  | 5260912  | 1414  |
| ENSG000001 | 1211.864 | 773.769  | 0.64712  | 1.96E-06  | 6.82E-06  | COPS8     | chr2  | + | 2.38E+08 | 2.38E+08 | 4007  |
| ENSG000001 | 680.7484 | 844.9599 | -0.31053 | 0.046389  | 0.083358  | PPIAP22   | chr21 | + | 20230097 | 20230594 | 498   |
| ENSG000001 | 39.2529  | 407.9104 | -3.3613  | 3.36E-59  | 9.59E-58  | CCDC69    | chr5  | - | 1.51E+08 | 1.51E+08 | 3451  |
| ENSG000001 | 818.4628 | 980.9822 | -0.26171 | 0.053658  | 0.09459   | MDM4      | chr1  | + | 2.04E+08 | 2.05E+08 | 10073 |
| ENSG000001 | 114.5321 | 218.2122 | -0.92727 | 2.01E-05  | 6.22E-05  | RYR2      | chr1  | + | 2.37E+08 | 2.38E+08 | 16562 |
| ENSG000001 | 0        | 0.951736 | -1.2555  | 0.48145   | NA        | ZNF534    | chr19 | + | 52932440 | 52955568 | 2086  |
| ENSG000001 | 1142.433 | 474.182  | 1.2671   | 1.22E-25  | 1.31E-24  | KLHL9     | chr9  | - | 21329670 | 21335379 | 5710  |
| ENSG000001 | 0.36308  | 1.188058 | -0.99796 | 0.5724    | NA        | FAM3D     | chr3  | - | 58619673 | 58652575 | 1319  |
| ENSG000001 | 1166.479 | 201.2596 | 2.5269   | 2.66E-65  | 8.77E-64  | NCOA6     | chr20 | - | 33284722 | 33413452 | 9311  |
| ENSG000001 | 698.609  | 561.6208 | 0.31369  | 0.030977  | 0.05834   | STK39     | chr2  | - | 1.69E+08 | 1.69E+08 | 3820  |
| ENSG000001 | 0        | 1.98115  | -2.4527  | 0.13291   | 0.20539   | TAT       | chr16 | - | 71599563 | 71611033 | 3983  |
| ENSG000001 | 743.4964 | 194.2297 | 1.9364   | 3.06E-42  | 5.71E-41  | C6orf89   | chr6  | + | 36839646 | 36892331 | 2565  |
| ENSG000001 | 6145.937 | 3891.031 | 0.65887  | 1.75E-08  | 7.27E-08  | CALM1     | chr14 | + | 90862846 | 90874605 | 4242  |
| ENSG000001 | 0.36308  | 0.654722 | -0.52647 | 0.7643    | NA        | LPA       | chr6  | - | 1.61E+08 | 1.61E+08 | 6490  |
| ENSG000001 | 3.060548 | 12.36599 | -1.9307  | 0.013872  | 0.028308  | FAM19A2   | chr12 | - | 62102040 | 62672931 | 4128  |
| ENSG000001 | 2011.616 | 932.8938 | 1.1056   | 7.82E-08  | 3.08E-07  | TTC37     | chr5  | - | 94799599 | 94890711 | 5706  |
| ENSG000001 | 729.1868 | 229.5722 | 1.6593   | 4.41E-16  | 3.06E-15  | TUSC1     | chr9  | - | 25676396 | 25678856 | 2461  |
| ENSG000001 | 0.342542 | 0        | 0.4146   | 0.81455   | NA        | MAGEA1    | chrX  | - | 1.52E+08 | 1.52E+08 | 1708  |
| ENSG000001 | 1491.696 | 646.9743 | 1.2043   | 5.79E-27  | 6.55E-26  | PAPSS2    | chr10 | + | 89419370 | 89507462 | 3949  |
| ENSG000001 | 0.36308  | 1.652581 | -1.6393  | 0.29595   | 0.39799   | C3orf27   | chr3  | - | 1.28E+08 | 1.28E+08 | 2697  |
| ENSG000001 | 340.1557 | 213.2555 | 0.67347  | 1.02E-05  | 3.26E-05  | SLC9A6    | chrX  | + | 1.35E+08 | 1.35E+08 | 4681  |
| ENSG000001 | 340.8585 | 388.9477 | -0.18933 | 0.15542   | 0.23401   | FAN1      | chr15 | + | 31196055 | 31235311 | 4999  |
| ENSG000001 | 7.758422 | 1.995719 | 1.8277   | 0.046272  | 0.083179  | ABCA4     | chr1  | - | 94458393 | 94586688 | 7309  |
| ENSG000001 | 283.6043 | 335.9724 | -0.24197 | 0.22797   | 0.32099   | EIF1AY    | chrY  | + | 22737611 | 22755040 | 3148  |
| ENSG000001 | 6127.286 | 8193.315 | -0.41906 | 2.94E-06  | 1.00E-05  | MT-ND6    | chrMT | - | 14149    | 14673    | 525   |
| ENSG000001 | 2661.963 | 2394.204 | 0.15283  | 0.30949   | 0.41131   | IPO9      | chr1  | + | 2.02E+08 | 2.02E+08 | 11435 |
| ENSG000001 | 486.2337 | 145.4128 | 1.7353   | 2.51E-10  | 1.21E-09  | CEP290    | chr12 | - | 88442793 | 88535993 | 7948  |
| ENSG000001 | 11.80471 | 19.0654  | -0.66705 | 0.2389    | 0.33356   | C1orf191  | chr1  | + | 54703710 | 54704736 | 1027  |
| ENSG000001 | 34244.26 | 60015.4  | -0.80872 | 8.14E-14  | 4.94E-13  | MT-CO2    | chrMT | + | 7586     | 8269     | 684   |
| ENSG000001 | 531.9868 | 519.273  | 0.036383 | 0.79577   | 0.85521   | C1orf85   | chr1  | - | 1.56E+08 | 1.56E+08 | 1604  |
| ENSG000001 | 252.8536 | 112.5977 | 1.1662   | 3.11E-06  | 1.06E-05  | FAM179B   | chr14 | + | 45431411 | 45543634 | 6375  |
| ENSG000001 | 12.74741 | 689.1223 | -5.7121  | 3.69E-88  | 1.78E-86  | DLL1      | chr6  | - | 1.71E+08 | 1.71E+08 | 3174  |
| ENSG000001 | 422.1836 | 626.4555 | -0.56787 | 0.003358  | 0.007683  | ANKRD13B  | chr17 | + | 27916787 | 27941779 | 3214  |
| ENSG000001 | 173.5672 | 237.1612 | -0.44935 | 0.016671  | 0.03345   | ECI2      | chr6  | - | 4115923  | 4135831  | 3870  |
| ENSG000001 | 858.5641 | 1756.482 | -1.0321  | 1.49E-21  | 1.35E-20  | UNC13B    | chr9  | + | 35161999 | 35405335 | 6303  |
| ENSG000001 | 0        | 12.32074 | -5.1666  | 5.50E-05  | 0.000162  | C19orf45  | chr19 | + | 7557862  | 7573336  | 1679  |
| ENSG000001 | 28562.16 | 28161.09 | 0.02036  | 0.90471   | 0.93419   | MT-CYB    | chrMT | + | 14747    | 15887    | 1141  |
| ENSG000001 | 1750.705 | 2141.165 | -0.28996 | 0.017493  | 0.034971  | LDB1      | chr10 | - | 1.04E+08 | 1.04E+08 | 2285  |
| ENSG000001 | 21.70216 | 12.41782 | 0.77734  | 0.12521   | 0.19562   | PPP1R14C  | chr6  | + | 1.5E+08  | 1.51E+08 | 2152  |
| ENSG000001 | 1045     | 1093.239 | -0.0643  | 0.55673   | 0.65578   | CTR9      | chr11 | + | 10772534 | 10801290 | 4586  |
| ENSG000001 | 53.22736 | 8.181938 | 2.6687   | 5.68E-08  | 2.26E-07  | SMOC1     | chr14 | + | 70320848 | 70499083 | 3666  |
| ENSG000001 | 0.705622 | 1.248751 | -0.63959 | 0.68663   | 0.76619   | F5        | chr1  | - | 1.69E+08 | 1.7E+08  | 7039  |
| ENSG000001 | 495.428  | 433.3983 | 0.19156  | 0.15754   | 0.23678   | MSRB1     | chr16 | - | 1988211  | 1993327  | 1423  |
| ENSG000001 | 0        | 0.357707 | -0.41864 | 0.81278   | NA        | SMIM11P1  | chr6  | - | 86444925 | 86445786 | 862   |
| ENSG000001 | 80.38061 | 56.79587 | 0.45216  | 0.67128   | 0.75379   | LRRTM3    | chr10 | + | 68685764 | 68859588 | 4358  |
| ENSG000001 | 389.5207 | 773.9188 | -0.98785 | 2.34E-06  | 8.08E-06  | ZNF652    | chr17 | - | 47366568 | 47439835 | 5988  |
| ENSG000001 | 1001.642 | 667.4071 | 0.58453  | 2.29E-05  | 7.03E-05  | SMURF1    | chr7  | - | 98625061 | 98741723 | 5737  |
| ENSG000001 | 5503.456 | 586.4445 | 3.2222   | 1.18E-77  | 4.83E-76  | SLC5A3    | chr21 | + | 35445870 | 35478559 | 11574 |
| ENSG000001 | 12.06672 | 27.47151 | -1.1745  | 0.021141  | 0.041496  | RP5-857K2 | chr1  | + | 569756   | 570302   | 547   |
| ENSG000001 | 192.0807 | 292.0789 | -0.601   | 0.003642  | 0.008286  | GPATCH3   | chr1  | - | 27216979 | 27226957 | 2123  |
| ENSG000001 | 49.94253 | 77.11279 | -0.62829 | 0.033526  | 0.062673  | GATSL2    | chr7  | - | 74807499 | 74867509 | 1264  |
| ENSG000001 | 4401.915 | 2191.896 | 1.0046   | 3.11E-21  | 2.77E-20  | CDC42BPB  | chr14 | - | 1.03E+08 | 1.04E+08 | 6758  |
| ENSG000001 | 175.8306 | 19.47085 | 3.1441   | 2.57E-20  | 2.20E-19  | PLXNB3    | chrX  | + | 1.53E+08 | 1.53E+08 | 6377  |
| ENSG000001 | 6.773664 | 8.311444 | -0.27101 | 0.69374   | 0.77159   | OXCT2     | chr1  | - | 40235195 | 40237020 | 1826  |
| ENSG000001 | 7306.709 | 12602.51 | -0.78599 | 1.23E-20  | 1.06E-19  | RPL10A    | chr6  | + | 35436185 | 35438562 | 1069  |
| ENSG000001 | 81.39928 | 27.88582 | 1.5413   | 3.34E-06  | 1.13E-05  | COLGALT2  | chr1  | - | 1.84E+08 | 1.84E+08 | 5177  |
| ENSG000001 | 0        | 10.72556 | -5.044   | 5.25E-05  | 0.000155  | EGFL6     | chrX  | + | 13587724 | 13651694 | 2398  |
| ENSG000001 | 15999.87 | 30183.05 | -0.91501 | 5.76E-21  | 5.07E-20  | MT-ND2    | chrMT | + | 4470     | 5511     | 1042  |
| ENSG000001 | 0        | 0.937167 | -1.2408  | 0.48662   | NA        | SYCP1     | chr1  | + | 1.15E+08 | 1.16E+08 | 3522  |
| ENSG000001 | 309.3909 | 69.28379 | 2.1448   | 6.48E-25  | 6.74E-24  | APCDD1L   | chr20 | - | 57034157 | 57090187 | 3426  |
| ENSG000001 | 65.30021 | 6.993137 | 3.1346   | 1.95E-11  | 1.01E-10  | RCSD1     | chr1  | + | 1.68E+08 | 1.68E+08 | 3135  |
| ENSG000001 | 84.6049  | 1.888903 | 5.2416   | 2.06E-16  | 1.46E-15  | RASSF9    | chr12 | - | 86198331 | 86230348 | 1826  |
| ENSG000001 | 45.87147 | 931.5273 | -4.3334  | 1.98E-110 | 1.33E-108 | FAM169A   | chr5  | - | 74073399 | 74162776 | 5990  |

|            |          |          |          |           |           |          |       |   |          |          |       |
|------------|----------|----------|----------|-----------|-----------|----------|-------|---|----------|----------|-------|
| ENSG000001 | 220.982  | 309.4934 | -0.48449 | 0.004158  | 0.00937   | ZNF830   | chr17 | + | 33288549 | 33290205 | 1657  |
| ENSG000001 | 17.61578 | 19.76129 | -0.15586 | 0.77185   | 0.83564   | GRIN3A   | chr9  | - | 1.04E+08 | 1.05E+08 | 7770  |
| ENSG000001 | 18174.16 | 25062.24 | -0.46323 | 2.57E-05  | 7.86E-05  | MT-ND5   | chrMT | + | 12337    | 14148    | 1812  |
| ENSG000001 | 0.290301 | 0.297015 | -0.00202 | 0.99909   | NA        | MUC2     | chr11 | + | 1074875  | 1104419  | 8637  |
| ENSG000001 | 966.2076 | 1370.003 | -0.50232 | 0.005167  | 0.011484  | CNOT7    | chr8  | - | 17086737 | 17104387 | 2649  |
| ENSG000001 | 1577.314 | 1462.657 | 0.1088   | 0.37066   | 0.47519   | TMEM184E | chr22 | - | 38615298 | 38669040 | 3667  |
| ENSG000001 | 2041.311 | 2307.192 | -0.17675 | 0.054856  | 0.096375  | MTOR     | chr1  | - | 11166592 | 11322564 | 8677  |
| ENSG000001 | 118.5798 | 1306.454 | -3.4556  | 2.59E-101 | 1.50E-99  | SCAMP5   | chr15 | + | 75249560 | 75313837 | 3427  |
| ENSG000001 | 1003.171 | 251.9619 | 1.9875   | 5.85E-25  | 6.09E-24  | ZNF521   | chr18 | - | 22641890 | 22932154 | 4871  |
| ENSG000001 | 454.7731 | 2.745103 | 6.1254   | 2.52E-06  | 8.68E-06  | ALPK2    | chr18 | - | 56148479 | 56296189 | 7303  |
| ENSG000001 | 18.82922 | 1.684135 | 3.3115   | 3.11E-05  | 9.41E-05  | FAM5B    | chr1  | + | 1.77E+08 | 1.77E+08 | 3558  |
| ENSG000001 | 0        | 1.730259 | -1.9792  | 0.25882   | NA        | MAGEB3   | chrX  | + | 30248553 | 30255607 | 2303  |
| ENSG000001 | 256.5474 | 382.4407 | -0.57504 | 0.000276  | 0.000742  | LRIG2    | chr1  | + | 1.14E+08 | 1.14E+08 | 5076  |
| ENSG000001 | 123443.1 | 173824.9 | -0.49317 | 9.28E-05  | 0.000266  | MT-CO1   | chrMT | + | 5904     | 7445     | 1542  |
| ENSG000001 | 524.1656 | 801.7152 | -0.61105 | 0.001404  | 0.003404  | PNP      | chr14 | + | 20937113 | 20945253 | 2573  |
| ENSG000001 | 0.342542 | 9.683996 | -4.0713  | 0.000976  | 0.002426  | PAX9     | chr14 | + | 37126773 | 37148920 | 4514  |
| ENSG000001 | 0        | 0.343138 | -0.41864 | 0.81278   | NA        | LRR10    | chr12 | - | 70002351 | 70004942 | 2592  |
| ENSG000001 | 102.2333 | 64.36559 | 0.66383  | 0.007019  | 0.015193  | GK       | chrX  | + | 30671476 | 30748725 | 3707  |
| ENSG000001 | 808.1593 | 686.6346 | 0.23495  | 0.032399  | 0.06078   | FOXJ3    | chr1  | - | 42642210 | 42801548 | 5352  |
| ENSG000001 | 322.9313 | 271.5837 | 0.25143  | 0.10633   | 0.17007   | ZNF358   | chr19 | + | 7580178  | 7585912  | 1954  |
| ENSG000001 | 553.6034 | 665.1505 | -0.26464 | 0.041181  | 0.075226  | SFT2D1   | chr6  | - | 1.67E+08 | 1.67E+08 | 2576  |
| ENSG000001 | 0        | 10.30716 | -4.9919  | 6.52E-05  | 0.00019   | CD247    | chr1  | - | 1.67E+08 | 1.67E+08 | 2922  |
| ENSG000001 | 2.624689 | 20.27448 | -2.827   | 6.31E-05  | 0.000184  | GRM3     | chr7  | + | 86273230 | 86494200 | 4268  |
| ENSG000001 | 466.9356 | 626.2261 | -0.4212  | 0.087327  | 0.14409   | CHAMP1   | chr13 | + | 1.15E+08 | 1.15E+08 | 3788  |
| ENSG000001 | 699.758  | 394.88   | 0.82409  | 4.92E-11  | 2.50E-10  | INPP5F   | chr10 | + | 1.21E+08 | 1.22E+08 | 4925  |
| ENSG000001 | 1361.531 | 1637.625 | -0.26558 | 0.027333  | 0.052297  | ARHGAP11 | chr15 | + | 32907345 | 32932150 | 5898  |
| ENSG000001 | 4.221753 | 0        | 3.6318   | 0.011389  | 0.023647  | SUCNR1   | chr3  | + | 1.52E+08 | 1.52E+08 | 1439  |
| ENSG000001 | 5544.331 | 4823.707 | 0.20031  | 0.31526   | 0.41791   | HMG2     | chr1  | + | 26798941 | 26802463 | 1496  |
| ENSG000001 | 1503.366 | 170.0444 | 3.1252   | 2.82E-31  | 3.79E-30  | SELM     | chr22 | - | 31500758 | 31516055 | 2070  |
| ENSG000001 | 1819.115 | 335.1467 | 2.4372   | 3.29E-106 | 2.07E-104 | UBE2J1   | chr6  | - | 90036344 | 90062567 | 4290  |
| ENSG000001 | 35.87891 | 12.07227 | 1.5405   | 0.001135  | 0.002793  | GJC2     | chr1  | + | 2.28E+08 | 2.28E+08 | 2243  |
| ENSG000001 | 1217.985 | 1291.191 | -0.08339 | 0.56624   | 0.66407   | OPA1     | chr3  | + | 1.93E+08 | 1.93E+08 | 6492  |
| ENSG000001 | 1262.167 | 1832.687 | -0.53678 | 0.001682  | 0.004029  | DNND4B   | chr1  | - | 1.54E+08 | 1.54E+08 | 5706  |
| ENSG000001 | 47.35566 | 62.17792 | -0.3841  | 0.34506   | 0.44915   | RYSR3    | chr15 | + | 33603163 | 34158303 | 15559 |
| ENSG000001 | 160.7214 | 223.8637 | -0.47565 | 0.064003  | 0.11037   | ZNF277   | chr7  | + | 1.12E+08 | 1.12E+08 | 2218  |
| ENSG000001 | 5943.134 | 8125.801 | -0.45063 | 0.000718  | 0.001821  | MT-ND3   | chrMT | + | 10059    | 10404    | 346   |
| ENSG000001 | 170.2509 | 201.6114 | -0.24443 | 0.18759   | 0.2736    | KTI12    | chr1  | - | 52497775 | 52499488 | 1714  |
| ENSG000001 | 9.689468 | 1.71569  | 2.2595   | 0.034761  | 0.064748  | DUSP27   | chr1  | + | 1.67E+08 | 1.67E+08 | 4164  |
| ENSG000001 | 745.3759 | 626.1989 | 0.25113  | 0.17032   | 0.25249   | SELT     | chr3  | + | 1.5E+08  | 1.5E+08  | 3469  |
| ENSG000001 | 0.290301 | 31.88787 | -5.6797  | 7.02E-07  | 2.54E-06  | ARHGEF15 | chr17 | + | 8213559  | 8225829  | 4154  |
| ENSG000001 | 280.151  | 82.71888 | 1.75     | 1.09E-10  | 5.38E-10  | TOX      | chr8  | - | 59717977 | 60031767 | 4131  |
| ENSG000001 | 1.681007 | 0        | 2.1857   | 0.19206   | NA        | CES1     | chr16 | - | 55836763 | 55867249 | 2178  |
| ENSG000001 | 40.35249 | 2.725702 | 3.7911   | 2.39E-09  | 1.06E-08  | CD3E     | chr11 | + | 1.18E+08 | 1.18E+08 | 2643  |
| ENSG000001 | 1676.528 | 326.6113 | 2.3541   | 1.40E-62  | 4.37E-61  | RUSC2    | chr9  | + | 35490124 | 35561895 | 5636  |
| ENSG000001 | 161.9259 | 86.89796 | 0.89192  | 8.79E-05  | 0.000252  | FICD     | chr12 | + | 1.09E+08 | 1.09E+08 | 3347  |
| ENSG000001 | 2763.169 | 1091.751 | 1.3389   | 9.35E-35  | 1.41E-33  | OSTC     | chr4  | + | 1.1E+08  | 1.1E+08  | 1077  |
| ENSG000001 | 20.11545 | 25.37791 | -0.32703 | 0.57311   | 0.67029   | HSD3BP5  | chr1  | + | 1.2E+08  | 1.2E+08  | 1132  |
| ENSG000001 | 1487.869 | 1731.423 | -0.2187  | 0.13971   | 0.21349   | R3HDM4   | chr19 | - | 896503   | 913240   | 1815  |
| ENSG000001 | 491.8001 | 262.9154 | 0.90334  | 7.59E-11  | 3.79E-10  | TSEN15   | chr1  | + | 1.84E+08 | 1.84E+08 | 1960  |
| ENSG000001 | 801.7925 | 490.8722 | 0.70506  | 0.008439  | 0.017972  | LTN1     | chr21 | - | 30300466 | 30365277 | 7756  |
| ENSG000001 | 418.8349 | 432.8721 | -0.04856 | 0.77157   | 0.83546   | RUNDC1   | chr17 | + | 41132582 | 41145707 | 3828  |
| ENSG000001 | 0        | 1.788535 | -1.712   | 0.33711   | NA        | CCDC152  | chr5  | + | 42756903 | 42802462 | 3431  |
| ENSG000001 | 22.01137 | 18.82666 | 0.21974  | 0.65507   | 0.73998   | C9orf96  | chr9  | + | 1.36E+08 | 1.36E+08 | 2825  |
| ENSG000001 | 343.9011 | 44.32676 | 2.9336   | 1.42E-35  | 2.21E-34  | GRK5     | chr10 | + | 1.21E+08 | 1.21E+08 | 2654  |
| ENSG000001 | 301.7811 | 351.0506 | -0.21578 | 0.19043   | 0.27714   | TYW1     | chr7  | + | 66460160 | 66704501 | 3348  |
| ENSG000001 | 736.276  | 744.1763 | -0.01521 | 0.91842   | 0.94503   | DCAF12   | chr9  | - | 34086385 | 34127397 | 3667  |
| ENSG000001 | 192.2584 | 343.9975 | -0.83754 | 0.000262  | 0.000707  | SFMBT2   | chr10 | - | 7200586  | 7453450  | 7922  |
| ENSG000001 | 0.342542 | 3.2299   | -2.536   | 0.076326  | 0.12833   | PNA5     | chrX  | - | 1.52E+08 | 1.52E+08 | 3213  |
| ENSG000001 | 59.81716 | 105.2641 | -0.81175 | 0.000553  | 0.001426  | ITPR1L1  | chr2  | + | 96991069 | 96994091 | 2156  |
| ENSG000001 | 48954.17 | 76675.16 | -0.64694 | 3.91E-13  | 2.28E-12  | MT-ND4   | chrMT | + | 10760    | 12137    | 1378  |
| ENSG000001 | 1240.752 | 477.7631 | 1.3749   | 4.15E-15  | 2.74E-14  | SMC5     | chr9  | + | 72873937 | 72969804 | 5921  |
| ENSG000001 | 19971.8  | 39622.56 | -0.9863  | 1.17E-09  | 5.37E-09  | MT-ND1   | chrMT | + | 3307     | 4262     | 956   |
| ENSG000001 | 14.73168 | 85.61033 | -2.5054  | 6.66E-11  | 3.34E-10  | DCAF12L1 | chrX  | - | 1.26E+08 | 1.26E+08 | 3379  |
| ENSG000001 | 764.3352 | 992.8674 | -0.37601 | 0.082313  | 0.13688   | PRMT6    | chr1  | + | 1.08E+08 | 1.08E+08 | 2639  |
| ENSG000001 | 457.2568 | 69.4805  | 2.6967   | 5.13E-19  | 4.11E-18  | SHISA4   | chr1  | + | 2.02E+08 | 2.02E+08 | 1341  |

|            |          |          |          |           |           |           |       |   |          |          |       |
|------------|----------|----------|----------|-----------|-----------|-----------|-------|---|----------|----------|-------|
| ENSG000001 | 188.2974 | 347.6245 | -0.88201 | 1.12E-06  | 3.99E-06  | KIAA1737  | chr14 | + | 77564440 | 77583630 | 4486  |
| ENSG000001 | 931.4092 | 808.9406 | 0.204    | 0.2075    | 0.29725   | CAPZA2    | chr7  | + | 1.16E+08 | 1.17E+08 | 2394  |
| ENSG000001 | 28282.07 | 48446.37 | -0.77596 | 1.74E-16  | 1.24E-15  | MT-ATP6   | chrMT | + | 8527     | 9207     | 681   |
| ENSG000001 | 2523.99  | 2752.847 | -0.12487 | 0.23801   | 0.33248   | TOP1      | chr20 | + | 39657458 | 39753127 | 3738  |
| ENSG000001 | 1473.761 | 942.6133 | 0.64342  | 1.16E-05  | 3.68E-05  | PRC1      | chr15 | - | 91509270 | 91538859 | 4087  |
| ENSG000001 | 168.3155 | 299.3634 | -0.82588 | 3.20E-06  | 1.09E-05  | BHLHB9    | chrX  | + | 1.02E+08 | 1.02E+08 | 5130  |
| ENSG000001 | 1271.118 | 490.3745 | 1.3717   | 3.08E-22  | 2.86E-21  | MAP3K3    | chr17 | + | 61699775 | 61773663 | 4818  |
| ENSG000001 | 19.62995 | 1508.917 | -6.2325  | 3.53E-105 | 2.21E-103 | L1CAM     | chrX  | - | 1.53E+08 | 1.53E+08 | 5113  |
| ENSG000001 | 7267.775 | 6802.806 | 0.09546  | 0.32515   | 0.42805   | SREBF2    | chr22 | + | 42229109 | 42303312 | 5699  |
| ENSG000001 | 392.2284 | 365.7517 | 0.10051  | 0.53882   | 0.63949   | C1orf174  | chr1  | - | 3805689  | 3816857  | 3499  |
| ENSG000001 | 1251.235 | 2.872193 | 8.5544   | 1.65E-72  | 6.17E-71  | POU3F3    | chr2  | + | 1.05E+08 | 1.05E+08 | 4961  |
| ENSG000001 | 25.29205 | 401.7695 | -3.9664  | 2.32E-52  | 5.65E-51  | RASGEF1A  | chr10 | - | 43689983 | 43762367 | 4104  |
| ENSG000001 | 550.1096 | 1078.741 | -0.97115 | 4.52E-17  | 3.33E-16  | C9orf114  | chr9  | - | 1.32E+08 | 1.32E+08 | 4286  |
| ENSG000001 | 4512.634 | 3887.517 | 0.215    | 0.10761   | 0.17184   | RPL39     | chrX  | - | 1.19E+08 | 1.19E+08 | 1915  |
| ENSG000001 | 368.1687 | 512.3864 | -0.47488 | 0.007365  | 0.015865  | DZIP3     | chr3  | + | 1.08E+08 | 1.08E+08 | 5350  |
| ENSG000001 | 468.3693 | 354.0807 | 0.4033   | 0.004013  | 0.009061  | KIAA0753  | chr17 | - | 6481468  | 6544247  | 4859  |
| ENSG000001 | 131.216  | 289.72   | -1.1378  | 9.97E-08  | 3.89E-07  | DCLRE1A   | chr10 | - | 1.16E+08 | 1.16E+08 | 4464  |
| ENSG000001 | 1656.847 | 1406.292 | 0.23634  | 0.019752  | 0.039027  | ATG9A     | chr2  | - | 2.2E+08  | 2.2E+08  | 5245  |
| ENSG000001 | 60.02613 | 156.334  | -1.3772  | 2.26E-08  | 9.33E-08  | NOS1AP    | chr1  | + | 1.62E+08 | 1.62E+08 | 5559  |
| ENSG000001 | 720.0954 | 2076.985 | -1.527   | 4.61E-46  | 9.45E-45  | APRT      | chr16 | - | 88875747 | 88878352 | 947   |
| ENSG000001 | 232.6326 | 95.36315 | 1.2872   | 4.11E-11  | 2.09E-10  | GPRASP1   | chrX  | + | 1.02E+08 | 1.02E+08 | 5980  |
| ENSG000001 | 842.5699 | 382.3663 | 1.1384   | 1.42E-12  | 7.98E-12  | TBKBP1    | chr17 | + | 45771447 | 45789416 | 4121  |
| ENSG000001 | 30.45055 | 261.3886 | -3.0856  | 1.38E-19  | 1.14E-18  | MAGEE1    | chrX  | + | 75648046 | 75651744 | 3699  |
| ENSG000001 | 415.6687 | 189.8678 | 1.1305   | 2.17E-12  | 1.20E-11  | CCDC167   | chr6  | - | 37450696 | 37467698 | 619   |
| ENSG000001 | 35048.5  | 70305.99 | -1.0033  | 4.25E-20  | 3.60E-19  | MT-CO3    | chrMT | + | 9207     | 9990     | 784   |
| ENSG000001 | 6.111723 | 31.46947 | -2.2808  | 0.001234  | 0.003016  | ZFP2      | chr5  | + | 1.78E+08 | 1.78E+08 | 2429  |
| ENSG000001 | 2.209369 | 2.278164 | -0.02721 | 0.98104   | 0.98953   | SOWAHA    | chr5  | + | 1.32E+08 | 1.32E+08 | 3456  |
| ENSG000001 | 744.2857 | 272.8258 | 1.4407   | 2.48E-10  | 1.20E-09  | L3MBTL3   | chr6  | + | 1.3E+08  | 1.3E+08  | 4518  |
| ENSG000001 | 994.9265 | 184.2827 | 2.4305   | 2.71E-43  | 5.22E-42  | DMD       | chrX  | - | 31137336 | 33357558 | 13956 |
| ENSG000001 | 585.2541 | 302.215  | 0.94983  | 3.42E-11  | 1.75E-10  | MFAP3L    | chr4  | - | 1.71E+08 | 1.71E+08 | 6318  |
| ENSG000001 | 859.0377 | 670.6021 | 0.35587  | 0.014347  | 0.029184  | NAGA      | chr22 | - | 42454358 | 42466846 | 3694  |
| ENSG000001 | 1940.932 | 3205.475 | -0.7213  | 0.000445  | 0.001166  | SMG5      | chr1  | - | 1.56E+08 | 1.56E+08 | 4559  |
| ENSG000001 | 916.6433 | 638.478  | 0.52042  | 0.003623  | 0.008247  | KIAA1279  | chr10 | + | 70748487 | 70776738 | 2534  |
| ENSG000001 | 130.8976 | 23.86933 | 2.4295   | 5.11E-16  | 3.54E-15  | TGM2      | chr20 | - | 36756863 | 36794980 | 3996  |
| ENSG000001 | 60.16908 | 170.0244 | -1.489   | 6.56E-09  | 2.83E-08  | ARMCX6    | chrX  | - | 1.01E+08 | 1.01E+08 | 1928  |
| ENSG000001 | 3300.025 | 1063.153 | 1.6301   | 1.13E-17  | 8.58E-17  | PJA2      | chr5  | - | 1.09E+08 | 1.09E+08 | 4889  |
| ENSG000001 | 5.124359 | 144.9527 | -4.7217  | 2.47E-29  | 3.07E-28  | RORB      | chr9  | + | 77112281 | 77302117 | 3567  |
| ENSG000001 | 339.4783 | 265.4198 | 0.35278  | 0.10685   | 0.17079   | SGMS1     | chr10 | - | 52065360 | 52384795 | 3744  |
| ENSG000001 | 0        | 0.297015 | -0.41864 | 0.81278   | NA        | AL691479. | chr1  | - | 2.3E+08  | 2.3E+08  | 528   |
| ENSG000001 | 1.628766 | 1.759397 | -0.06576 | 0.96047   | 0.97641   | RP11-47J1 | chr11 | - | 12942733 | 12944472 | 566   |
| ENSG000001 | 1.411244 | 0        | 1.7307   | 0.32696   | NA        | AL356475. | chr1  | - | 1.7E+08  | 1.7E+08  | 790   |
| ENSG000001 | 0.36308  | 6.892769 | -3.6081  | 0.004746  | 0.010607  | RP11-560A | chr20 | + | 55689971 | 55697148 | 770   |
| ENSG000001 | 7.97855  | 4.761096 | 0.68172  | 0.3962    | 0.50078   | AL353898. | chr1  | - | 54498816 | 54500553 | 1737  |
| ENSG000001 | 2.624689 | 33.07189 | -3.4987  | 9.20E-07  | 3.30E-06  | RP11-498P | chr9  | - | 1E+08    | 1E+08    | 578   |
| ENSG000001 | 3.153051 | 2.840639 | 0.13269  | 0.90183   | 0.93217   | CTA-221G9 | chr22 | - | 25498407 | 25508659 | 950   |
| ENSG000001 | 0.72616  | 1.073121 | -0.33426 | 0.84917   | NA        | AL591516. | chr6  | + | 1.08E+08 | 1.08E+08 | 255   |
| ENSG000001 | 0.290301 | 0.357707 | -0.00203 | 0.99908   | NA        | AL591516. | chr6  | + | 1.08E+08 | 1.08E+08 | 234   |
| ENSG000001 | 0.975385 | 0.654722 | 0.40949  | 0.80016   | NA        | AL365202. | chr9  | - | 3452305  | 3469181  | 312   |
| ENSG000001 | 0        | 1.043983 | -1.3473  | 0.44976   | NA        | RP11-98D1 | chr1  | + | 1.52E+08 | 1.52E+08 | 992   |
| ENSG000001 | 5.996077 | 2.125225 | 1.3022   | 0.22239   | 0.31465   | AL590822. | chr1  | - | 2143360  | 2145620  | 2261  |
| ENSG000001 | 8.506098 | 13.70786 | -0.64602 | 0.37109   | 0.47551   | AP001007. | chr11 | + | 1.25E+08 | 1.25E+08 | 2033  |
| ENSG000001 | 0.580602 | 2.621302 | -1.6513  | 0.2513    | 0.348     | RP11-375F | chr1  | + | 1.66E+08 | 1.66E+08 | 594   |
| ENSG000001 | 0        | 0.686276 | -0.84936 | 0.6309    | NA        | AC015815. | chr17 | + | 75099519 | 75099654 | 135   |
| ENSG000001 | 2.386629 | 6.186219 | -1.2586  | 0.21432   | 0.30518   | AC015815. | chr17 | + | 75087901 | 75088024 | 123   |
| ENSG000001 | 0        | 0.297015 | -0.41864 | 0.81278   | NA        | AC015815. | chr17 | + | 75083297 | 75083384 | 87    |
| ENSG000001 | 5.145711 | 5.551772 | -0.1252  | 0.8836    | 0.91879   | RP11-197P | chr9  | + | 77567884 | 77611209 | 719   |
| ENSG000001 | 9.36665  | 5.729818 | 0.66111  | 0.40536   | 0.51022   | RP11-277A | chr1  | - | 32517892 | 32539075 | 624   |
| ENSG000001 | 11.61114 | 353.3812 | -4.9038  | 2.17E-40  | 3.85E-39  | ZNF525    | chr19 | + | 53868946 | 53895470 | 6107  |
| ENSG000001 | 4.181491 | 0.951736 | 1.7786   | 0.15872   | 0.23813   | AC012358. | chr2  | - | 55441523 | 55443262 | 916   |
| ENSG000001 | 0.290301 | 0        | 0.4146   | 0.81455   | NA        | AP003027. | chr11 | + | 1.09E+08 | 1.09E+08 | 2076  |
| ENSG000001 | 0.290301 | 0.715414 | -0.50514 | 0.77701   | NA        | AC006019. | chr7  | - | 1.54E+08 | 1.54E+08 | 2470  |
| ENSG000001 | 0        | 0.297015 | -0.41864 | 0.81278   | NA        | AL162458. | chr20 | + | 44644111 | 44644231 | 117   |
| ENSG000001 | 14.08767 | 52.08547 | -1.8591  | 1.06E-05  | 3.39E-05  | RP3-337H4 | chr6  | - | 43555967 | 43559099 | 990   |
| ENSG000001 | 0.342542 | 1.40169  | -1.3086  | 0.4368    | NA        | AC131568. | chr8  | + | 1.31E+08 | 1.31E+08 | 246   |
| ENSG000001 | 40.70522 | 19.23049 | 1.0608   | 0.009738  | 0.020511  | AC105020. | chr15 | + | 75970672 | 75973093 | 2422  |

|            |          |          |          |          |          |                 |   |          |          |      |
|------------|----------|----------|----------|----------|----------|-----------------|---|----------|----------|------|
| ENSG000001 | 3.64115  | 0        | 3.4049   | 0.020363 | 0.040101 | RP13-36G1 chrX  | + | 73285918 | 73286427 | 510  |
| ENSG000001 | 0.632843 | 63.76102 | -6.1114  | 3.62E-12 | 1.98E-11 | AC009061. chr16 | + | 67466595 | 67468931 | 2334 |
| ENSG000001 | 0.36308  | 25.20067 | -5.412   | 1.22E-06 | 4.31E-06 | AC020907. chr19 | - | 35628549 | 35630484 | 1934 |
| ENSG000001 | 0.923144 | 0.937167 | -0.01228 | 0.99379  | NA       | AC016734. chr2  | - | 63745026 | 63746647 | 1621 |
| ENSG000001 | 0        | 0.357707 | -0.41864 | 0.81278  | NA       | AC140061. chr12 | + | 50711462 | 50711558 | 93   |
| ENSG000001 | 0        | 0.297015 | -0.41864 | 0.81278  | NA       | AC140061. chr12 | - | 50710006 | 50710100 | 93   |
| ENSG000001 | 0        | 0.297015 | -0.41864 | 0.81278  | NA       | AC008147. chr12 | - | 50683977 | 50684073 | 93   |
| ENSG000001 | 0        | 0.997859 | -1.5018  | 0.39072  | NA       | AC008147. chr12 | - | 50678449 | 50678545 | 93   |
| ENSG000001 | 2.229907 | 0        | 2.6238   | 0.10304  | 0.16551  | RP11-163F chr10 | - | 1.1E+08  | 1.1E+08  | 575  |
| ENSG000001 | 0.943682 | 0        | 1.2438   | 0.48556  | NA       | AC104600. chr2  | - | 1.97E+08 | 1.97E+08 | 1422 |
| ENSG000001 | 0.632843 | 1.073121 | -0.47016 | 0.7819   | NA       | RP11-820K chr12 | + | 31617996 | 31618776 | 781  |
| ENSG000001 | 3.092251 | 28.28891 | -3.1194  | 1.98E-06 | 6.88E-06 | LINC00449 chr13 | - | 1E+08    | 1E+08    | 872  |
| ENSG000001 | 0.342542 | 0        | 0.4146   | 0.81455  | NA       | AC092964. chr3  | + | 1.72E+08 | 1.72E+08 | 198  |
| ENSG000001 | 6.814739 | 0.715414 | 2.8713   | 0.016378 | 0.032921 | AC004988. chr7  | - | 40577726 | 40586527 | 1771 |
| ENSG000001 | 1.016461 | 0.343138 | 0.95782  | 0.57832  | NA       | AC068896. chr10 | + | 1.26E+08 | 1.26E+08 | 219  |
| ENSG000001 | 0.290301 | 0        | 0.4146   | 0.81455  | NA       | AL359697. chr10 | + | 22183277 | 22183445 | 165  |
| ENSG000001 | 260.5276 | 37.16599 | 2.8063   | 2.57E-33 | 3.72E-32 | RP11-77K1 chr16 | + | 75509794 | 75529305 | 573  |
| ENSG000001 | 0        | 0.343138 | -0.41864 | 0.81278  | NA       | AC061975. chr17 | + | 26547062 | 26547215 | 150  |
| ENSG000001 | 0        | 1.40169  | -1.7271  | 0.32809  | NA       | AC100852. chr17 | + | 26506506 | 26506662 | 153  |
| ENSG000001 | 2775.484 | 1496.023 | 0.88914  | 2.12E-07 | 8.06E-07 | INF2 chr14      | + | 1.05E+08 | 1.05E+08 | 4672 |
| ENSG000001 | 0        | 0.715414 | -0.84936 | 0.6309   | NA       | HMGB1P35 chr6   | - | 76028817 | 76029696 | 880  |
| ENSG000001 | 36.63163 | 17.47755 | 1.047    | 0.01581  | 0.031875 | PDCD4-AS1 chr10 | - | 1.13E+08 | 1.13E+08 | 778  |
| ENSG000001 | 0.36308  | 118.9096 | -7.5535  | 3.21E-14 | 2.00E-13 | RP11-429J chr8  | + | 1.45E+08 | 1.45E+08 | 5239 |
| ENSG000001 | 0        | 0.357707 | -0.41864 | 0.81278  | NA       | AC131571. chr11 | + | 31705636 | 31707478 | 1841 |
| ENSG000001 | 4.741555 | 1.058552 | 1.923    | 0.10207  | 0.16417  | RBMS3-AS2 chr3  | - | 29657466 | 29684300 | 865  |
| ENSG000001 | 3.205292 | 0.357707 | 2.5277   | 0.077538 | 0.13005  | AC103801. chr11 | + | 22766126 | 22768414 | 2288 |
| ENSG000001 | 0.36308  | 0.297015 | -0.00205 | 0.99908  | NA       | AL353662. chr9  | - | 34201271 | 34201513 | 237  |
| ENSG000001 | 0.342542 | 2.307303 | -2.0599  | 0.17308  | 0.25581  | AL353662. chr9  | + | 34169687 | 34169934 | 246  |
| ENSG000001 | 0.36308  | 0.343138 | -0.0021  | 0.99905  | NA       | AL023807. chr6  | + | 17894075 | 17894300 | 225  |
| ENSG000001 | 19.75237 | 2.728118 | 2.7566   | 0.000142 | 0.000398 | TAS2R2P chr7    | + | 12530721 | 12531630 | 910  |
| ENSG000001 | 0        | 0.700845 | -0.87835 | 0.62047  | NA       | Z99756.1 chr22  | + | 43671961 | 43679836 | 1951 |
| ENSG000001 | 0        | 0.343138 | -0.41864 | 0.81278  | NA       | AC016712. chr2  | - | 2.24E+08 | 2.24E+08 | 862  |
| ENSG000001 | 7.375617 | 0.343138 | 3.681    | 0.004005 | 0.009045 | AL353671. chr9  | - | 32548215 | 32548487 | 264  |
| ENSG000001 | 2.209369 | 1.531196 | 0.42641  | 0.7449   | 0.81283  | AL353671. chr9  | + | 32547881 | 32548148 | 267  |
| ENSG000001 | 0.943682 | 1.623443 | -0.59246 | 0.69245  | 0.77071  | RP11-176F chr14 | - | 31803518 | 31926647 | 3860 |
| ENSG000001 | 0        | 1.043983 | -1.3473  | 0.44976  | NA       | AL135901. chr13 | + | 50243040 | 50243254 | 213  |
| ENSG000001 | 1.379541 | 3.633731 | -1.2431  | 0.29713  | 0.39912  | AC138951. chr5  | + | 21493692 | 21494062 | 369  |
| ENSG000001 | 0.290301 | 0        | 0.4146   | 0.81455  | NA       | AC090519. chr15 | - | 44614380 | 44614557 | 174  |
| ENSG000001 | 0.632843 | 0        | 0.81931  | 0.64303  | NA       | AC090519. chr15 | + | 44589782 | 44590272 | 174  |
| ENSG000001 | 0.342542 | 0        | 0.4146   | 0.81455  | NA       | AC073940. chr15 | - | 44564040 | 44564218 | 177  |
| ENSG000001 | 0.290301 | 0.891044 | -0.7342  | 0.68015  | NA       | OR1F2P chr16    | + | 32655562 | 32665466 | 983  |
| ENSG000001 | 0.995923 | 0        | 1.4959   | 0.39264  | NA       | RP11-542B chr12 | + | 67913609 | 67960906 | 1766 |
| ENSG000001 | 8.733807 | 6.047849 | 0.52399  | 0.45911  | 0.56438  | IGBP1-AS1 chrX  | - | 69383692 | 69385056 | 542  |
| ENSG000001 | 12.47007 | 3.38284  | 1.8116   | 0.01555  | 0.031389 | RP5-886K2 chr1  | - | 24032291 | 24033424 | 1134 |
| ENSG000001 | 0.342542 | 1.430828 | -1.1489  | 0.51399  | NA       | RP5-1096C chr12 | + | 2113832  | 2120558  | 629  |
| ENSG000001 | 1.08924  | 0.357707 | 0.88709  | 0.61692  | NA       | RP11-375F chr1  | - | 1.69E+08 | 1.69E+08 | 1129 |
| ENSG000001 | 2.012384 | 1.430828 | 0.40688  | 0.77966  | 0.84184  | AL137059. chr13 | - | 28008286 | 28008752 | 465  |
| ENSG000001 | 0        | 1.372552 | -1.3974  | 0.43145  | NA       | AC004832. chr22 | + | 30831531 | 30832231 | 699  |
| ENSG000001 | 4.36731  | 0.654722 | 2.3176   | 0.063016 | 0.10888  | AL512652. chr13 | + | 21286570 | 21288285 | 1714 |
| ENSG000001 | 10.79925 | 8.173074 | 0.37251  | 0.56707  | 0.6646   | AC069200. chr4  | - | 56277189 | 56277313 | 123  |
| ENSG000001 | 10.30952 | 6.968031 | 0.5569   | 0.4565   | 0.56183  | AL136531. chr20 | - | 1316228  | 1317555  | 1328 |
| ENSG000001 | 7.397134 | 21.18654 | -1.4545  | 0.02389  | 0.046307 | AC007690. chr3  | + | 1.87E+08 | 1.87E+08 | 1845 |
| ENSG000001 | 5.758016 | 37.84501 | -2.6716  | 8.28E-07 | 2.98E-06 | AC144450. chr2  | - | 1624282  | 1629191  | 1641 |
| ENSG000001 | 23.47404 | 34.00819 | -0.51764 | 0.19698  | 0.28497  | AC083799. chr3  | - | 1.3E+08  | 1.3E+08  | 906  |
| ENSG000001 | 0.290301 | 0        | 0.4146   | 0.81455  | NA       | LINC00501 chr3  | + | 1.77E+08 | 1.77E+08 | 2046 |
| ENSG000001 | 0.632843 | 0.891044 | -0.33035 | 0.84668  | NA       | AC106827. chr3  | - | 65994445 | 65994875 | 429  |
| ENSG000001 | 0.923144 | 0        | 1.223    | 0.49292  | NA       | AC007618. chr12 | + | 2769103  | 2770135  | 732  |
| ENSG000001 | 2.157128 | 1.66715  | 0.33572  | 0.79884  | 0.8575   | RP4-562J1. chrX | + | 1.18E+08 | 1.18E+08 | 2290 |
| ENSG000001 | 0.943682 | 0.715414 | 0.29201  | 0.863    | NA       | AC099048. chr3  | + | 30030355 | 30031951 | 1596 |
| ENSG000001 | 102.8047 | 108.6809 | -0.07703 | 0.72867  | 0.79938  | EFCAB2 chr1     | + | 2.45E+08 | 2.45E+08 | 6167 |
| ENSG000001 | 27.84135 | 47.09039 | -0.74384 | 0.049196 | 0.087736 | COX20 chr1      | + | 2.45E+08 | 2.45E+08 | 2631 |
| ENSG000001 | 367.7075 | 803.0435 | -1.1222  | 2.10E-07 | 7.99E-07 | CHML chr1       | - | 2.42E+08 | 2.42E+08 | 7078 |
| ENSG000001 | 4.439275 | 2.102535 | 0.99775  | 0.36885  | 0.47345  | C1orf148 chr1   | - | 2.28E+08 | 2.28E+08 | 594  |
| ENSG000001 | 1.379541 | 42.44672 | -4.7479  | 4.49E-10 | 2.12E-09 | C1orf95 chr1    | + | 2.27E+08 | 2.27E+08 | 7705 |
| ENSG000001 | 2.894453 | 0.98329  | 1.3109   | 0.31311  | 0.41535  | RP11-351J. chr6 | - | 1.68E+08 | 1.68E+08 | 2557 |

|            |          |          |          |          |          |           |       |   |          |          |       |
|------------|----------|----------|----------|----------|----------|-----------|-------|---|----------|----------|-------|
| ENSG000001 | 8.143832 | 4.05213  | 0.97227  | 0.21504  | 0.306    | AC092811. | chr1  | + | 2.26E+08 | 2.26E+08 | 1637  |
| ENSG000001 | 0.36308  | 0        | 0.4146   | 0.81455  | NA       | CAPN8     | chr1  | - | 2.24E+08 | 2.24E+08 | 2596  |
| ENSG000001 | 142.3168 | 256.0455 | -0.8426  | 0.000559 | 0.001441 | TATDN3    | chr1  | + | 2.13E+08 | 2.13E+08 | 2389  |
| ENSG000001 | 219.474  | 19.3065  | 3.5019   | 4.15E-31 | 5.55E-30 | SERTAD4-A | chr1  | - | 2.1E+08  | 2.1E+08  | 726   |
| ENSG000001 | 2.177666 | 1.828211 | 0.19378  | 0.89131  | 0.92458  | C1orf132  | chr1  | - | 2.08E+08 | 2.08E+08 | 3197  |
| ENSG000001 | 0.705622 | 12.71316 | -3.75    | 0.000623 | 0.001593 | CR1       | chr1  | + | 2.08E+08 | 2.08E+08 | 7470  |
| ENSG000001 | 1.379541 | 13.26032 | -3.0559  | 0.001152 | 0.002831 | C6orf99   | chr6  | + | 1.59E+08 | 1.59E+08 | 1018  |
| ENSG000001 | 3.081086 | 9.359459 | -1.4932  | 0.10892  | 0.17356  | LINC00862 | chr1  | - | 2E+08    | 2E+08    | 1417  |
| ENSG000001 | 2.789971 | 0.357707 | 2.3046   | 0.12243  | 0.1921   | RAET1G    | chr6  | - | 1.5E+08  | 1.5E+08  | 1107  |
| ENSG000001 | 49.33471 | 2.621302 | 4.0926   | 4.79E-11 | 2.43E-10 | C1orf53   | chr1  | + | 1.98E+08 | 1.98E+08 | 588   |
| ENSG000001 | 2715.374 | 1.935026 | 10.156   | 1.99E-79 | 8.30E-78 | SAMD5     | chr6  | + | 1.48E+08 | 1.48E+08 | 6089  |
| ENSG000001 | 0        | 1.669566 | -1.94    | 0.2691   | NA       | TEDDM1    | chr1  | - | 1.82E+08 | 1.82E+08 | 2500  |
| ENSG000001 | 2.645227 | 4.524774 | -0.72728 | 0.44414  | 0.54974  | ECT2L     | chr6  | + | 1.39E+08 | 1.39E+08 | 4319  |
| ENSG000001 | 1.681007 | 0.357707 | 1.6359   | 0.30139  | 0.40279  | GPR52     | chr1  | + | 1.74E+08 | 1.74E+08 | 1472  |
| ENSG000001 | 28.84069 | 28.59646 | 0.001956 | 0.99605  | 0.99778  | RP11-296C | chr1  | - | 1.73E+08 | 1.73E+08 | 1815  |
| ENSG000001 | 7.885233 | 3.9623   | 0.93492  | 0.26309  | 0.36125  | METTL11B  | chr1  | + | 1.7E+08  | 1.7E+08  | 992   |
| ENSG000001 | 7.636008 | 0        | 4.5301   | 0.000536 | 0.001384 | FCGR3A    | chr1  | - | 1.62E+08 | 1.62E+08 | 2310  |
| ENSG000001 | 2.012384 | 0        | 2.4635   | 0.13092  | 0.20286  | TMEM244   | chr6  | - | 1.3E+08  | 1.3E+08  | 568   |
| ENSG000001 | 380.1984 | 558.9541 | -0.55396 | 0.000327 | 0.000872 | CENPW     | chr6  | + | 1.27E+08 | 1.27E+08 | 750   |
| ENSG000001 | 25.6037  | 27.67628 | -0.12134 | 0.76814  | 0.83243  | MSTO2P    | chr1  | + | 1.56E+08 | 1.56E+08 | 2045  |
| ENSG000001 | 85.69593 | 70.25634 | 0.28848  | 0.40729  | 0.51207  | SPRN      | chr10 | - | 1.35E+08 | 1.35E+08 | 3172  |
| ENSG000001 | 149.7592 | 105.353  | 0.51022  | 0.030997 | 0.05836  | FAM229B   | chr6  | + | 1.12E+08 | 1.12E+08 | 2543  |
| ENSG000001 | 56.67349 | 23.16769 | 1.2786   | 0.000253 | 0.000685 | FANK1     | chr10 | + | 1.28E+08 | 1.28E+08 | 1583  |
| ENSG000001 | 0        | 2.382564 | -2.4485  | 0.15134  | 0.22879  | LOR       | chr1  | + | 1.53E+08 | 1.53E+08 | 1230  |
| ENSG000001 | 0        | 0.343138 | -0.41864 | 0.81278  | NA       | KPRP      | chr1  | + | 1.53E+08 | 1.53E+08 | 2523  |
| ENSG000001 | 84.12103 | 85.24545 | -0.01575 | 0.94957  | 0.96852  | METTL10   | chr10 | - | 1.26E+08 | 1.26E+08 | 3587  |
| ENSG000001 | 0        | 0.343138 | -0.41864 | 0.81278  | NA       | FAM24A    | chr10 | + | 1.25E+08 | 1.25E+08 | 596   |
| ENSG000001 | 1.939605 | 16.56952 | -2.893   | 0.00059  | 0.001516 | CCDC162P  | chr6  | + | 1.1E+08  | 1.1E+08  | 2943  |
| ENSG000001 | 0.632843 | 1.294874 | -0.78057 | 0.60302  | 0.69637  | LINC00222 | chr6  | + | 1.09E+08 | 1.09E+08 | 1785  |
| ENSG000001 | 7.446769 | 2.742687 | 1.3605   | 0.1569   | 0.23594  | C1orf138  | chr1  | - | 1.51E+08 | 1.51E+08 | 490   |
| ENSG000001 | 165.1726 | 3.039702 | 5.67     | 2.15E-29 | 2.68E-28 | PPAPDC1A  | chr10 | + | 1.22E+08 | 1.22E+08 | 1521  |
| ENSG000001 | 5.363233 | 0.891044 | 2.1589   | 0.076064 | 0.12794  | BVES-AS1  | chr6  | + | 1.06E+08 | 1.06E+08 | 1716  |
| ENSG000001 | 0        | 12.15565 | -5.1905  | 3.70E-05 | 0.000111 | LINC00577 | chr6  | - | 1.05E+08 | 1.05E+08 | 575   |
| ENSG000001 | 0.290301 | 0        | 0.4146   | 0.81455  | NA       | HIST2H3C  | chr1  | - | 1.5E+08  | 1.5E+08  | 1656  |
| ENSG000001 | 1.213446 | 1.577319 | -0.28206 | 0.84831  | 0.8934   | HIST2H2AA | chr1  | + | 1.5E+08  | 1.5E+08  | 549   |
| ENSG000001 | 19.71806 | 27.73442 | -0.47044 | 0.38509  | 0.48932  | HIST1H3H  | chr6  | + | 27777842 | 27778314 | 473   |
| ENSG000001 | 2.987769 | 2.278164 | 0.3404   | 0.74856  | 0.81599  | HIST2H2BF | chr1  | - | 1.5E+08  | 1.5E+08  | 1047  |
| ENSG000001 | 8.40243  | 3.725978 | 1.1287   | 0.16451  | 0.24536  | AL358813. | chr1  | + | 1.5E+08  | 1.5E+08  | 632   |
| ENSG000001 | 0        | 5.196481 | -3.912   | 0.005676 | 0.012499 | FAM72C    | chr1  | - | 1.49E+08 | 1.49E+08 | 1243  |
| ENSG000001 | 7.729324 | 10.69642 | -0.45855 | 0.48184  | 0.58615  | HIST2H2BC | chr1  | - | 1.5E+08  | 1.5E+08  | 580   |
| ENSG000001 | 27.71796 | 4.991713 | 2.4008   | 9.05E-05 | 0.000259 | NBPF16    | chr1  | + | 1.49E+08 | 1.49E+08 | 3830  |
| ENSG000001 | 172.6773 | 13.94089 | 3.6031   | 1.10E-29 | 1.40E-28 | NBPF20    | chr1  | - | 1.48E+08 | 1.48E+08 | 15690 |
| ENSG000001 | 19.01504 | 16.26605 | 0.21552  | 0.68707  | 0.76665  | NBPF24    | chr1  | - | 1.48E+08 | 1.48E+08 | 5152  |
| ENSG000001 | 1.628766 | 0.343138 | 1.6246   | 0.30143  | 0.40279  | PNLIPRP3  | chr10 | + | 1.18E+08 | 1.18E+08 | 2354  |
| ENSG000001 | 2.572449 | 0        | 2.8674   | 0.066043 | 0.11336  | PFN1P2    | chr1  | - | 1.45E+08 | 1.45E+08 | 418   |
| ENSG000001 | 0.342542 | 0        | 0.4146   | 0.81455  | NA       | RP11-417J | chr1  | - | 1.43E+08 | 1.43E+08 | 5786  |
| ENSG000001 | 0        | 0.297015 | -0.41864 | 0.81278  | NA       | HIST2H3A  | chr1  | + | 1.5E+08  | 1.5E+08  | 1656  |
| ENSG000001 | 0.705622 | 2.24661  | -1.3953  | 0.31823  | 0.42103  | HSD3BP4   | chr1  | + | 1.2E+08  | 1.2E+08  | 1120  |
| ENSG000001 | 0        | 0.297015 | -0.41864 | 0.81278  | NA       | HSD3B1    | chr1  | + | 1.2E+08  | 1.2E+08  | 1680  |
| ENSG000001 | 0        | 0.654722 | -0.83442 | 0.63731  | NA       | HSD3BP2   | chr1  | + | 1.2E+08  | 1.2E+08  | 1118  |
| ENSG000001 | 0.870904 | 0.343138 | 0.71634  | 0.68735  | NA       | AL079342. | chr6  | + | 89674246 | 89676685 | 2440  |
| ENSG000001 | 5.052394 | 9.701854 | -0.91373 | 0.23527  | 0.32913  | ATP1A1OS  | chr1  | - | 1.17E+08 | 1.17E+08 | 1011  |
| ENSG000001 | 59.40022 | 19.27333 | 1.6133   | 1.26E-05 | 3.98E-05 | RBM20     | chr10 | + | 1.12E+08 | 1.13E+08 | 7233  |
| ENSG000001 | 4.616536 | 9.321457 | -0.96665 | 0.18945  | 0.27588  | C6orf164  | chr6  | + | 88106840 | 88109467 | 1560  |
| ENSG000001 | 5.890781 | 12.11597 | -0.96633 | 0.20835  | 0.29832  | C6orf163  | chr6  | + | 88054571 | 88075181 | 1296  |
| ENSG000001 | 2815.207 | 4434.483 | -0.65488 | 4.89E-12 | 2.64E-11 | SNHG5     | chr6  | - | 86370710 | 86388451 | 1029  |
| ENSG000001 | 7.677084 | 2.901332 | 1.2965   | 0.13145  | 0.2036   | RP11-451N | chr10 | - | 1.12E+08 | 1.12E+08 | 1063  |
| ENSG000001 | 0        | 6.987432 | -4.3684  | 0.001174 | 0.002882 | RIPPLY2   | chr6  | + | 84562985 | 84567234 | 664   |
| ENSG000001 | 4116.394 | 1692.145 | 1.281    | 6.95E-27 | 7.85E-26 | GDI1      | chrX  | + | 1.54E+08 | 1.54E+08 | 4069  |
| ENSG000001 | 859.6194 | 837.7522 | 0.036715 | 0.77768  | 0.84028  | PCMTD2    | chr20 | + | 62887048 | 62926855 | 3843  |
| ENSG000001 | 6.835277 | 25.87325 | -1.829   | 0.015364 | 0.031065 | SOX18     | chr20 | - | 62679076 | 62680994 | 1723  |
| ENSG000001 | 0        | 2.024857 | -2.2291  | 0.19662  | 0.28458  | RP11-261N | chr20 | + | 61991340 | 62002529 | 3264  |
| ENSG000001 | 0        | 4.600036 | -3.763   | 0.007915 | 0.016934 | OOEP      | chr6  | - | 74078278 | 74104856 | 1007  |
| ENSG000001 | 0        | 1.012429 | -1.3162  | 0.46038  | NA       | KHDC3L    | chr6  | + | 74072400 | 74073894 | 1018  |
| ENSG000001 | 0        | 14.89592 | -5.4807  | 8.79E-06 | 2.84E-05 | DPPA5     | chr6  | - | 74062785 | 74064018 | 679   |

|            |          |          |          |          |          |           |       |   |          |          |      |
|------------|----------|----------|----------|----------|----------|-----------|-------|---|----------|----------|------|
| ENSG000001 | 0.72616  | 1.309443 | -0.61368 | 0.71013  | 0.78467  | C1orf146  | chr1  | + | 92683497 | 92711370 | 871  |
| ENSG000001 | 0        | 0.686276 | -0.84936 | 0.6309   | NA       | SPANXN1   | chrX  | + | 1.44E+08 | 1.44E+08 | 1276 |
| ENSG000001 | 39.40269 | 5.738682 | 2.7071   | 6.65E-06 | 2.18E-05 | RP1-177G6 | chrX  | + | 1.4E+08  | 1.4E+08  | 1381 |
| ENSG000001 | 0.975385 | 0        | 1.2767   | 0.47406  | NA       | C10orf62  | chr10 | + | 99349450 | 99350690 | 1241 |
| ENSG000001 | 7.261763 | 16.74353 | -1.1798  | 0.051924 | 0.091952 | SAMD13    | chr1  | + | 84764049 | 84855640 | 1565 |
| ENSG000001 | 878.4936 | 748.9974 | 0.23006  | 0.10669  | 0.17056  | FAM127B   | chrX  | - | 1.34E+08 | 1.34E+08 | 1244 |
| ENSG000001 | 10.48841 | 21.74572 | -1.0389  | 0.052    | 0.092065 | CCDC160   | chrX  | + | 1.33E+08 | 1.33E+08 | 1790 |
| ENSG000001 | 0        | 0.357707 | -0.41864 | 0.81278  | NA       | C1orf141  | chr1  | - | 67557848 | 67697536 | 4304 |
| ENSG000001 | 76.4129  | 31.13029 | 1.2931   | 2.01E-05 | 6.22E-05 | EFCAB7    | chr1  | + | 63989043 | 64038364 | 3795 |
| ENSG000001 | 0.36308  | 0        | 0.4146   | 0.81455  | NA       | RP13-379L | chr20 | - | 56532182 | 56534716 | 1854 |
| ENSG000001 | 0.290301 | 0        | 0.4146   | 0.81455  | NA       | LDLRAD1   | chr1  | - | 54474412 | 54483856 | 785  |
| ENSG000001 | 0.342542 | 5.585742 | -3.2593  | 0.01595  | 0.032135 | RP11-188C | chr9  | - | 1.41E+08 | 1.41E+08 | 3222 |
| ENSG000001 | 263.1903 | 483.6244 | -0.87515 | 4.64E-06 | 1.55E-05 | C9orf37   | chr9  | - | 1.41E+08 | 1.41E+08 | 1424 |
| ENSG000001 | 32.55462 | 164.3161 | -2.329   | 1.00E-16 | 7.21E-16 | ZYG11A    | chr1  | + | 53308183 | 53360670 | 4469 |
| ENSG000001 | 8.174556 | 0.357707 | 3.7924   | 0.003076 | 0.007078 | RP11-290F | chr20 | + | 48909257 | 48931459 | 2281 |
| ENSG000001 | 0        | 0.297015 | -0.41864 | 0.81278  | NA       | LCN8      | chr9  | - | 1.4E+08  | 1.4E+08  | 2625 |
| ENSG000001 | 0        | 0.297015 | -0.41864 | 0.81278  | NA       | IFIT1B    | chr10 | + | 91137813 | 91144962 | 1972 |
| ENSG000001 | 12.63535 | 0.297015 | 4.4814   | 0.000173 | 0.000479 | COL5A1-AS | chr9  | - | 1.38E+08 | 1.38E+08 | 336  |
| ENSG000001 | 9.140568 | 228.5458 | -4.6051  | 3.32E-29 | 4.11E-28 | TRABD2B   | chr1  | - | 48231308 | 48462567 | 1926 |
| ENSG000001 | 0.36308  | 0.343138 | -0.0021  | 0.99905  | NA       | LIPN      | chr10 | + | 90521163 | 90537999 | 1197 |
| ENSG000001 | 6.5039   | 0.715414 | 2.8164   | 0.018295 | 0.036419 | LIPK      | chr10 | + | 90484301 | 90512543 | 1230 |
| ENSG000001 | 1.681007 | 0.594029 | 1.0706   | 0.4871   | 0.59109  | LIPJ      | chr10 | + | 90346510 | 90366733 | 3575 |
| ENSG000001 | 0.943682 | 0.357707 | 0.90033  | 0.60199  | NA       | TRPC5OS   | chrX  | + | 1.11E+08 | 1.11E+08 | 2806 |
| ENSG000001 | 0.342542 | 0.357707 | -0.0021  | 0.99906  | NA       | LRIT2     | chr10 | - | 85980254 | 85985345 | 3081 |
| ENSG000001 | 0        | 0.343138 | -0.41864 | 0.81278  | NA       | AL359195  | chr10 | + | 82009466 | 82013395 | 3930 |
| ENSG000001 | 0        | 6.603876 | -4.2475  | 0.002166 | 0.005099 | RP11-465L | chr20 | - | 44642141 | 44650712 | 1955 |
| ENSG000001 | 5.736665 | 1.98115  | 1.4084   | 0.16179  | 0.24202  | AL391421  | chr10 | + | 79626633 | 79629368 | 1922 |
| ENSG000001 | 26.30769 | 20.71631 | 0.34987  | 0.41803  | 0.52329  | LRRC73    | chr6  | - | 43474707 | 43478424 | 2121 |
| ENSG000001 | 0        | 1.545765 | -1.8556  | 0.29195  | NA       | MYCL1P1   | chrX  | + | 1.07E+08 | 1.07E+08 | 1075 |
| ENSG000001 | 380.5105 | 50.85612 | 2.8891   | 3.32E-47 | 7.01E-46 | RP11-492E | chr9  | + | 1.32E+08 | 1.32E+08 | 2003 |
| ENSG000001 | 6.141634 | 108.6673 | -4.1103  | 3.03E-19 | 2.46E-18 | RP11-247A | chr9  | + | 1.32E+08 | 1.32E+08 | 2047 |
| ENSG000001 | 28.27109 | 102.2142 | -1.8153  | 0.001058 | 0.002614 | FOXO6     | chr1  | + | 41827594 | 41849262 | 2398 |
| ENSG000001 | 1.390706 | 55.12913 | -5.1259  | 2.44E-12 | 1.35E-11 | TCEAL5    | chrX  | - | 1.03E+08 | 1.03E+08 | 1168 |
| ENSG000001 | 218.1304 | 191.7727 | 0.18644  | 0.29523  | 0.39725  | SYS1      | chr20 | + | 43990577 | 44005438 | 2915 |
| ENSG000001 | 0        | 2.307303 | -2.6761  | 0.094365 | 0.15383  | TCEAL6    | chrX  | - | 1.01E+08 | 1.01E+08 | 1106 |
| ENSG000001 | 0        | 1.638012 | -2.1885  | 0.18912  | NA       | RP4-545K1 | chrX  | + | 1.01E+08 | 1.01E+08 | 655  |
| ENSG000001 | 341.243  | 455.2799 | -0.41546 | 0.002793 | 0.006472 | INPP5B    | chr1  | - | 38326369 | 38412729 | 4694 |
| ENSG000001 | 1.608228 | 0.297015 | 1.5081   | 0.36518  | NA       | RPA4      | chrX  | + | 96138907 | 96140446 | 1540 |
| ENSG000001 | 0.342542 | 6.376418 | -3.4867  | 0.007115 | 0.015382 | TDRG1     | chr6  | + | 40302693 | 40347624 | 1165 |
| ENSG000001 | 1.027626 | 0.640152 | 0.42826  | 0.80114  | NA       | RP11-552E | chr6  | - | 40312083 | 40313890 | 554  |
| ENSG000001 | 0.705622 | 9.09084  | -3.214   | 0.008077 | 0.01725  | NEU4      | chr2  | + | 2.43E+08 | 2.43E+08 | 3142 |
| ENSG000001 | 33.05128 | 458.642  | -3.7851  | 1.59E-68 | 5.59E-67 | MAFB      | chr20 | + | 39314488 | 39317880 | 3393 |
| ENSG000001 | 344.8349 | 269.9025 | 0.35078  | 0.062007 | 0.10732  | TRAF3IP1  | chr2  | + | 2.39E+08 | 2.39E+08 | 4279 |
| ENSG000001 | 0        | 2.232041 | -2.63    | 0.10215  | 0.16421  | RP1-153P1 | chr6  | + | 37475124 | 37503392 | 537  |
| ENSG000001 | 0.580602 | 0.654722 | -0.07721 | 0.96449  | NA       | BMP2KL    | chrX  | + | 73405764 | 73406990 | 1225 |
| ENSG000001 | 136.1187 | 131.3443 | 0.056473 | 0.80209  | 0.85994  | CHIC1     | chrX  | + | 72783036 | 72906937 | 6797 |
| ENSG000001 | 0        | 106.6789 | -8.2013  | 1.26E-13 | 7.57E-13 | NAP1L6    | chrX  | - | 72345876 | 72347919 | 2044 |
| ENSG000001 | 1411.988 | 1227.551 | 0.20136  | 0.10348  | 0.16612  | GIGYF2    | chr2  | + | 2.34E+08 | 2.34E+08 | 7878 |
| ENSG000001 | 0        | 125.9732 | -8.4513  | 8.68E-15 | 5.62E-14 | AC068134  | chr2  | - | 2.33E+08 | 2.33E+08 | 1742 |
| ENSG000001 | 0        | 47.27267 | -7.0298  | 2.23E-09 | 9.96E-09 | C2orf72   | chr2  | + | 2.32E+08 | 2.32E+08 | 3657 |
| ENSG000001 | 317.2021 | 106.2709 | 1.5748   | 2.46E-21 | 2.21E-20 | RUFY2     | chr10 | - | 70100864 | 70167051 | 4512 |
| ENSG000001 | 180.7804 | 111.8835 | 0.68762  | 0.011383 | 0.02364  | NHSL2     | chrX  | + | 71130938 | 71363424 | 3978 |
| ENSG000001 | 0.342542 | 0.297015 | -0.00202 | 0.99909  | NA       | GGTA1P    | chr9  | - | 1.24E+08 | 1.24E+08 | 3478 |
| ENSG000001 | 1041.583 | 1282.763 | -0.30063 | 0.017896 | 0.035702 | PHACTR4   | chr1  | + | 28696114 | 28826881 | 6190 |
| ENSG000001 | 0        | 1.188058 | -1.268   | 0.47398  | NA       | CLPSL1    | chr6  | + | 35748794 | 35761452 | 602  |
| ENSG000001 | 74.67728 | 53.85849 | 0.46513  | 0.16772  | 0.24917  | ASAH2B    | chr10 | + | 52499078 | 52576255 | 3715 |
| ENSG000001 | 305.4002 | 216.0021 | 0.49877  | 0.007393 | 0.01592  | AGAP6     | chr10 | + | 51748078 | 51770259 | 2703 |
| ENSG000001 | 1.411244 | 3.215331 | -1.0599  | 0.39368  | 0.49809  | CTGLF11P  | chr10 | + | 47708307 | 47730235 | 2419 |
| ENSG000001 | 11.79435 | 13.11296 | -0.14068 | 0.81501  | 0.87019  | TIMM23B   | chr10 | + | 51371390 | 51387768 | 784  |
| ENSG000001 | 828.1945 | 801.9721 | 0.045288 | 0.69144  | 0.76991  | ZDHHC18   | chr1  | + | 27153201 | 27184093 | 3135 |
| ENSG000001 | 67.33557 | 79.59398 | -0.23914 | 0.42575  | 0.53112  | BMS1P5    | chr10 | - | 48901102 | 48950972 | 4074 |
| ENSG000001 | 0        | 4.767544 | -3.7849  | 0.007897 | 0.0169   | CXorf65   | chrX  | - | 70323837 | 70326561 | 766  |
| ENSG000001 | 52.96974 | 76.0251  | -0.51983 | 0.047268 | 0.084731 | AGAP7     | chr10 | - | 51464162 | 51486327 | 2420 |
| ENSG000001 | 10.67602 | 7.878476 | 0.41385  | 0.53713  | 0.63798  | AGAP10    | chr10 | - | 47191844 | 47239738 | 5005 |
| ENSG000001 | 3.910914 | 1.012429 | 1.7085   | 0.15425  | 0.23251  | LRRC37A5f | chr9  | - | 1.14E+08 | 1.14E+08 | 1103 |

|            |          |          |          |           |           |           |       |   |          |          |       |
|------------|----------|----------|----------|-----------|-----------|-----------|-------|---|----------|----------|-------|
| ENSG000001 | 0        | 1.340997 | -1.8899  | 0.26871   | NA        | NPY4R     | chr10 | + | 47083534 | 47088320 | 1956  |
| ENSG000001 | 0        | 441.2495 | -9.8355  | 9.08E-17  | 6.55E-16  | GPRIN2    | chr10 | + | 46994087 | 47005643 | 7718  |
| ENSG000001 | 40.23424 | 23.37816 | 0.76522  | 0.14193   | 0.21642   | SYT15     | chr10 | - | 46955444 | 46971400 | 3537  |
| ENSG000001 | 10.34204 | 8.432829 | 0.30198  | 0.63767   | 0.72578   | BMS1P1    | chr10 | - | 46737612 | 46761205 | 4073  |
| ENSG000001 | 690.2112 | 364.5147 | 0.9183   | 9.86E-06  | 3.17E-05  | TMEM57    | chr1  | + | 25757388 | 25826700 | 3917  |
| ENSG000001 | 329.1535 | 253.7995 | 0.37664  | 0.02192   | 0.042887  | ZDBF2     | chr2  | + | 2.07E+08 | 2.07E+08 | 10282 |
| ENSG000001 | 0.705622 | 0        | 0.8807   | 0.6196    | NA        | LINC00619 | chr10 | + | 44340754 | 44346070 | 1121  |
| ENSG000001 | 0        | 1.638012 | -2.1885  | 0.18912   | NA        | GGNBP1    | chr6  | + | 33551515 | 33556803 | 960   |
| ENSG000001 | 0        | 0.297015 | -0.41864 | 0.81278   | NA        | RPL12P1   | chr6  | - | 33367836 | 33368333 | 498   |
| ENSG000001 | 0        | 0.297015 | -0.41864 | 0.81278   | NA        | AWAT1     | chrX  | + | 69454505 | 69460477 | 1365  |
| ENSG000001 | 1131.541 | 1710.608 | -0.59488 | 8.20E-07  | 2.95E-06  | DAXX      | chr6  | - | 33286335 | 33297046 | 2613  |
| ENSG000001 | 5670.994 | 626.8349 | 3.1658   | 2.22E-49  | 4.98E-48  | BMPR2     | chr2  | + | 2.03E+08 | 2.03E+08 | 11461 |
| ENSG000001 | 63.32034 | 1.888903 | 4.8355   | 3.39E-14  | 2.10E-13  | TCEA3     | chr1  | - | 23707554 | 23751233 | 1559  |
| ENSG000001 | 480.669  | 747.3866 | -0.63667 | 3.09E-06  | 1.05E-05  | PFDN6     | chr6  | + | 33257079 | 33266178 | 1915  |
| ENSG000001 | 931.0837 | 553.6504 | 0.74978  | 2.99E-11  | 1.54E-10  | RING1     | chr6  | + | 33176272 | 33180499 | 1752  |
| ENSG000001 | 54.37838 | 130.6098 | -1.2525  | 0.000306  | 0.000818  | HSD17B8   | chr6  | + | 33172419 | 33174608 | 990   |
| ENSG000001 | 986.3198 | 442.9991 | 1.1529   | 7.43E-14  | 4.52E-13  | RXR8      | chr6  | - | 33161365 | 33168630 | 2908  |
| ENSG000001 | 194.4249 | 324.1963 | -0.7386  | 4.57E-05  | 0.000136  | OXLD1     | chr17 | - | 79632066 | 79633665 | 1600  |
| ENSG000001 | 1.068702 | 4.020576 | -1.6888  | 0.1676    | 0.24904   | RP11-713P | chr11 | + | 1.34E+08 | 1.34E+08 | 2206  |
| ENSG000001 | 35.7908  | 72.22399 | -1.0055  | 0.002869  | 0.006635  | COL11A2   | chr6  | - | 33130458 | 33160276 | 6425  |
| ENSG000001 | 1.597063 | 346.2116 | -7.4566  | 1.15E-32  | 1.62E-31  | HLA-DOA   | chr6  | - | 32971955 | 32977389 | 3489  |
| ENSG000001 | 36.26774 | 103.4933 | -1.5046  | 1.31E-08  | 5.50E-08  | AC019178  | chr2  | + | 1.91E+08 | 1.91E+08 | 881   |
| ENSG000001 | 2755.565 | 3052.388 | -0.14724 | 0.33709   | 0.44088   | BRD2      | chr6  | + | 32936437 | 32949282 | 4898  |
| ENSG000001 | 17.4487  | 30.19641 | -0.78431 | 0.09964   | 0.16098   | HLA-DMA   | chr6  | - | 32916390 | 32936871 | 1735  |
| ENSG000001 | 4.056471 | 1.652581 | 1.1566   | 0.27725   | 0.37749   | XXbac-BPG | chr6  | + | 32811863 | 32814272 | 1267  |
| ENSG000001 | 24517.8  | 684.0916 | 5.1517   | 1.09E-191 | 2.19E-189 | COL5A2    | chr2  | - | 1.9E+08  | 1.9E+08  | 6949  |
| ENSG000001 | 277.5414 | 125.792  | 1.1365   | 1.14E-08  | 4.80E-08  | PSMB8     | chr6  | - | 32808494 | 32812480 | 1351  |
| ENSG000001 | 42.75966 | 36.78894 | 0.21152  | 0.56111   | 0.65963   | TAP2      | chr6  | - | 32789610 | 32806557 | 5684  |
| ENSG000001 | 68.9037  | 88.7966  | -0.36592 | 0.11585   | 0.18328   | SPIN3     | chrX  | - | 57002803 | 57021970 | 1670  |
| ENSG000001 | 526.4993 | 364.477  | 0.5312   | 0.000464  | 0.001213  | RP11-622K | chrX  | + | 56755692 | 56844813 | 1529  |
| ENSG000001 | 2.250445 | 0.951736 | 0.97068  | 0.50227   | 0.60574   | RP11-219C | chr17 | - | 76257430 | 76274573 | 2934  |
| ENSG000001 | 0        | 5.656172 | -3.7212  | 0.01714   | 0.034312  | TMEM235   | chr17 | + | 76227391 | 76237068 | 2409  |
| ENSG000001 | 5.322158 | 17.93562 | -1.7067  | 0.006995  | 0.015145  | RP11-153A | chr17 | - | 76103479 | 76107880 | 3192  |
| ENSG000001 | 22.56288 | 15.48095 | 0.54381  | 0.26245   | 0.36067   | HLA-DRA   | chr6  | + | 32407619 | 32412823 | 1280  |
| ENSG000001 | 0        | 0.343138 | -0.41864 | 0.81278   | NA        | BTNL2     | chr6  | - | 32361740 | 32374905 | 1460  |
| ENSG000001 | 634.8491 | 4.349145 | 7.1072   | 1.52E-67  | 5.21E-66  | COL15A1   | chr9  | + | 1.02E+08 | 1.02E+08 | 5491  |
| ENSG000001 | 0        | 2.292733 | -2.7     | 0.088315  | 0.14543   | C6orf10   | chr6  | - | 32256303 | 32339684 | 2173  |
| ENSG000001 | 9.389794 | 28.59479 | -1.5844  | 0.00154   | 0.003712  | NOTCH4    | chr6  | - | 32162620 | 32191844 | 6745  |
| ENSG000001 | 1737.044 | 2643.237 | -0.60465 | 2.82E-05  | 8.57E-05  | PBX2      | chr6  | - | 32151966 | 32157963 | 3757  |
| ENSG000001 | 37.68673 | 66.91741 | -0.818   | 0.011082  | 0.02307   | AGER      | chr6  | - | 32148745 | 32152101 | 1597  |
| ENSG000001 | 1040.62  | 1649.526 | -0.66292 | 4.24E-08  | 1.71E-07  | RNF5      | chr6  | + | 32146131 | 32151930 | 1325  |
| ENSG000001 | 445.9536 | 483.0113 | -0.11515 | 0.37582   | 0.47988   | AGPAT1    | chr6  | - | 32135989 | 32145873 | 2496  |
| ENSG000001 | 14.63738 | 20.36672 | -0.47602 | 0.32219   | 0.4251    | DFNB59    | chr2  | + | 1.79E+08 | 1.79E+08 | 1942  |
| ENSG000001 | 14.05678 | 38.44159 | -1.4296  | 0.006146  | 0.013455  | PRRT1     | chr6  | - | 32116136 | 32122150 | 2782  |
| ENSG000001 | 109.0337 | 130.9956 | -0.26542 | 0.22464   | 0.31726   | FKBP1     | chr6  | - | 32096484 | 32098068 | 1345  |
| ENSG000001 | 14.83355 | 23.3166  | -0.63315 | 0.17097   | 0.25333   | MRPL38    | chr17 | - | 73894724 | 73905899 | 1888  |
| ENSG000001 | 6.837069 | 13.42696 | -0.92212 | 0.20804   | 0.29791   | SMIM5     | chr17 | + | 73629514 | 73637484 | 4344  |
| ENSG000001 | 0.36308  | 2.696564 | -2.2822  | 0.11928   | 0.18793   | ERIC2     | chr2  | + | 1.72E+08 | 1.72E+08 | 601   |
| ENSG000001 | 0        | 39.1235  | -6.666   | 7.42E-08  | 2.93E-07  | SP5       | chr2  | + | 1.72E+08 | 1.72E+08 | 2033  |
| ENSG000001 | 0.36308  | 1.309443 | -1.2534  | 0.45722   | NA        | CYP21A1P  | chr6  | + | 31973413 | 31976228 | 1971  |
| ENSG000001 | 278.8911 | 156.915  | 0.82459  | 1.02E-06  | 3.63E-06  | STK19     | chr6  | + | 31938868 | 31950598 | 1894  |
| ENSG000001 | 0        | 48.77527 | -7.1599  | 1.95E-10  | 9.46E-10  | BTBD17    | chr17 | - | 72352555 | 72358085 | 1805  |
| ENSG000001 | 164.146  | 132.7922 | 0.30669  | 0.088454  | 0.14563   | DOM3Z     | chr6  | - | 31937587 | 31940069 | 2093  |
| ENSG000001 | 1361.966 | 1303.204 | 0.062886 | 0.56323   | 0.6613    | SKIV2L    | chr6  | + | 31926857 | 31937532 | 4507  |
| ENSG000001 | 0.870904 | 171.2326 | -7.0381  | 1.84E-19  | 1.51E-18  | C9orf129  | chr9  | - | 96080481 | 96108696 | 1154  |
| ENSG000001 | 1183.233 | 1202.866 | -0.02299 | 0.83046   | 0.88055   | NELFE     | chr6  | - | 31919864 | 31926887 | 1855  |
| ENSG000001 | 4.418737 | 0.343138 | 2.9553   | 0.03276   | 0.06137   | NXPE2     | chr11 | + | 1.15E+08 | 1.15E+08 | 2273  |
| ENSG000001 | 1.45232  | 0        | 1.4544   | 0.41354   | NA        | RP11-380J | chr1  | + | 17516278 | 17524112 | 4676  |
| ENSG000001 | 157.1362 | 350.0289 | -1.1516  | 1.08E-09  | 4.95E-09  | ZBTB12    | chr6  | - | 31867384 | 31869769 | 1875  |
| ENSG000001 | 253.9767 | 451.3466 | -0.82927 | 4.06E-07  | 1.50E-06  | SDHD      | chr11 | + | 1.12E+08 | 1.12E+08 | 1439  |
| ENSG000001 | 1755.068 | 4013.538 | -1.1923  | 2.66E-30  | 3.42E-29  | EHMT2     | chr6  | - | 31847536 | 31865464 | 4129  |
| ENSG000001 | 35.37711 | 13.36714 | 1.3696   | 0.001898  | 0.004507  | C1orf134  | chr1  | - | 16555368 | 16556038 | 252   |
| ENSG000001 | 13.33062 | 7.01657  | 0.89806  | 0.14762   | 0.2239    | AC005042  | chr2  | - | 1.6E+08  | 1.6E+08  | 4067  |
| ENSG000001 | 566.4294 | 41.05228 | 3.7691   | 5.11E-83  | 2.26E-81  | LAYN      | chr11 | + | 1.11E+08 | 1.11E+08 | 2172  |
| ENSG000001 | 4.81352  | 46.8671  | -3.1893  | 9.77E-10  | 4.51E-09  | SLC44A4   | chr6  | - | 31830969 | 31846823 | 2634  |

|            |          |          |          |           |           |           |       |   |          |          |      |
|------------|----------|----------|----------|-----------|-----------|-----------|-------|---|----------|----------|------|
| ENSG000001 | 890.865  | 796.019  | 0.16283  | 0.19721   | 0.28523   | NEU1      | chr6  | - | 31825436 | 31830683 | 4616 |
| ENSG000001 | 2083.069 | 1582.525 | 0.39676  | 0.000111  | 0.000316  | C6orf48   | chr6  | + | 31802385 | 31807541 | 1053 |
| ENSG000001 | 509.4002 | 686.6734 | -0.42951 | 0.083002  | 0.13788   | HSPA1B    | chr6  | + | 31795512 | 31798031 | 2520 |
| ENSG000001 | 336.2126 | 318.3287 | 0.076585 | 0.76794   | 0.83226   | HSPA1A    | chr6  | + | 31783291 | 31785717 | 2427 |
| ENSG000001 | 21.30819 | 35.45284 | -0.73448 | 0.12643   | 0.19712   | HSPA1L    | chr6  | - | 31777396 | 31783437 | 2544 |
| ENSG000001 | 469.0483 | 835.5782 | -0.83159 | 3.85E-10  | 1.83E-09  | LSM2      | chr6  | - | 31765173 | 31774761 | 876  |
| ENSG000001 | 4496.461 | 6757.525 | -0.58743 | 2.84E-10  | 1.36E-09  | VAR5      | chr6  | - | 31745295 | 31763730 | 4312 |
| ENSG000001 | 3.890376 | 18.57336 | -2.151   | 0.002901  | 0.006702  | VWA7      | chr6  | - | 31733367 | 31745108 | 2942 |
| ENSG000001 | 4.387848 | 0.686276 | 2.2331   | 0.091503  | 0.14987   | CARD16    | chr11 | - | 1.05E+08 | 1.05E+08 | 1051 |
| ENSG000001 | 1.016461 | 0        | 1.3167   | 0.46021   | NA        | CASP12    | chr11 | - | 1.05E+08 | 1.05E+08 | 1451 |
| ENSG000001 | 322.8665 | 122.995  | 1.3856   | 5.45E-14  | 3.34E-13  | MBD5      | chr2  | + | 1.49E+08 | 1.49E+08 | 8489 |
| ENSG000001 | 33.21917 | 42.89909 | -0.37098 | 0.26328   | 0.36143   | MSH5      | chr6  | + | 31707725 | 31732622 | 3986 |
| ENSG000001 | 9.026714 | 12.77069 | -0.49184 | 0.45662   | 0.56188   | C6orf25   | chr6  | + | 31686371 | 31694491 | 2396 |
| ENSG000001 | 1.608228 | 0.343138 | 1.4905   | 0.36958   | 0.47408   | LY6G6C    | chr6  | - | 31686425 | 31689622 | 992  |
| ENSG000001 | 8.298762 | 4.867912 | 0.7199   | 0.33616   | 0.43984   | ABHD16A   | chr6  | - | 31654726 | 31671221 | 2260 |
| ENSG000001 | 21.85986 | 14.39655 | 0.58389  | 0.22545   | 0.31821   | LY6G5C    | chr6  | - | 31644461 | 31651817 | 1428 |
| ENSG000001 | 0        | 0.715414 | -0.84936 | 0.6309    | NA        | RP11-1E11 | chr9  | + | 90795588 | 90796362 | 775  |
| ENSG000001 | 43.05159 | 49.85739 | -0.2139  | 0.47689   | 0.58143   | CSNK2B    | chr6  | + | 31633013 | 31638120 | 1792 |
| ENSG000001 | 401.4688 | 797.1186 | -0.98778 | 3.47E-17  | 2.57E-16  | GPANK1    | chr6  | - | 31629006 | 31634060 | 2793 |
| ENSG000001 | 259.724  | 219.7712 | 0.24105  | 0.17457   | 0.25768   | C6orf47   | chr6  | - | 31626075 | 31628549 | 2475 |
| ENSG000001 | 293.2267 | 162.5217 | 0.84996  | 9.98E-07  | 3.57E-06  | FAM155A   | chr13 | - | 1.08E+08 | 1.09E+08 | 2043 |
| ENSG000001 | 15.23933 | 25.73071 | -0.75543 | 0.12302   | 0.19284   | APOM      | chr6  | + | 31620193 | 31625987 | 1184 |
| ENSG000001 | 1.991846 | 1.903472 | 0.03666  | 0.9768    | 0.98684   | C9orf170  | chr9  | + | 89763559 | 89774471 | 3239 |
| ENSG000001 | 0        | 0.297015 | -0.41864 | 0.81278   | NA        | TRIM49C   | chr11 | + | 89764274 | 89806558 | 2163 |
| ENSG000001 | 0.36308  | 0.343138 | -0.0021  | 0.99905   | NA        | AC079586  | chr2  | - | 1.3E+08  | 1.3E+08  | 2213 |
| ENSG000001 | 6408.432 | 6836.241 | -0.09309 | 0.43275   | 0.53821   | BAG6      | chr6  | - | 31606805 | 31620482 | 3881 |
| ENSG000001 | 0        | 1.340997 | -1.8899  | 0.26871   | NA        | C1orf195  | chr1  | - | 15490840 | 15497813 | 441  |
| ENSG000001 | 0.705622 | 22.44166 | -4.5674  | 7.15E-06  | 2.34E-05  | DGKK      | chrX  | - | 50108408 | 50213737 | 7406 |
| ENSG000001 | 12519.58 | 14846.44 | -0.24557 | 0.084644  | 0.14025   | PRRC2A    | chr6  | + | 31588497 | 31605548 | 6893 |
| ENSG000001 | 3.994857 | 14.54708 | -1.7916  | 0.012752  | 0.026236  | AIF1      | chr6  | + | 31582961 | 31584798 | 1180 |
| ENSG000001 | 0        | 0.594029 | -0.81444 | 0.64499   | NA        | NCR3      | chr6  | - | 31556672 | 31560762 | 1097 |
| ENSG000001 | 4.750928 | 1.903472 | 1.141    | 0.31466   | 0.41721   | LST1      | chr6  | + | 31553901 | 31556686 | 1832 |
| ENSG000001 | 147.187  | 188.8371 | -0.35899 | 0.17375   | 0.25662   | NFKBIL1   | chr6  | + | 31514647 | 31526606 | 1478 |
| ENSG000001 | 1.359003 | 5.271743 | -1.7911  | 0.087087  | 0.14377   | MCCD1     | chr6  | + | 31496494 | 31498009 | 955  |
| ENSG000001 | 235.0929 | 388.8816 | -0.72093 | 0.005289  | 0.011728  | ZNF814    | chr19 | - | 58360099 | 58400442 | 3146 |
| ENSG000001 | 424.385  | 418.2544 | 0.020943 | 0.93539   | 0.95756   | MICB      | chr6  | + | 31462658 | 31478901 | 2446 |
| ENSG000001 | 110.0045 | 494.3125 | -2.1626  | 1.61E-29  | 2.03E-28  | ZNF551    | chr19 | + | 58193337 | 58202022 | 4564 |
| ENSG000001 | 597.1616 | 110.2591 | 2.4299   | 4.52E-53  | 1.13E-51  | MICA      | chr6  | + | 31371356 | 31383092 | 1386 |
| ENSG000001 | 98.20421 | 76.92185 | 0.34651  | 0.16017   | 0.23992   | ZNF805    | chr19 | + | 57751973 | 57766503 | 2413 |
| ENSG000001 | 642.0491 | 517.833  | 0.30972  | 0.042537  | 0.077318  | HLA-C     | chr6  | - | 31236526 | 31239907 | 1880 |
| ENSG000001 | 0        | 4.587883 | -3.6555  | 0.013467  | 0.027567  | PSORS1C3  | chr6  | - | 31141512 | 31145676 | 593  |
| ENSG000001 | 0        | 1.416259 | -1.7181  | 0.33141   | NA        | GUCY2EP   | chr11 | - | 76405087 | 76418685 | 839  |
| ENSG000001 | 4.221753 | 49200.36 | -13.319  | 3.69E-257 | 1.33E-254 | POU5F1    | chr6  | - | 31130253 | 31148508 | 3262 |
| ENSG000001 | 0.870904 | 0.357707 | 0.7191   | 0.68613   | NA        | ZSCAN5C   | chr19 | + | 56713670 | 56720821 | 1892 |
| ENSG000001 | 32.39871 | 24.15339 | 0.4131   | 0.28373   | 0.38502   | AC024580  | chr19 | - | 56662314 | 56663250 | 717  |
| ENSG000001 | 417.0448 | 893.1389 | -1.0948  | 9.50E-07  | 3.40E-06  | CCHCR1    | chr6  | - | 31110216 | 31126015 | 2958 |
| ENSG000001 | 4.440089 | 2.635871 | 0.67347  | 0.49281   | 0.59674   | PSORS1C2  | chr6  | - | 31105313 | 31107127 | 1150 |
| ENSG000001 | 1.027626 | 0        | 1.1491   | 0.51623   | NA        | CDSN      | chr6  | - | 31082867 | 31088223 | 2552 |
| ENSG000001 | 35.03376 | 3.215331 | 3.3139   | 4.14E-08  | 1.67E-07  | PSORS1C1  | chr6  | + | 31082527 | 31107869 | 3827 |
| ENSG000001 | 0        | 0.297015 | -0.41864 | 0.81278   | NA        | MUC21     | chr6  | + | 30951495 | 30957680 | 3651 |
| ENSG000001 | 4.927375 | 17.81095 | -1.7966  | 0.003483  | 0.007949  | CTD-2514C | chr20 | + | 25999468 | 26001320 | 353  |
| ENSG000001 | 1063.195 | 989.4589 | 0.1037   | 0.50631   | 0.60985   | DHX16     | chr6  | - | 30620896 | 30640814 | 3445 |
| ENSG000001 | 147.2424 | 262.6768 | -0.83248 | 2.22E-06  | 7.68E-06  | C6orf136  | chr6  | + | 30614816 | 30620987 | 1978 |
| ENSG000001 | 600.143  | 806.7322 | -0.42538 | 0.004551  | 0.010199  | MRPS18B   | chr6  | + | 30585486 | 30594172 | 1610 |
| ENSG000001 | 1645.9   | 2524.633 | -0.61568 | 0.000465  | 0.001214  | PPP1R10   | chr6  | - | 30568177 | 30586389 | 4525 |
| ENSG000001 | 0        | 0.357707 | -0.41864 | 0.81278   | NA        | KRTAP5-11 | chr11 | - | 71292901 | 71314399 | 1021 |
| ENSG000001 | 0.72616  | 1.638012 | -0.93449 | 0.53888   | 0.63949   | KRTAP5-10 | chr11 | + | 71276609 | 71279980 | 1058 |
| ENSG000001 | 2154.991 | 3548.428 | -0.71794 | 1.05E-05  | 3.37E-05  | ABCF1     | chr6  | + | 30539153 | 30564956 | 3481 |
| ENSG000001 | 366.9564 | 151.8574 | 1.2669   | 1.01E-06  | 3.14E-06  | PRR3      | chr6  | + | 30524663 | 30531500 | 3429 |
| ENSG000001 | 5.363233 | 1.98115  | 1.3083   | 0.1845    | 0.26979   | LILRB3    | chr19 | - | 54720147 | 54746602 | 2848 |
| ENSG000001 | 686.1968 | 6514.215 | -3.2417  | 1.49E-128 | 1.32E-126 | DDR1      | chr6  | + | 30844198 | 30867933 | 4148 |
| ENSG000001 | 1.608228 | 2.353426 | -0.45338 | 0.71658   | 0.79003   | AC096670  | chr2  | - | 1.12E+08 | 1.12E+08 | 3026 |
| ENSG000001 | 1.016461 | 0        | 1.3167   | 0.46021   | NA        | LRCOL1    | chr12 | - | 1.33E+08 | 1.33E+08 | 921  |
| ENSG000001 | 1.628766 | 26.63062 | -3.8269  | 2.88E-07  | 1.08E-06  | RP11-304F | chr17 | + | 47923272 | 47926199 | 2100 |
| ENSG000001 | 3.495593 | 3.723561 | -0.05791 | 0.95285   | 0.97057   | AC013268  | chr2  | + | 1.11E+08 | 1.11E+08 | 2436 |

|            |          |          |          |           |           |           |       |   |          |          |      |
|------------|----------|----------|----------|-----------|-----------|-----------|-------|---|----------|----------|------|
| ENSG000001 | 2177.638 | 1196.256 | 0.86382  | 2.67E-17  | 1.98E-16  | GNL1      | chr6  | - | 30509154 | 30524951 | 7490 |
| ENSG000001 | 2384.606 | 1274.271 | 0.89989  | 0.000188  | 0.000518  | HLA-E     | chr6  | + | 30457244 | 30461982 | 2601 |
| ENSG000001 | 0        | 0.654722 | -0.83442 | 0.63731   | NA        | DPRX      | chr19 | + | 54135310 | 54140263 | 648  |
| ENSG000001 | 169.0022 | 236.6574 | -0.48153 | 0.10879   | 0.17337   | TRIM39    | chr6  | + | 30294256 | 30311506 | 3535 |
| ENSG000001 | 121.6268 | 237.8959 | -0.96163 | 2.97E-05  | 9.00E-05  | ZNF468    | chr19 | - | 53341261 | 53360902 | 4407 |
| ENSG000001 | 0        | 3.526915 | -3.3414  | 0.025042  | 0.048329  | TRIM15    | chr6  | + | 30130993 | 30140473 | 2214 |
| ENSG000001 | 133.1301 | 333.8507 | -1.3241  | 4.36E-15  | 2.87E-14  | ZNF616    | chr19 | - | 52616344 | 52643175 | 4335 |
| ENSG000001 | 0        | 6.51962  | -3.4331  | 0.044112  | 0.079742  | FOXB2     | chr9  | + | 79634571 | 79635869 | 1299 |
| ENSG000001 | 0        | 0.297015 | -0.41864 | 0.81278   | NA        | TRIM10    | chr6  | - | 30119722 | 30128711 | 3546 |
| ENSG000001 | 0        | 0.297015 | -0.41864 | 0.81278   | NA        | TRIM40    | chr6  | + | 30103885 | 30116512 | 2086 |
| ENSG000001 | 0        | 1.903472 | -2.1599  | 0.21236   | NA        | TRIM31    | chr6  | - | 30070674 | 30080883 | 2043 |
| ENSG000001 | 39.51329 | 28.86354 | 0.44712  | 0.25157   | 0.34832   | RNF39     | chr6  | - | 30038043 | 30043664 | 2206 |
| ENSG000001 | 710.5811 | 316.1516 | 1.1668   | 1.55E-16  | 1.10E-15  | PPP1R11   | chr6  | + | 30034486 | 30038110 | 1731 |
| ENSG000001 | 5.975539 | 4.882481 | 0.26435  | 0.73585   | 0.80509   | AC115618  | chrX  | - | 48431482 | 48433275 | 1794 |
| ENSG000001 | 1.233984 | 1.012429 | 0.23966  | 0.87666   | 0.91427   | HLA-J     | chr6  | + | 29974360 | 29977733 | 1306 |
| ENSG000001 | 75.68078 | 110.0301 | -0.54192 | 0.02511   | 0.048433  | ZNRD1-AS1 | chr6  | - | 29968788 | 30029417 | 9771 |
| ENSG000001 | 8.505119 | 172.9641 | -4.2932  | 3.56E-31  | 4.76E-30  | PTCHD2    | chr1  | + | 11539223 | 11597641 | 5215 |
| ENSG000001 | 0.290301 | 1.043983 | -0.98014 | 0.57012   | NA        | HCG9      | chr6  | + | 29942889 | 29946183 | 659  |
| ENSG000001 | 13894.42 | 17946.42 | -0.36881 | 0.000564  | 0.001453  | GNB2L1    | chr5  | - | 1.81E+08 | 1.81E+08 | 1651 |
| ENSG000001 | 0        | 4.066699 | -3.547   | 0.015001  | 0.030392  | HLA-G     | chr6  | + | 29794744 | 29798902 | 1578 |
| ENSG000001 | 60.89182 | 1269.902 | -4.3631  | 1.68E-119 | 1.30E-117 | TBC1D8    | chr2  | - | 1.02E+08 | 1.02E+08 | 3803 |
| ENSG000001 | 17.47022 | 26.07956 | -0.57527 | 0.19074   | 0.27753   | HLA-F     | chr6  | + | 29690552 | 29706305 | 1622 |
| ENSG000001 | 0.36308  | 9.292319 | -4.034   | 0.000986  | 0.002449  | ZFP57     | chr6  | - | 29640169 | 29648887 | 1980 |
| ENSG000001 | 0        | 0.357707 | -0.41864 | 0.81278   | NA        | SSX9      | chrX  | - | 48154885 | 48165675 | 1230 |
| ENSG000001 | 174.2155 | 475.2598 | -1.4393  | 2.14E-07  | 8.12E-07  | CRHR1-IT1 | chr17 | + | 43697694 | 43725582 | 2609 |
| ENSG000001 | 0.290301 | 1.058552 | -0.99174 | 0.56536   | NA        | RPS26P8   | chr17 | + | 43685909 | 43686349 | 441  |
| ENSG000001 | 4.721017 | 7.547491 | -0.65684 | 0.40492   | 0.50978   | ASPDH     | chr19 | - | 51014857 | 51017947 | 1040 |
| ENSG000001 | 0.342542 | 6.75111  | -3.5338  | 0.006988  | 0.015133  | MOG       | chr6  | + | 29624758 | 29640149 | 2499 |
| ENSG000001 | 0.72616  | 4.395268 | -2.2336  | 0.084535  | 0.14011   | OR2H2     | chr6  | + | 29555683 | 29556745 | 1063 |
| ENSG000001 | 1.722083 | 3.411978 | -0.88622 | 0.43528   | 0.54073   | CBY3      | chr5  | - | 1.79E+08 | 1.79E+08 | 785  |
| ENSG000001 | 0.72616  | 6.359433 | -2.7694  | 0.021418  | 0.041979  | C5orf60   | chr5  | - | 1.79E+08 | 1.79E+08 | 3245 |
| ENSG000001 | 0        | 0.297015 | -0.41864 | 0.81278   | NA        | CST13P    | chr20 | + | 23499783 | 23522655 | 1157 |
| ENSG000001 | 0.36308  | 1.84278  | -1.6293  | 0.32578   | 0.4287    | CTD-2126E | chr19 | + | 50553846 | 50570050 | 1525 |
| ENSG000001 | 1772.057 | 1110.075 | 0.67322  | 0.000204  | 0.000558  | AKT1S1    | chr19 | - | 50372295 | 50381716 | 3640 |
| ENSG000001 | 0        | 1.387121 | -1.6961  | 0.33794   | NA        | FAM153C   | chr5  | + | 1.77E+08 | 1.77E+08 | 1510 |
| ENSG000001 | 1032.298 | 1071.231 | -0.05294 | 0.84094   | 0.88835   | GABBR1    | chr6  | - | 29523406 | 29601753 | 4527 |
| ENSG000001 | 425.0661 | 487.2079 | -0.19613 | 0.37241   | 0.4769    | C10orf114 | chr10 | - | 21781587 | 21786191 | 3801 |
| ENSG000001 | 59.49418 | 32.69304 | 0.86057  | 0.005508  | 0.012162  | AC012307  | chr2  | + | 96874154 | 96908359 | 1721 |
| ENSG000001 | 0        | 0.594029 | -0.81444 | 0.64499   | NA        | OR2H1     | chr6  | + | 29424958 | 29432105 | 3024 |
| ENSG000001 | 0.290301 | 0        | 0.4146   | 0.81455   | NA        | OR2W1     | chr6  | - | 29011990 | 29013017 | 1028 |
| ENSG000001 | 35.29154 | 7.350844 | 2.1928   | 1.78E-05  | 5.55E-05  | RP11-195E | chr9  | - | 72700732 | 72790804 | 2097 |
| ENSG000001 | 0        | 0.594029 | -0.81444 | 0.64499   | NA        | C6orf100  | chr6  | + | 28911654 | 28912314 | 466  |
| ENSG000001 | 2.334388 | 15.26249 | -2.5853  | 0.000742  | 0.001877  | SPDYC     | chr11 | + | 64937625 | 64940715 | 991  |
| ENSG000001 | 0        | 101.9402 | -8.162   | 9.48E-14  | 5.72E-13  | C9orf135  | chr9  | + | 72435709 | 72521148 | 873  |
| ENSG000001 | 1795.923 | 2086.722 | -0.21589 | 0.093286  | 0.15245   | TRIM27    | chr6  | - | 28870779 | 28891766 | 7006 |
| ENSG000001 | 0.632843 | 4.441392 | -2.3416  | 0.06369   | 0.10991   | C10orf112 | chr10 | + | 19492779 | 20079330 | 4661 |
| ENSG000001 | 46.34082 | 80.39606 | -0.79173 | 0.003124  | 0.007184  | AC083899  | chr2  | + | 87352513 | 87423770 | 3819 |
| ENSG000001 | 1.576526 | 4.196206 | -1.2463  | 0.2534    | 0.35034   | CTC-308K2 | chr5  | - | 1.72E+08 | 1.72E+08 | 2067 |
| ENSG000001 | 81.55021 | 138.696  | -0.76187 | 0.000254  | 0.000686  | RANBP17   | chr5  | + | 1.7E+08  | 1.71E+08 | 4739 |
| ENSG000001 | 64.16394 | 0        | 7.5573   | 6.05E-12  | 3.25E-11  | FAM196B   | chr5  | - | 1.69E+08 | 1.69E+08 | 2999 |
| ENSG000001 | 1.379541 | 0        | 1.686    | 0.34092   | NA        | CTD-3232N | chr8  | + | 1.45E+08 | 1.45E+08 | 3778 |
| ENSG000001 | 18.77519 | 2.652857 | 2.6655   | 0.001085  | 0.002676  | KM-PA-2   | chr8  | - | 1.45E+08 | 1.45E+08 | 1969 |
| ENSG000001 | 3.568372 | 6.29874  | -0.76336 | 0.35571   | 0.46      | RP11-15J1 | chr9  | - | 70181520 | 70216621 | 655  |
| ENSG000001 | 0.342542 | 0        | 0.4146   | 0.81455   | NA        | FOXD4L5   | chr9  | - | 70175707 | 70178815 | 3109 |
| ENSG000001 | 0        | 0.297015 | -0.41864 | 0.81278   | NA        | CR769776  | chr9  | - | 69377902 | 69380597 | 2018 |
| ENSG000001 | 2.044087 | 134.5622 | -5.8885  | 7.16E-22  | 6.56E-21  | ZNF204P   | chr6  | - | 27325604 | 27339304 | 4006 |
| ENSG000001 | 48.22819 | 59.96549 | -0.31571 | 0.25677   | 0.35424   | CBWD6     | chr9  | - | 69204538 | 69269662 | 3334 |
| ENSG000001 | 2.863563 | 163.2724 | -5.7274  | 3.47E-20  | 2.95E-19  | CTD-3065J | chr8  | + | 1.45E+08 | 1.45E+08 | 1390 |
| ENSG000001 | 4.096733 | 6.503508 | -0.60944 | 0.48618   | 0.59015   | PGM5P1    | chr9  | - | 68741234 | 68809906 | 2259 |
| ENSG000001 | 3.620613 | 3.38284  | 0.1012   | 0.9159    | 0.94307   | RP11-111F | chr9  | - | 46685429 | 46688137 | 2541 |
| ENSG000001 | 0.685084 | 0.937167 | -0.31802 | 0.85111   | NA        | AL953889  | chr9  | - | 45727440 | 45727852 | 381  |
| ENSG000001 | 0.923144 | 2.96444  | -1.3748  | 0.29231   | 0.39416   | FAM27E4   | chr9  | + | 44997777 | 44999352 | 1401 |
| ENSG000001 | 0.72616  | 0.715414 | 0.009201 | 0.99586   | NA        | FAM27E2   | chr9  | + | 45733559 | 45734896 | 1338 |
| ENSG000001 | 25.57281 | 17.70172 | 0.50979  | 0.26346   | 0.36164   | TTC25     | chr17 | + | 40086888 | 40117648 | 1752 |
| ENSG000001 | 0.290301 | 1.029414 | -0.85389 | 0.63097   | NA        | BX649563  | chr9  | - | 44170447 | 44175727 | 1659 |

|            |          |          |          |          |          |            |       |   |          |          |       |
|------------|----------|----------|----------|----------|----------|------------|-------|---|----------|----------|-------|
| ENSG000001 | 33.50768 | 10.65842 | 1.6044   | 0.000982 | 0.002439 | MRPL53     | chr2  | - | 74699085 | 74700449 | 1162  |
| ENSG000001 | 1.213446 | 8.187643 | -2.4434  | 0.015879 | 0.032005 | ST8SIA6-AS | chr10 | + | 17428935 | 17455502 | 1811  |
| ENSG000001 | 22.44902 | 30.5468  | -0.43123 | 0.27521  | 0.37527  | RP11-204N  | chr9  | - | 41961615 | 42019580 | 1890  |
| ENSG000001 | 33.96505 | 83.52089 | -1.291   | 2.32E-05 | 7.13E-05 | MROH6      | chr8  | - | 1.45E+08 | 1.45E+08 | 3469  |
| ENSG000001 | 1073.618 | 748.5551 | 0.51876  | 0.003545 | 0.008083 | ATXN2      | chr12 | - | 1.12E+08 | 1.12E+08 | 4702  |
| ENSG000001 | 3087.818 | 2925.036 | 0.078383 | 0.46097  | 0.56623  | DCTN1      | chr2  | - | 74588281 | 74619214 | 5414  |
| ENSG000001 | 0        | 0.343138 | -0.41864 | 0.81278  | NA       | FAM74A3    | chr9  | + | 40715662 | 40722679 | 1745  |
| ENSG000001 | 77.64965 | 171.1024 | -1.1255  | 0.005407 | 0.011965 | PNMAL2     | chr19 | - | 46990163 | 46999755 | 5308  |
| ENSG000001 | 199.7207 | 73.69282 | 1.4291   | 3.62E-09 | 1.59E-08 | TCTN1      | chr12 | + | 1.11E+08 | 1.11E+08 | 4209  |
| ENSG000001 | 68.75912 | 115.878  | -0.74772 | 0.001183 | 0.002902 | FAM216A    | chr12 | + | 1.11E+08 | 1.11E+08 | 1679  |
| ENSG000001 | 294.7584 | 354.5042 | -0.26731 | 0.064418 | 0.111103 | ZBTB48     | chr1  | + | 6640061  | 6649340  | 2484  |
| ENSG000001 | 4.543757 | 121.1014 | -4.6181  | 1.12E-18 | 8.80E-18 | FAM201A    | chr9  | + | 38620471 | 38624987 | 3437  |
| ENSG000001 | 14.97992 | 0.700845 | 4.0462   | 6.86E-05 | 0.000199 | IGFL2      | chr19 | + | 46646363 | 46664556 | 1920  |
| ENSG000001 | 9.12859  | 5.376142 | 0.74287  | 0.30942  | 0.41124  | IGFL4      | chr19 | - | 46543006 | 46580376 | 2719  |
| ENSG000001 | 5.197138 | 0.98329  | 2.1159   | 0.062708 | 0.10841  | GPR20      | chr8  | - | 1.42E+08 | 1.42E+08 | 1515  |
| ENSG000001 | 513.6845 | 574.4545 | -0.16204 | 0.2232   | 0.31564  | MZT1       | chr13 | - | 73282495 | 73301825 | 2299  |
| ENSG000001 | 1.338465 | 5.223203 | -1.7514  | 0.12101  | 0.19015  | CXorf31    | chrX  | - | 46746852 | 46759138 | 521   |
| ENSG000001 | 0.290301 | 1.727843 | -1.5606  | 0.3514   | 0.45573  | SPINK9     | chr5  | + | 1.48E+08 | 1.48E+08 | 604   |
| ENSG000001 | 0        | 0.357707 | -0.41864 | 0.81278  | NA       | LRR3C      | chr17 | + | 38097727 | 38101000 | 891   |
| ENSG000001 | 51.43609 | 51.32138 | 0.003216 | 0.99147  | 0.99546  | ZNF155     | chr19 | + | 44472014 | 44502477 | 2596  |
| ENSG000001 | 29.46156 | 53.97591 | -0.86527 | 0.006129 | 0.013422 | C11orf83   | chr11 | + | 62437745 | 62441159 | 2288  |
| ENSG000001 | 21.29124 | 18.05701 | 0.22258  | 0.68215  | 0.76245  | FBXO48     | chr2  | - | 68689486 | 68694390 | 2731  |
| ENSG000001 | 2.261609 | 0        | 2.6509   | 0.097945 | 0.15859  | AC074391   | chr2  | + | 65663864 | 66126649 | 1266  |
| ENSG000001 | 0.290301 | 2.232041 | -2.0446  | 0.17992  | 0.26411  | FAM221B    | chr9  | - | 35816388 | 35828744 | 3763  |
| ENSG000001 | 14.86607 | 10.74013 | 0.46441  | 0.39216  | 0.4965   | ATP6V0E2   | chr7  | - | 1.5E+08  | 1.5E+08  | 2974  |
| ENSG000001 | 0        | 13.04743 | -5.3328  | 1.20E-05 | 3.82E-05 | CD177      | chr19 | + | 43857825 | 43867480 | 2483  |
| ENSG000001 | 0.36308  | 0.654722 | -0.52647 | 0.7643   | NA       | PSG5       | chr19 | - | 43670408 | 43690688 | 2145  |
| ENSG000001 | 416.229  | 216.453  | 0.94146  | 1.53E-10 | 7.47E-10 | ZNF783     | chr7  | + | 1.49E+08 | 1.49E+08 | 4452  |
| ENSG000001 | 52.0757  | 187.541  | -1.8422  | 2.64E-17 | 1.96E-16 | ZNF425     | chr7  | - | 1.49E+08 | 1.49E+08 | 3220  |
| ENSG000001 | 0.36308  | 0        | 0.4146   | 0.81455  | NA       | RP11-539E  | chr8  | - | 1.24E+08 | 1.24E+08 | 1347  |
| ENSG000001 | 2.873915 | 77.43417 | -4.5952  | 2.65E-16 | 1.86E-15 | LRR3C10B   | chr11 | + | 61276272 | 61278482 | 2211  |
| ENSG000001 | 0        | 0.686276 | -0.84936 | 0.6309   | NA       | FBXO47     | chr17 | - | 37092685 | 37123655 | 2302  |
| ENSG000001 | 115.2933 | 156.2941 | -0.43713 | 0.026492 | 0.05083  | C12orf73   | chr12 | - | 1.04E+08 | 1.04E+08 | 1738  |
| ENSG000001 | 4.709852 | 9.522936 | -0.96792 | 0.21102  | 0.3013   | PCDHGA1    | chr5  | + | 1.41E+08 | 1.41E+08 | 4602  |
| ENSG000001 | 10.89435 | 3.633731 | 1.4936   | 0.054769 | 0.096238 | AC006486   | chr19 | + | 42746927 | 42749125 | 2199  |
| ENSG000001 | 24.55733 | 247.7185 | -3.3221  | 1.71E-34 | 2.56E-33 | RP4-798C1  | chr7  | - | 1.44E+08 | 1.44E+08 | 5045  |
| ENSG000001 | 0.685084 | 0        | 0.85004  | 0.63064  | NA       | BLACE      | chr7  | - | 1.55E+08 | 1.55E+08 | 2456  |
| ENSG000001 | 17.45987 | 25.09143 | -0.52035 | 0.34418  | 0.44812  | PCDHA9     | chr5  | + | 1.4E+08  | 1.4E+08  | 6388  |
| ENSG000001 | 12.75776 | 21.452   | -0.71782 | 0.21238  | 0.30293  | PCDHA8     | chr5  | + | 1.4E+08  | 1.4E+08  | 5260  |
| ENSG000001 | 6.919221 | 13.24575 | -0.91593 | 0.14692  | 0.22298  | PCDHA7     | chr5  | + | 1.4E+08  | 1.4E+08  | 5221  |
| ENSG000001 | 11.67194 | 14.45483 | -0.30845 | 0.58864  | 0.6842   | PCDHA5     | chr5  | + | 1.4E+08  | 1.4E+08  | 5218  |
| ENSG000001 | 183.3007 | 93.17562 | 0.97813  | 4.45E-06 | 1.49E-05 | PCDHA4     | chr5  | + | 1.4E+08  | 1.4E+08  | 5251  |
| ENSG000001 | 94.66666 | 22.85369 | 2.0333   | 6.97E-09 | 2.99E-08 | PCDHA2     | chr5  | + | 1.4E+08  | 1.4E+08  | 5254  |
| ENSG000001 | 7.862903 | 20.50509 | -1.3482  | 0.011513 | 0.023879 | PCDHA1     | chr5  | + | 1.4E+08  | 1.4E+08  | 5260  |
| ENSG000001 | 603.0845 | 399.596  | 0.59316  | 0.000545 | 0.001406 | TRIM13     | chr13 | + | 50570024 | 50594617 | 7249  |
| ENSG000001 | 0        | 0.297015 | -0.41864 | 0.81278  | NA       | MS4A13     | chr11 | + | 60282886 | 60310194 | 928   |
| ENSG000001 | 0.36308  | 3.526915 | -2.6526  | 0.061401 | 0.10645  | PRSS3P4    | chr9  | - | 33613846 | 33614007 | 162   |
| ENSG000001 | 0        | 0.297015 | -0.41864 | 0.81278  | NA       | RP5-842K1  | chr7  | - | 1.41E+08 | 1.41E+08 | 1439  |
| ENSG000001 | 86.32926 | 243.4347 | -1.4885  | 7.87E-08 | 3.09E-07 | SPIRE2     | chr16 | + | 89884587 | 89937727 | 3235  |
| ENSG000001 | 0        | 1.073121 | -1.1788  | 0.50551  | NA       | AC139712   | chr2  | + | 52797786 | 52799660 | 1875  |
| ENSG000001 | 11.31742 | 15.05369 | -0.39705 | 0.47109  | 0.57589  | AARD       | chr8  | + | 1.18E+08 | 1.18E+08 | 2299  |
| ENSG000001 | 0        | 0.357707 | -0.41864 | 0.81278  | NA       | RP11-830F  | chr16 | + | 89006197 | 89017932 | 1812  |
| ENSG000001 | 0        | 0.357707 | -0.41864 | 0.81278  | NA       | PABPN1L    | chr16 | - | 88928034 | 88933068 | 1272  |
| ENSG000001 | 0        | 3.487239 | -3.204   | 0.038966 | 0.071702 | RP11-707A  | chr11 | + | 49580098 | 49831971 | 2196  |
| ENSG000001 | 0        | 2.012704 | -2.1825  | 0.20921  | 0.29918  | RP11-863P  | chr16 | - | 88121647 | 88134591 | 3468  |
| ENSG000001 | 0        | 4.022992 | -3.5371  | 0.015289 | 0.03093  | PKHD1L1    | chr8  | + | 1.1E+08  | 1.11E+08 | 13076 |
| ENSG000001 | 36.22308 | 44.57598 | -0.29662 | 0.43527  | 0.54073  | CTC-425O2  | chr19 | - | 40779396 | 40781386 | 1462  |
| ENSG000001 | 0        | 0.357707 | -0.41864 | 0.81278  | NA       | RP11-56P9  | chr11 | - | 49035495 | 49037446 | 819   |
| ENSG000001 | 48.04156 | 75.5889  | -0.65138 | 0.026052 | 0.050069 | FLJ00104   | chr16 | - | 87731749 | 87739290 | 6938  |
| ENSG000001 | 7.426231 | 0.654722 | 3.0212   | 0.01211  | 0.025022 | AC009236   | chr2  | - | 45392009 | 45550434 | 2226  |
| ENSG000001 | 1.317927 | 0.343138 | 1.2418   | 0.46439  | NA       | RP11-693J  | chr12 | + | 92860227 | 92885867 | 10626 |
| ENSG000001 | 705.2657 | 697.8223 | 0.014266 | 0.9271   | 0.95152  | SLC35B4    | chr7  | - | 1.34E+08 | 1.34E+08 | 6797  |
| ENSG000001 | 0        | 2.711133 | -2.9254  | 0.060083 | 0.10456  | LGALS7     | chr19 | - | 39261611 | 39264132 | 565   |
| ENSG000001 | 87.3357  | 58.20622 | 0.57617  | 0.069909 | 0.11905  | SYCE1L     | chr16 | + | 77233294 | 77247112 | 858   |
| ENSG000001 | 544.0837 | 152.6879 | 1.831    | 4.19E-31 | 5.60E-30 | TMEM231    | chr16 | - | 75572015 | 75590184 | 2991  |

|                    |          |          |          |          |           |       |   |          |          |       |
|--------------------|----------|----------|----------|----------|-----------|-------|---|----------|----------|-------|
| ENSG0000016285564  | 0.997859 | 2.3823   | 0.03009  | 0.056904 | FAM71F2   | chr7  | + | 1.28E+08 | 1.28E+08 | 2147  |
| ENSG000001632843   | 1.012429 | -0.45981 | 0.7761   | NA       | C2orf91   | chr2  | - | 42162508 | 42181406 | 3721  |
| ENSG0000012697468  | 11.59962 | -2.0152  | 0.009735 | 0.020507 | CCNI2     | chr5  | + | 1.32E+08 | 1.32E+08 | 2355  |
| ENSG00000146.94132 | 54.25775 | -0.20828 | 0.64343  | 0.73043  | TMEM240   | chr1  | - | 1470554  | 1475833  | 718   |
| ENSG0000011.390706 | 0        | 1.6954   | 0.33813  | NA       | FRG2      | chr4  | - | 1.91E+08 | 1.91E+08 | 2100  |
| ENSG0000010.290301 | 0        | 0.4146   | 0.81455  | NA       | COX17P1   | chr13 | + | 47064997 | 47065397 | 401   |
| ENSG0000010.705622 | 1.309443 | -0.68537 | 0.66213  | 0.7458   | FAM205A   | chr9  | - | 34723052 | 34729464 | 4225  |
| ENSG0000011.016461 | 2.621302 | -1.1594  | 0.37982  | 0.48383  | CDKL4     | chr2  | - | 39402787 | 39456729 | 1567  |
| ENSG0000012.302685 | 43.25122 | -4.0717  | 1.79E-09 | 8.07E-09 | TMEM88B   | chr1  | + | 1361508  | 1363167  | 492   |
| ENSG00000110.6144  | 30.10658 | -1.4736  | 0.005245 | 0.011641 | C4orf47   | chr4  | + | 1.86E+08 | 1.86E+08 | 1134  |
| ENSG000001166.863  | 104.9655 | 0.66751  | 0.020186 | 0.039791 | TRIQQ     | chr8  | - | 93895758 | 94029901 | 3672  |
| ENSG000001190.0469 | 282.2562 | -0.5692  | 0.001827 | 0.004349 | SDHAF1    | chr19 | + | 36486090 | 36487220 | 1131  |
| ENSG0000011.649304 | 3.792375 | -1.0779  | 0.34414  | 0.44811  | ARID3C    | chr9  | - | 34621376 | 34628104 | 1411  |
| ENSG0000019.161106 | 11.3253  | -0.31619 | 0.62873  | 0.71841  | AC016586  | chr19 | - | 4041127  | 4043154  | 2028  |
| ENSG0000010.975385 | 0        | 1.2767   | 0.47406  | NA       | AC016251  | chr15 | - | 96831280 | 96831660 | 381   |
| ENSG00000137.99822 | 34.05028 | 0.14825  | 0.69838  | 0.7753   | PSENNEN   | chr19 | + | 36236015 | 36237911 | 1152  |
| ENSG0000013.423628 | 0.357707 | 2.5849   | 0.071128 | 0.12078  | C11orf91  | chr11 | - | 33719807 | 33722347 | 811   |
| ENSG0000010.36308  | 0        | 0.4146   | 0.81455  | NA       | RP11-34M  | chr8  | - | 82546592 | 82547897 | 1306  |
| ENSG000001531.404  | 445.6891 | 0.25284  | 0.043845 | 0.079352 | ZBTB10    | chr8  | + | 81397854 | 81438500 | 10132 |
| ENSG000001427.9997 | 477.8945 | -0.1598  | 0.29523  | 0.39725  | C4orf46   | chr4  | - | 1.6E+08  | 1.6E+08  | 3521  |
| ENSG0000011.411244 | 7.074847 | -2.1401  | 0.041407 | 0.075523 | SCGB2B2   | chr19 | - | 35084234 | 35166604 | 2505  |
| ENSG0000010        | 14.1084  | -5.4362  | 7.57E-06 | 2.47E-05 | CCDC144N  | chr17 | - | 20739760 | 20799453 | 2806  |
| ENSG000001877.6561 | 1512.077 | -0.78132 | 0.000678 | 0.001725 | LGR4      | chr11 | - | 27387508 | 27494322 | 5206  |
| ENSG0000010.342542 | 0        | 0.4146   | 0.81455  | NA       | AC015818  | chr17 | - | 20422625 | 20432000 | 2334  |
| ENSG0000010.685084 | 0.715414 | -0.02805 | 0.98738  | NA       | FAM106B   | chr17 | + | 20320741 | 20322363 | 1623  |
| ENSG00000147.10464 | 12.96002 | 1.8385   | 2.12E-05 | 6.55E-05 | PSMB10    | chr16 | - | 67968405 | 67970990 | 1218  |
| ENSG00000110.40365 | 17.34072 | -0.70907 | 0.22101  | 0.31303  | VIT       | chr2  | + | 36923833 | 37041935 | 2810  |
| ENSG0000010        | 0.594029 | -0.81444 | 0.64499  | NA       | TTL10-AS1 | chr1  | - | 1108436  | 1114935  | 3532  |
| ENSG0000010.632843 | 1.309443 | -0.75604 | 0.63051  | 0.71982  | AC105052  | chr7  | - | 1.02E+08 | 1.02E+08 | 915   |
| ENSG00000182.98958 | 46.23581 | 0.83854  | 0.001306 | 0.003183 | SPDYE2    | chr7  | + | 1.02E+08 | 1.02E+08 | 1742  |
| ENSG000001135.5578 | 340.707  | -1.3268  | 1.36E-13 | 8.15E-13 | RPSAP58   | chr19 | + | 23945807 | 24010937 | 1397  |
| ENSG0000011199.274 | 1577.194 | -0.39417 | 0.010933 | 0.022785 | E2F4      | chr16 | + | 67226072 | 67232821 | 2615  |
| ENSG0000010        | 8.377842 | -4.6579  | 0.00036  | 0.000952 | DGAT2L7P  | chr7  | - | 1.01E+08 | 1.01E+08 | 744   |
| ENSG000001485.5527 | 1082.275 | -1.1559  | 4.33E-25 | 4.54E-24 | PDE7A     | chr8  | - | 66629745 | 66754557 | 3673  |
| ENSG000001196.1625 | 224.6564 | -0.19633 | 0.37063  | 0.47517  | TMEM170E  | chr6  | + | 11537938 | 11583757 | 8362  |
| ENSG0000011.265686 | 2.370411 | -0.72658 | 0.58795  | 0.68349  | RP11-152F | chr15 | + | 83128128 | 83145983 | 4893  |
| ENSG0000010        | 2.901332 | -3.0081  | 0.053293 | 0.094014 | TRBV200R  | chr9  | + | 33617760 | 33618504 | 416   |
| ENSG0000013.391925 | 5.89491  | -0.75834 | 0.41112  | 0.51598  | RP13-608F | chr15 | - | 82970479 | 82988374 | 4926  |
| ENSG0000014.294532 | 18.00443 | -1.9962  | 0.003966 | 0.008964 | MUC12     | chr7  | + | 1.01E+08 | 1.01E+08 | 16737 |
| ENSG0000010        | 0.297015 | -0.41864 | 0.81278  | NA       | GOLGA6L1  | chr15 | - | 82635130 | 82641706 | 1540  |
| ENSG0000010        | 0.654722 | -0.83442 | 0.63731  | NA       | RP11-1112 | chr8  | + | 58890917 | 58896685 | 2109  |
| ENSG000001745.5305 | 844.5871 | -0.17889 | 0.24556  | 0.34137  | SNX2      | chr5  | + | 1.22E+08 | 1.22E+08 | 2128  |
| ENSG00000136.47687 | 304.1402 | -3.0186  | 3.30E-14 | 2.06E-13 | NT5M      | chr17 | + | 17206649 | 17250977 | 1617  |
| ENSG0000010        | 0.700845 | -0.87835 | 0.62047  | NA       | AC022596  | chr17 | - | 16750949 | 16756091 | 2555  |
| ENSG0000010.36308  | 0.715414 | -0.51558 | 0.77246  | NA       | GCNT6     | chr6  | + | 10633993 | 10647501 | 1176  |
| ENSG00000178.79015 | 35.87594 | 1.1313   | 0.000487 | 0.001267 | SARNP     | chr12 | - | 56146247 | 56211540 | 2242  |
| ENSG0000014.543757 | 1.043983 | 1.8928   | 0.10604  | 0.16967  | AC005863  | chr17 | - | 14670900 | 14683520 | 2998  |
| ENSG0000010        | 7.057862 | -4.3113  | 0.001881 | 0.004468 | AC074091  | chr2  | - | 27928653 | 27938599 | 2860  |
| ENSG000001343.5716 | 13.60749 | 4.6284   | 5.93E-53 | 1.47E-51 | GPR56     | chr16 | + | 57644564 | 57698944 | 4042  |
| ENSG0000012979.452 | 5171.91  | -0.79481 | 1.13E-11 | 5.99E-11 | IPO7      | chr11 | + | 9406169  | 9469673  | 6191  |
| ENSG000001403.6033 | 544.8541 | -0.43252 | 0.000792 | 0.001996 | PRR13     | chr12 | + | 53835389 | 53840429 | 1375  |
| ENSG000001743.5288 | 382.0295 | 0.95696  | 5.75E-09 | 2.49E-08 | TECPR1    | chr7  | - | 97843936 | 97881563 | 6564  |
| ENSG0000010        | 61.9482  | -7.4759  | 2.39E-11 | 1.23E-10 | MT1H      | chr16 | + | 56703726 | 56705041 | 697   |
| ENSG0000015.613272 | 4.499668 | 0.28728  | 0.7817   | 0.84343  | SLC06A1   | chr5  | - | 1.02E+08 | 1.02E+08 | 2689  |
| ENSG0000011.597063 | 1.387121 | 0.18027  | 0.90259  | 0.93263  | MT1A      | chr16 | + | 56672578 | 56673999 | 396   |
| ENSG00000117.9258  | 133.5969 | -2.8689  | 1.75E-19 | 1.44E-18 | C15orf59  | chr15 | - | 74032141 | 74045088 | 2204  |
| ENSG0000014.377662 | 7.46894  | -0.67849 | 0.51517  | 0.61808  | MT1M      | chr16 | + | 56666145 | 56667898 | 829   |
| ENSG00000119.89613 | 0.297015 | 5.1051   | 7.40E-06 | 2.42E-05 | CFI       | chr4  | - | 1.11E+08 | 1.11E+08 | 2366  |
| ENSG00000186.5075  | 0.715414 | 6.5264   | 2.93E-14 | 1.83E-13 | SAMD9     | chr7  | - | 92728829 | 92747336 | 6852  |
| ENSG0000013.693391 | 0.686276 | 2.0255   | 0.1277   | 0.19871  | RP11-401P | chr16 | - | 50639987 | 50647595 | 2469  |
| ENSG000001276.723  | 133.4519 | 1.0472   | 4.87E-10 | 2.30E-09 | CNEP1R1   | chr16 | + | 50058321 | 50070999 | 2965  |
| ENSG0000010.36308  | 4.110407 | -2.6044  | 0.090472 | 0.14842  | AL592528  | chr21 | - | 47247875 | 47256333 | 3466  |
| ENSG00000112.78009 | 1.326428 | 3.0089   | 0.001783 | 0.004254 | KRT81     | chr12 | - | 52679697 | 52685318 | 1929  |
| ENSG0000010        | 0.937167 | -1.2408  | 0.48662  | NA       | EXOC3L4   | chr14 | + | 1.04E+08 | 1.04E+08 | 2341  |
| ENSG0000010        | 0.594029 | -0.81444 | 0.64499  | NA       | KRTAP10-7 | chr21 | + | 46020497 | 46022091 | 1595  |

|            |          |          |          |           |           |            |       |   |          |          |       |
|------------|----------|----------|----------|-----------|-----------|------------|-------|---|----------|----------|-------|
| ENSG000001 | 0.705622 | 0        | 0.8807   | 0.6196    | NA        | IZUMO3     | chr9  | - | 24542950 | 24545944 | 1229  |
| ENSG000001 | 0        | 0.700845 | -0.87835 | 0.62047   | NA        | KRTAP10-2  | chr21 | - | 45970240 | 45971388 | 1149  |
| ENSG000001 | 25.82978 | 42.95012 | -0.7207  | 0.090431  | 0.14839   | ATP6AP1L   | chr5  | + | 81575281 | 81682796 | 3524  |
| ENSG000001 | 357.7755 | 863.1327 | -1.2694  | 1.91E-27  | 2.21E-26  | CCDC85C    | chr14 | - | 99977603 | 1E+08    | 5307  |
| ENSG000001 | 12.1078  | 16.67875 | -0.45688 | 0.41042   | 0.51523   | AC007000.  | chr7  | - | 76682095 | 76688757 | 939   |
| ENSG000001 | 45.09568 | 46.48986 | -0.04211 | 0.89498   | 0.92705   | AC004980.  | chr7  | + | 76178677 | 76257299 | 2667  |
| ENSG000001 | 1.628766 | 0.297015 | 1.6275   | 0.30182   | 0.40306   | CALML3-AS  | chr10 | - | 5556207  | 5568209  | 4531  |
| ENSG000001 | 0        | 0.357707 | -0.41864 | 0.81278   | NA        | OR52A4     | chr11 | - | 5141849  | 5145743  | 1014  |
| ENSG000001 | 0.653381 | 1.309443 | -0.73727 | 0.6388    | 0.72643   | AC013472.  | chr2  | - | 27207644 | 27237480 | 1966  |
| ENSG000001 | 14.93803 | 5.972588 | 1.2891   | 0.036651  | 0.067881  | C2CD4B     | chr15 | - | 62455734 | 62457482 | 1579  |
| ENSG000001 | 1.233984 | 0.357707 | 1.1886   | 0.48459   | NA        | AC004878.  | chr7  | + | 74936533 | 74944219 | 1369  |
| ENSG000001 | 1.390706 | 0.297015 | 1.2986   | 0.44429   | NA        | AC004878.  | chr7  | + | 74910311 | 74918380 | 1850  |
| ENSG000001 | 3.496407 | 0.297015 | 2.5931   | 0.077239  | 0.12965   | AC138783.  | chr7  | + | 74696066 | 74704116 | 1850  |
| ENSG000001 | 0        | 624.7051 | -10.53   | 2.94E-22  | 2.74E-21  | RGL3       | chr19 | - | 11495017 | 11530018 | 2542  |
| ENSG000001 | 2689.478 | 3293.497 | -0.29175 | 0.024505  | 0.047383  | NAP1L4     | chr11 | - | 2965667  | 3013607  | 2511  |
| ENSG000001 | 35.9234  | 35.45996 | 0.021278 | 0.95896   | 0.97521   | RP11-345J. | chr16 | - | 29538889 | 29606395 | 4221  |
| ENSG000001 | 25618.41 | 27415.02 | -0.09774 | 0.22361   | 0.31604   | TMSB4X     | chrX  | + | 12993227 | 12995346 | 1702  |
| ENSG000001 | 16.4725  | 36.76873 | -1.1411  | 0.013622  | 0.027847  | TMEM256    | chr17 | - | 7306294  | 7307456  | 511   |
| ENSG000001 | 1.08924  | 0        | 1.1858   | 0.50299   | NA        | C9orf92    | chr9  | - | 16203933 | 16276311 | 379   |
| ENSG000001 | 10.71628 | 9.767379 | 0.12815  | 0.83951   | 0.88739   | CTA-384D8  | chr22 | + | 51021455 | 51022306 | 578   |
| ENSG000001 | 1.814586 | 8.602011 | -1.9759  | 0.068071  | 0.11631   | CPT1B      | chr22 | - | 51007290 | 51017899 | 2933  |
| ENSG000001 | 27.62464 | 0.297015 | 5.5717   | 3.68E-07  | 1.37E-06  | RP11-497E  | chr14 | - | 85991477 | 85996332 | 1747  |
| ENSG000001 | 3.04001  | 4.522358 | -0.52567 | 0.63469   | 0.7232    | RP11-497F  | chr5  | + | 69803906 | 69808422 | 4335  |
| ENSG000001 | 49.52981 | 67.39717 | -0.44704 | 0.18166   | 0.26637   | SMN2       | chr5  | + | 69345350 | 69374349 | 1573  |
| ENSG000001 | 16.75343 | 16.4384  | 0.024908 | 0.95778   | 0.97453   | SERF1B     | chr5  | + | 69321074 | 69338940 | 1889  |
| ENSG000001 | 34.30499 | 43.04558 | -0.32379 | 0.32094   | 0.42374   | POM121B    | chr7  | + | 72707497 | 72716496 | 3067  |
| ENSG000001 | 0.705622 | 1.294874 | -0.71528 | 0.63274   | 0.72172   | DYNLL1P1   | chr14 | - | 81712638 | 81712907 | 270   |
| ENSG000001 | 1.306762 | 0        | 1.6479   | 0.35189   | NA        | AC006995.  | chr7  | - | 72518503 | 72525485 | 2024  |
| ENSG000001 | 4688.392 | 6543.531 | -0.48064 | 7.41E-06  | 2.42E-05  | HMG1       | chr21 | - | 40714241 | 40721573 | 4299  |
| ENSG000001 | 112.9325 | 67.35588 | 0.74186  | 0.005113  | 0.011376  | STAG3L1    | chr7  | + | 74988448 | 75024657 | 1818  |
| ENSG000001 | 1.431782 | 0.715414 | 0.68881  | 0.67774   | 0.7586    | AC005488.  | chr7  | + | 72440345 | 72442258 | 468   |
| ENSG000001 | 2.903826 | 4.723837 | -0.62026 | 0.55901   | 0.6578    | MUC19      | chr12 | + | 40787197 | 40964632 | 19569 |
| ENSG000001 | 61.26427 | 19.57363 | 1.6229   | 1.33E-05  | 4.19E-05  | DENND6B    | chr22 | - | 50750392 | 50765489 | 2450  |
| ENSG000001 | 92.63878 | 177.568  | -0.93754 | 1.43E-05  | 4.50E-05  | EIF3CL     | chr16 | - | 28390900 | 28415200 | 3096  |
| ENSG000001 | 2.229907 | 12.40083 | -2.3178  | 0.004086  | 0.009219  | RP4-610C1  | chr20 | - | 29513582 | 29521213 | 3328  |
| ENSG000001 | 0.36308  | 0.686276 | -0.48701 | 0.78478   | NA        | AF064858.  | chr21 | - | 40249215 | 40328392 | 3823  |
| ENSG000001 | 406.7624 | 746.7813 | -0.8757  | 8.54E-12  | 4.55E-11  | LCMT1      | chr16 | + | 25123050 | 25189552 | 1529  |
| ENSG000001 | 0        | 3.449237 | -3.0017  | 0.06801   | 0.11622   | W12-81516  | chr22 | + | 49288729 | 49294198 | 3426  |
| ENSG000001 | 3.434793 | 9.635457 | -1.4259  | 0.084153  | 0.13958   | MFSD2B     | chr2  | + | 24232951 | 24286191 | 2834  |
| ENSG000001 | 0        | 4.660728 | -3.7747  | 0.007744  | 0.016609  | VCX3B      | chrX  | + | 8432871  | 8434550  | 1171  |
| ENSG000001 | 168.5107 | 183.7256 | -0.12613 | 0.59237   | 0.68726   | CDPF1      | chr22 | - | 46639908 | 46646576 | 1875  |
| ENSG000001 | 5.818816 | 2.321872 | 1.2082   | 0.24379   | 0.33936   | CTD-2375C  | chr5  | + | 64711180 | 64712049 | 870   |
| ENSG000001 | 272.9275 | 175.3877 | 0.63755  | 0.000143  | 0.000398  | LIN52      | chr14 | + | 74551499 | 74667936 | 2774  |
| ENSG000001 | 0.705622 | 0        | 0.8807   | 0.6196    | NA        | RP11-706C  | chrX  | - | 3809479  | 3838787  | 2194  |
| ENSG000001 | 131.5324 | 235.3719 | -0.83597 | 5.17E-06  | 1.72E-05  | RP11-706C  | chrX  | - | 3735569  | 3761898  | 922   |
| ENSG000001 | 1.317927 | 0.357707 | 1.2439   | 0.46333   | NA        | ARSH       | chrX  | + | 2924654  | 2951612  | 1875  |
| ENSG000001 | 0        | 2.947455 | -3.0782  | 0.043573  | 0.078942  | AC076      | chr14 | + | 74077649 | 74086592 | 1004  |
| ENSG000001 | 147.6966 | 153.7232 | -0.05839 | 0.7851    | 0.84609   | SMIM11     | chr21 | + | 35747779 | 35780164 | 1857  |
| ENSG000001 | 4.802355 | 2.711133 | 0.78398  | 0.41408   | 0.519     | RP11-798L  | chr4  | - | 62285964 | 62293939 | 2079  |
| ENSG000001 | 182.2096 | 8.095397 | 4.423    | 1.12E-34  | 1.68E-33  | DPF3       | chr14 | - | 73086004 | 73360809 | 3755  |
| ENSG000001 | 2.261609 | 0        | 2.6509   | 0.097945  | 0.15859   | MANSC4     | chr12 | - | 27915671 | 27924209 | 1023  |
| ENSG000001 | 0        | 0.357707 | -0.41864 | 0.81278   | NA        | ADARB2-AS  | chr10 | + | 1568832  | 1599179  | 637   |
| ENSG000001 | 16.04862 | 25.33017 | -0.65688 | 0.19349   | 0.28097   | CYP2D7P1   | chr22 | - | 42536214 | 42540576 | 1738  |
| ENSG000001 | 3.682226 | 9.450963 | -1.2924  | 0.12552   | 0.19604   | LINC00634  | chr22 | + | 42348169 | 42354937 | 1510  |
| ENSG000001 | 69.1623  | 40.45255 | 0.76969  | 0.008171  | 0.017438  | LYRM5      | chr12 | + | 25348150 | 25362579 | 1138  |
| ENSG000001 | 33.22692 | 43.61222 | -0.38703 | 0.41675   | 0.52187   | C17orf107  | chr17 | + | 4802713  | 4806227  | 3199  |
| ENSG000001 | 1378.134 | 1971.418 | -0.51616 | 7.36E-07  | 2.66E-06  | ITSN1      | chr21 | + | 35014706 | 35272165 | 17015 |
| ENSG000001 | 3022.913 | 144.0335 | 4.3791   | 7.65E-187 | 1.41E-184 | ITPR1PL2   | chr16 | + | 19125254 | 19132946 | 7693  |
| ENSG000001 | 0.632843 | 1.591889 | -1.0299  | 0.48346   | 0.58754   | AL359878.  | chr10 | - | 1017097  | 1034281  | 1875  |
| ENSG000001 | 1.576526 | 533.1925 | -8.0493  | 1.46E-36  | 2.32E-35  | DENND1C    | chr19 | - | 6467218  | 6482568  | 2933  |
| ENSG000001 | 0.36308  | 0        | 0.4146   | 0.81455   | NA        | PP13004    | chr7  | + | 36118694 | 36125346 | 1497  |
| ENSG000001 | 178.2171 | 77.41873 | 1.1975   | 1.61E-08  | 6.71E-08  | RP11-1212  | chr16 | - | 18428257 | 18488396 | 6405  |
| ENSG000001 | 0        | 2.056411 | -2.4909  | 0.12616   | 0.19678   | CRLF2      | chrX  | - | 1314890  | 1331616  | 1035  |
| ENSG000001 | 311.712  | 164.3104 | 0.9181   | 5.56E-07  | 2.03E-06  | CRYZL1     | chr21 | - | 34961647 | 35016232 | 2558  |
| ENSG000001 | 180.4085 | 1.713273 | 6.542    | 5.08E-26  | 5.53E-25  | RP9P       | chr7  | - | 32956427 | 32982788 | 1303  |

|            |          |          |          |          |          |           |       |   |          |          |      |
|------------|----------|----------|----------|----------|----------|-----------|-------|---|----------|----------|------|
| ENSG000001 | 594.0852 | 475.9624 | 0.31911  | 0.11606  | 0.18355  | C5orf51   | chr5  | + | 41904290 | 41921738 | 5241 |
| ENSG000001 | 17.57389 | 27.25063 | -0.62171 | 0.19923  | 0.28765  | CATSPER2P | chr15 | - | 44019116 | 44039292 | 1653 |
| ENSG000001 | 0.36308  | 0        | 0.4146   | 0.81455  | NA       | ARRDC5    | chr19 | - | 4890449  | 4902879  | 1638 |
| ENSG000001 | 6.753939 | 10.48279 | -0.62841 | 0.34845  | 0.45264  | AC005594. | chr19 | + | 4679294  | 4685960  | 3071 |
| ENSG000001 | 10.07146 | 5.31545  | 0.89413  | 0.24251  | 0.3378   | LOH12CR2  | chr12 | - | 12508342 | 12510001 | 1538 |
| ENSG000001 | 2.177666 | 1.012429 | 0.88875  | 0.54294  | 0.6435   | RP11-333E | chr4  | - | 40044537 | 40058819 | 1613 |
| ENSG000001 | 1022.009 | 28.28978 | 5.1312   | 1.16E-70 | 4.22E-69 | CYS1      | chr2  | - | 10196907 | 10221071 | 2738 |
| ENSG000001 | 112.7175 | 205.9108 | -0.86582 | 0.000323 | 0.000862 | PPAPDC2   | chr9  | + | 4662298  | 4665256  | 2959 |
| ENSG000001 | 21.35962 | 30.36955 | -0.50576 | 0.26639  | 0.36512  | RP1-59D14 | chr17 | - | 2308856  | 2319379  | 2644 |
| ENSG000001 | 0        | 1.294874 | -1.8547  | 0.27869  | NA       | TPTE2P6   | chr13 | + | 25141011 | 25171814 | 1710 |
| ENSG000001 | 0.632843 | 0        | 0.81931  | 0.64303  | NA       | AC024132. | chr4  | - | 27209127 | 27220026 | 2509 |
| ENSG000001 | 1.431782 | 45.70985 | -4.8345  | 3.27E-10 | 1.56E-09 | C16orf96  | chr16 | + | 4606491  | 4650715  | 3823 |
| ENSG000001 | 0.290301 | 0        | 0.4146   | 0.81455  | NA       | GMNC      | chr3  | - | 1.91E+08 | 1.91E+08 | 3422 |
| ENSG000001 | 0        | 0.951736 | -1.2555  | 0.48145  | NA       | LINC00487 | chr2  | - | 6868309  | 6910442  | 2131 |
| ENSG000001 | 2.978396 | 23.76172 | -2.8476  | 0.000239 | 0.000647 | TTC23L    | chr5  | + | 34838938 | 34899561 | 3410 |
| ENSG000001 | 0.290301 | 1.66715  | -1.5481  | 0.35178  | 0.456    | CLEC6A    | chr12 | + | 8608522  | 8630926  | 1682 |
| ENSG000001 | 3.412463 | 4.689867 | -0.41163 | 0.72152  | 0.79399  | RFPL3S    | chr22 | - | 32755893 | 32778039 | 1295 |
| ENSG000001 | 0        | 11.7688  | -5.134   | 5.21E-05 | 0.000154 | C22orf42  | chr22 | - | 32544993 | 32555309 | 1909 |
| ENSG000001 | 0.290301 | 0        | 0.4146   | 0.81455  | NA       | LRRC72    | chr7  | + | 16566505 | 16621193 | 1000 |
| ENSG000001 | 0.290301 | 0.654722 | -0.51764 | 0.76892  | NA       | C1QTNF9B- | chr13 | + | 24463028 | 24471402 | 805  |
| ENSG000001 | 0.36308  | 0.640152 | -0.51156 | 0.77091  | NA       | C1QTNF9B  | chr13 | - | 24465238 | 24476794 | 1111 |
| ENSG000001 | 0        | 0.594029 | -0.81444 | 0.64499  | NA       | KRTAP5-6  | chr11 | + | 1718425  | 1718985  | 561  |
| ENSG000001 | 0        | 0.700845 | -0.87835 | 0.62047  | NA       | KRTAP5-1  | chr11 | - | 1605572  | 1606513  | 942  |
| ENSG000001 | 1.681007 | 2.010288 | -0.22523 | 0.85551  | 0.89838  | RPS3AP47  | chr15 | - | 43407897 | 43408691 | 792  |
| ENSG000001 | 53.18825 | 118.8951 | -1.1556  | 2.88E-06 | 9.83E-06 | AC130352. | chr8  | + | 12294626 | 12424423 | 2501 |
| ENSG000001 | 1.016461 | 3.273608 | -1.38    | 0.32204  | 0.42494  | FAM90A2P  | chr8  | - | 12029711 | 12036084 | 2423 |
| ENSG000001 | 0        | 1.294874 | -1.8547  | 0.27869  | NA       | DEFB134   | chr8  | - | 11850692 | 11853821 | 1059 |
| ENSG000001 | 99.01603 | 50.449   | 0.96803  | 8.37E-05 | 0.000241 | C1RL-AS1  | chr12 | + | 7260648  | 7275097  | 5272 |
| ENSG000001 | 0.975385 | 139.1147 | -6.7625  | 6.76E-19 | 5.39E-18 | RP11-473A | chr16 | + | 3082482  | 3089134  | 3061 |
| ENSG000001 | 0        | 0.891044 | -1.0625  | 0.54819  | NA       | OR7E136P  | chr7  | - | 6906289  | 6907303  | 1015 |
| ENSG000001 | 0.653381 | 0.594029 | 0.059135 | 0.97278  | NA       | RP11-3B12 | chr7  | - | 1.25E+08 | 1.25E+08 | 574  |
| ENSG000001 | 0.36308  | 26.59033 | -5.3127  | 1.01E-05 | 3.25E-05 | BHLHA9    | chr17 | + | 1173853  | 1174754  | 902  |
| ENSG000001 | 1031.41  | 523.631  | 0.97461  | 1.62E-08 | 6.78E-08 | ZNF316    | chr7  | + | 6676953  | 6694242  | 3015 |
| ENSG000001 | 12.9787  | 17.84733 | -0.44954 | 0.46528  | 0.57005  | SRRM2-AS1 | chr16 | - | 2787077  | 2802601  | 3523 |
| ENSG000001 | 49.95704 | 29.63306 | 0.75184  | 0.052214 | 0.092378 | PDPK2     | chr16 | - | 2666122  | 2693297  | 2387 |
| ENSG000001 | 0.342542 | 1.606458 | -1.4884  | 0.37005  | 0.4745   | ONECUT3   | chr19 | + | 1752372  | 1780987  | 8318 |
| ENSG000001 | 0.995923 | 5.384264 | -2.1591  | 0.059908 | 0.10432  | OLIG2     | chr21 | + | 34398153 | 34401504 | 3262 |
| ENSG000001 | 0        | 0.951736 | -1.2555  | 0.48145  | NA       | C21orf62  | chr21 | - | 34162985 | 34186053 | 3889 |
| ENSG000001 | 2.157128 | 1.903472 | 0.15902  | 0.90277  | 0.93274  | C21orf49  | chr21 | + | 34144411 | 34266043 | 2453 |
| ENSG000001 | 1740.144 | 3240.564 | -0.89644 | 1.51E-20 | 1.31E-19 | RNPS1     | chr16 | - | 2303117  | 2318413  | 3337 |
| ENSG000001 | 2.624689 | 5.62945  | -1.0235  | 0.25285  | 0.34979  | HSP90AB2I | chr4  | + | 13335038 | 13340281 | 2176 |
| ENSG000001 | 0.36308  | 0.343138 | -0.0021  | 0.99905  | NA       | HSP90AA5I | chr3  | + | 1.84E+08 | 1.84E+08 | 2192 |
| ENSG000001 | 5.124359 | 36.01935 | -2.7083  | 1.20E-05 | 3.82E-05 | RP11-689P | chr4  | + | 8483997  | 8514337  | 3204 |
| ENSG000001 | 0.36308  | 1.073121 | -0.87448 | 0.62195  | NA       | AC074389. | chr7  | - | 1732446  | 1733961  | 1423 |
| ENSG000001 | 12.28245 | 14.32129 | -0.22752 | 0.67583  | 0.75727  | RP11-404K | chr5  | - | 7299887  | 7306705  | 2465 |
| ENSG000001 | 3119.021 | 888.4612 | 1.8085   | 2.38E-45 | 4.79E-44 | NYNRIN    | chr14 | + | 24867992 | 24888494 | 7857 |
| ENSG000001 | 246.3281 | 416.555  | -0.75617 | 5.72E-08 | 2.28E-07 | DNAJC19   | chr3  | - | 1.81E+08 | 1.81E+08 | 1630 |
| ENSG000001 | 2.085163 | 2.514486 | -0.26303 | 0.8371   | 0.88571  | IFITM5    | chr11 | - | 298200   | 299526   | 736  |
| ENSG000001 | 2.976604 | 0        | 2.7909   | 0.093459 | 0.15263  | SMIM21    | chr18 | - | 73121431 | 73139658 | 2554 |
| ENSG000001 | 5.799092 | 1.073121 | 2.1264   | 0.08378  | 0.13903  | CTA-373H7 | chr22 | - | 27063656 | 27068617 | 2613 |
| ENSG000001 | 2.407167 | 1.949596 | 0.24097  | 0.83623  | 0.88507  | AC005841. | chr12 | - | 2958397  | 2966213  | 939  |
| ENSG000001 | 147.956  | 72.83891 | 1.0234   | 1.01E-05 | 3.25E-05 | DOK6      | chr18 | + | 67068291 | 67516323 | 8890 |
| ENSG000001 | 2136.118 | 2760.049 | -0.36846 | 0.060506 | 0.10514  | HN1L      | chr16 | + | 1728257  | 1752281  | 3718 |
| ENSG000001 | 3.382552 | 1.903472 | 0.70054  | 0.55102  | 0.65071  | IGLL3P    | chr22 | + | 25714223 | 25716047 | 434  |
| ENSG000001 | 0        | 1.606458 | -1.9287  | 0.27074  | NA       | TMEM211   | chr22 | - | 25331077 | 25342662 | 866  |
| ENSG000001 | 0        | 0.343138 | -0.41864 | 0.81278  | NA       | SERPINB4  | chr18 | - | 61304493 | 61311532 | 1749 |
| ENSG000001 | 0.580602 | 0        | 0.8036   | 0.6494   | NA       | SERPINB5  | chr18 | + | 61143994 | 61172318 | 2783 |
| ENSG000001 | 0.290301 | 10.54107 | -4.2373  | 0.000474 | 0.001234 | ZDHHC11B  | chr5  | - | 710475   | 767067   | 2733 |
| ENSG000001 | 1.233984 | 8.608459 | -2.5051  | 0.012128 | 0.025054 | AC010507. | chr19 | - | 197124   | 205076   | 1478 |
| ENSG000001 | 14.60747 | 18.86467 | -0.36505 | 0.46434  | 0.56935  | EGFEM1P   | chr3  | + | 1.68E+08 | 1.69E+08 | 2327 |
| ENSG000001 | 16.78334 | 2.886762 | 2.4      | 0.001192 | 0.002921 | GOLGA8O   | chr15 | - | 32737307 | 32747835 | 1997 |
| ENSG000001 | 32.15307 | 23.75285 | 0.41968  | 0.38753  | 0.49163  | CTD-2008L | chr18 | - | 53670844 | 53858493 | 2558 |
| ENSG000001 | 6.193061 | 25.18442 | -1.9566  | 0.000853 | 0.002142 | TMEM191C  | chr22 | + | 21820712 | 21825558 | 2593 |
| ENSG000001 | 0        | 2.725702 | -2.8801  | 0.068833 | 0.11738  | RP11-400K | chr8  | + | 54449620 | 54452860 | 2156 |
| ENSG000001 | 0.290301 | 2.696564 | -2.3042  | 0.11706  | 0.18485  | RP11-106A | chr9  | + | 6639139  | 6639604  | 466  |

|            |          |          |          |          |          |           |       |   |          |          |       |
|------------|----------|----------|----------|----------|----------|-----------|-------|---|----------|----------|-------|
| ENSG000001 | 302.7393 | 226.5075 | 0.41682  | 0.041977 | 0.076453 | HERC2P9   | chr15 | + | 28834638 | 28930410 | 5187  |
| ENSG000001 | 11.23348 | 16.28949 | -0.50851 | 0.3793   | 0.48339  | GYG2P1    | chrY  | - | 14475147 | 14532255 | 944   |
| ENSG000001 | 1.016461 | 2.338857 | -1.0164  | 0.44151  | 0.54729  | Z69890.1  | chr16 | + | 281133   | 281471   | 339   |
| ENSG000001 | 0.72616  | 0.297015 | 0.51367  | 0.77334  | NA       | HBA1      | chr16 | + | 226679   | 227521   | 674   |
| ENSG000001 | 1.286224 | 9.519777 | -2.6225  | 0.009004 | 0.019086 | AC023490  | chr22 | + | 20378814 | 20380440 | 788   |
| ENSG000001 | 0        | 0.297015 | -0.41864 | 0.81278  | NA       | HBZP1     | chr16 | + | 213121   | 215155   | 429   |
| ENSG000001 | 0.995923 | 1.66715  | -0.59712 | 0.67362  | 0.75563  | TCEB3B    | chr18 | - | 44558943 | 44561988 | 3046  |
| ENSG000001 | 413.0656 | 121.8183 | 1.7553   | 1.14E-24 | 1.18E-23 | ATP10A    | chr15 | - | 25922420 | 26110317 | 6766  |
| ENSG000001 | 13.79557 | 3.353702 | 1.9296   | 0.020237 | 0.039882 | AP000525  | chr22 | - | 16147979 | 16193004 | 4136  |
| ENSG000001 | 0.685084 | 0        | 0.85004  | 0.63064  | NA       | ANKUB1    | chr3  | - | 1.49E+08 | 1.5E+08  | 2471  |
| ENSG000001 | 3.620613 | 11.82379 | -1.6355  | 0.024334 | 0.047078 | HNRNPA1P  | chr8  | - | 83203859 | 83204614 | 756   |
| ENSG000001 | 0        | 0.357707 | -0.41864 | 0.81278  | NA       | CTD-2308A | chr20 | - | 36916733 | 36954938 | 806   |
| ENSG000001 | 1.608228 | 0.98329  | 0.55037  | 0.71326  | 0.78728  | AP000525  | chr22 | - | 16157306 | 16157938 | 633   |
| ENSG000001 | 0.36308  | 0        | 0.4146   | 0.81455  | NA       | PRR23A    | chr3  | - | 1.39E+08 | 1.39E+08 | 2307  |
| ENSG000001 | 0.870904 | 91.12646 | -6.1843  | 1.44E-15 | 9.76E-15 | C3orf72   | chr3  | + | 1.39E+08 | 1.39E+08 | 3538  |
| ENSG000001 | 15.40299 | 32.49243 | -1.0426  | 0.061545 | 0.10667  | HCP5      | chr6  | + | 31368479 | 31445283 | 2658  |
| ENSG000001 | 2.976604 | 11.14396 | -1.7798  | 0.042235 | 0.076891 | HLA-H     | chr6  | + | 29855350 | 29858259 | 1366  |
| ENSG000001 | 3.40309  | 6.260738 | -0.8434  | 0.37384  | 0.47821  | HCG27     | chr6  | + | 31165537 | 31171745 | 1720  |
| ENSG000001 | 0.290301 | 0        | 0.4146   | 0.81455  | NA       | RP11-9301 | chr5  | - | 98858015 | 98861166 | 3152  |
| ENSG000001 | 2.282147 | 2.903748 | -0.30925 | 0.793    | 0.85287  | COL6A6    | chr3  | + | 1.3E+08  | 1.3E+08  | 9581  |
| ENSG000001 | 25.40769 | 51.99309 | -1.0212  | 0.004182 | 0.009416 | H1FX-AS1  | chr3  | + | 1.29E+08 | 1.29E+08 | 2600  |
| ENSG000001 | 359.8628 | 944.3036 | -1.3875  | 5.91E-11 | 2.98E-10 | RAB12     | chr18 | + | 8609443  | 8639379  | 2137  |
| ENSG000001 | 367.9522 | 304.2683 | 0.27179  | 0.13056  | 0.20237  | TMEM200C  | chr18 | - | 5889419  | 5895954  | 3290  |
| ENSG000001 | 0.943682 | 1.043983 | -0.07795 | 0.96042  | 0.97641  | PPIAP30   | chr10 | - | 15196801 | 15197319 | 519   |
| ENSG000001 | 1252.39  | 1256.55  | -0.00436 | 0.97257  | 0.98483  | HLA-A     | chr6  | + | 29909037 | 29913661 | 1868  |
| ENSG000001 | 492.6982 | 611.5739 | -0.31126 | 0.018297 | 0.03642  | PTPLB     | chr3  | + | 1.23E+08 | 1.23E+08 | 4257  |
| ENSG000001 | 123.5349 | 8.59389  | 3.8031   | 7.50E-25 | 7.79E-24 | WDR52     | chr3  | - | 1.13E+08 | 1.13E+08 | 10259 |
| ENSG000001 | 0.705622 | 2.962024 | -1.7447  | 0.19557  | 0.28351  | CD200R1L  | chr3  | - | 1.13E+08 | 1.13E+08 | 1597  |
| ENSG000001 | 70.2517  | 8.282306 | 3.0429   | 9.54E-13 | 5.43E-12 | RP11-553A | chr3  | - | 1.11E+08 | 1.11E+08 | 856   |
| ENSG000001 | 32.22243 | 89.96854 | -1.4724  | 6.21E-07 | 2.26E-06 | LNP1      | chr3  | + | 1E+08    | 1E+08    | 2210  |
| ENSG000001 | 827.4856 | 158.851  | 2.3603   | 4.68E-12 | 2.53E-11 | VGLL3     | chr3  | - | 86987119 | 87040269 | 10400 |
| ENSG000001 | 0        | 10.28131 | -4.9406  | 0.000121 | 0.00034  | PRSS50    | chr3  | - | 46753605 | 46854064 | 2958  |
| ENSG000001 | 0        | 10542.88 | -14.261  | 1.34E-43 | 2.59E-42 | TRIM71    | chr3  | + | 32859510 | 32938323 | 7690  |
| ENSG000001 | 13.15417 | 4.305438 | 1.5312   | 0.03952  | 0.072623 | ZCWPW2    | chr3  | + | 28390637 | 28579613 | 1716  |
| ENSG000001 | 1485.274 | 803.8337 | 0.88483  | 3.19E-12 | 1.75E-11 | ANKRD28   | chr3  | - | 15708743 | 15901278 | 6564  |
| ENSG000001 | 85.73089 | 22.32115 | 1.9218   | 8.63E-10 | 4.01E-09 | COLQ      | chr3  | - | 15491640 | 15563258 | 3147  |
| ENSG000001 | 145.0606 | 127.1141 | 0.19171  | 0.35815  | 0.46249  | METTL6    | chr3  | - | 15422782 | 15482073 | 4020  |
| ENSG000001 | 30.1662  | 38.34115 | -0.34873 | 0.35092  | 0.45531  | AC022007  | chr3  | - | 10048102 | 10052893 | 1897  |
| ENSG000001 | 257.0873 | 266.7651 | -0.05385 | 0.7987   | 0.85745  | SETD5-AS1 | chr3  | - | 9391373  | 9440263  | 3253  |
| ENSG000001 | 0.870904 | 27.25949 | -4.4857  | 3.49E-07 | 1.30E-06 | XKR4      | chr8  | + | 56014949 | 56438714 | 3981  |
| ENSG000001 | 29.84518 | 219.6828 | -2.8607  | 4.77E-29 | 5.85E-28 | GPX3      | chr5  | + | 1.5E+08  | 1.5E+08  | 1636  |
| ENSG000001 | 23.78749 | 1.759397 | 3.6211   | 4.03E-06 | 1.35E-05 | DIO2      | chr14 | - | 80663873 | 80854100 | 6367  |
| ENSG000001 | 398.6953 | 809.8412 | -1.0187  | 3.48E-07 | 1.30E-06 | C11orf31  | chr11 | + | 57508825 | 57510986 | 1454  |
| ENSG000001 | 22.05245 | 21.84696 | 0.013437 | 0.9806   | 0.98926  | GNRHR2    | chr1  | - | 1.46E+08 | 1.46E+08 | 1599  |
| ENSG000001 | 4.480351 | 0.357707 | 2.9263   | 0.038446 | 0.070868 | DIO1      | chr1  | + | 54356912 | 54376759 | 1861  |
| ENSG000001 | 18.51838 | 10.50307 | 0.77695  | 0.1836   | 0.26877  | AKR7L     | chr1  | - | 19592476 | 19600688 | 2115  |
| ENSG000001 | 844.0537 | 549.9063 | 0.61792  | 6.29E-06 | 2.07E-05 | STK38L    | chr12 | + | 27396901 | 27478892 | 5068  |
| ENSG000001 | 709.3209 | 1313.196 | -0.8877  | 1.80E-14 | 1.14E-13 | SACM1L    | chr3  | + | 45730548 | 45786916 | 4661  |
| ENSG000001 | 1444.896 | 1586.378 | -0.13428 | 0.39392  | 0.49833  | TSN       | chr2  | + | 1.22E+08 | 1.23E+08 | 3420  |
| ENSG000001 | 278.0687 | 199.3781 | 0.4775   | 0.074112 | 0.12521  | SLC48A1   | chr12 | + | 48147699 | 48176536 | 3010  |
| ENSG000001 | 0.975385 | 0.297015 | 0.91901  | 0.59525  | NA       | IGLV5-52  | chr22 | + | 22673082 | 22673581 | 379   |
| ENSG000001 | 0        | 0.297015 | -0.41864 | 0.81278  | NA       | IGLV1-50  | chr22 | + | 22681658 | 22682172 | 405   |
| ENSG000001 | 0        | 1.029414 | -1.1526  | 0.51496  | NA       | TRGV9     | chr7  | - | 38356618 | 38358462 | 1735  |
| ENSG000001 | 0        | 0.700845 | -0.87835 | 0.62047  | NA       | TRGV5     | chr7  | - | 38388956 | 38389623 | 552   |
| ENSG000001 | 0        | 1.248751 | -1.5848  | 0.37202  | NA       | TRGV4     | chr7  | - | 38393316 | 38394118 | 688   |
| ENSG000001 | 0        | 1.280305 | -1.6305  | 0.35731  | NA       | TRGV3     | chr7  | - | 38398113 | 38398763 | 537   |
| ENSG000001 | 0        | 0.640152 | -0.82869 | 0.63935  | NA       | TRGV1     | chr7  | - | 38407187 | 38407770 | 465   |
| ENSG000001 | 0.705622 | 0        | 0.8807   | 0.6196   | NA       | TRBV7-3   | chr7  | - | 1.42E+08 | 1.42E+08 | 397   |
| ENSG000001 | 1.08924  | 0        | 1.1858   | 0.50299  | NA       | TRBV9     | chr7  | - | 1.42E+08 | 1.42E+08 | 390   |
| ENSG000001 | 0.290301 | 0        | 0.4146   | 0.81455  | NA       | TRBV10-1  | chr7  | - | 1.42E+08 | 1.42E+08 | 412   |
| ENSG000001 | 0        | 0.297015 | -0.41864 | 0.81278  | NA       | TRBV6-5   | chr7  | - | 1.42E+08 | 1.42E+08 | 410   |
| ENSG000001 | 0        | 0.297015 | -0.41864 | 0.81278  | NA       | TRBV27    | chr7  | + | 1.42E+08 | 1.42E+08 | 387   |
| ENSG000001 | 0        | 0.343138 | -0.41864 | 0.81278  | NA       | TRBJ2-6   | chr7  | + | 1.42E+08 | 1.42E+08 | 53    |
| ENSG000001 | 4.387035 | 67.95085 | -3.8167  | 6.97E-13 | 4.00E-12 | TRBC2     | chr7  | + | 1.42E+08 | 1.43E+08 | 758   |
| ENSG000001 | 0        | 0.357707 | -0.41864 | 0.81278  | NA       | TRAV4     | chr14 | + | 22204434 | 22205264 | 395   |

|            |          |          |          |          |          |           |       |   |          |          |      |
|------------|----------|----------|----------|----------|----------|-----------|-------|---|----------|----------|------|
| ENSG000001 | 0        | 0.357707 | -0.41864 | 0.81278  | NA       | TRAV5     | chr14 | + | 22217462 | 22217989 | 352  |
| ENSG000001 | 0        | 0.357707 | -0.41864 | 0.81278  | NA       | TRAV6     | chr14 | + | 22236729 | 22237320 | 404  |
| ENSG000001 | 0        | 0.357707 | -0.41864 | 0.81278  | NA       | TRAV8-2   | chr14 | + | 22314719 | 22315403 | 566  |
| ENSG000001 | 2.261609 | 1.888903 | 0.21211  | 0.85872  | 0.90083  | TRAV8-3   | chr14 | + | 22320735 | 22321183 | 341  |
| ENSG000001 | 188.4641 | 9.560195 | 4.2586   | 4.27E-37 | 6.94E-36 | TRAV13-1  | chr14 | + | 22337020 | 22337546 | 360  |
| ENSG000001 | 0.36308  | 0        | 0.4146   | 0.81455  | NA       | TRAV12-2  | chr14 | + | 22356037 | 22356682 | 445  |
| ENSG000001 | 7.926309 | 0        | 4.5912   | 0.000408 | 0.001072 | TRAV8-4   | chr14 | + | 22362613 | 22363210 | 469  |
| ENSG000001 | 0.290301 | 0        | 0.4146   | 0.81455  | NA       | TRAJ44    | chr14 | + | 22963806 | 22963868 | 63   |
| ENSG000001 | 0.653381 | 0        | 0.82678  | 0.64037  | NA       | TRAJ43    | chr14 | + | 22964896 | 22964949 | 54   |
| ENSG000001 | 0.995923 | 0        | 1.4959   | 0.39264  | NA       | TRAJ41    | chr14 | + | 22966642 | 22966703 | 62   |
| ENSG000001 | 0.290301 | 0        | 0.4146   | 0.81455  | NA       | TRAJ40    | chr14 | + | 22968672 | 22968732 | 61   |
| ENSG000001 | 0        | 0.297015 | -0.41864 | 0.81278  | NA       | TRAJ39    | chr14 | + | 22970585 | 22970647 | 63   |
| ENSG000001 | 2.323223 | 0        | 2.4326   | 0.15328  | 0.23122  | TRAJ38    | chr14 | + | 22971215 | 22971276 | 62   |
| ENSG000001 | 0.705622 | 0        | 0.8807   | 0.6196   | NA       | TRAJ37    | chr14 | + | 22972735 | 22972797 | 63   |
| ENSG000001 | 0.72616  | 0.343138 | 0.52026  | 0.77047  | NA       | TRAJ36    | chr14 | + | 22974096 | 22974155 | 60   |
| ENSG000001 | 1.846289 | 0        | 2.122    | 0.22126  | NA       | TRAJ35    | chr14 | + | 22975629 | 22975687 | 59   |
| ENSG000001 | 0.653381 | 0        | 0.82678  | 0.64037  | NA       | TRAJ34    | chr14 | + | 22976651 | 22976708 | 58   |
| ENSG000001 | 1.08924  | 0        | 1.1858   | 0.50299  | NA       | TRAJ32    | chr14 | + | 22978325 | 22978390 | 66   |
| ENSG000001 | 0.975385 | 0        | 1.2767   | 0.47406  | NA       | TRAJ30    | chr14 | + | 22981834 | 22981890 | 57   |
| ENSG000001 | 0.36308  | 0        | 0.4146   | 0.81455  | NA       | TRAJ29    | chr14 | + | 22982921 | 22982980 | 60   |
| ENSG000001 | 0.36308  | 0        | 0.4146   | 0.81455  | NA       | TRAJ28    | chr14 | + | 22984601 | 22984666 | 66   |
| ENSG000001 | 0.653381 | 0        | 0.82678  | 0.64037  | NA       | TRAJ27    | chr14 | + | 22985251 | 22985309 | 59   |
| ENSG000001 | 0.580602 | 0        | 0.8036   | 0.6494   | NA       | TRAJ26    | chr14 | + | 22987424 | 22987483 | 60   |
| ENSG000001 | 0.290301 | 0.357707 | -0.00203 | 0.99908  | NA       | TRAJ25    | chr14 | + | 22987790 | 22987849 | 60   |
| ENSG000001 | 0.290301 | 0        | 0.4146   | 0.81455  | NA       | TRAJ23    | chr14 | + | 22989394 | 22989456 | 63   |
| ENSG000001 | 0.290301 | 0        | 0.4146   | 0.81455  | NA       | TRAJ21    | chr14 | + | 22992573 | 22992627 | 55   |
| ENSG000001 | 0.342542 | 0        | 0.4146   | 0.81455  | NA       | TRAJ20    | chr14 | + | 22993296 | 22993352 | 57   |
| ENSG000001 | 0.632843 | 0        | 0.81931  | 0.64303  | NA       | TRAJ19    | chr14 | + | 22994233 | 22994292 | 60   |
| ENSG000001 | 0.975385 | 0        | 1.2767   | 0.47406  | NA       | TRAJ18    | chr14 | + | 22994620 | 22994685 | 66   |
| ENSG000001 | 0.36308  | 0        | 0.4146   | 0.81455  | NA       | TRAJ17    | chr14 | + | 22995812 | 22995874 | 63   |
| ENSG000001 | 0.685084 | 0        | 0.85004  | 0.63064  | NA       | TRAJ16    | chr14 | + | 22997487 | 22997546 | 60   |
| ENSG000001 | 0.685084 | 0        | 0.85004  | 0.63064  | NA       | TRAJ15    | chr14 | + | 22998580 | 22998641 | 62   |
| ENSG000001 | 0.72616  | 0        | 0.85004  | 0.63064  | NA       | TRAJ13    | chr14 | + | 23000026 | 23000088 | 63   |
| ENSG000001 | 0.632843 | 0        | 0.81931  | 0.64303  | NA       | TRAJ12    | chr14 | + | 23000889 | 23000948 | 60   |
| ENSG000001 | 0.870904 | 0        | 1.046    | 0.5544   | NA       | TRAJ11    | chr14 | + | 23001452 | 23001511 | 60   |
| ENSG000001 | 0.290301 | 0        | 0.4146   | 0.81455  | NA       | TRAJ10    | chr14 | + | 23002445 | 23002508 | 64   |
| ENSG000001 | 0.36308  | 0        | 0.4146   | 0.81455  | NA       | TRAJ9     | chr14 | + | 23004502 | 23004562 | 61   |
| ENSG000001 | 1.503747 | 0        | 1.8221   | 0.30126  | NA       | TRAJ8     | chr14 | + | 23005092 | 23005151 | 60   |
| ENSG000001 | 2.064625 | 0        | 2.4902   | 0.12625  | 0.19686  | TRAJ7     | chr14 | + | 23006567 | 23006625 | 59   |
| ENSG000001 | 0.36308  | 0.357707 | -0.00212 | 0.99905  | NA       | TRAJ6     | chr14 | + | 23008016 | 23008077 | 62   |
| ENSG000001 | 0        | 0.715414 | -0.84936 | 0.6309   | NA       | TRAJ5     | chr14 | + | 23009190 | 23009249 | 60   |
| ENSG000001 | 1.048164 | 0        | 1.348    | 0.44949  | NA       | TRAJ4     | chr14 | + | 23011142 | 23011204 | 63   |
| ENSG000001 | 0.36308  | 0        | 0.4146   | 0.81455  | NA       | TRAJ1     | chr14 | + | 23013981 | 23014042 | 62   |
| ENSG000001 | 5.238214 | 20.46535 | -1.8555  | 0.021577 | 0.042261 | PRR22     | chr19 | - | 5782971  | 5784776  | 1640 |
| ENSG000001 | 6.607568 | 5.644019 | 0.2343   | 0.77305  | 0.83661  | TAS2R19   | chr12 | - | 11174218 | 11175219 | 1002 |
| ENSG000001 | 4.148974 | 2.38498  | 0.75188  | 0.46493  | 0.5697   | TAS2R15   | chr12 | - | 11117024 | 11117951 | 928  |
| ENSG000001 | 0.36308  | 0.98329  | -0.93796 | 0.58624  | NA       | TAS2R50   | chr12 | - | 11138512 | 11139511 | 1000 |
| ENSG000001 | 16.30722 | 9.86849  | 0.70458  | 0.29746  | 0.39939  | TAS2R14   | chr12 | - | 11090005 | 11324172 | 1858 |
| ENSG000001 | 1.555988 | 0.594029 | 0.9472   | 0.56119  | 0.65969  | TAS2R13   | chr12 | - | 11060525 | 11062161 | 1637 |
| ENSG000001 | 13.39402 | 26.05445 | -0.95151 | 0.049527 | 0.088256 | RP11-592N | chr15 | - | 71633466 | 71634086 | 580  |
| ENSG000001 | 19.54243 | 11.58908 | 0.73599  | 0.262    | 0.36017  | AL161915. | chr1  | + | 54569968 | 54571750 | 1783 |
| ENSG000001 | 9.637227 | 6.407972 | 0.57     | 0.42299  | 0.52841  | AL136115. | chr1  | + | 32379174 | 32380745 | 1572 |
| ENSG000001 | 198.6144 | 333.2893 | -0.74805 | 7.88E-06 | 2.56E-05 | AC084018. | chr12 | - | 1.22E+08 | 1.22E+08 | 1603 |
| ENSG000001 | 0        | 0.297015 | -0.41864 | 0.81278  | NA       | RP11-134K | chr9  | + | 8713311  | 8713841  | 531  |
| ENSG000001 | 0        | 0.343138 | -0.41864 | 0.81278  | NA       | CTAGE1    | chr18 | - | 19993564 | 19997878 | 4306 |
| ENSG000001 | 0.72616  | 0        | 0.85004  | 0.63064  | NA       | AP002414. | chr18 | - | 12056675 | 12057821 | 1147 |
| ENSG000001 | 1015.741 | 528.9615 | 0.93977  | 3.34E-16 | 2.34E-15 | C17orf51  | chr17 | - | 21428051 | 21477781 | 7914 |
| ENSG000001 | 0.290301 | 0        | 0.4146   | 0.81455  | NA       | KRTAP4-9  | chr17 | + | 39261584 | 39262740 | 1157 |
| ENSG000001 | 0.943682 | 0        | 1.2438   | 0.48556  | NA       | KRTAP2-3  | chr17 | - | 39215495 | 39216344 | 850  |
| ENSG000001 | 4.221753 | 11.20794 | -1.3243  | 0.10476  | 0.16786  | DKFZP667F | chr10 | + | 6392278  | 6394723  | 2446 |
| ENSG000001 | 748.7188 | 145.3088 | 2.3598   | 2.34E-54 | 5.95E-53 | FAM127C   | chrX  | - | 1.34E+08 | 1.34E+08 | 2017 |
| ENSG000001 | 8.807399 | 8.980735 | -0.03732 | 0.95571  | 0.97271  | LINC00277 | chr15 | + | 69365266 | 69388160 | 2498 |
| ENSG000001 | 2.188831 | 2.713549 | -0.23994 | 0.85066  | 0.89494  | ST13P5    | chr11 | + | 18283529 | 18284638 | 1110 |
| ENSG000001 | 62.76288 | 94.73521 | -0.59398 | 0.01131  | 0.023497 | RPL15P3   | chr6  | + | 12514342 | 12515006 | 615  |
| ENSG000001 | 0.995923 | 8.992888 | -2.87    | 0.005772 | 0.01269  | OR2A42    | chr7  | - | 1.44E+08 | 1.44E+08 | 933  |

|            |          |          |          |          |          |           |       |   |          |          |      |
|------------|----------|----------|----------|----------|----------|-----------|-------|---|----------|----------|------|
| ENSG000001 | 0.36308  | 4.989297 | -3.152   | 0.017978 | 0.03584  | RPS26P3   | chr9  | + | 9090876  | 9091311  | 436  |
| ENSG000001 | 53.13421 | 267.5644 | -2.3194  | 1.54E-19 | 1.27E-18 | RNF208    | chr9  | - | 1.4E+08  | 1.4E+08  | 1127 |
| ENSG000001 | 2216.265 | 3713.133 | -0.74302 | 1.66E-05 | 5.21E-05 | MT-ND4L   | chrMT | + | 10470    | 10766    | 297  |
| ENSG000001 | 77.19904 | 62.13671 | 0.31567  | 0.29709  | 0.39909  | MAP10     | chr1  | + | 2.33E+08 | 2.33E+08 | 5450 |
| ENSG000001 | 0.290301 | 0        | 0.4146   | 0.81455  | NA       | RPL23AP4  | chr21 | + | 48110676 | 48111157 | 463  |
| ENSG000001 | 0        | 0.654722 | -0.83442 | 0.63731  | NA       | KRTAP12-4 | chr21 | - | 46074130 | 46074576 | 447  |
| ENSG000001 | 0.685084 | 0        | 0.85004  | 0.63064  | NA       | RP11-211N | chr9  | - | 46842616 | 46844326 | 1711 |
| ENSG000001 | 0.290301 | 0.357707 | -0.00203 | 0.99908  | NA       | RP11-632K | chr11 | + | 74065488 | 74066765 | 1278 |
| ENSG000001 | 73.61111 | 80.20674 | -0.11787 | 0.63432  | 0.72301  | AC016747. | chr2  | - | 61368732 | 61372104 | 2346 |
| ENSG000001 | 1.628766 | 139.834  | -6.1906  | 1.16E-22 | 1.10E-21 | POU5F1B   | chr8  | + | 1.28E+08 | 1.28E+08 | 5357 |
| ENSG000001 | 2.334388 | 4.213191 | -0.79359 | 0.42776  | 0.53312  | RPS26P6   | chr8  | + | 1.02E+08 | 1.02E+08 | 414  |
| ENSG000001 | 1.628766 | 1.84278  | -0.16858 | 0.90018  | 0.93097  | AC023632. | chr8  | + | 95558771 | 95560630 | 1860 |
| ENSG000001 | 22.47298 | 14.13754 | 0.65662  | 0.20317  | 0.29203  | RBM12B-A' | chr8  | + | 94752349 | 94753001 | 653  |
| ENSG000001 | 1.306762 | 0.715414 | 0.62012  | 0.70732  | 0.78242  | BTF3P12   | chr8  | + | 71185604 | 71186072 | 469  |
| ENSG000001 | 0.36308  | 0        | 0.4146   | 0.81455  | NA       | CTD-3138B | chr19 | + | 58727546 | 58727927 | 382  |
| ENSG000001 | 507.5596 | 334.7801 | 0.59991  | 5.35E-05 | 0.000158 | ZNF580    | chr19 | + | 56146382 | 56154835 | 1418 |
| ENSG000001 | 6.204226 | 9.927639 | -0.6296  | 0.47977  | 0.58402  | AL590762. | chrX  | - | 70639933 | 70640364 | 432  |
| ENSG000001 | 207.4323 | 253.6181 | -0.28929 | 0.12178  | 0.19123  | ZNF611    | chr19 | - | 53206066 | 53238326 | 4796 |
| ENSG000001 | 0        | 175.5629 | -8.8753  | 4.25E-16 | 2.96E-15 | SYT3      | chr19 | - | 51124564 | 51171651 | 2915 |
| ENSG000001 | 1418.111 | 1967.432 | -0.47155 | 4.68E-06 | 1.56E-05 | NUP62     | chr19 | - | 50410082 | 50433020 | 3590 |
| ENSG000001 | 1.576526 | 4.585467 | -1.3686  | 0.19012  | 0.27677  | COX20P1   | chr10 | + | 70392128 | 70392484 | 357  |
| ENSG000001 | 0.290301 | 0        | 0.4146   | 0.81455  | NA       | CFL1P4    | chr1  | + | 2.42E+08 | 2.42E+08 | 498  |
| ENSG000001 | 1.265686 | 3.010564 | -1.0361  | 0.41909  | 0.52442  | RP11-108F | chr1  | - | 2.3E+08  | 2.3E+08  | 906  |
| ENSG000001 | 0.290301 | 0.357707 | -0.00203 | 0.99908  | NA       | AURKAPS1  | chr1  | - | 2.2E+08  | 2.2E+08  | 1212 |
| ENSG000001 | 2.188831 | 0        | 2.3658   | 0.16633  | 0.24754  | RP11-365C | chr1  | - | 2.15E+08 | 2.15E+08 | 575  |
| ENSG000001 | 0.653381 | 2.38498  | -1.4933  | 0.28563  | 0.38705  | RP11-383C | chr1  | + | 2.05E+08 | 2.05E+08 | 552  |
| ENSG000001 | 0        | 2.324288 | -2.6717  | 0.096097 | 0.15624  | RP11-532L | chr1  | + | 2E+08    | 2E+08    | 517  |
| ENSG000001 | 0.290301 | 0.297015 | -0.00202 | 0.99909  | NA       | EEF1A1P32 | chr1  | + | 1.98E+08 | 1.98E+08 | 1347 |
| ENSG000001 | 275.5218 | 31.14486 | 3.1419   | 4.67E-39 | 8.04E-38 | DENND1B   | chr1  | - | 1.97E+08 | 1.98E+08 | 6960 |
| ENSG000001 | 0        | 0.297015 | -0.41864 | 0.81278  | NA       | OR5S1P    | chr2  | + | 2.41E+08 | 2.41E+08 | 951  |
| ENSG000001 | 0.36308  | 0        | 0.4146   | 0.81455  | NA       | RP11-436I | chr12 | - | 9180128  | 9181685  | 950  |
| ENSG000001 | 0        | 1.280305 | -1.6305  | 0.35731  | NA       | TPM3P1    | chr7  | - | 1.17E+08 | 1.17E+08 | 747  |
| ENSG000001 | 0.870904 | 1.652581 | -0.66289 | 0.65825  | 0.74249  | AC064852. | chr2  | - | 2.34E+08 | 2.34E+08 | 676  |
| ENSG000001 | 2.810509 | 1.623443 | 0.68359  | 0.58695  | 0.68261  | C1orf220  | chr1  | + | 1.79E+08 | 1.79E+08 | 2595 |
| ENSG000001 | 1.027626 | 1.744828 | -0.54842 | 0.73199  | 0.80198  | RP4-765C7 | chr1  | + | 1.78E+08 | 1.78E+08 | 357  |
| ENSG000001 | 0        | 1.652581 | -2.1974  | 0.1871   | NA       | RP4-612B1 | chr1  | + | 1.72E+08 | 1.72E+08 | 423  |
| ENSG000001 | 0.943682 | 0.343138 | 0.89828  | 0.6031   | NA       | PFN1P11   | chr10 | - | 1.05E+08 | 1.05E+08 | 389  |
| ENSG000001 | 16.06916 | 11.8675  | 0.41854  | 0.43238  | 0.53785  | AL021068. | chr1  | + | 1.69E+08 | 1.69E+08 | 1463 |
| ENSG000001 | 0.342542 | 0        | 0.4146   | 0.81455  | NA       | RP11-375F | chr1  | + | 1.69E+08 | 1.69E+08 | 457  |
| ENSG000001 | 250.2576 | 73.17801 | 1.7694   | 1.42E-20 | 1.23E-19 | SFT2D2    | chr1  | + | 1.68E+08 | 1.68E+08 | 1155 |
| ENSG000001 | 316.7457 | 474.9623 | -0.58253 | 0.002833 | 0.006557 | FGFR1OP   | chr6  | + | 1.67E+08 | 1.67E+08 | 3871 |
| ENSG000001 | 0        | 0.654722 | -0.83442 | 0.63731  | NA       | RP11-277B | chr1  | - | 1.67E+08 | 1.67E+08 | 415  |
| ENSG000001 | 0.36308  | 0.297015 | -0.00205 | 0.99908  | NA       | KRT8P40   | chr2  | + | 1.78E+08 | 1.78E+08 | 563  |
| ENSG000001 | 0.685084 | 2.171348 | -1.2276  | 0.43885  | 0.54452  | HMGB3P6   | chr1  | + | 1.64E+08 | 1.64E+08 | 598  |
| ENSG000001 | 12.37675 | 11.26373 | 0.13411  | 0.84677  | 0.8925   | LPAL2     | chr6  | - | 1.61E+08 | 1.61E+08 | 2368 |
| ENSG000001 | 42.81271 | 27.04902 | 0.66134  | 0.055477 | 0.097354 | RP11-288F | chr6  | + | 1.61E+08 | 1.61E+08 | 3131 |
| ENSG000001 | 1.411244 | 0.297015 | 1.325    | 0.43226  | NA       | yR211F11. | chr6  | - | 1.59E+08 | 1.59E+08 | 580  |
| ENSG000001 | 1.317927 | 0.343138 | 1.2418   | 0.46439  | NA       | FAM106A   | chr17 | - | 18427880 | 18430160 | 2281 |
| ENSG000001 | 0        | 0.357707 | -0.41864 | 0.81278  | NA       | RP5-933K2 | chr6  | - | 1.58E+08 | 1.58E+08 | 934  |
| ENSG000001 | 698.4754 | 861.3601 | -0.30122 | 0.13858  | 0.21213  | SCAF8     | chr6  | + | 1.55E+08 | 1.55E+08 | 5055 |
| ENSG000001 | 4.927375 | 8.129367 | -0.69379 | 0.36118  | 0.46536  | RP11-312J | chr1  | + | 1.61E+08 | 1.61E+08 | 1097 |
| ENSG000001 | 0        | 1.248751 | -1.5848  | 0.37202  | NA       | AC012362. | chr2  | - | 2.09E+08 | 2.09E+08 | 739  |
| ENSG000001 | 0        | 4.63159  | -3.7851  | 0.007148 | 0.015444 | PPP1R14BI | chr2  | + | 2.09E+08 | 2.09E+08 | 444  |
| ENSG000001 | 17.65685 | 1.043983 | 3.8242   | 2.82E-05 | 8.58E-05 | CCDC19    | chr1  | - | 1.6E+08  | 1.6E+08  | 1976 |
| ENSG000001 | 0        | 2.962024 | -3.0366  | 0.050267 | 0.089367 | DARC      | chr1  | + | 1.59E+08 | 1.59E+08 | 1902 |
| ENSG000001 | 4.689314 | 1.355566 | 1.6194   | 0.13096  | 0.20289  | PDCL3P5   | chr6  | + | 1.51E+08 | 1.51E+08 | 722  |
| ENSG000001 | 1.701545 | 1.248751 | 0.32998  | 0.81004  | 0.86609  | AC007256. | chr2  | - | 2.02E+08 | 2.02E+08 | 2765 |
| ENSG000001 | 172.3016 | 359.4673 | -1.0546  | 6.45E-08 | 2.56E-07 | ZNF254    | chr19 | + | 24216276 | 24312654 | 3967 |
| ENSG000001 | 0.342542 | 4.692283 | -3.058   | 0.023315 | 0.045333 | NPM1P46   | chr2  | - | 1.98E+08 | 1.98E+08 | 865  |
| ENSG000001 | 1.233984 | 3.662869 | -1.3227  | 0.27337  | 0.37307  | RP11-55K2 | chr6  | - | 1.37E+08 | 1.37E+08 | 1297 |
| ENSG000001 | 0.943682 | 0        | 1.2438   | 0.48556  | NA       | COX5BP2   | chr6  | - | 1.36E+08 | 1.36E+08 | 1125 |
| ENSG000001 | 0        | 5.520218 | -3.924   | 0.006728 | 0.014604 | TUBB8P8   | chr3  | + | 1.98E+08 | 1.98E+08 | 1058 |
| ENSG000001 | 0        | 0.297015 | -0.41864 | 0.81278  | NA       | CHCHD2P4  | chr6  | - | 1.35E+08 | 1.35E+08 | 434  |
| ENSG000001 | 0.290301 | 0        | 0.4146   | 0.81455  | NA       | LIN28AP1  | chr2  | + | 1.84E+08 | 1.84E+08 | 405  |
| ENSG000001 | 35.00043 | 19.84721 | 0.79491  | 0.10353  | 0.16619  | TCTEX1D2  | chr3  | - | 1.96E+08 | 1.96E+08 | 800  |

|            |          |          |          |          |          |            |       |   |          |          |      |
|------------|----------|----------|----------|----------|----------|------------|-------|---|----------|----------|------|
| ENSG000001 | 7.168446 | 1.98115  | 1.723    | 0.061432 | 0.1065   | YWHAZP4    | chr6  | + | 1.28E+08 | 1.28E+08 | 708  |
| ENSG000001 | 6.700885 | 2.321872 | 1.4076   | 0.15899  | 0.23843  | AC022498.  | chr3  | + | 1.88E+08 | 1.88E+08 | 2268 |
| ENSG000001 | 0.290301 | 0.297015 | -0.00202 | 0.99909  | NA       | PPP1R14BI  | chr6  | - | 1.27E+08 | 1.27E+08 | 435  |
| ENSG000001 | 5.519142 | 14.33016 | -1.3172  | 0.043768 | 0.079248 | AC015815.  | chr17 | - | 75085986 | 75087063 | 123  |
| ENSG000001 | 0.290301 | 0.700845 | -0.56655 | 0.74739  | NA       | ARF1P2     | chr12 | - | 1.21E+08 | 1.21E+08 | 538  |
| ENSG000001 | 23.23003 | 14.38602 | 0.67962  | 0.1892   | 0.27558  | CRYGS      | chr3  | - | 1.86E+08 | 1.86E+08 | 1536 |
| ENSG000001 | 2.323223 | 4.244745 | -0.77291 | 0.50432  | 0.60777  | RP11-64B1  | chr12 | + | 1.2E+08  | 1.2E+08  | 545  |
| ENSG000001 | 2.229907 | 0.343138 | 2.0199   | 0.18438  | 0.26969  | CRIP1      | chr14 | + | 1.06E+08 | 1.06E+08 | 2241 |
| ENSG000001 | 5.841146 | 3.974453 | 0.51955  | 0.58158  | 0.67795  | CNN2P9     | chr6  | + | 1.11E+08 | 1.11E+08 | 909  |
| ENSG000001 | 0        | 0.343138 | -0.41864 | 0.81278  | NA       | RP11-346C  | chr6  | + | 1.11E+08 | 1.11E+08 | 860  |
| ENSG000001 | 1.048164 | 1.294874 | -0.27358 | 0.85003  | 0.89459  | RPL7AP60   | chr12 | - | 1.13E+08 | 1.13E+08 | 794  |
| ENSG000001 | 193.1185 | 909.3674 | -2.2318  | 2.66E-56 | 7.12E-55 | KLHL23     | chr2  | + | 1.71E+08 | 1.71E+08 | 4077 |
| ENSG000001 | 0.342542 | 0.654722 | -0.52406 | 0.76557  | NA       | AL591516.  | chr6  | + | 1.08E+08 | 1.08E+08 | 276  |
| ENSG000001 | 1.89853  | 0        | 2.1633   | 0.21098  | NA       | RP11-81B1  | chr10 | + | 1.28E+08 | 1.28E+08 | 594  |
| ENSG000001 | 0        | 2.65044  | -2.9164  | 0.059842 | 0.10422  | PRDX2P4    | chr6  | + | 1.01E+08 | 1.01E+08 | 600  |
| ENSG000001 | 24.08797 | 65.63456 | -1.4333  | 1.08E-05 | 3.44E-05 | RP11-641C  | chr3  | - | 1.69E+08 | 1.69E+08 | 410  |
| ENSG000001 | 368.2375 | 371.1452 | -0.00971 | 0.95859  | 0.97496  | TRIM59     | chr3  | - | 1.6E+08  | 1.6E+08  | 4615 |
| ENSG000001 | 4.729577 | 4.196206 | 0.16735  | 0.85457  | 0.89775  | YBX1P4     | chr7  | + | 1.52E+08 | 1.52E+08 | 808  |
| ENSG000001 | 18.71358 | 28.79955 | -0.61199 | 0.13439  | 0.20735  | BTF3L4P2   | chr2  | + | 1.6E+08  | 1.6E+08  | 712  |
| ENSG000001 | 1399.968 | 338.8399 | 2.0456   | 1.54E-46 | 3.20E-45 | MLLT11     | chr1  | + | 1.51E+08 | 1.51E+08 | 4072 |
| ENSG000001 | 0        | 0.297015 | -0.41864 | 0.81278  | NA       | AC016732.  | chr2  | - | 1.58E+08 | 1.58E+08 | 693  |
| ENSG000001 | 3.257533 | 3.025133 | 0.10948  | 0.91395  | 0.94127  | AC012066.  | chr2  | + | 1.53E+08 | 1.53E+08 | 694  |
| ENSG000001 | 25.15765 | 26.57483 | -0.07381 | 0.88672  | 0.92087  | ASIC3      | chr7  | + | 1.51E+08 | 1.51E+08 | 2232 |
| ENSG000001 | 0.632843 | 0        | 0.81931  | 0.64303  | NA       | GIMAP1     | chr7  | + | 1.5E+08  | 1.5E+08  | 4420 |
| ENSG000001 | 12.1686  | 2.886762 | 1.9539   | 0.009868 | 0.020765 | C6orf165   | chr6  | + | 88117701 | 88221352 | 2580 |
| ENSG000001 | 0        | 0.343138 | -0.41864 | 0.81278  | NA       | STRADBP1   | chr7  | - | 1.5E+08  | 1.5E+08  | 1281 |
| ENSG000001 | 0.685084 | 0        | 0.85004  | 0.63064  | NA       | RP11-30P6  | chr6  | + | 85997507 | 85998725 | 1219 |
| ENSG000001 | 7.49045  | 12.06011 | -0.66264 | 0.3134   | 0.41567  | NCLP1      | chr9  | - | 1.4E+08  | 1.4E+08  | 1963 |
| ENSG000001 | 24.91601 | 40.05684 | -0.67737 | 0.086443 | 0.14281  | KIAA1984   | chr9  | + | 1.4E+08  | 1.4E+08  | 4244 |
| ENSG000001 | 3.725094 | 364.6963 | -6.5306  | 1.23E-44 | 2.43E-43 | ARHGEF35   | chr7  | - | 1.44E+08 | 1.44E+08 | 2431 |
| ENSG000001 | 0        | 0.297015 | -0.41864 | 0.81278  | NA       | RP11-355C  | chr9  | - | 1.26E+08 | 1.26E+08 | 381  |
| ENSG000001 | 3.133327 | 4.965864 | -0.63724 | 0.5484   | 0.64847  | DNLZ       | chr9  | - | 1.39E+08 | 1.39E+08 | 2934 |
| ENSG000001 | 73.08096 | 15.93017 | 2.1643   | 4.71E-09 | 2.05E-08 | AC093724.  | chr2  | - | 1.32E+08 | 1.32E+08 | 1027 |
| ENSG000001 | 0        | 3.855484 | -3.424   | 0.022534 | 0.043969 | AC018804.  | chr2  | + | 1.31E+08 | 1.31E+08 | 2235 |
| ENSG000001 | 0.342542 | 0        | 0.4146   | 0.81455  | NA       | RP11-337C  | chr1  | + | 1.47E+08 | 1.47E+08 | 960  |
| ENSG000001 | 1.213446 | 2.292733 | -0.73711 | 0.56892  | 0.66621  | RPL12P38   | chr17 | - | 58511039 | 58513357 | 2319 |
| ENSG000001 | 0        | 2.604317 | -2.8535  | 0.070151 | 0.11941  | TCL1B      | chr14 | + | 96152754 | 96158980 | 1724 |
| ENSG000001 | 0.653381 | 0.297015 | 0.51304  | 0.77085  | NA       | ST13P10    | chr11 | - | 1.12E+08 | 1.12E+08 | 1082 |
| ENSG000001 | 1.597063 | 2.079102 | -0.29467 | 0.85034  | 0.89482  | EEF1A1P16  | chr12 | + | 17143604 | 17145017 | 1414 |
| ENSG000001 | 4.273994 | 2.428687 | 0.7621   | 0.46608  | 0.57085  | YWHAZP2    | chr2  | - | 1.27E+08 | 1.27E+08 | 728  |
| ENSG000001 | 306.4535 | 51.03013 | 2.566    | 1.44E-30 | 1.87E-29 | NOTCH2NL   | chr1  | + | 1.45E+08 | 1.45E+08 | 5036 |
| ENSG000001 | 183.9588 | 254.3358 | -0.46515 | 0.033577 | 0.062759 | SUPT4H1    | chr17 | - | 56422539 | 56430454 | 1643 |
| ENSG000001 | 6.234137 | 1.058552 | 2.321    | 0.036257 | 0.067238 | RBMS2P1    | chr12 | - | 94817520 | 94818745 | 1226 |
| ENSG000001 | 0        | 0.357707 | -0.41864 | 0.81278  | NA       | RP11-819A  | chr11 | - | 1.07E+08 | 1.07E+08 | 1499 |
| ENSG000001 | 1.016461 | 5.393128 | -2.1392  | 0.060184 | 0.1047   | CTC-250I14 | chr19 | - | 13268773 | 13269602 | 499  |
| ENSG000001 | 0.632843 | 0.343138 | 0.49756  | 0.77728  | NA       | YWHAZP5    | chr10 | + | 1.07E+08 | 1.07E+08 | 730  |
| ENSG000001 | 5.685237 | 12.55377 | -1.1151  | 0.082613 | 0.1373   | AC093106.  | chr7  | - | 1.31E+08 | 1.31E+08 | 673  |
| ENSG000001 | 0        | 2.056411 | -2.4909  | 0.12616  | 0.19678  | NIP7P2     | chr3  | + | 1.32E+08 | 1.32E+08 | 544  |
| ENSG000001 | 0        | 0.654722 | -0.83442 | 0.63731  | NA       | RP11-613A  | chr12 | + | 76993451 | 76994250 | 800  |
| ENSG000001 | 0.342542 | 0.297015 | -0.00202 | 0.99909  | NA       | IFITM9P    | chr11 | - | 69070879 | 69071274 | 396  |
| ENSG000001 | 3.95199  | 5.183528 | -0.3381  | 0.76425  | 0.82903  | MARCKSL1   | chr10 | + | 1.05E+08 | 1.05E+08 | 541  |
| ENSG000001 | 0        | 0.343138 | -0.41864 | 0.81278  | NA       | RP11-29C18 | chr22 | - | 49965912 | 49969074 | 2379 |
| ENSG000001 | 4.668776 | 2.65044  | 0.75143  | 0.42435  | 0.52967  | RP11-212P  | chr7  | - | 1.28E+08 | 1.28E+08 | 448  |
| ENSG000001 | 1918.456 | 1705.85  | 0.1695   | 0.17915  | 0.2632   | NRAS       | chr1  | - | 1.15E+08 | 1.15E+08 | 4449 |
| ENSG000001 | 0        | 0.297015 | -0.41864 | 0.81278  | NA       | AC009237.  | chr2  | + | 96191093 | 96192968 | 1427 |
| ENSG000001 | 0.290301 | 0.997859 | -1.0217  | 0.53916  | NA       | RP11-680L  | chr11 | - | 86969893 | 86970301 | 409  |
| ENSG000001 | 0        | 0.343138 | -0.41864 | 0.81278  | NA       | PGK1P2     | chr19 | + | 12670385 | 12671919 | 1214 |
| ENSG000001 | 0.653381 | 0        | 0.82678  | 0.64037  | NA       | CTD-2666L  | chr19 | + | 12370941 | 12371352 | 412  |
| ENSG000001 | 55.39582 | 67.94582 | -0.28723 | 0.3367   | 0.44048  | RP11-642N  | chr3  | + | 75263782 | 75264787 | 1006 |
| ENSG000001 | 1.213446 | 1.294874 | -0.05041 | 0.97171  | 0.98436  | CTC-398G3  | chr19 | + | 11634251 | 11634646 | 396  |
| ENSG000001 | 5.156876 | 9.591749 | -0.87364 | 0.25289  | 0.34981  | CTC-398G3  | chr19 | + | 11632783 | 11633313 | 531  |
| ENSG000001 | 0.36308  | 0.715414 | -0.51558 | 0.77246  | NA       | AP000857.  | chr11 | - | 84731829 | 84732699 | 871  |
| ENSG000001 | 0.72616  | 0        | 0.85004  | 0.63064  | NA       | RP11-3L10  | chr7  | + | 1.21E+08 | 1.21E+08 | 316  |
| ENSG000001 | 1.628766 | 0.654722 | 1.0347   | 0.47599  | 0.58054  | CTD-3035C  | chr14 | + | 91232875 | 91233333 | 459  |
| ENSG000001 | 0.342542 | 0.297015 | -0.00202 | 0.99909  | NA       | LTC4S      | chr5  | + | 1.79E+08 | 1.79E+08 | 909  |

|            |          |          |          |          |          |            |       |   |          |          |      |
|------------|----------|----------|----------|----------|----------|------------|-------|---|----------|----------|------|
| ENSG000001 | 11.89802 | 19.49508 | -0.68528 | 0.18454  | 0.26982  | RPS7P11    | chr17 | - | 44798948 | 44799533 | 586  |
| ENSG000001 | 0        | 2.740271 | -2.6376  | 0.11836  | 0.18676  | RP11-281C  | chr5  | - | 1.78E+08 | 1.78E+08 | 900  |
| ENSG000001 | 0        | 0.357707 | -0.41864 | 0.81278  | NA       | SLC25A5P6  | chr4  | - | 1.87E+08 | 1.87E+08 | 886  |
| ENSG000001 | 0.290301 | 0.686276 | -0.47648 | 0.78935  | NA       | NPM1P50    | chr11 | - | 74790310 | 74791176 | 867  |
| ENSG000001 | 0.342542 | 0        | 0.4146   | 0.81455  | NA       | CLNS1AP1   | chr6  | - | 54349967 | 54350648 | 682  |
| ENSG000001 | 24.93834 | 31.22421 | -0.32194 | 0.38686  | 0.49106  | ANKRD39    | chr2  | - | 97502348 | 97523832 | 4965 |
| ENSG000001 | 0        | 0.297015 | -0.41864 | 0.81278  | NA       | ATF4P1     | chrX  | - | 1.54E+08 | 1.54E+08 | 1073 |
| ENSG000001 | 627.1066 | 779.8829 | -0.31283 | 0.076898 | 0.12916  | QTRT1      | chr19 | + | 10812106 | 10824113 | 2034 |
| ENSG000001 | 481.138  | 293.4481 | 0.71178  | 0.000464 | 0.001211 | CHUK       | chr10 | - | 1.02E+08 | 1.02E+08 | 4845 |
| ENSG000001 | 0.36308  | 0        | 0.4146   | 0.81455  | NA       | PCNPP3     | chr12 | - | 66039772 | 66040242 | 471  |
| ENSG000001 | 412.6979 | 387.224  | 0.0907   | 0.722    | 0.79434  | MXD3       | chr5  | - | 1.77E+08 | 1.77E+08 | 2279 |
| ENSG000001 | 0.36308  | 2.217472 | -1.8856  | 0.24144  | 0.33645  | GAPDHP44   | chr12 | + | 63149007 | 63150013 | 1007 |
| ENSG000001 | 0        | 0.715414 | -0.84936 | 0.6309   | NA       | RP4-778K6  | chr7  | + | 1.05E+08 | 1.05E+08 | 319  |
| ENSG000001 | 0        | 0.297015 | -0.41864 | 0.81278  | NA       | FTH1P12    | chr9  | - | 15527131 | 15527681 | 551  |
| ENSG000001 | 0        | 0.297015 | -0.41864 | 0.81278  | NA       | AP000593.  | chr11 | + | 71991195 | 71992222 | 712  |
| ENSG000001 | 241.5369 | 76.61201 | 1.6432   | 1.29E-08 | 5.43E-08 | GSTM2      | chr1  | + | 1.1E+08  | 1.1E+08  | 4321 |
| ENSG000001 | 1.286224 | 0.715414 | 0.65982  | 0.67411  | 0.75592  | ST13P11    | chr11 | + | 94646212 | 94646931 | 720  |
| ENSG000001 | 0        | 0.357707 | -0.41864 | 0.81278  | NA       | RANP6      | chr4  | - | 1.75E+08 | 1.75E+08 | 644  |
| ENSG000001 | 1.027626 | 0        | 1.1491   | 0.51623  | NA       | NAP1L1P3   | chr3  | + | 1.21E+08 | 1.21E+08 | 880  |
| ENSG000001 | 455.2297 | 600.8087 | -0.39868 | 0.001184 | 0.002906 | COG8       | chr16 | - | 69354043 | 69373570 | 4247 |
| ENSG000001 | 0        | 1.949596 | -2.4359  | 0.13595  | 0.20899  | AC104297.  | chr3  | - | 17913221 | 17914090 | 870  |
| ENSG000001 | 1.971308 | 1.995719 | -0.01132 | 0.99229  | 0.99582  | RP11-577F  | chr7  | + | 1.02E+08 | 1.02E+08 | 794  |
| ENSG000001 | 397.5407 | 921.2762 | -1.209   | 3.12E-10 | 1.49E-09 | ARHGAP19   | chr10 | - | 98978996 | 99052413 | 5525 |
| ENSG000001 | 0.342542 | 0.297015 | -0.00202 | 0.99909  | NA       | RP11-66N1  | chrX  | + | 1.53E+08 | 1.53E+08 | 372  |
| ENSG000001 | 0        | 0.686276 | -0.84936 | 0.6309   | NA       | RP4-747G1  | chr7  | - | 1.01E+08 | 1.01E+08 | 882  |
| ENSG000001 | 9.273333 | 6.598171 | 0.48095  | 0.49579  | 0.59967  | HAUS7      | chrX  | - | 1.53E+08 | 1.53E+08 | 2124 |
| ENSG000001 | 135.4211 | 114.9426 | 0.23559  | 0.36994  | 0.47445  | LCAT       | chr16 | - | 67973653 | 67978034 | 1507 |
| ENSG000001 | 0.632843 | 1.043983 | -0.48405 | 0.76438  | NA       | AC022210.  | chr2  | + | 85142910 | 85143789 | 876  |
| ENSG000001 | 0        | 0.297015 | -0.41864 | 0.81278  | NA       | RPL12P18   | chr2  | + | 85101820 | 85102144 | 325  |
| ENSG000001 | 11.70185 | 36.72174 | -1.6359  | 0.000169 | 0.000467 | PTPRCAP    | chr11 | - | 67202981 | 67205538 | 1292 |
| ENSG000001 | 1.597063 | 3.339132 | -0.86014 | 0.53156  | 0.63287  | ANXA2P1    | chr4  | - | 1.54E+08 | 1.54E+08 | 926  |
| ENSG000001 | 2.635854 | 1.727843 | 0.50149  | 0.7239   | 0.79565  | RP11-658F  | chr11 | - | 66529046 | 66529870 | 825  |
| ENSG000001 | 1.233984 | 0.937167 | 0.29627  | 0.84809  | 0.89328  | RBM22P2    | chr13 | - | 31113734 | 31117598 | 1814 |
| ENSG000001 | 3.890376 | 3.573038 | 0.11214  | 0.90486  | 0.93427  | PVRIG      | chr7  | + | 99815864 | 99819113 | 1583 |
| ENSG000001 | 484.3863 | 1661.114 | -1.7693  | 1.66E-12 | 9.28E-12 | GPC2       | chr7  | - | 99767229 | 99774995 | 2532 |
| ENSG000001 | 0.72616  | 0        | 0.85004  | 0.63064  | NA       | RBMX2P2    | chrX  | - | 1.4E+08  | 1.4E+08  | 946  |
| ENSG000001 | 0        | 0.357707 | -0.41864 | 0.81278  | NA       | KRT222     | chr17 | - | 38810917 | 38821433 | 2764 |
| ENSG000001 | 4.128436 | 17.16435 | -1.9544  | 0.005312 | 0.011772 | HSPD1P1    | chr5  | + | 21882694 | 21884421 | 1726 |
| ENSG000001 | 1.846289 | 4.495636 | -1.1057  | 0.34065  | 0.44459  | RP11-54C4  | chr5  | - | 1.51E+08 | 1.51E+08 | 520  |
| ENSG000001 | 1.669842 | 0.357707 | 1.5246   | 0.35757  | 0.46184  | VTI1BP2    | chr4  | + | 1.84E+08 | 1.84E+08 | 696  |
| ENSG000001 | 0.290301 | 0.715414 | -0.50514 | 0.77701  | NA       | RP11-47G1  | chr10 | + | 1.26E+08 | 1.26E+08 | 760  |
| ENSG000001 | 0.943682 | 0.997859 | -0.04164 | 0.97782  | 0.9876   | H2AF2P1    | chr21 | - | 45466228 | 45466922 | 395  |
| ENSG000001 | 247.884  | 455.9886 | -0.87599 | 3.97E-08 | 1.60E-07 | RPL18AP3   | chr12 | + | 1.05E+08 | 1.05E+08 | 563  |
| ENSG000001 | 14.74105 | 17.56334 | -0.25221 | 0.61609  | 0.70758  | RP11-75L1  | chr12 | + | 9847980  | 9848823  | 844  |
| ENSG000001 | 1607.119 | 1230.91  | 0.38329  | 0.039937 | 0.073283 | SIPA1      | chr11 | + | 65405568 | 65418401 | 3628 |
| ENSG000001 | 0        | 0.686276 | -0.84936 | 0.6309   | NA       | RP11-425J. | chr4  | + | 1.38E+08 | 1.38E+08 | 415  |
| ENSG000001 | 1.960143 | 4.974728 | -1.2091  | 0.25138  | 0.3481   | FTH1P3     | chr2  | - | 27615651 | 27616234 | 584  |
| ENSG000001 | 6.129655 | 0        | 4.1366   | 0.002987 | 0.006888 | RP13-235E  | chr6  | - | 41275904 | 41276303 | 400  |
| ENSG000001 | 143.5168 | 80.7733  | 0.82233  | 0.000131 | 0.000367 | ERV3-1     | chr7  | - | 64451187 | 64467121 | 2719 |
| ENSG000001 | 280.9062 | 227.3009 | 0.30513  | 0.052126 | 0.092262 | SYNJ2BP    | chr14 | - | 70838148 | 70883778 | 2080 |
| ENSG000001 | 234.5165 | 595.6502 | -1.3406  | 9.54E-13 | 5.43E-12 | ARL2       | chr11 | + | 64781585 | 64789656 | 1228 |
| ENSG000001 | 0        | 0.357707 | -0.41864 | 0.81278  | NA       | HMGB1P3    | chr9  | - | 1.24E+08 | 1.24E+08 | 609  |
| ENSG000001 | 11.13241 | 190.4771 | -4.0885  | 2.36E-36 | 3.73E-35 | RP11-453F  | chrX  | - | 1.31E+08 | 1.31E+08 | 2928 |
| ENSG000001 | 1.669842 | 1.98115  | -0.21522 | 0.86843  | 0.90844  | TLL13      | chr15 | + | 90792762 | 90808199 | 2738 |
| ENSG000001 | 0        | 0.297015 | -0.41864 | 0.81278  | NA       | RP11-364P  | chr4  | - | 1.22E+08 | 1.22E+08 | 913  |
| ENSG000001 | 0        | 0.357707 | -0.41864 | 0.81278  | NA       | EIF4A1P8   | chr10 | + | 93896632 | 93898127 | 1190 |
| ENSG000001 | 1.649304 | 0        | 2.1906   | 0.18857  | NA       | ACTN4P1    | chr4  | + | 1.18E+08 | 1.18E+08 | 1451 |
| ENSG000001 | 0        | 0.98329  | -1.2878  | 0.47019  | NA       | PPIAP16    | chr3  | + | 57927545 | 57928031 | 487  |
| ENSG000001 | 1.649304 | 0        | 2.1906   | 0.18857  | NA       | GBP7       | chr1  | - | 89597434 | 89641723 | 2454 |
| ENSG000001 | 17.50094 | 15.45511 | 0.16392  | 0.74741  | 0.81503  | RP13-39P1  | chr10 | - | 79540095 | 79541634 | 1540 |
| ENSG000001 | 2.967231 | 0.997859 | 1.3615   | 0.26316  | 0.36132  | RP11-428P  | chr10 | + | 79490524 | 79494527 | 3711 |
| ENSG000001 | 233.4804 | 376.7496 | -0.68837 | 0.000109 | 0.00031  | RBMXL1     | chr1  | - | 89445139 | 89458643 | 5084 |
| ENSG000001 | 0        | 0.357707 | -0.41864 | 0.81278  | NA       | AC132008.  | chr3  | - | 1.97E+08 | 1.97E+08 | 286  |
| ENSG000001 | 1177.499 | 590.3219 | 0.99503  | 1.62E-18 | 1.27E-17 | SRA1       | chr5  | - | 1.4E+08  | 1.4E+08  | 2165 |
| ENSG000001 | 0        | 0.297015 | -0.41864 | 0.81278  | NA       | SETP8      | chrX  | + | 1.16E+08 | 1.16E+08 | 628  |

|            |          |          |          |           |           |                 |   |          |          |      |
|------------|----------|----------|----------|-----------|-----------|-----------------|---|----------|----------|------|
| ENSG000001 | 1.161205 | 1.073121 | 0.097305 | 0.95531   | 0.97242   | RP11-432F chr9  | + | 1.15E+08 | 1.15E+08 | 403  |
| ENSG000001 | 4.439275 | 8.809938 | -0.90383 | 0.30082   | 0.40226   | TMEM110 chr3    | - | 52870235 | 52931612 | 4769 |
| ENSG000001 | 0.653381 | 0        | 0.82678  | 0.64037   | NA        | KRT8P41 chr11   | + | 9115910  | 9117737  | 1828 |
| ENSG000001 | 2.334388 | 2.399549 | -0.02479 | 0.98237   | 0.99011   | RP11-486C chr1  | + | 84551424 | 84551916 | 493  |
| ENSG000001 | 1.576526 | 2.757256 | -0.66604 | 0.57654   | 0.67327   | RP11-467F chr7  | - | 76744716 | 76745509 | 794  |
| ENSG000001 | 0.685084 | 0        | 0.85004  | 0.63064   | NA        | XX-2136C1 chr10 | - | 1.35E+08 | 1.35E+08 | 485  |
| ENSG000001 | 1.846289 | 1.606458 | 0.17273  | 0.90255   | 0.93263   | AC005077. chr7  | - | 75742344 | 75742718 | 375  |
| ENSG000001 | 81.68558 | 92.13969 | -0.17112 | 0.54045   | 0.64097   | DNAJC9 chr10    | - | 74943120 | 75008620 | 3032 |
| ENSG000001 | 140.0588 | 289.7102 | -1.0433  | 1.07E-07  | 4.16E-07  | RPLP0P6 chr2    | + | 38708920 | 38710012 | 954  |
| ENSG000001 | 0        | 0.297015 | -0.41864 | 0.81278   | NA        | RP11-386I chr1  | + | 78557183 | 78557738 | 556  |
| ENSG000001 | 0        | 0.640152 | -0.82869 | 0.63935   | NA        | RP11-386I chr1  | - | 78509067 | 78509832 | 766  |
| ENSG000001 | 747.7255 | 578.6476 | 0.36812  | 0.014308  | 0.029121  | C8orf82 chr8    | - | 1.46E+08 | 1.46E+08 | 2476 |
| ENSG000001 | 0        | 0.951736 | -1.2555  | 0.48145   | NA        | RP13-383K chrX  | + | 1.06E+08 | 1.06E+08 | 611  |
| ENSG000001 | 0        | 0.343138 | -0.41864 | 0.81278   | NA        | RP4-595K1 chr1  | + | 76047784 | 76048240 | 457  |
| ENSG000001 | 3782.75  | 4481.313 | -0.24421 | 0.009007  | 0.019092  | VDAC1 chr5      | - | 1.33E+08 | 1.33E+08 | 1953 |
| ENSG000001 | 297.481  | 681.988  | -1.1938  | 8.28E-11  | 4.12E-10  | ZBTB9 chr6      | + | 33422356 | 33425325 | 2716 |
| ENSG000001 | 1.233984 | 3.336716 | -1.2043  | 0.32011   | 0.42293   | RP11-229P chr9  | + | 1.4E+08  | 1.4E+08  | 1322 |
| ENSG000001 | 2.293312 | 2.918317 | -0.30473 | 0.80184   | 0.85978   | AP000662. chr11 | - | 57485516 | 57486002 | 487  |
| ENSG000001 | 641.4118 | 820.0821 | -0.35226 | 0.16245   | 0.24284   | TMX2 chr11      | + | 57480072 | 57508445 | 1697 |
| ENSG000001 | 0.342542 | 0        | 0.4146   | 0.81455   | NA        | RP11-112J chr14 | + | 59261372 | 59261747 | 376  |
| ENSG000001 | 11.36966 | 3.573038 | 1.5867   | 0.03191   | 0.059945  | U73169.1 chr3   | + | 50277054 | 50277416 | 359  |
| ENSG000001 | 2.044087 | 1.326428 | 0.50628  | 0.70665   | 0.78193   | SLC25A14F chr4  | + | 84398677 | 84399577 | 901  |
| ENSG000001 | 0.342542 | 1.355566 | -1.3789  | 0.3926    | NA        | RP11-170N chr10 | - | 65662211 | 65663005 | 795  |
| ENSG000001 | 2.096328 | 243.0805 | -6.7446  | 4.43E-32  | 6.12E-31  | FAM220CP chr9   | + | 99883941 | 99884771 | 831  |
| ENSG000001 | 10.30177 | 10.64789 | -0.04785 | 0.93515   | 0.95753   | RP11-380C chr10 | + | 89705259 | 89705781 | 523  |
| ENSG000001 | 82.69153 | 46.15652 | 0.82832  | 0.003643  | 0.008286  | HEXA chr15      | - | 72635775 | 72668817 | 6909 |
| ENSG000001 | 734.1852 | 905.6529 | -0.30227 | 0.010342  | 0.021679  | NDUFS3 chr11    | + | 47586888 | 47606114 | 1769 |
| ENSG000001 | 1.379541 | 4.317591 | -1.4601  | 0.21791   | 0.30936   | AL121657. chr2  | + | 31513628 | 31514470 | 531  |
| ENSG000001 | 4.637074 | 8.637597 | -0.86046 | 0.23637   | 0.3304    | RPSAP54 chr13   | + | 21535449 | 21536334 | 886  |
| ENSG000001 | 813.3627 | 276.3264 | 1.5558   | 2.99E-33  | 4.31E-32  | LEPROT chr1     | + | 65886270 | 65901690 | 4622 |
| ENSG000001 | 643.0554 | 613.8269 | 0.067559 | 0.62867   | 0.71839   | LBH chr2        | + | 30454397 | 30546596 | 2933 |
| ENSG000001 | 94.03821 | 252.2189 | -1.4172  | 1.68E-13  | 1.00E-12  | ADAT3 chr19     | + | 1905377  | 1913444  | 1618 |
| ENSG000001 | 1798.898 | 1402.647 | 0.35838  | 0.041152  | 0.075197  | PPP1CB chr2     | + | 28974506 | 29025806 | 4893 |
| ENSG000001 | 0        | 0.343138 | -0.41864 | 0.81278   | NA        | RP11-797F chr7  | + | 64323377 | 64324748 | 880  |
| ENSG000001 | 0        | 0.297015 | -0.41864 | 0.81278   | NA        | RP11-132J chr14 | + | 56010119 | 56010887 | 769  |
| ENSG000001 | 0        | 2.261179 | -2.4065  | 0.15834   | 0.23767   | RP11-561N chr7  | - | 64029806 | 64030815 | 1010 |
| ENSG000001 | 0.36308  | 0        | 0.4146   | 0.81455   | NA        | RP11-165F chr7  | + | 63642088 | 63643271 | 1184 |
| ENSG000001 | 0        | 0.343138 | -0.41864 | 0.81278   | NA        | HMGB3P3C chrX   | + | 1.12E+08 | 1.12E+08 | 606  |
| ENSG000001 | 82.32861 | 115.6533 | -0.49051 | 0.080665  | 0.13449   | GPSM3 chr6      | - | 32158543 | 32163300 | 1476 |
| ENSG000001 | 0.580602 | 0        | 0.8036   | 0.6494    | NA        | RP11-346C chr10 | - | 54148872 | 54149248 | 377  |
| ENSG000001 | 1.753786 | 1.698704 | 0.025873 | 0.98445   | 0.99109   | RSU1P3 chr10    | + | 53079586 | 53080420 | 835  |
| ENSG000001 | 0        | 0.357707 | -0.41864 | 0.81278   | NA        | RPS16P8 chr17   | + | 25607508 | 25607938 | 431  |
| ENSG000001 | 0.632843 | 0.297015 | 0.49183  | 0.78024   | NA        | PGGT1BP1 chr10  | - | 52486707 | 52487729 | 1023 |
| ENSG000001 | 0.290301 | 0        | 0.4146   | 0.81455   | NA        | RP11-476B chr9  | - | 95439225 | 95439689 | 465  |
| ENSG000001 | 305.6144 | 751.1256 | -1.294   | 5.30E-21  | 4.68E-20  | NCKIPSD chr3    | - | 48701364 | 48723797 | 2989 |
| ENSG000001 | 1771.829 | 700.6074 | 1.3379   | 3.27E-27  | 3.74E-26  | ATF6B chr6      | - | 32065953 | 32096030 | 2624 |
| ENSG000001 | 0.705622 | 4.106375 | -2.1767  | 0.094978  | 0.1547    | AC002056. chr22 | - | 51193096 | 51193862 | 762  |
| ENSG000001 | 193.8652 | 75.70532 | 1.3537   | 3.04E-08  | 1.24E-07  | TREX1 chr3      | + | 48506445 | 48509044 | 2197 |
| ENSG000001 | 32.30621 | 15.92117 | 0.99118  | 0.113     | 0.1793    | SEC14L1P1 chr11 | + | 43919006 | 43921186 | 2181 |
| ENSG000001 | 2670.156 | 135.502  | 4.2843   | 1.46E-128 | 1.29E-126 | S1PR3 chr9      | + | 91606362 | 91619925 | 8505 |
| ENSG000001 | 0        | 0.640152 | -0.82869 | 0.63935   | NA        | RPS7P14 chrX    | + | 73629353 | 73629935 | 583  |
| ENSG000001 | 785.4794 | 245.8433 | 1.6723   | 3.13E-25  | 3.31E-24  | SLC35F6 chr2    | + | 26987152 | 27004099 | 3898 |
| ENSG000001 | 23.30957 | 10.48682 | 1.141    | 0.028784  | 0.054712  | RPL17P50 chr10  | - | 74765591 | 74766353 | 546  |
| ENSG000001 | 0        | 1.40169  | -1.7271  | 0.32809   | NA        | RP5-849H1 chr1  | - | 63106793 | 63107338 | 546  |
| ENSG000001 | 2.032922 | 0        | 2.2293   | 0.19653   | 0.28458   | AL590762. chrX  | + | 70572268 | 70572838 | 571  |
| ENSG000001 | 22.17926 | 38.84367 | -0.79298 | 0.03418   | 0.063793  | HMGB1P1C chr22  | + | 26956492 | 26957054 | 563  |
| ENSG000001 | 112.9386 | 81.05502 | 0.47454  | 0.17749   | 0.26115   | PIGCP1 chr11    | - | 33097112 | 33098006 | 895  |
| ENSG000001 | 1.068702 | 4.120944 | -1.732   | 0.1582    | 0.23758   | FAM209B chr20   | + | 55108302 | 55111576 | 694  |
| ENSG000001 | 1.649304 | 0.357707 | 1.6361   | 0.29742   | 0.39936   | AC004692. chr7  | + | 43313758 | 43314181 | 424  |
| ENSG000001 | 5924.665 | 2744.503 | 1.1096   | 1.32E-28  | 1.60E-27  | CLIC1 chr6      | - | 31698358 | 31707540 | 1560 |
| ENSG000001 | 0.580602 | 0.343138 | 0.37443  | 0.8337    | NA        | HMG2P3C chr7    | + | 42152964 | 42153219 | 256  |
| ENSG000001 | 2575.122 | 1768.689 | 0.54087  | 0.000382  | 0.001007  | DDAH2 chr6      | - | 31694815 | 31698394 | 1688 |
| ENSG000001 | 0        | 0.357707 | -0.41864 | 0.81278   | NA        | RPS2P52 chr19   | + | 690381   | 691175   | 795  |
| ENSG000001 | 0        | 0.357707 | -0.41864 | 0.81278   | NA        | POLD2P1 chr5    | + | 92603135 | 92604131 | 997  |
| ENSG000001 | 0.36308  | 3.91376  | -2.7502  | 0.054214  | 0.095421  | RAB5CP1 chr10   | - | 76183193 | 76183772 | 580  |

|            |          |          |          |          |          |           |       |   |          |          |      |
|------------|----------|----------|----------|----------|----------|-----------|-------|---|----------|----------|------|
| ENSG000001 | 0        | 0.686276 | -0.84936 | 0.6309   | NA       | ANAPC10P  | chr1  | + | 52719293 | 52719848 | 556  |
| ENSG000001 | 7.323377 | 11.9533  | -0.693   | 0.31336  | 0.41564  | SERBP1P1  | chrX  | + | 68003315 | 68004909 | 1160 |
| ENSG000001 | 2105.92  | 4196.521 | -0.99289 | 5.15E-12 | 2.78E-11 | RPS29     | chr14 | - | 50043390 | 50065408 | 1374 |
| ENSG000001 | 10.59126 | 17.34401 | -0.68501 | 0.21044  | 0.30061  | RP4-694B1 | chr20 | + | 25604681 | 25658710 | 4666 |
| ENSG000001 | 0        | 0.594029 | -0.81444 | 0.64499  | NA       | RPS10P14  | chr7  | + | 37415125 | 37415626 | 502  |
| ENSG000001 | 652.5828 | 501.8259 | 0.37768  | 0.003131 | 0.007199 | RPL23AP7  | chr19 | + | 59084870 | 59111168 | 3282 |
| ENSG000001 | 0        | 2.338857 | -2.7203  | 0.085631 | 0.14161  | RP11-284B | chrX  | - | 63524927 | 63526613 | 1436 |
| ENSG000001 | 0.290301 | 1.698704 | -1.6722  | 0.28779  | 0.38931  | RP11-342F | chr5  | + | 78806257 | 78806742 | 486  |
| ENSG000001 | 2.229907 | 3.80936  | -0.69175 | 0.52389  | 0.62621  | CTC-451P1 | chr5  | - | 78579955 | 78580741 | 787  |
| ENSG000001 | 12.23021 | 16.84223 | -0.45502 | 0.37524  | 0.47947  | ATP6V1G2  | chr6  | - | 31512239 | 31516204 | 1588 |
| ENSG000001 | 0.36308  | 2.117104 | -1.7886  | 0.27236  | 0.37188  | MT1P1     | chr9  | - | 98175549 | 98175731 | 183  |
| ENSG000001 | 277.5856 | 819.753  | -1.5574  | 2.94E-21 | 2.63E-20 | ZNF134    | chr19 | + | 58125601 | 58134724 | 3547 |
| ENSG000001 | 1.524285 | 3.757532 | -1.0661  | 0.40474  | 0.5096   | ACTBP2    | chr5  | + | 77080705 | 77081827 | 1123 |
| ENSG000001 | 0.580602 | 0        | 0.8036   | 0.6494   | NA       | RP11-385J | chr2  | - | 9411421  | 9411757  | 337  |
| ENSG000001 | 0.580602 | 10.29018 | -3.5543  | 0.0012   | 0.002941 | CTD-2224J | chr19 | + | 54006646 | 54015941 | 887  |
| ENSG000001 | 0.36308  | 0.357707 | -0.00212 | 0.99905  | NA       | RP11-452G | chr11 | + | 17215036 | 17215855 | 454  |
| ENSG000001 | 10.13649 | 8.41826  | 0.25608  | 0.70101  | 0.77757  | DDX47     | chr12 | + | 12966250 | 12982915 | 2689 |
| ENSG000001 | 0.632843 | 0.343138 | 0.49756  | 0.77728  | NA       | RP11-449L | chr11 | - | 16505631 | 16506218 | 588  |
| ENSG000001 | 1.027626 | 2.367995 | -0.9604  | 0.50663  | 0.61015  | OLA1P1    | chr22 | - | 42503769 | 42504957 | 1189 |
| ENSG000001 | 7.084503 | 21.3613  | -1.5341  | 0.006778 | 0.014707 | ZNF888    | chr19 | - | 53418449 | 53426723 | 551  |
| ENSG000001 | 123.7859 | 228.1647 | -0.87497 | 0.001592 | 0.003823 | ZNF845    | chr19 | + | 53837002 | 53858122 | 4311 |
| ENSG000001 | 0.705622 | 0.686276 | 0.017556 | 0.99188  | NA       | KLRK1     | chr12 | - | 10524952 | 10544473 | 2064 |
| ENSG000001 | 0        | 1.188058 | -1.268   | 0.47398  | NA       | AC017028  | chr2  | - | 2.4E+08  | 2.4E+08  | 264  |
| ENSG000001 | 0.36308  | 0        | 0.4146   | 0.81455  | NA       | CFL1P5    | chr5  | - | 68609198 | 68609699 | 502  |
| ENSG000001 | 77.10752 | 38.35089 | 0.99896  | 0.000487 | 0.001267 | RP11-3J10 | chr9  | + | 37885680 | 37886387 | 708  |
| ENSG000001 | 2.738544 | 1.98115  | 0.39388  | 0.73571  | 0.80501  | SUGT1P2   | chr3  | + | 32794402 | 32795393 | 992  |
| ENSG000001 | 31.97321 | 4.960159 | 2.622    | 1.86E-06 | 6.49E-06 | AC098614  | chr3  | + | 27674467 | 27675211 | 745  |
| ENSG000001 | 568.6993 | 291.4693 | 0.96117  | 6.45E-10 | 3.03E-09 | EMP2      | chr16 | - | 10622279 | 10674555 | 5197 |
| ENSG000001 | 0.923144 | 0.951736 | -0.02288 | 0.98842  | NA       | VDAC1P2   | chrX  | - | 49397103 | 49397952 | 850  |
| ENSG000001 | 1.068702 | 1.730259 | -0.54377 | 0.72022  | 0.79307  | RP11-12M  | chr22 | - | 41470184 | 41471243 | 1060 |
| ENSG000001 | 274.2723 | 106.865  | 1.3514   | 3.60E-06 | 1.21E-05 | KCTD11    | chr17 | + | 7255208  | 7258258  | 3051 |
| ENSG000001 | 3.092251 | 3.930745 | -0.33983 | 0.7326   | 0.80242  | RPL21P75  | chr7  | + | 20042346 | 20042909 | 564  |
| ENSG000001 | 3.82697  | 3.899191 | -0.01932 | 0.98432  | 0.99109  | CTD-2270N | chr15 | - | 48022341 | 48023132 | 792  |
| ENSG000001 | 0        | 0.357707 | -0.41864 | 0.81278  | NA       | XX-C2158C | chr6  | + | 1.71E+08 | 1.71E+08 | 758  |
| ENSG000001 | 0.290301 | 0        | 0.4146   | 0.81455  | NA       | EEF1B2P2  | chr5  | - | 67455046 | 67455721 | 676  |
| ENSG000001 | 47.80252 | 52.63821 | -0.14504 | 0.65285  | 0.73804  | C8orf44   | chr8  | + | 67579850 | 67597799 | 1835 |
| ENSG000001 | 20.42629 | 30.73867 | -0.58837 | 0.17901  | 0.26305  | YBX1P10   | chr9  | - | 35971341 | 35972315 | 975  |
| ENSG000001 | 0.632843 | 3.558469 | -2.0483  | 0.1205   | 0.18946  | TAF9BP1   | chr3  | + | 25796416 | 25797161 | 746  |
| ENSG000001 | 4.12925  | 1.684135 | 1.1481   | 0.30044  | 0.40197  | AC092798  | chr3  | + | 25790979 | 25791387 | 409  |
| ENSG000001 | 0.72616  | 0        | 0.85004  | 0.63064  | NA       | RPL7AP64  | chr17 | + | 7044249  | 7044911  | 663  |
| ENSG000001 | 2.540746 | 16.26518 | -2.5105  | 0.001552 | 0.003737 | NPM1P6    | chr8  | + | 62114909 | 62115779 | 871  |
| ENSG000001 | 4.87432  | 4.617021 | 0.096914 | 0.92007  | 0.94625  | RPL13AP7  | chr21 | + | 26734135 | 26734745 | 611  |
| ENSG000001 | 95.43152 | 141.9445 | -0.57062 | 0.016534 | 0.0332   | AC005003  | chr22 | + | 31742875 | 31744670 | 1796 |
| ENSG000001 | 5.882222 | 175.3209 | -4.8198  | 7.21E-30 | 9.16E-29 | PPM1N     | chr19 | + | 45992035 | 46005768 | 1953 |
| ENSG000001 | 5.560218 | 3.169208 | 0.7338   | 0.42004  | 0.52551  | RPL3P6    | chr5  | - | 60686495 | 60687698 | 1204 |
| ENSG000001 | 0        | 0.357707 | -0.41864 | 0.81278  | NA       | CEACAM16  | chr19 | + | 45202421 | 45213986 | 1701 |
| ENSG000001 | 10.07227 | 4.914036 | 0.99181  | 0.16201  | 0.2423   | SLC23A3   | chr2  | - | 2.2E+08  | 2.2E+08  | 4222 |
| ENSG000001 | 52.9783  | 100.6616 | -0.92106 | 0.000884 | 0.002212 | LTB4R     | chr14 | + | 24780656 | 24787242 | 4110 |
| ENSG000001 | 3.04001  | 9.961609 | -1.637   | 0.040338 | 0.073919 | CTB-50E14 | chr19 | + | 42901280 | 43156507 | 2383 |
| ENSG000001 | 9.596151 | 11.80922 | -0.29682 | 0.62179  | 0.71229  | LTB4R2    | chr14 | + | 24774940 | 24781259 | 3092 |
| ENSG000001 | 258.2194 | 229.1542 | 0.17419  | 0.38303  | 0.48713  | DNASE1    | chr16 | + | 3661729  | 3730144  | 4731 |
| ENSG000001 | 0.580602 | 0.357707 | 0.37639  | 0.83285  | NA       | MDP1      | chr14 | - | 24683143 | 24685276 | 889  |
| ENSG000001 | 0.632843 | 0        | 0.81931  | 0.64303  | NA       | AC011500  | chr19 | + | 39930212 | 39932082 | 468  |
| ENSG000001 | 4220.09  | 4349.1   | -0.04344 | 0.79108  | 0.85123  | CSNK1E    | chr22 | - | 38686697 | 38794527 | 2791 |
| ENSG000001 | 0        | 0.357707 | -0.41864 | 0.81278  | NA       | MSRB1P1   | chr19 | - | 39745556 | 39745909 | 354  |
| ENSG000001 | 15.8919  | 3.815808 | 1.992    | 0.007617 | 0.016361 | IRF9      | chr14 | + | 24630262 | 24635774 | 1838 |
| ENSG000001 | 95.0783  | 80.67697 | 0.23097  | 0.4006   | 0.50533  | GALT      | chr9  | + | 34638130 | 34651032 | 2566 |
| ENSG000001 | 0        | 3.928329 | -3.2035  | 0.047445 | 0.085018 | UBE1      | chr11 | - | 5289582  | 5526847  | 906  |
| ENSG000001 | 0        | 74.56278 | -7.7556  | 1.74E-12 | 9.71E-12 | CLDN9     | chr16 | + | 3062457  | 3064506  | 2050 |
| ENSG000001 | 0        | 1.280305 | -1.6305  | 0.35731  | NA       | SEPHS1P6  | chr2  | + | 2.01E+08 | 2.01E+08 | 1179 |
| ENSG000001 | 0.685084 | 2.38498  | -1.4135  | 0.33521  | 0.43884  | RP11-314A | chr17 | - | 4608111  | 4608512  | 402  |
| ENSG000001 | 0        | 0.357707 | -0.41864 | 0.81278  | NA       | RP1-102E2 | chr12 | - | 6518803  | 6519179  | 377  |
| ENSG000001 | 0        | 0.937167 | -1.2408  | 0.48662  | NA       | KRT18P17  | chr3  | - | 12828892 | 12830170 | 1279 |
| ENSG000001 | 853.225  | 95.6131  | 3.1507   | 6.29E-50 | 1.44E-48 | ITGA1     | chr5  | + | 52083730 | 52252327 | 8044 |
| ENSG000001 | 0        | 0.700845 | -0.87835 | 0.62047  | NA       | RPS10P2   | chr20 | + | 14738209 | 14738702 | 494  |

|            |          |          |          |          |          |                 |   |          |          |      |
|------------|----------|----------|----------|----------|----------|-----------------|---|----------|----------|------|
| ENSG000001 | 0        | 0.715414 | -0.84936 | 0.6309   | NA       | AC018867. chr2  | + | 1.87E+08 | 1.87E+08 | 57   |
| ENSG000001 | 0.685084 | 0.357707 | 0.4822   | 0.78686  | NA       | KRT18P29 chr2   | - | 1.83E+08 | 1.83E+08 | 1267 |
| ENSG000001 | 21.28602 | 8.626317 | 1.2284   | 0.11555  | 0.18287  | AC074286. chr2  | - | 1.78E+08 | 1.78E+08 | 5202 |
| ENSG000001 | 1.379541 | 0        | 1.686    | 0.34092  | NA       | CHCHD4P4 chr3   | - | 11275942 | 11276268 | 327  |
| ENSG000001 | 148.7346 | 65.14108 | 1.1756   | 7.61E-05 | 0.00022  | NUDT19 chr19    | + | 33182867 | 33204702 | 2967 |
| ENSG000001 | 4.627701 | 103.1721 | -4.4039  | 7.30E-21 | 6.39E-20 | ZNF726 chr19    | + | 24097678 | 24127961 | 2473 |
| ENSG000001 | 0.975385 | 1.058552 | -0.06268 | 0.96813  | 0.98204  | RP11-264F chr12 | - | 4433538  | 4433977  | 440  |
| ENSG000001 | 20.12743 | 83.56353 | -2.0355  | 3.18E-07 | 1.19E-06 | RP11-15H2 chr19 | - | 23442708 | 23457053 | 2651 |
| ENSG000001 | 11.04766 | 95.43593 | -3.0632  | 2.49E-16 | 1.75E-15 | CTD-2561J chr19 | + | 21565667 | 21569979 | 1764 |
| ENSG000001 | 7.46812  | 5.164927 | 0.49823  | 0.52282  | 0.62537  | TAX1BP3 chr17   | - | 3566196  | 3571976  | 1377 |
| ENSG000001 | 0.653381 | 0.654722 | -0.00313 | 0.9985   | NA       | RPL7AP14 chr20  | - | 36073135 | 36073936 | 802  |
| ENSG000001 | 0        | 0.297015 | -0.41864 | 0.81278  | NA       | AC007277. chr2  | - | 1.71E+08 | 1.72E+08 | 2189 |
| ENSG000001 | 99.34309 | 205.6758 | -1.0519  | 8.88E-08 | 3.48E-07 | AP1G2 chr14     | - | 24028774 | 24037279 | 3298 |
| ENSG000001 | 1.286224 | 2.482932 | -0.81817 | 0.51849  | 0.62119  | AC078899. chr19 | + | 20368529 | 20370227 | 1185 |
| ENSG000001 | 13.80853 | 594.482  | -5.3904  | 7.15E-78 | 2.93E-76 | ZNF90 chr19     | + | 20188803 | 20237885 | 2310 |
| ENSG000001 | 1.286224 | 1.698704 | -0.3154  | 0.8069   | 0.86357  | RP11-414F chr10 | - | 6239575  | 6244656  | 438  |
| ENSG000001 | 541.885  | 417.4242 | 0.37614  | 0.004914 | 0.010953 | CARKD chr13     | + | 1.11E+08 | 1.11E+08 | 2659 |
| ENSG000001 | 0.342542 | 8.871503 | -3.9341  | 0.001789 | 0.004266 | TM6SF2 chr19    | + | 19375173 | 19384200 | 1829 |
| ENSG000001 | 1.265686 | 3.380424 | -1.1847  | 0.34423  | 0.44817  | PGAM1P7 chrX    | - | 46506029 | 46506765 | 737  |
| ENSG000001 | 0.632843 | 0.343138 | 0.49756  | 0.77728  | NA       | MEF2B chr19     | - | 19256377 | 19281098 | 1683 |
| ENSG000001 | 8.809191 | 7.564476 | 0.19729  | 0.7797   | 0.84184  | AL353671. chr9  | + | 32556904 | 32557921 | 267  |
| ENSG000001 | 162.0246 | 171.4467 | -0.08062 | 0.69691  | 0.77397  | GANC chr15      | + | 42565431 | 42645864 | 4512 |
| ENSG000001 | 0.36308  | 0.594029 | -0.39069 | 0.82661  | NA       | RP6-105D1 chrX  | + | 44600333 | 44601210 | 878  |
| ENSG000001 | 2.468781 | 6.57877  | -1.2795  | 0.25803  | 0.35569  | RRM2P3 chrX     | - | 44168560 | 44169722 | 1163 |
| ENSG000001 | 0        | 0.937167 | -1.2408  | 0.48662  | NA       | RP6-218J1 chrX  | + | 43888578 | 43890167 | 1590 |
| ENSG000001 | 368.8418 | 111.5486 | 1.7069   | 4.97E-07 | 1.82E-06 | TLL3 chr3       | + | 9849770  | 9896822  | 5282 |
| ENSG000001 | 1685.687 | 2635.824 | -0.6443  | 1.06E-08 | 4.50E-08 | REPIN1 chr7     | + | 1.5E+08  | 1.5E+08  | 3292 |
| ENSG000001 | 0        | 0.343138 | -0.41864 | 0.81278  | NA       | ATP5F1P4 chr2   | + | 1.54E+08 | 1.54E+08 | 746  |
| ENSG000001 | 791.7782 | 977.2568 | -0.30269 | 0.01357  | 0.027755 | MRPL23 chr11    | + | 1968508  | 2005752  | 919  |
| ENSG000001 | 0        | 0.297015 | -0.41864 | 0.81278  | NA       | ARPC3P5 chr6    | + | 15935013 | 15935546 | 534  |
| ENSG000001 | 40.98876 | 53.2605  | -0.37964 | 0.20298  | 0.29184  | ZNF891 chr12    | - | 1.34E+08 | 1.34E+08 | 4118 |
| ENSG000001 | 1.597063 | 3.037286 | -0.7491  | 0.58199  | 0.67831  | PGAM1P4 chr3    | + | 9390071  | 9390952  | 882  |
| ENSG000001 | 2.520208 | 0        | 2.7948   | 0.078637 | 0.13159  | RP5-944M chr12  | + | 1.27E+08 | 1.27E+08 | 2458 |
| ENSG000001 | 488.1555 | 435.0561 | 0.1658   | 0.3596   | 0.46376  | SMIM7 chr19     | - | 16741562 | 16771253 | 2776 |
| ENSG000001 | 0.36308  | 0        | 0.4146   | 0.81455  | NA       | RPS11P7 chrX    | + | 39724678 | 39725142 | 465  |
| ENSG000001 | 0        | 4.629174 | -3.6706  | 0.012851 | 0.026418 | UCA1 chr19      | + | 15939757 | 15947130 | 2313 |
| ENSG000001 | 36.48787 | 45.43788 | -0.31738 | 0.37484  | 0.47909  | FBXO16 chr8     | - | 28205804 | 28347835 | 2983 |
| ENSG000001 | 2.157942 | 0.937167 | 0.88506  | 0.55577  | 0.65486  | RP11-1E1.1 chr4 | - | 78003556 | 78004279 | 724  |
| ENSG000001 | 573.3227 | 1050.747 | -0.8732  | 2.02E-08 | 8.35E-08 | TSPAN4 chr11    | + | 842808   | 867116   | 2777 |
| ENSG000001 | 0        | 1.073121 | -1.1788  | 0.50551  | NA       | RP11-549L chr10 | + | 1.12E+08 | 1.12E+08 | 468  |
| ENSG000001 | 0        | 0.297015 | -0.41864 | 0.81278  | NA       | AC011999. chr2  | - | 1.37E+08 | 1.37E+08 | 1024 |
| ENSG000001 | 15.12467 | 111.1562 | -2.8103  | 2.14E-07 | 8.13E-07 | CPSF1P1 chr22   | + | 32665368 | 32669097 | 3730 |
| ENSG000001 | 0        | 23.78998 | -6.186   | 9.14E-08 | 3.58E-07 | GNAQP1 chr2     | - | 1.32E+08 | 1.32E+08 | 1067 |
| ENSG000001 | 1865.723 | 1628.542 | 0.19589  | 0.24864  | 0.34487  | CPNE1 chr20     | - | 34213953 | 34252878 | 2204 |
| ENSG000001 | 498.9387 | 325.7447 | 0.61274  | 0.004793 | 0.010705 | ARL16 chr17     | - | 79648204 | 79650954 | 2343 |
| ENSG000001 | 0.632843 | 1.309443 | -0.75604 | 0.63051  | 0.71982  | RP11-247I chr22 | + | 31955469 | 31955925 | 457  |
| ENSG000001 | 1.306762 | 0        | 1.6479   | 0.35189  | NA       | SMCO1 chr3      | - | 1.96E+08 | 1.96E+08 | 1846 |
| ENSG000001 | 0        | 0.357707 | -0.41864 | 0.81278  | NA       | AC079776. chr2  | - | 1.31E+08 | 1.31E+08 | 400  |
| ENSG000001 | 0.653381 | 0.997859 | -0.4521  | 0.77012  | NA       | WEE2 chr7       | + | 1.41E+08 | 1.41E+08 | 3061 |
| ENSG000001 | 0.36308  | 0        | 0.4146   | 0.81455  | NA       | CTD-2116F chr17 | + | 77681075 | 77686081 | 4192 |
| ENSG000001 | 28.28242 | 18.03599 | 0.62335  | 0.19992  | 0.28852  | AC093726. chr7  | + | 1.55E+08 | 1.55E+08 | 2121 |
| ENSG000001 | 0        | 1.71569  | -1.6656  | 0.35029  | NA       | MAGEB1 chrX     | + | 30261847 | 30270155 | 1866 |
| ENSG000001 | 1.306762 | 1.66715  | -0.27299 | 0.85098  | 0.89521  | CTD-2206C chr5  | + | 31908467 | 31909292 | 521  |
| ENSG000001 | 0.943682 | 0.937167 | 0.002657 | 0.99865  | NA       | AC008686. chr19 | - | 13890884 | 13900972 | 384  |
| ENSG000001 | 19.88595 | 40.89284 | -1.0206  | 0.007568 | 0.016265 | LDHAP4 chr9     | - | 14921335 | 14922332 | 998  |
| ENSG000001 | 428.8826 | 632.2649 | -0.55804 | 4.66E-05 | 0.000138 | LYRM4 chr6      | - | 5108653  | 5261172  | 1489 |
| ENSG000001 | 127.2139 | 211.4627 | -0.72623 | 0.000639 | 0.001633 | MYCBP chr1      | - | 39328636 | 39347289 | 3231 |
| ENSG000001 | 2.229907 | 4.120944 | -0.7994  | 0.4469   | 0.55243  | PP12708 chr7    | + | 1.39E+08 | 1.39E+08 | 1921 |
| ENSG000001 | 1.576526 | 5.237772 | -1.484   | 0.21908  | 0.31075  | TDPIX2 chr9     | - | 12972842 | 12973437 | 596  |
| ENSG000001 | 0.290301 | 0        | 0.4146   | 0.81455  | NA       | SNRPEP9 chrX    | + | 24531567 | 24531804 | 238  |
| ENSG000001 | 0        | 5.71928  | -4.0796  | 0.003026 | 0.00697  | TMEM213 chr7    | + | 1.38E+08 | 1.39E+08 | 4167 |
| ENSG000001 | 0.342542 | 0.357707 | -0.0021  | 0.99906  | NA       | RP11-420C chr5  | - | 20304154 | 20305557 | 1404 |
| ENSG000001 | 284.2659 | 224.997  | 0.33484  | 0.088854 | 0.14613  | AC024560. chr3  | - | 1.97E+08 | 1.97E+08 | 1552 |
| ENSG000001 | 46.93422 | 36.8368  | 0.3332   | 0.47951  | 0.58379  | PRCD chr17      | + | 74523668 | 74549660 | 3372 |
| ENSG000001 | 0.36308  | 0        | 0.4146   | 0.81455  | NA       | AC073842. chr7  | - | 99737252 | 99738305 | 735  |

|            |          |          |          |          |          |            |       |   |          |          |       |
|------------|----------|----------|----------|----------|----------|------------|-------|---|----------|----------|-------|
| ENSG000001 | 7.955406 | 3.085825 | 1.3031   | 0.14493  | 0.22035  | RP11-513C  | chr3  | - | 1.94E+08 | 1.94E+08 | 2880  |
| ENSG000001 | 1.306762 | 0.937167 | 0.3445   | 0.82157  | 0.87444  | RP11-699L  | chr3  | - | 1.94E+08 | 1.94E+08 | 1615  |
| ENSG000001 | 542.7356 | 935.8988 | -0.78369 | 2.03E-07 | 7.72E-07 | ALG3       | chr3  | - | 1.84E+08 | 1.84E+08 | 1697  |
| ENSG000001 | 138.7692 | 88.10004 | 0.64685  | 0.044559 | 0.080436 | AMZ2P1     | chr17 | - | 62962668 | 62971694 | 3425  |
| ENSG000001 | 213.5936 | 70.50085 | 1.5961   | 9.47E-16 | 6.48E-15 | PLEKHM1P   | chr17 | - | 62775377 | 62833272 | 5014  |
| ENSG000001 | 1.701545 | 0        | 2.2228   | 0.18134  | NA       | DDX6P2     | chr13 | + | 86927755 | 86929524 | 1454  |
| ENSG000001 | 40.2608  | 118.2793 | -1.5506  | 9.25E-10 | 4.28E-09 | PTMAP5     | chr13 | + | 82264203 | 82264535 | 333   |
| ENSG000001 | 32.9468  | 22.18681 | 0.5642   | 0.14223  | 0.21676  | AC012487.  | chr2  | - | 1.09E+08 | 1.09E+08 | 574   |
| ENSG000001 | 1.027626 | 0.937167 | 0.069563 | 0.96674  | 0.98099  | XPOTP1     | chr20 | - | 32801301 | 32803698 | 2398  |
| ENSG000001 | 3.786708 | 2.012704 | 0.78311  | 0.51858  | 0.62125  | ST7-OT4    | chr7  | + | 1.17E+08 | 1.17E+08 | 1576  |
| ENSG000001 | 1.233984 | 10.47467 | -2.7665  | 0.004844 | 0.010809 | ZNF788     | chr19 | + | 12203078 | 12248050 | 3774  |
| ENSG000001 | 1.306762 | 0        | 1.6479   | 0.35189  | NA       | RP11-12D2  | chr9  | - | 5418373  | 5418976  | 604   |
| ENSG000001 | 3.028845 | 2.65044  | 0.16444  | 0.87763  | 0.9148   | UBE2V1P2   | chr3  | - | 1.75E+08 | 1.75E+08 | 440   |
| ENSG000001 | 109.4052 | 199.1691 | -0.86375 | 1.04E-05 | 3.34E-05 | SH3D21     | chr1  | + | 36771988 | 36790484 | 3179  |
| ENSG000001 | 487.6737 | 330.9595 | 0.55813  | 0.000184 | 0.000506 | AC073346.  | chr7  | - | 1.13E+08 | 1.13E+08 | 1070  |
| ENSG000001 | 6.950924 | 2.918317 | 1.1583   | 0.18273  | 0.26763  | RP11-642P  | chr12 | - | 1.04E+08 | 1.04E+08 | 3963  |
| ENSG000001 | 14.98074 | 28.61103 | -0.93422 | 0.063412 | 0.10947  | EEF1A1P12  | chr2  | - | 1.07E+08 | 1.07E+08 | 1346  |
| ENSG000001 | 0.290301 | 0        | 0.4146   | 0.81455  | NA       | RP11-135F  | chr12 | - | 1E+08    | 1E+08    | 787   |
| ENSG000001 | 1.08924  | 1.698704 | -0.52127 | 0.72727  | 0.79827  | CTAGE14P   | chr2  | - | 1.69E+08 | 1.69E+08 | 2403  |
| ENSG000001 | 3.028845 | 2.872193 | 0.044737 | 0.96717  | 0.98131  | C19orf38   | chr19 | + | 10947251 | 10980466 | 1223  |
| ENSG000001 | 0        | 0.700845 | -0.87835 | 0.62047  | NA       | IQCJ       | chr3  | + | 1.59E+08 | 1.59E+08 | 1460  |
| ENSG000001 | 0.632843 | 1.545765 | -0.94986 | 0.54388  | 0.64427  | TUBBP2     | chr13 | - | 41958909 | 41959319 | 411   |
| ENSG000001 | 68.38569 | 139.574  | -1.0231  | 8.90E-06 | 2.88E-05 | HNRNPA1P   | chr19 | - | 11776884 | 11777845 | 962   |
| ENSG000001 | 90.39625 | 73.63044 | 0.29309  | 0.28908  | 0.39061  | C17orf67   | chr17 | - | 54869274 | 54916134 | 2013  |
| ENSG000001 | 0        | 0.98329  | -1.2878  | 0.47019  | NA       | FAM188B2   | chr3  | - | 1.51E+08 | 1.51E+08 | 1071  |
| ENSG000001 | 14.63575 | 12.16451 | 0.2708   | 0.63161  | 0.72083  | AL591025.  | chr6  | + | 1.59E+08 | 1.59E+08 | 66    |
| ENSG000001 | 3.330311 | 3.319731 | 0.001421 | 0.99887  | 0.99961  | AC004980.  | chr7  | - | 76279718 | 76280214 | 497   |
| ENSG000001 | 4.646446 | 10.12267 | -1.0572  | 0.22934  | 0.32257  | AC010336.  | chr19 | - | 7963689  | 7968427  | 4739  |
| ENSG000001 | 0        | 2.932886 | -3.0734  | 0.043938 | 0.079479 | AZGP1P2    | chr7  | - | 1.01E+08 | 1.01E+08 | 345   |
| ENSG000001 | 1036.933 | 954.1574 | 0.12068  | 0.27976  | 0.38051  | FIS1       | chr7  | - | 1.01E+08 | 1.01E+08 | 1005  |
| ENSG000001 | 161.1532 | 48.38527 | 1.7241   | 6.77E-11 | 3.40E-10 | ANKRD36B   | chr1  | - | 1.68E+08 | 1.68E+08 | 1779  |
| ENSG000001 | 0        | 0.343138 | -0.41864 | 0.81278  | NA       | RP11-356J. | chr11 | + | 1.12E+08 | 1.12E+08 | 1166  |
| ENSG000001 | 76.62186 | 584.3127 | -2.9258  | 1.87E-63 | 5.88E-62 | SNURF      | chr15 | + | 25200133 | 25245423 | 3210  |
| ENSG000001 | 0.36308  | 0        | 0.4146   | 0.81455  | NA       | LGMNP1     | chr13 | - | 65532229 | 65533528 | 1300  |
| ENSG000001 | 0.975385 | 0        | 1.2767   | 0.47406  | NA       | AGGF1P1    | chr4  | + | 1.91E+08 | 1.91E+08 | 2073  |
| ENSG000001 | 17.42817 | 9.122394 | 0.89217  | 0.16058  | 0.24045  | ANG        | chr14 | + | 21152336 | 21167130 | 1222  |
| ENSG000001 | 62.71822 | 14.65315 | 2.0432   | 8.28E-06 | 2.69E-05 | RP11-108K  | chr10 | + | 1.35E+08 | 1.35E+08 | 4904  |
| ENSG000001 | 1.742621 | 1.545765 | 0.10262  | 0.94483  | 0.96451  | RP11-553K  | chr3  | - | 1.39E+08 | 1.39E+08 | 666   |
| ENSG000001 | 3.547834 | 0        | 3.356    | 0.02365  | 0.045912 | KRT8P14    | chrX  | - | 45491537 | 45492978 | 1442  |
| ENSG000001 | 0.290301 | 0.297015 | -0.00202 | 0.99909  | NA       | RP11-85F1  | chr3  | - | 1.37E+08 | 1.37E+08 | 1001  |
| ENSG000001 | 0.632843 | 1.920457 | -1.2102  | 0.42305  | 0.52846  | PDCL3P3    | chr3  | - | 17918947 | 17919661 | 715   |
| ENSG000001 | 0.290301 | 0.951736 | -0.90191 | 0.60254  | NA       | RPL39P5    | chr3  | - | 1.34E+08 | 1.34E+08 | 449   |
| ENSG000001 | 0        | 25.85297 | -6.2466  | 1.41E-07 | 5.45E-07 | C11orf93   | chr11 | + | 1.11E+08 | 1.11E+08 | 1414  |
| ENSG000001 | 86.16756 | 111.4894 | -0.37316 | 0.13428  | 0.20725  | RSBN1L-AS  | chr7  | - | 77286977 | 77325582 | 2029  |
| ENSG000001 | 0        | 2.468363 | -2.5197  | 0.13799  | 0.21141  | FOXO1B     | chr5  | - | 1.81E+08 | 1.81E+08 | 1527  |
| ENSG000001 | 0        | 0.891044 | -1.0625  | 0.54819  | NA       | MRPS21P6   | chr10 | + | 1.27E+08 | 1.27E+08 | 261   |
| ENSG000001 | 71.99253 | 56.66436 | 0.34703  | 0.17835  | 0.26219  | SPDYE3     | chr7  | + | 99905325 | 99919819 | 3185  |
| ENSG000001 | 0.580602 | 0        | 0.8036   | 0.6494   | NA       | AP001024.  | chr11 | + | 1.08E+08 | 1.08E+08 | 297   |
| ENSG000001 | 35.02096 | 34.50507 | 0.024123 | 0.95024  | 0.96892  | MBLAC1     | chr7  | + | 99724317 | 99726118 | 1499  |
| ENSG000001 | 0        | 0.654722 | -0.83442 | 0.63731  | NA       | AZGP1P1    | chr7  | + | 99578385 | 99585158 | 1181  |
| ENSG000001 | 2.697468 | 1.012429 | 1.1964   | 0.35403  | 0.45819  | AC025287.  | chr16 | - | 75728367 | 75734089 | 456   |
| ENSG000001 | 106.1486 | 95.27412 | 0.15639  | 0.47941  | 0.5837   | RP11-252A  | chr16 | - | 74366300 | 74402138 | 2355  |
| ENSG000001 | 0        | 184.2104 | -8.9095  | 7.25E-16 | 4.98E-15 | FOXI3      | chr2  | - | 88747726 | 88752131 | 1340  |
| ENSG000001 | 6.701698 | 1.638012 | 1.8569   | 0.053392 | 0.094161 | SOGA3      | chr6  | - | 1.28E+08 | 1.28E+08 | 11818 |
| ENSG000001 | 0.290301 | 0        | 0.4146   | 0.81455  | NA       | ATP5F1P2   | chr7  | + | 94367964 | 94368723 | 760   |
| ENSG000001 | 3.278071 | 1.964165 | 0.6504   | 0.56887  | 0.66619  | CTB-180A7  | chr19 | + | 6393820  | 6412415  | 644   |
| ENSG000001 | 12.54105 | 15.50123 | -0.30156 | 0.57073  | 0.66795  | RP11-394B  | chr16 | + | 70789001 | 70807154 | 4853  |
| ENSG000001 | 1.431782 | 0        | 1.7261   | 0.329    | NA       | AC133644.  | chr2  | - | 87865347 | 87866283 | 937   |
| ENSG000001 | 239.3165 | 281.3639 | -0.23277 | 0.37937  | 0.48346  | NEURL1B    | chr5  | + | 1.72E+08 | 1.72E+08 | 6424  |
| ENSG000001 | 1.939605 | 1.759397 | 0.14827  | 0.90921  | 0.93757  | RPL18P10   | chr13 | + | 50673467 | 50674004 | 538   |
| ENSG000001 | 1.628766 | 0.357707 | 1.626    | 0.30064  | 0.40208  | EFCAB9     | chr5  | + | 1.72E+08 | 1.72E+08 | 702   |
| ENSG000001 | 135.7623 | 139.8078 | -0.04049 | 0.86732  | 0.90758  | HAUS3      | chr4  | - | 2229191  | 2243891  | 5620  |
| ENSG000001 | 2.023549 | 0.937167 | 0.86489  | 0.53625  | 0.63727  | AC009967.  | chr2  | + | 1.71E+08 | 1.71E+08 | 793   |
| ENSG000001 | 3.289235 | 6.235632 | -0.84103 | 0.40773  | 0.51246  | VSTM5      | chr11 | - | 93551398 | 93583697 | 2969  |
| ENSG000001 | 39.86521 | 74.50519 | -0.8892  | 0.002503 | 0.005835 | RPS3AP26   | chr7  | - | 98015113 | 98015896 | 784   |

|            |          |          |          |          |          |           |       |   |          |          |      |
|------------|----------|----------|----------|----------|----------|-----------|-------|---|----------|----------|------|
| ENSG000001 | 2.334388 | 4.006007 | -0.7157  | 0.47224  | 0.57686  | RP11-121L | chr11 | + | 90015728 | 90017340 | 1613 |
| ENSG000001 | 6.576679 | 9.014706 | -0.43131 | 0.55774  | 0.65665  | KANSL1-AS | chr17 | + | 44270942 | 44274089 | 666  |
| ENSG000001 | 1.068702 | 1.248751 | -0.20946 | 0.89196  | 0.92501  | LCNL1     | chr9  | + | 1.4E+08  | 1.4E+08  | 3706 |
| ENSG000001 | 0.342542 | 0        | 0.4146   | 0.81455  | NA       | RP11-221J | chr3  | + | 1.02E+08 | 1.02E+08 | 2051 |
| ENSG000001 | 224.2756 | 119.5854 | 0.90318  | 2.24E-07 | 8.50E-07 | BBIP1     | chr10 | - | 1.13E+08 | 1.13E+08 | 4712 |
| ENSG000001 | 0        | 0.951736 | -1.2555  | 0.48145  | NA       | TRIM77    | chr11 | + | 89443467 | 89451040 | 1353 |
| ENSG000001 | 0.342542 | 0        | 0.4146   | 0.81455  | NA       | FAM149B1  | chr15 | + | 97300217 | 97301826 | 1610 |
| ENSG000001 | 202.6915 | 210.4485 | -0.05325 | 0.84063  | 0.88814  | LRRC37A4f | chr17 | - | 43578685 | 43627701 | 4939 |
| ENSG000001 | 0        | 3.261455 | -3.1777  | 0.038177 | 0.070435 | AC064872  | chr2  | - | 78639919 | 78640220 | 302  |
| ENSG000001 | 1.597063 | 4.972312 | -1.4395  | 0.19783  | 0.28597  | AC068831  | chr15 | + | 91565849 | 91579841 | 2159 |
| ENSG000001 | 10.08344 | 13.06771 | -0.36109 | 0.56272  | 0.66096  | AC091167  | chr15 | + | 90835194 | 90838915 | 779  |
| ENSG000001 | 1.286224 | 0.700845 | 0.71072  | 0.63507  | 0.72353  | AS3MT     | chr10 | + | 1.05E+08 | 1.05E+08 | 2404 |
| ENSG000001 | 5.124359 | 5.943449 | -0.19024 | 0.81759  | 0.87195  | FAM185BP  | chr7  | - | 76713203 | 76751433 | 716  |
| ENSG000001 | 180.1493 | 66.29504 | 1.4318   | 3.01E-10 | 1.44E-09 | RCN1P2    | chr13 | - | 45964486 | 45965402 | 915  |
| ENSG000001 | 0        | 13.31531 | -5.3699  | 9.30E-06 | 2.99E-05 | PLIN5     | chr19 | - | 4522543  | 4535236  | 2470 |
| ENSG000001 | 1.265686 | 0.357707 | 1.2256   | 0.46821  | NA       | SMARCE1P  | chr2  | + | 26372073 | 26373600 | 1216 |
| ENSG000001 | 0        | 1.043983 | -1.3473  | 0.44976  | NA       | AL139333  | chr6  | + | 83782692 | 83782854 | 54   |
| ENSG000001 | 60.75229 | 125.6429 | -1.0436  | 1.14E-05 | 3.62E-05 | CTB-13H5  | chr5  | + | 1.49E+08 | 1.49E+08 | 760  |
| ENSG000001 | 0        | 25.35602 | -6.2877  | 4.24E-08 | 1.71E-07 | SEC14L6   | chr22 | - | 30920465 | 30942669 | 1713 |
| ENSG000001 | 0        | 1.188058 | -1.268   | 0.47398  | NA       | SPINK13   | chr5  | + | 1.48E+08 | 1.48E+08 | 1022 |
| ENSG000001 | 0        | 0.343138 | -0.41864 | 0.81278  | NA       | HIGD1C    | chr12 | + | 51347705 | 51364289 | 371  |
| ENSG000001 | 0.72616  | 2.38498  | -1.3769  | 0.34774  | 0.45194  | NOTO      | chr2  | + | 73429386 | 73439641 | 2749 |
| ENSG000001 | 0.653381 | 0.357707 | 0.52032  | 0.76705  | NA       | KRT42P    | chr17 | - | 39782579 | 39796451 | 2895 |
| ENSG000001 | 1691.433 | 513.7587 | 1.7179   | 5.43E-40 | 9.53E-39 | PPME1     | chr11 | + | 73882144 | 73965748 | 4055 |
| ENSG000001 | 0        | 0.686276 | -0.84936 | 0.6309   | NA       | AC130709  | chr2  | - | 68755373 | 68756584 | 1212 |
| ENSG000001 | 168.1175 | 400.5877 | -1.2467  | 1.52E-06 | 5.34E-06 | STARD10   | chr11 | - | 72465774 | 72505213 | 1963 |
| ENSG000001 | 0.342542 | 0        | 0.4146   | 0.81455  | NA       | AC007389  | chr2  | + | 65893829 | 65894871 | 1043 |
| ENSG000001 | 1.286224 | 2.915901 | -0.99103 | 0.44311  | 0.54874  | ZNF705E   | chr11 | - | 71518637 | 71532594 | 3442 |
| ENSG000001 | 2.302685 | 3.636147 | -0.57251 | 0.63592  | 0.72423  | RPS15AP1  | chr20 | - | 21146846 | 21147236 | 391  |
| ENSG000001 | 1.317927 | 0        | 1.6383   | 0.35541  | NA       | GTF2IRD2P | chr7  | - | 72656902 | 72694143 | 3010 |
| ENSG000001 | 1.390706 | 1.531196 | -0.14169 | 0.92471  | 0.94942  | AC087491  | chr17 | + | 37775866 | 37778766 | 616  |
| ENSG000001 | 0        | 0.700845 | -0.87835 | 0.62047  | NA       | MEG3      | chr14 | + | 1.01E+08 | 1.01E+08 | 4867 |
| ENSG000001 | 0.290301 | 0.715414 | -0.50514 | 0.77701  | NA       | COPS8P2   | chr3  | + | 68194154 | 68194780 | 627  |
| ENSG000001 | 0        | 6.907338 | -4.3743  | 0.001049 | 0.002592 | LRRC37A11 | chr17 | + | 37183530 | 37209458 | 3717 |
| ENSG000001 | 0.995923 | 0.297015 | 1.0163   | 0.54122  | NA       | RP11-74E2 | chr6  | + | 66011354 | 66014960 | 3237 |
| ENSG000001 | 0.36308  | 0.343138 | -0.0021  | 0.99905  | NA       | RP11-323J | chr4  | - | 99172839 | 99182781 | 397  |
| ENSG000001 | 0.342542 | 0        | 0.4146   | 0.81455  | NA       | RBBP4P4   | chr6  | - | 58446019 | 58447307 | 1289 |
| ENSG000001 | 24.65741 | 16.22476 | 0.58448  | 0.20515  | 0.29441  | NUTM2D    | chr10 | + | 89117425 | 89130452 | 5543 |
| ENSG000001 | 4.781817 | 4.334576 | 0.15176  | 0.8596   | 0.90163  | CPEB1     | chr15 | - | 83211951 | 83317612 | 4882 |
| ENSG000001 | 2.116866 | 2.872193 | -0.41735 | 0.73224  | 0.80216  | HMGN2P1   | chr17 | - | 40904898 | 40905817 | 270  |
| ENSG000001 | 0.290301 | 0        | 0.4146   | 0.81455  | NA       | RP11-65N1 | chr9  | - | 1.28E+08 | 1.28E+08 | 246  |
| ENSG000001 | 90.95084 | 20.8822  | 2.1007   | 1.22E-09 | 5.58E-09 | EML6      | chr2  | + | 54950636 | 55199157 | 8320 |
| ENSG000001 | 3.205292 | 7.294184 | -1.088   | 0.23307  | 0.32667  | TMEM249   | chr8  | - | 1.46E+08 | 1.46E+08 | 1763 |
| ENSG000001 | 0.685084 | 1.248751 | -0.60628 | 0.71608  | 0.78964  | POLR3DP1  | chr10 | + | 76414714 | 76415889 | 1176 |
| ENSG000001 | 0        | 0.357707 | -0.41864 | 0.81278  | NA       | RP11-392A | chrX  | - | 96208629 | 96209194 | 566  |
| ENSG000001 | 0.36308  | 1.248751 | -1.1986  | 0.48045  | NA       | RP11-506B | chr10 | + | 76131293 | 76132174 | 882  |
| ENSG000001 | 0        | 1.416259 | -1.7181  | 0.33141  | NA       | DEFB133   | chr6  | - | 49913814 | 49917157 | 186  |
| ENSG000001 | 0.705622 | 0.715414 | -0.00991 | 0.99541  | NA       | RP11-114F | chr15 | - | 78232253 | 78236924 | 602  |
| ENSG000001 | 3.890376 | 3.9623   | -0.01827 | 0.98441  | 0.99109  | RP11-83B2 | chr12 | + | 1.25E+08 | 1.25E+08 | 1282 |
| ENSG000001 | 5.872849 | 8.510507 | -0.48946 | 0.57946  | 0.67587  | HNRNPA3P  | chrX  | + | 1.39E+08 | 1.39E+08 | 1137 |
| ENSG000001 | 20.65399 | 45.14725 | -1.1189  | 0.005507 | 0.012162 | RP11-27I1 | chr9  | + | 1.24E+08 | 1.24E+08 | 1017 |
| ENSG000001 | 1211.211 | 397.2805 | 1.6047   | 1.60E-34 | 2.39E-33 | ZSWIM8    | chr10 | + | 75545340 | 75561551 | 6075 |
| ENSG000001 | 8.154018 | 0.357707 | 3.8049   | 0.002764 | 0.006409 | KRT8P26   | chr11 | + | 65494410 | 65495685 | 1276 |
| ENSG000001 | 12.52231 | 0        | 5.2653   | 1.80E-05 | 5.60E-05 | RPL9P16   | chr4  | + | 1.7E+08  | 1.7E+08  | 567  |
| ENSG000001 | 0        | 0.357707 | -0.41864 | 0.81278  | NA       | C10orf105 | chr10 | - | 73471458 | 73497581 | 4837 |
| ENSG000001 | 6.079207 | 8.579321 | -0.46082 | 0.54966  | 0.64947  | ARHGFEF33 | chr2  | + | 39117021 | 39202590 | 4484 |
| ENSG000001 | 1.503747 | 1.234181 | 0.22285  | 0.88203  | 0.91786  | C12orf71  | chr12 | - | 27233991 | 27235447 | 957  |
| ENSG000001 | 0        | 5.398833 | -3.8832  | 0.007759 | 0.016637 | RP11-247C | chr15 | - | 74387926 | 74390758 | 459  |
| ENSG000001 | 799.5732 | 969.1201 | -0.27612 | 0.15468  | 0.23301  | IFRD2     | chr3  | - | 50325163 | 50330349 | 2275 |
| ENSG000001 | 0.632843 | 5.330019 | -2.5925  | 0.03563  | 0.066217 | AC090616  | chr17 | - | 30468245 | 30470154 | 1599 |
| ENSG000001 | 5.403496 | 4.08939  | 0.36117  | 0.7121   | 0.78631  | CAPN14    | chr2  | - | 31395924 | 31456724 | 3820 |
| ENSG000001 | 820.7718 | 1320.712 | -0.68551 | 4.39E-09 | 1.92E-08 | ZBED1     | chrX  | - | 2404455  | 2419008  | 4510 |
| ENSG000001 | 235.5951 | 217.57   | 0.11306  | 0.53314  | 0.63419  | AC005562  | chr17 | + | 28903482 | 28999807 | 4740 |
| ENSG000001 | 0.290301 | 5.424682 | -3.2643  | 0.015326 | 0.030999 | CTD-2574C | chr16 | + | 29874914 | 29879371 | 756  |
| ENSG000001 | 0.342542 | 14.16352 | -4.543   | 0.000216 | 0.000589 | RP11-429J | chr8  | + | 1.45E+08 | 1.45E+08 | 699  |

|            |          |          |          |          |          |                  |   |          |          |      |
|------------|----------|----------|----------|----------|----------|------------------|---|----------|----------|------|
| ENSG000001 | 0.342542 | 2.399549 | -2.0947  | 0.16547  | 0.24648  | RP11-54I5. chrX  | + | 55987641 | 55988915 | 1275 |
| ENSG000001 | 1076.116 | 864.4536 | 0.31511  | 0.004476 | 0.010043 | HNRNPUL2 chr11   | - | 62480102 | 62494821 | 5106 |
| ENSG000001 | 0        | 0.654722 | -0.83442 | 0.63731  | NA       | AC004870. chr7   | + | 47092391 | 47093272 | 882  |
| ENSG000001 | 58.31065 | 119.3271 | -1.0282  | 0.000272 | 0.000732 | METTL12 chr11    | + | 62432781 | 62435968 | 2870 |
| ENSG000001 | 0.36308  | 0.297015 | -0.00205 | 0.99908  | NA       | RPL21P1 chr12    | + | 1.23E+08 | 1.23E+08 | 507  |
| ENSG000001 | 169.8346 | 168.9514 | 0.009268 | 0.96189  | 0.97743  | SEPT7P2 chr7     | - | 45763379 | 45808617 | 3006 |
| ENSG000001 | 4.773258 | 16.61973 | -1.7433  | 0.019057 | 0.037793 | RP11-544I. chr14 | - | 64796149 | 64805317 | 1751 |
| ENSG000001 | 1.390706 | 8.737965 | -2.4501  | 0.016344 | 0.032859 | RP11-174C chr12  | + | 14818589 | 14910897 | 657  |
| ENSG000001 | 2.386629 | 3.777806 | -0.62566 | 0.56529  | 0.66321  | RP11-717C chr3   | - | 47643205 | 47646167 | 1428 |
| ENSG000001 | 15.46721 | 22.80353 | -0.55587 | 0.23683  | 0.33097  | RP11-726C chr12  | + | 9620148  | 9728864  | 7863 |
| ENSG000001 | 0        | 0.343138 | -0.41864 | 0.81278  | NA       | MS4A18 chr11     | + | 60496789 | 60511685 | 969  |
| ENSG000001 | 126.6492 | 82.92014 | 0.60564  | 0.094988 | 0.15471  | POLR2J4 chr7     | - | 43980494 | 44058774 | 6466 |
| ENSG000001 | 0.923144 | 2.38498  | -1.0855  | 0.42156  | 0.52708  | AC010468. chr5   | - | 1.11E+08 | 1.11E+08 | 817  |
| ENSG000001 | 0        | 1.012429 | -1.3162  | 0.46038  | NA       | MS4A4E chr11     | - | 59968726 | 60010561 | 1125 |
| ENSG000001 | 35.05169 | 293.6501 | -3.0507  | 1.91E-37 | 3.13E-36 | RP11-480I. chr1  | - | 2.03E+08 | 2.03E+08 | 1835 |
| ENSG000001 | 2.894453 | 0.343138 | 2.3612   | 0.109    | 0.17366  | RP11-37N2 chr8   | - | 1.25E+08 | 1.25E+08 | 1195 |
| ENSG000001 | 0        | 0.686276 | -0.84936 | 0.6309   | NA       | CYCSP55 chr6     | + | 34187216 | 34187843 | 311  |
| ENSG000001 | 6.607568 | 0        | 4.2473   | 0.002131 | 0.005021 | FER1L6 chr8      | + | 1.25E+08 | 1.25E+08 | 6051 |
| ENSG000001 | 1.068702 | 0        | 1.3672   | 0.44297  | NA       | AC008265. chr7   | + | 1.38E+08 | 1.38E+08 | 1549 |
| ENSG000001 | 14.57577 | 31.3327  | -1.0945  | 0.020842 | 0.040949 | MPRIIP1 chr3     | - | 44621430 | 44622518 | 1089 |
| ENSG000001 | 0        | 1.012429 | -1.3162  | 0.46038  | NA       | KRT16P3 chr17    | - | 20404826 | 20415670 | 1939 |
| ENSG000001 | 269.1625 | 378.171  | -0.48892 | 0.00091  | 0.002272 | DDX12P chr12     | - | 9570309  | 9600825  | 3929 |
| ENSG000001 | 8.673007 | 5.836634 | 0.5305   | 0.47731  | 0.58181  | MTCP1 chrX       | - | 1.54E+08 | 1.54E+08 | 2274 |
| ENSG000001 | 5.923298 | 12.89691 | -1.0865  | 0.084405 | 0.13995  | UPF3AP2 chr17    | - | 20278682 | 20280153 | 1132 |
| ENSG000001 | 0        | 0.343138 | -0.41864 | 0.81278  | NA       | RPL23AP6 chr20   | - | 10329805 | 10330276 | 472  |
| ENSG000001 | 2.540746 | 8.121246 | -1.52    | 0.1137   | 0.18026  | RP11-261C chr1   | - | 2.43E+08 | 2.43E+08 | 774  |
| ENSG000001 | 1.753786 | 2.543625 | -0.49252 | 0.69835  | 0.7753   | RAD51AP2 chr2    | - | 17691851 | 17699706 | 3724 |
| ENSG000001 | 0.342542 | 0        | 0.4146   | 0.81455  | NA       | ZFYVE9P2 chr2    | + | 17465559 | 17466162 | 604  |
| ENSG000001 | 0.290301 | 1.012429 | -0.95336 | 0.58114  | NA       | RP11-115L chr4   | - | 15732585 | 15733250 | 666  |
| ENSG000001 | 0.943682 | 4.63159  | -1.9809  | 0.087649 | 0.14449  | LINC00612 chr12  | - | 9208182  | 9217666  | 2213 |
| ENSG000001 | 0        | 3.801239 | -3.3733  | 0.025784 | 0.049623 | APOC1P1 chr19    | + | 45430061 | 45434643 | 731  |
| ENSG000001 | 0        | 1.340997 | -1.8899  | 0.26871  | NA       | KRT16P1 chr17    | + | 18335365 | 18346209 | 1958 |
| ENSG000001 | 3.475055 | 0.700845 | 1.9656   | 0.13675  | 0.21002  | SRSF9P1 chr21    | - | 37667471 | 37668000 | 530  |
| ENSG000001 | 2.032922 | 18.57007 | -3.0458  | 0.000127 | 0.000358 | AC004540. chr7   | + | 26438213 | 26538594 | 3202 |
| ENSG000001 | 0.995923 | 4.570898 | -1.9558  | 0.082786 | 0.13758  | AC005082. chr7   | + | 23210760 | 23234503 | 258  |
| ENSG000001 | 1.379541 | 13.48369 | -2.9774  | 0.005514 | 0.012175 | SMTNL1 chr11     | + | 57308979 | 57318108 | 2062 |
| ENSG000001 | 1.286224 | 3.480792 | -1.2611  | 0.27968  | 0.38046  | MED28P1 chr10    | + | 70750893 | 70751463 | 571  |
| ENSG000001 | 0        | 4.196206 | -3.5967  | 0.013501 | 0.027629 | RPL5P31 chr13    | - | 51735859 | 51736493 | 635  |
| ENSG000001 | 0        | 2.979009 | -3.0888  | 0.042781 | 0.077703 | OR7E5P chr11     | - | 55746179 | 55753881 | 1833 |
| ENSG000001 | 0        | 0.357707 | -0.41864 | 0.81278  | NA       | TMEM14D chr10    | - | 70304246 | 70304590 | 345  |
| ENSG000001 | 0.36308  | 0        | 0.4146   | 0.81455  | NA       | FAM177A1 chr4    | + | 99877133 | 99877918 | 473  |
| ENSG000001 | 0.685084 | 0        | 0.85004  | 0.63064  | NA       | USP8P1 chr6      | + | 31243349 | 31246531 | 3183 |
| ENSG000001 | 0.943682 | 0.715414 | 0.29201  | 0.863    | NA       | LINC00243 chr6   | - | 30766431 | 30798436 | 2052 |
| ENSG000001 | 6.202434 | 0.686276 | 2.7162   | 0.030576 | 0.057679 | C14orf182 chr14  | - | 50448430 | 50474238 | 4279 |
| ENSG000001 | 0        | 2.24661  | -2.6365  | 0.10117  | 0.16301  | AC104472. chr3   | - | 1.55E+08 | 1.55E+08 | 1583 |
| ENSG000001 | 7.023703 | 11.94846 | -0.75074 | 0.28141  | 0.38241  | HLA-F-AS1 chr6   | - | 29694378 | 29716826 | 2835 |
| ENSG000001 | 161.9795 | 170.736  | -0.07479 | 0.66665  | 0.74943  | ZSWIM7 chr17     | - | 15879874 | 15903031 | 2008 |
| ENSG000001 | 300.5301 | 50.26941 | 2.561    | 4.57E-20 | 3.86E-19 | ARHGEF28 chr5    | + | 72921983 | 73237818 | 8285 |
| ENSG000001 | 0.36308  | 5.480542 | -2.976   | 0.046985 | 0.084287 | TBC1D26 chr17    | + | 15635561 | 15649476 | 3772 |
| ENSG000001 | 8.495746 | 10.61875 | -0.30676 | 0.61383  | 0.70589  | LRRRC69 chr8     | + | 92114060 | 92231464 | 1861 |
| ENSG000001 | 2.770247 | 1.326428 | 0.88052  | 0.49789  | 0.60167  | AP000318. chr21  | + | 35445892 | 35732332 | 805  |
| ENSG000001 | 67.59531 | 7.33057  | 3.1598   | 3.72E-12 | 2.03E-11 | ISPD chr7        | - | 16130817 | 16460947 | 1859 |
| ENSG000001 | 0.290301 | 0        | 0.4146   | 0.81455  | NA       | RP11-467A chr16  | + | 16472912 | 16487811 | 1331 |
| ENSG000001 | 0.342542 | 0        | 0.4146   | 0.81455  | NA       | CTC-297N7 chr17  | + | 10286449 | 10527201 | 2272 |
| ENSG000001 | 0.685084 | 0.357707 | 0.4822   | 0.78686  | NA       | CHCHD3P3 chr1    | - | 27527325 | 27527964 | 640  |
| ENSG000001 | 15.17789 | 16.42141 | -0.10558 | 0.85191  | 0.89588  | PPIAP29 chr6     | + | 24976647 | 24977210 | 499  |
| ENSG000001 | 1.866827 | 0        | 2.3484   | 0.15622  | NA       | RP11-477A chr17  | - | 9705703  | 9725388  | 882  |
| ENSG000001 | 144.7748 | 156.9652 | -0.11459 | 0.5586   | 0.65756  | PARGP1 chr10     | + | 51623417 | 51732824 | 2455 |
| ENSG000001 | 0        | 0.594029 | -0.81444 | 0.64499  | NA       | AL591516. chr6   | - | 1.08E+08 | 1.08E+08 | 201  |
| ENSG000001 | 1.701545 | 1.188058 | 0.35971  | 0.80814  | 0.86459  | RPL7AP26 chr4    | - | 83411976 | 83412788 | 813  |
| ENSG000001 | 0.290301 | 2.07098  | -1.8977  | 0.2248   | 0.3174   | AKAP16BP chrX    | - | 1.18E+08 | 1.18E+08 | 2719 |
| ENSG000001 | 0.342542 | 0        | 0.4146   | 0.81455  | NA       | AC006465. chr7   | - | 7948931  | 7950080  | 1150 |
| ENSG000001 | 0        | 6.783537 | -3.9932  | 0.00908  | 0.019227 | AC129492. chr17  | + | 7982800  | 7984883  | 1804 |
| ENSG000001 | 0        | 0.357707 | -0.41864 | 0.81278  | NA       | HSPD1P7 chr21    | - | 30259602 | 30261594 | 1686 |
| ENSG000001 | 0        | 2.979009 | -3.0888  | 0.042781 | 0.077703 | DNAJA1P3 chrX    | - | 1.07E+08 | 1.07E+08 | 1194 |

|            |          |          |          |          |          |           |       |   |          |          |      |
|------------|----------|----------|----------|----------|----------|-----------|-------|---|----------|----------|------|
| ENSG000001 | 1.608228 | 0        | 1.9264   | 0.27132  | NA       | ACSM4     | chr12 | + | 7456880  | 7481320  | 2142 |
| ENSG000001 | 827.8343 | 521.8736 | 0.66446  | 3.90E-09 | 1.71E-08 | C22orf29  | chr22 | - | 19833661 | 19842419 | 6785 |
| ENSG000001 | 4.055658 | 8.608459 | -0.9967  | 0.22184  | 0.31401  | AL645728. | chr1  | + | 1510355  | 1511373  | 1019 |
| ENSG000001 | 0.943682 | 20.59493 | -4.0801  | 5.07E-06 | 1.68E-05 | COL28A1   | chr7  | - | 7395834  | 7575484  | 4277 |
| ENSG000001 | 3165.652 | 5725.108 | -0.85359 | 1.92E-12 | 1.07E-11 | PHB2      | chr12 | - | 7074490  | 7079988  | 1518 |
| ENSG000001 | 0.36308  | 1.188058 | -0.99796 | 0.5724   | NA       | AC114730. | chr2  | - | 2.43E+08 | 2.43E+08 | 739  |
| ENSG000001 | 0        | 0.357707 | -0.41864 | 0.81278  | NA       | DUSP8P2   | chr10 | - | 48173347 | 48175106 | 1760 |
| ENSG000001 | 64.63989 | 107.6563 | -0.73325 | 0.003052 | 0.007027 | RPL13P12  | chr17 | - | 17286691 | 17287326 | 636  |
| ENSG000001 | 1.939605 | 1.370136 | 0.43622  | 0.74566  | 0.81341  | GNL3LP1   | chr5  | - | 60187762 | 60189404 | 1643 |
| ENSG000001 | 37.80156 | 20.10126 | 0.9038   | 0.026044 | 0.050058 | CD27-AS1  | chr12 | - | 6548167  | 6560733  | 2364 |
| ENSG000001 | 202.5037 | 245.8582 | -0.28151 | 0.13406  | 0.20697  | NEURL4    | chr17 | - | 7218947  | 7232712  | 5200 |
| ENSG000001 | 3.620613 | 103.2235 | -4.6522  | 4.83E-12 | 2.61E-11 | GRID2IP   | chr7  | - | 6537093  | 6591067  | 3636 |
| ENSG000001 | 2.354926 | 0.594029 | 1.5036   | 0.29727  | 0.3992   | PRDX2P1   | chr13 | + | 30870284 | 30870872 | 589  |
| ENSG000001 | 0.580602 | 1.545765 | -0.94378 | 0.56695  | 0.6646   | PKMP5     | chr6  | + | 5972645  | 5974245  | 1601 |
| ENSG000001 | 2.293312 | 1.888903 | 0.22085  | 0.86548  | 0.9064   | DUSP8P4   | chr10 | + | 47254247 | 47256007 | 1761 |
| ENSG000001 | 6.193061 | 3.587607 | 0.73891  | 0.37125  | 0.47565  | C9orf38   | chr9  | - | 6467618  | 6470375  | 2758 |
| ENSG000001 | 15.64447 | 18.77967 | -0.26558 | 0.58502  | 0.6808   | AC027763. | chr17 | - | 6779954  | 6915668  | 1730 |
| ENSG000001 | 69.43108 | 6.272018 | 3.3997   | 2.78E-12 | 1.53E-11 | AC025171. | chr5  | + | 43041677 | 43045492 | 2423 |
| ENSG000001 | 0        | 0.357707 | -0.41864 | 0.81278  | NA       | RP11-471C | chrX  | + | 94839302 | 94839941 | 640  |
| ENSG000001 | 0.995923 | 1.591889 | -0.578   | 0.66992  | 0.75247  | NPM1P24   | chr10 | - | 74677399 | 74678292 | 894  |
| ENSG000001 | 0.36308  | 0.357707 | -0.00212 | 0.99905  | NA       | RPSSP3    | chr21 | - | 34853887 | 34854502 | 616  |
| ENSG000001 | 0        | 0.654722 | -0.83442 | 0.63731  | NA       | RP13-138P | chrX  | + | 91714669 | 91715951 | 1283 |
| ENSG000001 | 0        | 0.343138 | -0.41864 | 0.81278  | NA       | EEF1A1P29 | chrX  | - | 85415268 | 85416363 | 1096 |
| ENSG000001 | 0        | 5.003866 | -3.8948  | 0.005204 | 0.011559 | TERF1P4   | chrX  | - | 83003833 | 83004947 | 1115 |
| ENSG000001 | 5.258752 | 6.771384 | -0.35406 | 0.66379  | 0.74709  | RP11-217F | chrX  | - | 79528830 | 79565669 | 500  |
| ENSG000001 | 16.27731 | 34.82148 | -1.0816  | 0.027537 | 0.05263  | TTC3P1    | chrX  | - | 74960541 | 74966749 | 6081 |
| ENSG000001 | 304.7493 | 506.6616 | -0.73077 | 3.26E-05 | 9.84E-05 | UBXN2B    | chr8  | + | 59323823 | 59364060 | 5068 |
| ENSG000001 | 0        | 0.343138 | -0.41864 | 0.81278  | NA       | AL590763. | chrX  | - | 70747664 | 70750075 | 1545 |
| ENSG000001 | 3.444166 | 3.991438 | -0.21434 | 0.82471  | 0.87634  | CBWD7     | chr9  | + | 42668608 | 42714962 | 3326 |
| ENSG000001 | 0.653381 | 3.777806 | -2.1198  | 0.10503  | 0.16822  | C16orf90  | chr16 | - | 3543484  | 3545480  | 929  |
| ENSG000001 | 2.044087 | 8.311444 | -1.9079  | 0.033355 | 0.062382 | RP11-292B | chr9  | - | 40491622 | 40633282 | 1477 |
| ENSG000001 | 0        | 0.357707 | -0.41864 | 0.81278  | NA       | KRT18P32  | chr1  | + | 2.39E+08 | 2.39E+08 | 1287 |
| ENSG000001 | 135.6076 | 103.3954 | 0.38882  | 0.091544 | 0.14993  | AC141586. | chr16 | + | 2653351  | 2680495  | 2748 |
| ENSG000001 | 99.71228 | 316.3319 | -1.6559  | 1.07E-09 | 4.90E-09 | RP11-1023 | chr5  | + | 34190161 | 34193758 | 3598 |
| ENSG000001 | 94.951   | 185.5924 | -0.96446 | 1.24E-06 | 4.39E-06 | RP11-1023 | chr5  | - | 34164803 | 34244901 | 5001 |
| ENSG000001 | 2.73773  | 1.638012 | 0.66331  | 0.58622  | 0.68187  | RP11-629A | chr12 | + | 65153301 | 65173098 | 589  |
| ENSG000001 | 0        | 0.343138 | -0.41864 | 0.81278  | NA       | OR7E122P  | chr3  | + | 8729829  | 8730845  | 1017 |
| ENSG000001 | 0        | 0.357707 | -0.41864 | 0.81278  | NA       | LINC00269 | chrX  | + | 68399400 | 68429767 | 2173 |
| ENSG000001 | 0        | 0.357707 | -0.41864 | 0.81278  | NA       | MAPK6PS4  | chr8  | - | 47884099 | 47886240 | 2142 |
| ENSG000001 | 0        | 0.715414 | -0.84936 | 0.6309   | NA       | MUC5AC    | chr11 | + | 1151580  | 1222364  | 4012 |
| ENSG000001 | 1.068702 | 1.280305 | -0.23359 | 0.87825  | 0.91515  | RP11-8L18 | chr10 | - | 34964563 | 34964969 | 407  |
| ENSG000001 | 0        | 16.50479 | -5.6579  | 2.56E-06 | 8.79E-06 | GOLGA6B   | chr15 | + | 72947079 | 72958735 | 2134 |
| ENSG000001 | 3.40309  | 4.210775 | -0.30225 | 0.76155  | 0.82702  | FAM166B   | chr9  | - | 35561828 | 35563896 | 971  |
| ENSG000001 | 68.64168 | 36.42539 | 0.90414  | 0.047551 | 0.085183 | LINC00680 | chr6  | - | 58272352 | 58287779 | 2622 |
| ENSG000001 | 1042.509 | 1349.835 | -0.37182 | 0.022685 | 0.044224 | PEX26     | chr22 | + | 18560689 | 18613905 | 4519 |
| ENSG000001 | 6.007242 | 6.330295 | -0.07496 | 0.92056  | 0.94672  | AC091878. | chr5  | - | 17130137 | 17217156 | 2941 |
| ENSG000001 | 0        | 0.343138 | -0.41864 | 0.81278  | NA       | RP11-182A | chr9  | - | 35147407 | 35149181 | 1775 |
| ENSG000001 | 0.342542 | 0        | 0.4146   | 0.81455  | NA       | YWHAZP6   | chr9  | - | 34922181 | 34922918 | 738  |
| ENSG000001 | 0.705622 | 0        | 0.8807   | 0.6196   | NA       | RP11-316C | chr12 | - | 65812511 | 65813807 | 1297 |
| ENSG000001 | 1.628766 | 0.357707 | 1.626    | 0.30064  | 0.40208  | RBMXP2    | chr9  | + | 30689103 | 30690270 | 1168 |
| ENSG000001 | 24.37828 | 2.543625 | 3.0962   | 6.53E-06 | 2.14E-05 | C5orf49   | chr5  | - | 7830491  | 7851603  | 2385 |
| ENSG000001 | 15.39443 | 32.86713 | -1.0723  | 0.029279 | 0.055558 | UBE2QL1   | chr5  | + | 6448736  | 6495022  | 4317 |
| ENSG000001 | 1.814586 | 0        | 2.063    | 0.23747  | NA       | UBA52P6   | chr9  | + | 22012154 | 22012535 | 382  |
| ENSG000001 | 7.032262 | 1.888903 | 1.7177   | 0.077906 | 0.13053  | CYP51P3   | chr6  | + | 1.49E+08 | 1.49E+08 | 1428 |
| ENSG000001 | 1.233984 | 0        | 1.5686   | 0.37707  | NA       | RP11-308K | chr10 | + | 13912797 | 13913175 | 379  |
| ENSG000001 | 0.290301 | 5.727402 | -3.3467  | 0.012745 | 0.026224 | RP11-54D1 | chr9  | + | 14993310 | 15019727 | 1188 |
| ENSG000001 | 9.887266 | 9.886348 | -0.0161  | 0.98011  | 0.98907  | RP11-266K | chr12 | + | 8388011  | 8395160  | 795  |
| ENSG000001 | 3.64115  | 14.43214 | -1.9036  | 0.007375 | 0.015883 | AL137145. | chr10 | + | 6319650  | 6377938  | 3080 |
| ENSG000001 | 1.306762 | 3.025133 | -1.0314  | 0.40601  | 0.51082  | RP11-43F1 | chr5  | - | 987295   | 997423   | 3482 |
| ENSG000001 | 172.8814 | 380.0801 | -1.1342  | 1.59E-11 | 8.32E-11 | FASTKD5   | chr20 | - | 3127165  | 3140543  | 2874 |
| ENSG000001 | 159.2833 | 129.3893 | 0.29457  | 0.15836  | 0.23769  | GOLGA8B   | chr15 | - | 34817408 | 34880704 | 6488 |
| ENSG000001 | 76.48568 | 44.86084 | 0.76331  | 0.006532 | 0.014221 | DHRS4-AS1 | chr14 | - | 24407940 | 24458048 | 2852 |
| ENSG000001 | 0.632843 | 0        | 0.81931  | 0.64303  | NA       | KCNU1     | chr8  | + | 36641842 | 36793646 | 3745 |
| ENSG000001 | 0        | 0.640152 | -0.82869 | 0.63935  | NA       | AC025750. | chr2  | - | 42759906 | 42760582 | 379  |
| ENSG000001 | 0.290301 | 0.357707 | -0.00203 | 0.99908  | NA       | AKR1C7P   | chr10 | - | 5317136  | 5330433  | 895  |

|            |          |          |          |          |          |            |       |   |          |          |      |
|------------|----------|----------|----------|----------|----------|------------|-------|---|----------|----------|------|
| ENSG000001 | 1.306762 | 1.40169  | -0.05987 | 0.96773  | 0.98179  | LA16c-60H  | chr22 | + | 16122720 | 16123768 | 1049 |
| ENSG000001 | 31.42252 | 46.80889 | -0.56847 | 0.21503  | 0.30599  | HOMEZ      | chr14 | - | 23743250 | 23755326 | 3352 |
| ENSG000001 | 4.668776 | 9.564227 | -0.97606 | 0.22096  | 0.313    | C14orf164  | chr14 | + | 23654525 | 23742686 | 1670 |
| ENSG000001 | 0        | 0.297015 | -0.41864 | 0.81278  | NA       | RPS7P6     | chr4  | - | 17429319 | 17429897 | 579  |
| ENSG000001 | 4.294532 | 3.276024 | 0.35549  | 0.69969  | 0.77633  | HMGB3P24   | chr9  | - | 36303496 | 36304921 | 622  |
| ENSG000001 | 0.580602 | 0.357707 | 0.37639  | 0.83285  | NA       | RP11-198A  | chrX  | - | 46584599 | 46585253 | 655  |
| ENSG000001 | 0        | 0.343138 | -0.41864 | 0.81278  | NA       | RP5-1158E  | chrX  | + | 45772553 | 45773306 | 754  |
| ENSG000001 | 0.342542 | 0        | 0.4146   | 0.81455  | NA       | RP11-62E1  | chr9  | - | 3364329  | 3364792  | 464  |
| ENSG000001 | 4890.197 | 5449.977 | -0.15587 | 0.40167  | 0.50644  | DDX3X      | chrX  | + | 41192651 | 41223725 | 5334 |
| ENSG000001 | 36.4877  | 2.024857 | 3.9969   | 5.09E-08 | 2.03E-07 | CTD-3092A  | chr15 | + | 30762982 | 30799826 | 1502 |
| ENSG000001 | 1.451506 | 2.728118 | -0.68739 | 0.62668  | 0.71662  | RP13-395E  | chr15 | - | 32691157 | 32727434 | 1097 |
| ENSG000001 | 553.6981 | 314.1875 | 0.81671  | 1.74E-10 | 8.47E-10 | VPS16      | chr20 | + | 2821349  | 2847378  | 2750 |
| ENSG000001 | 1.742621 | 2.872193 | -0.64531 | 0.61237  | 0.7047   | AL135998.  | chr14 | - | 23286463 | 23291750 | 66   |
| ENSG000001 | 0        | 0.594029 | -0.81444 | 0.64499  | NA       | NPM1P12    | chr7  | + | 1.49E+08 | 1.49E+08 | 834  |
| ENSG000001 | 0        | 0.343138 | -0.41864 | 0.81278  | NA       | RPL6P30    | chrX  | - | 16216551 | 16217412 | 862  |
| ENSG000001 | 0        | 0.343138 | -0.41864 | 0.81278  | NA       | RP11-98L4  | chrX  | - | 9786279  | 9787509  | 1231 |
| ENSG000001 | 2.209369 | 0.640152 | 1.433    | 0.30634  | 0.40788  | ASS1P10    | chr5  | + | 1.45E+08 | 1.45E+08 | 1244 |
| ENSG000001 | 7.540899 | 13.60588 | -0.82803 | 0.20031  | 0.289    | AF131215.  | chr8  | - | 10983980 | 10987745 | 2179 |
| ENSG000001 | 0.705622 | 0        | 0.8807   | 0.6196   | NA       | MRPL3P1    | chr13 | - | 19878733 | 19879765 | 1033 |
| ENSG000001 | 0        | 0.297015 | -0.41864 | 0.81278  | NA       | FAM90A24   | chr8  | - | 7876951  | 7888168  | 2369 |
| ENSG000001 | 0        | 0.343138 | -0.41864 | 0.81278  | NA       | HSPD1P8    | chr13 | + | 79423366 | 79425343 | 1658 |
| ENSG000001 | 0        | 0.297015 | -0.41864 | 0.81278  | NA       | TMED11P    | chr4  | - | 1108985  | 1147514  | 690  |
| ENSG000001 | 0.72616  | 5.468389 | -2.5217  | 0.046137 | 0.082961 | FAM66B     | chr8  | - | 7159133  | 7212876  | 1432 |
| ENSG000001 | 45.21825 | 71.61129 | -0.6573  | 0.04851  | 0.086678 | MYL5       | chr4  | + | 667369   | 675822   | 2956 |
| ENSG000001 | 15.25825 | 0.357707 | 4.7183   | 5.25E-05 | 0.000155 | LINC00478  | chr21 | + | 17442842 | 17999716 | 3475 |
| ENSG000001 | 9.224512 | 6.543926 | 0.47096  | 0.57146  | 0.66861  | ACTG1P3    | chr20 | + | 1141228  | 1142341  | 1114 |
| ENSG000001 | 2.427705 | 0.357707 | 2.0959   | 0.16719  | 0.24853  | LINC00516  | chr14 | + | 19889386 | 19904890 | 783  |
| ENSG000001 | 0.342542 | 18.64217 | -4.948   | 2.77E-05 | 8.45E-05 | SCRT2      | chr20 | - | 642240   | 656823   | 3577 |
| ENSG000001 | 3.008307 | 0        | 3.0928   | 0.042511 | 0.077288 | HMGB3P7    | chr13 | + | 1.02E+08 | 1.02E+08 | 611  |
| ENSG000001 | 2.479946 | 1.652581 | 0.47332  | 0.71256  | 0.78662  | PSMA6P1    | chrY  | + | 15398518 | 15399258 | 741  |
| ENSG000001 | 27.23165 | 233.9851 | -3.0642  | 3.25E-15 | 2.16E-14 | MIR17HG    | chr13 | + | 92000074 | 92006833 | 2845 |
| ENSG000001 | 349.8288 | 162.2594 | 1.106    | 3.82E-09 | 1.68E-08 | ZNF407     | chr18 | + | 72265106 | 72777627 | 7948 |
| ENSG000001 | 65.61544 | 64.58734 | 0.022518 | 0.93532  | 0.95756  | MCM3AP-A   | chr21 | + | 47649131 | 47679304 | 2539 |
| ENSG000001 | 90.8158  | 171.0364 | -0.91332 | 1.78E-05 | 5.55E-05 | NPEPL1     | chr20 | + | 57264187 | 57294294 | 4684 |
| ENSG000001 | 0        | 1.638012 | -2.1885  | 0.18912  | NA       | CTAGE12P   | chr9  | - | 27608380 | 27610743 | 2364 |
| ENSG000001 | 0        | 0.297015 | -0.41864 | 0.81278  | NA       | RP5-827A1  | chr20 | + | 50351072 | 50351606 | 459  |
| ENSG000001 | 154.4059 | 88.55631 | 0.79729  | 0.000288 | 0.000774 | BX322557.  | chr21 | + | 46707967 | 46711653 | 1460 |
| ENSG000001 | 0        | 0.343138 | -0.41864 | 0.81278  | NA       | RP5-890O1  | chr20 | - | 45789477 | 45790339 | 863  |
| ENSG000001 | 0        | 34.74858 | -6.678   | 6.67E-09 | 2.87E-08 | RP5-981L2  | chr20 | - | 45042867 | 45087915 | 2722 |
| ENSG000001 | 0        | 0.343138 | -0.41864 | 0.81278  | NA       | KRTAP10-4  | chr21 | + | 45993606 | 45994987 | 1382 |
| ENSG000001 | 17.66802 | 55.30247 | -1.6334  | 0.000128 | 0.000359 | AP001053.  | chr21 | - | 45225639 | 45232448 | 4598 |
| ENSG000001 | 0.342542 | 0.343138 | -0.00208 | 0.99906  | NA       | AP000354.  | chr22 | - | 24665314 | 24666102 | 456  |
| ENSG000001 | 0.580602 | 43.59987 | -5.5479  | 5.67E-09 | 2.46E-08 | SKOR2      | chr18 | - | 44746293 | 44775554 | 3006 |
| ENSG000001 | 0        | 10.32985 | -4.9764  | 8.44E-05 | 0.000243 | SLAH3      | chr13 | - | 46354405 | 46425871 | 4030 |
| ENSG000001 | 0        | 0.951736 | -1.2555  | 0.48145  | NA       | CESSAP1    | chr22 | - | 23701790 | 23729918 | 1016 |
| ENSG000001 | 0.36308  | 8.371394 | -3.752   | 0.004832 | 0.010784 | BCRP3      | chr22 | + | 25028882 | 25046799 | 1457 |
| ENSG000001 | 0.36308  | 1.652581 | -1.6393  | 0.29595  | 0.39799  | CALM2P3    | chr13 | - | 41744836 | 41745284 | 449  |
| ENSG000001 | 0.975385 | 1.372552 | -0.33146 | 0.84042  | 0.88801  | LINC00598  | chr13 | - | 41025131 | 41055143 | 702  |
| ENSG000001 | 0.975385 | 1.294874 | -0.32515 | 0.82243  | 0.87489  | HNRNPA1P   | chr18 | - | 29991471 | 29993167 | 1538 |
| ENSG000001 | 29.83401 | 3.616746 | 2.9452   | 1.91E-06 | 6.65E-06 | XXbac-B56. | chr22 | + | 20804409 | 20806111 | 1703 |
| ENSG000001 | 6.630712 | 1.773966 | 1.7045   | 0.13977  | 0.21349  | AP000974.  | chr11 | - | 85563600 | 85565986 | 2387 |
| ENSG000001 | 0        | 1.949596 | -2.4359  | 0.13595  | 0.20899  | TPTE2P4    | chrY  | + | 28654360 | 28725837 | 1605 |
| ENSG000001 | 107.1007 | 153.584  | -0.51908 | 0.042381 | 0.077108 | PI4KAP1    | chr22 | - | 20383524 | 20427835 | 2637 |
| ENSG000001 | 1.794048 | 0.997859 | 0.70727  | 0.62096  | 0.71163  | IFIT1P1    | chr13 | + | 32958797 | 32960245 | 1449 |
| ENSG000001 | 1.524285 | 3.501809 | -0.96072 | 0.46901  | 0.5737   | AP005482.  | chr18 | + | 12658042 | 12658892 | 471  |
| ENSG000001 | 1.08924  | 3.974453 | -1.5785  | 0.24305  | 0.33844  | EFCAB8     | chr20 | + | 31446729 | 31549006 | 1281 |
| ENSG000001 | 0.975385 | 0        | 1.2767   | 0.47406  | NA       | LINC00189  | chr21 | + | 30565801 | 30660526 | 989  |
| ENSG000001 | 84.04711 | 64.69181 | 0.37431  | 0.1772   | 0.26081  | RP11-764K  | chr9  | - | 68427861 | 68455375 | 931  |
| ENSG000001 | 0.342542 | 0        | 0.4146   | 0.81455  | NA       | AL138815.  | chr13 | + | 26442061 | 26455095 | 105  |
| ENSG000001 | 0        | 0.700845 | -0.87835 | 0.62047  | NA       | ANKRD20A   | chr21 | - | 15281895 | 15352758 | 3717 |
| ENSG000001 | 0        | 0.343138 | -0.41864 | 0.81278  | NA       | AP003041.  | chr11 | + | 1.3E+08  | 1.3E+08  | 261  |
| ENSG000001 | 0        | 4.008423 | -3.5002  | 0.017901 | 0.035702 | GAB4       | chr22 | - | 17442826 | 17489112 | 2698 |
| ENSG000001 | 0.943682 | 0        | 1.2438   | 0.48556  | NA       | GRK6P1     | chr13 | + | 21893231 | 21895005 | 1711 |
| ENSG000001 | 0.580602 | 1.372552 | -0.71233 | 0.68356  | 0.76375  | ESRRAP1    | chr13 | - | 20134153 | 20135409 | 1257 |
| ENSG000001 | 0.342542 | 0.343138 | -0.00208 | 0.99906  | NA       | BCORP1     | chrY  | - | 21617317 | 21665039 | 5093 |

|            |          |          |          |          |          |             |       |   |          |          |      |
|------------|----------|----------|----------|----------|----------|-------------|-------|---|----------|----------|------|
| ENSG000001 | 0.36308  | 2.711133 | -2.277   | 0.12211  | 0.19166  | C20orf202   | chr20 | + | 1184098  | 1188918  | 1604 |
| ENSG000001 | 0        | 0.357707 | -0.41864 | 0.81278  | NA       | RP11-438C   | chr3  | - | 1.41E+08 | 1.41E+08 | 1269 |
| ENSG000001 | 5.871057 | 8.968582 | -0.57811 | 0.43575  | 0.54122  | HMx1        | chr4  | - | 8847802  | 8873543  | 1893 |
| ENSG000001 | 16.08986 | 7.905198 | 0.99867  | 0.10877  | 0.17337  | GUSBP9      | chr5  | - | 70435716 | 70585611 | 1211 |
| ENSG000001 | 0        | 16.64645 | -5.5775  | 9.26E-06 | 2.98E-05 | GCGR        | chr17 | + | 79762008 | 79771889 | 2051 |
| ENSG000001 | 0        | 2.915901 | -2.7723  | 0.095997 | 0.15615  | AC114730.   | chr2  | - | 2.43E+08 | 2.43E+08 | 472  |
| ENSG000001 | 0.995923 | 2.321872 | -1.0027  | 0.46392  | 0.56892  | CELA2B      | chr1  | + | 15792404 | 15817895 | 923  |
| ENSG000001 | 202.4791 | 151.8778 | 0.4143   | 0.035785 | 0.066488 | TMEM242     | chr6  | - | 1.58E+08 | 1.58E+08 | 1799 |
| ENSG000001 | 634.0621 | 304.9318 | 1.0545   | 1.64E-12 | 9.20E-12 | TMEM167E    | chr1  | + | 1.1E+08  | 1.1E+08  | 2798 |
| ENSG000001 | 0        | 0.297015 | -0.41864 | 0.81278  | NA       | MRPL20P1    | chr21 | + | 38366943 | 38367375 | 433  |
| ENSG000001 | 0.290301 | 0.343138 | -0.00202 | 0.99909  | NA       | RP13-996F   | chr15 | - | 82930438 | 82939159 | 4353 |
| ENSG000001 | 10.04138 | 1.84278  | 2.1915   | 0.025721 | 0.049518 | hsa-mir-60i | chr17 | - | 62745781 | 62778117 | 2861 |
| ENSG000001 | 0.290301 | 0        | 0.4146   | 0.81455  | NA       | LRRC37A14   | chr22 | - | 41585731 | 41586192 | 462  |
| ENSG000001 | 21.99083 | 106.2832 | -2.2384  | 8.34E-09 | 3.56E-08 | FAM72D      | chr1  | - | 1.44E+08 | 1.44E+08 | 2393 |
| ENSG000001 | 0        | 1.012429 | -1.3162  | 0.46038  | NA       | CFL1P6      | chr1  | - | 11051035 | 11051854 | 494  |
| ENSG000001 | 261.6275 | 118.2283 | 1.139    | 2.14E-09 | 9.61E-09 | TNFRSF25    | chr1  | - | 6521211  | 6526255  | 3483 |
| ENSG000001 | 146.1217 | 111.4683 | 0.38718  | 0.12053  | 0.18949  | SLC35E2     | chr1  | - | 1656277  | 1677431  | 2078 |
| ENSG000001 | 7.749049 | 2.24661  | 1.6508   | 0.065491 | 0.11257  | RP11-488L   | chr1  | - | 2.47E+08 | 2.47E+08 | 1670 |
| ENSG000001 | 2.479946 | 2.497501 | -0.03884 | 0.97716  | 0.98702  | RP11-551C   | chr1  | + | 2.47E+08 | 2.47E+08 | 1231 |
| ENSG000001 | 0.705622 | 0        | 0.8807   | 0.6196   | NA       | RFKP1       | chr1  | - | 2.41E+08 | 2.41E+08 | 428  |
| ENSG000001 | 0.36308  | 0        | 0.4146   | 0.81455  | NA       | RP11-506B   | chr6  | - | 1.13E+08 | 1.13E+08 | 1286 |
| ENSG000001 | 214.5915 | 169.3637 | 0.34051  | 0.11856  | 0.18705  | RP11-371I   | chr1  | - | 2.39E+08 | 2.39E+08 | 1537 |
| ENSG000001 | 0.995923 | 0.343138 | 1.0212   | 0.53809  | NA       | BTNL10      | chr1  | - | 2.29E+08 | 2.29E+08 | 869  |
| ENSG000001 | 2.302685 | 2.08555  | 0.1369   | 0.91596  | 0.9431   | ZNF847P     | chr1  | - | 2.28E+08 | 2.28E+08 | 1077 |
| ENSG000001 | 1.701545 | 1.591889 | 0.049522 | 0.96872  | 0.98247  | ZC3H11B     | chr1  | - | 2.2E+08  | 2.2E+08  | 3237 |
| ENSG000001 | 0        | 0.357707 | -0.41864 | 0.81278  | NA       | KRT18P12    | chr1  | + | 2.15E+08 | 2.15E+08 | 1273 |
| ENSG000001 | 0        | 0.594029 | -0.81444 | 0.64499  | NA       | QRSL1P1     | chr1  | - | 1.68E+08 | 1.68E+08 | 1540 |
| ENSG000001 | 4.242291 | 7.039261 | -0.69439 | 0.41348  | 0.51831  | RP11-9L18   | chr1  | - | 1.66E+08 | 1.66E+08 | 1969 |
| ENSG000001 | 0.36308  | 1.012429 | -0.95988 | 0.57711  | NA       | RP11-466F   | chr1  | + | 1.66E+08 | 1.66E+08 | 1216 |
| ENSG000001 | 0.342542 | 0.700845 | -0.57269 | 0.74414  | NA       | RP11-122G   | chr1  | + | 1.61E+08 | 1.61E+08 | 884  |
| ENSG000001 | 0        | 0.357707 | -0.41864 | 0.81278  | NA       | RP11-800A   | chr11 | - | 72926043 | 72926958 | 262  |
| ENSG000001 | 1.524285 | 163.0033 | -6.4037  | 1.93E-23 | 1.90E-22 | TSTD1       | chr1  | - | 1.61E+08 | 1.61E+08 | 813  |
| ENSG000001 | 0.36308  | 0        | 0.4146   | 0.81455  | NA       | RP11-550P   | chr1  | + | 1.59E+08 | 1.59E+08 | 609  |
| ENSG000001 | 0.995923 | 0.357707 | 1.0227   | 0.53712  | NA       | PDZK1P1     | chr1  | - | 1.46E+08 | 1.46E+08 | 3498 |
| ENSG000001 | 5.249379 | 1.40169  | 1.7417   | 0.10997  | 0.17497  | W12-1896C   | chr1  | - | 1.45E+08 | 1.45E+08 | 377  |
| ENSG000001 | 38.28192 | 19.30005 | 0.97873  | 0.013364 | 0.027381 | RP11-495P   | chr1  | - | 1.48E+08 | 1.48E+08 | 2210 |
| ENSG000001 | 1.722083 | 110.5414 | -5.8267  | 2.77E-18 | 2.15E-17 | RP11-426L   | chr1  | - | 1.13E+08 | 1.13E+08 | 1819 |
| ENSG000001 | 1.701545 | 2.742687 | -0.60622 | 0.60603  | 0.69925  | RP4-773A1   | chr1  | - | 1.12E+08 | 1.12E+08 | 1254 |
| ENSG000001 | 0        | 0.357707 | -0.41864 | 0.81278  | NA       | RP5-837M    | chr1  | - | 1.01E+08 | 1.01E+08 | 814  |
| ENSG000001 | 0        | 0.357707 | -0.41864 | 0.81278  | NA       | ST13P20     | chr1  | + | 82187378 | 82188753 | 1065 |
| ENSG000001 | 0.72616  | 2.324288 | -1.3538  | 0.3561   | 0.46041  | MARCKSL1    | chr1  | - | 1.39E+08 | 1.39E+08 | 976  |
| ENSG000001 | 65.27967 | 112.2299 | -0.77683 | 0.003714 | 0.00843  | CYB5RL      | chr1  | - | 54638009 | 54665709 | 5643 |
| ENSG000001 | 0.653381 | 0.357707 | 0.52032  | 0.76705  | NA       | RP4-635E8   | chr1  | + | 41564310 | 41564808 | 499  |
| ENSG000001 | 0.36308  | 0.357707 | -0.00212 | 0.99905  | NA       | RP11-334L   | chr1  | + | 39174603 | 39176562 | 1960 |
| ENSG000001 | 9.555889 | 58.65946 | -2.5829  | 9.44E-07 | 3.38E-06 | ZBTB8B      | chr1  | + | 32930670 | 32953461 | 4008 |
| ENSG000001 | 0        | 0.357707 | -0.41864 | 0.81278  | NA       | AL353354.   | chr1  | - | 28527013 | 28527152 | 66   |
| ENSG000001 | 0        | 1.903472 | -2.1599  | 0.21236  | NA       | RP11-4M2    | chr1  | - | 24334371 | 24335009 | 328  |
| ENSG000001 | 0        | 0.686276 | -0.84936 | 0.6309   | NA       | LACTBL1     | chr1  | - | 23279536 | 23291831 | 1641 |
| ENSG000001 | 585.1725 | 556.9522 | 0.070184 | 0.68025  | 0.76081  | CROCCP2     | chr1  | - | 16944751 | 16971178 | 2763 |
| ENSG000001 | 0.36308  | 7.417242 | -3.527   | 0.010751 | 0.022446 | C1orf167    | chr1  | + | 11821844 | 11849642 | 4560 |
| ENSG000001 | 5.528515 | 4.006007 | 0.44608  | 0.60205  | 0.69555  | TTC34       | chr1  | - | 2567415  | 2718286  | 3737 |
| ENSG000001 | 5.829981 | 2.171348 | 1.2652   | 0.21747  | 0.30886  | MMP23A      | chr1  | + | 1631369  | 1633249  | 1124 |
| ENSG000001 | 3.153051 | 12.03426 | -1.8042  | 0.031027 | 0.058404 | ATAD3C      | chr1  | + | 1385069  | 1405538  | 3859 |
| ENSG000001 | 14.38995 | 51.98497 | -1.8345  | 8.93E-06 | 2.88E-05 | RP11-490F   | chr12 | + | 1.04E+08 | 1.04E+08 | 765  |
| ENSG000001 | 0        | 1.248751 | -1.5848  | 0.37202  | NA       | KRT19P5     | chr12 | + | 95227923 | 95228934 | 1012 |
| ENSG000001 | 0.943682 | 0.357707 | 0.90033  | 0.60199  | NA       | RP3-354N1   | chr6  | - | 1.2E+08  | 1.2E+08  | 582  |
| ENSG000001 | 2.012384 | 6.877327 | -1.4959  | 0.24739  | 0.34347  | HIST1H1P5   | chr6  | + | 26195794 | 26195999 | 206  |
| ENSG000001 | 0.580602 | 0        | 0.8036   | 0.6494   | NA       | RP11-486E   | chr6  | - | 81265558 | 81266906 | 1349 |
| ENSG000001 | 0        | 0.297015 | -0.41864 | 0.81278  | NA       | RP11-360C   | chr6  | + | 10514515 | 10515206 | 692  |
| ENSG000001 | 0.685084 | 0        | 0.85004  | 0.63064  | NA       | RP1-182O1   | chr6  | - | 5817654  | 5818599  | 946  |
| ENSG000001 | 0.36308  | 0        | 0.4146   | 0.81455  | NA       | RPL37P15    | chr6  | - | 70808282 | 70808568 | 287  |
| ENSG000001 | 0        | 0.357707 | -0.41864 | 0.81278  | NA       | RP3-344J2   | chr6  | + | 1.01E+08 | 1.01E+08 | 984  |
| ENSG000001 | 0        | 2.618886 | -2.6151  | 0.12026  | 0.18917  | RPL12P2     | chr6  | + | 37059088 | 37059582 | 495  |
| ENSG000001 | 0        | 0.297015 | -0.41864 | 0.81278  | NA       | RAET1M      | chr6  | + | 1.5E+08  | 1.5E+08  | 596  |
| ENSG000001 | 0        | 0.343138 | -0.41864 | 0.81278  | NA       | RPSAP43     | chr6  | - | 1.14E+08 | 1.14E+08 | 625  |

|            |          |          |          |          |          |                 |   |          |          |      |
|------------|----------|----------|----------|----------|----------|-----------------|---|----------|----------|------|
| ENSG000001 | 0.342542 | 1.788535 | -1.3855  | 0.42741  | 0.53278  | RP1-91J24. chr6 | - | 1.45E+08 | 1.45E+08 | 591  |
| ENSG000001 | 0        | 0.594029 | -0.81444 | 0.64499  | NA       | IFI30 chr19     | + | 18283972 | 18288927 | 2116 |
| ENSG000001 | 0.975385 | 4.043266 | -1.6692  | 0.22803  | 0.32105  | IGSF23 chr19    | + | 45116940 | 45140081 | 989  |
| ENSG000001 | 0.685084 | 0        | 0.85004  | 0.63064  | NA       | RP3-391O2 chr6  | + | 34584315 | 34585035 | 721  |
| ENSG000001 | 1.370168 | 1.416259 | -0.02766 | 0.9864   | 0.99192  | RP3-355L5 chr6  | + | 1.06E+08 | 1.06E+08 | 747  |
| ENSG000001 | 0.342542 | 0        | 0.4146   | 0.81455  | NA       | RP1-95L4.3 chr6 | + | 1.44E+08 | 1.44E+08 | 381  |
| ENSG000001 | 0        | 2.979009 | -3.0888  | 0.042781 | 0.077703 | NUDT19P3 chr6   | - | 1.14E+08 | 1.14E+08 | 555  |
| ENSG000001 | 0        | 0.343138 | -0.41864 | 0.81278  | NA       | RP1-190J2 chr6  | - | 15103177 | 15104361 | 869  |
| ENSG000001 | 295.0822 | 118.8767 | 1.3035   | 1.44E-07 | 5.55E-07 | RP1-152L7 chr6  | + | 52529946 | 52533953 | 3039 |
| ENSG000001 | 0.995923 | 0.640152 | 0.45774  | 0.76749  | NA       | RP11-390P chr6  | - | 1.39E+08 | 1.39E+08 | 748  |
| ENSG000001 | 8.911067 | 0.343138 | 3.975    | 0.001258 | 0.003072 | RP11-57K1 chr6  | - | 1.19E+08 | 1.19E+08 | 2524 |
| ENSG000001 | 0.580602 | 1.698704 | -1.1048  | 0.46854  | 0.5732   | RP11-812L chr6  | + | 47530358 | 47530754 | 397  |
| ENSG000001 | 1.027626 | 2.589748 | -1.0994  | 0.43097  | 0.53651  | TUBB2BP1 chr6   | - | 3177278  | 3179998  | 871  |
| ENSG000001 | 0.870904 | 0.715414 | 0.19229  | 0.91324  | NA       | RPL17P26 chr6   | + | 56735989 | 56736541 | 553  |
| ENSG000001 | 13.29892 | 34.1434  | -1.3456  | 0.004852 | 0.010826 | RPS2P55 chrX    | - | 40794198 | 40795117 | 883  |
| ENSG000001 | 1.971308 | 3.010564 | -0.53261 | 0.6458   | 0.73251  | AC114776. chr2  | + | 1.11E+08 | 1.11E+08 | 387  |
| ENSG000001 | 25.94543 | 47.92726 | -0.87472 | 0.017493 | 0.034971 | AC009403. chr7  | - | 1.55E+08 | 1.55E+08 | 1008 |
| ENSG000001 | 2.31385  | 0.297015 | 2.0703   | 0.17427  | 0.2573   | RP11-350J. chr6 | + | 1.5E+08  | 1.5E+08  | 2176 |
| ENSG000001 | 0.995923 | 5.575205 | -2.1571  | 0.068133 | 0.1164   | AC131097. chr2  | - | 2.43E+08 | 2.43E+08 | 595  |
| ENSG000001 | 5.923298 | 5.033005 | 0.2284   | 0.78375  | 0.84514  | CCDC7 chr10     | + | 32735068 | 32863492 | 3998 |
| ENSG000001 | 0.975385 | 0.686276 | 0.34537  | 0.83826  | NA       | RPL21P65 chr6   | + | 1.07E+08 | 1.07E+08 | 466  |
| ENSG000001 | 0        | 0.640152 | -0.82869 | 0.63935  | NA       | HSPD1P10 chr6   | + | 88008490 | 88010165 | 1676 |
| ENSG000001 | 2.261609 | 0.891044 | 1.0258   | 0.47573  | 0.58032  | RP3-329A5 chr6  | - | 35246954 | 35247596 | 328  |
| ENSG000001 | 1.846289 | 0.357707 | 1.6637   | 0.31047  | 0.41244  | RP1-83M4. chr6  | - | 1.45E+08 | 1.45E+08 | 519  |
| ENSG000001 | 0        | 0.297015 | -0.41864 | 0.81278  | NA       | RP11-346C chr6  | + | 1.11E+08 | 1.11E+08 | 339  |
| ENSG000001 | 3.547834 | 2.338857 | 0.56134  | 0.58291  | 0.67895  | AC007401. chr2  | - | 36758948 | 36779411 | 430  |
| ENSG000001 | 0        | 0.343138 | -0.41864 | 0.81278  | NA       | RP1-13D1C chr6  | - | 16163608 | 16163993 | 386  |
| ENSG000001 | 4.73039  | 8.319566 | -0.79099 | 0.33872  | 0.44257  | PPIAP31 chr10   | - | 32477251 | 32477745 | 495  |
| ENSG000001 | 619.6901 | 267.1726 | 1.2104   | 1.76E-11 | 9.19E-11 | FNIP1 chr5      | - | 1.31E+08 | 1.31E+08 | 6393 |
| ENSG000001 | 0        | 2.66501  | -2.877   | 0.067583 | 0.11559  | RP3-375P9 chr6  | + | 34711953 | 34712450 | 498  |
| ENSG000001 | 0.342542 | 0        | 0.4146   | 0.81455  | NA       | LARP1P1 chr6    | + | 26164300 | 26164591 | 292  |
| ENSG000001 | 46.93259 | 20.34329 | 1.1777   | 0.003262 | 0.00748  | ANKRD18E chr6   | + | 39078097 | 39080728 | 2632 |
| ENSG000001 | 0        | 3.38284  | -3.2606  | 0.030247 | 0.057159 | RP11-360C chr6  | - | 10574982 | 10575460 | 479  |
| ENSG000001 | 0        | 0.951736 | -1.2555  | 0.48145  | NA       | RP11-277I. chr6 | - | 1.45E+08 | 1.45E+08 | 315  |
| ENSG000001 | 0        | 0.357707 | -0.41864 | 0.81278  | NA       | RP1-319M. chr6  | + | 38555099 | 38556305 | 1207 |
| ENSG000001 | 0        | 1.029414 | -1.1526  | 0.51496  | NA       | RP3-340H1 chr6  | + | 1.44E+08 | 1.44E+08 | 649  |
| ENSG000001 | 0.685084 | 2.401965 | -1.1634  | 0.49471  | 0.59848  | SP9 chr2        | + | 1.75E+08 | 1.75E+08 | 2554 |
| ENSG000001 | 0.975385 | 1.280305 | -0.3025  | 0.84299  | 0.88985  | CBX3P9 chr6     | - | 1.17E+08 | 1.17E+08 | 552  |
| ENSG000001 | 0.342542 | 3.480792 | -2.6153  | 0.068782 | 0.11733  | AC007249. chr2  | + | 10592445 | 10595678 | 494  |
| ENSG000001 | 1.027626 | 1.326428 | -0.26349 | 0.87249  | 0.91093  | RP1-34B20 chr6  | + | 26202384 | 26202882 | 499  |
| ENSG000001 | 0        | 0.297015 | -0.41864 | 0.81278  | NA       | AC018865. chr2  | + | 1.31E+08 | 1.31E+08 | 1152 |
| ENSG000001 | 0        | 1.248751 | -1.5848  | 0.37202  | NA       | UQCRFS1P. chr6  | - | 19638271 | 19639039 | 385  |
| ENSG000001 | 0.36308  | 4.303021 | -2.9367  | 0.031683 | 0.059557 | PRELID1P1 chr6  | + | 1.27E+08 | 1.27E+08 | 903  |
| ENSG000001 | 1.027626 | 0        | 1.1491   | 0.51623  | NA       | RP11-33E2 chr6  | + | 86441089 | 86441729 | 641  |
| ENSG000001 | 1.306762 | 2.056411 | -0.53107 | 0.68844  | 0.76773  | ISCA1P1 chr5    | - | 62072704 | 62073090 | 387  |
| ENSG000001 | 0.653381 | 3.24447  | -1.9316  | 0.13938  | 0.21312  | SYCE3 chr22     | - | 50989541 | 51001334 | 448  |
| ENSG000001 | 0        | 1.698704 | -2.2257  | 0.18075  | NA       | RP3-366N2 chr6  | + | 1.68E+08 | 1.68E+08 | 582  |
| ENSG000001 | 3.983692 | 0.343138 | 2.8312   | 0.040121 | 0.073589 | AC091801. chr7  | - | 3179868  | 3214287  | 988  |
| ENSG000001 | 0.580602 | 1.652581 | -1.0812  | 0.47855  | 0.58285  | RP11-474L chr6  | - | 76320674 | 76321661 | 831  |
| ENSG000001 | 0.342542 | 0.357707 | -0.0021  | 0.99906  | NA       | RP1-95L4.2 chr6 | - | 1.44E+08 | 1.44E+08 | 785  |
| ENSG000001 | 1.597063 | 1.66715  | -0.03824 | 0.97864  | 0.98818  | RP11-477E chr6  | - | 79777409 | 79777855 | 447  |
| ENSG000001 | 1.971308 | 1.370136 | 0.45076  | 0.73753  | 0.80652  | RPS16P5 chr6    | - | 53201741 | 53202144 | 404  |
| ENSG000001 | 40.62307 | 21.44226 | 0.91285  | 0.011329 | 0.023536 | CKLF chr16      | + | 66586466 | 66600331 | 669  |
| ENSG000001 | 67.60973 | 61.32992 | 0.13636  | 0.61693  | 0.70808  | RP11-64P1 chr13 | - | 52741844 | 52865692 | 3796 |
| ENSG000001 | 2.978396 | 3.336716 | -0.14254 | 0.90146  | 0.93194  | RP11-204C chrX  | - | 41535013 | 41535747 | 735  |
| ENSG000001 | 0.580602 | 2.589748 | -1.6532  | 0.24441  | 0.3401   | PTGES3P2 chr2   | + | 26045338 | 26045819 | 482  |
| ENSG000001 | 0.632843 | 0        | 0.81931  | 0.64303  | NA       | RP4-803A2 chr1  | + | 33445543 | 33446073 | 531  |
| ENSG000001 | 14.75979 | 3.414394 | 2.0003   | 0.018525 | 0.036853 | RP1-95L4.2 chr6 | + | 1.44E+08 | 1.44E+08 | 1138 |
| ENSG000001 | 1.701545 | 16.74756 | -3.1416  | 0.000128 | 0.000359 | RP11-63K6 chr6  | + | 90524428 | 90525182 | 755  |
| ENSG000001 | 0.632843 | 0.343138 | 0.49756  | 0.77728  | NA       | MGC10955 chr2   | + | 74361599 | 74362521 | 923  |
| ENSG000001 | 2.354926 | 6.907338 | -1.4607  | 0.1065   | 0.17028  | RPS10P3 chr9    | + | 90631215 | 90631708 | 494  |
| ENSG000001 | 1.649304 | 0.343138 | 1.6347   | 0.29819  | 0.40002  | CCT7P1 chr6     | + | 1.5E+08  | 1.5E+08  | 1611 |
| ENSG000001 | 0.72616  | 0.700845 | 0.022935 | 0.98937  | NA       | RP11-160A chr6  | + | 71444206 | 71444665 | 460  |
| ENSG000001 | 0        | 0.357707 | -0.41864 | 0.81278  | NA       | RP11-76H1 chr6  | + | 87606836 | 87607139 | 304  |
| ENSG000001 | 3.019472 | 0.357707 | 2.4152   | 0.098018 | 0.15869  | LDHAL6FP chr6   | - | 1.58E+08 | 1.58E+08 | 1082 |

|            |          |          |          |           |           |                  |   |          |          |       |
|------------|----------|----------|----------|-----------|-----------|------------------|---|----------|----------|-------|
| ENSG000001 | 38.31101 | 36.49199 | 0.066824 | 0.87929   | 0.91599   | RP11-465B chr1   | + | 995114   | 1004735  | 1220  |
| ENSG000001 | 0        | 0.357707 | -0.41864 | 0.81278   | NA        | RP11-191A chr6   | + | 25181587 | 25181973 | 387   |
| ENSG000001 | 0.36308  | 1.684135 | -1.6385  | 0.30012   | 0.40168   | RP6-159A1 chrX   | - | 65176131 | 65177038 | 908   |
| ENSG000001 | 0.653381 | 0.343138 | 0.51863  | 0.76794   | NA        | HIST1H4PS chr6   | + | 27774853 | 27775117 | 265   |
| ENSG000001 | 0.653381 | 0.297015 | 0.51304  | 0.77085   | NA        | RP11-66N1 chrX   | - | 1.53E+08 | 1.53E+08 | 852   |
| ENSG000001 | 1.939605 | 3.443532 | -0.7133  | 0.52459   | 0.62674   | ZNF839P1 chrY    | + | 21147061 | 21148284 | 861   |
| ENSG000001 | 0.923144 | 0.654722 | 0.36894  | 0.81994   | NA        | RP11-420K chr1   | - | 39769966 | 39770570 | 288   |
| ENSG000001 | 1.411244 | 0        | 1.7307   | 0.32696   | NA        | RP1-24O22 chr6   | - | 142272   | 145083   | 2812  |
| ENSG000001 | 80.3617  | 98.48535 | -0.292   | 0.37415   | 0.47837   | PAM16 chr16      | - | 4381550  | 4405608  | 806   |
| ENSG000001 | 0        | 1.309443 | -1.6539  | 0.35008   | NA        | AC073869. chr2   | - | 1.32E+08 | 1.32E+08 | 2301  |
| ENSG000001 | 1.628766 | 3.512346 | -0.98939 | 0.38106   | 0.48518   | RP4-800J2 chr20  | - | 55959216 | 55968118 | 1540  |
| ENSG000001 | 0        | 0.715414 | -0.84936 | 0.6309    | NA        | RP3-407E4 chr6   | + | 64150671 | 64153485 | 968   |
| ENSG000001 | 11.26518 | 0        | 5.1146   | 3.88E-05  | 0.000116  | RP11-561C chr15  | - | 85798600 | 85873565 | 3611  |
| ENSG000001 | 0        | 0.357707 | -0.41864 | 0.81278   | NA        | RSL24D1P1 chr6   | - | 27748398 | 27748890 | 493   |
| ENSG000001 | 0.36308  | 1.669566 | -1.4999  | 0.36942   | 0.47399   | RP1-13D1C chr6   | + | 16161157 | 16161642 | 486   |
| ENSG000001 | 0        | 0.297015 | -0.41864 | 0.81278   | NA        | DNAJA1P4 chr6    | - | 1.15E+08 | 1.15E+08 | 1166  |
| ENSG000001 | 0.632843 | 0.297015 | 0.49183  | 0.78024   | NA        | KIRREL3-AS chr11 | + | 1.27E+08 | 1.27E+08 | 1768  |
| ENSG000001 | 1.016461 | 0        | 1.3167   | 0.46021   | NA        | KRT18P22 chr6    | - | 1.17E+08 | 1.17E+08 | 1347  |
| ENSG000001 | 12.91709 | 14.46128 | -0.15408 | 0.79664   | 0.85558   | AC016739. chr2   | - | 1.77E+08 | 1.77E+08 | 345   |
| ENSG000001 | 0        | 1.416259 | -1.7181  | 0.33141   | NA        | KRT8P43 chr6     | + | 24598240 | 24600018 | 1458  |
| ENSG000001 | 3.081086 | 1.84278  | 0.5964   | 0.63184   | 0.72096   | POM121L1 chr6    | + | 58263736 | 58265293 | 1558  |
| ENSG000001 | 0.705622 | 0.951736 | -0.34312 | 0.83184   | NA        | RP11-367C chr6   | + | 1.14E+08 | 1.14E+08 | 447   |
| ENSG000001 | 68.19987 | 88.54154 | -0.37278 | 0.18356   | 0.26873   | TATDN2P2 chr6    | - | 1.59E+08 | 1.59E+08 | 2226  |
| ENSG000001 | 2.407167 | 6.955878 | -1.4493  | 0.11274   | 0.17895   | RP11-889L chr5   | + | 1.77E+08 | 1.77E+08 | 591   |
| ENSG000001 | 0.342542 | 3.054271 | -2.4422  | 0.091221  | 0.14948   | NEPNP chr6       | + | 1.18E+08 | 1.18E+08 | 1371  |
| ENSG000001 | 0.342542 | 0.997859 | -1.0273  | 0.53559   | NA        | HIST1H2AP chr6   | + | 26233350 | 26233483 | 134   |
| ENSG000001 | 296.1391 | 323.3776 | -0.12506 | 0.50901   | 0.61238   | MORF4L1P chr1    | + | 2.2E+08  | 2.2E+08  | 967   |
| ENSG000001 | 0        | 0.686276 | -0.84936 | 0.6309    | NA        | AC006024. chr7   | + | 48959361 | 48965612 | 1719  |
| ENSG000001 | 0.36308  | 3.054271 | -2.4434  | 0.090836  | 0.14891   | RP11-393I. chr6  | - | 87883086 | 87884021 | 936   |
| ENSG000001 | 11904.13 | 1788.964 | 2.7325   | 2.51E-186 | 4.57E-184 | TENM3 chr4       | + | 1.83E+08 | 1.84E+08 | 10896 |
| ENSG000001 | 0.632843 | 0.343138 | 0.49756  | 0.77728   | NA        | VN1R14P chr6     | - | 26630782 | 26632007 | 929   |
| ENSG000001 | 0        | 1.995719 | -2.4883  | 0.12386   | 0.19391   | LYPLA1P3 chr6    | + | 71874779 | 71875473 | 695   |
| ENSG000001 | 1.701545 | 5.018435 | -1.4317  | 0.1659    | 0.247     | RAET1K chr6      | - | 1.5E+08  | 1.5E+08  | 1883  |
| ENSG000001 | 0.72616  | 0        | 0.85004  | 0.63064   | NA        | AC012078. chrY   | - | 3719265  | 3720910  | 1646  |
| ENSG000001 | 9.886452 | 5.274159 | 0.8564   | 0.2829    | 0.38403   | AC110619. chr2   | - | 2.41E+08 | 2.41E+08 | 2017  |
| ENSG000001 | 4.781817 | 4.037561 | 0.2508   | 0.77542   | 0.83869   | RP11-296E chr6   | - | 80774003 | 80779916 | 5914  |
| ENSG000001 | 32.63873 | 45.79801 | -0.4803  | 0.22093   | 0.31297   | AC016773. chr4   | + | 1741078  | 1743830  | 2751  |
| ENSG000001 | 0        | 0.297015 | -0.41864 | 0.81278   | NA        | NDUF55P1 chr6    | - | 1.37E+08 | 1.37E+08 | 289   |
| ENSG000001 | 64.34699 | 112.1399 | -0.79993 | 0.000882  | 0.00221   | RP11-475C chr6   | - | 1.54E+08 | 1.54E+08 | 447   |
| ENSG000001 | 0.36308  | 3.847363 | -2.5427  | 0.097628  | 0.15826   | NIP7P3 chr6      | - | 1.16E+08 | 1.16E+08 | 515   |
| ENSG000001 | 0.342542 | 1.012429 | -0.95691 | 0.57869   | NA        | RPS27P15 chr6    | + | 74328069 | 74328320 | 252   |
| ENSG000001 | 0.290301 | 0        | 0.4146   | 0.81455   | NA        | RP1-140K8 chr6   | - | 3914156  | 3914526  | 371   |
| ENSG000001 | 0        | 0.343138 | -0.41864 | 0.81278   | NA        | RP11-93K7 chr6   | - | 1.02E+08 | 1.02E+08 | 1143  |
| ENSG000001 | 0.72616  | 0.997859 | -0.35968 | 0.82345   | NA        | H2AFZP3 chr13    | - | 99867626 | 99868012 | 387   |
| ENSG000001 | 153.7069 | 251.096  | -0.70452 | 0.00929   | 0.019635  | LINC00339 chr1   | + | 22351681 | 22357716 | 1054  |
| ENSG000001 | 0.36308  | 0        | 0.4146   | 0.81455   | NA        | RP11-420A chr6   | - | 37970608 | 37971089 | 482   |
| ENSG000001 | 0        | 0.343138 | -0.41864 | 0.81278   | NA        | AP002530. chr6   | + | 1.03E+08 | 1.03E+08 | 684   |
| ENSG000001 | 0.923144 | 2.232041 | -1.0273  | 0.44686   | 0.55241   | AP000350. chr22  | - | 24236613 | 24241117 | 1476  |
| ENSG000001 | 0        | 0.343138 | -0.41864 | 0.81278   | NA        | RP1-253B1 chr6   | - | 87439426 | 87439826 | 401   |
| ENSG000001 | 0        | 0.297015 | -0.41864 | 0.81278   | NA        | GAPDHP63 chr6    | - | 80662722 | 80663728 | 1007  |
| ENSG000001 | 0.342542 | 0        | 0.4146   | 0.81455   | NA        | RP4-791C1 chr7   | + | 55001392 | 55005877 | 4486  |
| ENSG000001 | 0.653381 | 5.614881 | -2.6844  | 0.023641  | 0.045901  | RP11-2J18. chr6  | + | 1.57E+08 | 1.57E+08 | 378   |
| ENSG000001 | 1.846289 | 0.357707 | 1.6637   | 0.31047   | 0.41244   | RP3-395C1 chr6   | - | 1.58E+08 | 1.58E+08 | 616   |
| ENSG000001 | 0        | 0.654722 | -0.83442 | 0.63731   | NA        | RP11-425C chr6   | - | 1.1E+08  | 1.1E+08  | 740   |
| ENSG000001 | 0.72616  | 0        | 0.85004  | 0.63064   | NA        | AC008060. chr7   | + | 1.55E+08 | 1.55E+08 | 1551  |
| ENSG000001 | 0.36308  | 0.640152 | -0.51156 | 0.77091   | NA        | BRD7P4 chr6      | + | 1.12E+08 | 1.12E+08 | 1522  |
| ENSG000001 | 0.685084 | 0.700845 | -0.01556 | 0.9928    | NA        | AC010150. chr2   | - | 26079330 | 26079835 | 506   |
| ENSG000001 | 0.943682 | 8.625444 | -2.8291  | 0.007707  | 0.016537  | HIST1H2AP chr6   | - | 26272421 | 26272768 | 348   |
| ENSG000001 | 0.36308  | 0        | 0.4146   | 0.81455   | NA        | RP11-174C chr6   | + | 1.3E+08  | 1.3E+08  | 1295  |
| ENSG000001 | 0.580602 | 0        | 0.8036   | 0.6494    | NA        | RP5-1032F chrX   | + | 1.28E+08 | 1.28E+08 | 1285  |
| ENSG000001 | 0        | 0.357707 | -0.41864 | 0.81278   | NA        | RP3-453I5. chr6  | - | 90826419 | 90826824 | 406   |
| ENSG000001 | 6.814739 | 62.34489 | -3.1298  | 1.16E-11  | 6.11E-11  | AC007390. chr2   | + | 37423631 | 37440868 | 3158  |
| ENSG000001 | 0        | 0.700845 | -0.87835 | 0.62047   | NA        | RP3-340B1 chr6   | + | 35575405 | 35575711 | 307   |
| ENSG000001 | 0.995923 | 0.654722 | 0.44529  | 0.7735    | NA        | RP3-472M. chr6   | - | 1.55E+08 | 1.55E+08 | 547   |
| ENSG000001 | 0        | 0.343138 | -0.41864 | 0.81278   | NA        | RP11-207F chr6   | + | 86578671 | 86579182 | 512   |

|            |          |          |          |          |          |           |       |   |          |          |      |
|------------|----------|----------|----------|----------|----------|-----------|-------|---|----------|----------|------|
| ENSG000001 | 0.342542 | 0        | 0.4146   | 0.81455  | NA       | FAM8A6P   | chr6  | - | 1.35E+08 | 1.35E+08 | 1135 |
| ENSG000001 | 0        | 0.297015 | -0.41864 | 0.81278  | NA       | GSTM2P1   | chr6  | - | 1.11E+08 | 1.11E+08 | 654  |
| ENSG000001 | 0.685084 | 0        | 0.85004  | 0.63064  | NA       | RP1-229K2 | chr6  | - | 41237613 | 41237977 | 365  |
| ENSG000001 | 0.36308  | 1.606458 | -1.4912  | 0.36867  | 0.4733   | PAPOLB    | chr7  | - | 4897364  | 4901625  | 4262 |
| ENSG000001 | 0.342542 | 0.700845 | -0.57269 | 0.74414  | NA       | RP1-209B5 | chr6  | - | 1.32E+08 | 1.32E+08 | 1162 |
| ENSG000001 | 0.342542 | 0.594029 | -0.38792 | 0.8278   | NA       | NUFIP1P   | chr6  | - | 66803324 | 66804802 | 1479 |
| ENSG000001 | 1196.506 | 938.4862 | 0.34792  | 0.22488  | 0.31748  | ZNF579    | chr19 | - | 56088899 | 56092211 | 2136 |
| ENSG000001 | 1.701545 | 2.66501  | -0.58069 | 0.62072  | 0.71143  | TUBB8P2   | chr6  | + | 1.44E+08 | 1.44E+08 | 495  |
| ENSG000001 | 0.290301 | 1.713273 | -1.665   | 0.29391  | 0.39595  | PTMAP3    | chr20 | + | 17992599 | 17992928 | 330  |
| ENSG000001 | 0.36308  | 0        | 0.4146   | 0.81455  | NA       | FTH1P15   | chr6  | + | 56869318 | 56869597 | 280  |
| ENSG000001 | 0.290301 | 0        | 0.4146   | 0.81455  | NA       | RP1-137F1 | chr6  | + | 39321523 | 39321948 | 426  |
| ENSG000001 | 2.935529 | 4.424406 | -0.52875 | 0.58371  | 0.67963  | RP1-99E18 | chr6  | + | 1.51E+08 | 1.51E+08 | 599  |
| ENSG000001 | 1.317927 | 6.157081 | -1.9431  | 0.094518 | 0.15403  | CTA-299D3 | chr22 | - | 48934712 | 48943199 | 3012 |
| ENSG000001 | 0.580602 | 1.248751 | -0.71642 | 0.66818  | NA       | RP3-340B1 | chr6  | + | 35523650 | 35524041 | 392  |
| ENSG000001 | 0        | 0.686276 | -0.84936 | 0.6309   | NA       | RPS3AP2   | chr16 | + | 1527831  | 1528584  | 754  |
| ENSG000001 | 0        | 0.343138 | -0.41864 | 0.81278  | NA       | TRIM51FP  | chr11 | - | 49854692 | 49860872 | 1353 |
| ENSG000001 | 0        | 0.297015 | -0.41864 | 0.81278  | NA       | SOD1P1    | chr6  | - | 53061518 | 53061957 | 440  |
| ENSG000001 | 1.016461 | 2.800964 | -1.1363  | 0.44218  | 0.54795  | NPM1P37   | chr6  | - | 70415179 | 70416052 | 874  |
| ENSG000001 | 0.342542 | 1.920457 | -1.7057  | 0.29613  | 0.39817  | RP1-167A1 | chr1  | - | 54440642 | 54441704 | 1063 |
| ENSG000001 | 0        | 0.297015 | -0.41864 | 0.81278  | NA       | RP11-203F | chr1  | - | 2.04E+08 | 2.04E+08 | 483  |
| ENSG000001 | 0        | 0.715414 | -0.84936 | 0.6309   | NA       | RP11-569A | chr6  | - | 1.11E+08 | 1.11E+08 | 204  |
| ENSG000001 | 0.72616  | 0        | 0.85004  | 0.63064  | NA       | FTH1P19   | chrX  | + | 37351274 | 37351801 | 528  |
| ENSG000001 | 1.048164 | 0        | 1.348    | 0.44949  | NA       | CACYBPP3  | chr6  | - | 1.59E+08 | 1.59E+08 | 625  |
| ENSG000001 | 2.354926 | 2.681995 | -0.17317 | 0.87317  | 0.91156  | RNASEK    | chr17 | + | 6915736  | 6917851  | 952  |
| ENSG000001 | 42.40839 | 47.78232 | -0.1725  | 0.61296  | 0.70505  | RP11-181C | chr1  | - | 78276507 | 78277621 | 1115 |
| ENSG000001 | 0.342542 | 0        | 0.4146   | 0.81455  | NA       | RP11-480N | chr6  | + | 43277969 | 43278095 | 127  |
| ENSG000001 | 0        | 0.297015 | -0.41864 | 0.81278  | NA       | AMZ2P2    | chr6  | - | 1.59E+08 | 1.59E+08 | 1057 |
| ENSG000001 | 0        | 0.297015 | -0.41864 | 0.81278  | NA       | NPM1P38   | chr6  | - | 1E+08    | 1E+08    | 865  |
| ENSG000001 | 0        | 0.686276 | -0.84936 | 0.6309   | NA       | PIP5K1P1  | chr6  | + | 7986730  | 7988425  | 1656 |
| ENSG000001 | 0.36308  | 0.357707 | -0.00212 | 0.99905  | NA       | RP11-397C | chr6  | + | 1.11E+08 | 1.11E+08 | 542  |
| ENSG000001 | 1.048164 | 2.171348 | -0.86108 | 0.5556   | 0.65473  | RPL31P52  | chr12 | - | 1.21E+08 | 1.21E+08 | 367  |
| ENSG000001 | 2.261609 | 1.058552 | 0.94563  | 0.48062  | 0.58485  | RP11-250B | chr6  | - | 81179788 | 81180145 | 358  |
| ENSG000001 | 0.36308  | 0        | 0.4146   | 0.81455  | NA       | ATF1P1    | chr6  | - | 93596969 | 93598299 | 927  |
| ENSG000001 | 2.883288 | 0.297015 | 2.3751   | 0.10878  | 0.17337  | RP1-265C2 | chr6  | + | 28083406 | 28084329 | 924  |
| ENSG000001 | 11.37047 | 9.433105 | 0.2619   | 0.68788  | 0.76727  | HSPA8P15  | chr6  | - | 1.52E+08 | 1.52E+08 | 786  |
| ENSG000001 | 1.608228 | 5.127667 | -1.4605  | 0.19608  | 0.28411  | RP11-524C | chr6  | - | 22213535 | 22214466 | 604  |
| ENSG000001 | 0        | 0.594029 | -0.81444 | 0.64499  | NA       | RP11-106E | chr6  | + | 1.45E+08 | 1.45E+08 | 794  |
| ENSG000001 | 2.914991 | 1.935026 | 0.52206  | 0.63384  | 0.72257  | RP4-761J1 | chr12 | + | 6772426  | 6781235  | 723  |
| ENSG000001 | 0.342542 | 0        | 0.4146   | 0.81455  | NA       | MBL3P     | chr10 | - | 81342054 | 81344633 | 644  |
| ENSG000001 | 4.00423  | 0.640152 | 2.2152   | 0.078241 | 0.13102  | RP11-350J | chr6  | + | 1.5E+08  | 1.5E+08  | 676  |
| ENSG000001 | 0        | 0.343138 | -0.41864 | 0.81278  | NA       | TEX40     | chr11 | + | 64067863 | 64072242 | 917  |
| ENSG000001 | 261.9913 | 990.163  | -1.9135  | 5.75E-26 | 6.25E-25 | FAM19A5   | chr22 | + | 48885272 | 49246724 | 2638 |
| ENSG000001 | 0        | 369.4463 | -9.882   | 3.02E-20 | 2.57E-19 | RP11-3B12 | chr7  | - | 1.25E+08 | 1.25E+08 | 1918 |
| ENSG000001 | 0        | 1.71569  | -1.6656  | 0.35029  | NA       | RPL23P8   | chr7  | + | 20866945 | 20867372 | 428  |
| ENSG000001 | 9.512207 | 12.13779 | -0.34226 | 0.58736  | 0.68295  | RP3-337H4 | chr6  | - | 43506559 | 43507440 | 882  |
| ENSG000001 | 907.172  | 347.1753 | 1.3832   | 9.07E-20 | 7.57E-19 | NBPF1     | chr1  | - | 16888814 | 16940057 | 5932 |
| ENSG000001 | 3.672853 | 4.524774 | -0.29741 | 0.74123  | 0.80963  | FTH1P8    | chrX  | + | 1.47E+08 | 1.47E+08 | 514  |
| ENSG000001 | 1.08924  | 0.686276 | 0.38123  | 0.82834  | NA       | AP000580  | chr11 | - | 77524365 | 77524722 | 358  |
| ENSG000001 | 0.72616  | 0.297015 | 0.51367  | 0.77334  | NA       | RP3-323K2 | chr6  | - | 1.32E+08 | 1.32E+08 | 289  |
| ENSG000001 | 87.51035 | 82.68309 | 0.088104 | 0.73134  | 0.80153  | AC006465  | chr7  | + | 7680342  | 8043689  | 2111 |
| ENSG000001 | 0.653381 | 0.297015 | 0.51304  | 0.77085  | NA       | RPL17P25  | chr6  | - | 81083732 | 81084286 | 555  |
| ENSG000001 | 1.068702 | 0.997859 | 0.04858  | 0.97403  | 0.98544  | ZNF259P1  | chr6  | - | 1.09E+08 | 1.09E+08 | 4912 |
| ENSG000001 | 0.685084 | 0        | 0.85004  | 0.63064  | NA       | RP11-132N | chr6  | - | 85399010 | 85399147 | 138  |
| ENSG000001 | 6.918407 | 7.2966   | -0.05235 | 0.94438  | 0.96427  | PPP1R3G   | chr6  | + | 5085720  | 5087455  | 1736 |
| ENSG000001 | 0.632843 | 0.951736 | -0.41411 | 0.79829  | NA       | HIGD1AP1f | chr20 | + | 34466398 | 34466655 | 258  |
| ENSG000001 | 41.24059 | 10.71099 | 1.917    | 3.56E-05 | 0.000107 | FAM228B   | chr2  | + | 24299396 | 24392509 | 2616 |
| ENSG000001 | 2.13659  | 2.932886 | -0.37391 | 0.75014  | 0.81726  | BMPRI1APS | chr6  | - | 1.29E+08 | 1.29E+08 | 1598 |
| ENSG000001 | 56.08947 | 128.4003 | -1.1852  | 3.54E-07 | 1.32E-06 | CTD-2006C | chr19 | + | 12098432 | 12157090 | 4000 |
| ENSG000001 | 0.632843 | 1.606458 | -0.99581 | 0.5182   | 0.6209   | RP3-425P1 | chr6  | + | 25140212 | 25141649 | 1438 |
| ENSG000001 | 1.608228 | 2.979009 | -0.76139 | 0.52527  | 0.62722  | RP11-262F | chr9  | + | 66544359 | 66545745 | 292  |
| ENSG000001 | 0        | 0.715414 | -0.84936 | 0.6309   | NA       | RP11-325C | chr6  | - | 1.28E+08 | 1.28E+08 | 422  |
| ENSG000001 | 0        | 1.188058 | -1.268   | 0.47398  | NA       | PTCHD3P3  | chr6  | - | 1.1E+08  | 1.1E+08  | 906  |
| ENSG000001 | 0.653381 | 3.259039 | -1.9155  | 0.15101  | 0.22845  | RP11-532F | chr6  | - | 669081   | 670307   | 1227 |
| ENSG000001 | 0.975385 | 0        | 1.2767   | 0.47406  | NA       | RP11-560C | chr6  | - | 75558793 | 75560200 | 1408 |
| ENSG000001 | 2.624689 | 2.711133 | -0.02859 | 0.97842  | 0.98805  | RP1-292B1 | chr6  | + | 1.51E+08 | 1.51E+08 | 405  |

|            |          |          |          |          |          |           |       |   |          |          |      |
|------------|----------|----------|----------|----------|----------|-----------|-------|---|----------|----------|------|
| ENSG000001 | 5.084097 | 1.294874 | 1.746    | 0.10501  | 0.1682   | RP1-199J3 | chr6  | + | 1E+08    | 1E+08    | 745  |
| ENSG000001 | 0.342542 | 0.357707 | -0.0021  | 0.99906  | NA       | RP11-506B | chr6  | - | 1.13E+08 | 1.13E+08 | 874  |
| ENSG000001 | 0.36308  | 0.297015 | -0.00205 | 0.99908  | NA       | OSTCP6    | chr6  | - | 56840404 | 56840860 | 457  |
| ENSG000001 | 2.375464 | 0.715414 | 1.3794   | 0.34703  | 0.45128  | XX-C2158C | chr6  | + | 1.71E+08 | 1.71E+08 | 460  |
| ENSG000001 | 3.391925 | 0.654722 | 1.9391   | 0.14892  | 0.22566  | GAPDHP42  | chr6  | + | 70455763 | 70456743 | 981  |
| ENSG000001 | 8.806586 | 17.1765  | -0.94065 | 0.10097  | 0.16281  | ZSCAN12P1 | chr6  | + | 28058932 | 28061442 | 1657 |
| ENSG000001 | 1.555988 | 0.654722 | 0.94635  | 0.53945  | 0.64005  | RPL35P3   | chr6  | - | 1.06E+08 | 1.06E+08 | 371  |
| ENSG000001 | 0        | 0.700845 | -0.87835 | 0.62047  | NA       | RP11-40C6 | chr9  | + | 90140217 | 90140390 | 174  |
| ENSG000001 | 0        | 0.297015 | -0.41864 | 0.81278  | NA       | RPL12P8   | chr10 | + | 69634090 | 69634672 | 580  |
| ENSG000001 | 1.286224 | 0.357707 | 1.3361   | 0.4083   | NA       | RP11-378C | chr6  | + | 84102135 | 84103128 | 994  |
| ENSG000001 | 17.14561 | 0.654722 | 4.2433   | 3.07E-05 | 9.29E-05 | RP11-420L | chr6  | + | 3754333  | 3755074  | 436  |
| ENSG000001 | 2.540746 | 88.67642 | -4.8174  | 2.46E-09 | 1.10E-08 | LINGO3    | chr19 | - | 2289774  | 2308156  | 2241 |
| ENSG000001 | 6.451659 | 19.5024  | -1.5322  | 0.015994 | 0.032208 | RP11-17M1 | chr18 | + | 74207477 | 74210045 | 2077 |
| ENSG000001 | 0        | 0.297015 | -0.41864 | 0.81278  | NA       | MTCYBP4   | chr6  | + | 1.33E+08 | 1.33E+08 | 249  |
| ENSG000001 | 0        | 0.297015 | -0.41864 | 0.81278  | NA       | RP11-46B1 | chr6  | - | 79987822 | 79988144 | 323  |
| ENSG000001 | 0.36308  | 1.294874 | -1.3442  | 0.40498  | NA       | HNRNPA1P  | chr5  | - | 79654899 | 79655859 | 961  |
| ENSG000001 | 7.761027 | 14.09954 | -0.8506  | 0.16915  | 0.25091  | RP1-37N7  | chr17 | + | 18314473 | 18317694 | 1871 |
| ENSG000001 | 2.085163 | 5.753251 | -1.3449  | 0.20124  | 0.29002  | ZGLP1     | chr19 | - | 10415479 | 10420556 | 2303 |
| ENSG000001 | 283.7554 | 241.2052 | 0.23487  | 0.1557   | 0.2344   | VAMP2     | chr17 | - | 8062467  | 8066864  | 2153 |
| ENSG000001 | 1.524285 | 0.343138 | 1.4176   | 0.39874  | NA       | RPS24P12  | chr6  | + | 1.08E+08 | 1.08E+08 | 394  |
| ENSG000001 | 5.1766   | 3.336716 | 0.60431  | 0.49469  | 0.59848  | RP1-56L9  | chr6  | - | 1.6E+08  | 1.6E+08  | 1185 |
| ENSG000001 | 5.966166 | 4.76996  | 0.31036  | 0.7302   | 0.80087  | HIST2H2BC | chr1  | + | 1.5E+08  | 1.5E+08  | 493  |
| ENSG000001 | 0        | 0.640152 | -0.82869 | 0.63935  | NA       | RP11-129F | chr6  | - | 1.22E+08 | 1.22E+08 | 213  |
| ENSG000001 | 0.975385 | 0        | 1.2767   | 0.47406  | NA       | RP1-152L7 | chr6  | - | 52552728 | 52568623 | 637  |
| ENSG000001 | 0.342542 | 0        | 0.4146   | 0.81455  | NA       | KRT8P42   | chr6  | - | 1.35E+08 | 1.35E+08 | 1399 |
| ENSG000001 | 1.016461 | 0.715414 | 0.34797  | 0.83671  | NA       | FCF1P5    | chr6  | + | 1.12E+08 | 1.12E+08 | 482  |
| ENSG000001 | 0.36308  | 0        | 0.4146   | 0.81455  | NA       | TUBB3P1   | chr6  | + | 90011502 | 90012833 | 1332 |
| ENSG000001 | 0.342542 | 0        | 0.4146   | 0.81455  | NA       | RP3-520B1 | chr6  | - | 5291263  | 5291621  | 359  |
| ENSG000001 | 0.36308  | 4.706852 | -3.0566  | 0.023712 | 0.046006 | RP11-69L1 | chr6  | - | 7339072  | 7339801  | 730  |
| ENSG000001 | 2.334388 | 0        | 2.7132   | 0.086551 | 0.14296  | YAP1P1    | chr6  | + | 1.48E+08 | 1.48E+08 | 1393 |
| ENSG000001 | 0        | 0.700845 | -0.87835 | 0.62047  | NA       | RP11-111C | chr6  | - | 98627375 | 98627708 | 334  |
| ENSG000001 | 0.943682 | 2.543625 | -1.1757  | 0.37851  | 0.48262  | RP3-415N1 | chr6  | - | 1.12E+08 | 1.12E+08 | 654  |
| ENSG000001 | 0.632843 | 0        | 0.81931  | 0.64303  | NA       | PGAM1P1C  | chr6  | + | 73764820 | 73765580 | 761  |
| ENSG000001 | 0        | 0.297015 | -0.41864 | 0.81278  | NA       | ASS1P1    | chr6  | - | 25023475 | 25024711 | 1237 |
| ENSG000001 | 0.290301 | 0        | 0.4146   | 0.81455  | NA       | RP1-177A1 | chr6  | - | 1.28E+08 | 1.28E+08 | 418  |
| ENSG000001 | 0        | 0.686276 | -0.84936 | 0.6309   | NA       | RP5-1170C | chrX  | + | 1.13E+08 | 1.13E+08 | 508  |
| ENSG000001 | 3.890376 | 1.430828 | 1.2461   | 0.33944  | 0.44332  | PKMP3     | chr6  | - | 86369610 | 86370324 | 715  |
| ENSG000001 | 1.213446 | 2.696564 | -0.93278 | 0.46067  | 0.56599  | RPL35P2   | chr6  | - | 34231088 | 34231450 | 363  |
| ENSG000001 | 0.290301 | 0.594029 | -0.38058 | 0.83094  | NA       | RP11-480N | chr6  | + | 43295872 | 43296214 | 343  |
| ENSG000001 | 0        | 1.71569  | -1.6656  | 0.35029  | NA       | RP3-391O2 | chr6  | + | 34654379 | 34654883 | 280  |
| ENSG000001 | 0        | 0.357707 | -0.41864 | 0.81278  | NA       | RP3-406A7 | chr6  | + | 1.37E+08 | 1.37E+08 | 543  |
| ENSG000001 | 0.36308  | 0        | 0.4146   | 0.81455  | NA       | RCC2P7    | chr6  | - | 56296748 | 56298011 | 1264 |
| ENSG000001 | 1.919068 | 0.686276 | 1.1663   | 0.43441  | 0.53992  | RP11-530A | chr6  | - | 5066029  | 5067216  | 1188 |
| ENSG000001 | 4.378475 | 5.602728 | -0.32783 | 0.75805  | 0.82414  | AC011498  | chr19 | + | 4477048  | 4479576  | 1846 |
| ENSG000001 | 0.975385 | 0        | 1.2767   | 0.47406  | NA       | RP3-403A1 | chr6  | + | 1.28E+08 | 1.28E+08 | 554  |
| ENSG000001 | 1.742621 | 2.010288 | -0.18801 | 0.88769  | 0.92164  | RP1-121G1 | chr6  | + | 1.01E+08 | 1.01E+08 | 777  |
| ENSG000001 | 0        | 0.640152 | -0.82869 | 0.63935  | NA       | OR1F12    | chr6  | + | 28041094 | 28042011 | 918  |
| ENSG000001 | 0.290301 | 0.357707 | -0.00203 | 0.99908  | NA       | RP11-277I | chr6  | - | 1.45E+08 | 1.45E+08 | 392  |
| ENSG000001 | 1.338465 | 0.686276 | 0.71882  | 0.64669  | 0.73297  | RP3-351K2 | chr6  | + | 1.28E+08 | 1.28E+08 | 891  |
| ENSG000001 | 20.62506 | 34.83451 | -0.7464  | 0.089436 | 0.14698  | RPL21P28  | chr1  | - | 2.12E+08 | 2.12E+08 | 543  |
| ENSG000001 | 0.995923 | 7.639738 | -2.6687  | 0.009212 | 0.019486 | RP3-322L4 | chr6  | + | 21602359 | 21602614 | 256  |
| ENSG000001 | 8.196072 | 0        | 4.6304   | 0.000372 | 0.000981 | RP3-334F4 | chr6  | + | 54489403 | 54490286 | 884  |
| ENSG000001 | 167.2937 | 236.9109 | -0.50068 | 0.043526 | 0.078903 | MTMR9LP   | chr1  | - | 32697259 | 32707221 | 2624 |
| ENSG000001 | 3.910914 | 4.36613  | -0.13648 | 0.88038  | 0.91661  | RPL21P115 | chr16 | - | 9250219  | 9250761  | 543  |
| ENSG000001 | 13.269   | 7.87606  | 0.72373  | 0.2208   | 0.31281  | AC093642  | chr2  | + | 2.43E+08 | 2.43E+08 | 1235 |
| ENSG000001 | 76.38992 | 131.4982 | -0.77521 | 0.000851 | 0.002136 | RP11-572P | chr10 | - | 1.22E+08 | 1.22E+08 | 542  |
| ENSG000001 | 20.4879  | 11.90717 | 0.75018  | 0.16029  | 0.24006  | RPS18P9   | chr6  | + | 1.5E+08  | 1.5E+08  | 460  |
| ENSG000001 | 7.604305 | 3.679854 | 0.99755  | 0.20929  | 0.29925  | RP3-403L1 | chr6  | + | 1.58E+08 | 1.58E+08 | 275  |
| ENSG000001 | 0        | 0.357707 | -0.41864 | 0.81278  | NA       | MRPL35P1  | chr6  | + | 13949326 | 13949897 | 572  |
| ENSG000001 | 0.36308  | 0.891044 | -0.73478 | 0.67953  | NA       | DNAJC19Pt | chr6  | + | 90507317 | 90507596 | 280  |
| ENSG000001 | 0        | 0.357707 | -0.41864 | 0.81278  | NA       | HIST1H3PS | chr6  | - | 26322104 | 26322520 | 417  |
| ENSG000001 | 0        | 0.343138 | -0.41864 | 0.81278  | NA       | MESTP1    | chr6  | - | 1.29E+08 | 1.29E+08 | 994  |
| ENSG000001 | 0.653381 | 2.460242 | -1.4614  | 0.32468  | 0.4276   | RP3-525L6 | chr6  | + | 17953803 | 17954161 | 359  |
| ENSG000001 | 0.342542 | 0.640152 | -0.50911 | 0.77219  | NA       | OSTCP4    | chr4  | + | 1.14E+08 | 1.14E+08 | 449  |
| ENSG000001 | 1.286224 | 1.012429 | 0.29146  | 0.84048  | 0.88802  | IGBP1-AS2 | chrX  | - | 69368432 | 69369504 | 513  |

|            |          |          |          |           |           |           |       |   |          |          |       |
|------------|----------|----------|----------|-----------|-----------|-----------|-------|---|----------|----------|-------|
| ENSG000001 | 0.72616  | 1.370136 | -0.6429  | 0.69851   | 0.77541   | RP11-125K | chr9  | - | 4944670  | 4945902  | 928   |
| ENSG000001 | 17.87438 | 12.5392  | 0.49761  | 0.31642   | 0.41911   | RP11-137L | chr10 | + | 75255283 | 75279828 | 1141  |
| ENSG000001 | 379.3438 | 287.9301 | 0.3958   | 0.15175   | 0.22932   | EBF2      | chr8  | - | 25699246 | 25902913 | 5145  |
| ENSG000001 | 6.474803 | 6.050265 | 0.086007 | 0.91883   | 0.94534   | C16orf3   | chr16 | - | 90095316 | 90096309 | 994   |
| ENSG000001 | 69.31821 | 50.91124 | 0.43588  | 0.22723   | 0.32026   | C6orf226  | chr6  | - | 42858005 | 42858554 | 550   |
| ENSG000001 | 1144.887 | 783.1023 | 0.54657  | 0.005926  | 0.013002  | PPP3R1    | chr2  | - | 68358370 | 68488362 | 3023  |
| ENSG000001 | 0        | 0.297015 | -0.41864 | 0.81278   | NA        | PSG3      | chr19 | - | 43225790 | 43244721 | 1961  |
| ENSG000001 | 690.2255 | 919.7162 | -0.41418 | 0.000108  | 0.000307  | FANCG     | chr9  | - | 35073832 | 35080013 | 2631  |
| ENSG000001 | 0        | 1.012429 | -1.3162  | 0.46038   | NA        | KRTAP10-9 | chr21 | + | 46047040 | 46048294 | 1255  |
| ENSG000001 | 379.1664 | 231.8173 | 0.71047  | 1.94E-05  | 6.02E-05  | AP4M1     | chr7  | + | 99699172 | 99707968 | 3408  |
| ENSG000001 | 24.03573 | 16.51849 | 0.53054  | 0.26285   | 0.36104   | C2orf16   | chr2  | + | 27799389 | 27805588 | 6200  |
| ENSG000001 | 0        | 2.010288 | -2.4674  | 0.13027   | 0.202     | RP11-404E | chr9  | - | 76089294 | 76090989 | 1696  |
| ENSG000001 | 0        | 0.997859 | -1.5018  | 0.39072   | NA        | TAS2R41   | chr7  | + | 1.43E+08 | 1.43E+08 | 924   |
| ENSG000001 | 0        | 0.357707 | -0.41864 | 0.81278   | NA        | OR2A12    | chr7  | + | 1.44E+08 | 1.44E+08 | 1046  |
| ENSG000001 | 0        | 2.558194 | -2.582   | 0.12605   | 0.1967    | KRTAP10-1 | chr21 | + | 46057273 | 46058370 | 1098  |
| ENSG000001 | 0        | 0.297015 | -0.41864 | 0.81278   | NA        | KRTAP12-2 | chr21 | - | 46086106 | 46086844 | 739   |
| ENSG000001 | 1161.529 | 27.53778 | 5.3774   | 8.57E-87  | 4.05E-85  | PLXNA4    | chr7  | - | 1.32E+08 | 1.32E+08 | 13786 |
| ENSG000001 | 102.9203 | 108.7961 | -0.08031 | 0.78018   | 0.84227   | CEBPD     | chr8  | - | 48649471 | 48651648 | 2178  |
| ENSG000001 | 0        | 0.343138 | -0.41864 | 0.81278   | NA        | PSG7      | chr19 | - | 43428286 | 43441330 | 2496  |
| ENSG000001 | 0        | 0.891044 | -1.0625  | 0.54819   | NA        | OR3A2     | chr17 | - | 3181193  | 3182268  | 1076  |
| ENSG000001 | 15.39362 | 10.66245 | 0.52969  | 0.35315   | 0.4575    | ARIH2OS   | chr3  | - | 48955221 | 48956818 | 1598  |
| ENSG000001 | 70.82277 | 57.68981 | 0.29263  | 0.33938   | 0.44332   | C5orf54   | chr5  | - | 1.6E+08  | 1.6E+08  | 2851  |
| ENSG000001 | 18.89165 | 22.03059 | -0.2248  | 0.63468   | 0.7232    | HMSD      | chr18 | + | 61616535 | 61649008 | 682   |
| ENSG000001 | 1369.12  | 465.0349 | 1.5532   | 7.18E-18  | 5.48E-17  | NPTXR     | chr22 | - | 39214457 | 39239987 | 5784  |
| ENSG000001 | 72.51315 | 88.71147 | -0.28734 | 0.32247   | 0.42537   | FAM200A   | chr7  | - | 99143931 | 99156159 | 2480  |
| ENSG000001 | 855.755  | 1050.848 | -0.29491 | 0.014676  | 0.029785  | PPP2R2A   | chr8  | + | 26149007 | 26230196 | 3940  |
| ENSG000001 | 10.8704  | 21.06844 | -0.90971 | 0.20258   | 0.29141   | C19orf73  | chr19 | - | 49621655 | 49622397 | 743   |
| ENSG000001 | 4.523219 | 16.83095 | -1.8123  | 0.009891  | 0.02081   | ZNF880    | chr19 | + | 52873170 | 52889048 | 2230  |
| ENSG000001 | 244.7092 | 163.1256 | 0.58306  | 0.009831  | 0.02069   | TRIM16    | chr17 | - | 15531274 | 15587625 | 3206  |
| ENSG000001 | 4.564295 | 7.213217 | -0.60465 | 0.46422   | 0.56923   | FAM45B    | chrX  | + | 1.3E+08  | 1.3E+08  | 1624  |
| ENSG000001 | 0        | 0.686276 | -0.84936 | 0.6309    | NA        | OR6X1     | chr11 | - | 1.24E+08 | 1.24E+08 | 1058  |
| ENSG000001 | 0.705622 | 0        | 0.8807   | 0.6196    | NA        | TAS2R40   | chr7  | + | 1.43E+08 | 1.43E+08 | 1033  |
| ENSG000001 | 0        | 0.594029 | -0.81444 | 0.64499   | NA        | OR2A14    | chr7  | + | 1.44E+08 | 1.44E+08 | 1012  |
| ENSG000001 | 63.25196 | 57.96332 | 0.12101  | 0.66887   | 0.75148   | TIGD1     | chr2  | - | 2.33E+08 | 2.33E+08 | 2448  |
| ENSG000001 | 1.681007 | 41.20368 | -4.4314  | 1.06E-09  | 4.87E-09  | FXVD7     | chr19 | + | 35634154 | 35645204 | 1111  |
| ENSG000001 | 3.733653 | 15.80153 | -1.9438  | 0.015331  | 0.031005  | XKR9      | chr8  | + | 71581600 | 71702606 | 3174  |
| ENSG000001 | 13.33062 | 27.06842 | -1.0067  | 0.035324  | 0.065703  | C12orf61  | chr12 | - | 62995531 | 62997214 | 1684  |
| ENSG000001 | 16.11122 | 13.06529 | 0.28788  | 0.67757   | 0.75844   | C1orf229  | chr1  | - | 2.47E+08 | 2.47E+08 | 2258  |
| ENSG000001 | 69.63067 | 161.7317 | -1.2109  | 1.79E-05  | 5.59E-05  | SLC12A8   | chr3  | - | 1.25E+08 | 1.25E+08 | 3484  |
| ENSG000001 | 1.722083 | 0.357707 | 1.6558   | 0.2951    | 0.39715   | TMEM14E   | chr3  | - | 1.52E+08 | 1.52E+08 | 1296  |
| ENSG000001 | 5.612459 | 0.700845 | 2.6542   | 0.024289  | 0.047014  | APOL6     | chr22 | + | 36044442 | 36057404 | 3069  |
| ENSG000001 | 523.8765 | 433.6561 | 0.27129  | 0.12899   | 0.20042   | FADS3     | chr11 | - | 61640991 | 61659523 | 5314  |
| ENSG000001 | 0.653381 | 10.78954 | -3.5468  | 0.001739  | 0.004156  | OR2A1     | chr7  | + | 1.44E+08 | 1.44E+08 | 933   |
| ENSG000001 | 0.870904 | 0        | 1.046    | 0.5544    | NA        | TTC4P1    | chr7  | - | 46039220 | 46040377 | 1158  |
| ENSG000001 | 0.36308  | 0.700845 | -0.575   | 0.7429    | NA        | C3orf36   | chr3  | - | 1.34E+08 | 1.34E+08 | 1665  |
| ENSG000001 | 2460.67  | 1846.176 | 0.41315  | 0.044096  | 0.079723  | CCNL2     | chr1  | - | 1321091  | 1334708  | 4452  |
| ENSG000001 | 5995.695 | 7504.208 | -0.32328 | 0.003658  | 0.008318  | UBA52     | chr19 | + | 18682540 | 18688360 | 2845  |
| ENSG000001 | 0.342542 | 0.937167 | -0.89746 | 0.60352   | NA        | MYBPHL    | chr1  | - | 1.1E+08  | 1.1E+08  | 1372  |
| ENSG000001 | 108.7947 | 109.7799 | -0.0106  | 0.96433   | 0.9792    | PPT2      | chr6  | + | 32121218 | 32131455 | 2202  |
| ENSG000001 | 54.89916 | 36.0176  | 0.60805  | 0.052993  | 0.093552  | C5orf55   | chr5  | - | 441645   | 443258   | 1614  |
| ENSG000001 | 29.11804 | 22.49028 | 0.37107  | 0.40152   | 0.50629   | ZNF630    | chrX  | - | 47842756 | 47931025 | 2791  |
| ENSG000001 | 23.6487  | 30.22468 | -0.33302 | 0.46672   | 0.57149   | TIAF1     | chr17 | - | 27400537 | 27418537 | 5337  |
| ENSG000001 | 0.290301 | 0        | 0.4146   | 0.81455   | NA        | AC092675. | chr2  | - | 98947852 | 98972468 | 588   |
| ENSG000001 | 0.36308  | 0        | 0.4146   | 0.81455   | NA        | C7orf71   | chr7  | + | 26677490 | 26686889 | 1956  |
| ENSG000001 | 1.233984 | 0.700845 | 0.6319   | 0.69038   | 0.76918   | AC016722. | chr2  | + | 47043807 | 47049796 | 1588  |
| ENSG000001 | 3.785894 | 0.640152 | 2.1434   | 0.095648  | 0.15566   | AC064874. | chr2  | - | 2.37E+08 | 2.37E+08 | 441   |
| ENSG000001 | 766.6008 | 11.76955 | 6.0077   | 1.55E-101 | 9.10E-100 | BTBD19    | chr1  | + | 45274154 | 45281257 | 2659  |
| ENSG000001 | 58.32956 | 51.71474 | 0.17252  | 0.54159   | 0.64216   | FAM185A   | chr7  | + | 1.02E+08 | 1.02E+08 | 2217  |
| ENSG000001 | 1.359003 | 0.686276 | 0.73076  | 0.64104   | 0.72806   | AC005481. | chr7  | + | 1.57E+08 | 1.57E+08 | 3456  |
| ENSG000001 | 0.290301 | 0.343138 | -0.00202 | 0.99909   | NA        | RAB6C     | chr2  | + | 1.31E+08 | 1.31E+08 | 3077  |
| ENSG000001 | 0        | 1.995719 | -2.4883  | 0.12386   | 0.19391   | AC011997. | chr2  | + | 1.99E+08 | 1.99E+08 | 1032  |
| ENSG000001 | 4.36731  | 0.357707 | 2.9411   | 0.032269  | 0.060559  | AP000322. | chr21 | - | 35772615 | 35773370 | 756   |
| ENSG000001 | 3.910914 | 7.988581 | -0.97494 | 0.24732   | 0.34339   | AC133919. | chr16 | - | 90106169 | 90114181 | 1381  |
| ENSG000001 | 4.346772 | 11.67488 | -1.3724  | 0.055184  | 0.096922  | AC062017. | chr2  | + | 2.4E+08  | 2.4E+08  | 455   |
| ENSG000001 | 174.0548 | 0        | 8.8879   | 1.68E-16  | 1.19E-15  | AC112721. | chr2  | - | 2.38E+08 | 2.38E+08 | 588   |

|            |          |          |          |          |          |                 |   |          |          |      |
|------------|----------|----------|----------|----------|----------|-----------------|---|----------|----------|------|
| ENSG000001 | 0.290301 | 0        | 0.4146   | 0.81455  | NA       | AC004945. chr7  | + | 78982726 | 78983708 | 983  |
| ENSG000001 | 266.0482 | 0        | 9.4436   | 1.67E-18 | 1.31E-17 | AC112721. chr2  | - | 2.38E+08 | 2.38E+08 | 541  |
| ENSG000001 | 0        | 1.029414 | -1.1526  | 0.51496  | NA       | AC007405. chr2  | - | 1.72E+08 | 1.72E+08 | 2117 |
| ENSG000001 | 0        | 0.297015 | -0.41864 | 0.81278  | NA       | AC079354. chr2  | - | 2.03E+08 | 2.03E+08 | 3093 |
| ENSG000001 | 1.846289 | 105.2167 | -5.5131  | 9.00E-15 | 5.82E-14 | ADRA2B chr2     | - | 96778707 | 96781984 | 3278 |
| ENSG000001 | 380.2983 | 9.136091 | 5.3595   | 1.65E-59 | 4.76E-58 | LINC00152 chr2  | + | 87754887 | 87906324 | 1096 |
| ENSG000001 | 0.685084 | 0        | 0.85004  | 0.63064  | NA       | AP000233. chr21 | - | 26541745 | 26706139 | 763  |
| ENSG000001 | 3.547834 | 2.575179 | 0.41535  | 0.68483  | 0.76481  | AC079305. chr2  | + | 1.78E+08 | 1.78E+08 | 499  |
| ENSG000001 | 0.632843 | 0.715414 | -0.08242 | 0.96193  | NA       | RP5-1039K chr22 | - | 38428172 | 38430235 | 1055 |
| ENSG000001 | 10.92345 | 6.361849 | 0.75573  | 0.25918  | 0.3571   | DCDC2B chr1     | + | 32674695 | 32681797 | 1863 |
| ENSG000001 | 2.624689 | 2.497501 | 0.043345 | 0.97095  | 0.98392  | C10orf55 chr10  | - | 75669727 | 75682535 | 2513 |
| ENSG000001 | 1.048164 | 6.313309 | -2.3419  | 0.034817 | 0.064839 | RP13-131K chr3  | - | 49022482 | 49027421 | 782  |
| ENSG000001 | 0        | 1.248751 | -1.5848  | 0.37202  | NA       | HIST2H2BA chr1  | + | 1.21E+08 | 1.21E+08 | 752  |
| ENSG000001 | 9.877893 | 8.980735 | 0.12181  | 0.85681  | 0.89937  | RP11-66D1 chr1  | - | 1.57E+08 | 1.57E+08 | 433  |
| ENSG000001 | 0.975385 | 0.640152 | 0.42301  | 0.79383  | NA       | FTH1P10 chr5    | - | 17353804 | 17354733 | 930  |
| ENSG000001 | 0.342542 | 0        | 0.4146   | 0.81455  | NA       | PROX1-IT1 chr1  | + | 2.14E+08 | 2.14E+08 | 229  |
| ENSG000001 | 0        | 1.012429 | -1.3162  | 0.46038  | NA       | RP11-401G chr9  | - | 76485812 | 76488213 | 614  |
| ENSG000001 | 16.03665 | 13.1227  | 0.29241  | 0.5907   | 0.68561  | AC005104. chr2  | - | 2.42E+08 | 2.42E+08 | 442  |
| ENSG000001 | 0.36308  | 0        | 0.4146   | 0.81455  | NA       | RP11-224C chr1  | + | 2.19E+08 | 2.19E+08 | 216  |
| ENSG000001 | 1896.551 | 474.0825 | 1.9954   | 9.44E-28 | 1.11E-26 | SEC22B chr1     | + | 1.45E+08 | 1.45E+08 | 2008 |
| ENSG000001 | 7.302839 | 0        | 4.4594   | 0.000722 | 0.001829 | RP1-65J11. chr1 | + | 31297075 | 31307131 | 1108 |
| ENSG000001 | 0.36308  | 0        | 0.4146   | 0.81455  | NA       | RP11-408F chr3  | - | 1.72E+08 | 1.72E+08 | 3212 |
| ENSG000001 | 0.36308  | 0.686276 | -0.48701 | 0.78478  | NA       | RP11-91A1 chr1  | + | 52499063 | 52509951 | 762  |
| ENSG000001 | 5.051581 | 8.106677 | -0.61919 | 0.4444   | 0.54995  | RP5-858B6 chr1  | + | 2.31E+08 | 2.31E+08 | 794  |
| ENSG000001 | 0        | 0.700845 | -0.87835 | 0.62047  | NA       | AC027124. chr3  | - | 13501924 | 13502389 | 466  |
| ENSG000001 | 19.55538 | 6.145801 | 1.605    | 0.007358 | 0.01585  | RP11-211G chr3  | + | 1.87E+08 | 1.87E+08 | 536  |
| ENSG000001 | 0        | 1.370136 | -1.6825  | 0.34201  | NA       | AC074121. chr7  | - | 98107863 | 98108537 | 348  |
| ENSG000001 | 14.51236 | 4.276299 | 1.6573   | 0.04615  | 0.082976 | MEG9 chr14      | + | 1.02E+08 | 1.02E+08 | 2638 |
| ENSG000001 | 0.632843 | 1.248751 | -0.71101 | 0.65451  | NA       | RPL17P17 chr3   | + | 65829565 | 65830121 | 557  |
| ENSG000001 | 0        | 0.343138 | -0.41864 | 0.81278  | NA       | RP1-191L6 chr20 | + | 38749682 | 38754998 | 426  |
| ENSG000001 | 2.697468 | 0        | 2.9287   | 0.058655 | 0.10242  | LINC00473 chr6  | - | 1.66E+08 | 1.66E+08 | 2212 |
| ENSG000001 | 0.685084 | 1.248751 | -0.60628 | 0.71608  | 0.78964  | RP11-393L1 chr1 | - | 58521805 | 58522152 | 348  |
| ENSG000001 | 0        | 2.08555  | -2.222   | 0.20032  | 0.289    | AC006022. chr7  | - | 30782047 | 30782434 | 388  |
| ENSG000001 | 1.068702 | 0.686276 | 0.41528  | 0.80556  | NA       | AC016716. chr2  | - | 80389554 | 80390261 | 708  |
| ENSG000001 | 0.290301 | 0.686276 | -0.47648 | 0.78935  | NA       | RP4-800M1 chr1  | - | 52627858 | 52628698 | 841  |
| ENSG000001 | 0.632843 | 1.248751 | -0.71101 | 0.65451  | NA       | MTND6P21 chr21  | + | 45892778 | 45893622 | 482  |
| ENSG000001 | 0.342542 | 0        | 0.4146   | 0.81455  | NA       | AC011625. chr7  | + | 1.32E+08 | 1.32E+08 | 526  |
| ENSG000001 | 1.722083 | 1.043983 | 0.58629  | 0.67894  | 0.7597   | AC004041. chr5  | - | 1.32E+08 | 1.32E+08 | 472  |
| ENSG000001 | 0.632843 | 0.594029 | 0.039277 | 0.98194  | NA       | RP11-521L1 chr1 | - | 1.8E+08  | 1.8E+08  | 371  |
| ENSG000001 | 0        | 0.357707 | -0.41864 | 0.81278  | NA       | HTATSFP1 chr6   | + | 33205576 | 33207467 | 984  |
| ENSG000001 | 0.580602 | 0.343138 | 0.37443  | 0.8337   | NA       | RP11-332E chr13 | + | 76452849 | 76455263 | 243  |
| ENSG000001 | 245.725  | 52.32086 | 2.2263   | 1.16E-17 | 8.78E-17 | FAM115B chr7    | + | 1.43E+08 | 1.43E+08 | 2232 |
| ENSG000001 | 3.527296 | 8.635181 | -1.1955  | 0.16481  | 0.24571  | AC004471. chr22 | + | 19109042 | 19112016 | 582  |
| ENSG000001 | 0.653381 | 0        | 0.82678  | 0.64037  | NA       | RP11-285G chr10 | + | 45432956 | 45451173 | 425  |
| ENSG000001 | 0.342542 | 0        | 0.4146   | 0.81455  | NA       | RP11-490C chr10 | + | 34198166 | 34206723 | 622  |
| ENSG000001 | 10.3532  | 19.43197 | -0.87981 | 0.093082 | 0.15214  | GS1-124K5 chr7  | - | 65956083 | 65958553 | 699  |
| ENSG000001 | 0.290301 | 0        | 0.4146   | 0.81455  | NA       | AL020996. chr1  | - | 26145212 | 26147288 | 2077 |
| ENSG000001 | 1.681007 | 9.032564 | -2.2576  | 0.017411 | 0.034817 | VN1R42P chr7    | + | 64393651 | 64393994 | 344  |
| ENSG000001 | 12.89476 | 15.48183 | -0.26044 | 0.6401   | 0.72726  | RP11-545E chr9  | + | 1.31E+08 | 1.31E+08 | 544  |
| ENSG000001 | 275.4498 | 239.9308 | 0.19807  | 0.21613  | 0.30727  | NUTM2A-A1 chr10 | + | 88963632 | 89102369 | 2394 |
| ENSG000001 | 8.724434 | 0        | 4.7275   | 0.000246 | 0.000665 | RP11-417E chr6  | - | 1.7E+08  | 1.7E+08  | 647  |
| ENSG000001 | 6.027779 | 104.1747 | -4.0616  | 1.19E-19 | 9.84E-19 | AC092198. chrX  | + | 39868529 | 39871435 | 2691 |
| ENSG000001 | 0.705622 | 1.545765 | -0.87793 | 0.57415  | 0.6713   | RP3-328E1 chr1  | + | 1.48E+08 | 1.48E+08 | 282  |
| ENSG000001 | 1.338465 | 0        | 1.8837   | 0.27037  | NA       | RP11-15M1 chr20 | - | 51785182 | 51796089 | 1620 |
| ENSG000001 | 804.0382 | 996.1287 | -0.3082  | 0.087333 | 0.14409  | EXOSC6 chr16    | - | 70284134 | 70285833 | 1700 |
| ENSG000001 | 504.7146 | 536.539  | -0.08655 | 0.58096  | 0.67743  | VPS52 chr6      | - | 33218049 | 33239824 | 3338 |
| ENSG000001 | 0.36308  | 0.686276 | -0.48701 | 0.78478  | NA       | RP11-96B5 chr10 | - | 52822339 | 52828313 | 421  |
| ENSG000001 | 0.943682 | 1.730259 | -0.63992 | 0.67375  | 0.75571  | RP11-29H2 chr1  | - | 1.56E+08 | 1.56E+08 | 662  |
| ENSG000001 | 3.64115  | 1.995719 | 0.7883   | 0.44495  | 0.55046  | RP11-397P chr1  | - | 2.04E+08 | 2.04E+08 | 328  |
| ENSG000001 | 19.21203 | 9.231626 | 1.0366   | 0.047933 | 0.085778 | RPL23AP51 chr8  | - | 163251   | 163707   | 457  |
| ENSG000001 | 65.94249 | 4.478651 | 3.7593   | 6.10E-13 | 3.52E-12 | RP11-632K chr15 | - | 32812049 | 32829127 | 1673 |
| ENSG000001 | 9.689468 | 8.300907 | 0.22437  | 0.76275  | 0.82784  | CDRT15 chr17    | - | 14138990 | 14140179 | 766  |
| ENSG000001 | 0        | 2.382564 | -2.4485  | 0.15134  | 0.22879  | RP13-297E chrX  | + | 1851477  | 1874878  | 445  |
| ENSG000001 | 1.338465 | 0.937167 | 0.37552  | 0.79552  | 0.85505  | ATP6V0E1F chr3  | - | 41900842 | 41901086 | 245  |
| ENSG000001 | 0.290301 | 0.357707 | -0.00203 | 0.99908  | NA       | AFF2-IT1 chrX   | + | 1.48E+08 | 1.48E+08 | 443  |

|            |          |          |          |          |          |                 |   |          |          |      |
|------------|----------|----------|----------|----------|----------|-----------------|---|----------|----------|------|
| ENSG000001 | 0.870904 | 1.309443 | -0.38061 | 0.81589  | 0.87074  | CSNK1A1P: chr15 | - | 37090797 | 37110660 | 2147 |
| ENSG000001 | 8.850267 | 3.679854 | 1.192    | 0.14255  | 0.21719  | RP11-439E chr1  | - | 2.47E+08 | 2.47E+08 | 3050 |
| ENSG000001 | 2.023549 | 2.604317 | -0.33403 | 0.77681  | 0.83959  | AC093690. chr2  | - | 28530558 | 28533326 | 2110 |
| ENSG000001 | 0.705622 | 0        | 0.8807   | 0.6196   | NA       | AC079613. chr2  | - | 1.89E+08 | 1.9E+08  | 797  |
| ENSG000001 | 1.08924  | 11.85293 | -3.2042  | 0.001651 | 0.003955 | RABGAP1L: chr1  | + | 1.75E+08 | 1.75E+08 | 737  |
| ENSG000001 | 3.899749 | 2.857624 | 0.3857   | 0.73472  | 0.8042   | RP11-223P chr10 | - | 1.29E+08 | 1.29E+08 | 837  |
| ENSG000001 | 0.290301 | 0.654722 | -0.51764 | 0.76892  | NA       | EEF1A1P8 chr3   | - | 1.84E+08 | 1.84E+08 | 1388 |
| ENSG000001 | 0        | 0.343138 | -0.41864 | 0.81278  | NA       | HLA-DQB1- chr6  | + | 32627657 | 32628506 | 552  |
| ENSG000001 | 0.342542 | 0.297015 | -0.00202 | 0.99909  | NA       | RP1-283K1 chr6  | - | 1.34E+08 | 1.34E+08 | 631  |
| ENSG000001 | 0.72616  | 0        | 0.85004  | 0.63064  | NA       | TCEAL4P1 chr13  | - | 37316015 | 37316602 | 588  |
| ENSG000001 | 45.84335 | 45.00075 | 0.028943 | 0.92838  | 0.95256  | LINC00630 chrX  | + | 1.02E+08 | 1.02E+08 | 2101 |
| ENSG000001 | 10.79925 | 255.9643 | -4.5529  | 5.39E-43 | 1.03E-41 | ZNF844 chr19    | + | 12175514 | 12192380 | 6620 |
| ENSG000001 | 2.956066 | 3.784254 | -0.30713 | 0.77174  | 0.83559  | MTND5P28 chr2   | + | 1.21E+08 | 1.21E+08 | 1594 |
| ENSG000001 | 4.689314 | 3.276024 | 0.46893  | 0.60367  | 0.69701  | TMSB4XP4 chr9   | + | 1.31E+08 | 1.31E+08 | 618  |
| ENSG000001 | 0        | 0.594029 | -0.81444 | 0.64499  | NA       | RP11-24F1 chr3  | - | 46406446 | 46448550 | 656  |
| ENSG000001 | 0.342542 | 4.600036 | -3.0296  | 0.025468 | 0.049085 | SMPD4P1 chr22   | - | 20956882 | 21011201 | 2163 |
| ENSG000001 | 0.290301 | 0        | 0.4146   | 0.81455  | NA       | AC078851. chr2  | - | 1.41E+08 | 1.41E+08 | 298  |
| ENSG000001 | 0.580602 | 1.713273 | -1.1032  | 0.47375  | 0.57833  | RP11-700P chr7  | + | 56355923 | 56359118 | 2884 |
| ENSG000001 | 0.342542 | 0.297015 | -0.00202 | 0.99909  | NA       | AC003090. chr7  | - | 25632971 | 25790614 | 1870 |
| ENSG000001 | 1.027626 | 0        | 1.1491   | 0.51623  | NA       | AP001601. chr21 | + | 28261695 | 28312061 | 361  |
| ENSG000001 | 0        | 0.937167 | -1.2408  | 0.48662  | NA       | CYP4F32P chr2   | - | 95425004 | 95426024 | 504  |
| ENSG000001 | 2.085163 | 4.617021 | -1.068   | 0.30779  | 0.40955  | DHRXS-IT1 chrX  | - | 2252336  | 2254451  | 651  |
| ENSG000001 | 0        | 135.8336 | -8.545   | 4.63E-15 | 3.04E-14 | CKMT1A chr15    | + | 43985084 | 43991420 | 1911 |
| ENSG000001 | 5.113194 | 12.96976 | -1.2689  | 0.07511  | 0.12665  | TINCR chr19     | - | 5558178  | 5568045  | 3733 |
| ENSG000001 | 0        | 0.594029 | -0.81444 | 0.64499  | NA       | RBMX2P3 chr1    | - | 1.2E+08  | 1.2E+08  | 957  |
| ENSG000001 | 4.81352  | 5.020852 | -0.04038 | 0.96256  | 0.97789  | RP11-61K9 chr13 | + | 20415967 | 20417812 | 444  |
| ENSG000001 | 2.697468 | 3.169208 | -0.23857 | 0.82153  | 0.87444  | RP3-476K8 chr1  | - | 26781144 | 26781678 | 535  |
| ENSG000001 | 1.794048 | 2.131673 | -0.15726 | 0.91426  | 0.94154  | TVP23CP1 chr7   | + | 90261220 | 90261882 | 639  |
| ENSG000001 | 0.290301 | 0        | 0.4146   | 0.81455  | NA       | RP4-662A9 chr6  | + | 1.34E+08 | 1.34E+08 | 813  |
| ENSG000001 | 0        | 0.594029 | -0.81444 | 0.64499  | NA       | RP5-884C9 chr1  | - | 38546244 | 38546583 | 340  |
| ENSG000001 | 0        | 21.43823 | -6.0253  | 3.22E-07 | 1.20E-06 | CENPVP1 chrX    | + | 51453887 | 51455227 | 1303 |
| ENSG000001 | 0.685084 | 0        | 0.85004  | 0.63064  | NA       | FNDC3CP chrX    | - | 77421193 | 77427919 | 1155 |
| ENSG000001 | 0.290301 | 0        | 0.4146   | 0.81455  | NA       | AL356806. chr14 | - | 34885893 | 34886808 | 916  |
| ENSG000001 | 0.705622 | 2.307303 | -1.4238  | 0.30538  | 0.40696  | RP1-292B1 chr6  | - | 1.51E+08 | 1.52E+08 | 853  |
| ENSG000001 | 3.818411 | 9.441226 | -1.2453  | 0.16367  | 0.24431  | RP11-216N chr1  | - | 1.54E+08 | 1.54E+08 | 1309 |
| ENSG000001 | 0.995923 | 0        | 1.4959   | 0.39264  | NA       | AC125634. chr9  | - | 69891208 | 69901481 | 1403 |
| ENSG000001 | 2.749709 | 6.828788 | -1.2025  | 0.24316  | 0.33856  | SUPT20HL2 chrX  | - | 24328979 | 24331432 | 2454 |
| ENSG000001 | 13.66379 | 11.20062 | 0.27222  | 0.64794  | 0.73402  | RP11-289I: chr1 | + | 1.48E+08 | 1.48E+08 | 704  |
| ENSG000001 | 0        | 0.343138 | -0.41864 | 0.81278  | NA       | RP11-54H7 chr13 | + | 1.1E+08  | 1.1E+08  | 698  |
| ENSG000001 | 0.290301 | 0        | 0.4146   | 0.81455  | NA       | AK4P4 chr9      | - | 5855781  | 5856426  | 646  |
| ENSG000001 | 2.116866 | 0.686276 | 1.172    | 0.46125  | 0.56647  | RP1-125I3. chr1 | + | 26215461 | 26215600 | 140  |
| ENSG000001 | 0        | 0.343138 | -0.41864 | 0.81278  | NA       | AC073869. chr2  | + | 1.32E+08 | 1.32E+08 | 1861 |
| ENSG000001 | 0        | 0.357707 | -0.41864 | 0.81278  | NA       | AC012506. chr2  | - | 23580387 | 23583247 | 533  |
| ENSG000001 | 0        | 1.280305 | -1.6305  | 0.35731  | NA       | RP4-613A2 chr1  | + | 2.3E+08  | 2.3E+08  | 591  |
| ENSG000001 | 1.306762 | 0.343138 | 1.2492   | 0.4594   | NA       | AC008277. chr2  | + | 1.6E+08  | 1.6E+08  | 1149 |
| ENSG000001 | 0.342542 | 0        | 0.4146   | 0.81455  | NA       | AL133249. chr2  | - | 32018892 | 32029049 | 418  |
| ENSG000001 | 1.701545 | 1.309443 | 0.29605  | 0.82676  | 0.87797  | UHRF2P1 chrX    | + | 73325407 | 73327793 | 2387 |
| ENSG000001 | 36.95103 | 0        | 6.8046   | 1.35E-09 | 6.16E-09 | AC106786. chr5  | - | 1.22E+08 | 1.22E+08 | 792  |
| ENSG000001 | 8.652469 | 2.947455 | 1.4586   | 0.071106 | 0.12077  | RP11-131L chr1  | + | 85742398 | 85913807 | 1950 |
| ENSG000001 | 0        | 0.594029 | -0.81444 | 0.64499  | NA       | AC011242. chr2  | - | 43902292 | 43903461 | 1170 |
| ENSG000001 | 0        | 0.654722 | -0.83442 | 0.63731  | NA       | AC012314. chr19 | - | 54703321 | 54703838 | 410  |
| ENSG000001 | 0        | 0.700845 | -0.87835 | 0.62047  | NA       | SAMSN1-A5 chr21 | + | 15954523 | 15970624 | 840  |
| ENSG000001 | 0.342542 | 1.073121 | -0.87093 | 0.62353  | NA       | RP5-890O3 chr1  | + | 1314046  | 1314412  | 367  |
| ENSG000001 | 0.632843 | 0        | 0.81931  | 0.64303  | NA       | CTB-111F1: chr7 | - | 91268162 | 91272827 | 536  |
| ENSG000001 | 0        | 0.357707 | -0.41864 | 0.81278  | NA       | EEF1A1P24 chr3  | + | 39400036 | 39401413 | 1378 |
| ENSG000001 | 18.01912 | 5.116387 | 1.7152   | 0.023711 | 0.046006 | RP11-93B1 chr20 | - | 61363918 | 61366699 | 739  |
| ENSG000001 | 0.923144 | 0        | 1.223    | 0.49292  | NA       | RP11-86H7 chr1  | - | 95051112 | 95057853 | 2171 |
| ENSG000001 | 0.290301 | 0        | 0.4146   | 0.81455  | NA       | RP11-311F: chr9 | + | 33402855 | 33409946 | 353  |
| ENSG000001 | 0        | 0.357707 | -0.41864 | 0.81278  | NA       | AL138935. chr1  | + | 63727784 | 63728378 | 595  |
| ENSG000001 | 2.282147 | 0.357707 | 2.0705   | 0.1665   | 0.24767  | LINC00571 chr13 | - | 38624954 | 38717369 | 525  |
| ENSG000001 | 0        | 0.357707 | -0.41864 | 0.81278  | NA       | RPS24P14 chr11  | + | 3580887  | 3581252  | 366  |
| ENSG000001 | 3.910914 | 5.568757 | -0.4792  | 0.5645   | 0.6625   | DIP2A-IT1 chr21 | + | 47882384 | 47889219 | 428  |
| ENSG000001 | 2.31385  | 1.012429 | 0.99399  | 0.46162  | 0.56683  | RP4-633O1 chr22 | + | 36784671 | 36792562 | 510  |
| ENSG000001 | 3.071713 | 2.027273 | 0.52033  | 0.66238  | 0.74598  | AF230666. chr8  | - | 1.34E+08 | 1.34E+08 | 773  |
| ENSG000001 | 0        | 0.343138 | -0.41864 | 0.81278  | NA       | GOLGA6L1 chrY   | + | 26314334 | 26320641 | 1298 |

|            |          |          |          |           |           |                  |   |          |          |      |
|------------|----------|----------|----------|-----------|-----------|------------------|---|----------|----------|------|
| ENSG000001 | 0.342542 | 4.41467  | -2.6339  | 0.094386  | 0.15385   | AC027612. chr2   | + | 91924752 | 91955465 | 2395 |
| ENSG000001 | 0.342542 | 1.188058 | -0.99414 | 0.57407   | NA        | RP1-90L6.2 chr22 | + | 27254597 | 27261749 | 6043 |
| ENSG000001 | 212.2857 | 408.3557 | -0.94439 | 4.23E-08  | 1.70E-07  | NSUN5P1 chr7     | + | 75039605 | 75046066 | 4792 |
| ENSG000001 | 0.342542 | 0.343138 | -0.00208 | 0.99906   | NA        | AC091633. chr3   | + | 1.95E+08 | 1.95E+08 | 810  |
| ENSG000001 | 0.342542 | 2.367995 | -2.0738  | 0.17182   | 0.25433   | RP5-1172N chrX   | + | 41134992 | 41136031 | 835  |
| ENSG000001 | 0.342542 | 0.343138 | -0.00208 | 0.99906   | NA        | AC093107. chr7   | + | 1.35E+08 | 1.35E+08 | 615  |
| ENSG000001 | 8.019626 | 2.635871 | 1.5025   | 0.073078  | 0.12366   | AC024162. chr3   | + | 6734006  | 6734775  | 432  |
| ENSG000001 | 0.36308  | 0        | 0.4146   | 0.81455   | NA        | RP5-1024N chr1   | + | 48671637 | 48672515 | 270  |
| ENSG000001 | 0        | 0.654722 | -0.83442 | 0.63731   | NA        | RP11-467L chr12  | + | 31907651 | 31908055 | 405  |
| ENSG000001 | 1.359003 | 1.638012 | -0.24805 | 0.84753   | 0.89291   | BX842568. chrX   | - | 36980269 | 36981498 | 1230 |
| ENSG000001 | 0.290301 | 1.638012 | -1.64    | 0.2979    | 0.3998    | RAD17P2 chr13    | - | 49618215 | 49620930 | 1977 |
| ENSG000001 | 1.359003 | 1.652581 | -0.25445 | 0.84363   | 0.8902    | AC007879. chr2   | - | 2.08E+08 | 2.08E+08 | 741  |
| ENSG000001 | 0        | 7.662428 | -4.5137  | 0.000686  | 0.001742  | RP1-127B2 chr22  | + | 45297427 | 45298351 | 925  |
| ENSG000001 | 1.660469 | 3.305162 | -0.8624  | 0.47755   | 0.58202   | SUP720HL1 chrX   | + | 24380878 | 24383541 | 2618 |
| ENSG000001 | 0        | 0.700845 | -0.87835 | 0.62047   | NA        | RP11-321C chr13  | - | 45556212 | 45657260 | 315  |
| ENSG000001 | 0.705622 | 2.757256 | -1.6327  | 0.23279   | 0.32635   | RP11-644K chr2   | + | 20251895 | 20254257 | 573  |
| ENSG000001 | 0        | 0.357707 | -0.41864 | 0.81278   | NA        | OR51B3P chr11    | - | 5336002  | 5336914  | 913  |
| ENSG000001 | 0        | 0.297015 | -0.41864 | 0.81278   | NA        | RP11-149B chrX   | - | 28589649 | 28604512 | 756  |
| ENSG000001 | 92.62183 | 131.9518 | -0.5038  | 0.25242   | 0.34927   | RP4-717I2. chr1  | - | 93727743 | 93811582 | 2973 |
| ENSG000001 | 101.1046 | 44.92059 | 1.1574   | 0.00271   | 0.006291  | AC004383. chrX   | - | 1.34E+08 | 1.34E+08 | 760  |
| ENSG000001 | 0        | 0.297015 | -0.41864 | 0.81278   | NA        | RP4-673D2 chr20  | - | 1645929  | 1688846  | 1216 |
| ENSG000001 | 4.439275 | 5.748419 | -0.3238  | 0.72248   | 0.79466   | AC116609. chr2   | + | 742488   | 747767   | 535  |
| ENSG000001 | 0        | 0.686276 | -0.84936 | 0.6309    | NA        | GHc-602D8 chrX   | + | 1.01E+08 | 1.01E+08 | 670  |
| ENSG000001 | 0.290301 | 0        | 0.4146   | 0.81455   | NA        | AC008073. chr2   | - | 24422708 | 24424567 | 543  |
| ENSG000001 | 17.14822 | 1804.04  | -6.6894  | 3.22E-172 | 4.97E-170 | TSSC2 chr11      | + | 3402191  | 3430208  | 2337 |
| ENSG000001 | 8.21661  | 4.568482 | 0.79444  | 0.33128   | 0.43443   | RP11-353N chr1   | + | 1.5E+08  | 1.5E+08  | 1988 |
| ENSG000001 | 0        | 1.698704 | -2.2257  | 0.18075   | NA        | CCDC74B-2 chr2   | + | 1.31E+08 | 1.31E+08 | 1841 |
| ENSG000001 | 168.5739 | 24.81141 | 2.736    | 3.22E-19  | 2.60E-18  | RP11-5407 chr1   | - | 852250   | 855072   | 1389 |
| ENSG000001 | 151.8909 | 75.10659 | 1.009    | 3.26E-06  | 1.11E-05  | LINC00205 chr21  | + | 46713200 | 46717269 | 1391 |
| ENSG000001 | 2.375464 | 0.343138 | 2.0752   | 0.17189   | 0.2544    | MIR1255B. chr7   | + | 81638493 | 81659271 | 2651 |
| ENSG000001 | 0        | 0.686276 | -0.84936 | 0.6309    | NA        | GEMIN8P3 chrX    | + | 85559370 | 85560089 | 720  |
| ENSG000001 | 131.4842 | 147.9925 | -0.1731  | 0.40658   | 0.51136   | CD99P1 chrX      | + | 2527389  | 2575270  | 3071 |
| ENSG000001 | 0.632843 | 0        | 0.81931  | 0.64303   | NA        | RP11-307B chr1   | + | 2.02E+08 | 2.02E+08 | 600  |
| ENSG000001 | 0        | 0.297015 | -0.41864 | 0.81278   | NA        | LGALS8-AS. chr1  | - | 2.37E+08 | 2.37E+08 | 1440 |
| ENSG000001 | 0.632843 | 0        | 0.81931  | 0.64303   | NA        | AC092162. chr2   | - | 1.78E+08 | 1.78E+08 | 434  |
| ENSG000001 | 1.971308 | 2.635871 | -0.37319 | 0.73813   | 0.80693   | RP11-403I. chr1  | + | 1.49E+08 | 1.49E+08 | 5057 |
| ENSG000001 | 0        | 0.891044 | -1.0625  | 0.54819   | NA        | AC124944. chr3   | - | 1.96E+08 | 1.96E+08 | 574  |
| ENSG000001 | 1.660469 | 3.10281  | -0.70891 | 0.62426   | 0.7145    | RP11-554I8 chr10 | + | 6779344  | 6780988  | 917  |
| ENSG000001 | 0.36308  | 0        | 0.4146   | 0.81455   | NA        | RP4-593M8 chr1   | - | 93046033 | 93046378 | 346  |
| ENSG000001 | 1.286224 | 6.746278 | -2.1346  | 0.04213   | 0.076714  | UBE2E1-AS chr3   | - | 23845515 | 23848396 | 778  |
| ENSG000001 | 10.73682 | 17.89836 | -0.71336 | 0.17336   | 0.25617   | ENTPD3-AS chr3   | - | 40355293 | 40494820 | 2036 |
| ENSG000001 | 0.632843 | 0        | 0.81931  | 0.64303   | NA        | AP000295. chr21  | - | 34636178 | 34638565 | 2228 |
| ENSG000001 | 25.85292 | 52.72159 | -1.0248  | 0.005442  | 0.012032  | CERS1 chr19      | - | 18979361 | 19007536 | 2558 |
| ENSG000001 | 1.359003 | 0        | 1.8987   | 0.26617   | NA        | RPS20P14 chr3    | + | 1.87E+08 | 1.87E+08 | 360  |
| ENSG000001 | 47.34612 | 46.71174 | 0.012609 | 0.96941   | 0.9828    | RP6-206I1. chr1  | - | 1.44E+08 | 1.44E+08 | 2210 |
| ENSG000001 | 0        | 0.640152 | -0.82869 | 0.63935   | NA        | LINC00114 chr21  | - | 40110945 | 40119384 | 1790 |
| ENSG000001 | 0        | 0.343138 | -0.41864 | 0.81278   | NA        | RP11-562N chr9   | + | 32926049 | 32926448 | 400  |
| ENSG000001 | 1.048164 | 0        | 1.348    | 0.44949   | NA        | RP11-437J chr6   | - | 1.14E+08 | 1.14E+08 | 507  |
| ENSG000001 | 0.342542 | 0        | 0.4146   | 0.81455   | NA        | RP11-197K chr3   | + | 1.91E+08 | 1.91E+08 | 901  |
| ENSG000001 | 8.443506 | 30.20695 | -1.7952  | 0.000326  | 0.000868  | AC007255. chr7   | - | 29554385 | 29603286 | 889  |
| ENSG000001 | 0.705622 | 10.92791 | -3.5801  | 0.00094   | 0.002343  | RP11-543C chr1   | - | 48226804 | 48231219 | 407  |
| ENSG000001 | 0        | 1.340997 | -1.8899  | 0.26871   | NA        | DIAPH3-AS. chr13 | + | 60718832 | 60727639 | 367  |
| ENSG000001 | 2.447429 | 11.30831 | -2.0096  | 0.029694  | 0.056267  | CFL1P1 chr10     | + | 89577685 | 89605369 | 2120 |
| ENSG000001 | 0.36308  | 0.343138 | -0.0021  | 0.99905   | NA        | RP11-505P chr6   | - | 74201748 | 74202465 | 370  |
| ENSG000001 | 0        | 0.297015 | -0.41864 | 0.81278   | NA        | RP11-465B chr1   | + | 1072397  | 1079436  | 1620 |
| ENSG000001 | 1.379541 | 1.294874 | 0.047441 | 0.97332   | 0.98515   | DAZAP2P1 chr2    | - | 2.03E+08 | 2.03E+08 | 503  |
| ENSG000001 | 1.359003 | 0.297015 | 1.3758   | 0.39512   | NA        | BANF1P4 chr1     | - | 1.75E+08 | 1.75E+08 | 270  |
| ENSG000001 | 3.516131 | 0.343138 | 2.646    | 0.062548  | 0.10817   | RP1-561J0. chr22 | + | 30994296 | 31002674 | 249  |
| ENSG000001 | 0.290301 | 0.594029 | -0.38058 | 0.83094   | NA        | RP11-472N chr10  | + | 31893528 | 31895146 | 421  |
| ENSG000001 | 0        | 0.297015 | -0.41864 | 0.81278   | NA        | BRD2-IT1 chr6    | + | 32938009 | 32938663 | 338  |
| ENSG000001 | 1.068702 | 0        | 1.3672   | 0.44297   | NA        | AC007091. chr7   | + | 19393157 | 19618229 | 566  |
| ENSG000001 | 0.632843 | 8.409396 | -3.262   | 0.003482  | 0.007948  | FAM95B1 chr9     | + | 42466317 | 42474239 | 4692 |
| ENSG000001 | 0.975385 | 0.654722 | 0.40949  | 0.80016   | NA        | RP11-135J. chr1  | - | 2.19E+08 | 2.19E+08 | 1126 |
| ENSG000001 | 6.671788 | 1.40169  | 2.0504   | 0.057702  | 0.10088   | RP11-80I1. chr9  | + | 97885803 | 97886150 | 348  |
| ENSG000001 | 0        | 0.654722 | -0.83442 | 0.63731   | NA        | AC010145. chr2   | + | 16060521 | 16076139 | 1039 |

|            |          |          |          |          |          |                  |   |          |          |      |
|------------|----------|----------|----------|----------|----------|------------------|---|----------|----------|------|
| ENSG000001 | 23.33948 | 90.62977 | -1.9421  | 1.10E-08 | 4.64E-08 | AC147651. chr7   | + | 560028   | 564869   | 3506 |
| ENSG000001 | 1.866827 | 0        | 2.3484   | 0.15622  | NA       | RP11-74C1 chr1   | + | 1.52E+08 | 1.52E+08 | 495  |
| ENSG000001 | 0.290301 | 0.951736 | -0.90191 | 0.60254  | NA       | NPM1P19 chr20    | - | 37606354 | 37607065 | 712  |
| ENSG000001 | 42.44964 | 322.0175 | -2.9144  | 9.14E-48 | 1.96E-46 | HLA-DPB1 chr6    | + | 33043703 | 33054978 | 1560 |
| ENSG000001 | 0.290301 | 0        | 0.4146   | 0.81455  | NA       | AC002486. chr7   | - | 20681181 | 20681571 | 391  |
| ENSG000001 | 0        | 0.343138 | -0.41864 | 0.81278  | NA       | RP11-2F9.3 chr15 | - | 22440227 | 22440848 | 622  |
| ENSG000001 | 23.19816 | 5.355125 | 1.9984   | 0.00391  | 0.008844 | AC005517. chr17  | + | 15410180 | 15410668 | 489  |
| ENSG000001 | 0.342542 | 1.294874 | -1.342   | 0.40631  | NA       | ABCC5-AS1 chr3   | + | 1.84E+08 | 1.84E+08 | 469  |
| ENSG000001 | 2.738544 | 1.294874 | 0.90438  | 0.46336  | 0.56849  | AC019048. chr2   | - | 7202858  | 7218011  | 555  |
| ENSG000001 | 3.682226 | 5.505649 | -0.54865 | 0.56814  | 0.66559  | RP11-251G chr7   | + | 1.05E+08 | 1.05E+08 | 463  |
| ENSG000001 | 36.37997 | 80.33873 | -1.1269  | 0.001015 | 0.002514 | RP5-995J1. chr20 | + | 42839600 | 42854667 | 1563 |
| ENSG000001 | 0        | 0.357707 | -0.41864 | 0.81278  | NA       | AC096568. chr7   | - | 49981847 | 49984036 | 2190 |
| ENSG000001 | 0.653381 | 1.058552 | -0.47534 | 0.76821  | NA       | CCNP2 chr1       | + | 93221351 | 93222513 | 1163 |
| ENSG000001 | 1.233984 | 0.640152 | 0.69125  | 0.6636   | NA       | SEC13P1 chr3     | + | 33075355 | 33076302 | 948  |
| ENSG000001 | 1.95077  | 1.340997 | 0.45645  | 0.73609  | 0.80532  | AP001469. chr21  | + | 47640183 | 47641992 | 525  |
| ENSG000001 | 0        | 0.297015 | -0.41864 | 0.81278  | NA       | AC009502. chr2   | + | 2.21E+08 | 2.21E+08 | 416  |
| ENSG000001 | 0        | 0.343138 | -0.41864 | 0.81278  | NA       | RP11-439L chr1   | + | 31984036 | 31989846 | 2741 |
| ENSG000001 | 0.923144 | 0.686276 | 0.30412  | 0.8576   | NA       | AC068657. chr5   | - | 1.59E+08 | 1.59E+08 | 306  |
| ENSG000001 | 0        | 1.012429 | -1.3162  | 0.46038  | NA       | ZNF32-AS3 chr10  | + | 44124265 | 44170151 | 1932 |
| ENSG000001 | 0.36308  | 0.640152 | -0.51156 | 0.77091  | NA       | AC009480. chr2   | - | 1.49E+08 | 1.49E+08 | 412  |
| ENSG000001 | 1.576526 | 0.98329  | 0.55672  | 0.69492  | 0.77231  | DPPA2P1 chrY     | + | 15342765 | 15343320 | 556  |
| ENSG000001 | 1.649304 | 2.976593 | -0.72982 | 0.55968  | 0.65836  | RP11-353F chr3   | - | 43526464 | 43527372 | 515  |
| ENSG000001 | 0.580602 | 0        | 0.8036   | 0.6494   | NA       | RP11-430G chr1   | + | 62119866 | 62120580 | 715  |
| ENSG000001 | 6.991186 | 5.424682 | 0.37039  | 0.64598  | 0.73254  | ASS1P2 chr2      | - | 39037574 | 39038796 | 1223 |
| ENSG000001 | 4.678149 | 1.713273 | 1.3138   | 0.22611  | 0.31892  | AC010136. chr2   | + | 2.19E+08 | 2.19E+08 | 568  |
| ENSG000001 | 1.359003 | 0.654722 | 0.79525  | 0.59532  | 0.68965  | RP11-33A1 chr3   | - | 1.78E+08 | 1.78E+08 | 2100 |
| ENSG000001 | 0.923144 | 0.997859 | -0.05562 | 0.97039  | 0.98357  | AC008074. chr2   | - | 64622354 | 64680932 | 723  |
| ENSG000001 | 2.583614 | 0.297015 | 2.1045   | 0.18758  | 0.27359  | RP11-458I chr1   | + | 1.5E+08  | 1.5E+08  | 870  |
| ENSG000001 | 0.36308  | 0        | 0.4146   | 0.81455  | NA       | RP11-533C chr6   | + | 41997791 | 41999120 | 161  |
| ENSG000001 | 9.575613 | 0        | 4.8808   | 0.000109 | 0.000308 | AC016738. chr2   | - | 1.02E+08 | 1.02E+08 | 3485 |
| ENSG000001 | 2.935529 | 15.89532 | -2.3097  | 0.002745 | 0.006368 | RP11-24J2. chr1  | - | 64560125 | 64636980 | 2189 |
| ENSG000001 | 0.36308  | 0.297015 | -0.00205 | 0.99908  | NA       | AL133244. chr2   | - | 33281400 | 33288180 | 258  |
| ENSG000001 | 1.048164 | 1.294874 | -0.27358 | 0.85003  | 0.89459  | RP4-710M chr1    | + | 56880635 | 56881638 | 545  |
| ENSG000001 | 349.5936 | 310.0684 | 0.17276  | 0.50325  | 0.60676  | AFG3L1P chr16    | + | 90038994 | 90068569 | 3327 |
| ENSG000001 | 211.4973 | 111.8767 | 0.91787  | 6.32E-06 | 2.08E-05 | AC009948. chr2   | + | 1.79E+08 | 1.79E+08 | 2007 |
| ENSG000001 | 2.665765 | 1.280305 | 0.87732  | 0.49163  | 0.59558  | PRKRIRP8 chr1    | - | 2.41E+08 | 2.41E+08 | 2115 |
| ENSG000001 | 1.649304 | 1.698704 | -0.02525 | 0.98381  | 0.99083  | ZNF587P1 chr3    | + | 31835962 | 31837667 | 1386 |
| ENSG000001 | 3.806432 | 10.30475 | -1.3427  | 0.079069 | 0.13219  | AC002456. chr7   | - | 90219933 | 90226667 | 450  |
| ENSG000001 | 0        | 0.297015 | -0.41864 | 0.81278  | NA       | DDX11L1 chr1     | + | 11869    | 14412    | 1657 |
| ENSG000001 | 0.653381 | 0        | 0.82678  | 0.64037  | NA       | AC068491. chr2   | + | 1.12E+08 | 1.12E+08 | 1241 |
| ENSG000001 | 0        | 0.891044 | -1.0625  | 0.54819  | NA       | RP11-561N chr7   | + | 64011876 | 64012444 | 569  |
| ENSG000001 | 2.188831 | 1.652581 | 0.36229  | 0.77715  | 0.83989  | SMCR2 chr17      | - | 17577340 | 17581002 | 564  |
| ENSG000001 | 0.36308  | 0        | 0.4146   | 0.81455  | NA       | PHBP6 chr7       | + | 74619641 | 74620426 | 786  |
| ENSG000001 | 0        | 0.343138 | -0.41864 | 0.81278  | NA       | RP11-12A2 chr9   | + | 67864636 | 67864981 | 346  |
| ENSG000001 | 0.290301 | 2.367995 | -2.0987  | 0.16791  | 0.24938  | HNRNRP1 chr10    | - | 21913521 | 21915215 | 1695 |
| ENSG000001 | 0        | 0.357707 | -0.41864 | 0.81278  | NA       | AC104809. chr2   | - | 2.42E+08 | 2.42E+08 | 2345 |
| ENSG000001 | 1.016461 | 0.594029 | 0.47076  | 0.78115  | NA       | RP11-321N chr6   | - | 86270033 | 86270928 | 596  |
| ENSG000001 | 0.290301 | 0        | 0.4146   | 0.81455  | NA       | RP3-471M chr1    | + | 1.73E+08 | 1.73E+08 | 658  |
| ENSG000001 | 0.36308  | 0        | 0.4146   | 0.81455  | NA       | RP11-270F chr9   | + | 1.01E+08 | 1.01E+08 | 555  |
| ENSG000001 | 0.632843 | 2.367995 | -1.5025  | 0.28295  | 0.38408  | CTA-407F1 chr22  | + | 26043228 | 26045199 | 1628 |
| ENSG000001 | 0.290301 | 0        | 0.4146   | 0.81455  | NA       | ATP5C1P1 chr14   | - | 54457819 | 54458713 | 895  |
| ENSG000001 | 5.560218 | 3.198346 | 0.72683  | 0.42518  | 0.53052  | AC022400. chr10  | - | 75473354 | 75473609 | 252  |
| ENSG000001 | 1.068702 | 0        | 1.3672   | 0.44297  | NA       | AC019070. chr2   | - | 1.49E+08 | 1.49E+08 | 1024 |
| ENSG000001 | 0        | 0.297015 | -0.41864 | 0.81278  | NA       | AC111155. chr17  | - | 58804526 | 58804843 | 318  |
| ENSG000001 | 3.579537 | 0        | 3.3029   | 0.029624 | 0.056152 | RP11-488L chr1   | + | 2.47E+08 | 2.47E+08 | 270  |
| ENSG000001 | 0        | 1.340997 | -1.8899  | 0.26871  | NA       | AC063976. chr5   | - | 1.32E+08 | 1.32E+08 | 381  |
| ENSG000001 | 0        | 5.081544 | -3.8883  | 0.00574  | 0.012629 | RP11-728K chr7   | - | 1.5E+08  | 1.5E+08  | 291  |
| ENSG000001 | 2.769433 | 0.640152 | 1.6519   | 0.25705  | 0.35458  | AC005022. chr7   | + | 41141202 | 41173105 | 1220 |
| ENSG000001 | 1.524285 | 0        | 1.8365   | 0.29722  | NA       | AC097500. chr2   | - | 1.87E+08 | 1.87E+08 | 477  |
| ENSG000001 | 27.47134 | 12.44696 | 1.1103   | 0.017932 | 0.035753 | MIR181A2I chr9   | + | 1.27E+08 | 1.27E+08 | 662  |
| ENSG000001 | 0        | 0.343138 | -0.41864 | 0.81278  | NA       | RP11-383C chr10  | - | 1.27E+08 | 1.27E+08 | 2600 |
| ENSG000001 | 0.705622 | 0.357707 | 0.57557  | 0.74268  | NA       | RP1-231P7 chr22  | - | 27959800 | 27969534 | 577  |
| ENSG000001 | 0.685084 | 0.357707 | 0.4822   | 0.78686  | NA       | RP11-136K chr6   | + | 1.51E+08 | 1.51E+08 | 639  |
| ENSG000001 | 0        | 0.343138 | -0.41864 | 0.81278  | NA       | TCEAL3-AS1 chrX  | - | 1.03E+08 | 1.03E+08 | 361  |
| ENSG000001 | 161.4083 | 548.9784 | -1.7624  | 2.22E-33 | 3.21E-32 | EPB41L4A chr5    | + | 1.11E+08 | 1.11E+08 | 2969 |

|            |          |          |          |          |          |                  |   |          |          |      |
|------------|----------|----------|----------|----------|----------|------------------|---|----------|----------|------|
| ENSG000001 | 0        | 0.686276 | -0.84936 | 0.6309   | NA       | RP11-445P chr10  | - | 5307996  | 5313199  | 692  |
| ENSG000001 | 0        | 0.343138 | -0.41864 | 0.81278  | NA       | SFPQP1 chrY      | + | 15195704 | 15207719 | 1786 |
| ENSG000001 | 0.290301 | 0        | 0.4146   | 0.81455  | NA       | CTSL1P2 chr10    | + | 48157041 | 48158148 | 391  |
| ENSG000001 | 0.290301 | 0        | 0.4146   | 0.81455  | NA       | RP4-781K5 chr1   | + | 2.35E+08 | 2.35E+08 | 1008 |
| ENSG000001 | 0        | 1.058552 | -1.361   | 0.4451   | NA       | AC091493. chr3   | - | 16734252 | 16735709 | 1458 |
| ENSG000001 | 0.36308  | 1.684135 | -1.6385  | 0.30012  | 0.40168  | HMG1N1P4 chr1    | - | 1.83E+08 | 1.83E+08 | 290  |
| ENSG000001 | 5.705775 | 10.86393 | -0.89062 | 0.21852  | 0.31007  | AC016725. chr2   | - | 1.35E+08 | 1.36E+08 | 976  |
| ENSG000001 | 2.956066 | 16.04343 | -2.3269  | 0.001543 | 0.003716 | AC005076. chr7   | - | 86780739 | 86781736 | 769  |
| ENSG000001 | 0        | 2.66501  | -2.877   | 0.067583 | 0.11559  | RP11-3001 chr3   | + | 1.88E+08 | 1.88E+08 | 608  |
| ENSG000001 | 0.290301 | 6.114247 | -3.3775  | 0.014403 | 0.02928  | RP1-90G24 chr22  | + | 32669407 | 32673173 | 590  |
| ENSG000001 | 580.9011 | 279.2173 | 1.0541   | 7.81E-13 | 4.47E-12 | GLTPD1 chr1      | + | 1260136  | 1264277  | 2190 |
| ENSG000001 | 2.012384 | 0.357707 | 1.8757   | 0.22318  | 0.31563  | GAPDHP55 chr15   | + | 44355709 | 44356511 | 803  |
| ENSG000001 | 16.32695 | 0        | 5.6477   | 2.36E-06 | 8.14E-06 | EGFR-AS1 chr7    | - | 55247443 | 55256627 | 2806 |
| ENSG000001 | 0.685084 | 0        | 0.85004  | 0.63064  | NA       | HSPA8P16 chr7    | + | 84657144 | 84659008 | 1865 |
| ENSG000001 | 0.870904 | 0.297015 | 0.71032  | 0.69005  | NA       | ARSEP1 chrY      | + | 14460540 | 14468218 | 635  |
| ENSG000001 | 0.705622 | 6.569033 | -2.8227  | 0.019457 | 0.0385   | AC007319. chr2   | + | 1.88E+08 | 1.88E+08 | 829  |
| ENSG000001 | 0        | 0.297015 | -0.41864 | 0.81278  | NA       | RP11-344F chr1   | + | 27310119 | 27310515 | 397  |
| ENSG000001 | 0        | 1.073121 | -1.1788  | 0.50551  | NA       | RP4-622L5 chr1   | - | 32670370 | 32672415 | 786  |
| ENSG000001 | 1.89853  | 0.357707 | 1.6975   | 0.29865  | 0.40041  | RP11-430K chr9   | + | 1.15E+08 | 1.15E+08 | 413  |
| ENSG000001 | 4.035933 | 2.399549 | 0.69367  | 0.49599  | 0.59988  | RP11-75A9 chrX   | - | 46313532 | 46316634 | 2299 |
| ENSG000001 | 0        | 0.715414 | -0.84936 | 0.6309   | NA       | RP1-56L9.7 chr6  | - | 1.6E+08  | 1.6E+08  | 741  |
| ENSG000001 | 0        | 0.297015 | -0.41864 | 0.81278  | NA       | LINC00691 chr3   | - | 24137760 | 24144729 | 2964 |
| ENSG000001 | 1705.285 | 9449.69  | -2.4662  | 6.46E-65 | 2.11E-63 | SNHG14 chr15     | + | 25224704 | 25664609 | 8842 |
| ENSG000001 | 3.350849 | 6.819924 | -0.97099 | 0.27917  | 0.37986  | AC091729. chr7   | + | 1114086  | 1117672  | 869  |
| ENSG000001 | 3.713929 | 1.698704 | 1.0175   | 0.34862  | 0.45277  | UBE2FP1 chr3     | - | 37185003 | 37185449 | 447  |
| ENSG000001 | 15.10331 | 18.59034 | -0.28774 | 0.58755  | 0.68313  | RP11-86H7 chr1   | - | 95104017 | 95285837 | 1331 |
| ENSG000001 | 0.943682 | 1.073121 | -0.09955 | 0.95235  | 0.97023  | RP11-39K2 chr9   | + | 5096666  | 5098193  | 1528 |
| ENSG000001 | 30.44811 | 4.49322  | 2.66     | 6.05E-06 | 1.99E-05 | LL22NC03- chr22  | + | 22292609 | 22297799 | 3647 |
| ENSG000001 | 0.36308  | 0        | 0.4146   | 0.81455  | NA       | RP11-443B chr9   | - | 1977784  | 1978547  | 764  |
| ENSG000001 | 10.60145 | 3.259039 | 1.599    | 0.046784 | 0.083968 | RP5-1033F chr1   | + | 94057756 | 94071130 | 722  |
| ENSG000001 | 0.290301 | 0.686276 | -0.47648 | 0.78935  | NA       | RP11-578F chr3   | - | 45201266 | 45201667 | 402  |
| ENSG000001 | 0.290301 | 0        | 0.4146   | 0.81455  | NA       | AC108051. chr2   | - | 1.04E+08 | 1.04E+08 | 437  |
| ENSG000001 | 1.265686 | 0.891044 | 0.33494  | 0.83777  | 0.886    | RP11-472B chr4   | + | 39481875 | 39483525 | 1532 |
| ENSG000001 | 3.858673 | 0        | 3.4921   | 0.016684 | 0.033465 | AC064834. chr2   | + | 1.96E+08 | 1.96E+08 | 989  |
| ENSG000001 | 0.342542 | 0.654722 | -0.52406 | 0.76557  | NA       | AP001630. chr21  | - | 44384749 | 44385473 | 437  |
| ENSG000001 | 0        | 1.058552 | -1.361   | 0.4451   | NA       | ELMO1-AS1 chr7   | + | 37037401 | 37053235 | 528  |
| ENSG000001 | 0        | 2.604317 | -2.8535  | 0.070151 | 0.11941  | CYP4F25P chr9    | + | 69477881 | 69478916 | 520  |
| ENSG000001 | 0.685084 | 53.75658 | -5.8688  | 3.88E-11 | 1.98E-10 | CENPVP3 chrX     | - | 51360961 | 51361446 | 486  |
| ENSG000001 | 29.59856 | 50.59878 | -0.77524 | 0.026233 | 0.050369 | RP5-837J1. chr17 | + | 33332107 | 33336762 | 4656 |
| ENSG000001 | 2.551911 | 0.891044 | 1.1771   | 0.406    | 0.51082  | RP11-343F chr1   | - | 2.07E+08 | 2.07E+08 | 433  |
| ENSG000001 | 6.971462 | 0        | 4.4055   | 0.000826 | 0.002076 | INHBA-AS1 chr7   | + | 41733514 | 41818986 | 3005 |
| ENSG000001 | 0.705622 | 0        | 0.8807   | 0.6196   | NA       | PTPN2P2 chr13    | + | 31127807 | 31128830 | 1024 |
| ENSG000001 | 0        | 3.794791 | -3.1617  | 0.051001 | 0.09052  | AP001271. chr11  | - | 70412492 | 70417428 | 421  |
| ENSG000001 | 0.943682 | 0.640152 | 0.39749  | 0.80623  | NA       | ATG12P2 chr2     | - | 2.24E+08 | 2.24E+08 | 416  |
| ENSG000001 | 7.075943 | 13.09523 | -0.87421 | 0.20717  | 0.29688  | POM121L1 chr22   | - | 25041133 | 25055114 | 9547 |
| ENSG000001 | 9.107238 | 16.96361 | -0.8459  | 0.17324  | 0.25601  | UBE2SP2 chr17    | + | 18580574 | 18581070 | 497  |
| ENSG000001 | 1.971308 | 0        | 2.4428   | 0.13467  | 0.20767  | RP11-510C chr1   | - | 75593515 | 75598743 | 670  |
| ENSG000001 | 0.653381 | 2.324288 | -1.4709  | 0.29307  | 0.39506  | AC107057. chr2   | - | 5742637  | 5831620  | 468  |
| ENSG000001 | 10.23755 | 0        | 4.9608   | 8.98E-05 | 0.000258 | AC112715. chr2   | + | 2.38E+08 | 2.38E+08 | 350  |
| ENSG000001 | 18.11423 | 1.744828 | 3.222    | 0.000111 | 0.000314 | AC000123. chr7   | + | 1.27E+08 | 1.27E+08 | 516  |
| ENSG000001 | 0.36308  | 0.357707 | -0.00212 | 0.99905  | NA       | AMMECR1- chrX    | - | 1.1E+08  | 1.1E+08  | 561  |
| ENSG000001 | 8.454671 | 0        | 4.6948   | 0.000258 | 0.000697 | RP11-510C chr1   | - | 75595659 | 75598261 | 2203 |
| ENSG000001 | 25.8623  | 22.08812 | 0.21348  | 0.61893  | 0.7101   | AC009506. chr2   | + | 1.6E+08  | 1.6E+08  | 1494 |
| ENSG000001 | 0.290301 | 0        | 0.4146   | 0.81455  | NA       | RP11-700P chr7   | - | 56372371 | 56373219 | 849  |
| ENSG000001 | 0.36308  | 1.66715  | -1.5237  | 0.35755  | 0.46184  | HCG14 chr6       | + | 28864307 | 28865099 | 413  |
| ENSG000001 | 0.705622 | 0        | 0.8807   | 0.6196   | NA       | UQCRHP3 chr10    | + | 44227782 | 44228032 | 251  |
| ENSG000001 | 1.048164 | 0        | 1.348    | 0.44949  | NA       | RP11-309L chr7   | - | 1.29E+08 | 1.29E+08 | 560  |
| ENSG000001 | 5.382958 | 2.010288 | 1.3166   | 0.19154  | 0.27851  | DNAJC27-A chr2   | + | 25194259 | 25262563 | 4660 |
| ENSG000001 | 1.701545 | 0.297015 | 1.6662   | 0.28961  | 0.39113  | RP11-416N chr7   | - | 64196311 | 64197121 | 811  |
| ENSG000001 | 0.36308  | 0.357707 | -0.00212 | 0.99905  | NA       | RP4-798A1 chr1   | + | 16847189 | 16848291 | 327  |
| ENSG000001 | 1.068702 | 1.66715  | -0.51921 | 0.7284   | 0.79926  | LINC00570 chr2   | + | 11534107 | 11543203 | 1330 |
| ENSG000001 | 2.479946 | 2.621302 | -0.09667 | 0.93685  | 0.95831  | SDHDP6 chr1      | - | 25620655 | 25621134 | 480  |
| ENSG000001 | 22.51919 | 0        | 6.1028   | 1.73E-07 | 6.63E-07 | AC096559. chr2   | + | 11988748 | 12718474 | 2183 |
| ENSG000001 | 32.29342 | 5.164927 | 2.5607   | 2.24E-06 | 7.75E-06 | CTC-203F4. chr5  | + | 1.34E+08 | 1.35E+08 | 2479 |
| ENSG000001 | 0.36308  | 0        | 0.4146   | 0.81455  | NA       | UBE2D3P4 chr13   | + | 84594462 | 84594897 | 436  |

|            |          |          |          |          |          |                 |   |          |          |      |
|------------|----------|----------|----------|----------|----------|-----------------|---|----------|----------|------|
| ENSG000001 | 154.5035 | 1.326428 | 6.5907   | 2.26E-22 | 2.12E-21 | HOXD-AS1 chr2   | - | 1.77E+08 | 1.77E+08 | 4235 |
| ENSG000001 | 5.560218 | 13.44723 | -1.2285  | 0.061651 | 0.10683  | RP11-574K chr10 | + | 75573276 | 75574495 | 445  |
| ENSG000001 | 0.995923 | 3.054271 | -1.392   | 0.25296  | 0.34982  | RP4-604K5 chr1  | - | 87409368 | 87410425 | 233  |
| ENSG000001 | 0.290301 | 1.043983 | -0.98014 | 0.57012  | NA       | PHEX-AS1 chrX   | - | 22180850 | 22191100 | 1906 |
| ENSG000001 | 0.290301 | 0.700845 | -0.56655 | 0.74739  | NA       | RP11-10L1 chr4  | + | 1.04E+08 | 1.04E+08 | 258  |
| ENSG000001 | 0.36308  | 0.357707 | -0.00212 | 0.99905  | NA       | AL590762. chrX  | - | 70534762 | 70535729 | 640  |
| ENSG000001 | 0        | 1.355566 | -1.9006  | 0.26573  | NA       | LINC00466 chr1  | - | 63655660 | 63782902 | 1098 |
| ENSG000001 | 0.580602 | 0.297015 | 0.36801  | 0.83644  | NA       | RP11-371A chr10 | + | 23632886 | 23634110 | 892  |
| ENSG000001 | 6.742774 | 4.899467 | 0.41902  | 0.61659  | 0.70789  | RP13-228J chrX  | - | 1.55E+08 | 1.55E+08 | 1329 |
| ENSG000001 | 0.342542 | 0        | 0.4146   | 0.81455  | NA       | RP11-359C chr4  | - | 77679707 | 77723117 | 110  |
| ENSG000001 | 0.72616  | 0        | 0.85004  | 0.63064  | NA       | AC074290. chr2  | - | 1.95E+08 | 1.95E+08 | 135  |
| ENSG000001 | 0.653381 | 1.903472 | -1.178   | 0.43762  | 0.54315  | AC104699. chr2  | + | 25643986 | 25650512 | 414  |
| ENSG000001 | 0        | 0.594029 | -0.81444 | 0.64499  | NA       | RPS6P8 chr6     | - | 74100761 | 74101490 | 730  |
| ENSG000001 | 0.36308  | 1.606458 | -1.4912  | 0.36867  | 0.4733   | RP11-262L chr10 | - | 71754382 | 71767592 | 524  |
| ENSG000001 | 0        | 0.951736 | -1.2555  | 0.48145  | NA       | GS1-18A18 chr7  | + | 54624663 | 54639419 | 3031 |
| ENSG000001 | 0.342542 | 0.98329  | -0.93492 | 0.58786  | NA       | OR2L1P chr1     | + | 2.48E+08 | 2.48E+08 | 938  |
| ENSG000001 | 0.290301 | 0        | 0.4146   | 0.81455  | NA       | AC069394. chr2  | + | 1.39E+08 | 1.39E+08 | 553  |
| ENSG000001 | 0.685084 | 1.698704 | -1.002   | 0.5098   | 0.61316  | AC110299. chr2  | + | 2.42E+08 | 2.42E+08 | 678  |
| ENSG000001 | 0.36308  | 0        | 0.4146   | 0.81455  | NA       | MINOS1P3 chr3   | - | 27256307 | 27256509 | 203  |
| ENSG000001 | 1.89853  | 1.387121 | 0.38362  | 0.79085  | 0.85104  | WARS2-IT1 chr1  | + | 1.2E+08  | 1.2E+08  | 2060 |
| ENSG000001 | 0        | 0.343138 | -0.41864 | 0.81278  | NA       | LINC00403 chr13 | + | 1.13E+08 | 1.13E+08 | 545  |
| ENSG000001 | 0.342542 | 3.916176 | -2.7952  | 0.045254 | 0.081492 | RP11-533K chr9  | + | 97258557 | 97275161 | 501  |
| ENSG000001 | 0        | 0.357707 | -0.41864 | 0.81278  | NA       | RP11-78A1 chr10 | + | 1.23E+08 | 1.23E+08 | 299  |
| ENSG000001 | 0        | 0.357707 | -0.41864 | 0.81278  | NA       | RP11-499C chr10 | + | 5037680  | 5039572  | 425  |
| ENSG000001 | 3.008307 | 0.997859 | 1.3727   | 0.25946  | 0.35738  | CTA-292E1 chr22 | - | 29231881 | 29232125 | 245  |
| ENSG000001 | 1.753786 | 2.80338  | -0.56045 | 0.68248  | 0.76275  | RP11-179C chr1  | - | 1.6E+08  | 1.6E+08  | 886  |
| ENSG000001 | 3.080272 | 0        | 3.0721   | 0.048815 | 0.087152 | AP000697. chr21 | - | 38071073 | 38073864 | 339  |
| ENSG000001 | 1.919068 | 2.079102 | -0.11061 | 0.93841  | 0.95938  | AC114730. chr2  | - | 2.43E+08 | 2.43E+08 | 1228 |
| ENSG000001 | 3.516131 | 4.91162  | -0.43677 | 0.63827  | 0.72626  | AC005077. chr7  | - | 75747043 | 75761505 | 631  |
| ENSG000001 | 0        | 0.343138 | -0.41864 | 0.81278  | NA       | RP1-199H1 chr22 | - | 38970936 | 38971436 | 164  |
| ENSG000001 | 0.995923 | 0        | 1.4959   | 0.39264  | NA       | AC005014. chr7  | - | 16623407 | 16626382 | 2976 |
| ENSG000001 | 26.67419 | 44.97491 | -0.75177 | 0.039557 | 0.07268  | SLC25A5-A chrX  | - | 1.19E+08 | 1.19E+08 | 3062 |
| ENSG000001 | 1.08924  | 0        | 1.1858   | 0.50299  | NA       | RP11-297F chr1  | - | 1.7E+08  | 1.7E+08  | 1457 |
| ENSG000001 | 36.20792 | 82.17828 | -1.1748  | 0.000278 | 0.000748 | MSL3P1 chr2     | - | 2.35E+08 | 2.35E+08 | 2032 |
| ENSG000001 | 0.632843 | 1.043983 | -0.48405 | 0.76438  | NA       | AF196972. chrX  | - | 48364911 | 48367226 | 653  |
| ENSG000001 | 0.290301 | 0.357707 | -0.00203 | 0.99908  | NA       | RP3-326I1 chrX  | + | 43036243 | 43085847 | 2228 |
| ENSG000001 | 2.749709 | 0.700845 | 1.6306   | 0.23359  | 0.32724  | AC087380. chr11 | - | 5539671  | 5546185  | 1478 |
| ENSG000001 | 1.649304 | 0.654722 | 1.0443   | 0.47174  | 0.57637  | RP11-302K chr10 | - | 1.04E+08 | 1.04E+08 | 255  |
| ENSG000001 | 0.632843 | 6.382123 | -2.8554  | 0.016931 | 0.033922 | RP11-344B chr9  | + | 1.32E+08 | 1.32E+08 | 583  |
| ENSG000001 | 0.72616  | 0        | 0.85004  | 0.63064  | NA       | ANKRD30B chr21  | + | 14410481 | 14439354 | 3260 |
| ENSG000001 | 0.705622 | 3.097978 | -1.6808  | 0.25277  | 0.34973  | AC012317. chr16 | - | 24672743 | 24682383 | 2907 |
| ENSG000001 | 0.923144 | 0.715414 | 0.27646  | 0.87032  | NA       | MCDD1P2 chr6    | - | 29962214 | 29963091 | 335  |
| ENSG000001 | 3.22583  | 6.428247 | -0.92988 | 0.28855  | 0.39012  | RP4-633I8. chr1 | - | 8846270  | 8846972  | 703  |
| ENSG000001 | 1.555988 | 2.604317 | -0.61566 | 0.62231  | 0.71268  | RP11-479C chr7  | + | 65238607 | 65267054 | 731  |
| ENSG000001 | 0.342542 | 0        | 0.4146   | 0.81455  | NA       | RP11-169K chr1  | + | 16119291 | 16119780 | 490  |
| ENSG000001 | 1.794048 | 3.008147 | -0.60006 | 0.62403  | 0.71431  | THAP5P1 chr7    | - | 1.58E+08 | 1.58E+08 | 262  |
| ENSG000001 | 0.342542 | 0        | 0.4146   | 0.81455  | NA       | AC005019. chr7  | - | 13893980 | 13898650 | 359  |
| ENSG000001 | 1.048164 | 0        | 1.348    | 0.44949  | NA       | AC019181. chr2  | - | 1.66E+08 | 1.66E+08 | 310  |
| ENSG000001 | 0.290301 | 0.997859 | -1.0217  | 0.53916  | NA       | GAPDHP20 chr1   | - | 32867710 | 32868716 | 1007 |
| ENSG000001 | 0.36308  | 0.686276 | -0.48701 | 0.78478  | NA       | AP000357. chr22 | + | 25082890 | 25084054 | 1165 |
| ENSG000001 | 0        | 0.343138 | -0.41864 | 0.81278  | NA       | RP11-496F chr1  | - | 10114503 | 10114839 | 337  |
| ENSG000001 | 0        | 0.654722 | -0.83442 | 0.63731  | NA       | RP4-562J1 chrX  | - | 1.18E+08 | 1.18E+08 | 959  |
| ENSG000001 | 0.72616  | 0        | 0.85004  | 0.63064  | NA       | AC007879. chr2  | + | 2.08E+08 | 2.08E+08 | 554  |
| ENSG000001 | 17.99858 | 38.00533 | -1.0639  | 0.008953 | 0.01899  | RP3-486L4 chr6  | + | 88410228 | 88411243 | 413  |
| ENSG000001 | 0.975385 | 0        | 1.2767   | 0.47406  | NA       | RP11-306K chr1  | - | 2.41E+08 | 2.41E+08 | 303  |
| ENSG000001 | 0        | 0.654722 | -0.83442 | 0.63731  | NA       | RP11-462C chr6  | - | 71122531 | 71123653 | 349  |
| ENSG000001 | 0        | 0.594029 | -0.81444 | 0.64499  | NA       | MTND2P5 chr7    | - | 1.42E+08 | 1.42E+08 | 1006 |
| ENSG000001 | 3.64115  | 2.993578 | 0.26091  | 0.78461  | 0.84578  | RP11-151A chr13 | - | 1.01E+08 | 1.01E+08 | 2372 |
| ENSG000001 | 1.306762 | 2.652857 | -0.82099 | 0.56016  | 0.65886  | RP11-466F chr1  | + | 1.66E+08 | 1.66E+08 | 2150 |
| ENSG000001 | 0.342542 | 0        | 0.4146   | 0.81455  | NA       | RP11-467I1 chr1 | + | 2.41E+08 | 2.41E+08 | 354  |
| ENSG000001 | 1.016461 | 0        | 1.3167   | 0.46021  | NA       | AC011239. chr2  | - | 23729913 | 23747214 | 584  |
| ENSG000001 | 0.653381 | 1.545765 | -0.93073 | 0.5518   | 0.65135  | RP11-289F chr1  | - | 1.44E+08 | 1.44E+08 | 2175 |
| ENSG000001 | 11.83722 | 0.640152 | 3.7382   | 0.00038  | 0.001002 | OACYLP chr18    | + | 56663966 | 56736570 | 2208 |
| ENSG000001 | 0.342542 | 0        | 0.4146   | 0.81455  | NA       | RP1-32B1 chr6   | + | 1.36E+08 | 1.36E+08 | 216  |
| ENSG000001 | 23.38317 | 12.26005 | 0.893    | 0.12449  | 0.19468  | AC017104. chr2  | + | 2.32E+08 | 2.32E+08 | 1313 |

|            |          |          |          |          |          |                 |   |          |          |      |
|------------|----------|----------|----------|----------|----------|-----------------|---|----------|----------|------|
| ENSG000001 | 1.265686 | 0        | 1.6147   | 0.36215  | NA       | LINC00703 chr10 | + | 4426438  | 4452804  | 2390 |
| ENSG000001 | 1.919068 | 1.949596 | -0.01415 | 0.99051  | 0.99515  | C17orf72 chr17  | + | 62075711 | 62081664 | 3127 |
| ENSG000001 | 4.697874 | 19.4587  | -1.9378  | 0.006182 | 0.01353  | RP3-41702 chr6  | + | 97233013 | 97243697 | 481  |
| ENSG000001 | 1.681007 | 0        | 2.1857   | 0.19206  | NA       | RP3-395M chr1   | - | 2423739  | 2424697  | 455  |
| ENSG000001 | 1.338465 | 1.949596 | -0.4781  | 0.70486  | 0.78064  | BACE2-IT1 chr21 | + | 42552024 | 42552553 | 382  |
| ENSG000001 | 1.08924  | 0.891044 | 0.14492  | 0.93391  | 0.95662  | C4B chr6        | + | 31982539 | 32003195 | 5460 |
| ENSG000001 | 0        | 0.951736 | -1.2555  | 0.48145  | NA       | AC073321. chr2  | - | 2.17E+08 | 2.17E+08 | 1184 |
| ENSG000001 | 1.265686 | 0.357707 | 1.2256   | 0.46821  | NA       | GPC6-AS2 chr13  | - | 94470677 | 94488397 | 587  |
| ENSG000001 | 0.36308  | 0        | 0.4146   | 0.81455  | NA       | RP11-290F chr20 | + | 48884023 | 48896332 | 2010 |
| ENSG000001 | 1.701545 | 2.338857 | -0.4153  | 0.72298  | 0.79507  | RPL7P57 chrX    | - | 47700362 | 47701101 | 740  |
| ENSG000001 | 0.685084 | 0        | 0.85004  | 0.63064  | NA       | RP11-114B chr1  | - | 33183335 | 33190838 | 395  |
| ENSG000001 | 6.825904 | 12.94303 | -0.88562 | 0.15083  | 0.22821  | RP11-1033 chr11 | - | 27910385 | 27912580 | 2196 |
| ENSG000001 | 0.290301 | 0.357707 | -0.00203 | 0.99908  | NA       | RP11-351C chr10 | + | 65249221 | 65249398 | 178  |
| ENSG000001 | 9.815466 | 1.326428 | 2.597    | 0.014696 | 0.029822 | AP001476. chr21 | + | 47456966 | 47459721 | 2198 |
| ENSG000001 | 0.290301 | 0.343138 | -0.00202 | 0.99909  | NA       | AC010886. chr2  | + | 2.19E+08 | 2.19E+08 | 2869 |
| ENSG000001 | 2.105701 | 1.294874 | 0.54418  | 0.6948   | 0.77231  | RPL19P12 chr7   | - | 1.03E+08 | 1.03E+08 | 591  |
| ENSG000001 | 1.161205 | 0        | 1.2509   | 0.47995  | NA       | RP11-503C chr6  | - | 1.69E+08 | 1.69E+08 | 445  |
| ENSG000001 | 2.883288 | 4.481067 | -0.56274 | 0.62087  | 0.71157  | STK24-AS1 chr13 | + | 99229498 | 99231084 | 1278 |
| ENSG000001 | 10.6118  | 51.66854 | -2.2242  | 1.28E-05 | 4.07E-05 | ADM5 chr19      | + | 50191921 | 50193832 | 1718 |
| ENSG000001 | 0.705622 | 1.638012 | -0.99792 | 0.491    | 0.59505  | ATP5J2LP chr21  | - | 37761176 | 37761410 | 235  |
| ENSG000001 | 3.899749 | 13.02159 | -1.6403  | 0.044199 | 0.079886 | PRKAR2A-A chr3  | + | 48885005 | 48889414 | 3447 |
| ENSG000001 | 3.713929 | 5.811527 | -0.60344 | 0.49697  | 0.6007   | LINC00422 chr13 | - | 21877651 | 21922860 | 1178 |
| ENSG000001 | 2.209369 | 0.951736 | 0.99549  | 0.46105  | 0.56628  | MKRN5P chrX     | - | 73380897 | 73382363 | 1467 |
| ENSG000001 | 8.259478 | 0.715414 | 3.0879   | 0.010759 | 0.022461 | AC063976. chr5  | + | 1.32E+08 | 1.32E+08 | 3556 |
| ENSG000001 | 0        | 3.290593 | -3.2571  | 0.028994 | 0.055057 | RP11-284L chr1  | - | 2.32E+08 | 2.32E+08 | 237  |
| ENSG000001 | 0.290301 | 0.686276 | -0.47648 | 0.78935  | NA       | PIGUP1 chr9     | - | 73531913 | 73532417 | 505  |
| ENSG000001 | 0        | 1.66715  | -1.9695  | 0.25993  | NA       | AC068831. chr15 | - | 91475816 | 91478360 | 367  |
| ENSG000001 | 1.265686 | 0        | 1.6147   | 0.36215  | NA       | AC017035. chr2  | - | 1.98E+08 | 1.98E+08 | 1115 |
| ENSG000001 | 0        | 0.343138 | -0.41864 | 0.81278  | NA       | AC006509. chr2  | + | 47932607 | 47933118 | 395  |
| ENSG000001 | 1.89853  | 2.399549 | -0.26134 | 0.83392  | 0.8832   | GS1-259H1 chr7  | - | 99235865 | 99236390 | 526  |
| ENSG000001 | 3.144492 | 1.234181 | 1.0549   | 0.45114  | 0.55674  | ATP5F1P1 chr13  | + | 52172552 | 52173596 | 569  |
| ENSG000001 | 3.391925 | 0.594029 | 1.9441   | 0.1674   | 0.24881  | RSL24D1P chr20  | - | 30758193 | 30758593 | 401  |
| ENSG000001 | 0        | 0.594029 | -0.81444 | 0.64499  | NA       | RP11-169K chr1  | - | 16066546 | 16076391 | 639  |
| ENSG000001 | 7.790125 | 5.323571 | 0.49954  | 0.54676  | 0.64697  | RP11-439L chr6  | - | 1.43E+08 | 1.43E+08 | 402  |
| ENSG000001 | 0.995923 | 1.430828 | -0.37089 | 0.81207  | 0.86784  | PGAM1P6 chr2    | - | 24095138 | 24095884 | 747  |
| ENSG000001 | 0.870904 | 0        | 1.046    | 0.5544   | NA       | AC009313. chr2  | - | 1.62E+08 | 1.62E+08 | 503  |
| ENSG000001 | 13.58922 | 4.49322  | 1.5098   | 0.03359  | 0.062778 | RP11-181K chr1  | + | 1.83E+08 | 1.83E+08 | 524  |
| ENSG000001 | 0        | 0.297015 | -0.41864 | 0.81278  | NA       | AC009517. chr7  | + | 1.37E+08 | 1.37E+08 | 570  |
| ENSG000001 | 936.104  | 877.3724 | 0.093813 | 0.52889  | 0.6304   | ATXN1L chr16    | + | 71879894 | 71891231 | 7881 |
| ENSG000001 | 0.290301 | 0        | 0.4146   | 0.81455  | NA       | RP11-522L chrX  | + | 1.02E+08 | 1.02E+08 | 321  |
| ENSG000001 | 20.72596 | 8.034704 | 1.3139   | 0.023978 | 0.046456 | AL355490. chr10 | - | 99179228 | 99185831 | 236  |
| ENSG000001 | 0        | 0.654722 | -0.83442 | 0.63731  | NA       | RPL36P16 chr19  | + | 41675766 | 41676071 | 306  |
| ENSG000001 | 0        | 0.357707 | -0.41864 | 0.81278  | NA       | RP11-13P5 chr6  | + | 1.6E+08  | 1.6E+08  | 845  |
| ENSG000001 | 1.379541 | 0.715414 | 0.65696  | 0.69225  | 0.77062  | AC136289. chr3  | - | 63727969 | 63813121 | 1843 |
| ENSG000001 | 1.213446 | 3.731683 | -1.3479  | 0.29248  | 0.39434  | RP11-495P chr1  | + | 1.48E+08 | 1.48E+08 | 1331 |
| ENSG000001 | 0.943682 | 0.700845 | 0.33849  | 0.83415  | NA       | RP11-492A chr9  | - | 17447143 | 17448541 | 1399 |
| ENSG000001 | 3.205292 | 2.696564 | 0.24913  | 0.80624  | 0.86301  | AC010127. chr2  | + | 1.67E+08 | 1.67E+08 | 2260 |
| ENSG000001 | 0        | 0.594029 | -0.81444 | 0.64499  | NA       | RP11-87O1 chr1  | + | 75987247 | 75987916 | 670  |
| ENSG000001 | 0.685084 | 0        | 0.85004  | 0.63064  | NA       | RP11-328K chr10 | + | 79073699 | 79075452 | 418  |
| ENSG000001 | 0        | 1.294874 | -1.8547  | 0.27869  | NA       | AC104438. chr3  | + | 65573177 | 65573725 | 545  |
| ENSG000001 | 3.910914 | 0.997859 | 1.7402   | 0.13127  | 0.20334  | AC002117. chr17 | - | 43227767 | 43238877 | 570  |
| ENSG000001 | 0        | 14.41999 | -5.4745  | 5.79E-06 | 1.91E-05 | RP1-293L8 chr6  | + | 1.26E+08 | 1.26E+08 | 843  |
| ENSG000001 | 0.36308  | 4.181636 | -2.8932  | 0.036115 | 0.067021 | AC010884. chr2  | - | 1.06E+08 | 1.06E+08 | 472  |
| ENSG000001 | 0.290301 | 0.700845 | -0.56655 | 0.74739  | NA       | LINC00365 chr13 | - | 30677315 | 30683012 | 2618 |
| ENSG000001 | 0        | 0.297015 | -0.41864 | 0.81278  | NA       | AC109309. chr11 | + | 3247291  | 3254068  | 435  |
| ENSG000001 | 0        | 0.715414 | -0.84936 | 0.6309   | NA       | LINC00620 chr3  | + | 13692196 | 13788132 | 994  |
| ENSG000001 | 0.36308  | 1.387121 | -1.2869  | 0.44679  | NA       | KRT8P45 chr1    | + | 1.57E+08 | 1.57E+08 | 1447 |
| ENSG000001 | 0        | 0.594029 | -0.81444 | 0.64499  | NA       | AC093698. chr2  | - | 2.09E+08 | 2.09E+08 | 1078 |
| ENSG000001 | 1.048164 | 0        | 1.348    | 0.44949  | NA       | PPIAP10 chr20   | + | 52037738 | 52038195 | 458  |
| ENSG000001 | 551.8168 | 245.3176 | 1.1663   | 1.10E-12 | 6.23E-12 | SMIM13 chr6     | + | 11094266 | 11138964 | 4686 |
| ENSG000001 | 0.290301 | 0.297015 | -0.00202 | 0.99909  | NA       | TMLHE-AS1 chrX  | + | 1.55E+08 | 1.55E+08 | 1702 |
| ENSG000001 | 0        | 0.343138 | -0.41864 | 0.81278  | NA       | RP11-385A chr1  | + | 2.09E+08 | 2.09E+08 | 1224 |
| ENSG000001 | 1.317927 | 1.591889 | -0.23392 | 0.86657  | 0.90708  | AP001439. chr21 | + | 27530409 | 27548142 | 392  |
| ENSG000001 | 46.41458 | 41.49491 | 0.1584   | 0.6821   | 0.76243  | AC012318. chr19 | + | 14599758 | 14600691 | 934  |
| ENSG000001 | 0        | 2.993578 | -3.1081  | 0.040328 | 0.073907 | AC008264. chr7  | + | 1.31E+08 | 1.31E+08 | 367  |

|            |          |          |          |          |          |            |       |   |          |          |      |
|------------|----------|----------|----------|----------|----------|------------|-------|---|----------|----------|------|
| ENSG000001 | 23.95277 | 67.56897 | -1.4726  | 0.000297 | 0.000795 | EIF4BP3    | chr9  | + | 98908289 | 98910138 | 1850 |
| ENSG000001 | 0.290301 | 0        | 0.4146   | 0.81455  | NA       | AC023669.  | chr7  | + | 46184535 | 46185286 | 752  |
| ENSG000001 | 0.342542 | 0.937167 | -0.89746 | 0.60352  | NA       | HMGB3P21   | chr7  | - | 96764327 | 96764873 | 547  |
| ENSG000001 | 0        | 0.357707 | -0.41864 | 0.81278  | NA       | AC008065.  | chr2  | - | 1.72E+08 | 1.72E+08 | 348  |
| ENSG000001 | 0        | 717.446  | -10.75   | 8.73E-24 | 8.70E-23 | HLA-DPB2   | chr6  | + | 33080228 | 33102442 | 1617 |
| ENSG000001 | 0        | 0.715414 | -0.84936 | 0.6309   | NA       | RP11-148H1 | chr20 | - | 46020673 | 46041071 | 750  |
| ENSG000001 | 1.027626 | 1.248751 | -0.21406 | 0.89642  | 0.92822  | FAM96AP2   | chr1  | - | 2.28E+08 | 2.28E+08 | 477  |
| ENSG000001 | 0.36308  | 0        | 0.4146   | 0.81455  | NA       | AC096669.  | chr2  | + | 1.08E+08 | 1.08E+08 | 1539 |
| ENSG000001 | 0        | 0.640152 | -0.82869 | 0.63935  | NA       | RP11-430F  | chr1  | - | 66041812 | 66044063 | 1797 |
| ENSG000001 | 7.35508  | 5.257174 | 0.4511   | 0.5536   | 0.65294  | COL18A1-A  | chr21 | - | 46827301 | 46829980 | 552  |
| ENSG000001 | 3.341476 | 0        | 3.1553   | 0.042403 | 0.077131 | AC017048.  | chr2  | + | 1.78E+08 | 1.78E+08 | 699  |
| ENSG000001 | 156.3601 | 322.2854 | -1.0441  | 2.40E-10 | 1.16E-09 | CTD-2119F  | chr16 | + | 51679667 | 51681043 | 1377 |
| ENSG000001 | 1.213446 | 1.043983 | 0.20268  | 0.89556  | 0.92753  | AC012314.  | chr19 | - | 54712960 | 54713286 | 327  |
| ENSG000001 | 0.632843 | 0.594029 | 0.039277 | 0.98194  | NA       | RP11-365C  | chr1  | - | 2.15E+08 | 2.15E+08 | 439  |
| ENSG000001 | 1.576526 | 27.67877 | -3.8343  | 8.31E-06 | 2.70E-05 | RP5-884C9  | chr1  | + | 38512986 | 38584697 | 593  |
| ENSG000001 | 0        | 6.313309 | -4.2391  | 0.001701 | 0.004072 | RP11-30B1  | chr7  | + | 3377521  | 3378233  | 601  |
| ENSG000001 | 6.795015 | 0.297015 | 3.5781   | 0.006099 | 0.01336  | RPL29P19   | chr8  | + | 49297150 | 49297609 | 460  |
| ENSG000001 | 13.80853 | 4.028697 | 1.6484   | 0.039793 | 0.073042 | ZMI21-AS1  | chr10 | - | 80703085 | 80827652 | 2878 |
| ENSG000001 | 71.12423 | 40.84181 | 0.79669  | 0.006843 | 0.014841 | PTCHD3P1   | chr10 | + | 29698331 | 29776674 | 2025 |
| ENSG000001 | 3.475055 | 2.338857 | 0.53638  | 0.61371  | 0.70578  | RPS5P2     | chr21 | - | 35507732 | 35508371 | 640  |
| ENSG000001 | 0        | 1.043983 | -1.3473  | 0.44976  | NA       | RP11-470E  | chr1  | - | 59597608 | 59664293 | 1111 |
| ENSG000001 | 0.36308  | 0.357707 | -0.00212 | 0.99905  | NA       | RP11-153F  | chr1  | - | 1.04E+08 | 1.04E+08 | 527  |
| ENSG000001 | 7.241225 | 9.003425 | -0.31397 | 0.64629  | 0.7328   | AC124944.  | chr3  | + | 1.96E+08 | 1.96E+08 | 2096 |
| ENSG000001 | 8.768115 | 3.731683 | 1.1108   | 0.23333  | 0.32698  | RP11-305E  | chr1  | - | 1.01E+08 | 1.01E+08 | 423  |
| ENSG000001 | 0.705622 | 0.700845 | 0.003311 | 0.99841  | NA       | AC096921.  | chr3  | - | 30667915 | 30668289 | 375  |
| ENSG000001 | 2.729171 | 1.234181 | 0.91784  | 0.48451  | 0.58859  | RP11-276F  | chr1  | + | 16485761 | 16488378 | 544  |
| ENSG000001 | 0.290301 | 0        | 0.4146   | 0.81455  | NA       | TUBB8P6    | chr1  | + | 2.42E+08 | 2.42E+08 | 1288 |
| ENSG000001 | 0        | 0.297015 | -0.41864 | 0.81278  | NA       | RP5-854E1  | chr20 | - | 29873120 | 29874638 | 1519 |
| ENSG000001 | 1.359003 | 4.726253 | -1.5696  | 0.19356  | 0.28103  | RP5-1142J  | chr7  | - | 1.57E+08 | 1.57E+08 | 208  |
| ENSG000001 | 26.19547 | 54.04876 | -1.0411  | 0.001778 | 0.004242 | RP11-510E  | chr16 | - | 61089303 | 61089868 | 566  |
| ENSG000001 | 4.035933 | 10.26346 | -1.2932  | 0.092339 | 0.15112  | RP4-564F2  | chr20 | - | 37034658 | 37045444 | 2004 |
| ENSG000001 | 0        | 0.654722 | -0.83442 | 0.63731  | NA       | AC019129.  | chr2  | + | 44393405 | 44394082 | 678  |
| ENSG000001 | 0.705622 | 2.056411 | -1.2605  | 0.37392  | 0.47828  | AC106900.  | chr2  | - | 1.75E+08 | 1.75E+08 | 456  |
| ENSG000001 | 0.342542 | 0.654722 | -0.52406 | 0.76557  | NA       | RP11-16L2  | chr9  | + | 1.14E+08 | 1.14E+08 | 302  |
| ENSG000001 | 0        | 0.297015 | -0.41864 | 0.81278  | NA       | AC007387.  | chr2  | - | 74981797 | 74981946 | 150  |
| ENSG000001 | 0.36308  | 5.405281 | -3.1402  | 0.02493  | 0.048143 | AC026954.  | chr17 | + | 7233771  | 7238732  | 1293 |
| ENSG000001 | 0.72616  | 0.297015 | 0.51367  | 0.77334  | NA       | RP11-397C  | chr9  | - | 37383175 | 37384431 | 243  |
| ENSG000001 | 4.99078  | 0        | 3.8527   | 0.006518 | 0.014193 | RP11-631F  | chr6  | - | 1.49E+08 | 1.49E+08 | 311  |
| ENSG000001 | 97.07048 | 26.07056 | 1.8879   | 1.44E-09 | 6.56E-09 | SH3BP5-AS  | chr3  | + | 15295691 | 15306000 | 5570 |
| ENSG000001 | 0        | 0.343138 | -0.41864 | 0.81278  | NA       | ATP6V1G1I  | chr9  | + | 1.4E+08  | 1.4E+08  | 280  |
| ENSG000001 | 0        | 10.29904 | -4.9021  | 0.000168 | 0.000466 | RPL36AP5   | chrX  | + | 1.14E+08 | 1.14E+08 | 316  |
| ENSG000001 | 1.95077  | 0.686276 | 1.0922   | 0.49529  | 0.59912  | AC013470.  | chr7  | + | 12545633 | 12547104 | 462  |
| ENSG000001 | 0.632843 | 0.343138 | 0.49756  | 0.77728  | NA       | IPO8P1     | chr1  | - | 2.11E+08 | 2.11E+08 | 3109 |
| ENSG000001 | 0.342542 | 0        | 0.4146   | 0.81455  | NA       | AC068135.  | chr2  | + | 1.95E+08 | 1.95E+08 | 246  |
| ENSG000001 | 0        | 0.357707 | -0.41864 | 0.81278  | NA       | RP11-335C  | chr1  | - | 2.03E+08 | 2.03E+08 | 741  |
| ENSG000001 | 0        | 2.324288 | -2.6717  | 0.096097 | 0.15624  | AC009227.  | chr2  | - | 1.55E+08 | 1.55E+08 | 2362 |
| ENSG000001 | 4.657611 | 1.949596 | 1.13     | 0.26466  | 0.36311  | AC011330.  | chr15 | + | 43941321 | 43941478 | 158  |
| ENSG000001 | 0        | 0.357707 | -0.41864 | 0.81278  | NA       | GAPDHP46   | chr1  | - | 92580360 | 92581353 | 994  |
| ENSG000001 | 5.53968  | 3.368271 | 0.68086  | 0.45276  | 0.55823  | PLA2G12AI  | chr1  | + | 52834349 | 52834916 | 568  |
| ENSG000001 | 0.36308  | 3.792375 | -2.6994  | 0.061664 | 0.10684  | SOC5P2     | chr9  | + | 1.38E+08 | 1.38E+08 | 1359 |
| ENSG000001 | 0.290301 | 0        | 0.4146   | 0.81455  | NA       | AC073629.  | chr7  | + | 16248570 | 16248890 | 321  |
| ENSG000001 | 3.838135 | 9.156365 | -1.1796  | 0.12305  | 0.19287  | RASAL2-AS  | chr1  | - | 1.78E+08 | 1.78E+08 | 2329 |
| ENSG000001 | 0.685084 | 0        | 0.85004  | 0.63064  | NA       | KB-1592A4  | chr22 | - | 21495913 | 21496660 | 748  |
| ENSG000001 | 0        | 2.027273 | -2.4385  | 0.13903  | 0.2127   | ZNFX12     | chr19 | - | 9800600  | 9811452  | 2098 |
| ENSG000001 | 0.290301 | 0        | 0.4146   | 0.81455  | NA       | UBE2D3P3   | chr1  | + | 1.51E+08 | 1.51E+08 | 425  |
| ENSG000001 | 6.025174 | 0.98329  | 2.1796   | 0.097299 | 0.15784  | GS1-174L6  | chr1  | - | 1.86E+08 | 1.86E+08 | 353  |
| ENSG000001 | 3.362014 | 8.542934 | -1.256   | 0.17796  | 0.26171  | LAMTOR5-1  | chr1  | + | 1.11E+08 | 1.11E+08 | 881  |
| ENSG000001 | 5.185973 | 0.343138 | 3.166    | 0.019855 | 0.039224 | RP11-697E  | chr11 | - | 1.32E+08 | 1.32E+08 | 577  |
| ENSG000001 | 0        | 0.297015 | -0.41864 | 0.81278  | NA       | RPS17P13   | chr7  | + | 37156384 | 37156790 | 407  |
| ENSG000001 | 3.04001  | 3.916176 | -0.35429 | 0.71549  | 0.78917  | E2F3-IT1   | chr6  | + | 20438052 | 20440409 | 400  |
| ENSG000001 | 0.342542 | 0.297015 | -0.00202 | 0.99909  | NA       | OR11M1P    | chr12 | + | 49021671 | 49022565 | 895  |
| ENSG000001 | 4.657611 | 3.884622 | 0.22887  | 0.79614  | 0.85538  | RP11-719K  | chr16 | + | 14802801 | 14820195 | 1155 |
| ENSG000001 | 9.233071 | 0.297015 | 4.0473   | 0.001003 | 0.002487 | AC025165.  | chr12 | - | 58005901 | 58013421 | 2355 |
| ENSG000001 | 0        | 2.436809 | -2.4534  | 0.15276  | 0.23056  | RP11-179K  | chr10 | - | 66662885 | 66684276 | 581  |
| ENSG000001 | 0.36308  | 2.976593 | -2.239   | 0.15343  | 0.23141  | CITF22-49C | chr22 | + | 47741319 | 47769291 | 4364 |

|            |          |          |          |          |          |                  |   |          |          |      |
|------------|----------|----------|----------|----------|----------|------------------|---|----------|----------|------|
| ENSG000001 | 0.36308  | 54.34906 | -6.4785  | 6.11E-10 | 2.87E-09 | RP11-576C chr1   | + | 2.05E+08 | 2.05E+08 | 2885 |
| ENSG000001 | 0        | 0.640152 | -0.82869 | 0.63935  | NA       | AC007182. chr14  | - | 76041231 | 76045931 | 2159 |
| ENSG000001 | 0.290301 | 2.041842 | -1.9077  | 0.21643  | 0.30763  | RP11-255B chr8   | - | 1.28E+08 | 1.28E+08 | 1248 |
| ENSG000001 | 0.36308  | 0        | 0.4146   | 0.81455  | NA       | CEP57L1P1 chr10  | + | 72149182 | 72150382 | 1201 |
| ENSG000001 | 7.16926  | 0.594029 | 3.0006   | 0.012571 | 0.025887 | FCF1P7 chr1      | - | 2.43E+08 | 2.43E+08 | 558  |
| ENSG000001 | 6.980021 | 6.512372 | 0.11983  | 0.88434  | 0.91933  | AC090945. chr3   | + | 15919554 | 15921078 | 1525 |
| ENSG000001 | 14.4721  | 36.7065  | -1.2952  | 0.064961 | 0.11179  | PCOLCE-AS chr7   | - | 1E+08    | 1E+08    | 2537 |
| ENSG000001 | 0        | 0.686276 | -0.84936 | 0.6309   | NA       | AC016716. chr2   | - | 80255138 | 80257677 | 486  |
| ENSG000001 | 0        | 1.698704 | -2.2257  | 0.18075  | NA       | RP1-86D1.1 chr6  | + | 1.29E+08 | 1.29E+08 | 549  |
| ENSG000001 | 8.651655 | 13.84623 | -0.6449  | 0.29659  | 0.39867  | AC099850. chr17  | + | 57183959 | 57195628 | 1338 |
| ENSG000001 | 0        | 0.951736 | -1.2555  | 0.48145  | NA       | AC016735. chr2   | - | 43228495 | 43233200 | 237  |
| ENSG000001 | 0.290301 | 2.307303 | -2.0824  | 0.16959  | 0.25149  | TEX26-AS1 chr13  | - | 31456070 | 31507983 | 2053 |
| ENSG000001 | 5.53968  | 4.378283 | 0.33171  | 0.69971  | 0.77633  | RP11-380C chr10  | + | 89638449 | 89640184 | 499  |
| ENSG000001 | 0.995923 | 0.654722 | 0.44529  | 0.7735   | NA       | AC015987. chr7   | + | 1.36E+08 | 1.36E+08 | 804  |
| ENSG000001 | 2.843026 | 4.392852 | -0.56798 | 0.62892  | 0.7186   | AP001065. chr21  | - | 45889812 | 45892399 | 1113 |
| ENSG000001 | 0.923144 | 0        | 1.223    | 0.49292  | NA       | RP11-94M. chr10  | + | 92213927 | 92262725 | 2368 |
| ENSG000001 | 2.946693 | 0.951736 | 1.3469   | 0.30232  | 0.40358  | SHMT1P1 chr1     | - | 44315972 | 44317283 | 1312 |
| ENSG000001 | 0        | 0.297015 | -0.41864 | 0.81278  | NA       | VN1R21P chr3     | - | 14130607 | 14131371 | 765  |
| ENSG000001 | 1.608228 | 2.367995 | -0.45497 | 0.72265  | 0.79477  | FDPSP8 chr1      | - | 2.12E+08 | 2.12E+08 | 1089 |
| ENSG000001 | 1.597063 | 0.640152 | 0.98039  | 0.52475  | 0.62681  | RP11-54O1 chr9   | - | 97690833 | 97697228 | 487  |
| ENSG000001 | 0.36308  | 14.26946 | -4.631   | 7.51E-05 | 0.000217 | RP1-137H1 chrX   | - | 1.37E+08 | 1.37E+08 | 586  |
| ENSG000001 | 0        | 0.357707 | -0.41864 | 0.81278  | NA       | AC069213. chr3   | + | 1.95E+08 | 1.95E+08 | 1680 |
| ENSG000001 | 0        | 0.700845 | -0.87835 | 0.62047  | NA       | HSPA8P7 chrX     | - | 1.14E+08 | 1.14E+08 | 1948 |
| ENSG000001 | 0        | 0.357707 | -0.41864 | 0.81278  | NA       | BRAFP1 chrX      | + | 74802511 | 74805341 | 2703 |
| ENSG000001 | 3.298608 | 2.321872 | 0.44851  | 0.69485  | 0.77231  | CETN4P chr4      | - | 1.24E+08 | 1.24E+08 | 469  |
| ENSG000001 | 0        | 0.357707 | -0.41864 | 0.81278  | NA       | AC012363. chr2   | - | 1.21E+08 | 1.21E+08 | 575  |
| ENSG000001 | 0.923144 | 3.512346 | -1.6046  | 0.20712  | 0.29682  | AP000704. chr21  | + | 38338812 | 38344128 | 438  |
| ENSG000001 | 2.583614 | 0.297015 | 2.1045   | 0.18758  | 0.27359  | RP3-333H2 chr22  | + | 39688993 | 39691568 | 1778 |
| ENSG000001 | 0.36308  | 0.297015 | -0.00205 | 0.99908  | NA       | RP11-57C1 chr9   | - | 1.34E+08 | 1.34E+08 | 265  |
| ENSG000001 | 0.580602 | 3.246886 | -1.8248  | 0.22904  | 0.32222  | RP11-445C chrX   | + | 56999943 | 57001229 | 644  |
| ENSG000001 | 0.290301 | 0        | 0.4146   | 0.81455  | NA       | RP11-235C chr1   | - | 1.51E+08 | 1.51E+08 | 448  |
| ENSG000001 | 0.342542 | 0.654722 | -0.52406 | 0.76557  | NA       | TUBB4BP2 chr9    | - | 34109169 | 34109966 | 798  |
| ENSG000001 | 0.36308  | 0.951736 | -0.91212 | 0.59701  | NA       | LINC00853 chr1   | + | 47644922 | 47646011 | 661  |
| ENSG000001 | 0        | 0.640152 | -0.82869 | 0.63935  | NA       | ARL5AP4 chr22    | + | 25082135 | 25082646 | 512  |
| ENSG000001 | 0.995923 | 0        | 1.4959   | 0.39264  | NA       | DUX4L9 chr4      | - | 1.91E+08 | 1.91E+08 | 1259 |
| ENSG000001 | 0        | 0.343138 | -0.41864 | 0.81278  | NA       | SRGAP3-AS chr3   | + | 9055807  | 9057663  | 428  |
| ENSG000001 | 0        | 0.686276 | -0.84936 | 0.6309   | NA       | RP11-538C chr1   | - | 1.82E+08 | 1.82E+08 | 2463 |
| ENSG000001 | 0.342542 | 0.297015 | -0.00202 | 0.99909  | NA       | TMEM72-A' chr10  | - | 45306472 | 45455137 | 3300 |
| ENSG000001 | 44.71043 | 19.23049 | 1.197    | 0.002584 | 0.006015 | RP11-134C chr1   | - | 2.01E+08 | 2.01E+08 | 598  |
| ENSG000001 | 24.28659 | 4.049714 | 2.4706   | 0.001055 | 0.002606 | COL4A2-AS chr13  | - | 1.11E+08 | 1.11E+08 | 1522 |
| ENSG000001 | 0        | 0.640152 | -0.82869 | 0.63935  | NA       | THRB-IT1 chr3    | - | 24496627 | 24500925 | 1754 |
| ENSG000001 | 0        | 45.44842 | -7.0851  | 2.33E-10 | 1.13E-09 | RP11-171A chr9   | - | 77100467 | 77114043 | 1178 |
| ENSG000001 | 13.08318 | 14.25248 | -0.12805 | 0.81327  | 0.86882  | RP11-651P chr3   | - | 1.5E+08  | 1.5E+08  | 1131 |
| ENSG000001 | 4.326234 | 22.18681 | -2.2958  | 0.00016  | 0.000445 | GCSHP5 chr1      | - | 1.68E+08 | 1.68E+08 | 522  |
| ENSG000001 | 0.632843 | 0.297015 | 0.49183  | 0.78024  | NA       | AC093698. chr2   | - | 2.09E+08 | 2.09E+08 | 498  |
| ENSG000001 | 1.45232  | 9.058413 | -2.4106  | 0.027906 | 0.053259 | RP11-123K chr9   | - | 1.29E+08 | 1.29E+08 | 506  |
| ENSG000001 | 1.794862 | 5.401249 | -1.4478  | 0.20972  | 0.29975  | LINC00240 chr6   | + | 26988232 | 26991703 | 507  |
| ENSG000001 | 0.580602 | 0.343138 | 0.37443  | 0.8337   | NA       | AC107079. chr2   | - | 2.38E+08 | 2.38E+08 | 669  |
| ENSG000001 | 0.705622 | 1.248751 | -0.63959 | 0.68663  | 0.76619  | RP1-90J20. chr6  | - | 2989960  | 2999368  | 413  |
| ENSG000001 | 2.645227 | 14.69927 | -2.3543  | 0.003155 | 0.00725  | RP11-535A chr9   | + | 99449338 | 99483403 | 425  |
| ENSG000001 | 0.342542 | 0        | 0.4146   | 0.81455  | NA       | AC108051. chr2   | + | 1.04E+08 | 1.04E+08 | 478  |
| ENSG000001 | 0.342542 | 0        | 0.4146   | 0.81455  | NA       | C9orf53 chr9     | + | 21967137 | 21967738 | 602  |
| ENSG000001 | 1.971308 | 0.891044 | 0.85363  | 0.56108  | 0.65963  | OPA1-AS1 chr3    | - | 1.93E+08 | 1.93E+08 | 492  |
| ENSG000001 | 0.653381 | 0.951736 | -0.39511 | 0.8072   | NA       | RP4-79611. chr22 | + | 44352907 | 44353228 | 322  |
| ENSG000001 | 0.290301 | 0.654722 | -0.51764 | 0.76892  | NA       | AL592494. chr1   | - | 1.21E+08 | 1.21E+08 | 426  |
| ENSG000001 | 20.04169 | 23.00817 | -0.19326 | 0.71177  | 0.78613  | RPL29P11 chr3    | - | 37058011 | 37058505 | 492  |
| ENSG000001 | 67.7315  | 101.1044 | -0.57584 | 0.021766 | 0.042608 | YBX1P1 chr14     | - | 66479548 | 66480507 | 960  |
| ENSG000001 | 0        | 1.043983 | -1.3473  | 0.44976  | NA       | RP5-1109J. chr1  | - | 46912345 | 46915376 | 1129 |
| ENSG000001 | 1.048164 | 6.734125 | -2.4322  | 0.026059 | 0.050079 | CTC-260E6. chr19 | + | 20235248 | 20236293 | 483  |
| ENSG000001 | 1.317927 | 0        | 1.6383   | 0.35541  | NA       | AC009518. chr7   | + | 1.32E+08 | 1.32E+08 | 1229 |
| ENSG000001 | 276.0645 | 400.0906 | -0.53239 | 0.001134 | 0.00279  | RP4-758J1. chr1  | + | 1334902  | 1337426  | 2228 |
| ENSG000001 | 0        | 0.297015 | -0.41864 | 0.81278  | NA       | XX-FW810I chrX   | + | 1.49E+08 | 1.49E+08 | 578  |
| ENSG000001 | 0.290301 | 0.640152 | -0.50256 | 0.77558  | NA       | AC083949. chr2   | - | 42370378 | 42397441 | 657  |
| ENSG000001 | 649.2879 | 575.8956 | 0.17194  | 0.32402  | 0.42696  | C17orf89 chr17   | + | 79213039 | 79215081 | 741  |
| ENSG000001 | 5.71694  | 3.497777 | 0.62639  | 0.53158  | 0.63287  | IKBKGP1 chrX     | - | 1.54E+08 | 1.54E+08 | 1075 |

|            |          |          |          |          |          |                  |   |          |          |      |
|------------|----------|----------|----------|----------|----------|------------------|---|----------|----------|------|
| ENSG000001 | 0        | 0.640152 | -0.82869 | 0.63935  | NA       | CTA-250D1 chr22  | - | 42377308 | 42378221 | 515  |
| ENSG000001 | 4.604557 | 4.709268 | -0.00074 | 0.9994   | 0.99973  | TSSC1-IT1 chr2   | - | 3302112  | 3305236  | 718  |
| ENSG000001 | 43.84213 | 21.44313 | 1.0061   | 0.041539 | 0.075746 | BEND3P3 chr10    | - | 81444248 | 81444739 | 492  |
| ENSG000001 | 7.999088 | 1.684135 | 2.0834   | 0.027746 | 0.052991 | RP5-1142A chr16  | + | 88797588 | 88807826 | 4521 |
| ENSG000001 | 0.342542 | 0.654722 | -0.52406 | 0.76557  | NA       | AC007899. chr2   | + | 37375673 | 37376447 | 775  |
| ENSG000001 | 1.016461 | 2.185918 | -0.93062 | 0.50105  | 0.60472  | RPS4XP16 chr13   | + | 52028300 | 52035451 | 807  |
| ENSG000001 | 2.665765 | 1.294874 | 0.88416  | 0.46741  | 0.57228  | VPS26BP1 chr3    | - | 48001817 | 48002571 | 755  |
| ENSG000001 | 0.342542 | 0.357707 | -0.0021  | 0.99906  | NA       | SIGLEC30P chr1   | + | 1.7E+08  | 1.7E+08  | 941  |
| ENSG000001 | 7.480099 | 17.18536 | -1.1859  | 0.044563 | 0.080438 | RP11-3B12 chr7   | + | 1.25E+08 | 1.25E+08 | 3252 |
| ENSG000001 | 0.290301 | 2.618886 | -2.1293  | 0.18113  | 0.26572  | RP11-3B12 chr7   | - | 1.25E+08 | 1.25E+08 | 600  |
| ENSG000001 | 0        | 0.357707 | -0.41864 | 0.81278  | NA       | RP11-448C chr1   | + | 1.98E+08 | 1.98E+08 | 247  |
| ENSG000001 | 0.290301 | 0.594029 | -0.38058 | 0.83094  | NA       | AC005534. chr7   | - | 1.56E+08 | 1.56E+08 | 742  |
| ENSG000001 | 0.342542 | 0        | 0.4146   | 0.81455  | NA       | RP5-934G1 chr1   | + | 11937827 | 11940463 | 2637 |
| ENSG000001 | 45.67546 | 43.80471 | 0.058818 | 0.84548  | 0.8916   | AP001347. chr21  | + | 15399742 | 15516789 | 1332 |
| ENSG000001 | 0        | 0.343138 | -0.41864 | 0.81278  | NA       | AC002115. chr19  | + | 36088809 | 36092403 | 362  |
| ENSG000001 | 135.669  | 107.6717 | 0.32984  | 0.17613  | 0.25956  | LINC00863 chr10  | + | 89102493 | 89117639 | 3287 |
| ENSG000001 | 0        | 0.594029 | -0.81444 | 0.64499  | NA       | LINC00320 chr21  | - | 22114908 | 22175534 | 2004 |
| ENSG000001 | 0        | 4.943174 | -3.8842  | 0.005303 | 0.011756 | KRT8P30 chr2     | - | 2.2E+08  | 2.2E+08  | 650  |
| ENSG000001 | 0.342542 | 0        | 0.4146   | 0.81455  | NA       | LINC00162 chr21  | - | 46419122 | 46424642 | 734  |
| ENSG000001 | 0.36308  | 0.654722 | -0.52647 | 0.7643   | NA       | AC107399. chr4   | - | 1.18E+08 | 1.18E+08 | 735  |
| ENSG000001 | 13.13543 | 22.88766 | -0.79433 | 0.11832  | 0.18673  | RP11-441C chr10  | + | 1.01E+08 | 1.01E+08 | 666  |
| ENSG000001 | 0        | 0.343138 | -0.41864 | 0.81278  | NA       | RP11-74C3 chr9   | - | 12098660 | 12159147 | 561  |
| ENSG000001 | 0.653381 | 0        | 0.82678  | 0.64037  | NA       | LINC00184 chr1   | + | 2.35E+08 | 2.35E+08 | 2270 |
| ENSG000001 | 3.060548 | 24.48767 | -2.9232  | 1.10E-05 | 3.50E-05 | PRRT4 chr7       | - | 1.28E+08 | 1.28E+08 | 3544 |
| ENSG000001 | 0.685084 | 0        | 0.85004  | 0.63064  | NA       | RP11-180C chr1   | + | 1.59E+08 | 1.59E+08 | 853  |
| ENSG000001 | 35.32145 | 60.52387 | -0.76589 | 0.012159 | 0.025113 | RP11-82L1 chr9   | - | 91703519 | 91724849 | 585  |
| ENSG000001 | 5.799092 | 0.297015 | 3.3461   | 0.012425 | 0.02561  | RP5-1086K chr1   | - | 1.17E+08 | 1.17E+08 | 2295 |
| ENSG000001 | 0.632843 | 0        | 0.81931  | 0.64303  | NA       | RP11-32I2. chr9  | - | 28598666 | 28599290 | 625  |
| ENSG000001 | 32.89375 | 45.79069 | -0.46952 | 0.15734  | 0.23656  | RP11-206L chr1   | - | 661611   | 663527   | 1236 |
| ENSG000001 | 0        | 0.937167 | -1.2408  | 0.48662  | NA       | AC090044. chr3   | + | 577914   | 887698   | 3948 |
| ENSG000001 | 9.233071 | 0        | 4.8298   | 0.000135 | 0.000378 | AC017002. chr2   | - | 1.12E+08 | 1.12E+08 | 881  |
| ENSG000001 | 0.943682 | 0.297015 | 0.89158  | 0.60669  | NA       | U82695.9 chrX    | + | 1.53E+08 | 1.53E+08 | 700  |
| ENSG000001 | 0.705622 | 0        | 0.8807   | 0.6196   | NA       | KCNC4-AS1 chr1   | - | 1.11E+08 | 1.11E+08 | 748  |
| ENSG000001 | 0.290301 | 0.700845 | -0.56655 | 0.74739  | NA       | AC009303. chr2   | - | 1.19E+08 | 1.19E+08 | 352  |
| ENSG000001 | 1.887365 | 0.297015 | 1.7078   | 0.2989   | 0.40066  | RP11-5407 chr1   | - | 947377   | 948573   | 471  |
| ENSG000001 | 0.632843 | 0        | 0.81931  | 0.64303  | NA       | SUMO2P3 chr7     | + | 55799837 | 55800124 | 288  |
| ENSG000001 | 0.72616  | 9.828071 | -3.4033  | 0.0023   | 0.005389 | CTA-282F2. chr22 | + | 34121000 | 34146830 | 2618 |
| ENSG000001 | 45.7295  | 28.59237 | 0.67448  | 0.049265 | 0.08784  | INE1 chrX        | + | 47064320 | 47065264 | 945  |
| ENSG000001 | 0.995923 | 1.71569  | -0.58282 | 0.70597  | 0.78152  | RP11-160F chr1   | + | 1.74E+08 | 1.74E+08 | 335  |
| ENSG000001 | 0        | 0.357707 | -0.41864 | 0.81278  | NA       | RP11-377K chr1   | - | 57051285 | 57051915 | 433  |
| ENSG000001 | 0        | 1.355566 | -1.9006  | 0.26573  | NA       | TMEM233 chr12    | + | 1.2E+08  | 1.2E+08  | 1573 |
| ENSG000001 | 0        | 1.234181 | -1.5727  | 0.37581  | NA       | RP11-524F chr6   | - | 54704916 | 54705653 | 586  |
| ENSG000001 | 0.632843 | 1.355566 | -0.81587 | 0.58613  | 0.68179  | RP11-297K chr1   | - | 1.61E+08 | 1.61E+08 | 379  |
| ENSG000001 | 0.342542 | 0        | 0.4146   | 0.81455  | NA       | PPP1R8P1 chr1    | - | 48790752 | 48791795 | 1044 |
| ENSG000001 | 0.36308  | 0        | 0.4146   | 0.81455  | NA       | RP1-191J1. chr6  | - | 1.08E+08 | 1.08E+08 | 274  |
| ENSG000001 | 0.580602 | 0.715414 | -0.13184 | 0.94086  | NA       | RP11-409K chr9   | - | 1.33E+08 | 1.33E+08 | 341  |
| ENSG000001 | 1.814586 | 1.66715  | 0.12136  | 0.93309  | 0.95614  | RP11-295C chr9   | - | 1.36E+08 | 1.36E+08 | 531  |
| ENSG000001 | 0.36308  | 0.715414 | -0.51558 | 0.77246  | NA       | CTD-2210P chr5   | - | 43666867 | 43667334 | 468  |
| ENSG000001 | 18.74707 | 20.78351 | -0.15163 | 0.7637   | 0.82851  | AL049840. chr14  | + | 1.04E+08 | 1.04E+08 | 1543 |
| ENSG000001 | 0.870904 | 0        | 1.046    | 0.5544   | NA       | AC000067. chr22  | + | 19654546 | 19655078 | 287  |
| ENSG000001 | 0        | 18.51179 | -5.8426  | 6.65E-07 | 2.41E-06 | AC006509. chr2   | + | 47922955 | 47984932 | 725  |
| ENSG000001 | 0        | 0.343138 | -0.41864 | 0.81278  | NA       | RP11-810F chr1   | - | 29814705 | 29823405 | 349  |
| ENSG000001 | 0        | 0.343138 | -0.41864 | 0.81278  | NA       | KCTD9P1 chr17    | + | 20015137 | 20016303 | 1167 |
| ENSG000001 | 0.580602 | 1.012429 | -0.48451 | 0.77505  | NA       | AP004289. chr8   | - | 1E+08    | 1E+08    | 2205 |
| ENSG000001 | 3.309773 | 4.256898 | -0.34088 | 0.72065  | 0.79332  | UBE2D3P1 chr20   | - | 5273034  | 5273477  | 444  |
| ENSG000001 | 0.36308  | 0        | 0.4146   | 0.81455  | NA       | AC091492. chr3   | + | 12369502 | 12369773 | 272  |
| ENSG000001 | 3.338871 | 1.40169  | 1.0515   | 0.44872  | 0.55412  | RP11-330A chr1   | + | 48283738 | 48285909 | 1807 |
| ENSG000001 | 1.991846 | 2.087966 | -0.04311 | 0.9728   | 0.98486  | RP4-784A1 chr1   | - | 53757463 | 53757810 | 237  |
| ENSG000001 | 14.77275 | 26.38544 | -0.82357 | 0.058224 | 0.10173  | EIF4BP7 chrX     | - | 1.11E+08 | 1.11E+08 | 1813 |
| ENSG000001 | 27.06539 | 18.61303 | 0.5143   | 0.32317  | 0.42608  | RP11-228B chr9   | + | 1.31E+08 | 1.31E+08 | 2055 |
| ENSG000001 | 2.822488 | 4.198622 | -0.53456 | 0.6416   | 0.72856  | EIF1AX-AS1 chrX  | + | 20158086 | 20158562 | 378  |
| ENSG000001 | 1.286224 | 2.07098  | -0.55275 | 0.66839  | 0.75105  | RP11-223E chr13  | - | 30993656 | 30996374 | 448  |
| ENSG000001 | 0.653381 | 0        | 0.82678  | 0.64037  | NA       | RPL18AP2 chr21   | - | 47840467 | 47840948 | 482  |
| ENSG000001 | 0.36308  | 0        | 0.4146   | 0.81455  | NA       | AC068279. chr2   | - | 87586177 | 87586367 | 189  |
| ENSG000001 | 2.624689 | 2.217472 | 0.19643  | 0.86739  | 0.90758  | HMGB3P2.2 chr5   | + | 1.79E+08 | 1.79E+08 | 597  |

|            |          |          |          |          |          |                 |   |          |          |      |
|------------|----------|----------|----------|----------|----------|-----------------|---|----------|----------|------|
| ENSG000001 | 1.338465 | 0.594029 | 0.81007  | 0.6065   | 0.6996   | AC096574. chr2  | + | 2.39E+08 | 2.39E+08 | 2509 |
| ENSG000001 | 0        | 0.357707 | -0.41864 | 0.81278  | NA       | AC021016. chr2  | - | 2.19E+08 | 2.19E+08 | 529  |
| ENSG000001 | 0        | 0.640152 | -0.82869 | 0.63935  | NA       | RP11-383C chr1  | - | 2.05E+08 | 2.05E+08 | 686  |
| ENSG000001 | 0.290301 | 0.715414 | -0.50514 | 0.77701  | NA       | GS1-184P1 chrX  | - | 24447690 | 24448037 | 348  |
| ENSG000001 | 1.669842 | 2.102535 | -0.25915 | 0.85347  | 0.89706  | RP11-426L chr1  | - | 1.13E+08 | 1.13E+08 | 449  |
| ENSG000001 | 1.265686 | 1.874334 | -0.45301 | 0.75221  | 0.81899  | WWC3-AS1 chrX   | - | 9992882  | 10006694 | 578  |
| ENSG000001 | 1.338465 | 186.9925 | -6.8608  | 3.29E-24 | 3.34E-23 | LINC00337 chr1  | + | 6296300  | 6299504  | 1302 |
| ENSG000001 | 2.467967 | 2.901332 | -0.18843 | 0.87645  | 0.91421  | PFN1P4 chr1     | + | 1.48E+08 | 1.48E+08 | 402  |
| ENSG000001 | 0        | 0.343138 | -0.41864 | 0.81278  | NA       | DAP3P1 chr1     | + | 1.56E+08 | 1.56E+08 | 278  |
| ENSG000001 | 0        | 9.187919 | -4.8144  | 0.00016  | 0.000444 | GRTP1-AS1 chr13 | + | 1.14E+08 | 1.14E+08 | 867  |
| ENSG000001 | 0        | 0.594029 | -0.81444 | 0.64499  | NA       | AL450226. chr17 | + | 2135974  | 2136904  | 710  |
| ENSG000001 | 0        | 16.4821  | -5.6761  | 1.78E-06 | 6.21E-06 | RP4-660H1 chr1  | - | 73214604 | 73364823 | 499  |
| ENSG000001 | 1.649304 | 3.991438 | -1.1503  | 0.27546  | 0.37557  | SNORA71A chr20  | - | 37055949 | 37056086 | 138  |
| ENSG000001 | 1.431782 | 0.997859 | 0.38378  | 0.79292  | 0.85287  | RP11-405C chr6  | + | 7183316  | 7185520  | 1676 |
| ENSG000001 | 0.653381 | 0        | 0.82678  | 0.64037  | NA       | RPL3P7 chr6     | - | 1.08E+08 | 1.08E+08 | 1212 |
| ENSG000001 | 3.423628 | 1.698704 | 0.89957  | 0.42049  | 0.52593  | SETP20 chr4     | - | 1.1E+08  | 1.1E+08  | 852  |
| ENSG000001 | 0.342542 | 0.297015 | -0.00202 | 0.99909  | NA       | XXbac-BPG chr6  | + | 58291908 | 58298496 | 301  |
| ENSG000001 | 0.290301 | 0.297015 | -0.00202 | 0.99909  | NA       | BCRP1 chr22     | - | 24655897 | 24659732 | 691  |
| ENSG000001 | 0.72616  | 0.715414 | 0.009201 | 0.99586  | NA       | OR52K3P chr11   | + | 4496043  | 4497123  | 943  |
| ENSG000001 | 3.153865 | 0        | 3.0631   | 0.050356 | 0.089485 | RP11-429E chr20 | - | 60313275 | 60330112 | 937  |
| ENSG000001 | 0        | 0.686276 | -0.84936 | 0.6309   | NA       | LLOXNC01- chrX  | - | 1.53E+08 | 1.53E+08 | 1960 |
| ENSG000001 | 1.306762 | 1.029414 | 0.2508   | 0.8777   | 0.91481  | AC083900. chr2  | - | 2.09E+08 | 2.09E+08 | 469  |
| ENSG000001 | 7.843179 | 0.297015 | 3.7798   | 0.003181 | 0.007305 | RP11-295P chr10 | + | 13752415 | 13754054 | 373  |
| ENSG000001 | 7.023703 | 8.403691 | -0.24893 | 0.72493  | 0.79645  | RP5-1160K chr1  | + | 1.1E+08  | 1.1E+08  | 596  |
| ENSG000001 | 0.290301 | 2.993578 | -2.4591  | 0.088043 | 0.14506  | ARSDP1 chrY     | + | 14474827 | 14499123 | 1215 |
| ENSG000001 | 0        | 0.357707 | -0.41864 | 0.81278  | NA       | RP11-477L chr10 | - | 94637849 | 94638046 | 198  |
| ENSG000001 | 1.991846 | 4.320007 | -1.0218  | 0.31188  | 0.41397  | AL133216. chr10 | + | 38717074 | 38736820 | 992  |
| ENSG000001 | 0.653381 | 2.056411 | -1.3069  | 0.3572   | 0.46156  | RP11-255A chr9  | - | 33574359 | 33574586 | 228  |
| ENSG000001 | 3.060548 | 2.558194 | 0.20484  | 0.85923  | 0.90132  | RANP4 chrX      | - | 1.36E+08 | 1.36E+08 | 655  |
| ENSG000001 | 0        | 0.297015 | -0.41864 | 0.81278  | NA       | RP4-549F1 chr1  | - | 7501156  | 7501614  | 361  |
| ENSG000001 | 0        | 36.63432 | -6.7974  | 1.44E-09 | 6.57E-09 | LINC00237 chr20 | - | 21068245 | 21086999 | 1220 |
| ENSG000001 | 0.36308  | 0        | 0.4146   | 0.81455  | NA       | PSME2P2 chr13   | + | 49345264 | 49345965 | 700  |
| ENSG000001 | 0.342542 | 0.343138 | -0.00208 | 0.99906  | NA       | MORF4L1P chr13  | - | 41773968 | 41774943 | 976  |
| ENSG000001 | 39.89854 | 12.23977 | 1.6776   | 7.48E-05 | 0.000216 | RP11-361F chr6  | + | 1.48E+08 | 1.48E+08 | 1477 |
| ENSG000001 | 9.48311  | 7.129091 | 0.37506  | 0.59248  | 0.68735  | DYNC1I2P1 chr10 | + | 52024738 | 52026575 | 1838 |
| ENSG000001 | 116.4228 | 174.1282 | -0.58018 | 0.024846 | 0.048001 | CTD-2228K chr5  | + | 478238   | 480999   | 2762 |
| ENSG000001 | 3.04001  | 2.146242 | 0.42958  | 0.75144  | 0.81836  | RP11-809C chr10 | + | 674578   | 677195   | 1657 |
| ENSG000001 | 0.342542 | 0        | 0.4146   | 0.81455  | NA       | AC073957. chr7  | + | 1068661  | 1083527  | 535  |
| ENSG000001 | 233.8771 | 554.1676 | -1.24    | 1.90E-09 | 8.55E-09 | AC103965. chr15 | - | 84867600 | 84898888 | 4253 |
| ENSG000001 | 0        | 2.382564 | -2.4485  | 0.15134  | 0.22879  | RP11-338C chr10 | - | 1.25E+08 | 1.25E+08 | 416  |
| ENSG000001 | 0        | 5.863356 | -4.0782  | 0.003552 | 0.008095 | AC012354. chr2  | + | 45181803 | 45195901 | 2685 |
| ENSG000001 | 0.685084 | 0        | 0.85004  | 0.63064  | NA       | AC005779. chr19 | - | 45687584 | 45688190 | 303  |
| ENSG000001 | 1.742621 | 10.25862 | -2.3883  | 0.013626 | 0.027851 | NPM1P39 chr1    | + | 27533421 | 27534287 | 867  |
| ENSG000001 | 3.185568 | 1.370136 | 0.98494  | 0.48006  | 0.58426  | LINC00618 chr14 | + | 97409916 | 97411731 | 448  |
| ENSG000001 | 0.290301 | 0        | 0.4146   | 0.81455  | NA       | CTD-2538A chr5  | + | 94775748 | 94776391 | 644  |
| ENSG000001 | 2.334388 | 4.303021 | -0.81629 | 0.4052   | 0.51008  | BRI3P1 chr1     | + | 1.01E+08 | 1.01E+08 | 378  |
| ENSG000001 | 2.708633 | 2.24661  | 0.21519  | 0.85663  | 0.89933  | DUTP6 chr1      | + | 1.67E+08 | 1.67E+08 | 462  |
| ENSG000001 | 0.342542 | 22.5041  | -5.25    | 3.69E-06 | 1.24E-05 | XXbac-BPG chr6  | - | 28805646 | 28806783 | 709  |
| ENSG000001 | 123.4508 | 58.79361 | 1.0663   | 6.92E-06 | 2.26E-05 | RP11-390P chr6  | + | 1.39E+08 | 1.39E+08 | 917  |
| ENSG000001 | 0        | 0.357707 | -0.41864 | 0.81278  | NA       | LINC00457 chr13 | - | 35009587 | 35214822 | 413  |
| ENSG000001 | 1.286224 | 3.526915 | -1.2811  | 0.26271  | 0.3609   | AATK-AS1 chr17  | + | 79139307 | 79156964 | 1577 |
| ENSG000001 | 2.448243 | 0.640152 | 1.5041   | 0.29202  | 0.39393  | AC073283. chr2  | + | 47294961 | 47298343 | 860  |
| ENSG000001 | 467.1671 | 269.2184 | 0.79325  | 2.22E-07 | 8.40E-07 | PLEKHM1 chr17   | - | 43513266 | 43568115 | 5263 |
| ENSG000001 | 1.048164 | 2.711133 | -1.1749  | 0.36649  | 0.47113  | RPS12P26 chr15  | + | 90749804 | 90750199 | 396  |
| ENSG000001 | 0.342542 | 1.043983 | -0.98163 | 0.56849  | NA       | LINC00092 chr9  | - | 98782014 | 98790247 | 1726 |
| ENSG000001 | 0.653381 | 3.870053 | -2.1686  | 0.088738 | 0.14603  | RP11-338E chr12 | + | 65022124 | 65023756 | 281  |
| ENSG000001 | 2.064625 | 6.255033 | -1.5033  | 0.11673  | 0.18447  | ABO19441. chr14 | - | 1.06E+08 | 1.06E+08 | 627  |
| ENSG000001 | 0        | 0.715414 | -0.84936 | 0.6309   | NA       | TBC1D4-AS chr13 | - | 75949647 | 75951430 | 425  |
| ENSG000001 | 7.688249 | 28.27837 | -1.8423  | 0.00068  | 0.00173  | AC093818. chr2  | - | 1.73E+08 | 1.73E+08 | 1397 |
| ENSG000001 | 29.40915 | 0        | 6.4608   | 2.05E-08 | 8.48E-08 | MIR137HG chr1   | - | 98453556 | 98515419 | 2639 |
| ENSG000001 | 10.00887 | 0.98329  | 3.0059   | 0.004364 | 0.009804 | AL589743. chr14 | + | 19650018 | 19718563 | 4676 |
| ENSG000001 | 6.08858  | 5.794542 | 0.089369 | 0.9152   | 0.94244  | RP11-197A chr10 | - | 16763351 | 16790376 | 697  |
| ENSG000001 | 0.36308  | 0        | 0.4146   | 0.81455  | NA       | AC079790. chr2  | + | 1.53E+08 | 1.53E+08 | 507  |
| ENSG000001 | 15.67617 | 0.357707 | 4.7606   | 3.89E-05 | 0.000117 | AC007362. chr2  | - | 2.07E+08 | 2.07E+08 | 555  |
| ENSG000001 | 16.00413 | 1.485073 | 3.073    | 0.001593 | 0.003826 | HSPA7 chr1      | + | 1.62E+08 | 1.62E+08 | 1927 |

|            |          |          |          |           |           |                  |   |          |          |      |
|------------|----------|----------|----------|-----------|-----------|------------------|---|----------|----------|------|
| ENSG000001 | 3.713929 | 25.07754 | -2.6597  | 0.000148  | 0.000413  | AP001628. chr21  | - | 44251150 | 44256587 | 285  |
| ENSG000001 | 0        | 1.370136 | -1.6825  | 0.34201   | NA        | CHCHDAP5 chr1    | + | 2.46E+08 | 2.46E+08 | 427  |
| ENSG000001 | 1.068702 | 3.916176 | -1.6682  | 0.17059   | 0.25285   | RP4-814D1 chr7   | + | 1.57E+08 | 1.57E+08 | 465  |
| ENSG000001 | 4.637074 | 2.606733 | 0.74196  | 0.47992   | 0.58411   | ARL2BPP1( chr22  | - | 18585223 | 18586415 | 531  |
| ENSG000001 | 1.048164 | 1.652581 | -0.55786 | 0.69005   | 0.76896   | AC008937. chr5   | - | 56195868 | 56206541 | 914  |
| ENSG000001 | 54.66787 | 37.44044 | 0.54017  | 0.10945   | 0.17424   | TRAPP12- chr2    | - | 3485013  | 3486180  | 908  |
| ENSG000001 | 0.36308  | 0.297015 | -0.00205 | 0.99908   | NA        | DDX26B-A5 chrX   | - | 1.35E+08 | 1.35E+08 | 398  |
| ENSG000001 | 0        | 0.343138 | -0.41864 | 0.81278   | NA        | AP000936. chr11  | - | 1.17E+08 | 1.17E+08 | 681  |
| ENSG000001 | 0        | 2.232041 | -2.63    | 0.10215   | 0.16421   | RP1-169I5. chrX  | - | 41331517 | 41331906 | 390  |
| ENSG000001 | 0.632843 | 0        | 0.81931  | 0.64303   | NA        | AC117490. chr3   | - | 1.96E+08 | 1.96E+08 | 60   |
| ENSG000001 | 785.4776 | 22.78568 | 5.0858   | 1.79E-114 | 1.27E-112 | RP11-640N chr1   | + | 1.45E+08 | 1.45E+08 | 3056 |
| ENSG000001 | 0.923144 | 0.357707 | 0.88371  | 0.60898   | NA        | RPS2P1 chr20     | + | 32710276 | 32711096 | 821  |
| ENSG000001 | 0        | 0.343138 | -0.41864 | 0.81278   | NA        | AC009478. chr2   | - | 1.81E+08 | 1.82E+08 | 562  |
| ENSG000001 | 4.491516 | 4.392852 | 0.047655 | 0.96025   | 0.97627   | ST13P6 chr8      | + | 1.34E+08 | 1.34E+08 | 1102 |
| ENSG000001 | 2.323223 | 1.294874 | 0.6907   | 0.60244   | 0.69589   | AC007255. chr7   | - | 29638411 | 29724871 | 663  |
| ENSG000001 | 5.289641 | 11.13751 | -0.99974 | 0.17762   | 0.2613    | RP11-378J chr1   | + | 2.23E+08 | 2.23E+08 | 1313 |
| ENSG000001 | 2.096328 | 0        | 2.2646   | 0.18883   | 0.27515   | LINC00705 chr10  | + | 4697619  | 4704611  | 1745 |
| ENSG000001 | 0.36308  | 0        | 0.4146   | 0.81455   | NA        | RP11-466F chr1   | + | 1.66E+08 | 1.66E+08 | 472  |
| ENSG000001 | 0.36308  | 1.888903 | -1.7962  | 0.25037   | 0.34685   | UBE2Q2P2 chr15   | + | 82647360 | 82712277 | 758  |
| ENSG000001 | 0        | 0.891044 | -1.0625  | 0.54819   | NA        | RP11-782C chr1   | - | 1.43E+08 | 1.43E+08 | 766  |
| ENSG000001 | 0        | 0.357707 | -0.41864 | 0.81278   | NA        | RP11-536C chr1   | + | 1.6E+08  | 1.6E+08  | 645  |
| ENSG000001 | 0.72616  | 1.188058 | -0.45174 | 0.79635   | 0.85544   | AC018693. chr2   | + | 39088862 | 39090275 | 550  |
| ENSG000001 | 3.807246 | 17.02927 | -2.0658  | 0.014002  | 0.028542  | RP4-758J1: chr1  | - | 1365919  | 1369953  | 634  |
| ENSG000001 | 1.71271  | 1.903472 | -0.12609 | 0.93571   | 0.95758   | RP11-57H1 chr10  | + | 1.15E+08 | 1.15E+08 | 315  |
| ENSG000001 | 0        | 1.280305 | -1.6305  | 0.35731   | NA        | RP4-612C1 chr1   | - | 93665312 | 93665496 | 185  |
| ENSG000001 | 0        | 0.343138 | -0.41864 | 0.81278   | NA        | LINC00113 chr21  | + | 29094698 | 29123552 | 572  |
| ENSG000001 | 0.705622 | 0        | 0.8807   | 0.6196    | NA        | RP11-344A chr10  | + | 68812367 | 68814786 | 505  |
| ENSG000001 | 2.427705 | 1.058552 | 1.0034   | 0.45748   | 0.56263   | RP11-439E chr1   | + | 2.47E+08 | 2.47E+08 | 1960 |
| ENSG000001 | 4.926561 | 2.80338  | 0.75068  | 0.51451   | 0.61745   | RP11-539I: chr10 | - | 1.19E+08 | 1.19E+08 | 657  |
| ENSG000001 | 0        | 0.686276 | -0.84936 | 0.6309    | NA        | RP11-512N chr10  | + | 52232574 | 52234006 | 373  |
| ENSG000001 | 0.290301 | 2.367995 | -2.0987  | 0.16791   | 0.24938   | RP1-91J24. chr6  | - | 1.45E+08 | 1.45E+08 | 501  |
| ENSG000001 | 27.76857 | 0.654722 | 4.9373   | 2.04E-07  | 7.74E-07  | RP11-415J: chr1  | + | 33772967 | 33791644 | 801  |
| ENSG000001 | 0.685084 | 0        | 0.85004  | 0.63064   | NA        | AC019100. chr2   | - | 1.09E+08 | 1.09E+08 | 611  |
| ENSG000001 | 0.36308  | 0.297015 | -0.00205 | 0.99908   | NA        | RP11-325F chr7   | - | 1.05E+08 | 1.05E+08 | 640  |
| ENSG000001 | 1.027626 | 2.514486 | -0.98436 | 0.52347   | 0.62586   | AF064860. chr21  | + | 41002198 | 41098012 | 544  |
| ENSG000001 | 19.06549 | 15.69472 | 0.26316  | 0.67167   | 0.75409   | AP001055. chr21  | - | 45578623 | 45579959 | 863  |
| ENSG000001 | 9.721171 | 0.297015 | 4.1081   | 0.000833  | 0.002093  | RP11-449J chr1   | + | 2.25E+08 | 2.25E+08 | 423  |
| ENSG000001 | 2.282147 | 4.054546 | -0.73575 | 0.48881   | 0.59284   | XXbac-B47: chr22 | - | 18559293 | 18560563 | 805  |
| ENSG000001 | 0.36308  | 0        | 0.4146   | 0.81455   | NA        | RP11-384C chr1   | - | 2.12E+08 | 2.12E+08 | 468  |
| ENSG000001 | 1600.75  | 1166.688 | 0.45582  | 1.46E-05  | 4.59E-05  | RP11-513I: chr6  | + | 34247456 | 34254545 | 7090 |
| ENSG000001 | 2.624689 | 7.405832 | -1.3904  | 0.11421   | 0.18099   | SNX18P3 chr9     | - | 38566257 | 38568208 | 1750 |
| ENSG000001 | 0.580602 | 1.012429 | -0.48451 | 0.77505   | NA        | RP11-820K chr12  | - | 31687649 | 31688181 | 533  |
| ENSG000001 | 0.653381 | 1.638012 | -1.0449  | 0.47153   | 0.57623   | RP11-292F chr9   | - | 46270841 | 46274928 | 876  |
| ENSG000001 | 0        | 1.280305 | -1.6305  | 0.35731   | NA        | RP11-433C chr4   | + | 1.82E+08 | 1.82E+08 | 342  |
| ENSG000001 | 0        | 0.343138 | -0.41864 | 0.81278   | NA        | RPF2P1 chr20     | + | 34340736 | 34341641 | 906  |
| ENSG000001 | 32.749   | 59.82632 | -0.85978 | 0.007801  | 0.01671   | RP11-426A chr9   | - | 1.38E+08 | 1.38E+08 | 2919 |
| ENSG000001 | 1.286224 | 1.387121 | -0.06192 | 0.96519   | 0.97971   | CT62 chr15       | - | 71402583 | 71407833 | 2822 |
| ENSG000001 | 0.653381 | 1.012429 | -0.44082 | 0.78495   | NA        | ATP6V0E1F chr5   | + | 1.32E+08 | 1.32E+08 | 226  |
| ENSG000001 | 0        | 29.54652 | -6.5017  | 1.01E-08  | 4.28E-08  | TDGF1P3 chrX     | + | 1.1E+08  | 1.1E+08  | 2710 |
| ENSG000001 | 0.36308  | 0        | 0.4146   | 0.81455   | NA        | CICP8 chr7       | + | 56430151 | 56432963 | 2813 |
| ENSG000001 | 17.47959 | 16.9199  | 0.046538 | 0.92162   | 0.94733   | AC008993. chr19  | - | 60105    | 70966    | 622  |
| ENSG000001 | 0.342542 | 0.594029 | -0.38792 | 0.8278    | NA        | RP11-490C chr9   | + | 1.04E+08 | 1.04E+08 | 538  |
| ENSG000001 | 36.65315 | 43.73676 | -0.25432 | 0.50731   | 0.61088   | RP5-1103C chr20  | - | 300957   | 328868   | 762  |
| ENSG000001 | 0.342542 | 0        | 0.4146   | 0.81455   | NA        | AC015977. chr2   | - | 26894122 | 26897332 | 567  |
| ENSG000001 | 0.653381 | 0        | 0.82678  | 0.64037   | NA        | AC129778. chr9   | + | 42751727 | 42752381 | 321  |
| ENSG000001 | 7.095668 | 2.309719 | 1.4811   | 0.14024   | 0.21415   | SFTA1P chr10     | - | 10826400 | 10836943 | 693  |
| ENSG000001 | 0.36308  | 0.640152 | -0.51156 | 0.77091   | NA        | RP11-350E chr9   | + | 90681830 | 90682952 | 417  |
| ENSG000001 | 0        | 1.416259 | -1.7181  | 0.33141   | NA        | AC099754. chr3   | - | 26660821 | 26664181 | 454  |
| ENSG000001 | 0.705622 | 0        | 0.8807   | 0.6196    | NA        | RP11-3B7.: chr3  | + | 49297518 | 49298744 | 1227 |
| ENSG000001 | 0        | 1.058552 | -1.361   | 0.4451    | NA        | RP11-1114 chrX   | + | 1.36E+08 | 1.36E+08 | 651  |
| ENSG000001 | 2.334388 | 2.041842 | 0.17867  | 0.87615   | 0.91404   | TGIF2P1 chr1     | - | 2.45E+08 | 2.45E+08 | 685  |
| ENSG000001 | 0.36308  | 0        | 0.4146   | 0.81455   | NA        | AC010878. chr2   | + | 38044058 | 38045104 | 1047 |
| ENSG000001 | 0        | 2.431104 | -2.4718  | 0.14705   | 0.22313   | AC080125. chr2   | - | 1.86E+08 | 1.86E+08 | 684  |
| ENSG000001 | 2.323223 | 5.292017 | -1.0182  | 0.42684   | 0.53223   | CTD-2384B chr5   | - | 75987264 | 76012040 | 600  |
| ENSG000001 | 0.705622 | 0        | 0.8807   | 0.6196    | NA        | RP11-207C chr9   | - | 5719021  | 5720244  | 543  |

|            |          |          |          |          |          |                  |   |          |          |      |
|------------|----------|----------|----------|----------|----------|------------------|---|----------|----------|------|
| ENSG000001 | 1.016461 | 2.263595 | -0.93101 | 0.51985  | 0.62257  | RP11-764K chr9   | - | 68397878 | 68409893 | 2878 |
| ENSG000001 | 0        | 0.357707 | -0.41864 | 0.81278  | NA       | AP000345. chr22  | - | 23854681 | 23855789 | 477  |
| ENSG000001 | 0        | 0.343138 | -0.41864 | 0.81278  | NA       | AC104843. chr7   | - | 1.52E+08 | 1.52E+08 | 319  |
| ENSG000001 | 0.685084 | 1.012429 | -0.37562 | 0.82411  | NA       | RPL21P3 chr20    | + | 18465909 | 18466696 | 478  |
| ENSG000001 | 0        | 3.731683 | -3.3275  | 0.030327 | 0.057297 | AC104134. chr2   | + | 88838238 | 88875128 | 1747 |
| ENSG000001 | 1.701545 | 1.652581 | 0.020687 | 0.98674  | 0.99218  | RBMS1P1 chr12    | - | 66627859 | 66629014 | 1156 |
| ENSG000001 | 0.653381 | 1.430828 | -0.74222 | 0.6575   | 0.74206  | TNPO1P1 chr10    | + | 86150664 | 86151801 | 1138 |
| ENSG000001 | 0        | 0.640152 | -0.82869 | 0.63935  | NA       | AP001626. chr21  | - | 44019390 | 44035168 | 1775 |
| ENSG000001 | 0.342542 | 0        | 0.4146   | 0.81455  | NA       | RP11-63P1 chr9   | + | 74920346 | 74958126 | 2078 |
| ENSG000001 | 120.8416 | 109.4647 | 0.13951  | 0.73133  | 0.80153  | BOLA3-AS1 chr2   | + | 74375136 | 74377188 | 1804 |
| ENSG000001 | 0.653381 | 0.98329  | -0.41986 | 0.79515  | NA       | MPRIP-AS1 chr17  | - | 16979352 | 16981066 | 1058 |
| ENSG000001 | 9.564448 | 5.794542 | 0.70357  | 0.34785  | 0.45206  | RPS15AP1( chr1   | - | 46111488 | 46111869 | 382  |
| ENSG000001 | 1.233984 | 0        | 1.5686   | 0.37707  | NA       | AC079776. chr2   | - | 1.31E+08 | 1.31E+08 | 2454 |
| ENSG000001 | 0.36308  | 0.297015 | -0.00205 | 0.99908  | NA       | RP3-50811( chr22 | + | 39135008 | 39145046 | 500  |
| ENSG000001 | 0        | 0.343138 | -0.41864 | 0.81278  | NA       | RP5-11211( chr20 | + | 40619780 | 40692609 | 594  |
| ENSG000001 | 0.36308  | 3.945314 | -2.8204  | 0.041183 | 0.075226 | RP13-93L1 chr9   | + | 92087152 | 92087607 | 456  |
| ENSG000001 | 0        | 0.297015 | -0.41864 | 0.81278  | NA       | ZNF70P1 chr6     | + | 33183482 | 33184105 | 624  |
| ENSG000001 | 1.016461 | 7.036845 | -2.4989  | 0.026038 | 0.05005  | RFPL1S chr22     | - | 29832818 | 29874115 | 5559 |
| ENSG000001 | 203.1164 | 241.6454 | -0.24817 | 0.18491  | 0.27029  | JPX chrX         | + | 73164159 | 73290243 | 2194 |
| ENSG000001 | 16.3082  | 12.95519 | 0.33118  | 0.52777  | 0.62944  | RP11-262C chrX   | + | 71364034 | 71381600 | 2269 |
| ENSG000001 | 0        | 1.638012 | -2.1885  | 0.18912  | NA       | RP11-120J chr9   | + | 14317084 | 14357907 | 964  |
| ENSG000001 | 0        | 0.343138 | -0.41864 | 0.81278  | NA       | RP11-38J2( chr1  | + | 2.06E+08 | 2.06E+08 | 390  |
| ENSG000001 | 72.36596 | 44.10252 | 0.70658  | 0.024295 | 0.047017 | RP11-773C chr10  | - | 81563813 | 81586350 | 829  |
| ENSG000001 | 2747.723 | 980.5257 | 1.4847   | 7.14E-33 | 1.02E-31 | ARHGAP23 chr17   | + | 36584662 | 36668628 | 6276 |
| ENSG000001 | 0.290301 | 4.553913 | -3.0272  | 0.028151 | 0.053671 | RP11-390F chr9   | + | 6716548  | 6727438  | 1501 |
| ENSG000001 | 1.213446 | 3.037286 | -1.0363  | 0.45885  | 0.56415  | RP4-610C1 chr20  | - | 29521637 | 29522987 | 553  |
| ENSG000001 | 0        | 10.29588 | -4.9223  | 0.000148 | 0.000411 | GBP1P1 chr1      | + | 89873238 | 89891802 | 1740 |
| ENSG000001 | 2.592987 | 0.343138 | 2.2135   | 0.13825  | 0.21169  | AC092619. chr2   | - | 2.39E+08 | 2.39E+08 | 1975 |
| ENSG000001 | 0        | 0.891044 | -1.0625  | 0.54819  | NA       | AC104651. chr2   | - | 1.13E+08 | 1.13E+08 | 735  |
| ENSG000001 | 0        | 0.343138 | -0.41864 | 0.81278  | NA       | RPL15P4 chr6     | + | 31495891 | 31496470 | 580  |
| ENSG000001 | 0.36308  | 0        | 0.4146   | 0.81455  | NA       | GAPDHP16 chr21   | + | 16146622 | 16147583 | 962  |
| ENSG000001 | 0.290301 | 0.700845 | -0.56655 | 0.74739  | NA       | RP11-160A chr6   | + | 1.23E+08 | 1.23E+08 | 2629 |
| ENSG000001 | 0.975385 | 0.594029 | 0.4404   | 0.79523  | NA       | RP11-330C chr1   | + | 93197557 | 93198814 | 797  |
| ENSG000001 | 0.342542 | 5.156806 | -3.1365  | 0.02181  | 0.042691 | CYP4A22-A chr1   | - | 47562325 | 47644943 | 921  |
| ENSG000001 | 15.19924 | 30.12195 | -0.97543 | 0.032604 | 0.061118 | AC069282. chr7   | + | 47996390 | 47996915 | 526  |
| ENSG000001 | 7.043427 | 2.321872 | 1.4759   | 0.1351   | 0.20806  | LINC00475 chr9   | + | 94903580 | 94922396 | 2506 |
| ENSG000001 | 1.233984 | 3.769685 | -1.3464  | 0.27026  | 0.3694   | RP11-165N chr9   | - | 1.15E+08 | 1.15E+08 | 450  |
| ENSG000001 | 0        | 0.715414 | -0.84936 | 0.6309   | NA       | MTND1P34 chr1    | - | 47630182 | 47631592 | 671  |
| ENSG000001 | 10.11416 | 9.382149 | 0.10045  | 0.88363  | 0.91879  | RP11-396C chr1   | + | 2.26E+08 | 2.26E+08 | 595  |
| ENSG000001 | 4.886299 | 1.416259 | 1.6216   | 0.15375  | 0.23184  | AC005237. chr2   | - | 2.42E+08 | 2.42E+08 | 559  |
| ENSG000001 | 2.894453 | 6.829661 | -1.1245  | 0.26129  | 0.35938  | C3orf83 chr3     | - | 12556433 | 12602558 | 901  |
| ENSG000001 | 1.597063 | 4.378283 | -1.2628  | 0.27139  | 0.37073  | RP11-383B chr10  | - | 18820778 | 18822265 | 413  |
| ENSG000001 | 0.36308  | 0        | 0.4146   | 0.81455  | NA       | RP3-370M( chr22  | + | 40356401 | 40360687 | 1287 |
| ENSG000001 | 0        | 0.686276 | -0.84936 | 0.6309   | NA       | SP3P chr13       | - | 90013414 | 90015478 | 2065 |
| ENSG000001 | 0        | 0.715414 | -0.84936 | 0.6309   | NA       | XX-C2158C chr6   | - | 1.71E+08 | 1.71E+08 | 439  |
| ENSG000001 | 0.36308  | 2.811501 | -2.1769  | 0.16762  | 0.24905  | PAWRP1 chr10     | + | 96943410 | 96943974 | 565  |
| ENSG000001 | 0        | 1.903472 | -2.1599  | 0.21236  | NA       | AC068610. chr7   | + | 1.15E+08 | 1.15E+08 | 1187 |
| ENSG000001 | 0.290301 | 0        | 0.4146   | 0.81455  | NA       | RP6-145B8 chrX   | - | 85339720 | 85341343 | 1624 |
| ENSG000001 | 0        | 0.343138 | -0.41864 | 0.81278  | NA       | OR5BE1P chr11    | + | 55850277 | 55851215 | 939  |
| ENSG000001 | 0        | 0.297015 | -0.41864 | 0.81278  | NA       | AC018799. chr2   | + | 1.95E+08 | 1.95E+08 | 1084 |
| ENSG000001 | 0        | 7.545075 | -4.3524  | 0.002031 | 0.004803 | ZNF385D-A chr3   | + | 21584308 | 21621451 | 705  |
| ENSG000001 | 0.995923 | 0        | 1.4959   | 0.39264  | NA       | KB-1027C1 chr22  | - | 22239621 | 22240012 | 392  |
| ENSG000001 | 2.656392 | 0        | 2.8491   | 0.072291 | 0.12249  | RP11-328J( chr7  | - | 1.19E+08 | 1.2E+08  | 1577 |
| ENSG000001 | 0        | 57.87343 | -7.4188  | 1.76E-11 | 9.19E-11 | AC098973. chr3   | + | 27844253 | 27932792 | 543  |
| ENSG000001 | 0.653381 | 0.297015 | 0.51304  | 0.77085  | NA       | RP11-210F( chr6  | + | 1.19E+08 | 1.19E+08 | 1179 |
| ENSG000001 | 0        | 1.029414 | -1.1526  | 0.51496  | NA       | RP11-19J3. chr9  | - | 95301335 | 95301466 | 132  |
| ENSG000001 | 11.02793 | 14.58192 | -0.39855 | 0.55259  | 0.65194  | RP11-527C( chr1  | + | 2.42E+08 | 2.42E+08 | 504  |
| ENSG000001 | 0.72616  | 0.343138 | 0.52026  | 0.77047  | NA       | AP000320. chr21  | - | 35743101 | 35747647 | 471  |
| ENSG000001 | 39.80522 | 43.53125 | -0.13427 | 0.73787  | 0.80668  | C2CD4D chr1      | - | 1.52E+08 | 1.52E+08 | 1757 |
| ENSG000001 | 0.580602 | 0        | 0.8036   | 0.6494   | NA       | UBE2D3P2 chr3    | + | 37176149 | 37176593 | 445  |
| ENSG000001 | 1.016461 | 0.891044 | 0.096278 | 0.95404  | 0.97142  | AC083867. chr7   | + | 1.38E+08 | 1.38E+08 | 457  |
| ENSG000001 | 0        | 0.297015 | -0.41864 | 0.81278  | NA       | RP11-384B chr1   | + | 87511558 | 87512383 | 826  |
| ENSG000001 | 0.36308  | 3.619162 | -2.6856  | 0.056851 | 0.099565 | CCT4P2 chrX      | + | 64490793 | 64492899 | 1548 |
| ENSG000001 | 3.983692 | 2.436809 | 0.59191  | 0.60762  | 0.70048  | AC003077. chr7   | + | 1.11E+08 | 1.11E+08 | 2494 |
| ENSG000001 | 1.068702 | 1.652581 | -0.54445 | 0.69706  | 0.77409  | RPL35P5 chr7     | - | 66071725 | 66072094 | 370  |

|            |          |          |          |          |          |                 |   |          |          |       |
|------------|----------|----------|----------|----------|----------|-----------------|---|----------|----------|-------|
| ENSG000001 | 0.290301 | 0        | 0.4146   | 0.81455  | NA       | DRAXINP1 chrX   | - | 8751555  | 8752502  | 948   |
| ENSG000001 | 8.547987 | 5.257174 | 0.66779  | 0.35617  | 0.46048  | NCBP2-AS1 chr3  | + | 1.97E+08 | 1.97E+08 | 562   |
| ENSG000001 | 0        | 1.744828 | -2.0203  | 0.24683  | NA       | RP11-318C chr13 | + | 78402357 | 78408085 | 601   |
| ENSG000001 | 0        | 0.297015 | -0.41864 | 0.81278  | NA       | RP11-159M chr6  | - | 1.13E+08 | 1.13E+08 | 1178  |
| ENSG000001 | 0.36308  | 0        | 0.4146   | 0.81455  | NA       | RP11-360C chr1  | + | 1.74E+08 | 1.74E+08 | 255   |
| ENSG000001 | 0        | 1.309443 | -1.6539  | 0.35008  | NA       | XXbac-BPG chr6  | - | 28827402 | 28831127 | 2458  |
| ENSG000001 | 0.685084 | 0.297015 | 0.4735   | 0.79064  | NA       | MTOR-AS1 chr1   | + | 11203955 | 11209594 | 705   |
| ENSG000001 | 0.36308  | 5.147942 | -3.156   | 0.020482 | 0.040303 | RP11-325P chr1  | + | 1.47E+08 | 1.47E+08 | 1665  |
| ENSG000001 | 0        | 0.357707 | -0.41864 | 0.81278  | NA       | AC007679 chr2   | + | 2.07E+08 | 2.07E+08 | 781   |
| ENSG000001 | 0.290301 | 1.029414 | -0.85389 | 0.63097  | NA       | RP11-70C1 chr3  | + | 42812104 | 42815127 | 897   |
| ENSG000001 | 937.4416 | 141.754  | 2.7054   | 1.13E-23 | 1.12E-22 | ZNF469 chr16    | + | 88493879 | 88507165 | 13279 |
| ENSG000001 | 0        | 0.297015 | -0.41864 | 0.81278  | NA       | RP4-604A2 chr1  | - | 29308790 | 29309120 | 331   |
| ENSG000001 | 0        | 1.713273 | -2.2094  | 0.18675  | NA       | RP11-569A chr1  | + | 2.03E+08 | 2.03E+08 | 365   |
| ENSG000001 | 0        | 1.372552 | -1.3974  | 0.43145  | NA       | RP11-109C chr9  | - | 72433899 | 72435655 | 1375  |
| ENSG000001 | 135.671  | 307.7763 | -1.1785  | 1.82E-13 | 1.08E-12 | MTND2P28 chr1   | + | 565020   | 566063   | 1044  |
| ENSG000001 | 0        | 2.102535 | -2.2822  | 0.18452  | 0.26979  | RP5-997D2 chr1  | + | 54751078 | 54753044 | 1111  |
| ENSG000001 | 1.753786 | 0        | 2.0221   | 0.24632  | NA       | AC017035 chr2   | + | 1.98E+08 | 1.98E+08 | 1026  |
| ENSG000001 | 1.306762 | 0        | 1.6479   | 0.35189  | NA       | PGAM1P2 chr9    | - | 35943207 | 35943931 | 725   |
| ENSG000001 | 0.72616  | 0        | 0.85004  | 0.63064  | NA       | SNRPEP5 chr2    | + | 8743212  | 8743489  | 278   |
| ENSG000001 | 1.681007 | 4.865496 | -1.3786  | 0.21681  | 0.30808  | RP11-70P1 chr1  | + | 25907969 | 25916847 | 483   |
| ENSG000001 | 0.580602 | 0.640152 | -0.06311 | 0.97099  | NA       | RPL35AP4 chr6   | - | 33357151 | 33357252 | 102   |
| ENSG000001 | 0.36308  | 0        | 0.4146   | 0.81455  | NA       | AC015815 chr17  | - | 75104708 | 75104798 | 90    |
| ENSG000001 | 215.6079 | 114.272  | 0.9054   | 0.026122 | 0.050187 | SBDSP1 chr7     | + | 72300004 | 72307909 | 1714  |
| ENSG000001 | 42.00343 | 0.357707 | 6.1353   | 6.43E-09 | 2.77E-08 | AC064875 chr2   | - | 13106910 | 13147138 | 1942  |
| ENSG000001 | 0.290301 | 0.98329  | -0.92952 | 0.59103  | NA       | EIF2S2P5 chr1   | + | 1.15E+08 | 1.15E+08 | 968   |
| ENSG000001 | 2.229907 | 0.594029 | 1.4374   | 0.32869  | 0.4318   | RP11-619F chr10 | + | 79114162 | 79136371 | 701   |
| ENSG000001 | 0        | 0.594029 | -0.81444 | 0.64499  | NA       | RNF19BPY chrY   | - | 3646038  | 3647587  | 1550  |
| ENSG000001 | 0        | 0.640152 | -0.82869 | 0.63935  | NA       | RP5-858B6 chr1  | - | 2.31E+08 | 2.31E+08 | 311   |
| ENSG000001 | 0.342542 | 0        | 0.4146   | 0.81455  | NA       | TAF13P2 chr2    | + | 74578261 | 74578546 | 286   |
| ENSG000001 | 0.36308  | 0        | 0.4146   | 0.81455  | NA       | RPL14P5 chrX    | - | 969238   | 970836   | 730   |
| ENSG000001 | 31.65039 | 27.67386 | 0.1881   | 0.62353  | 0.71388  | FAM195B chr17   | - | 79780287 | 79791178 | 2979  |
| ENSG000001 | 1.213446 | 5.863356 | -1.9607  | 0.084101 | 0.13951  | AC005534 chr7   | - | 1.56E+08 | 1.56E+08 | 514   |
| ENSG000001 | 0        | 2.261179 | -2.4065  | 0.15834  | 0.23767  | LINC00505 chr1  | + | 46921495 | 46948147 | 354   |
| ENSG000001 | 0        | 0.891044 | -1.0625  | 0.54819  | NA       | CTA-134P2 chr1  | + | 1.59E+08 | 1.59E+08 | 3384  |
| ENSG000001 | 0        | 0.700845 | -0.87835 | 0.62047  | NA       | RP11-641C chr3  | - | 60715788 | 60716377 | 590   |
| ENSG000001 | 0.342542 | 0.594029 | -0.38792 | 0.8278   | NA       | IPO7P2 chr13    | - | 24696204 | 24697953 | 1750  |
| ENSG000001 | 2.188831 | 3.884622 | -0.72182 | 0.51172  | 0.61488  | RP4-784A1 chr1  | + | 53793905 | 53802181 | 567   |
| ENSG000001 | 0        | 3.604593 | -3.3151  | 0.028943 | 0.054986 | AP000619 chr11  | - | 1.03E+08 | 1.03E+08 | 1000  |
| ENSG000001 | 0.342542 | 0        | 0.4146   | 0.81455  | NA       | AL163953 chr14  | - | 54066550 | 54080744 | 726   |
| ENSG000001 | 1.451506 | 0.700845 | 0.74669  | 0.65406  | 0.7391   | FAM225B chr9    | - | 1.16E+08 | 1.16E+08 | 7380  |
| ENSG000001 | 1.681007 | 2.725702 | -0.60287 | 0.61835  | 0.70952  | RP11-54K1 chr9  | - | 33019680 | 33020163 | 484   |
| ENSG000001 | 3.350849 | 5.750835 | -0.73031 | 0.40264  | 0.5074   | AC007272 chr2   | + | 2.02E+08 | 2.02E+08 | 963   |
| ENSG000001 | 500.1632 | 599.4506 | -0.26052 | 0.064268 | 0.11078  | SLC26A6 chr3    | - | 48663156 | 48672926 | 5682  |
| ENSG000001 | 1.048164 | 4.663145 | -1.9128  | 0.10545  | 0.16883  | AC005522 chr7   | - | 76601996 | 76606278 | 453   |
| ENSG000001 | 7.447583 | 9.85721  | -0.38502 | 0.55384  | 0.6532   | RP11-75C9 chr9  | + | 8858130  | 8862255  | 1959  |
| ENSG000001 | 0.36308  | 0        | 0.4146   | 0.81455  | NA       | RP13-379L chr20 | - | 56644110 | 56647126 | 1014  |
| ENSG000001 | 1.991846 | 1.652581 | 0.23052  | 0.8474   | 0.8929   | RP11-345I chr1  | + | 1.79E+08 | 1.79E+08 | 721   |
| ENSG000001 | 0.685084 | 0.654722 | 0.030656 | 0.98584  | NA       | RP11-325E chrX  | + | 79965427 | 79966204 | 778   |
| ENSG000001 | 6.038944 | 5.04999  | 0.24423  | 0.7692   | 0.83337  | RP11-269F chr1  | - | 45224709 | 45241482 | 580   |
| ENSG000001 | 1.068702 | 0        | 1.3672   | 0.44297  | NA       | AC007000 chr7   | - | 76701068 | 76701554 | 487   |
| ENSG000001 | 2.520208 | 0        | 2.7948   | 0.078637 | 0.13159  | RP11-71C5 chr13 | + | 45011343 | 45026963 | 364   |
| ENSG000001 | 0.342542 | 1.591889 | -1.589   | 0.31649  | 0.41913  | RP6-191P2 chrX  | - | 1.07E+08 | 1.07E+08 | 380   |
| ENSG000001 | 1.555988 | 0        | 1.8901   | 0.28116  | NA       | RP3-365O1 chr6  | + | 46871208 | 46876815 | 781   |
| ENSG000001 | 0        | 1.66715  | -1.9695  | 0.25993  | NA       | AP001627 chr21  | - | 44153704 | 44161868 | 1754  |
| ENSG000001 | 2451.585 | 1392.871 | 0.81448  | 4.51E-13 | 2.62E-12 | FGD5-AS1 chr3   | - | 14961854 | 14989931 | 3792  |
| ENSG000001 | 0        | 0.297015 | -0.41864 | 0.81278  | NA       | NRG3-AS1 chr10  | - | 83988741 | 83992676 | 555   |
| ENSG000001 | 0        | 0.654722 | -0.83442 | 0.63731  | NA       | NPM1P18 chr7    | + | 36858564 | 36859295 | 732   |
| ENSG000001 | 0        | 8.41826  | -4.6682  | 0.00032  | 0.000853 | RP11-513C chr3  | - | 1.94E+08 | 1.94E+08 | 910   |
| ENSG000001 | 0.36308  | 0.297015 | -0.00205 | 0.99908  | NA       | AC017002 chr2   | + | 1.12E+08 | 1.12E+08 | 792   |
| ENSG000001 | 4.616536 | 4.926189 | -0.09001 | 0.92106  | 0.94695  | AL773572 chr21  | - | 42548249 | 42558715 | 1011  |
| ENSG000001 | 1.016461 | 1.623443 | -0.53732 | 0.71959  | 0.79258  | RP11-242C chr1  | - | 29471006 | 29473506 | 279   |
| ENSG000001 | 3.246368 | 1.698704 | 0.84453  | 0.45944  | 0.5647   | AC087501 chr17  | + | 9355514  | 9373331  | 715   |
| ENSG000001 | 0        | 1.545765 | -1.8556  | 0.29195  | NA       | RP1-4514.2 chr6 | - | 1.43E+08 | 1.43E+08 | 455   |
| ENSG000001 | 0        | 0.357707 | -0.41864 | 0.81278  | NA       | RP11-267N chr1  | + | 1.63E+08 | 1.63E+08 | 1133  |
| ENSG000001 | 12.8545  | 23.65007 | -0.86026 | 0.17621  | 0.25966  | DBH-AS1 chr9    | - | 1.37E+08 | 1.37E+08 | 2139  |

|            |          |          |          |          |          |                  |   |          |          |       |
|------------|----------|----------|----------|----------|----------|------------------|---|----------|----------|-------|
| ENSG000001 | 0.943682 | 0        | 1.2438   | 0.48556  | NA       | RP11-365P chr13  | + | 1.12E+08 | 1.12E+08 | 684   |
| ENSG000001 | 3.350036 | 4.037561 | -0.20936 | 0.84662  | 0.89238  | RP11-417C chr10  | + | 75764895 | 75787673 | 442   |
| ENSG000001 | 1.359003 | 0.686276 | 0.73076  | 0.64104  | 0.72806  | RP11-511I: chr1  | - | 47846600 | 47874149 | 483   |
| ENSG000001 | 0        | 0.951736 | -1.2555  | 0.48145  | NA       | LEPREL1-AS chr3  | + | 1.9E+08  | 1.9E+08  | 730   |
| ENSG000001 | 0        | 0.343138 | -0.41864 | 0.81278  | NA       | AC068535. chr2   | - | 1.05E+08 | 1.05E+08 | 493   |
| ENSG000001 | 1.161205 | 2.200487 | -0.66113 | 0.67164  | 0.75408  | RP11-468E chr14  | + | 24505662 | 24520237 | 899   |
| ENSG000001 | 2.572449 | 1.294874 | 0.85887  | 0.47281  | 0.57745  | RP5-850O1 chr1   | + | 50927141 | 50936822 | 503   |
| ENSG000001 | 0        | 0.297015 | -0.41864 | 0.81278  | NA       | CROCCP1 chrX     | + | 1.35E+08 | 1.35E+08 | 5675  |
| ENSG000001 | 0.923144 | 2.932886 | -1.3801  | 0.27667  | 0.37689  | SIRPAP1 chr22    | + | 30938523 | 30940292 | 1770  |
| ENSG000001 | 1.068702 | 5.240188 | -2.0805  | 0.067622 | 0.11564  | PROSER2-A chr10  | - | 11891612 | 11936699 | 3141  |
| ENSG000001 | 1.524285 | 2.027273 | -0.30543 | 0.82212  | 0.87479  | RP4-603I1: chr1  | + | 46836258 | 46836627 | 370   |
| ENSG000001 | 2088.222 | 837.573  | 1.308    | 1.87E-05 | 5.83E-05 | MIAT chr22       | + | 27042392 | 27072438 | 10216 |
| ENSG000001 | 19.56476 | 30.7564  | -0.64693 | 0.13196  | 0.2043   | RP11-592B chr10  | - | 51287081 | 51371070 | 2353  |
| ENSG000001 | 1.08924  | 0        | 1.1858   | 0.50299  | NA       | RP11-2L8.1 chr3  | + | 1.78E+08 | 1.78E+08 | 560   |
| ENSG000001 | 41.20807 | 31.61676 | 0.37196  | 0.32201  | 0.42493  | RP1-180E2 chr6   | + | 52442283 | 52444325 | 664   |
| ENSG000001 | 0.72616  | 1.713273 | -0.96135 | 0.53109  | 0.63247  | AC004540. chr7   | - | 26411764 | 26416321 | 611   |
| ENSG000001 | 0.943682 | 2.886762 | -1.3469  | 0.29437  | 0.39641  | RP1-234P1 chr6   | + | 75994730 | 76006283 | 445   |
| ENSG000001 | 0        | 0.357707 | -0.41864 | 0.81278  | NA       | AC073321. chr2   | + | 2.17E+08 | 2.17E+08 | 654   |
| ENSG000001 | 0        | 0.594029 | -0.81444 | 0.64499  | NA       | MTND4P23 chr2    | - | 2.02E+08 | 2.02E+08 | 1363  |
| ENSG000001 | 0.995923 | 0        | 1.4959   | 0.39264  | NA       | AC025918. chr15  | + | 59182166 | 59186281 | 383   |
| ENSG000001 | 3.370574 | 3.336716 | 0.045328 | 0.96511  | 0.97971  | CTD-2313N chr11  | + | 71589499 | 71595607 | 216   |
| ENSG000001 | 1.628766 | 18.84036 | -3.3305  | 2.87E-05 | 8.73E-05 | RP1-309F2 chr20  | - | 57438583 | 57463864 | 893   |
| ENSG000001 | 6.867794 | 9.942208 | -0.49577 | 0.62068  | 0.71141  | DNAJC19P1 chr2   | - | 1.78E+08 | 1.78E+08 | 316   |
| ENSG000001 | 0        | 1.949596 | -2.4359  | 0.13595  | 0.20899  | AC006038. chr2   | - | 42592810 | 42652228 | 811   |
| ENSG000001 | 0.342542 | 2.468363 | -2.0021  | 0.21246  | 0.30302  | AC092669. chr2   | + | 66554481 | 66556116 | 1024  |
| ENSG000001 | 3.994857 | 6.001726 | -0.55191 | 0.52364  | 0.62598  | UBXN7-AS1 chr3   | + | 1.96E+08 | 1.96E+08 | 2008  |
| ENSG000001 | 0.36308  | 0        | 0.4146   | 0.81455  | NA       | RPL7P45 chr13    | + | 1.05E+08 | 1.05E+08 | 743   |
| ENSG000001 | 67.62522 | 0.343138 | 6.7909   | 3.33E-11 | 1.71E-10 | LINC00626 chr1   | + | 1.69E+08 | 1.69E+08 | 955   |
| ENSG000001 | 37.26285 | 43.88809 | -0.23467 | 0.47551  | 0.5801   | FAM229A chr1     | - | 32826871 | 32829879 | 2759  |
| ENSG000001 | 107.8817 | 70.66191 | 0.60429  | 0.010477 | 0.021937 | ERC6 chr10       | - | 50663414 | 50747584 | 8008  |
| ENSG000001 | 0        | 0.297015 | -0.41864 | 0.81278  | NA       | RP3-348I2: chr6  | - | 20722559 | 20723886 | 332   |
| ENSG000001 | 0        | 0.357707 | -0.41864 | 0.81278  | NA       | RP11-80H5 chr10  | - | 91406046 | 91410579 | 368   |
| ENSG000001 | 2.540746 | 0.357707 | 2.049    | 0.19838  | 0.28666  | TRMT2B-AS chrX   | + | 1E+08    | 1E+08    | 401   |
| ENSG000001 | 0.290301 | 7.600062 | -3.6996  | 0.005065 | 0.011274 | MKRN7P chr20     | - | 45092541 | 45093763 | 1223  |
| ENSG000001 | 1.628766 | 31.84738 | -4.0865  | 1.83E-08 | 7.61E-08 | RP11-452K chr10  | + | 99094321 | 99102770 | 615   |
| ENSG000001 | 0.290301 | 0        | 0.4146   | 0.81455  | NA       | HLA-S chr6       | - | 31349851 | 31350065 | 53    |
| ENSG000001 | 0        | 2.711133 | -2.9254  | 0.060083 | 0.10456  | RP11-569C chr1   | + | 26653179 | 26653524 | 346   |
| ENSG000001 | 189.1596 | 62.54778 | 1.5846   | 1.40E-06 | 4.92E-06 | RUSC1-AS1 chr1   | - | 1.55E+08 | 1.55E+08 | 1836  |
| ENSG000001 | 2.592987 | 0        | 2.8438   | 0.071235 | 0.12092  | RP11-46A1 chr1   | + | 1.81E+08 | 1.81E+08 | 543   |
| ENSG000001 | 0.342542 | 0        | 0.4146   | 0.81455  | NA       | RP5-1177I: chr22 | + | 37946033 | 37947742 | 498   |
| ENSG000001 | 0        | 15.79341 | -5.5584  | 6.03E-06 | 1.99E-05 | AC016582. chr19  | - | 38314362 | 38345855 | 1716  |
| ENSG000001 | 0        | 0.594029 | -0.81444 | 0.64499  | NA       | CTB-70D19 chr5   | - | 1.43E+08 | 1.43E+08 | 615   |
| ENSG000001 | 0        | 0.357707 | -0.41864 | 0.81278  | NA       | RP11-551N chr13  | + | 1.12E+08 | 1.12E+08 | 650   |
| ENSG000001 | 0        | 1.309443 | -1.6539  | 0.35008  | NA       | AC002398. chr19  | - | 36279778 | 36288787 | 2167  |
| ENSG000001 | 0        | 0.343138 | -0.41864 | 0.81278  | NA       | LINC00694 chr3   | - | 44462619 | 44465499 | 732   |
| ENSG000001 | 0        | 0.654722 | -0.83442 | 0.63731  | NA       | AC004603. chr19  | + | 43326015 | 43331030 | 1873  |
| ENSG000001 | 15.27022 | 14.76883 | 0.039512 | 0.93754  | 0.95877  | LINC00115 chr1   | - | 761586   | 762902   | 1317  |
| ENSG000001 | 0        | 6.924324 | -4.403   | 0.000835 | 0.002097 | RP3-410B1 chrX   | - | 17988317 | 18122764 | 708   |
| ENSG000001 | 3.257533 | 0.700845 | 1.8974   | 0.14462  | 0.21995  | RP11-574E chr9   | - | 69718152 | 69721729 | 885   |
| ENSG000001 | 0        | 2.041842 | -2.4837  | 0.12741  | 0.19837  | AC023590. chr8   | + | 1.19E+08 | 1.19E+08 | 781   |
| ENSG000001 | 1.027626 | 0        | 1.1491   | 0.51623  | NA       | RP11-288L chr1   | + | 27995979 | 27996787 | 489   |
| ENSG000001 | 6.286378 | 123.4934 | -4.2427  | 4.16E-25 | 4.37E-24 | AC074289. chr2   | + | 64370373 | 64479993 | 1504  |
| ENSG000001 | 3.309773 | 2.073397 | 0.59774  | 0.62428  | 0.7145   | RP3-476K8 chr1   | - | 26789247 | 26793773 | 529   |
| ENSG000001 | 48.43715 | 78.31293 | -0.69155 | 0.012989 | 0.026665 | RP11-384K chr4   | + | 1.2E+08  | 1.2E+08  | 2486  |
| ENSG000001 | 0.290301 | 0        | 0.4146   | 0.81455  | NA       | FRG2B chr10      | - | 1.35E+08 | 1.35E+08 | 2094  |
| ENSG000001 | 0        | 0.343138 | -0.41864 | 0.81278  | NA       | AC019171. chr2   | - | 39325290 | 39325586 | 297   |
| ENSG000001 | 0.72616  | 1.234181 | -0.55797 | 0.73769  | 0.80658  | RP4-758J1: chr1  | + | 1355625  | 1358071  | 543   |
| ENSG000001 | 0        | 0.297015 | -0.41864 | 0.81278  | NA       | RP527P16 chr7    | + | 30207420 | 30207620 | 201   |
| ENSG000001 | 1.08924  | 1.531196 | -0.3826  | 0.81382  | 0.86926  | RP13-258C chrX   | - | 91931518 | 91931953 | 436   |
| ENSG000001 | 7.427858 | 24.67378 | -1.6962  | 0.003953 | 0.008934 | RP11-57C1 chr10  | + | 89367742 | 89419036 | 495   |
| ENSG000001 | 0        | 5.600312 | -4.0458  | 0.003473 | 0.007929 | XXbac-BPG chr6   | + | 32223488 | 32233615 | 3458  |
| ENSG000001 | 11.11188 | 6.616772 | 0.72052  | 0.37275  | 0.47713  | RIMKLBP2 chr1    | - | 2.19E+08 | 2.19E+08 | 654   |
| ENSG000001 | 21.98227 | 21.1055  | 0.05928  | 0.92868  | 0.95282  | NOL7 chr6        | + | 13615559 | 13632971 | 1184  |
| ENSG000001 | 2.157128 | 0.594029 | 1.3872   | 0.35591  | 0.46019  | CACYBPP1 chr10   | - | 86214435 | 86215812 | 684   |
| ENSG000001 | 0        | 0.357707 | -0.41864 | 0.81278  | NA       | AC000036. chr22  | - | 51174253 | 51176567 | 2030  |

|            |          |          |          |          |          |                  |   |          |          |      |
|------------|----------|----------|----------|----------|----------|------------------|---|----------|----------|------|
| ENSG000001 | 2.645227 | 8.798658 | -1.6434  | 0.046726 | 0.083876 | AC026150. chr15  | + | 30488239 | 30506743 | 4260 |
| ENSG000001 | 0        | 0.297015 | -0.41864 | 0.81278  | NA       | RP3-395M. chr1   | + | 2497849  | 2508811  | 1497 |
| ENSG000001 | 1.306762 | 0        | 1.6479   | 0.35189  | NA       | AC133965. chr2   | + | 87954409 | 87954762 | 354  |
| ENSG000001 | 0.290301 | 0.654722 | -0.51764 | 0.76892  | NA       | RP4-566D2 chr1   | - | 2.28E+08 | 2.28E+08 | 671  |
| ENSG000001 | 0        | 1.40169  | -1.7271  | 0.32809  | NA       | RP11-501J. chr10 | - | 1.19E+08 | 1.19E+08 | 744  |
| ENSG000001 | 0.342542 | 1.577319 | -1.4728  | 0.37548  | 0.47961  | PCA3 chr9        | + | 79379352 | 79402485 | 3922 |
| ENSG000001 | 1.971308 | 1.638012 | 0.22785  | 0.85145  | 0.89555  | RP4-575N6 chr1   | - | 1.02E+08 | 1.02E+08 | 403  |
| ENSG000001 | 1.068702 | 0.997859 | 0.04858  | 0.97403  | 0.98544  | RP3-441A1 chr6   | - | 37783553 | 37786994 | 419  |
| ENSG000001 | 0        | 57.15573 | -7.3634  | 6.25E-11 | 3.14E-10 | RP11-395B chr7   | - | 1.01E+08 | 1.01E+08 | 2083 |
| ENSG000001 | 7.116206 | 43.22612 | -2.5341  | 1.50E-06 | 5.26E-06 | NTF4 chr19       | - | 49559050 | 49568333 | 1748 |
| ENSG000001 | 5.613272 | 2.742687 | 0.93121  | 0.37825  | 0.48243  | RP11-339B chr9   | - | 1.31E+08 | 1.31E+08 | 407  |
| ENSG000001 | 0        | 0.297015 | -0.41864 | 0.81278  | NA       | RP11-69E9 chr1   | - | 23162206 | 23163342 | 480  |
| ENSG000001 | 22.76923 | 35.34677 | -0.62118 | 0.11588  | 0.18331  | SATB2-AS1 chr2   | + | 2E+08    | 2E+08    | 3314 |
| ENSG000001 | 0.995923 | 0.686276 | 0.39213  | 0.8081   | NA       | RP5-1077I. chr20 | - | 13224711 | 13226016 | 446  |
| ENSG000001 | 1.733248 | 0        | 1.9774   | 0.25925  | NA       | AC009950. chr2   | + | 2.31E+08 | 2.31E+08 | 773  |
| ENSG000001 | 0.290301 | 0.357707 | -0.00203 | 0.99908  | NA       | RP11-508N chr10  | + | 38450498 | 38450677 | 180  |
| ENSG000001 | 158.1593 | 375.6193 | -1.2413  | 2.42E-06 | 8.35E-06 | ELFN1 chr7       | + | 1727755  | 1787590  | 3845 |
| ENSG000001 | 2.656392 | 4.819373 | -0.76263 | 0.51338  | 0.61643  | LINC00035 chr7   | + | 73149368 | 73150384 | 558  |
| ENSG000001 | 0        | 0.343138 | -0.41864 | 0.81278  | NA       | RP3-526F5 chrX   | + | 1.43E+08 | 1.43E+08 | 318  |
| ENSG000001 | 6.431935 | 17.06398 | -1.3853  | 0.023556 | 0.045769 | MTND1P23 chr1    | + | 564442   | 564813   | 372  |
| ENSG000001 | 85.32853 | 51.25109 | 0.72626  | 0.016407 | 0.032976 | RP11-139F chr15  | - | 55609382 | 55611359 | 866  |
| ENSG000001 | 9.607316 | 0        | 4.869    | 0.000128 | 0.000359 | AC005550. chr7   | - | 15728700 | 15730479 | 312  |
| ENSG000001 | 17.40681 | 8.957302 | 0.91562  | 0.11509  | 0.18227  | AC074138. chr19  | - | 37176342 | 37178351 | 815  |
| ENSG000001 | 0.705622 | 2.65044  | -1.6176  | 0.22793  | 0.32098  | RP11-192N chr10  | + | 29986832 | 29987157 | 326  |
| ENSG000001 | 0.580602 | 0.686276 | -0.10523 | 0.9528   | NA       | HAR1A chr20      | + | 61733557 | 61735738 | 1882 |
| ENSG000001 | 1.555988 | 1.188058 | 0.26817  | 0.86642  | 0.90701  | AC102953. chr7   | + | 1499573  | 1503644  | 498  |
| ENSG000001 | 0        | 0.715414 | -0.84936 | 0.6309   | NA       | RP11-538C chr1   | + | 1.82E+08 | 1.82E+08 | 1145 |
| ENSG000001 | 0.72616  | 0.686276 | 0.035772 | 0.98391  | NA       | HMGB1P26 chr1    | - | 2.3E+08  | 2.3E+08  | 628  |
| ENSG000001 | 0        | 3.420099 | -3.213   | 0.037739 | 0.06969  | RP3-340N1 chr1   | - | 20510735 | 20512979 | 510  |
| ENSG000001 | 0        | 8.559919 | -4.6963  | 0.000287 | 0.000771 | RP11-436C chr6   | + | 98723022 | 98727735 | 226  |
| ENSG000001 | 2.261609 | 5.505649 | -1.1701  | 0.23867  | 0.3333   | RP11-460N chr7   | + | 64544481 | 64560610 | 586  |
| ENSG000001 | 0.705622 | 5.782389 | -2.6623  | 0.02696  | 0.051651 | RP11-211N chr9   | + | 46843638 | 46846025 | 2245 |
| ENSG000001 | 1.431782 | 4.135513 | -1.3775  | 0.25413  | 0.35119  | RP11-190J chr10  | + | 1.04E+08 | 1.04E+08 | 850  |
| ENSG000001 | 0.342542 | 0.297015 | -0.00202 | 0.99909  | NA       | RP11-403E chrX   | - | 63364752 | 63366932 | 1771 |
| ENSG000001 | 6.472197 | 0        | 4.2533   | 0.001777 | 0.00424  | AP001434. chr21  | - | 39609139 | 39610123 | 287  |
| ENSG000001 | 0.290301 | 0        | 0.4146   | 0.81455  | NA       | RP11-467I. chr1  | - | 2.41E+08 | 2.41E+08 | 204  |
| ENSG000001 | 5.71694  | 7.177631 | -0.32542 | 0.68229  | 0.76258  | CCT8P1 chr1      | - | 1.47E+08 | 1.47E+08 | 1657 |
| ENSG000001 | 0.72616  | 0        | 0.85004  | 0.63064  | NA       | RPL36AP55 chr10  | + | 28193138 | 28194091 | 305  |
| ENSG000001 | 1.286224 | 0        | 1.8436   | 0.2818   | NA       | PRICKLE2-2 chr3  | + | 64173220 | 64186641 | 2496 |
| ENSG000001 | 0        | 0.357707 | -0.41864 | 0.81278  | NA       | CDK2AP2P. chr9   | - | 68370604 | 68370975 | 372  |
| ENSG000001 | 5.414661 | 1.638012 | 1.5748   | 0.12095  | 0.19008  | RP11-57H1 chr1   | - | 95628775 | 95699538 | 2447 |
| ENSG000001 | 47.84376 | 23.5975  | 0.99237  | 0.056863 | 0.099579 | RP4-798A1 chr1   | + | 16787443 | 16794976 | 3245 |
| ENSG000001 | 3.910914 | 21.14679 | -2.3198  | 0.001375 | 0.00334  | FGF13-AS1 chrX   | + | 1.38E+08 | 1.38E+08 | 849  |
| ENSG000001 | 0.685084 | 0        | 0.85004  | 0.63064  | NA       | RP11-338C chr1   | + | 2.13E+08 | 2.13E+08 | 460  |
| ENSG000001 | 0        | 3.183777 | -3.1728  | 0.037267 | 0.068902 | AC005740. chr5   | - | 1.41E+08 | 1.41E+08 | 522  |
| ENSG000001 | 3.008307 | 2.232041 | 0.36122  | 0.7388   | 0.80741  | AC009274. chr7   | - | 1.3E+08  | 1.3E+08  | 370  |
| ENSG000001 | 0        | 0.700845 | -0.87835 | 0.62047  | NA       | YBX1P8 chrX      | - | 46544200 | 46545142 | 943  |
| ENSG000001 | 4.677336 | 10.33872 | -1.0567  | 0.17749  | 0.26115  | TLK2P1 chr17     | - | 32363700 | 32366891 | 3192 |
| ENSG000001 | 0.653381 | 1.073121 | -0.45012 | 0.79086  | NA       | ZNF503-AS chr10  | + | 77029577 | 77133258 | 1860 |
| ENSG000001 | 1.265686 | 0        | 1.6147   | 0.36215  | NA       | RP5-1070A chr1   | + | 98676303 | 98738214 | 2229 |
| ENSG000001 | 8.309113 | 14.09954 | -0.72748 | 0.2312   | 0.32468  | MEMO1P1 chr21    | + | 37502669 | 37504208 | 1540 |
| ENSG000001 | 3.246368 | 1.98115  | 0.63749  | 0.56806  | 0.66556  | PAICSP1 chr9     | + | 37878113 | 37879490 | 1217 |
| ENSG000001 | 0        | 1.234181 | -1.5727  | 0.37581  | NA       | MTND4P32 chrX    | + | 1.02E+08 | 1.02E+08 | 1237 |
| ENSG000001 | 36.80808 | 25.2435  | 0.53793  | 0.13573  | 0.20886  | LINC00869 chr1   | + | 1.49E+08 | 1.49E+08 | 695  |
| ENSG000001 | 0.36308  | 2.278164 | -2.0508  | 0.17475  | 0.25787  | RP11-552E chr6   | - | 40326483 | 40337213 | 824  |
| ENSG000001 | 0        | 0.343138 | -0.41864 | 0.81278  | NA       | AC016772. chr2   | - | 1.71E+08 | 1.71E+08 | 1261 |
| ENSG000001 | 0        | 7.328154 | -4.4838  | 0.000611 | 0.001566 | PRSS44 chr3      | - | 46850849 | 46854048 | 1146 |
| ENSG000001 | 0        | 0.343138 | -0.41864 | 0.81278  | NA       | USP12PX chrX     | + | 89367649 | 89368705 | 1057 |
| ENSG000001 | 39.22299 | 67.15763 | -0.76335 | 0.011378 | 0.023632 | RP4-706A1 chr1   | + | 77594768 | 77595384 | 617  |
| ENSG000001 | 64.71007 | 143.1142 | -1.1419  | 3.02E-05 | 9.15E-05 | UQCRFS1P. chr22  | + | 40271293 | 40272119 | 825  |
| ENSG000001 | 0        | 1.370136 | -1.6825  | 0.34201  | NA       | EIF3LP3 chr10    | - | 38368984 | 38369805 | 822  |
| ENSG000001 | 0.342542 | 0        | 0.4146   | 0.81455  | NA       | AC106869. chr2   | + | 47452933 | 47466364 | 591  |
| ENSG000001 | 2.354926 | 1.416259 | 0.64114  | 0.62114  | 0.71174  | RP11-180C chr1   | - | 70825245 | 70826120 | 575  |
| ENSG000001 | 16.93069 | 156.9715 | -3.1919  | 6.63E-22 | 6.09E-21 | RP11-90D4 chr12  | - | 8448582  | 8549399  | 3033 |
| ENSG000001 | 3.682226 | 0.686276 | 1.9744   | 0.15409  | 0.23229  | AC007461. chr17  | + | 70068474 | 70089622 | 2063 |

|            |          |          |          |          |          |                  |   |          |          |      |
|------------|----------|----------|----------|----------|----------|------------------|---|----------|----------|------|
| ENSG000001 | 1.701545 | 3.711409 | -1.0079  | 0.37311  | 0.47742  | AC011475. chr19  | + | 10751715 | 10752093 | 81   |
| ENSG000001 | 3.028845 | 0.700845 | 1.7602   | 0.19352  | 0.28099  | AC004383. chrX   | + | 1.34E+08 | 1.34E+08 | 289  |
| ENSG000001 | 0.36308  | 0        | 0.4146   | 0.81455  | NA       | FCF1P4 chrX      | + | 1.1E+08  | 1.1E+08  | 183  |
| ENSG000001 | 0.342542 | 0        | 0.4146   | 0.81455  | NA       | AP001476. chr21  | + | 47476430 | 47477481 | 355  |
| ENSG000001 | 6.795015 | 3.769685 | 0.80139  | 0.36326  | 0.46747  | AHCTF1P1 chr2    | - | 1.62E+08 | 1.62E+08 | 6821 |
| ENSG000001 | 0        | 9.9843   | -4.903   | 0.000137 | 0.000384 | AC073043. chr2   | - | 2.01E+08 | 2.01E+08 | 1021 |
| ENSG000001 | 0        | 1.058552 | -1.361   | 0.4451   | NA       | AC098823. chr2   | - | 2.32E+08 | 2.32E+08 | 2609 |
| ENSG000001 | 0.36308  | 0        | 0.4146   | 0.81455  | NA       | RPL26P9 chr1     | + | 98051418 | 98051850 | 433  |
| ENSG000001 | 0.342542 | 0        | 0.4146   | 0.81455  | NA       | RP11-157L chr9   | + | 46117312 | 46117651 | 340  |
| ENSG000001 | 0        | 0.297015 | -0.41864 | 0.81278  | NA       | RP4-683M chr1    | + | 48519217 | 48532873 | 789  |
| ENSG000001 | 868.5147 | 229.0566 | 1.915    | 1.48E-21 | 1.34E-20 | BAIAP2-AS1 chr17 | - | 79002933 | 79008501 | 4462 |
| ENSG000001 | 0.923144 | 1.188058 | -0.25605 | 0.87702  | 0.91433  | RP1-228P1 chr12  | + | 48478833 | 48479204 | 372  |
| ENSG000001 | 0        | 0.640152 | -0.82869 | 0.63935  | NA       | RP11-461K chr10  | + | 16320700 | 16337857 | 458  |
| ENSG000001 | 0.342542 | 0        | 0.4146   | 0.81455  | NA       | RPS27AP3 chr20   | + | 35677657 | 35678110 | 454  |
| ENSG000001 | 5.052394 | 8.810811 | -0.77939 | 0.31031  | 0.41229  | SLC25A39F chr1   | + | 2.03E+08 | 2.03E+08 | 1065 |
| ENSG000001 | 2.883288 | 0        | 2.9964   | 0.054348 | 0.095606 | RP1-69D17 chr6   | - | 1.3E+08  | 1.3E+08  | 728  |
| ENSG000001 | 0.290301 | 1.372552 | -1.154   | 0.51326  | NA       | AC073343. chr7   | - | 6833765  | 6836573  | 602  |
| ENSG000001 | 0        | 0.686276 | -0.84936 | 0.6309   | NA       | RP3-389A2 chrX   | - | 17723459 | 17723811 | 353  |
| ENSG000001 | 0.342542 | 0.297015 | -0.00202 | 0.99909  | NA       | CLCP2 chr13      | + | 1.15E+08 | 1.15E+08 | 421  |
| ENSG000001 | 0        | 0.297015 | -0.41864 | 0.81278  | NA       | EIF4A1P5 chr13   | - | 37512537 | 37513631 | 1095 |
| ENSG000001 | 0        | 1.058552 | -1.361   | 0.4451   | NA       | RP11-167P chr10  | + | 74261504 | 74262714 | 162  |
| ENSG000001 | 4.81352  | 1.98115  | 1.1718   | 0.25283  | 0.34979  | AP4B1-AS1 chr1   | + | 1.14E+08 | 1.14E+08 | 1734 |
| ENSG000001 | 0        | 15.15239 | -5.5313  | 4.88E-06 | 1.62E-05 | RP11-375F chr22  | + | 28112468 | 28117665 | 451  |
| ENSG000001 | 13.6937  | 7.997445 | 0.75215  | 0.20679  | 0.29652  | TEX22 chr14      | + | 1.06E+08 | 1.06E+08 | 2571 |
| ENSG000001 | 22.31365 | 11.48065 | 0.93681  | 0.054107 | 0.095286 | LINC00685 chrX   | + | 281725   | 282586   | 428  |
| ENSG000001 | 15.14781 | 44.91817 | -1.5446  | 0.002159 | 0.005084 | AC010536. chr16  | + | 87727144 | 87729753 | 2610 |
| ENSG000001 | 0        | 0.654722 | -0.83442 | 0.63731  | NA       | HNRNPA1P chr20   | - | 44374376 | 44374926 | 551  |
| ENSG000001 | 0        | 3.290593 | -3.2571  | 0.028994 | 0.055057 | RP11-438F chr1   | - | 2.48E+08 | 2.48E+08 | 1453 |
| ENSG000001 | 0.995923 | 1.370136 | -0.35234 | 0.80971  | 0.86587  | RP1-137D1 chr6   | - | 1.7E+08  | 1.7E+08  | 2282 |
| ENSG000001 | 2.749709 | 3.322147 | -0.264   | 0.80211  | 0.85994  | RP11-50E1 chr10  | + | 52388910 | 52391396 | 2089 |
| ENSG000001 | 2.012384 | 3.899191 | -0.87818 | 0.40672  | 0.51151  | AC007790. chr7   | - | 1.33E+08 | 1.33E+08 | 782  |
| ENSG000001 | 0.290301 | 0        | 0.4146   | 0.81455  | NA       | RP1-104O1 chr6   | - | 98158829 | 98165073 | 499  |
| ENSG000001 | 483.3272 | 437.8866 | 0.14198  | 0.27005  | 0.36918  | ABC7-4238 chr12  | + | 73725    | 91218    | 1817 |
| ENSG000001 | 0        | 0.357707 | -0.41864 | 0.81278  | NA       | TRGV6 chr7       | - | 38380301 | 38380599 | 299  |
| ENSG000001 | 0        | 1.698704 | -2.2257  | 0.18075  | NA       | RPS12P5 chr3     | + | 29432339 | 29432709 | 371  |
| ENSG000001 | 1.681007 | 2.338857 | -0.42124 | 0.7235   | 0.79545  | AC004987. chr7   | - | 39836192 | 39837510 | 1319 |
| ENSG000001 | 12.47088 | 30.37358 | -1.2707  | 0.008311 | 0.017713 | AC022431. chr5   | - | 55800462 | 55800899 | 438  |
| ENSG000001 | 0        | 0.297015 | -0.41864 | 0.81278  | NA       | RPLPOP1 chr20    | - | 16566978 | 16567338 | 361  |
| ENSG000001 | 0        | 0.297015 | -0.41864 | 0.81278  | NA       | AC007237. chr7   | + | 78115847 | 78116345 | 499  |
| ENSG000001 | 0        | 1.073121 | -1.1788  | 0.50551  | NA       | RP11-507F chr9   | - | 81651329 | 81652484 | 1156 |
| ENSG000001 | 1.733248 | 2.66501  | -0.54068 | 0.67458  | 0.75627  | LEMD1-AS1 chr1   | + | 2.05E+08 | 2.05E+08 | 2781 |
| ENSG000001 | 4.689314 | 0.715414 | 2.3399   | 0.065518 | 0.1126   | RP11-276F chr9   | + | 89563614 | 89616948 | 4387 |
| ENSG000001 | 0.342542 | 0        | 0.4146   | 0.81455  | NA       | AC132807. chr3   | + | 18031515 | 18037036 | 458  |
| ENSG000001 | 0        | 13.71598 | -5.3375  | 2.25E-05 | 6.93E-05 | RP1-310O1 chr20  | - | 30615556 | 30619378 | 2013 |
| ENSG000001 | 0        | 0.297015 | -0.41864 | 0.81278  | NA       | LINC00381 chr13  | + | 74993310 | 75009296 | 727  |
| ENSG000001 | 0        | 0.343138 | -0.41864 | 0.81278  | NA       | RPL37AP1 chr20   | - | 43095204 | 43095482 | 279  |
| ENSG000001 | 1.939605 | 2.232041 | -0.18557 | 0.87418  | 0.91242  | ZNF32-AS1 chr10  | + | 44139320 | 44140495 | 434  |
| ENSG000001 | 0.290301 | 0        | 0.4146   | 0.81455  | NA       | AC005034. chr2   | - | 75878414 | 75878753 | 340  |
| ENSG000001 | 1.887365 | 0        | 2.1461   | 0.21553  | NA       | RP11-307P chr6   | - | 1.48E+08 | 1.48E+08 | 603  |
| ENSG000001 | 0.632843 | 0.654722 | -0.02224 | 0.98935  | NA       | RP11-151I chr1   | - | 2.12E+08 | 2.12E+08 | 362  |
| ENSG000001 | 0        | 0.357707 | -0.41864 | 0.81278  | NA       | RP1-18D14 chr1   | + | 47691469 | 47696422 | 4036 |
| ENSG000001 | 0.632843 | 0        | 0.81931  | 0.64303  | NA       | MRPL35P3 chr10   | + | 76287342 | 76287705 | 364  |
| ENSG000001 | 1.89853  | 1.430828 | 0.32538  | 0.83547  | 0.88452  | PTP4A1P3 chr7    | + | 90736689 | 90737108 | 420  |
| ENSG000001 | 6.784828 | 9.07943  | -0.37445 | 0.67677  | 0.75796  | GRM7-AS3 chr3    | - | 6673376  | 6847136  | 947  |
| ENSG000001 | 58.97796 | 60.07472 | -0.02749 | 0.92154  | 0.94728  | GTF2H2B chr5     | + | 69711179 | 69743885 | 2106 |
| ENSG000001 | 0.632843 | 0        | 0.81931  | 0.64303  | NA       | AC064836. chr2   | - | 2.03E+08 | 2.03E+08 | 704  |
| ENSG000001 | 1.390706 | 0.98329  | 0.35875  | 0.81584  | 0.87074  | ISM1-AS1 chr20   | - | 13218448 | 13220321 | 652  |
| ENSG000001 | 14.84374 | 11.683   | 0.32693  | 0.57835  | 0.67484  | AC009961. chr2   | - | 1.61E+08 | 1.61E+08 | 401  |
| ENSG000001 | 2.624689 | 2.261179 | 0.18071  | 0.87806  | 0.91499  | RP11-61N2 chr11  | - | 49455025 | 49455990 | 966  |
| ENSG000001 | 0.36308  | 2.232041 | -2.0241  | 0.18269  | 0.26759  | AC093382. chr2   | - | 2.17E+08 | 2.17E+08 | 379  |
| ENSG000001 | 0        | 0.594029 | -0.81444 | 0.64499  | NA       | AC005682. chr7   | + | 22921512 | 22922009 | 498  |
| ENSG000001 | 0        | 0.357707 | -0.41864 | 0.81278  | NA       | RP1-80N2 chr6    | - | 6692977  | 6711235  | 568  |
| ENSG000001 | 1.524285 | 1.248751 | 0.22467  | 0.88101  | 0.91701  | ARPC3P1 chr20    | + | 47751017 | 47751549 | 533  |
| ENSG000001 | 0.290301 | 0        | 0.4146   | 0.81455  | NA       | RP1-163G5 chr1   | - | 3049491  | 3050273  | 469  |
| ENSG000001 | 6.524438 | 79.46622 | -3.542   | 3.51E-16 | 2.45E-15 | TMEM191A chr22   | + | 21055220 | 21058894 | 1961 |

|            |          |          |          |          |          |                 |   |          |          |      |
|------------|----------|----------|----------|----------|----------|-----------------|---|----------|----------|------|
| ENSG000001 | 0        | 0.997859 | -1.5018  | 0.39072  | NA       | RP11-5711 chr1  | + | 2.08E+08 | 2.08E+08 | 689  |
| ENSG000001 | 1.048164 | 1.40169  | -0.32158 | 0.83269  | 0.88212  | AC091729 chr7   | + | 1120499  | 1121814  | 302  |
| ENSG000001 | 0.290301 | 0        | 0.4146   | 0.81455  | NA       | PDCL3P1 chr8    | + | 61299821 | 61300554 | 734  |
| ENSG000001 | 0        | 0.654722 | -0.83442 | 0.63731  | NA       | RP11-528N chr3  | - | 40644616 | 40646918 | 717  |
| ENSG000001 | 0        | 0.594029 | -0.81444 | 0.64499  | NA       | NPY6R chr5      | + | 1.37E+08 | 1.37E+08 | 2988 |
| ENSG000001 | 0.632843 | 2.261179 | -1.4026  | 0.34571  | 0.44981  | RP4-813D1 chr20 | + | 55841853 | 55858054 | 1166 |
| ENSG000001 | 0        | 0.297015 | -0.41864 | 0.81278  | NA       | SMARCE1P chr6   | - | 85139302 | 85140520 | 1219 |
| ENSG000001 | 0.290301 | 1.188058 | -1.0232  | 0.56351  | NA       | RP3-323P2 chrX  | + | 57148095 | 57153676 | 665  |
| ENSG000001 | 5.778554 | 5.309002 | 0.082222 | 0.92702  | 0.95148  | CFLAR-AS1 chr2  | - | 2.02E+08 | 2.02E+08 | 1072 |
| ENSG000001 | 9.450594 | 14.64744 | -0.61671 | 0.27672  | 0.37694  | ZNF192P1 chr6   | + | 28129559 | 28137372 | 1628 |
| ENSG000001 | 7.221501 | 5.482958 | 0.37326  | 0.66294  | 0.74637  | RP11-474C chr10 | - | 69720459 | 69721221 | 763  |
| ENSG000001 | 0.72616  | 0        | 0.85004  | 0.63064  | NA       | AC104809 chr2   | + | 2.42E+08 | 2.42E+08 | 3148 |
| ENSG000001 | 76.616   | 100.8076 | -0.39096 | 0.30036  | 0.40189  | CTA-217C2 chr22 | - | 45529710 | 45559662 | 1267 |
| ENSG000001 | 2.044087 | 23.61523 | -3.3835  | 1.04E-05 | 3.32E-05 | AC005682 chr7   | - | 22903493 | 22920969 | 1467 |
| ENSG000001 | 0.653381 | 8.507348 | -3.2273  | 0.005614 | 0.012371 | RP11-739N chr1  | + | 2.04E+08 | 2.04E+08 | 486  |
| ENSG000001 | 0        | 0.357707 | -0.41864 | 0.81278  | NA       | AC009302 chr2   | - | 2.23E+08 | 2.23E+08 | 470  |
| ENSG000001 | 7.685643 | 12.19607 | -0.63154 | 0.32468  | 0.4276   | RP11-157P chr20 | - | 60880488 | 60881381 | 681  |
| ENSG000001 | 0        | 0.640152 | -0.82869 | 0.63935  | NA       | AC105402 chr2   | - | 1.5E+08  | 1.5E+08  | 545  |
| ENSG000001 | 0.342542 | 2.010288 | -1.8748  | 0.22334  | 0.31569  | AC083822 chr3   | + | 1.96E+08 | 1.96E+08 | 201  |
| ENSG000001 | 1.338465 | 0.594029 | 0.81007  | 0.6065   | 0.6996   | VN2R10P chr16   | + | 77254303 | 77255155 | 853  |
| ENSG000001 | 1.016461 | 0        | 1.3167   | 0.46021  | NA       | RP11-145A chr1  | - | 2.26E+08 | 2.26E+08 | 534  |
| ENSG000001 | 4.056471 | 2.445673 | 0.66586  | 0.54726  | 0.64731  | RP11-523F chr13 | + | 20248764 | 20250024 | 376  |
| ENSG000001 | 0        | 0.654722 | -0.83442 | 0.63731  | NA       | RP11-65J3 chr9  | + | 1.32E+08 | 1.32E+08 | 800  |
| ENSG000001 | 1.8154   | 0        | 1.7256   | 0.33328  | NA       | KRT8P38 chr10   | + | 90487242 | 90488671 | 1430 |
| ENSG000001 | 0.580602 | 5.286312 | -2.6198  | 0.03432  | 0.064016 | AC055811 chr17  | + | 17145324 | 17146200 | 877  |
| ENSG000001 | 9.462572 | 17.43625 | -0.87432 | 0.12374  | 0.19385  | RPL10AP6 chr3   | - | 61728129 | 61728780 | 652  |
| ENSG000001 | 0        | 2.324288 | -2.6717  | 0.096097 | 0.15624  | TERF1P5 chr13   | + | 19254634 | 19255846 | 1212 |
| ENSG000001 | 7.272928 | 0.640152 | 3.0426   | 0.007806 | 0.01672  | AC009336 chr2   | + | 1.77E+08 | 1.77E+08 | 1121 |
| ENSG000001 | 1.411244 | 1.995719 | -0.44869 | 0.73082  | 0.80122  | ST7-AS2 chr7    | - | 1.17E+08 | 1.17E+08 | 1351 |
| ENSG000001 | 0        | 0.357707 | -0.41864 | 0.81278  | NA       | RP3-395P1 chr1  | - | 1.73E+08 | 1.73E+08 | 690  |
| ENSG000001 | 0        | 1.98115  | -2.4527  | 0.13291  | 0.20539  | AC084809 chr17  | + | 31203777 | 31205655 | 591  |
| ENSG000001 | 17.73998 | 1.355566 | 3.5071   | 3.11E-05 | 9.42E-05 | AC058791 chr7   | - | 1.31E+08 | 1.31E+08 | 2228 |
| ENSG000001 | 33.67296 | 20.08998 | 0.72372  | 0.11289  | 0.17917  | RP11-119F chr10 | - | 81422844 | 81526085 | 616  |
| ENSG000001 | 5.031856 | 24.24323 | -2.2193  | 0.000142 | 0.000396 | AC093375 chr2   | - | 1.57E+08 | 1.57E+08 | 1603 |
| ENSG000001 | 2.003011 | 5.698263 | -1.3449  | 0.24037  | 0.33524  | PARD3-AS1 chr10 | + | 35104695 | 35105314 | 302  |
| ENSG000001 | 0        | 0.297015 | -0.41864 | 0.81278  | NA       | SORCS3-AS chr10 | - | 1.06E+08 | 1.06E+08 | 1278 |
| ENSG000001 | 0.580602 | 14.47181 | -4.0387  | 0.000101 | 0.000287 | RP11-358C chr20 | + | 62079404 | 62080682 | 789  |
| ENSG000001 | 2.044087 | 1.372552 | 0.45591  | 0.75389  | 0.82063  | IFNA20P chr9    | + | 21321299 | 21321826 | 528  |
| ENSG000001 | 3.516131 | 0        | 3.3327   | 0.025484 | 0.049108 | RP11-218C chr10 | + | 28293631 | 28293861 | 231  |
| ENSG000001 | 1.919068 | 8.992888 | -2.0423  | 0.027234 | 0.052119 | RPS14P3 chr1    | + | 19934608 | 19935062 | 455  |
| ENSG000001 | 0.342542 | 0        | 0.4146   | 0.81455  | NA       | C12orf77 chr12  | - | 25146358 | 25150453 | 1516 |
| ENSG000001 | 0.923144 | 0        | 1.223    | 0.49292  | NA       | AC013480 chr2   | - | 42242765 | 42252442 | 346  |
| ENSG000001 | 0        | 4.256898 | -3.6202  | 0.012537 | 0.02582  | RP11-31F1 chr9  | + | 547317   | 549531   | 449  |
| ENSG000001 | 1.431782 | 0        | 1.7261   | 0.329    | NA       | RBMX2P1 chr21   | - | 16201475 | 16202310 | 836  |
| ENSG000001 | 0.290301 | 0        | 0.4146   | 0.81455  | NA       | RP11-735C chr6  | - | 1.26E+08 | 1.26E+08 | 821  |
| ENSG000001 | 0        | 0.297015 | -0.41864 | 0.81278  | NA       | AC104058 chr2   | - | 1.87E+08 | 1.87E+08 | 297  |
| ENSG000001 | 1.390706 | 0        | 1.6954   | 0.33813  | NA       | OR8T1P chr12    | - | 48835813 | 48836730 | 918  |
| ENSG000001 | 28.04273 | 56.43932 | -0.99049 | 0.01098  | 0.022872 | TP11P1 chr1     | + | 77165474 | 77166223 | 750  |
| ENSG000001 | 11.96901 | 40.15741 | -1.6539  | 0.037699 | 0.069633 | MRPL23-AS chr11 | - | 2004467  | 2011150  | 1876 |
| ENSG000001 | 38.72633 | 56.84012 | -0.55169 | 0.12104  | 0.19016  | RP11-31F1 chr1  | + | 1.13E+08 | 1.14E+08 | 2314 |
| ENSG000001 | 0        | 4.083685 | -3.5361  | 0.015969 | 0.032166 | SLC25A5P5 chr7  | + | 32511125 | 32512021 | 897  |
| ENSG000001 | 0.943682 | 0.297015 | 0.89158  | 0.60669  | NA       | AC093642 chr2   | - | 2.43E+08 | 2.43E+08 | 565  |
| ENSG000001 | 0.995923 | 1.029414 | -0.02734 | 0.98622  | 0.99179  | CTD-2015B chr5  | + | 24170479 | 24171355 | 877  |
| ENSG000001 | 0.290301 | 0        | 0.4146   | 0.81455  | NA       | RP11-1L9.1 chrX | + | 13395307 | 13421138 | 453  |
| ENSG000001 | 0        | 6.177355 | -4.2216  | 0.001743 | 0.004166 | ANKRD18D chr3   | - | 1.98E+08 | 1.98E+08 | 2897 |
| ENSG000001 | 0.685084 | 1.730259 | -0.93048 | 0.57001  | 0.6672   | RP11-420K chr1  | - | 39715510 | 39723321 | 558  |
| ENSG000001 | 0        | 1.40169  | -1.7271  | 0.32809  | NA       | RP11-621K chr4  | - | 62641167 | 62641568 | 402  |
| ENSG000001 | 0.342542 | 0        | 0.4146   | 0.81455  | NA       | RP11-506B chr6  | + | 1.13E+08 | 1.13E+08 | 894  |
| ENSG000001 | 0.36308  | 0        | 0.4146   | 0.81455  | NA       | PLCL2-AS1 chr3  | - | 17084234 | 17085684 | 311  |
| ENSG000001 | 0        | 0.297015 | -0.41864 | 0.81278  | NA       | GAPDHP32 chr1   | - | 1.2E+08  | 1.2E+08  | 998  |
| ENSG000001 | 24.89645 | 1.623443 | 3.7175   | 2.06E-06 | 7.14E-06 | XXYac-YX6 chr6  | + | 1.7E+08  | 1.7E+08  | 980  |
| ENSG000001 | 7.843179 | 16.66989 | -1.0687  | 0.10434  | 0.16727  | CYP2D8P1 chr22  | - | 42545877 | 42551007 | 1490 |
| ENSG000001 | 1.233984 | 3.458101 | -1.2229  | 0.33322  | 0.43657  | RP11-379B chr6  | - | 82554902 | 82643197 | 822  |
| ENSG000001 | 0.36308  | 1.326428 | -1.249   | 0.46108  | NA       | RP3-462C1 chr6  | - | 40484075 | 40491672 | 421  |
| ENSG000001 | 1.431782 | 0.700845 | 0.75326  | 0.63313  | 0.72196  | RP3-512E2 chr6  | + | 90659835 | 90662905 | 876  |

|            |          |          |          |          |          |                 |   |          |          |      |
|------------|----------|----------|----------|----------|----------|-----------------|---|----------|----------|------|
| ENSG000001 | 0.342542 | 2.840639 | -2.321   | 0.11946  | 0.18813  | RP11-430L chr1  | - | 16695645 | 16696025 | 381  |
| ENSG000001 | 0        | 3.501809 | -3.1505  | 0.046269 | 0.083179 | RP13-401N chr20 | + | 25731854 | 25733397 | 320  |
| ENSG000001 | 0        | 4.882481 | -3.8624  | 0.005785 | 0.012715 | AC018641. chr7  | - | 32496575 | 32497370 | 796  |
| ENSG000001 | 1.048164 | 2.66501  | -1.1499  | 0.38395  | 0.48815  | ADAM1B chr12    | + | 1.12E+08 | 1.12E+08 | 2000 |
| ENSG000001 | 23.12636 | 18.23264 | 0.32474  | 0.51623  | 0.61905  | CTA-292E1 chr22 | + | 29196671 | 29244547 | 516  |
| ENSG000001 | 1.887365 | 5.788094 | -1.4398  | 0.17586  | 0.25918  | RP11-551L chr12 | - | 31149973 | 31158938 | 616  |
| ENSG000001 | 78.68926 | 14.89021 | 2.3789   | 1.67E-11 | 8.73E-11 | RP11-776F chr1  | - | 61005921 | 61106163 | 1798 |
| ENSG000001 | 4.85541  | 7.221338 | -0.56747 | 0.49018  | 0.59421  | UPF3AP1 chr17   | - | 16648945 | 16650075 | 1126 |
| ENSG000001 | 421.8705 | 211.4224 | 0.99553  | 8.49E-09 | 3.62E-08 | TMEM185E chr2   | - | 1.21E+08 | 1.21E+08 | 2131 |
| ENSG000001 | 10.29061 | 4.303021 | 1.201    | 0.097736 | 0.15837  | FTOP1 chr2      | - | 43024365 | 43025852 | 861  |
| ENSG000001 | 3.309773 | 1.029414 | 1.4048   | 0.29727  | 0.3992   | RP11-524C chr10 | + | 70259289 | 70259725 | 437  |
| ENSG000001 | 0        | 0.297015 | -0.41864 | 0.81278  | NA       | LINC00323 chr21 | - | 42513427 | 42520060 | 2088 |
| ENSG000001 | 0.870904 | 0.297015 | 0.71032  | 0.69005  | NA       | RP11-182B chr1  | + | 2.37E+08 | 2.37E+08 | 885  |
| ENSG000001 | 0.995923 | 0.700845 | 0.40256  | 0.79432  | NA       | RP5-882O7 chr1  | - | 45309593 | 45309754 | 162  |
| ENSG000001 | 0.36308  | 0.715414 | -0.51558 | 0.77246  | NA       | USF1P1 chr21    | + | 34706877 | 34707402 | 526  |
| ENSG000001 | 1.048164 | 1.531196 | -0.454   | 0.76559  | 0.83041  | AC016700. chr2  | - | 70321026 | 70330352 | 793  |
| ENSG000001 | 0        | 20.65803 | -5.998   | 2.55E-07 | 9.62E-07 | AC007463. chr2  | - | 8026901  | 8039786  | 734  |
| ENSG000001 | 7.397947 | 36.74275 | -2.2751  | 1.05E-05 | 3.35E-05 | AC104655. chr2  | + | 1.06E+08 | 1.06E+08 | 797  |
| ENSG000001 | 0        | 8.430413 | -4.6605  | 0.000348 | 0.000922 | UPK1A-AS1 chr19 | - | 36158850 | 36164193 | 795  |
| ENSG000001 | 0        | 0.951736 | -1.2555  | 0.48145  | NA       | FAM138B chr2    | + | 1.14E+08 | 1.14E+08 | 1232 |
| ENSG000001 | 6.835277 | 5.551772 | 0.28264  | 0.72444  | 0.79609  | KIRREL-IT1 chr1 | + | 1.58E+08 | 1.58E+08 | 587  |
| ENSG000001 | 0.342542 | 0.594029 | -0.38792 | 0.8278   | NA       | AC074375. chr2  | - | 42907228 | 42907419 | 192  |
| ENSG000001 | 6.764291 | 3.801239 | 0.79318  | 0.39995  | 0.5046   | RP1-102H1 chr6  | + | 88081311 | 88102519 | 542  |
| ENSG000001 | 2.914991 | 3.991438 | -0.40741 | 0.66583  | 0.7489   | RPS7P10 chr13   | - | 22202552 | 22203154 | 603  |
| ENSG000001 | 9.573821 | 3.976869 | 1.1999   | 0.13305  | 0.20556  | RP1-37C10 chr1  | + | 17305421 | 17331586 | 636  |
| ENSG000001 | 0        | 0.297015 | -0.41864 | 0.81278  | NA       | AP000289. chr21 | - | 34484005 | 34496009 | 1361 |
| ENSG000001 | 0        | 1.058552 | -1.361   | 0.4451   | NA       | RP11-348F chrX  | + | 51139363 | 51208513 | 586  |
| ENSG000001 | 0.36308  | 1.029414 | -0.84272 | 0.63492  | NA       | BTBD9-AS1 chr6  | + | 38449468 | 38450307 | 560  |
| ENSG000001 | 1.649304 | 12.95028 | -2.7009  | 0.00812  | 0.017335 | AC012512. chr2  | + | 2.25E+08 | 2.25E+08 | 718  |
| ENSG000001 | 0        | 0.951736 | -1.2555  | 0.48145  | NA       | MYL6P1 chr21    | - | 45275771 | 45276223 | 453  |
| ENSG000001 | 2.551911 | 8.14152  | -1.5503  | 0.075396 | 0.12702  | RP4-633I8. chr1 | + | 8858534  | 8859565  | 415  |
| ENSG000001 | 0.685084 | 0.686276 | -0.00148 | 0.99933  | NA       | RP11-34H1 chr9  | + | 46382965 | 46383307 | 343  |
| ENSG000001 | 0        | 0.997859 | -1.5018  | 0.39072  | NA       | SSU72P1 chrX    | + | 1.14E+08 | 1.14E+08 | 583  |
| ENSG000001 | 0.580602 | 0.357707 | 0.37639  | 0.83285  | NA       | SCDP1 chr17     | + | 20687958 | 20689038 | 1081 |
| ENSG000001 | 0        | 4.008423 | -3.5002  | 0.017901 | 0.035702 | AGKP1 chrY      | + | 16750976 | 16752238 | 1263 |
| ENSG000001 | 0.36308  | 0        | 0.4146   | 0.81455  | NA       | NPM1P49 chrX    | - | 47298135 | 47299173 | 714  |
| ENSG000001 | 6.4431   | 59.77133 | -3.177   | 1.15E-10 | 5.66E-10 | RP11-255A chr9  | + | 33580693 | 33605289 | 852  |
| ENSG000001 | 2.86275  | 3.108515 | -0.11331 | 0.92202  | 0.94757  | FTH1P20 chr2    | - | 1.82E+08 | 1.82E+08 | 548  |
| ENSG000001 | 0.290301 | 0        | 0.4146   | 0.81455  | NA       | RP11-445F chr6  | + | 1.4E+08  | 1.4E+08  | 914  |
| ENSG000001 | 0.290301 | 0        | 0.4146   | 0.81455  | NA       | SPANXA2-C chrX  | + | 1.41E+08 | 1.41E+08 | 1701 |
| ENSG000001 | 0.342542 | 1.935026 | -1.8424  | 0.23208  | 0.32554  | RP11-258F chr10 | - | 38064299 | 38073059 | 712  |
| ENSG000001 | 0        | 0.640152 | -0.82869 | 0.63935  | NA       | RPL39P40 chr21  | - | 18872997 | 18873142 | 146  |
| ENSG000001 | 2.635854 | 3.991438 | -0.5311  | 0.63217  | 0.72124  | RP4-765C7 chr1  | - | 1.78E+08 | 1.78E+08 | 4755 |
| ENSG000001 | 0.290301 | 0        | 0.4146   | 0.81455  | NA       | RP11-136K chr6  | - | 1.51E+08 | 1.51E+08 | 614  |
| ENSG000001 | 4.357937 | 1.606458 | 1.2538   | 0.27008  | 0.3692   | RP11-45A1 chr9  | - | 1.19E+08 | 1.19E+08 | 1854 |
| ENSG000001 | 12.68759 | 8.063842 | 0.62086  | 0.38262  | 0.48679  | FTLP3 chr20     | + | 4004552  | 4005091  | 528  |
| ENSG000001 | 1.359003 | 0.997859 | 0.35215  | 0.79917  | 0.85777  | RP11-276E chr9  | - | 1.16E+08 | 1.16E+08 | 420  |
| ENSG000001 | 0.705622 | 0        | 0.8807   | 0.6196   | NA       | AC018696. chr2  | + | 91635931 | 91636149 | 219  |
| ENSG000001 | 0        | 0.297015 | -0.41864 | 0.81278  | NA       | OR52M2P chr11   | - | 4536196  | 4537154  | 959  |
| ENSG000001 | 0.923144 | 0        | 1.223    | 0.49292  | NA       | RPL21P11C chr13 | + | 73277831 | 73278276 | 446  |
| ENSG000001 | 0        | 0.594029 | -0.81444 | 0.64499  | NA       | AC083855. chr3  | - | 11332092 | 11332349 | 258  |
| ENSG000001 | 0.653381 | 1.623443 | -0.98662 | 0.5217   | 0.62424  | RP11-290L chr9  | + | 39154072 | 39155476 | 1190 |
| ENSG000001 | 2.956066 | 6.997169 | -1.1427  | 0.23303  | 0.32663  | RP11-315I chr9  | + | 23681892 | 23682660 | 769  |
| ENSG000001 | 0        | 8.737965 | -4.7301  | 0.000251 | 0.000678 | SHANK2-AS chr11 | + | 70477199 | 70481595 | 2252 |
| ENSG000001 | 2.978396 | 3.129532 | -0.04889 | 0.96862  | 0.98241  | UBE2V1P1 chr20  | - | 3342527  | 3342971  | 445  |
| ENSG000001 | 0        | 1.995719 | -2.4883  | 0.12386  | 0.19391  | RP5-1049N chr7  | + | 1.22E+08 | 1.22E+08 | 1854 |
| ENSG000001 | 0        | 0.997859 | -1.5018  | 0.39072  | NA       | ACTG1P12 chr3   | + | 12111695 | 12112860 | 1166 |
| ENSG000001 | 0.342542 | 0        | 0.4146   | 0.81455  | NA       | RP11-358F chr1  | - | 2.23E+08 | 2.23E+08 | 316  |
| ENSG000001 | 1.027626 | 3.777806 | -1.5742  | 0.24301  | 0.3384   | RP11-128N chr20 | + | 2187863  | 2193797  | 536  |
| ENSG000001 | 2.645227 | 4.928605 | -0.83887 | 0.36271  | 0.46686  | AP006216. chr11 | + | 1.17E+08 | 1.17E+08 | 419  |
| ENSG000001 | 2.323223 | 0.640152 | 1.4165   | 0.34064  | 0.44459  | RP11-336A chr10 | - | 5754137  | 5786030  | 945  |
| ENSG000001 | 3.95199  | 6.238048 | -0.62437 | 0.4519   | 0.55736  | RP1-116.2 chr20 | - | 39726969 | 39766643 | 1462 |
| ENSG000001 | 0.342542 | 0.997859 | -1.0273  | 0.53559  | NA       | AC019118. chr2  | + | 3160527  | 3161568  | 435  |
| ENSG000001 | 0.342542 | 1.638012 | -1.6301  | 0.29933  | 0.40091  | KIF4B chr5      | + | 1.54E+08 | 1.54E+08 | 4426 |
| ENSG000001 | 0.975385 | 1.029414 | -0.04223 | 0.97978  | 0.98885  | AC005037. chr2  | + | 2.02E+08 | 2.02E+08 | 501  |

|            |          |          |          |           |           |                  |   |          |          |      |
|------------|----------|----------|----------|-----------|-----------|------------------|---|----------|----------|------|
| ENSG000001 | 11.05964 | 2.232041 | 2.1404   | 0.010218  | 0.02144   | RP11-137F chr10  | - | 82289353 | 82295698 | 598  |
| ENSG000001 | 0        | 3.784254 | -3.3783  | 0.025046  | 0.048334  | HSPA9P1 chr2     | + | 2.23E+08 | 2.23E+08 | 2029 |
| ENSG000001 | 0        | 3.290593 | -3.2571  | 0.028994  | 0.055057  | RP11-526C chr9   | + | 95644849 | 95661890 | 3844 |
| ENSG000001 | 0.685084 | 0.297015 | 0.4735   | 0.79064   | NA        | RP11-509J chr9   | - | 3684076  | 3689626  | 679  |
| ENSG000001 | 50.46584 | 1879.514 | -5.1968  | 3.21E-172 | 4.97E-170 | RP11-359N chr6   | - | 14280358 | 14285376 | 3152 |
| ENSG000001 | 1.411244 | 12.76257 | -2.9711  | 0.001923  | 0.004563  | AC074093 chr2    | + | 1.45E+08 | 1.46E+08 | 4635 |
| ENSG000001 | 1.660469 | 3.2299   | -0.83939 | 0.4912    | 0.59522   | RP11-666A chr1   | - | 1.49E+08 | 1.49E+08 | 513  |
| ENSG000001 | 0.290301 | 0        | 0.4146   | 0.81455   | NA        | RP11-589B chr10  | - | 81388513 | 81391944 | 606  |
| ENSG000001 | 0.685084 | 0.654722 | 0.030656 | 0.98584   | NA        | IGBP1P1 chr14    | + | 35408530 | 35409693 | 1009 |
| ENSG000001 | 2.31385  | 0.343138 | 2.0527   | 0.17691   | 0.26046   | RP13-43E1 chrX   | + | 38080644 | 38082920 | 655  |
| ENSG000001 | 1.701545 | 0        | 2.2228   | 0.18134   | NA        | PWWP2AP chr13    | + | 81228890 | 81231162 | 2273 |
| ENSG000001 | 0        | 0.357707 | -0.41864 | 0.81278   | NA        | RP3-418C2 chr6   | + | 97731179 | 97757924 | 578  |
| ENSG000001 | 0.653381 | 19.95074 | -4.48    | 4.95E-06  | 1.64E-05  | AC012309 chr19   | + | 37742814 | 37756437 | 1699 |
| ENSG000001 | 3.858673 | 10.88991 | -1.4105  | 0.082311  | 0.13688   | ENTPD1-AS chr10  | - | 97512963 | 97849995 | 4241 |
| ENSG000001 | 19.04414 | 3.025133 | 2.5572   | 0.000389  | 0.001024  | AC005281 chr7    | + | 12536055 | 12581536 | 1094 |
| ENSG000001 | 37.91867 | 39.62474 | -0.07544 | 0.84101   | 0.88839   | LENG8-AS1 chr19  | - | 54955991 | 54960223 | 871  |
| ENSG000001 | 30.58332 | 27.90448 | 0.12305  | 0.74449   | 0.81246   | RP1-50024 chr1   | + | 27202624 | 27204736 | 306  |
| ENSG000001 | 2.354926 | 7.888213 | -1.6224  | 0.08836   | 0.14549   | RP11-122K chr10  | - | 1.35E+08 | 1.35E+08 | 184  |
| ENSG000001 | 0.290301 | 0.297015 | -0.00202 | 0.99909   | NA        | RP11-570C chr10  | + | 73949699 | 73950334 | 636  |
| ENSG000001 | 0.342542 | 0.715414 | -0.51272 | 0.77372   | NA        | SDCBPP1 chr10    | - | 6335063  | 6336647  | 890  |
| ENSG000001 | 0.943682 | 0.654722 | 0.38398  | 0.81258   | NA        | RP11-426A chr9   | - | 1.38E+08 | 1.38E+08 | 1117 |
| ENSG000001 | 0        | 2.947455 | -3.0782  | 0.043573  | 0.078942  | FGF12-AS3 chr3   | + | 1.92E+08 | 1.92E+08 | 291  |
| ENSG000001 | 37.58225 | 17.07372 | 1.1213   | 0.01228   | 0.025334  | FAM66C chr12     | + | 8332805  | 8368747  | 2623 |
| ENSG000001 | 0.342542 | 0        | 0.4146   | 0.81455   | NA        | RP11-411F chr1   | + | 1.02E+08 | 1.02E+08 | 478  |
| ENSG000001 | 0.290301 | 0        | 0.4146   | 0.81455   | NA        | RP11-87N2 chr9   | + | 10613202 | 10618218 | 636  |
| ENSG000001 | 0        | 0.343138 | -0.41864 | 0.81278   | NA        | LINC00424 chr13  | - | 22446909 | 22449705 | 654  |
| ENSG000001 | 1.068702 | 0.357707 | 1.0016   | 0.56008   | NA        | RP11-142L chr1   | - | 1.92E+08 | 1.92E+08 | 780  |
| ENSG000001 | 0        | 0.357707 | -0.41864 | 0.81278   | NA        | RP11-31L2 chr10  | - | 1.03E+08 | 1.03E+08 | 816  |
| ENSG000001 | 0        | 0.686276 | -0.84936 | 0.6309    | NA        | CTA-929C8 chr22  | + | 27706612 | 27713417 | 5052 |
| ENSG000001 | 26.63988 | 25.55676 | 0.050261 | 0.9042    | 0.93383   | HSBP1L1 chr18    | + | 77724561 | 77730822 | 1057 |
| ENSG000001 | 0.342542 | 2.932886 | -2.4071  | 0.096032  | 0.15618   | AC079781 chr7    | + | 97499479 | 97499601 | 123  |
| ENSG000001 | 0        | 0.594029 | -0.81444 | 0.64499   | NA        | RP11-115C chr1   | + | 40598436 | 40599120 | 685  |
| ENSG000001 | 3.547834 | 3.466222 | 0.018924 | 0.98499   | 0.99131   | SMCR5 chr17      | - | 17680000 | 17682843 | 2844 |
| ENSG000001 | 1.286224 | 3.916176 | -1.4159  | 0.2063    | 0.29595   | AC007966 chr2    | - | 1.87E+08 | 1.87E+08 | 1179 |
| ENSG000001 | 0        | 0.297015 | -0.41864 | 0.81278   | NA        | RP11-513C chr1   | + | 2.43E+08 | 2.43E+08 | 161  |
| ENSG000001 | 385.8558 | 241.4627 | 0.67422  | 2.86E-06  | 9.79E-06  | RP11-27I1 chr9   | + | 1.24E+08 | 1.24E+08 | 3519 |
| ENSG000001 | 8.184094 | 2.010288 | 1.8873   | 0.048147  | 0.086086  | RP5-1024C chr1   | + | 53704282 | 53708455 | 1181 |
| ENSG000001 | 0        | 0.297015 | -0.41864 | 0.81278   | NA        | VPS25P1 chr1     | + | 1.18E+08 | 1.18E+08 | 508  |
| ENSG000001 | 1.213446 | 1.903472 | -0.49516 | 0.73357   | 0.80324   | AC007365 chr2    | + | 64871746 | 64873832 | 627  |
| ENSG000001 | 0.870904 | 0.297015 | 0.71032  | 0.69005   | NA        | AC079341 chr4    | + | 1.23E+08 | 1.23E+08 | 2223 |
| ENSG000001 | 1.213446 | 0        | 1.5515   | 0.38249   | NA        | DISC1-IT1 chr1   | + | 2.32E+08 | 2.32E+08 | 762  |
| ENSG000001 | 0        | 0.343138 | -0.41864 | 0.81278   | NA        | RP4-737A2 chr1   | + | 58326204 | 58346577 | 1262 |
| ENSG000001 | 1.971308 | 1.073121 | 0.71616  | 0.6255    | 0.71563   | TAS2R46 chr12    | - | 11213964 | 11214893 | 930  |
| ENSG000001 | 11.87911 | 10.11052 | 0.2079   | 0.7474    | 0.81503   | SRRM5 chr19      | + | 44100769 | 44118649 | 2698 |
| ENSG000001 | 0.342542 | 1.248751 | -1.1955  | 0.48202   | NA        | FABP7P1 chr1     | - | 2.44E+08 | 2.44E+08 | 391  |
| ENSG000001 | 0        | 0.297015 | -0.41864 | 0.81278   | NA        | CTA-747E2 chr22  | - | 29495029 | 29507671 | 539  |
| ENSG000001 | 0.685084 | 3.175656 | -1.6577  | 0.28015   | 0.38101   | RP11-654E chrX   | + | 23369130 | 23369567 | 438  |
| ENSG000001 | 0        | 0.715414 | -0.84936 | 0.6309    | NA        | RP11-38J2 chr1   | - | 2.06E+08 | 2.06E+08 | 630  |
| ENSG000001 | 0        | 0.357707 | -0.41864 | 0.81278   | NA        | TBCAP1 chrX      | + | 33059512 | 33059838 | 327  |
| ENSG000001 | 2.604151 | 8.64975  | -1.5981  | 0.082464  | 0.13707   | PGAM4 chrX       | - | 77223458 | 77225135 | 1678 |
| ENSG000001 | 1.95077  | 1.073121 | 0.65024  | 0.68145   | 0.76188   | RP1-167F1 chr6   | - | 19535175 | 19839311 | 794  |
| ENSG000001 | 0.342542 | 0        | 0.4146   | 0.81455   | NA        | AC110926 chr2    | + | 1.28E+08 | 1.28E+08 | 2825 |
| ENSG000001 | 0.653381 | 0        | 0.82678  | 0.64037   | NA        | HNRNPA3P chr10   | - | 44282860 | 44285865 | 3006 |
| ENSG000001 | 0.632843 | 0        | 0.81931  | 0.64303   | NA        | AC109826 chr2    | - | 99378401 | 99388543 | 1424 |
| ENSG000001 | 0        | 703.8529 | -10.722  | 1.32E-23  | 1.31E-22  | LINC00371 chr13  | - | 51656984 | 51746524 | 2014 |
| ENSG000001 | 2.572449 | 0        | 2.8674   | 0.066043  | 0.11336   | AC015923 chr17   | - | 61458592 | 61491673 | 524  |
| ENSG000001 | 0        | 0.343138 | -0.41864 | 0.81278   | NA        | RP11-289F chr9   | - | 83484673 | 83486210 | 791  |
| ENSG000001 | 8.601042 | 7.999861 | 0.086672 | 0.90624   | 0.93545   | CACTIN-AS1 chr19 | + | 3607245  | 3613928  | 1913 |
| ENSG000001 | 2.873915 | 3.336716 | -0.17691 | 0.87282   | 0.91124   | OSTCP8 chr9      | - | 33968069 | 33968516 | 448  |
| ENSG000001 | 22.72637 | 8.905474 | 1.3221   | 0.01495   | 0.030301  | RP11-203B chr6   | - | 56979692 | 57039034 | 899  |
| ENSG000001 | 58.28253 | 0        | 7.4254   | 1.63E-11  | 8.49E-11  | AC011893 chr2    | + | 1.37E+08 | 1.37E+08 | 1862 |
| ENSG000001 | 0        | 0.654722 | -0.83442 | 0.63731   | NA        | MROH5 chr8       | - | 1.42E+08 | 1.43E+08 | 4164 |
| ENSG000001 | 0        | 0.594029 | -0.81444 | 0.64499   | NA        | AC005082 chr7    | + | 23245632 | 23247664 | 2033 |
| ENSG000001 | 0.36308  | 0        | 0.4146   | 0.81455   | NA        | MEIS1-AS3 chr2   | - | 66653867 | 66660602 | 707  |
| ENSG000001 | 1.068702 | 0        | 1.3672   | 0.44297   | NA        | RP11-356N chr1   | + | 1.09E+08 | 1.09E+08 | 432  |

|            |          |          |          |          |          |            |       |   |          |          |      |
|------------|----------|----------|----------|----------|----------|------------|-------|---|----------|----------|------|
| ENSG000001 | 6.399419 | 2.321872 | 1.3367   | 0.19436  | 0.28201  | SUGT1P     | chr9  | - | 33503653 | 33510709 | 476  |
| ENSG000001 | 55.62614 | 63.05943 | -0.18527 | 0.50078  | 0.60444  | RP4-756H1  | chr7  | + | 66119525 | 66134842 | 508  |
| ENSG000001 | 0.290301 | 0        | 0.4146   | 0.81455  | NA       | RP11-363C  | chr9  | - | 1.1E+08  | 1.1E+08  | 408  |
| ENSG000001 | 0        | 0.343138 | -0.41864 | 0.81278  | NA       | NPM1P11    | chr7  | - | 11297308 | 11298162 | 855  |
| ENSG000001 | 0.36308  | 0.297015 | -0.00205 | 0.99908  | NA       | RP11-278F  | chr1  | + | 2.44E+08 | 2.44E+08 | 1799 |
| ENSG000001 | 2.592987 | 7.995029 | -1.4955  | 0.10589  | 0.1695   | AC097724   | chr2  | - | 28931819 | 28959071 | 726  |
| ENSG000001 | 0.975385 | 0        | 1.2767   | 0.47406  | NA       | RP11-148B  | chr1  | + | 94798823 | 94800404 | 480  |
| ENSG000001 | 0.36308  | 0        | 0.4146   | 0.81455  | NA       | PAICSP3    | chr6  | + | 74037247 | 74038740 | 1168 |
| ENSG000001 | 1.555988 | 1.043983 | 0.47704  | 0.75011  | 0.81726  | RP11-166N  | chr10 | + | 32570614 | 32571757 | 466  |
| ENSG000001 | 0.342542 | 0.715414 | -0.51272 | 0.77372  | NA       | EEF1GP3    | chr3  | - | 40637698 | 40638985 | 1288 |
| ENSG000001 | 0        | 0.297015 | -0.41864 | 0.81278  | NA       | LINC00348  | chr13 | + | 71589273 | 71742549 | 948  |
| ENSG000001 | 2.842212 | 0.937167 | 1.3234   | 0.31052  | 0.41246  | RP4-635E1  | chr1  | + | 11128528 | 11133154 | 2682 |
| ENSG000001 | 1.027626 | 2.079102 | -0.67377 | 0.6923   | 0.77062  | AC004112   | chr7  | - | 1.12E+08 | 1.12E+08 | 561  |
| ENSG000001 | 3.713929 | 2.993578 | 0.27758  | 0.77365  | 0.83718  | RP1-212P9  | chr1  | + | 29194087 | 29197779 | 1747 |
| ENSG000001 | 4.781817 | 4.305438 | 0.15465  | 0.86329  | 0.90465  | AC010894   | chr2  | + | 1.75E+08 | 1.75E+08 | 561  |
| ENSG000001 | 0.72616  | 9.871779 | -3.4253  | 0.001849 | 0.004397 | AC093901   | chr2  | - | 1.19E+08 | 1.19E+08 | 778  |
| ENSG000001 | 0        | 0.297015 | -0.41864 | 0.81278  | NA       | RP11-48F1  | chr3  | + | 1.86E+08 | 1.86E+08 | 690  |
| ENSG000001 | 0        | 1.744828 | -2.0203  | 0.24683  | NA       | RP11-569A  | chr1  | + | 2.03E+08 | 2.03E+08 | 314  |
| ENSG000001 | 2.810509 | 0.297015 | 2.3348   | 0.11857  | 0.18705  | RP11-500C  | chr10 | + | 1.24E+08 | 1.24E+08 | 951  |
| ENSG000001 | 0.36308  | 0.343138 | -0.0021  | 0.99905  | NA       | RP11-122N  | chr1  | - | 2.12E+08 | 2.12E+08 | 174  |
| ENSG000001 | 1.649304 | 0.937167 | 0.63058  | 0.65265  | 0.73789  | AC005154   | chr7  | + | 30583669 | 30584047 | 379  |
| ENSG000001 | 1.960143 | 3.276024 | -0.65364 | 0.57102  | 0.66823  | RP11-36N2  | chr1  | + | 2.46E+08 | 2.46E+08 | 581  |
| ENSG000001 | 1.701545 | 0        | 2.2228   | 0.18134  | NA       | RP11-575L  | chr9  | + | 86444571 | 86452776 | 495  |
| ENSG000001 | 0.632843 | 0        | 0.81931  | 0.64303  | NA       | GSTM3P2    | chr2  | - | 1.6E+08  | 1.6E+08  | 441  |
| ENSG000001 | 1.317927 | 0        | 1.6383   | 0.35541  | NA       | RP4-782L2  | chr1  | - | 60220419 | 60254854 | 767  |
| ENSG000001 | 0        | 0.297015 | -0.41864 | 0.81278  | NA       | AC093787   | chr2  | - | 1.33E+08 | 1.33E+08 | 207  |
| ENSG000001 | 48.45011 | 232.5881 | -2.2583  | 4.91E-22 | 4.53E-21 | ERVMER34   | chr4  | - | 53588785 | 53617807 | 3830 |
| ENSG000001 | 0.975385 | 1.294874 | -0.32515 | 0.82243  | 0.87489  | LA16c-395I | chr16 | - | 1675629  | 1676161  | 329  |
| ENSG000001 | 0.705622 | 3.723561 | -2.0497  | 0.11362  | 0.18015  | RP11-182I  | chr1  | - | 65437908 | 65468159 | 2804 |
| ENSG000001 | 0        | 0.654722 | -0.83442 | 0.63731  | NA       | RP11-298J  | chr10 | - | 1.27E+08 | 1.27E+08 | 830  |
| ENSG000001 | 0        | 1.66715  | -1.9695  | 0.25993  | NA       | RP11-432J  | chr10 | - | 1.34E+08 | 1.34E+08 | 634  |
| ENSG000001 | 0        | 0.594029 | -0.81444 | 0.64499  | NA       | LINC00354  | chr13 | + | 1.13E+08 | 1.13E+08 | 376  |
| ENSG000001 | 0.290301 | 0        | 0.4146   | 0.81455  | NA       | RP11-561C  | chr9  | + | 70843567 | 70844228 | 340  |
| ENSG000001 | 0.685084 | 0.937167 | -0.31802 | 0.85111  | NA       | ISCA2P1    | chr22 | + | 27040853 | 27041300 | 448  |
| ENSG000001 | 0.290301 | 6.428247 | -3.5245  | 0.007071 | 0.015298 | BSN-AS2    | chr3  | - | 49586739 | 49591799 | 2603 |
| ENSG000001 | 0.580602 | 3.037286 | -1.7266  | 0.26128  | 0.35938  | RP11-328N  | chr6  | + | 41470182 | 41487590 | 816  |
| ENSG000001 | 0.705622 | 0.700845 | 0.003311 | 0.99841  | NA       | RP11-80B9  | chr1  | + | 2.41E+08 | 2.41E+08 | 572  |
| ENSG000001 | 5.342695 | 14.26705 | -1.3797  | 0.029025 | 0.055111 | RP5-1068B  | chr1  | - | 2.3E+08  | 2.3E+08  | 478  |
| ENSG000001 | 1.08924  | 0.357707 | 0.88709  | 0.61692  | NA       | AC010423   | chr5  | - | 1.03E+08 | 1.03E+08 | 1783 |
| ENSG000001 | 1.451506 | 0        | 1.4786   | 0.40599  | NA       | AC068491   | chr2  | - | 1.12E+08 | 1.12E+08 | 418  |
| ENSG000001 | 0        | 0.686276 | -0.84936 | 0.6309   | NA       | GTF2IP2    | chr21 | - | 14815694 | 14861497 | 697  |
| ENSG000001 | 0        | 0.343138 | -0.41864 | 0.81278  | NA       | NRBF2P2    | chr3  | + | 46064788 | 46065648 | 861  |
| ENSG000001 | 0        | 0.297015 | -0.41864 | 0.81278  | NA       | LINC00161  | chr21 | + | 29911640 | 29912677 | 870  |
| ENSG000001 | 2.209369 | 0.640152 | 1.433    | 0.30634  | 0.40788  | CEP164P1   | chr10 | - | 45497670 | 45642669 | 2472 |
| ENSG000001 | 0        | 0.686276 | -0.84936 | 0.6309   | NA       | RP11-117C  | chr1  | - | 53814160 | 53814905 | 383  |
| ENSG000001 | 1.213446 | 0        | 1.5515   | 0.38249  | NA       | AC062021   | chr2  | + | 1.4E+08  | 1.4E+08  | 557  |
| ENSG000001 | 0.290301 | 0        | 0.4146   | 0.81455  | NA       | RBMY1J     | chrY  | + | 24454970 | 24564028 | 1921 |
| ENSG000001 | 2.229907 | 32.44382 | -3.6859  | 4.23E-08 | 1.70E-07 | IL9RP3     | chr16 | - | 79336    | 88321    | 1674 |
| ENSG000001 | 0        | 0.297015 | -0.41864 | 0.81278  | NA       | ALG1L5P    | chr7  | + | 6963435  | 6970466  | 771  |
| ENSG000001 | 5.197138 | 2.65044  | 0.90978  | 0.31909  | 0.42198  | RP1-120G2  | chr1  | - | 6264900  | 6265840  | 378  |
| ENSG000001 | 0.342542 | 0        | 0.4146   | 0.81455  | NA       | RP5-1068F  | chr20 | - | 4610073  | 4610865  | 793  |
| ENSG000001 | 608.9384 | 2477.07  | -2.0194  | 2.07E-33 | 3.00E-32 | DANCR      | chr4  | + | 53578597 | 53586518 | 878  |
| ENSG000001 | 0        | 0.357707 | -0.41864 | 0.81278  | NA       | RP4-714D9  | chr1  | + | 1.01E+08 | 1.01E+08 | 252  |
| ENSG000001 | 0        | 5.269327 | -3.9243  | 0.005544 | 0.012234 | AC010890   | chr2  | + | 1.34E+08 | 1.34E+08 | 535  |
| ENSG000001 | 0        | 0.343138 | -0.41864 | 0.81278  | NA       | RP5-983L1  | chr22 | - | 50111701 | 50118154 | 3775 |
| ENSG000001 | 0.943682 | 0.343138 | 0.89828  | 0.6031   | NA       | RP4-533D7  | chr1  | + | 46512490 | 46514040 | 649  |
| ENSG000001 | 1436.401 | 1024.084 | 0.4867   | 0.006461 | 0.014083 | RNA28S5    | chrX  | - | 1.08E+08 | 1.08E+08 | 432  |
| ENSG000001 | 0.36308  | 0.640152 | -0.51156 | 0.77091  | NA       | AC078883   | chr2  | - | 1.73E+08 | 1.73E+08 | 558  |
| ENSG000001 | 6.878145 | 3.161087 | 1.0592   | 0.27539  | 0.37549  | RHEBP2     | chr10 | + | 47396223 | 47396822 | 600  |
| ENSG000001 | 0.342542 | 0        | 0.4146   | 0.81455  | NA       | AC003088   | chr7  | - | 1.1E+08  | 1.1E+08  | 495  |
| ENSG000001 | 0.36308  | 0        | 0.4146   | 0.81455  | NA       | LINC00423  | chr13 | - | 33451569 | 33485788 | 903  |
| ENSG000001 | 0        | 1.280305 | -1.6305  | 0.35731  | NA       | RP11-547C  | chr1  | - | 1980642  | 1981509  | 437  |
| ENSG000001 | 0.342542 | 0.357707 | -0.0021  | 0.99906  | NA       | RP11-82H1  | chr1  | + | 84710017 | 84710260 | 244  |
| ENSG000001 | 0        | 0.297015 | -0.41864 | 0.81278  | NA       | AF196972   | chrX  | - | 48305273 | 48307251 | 1330 |
| ENSG000001 | 0.342542 | 0        | 0.4146   | 0.81455  | NA       | RP4-663N1  | chr1  | + | 1.16E+08 | 1.16E+08 | 794  |

|            |          |          |          |          |          |                  |   |          |          |      |
|------------|----------|----------|----------|----------|----------|------------------|---|----------|----------|------|
| ENSG000001 | 8.858826 | 11.85938 | -0.39641 | 0.5257   | 0.62766  | COX6A1P2 chr6    | + | 37012607 | 37013177 | 571  |
| ENSG000001 | 3.713116 | 1.280305 | 1.32     | 0.28507  | 0.38646  | HMG1N1P2 chr13   | - | 96461564 | 96461861 | 298  |
| ENSG000001 | 0.342542 | 2.497501 | -2.0129  | 0.2098   | 0.29981  | LTA chr6         | + | 31539831 | 31542101 | 1507 |
| ENSG000001 | 0        | 0.997859 | -1.5018  | 0.39072  | NA       | ABHD17AP chr17   | + | 20717933 | 20747570 | 1044 |
| ENSG000001 | 1.08924  | 0        | 1.1858   | 0.50299  | NA       | CENPC1P1 chr12   | + | 89893870 | 89896447 | 2578 |
| ENSG000001 | 0        | 0.937167 | -1.2408  | 0.48662  | NA       | RP4-591B8 chr1   | + | 1.15E+08 | 1.15E+08 | 427  |
| ENSG000001 | 0        | 0.343138 | -0.41864 | 0.81278  | NA       | RP11-142C chrX   | + | 13353360 | 13391753 | 580  |
| ENSG000001 | 0.36308  | 0.343138 | -0.0021  | 0.99905  | NA       | RP11-544A chr9   | + | 1.34E+08 | 1.34E+08 | 559  |
| ENSG000001 | 0.342542 | 0        | 0.4146   | 0.81455  | NA       | AL049758 chr22   | - | 43249409 | 43249805 | 397  |
| ENSG000001 | 0        | 0.594029 | -0.81444 | 0.64499  | NA       | LINC00658 chr20  | - | 5407541  | 5451740  | 1542 |
| ENSG000001 | 5.30162  | 7.608183 | -0.49976 | 0.50545  | 0.60885  | NBPF2P chr1      | - | 21751118 | 21754460 | 661  |
| ENSG000001 | 14.4721  | 1.234181 | 3.2228   | 0.000434 | 0.001137 | RP5-956O1 chr1   | - | 2.3E+08  | 2.3E+08  | 861  |
| ENSG000001 | 7.520361 | 16.23121 | -1.0754  | 0.063056 | 0.10893  | RP3-417G1 chrX   | + | 1.33E+08 | 1.33E+08 | 416  |
| ENSG000001 | 0.580602 | 13.63173 | -3.9233  | 0.000296 | 0.000794 | RP1-97J1.2 chr6  | + | 1.12E+08 | 1.12E+08 | 762  |
| ENSG000001 | 24.53321 | 24.02389 | 0.030455 | 0.94281  | 0.96299  | AC007285 chr7    | + | 30028216 | 30065276 | 893  |
| ENSG000001 | 0.36308  | 0.715414 | -0.51558 | 0.77246  | NA       | AC007036 chr7    | - | 30216003 | 30218630 | 674  |
| ENSG000001 | 3.071713 | 1.280305 | 1.0434   | 0.41635  | 0.52145  | SLC8A1-AS1 chr2  | + | 40013593 | 40482349 | 935  |
| ENSG000001 | 0        | 0.715414 | -0.84936 | 0.6309   | NA       | RP11-34E5 chr10  | - | 98380634 | 98381464 | 831  |
| ENSG000001 | 0        | 0.297015 | -0.41864 | 0.81278  | NA       | AC105461 chr2    | - | 2.33E+08 | 2.33E+08 | 391  |
| ENSG000001 | 36.68983 | 10.90119 | 1.7231   | 0.000132 | 0.000371 | LINC00511 chr17  | - | 70319264 | 70636611 | 2265 |
| ENSG000001 | 5.404309 | 13.08711 | -1.2403  | 0.082441 | 0.13704  | AC005077 chr7    | - | 75719749 | 75738097 | 2399 |
| ENSG000001 | 1.317927 | 0        | 1.6383   | 0.35541  | NA       | ITGB2-AS1 chr21  | + | 46340966 | 46349593 | 2282 |
| ENSG000001 | 0.290301 | 0        | 0.4146   | 0.81455  | NA       | RP11-98D1 chr1   | + | 1.52E+08 | 1.52E+08 | 386  |
| ENSG000001 | 0.290301 | 0        | 0.4146   | 0.81455  | NA       | AC012065 chr2    | - | 20699331 | 20701071 | 686  |
| ENSG000001 | 0        | 7.763539 | -4.5339  | 0.000592 | 0.001521 | RP11-460I chr1   | - | 28265386 | 28286704 | 491  |
| ENSG000001 | 1093.407 | 687.8121 | 0.66885  | 9.94E-09 | 4.22E-08 | C14orf132 chr14  | + | 96505661 | 96560417 | 7774 |
| ENSG000001 | 0        | 1.294874 | -1.8547  | 0.27869  | NA       | RP11-395B chr7   | - | 1.01E+08 | 1.01E+08 | 407  |
| ENSG000001 | 0        | 0.937167 | -1.2408  | 0.48662  | NA       | AC009961 chr2    | - | 1.61E+08 | 1.61E+08 | 251  |
| ENSG000001 | 0.72616  | 0.891044 | -0.19964 | 0.90989  | NA       | RP11-418J chr1   | - | 1.2E+08  | 1.2E+08  | 783  |
| ENSG000001 | 1138.947 | 1207.231 | -0.08366 | 0.66199  | 0.74571  | WDR46 chr6       | - | 33246885 | 33257304 | 2358 |
| ENSG000001 | 4.803169 | 5.33814  | -0.16799 | 0.86451  | 0.90562  | LINC00629 chrX   | + | 1.34E+08 | 1.34E+08 | 844  |
| ENSG000001 | 952.1995 | 1263.064 | -0.40535 | 0.049156 | 0.087684 | RPL41P1 chr20    | + | 21735866 | 21736171 | 306  |
| ENSG000001 | 0        | 0.357707 | -0.41864 | 0.81278  | NA       | RP3-340N1 chr1   | + | 20480831 | 20487061 | 2493 |
| ENSG000001 | 0.72616  | 1.280305 | -0.59587 | 0.71841  | 0.7915   | RP11-12A1 chr9   | + | 1.28E+08 | 1.28E+08 | 633  |
| ENSG000001 | 0.290301 | 1.012429 | -0.95336 | 0.58114  | NA       | RP11-191C chr1   | + | 51983981 | 52027301 | 362  |
| ENSG000001 | 7.665919 | 4.020576 | 0.88122  | 0.28414  | 0.38545  | RP11-4E23 chr9   | - | 20683303 | 20684687 | 359  |
| ENSG000001 | 0.36308  | 0.594029 | -0.39069 | 0.82661  | NA       | SDHDP2 chr7      | + | 1.35E+08 | 1.35E+08 | 465  |
| ENSG000001 | 1.233984 | 0        | 1.5686   | 0.37707  | NA       | RP11-4C20 chr10  | + | 1.3E+08  | 1.3E+08  | 371  |
| ENSG000001 | 0.342542 | 0.297015 | -0.00202 | 0.99909  | NA       | AC107983 chr17   | + | 18476045 | 18476415 | 371  |
| ENSG000001 | 81.89096 | 146.3132 | -0.8345  | 5.13E-05 | 0.000151 | RP11-543P chr12  | - | 3320775  | 3321096  | 322  |
| ENSG000001 | 4.959078 | 0.357707 | 3.1382   | 0.01901  | 0.03771  | AL592494 chr1    | + | 1.21E+08 | 1.21E+08 | 3662 |
| ENSG000001 | 0        | 3.273608 | -2.9384  | 0.074324 | 0.12551  | L29074.3 chrX    | + | 1.47E+08 | 1.47E+08 | 534  |
| ENSG000001 | 0        | 0.297015 | -0.41864 | 0.81278  | NA       | AC084149 chr2    | - | 77879539 | 77881794 | 284  |
| ENSG000001 | 0.342542 | 1.012429 | -0.95691 | 0.57869  | NA       | RP11-565P chr1   | - | 1.62E+08 | 1.62E+08 | 517  |
| ENSG000001 | 266.434  | 587.9085 | -1.1398  | 1.22E-15 | 8.30E-15 | RP11-742N chr11  | + | 82400571 | 82400944 | 374  |
| ENSG000001 | 4.003417 | 5.31545  | -0.34893 | 0.71158  | 0.786    | AC096574 chr2    | + | 2.39E+08 | 2.39E+08 | 2057 |
| ENSG000001 | 15.67357 | 10.3363  | 0.59363  | 0.27969  | 0.38046  | LMCD1-AS1 chr3   | - | 7994492  | 8653610  | 2683 |
| ENSG000001 | 0        | 1.935026 | -2.4284  | 0.13734  | 0.21062  | RP1-86D1 chr6    | + | 1.29E+08 | 1.29E+08 | 339  |
| ENSG000001 | 4.906837 | 6.880616 | -0.46283 | 0.56196  | 0.66037  | RP11-460N chr7   | + | 64535401 | 64539158 | 232  |
| ENSG000001 | 0        | 1.935026 | -2.4284  | 0.13734  | 0.21062  | RP11-267C chr18  | + | 48872619 | 49088939 | 3188 |
| ENSG000001 | 0        | 0.357707 | -0.41864 | 0.81278  | NA       | RP3-471C1 chr6   | - | 19730658 | 19734798 | 470  |
| ENSG000001 | 0.632843 | 5.240188 | -2.6039  | 0.029749 | 0.05635  | CTA-85E5.1 chr22 | - | 30404731 | 30476469 | 902  |
| ENSG000001 | 0        | 0.343138 | -0.41864 | 0.81278  | NA       | RP11-319F chr10  | - | 54733248 | 54735575 | 415  |
| ENSG000001 | 1.390706 | 0.640152 | 0.78915  | 0.61796  | 0.70912  | RPL12P44 chr3    | + | 44979165 | 44979974 | 502  |
| ENSG000001 | 20.99833 | 91.06268 | -2.1074  | 1.50E-10 | 7.34E-10 | ZNF717 chr3      | - | 75758794 | 75834734 | 3875 |
| ENSG000001 | 0.290301 | 0        | 0.4146   | 0.81455  | NA       | RP11-324L chr10  | + | 1.03E+08 | 1.03E+08 | 2553 |
| ENSG000001 | 0        | 0.297015 | -0.41864 | 0.81278  | NA       | AC011742 chr2    | + | 26382892 | 26384005 | 434  |
| ENSG000001 | 0.685084 | 1.387121 | -0.6933  | 0.67629  | 0.7576   | RP11-545A chr1   | + | 1.8E+08  | 1.8E+08  | 2471 |
| ENSG000001 | 1.431782 | 0        | 1.7261   | 0.329    | NA       | IL21-AS1 chr4    | + | 1.24E+08 | 1.24E+08 | 3748 |
| ENSG000001 | 1.660469 | 0        | 1.9303   | 0.27163  | NA       | RP11-473E chr9   | + | 1.37E+08 | 1.37E+08 | 280  |
| ENSG000001 | 0.36308  | 0.715414 | -0.51558 | 0.77246  | NA       | MKRN2P2 chr6     | + | 35410821 | 35417643 | 792  |
| ENSG000001 | 0.290301 | 2.414118 | -2.1169  | 0.16404  | 0.24477  | RP11-165F chr9   | - | 454304   | 492112   | 1295 |
| ENSG000001 | 0        | 0.343138 | -0.41864 | 0.81278  | NA       | RP1-65P5 chr11   | - | 32133595 | 32364955 | 760  |
| ENSG000001 | 0.632843 | 1.416259 | -0.81358 | 0.60692  | 0.69991  | AC092755 chr15   | - | 59936497 | 59964501 | 97   |
| ENSG000001 | 0.632843 | 0        | 0.81931  | 0.64303  | NA       | RP5-1198C chr1   | - | 44553630 | 44554149 | 520  |

|            |          |          |          |          |          |            |       |   |          |          |      |
|------------|----------|----------|----------|----------|----------|------------|-------|---|----------|----------|------|
| ENSG000001 | 0        | 2.38498  | -2.6982  | 0.092399 | 0.15121  | WDR11-AS   | chr10 | - | 1.23E+08 | 1.23E+08 | 2242 |
| ENSG000001 | 3.434793 | 0.357707 | 2.547    | 0.081883 | 0.13628  | AF178030.  | chr8  | + | 1.17E+08 | 1.17E+08 | 402  |
| ENSG000001 | 0.36308  | 0.640152 | -0.51156 | 0.77091  | NA       | AC011290.  | chr7  | - | 39585245 | 39605838 | 414  |
| ENSG000001 | 0.342542 | 0        | 0.4146   | 0.81455  | NA       | RP11-214C  | chr10 | + | 13570516 | 13572262 | 380  |
| ENSG000001 | 2.157128 | 0.343138 | 1.9572   | 0.20631  | 0.29595  | AC092641.  | chr2  | - | 1.71E+08 | 1.71E+08 | 772  |
| ENSG000001 | 0.342542 | 0        | 0.4146   | 0.81455  | NA       | RP11-317P  | chr1  | + | 1.83E+08 | 1.83E+08 | 259  |
| ENSG000001 | 4.886299 | 1114.152 | -7.6841  | 1.46E-61 | 4.38E-60 | EPPK1      | chr8  | - | 1.45E+08 | 1.45E+08 | 7997 |
| ENSG000001 | 0.995923 | 0.640152 | 0.45774  | 0.76749  | NA       | RP11-77G2  | chr10 | - | 76783233 | 76784009 | 380  |
| ENSG000001 | 1.919068 | 2.041842 | -0.05181 | 0.96529  | 0.97973  | RP5-1104E  | chr22 | - | 39871812 | 39872827 | 498  |
| ENSG000001 | 0.342542 | 0        | 0.4146   | 0.81455  | NA       | AC092535.  | chr4  | + | 1145160  | 1147489  | 2165 |
| ENSG000001 | 0.290301 | 0.700845 | -0.56655 | 0.74739  | NA       | RP1-4514.3 | chr6  | - | 1.43E+08 | 1.43E+08 | 552  |
| ENSG000001 | 0.342542 | 0.297015 | -0.00202 | 0.99909  | NA       | RP11-439A  | chr1  | - | 1.21E+08 | 1.21E+08 | 494  |
| ENSG000001 | 5.560218 | 5.926464 | -0.08664 | 0.90876  | 0.9373   | RP3-410C9  | chr20 | - | 26167556 | 26232162 | 1213 |
| ENSG000001 | 1.359003 | 2.771825 | -0.88502 | 0.47329  | 0.57792  | AC009518.  | chr7  | + | 1.33E+08 | 1.33E+08 | 799  |
| ENSG000001 | 7.105041 | 20.70986 | -1.4931  | 0.008644 | 0.018391 | ST7-AS1    | chr7  | - | 1.17E+08 | 1.17E+08 | 1889 |
| ENSG000001 | 5.684424 | 0.594029 | 2.6804   | 0.034607 | 0.064481 | RP11-121A  | chr9  | + | 1.27E+08 | 1.27E+08 | 373  |
| ENSG000001 | 0.36308  | 3.633731 | -2.7066  | 0.052599 | 0.092924 | CNN2P1     | chr22 | - | 30442265 | 30443182 | 918  |
| ENSG000001 | 0.653381 | 0.297015 | 0.51304  | 0.77085  | NA       | SUB1P1     | chr8  | + | 11647514 | 11647897 | 384  |
| ENSG000001 | 0.36308  | 0.343138 | -0.0021  | 0.99905  | NA       | RBMV2JP    | chrY  | + | 7995171  | 8012244  | 1059 |
| ENSG000001 | 0        | 0.297015 | -0.41864 | 0.81278  | NA       | LINC00552  | chr13 | - | 1.14E+08 | 1.14E+08 | 2577 |
| ENSG000001 | 3.922079 | 7.890629 | -0.9461  | 0.26094  | 0.35893  | AC079145.  | chr2  | + | 20189978 | 20203971 | 541  |
| ENSG000001 | 1.265686 | 0        | 1.6147   | 0.36215  | NA       | RP5-1100E  | chrX  | - | 1.02E+08 | 1.02E+08 | 348  |
| ENSG000001 | 3.547834 | 0        | 3.356    | 0.02365  | 0.045912 | PFN1P7     | chr1  | - | 1.49E+08 | 1.49E+08 | 399  |
| ENSG000001 | 0.653381 | 0.700845 | -0.04855 | 0.97667  | NA       | SPATA13-A' | chr13 | - | 24826887 | 24828577 | 433  |
| ENSG000001 | 2.729171 | 10.16879 | -1.8105  | 0.030933 | 0.058272 | HCG15      | chr6  | + | 28953980 | 28955261 | 1032 |
| ENSG000001 | 1.161205 | 1.340997 | -0.11579 | 0.93953  | 0.96033  | RP11-445L  | chr6  | + | 83642320 | 83648396 | 480  |
| ENSG000001 | 2.86275  | 3.728394 | -0.31345 | 0.80093  | 0.85905  | RP11-203J. | chr9  | + | 1.31E+08 | 1.31E+08 | 1105 |
| ENSG000001 | 3.008307 | 5.456236 | -0.78649 | 0.42186  | 0.52743  | RP11-69I8. | chr6  | + | 1.32E+08 | 1.32E+08 | 495  |
| ENSG000001 | 0        | 0.343138 | -0.41864 | 0.81278  | NA       | MTND1P14   | chr17 | + | 19505572 | 19506521 | 950  |
| ENSG000001 | 1.451506 | 2.757256 | -0.70025 | 0.61679  | 0.70803  | AC017101.  | chr2  | - | 1.88E+08 | 1.88E+08 | 571  |
| ENSG000001 | 8.943584 | 0.297015 | 3.9434   | 0.002015 | 0.004767 | RP11-261C  | chr1  | + | 2.43E+08 | 2.43E+08 | 694  |
| ENSG000001 | 320.5075 | 305.1704 | 0.070332 | 0.61984  | 0.71075  | WASH7P     | chr1  | - | 14363    | 29806    | 1783 |
| ENSG000001 | 0        | 0.297015 | -0.41864 | 0.81278  | NA       | CTD-2021A  | chr7  | + | 51449981 | 51452357 | 2377 |
| ENSG000001 | 0        | 4.069116 | -3.5147  | 0.01742  | 0.034833 | RP11-365C  | chr1  | + | 2.36E+08 | 2.36E+08 | 1724 |
| ENSG000001 | 0.72616  | 0.357707 | 0.52227  | 0.76959  | NA       | AL672294.  | chr1  | + | 2.49E+08 | 2.49E+08 | 462  |
| ENSG000001 | 0.36308  | 0        | 0.4146   | 0.81455  | NA       | RP11-563C  | chr1  | + | 1.94E+08 | 1.94E+08 | 832  |
| ENSG000001 | 2.261609 | 1.698704 | 0.38219  | 0.748    | 0.81551  | NBPF13P    | chr1  | - | 1.46E+08 | 1.47E+08 | 3808 |
| ENSG000001 | 1.016461 | 1.294874 | -0.29777 | 0.83702  | 0.88567  | RP11-136C  | chr3  | + | 43128971 | 43129560 | 509  |
| ENSG000001 | 1.669842 | 1.043983 | 0.53557  | 0.72026  | 0.79307  | FAM155A-I  | chr13 | - | 1.08E+08 | 1.08E+08 | 819  |
| ENSG000001 | 7.075943 | 6.999585 | 0.008234 | 0.99088  | 0.99525  | AC105760.  | chr2  | - | 2.38E+08 | 2.38E+08 | 2341 |
| ENSG000001 | 1.233984 | 0        | 1.5686   | 0.37707  | NA       | RP11-166N  | chr10 | + | 32555217 | 32558402 | 696  |
| ENSG000001 | 0.290301 | 0.594029 | -0.38058 | 0.83094  | NA       | VDAC1P12   | chr13 | - | 34656566 | 34657447 | 882  |
| ENSG000001 | 4.044493 | 2.604317 | 0.58203  | 0.58908  | 0.68447  | MIS18A-AS  | chr21 | + | 33650174 | 33653299 | 769  |
| ENSG000001 | 1.555988 | 0.297015 | 1.4773   | 0.37579  | NA       | RP11-330N  | chr9  | + | 99681210 | 99681600 | 391  |
| ENSG000001 | 0        | 0.891044 | -1.0625  | 0.54819  | NA       | SMIM2-AS1  | chr13 | + | 44716682 | 44813010 | 499  |
| ENSG000001 | 0        | 0.343138 | -0.41864 | 0.81278  | NA       | YWHAZP7    | chrX  | - | 63832512 | 63833142 | 631  |
| ENSG000001 | 0        | 0.343138 | -0.41864 | 0.81278  | NA       | HCG4B      | chr6  | - | 29893760 | 29894750 | 991  |
| ENSG000001 | 0.290301 | 1.387121 | -1.3028  | 0.4429   | NA       | RP11-305C  | chr3  | + | 1.36E+08 | 1.36E+08 | 581  |
| ENSG000001 | 10.43535 | 8.572873 | 0.25723  | 0.76946  | 0.83357  | KLLN       | chr10 | - | 89618918 | 89623194 | 4277 |
| ENSG000001 | 0.705622 | 0.343138 | 0.57395  | 0.74355  | NA       | RP11-96L7  | chr9  | + | 1.02E+08 | 1.02E+08 | 439  |
| ENSG000001 | 0        | 0.297015 | -0.41864 | 0.81278  | NA       | AC005358.  | chr17 | - | 12575179 | 12609452 | 1143 |
| ENSG000001 | 0.36308  | 0        | 0.4146   | 0.81455  | NA       | RP11-656C  | chr1  | - | 40980133 | 40980729 | 432  |
| ENSG000001 | 7.314004 | 1.234181 | 2.2703   | 0.027791 | 0.053061 | AC015933.  | chr18 | + | 25534483 | 25543651 | 440  |
| ENSG000001 | 2.479132 | 6.907338 | -1.3256  | 0.17563  | 0.25887  | RP11-458C  | chr1  | - | 1.45E+08 | 1.45E+08 | 784  |
| ENSG000001 | 0        | 0.594029 | -0.81444 | 0.64499  | NA       | RP11-164C  | chr20 | + | 58090246 | 58091094 | 566  |
| ENSG000001 | 18.55685 | 14.1554  | 0.38093  | 0.52428  | 0.62647  | RP3-327A1  | chrX  | - | 1.19E+08 | 1.19E+08 | 810  |
| ENSG000001 | 1.306762 | 11.68945 | -2.9007  | 0.002355 | 0.00551  | RP5-837I2' | chr1  | + | 81967479 | 81969153 | 1675 |
| ENSG000001 | 2.903826 | 1.326428 | 0.92119  | 0.50827  | 0.61176  | HSFY3P     | chrY  | - | 2749724  | 2751693  | 1191 |
| ENSG000001 | 0.290301 | 0        | 0.4146   | 0.81455  | NA       | RP4-544H'  | chr1  | - | 87819207 | 87837338 | 889  |
| ENSG000001 | 1.016461 | 0        | 1.3167   | 0.46021  | NA       | AC009229.  | chr2  | - | 38430505 | 38466732 | 622  |
| ENSG000001 | 0        | 1.935026 | -2.4284  | 0.13734  | 0.21062  | AC118345.  | chr2  | - | 66462509 | 66463345 | 366  |
| ENSG000001 | 6.474803 | 0.997859 | 2.3959   | 0.029678 | 0.056241 | AC016994.  | chr2  | + | 1.07E+08 | 1.07E+08 | 552  |
| ENSG000001 | 0        | 1.730259 | -1.9792  | 0.25882  | NA       | ELL2P1     | chr1  | - | 1.58E+08 | 1.58E+08 | 1906 |
| ENSG000001 | 0.342542 | 0        | 0.4146   | 0.81455  | NA       | RP4-718J7. | chr20 | - | 56174751 | 56176256 | 823  |
| ENSG000001 | 1.628766 | 0.951736 | 0.6114   | 0.66255  | 0.7461   | RP11-791C  | chr4  | - | 83415939 | 83417431 | 1493 |

|            |          |          |          |          |          |                  |   |          |          |      |
|------------|----------|----------|----------|----------|----------|------------------|---|----------|----------|------|
| ENSG000001 | 0.342542 | 0.297015 | -0.00202 | 0.99909  | NA       | AC140076. chr3   | + | 17506642 | 17507002 | 361  |
| ENSG000001 | 4.283367 | 0        | 3.3212   | 0.038283 | 0.070605 | RP11-282E chr9   | + | 66664325 | 66665950 | 1626 |
| ENSG000001 | 0.975385 | 2.307303 | -1.0223  | 0.44577  | 0.55121  | MTND4P15 chr9    | + | 94873147 | 94874179 | 1033 |
| ENSG000001 | 5.281082 | 7.311169 | -0.44454 | 0.56677  | 0.66446  | RP11-258C chrX   | - | 53193573 | 53193739 | 167  |
| ENSG000001 | 0        | 0.700845 | -0.87835 | 0.62047  | NA       | AP000998. chr21  | - | 19394687 | 19487222 | 478  |
| ENSG000001 | 0        | 1.387121 | -1.6961  | 0.33794  | NA       | AC005042. chr2   | + | 1.59E+08 | 1.59E+08 | 800  |
| ENSG000001 | 0.36308  | 4.740822 | -2.9711  | 0.036081 | 0.066978 | AC139452. chr3   | + | 32827138 | 32827608 | 471  |
| ENSG000001 | 0.290301 | 1.577319 | -1.4968  | 0.36921  | NA       | HAUS6P1 chr7     | + | 53255081 | 53256631 | 1551 |
| ENSG000001 | 258.31   | 425.3635 | -0.71569 | 1.92E-06 | 6.70E-06 | PARG chr10       | - | 51026325 | 51130715 | 2537 |
| ENSG000001 | 0.36308  | 0        | 0.4146   | 0.81455  | NA       | ARHGEF7-A chr13  | - | 1.12E+08 | 1.12E+08 | 321  |
| ENSG000001 | 4.637074 | 11.45555 | -1.2493  | 0.075066 | 0.12658  | RBM26-AS1 chr13  | + | 79980444 | 79997090 | 1756 |
| ENSG000001 | 0        | 3.397409 | -3.273   | 0.029074 | 0.055192 | RP11-162C chr9   | + | 1.24E+08 | 1.24E+08 | 440  |
| ENSG000001 | 0        | 0.654722 | -0.83442 | 0.63731  | NA       | LINC00866 chr10  | - | 99588235 | 99609555 | 418  |
| ENSG000001 | 1.628766 | 0.715414 | 0.93656  | 0.53818  | 0.63889  | AC017074. chr2   | - | 1.14E+08 | 1.14E+08 | 561  |
| ENSG000001 | 0.653381 | 0.891044 | -0.31039 | 0.85574  | NA       | AC019172. chr2   | + | 3891774  | 3895001  | 717  |
| ENSG000001 | 0        | 0.357707 | -0.41864 | 0.81278  | NA       | AC079753. chr2   | + | 1.14E+08 | 1.14E+08 | 547  |
| ENSG000001 | 3.620613 | 1.638012 | 1.0225   | 0.34121  | 0.44511  | RP4-669P1 chr22  | + | 42528550 | 42529005 | 456  |
| ENSG000001 | 0.290301 | 0        | 0.4146   | 0.81455  | NA       | RP11-3110 chr7   | + | 1.21E+08 | 1.21E+08 | 418  |
| ENSG000001 | 699.3829 | 1450.716 | -1.0517  | 8.33E-15 | 5.40E-14 | TP73-AS1 chr1    | - | 3652548  | 3663900  | 6358 |
| ENSG000001 | 1.597063 | 2.681995 | -0.62711 | 0.61013  | 0.70278  | RP11-160F chr1   | - | 1.74E+08 | 1.74E+08 | 688  |
| ENSG000001 | 0.923144 | 0.343138 | 0.88162  | 0.61011  | NA       | RP11-109A chr10  | + | 1.32E+08 | 1.32E+08 | 495  |
| ENSG000001 | 0.36308  | 0.343138 | -0.0021  | 0.99905  | NA       | DLG1-AS1 chr3    | + | 1.97E+08 | 1.97E+08 | 1694 |
| ENSG000001 | 1.991846 | 8.250752 | -1.9217  | 0.029534 | 0.055999 | FTH1P16 chr11    | - | 77445520 | 77446071 | 552  |
| ENSG000001 | 2.624689 | 1.280305 | 0.87229  | 0.48265  | 0.58691  | PPIAP2 chr20     | - | 25348911 | 25349402 | 492  |
| ENSG000001 | 1.451506 | 0.297015 | 1.2347   | 0.48306  | NA       | EIF4A2P2 chr10   | + | 74959584 | 74960983 | 1070 |
| ENSG000001 | 0.943682 | 2.918317 | -1.3504  | 0.2986   | 0.40041  | RP11-571F chr9   | + | 34191553 | 34191879 | 327  |
| ENSG000001 | 2.697468 | 9.532673 | -1.701   | 0.05976  | 0.10415  | RP11-112J chr9   | + | 35772160 | 35790429 | 546  |
| ENSG000001 | 0        | 5.390712 | -3.9322  | 0.005745 | 0.012638 | HPN-AS1 chr19    | - | 35549963 | 35597208 | 1124 |
| ENSG000001 | 0.36308  | 2.558194 | -2.0563  | 0.19625  | 0.2843   | AC007386. chr2   | - | 65187187 | 65187768 | 582  |
| ENSG000001 | 0.72616  | 0        | 0.85004  | 0.63064  | NA       | EIF2AP4 chr10    | + | 45301891 | 45303671 | 1781 |
| ENSG000001 | 20.86052 | 15.67686 | 0.408    | 0.40831  | 0.51314  | KIF9-AS1 chr3    | + | 47205987 | 47285546 | 2353 |
| ENSG000001 | 0        | 0.357707 | -0.41864 | 0.81278  | NA       | AC012501. chr2   | - | 1.54E+08 | 1.54E+08 | 586  |
| ENSG000001 | 0        | 1.188058 | -1.268   | 0.47398  | NA       | RPL37P1 chr20    | + | 34176246 | 34176529 | 284  |
| ENSG000001 | 0        | 11.89335 | -5.1337  | 5.30E-05 | 0.000156 | AC009299. chr2   | + | 1.62E+08 | 1.62E+08 | 2333 |
| ENSG000001 | 1.411244 | 0.715414 | 0.68507  | 0.67745  | 0.75844  | ZMYM4-AS1 chr1   | - | 35824423 | 35831678 | 459  |
| ENSG000001 | 1.390706 | 51.42833 | -4.9914  | 1.45E-10 | 7.07E-10 | RP11-265B chr9   | + | 71736209 | 71737148 | 822  |
| ENSG000001 | 4.056471 | 2.217472 | 0.75058  | 0.49297  | 0.59687  | RP5-1042K chr22  | + | 40829140 | 40829645 | 355  |
| ENSG000001 | 2.686303 | 0.715414 | 1.4362   | 0.35509  | 0.45932  | RP11-397P chr1   | - | 2.04E+08 | 2.04E+08 | 643  |
| ENSG000001 | 0.290301 | 0        | 0.4146   | 0.81455  | NA       | PCGEM1 chr2      | + | 1.94E+08 | 1.94E+08 | 1590 |
| ENSG000001 | 0        | 0.594029 | -0.81444 | 0.64499  | NA       | AC019185. chr2   | - | 2.09E+08 | 2.09E+08 | 389  |
| ENSG000001 | 1.971308 | 2.041842 | -0.03026 | 0.97974  | 0.98885  | RP1-155G6 chr20  | - | 47657000 | 47662581 | 556  |
| ENSG000001 | 1.701545 | 0.297015 | 1.6662   | 0.28961  | 0.39113  | AC053503. chr2   | - | 2.2E+08  | 2.2E+08  | 519  |
| ENSG000001 | 0        | 0.357707 | -0.41864 | 0.81278  | NA       | AC069213. chr3   | + | 1.95E+08 | 1.95E+08 | 367  |
| ENSG000001 | 1.991846 | 1.652581 | 0.23052  | 0.8474   | 0.8929   | FCF1P1 chr7      | + | 23658952 | 23662445 | 571  |
| ENSG000001 | 5.882222 | 0        | 4.1418   | 0.002296 | 0.005381 | AP001471. chr21  | - | 47513178 | 47517444 | 672  |
| ENSG000001 | 4.243104 | 7.014154 | -0.69422 | 0.46291  | 0.56805  | ATP5G1P4 chr3    | - | 1.73E+08 | 1.73E+08 | 441  |
| ENSG000001 | 6.015801 | 8.834244 | -0.50102 | 0.51171  | 0.61488  | CTB-58E17. chr17 | + | 36905613 | 36906969 | 1357 |
| ENSG000001 | 4.160139 | 0.700845 | 2.1978   | 0.089487 | 0.14705  | LINC00310 chr21  | + | 35552978 | 35562220 | 1198 |
| ENSG000001 | 0        | 0.357707 | -0.41864 | 0.81278  | NA       | RP11-108B chr10  | + | 22514627 | 22514953 | 327  |
| ENSG000001 | 0        | 0.686276 | -0.84936 | 0.6309   | NA       | RP11-169C chr11  | + | 72281704 | 72284273 | 2450 |
| ENSG000001 | 4.781817 | 8.075122 | -0.6954  | 0.36502  | 0.46941  | AC073415. chr2   | + | 1.09E+08 | 1.09E+08 | 153  |
| ENSG000001 | 0        | 0.700845 | -0.87835 | 0.62047  | NA       | AKR1B15 chr7     | + | 1.34E+08 | 1.34E+08 | 1989 |
| ENSG000001 | 0.342542 | 0        | 0.4146   | 0.81455  | NA       | RP11-295P chr10  | - | 13633460 | 13634323 | 864  |
| ENSG000001 | 0.580602 | 0        | 0.8036   | 0.6494   | NA       | RP11-810B chr10  | - | 36378014 | 36378317 | 187  |
| ENSG000001 | 2.956066 | 1.84278  | 0.55481  | 0.65909  | 0.74303  | STK4-AS1 chr20   | - | 43592435 | 43595043 | 2065 |
| ENSG000001 | 1.016461 | 1.012429 | 0.001343 | 0.99932  | 0.99973  | RP11-89N1 chr7   | - | 33769904 | 33771676 | 577  |
| ENSG000001 | 0.653381 | 0.951736 | -0.39511 | 0.8072   | NA       | RP11-18B1 chr9   | + | 1.16E+08 | 1.16E+08 | 1223 |
| ENSG000001 | 1.306762 | 14.7648  | -3.2251  | 0.000624 | 0.001596 | RP13-188A chrX   | + | 55934556 | 56041606 | 1007 |
| ENSG000001 | 7.188984 | 0        | 4.4561   | 0.000676 | 0.00172  | RP11-839C chr11  | - | 1.13E+08 | 1.13E+08 | 1081 |
| ENSG000001 | 1.265686 | 0.297015 | 1.2266   | 0.46934  | NA       | AC006458. chr7   | + | 15105832 | 15108276 | 653  |
| ENSG000001 | 3.631777 | 2.886762 | 0.28588  | 0.78694  | 0.84758  | RP11-316A chr10  | + | 1.02E+08 | 1.02E+08 | 846  |
| ENSG000001 | 0.290301 | 0        | 0.4146   | 0.81455  | NA       | USP9YP14 chrY    | + | 20642973 | 20649286 | 563  |
| ENSG000001 | 1.45232  | 1.606458 | -0.1305  | 0.93454  | 0.95713  | AC109333. chr17  | - | 4922509  | 4923388  | 583  |
| ENSG000001 | 5.166249 | 0.594029 | 2.5205   | 0.052768 | 0.093196 | RP11-145A chr1   | + | 2.26E+08 | 2.26E+08 | 1530 |
| ENSG000001 | 1007.538 | 809.0331 | 0.31633  | 0.004064 | 0.009173 | SCAMP4 chr19     | + | 1905213  | 1926016  | 2954 |

|            |          |          |          |          |          |                 |   |          |          |      |
|------------|----------|----------|----------|----------|----------|-----------------|---|----------|----------|------|
| ENSG000001 | 0.72616  | 0.343138 | 0.52026  | 0.77047  | NA       | RP1-249H1 chr6  | - | 1.14E+08 | 1.14E+08 | 413  |
| ENSG000001 | 4.895672 | 4.729542 | 0.031054 | 0.97336  | 0.98515  | LTB chr6        | - | 31548302 | 31550299 | 1388 |
| ENSG000001 | 8.475209 | 8.394827 | 0.00657  | 0.99212  | 0.99579  | RP11-413N chr9  | + | 1.39E+08 | 1.39E+08 | 864  |
| ENSG000001 | 0.705622 | 5.410113 | -2.5625  | 0.03651  | 0.06764  | RP5-973N2 chr6  | + | 41836360 | 41837469 | 403  |
| ENSG000001 | 3.184754 | 5.257174 | -0.65556 | 0.48042  | 0.58464  | MIR1302-2 chr9  | + | 27657    | 30891    | 2923 |
| ENSG000001 | 0        | 0.715414 | -0.84936 | 0.6309   | NA       | RP13-213K chrX  | + | 93574037 | 93575024 | 988  |
| ENSG000001 | 1.306762 | 1.340997 | -0.02286 | 0.98697  | 0.99238  | RPS20P15 chr3   | + | 27503997 | 27504307 | 311  |
| ENSG000001 | 1.016461 | 1.935026 | -0.78432 | 0.56702  | 0.6646   | RP11-223A chr1  | - | 42801057 | 42804047 | 661  |
| ENSG000001 | 0.290301 | 0.700845 | -0.56655 | 0.74739  | NA       | DIAPH3-AS chr13 | + | 60586885 | 60618491 | 467  |
| ENSG000001 | 0.290301 | 0        | 0.4146   | 0.81455  | NA       | AC002542. chr7  | - | 1.17E+08 | 1.17E+08 | 193  |
| ENSG000001 | 23.78651 | 66.10653 | -1.4541  | 0.000961 | 0.00239  | SLC2A1-AS1 chr1 | + | 43424720 | 43449029 | 3075 |
| ENSG000001 | 0        | 0.951736 | -1.2555  | 0.48145  | NA       | RP3-323B6 chrX  | + | 64688967 | 64690260 | 968  |
| ENSG000001 | 0        | 0.357707 | -0.41864 | 0.81278  | NA       | RP11-809N chr6  | + | 1.05E+08 | 1.05E+08 | 278  |
| ENSG000001 | 4.294532 | 4.850927 | -0.17531 | 0.84301  | 0.88985  | SOC55P4 chrX    | - | 70263064 | 70265320 | 1566 |
| ENSG000001 | 1.887365 | 14.92747 | -2.7635  | 0.001355 | 0.003295 | RP11-152N chr10 | + | 75012549 | 75014107 | 762  |
| ENSG000001 | 0        | 0.654722 | -0.83442 | 0.63731  | NA       | RP3-525N1 chrX  | - | 1.19E+08 | 1.19E+08 | 688  |
| ENSG000001 | 16.10364 | 17.5042  | -0.11501 | 0.87129  | 0.91011  | AC092614. chr2  | - | 1.92E+08 | 1.92E+08 | 909  |
| ENSG000001 | 14.05678 | 18.28192 | -0.3693  | 0.49269  | 0.59663  | SPAG5-AS1 chr17 | + | 26925808 | 26944393 | 2141 |
| ENSG000001 | 0        | 0.343138 | -0.41864 | 0.81278  | NA       | AC018647. chr7  | + | 35756055 | 35774497 | 1651 |
| ENSG000001 | 0        | 0.343138 | -0.41864 | 0.81278  | NA       | RP11-406A chr9  | - | 92782936 | 92803781 | 2720 |
| ENSG000001 | 20.13598 | 9.246195 | 1.0969   | 0.034261 | 0.063927 | PGM5P2 chr9     | - | 69080240 | 69147854 | 1968 |
| ENSG000001 | 2.759082 | 1.591889 | 0.6382   | 0.62639  | 0.71641  | RP11-139K chr10 | + | 1.15E+08 | 1.15E+08 | 390  |
| ENSG000001 | 0.290301 | 0.343138 | -0.00202 | 0.99909  | NA       | RP5-1166A chr7  | + | 1.22E+08 | 1.22E+08 | 607  |
| ENSG000001 | 4.305697 | 0.297015 | 2.9531   | 0.031924 | 0.059962 | RPS3AP53 chr3   | + | 15182887 | 15183664 | 778  |
| ENSG000001 | 1.286224 | 0        | 1.8436   | 0.2818   | NA       | RP1-35C21 chr1  | - | 1.77E+08 | 1.78E+08 | 798  |
| ENSG000001 | 4.160953 | 0.343138 | 2.8024   | 0.050335 | 0.08946  | RP11-262F chr9  | - | 66516697 | 66520781 | 1135 |
| ENSG000001 | 0.36308  | 2.027273 | -1.8576  | 0.23341  | 0.32704  | RP11-119F chr10 | + | 70434113 | 70434857 | 745  |
| ENSG000001 | 0.36308  | 0.343138 | -0.0021  | 0.99905  | NA       | RP11-162A chr10 | - | 1.25E+08 | 1.25E+08 | 348  |
| ENSG000001 | 0        | 0.891044 | -1.0625  | 0.54819  | NA       | RP5-1092A chr1  | - | 3575502  | 3585336  | 754  |
| ENSG000001 | 0        | 0.297015 | -0.41864 | 0.81278  | NA       | ATP5G1P5 chr13  | + | 1.07E+08 | 1.07E+08 | 411  |
| ENSG000001 | 0.290301 | 0.891044 | -0.7342  | 0.68015  | NA       | RP1-2801C chr1  | - | 2.1E+08  | 2.1E+08  | 449  |
| ENSG000001 | 8.869991 | 9.848346 | -0.15935 | 0.81609  | 0.8708   | RP1-167A1 chr6  | - | 1.67E+08 | 1.67E+08 | 385  |
| ENSG000001 | 4.088174 | 6.673433 | -0.67985 | 0.41576  | 0.52088  | RP11-165J chr9  | - | 96197614 | 96199403 | 691  |
| ENSG000001 | 0        | 0.357707 | -0.41864 | 0.81278  | NA       | SUMO2P2 chr9    | + | 23632104 | 23632358 | 255  |
| ENSG000001 | 8.94277  | 15.75045 | -0.78193 | 0.22008  | 0.31195  | RP11-864N chr11 | - | 74456761 | 74457159 | 399  |
| ENSG000001 | 0        | 0.297015 | -0.41864 | 0.81278  | NA       | AC063976. chr5  | - | 1.31E+08 | 1.31E+08 | 329  |
| ENSG000001 | 0        | 0.357707 | -0.41864 | 0.81278  | NA       | CERS6-AS1 chr2  | - | 1.7E+08  | 1.7E+08  | 2890 |
| ENSG000001 | 0        | 0.343138 | -0.41864 | 0.81278  | NA       | RP11-492E chr9  | + | 1.32E+08 | 1.32E+08 | 2449 |
| ENSG000001 | 0.923144 | 5.568757 | -2.2459  | 0.045636 | 0.082125 | ALG1L8P chr11   | + | 67552744 | 67559806 | 760  |
| ENSG000001 | 2.064625 | 4.303021 | -0.98792 | 0.33557  | 0.43921  | RP1-101K1 chr6  | + | 1.53E+08 | 1.53E+08 | 663  |
| ENSG000001 | 0.290301 | 0.297015 | -0.00202 | 0.99909  | NA       | RP4-781K5 chr1  | + | 2.35E+08 | 2.35E+08 | 3574 |
| ENSG000001 | 0.72616  | 0        | 0.85004  | 0.63064  | NA       | AC018804. chr2  | + | 1.31E+08 | 1.31E+08 | 618  |
| ENSG000001 | 0.632843 | 0.297015 | 0.49183  | 0.78024  | NA       | RP11-431K chr1  | + | 8268732  | 8275270  | 497  |
| ENSG000001 | 4.822893 | 4.899467 | -0.01736 | 0.98451  | 0.99109  | RP11-242C chr1  | + | 29479001 | 29479503 | 320  |
| ENSG000001 | 3.236995 | 6.108542 | -0.83363 | 0.36004  | 0.46418  | HNRNPA1P chr9   | - | 91025444 | 91026378 | 935  |
| ENSG000001 | 0        | 195.114  | -9.0032  | 2.00E-16 | 1.41E-15 | SOX21-AS1 chr13 | + | 95364970 | 95366749 | 1536 |
| ENSG000001 | 0.36308  | 0.357707 | -0.00212 | 0.99905  | NA       | STEAP2-AS1 chr7 | - | 89511667 | 89840949 | 1005 |
| ENSG000001 | 0.923144 | 0        | 1.223    | 0.49292  | NA       | AC005160. chr7  | + | 40815157 | 40824816 | 381  |
| ENSG000001 | 0        | 0.715414 | -0.84936 | 0.6309   | NA       | CLYBL-AS2 chr13 | - | 1E+08    | 1E+08    | 695  |
| ENSG000001 | 1.306762 | 2.307303 | -0.68995 | 0.59412  | 0.68869  | RP11-162J chr6  | - | 1.49E+08 | 1.49E+08 | 714  |
| ENSG000001 | 2.250445 | 0.654722 | 1.3746   | 0.35539  | 0.45963  | RP11-490F chr9  | + | 96800312 | 96800627 | 316  |
| ENSG000001 | 209.799  | 195.574  | 0.099912 | 0.57729  | 0.67398  | RP11-488L chr1  | - | 2.47E+08 | 2.47E+08 | 1465 |
| ENSG000001 | 0        | 1.372552 | -1.3974  | 0.43145  | NA       | RP11-243J chr1  | - | 1.56E+08 | 1.56E+08 | 157  |
| ENSG000001 | 2.790785 | 0.594029 | 1.683    | 0.24609  | 0.34193  | RP11-730E chr6  | - | 1.3E+08  | 1.3E+08  | 769  |
| ENSG000001 | 0.342542 | 0        | 0.4146   | 0.81455  | NA       | AC108051. chr2  | + | 1.04E+08 | 1.04E+08 | 549  |
| ENSG000001 | 2.229907 | 0.297015 | 2.0357   | 0.18202  | 0.26681  | RP11-307P chr6  | + | 1.48E+08 | 1.48E+08 | 773  |
| ENSG000001 | 0.653381 | 0.343138 | 0.51863  | 0.76794  | NA       | RP11-445N chr10 | - | 45659676 | 45676875 | 535  |
| ENSG000001 | 0        | 4.150082 | -3.5165  | 0.018741 | 0.037225 | CROCCP4 chr1    | + | 17076728 | 17077459 | 498  |
| ENSG000001 | 0        | 0.343138 | -0.41864 | 0.81278  | NA       | HNRNPA3P chr20  | + | 35248806 | 35249826 | 662  |
| ENSG000001 | 0.290301 | 0        | 0.4146   | 0.81455  | NA       | SRP68P2 chr17   | + | 18430871 | 18431775 | 254  |
| ENSG000001 | 3.10081  | 2.42224  | 0.29183  | 0.8182   | 0.87233  | MED28P3 chr2    | + | 1.87E+08 | 1.87E+08 | 531  |
| ENSG000001 | 0        | 9.701854 | -4.8452  | 0.000192 | 0.000528 | GSTM3P1 chr20   | + | 21482033 | 21482606 | 574  |
| ENSG000001 | 1.08924  | 0.343138 | 0.88459  | 0.61802  | NA       | DNMBP-AS chr10  | + | 1.02E+08 | 1.02E+08 | 2034 |
| ENSG000001 | 3.942617 | 5.439251 | -0.42123 | 0.63648  | 0.72476  | AP001619. chr21 | - | 43294865 | 43297722 | 447  |
| ENSG000001 | 0        | 2.604317 | -2.8535  | 0.070151 | 0.11941  | RP11-301N chr1  | + | 1.48E+08 | 1.48E+08 | 517  |

|            |          |          |          |          |          |                  |   |          |          |      |
|------------|----------|----------|----------|----------|----------|------------------|---|----------|----------|------|
| ENSG000001 | 1.068702 | 0        | 1.3672   | 0.44297  | NA       | RP11-15M: chr20  | - | 51812768 | 51825244 | 485  |
| ENSG000001 | 0        | 12.04145 | -5.1273  | 6.36E-05 | 0.000186 | RP11-301C chr6   | - | 68597538 | 68599231 | 1605 |
| ENSG000001 | 0.290301 | 0        | 0.4146   | 0.81455  | NA       | RP11-275C chr1   | - | 2.28E+08 | 2.28E+08 | 619  |
| ENSG000001 | 0        | 7.03114  | -4.4148  | 0.000825 | 0.002075 | RP11-418J chr1   | - | 1.2E+08  | 1.2E+08  | 898  |
| ENSG000001 | 0        | 0.297015 | -0.41864 | 0.81278  | NA       | MTND6P18 chr13   | - | 96346237 | 96346749 | 513  |
| ENSG000001 | 4.834058 | 14.45241 | -1.4979  | 0.043996 | 0.079561 | AC006042. chr7   | + | 8153655  | 8156191  | 524  |
| ENSG000001 | 0        | 1.012429 | -1.3162  | 0.46038  | NA       | RP5-1059F chr1   | + | 1.68E+08 | 1.68E+08 | 548  |
| ENSG000001 | 0.342542 | 0        | 0.4146   | 0.81455  | NA       | CTA-31J9.2 chr6  | + | 1.35E+08 | 1.35E+08 | 370  |
| ENSG000001 | 3.092251 | 1.949596 | 0.5653   | 0.61975  | 0.71071  | GCOM2 chr4       | + | 68904262 | 68905368 | 1107 |
| ENSG000001 | 0        | 9.823239 | -4.8641  | 0.000174 | 0.000481 | AP001271. chr11  | - | 70323382 | 70323697 | 206  |
| ENSG000001 | 0.653381 | 0        | 0.82678  | 0.64037  | NA       | MTND6P5 chr9     | + | 5091093  | 5091604  | 512  |
| ENSG000001 | 0        | 2.428687 | -2.6709  | 0.10016  | 0.16168  | RP4-565E6 chr1   | - | 1.46E+08 | 1.46E+08 | 2513 |
| ENSG000001 | 0        | 0.343138 | -0.41864 | 0.81278  | NA       | RP11-523K chr1   | - | 2.45E+08 | 2.45E+08 | 297  |
| ENSG000001 | 1.265686 | 0        | 1.6147   | 0.36215  | NA       | RP11-318C chr1   | - | 1.76E+08 | 1.76E+08 | 657  |
| ENSG000001 | 24.98121 | 15.27457 | 0.68438  | 0.30908  | 0.41086  | RP11-536C chr1   | - | 1.6E+08  | 1.6E+08  | 1578 |
| ENSG000001 | 5.984912 | 0.297015 | 3.3767   | 0.012362 | 0.025486 | AC114788. chr2   | - | 2.4E+08  | 2.4E+08  | 3489 |
| ENSG000001 | 0        | 0.98329  | -1.2878  | 0.47019  | NA       | AC098826. chr2   | - | 1.33E+08 | 1.33E+08 | 651  |
| ENSG000001 | 1.608228 | 0.357707 | 1.4924   | 0.36861  | 0.4733   | RP11-497C chr6   | + | 1.47E+08 | 1.47E+08 | 455  |
| ENSG000001 | 0        | 0.937167 | -1.2408  | 0.48662  | NA       | AP000344. chr22  | + | 23788785 | 23803020 | 641  |
| ENSG000001 | 2.096328 | 0.700845 | 1.2139   | 0.4222   | 0.52764  | HCG9P5 chr6      | + | 29716066 | 29716290 | 225  |
| ENSG000001 | 0.290301 | 0        | 0.4146   | 0.81455  | NA       | VTI1BP4 chr9     | + | 1.31E+08 | 1.31E+08 | 527  |
| ENSG000001 | 0.342542 | 0        | 0.4146   | 0.81455  | NA       | GUSBP8 chr5      | + | 98868332 | 98870315 | 679  |
| ENSG000001 | 0.342542 | 0        | 0.4146   | 0.81455  | NA       | AC072062. chr2   | + | 2.16E+08 | 2.16E+08 | 1132 |
| ENSG000001 | 2.012384 | 1.248751 | 0.53853  | 0.68879  | 0.76797  | ASH1L-IT1 chr1   | - | 1.55E+08 | 1.55E+08 | 448  |
| ENSG000001 | 290.6453 | 226.4245 | 0.35852  | 0.024484 | 0.047345 | RP1-283E3 chr1   | + | 1655951  | 1668690  | 1808 |
| ENSG000001 | 0        | 2.041842 | -2.4837  | 0.12741  | 0.19837  | RP4-738P1 chr1   | + | 1.69E+08 | 1.69E+08 | 618  |
| ENSG000001 | 1.503747 | 0.715414 | 0.77806  | 0.63645  | 0.72476  | XXyac-YX15 chr1  | + | 1.48E+08 | 1.48E+08 | 1537 |
| ENSG000001 | 7.645381 | 4.989297 | 0.58673  | 0.42902  | 0.53449  | GLUD1P2 chr10    | + | 48952491 | 48980269 | 932  |
| ENSG000001 | 0        | 0.343138 | -0.41864 | 0.81278  | NA       | AC002553. chr17  | + | 15943505 | 15943994 | 81   |
| ENSG000001 | 0        | 1.340997 | -1.8899  | 0.26871  | NA       | RP11-266I chr1   | + | 67240729 | 67241261 | 360  |
| ENSG000001 | 0.290301 | 1.591889 | -1.5998  | 0.31468  | NA       | AC012363. chr2   | + | 1.21E+08 | 1.21E+08 | 771  |
| ENSG000001 | 0        | 0.343138 | -0.41864 | 0.81278  | NA       | AC015922. chr17  | + | 15732683 | 15767467 | 1074 |
| ENSG000001 | 0.36308  | 0        | 0.4146   | 0.81455  | NA       | RP13-210C chrX   | + | 1.34E+08 | 1.34E+08 | 556  |
| ENSG000001 | 27.24282 | 15.52466 | 0.80883  | 0.081072 | 0.13507  | AC012358. chr2   | + | 55451416 | 55453044 | 1434 |
| ENSG000001 | 0.290301 | 0.715414 | -0.50514 | 0.77701  | NA       | RP11-239F chr6   | + | 20212318 | 20294706 | 191  |
| ENSG000001 | 0        | 0.297015 | -0.41864 | 0.81278  | NA       | RP11-248J chr10  | - | 97759535 | 97760000 | 466  |
| ENSG000001 | 0.943682 | 5.444956 | -2.1829  | 0.063858 | 0.11017  | RP4-773A1 chr1   | + | 1.12E+08 | 1.12E+08 | 2131 |
| ENSG000001 | 1.359003 | 0.640152 | 0.80743  | 0.58991  | 0.68514  | RP1-180M: chr22  | - | 32286330 | 32287420 | 490  |
| ENSG000001 | 0.342542 | 0        | 0.4146   | 0.81455  | NA       | RP11-195C chr1   | + | 1.76E+08 | 1.76E+08 | 795  |
| ENSG000001 | 0.685084 | 0        | 0.85004  | 0.63064  | NA       | AL392086. chr10  | - | 6867825  | 6868186  | 360  |
| ENSG000001 | 0        | 1.326428 | -1.6486  | 0.3523   | NA       | AC006370. chrY   | + | 15863673 | 15970474 | 689  |
| ENSG000001 | 56.17504 | 10.60659 | 2.37     | 3.56E-08 | 1.44E-07 | SLC9A7P1 chr12   | - | 98847613 | 98850923 | 3311 |
| ENSG000001 | 99.36053 | 67.62383 | 0.55695  | 0.02611  | 0.050172 | RP11-958N chr16  | + | 16450081 | 16471364 | 9932 |
| ENSG000001 | 2.064625 | 0.343138 | 1.8971   | 0.21788  | 0.30936  | AC008850. chr5   | + | 96278003 | 96278888 | 362  |
| ENSG000001 | 0.290301 | 71.0875  | -6.8538  | 2.84E-11 | 1.46E-10 | RP1-213J1 chr22  | - | 28072556 | 28110959 | 819  |
| ENSG000001 | 2.624689 | 0        | 2.9014   | 0.06135  | 0.10638  | RP13-143C chr6   | - | 1.36E+08 | 1.36E+08 | 1570 |
| ENSG000001 | 0.342542 | 0        | 0.4146   | 0.81455  | NA       | RP11-184B chr9   | - | 1.28E+08 | 1.28E+08 | 442  |
| ENSG000001 | 1.390706 | 1.903472 | -0.38304 | 0.79233  | 0.85237  | SUCLA2-AS chr13  | + | 48575525 | 48576688 | 552  |
| ENSG000001 | 0.36308  | 0.700845 | -0.575   | 0.7429   | NA       | RP11-156C chr9   | + | 35592783 | 35592948 | 166  |
| ENSG000001 | 27.24461 | 26.55865 | 0.034676 | 0.93802  | 0.95911  | AC007276. chr7   | + | 29689843 | 29782210 | 2326 |
| ENSG000001 | 0.995923 | 1.828211 | -0.7278  | 0.61071  | 0.70319  | RP4-533D7 chr1   | + | 46600203 | 46604753 | 339  |
| ENSG000001 | 0        | 0.98329  | -1.2878  | 0.47019  | NA       | RP4-805N2 chr1   | - | 23337327 | 23342343 | 510  |
| ENSG000001 | 0.632843 | 0.343138 | 0.49756  | 0.77728  | NA       | RP11-807F chr7   | + | 1.25E+08 | 1.25E+08 | 531  |
| ENSG000001 | 0        | 0.594029 | -0.81444 | 0.64499  | NA       | RP11-426N chr1   | - | 12140350 | 12140604 | 255  |
| ENSG000001 | 1.338465 | 0.686276 | 0.71882  | 0.64669  | 0.73297  | RP11-59J5. chr10 | - | 61496753 | 61513203 | 870  |
| ENSG000001 | 0.705622 | 3.38284  | -1.9268  | 0.14033  | 0.21424  | PSPC1P1 chr13    | - | 19775777 | 19801572 | 665  |
| ENSG000001 | 0        | 0.891044 | -1.0625  | 0.54819  | NA       | ATP6V0E1F chr1   | + | 48015868 | 48016425 | 242  |
| ENSG000001 | 9.752874 | 5.903031 | 0.65442  | 0.42712  | 0.53254  | RP11-79N2 chr6   | - | 53605547 | 53611820 | 850  |
| ENSG000001 | 0.36308  | 0        | 0.4146   | 0.81455  | NA       | RP11-459K chr1   | - | 2.09E+08 | 2.09E+08 | 330  |
| ENSG000001 | 3.879211 | 4.989297 | -0.32857 | 0.70528  | 0.78094  | FAM66A chr8      | + | 12219527 | 12268510 | 921  |
| ENSG000001 | 2.023549 | 0        | 2.432    | 0.14018  | 0.21407  | LINC00352 chr13  | + | 24072935 | 24077013 | 552  |
| ENSG000001 | 10.27007 | 26.4413  | -1.339   | 0.009484 | 0.020016 | RP11-77P6 chr10  | + | 88281702 | 88282443 | 643  |
| ENSG000001 | 1.265686 | 0        | 1.6147   | 0.36215  | NA       | SNAP25-AS chr20  | - | 10002620 | 10349424 | 3207 |
| ENSG000001 | 0        | 3.717114 | -3.3236  | 0.03054  | 0.057622 | CTD-2031P chr5   | + | 55290995 | 55299477 | 2289 |
| ENSG000001 | 0.923144 | 0        | 1.223    | 0.49292  | NA       | RP11-141N chr13  | - | 33907983 | 33909403 | 466  |

|            |          |          |          |          |          |            |       |   |          |          |      |
|------------|----------|----------|----------|----------|----------|------------|-------|---|----------|----------|------|
| ENSG000001 | 0        | 0.297015 | -0.41864 | 0.81278  | NA       | KRT8P44    | chr6  | + | 1.63E+08 | 1.63E+08 | 1350 |
| ENSG000001 | 0.975385 | 1.698704 | -0.63147 | 0.65184  | 0.7372   | RP11-130C  | chr9  | - | 673478   | 685555   | 1120 |
| ENSG000001 | 0        | 0.594029 | -0.81444 | 0.64499  | NA       | RP1-153P1  | chr6  | + | 37512921 | 37518636 | 998  |
| ENSG000001 | 2.105701 | 1.029414 | 0.73831  | 0.64522  | 0.732    | AL353791.  | chr9  | + | 40028620 | 40032417 | 3798 |
| ENSG000001 | 0.685084 | 0.343138 | 0.48017  | 0.78775  | NA       | RP11-191N  | chr1  | - | 2.22E+08 | 2.22E+08 | 423  |
| ENSG000001 | 0        | 1.073121 | -1.1788  | 0.50551  | NA       | MACROD2-   | chr20 | + | 14535030 | 14617170 | 665  |
| ENSG000001 | 0.36308  | 1.043983 | -0.98453 | 0.56694  | NA       | SRGAP3-AS  | chr3  | + | 9258579  | 9259771  | 567  |
| ENSG000001 | 0        | 0.654722 | -0.83442 | 0.63731  | NA       | RP11-331F  | chr9  | + | 35646267 | 35647096 | 574  |
| ENSG000001 | 0.943682 | 0.700845 | 0.33849  | 0.83415  | NA       | RP11-423F  | chr1  | + | 2.31E+08 | 2.31E+08 | 573  |
| ENSG000001 | 0        | 1.591889 | -2.1342  | 0.20414  | NA       | RP6-102O1  | chr1  | + | 57852248 | 57853122 | 708  |
| ENSG000001 | 0.342542 | 1.66715  | -1.521   | 0.35886  | 0.46305  | RPL3P2     | chr6  | + | 31248094 | 31249296 | 1203 |
| ENSG000001 | 0        | 0.357707 | -0.41864 | 0.81278  | NA       | RP11-103C  | chr6  | + | 1.28E+08 | 1.28E+08 | 752  |
| ENSG000001 | 21.27405 | 94.38005 | -2.1186  | 2.18E-09 | 9.78E-09 | AC007383.  | chr2  | + | 2.07E+08 | 2.07E+08 | 752  |
| ENSG000001 | 0        | 0.357707 | -0.41864 | 0.81278  | NA       | RP11-543C  | chr1  | + | 48154135 | 48169055 | 815  |
| ENSG000001 | 0        | 0.937167 | -1.2408  | 0.48662  | NA       | AC003989.  | chr7  | + | 1.11E+08 | 1.11E+08 | 565  |
| ENSG000001 | 0.870904 | 1.591889 | -0.62638 | 0.67983  | 0.76041  | RP11-312B  | chr1  | - | 6894393  | 6894678  | 286  |
| ENSG000001 | 5.144897 | 3.212915 | 0.61387  | 0.54719  | 0.64731  | RP11-439E  | chr1  | + | 2.47E+08 | 2.47E+08 | 2600 |
| ENSG000001 | 0        | 0.343138 | -0.41864 | 0.81278  | NA       | RP11-704J  | chr6  | - | 1.34E+08 | 1.34E+08 | 753  |
| ENSG000001 | 5.281082 | 2.399549 | 1.063    | 0.27942  | 0.38019  | RP11-276F  | chr1  | + | 16481706 | 16483824 | 904  |
| ENSG000001 | 0        | 1.591889 | -2.1342  | 0.20414  | NA       | RP5-837I2  | chr1  | + | 81970784 | 81971981 | 343  |
| ENSG000001 | 0.342542 | 0.640152 | -0.50911 | 0.77219  | NA       | RP11-382C  | chr1  | + | 2.36E+08 | 2.36E+08 | 282  |
| ENSG000001 | 3.755005 | 5.989573 | -0.63402 | 0.51053  | 0.61384  | RP5-1074L  | chr1  | - | 1.11E+08 | 1.11E+08 | 2611 |
| ENSG000001 | 2.540746 | 1.888903 | 0.35571  | 0.78026  | 0.84228  | RP5-1112F  | chr20 | - | 50448336 | 50479451 | 2326 |
| ENSG000001 | 1.669842 | 0        | 1.9671   | 0.26049  | NA       | PRKRIRP3   | chr10 | + | 54170895 | 54173252 | 2266 |
| ENSG000001 | 4.804961 | 2.010288 | 1.1117   | 0.32338  | 0.42632  | PIN4P1     | chr15 | - | 44168047 | 44168442 | 396  |
| ENSG000001 | 0        | 2.65044  | -2.9164  | 0.059842 | 0.10422  | TRIM60P1   | chr7  | + | 63815456 | 63816577 | 828  |
| ENSG000001 | 19.13232 | 0        | 5.8184   | 1.51E-06 | 5.30E-06 | AC108463.  | chr2  | - | 1.12E+08 | 1.12E+08 | 347  |
| ENSG000001 | 1.939605 | 8.856934 | -2.0288  | 0.02421  | 0.046876 | MTND5P1    | chr21 | - | 45893606 | 45894980 | 1375 |
| ENSG000001 | 1.359003 | 2.589748 | -0.83624 | 0.48475  | 0.58873  | RPL7AP65   | chr17 | + | 18215218 | 18215965 | 748  |
| ENSG000001 | 0.685084 | 0        | 0.85004  | 0.63064  | NA       | DHX9P1     | chr13 | + | 77559003 | 77562078 | 3076 |
| ENSG000001 | 0        | 0.343138 | -0.41864 | 0.81278  | NA       | AC020743.  | chr7  | - | 50181136 | 50182419 | 767  |
| ENSG000001 | 0.36308  | 2.056411 | -1.8964  | 0.21731  | 0.30867  | AC011933.  | chr17 | + | 73334908 | 73335228 | 321  |
| ENSG000001 | 2.375464 | 0.98329  | 1.0352   | 0.44332  | 0.54895  | CTD-2330K  | chr3  | + | 49941278 | 49954370 | 600  |
| ENSG000001 | 3.858673 | 7.31929  | -0.86925 | 0.30507  | 0.40665  | AC073343.  | chr7  | + | 6703605  | 6748532  | 564  |
| ENSG000001 | 0        | 0.594029 | -0.81444 | 0.64499  | NA       | RP11-321E  | chr7  | + | 63929563 | 63931031 | 1469 |
| ENSG000001 | 0        | 0.343138 | -0.41864 | 0.81278  | NA       | AC074338.  | chr7  | - | 33168600 | 33168755 | 156  |
| ENSG000001 | 1.503747 | 0        | 1.8221   | 0.30126  | NA       | RAPGEF4-A  | chr2  | - | 1.74E+08 | 1.74E+08 | 4625 |
| ENSG000001 | 3.423628 | 1.935026 | 0.70837  | 0.51579  | 0.61867  | RP11-166C  | chr7  | - | 66772592 | 66773343 | 378  |
| ENSG000001 | 1.370168 | 0.654722 | 0.70321  | 0.67494  | 0.75646  | RP11-383C  | chr10 | + | 1.27E+08 | 1.27E+08 | 3530 |
| ENSG000001 | 0.995923 | 1.888903 | -0.79027 | 0.55413  | 0.65347  | HCG20      | chr6  | + | 30734602 | 30760027 | 1202 |
| ENSG000001 | 7.148722 | 1.340997 | 2.1939   | 0.031253 | 0.058775 | AC069257.  | chr3  | + | 1.96E+08 | 1.96E+08 | 422  |
| ENSG000001 | 1.649304 | 0        | 2.1906   | 0.18857  | NA       | AC078842.  | chr7  | - | 1.37E+08 | 1.37E+08 | 553  |
| ENSG000001 | 1.027626 | 0.937167 | 0.069563 | 0.96674  | 0.98099  | AC010967.  | chr2  | - | 52949815 | 53137158 | 489  |
| ENSG000001 | 1.370168 | 0        | 1.3929   | 0.43293  | NA       | RP4-663N1  | chr1  | + | 1.16E+08 | 1.16E+08 | 2610 |
| ENSG000001 | 0.72616  | 2.087966 | -1.1167  | 0.48434  | 0.58847  | RP3-395M.  | chr1  | + | 2512999  | 2515972  | 626  |
| ENSG000001 | 0        | 28.37874 | -6.4399  | 1.70E-08 | 7.08E-08 | VN1R51P    | chr9  | - | 99855976 | 99856920 | 945  |
| ENSG000001 | 1.939605 | 6.29874  | -1.5568  | 0.098541 | 0.15945  | AC097721.  | chr2  | - | 1.39E+08 | 1.39E+08 | 928  |
| ENSG000001 | 0        | 1.623443 | -1.9406  | 0.26756  | NA       | DNAJA1P6   | chr22 | - | 17997708 | 17998061 | 354  |
| ENSG000001 | 2.729171 | 0        | 2.877    | 0.069197 | 0.11795  | POLR2J2    | chr7  | - | 1.02E+08 | 1.02E+08 | 1714 |
| ENSG000001 | 0.685084 | 1.638012 | -0.9712  | 0.52341  | 0.62585  | TOP3BP1    | chr22 | - | 22577580 | 22578959 | 1380 |
| ENSG000001 | 0.943682 | 0.297015 | 0.89158  | 0.60669  | NA       | RP11-151F  | chr9  | - | 1.13E+08 | 1.13E+08 | 478  |
| ENSG000001 | 1.265686 | 0        | 1.6147   | 0.36215  | NA       | RANP5      | chr1  | + | 1.1E+08  | 1.1E+08  | 655  |
| ENSG000001 | 0        | 4.914036 | -3.863   | 0.005903 | 0.012954 | CFL1P3     | chr1  | - | 64308862 | 64309356 | 490  |
| ENSG000001 | 3.132513 | 0.700845 | 1.8296   | 0.17263  | 0.25523  | SEC63P1    | chr1  | + | 98011257 | 98012514 | 1258 |
| ENSG000001 | 5.943836 | 6.50834  | -0.12949 | 0.88206  | 0.91786  | RP11-69E1  | chr1  | + | 40030832 | 40038875 | 551  |
| ENSG000001 | 2.407167 | 1.012429 | 1.0323   | 0.44146  | 0.54726  | Z83001.1   | chr11 | - | 31658875 | 31789501 | 598  |
| ENSG000001 | 0.342542 | 0        | 0.4146   | 0.81455  | NA       | RP11-135J. | chr1  | - | 2.19E+08 | 2.19E+08 | 724  |
| ENSG000001 | 0        | 0.343138 | -0.41864 | 0.81278  | NA       | AC023469.  | chr1  | + | 1.52E+08 | 1.52E+08 | 657  |
| ENSG000001 | 32.87142 | 37.3392  | -0.17456 | 0.64001  | 0.72726  | RP11-222A  | chr10 | + | 67330208 | 67526299 | 1227 |
| ENSG000001 | 1.027626 | 4.008423 | -1.6481  | 0.2136   | 0.30426  | RP11-100C  | chr9  | + | 94871295 | 94872377 | 779  |
| ENSG000001 | 0        | 0.686276 | -0.84936 | 0.6309   | NA       | RPL7P47    | chr16 | + | 18026577 | 18027132 | 556  |
| ENSG000001 | 1.317927 | 0.686276 | 0.64816  | 0.69683  | 0.77397  | AC133106.  | chr2  | + | 1.9E+08  | 1.9E+08  | 397  |
| ENSG000001 | 0        | 0.343138 | -0.41864 | 0.81278  | NA       | UBBP5      | chr13 | + | 87871259 | 87871524 | 266  |
| ENSG000001 | 0        | 1.043983 | -1.3473  | 0.44976  | NA       | BOD1L2     | chr18 | + | 54814293 | 54817531 | 3239 |
| ENSG000001 | 0.72616  | 1.545765 | -0.79253 | 0.62975  | 0.71935  | RP11-475E  | chr1  | - | 1.09E+08 | 1.09E+08 | 744  |

|            |          |          |          |          |          |           |       |   |          |          |      |
|------------|----------|----------|----------|----------|----------|-----------|-------|---|----------|----------|------|
| ENSG000001 | 0        | 0.297015 | -0.41864 | 0.81278  | NA       | HLA-U     | chr6  | + | 29901878 | 29902063 | 186  |
| ENSG000001 | 1.286224 | 2.416535 | -0.72404 | 0.59904  | 0.69309  | AC012368  | chr2  | - | 64313484 | 64315380 | 563  |
| ENSG000001 | 0        | 0.343138 | -0.41864 | 0.81278  | NA       | RP11-385N | chr1  | + | 2.09E+08 | 2.09E+08 | 362  |
| ENSG000001 | 4.12925  | 4.522358 | -0.13635 | 0.89958  | 0.9305   | RP5-884G6 | chr1  | - | 1E+08    | 1E+08    | 655  |
| ENSG000001 | 1.048164 | 0        | 1.348    | 0.44949  | NA       | RP5-837M  | chr1  | - | 1.01E+08 | 1.01E+08 | 592  |
| ENSG000001 | 0.870904 | 6.03328  | -2.3432  | 0.047007 | 0.084319 | RP1-19701 | chrX  | - | 1.31E+08 | 1.31E+08 | 430  |
| ENSG000001 | 19.79344 | 21.91491 | -0.15096 | 0.72507  | 0.79654  | RP11-452F | chr1  | + | 2.23E+08 | 2.23E+08 | 767  |
| ENSG000001 | 8.030791 | 7.129091 | 0.14932  | 0.837    | 0.88567  | AP000692  | chr21 | + | 37732928 | 37734338 | 596  |
| ENSG000001 | 0.975385 | 0        | 1.2767   | 0.47406  | NA       | AC092839  | chr2  | - | 54743185 | 54767834 | 536  |
| ENSG000001 | 5.955001 | 19.49837 | -1.6703  | 0.005263 | 0.011676 | MF12-AS1  | chr3  | + | 1.97E+08 | 1.97E+08 | 951  |
| ENSG000001 | 0.685084 | 2.307303 | -1.3895  | 0.34112  | 0.44506  | ST13P19   | chr1  | - | 2.1E+08  | 2.1E+08  | 1124 |
| ENSG000001 | 0.653381 | 0.357707 | 0.52032  | 0.76705  | NA       | AC003991  | chr7  | + | 87848674 | 87921781 | 821  |
| ENSG000001 | 0.290301 | 3.273608 | -2.4211  | 0.12033  | 0.18926  | RP11-165F | chr9  | + | 487774   | 495610   | 403  |
| ENSG000001 | 0        | 0.343138 | -0.41864 | 0.81278  | NA       | AP001631  | chr21 | - | 44579176 | 44582387 | 1052 |
| ENSG000001 | 0.685084 | 0.654722 | 0.030656 | 0.98584  | NA       | RP1-12208 | chr6  | + | 90383188 | 90385502 | 472  |
| ENSG000001 | 0.36308  | 0.297015 | -0.00205 | 0.99908  | NA       | RP11-516A | chrX  | + | 67352710 | 67353279 | 570  |
| ENSG000001 | 7.116206 | 6.518077 | 0.12143  | 0.87671  | 0.91428  | LINC00568 | chr1  | + | 1.5E+08  | 1.5E+08  | 566  |
| ENSG000001 | 0        | 2.041842 | -2.4837  | 0.12741  | 0.19837  | RP11-12L8 | chr1  | + | 1.16E+08 | 1.16E+08 | 1396 |
| ENSG000001 | 0.705622 | 0        | 0.8807   | 0.6196   | NA       | AC099684  | chr17 | + | 1921010  | 1924000  | 1747 |
| ENSG000001 | 0        | 1.355566 | -1.9006  | 0.26573  | NA       | AC073128  | chr2  | - | 2.2E+08  | 2.2E+08  | 1011 |
| ENSG000001 | 5.592734 | 2.765378 | 0.85934  | 0.45733  | 0.56257  | AP001469  | chr21 | + | 47666804 | 47667596 | 390  |
| ENSG000001 | 0.36308  | 0        | 0.4146   | 0.81455  | NA       | GS1-421I3 | chrX  | - | 1.19E+08 | 1.19E+08 | 279  |
| ENSG000001 | 0.995923 | 1.606458 | -0.5669  | 0.68944  | 0.76855  | RP3-467K1 | chr1  | - | 15729475 | 15735929 | 5178 |
| ENSG000001 | 0        | 3.212915 | -2.9127  | 0.077518 | 0.13005  | AC105339  | chr15 | - | 83379223 | 83382778 | 2569 |
| ENSG000001 | 10.27007 | 9.641162 | 0.074181 | 0.91169  | 0.93961  | CASP16    | chr16 | + | 3194220  | 3199964  | 2161 |
| ENSG000001 | 0        | 1.638012 | -2.1885  | 0.18912  | NA       | RPL3P1    | chr21 | - | 37541268 | 37542478 | 1211 |
| ENSG000001 | 4.689314 | 8.729844 | -0.86038 | 0.24458  | 0.34032  | RP11-84A1 | chr1  | + | 10002981 | 10010032 | 440  |
| ENSG000001 | 0.342542 | 0.343138 | -0.00208 | 0.99906  | NA       | AC004941  | chr7  | + | 1.49E+08 | 1.49E+08 | 3120 |
| ENSG000001 | 0        | 2.324288 | -2.6717  | 0.096097 | 0.15624  | RP11-23I7 | chr1  | + | 2.05E+08 | 2.05E+08 | 445  |
| ENSG000001 | 0.342542 | 1.326428 | -1.2461  | 0.46257  | NA       | AL589685  | chr1  | + | 1.56E+08 | 1.56E+08 | 177  |
| ENSG000001 | 0.36308  | 0        | 0.4146   | 0.81455  | NA       | RP11-410N | chr20 | + | 31169765 | 31181702 | 370  |
| ENSG000001 | 0        | 8.012014 | -4.6056  | 0.000394 | 0.001037 | AC007952  | chr17 | + | 18996287 | 19000150 | 1921 |
| ENSG000001 | 1.370168 | 9.983427 | -2.5462  | 0.025172 | 0.048539 | TLE1P1    | chrX  | + | 64627964 | 64628565 | 589  |
| ENSG000001 | 0.342542 | 0        | 0.4146   | 0.81455  | NA       | MTND1P11  | chr9  | + | 5094139  | 5095014  | 876  |
| ENSG000001 | 0        | 0.654722 | -0.83442 | 0.63731  | NA       | PPIAP19   | chr10 | - | 1.16E+08 | 1.16E+08 | 492  |
| ENSG000001 | 0.36308  | 0.594029 | -0.39069 | 0.82661  | NA       | AC121251  | chr3  | - | 23431152 | 23431400 | 249  |
| ENSG000001 | 1.733248 | 0.357707 | 1.5335   | 0.35837  | 0.46266  | RP1-317E2 | chr1  | - | 26143240 | 26146263 | 517  |
| ENSG000001 | 4.148974 | 31.29464 | -2.8063  | 2.18E-06 | 7.53E-06 | GEMIN8P4  | chr1  | - | 90459152 | 90459880 | 729  |
| ENSG000001 | 0.36308  | 0        | 0.4146   | 0.81455  | NA       | RP4-656G2 | chr1  | - | 30181698 | 30182394 | 498  |
| ENSG000001 | 0.290301 | 0        | 0.4146   | 0.81455  | NA       | RP11-455B | chr10 | - | 15213035 | 15213277 | 243  |
| ENSG000001 | 0        | 1.012429 | -1.3162  | 0.46038  | NA       | RP11-363F | chr1  | + | 77660510 | 77661080 | 571  |
| ENSG000001 | 0.870904 | 0.297015 | 0.71032  | 0.69005  | NA       | RP11-342N | chr1  | - | 43307569 | 43312058 | 610  |
| ENSG000001 | 0        | 0.357707 | -0.41864 | 0.81278  | NA       | RP11-498B | chr10 | + | 1.19E+08 | 1.19E+08 | 881  |
| ENSG000001 | 0        | 1.40169  | -1.7271  | 0.32809  | NA       | PTPN2P1   | chr1  | - | 1.79E+08 | 1.79E+08 | 1072 |
| ENSG000001 | 4.793796 | 1.40169  | 1.5795   | 0.17356  | 0.25638  | AL022341  | chr16 | - | 698473   | 699200   | 389  |
| ENSG000001 | 74.45536 | 20.77056 | 1.8232   | 1.61E-08 | 6.74E-08 | RNF144A-A | chr2  | - | 7052408  | 7058813  | 2954 |
| ENSG000001 | 0        | 8.576905 | -4.7259  | 0.000215 | 0.000587 | RP4-724E1 | chr7  | + | 50934444 | 51090687 | 762  |
| ENSG000001 | 4.741555 | 1.713273 | 1.3357   | 0.20838  | 0.29834  | RP11-778C | chr3  | + | 1.84E+08 | 1.84E+08 | 732  |
| ENSG000001 | 0.870904 | 2.543625 | -1.1862  | 0.40695  | 0.51174  | OFD1P17   | chr5  | + | 37209466 | 37212483 | 3018 |
| ENSG000001 | 1.359003 | 1.355566 | -0.00028 | 0.99983  | 0.99987  | NLGN1-AS1 | chr3  | - | 1.74E+08 | 1.74E+08 | 815  |
| ENSG000001 | 10.54244 | 19.99686 | -0.91297 | 0.12582  | 0.19642  | LINC00693 | chr3  | + | 28616282 | 28799296 | 1609 |
| ENSG000001 | 1.742621 | 2.370411 | -0.38035 | 0.77806  | 0.84057  | AL390877  | chr1  | - | 1.18E+08 | 1.18E+08 | 420  |
| ENSG000001 | 1.08924  | 2.993578 | -1.2431  | 0.35879  | 0.46305  | ATF4P3    | chr17 | - | 74221832 | 74222887 | 1056 |
| ENSG000001 | 0        | 0.686276 | -0.84936 | 0.6309   | NA       | NPM1P30   | chr10 | + | 21399611 | 21402317 | 828  |
| ENSG000001 | 6.318081 | 24.79596 | -1.9342  | 0.000336 | 0.000893 | AC074363  | chr2  | + | 1.68E+08 | 1.68E+08 | 462  |
| ENSG000001 | 462.1436 | 266.5188 | 0.78984  | 0.001313 | 0.003198 | HCG11     | chr6  | + | 26522076 | 26526807 | 4732 |
| ENSG000001 | 10.10397 | 23.65161 | -1.1943  | 0.014769 | 0.029953 | GAPDHP1   | chrX  | - | 39646386 | 39647390 | 1005 |
| ENSG000001 | 3.609448 | 2.979009 | 0.25291  | 0.80431  | 0.86166  | EFCA14-A  | chr1  | + | 47139708 | 47157770 | 500  |
| ENSG000001 | 0.342542 | 0        | 0.4146   | 0.81455  | NA       | MOB1AP1   | chr13 | + | 86543134 | 86543668 | 535  |
| ENSG000001 | 2.686303 | 2.027273 | 0.34475  | 0.78785  | 0.8483   | AC093495  | chr3  | + | 14186320 | 14189784 | 575  |
| ENSG000001 | 11.96901 | 0.343138 | 4.3251   | 0.000473 | 0.001232 | RP11-436C | chr9  | + | 45949232 | 45949823 | 592  |
| ENSG000001 | 0.72616  | 0        | 0.85004  | 0.63064  | NA       | UBBP2     | chr1  | - | 2.18E+08 | 2.18E+08 | 231  |
| ENSG000001 | 3.704556 | 3.573038 | 0.031762 | 0.9746   | 0.98577  | AC012442  | chr2  | + | 1.13E+08 | 1.13E+08 | 529  |
| ENSG000001 | 21.5901  | 13.07012 | 0.7006   | 0.15765  | 0.23692  | COL6A4P2  | chr3  | + | 1.3E+08  | 1.3E+08  | 2612 |
| ENSG000001 | 51.67154 | 128.305  | -1.306   | 2.59E-05 | 7.92E-05 | MT-ATP8   | chrMT | + | 8366     | 8572     | 207  |

|            |          |          |          |          |          |                 |   |          |          |      |
|------------|----------|----------|----------|----------|----------|-----------------|---|----------|----------|------|
| ENSG000001 | 0        | 2.278164 | -2.6634  | 0.096176 | 0.1563   | AC136604. chr5  | + | 1.79E+08 | 1.79E+08 | 777  |
| ENSG000001 | 4.979616 | 5.361573 | -0.09856 | 0.90281  | 0.93274  | RP11-127L chr10 | + | 1.06E+08 | 1.06E+08 | 954  |
| ENSG000001 | 0        | 0.98329  | -1.2878  | 0.47019  | NA       | AC073218. chr2  | + | 34902646 | 34963298 | 1205 |
| ENSG000001 | 10.64171 | 14.77125 | -0.45355 | 0.44483  | 0.5504   | RP5-1125A chr20 | - | 32570858 | 32582163 | 660  |
| ENSG000001 | 0.995923 | 1.372552 | -0.33699 | 0.82916  | 0.87967  | RP11-513C chr3  | + | 1.94E+08 | 1.94E+08 | 1771 |
| ENSG000001 | 53.47594 | 27.86164 | 0.9241   | 0.010855 | 0.022646 | RP3-50811 chr22 | - | 39063590 | 39077825 | 1325 |
| ENSG000001 | 0.36308  | 2.324288 | -2.0595  | 0.17468  | 0.2578   | ORM2 chr9       | + | 1.17E+08 | 1.17E+08 | 980  |
| ENSG000001 | 0        | 0.297015 | -0.41864 | 0.81278  | NA       | RP11-367B chr10 | + | 77502498 | 77503513 | 434  |
| ENSG000001 | 0.632843 | 0        | 0.81931  | 0.64303  | NA       | RP11-497C chr6  | - | 1.47E+08 | 1.47E+08 | 1466 |
| ENSG000001 | 0.290301 | 1.294874 | -1.3421  | 0.40775  | NA       | LYPLA2P1 chr6   | - | 33333325 | 33334020 | 696  |
| ENSG000001 | 66.60599 | 130.0271 | -0.95793 | 0.001712 | 0.004096 | KDM5B-AS1 chr1  | + | 2.03E+08 | 2.03E+08 | 748  |
| ENSG000001 | 0        | 0.715414 | -0.84936 | 0.6309   | NA       | RP4-640E2 chr1  | - | 1.64E+08 | 1.64E+08 | 353  |
| ENSG000001 | 7.117019 | 0        | 4.4068   | 0.000923 | 0.002303 | RP11-132A chr6  | + | 85399143 | 85419252 | 762  |
| ENSG000001 | 0.342542 | 0.937167 | -0.89746 | 0.60352  | NA       | RP11-220L chr9  | - | 37205109 | 37205365 | 257  |
| ENSG000001 | 0.290301 | 0.357707 | -0.00203 | 0.99908  | NA       | RP4-686C3 chr20 | + | 2644998  | 2646520  | 872  |
| ENSG000001 | 0        | 0.357707 | -0.41864 | 0.81278  | NA       | AL589743. chr14 | - | 19670480 | 19686002 | 777  |
| ENSG000001 | 617.1802 | 862.5565 | -0.48099 | 7.10E-05 | 0.000206 | C19orf24 chr19  | + | 1275026  | 1279248  | 1653 |
| ENSG000001 | 26.04991 | 16.76938 | 0.62128  | 0.17657  | 0.26008  | RP11-186A chr10 | - | 12286750 | 12289844 | 1914 |
| ENSG000001 | 3.64115  | 7.786229 | -1.0472  | 0.19671  | 0.28468  | AC016734. chr2  | - | 63849309 | 63849965 | 657  |
| ENSG000001 | 0        | 0.297015 | -0.41864 | 0.81278  | NA       | RP11-255C chr3  | - | 1.77E+08 | 1.77E+08 | 2400 |
| ENSG000001 | 0        | 0.343138 | -0.41864 | 0.81278  | NA       | GAPDHP45 chr10  | - | 15135262 | 15135610 | 349  |
| ENSG000001 | 5.632997 | 2.292733 | 1.1945   | 0.19436  | 0.28201  | CTD-2555K chr14 | - | 23064715 | 23067855 | 2673 |
| ENSG000001 | 219.5066 | 179.2354 | 0.28935  | 0.16434  | 0.24515  | GUSBP11 chr22   | - | 23980674 | 24059543 | 5004 |
| ENSG000001 | 0.290301 | 0.357707 | -0.00203 | 0.99908  | NA       | RP11-522L chrX  | + | 1.02E+08 | 1.02E+08 | 659  |
| ENSG000001 | 0.290301 | 0        | 0.4146   | 0.81455  | NA       | RP11-358A chr9  | + | 4299390  | 4306046  | 873  |
| ENSG000001 | 1.701545 | 2.604317 | -0.56116 | 0.63213  | 0.72123  | AC008753. chr19 | - | 54357835 | 54372361 | 439  |
| ENSG000001 | 38.79895 | 43.98275 | -0.18873 | 0.57969  | 0.67609  | RP11-206L chr1  | - | 700237   | 714006   | 1317 |
| ENSG000001 | 0.290301 | 0.297015 | -0.00202 | 0.99909  | NA       | RP11-516A chrX  | - | 67290362 | 67291609 | 1248 |
| ENSG000001 | 0.36308  | 0        | 0.4146   | 0.81455  | NA       | RP11-730A chr10 | - | 13184185 | 13184977 | 793  |
| ENSG000001 | 0.705622 | 0        | 0.8807   | 0.6196   | NA       | AC073063. chr7  | - | 99040513 | 99041119 | 607  |
| ENSG000001 | 0.36308  | 0.951736 | -0.91212 | 0.59701  | NA       | AMD1P1 chr10    | + | 20638978 | 20640029 | 922  |
| ENSG000001 | 2.592987 | 0        | 2.8438   | 0.071235 | 0.12092  | RP5-1043L chr20 | + | 58662895 | 59102516 | 2043 |
| ENSG000001 | 118.6051 | 93.92897 | 0.33863  | 0.22675  | 0.31967  | RP11-1148 chrX  | - | 48438162 | 48439545 | 450  |
| ENSG000001 | 0        | 0.715414 | -0.84936 | 0.6309   | NA       | EFCAB14P1 chr1  | + | 35587623 | 35588085 | 463  |
| ENSG000001 | 1.286224 | 6.459801 | -2.105   | 0.038997 | 0.071752 | RP11-148C chr3  | + | 48701209 | 48706607 | 196  |
| ENSG000001 | 5.955001 | 4.487515 | 0.39712  | 0.65575  | 0.74054  | RP11-537F chr9  | + | 34084330 | 34096223 | 635  |
| ENSG000001 | 0.290301 | 0        | 0.4146   | 0.81455  | NA       | RP11-184A chr10 | + | 3810107  | 3810943  | 313  |
| ENSG000001 | 2.032922 | 0.297015 | 1.7795   | 0.27748  | 0.3778   | AC113617. chr4  | + | 1.18E+08 | 1.18E+08 | 601  |
| ENSG000001 | 0        | 0.654722 | -0.83442 | 0.63731  | NA       | RP11-365F chr7  | - | 1.39E+08 | 1.39E+08 | 275  |
| ENSG000001 | 6.898683 | 1.340997 | 2.1712   | 0.028419 | 0.054104 | AC015971. chr2  | + | 86789193 | 86845889 | 1948 |
| ENSG000001 | 0        | 0.357707 | -0.41864 | 0.81278  | NA       | RP11-18B3 chr9  | - | 1.08E+08 | 1.08E+08 | 492  |
| ENSG000001 | 0.290301 | 3.679854 | -2.7377  | 0.05158  | 0.091394 | RP11-91A1 chr1  | + | 52516590 | 52518355 | 391  |
| ENSG000001 | 0        | 19.97417 | -5.9474  | 3.63E-07 | 1.35E-06 | RP11-497K chr9  | + | 90038549 | 90038808 | 260  |
| ENSG000001 | 0.342542 | 0        | 0.4146   | 0.81455  | NA       | AC012497. chr2  | - | 1.4E+08  | 1.4E+08  | 575  |
| ENSG000001 | 0.290301 | 14.03885 | -4.6412  | 7.53E-05 | 0.000218 | RP11-520B chr9  | - | 99837953 | 99844227 | 2262 |
| ENSG000001 | 0.632843 | 0.343138 | 0.49756  | 0.77728  | NA       | AC016697. chr2  | - | 2.09E+08 | 2.09E+08 | 615  |
| ENSG000001 | 0.290301 | 0        | 0.4146   | 0.81455  | NA       | ITPKB-IT1 chr1  | - | 2.27E+08 | 2.27E+08 | 746  |
| ENSG000001 | 1.960143 | 1.029414 | 0.68938  | 0.66223  | 0.74588  | AC007040. chr2  | + | 71221573 | 71229884 | 1211 |
| ENSG000001 | 0.342542 | 1.684135 | -1.6365  | 0.30118  | 0.40267  | RP5-1125A chr20 | - | 32602775 | 32605555 | 603  |
| ENSG000001 | 15.02279 | 3.307578 | 2.0766   | 0.005807 | 0.012761 | AC068039. chr2  | + | 1.73E+08 | 1.73E+08 | 2102 |
| ENSG000001 | 27.03629 | 22.48221 | 0.24788  | 0.60063  | 0.69449  | RP11-325F chr7  | - | 1.05E+08 | 1.05E+08 | 686  |
| ENSG000001 | 21.66964 | 5.941033 | 1.8169   | 0.001494 | 0.003608 | RP11-216B chr9  | - | 1.31E+08 | 1.31E+08 | 970  |
| ENSG000001 | 0.72616  | 0        | 0.85004  | 0.63064  | NA       | RP1-224A6 chr1  | - | 22350487 | 22351461 | 615  |
| ENSG000001 | 1.027626 | 2.445673 | -0.93012 | 0.54967  | 0.64947  | RP4-800M1 chr1  | - | 52625933 | 52626272 | 340  |
| ENSG000001 | 84.19365 | 145.1055 | -0.77953 | 0.003792 | 0.008596 | CCT6P1 chr7     | + | 65216129 | 65228341 | 1315 |
| ENSG000001 | 3.092251 | 3.2299   | -0.08431 | 0.93552  | 0.95758  | CDY4P chrY      | - | 14913906 | 14915763 | 1513 |
| ENSG000001 | 1.919068 | 0.700845 | 1.2029   | 0.39689  | 0.50145  | RP4-625H1 chr6  | - | 19803602 | 19804973 | 1016 |
| ENSG000001 | 0        | 1.698704 | -2.2257  | 0.18075  | NA       | AC024937. chr3  | + | 1.96E+08 | 1.96E+08 | 344  |
| ENSG000001 | 0.342542 | 0        | 0.4146   | 0.81455  | NA       | AC010733. chr2  | - | 61052267 | 61108449 | 1705 |
| ENSG000001 | 13.1739  | 6.627309 | 0.96036  | 0.12543  | 0.19591  | PTMAP1 chr6     | + | 30601409 | 30601675 | 267  |
| ENSG000001 | 0.685084 | 0.951736 | -0.32904 | 0.84594  | NA       | CTSL1P3 chr10   | - | 48980162 | 48981273 | 393  |
| ENSG000001 | 0        | 6.566617 | -4.3192  | 0.001178 | 0.002891 | RP4-735C1 chr1  | + | 1.1E+08  | 1.1E+08  | 476  |
| ENSG000001 | 4.679941 | 0.715414 | 2.2815   | 0.086473 | 0.14285  | AC005013. chr7  | + | 28997283 | 28998961 | 588  |
| ENSG000001 | 2.032922 | 7.968307 | -1.8306  | 0.057781 | 0.10101  | RP4-633I8. chr1 | + | 8865919  | 8867110  | 353  |
| ENSG000001 | 1.213446 | 0        | 1.5515   | 0.38249  | NA       | ARL5AP3 chr1    | - | 68515043 | 68515428 | 386  |

|            |          |          |          |          |          |                   |   |          |          |      |
|------------|----------|----------|----------|----------|----------|-------------------|---|----------|----------|------|
| ENSG000001 | 24.0178  | 13.09926 | 0.84818  | 0.089785 | 0.14744  | AC004951. chr7    | - | 44043645 | 44047465 | 1866 |
| ENSG000001 | 8.536009 | 2.558194 | 1.5914   | 0.099513 | 0.16081  | RP5-864K1 chr1    | + | 39325672 | 39385068 | 630  |
| ENSG000001 | 0        | 0.343138 | -0.41864 | 0.81278  | NA       | RP11-400N chr1    | + | 2.22E+08 | 2.22E+08 | 1148 |
| ENSG000001 | 15.51945 | 16.64149 | -0.08933 | 0.86692  | 0.90732  | TSTD3 chr6        | + | 99968569 | 99979794 | 962  |
| ENSG000001 | 8.68238  | 8.959718 | -0.06014 | 0.93542  | 0.95756  | RP11-173B chr13   | - | 76203370 | 76206271 | 2044 |
| ENSG000001 | 2.003011 | 1.531196 | 0.28038  | 0.84885  | 0.89393  | AC073052. chr2    | - | 2.25E+08 | 2.25E+08 | 714  |
| ENSG000001 | 0        | 0.640152 | -0.82869 | 0.63935  | NA       | RP1-154J1. chrX   | - | 1.31E+08 | 1.31E+08 | 608  |
| ENSG000001 | 11.54774 | 14.59078 | -0.33782 | 0.584    | 0.67987  | SDAD1P1 chr8      | - | 26236775 | 26240469 | 3174 |
| ENSG000001 | 13.17471 | 13.50309 | -0.04613 | 0.93775  | 0.95891  | RP5-994D1 chr1    | - | 43241484 | 43242461 | 484  |
| ENSG000001 | 1.317927 | 0        | 1.6383   | 0.35541  | NA       | CXorf28 chrX      | + | 3189861  | 3202694  | 674  |
| ENSG000001 | 0.685084 | 0        | 0.85004  | 0.63064  | NA       | RP11-445N chr10   | - | 45568594 | 45568989 | 396  |
| ENSG000001 | 6.858421 | 3.215331 | 0.98783  | 0.28394  | 0.38526  | AP006222. chr1    | - | 227615   | 267253   | 2257 |
| ENSG000001 | 0.870904 | 0        | 1.046    | 0.5544   | NA       | RP11-402N chr9    | + | 38804004 | 38851913 | 891  |
| ENSG000001 | 8.184907 | 1.995719 | 1.9099   | 0.029236 | 0.055485 | RP11-176C chr1    | - | 2.15E+08 | 2.15E+08 | 518  |
| ENSG000001 | 638.8053 | 282.9449 | 1.1726   | 6.31E-11 | 3.17E-10 | OST4 chr2         | - | 27293340 | 27294641 | 561  |
| ENSG000001 | 10.33266 | 7.959443 | 0.35224  | 0.622    | 0.71247  | RP3-342P2 chr1    | + | 40428352 | 40429076 | 725  |
| ENSG000001 | 0.36308  | 0.343138 | -0.0021  | 0.99905  | NA       | AC130464. chr16   | - | 26366117 | 26369676 | 1500 |
| ENSG000001 | 0.342542 | 0        | 0.4146   | 0.81455  | NA       | U51244.2 chr2     | - | 45901840 | 45902615 | 374  |
| ENSG000001 | 0        | 1.029414 | -1.1526  | 0.51496  | NA       | RP11-106N chr10   | + | 1.17E+08 | 1.17E+08 | 2378 |
| ENSG000001 | 1.576526 | 0.343138 | 1.5802   | 0.31968  | 0.42255  | RP11-567J1. chr10 | + | 1.21E+08 | 1.21E+08 | 400  |
| ENSG000001 | 12.3664  | 17.11339 | -0.47178 | 0.3995   | 0.5042   | AC017099. chr2    | + | 98280680 | 98319527 | 1356 |
| ENSG000001 | 1.794862 | 6.434694 | -1.6823  | 0.12655  | 0.19727  | RP13-225C chr9    | - | 1.3E+08  | 1.3E+08  | 397  |
| ENSG000001 | 33.96424 | 8.326014 | 1.9997   | 2.67E-05 | 8.15E-05 | RAB11FIP1 chrX    | + | 73422669 | 73424430 | 1762 |
| ENSG000001 | 35.93636 | 0        | 6.7676   | 1.71E-09 | 7.74E-09 | RP3-523C2 chr6    | + | 1.32E+08 | 1.32E+08 | 1831 |
| ENSG000001 | 0        | 15.41785 | -5.5718  | 3.36E-06 | 1.14E-05 | AC106875. chr2    | + | 11821586 | 11823454 | 1170 |
| ENSG000001 | 0.36308  | 1.416259 | -1.3043  | 0.44028  | NA       | TMSB10P1 chr2     | - | 2.37E+08 | 2.37E+08 | 132  |
| ENSG000001 | 0.705622 | 0.357707 | 0.57557  | 0.74268  | NA       | RPL15P18 chr13    | - | 1.01E+08 | 1.01E+08 | 612  |
| ENSG000001 | 15.74553 | 23.61361 | -0.56578 | 0.23029  | 0.32369  | EEF1A1P11 chr1    | + | 96912486 | 96913874 | 1389 |
| ENSG000001 | 19.45009 | 32.5871  | -0.72707 | 0.10613  | 0.16979  | RP11-98I9. chr6   | + | 99872798 | 99879249 | 1638 |
| ENSG000001 | 0.342542 | 0.640152 | -0.50911 | 0.77219  | NA       | DAP3P2 chr2       | + | 1.72E+08 | 1.72E+08 | 510  |
| ENSG000001 | 3.350849 | 0        | 3.2689   | 0.028425 | 0.05411  | AC006460. chr2    | - | 1.92E+08 | 1.92E+08 | 808  |
| ENSG000001 | 4.096733 | 0.654722 | 2.2334   | 0.080712 | 0.13454  | RP11-339B chr9    | + | 1.31E+08 | 1.31E+08 | 1734 |
| ENSG000001 | 2.520208 | 0        | 2.7948   | 0.078637 | 0.13159  | RP11-281A chr9    | + | 1.21E+08 | 1.21E+08 | 521  |
| ENSG000001 | 2.282147 | 0        | 2.6902   | 0.089639 | 0.14723  | AC023271. chr2    | - | 2.04E+08 | 2.04E+08 | 1090 |
| ENSG000001 | 5.507977 | 12.33202 | -1.1094  | 0.090149 | 0.14799  | RP11-298C chrX    | - | 25663839 | 25664444 | 606  |
| ENSG000001 | 10.85149 | 0        | 5.0264   | 6.92E-05 | 0.000201 | RP11-236F chr9    | + | 67285298 | 67298632 | 786  |
| ENSG000001 | 0        | 1.966581 | -2.1968  | 0.20389  | 0.29293  | RP5-1087E chr1    | - | 2.27E+08 | 2.27E+08 | 199  |
| ENSG000001 | 3.382552 | 3.853068 | -0.19285 | 0.84917  | 0.89415  | RP3-510D1 chr1    | - | 9228327  | 9262678  | 548  |
| ENSG000001 | 0.342542 | 1.012429 | -0.95691 | 0.57869  | NA       | RP11-179B chr10   | + | 60064313 | 60065381 | 328  |
| ENSG000001 | 2.157128 | 4.317591 | -0.86694 | 0.41613  | 0.52129  | AC068057. chr2    | + | 1.05E+08 | 1.05E+08 | 709  |
| ENSG000001 | 3.455331 | 0.357707 | 2.5619   | 0.07861  | 0.13158  | RP11-392C chr1    | - | 2.2E+08  | 2.2E+08  | 811  |
| ENSG000001 | 0.36308  | 0        | 0.4146   | 0.81455  | NA       | AL353608. chr9    | - | 70866135 | 70866572 | 438  |
| ENSG000001 | 0.580602 | 3.679854 | -2.1106  | 0.11439  | 0.18124  | RP11-526K chr20   | - | 24472108 | 24482981 | 823  |
| ENSG000001 | 0.342542 | 0.357707 | -0.0021  | 0.99906  | NA       | AC093159. chr2    | + | 62690262 | 62691205 | 424  |
| ENSG000001 | 7.915144 | 5.320282 | 0.5386   | 0.53072  | 0.63211  | KIAA1984-7 chr9   | - | 1.4E+08  | 1.4E+08  | 2386 |
| ENSG000001 | 0.36308  | 0.594029 | -0.39069 | 0.82661  | NA       | ITPKB-AS1 chr1    | + | 2.27E+08 | 2.27E+08 | 538  |
| ENSG000001 | 2.592987 | 62.41211 | -4.4018  | 6.38E-11 | 3.21E-10 | RP11-108N chr1    | + | 17197440 | 17200587 | 2520 |
| ENSG000001 | 0.290301 | 0        | 0.4146   | 0.81455  | NA       | RP11-483N chrX    | - | 7031046  | 7031445  | 400  |
| ENSG000001 | 3.82697  | 4.303021 | -0.14252 | 0.8806   | 0.91673  | AC004837. chr7    | - | 39739940 | 39742895 | 731  |
| ENSG000001 | 0.290301 | 4.363714 | -2.9728  | 0.030656 | 0.057813 | RP3-340B1 chr6    | + | 35512409 | 35513446 | 595  |
| ENSG000001 | 0.705622 | 0        | 0.8807   | 0.6196   | NA       | RP11-550P chr1    | - | 1.59E+08 | 1.59E+08 | 1063 |
| ENSG000001 | 0        | 0.343138 | -0.41864 | 0.81278  | NA       | RP11-114N chr3    | + | 1.77E+08 | 1.77E+08 | 587  |
| ENSG000001 | 0.653381 | 0        | 0.82678  | 0.64037  | NA       | RP11-170N chr10   | + | 65424424 | 65750328 | 794  |
| ENSG000001 | 4.451254 | 10.56376 | -1.21    | 0.12881  | 0.20017  | AC010731. chr2    | - | 2.07E+08 | 2.07E+08 | 440  |
| ENSG000001 | 17.84446 | 21.37828 | -0.25361 | 0.60078  | 0.69459  | SPCS2P4 chr1      | - | 28421582 | 28422933 | 1252 |
| ENSG000001 | 0        | 197.6617 | -9.0339  | 1.02E-16 | 7.35E-16 | AP000459. chr21   | - | 24733426 | 24757182 | 1725 |
| ENSG000001 | 268.7231 | 1045.288 | -1.9512  | 2.82E-16 | 1.98E-15 | C1orf233 chr1     | - | 1533392  | 1535476  | 2085 |
| ENSG000001 | 0        | 22.00561 | -5.9405  | 1.89E-06 | 6.60E-06 | MACC1-AS1 chr7    | + | 20181539 | 20193154 | 639  |
| ENSG000001 | 0        | 0.654722 | -0.83442 | 0.63731  | NA       | RP6-1107.. chr22  | - | 40502329 | 40503070 | 742  |
| ENSG000001 | 1.016461 | 0        | 1.3167   | 0.46021  | NA       | RPL39P chr20      | - | 55034484 | 55034639 | 156  |
| ENSG000001 | 1.649304 | 3.169208 | -0.84827 | 0.46043  | 0.56578  | RP5-872K7 chr20   | - | 21129382 | 21143531 | 795  |
| ENSG000001 | 0        | 3.100394 | -3.0831  | 0.046478 | 0.083487 | RP11-574F chr1    | + | 1.6E+08  | 1.6E+08  | 557  |
| ENSG000001 | 34.22365 | 27.51683 | 0.31271  | 0.40375  | 0.50855  | RP3-341D1 chrX    | - | 1E+08    | 1E+08    | 3216 |
| ENSG000001 | 0        | 0.98329  | -1.2878  | 0.47019  | NA       | HK2P1 chrX        | - | 79827370 | 79830106 | 2737 |
| ENSG000001 | 3.008307 | 28.90879 | -3.1708  | 5.31E-07 | 1.94E-06 | AC144450. chr2    | - | 1550437  | 1623885  | 786  |

|            |          |          |          |          |          |                  |   |          |          |      |
|------------|----------|----------|----------|----------|----------|------------------|---|----------|----------|------|
| ENSG000001 | 2.375464 | 2.901332 | -0.27978 | 0.8032   | 0.86085  | RP13-476E chr6   | - | 53655673 | 53659072 | 483  |
| ENSG000001 | 0.653381 | 0.297015 | 0.51304  | 0.77085  | NA       | AC093166. chr2   | + | 1.13E+08 | 1.13E+08 | 1017 |
| ENSG000001 | 0        | 0.357707 | -0.41864 | 0.81278  | NA       | RP3-434P1 chr22  | + | 38820293 | 38823341 | 556  |
| ENSG000001 | 0.36308  | 0        | 0.4146   | 0.81455  | NA       | RP1-302D9 chr22  | - | 33501369 | 33502045 | 437  |
| ENSG000001 | 20.66614 | 145.1954 | -2.7881  | 2.52E-20 | 2.15E-19 | ZNF883 chr9      | - | 1.16E+08 | 1.16E+08 | 2319 |
| ENSG000001 | 16.82702 | 1087.624 | -5.9923  | 1.47E-90 | 7.41E-89 | RP3-399L1 chr6   | + | 1.14E+08 | 1.15E+08 | 2016 |
| ENSG000001 | 1.286224 | 0        | 1.8436   | 0.2818   | NA       | RP11-1B20 chr1   | + | 2.27E+08 | 2.27E+08 | 814  |
| ENSG000001 | 9.688654 | 1.623443 | 2.3719   | 0.011392 | 0.023651 | RP11-495P chr1   | - | 1.48E+08 | 1.48E+08 | 285  |
| ENSG000001 | 0.653381 | 1.309443 | -0.73727 | 0.6388   | 0.72643  | AC092295. chr19  | + | 37019220 | 37026137 | 434  |
| ENSG000001 | 108.9779 | 1.029414 | 6.4245   | 1.72E-17 | 1.29E-16 | HOTAIR chr12     | - | 54356092 | 54368740 | 2421 |
| ENSG000001 | 2.551911 | 4.349145 | -0.68407 | 0.48286  | 0.58704  | RP4-534N1 chr1   | + | 32398621 | 32399576 | 517  |
| ENSG000001 | 58.86394 | 24.33956 | 1.2482   | 0.000592 | 0.001519 | FCF1P2 chr3      | - | 48332283 | 48332865 | 583  |
| ENSG000001 | 0.36308  | 0        | 0.4146   | 0.81455  | NA       | AC079779. chr2   | + | 286419   | 301515   | 694  |
| ENSG000001 | 0        | 55.81145 | -7.357   | 3.83E-11 | 1.96E-10 | RP11-568A chr6   | + | 1.68E+08 | 1.68E+08 | 205  |
| ENSG000001 | 12.74064 | 128.718  | -3.3016  | 2.16E-15 | 1.44E-14 | AC005682. chr7   | + | 22893875 | 22901021 | 1021 |
| ENSG000001 | 5.995263 | 0        | 4.1392   | 0.002678 | 0.006223 | RP11-556E chr10  | - | 54316462 | 54515169 | 540  |
| ENSG000001 | 5.675864 | 2.96444  | 0.85444  | 0.38149  | 0.4856   | RP11-321E chr7   | + | 63961203 | 63962107 | 905  |
| ENSG000001 | 1.576526 | 0        | 2.1197   | 0.20755  | NA       | RP11-170J. chr10 | - | 1.04E+08 | 1.04E+08 | 469  |
| ENSG000001 | 5.197138 | 3.183777 | 0.64274  | 0.47892  | 0.58322  | AC090587. chr11  | - | 3875548  | 3876739  | 494  |
| ENSG000001 | 15.44586 | 10.01989 | 0.61167  | 0.36064  | 0.4648   | PSMD10P1 chr20   | + | 49530268 | 49530948 | 681  |
| ENSG000001 | 0.290301 | 0.715414 | -0.50514 | 0.77701  | NA       | RP11-129C chr10  | + | 25156574 | 25157119 | 268  |
| ENSG000001 | 0.705622 | 0.715414 | -0.00991 | 0.99541  | NA       | TRGV5P chr7      | - | 38384631 | 38385100 | 354  |
| ENSG000001 | 72.30516 | 178.1674 | -1.2916  | 3.03E-05 | 9.19E-05 | PROB1 chr5       | - | 1.39E+08 | 1.39E+08 | 3251 |
| ENSG000001 | 2.43887  | 0        | 2.4712   | 0.14712  | 0.22317  | TTC3-AS1 chr21   | - | 38559967 | 38566227 | 1097 |
| ENSG000001 | 0.632843 | 0.640152 | -0.00865 | 0.99586  | NA       | RP4-676J1. chr6  | + | 84693447 | 84717042 | 835  |
| ENSG000001 | 1.774324 | 0.594029 | 1.0621   | 0.51235  | 0.61549  | AC004692. chr7   | + | 43278665 | 43288867 | 497  |
| ENSG000001 | 2.261609 | 0        | 2.6509   | 0.097945 | 0.15859  | RP11-31E1 chr10  | - | 80455819 | 80456779 | 579  |
| ENSG000001 | 0.290301 | 0        | 0.4146   | 0.81455  | NA       | RP11-336A chr10  | + | 5666894  | 5667089  | 196  |
| ENSG000001 | 0.685084 | 7.942457 | -3.0422  | 0.01395  | 0.028452 | RP11-492L. chr1  | + | 1.76E+08 | 1.76E+08 | 629  |
| ENSG000001 | 1.286224 | 0.654722 | 0.75279  | 0.61578  | 0.70735  | RP5-826L7 chr6   | + | 1.64E+08 | 1.64E+08 | 600  |
| ENSG000001 | 4.721017 | 3.169208 | 0.50021  | 0.60719  | 0.70009  | ARL17B chr17     | - | 44352150 | 44439130 | 2197 |
| ENSG000001 | 0        | 3.022717 | -3.0495  | 0.04972  | 0.088547 | RP5-968D2 chr1   | - | 1.68E+08 | 1.68E+08 | 1801 |
| ENSG000001 | 4.023955 | 4.083685 | 0.014134 | 0.98858  | 0.9936   | TNKS2-AS1 chr10  | - | 93542596 | 93558048 | 609  |
| ENSG000001 | 0.342542 | 1.727843 | -1.5273  | 0.36046  | 0.46462  | RP11-671E chr10  | - | 46221142 | 46221486 | 345  |
| ENSG000001 | 0.632843 | 7.350844 | -3.0618  | 0.008184 | 0.017464 | LINC00659 chr20  | - | 61405480 | 61406764 | 540  |
| ENSG000001 | 9.698841 | 63.15571 | -2.6766  | 4.20E-10 | 1.99E-09 | AP001065. chr21  | + | 45905460 | 45910171 | 912  |
| ENSG000001 | 0.870904 | 0.297015 | 0.71032  | 0.69005  | NA       | RP11-284C chr9   | - | 1.19E+08 | 1.19E+08 | 396  |
| ENSG000001 | 913.5003 | 1583.655 | -0.79076 | 0.000208 | 0.000568 | DHFR chr5        | - | 79922047 | 79950802 | 3917 |
| ENSG000001 | 0        | 0.686276 | -0.84936 | 0.6309   | NA       | RP11-145F. chr6  | + | 2637170  | 2640235  | 834  |
| ENSG000001 | 0        | 0.594029 | -0.81444 | 0.64499  | NA       | RP5-1119A chr22  | - | 36841445 | 36850991 | 372  |
| ENSG000001 | 0        | 0.357707 | -0.41864 | 0.81278  | NA       | SRGAP3-AS chr3   | + | 9234177  | 9236137  | 1189 |
| ENSG000001 | 1.359003 | 7.357292 | -2.2493  | 0.022922 | 0.044648 | SAPCD1 chr6      | + | 31730576 | 31732628 | 916  |
| ENSG000001 | 0.342542 | 1.340997 | -1.3704  | 0.39575  | NA       | RP11-316K chrX   | + | 1.5E+08  | 1.5E+08  | 494  |
| ENSG000001 | 0.685084 | 0.98329  | -0.35409 | 0.8342   | NA       | RP11-211A chr1   | + | 2.27E+08 | 2.27E+08 | 821  |
| ENSG000001 | 0.580602 | 0.640152 | -0.06311 | 0.97099  | NA       | AC015815. chr17  | - | 75108843 | 75108930 | 87   |
| ENSG000001 | 0        | 0.640152 | -0.82869 | 0.63935  | NA       | RP11-335E chr1   | + | 63715591 | 63717442 | 859  |
| ENSG000001 | 0        | 1.355566 | -1.9006  | 0.26573  | NA       | AC008781. chr5   | + | 1.41E+08 | 1.41E+08 | 622  |
| ENSG000001 | 1.628766 | 0        | 2.1781   | 0.19145  | NA       | AC136896. chr15  | - | 27402762 | 27406466 | 970  |
| ENSG000001 | 2.096328 | 0.343138 | 1.7779   | 0.27612  | 0.37636  | RP11-309L. chr13 | + | 24553949 | 24609166 | 1721 |
| ENSG000001 | 0        | 0.297015 | -0.41864 | 0.81278  | NA       | RP53AP30 chr8    | + | 6980379  | 6981226  | 848  |
| ENSG000001 | 0        | 0.297015 | -0.41864 | 0.81278  | NA       | CTSLP5 chr10     | - | 46790404 | 46791522 | 402  |
| ENSG000001 | 14.22467 | 7.87606  | 0.81229  | 0.19278  | 0.28008  | RP13-39P1 chr10  | + | 79542624 | 79552934 | 2028 |
| ENSG000001 | 0        | 0.715414 | -0.84936 | 0.6309   | NA       | EIF4BP2 chr10    | + | 21317928 | 21319721 | 1794 |
| ENSG000001 | 9.813674 | 0.297015 | 4.1352   | 0.000709 | 0.001799 | AC010095. chr2   | - | 1.09E+08 | 1.09E+08 | 477  |
| ENSG000001 | 0.290301 | 0.297015 | -0.00202 | 0.99909  | NA       | RPL7L1P8 chr3    | + | 1.82E+08 | 1.82E+08 | 741  |
| ENSG000001 | 2.229907 | 0.357707 | 2.0211   | 0.18385  | 0.26906  | AC003101. chr17  | + | 29898161 | 29902678 | 459  |
| ENSG000001 | 0        | 0.357707 | -0.41864 | 0.81278  | NA       | RP4-635O5 chr7   | + | 71568166 | 71569194 | 296  |
| ENSG000001 | 0        | 0.594029 | -0.81444 | 0.64499  | NA       | RP1-309H1 chr6   | - | 22589366 | 22594062 | 743  |
| ENSG000001 | 5.809443 | 8.513796 | -0.5191  | 0.49336  | 0.59725  | RP5-894A1 chr7   | - | 1.41E+08 | 1.41E+08 | 2262 |
| ENSG000001 | 1.991846 | 3.290593 | -0.66182 | 0.52856  | 0.63022  | Z69666.2 chr16   | + | 175736   | 177218   | 801  |
| ENSG000001 | 37.97108 | 52.45841 | -0.46204 | 0.16513  | 0.2461   | MRPL45P2 chr17   | - | 45527934 | 45569858 | 1763 |
| ENSG000001 | 1.576526 | 4.349145 | -1.2884  | 0.22331  | 0.31569  | AC013400. chr2   | + | 20068635 | 20084808 | 2995 |
| ENSG000001 | 1.960143 | 3.008147 | -0.53496 | 0.6491   | 0.73506  | NLGN4Y-AS chrY   | - | 16905522 | 16915913 | 532  |
| ENSG000001 | 0.995923 | 0.357707 | 1.0227   | 0.53712  | NA       | HCG22 chr6       | + | 31021227 | 31027667 | 1980 |
| ENSG000001 | 0.632843 | 4.213191 | -2.2945  | 0.068486 | 0.1169   | THRB-AS1 chr3    | + | 24535578 | 24541833 | 1216 |

|            |          |          |          |          |          |                 |   |          |          |      |
|------------|----------|----------|----------|----------|----------|-----------------|---|----------|----------|------|
| ENSG000001 | 2.044087 | 0.98329  | 0.84876  | 0.53567  | 0.63667  | RP1-223B1 chr6  | - | 3594481  | 3624981  | 789  |
| ENSG000001 | 165.5553 | 104.3989 | 0.66357  | 0.000696 | 0.001769 | RP11-206L chr1  | + | 762988   | 794826   | 6606 |
| ENSG000001 | 0.653381 | 6.390987 | -2.8592  | 0.01391  | 0.028378 | FAM207BP chr13  | + | 19271143 | 19271647 | 505  |
| ENSG000001 | 36.29602 | 41.01268 | -0.1694  | 0.71532  | 0.78906  | RP11-110G chr8  | + | 52811885 | 52859733 | 936  |
| ENSG000001 | 0        | 0.343138 | -0.41864 | 0.81278  | NA       | AC073641. chr2  | - | 2.25E+08 | 2.25E+08 | 429  |
| ENSG000001 | 1.048164 | 0.343138 | 0.98412  | 0.56751  | NA       | RP11-211G chr3  | + | 1.87E+08 | 1.87E+08 | 672  |
| ENSG000001 | 0.36308  | 0.357707 | -0.00212 | 0.99905  | NA       | MRPS18CP chr22  | - | 44879375 | 44879597 | 223  |
| ENSG000001 | 4.107898 | 3.06884  | 0.41052  | 0.68923  | 0.76839  | HMGB3P4 chr13   | + | 1E+08    | 1E+08    | 514  |
| ENSG000001 | 0.290301 | 2.324288 | -2.0819  | 0.17158  | 0.25407  | RP4-705D1 chr20 | - | 16695489 | 16711593 | 1101 |
| ENSG000001 | 0.36308  | 0.891044 | -0.73478 | 0.67953  | NA       | RP11-157P chr20 | + | 60928066 | 60931536 | 690  |
| ENSG000001 | 5.217676 | 5.38668  | -0.05569 | 0.95003  | 0.9688   | AK3P5 chr10     | + | 33233409 | 33233927 | 519  |
| ENSG000001 | 2.012384 | 2.589748 | -0.34217 | 0.76136  | 0.82688  | BACH1-IT2 chr21 | + | 30743268 | 30746029 | 806  |
| ENSG000001 | 3.734467 | 1.684135 | 1.0178   | 0.36639  | 0.47102  | RP11-567C chr1  | - | 2.4E+08  | 2.4E+08  | 2720 |
| ENSG000001 | 4.077009 | 1.248751 | 1.446    | 0.22372  | 0.31611  | MIR4500H chr13  | - | 88096247 | 88323514 | 1670 |
| ENSG000001 | 0.342542 | 1.043983 | -0.98163 | 0.56849  | NA       | AL592494. chr1  | - | 1.21E+08 | 1.21E+08 | 369  |
| ENSG000001 | 1.233984 | 0.343138 | 1.1864   | 0.48571  | NA       | RP11-234P chrX  | - | 51646434 | 51646946 | 154  |
| ENSG000001 | 5.394936 | 6.106126 | -0.16699 | 0.84813  | 0.89328  | RP11-162C chr10 | - | 38107534 | 38109910 | 2240 |
| ENSG000001 | 0        | 0.715414 | -0.84936 | 0.6309   | NA       | AC005077. chr7  | + | 75803051 | 75806523 | 300  |
| ENSG000001 | 0.290301 | 0.297015 | -0.00202 | 0.99909  | NA       | RP11-249L chr6  | - | 1.09E+08 | 1.09E+08 | 259  |
| ENSG000001 | 48.98622 | 12.53437 | 1.9358   | 1.55E-05 | 4.87E-05 | AC012123. chr18 | + | 30349758 | 30354376 | 1661 |
| ENSG000001 | 3.785894 | 2.338857 | 0.65384  | 0.52442  | 0.6266   | RP4-784A1 chr1  | + | 53753696 | 53755378 | 675  |
| ENSG000001 | 4.00423  | 6.73983  | -0.72322 | 0.39624  | 0.5008   | RP3-400N2 chr22 | + | 31688485 | 31734007 | 554  |
| ENSG000001 | 22.60477 | 3.662869 | 2.5403   | 7.53E-05 | 0.000218 | RP11-57H1 chr1  | - | 95708781 | 95729610 | 371  |
| ENSG000001 | 2.302685 | 0.343138 | 2.0565   | 0.1742   | 0.25721  | AC104653. chr2  | - | 1.15E+08 | 1.15E+08 | 578  |
| ENSG000001 | 0.580602 | 0        | 0.8036   | 0.6494   | NA       | RP11-91I2I chr8 | - | 61544068 | 61548830 | 3564 |
| ENSG000001 | 0        | 1.248751 | -1.5848  | 0.37202  | NA       | RP11-404F chr1  | + | 1.61E+08 | 1.61E+08 | 1125 |
| ENSG000001 | 0.290301 | 0.640152 | -0.50256 | 0.77558  | NA       | RP11-463P chr10 | + | 48357926 | 48358600 | 227  |
| ENSG000001 | 0        | 0.297015 | -0.41864 | 0.81278  | NA       | MYLKP1 chr3     | - | 75377700 | 75388222 | 1580 |
| ENSG000001 | 0        | 0.343138 | -0.41864 | 0.81278  | NA       | AC096664. chr2  | + | 63944256 | 63945033 | 778  |
| ENSG000001 | 0.342542 | 0        | 0.4146   | 0.81455  | NA       | AC012307. chr2  | - | 96811341 | 96812751 | 197  |
| ENSG000001 | 1.213446 | 0        | 1.5515   | 0.38249  | NA       | AC090954. chr3  | - | 15173355 | 15173715 | 361  |
| ENSG000001 | 1.628766 | 0        | 2.1781   | 0.19145  | NA       | RP11-473E chr9  | + | 1.37E+08 | 1.37E+08 | 428  |
| ENSG000001 | 5.705775 | 4.899467 | 0.19279  | 0.81733  | 0.87175  | AC007551. chr7  | - | 35794574 | 35840226 | 702  |
| ENSG000001 | 0.290301 | 1.248751 | -1.2076  | 0.47886  | NA       | RP11-439E chr1  | - | 2.47E+08 | 2.47E+08 | 322  |
| ENSG000001 | 2.810509 | 1.713273 | 0.65637  | 0.58398  | 0.67987  | LLOXNC01- chrX  | + | 1.03E+08 | 1.03E+08 | 418  |
| ENSG000001 | 3.660875 | 4.081268 | -0.10601 | 0.91961  | 0.94594  | RP11-290C chr13 | + | 45924458 | 45925485 | 310  |
| ENSG000001 | 0.943682 | 0.640152 | 0.39749  | 0.80623  | NA       | EEF1DP1 chr19   | + | 14181154 | 14182052 | 896  |
| ENSG000001 | 0.290301 | 0        | 0.4146   | 0.81455  | NA       | RP4-764O2 chr20 | - | 7127114  | 7234849  | 874  |
| ENSG000001 | 16.81684 | 26.96805 | -0.66382 | 0.15666  | 0.23563  | UBAC2-AS1 chr13 | - | 99848696 | 99852964 | 1706 |
| ENSG000001 | 0.36308  | 0        | 0.4146   | 0.81455  | NA       | CTD-2021A chr7  | - | 51454060 | 51454798 | 739  |
| ENSG000001 | 0        | 0.343138 | -0.41864 | 0.81278  | NA       | AC012365. chr2  | + | 1.18E+08 | 1.18E+08 | 488  |
| ENSG000001 | 13.5276  | 25.95092 | -0.91772 | 0.12236  | 0.19202  | RASA4CP chr7    | - | 44066550 | 44081491 | 3193 |
| ENSG000001 | 3.847508 | 7.564476 | -0.89619 | 0.33104  | 0.43423  | RP13-216E chrX  | + | 73168808 | 73169393 | 451  |
| ENSG000001 | 5.6647   | 8.398859 | -0.53991 | 0.48284  | 0.58704  | RP11-757C chr11 | + | 71604456 | 71605479 | 1024 |
| ENSG000001 | 0        | 0.357707 | -0.41864 | 0.81278  | NA       | RP11-544N chr1  | + | 1.61E+08 | 1.61E+08 | 1109 |
| ENSG000001 | 0        | 0.297015 | -0.41864 | 0.81278  | NA       | GS1-122H1 chr1  | - | 1.82E+08 | 1.82E+08 | 2631 |
| ENSG000001 | 3.806432 | 5.147942 | -0.39735 | 0.66892  | 0.75148  | AC097381. chr4  | + | 7940728  | 7942022  | 1295 |
| ENSG000001 | 12.40666 | 6.047849 | 1.0152   | 0.11319  | 0.17954  | AC016722. chr2  | + | 47126414 | 47135817 | 1835 |
| ENSG000001 | 1.068702 | 1.591889 | -0.50828 | 0.71995  | 0.79287  | RP11-159C chr1  | - | 53237866 | 53238320 | 455  |
| ENSG000001 | 0.290301 | 0        | 0.4146   | 0.81455  | NA       | MTCO1P3 chr21   | - | 46796106 | 46796297 | 192  |
| ENSG000001 | 2.67693  | 1.606458 | 0.61695  | 0.61605  | 0.70757  | RP11-88G1 chr9  | + | 1.33E+08 | 1.33E+08 | 648  |
| ENSG000001 | 0.705622 | 0        | 0.8807   | 0.6196   | NA       | RP11-268C chrX  | - | 27193037 | 27417114 | 1879 |
| ENSG000001 | 5.322158 | 2.292733 | 1.1147   | 0.23208  | 0.32554  | AKT3-IT1 chr1   | - | 2.44E+08 | 2.44E+08 | 517  |
| ENSG000001 | 0        | 0.297015 | -0.41864 | 0.81278  | NA       | UBE3AP2 chr21   | - | 32432919 | 32435487 | 2259 |
| ENSG000001 | 0.290301 | 5.159222 | -3.1152  | 0.028288 | 0.053883 | AC004485. chr7  | - | 24236281 | 24295338 | 527  |
| ENSG000001 | 0        | 0.594029 | -0.81444 | 0.64499  | NA       | SLC25A6P5 chr9  | + | 1.09E+08 | 1.09E+08 | 1038 |
| ENSG000001 | 0        | 0.357707 | -0.41864 | 0.81278  | NA       | UGT1A12P chr2   | + | 2.34E+08 | 2.34E+08 | 853  |
| ENSG000001 | 0.632843 | 0        | 0.81931  | 0.64303  | NA       | AC023137. chr2  | + | 20650803 | 20652708 | 308  |
| ENSG000001 | 1.846289 | 0        | 2.122    | 0.22126  | NA       | RP11-336A chr10 | - | 5658825  | 5660124  | 657  |
| ENSG000001 | 1.016461 | 3.215331 | -1.4283  | 0.26602  | 0.36476  | RP11-567C chr3  | + | 1.87E+08 | 1.87E+08 | 246  |
| ENSG000001 | 0.342542 | 0.997859 | -1.0273  | 0.53559  | NA       | RP11-452Ji chr1 | - | 2.47E+08 | 2.47E+08 | 222  |
| ENSG000001 | 1.016461 | 59.628   | -5.5699  | 3.00E-12 | 1.65E-11 | AC144521. chr3  | + | 18486516 | 18959184 | 1119 |
| ENSG000001 | 5.737478 | 24.23436 | -2.0395  | 0.000567 | 0.00146  | OR2A9P chr7     | + | 1.44E+08 | 1.44E+08 | 2913 |
| ENSG000001 | 0        | 0.297015 | -0.41864 | 0.81278  | NA       | AP000282. chr21 | + | 34331196 | 34332874 | 576  |
| ENSG000001 | 0        | 0.997859 | -1.5018  | 0.39072  | NA       | HCG23 chr6      | + | 32358287 | 32361463 | 610  |

|            |          |          |          |          |          |                  |   |          |          |      |
|------------|----------|----------|----------|----------|----------|------------------|---|----------|----------|------|
| ENSG000001 | 1.649304 | 0        | 2.1906   | 0.18857  | NA       | RP11-286B chr1   | + | 95975672 | 96247898 | 1440 |
| ENSG000001 | 0.870904 | 1.652581 | -0.66289 | 0.65825  | 0.74249  | RP1-86D1. chr6   | - | 1.29E+08 | 1.29E+08 | 1828 |
| ENSG000001 | 0.342542 | 1.638012 | -1.6301  | 0.29933  | 0.40091  | AC009955. chr2   | - | 2.2E+08  | 2.2E+08  | 271  |
| ENSG000001 | 1.338465 | 0.686276 | 0.71882  | 0.64669  | 0.73297  | AC006483. chr7   | + | 5600374  | 5600686  | 313  |
| ENSG000001 | 0.995923 | 0        | 1.4959   | 0.39264  | NA       | SUMO2P8 chr6     | - | 1.09E+08 | 1.09E+08 | 286  |
| ENSG000001 | 0        | 0.700845 | -0.87835 | 0.62047  | NA       | AC113554. chr17  | + | 61548965 | 61549456 | 492  |
| ENSG000001 | 0        | 1.248751 | -1.5848  | 0.37202  | NA       | RP11-702L chr3   | + | 1.09E+08 | 1.09E+08 | 1493 |
| ENSG000001 | 1.306762 | 6.099678 | -1.9758  | 0.077355 | 0.12982  | RP11-364L chr4   | - | 1.44E+08 | 1.44E+08 | 843  |
| ENSG000001 | 0.36308  | 0        | 0.4146   | 0.81455  | NA       | RP11-107C chr1   | - | 2.47E+08 | 2.47E+08 | 321  |
| ENSG000001 | 0        | 2.742687 | -2.9066  | 0.064462 | 0.11107  | AC025627. chr17  | + | 19483256 | 19499371 | 598  |
| ENSG000001 | 0.36308  | 0        | 0.4146   | 0.81455  | NA       | RP13-228J chrX   | + | 1.55E+08 | 1.55E+08 | 973  |
| ENSG000001 | 1.742621 | 0.297015 | 1.5615   | 0.351    | 0.45536  | RP4-677H1 chr1   | - | 70684272 | 70686706 | 457  |
| ENSG000001 | 40.3551  | 55.25139 | -0.45031 | 0.14029  | 0.21421  | AC133528. chr2   | + | 2.43E+08 | 2.43E+08 | 415  |
| ENSG000001 | 0.36308  | 0        | 0.4146   | 0.81455  | NA       | RP11-318K chr9   | - | 66693277 | 66721073 | 1452 |
| ENSG000001 | 0.290301 | 2.460242 | -2.0264  | 0.20785  | 0.29768  | MTND1P9 chr20    | - | 55932482 | 55933425 | 944  |
| ENSG000001 | 238.0231 | 107.1684 | 1.1458   | 4.24E-09 | 1.85E-08 | RP11-697E chr15  | + | 90818266 | 90820841 | 2576 |
| ENSG000001 | 0        | 0.997859 | -1.5018  | 0.39072  | NA       | SEPT7P8 chr19    | - | 54275760 | 54276534 | 775  |
| ENSG000001 | 0.632843 | 0        | 0.81931  | 0.64303  | NA       | ACTBP14 chr10    | + | 70782534 | 70783622 | 1089 |
| ENSG000001 | 1.213446 | 0.98329  | 0.24825  | 0.87242  | 0.91093  | EXOSC3P1 chr21   | + | 33869122 | 33869621 | 500  |
| ENSG000001 | 0.342542 | 0        | 0.4146   | 0.81455  | NA       | TMPRSS11 chr4    | - | 68857402 | 68881486 | 1204 |
| ENSG000001 | 5.144897 | 5.729818 | -0.14987 | 0.86657  | 0.90708  | RP5-979D1 chr1   | + | 23466818 | 23467635 | 818  |
| ENSG000001 | 0.72616  | 0.357707 | 0.52227  | 0.76959  | NA       | RPL30P13 chr12   | - | 40462045 | 40462392 | 348  |
| ENSG000001 | 0        | 0.343138 | -0.41864 | 0.81278  | NA       | RP11-265C chrX   | + | 1.35E+08 | 1.35E+08 | 405  |
| ENSG000001 | 0        | 0.343138 | -0.41864 | 0.81278  | NA       | RP11-224C chr1   | - | 2.18E+08 | 2.18E+08 | 711  |
| ENSG000001 | 0        | 1.280305 | -1.6305  | 0.35731  | NA       | RP11-439L chr6   | - | 1.43E+08 | 1.43E+08 | 2398 |
| ENSG000001 | 2.31385  | 1.888903 | 0.23162  | 0.84733  | 0.8929   | RP11-313P chr7   | + | 72476064 | 72555749 | 1333 |
| ENSG000001 | 6.992    | 27.05231 | -1.9156  | 0.000363 | 0.00096  | AKR7A2P1 chr1    | + | 1.13E+08 | 1.13E+08 | 915  |
| ENSG000001 | 1.628766 | 1.012429 | 0.56917  | 0.68429  | 0.76428  | AL591893. chr1   | + | 1.52E+08 | 1.52E+08 | 4109 |
| ENSG000001 | 0.72616  | 0.686276 | 0.035772 | 0.98391  | NA       | AC067945. chr2   | - | 1.92E+08 | 1.92E+08 | 618  |
| ENSG000001 | 3.838949 | 0.715414 | 1.9891   | 0.15123  | 0.22872  | RP11-408A chr9   | + | 14593575 | 14594198 | 624  |
| ENSG000001 | 0.290301 | 0.951736 | -0.90191 | 0.60254  | NA       | RP11-91A1 chr1   | + | 52446145 | 52446486 | 342  |
| ENSG000001 | 2.645227 | 6.047849 | -1.1097  | 0.21333  | 0.30391  | RP5-931E1 chrX   | + | 1.23E+08 | 1.23E+08 | 853  |
| ENSG000001 | 0        | 0.357707 | -0.41864 | 0.81278  | NA       | SPRR2C chr1      | - | 1.53E+08 | 1.53E+08 | 219  |
| ENSG000001 | 23.35244 | 28.17639 | -0.26603 | 0.49314  | 0.59702  | RP1-20N2. chr6   | + | 1.44E+08 | 1.44E+08 | 2079 |
| ENSG000001 | 17.0232  | 34.52696 | -1.0062  | 0.011772 | 0.024365 | AC091729. chr7   | + | 1200010  | 1204903  | 1401 |
| ENSG000001 | 0.72616  | 0.297015 | 0.51367  | 0.77334  | NA       | RP11-266K chr1   | - | 31805914 | 31819646 | 439  |
| ENSG000001 | 0.290301 | 0.715414 | -0.50514 | 0.77701  | NA       | HMG1N1P2 chr21   | + | 33078868 | 33079177 | 310  |
| ENSG000001 | 0.580602 | 0        | 0.8036   | 0.6494   | NA       | DUTP1 chr3       | + | 1.25E+08 | 1.25E+08 | 470  |
| ENSG000001 | 0        | 1.903472 | -2.1599  | 0.21236  | NA       | RP11-386L chr1   | + | 93396253 | 93399655 | 3403 |
| ENSG000001 | 1.317927 | 0.997859 | 0.31824  | 0.82798  | 0.87881  | AC074338. chr7   | - | 33075824 | 33075994 | 171  |
| ENSG000001 | 8.112129 | 0.343138 | 3.8411   | 0.002132 | 0.005024 | AC020571. chr2   | + | 1.97E+08 | 1.97E+08 | 1413 |
| ENSG000001 | 2.624689 | 38.53779 | -3.7509  | 1.30E-09 | 5.92E-09 | RP11-106A chr9   | + | 6662424  | 6663792  | 734  |
| ENSG000001 | 1.701545 | 1.920457 | -0.1724  | 0.89443  | 0.92676  | RP11-746P chr7   | - | 64707972 | 64708122 | 151  |
| ENSG000001 | 1.555988 | 1.98115  | -0.27058 | 0.83487  | 0.88401  | RP11-801L chr9   | + | 97875990 | 97876743 | 529  |
| ENSG000001 | 0        | 0.343138 | -0.41864 | 0.81278  | NA       | TMPOP1 chr6      | + | 30434229 | 30435771 | 1267 |
| ENSG000001 | 3.652315 | 0.357707 | 2.6801   | 0.059249 | 0.10333  | RP11-432J. chr10 | - | 1.34E+08 | 1.34E+08 | 1623 |
| ENSG000001 | 1.411244 | 0        | 1.7307   | 0.32696  | NA       | OR5AW1P chrX     | - | 1.3E+08  | 1.3E+08  | 1006 |
| ENSG000001 | 0.36308  | 0        | 0.4146   | 0.81455  | NA       | RP11-32P2 chr2   | - | 15537559 | 15537906 | 348  |
| ENSG000001 | 22.38724 | 7.671292 | 1.509    | 0.005488 | 0.012125 | CALM2P2 chr10    | + | 71923441 | 71923880 | 440  |
| ENSG000001 | 0.290301 | 1.531196 | -1.4473  | 0.39003  | NA       | RP11-264C chr9   | + | 1.19E+08 | 1.19E+08 | 1756 |
| ENSG000001 | 0.290301 | 0.951736 | -0.90191 | 0.60254  | NA       | ABHD17AP chr22   | - | 21022124 | 21025272 | 909  |
| ENSG000001 | 275.0674 | 1.698704 | 7.1327   | 6.50E-31 | 8.61E-30 | AC005550. chr7   | + | 15728003 | 15735116 | 697  |
| ENSG000001 | 1.45232  | 0.357707 | 1.1661   | 0.50745  | NA       | RP11-439K chr9   | + | 85834246 | 85849157 | 444  |
| ENSG000001 | 0.580602 | 1.652581 | -1.0812  | 0.47855  | 0.58285  | MED4-AS1 chr13   | + | 48651273 | 48654127 | 542  |
| ENSG000001 | 0.342542 | 0.297015 | -0.00202 | 0.99909  | NA       | RP11-417B chr9   | + | 1.27E+08 | 1.27E+08 | 246  |
| ENSG000001 | 0.342542 | 16.44813 | -4.7923  | 5.06E-05 | 0.000149 | RP11-20J1. chr10 | - | 44787706 | 44789157 | 915  |
| ENSG000001 | 5680.028 | 8535.887 | -0.58689 | 3.46E-07 | 1.29E-06 | RPL41 chr12      | + | 56510370 | 56511727 | 699  |
| ENSG000001 | 0.943682 | 0.343138 | 0.89828  | 0.6031   | NA       | AC068491. chr2   | + | 1.12E+08 | 1.12E+08 | 617  |
| ENSG000001 | 14.8232  | 31.56084 | -1.0669  | 0.024356 | 0.047116 | CTB-63M2. chr5   | + | 1.66E+08 | 1.66E+08 | 295  |
| ENSG000001 | 0        | 0.297015 | -0.41864 | 0.81278  | NA       | RP11-396C chr1   | - | 2.02E+08 | 2.02E+08 | 331  |
| ENSG000001 | 19.45432 | 5.332435 | 1.7951   | 0.00717  | 0.015484 | AGBL5-IT1 chr2   | + | 27283906 | 27284683 | 339  |
| ENSG000001 | 25.28007 | 6.535062 | 1.9016   | 0.000472 | 0.00123  | VIM-AS1 chr10    | - | 17256238 | 17271984 | 1351 |
| ENSG000001 | 7.915958 | 8.623028 | -0.13564 | 0.84973  | 0.89449  | AC007038. chr2   | + | 2.11E+08 | 2.11E+08 | 2199 |
| ENSG000001 | 0.36308  | 0.715414 | -0.51558 | 0.77246  | NA       | AC016710. chr2   | + | 1.4E+08  | 1.4E+08  | 466  |
| ENSG000001 | 17.76989 | 46.18236 | -1.3623  | 0.000455 | 0.001191 | EIF4A1P10 chrX   | - | 91368245 | 91369460 | 1216 |

|            |          |          |          |          |          |                 |   |          |          |      |
|------------|----------|----------|----------|----------|----------|-----------------|---|----------|----------|------|
| ENSG000001 | 0        | 0.700845 | -0.87835 | 0.62047  | NA       | RP11-101P chr13 | + | 21861545 | 21868998 | 678  |
| ENSG000001 | 0        | 59.39261 | -7.4395  | 2.23E-11 | 1.16E-10 | CRYGEP chr2     | - | 2.09E+08 | 2.09E+08 | 528  |
| ENSG000001 | 0        | 0.297015 | -0.41864 | 0.81278  | NA       | RP11-348F chrX  | - | 51099796 | 51139314 | 451  |
| ENSG000001 | 121.9343 | 134.1293 | -0.14079 | 0.56287  | 0.661    | ANKRD10-I chr13 | - | 1.12E+08 | 1.12E+08 | 380  |
| ENSG000001 | 2.447429 | 95.44171 | -5.0533  | 1.93E-18 | 1.51E-17 | EPHA1-AS1 chr7  | + | 1.43E+08 | 1.43E+08 | 5018 |
| ENSG000001 | 0.653381 | 0.640152 | 0.01046  | 0.99499  | NA       | KCNQ5-AS1 chr6  | - | 73844526 | 73853237 | 1101 |
| ENSG000001 | 0        | 0.654722 | -0.83442 | 0.63731  | NA       | RP11-250F chr9  | + | 69475237 | 69475614 | 378  |
| ENSG000001 | 3.527296 | 0        | 3.2936   | 0.029826 | 0.056464 | AC009229. chr2  | - | 38359779 | 38366088 | 351  |
| ENSG000001 | 6.442287 | 0.951736 | 2.4208   | 0.030099 | 0.056916 | RP11-84D1 chr1  | + | 25287836 | 25289588 | 820  |
| ENSG000001 | 0.72616  | 0.357707 | 0.52227  | 0.76959  | NA       | NAP1L1P2 chrY   | - | 2797042  | 2799161  | 1089 |
| ENSG000001 | 437.7121 | 38.27717 | 3.4992   | 1.65E-52 | 4.03E-51 | TRAC chr14      | + | 23016447 | 23021097 | 974  |
| ENSG000001 | 0.290301 | 0.297015 | -0.00202 | 0.99909  | NA       | RP11-247I chr22 | - | 31934338 | 31934575 | 238  |
| ENSG000001 | 1.774324 | 0.297015 | 1.601    | 0.33424  | 0.43769  | AC108059. chr2  | - | 1.29E+08 | 1.29E+08 | 725  |
| ENSG000001 | 0.342542 | 0.594029 | -0.38792 | 0.8278   | NA       | AC069513. chr3  | - | 1.95E+08 | 1.95E+08 | 1684 |
| ENSG000001 | 93.87635 | 43.57892 | 1.0947   | 3.68E-05 | 0.000111 | GS1-124K5 chr7  | - | 65992918 | 66007536 | 5249 |
| ENSG000001 | 63.06435 | 115.5064 | -0.8665  | 0.006253 | 0.013666 | ADAM1A chr12    | + | 1.12E+08 | 1.12E+08 | 2608 |
| ENSG000001 | 1.379541 | 0.297015 | 1.2901   | 0.44742  | NA       | RP11-390B chr10 | - | 17737708 | 17742231 | 557  |
| ENSG000001 | 4.656798 | 94.85747 | -4.2069  | 2.52E-18 | 1.95E-17 | RP11-168C chr1  | + | 2.01E+08 | 2.01E+08 | 3496 |
| ENSG000001 | 1.722083 | 0.951736 | 0.65279  | 0.64525  | 0.732    | RP11-775C chr7  | + | 1.3E+08  | 1.3E+08  | 427  |
| ENSG000001 | 0.290301 | 0        | 0.4146   | 0.81455  | NA       | TRBV7-8 chr7    | - | 1.42E+08 | 1.42E+08 | 386  |
| ENSG000001 | 0.36308  | 0.891044 | -0.73478 | 0.67953  | NA       | RP11-397C chr10 | + | 11072297 | 11072831 | 433  |
| ENSG000001 | 2.064625 | 3.602177 | -0.74991 | 0.48333  | 0.58747  | SERPINH1P chr9  | + | 34318405 | 34319653 | 1249 |
| ENSG000001 | 0        | 0.715414 | -0.84936 | 0.6309   | NA       | AC073987. chr2  | - | 1.04E+08 | 1.04E+08 | 638  |
| ENSG000001 | 65.49898 | 161.423  | -1.2912  | 1.33E-05 | 4.21E-05 | RP11-561C chr15 | - | 85747141 | 85778026 | 2525 |
| ENSG000001 | 8.414408 | 5.12122  | 0.64897  | 0.47971  | 0.58397  | LINC00242 chr6  | - | 1.7E+08  | 1.7E+08  | 2418 |
| ENSG000001 | 0        | 8.321181 | -4.4749  | 0.00145  | 0.003511 | RP11-47A1 chr1  | - | 2E+08    | 2E+08    | 749  |
| ENSG000001 | 0.290301 | 0.297015 | -0.00202 | 0.99909  | NA       | AC096664. chr2  | - | 63978831 | 63979764 | 934  |
| ENSG000001 | 1.649304 | 2.635871 | -0.60115 | 0.59857  | 0.69263  | KRT18P4 chr20   | + | 48573282 | 48574569 | 1288 |
| ENSG000001 | 0.653381 | 0        | 0.82678  | 0.64037  | NA       | LINC00582 chr1  | - | 2.32E+08 | 2.32E+08 | 597  |
| ENSG000001 | 0        | 0.297015 | -0.41864 | 0.81278  | NA       | MT1P3 chr20     | + | 33805812 | 33805988 | 177  |
| ENSG000001 | 2.604151 | 0        | 2.8487   | 0.070705 | 0.12022  | AC011891. chr7  | + | 12693804 | 12694610 | 432  |
| ENSG000001 | 0.632843 | 1.387121 | -0.79676 | 0.61465  | 0.70643  | RP11-8L18 chr10 | - | 34952787 | 34953029 | 243  |
| ENSG000001 | 2.738544 | 1.309443 | 0.88183  | 0.49536  | 0.59917  | TTY10 chrY      | - | 22627554 | 22681114 | 1628 |
| ENSG000001 | 0        | 1.964165 | -2.2052  | 0.20143  | 0.2901   | HMG1N1P3 chrX   | - | 1.54E+08 | 1.54E+08 | 303  |
| ENSG000001 | 0        | 0.343138 | -0.41864 | 0.81278  | NA       | PPP1R12BI chrY  | - | 28424070 | 28500565 | 1671 |
| ENSG000001 | 0.342542 | 0        | 0.4146   | 0.81455  | NA       | LINC00710 chr10 | - | 10969021 | 10994143 | 1460 |
| ENSG000001 | 0.342542 | 0        | 0.4146   | 0.81455  | NA       | PNPT1P1 chr3    | - | 4023665  | 4025979  | 2315 |
| ENSG000001 | 0        | 8.041152 | -4.5698  | 0.000562 | 0.001448 | AC098973. chr3  | - | 27872379 | 27875627 | 2833 |
| ENSG000001 | 40.02095 | 0        | 6.9046   | 8.03E-10 | 3.74E-09 | RP11-521J chr13 | + | 81617805 | 81618577 | 657  |
| ENSG000001 | 0.36308  | 0        | 0.4146   | 0.81455  | NA       | WBP2P1 chr18    | - | 22596398 | 22597168 | 771  |
| ENSG000001 | 0.36308  | 1.355566 | -1.381   | 0.39134  | NA       | HNRNPA1P chr7   | + | 84612863 | 84613825 | 963  |
| ENSG000001 | 0        | 3.420099 | -3.213   | 0.037739 | 0.06969  | ST13P13 chr10   | + | 1.05E+08 | 1.05E+08 | 1092 |
| ENSG000001 | 0        | 9.937303 | -4.8557  | 0.000206 | 0.000564 | LRRC37A12 chr1  | - | 32888815 | 32892390 | 1801 |
| ENSG000001 | 1.359003 | 1.012429 | 0.33405  | 0.81733  | 0.87175  | AC004691. chr7  | - | 30836307 | 30843026 | 547  |
| ENSG000001 | 0.923144 | 1.370136 | -0.39431 | 0.79824  | 0.85707  | AC072062. chr2  | + | 2.16E+08 | 2.16E+08 | 452  |
| ENSG000001 | 0        | 1.935026 | -2.4284  | 0.13734  | 0.21062  | AC091493. chr3  | - | 16729493 | 16738986 | 411  |
| ENSG000001 | 44.54613 | 90.62555 | -1.011   | 0.000472 | 0.00123  | RP11-104C chr9  | + | 41954580 | 41955037 | 458  |
| ENSG000001 | 0.36308  | 0        | 0.4146   | 0.81455  | NA       | REV3L-IT1 chr6  | - | 1.12E+08 | 1.12E+08 | 382  |
| ENSG000001 | 2.520208 | 0.700845 | 1.5438   | 0.26419  | 0.36253  | RP11-483F chr10 | - | 1.01E+08 | 1.01E+08 | 303  |
| ENSG000001 | 1.068702 | 1.773966 | -0.56517 | 0.70955  | 0.78429  | RP11-40E16 chr6 | + | 3056124  | 3056995  | 398  |
| ENSG000001 | 1.774324 | 0        | 2.0349   | 0.24308  | NA       | RP4-580N2 chr1  | - | 2.36E+08 | 2.36E+08 | 190  |
| ENSG000001 | 0        | 0.297015 | -0.41864 | 0.81278  | NA       | RP5-1044F chr1  | - | 65745139 | 65772204 | 512  |
| ENSG000001 | 8.331278 | 15.19609 | -0.8489  | 0.21995  | 0.3118   | TUBB8P1 chr9    | - | 21811620 | 21812346 | 727  |
| ENSG000001 | 0        | 0.594029 | -0.81444 | 0.64499  | NA       | RP11-431K chr1  | + | 8249884  | 8252830  | 1075 |
| ENSG000001 | 1.649304 | 0        | 2.1906   | 0.18857  | NA       | AC010084. chrY  | + | 3904538  | 3968361  | 559  |
| ENSG000001 | 90.22722 | 68.56986 | 0.39592  | 0.14084  | 0.21487  | KRT8P12 chr3    | + | 1.6E+08  | 1.6E+08  | 1397 |
| ENSG000001 | 0        | 2.681995 | -2.9147  | 0.061147 | 0.10611  | AC008269. chr2  | + | 2.08E+08 | 2.08E+08 | 646  |
| ENSG000001 | 0.290301 | 0.686276 | -0.47648 | 0.78935  | NA       | RP11-175B chr13 | - | 51095069 | 51101585 | 731  |
| ENSG000001 | 0.290301 | 0        | 0.4146   | 0.81455  | NA       | RP5-1091N chrX  | - | 70236381 | 70236755 | 375  |
| ENSG000001 | 9.439429 | 7.014154 | 0.42249  | 0.53106  | 0.63246  | ACAP2-IT1 chr3  | - | 1.95E+08 | 1.95E+08 | 690  |
| ENSG000001 | 0.342542 | 4.928605 | -3.1364  | 0.018854 | 0.03743  | AC069154. chr2  | + | 1.2E+08  | 1.2E+08  | 542  |
| ENSG000001 | 0.290301 | 1.698704 | -1.6722  | 0.28779  | 0.38931  | RP11-135A chr10 | + | 32636325 | 32663416 | 265  |
| ENSG000001 | 1.939605 | 0.654722 | 1.2517   | 0.37851  | 0.48262  | AC006947. chr17 | + | 64672490 | 64673522 | 484  |
| ENSG000001 | 2.261609 | 0        | 2.6509   | 0.097945 | 0.15859  | PGBD4P8 chr1    | + | 60563087 | 60563648 | 562  |
| ENSG000001 | 23.98691 | 3.772101 | 2.5761   | 0.000297 | 0.000796 | AC046143. chr3  | + | 1.94E+08 | 1.94E+08 | 972  |

|            |          |          |          |          |          |                  |   |          |          |      |
|------------|----------|----------|----------|----------|----------|------------------|---|----------|----------|------|
| ENSG000001 | 0        | 37.29549 | -6.8196  | 1.25E-09 | 5.71E-09 | RP1-241P1 chrX   | + | 1.15E+08 | 1.15E+08 | 444  |
| ENSG000001 | 13.67316 | 41.38085 | -1.5866  | 0.000138 | 0.000387 | RP5-857K2 chr1   | + | 568137   | 568818   | 682  |
| ENSG000001 | 3.506758 | 0.343138 | 2.4663   | 0.10981  | 0.17474  | HY1-AS1 chr1     | + | 43919598 | 43922666 | 545  |
| ENSG000001 | 0.36308  | 0        | 0.4146   | 0.81455  | NA       | ACTG1P9 chr6     | + | 46172466 | 46175123 | 2658 |
| ENSG000001 | 0.290301 | 2.901332 | -2.3888  | 0.10648  | 0.17027  | LRRC3-AS1 chr21  | - | 45870869 | 45875167 | 784  |
| ENSG000001 | 38.26219 | 29.03346 | 0.38924  | 0.29988  | 0.40144  | AC018633. chr7   | - | 32660019 | 32801399 | 1724 |
| ENSG000001 | 0.290301 | 0        | 0.4146   | 0.81455  | NA       | PPP1R2P5 chr2    | - | 1.08E+08 | 1.08E+08 | 603  |
| ENSG000001 | 1.628766 | 1.012429 | 0.56917  | 0.68429  | 0.76428  | AC090587. chr11  | + | 3875842  | 3876629  | 527  |
| ENSG000001 | 0.342542 | 0        | 0.4146   | 0.81455  | NA       | RP13-225C chr9   | - | 1.3E+08  | 1.3E+08  | 589  |
| ENSG000001 | 3.579537 | 0        | 3.3029   | 0.029624 | 0.056152 | LINC00452 chr13  | + | 1.15E+08 | 1.15E+08 | 1607 |
| ENSG000001 | 3.371387 | 4.740822 | -0.45005 | 0.66039  | 0.74429  | CICP3 chr1       | + | 657472   | 660283   | 2455 |
| ENSG000001 | 0.685084 | 1.340997 | -0.72382 | 0.64437  | 0.73126  | AC147651. chr7   | + | 601595   | 605256   | 572  |
| ENSG000001 | 0.290301 | 0.297015 | -0.00202 | 0.99909  | NA       | BX322557. chr21  | + | 46756622 | 46758580 | 379  |
| ENSG000001 | 0        | 0.297015 | -0.41864 | 0.81278  | NA       | OR8B9P chr11     | - | 1.24E+08 | 1.24E+08 | 925  |
| ENSG000001 | 1.866827 | 1.280305 | 0.454    | 0.73741  | 0.80645  | RP11-442N chr1   | + | 28969740 | 28975093 | 688  |
| ENSG000001 | 0.580602 | 0.297015 | 0.36801  | 0.83644  | NA       | MICD chr6        | - | 29938578 | 29940241 | 813  |
| ENSG000001 | 2.354926 | 0.343138 | 2.0964   | 0.16123  | 0.24129  | RP3-395M1 chr1   | - | 2424876  | 2425918  | 514  |
| ENSG000001 | 1.89853  | 1.073121 | 0.6292   | 0.69032  | 0.76915  | RP11-378J chr1   | - | 2.23E+08 | 2.23E+08 | 445  |
| ENSG000001 | 9.450594 | 1.234181 | 2.6348   | 0.00717  | 0.015484 | RP11-3L21 chr1   | - | 2.25E+08 | 2.25E+08 | 837  |
| ENSG000001 | 0        | 0.343138 | -0.41864 | 0.81278  | NA       | AL162151. chr14  | + | 99624753 | 99626006 | 561  |
| ENSG000001 | 0.943682 | 0        | 1.2438   | 0.48556  | NA       | RP4-718N1 chr7   | + | 51681947 | 51698566 | 588  |
| ENSG000001 | 3.048569 | 7.01657  | -1.0643  | 0.28796  | 0.38945  | LINC00858 chr10  | + | 86039736 | 86054415 | 2685 |
| ENSG000001 | 0.36308  | 0        | 0.4146   | 0.81455  | NA       | RP11-12M1 chr1   | - | 1.8E+08  | 1.8E+08  | 544  |
| ENSG000001 | 0.653381 | 1.012429 | -0.44082 | 0.78495  | NA       | RP11-494C chr22  | + | 50239577 | 50239738 | 162  |
| ENSG000001 | 7.282301 | 9.762547 | -0.41396 | 0.55752  | 0.65651  | AC018638. chr7   | - | 1.28E+08 | 1.28E+08 | 246  |
| ENSG000001 | 0        | 1.577319 | -1.9089  | 0.27608  | NA       | KCNQ1-AS1 chr11  | - | 2861365  | 2882798  | 1084 |
| ENSG000001 | 0.342542 | 0.891044 | -0.73092 | 0.68123  | NA       | NPM1P25 chr10    | - | 97949122 | 97949975 | 854  |
| ENSG000001 | 9.895012 | 10.7547  | -0.09677 | 0.87973  | 0.91625  | RALGAPA1I chr9   | + | 1.08E+08 | 1.08E+08 | 6232 |
| ENSG000001 | 3.371387 | 0.654722 | 1.9589   | 0.13434  | 0.20733  | RP11-262F chr9   | - | 66493572 | 66494196 | 625  |
| ENSG000001 | 1.576526 | 0.357707 | 1.5817   | 0.31886  | 0.42176  | ANKRD26P chr13   | + | 31885426 | 31887058 | 950  |
| ENSG000001 | 23.9544  | 5.677989 | 2.0096   | 0.001813 | 0.004318 | RP1-92O14 chr1   | + | 43850784 | 43854826 | 731  |
| ENSG000001 | 0        | 1.995719 | -2.4883  | 0.12386  | 0.19391  | RP11-329B chr3   | - | 1.84E+08 | 1.84E+08 | 2591 |
| ENSG000001 | 0.36308  | 0        | 0.4146   | 0.81455  | NA       | AC017048. chr2   | - | 1.77E+08 | 1.77E+08 | 495  |
| ENSG000001 | 0.290301 | 0        | 0.4146   | 0.81455  | NA       | AC073850. chr7   | - | 80291647 | 80291901 | 255  |
| ENSG000001 | 0        | 0.594029 | -0.81444 | 0.64499  | NA       | RP11-301N chr1   | + | 1.48E+08 | 1.48E+08 | 536  |
| ENSG000001 | 2.354926 | 1.949596 | 0.22219  | 0.84608  | 0.892    | RP11-184I chr1   | - | 44175063 | 44193014 | 469  |
| ENSG000001 | 6.151985 | 9.27775  | -0.55922 | 0.42195  | 0.52746  | RP11-490K chr1   | - | 31736092 | 31736528 | 437  |
| ENSG000001 | 0        | 0.297015 | -0.41864 | 0.81278  | NA       | AC005162. chr7   | + | 29119900 | 29122143 | 389  |
| ENSG000001 | 1.960143 | 3.06884  | -0.5509  | 0.64522  | 0.732    | SPINK8 chr3      | - | 48348336 | 48369831 | 440  |
| ENSG000001 | 2.044087 | 2.558194 | -0.30017 | 0.80973  | 0.86587  | RPS10P18 chr10   | - | 1.26E+08 | 1.26E+08 | 495  |
| ENSG000001 | 0.632843 | 5.79051  | -2.7176  | 0.025386 | 0.048931 | RLIMP1 chr13     | + | 41192875 | 41195485 | 1680 |
| ENSG000001 | 0.290301 | 0        | 0.4146   | 0.81455  | NA       | AC023669. chr7   | + | 46300662 | 46334067 | 524  |
| ENSG000001 | 0        | 0.297015 | -0.41864 | 0.81278  | NA       | RP11-56I2 chr10  | - | 1.08E+08 | 1.08E+08 | 456  |
| ENSG000001 | 6.846442 | 6.673433 | 0.044444 | 0.95028  | 0.96892  | RP1-64K7.4 chr20 | + | 32668955 | 32669754 | 230  |
| ENSG000001 | 0.870904 | 0.297015 | 0.71032  | 0.69005  | NA       | RGS17P1 chr13    | - | 41566915 | 41567467 | 553  |
| ENSG000001 | 1.649304 | 2.679579 | -0.59241 | 0.641    | 0.72806  | PATL2 chr15      | - | 44957930 | 45003514 | 2100 |
| ENSG000001 | 0        | 24.02389 | -6.2079  | 7.17E-08 | 2.83E-07 | CTD-2554C chr19  | + | 38320191 | 38322797 | 2607 |
| ENSG000001 | 0.342542 | 0        | 0.4146   | 0.81455  | NA       | RP5-888M1 chr1   | + | 12587766 | 12588462 | 438  |
| ENSG000001 | 7.613678 | 3.541484 | 1.0213   | 0.22686  | 0.3198   | ALG13-AS1 chrX   | - | 1.11E+08 | 1.11E+08 | 195  |
| ENSG000001 | 0.580602 | 0        | 0.8036   | 0.6494   | NA       | ATP5A1P5 chr9    | + | 43399987 | 43401315 | 1329 |
| ENSG000001 | 0.923144 | 0.357707 | 0.88371  | 0.60898  | NA       | RP11-342C chrX   | + | 45042496 | 45193162 | 736  |
| ENSG000001 | 0        | 8.671568 | -4.6846  | 0.000353 | 0.000934 | AC004019. chr22  | + | 17897744 | 17898875 | 1132 |
| ENSG000001 | 0.342542 | 0.594029 | -0.38792 | 0.8278   | NA       | AC005189. chr7   | + | 43806889 | 43807198 | 310  |
| ENSG000001 | 0.342542 | 0        | 0.4146   | 0.81455  | NA       | AC105053. chr2   | + | 86042253 | 86052514 | 1711 |
| ENSG000001 | 0.653381 | 2.696564 | -1.6755  | 0.21231  | 0.30286  | RP11-52J3. chr6  | - | 1.58E+08 | 1.58E+08 | 743  |
| ENSG000001 | 0.290301 | 0.715414 | -0.50514 | 0.77701  | NA       | AC092155. chr2   | - | 62759718 | 62760194 | 477  |
| ENSG000001 | 0.72616  | 0        | 0.85004  | 0.63064  | NA       | RP4-682E1 chr1   | + | 86495537 | 86496272 | 736  |
| ENSG000001 | 0.342542 | 0.297015 | -0.00202 | 0.99909  | NA       | RP11-421E chr1   | - | 2.07E+08 | 2.07E+08 | 112  |
| ENSG000001 | 0        | 0.297015 | -0.41864 | 0.81278  | NA       | RP11-392E chr9   | - | 38486856 | 38488335 | 1480 |
| ENSG000001 | 3.030637 | 2.324288 | 0.31939  | 0.80537  | 0.86232  | AC068580. chr11  | - | 1784239  | 1784979  | 252  |
| ENSG000001 | 12.2611  | 10.10481 | 0.28135  | 0.67653  | 0.75776  | RP11-58A1 chr1   | + | 6607965  | 6608679  | 401  |
| ENSG000001 | 0        | 0.343138 | -0.41864 | 0.81278  | NA       | LINC00404 chr13  | - | 1.13E+08 | 1.13E+08 | 428  |
| ENSG000001 | 0.943682 | 0.343138 | 0.89828  | 0.6031   | NA       | MYCBP2-AS1 chr13 | - | 77654646 | 77655325 | 428  |
| ENSG000001 | 0        | 0.297015 | -0.41864 | 0.81278  | NA       | RP11-7G23 chr9   | + | 45729709 | 45730417 | 194  |
| ENSG000001 | 0        | 6.013879 | -3.8049  | 0.014326 | 0.029152 | AC053503. chr2   | + | 2.2E+08  | 2.2E+08  | 1598 |

|            |          |          |          |          |          |                 |   |          |          |      |
|------------|----------|----------|----------|----------|----------|-----------------|---|----------|----------|------|
| ENSG000001 | 0        | 0.686276 | -0.84936 | 0.6309   | NA       | RP5-1066F chr1  | + | 41329586 | 41342342 | 471  |
| ENSG000001 | 0.580602 | 0.343138 | 0.37443  | 0.8337   | NA       | RP11-62C3 chr9  | - | 95101940 | 95103945 | 913  |
| ENSG000001 | 0.653381 | 9.176639 | -3.3214  | 0.004314 | 0.009698 | RP1-102G2 chr1  | - | 1.75E+08 | 1.75E+08 | 670  |
| ENSG000001 | 0.36308  | 4.602452 | -3.0046  | 0.028935 | 0.054974 | AC079776 chr2   | - | 1.31E+08 | 1.31E+08 | 563  |
| ENSG000001 | 10.97569 | 8.801074 | 0.29665  | 0.66087  | 0.74469  | RP11-119B chr20 | - | 3868886  | 3869515  | 441  |
| ENSG000001 | 0        | 131.3547 | -8.458   | 2.79E-14 | 1.75E-13 | NKX1-2 chr10    | - | 1.26E+08 | 1.26E+08 | 1580 |
| ENSG000001 | 0        | 42.84968 | -7.0108  | 3.28E-10 | 1.57E-09 | RP11-366C chr13 | - | 43416550 | 43417023 | 227  |
| ENSG000001 | 0        | 0.357707 | -0.41864 | 0.81278  | NA       | RP11-363C chr13 | + | 23425912 | 23428277 | 2042 |
| ENSG000001 | 0        | 0.357707 | -0.41864 | 0.81278  | NA       | LINC00379 chr13 | - | 91779867 | 91783661 | 464  |
| ENSG000001 | 2.479132 | 4.412253 | -0.7076  | 0.52999  | 0.6314   | SACS-AS1 chr13  | + | 23993110 | 24002818 | 2044 |
| ENSG000001 | 2.064625 | 0        | 2.4902   | 0.12625  | 0.19686  | RP11-245N chrX  | + | 45364633 | 45489447 | 2214 |
| ENSG000001 | 0        | 0.686276 | -0.84936 | 0.6309   | NA       | AC108056 chr4   | + | 1.19E+08 | 1.19E+08 | 576  |
| ENSG000001 | 0        | 0.297015 | -0.41864 | 0.81278  | NA       | RP4-717I2 chr1  | - | 93744518 | 93744686 | 169  |
| ENSG000001 | 0.342542 | 0        | 0.4146   | 0.81455  | NA       | RP11-481C chr10 | - | 80760241 | 80763560 | 2018 |
| ENSG000001 | 0.72616  | 0.343138 | 0.52026  | 0.77047  | NA       | RP11-423C chr9  | - | 1.29E+08 | 1.29E+08 | 509  |
| ENSG000001 | 0.290301 | 1.073121 | -0.88899 | 0.61676  | NA       | RPL21P44 chr4   | - | 54852754 | 54853225 | 472  |
| ENSG000001 | 0.653381 | 2.474811 | -1.4579  | 0.32944  | 0.43258  | RP11-197P chr9  | - | 77624744 | 77630952 | 670  |
| ENSG000001 | 0        | 0.715414 | -0.84936 | 0.6309   | NA       | RP11-479J chr1  | + | 1.66E+08 | 1.66E+08 | 423  |
| ENSG000001 | 10.08425 | 62.94699 | -2.6188  | 1.52E-09 | 6.91E-09 | ACVR2B-AS chr3  | - | 38492518 | 38496311 | 2517 |
| ENSG000001 | 0        | 13.3186  | -5.2962  | 2.65E-05 | 8.09E-05 | MSX2P1 chr17    | + | 56234389 | 56235161 | 773  |
| ENSG000001 | 2.427705 | 1.309443 | 0.72743  | 0.5777   | 0.67421  | RP5-981O7 chr7  | - | 1.52E+08 | 1.52E+08 | 673  |
| ENSG000001 | 0.290301 | 1.073121 | -0.88899 | 0.61676  | NA       | SUCLA2P3 chr2   | - | 25302770 | 25304558 | 1357 |
| ENSG000001 | 5.871057 | 5.675573 | 0.055084 | 0.94316  | 0.96323  | PRDX3P1 chr22   | - | 39118748 | 39119510 | 763  |
| ENSG000001 | 2.665765 | 2.497501 | 0.058225 | 0.96211  | 0.97755  | AL590762 chrX   | - | 70633684 | 70633936 | 253  |
| ENSG000001 | 0        | 0.98329  | -1.2878  | 0.47019  | NA       | RP11-492N chr10 | - | 29187925 | 29188422 | 492  |
| ENSG000001 | 0.36308  | 0        | 0.4146   | 0.81455  | NA       | GOLGA2P4 chr22  | + | 43180468 | 43183106 | 777  |
| ENSG000001 | 0        | 0.937167 | -1.2408  | 0.48662  | NA       | RP11-125I chr13 | + | 27947485 | 27948503 | 580  |
| ENSG000001 | 0        | 3.198346 | -3.1449  | 0.041263 | 0.075338 | RP11-390F chr9  | + | 6704471  | 6707780  | 422  |
| ENSG000001 | 0        | 0.640152 | -0.82869 | 0.63935  | NA       | RP11-555F chr9  | - | 93225806 | 93345026 | 791  |
| ENSG000001 | 0        | 0.343138 | -0.41864 | 0.81278  | NA       | AC011288 chr7   | + | 13141016 | 13743774 | 575  |
| ENSG000001 | 0.580602 | 0        | 0.8036   | 0.6494   | NA       | AC018742 chr2   | - | 21910306 | 21933495 | 2098 |
| ENSG000001 | 0.290301 | 0.594029 | -0.38058 | 0.83094  | NA       | METTL21AF chr21 | - | 40607312 | 40607946 | 635  |
| ENSG000001 | 0.705622 | 0        | 0.8807   | 0.6196   | NA       | RP11-44N1 chr8  | + | 99973656 | 99980512 | 464  |
| ENSG000001 | 3.536669 | 0        | 3.2905   | 0.030278 | 0.057214 | AC073115 chr7   | + | 46030504 | 46040497 | 532  |
| ENSG000001 | 0.72616  | 0.343138 | 0.52026  | 0.77047  | NA       | RP11-302K chr10 | + | 1.04E+08 | 1.04E+08 | 95   |
| ENSG000001 | 0        | 0.297015 | -0.41864 | 0.81278  | NA       | RP11-124C chr10 | - | 43474465 | 43476955 | 500  |
| ENSG000001 | 3.246368 | 0        | 3.1673   | 0.038894 | 0.071601 | RP4-713B5 chr1  | - | 93850044 | 93850555 | 512  |
| ENSG000001 | 0        | 2.66501  | -2.877   | 0.067583 | 0.11559  | KRT8P21 chr1    | + | 73570475 | 73571965 | 1491 |
| ENSG000001 | 52.89794 | 153.3384 | -1.5245  | 8.84E-09 | 3.77E-08 | HOXB-AS5 chr17  | + | 46800530 | 46802819 | 1276 |
| ENSG000001 | 69.11862 | 99.6087  | -0.52136 | 0.030046 | 0.056842 | RPL4P4 chr3     | - | 1.85E+08 | 1.85E+08 | 1284 |
| ENSG000001 | 7.613678 | 10.65359 | -0.47289 | 0.52049  | 0.62318  | NAMPTL chr10    | - | 36810649 | 36813162 | 2514 |
| ENSG000001 | 91.39136 | 2.292733 | 5.1551   | 1.42E-18 | 1.11E-17 | LINC00341 chr14 | - | 95873606 | 95876427 | 2822 |
| ENSG000001 | 0.36308  | 2.200487 | -1.8637  | 0.24964  | 0.34596  | RP11-330A chr6  | - | 14597745 | 14599921 | 146  |
| ENSG000001 | 4.906837 | 1.888903 | 1.2263   | 0.22693  | 0.31987  | RP11-462L chr10 | + | 33247773 | 33371030 | 1048 |
| ENSG000001 | 0        | 0.343138 | -0.41864 | 0.81278  | NA       | RP11-494K chr1  | + | 2.05E+08 | 2.05E+08 | 562  |
| ENSG000001 | 5.467715 | 3.602177 | 0.54227  | 0.54542  | 0.64566  | RP11-345K chr10 | - | 75182017 | 75182454 | 438  |
| ENSG000001 | 0.290301 | 0.297015 | -0.00202 | 0.99909  | NA       | RP5-1142J chr7  | - | 1.57E+08 | 1.57E+08 | 565  |
| ENSG000001 | 1.741807 | 6.016295 | -1.5029  | 0.20697  | 0.29669  | MAST4-AS1 chr5  | - | 66297211 | 66299781 | 777  |
| ENSG000001 | 0        | 1.387121 | -1.6961  | 0.33794  | NA       | PKP4P1 chr2     | + | 2.1E+08  | 2.1E+08  | 2158 |
| ENSG000001 | 0.342542 | 0.343138 | -0.00208 | 0.99906  | NA       | AC051649 chr11  | + | 1923877  | 1929145  | 315  |
| ENSG000001 | 0.36308  | 0        | 0.4146   | 0.81455  | NA       | AL121578 chrX   | + | 37853597 | 37854043 | 447  |
| ENSG000001 | 1.701545 | 3.991438 | -1.1283  | 0.28548  | 0.38689  | RP11-383F chr7  | - | 1.39E+08 | 1.39E+08 | 551  |
| ENSG000001 | 0.342542 | 0        | 0.4146   | 0.81455  | NA       | AC114755 chr2   | - | 1.07E+08 | 1.07E+08 | 361  |
| ENSG000001 | 0        | 0.891044 | -1.0625  | 0.54819  | NA       | ASNSP5 chr1     | + | 1.43E+08 | 1.43E+08 | 153  |
| ENSG000001 | 2.229907 | 1.309443 | 0.65227  | 0.61709  | 0.70823  | AC004741 chr7   | + | 16250113 | 16310229 | 2252 |
| ENSG000001 | 2.448243 | 2.012704 | 0.22196  | 0.86863  | 0.90849  | RP11-21N7 chr1  | - | 1.55E+08 | 1.55E+08 | 301  |
| ENSG000001 | 22.60379 | 29.49557 | -0.38299 | 0.45191  | 0.55736  | SOS1-IT1 chr2   | - | 39219420 | 39220998 | 1191 |
| ENSG000001 | 0        | 1.416259 | -1.7181  | 0.33141  | NA       | RP11-305L chr9  | + | 93881344 | 93945044 | 561  |
| ENSG000001 | 0.342542 | 0.357707 | -0.0021  | 0.99906  | NA       | AC011242 chr2   | - | 43907604 | 43908761 | 1158 |
| ENSG000001 | 0        | 0.640152 | -0.82869 | 0.63935  | NA       | KARSP1 chr13    | + | 42499734 | 42501485 | 1752 |
| ENSG000001 | 0        | 0.297015 | -0.41864 | 0.81278  | NA       | RP1-140J1 chr1  | + | 1.53E+08 | 1.53E+08 | 2254 |
| ENSG000001 | 0.580602 | 0.357707 | 0.37639  | 0.83285  | NA       | RP1-130G2 chr6  | - | 20042686 | 20043171 | 486  |
| ENSG000001 | 0        | 2.139794 | -2.2809  | 0.18733  | 0.27337  | RP1-274L7 chrX  | - | 1.3E+08  | 1.3E+08  | 1646 |
| ENSG000001 | 0.342542 | 0        | 0.4146   | 0.81455  | NA       | XX-CR54.1 chr1  | + | 2.49E+08 | 2.49E+08 | 580  |
| ENSG000001 | 0        | 0.343138 | -0.41864 | 0.81278  | NA       | RP11-449C chr10 | - | 52582452 | 52584285 | 636  |

|            |          |          |          |          |          |            |       |   |          |          |       |
|------------|----------|----------|----------|----------|----------|------------|-------|---|----------|----------|-------|
| ENSG000001 | 13.17487 | 1.995719 | 2.5702   | 0.00226  | 0.005302 | EEF1DP3    | chr13 | + | 32420978 | 32527609 | 3283  |
| ENSG000001 | 0        | 2.24661  | -2.6365  | 0.10117  | 0.16301  | RP11-556N  | chr4  | + | 76751904 | 76753858 | 1955  |
| ENSG000001 | 0        | 1.326428 | -1.6486  | 0.3523   | NA       | AP001187.  | chr11 | - | 64658898 | 64660921 | 1781  |
| ENSG000001 | 1.722083 | 0        | 2.21     | 0.18654  | NA       | RP3-495K2  | chr6  | - | 1.69E+08 | 1.69E+08 | 934   |
| ENSG000001 | 0.290301 | 1.964165 | -1.7606  | 0.2818   | 0.38282  | RP11-252I. | chr5  | - | 1.8E+08  | 1.8E+08  | 623   |
| ENSG000001 | 0.36308  | 2.575179 | -2.2111  | 0.13803  | 0.21143  | AL845154.  | chr13 | - | 1.15E+08 | 1.15E+08 | 514   |
| ENSG000001 | 1.960143 | 1.744828 | 0.15244  | 0.91347  | 0.94093  | AC013460.  | chr2  | + | 7561392  | 7590385  | 2253  |
| ENSG000001 | 12.1369  | 5.566341 | 1.076    | 0.1221   | 0.19165  | RP11-314N  | chr20 | + | 1342266  | 1343229  | 480   |
| ENSG000001 | 62.51447 | 39.52432 | 0.65674  | 0.070272 | 0.11959  | RP11-159C  | chr3  | + | 88108424 | 88188123 | 1377  |
| ENSG000001 | 0.290301 | 0.700845 | -0.56655 | 0.74739  | NA       | RP11-295K  | chr1  | + | 1.86E+08 | 1.86E+08 | 314   |
| ENSG000001 | 0.580602 | 1.326428 | -0.76629 | 0.64583  | 0.73251  | RP11-365C  | chr1  | + | 2.24E+08 | 2.24E+08 | 474   |
| ENSG000001 | 5.197138 | 0        | 3.9587   | 0.004186 | 0.009426 | AC018730.  | chr2  | - | 1.05E+08 | 1.05E+08 | 3103  |
| ENSG000001 | 0.580602 | 0        | 0.8036   | 0.6494   | NA       | AC011998.  | chr2  | + | 1.79E+08 | 1.79E+08 | 473   |
| ENSG000001 | 0.685084 | 1.043983 | -0.4     | 0.81273  | NA       | AC096649.  | chr2  | + | 1.76E+08 | 1.76E+08 | 497   |
| ENSG000001 | 2.407167 | 0        | 2.7149   | 0.089055 | 0.14641  | RP11-142N  | chr10 | + | 14033815 | 14049525 | 570   |
| ENSG000001 | 0.632843 | 0        | 0.81931  | 0.64303  | NA       | CXCR2P1    | chr2  | - | 2.19E+08 | 2.19E+08 | 2503  |
| ENSG000001 | 0        | 1.370136 | -1.6825  | 0.34201  | NA       | RP4-738P1  | chr1  | - | 1.69E+08 | 1.69E+08 | 787   |
| ENSG000001 | 0.342542 | 1.623443 | -1.4981  | 0.36671  | 0.47131  | DYNLT3P2   | chr2  | + | 1.29E+08 | 1.29E+08 | 295   |
| ENSG000001 | 0.36308  | 5.47651  | -3.274   | 0.013684 | 0.02796  | MRPS18AP   | chr3  | - | 48297840 | 48298428 | 589   |
| ENSG000001 | 0.580602 | 0        | 0.8036   | 0.6494   | NA       | RP5-971N1  | chr20 | + | 8000549  | 8008603  | 1929  |
| ENSG000001 | 0        | 0.357707 | -0.41864 | 0.81278  | NA       | TRBV10-2   | chr7  | - | 1.42E+08 | 1.42E+08 | 395   |
| ENSG000001 | 0        | 0.297015 | -0.41864 | 0.81278  | NA       | CTA-796E4. | chr22 | - | 26557876 | 26559180 | 357   |
| ENSG000001 | 0.290301 | 0.686276 | -0.47648 | 0.78935  | NA       | RP4-644L1  | chr20 | - | 39326535 | 39327256 | 273   |
| ENSG000001 | 0.290301 | 1.652581 | -1.6475  | 0.2955   | 0.3975   | UBE2Q1-AS  | chr1  | + | 1.55E+08 | 1.55E+08 | 432   |
| ENSG000001 | 0        | 0.357707 | -0.41864 | 0.81278  | NA       | AC118754.  | chr17 | - | 4400689  | 4402969  | 370   |
| ENSG000001 | 0.995923 | 0.297015 | 1.0163   | 0.54122  | NA       | SNRPPF2    | chr1  | + | 26213851 | 26214101 | 251   |
| ENSG000001 | 23.99547 | 23.03173 | 0.050803 | 0.90454  | 0.93409  | RP11-391N  | chr9  | + | 68726629 | 68745997 | 425   |
| ENSG000001 | 0.36308  | 0        | 0.4146   | 0.81455  | NA       | RP11-460F  | chr13 | + | 1.1E+08  | 1.1E+08  | 414   |
| ENSG000001 | 0.36308  | 0        | 0.4146   | 0.81455  | NA       | RP11-522L  | chrX  | + | 1.02E+08 | 1.02E+08 | 1084  |
| ENSG000001 | 0.943682 | 0.297015 | 0.89158  | 0.60669  | NA       | RP11-293C  | chr1  | + | 2.36E+08 | 2.36E+08 | 247   |
| ENSG000001 | 0        | 0.357707 | -0.41864 | 0.81278  | NA       | AC140481.  | chr2  | - | 1.32E+08 | 1.32E+08 | 706   |
| ENSG000001 | 0        | 0.357707 | -0.41864 | 0.81278  | NA       | AC006030.  | chr2  | - | 74533855 | 74535135 | 1281  |
| ENSG000001 | 0.36308  | 0        | 0.4146   | 0.81455  | NA       | ATP8A2P2   | chr13 | + | 33051411 | 33052978 | 1568  |
| ENSG000001 | 0        | 2.367995 | -2.6905  | 0.093451 | 0.15263  | RP515P5    | chr3  | + | 54660242 | 54660673 | 432   |
| ENSG000001 | 0        | 0.715414 | -0.84936 | 0.6309   | NA       | XIST       | chrX  | - | 73040486 | 73072588 | 19275 |
| ENSG000001 | 2.749709 | 2.711133 | 0.011037 | 0.99194  | 0.99565  | RP11-456P  | chr1  | + | 1.62E+08 | 1.62E+08 | 1364  |
| ENSG000001 | 138.4138 | 70.52516 | 0.96801  | 1.29E-05 | 4.08E-05 | ZNF688     | chr16 | - | 30580667 | 30584055 | 2506  |
| ENSG000001 | 0.580602 | 0.357707 | 0.37639  | 0.83285  | NA       | CCNB1IP1F  | chr1  | + | 45424229 | 45425067 | 839   |
| ENSG000001 | 10.0629  | 10.99102 | -0.11331 | 0.85056  | 0.89488  | DDX50P1    | chr2  | + | 32426669 | 32429068 | 2400  |
| ENSG000001 | 2.282147 | 1.355566 | 0.66828  | 0.58255  | 0.67866  | RP11-510F  | chr6  | - | 1.25E+08 | 1.25E+08 | 484   |
| ENSG000001 | 2.096328 | 1.782087 | 0.14579  | 0.92529  | 0.94994  | RP1-308E4  | chr1  | + | 28780052 | 28780445 | 394   |
| ENSG000001 | 0.36308  | 0        | 0.4146   | 0.81455  | NA       | RP11-567E  | chr1  | - | 2.01E+08 | 2.01E+08 | 771   |
| ENSG000001 | 0.36308  | 0.715414 | -0.51558 | 0.77246  | NA       | RP5-1174J. | chrX  | + | 41607475 | 41607861 | 387   |
| ENSG000001 | 0        | 2.07098  | -2.4602  | 0.13507  | 0.20805  | RP11-384C  | chr1  | + | 2.13E+08 | 2.13E+08 | 496   |
| ENSG000001 | 11.01677 | 13.0377  | -0.23729 | 0.70896  | 0.78374  | PET100     | chr19 | + | 7694623  | 7696842  | 1815  |
| ENSG000001 | 4.169512 | 2.338857 | 0.77628  | 0.44139  | 0.54722  | KHSRPP1    | chr9  | + | 21695175 | 21696942 | 1768  |
| ENSG000001 | 0        | 0.594029 | -0.81444 | 0.64499  | NA       | XXbac-BPG  | chr6  | - | 31275592 | 31276326 | 306   |
| ENSG000001 | 3.547834 | 1.935026 | 0.78216  | 0.46222  | 0.56726  | AC018462.  | chr2  | - | 62296582 | 62374016 | 1684  |
| ENSG000001 | 12.17976 | 3.305162 | 1.7959   | 0.015602 | 0.031486 | RP11-361K  | chr1  | + | 2.18E+08 | 2.18E+08 | 1963  |
| ENSG000001 | 0        | 0.343138 | -0.41864 | 0.81278  | NA       | RP11-141A  | chr1  | + | 49513988 | 49653257 | 713   |
| ENSG000001 | 0        | 0.686276 | -0.84936 | 0.6309   | NA       | EMX2OS     | chr10 | - | 1.19E+08 | 1.19E+08 | 1924  |
| ENSG000001 | 11.54432 | 6.566617 | 0.78987  | 0.23761  | 0.33201  | RP13-766C  | chr17 | + | 79481073 | 79494802 | 783   |
| ENSG000001 | 64.85904 | 61.695   | 0.06255  | 0.83874  | 0.88684  | RP11-398K  | chr6  | + | 73972938 | 74011124 | 3362  |
| ENSG000001 | 1.016461 | 0.700845 | 0.39345  | 0.80723  | NA       | RP5-1049C  | chr20 | - | 46259010 | 46260182 | 860   |
| ENSG000001 | 5.135524 | 0        | 3.8247   | 0.00862  | 0.018342 | RP11-524C  | chr9  | - | 1.24E+08 | 1.24E+08 | 662   |
| ENSG000001 | 0.36308  | 0        | 0.4146   | 0.81455  | NA       | CTC-546K2  | chr5  | + | 1.21E+08 | 1.21E+08 | 821   |
| ENSG000001 | 1.027626 | 0.640152 | 0.42826  | 0.80114  | NA       | RP11-505P  | chr6  | + | 74233341 | 74280319 | 586   |
| ENSG000001 | 6.535603 | 3.526915 | 0.82283  | 0.3263   | 0.42918  | RP11-157F  | chr3  | + | 57168170 | 57168751 | 582   |
| ENSG000001 | 7.522153 | 2.65044  | 1.4049   | 0.11937  | 0.18801  | STEAP3-AS1 | chr2  | - | 1.2E+08  | 1.2E+08  | 3218  |
| ENSG000001 | 0.580602 | 0.640152 | -0.06311 | 0.97099  | NA       | RP11-363N  | chr10 | + | 978966   | 988683   | 407   |
| ENSG000001 | 1.306762 | 2.200487 | -0.61351 | 0.66577  | 0.74887  | RP11-507K  | chr10 | + | 51023142 | 51023608 | 467   |
| ENSG000001 | 0        | 0.357707 | -0.41864 | 0.81278  | NA       | RP4-710M.  | chr1  | - | 56673239 | 56674128 | 890   |
| ENSG000001 | 10.38572 | 17.78671 | -0.75322 | 0.26758  | 0.36633  | OGFR-AS1   | chr20 | - | 61431979 | 61436939 | 668   |
| ENSG000001 | 103.1104 | 36.41915 | 1.4814   | 8.67E-06 | 2.81E-05 | RP11-312C  | chr1  | - | 2.06E+08 | 2.06E+08 | 758   |
| ENSG000001 | 0.36308  | 0.297015 | -0.00205 | 0.99908  | NA       | RP11-130C  | chr9  | + | 659986   | 660326   | 341   |

|            |          |          |          |          |          |                  |   |          |          |      |
|------------|----------|----------|----------|----------|----------|------------------|---|----------|----------|------|
| ENSG000001 | 0        | 0.343138 | -0.41864 | 0.81278  | NA       | RP11-199C chr20  | + | 6427370  | 6509106  | 1484 |
| ENSG000001 | 0        | 1.84278  | -2.0842  | 0.23234  | NA       | IMMTP1 chr21     | - | 46095785 | 46098003 | 2219 |
| ENSG000001 | 0        | 1.66715  | -1.9695  | 0.25993  | NA       | RP5-1132F chr7   | - | 65490113 | 65496531 | 306  |
| ENSG000001 | 0        | 1.773966 | -2.0065  | 0.25182  | NA       | HNRNPA1P chr1    | - | 58513847 | 58514963 | 963  |
| ENSG000001 | 18.8703  | 378.8441 | -4.3095  | 1.81E-57 | 4.95E-56 | Z83851.1 chr22   | - | 42760406 | 42765242 | 1142 |
| ENSG000001 | 0        | 0.297015 | -0.41864 | 0.81278  | NA       | RP4-730D4 chr20  | + | 41235334 | 41236199 | 348  |
| ENSG000001 | 0.685084 | 0.98329  | -0.35409 | 0.8342   | NA       | AC004549. chr7   | - | 27773014 | 27780014 | 859  |
| ENSG000001 | 0        | 0.686276 | -0.84936 | 0.6309   | NA       | GK3P chr4        | - | 1.66E+08 | 1.66E+08 | 2232 |
| ENSG000001 | 0.653381 | 1.416259 | -0.79451 | 0.61517  | 0.70699  | RP11-456F chr6   | + | 12007903 | 12009089 | 784  |
| ENSG000001 | 0.653381 | 0        | 0.82678  | 0.64037  | NA       | SEPT7P7 chr9     | + | 1.01E+08 | 1.01E+08 | 1301 |
| ENSG000001 | 0        | 0.98329  | -1.2878  | 0.47019  | NA       | HSPD1P21 chr20   | - | 44168622 | 44168866 | 245  |
| ENSG000001 | 0.685084 | 1.073121 | -0.37207 | 0.83246  | NA       | RP11-399E chr1   | - | 41840676 | 41841341 | 394  |
| ENSG000001 | 1.286224 | 1.234181 | 0.029042 | 0.98369  | 0.99083  | RP11-206L chr1   | + | 696291   | 697369   | 456  |
| ENSG000001 | 0        | 0.297015 | -0.41864 | 0.81278  | NA       | AC128709. chr3   | - | 1.97E+08 | 1.97E+08 | 600  |
| ENSG000001 | 0        | 0.686276 | -0.84936 | 0.6309   | NA       | RP11-404C chr1   | - | 1.58E+08 | 1.58E+08 | 499  |
| ENSG000001 | 4.584833 | 0.343138 | 3.0233   | 0.026007 | 0.049998 | AC016999. chr2   | - | 2.39E+08 | 2.39E+08 | 452  |
| ENSG000001 | 0.290301 | 2.102535 | -1.8274  | 0.26251  | 0.36071  | AC007014. chr16  | + | 11120881 | 11121620 | 740  |
| ENSG000001 | 2.096328 | 0        | 2.2646   | 0.18883  | 0.27515  | DOCK9-AS1 chr13  | + | 99484338 | 99486883 | 392  |
| ENSG000001 | 0        | 2.027273 | -2.4385  | 0.13903  | 0.2127   | AC016734. chr2   | - | 63869589 | 63871172 | 1334 |
| ENSG000001 | 2.976604 | 100.5799 | -4.9483  | 4.51E-18 | 3.47E-17 | KIF25-AS1 chr6   | - | 1.68E+08 | 1.68E+08 | 2795 |
| ENSG000001 | 0.632843 | 0.594029 | 0.039277 | 0.98194  | NA       | FAM90A26 chr4    | + | 9172135  | 9178453  | 2489 |
| ENSG000001 | 0.995923 | 1.280305 | -0.30329 | 0.83416  | 0.88339  | RHEBP1 chr10     | + | 46914088 | 46914795 | 708  |
| ENSG000001 | 2.023549 | 0        | 2.432    | 0.14018  | 0.21407  | RP11-504P chr1   | - | 2.24E+08 | 2.24E+08 | 246  |
| ENSG000001 | 14.24358 | 5.834217 | 1.236    | 0.061263 | 0.10629  | RP1-151F1 chr6   | + | 16761369 | 16762883 | 635  |
| ENSG000001 | 4.689314 | 4.22776  | 0.1236   | 0.88515  | 0.91974  | YWHAZP3 chr10    | + | 23425852 | 23426590 | 738  |
| ENSG000001 | 1.701545 | 3.633731 | -1.0038  | 0.35084  | 0.45522  | RP11-111F chrX   | + | 1.11E+08 | 1.11E+08 | 287  |
| ENSG000001 | 0.342542 | 0        | 0.4146   | 0.81455  | NA       | AC012499. chr2   | + | 1.79E+08 | 1.79E+08 | 741  |
| ENSG000001 | 12.53168 | 16.76696 | -0.41528 | 0.40956  | 0.51444  | AC004797. chr17  | - | 47500970 | 47502298 | 1329 |
| ENSG000001 | 0        | 0.937167 | -1.2408  | 0.48662  | NA       | RP13-766C chr17  | + | 79480089 | 79480210 | 122  |
| ENSG000001 | 0.632843 | 1.073121 | -0.47016 | 0.7819   | NA       | AC092431. chr2   | + | 69824485 | 69826083 | 975  |
| ENSG000001 | 1.628766 | 0        | 2.1781   | 0.19145  | NA       | RP1-290I1 chr6   | + | 10409573 | 10416679 | 1575 |
| ENSG000001 | 1.431782 | 0.700845 | 0.75326  | 0.63313  | 0.72196  | AC104695. chr2   | - | 28607276 | 28617539 | 3001 |
| ENSG000001 | 0        | 0.997859 | -1.5018  | 0.39072  | NA       | RP11-284F chr1   | - | 1.57E+08 | 1.57E+08 | 758  |
| ENSG000001 | 0.705622 | 1.370136 | -0.71417 | 0.6513   | 0.73678  | MTND2P2 chrX     | + | 1.02E+08 | 1.02E+08 | 945  |
| ENSG000001 | 2.386629 | 9.292319 | -1.8612  | 0.030497 | 0.057592 | RP1-506.4 chr22  | - | 38783923 | 38784862 | 541  |
| ENSG000001 | 4.887113 | 0.686276 | 2.3321   | 0.083431 | 0.1385   | ZRANB2-AS chr1   | + | 71547007 | 71955652 | 888  |
| ENSG000001 | 0        | 0.297015 | -0.41864 | 0.81278  | NA       | RP11-71G1 chr1   | + | 1.57E+08 | 1.57E+08 | 471  |
| ENSG000001 | 0        | 0.951736 | -1.2555  | 0.48145  | NA       | RP11-366F chrX   | - | 1.51E+08 | 1.51E+08 | 850  |
| ENSG000001 | 0        | 0.357707 | -0.41864 | 0.81278  | NA       | RP3-393P1 chrX   | - | 47636226 | 47638096 | 1433 |
| ENSG000001 | 4.107898 | 38.58466 | -3.1005  | 1.83E-07 | 6.98E-07 | AC007128. chr7   | + | 8301894  | 8384146  | 1853 |
| ENSG000001 | 0        | 0.357707 | -0.41864 | 0.81278  | NA       | IQCF3 chr3       | + | 51851620 | 51864876 | 1685 |
| ENSG000001 | 0.685084 | 0        | 0.85004  | 0.63064  | NA       | LIPT1P1 chr13    | + | 1.03E+08 | 1.03E+08 | 1186 |
| ENSG000001 | 0        | 5.361573 | -3.9914  | 0.00392  | 0.008864 | RP5-1031J1 chr20 | + | 38414363 | 38441871 | 480  |
| ENSG000001 | 3.516131 | 16.68204 | -2.0959  | 0.013875 | 0.028313 | TOB1-AS1 chr17   | + | 48944040 | 48987098 | 1351 |
| ENSG000001 | 6.007242 | 0        | 4.1622   | 0.002187 | 0.005142 | RP11-215N chr10  | - | 1.1E+08  | 1.1E+08  | 800  |
| ENSG000001 | 0        | 0.654722 | -0.83442 | 0.63731  | NA       | RP11-151I1 chr1  | + | 2.12E+08 | 2.12E+08 | 510  |
| ENSG000001 | 7.23006  | 0        | 4.4517   | 0.000727 | 0.001842 | RP11-31E2 chr1   | - | 1.99E+08 | 1.99E+08 | 2308 |
| ENSG000001 | 2.842212 | 4.412253 | -0.54942 | 0.59318  | 0.68796  | RP11-574K chr10  | + | 75601591 | 75606324 | 317  |
| ENSG000001 | 1.265686 | 1.713273 | -0.32798 | 0.81115  | 0.86704  | HMGB3P9 chr1     | - | 93112605 | 93113187 | 583  |
| ENSG000001 | 5.850519 | 10.41968 | -0.80067 | 0.23579  | 0.32974  | RP4-765A1 chr1   | + | 35816323 | 35817208 | 886  |
| ENSG000001 | 3.600075 | 1.485073 | 1.0312   | 0.43166  | 0.53715  | AC093585. chr2   | - | 2.42E+08 | 2.42E+08 | 428  |
| ENSG000001 | 0.943682 | 1.828211 | -0.73536 | 0.62578  | 0.71582  | RP5-1042K chr22  | - | 40768668 | 40784294 | 432  |
| ENSG000001 | 7.292652 | 50.93467 | -2.7135  | 7.72E-07 | 2.78E-06 | ALMS1-IT1 chr2   | + | 73683891 | 73686611 | 2107 |
| ENSG000001 | 0.342542 | 0        | 0.4146   | 0.81455  | NA       | RP11-217F chr9   | - | 75060670 | 75060885 | 216  |
| ENSG000001 | 1.89853  | 2.185918 | -0.17587 | 0.89172  | 0.92489  | SNAP47-AS chr1   | - | 2.28E+08 | 2.28E+08 | 1708 |
| ENSG000001 | 0.290301 | 1.012429 | -0.95336 | 0.58114  | NA       | ANKRD36B chr2    | + | 89065324 | 89106126 | 5395 |
| ENSG000001 | 3.963155 | 0.654722 | 2.1973   | 0.080398 | 0.13413  | RP4-568F9 chr20  | - | 18303196 | 18339944 | 2490 |
| ENSG000001 | 0        | 0.951736 | -1.2555  | 0.48145  | NA       | CTSL1P4 chr10    | - | 52465140 | 52468666 | 1002 |
| ENSG000001 | 0.580602 | 0.343138 | 0.37443  | 0.8337   | NA       | RP11-80B9 chr1   | - | 2.41E+08 | 2.41E+08 | 456  |
| ENSG000001 | 0        | 0.357707 | -0.41864 | 0.81278  | NA       | NHS-AS1 chrX     | - | 17570470 | 17575508 | 366  |
| ENSG000001 | 0.72616  | 0        | 0.85004  | 0.63064  | NA       | RP5-857K2 chr1   | - | 536816   | 741274   | 750  |
| ENSG000001 | 2.811323 | 1.073121 | 1.1027   | 0.45129  | 0.55687  | FNTAP2 chr13     | + | 22104829 | 22105462 | 634  |
| ENSG000001 | 5.757203 | 0.891044 | 2.2626   | 0.061106 | 0.10608  | RP11-95P1 chr1   | - | 2.2E+08  | 2.2E+08  | 451  |
| ENSG000001 | 0.705622 | 0.343138 | 0.57395  | 0.74355  | NA       | RP11-382C chr1   | + | 2.36E+08 | 2.36E+08 | 1388 |
| ENSG000001 | 0        | 0.297015 | -0.41864 | 0.81278  | NA       | RP5-1121A chr7   | + | 1.57E+08 | 1.57E+08 | 531  |

|            |          |          |          |          |          |                  |   |          |          |      |
|------------|----------|----------|----------|----------|----------|------------------|---|----------|----------|------|
| ENSG000001 | 0        | 1.416259 | -1.7181  | 0.33141  | NA       | RP11-174G chr1   | - | 18493423 | 18505840 | 430  |
| ENSG000001 | 0.290301 | 0.594029 | -0.38058 | 0.83094  | NA       | AL596137. chr10  | - | 52365750 | 52365953 | 195  |
| ENSG000001 | 6.95011  | 30.80011 | -2.0656  | 0.000245 | 0.000662 | AK3P3 chr7       | + | 23168797 | 23169460 | 664  |
| ENSG000001 | 0.36308  | 0.297015 | -0.00205 | 0.99908  | NA       | BIRC6-AS1 chr2   | - | 32602699 | 32604667 | 697  |
| ENSG000001 | 251.0317 | 358.0069 | -0.51174 | 0.000589 | 0.001513 | CISD3 chr17      | + | 36886488 | 36891297 | 2326 |
| ENSG000001 | 0        | 1.248751 | -1.5848  | 0.37202  | NA       | RP11-172E chr13  | - | 40918094 | 40924440 | 444  |
| ENSG000001 | 0        | 0.297015 | -0.41864 | 0.81278  | NA       | RP11-384C chr1   | + | 2.12E+08 | 2.12E+08 | 650  |
| ENSG000001 | 1.866827 | 0        | 2.3484   | 0.15622  | NA       | AC010974. chr2   | + | 1.33E+08 | 1.33E+08 | 374  |
| ENSG000001 | 0        | 0.640152 | -0.82869 | 0.63935  | NA       | HSPD1P6 chr3     | - | 36808608 | 36810290 | 1683 |
| ENSG000001 | 3.04001  | 2.66501  | 0.16438  | 0.87699  | 0.91433  | CDC42-IT1 chr1   | + | 22385690 | 22390692 | 692  |
| ENSG000001 | 7.032262 | 4.721421 | 0.56296  | 0.49218  | 0.59609  | LRRC37A1 chr4    | - | 1.04E+08 | 1.04E+08 | 1355 |
| ENSG000001 | 3.008307 | 2.872193 | 0.037179 | 0.97168  | 0.98436  | RPL4P6 chr22     | - | 40982704 | 40984007 | 1304 |
| ENSG000001 | 8.307321 | 18.38961 | -1.0854  | 0.13035  | 0.20206  | RP11-195F chr9   | + | 34665662 | 34681295 | 665  |
| ENSG000001 | 3.008307 | 2.667426 | 0.15237  | 0.88772  | 0.92164  | AC016708. chr2   | + | 2.16E+08 | 2.16E+08 | 318  |
| ENSG000001 | 0.36308  | 0        | 0.4146   | 0.81455  | NA       | MTAPP2 chr3      | - | 1.9E+08  | 1.9E+08  | 832  |
| ENSG000001 | 0.36308  | 1.326428 | -1.249   | 0.46108  | NA       | RP11-165N chr9   | - | 1.15E+08 | 1.15E+08 | 211  |
| ENSG000001 | 4.814334 | 3.365854 | 0.46866  | 0.62464  | 0.71475  | PRRT3-AS1 chr3   | + | 9989088  | 9996471  | 614  |
| ENSG000001 | 16.57699 | 6.420125 | 1.3368   | 0.03104  | 0.058424 | RP4-613B2 chr3   | - | 42643455 | 42695880 | 722  |
| ENSG000001 | 2.064625 | 2.635871 | -0.33741 | 0.76298  | 0.82798  | AC108025. chr2   | - | 5758459  | 5831250  | 1058 |
| ENSG000001 | 5.414661 | 24.69244 | -2.1061  | 0.000468 | 0.001221 | TMEM254-1. chr10 | - | 81806616 | 81838668 | 3121 |
| ENSG000001 | 0.705622 | 0.951736 | -0.34312 | 0.83184  | NA       | RP11-206L chr1   | - | 736259   | 745541   | 523  |
| ENSG000001 | 0        | 4.103959 | -3.2596  | 0.04339  | 0.078704 | RP11-462G chr10  | + | 1.33E+08 | 1.33E+08 | 472  |
| ENSG000001 | 0.290301 | 0        | 0.4146   | 0.81455  | NA       | TUBB3P2 chr7     | - | 1.34E+08 | 1.34E+08 | 297  |
| ENSG000001 | 0.290301 | 0.997859 | -1.0217  | 0.53916  | NA       | RP11-407B chr3   | - | 1.94E+08 | 1.94E+08 | 2666 |
| ENSG000001 | 0.342542 | 0.357707 | -0.0021  | 0.99906  | NA       | AC018712. chr2   | - | 1.74E+08 | 1.74E+08 | 687  |
| ENSG000001 | 0.290301 | 2.759672 | -2.1272  | 0.19084  | 0.27764  | RP11-431N chrX   | + | 56644824 | 56650891 | 713  |
| ENSG000001 | 0        | 0.997859 | -1.5018  | 0.39072  | NA       | AF228730. chr8   | + | 7028072  | 7028263  | 192  |
| ENSG000001 | 0.995923 | 3.305162 | -1.5089  | 0.20749  | 0.29725  | CTA-126B4 chr22  | + | 42834029 | 42842201 | 572  |
| ENSG000001 | 0.943682 | 0.357707 | 0.90033  | 0.60199  | NA       | RP11-275N chr10  | - | 21629162 | 21661879 | 439  |
| ENSG000001 | 0        | 3.489656 | -3.0062  | 0.067273 | 0.11517  | AC005086. chr7   | - | 1.02E+08 | 1.02E+08 | 213  |
| ENSG000001 | 0.342542 | 0        | 0.4146   | 0.81455  | NA       | RP11-163C chr1   | + | 42957410 | 42958164 | 755  |
| ENSG000001 | 0        | 0.343138 | -0.41864 | 0.81278  | NA       | AC092569. chr2   | - | 30969310 | 30969567 | 258  |
| ENSG000001 | 0.342542 | 0        | 0.4146   | 0.81455  | NA       | AC123900. chr3   | - | 33231725 | 33231820 | 96   |
| ENSG000001 | 0        | 0.654722 | -0.83442 | 0.63731  | NA       | ECEL1P3 chr2     | - | 2.33E+08 | 2.33E+08 | 737  |
| ENSG000001 | 18.9919  | 22.22803 | -0.21433 | 0.70316  | 0.77919  | RP5-1180C chr1   | - | 1.8E+08  | 1.8E+08  | 2667 |
| ENSG000001 | 0.995923 | 7.807246 | -2.679   | 0.010278 | 0.021554 | FGF12-AS2 chr3   | + | 1.92E+08 | 1.92E+08 | 580  |
| ENSG000001 | 0        | 5.788094 | -4.0903  | 0.003116 | 0.007167 | RP11-282I. chr10 | + | 1.25E+08 | 1.25E+08 | 831  |
| ENSG000001 | 0.342542 | 0        | 0.4146   | 0.81455  | NA       | RP5-1100I. chr20 | + | 24180403 | 24205224 | 2376 |
| ENSG000001 | 3.693391 | 0        | 3.4184   | 0.01986  | 0.039228 | AC016738. chr2   | - | 1.02E+08 | 1.02E+08 | 493  |
| ENSG000001 | 0        | 0.715414 | -0.84936 | 0.6309   | NA       | SEPHS1P4 chrX    | + | 72989083 | 72990258 | 1176 |
| ENSG000001 | 0        | 0.357707 | -0.41864 | 0.81278  | NA       | RP11-305L chr9   | - | 93931867 | 93932327 | 461  |
| ENSG000001 | 46.94636 | 7.160646 | 2.6466   | 4.20E-08 | 1.69E-07 | HOXB-AS1 chr17   | + | 46620913 | 46628610 | 804  |
| ENSG000001 | 0.342542 | 1.280305 | -1.2322  | 0.4658   | NA       | RP3-508I1. chr22 | + | 39130735 | 39134995 | 527  |
| ENSG000001 | 1.608228 | 1.66715  | -0.03103 | 0.98267  | 0.99021  | AC018463. chr2   | + | 11448151 | 11449067 | 917  |
| ENSG000001 | 1.265686 | 0.951736 | 0.30973  | 0.83942  | 0.88733  | RP3-477O4 chr20  | - | 34064028 | 34078808 | 600  |
| ENSG000001 | 0        | 0.997859 | -1.5018  | 0.39072  | NA       | LINC00443 chr13  | + | 1.07E+08 | 1.07E+08 | 1170 |
| ENSG000001 | 0.36308  | 0.357707 | -0.00212 | 0.99905  | NA       | MTND1P28 chr2    | + | 1.18E+08 | 1.18E+08 | 950  |
| ENSG000001 | 0        | 0.357707 | -0.41864 | 0.81278  | NA       | RP11-232C chrX   | - | 1.16E+08 | 1.16E+08 | 512  |
| ENSG000001 | 0.72616  | 0        | 0.85004  | 0.63064  | NA       | AC004854. chr7   | + | 44959268 | 44959928 | 349  |
| ENSG000001 | 0.72616  | 0.654722 | 0.069147 | 0.96802  | NA       | RP11-97N5 chrX   | - | 1.35E+08 | 1.35E+08 | 1134 |
| ENSG000001 | 15.76688 | 8.03712  | 0.92752  | 0.13681  | 0.21005  | SMIM12-A5 chr1   | + | 35316295 | 35317156 | 720  |
| ENSG000001 | 0        | 0.343138 | -0.41864 | 0.81278  | NA       | CTB-1144G chr10  | + | 1.16E+08 | 1.16E+08 | 333  |
| ENSG000001 | 0        | 0.357707 | -0.41864 | 0.81278  | NA       | HNRNPA1P chrX    | + | 1.18E+08 | 1.18E+08 | 961  |
| ENSG000001 | 1.08924  | 0        | 1.1858   | 0.50299  | NA       | RP11-369J. chr10 | + | 81885697 | 81886073 | 377  |
| ENSG000001 | 1.048164 | 0        | 1.348    | 0.44949  | NA       | XXbac-BPG chr6   | + | 31409444 | 31414750 | 2141 |
| ENSG000001 | 0.36308  | 0.357707 | -0.00212 | 0.99905  | NA       | RP11-466F chr1   | + | 1.66E+08 | 1.66E+08 | 470  |
| ENSG000001 | 0.342542 | 0        | 0.4146   | 0.81455  | NA       | RP4-779E1 chr20  | + | 4173712  | 4176590  | 697  |
| ENSG000001 | 21.19352 | 18.41142 | 0.20282  | 0.6533   | 0.73847  | RP5-1112C chr6   | + | 1.12E+08 | 1.12E+08 | 557  |
| ENSG000001 | 0.685084 | 1.430828 | -0.63766 | 0.71446  | 0.7884   | CTD-2542C chrX   | + | 16821356 | 16821476 | 121  |
| ENSG000001 | 0.705622 | 0        | 0.8807   | 0.6196   | NA       | CNOT6LP1 chr15   | - | 56297911 | 56299374 | 1462 |
| ENSG000001 | 7.8312   | 4.438975 | 0.78615  | 0.35762  | 0.46189  | SMYD3-IT1 chr1   | - | 2.46E+08 | 2.46E+08 | 361  |
| ENSG000001 | 2.738544 | 4.974728 | -0.81073 | 0.40644  | 0.51123  | C9orf147 chr9    | - | 1.15E+08 | 1.15E+08 | 863  |
| ENSG000001 | 1.265686 | 0.640152 | 0.71969  | 0.64739  | NA       | RP11-405L chr9   | - | 37490418 | 37490890 | 473  |
| ENSG000001 | 17.69614 | 12.51651 | 0.4875   | 0.43346  | 0.53886  | GS1-124K5 chr7   | - | 65874130 | 65955046 | 1016 |
| ENSG000001 | 0.342542 | 0        | 0.4146   | 0.81455  | NA       | AC073387. chr7   | + | 1.09E+08 | 1.09E+08 | 709  |

|            |          |          |          |          |          |                   |   |          |          |      |
|------------|----------|----------|----------|----------|----------|-------------------|---|----------|----------|------|
| ENSG000001 | 0.36308  | 0        | 0.4146   | 0.81455  | NA       | AC000081. chr22   | - | 19225966 | 19226262 | 297  |
| ENSG000001 | 7.022889 | 10.5459  | -0.5489  | 0.45329  | 0.55877  | AC118138. chr7    | + | 74765876 | 74789332 | 950  |
| ENSG000001 | 3.266906 | 3.319731 | -0.01733 | 0.98802  | 0.99322  | ATP6V0CP1 chr17   | - | 4760052  | 4760669  | 618  |
| ENSG000001 | 80.27157 | 139.5767 | -0.79559 | 0.00027  | 0.000727 | RP11-632C chr6    | + | 1.18E+08 | 1.18E+08 | 474  |
| ENSG000001 | 2.49967  | 0        | 2.7866   | 0.07964  | 0.13296  | RP11-631F chr6    | - | 1.48E+08 | 1.48E+08 | 426  |
| ENSG000001 | 2.396002 | 4.80722  | -0.91905 | 0.40972  | 0.51457  | RPL4P5 chr9       | - | 7477045  | 7478320  | 1276 |
| ENSG000001 | 0        | 0.297015 | -0.41864 | 0.81278  | NA       | IFNNP1 chr9       | - | 21058770 | 21059322 | 553  |
| ENSG000001 | 1.068702 | 7.097537 | -2.483   | 0.02598  | 0.049955 | AP000688. chr21   | - | 37441940 | 37498938 | 1221 |
| ENSG000001 | 0.290301 | 5.505649 | -3.2823  | 0.015409 | 0.03115  | HSPB1P2 chrX      | - | 49090415 | 49090960 | 546  |
| ENSG000001 | 0        | 0.357707 | -0.41864 | 0.81278  | NA       | FAM92A1P chr4     | + | 1.84E+08 | 1.84E+08 | 2455 |
| ENSG000001 | 0.290301 | 1.40169  | -1.3255  | 0.43225  | NA       | RP11-173C chr9    | + | 98054620 | 98057092 | 2473 |
| ENSG000001 | 21.09083 | 20.59089 | 0.028132 | 0.94863  | 0.96766  | PHBP9 chr10       | + | 1.02E+08 | 1.02E+08 | 825  |
| ENSG000001 | 0.342542 | 0        | 0.4146   | 0.81455  | NA       | MTND5P14 chr9     | + | 5109496  | 5110762  | 1267 |
| ENSG000001 | 0        | 0.343138 | -0.41864 | 0.81278  | NA       | SIAH1P1 chrX      | + | 35644247 | 35645181 | 923  |
| ENSG000001 | 0.72616  | 0        | 0.85004  | 0.63064  | NA       | RP11-241I chr10   | + | 32272813 | 32273482 | 342  |
| ENSG000001 | 0        | 0.686276 | -0.84936 | 0.6309   | NA       | SPATA31C1 chr9    | + | 90529408 | 90538572 | 3895 |
| ENSG000001 | 0        | 0.997859 | -1.5018  | 0.39072  | NA       | PHBP4 chr2        | + | 1.55E+08 | 1.55E+08 | 837  |
| ENSG000001 | 0.685084 | 2.185918 | -1.3114  | 0.38184  | 0.48599  | RP11-423C chr1    | + | 1.43E+08 | 1.43E+08 | 1069 |
| ENSG000001 | 3.797873 | 0.997859 | 1.651    | 0.1771   | 0.2607   | RP11-645N chr7    | + | 1.03E+08 | 1.03E+08 | 1072 |
| ENSG000001 | 0.290301 | 0.343138 | -0.00202 | 0.99909  | NA       | MIRLET7D chr9     | - | 96938884 | 96966850 | 1294 |
| ENSG000001 | 1.068702 | 0.640152 | 0.49176  | 0.76049  | NA       | XXYLT1-AS2 chr3   | + | 1.95E+08 | 1.95E+08 | 784  |
| ENSG000001 | 0        | 18.48756 | -5.7393  | 3.49E-06 | 1.18E-05 | RP1-40E16 chr6    | - | 3182978  | 3195990  | 1506 |
| ENSG000001 | 0.36308  | 0        | 0.4146   | 0.81455  | NA       | AC087163. chr17   | - | 17884506 | 17884886 | 381  |
| ENSG000001 | 9.325574 | 3.945314 | 1.1876   | 0.11676  | 0.18451  | RP11-38O1 chr1    | + | 2.03E+08 | 2.03E+08 | 918  |
| ENSG000001 | 0.72616  | 0        | 0.85004  | 0.63064  | NA       | RP11-290N chr1    | + | 86064814 | 86066417 | 255  |
| ENSG000001 | 0.290301 | 0.297015 | -0.00202 | 0.99909  | NA       | RP11-305E chr1    | + | 1.01E+08 | 1.01E+08 | 228  |
| ENSG000001 | 2.551911 | 8.386706 | -1.5847  | 0.063403 | 0.10946  | RP11-334J chr9    | - | 1.34E+08 | 1.34E+08 | 473  |
| ENSG000001 | 0.653381 | 0        | 0.82678  | 0.64037  | NA       | ARMC2-AS1 chr6    | - | 1.09E+08 | 1.09E+08 | 112  |
| ENSG000001 | 6.349784 | 5.07268  | 0.28134  | 0.7368   | 0.80595  | RP11-244J chr12   | - | 80496676 | 80497113 | 438  |
| ENSG000001 | 0        | 0.343138 | -0.41864 | 0.81278  | NA       | RP13-507P chr12   | + | 1.32E+08 | 1.32E+08 | 2009 |
| ENSG000001 | 11.97341 | 9.589333 | 0.30679  | 0.62167  | 0.71218  | RP11-458F chr7    | + | 66345695 | 66347968 | 351  |
| ENSG000001 | 0.36308  | 1.326428 | -1.249   | 0.46108  | NA       | AC093162. chr2    | - | 85489267 | 85489390 | 124  |
| ENSG000001 | 2.592987 | 0        | 2.8438   | 0.071235 | 0.12092  | STARD13-IT1 chr13 | - | 33732724 | 33738546 | 452  |
| ENSG000001 | 0        | 0.654722 | -0.83442 | 0.63731  | NA       | OR5H6 chr3        | + | 97983088 | 97984200 | 1113 |
| ENSG000001 | 0.342542 | 0.640152 | -0.50911 | 0.77219  | NA       | RP11-213C chr9    | - | 88400637 | 88408395 | 492  |
| ENSG000001 | 0        | 1.387121 | -1.6961  | 0.33794  | NA       | CICP6 chr3        | - | 1.98E+08 | 1.98E+08 | 2729 |
| ENSG000001 | 2.49967  | 3.708992 | -0.48274 | 0.64051  | 0.72762  | BANF1P2 chr10     | - | 1.35E+08 | 1.35E+08 | 264  |
| ENSG000001 | 0.342542 | 0.891044 | -0.73092 | 0.68123  | NA       | CTD-2192J chr19   | + | 12663411 | 12664458 | 543  |
| ENSG000001 | 0.36308  | 2.010288 | -1.8766  | 0.22248  | 0.31471  | AC004074. chrX    | + | 72442960 | 72443394 | 435  |
| ENSG000001 | 4.221753 | 0.297015 | 2.9354   | 0.032845 | 0.061498 | LLOXNC01- chrX    | + | 1.03E+08 | 1.03E+08 | 919  |
| ENSG000001 | 0        | 5.110682 | -3.8934  | 0.005686 | 0.012518 | HCG24 chr6        | + | 33112560 | 33115544 | 717  |
| ENSG000001 | 0        | 0.357707 | -0.41864 | 0.81278  | NA       | ELOVL2-AS1 chr6   | + | 11043993 | 11078459 | 903  |
| ENSG000001 | 0.36308  | 263.8588 | -8.5922  | 1.39E-18 | 1.10E-17 | FEZF1-AS1 chr7    | + | 1.22E+08 | 1.22E+08 | 2653 |
| ENSG000001 | 8.040164 | 4.210775 | 0.86411  | 0.29595  | 0.39799  | AL022476. chr22   | + | 43434591 | 43448372 | 2083 |
| ENSG000001 | 1.016461 | 0.297015 | 0.95157  | 0.5817   | NA       | RP4-769N1 chrX    | + | 1.02E+08 | 1.02E+08 | 457  |
| ENSG000001 | 0.632843 | 0.937167 | -0.40344 | 0.80349  | NA       | CTD-3105F chr19   | + | 12615719 | 12616790 | 428  |
| ENSG000001 | 0.290301 | 0.654722 | -0.51764 | 0.76892  | NA       | RP3-323N1 chr10   | - | 11210885 | 11213339 | 430  |
| ENSG000001 | 0.72616  | 2.382564 | -1.2725  | 0.42054  | 0.52595  | LINC00159 chr21   | - | 33452629 | 33570125 | 438  |
| ENSG000001 | 1.338465 | 0        | 1.8837   | 0.27037  | NA       | RP11-385F chr1    | - | 2.37E+08 | 2.37E+08 | 494  |
| ENSG000001 | 0.36308  | 0.715414 | -0.51558 | 0.77246  | NA       | HMG1N1P3 chrX     | - | 9833133  | 9833583  | 451  |
| ENSG000001 | 17.39825 | 16.50634 | 0.068379 | 0.90982  | 0.93808  | HMG1N2P3 chr16    | - | 26043860 | 26044132 | 273  |
| ENSG000001 | 1.733248 | 0.357707 | 1.5335   | 0.35837  | 0.46266  | AC004538. chr7    | + | 11221359 | 11559802 | 2078 |
| ENSG000001 | 0.685084 | 3.665285 | -2.001   | 0.13984  | 0.21358  | RP4-635E1 chr1    | + | 11159732 | 11162157 | 487  |
| ENSG000001 | 0.342542 | 1.995719 | -1.8877  | 0.21566  | 0.30671  | FANCD2P2 chr3     | + | 11901148 | 11932646 | 1400 |
| ENSG000001 | 0        | 0.98329  | -1.2878  | 0.47019  | NA       | NCAPD2P1 chr7     | - | 34789865 | 34791665 | 1801 |
| ENSG000001 | 10.09281 | 10.63332 | -0.06565 | 0.91237  | 0.94008  | RP11-166C chr7    | + | 66744765 | 66751606 | 1017 |
| ENSG000001 | 7.707973 | 3.757532 | 0.97599  | 0.30322  | 0.40449  | TP11P2 chr7       | + | 1.29E+08 | 1.29E+08 | 752  |
| ENSG000001 | 0.342542 | 0.98329  | -0.93492 | 0.58786  | NA       | RPL4P3 chr1       | - | 1.72E+08 | 1.72E+08 | 1311 |
| ENSG000001 | 2.967231 | 0.951736 | 1.3686   | 0.28102  | 0.38202  | DSCR9 chr21       | + | 38580804 | 38594037 | 1644 |
| ENSG000001 | 0.653381 | 1.340997 | -0.79074 | 0.59756  | 0.69176  | AC005007. chr7    | - | 11046026 | 11046503 | 478  |
| ENSG000001 | 0.943682 | 0.594029 | 0.4146   | 0.80719  | NA       | KARSP2 chr13      | + | 1.14E+08 | 1.14E+08 | 1639 |
| ENSG000001 | 65.4998  | 19.48051 | 1.7334   | 5.09E-07 | 1.87E-06 | GOLGA6L5 chr15    | - | 85051116 | 85060045 | 2337 |
| ENSG000001 | 0        | 0.343138 | -0.41864 | 0.81278  | NA       | MEMO1P4 chrX      | + | 1.23E+08 | 1.23E+08 | 386  |
| ENSG000001 | 13.34178 | 17.55764 | -0.39446 | 0.42588  | 0.53124  | AC009245. chr7    | + | 1.37E+08 | 1.37E+08 | 862  |
| ENSG000001 | 4.410178 | 0        | 3.6175   | 0.013819 | 0.028211 | RP11-14O2 chr13   | - | 38055604 | 38058906 | 511  |

|            |          |          |          |          |          |                  |   |          |          |      |
|------------|----------|----------|----------|----------|----------|------------------|---|----------|----------|------|
| ENSG000001 | 0        | 0.937167 | -1.2408  | 0.48662  | NA       | AC017040. chr2   | + | 1.16E+08 | 1.16E+08 | 883  |
| ENSG000001 | 0.342542 | 0.357707 | -0.0021  | 0.99906  | NA       | RP5-11391. chrX  | + | 1.18E+08 | 1.18E+08 | 2907 |
| ENSG000001 | 13.82728 | 0        | 5.4031   | 9.25E-06 | 2.98E-05 | AC092667. chr2   | + | 1.01E+08 | 1.01E+08 | 2586 |
| ENSG000001 | 0        | 0.937167 | -1.2408  | 0.48662  | NA       | RP11-692P chrX   | + | 7975419  | 7986201  | 177  |
| ENSG000001 | 1.016461 | 0.357707 | 0.95974  | 0.57727  | NA       | SPTLC1P1 chr10   | + | 31649884 | 31650144 | 261  |
| ENSG000001 | 1.939605 | 0        | 2.4257   | 0.13778  | 0.21116  | RBBP8P1 chrX     | - | 1.18E+08 | 1.18E+08 | 1844 |
| ENSG000001 | 0.290301 | 0.357707 | -0.00203 | 0.99908  | NA       | RP11-359C chr20  | - | 22656710 | 22665982 | 2320 |
| ENSG000001 | 25.22269 | 58.47075 | -1.2078  | 0.0019   | 0.004512 | TCEA1P2 chr3     | + | 37317087 | 37318089 | 940  |
| ENSG000001 | 0        | 0.594029 | -0.81444 | 0.64499  | NA       | OR3D1P chr1      | + | 2.48E+08 | 2.48E+08 | 955  |
| ENSG000001 | 4.688501 | 5.658588 | -0.22915 | 0.79637  | 0.85544  | RP5-902P8 chr1   | + | 1210603  | 1215800  | 389  |
| ENSG000001 | 0        | 0.98329  | -1.2878  | 0.47019  | NA       | LINC00856 chr10  | + | 80008505 | 80434724 | 2692 |
| ENSG000001 | 0        | 0.686276 | -0.84936 | 0.6309   | NA       | XX-C2158C chr6   | + | 1.71E+08 | 1.71E+08 | 333  |
| ENSG000001 | 8.713269 | 8.331719 | 0.057047 | 0.93567  | 0.95758  | RP1-43E13 chr1   | + | 19536995 | 19567198 | 507  |
| ENSG000001 | 0        | 0.594029 | -0.81444 | 0.64499  | NA       | RP11-313A chr1   | + | 95527152 | 95533101 | 1096 |
| ENSG000001 | 1.742621 | 0        | 1.9826   | 0.25789  | NA       | RP1-196A1 chr16  | + | 501404   | 503461   | 278  |
| ENSG000001 | 0.580602 | 0.357707 | 0.37639  | 0.83285  | NA       | AC114803. chr2   | + | 2.2E+08  | 2.2E+08  | 311  |
| ENSG000001 | 1.359003 | 3.573038 | -1.2604  | 0.26684  | 0.36556  | RP1-20B11 chr6   | + | 524171   | 525581   | 851  |
| ENSG000001 | 0        | 0.297015 | -0.41864 | 0.81278  | NA       | RP11-1401 chr1   | - | 95816807 | 95817810 | 602  |
| ENSG000001 | 8.724434 | 0.937167 | 2.8578   | 0.006229 | 0.013622 | RP11-420C chr6   | - | 2854891  | 2876744  | 1254 |
| ENSG000001 | 2.624689 | 3.183777 | -0.2676  | 0.79607  | 0.85538  | RP11-488P chr1   | - | 94218480 | 94241000 | 1671 |
| ENSG000001 | 0        | 0.357707 | -0.41864 | 0.81278  | NA       | TFAMP1 chr7      | + | 1654226  | 1654961  | 736  |
| ENSG000001 | 5.766575 | 20.35786 | -1.7437  | 0.009322 | 0.019694 | LRRC37A6f chr10  | - | 27535279 | 27548384 | 5444 |
| ENSG000001 | 1.317927 | 0.640152 | 0.74499  | 0.63843  | 0.72627  | RPL7P4 chr6      | - | 30664583 | 30665312 | 730  |
| ENSG000001 | 0        | 0.686276 | -0.84936 | 0.6309   | NA       | AC012457. chr2   | + | 25427182 | 25432071 | 466  |
| ENSG000001 | 45.82021 | 184.0976 | -1.9944  | 9.49E-16 | 6.49E-15 | ANKRD18B chr9    | + | 33524392 | 33573007 | 3773 |
| ENSG000001 | 18.00698 | 32.0449  | -0.81436 | 0.16364  | 0.24429  | U73166.2 chr3    | + | 50297735 | 50300790 | 2625 |
| ENSG000001 | 2.323223 | 0        | 2.4326   | 0.15328  | 0.23122  | AC129778. chr9   | + | 42808660 | 42812274 | 762  |
| ENSG000001 | 2.946693 | 2.307303 | 0.3161   | 0.77604  | 0.83917  | PA2G4P4 chr3     | - | 1.57E+08 | 1.57E+08 | 1182 |
| ENSG000001 | 1.338465 | 1.188058 | 0.094053 | 0.95085  | 0.96922  | RP11-741C chr15  | + | 77570807 | 77571116 | 310  |
| ENSG000001 | 6.701698 | 0.594029 | 2.9284   | 0.01402  | 0.028569 | PROX1-AS1 chr1   | - | 2.14E+08 | 2.14E+08 | 5185 |
| ENSG000001 | 13.03094 | 0.297015 | 4.5188   | 0.000143 | 0.0004   | AP000695. chr21  | + | 37802658 | 37853368 | 893  |
| ENSG000001 | 2.386629 | 0        | 2.6941   | 0.092956 | 0.15198  | ATP5G2P3 chr2    | + | 1.98E+08 | 1.98E+08 | 425  |
| ENSG000001 | 0.290301 | 0        | 0.4146   | 0.81455  | NA       | OR51A10P chr11   | - | 5489716  | 5490652  | 937  |
| ENSG000001 | 26.38047 | 26.54891 | -0.00829 | 0.98349  | 0.99083  | PSMG3-AS1 chr7   | + | 1609709  | 1629262  | 5701 |
| ENSG000001 | 0.36308  | 0.357707 | -0.00212 | 0.99905  | NA       | RP11-141N chr13  | - | 33929343 | 34250905 | 892  |
| ENSG000001 | 1.814586 | 0.343138 | 1.6133   | 0.33149  | 0.43467  | RP11-462C chr20  | - | 17579900 | 17580452 | 553  |
| ENSG000001 | 5.507977 | 1.545765 | 1.6052   | 0.14068  | 0.21463  | RP4-564M. chr1   | + | 77533605 | 77544167 | 497  |
| ENSG000001 | 5.653535 | 0        | 4.0717   | 0.00297  | 0.00685  | AC108463. chr2   | + | 1.12E+08 | 1.12E+08 | 412  |
| ENSG000001 | 10.83013 | 0        | 5.0683   | 4.29E-05 | 0.000128 | RP11-360I. chr10 | + | 28033715 | 28056723 | 745  |
| ENSG000001 | 0.290301 | 0        | 0.4146   | 0.81455  | NA       | ANKRD30B chr10   | + | 45652223 | 45672373 | 1070 |
| ENSG000001 | 0.342542 | 0        | 0.4146   | 0.81455  | NA       | RPL19P21 chrX    | + | 1.5E+08  | 1.5E+08  | 591  |
| ENSG000001 | 5.333322 | 13.63502 | -1.3121  | 0.060192 | 0.10471  | PPP5D1 chr19     | - | 46984053 | 47104457 | 2777 |
| ENSG000001 | 14.16045 | 21.41641 | -0.59154 | 0.24055  | 0.33541  | THAP7-AS1 chr22  | + | 21356175 | 21364631 | 2298 |
| ENSG000001 | 0        | 1.043983 | -1.3473  | 0.44976  | NA       | AC092580. chr2   | - | 7811735  | 7812377  | 469  |
| ENSG000001 | 1.390706 | 0        | 1.6954   | 0.33813  | NA       | RP11-1060 chr12  | + | 27855271 | 27855839 | 569  |
| ENSG000001 | 0.975385 | 0.297015 | 0.91901  | 0.59525  | NA       | HCG4P7 chr6      | - | 29855071 | 29856045 | 975  |
| ENSG000001 | 0.290301 | 0.357707 | -0.00203 | 0.99908  | NA       | RP3-437I1f chr1  | - | 29656132 | 29676626 | 2148 |
| ENSG000001 | 2.697468 | 0.640152 | 1.6802   | 0.21134  | 0.30167  | COL6A4P1 chr3    | - | 15193340 | 15247466 | 4317 |
| ENSG000001 | 0.580602 | 0        | 0.8036   | 0.6494   | NA       | NOS2P3 chr17     | + | 20339650 | 20350557 | 3323 |
| ENSG000001 | 0        | 0.343138 | -0.41864 | 0.81278  | NA       | CEACAMP9 chr19   | - | 43600608 | 43601512 | 513  |
| ENSG000001 | 0        | 5.537203 | -4.0522  | 0.003169 | 0.00728  | LIMD1-AS1 chr3   | - | 45720535 | 45730626 | 1536 |
| ENSG000001 | 0        | 0.997859 | -1.5018  | 0.39072  | NA       | RP11-297A chr10  | - | 35386934 | 35415948 | 651  |
| ENSG000001 | 0        | 7.393679 | -4.3206  | 0.002236 | 0.005248 | BASP1P1 chr13    | - | 23471480 | 23472144 | 665  |
| ENSG000001 | 0.290301 | 0        | 0.4146   | 0.81455  | NA       | RP11-379C chr9   | - | 1.31E+08 | 1.31E+08 | 765  |
| ENSG000001 | 0.870904 | 1.012429 | -0.11194 | 0.94661  | NA       | RP11-305L chr9   | - | 93867239 | 93869586 | 815  |
| ENSG000001 | 3.081086 | 6.030864 | -0.9125  | 0.32929  | 0.43245  | LINC00102 chrX   | - | 2531029  | 2533388  | 1340 |
| ENSG000001 | 0        | 1.294874 | -1.8547  | 0.27869  | NA       | RP11-74C1 chr1   | + | 2.04E+08 | 2.04E+08 | 1126 |
| ENSG000001 | 319.838  | 311.0285 | 0.040019 | 0.8265   | 0.87784  | CTB-89H12 chr5   | - | 1.49E+08 | 1.49E+08 | 8636 |
| ENSG000001 | 1.741807 | 5.447372 | -1.3682  | 0.27184  | 0.37125  | AC092162. chr2   | - | 1.78E+08 | 1.78E+08 | 4673 |
| ENSG000001 | 29.4931  | 25.09943 | 0.22761  | 0.58934  | 0.68468  | RP11-517P chr10  | + | 43916186 | 43917548 | 760  |
| ENSG000001 | 1.919068 | 3.06884  | -0.57526 | 0.60674  | 0.69981  | CTC-228N2 chr5   | + | 1.27E+08 | 1.27E+08 | 1044 |
| ENSG000001 | 8.19428  | 10.19706 | -0.2911  | 0.7166   | 0.79003  | FAM133DP chr2    | - | 1.58E+08 | 1.58E+08 | 691  |
| ENSG000001 | 20.36369 | 13.85032 | 0.51961  | 0.43077  | 0.5363   | ZNF32-AS2 chr10  | + | 44141390 | 44143467 | 905  |
| ENSG000001 | 0.995923 | 1.606458 | -0.5669  | 0.68944  | 0.76855  | SF3A3P1 chr20    | - | 3470176  | 3471652  | 1477 |
| ENSG000001 | 0        | 0.700845 | -0.87835 | 0.62047  | NA       | RP11-69L1 chr6   | - | 7341087  | 7342289  | 1203 |

|            |          |          |          |          |          |                 |   |          |          |      |
|------------|----------|----------|----------|----------|----------|-----------------|---|----------|----------|------|
| ENSG000001 | 2.842212 | 1.370136 | 0.91987  | 0.47338  | 0.57796  | RP13-228J chrX  | + | 1.55E+08 | 1.55E+08 | 426  |
| ENSG000001 | 1.048164 | 4.570898 | -1.8999  | 0.10477  | 0.16786  | RP11-390F chr9  | + | 6834456  | 6835577  | 1122 |
| ENSG000001 | 0.290301 | 4.303021 | -2.9643  | 0.030611 | 0.057737 | GTF2IRD1P chr7  | - | 66274980 | 66309813 | 2426 |
| ENSG000001 | 1.027626 | 2.543625 | -1.0637  | 0.45737  | 0.56257  | PHBP12 chr1     | + | 51246012 | 51246822 | 811  |
| ENSG000001 | 1.068702 | 0.343138 | 0.99978  | 0.56109  | NA       | AC093609. chr2  | - | 43324884 | 43329829 | 952  |
| ENSG000001 | 127.1314 | 68.21046 | 0.89061  | 0.006823 | 0.014799 | FTX chrX        | - | 73183790 | 73513409 | 2597 |
| ENSG000001 | 0        | 0.357707 | -0.41864 | 0.81278  | NA       | RPSAP8 chrX     | - | 99410883 | 99411771 | 889  |
| ENSG000001 | 0.290301 | 0        | 0.4146   | 0.81455  | NA       | RP3-331H2 chr6  | + | 72038645 | 72039509 | 352  |
| ENSG000001 | 0        | 0.297015 | -0.41864 | 0.81278  | NA       | RP11-402C chr9  | - | 1.17E+08 | 1.17E+08 | 550  |
| ENSG000001 | 0.923144 | 0.98329  | -0.04766 | 0.97585  | 0.9865   | TSEN15P2 chr1   | + | 52325450 | 52325807 | 358  |
| ENSG000001 | 8.777488 | 1.326428 | 2.4714   | 0.015218 | 0.0308   | AC159540. chr2  | - | 98081083 | 98095220 | 3563 |
| ENSG000001 | 1.338465 | 0        | 1.8837   | 0.27037  | NA       | RP11-167P chr10 | + | 74320022 | 74320214 | 193  |
| ENSG000001 | 1.649304 | 0.357707 | 1.6361   | 0.29742  | 0.39936  | HMGB1P2 chr2    | + | 1.92E+08 | 1.92E+08 | 603  |
| ENSG000001 | 1.317927 | 0.640152 | 0.74499  | 0.63843  | 0.72627  | AC004237. chr5  | + | 1.32E+08 | 1.32E+08 | 502  |
| ENSG000001 | 5.467715 | 12.10382 | -1.1275  | 0.10142  | 0.16334  | HM13-AS1 chr20  | - | 30155510 | 30161066 | 489  |
| ENSG000001 | 8.631931 | 0        | 4.7164   | 0.000241 | 0.000652 | RP5-1198C chr1  | + | 44509600 | 44570647 | 2644 |
| ENSG000001 | 0        | 0.343138 | -0.41864 | 0.81278  | NA       | AC079987. chr7  | + | 83054196 | 83054318 | 123  |
| ENSG000001 | 0        | 1.652581 | -2.1974  | 0.1871   | NA       | UQCRHP1 chr6    | - | 31578860 | 31579133 | 274  |
| ENSG000001 | 0.685084 | 163.2761 | -7.398   | 1.85E-18 | 1.44E-17 | RP11-469A chr1  | + | 2E+08    | 2E+08    | 507  |
| ENSG000001 | 3.298608 | 4.120944 | -0.314   | 0.74575  | 0.81348  | RP11-286F chr7  | + | 1.29E+08 | 1.29E+08 | 1200 |
| ENSG000001 | 16.35946 | 33.41416 | -1.0235  | 0.016071 | 0.032349 | RPS23P8 chrX    | + | 70182814 | 70183143 | 330  |
| ENSG000001 | 1183.223 | 1.71569  | 9.1964   | 6.65E-56 | 1.76E-54 | DNM3OS chr1     | - | 1.72E+08 | 1.72E+08 | 568  |
| ENSG000001 | 0        | 0.594029 | -0.81444 | 0.64499  | NA       | RP11-359N chr6  | - | 14230006 | 14231801 | 470  |
| ENSG000001 | 2.479132 | 0.594029 | 1.4883   | 0.33943  | 0.44332  | RP11-37E2 chr13 | + | 32872291 | 32872849 | 437  |
| ENSG000001 | 0        | 0.343138 | -0.41864 | 0.81278  | NA       | RP5-996D2 chr22 | - | 46877226 | 46877657 | 432  |
| ENSG000001 | 3.153051 | 1.964165 | 0.60684  | 0.60777  | 0.70056  | CTA-246H3 chr22 | + | 25723219 | 25735942 | 663  |
| ENSG000001 | 16.40152 | 0        | 5.6678   | 1.80E-06 | 6.29E-06 | RP11-486B chr1  | + | 42007740 | 42010258 | 2242 |
| ENSG000001 | 0.290301 | 0        | 0.4146   | 0.81455  | NA       | USP12-AS2 chr13 | + | 27746396 | 27757135 | 279  |
| ENSG000001 | 0.342542 | 6.618445 | -3.4943  | 0.008677 | 0.018458 | AC010984. chr2  | + | 1.31E+08 | 1.31E+08 | 1039 |
| ENSG000001 | 0.36308  | 0        | 0.4146   | 0.81455  | NA       | AC022816. chr17 | + | 14277456 | 14324343 | 804  |
| ENSG000001 | 1.286224 | 2.993578 | -1.0548  | 0.36259  | 0.46675  | RP3-406P2 chr6  | - | 4019077  | 4021449  | 209  |
| ENSG000001 | 0.653381 | 0        | 0.82678  | 0.64037  | NA       | AC024084. chr7  | + | 1.36E+08 | 1.36E+08 | 455  |
| ENSG000001 | 1.068702 | 1.355566 | -0.29535 | 0.83804  | 0.88621  | AC112229. chr2  | - | 1.11E+08 | 1.11E+08 | 3130 |
| ENSG000001 | 2.770247 | 0.343138 | 2.2727   | 0.12751  | 0.19845  | PRB4 chr12      | - | 11460017 | 11463369 | 913  |
| ENSG000001 | 3.569185 | 7.486798 | -1.0128  | 0.3064   | 0.40793  | KLHL7-AS1 chr7  | - | 23140847 | 23145322 | 2564 |
| ENSG000001 | 0        | 0.686276 | -0.84936 | 0.6309   | NA       | YY1P1 chr10     | - | 72245092 | 72246081 | 668  |
| ENSG000001 | 2.084349 | 1.370136 | 0.50528  | 0.73196  | 0.80198  | FAM224B chrY    | - | 19664680 | 19691634 | 2032 |
| ENSG000001 | 0        | 1.591889 | -2.1342  | 0.20414  | NA       | PRKRIRP1 chrX   | - | 73616706 | 73619385 | 2203 |
| ENSG000001 | 0.342542 | 3.512346 | -2.6138  | 0.070288 | 0.1196   | CEACAM22 chr19  | - | 45041045 | 45124119 | 3016 |
| ENSG000001 | 0.580602 | 1.935026 | -1.2792  | 0.39216  | 0.4965   | SETP18 chr1     | - | 92540090 | 92540968 | 879  |
| ENSG000001 | 2.604151 | 8.785704 | -1.5994  | 0.1012   | 0.16304  | PABPC1P3 chrX   | - | 73802923 | 73803381 | 459  |
| ENSG000001 | 0.342542 | 0.594029 | -0.38792 | 0.8278   | NA       | RP11-65J3 chr9  | - | 1.32E+08 | 1.32E+08 | 1846 |
| ENSG000001 | 1.048164 | 0.997859 | 0.034858 | 0.98138  | 0.98968  | ENO1-AS1 chr1   | + | 8938894  | 8939953  | 456  |
| ENSG000001 | 12.67903 | 3.859516 | 1.6189   | 0.07471  | 0.12608  | DDTP1 chr3      | - | 38556939 | 38557321 | 383  |
| ENSG000001 | 0.943682 | 2.589748 | -1.2063  | 0.35334  | 0.4577   | RP11-409K chr9  | + | 1.33E+08 | 1.33E+08 | 266  |
| ENSG000001 | 0        | 0.343138 | -0.41864 | 0.81278  | NA       | MRPL35P4 chrX   | - | 12862984 | 12863549 | 566  |
| ENSG000001 | 1.016461 | 0        | 1.3167   | 0.46021  | NA       | RP11-62F2 chr9  | + | 16625674 | 16626388 | 455  |
| ENSG000001 | 2.366091 | 1.964165 | 0.21645  | 0.86739  | 0.90758  | AC012462. chr2  | + | 2.16E+08 | 2.16E+08 | 131  |
| ENSG000001 | 0.36308  | 0.297015 | -0.00205 | 0.99908  | NA       | AC011753. chr2  | - | 1.1E+08  | 1.1E+08  | 610  |
| ENSG000001 | 2.354926 | 0.715414 | 1.3929   | 0.33335  | 0.43665  | AC097635. chr3  | - | 20049344 | 20049739 | 396  |
| ENSG000001 | 0        | 0.640152 | -0.82869 | 0.63935  | NA       | CTD-2330K chr3  | + | 49936735 | 49941190 | 544  |
| ENSG000001 | 39.50555 | 25.97603 | 0.58318  | 0.23438  | 0.32812  | RP11-5407 chr1  | + | 846815   | 850328   | 3043 |
| ENSG000001 | 12.3955  | 28.67971 | -1.1772  | 0.026309 | 0.050507 | FBXW4P1 chr22   | + | 23605323 | 23606541 | 1219 |
| ENSG000001 | 0.290301 | 0.700845 | -0.56655 | 0.74739  | NA       | RP11-681L chr2  | + | 62083830 | 62084190 | 361  |
| ENSG000001 | 0        | 15.34903 | -5.5132  | 7.46E-06 | 2.43E-05 | RP11-364B chrX  | + | 1.39E+08 | 1.39E+08 | 819  |
| ENSG000001 | 0        | 0.357707 | -0.41864 | 0.81278  | NA       | AP000354. chr22 | - | 24644042 | 24645434 | 664  |
| ENSG000001 | 159.7907 | 95.28808 | 0.73829  | 0.000955 | 0.002376 | RP11-274B chr7  | + | 1.28E+08 | 1.28E+08 | 507  |
| ENSG000001 | 0        | 0.357707 | -0.41864 | 0.81278  | NA       | RP11-14C2 chr10 | + | 31012180 | 31012669 | 408  |
| ENSG000001 | 85.41393 | 185.3551 | -1.1186  | 3.66E-07 | 1.36E-06 | RP11-304N chr11 | - | 127115   | 139117   | 2661 |
| ENSG000001 | 0        | 1.964165 | -2.2052  | 0.20143  | 0.2901   | RP11-296L chr9  | + | 34521525 | 34524239 | 631  |
| ENSG000001 | 10.85149 | 8.394827 | 0.33507  | 0.61715  | 0.70827  | AC127904. chr3  | + | 1.97E+08 | 1.97E+08 | 958  |
| ENSG000001 | 534.3063 | 371.5065 | 0.52282  | 0.004708 | 0.010527 | AC092171. chr7  | + | 5515435  | 5519442  | 3251 |
| ENSG000001 | 0.290301 | 0.297015 | -0.00202 | 0.99909  | NA       | RPL10P3 chr9    | - | 1.2E+08  | 1.2E+08  | 468  |
| ENSG000001 | 1.431782 | 0.343138 | 1.3118   | 0.43803  | NA       | RP11-413E chr1  | + | 90095284 | 90141945 | 437  |
| ENSG000001 | 4.93854  | 2.575179 | 0.84971  | 0.37894  | 0.48309  | RP1-149A1 chr22 | + | 32772651 | 32780330 | 1558 |

|            |          |          |          |          |          |                  |   |          |          |      |
|------------|----------|----------|----------|----------|----------|------------------|---|----------|----------|------|
| ENSG000001 | 0        | 0.700845 | -0.87835 | 0.62047  | NA       | SC22CB-1D chr22  | + | 33716851 | 33718799 | 484  |
| ENSG000001 | 1.524285 | 7.842089 | -2.0451  | 0.07501  | 0.12651  | AC021188. chr2   | - | 96973001 | 96987469 | 740  |
| ENSG000001 | 0        | 0.937167 | -1.2408  | 0.48662  | NA       | AC007036. chr7   | + | 30180486 | 30181033 | 437  |
| ENSG000001 | 0        | 1.759397 | -2.0294  | 0.24451  | NA       | RP4-553F4 chr20  | - | 32375179 | 32398903 | 642  |
| ENSG000001 | 0        | 0.640152 | -0.82869 | 0.63935  | NA       | RHOQP3 chr2      | - | 1.31E+08 | 1.31E+08 | 621  |
| ENSG000001 | 0.342542 | 0.640152 | -0.50911 | 0.77219  | NA       | SNAP23P chr20    | - | 47654894 | 47655139 | 246  |
| ENSG000001 | 2.012384 | 2.979009 | -0.51579 | 0.63915  | 0.72668  | RP3-408N2 chr22  | - | 41184781 | 41185271 | 491  |
| ENSG000001 | 1.649304 | 0.297015 | 1.6381   | 0.29841  | 0.40025  | VN1R108P chr20   | + | 25714900 | 25715729 | 830  |
| ENSG000001 | 0        | 0.343138 | -0.41864 | 0.81278  | NA       | AC079807. chr2   | - | 48168835 | 48468122 | 1808 |
| ENSG000001 | 0.632843 | 0.357707 | 0.4993   | 0.77637  | NA       | RP11-318C chr1   | + | 1.76E+08 | 1.76E+08 | 171  |
| ENSG000001 | 2.282147 | 19.84238 | -2.8842  | 0.001981 | 0.004692 | ANKRD63 chr15    | - | 40573645 | 40574787 | 1143 |
| ENSG000001 | 0.290301 | 0        | 0.4146   | 0.81455  | NA       | RP1-215K1 chrX   | + | 84228223 | 84232835 | 1499 |
| ENSG000001 | 1.733248 | 1.995719 | -0.18679 | 0.88668  | 0.92087  | RP11-508N chr9   | - | 1.1E+08  | 1.1E+08  | 2277 |
| ENSG000001 | 1.359003 | 0.700845 | 0.75316  | 0.61437  | 0.70624  | AC009961. chr2   | - | 1.61E+08 | 1.61E+08 | 765  |
| ENSG000001 | 0.36308  | 0        | 0.4146   | 0.81455  | NA       | PSAT1P3 chr1     | - | 79520630 | 79521740 | 1111 |
| ENSG000001 | 0.653381 | 0.357707 | 0.52032  | 0.76705  | NA       | ARHGAP26 chr5    | + | 1.43E+08 | 1.43E+08 | 388  |
| ENSG000001 | 0.943682 | 0.357707 | 0.90033  | 0.60199  | NA       | AC012456. chr2   | - | 11881123 | 11885427 | 561  |
| ENSG000001 | 1.597063 | 0.640152 | 0.98039  | 0.52475  | 0.62681  | SMARCE1P chr13   | + | 45168994 | 45170218 | 1225 |
| ENSG000001 | 1.576526 | 8.576905 | -2.2319  | 0.015258 | 0.030878 | HLA-K chr6       | + | 29894236 | 29897009 | 1037 |
| ENSG000001 | 33.81608 | 8.386706 | 1.9873   | 7.19E-05 | 0.000208 | YY2 chrX         | + | 21874105 | 21876845 | 2741 |
| ENSG000001 | 0        | 2215.642 | -12.223  | 7.38E-31 | 9.75E-30 | RP4-792G4 chr1   | - | 63786555 | 63790112 | 941  |
| ENSG000001 | 5.90276  | 4.242329 | 0.44523  | 0.58206  | 0.67836  | AC007279. chr2   | + | 2.03E+08 | 2.03E+08 | 837  |
| ENSG000001 | 0.705622 | 0.343138 | 0.57395  | 0.74355  | NA       | RP11-243J chr20  | - | 30396306 | 30396552 | 247  |
| ENSG000001 | 13.03869 | 4.242329 | 1.5523   | 0.032257 | 0.060542 | AL132709. chr14  | - | 1.02E+08 | 1.02E+08 | 588  |
| ENSG000001 | 5.644162 | 1.40169  | 1.8317   | 0.092666 | 0.1516   | RP11-343N chr1   | - | 1.21E+08 | 1.21E+08 | 2504 |
| ENSG000001 | 1.701545 | 0.686276 | 0.99978  | 0.51076  | 0.61399  | RP4-794H1 chr1   | + | 59486059 | 59510286 | 530  |
| ENSG000001 | 0.632843 | 1.577319 | -0.98107 | 0.52471  | 0.62681  | RP11-4901 chr9   | + | 97586554 | 97587055 | 424  |
| ENSG000001 | 0        | 0.343138 | -0.41864 | 0.81278  | NA       | RP4-601K2 chr1   | + | 83368866 | 83632498 | 1712 |
| ENSG000001 | 0.342542 | 0        | 0.4146   | 0.81455  | NA       | KB-288A10 chr22  | + | 22801024 | 22802674 | 1651 |
| ENSG000001 | 0.36308  | 0        | 0.4146   | 0.81455  | NA       | CBX1P1 chrX      | - | 62519126 | 62519552 | 427  |
| ENSG000001 | 0.653381 | 2.010288 | -1.2874  | 0.36461  | 0.469    | AC005532. chr7   | + | 7294785  | 7317410  | 675  |
| ENSG000001 | 0.653381 | 0.594029 | 0.059135 | 0.97278  | NA       | RP11-417B chr9   | + | 1.26E+08 | 1.27E+08 | 788  |
| ENSG000001 | 0.342542 | 0.297015 | -0.00202 | 0.99909  | NA       | AC007349. chr7   | + | 36878577 | 36880978 | 553  |
| ENSG000001 | 0        | 2.07098  | -2.4602  | 0.13507  | 0.20805  | RP11-325P chr1   | - | 1.47E+08 | 1.47E+08 | 1241 |
| ENSG000001 | 0.342542 | 1.309443 | -1.2504  | 0.45877  | NA       | RPEP3 chr1       | + | 28066465 | 28067140 | 676  |
| ENSG000001 | 0        | 0.343138 | -0.41864 | 0.81278  | NA       | AP001187. chr11  | + | 64649007 | 64649417 | 411  |
| ENSG000001 | 0.342542 | 0.997859 | -1.0273  | 0.53559  | NA       | RPL31P2 chr20    | - | 32339973 | 32340349 | 377  |
| ENSG000001 | 68.44747 | 0        | 7.636    | 4.25E-12 | 2.31E-11 | AC093850. chr2   | + | 2.17E+08 | 2.17E+08 | 648  |
| ENSG000001 | 2.188831 | 1.043983 | 0.87594  | 0.54513  | 0.64541  | RP5-968J1. chr20 | - | 1784662  | 1798252  | 346  |
| ENSG000001 | 68.95757 | 65.64838 | 0.065222 | 0.81069  | 0.86667  | ZNF674-AS chrX   | + | 46404928 | 46407671 | 1906 |
| ENSG000001 | 0        | 0.297015 | -0.41864 | 0.81278  | NA       | RP11-392A chr6   | - | 52737812 | 52744738 | 576  |
| ENSG000001 | 0        | 1.234181 | -1.5727  | 0.37581  | NA       | RP11-195E chr5   | - | 70370052 | 70389020 | 679  |
| ENSG000001 | 0        | 3.616746 | -3.3235  | 0.028216 | 0.053767 | RP11-782C chr1   | + | 1.43E+08 | 1.43E+08 | 1786 |
| ENSG000001 | 0        | 0.357707 | -0.41864 | 0.81278  | NA       | AP006294. chr11  | - | 3612507  | 3612845  | 339  |
| ENSG000001 | 0        | 1.888903 | -2.3653  | 0.15293  | NA       | AC138649. chr15  | - | 23157871 | 23158157 | 287  |
| ENSG000001 | 0.342542 | 0.343138 | -0.00208 | 0.99906  | NA       | RP11-318K chr9   | + | 66720898 | 66759372 | 507  |
| ENSG000001 | 0.290301 | 0.891044 | -0.7342  | 0.68015  | NA       | CCNB1IP1F chr20  | - | 44196629 | 44197446 | 818  |
| ENSG000001 | 0        | 1.684135 | -2.1921  | 0.19067  | NA       | RP4-595K1 chr1   | - | 76107031 | 76107772 | 742  |
| ENSG000001 | 0        | 0.357707 | -0.41864 | 0.81278  | NA       | CTA-342B1 chr22  | + | 32366810 | 32369462 | 298  |
| ENSG000001 | 0.342542 | 0        | 0.4146   | 0.81455  | NA       | RP11-462B chr9   | - | 32727067 | 32727520 | 454  |
| ENSG000001 | 3.081086 | 2.232041 | 0.38217  | 0.72915  | 0.79983  | CTGLF10P chr10   | + | 46174140 | 46195980 | 2418 |
| ENSG000001 | 1.608228 | 1.012429 | 0.52947  | 0.7236   | 0.79549  | FBXW11P1 chr21   | - | 32999440 | 33000913 | 1474 |
| ENSG000001 | 4.834872 | 3.114963 | 0.58251  | 0.56488  | 0.66278  | AC092338. chr16  | + | 22393757 | 22418749 | 1290 |
| ENSG000001 | 0        | 3.602177 | -3.376   | 0.022745 | 0.044317 | STMND1 chr6      | + | 17102489 | 17131603 | 2085 |
| ENSG000001 | 1.233984 | 0.343138 | 1.1864   | 0.48571  | NA       | LINC00486 chr2   | + | 33050510 | 33151760 | 1794 |
| ENSG000001 | 0.290301 | 0        | 0.4146   | 0.81455  | NA       | RP11-417J1 chr1  | + | 1.43E+08 | 1.43E+08 | 738  |
| ENSG000001 | 2.914991 | 0        | 3.062    | 0.044848 | 0.080877 | RP11-486B chr1   | + | 42001114 | 42001539 | 265  |
| ENSG000001 | 17.94634 | 54.38216 | -1.5787  | 8.52E-06 | 2.76E-05 | AC005077. chr7   | - | 75700787 | 75704281 | 3495 |
| ENSG000001 | 0        | 2.058828 | -1.8947  | 0.28782  | 0.38931  | SHC1P1 chrX      | + | 63652281 | 63654025 | 1745 |
| ENSG000001 | 1.265686 | 3.276024 | -1.1723  | 0.32863  | 0.43177  | RP11-67K1 chr9   | + | 1.19E+08 | 1.19E+08 | 4996 |
| ENSG000001 | 36.98273 | 9.467948 | 1.9233   | 1.92E-05 | 5.97E-05 | RP11-767N chr1   | - | 46160356 | 46162747 | 598  |
| ENSG000001 | 0.923144 | 1.188058 | -0.25605 | 0.87702  | 0.91433  | RPS18P12 chr17   | - | 14608393 | 14608851 | 459  |
| ENSG000001 | 0        | 0.343138 | -0.41864 | 0.81278  | NA       | MAGEA8-A1 chrX   | - | 1.49E+08 | 1.49E+08 | 476  |
| ENSG000001 | 0.342542 | 1.280305 | -1.2322  | 0.4658   | NA       | RPL9P8 chr15     | - | 83041000 | 83125316 | 673  |
| ENSG000001 | 0        | 0.297015 | -0.41864 | 0.81278  | NA       | AC023115. chr2   | + | 67314145 | 67485098 | 863  |

|            |          |          |          |          |          |                  |   |          |          |      |
|------------|----------|----------|----------|----------|----------|------------------|---|----------|----------|------|
| ENSG000001 | 0.923144 | 8.925748 | -2.8789  | 0.007771 | 0.016656 | RP3-525N1 chr6   | - | 69339854 | 69344919 | 2365 |
| ENSG000001 | 2.012384 | 3.025133 | -0.52674 | 0.63785  | 0.72592  | PPIHP1 chr11     | - | 1.12E+08 | 1.12E+08 | 510  |
| ENSG000001 | 4.741555 | 2.855208 | 0.63522  | 0.55058  | 0.65036  | RP3-508I1! chr22 | - | 39062513 | 39064755 | 410  |
| ENSG000001 | 1.286224 | 1.043983 | 0.2681   | 0.85303  | 0.89671  | AC004840. chr7   | + | 2423756  | 2428232  | 608  |
| ENSG000001 | 1.213446 | 0        | 1.5515   | 0.38249  | NA       | AC008063. chr2   | + | 1.63E+08 | 1.63E+08 | 640  |
| ENSG000001 | 0        | 61.903   | -7.4931  | 1.54E-11 | 8.05E-11 | RP4-753M! chr22  | - | 45396446 | 45399500 | 1633 |
| ENSG000001 | 0        | 4.458377 | -3.5666  | 0.017894 | 0.035702 | LINC00309 chr2   | - | 64412212 | 64432619 | 3307 |
| ENSG000001 | 2.718006 | 3.351285 | -0.28549 | 0.77847  | 0.84087  | RP11-176F chr9   | - | 33909607 | 33911120 | 791  |
| ENSG000001 | 0        | 0.343138 | -0.41864 | 0.81278  | NA       | AC007566. chr7   | - | 92042290 | 92068876 | 1287 |
| ENSG000001 | 14.11937 | 0        | 5.4504   | 6.15E-06 | 2.03E-05 | RP11-34A1 chr10  | + | 1E+08    | 1E+08    | 1168 |
| ENSG000001 | 2.842212 | 3.305162 | -0.17817 | 0.86229  | 0.90376  | RP11-395C chr5   | - | 1.26E+08 | 1.26E+08 | 303  |
| ENSG000001 | 0        | 0.654722 | -0.83442 | 0.63731  | NA       | RP11-775L chr7   | + | 55410009 | 55412651 | 2643 |
| ENSG000001 | 0        | 308.2816 | -8.8643  | 5.16E-11 | 2.62E-10 | MIR205HG chr1    | + | 2.1E+08  | 2.1E+08  | 3348 |
| ENSG000001 | 2.987769 | 1.652581 | 0.75692  | 0.49684  | 0.6006   | RP11-314C chr6   | + | 8784411  | 8785678  | 489  |
| ENSG000001 | 0.290301 | 0        | 0.4146   | 0.81455  | NA       | RP11-367C chr6   | - | 1.14E+08 | 1.14E+08 | 465  |
| ENSG000001 | 1.722083 | 2.993578 | -0.72893 | 0.52071  | 0.62339  | RP4-549L2 chr1   | - | 1.01E+08 | 1.01E+08 | 979  |
| ENSG000001 | 0.653381 | 1.309443 | -0.73727 | 0.6388   | 0.72643  | AP000356. chr22  | + | 24994021 | 24995365 | 364  |
| ENSG000001 | 2.604151 | 6.327879 | -1.1745  | 0.21262  | 0.30317  | RP4-631H1 chr1   | + | 53386094 | 53386268 | 175  |
| ENSG000001 | 0        | 0.297015 | -0.41864 | 0.81278  | NA       | RP3-452M! chrX   | - | 87351394 | 87352226 | 833  |
| ENSG000001 | 0.653381 | 1.652581 | -1.0517  | 0.46852  | 0.5732   | AC093166. chr2   | + | 1.13E+08 | 1.13E+08 | 303  |
| ENSG000001 | 0.580602 | 0.297015 | 0.36801  | 0.83644  | NA       | AC018696. chr2   | + | 91766537 | 91766632 | 96   |
| ENSG000001 | 0        | 0.640152 | -0.82869 | 0.63935  | NA       | RP11-107I! chr10 | - | 1.03E+08 | 1.03E+08 | 522  |
| ENSG000001 | 0        | 0.640152 | -0.82869 | 0.63935  | NA       | HHATL-AS1 chr3   | + | 42744145 | 42748154 | 719  |
| ENSG000001 | 0.36308  | 0        | 0.4146   | 0.81455  | NA       | AC005703. chr17  | - | 15170778 | 15175607 | 1773 |
| ENSG000001 | 0.290301 | 0        | 0.4146   | 0.81455  | NA       | AP001255. chr21  | + | 24437813 | 24503528 | 762  |
| ENSG000001 | 5.310993 | 11.52194 | -1.0755  | 0.13718  | 0.21054  | AC079250. chr2   | - | 47917855 | 47918385 | 531  |
| ENSG000001 | 3.309773 | 0.343138 | 2.5548   | 0.074573 | 0.12587  | AC006035. chr7   | - | 16128696 | 16129261 | 561  |
| ENSG000001 | 30.31176 | 5.347004 | 2.4443   | 1.35E-05 | 4.25E-05 | DSTNP1 chr21     | - | 48073470 | 48073934 | 465  |
| ENSG000001 | 1.233984 | 0        | 1.5686   | 0.37707  | NA       | DDX3YP2 chrX     | - | 73352839 | 73352949 | 111  |
| ENSG000001 | 0        | 0.297015 | -0.41864 | 0.81278  | NA       | RP11-661C chr14  | - | 1.03E+08 | 1.03E+08 | 469  |
| ENSG000001 | 1987.998 | 2264.363 | -0.18753 | 0.048282 | 0.086295 | HSBP1 chr16      | + | 83841448 | 83853342 | 5371 |
| ENSG000001 | 2.044087 | 20.64105 | -3.2078  | 1.93E-05 | 5.98E-05 | FAM201B chr2     | + | 1.33E+08 | 1.33E+08 | 2173 |
| ENSG000001 | 1.016461 | 0.997859 | 0.010629 | 0.99432  | 0.99669  | AC018737. chr2   | - | 1.22E+08 | 1.22E+08 | 499  |
| ENSG000001 | 0        | 1.043983 | -1.3473  | 0.44976  | NA       | RAB42P1 chr14    | + | 90358132 | 90358788 | 657  |
| ENSG000001 | 0.580602 | 0        | 0.8036   | 0.6494   | NA       | RP11-14C2 chr10  | + | 30944418 | 30946464 | 486  |
| ENSG000001 | 0        | 0.654722 | -0.83442 | 0.63731  | NA       | CCNB1IP1F chrX   | - | 94031738 | 94032566 | 829  |
| ENSG000001 | 0        | 0.297015 | -0.41864 | 0.81278  | NA       | RP3-481F1 chr20  | + | 55903602 | 55903752 | 151  |
| ENSG000001 | 1.306762 | 2.69898  | -0.8233  | 0.56923  | 0.66648  | CTB-54D4.1 chr7  | + | 1.08E+08 | 1.08E+08 | 744  |
| ENSG000001 | 1.971308 | 14.70814 | -2.7441  | 0.000593 | 0.001522 | CDC20P1 chr9     | + | 89626567 | 89628066 | 1500 |
| ENSG000001 | 0.705622 | 0.357707 | 0.57557  | 0.74268  | NA       | RP6-109B7 chr22  | - | 46451620 | 46454040 | 1181 |
| ENSG000001 | 0        | 0.297015 | -0.41864 | 0.81278  | NA       | RP5-860P4 chr20  | + | 24660183 | 24661627 | 805  |
| ENSG000001 | 0.943682 | 0        | 1.2438   | 0.48556  | NA       | LINC00326 chr6   | + | 1.33E+08 | 1.33E+08 | 2515 |
| ENSG000001 | 0        | 0.297015 | -0.41864 | 0.81278  | NA       | AC092431. chr2   | - | 69927324 | 69940979 | 420  |
| ENSG000001 | 54.53348 | 124.496  | -1.1793  | 9.07E-06 | 2.93E-05 | RP11-175C chr10  | + | 98752207 | 98755716 | 3510 |
| ENSG000001 | 0.342542 | 0        | 0.4146   | 0.81455  | NA       | AC079325. chr17  | - | 72556855 | 72563482 | 501  |
| ENSG000001 | 4.108712 | 2.217472 | 0.76072  | 0.49608  | 0.59992  | LINC00271 chr6   | + | 1.36E+08 | 1.36E+08 | 1580 |
| ENSG000001 | 0.580602 | 0.357707 | 0.37639  | 0.83285  | NA       | RPL7L1P9 chr2    | - | 2.19E+08 | 2.19E+08 | 745  |
| ENSG000001 | 1.649304 | 1.355566 | 0.25027  | 0.84618  | 0.892    | AC007238. chr2   | - | 58687427 | 58689167 | 1741 |
| ENSG000001 | 0        | 8.114798 | -4.5777  | 0.000581 | 0.001495 | RP11-428F chr6   | - | 1.12E+08 | 1.12E+08 | 433  |
| ENSG000001 | 0.685084 | 0.357707 | 0.4822   | 0.78686  | NA       | GCNT1P3 chr3     | + | 1.9E+08  | 1.9E+08  | 575  |
| ENSG000001 | 0        | 0.357707 | -0.41864 | 0.81278  | NA       | OR52B5P chr11    | + | 5582197  | 5583147  | 951  |
| ENSG000001 | 3.402276 | 1.698704 | 0.89103  | 0.46997  | 0.57473  | RP1-140A9 chr1   | + | 1822910  | 1824097  | 906  |
| ENSG000001 | 0.36308  | 0        | 0.4146   | 0.81455  | NA       | AC009236. chr2   | + | 45395722 | 45396553 | 553  |
| ENSG000001 | 0        | 1.416259 | -1.7181  | 0.33141  | NA       | RP11-122A chr1   | + | 2.12E+08 | 2.12E+08 | 1846 |
| ENSG000001 | 1.265686 | 1.652581 | -0.29963 | 0.82472  | 0.87634  | AC006994. chr2   | + | 2.11E+08 | 2.11E+08 | 839  |
| ENSG000001 | 1.991846 | 2.468363 | -0.29241 | 0.81399  | 0.86935  | RP11-263K chr1   | + | 1.55E+08 | 1.55E+08 | 912  |
| ENSG000001 | 4.19005  | 3.679854 | 0.18453  | 0.84932  | 0.89424  | NPM1P9 chrX      | - | 14852598 | 14853441 | 844  |
| ENSG000001 | 2.293312 | 0        | 2.4016   | 0.16024  | 0.24001  | BX842568. chrX   | - | 37003596 | 37004166 | 571  |
| ENSG000001 | 3.745632 | 9.551331 | -1.3019  | 0.11635  | 0.18395  | RP11-316A chr1   | + | 1.51E+08 | 1.51E+08 | 368  |
| ENSG000001 | 535.7882 | 399.7892 | 0.42118  | 0.04823  | 0.086229 | HCG18 chr6       | - | 30255174 | 30294927 | 4862 |
| ENSG000001 | 0        | 5.179496 | -3.9471  | 0.004534 | 0.010165 | AC105402. chr2   | - | 1.5E+08  | 1.5E+08  | 2045 |
| ENSG000001 | 4.822893 | 8.438535 | -0.76052 | 0.33545  | 0.4391   | RP4-760C5 chr20  | - | 25989427 | 25991167 | 542  |
| ENSG000001 | 1.628766 | 0        | 2.1781   | 0.19145  | NA       | AC011747. chr2   | - | 8741022  | 8763072  | 565  |
| ENSG000001 | 6.038944 | 1.669566 | 1.6501   | 0.13815  | 0.21159  | CTA-253N1 chr1   | - | 1.85E+08 | 1.85E+08 | 376  |
| ENSG000001 | 0.342542 | 6.875784 | -3.541   | 0.007511 | 0.01615  | TSSK1A chr22     | + | 19112392 | 19113159 | 768  |

|            |          |          |          |          |          |            |       |   |          |          |      |
|------------|----------|----------|----------|----------|----------|------------|-------|---|----------|----------|------|
| ENSG000001 | 0        | 1.294874 | -1.8547  | 0.27869  | NA       | FDPSP7     | chr7  | - | 76597514 | 76598567 | 1054 |
| ENSG000001 | 0.290301 | 0        | 0.4146   | 0.81455  | NA       | AC015726.  | chr17 | + | 19743439 | 19743828 | 390  |
| ENSG000001 | 0        | 0.654722 | -0.83442 | 0.63731  | NA       | AC008154.  | chr7  | + | 1.34E+08 | 1.34E+08 | 414  |
| ENSG000001 | 2.935529 | 0        | 3.0687   | 0.044324 | 0.08007  | RP11-298J. | chr6  | + | 41688134 | 41701770 | 408  |
| ENSG000001 | 5.765762 | 1.713273 | 1.5861   | 0.16115  | 0.24119  | RP11-354N  | chr10 | + | 1.2E+08  | 1.2E+08  | 895  |
| ENSG000001 | 1.669842 | 5.802663 | -1.6174  | 0.14254  | 0.21719  | RP5-1071N  | chr1  | + | 21619783 | 21626267 | 2479 |
| ENSG000001 | 0        | 1.370136 | -1.6825  | 0.34201  | NA       | AP000688.  | chr21 | + | 37377636 | 37379899 | 811  |
| ENSG000001 | 3.879211 | 13.65845 | -1.7278  | 0.0137   | 0.027988 | RP11-389K  | chr9  | - | 93063184 | 93195787 | 1013 |
| ENSG000001 | 75.59505 | 51.37401 | 0.54937  | 0.042326 | 0.077025 | RP3-475N1  | chr6  | + | 42908102 | 42911708 | 679  |
| ENSG000001 | 0.653381 | 0.686276 | -0.0351  | 0.98379  | NA       | AC078842.  | chr7  | + | 1.37E+08 | 1.37E+08 | 1835 |
| ENSG000001 | 4.792004 | 5.551772 | -0.20627 | 0.84336  | 0.89009  | RP4-569M.  | chr20 | + | 45981305 | 45983377 | 1809 |
| ENSG000001 | 3.008307 | 0.594029 | 1.8233   | 0.18875  | 0.27515  | RP1-34H18  | chr12 | + | 77718421 | 77966055 | 991  |
| ENSG000001 | 6.410584 | 0        | 4.2666   | 0.001535 | 0.003701 | SPATA20P1  | chr21 | - | 39610149 | 39610586 | 438  |
| ENSG000001 | 4.459813 | 2.711133 | 0.68179  | 0.49221  | 0.5961   | AF129075.  | chr21 | - | 30430394 | 30432416 | 794  |
| ENSG000001 | 0.36308  | 1.309443 | -1.2534  | 0.45722  | NA       | HLA-T      | chr6  | + | 29864431 | 29865563 | 450  |
| ENSG000001 | 2.229907 | 0.343138 | 2.0199   | 0.18438  | 0.26969  | RP11-346C  | chr10 | - | 54210634 | 54230293 | 975  |
| ENSG000001 | 1.649304 | 0.343138 | 1.6347   | 0.29819  | 0.40002  | RP11-40C1  | chr10 | - | 53004654 | 53005566 | 446  |
| ENSG000001 | 0        | 0.297015 | -0.41864 | 0.81278  | NA       | HAR1B      | chr20 | - | 61727150 | 61733631 | 551  |
| ENSG000001 | 1.016461 | 4.36613  | -1.8359  | 0.12749  | 0.19844  | TCF7L1-IT1 | chr2  | + | 85413532 | 85414376 | 458  |
| ENSG000001 | 0        | 1.66715  | -1.9695  | 0.25993  | NA       | RP11-391N  | chr10 | + | 1.26E+08 | 1.26E+08 | 806  |
| ENSG000001 | 0        | 0.357707 | -0.41864 | 0.81278  | NA       | AC104843.  | chr7  | - | 1.52E+08 | 1.52E+08 | 297  |
| ENSG000001 | 1.068702 | 0.997859 | 0.04858  | 0.97403  | 0.98544  | AC013468.  | chr2  | - | 1.91E+08 | 1.91E+08 | 48   |
| ENSG000001 | 0        | 0.297015 | -0.41864 | 0.81278  | NA       | HMGB1P7    | chr10 | + | 32202071 | 32202682 | 612  |
| ENSG000001 | 0        | 0.715414 | -0.84936 | 0.6309   | NA       | RP11-10J1. | chr9  | - | 1.27E+08 | 1.27E+08 | 266  |
| ENSG000001 | 0        | 0.297015 | -0.41864 | 0.81278  | NA       | MTND2P15   | chr10 | - | 71353797 | 71354688 | 892  |
| ENSG000001 | 0        | 0.343138 | -0.41864 | 0.81278  | NA       | AC002429.  | chr7  | + | 94647719 | 94647866 | 148  |
| ENSG000001 | 9.721171 | 21.11698 | -1.0988  | 0.068254 | 0.11657  | MORF4L2-7  | chrX  | + | 1.03E+08 | 1.03E+08 | 2086 |
| ENSG000001 | 3.910914 | 1.684135 | 1.1051   | 0.30606  | 0.40762  | AC093702.  | chr2  | - | 45240353 | 45240807 | 367  |
| ENSG000001 | 12.18832 | 8.248336 | 0.55503  | 0.37254  | 0.47693  | RP11-617C  | chr4  | - | 38614322 | 38666504 | 2368 |
| ENSG000001 | 2.023549 | 1.058552 | 0.77851  | 0.57738  | 0.67403  | RP5-1007C  | chr1  | + | 34334554 | 34351059 | 1367 |
| ENSG000001 | 0        | 0.297015 | -0.41864 | 0.81278  | NA       | RPL7P56    | chrX  | + | 1.36E+08 | 1.36E+08 | 717  |
| ENSG000001 | 0.995923 | 3.076961 | -1.3945  | 0.2818   | 0.38282  | TRBV26OR.  | chr9  | + | 33695765 | 33696057 | 293  |
| ENSG000001 | 5.644162 | 12.39842 | -1.0992  | 0.11323  | 0.17958  | YBX1P2     | chr7  | - | 1.05E+08 | 1.05E+08 | 999  |
| ENSG000001 | 0        | 0.686276 | -0.84936 | 0.6309   | NA       | EEF1B2P1   | chr15 | + | 52797386 | 52798060 | 675  |
| ENSG000001 | 0        | 2.399549 | -2.7165  | 0.088838 | 0.14612  | RP11-389E  | chr4  | + | 1.79E+08 | 1.79E+08 | 1034 |
| ENSG000001 | 4.00423  | 0.343138 | 2.8287   | 0.0411   | 0.075113 | AC007099.  | chr2  | + | 75767865 | 75769832 | 1101 |
| ENSG000001 | 0        | 4.020576 | -3.521   | 0.016426 | 0.033004 | AC116609.  | chr2  | + | 741977   | 749856   | 256  |
| ENSG000001 | 10.18873 | 23.41126 | -1.189   | 0.028726 | 0.054622 | LINC00852  | chr3  | + | 10326103 | 10327430 | 1328 |
| ENSG000001 | 8.090612 | 6.780248 | 0.24049  | 0.77462  | 0.83793  | RP13-15M.  | chr1  | + | 9636485  | 9637043  | 559  |
| ENSG000001 | 35.20841 | 14.43784 | 1.2593   | 0.008352 | 0.017798 | AC005592.  | chr5  | + | 1.42E+08 | 1.42E+08 | 591  |
| ENSG000001 | 9.213347 | 5.330019 | 0.74074  | 0.35351  | 0.45773  | RP11-38L1  | chr10 | + | 46951472 | 46966835 | 669  |
| ENSG000001 | 0.342542 | 1.340997 | -1.3704  | 0.39575  | NA       | RP11-34D1  | chr10 | - | 1.02E+08 | 1.02E+08 | 471  |
| ENSG000001 | 0.342542 | 0        | 0.4146   | 0.81455  | NA       | AC013448.  | chr2  | + | 2.24E+08 | 2.24E+08 | 808  |
| ENSG000001 | 0.36308  | 0.343138 | -0.0021  | 0.99905  | NA       | RP11-462B  | chr9  | - | 32840596 | 32841760 | 551  |
| ENSG000001 | 0        | 0.297015 | -0.41864 | 0.81278  | NA       | FARP1-AS1  | chr13 | - | 99087659 | 99088094 | 323  |
| ENSG000001 | 5.455736 | 1.98115  | 1.3439   | 0.17623  | 0.25966  | RP11-495P  | chr1  | - | 1.48E+08 | 1.48E+08 | 678  |
| ENSG000001 | 1.027626 | 0        | 1.1491   | 0.51623  | NA       | AF127577.  | chr21 | + | 16343791 | 16365175 | 824  |
| ENSG000001 | 0        | 2.24661  | -2.6365  | 0.10117  | 0.16301  | KRT8P10    | chr2  | - | 1.84E+08 | 1.84E+08 | 1447 |
| ENSG000001 | 42.52502 | 176.4866 | -2.0441  | 2.47E-13 | 1.46E-12 | ZNF826P    | chr19 | - | 20451078 | 20607775 | 3330 |
| ENSG000001 | 0.36308  | 0        | 0.4146   | 0.81455  | NA       | HNRNPA1P   | chrX  | - | 73692852 | 73693788 | 937  |
| ENSG000001 | 0.290301 | 0.297015 | -0.00202 | 0.99909  | NA       | RP1-144C9  | chr1  | + | 27715972 | 27716649 | 355  |
| ENSG000001 | 0.290301 | 0.715414 | -0.50514 | 0.77701  | NA       | RP4-583P1  | chr20 | + | 62439429 | 62447874 | 533  |
| ENSG000001 | 0.632843 | 0        | 0.81931  | 0.64303  | NA       | AC006159.  | chr7  | - | 1.16E+08 | 1.16E+08 | 626  |
| ENSG000001 | 0        | 0.297015 | -0.41864 | 0.81278  | NA       | RP11-111F  | chr9  | - | 46661242 | 46662837 | 543  |
| ENSG000001 | 0.290301 | 2.056411 | -1.914   | 0.21479  | 0.3057   | RP11-1M1.  | chrX  | - | 6585906  | 6639585  | 517  |
| ENSG000001 | 4.595998 | 0        | 3.7564   | 0.008059 | 0.017215 | ARF4P4     | chr13 | + | 81462483 | 81463002 | 520  |
| ENSG000001 | 13.3743  | 0        | 5.29     | 2.66E-05 | 8.12E-05 | AP001422.  | chr21 | - | 39695557 | 39705343 | 608  |
| ENSG000001 | 7.055405 | 9.185503 | -0.37867 | 0.58266  | 0.67876  | CCDC147-7  | chr10 | - | 1.06E+08 | 1.06E+08 | 795  |
| ENSG000001 | 2.407167 | 5.395544 | -1.0748  | 0.29365  | 0.39568  | SKP1P1     | chr7  | - | 65888392 | 65888880 | 489  |
| ENSG000001 | 0.685084 | 8.020135 | -3.1195  | 0.007836 | 0.016779 | AC018865.  | chr2  | + | 1.31E+08 | 1.31E+08 | 1042 |
| ENSG000001 | 0.685084 | 1.485073 | -0.69856 | 0.68772  | 0.76717  | RPS3AP3    | chr20 | - | 35650146 | 35650387 | 242  |
| ENSG000001 | 3.40309  | 1.234181 | 1.2144   | 0.32141  | 0.42423  | RP11-87H9  | chr9  | - | 69082536 | 69108793 | 2033 |
| ENSG000001 | 0        | 0.297015 | -0.41864 | 0.81278  | NA       | RP5-965F6  | chr1  | - | 1.13E+08 | 1.13E+08 | 547  |
| ENSG000001 | 1.286224 | 4.15653  | -1.4399  | 0.23471  | 0.32852  | ITPR1-AS1  | chr3  | - | 4532575  | 4534847  | 858  |
| ENSG000001 | 1.846289 | 0        | 2.122    | 0.22126  | NA       | RP11-436K  | chr1  | - | 61125303 | 61291256 | 2344 |

|            |          |          |          |          |          |                 |   |          |          |      |
|------------|----------|----------|----------|----------|----------|-----------------|---|----------|----------|------|
| ENSG000001 | 0        | 1.309443 | -1.6539  | 0.35008  | NA       | RP1-302D9 chr22 | + | 33504515 | 33512280 | 550  |
| ENSG000001 | 1.390706 | 4.723837 | -1.5728  | 0.17554  | 0.25878  | C17orf105 chr17 | + | 41857803 | 41864980 | 3753 |
| ENSG000001 | 0        | 1.073121 | -1.1788  | 0.50551  | NA       | ZSWIM5P2 chr17  | - | 20487071 | 20494493 | 2038 |
| ENSG000001 | 64.83867 | 349.3067 | -2.4187  | 1.76E-19 | 1.45E-18 | AC125232. chr2  | - | 87257800 | 87303536 | 2199 |
| ENSG000001 | 0.342542 | 0.357707 | -0.0021  | 0.99906  | NA       | LINC00651 chr20 | - | 48657253 | 48658041 | 462  |
| ENSG000001 | 0        | 0.343138 | -0.41864 | 0.81278  | NA       | AP000350. chr22 | + | 24292105 | 24296229 | 289  |
| ENSG000001 | 2.770247 | 28.59566 | -3.2664  | 5.19E-06 | 1.72E-05 | SGK110 chr19    | - | 56052023 | 56056909 | 1269 |
| ENSG000001 | 11.34994 | 0.654722 | 3.6682   | 0.000535 | 0.001383 | APCDD1L-A chr20 | + | 57090435 | 57194944 | 2630 |
| ENSG000001 | 0        | 1.248751 | -1.5848  | 0.37202  | NA       | RP11-445C chr5  | + | 4512375  | 4516889  | 1676 |
| ENSG000001 | 0        | 0.594029 | -0.81444 | 0.64499  | NA       | AC006994. chr2  | + | 2.11E+08 | 2.11E+08 | 506  |
| ENSG000001 | 0        | 0.297015 | -0.41864 | 0.81278  | NA       | RP4-797C5 chr7  | - | 1.2E+08  | 1.2E+08  | 547  |
| ENSG000001 | 0.72616  | 1.012429 | -0.3368  | 0.84185  | NA       | RP1-39G22 chr1  | - | 40728344 | 40728656 | 313  |
| ENSG000001 | 8.153204 | 0        | 4.6379   | 0.000333 | 0.000885 | LINC00704 chr10 | - | 4693009  | 4720346  | 846  |
| ENSG000001 | 0        | 0.654722 | -0.83442 | 0.63731  | NA       | RPL13AP chr6    | + | 29550285 | 29550802 | 518  |
| ENSG000001 | 0.290301 | 0        | 0.4146   | 0.81455  | NA       | RPL36P2 chr20   | + | 49237300 | 49237614 | 315  |
| ENSG000001 | 2.084349 | 7.396968 | -1.6083  | 0.12353  | 0.19357  | RP11-723C chr3  | - | 1.29E+08 | 1.29E+08 | 1298 |
| ENSG000001 | 1.555988 | 1.340997 | 0.20257  | 0.88271  | 0.91838  | RPS3P2 chr20    | + | 37166401 | 37167101 | 701  |
| ENSG000001 | 1.213446 | 0.891044 | 0.29784  | 0.85677  | 0.89936  | TBL1XR1-A' chr3 | + | 1.77E+08 | 1.77E+08 | 414  |
| ENSG000001 | 40.37385 | 98.36511 | -1.2733  | 0.000362 | 0.000957 | AC007246. chr2  | + | 39663778 | 39892483 | 2517 |
| ENSG000001 | 0.290301 | 2.460242 | -2.0264  | 0.20785  | 0.29768  | RPL13AP1 chr7   | + | 77976459 | 77988775 | 1895 |
| ENSG000001 | 0.705622 | 0        | 0.8807   | 0.6196   | NA       | AP000696. chr21 | - | 38004979 | 38009331 | 1133 |
| ENSG000001 | 0        | 0.686276 | -0.84936 | 0.6309   | NA       | RP11-69C1 chr10 | - | 2211334  | 2231668  | 587  |
| ENSG000001 | 9.918155 | 20.59164 | -1.0236  | 0.064103 | 0.11054  | AC016700. chr2  | - | 70351168 | 70352449 | 662  |
| ENSG000001 | 3.672853 | 2.66501  | 0.41972  | 0.68089  | 0.76139  | RP1-225E1 chr6  | - | 1.39E+08 | 1.4E+08  | 829  |
| ENSG000001 | 0        | 0.343138 | -0.41864 | 0.81278  | NA       | AC103563. chr2  | - | 95618906 | 95619338 | 354  |
| ENSG000001 | 0        | 0.297015 | -0.41864 | 0.81278  | NA       | O0EP-AS1 chr6   | + | 74079427 | 74097440 | 463  |
| ENSG000001 | 0.975385 | 1.66715  | -0.58851 | 0.69412  | 0.77187  | RPL34P6 chr1    | + | 2.01E+08 | 2.01E+08 | 345  |
| ENSG000001 | 0.36308  | 0        | 0.4146   | 0.81455  | NA       | AC107072. chr4  | + | 77558776 | 77565521 | 239  |
| ENSG000001 | 0.342542 | 0        | 0.4146   | 0.81455  | NA       | AC017006. chr2  | - | 46393928 | 46395117 | 364  |
| ENSG000001 | 12.36477 | 9.94704  | 0.31813  | 0.62002  | 0.71082  | ACTG1P10 chrX   | - | 53172014 | 53173095 | 1082 |
| ENSG000001 | 1.597063 | 0.937167 | 0.57879  | 0.69932  | 0.7761   | VDAC1P6 chrY    | - | 5075256  | 5076110  | 855  |
| ENSG000001 | 1.701545 | 1.71569  | -0.00912 | 0.99505  | 0.99717  | RP3-426I6. chr1 | + | 28065602 | 28065950 | 349  |
| ENSG000001 | 2.769433 | 5.738682 | -0.91178 | 0.40139  | 0.50616  | RP11-564C chr10 | + | 52415727 | 52420232 | 2762 |
| ENSG000001 | 2.282147 | 0.357707 | 2.0705   | 0.1665   | 0.24767  | RP5-836N1 chr1  | - | 1.12E+08 | 1.12E+08 | 894  |
| ENSG000001 | 1.338465 | 0.997859 | 0.34148  | 0.8052   | 0.86223  | AC111200. chr2  | - | 87157373 | 87157877 | 505  |
| ENSG000001 | 0.36308  | 0        | 0.4146   | 0.81455  | NA       | AP000302. chr21 | - | 34854806 | 34856565 | 666  |
| ENSG000001 | 0.632843 | 1.638012 | -1.0613  | 0.46491  | 0.5697   | AC006028. chr7  | + | 2875255  | 2875656  | 402  |
| ENSG000001 | 0.632843 | 7.24806  | -2.9673  | 0.016419 | 0.032996 | AC072052. chr7  | - | 6530424  | 6530729  | 306  |
| ENSG000001 | 0.290301 | 1.355566 | -1.3811  | 0.39332  | NA       | AL592284. chr1  | + | 1.44E+08 | 1.45E+08 | 1073 |
| ENSG000001 | 63.13094 | 49.73674 | 0.3445   | 0.28908  | 0.39061  | RP11-418J chr1  | + | 1.2E+08  | 1.2E+08  | 2469 |
| ENSG000001 | 0        | 0.715414 | -0.84936 | 0.6309   | NA       | AC016995. chr2  | - | 38633861 | 38742882 | 1156 |
| ENSG000001 | 0        | 1.073121 | -1.1788  | 0.50551  | NA       | RP1-40G4F chr22 | - | 27282872 | 27283511 | 578  |
| ENSG000001 | 0.342542 | 5.401249 | -3.2207  | 0.017639 | 0.035237 | RP11-466A chr9  | + | 80071211 | 80141613 | 605  |
| ENSG000001 | 0.290301 | 0        | 0.4146   | 0.81455  | NA       | HMG2N2P1 chr9   | + | 15588353 | 15588613 | 261  |
| ENSG000001 | 0.632843 | 0.357707 | 0.4993   | 0.77637  | NA       | NDUFA4P1 chr1   | - | 1.75E+08 | 1.75E+08 | 502  |
| ENSG000001 | 2.096328 | 14.95258 | -2.6784  | 0.003202 | 0.00735  | RNF2P1 chr9     | - | 6668999  | 6670008  | 1010 |
| ENSG000001 | 0.342542 | 0        | 0.4146   | 0.81455  | NA       | NBPF21P chr3    | - | 36657498 | 36678949 | 1451 |
| ENSG000001 | 0.290301 | 0.997859 | -1.0217  | 0.53916  | NA       | FGF12-AS1 chr3  | + | 1.92E+08 | 1.92E+08 | 580  |
| ENSG000001 | 0.36308  | 0.951736 | -0.91212 | 0.59701  | NA       | AC007919. chr3  | + | 1.72E+08 | 1.72E+08 | 511  |
| ENSG000001 | 25.21748 | 55.54102 | -1.1218  | 0.001505 | 0.003634 | HLA-DPA1 chr6   | + | 33032346 | 33048552 | 5025 |
| ENSG000001 | 3.028032 | 1.727843 | 0.70938  | 0.5929   | 0.68773  | RP11-331F chr9  | + | 35642511 | 35643514 | 679  |
| ENSG000001 | 2.656392 | 2.102535 | 0.30716  | 0.80602  | 0.86281  | AC124914. chr3  | - | 23920472 | 23920989 | 518  |
| ENSG000001 | 0.342542 | 0        | 0.4146   | 0.81455  | NA       | RP11-375N chr10 | + | 99034769 | 99037854 | 365  |
| ENSG000001 | 0        | 0.951736 | -1.2555  | 0.48145  | NA       | AC023481. chr3  | - | 8406393  | 8408078  | 938  |
| ENSG000001 | 0        | 0.654722 | -0.83442 | 0.63731  | NA       | AC099344. chr2  | - | 11528149 | 11530493 | 626  |
| ENSG000001 | 16.55563 | 2.711133 | 2.5186   | 0.000587 | 0.001508 | RP11-576I chr1  | - | 1.7E+08  | 1.71E+08 | 2080 |
| ENSG000001 | 0.995923 | 1.387121 | -0.36335 | 0.80384  | 0.8613   | RP11-83J1 chr15 | + | 35235281 | 35235595 | 315  |
| ENSG000001 | 0        | 1.248751 | -1.5848  | 0.37202  | NA       | CTC-490G2 chr19 | + | 43833447 | 43835582 | 301  |
| ENSG000001 | 0.995923 | 1.888903 | -0.79027 | 0.55413  | 0.65347  | AC016700. chr2  | - | 70480987 | 70481142 | 156  |
| ENSG000001 | 0        | 1.340997 | -1.8899  | 0.26871  | NA       | RP11-422P chr1  | + | 1.54E+08 | 1.54E+08 | 329  |
| ENSG000001 | 0        | 0.343138 | -0.41864 | 0.81278  | NA       | IRX1P1 chr13    | + | 25316815 | 25320322 | 1838 |
| ENSG000001 | 0        | 1.309443 | -1.6539  | 0.35008  | NA       | LINC00689 chr7  | + | 1.59E+08 | 1.59E+08 | 4684 |
| ENSG000001 | 0        | 1.309443 | -1.6539  | 0.35008  | NA       | AC006050. chr17 | - | 28900489 | 28904018 | 1351 |
| ENSG000001 | 0        | 1.355566 | -1.9006  | 0.26573  | NA       | RP1-45C12 chr1  | - | 1.71E+08 | 1.71E+08 | 500  |
| ENSG000001 | 0.290301 | 0        | 0.4146   | 0.81455  | NA       | RP11-472K chr13 | + | 1.11E+08 | 1.11E+08 | 439  |

|                     |          |          |          |          |                  |   |          |          |      |
|---------------------|----------|----------|----------|----------|------------------|---|----------|----------|------|
| ENSG000001.1233984  | 0        | 1.5686   | 0.37707  | NA       | RP11-343N chr1   | + | 1.21E+08 | 1.21E+08 | 529  |
| ENSG000001.0        | 1.248751 | -1.5848  | 0.37202  | NA       | AC131180. chr2   | + | 1.32E+08 | 1.32E+08 | 1643 |
| ENSG000001.0        | 1.073121 | -1.1788  | 0.50551  | NA       | AC011747. chr2   | - | 8683722  | 8715631  | 1036 |
| ENSG000001.0        | 0.297015 | -0.41864 | 0.81278  | NA       | RP11-88H9 chr1   | + | 1.13E+08 | 1.13E+08 | 3068 |
| ENSG000001.1960143  | 17.46298 | -2.9707  | 0.000287 | 0.00077  | WASIR2 chr16     | + | 72910    | 75123    | 1080 |
| ENSG000001.0.36308  | 0        | 0.4146   | 0.81455  | NA       | RP11-4671I chr1  | - | 2.41E+08 | 2.41E+08 | 675  |
| ENSG000001.2.012384 | 2.321872 | -0.18213 | 0.88491  | 0.91965  | RP11-472N chr6   | + | 56708800 | 56728876 | 551  |
| ENSG000001.0.653381 | 7.112106 | -2.9719  | 0.013001 | 0.026686 | AC024937. chr3   | + | 1.96E+08 | 1.96E+08 | 1242 |
| ENSG000001.1.939605 | 0.297015 | 1.8531   | 0.23087  | 0.32429  | TIMM8AP1 chr2    | - | 1.63E+08 | 1.63E+08 | 295  |
| ENSG000001.0.342542 | 0        | 0.4146   | 0.81455  | NA       | AC097359. chr3   | + | 37237695 | 37238157 | 463  |
| ENSG000001.0        | 1.058552 | -1.361   | 0.4451   | NA       | AC018470. chr2   | + | 1.75E+08 | 1.75E+08 | 3123 |
| ENSG000001.0.342542 | 0        | 0.4146   | 0.81455  | NA       | RNASEH1P1 chr17  | + | 16586752 | 16587541 | 790  |
| ENSG000001.0        | 6.281755 | -4.1689  | 0.002733 | 0.006343 | LINC00032 chr9   | - | 27245682 | 27282791 | 2913 |
| ENSG000001.4.709852 | 2.056411 | 1.1028   | 0.27586  | 0.37603  | RP11-321L chr9   | + | 23829668 | 23849912 | 1430 |
| ENSG000001.0        | 0.594029 | -0.81444 | 0.64499  | NA       | AC024937. chr3   | + | 1.96E+08 | 1.96E+08 | 1242 |
| ENSG000001.14.04561 | 9.372413 | 0.56304  | 0.38718  | 0.49132  | CTA-246H3 chr22  | - | 25745510 | 25746289 | 780  |
| ENSG000001.2.49967  | 8.060553 | -1.5379  | 0.084455 | 0.14002  | PRDX3P2 chr1     | - | 28852830 | 28853739 | 611  |
| ENSG000001.0        | 0.343138 | -0.41864 | 0.81278  | NA       | HMGB3P2 chr20    | - | 34663940 | 34664523 | 584  |
| ENSG000001.0        | 0.654722 | -0.83442 | 0.63731  | NA       | HMG2N2P3 chr10   | - | 74396255 | 74396523 | 269  |
| ENSG000001.3.341476 | 3.495361 | -0.07517 | 0.94548  | 0.96511  | LINC00441 chr13  | - | 48870649 | 48877797 | 1143 |
| ENSG000001.4.056471 | 1.903472 | 0.94201  | 0.4002   | 0.50484  | AC141930. chr2   | - | 1576326  | 1584083  | 555  |
| ENSG000001.0        | 6.374002 | -4.2407  | 0.001763 | 0.004209 | RP4-535B2 chr1   | - | 65532310 | 65533420 | 310  |
| ENSG000001.0        | 0.297015 | -0.41864 | 0.81278  | NA       | RPL7L1P2 chr7    | - | 51327126 | 51327864 | 739  |
| ENSG000001.0        | 7.982876 | -4.615   | 0.000351 | 0.00093  | RP1-213J1I chr22 | + | 28103578 | 28105929 | 115  |
| ENSG000001.13349.45 | 18316.1  | -0.45574 | 0.00025  | 0.000676 | RPS18 chr6       | + | 33239787 | 33244287 | 1109 |
| ENSG000001.0.653381 | 2.232041 | -1.4361  | 0.30493  | 0.40652  | RP11-118B chr12  | - | 9392582  | 9392927  | 346  |
| ENSG000001.0        | 0.357707 | -0.41864 | 0.81278  | NA       | RP11-134P chr1   | + | 2.03E+08 | 2.03E+08 | 775  |
| ENSG000001.0        | 0.343138 | -0.41864 | 0.81278  | NA       | RP11-452K chr10  | - | 99152954 | 99153304 | 351  |
| ENSG000001.0.653381 | 0.594029 | 0.059135 | 0.97278  | NA       | RP11-574F chr9   | + | 5584490  | 5588994  | 758  |
| ENSG000001.0        | 4.68013  | -3.6379  | 0.015266 | 0.03089  | RP11-542C chr1   | - | 5146519  | 5150959  | 449  |
| ENSG000001.0        | 1.058552 | -1.361   | 0.4451   | NA       | RP11-274K chrX   | - | 1.35E+08 | 1.35E+08 | 514  |
| ENSG000001.2.572449 | 1.995719 | 0.34059  | 0.75821  | 0.82423  | AC007285. chr7   | - | 30109274 | 30114731 | 518  |
| ENSG000001.0.36308  | 0.654722 | -0.52647 | 0.7643   | NA       | RP11-244N chr9   | - | 1E+08    | 1E+08    | 285  |
| ENSG000001.0.290301 | 0.715414 | -0.50514 | 0.77701  | NA       | RP11-374N chr9   | + | 45108392 | 45112532 | 931  |
| ENSG000001.0.632843 | 0.654722 | -0.02224 | 0.98935  | NA       | FAM225A chr9     | + | 1.16E+08 | 1.16E+08 | 6100 |
| ENSG000001.5.737478 | 3.933161 | 0.48645  | 0.63151  | 0.72078  | RP11-187A chr13  | - | 42617863 | 42618383 | 363  |
| ENSG000001.0        | 4.218896 | -3.182   | 0.054597 | 0.096003 | AC022311. chr2   | - | 4675812  | 4703805  | 2663 |
| ENSG000001.0        | 0.715414 | -0.84936 | 0.6309   | NA       | RP1-232L2 chr6   | + | 80130014 | 80131022 | 474  |
| ENSG000001.0.36308  | 0.297015 | -0.00205 | 0.99908  | NA       | FBXO36-IT1 chr2  | + | 2.31E+08 | 2.31E+08 | 582  |
| ENSG000001.0.632843 | 0.640152 | -0.00865 | 0.99586  | NA       | AC123886. chr2   | + | 1.11E+08 | 1.11E+08 | 747  |
| ENSG000001.0        | 1.073121 | -1.1788  | 0.50551  | NA       | AC010132. chr7   | - | 42869271 | 42884037 | 561  |
| ENSG000001.0.36308  | 0        | 0.4146   | 0.81455  | NA       | RSL24D1P1 chr18  | + | 55505708 | 55506198 | 491  |
| ENSG000001.0        | 0.891044 | -1.0625  | 0.54819  | NA       | RPL3P5 chr2      | - | 2.37E+08 | 2.37E+08 | 1232 |
| ENSG000001.0.36308  | 0.357707 | -0.00212 | 0.99905  | NA       | USMG5P1 chrX     | + | 73393725 | 73393901 | 177  |
| ENSG000001.1.390706 | 5.773525 | -1.8641  | 0.094417 | 0.15389  | PTCHD3P2 chr2    | - | 1.71E+08 | 1.71E+08 | 1205 |
| ENSG000001.3.484428 | 2.353426 | 0.51416  | 0.65971  | 0.74366  | RP11-495P chr1   | + | 1.48E+08 | 1.48E+08 | 1555 |
| ENSG000001.0        | 0.98329  | -1.2878  | 0.47019  | NA       | RSL24D1P1 chr7   | - | 64800087 | 64800581 | 495  |
| ENSG000001.1.338465 | 0        | 1.8837   | 0.27037  | NA       | RP3-354J5. chr6  | + | 1.09E+08 | 1.09E+08 | 247  |
| ENSG000001.2.157128 | 0        | 2.543    | 0.11988  | 0.18865  | AC091814. chr12  | - | 10100736 | 10105935 | 3956 |
| ENSG000001.0.580602 | 0.654722 | -0.07721 | 0.96449  | NA       | CEACAMP5 chr19   | + | 43158352 | 43173228 | 961  |
| ENSG000001.1.338465 | 0.997859 | 0.34148  | 0.8052   | 0.86223  | RP11-508N chr9   | - | 1.1E+08  | 1.1E+08  | 779  |
| ENSG000001.8.475209 | 1.012429 | 2.7911   | 0.006945 | 0.015048 | RP11-245P chr1   | + | 2.29E+08 | 2.29E+08 | 283  |
| ENSG000001.0.290301 | 0        | 0.4146   | 0.81455  | NA       | EIF4A1P11 chr1   | + | 1.79E+08 | 1.79E+08 | 222  |
| ENSG000001.7.417672 | 24.09995 | -1.6378  | 0.007199 | 0.015543 | RP5-1158E chrX   | - | 45707328 | 45710920 | 1960 |
| ENSG000001.0        | 0.297015 | -0.41864 | 0.81278  | NA       | RP11-399L chr10  | - | 89167801 | 89168015 | 215  |
| ENSG000001.1.359003 | 0        | 1.8987   | 0.26617  | NA       | RP11-91K9 chr3   | + | 1.78E+08 | 1.78E+08 | 2957 |
| ENSG000001.2.592987 | 0.98329  | 1.1663   | 0.37704  | 0.48112  | RP11-278Ji chr5  | + | 1.43E+08 | 1.43E+08 | 635  |
| ENSG000001.47.07815 | 53.90717 | -0.19458 | 0.62109  | 0.71172  | FAHD2CP chr2     | + | 96676299 | 96689128 | 965  |
| ENSG000001.8.059888 | 10.03284 | -0.30396 | 0.64331  | 0.73033  | RP11-334Ji chr9  | + | 1.34E+08 | 1.34E+08 | 86   |
| ENSG000001.12.60446 | 12.2389  | 0.046345 | 0.94625  | 0.96578  | AC005224. chr17  | + | 14113805 | 14121239 | 1537 |
| ENSG000001.0        | 1.545765 | -1.8556  | 0.29195  | NA       | RP11-277B chr1   | - | 1.67E+08 | 1.67E+08 | 971  |
| ENSG000001.76.67427 | 26.72441 | 1.5021   | 0.001064 | 0.002627 | DLEU2 chr13      | - | 50601269 | 50699856 | 1294 |
| ENSG000001.8.963308 | 2.399549 | 1.8066   | 0.034659 | 0.064573 | AC009501. chr2   | - | 63271057 | 63275775 | 2069 |
| ENSG000001.21.87779 | 20.00573 | 0.13422  | 0.76166  | 0.82702  | AP006216. chr11  | - | 1.17E+08 | 1.17E+08 | 598  |
| ENSG000001.1.379541 | 0        | 1.686    | 0.34092  | NA       | RP11-522N chr1   | - | 2.46E+08 | 2.46E+08 | 447  |

|            |          |          |          |          |          |                  |   |          |          |      |
|------------|----------|----------|----------|----------|----------|------------------|---|----------|----------|------|
| ENSG000001 | 0.36308  | 0        | 0.4146   | 0.81455  | NA       | RP5-943J3. chr1  | + | 90254473 | 90256051 | 509  |
| ENSG000001 | 0.290301 | 0.357707 | -0.00203 | 0.99908  | NA       | RP11-296C chr1   | - | 1.73E+08 | 1.73E+08 | 1337 |
| ENSG000001 | 5.531121 | 2.024857 | 1.2678   | 0.28128  | 0.38233  | RP11-575L chr9   | + | 86446501 | 86483335 | 1434 |
| ENSG000001 | 0.995923 | 0        | 1.4959   | 0.39264  | NA       | AC013264. chr2   | + | 1.98E+08 | 1.98E+08 | 455  |
| ENSG000001 | 0.36308  | 0.343138 | -0.0021  | 0.99905  | NA       | RP4-700A9 chr1   | + | 65620163 | 65620333 | 171  |
| ENSG000001 | 0.290301 | 1.043983 | -0.98014 | 0.57012  | NA       | CTD-2104P chr17  | + | 19519102 | 19537138 | 1150 |
| ENSG000001 | 9.233071 | 9.064118 | 0.014946 | 0.98123  | 0.98966  | RP3-355L5 chr6   | + | 1.06E+08 | 1.06E+08 | 1198 |
| ENSG000001 | 68.17852 | 19.65373 | 1.773    | 1.94E-07 | 7.37E-07 | RP11-82L1 chr9   | - | 91624949 | 91625393 | 445  |
| ENSG000001 | 0.342542 | 0        | 0.4146   | 0.81455  | NA       | LINC00283 chr13  | + | 1.03E+08 | 1.03E+08 | 1947 |
| ENSG000001 | 1.213446 | 3.67099  | -1.3129  | 0.32126  | 0.42405  | AGBL5-AS1 chr2   | - | 27272551 | 27273132 | 407  |
| ENSG000001 | 7.345707 | 3.991438 | 0.83189  | 0.29544  | 0.39747  | AC011738. chr7   | - | 43548327 | 43562141 | 2916 |
| ENSG000001 | 0        | 0.343138 | -0.41864 | 0.81278  | NA       | AC025627. chr17  | - | 20415873 | 20420792 | 1220 |
| ENSG000001 | 1.960143 | 0.357707 | 1.7256   | 0.29004  | 0.39159  | AC008174. chr2   | - | 1.87E+08 | 1.87E+08 | 689  |
| ENSG000001 | 1.991846 | 0.297015 | 1.8936   | 0.2158   | 0.30683  | DLG3-AS1 chrX    | - | 69672808 | 69675844 | 432  |
| ENSG000001 | 1.068702 | 0        | 1.3672   | 0.44297  | NA       | RP11-553A chr6   | - | 74405258 | 74405854 | 341  |
| ENSG000001 | 0        | 1.66715  | -1.9695  | 0.25993  | NA       | RPS6KA2-A chr6   | + | 1.67E+08 | 1.67E+08 | 627  |
| ENSG000001 | 0.995923 | 1.294874 | -0.32243 | 0.816    | 0.87078  | AC011742. chr2   | - | 26363132 | 26364133 | 352  |
| ENSG000001 | 5.426639 | 9.179798 | -0.72465 | 0.35335  | 0.4577   | RP5-827C2 chr1   | - | 2.35E+08 | 2.35E+08 | 575  |
| ENSG000001 | 1.971308 | 0.715414 | 1.1638   | 0.43483  | 0.54035  | OGFOD1P1 chr13   | - | 49784558 | 49786430 | 1592 |
| ENSG000001 | 0        | 0.297015 | -0.41864 | 0.81278  | NA       | RP11-404C chr1   | - | 1.58E+08 | 1.58E+08 | 834  |
| ENSG000001 | 0.72616  | 1.073121 | -0.33426 | 0.84917  | NA       | RP11-368C chrX   | + | 64808261 | 64820630 | 539  |
| ENSG000001 | 0        | 0.357707 | -0.41864 | 0.81278  | NA       | RP11-157A chr1   | + | 1.02E+08 | 1.02E+08 | 771  |
| ENSG000001 | 9.502835 | 3.100394 | 1.5512   | 0.060165 | 0.10469  | DIRC3 chr2       | - | 2.18E+08 | 2.19E+08 | 3078 |
| ENSG000001 | 0.36308  | 0        | 0.4146   | 0.81455  | NA       | LINC00410 chr13  | - | 91543208 | 91578851 | 2018 |
| ENSG000001 | 1.814586 | 1.84278  | -0.01488 | 0.99188  | 0.99563  | AP003774. chr11  | - | 64161814 | 64163303 | 985  |
| ENSG000001 | 4.264621 | 2.667426 | 0.61159  | 0.57322  | 0.67038  | RP1-203P1 chrX   | - | 1.46E+08 | 1.46E+08 | 988  |
| ENSG000001 | 1.016461 | 3.144102 | -1.3371  | 0.32654  | 0.42947  | RPL21P43 chr3    | - | 1.69E+08 | 1.69E+08 | 472  |
| ENSG000001 | 0        | 156.4682 | -8.7519  | 5.13E-16 | 3.55E-15 | AC068718. chr2   | - | 1.89E+08 | 1.89E+08 | 881  |
| ENSG000001 | 4.482143 | 3.662869 | 0.27237  | 0.80063  | 0.85881  | LINC00574 chr6   | + | 1.7E+08  | 1.7E+08  | 2318 |
| ENSG000001 | 0        | 0.594029 | -0.81444 | 0.64499  | NA       | RP11-203F chr1   | + | 2.04E+08 | 2.04E+08 | 446  |
| ENSG000001 | 0.975385 | 0.654722 | 0.40949  | 0.80016  | NA       | NANOGP5 chr9     | + | 1.03E+08 | 1.03E+08 | 879  |
| ENSG000001 | 0        | 125.7648 | -8.4025  | 3.94E-14 | 2.44E-13 | AP002856. chr11  | + | 1.31E+08 | 1.31E+08 | 584  |
| ENSG000001 | 0.290301 | 0        | 0.4146   | 0.81455  | NA       | AC020550. chr2   | + | 1.98E+08 | 1.98E+08 | 163  |
| ENSG000001 | 0.342542 | 1.248751 | -1.1955  | 0.48202  | NA       | RP11-5407 chr1   | - | 943456   | 943609   | 154  |
| ENSG000001 | 6.525252 | 1.188058 | 2.0614   | 0.088136 | 0.1452   | RP4-669H2 chr20  | - | 52014199 | 52029448 | 3280 |
| ENSG000001 | 0        | 0.654722 | -0.83442 | 0.63731  | NA       | AC004895. chr7   | + | 6120734  | 6132716  | 547  |
| ENSG000001 | 0.705622 | 0        | 0.8807   | 0.6196   | NA       | RP11-432J. chr10 | + | 1.34E+08 | 1.34E+08 | 297  |
| ENSG000001 | 1.338465 | 4.006007 | -1.4158  | 0.2008   | 0.28951  | PABPC1P1 chr4    | + | 39975064 | 39975958 | 591  |
| ENSG000001 | 1.016461 | 0.891044 | 0.096278 | 0.95404  | 0.97142  | RP5-857K2 chr1   | - | 521369   | 523833   | 842  |
| ENSG000001 | 27.93727 | 21.37029 | 0.37249  | 0.41013  | 0.51492  | RP11-398F chr22  | - | 46436146 | 46440733 | 2584 |
| ENSG000001 | 0.580602 | 7.437386 | -3.0485  | 0.012469 | 0.025696 | AF064860. chr21  | + | 41099682 | 41102607 | 1542 |
| ENSG000001 | 0.342542 | 0        | 0.4146   | 0.81455  | NA       | RP11-382E chr1   | + | 1.99E+08 | 1.99E+08 | 2296 |
| ENSG000001 | 0        | 14.30343 | -5.3977  | 1.58E-05 | 4.96E-05 | RP11-568A chr6   | - | 1.68E+08 | 1.68E+08 | 579  |
| ENSG000001 | 31.70442 | 21.61789 | 0.54306  | 0.19768  | 0.28585  | AC058791. chr7   | - | 1.31E+08 | 1.31E+08 | 3505 |
| ENSG000001 | 0        | 0.951736 | -1.2555  | 0.48145  | NA       | RP11-573C chr3   | + | 1.87E+08 | 1.87E+08 | 540  |
| ENSG000001 | 0        | 0.357707 | -0.41864 | 0.81278  | NA       | VN1R110P chrX    | + | 48494553 | 48495523 | 971  |
| ENSG000001 | 7.35508  | 4.600036 | 0.63369  | 0.41263  | 0.5175   | LLOXNC01- chrX   | - | 1.03E+08 | 1.03E+08 | 1229 |
| ENSG000001 | 0        | 1.485073 | -1.5064  | 0.39745  | NA       | ARHGEF9-I' chrX  | - | 62890076 | 62891382 | 394  |
| ENSG000001 | 13.93436 | 13.77339 | 0.001061 | 0.99854  | 0.9994   | AC010976. chr2   | + | 1.28E+08 | 1.28E+08 | 1007 |
| ENSG000001 | 2.012384 | 1.043983 | 0.79257  | 0.56288  | 0.661    | RP6-20611' chr1  | + | 1.44E+08 | 1.44E+08 | 1523 |
| ENSG000001 | 0        | 0.594029 | -0.81444 | 0.64499  | NA       | RP11-107' chr2   | + | 1.74E+08 | 1.74E+08 | 884  |
| ENSG000001 | 0.705622 | 2.543625 | -1.5518  | 0.26153  | 0.35969  | TSPAN19 chr12    | - | 85408094 | 85430055 | 3829 |
| ENSG000001 | 0        | 1.340997 | -1.8899  | 0.26871  | NA       | GAPDHP59 chr2    | + | 1.88E+08 | 1.88E+08 | 267  |
| ENSG000001 | 2.894453 | 13.08711 | -2.0578  | 0.006723 | 0.014596 | RP11-112L chr20  | + | 48789087 | 48793096 | 573  |
| ENSG000001 | 0        | 0.98329  | -1.2878  | 0.47019  | NA       | RP11-164F chr9   | - | 1.27E+08 | 1.27E+08 | 607  |
| ENSG000001 | 0.923144 | 0.343138 | 0.88162  | 0.61011  | NA       | AC079922. chr2   | - | 1.13E+08 | 1.13E+08 | 359  |
| ENSG000001 | 15.37471 | 21.94646 | -0.51651 | 0.26698  | 0.36564  | EMBP1 chr1       | + | 1.21E+08 | 1.21E+08 | 903  |
| ENSG000001 | 0        | 0.343138 | -0.41864 | 0.81278  | NA       | CHODL-AS1 chr21  | - | 19207333 | 19257925 | 1117 |
| ENSG000001 | 4.056471 | 0.640152 | 2.2267   | 0.07689  | 0.12916  | RP11-183If chr9  | + | 16473186 | 16476235 | 414  |
| ENSG000001 | 4.771466 | 3.38284  | 0.44854  | 0.66125  | 0.74502  | RP11-350J' chr6  | - | 1.5E+08  | 1.5E+08  | 1117 |
| ENSG000001 | 1.411244 | 3.414394 | -1.1018  | 0.38911  | 0.49335  | RP11-354K chr6   | + | 77370203 | 77372487 | 2285 |
| ENSG000001 | 0.653381 | 0.640152 | 0.01046  | 0.99499  | NA       | DLX6-AS1 chr7    | - | 96594839 | 96643377 | 4978 |
| ENSG000001 | 6.825904 | 9.338442 | -0.42518 | 0.52024  | 0.62295  | MIR4426 chr1     | + | 1.93E+08 | 1.93E+08 | 471  |
| ENSG000001 | 0.705622 | 0.357707 | 0.57557  | 0.74268  | NA       | RP5-855F1 chr1   | - | 2.35E+08 | 2.35E+08 | 2860 |
| ENSG000001 | 0.290301 | 0.700845 | -0.56655 | 0.74739  | NA       | RP1-8B1.4 chr6   | - | 46064830 | 46097443 | 462  |

|            |          |          |          |          |          |                 |   |          |          |      |
|------------|----------|----------|----------|----------|----------|-----------------|---|----------|----------|------|
| ENSG000001 | 18.51659 | 22.01198 | -0.24894 | 0.61689  | 0.70807  | TMEM44-A chr3   | + | 1.94E+08 | 1.94E+08 | 1119 |
| ENSG000001 | 1.649304 | 2.08555  | -0.26578 | 0.84342  | 0.89009  | RP11-147C chrX  | + | 21911718 | 21920026 | 7619 |
| ENSG000001 | 0        | 0.357707 | -0.41864 | 0.81278  | NA       | RP1-154K9 chrX  | + | 42111712 | 42558636 | 895  |
| ENSG000001 | 3.362014 | 1.370136 | 1.1181   | 0.37296  | 0.4773   | RP1-90L14 chr6  | - | 85130746 | 85265870 | 504  |
| ENSG000001 | 0        | 1.71569  | -1.6656  | 0.35029  | NA       | AC079896 chr2   | - | 82210396 | 82232824 | 488  |
| ENSG000001 | 4.543757 | 7.420401 | -0.65598 | 0.40418  | 0.50899  | DBIL5P chr17    | + | 655900   | 658576   | 2677 |
| ENSG000001 | 4.55313  | 0        | 3.6489   | 0.013433 | 0.027506 | RP11-370B chrX  | - | 1.03E+08 | 1.03E+08 | 433  |
| ENSG000001 | 28.68299 | 55.28053 | -0.94419 | 0.009536 | 0.020112 | RP11-558F chr1  | - | 9732484  | 9747613  | 939  |
| ENSG000001 | 7.188984 | 32.6729  | -2.134   | 4.58E-05 | 0.000136 | DOC2GP chr11    | - | 67380124 | 67383728 | 1163 |
| ENSG000001 | 3.444166 | 0.700845 | 1.9281   | 0.14573  | 0.22142  | AC009542 chr7   | + | 1.35E+08 | 1.35E+08 | 1810 |
| ENSG000001 | 1.233984 | 2.543625 | -0.8574  | 0.51306  | 0.61613  | ITCH-IT1 chr20  | + | 33038735 | 33042357 | 208  |
| ENSG000001 | 0.870904 | 4.49322  | -1.9299  | 0.13378  | 0.20656  | RP13-93L1 chr9  | + | 92064473 | 92065669 | 1197 |
| ENSG000001 | 3.725094 | 24.56776 | -2.6533  | 4.02E-05 | 0.00012  | RP11-342C chr9  | + | 97320996 | 97330312 | 1080 |
| ENSG000001 | 0.342542 | 0        | 0.4146   | 0.81455  | NA       | RP11-339N chr9  | + | 1.12E+08 | 1.12E+08 | 308  |
| ENSG000001 | 0.36308  | 0        | 0.4146   | 0.81455  | NA       | RP3-527G5 chr6  | - | 4345977  | 4347271  | 329  |
| ENSG000001 | 2.520208 | 8.357568 | -1.5856  | 0.070941 | 0.12053  | AC019097 chr2   | + | 99718481 | 99719215 | 735  |
| ENSG000001 | 1.722083 | 0        | 2.21     | 0.18654  | NA       | AC016735 chr2   | - | 43254992 | 43266686 | 2156 |
| ENSG000001 | 1.161205 | 0.297015 | 0.99731  | 0.57355  | NA       | RP11-216N chr1  | + | 1.54E+08 | 1.54E+08 | 2040 |
| ENSG000001 | 0        | 0.997859 | -1.5018  | 0.39072  | NA       | RP11-310E chr10 | - | 96901682 | 96928182 | 420  |
| ENSG000001 | 0.580602 | 0.98329  | -0.46292 | 0.78504  | NA       | XX-FW831 chrX   | - | 1.54E+08 | 1.54E+08 | 341  |
| ENSG000001 | 0.705622 | 1.370136 | -0.71417 | 0.6513   | 0.73678  | MTHFD1P1 chrX   | - | 57419079 | 57421842 | 2764 |
| ENSG000001 | 0        | 0.357707 | -0.41864 | 0.81278  | NA       | RP11-449F chr9  | + | 45164578 | 45212501 | 891  |
| ENSG000001 | 0.705622 | 0        | 0.8807   | 0.6196   | NA       | AC073342 chr7   | - | 1.43E+08 | 1.43E+08 | 592  |
| ENSG000001 | 0.943682 | 2.07098  | -0.88418 | 0.52695  | 0.62874  | RP11-206F chr4  | + | 1.54E+08 | 1.54E+08 | 762  |
| ENSG000001 | 0.342542 | 1.40169  | -1.3086  | 0.4368   | NA       | RP11-527F chr6  | + | 1.26E+08 | 1.27E+08 | 583  |
| ENSG000001 | 4.077009 | 1.652581 | 1.1581   | 0.28208  | 0.38315  | HMGB3P1 chr3    | + | 1.34E+08 | 1.34E+08 | 599  |
| ENSG000001 | 0        | 1.043983 | -1.3473  | 0.44976  | NA       | AC012354 chr2   | + | 45223552 | 45224012 | 461  |
| ENSG000001 | 0        | 1.309443 | -1.6539  | 0.35008  | NA       | UBE2V2P4 chr1   | - | 36707499 | 36707757 | 259  |
| ENSG000001 | 4.491516 | 11.30261 | -1.2585  | 0.074222 | 0.12538  | AC104655 chr2   | - | 1.06E+08 | 1.06E+08 | 565  |
| ENSG000001 | 3.631777 | 5.242605 | -0.48958 | 0.61741  | 0.70853  | RP11-327P chr13 | + | 52378433 | 52387356 | 569  |
| ENSG000001 | 0.705622 | 0.594029 | 0.11178  | 0.94848  | NA       | AC067945 chr2   | + | 1.92E+08 | 1.92E+08 | 490  |
| ENSG000001 | 0.632843 | 0.297015 | 0.49183  | 0.78024  | NA       | AC007875 chr7   | + | 97535741 | 97536134 | 394  |
| ENSG000001 | 0.290301 | 0.297015 | -0.00202 | 0.99909  | NA       | RP3-428L1 chr6  | + | 1.61E+08 | 1.61E+08 | 573  |
| ENSG000001 | 5.6647   | 6.413677 | -0.18897 | 0.80865  | 0.86501  | SIK3-IT1 chr11  | - | 1.17E+08 | 1.17E+08 | 2472 |
| ENSG000001 | 0        | 4.164651 | -3.289   | 0.040719 | 0.074512 | RP1-202O8 chr1  | - | 6503094  | 6507066  | 351  |
| ENSG000001 | 1.286224 | 2.370411 | -0.72904 | 0.56837  | 0.66573  | IPO9-AS1 chr1   | - | 2.02E+08 | 2.02E+08 | 839  |
| ENSG000001 | 0.36308  | 0.343138 | -0.0021  | 0.99905  | NA       | RP11-346E chrX  | + | 80618767 | 80619669 | 903  |
| ENSG000001 | 7.999088 | 5.811527 | 0.45034  | 0.55259  | 0.65194  | RP11-177F chr1  | + | 2.39E+08 | 2.39E+08 | 2900 |
| ENSG000001 | 0.342542 | 1.043983 | -0.98163 | 0.56849  | NA       | SNRPPF1 chr20   | - | 48346128 | 48346379 | 252  |
| ENSG000001 | 0        | 0.951736 | -1.2555  | 0.48145  | NA       | RP5-1120P chr6  | + | 44041650 | 44045689 | 1608 |
| ENSG000001 | 0        | 0.343138 | -0.41864 | 0.81278  | NA       | F10-AS1 chr13   | - | 1.14E+08 | 1.14E+08 | 417  |
| ENSG000001 | 0        | 0.654722 | -0.83442 | 0.63731  | NA       | NDUFB1P1 chr3   | + | 48223037 | 48223216 | 180  |
| ENSG000001 | 0.290301 | 0.343138 | -0.00202 | 0.99909  | NA       | MTND5P15 chr3   | - | 1.77E+08 | 1.77E+08 | 349  |
| ENSG000001 | 35.09635 | 81.348   | -1.1982  | 0.001994 | 0.00472  | TRAF3IP2-A chr6 | + | 1.12E+08 | 1.12E+08 | 2191 |
| ENSG000001 | 0        | 3.711409 | -3.3594  | 0.025926 | 0.049862 | AC093391 chr2   | + | 1.37E+08 | 1.37E+08 | 1394 |
| ENSG000001 | 0        | 0.357707 | -0.41864 | 0.81278  | NA       | AC073316 chr7   | - | 3236258  | 3237888  | 418  |
| ENSG000001 | 0.290301 | 0.343138 | -0.00202 | 0.99909  | NA       | AC012594 chr2   | - | 1.71E+08 | 1.71E+08 | 876  |
| ENSG000001 | 3.64115  | 0        | 3.4049   | 0.020363 | 0.040101 | RP11-281A chr9  | - | 1.21E+08 | 1.21E+08 | 625  |
| ENSG000001 | 0        | 0.297015 | -0.41864 | 0.81278  | NA       | AC079354 chr2   | - | 2.03E+08 | 2.03E+08 | 311  |
| ENSG000001 | 1.068702 | 1.531196 | -0.43932 | 0.77291  | 0.83657  | SETP10 chr1     | + | 1.79E+08 | 1.79E+08 | 814  |
| ENSG000001 | 0        | 2.370411 | -2.6458  | 0.10384  | 0.16657  | GAPDHP37 chr22  | - | 41069488 | 41070455 | 968  |
| ENSG000001 | 6.338619 | 13.51121 | -1.0688  | 0.10871  | 0.17331  | IDH1-AS1 chr2   | + | 2.09E+08 | 2.09E+08 | 489  |
| ENSG000001 | 0        | 0.357707 | -0.41864 | 0.81278  | NA       | RP11-363E chr9  | - | 19460924 | 19464522 | 516  |
| ENSG000001 | 0.290301 | 0        | 0.4146   | 0.81455  | NA       | SALL4P5 chr3    | + | 23031314 | 23033073 | 1760 |
| ENSG000001 | 0        | 1.012429 | -1.3162  | 0.46038  | NA       | AC006033 chr7   | + | 38350984 | 38351409 | 426  |
| ENSG000001 | 0        | 2.353426 | -2.7264  | 0.084821 | 0.14042  | AC007682 chr2   | + | 51259739 | 52635055 | 3939 |
| ENSG000001 | 0.685084 | 0        | 0.85004  | 0.63064  | NA       | PSG1 chr19      | - | 43370616 | 43383974 | 2830 |
| ENSG000001 | 2153.868 | 1202.208 | 0.83912  | 5.71E-07 | 2.09E-06 | TAPBP chr6      | - | 33267471 | 33282164 | 3759 |
| ENSG000001 | 0.685084 | 1.698704 | -1.002   | 0.5098   | 0.61316  | AC102953 chr7   | - | 1548291  | 1549063  | 242  |
| ENSG000001 | 0.290301 | 0        | 0.4146   | 0.81455  | NA       | HMGB3P31 chrX   | - | 1.34E+08 | 1.34E+08 | 595  |
| ENSG000001 | 0        | 3.633731 | -3.4088  | 0.020168 | 0.039758 | AF228730 chr8   | + | 7058278  | 7058379  | 102  |
| ENSG000001 | 0        | 0.343138 | -0.41864 | 0.81278  | NA       | RP4-610C1 chr20 | - | 29558488 | 29596406 | 719  |
| ENSG000001 | 0.975385 | 12.63145 | -3.3683  | 0.000525 | 0.001359 | RPS7P3 chr1     | - | 2.33E+08 | 2.33E+08 | 580  |
| ENSG000001 | 2.064625 | 1.294874 | 0.54481  | 0.66624  | 0.74916  | RP13-923C chr8  | + | 82720007 | 82720961 | 955  |
| ENSG000001 | 1.068702 | 0.700845 | 0.43272  | 0.78808  | NA       | PHKA1-AS1 chrX  | + | 71908800 | 71932190 | 598  |

|            |          |          |          |          |          |                  |   |          |          |      |
|------------|----------|----------|----------|----------|----------|------------------|---|----------|----------|------|
| ENSG000001 | 1.576526 | 0        | 2.1197   | 0.20755  | NA       | HS1BP3-IT1 chr2  | - | 20790535 | 20792308 | 600  |
| ENSG000001 | 5.125173 | 1.40169  | 1.6818   | 0.13506  | 0.20805  | AC018648. chr7   | + | 32852369 | 32878182 | 915  |
| ENSG000001 | 0.342542 | 0        | 0.4146   | 0.81455  | NA       | RP4-706G2 chr1   | + | 25534630 | 25535360 | 420  |
| ENSG000001 | 0        | 0.297015 | -0.41864 | 0.81278  | NA       | MTND2P22 chr2    | + | 1.31E+08 | 1.31E+08 | 1033 |
| ENSG000001 | 35.02259 | 24.9967  | 0.47094  | 0.25808  | 0.35572  | AC007383. chr2   | + | 2.07E+08 | 2.07E+08 | 1411 |
| ENSG000001 | 0.653381 | 0        | 0.82678  | 0.64037  | NA       | GNAI2P2 chr10    | - | 79828458 | 79829385 | 928  |
| ENSG000001 | 0        | 0.686276 | -0.84936 | 0.6309   | NA       | RP5-967N2 chr20  | + | 5945826  | 5946157  | 332  |
| ENSG000001 | 1.359003 | 6.255033 | -2.0251  | 0.047727 | 0.085448 | AF131215. chr8   | + | 11032560 | 11033079 | 520  |
| ENSG000001 | 1.048164 | 0.937167 | 0.082641 | 0.95805  | 0.97466  | RP11-12M1 chr1   | - | 1.8E+08  | 1.8E+08  | 353  |
| ENSG000001 | 0.342542 | 0.343138 | -0.00208 | 0.99906  | NA       | RP11-12D2 chr9   | - | 5356312  | 5356525  | 214  |
| ENSG000001 | 1.45232  | 0.343138 | 1.1637   | 0.50848  | NA       | AC144449. chr2   | + | 1.5E+08  | 1.51E+08 | 1022 |
| ENSG000001 | 13.72459 | 5.658588 | 1.2433   | 0.05117  | 0.090773 | RP11-452K chr10  | + | 99160872 | 99179281 | 548  |
| ENSG000001 | 0.995923 | 0.297015 | 1.0163   | 0.54122  | NA       | RP11-557F chr6   | - | 1.35E+08 | 1.35E+08 | 1360 |
| ENSG000001 | 0        | 0.297015 | -0.41864 | 0.81278  | NA       | LINC00202 chr10  | + | 26932098 | 26942383 | 6037 |
| ENSG000001 | 0        | 3.679854 | -3.4118  | 0.020515 | 0.040357 | RP5-963E2 chr20  | - | 61798149 | 61812255 | 542  |
| ENSG000001 | 0.36308  | 0.937167 | -0.90039 | 0.60194  | NA       | RP11-132C chr1   | + | 22094762 | 22095068 | 307  |
| ENSG000001 | 0.36308  | 0.297015 | -0.00205 | 0.99908  | NA       | RPL7L1P12 chr13  | - | 99601973 | 99602701 | 729  |
| ENSG000001 | 8.652469 | 21.87449 | -1.3162  | 0.021831 | 0.042727 | RP11-573C chr3   | + | 1.87E+08 | 1.87E+08 | 330  |
| ENSG000001 | 0.290301 | 0        | 0.4146   | 0.81455  | NA       | LINC00415 chr13  | - | 26626414 | 26627523 | 435  |
| ENSG000001 | 0.975385 | 0.297015 | 0.91901  | 0.59525  | NA       | PPP1R2P3 chr5    | + | 1.56E+08 | 1.56E+08 | 1991 |
| ENSG000001 | 0        | 3.198346 | -3.1449  | 0.041263 | 0.075338 | RP11-53B5 chr9   | + | 96619365 | 96620615 | 391  |
| ENSG000001 | 143.2803 | 12.97217 | 3.4404   | 4.29E-26 | 4.68E-25 | ANXA2P2 chr9     | + | 33624223 | 33625532 | 1310 |
| ENSG000001 | 0.653381 | 0        | 0.82678  | 0.64037  | NA       | RP11-57H1 chr1   | + | 95585703 | 95604110 | 420  |
| ENSG000001 | 7.915144 | 13.59534 | -0.75864 | 0.19692  | 0.28489  | RP1-85F18 chr22  | - | 41570595 | 41593460 | 457  |
| ENSG000001 | 29.31763 | 2.102535 | 3.6866   | 3.75E-07 | 1.39E-06 | RP11-111F chr9   | + | 46577620 | 46578220 | 601  |
| ENSG000001 | 0        | 0.297015 | -0.41864 | 0.81278  | NA       | FAM27D1 chr9     | + | 46389110 | 46391556 | 2447 |
| ENSG000001 | 10.93543 | 2.857624 | 1.7711   | 0.05025  | 0.089343 | RP5-1007N chr1   | - | 90048800 | 90098453 | 851  |
| ENSG000001 | 0        | 0.343138 | -0.41864 | 0.81278  | NA       | RP11-54D1 chr9   | - | 15034178 | 15048059 | 1000 |
| ENSG000001 | 0.36308  | 2.012704 | -1.7092  | 0.30085  | 0.40228  | AC005537. chr7   | - | 42993734 | 43087661 | 1238 |
| ENSG000001 | 0        | 0.640152 | -0.82869 | 0.63935  | NA       | AP001059. chr21  | + | 45670696 | 45671403 | 523  |
| ENSG000001 | 1.939605 | 0.343138 | 1.8429   | 0.23227  | 0.3257   | AC107021. chr3   | + | 1.46E+08 | 1.46E+08 | 1799 |
| ENSG000001 | 1.233984 | 0        | 1.5686   | 0.37707  | NA       | RP11-181C chr1   | + | 78319040 | 78319578 | 251  |
| ENSG000001 | 0.290301 | 0        | 0.4146   | 0.81455  | NA       | AL132709. chr14  | + | 1.01E+08 | 1.01E+08 | 823  |
| ENSG000001 | 0        | 0.343138 | -0.41864 | 0.81278  | NA       | AC074183. chr7   | - | 84568665 | 84569561 | 782  |
| ENSG000001 | 19.38668 | 0.640152 | 4.4317   | 8.01E-06 | 2.60E-05 | LEF1-AS1 chr4    | + | 1.09E+08 | 1.09E+08 | 3360 |
| ENSG000001 | 1.286224 | 14.55761 | -3.2439  | 0.000259 | 0.000698 | RP5-1109J chr1   | + | 46897801 | 46911374 | 1267 |
| ENSG000001 | 0        | 0.357707 | -0.41864 | 0.81278  | NA       | AC009410. chr2   | - | 2.29E+08 | 2.29E+08 | 676  |
| ENSG000001 | 12.76974 | 18.07882 | -0.4911  | 0.33657  | 0.44033  | LSM12P1 chr8     | - | 35382694 | 35383281 | 588  |
| ENSG000001 | 1.649304 | 2.131673 | -0.28593 | 0.83178  | 0.88138  | RP11-275F chr1   | + | 51837942 | 51838896 | 955  |
| ENSG000001 | 0.580602 | 1.652581 | -1.0812  | 0.47855  | 0.58285  | AC007391. chr2   | + | 37552483 | 37553940 | 504  |
| ENSG000001 | 0        | 0.343138 | -0.41864 | 0.81278  | NA       | AC079781. chr7   | + | 97537568 | 97537736 | 169  |
| ENSG000001 | 1.431782 | 0        | 1.7261   | 0.329    | NA       | AC092168. chr2   | + | 1.01E+08 | 1.01E+08 | 717  |
| ENSG000001 | 0        | 0.937167 | -1.2408  | 0.48662  | NA       | GS1-115G2 chr1   | + | 1.85E+08 | 1.85E+08 | 1325 |
| ENSG000001 | 42.55926 | 76.24195 | -0.82564 | 0.010861 | 0.022655 | SCAND3 chr6      | - | 28539407 | 28583989 | 4877 |
| ENSG000001 | 1.08924  | 0        | 1.1858   | 0.50299  | NA       | PSMD10P3 chr13   | + | 73610539 | 73610986 | 448  |
| ENSG000001 | 12.4906  | 5.658588 | 1.1078   | 0.089637 | 0.14723  | RP4-530I1 chr20  | - | 49187512 | 49194578 | 4587 |
| ENSG000001 | 13.44529 | 0.715414 | 3.7898   | 0.000677 | 0.001721 | AC073479. chr2   | + | 6072819  | 6141407  | 3329 |
| ENSG000001 | 2.810509 | 0.715414 | 1.6103   | 0.26277  | 0.36096  | AC007392. chr2   | + | 66801162 | 66957289 | 682  |
| ENSG000001 | 0.923144 | 0        | 1.223    | 0.49292  | NA       | AC009784. chr7   | + | 1.36E+08 | 1.36E+08 | 889  |
| ENSG000001 | 0        | 2.073397 | -2.2159  | 0.20168  | 0.2903   | AC093390. chr2   | + | 1828184  | 1832439  | 3403 |
| ENSG000001 | 0.36308  | 0        | 0.4146   | 0.81455  | NA       | AC005772. chr17  | + | 14918122 | 14955593 | 976  |
| ENSG000001 | 4.107898 | 3.037286 | 0.4021   | 0.72637  | 0.79764  | RP11-173A chr1   | - | 2.45E+08 | 2.45E+08 | 291  |
| ENSG000001 | 0.342542 | 1.234181 | -1.1862  | 0.48567  | NA       | RP11-255N chr9   | - | 30558878 | 30559479 | 602  |
| ENSG000001 | 2.645227 | 1.638012 | 0.60355  | 0.59719  | 0.6915   | RP11-307E chr9   | + | 97094758 | 97123230 | 2162 |
| ENSG000001 | 1.338465 | 4.273883 | -1.5109  | 0.1659   | 0.247    | AC023797. chr3   | - | 1.96E+08 | 1.96E+08 | 348  |
| ENSG000001 | 1.390706 | 2.711133 | -0.83273 | 0.51474  | 0.6177   | TMEM253 chr14    | + | 21567096 | 21571883 | 1526 |
| ENSG000001 | 1.503747 | 1.623443 | -0.066   | 0.96388  | 0.97883  | RP1-302D5 chr22  | + | 33560049 | 33562425 | 567  |
| ENSG000001 | 4.822893 | 3.2299   | 0.53205  | 0.57086  | 0.66808  | MRPL35P2 chr10   | - | 65394077 | 65394587 | 511  |
| ENSG000001 | 1.451506 | 0        | 1.4786   | 0.40599  | NA       | RP11-452J chr1   | + | 1.93E+08 | 1.93E+08 | 779  |
| ENSG000001 | 0        | 0.343138 | -0.41864 | 0.81278  | NA       | AL035610. chr21  | + | 29420733 | 29509930 | 1754 |
| ENSG000001 | 0        | 1.698704 | -2.2257  | 0.18075  | NA       | LARGE-IT1 chr22  | - | 34119818 | 34120898 | 558  |
| ENSG000001 | 1.887365 | 3.336716 | -0.70094 | 0.54319  | 0.64365  | RPS6KA2-IT1 chr6 | - | 1.67E+08 | 1.67E+08 | 579  |
| ENSG000001 | 4.253456 | 0        | 3.645    | 0.010889 | 0.022705 | AC104782. chr2   | + | 1.01E+08 | 1.01E+08 | 3115 |
| ENSG000001 | 1.048164 | 0.343138 | 0.98412  | 0.56751  | NA       | RP11-261C chr1   | + | 2.43E+08 | 2.43E+08 | 373  |
| ENSG000001 | 5.290455 | 13.9846  | -1.3563  | 0.034102 | 0.063668 | RP11-307C chr1   | - | 1.55E+08 | 1.55E+08 | 822  |

|            |          |          |          |          |          |                  |   |          |          |       |
|------------|----------|----------|----------|----------|----------|------------------|---|----------|----------|-------|
| ENSG000001 | 1.379541 | 1.652581 | -0.2327  | 0.86535  | 0.90634  | AC079781. chr7   | - | 97567751 | 97568106 | 356   |
| ENSG000001 | 148.7103 | 98.50757 | 0.5856   | 0.04393  | 0.079477 | CTD-2619J. chr19 | - | 58915605 | 58919851 | 3059  |
| ENSG000001 | 0        | 1.280305 | -1.6305  | 0.35731  | NA       | AC108059. chr2   | - | 1.29E+08 | 1.29E+08 | 151   |
| ENSG000001 | 6.225578 | 15.97146 | -1.334   | 0.054228 | 0.095429 | RP11-509J. chr9  | + | 3526723  | 3671646  | 552   |
| ENSG000001 | 3.910914 | 0.297015 | 2.8312   | 0.041234 | 0.075312 | RP11-149I. chr10 | + | 91043522 | 91051882 | 603   |
| ENSG000001 | 0.36308  | 0.297015 | -0.00205 | 0.99908  | NA       | RP11-126C chrX   | + | 9370791  | 9382606  | 11812 |
| ENSG000001 | 203.953  | 199.5871 | 0.032826 | 0.88581  | 0.92025  | TMA7 chr3        | + | 48481667 | 48485616 | 688   |
| ENSG000001 | 0.36308  | 0        | 0.4146   | 0.81455  | NA       | RP11-123C chr10  | - | 59866184 | 59866640 | 457   |
| ENSG000001 | 1.233984 | 1.355566 | -0.07449 | 0.95815  | 0.97466  | RP11-187C chr9   | + | 45484572 | 45488153 | 935   |
| ENSG000001 | 1.286224 | 0        | 1.8436   | 0.2818   | NA       | RP11-490N chr13  | - | 30726023 | 30733758 | 6852  |
| ENSG000001 | 1.701545 | 0.715414 | 0.9736   | 0.52165  | 0.62424  | BACH1-AS1 chr21  | - | 30742340 | 30743547 | 241   |
| ENSG000001 | 341.2179 | 211.4401 | 0.69067  | 0.000283 | 0.000762 | MCTS1 chrX       | + | 1.2E+08  | 1.2E+08  | 1130  |
| ENSG000001 | 4.543757 | 5.17708  | -0.17267 | 0.86527  | 0.9063   | AP001057. chr21  | + | 45621173 | 45622579 | 799   |
| ENSG000001 | 1.991846 | 2.886762 | -0.49673 | 0.65005  | 0.73589  | AC011385. chr5   | + | 1.38E+08 | 1.38E+08 | 195   |
| ENSG000001 | 0.36308  | 0.297015 | -0.00205 | 0.99908  | NA       | RP1-293L8 chr6   | - | 1.26E+08 | 1.26E+08 | 501   |
| ENSG000001 | 1.068702 | 0.297015 | 0.9938   | 0.56435  | NA       | RP11-544K chr1   | - | 2.2E+08  | 2.2E+08  | 388   |
| ENSG000001 | 0.580602 | 1.935026 | -1.2792  | 0.39216  | 0.4965   | DUXAP7 chr20     | - | 18623426 | 18624278 | 689   |
| ENSG000001 | 0        | 0.343138 | -0.41864 | 0.81278  | NA       | LINC00867 chr10  | + | 1.2E+08  | 1.2E+08  | 580   |
| ENSG000001 | 0        | 0.357707 | -0.41864 | 0.81278  | NA       | FMO11P chr1      | + | 1.67E+08 | 1.67E+08 | 1370  |
| ENSG000001 | 4.843431 | 1.248751 | 1.6675   | 0.16729  | 0.24867  | FERP1 chrX       | + | 1.23E+08 | 1.23E+08 | 793   |
| ENSG000001 | 8.34163  | 5.393128 | 0.60607  | 0.41125  | 0.51604  | ST13P4 chr13     | + | 50746225 | 50747317 | 1093  |
| ENSG000001 | 0.632843 | 1.012429 | -0.45981 | 0.7761   | NA       | RP11-277L chr1   | + | 1.5E+08  | 1.5E+08  | 5730  |
| ENSG000001 | 0        | 0.343138 | -0.41864 | 0.81278  | NA       | RP11-252C chr9   | + | 19705336 | 19705653 | 318   |
| ENSG000001 | 15.04251 | 6.566617 | 1.1588   | 0.054426 | 0.09573  | RP5-842K2 chrX   | + | 1.31E+08 | 1.32E+08 | 3474  |
| ENSG000001 | 0.685084 | 0.700845 | -0.01556 | 0.9928   | NA       | USP12-AS1 chr13  | + | 27736992 | 27743272 | 268   |
| ENSG000001 | 7.261763 | 2.041842 | 1.719    | 0.060067 | 0.10456  | RPLP1P13 chr13   | + | 23947562 | 23948200 | 299   |
| ENSG000001 | 0        | 2.725702 | -2.8801  | 0.068833 | 0.11738  | AC092669. chr2   | + | 66610438 | 66619582 | 1679  |
| ENSG000001 | 0.342542 | 0.297015 | -0.00202 | 0.99909  | NA       | OR2H5P chr6      | + | 29541686 | 29542613 | 928   |
| ENSG000001 | 0        | 0.98329  | -1.2878  | 0.47019  | NA       | RP11-146N chr9   | - | 19200333 | 19201044 | 712   |
| ENSG000001 | 1.359003 | 1.652581 | -0.25445 | 0.84363  | 0.8902   | RP6-27P15 chrX   | + | 1.38E+08 | 1.38E+08 | 142   |
| ENSG000001 | 0.580602 | 0        | 0.8036   | 0.6494   | NA       | RP11-370K chr1   | - | 2.44E+08 | 2.44E+08 | 389   |
| ENSG000001 | 3.786708 | 10.43909 | -1.4044  | 0.093501 | 0.15267  | RP11-311P chrX   | - | 74546607 | 74547834 | 1228  |
| ENSG000001 | 8.620766 | 12.0156  | -0.46116 | 0.49192  | 0.59588  | FTH1P7 chr13     | - | 23270162 | 23270713 | 552   |
| ENSG000001 | 0        | 0.686276 | -0.84936 | 0.6309   | NA       | RP11-312J chr1   | - | 1.61E+08 | 1.61E+08 | 575   |
| ENSG000001 | 0.36308  | 0.357707 | -0.00212 | 0.99905  | NA       | RP11-134C chr16  | + | 87091390 | 87097597 | 4083  |
| ENSG000001 | 7.480099 | 0        | 4.4733   | 0.00074  | 0.001873 | RP11-62I2. chr1  | - | 2.45E+08 | 2.45E+08 | 810   |
| ENSG000001 | 0        | 0.654722 | -0.83442 | 0.63731  | NA       | RP1-313L4 chr1   | + | 1.68E+08 | 1.68E+08 | 718   |
| ENSG000001 | 0        | 4.115239 | -3.4607  | 0.022338 | 0.043622 | TOMM22P. chrY    | + | 2696023  | 2696259  | 237   |
| ENSG000001 | 0        | 0.297015 | -0.41864 | 0.81278  | NA       | MTRNR2L4 chr16   | - | 3421053  | 3422283  | 1231  |
| ENSG000001 | 0        | 0.654722 | -0.83442 | 0.63731  | NA       | RP11-302L chr6   | + | 1.7E+08  | 1.7E+08  | 429   |
| ENSG000001 | 1.027626 | 1.248751 | -0.21406 | 0.89642  | 0.92822  | AC098824. chr2   | - | 43053462 | 43054757 | 980   |
| ENSG000001 | 4.366497 | 6.004142 | -0.40296 | 0.64664  | 0.73297  | PHBP15 chr7      | - | 74155796 | 74156460 | 665   |
| ENSG000001 | 0        | 0.891044 | -1.0625  | 0.54819  | NA       | FTLP8 chr13      | - | 98639204 | 98639470 | 267   |
| ENSG000001 | 2.448243 | 2.309719 | 0.05221  | 0.96795  | 0.98191  | RP1-149A1 chr22  | + | 32782655 | 32782855 | 201   |
| ENSG000001 | 9.584986 | 8.810811 | 0.10976  | 0.8707   | 0.90976  | LINC00202 chr10  | - | 27220135 | 27230930 | 3620  |
| ENSG000001 | 2.624689 | 0        | 2.9014   | 0.06135  | 0.10638  | RP11-7707 chr2   | - | 69821873 | 69822190 | 318   |
| ENSG000001 | 0        | 0.343138 | -0.41864 | 0.81278  | NA       | LINC00865 chr10  | + | 91589267 | 91600618 | 4272  |
| ENSG000001 | 0.653381 | 27.85755 | -4.9286  | 3.14E-07 | 1.17E-06 | RP11-573C chr3   | - | 1.87E+08 | 1.87E+08 | 1832  |
| ENSG000001 | 2.334388 | 3.989022 | -0.68303 | 0.55557  | 0.65473  | ASCL5 chr1       | - | 2.01E+08 | 2.01E+08 | 2026  |
| ENSG000001 | 0        | 0.640152 | -0.82869 | 0.63935  | NA       | RBPIP5 chr9      | - | 41884765 | 41886211 | 1447  |
| ENSG000001 | 1.991846 | 0.700845 | 1.2446   | 0.37452  | 0.47873  | RP11-30L8 chr13  | + | 86634948 | 86745025 | 194   |
| ENSG000001 | 0.36308  | 2.979009 | -2.422   | 0.093732 | 0.15299  | TMEM114 chr16    | - | 8619502  | 8622304  | 644   |
| ENSG000001 | 0        | 1.828211 | -2.0755  | 0.23445  | NA       | BTF3L4P1 chr21   | - | 18890841 | 18891311 | 471   |
| ENSG000001 | 0.290301 | 0.357707 | -0.00203 | 0.99908  | NA       | OR52I1 chr11     | + | 4615037  | 4616243  | 1047  |
| ENSG000001 | 1.939605 | 2.382564 | -0.23625 | 0.85295  | 0.8967   | INTS4L2 chr7     | + | 65112777 | 65180636 | 1403  |
| ENSG000001 | 2.914991 | 1.355566 | 0.99019  | 0.39666  | 0.5012   | FTH1P1 chr1      | + | 38010364 | 38010895 | 532   |
| ENSG000001 | 0        | 6.679138 | -4.2812  | 0.001802 | 0.004295 | RP11-782C chr1   | - | 1.43E+08 | 1.43E+08 | 5783  |
| ENSG000001 | 0.705622 | 0        | 0.8807   | 0.6196   | NA       | AC104651. chr2   | - | 1.13E+08 | 1.13E+08 | 528   |
| ENSG000001 | 0.290301 | 0        | 0.4146   | 0.81455  | NA       | GS1-204I1. chr1  | - | 1.86E+08 | 1.86E+08 | 642   |
| ENSG000001 | 0.290301 | 0.357707 | -0.00203 | 0.99908  | NA       | MTND1P32 chrX    | + | 1.02E+08 | 1.02E+08 | 938   |
| ENSG000001 | 57.6505  | 3.351285 | 4.013    | 4.35E-13 | 2.53E-12 | GNG12-AS1 chr1   | + | 68297986 | 68668670 | 2232  |
| ENSG000001 | 0.290301 | 0        | 0.4146   | 0.81455  | NA       | SLC6A1-AS. chr3  | - | 11047784 | 11060910 | 584   |
| ENSG000001 | 2.137404 | 2.07098  | 0.027733 | 0.98323  | 0.99069  | RP1-292B1 chr6   | - | 1.51E+08 | 1.51E+08 | 396   |
| ENSG000001 | 0        | 7.622753 | -4.5087  | 0.00066  | 0.001683 | PAICSP7 chrX     | - | 93891662 | 93894569 | 962   |
| ENSG000001 | 60.57242 | 13.06442 | 2.1994   | 6.99E-09 | 3.00E-08 | RP11-154C chr6   | - | 71931160 | 72037931 | 946   |

|            |          |          |          |          |          |                  |   |          |          |      |
|------------|----------|----------|----------|----------|----------|------------------|---|----------|----------|------|
| ENSG000001 | 0        | 0.654722 | -0.83442 | 0.63731  | NA       | RP11-10N1 chr1   | - | 24634046 | 24648391 | 856  |
| ENSG000001 | 7.043427 | 7.033556 | 0.017335 | 0.98225  | 0.99011  | FAM215B chr17    | - | 44636196 | 44640161 | 2183 |
| ENSG000001 | 0        | 617.7423 | -10.544  | 9.50E-23 | 9.07E-22 | RP11-132A chr7   | + | 1.01E+08 | 1.01E+08 | 756  |
| ENSG000001 | 2.395188 | 1.698704 | 0.44893  | 0.73566  | 0.80499  | RP11-205A chr9   | - | 32566146 | 32567124 | 979  |
| ENSG000001 | 0        | 4.481067 | -3.4029  | 0.03257  | 0.06106  | CLCP1 chr22      | - | 17903436 | 17903823 | 388  |
| ENSG000001 | 0        | 0.343138 | -0.41864 | 0.81278  | NA       | AC012485. chr2   | - | 2.39E+08 | 2.39E+08 | 563  |
| ENSG000001 | 1.597063 | 0        | 1.9181   | 0.27352  | NA       | RP11-557F chr6   | - | 1.35E+08 | 1.35E+08 | 892  |
| ENSG000001 | 0.632843 | 1.387121 | -0.79676 | 0.61465  | 0.70643  | RP1-249I4. chr6  | + | 1.1E+08  | 1.1E+08  | 465  |
| ENSG000001 | 12.08466 | 6.131232 | 0.9327   | 0.15998  | 0.23966  | AC009299. chr2   | - | 1.62E+08 | 1.62E+08 | 513  |
| ENSG000001 | 1.576526 | 0.700845 | 0.95778  | 0.51389  | 0.61691  | AC008440. chr19  | + | 54368017 | 54369394 | 555  |
| ENSG000001 | 0.653381 | 29.22433 | -4.9478  | 7.91E-07 | 2.85E-06 | AC093627. chr7   | - | 70972    | 71835    | 759  |
| ENSG000001 | 0.290301 | 0        | 0.4146   | 0.81455  | NA       | RP11-395C chr4   | - | 81307332 | 81309870 | 2539 |
| ENSG000001 | 2.282147 | 1.416259 | 0.61379  | 0.63587  | 0.72421  | RPS27AP2 chr20   | + | 17497488 | 17497952 | 465  |
| ENSG000001 | 0.290301 | 2.07098  | -1.8977  | 0.2248   | 0.3174   | RP11-47G1 chr10  | - | 1.26E+08 | 1.26E+08 | 525  |
| ENSG000001 | 0.342542 | 0        | 0.4146   | 0.81455  | NA       | RP11-435C chr1   | + | 36204990 | 36209177 | 539  |
| ENSG000001 | 0        | 0.640152 | -0.82869 | 0.63935  | NA       | RP11-782C chr1   | + | 1.43E+08 | 1.43E+08 | 470  |
| ENSG000001 | 0.36308  | 1.058552 | -0.99522 | 0.56254  | NA       | RP11-46O2 chr10  | - | 76265890 | 76289096 | 897  |
| ENSG000001 | 12.43918 | 5.361573 | 1.1693   | 0.084768 | 0.1404   | AC087163. chr17  | + | 17913957 | 17915136 | 853  |
| ENSG000001 | 1.555988 | 3.853068 | -1.1181  | 0.3508   | 0.45522  | SC22CB-1E chr22  | + | 32435477 | 32435883 | 407  |
| ENSG000001 | 24.09897 | 14.35855 | 0.70712  | 0.22472  | 0.31735  | RP11-488L chr1   | - | 2.47E+08 | 2.47E+08 | 706  |
| ENSG000001 | 5.217676 | 7.769244 | -0.55233 | 0.4578   | 0.56294  | U73167.7 chr3    | - | 50304073 | 50304803 | 338  |
| ENSG000001 | 0.632843 | 5.168959 | -2.4821  | 0.058739 | 0.10254  | VIPR1-AS1 chr3   | - | 42548016 | 42574098 | 810  |
| ENSG000001 | 0.653381 | 0.343138 | 0.51863  | 0.76794  | NA       | RP5-955M1. chr20 | + | 49615907 | 49626556 | 802  |
| ENSG000001 | 0.342542 | 0        | 0.4146   | 0.81455  | NA       | AP000281. chr21  | - | 34216677 | 34222244 | 384  |
| ENSG000001 | 0        | 0.654722 | -0.83442 | 0.63731  | NA       | RP1-102D2 chr22  | - | 45831744 | 45844624 | 545  |
| ENSG000001 | 0.290301 | 2.292733 | -2.0944  | 0.16266  | 0.24304  | RP5-882O7 chr1   | - | 45453906 | 45454397 | 492  |
| ENSG000001 | 11.65059 | 15.64772 | -0.41088 | 0.48921  | 0.59323  | RP11-504P chr1   | - | 2.24E+08 | 2.24E+08 | 360  |
| ENSG000001 | 0.685084 | 0        | 0.85004  | 0.63064  | NA       | GPR79 chr3       | - | 1.59E+08 | 1.59E+08 | 1086 |
| ENSG000001 | 3.64115  | 1.043983 | 1.5851   | 0.1926   | 0.27987  | AC016910. chr2   | + | 1.45E+08 | 1.45E+08 | 1046 |
| ENSG000001 | 0        | 0.297015 | -0.41864 | 0.81278  | NA       | RP11-308C chrX   | - | 1.36E+08 | 1.36E+08 | 386  |
| ENSG000001 | 0        | 0.357707 | -0.41864 | 0.81278  | NA       | OR52U1P chr11    | + | 5740520  | 5741442  | 923  |
| ENSG000001 | 0.870904 | 3.899191 | -1.7452  | 0.18165  | 0.26637  | RPS3AP25 chr7    | - | 94324339 | 94325131 | 793  |
| ENSG000001 | 0.36308  | 6.593339 | -3.4197  | 0.01225  | 0.025279 | RP11-66B2 chr15  | + | 1.01E+08 | 1.01E+08 | 3907 |
| ENSG000001 | 0.290301 | 0.951736 | -0.90191 | 0.60254  | NA       | SKA2P1 chr9      | + | 1.26E+08 | 1.26E+08 | 390  |
| ENSG000001 | 297.8844 | 418.5502 | -0.49174 | 0.000822 | 0.002067 | LINC00493 chr20  | + | 18548064 | 18550207 | 505  |
| ENSG000001 | 0        | 0.594029 | -0.81444 | 0.64499  | NA       | RP11-134K chr6   | - | 71317937 | 71319037 | 1101 |
| ENSG000001 | 0.342542 | 0        | 0.4146   | 0.81455  | NA       | AC090696. chr15  | + | 28020767 | 28021944 | 418  |
| ENSG000001 | 0        | 1.40169  | -1.7271  | 0.32809  | NA       | RP3-399L1 chr6   | - | 1.15E+08 | 1.15E+08 | 786  |
| ENSG000001 | 0.36308  | 0.594029 | -0.39069 | 0.82661  | NA       | RP1-76B20 chr22  | - | 30101245 | 30115848 | 590  |
| ENSG000001 | 0        | 0.297015 | -0.41864 | 0.81278  | NA       | TMPRSS11 chr4    | - | 68632198 | 68639572 | 683  |
| ENSG000001 | 0.632843 | 0.357707 | 0.4993   | 0.77637  | NA       | RP11-234K chr20  | - | 34738335 | 34743655 | 2701 |
| ENSG000001 | 0.580602 | 0.297015 | 0.36801  | 0.83644  | NA       | RP11-641C chr3   | - | 60675958 | 60676452 | 495  |
| ENSG000001 | 0.72616  | 0.594029 | 0.12651  | 0.94322  | NA       | AC009495. chr2   | - | 1.67E+08 | 1.67E+08 | 506  |
| ENSG000001 | 1.359003 | 2.355842 | -0.65632 | 0.63373  | 0.72255  | RP1-315G1 chrX   | - | 1.23E+08 | 1.23E+08 | 326  |
| ENSG000001 | 0.870904 | 0        | 1.046    | 0.5544   | NA       | CTB-51J22. chr7  | - | 73473906 | 73476614 | 532  |
| ENSG000001 | 0        | 1.188058 | -1.268   | 0.47398  | NA       | BPESC1 chr3      | + | 1.39E+08 | 1.39E+08 | 3518 |
| ENSG000001 | 0.290301 | 0        | 0.4146   | 0.81455  | NA       | RP11-380A chr6   | + | 73696036 | 73697473 | 1438 |
| ENSG000001 | 2.157128 | 0.951736 | 0.96145  | 0.48726  | 0.59122  | AC105396. chr2   | + | 1.84E+08 | 1.84E+08 | 338  |
| ENSG000001 | 0.290301 | 7.685861 | -3.7891  | 0.002635 | 0.006128 | RP11-341A chr9   | + | 42493617 | 42494809 | 1193 |
| ENSG000001 | 161.3751 | 28.77766 | 2.47     | 1.79E-15 | 1.20E-14 | C9orf172 chr9    | + | 1.4E+08  | 1.4E+08  | 2931 |
| ENSG000001 | 0.36308  | 0        | 0.4146   | 0.81455  | NA       | RP11-103C chr1   | + | 2.22E+08 | 2.22E+08 | 807  |
| ENSG000001 | 22.2425  | 6.708276 | 1.6413   | 0.0179   | 0.035702 | RPL18AP7 chr3    | - | 38568293 | 38568816 | 524  |
| ENSG000001 | 40.189   | 70.30837 | -0.80034 | 0.011373 | 0.023622 | CTD-3184A chr20  | + | 62258580 | 62260177 | 801  |
| ENSG000001 | 2.551911 | 768.2269 | -8.0017  | 4.33E-52 | 1.05E-50 | RP11-132A chr7   | + | 1.01E+08 | 1.01E+08 | 705  |
| ENSG000001 | 7.366245 | 5.439251 | 0.42269  | 0.58421  | 0.68004  | RP4-730K3 chr1   | - | 1.14E+08 | 1.14E+08 | 748  |
| ENSG000001 | 0        | 0.640152 | -0.82869 | 0.63935  | NA       | AC016768. chr2   | - | 23240997 | 23421927 | 717  |
| ENSG000001 | 6.886704 | 1.759397 | 1.8167   | 0.088624 | 0.14586  | RP4-794H1 chr1   | - | 59348540 | 59362375 | 1211 |
| ENSG000001 | 5.031856 | 2.041842 | 1.2005   | 0.22795  | 0.32098  | RP11-3J10. chr9  | + | 37836041 | 37836391 | 351  |
| ENSG000001 | 2.998934 | 1.577319 | 0.76794  | 0.54242  | 0.64295  | LARS2-AS1 chr3   | - | 45525466 | 45551037 | 575  |
| ENSG000001 | 1.161205 | 0.891044 | 0.23244  | 0.89383  | 0.9264   | RP11-5P18 chr1   | - | 16361673 | 16366524 | 704  |
| ENSG000001 | 4.471792 | 8.801074 | -0.94205 | 0.26664  | 0.36533  | RP11-583F chr17  | + | 62936720 | 62952664 | 1059 |
| ENSG000001 | 0.290301 | 0        | 0.4146   | 0.81455  | NA       | AC005029. chr7   | - | 41004266 | 41019537 | 3263 |
| ENSG000001 | 0.580602 | 4.478651 | -2.3798  | 0.067775 | 0.11587  | BMPR1APS chr11   | - | 1.21E+08 | 1.21E+08 | 1014 |
| ENSG000001 | 1.503747 | 3.365854 | -0.95668 | 0.432    | 0.53749  | RP11-337A chr9   | - | 26880176 | 26880547 | 372  |
| ENSG000001 | 0        | 0.98329  | -1.2878  | 0.47019  | NA       | TMA16P2 chr1     | - | 46312666 | 46313266 | 601  |

|            |          |          |          |          |          |                 |   |          |          |      |
|------------|----------|----------|----------|----------|----------|-----------------|---|----------|----------|------|
| ENSG000001 | 5.394936 | 5.133373 | 0.043676 | 0.95818  | 0.97466  | RP11-313C chr10 | + | 1.13E+08 | 1.13E+08 | 401  |
| ENSG000001 | 25.45896 | 40.68075 | -0.67368 | 0.080277 | 0.13394  | EEF1B2P3 chrX   | - | 24806509 | 24807186 | 678  |
| ENSG000001 | 0        | 1.280305 | -1.6305  | 0.35731  | NA       | AC010900. chr2  | + | 2.04E+08 | 2.04E+08 | 1296 |
| ENSG000001 | 52.36779 | 2.399549 | 4.3475   | 1.78E-12 | 9.92E-12 | RP11-224C chr1  | - | 2.19E+08 | 2.19E+08 | 557  |
| ENSG000001 | 0.36308  | 0        | 0.4146   | 0.81455  | NA       | RP4-654C1 chr1  | + | 23737325 | 23738639 | 426  |
| ENSG000001 | 5.249379 | 2.200487 | 1.1105   | 0.28842  | 0.38997  | AC098820. chr2  | - | 2.17E+08 | 2.17E+08 | 750  |
| ENSG000001 | 0.653381 | 0.891044 | -0.31039 | 0.85574  | NA       | RP11-18B3 chr9  | + | 1.09E+08 | 1.09E+08 | 2434 |
| ENSG000001 | 6.222158 | 0.98329  | 2.2964   | 0.059521 | 0.10378  | RASA3-IT1 chr13 | - | 1.15E+08 | 1.15E+08 | 380  |
| ENSG000001 | 3.829576 | 0        | 3.1154   | 0.056956 | 0.099713 | MFAP1P1 chr13   | - | 31115780 | 31117034 | 1255 |
| ENSG000001 | 1.814586 | 4.409837 | -1.0836  | 0.34586  | 0.44993  | OSBPL10-A chr3  | + | 31745550 | 31763144 | 575  |
| ENSG000001 | 2.583614 | 3.359407 | -0.32617 | 0.80647  | 0.86317  | RP4-756H1 chr7  | + | 66021203 | 66022052 | 850  |
| ENSG000001 | 0.943682 | 0.891044 | 0.040239 | 0.98082  | NA       | RPL12P11 chr20  | + | 40176061 | 40176561 | 501  |
| ENSG000001 | 0.290301 | 0        | 0.4146   | 0.81455  | NA       | RP5-1011C chr1  | - | 1.92E+08 | 1.93E+08 | 396  |
| ENSG000001 | 4.543757 | 7.746554 | -0.71676 | 0.34921  | 0.45347  | RP11-512F chr1  | + | 1.14E+08 | 1.14E+08 | 1029 |
| ENSG000001 | 0        | 0.357707 | -0.41864 | 0.81278  | NA       | AC073464. chr2  | - | 95426519 | 95426861 | 343  |
| ENSG000001 | 3.338871 | 0.297015 | 2.4207   | 0.12484  | 0.19513  | AC105053. chr2  | + | 86116403 | 86118103 | 783  |
| ENSG000001 | 0        | 0.357707 | -0.41864 | 0.81278  | NA       | XXbac-BPG chr6  | + | 29191750 | 29234862 | 464  |
| ENSG000001 | 0.705622 | 2.65044  | -1.6176  | 0.22793  | 0.32098  | AC112198. chr5  | - | 54104038 | 54168379 | 6996 |
| ENSG000001 | 0.36308  | 2.497501 | -2.015   | 0.20897  | 0.29899  | AC074366. chr2  | - | 38895830 | 38898563 | 552  |
| ENSG000001 | 1.524285 | 1.355566 | 0.17298  | 0.90173  | 0.93215  | RP11-29H2 chr1  | - | 1.56E+08 | 1.56E+08 | 448  |
| ENSG000001 | 0.342542 | 0.343138 | -0.00208 | 0.99906  | NA       | AC012507. chr2  | + | 2.32E+08 | 2.32E+08 | 1765 |
| ENSG000001 | 0        | 0.654722 | -0.83442 | 0.63731  | NA       | RP11-332K chr7  | + | 1.23E+08 | 1.23E+08 | 451  |
| ENSG000001 | 0        | 3.2299   | -3.2154  | 0.032806 | 0.061439 | AC025750. chr2  | - | 42690279 | 42691137 | 859  |
| ENSG000001 | 255.4811 | 7.679413 | 4.9651   | 1.89E-42 | 3.55E-41 | RP11-14N7 chr1  | + | 1.49E+08 | 1.49E+08 | 605  |
| ENSG000001 | 2.261609 | 1.012429 | 0.97786  | 0.46578  | 0.57058  | RP4-673D2 chr20 | - | 1748603  | 1760641  | 1367 |
| ENSG000001 | 1.286224 | 0.357707 | 1.3361   | 0.4083   | NA       | RP1-102K2 chr22 | + | 30635183 | 30636527 | 808  |
| ENSG000001 | 2.282147 | 1.387121 | 0.62948  | 0.62716  | 0.71706  | AC027612. chr2  | - | 91935966 | 91937021 | 1056 |
| ENSG000001 | 0        | 0.357707 | -0.41864 | 0.81278  | NA       | RP11-63K6 chr6  | + | 90629915 | 90631479 | 756  |
| ENSG000001 | 130.4429 | 116.0812 | 0.16522  | 0.40295  | 0.50763  | AC093673. chr7  | - | 1.43E+08 | 1.43E+08 | 648  |
| ENSG000001 | 0        | 1.995719 | -2.4883  | 0.12386  | 0.19391  | OR5H8P chr3     | + | 98030757 | 98031687 | 931  |
| ENSG000001 | 1.265686 | 1.623443 | -0.27543 | 0.84975  | 0.89449  | RP11-74C1 chr1  | + | 1.52E+08 | 1.52E+08 | 526  |
| ENSG000001 | 0.342542 | 0        | 0.4146   | 0.81455  | NA       | RPL36P19 chr13  | + | 43968661 | 43968961 | 301  |
| ENSG000001 | 1.048164 | 0        | 1.348    | 0.44949  | NA       | DPYD-IT1 chr1   | - | 97859710 | 97885697 | 401  |
| ENSG000001 | 15.83208 | 11.92819 | 0.39959  | 0.45657  | 0.56185  | KB-318B8. chr22 | + | 24497652 | 24499317 | 558  |
| ENSG000001 | 8.693545 | 7.405832 | 0.22338  | 0.74977  | 0.81698  | RP11-458F chr7  | + | 66313483 | 66323123 | 298  |
| ENSG000001 | 0.36308  | 0.297015 | -0.00205 | 0.99908  | NA       | AC104088. chr2  | + | 1.73E+08 | 1.73E+08 | 510  |
| ENSG000001 | 0.290301 | 0        | 0.4146   | 0.81455  | NA       | AC092570. chr2  | - | 1.02E+08 | 1.02E+08 | 1143 |
| ENSG000001 | 173.0758 | 149.1974 | 0.21336  | 0.31995  | 0.42277  | GS1-124K5 chr7  | - | 66010634 | 66057373 | 958  |
| ENSG000001 | 0.290301 | 0        | 0.4146   | 0.81455  | NA       | C21orf37 chr21  | + | 18811208 | 18821503 | 714  |
| ENSG000001 | 46.82632 | 93.56252 | -0.99526 | 0.000223 | 0.000605 | GTF2IP1 chr7    | - | 74602783 | 74653438 | 2629 |
| ENSG000001 | 9.926715 | 9.436394 | 0.075296 | 0.90729  | 0.93617  | RP4-591N1 chr22 | + | 40917804 | 40922711 | 1932 |
| ENSG000001 | 0        | 0.297015 | -0.41864 | 0.81278  | NA       | AC093038. chr2  | - | 1.87E+08 | 1.87E+08 | 501  |
| ENSG000001 | 104.9445 | 200.0971 | -0.92758 | 2.04E-06 | 7.08E-06 | RPL3P4 chr14    | - | 99439216 | 99439638 | 423  |
| ENSG000001 | 0        | 0.297015 | -0.41864 | 0.81278  | NA       | CTC-303L1. chr5 | + | 93928473 | 93930496 | 2021 |
| ENSG000001 | 0        | 0.654722 | -0.83442 | 0.63731  | NA       | CTD-3105F chr19 | + | 12615479 | 12615704 | 226  |
| ENSG000001 | 0        | 3.212915 | -2.9127  | 0.077518 | 0.13005  | GPR143P chrY    | - | 6968774  | 6974543  | 205  |
| ENSG000001 | 2.282147 | 0        | 2.6902   | 0.089639 | 0.14723  | RP11-397C chr13 | + | 1.02E+08 | 1.02E+08 | 429  |
| ENSG000001 | 5.798278 | 3.679854 | 0.6305   | 0.46166  | 0.56683  | RP11-46A1 chr1  | - | 1.81E+08 | 1.81E+08 | 1440 |
| ENSG000001 | 3.64115  | 3.336716 | 0.11818  | 0.89978  | 0.9306   | EEF1A1P3 chr13  | + | 28788650 | 28790034 | 1385 |
| ENSG000001 | 0.36308  | 0        | 0.4146   | 0.81455  | NA       | RP5-1031C chr10 | - | 7487520  | 7513904  | 557  |
| ENSG000001 | 31.06979 | 20.71148 | 0.57904  | 0.24269  | 0.33802  | RP11-258C chrX  | + | 53123327 | 53196196 | 1196 |
| ENSG000001 | 1.960143 | 4.507789 | -1.0606  | 0.36042  | 0.46459  | RP1-161N1 chrX  | - | 1.24E+08 | 1.24E+08 | 534  |
| ENSG000001 | 4.253456 | 14.24361 | -1.6787  | 0.014572 | 0.029583 | AC084125. chr8  | + | 1.46E+08 | 1.46E+08 | 555  |
| ENSG000001 | 0        | 1.782087 | -1.7295  | 0.3322   | NA       | AC010967. chr2  | + | 53091373 | 53093769 | 333  |
| ENSG000001 | 2.656392 | 3.443532 | -0.32329 | 0.76959  | 0.83366  | TMM9P2 chr21    | + | 40588550 | 40589432 | 266  |
| ENSG000001 | 19.01586 | 19.09212 | -0.01738 | 0.97376  | 0.98544  | RP11-1114 chrX  | - | 1.36E+08 | 1.36E+08 | 3018 |
| ENSG000001 | 1.359003 | 3.859516 | -1.2853  | 0.30654  | 0.4081   | AC007386. chr2  | - | 65257861 | 65280151 | 1018 |
| ENSG000001 | 0        | 0.700845 | -0.87835 | 0.62047  | NA       | CTD-2012J chr5  | + | 1614951  | 1616449  | 1075 |
| ENSG000001 | 0.290301 | 1.84278  | -1.6645  | 0.31717  | 0.41985  | RP11-439L chr6  | + | 1.43E+08 | 1.43E+08 | 554  |
| ENSG000001 | 2.572449 | 2.041842 | 0.31989  | 0.77658  | 0.83946  | AP000266. chr21 | - | 33678775 | 33681048 | 582  |
| ENSG000001 | 0.290301 | 1.188058 | -1.0232  | 0.56351  | NA       | RP11-175B chr1  | + | 2.02E+08 | 2.02E+08 | 1171 |
| ENSG000001 | 1.960143 | 2.976593 | -0.49995 | 0.70712  | 0.78231  | AC021876. chr7  | + | 23405237 | 23405595 | 359  |
| ENSG000001 | 4.294532 | 0.997859 | 1.86     | 0.10273  | 0.1651   | RP11-365C chr1  | - | 2.24E+08 | 2.24E+08 | 790  |
| ENSG000001 | 0.36308  | 0.594029 | -0.39069 | 0.82661  | NA       | HLA-DQB2 chr6   | - | 32723875 | 32731311 | 2026 |
| ENSG000001 | 17.37853 | 19.19478 | -0.144   | 0.81336  | 0.86888  | PRPS1P2 chr9    | + | 1.28E+08 | 1.28E+08 | 937  |

|            |          |          |          |          |          |            |       |   |          |          |      |
|------------|----------|----------|----------|----------|----------|------------|-------|---|----------|----------|------|
| ENSG000001 | 2.064625 | 1.591889 | 0.28628  | 0.81693  | 0.87162  | CTD-2201C  | chr5  | + | 1.13E+08 | 1.13E+08 | 3361 |
| ENSG000001 | 104.1131 | 31.75426 | 1.7024   | 4.69E-09 | 2.04E-08 | WI2-3658N  | chr1  | - | 1.46E+08 | 1.46E+08 | 5496 |
| ENSG000001 | 20.6249  | 62.42411 | -1.5936  | 4.79E-05 | 0.000142 | RP1-266L2  | chr6  | - | 1.7E+08  | 1.7E+08  | 403  |
| ENSG000001 | 1.265686 | 0.343138 | 1.2235   | 0.46934  | NA       | AC008073.  | chr2  | - | 24388753 | 24397874 | 792  |
| ENSG000001 | 4.253456 | 1.638012 | 1.2414   | 0.23511  | 0.32902  | RP3-322G1  | chr20 | - | 23337231 | 23338753 | 514  |
| ENSG000001 | 0.72616  | 0        | 0.85004  | 0.63064  | NA       | RP11-344N  | chr10 | + | 74824884 | 74825225 | 214  |
| ENSG000001 | 12.09582 | 14.14566 | -0.21972 | 0.67542  | 0.75694  | RP11-367N  | chr4  | - | 1.84E+08 | 1.84E+08 | 559  |
| ENSG000001 | 0        | 23.76581 | -6.1621  | 1.61E-07 | 6.17E-07 | RP5-834N1  | chr1  | + | 1.2E+08  | 1.2E+08  | 442  |
| ENSG000001 | 7.427858 | 2.292733 | 1.5661   | 0.079011 | 0.13211  | GOLGA8N    | chr15 | + | 32885657 | 32896179 | 1997 |
| ENSG000001 | 0.36308  | 0.343138 | -0.0021  | 0.99905  | NA       | IDI2-AS1   | chr10 | + | 1068606  | 1090138  | 1054 |
| ENSG000001 | 0        | 0.343138 | -0.41864 | 0.81278  | NA       | LDHBP1     | chr13 | + | 1.14E+08 | 1.14E+08 | 1119 |
| ENSG000001 | 1.701545 | 1.669566 | 0.013877 | 0.99184  | 0.99563  | RP11-126K  | chr1  | - | 1.51E+08 | 1.51E+08 | 622  |
| ENSG000001 | 0.342542 | 0        | 0.4146   | 0.81455  | NA       | ADH5P2     | chr1  | + | 79986765 | 79987888 | 1124 |
| ENSG000001 | 56.82777 | 1458.624 | -4.6544  | 2.70E-86 | 1.27E-84 | LINC00665  | chr19 | - | 36803969 | 36822620 | 2732 |
| ENSG000001 | 3.298608 | 0.343138 | 2.5576   | 0.07325  | 0.12392  | RP11-400N  | chr1  | - | 2.22E+08 | 2.22E+08 | 562  |
| ENSG000001 | 2.43887  | 3.183777 | -0.36506 | 0.75995  | 0.82564  | RP11-388P  | chr10 | + | 61815632 | 61820501 | 1546 |
| ENSG000001 | 0.705622 | 9.693733 | -3.3973  | 0.002235 | 0.005246 | ATP11A-AS  | chr13 | - | 1.13E+08 | 1.13E+08 | 2192 |
| ENSG000001 | 3.423628 | 3.723561 | -0.11801 | 0.90566  | 0.93497  | ARID4B-IT1 | chr1  | - | 2.35E+08 | 2.35E+08 | 463  |
| ENSG000001 | 0        | 1.234181 | -1.5727  | 0.37581  | NA       | RP11-561I. | chr1  | - | 2.42E+08 | 2.42E+08 | 462  |
| ENSG000001 | 0.342542 | 0        | 0.4146   | 0.81455  | NA       | AC097713.  | chr2  | - | 2.35E+08 | 2.35E+08 | 311  |
| ENSG000001 | 5.365025 | 6.215358 | -0.18892 | 0.84255  | 0.8896   | AP001596.  | chr21 | + | 27750871 | 27844017 | 1078 |
| ENSG000001 | 1.669842 | 1.234181 | 0.3137   | 0.83136  | 0.88112  | AC012370.  | chr2  | - | 65600834 | 65607819 | 530  |
| ENSG000001 | 0.36308  | 0        | 0.4146   | 0.81455  | NA       | AC017006.  | chr2  | - | 46305154 | 46305967 | 464  |
| ENSG000001 | 2.448243 | 1.84278  | 0.30053  | 0.82248  | 0.87489  | AP001058.  | chr21 | - | 45626408 | 45627282 | 463  |
| ENSG000001 | 0.36308  | 0        | 0.4146   | 0.81455  | NA       | BDH2P1     | chr6  | + | 99622620 | 99623357 | 738  |
| ENSG000001 | 0.36308  | 1.073121 | -0.87448 | 0.62195  | NA       | RP3-437C1  | chr6  | + | 51274879 | 51275335 | 457  |
| ENSG000001 | 0.36308  | 0.594029 | -0.39069 | 0.82661  | NA       | NUTMHP     | chr10 | + | 52439351 | 52446086 | 1698 |
| ENSG000001 | 3.22583  | 1.029414 | 1.3804   | 0.30551  | 0.40705  | MARK2P9    | chr10 | + | 94178424 | 94180632 | 1727 |
| ENSG000001 | 5.996077 | 8.415844 | -0.46726 | 0.51448  | 0.61744  | RP4-669P1  | chr22 | - | 42532442 | 42535938 | 667  |
| ENSG000001 | 5.45655  | 9.94704  | -0.84439 | 0.25566  | 0.35297  | RP4-777D9  | chr20 | - | 21134664 | 21198927 | 5369 |
| ENSG000001 | 5.104635 | 0.654722 | 2.5252   | 0.038644 | 0.071189 | AC010733.  | chr2  | - | 61165339 | 61165739 | 401  |
| ENSG000001 | 0        | 0.297015 | -0.41864 | 0.81278  | NA       | AC016831.  | chr7  | - | 1.31E+08 | 1.31E+08 | 1723 |
| ENSG000001 | 4.117271 | 0        | 3.5031   | 0.019252 | 0.038135 | TRIM51P    | chr2  | + | 96240647 | 96246512 | 1320 |
| ENSG000001 | 0.342542 | 1.84278  | -1.6267  | 0.32697  | 0.42994  | RP11-13J8  | chr2  | + | 2.02E+08 | 2.02E+08 | 1269 |
| ENSG000001 | 0        | 0.640152 | -0.82869 | 0.63935  | NA       | RP11-403I. | chr1  | + | 1.49E+08 | 1.49E+08 | 1073 |
| ENSG000001 | 0.342542 | 0.343138 | -0.00208 | 0.99906  | NA       | AC111186.  | chr17 | + | 73070401 | 73075644 | 2848 |
| ENSG000001 | 2.656392 | 1.949596 | 0.38164  | 0.74305  | 0.81118  | U52111.14  | chrX  | - | 1.53E+08 | 1.53E+08 | 914  |
| ENSG000001 | 12.46151 | 9.692117 | 0.33353  | 0.63854  | 0.72637  | AC083884.  | chr7  | - | 74103273 | 74143339 | 1268 |
| ENSG000001 | 0.923144 | 0.343138 | 0.88162  | 0.61011  | NA       | AC073043.  | chr2  | - | 2.01E+08 | 2.01E+08 | 982  |
| ENSG000001 | 5.519142 | 4.242329 | 0.35689  | 0.67126  | 0.75379  | RP11-25G1  | chr10 | + | 15279491 | 15283766 | 794  |
| ENSG000001 | 3.443352 | 1.888903 | 0.76146  | 0.49953  | 0.60327  | RHOQP2     | chr2  | + | 1.32E+08 | 1.32E+08 | 600  |
| ENSG000001 | 0.36308  | 1.698704 | -1.6626  | 0.28864  | 0.39018  | ANKRD20A   | chr1  | + | 1.43E+08 | 1.43E+08 | 1746 |
| ENSG000001 | 1.555988 | 0.297015 | 1.4773   | 0.37579  | NA       | RP11-177A  | chr1  | - | 1.79E+08 | 1.79E+08 | 344  |
| ENSG000001 | 0.342542 | 0        | 0.4146   | 0.81455  | NA       | RP11-296C  | chr1  | + | 1.73E+08 | 1.73E+08 | 316  |
| ENSG000001 | 0        | 0.297015 | -0.41864 | 0.81278  | NA       | RP5-837O2  | chr1  | - | 94390299 | 94390941 | 643  |
| ENSG000001 | 1.628766 | 0.343138 | 1.6246   | 0.30143  | 0.40279  | RP1-85F18  | chr22 | - | 41565194 | 41579148 | 357  |
| ENSG000001 | 2.157942 | 2.918317 | -0.40581 | 0.74849  | 0.81596  | RP5-1185I. | chr7  | + | 77619701 | 77624488 | 1965 |
| ENSG000001 | 0.36308  | 1.355566 | -1.381   | 0.39134  | NA       | ETF1P1     | chr6  | + | 29999490 | 30000780 | 984  |
| ENSG000001 | 1.213446 | 0.686276 | 0.58081  | 0.72779  | NA       | AC002480.  | chr7  | + | 22602956 | 22613615 | 2432 |
| ENSG000001 | 5.091843 | 5.66342  | -0.11594 | 0.9206   | 0.94672  | RP4-784A1  | chr1  | + | 53770208 | 53773134 | 752  |
| ENSG000001 | 0        | 0.343138 | -0.41864 | 0.81278  | NA       | RP11-498B  | chr10 | + | 1.18E+08 | 1.18E+08 | 778  |
| ENSG000001 | 0.290301 | 2.367995 | -2.0987  | 0.16791  | 0.24938  | RP11-201C  | chr1  | + | 31523719 | 31523881 | 163  |
| ENSG000001 | 0        | 2.056411 | -2.4909  | 0.12616  | 0.19678  | RP11-47I2. | chr14 | + | 62037258 | 62125414 | 1655 |
| ENSG000001 | 0        | 0.343138 | -0.41864 | 0.81278  | NA       | AP000525.  | chr22 | + | 16162066 | 16172700 | 1160 |
| ENSG000001 | 0        | 0.640152 | -0.82869 | 0.63935  | NA       | MRPL51P2   | chr21 | - | 44535444 | 44535819 | 376  |
| ENSG000001 | 0.342542 | 1.759397 | -1.5695  | 0.34259  | 0.44649  | RPL23AP5C  | chr6  | + | 1.08E+08 | 1.08E+08 | 455  |
| ENSG000001 | 0        | 0.654722 | -0.83442 | 0.63731  | NA       | RP5-871G1  | chr1  | - | 1.2E+08  | 1.2E+08  | 625  |
| ENSG000001 | 0        | 0.357707 | -0.41864 | 0.81278  | NA       | AC073135.  | chr3  | + | 1.98E+08 | 1.98E+08 | 852  |
| ENSG000001 | 0.342542 | 0        | 0.4146   | 0.81455  | NA       | OR7L1P     | chrX  | + | 1.31E+08 | 1.31E+08 | 380  |
| ENSG000001 | 1.286224 | 3.899191 | -1.4101  | 0.20978  | 0.29981  | AC078883.  | chr2  | - | 1.73E+08 | 1.73E+08 | 754  |
| ENSG000001 | 0        | 16.78153 | -5.7069  | 1.42E-06 | 4.99E-06 | AC006481.  | chr7  | + | 20875050 | 21062767 | 447  |
| ENSG000001 | 0.870904 | 0.715414 | 0.19229  | 0.91324  | NA       | FTH1P25    | chr1  | - | 1.85E+08 | 1.85E+08 | 469  |
| ENSG000001 | 0.705622 | 0        | 0.8807   | 0.6196   | NA       | DNAJC19P1  | chr1  | - | 2.45E+08 | 2.45E+08 | 259  |
| ENSG000001 | 0.36308  | 0        | 0.4146   | 0.81455  | NA       | CRYGFP     | chr2  | + | 2.1E+08  | 2.1E+08  | 633  |
| ENSG000001 | 0        | 0.357707 | -0.41864 | 0.81278  | NA       | SLC7A15P   | chr2  | + | 20586147 | 20596349 | 1363 |

|            |          |          |          |          |          |                 |   |          |          |      |
|------------|----------|----------|----------|----------|----------|-----------------|---|----------|----------|------|
| ENSG000001 | 2.229907 | 2.443257 | -0.08575 | 0.94746  | 0.96682  | RP11-93B1 chr20 | - | 61294371 | 61298076 | 1420 |
| ENSG000001 | 0.36308  | 0        | 0.4146   | 0.81455  | NA       | RP11-536K chr10 | - | 5979079  | 5987863  | 640  |
| ENSG000001 | 0.36308  | 0        | 0.4146   | 0.81455  | NA       | TNF chr6        | + | 31543344 | 31546113 | 1676 |
| ENSG000001 | 7.697622 | 8.856934 | -0.20582 | 0.76286  | 0.82792  | RP11-96K1 chr1  | + | 1.11E+08 | 1.11E+08 | 2359 |
| ENSG000001 | 22.41813 | 3.022717 | 2.7939   | 3.97E-05 | 0.000119 | COL4A2-AS chr13 | - | 1.11E+08 | 1.11E+08 | 540  |
| ENSG000001 | 26.78723 | 3.40553  | 2.8039   | 7.17E-05 | 0.000208 | RP11-764K chr9  | - | 68413482 | 68414196 | 715  |
| ENSG000001 | 15.53061 | 22.82052 | -0.55324 | 0.23201  | 0.32553  | RPS2P32 chr7    | + | 23530092 | 23530983 | 892  |
| ENSG000001 | 6.007242 | 0        | 4.1622   | 0.002187 | 0.005142 | AC003986. chr7  | + | 19152097 | 19153894 | 1711 |
| ENSG000001 | 0.653381 | 0.357707 | 0.52032  | 0.76705  | NA       | RP11-401A chr1  | - | 1.98E+08 | 1.98E+08 | 408  |
| ENSG000001 | 0.290301 | 0        | 0.4146   | 0.81455  | NA       | AF196970. chrX  | - | 48557354 | 48595570 | 925  |
| ENSG000001 | 0.290301 | 0.297015 | -0.00202 | 0.99909  | NA       | RP11-144C chr3  | + | 1.01E+08 | 1.01E+08 | 406  |
| ENSG000001 | 4.470978 | 7.579045 | -0.70772 | 0.36238  | 0.46653  | FAM27E3 chr9    | - | 67784944 | 67786624 | 1506 |
| ENSG000001 | 0        | 0.654722 | -0.83442 | 0.63731  | NA       | AF064858. chr21 | - | 40346355 | 40349700 | 1598 |
| ENSG000001 | 0        | 1.248751 | -1.5848  | 0.37202  | NA       | SNX18P2 chr9    | - | 95655980 | 95656787 | 808  |
| ENSG000001 | 0        | 0.357707 | -0.41864 | 0.81278  | NA       | SLC25A6P3 chr1  | + | 52174734 | 52175612 | 879  |
| ENSG000001 | 8.413595 | 0        | 4.6549   | 0.00037  | 0.000976 | CTA-215D1 chr1  | - | 8117305  | 8118523  | 800  |
| ENSG000001 | 5.136338 | 2.901332 | 0.72983  | 0.46454  | 0.56954  | AL590708. chr9  | + | 1.31E+08 | 1.31E+08 | 696  |
| ENSG000001 | 2.67693  | 2.604317 | 0.021982 | 0.98385  | 0.99083  | CICP4 chr20     | - | 62921540 | 62924351 | 2812 |
| ENSG000001 | 0.685084 | 0.715414 | -0.02805 | 0.98738  | NA       | AF131217. chr21 | - | 29816870 | 30047170 | 900  |
| ENSG000001 | 20.84242 | 16.50238 | 0.31527  | 0.56952  | 0.66669  | LYRM9 chr17     | - | 26205340 | 26221778 | 2824 |
| ENSG000001 | 7.708787 | 3.100394 | 1.2468   | 0.15457  | 0.23292  | SMG7-AS1 chr1   | - | 1.83E+08 | 1.83E+08 | 2246 |
| ENSG000001 | 0.923144 | 0        | 1.223    | 0.49292  | NA       | RP4-665N4 chr1  | - | 36545667 | 36547923 | 898  |
| ENSG000001 | 0.36308  | 0.951736 | -0.91212 | 0.59701  | NA       | RP11-179C chr9  | + | 27210325 | 27210624 | 300  |
| ENSG000001 | 1.991846 | 3.587607 | -0.78061 | 0.45148  | 0.55699  | SEC1P chr19     | + | 49141328 | 49184461 | 1511 |
| ENSG000001 | 0.653381 | 7.951321 | -3.1734  | 0.004557 | 0.010211 | CTAGE3P chr13   | - | 52482354 | 52484757 | 2404 |
| ENSG000001 | 0        | 2.010288 | -2.4674  | 0.13027  | 0.202    | RP11-135A chr3  | - | 1.94E+08 | 1.94E+08 | 430  |
| ENSG000001 | 0.36308  | 0.357707 | -0.00212 | 0.99905  | NA       | HMGN2P3! chr10  | - | 98675390 | 98675659 | 270  |
| ENSG000001 | 0.632843 | 1.309443 | -0.75604 | 0.63051  | 0.71982  | CTA-212D2 chr6  | + | 1.35E+08 | 1.35E+08 | 790  |
| ENSG000001 | 0.653381 | 0        | 0.82678  | 0.64037  | NA       | DPYD-AS1 chr1   | + | 97561479 | 97788511 | 533  |
| ENSG000001 | 0        | 3.755116 | -3.416   | 0.021122 | 0.041462 | RP11-544N chr1  | + | 1.61E+08 | 1.61E+08 | 173  |
| ENSG000001 | 0        | 0.297015 | -0.41864 | 0.81278  | NA       | RP3-453C1 chr20 | - | 44016987 | 44017345 | 359  |
| ENSG000001 | 1.370168 | 1.935026 | -0.40992 | 0.7781   | 0.84058  | PHKA1P1 chr1    | - | 91358549 | 91359169 | 621  |
| ENSG000001 | 0.342542 | 0        | 0.4146   | 0.81455  | NA       | AF127936. chr21 | - | 16120066 | 16126186 | 816  |
| ENSG000001 | 0        | 0.297015 | -0.41864 | 0.81278  | NA       | AC006466. chr7  | - | 31158898 | 31159186 | 289  |
| ENSG000001 | 52.9012  | 10.76524 | 2.2438   | 1.31E-06 | 4.62E-06 | RPS11P5 chr12   | + | 1.33E+08 | 1.33E+08 | 486  |
| ENSG000001 | 0.653381 | 0.594029 | 0.059135 | 0.97278  | NA       | RP11-136K chr6  | + | 1.51E+08 | 1.51E+08 | 378  |
| ENSG000001 | 0        | 2.635871 | -2.911   | 0.060379 | 0.10495  | AC019068. chr2  | + | 2.37E+08 | 2.37E+08 | 489  |
| ENSG000001 | 1.338465 | 0        | 1.8837   | 0.27037  | NA       | MRPS31P2 chr13  | - | 20126711 | 20144428 | 518  |
| ENSG000001 | 8.454671 | 7.405832 | 0.19652  | 0.77952  | 0.84182  | CYCSP10 chr3    | - | 10042331 | 10042624 | 294  |
| ENSG000001 | 0        | 7.411537 | -4.4853  | 0.000685 | 0.001741 | RP11-746P chr7  | + | 64820847 | 64822089 | 1243 |
| ENSG000001 | 1.576526 | 13.29188 | -2.8478  | 0.000941 | 0.002345 | RP5-977B1 chr20 | - | 35136563 | 35201794 | 749  |
| ENSG000001 | 1.971308 | 7.03114  | -1.6941  | 0.067195 | 0.11505  | RP3-510O8 chr6  | - | 35701644 | 35704724 | 669  |
| ENSG000001 | 0.685084 | 3.738131 | -1.9829  | 0.15546  | 0.23405  | RP5-1115A chr1  | + | 8484705  | 8494898  | 516  |
| ENSG000001 | 1.866827 | 0        | 2.3484   | 0.15622  | NA       | RP11-429F chr10 | - | 95841707 | 95868571 | 1612 |
| ENSG000001 | 1.411244 | 0.654722 | 0.79457  | 0.61203  | 0.70441  | AC097721. chr2  | - | 1.39E+08 | 1.39E+08 | 1253 |
| ENSG000001 | 0.290301 | 0        | 0.4146   | 0.81455  | NA       | HMGN2P2! chr5   | - | 1.16E+08 | 1.16E+08 | 270  |
| ENSG000001 | 0.290301 | 0        | 0.4146   | 0.81455  | NA       | RP11-450C chr1  | - | 2.04E+08 | 2.04E+08 | 297  |
| ENSG000001 | 2.334388 | 0        | 2.7132   | 0.086551 | 0.14296  | AC000078. chr22 | + | 19874812 | 19875493 | 682  |
| ENSG000001 | 2.831047 | 0.98329  | 1.2269   | 0.38699  | 0.49117  | DDX3YP1 chrX    | + | 73340847 | 73351758 | 1950 |
| ENSG000001 | 288.1402 | 15.40569 | 4.2055   | 3.92E-44 | 7.67E-43 | LINC00342 chr2  | - | 96472866 | 96481963 | 2351 |
| ENSG000001 | 0.290301 | 3.692007 | -2.5656  | 0.097426 | 0.15798  | RP11-80H5 chr10 | + | 91405039 | 91410424 | 563  |
| ENSG000001 | 1.390706 | 5.661004 | -1.832   | 0.098867 | 0.15993  | AC139099. chr17 | + | 81174666 | 81188573 | 2256 |
| ENSG000001 | 0.632843 | 0.715414 | -0.08242 | 0.96193  | NA       | RP11-406C chr9  | - | 1.13E+08 | 1.13E+08 | 478  |
| ENSG000001 | 4.595998 | 1.935026 | 1.1234   | 0.26623  | 0.36496  | HCG25 chr6      | + | 33217311 | 33222766 | 759  |
| ENSG000001 | 1.265686 | 17.41685 | -3.487   | 8.14E-05 | 0.000234 | RP11-390F chr9  | + | 6675284  | 6675614  | 331  |
| ENSG000001 | 0        | 0.357707 | -0.41864 | 0.81278  | NA       | AC002480. chr7  | + | 22629324 | 22631241 | 557  |
| ENSG000001 | 0        | 0.357707 | -0.41864 | 0.81278  | NA       | RP11-36D1 chr10 | + | 82057476 | 82059411 | 1626 |
| ENSG000001 | 0.580602 | 0.343138 | 0.37443  | 0.8337   | NA       | RP11-90H3 chr1  | + | 1.06E+08 | 1.06E+08 | 1779 |
| ENSG000001 | 0.580602 | 0.357707 | 0.37639  | 0.83285  | NA       | HSPA8P18 chr3   | - | 19981761 | 19984802 | 1928 |
| ENSG000001 | 192.288  | 408.6493 | -1.0812  | 2.55E-06 | 8.75E-06 | SNHG15 chr7     | - | 45022622 | 45026560 | 3116 |
| ENSG000001 | 0.36308  | 0        | 0.4146   | 0.81455  | NA       | HMGN2P2! chr2   | + | 24553271 | 24553543 | 273  |
| ENSG000001 | 1.068702 | 0.357707 | 1.0016   | 0.56008  | NA       | AP001062. chr21 | + | 45759259 | 45760353 | 127  |
| ENSG000001 | 0.632843 | 2.321872 | -1.4264  | 0.33723  | 0.44103  | POLHP1 chr2     | - | 2.17E+08 | 2.17E+08 | 470  |
| ENSG000001 | 13.18425 | 1.294874 | 3.1008   | 0.000533 | 0.001378 | CYP1B1-AS chr2  | + | 38302791 | 38408997 | 1757 |
| ENSG000001 | 42.02478 | 1.234181 | 4.7453   | 6.65E-10 | 3.12E-09 | LINC00327 chr13 | + | 24040710 | 24061603 | 2087 |

|            |          |          |          |          |          |                 |   |          |          |      |
|------------|----------|----------|----------|----------|----------|-----------------|---|----------|----------|------|
| ENSG000001 | 0.36308  | 0.297015 | -0.00205 | 0.99908  | NA       | RP11-146N chr9  | - | 19291335 | 19292574 | 409  |
| ENSG000001 | 0        | 0.357707 | -0.41864 | 0.81278  | NA       | RP11-296L chr9  | - | 34546522 | 34546994 | 473  |
| ENSG000001 | 1.286224 | 9.402424 | -2.4962  | 0.03348  | 0.062598 | AC051649. chr11 | + | 2012326  | 2014699  | 722  |
| ENSG000001 | 0.995923 | 0        | 1.4959   | 0.39264  | NA       | RPL7P14 chr2    | + | 2.04E+08 | 2.04E+08 | 741  |
| ENSG000001 | 18.52776 | 21.75056 | -0.22517 | 0.62451  | 0.71467  | RP11-267N chr1  | - | 1.63E+08 | 1.63E+08 | 1441 |
| ENSG000001 | 0.290301 | 0        | 0.4146   | 0.81455  | NA       | AC005324. chr17 | - | 15638337 | 15652506 | 746  |
| ENSG000001 | 0.342542 | 0        | 0.4146   | 0.81455  | NA       | RP11-192L chr1  | - | 2.28E+08 | 2.28E+08 | 2448 |
| ENSG000001 | 0.290301 | 0        | 0.4146   | 0.81455  | NA       | AC067959. chr2  | + | 21444047 | 22193831 | 504  |
| ENSG000001 | 4.656798 | 8.398859 | -0.76892 | 0.36913  | 0.47372  | AC034220. chr5  | - | 1.32E+08 | 1.32E+08 | 1792 |
| ENSG000001 | 0.705622 | 0        | 0.8807   | 0.6196   | NA       | RP11-475C chr1  | - | 84041459 | 84326706 | 3177 |
| ENSG000001 | 11.65817 | 0.357707 | 4.3053   | 0.000438 | 0.001148 | NALCN-AS1 chr13 | + | 1.01E+08 | 1.02E+08 | 2846 |
| ENSG000001 | 5.632997 | 1.684135 | 1.5983   | 0.11205  | 0.17796  | RPEP4 chr22     | + | 30004889 | 30005490 | 602  |
| ENSG000001 | 0        | 8.890904 | -4.7654  | 0.000198 | 0.000543 | HDAC1P2 chr1    | + | 2.21E+08 | 2.21E+08 | 1398 |
| ENSG000001 | 3.362014 | 7.495662 | -1.0802  | 0.22552  | 0.31827  | FAM157B chr9    | + | 1.41E+08 | 1.41E+08 | 1795 |
| ENSG000001 | 471.6336 | 678.528  | -0.52239 | 0.001017 | 0.002517 | SNHG7 chr9      | - | 1.4E+08  | 1.4E+08  | 2357 |
| ENSG000001 | 0        | 0.654722 | -0.83442 | 0.63731  | NA       | RP5-908M chr20  | + | 61004604 | 61006568 | 477  |
| ENSG000001 | 0.653381 | 0.297015 | 0.51304  | 0.77085  | NA       | RP11-490E chr10 | + | 483501   | 487110   | 558  |
| ENSG000001 | 0        | 0.357707 | -0.41864 | 0.81278  | NA       | RP11-118F chr9  | - | 65880533 | 65883885 | 793  |
| ENSG000001 | 0.943682 | 0        | 1.2438   | 0.48556  | NA       | PKD1P1 chr16    | - | 18451943 | 18473188 | 1547 |
| ENSG000001 | 13.79818 | 10.3363  | 0.40082  | 0.48225  | 0.58654  | CRYZP1 chr7     | - | 1.03E+08 | 1.03E+08 | 947  |
| ENSG000001 | 0.632843 | 2.338857 | -1.5075  | 0.27252  | 0.37203  | RP11-439A chr1  | + | 1.21E+08 | 1.21E+08 | 3543 |
| ENSG000001 | 1.265686 | 1.309443 | -0.02753 | 0.98518  | 0.99139  | RP11-196C chr1  | - | 1.5E+08  | 1.5E+08  | 3543 |
| ENSG000001 | 0.923144 | 0.297015 | 0.87478  | 0.61377  | NA       | CASK-AS1 chrX   | + | 41379289 | 41381589 | 515  |
| ENSG000001 | 0.653381 | 1.577319 | -0.96236 | 0.53242  | 0.63355  | AC011899. chr7  | + | 1.58E+08 | 1.58E+08 | 4302 |
| ENSG000001 | 0.342542 | 0        | 0.4146   | 0.81455  | NA       | PHGR1 chr15     | + | 40643234 | 40648635 | 571  |
| ENSG000001 | 0.580602 | 1.043983 | -0.50894 | 0.7638   | NA       | RP1-137K2 chr6  | - | 1.57E+08 | 1.57E+08 | 423  |
| ENSG000001 | 0.290301 | 1.073121 | -0.88899 | 0.61676  | NA       | AC097523. chr2  | + | 1.39E+08 | 1.39E+08 | 637  |
| ENSG000001 | 0.342542 | 0.357707 | -0.0021  | 0.99906  | NA       | RP5-1069C chr20 | - | 12845850 | 12933167 | 3033 |
| ENSG000001 | 0.290301 | 0        | 0.4146   | 0.81455  | NA       | RP11-398B chr10 | - | 1403196  | 1403832  | 359  |
| ENSG000001 | 3.713929 | 454.3922 | -6.8312  | 4.19E-45 | 8.37E-44 | ERVH48-1 chr21  | - | 44336913 | 44345756 | 2790 |
| ENSG000001 | 0.36308  | 0        | 0.4146   | 0.81455  | NA       | EEF1A1P14 chr1  | + | 1.94E+08 | 1.94E+08 | 1376 |
| ENSG000001 | 1.265686 | 33.02341 | -4.3625  | 4.60E-07 | 1.69E-06 | AC046143. chr3  | + | 1.94E+08 | 1.94E+08 | 2680 |
| ENSG000001 | 0.36308  | 0.343138 | -0.0021  | 0.99905  | NA       | AC016700. chr2  | + | 70316853 | 70323232 | 448  |
| ENSG000001 | 1.016461 | 0.297015 | 0.95157  | 0.5817   | NA       | TLL7-IT1 chr1   | - | 84444801 | 84449983 | 2921 |
| ENSG000001 | 0        | 0.594029 | -0.81444 | 0.64499  | NA       | RP3-380B8 chr6  | + | 5851739  | 5870453  | 411  |
| ENSG000001 | 1.306762 | 0.357707 | 1.2513   | 0.45831  | NA       | RP11-40F8 chrX  | - | 22407432 | 23082236 | 718  |
| ENSG000001 | 4.326234 | 0        | 3.6698   | 0.010069 | 0.021158 | RP1-140K8 chr6  | + | 3893360  | 3894524  | 451  |
| ENSG000001 | 0.36308  | 0        | 0.4146   | 0.81455  | NA       | RP5-930J4. chr1 | + | 21059373 | 21060445 | 299  |
| ENSG000001 | 0.36308  | 0.343138 | -0.0021  | 0.99905  | NA       | ZFY-AS1 chrY    | - | 2834885  | 2870667  | 500  |
| ENSG000001 | 1.027626 | 0.297015 | 0.84706  | 0.63368  | NA       | RP11-487E chr1  | - | 21330043 | 21330427 | 385  |
| ENSG000001 | 0.290301 | 0.297015 | -0.00202 | 0.99909  | NA       | AC005009. chr7  | - | 86413542 | 86415986 | 687  |
| ENSG000001 | 0.870904 | 0.640152 | 0.30433  | 0.85869  | NA       | RP11-290F chr20 | - | 48927248 | 48937879 | 2250 |
| ENSG000001 | 0        | 0.357707 | -0.41864 | 0.81278  | NA       | CTA-714B7 chr22 | - | 35515817 | 35627049 | 648  |
| ENSG000001 | 0        | 0.951736 | -1.2555  | 0.48145  | NA       | RP11-440C chr9  | + | 94188520 | 94189426 | 474  |
| ENSG000001 | 0        | 0.357707 | -0.41864 | 0.81278  | NA       | FTH1P6 chr2     | + | 52856881 | 52857216 | 320  |
| ENSG000001 | 1.265686 | 2.367995 | -0.73259 | 0.57465  | 0.67168  | AL672183. chr1  | + | 2.49E+08 | 2.49E+08 | 463  |
| ENSG000001 | 0.653381 | 0        | 0.82678  | 0.64037  | NA       | XXYac-YX6 chr6  | - | 1.7E+08  | 1.7E+08  | 654  |
| ENSG000001 | 0.342542 | 0        | 0.4146   | 0.81455  | NA       | RP11-375C chr9  | - | 82120719 | 82147257 | 1788 |
| ENSG000001 | 0.36308  | 2.725702 | -2.246   | 0.13439  | 0.20735  | AC073869. chr2  | - | 1.32E+08 | 1.32E+08 | 3666 |
| ENSG000001 | 15.57169 | 0        | 5.5932   | 2.68E-06 | 9.18E-06 | RP3-527F8 chrX  | + | 1.36E+08 | 1.36E+08 | 1721 |
| ENSG000001 | 0        | 0.357707 | -0.41864 | 0.81278  | NA       | RP11-520A chr3  | - | 41012032 | 41013069 | 670  |
| ENSG000001 | 2.375464 | 195.1144 | -6.2402  | 3.62E-30 | 4.64E-29 | RP11-344E chr17 | + | 20771746 | 20905589 | 3727 |
| ENSG000001 | 0.342542 | 0        | 0.4146   | 0.81455  | NA       | RP11-375A chr1  | - | 77811731 | 77815270 | 377  |
| ENSG000001 | 6.690533 | 6.176483 | 0.10003  | 0.93729  | 0.95862  | HOXB-AS3 chr17  | + | 46626992 | 46683776 | 743  |
| ENSG000001 | 1.048164 | 0        | 1.348    | 0.44949  | NA       | AC006042. chr7  | - | 7997814  | 8009534  | 568  |
| ENSG000001 | 3.268698 | 0        | 2.9129   | 0.07831  | 0.13112  | RP11-301L chr4  | + | 1.87E+08 | 1.87E+08 | 1789 |
| ENSG000001 | 1.794048 | 0.715414 | 0.96816  | 0.55211  | 0.65153  | RP4-533D7 chr1  | + | 46570622 | 46570847 | 226  |
| ENSG000001 | 0.36308  | 0        | 0.4146   | 0.81455  | NA       | FAM90A11 chr8   | - | 7869304  | 7874534  | 2218 |
| ENSG000001 | 6.640085 | 0        | 4.3153   | 0.00126  | 0.003076 | LINC00702 chr10 | - | 4277752  | 4285981  | 446  |
| ENSG000001 | 7.821827 | 14.46369 | -0.84883 | 0.15657  | 0.23552  | CTAGE7P chr10   | + | 1.32E+08 | 1.32E+08 | 2823 |
| ENSG000001 | 0.36308  | 1.727843 | -1.5299  | 0.35924  | 0.46337  | AC104451. chr3  | - | 17747550 | 17747725 | 176  |
| ENSG000001 | 1035.571 | 740.637  | 0.48201  | 0.002386 | 0.005578 | RP11-220L chr9  | + | 37079893 | 37090398 | 4375 |
| ENSG000001 | 1.939605 | 0        | 2.4257   | 0.13778  | 0.21116  | AC009492. chr2  | + | 2.18E+08 | 2.18E+08 | 557  |
| ENSG000001 | 2.334388 | 0.715414 | 1.3854   | 0.33604  | 0.43971  | RP11-537A chr10 | + | 75141191 | 75143254 | 401  |
| ENSG000001 | 0.632843 | 0        | 0.81931  | 0.64303  | NA       | RP11-90CA chr1  | + | 56289480 | 56333921 | 645  |

|            |          |          |          |          |          |            |       |   |          |          |      |
|------------|----------|----------|----------|----------|----------|------------|-------|---|----------|----------|------|
| ENSG000001 | 0.685084 | 0.715414 | -0.02805 | 0.98738  | NA       | SYF2P2     | chr9  | + | 35010700 | 35011282 | 583  |
| ENSG000001 | 0.290301 | 0.98329  | -0.92952 | 0.59103  | NA       | UBE2E2-AS  | chr3  | - | 23236561 | 23244069 | 499  |
| ENSG000001 | 0.72616  | 3.273608 | -1.6823  | 0.26692  | 0.36562  | RP4-655J1  | chr1  | - | 1.17E+08 | 1.17E+08 | 621  |
| ENSG000001 | 0.342542 | 0.343138 | -0.00208 | 0.99906  | NA       | HMGAI1P8   | chr2  | - | 74645249 | 74645569 | 321  |
| ENSG000001 | 0        | 1.012429 | -1.3162  | 0.46038  | NA       | AC007390   | chr2  | - | 37421525 | 37421880 | 356  |
| ENSG000001 | 0.72616  | 0        | 0.85004  | 0.63064  | NA       | RP11-259F  | chr10 | - | 70921286 | 70921662 | 377  |
| ENSG000001 | 8.539428 | 7.469813 | 0.1664   | 0.83756  | 0.88597  | ADIRF-AS1  | chr10 | - | 88725496 | 88729158 | 718  |
| ENSG000001 | 6.544162 | 5.089665 | 0.33832  | 0.71475  | 0.78863  | RP11-863K  | chr8  | - | 37604854 | 37605522 | 669  |
| ENSG000001 | 0.995923 | 1.309443 | -0.3196  | 0.82529  | 0.87686  | CTD-2020K  | chr17 | - | 43315395 | 43319101 | 2003 |
| ENSG000001 | 0.342542 | 1.012429 | -0.95691 | 0.57869  | NA       | RP11-881I  | chr9  | - | 71010609 | 71021416 | 2663 |
| ENSG000001 | 48.3867  | 20.48811 | 1.2242   | 0.000884 | 0.002213 | RP11-421L  | chr1  | + | 1.01E+08 | 1.02E+08 | 1531 |
| ENSG000001 | 0        | 2.307303 | -2.6761  | 0.094365 | 0.15383  | RP11-307I  | chr9  | - | 4803788  | 4804972  | 1185 |
| ENSG000001 | 0.36308  | 1.073121 | -0.87448 | 0.62195  | NA       | RP11-122F  | chr10 | - | 86148926 | 86149382 | 457  |
| ENSG000001 | 0        | 0.891044 | -1.0625  | 0.54819  | NA       | AC006372   | chr7  | + | 1.57E+08 | 1.57E+08 | 292  |
| ENSG000001 | 0.342542 | 0        | 0.4146   | 0.81455  | NA       | GS1-304P7  | chr1  | - | 1.87E+08 | 1.87E+08 | 677  |
| ENSG000001 | 3.370574 | 3.685559 | -0.11083 | 0.92766  | 0.95202  | RNF224     | chr9  | + | 1.4E+08  | 1.4E+08  | 1503 |
| ENSG000001 | 2.302685 | 3.587607 | -0.58692 | 0.56877  | 0.66611  | AC006028   | chr7  | + | 2804242  | 2815134  | 544  |
| ENSG000001 | 1.722083 | 0.686276 | 0.99948  | 0.51521  | 0.61808  | RP11-67L3  | chr1  | + | 55353236 | 55354523 | 515  |
| ENSG000001 | 4.523219 | 2.635871 | 0.72284  | 0.45378  | 0.55921  | AC108479   | chr2  | + | 88272175 | 88272601 | 427  |
| ENSG000001 | 0        | 0.357707 | -0.41864 | 0.81278  | NA       | RP11-216A  | chr9  | - | 42363048 | 42367092 | 3200 |
| ENSG000001 | 0        | 0.297015 | -0.41864 | 0.81278  | NA       | KCNJ6-IT1  | chr21 | - | 39089405 | 39091872 | 357  |
| ENSG000001 | 0.72616  | 0        | 0.85004  | 0.63064  | NA       | AP000472   | chr21 | - | 23381263 | 23470778 | 897  |
| ENSG000001 | 0.342542 | 0.640152 | -0.50911 | 0.77219  | NA       | RP11-414C  | chr1  | - | 58694354 | 58694675 | 322  |
| ENSG000001 | 0        | 1.949596 | -2.4359  | 0.13595  | 0.20899  | MROH3P     | chr1  | + | 2.01E+08 | 2.01E+08 | 2625 |
| ENSG000001 | 0        | 1.903472 | -2.1599  | 0.21236  | NA       | RP11-89N1  | chr7  | - | 33908113 | 33913843 | 380  |
| ENSG000001 | 0.36308  | 1.340997 | -1.3725  | 0.39447  | NA       | LINC00167  | chr11 | + | 1.3E+08  | 1.3E+08  | 1419 |
| ENSG000001 | 0        | 11.87965 | -5.1624  | 3.86E-05 | 0.000116 | AC133785   | chr2  | - | 1.32E+08 | 1.32E+08 | 2824 |
| ENSG000001 | 31.14257 | 177.5725 | -2.4919  | 1.44E-15 | 9.76E-15 | AC113189   | chr17 | - | 7485282  | 7487390  | 679  |
| ENSG000001 | 0        | 1.043983 | -1.3473  | 0.44976  | NA       | HIST1H2AA  | chr6  | - | 27860477 | 27860963 | 487  |
| ENSG000001 | 12.92467 | 22.94835 | -0.81239 | 0.11562  | 0.18294  | AC004987   | chr7  | + | 39872813 | 39874544 | 1731 |
| ENSG000001 | 0.36308  | 0        | 0.4146   | 0.81455  | NA       | LPCAT2BP   | chr1  | + | 92531863 | 92533396 | 1534 |
| ENSG000001 | 64.77803 | 43.11272 | 0.58518  | 0.050941 | 0.090419 | AC079807   | chr2  | + | 48132817 | 48134949 | 656  |
| ENSG000001 | 12.60446 | 14.21448 | -0.18272 | 0.74017  | 0.80883  | RP4-655C5  | chr6  | + | 1.67E+08 | 1.67E+08 | 904  |
| ENSG000001 | 0.342542 | 0.343138 | -0.00208 | 0.99906  | NA       | NPIPL1     | chr16 | - | 28467693 | 28481868 | 1406 |
| ENSG000001 | 21.38455 | 10.23761 | 1.0093   | 0.10277  | 0.16514  | LINC00472  | chr6  | - | 72054047 | 72130472 | 2958 |
| ENSG000001 | 0.685084 | 0.357707 | 0.4822   | 0.78686  | NA       | RP11-220I  | chr9  | - | 37112545 | 37115487 | 1314 |
| ENSG000001 | 0        | 1.309443 | -1.6539  | 0.35008  | NA       | RP11-399F  | chr9  | - | 43027748 | 43032877 | 783  |
| ENSG000001 | 4.532592 | 0        | 3.7077   | 0.009991 | 0.021012 | RP11-415J  | chr1  | + | 33815953 | 33828846 | 490  |
| ENSG000001 | 3.338871 | 2.713549 | 0.27836  | 0.82721  | 0.87829  | GS1-257G1  | chrX  | + | 14262325 | 14263544 | 1220 |
| ENSG000001 | 2.770247 | 2.309719 | 0.20928  | 0.86562  | 0.90644  | RP3-339A1  | chrX  | - | 53459670 | 53459979 | 218  |
| ENSG000001 | 1.794048 | 9.20652  | -2.08    | 0.042731 | 0.077641 | AC007743   | chr2  | - | 56400669 | 56412905 | 3075 |
| ENSG000001 | 0.36308  | 0        | 0.4146   | 0.81455  | NA       | CRIP1P1    | chr3  | + | 12715198 | 12715382 | 185  |
| ENSG000001 | 0.290301 | 0        | 0.4146   | 0.81455  | NA       | RPL21P13   | chrX  | + | 74604181 | 74604663 | 483  |
| ENSG000001 | 0        | 1.66715  | -1.9695  | 0.25993  | NA       | RP11-445K  | chr10 | + | 13457202 | 13465133 | 454  |
| ENSG000001 | 0        | 0.357707 | -0.41864 | 0.81278  | NA       | LINC00264  | chr10 | + | 26878794 | 26883253 | 1085 |
| ENSG000001 | 2.86275  | 11.49281 | -1.8809  | 0.015914 | 0.032072 | AC006042   | chr7  | + | 8019943  | 8021859  | 1469 |
| ENSG000001 | 0        | 0.715414 | -0.84936 | 0.6309   | NA       | MICF       | chr6  | - | 29820140 | 29820268 | 129  |
| ENSG000001 | 3.04001  | 0.98329  | 1.3686   | 0.28142  | 0.38241  | HMG1B1P3   | chr2  | + | 54278471 | 54278897 | 427  |
| ENSG000001 | 8.66282  | 12.37982 | -0.48963 | 0.5362   | 0.63725  | SNRPEP4    | chr19 | - | 5576671  | 5576949  | 279  |
| ENSG000001 | 0.36308  | 0        | 0.4146   | 0.81455  | NA       | AC009238   | chr2  | + | 96100507 | 96100861 | 355  |
| ENSG000001 | 3473.358 | 4620.341 | -0.41115 | 2.64E-05 | 8.07E-05 | GPX1       | chr3  | - | 49394609 | 49396033 | 1146 |
| ENSG000001 | 0        | 0.715414 | -0.84936 | 0.6309   | NA       | RPS26P2    | chr9  | - | 30831876 | 30832223 | 348  |
| ENSG000001 | 241.0933 | 58.24242 | 2.0487   | 4.91E-21 | 4.34E-20 | CRYBG3     | chr3  | + | 97540884 | 97594132 | 4261 |
| ENSG000001 | 0        | 2.278164 | -2.6634  | 0.096176 | 0.1563   | RP11-410N  | chr20 | + | 31148895 | 31161690 | 469  |
| ENSG000001 | 0        | 0.715414 | -0.84936 | 0.6309   | NA       | FAM90A20   | chr8  | + | 7152536  | 7155546  | 1395 |
| ENSG000001 | 0.342542 | 4.692283 | -3.058   | 0.023315 | 0.045333 | AC092159   | chr2  | + | 677186   | 697371   | 1943 |
| ENSG000001 | 3.371387 | 0.640152 | 1.969    | 0.13247  | 0.20492  | RASA4DP    | chr7  | - | 1.02E+08 | 1.02E+08 | 1199 |
| ENSG000001 | 1.660469 | 1.71569  | -0.02935 | 0.98533  | 0.99146  | XXYLT1-AS1 | chr3  | + | 1.95E+08 | 1.95E+08 | 431  |
| ENSG000001 | 0        | 0.997859 | -1.5018  | 0.39072  | NA       | TRGV2      | chr7  | - | 38402465 | 38403119 | 544  |
| ENSG000001 | 0        | 0.343138 | -0.41864 | 0.81278  | NA       | OSTN-AS1   | chr3  | - | 1.91E+08 | 1.91E+08 | 515  |
| ENSG000001 | 0        | 5.865772 | -4.1421  | 0.002314 | 0.005417 | RP11-22C1  | chr9  | - | 85358982 | 85359707 | 726  |
| ENSG000001 | 0.36308  | 0        | 0.4146   | 0.81455  | NA       | HMGAI1P5   | chr10 | - | 77036134 | 77036404 | 271  |
| ENSG000001 | 0.290301 | 0        | 0.4146   | 0.81455  | NA       | H2BFXP     | chrX  | + | 1.03E+08 | 1.03E+08 | 364  |
| ENSG000001 | 0.36308  | 0        | 0.4146   | 0.81455  | NA       | RP11-482E  | chr10 | - | 3529086  | 3545030  | 832  |
| ENSG000001 | 1.048164 | 0.654722 | 0.46381  | 0.77376  | NA       | MIPEPP3    | chr13 | + | 21872398 | 21880512 | 444  |

|            |          |          |          |          |          |            |       |   |          |          |      |
|------------|----------|----------|----------|----------|----------|------------|-------|---|----------|----------|------|
| ENSG000001 | 0.290301 | 3.772101 | -2.7045  | 0.063448 | 0.10951  | USP32P2    | chr17 | - | 18414535 | 18445234 | 4735 |
| ENSG000001 | 20.92294 | 27.94094 | -0.40928 | 0.37754  | 0.48163  | PFN1P1     | chr1  | - | 1.72E+08 | 1.72E+08 | 423  |
| ENSG000001 | 1.555988 | 1.652581 | -0.04926 | 0.97036  | 0.98357  | RP1-12G14  | chr6  | - | 1.5E+08  | 1.5E+08  | 340  |
| ENSG000001 | 0.342542 | 7.836384 | -3.7479  | 0.003448 | 0.007878 | RP4-799P1  | chr1  | - | 2.34E+08 | 2.34E+08 | 1723 |
| ENSG000001 | 0        | 0.357707 | -0.41864 | 0.81278  | NA       | RNFT1P2    | chr1  | - | 78636165 | 78636921 | 757  |
| ENSG000001 | 1.233984 | 2.399549 | -0.76257 | 0.56232  | 0.66064  | RP11-464C  | chr10 | + | 1.26E+08 | 1.26E+08 | 1491 |
| ENSG000001 | 5.404309 | 5.081544 | 0.081934 | 0.92681  | 0.9513   | UBE2FP3    | chr1  | + | 1.12E+08 | 1.12E+08 | 524  |
| ENSG000001 | 0        | 7.060278 | -4.4114  | 0.00087  | 0.002181 | TLR8-AS1   | chrX  | - | 12920936 | 12926452 | 1349 |
| ENSG000001 | 1.068702 | 1.234181 | -0.20066 | 0.8965   | 0.92827  | AC018878.  | chr2  | + | 1.07E+08 | 1.07E+08 | 433  |
| ENSG000001 | 0.705622 | 1.40169  | -0.74151 | 0.63559  | 0.72395  | RP11-25C1  | chr10 | - | 1.14E+08 | 1.14E+08 | 358  |
| ENSG000001 | 0        | 1.012429 | -1.3162  | 0.46038  | NA       | ATP6V1G1   | chr10 | + | 35447234 | 35447568 | 335  |
| ENSG000001 | 0.975385 | 2.307303 | -1.0223  | 0.44577  | 0.55121  | ERP29P1    | chr20 | - | 50726883 | 50727588 | 706  |
| ENSG000001 | 0.290301 | 0        | 0.4146   | 0.81455  | NA       | LINC00333  | chr13 | + | 85136499 | 85137371 | 613  |
| ENSG000001 | 0        | 1.012429 | -1.3162  | 0.46038  | NA       | CHRM3-AS:  | chr1  | - | 2.4E+08  | 2.4E+08  | 2431 |
| ENSG000001 | 1.733248 | 1.309443 | 0.30027  | 0.83923  | 0.88728  | Z83844.1   | chr22 | - | 38037839 | 38054384 | 1945 |
| ENSG000001 | 1.048164 | 0        | 1.348    | 0.44949  | NA       | AC006019.  | chr7  | - | 1.54E+08 | 1.54E+08 | 3044 |
| ENSG000001 | 1.722083 | 0        | 2.21     | 0.18654  | NA       | RP11-307L  | chr9  | - | 6415145  | 6449558  | 638  |
| ENSG000001 | 159.2424 | 275.0477 | -0.78963 | 3.38E-06 | 1.14E-05 | RP11-396K  | chr7  | + | 72569033 | 72619657 | 2629 |
| ENSG000001 | 1.08924  | 0        | 1.1858   | 0.50299  | NA       | AC092664.  | chr2  | + | 1.11E+08 | 1.11E+08 | 1126 |
| ENSG000001 | 0        | 2.947455 | -3.0782  | 0.043573 | 0.078942 | AK4P3      | chr12 | - | 31768702 | 31769373 | 672  |
| ENSG000001 | 11.19321 | 28.28246 | -1.3191  | 0.005542 | 0.01223  | NKAPP1     | chrX  | - | 1.19E+08 | 1.19E+08 | 4940 |
| ENSG000001 | 25.26034 | 9.41612  | 1.4067   | 0.005257 | 0.011663 | RP11-100E  | chr1  | - | 2.25E+08 | 2.25E+08 | 403  |
| ENSG000001 | 0        | 0.594029 | -0.81444 | 0.64499  | NA       | RP11-342C  | chr10 | - | 33385185 | 33405600 | 552  |
| ENSG000001 | 0        | 0.297015 | -0.41864 | 0.81278  | NA       | RP4-569D1  | chr22 | - | 35897908 | 35899633 | 1337 |
| ENSG000001 | 0        | 298.5265 | -9.5666  | 1.58E-18 | 1.24E-17 | AP000688.  | chr21 | + | 37477179 | 37481988 | 2336 |
| ENSG000001 | 7.241225 | 16.71842 | -1.178   | 0.04065  | 0.074408 | RP11-458C  | chr1  | - | 1.45E+08 | 1.45E+08 | 872  |
| ENSG000001 | 0.685084 | 0        | 0.85004  | 0.63064  | NA       | AC008063.  | chr2  | + | 1.63E+08 | 1.63E+08 | 619  |
| ENSG000001 | 0        | 0.594029 | -0.81444 | 0.64499  | NA       | PRKAR1AP   | chr1  | + | 92590858 | 92592019 | 1162 |
| ENSG000001 | 1.628766 | 4.305438 | -1.2523  | 0.245    | 0.34082  | RP11-296A  | chr1  | - | 51716270 | 51717144 | 870  |
| ENSG000001 | 0        | 0.343138 | -0.41864 | 0.81278  | NA       | RP11-567C  | chr1  | - | 50671756 | 50688799 | 250  |
| ENSG000001 | 0        | 0.297015 | -0.41864 | 0.81278  | NA       | CNN2P5     | chr9  | + | 66345261 | 66346161 | 901  |
| ENSG000001 | 0        | 0.343138 | -0.41864 | 0.81278  | NA       | RP11-101E  | chr20 | + | 38660227 | 38672531 | 640  |
| ENSG000001 | 0.342542 | 0        | 0.4146   | 0.81455  | NA       | AC012065.  | chr2  | - | 20806040 | 20806414 | 375  |
| ENSG000001 | 0.36308  | 13.29758 | -4.4663  | 0.000261 | 0.000706 | RP5-875O1  | chr1  | - | 16860381 | 16862144 | 1548 |
| ENSG000001 | 0.36308  | 0        | 0.4146   | 0.81455  | NA       | RP11-163B  | chr9  | + | 1.26E+08 | 1.26E+08 | 1264 |
| ENSG000001 | 23.62799 | 36.65863 | -0.62158 | 0.1984   | 0.28668  | EIF3FP3    | chr2  | + | 58478575 | 58479703 | 1086 |
| ENSG000001 | 0.870904 | 0.297015 | 0.71032  | 0.69005  | NA       | RP1-212P9  | chr1  | - | 29196995 | 29203848 | 1085 |
| ENSG000001 | 123.8651 | 0.343138 | 7.6033   | 1.97E-14 | 1.25E-13 | HOTAIRM1   | chr7  | + | 27135266 | 27139884 | 889  |
| ENSG000001 | 3.298608 | 2.65044  | 0.28771  | 0.77577  | 0.83899  | RP11-403I: | chr1  | - | 1.49E+08 | 1.49E+08 | 537  |
| ENSG000001 | 0        | 0.997859 | -1.5018  | 0.39072  | NA       | RP11-63N8  | chr1  | + | 21912965 | 21917680 | 821  |
| ENSG000001 | 0.36308  | 0        | 0.4146   | 0.81455  | NA       | RP1-296G1  | chrX  | - | 1.2E+08  | 1.2E+08  | 1600 |
| ENSG000001 | 1.701545 | 0        | 2.2228   | 0.18134  | NA       | AGGF1P2    | chr10 | + | 1.35E+08 | 1.35E+08 | 809  |
| ENSG000001 | 8.278224 | 10.66487 | -0.35407 | 0.56574  | 0.66361  | BTBD18     | chr11 | - | 57510986 | 57519253 | 3044 |
| ENSG000001 | 4.221753 | 1.577319 | 1.2405   | 0.26571  | 0.36443  | AC109829.  | chr2  | + | 27760253 | 27790011 | 825  |
| ENSG000001 | 22.35391 | 7.45766  | 1.5371   | 0.005325 | 0.0118   | STXBP5-AS: | chr6  | - | 1.47E+08 | 1.48E+08 | 2927 |
| ENSG000001 | 0.580602 | 0        | 0.8036   | 0.6494   | NA       | RP4-667H1  | chr1  | + | 2.1E+08  | 2.1E+08  | 857  |
| ENSG000001 | 0.290301 | 0        | 0.4146   | 0.81455  | NA       | RP11-165C  | chr13 | - | 49144775 | 49147453 | 413  |
| ENSG000001 | 0.36308  | 0        | 0.4146   | 0.81455  | NA       | RP11-336A  | chr9  | - | 80765448 | 80766109 | 662  |
| ENSG000001 | 0.290301 | 0        | 0.4146   | 0.81455  | NA       | RPL35AP31  | chr13 | + | 72420113 | 72420449 | 337  |
| ENSG000001 | 23.34046 | 22.49182 | 0.063865 | 0.907    | 0.93608  | RP11-295C  | chr1  | - | 2.32E+08 | 2.32E+08 | 465  |
| ENSG000001 | 7.386782 | 1.888903 | 1.777    | 0.059748 | 0.10414  | ST6GALNA:  | chr13 | - | 20392261 | 20392759 | 499  |
| ENSG000001 | 1.286224 | 0.951736 | 0.33447  | 0.81756  | 0.87195  | AC000094.  | chr22 | + | 19245043 | 19246329 | 1287 |
| ENSG000001 | 4.00423  | 0        | 3.5416   | 0.014566 | 0.029576 | RP11-218C  | chr10 | + | 28288717 | 28338544 | 469  |
| ENSG000001 | 0.342542 | 2.482932 | -2.1229  | 0.16608  | 0.24721  | RP11-520F  | chr1  | - | 1.59E+08 | 1.59E+08 | 663  |
| ENSG000001 | 197.5275 | 358.1495 | -0.8586  | 8.46E-07 | 3.04E-06 | EEF1A1P6   | chr7  | - | 22550231 | 22551618 | 1386 |
| ENSG000001 | 0        | 7.089416 | -4.3802  | 0.001154 | 0.002835 | RP1-187B2  | chr1  | - | 25971035 | 25985602 | 2224 |
| ENSG000001 | 6.129655 | 10.67058 | -0.76177 | 0.30514  | 0.40673  | CTD-2020K  | chr17 | - | 43322553 | 43326203 | 579  |
| ENSG000001 | 0.290301 | 0        | 0.4146   | 0.81455  | NA       | RP3-467K1  | chr1  | - | 15653176 | 15670372 | 3105 |
| ENSG000001 | 1.431782 | 2.261179 | -0.55788 | 0.69601  | 0.77337  | AC011322.  | chr3  | - | 1.97E+08 | 1.97E+08 | 883  |
| ENSG000001 | 31.49529 | 0.654722 | 5.1166   | 3.82E-08 | 1.54E-07 | RP11-181E  | chr2  | - | 1.12E+08 | 1.12E+08 | 2044 |
| ENSG000001 | 0.923144 | 0        | 1.223    | 0.49292  | NA       | AC010091.  | chr7  | - | 81205702 | 81255532 | 4571 |
| ENSG000001 | 0        | 1.012429 | -1.3162  | 0.46038  | NA       | RP5-984P4  | chr20 | + | 21510840 | 21511382 | 449  |
| ENSG000001 | 10.63234 | 100.1017 | -3.1822  | 2.72E-17 | 2.01E-16 | TMEM238    | chr19 | - | 55890613 | 55895966 | 1000 |
| ENSG000001 | 0.705622 | 0        | 0.8807   | 0.6196   | NA       | SYNJ2-IT1  | chr6  | + | 1.58E+08 | 1.58E+08 | 599  |
| ENSG000001 | 0.923144 | 0        | 1.223    | 0.49292  | NA       | SRGAP2-AS  | chr1  | - | 2.07E+08 | 2.07E+08 | 2178 |

|            |          |          |          |          |          |                 |   |          |          |      |
|------------|----------|----------|----------|----------|----------|-----------------|---|----------|----------|------|
| ENSG000001 | 1.576526 | 0        | 2.1197   | 0.20755  | NA       | AC104794. chr2  | + | 10223908 | 10226228 | 312  |
| ENSG000001 | 2.894453 | 4.989297 | -0.7123  | 0.4434   | 0.54902  | ZNF197-AS chr3  | - | 44658620 | 44666289 | 623  |
| ENSG000001 | 0        | 0.594029 | -0.81444 | 0.64499  | NA       | RP1-128O3 chr6  | + | 1.09E+08 | 1.09E+08 | 187  |
| ENSG000001 | 4.761279 | 0        | 3.7848   | 0.008117 | 0.01733  | RP11-132N chr6  | - | 85397069 | 85398465 | 495  |
| ENSG000001 | 1.919068 | 1.294874 | 0.48552  | 0.7005   | 0.77713  | RP11-570P chr1  | - | 44587825 | 44588184 | 360  |
| ENSG000001 | 0        | 0.297015 | -0.41864 | 0.81278  | NA       | AL022344. chr10 | - | 43169645 | 43187171 | 519  |
| ENSG000001 | 0.975385 | 0.357707 | 0.92752  | 0.59066  | NA       | AC005162. chr7  | + | 29026644 | 29028515 | 578  |
| ENSG000001 | 8.381892 | 0        | 4.6707   | 0.000309 | 0.000826 | RP5-1172A chr22 | - | 27617310 | 27620688 | 637  |
| ENSG000001 | 0        | 0.297015 | -0.41864 | 0.81278  | NA       | PHBP5 chr7      | - | 72602009 | 72602776 | 768  |
| ENSG000001 | 1.939605 | 0.654722 | 1.2517   | 0.37851  | 0.48262  | RANP8 chr13     | - | 21321174 | 21322196 | 713  |
| ENSG000001 | 34.13034 | 26.4607  | 0.36505  | 0.31106  | 0.41304  | AC092295. chr19 | + | 37063972 | 37085610 | 1033 |
| ENSG000001 | 10.88238 | 0        | 5.0746   | 4.14E-05 | 0.000124 | LINC00460 chr13 | + | 1.07E+08 | 1.07E+08 | 739  |
| ENSG000001 | 0.36308  | 1.355566 | -1.381   | 0.39134  | NA       | RP11-867C chr11 | + | 94371204 | 94373999 | 712  |
| ENSG000001 | 1.919068 | 15.00428 | -2.7567  | 0.001299 | 0.003166 | AC017104. chr2  | + | 2.32E+08 | 2.32E+08 | 568  |
| ENSG000001 | 0        | 6.595755 | -4.3227  | 0.001173 | 0.00288  | RP11-547C chr1  | - | 1944652  | 1946969  | 1954 |
| ENSG000001 | 0.870904 | 1.029414 | -0.12049 | 0.94512  | NA       | RP11-57H1 chr10 | - | 1.15E+08 | 1.15E+08 | 460  |
| ENSG000001 | 0.290301 | 0.700845 | -0.56655 | 0.74739  | NA       | RP11-335F chr9  | - | 16775571 | 16775843 | 273  |
| ENSG000001 | 2.157128 | 0.700845 | 1.3393   | 0.3486   | 0.45277  | RP11-326F chr9  | + | 33166973 | 33179981 | 843  |
| ENSG000001 | 0        | 0.357707 | -0.41864 | 0.81278  | NA       | RP3-486I3. chr6 | - | 1.17E+08 | 1.17E+08 | 623  |
| ENSG000001 | 5.644162 | 2.482932 | 1.0482   | 0.29345  | 0.39548  | AC016831. chr7  | + | 1.31E+08 | 1.31E+08 | 1616 |
| ENSG000001 | 6.370321 | 14.66114 | -1.1627  | 0.092336 | 0.15112  | KRT8P39 chr12   | + | 69099414 | 69100846 | 1433 |
| ENSG000001 | 0        | 0.700845 | -0.87835 | 0.62047  | NA       | RP11-548N chr1  | + | 1.83E+08 | 1.83E+08 | 684  |
| ENSG000001 | 0        | 1.40169  | -1.7271  | 0.32809  | NA       | RP11-545C chrX  | - | 34224842 | 34433654 | 526  |
| ENSG000001 | 0.290301 | 0        | 0.4146   | 0.81455  | NA       | CTA-929C8 chr22 | + | 27672201 | 27682310 | 274  |
| ENSG000001 | 0.36308  | 0        | 0.4146   | 0.81455  | NA       | RP11-778C chr3  | + | 1.84E+08 | 1.84E+08 | 1057 |
| ENSG000001 | 0        | 3.884622 | -3.5041  | 0.016263 | 0.032712 | RP3-462D8 chr22 | - | 25675496 | 25679061 | 568  |
| ENSG000001 | 0.632843 | 0.715414 | -0.08242 | 0.96193  | NA       | RP5-1022P chr20 | + | 5529486  | 5530127  | 642  |
| ENSG000001 | 0.632843 | 1.355566 | -0.81587 | 0.58613  | 0.68179  | KRT8P15 chr2    | - | 2.04E+08 | 2.04E+08 | 1451 |
| ENSG000001 | 1.027626 | 0.343138 | 0.83995  | 0.63621  | NA       | AC069155. chr2  | + | 2.17E+08 | 2.17E+08 | 575  |
| ENSG000001 | 0.290301 | 1.188058 | -1.0232  | 0.56351  | NA       | AC115617. chrX  | - | 48634408 | 48635385 | 978  |
| ENSG000001 | 1.555988 | 1.684135 | -0.06625 | 0.96076  | 0.97663  | CYP51P2 chr13   | - | 29296523 | 29298158 | 1499 |
| ENSG000001 | 2.334388 | 6.884648 | -1.4337  | 0.13325  | 0.20585  | RP4-694A7 chr1  | + | 68944812 | 68949222 | 960  |
| ENSG000001 | 15.52026 | 28.58592 | -0.88182 | 0.052322 | 0.092541 | RP4-665J2 chr1  | - | 91295104 | 91317207 | 2986 |
| ENSG000001 | 0.290301 | 0        | 0.4146   | 0.81455  | NA       | BTF3P5 chr2     | - | 55662292 | 55662758 | 467  |
| ENSG000001 | 1.048164 | 0.343138 | 0.98412  | 0.56751  | NA       | RP11-343B chr3  | - | 1.42E+08 | 1.42E+08 | 576  |
| ENSG000001 | 6.794201 | 1.684135 | 1.8636   | 0.056496 | 0.099014 | ERI3-IT1 chr1   | - | 44709080 | 44709945 | 619  |
| ENSG000001 | 3.060548 | 1.058552 | 1.3261   | 0.29693  | 0.39898  | JTBP1 chr22     | + | 41194043 | 41194289 | 247  |
| ENSG000001 | 257.6182 | 128.4021 | 0.99672  | 4.53E-06 | 1.51E-05 | TWIST2 chr2     | + | 2.4E+08  | 2.4E+08  | 1176 |
| ENSG000001 | 0.290301 | 1.355566 | -1.3811  | 0.39332  | NA       | RP11-62H7 chr8  | + | 8818710  | 8836535  | 722  |
| ENSG000001 | 0.36308  | 0        | 0.4146   | 0.81455  | NA       | LINC00462 chr13 | - | 49151110 | 49152224 | 962  |
| ENSG000001 | 0.580602 | 1.355566 | -0.83684 | 0.59462  | 0.68907  | AC079135. chr2  | + | 2.37E+08 | 2.37E+08 | 768  |
| ENSG000001 | 15.53143 | 23.54567 | -0.59602 | 0.29106  | 0.39282  | DCUN1D2- chr13  | + | 1.14E+08 | 1.14E+08 | 330  |
| ENSG000001 | 122.1777 | 12.49308 | 3.2551   | 3.21E-22 | 2.97E-21 | RP11-422J1 chr1 | - | 37920480 | 37940012 | 1395 |
| ENSG000001 | 20.69507 | 28.04366 | -0.42631 | 0.45225  | 0.55769  | CYP2T2P chr19   | - | 41314430 | 41317295 | 1285 |
| ENSG000001 | 3.548647 | 2.618886 | 0.35211  | 0.7868   | 0.84755  | PGAM1P11 chr1   | + | 10118729 | 10119706 | 680  |
| ENSG000001 | 0.342542 | 0        | 0.4146   | 0.81455  | NA       | RP11-565J chr1  | + | 2.12E+08 | 2.12E+08 | 386  |
| ENSG000001 | 2.873915 | 4.570898 | -0.59661 | 0.56749  | 0.66499  | RP11-457N chr6  | - | 26634611 | 26637008 | 530  |
| ENSG000001 | 1.701545 | 0.297015 | 1.6662   | 0.28961  | 0.39113  | AC037445. chr17 | - | 61271291 | 61416414 | 491  |
| ENSG000001 | 61.56981 | 0        | 7.4806   | 1.59E-11 | 8.32E-11 | AC018730. chr2  | - | 1.05E+08 | 1.05E+08 | 747  |
| ENSG000001 | 0.342542 | 0        | 0.4146   | 0.81455  | NA       | KRTAP13-5 chr21 | - | 31808784 | 31809282 | 499  |
| ENSG000001 | 0.705622 | 0        | 0.8807   | 0.6196   | NA       | RP11-491F chr10 | - | 63541503 | 63581004 | 510  |
| ENSG000001 | 0        | 0.357707 | -0.41864 | 0.81278  | NA       | ARHGEF7-1 chr13 | + | 1.12E+08 | 1.12E+08 | 804  |
| ENSG000001 | 0.290301 | 0        | 0.4146   | 0.81455  | NA       | OR52T1P chr11   | - | 5587908  | 5588846  | 939  |
| ENSG000001 | 0        | 0.594029 | -0.81444 | 0.64499  | NA       | RP11-8J9.1 chr1 | - | 47131582 | 47132047 | 466  |
| ENSG000001 | 0.705622 | 0        | 0.8807   | 0.6196   | NA       | AC010095. chr2  | - | 1.09E+08 | 1.09E+08 | 144  |
| ENSG000001 | 8.661842 | 3.169208 | 1.334    | 0.11544  | 0.18272  | AC093388. chr2  | + | 1.91E+08 | 1.91E+08 | 404  |
| ENSG000001 | 2.116866 | 1.029414 | 0.76014  | 0.62927  | 0.7189   | RP11-571F chr9  | - | 34223982 | 34224626 | 645  |
| ENSG000001 | 0.36308  | 0        | 0.4146   | 0.81455  | NA       | PIRT chr17      | - | 10726858 | 10741762 | 1794 |
| ENSG000001 | 0        | 0.357707 | -0.41864 | 0.81278  | NA       | AC083899. chr2  | - | 87448236 | 87449611 | 1376 |
| ENSG000001 | 3.444166 | 6.390987 | -0.84978 | 0.34122  | 0.44511  | RNASEH2B- chr13 | - | 51450822 | 51484848 | 794  |
| ENSG000001 | 1.016461 | 1.652581 | -0.58182 | 0.67755  | 0.75844  | ANAPC1P1 chr2   | + | 87098424 | 87149816 | 2149 |
| ENSG000001 | 3.257533 | 1.652581 | 0.87808  | 0.42641  | 0.53178  | RP11-184I1 chr1 | + | 44209142 | 44209412 | 271  |
| ENSG000001 | 0.342542 | 0.357707 | -0.0021  | 0.99906  | NA       | DDX39BP1 chr6   | + | 29874320 | 29874686 | 192  |
| ENSG000001 | 0        | 7.881765 | -4.4629  | 0.001227 | 0.003    | HNRNPA1P chrX   | - | 1E+08    | 1E+08    | 955  |
| ENSG000001 | 0        | 0.654722 | -0.83442 | 0.63731  | NA       | CEACAMP1 chr19  | - | 43124364 | 43137186 | 1035 |

|            |          |          |          |          |          |                 |   |          |          |      |
|------------|----------|----------|----------|----------|----------|-----------------|---|----------|----------|------|
| ENSG000001 | 9.364858 | 0.640152 | 3.2015   | 0.013758 | 0.028096 | RP11-13P5 chr6  | + | 1.6E+08  | 1.6E+08  | 385  |
| ENSG000001 | 0        | 1.294874 | -1.8547  | 0.27869  | NA       | RP5-1106F chr7  | - | 1.01E+08 | 1.01E+08 | 213  |
| ENSG000001 | 0.995923 | 0.357707 | 1.0227   | 0.53712  | NA       | AC079779. chr2  | + | 317912   | 342118   | 853  |
| ENSG000001 | 8.766323 | 2.232041 | 1.8109   | 0.039622 | 0.072785 | EBAG9P1 chr10   | - | 1.01E+08 | 1.01E+08 | 543  |
| ENSG000001 | 0        | 0.594029 | -0.81444 | 0.64499  | NA       | RP11-312J chr1  | + | 1.61E+08 | 1.61E+08 | 590  |
| ENSG000001 | 0.342542 | 0.343138 | -0.00208 | 0.99906  | NA       | RP11-506C chr1  | - | 1.65E+08 | 1.65E+08 | 1963 |
| ENSG000001 | 0.290301 | 0.297015 | -0.00202 | 0.99909  | NA       | AC007365. chr2  | + | 64834109 | 64843616 | 1722 |
| ENSG000001 | 10.05173 | 2.589748 | 1.8398   | 0.0223   | 0.043554 | GAS6-AS1 chr13  | + | 1.15E+08 | 1.15E+08 | 773  |
| ENSG000001 | 0.653381 | 0        | 0.82678  | 0.64037  | NA       | SLC26A4-A' chr7 | - | 1.07E+08 | 1.07E+08 | 3687 |
| ENSG000001 | 0        | 1.012429 | -1.3162  | 0.46038  | NA       | RP11-342N chr1  | - | 43352268 | 43354438 | 1962 |
| ENSG000001 | 0        | 0.343138 | -0.41864 | 0.81278  | NA       | RP4-801G2 chr1  | - | 1.58E+08 | 1.58E+08 | 552  |
| ENSG000001 | 0        | 0.951736 | -1.2555  | 0.48145  | NA       | AC012506. chr2  | + | 23570525 | 23574735 | 892  |
| ENSG000001 | 2.157128 | 0        | 2.543    | 0.11988  | 0.18865  | RP4-798P1 chr1  | - | 1.78E+08 | 1.78E+08 | 811  |
| ENSG000001 | 0.36308  | 0.700845 | -0.575   | 0.7429   | NA       | AC074367. chr2  | - | 63459588 | 63460712 | 1125 |
| ENSG000001 | 0.290301 | 0.343138 | -0.00202 | 0.99909  | NA       | RP11-681I chr1  | - | 1.51E+08 | 1.51E+08 | 171  |
| ENSG000001 | 0        | 55.91168 | -7.3724  | 2.45E-11 | 1.27E-10 | MYCNOS chr2     | - | 16061159 | 16082371 | 1313 |
| ENSG000001 | 0.290301 | 0        | 0.4146   | 0.81455  | NA       | RP11-205K chr9  | + | 1.29E+08 | 1.29E+08 | 719  |
| ENSG000001 | 1.971308 | 11.6773  | -2.4111  | 0.003752 | 0.008511 | AC007092. chr2  | + | 58654934 | 59290901 | 4077 |
| ENSG000001 | 1.286224 | 0.357707 | 1.3361   | 0.4083   | NA       | LINC00284 chr13 | + | 44482850 | 44604597 | 3208 |
| ENSG000001 | 0.290301 | 0        | 0.4146   | 0.81455  | NA       | AC016909. chr2  | + | 1.34E+08 | 1.34E+08 | 1711 |
| ENSG000001 | 0.72616  | 0.357707 | 0.52227  | 0.76959  | NA       | H2AFZP6 chr22   | - | 31917185 | 31917578 | 394  |
| ENSG000001 | 0        | 0.357707 | -0.41864 | 0.81278  | NA       | RP11-573N chr11 | - | 92954652 | 92954796 | 145  |
| ENSG000001 | 0.342542 | 1.234181 | -1.1862  | 0.48567  | NA       | RP11-219F chr2  | + | 24557381 | 24558021 | 317  |
| ENSG000001 | 2.023549 | 8.766231 | -1.9003  | 0.080658 | 0.13449  | RP11-34P1 chr1  | + | 131025   | 134836   | 3812 |
| ENSG000001 | 0        | 2.757256 | -2.912   | 0.06391  | 0.11024  | AP001628. chr21 | - | 44201184 | 44202343 | 788  |
| ENSG000001 | 29.2261  | 47.52752 | -0.70123 | 0.066608 | 0.11415  | AC092835. chr2  | + | 95873283 | 95881351 | 1096 |
| ENSG000001 | 31.09033 | 52.09681 | -0.74058 | 0.04371  | 0.079155 | AC007969. chr2  | - | 1.72E+08 | 1.72E+08 | 484  |
| ENSG000001 | 1.027626 | 0.297015 | 0.84706  | 0.63368  | NA       | RP11-154P chr9  | + | 70662044 | 70663084 | 635  |
| ENSG000001 | 0.995923 | 1.71569  | -0.58282 | 0.70597  | 0.78152  | AC098617. chr2  | + | 1.93E+08 | 1.93E+08 | 1207 |
| ENSG000001 | 0.580602 | 2.010288 | -1.3122  | 0.37946  | 0.48352  | CICP5 chr1      | + | 2.24E+08 | 2.24E+08 | 2215 |
| ENSG000001 | 0.290301 | 0.654722 | -0.51764 | 0.76892  | NA       | RP4-811H2 chr1  | - | 32814795 | 32816264 | 687  |
| ENSG000001 | 0        | 0.297015 | -0.41864 | 0.81278  | NA       | RP11-384P chr9  | - | 33732973 | 33738414 | 486  |
| ENSG000001 | 0        | 0.297015 | -0.41864 | 0.81278  | NA       | RP11-777J. chr8 | - | 93156316 | 93156663 | 348  |
| ENSG000001 | 4.180677 | 7.290152 | -0.75532 | 0.37919  | 0.48329  | AP001442. chr21 | + | 27306401 | 27315001 | 1573 |
| ENSG000001 | 0        | 1.949596 | -2.4359  | 0.13595  | 0.20899  | RP13-314C chrX  | - | 23791109 | 23801073 | 672  |
| ENSG000001 | 9.781971 | 1.964165 | 2.1495   | 0.017647 | 0.035247 | AC139887. chr4  | - | 758275   | 758862   | 286  |
| ENSG000001 | 0        | 2.012704 | -2.1825  | 0.20921  | 0.29918  | RP11-295C chr9  | + | 1.36E+08 | 1.36E+08 | 526  |
| ENSG000001 | 5.496812 | 2.65044  | 0.96777  | 0.33292  | 0.43626  | AC131097. chr2  | + | 2.43E+08 | 2.43E+08 | 843  |
| ENSG000001 | 0.342542 | 0.357707 | -0.0021  | 0.99906  | NA       | AC139426. chr15 | - | 32694108 | 32695493 | 1386 |
| ENSG000001 | 4.959078 | 0        | 3.881    | 0.005376 | 0.011902 | RP11-168K chr9  | + | 1.16E+08 | 1.16E+08 | 3043 |
| ENSG000001 | 7.064778 | 0        | 4.4056   | 0.000893 | 0.002233 | AP000695. chr21 | + | 37818029 | 37904706 | 715  |
| ENSG000001 | 1.359003 | 5.361573 | -1.8042  | 0.086697 | 0.14318  | RP11-535N chr9  | + | 99488172 | 99489751 | 1262 |
| ENSG000001 | 4.729577 | 0        | 3.7782   | 0.008226 | 0.017546 | ENOX1-AS1 chr13 | + | 44118054 | 44122192 | 3907 |
| ENSG000001 | 15.44406 | 11.88448 | 0.3747   | 0.51813  | 0.62088  | HIST1H2BN chr6  | + | 27806323 | 27819974 | 707  |
| ENSG000001 | 1.503747 | 1.326428 | 0.16417  | 0.91287  | 0.94047  | RP11-135A chr10 | + | 32635427 | 32636107 | 383  |
| ENSG000001 | 0        | 0.343138 | -0.41864 | 0.81278  | NA       | AC008394. chr5  | - | 86512423 | 86534822 | 1936 |
| ENSG000001 | 21.30835 | 23.25993 | -0.12029 | 0.77929  | 0.8416   | AC073150. chr7  | - | 27497782 | 27498468 | 687  |
| ENSG000001 | 0        | 64.41903 | -7.5687  | 5.34E-12 | 2.88E-11 | AC005083. chr7  | + | 20257200 | 20261323 | 740  |
| ENSG000001 | 0        | 76.70017 | -7.745   | 5.32E-12 | 2.87E-11 | RP11-255F chr19 | + | 23945746 | 24016116 | 1931 |
| ENSG000001 | 0.342542 | 0.654722 | -0.52406 | 0.76557  | NA       | EIF3LP2 chr10   | + | 43062125 | 43062931 | 807  |
| ENSG000001 | 0        | 0.343138 | -0.41864 | 0.81278  | NA       | DPH3P1 chr20    | + | 61476490 | 61477543 | 1054 |
| ENSG000001 | 0        | 0.297015 | -0.41864 | 0.81278  | NA       | CYCSP48 chrY    | + | 28546758 | 28547377 | 323  |
| ENSG000001 | 0.653381 | 0.700845 | -0.04855 | 0.97667  | NA       | KCNQ5-IT1 chr6  | + | 73340223 | 73388282 | 563  |
| ENSG000001 | 3.484428 | 1.995719 | 0.71412  | 0.54845  | 0.6485   | AC093732. chr2  | - | 47262418 | 47267663 | 504  |
| ENSG000001 | 0.632843 | 1.012429 | -0.45981 | 0.7761   | NA       | RP11-307L chr9  | + | 6278667  | 6279153  | 487  |
| ENSG000001 | 1.161205 | 0.343138 | 0.97766  | 0.58067  | NA       | AC104113. chr5  | + | 60213317 | 60215400 | 408  |
| ENSG000001 | 0.580602 | 0.594029 | -0.01451 | 0.9935   | NA       | RP3-348I2 chr6  | - | 20756334 | 20800925 | 614  |
| ENSG000001 | 0.72616  | 0.297015 | 0.51367  | 0.77334  | NA       | LATS2-AS1 chr13 | + | 21579296 | 21592261 | 632  |
| ENSG000001 | 0        | 0.640152 | -0.82869 | 0.63935  | NA       | AC005304. chr17 | - | 13836037 | 13843911 | 405  |
| ENSG000001 | 0.685084 | 0.686276 | -0.00148 | 0.99933  | NA       | POU6F2-AS chr7  | - | 39023843 | 39053151 | 514  |
| ENSG000001 | 17.543   | 0.357707 | 4.9263   | 1.54E-05 | 4.84E-05 | AC026904. chr8  | + | 49502961 | 49507181 | 3549 |
| ENSG000001 | 1.265686 | 3.388545 | -1.1545  | 0.4046   | 0.50945  | ADH5P4 chr6     | - | 66546823 | 66547947 | 1110 |
| ENSG000001 | 0.705622 | 0.640152 | 0.062329 | 0.97007  | NA       | RP11-359C chr4  | - | 77678113 | 77679627 | 555  |
| ENSG000001 | 0.342542 | 0.594029 | -0.38792 | 0.8278   | NA       | AC016907. chr2  | - | 30273932 | 30366670 | 3563 |
| ENSG000001 | 377.3026 | 429.5295 | -0.18696 | 0.25962  | 0.35755  | TTY15 chrY      | + | 14774265 | 14804162 | 5284 |

|            |          |          |          |          |          |                  |   |          |          |      |
|------------|----------|----------|----------|----------|----------|------------------|---|----------|----------|------|
| ENSG000001 | 0        | 1.370136 | -1.6825  | 0.34201  | NA       | AC009302. chr2   | + | 2.23E+08 | 2.23E+08 | 390  |
| ENSG000001 | 8.434946 | 17.78181 | -1.0617  | 0.067779 | 0.11587  | DLG5-AS1 chr10   | + | 79687130 | 79689582 | 487  |
| ENSG000001 | 0.36308  | 0.357707 | -0.00212 | 0.99905  | NA       | RP11-182I1 chr1  | + | 65407662 | 65408048 | 387  |
| ENSG000001 | 0        | 0.654722 | -0.83442 | 0.63731  | NA       | AC073133. chr7   | - | 1.56E+08 | 1.56E+08 | 2698 |
| ENSG000001 | 8.577898 | 2.725702 | 1.5445   | 0.10026  | 0.16181  | YEATS2-AS1 chr3  | - | 1.84E+08 | 1.84E+08 | 1868 |
| ENSG000001 | 0.580602 | 0        | 0.8036   | 0.6494   | NA       | AC009960. chr2   | + | 2.03E+08 | 2.03E+08 | 677  |
| ENSG000001 | 0        | 0.343138 | -0.41864 | 0.81278  | NA       | AC007131. chr2   | - | 59465851 | 59960531 | 765  |
| ENSG000001 | 5.342695 | 6.921908 | -0.3622  | 0.64624  | 0.7328   | PAIP1P1 chr6     | - | 30154575 | 30156391 | 1203 |
| ENSG000001 | 0.943682 | 0.594029 | 0.4146   | 0.80719  | NA       | EZR-AS1 chr6     | + | 1.59E+08 | 1.59E+08 | 217  |
| ENSG000001 | 23.34984 | 2.575179 | 3.0328   | 1.20E-05 | 3.81E-05 | RP1-122P2 chr20  | + | 19738352 | 19790319 | 677  |
| ENSG000001 | 0        | 2.474811 | -2.4918  | 0.14342  | 0.21836  | RP4-684O2 chr20  | + | 1927892  | 1988163  | 1802 |
| ENSG000001 | 7.572602 | 7.011738 | 0.10788  | 0.89755  | 0.9289   | RP4-742C1 chr22  | - | 39532704 | 39537189 | 2364 |
| ENSG000001 | 89.47554 | 76.43302 | 0.22337  | 0.32987  | 0.43294  | RP11-65J3 chr9   | + | 1.32E+08 | 1.32E+08 | 901  |
| ENSG000001 | 0        | 0.357707 | -0.41864 | 0.81278  | NA       | XXbac-BPG chr6   | - | 31430505 | 31431113 | 609  |
| ENSG000001 | 5.652721 | 9.997996 | -0.75789 | 0.34028  | 0.44421  | Z83851.4 chr22   | + | 42672361 | 42673057 | 544  |
| ENSG000001 | 1.576526 | 2.07098  | -0.29963 | 0.81276  | 0.86839  | RP11-315I1 chr9  | - | 23671786 | 23672397 | 237  |
| ENSG000001 | 2.572449 | 1.744828 | 0.51329  | 0.67689  | 0.75806  | AC026202. chr3   | - | 5198590  | 5229014  | 672  |
| ENSG000001 | 37.98722 | 36.73705 | 0.056432 | 0.87941  | 0.91609  | CTC-575D1 chr5   | + | 1.68E+08 | 1.68E+08 | 743  |
| ENSG000001 | 0.290301 | 0        | 0.4146   | 0.81455  | NA       | RP11-298P chr8   | - | 87672753 | 87674150 | 900  |
| ENSG000001 | 0        | 0.700845 | -0.87835 | 0.62047  | NA       | ZDHHC20P chr6    | - | 29675902 | 29676324 | 423  |
| ENSG000001 | 0        | 5.330019 | -3.9315  | 0.00554  | 0.012228 | AL133493. chr21  | + | 47013568 | 47017005 | 821  |
| ENSG000001 | 0.653381 | 2.979009 | -1.8133  | 0.17036  | 0.25253  | AL160471. chr14  | - | 55471531 | 55472405 | 875  |
| ENSG000001 | 0.342542 | 2.370411 | -2.0419  | 0.18569  | 0.27132  | RP11-154C chr9   | + | 84304628 | 84391815 | 1449 |
| ENSG000001 | 3584.031 | 7209.968 | -1.0072  | 5.45E-18 | 4.18E-17 | RPS28 chr19      | + | 8386042  | 8388224  | 1523 |
| ENSG000001 | 0.36308  | 8.294459 | -3.8726  | 0.001838 | 0.004374 | RP11-305F chrX   | + | 33744625 | 33960397 | 495  |
| ENSG000001 | 1.338465 | 2.794516 | -0.90921 | 0.49192  | 0.59588  | MT1XP1 chr1      | - | 16567708 | 16567893 | 186  |
| ENSG000001 | 0        | 2.529055 | -2.8037  | 0.077578 | 0.13005  | RP13-25N2 chr11  | + | 1592583  | 1620414  | 2265 |
| ENSG000001 | 0        | 0.357707 | -0.41864 | 0.81278  | NA       | RP11-399F chr9   | - | 1.38E+08 | 1.38E+08 | 886  |
| ENSG000001 | 29.73132 | 60.80403 | -1.0197  | 0.007681 | 0.016483 | CTC-338M1 chr5   | + | 1.81E+08 | 1.81E+08 | 1000 |
| ENSG000001 | 0.290301 | 0        | 0.4146   | 0.81455  | NA       | RP11-336N chr9   | + | 80793179 | 80794428 | 1250 |
| ENSG000001 | 2.407167 | 0        | 2.7149   | 0.089055 | 0.14641  | FTLP15 chr7      | - | 46037139 | 46037670 | 532  |
| ENSG000001 | 2.426891 | 5.926464 | -1.1337  | 0.26348  | 0.36165  | AC009970. chr2   | + | 60722821 | 60727099 | 432  |
| ENSG000001 | 11.65817 | 30.6375  | -1.3541  | 0.013426 | 0.027497 | RP11-169K chr1   | - | 16133679 | 16134194 | 516  |
| ENSG000001 | 0.290301 | 0        | 0.4146   | 0.81455  | NA       | AHCYP3 chr2      | - | 1.05E+08 | 1.05E+08 | 1279 |
| ENSG000001 | 0.653381 | 4.395268 | -2.333   | 0.060437 | 0.10504  | BTF3P6 chr21     | - | 34890917 | 34891415 | 499  |
| ENSG000001 | 0        | 0.357707 | -0.41864 | 0.81278  | NA       | RP11-153N chr7   | - | 52232931 | 52260609 | 738  |
| ENSG000001 | 33.88192 | 35.19383 | -0.05978 | 0.87188  | 0.91041  | RP11-87H9 chr9   | + | 69065655 | 69084989 | 457  |
| ENSG000001 | 22.34535 | 36.45386 | -0.6966  | 0.058714 | 0.10251  | UBE2SP1 chr17    | - | 15607546 | 15608214 | 669  |
| ENSG000001 | 16.78595 | 10.46984 | 0.66301  | 0.28598  | 0.38747  | RP11-250B chr6   | + | 81153061 | 81175644 | 682  |
| ENSG000001 | 1.048164 | 0        | 1.348    | 0.44949  | NA       | RP11-354E chr10  | - | 19999257 | 20017479 | 1404 |
| ENSG000001 | 55.82133 | 93.06195 | -0.72693 | 0.12543  | 0.19591  | RP11-823P chr5   | - | 21481436 | 21484120 | 2685 |
| ENSG000001 | 0.342542 | 0        | 0.4146   | 0.81455  | NA       | RP11-288L chr1   | - | 27986839 | 27989233 | 441  |
| ENSG000001 | 1.317927 | 0        | 1.6383   | 0.35541  | NA       | AC016735. chr2   | - | 43268332 | 43270921 | 569  |
| ENSG000001 | 0.342542 | 0        | 0.4146   | 0.81455  | NA       | AC002553. chr17  | + | 15987356 | 15987695 | 340  |
| ENSG000001 | 0        | 1.638012 | -2.1885  | 0.18912  | NA       | FDPSP2 chr7      | - | 76099479 | 76100375 | 897  |
| ENSG000001 | 0        | 0.640152 | -0.82869 | 0.63935  | NA       | RP3-380E1 chr6   | + | 14005151 | 14007132 | 386  |
| ENSG000001 | 0.342542 | 0        | 0.4146   | 0.81455  | NA       | RPSAP14 chrX     | + | 73251297 | 73251655 | 359  |
| ENSG000001 | 0.995923 | 0        | 1.4959   | 0.39264  | NA       | RP11-297F chr1   | + | 1.7E+08  | 1.7E+08  | 760  |
| ENSG000001 | 0        | 0.297015 | -0.41864 | 0.81278  | NA       | AC106706. chr3   | + | 1.94E+08 | 1.94E+08 | 556  |
| ENSG000001 | 0.943682 | 1.698704 | -0.65551 | 0.63964  | 0.72707  | RP11-401E chr10  | - | 7875581  | 7875920  | 340  |
| ENSG000001 | 57.2232  | 2.740271 | 4.2831   | 3.32E-12 | 1.82E-11 | AC116050. chr2   | + | 91777536 | 91809447 | 1804 |
| ENSG000001 | 1.503747 | 1.294874 | 0.19893  | 0.88715  | 0.9212   | RP11-379J1 chr20 | - | 18655039 | 18679353 | 1695 |
| ENSG000001 | 1.939605 | 0.997859 | 0.81425  | 0.53422  | 0.63511  | GDI2P2 chr1      | + | 72740235 | 72740842 | 608  |
| ENSG000001 | 0.36308  | 0.654722 | -0.52647 | 0.7643   | NA       | SETP5 chr9       | - | 1.41E+08 | 1.41E+08 | 562  |
| ENSG000001 | 0        | 3.945314 | -3.5337  | 0.014733 | 0.029886 | CTD-3105F chr19  | + | 12617063 | 12618844 | 621  |
| ENSG000001 | 0        | 0.343138 | -0.41864 | 0.81278  | NA       | RP11-543B chr1   | + | 2.11E+08 | 2.11E+08 | 375  |
| ENSG000001 | 0.36308  | 1.903472 | -1.6912  | 0.30152  | 0.40282  | GAPDHP22 chr13   | - | 99842833 | 99843245 | 413  |
| ENSG000001 | 1.524285 | 1.730259 | -0.11166 | 0.93998  | 0.96067  | DDX39B-AS chr6   | + | 31510081 | 31510915 | 516  |
| ENSG000001 | 0        | 0.343138 | -0.41864 | 0.81278  | NA       | PPP1R2P2 chr21   | + | 37259365 | 37260724 | 1360 |
| ENSG000001 | 7.696808 | 38.09671 | -2.2439  | 2.89E-06 | 9.88E-06 | AL049757. chr22  | - | 43172412 | 43173302 | 891  |
| ENSG000001 | 0        | 0.686276 | -0.84936 | 0.6309   | NA       | RP11-214N chr10  | - | 1.14E+08 | 1.14E+08 | 241  |
| ENSG000001 | 0.342542 | 1.430828 | -1.1489  | 0.51399  | NA       | RP11-236P chrX   | - | 53122892 | 53124040 | 615  |
| ENSG000001 | 0.975385 | 0        | 1.2767   | 0.47406  | NA       | RP11-257K chr6   | - | 73867240 | 73867862 | 623  |
| ENSG000001 | 0        | 7.893045 | -4.5831  | 0.000443 | 0.00116  | RP11-310E chr10  | - | 96988000 | 96990901 | 663  |
| ENSG000001 | 11.49468 | 24.59448 | -1.0789  | 0.023863 | 0.046265 | AC062029. chr2   | + | 88927057 | 88931337 | 1614 |

|            |          |          |          |          |          |                 |   |          |          |      |
|------------|----------|----------|----------|----------|----------|-----------------|---|----------|----------|------|
| ENSG000001 | 0        | 0.297015 | -0.41864 | 0.81278  | NA       | TMEM97P1 chr21  | + | 45203004 | 45203454 | 451  |
| ENSG000001 | 0        | 0.357707 | -0.41864 | 0.81278  | NA       | RPS3AP44 chr13  | + | 27151023 | 27151812 | 790  |
| ENSG000001 | 2.624689 | 0.343138 | 2.2555   | 0.12454  | 0.19474  | RP11-123J chr4  | - | 77880013 | 77880322 | 310  |
| ENSG000001 | 1.576526 | 0.297015 | 1.5836   | 0.31987  | NA       | AC123768. chr15 | + | 32885854 | 32886380 | 525  |
| ENSG000001 | 4.314256 | 1.964165 | 1.0095   | 0.38684  | 0.49106  | RP11-254B chr12 | - | 69020650 | 69020967 | 318  |
| ENSG000001 | 0.36308  | 0.594029 | -0.39069 | 0.82661  | NA       | RP11-345I chr1  | + | 1.79E+08 | 1.79E+08 | 171  |
| ENSG000001 | 0        | 2.232041 | -2.63    | 0.10215  | 0.16421  | RP11-452C chr9  | + | 68298799 | 68299489 | 691  |
| ENSG000001 | 0.653381 | 0.654722 | -0.00313 | 0.9985   | NA       | RP11-56M chr10  | - | 92912362 | 92913106 | 745  |
| ENSG000001 | 0        | 0.343138 | -0.41864 | 0.81278  | NA       | LLOXNC01- chrX  | - | 1.02E+08 | 1.02E+08 | 628  |
| ENSG000001 | 1.016461 | 0.297015 | 0.95157  | 0.5817   | NA       | RP11-247A chr9  | + | 1.32E+08 | 1.32E+08 | 241  |
| ENSG000001 | 18.46614 | 21.16223 | -0.19452 | 0.65628  | 0.74103  | RP11-308C chrX  | + | 1.36E+08 | 1.36E+08 | 2222 |
| ENSG000001 | 0.290301 | 0.891044 | -0.7342  | 0.68015  | NA       | MTND4P26 chr2   | + | 1.21E+08 | 1.21E+08 | 1359 |
| ENSG000001 | 0        | 1.073121 | -1.1788  | 0.50551  | NA       | TAS2R62P chr7   | + | 1.43E+08 | 1.43E+08 | 940  |
| ENSG000001 | 0        | 0.715414 | -0.84936 | 0.6309   | NA       | PAGE2 chrX      | + | 55115441 | 55119275 | 551  |
| ENSG000001 | 154.2476 | 276.2721 | -0.83777 | 4.13E-07 | 1.53E-06 | AC074117. chr2  | + | 27579113 | 27590489 | 3060 |
| ENSG000001 | 0        | 0.297015 | -0.41864 | 0.81278  | NA       | AC011816. chr3  | - | 36921675 | 36922220 | 546  |
| ENSG000001 | 0.632843 | 0        | 0.81931  | 0.64303  | NA       | TPRG1-AS1 chr3  | - | 1.89E+08 | 1.89E+08 | 697  |
| ENSG000001 | 0        | 0.297015 | -0.41864 | 0.81278  | NA       | RP11-183C chr1  | + | 50791803 | 50792682 | 877  |
| ENSG000001 | 14.32735 | 4.585467 | 1.5597   | 0.027474 | 0.052537 | RP3-388E2 chr6  | + | 1.36E+08 | 1.36E+08 | 577  |
| ENSG000001 | 3.132513 | 2.482932 | 0.28849  | 0.80047  | 0.85871  | AL391994. chr1  | - | 2.35E+08 | 2.35E+08 | 375  |
| ENSG000001 | 4.056471 | 0.594029 | 2.2244   | 0.090519 | 0.14847  | RP11-353N chr10 | + | 13771383 | 13798200 | 474  |
| ENSG000001 | 0.632843 | 0        | 0.81931  | 0.64303  | NA       | RP11-269F chr1  | - | 45245998 | 45246387 | 390  |
| ENSG000001 | 0.653381 | 2.117104 | -1.2727  | 0.40015  | 0.50481  | RP11-288E chr11 | + | 93268634 | 93268982 | 349  |
| ENSG000001 | 0.342542 | 0.654722 | -0.52406 | 0.76557  | NA       | RP11-145A chr1  | + | 2.26E+08 | 2.26E+08 | 301  |
| ENSG000001 | 0.685084 | 0        | 0.85004  | 0.63064  | NA       | RPL13AP6 chr10  | - | 1.13E+08 | 1.13E+08 | 612  |
| ENSG000001 | 0        | 0.594029 | -0.81444 | 0.64499  | NA       | AF228730. chr8  | - | 6969836  | 6971250  | 183  |
| ENSG000001 | 0        | 2.514486 | -2.5628  | 0.12928  | 0.20079  | RHBDF1P1 chr3   | - | 14614359 | 14616299 | 1941 |
| ENSG000001 | 900.9257 | 1390.107 | -0.62218 | 0.017524 | 0.035029 | TRIM26 chr6     | - | 30152232 | 30181204 | 3478 |
| ENSG000001 | 4.335607 | 6.627309 | -0.5804  | 0.49986  | 0.60355  | RP11-120C chrX  | - | 10988011 | 11129234 | 1071 |
| ENSG000001 | 0        | 0.594029 | -0.81444 | 0.64499  | NA       | RP13-88F2 chrX  | - | 92477219 | 92480014 | 2796 |
| ENSG000001 | 0        | 0.997859 | -1.5018  | 0.39072  | NA       | RP11-168C chr1  | + | 2.01E+08 | 2.01E+08 | 508  |
| ENSG000001 | 2.468781 | 0.594029 | 1.4177   | 0.37656  | 0.48058  | AC005154. chr7  | - | 30586782 | 30590397 | 353  |
| ENSG000001 | 2.282147 | 4.259314 | -0.82119 | 0.41168  | 0.51652  | RP11-383C chr10 | - | 1.27E+08 | 1.27E+08 | 300  |
| ENSG000001 | 0.975385 | 2.024857 | -0.81092 | 0.58247  | 0.67863  | AC055764. chr3  | - | 1.98E+08 | 1.98E+08 | 473  |
| ENSG000001 | 0.342542 | 0.640152 | -0.50911 | 0.77219  | NA       | AC009473. chr7  | - | 7989484  | 7990340  | 692  |
| ENSG000001 | 0        | 0.343138 | -0.41864 | 0.81278  | NA       | RP5-1044F chr1  | - | 65764438 | 65764663 | 226  |
| ENSG000001 | 0        | 0.357707 | -0.41864 | 0.81278  | NA       | RP3-460G2 chr6  | - | 1.41E+08 | 1.41E+08 | 453  |
| ENSG000001 | 0.685084 | 0.343138 | 0.48017  | 0.78775  | NA       | RP11-77G2 chr10 | - | 76762813 | 76784932 | 189  |
| ENSG000001 | 10.59126 | 0        | 5.0119   | 7.00E-05 | 0.000203 | RP11-30P6 chr6  | - | 86096937 | 86099904 | 2513 |
| ENSG000001 | 0        | 2.041842 | -2.4837  | 0.12741  | 0.19837  | RBPMSLP chr21   | - | 17116323 | 17117399 | 502  |
| ENSG000001 | 31.60255 | 93.26391 | -1.5451  | 9.74E-06 | 3.13E-05 | RP11-613N chr9  | + | 37509147 | 37510296 | 289  |
| ENSG000001 | 0.342542 | 0.686276 | -0.48412 | 0.78604  | NA       | PABPC5-AS chrX  | + | 90669877 | 90689998 | 426  |
| ENSG000001 | 0        | 0.700845 | -0.87835 | 0.62047  | NA       | AC009505. chr2  | - | 1.07E+08 | 1.07E+08 | 424  |
| ENSG000001 | 0        | 9.811086 | -4.9232  | 9.03E-05 | 0.000259 | AC114877. chr3  | + | 26753798 | 26754855 | 582  |
| ENSG000001 | 0.36308  | 1.280305 | -1.2352  | 0.46421  | NA       | TCEB2P4 chr10   | - | 34777511 | 34777806 | 296  |
| ENSG000001 | 0        | 0.357707 | -0.41864 | 0.81278  | NA       | RP11-446F chr10 | - | 2488447  | 2489546  | 764  |
| ENSG000001 | 71.04632 | 232.1905 | -1.7067  | 6.69E-14 | 4.08E-13 | AC108488. chr2  | + | 3606082  | 3609324  | 1207 |
| ENSG000001 | 1.411244 | 0.357707 | 1.3172   | 0.43349  | NA       | AC016683. chr2  | - | 1.14E+08 | 1.14E+08 | 583  |
| ENSG000001 | 0.975385 | 0.654722 | 0.40949  | 0.80016  | NA       | RP11-730A chr10 | - | 13181196 | 13181533 | 338  |
| ENSG000001 | 0.290301 | 0.686276 | -0.47648 | 0.78935  | NA       | HSPA8P1 chrX    | - | 1.2E+08  | 1.2E+08  | 1833 |
| ENSG000001 | 4.918815 | 0.343138 | 2.8746   | 0.055983 | 0.098178 | AC068057. chr2  | - | 1.05E+08 | 1.05E+08 | 2434 |
| ENSG000001 | 0        | 0.715414 | -0.84936 | 0.6309   | NA       | RP11-182N chr9  | + | 35096375 | 35098138 | 425  |
| ENSG000001 | 0        | 0.951736 | -1.2555  | 0.48145  | NA       | AC004854. chr7  | + | 44888015 | 44889167 | 281  |
| ENSG000001 | 0.290301 | 0        | 0.4146   | 0.81455  | NA       | RP5-887A1 chr1  | + | 81001440 | 81112473 | 591  |
| ENSG000001 | 2.749709 | 2.932886 | -0.1095  | 0.91782  | 0.94451  | RP5-1132F chr7  | - | 65584590 | 65629998 | 404  |
| ENSG000001 | 3.019472 | 1.372552 | 0.93879  | 0.49417  | 0.59803  | AC097461. chr2  | - | 2.24E+08 | 2.24E+08 | 537  |
| ENSG000001 | 4.782631 | 2.872193 | 0.64402  | 0.51098  | 0.61415  | ETV5-AS1 chr3   | + | 1.86E+08 | 1.86E+08 | 560  |
| ENSG000001 | 6.462824 | 1.935026 | 1.5958   | 0.091283 | 0.14956  | AC092431. chr2  | + | 69871557 | 70008692 | 905  |
| ENSG000001 | 1.597063 | 0        | 1.9181   | 0.27352  | NA       | RP5-1050C chr17 | + | 4876146  | 4877976  | 439  |
| ENSG000001 | 9.161106 | 5.987157 | 0.5794   | 0.41437  | 0.51934  | RP1-67A8.1 chr6 | - | 1.08E+08 | 1.08E+08 | 338  |
| ENSG000001 | 0.342542 | 0.594029 | -0.38792 | 0.8278   | NA       | CTA-256D1 chr22 | - | 29909878 | 29931379 | 289  |
| ENSG000001 | 0.290301 | 0.686276 | -0.47648 | 0.78935  | NA       | AC006372. chr7  | + | 1.57E+08 | 1.57E+08 | 4049 |
| ENSG000001 | 0.290301 | 0        | 0.4146   | 0.81455  | NA       | RP5-942I1 chr7  | - | 69060944 | 69062434 | 691  |
| ENSG000001 | 1.866827 | 3.025133 | -0.58182 | 0.61149  | 0.70383  | RP11-454L chr1  | + | 2.08E+08 | 2.08E+08 | 680  |
| ENSG000001 | 18.06101 | 9.081103 | 0.9496   | 0.097655 | 0.15828  | RP11-315I chr1  | - | 1.45E+08 | 1.46E+08 | 919  |

|            |          |          |          |          |          |                 |   |          |          |      |
|------------|----------|----------|----------|----------|----------|-----------------|---|----------|----------|------|
| ENSG000001 | 1.669842 | 0        | 1.9671   | 0.26049  | NA       | AC003988. chr7  | - | 79875725 | 79941772 | 578  |
| ENSG000001 | 0        | 5.378559 | -3.9943  | 0.003901 | 0.008826 | TMEM229A chr7   | - | 1.24E+08 | 1.24E+08 | 2551 |
| ENSG000001 | 0.705622 | 3.008147 | -1.7793  | 0.17807  | 0.26185  | RP4-704D2 chr1  | - | 1.46E+08 | 1.46E+08 | 727  |
| ENSG000001 | 0.72616  | 0        | 0.85004  | 0.63064  | NA       | NCLP2 chrX      | - | 1.34E+08 | 1.34E+08 | 1462 |
| ENSG000001 | 0.36308  | 0        | 0.4146   | 0.81455  | NA       | RP11-308A chr9  | + | 1.09E+08 | 1.09E+08 | 2054 |
| ENSG000001 | 0.632843 | 0        | 0.81931  | 0.64303  | NA       | ZFX-AS1 chrX    | - | 24164342 | 24167771 | 417  |
| ENSG000001 | 59.20225 | 16.46183 | 1.8392   | 6.64E-07 | 2.41E-06 | AC093616. chr2  | + | 88000503 | 88038766 | 2095 |
| ENSG000001 | 0        | 8.576905 | -4.7259  | 0.000215 | 0.000587 | RP11-353A chr1  | - | 1.5E+08  | 1.5E+08  | 537  |
| ENSG000001 | 0.923144 | 0.686276 | 0.30412  | 0.8576   | NA       | KCNH1-IT1 chr1  | - | 2.11E+08 | 2.11E+08 | 626  |
| ENSG000001 | 0.580602 | 0.357707 | 0.37639  | 0.83285  | NA       | BOK-AS1 chr2    | - | 2.42E+08 | 2.42E+08 | 643  |
| ENSG000001 | 1.411244 | 0.997859 | 0.37465  | 0.79551  | 0.85505  | AL162431. chr1  | + | 1.81E+08 | 1.81E+08 | 168  |
| ENSG000001 | 1.08924  | 1.744828 | -0.50318 | 0.75322  | 0.81994  | RP4-775C1 chr20 | + | 6194346  | 6196028  | 1683 |
| ENSG000001 | 2.468781 | 0        | 2.4376   | 0.15593  | 0.23467  | RP11-100E chr1  | - | 2.25E+08 | 2.25E+08 | 714  |
| ENSG000001 | 5.90276  | 2.087966 | 1.3887   | 0.17794  | 0.2617   | AC007308. chr22 | + | 21077335 | 21080208 | 2400 |
| ENSG000001 | 0        | 0.297015 | -0.41864 | 0.81278  | NA       | AC012370. chr2  | - | 65669189 | 65683705 | 1320 |
| ENSG000001 | 0.943682 | 0        | 1.2438   | 0.48556  | NA       | SOD2P1 chr1     | - | 1.04E+08 | 1.04E+08 | 562  |
| ENSG000001 | 0        | 51.51642 | -7.263   | 5.28E-11 | 2.67E-10 | RP11-146I chr6  | - | 14977019 | 15090234 | 1017 |
| ENSG000001 | 4.316861 | 0        | 3.529    | 0.019234 | 0.038105 | RP3-325F2 chr6  | + | 1.37E+08 | 1.37E+08 | 505  |
| ENSG000001 | 5.084097 | 1.029414 | 1.9796   | 0.11304  | 0.17935  | RP4-694A7 chr1  | + | 68962359 | 69004310 | 1247 |
| ENSG000001 | 1.919068 | 1.280305 | 0.48275  | 0.71538  | 0.78909  | AP000936. chr11 | - | 1.17E+08 | 1.17E+08 | 255  |
| ENSG000001 | 0        | 0.297015 | -0.41864 | 0.81278  | NA       | RPL36P20 chr3   | + | 41996937 | 41997255 | 319  |
| ENSG000001 | 1.628766 | 0.715414 | 0.93656  | 0.53818  | 0.63889  | RP1-138B7 chr20 | - | 42151901 | 42152212 | 312  |
| ENSG000001 | 0.995923 | 0.640152 | 0.45774  | 0.76749  | NA       | AC079790. chr2  | + | 1.53E+08 | 1.53E+08 | 291  |
| ENSG000001 | 0.290301 | 9.012289 | -4.0114  | 0.001191 | 0.002919 | AC073071. chr7  | - | 1.09E+08 | 1.09E+08 | 388  |
| ENSG000001 | 1.016461 | 0.640152 | 0.45247  | 0.77949  | NA       | COX7BP2 chr20   | - | 34438596 | 34438837 | 242  |
| ENSG000001 | 7.790938 | 6.566617 | 0.2201   | 0.76172  | 0.82702  | AC007970. chr2  | + | 2.11E+08 | 2.11E+08 | 864  |
| ENSG000001 | 0.632843 | 0.891044 | -0.33035 | 0.84668  | NA       | RP11-495P chr1  | - | 1.48E+08 | 1.48E+08 | 420  |
| ENSG000001 | 31.75487 | 59.84565 | -0.9029  | 0.010941 | 0.022797 | ZNF879 chr5     | + | 1.78E+08 | 1.78E+08 | 3304 |
| ENSG000001 | 0        | 1.713273 | -2.2094  | 0.18675  | NA       | AC006026. chr7  | - | 23719814 | 23720405 | 143  |
| ENSG000001 | 12.7492  | 30.00051 | -1.2023  | 0.011998 | 0.024805 | RP11-761A chr3  | + | 40803036 | 40803290 | 255  |
| ENSG000001 | 0        | 0.343138 | -0.41864 | 0.81278  | NA       | OR1AA1P chrX    | + | 1.31E+08 | 1.31E+08 | 916  |
| ENSG000001 | 0.342542 | 0.937167 | -0.89746 | 0.60352  | NA       | H2BFS chr21     | + | 44985070 | 44985529 | 460  |
| ENSG000001 | 3.693391 | 2.443257 | 0.53489  | 0.65186  | 0.7372   | AC116366. chr5  | - | 1.32E+08 | 1.32E+08 | 3730 |
| ENSG000001 | 0.870904 | 0.715414 | 0.19229  | 0.91324  | NA       | RP11-213F chr5  | - | 90575914 | 90576959 | 1046 |
| ENSG000001 | 0.36308  | 0        | 0.4146   | 0.81455  | NA       | BACH1-IT3 chr21 | + | 30868367 | 30872706 | 406  |
| ENSG000001 | 1.431782 | 3.901607 | -1.284   | 0.30058  | 0.40208  | RP11-54D1 chr9  | + | 15055055 | 15056050 | 996  |
| ENSG000001 | 0        | 0.343138 | -0.41864 | 0.81278  | NA       | TCEB3CL chr18   | - | 44548658 | 44550534 | 1877 |
| ENSG000001 | 0.342542 | 0.357707 | -0.0021  | 0.99906  | NA       | CDK2AP2P chr9   | + | 45363481 | 45363852 | 372  |
| ENSG000001 | 0.290301 | 0        | 0.4146   | 0.81455  | NA       | RP11-271F chr10 | - | 10407143 | 10408450 | 335  |
| ENSG000001 | 2.572449 | 0.343138 | 2.2282   | 0.13135  | 0.20345  | RP11-432J chr10 | - | 1.34E+08 | 1.34E+08 | 1013 |
| ENSG000001 | 0        | 0.343138 | -0.41864 | 0.81278  | NA       | RPS12P2 chr10   | - | 81975607 | 81975875 | 269  |
| ENSG000001 | 4.81352  | 0        | 3.8023   | 0.007644 | 0.016416 | RP11-381C chr9  | + | 66954107 | 66954749 | 643  |
| ENSG000001 | 2.903826 | 1.949596 | 0.49478  | 0.68657  | 0.76619  | ST13P18 chrX    | - | 92542732 | 92543758 | 1027 |
| ENSG000001 | 6.669996 | 2.428687 | 1.3576   | 0.16828  | 0.24991  | RP11-308A chr9  | + | 1.09E+08 | 1.09E+08 | 1686 |
| ENSG000001 | 5.145711 | 2.307303 | 1.0415   | 0.2985   | 0.40035  | RPL9P2 chr17    | + | 15346953 | 15347505 | 553  |
| ENSG000001 | 20.7782  | 26.78356 | -0.35727 | 0.39694  | 0.50145  | AC012146. chr17 | + | 5014763  | 5018299  | 1646 |
| ENSG000001 | 16.04944 | 6.34728  | 1.281    | 0.064398 | 0.111    | RP11-767A chr1  | - | 46116711 | 46117498 | 788  |
| ENSG000001 | 0.632843 | 0.654722 | -0.02224 | 0.98935  | NA       | BCAS2P2 chr1    | - | 1.01E+08 | 1.01E+08 | 674  |
| ENSG000001 | 0        | 0.700845 | -0.87835 | 0.62047  | NA       | RP11-241I chr10 | - | 32391450 | 32392221 | 772  |
| ENSG000001 | 2.592987 | 2.185918 | 0.19751  | 0.86546  | 0.9064   | JAZF1-AS1 chr7  | + | 28219941 | 28283536 | 3684 |
| ENSG000001 | 1.048164 | 0.297015 | 0.97802  | 0.57083  | NA       | RP11-297L chr16 | + | 52689216 | 52689962 | 747  |
| ENSG000001 | 23.08528 | 32.43007 | -0.48042 | 0.37412  | 0.47837  | RP11-797F chr7  | - | 64295658 | 64297260 | 1603 |
| ENSG000001 | 8.455484 | 2.621302 | 1.567    | 0.071439 | 0.12122  | LLOXNC01- chrX  | - | 1.03E+08 | 1.03E+08 | 1048 |
| ENSG000001 | 0        | 2.261179 | -2.4065  | 0.15834  | 0.23767  | AC007405. chr2  | - | 1.72E+08 | 1.72E+08 | 2026 |
| ENSG000001 | 0        | 14.09712 | -5.4363  | 7.87E-06 | 2.56E-05 | AC009264. chr7  | - | 1.36E+08 | 1.37E+08 | 2160 |
| ENSG000001 | 6.484176 | 7.927888 | -0.30027 | 0.71335  | 0.78731  | AP000347. chr22 | - | 23980679 | 23982949 | 906  |
| ENSG000001 | 1.524285 | 1.713273 | -0.09875 | 0.94276  | 0.96298  | RPS26P47 chr13  | - | 1.01E+08 | 1.01E+08 | 440  |
| ENSG000001 | 2.334388 | 1.340997 | 0.6942   | 0.56823  | 0.6656   | AC003080. chr7  | - | 1.12E+08 | 1.12E+08 | 767  |
| ENSG000001 | 2.064625 | 0.339702 | -0.51229 | 0.64253  | 0.72954  | RP11-52J3. chr6 | - | 1.58E+08 | 1.58E+08 | 681  |
| ENSG000001 | 1.213446 | 0.343138 | 1.1732   | 0.4909   | NA       | AC104654. chr2  | - | 42158739 | 42160863 | 769  |
| ENSG000001 | 16.62841 | 0.997859 | 3.7689   | 3.27E-05 | 9.88E-05 | PFN1P3 chr1     | + | 1.48E+08 | 1.48E+08 | 402  |
| ENSG000001 | 0        | 0.997859 | -1.5018  | 0.39072  | NA       | TATDN1P1 chr10  | + | 64981915 | 64982805 | 891  |
| ENSG000001 | 6.204226 | 16.06041 | -1.316   | 0.044129 | 0.079765 | SNX18P7 chr9    | + | 33576378 | 33577012 | 635  |
| ENSG000001 | 5.90276  | 2.918317 | 0.93701  | 0.29603  | 0.39808  | RNF219-AS chr13 | + | 79152611 | 79193239 | 4001 |
| ENSG000001 | 0.36308  | 0.297015 | -0.00205 | 0.99908  | NA       | AC098828. chr2  | - | 20263617 | 20306590 | 746  |

|            |          |          |          |          |          |                 |   |          |          |      |
|------------|----------|----------|----------|----------|----------|-----------------|---|----------|----------|------|
| ENSG000001 | 4.345959 | 3.114963 | 0.46978  | 0.65671  | 0.74137  | AP000330. chr21 | + | 36118054 | 36157183 | 2632 |
| ENSG000001 | 0        | 0.343138 | -0.41864 | 0.81278  | NA       | RP11-40F6 chr10 | + | 81993420 | 82005123 | 635  |
| ENSG000001 | 23.77974 | 1.684135 | 3.6314   | 3.85E-06 | 1.29E-05 | CTBP2P8 chr1    | - | 68627444 | 68628773 | 1330 |
| ENSG000001 | 1.213446 | 0        | 1.5515   | 0.38249  | NA       | RP11-158A chr13 | + | 91145541 | 91187334 | 742  |
| ENSG000001 | 10.57154 | 7.907614 | 0.40214  | 0.51874  | 0.62139  | AF238380. chrX  | - | 49641892 | 49643844 | 1610 |
| ENSG000001 | 0.290301 | 0.640152 | -0.50256 | 0.77558  | NA       | RP11-211N chr10 | - | 1.15E+08 | 1.15E+08 | 692  |
| ENSG000001 | 0        | 0.343138 | -0.41864 | 0.81278  | NA       | RP11-181C chr1  | + | 2143962  | 2152177  | 326  |
| ENSG000001 | 0.342542 | 2.370411 | -2.0419  | 0.18569  | 0.27132  | LLOXNC01- chrX  | + | 1.03E+08 | 1.03E+08 | 632  |
| ENSG000001 | 9.584986 | 3.183777 | 1.4781   | 0.066461 | 0.11395  | AC006547. chr22 | - | 20135970 | 20138399 | 1266 |
| ENSG000001 | 0        | 0.343138 | -0.41864 | 0.81278  | NA       | RBMY1A1 chrY    | + | 23673258 | 23711212 | 1921 |
| ENSG000001 | 0        | 0.357707 | -0.41864 | 0.81278  | NA       | RP11-560I chr7  | + | 1.22E+08 | 1.22E+08 | 472  |
| ENSG000001 | 0.943682 | 0        | 1.2438   | 0.48556  | NA       | CICP13 chr1     | + | 2.23E+08 | 2.23E+08 | 2789 |
| ENSG000001 | 116.6356 | 66.26577 | 0.813    | 0.003555 | 0.008101 | ZNF37BP chr10   | - | 43015073 | 43048270 | 2929 |
| ENSG000001 | 0        | 0.98329  | -1.2878  | 0.47019  | NA       | SLC25A5P4 chr13 | + | 57888873 | 57890043 | 869  |
| ENSG000001 | 0.290301 | 1.995719 | -1.903   | 0.2133   | 0.3039   | RP11-666F chr12 | + | 26776302 | 26802412 | 876  |
| ENSG000001 | 39.24695 | 17.29788 | 1.1558   | 0.004177 | 0.009405 | AC007283. chr2  | + | 2.02E+08 | 2.02E+08 | 445  |
| ENSG000001 | 26.74355 | 26.73266 | -0.00507 | 0.99119  | 0.99535  | AC092171. chr7  | - | 5465916  | 5468558  | 2643 |
| ENSG000001 | 0        | 1.012429 | -1.3162  | 0.46038  | NA       | RP11-125P chr20 | + | 22034831 | 22055238 | 520  |
| ENSG000001 | 10.90291 | 2.058828 | 2.1878   | 0.037029 | 0.068514 | KBTBD13 chr15   | + | 65369154 | 65372276 | 3123 |
| ENSG000001 | 0        | 24.4253  | -6.2191  | 7.88E-08 | 3.10E-07 | ZNF736 chr7     | + | 63767837 | 63810017 | 2098 |
| ENSG000001 | 2.282147 | 0        | 2.6902   | 0.089639 | 0.14723  | FGF14-AS1 chr13 | + | 1.03E+08 | 1.03E+08 | 321  |
| ENSG000001 | 0        | 1.874334 | -2.1429  | 0.21634  | NA       | RP11-706C chrX  | - | 3771051  | 3800358  | 2198 |
| ENSG000001 | 0.685084 | 2.324288 | -1.3902  | 0.34351  | 0.44752  | AC005534. chr7  | + | 1.56E+08 | 1.56E+08 | 433  |
| ENSG000001 | 0        | 0.297015 | -0.41864 | 0.81278  | NA       | RP11-168C chr10 | + | 91215821 | 91227897 | 478  |
| ENSG000001 | 0        | 0.594029 | -0.81444 | 0.64499  | NA       | RP1-14D6 chrX   | + | 1.52E+08 | 1.52E+08 | 817  |
| ENSG000001 | 484.3585 | 9.075398 | 5.7096   | 1.57E-69 | 5.58E-68 | MAGI2-AS3 chr7  | + | 79082198 | 79100524 | 4505 |
| ENSG000001 | 0.290301 | 0.594029 | -0.38058 | 0.83094  | NA       | AC006960. chr7  | + | 36345240 | 36345513 | 153  |
| ENSG000001 | 1.939605 | 1.485073 | 0.2778   | 0.84753  | 0.89291  | AC002064. chr7  | - | 89895348 | 89899530 | 289  |
| ENSG000001 | 0.290301 | 0        | 0.4146   | 0.81455  | NA       | RP11-136B chr1  | + | 2.38E+08 | 2.38E+08 | 197  |
| ENSG000001 | 8.57969  | 96.81835 | -3.4583  | 1.31E-19 | 1.09E-18 | PINLYP chr19    | + | 44080952 | 44088116 | 2587 |
| ENSG000001 | 1.846289 | 0.594029 | 1.1406   | 0.47787  | 0.58224  | AC002365. chrX  | + | 9935392  | 9936134  | 642  |
| ENSG000001 | 0.36308  | 2.606733 | -2.0744  | 0.19205  | 0.27917  | AC147651. chr7  | - | 523744   | 535755   | 420  |
| ENSG000001 | 1.338465 | 2.618886 | -0.82216 | 0.52936  | 0.63077  | ZNF101P2 chr1   | - | 1.93E+08 | 1.93E+08 | 1229 |
| ENSG000001 | 0.685084 | 1.698704 | -1.002   | 0.5098   | 0.61316  | RP11-496N chr1  | - | 2.26E+08 | 2.26E+08 | 656  |
| ENSG000001 | 3.205292 | 1.638012 | 0.86834  | 0.43363  | 0.53902  | RP11-275I chr1  | + | 2.26E+08 | 2.26E+08 | 535  |
| ENSG000001 | 0        | 0.343138 | -0.41864 | 0.81278  | NA       | AP1B1P1 chr22   | + | 32517964 | 32529456 | 827  |
| ENSG000001 | 0.290301 | 0        | 0.4146   | 0.81455  | NA       | AC096664. chr2  | + | 63911439 | 63911844 | 406  |
| ENSG000001 | 0.290301 | 0        | 0.4146   | 0.81455  | NA       | ALDH7A1P. chr10 | - | 64500968 | 64501145 | 178  |
| ENSG000001 | 4.637074 | 3.100394 | 0.55346  | 0.56202  | 0.6604   | RPL34-AS1 chr4  | - | 1.09E+08 | 1.1E+08  | 3713 |
| ENSG000001 | 17.63631 | 8.363273 | 1.0283   | 0.073742 | 0.12468  | AC003665. chr17 | - | 45974696 | 46018776 | 1738 |
| ENSG000001 | 0.290301 | 0        | 0.4146   | 0.81455  | NA       | RP4-612J1 chr1  | + | 75055419 | 75087403 | 588  |
| ENSG000001 | 2.697468 | 7.884181 | -1.4631  | 0.11152  | 0.17719  | RPL13AP2C chr12 | + | 13028433 | 13029044 | 612  |
| ENSG000001 | 17.81357 | 8.599595 | 0.99428  | 0.10527  | 0.16858  | GS1-124K5 chr7  | + | 65976543 | 66010053 | 712  |
| ENSG000001 | 0.342542 | 0.297015 | -0.00202 | 0.99909  | NA       | FYTTD1P1 chr9   | - | 1.04E+08 | 1.04E+08 | 921  |
| ENSG000001 | 0        | 2.010288 | -2.4674  | 0.13027  | 0.202    | KB-1592A4 chr22 | - | 21532181 | 21534164 | 774  |
| ENSG000001 | 0.290301 | 0        | 0.4146   | 0.81455  | NA       | RP11-285C chr10 | - | 45395062 | 45415668 | 1444 |
| ENSG000001 | 2.188831 | 6.700155 | -1.4262  | 0.17939  | 0.26348  | AP000253. chr21 | - | 33025906 | 33031813 | 2233 |
| ENSG000001 | 0        | 9.923607 | -4.8868  | 0.000155 | 0.000432 | C5orf58 chr5    | + | 1.7E+08  | 1.7E+08  | 2113 |
| ENSG000001 | 1.306762 | 0.937167 | 0.3445   | 0.82157  | 0.87444  | PTGES3P1 chr1   | - | 89569968 | 89570450 | 483  |
| ENSG000001 | 0.342542 | 0.594029 | -0.38792 | 0.8278   | NA       | NDUFB1P2 chr1   | + | 2.23E+08 | 2.23E+08 | 176  |
| ENSG000001 | 0.580602 | 0        | 0.8036   | 0.6494   | NA       | RP11-288C chr10 | - | 1.35E+08 | 1.35E+08 | 475  |
| ENSG000001 | 0.36308  | 0        | 0.4146   | 0.81455  | NA       | RP11-39K2 chr9  | + | 5040945  | 5041940  | 955  |
| ENSG000001 | 0.653381 | 0.357707 | 0.52032  | 0.76705  | NA       | RP11-37L2 chr13 | + | 34185104 | 34185659 | 385  |
| ENSG000001 | 2.282147 | 6.179772 | -1.3232  | 0.16892  | 0.25063  | AC096582. chr7  | + | 45813194 | 45822756 | 386  |
| ENSG000001 | 5.426639 | 10.96517 | -0.97611 | 0.2321   | 0.32555  | RP11-100C chr9  | + | 94894680 | 94900911 | 1863 |
| ENSG000001 | 0        | 1.638012 | -2.1885  | 0.18912  | NA       | RP3-448I9. chr6 | + | 14394557 | 14404520 | 405  |
| ENSG000001 | 270.6327 | 460.8696 | -0.76354 | 0.001196 | 0.00293  | FAM133B chr7    | - | 92190107 | 92219708 | 2434 |
| ENSG000001 | 2.665765 | 6.520493 | -1.2145  | 0.17863  | 0.26257  | RP3-510D1 chr1  | + | 9242271  | 9243855  | 269  |
| ENSG000001 | 0        | 1.043983 | -1.3473  | 0.44976  | NA       | RP1-164F3 chrX  | - | 1.01E+08 | 1.01E+08 | 397  |
| ENSG000001 | 0.705622 | 1.294874 | -0.71528 | 0.63274  | 0.72172  | API5P1 chrX     | - | 1.15E+08 | 1.15E+08 | 1510 |
| ENSG000001 | 0.36308  | 0.594029 | -0.39069 | 0.82661  | NA       | TPMTP2 chr3     | - | 42187138 | 42187863 | 726  |
| ENSG000001 | 0        | 0.357707 | -0.41864 | 0.81278  | NA       | COX6B1P1 chr7   | + | 1.49E+08 | 1.49E+08 | 213  |
| ENSG000001 | 0        | 1.416259 | -1.7181  | 0.33141  | NA       | RPL7AP71 chrX   | + | 54249757 | 54250495 | 739  |
| ENSG000001 | 0.923144 | 0        | 1.223    | 0.49292  | NA       | RP1-283K1 chr6  | - | 1.34E+08 | 1.34E+08 | 317  |
| ENSG000001 | 0.290301 | 0        | 0.4146   | 0.81455  | NA       | BIN2P1 chr4     | + | 83196224 | 83197753 | 1530 |

|            |          |          |          |          |          |                  |   |          |          |      |
|------------|----------|----------|----------|----------|----------|------------------|---|----------|----------|------|
| ENSG000001 | 0        | 0.357707 | -0.41864 | 0.81278  | NA       | RP5-998N2 chr1   | - | 1.49E+08 | 1.49E+08 | 3540 |
| ENSG000001 | 0        | 0.343138 | -0.41864 | 0.81278  | NA       | AC007880. chr2   | - | 65073264 | 65090760 | 1977 |
| ENSG000001 | 0.342542 | 0        | 0.4146   | 0.81455  | NA       | CTSL1P8 chr9     | + | 90459067 | 90462229 | 967  |
| ENSG000001 | 0.36308  | 0        | 0.4146   | 0.81455  | NA       | SYNE1-AS1 chr6   | + | 1.53E+08 | 1.53E+08 | 553  |
| ENSG000001 | 0.632843 | 0        | 0.81931  | 0.64303  | NA       | AC019186. chr2   | - | 1.59E+08 | 1.59E+08 | 545  |
| ENSG000001 | 38.19439 | 29.24219 | 0.38138  | 0.35524  | 0.45947  | CCT6P3 chr7      | + | 64498732 | 64535091 | 3702 |
| ENSG000001 | 0        | 0.715414 | -0.84936 | 0.6309   | NA       | RP11-382F chr9   | - | 13021693 | 13022891 | 1199 |
| ENSG000001 | 0        | 1.058552 | -1.361   | 0.4451   | NA       | RP11-41L1 chrX   | - | 1.28E+08 | 1.28E+08 | 1648 |
| ENSG000001 | 0        | 0.357707 | -0.41864 | 0.81278  | NA       | CHRM3-AS1 chr1   | - | 2.4E+08  | 2.4E+08  | 486  |
| ENSG000001 | 0.923144 | 0        | 1.223    | 0.49292  | NA       | MCIDAS chr5      | - | 54515442 | 54523143 | 2091 |
| ENSG000001 | 3.298608 | 2.575179 | 0.30908  | 0.76588  | 0.83062  | RP1-206D1 chr1   | - | 1.69E+08 | 1.69E+08 | 100  |
| ENSG000001 | 0.975385 | 0.343138 | 0.92553  | 0.59174  | NA       | RP11-5P18 chr1   | + | 16296127 | 16296689 | 563  |
| ENSG000001 | 42.57726 | 122.436  | -1.5129  | 2.75E-05 | 8.39E-05 | MAPKAPK5 chr12   | - | 1.12E+08 | 1.12E+08 | 2285 |
| ENSG000001 | 0        | 3.085825 | -3.0709  | 0.047974 | 0.085814 | LINC00624 chr1   | - | 1.47E+08 | 1.47E+08 | 701  |
| ENSG000001 | 0.342542 | 0        | 0.4146   | 0.81455  | NA       | OR2AT2P chr11    | - | 74782193 | 74783097 | 905  |
| ENSG000001 | 0.870904 | 0.997859 | -0.09987 | 0.94993  | NA       | H2AFZP5 chr10    | + | 79713253 | 79713634 | 382  |
| ENSG000001 | 25.79808 | 33.7759  | -0.37654 | 0.36672  | 0.47131  | AL450992. chr1   | + | 1.52E+08 | 1.52E+08 | 506  |
| ENSG000001 | 714.794  | 888.5046 | -0.31364 | 0.027449 | 0.052499 | JRK chr8         | - | 1.44E+08 | 1.44E+08 | 8937 |
| ENSG000001 | 0.923144 | 0.98329  | -0.04766 | 0.97585  | 0.9865   | SNRK-AS1 chr3    | - | 43391136 | 43393454 | 750  |
| ENSG000001 | 3.993065 | 7.953737 | -0.92591 | 0.31965  | 0.42255  | RPSAP9 chr9      | + | 79013615 | 79014502 | 888  |
| ENSG000001 | 0.290301 | 3.556053 | -2.6592  | 0.066255 | 0.11369  | RP4-633I8. chr1  | + | 8810489  | 8811146  | 658  |
| ENSG000001 | 0.342542 | 0.594029 | -0.38792 | 0.8278   | NA       | RP13-297E chrX   | + | 1886240  | 1887669  | 548  |
| ENSG000001 | 0.290301 | 0        | 0.4146   | 0.81455  | NA       | AC016894. chr2   | - | 61644022 | 61644332 | 311  |
| ENSG000001 | 0.342542 | 1.577319 | -1.4728  | 0.37548  | 0.47961  | RP1-149A1 chr22  | - | 32723158 | 32739092 | 361  |
| ENSG000001 | 42.72796 | 7.656723 | 2.4446   | 1.87E-07 | 7.15E-07 | LL22NC03- chr22  | + | 22648098 | 22649159 | 524  |
| ENSG000001 | 0        | 0.715414 | -0.84936 | 0.6309   | NA       | NECAP1P2 chr2    | + | 74577196 | 74578136 | 727  |
| ENSG000001 | 35.67418 | 10.48279 | 1.7287   | 0.000204 | 0.000558 | LINC00849 chr10  | - | 70237756 | 70240521 | 1779 |
| ENSG000001 | 2.282147 | 3.428963 | -0.50871 | 0.64035  | 0.72748  | MED14-AS1 chrX   | + | 40594652 | 40597950 | 897  |
| ENSG000001 | 0        | 0.686276 | -0.84936 | 0.6309   | NA       | AC009263. chr7   | + | 1.38E+08 | 1.38E+08 | 1239 |
| ENSG000001 | 0        | 0.951736 | -1.2555  | 0.48145  | NA       | AC097523. chr2   | - | 1.39E+08 | 1.39E+08 | 765  |
| ENSG000001 | 9.657765 | 18.2286  | -0.90478 | 0.13453  | 0.20755  | AL162151. chr14  | + | 99439651 | 99439808 | 158  |
| ENSG000001 | 9.480505 | 6.61274  | 0.5011   | 0.47319  | 0.57785  | PCCA-AS1 chr13   | - | 1.01E+08 | 1.01E+08 | 474  |
| ENSG000001 | 0        | 0.343138 | -0.41864 | 0.81278  | NA       | AC079117. chr2   | + | 77213091 | 77236917 | 1000 |
| ENSG000001 | 0.975385 | 0        | 1.2767   | 0.47406  | NA       | AC104820. chr2   | + | 1.82E+08 | 1.82E+08 | 1771 |
| ENSG000001 | 38.11061 | 50.21348 | -0.38929 | 0.28171  | 0.38276  | HMG2N2P5 chr15   | + | 30022917 | 30023189 | 273  |
| ENSG000001 | 1.742621 | 1.98115  | -0.1758  | 0.89493  | 0.92703  | RP11-262F chr9   | - | 66513488 | 66553911 | 1602 |
| ENSG000001 | 0        | 1.294874 | -1.8547  | 0.27869  | NA       | ACTBP13 chr3     | - | 49910780 | 49915413 | 4634 |
| ENSG000001 | 4.045306 | 0        | 3.4567   | 0.021651 | 0.042397 | RP11-242F chr6   | - | 1.48E+08 | 1.48E+08 | 446  |
| ENSG000001 | 0.580602 | 1.355566 | -0.83684 | 0.59462  | 0.68907  | RP11-337A chr9   | - | 26955778 | 26956293 | 405  |
| ENSG000001 | 7.699414 | 5.863356 | 0.35971  | 0.67242  | 0.75474  | RP11-465N chr1   | - | 2.02E+08 | 2.02E+08 | 788  |
| ENSG000001 | 0.685084 | 0        | 0.85004  | 0.63064  | NA       | VN2R3P chr9      | + | 39016966 | 39039591 | 1412 |
| ENSG000001 | 0        | 0.357707 | -0.41864 | 0.81278  | NA       | AC110620. chr2   | + | 1.36E+08 | 1.36E+08 | 711  |
| ENSG000001 | 20.41675 | 17.16838 | 0.23271  | 0.65235  | 0.73765  | SDCBP2-AS1 chr20 | + | 1306065  | 1358827  | 1811 |
| ENSG000001 | 0        | 1.416259 | -1.7181  | 0.33141  | NA       | NUS1P2 chr13     | + | 23489790 | 23490662 | 873  |
| ENSG000001 | 0        | 0.700845 | -0.87835 | 0.62047  | NA       | LINC00444 chr13  | - | 48479464 | 48481492 | 215  |
| ENSG000001 | 0.653381 | 3.959884 | -2.1914  | 0.084763 | 0.1404   | AC073283. chr2   | - | 47419544 | 47572213 | 1892 |
| ENSG000001 | 0        | 7.077263 | -4.4087  | 0.000905 | 0.002259 | RP11-445L chr9   | - | 1.18E+08 | 1.18E+08 | 427  |
| ENSG000001 | 1.503747 | 1.280305 | 0.19592  | 0.89491  | 0.92703  | RP4-530I1 chr20  | + | 49262008 | 49278812 | 638  |
| ENSG000001 | 2.302685 | 13.4804  | -2.4039  | 0.002941 | 0.006786 | RP1-92O14 chr1   | - | 43820355 | 43824329 | 661  |
| ENSG000001 | 0        | 13.61716 | -5.339   | 1.92E-05 | 5.95E-05 | GPR50-AS1 chrX   | - | 1.5E+08  | 1.5E+08  | 1620 |
| ENSG000001 | 0        | 0.891044 | -1.0625  | 0.54819  | NA       | RP11-112L chr20  | + | 48782899 | 48788279 | 425  |
| ENSG000001 | 0.36308  | 0.297015 | -0.00205 | 0.99908  | NA       | RP11-225F chr10  | + | 1.05E+08 | 1.05E+08 | 657  |
| ENSG000001 | 0.342542 | 1.66715  | -1.521   | 0.35886  | 0.46305  | AC004478. chrX   | - | 91237654 | 91238504 | 851  |
| ENSG000001 | 4.439275 | 0.343138 | 2.9707   | 0.030838 | 0.058115 | AF015262. chr21  | + | 36508935 | 36511519 | 698  |
| ENSG000001 | 1.887365 | 0.343138 | 1.6811   | 0.30529  | 0.40686  | HMG1A1P4 chr9    | - | 1.31E+08 | 1.31E+08 | 334  |
| ENSG000001 | 0        | 1.340997 | -1.8899  | 0.26871  | NA       | RP11-745C chr7   | + | 54827118 | 54872621 | 481  |
| ENSG000001 | 6.121096 | 2.56061  | 1.1217   | 0.26569  | 0.36443  | UPF3AP3 chr9     | - | 1.03E+08 | 1.03E+08 | 769  |
| ENSG000001 | 0        | 0.951736 | -1.2555  | 0.48145  | NA       | AC060834. chr7   | + | 9776951  | 9809142  | 618  |
| ENSG000001 | 0        | 0.343138 | -0.41864 | 0.81278  | NA       | AC007161. chr7   | - | 7778165  | 7782204  | 1050 |
| ENSG000001 | 0.342542 | 2.621302 | -2.2253  | 0.13564  | 0.20879  | RP11-166B chr16  | - | 12021230 | 12070500 | 1194 |
| ENSG000001 | 0.342542 | 0.343138 | -0.00208 | 0.99906  | NA       | AC073236. chr7   | - | 1.53E+08 | 1.53E+08 | 2624 |
| ENSG000001 | 0.923144 | 0        | 1.223    | 0.49292  | NA       | HDAC1P1 chr10    | + | 95897505 | 95899257 | 1445 |
| ENSG000001 | 0.290301 | 2.681995 | -2.2909  | 0.12121  | 0.1904   | KRT18P15 chr3    | + | 32300432 | 32301722 | 1291 |
| ENSG000001 | 1.814586 | 3.365854 | -0.73196 | 0.54604  | 0.6462   | RP11-272P chr9   | - | 13274509 | 13279186 | 457  |
| ENSG000001 | 1091.459 | 2440.832 | -1.16    | 2.10E-30 | 2.72E-29 | GAS5 chr1        | - | 1.74E+08 | 1.74E+08 | 1698 |

|            |          |          |          |          |          |                  |   |          |          |      |
|------------|----------|----------|----------|----------|----------|------------------|---|----------|----------|------|
| ENSG000001 | 3.371387 | 5.748419 | -0.71357 | 0.45547  | 0.56078  | AC144530. chr3   | - | 1.98E+08 | 1.98E+08 | 555  |
| ENSG000001 | 1.971308 | 4.495636 | -1.0761  | 0.31796  | 0.42071  | EIF5AP4 chr10    | - | 82006975 | 82007439 | 465  |
| ENSG000001 | 520.3382 | 165.0661 | 1.6543   | 2.28E-22 | 2.14E-21 | HLA-B chr6       | - | 31321649 | 31324965 | 1547 |
| ENSG000001 | 2.935529 | 3.336716 | -0.16092 | 0.86992  | 0.90949  | CTD-2666L chr19  | + | 12395152 | 12396000 | 849  |
| ENSG000001 | 0        | 0.594029 | -0.81444 | 0.64499  | NA       | AP002381. chr11  | + | 72651543 | 72652157 | 615  |
| ENSG000001 | 2.188831 | 29.98761 | -3.5742  | 2.36E-07 | 8.92E-07 | RP11-328A chr6   | - | 41462591 | 41516359 | 575  |
| ENSG000001 | 7.613678 | 0.343138 | 3.721    | 0.00364  | 0.008283 | RP11-421L chr1   | - | 2.22E+08 | 2.22E+08 | 4340 |
| ENSG000001 | 0        | 0.297015 | -0.41864 | 0.81278  | NA       | RP11-380I chr1   | - | 2.03E+08 | 2.03E+08 | 1239 |
| ENSG000001 | 0.705622 | 1.248751 | -0.63959 | 0.68663  | 0.76619  | AC008132. chr22  | + | 18821207 | 18821951 | 745  |
| ENSG000001 | 48.27962 | 43.76986 | 0.14286  | 0.62778  | 0.71765  | WASH4P chr16     | - | 64043    | 69452    | 4243 |
| ENSG000001 | 0        | 1.888903 | -2.3653  | 0.15293  | NA       | GULOP chr8       | + | 27417791 | 27446590 | 748  |
| ENSG000001 | 52.80805 | 61.18261 | -0.21316 | 0.57606  | 0.6728   | RP11-395P chr9   | - | 1.31E+08 | 1.31E+08 | 3801 |
| ENSG000001 | 0        | 0.997859 | -1.5018  | 0.39072  | NA       | RP11-428C chr13  | - | 27810419 | 27810948 | 420  |
| ENSG000001 | 0.923144 | 0.937167 | -0.01228 | 0.99379  | NA       | CTD-2666L chr19  | + | 12305830 | 12348582 | 917  |
| ENSG000001 | 0.995923 | 3.443532 | -1.5306  | 0.21411  | 0.3049   | C11orf94 chr11   | - | 45928085 | 45928833 | 369  |
| ENSG000001 | 23.75236 | 45.39089 | -0.90506 | 0.030842 | 0.058118 | RP11-62F2 chr9   | + | 16726812 | 16727522 | 428  |
| ENSG000001 | 0.580602 | 0        | 0.8036   | 0.6494   | NA       | AC068535. chr2   | - | 1.05E+08 | 1.05E+08 | 1457 |
| ENSG000001 | 0        | 1.029414 | -1.1526  | 0.51496  | NA       | EEF1GP5 chrX     | + | 1.15E+08 | 1.15E+08 | 1310 |
| ENSG000001 | 0        | 169.4552 | -8.7712  | 4.33E-15 | 2.85E-14 | LINC00458 chr13  | - | 54689924 | 54707001 | 1054 |
| ENSG000001 | 3.484428 | 0.640152 | 1.9313   | 0.17499  | 0.25815  | HSPA8P3 chr10    | + | 27003551 | 27004761 | 780  |
| ENSG000001 | 5.041229 | 3.480792 | 0.46501  | 0.63109  | 0.72038  | RP11-483F chr9   | + | 1.32E+08 | 1.32E+08 | 470  |
| ENSG000001 | 0        | 3.636147 | -3.0614  | 0.062014 | 0.10732  | AC108448. chr11  | + | 3210776  | 3211159  | 293  |
| ENSG000001 | 79.70734 | 114.6517 | -0.52081 | 0.065359 | 0.11236  | RPS3AP6 chr15    | + | 60060543 | 60061347 | 805  |
| ENSG000001 | 0.342542 | 2.932886 | -2.4071  | 0.096032 | 0.15618  | RP11-9E13 chr10  | + | 70184317 | 70184754 | 438  |
| ENSG000001 | 0.290301 | 0        | 0.4146   | 0.81455  | NA       | RP4-794H1 chr1   | + | 59250823 | 59365384 | 996  |
| ENSG000001 | 0.72616  | 0        | 0.85004  | 0.63064  | NA       | RP11-466L chr1   | + | 56046710 | 56200675 | 4063 |
| ENSG000001 | 21.2954  | 4.524774 | 2.1445   | 0.000793 | 0.001999 | SVILP1 chr10     | + | 30960495 | 31006195 | 2592 |
| ENSG000001 | 0        | 1.309443 | -1.6539  | 0.35008  | NA       | U91328.2 chr6    | + | 26044217 | 26044585 | 369  |
| ENSG000001 | 0.923144 | 1.623443 | -0.60734 | 0.68519  | 0.76508  | RP3-400B1 chr6   | + | 4136306  | 4157619  | 2277 |
| ENSG000001 | 0.342542 | 0.686276 | -0.48412 | 0.78604  | NA       | AC092687. chr2   | + | 10729292 | 10744956 | 565  |
| ENSG000001 | 1.794862 | 3.154639 | -0.69905 | 0.6114   | 0.70375  | XRCC6P2 chrX     | - | 1.49E+08 | 1.49E+08 | 1822 |
| ENSG000001 | 0.36308  | 0        | 0.4146   | 0.81455  | NA       | AC003084. chr7   | - | 1.18E+08 | 1.18E+08 | 435  |
| ENSG000001 | 0        | 0.997859 | -1.5018  | 0.39072  | NA       | RP11-526A chr4   | - | 1.5E+08  | 1.51E+08 | 2138 |
| ENSG000001 | 4.273994 | 2.38498  | 0.78475  | 0.43478  | 0.54034  | RP3-322G1 chr20  | - | 23327578 | 23332123 | 814  |
| ENSG000001 | 0.923144 | 0.937167 | -0.01228 | 0.99379  | NA       | PHBP13 chr13     | + | 35825207 | 35825966 | 760  |
| ENSG000001 | 0        | 0.654722 | -0.83442 | 0.63731  | NA       | AC005251. chr7   | + | 20883246 | 20883580 | 335  |
| ENSG000001 | 6.14082  | 1.355566 | 2.0047   | 0.049409 | 0.088065 | RP11-399C chr9   | + | 22646199 | 22824212 | 2347 |
| ENSG000001 | 4.814334 | 12.56189 | -1.3501  | 0.07161  | 0.12145  | RP11-119F chr4   | + | 1.14E+08 | 1.14E+08 | 1301 |
| ENSG000001 | 0.36308  | 0        | 0.4146   | 0.81455  | NA       | AC007163. chr2   | + | 2.02E+08 | 2.02E+08 | 677  |
| ENSG000001 | 0.290301 | 0        | 0.4146   | 0.81455  | NA       | CDC42P2 chr7     | - | 55705967 | 55706535 | 569  |
| ENSG000001 | 0.685084 | 0        | 0.85004  | 0.63064  | NA       | CTD-3105F chr19  | + | 12561749 | 12571519 | 695  |
| ENSG000001 | 0        | 0.686276 | -0.84936 | 0.6309   | NA       | RP11-513A chr9   | - | 19383215 | 19383885 | 345  |
| ENSG000001 | 1.411244 | 4.349145 | -1.4733  | 0.19389  | 0.28142  | RP11-831F chr11  | - | 62457747 | 62494856 | 4001 |
| ENSG000001 | 1.068702 | 4.614605 | -1.882   | 0.11525  | 0.18246  | RP3-439F8 chr22  | + | 46937392 | 46944093 | 2949 |
| ENSG000001 | 1.359003 | 0.297015 | 1.3758   | 0.39512  | NA       | RP11-139E chr1   | - | 1.93E+08 | 1.93E+08 | 276  |
| ENSG000001 | 1.068702 | 0.715414 | 0.38756  | 0.81816  | NA       | LINC00163 chr21  | - | 46409779 | 46414001 | 2155 |
| ENSG000001 | 7.987923 | 4.363714 | 0.8339   | 0.27897  | 0.37961  | EIF3EP1 chr6     | + | 74001685 | 74003000 | 1316 |
| ENSG000001 | 51.65019 | 2.056411 | 4.5288   | 2.84E-12 | 1.56E-11 | MIR155HG chr21   | + | 26934221 | 26947480 | 1600 |
| ENSG000001 | 0.342542 | 0.686276 | -0.48412 | 0.78604  | NA       | CTA-407F1 chr22  | - | 25957084 | 25960429 | 488  |
| ENSG000001 | 0.36308  | 0.654722 | -0.52647 | 0.7643   | NA       | MTND5P26 chrX    | + | 1.02E+08 | 1.02E+08 | 1752 |
| ENSG000001 | 0        | 0.686276 | -0.84936 | 0.6309   | NA       | RP1-288L1 chr22  | - | 35099117 | 35100876 | 768  |
| ENSG000001 | 17.70909 | 5.970172 | 1.5171   | 0.01461  | 0.029655 | AC005152. chr17  | - | 70033455 | 70217977 | 3032 |
| ENSG000001 | 0.36308  | 0        | 0.4146   | 0.81455  | NA       | RP1-278O2 chr20  | - | 10733926 | 10745934 | 729  |
| ENSG000001 | 0.923144 | 0.594029 | 0.399    | 0.81445  | NA       | AC007879. chr2   | - | 2.08E+08 | 2.08E+08 | 823  |
| ENSG000001 | 0.290301 | 0.357707 | -0.00203 | 0.99908  | NA       | APOC2 chr19      | + | 45450460 | 45452822 | 880  |
| ENSG000001 | 2.157128 | 4.325712 | -0.87358 | 0.45192  | 0.55736  | TEX21P chr14     | - | 64812889 | 64841384 | 1476 |
| ENSG000001 | 54.17202 | 85.83121 | -0.65859 | 0.054602 | 0.096005 | LINC00338 chr17  | + | 75082798 | 75091068 | 2139 |
| ENSG000001 | 1.753786 | 0.640152 | 1.0617   | 0.48959  | 0.59361  | XXbac-B47I chr22 | - | 18487036 | 18490074 | 2493 |
| ENSG000001 | 0        | 0.343138 | -0.41864 | 0.81278  | NA       | RP11-384C chr1   | - | 2.12E+08 | 2.13E+08 | 387  |
| ENSG000001 | 1.753786 | 2.65044  | -0.54105 | 0.65804  | 0.74243  | RP5-994D1 chr1   | + | 43144406 | 43147325 | 596  |
| ENSG000001 | 0.342542 | 0        | 0.4146   | 0.81455  | NA       | AC064834. chr2   | - | 1.96E+08 | 1.96E+08 | 555  |
| ENSG000001 | 6.286378 | 2.041842 | 1.5146   | 0.10969  | 0.17457  | RP11-254B chr12  | - | 69036299 | 69036773 | 475  |
| ENSG000001 | 0        | 3.723561 | -3.3938  | 0.022736 | 0.044303 | AP000344. chr22  | + | 23775751 | 23777258 | 917  |
| ENSG000001 | 0        | 0.686276 | -0.84936 | 0.6309   | NA       | CDC42P1 chr20    | - | 32989955 | 32990502 | 548  |
| ENSG000001 | 2.302685 | 6.817508 | -1.4621  | 0.10846  | 0.17293  | AC010883. chr2   | + | 43456712 | 43460533 | 398  |

|            |          |          |          |          |          |                  |   |          |          |      |
|------------|----------|----------|----------|----------|----------|------------------|---|----------|----------|------|
| ENSG000001 | 0.290301 | 2.353426 | -2.118   | 0.15772  | 0.23701  | RP11-101C chr1   | + | 1.56E+08 | 1.56E+08 | 941  |
| ENSG000001 | 0.36308  | 0        | 0.4146   | 0.81455  | NA       | AC012668. chr2   | - | 2.16E+08 | 2.16E+08 | 503  |
| ENSG000001 | 0.705622 | 0.343138 | 0.57395  | 0.74355  | NA       | AC092839. chr2   | - | 54772505 | 54773814 | 377  |
| ENSG000001 | 0        | 0.343138 | -0.41864 | 0.81278  | NA       | RP11-124C chr10  | + | 43366969 | 43369508 | 1714 |
| ENSG000001 | 6.483362 | 10.67702 | -0.68115 | 0.31193  | 0.41401  | AC109828. chr2   | + | 27558409 | 27565466 | 863  |
| ENSG000001 | 0        | 0.951736 | -1.2555  | 0.48145  | NA       | SDHCP3 chr2      | + | 24166716 | 24167221 | 506  |
| ENSG000001 | 1.048164 | 0        | 1.348    | 0.44949  | NA       | RP4-723E3 chr20  | + | 50827184 | 51266970 | 4390 |
| ENSG000001 | 0.342542 | 3.945314 | -2.8194  | 0.041375 | 0.075474 | AC104667. chr2   | + | 2.38E+08 | 2.39E+08 | 1301 |
| ENSG000001 | 0.342542 | 0        | 0.4146   | 0.81455  | NA       | LINC00700 chr10  | - | 2047667  | 2056542  | 2097 |
| ENSG000001 | 37.56594 | 36.47481 | 0.042363 | 0.92085  | 0.9469   | FABP5P7 chr11    | - | 59548786 | 59549195 | 408  |
| ENSG000001 | 0.705622 | 38.00217 | -5.3228  | 2.99E-08 | 1.22E-07 | SHISA8 chr22     | - | 42307297 | 42310570 | 486  |
| ENSG000001 | 4.305697 | 1.966581 | 1.0008   | 0.36722  | 0.47183  | RP13-33H1 chrX   | + | 73289111 | 73290667 | 1182 |
| ENSG000001 | 12.00332 | 4.432528 | 1.343    | 0.0701   | 0.11935  | TBC1D3C chr17    | - | 34580902 | 34757050 | 2653 |
| ENSG000001 | 5.197138 | 4.539343 | 0.18045  | 0.82782  | 0.87876  | FTH1P2 chr1      | + | 2.29E+08 | 2.29E+08 | 412  |
| ENSG000001 | 0.36308  | 0        | 0.4146   | 0.81455  | NA       | AC074389. chr7   | - | 1731542  | 1732086  | 454  |
| ENSG000001 | 0.943682 | 9.116689 | -2.9097  | 0.005105 | 0.011359 | RP11-423C chr1   | - | 1.43E+08 | 1.43E+08 | 1742 |
| ENSG000001 | 0        | 1.012429 | -1.3162  | 0.46038  | NA       | RP11-534L chr1   | + | 2.07E+08 | 2.07E+08 | 792  |
| ENSG000001 | 0        | 0.686276 | -0.84936 | 0.6309   | NA       | RP11-280C chr9   | + | 14204247 | 14205038 | 792  |
| ENSG000001 | 0.342542 | 0.686276 | -0.48412 | 0.78604  | NA       | CUBNP2 chr10     | - | 45727474 | 45742809 | 1139 |
| ENSG000001 | 0.290301 | 1.623443 | -1.5237  | 0.36002  | 0.46417  | AC013429. chr7   | - | 1.38E+08 | 1.38E+08 | 781  |
| ENSG000001 | 0.870904 | 9.811086 | -3.0351  | 0.004159 | 0.00937  | RP11-480I. chr1  | + | 2.03E+08 | 2.03E+08 | 2321 |
| ENSG000001 | 0.290301 | 0.357707 | -0.00203 | 0.99908  | NA       | AC016745. chr2   | + | 1.14E+08 | 1.14E+08 | 508  |
| ENSG000001 | 0.36308  | 0.891044 | -0.73478 | 0.67953  | NA       | AC004016. chr7   | - | 24945754 | 24946213 | 460  |
| ENSG000001 | 1.411244 | 11.01371 | -2.7889  | 0.003425 | 0.007827 | EIF4A1P2 chrY    | - | 5205786  | 5207005  | 1220 |
| ENSG000001 | 0        | 4.213191 | -3.6108  | 0.012765 | 0.026258 | RP11-195N chr1   | - | 1.1E+08  | 1.1E+08  | 450  |
| ENSG000001 | 0        | 4.697988 | -3.4469  | 0.03077  | 0.058004 | RP11-344B chr9   | + | 1.32E+08 | 1.32E+08 | 966  |
| ENSG000001 | 0        | 2.24661  | -2.6365  | 0.10117  | 0.16301  | RP3-497J2 chr6   | - | 1.67E+08 | 1.67E+08 | 1746 |
| ENSG000001 | 0.580602 | 0.343138 | 0.37443  | 0.8337   | NA       | RP11-140A chr10  | - | 1.34E+08 | 1.34E+08 | 481  |
| ENSG000001 | 0.290301 | 0.640152 | -0.50256 | 0.77558  | NA       | AF121897. chr21  | + | 40897510 | 40901782 | 3980 |
| ENSG000001 | 8.714083 | 12.99157 | -0.56265 | 0.38462  | 0.48882  | RP11-493K chr3   | - | 50153455 | 50193518 | 2755 |
| ENSG000001 | 0.36308  | 0.343138 | -0.0021  | 0.99905  | NA       | RP11-11M. chr20  | - | 60612485 | 60613012 | 528  |
| ENSG000001 | 0.943682 | 2.367995 | -1.0653  | 0.43011  | 0.53558  | RP11-109I. chr10 | - | 18523097 | 18550123 | 793  |
| ENSG000001 | 0        | 12.84676 | -5.1955  | 6.02E-05 | 0.000176 | AP001626. chr21  | - | 44068381 | 44071354 | 2854 |
| ENSG000001 | 0        | 0.357707 | -0.41864 | 0.81278  | NA       | AC097468. chr2   | - | 2.2E+08  | 2.2E+08  | 553  |
| ENSG000001 | 0        | 26.8985  | -6.3685  | 2.52E-08 | 1.03E-07 | AC066593. chr2   | - | 1.16E+08 | 1.16E+08 | 730  |
| ENSG000001 | 5.644162 | 3.717114 | 0.52588  | 0.58367  | 0.67961  | AC068580. chr11  | + | 1781578  | 1783716  | 2015 |
| ENSG000001 | 0        | 0.297015 | -0.41864 | 0.81278  | NA       | RP5-1121A chr7   | + | 1.57E+08 | 1.57E+08 | 374  |
| ENSG000001 | 0        | 0.594029 | -0.81444 | 0.64499  | NA       | RP4-813D1 chr20  | + | 55789928 | 55790922 | 436  |
| ENSG000001 | 5.632997 | 0        | 4.08     | 0.002758 | 0.006396 | RP11-61I1. chr6  | - | 39856566 | 39865156 | 638  |
| ENSG000001 | 0        | 101.2089 | -8.1443  | 1.44E-13 | 8.63E-13 | C19orf81 chr19   | + | 51152702 | 51162567 | 760  |
| ENSG000001 | 0        | 1.355566 | -1.9006  | 0.26573  | NA       | AC007395. chr2   | + | 70914274 | 70918956 | 434  |
| ENSG000001 | 5.995263 | 4.424406 | 0.43852  | 0.61662  | 0.70789  | RP5-1099C chr20  | - | 10593509 | 10594877 | 1369 |
| ENSG000001 | 24.21479 | 32.80227 | -0.43108 | 0.28836  | 0.38994  | TECRP1 chr4      | - | 87870818 | 87871276 | 459  |
| ENSG000001 | 0        | 0.343138 | -0.41864 | 0.81278  | NA       | PPIAP3 chr20     | + | 36158441 | 36158945 | 505  |
| ENSG000001 | 0.36308  | 0        | 0.4146   | 0.81455  | NA       | RP5-1096C chr12  | - | 2038368  | 2045740  | 2350 |
| ENSG000001 | 1.317927 | 1.294874 | 0.013073 | 0.99265  | 0.99599  | RP11-637C chr6   | + | 10882013 | 10884447 | 531  |
| ENSG000001 | 0.290301 | 4.991713 | -3.1282  | 0.023611 | 0.04586  | RP1-150O5 chr1   | - | 23875630 | 23877406 | 456  |
| ENSG000001 | 0        | 0.297015 | -0.41864 | 0.81278  | NA       | RP5-1166F chr1   | + | 4472111  | 4484747  | 2077 |
| ENSG000001 | 0.36308  | 0.297015 | -0.00205 | 0.99908  | NA       | RP4-609E1 chr1   | + | 68509013 | 68509916 | 904  |
| ENSG000001 | 0.72616  | 0.343138 | 0.52026  | 0.77047  | NA       | VDAC1P4 chr1     | + | 1.8E+08  | 1.8E+08  | 835  |
| ENSG000001 | 0        | 0.654722 | -0.83442 | 0.63731  | NA       | BCRP5 chr22      | - | 21052250 | 21053222 | 253  |
| ENSG000001 | 0.290301 | 1.355566 | -1.3811  | 0.39332  | NA       | RPL24P2 chr20    | + | 21095364 | 21095838 | 475  |
| ENSG000001 | 3.080272 | 0.951736 | 1.4124   | 0.28267  | 0.38376  | AC009303. chr2   | + | 1.19E+08 | 1.19E+08 | 853  |
| ENSG000001 | 0.995923 | 4.600036 | -1.9611  | 0.082137 | 0.13664  | AC012074. chr2   | - | 25592042 | 25598714 | 419  |
| ENSG000001 | 0.72616  | 1.623443 | -0.85011 | 0.60052  | 0.69444  | GAPDHP52 chr13   | + | 21932512 | 21933453 | 942  |
| ENSG000001 | 1.669842 | 0.297015 | 1.5424   | 0.35353  | 0.45773  | AC142528. chr2   | + | 3523046  | 3526968  | 974  |
| ENSG000001 | 2.396002 | 3.47267  | -0.46359 | 0.70458  | 0.78045  | ZRANB2-AS chr1   | + | 71514538 | 71532867 | 607  |
| ENSG000001 | 1.317927 | 0        | 1.6383   | 0.35541  | NA       | AC010492. chr19  | + | 54732911 | 54734088 | 901  |
| ENSG000001 | 4.657611 | 4.438975 | 0.073122 | 0.93707  | 0.95849  | RP11-179C chr1   | + | 1.6E+08  | 1.6E+08  | 304  |
| ENSG000001 | 1.794048 | 1.698704 | 0.108    | 0.93596  | 0.95772  | CHCHD2P6 chr1    | + | 15931077 | 15931538 | 462  |
| ENSG000001 | 0.632843 | 1.416259 | -0.81358 | 0.60692  | 0.69991  | AC091153. chr17  | + | 4578674  | 4600126  | 384  |
| ENSG000001 | 2.032922 | 0.343138 | 1.7486   | 0.2847   | 0.38604  | FNDC1-IT1 chr6   | + | 1.6E+08  | 1.6E+08  | 516  |
| ENSG000001 | 2.718006 | 0.654722 | 1.6705   | 0.2168   | 0.30808  | RP4-620E1 chr20  | - | 40087994 | 40090584 | 323  |
| ENSG000001 | 0.36308  | 3.838499 | -2.7601  | 0.050098 | 0.089105 | RPL7L1P3 chr7    | + | 75552073 | 75552761 | 689  |
| ENSG000001 | 0.923144 | 1.370136 | -0.39431 | 0.79824  | 0.85707  | WI2-85898 chr22  | - | 46271879 | 46283628 | 805  |

|            |          |          |          |          |          |                  |   |          |          |      |
|------------|----------|----------|----------|----------|----------|------------------|---|----------|----------|------|
| ENSG000001 | 12.80144 | 14.63046 | -0.1937  | 0.72287  | 0.79498  | AC011747. chr2   | - | 8806766  | 8821993  | 953  |
| ENSG000001 | 1.649304 | 1.995719 | -0.23815 | 0.8424   | 0.88959  | RP11-83A1 chr1   | + | 2.46E+08 | 2.46E+08 | 703  |
| ENSG000001 | 0        | 0.343138 | -0.41864 | 0.81278  | NA       | LINC00330 chr13  | - | 45373639 | 45383766 | 2036 |
| ENSG000001 | 2.604151 | 28.07373 | -3.2141  | 0.000157 | 0.000436 | ANKRD65 chr1     | - | 1353800  | 1357149  | 2014 |
| ENSG000001 | 1.597063 | 5.003866 | -1.4592  | 0.17526  | 0.25847  | RP11-80H5 chr10  | - | 91426938 | 91459428 | 1298 |
| ENSG000001 | 0        | 0.297015 | -0.41864 | 0.81278  | NA       | SETP9 chr1       | + | 1.61E+08 | 1.61E+08 | 832  |
| ENSG000001 | 0.36308  | 2.48938  | -1.9375  | 0.23518  | 0.32906  | RP11-329A chr1   | + | 48901639 | 48902895 | 1257 |
| ENSG000001 | 446.7736 | 294.4876 | 0.60159  | 2.91E-05 | 8.82E-05 | LINC00094 chr9   | + | 1.37E+08 | 1.37E+08 | 5179 |
| ENSG000001 | 29.45895 | 94.50285 | -1.6588  | 1.89E-07 | 7.19E-07 | ZSCAN31 chr6     | - | 28292470 | 28324048 | 3551 |
| ENSG000001 | 3.713116 | 4.836358 | -0.33408 | 0.72723  | 0.79827  | RP11-628K chr1   | + | 21487968 | 21488574 | 296  |
| ENSG000001 | 0        | 0.357707 | -0.41864 | 0.81278  | NA       | RP11-241L chr10  | + | 32398789 | 32400594 | 679  |
| ENSG000001 | 4.056471 | 4.035145 | 0.003628 | 0.99703  | 0.99834  | RP11-229P chr9   | + | 1.4E+08  | 1.4E+08  | 697  |
| ENSG000001 | 0        | 0.686276 | -0.84936 | 0.6309   | NA       | AC010731. chr2   | + | 2.08E+08 | 2.08E+08 | 1376 |
| ENSG000001 | 11.14097 | 6.924324 | 0.66421  | 0.29162  | 0.39347  | RP11-90L2 chr1   | - | 2.02E+08 | 2.02E+08 | 1809 |
| ENSG000001 | 0        | 1.326428 | -1.6486  | 0.3523   | NA       | DSCAM-AS1 chr21  | + | 41755010 | 41757285 | 1640 |
| ENSG000001 | 1.524285 | 0.357707 | 1.4197   | 0.39774  | NA       | AC013474. chr2   | + | 1.27E+08 | 1.27E+08 | 799  |
| ENSG000001 | 0.72616  | 0        | 0.85004  | 0.63064  | NA       | FABP7P2 chr2     | - | 96034255 | 96034633 | 379  |
| ENSG000001 | 0        | 0.640152 | -0.82869 | 0.63935  | NA       | RP5-1092A chr1   | - | 3628764  | 3630862  | 351  |
| ENSG000001 | 24.69009 | 37.27286 | -0.58277 | 0.19891  | 0.28723  | RP11-374P chr9   | + | 1.37E+08 | 1.37E+08 | 2112 |
| ENSG000001 | 0        | 0.297015 | -0.41864 | 0.81278  | NA       | RP5-1092K chr10  | - | 7337068  | 7337252  | 185  |
| ENSG000001 | 0        | 0.594029 | -0.81444 | 0.64499  | NA       | RP1-65J11. chr1  | + | 31331005 | 31333101 | 1747 |
| ENSG000001 | 0.342542 | 1.294874 | -1.342   | 0.40631  | NA       | RP11-533E chr1   | + | 1.8E+08  | 1.8E+08  | 821  |
| ENSG000001 | 0        | 0.357707 | -0.41864 | 0.81278  | NA       | AC114730. chr2   | + | 2.43E+08 | 2.43E+08 | 571  |
| ENSG000001 | 0        | 97.49167 | -8.1155  | 1.01E-13 | 6.10E-13 | RP5-865N1 chr1   | + | 2.32E+08 | 2.32E+08 | 818  |
| ENSG000001 | 0.632843 | 0        | 0.81931  | 0.64303  | NA       | TMEM30C chr3     | + | 99904531 | 99913035 | 454  |
| ENSG000001 | 2.987769 | 0.357707 | 2.4319   | 0.09098  | 0.14915  | RP6-109B7 chr22  | - | 46463236 | 46465771 | 867  |
| ENSG000001 | 1099.912 | 186.1749 | 2.5581   | 1.25E-81 | 5.37E-80 | C12orf75 chr12   | + | 1.06E+08 | 1.06E+08 | 1366 |
| ENSG000001 | 5.414661 | 12.94303 | -1.1902  | 0.074096 | 0.12519  | RP11-425N chr20  | - | 36120874 | 36137633 | 714  |
| ENSG000001 | 22.07478 | 26.64203 | -0.26765 | 0.54347  | 0.64389  | SMIM1 chr1       | + | 3689352  | 3692546  | 546  |
| ENSG000001 | 1.991846 | 1.029414 | 0.76413  | 0.59766  | 0.69184  | CTB-114C7 chr5   | + | 1.7E+08  | 1.7E+08  | 983  |
| ENSG000001 | 69.59555 | 72.35082 | -0.05059 | 0.85674  | 0.89936  | FAM203A chr8     | + | 1.45E+08 | 1.45E+08 | 2531 |
| ENSG000001 | 114.0338 | 108.9431 | 0.068711 | 0.76709  | 0.83155  | RPL39P3 chr6     | - | 74082831 | 74082986 | 156  |
| ENSG000001 | 9.60471  | 0        | 4.8623   | 0.000144 | 0.000403 | LINC00601 chr10  | - | 1.28E+08 | 1.28E+08 | 1168 |
| ENSG000001 | 0.342542 | 0.357707 | -0.0021  | 0.99906  | NA       | RP11-613C chr17  | + | 47872705 | 47873031 | 327  |
| ENSG000001 | 0.632843 | 0        | 0.81931  | 0.64303  | NA       | RP4-537K2 chrX   | - | 1.29E+08 | 1.29E+08 | 526  |
| ENSG000001 | 1.866827 | 0        | 2.3484   | 0.15622  | NA       | NUCB1-AS1 chr19  | - | 49414187 | 49422148 | 433  |
| ENSG000001 | 0.342542 | 2.635871 | -2.2612  | 0.12315  | 0.19299  | AC009495. chr2   | + | 1.67E+08 | 1.67E+08 | 779  |
| ENSG000001 | 107.1686 | 45.89434 | 1.2116   | 2.57E-05 | 7.86E-05 | PPP1R3E chr14    | - | 23765112 | 23772057 | 4513 |
| ENSG000001 | 0.36308  | 0        | 0.4146   | 0.81455  | NA       | RP1-3E10.2 chrX  | + | 1.01E+08 | 1.01E+08 | 544  |
| ENSG000001 | 7.728511 | 1.995719 | 1.8265   | 0.04498  | 0.081058 | RP11-121A chr9   | - | 1.27E+08 | 1.27E+08 | 308  |
| ENSG000001 | 0        | 0.343138 | -0.41864 | 0.81278  | NA       | TATDN2P3 chr13   | + | 23817659 | 23821323 | 3665 |
| ENSG000001 | 0.923144 | 0        | 1.223    | 0.49292  | NA       | CTA-150C2 chr22  | + | 39317232 | 39320713 | 678  |
| ENSG000001 | 0.342542 | 2.771825 | -2.2599  | 0.13216  | 0.20454  | FAM83C-AS1 chr20 | + | 33873054 | 33873559 | 352  |
| ENSG000001 | 0        | 2.102535 | -2.2822  | 0.18452  | 0.26979  | RP11-145N chr1   | - | 59521671 | 59543788 | 317  |
| ENSG000001 | 280.2526 | 250.6896 | 0.15942  | 0.32831  | 0.43138  | TSPY26P chr20    | - | 30774280 | 30778330 | 3884 |
| ENSG000001 | 0        | 0.297015 | -0.41864 | 0.81278  | NA       | RP11-459J. chr13 | + | 69885465 | 69896233 | 821  |
| ENSG000001 | 0        | 0.98329  | -1.2878  | 0.47019  | NA       | RP11-236P chrX   | - | 53142200 | 53142456 | 257  |
| ENSG000001 | 0.290301 | 0        | 0.4146   | 0.81455  | NA       | IGKV1OR-1 chr2   | + | 92005797 | 92006650 | 354  |
| ENSG000001 | 0.72616  | 4.89705  | -2.3956  | 0.058953 | 0.10287  | RP13-131K chr3   | - | 49017351 | 49021418 | 555  |
| ENSG000001 | 10.19729 | 20.58036 | -0.99068 | 0.048937 | 0.087351 | SUMO2P1 chr6     | - | 29603837 | 29604120 | 284  |
| ENSG000001 | 0.290301 | 1.638012 | -1.64    | 0.2979   | 0.3998   | AC026185. chr3   | - | 11529774 | 11529947 | 174  |
| ENSG000001 | 1.742621 | 6.639462 | -1.7381  | 0.12278  | 0.19253  | RP11-108N chr1   | + | 17215590 | 17216097 | 508  |
| ENSG000001 | 5.612459 | 8.27989  | -0.53938 | 0.4412   | 0.54707  | RP11-761E chrX   | - | 1.15E+08 | 1.15E+08 | 2445 |
| ENSG000001 | 33.29113 | 31.61676 | 0.067232 | 0.85721  | 0.89971  | RP11-122K chr10  | - | 1.35E+08 | 1.35E+08 | 626  |
| ENSG000001 | 1.89853  | 0.297015 | 1.7215   | 0.29345  | 0.39548  | RP1-506.5 chr22  | + | 38627326 | 38628254 | 297  |
| ENSG000001 | 3.629172 | 3.694423 | 0.006029 | 0.99574  | 0.99763  | AC010240. chr5   | + | 1.32E+08 | 1.32E+08 | 1205 |
| ENSG000001 | 1.919068 | 3.451653 | -0.7377  | 0.54173  | 0.64223  | TMEM185A chrX    | + | 1.49E+08 | 1.49E+08 | 546  |
| ENSG000001 | 33.62251 | 11.85051 | 1.4777   | 0.000878 | 0.0022   | AC093415. chr3   | - | 37786923 | 37903271 | 3139 |
| ENSG000001 | 1.742621 | 1.012429 | 0.58944  | 0.69792  | 0.77494  | AC115115. chr2   | - | 1.13E+08 | 1.13E+08 | 366  |
| ENSG000001 | 0.290301 | 1.638012 | -1.64    | 0.2979   | 0.3998   | KDM5C-IT1 chrX   | - | 53241590 | 53243861 | 755  |
| ENSG000001 | 0.36308  | 0        | 0.4146   | 0.81455  | NA       | RP13-392L. chr1  | - | 9561151  | 9563530  | 708  |
| ENSG000001 | 0.36308  | 1.66715  | -1.5237  | 0.35755  | 0.46184  | AC074117. chr2   | + | 27678023 | 27678729 | 397  |
| ENSG000001 | 0.36308  | 0.640152 | -0.51156 | 0.77091  | NA       | KDM4E chr11      | + | 94758422 | 94760760 | 2339 |
| ENSG000001 | 0.290301 | 0        | 0.4146   | 0.81455  | NA       | AL162759. chr14  | - | 54235660 | 54317600 | 602  |
| ENSG000001 | 0        | 1.355566 | -1.9006  | 0.26573  | NA       | RP1-90L6.3 chr22 | + | 27299255 | 27316574 | 517  |

|            |          |          |          |          |          |                  |   |          |          |      |
|------------|----------|----------|----------|----------|----------|------------------|---|----------|----------|------|
| ENSG000001 | 1.359003 | 1.326428 | 0.016616 | 0.99065  | 0.9952   | FAM103A2 chr6    | - | 1.67E+08 | 1.67E+08 | 354  |
| ENSG000001 | 0.342542 | 0        | 0.4146   | 0.81455  | NA       | KRT18P16 chr5    | + | 1.23E+08 | 1.23E+08 | 1294 |
| ENSG000001 | 0.705622 | 0.640152 | 0.062329 | 0.97007  | NA       | RP11-539E chr10  | + | 53062326 | 53066469 | 400  |
| ENSG000001 | 0.653381 | 7.809662 | -3.1116  | 0.00721  | 0.015562 | MCF2L-AS1 chr13  | - | 1.14E+08 | 1.14E+08 | 712  |
| ENSG000001 | 4.160953 | 1.684135 | 1.1457   | 0.31739  | 0.42009  | SNORD62A chr9    | + | 1.34E+08 | 1.34E+08 | 86   |
| ENSG000001 | 0.36308  | 0.297015 | -0.00205 | 0.99908  | NA       | SMIM2-IT1 chr13  | - | 44720606 | 44732358 | 478  |
| ENSG000001 | 1.742621 | 2.232041 | -0.33209 | 0.80041  | 0.85869  | AP000925. chr11  | - | 1.12E+08 | 1.12E+08 | 1449 |
| ENSG000001 | 0.653381 | 0.937167 | -0.38446 | 0.8124   | NA       | HLA-W chr6       | + | 29924373 | 29926347 | 771  |
| ENSG000001 | 0.342542 | 0.357707 | -0.0021  | 0.99906  | NA       | RP4-796I8. chr20 | - | 12224543 | 12224944 | 280  |
| ENSG000001 | 0        | 0.297015 | -0.41864 | 0.81278  | NA       | AC137723. chr17  | + | 79899745 | 79905477 | 691  |
| ENSG000001 | 0.995923 | 2.915901 | -1.295   | 0.33179  | 0.43499  | FAUP1 chr18      | - | 72057119 | 72057532 | 414  |
| ENSG000001 | 3.205292 | 4.600036 | -0.47251 | 0.60592  | 0.69915  | RP11-575L chr9   | + | 86587148 | 86590692 | 390  |
| ENSG000001 | 1.576526 | 2.949871 | -0.75182 | 0.55719  | 0.65619  | MRPL53P1 chr1    | - | 1.13E+08 | 1.13E+08 | 319  |
| ENSG000001 | 0.290301 | 0        | 0.4146   | 0.81455  | NA       | RP1-79C4. chr1   | + | 1.71E+08 | 1.71E+08 | 1923 |
| ENSG000001 | 3.330311 | 1.744828 | 0.83923  | 0.47388  | 0.57843  | RP11-82K1 chr1   | + | 89389053 | 89389527 | 475  |
| ENSG000001 | 0        | 0.686276 | -0.84936 | 0.6309   | NA       | RP11-250F chr9   | + | 69501018 | 69502204 | 1187 |
| ENSG000001 | 27.0235  | 16.00617 | 0.75169  | 0.13764  | 0.21103  | HM13-IT1 chr20   | + | 30150969 | 30151879 | 356  |
| ENSG000001 | 3.693391 | 2.529055 | 0.46584  | 0.65019  | 0.73599  | AC017116. chr7   | + | 44078770 | 44081905 | 2590 |
| ENSG000001 | 84.93456 | 46.19385 | 0.86401  | 0.028576 | 0.054376 | DUSP8P5 chr10    | + | 75491582 | 75493396 | 1815 |
| ENSG000001 | 1.068702 | 2.200487 | -0.85786 | 0.55699  | 0.65599  | AC012360. chr2   | + | 1.06E+08 | 1.06E+08 | 674  |
| ENSG000001 | 2.003011 | 0.357707 | 1.7049   | 0.30251  | 0.40375  | RP11-509J. chr9  | + | 3674546  | 3691814  | 537  |
| ENSG000001 | 1.213446 | 1.188058 | 0.015729 | 0.99231  | 0.99582  | AC006946. chr22  | - | 17574502 | 17574829 | 328  |
| ENSG000001 | 0.342542 | 4.804804 | -3.0165  | 0.031872 | 0.059883 | RP11-165F chr9   | + | 477750   | 478423   | 674  |
| ENSG000001 | 0.342542 | 0        | 0.4146   | 0.81455  | NA       | RP11-366C chr9   | - | 1.28E+08 | 1.28E+08 | 853  |
| ENSG000001 | 0.653381 | 1.340997 | -0.79074 | 0.59756  | 0.69176  | AC016723. chr2   | - | 1.69E+08 | 1.69E+08 | 643  |
| ENSG000001 | 0        | 0.343138 | -0.41864 | 0.81278  | NA       | DUSP5P2 chr3     | + | 9642432  | 9644412  | 1033 |
| ENSG000001 | 0.342542 | 0        | 0.4146   | 0.81455  | NA       | hsa-mir-10 chr10 | + | 91352504 | 91352584 | 81   |
| ENSG000001 | 0.923144 | 2.131673 | -0.88737 | 0.55484  | 0.65411  | RP1-37M3. chr22  | - | 46188298 | 46189516 | 1219 |
| ENSG000001 | 0        | 0.357707 | -0.41864 | 0.81278  | NA       | RP11-561N chr7   | - | 64027192 | 64027821 | 315  |
| ENSG000001 | 5.549867 | 12.37573 | -1.1163  | 0.15986  | 0.23951  | AC114730. chr2   | - | 2.43E+08 | 2.43E+08 | 584  |
| ENSG000001 | 1.068702 | 0.297015 | 0.9938   | 0.56435  | NA       | CTA-276O3 chr7   | + | 1.03E+08 | 1.03E+08 | 171  |
| ENSG000001 | 0.36308  | 0        | 0.4146   | 0.81455  | NA       | RP11-381C chr9   | - | 66951142 | 66951845 | 704  |
| ENSG000001 | 0.923144 | 0.700845 | 0.32346  | 0.84154  | NA       | RP11-399E chr1   | + | 41708045 | 41750533 | 709  |
| ENSG000001 | 0.342542 | 1.652581 | -1.6373  | 0.29704  | 0.39905  | AC016292. chr17  | + | 1085187  | 1088380  | 235  |
| ENSG000001 | 51.77619 | 86.42464 | -0.73143 | 0.011529 | 0.023908 | SNRPGP10 chr1    | + | 2.05E+08 | 2.05E+08 | 225  |
| ENSG000001 | 0        | 0.357707 | -0.41864 | 0.81278  | NA       | RP11-154C chr13  | - | 46255225 | 46256554 | 520  |
| ENSG000001 | 5.188579 | 2.139794 | 1.0713   | 0.37602  | 0.48007  | RPL36AP15 chr2   | - | 48024965 | 48025230 | 266  |
| ENSG000001 | 0.705622 | 0.357707 | 0.57557  | 0.74268  | NA       | CSPG4P5 chr15    | - | 84953014 | 84966399 | 8752 |
| ENSG000001 | 0.36308  | 0        | 0.4146   | 0.81455  | NA       | RP4-764D2 chr1   | + | 2.36E+08 | 2.36E+08 | 2310 |
| ENSG000001 | 9.419704 | 18.9075  | -0.98306 | 0.08848  | 0.14566  | RP11-206L chr1   | - | 677193   | 685396   | 4860 |
| ENSG000001 | 9.584986 | 9.392687 | 0.016619 | 0.97919  | 0.98841  | SSR4P1 chr21     | - | 46491648 | 46494080 | 967  |
| ENSG000001 | 0.290301 | 0.951736 | -0.90191 | 0.60254  | NA       | RP11-332C chr10  | + | 1.05E+08 | 1.05E+08 | 2130 |
| ENSG000001 | 105.7144 | 28.02016 | 1.9057   | 2.52E-10 | 1.21E-09 | RP11-477C chr6   | - | 1.56E+08 | 1.56E+08 | 3088 |
| ENSG000001 | 0        | 0.951736 | -1.2555  | 0.48145  | NA       | GS1-600G8 chrX   | - | 13284167 | 13321571 | 1497 |
| ENSG000001 | 14.07911 | 4.928605 | 1.4492   | 0.029591 | 0.056102 | RP11-397A chr1   | + | 2.47E+08 | 2.47E+08 | 105  |
| ENSG000001 | 4.067636 | 2.947455 | 0.40987  | 0.68074  | 0.76126  | RP11-327L chr9   | + | 35909480 | 35911683 | 1612 |
| ENSG000001 | 0.36308  | 0.640152 | -0.51156 | 0.77091  | NA       | RP11-134K chr9   | - | 8700595  | 8701552  | 486  |
| ENSG000001 | 3.879211 | 6.001726 | -0.57955 | 0.49086  | 0.59491  | EPN2-AS1 chr17   | - | 19199909 | 19209574 | 1190 |
| ENSG000001 | 10.34285 | 13.85751 | -0.40816 | 0.4939   | 0.59782  | LINC00623 chr1   | - | 1.44E+08 | 1.44E+08 | 2084 |
| ENSG000001 | 0.36308  | 0.997859 | -1.0294  | 0.53423  | NA       | AC114808. chr2   | - | 1054819  | 1064027  | 432  |
| ENSG000001 | 7.481891 | 9.650026 | -0.35894 | 0.63675  | 0.72498  | SNORA71B chr20   | - | 37053843 | 37053978 | 136  |
| ENSG000001 | 0        | 0.357707 | -0.41864 | 0.81278  | NA       | RP11-397C chr10  | + | 14116283 | 14129604 | 790  |
| ENSG000001 | 1.503747 | 0.997859 | 0.50177  | 0.72861  | 0.79935  | AC007041. chr2   | - | 20439653 | 20440807 | 1155 |
| ENSG000001 | 3.278071 | 2.416535 | 0.39774  | 0.74056  | 0.80908  | RP11-414P chr4   | + | 17913297 | 17914599 | 979  |
| ENSG000001 | 0        | 0.297015 | -0.41864 | 0.81278  | NA       | AC016737. chr2   | + | 1.75E+08 | 1.75E+08 | 873  |
| ENSG000001 | 0        | 0.343138 | -0.41864 | 0.81278  | NA       | AC005808. chr20  | + | 52224893 | 52251129 | 381  |
| ENSG000001 | 1.919068 | 0        | 2.4151   | 0.13977  | 0.21349  | AC010149. chr2   | - | 2.31E+08 | 2.31E+08 | 571  |
| ENSG000001 | 0.705622 | 0        | 0.8807   | 0.6196   | NA       | RPL29P30 chr15   | - | 71088936 | 71095027 | 833  |
| ENSG000001 | 76.2732  | 30.30719 | 1.3184   | 0.000729 | 0.001846 | RP11-282C chr12  | - | 1.24E+08 | 1.24E+08 | 1110 |
| ENSG000001 | 0        | 0.297015 | -0.41864 | 0.81278  | NA       | AC112211. chr3   | + | 33118696 | 33118983 | 288  |
| ENSG000001 | 5.830795 | 2.012704 | 1.3601   | 0.22416  | 0.31667  | RP11-342N chr10  | + | 81142084 | 81169030 | 511  |
| ENSG000001 | 0.995923 | 0.686276 | 0.39213  | 0.8081   | NA       | AC006159. chr7   | - | 1.16E+08 | 1.16E+08 | 386  |
| ENSG000001 | 0.290301 | 0        | 0.4146   | 0.81455  | NA       | WI2-2998C chr1   | - | 2.24E+08 | 2.24E+08 | 886  |
| ENSG000001 | 0        | 0.343138 | -0.41864 | 0.81278  | NA       | RP5-930J4. chr1  | - | 21019227 | 21020506 | 479  |
| ENSG000001 | 1.701545 | 3.144102 | -0.76175 | 0.53455  | 0.63545  | DPY19L2P4 chr7   | + | 89748714 | 89754914 | 2335 |

|            |          |          |          |          |          |                  |   |          |          |      |
|------------|----------|----------|----------|----------|----------|------------------|---|----------|----------|------|
| ENSG000001 | 87.00237 | 78.77994 | 0.14546  | 0.55735  | 0.65634  | RP11-357C chrX   | - | 62729822 | 62780929 | 529  |
| ENSG000001 | 0        | 2.367995 | -2.6905  | 0.093451 | 0.15263  | RP11-214J chr2   | - | 26324186 | 26325005 | 820  |
| ENSG000001 | 1.722083 | 1.188058 | 0.36823  | 0.80592  | 0.86274  | XXbac-B47I chr22 | - | 18465971 | 18466385 | 361  |
| ENSG000001 | 0        | 1.577319 | -1.9089  | 0.27608  | NA       | RP1-279N1 chrX   | - | 75875899 | 75876960 | 1062 |
| ENSG000001 | 1.08924  | 0.297015 | 0.89622  | 0.61378  | NA       | RP11-3L8.3 chr9  | - | 12700100 | 12814344 | 799  |
| ENSG000001 | 5.228841 | 4.850927 | 0.09539  | 0.91186  | 0.93966  | RP11-480I chr1   | - | 2.03E+08 | 2.03E+08 | 190  |
| ENSG000001 | 0        | 0.357707 | -0.41864 | 0.81278  | NA       | RP11-142A chr7   | - | 91010093 | 91186163 | 202  |
| ENSG000001 | 10.86102 | 13.17124 | -0.24989 | 0.68957  | 0.7686   | TOPORS-AS chr9   | + | 32551142 | 32567003 | 1000 |
| ENSG000001 | 3.620613 | 6.03328  | -0.6881  | 0.4091   | 0.51405  | RP11-678B chr7   | + | 53929926 | 53931032 | 1107 |
| ENSG000001 | 0        | 0.700845 | -0.87835 | 0.62047  | NA       | RP5-928E2 chrX   | + | 84465712 | 84474704 | 1135 |
| ENSG000001 | 0        | 0.297015 | -0.41864 | 0.81278  | NA       | TAB3P1 chrY      | - | 15265842 | 15274125 | 1634 |
| ENSG000001 | 0        | 0.686276 | -0.84936 | 0.6309   | NA       | RP11-513C chr1   | + | 2.43E+08 | 2.43E+08 | 634  |
| ENSG000001 | 0        | 0.297015 | -0.41864 | 0.81278  | NA       | MRPL50P4 chr10   | - | 61311162 | 61311636 | 475  |
| ENSG000001 | 0        | 0.654722 | -0.83442 | 0.63731  | NA       | RP11-225F chr10  | - | 1.05E+08 | 1.05E+08 | 640  |
| ENSG000001 | 3.205292 | 1.294874 | 1.1483   | 0.31956  | 0.42248  | RP11-166C chr7   | + | 66800963 | 66805011 | 489  |
| ENSG000001 | 92.37097 | 94.74092 | -0.03782 | 0.86643  | 0.90701  | RP11-122C chr1   | + | 1.61E+08 | 1.61E+08 | 1806 |
| ENSG000001 | 0.290301 | 2.779947 | -2.2957  | 0.13236  | 0.20479  | AC006946 chr22   | + | 17602476 | 17612994 | 1175 |
| ENSG000001 | 0.580602 | 4.432528 | -2.3493  | 0.077168 | 0.12956  | RP11-363C chr2   | - | 97193677 | 97198043 | 440  |
| ENSG000001 | 2.67693  | 5.033005 | -0.83738 | 0.39553  | 0.50002  | RP11-133C chr9   | - | 33785948 | 33818793 | 647  |
| ENSG000001 | 0.290301 | 0        | 0.4146   | 0.81455  | NA       | RPL21P13I chr3   | + | 37789601 | 37790391 | 791  |
| ENSG000001 | 0.870904 | 0.297015 | 0.71032  | 0.69005  | NA       | GYG2-AS1 chrX    | - | 2770781  | 2771801  | 515  |
| ENSG000001 | 0.290301 | 1.309443 | -1.2632  | 0.45557  | NA       | AC114755 chr2    | + | 1.07E+08 | 1.07E+08 | 831  |
| ENSG000001 | 2.261609 | 13.65442 | -2.425   | 0.004389 | 0.009858 | JARID2-AS1 chr6  | - | 15248046 | 15248865 | 455  |
| ENSG000001 | 0        | 1.698704 | -2.2257  | 0.18075  | NA       | DBF4P1 chr10     | - | 65928715 | 65930611 | 1892 |
| ENSG000001 | 0        | 10.99344 | -5.0783  | 4.56E-05 | 0.000135 | AC092415 chr3    | - | 28038701 | 28070095 | 755  |
| ENSG000001 | 0.705622 | 9.058413 | -3.3192  | 0.002627 | 0.00611  | RP11-498P chr9   | + | 99995483 | 99997296 | 281  |
| ENSG000001 | 0        | 0.343138 | -0.41864 | 0.81278  | NA       | AC012506 chr2    | - | 23598100 | 23604170 | 572  |
| ENSG000001 | 36.94247 | 24.93675 | 0.55827  | 0.16572  | 0.24679  | AC073046 chr2    | + | 74212259 | 74213470 | 390  |
| ENSG000001 | 89.30863 | 87.7494  | 0.026876 | 0.91044  | 0.93856  | RP4-639F2 chr1   | + | 95393122 | 95428826 | 952  |
| ENSG000001 | 0.943682 | 0        | 1.2438   | 0.48556  | NA       | RP11-693N chr11  | - | 1.05E+08 | 1.05E+08 | 3530 |
| ENSG000001 | 2.956066 | 4.836358 | -0.6631  | 0.4903   | 0.59429  | RPS2P7 chr20     | - | 44269125 | 44270009 | 885  |
| ENSG000001 | 0.580602 | 4.288452 | -2.3307  | 0.070419 | 0.11977  | BX842568 chrX    | + | 36975986 | 36976212 | 227  |
| ENSG000001 | 9.732336 | 5.750835 | 0.73087  | 0.31635  | 0.41904  | RP4-756G2 chr22  | - | 41605126 | 41613631 | 2500 |
| ENSG000001 | 0        | 5.21105  | -3.9509  | 0.004537 | 0.01017  | AC011196 chr15   | - | 26902177 | 26903910 | 595  |
| ENSG000001 | 3.184754 | 1.684135 | 0.8293   | 0.47456  | 0.57905  | AC009505 chr2    | - | 1.06E+08 | 1.06E+08 | 890  |
| ENSG000001 | 0        | 0.343138 | -0.41864 | 0.81278  | NA       | FTLP1 chr20      | - | 44603888 | 44604714 | 526  |
| ENSG000001 | 1.576526 | 0.357707 | 1.5817   | 0.31886  | 0.42176  | RP5-1028L chr1   | - | 1.11E+08 | 1.11E+08 | 508  |
| ENSG000001 | 0.975385 | 0.594029 | 0.4404   | 0.79523  | NA       | RP5-1073C chr1   | - | 1.14E+08 | 1.14E+08 | 2117 |
| ENSG000001 | 4.107898 | 11.54705 | -1.3989  | 0.07783  | 0.13041  | AGAP1-IT1 chr2   | + | 2.36E+08 | 2.36E+08 | 664  |
| ENSG000001 | 9.835025 | 1.684135 | 2.362    | 0.010895 | 0.022714 | AC087294 chr17   | + | 21117644 | 21133348 | 1152 |
| ENSG000001 | 209.4066 | 3.884622 | 5.6289   | 1.85E-35 | 2.85E-34 | RP11-383F chr8   | + | 72740402 | 73030628 | 4220 |
| ENSG000001 | 0        | 5.499944 | -3.9636  | 0.00515  | 0.011448 | LINC00402 chr13  | + | 74805594 | 74834113 | 3340 |
| ENSG000001 | 8.007647 | 11.28804 | -0.46367 | 0.46037  | 0.56573  | RP11-230B chr1   | + | 63154153 | 63176365 | 1228 |
| ENSG000001 | 0        | 0.357707 | -0.41864 | 0.81278  | NA       | AC087499 chr17   | + | 20515980 | 20517321 | 1342 |
| ENSG000001 | 0.580602 | 2.681995 | -1.6849  | 0.23529  | 0.32914  | NDUFB11P chr11   | - | 92069198 | 92069662 | 465  |
| ENSG000001 | 0        | 1.043983 | -1.3473  | 0.44976  | NA       | AC073551 chr2    | - | 1.57E+08 | 1.57E+08 | 834  |
| ENSG000001 | 0.290301 | 0        | 0.4146   | 0.81455  | NA       | RP11-781C chr1   | - | 39423947 | 39424597 | 350  |
| ENSG000001 | 138.6218 | 179.5928 | -0.36852 | 0.058928 | 0.10283  | RPL6P27 chr18    | - | 6462143  | 6463014  | 867  |
| ENSG000001 | 2.790785 | 1.98115  | 0.41134  | 0.72479  | 0.79633  | AC005822 chr17   | - | 16520162 | 16521195 | 1034 |
| ENSG000001 | 0        | 0.297015 | -0.41864 | 0.81278  | NA       | SUMO1P4 chr19    | + | 49778376 | 49778677 | 302  |
| ENSG000001 | 0.705622 | 2.263595 | -1.3338  | 0.36945  | 0.474    | NOL5BP chr6      | - | 28751410 | 28751781 | 372  |
| ENSG000001 | 3.95199  | 30.04031 | -2.8011  | 0.000124 | 0.000349 | AC002310 chr16   | + | 30546073 | 30548465 | 1445 |
| ENSG000001 | 0        | 0.297015 | -0.41864 | 0.81278  | NA       | RP11-334A chr1   | + | 53580248 | 53584281 | 1871 |
| ENSG000001 | 14.06794 | 10.38813 | 0.41017  | 0.48638  | 0.59036  | RP11-86H7 chr1   | - | 95086707 | 95089740 | 2272 |
| ENSG000001 | 4.023955 | 46.96908 | -3.3939  | 6.66E-09 | 2.87E-08 | NFAM1 chr22      | - | 42776416 | 42828401 | 5602 |
| ENSG000001 | 0        | 2.24661  | -2.6365  | 0.10117  | 0.16301  | LINC00533 chr6   | - | 28616063 | 28616843 | 537  |
| ENSG000001 | 1.753786 | 2.558194 | -0.47196 | 0.73104  | 0.80136  | AC073150 chr7    | - | 27531301 | 27532384 | 1084 |
| ENSG000001 | 0        | 0.357707 | -0.41864 | 0.81278  | NA       | AC092580 chr2    | + | 7865932  | 7870836  | 243  |
| ENSG000001 | 0        | 0.700845 | -0.87835 | 0.62047  | NA       | XXbac-B33I chr22 | - | 20330726 | 20331888 | 446  |
| ENSG000001 | 0.342542 | 0.297015 | -0.00202 | 0.99909  | NA       | AC007283 chr2    | - | 2.02E+08 | 2.02E+08 | 197  |
| ENSG000001 | 5.746038 | 3.633731 | 0.63054  | 0.46835  | 0.57312  | AC011247 chr2    | + | 38828740 | 38829320 | 233  |
| ENSG000001 | 2.520208 | 7.98046  | -1.5177  | 0.095931 | 0.15608  | GAPDHP65 chrX    | - | 46299144 | 46300149 | 1006 |
| ENSG000001 | 22.06263 | 57.64356 | -1.364   | 0.001185 | 0.002907 | GNAS-AS1 chr20   | - | 57393974 | 57425958 | 1156 |
| ENSG000001 | 0.632843 | 0        | 0.81931  | 0.64303  | NA       | RBMS3-AS1 chr3   | - | 29968302 | 29975647 | 554  |
| ENSG000001 | 0        | 0.343138 | -0.41864 | 0.81278  | NA       | GAPDHP23 chr1    | - | 1.2E+08  | 1.2E+08  | 993  |

|            |          |          |          |          |          |                  |   |          |          |      |
|------------|----------|----------|----------|----------|----------|------------------|---|----------|----------|------|
| ENSG000001 | 5.446363 | 0.297015 | 3.2688   | 0.015664 | 0.031606 | AC013402. chr2   | + | 1.05E+08 | 1.05E+08 | 3778 |
| ENSG000001 | 0        | 0.640152 | -0.82869 | 0.63935  | NA       | RP11-231K chr9   | + | 96717879 | 96721422 | 1445 |
| ENSG000001 | 8.153204 | 75.07907 | -3.1522  | 8.66E-15 | 5.61E-14 | POU5F1P3 chr12   | - | 8286372  | 8287447  | 670  |
| ENSG000001 | 0        | 0.297015 | -0.41864 | 0.81278  | NA       | RP5-827C2 chr1   | - | 2.34E+08 | 2.34E+08 | 438  |
| ENSG000001 | 0        | 0.98329  | -1.2878  | 0.47019  | NA       | NKX1-1 chr4      | - | 1396720  | 1400119  | 1236 |
| ENSG000001 | 21.6852  | 2.041842 | 3.2509   | 3.78E-05 | 0.000113 | AF127936. chr21  | - | 16193529 | 16254296 | 1997 |
| ENSG000001 | 0.705622 | 3.215331 | -1.8601  | 0.16276  | 0.24315  | NSRP1P1 chr1     | + | 78312795 | 78314487 | 1693 |
| ENSG000001 | 0        | 1.387121 | -1.6961  | 0.33794  | NA       | OR2A13P chr7     | + | 1.44E+08 | 1.44E+08 | 930  |
| ENSG000001 | 0        | 4.383115 | -3.5143  | 0.021216 | 0.041633 | ST13P2 chr2      | + | 1.89E+08 | 1.89E+08 | 1109 |
| ENSG000001 | 3.516945 | 1.730259 | 0.86443  | 0.50328  | 0.60677  | XXbac-B47I chr22 | + | 18584378 | 18584654 | 277  |
| ENSG000001 | 4.543757 | 1.888903 | 1.1239   | 0.27852  | 0.37904  | RP11-324F chr10  | - | 51780942 | 51827563 | 2177 |
| ENSG000001 | 0.342542 | 0.297015 | -0.00202 | 0.99909  | NA       | RP11-156G chr9   | + | 35507561 | 35507870 | 310  |
| ENSG000001 | 0        | 0.715414 | -0.84936 | 0.6309   | NA       | LINC00494 chr20  | + | 46988693 | 46999372 | 3544 |
| ENSG000001 | 0.580602 | 0.343138 | 0.37443  | 0.8337   | NA       | RP11-2K17 chr10  | - | 15028873 | 15031447 | 640  |
| ENSG000001 | 0        | 0.343138 | -0.41864 | 0.81278  | NA       | RP11-441F chr9   | + | 30773462 | 30774730 | 1269 |
| ENSG000001 | 2.023549 | 2.932886 | -0.49137 | 0.6637   | 0.74706  | SNRPFP4 chr3     | + | 48202666 | 48202907 | 242  |
| ENSG000001 | 1.08924  | 1.280305 | -0.19319 | 0.90559  | 0.93494  | RNF148 chr7      | - | 1.22E+08 | 1.22E+08 | 1304 |
| ENSG000001 | 2.188831 | 1.058552 | 0.86554  | 0.54992  | 0.6497   | AC016644. chr5   | + | 56237134 | 56242979 | 434  |
| ENSG000001 | 10.11335 | 9.589333 | 0.078095 | 0.90036  | 0.93109  | NUS1P1 chrX      | - | 47372001 | 47372882 | 882  |
| ENSG000001 | 0        | 0.686276 | -0.84936 | 0.6309   | NA       | AC092646. chr2   | + | 1.24E+08 | 1.24E+08 | 2095 |
| ENSG000001 | 1.08924  | 3.022717 | -1.2232  | 0.38294  | 0.48704  | LINC00484 chr9   | + | 93922051 | 93927858 | 2745 |
| ENSG000001 | 0        | 0.297015 | -0.41864 | 0.81278  | NA       | RP1-69M2I chr1   | + | 11669588 | 11673412 | 1285 |
| ENSG000001 | 2.914991 | 0        | 3.062    | 0.044848 | 0.080877 | MXRASP1 chrY     | + | 14077914 | 14108092 | 8000 |
| ENSG000001 | 1.555988 | 5.164927 | -1.5251  | 0.15821  | 0.23759  | AC064850. chr2   | - | 1.36E+08 | 1.36E+08 | 1398 |
| ENSG000001 | 9.264774 | 4.836358 | 0.87958  | 0.2361   | 0.33012  | RP11-545I chr6   | + | 1.46E+08 | 1.46E+08 | 715  |
| ENSG000001 | 361.7451 | 714.2803 | -0.97984 | 5.03E-09 | 2.19E-08 | H3F3AP4 chr2     | + | 1.76E+08 | 1.76E+08 | 1022 |
| ENSG000001 | 0.36308  | 0.997859 | -1.0294  | 0.53423  | NA       | LINC00345 chr13  | - | 53058296 | 53058815 | 285  |
| ENSG000001 | 0.36308  | 2.96444  | -2.3798  | 0.10651  | 0.17028  | AC005682. chr7   | - | 22928990 | 22980809 | 675  |
| ENSG000001 | 0        | 1.964165 | -2.2052  | 0.20143  | 0.2901   | RPL21P40 chr3    | + | 32071688 | 32072170 | 483  |
| ENSG000001 | 0        | 2.041842 | -2.4837  | 0.12741  | 0.19837  | AC090286. chr17  | + | 18811592 | 18812178 | 587  |
| ENSG000001 | 2.37465  | 0.343138 | 1.9239   | 0.23867  | 0.3333   | RP11-109P chr1   | + | 38306658 | 38307348 | 691  |
| ENSG000001 | 9.784576 | 3.428963 | 1.4278   | 0.10224  | 0.16435  | NPM1P26 chr10    | + | 98319942 | 98320679 | 738  |
| ENSG000001 | 5.499418 | 3.541484 | 0.56106  | 0.55031  | 0.65006  | AC008746. chr19  | + | 54958008 | 54958225 | 218  |
| ENSG000001 | 0.290301 | 0.951736 | -0.90191 | 0.60254  | NA       | AC018442. chr8   | + | 1.01E+08 | 1.01E+08 | 2061 |
| ENSG000001 | 0.342542 | 1.309443 | -1.2504  | 0.45877  | NA       | PPIAP20 chr19    | + | 12618943 | 12619077 | 135  |
| ENSG000001 | 0.342542 | 160.6365 | -7.9078  | 4.15E-15 | 2.74E-14 | AC116614. chr2   | - | 945320   | 945960   | 532  |
| ENSG000001 | 0.923144 | 1.591889 | -0.6117  | 0.66675  | 0.74946  | RP11-395P chr3   | + | 47705116 | 47705424 | 309  |
| ENSG000001 | 0.342542 | 0.594029 | -0.38792 | 0.8278   | NA       | PA2G4P2 chr20    | + | 12360704 | 12361903 | 1200 |
| ENSG000001 | 1.991846 | 0.686276 | 1.2111   | 0.41079  | 0.51562  | CYCSP52 chr1     | + | 1.57E+08 | 1.57E+08 | 310  |
| ENSG000001 | 0.653381 | 1.40169  | -0.79346 | 0.61259  | 0.70485  | PCBP2P1 chr21    | - | 40543056 | 40544032 | 977  |
| ENSG000001 | 27.242   | 34.43229 | -0.32999 | 0.42727  | 0.53263  | RP13-507I chrX   | + | 1.49E+08 | 1.49E+08 | 3414 |
| ENSG000001 | 0        | 1.713273 | -2.2094  | 0.18675  | NA       | AC023490. chr22  | + | 20377669 | 20378803 | 853  |
| ENSG000001 | 0        | 0.297015 | -0.41864 | 0.81278  | NA       | RP11-342N chr10  | - | 81265833 | 81270678 | 1594 |
| ENSG000001 | 15.4038  | 75.46853 | -2.2397  | 2.79E-05 | 8.49E-05 | DICER1-AS1 chr14 | + | 95623982 | 95646263 | 2323 |
| ENSG000001 | 0        | 0.343138 | -0.41864 | 0.81278  | NA       | ANKRD34C chr15   | + | 79575146 | 79590580 | 5423 |
| ENSG000001 | 0        | 0.357707 | -0.41864 | 0.81278  | NA       | RP4-604G5 chr7   | + | 99590020 | 99590673 | 654  |
| ENSG000001 | 1.722083 | 0.686276 | 0.99948  | 0.51521  | 0.61808  | RP11-340I chr7   | + | 63353664 | 63355019 | 1356 |
| ENSG000001 | 0.342542 | 0        | 0.4146   | 0.81455  | NA       | AC013268. chr2   | + | 1.11E+08 | 1.11E+08 | 2324 |
| ENSG000001 | 2.67693  | 1.012429 | 1.1856   | 0.36205  | 0.46631  | AC009299. chr2   | - | 1.62E+08 | 1.62E+08 | 1072 |
| ENSG000001 | 1.338465 | 11.85863 | -2.9253  | 0.001834 | 0.004364 | AC010148. chr2   | - | 2.36E+08 | 2.36E+08 | 1652 |
| ENSG000001 | 0        | 0.357707 | -0.41864 | 0.81278  | NA       | AC007349. chr7   | + | 36820613 | 36822394 | 872  |
| ENSG000001 | 0        | 0.715414 | -0.84936 | 0.6309   | NA       | RP11-290E chrX   | + | 1.43E+08 | 1.43E+08 | 343  |
| ENSG000001 | 0.580602 | 0        | 0.8036   | 0.6494   | NA       | OR2AF1P chrX     | + | 1.31E+08 | 1.31E+08 | 889  |
| ENSG000001 | 0        | 0.343138 | -0.41864 | 0.81278  | NA       | AC124997. chr15  | - | 25729978 | 25823938 | 2491 |
| ENSG000001 | 0.342542 | 0.357707 | -0.0021  | 0.99906  | NA       | RP3-522P1 chr6   | - | 25245584 | 25261639 | 745  |
| ENSG000001 | 6.919221 | 13.97003 | -0.98281 | 0.099691 | 0.16105  | HMGNI1P3I chr2   | + | 98443711 | 98444013 | 303  |
| ENSG000001 | 2.064625 | 3.154639 | -0.55925 | 0.64676  | 0.73302  | RP11-436I chr6   | - | 1.44E+08 | 1.44E+08 | 1699 |
| ENSG000001 | 0        | 1.355566 | -1.9006  | 0.26573  | NA       | CTBP2P2 chr10    | - | 96406121 | 96407753 | 1334 |
| ENSG000001 | 1.722083 | 3.784254 | -1.0111  | 0.38043  | 0.48446  | RP11-32D1 chr1   | - | 1.97E+08 | 1.97E+08 | 560  |
| ENSG000001 | 0        | 0.715414 | -0.84936 | 0.6309   | NA       | RP11-634B chr1   | + | 2.48E+08 | 2.48E+08 | 1541 |
| ENSG000001 | 0        | 2.200487 | -2.3588  | 0.16874  | 0.25044  | KIAA0040 chr1    | - | 1.75E+08 | 1.75E+08 | 4564 |
| ENSG000001 | 1.866827 | 15.8104  | -2.8592  | 0.000487 | 0.001266 | AC138655. chr2   | + | 47754676 | 47762338 | 434  |
| ENSG000001 | 0.653381 | 0        | 0.82678  | 0.64037  | NA       | SNRPGP5 chr10    | - | 13146574 | 13146793 | 220  |
| ENSG000001 | 0        | 0.357707 | -0.41864 | 0.81278  | NA       | BRD7P5 chr13     | - | 95409705 | 95411526 | 1822 |
| ENSG000001 | 152.182  | 0.951736 | 6.8939   | 2.26E-20 | 1.94E-19 | LINC00607 chr2   | - | 2.16E+08 | 2.17E+08 | 3690 |

|            |          |          |          |          |          |                  |   |          |          |      |
|------------|----------|----------|----------|----------|----------|------------------|---|----------|----------|------|
| ENSG000001 | 48.97733 | 13.0814  | 1.8729   | 7.28E-05 | 0.000211 | AP001625. chr21  | - | 43980484 | 43982044 | 575  |
| ENSG000001 | 0.653381 | 1.294874 | -0.76351 | 0.61066  | 0.70317  | AC000089. chr22  | + | 19779817 | 19780617 | 801  |
| ENSG000001 | 0.632843 | 1.995719 | -1.3071  | 0.35187  | 0.456    | XXbac-BPG chr6   | + | 30484043 | 30486994 | 851  |
| ENSG000001 | 0.705622 | 1.073121 | -0.39679 | 0.81492  | NA       | HNRNPA1P chr13   | - | 94047230 | 94048108 | 879  |
| ENSG000001 | 0        | 2.399549 | -2.7165  | 0.088838 | 0.14612  | AL109767. chr14  | + | 99729285 | 99731072 | 564  |
| ENSG000001 | 1.431782 | 3.947731 | -1.2916  | 0.30079  | 0.40225  | ZNRF3-IT1 chr22  | + | 29388709 | 29414608 | 674  |
| ENSG000001 | 10.92345 | 0.98329  | 3.158    | 0.00142  | 0.00344  | RP11-73M1 chr1   | + | 32110590 | 32125539 | 872  |
| ENSG000001 | 2.656392 | 3.114963 | -0.19055 | 0.86498  | 0.90608  | RP11-421L chr1   | + | 1.01E+08 | 1.01E+08 | 671  |
| ENSG000001 | 0.943682 | 0.343138 | 0.89828  | 0.6031   | NA       | HCFC1-AS1 chrX   | + | 1.53E+08 | 1.53E+08 | 350  |
| ENSG000001 | 1.233984 | 1.248751 | -0.01102 | 0.99422  | 0.99669  | RP4-646N3 chrX   | + | 38629584 | 38658911 | 1180 |
| ENSG000001 | 3.028845 | 1.949596 | 0.54535  | 0.63155  | 0.72079  | PRELID1P3 chr10  | + | 65187057 | 65187713 | 657  |
| ENSG000001 | 0.342542 | 0.700845 | -0.57269 | 0.74414  | NA       | RP5-1022P chr20  | + | 5514274  | 5516535  | 473  |
| ENSG000001 | 1.503747 | 4.49322  | -1.346   | 0.2491   | 0.34541  | IFITM4P chr6     | - | 29718506 | 29718925 | 420  |
| ENSG000001 | 547.3401 | 420.9416 | 0.37892  | 0.017872 | 0.035667 | LINC00263 chr10  | + | 1.02E+08 | 1.02E+08 | 2551 |
| ENSG000001 | 0.36308  | 0        | 0.4146   | 0.81455  | NA       | RPL36AP2 chr7    | - | 15741057 | 15741377 | 321  |
| ENSG000001 | 0        | 3.100394 | -3.0831  | 0.046478 | 0.083487 | TBCAP2 chr1      | - | 15018625 | 15019109 | 326  |
| ENSG000001 | 10.5827  | 12.57237 | -0.23206 | 0.72553  | 0.79697  | BHLHE40-A chr3   | - | 4938493  | 5021646  | 2356 |
| ENSG000001 | 0        | 0.343138 | -0.41864 | 0.81278  | NA       | CNN2P3 chr9      | - | 69498582 | 69499487 | 906  |
| ENSG000001 | 0        | 0.297015 | -0.41864 | 0.81278  | NA       | RP1-60N8. chrX   | + | 17546558 | 17605281 | 1554 |
| ENSG000001 | 3.019472 | 1.416259 | 0.9562   | 0.44992  | 0.55551  | AC073333. chr7   | - | 16735496 | 16759523 | 648  |
| ENSG000001 | 1.45232  | 0        | 1.4544   | 0.41354  | NA       | RP11-356L chr6   | - | 1.38E+08 | 1.38E+08 | 1025 |
| ENSG000001 | 0.870904 | 1.387121 | -0.42579 | 0.79563  | 0.8551   | RP13-16H1 chr10  | + | 27006564 | 27007707 | 485  |
| ENSG000001 | 0.342542 | 0.98329  | -0.93492 | 0.58786  | NA       | RMDN2-AS chr2    | - | 38177144 | 38294184 | 859  |
| ENSG000001 | 7.333728 | 12.32074 | -0.70783 | 0.33423  | 0.43769  | AC005540. chr2   | - | 1.92E+08 | 1.92E+08 | 919  |
| ENSG000001 | 8.974473 | 94.09662 | -3.3457  | 6.72E-15 | 4.38E-14 | AC006978. chr7   | + | 30410987 | 30412357 | 1234 |
| ENSG000001 | 0.290301 | 0.700845 | -0.56655 | 0.74739  | NA       | AC005237. chr2   | + | 2.42E+08 | 2.42E+08 | 219  |
| ENSG000001 | 70.47941 | 82.80065 | -0.2312  | 0.43016  | 0.5356   | B3GALT4 chr6     | + | 33244917 | 33246602 | 1686 |
| ENSG000001 | 0        | 1.788535 | -1.712   | 0.33711  | NA       | HSPA8P6 chr2     | - | 2.1E+08  | 2.1E+08  | 1552 |
| ENSG000001 | 334.2495 | 9.392687 | 5.0883   | 9.57E-57 | 2.58E-55 | GSN-AS1 chr9     | - | 1.24E+08 | 1.24E+08 | 4763 |
| ENSG000001 | 0.290301 | 4.585467 | -3.0621  | 0.023697 | 0.045992 | RP1-102G2 chr1   | - | 1.75E+08 | 1.75E+08 | 334  |
| ENSG000001 | 5.426639 | 3.305162 | 0.65403  | 0.47382  | 0.57839  | RP11-335C chr12  | - | 68052771 | 68064699 | 777  |
| ENSG000001 | 0        | 0.343138 | -0.41864 | 0.81278  | NA       | ARHGEF7-A chr13  | - | 1.12E+08 | 1.12E+08 | 777  |
| ENSG000001 | 0.72616  | 0        | 0.85004  | 0.63064  | NA       | FEM1AP4 chr13    | + | 19239375 | 19241361 | 1987 |
| ENSG000001 | 7.531526 | 6.157081 | 0.28957  | 0.72068  | 0.79332  | AP001468. chr21  | + | 47612391 | 47613673 | 804  |
| ENSG000001 | 0        | 0.357707 | -0.41864 | 0.81278  | NA       | RP11-590E chr9   | - | 267966   | 273002   | 406  |
| ENSG000001 | 29.38878 | 25.96287 | 0.18116  | 0.73054  | 0.80108  | RP11-77I2. chr12 | + | 30947977 | 30955645 | 1645 |
| ENSG000001 | 0        | 0.343138 | -0.41864 | 0.81278  | NA       | RP11-763B chr1   | + | 1.49E+08 | 1.49E+08 | 408  |
| ENSG000001 | 0.290301 | 0.700845 | -0.56655 | 0.74739  | NA       | AF064858. chr21  | - | 40360633 | 40378079 | 1412 |
| ENSG000001 | 6.431935 | 27.6456  | -2.058   | 0.001052 | 0.002599 | TSPEAR-AS1 chr21 | + | 45926690 | 45935738 | 1388 |
| ENSG000001 | 1.370168 | 0        | 1.3929   | 0.43293  | NA       | RP11-460E chr9   | + | 70348573 | 70349113 | 541  |
| ENSG000001 | 1.048164 | 4.553913 | -1.8798  | 0.11616  | 0.18368  | TM4SF19-A chr3   | + | 1.96E+08 | 1.96E+08 | 1829 |
| ENSG000001 | 1.08924  | 0        | 1.1858   | 0.50299  | NA       | RP11-345L chr6   | + | 53493178 | 53496192 | 566  |
| ENSG000001 | 1.068702 | 0.297015 | 0.9938   | 0.56435  | NA       | RP11-626E chr4   | + | 1.87E+08 | 1.87E+08 | 618  |
| ENSG000001 | 0.632843 | 1.888903 | -1.2375  | 0.39258  | 0.49697  | CPB2-AS1 chr13   | + | 46627037 | 46687467 | 747  |
| ENSG000001 | 3.298608 | 2.96444  | 0.13647  | 0.8948   | 0.92699  | RBMS3-AS3 chr3   | - | 29305685 | 29332217 | 613  |
| ENSG000001 | 1.742621 | 1.294874 | 0.31987  | 0.81926  | 0.873    | RP4-580O1 chr1   | - | 33977608 | 33978343 | 736  |
| ENSG000001 | 11.47235 | 4.510205 | 1.2724   | 0.083581 | 0.13872  | RHOA-IT1 chr3    | - | 49402578 | 49404439 | 517  |
| ENSG000001 | 2.375464 | 1.730259 | 0.38912  | 0.76736  | 0.83178  | AP006216. chr11  | + | 1.17E+08 | 1.17E+08 | 563  |
| ENSG000001 | 0.36308  | 1.98115  | -1.8644  | 0.22572  | 0.31845  | RP1-159A1 chr1   | + | 27975930 | 27976121 | 192  |
| ENSG000001 | 23.1134  | 53.37464 | -1.2035  | 0.001513 | 0.003651 | ASH1L-AS1 chr1   | + | 1.56E+08 | 1.56E+08 | 1955 |
| ENSG000001 | 0.342542 | 0        | 0.4146   | 0.81455  | NA       | AC073109. chr7   | - | 11859943 | 11860920 | 978  |
| ENSG000001 | 0        | 0.297015 | -0.41864 | 0.81278  | NA       | ZNRF2P3 chr10    | + | 81741595 | 81741968 | 374  |
| ENSG000001 | 0        | 0.343138 | -0.41864 | 0.81278  | NA       | RP13-650C chr7   | + | 1.01E+08 | 1.01E+08 | 171  |
| ENSG000001 | 18.70502 | 3.884622 | 2.1674   | 0.000891 | 0.002229 | NEXN-AS1 chr1    | - | 78347033 | 78355224 | 2292 |
| ENSG000001 | 0        | 0.594029 | -0.81444 | 0.64499  | NA       | C10orf40 chr10   | - | 61715188 | 61720671 | 4329 |
| ENSG000001 | 1.068702 | 0        | 1.3672   | 0.44297  | NA       | AC007405. chr2   | - | 1.72E+08 | 1.72E+08 | 547  |
| ENSG000001 | 0.653381 | 0.297015 | 0.51304  | 0.77085  | NA       | AC008280. chr2   | - | 54256689 | 54257819 | 412  |
| ENSG000001 | 31.15454 | 50.46357 | -0.69471 | 0.030874 | 0.05817  | ZNF815P chr7     | + | 5862791  | 5894066  | 2750 |
| ENSG000001 | 3.22583  | 2.338857 | 0.43421  | 0.67672  | 0.75794  | AC002543. chr7   | - | 1.17E+08 | 1.17E+08 | 1954 |
| ENSG000001 | 12.07349 | 2.855208 | 1.9195   | 0.030967 | 0.058331 | LLOXNC01- chrX   | - | 1.03E+08 | 1.03E+08 | 496  |
| ENSG000001 | 3.76617  | 0.700845 | 2.0666   | 0.10848  | 0.17295  | EGOT chr3        | - | 4790876  | 4793274  | 1464 |
| ENSG000001 | 1.379541 | 0        | 1.686    | 0.34092  | NA       | AC061961. chr2   | - | 1.56E+08 | 1.56E+08 | 432  |
| ENSG000001 | 51.19982 | 154.0162 | -1.5854  | 4.16E-09 | 1.82E-08 | TTC28-AS1 chr22  | + | 28315364 | 28404569 | 5859 |
| ENSG000001 | 0        | 0.357707 | -0.41864 | 0.81278  | NA       | AC096582. chr7   | - | 45855815 | 45858615 | 2801 |
| ENSG000001 | 1.359003 | 4.135513 | -1.4528  | 0.19979  | 0.28838  | COX7CP1 chr13    | - | 49761615 | 49761806 | 192  |

|            |          |          |          |          |          |                  |   |          |          |      |
|------------|----------|----------|----------|----------|----------|------------------|---|----------|----------|------|
| ENSG000001 | 8.361354 | 5.614881 | 0.55695  | 0.454    | 0.55936  | UBOX5-AS1 chr20  | + | 3087559  | 3131513  | 1792 |
| ENSG000001 | 18.65196 | 16.15024 | 0.21419  | 0.66129  | 0.74503  | PNMA6C chrX      | + | 1.52E+08 | 1.52E+08 | 2255 |
| ENSG000001 | 0.870904 | 0        | 1.046    | 0.5544   | NA       | RP11-462L chr10  | - | 33346543 | 33347343 | 793  |
| ENSG000001 | 0.290301 | 0.357707 | -0.00203 | 0.99908  | NA       | FXD6P2 chr10     | - | 38380692 | 38380979 | 288  |
| ENSG000001 | 1.919068 | 0        | 2.4151   | 0.13977  | 0.21349  | COX5BP3 chr7     | - | 1.33E+08 | 1.33E+08 | 367  |
| ENSG000001 | 0.290301 | 1.727843 | -1.5606  | 0.3514   | 0.45573  | VN2R19P chr19    | - | 58523957 | 58537294 | 1052 |
| ENSG000001 | 4.689314 | 1.545765 | 1.3788   | 0.21965  | 0.31146  | AC018816. chr3   | - | 4855978  | 4928977  | 509  |
| ENSG000001 | 0        | 1.280305 | -1.6305  | 0.35731  | NA       | AC004448. chr17  | - | 19342456 | 19364305 | 1072 |
| ENSG000001 | 0.290301 | 1.964165 | -1.7606  | 0.2818   | 0.38282  | AC007875. chr7   | + | 97512594 | 97513107 | 514  |
| ENSG000001 | 74.80141 | 124.8197 | -0.72807 | 0.017972 | 0.035832 | MORC2-AS1 chr22  | + | 31318295 | 31328436 | 2170 |
| ENSG000001 | 1.338465 | 1.012429 | 0.3227   | 0.8235   | 0.87542  | RP11-323C chr1   | + | 2.42E+08 | 2.42E+08 | 421  |
| ENSG000001 | 0        | 0.297015 | -0.41864 | 0.81278  | NA       | RP11-143F chrX   | + | 1.54E+08 | 1.54E+08 | 755  |
| ENSG000001 | 0        | 10.70213 | -5.0421  | 5.58E-05 | 0.000164 | RP3-470B2 chr6   | - | 1.68E+08 | 1.68E+08 | 1016 |
| ENSG000001 | 1.669842 | 3.708992 | -1.0155  | 0.37956  | 0.48363  | AC109642. chr2   | + | 30569525 | 30575297 | 2952 |
| ENSG000001 | 85.71458 | 60.99981 | 0.48414  | 0.081323 | 0.13546  | RP11-403I. chr1  | + | 1.49E+08 | 1.49E+08 | 1986 |
| ENSG000001 | 14.97992 | 5.194065 | 1.4595   | 0.025068 | 0.048372 | CTB-75G16 chr17  | - | 34930301 | 34931164 | 864  |
| ENSG000001 | 1.555988 | 1.029414 | 0.44648  | 0.78109  | 0.84292  | AC007050. chr22  | - | 20876357 | 20878157 | 652  |
| ENSG000001 | 0        | 0.343138 | -0.41864 | 0.81278  | NA       | RP4-800M. chr1   | - | 52655588 | 52655981 | 394  |
| ENSG000001 | 0.995923 | 8.306612 | -2.7309  | 0.012605 | 0.02595  | AC011747. chr2   | - | 8699963  | 8723922  | 8839 |
| ENSG000001 | 6.245302 | 4.320007 | 0.50627  | 0.52987  | 0.6313   | AC011290. chr7   | - | 39608975 | 39609797 | 823  |
| ENSG000001 | 1.338465 | 6.581186 | -2.1101  | 0.034926 | 0.065021 | RP1-3117.3 chr6  | + | 86340080 | 86340995 | 916  |
| ENSG000001 | 42.29633 | 35.39698 | 0.24294  | 0.49762  | 0.60137  | ASMTL-AS1 chrX   | + | 1520662  | 1532921  | 840  |
| ENSG000001 | 1.338465 | 4.349145 | -1.5287  | 0.15924  | 0.23875  | RP4-814D1 chr7   | - | 1.57E+08 | 1.57E+08 | 766  |
| ENSG000001 | 1.048164 | 1.234181 | -0.21521 | 0.88909  | 0.92285  | RP11-195C chr1   | + | 1.76E+08 | 1.76E+08 | 579  |
| ENSG000001 | 0.290301 | 0.357707 | -0.00203 | 0.99908  | NA       | AL953854. chr9   | - | 47295855 | 47314322 | 4523 |
| ENSG000001 | 2.479946 | 2.200487 | 0.11193  | 0.93457  | 0.95713  | RP11-269F chr1   | + | 2.44E+08 | 2.44E+08 | 751  |
| ENSG000001 | 1.576526 | 0.343138 | 1.5802   | 0.31968  | 0.42255  | RP11-9002 chr1   | - | 2.04E+08 | 2.04E+08 | 792  |
| ENSG000001 | 2.551911 | 1.387121 | 0.77093  | 0.5524   | 0.65181  | AC019117. chr7   | - | 17474101 | 17500296 | 589  |
| ENSG000001 | 0.943682 | 2.779947 | -1.2756  | 0.34912  | 0.45339  | FABP5P2 chr13    | + | 52540878 | 52541285 | 408  |
| ENSG000001 | 3.132513 | 0.297015 | 2.4897   | 0.09008  | 0.14789  | RP3-467K1 chr1   | - | 15660662 | 15661960 | 727  |
| ENSG000001 | 9.149128 | 3.616746 | 1.2654   | 0.11749  | 0.18545  | AC073410. chr2   | + | 2.03E+08 | 2.03E+08 | 589  |
| ENSG000001 | 1.265686 | 0        | 1.6147   | 0.36215  | NA       | AC013470. chr7   | + | 12510978 | 12512171 | 1194 |
| ENSG000001 | 0        | 0.951736 | -1.2555  | 0.48145  | NA       | AC104777. chr2   | - | 1.51E+08 | 1.51E+08 | 2528 |
| ENSG000001 | 0.653381 | 1.326428 | -0.74096 | 0.63999  | 0.72726  | MYCBP2-AS1 chr13 | + | 77649649 | 77672677 | 834  |
| ENSG000001 | 0        | 0.297015 | -0.41864 | 0.81278  | NA       | RP11-259F chr13  | + | 1.1E+08  | 1.1E+08  | 664  |
| ENSG000001 | 0        | 1.073121 | -1.1788  | 0.50551  | NA       | LL22NC03- chr22  | + | 32979286 | 32980190 | 457  |
| ENSG000001 | 0        | 0.297015 | -0.41864 | 0.81278  | NA       | RP11-423C chr1   | - | 1.43E+08 | 1.43E+08 | 593  |
| ENSG000001 | 0.290301 | 0        | 0.4146   | 0.81455  | NA       | GAPDHP14 chr21   | + | 30594642 | 30595578 | 937  |
| ENSG000001 | 1.359003 | 2.200487 | -0.60515 | 0.65175  | 0.73718  | RP11-215A chr10  | - | 1.21E+08 | 1.21E+08 | 549  |
| ENSG000001 | 3.620613 | 1.012429 | 1.6011   | 0.18785  | 0.27393  | HSPB1P1 chr9     | - | 74622797 | 74623052 | 256  |
| ENSG000001 | 0        | 1.248751 | -1.5848  | 0.37202  | NA       | GSTM5P1 chr3     | - | 12299300 | 12299959 | 660  |
| ENSG000001 | 0        | 3.305162 | -3.2461  | 0.030518 | 0.057606 | RP6-191P2 chrX   | - | 1.07E+08 | 1.07E+08 | 2090 |
| ENSG000001 | 0.995923 | 3.010564 | -1.3579  | 0.28402  | 0.3853   | RP1-117O3 chr1   | + | 33452676 | 33498070 | 1680 |
| ENSG000001 | 2.770247 | 2.382564 | 0.18208  | 0.88313  | 0.91853  | RP11-389C chr1   | + | 1.14E+08 | 1.14E+08 | 436  |
| ENSG000001 | 51.24766 | 0        | 7.253    | 5.51E-11 | 2.78E-10 | RP5-1011C chr1   | + | 1.92E+08 | 1.93E+08 | 684  |
| ENSG000001 | 0        | 1.043983 | -1.3473  | 0.44976  | NA       | RP11-281B chrX   | + | 34405839 | 34406581 | 743  |
| ENSG000001 | 0        | 1.058552 | -1.361   | 0.4451   | NA       | RP11-487E chr1   | - | 21400132 | 21400246 | 115  |
| ENSG000001 | 0        | 0.343138 | -0.41864 | 0.81278  | NA       | RP11-121P chr6   | - | 40469370 | 40470132 | 292  |
| ENSG000001 | 0        | 0.715414 | -0.84936 | 0.6309   | NA       | RP11-232C chrX   | - | 1.16E+08 | 1.16E+08 | 957  |
| ENSG000001 | 0        | 0.297015 | -0.41864 | 0.81278  | NA       | AC095067. chr7   | + | 47661537 | 47669491 | 2761 |
| ENSG000001 | 0.653381 | 0        | 0.82678  | 0.64037  | NA       | AC074389. chr7   | - | 1778266  | 1781927  | 637  |
| ENSG000001 | 6.256467 | 0        | 4.1905   | 0.002276 | 0.005337 | RP11-217L chr11  | - | 1.31E+08 | 1.31E+08 | 149  |
| ENSG000001 | 4.906837 | 25.99221 | -2.2413  | 0.012223 | 0.025232 | OR13E1P chr9     | - | 35859059 | 35859980 | 922  |
| ENSG000001 | 1.027626 | 0.357707 | 0.84252  | 0.63507  | NA       | HMG2P2 chr6      | + | 2341684  | 2341950  | 267  |
| ENSG000001 | 126.1712 | 43.87997 | 1.5106   | 2.68E-08 | 1.10E-07 | COX10-AS1 chr17  | - | 13659795 | 13972812 | 2998 |
| ENSG000001 | 3.890376 | 0        | 3.4902   | 0.017191 | 0.034412 | RP3-473B4 chrX   | + | 1.34E+08 | 1.34E+08 | 961  |
| ENSG000001 | 0.342542 | 2.855208 | -2.1918  | 0.16479  | 0.2457   | LINC00545 chr13  | + | 31456688 | 31457532 | 411  |
| ENSG000001 | 1.722083 | 1.012429 | 0.60973  | 0.66695  | 0.74965  | RP11-4901 chr9   | + | 97662711 | 97667036 | 779  |
| ENSG000001 | 2.697468 | 0        | 2.9287   | 0.058655 | 0.10242  | RP11-148B chr1   | - | 94784035 | 94790125 | 592  |
| ENSG000001 | 835.5026 | 270.8551 | 1.6183   | 3.55E-17 | 2.62E-16 | ZBTB22 chr6      | - | 33282183 | 33285719 | 2651 |
| ENSG000001 | 0.342542 | 14.27833 | -4.58    | 0.000147 | 0.000409 | AC010729. chr2   | + | 5866581  | 5870474  | 1746 |
| ENSG000001 | 0.342542 | 2.010288 | -1.8748  | 0.22334  | 0.31569  | AC010127. chr2   | + | 1.67E+08 | 1.67E+08 | 2305 |
| ENSG000001 | 0.632843 | 0        | 0.81931  | 0.64303  | NA       | RP11-383C chr1   | + | 2.05E+08 | 2.05E+08 | 305  |
| ENSG000001 | 0        | 0.686276 | -0.84936 | 0.6309   | NA       | RP11-62C3 chr9   | + | 94967638 | 94972440 | 333  |
| ENSG000001 | 0        | 0.700845 | -0.87835 | 0.62047  | NA       | RP4-754E2 chr22  | + | 43796337 | 43805687 | 951  |

|            |          |          |          |          |          |                  |   |          |          |      |
|------------|----------|----------|----------|----------|----------|------------------|---|----------|----------|------|
| ENSG000001 | 0        | 1.043983 | -1.3473  | 0.44976  | NA       | AP000688. chr21  | + | 37455157 | 37462712 | 348  |
| ENSG000001 | 1.431782 | 0.640152 | 0.81272  | 0.60712  | 0.70004  | RP11-733C chrX   | - | 5571462  | 5644346  | 860  |
| ENSG000001 | 0        | 1.416259 | -1.7181  | 0.33141  | NA       | CEACAMP1 chr19   | - | 43783085 | 43788470 | 583  |
| ENSG000001 | 0        | 0.654722 | -0.83442 | 0.63731  | NA       | AP002856. chr11  | + | 1.31E+08 | 1.31E+08 | 635  |
| ENSG000001 | 0        | 0.640152 | -0.82869 | 0.63935  | NA       | RP11-23B1 chr9   | - | 1.01E+08 | 1.01E+08 | 204  |
| ENSG000001 | 1.628766 | 0.997859 | 0.59457  | 0.65694  | 0.74154  | CTA-440B3 chr22  | - | 32212365 | 32213477 | 477  |
| ENSG000001 | 4.637074 | 5.422266 | -0.20467 | 0.80669  | 0.86338  | RP11-27K1 chr1   | - | 1.18E+08 | 1.18E+08 | 1814 |
| ENSG000001 | 6.608382 | 3.322147 | 0.93405  | 0.26851  | 0.36741  | RP11-413E chr3   | + | 75718082 | 75719336 | 1255 |
| ENSG000001 | 1.701545 | 1.340997 | 0.28247  | 0.82671  | 0.87795  | RP11-89F3 chr1   | - | 1.48E+08 | 1.48E+08 | 381  |
| ENSG000001 | 49.98458 | 209.3759 | -2.0603  | 1.75E-14 | 1.11E-13 | AD000090 chr19   | - | 36031640 | 36036931 | 3911 |
| ENSG000001 | 0.36308  | 0        | 0.4146   | 0.81455  | NA       | MRPS36P1 chr3    | - | 6814724  | 6815030  | 307  |
| ENSG000001 | 1.048164 | 1.874334 | -0.68846 | 0.64108  | 0.72806  | AC104076. chr2   | - | 1.82E+08 | 1.82E+08 | 265  |
| ENSG000001 | 0        | 47.89335 | -7.1386  | 2.33E-10 | 1.13E-09 | RP11-343J. chr10 | + | 71335563 | 71336910 | 503  |
| ENSG000001 | 3.309773 | 24.94574 | -2.8182  | 2.05E-05 | 6.35E-05 | RP11-231P chr1   | + | 26536232 | 26556331 | 2108 |
| ENSG000001 | 6.506506 | 6.405556 | 0.015269 | 0.98575  | 0.99164  | CHCHD4P3 chr9    | + | 37434174 | 37434583 | 410  |
| ENSG000001 | 0.342542 | 0        | 0.4146   | 0.81455  | NA       | RP11-187C chr9   | - | 45424050 | 45424634 | 585  |
| ENSG000001 | 0.290301 | 0.297015 | -0.00202 | 0.99909  | NA       | RP3-343K2 chr20  | - | 35794177 | 35794715 | 539  |
| ENSG000001 | 0        | 0.357707 | -0.41864 | 0.81278  | NA       | AC092687. chr2   | + | 10857899 | 10861078 | 568  |
| ENSG000001 | 3.319146 | 5.627034 | -0.70515 | 0.46364  | 0.56867  | PRADC1P1 chr3    | + | 37017807 | 37018331 | 525  |
| ENSG000001 | 6.608382 | 8.85935  | -0.41317 | 0.53685  | 0.63775  | RP3-523C2 chr6   | + | 1.32E+08 | 1.32E+08 | 552  |
| ENSG000001 | 0.290301 | 0.343138 | -0.00202 | 0.99909  | NA       | AC097517. chr2   | - | 6755722  | 6790667  | 1240 |
| ENSG000001 | 1.027626 | 0.357707 | 0.84252  | 0.63507  | NA       | RP1-182D1 chr6   | - | 1.7E+08  | 1.7E+08  | 694  |
| ENSG000001 | 6.587844 | 11.56162 | -0.79092 | 0.24667  | 0.3426   | TCEA1P4 chr9     | - | 32979558 | 32980401 | 844  |
| ENSG000001 | 0.685084 | 0        | 0.85004  | 0.63064  | NA       | GJA6P chrX       | + | 18553199 | 18554240 | 1042 |
| ENSG000001 | 1.161205 | 0.654722 | 0.56875  | 0.73595  | NA       | PRKX-AS1 chrX    | + | 3577528  | 3586233  | 516  |
| ENSG000001 | 0        | 0.357707 | -0.41864 | 0.81278  | NA       | RP3-431C2 chrX   | + | 86143589 | 86143819 | 231  |
| ENSG000001 | 0.290301 | 4.989297 | -3.179   | 0.017329 | 0.03467  | AC003104. chr17  | - | 40422535 | 40424701 | 855  |
| ENSG000001 | 0        | 4.363714 | -3.6679  | 0.010595 | 0.022151 | AC002429. chr7   | - | 94784025 | 94843644 | 2569 |
| ENSG000001 | 20.24723 | 1.730259 | 3.3575   | 0.000102 | 0.00029  | RP11-264I. chr9  | - | 2041900  | 2046023  | 420  |
| ENSG000001 | 14.95001 | 10.18336 | 0.53317  | 0.33547  | 0.4391   | KDM4A-AS. chr1   | - | 44165436 | 44173809 | 833  |
| ENSG000001 | 0        | 0.357707 | -0.41864 | 0.81278  | NA       | GRM7-AS1 chr3    | - | 7561428  | 7602020  | 430  |
| ENSG000001 | 2.935529 | 11.00559 | -1.8027  | 0.019453 | 0.038494 | AC092594. chr2   | - | 19167729 | 19546509 | 1949 |
| ENSG000001 | 0.943682 | 0.357707 | 0.90033  | 0.60199  | NA       | RP11-306I. chr1  | + | 1.66E+08 | 1.66E+08 | 492  |
| ENSG000001 | 0        | 0.594029 | -0.81444 | 0.64499  | NA       | AC068137. chr2   | + | 1.31E+08 | 1.31E+08 | 1542 |
| ENSG000001 | 0        | 3.397409 | -3.273   | 0.029074 | 0.055192 | AC009262. chr7   | + | 34249138 | 34295955 | 510  |
| ENSG000001 | 0.290301 | 0.343138 | -0.00202 | 0.99909  | NA       | RP11-645N chr7   | + | 1.03E+08 | 1.03E+08 | 333  |
| ENSG000001 | 0        | 0.297015 | -0.41864 | 0.81278  | NA       | VEZF1P1 chr3     | - | 1.93E+08 | 1.93E+08 | 1541 |
| ENSG000001 | 0.290301 | 0        | 0.4146   | 0.81455  | NA       | RP11-400N chr1   | - | 2.22E+08 | 2.23E+08 | 675  |
| ENSG000001 | 1.597063 | 0        | 1.9181   | 0.27352  | NA       | AC017048. chr2   | - | 1.77E+08 | 1.77E+08 | 822  |
| ENSG000001 | 0.290301 | 0        | 0.4146   | 0.81455  | NA       | AC004112. chr7   | + | 1.12E+08 | 1.12E+08 | 1106 |
| ENSG000001 | 1.555988 | 2.840639 | -0.73103 | 0.56087  | 0.65951  | RP11-12A2 chr9   | + | 67792167 | 67794649 | 2483 |
| ENSG000001 | 2.302685 | 1.043983 | 0.96986  | 0.46945  | 0.5742   | AC091132. chr17  | + | 43530210 | 43541431 | 769  |
| ENSG000001 | 0.342542 | 0        | 0.4146   | 0.81455  | NA       | RP11-744C chr3   | - | 1.75E+08 | 1.75E+08 | 1715 |
| ENSG000001 | 0        | 0.640152 | -0.82869 | 0.63935  | NA       | RP11-292B chr9   | + | 40479776 | 40481177 | 1402 |
| ENSG000001 | 0.290301 | 0        | 0.4146   | 0.81455  | NA       | RP11-15J1. chr9  | - | 70113593 | 70124467 | 1263 |
| ENSG000001 | 0        | 3.619162 | -3.3807  | 0.022552 | 0.04399  | SLC25A3P1 chr1   | - | 53878821 | 53905693 | 2531 |
| ENSG000001 | 0.290301 | 0.715414 | -0.50514 | 0.77701  | NA       | MTND4P14 chr9    | + | 5107937  | 5109290  | 1354 |
| ENSG000001 | 15.39443 | 73.34231 | -2.2212  | 5.53E-09 | 2.39E-08 | AC009404. chr2   | + | 1.19E+08 | 1.19E+08 | 3090 |
| ENSG000001 | 2.822488 | 4.022992 | -0.47757 | 0.66628  | 0.74917  | DIAPH2-AS chrX   | - | 96686257 | 96897588 | 1128 |
| ENSG000001 | 0        | 0.357707 | -0.41864 | 0.81278  | NA       | AC017083. chr2   | + | 68352397 | 68352879 | 483  |
| ENSG000001 | 0        | 2.543625 | -2.8094  | 0.076886 | 0.12916  | SHANK2-AS chr11  | + | 70492270 | 70493667 | 356  |
| ENSG000001 | 2.645227 | 6.179772 | -1.1405  | 0.22503  | 0.31766  | RPL26P30 chr11   | - | 2356362  | 2357006  | 645  |
| ENSG000001 | 1.359003 | 1.773966 | -0.30093 | 0.82975  | 0.88011  | RP3-467L1 chr1   | - | 7870302  | 7887402  | 830  |
| ENSG000001 | 0.36308  | 0.640152 | -0.51156 | 0.77091  | NA       | RP11-170N chr1   | - | 83439565 | 83451891 | 1526 |
| ENSG000001 | 4.056471 | 6.765679 | -0.69971 | 0.40635  | 0.51117  | ENO1-IT1 chr1    | - | 8935847  | 8938066  | 744  |
| ENSG000001 | 0        | 0.654722 | -0.83442 | 0.63731  | NA       | RP4-728D4 chr1   | + | 35975343 | 35977039 | 1003 |
| ENSG000001 | 0.705622 | 0        | 0.8807   | 0.6196   | NA       | PEBP1P3 chr1     | - | 1.99E+08 | 1.99E+08 | 548  |
| ENSG000001 | 0        | 6.639462 | -4.2424  | 0.002209 | 0.00519  | CLEC2L chr7      | + | 1.39E+08 | 1.39E+08 | 2190 |
| ENSG000001 | 0        | 0.686276 | -0.84936 | 0.6309   | NA       | AC093106. chr7   | - | 1.31E+08 | 1.31E+08 | 507  |
| ENSG000001 | 573.5044 | 682.0126 | -0.24905 | 0.17831  | 0.26215  | ZBED5 chr11      | - | 10833621 | 10880343 | 3677 |
| ENSG000001 | 0.290301 | 1.370136 | -1.2908  | 0.44733  | NA       | EEF1GP7 chr1     | + | 53038786 | 53039488 | 703  |
| ENSG000001 | 8.422968 | 23.73983 | -1.4516  | 0.006769 | 0.01469  | GUSBP5 chr4      | + | 1.44E+08 | 1.45E+08 | 1989 |
| ENSG000001 | 0.290301 | 1.326428 | -1.262   | 0.45814  | NA       | MIRGPRG-A chr11  | + | 3239562  | 3244361  | 1818 |
| ENSG000001 | 0.870904 | 0        | 1.046    | 0.5544   | NA       | AP001189. chr11  | + | 76368100 | 76374910 | 1426 |
| ENSG000001 | 3.101624 | 10.93604 | -1.728   | 0.05154  | 0.091345 | RP11-126L chr7   | - | 1E+08    | 1E+08    | 369  |

|            |          |          |          |          |          |                  |   |          |          |      |
|------------|----------|----------|----------|----------|----------|------------------|---|----------|----------|------|
| ENSG000001 | 0.342542 | 0.343138 | -0.00208 | 0.99906  | NA       | AC104651. chr2   | + | 1.13E+08 | 1.13E+08 | 430  |
| ENSG000001 | 5.913925 | 7.002001 | -0.22691 | 0.77158  | 0.83546  | RP11-316A chr10  | + | 1.02E+08 | 1.02E+08 | 578  |
| ENSG000001 | 1.306762 | 0        | 1.6479   | 0.35189  | NA       | AC005027. chr7   | - | 41706766 | 41744933 | 386  |
| ENSG000001 | 1.701545 | 3.604593 | -0.97977 | 0.38759  | 0.49168  | RP11-348F chr1   | - | 2.13E+08 | 2.13E+08 | 192  |
| ENSG000001 | 2.572449 | 0        | 2.8674   | 0.066043 | 0.11336  | AC019117. chr7   | + | 17414491 | 17506288 | 837  |
| ENSG000001 | 1.431782 | 1.280305 | 0.090606 | 0.95177  | 0.96991  | RP3-403L1 chr6   | - | 1.58E+08 | 1.58E+08 | 372  |
| ENSG000001 | 0        | 2.041842 | -2.4837  | 0.12741  | 0.19837  | AC005300. chr22  | + | 17673826 | 17674198 | 373  |
| ENSG000001 | 0.995923 | 0.654722 | 0.44529  | 0.7735   | NA       | RP11-759F chr1   | + | 1.54E+08 | 1.54E+08 | 271  |
| ENSG000001 | 0        | 0.654722 | -0.83442 | 0.63731  | NA       | AC096591. chr2   | + | 1.12E+08 | 1.12E+08 | 886  |
| ENSG000001 | 44.42338 | 62.29381 | -0.49201 | 0.12461  | 0.1948   | TRHDE-AS1 chr12  | - | 72647288 | 72668687 | 4733 |
| ENSG000001 | 0.342542 | 0        | 0.4146   | 0.81455  | NA       | PPIAL4G chr1     | - | 1.44E+08 | 1.44E+08 | 738  |
| ENSG000001 | 0        | 6.16037  | -4.1471  | 0.002907 | 0.006713 | RP3-430A1 chr6   | - | 4774760  | 4775642  | 369  |
| ENSG000001 | 4.12925  | 6.863631 | -0.71834 | 0.38772  | 0.49181  | FMR1-IT1 chrX    | + | 1.47E+08 | 1.47E+08 | 343  |
| ENSG000001 | 5.487439 | 0.343138 | 3.2844   | 0.012913 | 0.026531 | RP11-59D5 chr6   | + | 64516729 | 64532535 | 1454 |
| ENSG000001 | 1.286224 | 0.686276 | 0.68637  | 0.66207  | 0.74577  | RP11-346C chr6   | + | 1.14E+08 | 1.14E+08 | 597  |
| ENSG000001 | 3.22583  | 2.307303 | 0.4431   | 0.67585  | 0.75727  | SUCLG2P2 chr12   | + | 94942017 | 94943312 | 1296 |
| ENSG000001 | 0        | 0.715414 | -0.84936 | 0.6309   | NA       | AC005220. chr20  | + | 52556699 | 52559047 | 884  |
| ENSG000001 | 7.293466 | 7.532922 | -0.05262 | 0.93913  | 0.95999  | RP11-525C chr1   | - | 1.66E+08 | 1.66E+08 | 347  |
| ENSG000001 | 0        | 0.357707 | -0.41864 | 0.81278  | NA       | RP11-440C chr6   | - | 1.43E+08 | 1.43E+08 | 2293 |
| ENSG000001 | 0        | 39.85053 | -6.9058  | 8.11E-10 | 3.77E-09 | RP5-865N1 chr1   | - | 2.32E+08 | 2.32E+08 | 2241 |
| ENSG000001 | 1.939605 | 1.043983 | 0.76151  | 0.57836  | 0.67484  | POU5F1P5 chr10   | - | 69770184 | 69770601 | 418  |
| ENSG000001 | 0.870904 | 0.343138 | 0.71634  | 0.68735  | NA       | AC084809. chr17  | + | 31232680 | 31233602 | 512  |
| ENSG000001 | 0.36308  | 6.581186 | -3.5485  | 0.005594 | 0.012331 | KRTAP10-1 chr21  | + | 46122136 | 46122706 | 571  |
| ENSG000001 | 88.90546 | 8.524333 | 3.2926   | 3.27E-13 | 1.92E-12 | LINC00854 chr17  | - | 41368960 | 41383338 | 980  |
| ENSG000001 | 0        | 1.744828 | -2.0203  | 0.24683  | NA       | LINC00479 chr21  | - | 43131680 | 43135935 | 2033 |
| ENSG000001 | 0.36308  | 0        | 0.4146   | 0.81455  | NA       | RP11-114A chr3   | - | 1.77E+08 | 1.77E+08 | 723  |
| ENSG000001 | 0.705622 | 0.640152 | 0.062329 | 0.97007  | NA       | ITCH-AS1 chr20   | - | 33029397 | 33029830 | 299  |
| ENSG000001 | 1.016461 | 0        | 1.3167   | 0.46021  | NA       | RP1-287H1 chr6   | - | 1.35E+08 | 1.35E+08 | 929  |
| ENSG000001 | 5.072119 | 4.884898 | 0.05781  | 0.95005  | 0.9688   | RP11-25B7 chr1   | - | 2.02E+08 | 2.02E+08 | 579  |
| ENSG000001 | 0.653381 | 1.294874 | -0.76351 | 0.61066  | 0.70317  | AC092573. chr2   | - | 1.74E+08 | 1.74E+08 | 336  |
| ENSG000001 | 0.342542 | 0        | 0.4146   | 0.81455  | NA       | AC100848. chr18  | + | 61814443 | 61826533 | 637  |
| ENSG000001 | 1.89853  | 1.387121 | 0.38362  | 0.79085  | 0.85104  | RP11-320C chrX   | + | 40122170 | 40146973 | 3000 |
| ENSG000001 | 31.55707 | 13.85993 | 1.1746   | 0.021873 | 0.042802 | DDX11L2 chr2     | - | 1.14E+08 | 1.14E+08 | 1651 |
| ENSG000001 | 11.5272  | 66.97085 | -2.5083  | 2.04E-07 | 7.74E-07 | RP11-125B chr9   | - | 2422702  | 2641395  | 3167 |
| ENSG000001 | 1.411244 | 2.635871 | -0.80772 | 0.51648  | 0.61921  | NRADDP chr3      | + | 47053032 | 47054636 | 691  |
| ENSG000001 | 2.023549 | 0.594029 | 1.2868   | 0.39626  | 0.5008   | NDUFAF4P chr3    | - | 37831412 | 37831936 | 525  |
| ENSG000001 | 0        | 1.043983 | -1.3473  | 0.44976  | NA       | CTSL1P1 chr10    | - | 89146442 | 89149960 | 1002 |
| ENSG000001 | 4.843431 | 15.23577 | -1.5749  | 0.025542 | 0.04921  | RP13-15E1 chr1   | + | 3816936  | 3833789  | 3059 |
| ENSG000001 | 0.342542 | 0        | 0.4146   | 0.81455  | NA       | RP11-79M chr10   | - | 1.21E+08 | 1.21E+08 | 706  |
| ENSG000001 | 0.705622 | 2.443257 | -1.3691  | 0.36862  | 0.4733   | KRT8P29 chr1     | - | 2.04E+08 | 2.04E+08 | 1371 |
| ENSG000001 | 3.028845 | 12.72128 | -1.9779  | 0.011298 | 0.023474 | AC097662. chr2   | - | 2.28E+08 | 2.28E+08 | 2568 |
| ENSG000001 | 0.653381 | 0.700845 | -0.04855 | 0.97667  | NA       | RP11-296A chr1   | - | 51730588 | 51731746 | 435  |
| ENSG000001 | 0        | 0.594029 | -0.81444 | 0.64499  | NA       | AP001891. chr11  | - | 1.16E+08 | 1.16E+08 | 921  |
| ENSG000001 | 36.06317 | 205.9984 | -2.4975  | 2.68E-16 | 1.88E-15 | FAM157A chr3     | + | 1.98E+08 | 1.98E+08 | 2168 |
| ENSG000001 | 2.956066 | 11.18122 | -1.8211  | 0.020675 | 0.040647 | RP11-175B chr1   | - | 2.02E+08 | 2.02E+08 | 322  |
| ENSG000001 | 0.342542 | 0        | 0.4146   | 0.81455  | NA       | UBE2L5P chr13    | + | 31002084 | 31002656 | 573  |
| ENSG000001 | 0        | 1.591889 | -2.1342  | 0.20414  | NA       | ATG10-IT1 chr5   | + | 81287814 | 81288300 | 487  |
| ENSG000001 | 8.391265 | 0.700845 | 3.2134   | 0.004133 | 0.009316 | AC018890. chr2   | + | 1.75E+08 | 1.76E+08 | 2400 |
| ENSG000001 | 0        | 0.357707 | -0.41864 | 0.81278  | NA       | AC067956. chr2   | + | 2.21E+08 | 2.22E+08 | 2062 |
| ENSG000001 | 5.052394 | 0        | 3.8972   | 0.005222 | 0.011595 | AC003092. chr7   | + | 93652145 | 93695973 | 743  |
| ENSG000001 | 4.148974 | 1.309443 | 1.468    | 0.20322  | 0.29208  | AC005154. chr7   | - | 30617128 | 30625588 | 1405 |
| ENSG000001 | 0.36308  | 0.937167 | -0.90039 | 0.60194  | NA       | RP4-785G1 chr20  | - | 32833759 | 32834343 | 585  |
| ENSG000001 | 0        | 0.297015 | -0.41864 | 0.81278  | NA       | AC130689. chr17  | - | 2118776  | 2119309  | 323  |
| ENSG000001 | 0        | 0.357707 | -0.41864 | 0.81278  | NA       | HNRNP41P chr3    | + | 42930853 | 42931798 | 946  |
| ENSG000001 | 0.290301 | 0        | 0.4146   | 0.81455  | NA       | RP11-523L chr9   | - | 1.18E+08 | 1.18E+08 | 1525 |
| ENSG000001 | 0.342542 | 0.654722 | -0.52406 | 0.76557  | NA       | LINC00427 chr13  | - | 30890497 | 30894040 | 430  |
| ENSG000001 | 0        | 0.343138 | -0.41864 | 0.81278  | NA       | CTA-796E4. chr22 | + | 26557800 | 26560269 | 188  |
| ENSG000001 | 11.70022 | 0        | 5.1351   | 4.70E-05 | 0.000139 | RP11-443A chr10  | + | 78647802 | 78740382 | 3566 |
| ENSG000001 | 0        | 0.297015 | -0.41864 | 0.81278  | NA       | AC007040. chr2   | - | 71229661 | 71291873 | 570  |
| ENSG000001 | 1.213446 | 0.357707 | 1.1754   | 0.48976  | NA       | AC002401. chr17  | + | 48212951 | 48223541 | 468  |
| ENSG000001 | 0.975385 | 1.591889 | -0.57358 | 0.68613  | 0.76584  | GCNT1P1 chr20    | - | 18400804 | 18402098 | 1295 |
| ENSG000001 | 0.943682 | 0.686276 | 0.31965  | 0.85031  | NA       | TRIM26BP chr6    | + | 30206078 | 30210056 | 753  |
| ENSG000001 | 4.875134 | 9.409672 | -0.9029  | 0.23947  | 0.33413  | AC012513. chr2   | - | 2.17E+08 | 2.17E+08 | 1137 |
| ENSG000001 | 0        | 0.594029 | -0.81444 | 0.64499  | NA       | PKMP1 chr1       | + | 1.15E+08 | 1.15E+08 | 1523 |
| ENSG000001 | 0        | 1.043983 | -1.3473  | 0.44976  | NA       | AC002331. chr16  | - | 26596076 | 26606134 | 294  |

|            |          |          |          |          |          |            |       |   |          |          |      |
|------------|----------|----------|----------|----------|----------|------------|-------|---|----------|----------|------|
| ENSG000001 | 0.943682 | 2.436809 | -1.063   | 0.47341  | 0.57796  | CTD-3105F  | chr19 | + | 12613489 | 12614920 | 841  |
| ENSG000001 | 0.36308  | 0        | 0.4146   | 0.81455  | NA       | RRM2P2     | chr1  | - | 1.61E+08 | 1.61E+08 | 652  |
| ENSG000001 | 0.995923 | 0        | 1.4959   | 0.39264  | NA       | RP11-5371I | chr3  | + | 1.85E+08 | 1.85E+08 | 299  |
| ENSG000001 | 0.685084 | 0        | 0.85004  | 0.63064  | NA       | RP13-565C  | chrX  | - | 1.34E+08 | 1.34E+08 | 730  |
| ENSG000001 | 0.923144 | 1.623443 | -0.60734 | 0.68519  | 0.76508  | EIF2S2P3   | chr10 | - | 94428502 | 94429500 | 999  |
| ENSG000001 | 0.653381 | 2.529055 | -1.593   | 0.24964  | 0.34596  | RP11-89N1  | chr7  | - | 33832780 | 33842768 | 1589 |
| ENSG000001 | 3.330311 | 5.704711 | -0.72815 | 0.39938  | 0.50407  | AC107081.  | chr2  | + | 62095567 | 62113217 | 802  |
| ENSG000001 | 1.379541 | 0        | 1.686    | 0.34092  | NA       | EM:AC0065  | chr22 | + | 20194100 | 20194706 | 607  |
| ENSG000001 | 0        | 0.357707 | -0.41864 | 0.81278  | NA       | RP4-680D5  | chr1  | - | 15941138 | 15941362 | 225  |
| ENSG000001 | 0.290301 | 0        | 0.4146   | 0.81455  | NA       | AC079305.  | chr2  | - | 1.78E+08 | 1.78E+08 | 567  |
| ENSG000001 | 0        | 3.414394 | -3.1826  | 0.040436 | 0.074054 | SIX3-AS1   | chr2  | - | 45167293 | 45169012 | 844  |
| ENSG000001 | 0        | 0.357707 | -0.41864 | 0.81278  | NA       | AC011284.  | chr7  | - | 3682447  | 3683416  | 856  |
| ENSG000001 | 0.36308  | 0        | 0.4146   | 0.81455  | NA       | RP11-32F1  | chr9  | + | 3181589  | 3198517  | 886  |
| ENSG000001 | 0.36308  | 0        | 0.4146   | 0.81455  | NA       | RP11-162C  | chr10 | + | 38146668 | 38148038 | 826  |
| ENSG000001 | 0        | 0.357707 | -0.41864 | 0.81278  | NA       | AC131180.  | chr2  | - | 1.32E+08 | 1.32E+08 | 1225 |
| ENSG000001 | 1.846289 | 10.88662 | -2.334   | 0.009181 | 0.019428 | AL773604.  | chr21 | + | 46222492 | 46224632 | 1031 |
| ENSG000001 | 1.359003 | 1.773966 | -0.30093 | 0.82975  | 0.88011  | GPC6-AS1   | chr13 | - | 94806447 | 94840245 | 698  |
| ENSG000001 | 0        | 0.357707 | -0.41864 | 0.81278  | NA       | RP11-134F  | chr3  | - | 1.86E+08 | 1.86E+08 | 534  |
| ENSG000001 | 27.03385 | 9.160396 | 1.5394   | 0.005686 | 0.012518 | RP4-742J2. | chr20 | - | 11890052 | 11899325 | 1831 |
| ENSG000001 | 1.359003 | 0        | 1.8987   | 0.26617  | NA       | ARF4P2     | chr20 | - | 61503602 | 61504428 | 526  |
| ENSG000001 | 0.943682 | 1.248751 | -0.30461 | 0.84378  | 0.89032  | RP1-125I3. | chr1  | + | 26186104 | 26189911 | 849  |
| ENSG000001 | 0.290301 | 1.043983 | -0.98014 | 0.57012  | NA       | RP13-254B  | chr7  | + | 65305199 | 65305583 | 385  |
| ENSG000001 | 0        | 1.029414 | -1.1526  | 0.51496  | NA       | AL035610.  | chr21 | - | 29488413 | 29600986 | 4486 |
| ENSG000001 | 0.36308  | 0.640152 | -0.51156 | 0.77091  | NA       | H3F3BP1    | chr13 | + | 72249199 | 72249601 | 403  |
| ENSG000001 | 0.705622 | 3.441116 | -1.8982  | 0.16294  | 0.24338  | RC3H1-IT1  | chr1  | - | 1.74E+08 | 1.74E+08 | 448  |
| ENSG000001 | 3.371387 | 0        | 3.2515   | 0.030778 | 0.058012 | AC003986.  | chr7  | + | 19159556 | 19161539 | 692  |
| ENSG000001 | 56.66151 | 17.97442 | 1.6286   | 8.11E-05 | 0.000234 | RP11-732N  | chr6  | + | 1.59E+08 | 1.59E+08 | 424  |
| ENSG000001 | 0        | 0.891044 | -1.0625  | 0.54819  | NA       | RP11-215I. | chr1  | - | 1.79E+08 | 1.79E+08 | 9714 |
| ENSG000001 | 48.55117 | 22.61817 | 1.0868   | 0.002775 | 0.00643  | AC006547.  | chr22 | - | 20050503 | 20058045 | 930  |
| ENSG000001 | 0.36308  | 1.248751 | -1.1986  | 0.48045  | NA       | MED28P7    | chr20 | - | 25650493 | 25651022 | 530  |
| ENSG000001 | 0.72616  | 0        | 0.85004  | 0.63064  | NA       | AC008060.  | chr7  | - | 1.55E+08 | 1.55E+08 | 534  |
| ENSG000001 | 3.362014 | 1.531196 | 0.93461  | 0.45123  | 0.55683  | AP001619.  | chr21 | + | 43290742 | 43292163 | 587  |
| ENSG000001 | 0        | 0.937167 | -1.2408  | 0.48662  | NA       | RP1-118J2  | chr1  | + | 40363417 | 40364770 | 785  |
| ENSG000001 | 4.866575 | 2.185918 | 0.98963  | 0.3729   | 0.47728  | RP11-510F  | chr6  | - | 1.25E+08 | 1.25E+08 | 4507 |
| ENSG000001 | 4.709852 | 4.63159  | 0.012116 | 0.98849  | 0.99357  | AC079807.  | chr2  | + | 48110594 | 48111048 | 455  |
| ENSG000001 | 460.9252 | 710.8119 | -0.62336 | 5.12E-06 | 1.70E-05 | RPL13AP5   | chr10 | + | 98510045 | 98510675 | 612  |
| ENSG000001 | 1.411244 | 1.430828 | -0.01203 | 0.99403  | 0.99669  | ASN5P3     | chr13 | - | 1.01E+08 | 1.01E+08 | 1306 |
| ENSG000001 | 0.36308  | 4.847638 | -2.8031  | 0.065485 | 0.11256  | AC138655.  | chr2  | - | 47713153 | 47715691 | 2007 |
| ENSG000001 | 0.72616  | 2.087966 | -1.1167  | 0.48434  | 0.58847  | RP11-243J  | chr20 | + | 30274019 | 30304628 | 374  |
| ENSG000001 | 0.870904 | 0        | 1.046    | 0.5544   | NA       | YWHAQP5    | chr2  | + | 99310572 | 99311953 | 1382 |
| ENSG000001 | 16.80486 | 26.03014 | -0.61335 | 0.16316  | 0.24365  | HNRNPA3P   | chr13 | - | 66362064 | 66362896 | 833  |
| ENSG000001 | 2.250445 | 0.98329  | 0.94566  | 0.51337  | 0.61643  | RP11-39K2  | chr9  | + | 5110913  | 5112849  | 1937 |
| ENSG000001 | 0        | 0.700845 | -0.87835 | 0.62047  | NA       | RAD23BP1   | chr3  | + | 18580165 | 18581391 | 1227 |
| ENSG000001 | 0        | 2.292733 | -2.7     | 0.088315 | 0.14543  | RP11-22B1  | chrX  | + | 51600064 | 51601162 | 1099 |
| ENSG000001 | 0        | 1.294874 | -1.8547  | 0.27869  | NA       | SNRPGP14   | chr13 | + | 50063106 | 50063500 | 219  |
| ENSG000001 | 11.62826 | 0.700845 | 3.6901   | 0.00047  | 0.001224 | STARD13-A  | chr13 | + | 33851690 | 33855471 | 900  |
| ENSG000001 | 0.36308  | 0.700845 | -0.575   | 0.7429   | NA       | AP004290.  | chr8  | - | 1E+08    | 1E+08    | 1412 |
| ENSG000001 | 4.253456 | 3.319731 | 0.33442  | 0.72753  | 0.79848  | RP11-162J. | chr6  | - | 1.49E+08 | 1.49E+08 | 130  |
| ENSG000001 | 0.653381 | 0        | 0.82678  | 0.64037  | NA       | S100A11P2  | chr7  | + | 35208836 | 35209150 | 315  |
| ENSG000001 | 3.931452 | 6.598171 | -0.70401 | 0.3904   | 0.49478  | RANP1      | chr6  | + | 30453717 | 30454367 | 651  |
| ENSG000001 | 0.342542 | 1.430828 | -1.1489  | 0.51399  | NA       | AC023115.  | chr2  | + | 67551759 | 67552436 | 574  |
| ENSG000001 | 359.9903 | 384.84   | -0.09485 | 0.58678  | 0.68249  | ZNF853     | chr7  | + | 6655248  | 6663921  | 3857 |
| ENSG000001 | 0.36308  | 0        | 0.4146   | 0.81455  | NA       | BAK1P2     | chr11 | - | 1.3E+08  | 1.3E+08  | 631  |
| ENSG000001 | 1.45232  | 3.636147 | -1.0384  | 0.48976  | 0.59379  | RP11-46H1  | chr12 | + | 1.33E+08 | 1.33E+08 | 555  |
| ENSG000001 | 0.36308  | 3.071256 | -2.3924  | 0.10785  | 0.17214  | PITPN-AS1  | chr17 | + | 1420225  | 1421390  | 542  |
| ENSG000001 | 38.68428 | 54.66622 | -0.49692 | 0.097332 | 0.15786  | CCDC163P   | chr1  | - | 45959538 | 45965751 | 2229 |
| ENSG000001 | 0.290301 | 1.355566 | -1.3811  | 0.39332  | NA       | RP11-35J1. | chr6  | - | 77232168 | 77303340 | 570  |
| ENSG000001 | 0        | 0.357707 | -0.41864 | 0.81278  | NA       | RP11-211A  | chr1  | - | 2.27E+08 | 2.27E+08 | 432  |
| ENSG000001 | 0.342542 | 0        | 0.4146   | 0.81455  | NA       | CTA-221G9  | chr22 | + | 25608709 | 25609652 | 482  |
| ENSG000001 | 0.653381 | 5.721697 | -2.6966  | 0.023886 | 0.046302 | RP11-175C  | chr9  | + | 1.28E+08 | 1.28E+08 | 617  |
| ENSG000001 | 0        | 0.343138 | -0.41864 | 0.81278  | NA       | LAMTOR5P   | chr1  | + | 62504514 | 62504783 | 270  |
| ENSG000001 | 3.132513 | 0        | 3.1189   | 0.043187 | 0.078371 | AC104801.  | chr2  | + | 1.73E+08 | 1.73E+08 | 950  |
| ENSG000001 | 1.555988 | 2.414118 | -0.49924 | 0.69689  | 0.77397  | AC079780.  | chr7  | + | 23520372 | 23520578 | 207  |
| ENSG000001 | 2.366091 | 0.594029 | 1.4713   | 0.32618  | 0.42908  | RP11-83J2  | chr9  | + | 1.34E+08 | 1.34E+08 | 462  |
| ENSG000001 | 0.632843 | 1.591889 | -1.0299  | 0.48346  | 0.58754  | AP001631.  | chr21 | - | 44560633 | 44561202 | 422  |

|            |          |          |          |          |          |                  |   |          |          |       |
|------------|----------|----------|----------|----------|----------|------------------|---|----------|----------|-------|
| ENSG000001 | 0        | 4.600036 | -3.763   | 0.007915 | 0.016934 | AC114808. chr2   | - | 1153996  | 1156110  | 536   |
| ENSG000001 | 0        | 0.343138 | -0.41864 | 0.81278  | NA       | RP11-85O2 chr9   | - | 1.27E+08 | 1.27E+08 | 2146  |
| ENSG000001 | 0        | 1.577319 | -1.9089  | 0.27608  | NA       | AC006372. chr7   | + | 1.57E+08 | 1.57E+08 | 1543  |
| ENSG000001 | 4.056471 | 1.966581 | 0.91468  | 0.41534  | 0.52042  | KRT18P5 chr22    | - | 20837102 | 20838392 | 1291  |
| ENSG000001 | 9.732336 | 1.652581 | 2.3676   | 0.00977  | 0.020575 | PRKG1-AS1 chr10  | - | 53990502 | 54073888 | 1111  |
| ENSG000001 | 0        | 2086.615 | -12.143  | 2.11E-30 | 2.73E-29 | RP11-69I8. chr6  | + | 1.32E+08 | 1.32E+08 | 2305  |
| ENSG000001 | 0.290301 | 0        | 0.4146   | 0.81455  | NA       | RP4-792G4 chr1   | - | 63825494 | 63826850 | 1357  |
| ENSG000001 | 57.92222 | 14.71297 | 1.9394   | 1.50E-05 | 4.70E-05 | MTX1P1 chr1      | + | 1.55E+08 | 1.55E+08 | 838   |
| ENSG000001 | 0        | 2.232041 | -2.63    | 0.10215  | 0.16421  | AP000688. chr21  | + | 37432730 | 37436706 | 446   |
| ENSG000001 | 0        | 1.309443 | -1.6539  | 0.35008  | NA       | RP11-296P chr9   | + | 19026890 | 19028127 | 1238  |
| ENSG000001 | 4.305697 | 4.853343 | -0.1733  | 0.84464  | 0.89103  | AC068282. chr2   | + | 1.28E+08 | 1.28E+08 | 2690  |
| ENSG000001 | 0        | 0.343138 | -0.41864 | 0.81278  | NA       | RP5-837O2 chr1   | - | 94392171 | 94393125 | 677   |
| ENSG000001 | 9.054997 | 26.27291 | -1.4671  | 0.01096  | 0.022834 | EIF1AXP1 chr1    | - | 17012116 | 17012550 | 435   |
| ENSG000001 | 0.290301 | 0.98329  | -0.92952 | 0.59103  | NA       | ARHGEF38 chr4    | + | 1.06E+08 | 1.07E+08 | 5454  |
| ENSG000001 | 0        | 0.343138 | -0.41864 | 0.81278  | NA       | MYB-AS1 chr6     | - | 1.36E+08 | 1.36E+08 | 449   |
| ENSG000001 | 0        | 1.280305 | -1.6305  | 0.35731  | NA       | AC073316. chr7   | - | 3303664  | 3342084  | 982   |
| ENSG000001 | 0        | 1.684135 | -2.1921  | 0.19067  | NA       | DAPK1-IT1 chr9   | + | 90168369 | 90169374 | 702   |
| ENSG000001 | 0.943682 | 0        | 1.2438   | 0.48556  | NA       | AC108448. chr11  | - | 3105623  | 3106673  | 730   |
| ENSG000001 | 6.431122 | 1.638012 | 1.8127   | 0.062135 | 0.10751  | SMAD9-AS1 chr13  | - | 37423503 | 37424183 | 504   |
| ENSG000001 | 0.36308  | 0        | 0.4146   | 0.81455  | NA       | RP11-363I. chr1  | + | 1.51E+08 | 1.51E+08 | 373   |
| ENSG000001 | 5.6647   | 23.15312 | -1.9848  | 0.000601 | 0.001542 | AC005592. chr5   | + | 1.42E+08 | 1.42E+08 | 2237  |
| ENSG000001 | 0        | 0.343138 | -0.41864 | 0.81278  | NA       | RP11-478F. chr10 | + | 29032674 | 29033592 | 517   |
| ENSG000001 | 0        | 0.357707 | -0.41864 | 0.81278  | NA       | RP11-522C chr1   | + | 1.81E+08 | 1.81E+08 | 1489  |
| ENSG000001 | 0.580602 | 0        | 0.8036   | 0.6494   | NA       | RP11-252A chr9   | + | 3875584  | 3878809  | 243   |
| ENSG000001 | 1.681007 | 0        | 2.1857   | 0.19206  | NA       | AC094019. chr3   | - | 32192575 | 32193387 | 472   |
| ENSG000001 | 0.923144 | 1.012429 | -0.06857 | 0.96524  | 0.97971  | GRIFIN chr7      | - | 2514360  | 2516528  | 648   |
| ENSG000001 | 1.359003 | 0        | 1.8987   | 0.26617  | NA       | RP11-370B chr9   | + | 22747699 | 22748233 | 535   |
| ENSG000001 | 0        | 0.686276 | -0.84936 | 0.6309   | NA       | RP5-857K2 chr1   | + | 459656   | 461954   | 676   |
| ENSG000001 | 0.36308  | 0.594029 | -0.39069 | 0.82661  | NA       | RP11-168C chr10  | - | 57007515 | 57356993 | 439   |
| ENSG000001 | 0.705622 | 3.740547 | -2.0615  | 0.10908  | 0.17374  | YRDCP2 chr9      | + | 99717102 | 99717743 | 642   |
| ENSG000001 | 17.71847 | 22.86738 | -0.36222 | 0.44817  | 0.55364  | AC018642. chr7   | - | 1.31E+08 | 1.31E+08 | 2043  |
| ENSG000001 | 0        | 1.248751 | -1.5848  | 0.37202  | NA       | AC004019. chr22  | - | 18062923 | 18071958 | 1838  |
| ENSG000001 | 1.451506 | 0        | 1.4786   | 0.40599  | NA       | DNAJC9-AS chr10  | + | 75006946 | 75036742 | 3037  |
| ENSG000001 | 0.290301 | 0        | 0.4146   | 0.81455  | NA       | AC007251. chr2   | - | 1.03E+08 | 1.04E+08 | 708   |
| ENSG000001 | 1.359003 | 1.012429 | 0.33405  | 0.81733  | 0.87175  | AC019118. chr2   | - | 3135353  | 3149551  | 718   |
| ENSG000001 | 0        | 0.686276 | -0.84936 | 0.6309   | NA       | CTAGE9 chr6      | - | 1.32E+08 | 1.32E+08 | 2626  |
| ENSG000001 | 33.63009 | 9.869363 | 1.729    | 0.000636 | 0.001625 | RP5-1184F chr20  | + | 31037558 | 31041410 | 986   |
| ENSG000001 | 0        | 0.297015 | -0.41864 | 0.81278  | NA       | RP11-365C chr1   | - | 2.24E+08 | 2.24E+08 | 231   |
| ENSG000001 | 0        | 0.297015 | -0.41864 | 0.81278  | NA       | RP11-551C chr1   | + | 2.47E+08 | 2.47E+08 | 1256  |
| ENSG000001 | 0.632843 | 2.102535 | -1.2902  | 0.39176  | 0.49619  | RP11-213P chr1   | + | 57004124 | 57004583 | 460   |
| ENSG000001 | 5.654348 | 5.955602 | -0.09107 | 0.92219  | 0.94763  | INTS6-AS1 chr13  | + | 52026503 | 52126500 | 906   |
| ENSG000001 | 0.36308  | 0.357707 | -0.00212 | 0.99905  | NA       | RP11-430C chr1   | - | 2.04E+08 | 2.04E+08 | 848   |
| ENSG000001 | 0        | 2.010288 | -2.4674  | 0.13027  | 0.202    | AC078941. chr2   | - | 67350489 | 67442451 | 2100  |
| ENSG000001 | 0        | 0.343138 | -0.41864 | 0.81278  | NA       | RP11-96L1 chr1   | - | 26496438 | 26498312 | 721   |
| ENSG000001 | 0        | 1.309443 | -1.6539  | 0.35008  | NA       | LINC00299 chr2   | - | 8147901  | 8523751  | 2342  |
| ENSG000001 | 0.36308  | 0        | 0.4146   | 0.81455  | NA       | RP11-142L chr1   | + | 1.92E+08 | 1.92E+08 | 443   |
| ENSG000001 | 0.290301 | 1.058552 | -0.99174 | 0.56536  | NA       | RP11-462B chr9   | - | 32836573 | 32869593 | 1184  |
| ENSG000001 | 0.290301 | 0        | 0.4146   | 0.81455  | NA       | SPA17P1 chr10    | - | 77142151 | 77142602 | 452   |
| ENSG000001 | 0.342542 | 0.357707 | -0.0021  | 0.99906  | NA       | RP11-383C chr10  | + | 1.17E+08 | 1.17E+08 | 344   |
| ENSG000001 | 8.060701 | 17.51152 | -1.1039  | 0.049016 | 0.087468 | RP11-373A chr9   | + | 72832111 | 72832584 | 474   |
| ENSG000001 | 0.653381 | 0.343138 | 0.51863  | 0.76794  | NA       | RPS3AP12 chr1    | - | 1.2E+08  | 1.2E+08  | 753   |
| ENSG000001 | 0.632843 | 0.357707 | 0.4993   | 0.77637  | NA       | RP11-337C chr1   | + | 1.47E+08 | 1.47E+08 | 795   |
| ENSG000001 | 0.72616  | 9.165229 | -3.268   | 0.00465  | 0.010405 | SNX25P1 chr1     | + | 2.12E+08 | 2.12E+08 | 834   |
| ENSG000001 | 7.439023 | 11.82782 | -0.64965 | 0.33121  | 0.43437  | RP5-886K2 chr1   | - | 24086872 | 24104777 | 1074  |
| ENSG000001 | 1.991846 | 2.24661  | -0.1706  | 0.88242  | 0.9182   | GAPDHP2 chr20    | + | 13373324 | 13374321 | 998   |
| ENSG000001 | 2.354926 | 3.763237 | -0.6372  | 0.55354  | 0.6529   | RP11-446E chr8   | - | 56962597 | 56963766 | 1170  |
| ENSG000001 | 0        | 1.309443 | -1.6539  | 0.35008  | NA       | AC087393. chr17  | + | 20978869 | 20993928 | 750   |
| ENSG000001 | 57.284   | 53.00565 | 0.10785  | 0.75208  | 0.81892  | BCYRN1 chr2      | + | 47558199 | 47571656 | 13458 |
| ENSG000001 | 13.32043 | 47.59788 | -1.8045  | 4.01E-05 | 0.00012  | Z97634.5 chr16   | + | 432097   | 442960   | 1715  |
| ENSG000001 | 8.9651   | 3.748668 | 1.1317   | 0.24843  | 0.34468  | CBR3-AS1 chr21   | - | 37504065 | 37528605 | 4651  |
| ENSG000001 | 0        | 1.309443 | -1.6539  | 0.35008  | NA       | AC024560. chr3   | - | 1.97E+08 | 1.97E+08 | 1471  |
| ENSG000001 | 0.342542 | 0.297015 | -0.00202 | 0.99909  | NA       | AC090617. chr17  | + | 2116991  | 2117708  | 404   |
| ENSG000001 | 13.55931 | 0        | 5.3925   | 8.21E-06 | 2.66E-05 | AC007750. chr2   | + | 1.63E+08 | 1.63E+08 | 3694  |
| ENSG000001 | 0        | 0.357707 | -0.41864 | 0.81278  | NA       | AC091633. chr3   | + | 1.95E+08 | 1.95E+08 | 474   |
| ENSG000001 | 0        | 0.297015 | -0.41864 | 0.81278  | NA       | RP11-239E chr1   | + | 2.23E+08 | 2.23E+08 | 613   |

|            |          |          |          |          |          |                  |   |          |          |      |
|------------|----------|----------|----------|----------|----------|------------------|---|----------|----------|------|
| ENSG000001 | 0.632843 | 3.307578 | -1.9381  | 0.1491   | 0.22585  | RP11-401L chr7   | - | 1.03E+08 | 1.03E+08 | 265  |
| ENSG000001 | 413.9174 | 181.8873 | 1.1833   | 3.98E-16 | 2.77E-15 | LL22NC03- chr22  | + | 22657589 | 22677203 | 1776 |
| ENSG000001 | 0        | 1.248751 | -1.5848  | 0.37202  | NA       | OR2R1P chr7      | - | 1.43E+08 | 1.43E+08 | 914  |
| ENSG000001 | 0        | 0.594029 | -0.81444 | 0.64499  | NA       | AL121656. chr2   | + | 33152194 | 33153472 | 482  |
| ENSG000001 | 0.342542 | 0        | 0.4146   | 0.81455  | NA       | AC105393. chr2   | + | 388412   | 416885   | 549  |
| ENSG000001 | 22.47119 | 0        | 6.0987   | 1.60E-07 | 6.13E-07 | RP11-503K chr9   | - | 18717972 | 18718524 | 553  |
| ENSG000001 | 44.93895 | 45.84655 | -0.0316  | 0.91723  | 0.94417  | AC018737. chr2   | + | 1.22E+08 | 1.22E+08 | 1273 |
| ENSG000001 | 3.931452 | 0        | 3.5246   | 0.015037 | 0.030454 | RPL39P29 chr13   | - | 1.03E+08 | 1.03E+08 | 157  |
| ENSG000001 | 11.9708  | 9.263181 | 0.3676   | 0.53169  | 0.63296  | AC006378. chr7   | + | 93598754 | 93640425 | 563  |
| ENSG000001 | 0.342542 | 1.058552 | -0.99235 | 0.56407  | NA       | RPL23AP21 chr1   | + | 2.35E+08 | 2.35E+08 | 471  |
| ENSG000001 | 6.048317 | 4.383115 | 0.42838  | 0.65576  | 0.74054  | RP3-522J7. chr22 | + | 50210896 | 50211360 | 465  |
| ENSG000001 | 10.41563 | 9.70427  | 0.079948 | 0.89903  | 0.92998  | RP11-944L chr3   | - | 44598849 | 44727145 | 456  |
| ENSG000001 | 21.49678 | 26.16039 | -0.27538 | 0.54115  | 0.64169  | LINC00106 chrX   | + | 1515320  | 1518295  | 370  |
| ENSG000001 | 0        | 0.937167 | -1.2408  | 0.48662  | NA       | RP11-291L chr1   | + | 45880692 | 45881016 | 325  |
| ENSG000001 | 0        | 0.297015 | -0.41864 | 0.81278  | NA       | RP1-66N13 chr20  | - | 47012066 | 47013638 | 404  |
| ENSG000001 | 0.685084 | 0.640152 | 0.044759 | 0.97934  | NA       | TMSB4XP1 chr1    | - | 42965876 | 42966067 | 192  |
| ENSG000001 | 0.342542 | 0.357707 | -0.0021  | 0.99906  | NA       | AC012363. chr2   | + | 1.21E+08 | 1.21E+08 | 662  |
| ENSG000001 | 3.164216 | 0        | 2.8957   | 0.079252 | 0.13246  | C5orf27 chr5     | + | 95187936 | 95195837 | 2052 |
| ENSG000001 | 0        | 0.357707 | -0.41864 | 0.81278  | NA       | RP11-243N chr1   | - | 58071519 | 58071878 | 360  |
| ENSG000001 | 1.016461 | 0.997859 | 0.010629 | 0.99432  | 0.99669  | XXbac-B471 chr22 | - | 18564232 | 18564441 | 210  |
| ENSG000001 | 2.987769 | 2.745103 | 0.1069   | 0.93658  | 0.95819  | RP11-535C chr9   | - | 1.01E+08 | 1.01E+08 | 402  |
| ENSG000001 | 171.2776 | 711.6471 | -2.0523  | 2.43E-37 | 3.98E-36 | MIR600HG chr9    | - | 1.26E+08 | 1.26E+08 | 5984 |
| ENSG000001 | 1.45232  | 0.640152 | 0.76566  | 0.64734  | 0.73357  | RP11-348F chr1   | + | 2.13E+08 | 2.13E+08 | 479  |
| ENSG000001 | 1.753786 | 3.137654 | -0.7556  | 0.54737  | 0.6474   | RP5-1063N chr12  | + | 3427884  | 3434509  | 3004 |
| ENSG000001 | 0        | 2.353426 | -2.7264  | 0.084821 | 0.14042  | AC025750. chr2   | + | 42696957 | 42697406 | 450  |
| ENSG000001 | 21.33052 | 2.903748 | 2.7133   | 0.000376 | 0.000993 | RP11-1008 chr15  | - | 38361682 | 38365160 | 967  |
| ENSG000001 | 0        | 0.357707 | -0.41864 | 0.81278  | NA       | RP11-111C chr6   | + | 98657896 | 98662559 | 771  |
| ENSG000001 | 0.653381 | 0        | 0.82678  | 0.64037  | NA       | RP11-408N chr9   | - | 22203989 | 22214671 | 443  |
| ENSG000001 | 0        | 0.594029 | -0.81444 | 0.64499  | NA       | AC092661. chr4   | + | 1.18E+08 | 1.19E+08 | 2516 |
| ENSG000001 | 0.705622 | 22.65301 | -4.6341  | 2.06E-06 | 7.14E-06 | RP11-390F chr9   | + | 6645956  | 6670635  | 526  |
| ENSG000001 | 1.660469 | 1.713273 | -0.02687 | 0.98441  | 0.99109  | RP11-792A chr7   | - | 65899621 | 65900465 | 521  |
| ENSG000001 | 2.842212 | 1.073121 | 1.175    | 0.40189  | 0.50663  | RP11-439A chr1   | - | 1.21E+08 | 1.21E+08 | 754  |
| ENSG000001 | 0        | 0.686276 | -0.84936 | 0.6309   | NA       | AP003774. chr11  | - | 64092522 | 64096976 | 672  |
| ENSG000001 | 1.016461 | 0        | 1.3167   | 0.46021  | NA       | RP3-329E2 chr1   | + | 21592575 | 21593744 | 723  |
| ENSG000001 | 0.342542 | 0.343138 | -0.00208 | 0.99906  | NA       | PTGES3P4 chr10   | + | 1.05E+08 | 1.05E+08 | 356  |
| ENSG000001 | 1.379541 | 0        | 1.686    | 0.34092  | NA       | AC003092. chr7   | - | 93701071 | 93706469 | 446  |
| ENSG000001 | 1.027626 | 0        | 1.1491   | 0.51623  | NA       | C8orf56 chr8     | - | 1.04E+08 | 1.04E+08 | 496  |
| ENSG000001 | 0.290301 | 1.188058 | -1.0232  | 0.56351  | NA       | RP11-98D1 chr1   | + | 1.52E+08 | 1.52E+08 | 462  |
| ENSG000001 | 3.028845 | 0.594029 | 1.8055   | 0.20401  | 0.29307  | RP11-366N chr4   | + | 1.66E+08 | 1.66E+08 | 1360 |
| ENSG000001 | 2.656392 | 2.07098  | 0.32827  | 0.78394  | 0.84529  | RP11-6B61 chr1   | + | 2.06E+08 | 2.06E+08 | 353  |
| ENSG000001 | 49.23088 | 48.10444 | 0.035232 | 0.91183  | 0.93966  | RP11-640N chr1   | - | 1.44E+08 | 1.45E+08 | 2073 |
| ENSG000001 | 0        | 3.6483   | -3.4125  | 0.020029 | 0.039519 | RP11-98G7 chr1   | - | 1.56E+08 | 1.56E+08 | 675  |
| ENSG000001 | 5.90276  | 7.252893 | -0.28392 | 0.69527  | 0.77263  | ZDHHC20-L chr13  | - | 21951116 | 21952013 | 440  |
| ENSG000001 | 0        | 0.343138 | -0.41864 | 0.81278  | NA       | RP11-451C chr1   | + | 1.58E+08 | 1.58E+08 | 1041 |
| ENSG000001 | 0.36308  | 0        | 0.4146   | 0.81455  | NA       | RP11-298E chr10  | + | 3266008  | 3269599  | 597  |
| ENSG000001 | 0.632843 | 3.025133 | -1.8319  | 0.17087  | 0.25321  | GGT8P chr2       | + | 91963970 | 91969195 | 532  |
| ENSG000001 | 1.379541 | 0.357707 | 1.2814   | 0.44909  | NA       | FABP5P1 chr13    | - | 73674713 | 73675123 | 411  |
| ENSG000001 | 0.870904 | 0        | 1.046    | 0.5544   | NA       | GAPDHP51 chr1    | - | 52172810 | 52173809 | 1000 |
| ENSG000001 | 0        | 0.997859 | -1.5018  | 0.39072  | NA       | RP5-1065P chr1   | - | 2.29E+08 | 2.29E+08 | 599  |
| ENSG000001 | 6.327454 | 0.357707 | 3.4471   | 0.008925 | 0.018942 | ANKRD44-L chr2   | - | 1.98E+08 | 1.98E+08 | 1069 |
| ENSG000001 | 0        | 0.357707 | -0.41864 | 0.81278  | NA       | RP11-694I chr3   | - | 49215065 | 49229291 | 706  |
| ENSG000001 | 1.265686 | 1.188058 | 0.049726 | 0.97548  | 0.98643  | LINC00614 chr10  | - | 27232252 | 27233347 | 645  |
| ENSG000001 | 1.048164 | 5.064559 | -2.026   | 0.080615 | 0.13446  | RP11-544A chr9   | - | 1.34E+08 | 1.34E+08 | 931  |
| ENSG000001 | 0        | 11.70885 | -5.1722  | 2.81E-05 | 8.55E-05 | AC142119. chr2   | - | 16225344 | 16245963 | 853  |
| ENSG000001 | 9.741709 | 10.47709 | -0.1012  | 0.88126  | 0.91722  | RP11-383C chr10  | - | 1.27E+08 | 1.27E+08 | 712  |
| ENSG000001 | 1.286224 | 0.297015 | 1.3298   | 0.41218  | NA       | RPL12L3 chr20    | - | 19804087 | 19804587 | 501  |
| ENSG000001 | 0        | 5.407697 | -3.9989  | 0.00387  | 0.008761 | GAPDHP21 chr10   | - | 57427101 | 57428110 | 1010 |
| ENSG000001 | 0        | 0.357707 | -0.41864 | 0.81278  | NA       | YBX1P9 chr1      | - | 2.27E+08 | 2.27E+08 | 679  |
| ENSG000001 | 0        | 4.256898 | -3.6202  | 0.012537 | 0.02582  | RP11-203L chr9   | - | 71403223 | 71404586 | 1248 |
| ENSG000001 | 0.290301 | 1.623443 | -1.5237  | 0.36002  | 0.46417  | RP4-612C1 chr1   | - | 93656297 | 93656617 | 321  |
| ENSG000001 | 67.39833 | 90.07047 | -0.41219 | 0.18069  | 0.26519  | ZNRF2P1 chr7     | + | 32768181 | 32768623 | 443  |
| ENSG000001 | 0.290301 | 0        | 0.4146   | 0.81455  | NA       | KRT18P52 chr2    | - | 32047660 | 32048505 | 846  |
| ENSG000001 | 3.008307 | 0.343138 | 2.4266   | 0.093711 | 0.15297  | GLIS3-AS1 chr9   | + | 3898642  | 3901248  | 734  |
| ENSG000001 | 0.290301 | 0        | 0.4146   | 0.81455  | NA       | AC010987. chr2   | - | 68023186 | 68052694 | 725  |
| ENSG000001 | 8.434133 | 14.75668 | -0.77917 | 0.18943  | 0.27587  | CTA-984G1 chr22  | + | 29656878 | 29658026 | 385  |

|            |          |          |          |          |          |                  |   |          |          |      |
|------------|----------|----------|----------|----------|----------|------------------|---|----------|----------|------|
| ENSG000001 | 0        | 0.297015 | -0.41864 | 0.81278  | NA       | AC013410. chr2   | - | 1.74E+08 | 1.74E+08 | 1232 |
| ENSG000001 | 6.919221 | 11.95733 | -0.7626  | 0.22555  | 0.3183   | AC012314. chr19  | - | 54622891 | 54628722 | 4158 |
| ENSG000001 | 1.649304 | 0.951736 | 0.62103  | 0.65749  | 0.74206  | RP3-486I3. chr6  | + | 1.17E+08 | 1.17E+08 | 2081 |
| ENSG000001 | 3.133327 | 1.485073 | 0.83123  | 0.54878  | 0.64874  | RP1-315G1 chrX   | - | 1.23E+08 | 1.23E+08 | 707  |
| ENSG000001 | 1.213446 | 0.640152 | 0.67875  | 0.66953  | NA       | RP11-328P chr7   | - | 64696164 | 64697097 | 312  |
| ENSG000001 | 1.608228 | 0.594029 | 0.97576  | 0.54887  | 0.64874  | RP11-16C1 chr6   | - | 90270594 | 90276763 | 811  |
| ENSG000001 | 1.742621 | 5.851203 | -1.5941  | 0.14799  | 0.22444  | RP11-144L chr13  | + | 1.13E+08 | 1.13E+08 | 435  |
| ENSG000001 | 34.41126 | 13.29833 | 1.3563   | 0.001779 | 0.004244 | ZEB1-AS1 chr10   | - | 31596646 | 31608810 | 585  |
| ENSG000001 | 18.16305 | 18.61948 | -0.02827 | 0.95992  | 0.97606  | NDUFA6-AS1 chr22 | + | 42486937 | 42533614 | 2811 |
| ENSG000001 | 3.568372 | 5.164927 | -0.50174 | 0.56727  | 0.6648   | AC018738. chr2   | + | 2.32E+08 | 2.32E+08 | 210  |
| ENSG000001 | 0        | 0.357707 | -0.41864 | 0.81278  | NA       | AC007679. chr2   | + | 2.07E+08 | 2.07E+08 | 414  |
| ENSG000001 | 0.290301 | 0        | 0.4146   | 0.81455  | NA       | RPL34P1 chr1     | + | 1.68E+08 | 1.68E+08 | 354  |
| ENSG000001 | 0.72616  | 1.66715  | -0.87257 | 0.59055  | 0.68554  | PRMT5-AS1 chr14  | + | 23388665 | 23396105 | 2104 |
| ENSG000001 | 0.36308  | 0        | 0.4146   | 0.81455  | NA       | RP11-308N chr9   | - | 1.09E+08 | 1.09E+08 | 597  |
| ENSG000001 | 0.705622 | 1.188058 | -0.53656 | 0.7499   | NA       | NANOGP4 chr7     | + | 29251916 | 29252816 | 901  |
| ENSG000001 | 0        | 1.727843 | -1.9772  | 0.25933  | NA       | RPL5P2 chr20     | - | 44119458 | 44120311 | 854  |
| ENSG000001 | 15.53901 | 0.343138 | 4.6836   | 9.72E-05 | 0.000278 | AC005550. chr7   | + | 15707572 | 15721605 | 3743 |
| ENSG000001 | 3.173589 | 0.343138 | 2.4747   | 0.09123  | 0.14949  | RP11-168K chr9   | - | 1.16E+08 | 1.16E+08 | 395  |
| ENSG000001 | 1.991846 | 2.575179 | -0.34533 | 0.75905  | 0.82493  | RP11-497F chr5   | + | 69783429 | 69786959 | 3531 |
| ENSG000001 | 0        | 0.343138 | -0.41864 | 0.81278  | NA       | RP5-836J3. chr1  | + | 84255963 | 84267148 | 683  |
| ENSG000001 | 0.36308  | 0.594029 | -0.39069 | 0.82661  | NA       | EHMT2-AS1 chr6   | + | 31851538 | 31851831 | 223  |
| ENSG000001 | 31.11347 | 27.37846 | 0.17946  | 0.66555  | 0.74869  | COX5BP6 chr13    | - | 1.01E+08 | 1.01E+08 | 211  |
| ENSG000001 | 0        | 0.343138 | -0.41864 | 0.81278  | NA       | RP11-132E chr9   | - | 17108302 | 17108602 | 301  |
| ENSG000001 | 0        | 77.44067 | -7.7998  | 1.48E-12 | 8.29E-12 | AC068134. chr2   | - | 2.33E+08 | 2.33E+08 | 576  |
| ENSG000001 | 0.290301 | 0        | 0.4146   | 0.81455  | NA       | RP11-73E6 chr9   | + | 20532550 | 20533337 | 788  |
| ENSG000001 | 32.83474 | 49.85739 | -0.59674 | 0.066354 | 0.11381  | RP4-669L1 chr1   | + | 317720   | 453948   | 2661 |
| ENSG000001 | 1.451506 | 0        | 1.4786   | 0.40599  | NA       | RP4-782G3 chr1   | - | 1.67E+08 | 1.67E+08 | 562  |
| ENSG000001 | 1.991846 | 0        | 2.4814   | 0.12503  | 0.19536  | RP11-365C chr1   | + | 2.24E+08 | 2.24E+08 | 1323 |
| ENSG000001 | 4.148974 | 4.196206 | -0.01204 | 0.98951  | 0.99432  | RP1-131F1 chr6   | - | 1.32E+08 | 1.32E+08 | 2433 |
| ENSG000001 | 5.840168 | 15.85652 | -1.3994  | 0.05452  | 0.095874 | CYP2F1P chr19    | - | 41324626 | 41332677 | 1056 |
| ENSG000001 | 0        | 3.50993  | -3.0391  | 0.063282 | 0.10928  | RP11-305P chr20  | + | 61669363 | 61685215 | 1234 |
| ENSG000001 | 0        | 0.594029 | -0.81444 | 0.64499  | NA       | PIEZO1P2 chr20   | - | 57315588 | 57358877 | 2180 |
| ENSG000001 | 0        | 2.278164 | -2.6634  | 0.096176 | 0.1563   | MTND2P11 chr9    | + | 1.12E+08 | 1.12E+08 | 648  |
| ENSG000001 | 165.5048 | 0.686276 | 7.4276   | 4.06E-19 | 3.27E-18 | RP11-471J chr4   | + | 1.74E+08 | 1.75E+08 | 5278 |
| ENSG000001 | 9.296477 | 15.29888 | -0.69849 | 0.25586  | 0.35319  | AC073254. chr2   | - | 2.33E+08 | 2.33E+08 | 1244 |
| ENSG000001 | 0.685084 | 0        | 0.85004  | 0.63064  | NA       | RP11-351N chr10  | - | 28721937 | 28784742 | 273  |
| ENSG000001 | 0.36308  | 0.343138 | -0.0021  | 0.99905  | NA       | MRPS6P2 chr1     | + | 51312140 | 51312509 | 370  |
| ENSG000001 | 2.935529 | 1.248751 | 1.0304   | 0.40714  | 0.51194  | AC020594. chr2   | - | 33780114 | 33788614 | 338  |
| ENSG000001 | 1.390706 | 0.297015 | 1.2986   | 0.44429  | NA       | DDX10P1 chr10    | - | 31207941 | 31210164 | 1933 |
| ENSG000001 | 0.685084 | 154.6982 | -7.3344  | 2.15E-18 | 1.67E-17 | C4orf51 chr4     | + | 1.47E+08 | 1.47E+08 | 846  |
| ENSG000001 | 0        | 0.297015 | -0.41864 | 0.81278  | NA       | AP000260. chr21  | - | 33393279 | 33394095 | 616  |
| ENSG000001 | 0        | 2.056411 | -2.4909  | 0.12616  | 0.19678  | RP11-137L chr10  | + | 75297561 | 75298149 | 284  |
| ENSG000001 | 0        | 0.98329  | -1.2878  | 0.47019  | NA       | AC093509. chr16  | - | 26074071 | 26074418 | 348  |
| ENSG000001 | 22.78121 | 2.309719 | 3.1435   | 2.66E-05 | 8.10E-05 | ZNF503-AS1 chr10 | + | 77160759 | 77168738 | 2024 |
| ENSG000001 | 0        | 0.997859 | -1.5018  | 0.39072  | NA       | DLEU7-AS1 chr13  | + | 51381992 | 51423190 | 955  |
| ENSG000001 | 0        | 0.594029 | -0.81444 | 0.64499  | NA       | RP11-132E chr9   | + | 17048917 | 17112813 | 666  |
| ENSG000001 | 0        | 0.700845 | -0.87835 | 0.62047  | NA       | MCFD2P1 chr6     | + | 27375476 | 27375775 | 300  |
| ENSG000001 | 0        | 7.189784 | -4.4486  | 0.000744 | 0.001883 | RP11-472F chr9   | + | 6568844  | 6569360  | 517  |
| ENSG000001 | 0        | 6.907338 | -4.3743  | 0.001049 | 0.002592 | RP11-296L chr9   | + | 34568013 | 34582827 | 892  |
| ENSG000001 | 5.766575 | 2.497501 | 1.0644   | 0.32733  | 0.43034  | RP11-32B5 chr15  | - | 21936560 | 21938111 | 1549 |
| ENSG000001 | 0.632843 | 0        | 0.81931  | 0.64303  | NA       | RP11-443F chr2   | + | 63167051 | 63167417 | 367  |
| ENSG000001 | 0        | 0.357707 | -0.41864 | 0.81278  | NA       | AC128709. chr3   | + | 1.97E+08 | 1.97E+08 | 626  |
| ENSG000001 | 0        | 0.297015 | -0.41864 | 0.81278  | NA       | RP11-353N chr1   | + | 1.5E+08  | 1.5E+08  | 313  |
| ENSG000001 | 0        | 0.297015 | -0.41864 | 0.81278  | NA       | RP11-452K chr10  | - | 99068895 | 99069715 | 496  |
| ENSG000001 | 0.580602 | 0.297015 | 0.36801  | 0.83644  | NA       | RP11-323F chr4   | + | 4508805  | 4509504  | 584  |
| ENSG000001 | 825.2826 | 124.0716 | 2.7154   | 4.06E-23 | 3.94E-22 | B3GNT9 chr16     | - | 67182008 | 67185117 | 2917 |
| ENSG000001 | 7.502429 | 0.343138 | 3.648    | 0.00558  | 0.012304 | AC147651. chr7   | + | 642822   | 648119   | 731  |
| ENSG000001 | 251.7854 | 14.28645 | 4.1133   | 2.14E-40 | 3.79E-39 | RP11-65F1 chr5   | - | 92746995 | 92921354 | 2868 |
| ENSG000001 | 27.3764  | 24.73285 | 0.14809  | 0.70284  | 0.77898  | RP11-337C chr1   | + | 1.47E+08 | 1.47E+08 | 1057 |
| ENSG000001 | 383.0017 | 636.5849 | -0.73139 | 1.21E-06 | 4.30E-06 | CDKN2AIP1 chr5   | - | 1.34E+08 | 1.34E+08 | 1223 |
| ENSG000001 | 0.36308  | 0.297015 | -0.00205 | 0.99908  | NA       | FAM27E1 chr9     | - | 46385691 | 46387031 | 1341 |
| ENSG000001 | 2.427705 | 1.340997 | 0.72141  | 0.5626   | 0.66087  | ZBTB40-IT1 chr1  | + | 22843967 | 22846201 | 273  |
| ENSG000001 | 0        | 0.654722 | -0.83442 | 0.63731  | NA       | RP11-13E5 chrX   | + | 1.25E+08 | 1.25E+08 | 639  |
| ENSG000001 | 2.468781 | 3.290593 | -0.3856  | 0.7486   | 0.816    | RP11-12M1 chr22  | + | 41460056 | 41460640 | 585  |
| ENSG000001 | 0        | 0.357707 | -0.41864 | 0.81278  | NA       | AC008074. chr2   | + | 64677230 | 64677658 | 429  |

|            |          |          |          |          |          |                 |   |          |          |      |
|------------|----------|----------|----------|----------|----------|-----------------|---|----------|----------|------|
| ENSG000001 | 0        | 0.297015 | -0.41864 | 0.81278  | NA       | PPEF1-AS1 chrX  | - | 18706762 | 18709723 | 430  |
| ENSG000001 | 0.290301 | 0        | 0.4146   | 0.81455  | NA       | AC090505. chr3  | + | 1.94E+08 | 1.95E+08 | 3647 |
| ENSG000001 | 0.290301 | 0        | 0.4146   | 0.81455  | NA       | SULT1C2P1 chr2  | + | 1.09E+08 | 1.09E+08 | 1875 |
| ENSG000001 | 0.342542 | 0        | 0.4146   | 0.81455  | NA       | RP11-109A chr10 | - | 1.31E+08 | 1.31E+08 | 794  |
| ENSG000001 | 0.632843 | 0        | 0.81931  | 0.64303  | NA       | OR13K1P chrX    | + | 1.31E+08 | 1.31E+08 | 975  |
| ENSG000001 | 0.342542 | 1.073121 | -0.87093 | 0.62353  | NA       | RPS3AP39 chr11  | - | 3570975  | 3571749  | 775  |
| ENSG000001 | 1.317927 | 29.12651 | -4.2025  | 3.47E-07 | 1.29E-06 | RP5-1155K chr1  | - | 62673808 | 62674114 | 307  |
| ENSG000001 | 0.632843 | 0.997859 | -0.46957 | 0.76172  | NA       | ZNF295-AS chr21 | + | 43429303 | 43445060 | 2869 |
| ENSG000001 | 1.213446 | 0        | 1.5515   | 0.38249  | NA       | RP11-809N chr10 | + | 63212397 | 63241714 | 863  |
| ENSG000001 | 3.702764 | 0.594029 | 1.9587   | 0.19245  | 0.27966  | RP1-142L7 chr6  | + | 1.12E+08 | 1.12E+08 | 777  |
| ENSG000001 | 102.6213 | 10.03929 | 3.3296   | 5.41E-20 | 4.56E-19 | RP11-236F chr9  | - | 67327775 | 67334983 | 1120 |
| ENSG000001 | 5.238214 | 0.98329  | 2.116    | 0.065681 | 0.11283  | AC022173. chr7  | + | 1.38E+08 | 1.38E+08 | 577  |
| ENSG000001 | 0        | 0.357707 | -0.41864 | 0.81278  | NA       | RP11-118B chr12 | + | 9392599  | 9395635  | 2459 |
| ENSG000001 | 0.290301 | 5.690142 | -3.3609  | 0.010516 | 0.02201  | RP1-102G2 chr1  | + | 1.75E+08 | 1.75E+08 | 395  |
| ENSG000001 | 0        | 0.343138 | -0.41864 | 0.81278  | NA       | RP11-193F chr1  | + | 2.38E+08 | 2.38E+08 | 3127 |
| ENSG000001 | 0        | 0.715414 | -0.84936 | 0.6309   | NA       | AC072061. chr7  | + | 39856148 | 39907739 | 771  |
| ENSG000001 | 0        | 0.357707 | -0.41864 | 0.81278  | NA       | RP11-322A chrX  | + | 75443036 | 75443496 | 461  |
| ENSG000001 | 0.36308  | 0        | 0.4146   | 0.81455  | NA       | RP11-666A chr1  | + | 1.49E+08 | 1.49E+08 | 365  |
| ENSG000001 | 0        | 0.343138 | -0.41864 | 0.81278  | NA       | TRBV30 chr7     | - | 1.43E+08 | 1.43E+08 | 447  |
| ENSG000001 | 0        | 0.594029 | -0.81444 | 0.64499  | NA       | MTND2P8 chr9    | - | 81356636 | 81357660 | 1025 |
| ENSG000001 | 0.705622 | 0.357707 | 0.57557  | 0.74268  | NA       | RP4-568F9 chr20 | - | 18294409 | 18295755 | 258  |
| ENSG000001 | 0.580602 | 2.589748 | -1.6532  | 0.24441  | 0.3401   | MAPK6PS3 chr13  | - | 42643068 | 42645229 | 2162 |
| ENSG000001 | 2.718006 | 2.399549 | 0.16303  | 0.88293  | 0.91846  | FTH1P11 chr8    | - | 82433917 | 82434467 | 551  |
| ENSG000001 | 0        | 0.343138 | -0.41864 | 0.81278  | NA       | RP11-402P chrX  | - | 70882845 | 70885603 | 697  |
| ENSG000001 | 0        | 2.740271 | -2.6376  | 0.11836  | 0.18676  | RSL24D1P8 chr19 | + | 12207239 | 12207730 | 492  |
| ENSG000001 | 0        | 0.357707 | -0.41864 | 0.81278  | NA       | RP11-575C chr9  | + | 6195934  | 6197248  | 1004 |
| ENSG000001 | 12.73804 | 10.87937 | 0.21729  | 0.7803   | 0.84228  | ANO7P1 chr1     | - | 16542404 | 16554522 | 1720 |
| ENSG000001 | 7.563229 | 5.028973 | 0.52841  | 0.57228  | 0.66936  | RP11-96C2 chr10 | + | 88873711 | 88875280 | 688  |
| ENSG000001 | 0.653381 | 1.372552 | -0.70797 | 0.67284  | 0.75501  | AC021016. chr2  | - | 2.19E+08 | 2.19E+08 | 535  |
| ENSG000001 | 4.369102 | 0        | 3.506    | 0.021571 | 0.042252 | RP11-316I chr1  | - | 1.89E+08 | 1.89E+08 | 733  |
| ENSG000001 | 0        | 0.357707 | -0.41864 | 0.81278  | NA       | HNRNPA1P chr6   | + | 32292996 | 32293955 | 960  |
| ENSG000001 | 0        | 0.297015 | -0.41864 | 0.81278  | NA       | AC004906. chr7  | + | 2983669  | 2986725  | 969  |
| ENSG000001 | 0        | 153.3785 | -8.6979  | 1.75E-15 | 1.18E-14 | CKMT1B chr15    | + | 43885252 | 43891604 | 2396 |
| ENSG000001 | 0.290301 | 0.594029 | -0.38058 | 0.83094  | NA       | RP11-214L chr1  | - | 38674706 | 38680439 | 2283 |
| ENSG000001 | 0        | 1.309443 | -1.6539  | 0.35008  | NA       | RP11-782C chr1  | + | 1.43E+08 | 1.43E+08 | 605  |
| ENSG000001 | 0.290301 | 1.012429 | -0.95336 | 0.58114  | NA       | RP11-540K chr1  | + | 1.81E+08 | 1.81E+08 | 542  |
| ENSG000001 | 18.67331 | 21.68503 | -0.21468 | 0.63181  | 0.72096  | SMG1P1 chr16    | + | 22448329 | 22503541 | 4223 |
| ENSG000001 | 13.3906  | 13.92633 | -0.04122 | 0.94212  | 0.96249  | TTN-AS1 chr2    | + | 1.79E+08 | 1.8E+08  | 4592 |
| ENSG000001 | 0        | 0.343138 | -0.41864 | 0.81278  | NA       | RP11-522L chrX  | + | 1.02E+08 | 1.02E+08 | 500  |
| ENSG000001 | 4.75272  | 4.020576 | 0.21744  | 0.82278  | 0.87511  | RP4-680D5 chr1  | - | 15912631 | 15930121 | 2845 |
| ENSG000001 | 0.290301 | 0        | 0.4146   | 0.81455  | NA       | HIGD1AP8 chr12  | + | 11634317 | 11634590 | 274  |
| ENSG000001 | 0.290301 | 0        | 0.4146   | 0.81455  | NA       | RP11-118F chr9  | + | 94789780 | 94790106 | 327  |
| ENSG000001 | 1.068702 | 0.594029 | 0.51045  | 0.76284  | NA       | SRRM1P3 chrX    | - | 1.36E+08 | 1.36E+08 | 2678 |
| ENSG000001 | 4.979616 | 10.42781 | -1.0317  | 0.1816   | 0.26633  | GS1-124K5 chr7  | + | 65958693 | 65960461 | 540  |
| ENSG000001 | 0        | 0.343138 | -0.41864 | 0.81278  | NA       | RP1-288L1 chr22 | - | 35107899 | 35120910 | 549  |
| ENSG000001 | 0.653381 | 2.012704 | -1.2086  | 0.43278  | 0.53822  | AP000563. chr21 | + | 32824779 | 32825536 | 758  |
| ENSG000001 | 2.49967  | 2.056411 | 0.28507  | 0.80637  | 0.86311  | RAI1-AS1 chr17  | - | 17662468 | 17674135 | 724  |
| ENSG000001 | 0.342542 | 2.428687 | -2.0632  | 0.18081  | 0.26532  | RP11-201C chr1  | + | 31509581 | 31510087 | 507  |
| ENSG000001 | 0        | 0.297015 | -0.41864 | 0.81278  | NA       | RNF223 chr1     | - | 1007126  | 1009687  | 1122 |
| ENSG000001 | 3.194127 | 1.773966 | 0.71913  | 0.60115  | 0.69476  | XIAP-AS1 chrX   | - | 1.23E+08 | 1.23E+08 | 482  |
| ENSG000001 | 0.653381 | 0        | 0.82678  | 0.64037  | NA       | RP11-230L chr9  | + | 1.26E+08 | 1.26E+08 | 722  |
| ENSG000001 | 1.016461 | 3.076961 | -1.3463  | 0.32039  | 0.4232   | FTCD-AS1 chr21  | + | 47571528 | 47572561 | 500  |
| ENSG000001 | 0        | 4.49322  | -3.6922  | 0.010693 | 0.022332 | RP3-448I9. chr6 | - | 14391462 | 14393519 | 489  |
| ENSG000001 | 0.870904 | 2.370411 | -1.0708  | 0.4685   | 0.5732   | AC004461. chr22 | + | 19043314 | 19044025 | 403  |
| ENSG000001 | 0        | 0.343138 | -0.41864 | 0.81278  | NA       | RP5-1065J. chr1 | - | 1.1E+08  | 1.1E+08  | 283  |
| ENSG000001 | 13.80853 | 12.13537 | 0.17862  | 0.74318  | 0.81125  | CDC42P6 chr4    | - | 22728998 | 22729573 | 576  |
| ENSG000001 | 3.568372 | 5.845498 | -0.63524 | 0.52497  | 0.62698  | CTD-2522E chrX  | - | 47016037 | 47017598 | 1248 |
| ENSG000001 | 0        | 2.012704 | -2.1825  | 0.20921  | 0.29918  | PATE4 chr11     | + | 1.26E+08 | 1.26E+08 | 1983 |
| ENSG000001 | 15.17951 | 8.296875 | 0.83772  | 0.18128  | 0.26592  | AL163953. chr14 | + | 53635772 | 54153976 | 566  |
| ENSG000001 | 1.774324 | 6.03328  | -1.6372  | 0.11705  | 0.18485  | RP11-475I. chr9 | + | 44401766 | 44404440 | 2579 |
| ENSG000001 | 0.685084 | 0.343138 | 0.48017  | 0.78775  | NA       | RP11-509J. chr9 | + | 3647335  | 3648338  | 728  |
| ENSG000001 | 0        | 2.728118 | -2.8815  | 0.068704 | 0.11723  | RP11-269C chr13 | - | 44974487 | 44980002 | 858  |
| ENSG000001 | 0        | 0.297015 | -0.41864 | 0.81278  | NA       | AP006288. chr11 | + | 64298516 | 64300442 | 395  |
| ENSG000001 | 0        | 0.297015 | -0.41864 | 0.81278  | NA       | RP11-334N chr1  | - | 7068436  | 7074339  | 349  |
| ENSG000001 | 0        | 2.041842 | -2.4837  | 0.12741  | 0.19837  | RP11-316P chr9  | + | 92316566 | 92334585 | 822  |

|            |          |          |          |          |          |                 |   |          |          |      |
|------------|----------|----------|----------|----------|----------|-----------------|---|----------|----------|------|
| ENSG000001 | 0.342542 | 0        | 0.4146   | 0.81455  | NA       | BRWD1-IT1 chr21 | - | 40589019 | 40591731 | 489  |
| ENSG000001 | 108.2928 | 2.058828 | 5.0303   | 1.10E-05 | 3.51E-05 | HOXD-AS2 chr2   | - | 1.77E+08 | 1.77E+08 | 999  |
| ENSG000001 | 0.632843 | 1.684135 | -1.0761  | 0.46331  | 0.56845  | RPL21P121 chr17 | + | 18216074 | 18216847 | 465  |
| ENSG000001 | 0        | 1.949596 | -2.4359  | 0.13595  | 0.20899  | CTA-407F1 chr22 | - | 25976208 | 25977349 | 660  |
| ENSG000001 | 0        | 2.757256 | -2.912   | 0.06391  | 0.11024  | RP11-1391I chr1 | + | 1.56E+08 | 1.56E+08 | 5586 |
| ENSG000001 | 0        | 25.62947 | -6.2563  | 9.40E-08 | 3.68E-07 | HLA-DPA3 chr6   | - | 33098993 | 33111102 | 229  |
| ENSG000001 | 15.96387 | 7.555612 | 1.0194   | 0.13123  | 0.20328  | PITRM1-AS chr10 | + | 3183824  | 3210164  | 3823 |
| ENSG000001 | 0.342542 | 0.357707 | -0.0021  | 0.99906  | NA       | CAMTA1-IT chr1  | + | 7429003  | 7430331  | 365  |
| ENSG000001 | 0        | 0.343138 | -0.41864 | 0.81278  | NA       | RP3-471C1 chr6  | - | 19690056 | 19753344 | 212  |
| ENSG000001 | 1.451506 | 1.340997 | 0.12463  | 0.93432  | 0.95696  | NDUFA9P1 chr22  | - | 36293318 | 36294452 | 1135 |
| ENSG000001 | 0.72616  | 0.343138 | 0.52026  | 0.77047  | NA       | AP001092. chr11 | + | 64413871 | 64427153 | 469  |
| ENSG000001 | 0.290301 | 2.056411 | -1.914   | 0.21479  | 0.3057   | PRSS56 chr2     | + | 2.33E+08 | 2.33E+08 | 2157 |
| ENSG000001 | 0        | 0.640152 | -0.82869 | 0.63935  | NA       | NRBF2P3 chr1    | - | 1.11E+08 | 1.11E+08 | 865  |
| ENSG000001 | 1.306762 | 1.964165 | -0.47102 | 0.74102  | 0.80947  | RP11-465K chr1  | - | 95302304 | 95320982 | 697  |
| ENSG000001 | 3.817597 | 0.357707 | 2.7257   | 0.056752 | 0.099412 | AC069257. chr3  | - | 1.96E+08 | 1.96E+08 | 155  |
| ENSG000001 | 0        | 0.686276 | -0.84936 | 0.6309   | NA       | RP11-885N chr9  | - | 1.41E+08 | 1.41E+08 | 538  |
| ENSG000001 | 0        | 0.640152 | -0.82869 | 0.63935  | NA       | RP11-305L chr9  | - | 93881420 | 93925369 | 506  |
| ENSG000001 | 0.72616  | 0        | 0.85004  | 0.63064  | NA       | RP11-347C chr20 | - | 46609232 | 46617488 | 429  |
| ENSG000001 | 43.57653 | 5.288728 | 2.9671   | 1.08E-07 | 4.19E-07 | FOX2D-AS1 chr1  | - | 47897805 | 47900313 | 2509 |
| ENSG000001 | 0        | 0.357707 | -0.41864 | 0.81278  | NA       | RPSAP2 chr6     | + | 28699794 | 28700681 | 888  |
| ENSG000001 | 0.342542 | 1.012429 | -0.95691 | 0.57869  | NA       | RP1-159A1 chr1  | + | 27852316 | 27857072 | 283  |
| ENSG000001 | 3.278071 | 26.56993 | -2.9189  | 2.42E-06 | 8.32E-06 | RP11-312B chr1  | - | 6843952  | 6844903  | 415  |
| ENSG000001 | 15.72841 | 13.3954  | 0.22443  | 0.69914  | 0.77594  | ASS1P12 chr9    | + | 32945994 | 32947220 | 1227 |
| ENSG000001 | 0        | 6.303573 | -4.0701  | 0.005007 | 0.011152 | CECR7 chr22     | + | 17517460 | 17539682 | 2726 |
| ENSG000001 | 68.17591 | 152.5423 | -1.1519  | 1.69E-06 | 5.93E-06 | ZNF737 chr19    | - | 20718631 | 20748615 | 2867 |
| ENSG000001 | 866.5956 | 1024.463 | -0.2408  | 0.05048  | 0.089673 | RGL2 chr6       | - | 33259431 | 33267101 | 3278 |
| ENSG000001 | 0        | 0.715414 | -0.84936 | 0.6309   | NA       | CTA-520D8 chr1  | - | 13983806 | 13986405 | 379  |
| ENSG000001 | 0        | 0.297015 | -0.41864 | 0.81278  | NA       | RHEBP3 chr22    | + | 18501980 | 18502966 | 351  |
| ENSG000001 | 0.36308  | 0        | 0.4146   | 0.81455  | NA       | CDK2AP2P. chr9  | + | 66500642 | 66501008 | 367  |
| ENSG000001 | 0.36308  | 1.638012 | -1.6321  | 0.29822  | 0.40004  | AC074212. chr19 | + | 46236509 | 46267792 | 2749 |
| ENSG000001 | 0.653381 | 2.740271 | -1.5876  | 0.284    | 0.3853   | RP11-154C chr3  | - | 62109878 | 62110282 | 405  |
| ENSG000001 | 0.36308  | 3.694423 | -2.7206  | 0.051458 | 0.091219 | RP11-547I chr1  | + | 1.9E+08  | 1.9E+08  | 526  |
| ENSG000001 | 2.044087 | 1.713273 | 0.2218   | 0.85779  | 0.9002   | RP11-554F chr9  | - | 1.02E+08 | 1.03E+08 | 1544 |
| ENSG000001 | 0        | 0.640152 | -0.82869 | 0.63935  | NA       | RP11-280C chr1  | - | 1.65E+08 | 1.66E+08 | 2400 |
| ENSG000001 | 0        | 2.468363 | -2.5197  | 0.13799  | 0.21141  | RP3-461P1 chr20 | + | 44116253 | 44118888 | 355  |
| ENSG000001 | 4.99934  | 0        | 3.8395   | 0.007351 | 0.015838 | AC073115. chr7  | + | 46009256 | 46019790 | 555  |
| ENSG000001 | 2.302685 | 9.419409 | -1.8893  | 0.040359 | 0.073952 | XXbac-B13 chr22 | + | 21311380 | 21318967 | 684  |
| ENSG000001 | 0        | 0.343138 | -0.41864 | 0.81278  | NA       | RP5-926E3 chr1  | - | 50156934 | 50157195 | 262  |
| ENSG000001 | 0.943682 | 0.297015 | 0.89158  | 0.60669  | NA       | RP4-803J1 chr1  | + | 2.29E+08 | 2.29E+08 | 640  |
| ENSG000001 | 0        | 0.297015 | -0.41864 | 0.81278  | NA       | RP11-423E chr3  | - | 1.72E+08 | 1.72E+08 | 445  |
| ENSG000001 | 0        | 1.355566 | -1.9006  | 0.26573  | NA       | SGOL1-AS1 chr3  | + | 20215736 | 20227919 | 819  |
| ENSG000001 | 9.710006 | 18.31031 | -0.90697 | 0.097088 | 0.15754  | RP11-500C chr10 | - | 1.32E+08 | 1.32E+08 | 2843 |
| ENSG000001 | 38.19537 | 29.13141 | 0.38508  | 0.30849  | 0.4102   | RP11-206L chr1  | + | 714162   | 745440   | 1873 |
| ENSG000001 | 0        | 0.343138 | -0.41864 | 0.81278  | NA       | RP11-430I chr1  | + | 2.48E+08 | 2.48E+08 | 913  |
| ENSG000001 | 10.89435 | 6.079404 | 0.8044   | 0.26879  | 0.36769  | RP11-603J chr12 | - | 56374216 | 56374819 | 604  |
| ENSG000001 | 6.378881 | 1.995719 | 1.5619   | 0.099404 | 0.16066  | RP11-356I chr6  | - | 1.38E+08 | 1.38E+08 | 963  |
| ENSG000001 | 0.342542 | 0        | 0.4146   | 0.81455  | NA       | RP11-816B chr3  | - | 1.73E+08 | 1.73E+08 | 249  |
| ENSG000001 | 2.656392 | 3.755116 | -0.44263 | 0.67433  | 0.75603  | RP1-12G14 chr6  | - | 1.5E+08  | 1.5E+08  | 660  |
| ENSG000001 | 0.36308  | 2.794516 | -2.1464  | 0.17716  | 0.26078  | RP11-76N2 chr1  | - | 89003196 | 89150887 | 3542 |
| ENSG000001 | 31.66058 | 81.20211 | -1.3496  | 9.51E-06 | 3.06E-05 | RPSAP15 chrX    | - | 86958277 | 86959307 | 1031 |
| ENSG000001 | 0        | 2.947455 | -3.0782  | 0.043573 | 0.078942 | AC008268. chr2  | + | 96455402 | 96465914 | 1672 |
| ENSG000001 | 20.75587 | 54.54651 | -1.3793  | 0.000722 | 0.001829 | UNC5B-AS1 chr10 | - | 72976981 | 72977985 | 647  |
| ENSG000001 | 2.479946 | 0        | 2.5072   | 0.13961  | 0.21341  | RP11-325F chr7  | + | 1.05E+08 | 1.05E+08 | 891  |
| ENSG000001 | 67.64853 | 708.6665 | -3.3716  | 2.17E-70 | 7.88E-69 | SHISA9 chr16    | + | 12995477 | 13334272 | 6726 |
| ENSG000001 | 11.83722 | 97.74014 | -3.0108  | 4.77E-16 | 3.31E-15 | DGCR5 chr22     | + | 18958027 | 19018755 | 5492 |
| ENSG000001 | 7.003165 | 1.248751 | 2.1992   | 0.036384 | 0.067453 | NONOP2 chr2     | - | 61163954 | 61165184 | 1231 |
| ENSG000001 | 1.960143 | 9.635457 | -2.1304  | 0.018677 | 0.037118 | LINC00857 chr10 | + | 81967466 | 81979413 | 2161 |
| ENSG000001 | 4.076195 | 1.730259 | 1.1068   | 0.35549  | 0.45974  | AC012668. chr2  | + | 2.16E+08 | 2.17E+08 | 1642 |
| ENSG000001 | 0.580602 | 0.357707 | 0.37639  | 0.83285  | NA       | RP11-439K chr9  | + | 85891291 | 85894414 | 527  |
| ENSG000001 | 0.705622 | 1.531196 | -0.87037 | 0.57758  | 0.67416  | RP3-449H6 chr6  | + | 44492996 | 44494491 | 473  |
| ENSG000001 | 0        | 1.698704 | -2.2257  | 0.18075  | NA       | RP11-309N chrX  | + | 950956   | 955100   | 588  |
| ENSG000001 | 0.290301 | 0        | 0.4146   | 0.81455  | NA       | RP11-730A chr10 | - | 13201477 | 13201777 | 301  |
| ENSG000001 | 0.342542 | 0        | 0.4146   | 0.81455  | NA       | HLA-DQA2 chr6   | + | 32709119 | 32714992 | 1524 |
| ENSG000001 | 0.290301 | 0        | 0.4146   | 0.81455  | NA       | RP11-58A1 chr9  | + | 69146939 | 69149621 | 681  |
| ENSG000001 | 2.261609 | 0        | 2.6509   | 0.097945 | 0.15859  | TTL11-IT1 chr9  | - | 1.25E+08 | 1.25E+08 | 1052 |

|            |          |          |          |          |          |            |       |   |          |          |      |
|------------|----------|----------|----------|----------|----------|------------|-------|---|----------|----------|------|
| ENSG000001 | 1.597063 | 0.997859 | 0.55684  | 0.69471  | 0.77231  | RPL9P9     | chr15 | - | 82664459 | 82748784 | 673  |
| ENSG000001 | 0.36308  | 0        | 0.4146   | 0.81455  | NA       | AC096775.  | chr7  | + | 95912669 | 95913116 | 448  |
| ENSG000001 | 0.342542 | 2.606733 | -2.0723  | 0.19283  | 0.28013  | RP13-198C  | chr9  | + | 38643039 | 38643765 | 727  |
| ENSG000001 | 0.290301 | 0        | 0.4146   | 0.81455  | NA       | AC004562.  | chr17 | + | 67957848 | 67979679 | 665  |
| ENSG000001 | 0.342542 | 0        | 0.4146   | 0.81455  | NA       | RP3-359N1  | chr6  | - | 1.06E+08 | 1.06E+08 | 589  |
| ENSG000001 | 1.628766 | 5.681278 | -1.6304  | 0.1244   | 0.19457  | PYY2       | chr17 | + | 26553589 | 26555091 | 1076 |
| ENSG000001 | 0        | 2.263595 | -2.408   | 0.15804  | 0.23738  | RP11-174N  | chr12 | + | 1.3E+08  | 1.3E+08  | 505  |
| ENSG000001 | 0        | 0.343138 | -0.41864 | 0.81278  | NA       | RAC1P4     | chrX  | - | 1.37E+08 | 1.37E+08 | 579  |
| ENSG000001 | 0.290301 | 0        | 0.4146   | 0.81455  | NA       | RP11-442J. | chr13 | + | 45225948 | 45275152 | 295  |
| ENSG000001 | 3.330311 | 0        | 3.2631   | 0.028727 | 0.054622 | RP11-383J. | chr8  | + | 1.25E+08 | 1.25E+08 | 490  |
| ENSG000001 | 3.350849 | 11.10113 | -1.6252  | 0.066288 | 0.11374  | RP11-66D1  | chr1  | - | 1.57E+08 | 1.57E+08 | 4120 |
| ENSG000001 | 0        | 0.297015 | -0.41864 | 0.81278  | NA       | HMG1N1P3.  | chr19 | - | 54271225 | 54271807 | 256  |
| ENSG000001 | 12.31416 | 51.69613 | -2.0523  | 7.50E-07 | 2.71E-06 | AP000251.  | chr21 | + | 32931537 | 32932800 | 843  |
| ENSG000001 | 5.342695 | 6.639462 | -0.29977 | 0.71832  | 0.79147  | RP11-112L  | chr20 | - | 48780001 | 48782639 | 733  |
| ENSG000001 | 2.572449 | 0        | 2.8674   | 0.066043 | 0.11336  | RP13-143C  | chr6  | - | 1.36E+08 | 1.37E+08 | 824  |
| ENSG000001 | 0.342542 | 2.855208 | -2.1918  | 0.16479  | 0.2457   | AP001056.  | chr21 | + | 45595372 | 45596336 | 821  |
| ENSG000001 | 2.583614 | 0.715414 | 1.4002   | 0.36794  | 0.47257  | RP11-343F  | chr1  | - | 2.07E+08 | 2.07E+08 | 358  |
| ENSG000001 | 0.685084 | 1.326428 | -0.65605 | 0.69325  | 0.7714   | AF064858.  | chr21 | - | 40400461 | 40401053 | 292  |
| ENSG000001 | 11.50666 | 11.95733 | -0.06266 | 0.91873  | 0.94527  | AL353898.  | chr1  | - | 54565641 | 54565897 | 255  |
| ENSG000001 | 2.459408 | 5.390712 | -1.0312  | 0.3502   | 0.45457  | OXCT2P1    | chr1  | + | 39980628 | 39982162 | 1535 |
| ENSG000001 | 0.653381 | 0.654722 | -0.00313 | 0.9985   | NA       | RP11-522L  | chrX  | + | 1.02E+08 | 1.02E+08 | 598  |
| ENSG000001 | 0.72616  | 0.700845 | 0.022935 | 0.98937  | NA       | RP11-72B4  | chr9  | + | 98680418 | 98680986 | 569  |
| ENSG000001 | 1.048164 | 0.654722 | 0.46381  | 0.77376  | NA       | FRY-AS1    | chr13 | - | 32599451 | 32605776 | 1115 |
| ENSG000001 | 0        | 0.357707 | -0.41864 | 0.81278  | NA       | AC007386.  | chr2  | - | 65128974 | 65132271 | 2928 |
| ENSG000001 | 0        | 4.767544 | -3.7849  | 0.007897 | 0.0169   | RP4-604G5  | chr7  | + | 99527015 | 99546243 | 680  |
| ENSG000001 | 2.624689 | 2.087966 | 0.30729  | 0.79942  | 0.85793  | RP11-690I. | chr7  | - | 2.33E+08 | 2.33E+08 | 407  |
| ENSG000001 | 0.342542 | 0.715414 | -0.51272 | 0.77372  | NA       | RP11-521A  | chr3  | + | 1.73E+08 | 1.73E+08 | 481  |
| ENSG000001 | 1.919068 | 0.343138 | 1.8342   | 0.23468  | 0.32849  | HLCS-IT1   | chr21 | - | 38176285 | 38178585 | 531  |
| ENSG000001 | 0        | 0.686276 | -0.84936 | 0.6309   | NA       | ERIC11-AS1 | chr8  | + | 687651   | 1087777  | 1744 |
| ENSG000001 | 1409.13  | 2004.749 | -0.50822 | 3.17E-05 | 9.59E-05 | KIFC1      | chr6  | + | 33359313 | 33377701 | 2706 |
| ENSG000001 | 1.431782 | 0        | 1.7261   | 0.329    | NA       | OR11Q1P    | chrX  | + | 1.3E+08  | 1.3E+08  | 877  |
| ENSG000001 | 3.144492 | 1.591889 | 0.80192  | 0.53237  | 0.63353  | AP003025.  | chr11 | - | 1.31E+08 | 1.31E+08 | 4335 |
| ENSG000001 | 0        | 0.640152 | -0.82869 | 0.63935  | NA       | RP5-968D2  | chr1  | - | 1.68E+08 | 1.68E+08 | 519  |
| ENSG000001 | 0.975385 | 0.951736 | 0.017636 | 0.99106  | 0.99529  | LINC00316  | chr21 | - | 46758505 | 46761905 | 455  |
| ENSG000001 | 0.580602 | 0.686276 | -0.10523 | 0.9528   | NA       | WI2-80423  | chr22 | - | 36817318 | 36817689 | 372  |
| ENSG000001 | 1.939605 | 2.811501 | -0.47218 | 0.70217  | 0.77846  | HCG4P3     | chr6  | - | 29973898 | 29974893 | 996  |
| ENSG000001 | 10.90291 | 12.14182 | -0.14411 | 0.80333  | 0.86089  | KRR1P1     | chr13 | - | 20644390 | 20646276 | 803  |
| ENSG000001 | 0.36308  | 0.297015 | -0.00205 | 0.99908  | NA       | RP11-307E  | chr9  | - | 97049981 | 97050832 | 852  |
| ENSG000001 | 1.016461 | 1.935026 | -0.78432 | 0.56702  | 0.6646   | RP3-514P1  | chrX  | - | 1.01E+08 | 1.01E+08 | 1792 |
| ENSG000001 | 104.0153 | 430.6799 | -2.0425  | 2.44E-15 | 1.63E-14 | AL627309.  | chr1  | - | 134901   | 139379   | 2661 |
| ENSG000001 | 0.36308  | 0        | 0.4146   | 0.81455  | NA       | RP11-360C  | chr6  | - | 10511269 | 10514779 | 1475 |
| ENSG000001 | 9.034295 | 11.05413 | -0.28013 | 0.70818  | 0.78306  | RP5-1120P  | chr6  | - | 43963460 | 44042389 | 2232 |
| ENSG000001 | 0.870904 | 0        | 1.046    | 0.5544   | NA       | LINC00686  | chr20 | - | 61326376 | 61331832 | 332  |
| ENSG000001 | 0.580602 | 0        | 0.8036   | 0.6494   | NA       | AC007064.  | chr22 | + | 17350368 | 17352016 | 500  |
| ENSG000001 | 2.448243 | 0        | 2.6745   | 0.099619 | 0.16096  | IFNWP2     | chr9  | + | 21420233 | 21420812 | 580  |
| ENSG000001 | 1.431782 | 1.234181 | 0.12042  | 0.93669  | 0.95822  | IRGM       | chr5  | + | 1.5E+08  | 1.5E+08  | 1659 |
| ENSG000001 | 22.10729 | 2.575179 | 2.9536   | 1.82E-05 | 5.66E-05 | LINC00312  | chr3  | + | 8613468  | 8615561  | 2094 |
| ENSG000001 | 0.36308  | 0        | 0.4146   | 0.81455  | NA       | RP11-199F  | chr13 | + | 1.15E+08 | 1.15E+08 | 344  |
| ENSG000001 | 0        | 0.297015 | -0.41864 | 0.81278  | NA       | AP004289.  | chr8  | - | 1E+08    | 1E+08    | 1457 |
| ENSG000001 | 1.628766 | 0.297015 | 1.6275   | 0.30182  | 0.40306  | AC008937.  | chr5  | - | 56137843 | 56157991 | 619  |
| ENSG000001 | 2.085163 | 0        | 2.4626   | 0.13461  | 0.20763  | RP11-39K2  | chr9  | + | 5100236  | 5101009  | 774  |
| ENSG000001 | 0        | 3.3343   | -2.9544  | 0.072797 | 0.12324  | AC006000.  | chr7  | - | 13378826 | 13404674 | 842  |
| ENSG000001 | 1.608228 | 0.715414 | 0.85058  | 0.60052  | 0.69444  | P4HA2-AS1  | chr5  | + | 1.32E+08 | 1.32E+08 | 839  |
| ENSG000001 | 8.092404 | 9.395103 | -0.22237 | 0.76073  | 0.82635  | AC009095.  | chr16 | - | 67648284 | 67649245 | 522  |
| ENSG000001 | 6.95011  | 3.397409 | 0.9869   | 0.27691  | 0.37716  | RP1-179N1  | chr6  | - | 36059768 | 36060423 | 656  |
| ENSG000001 | 0        | 2.010288 | -2.4674  | 0.13027  | 0.202    | AF064858.  | chr21 | - | 40378574 | 40383255 | 509  |
| ENSG000001 | 0.290301 | 0        | 0.4146   | 0.81455  | NA       | RP3-453P2  | chr1  | - | 7442548  | 7449814  | 432  |
| ENSG000001 | 0.36308  | 0.297015 | -0.00205 | 0.99908  | NA       | RNGTTP1    | chr21 | + | 27015801 | 27016528 | 728  |
| ENSG000001 | 6.08002  | 0.98329  | 2.3125   | 0.039422 | 0.072469 | AC010980.  | chr2  | + | 2.23E+08 | 2.23E+08 | 1345 |
| ENSG000001 | 0        | 0.594029 | -0.81444 | 0.64499  | NA       | RP11-298E  | chr9  | + | 27391732 | 27397561 | 708  |
| ENSG000001 | 0.342542 | 0        | 0.4146   | 0.81455  | NA       | U82670.4   | chrX  | - | 1.52E+08 | 1.52E+08 | 921  |
| ENSG000001 | 1.681007 | 1.773966 | -0.0473  | 0.97258  | 0.98483  | DCTN1-AS1  | chr2  | + | 74612613 | 74621009 | 2145 |
| ENSG000001 | 2.188831 | 2.711133 | -0.23972 | 0.84038  | 0.88801  | RNF216-IT1 | chr7  | - | 5702063  | 5720092  | 337  |
| ENSG000001 | 0        | 0.297015 | -0.41864 | 0.81278  | NA       | RP11-157F  | chr10 | + | 89136653 | 89138238 | 1586 |
| ENSG000001 | 0        | 20.39257 | -5.9732  | 3.20E-07 | 1.20E-06 | RP11-624N  | chr6  | - | 1.26E+08 | 1.26E+08 | 708  |

|            |          |          |          |          |          |                 |   |          |          |      |
|------------|----------|----------|----------|----------|----------|-----------------|---|----------|----------|------|
| ENSG000001 | 0.290301 | 0        | 0.4146   | 0.81455  | NA       | AC009963. chr2  | + | 1.09E+08 | 1.09E+08 | 339  |
| ENSG000001 | 1.359003 | 1.340997 | 0.007245 | 0.99567  | 0.99763  | UQCRBP1 chrX    | - | 56763675 | 56764010 | 336  |
| ENSG000001 | 0.290301 | 0.357707 | -0.00203 | 0.99908  | NA       | RP3-423B2 chr1  | + | 38021843 | 38022108 | 266  |
| ENSG000001 | 0        | 0.343138 | -0.41864 | 0.81278  | NA       | AC007740. chr2  | + | 1.64E+08 | 1.64E+08 | 2999 |
| ENSG000001 | 55.32548 | 28.03486 | 0.95566  | 0.018278 | 0.036388 | AC079922. chr2  | - | 1.13E+08 | 1.13E+08 | 2022 |
| ENSG000001 | 0        | 1.248751 | -1.5848  | 0.37202  | NA       | RP11-77M1 chr1  | + | 1.63E+08 | 1.63E+08 | 469  |
| ENSG000001 | 0.580602 | 4.074821 | -2.2274  | 0.10172  | 0.16371  | EEF1A1P30 chrX  | - | 1.19E+08 | 1.19E+08 | 1335 |
| ENSG000001 | 8.568525 | 7.106401 | 0.27032  | 0.69436  | 0.77197  | BANF1P3 chr2    | - | 2.32E+08 | 2.32E+08 | 261  |
| ENSG000001 | 0.342542 | 0        | 0.4146   | 0.81455  | NA       | RP11-127C chr10 | + | 1.06E+08 | 1.06E+08 | 369  |
| ENSG000001 | 0        | 3.6483   | -3.4125  | 0.020029 | 0.039519 | RP11-3B12 chr7  | + | 1.25E+08 | 1.25E+08 | 1453 |
| ENSG000001 | 263.3048 | 188.0403 | 0.48514  | 0.005599 | 0.01234  | FAM200B chr4    | + | 15683285 | 15707188 | 2962 |
| ENSG000001 | 1.991846 | 0.98329  | 0.8324   | 0.53781  | 0.63861  | RP11-512C chr12 | - | 67659622 | 67660746 | 1125 |
| ENSG000001 | 0        | 1.713273 | -2.2094  | 0.18675  | NA       | RP11-101E chr20 | + | 38633119 | 38637171 | 731  |
| ENSG000001 | 1.660469 | 0        | 1.9303   | 0.27163  | NA       | RP11-344N chr10 | + | 74831053 | 74833766 | 291  |
| ENSG000001 | 0.685084 | 0.357707 | 0.4822   | 0.78686  | NA       | AC092620. chr2  | + | 1.39E+08 | 1.39E+08 | 680  |
| ENSG000001 | 0        | 0.686276 | -0.84936 | 0.6309   | NA       | RP11-129B chr12 | + | 95519536 | 95520165 | 630  |
| ENSG000001 | 2.282147 | 3.526915 | -0.57818 | 0.57503  | 0.67192  | RP11-544A chr1  | - | 1.51E+08 | 1.51E+08 | 663  |
| ENSG000001 | 3.568372 | 0.715414 | 1.9663   | 0.14067  | 0.21463  | RP5-1041C chr20 | + | 48445662 | 48447622 | 1653 |
| ENSG000001 | 1.027626 | 0.594029 | 0.4306   | 0.80706  | NA       | RP11-203I chr9  | + | 65585692 | 65661972 | 2390 |
| ENSG000001 | 0.290301 | 0.343138 | -0.00202 | 0.99909  | NA       | RP11-472N chr10 | - | 31982012 | 31996316 | 347  |
| ENSG000001 | 2.67693  | 0        | 2.9076   | 0.061873 | 0.10715  | AC010894. chr2  | + | 1.75E+08 | 1.75E+08 | 457  |
| ENSG000001 | 0.290301 | 0        | 0.4146   | 0.81455  | NA       | AMDP1 chrX      | - | 1.55E+08 | 1.55E+08 | 992  |
| ENSG000001 | 1.733248 | 0        | 1.9774   | 0.25925  | NA       | LINC00211 chr2  | - | 38053390 | 38103417 | 1923 |
| ENSG000001 | 0        | 0.297015 | -0.41864 | 0.81278  | NA       | AC018470. chr2  | - | 1.75E+08 | 1.75E+08 | 960  |
| ENSG000001 | 1.048164 | 0.640152 | 0.47734  | 0.76747  | NA       | AC015849. chr17 | + | 34195971 | 34212867 | 662  |
| ENSG000001 | 1.233984 | 4.259314 | -1.5273  | 0.19528  | 0.28319  | RP11-400K chr8  | - | 54427731 | 54436491 | 2387 |
| ENSG000001 | 0        | 0.357707 | -0.41864 | 0.81278  | NA       | AC002066. chr7  | - | 1.16E+08 | 1.16E+08 | 699  |
| ENSG000001 | 2.229907 | 7.2966   | -1.57    | 0.080572 | 0.13439  | AC007000. chr7  | - | 76689662 | 76689796 | 135  |
| ENSG000001 | 0        | 0.654722 | -0.83442 | 0.63731  | NA       | RPS3AP29 chr7   | - | 97527659 | 97528427 | 769  |
| ENSG000001 | 3.899749 | 1.698704 | 1.0836   | 0.33315  | 0.43651  | AC002454. chr7  | + | 92465797 | 92546501 | 527  |
| ENSG000001 | 1.991846 | 2.338857 | -0.20534 | 0.85527  | 0.89817  | AC083873. chr7  | - | 1.33E+08 | 1.33E+08 | 1099 |
| ENSG000001 | 0.342542 | 2.307303 | -2.0599  | 0.17308  | 0.25581  | RP11-332C chr10 | - | 1.05E+08 | 1.05E+08 | 400  |
| ENSG000001 | 0        | 0.357707 | -0.41864 | 0.81278  | NA       | PA2G4P1 chrX    | - | 1.2E+08  | 1.2E+08  | 1197 |
| ENSG000001 | 0.580602 | 0        | 0.8036   | 0.6494   | NA       | RP11-432N chrX  | - | 1.35E+08 | 1.35E+08 | 1432 |
| ENSG000001 | 4.503495 | 0.937167 | 1.8854   | 0.13247  | 0.20492  | PHKA2-AS1 chrX  | + | 18908414 | 18912615 | 656  |
| ENSG000001 | 0.36308  | 0        | 0.4146   | 0.81455  | NA       | AC133680. chr3  | + | 24729410 | 25215796 | 584  |
| ENSG000001 | 1.628766 | 1.430828 | 0.17108  | 0.90799  | 0.93663  | FAM21FP chr10   | - | 46201879 | 46217887 | 1131 |
| ENSG000001 | 0        | 0.357707 | -0.41864 | 0.81278  | NA       | RP11-110J chr1  | - | 1.57E+08 | 1.57E+08 | 1531 |
| ENSG000001 | 0.342542 | 0        | 0.4146   | 0.81455  | NA       | RP5-940F7 chr1  | - | 2.36E+08 | 2.36E+08 | 740  |
| ENSG000001 | 143.2145 | 98.22104 | 0.53763  | 0.067203 | 0.11505  | RP11-216N chr9  | + | 42250840 | 42251545 | 706  |
| ENSG000001 | 0        | 0.357707 | -0.41864 | 0.81278  | NA       | RP11-739N chr1  | + | 2.04E+08 | 2.04E+08 | 234  |
| ENSG000001 | 0        | 0.297015 | -0.41864 | 0.81278  | NA       | RP1-67K17 chr6  | + | 1.43E+08 | 1.43E+08 | 444  |
| ENSG000001 | 0.290301 | 0        | 0.4146   | 0.81455  | NA       | RP4-630A1 chr1  | + | 65952089 | 65959871 | 423  |
| ENSG000001 | 0.632843 | 0.937167 | -0.40344 | 0.80349  | NA       | RP5-833A2 chr1  | - | 61714617 | 61719182 | 480  |
| ENSG000001 | 92.86845 | 27.53382 | 1.7448   | 1.56E-09 | 7.09E-09 | LINC00674 chr17 | + | 66098049 | 66111659 | 678  |
| ENSG000001 | 5.704962 | 26.68487 | -2.1411  | 0.000145 | 0.000405 | RP11-435C chr9  | - | 98177116 | 98189078 | 1404 |
| ENSG000001 | 0        | 10.9643  | -5.0533  | 6.06E-05 | 0.000177 | RP6-24A23 chrX  | + | 1.08E+08 | 1.08E+08 | 1142 |
| ENSG000001 | 0.632843 | 0.654722 | -0.02224 | 0.98935  | NA       | AC097533. chr4  | - | 1.23E+08 | 1.23E+08 | 479  |
| ENSG000001 | 4.253456 | 0        | 3.645    | 0.010889 | 0.022705 | AC073130. chr7  | - | 1.16E+08 | 1.16E+08 | 1958 |
| ENSG000001 | 4.678149 | 30.07657 | -2.6158  | 1.33E-05 | 4.19E-05 | POU5F1P4 chr1   | + | 1.55E+08 | 1.55E+08 | 1085 |
| ENSG000001 | 5.217676 | 5.554188 | -0.08684 | 0.91385  | 0.94124  | AC097500. chr2  | - | 1.87E+08 | 1.87E+08 | 1079 |
| ENSG000001 | 0.36308  | 0        | 0.4146   | 0.81455  | NA       | LINC00398 chr13 | + | 31377343 | 31384782 | 906  |
| ENSG000001 | 10.45508 | 5.07268  | 0.9819   | 0.20757  | 0.29733  | DGUOK-AS1 chr2  | - | 74174769 | 74208568 | 601  |
| ENSG000001 | 17.20983 | 77.17226 | -2.1168  | 0.000121 | 0.000342 | RP11-611C chr9  | + | 1.39E+08 | 1.39E+08 | 738  |
| ENSG000001 | 3.558999 | 0.594029 | 1.9203   | 0.2019   | 0.29054  | AC092839. chr2  | + | 54756480 | 54756938 | 459  |
| ENSG000001 | 7.395342 | 2.788811 | 1.3161   | 0.18575  | 0.27136  | KLF7-IT1 chr2   | - | 2.08E+08 | 2.08E+08 | 655  |
| ENSG000001 | 2.209369 | 0        | 2.6146   | 0.10444  | 0.16741  | AC005008. chr7  | + | 80804824 | 80828431 | 715  |
| ENSG000001 | 6.370321 | 6.315726 | 0.005737 | 0.99389  | 0.99669  | RP4-739H1 chr1  | - | 41134761 | 41153260 | 471  |
| ENSG000001 | 4.595998 | 0.686276 | 2.3332   | 0.068377 | 0.11673  | RP3-404F1 chrX  | + | 1.19E+08 | 1.19E+08 | 433  |
| ENSG000001 | 0.923144 | 2.915901 | -1.309   | 0.35271  | 0.45699  | RP11-408C chr9  | - | 1.16E+08 | 1.16E+08 | 566  |
| ENSG000001 | 0.653381 | 1.248751 | -0.69198 | 0.66297  | NA       | SRP68P3 chr17   | - | 20319105 | 20320010 | 344  |
| ENSG000001 | 8.507725 | 2.041842 | 1.9188   | 0.03746  | 0.069227 | RP11-537E chr2  | + | 1.1E+08  | 1.1E+08  | 311  |
| ENSG000001 | 0.72616  | 0        | 0.85004  | 0.63064  | NA       | PARP4P1 chrY    | - | 28740998 | 28780799 | 2337 |
| ENSG000001 | 0        | 1.98115  | -2.4527  | 0.13291  | 0.20539  | AC004543. chr7  | - | 19853308 | 19857713 | 369  |
| ENSG000001 | 0.290301 | 0        | 0.4146   | 0.81455  | NA       | RP11-478F chr1  | - | 2.36E+08 | 2.36E+08 | 656  |

|            |          |          |          |          |          |                  |   |          |          |      |
|------------|----------|----------|----------|----------|----------|------------------|---|----------|----------|------|
| ENSG000001 | 0        | 60.10211 | -7.4202  | 4.95E-11 | 2.51E-10 | XXbac-BPG chr6   | - | 30807303 | 30815936 | 799  |
| ENSG000001 | 0        | 0.357707 | -0.41864 | 0.81278  | NA       | RP13-346F chrX   | + | 50905696 | 50906509 | 814  |
| ENSG000001 | 0        | 0.357707 | -0.41864 | 0.81278  | NA       | RP3-393E1 chr6   | - | 1.6E+08  | 1.6E+08  | 2002 |
| ENSG000001 | 11.98278 | 0        | 5.2056   | 2.29E-05 | 7.05E-05 | RP4-668G5 chr1   | - | 61405911 | 61436448 | 1275 |
| ENSG000001 | 0.36308  | 0        | 0.4146   | 0.81455  | NA       | RP11-469E chrX   | + | 40936252 | 40937003 | 752  |
| ENSG000001 | 2.261609 | 4.510205 | -0.90716 | 0.36905  | 0.47364  | RP11-467C chr1   | + | 29550445 | 29551328 | 573  |
| ENSG000001 | 0        | 0.700845 | -0.87835 | 0.62047  | NA       | AP000770. chr11  | + | 1.17E+08 | 1.17E+08 | 583  |
| ENSG000001 | 10.39428 | 4.167067 | 1.2442   | 0.093464 | 0.15263  | RP11-288I chr1   | - | 16049214 | 16063391 | 645  |
| ENSG000001 | 24.67893 | 13.26436 | 0.87895  | 0.11089  | 0.17632  | AC093642. chr2   | + | 2.43E+08 | 2.43E+08 | 2170 |
| ENSG000001 | 0        | 0.343138 | -0.41864 | 0.81278  | NA       | KCNQ1DN chr11    | + | 2891263  | 2893335  | 1093 |
| ENSG000001 | 6.660623 | 238.7312 | -5.1141  | 2.03E-39 | 3.52E-38 | PRKCQ-AS1 chr10  | + | 6622381  | 6627641  | 1133 |
| ENSG000001 | 11.70364 | 148.173  | -3.6335  | 5.78E-22 | 5.31E-21 | LINC00649 chr21  | + | 35287838 | 35349992 | 9124 |
| ENSG000001 | 2.448243 | 2.367995 | 0.028144 | 0.9813   | 0.98968  | RP11-7011 chr1   | - | 44410042 | 44412223 | 494  |
| ENSG000001 | 0        | 0.891044 | -1.0625  | 0.54819  | NA       | RP11-231N chrX   | - | 64404898 | 64407145 | 1362 |
| ENSG000001 | 1.555988 | 4.022992 | -1.1758  | 0.30292  | 0.40419  | TUBG1P chr7      | + | 43958296 | 43959653 | 1358 |
| ENSG000001 | 217.4752 | 414.822  | -0.93105 | 9.51E-09 | 4.05E-08 | hsa-mir-67. chr1 | + | 566454   | 567996   | 1543 |
| ENSG000001 | 0        | 0.297015 | -0.41864 | 0.81278  | NA       | FLG-AS1 chr1     | + | 1.52E+08 | 1.52E+08 | 2995 |
| ENSG000001 | 1.576526 | 3.38284  | -0.94373 | 0.40422  | 0.50902  | RP11-126K chr1   | + | 1.51E+08 | 1.51E+08 | 618  |
| ENSG000001 | 2.551911 | 16.51849 | -2.5373  | 0.000934 | 0.002327 | RP3-430N8 chr22  | + | 31298206 | 31298768 | 563  |
| ENSG000001 | 0.36308  | 50.63994 | -6.3955  | 8.72E-10 | 4.05E-09 | RP11-385J chr3   | - | 1.78E+08 | 1.79E+08 | 964  |
| ENSG000001 | 0.36308  | 0        | 0.4146   | 0.81455  | NA       | AC007389. chr2   | - | 65728127 | 65729272 | 793  |
| ENSG000001 | 2.447429 | 0.951736 | 1.1153   | 0.41632  | 0.52145  | RP11-338C chr1   | - | 2.13E+08 | 2.13E+08 | 473  |
| ENSG000001 | 0.36308  | 0        | 0.4146   | 0.81455  | NA       | RP11-815I chr3   | - | 38311774 | 38312258 | 485  |
| ENSG000001 | 11.95189 | 16.58409 | -0.46586 | 0.48502  | 0.58903  | PTENP1 chr9      | - | 33673502 | 33677497 | 3996 |
| ENSG000001 | 0.632843 | 0.654722 | -0.02224 | 0.98935  | NA       | CELF2-AS2 chr10  | - | 11117094 | 11140436 | 853  |
| ENSG000001 | 0        | 1.029414 | -1.1526  | 0.51496  | NA       | OR211P chr6      | + | 29520996 | 29521943 | 948  |
| ENSG000001 | 13.01978 | 0        | 5.3269   | 1.21E-05 | 3.84E-05 | AP001046. chr21  | - | 44778027 | 44782229 | 2798 |
| ENSG000001 | 0        | 0.357707 | -0.41864 | 0.81278  | NA       | RP11-159N chr1   | - | 1.17E+08 | 1.17E+08 | 705  |
| ENSG000001 | 5.923298 | 3.137654 | 0.82331  | 0.37445  | 0.47869  | RP11-432J chr10  | - | 72625245 | 72626128 | 884  |
| ENSG000001 | 0.36308  | 0        | 0.4146   | 0.81455  | NA       | RP11-394C chr9   | + | 1.03E+08 | 1.03E+08 | 1116 |
| ENSG000001 | 0.290301 | 0.297015 | -0.00202 | 0.99909  | NA       | RP11-465N chr1   | + | 2.02E+08 | 2.02E+08 | 308  |
| ENSG000001 | 0.342542 | 0        | 0.4146   | 0.81455  | NA       | RP11-443B chr1   | - | 2.35E+08 | 2.35E+08 | 889  |
| ENSG000001 | 1.306762 | 0.357707 | 1.2513   | 0.45831  | NA       | AC132515. chr3   | + | 33596128 | 33596351 | 224  |
| ENSG000001 | 1.048164 | 1.029414 | 0.012988 | 0.99377  | 0.99669  | RP11-34P1 chr1   | - | 89295    | 133566   | 2748 |
| ENSG000001 | 0        | 0.343138 | -0.41864 | 0.81278  | NA       | RP11-123K chr9   | + | 1.29E+08 | 1.29E+08 | 394  |
| ENSG000001 | 0        | 0.357707 | -0.41864 | 0.81278  | NA       | AC114752. chr2   | - | 64557620 | 64559265 | 289  |
| ENSG000001 | 0        | 0.357707 | -0.41864 | 0.81278  | NA       | RP11-427P chr3   | + | 46839613 | 46839880 | 268  |
| ENSG000001 | 1.161205 | 0        | 1.2509   | 0.47995  | NA       | RP4-641G1 chr1   | + | 79131957 | 79132380 | 424  |
| ENSG000001 | 16.24561 | 9.369996 | 0.77849  | 0.15662  | 0.23559  | AC093110. chr2   | - | 54888148 | 54889929 | 602  |
| ENSG000001 | 0        | 0.297015 | -0.41864 | 0.81278  | NA       | HTR3E-AS1 chr3   | - | 1.84E+08 | 1.84E+08 | 515  |
| ENSG000001 | 1.939605 | 0.937167 | 0.83589  | 0.54216  | 0.64269  | ARMC4P1 chr10    | + | 27547691 | 27577753 | 707  |
| ENSG000001 | 0        | 1.073121 | -1.1788  | 0.50551  | NA       | DDX39BP2 chr6    | + | 29960986 | 29961382 | 258  |
| ENSG000001 | 0        | 0.654722 | -0.83442 | 0.63731  | NA       | ZDHHC4P1 chr13   | + | 43507994 | 43509028 | 1035 |
| ENSG000001 | 0        | 0.297015 | -0.41864 | 0.81278  | NA       | AC002480. chr7   | - | 22689579 | 22705152 | 2592 |
| ENSG000001 | 0        | 3.855484 | -3.424   | 0.022534 | 0.043969 | RP5-1185K chr20  | + | 21928285 | 21951421 | 569  |
| ENSG000001 | 87.96764 | 71.8742  | 0.2857   | 0.35082  | 0.45522  | AC138035. chr5   | + | 1.81E+08 | 1.81E+08 | 2661 |
| ENSG000001 | 0.36308  | 4.150082 | -2.8238  | 0.047647 | 0.085326 | ATP6V0E1F chr2   | + | 33827108 | 33827353 | 246  |
| ENSG000001 | 0.705622 | 0        | 0.8807   | 0.6196   | NA       | AF011889. chrX   | - | 1.49E+08 | 1.49E+08 | 655  |
| ENSG000001 | 0.870904 | 0.297015 | 0.71032  | 0.69005  | NA       | RP11-59K5 chr11  | + | 56457941 | 56458199 | 259  |
| ENSG000001 | 1.576526 | 1.058552 | 0.50409  | 0.72225  | 0.79444  | RP11-815N chr1   | - | 2.22E+08 | 2.22E+08 | 720  |
| ENSG000001 | 0.72616  | 0        | 0.85004  | 0.63064  | NA       | RP11-699L chr3   | + | 1.94E+08 | 1.94E+08 | 566  |
| ENSG000001 | 3.568372 | 7.15823  | -0.94129 | 0.26768  | 0.36641  | AC009133. chr16  | - | 29819966 | 29823306 | 2440 |
| ENSG000001 | 0        | 0.700845 | -0.87835 | 0.62047  | NA       | AP005019. chr11  | + | 72231030 | 72232777 | 822  |
| ENSG000001 | 0.290301 | 0        | 0.4146   | 0.81455  | NA       | LLOXNC01- chrX   | - | 1.03E+08 | 1.03E+08 | 268  |
| ENSG000001 | 0        | 0.343138 | -0.41864 | 0.81278  | NA       | RP1-128O3 chr6   | + | 1.09E+08 | 1.09E+08 | 326  |
| ENSG000001 | 0.290301 | 0        | 0.4146   | 0.81455  | NA       | ZEB2-AS1 chr2    | + | 1.45E+08 | 1.45E+08 | 1908 |
| ENSG000001 | 15.01    | 7.907614 | 0.90461  | 0.14266  | 0.21735  | RP11-432J chr9   | + | 1.39E+08 | 1.39E+08 | 311  |
| ENSG000001 | 3.060548 | 1.280305 | 1.056    | 0.3884   | 0.49258  | RP4-635A2 chr1   | + | 1.85E+08 | 1.85E+08 | 973  |
| ENSG000001 | 0        | 9.54321  | -4.876   | 0.000116 | 0.000328 | AC105344. chr2   | - | 2.32E+08 | 2.32E+08 | 3508 |
| ENSG000001 | 0        | 0.343138 | -0.41864 | 0.81278  | NA       | RP11-329N chr1   | + | 38940868 | 38942156 | 790  |
| ENSG000001 | 0.632843 | 0        | 0.81931  | 0.64303  | NA       | ZNF630-AS chrX   | + | 47915699 | 47925971 | 396  |
| ENSG000001 | 1.89853  | 3.010564 | -0.55303 | 0.65515  | 0.74002  | RP11-305N chr7   | - | 1.29E+08 | 1.29E+08 | 258  |
| ENSG000001 | 0.580602 | 0        | 0.8036   | 0.6494   | NA       | RP11-198N chr3   | + | 1.9E+08  | 1.9E+08  | 888  |
| ENSG000001 | 1.286224 | 1.029414 | 0.25867  | 0.8668   | 0.90724  | RP11-295N chr1   | + | 2.21E+08 | 2.21E+08 | 962  |
| ENSG000001 | 3.246368 | 3.38284  | -0.03958 | 0.96917  | 0.98264  | AC009948. chr2   | + | 1.79E+08 | 1.79E+08 | 713  |

|            |          |          |          |          |          |           |       |   |          |          |      |
|------------|----------|----------|----------|----------|----------|-----------|-------|---|----------|----------|------|
| ENSG000001 | 83.77833 | 71.80788 | 0.22263  | 0.33978  | 0.44368  | LRRC37A2  | chr17 | + | 44588877 | 44633016 | 5669 |
| ENSG000001 | 0.290301 | 1.012429 | -0.95336 | 0.58114  | NA       | RP3-469D2 | chr1  | + | 25725203 | 25725771 | 569  |
| ENSG000001 | 0.342542 | 0        | 0.4146   | 0.81455  | NA       | RP11-435F | chr1  | - | 2.41E+08 | 2.41E+08 | 344  |
| ENSG000001 | 4.822893 | 2.621302 | 0.8076   | 0.41666  | 0.5218   | PPP1R26P1 | chr13 | - | 48890999 | 48894611 | 3613 |
| ENSG000001 | 0.923144 | 8.231351 | -2.7595  | 0.011727 | 0.024277 | AC006195  | chr7  | + | 33419576 | 33420498 | 923  |
| ENSG000001 | 0.36308  | 0        | 0.4146   | 0.81455  | NA       | AC016745  | chr2  | - | 1.14E+08 | 1.14E+08 | 438  |
| ENSG000001 | 11.18384 | 0        | 5.1022   | 4.02E-05 | 0.00012  | RP11-513C | chr3  | + | 1.94E+08 | 1.94E+08 | 1195 |
| ENSG000001 | 4.854596 | 13.09685 | -1.3567  | 0.075222 | 0.1268   | ABCA17P   | chr16 | + | 2389151  | 2476700  | 4188 |
| ENSG000001 | 0        | 0.594029 | -0.81444 | 0.64499  | NA       | RP11-12A2 | chr6  | - | 1.4E+08  | 1.4E+08  | 490  |
| ENSG000001 | 4.169512 | 6.29874  | -0.54688 | 0.50881  | 0.61225  | RPL9P7    | chrX  | - | 23854761 | 23855459 | 640  |
| ENSG000001 | 6.099745 | 198.9166 | -4.9329  | 9.33E-34 | 1.37E-32 | GOLGA2B   | chr12 | - | 1.01E+08 | 1.01E+08 | 5266 |
| ENSG000001 | 0.342542 | 0        | 0.4146   | 0.81455  | NA       | RP11-495P | chr1  | + | 1.48E+08 | 1.48E+08 | 1918 |
| ENSG000001 | 4.689314 | 3.899191 | 0.23248  | 0.79307  | 0.85287  | AC004893  | chr7  | - | 98596161 | 98597553 | 1393 |
| ENSG000001 | 0.36308  | 0.594029 | -0.39069 | 0.82661  | NA       | AC066692  | chr2  | + | 24123563 | 24124019 | 457  |
| ENSG000001 | 74.36123 | 2.713549 | 4.6701   | 1.11E-15 | 7.56E-15 | RP11-262F | chr9  | + | 66457285 | 66469310 | 2877 |
| ENSG000001 | 13.36151 | 0.951736 | 3.4621   | 0.000292 | 0.000782 | AP004372  | chr11 | - | 1.32E+08 | 1.32E+08 | 509  |
| ENSG000001 | 1.887365 | 0.297015 | 1.7078   | 0.2989   | 0.40066  | CTA-941F9 | chr22 | - | 46000312 | 46001501 | 548  |
| ENSG000001 | 1.660469 | 0.951736 | 0.59518  | 0.69567  | 0.77303  | LINC00426 | chr13 | - | 30914407 | 30951282 | 1589 |
| ENSG000001 | 26.205   | 31.63287 | -0.26227 | 0.55795  | 0.65686  | MID1P1-A  | chrX  | - | 38660821 | 38663136 | 376  |
| ENSG000001 | 0        | 0.357707 | -0.41864 | 0.81278  | NA       | SLC9A3P2  | chr22 | + | 21007017 | 21009037 | 2021 |
| ENSG000001 | 0.923144 | 1.372552 | -0.37317 | 0.82081  | 0.87406  | CASC4P1   | chr13 | - | 20137729 | 20139040 | 1312 |
| ENSG000001 | 4.544571 | 3.259039 | 0.41097  | 0.69334  | 0.77146  | MLK7-AS1  | chr2  | - | 1.74E+08 | 1.74E+08 | 2538 |
| ENSG000001 | 0        | 1.669566 | -1.94    | 0.2691   | NA       | ARPC3P2   | chr1  | + | 2.12E+08 | 2.12E+08 | 533  |
| ENSG000001 | 0.72616  | 0.700845 | 0.022935 | 0.98937  | NA       | RP11-253A | chr1  | + | 51927393 | 51929088 | 678  |
| ENSG000001 | 0.705622 | 1.98115  | -1.2292  | 0.3862   | 0.49045  | BRWD1-AS  | chr21 | + | 40687633 | 40695144 | 691  |
| ENSG000001 | 6.68972  | 23.62335 | -1.746   | 0.005306 | 0.01176  | RP11-108A | chr1  | - | 17215033 | 17216144 | 406  |
| ENSG000001 | 0.342542 | 0.654722 | -0.52406 | 0.76557  | NA       | AC104978  | chr11 | - | 28308782 | 28309172 | 391  |
| ENSG000001 | 0        | 0.343138 | -0.41864 | 0.81278  | NA       | AC008753  | chr19 | + | 54278853 | 54279136 | 284  |
| ENSG000001 | 2.604151 | 4.380699 | -0.67349 | 0.49701  | 0.6007   | MLLT10P1  | chr20 | - | 29637799 | 29638060 | 262  |
| ENSG000001 | 0        | 0.357707 | -0.41864 | 0.81278  | NA       | AC116366  | chr5  | - | 1.32E+08 | 1.32E+08 | 767  |
| ENSG000001 | 0        | 0.891044 | -1.0625  | 0.54819  | NA       | OR7E117P  | chr11 | - | 3620825  | 3621936  | 1112 |
| ENSG000001 | 0        | 0.343138 | -0.41864 | 0.81278  | NA       | RP3-395M  | chr1  | - | 2481359  | 2488470  | 3608 |
| ENSG000001 | 0.36308  | 0        | 0.4146   | 0.81455  | NA       | RP11-160C | chr15 | + | 79044449 | 79045715 | 392  |
| ENSG000001 | 0.290301 | 4.144377 | -2.8403  | 0.047579 | 0.085219 | RP11-686C | chr12 | + | 1.12E+08 | 1.12E+08 | 429  |
| ENSG000001 | 0.705622 | 0        | 0.8807   | 0.6196   | NA       | AC068196  | chr2  | - | 1.82E+08 | 1.82E+08 | 833  |
| ENSG000001 | 0        | 0.594029 | -0.81444 | 0.64499  | NA       | RPS2P35   | chr9  | - | 1.03E+08 | 1.03E+08 | 897  |
| ENSG000001 | 1.451506 | 0.715414 | 0.64988  | 0.70853  | 0.78334  | RPL39P6   | chr1  | + | 11293020 | 11293169 | 150  |
| ENSG000001 | 8.631931 | 36.79209 | -2.0533  | 5.29E-05 | 0.000156 | RP11-431J | chrX  | - | 16171064 | 16188992 | 1037 |
| ENSG000001 | 0.290301 | 0.343138 | -0.00202 | 0.99909  | NA       | RP11-169C | chr13 | + | 24993688 | 24995180 | 1070 |
| ENSG000001 | 0.342542 | 0        | 0.4146   | 0.81455  | NA       | AC017079  | chr2  | + | 1.29E+08 | 1.29E+08 | 485  |
| ENSG000001 | 6.079207 | 10.28131 | -0.71665 | 0.35308  | 0.45743  | AC129929  | chr11 | - | 2349979  | 2399222  | 1460 |
| ENSG000001 | 6.837069 | 6.520493 | 0.064077 | 0.93268  | 0.95581  | RP11-656C | chr1  | - | 40981426 | 40982846 | 546  |
| ENSG000001 | 3.600075 | 0.297015 | 2.7007   | 0.056495 | 0.099014 | RP5-875H3 | chrX  | + | 1.3E+08  | 1.3E+08  | 603  |
| ENSG000001 | 0.290301 | 0        | 0.4146   | 0.81455  | NA       | ENOX1-AS2 | chr13 | + | 44032601 | 44033259 | 248  |
| ENSG000001 | 0.685084 | 0        | 0.85004  | 0.63064  | NA       | RP4-719C8 | chr20 | - | 58201519 | 58203344 | 668  |
| ENSG000001 | 0.342542 | 0        | 0.4146   | 0.81455  | NA       | CTA-503F6 | chr22 | + | 27600173 | 27601088 | 308  |
| ENSG000001 | 9.773411 | 12.01802 | -0.29583 | 0.63022  | 0.71982  | PAXBP1-AS | chr21 | + | 34100426 | 34115433 | 3523 |
| ENSG000001 | 7.210336 | 5.395544 | 0.38583  | 0.6565   | 0.7412   | RP11-31F1 | chr1  | - | 1.14E+08 | 1.14E+08 | 2459 |
| ENSG000001 | 0.342542 | 2.012704 | -1.7068  | 0.30191  | 0.40315  | UBE2V2P3  | chr1  | - | 11338673 | 11339408 | 437  |
| ENSG000001 | 0        | 0.297015 | -0.41864 | 0.81278  | NA       | AC114752  | chr2  | - | 64565201 | 64568781 | 404  |
| ENSG000001 | 0        | 0.343138 | -0.41864 | 0.81278  | NA       | MPC1L     | chrX  | + | 40482836 | 40483112 | 277  |
| ENSG000001 | 127.2694 | 160.2843 | -0.33163 | 0.27338  | 0.37307  | RP11-472B | chr4  | + | 39549456 | 39551432 | 608  |
| ENSG000001 | 0        | 4.083685 | -3.5361  | 0.015969 | 0.032166 | AC009312  | chr2  | - | 1.19E+08 | 1.19E+08 | 592  |
| ENSG000001 | 0        | 0.640152 | -0.82869 | 0.63935  | NA       | RP11-112A | chr9  | - | 1.08E+08 | 1.08E+08 | 3759 |
| ENSG000001 | 0.870904 | 0        | 1.046    | 0.5544   | NA       | RP13-210C | chrX  | + | 1.34E+08 | 1.34E+08 | 560  |
| ENSG000001 | 1.317927 | 0        | 1.6383   | 0.35541  | NA       | AC005863  | chr17 | + | 14737955 | 14803871 | 953  |
| ENSG000001 | 0.705622 | 2.901332 | -1.7225  | 0.20301  | 0.29186  | TARDBPP2  | chr13 | + | 60848910 | 60850140 | 1231 |
| ENSG000001 | 1.45232  | 1.416259 | 0.02036  | 0.98998  | 0.9947   | RP11-69L1 | chr6  | + | 7276264  | 7299105  | 500  |
| ENSG000001 | 0        | 2.185918 | -2.5615  | 0.11691  | 0.18465  | MKRN4P    | chrX  | + | 40693738 | 40695258 | 1521 |
| ENSG000001 | 0.342542 | 0        | 0.4146   | 0.81455  | NA       | RP11-522A | chr1  | - | 2.46E+08 | 2.46E+08 | 271  |
| ENSG000001 | 0.342542 | 0        | 0.4146   | 0.81455  | NA       | CRIP1P2   | chr3  | + | 25728387 | 25728614 | 228  |
| ENSG000001 | 1360.348 | 1536.561 | -0.17565 | 0.1167   | 0.18444  | C9orf69   | chr9  | - | 1.39E+08 | 1.39E+08 | 2844 |
| ENSG000001 | 2.987769 | 3.708992 | -0.28251 | 0.76961  | 0.83366  | AC004967  | chr7  | - | 97576299 | 97577310 | 1012 |
| ENSG000001 | 0        | 2.589748 | -2.8794  | 0.06476  | 0.11148  | LINC00391 | chr13 | - | 95351948 | 95355116 | 1844 |
| ENSG000001 | 1.681007 | 1.430828 | 0.19607  | 0.89581  | 0.9277   | RP11-460L | chr1  | - | 28316669 | 28317035 | 367  |

|            |          |          |          |          |          |            |       |   |          |          |      |
|------------|----------|----------|----------|----------|----------|------------|-------|---|----------|----------|------|
| ENSG000001 | 0        | 0.297015 | -0.41864 | 0.81278  | NA       | CCR12P     | chr13 | - | 1E+08    | 1E+08    | 998  |
| ENSG000001 | 1.359003 | 0        | 1.8987   | 0.26617  | NA       | RP11-575B  | chr1  | + | 60580547 | 60615351 | 683  |
| ENSG000001 | 2.282147 | 4.286036 | -0.79938 | 0.48545  | 0.58947  | OR2W3      | chr1  | + | 2.48E+08 | 2.48E+08 | 1818 |
| ENSG000001 | 0        | 0.357707 | -0.41864 | 0.81278  | NA       | GABARAPL1  | chr15 | - | 90890819 | 90892669 | 1851 |
| ENSG000001 | 1.317927 | 0.686276 | 0.64816  | 0.69683  | 0.77397  | MYO5BP2    | chr9  | + | 66513032 | 66514308 | 1277 |
| ENSG000001 | 0.342542 | 1.073121 | -0.87093 | 0.62353  | NA       | RP11-575A  | chr10 | - | 20359734 | 20380713 | 499  |
| ENSG000001 | 24.87591 | 6.169234 | 1.9791   | 0.001108 | 0.002729 | ST6GAL2-IT | chr2  | - | 1.07E+08 | 1.07E+08 | 388  |
| ENSG000001 | 2.085163 | 5.202929 | -1.1866  | 0.28758  | 0.38929  | RP11-172F  | chr9  | + | 99169566 | 99170079 | 514  |
| ENSG000001 | 3.910914 | 0        | 3.5199   | 0.015173 | 0.030711 | RP11-342C  | chr10 | + | 33500205 | 33502732 | 781  |
| ENSG000001 | 0.342542 | 0.715414 | -0.51272 | 0.77372  | NA       | AC067940   | chr2  | - | 1.69E+08 | 1.69E+08 | 300  |
| ENSG000001 | 8.102756 | 5.805079 | 0.45109  | 0.56813  | 0.66559  | RP11-46F1  | chr1  | - | 3539754  | 3541307  | 622  |
| ENSG000001 | 0.290301 | 1.606458 | -1.5134  | 0.36351  | NA       | RP11-435B  | chr1  | + | 1.43E+08 | 1.43E+08 | 2495 |
| ENSG000001 | 0.342542 | 0        | 0.4146   | 0.81455  | NA       | NTM-IT     | chr11 | + | 1.32E+08 | 1.32E+08 | 373  |
| ENSG000001 | 0        | 15.34983 | -5.427   | 2.37E-05 | 7.29E-05 | LINC00707  | chr10 | + | 6821560  | 6884868  | 3070 |
| ENSG000001 | 0        | 0.343138 | -0.41864 | 0.81278  | NA       | RP11-241K  | chr3  | - | 39379620 | 39380370 | 476  |
| ENSG000001 | 0        | 0.297015 | -0.41864 | 0.81278  | NA       | PAGE2B     | chrX  | + | 55101496 | 55105342 | 493  |
| ENSG000001 | 30.11575 | 0.357707 | 5.6793   | 1.57E-07 | 6.04E-07 | IFNWP19    | chr9  | + | 21455483 | 21456048 | 566  |
| ENSG000001 | 4.399013 | 1.280305 | 1.5438   | 0.17543  | 0.25866  | AC012360   | chr2  | + | 1.06E+08 | 1.06E+08 | 2008 |
| ENSG000001 | 17.81016 | 17.67661 | 0.02093  | 0.96648  | 0.98085  | LINC00340  | chr6  | + | 22056775 | 22111157 | 327  |
| ENSG000001 | 104.4883 | 76.50029 | 0.44495  | 0.0998   | 0.16118  | ALG1L6P    | chr3  | + | 75464221 | 75471294 | 758  |
| ENSG000001 | 4.148974 | 0.297015 | 2.9072   | 0.035971 | 0.066794 | BX470102   | chr1  | + | 1.54E+08 | 1.54E+08 | 531  |
| ENSG000001 | 0.923144 | 0        | 1.223    | 0.49292  | NA       | RP11-436C  | chr10 | - | 64553322 | 64565647 | 688  |
| ENSG000001 | 0.705622 | 0        | 0.8807   | 0.6196   | NA       | MRPL50P2   | chr2  | - | 2.04E+08 | 2.04E+08 | 482  |
| ENSG000001 | 7.003165 | 0.640152 | 2.9905   | 0.009092 | 0.019249 | SLC35E1P1  | chr13 | + | 21181407 | 21182270 | 864  |
| ENSG000001 | 3.111975 | 5.162511 | -0.6374  | 0.56557  | 0.66347  | RP11-656C  | chr1  | - | 40958829 | 40974333 | 605  |
| ENSG000001 | 0        | 0.640152 | -0.82869 | 0.63935  | NA       | RP11-100C  | chr9  | + | 94872450 | 94872796 | 347  |
| ENSG000001 | 4.709039 | 2.679579 | 0.74509  | 0.49795  | 0.60168  | RP11-431K  | chr1  | + | 8086798  | 8182762  | 2044 |
| ENSG000001 | 0.342542 | 0        | 0.4146   | 0.81455  | NA       | RP11-94M   | chr10 | + | 92222474 | 92227709 | 831  |
| ENSG000001 | 0.342542 | 0        | 0.4146   | 0.81455  | NA       | RP5-1121E  | chr7  | - | 89748613 | 89752204 | 578  |
| ENSG000001 | 0        | 0.594029 | -0.81444 | 0.64499  | NA       | RP11-292E  | chr3  | - | 1.53E+08 | 1.53E+08 | 1958 |
| ENSG000001 | 0.290301 | 0        | 0.4146   | 0.81455  | NA       | AC002992   | chrY  | + | 14465804 | 14468226 | 499  |
| ENSG000001 | 1.08924  | 1.98115  | -0.71133 | 0.62781  | 0.71765  | GAPDHP39   | chr3  | + | 1.38E+08 | 1.38E+08 | 979  |
| ENSG000001 | 0        | 0.686276 | -0.84936 | 0.6309   | NA       | RPS26P55   | chr19 | - | 35024332 | 35024989 | 356  |
| ENSG000001 | 0        | 1.043983 | -1.3473  | 0.44976  | NA       | RPL6P7     | chr3  | + | 1.55E+08 | 1.55E+08 | 833  |
| ENSG000001 | 17.68774 | 52.8374  | -1.5522  | 0.001179 | 0.002894 | RP11-85F1  | chr3  | - | 1.37E+08 | 1.37E+08 | 1194 |
| ENSG000001 | 0        | 1.874334 | -2.1429  | 0.21634  | NA       | RPL27P12   | chr12 | - | 1.24E+08 | 1.24E+08 | 394  |
| ENSG000001 | 42.57996 | 72.9991  | -0.75693 | 0.039642 | 0.072813 | RPS20P22   | chr8  | - | 38291865 | 38293182 | 1318 |
| ENSG000001 | 1.048164 | 1.66715  | -0.53374 | 0.72116  | 0.79367  | RP11-379K  | chr3  | - | 1.7E+08  | 1.7E+08  | 6251 |
| ENSG000001 | 23.28129 | 20.97458 | 0.13043  | 0.81786  | 0.87212  | AC008280   | chr2  | + | 54197975 | 54307601 | 1330 |
| ENSG000001 | 1.265686 | 1.591889 | -0.26775 | 0.8454   | 0.89157  | RP11-464C  | chr17 | - | 60593682 | 60594128 | 447  |
| ENSG000001 | 3.859487 | 2.117104 | 0.75528  | 0.53775  | 0.63861  | RP11-365F  | chr7  | - | 1.39E+08 | 1.39E+08 | 1751 |
| ENSG000001 | 0        | 0.594029 | -0.81444 | 0.64499  | NA       | RBM43P1    | chr3  | - | 69520603 | 69521683 | 1081 |
| ENSG000001 | 211.6242 | 122.1635 | 0.78129  | 0.02355  | 0.04576  | TXNDC5     | chr6  | - | 7881750  | 7911047  | 2964 |
| ENSG000001 | 1.08924  | 1.294874 | -0.22395 | 0.8844   | 0.91933  | CLRN1-AS1  | chr3  | + | 1.51E+08 | 1.51E+08 | 2223 |
| ENSG000001 | 0        | 0.640152 | -0.82869 | 0.63935  | NA       | RP11-384F  | chr3  | - | 1.17E+08 | 1.18E+08 | 554  |
| ENSG000001 | 6.338619 | 4.600036 | 0.42932  | 0.58725  | 0.68291  | RPL21P10   | chr14 | - | 78149545 | 78150332 | 490  |
| ENSG000001 | 0        | 0.297015 | -0.41864 | 0.81278  | NA       | RP4-675G8  | chr1  | - | 44603514 | 44604485 | 320  |
| ENSG000001 | 4.491516 | 3.290593 | 0.4267   | 0.63779  | 0.72588  | RP11-271C  | chr3  | - | 1.13E+08 | 1.13E+08 | 432  |
| ENSG000001 | 1.431782 | 1.545765 | -0.12526 | 0.93339  | 0.95629  | GATSL3     | chr22 | - | 30681106 | 30685616 | 1623 |
| ENSG000001 | 3.994857 | 1.485073 | 1.1533   | 0.37991  | 0.4839   | RP5-867C2  | chr17 | - | 45236557 | 45237359 | 803  |
| ENSG000001 | 6.007242 | 4.098254 | 0.52876  | 0.53686  | 0.63775  | RP11-400L  | chr2  | + | 9645574  | 9652541  | 491  |
| ENSG000001 | 169.4406 | 104.8653 | 0.6865   | 0.010225 | 0.021453 | RNF103     | chr2  | - | 86830516 | 86850989 | 4560 |
| ENSG000001 | 899.5838 | 1456.419 | -0.69227 | 0.001119 | 0.002757 | RBM14      | chr11 | + | 66384053 | 66406124 | 2828 |
| ENSG000001 | 0.36308  | 0.700845 | -0.575   | 0.7429   | NA       | RP11-449F  | chr5  | + | 1.46E+08 | 1.46E+08 | 238  |
| ENSG000001 | 0.290301 | 1.188058 | -1.0232  | 0.56351  | NA       | AC007040   | chr2  | - | 71168947 | 71175740 | 1129 |
| ENSG000001 | 4.648238 | 0.700845 | 2.3721   | 0.054999 | 0.09662  | AC016722   | chr2  | + | 47043836 | 47086146 | 2157 |
| ENSG000001 | 6.960297 | 7.579045 | -0.12312 | 0.86215  | 0.90365  | RP11-745C  | chr12 | + | 66524531 | 66528229 | 623  |
| ENSG000001 | 0        | 0.297015 | -0.41864 | 0.81278  | NA       | RP11-771F  | chr8  | + | 1.05E+08 | 1.05E+08 | 749  |
| ENSG000001 | 7.01433  | 2.056411 | 1.6422   | 0.093175 | 0.15228  | NPM1P29    | chr3  | - | 1.5E+08  | 1.5E+08  | 803  |
| ENSG000001 | 6.733401 | 1.294874 | 2.1419   | 0.033838 | 0.063208 | RP11-492E  | chr9  | + | 1.32E+08 | 1.32E+08 | 382  |
| ENSG000001 | 0        | 0.654722 | -0.83442 | 0.63731  | NA       | RPS26P49   | chr14 | - | 1.05E+08 | 1.05E+08 | 334  |
| ENSG000001 | 0        | 0.343138 | -0.41864 | 0.81278  | NA       | TPTE2P2    | chr13 | - | 52793663 | 52871963 | 1466 |
| ENSG000001 | 0        | 0.357707 | -0.41864 | 0.81278  | NA       | RP11-407P  | chr12 | - | 1.17E+08 | 1.17E+08 | 480  |
| ENSG000001 | 8.76551  | 25.10426 | -1.4706  | 0.006653 | 0.014457 | RP4-584D1  | chr7  | - | 1.5E+08  | 1.5E+08  | 420  |
| ENSG000001 | 17.03257 | 18.41955 | -0.1113  | 0.81438  | 0.86966  | ALKBH6     | chr19 | - | 36500022 | 36505141 | 3326 |

|                    |           |          |          |          |            |       |   |          |          |      |
|--------------------|-----------|----------|----------|----------|------------|-------|---|----------|----------|------|
| ENSG0000011140218  | 9.667011  | 0.22706  | 0.70694  | 0.78214  | ASB14      | chr3  | - | 57302375 | 57326710 | 3179 |
| ENSG0000013785894  | 15.86626  | -1.9092  | 0.032459 | 0.060884 | PCDHA13    | chr5  | + | 1.4E+08  | 1.4E+08  | 5260 |
| ENSG0000010        | 1.416259  | -1.7181  | 0.33141  | NA       | RP11-537F  | chr9  | - | 34133155 | 34134694 | 1540 |
| ENSG0000010        | 1.531196  | -1.8455  | 0.29475  | NA       | CTD-2301A  | chr5  | + | 1.77E+08 | 1.77E+08 | 354  |
| ENSG0000010        | 0.297015  | -0.41864 | 0.81278  | NA       | CYP4F43P   | chr2  | - | 1.31E+08 | 1.31E+08 | 2248 |
| ENSG00000118.97397 | 10.05869  | 0.89793  | 0.12713  | 0.19807  | LLOXNC01-  | chrX  | + | 1.02E+08 | 1.02E+08 | 1133 |
| ENSG00000122.53117 | 20.56579  | 0.13518  | 0.74773  | 0.8153   | AP001469.  | chr21 | - | 47671463 | 47674047 | 2014 |
| ENSG0000010        | 0.343138  | -0.41864 | 0.81278  | NA       | RP11-260C  | chr3  | + | 82035289 | 82512826 | 1951 |
| ENSG0000012.883288 | 4.692283  | -0.62917 | 0.50928  | 0.61265  | ST3GAL6-A' | chr3  | - | 98433174 | 98451495 | 769  |
| ENSG0000010.685084 | 1.340997  | -0.72382 | 0.64437  | 0.73126  | CTD-2021J  | chr3  | + | 98621268 | 98737406 | 395  |
| ENSG0000010.16461  | 0.715414  | 0.34797  | 0.83671  | NA       | RP11-330L  | chr15 | - | 64923308 | 64924113 | 485  |
| ENSG0000010.48164  | 29.51584  | -4.5206  | 5.64E-07 | 2.06E-06 | AC007405.  | chr2  | + | 1.72E+08 | 1.72E+08 | 660  |
| ENSG0000012.334388 | 1.652581  | 0.43157  | 0.71241  | 0.78652  | RP11-16F1  | chr11 | + | 9681946  | 9682503  | 558  |
| ENSG0000013.725094 | 0.686276  | 2.0116   | 0.13799  | 0.21141  | KLHL41     | chr2  | + | 1.7E+08  | 1.7E+08  | 2464 |
| ENSG0000016.556141 | 4.692283  | 0.46814  | 0.54441  | 0.64477  | RP11-514P  | chr7  | - | 1.02E+08 | 1.02E+08 | 541  |
| ENSG0000014.627701 | 6.802939  | -0.53197 | 0.52585  | 0.62769  | RP11-90K6  | chr3  | + | 1.12E+08 | 1.12E+08 | 1097 |
| ENSG0000012.229907 | 5.332435  | -1.1363  | 0.23578  | 0.32974  | RPS15AP16  | chr3  | - | 1.29E+08 | 1.29E+08 | 361  |
| ENSG00000116.9606  | 9.961609  | 0.7464   | 0.18664  | 0.27248  | RP11-163E  | chr7  | - | 1.02E+08 | 1.02E+08 | 338  |
| ENSG0000010        | 0.297015  | -0.41864 | 0.81278  | NA       | RP11-101P  | chr13 | + | 21834168 | 21867568 | 621  |
| ENSG0000014.677336 | 5.36399   | -0.15779 | 0.86088  | 0.90262  | MARK2P8    | chr3  | - | 1.28E+08 | 1.28E+08 | 952  |
| ENSG0000010.975385 | 1.188058  | -0.21443 | 0.89677  | 0.92846  | PLCH1-AS1  | chr3  | + | 1.55E+08 | 1.55E+08 | 1308 |
| ENSG0000010        | 2.073397  | -2.2159  | 0.20168  | 0.2903   | RP11-2A4.  | chr3  | + | 1.37E+08 | 1.37E+08 | 1288 |
| ENSG0000010.36308  | 1.058552  | -0.99522 | 0.56254  | NA       | CADM2-AS   | chr3  | - | 86041333 | 86077157 | 2656 |
| ENSG00000183.3066  | 46.26662  | 0.8351   | 0.004104 | 0.009257 | GATS       | chr7  | - | 99798276 | 99869837 | 3522 |
| ENSG0000012.67693  | 8.066258  | -1.5094  | 0.080837 | 0.13472  | MYLK-AS1   | chr3  | + | 1.23E+08 | 1.23E+08 | 760  |
| ENSG0000012.354926 | 1.638012  | 0.44441  | 0.70429  | 0.7802   | RPL32P34   | chr19 | + | 5277745  | 5278144  | 400  |
| ENSG0000010.290301 | 6.535062  | -3.562   | 0.005753 | 0.012652 | CTB-118N6  | chr5  | + | 1.16E+08 | 1.16E+08 | 369  |
| ENSG0000010.870904 | 0         | 1.046    | 0.5544   | NA       | RP11-109N  | chr14 | - | 73430353 | 73430716 | 364  |
| ENSG00000172.83759 | 0.98329   | 5.8502   | 9.22E-14 | 5.57E-13 | HOXB-AS2   | chr17 | + | 46634624 | 46637695 | 845  |
| ENSG00000110.30177 | 6.045433  | 0.73895  | 0.31861  | 0.42148  | AC004951.  | chr7  | - | 44024597 | 44029806 | 786  |
| ENSG0000013.786708 | 0.297015  | 2.7378   | 0.054692 | 0.096121 | RP11-168J  | chr3  | + | 52407668 | 52408898 | 1231 |
| ENSG0000010.36308  | 0         | 0.4146   | 0.81455  | NA       | RPL37P2    | chr11 | - | 67450243 | 67450529 | 287  |
| ENSG00000115.93477 | 42.91695  | -1.4172  | 0.000681 | 0.001732 | RP11-325F  | chr7  | - | 1.05E+08 | 1.05E+08 | 736  |
| ENSG0000010.705622 | 2.38498   | -1.4471  | 0.30024  | 0.4018   | SETP11     | chr3  | + | 1.51E+08 | 1.51E+08 | 690  |
| ENSG0000011.451506 | 1.043983  | 0.36628  | 0.82283  | 0.87513  | RP13-480C  | chr3  | + | 49795916 | 49796089 | 174  |
| ENSG0000011.733248 | 5.758956  | -1.5732  | 0.15829  | 0.23767  | RP11-19G2  | chr17 | - | 35497536 | 35498349 | 814  |
| ENSG0000010        | 0.594029  | -0.81444 | 0.64499  | NA       | MTND1P16   | chr3  | + | 1.07E+08 | 1.07E+08 | 898  |
| ENSG0000017.737884 | 0.297015  | 3.788    | 0.002874 | 0.006645 | RP11-477J  | chr9  | - | 1.24E+08 | 1.24E+08 | 838  |
| ENSG0000010.923144 | 2.027273  | -0.87988 | 0.52918  | 0.63066  | RP11-449F  | chr5  | + | 1.46E+08 | 1.46E+08 | 321  |
| ENSG0000010.36308  | 1.029414  | -0.84272 | 0.63492  | NA       | C2orf61    | chr2  | - | 47314130 | 47382517 | 1621 |
| ENSG0000011.919068 | 2.024857  | -0.04708 | 0.97074  | 0.98381  | HUVBL1-AS  | chr3  | + | 1.28E+08 | 1.28E+08 | 588  |
| ENSG0000010.342542 | 1.294874  | -1.342   | 0.40631  | NA       | HMG1P7     | chr3  | - | 93707478 | 93707790 | 313  |
| ENSG0000010        | 5.1110682 | -3.8934  | 0.005686 | 0.012518 | RP11-88I2  | chr3  | - | 1.27E+08 | 1.27E+08 | 601  |
| ENSG0000010.72616  | 0.640152  | 0.083249 | 0.96152  | NA       | RPSAP41    | chr6  | + | 74000126 | 74000985 | 860  |
| ENSG0000010.290301 | 0         | 0.4146   | 0.81455  | NA       | RP11-124A  | chr4  | + | 41391132 | 41391610 | 479  |
| ENSG0000012.250445 | 8.24592   | -1.6873  | 0.10358  | 0.16622  | RP4-728D4  | chr1  | - | 36035414 | 36043330 | 852  |
| ENSG0000010        | 0.297015  | -0.41864 | 0.81278  | NA       | PLS1-AS1   | chr3  | - | 1.42E+08 | 1.42E+08 | 346  |
| ENSG0000010        | 0.357707  | -0.41864 | 0.81278  | NA       | MTND1P3    | chr7  | - | 1.42E+08 | 1.42E+08 | 952  |
| ENSG0000010.36308  | 0         | 0.4146   | 0.81455  | NA       | MYADML     | chr2  | - | 33947788 | 33953274 | 2147 |
| ENSG0000019.004384 | 6.396692  | 0.45114  | 0.55539  | 0.65458  | GUSBP4     | chr6  | - | 58246051 | 58256569 | 672  |
| ENSG00000132.49301 | 19.0589   | 0.75656  | 0.13476  | 0.20777  | PSMD6-AS2  | chr3  | + | 63989698 | 63997824 | 2456 |
| ENSG000001349.2905 | 84.81322  | 2.0363   | 1.20E-22 | 1.14E-21 | RP11-295P  | chr10 | + | 13652047 | 13710299 | 1446 |
| ENSG000001245.304  | 283.7601  | -0.20775 | 0.2739   | 0.37367  | NME1       | chr17 | + | 49230897 | 49239789 | 1645 |
| ENSG0000010        | 0.343138  | -0.41864 | 0.81278  | NA       | RP1-127L4  | chr22 | + | 32537254 | 32539259 | 274  |
| ENSG0000011.233984 | 0         | 1.5686   | 0.37707  | NA       | PDZRN3-AS  | chr3  | + | 73672719 | 73674658 | 494  |
| ENSG0000010.943682 | 0.297015  | 0.89158  | 0.60669  | NA       | RP11-665C  | chr14 | - | 55749014 | 55749361 | 348  |
| ENSG00000169.6103  | 49.31284  | 0.48966  | 0.24856  | 0.3448   | TNFSF12    | chr17 | + | 7452208  | 7464925  | 1768 |
| ENSG0000010.870904 | 0.654722  | 0.29016  | 0.86514  | NA       | RP3-461F1  | chr12 | + | 7139412  | 7139702  | 291  |
| ENSG00000115.87316 | 9.509239  | 0.7035   | 0.3373   | 0.44103  | CDRT4      | chr17 | - | 15339332 | 15406922 | 2495 |
| ENSG0000010.36308  | 0.297015  | -0.00205 | 0.99908  | NA       | RP11-65N1  | chr9  | + | 1.28E+08 | 1.28E+08 | 550  |
| ENSG00000127.85333 | 15.15809  | 0.86496  | 0.041695 | 0.076003 | APOBEC3G   | chr22 | + | 39436924 | 39483748 | 2775 |
| ENSG0000010.72616  | 0         | 0.85004  | 0.63064  | NA       | TLR9       | chr3  | - | 52255096 | 52273183 | 4129 |
| ENSG00000110.35222 | 3.123085  | 1.5814   | 0.071942 | 0.12197  | AC009120.  | chr16 | - | 74346507 | 74347288 | 473  |
| ENSG000001124.9575 | 79.6315   | 0.64191  | 0.022236 | 0.043449 | WBP1       | chr2  | + | 74685456 | 74688018 | 2047 |
| ENSG00000136.40311 | 83.24891  | -1.1853  | 9.24E-05 | 0.000265 | MRPS17     | chr7  | + | 56019512 | 56024192 | 1843 |

|                    |          |          |          |          |                 |   |          |          |      |
|--------------------|----------|----------|----------|----------|-----------------|---|----------|----------|------|
| ENSG0000010653381  | 0        | 0.82678  | 0.64037  | NA       | AC002310. chr16 | + | 30583571 | 30595181 | 1488 |
| ENSG0000010297015  | 0        | -0.41864 | 0.81278  | NA       | RP11-255N chr9  | - | 30670962 | 30671964 | 555  |
| ENSG0000010343138  | 0        | -0.41864 | 0.81278  | NA       | RP11-109C chr4  | + | 79689653 | 79689904 | 252  |
| ENSG0000010290301  | 0.343138 | -0.00202 | 0.99909  | NA       | RPL21P39 chr3   | - | 1.46E+08 | 1.46E+08 | 483  |
| ENSG0000010343138  | 0        | -0.41864 | 0.81278  | NA       | ITIH4-AS1 chr3  | + | 52857951 | 52859330 | 395  |
| ENSG0000010580602  | 0.951736 | -0.43779 | 0.79667  | NA       | RP11-755B chr3  | + | 57614537 | 57640645 | 364  |
| ENSG0000010686276  | 0        | -0.84936 | 0.6309   | NA       | RP11-379B chr3  | - | 1.26E+08 | 1.26E+08 | 259  |
| ENSG0000013132513  | 2.696564 | 0.22498  | 0.83134  | 0.88112  | RP11-309L chr7  | + | 1.29E+08 | 1.29E+08 | 431  |
| ENSG0000011359003  | 2.278164 | -0.66508 | 0.59006  | 0.68516  | SUGT1P3 chr13   | - | 41482295 | 41495910 | 1051 |
| ENSG0000016130469  | 0.686276 | 2.6678   | 0.037567 | 0.069404 | RP11-446F chr3  | - | 1.07E+08 | 1.07E+08 | 866  |
| ENSG0000011379541  | 0.594029 | 0.78145  | 0.63867  | 0.72643  | RPS4XP22 chr19  | - | 9793970  | 9794749  | 780  |
| ENSG0000010870904  | 0        | 1.046    | 0.5544   | NA       | RP11-767L chr3  | + | 1.2E+08  | 1.2E+08  | 1129 |
| ENSG0000011359003  | 0        | 1.8987   | 0.26617  | NA       | RPL23AP72 chr16 | - | 47184043 | 47184477 | 435  |
| ENSG0000019027367  | 268.6587 | -1.5656  | 6.13E-09 | 2.65E-08 | GET4 chr7       | + | 916189   | 936073   | 4356 |
| ENSG0000010290301  | 0        | 0.4146   | 0.81455  | NA       | RP11-690C chr11 | + | 1.03E+08 | 1.03E+08 | 476  |
| ENSG00000101073121 | 0        | -1.1788  | 0.50551  | NA       | RP11-420J chr3  | + | 1.8E+08  | 1.8E+08  | 1953 |
| ENSG000001036308   | 18.83237 | -4.9303  | 3.49E-05 | 0.000105 | RPS27P25 chr12  | + | 1.21E+08 | 1.21E+08 | 484  |
| ENSG0000011108955  | 8.041152 | 0.44425  | 0.52098  | 0.62356  | RP11-175I chr10 | - | 46349533 | 46411606 | 798  |
| ENSG0000011067986  | 364.5347 | -1.7656  | 9.02E-26 | 9.72E-25 | C1orf226 chr1   | + | 1.62E+08 | 1.62E+08 | 4118 |
| ENSG0000011211636  | 0        | 5.2327   | 1.88E-05 | 5.84E-05 | ZNF736P9\ chrY  | - | 7936937  | 7938764  | 1345 |
| ENSG000001882.3921 | 1712.733 | -0.95441 | 7.37E-09 | 3.16E-08 | ADSL chr22      | + | 40742507 | 40764823 | 2525 |
| ENSG0000010342542  | 0.654722 | -0.52406 | 0.76557  | NA       | RP11-353N chr1  | + | 1.5E+08  | 1.5E+08  | 2518 |
| ENSG0000011128653  | 49.85497 | -2.1227  | 1.58E-07 | 6.07E-07 | RP11-34P1 chr1  | - | 139790   | 140339   | 323  |
| ENSG00000101041968 | 0        | -5.0052  | 6.48E-05 | 0.000189 | PRKAG2-AS chr7  | + | 1.52E+08 | 1.52E+08 | 1055 |
| ENSG000001530162   | 4.037561 | 0.37538  | 0.65975  | 0.74367  | RPL39P36 chr19  | + | 53916443 | 53916598 | 156  |
| ENSG00000100594029 | 0        | -0.81444 | 0.64499  | NA       | RPS10P16 chr8   | - | 1.19E+08 | 1.19E+08 | 496  |
| ENSG00000100343138 | 0        | -0.41864 | 0.81278  | NA       | SNRPGP3 chr7    | + | 1.29E+08 | 1.29E+08 | 227  |
| ENSG00000101372552 | 0        | -1.3974  | 0.43145  | NA       | RP11-71N1 chr3  | + | 1.48E+08 | 1.48E+08 | 2569 |
| ENSG0000011213446  | 0        | 1.5515   | 0.38249  | NA       | PRDX3P4 chr3    | + | 64160077 | 64160823 | 747  |
| ENSG0000012282147  | 0        | 2.6902   | 0.089639 | 0.14723  | AP001625. chr21 | + | 43916118 | 43918313 | 1603 |
| ENSG0000011027626  | 0        | 1.1491   | 0.51623  | NA       | TRBV8-2 chr7    | - | 1.42E+08 | 1.42E+08 | 270  |
| ENSG0000010342542  | 0.357707 | -0.0021  | 0.99906  | NA       | ZBTB20-AS1 chr3 | + | 1.15E+08 | 1.15E+08 | 464  |
| ENSG000001171271   | 3.025133 | -0.67988 | 0.61977  | 0.71071  | RP11-803B chr3  | - | 75495920 | 75540353 | 943  |
| ENSG00000102185918 | 0        | -2.5615  | 0.11691  | 0.18465  | LILRA4 chr19    | - | 54844456 | 54850421 | 1944 |
| ENSG000001108924   | 1.012429 | 0.056203 | 0.97303  | 0.98493  | RP11-163E chr7  | + | 1.02E+08 | 1.02E+08 | 602  |
| ENSG0000010654722  | 0        | -0.83442 | 0.63731  | NA       | RPL31P60 chr19  | + | 33454405 | 33454771 | 367  |
| ENSG000001036308   | 0.937167 | -0.90039 | 0.60194  | NA       | FCF1P3 chr3     | + | 1.07E+08 | 1.07E+08 | 590  |
| ENSG0000011233984  | 0.715414 | 0.56569  | 0.73427  | 0.80386  | LILRA2 chr19    | + | 55084387 | 55099027 | 1799 |
| ENSG00000100343138 | 0        | -0.41864 | 0.81278  | NA       | CTD-2015F chr5  | + | 79796151 | 79797219 | 752  |
| ENSG0000012613524  | 2.962024 | -0.15732 | 0.89409  | 0.92663  | RP11-293A chr4  | - | 26861428 | 26862221 | 482  |
| ENSG0000010297015  | 0        | -0.41864 | 0.81278  | NA       | RP11-200A chr3  | + | 1.34E+08 | 1.34E+08 | 294  |
| ENSG0000011411244  | 0.343138 | 1.3153   | 0.43451  | NA       | RP6-206I1 chr1  | + | 1.44E+08 | 1.44E+08 | 1685 |
| ENSG00000103769685 | 0        | -3.4058  | 0.022243 | 0.043455 | RP11-90P5 chr8  | + | 37980792 | 37982169 | 621  |
| ENSG0000010686276  | 0        | -0.84936 | 0.6309   | NA       | TEX35 chr1      | + | 1.78E+08 | 1.79E+08 | 2452 |
| ENSG0000010937167  | 0        | -1.2408  | 0.48662  | NA       | RP11-561B chr14 | - | 35857327 | 35858275 | 949  |
| ENSG000001148.0459 | 107.1376 | 0.46597  | 0.021255 | 0.041702 | RP11-393B chr3  | + | 1.83E+08 | 1.83E+08 | 1490 |
| ENSG0000014491516  | 0.343138 | 2.9982   | 0.027851 | 0.053163 | RP11-274F chr3  | - | 1.46E+08 | 1.46E+08 | 709  |
| ENSG0000010290301  | 0        | 0.4146   | 0.81455  | NA       | RP11-12K1 chr3  | - | 1.67E+08 | 1.67E+08 | 789  |
| ENSG0000011649304  | 2.041842 | -0.25566 | 0.8337   | 0.88303  | RP11-587C chr11 | + | 27603227 | 27603602 | 376  |
| ENSG0000011408767  | 15.12009 | -0.10895 | 0.84008  | 0.88775  | AMY2B chr1      | + | 1.04E+08 | 1.04E+08 | 4716 |
| ENSG0000014314256  | 7.265046 | -0.67473 | 0.44232  | 0.54804  | RP1-93H18 chr6  | + | 1.17E+08 | 1.17E+08 | 1596 |
| ENSG0000010290301  | 1.638012 | -1.64    | 0.2979   | 0.3998   | RPL23AP1C chr14 | - | 96922913 | 96923378 | 466  |
| ENSG00000123.86189 | 32.55547 | -0.45103 | 0.30551  | 0.40705  | LY6G5B chr6     | + | 31637944 | 31641553 | 2654 |
| ENSG0000013994857  | 0.343138 | 2.7915   | 0.048121 | 0.086052 | RP11-572N chr3  | + | 1.13E+08 | 1.13E+08 | 764  |
| ENSG0000010685084  | 1.012429 | -0.37562 | 0.82411  | NA       | RP11-225N chr3  | - | 1.83E+08 | 1.83E+08 | 1877 |
| ENSG0000011501163  | 14.94204 | -0.00566 | 0.99177  | 0.99563  | PSMB9 chr6      | + | 32811913 | 32827362 | 2676 |
| ENSG0000010297015  | 0        | -0.41864 | 0.81278  | NA       | RPL9P30 chr17   | + | 28182777 | 28183350 | 574  |
| ENSG0000010357707  | 0        | -0.41864 | 0.81278  | NA       | RPS3AP22 chr5   | + | 87677774 | 87678542 | 769  |
| ENSG0000013568372  | 31.08175 | -3.0121  | 7.34E-07 | 2.65E-06 | RP11-657C chr3  | - | 1.35E+08 | 1.35E+08 | 827  |
| ENSG0000013475055  | 9.545626 | -1.3562  | 0.090182 | 0.14804  | RP11-254B chr12 | - | 68946775 | 68947662 | 888  |
| ENSG0000011016461  | 1.949596 | -0.79031 | 0.56403  | 0.66208  | AC093627. chr7  | - | 182935   | 194180   | 574  |
| ENSG0000013121348  | 1.355566 | 1.0385   | 0.42245  | 0.52786  | RP11-85G2 chr14 | - | 93689944 | 93690485 | 542  |
| ENSG0000010654722  | 0        | -0.83442 | 0.63731  | NA       | RP11-641C chr3  | + | 60602555 | 60603812 | 1258 |
| ENSG0000010997859  | 0        | -1.5018  | 0.39072  | NA       | FABP5P11 chr22  | - | 17075979 | 17076375 | 397  |
| ENSG0000010594029  | 0        | -0.81444 | 0.64499  | NA       | RP11-580G chr17 | - | 38595719 | 38596169 | 451  |

|            |          |          |          |          |          |                 |   |          |          |      |
|------------|----------|----------|----------|----------|----------|-----------------|---|----------|----------|------|
| ENSG000001 | 0        | 0.594029 | -0.81444 | 0.64499  | NA       | RP11-6111 chr6  | - | 39865116 | 39867847 | 436  |
| ENSG000001 | 2.447429 | 4.943174 | -0.88901 | 0.37684  | 0.48089  | ETF1P2 chr7     | + | 1.51E+08 | 1.51E+08 | 1586 |
| ENSG000001 | 6.732588 | 2.307303 | 1.4359   | 0.12582  | 0.19642  | RP11-103C chr3  | + | 1.5E+08  | 1.5E+08  | 621  |
| ENSG000001 | 1.431782 | 1.531196 | -0.11768 | 0.93742  | 0.95869  | RP4-753P9 chrX  | + | 1.29E+08 | 1.29E+08 | 326  |
| ENSG000001 | 1.286224 | 0.357707 | 1.3361   | 0.4083   | NA       | RP11-745A chr15 | + | 60682570 | 60682881 | 312  |
| ENSG000001 | 0        | 0.297015 | -0.41864 | 0.81278  | NA       | RPS7P7 chr4     | + | 42473827 | 42474397 | 571  |
| ENSG000001 | 0.995923 | 0.951736 | 0.030362 | 0.98382  | 0.99083  | MAG11-AS1 chr3  | + | 65879491 | 65910972 | 591  |
| ENSG000001 | 2230.889 | 438.3845 | 2.3432   | 1.18E-86 | 5.55E-85 | PCDHGC3 chr5    | + | 1.41E+08 | 1.41E+08 | 4711 |
| ENSG000001 | 2.282147 | 6.520493 | -1.4101  | 0.11606  | 0.18355  | SMKR1 chr7      | + | 1.29E+08 | 1.29E+08 | 1035 |
| ENSG000001 | 2.873915 | 3.480792 | -0.24665 | 0.82883  | 0.87944  | RP11-379F chr3  | + | 1.58E+08 | 1.59E+08 | 1087 |
| ENSG000001 | 0        | 1.370136 | -1.6825  | 0.34201  | NA       | RP11-204K chr14 | - | 68805445 | 68806258 | 801  |
| ENSG000001 | 0        | 1.340997 | -1.8899  | 0.26871  | NA       | RP11-758P chr7  | + | 1E+08    | 1E+08    | 303  |
| ENSG000001 | 0        | 0.297015 | -0.41864 | 0.81278  | NA       | CPHL1P chr3     | - | 1.49E+08 | 1.49E+08 | 3407 |
| ENSG000001 | 0        | 4.144377 | -3.4954  | 0.019736 | 0.038998 | RP11-430C chr1  | + | 2.05E+08 | 2.05E+08 | 2219 |
| ENSG000001 | 66.45285 | 156.273  | -1.2249  | 6.57E-07 | 2.39E-06 | ZNF542 chr19    | + | 56879468 | 56891197 | 3440 |
| ENSG000001 | 279.3143 | 252.8453 | 0.14458  | 0.38241  | 0.4866   | COX19 chr7      | - | 938415   | 1015235  | 3666 |
| ENSG000001 | 0.342542 | 0.343138 | -0.00208 | 0.99906  | NA       | RPS27P29 chr19  | + | 23780143 | 23780394 | 252  |
| ENSG000001 | 0        | 0.297015 | -0.41864 | 0.81278  | NA       | RP11-146C chr9  | + | 42409989 | 42474239 | 1761 |
| ENSG000001 | 1.887365 | 1.577319 | 0.20584  | 0.88398  | 0.91907  | GAPDHP33 chr1   | - | 1.2E+08  | 1.2E+08  | 1013 |
| ENSG000001 | 0        | 2.993578 | -3.1081  | 0.040328 | 0.073907 | AC140481. chr2  | + | 1.31E+08 | 1.31E+08 | 604  |
| ENSG000001 | 1.048164 | 0.700845 | 0.41829  | 0.79512  | NA       | B4GALT4-A chr3  | + | 1.19E+08 | 1.19E+08 | 544  |
| ENSG000001 | 0        | 4.288452 | -3.6677  | 0.010057 | 0.021136 | MAG11-IT1 chr3  | - | 65858490 | 65940233 | 2567 |
| ENSG000001 | 0        | 1.606458 | -1.9287  | 0.27074  | NA       | RP11-62G1 chr3  | - | 69584815 | 69585844 | 1030 |
| ENSG000001 | 0        | 6.806971 | -4.2775  | 0.001941 | 0.004604 | TCAM1P chr17    | + | 61926652 | 61941739 | 3317 |
| ENSG000001 | 0.632843 | 6.863631 | -2.9808  | 0.009254 | 0.01957  | RP11-574F chr6  | + | 1.23E+08 | 1.23E+08 | 586  |
| ENSG000001 | 0        | 0.640152 | -0.82869 | 0.63935  | NA       | MEAF6P1 chr2    | + | 2.1E+08  | 2.1E+08  | 327  |
| ENSG000001 | 5.955814 | 0.604418 | -0.81306 | 0.30622  | 0.40779  | GHRLOS chr3     | + | 10327438 | 10334601 | 1176 |
| ENSG000001 | 11.75409 | 30.18426 | -1.3485  | 0.003821 | 0.008659 | RP11-499P chr10 | - | 18802044 | 18834580 | 1028 |
| ENSG000001 | 0.290301 | 0        | 0.4146   | 0.81455  | NA       | RP11-298C chr3  | + | 1.68E+08 | 1.68E+08 | 661  |
| ENSG000001 | 5.031856 | 10.75067 | -1.0621  | 0.14813  | 0.2246   | CTA-286B1 chr22 | + | 35796135 | 35806001 | 557  |
| ENSG000001 | 0.36308  | 1.340997 | -1.3725  | 0.39447  | NA       | ACAD11 chr3     | - | 1.32E+08 | 1.32E+08 | 4142 |
| ENSG000001 | 0.72616  | 2.976593 | -1.5607  | 0.3084   | 0.41015  | RP11-1072 chr17 | - | 42797128 | 42797965 | 838  |
| ENSG000001 | 0.36308  | 0.891044 | -0.73478 | 0.67953  | NA       | LA16c-306 chr16 | + | 3546201  | 3546768  | 568  |
| ENSG000001 | 0        | 0.594029 | -0.81444 | 0.64499  | NA       | RP11-841C chr12 | + | 19661838 | 19662179 | 342  |
| ENSG000001 | 11.18384 | 3.414394 | 1.6286   | 0.051843 | 0.091822 | RP11-331F chr16 | + | 75259972 | 75262093 | 1252 |
| ENSG000001 | 2054.982 | 3453.114 | -0.74762 | 3.16E-08 | 1.29E-07 | RPS2P5 chr12    | + | 1.19E+08 | 1.19E+08 | 931  |
| ENSG000001 | 254.8675 | 234.5389 | 0.12216  | 0.53866  | 0.63936  | PPIL3 chr2      | - | 2.02E+08 | 2.02E+08 | 1370 |
| ENSG000001 | 4.968451 | 0.343138 | 3.1008   | 0.02336  | 0.04541  | AC017002. chr2  | + | 1.12E+08 | 1.12E+08 | 757  |
| ENSG000001 | 180.9516 | 47.06133 | 1.9287   | 7.02E-14 | 4.28E-13 | RPL23AP7 chr2   | - | 1.14E+08 | 1.14E+08 | 2078 |
| ENSG000001 | 0.870904 | 0.594029 | 0.31055  | 0.86063  | NA       | RPL36AP4 chr15  | - | 75478992 | 75479309 | 318  |
| ENSG000001 | 4.906837 | 3.801239 | 0.36371  | 0.69477  | 0.77231  | AP000304. chr21 | - | 34931848 | 34950669 | 528  |
| ENSG000001 | 20.44682 | 20.2542  | 0.014529 | 0.9729   | 0.98491  | RPL13P5 chr12   | + | 6982553  | 6993905  | 1438 |
| ENSG000001 | 4.822893 | 3.322147 | 0.50758  | 0.59051  | 0.68554  | SEC62-AS1 chr3  | - | 1.7E+08  | 1.7E+08  | 346  |
| ENSG000001 | 4.264621 | 4.259314 | 4.09E-05 | 0.99997  | 0.99997  | RP11-36C2 chr5  | + | 33162285 | 33162913 | 629  |
| ENSG000001 | 0.290301 | 0        | 0.4146   | 0.81455  | NA       | RPS29P20 chr11  | + | 4040178  | 4040348  | 171  |
| ENSG000001 | 0.36308  | 0.357707 | -0.00212 | 0.99905  | NA       | RPL9P3 chr14    | + | 35731668 | 35732242 | 575  |
| ENSG000001 | 0.36308  | 0        | 0.4146   | 0.81455  | NA       | RP11-768C chr3  | - | 1.17E+08 | 1.17E+08 | 803  |
| ENSG000001 | 2.032922 | 2.338857 | -0.18248 | 0.88271  | 0.91838  | RP11-231C chr8  | - | 42199285 | 42200152 | 868  |
| ENSG000001 | 4.460627 | 4.443808 | 0.001712 | 0.99872  | 0.99954  | RP1-228P1 chr12 | - | 48448596 | 48449374 | 779  |
| ENSG000001 | 10.3215  | 13.32746 | -0.34551 | 0.55836  | 0.65731  | AC012358. chr2  | + | 55535628 | 55573185 | 1110 |
| ENSG000001 | 0.36308  | 0.297015 | -0.00205 | 0.99908  | NA       | RP11-460N chr3  | + | 70048728 | 70064469 | 2044 |
| ENSG000001 | 0        | 0.343138 | -0.41864 | 0.81278  | NA       | CTD-2176I chr5  | + | 58118330 | 58119541 | 897  |
| ENSG000001 | 1.359003 | 0.343138 | 1.3802   | 0.3924   | NA       | CTD-2013N chr19 | + | 16523495 | 16524387 | 893  |
| ENSG000001 | 4.221753 | 0.654722 | 2.2881   | 0.065908 | 0.11317  | LINC00636 chr3  | + | 1.08E+08 | 1.08E+08 | 1264 |
| ENSG000001 | 0.342542 | 0        | 0.4146   | 0.81455  | NA       | LIMS1 chr2      | + | 1.11E+08 | 1.11E+08 | 2466 |
| ENSG000001 | 22.02416 | 19.10985 | 0.20199  | 0.65892  | 0.74291  | LRRFIP1P1 chr3  | - | 1.79E+08 | 1.79E+08 | 2246 |
| ENSG000001 | 1.701545 | 3.526915 | -0.96942 | 0.37896  | 0.48309  | RPS12P27 chr16  | + | 68243345 | 68243681 | 337  |
| ENSG000001 | 0        | 1.234181 | -1.5727  | 0.37581  | NA       | RP11-951I chr5  | - | 61871778 | 61872098 | 321  |
| ENSG000001 | 1.733248 | 0.343138 | 1.5317   | 0.35923  | 0.46337  | RP11-864J chr12 | + | 1.08E+08 | 1.08E+08 | 535  |
| ENSG000001 | 127.9929 | 113.0914 | 0.1791   | 0.48456  | 0.58862  | FOXO3B chr17    | - | 18574259 | 18576186 | 1928 |
| ENSG000001 | 2.375464 | 4.006007 | -0.69782 | 0.497    | 0.6007   | RP4-584D1 chr7  | - | 1.5E+08  | 1.5E+08  | 577  |
| ENSG000001 | 0        | 0.297015 | -0.41864 | 0.81278  | NA       | RP11-567P chr3  | + | 1.2E+08  | 1.2E+08  | 288  |
| ENSG000001 | 0.290301 | 1.340997 | -1.3722  | 0.39656  | NA       | RPL39P26 chr11  | - | 13707046 | 13707203 | 158  |
| ENSG000001 | 0.290301 | 0        | 0.4146   | 0.81455  | NA       | RP11-23D2 chr3  | - | 1.53E+08 | 1.54E+08 | 812  |
| ENSG000001 | 11.69248 | 5.522634 | 1.0261   | 0.12711  | 0.19806  | RPS19P3 chr14   | - | 35037895 | 35038335 | 441  |

|                     |          |          |          |                  |                         |          |          |          |      |
|---------------------|----------|----------|----------|------------------|-------------------------|----------|----------|----------|------|
| ENSG0000014035933   | 0        | 3.5491   | 0.014365 | 0.029211         | CTD-2021J chr3          | +        | 98699902 | 98701940 | 962  |
| ENSG0000010297015   | -0.41864 | 0.81278  | NA       | RP11-386A chr15  | +                       | 93262623 | 93262970 | 348      |      |
| ENSG0000018225983   | 27.57424 | -1.7019  | 0.001103 | 0.002719         | SETP14 chr3             | +        | 1.56E+08 | 1.56E+08 | 873  |
| ENSG0000010098329   | 0        | 0.98329  | -1.2878  | 0.47019          | NA RP11-185E chr3       | +        | 1.71E+08 | 1.71E+08 | 229  |
| ENSG0000011457577   | 0        | 5.4981   | 4.55E-06 | 1.52E-05         | CDKN2B-AS1 chr9         | +        | 21994777 | 22121096 | 3835 |
| ENSG0000010995923   | 1.730259 | -0.62259 | 0.66594  | 0.749            | RP5-1101C chr7          | +        | 1.22E+08 | 1.22E+08 | 743  |
| ENSG00000102355842  | 0        | 2.355842 | -2.3895  | 0.16517          | 0.24613 TNFRSF13B chr17 | -        | 16832849 | 16875432 | 1978 |
| ENSG00000100343138  | 0        | 0.343138 | -0.41864 | 0.81278          | NA CTC-788C1 chr8       | -        | 94969566 | 94969919 | 354  |
| ENSG0000010580602   | 0        | 0.8036   | 0.6494   | NA               | RP11-515C chr5          | +        | 1.4E+08  | 1.4E+08  | 316  |
| ENSG0000017084503   | 5.31545  | 0.40537  | 0.6008   | 0.69459          | RPL7AP10 chr19          | -        | 21332451 | 21333241 | 791  |
| ENSG0000010297015   | -0.41864 | 0.81278  | NA       | RP11-429C chr10  | +                       | 97593265 | 97633515 | 587      |      |
| ENSG0000011830005   | 18.2989  | 0.011676 | 0.9821   | 0.99011          | RP11-247I chr22         | -        | 31832963 | 31835893 | 597  |
| ENSG0000011960143   | 2.185918 | -0.14964 | 0.90787  | 0.93654          | RPL21P12 chr17          | -        | 28043297 | 28043703 | 407  |
| ENSG0000010923144   | 0        | 1.223    | 0.49292  | NA               | TM4SF1-AS chr3          | +        | 1.49E+08 | 1.49E+08 | 754  |
| ENSG0000010580602   | 0        | 0.8036   | 0.6494   | NA               | KRTAP9-1 chr17          | +        | 39344697 | 39346891 | 753  |
| ENSG0000011939605   | 1.874334 | 0.026317 | 0.98361  | 0.99083          | THOC7-AS1 chr3          | +        | 63846321 | 63847495 | 673  |
| ENSG0000011431782   | 3.91376  | -1.2865  | 0.2997   | 0.4013           | RP1-184J9 chr1          | -        | 23346640 | 23414551 | 666  |
| ENSG0000011794752   | 9602.253 | -5.7064  | 1.64E-94 | 8.81E-93         | L1TD1 chr1              | +        | 62660503 | 62678000 | 3849 |
| ENSG00000100891044  | -1.0625  | 0.54819  | NA       | RP11-3P17 chr3   | +                       | 1.61E+08 | 1.61E+08 | 2845     |      |
| ENSG0000011306762   | 2.012704 | -0.48428 | 0.74122  | 0.80963          | RP11-775C chr7          | +        | 1.3E+08  | 1.3E+08  | 575  |
| ENSG0000010870904   | 1.652581 | -0.66289 | 0.65825  | 0.74249          | RP11-20L2 chr7          | -        | 1.27E+08 | 1.27E+08 | 637  |
| ENSG0000012032714   | 1.577319 | 9.9593   | 3.43E-66 | 1.16E-64         | AQP1 chr7               | +        | 30893010 | 30965131 | 2752 |
| ENSG00000100594029  | -0.81444 | 0.64499  | NA       | KCNAB1-AS chr3   | -                       | 1.56E+08 | 1.56E+08 | 538      |      |
| ENSG0000011555988   | 5.914311 | -1.6668  | 0.14971  | 0.22668          | AD000092 chr19          | +        | 13004947 | 13005694 | 748  |
| ENSG0000011048164   | 1.012429 | 0.026348 | 0.98659  | 0.99208          | RP11-206L chr1          | -        | 694412   | 700305   | 295  |
| ENSG00000100700845  | -0.87835 | 0.62047  | NA       | OR2AO1P chr7     | +                       | 1.44E+08 | 1.44E+08 | 403      |      |
| ENSG0000010036308   | 0        | 0.4146   | 0.81455  | NA               | RP11-521J chr3          | -        | 1.24E+08 | 1.24E+08 | 712  |
| ENSG0000011774324   | 0.297015 | 1.601    | 0.33424  | 0.43769          | RP11-1348 chr16         | -        | 28825301 | 28825994 | 694  |
| ENSG0000015632183   | 0        | 4.0148   | 0.004419 | 0.00992          | C1QTNF9 chr13           | +        | 24881304 | 24896673 | 1854 |
| ENSG00000100715414  | -0.84936 | 0.6309   | NA       | RP11-174C chr3   | +                       | 1.2E+08  | 1.2E+08  | 813      |      |
| ENSG00000100357707  | -0.41864 | 0.81278  | NA       | LSP1P2 chr3      | +                       | 75444339 | 75444471 | 133      |      |
| ENSG0000011317927   | 0.343138 | 1.2418   | 0.46439  | NA               | MME-AS1 chr3            | -        | 1.55E+08 | 1.55E+08 | 457  |
| ENSG0000014035933   | 2.696564 | 0.53601  | 0.58185  | 0.67817          | KRT8P36 chr3            | -        | 1.38E+08 | 1.38E+08 | 1440 |
| ENSG0000010705622   | 0        | 0.8807   | 0.6196   | NA               | RP11-555K chr4          | -        | 1.54E+08 | 1.54E+08 | 459  |
| ENSG00000100715414  | -0.84936 | 0.6309   | NA       | IGKV1-8 chr2     | -                       | 89291928 | 89292450 | 398      |      |
| ENSG000001003305162 | -3.2461  | 0.030518 | 0.057606 | AC006539 chr19   | -                       | 20190627 | 20191348 | 501      |      |
| ENSG000001001012429 | -1.3162  | 0.46038  | NA       | RP11-366A chr4   | -                       | 1.66E+08 | 1.66E+08 | 480      |      |
| ENSG0000012193284   | 137.8746 | 0.66933  | 0.000285 | 0.000767         | ISY1 chr3               | -        | 1.29E+08 | 1.29E+08 | 3842 |
| ENSG000001005941033 | -4.1676  | 0.002037 | 0.004815 | RP11-286F chr7   | +                       | 1.29E+08 | 1.29E+08 | 472      |      |
| ENSG0000017894606   | 134.6877 | -4.0469  | 4.32E-27 | 4.91E-26         | PNMA2 chr8              | -        | 26362202 | 26371608 | 4965 |
| ENSG0000011286224   | 0.997859 | 0.31184  | 0.82197  | 0.87471          | RP11-102N chr3          | -        | 1.36E+08 | 1.36E+08 | 730  |
| ENSG0000010995923   | 0.594029 | 0.48398  | 0.76518  | NA               | RPS2P39 chr11           | -        | 1.09E+08 | 1.09E+08 | 668  |
| ENSG0000010036308   | 0.343138 | -0.0021  | 0.99905  | NA               | RP13-137A chr10         | +        | 1.35E+08 | 1.35E+08 | 5254 |
| ENSG0000011681007   | 0        | 2.1857   | 0.19206  | NA               | LRRD1 chr7              | -        | 91741473 | 91808845 | 3511 |
| ENSG00000100357707  | -0.41864 | 0.81278  | NA       | RPS12P15 chr8    | +                       | 1.04E+08 | 1.04E+08 | 385      |      |
| ENSG0000011649304   | 4.244745 | -1.22    | 0.27264  | 0.37218          | CTD-2301A chr5          | +        | 1.77E+08 | 1.77E+08 | 476  |
| ENSG0000012892285   | 21.80238 | 0.39772  | 0.31906  | 0.42196          | RP5-890O3 chr1          | -        | 1252961  | 1254069  | 386  |
| ENSG000001001012429 | -1.3162  | 0.46038  | NA       | RP11-69M chr12   | -                       | 8147366  | 8147680  | 315      |      |
| ENSG0000019801695   | 8.484658 | 0.21033  | 0.75718  | 0.82341          | RP11-465L chr20         | +        | 44650415 | 44656438 | 400  |
| ENSG000001004403389 | -3.6011  | 0.015491 | 0.031285 | KRBOX1 chr3      | +                       | 42850938 | 43097363 | 2566     |      |
| ENSG0000011628766   | 0        | 2.1781   | 0.19145  | NA               | RP11-553C chr3          | +        | 1.13E+08 | 1.13E+08 | 1053 |
| ENSG0000010632843   | 0.297015 | 0.49183  | 0.78024  | NA               | RP11-588C chr3          | +        | 78808124 | 78808524 | 401  |
| ENSG0000011331864   | 11.58505 | 0.20234  | 0.71653  | 0.79003          | RP11-155C chr7          | +        | 1.28E+08 | 1.28E+08 | 662  |
| ENSG0000011774324   | 1.773966 | -0.00061 | 0.99967  | 0.99987          | AC098831 chr2           | -        | 2.04E+08 | 2.04E+08 | 336  |
| ENSG0000012002647   | 14.1691  | 3.81     | 2.15E-34 | 3.21E-33         | PCDHGC5 chr5            | +        | 1.41E+08 | 1.41E+08 | 4641 |
| ENSG00000100594029  | -0.81444 | 0.64499  | NA       | C21orf91-C chr21 | -                       | 19135632 | 19164840 | 717      |      |
| ENSG0000011632349   | 39.01131 | 2.0452   | 2.66E-12 | 1.47E-11         | ARHGEF25 chr12          | +        | 58003963 | 58013162 | 2552 |
| ENSG0000010036308   | 3.123085 | -2.441   | 0.098955 | 0.16002          | RP11-170N chr4          | +        | 1.24E+08 | 1.24E+08 | 348  |
| ENSG0000010036308   | 0.715414 | -0.51558 | 0.77246  | NA               | RP11-435F chr3          | -        | 1.14E+08 | 1.14E+08 | 495  |
| ENSG000001108924    | 0        | 1.1858   | 0.50299  | NA               | AC073934 chr7           | -        | 1.27E+08 | 1.27E+08 | 495  |
| ENSG000001322583    | 5.444956 | -0.7004  | 0.45465  | 0.55998          | UBA52P8 chr16           | -        | 48368382 | 48368765 | 384  |
| ENSG00000100297015  | -0.41864 | 0.81278  | NA       | MTND2P14 chr3    | +                       | 1.07E+08 | 1.07E+08 | 351      |      |
| ENSG0000017894606   | 3.930745 | 0.95162  | 0.21402  | 0.30479          | CTD-3236F chr11         | -        | 17159523 | 17159812 | 290  |
| ENSG0000010975385   | 2.558194 | -1.1096  | 0.43796  | 0.54348          | RP11-963F chr17         | -        | 10648870 | 10649860 | 476  |
| ENSG000001001874334 | -2.1429  | 0.21634  | NA       | RPL21P4 chr17    | +                       | 41231319 | 41231797 | 479      |      |

|                    |          |          |          |          |            |       |   |          |          |      |
|--------------------|----------|----------|----------|----------|------------|-------|---|----------|----------|------|
| ENSG000001366.2088 | 413.0293 | -0.17402 | 0.23356  | 0.32724  | TMEM189    | chr20 | - | 48697663 | 48770335 | 2916 |
| ENSG000001131.9232 | 144.8298 | -0.13786 | 0.51484  | 0.61773  | RDH14      | chr2  | - | 18735989 | 18741946 | 1587 |
| ENSG0000010975385  | 20.2826  | -4.0326  | 1.33E-05 | 4.20E-05 | AC093627.  | chr7  | + | 149597   | 155465   | 5008 |
| ENSG0000010685084  | 0.951736 | -0.32904 | 0.84594  | NA       | RP11-572F  | chr16 | + | 74586149 | 74586644 | 496  |
| ENSG0000010342542  | 0        | 0.4146   | 0.81455  | NA       | KRTAP4-7   | chr17 | + | 39240459 | 39241396 | 938  |
| ENSG0000010975385  | 1.043983 | -0.05238 | 0.97338  | 0.98515  | RPS29P22   | chr17 | - | 26443265 | 26443432 | 168  |
| ENSG0000010        | 0.654722 | -0.83442 | 0.63731  | NA       | CTD-2515F  | chr15 | - | 57848149 | 57848577 | 429  |
| ENSG00000114.16045 | 5.069391 | 1.4047   | 0.090576 | 0.14855  | RP11-392A  | chr3  | - | 1.56E+08 | 1.57E+08 | 3306 |
| ENSG0000011.681007 | 0.640152 | 1.0645   | 0.46815  | 0.5729   | RP11-174C  | chr3  | + | 1.2E+08  | 1.2E+08  | 1227 |
| ENSG0000014.077009 | 1.248751 | 1.446    | 0.22372  | 0.31611  | NDUFB2-AS  | chr7  | - | 1.4E+08  | 1.4E+08  | 1648 |
| ENSG0000010        | 3.556053 | -3.3014  | 0.029657 | 0.056206 | RP11-65E2  | chr3  | + | 1.32E+08 | 1.32E+08 | 2247 |
| ENSG0000017.758422 | 8.773551 | -0.15462 | 0.82742  | 0.87848  | PLCXD2     | chr3  | + | 1.11E+08 | 1.12E+08 | 2063 |
| ENSG0000011.359003 | 0.654722 | 0.79525  | 0.59532  | 0.68965  | RP11-572C  | chr3  | - | 1.12E+08 | 1.12E+08 | 2022 |
| ENSG0000010.342542 | 0.297015 | -0.00202 | 0.99909  | NA       | RP11-119C  | chr3  | - | 1.1E+08  | 1.1E+08  | 801  |
| ENSG0000015.644162 | 2.765378 | 0.8978   | 0.39216  | 0.4965   | RP11-48B1  | chr17 | + | 3568514  | 3568996  | 483  |
| ENSG0000013.008307 | 7.391263 | -1.2157  | 0.16887  | 0.25059  | AP000356.  | chr22 | + | 25047814 | 25048364 | 551  |
| ENSG0000012.749709 | 2.604317 | 0.046253 | 0.96674  | 0.98099  | RPL15P2    | chr14 | - | 95267186 | 95267800 | 615  |
| ENSG0000010.290301 | 0.297015 | -0.00202 | 0.99909  | NA       | RP11-659E  | chr8  | + | 63925627 | 63927240 | 550  |
| ENSG0000010        | 1.043983 | -1.3473  | 0.44976  | NA       | RP11-400K  | chr8  | + | 54445468 | 54446264 | 478  |
| ENSG0000015.1766   | 1.698704 | 1.487    | 0.14367  | 0.21865  | LSAMP-AS1  | chr3  | + | 1.16E+08 | 1.16E+08 | 553  |
| ENSG0000011.939605 | 1.591889 | 0.2345   | 0.84941  | 0.89424  | RPS20P31   | chr12 | + | 1.21E+08 | 1.21E+08 | 332  |
| ENSG0000010.342542 | 0        | 0.4146   | 0.81455  | NA       | HIST2H2BB  | chr1  | - | 1.49E+08 | 1.49E+08 | 381  |
| ENSG0000011.411244 | 0.357707 | 1.3172   | 0.43349  | NA       | PLGLA      | chr2  | + | 1.07E+08 | 1.07E+08 | 3025 |
| ENSG0000013.568372 | 0.594029 | 2.0666   | 0.12194  | 0.19142  | RP11-372E  | chr3  | - | 1.43E+08 | 1.43E+08 | 633  |
| ENSG0000010.632843 | 0        | 0.81931  | 0.64303  | NA       | RP11-91A1  | chr3  | - | 89637036 | 89637720 | 685  |
| ENSG0000010        | 0.937167 | -1.2408  | 0.48662  | NA       | ST13P14    | chr3  | - | 50914143 | 50915088 | 734  |
| ENSG00000115.40641 | 18.83224 | -0.28481 | 0.57813  | 0.67468  | RPL23AP6   | chr11 | - | 1.19E+08 | 1.19E+08 | 435  |
| ENSG0000013.838135 | 6.459801 | -0.70043 | 0.40448  | 0.50932  | MIF        | chr22 | + | 24236191 | 24237414 | 939  |
| ENSG0000010        | 0.654722 | -0.83442 | 0.63731  | NA       | CTD-2024I  | chr5  | + | 1.41E+08 | 1.41E+08 | 208  |
| ENSG0000010        | 0.343138 | -0.41864 | 0.81278  | NA       | RP11-742C  | chr18 | + | 44302938 | 44303186 | 249  |
| ENSG000001292.12   | 3.088241 | 5.3594   | 7.11E-05 | 0.000206 | HOXA11-AS  | chr7  | + | 27224137 | 27228912 | 1723 |
| ENSG0000011.027626 | 0.343138 | 0.83995  | 0.63621  | NA       | RPL23AP6   | chr12 | + | 1.34E+08 | 1.34E+08 | 474  |
| ENSG0000011.068702 | 4.081268 | -1.6943  | 0.17131  | 0.25375  | RP11-80H5  | chr10 | - | 91454052 | 91457685 | 667  |
| ENSG0000010        | 0.997996 | -4.8771  | 0.000174 | 0.000481 | RP11-119F  | chr4  | + | 1.14E+08 | 1.14E+08 | 435  |
| ENSG0000010        | 3.428963 | -3.2154  | 0.036505 | 0.067636 | RP11-22C1  | chr8  | + | 95700456 | 95700838 | 383  |
| ENSG0000010.342542 | 0.715414 | -0.51272 | 0.77372  | NA       | SEPT7P6    | chr7  | + | 1.52E+08 | 1.52E+08 | 1143 |
| ENSG0000010        | 5.744387 | -4.0522  | 0.00386  | 0.008742 | RP11-713C  | chr4  | + | 1.89E+08 | 1.89E+08 | 357  |
| ENSG00000154.50503 | 21.6859  | 1.2997   | 0.008322 | 0.017736 | RP11-244F  | chr1  | - | 35439957 | 35450914 | 3163 |
| ENSG000001105.8462 | 157.3484 | -0.56823 | 0.036417 | 0.06751  | TPM3P9     | chr19 | + | 53935237 | 53947923 | 2920 |
| ENSG0000011.794048 | 0.686276 | 0.99696  | 0.54046  | 0.64097  | CTD-2036J  | chr8  | - | 22247378 | 22248168 | 483  |
| ENSG0000013.060548 | 3.755116 | -0.27228 | 0.78374  | 0.84514  | RPL29P24   | chr12 | - | 1.21E+08 | 1.21E+08 | 453  |
| ENSG0000010.580602 | 0.686276 | -0.10523 | 0.9528   | NA       | RP11-689J  | chr14 | + | 21867084 | 21867441 | 358  |
| ENSG0000010.342542 | 1.652581 | -1.6373  | 0.29704  | 0.39905  | RP11-145N  | chr1  | - | 59520069 | 59521721 | 171  |
| ENSG00000114.25295 | 10.65272 | 0.41564  | 0.49386  | 0.5978   | GVQW1      | chr9  | + | 32566787 | 32568619 | 1833 |
| ENSG0000014.088174 | 1.606458 | 1.1617   | 0.31556  | 0.41819  | AC004985.  | chr7  | - | 44001189 | 44012924 | 1170 |
| ENSG00000158.92214 | 86.01182 | -0.54307 | 0.028453 | 0.054154 | NSUN6      | chr10 | - | 18834490 | 18940551 | 2201 |
| ENSG0000010.36308  | 0.997859 | -1.0294  | 0.53423  | NA       | AC090602.  | chr15 | - | 25154076 | 25154972 | 894  |
| ENSG0000010.290301 | 0.951736 | -0.90191 | 0.60254  | NA       | RPL17P40   | chr16 | - | 16188049 | 16189066 | 413  |
| ENSG0000010.580602 | 0        | 0.8036   | 0.6494   | NA       | RP4-714D5  | chr1  | - | 1.01E+08 | 1.01E+08 | 384  |
| ENSG0000010        | 0.343138 | -0.41864 | 0.81278  | NA       | RP11-488C  | chr14 | - | 77352720 | 77353093 | 374  |
| ENSG0000010        | 2.146242 | -1.9426  | 0.27559  | 0.3757   | RP11-344B  | chr9  | + | 1.32E+08 | 1.32E+08 | 395  |
| ENSG0000011.016461 | 0.937167 | 0.057624 | 0.97077  | 0.98381  | RP11-657C  | chr3  | - | 82855666 | 82857172 | 1507 |
| ENSG0000011.016461 | 0        | 1.3167   | 0.46021  | NA       | PRICKLE2-A | chr3  | + | 64089146 | 64091732 | 496  |
| ENSG0000010        | 0.594029 | -0.81444 | 0.64499  | NA       | CEACAMP1   | chr19 | - | 43715943 | 43752798 | 1721 |
| ENSG0000012.80195  | 0.686276 | 1.5061   | 0.33145  | 0.43463  | RP11-129B  | chr3  | + | 64053640 | 64088807 | 6505 |
| ENSG0000012.67693  | 4.570898 | -0.72571 | 0.44764  | 0.55306  | RPL29P14   | chr5  | - | 1.49E+08 | 1.49E+08 | 428  |
| ENSG0000010        | 0.357707 | -0.41864 | 0.81278  | NA       | UGT1A9     | chr2  | + | 2.35E+08 | 2.35E+08 | 2416 |
| ENSG0000012.13659  | 3.022717 | -0.39981 | 0.74283  | 0.81098  | HMGNI1P8   | chr3  | - | 1.67E+08 | 1.67E+08 | 288  |
| ENSG0000010        | 0.357707 | -0.41864 | 0.81278  | NA       | RP11-508N  | chr10 | + | 38453576 | 38466958 | 428  |
| ENSG000001107.8799 | 133.9122 | -0.31251 | 0.22883  | 0.32198  | YAE1D1     | chr7  | + | 39605975 | 39649919 | 968  |
| ENSG0000010.580602 | 0.891044 | -0.34198 | 0.84667  | NA       | RPL22P19   | chr12 | - | 1.25E+08 | 1.25E+08 | 441  |
| ENSG0000010.36308  | 0        | 0.4146   | 0.81455  | NA       | RP11-6F2.6 | chr3  | + | 1.57E+08 | 1.57E+08 | 791  |
| ENSG0000018.330465 | 18.48997 | -1.1249  | 0.056435 | 0.098922 | ARHGAP31   | chr3  | - | 1.19E+08 | 1.19E+08 | 624  |
| ENSG0000012.386629 | 3.108515 | -0.35855 | 0.76898  | 0.83316  | RP11-3K24  | chr17 | - | 58322649 | 58323008 | 360  |
| ENSG0000016.887518 | 0.654722 | 2.9584   | 0.010482 | 0.021945 | ADAMTS9-7  | chr3  | + | 64547014 | 64573878 | 1727 |

|            |          |          |          |          |          |                  |   |          |          |      |
|------------|----------|----------|----------|----------|----------|------------------|---|----------|----------|------|
| ENSG000001 | 2.302685 | 9.246195 | -1.8834  | 0.026863 | 0.051478 | RP11-398A chr3   | - | 72084451 | 72291716 | 2506 |
| ENSG000001 | 0        | 0.343138 | -0.41864 | 0.81278  | NA       | RP11-1002 chr3   | + | 1.63E+08 | 1.63E+08 | 1834 |
| ENSG000001 | 1.161205 | 0.297015 | 0.99731  | 0.57355  | NA       | RP4-752I6. chr1  | + | 27783709 | 27786093 | 428  |
| ENSG000001 | 7.032262 | 4.259314 | 0.687    | 0.40947  | 0.51441  | RP11-147I: chr11 | + | 74587331 | 74631067 | 723  |
| ENSG000001 | 0.653381 | 0        | 0.82678  | 0.64037  | NA       | RP11-615J: chr3  | + | 1.11E+08 | 1.11E+08 | 546  |
| ENSG000001 | 0        | 0.357707 | -0.41864 | 0.81278  | NA       | CTB-2L9.1 chr5   | - | 1.34E+08 | 1.34E+08 | 355  |
| ENSG000001 | 0        | 0.297015 | -0.41864 | 0.81278  | NA       | RP11-5407 chr1   | + | 849551   | 850351   | 443  |
| ENSG000001 | 2.302685 | 2.918317 | -0.31375 | 0.77603  | 0.83917  | AC093734. chr7   | - | 1583450  | 1585885  | 2224 |
| ENSG000001 | 0        | 2.771825 | -2.8976  | 0.066963 | 0.11472  | RPL21P12: chr17  | - | 11901670 | 11924825 | 531  |
| ENSG000001 | 0        | 5649.391 | -13.43   | 1.42E-37 | 2.32E-36 | TDGF1 chr3       | + | 46616045 | 46668033 | 2513 |
| ENSG000001 | 0        | 1.430828 | -1.4414  | 0.41759  | NA       | CTC-209L1: chr5  | + | 1.54E+08 | 1.54E+08 | 464  |
| ENSG000001 | 0        | 0.357707 | -0.41864 | 0.81278  | NA       | RP11-344N chrX   | - | 48136139 | 48137013 | 284  |
| ENSG000001 | 2.770247 | 0.343138 | 2.2727   | 0.12751  | 0.19845  | IQCJ-SCHIP chr3  | - | 1.59E+08 | 1.59E+08 | 508  |
| ENSG000001 | 0.290301 | 0.686276 | -0.47648 | 0.78935  | NA       | RP11-768C chr3   | - | 1.17E+08 | 1.17E+08 | 489  |
| ENSG000001 | 5.330717 | 0.297015 | 3.2238   | 0.018829 | 0.037384 | RP11-446F: chr3  | - | 1.07E+08 | 1.07E+08 | 1368 |
| ENSG000001 | 0.342542 | 3.071256 | -2.3911  | 0.10827  | 0.17265  | RP11-572N chr3   | - | 1.13E+08 | 1.13E+08 | 1253 |
| ENSG000001 | 0.290301 | 1.684135 | -1.65    | 0.29863  | 0.40041  | RP5-916O1 chr11  | - | 36018776 | 36019225 | 450  |
| ENSG000001 | 0.72616  | 0        | 0.85004  | 0.63064  | NA       | RP11-275F: chr3  | - | 1.81E+08 | 1.81E+08 | 865  |
| ENSG000001 | 0        | 0.297015 | -0.41864 | 0.81278  | NA       | KRTAP5-8 chr11   | + | 71249071 | 71250253 | 1183 |
| ENSG000001 | 7.416693 | 1.326428 | 2.2095   | 0.044285 | 0.080016 | AP001052. chr21  | + | 45141573 | 45152146 | 342  |
| ENSG000001 | 1.265686 | 0        | 1.6147   | 0.36215  | NA       | AC006378. chr7   | - | 93594722 | 93597702 | 314  |
| ENSG000001 | 0.36308  | 3.24447  | -2.541   | 0.075556 | 0.12721  | RP1-89D4. chr11  | + | 33258554 | 33258955 | 402  |
| ENSG000001 | 0        | 5.817232 | -3.9967  | 0.005563 | 0.012271 | RP11-397K chr3   | - | 1.09E+08 | 1.09E+08 | 188  |
| ENSG000001 | 522.0389 | 532.7521 | -0.02819 | 0.8809   | 0.91693  | CRCP chr7        | + | 65579591 | 65619555 | 3139 |
| ENSG000001 | 0.36308  | 2.445673 | -1.9767  | 0.21763  | 0.30908  | RP11-393P chr4   | + | 62077370 | 62077921 | 552  |
| ENSG000001 | 10.24872 | 18.01813 | -0.78249 | 0.16882  | 0.25053  | AC093620. chr7   | + | 5459458  | 5460398  | 583  |
| ENSG000001 | 8.247335 | 4.867912 | 0.69528  | 0.39777  | 0.5023   | RP11-379B chr3   | + | 1.26E+08 | 1.26E+08 | 1086 |
| ENSG000001 | 23.87127 | 9.5659   | 1.2604   | 0.030199 | 0.057087 | RP11-379B chr3   | - | 1.26E+08 | 1.26E+08 | 1996 |
| ENSG000001 | 0.342542 | 0        | 0.4146   | 0.81455  | NA       | PPATP1 chr3      | - | 87100342 | 87101888 | 1547 |
| ENSG000001 | 0.975385 | 0.297015 | 0.91901  | 0.59525  | NA       | RP11-674E chr3   | + | 1.55E+08 | 1.55E+08 | 601  |
| ENSG000001 | 6.048317 | 5.361573 | 0.16234  | 0.83618  | 0.88507  | WWTR1-AS chr3    | + | 1.49E+08 | 1.49E+08 | 1700 |
| ENSG000001 | 20.39817 | 12.08355 | 0.73945  | 0.21774  | 0.3092   | RP11-81N1 chr3   | + | 67705121 | 67998137 | 2226 |
| ENSG000001 | 0        | 0.937167 | -1.2408  | 0.48662  | NA       | RP11-47K1 chr1   | - | 92000223 | 92001150 | 928  |
| ENSG000001 | 1.016461 | 0        | 1.3167   | 0.46021  | NA       | CDRT1 chr17      | - | 15468798 | 15522826 | 2571 |
| ENSG000001 | 2.209369 | 7.284447 | -1.5668  | 0.092444 | 0.15127  | RP11-451C chr3   | + | 1.55E+08 | 1.55E+08 | 905  |
| ENSG000001 | 65.2799  | 141.0278 | -1.1075  | 0.000137 | 0.000383 | RPL36A chrX      | + | 1.01E+08 | 1.01E+08 | 2240 |
| ENSG000001 | 0.685084 | 1.326428 | -0.65605 | 0.69325  | 0.7714   | PMS2P11 chr7     | + | 76640868 | 76645170 | 574  |
| ENSG000001 | 0        | 1.309443 | -1.6539  | 0.35008  | NA       | RP11-392P chr12  | + | 13003916 | 13004674 | 759  |
| ENSG000001 | 3.278071 | 0        | 3.2478   | 0.029532 | 0.055999 | RP11-1042 chr14  | - | 61068794 | 61069310 | 517  |
| ENSG000001 | 0        | 0.297015 | -0.41864 | 0.81278  | NA       | RP11-758P chr7   | + | 1E+08    | 1E+08    | 333  |
| ENSG000001 | 0        | 0.297015 | -0.41864 | 0.81278  | NA       | RP11-758I: chr3  | - | 1.46E+08 | 1.46E+08 | 705  |
| ENSG000001 | 0        | 11.80681 | -5.1978  | 2.30E-05 | 7.07E-05 | SYNPR-AS1 chr3   | - | 63409272 | 63535727 | 558  |
| ENSG000001 | 202.6247 | 314.7175 | -0.63481 | 0.007918 | 0.016937 | PDXP chr22       | + | 38054734 | 38062941 | 2010 |
| ENSG000001 | 3.184754 | 1.309443 | 1.1065   | 0.37208  | 0.47653  | RPL36AP4: chr15  | - | 90231168 | 90231474 | 307  |
| ENSG000001 | 7.979363 | 10.41968 | -0.38963 | 0.60543  | 0.69866  | RPP21 chr6       | + | 30312908 | 30314661 | 1492 |
| ENSG000001 | 0.870904 | 3.449237 | -1.4838  | 0.32383  | 0.42684  | RP11-239L chr6   | + | 26867311 | 26867986 | 676  |
| ENSG000001 | 0        | 0.686276 | -0.84936 | 0.6309   | NA       | HNF1A-AS1 chr12  | - | 1.21E+08 | 1.21E+08 | 2455 |
| ENSG000001 | 66.52049 | 49.32492 | 0.42274  | 0.148    | 0.22444  | CD302 chr2       | - | 1.61E+08 | 1.61E+08 | 3839 |
| ENSG000001 | 0.342542 | 0.594029 | -0.38792 | 0.8278   | NA       | RP11-764I: chr3  | + | 1.41E+08 | 1.41E+08 | 362  |
| ENSG000001 | 17.30412 | 12.93417 | 0.40321  | 0.44694  | 0.55245  | EGFL8 chr6       | + | 32132360 | 32136058 | 2441 |
| ENSG000001 | 0        | 0.297015 | -0.41864 | 0.81278  | NA       | AC064852. chr2   | - | 2.34E+08 | 2.34E+08 | 851  |
| ENSG000001 | 0.72616  | 23.20092 | -4.6403  | 2.88E-06 | 9.83E-06 | RP11-512F: chrX  | - | 1.31E+08 | 1.31E+08 | 511  |
| ENSG000001 | 1.048164 | 3.008147 | -1.3204  | 0.29853  | 0.40037  | EEF1A1P25 chr3   | + | 1.39E+08 | 1.39E+08 | 1267 |
| ENSG000001 | 0.923144 | 0.700845 | 0.32346  | 0.84154  | NA       | TDGF1P6 chr3     | + | 1.36E+08 | 1.36E+08 | 448  |
| ENSG000001 | 0        | 0.640152 | -0.82869 | 0.63935  | NA       | RP11-666A chr3   | + | 1.26E+08 | 1.26E+08 | 262  |
| ENSG000001 | 0        | 1.058552 | -1.361   | 0.4451   | NA       | RP4-555L1 chr7   | + | 1.51E+08 | 1.51E+08 | 564  |
| ENSG000001 | 0        | 0.937167 | -1.2408  | 0.48662  | NA       | RP11-461C chr5   | + | 1.38E+08 | 1.38E+08 | 618  |
| ENSG000001 | 1.068702 | 1.577319 | -0.47313 | 0.75195  | 0.81881  | RPL39P38 chr19   | - | 18396156 | 18396306 | 151  |
| ENSG000001 | 176.7959 | 239.6093 | -0.4366  | 0.009205 | 0.019474 | ATP5J2 chr7      | - | 99046098 | 99063954 | 774  |
| ENSG000001 | 0.72616  | 0.343138 | 0.52026  | 0.77047  | NA       | RP11-336K chr1   | - | 1.56E+08 | 1.56E+08 | 420  |
| ENSG000001 | 13.93274 | 15.30861 | -0.12307 | 0.82437  | 0.87617  | PTPRG-AS1 chr3   | - | 62247498 | 62355005 | 2661 |
| ENSG000001 | 0.290301 | 0        | 0.4146   | 0.81455  | NA       | HSPA8P9 chr3     | + | 1.38E+08 | 1.38E+08 | 1943 |
| ENSG000001 | 0.685084 | 0.343138 | 0.48017  | 0.78775  | NA       | RP11-641C chr3   | + | 1.69E+08 | 1.69E+08 | 535  |
| ENSG000001 | 2.282147 | 0.997859 | 1.0237   | 0.41799  | 0.52326  | AC159540. chr2   | + | 98086678 | 98100408 | 859  |
| ENSG000001 | 2.904639 | 104.5198 | -4.2042  | 0.002193 | 0.005154 | ARHGAP8 chr22    | + | 45098355 | 45258665 | 2905 |

|            |          |          |          |          |          |                  |   |          |          |      |
|------------|----------|----------|----------|----------|----------|------------------|---|----------|----------|------|
| ENSG000001 | 8.391265 | 0.997859 | 2.7912   | 0.006587 | 0.014323 | AF011889. chrX   | - | 1.49E+08 | 1.49E+08 | 1044 |
| ENSG000001 | 1.370168 | 0.686276 | 0.60093  | 0.73056  | 0.80108  | RP11-274B chr7   | - | 1.28E+08 | 1.28E+08 | 132  |
| ENSG000001 | 0.632843 | 0        | 0.81931  | 0.64303  | NA       | RP11-85G2 chr14  | + | 93710356 | 93710669 | 314  |
| ENSG000001 | 40.41329 | 27.37517 | 0.56643  | 0.12989  | 0.20164  | PSMC1P1 chr3     | + | 68684856 | 68686175 | 1320 |
| ENSG000001 | 0.36308  | 1.073121 | -0.87448 | 0.62195  | NA       | RPS15AP24 chr8   | - | 29974900 | 29975295 | 396  |
| ENSG000001 | 0        | 0.98329  | -1.2878  | 0.47019  | NA       | AC098820. chr2   | - | 2.17E+08 | 2.17E+08 | 976  |
| ENSG000001 | 0.653381 | 0        | 0.82678  | 0.64037  | NA       | AC108004. chr17  | - | 254326   | 263814   | 887  |
| ENSG000001 | 0.923144 | 2.96444  | -1.3748  | 0.29231  | 0.39416  | CA15P1 chr22     | - | 19019077 | 19022077 | 905  |
| ENSG000001 | 6.535603 | 4.602452 | 0.47797  | 0.55589  | 0.65494  | RP1-130H1 chr22  | - | 30770930 | 30773862 | 1443 |
| ENSG000001 | 2.645227 | 0.686276 | 1.5783   | 0.26249  | 0.3607   | AGGF1P3 chr3     | - | 75702712 | 75703924 | 1213 |
| ENSG000001 | 1.016461 | 1.698704 | -0.60464 | 0.66554  | 0.74869  | CBX5P1 chr3      | - | 88144558 | 88145118 | 561  |
| ENSG000001 | 0.870904 | 1.416259 | -0.44288 | 0.78749  | 0.84806  | RP11-624C chr3   | + | 72821690 | 72822622 | 933  |
| ENSG000001 | 0.36308  | 0        | 0.4146   | 0.81455  | NA       | RP11-6F2.5 chr3  | + | 1.57E+08 | 1.57E+08 | 1497 |
| ENSG000001 | 0.290301 | 0.357707 | -0.00203 | 0.99908  | NA       | RP11-767L chr3   | + | 1.2E+08  | 1.2E+08  | 348  |
| ENSG000001 | 13.08237 | 5.508065 | 1.1914   | 0.079347 | 0.13259  | RP11-4K3_ chr1   | + | 27651820 | 27652287 | 468  |
| ENSG000001 | 31.09114 | 29.96983 | 0.052722 | 0.91703  | 0.944    | GUSBP2 chr6      | - | 26839263 | 26924333 | 1457 |
| ENSG000001 | 1558.095 | 1288.549 | 0.27346  | 0.17497  | 0.25813  | ARPC4 chr3       | + | 9834179  | 9855035  | 2582 |
| ENSG000001 | 7.147908 | 11.6393  | -0.67991 | 0.30271  | 0.40397  | RP11-490G chr12  | - | 95861173 | 95861637 | 465  |
| ENSG000001 | 1.887365 | 0        | 2.1461   | 0.21553  | NA       | ZBTB20-AS1 chr3  | + | 1.14E+08 | 1.14E+08 | 1687 |
| ENSG000001 | 3.080272 | 3.351285 | -0.07641 | 0.94128  | 0.96179  | CORT chr1        | + | 10509776 | 10511959 | 1130 |
| ENSG000001 | 0.36308  | 2.696564 | -2.2822  | 0.11928  | 0.18793  | RP11-372E chr3   | + | 1.43E+08 | 1.43E+08 | 912  |
| ENSG000001 | 0        | 0.686276 | -0.84936 | 0.6309   | NA       | RP11-434C chr14  | + | 35163376 | 35163850 | 475  |
| ENSG000001 | 0        | 0.654722 | -0.83442 | 0.63731  | NA       | RP11-372E chr3   | + | 1.43E+08 | 1.43E+08 | 172  |
| ENSG000001 | 1.733248 | 0.357707 | 1.5335   | 0.35837  | 0.46266  | RP11-520C chr3   | - | 81295730 | 81346496 | 1014 |
| ENSG000001 | 0.290301 | 0.343138 | -0.00202 | 0.99909  | NA       | RP11-326J chr3   | + | 1.15E+08 | 1.15E+08 | 562  |
| ENSG000001 | 1.233984 | 0.343138 | 1.1864   | 0.48571  | NA       | CTD-2007H chr3   | + | 98290098 | 98290676 | 579  |
| ENSG000001 | 3.506758 | 3.945314 | -0.1432  | 0.89205  | 0.92504  | RP11-34P1 chr1   | + | 160446   | 161525   | 457  |
| ENSG000001 | 0        | 0.343138 | -0.41864 | 0.81278  | NA       | RP13-585F chr4   | + | 19815372 | 19815854 | 483  |
| ENSG000001 | 0        | 0.297015 | -0.41864 | 0.81278  | NA       | GOLGA2P6 chr10   | - | 30653339 | 30663315 | 2049 |
| ENSG000001 | 2.012384 | 0        | 2.4635   | 0.13092  | 0.20286  | RP11-413E chr3   | + | 75707685 | 75708165 | 481  |
| ENSG000001 | 8.786048 | 6.367554 | 0.4306   | 0.55467  | 0.65398  | UBQLN4P1 chr3    | - | 1.49E+08 | 1.49E+08 | 1801 |
| ENSG000001 | 20.48871 | 18.87192 | 0.10899  | 0.82547  | 0.87698  | RP11-381E chr3   | - | 1.08E+08 | 1.08E+08 | 509  |
| ENSG000001 | 0.685084 | 0.640152 | 0.044759 | 0.97934  | NA       | RPS23P6 chr16    | + | 12175094 | 12175759 | 431  |
| ENSG000001 | 5.103821 | 28.81258 | -2.3741  | 0.001021 | 0.002527 | INMT chr7        | + | 30737601 | 30797218 | 2559 |
| ENSG000001 | 0        | 1.949596 | -2.4359  | 0.13595  | 0.20899  | RP11-214C chr4   | - | 1.29E+08 | 1.29E+08 | 599  |
| ENSG000001 | 0.923144 | 0        | 1.223    | 0.49292  | NA       | PPP1R2P6 chr7    | + | 1.4E+08  | 1.4E+08  | 588  |
| ENSG000001 | 1.233984 | 0        | 1.5686   | 0.37707  | NA       | RP3-455J7. chr1  | + | 1.68E+08 | 1.68E+08 | 2523 |
| ENSG000001 | 0.342542 | 0        | 0.4146   | 0.81455  | NA       | RP11-732A chr11  | - | 6707122  | 6707600  | 479  |
| ENSG000001 | 26.35121 | 3.24447  | 2.8901   | 1.31E-05 | 4.15E-05 | RP11-80H8 chr3   | + | 1.43E+08 | 1.43E+08 | 529  |
| ENSG000001 | 1.681007 | 0.686276 | 0.97937  | 0.52405  | 0.62628  | RPL31P49 chr12   | + | 1.11E+08 | 1.11E+08 | 375  |
| ENSG000001 | 4.689314 | 1.773966 | 1.2718   | 0.26192  | 0.36008  | ADAMTS9-1 chr3   | + | 64670585 | 64997143 | 3691 |
| ENSG000001 | 2425.44  | 2010.488 | 0.27091  | 0.011785 | 0.024387 | ARPC1A chr7      | + | 98923521 | 98985787 | 1702 |
| ENSG000001 | 0.685084 | 0        | 0.85004  | 0.63064  | NA       | RP11-420J chr3   | + | 1.8E+08  | 1.8E+08  | 940  |
| ENSG000001 | 31.40035 | 375.0944 | -3.5409  | 1.04E-26 | 1.17E-25 | TMEFF1 chr9      | + | 1.03E+08 | 1.03E+08 | 2611 |
| ENSG000001 | 0.632843 | 0.297015 | 0.49183  | 0.78024  | NA       | RP4-735C1 chr1   | + | 1.1E+08  | 1.1E+08  | 808  |
| ENSG000001 | 1.971308 | 425.4882 | -7.5158  | 1.50E-36 | 2.39E-35 | RP11-38P2 chr3   | + | 1.53E+08 | 1.53E+08 | 2050 |
| ENSG000001 | 0        | 0.700845 | -0.87835 | 0.62047  | NA       | FABP5P3 chr7     | + | 1.52E+08 | 1.52E+08 | 1027 |
| ENSG000001 | 1.338465 | 0.891044 | 0.39821  | 0.79657  | 0.85554  | ZNF90P1 chr3     | + | 1.01E+08 | 1.01E+08 | 1951 |
| ENSG000001 | 2.665765 | 11.83024 | -2.0323  | 0.012964 | 0.026623 | RPL7AP30 chr4    | - | 1.14E+08 | 1.14E+08 | 796  |
| ENSG000001 | 0        | 4.083685 | -3.5361  | 0.015969 | 0.032166 | RP5-964N1 chrX   | - | 1.13E+08 | 1.13E+08 | 497  |
| ENSG000001 | 127.0379 | 17.89836 | 2.8071   | 9.28E-20 | 7.74E-19 | RPSAP52 chr12    | - | 66151800 | 66220777 | 1144 |
| ENSG000001 | 13.35034 | 17.54549 | -0.38044 | 0.45553  | 0.56083  | AC002467. chr7   | - | 1.07E+08 | 1.07E+08 | 657  |
| ENSG000001 | 7.07513  | 1.043983 | 2.4961   | 0.023989 | 0.046473 | AF011889. chrX   | - | 1.49E+08 | 1.49E+08 | 1120 |
| ENSG000001 | 0.870904 | 0.654722 | 0.29016  | 0.86514  | NA       | RP11-555A chr3   | + | 1.57E+08 | 1.57E+08 | 320  |
| ENSG000001 | 0        | 1.966581 | -2.1968  | 0.20389  | 0.29293  | AC092620. chr2   | + | 1.39E+08 | 1.39E+08 | 534  |
| ENSG000001 | 1.411244 | 3.259039 | -1.0718  | 0.3887   | 0.49293  | RP11-91P2 chr11  | - | 77579768 | 77580241 | 474  |
| ENSG000001 | 0.975385 | 0        | 1.2767   | 0.47406  | NA       | RP11-342A chr1   | - | 43302599 | 43312033 | 627  |
| ENSG000001 | 0        | 0.654722 | -0.83442 | 0.63731  | NA       | COX6B1P2 chr17   | + | 46791092 | 46791321 | 230  |
| ENSG000001 | 4.678963 | 1.66715  | 1.2113   | 0.37499  | 0.47923  | RP11-1000 chr15  | - | 32948285 | 32965266 | 461  |
| ENSG000001 | 0.36308  | 0.997859 | -1.0294  | 0.53423  | NA       | RP11-637A chr12  | + | 69078375 | 69080088 | 679  |
| ENSG000001 | 0        | 0.343138 | -0.41864 | 0.81278  | NA       | RP11-277J. chr12 | + | 8013033  | 8013360  | 328  |
| ENSG000001 | 0.342542 | 1.591889 | -1.589   | 0.31649  | 0.41913  | RPL21P54 chr5    | + | 34883162 | 34883625 | 464  |
| ENSG000001 | 0        | 3.025133 | -3.0821  | 0.044886 | 0.080924 | CECR3 chr22      | - | 17737749 | 17747623 | 1915 |
| ENSG000001 | 86.00726 | 159.2102 | -0.88681 | 0.000155 | 0.00043  | ATP5O chr21      | - | 35275757 | 35288284 | 2839 |
| ENSG000001 | 319.8115 | 586.9949 | -0.87304 | 2.18E-11 | 1.13E-10 | PLEKHO2 chr15    | + | 65134088 | 65160206 | 3720 |

|            |          |          |          |          |          |             |       |   |          |          |      |
|------------|----------|----------|----------|----------|----------|-------------|-------|---|----------|----------|------|
| ENSG000001 | 0.705622 | 0.343138 | 0.57395  | 0.74355  | NA       | RP1-20N2.1  | chr6  | + | 1.44E+08 | 1.44E+08 | 853  |
| ENSG000001 | 263.6767 | 170.486  | 0.62723  | 7.10E-05 | 0.000206 | C8orf58     | chr8  | + | 22457114 | 22461663 | 2021 |
| ENSG000001 | 2.044087 | 104.4482 | -5.5335  | 2.26E-19 | 1.84E-18 | KALP        | chrY  | + | 15863536 | 16027704 | 1816 |
| ENSG000001 | 33.02056 | 80.19451 | -1.2652  | 0.000168 | 0.000465 | RP11-34P1   | chr1  | - | 141474   | 173862   | 4860 |
| ENSG000001 | 0        | 0.343138 | -0.41864 | 0.81278  | NA       | CTB-14A14   | chr5  | + | 1.8E+08  | 1.8E+08  | 592  |
| ENSG000001 | 716.5498 | 919.3622 | -0.35863 | 0.004479 | 0.010046 | PISD        | chr22 | - | 32014477 | 32058418 | 2669 |
| ENSG000001 | 0.653381 | 0        | 0.82678  | 0.64037  | NA       | RP11-85I2.1 | chr3  | + | 67346724 | 67356783 | 2084 |
| ENSG000001 | 2.334388 | 0.686276 | 1.4105   | 0.32753  | 0.43053  | RP11-242C   | chrX  | + | 30716324 | 30740049 | 562  |
| ENSG000001 | 3.64115  | 2.558194 | 0.43949  | 0.6895   | 0.76857  | RP11-435F   | chr3  | + | 1.14E+08 | 1.14E+08 | 734  |
| ENSG000001 | 0.995923 | 1.029414 | -0.02734 | 0.98622  | 0.99179  | RPL13P4     | chr15 | + | 75680608 | 75681169 | 562  |
| ENSG000001 | 0.580602 | 0.357707 | 0.37639  | 0.83285  | NA       | CTB-46E9.1  | chr5  | - | 1.49E+08 | 1.49E+08 | 355  |
| ENSG000001 | 0        | 0.297015 | -0.41864 | 0.81278  | NA       | TRBVB       | chr7  | + | 1.42E+08 | 1.42E+08 | 408  |
| ENSG000001 | 0.290301 | 0        | 0.4146   | 0.81455  | NA       | RP11-292E   | chr3  | + | 1.53E+08 | 1.53E+08 | 382  |
| ENSG000001 | 0.290301 | 0.357707 | -0.00203 | 0.99908  | NA       | RP5-1073F   | chr17 | + | 57989558 | 57989727 | 170  |
| ENSG000001 | 0        | 0.357707 | -0.41864 | 0.81278  | NA       | RP11-425I.1 | chr4  | - | 1.41E+08 | 1.41E+08 | 622  |
| ENSG000001 | 0        | 0.715414 | -0.84936 | 0.6309   | NA       | RP5-1154E   | chr7  | - | 1.42E+08 | 1.42E+08 | 745  |
| ENSG000001 | 0.342542 | 0        | 0.4146   | 0.81455  | NA       | RP11-755B   | chr3  | + | 57678932 | 57682323 | 2919 |
| ENSG000001 | 3.466496 | 0.951736 | 1.4615   | 0.30568  | 0.40721  | HOGA1       | chr10 | + | 99344080 | 99372559 | 2581 |
| ENSG000001 | 0        | 0.357707 | -0.41864 | 0.81278  | NA       | RPL32P26    | chr12 | + | 63052603 | 63053005 | 403  |
| ENSG000001 | 0.943682 | 0        | 1.2438   | 0.48556  | NA       | RPS20P20    | chr8  | + | 72808226 | 72808565 | 340  |
| ENSG000001 | 823.6243 | 1489.286 | -0.85303 | 2.60E-08 | 1.06E-07 | PWP2        | chr21 | + | 45527171 | 45551063 | 4564 |
| ENSG000001 | 0.290301 | 0.686276 | -0.47648 | 0.78935  | NA       | HNRNPA1P    | chr3  | + | 1.5E+08  | 1.5E+08  | 1046 |
| ENSG000001 | 2.789971 | 1.888903 | 0.49144  | 0.67748  | 0.75844  | RP1-149A1   | chr22 | + | 32779773 | 32781618 | 444  |
| ENSG000001 | 9.200555 | 0        | 4.7909   | 0.00021  | 0.000573 | CTC-340A1   | chr5  | + | 1.64E+08 | 1.65E+08 | 1618 |
| ENSG000001 | 6.120282 | 71.22439 | -3.4642  | 4.37E-15 | 2.87E-14 | C2orf15     | chr2  | + | 99757948 | 99939204 | 2569 |
| ENSG000001 | 1836.044 | 938.0884 | 0.96865  | 8.54E-20 | 7.14E-19 | PI4KA       | chr22 | - | 21061979 | 21213705 | 6752 |
| ENSG000001 | 1.660469 | 1.759397 | -0.05145 | 0.97183  | 0.98444  | TCEB1P19    | chr1  | + | 89294785 | 89295102 | 318  |
| ENSG000001 | 4.088174 | 2.589748 | 0.57743  | 0.56581  | 0.66366  | AKAP2       | chr9  | + | 1.13E+08 | 1.13E+08 | 6866 |
| ENSG000001 | 2.883288 | 1.248751 | 1.0027   | 0.43385  | 0.53928  | AF224669.1  | chr4  | + | 1.04E+08 | 1.04E+08 | 463  |
| ENSG000001 | 2.914991 | 3.183777 | -0.12515 | 0.90215  | 0.93242  | RP11-407A   | chr14 | + | 39625946 | 39627056 | 740  |
| ENSG000001 | 40.76521 | 3.619162 | 3.3935   | 8.08E-09 | 3.45E-08 | WWTR1-IT1   | chr3  | - | 1.49E+08 | 1.49E+08 | 451  |
| ENSG000001 | 1.846289 | 0.686276 | 1.043    | 0.51584  | 0.61868  | RP6-109B7   | chr22 | + | 46449585 | 46453090 | 877  |
| ENSG000001 | 0        | 0.98329  | -1.2878  | 0.47019  | NA       | RP11-95I1.1 | chr5  | - | 61857686 | 61858043 | 358  |
| ENSG000001 | 0        | 0.357707 | -0.41864 | 0.81278  | NA       | RP11-287A   | chr9  | + | 1.08E+08 | 1.08E+08 | 576  |
| ENSG000001 | 0        | 0.343138 | -0.41864 | 0.81278  | NA       | RP11-338L   | chr3  | + | 1.82E+08 | 1.82E+08 | 328  |
| ENSG000001 | 121.7735 | 116.9796 | 0.05901  | 0.83651  | 0.88528  | USP27X      | chrX  | + | 49644470 | 49647166 | 2697 |
| ENSG000001 | 0.653381 | 0.297015 | 0.51304  | 0.77085  | NA       | ALG1L15P    | chr3  | - | 1.56E+08 | 1.56E+08 | 794  |
| ENSG000001 | 0.290301 | 0        | 0.4146   | 0.81455  | NA       | RP11-268C   | chrX  | - | 27177022 | 27194415 | 594  |
| ENSG000001 | 2.976604 | 2.338857 | 0.30557  | 0.79613  | 0.85538  | RP11-239L   | chr6  | + | 26866490 | 26867376 | 887  |
| ENSG000001 | 18.47731 | 13.28376 | 0.46817  | 0.34837  | 0.45262  | HYPK        | chr15 | + | 44088340 | 44095241 | 4777 |
| ENSG000001 | 0        | 1.188058 | -1.268   | 0.47398  | NA       | RP11-1396   | chr4  | - | 9555234  | 9555605  | 372  |
| ENSG000001 | 0        | 1.294874 | -1.8547  | 0.27869  | NA       | RP53AP49    | chr18 | + | 57816808 | 57817597 | 790  |
| ENSG000001 | 0.342542 | 0        | 0.4146   | 0.81455  | NA       | RPL9P28     | chr17 | - | 46768478 | 46769056 | 579  |
| ENSG000001 | 94.09885 | 171.5794 | -0.86443 | 1.85E-05 | 5.76E-05 | RPL7AP6     | chr14 | - | 70352057 | 70352869 | 813  |
| ENSG000001 | 0        | 13.11625 | -5.3494  | 1.06E-05 | 3.39E-05 | RP11-738B   | chr7  | - | 1.29E+08 | 1.29E+08 | 305  |
| ENSG000001 | 0.36308  | 6.128816 | -3.1724  | 0.029833 | 0.05647  | RP1-90G24   | chr22 | + | 32601102 | 32665653 | 876  |
| ENSG000001 | 1.306762 | 2.575179 | -0.83727 | 0.51122  | 0.61438  | RPL7AP31    | chr4  | + | 57222301 | 57223098 | 798  |
| ENSG000001 | 9.221906 | 15.42597 | -0.72747 | 0.1913   | 0.2782   | RPS20P33    | chr14 | + | 1.06E+08 | 1.06E+08 | 354  |
| ENSG000001 | 220.3851 | 108.9506 | 1.0093   | 2.60E-07 | 9.78E-07 | AC069513.1  | chr3  | + | 1.95E+08 | 1.95E+08 | 4208 |
| ENSG000001 | 0.290301 | 0.594029 | -0.38058 | 0.83094  | NA       | RPL36AP41   | chr12 | - | 64265519 | 64265824 | 306  |
| ENSG000001 | 0.342542 | 0.997859 | -1.0273  | 0.53559  | NA       | AC090602.1  | chr15 | - | 25156021 | 25156272 | 252  |
| ENSG000001 | 11.77463 | 3.526915 | 1.629    | 0.031628 | 0.059461 | FOXP1-IT1   | chr3  | - | 71619406 | 71623608 | 3539 |
| ENSG000001 | 0        | 1.294874 | -1.8547  | 0.27869  | NA       | RPL9P32     | chr19 | - | 30447276 | 30447895 | 620  |
| ENSG000001 | 0        | 0.715414 | -0.84936 | 0.6309   | NA       | RP11-340E   | chr3  | + | 1.41E+08 | 1.41E+08 | 976  |
| ENSG000001 | 0.36308  | 0        | 0.4146   | 0.81455  | NA       | CTD-2049J.1 | chr3  | + | 1.6E+08  | 1.6E+08  | 471  |
| ENSG000001 | 39.29756 | 11.05742 | 1.7871   | 0.000218 | 0.000594 | AMACR       | chr5  | - | 33986283 | 34008220 | 4153 |
| ENSG000001 | 2.770247 | 8.798658 | -1.6008  | 0.062123 | 0.1075   | MTFP1       | chr22 | + | 30821518 | 30825045 | 1375 |
| ENSG000001 | 501.9655 | 1305.312 | -1.3755  | 2.86E-21 | 2.56E-20 | SNHG3       | chr1  | + | 28832492 | 28837404 | 2614 |
| ENSG000001 | 0.705622 | 0        | 0.8807   | 0.6196   | NA       | RPL5P13     | chr4  | - | 1.43E+08 | 1.43E+08 | 709  |
| ENSG000001 | 0.36308  | 1.964165 | -1.7281  | 0.28889  | 0.39048  | RP11-734K   | chr2  | + | 9243569  | 9245243  | 547  |
| ENSG000001 | 0.290301 | 1.606458 | -1.5134  | 0.36351  | NA       | SERBP1P3    | chr3  | - | 53098299 | 53099107 | 809  |
| ENSG000001 | 24.96067 | 0        | 6.2575   | 5.41E-08 | 2.16E-07 | RP13-463A   | chr10 | - | 5636954  | 5638081  | 697  |
| ENSG000001 | 0        | 1.043983 | -1.3473  | 0.44976  | NA       | RP11-639F   | chr3  | - | 1.55E+08 | 1.55E+08 | 947  |
| ENSG000001 | 0        | 0.297015 | -0.41864 | 0.81278  | NA       | OFD1P6Y     | chrY  | + | 20835919 | 20901083 | 2724 |
| ENSG000001 | 1.681007 | 0.594029 | 1.0706   | 0.4871   | 0.59109  | RP4-778K6   | chr7  | + | 1.05E+08 | 1.05E+08 | 546  |

|            |          |          |          |          |          |                 |   |          |          |      |
|------------|----------|----------|----------|----------|----------|-----------------|---|----------|----------|------|
| ENSG000001 | 0        | 0.357707 | -0.41864 | 0.81278  | NA       | RP11-299L chr14 | - | 81799305 | 81799705 | 401  |
| ENSG000001 | 2.914991 | 43.8274  | -3.7816  | 2.19E-10 | 1.06E-09 | ARHGDIG chr16   | + | 318726   | 333003   | 1272 |
| ENSG000001 | 0        | 1.355566 | -1.9006  | 0.26573  | NA       | RP11-142L chr3  | - | 81811857 | 81813907 | 376  |
| ENSG000001 | 31.73433 | 22.97916 | 0.45217  | 0.28612  | 0.38759  | RP11-568K chr1  | - | 1.78E+08 | 1.78E+08 | 2921 |
| ENSG000001 | 0.342542 | 3.991438 | -2.8361  | 0.039478 | 0.07255  | RP11-588L chr4  | + | 40493750 | 40494041 | 292  |
| ENSG000001 | 4.979616 | 2.757256 | 0.80594  | 0.39804  | 0.50258  | CTD-2235C chr5  | + | 74670288 | 74670634 | 347  |
| ENSG000001 | 0.705622 | 2.96444  | -1.7419  | 0.19802  | 0.28623  | RP11-71H1 chr3  | - | 1.24E+08 | 1.24E+08 | 337  |
| ENSG000001 | 0.290301 | 0        | 0.4146   | 0.81455  | NA       | HOXB-AS4 chr17  | + | 46706037 | 46712294 | 566  |
| ENSG000001 | 17.78106 | 8.623028 | 1.0219   | 0.056258 | 0.098638 | PVRL3-AS1 chr3  | - | 1.11E+08 | 1.11E+08 | 792  |
| ENSG000001 | 1090.492 | 253.6844 | 2.0897   | 1.27E-13 | 7.59E-13 | ARFGAP3 chr22   | - | 43192508 | 43254112 | 2857 |
| ENSG000001 | 6.535603 | 6.221063 | 0.066744 | 0.93279  | 0.95588  | BGLAP chr1      | + | 1.56E+08 | 1.56E+08 | 931  |
| ENSG000001 | 0        | 0.686276 | -0.84936 | 0.6309   | NA       | RP11-511P chr7  | + | 1.5E+08  | 1.5E+08  | 2043 |
| ENSG000001 | 130.49   | 144.1023 | -0.14278 | 0.51933  | 0.62198  | C22orf39 chr22  | - | 19338891 | 19435755 | 2979 |
| ENSG000001 | 80.02837 | 94.18731 | -0.23922 | 0.32369  | 0.4267   | RP11-62J1 chr7  | + | 1.28E+08 | 1.28E+08 | 1030 |
| ENSG000001 | 0.342542 | 1.652581 | -1.6373  | 0.29704  | 0.39905  | RP11-100N chr4  | + | 47708389 | 47709004 | 616  |
| ENSG000001 | 5050.254 | 3480.555 | 0.53619  | 0.000514 | 0.001332 | PEG10 chr7      | + | 94285637 | 94299007 | 6618 |
| ENSG000001 | 0        | 3.198346 | -3.1449  | 0.041263 | 0.075338 | SKINTL chr1     | - | 48561764 | 48648100 | 817  |
| ENSG000001 | 1.971308 | 0.654722 | 1.2659   | 0.37299  | 0.47732  | RP11-368I chr3  | + | 1.69E+08 | 1.69E+08 | 710  |
| ENSG000001 | 0        | 0.700845 | -0.87835 | 0.62047  | NA       | RP11-382N chr16 | + | 5320175  | 5320955  | 781  |
| ENSG000001 | 0        | 0.357707 | -0.41864 | 0.81278  | NA       | RP4-669B1 chr7  | + | 1.44E+08 | 1.44E+08 | 1510 |
| ENSG000001 | 17.39565 | 6.502635 | 1.3421   | 0.1173   | 0.18518  | AC108488 chr2   | - | 3579403  | 3584463  | 914  |
| ENSG000001 | 0.36308  | 0        | 0.4146   | 0.81455  | NA       | RPL6P8 chr3     | + | 1.6E+08  | 1.6E+08  | 843  |
| ENSG000001 | 0.36308  | 0.343138 | -0.0021  | 0.99905  | NA       | DMD-AS2 chrX    | + | 31279225 | 31341747 | 655  |
| ENSG000001 | 29.31763 | 28.05742 | 0.056483 | 0.88288  | 0.91846  | RP11-464F chr10 | - | 75434053 | 75490272 | 3810 |
| ENSG000001 | 8.154018 | 13.30886 | -0.70371 | 0.2803   | 0.38117  | CTB-161A2 chr7  | + | 99933748 | 99938951 | 683  |
| ENSG000001 | 49.49567 | 63.50047 | -0.35606 | 0.21114  | 0.30143  | RP11-234A chr3  | - | 1.01E+08 | 1.01E+08 | 459  |
| ENSG000001 | 1.866827 | 2.321872 | -0.24451 | 0.84938  | 0.89424  | RPS26P52 chr16  | - | 14016189 | 14016536 | 348  |
| ENSG000001 | 0        | 0.343138 | -0.41864 | 0.81278  | NA       | RP11-572C chr3  | - | 1.12E+08 | 1.12E+08 | 159  |
| ENSG000001 | 0.36308  | 0        | 0.4146   | 0.81455  | NA       | RP11-428G chr12 | + | 32101268 | 32101761 | 494  |
| ENSG000001 | 0.290301 | 0        | 0.4146   | 0.81455  | NA       | RP11-810C chr4  | + | 99330441 | 99330914 | 474  |
| ENSG000001 | 0        | 0.98329  | -1.2878  | 0.47019  | NA       | RP11-117F chr3  | + | 1.39E+08 | 1.39E+08 | 390  |
| ENSG000001 | 1.576526 | 1.684135 | -0.05406 | 0.96635  | 0.98076  | RPS12P31 chr19  | + | 33126984 | 33127381 | 398  |
| ENSG000001 | 0        | 0.594029 | -0.81444 | 0.64499  | NA       | RP11-59H1 chr12 | - | 12993738 | 12994013 | 276  |
| ENSG000001 | 4.140415 | 0        | 3.4805   | 0.020722 | 0.040729 | TFP1 chr3       | + | 1.33E+08 | 1.33E+08 | 1573 |
| ENSG000001 | 17.65767 | 22.59232 | -0.36656 | 0.48186  | 0.58615  | BMS1P4 chr10    | - | 75475601 | 75490227 | 1716 |
| ENSG000001 | 3.931452 | 1.029414 | 1.6484   | 0.20077  | 0.28951  | NPPA-AS1 chr1   | + | 11901074 | 11908136 | 1032 |
| ENSG000001 | 0        | 0.357707 | -0.41864 | 0.81278  | NA       | RP11-403I chr1  | + | 1.49E+08 | 1.49E+08 | 2544 |
| ENSG000001 | 2.427705 | 2.82607  | -0.23443 | 0.83768  | 0.88598  | RP11-809C chr10 | + | 709498   | 712562   | 550  |
| ENSG000001 | 0        | 1.698704 | -2.2257  | 0.18075  | NA       | KCNAB1-AS chr3  | - | 1.56E+08 | 1.56E+08 | 456  |
| ENSG000001 | 744.7461 | 847.3214 | -0.18437 | 0.14869  | 0.22535  | EIF6 chr20      | - | 33866714 | 33872788 | 1289 |
| ENSG000001 | 2.375464 | 6.229184 | -1.2733  | 0.24068  | 0.33554  | RP11-498P chr9  | - | 99957633 | 99959969 | 474  |
| ENSG000001 | 0        | 0.343138 | -0.41864 | 0.81278  | NA       | TBC1D3H chr17   | - | 34581086 | 34808061 | 3389 |
| ENSG000001 | 0        | 0.654722 | -0.83442 | 0.63731  | NA       | RP4-631H1 chr1  | - | 53346888 | 53347402 | 380  |
| ENSG000001 | 0.943682 | 0.343138 | 0.89828  | 0.6031   | NA       | RP11-67L3 chr1  | + | 55352548 | 55353674 | 575  |
| ENSG000001 | 0.290301 | 1.744828 | -1.592   | 0.3373   | 0.44103  | RP11-267J chr12 | + | 12308196 | 12308706 | 511  |
| ENSG000001 | 16.33893 | 3.916176 | 1.9689   | 0.003686 | 0.008374 | CTD-2377C chr17 | + | 46810453 | 46811250 | 532  |
| ENSG000001 | 0.36308  | 1.340997 | -1.3725  | 0.39447  | NA       | CTD-2086L chr19 | - | 56728537 | 56729146 | 610  |
| ENSG000001 | 3.092251 | 1.713273 | 0.74756  | 0.52796  | 0.62959  | DBIL5P2 chr2    | - | 63344986 | 63346677 | 1692 |
| ENSG000001 | 119.414  | 113.0309 | 0.077014 | 0.73297  | 0.80273  | PCDHGC4 chr5    | + | 1.41E+08 | 1.41E+08 | 4623 |
| ENSG000001 | 0.290301 | 0        | 0.4146   | 0.81455  | NA       | RP11-147N chr3  | + | 58810163 | 59004819 | 2203 |
| ENSG000001 | 1.660469 | 1.935026 | -0.19456 | 0.88369  | 0.91881  | RP11-19G2 chr17 | + | 35519530 | 35520053 | 524  |
| ENSG000001 | 0.290301 | 0        | 0.4146   | 0.81455  | NA       | RP11-731J chr4  | - | 47492984 | 47493488 | 505  |
| ENSG000001 | 1.359003 | 1.188058 | 0.10618  | 0.94451  | 0.96429  | UPK3BP1 chr7    | + | 76633979 | 76635091 | 509  |
| ENSG000001 | 0        | 2.07098  | -2.4602  | 0.13507  | 0.20805  | CTD-2349P chr17 | + | 29157919 | 29158336 | 418  |
| ENSG000001 | 0        | 1.012429 | -1.3162  | 0.46038  | NA       | RP11-320N chr12 | - | 4218827  | 4227298  | 555  |
| ENSG000001 | 2.697468 | 5.347004 | -0.92773 | 0.30903  | 0.41081  | RPL7AP11 chr3   | + | 1.21E+08 | 1.21E+08 | 799  |
| ENSG000001 | 1.016461 | 1.888903 | -0.75333 | 0.59002  | 0.68516  | RBBP4P2 chr3    | - | 93794756 | 93796019 | 1264 |
| ENSG000001 | 7.302839 | 30.04098 | -1.9993  | 0.000212 | 0.000578 | AC093627 chr7   | - | 135853   | 149466   | 662  |
| ENSG000001 | 4.076195 | 2.497501 | 0.61672  | 0.58878  | 0.68423  | CTD-2161E chr5  | - | 86180048 | 86180698 | 651  |
| ENSG000001 | 743.6565 | 945.5566 | -0.34503 | 0.050427 | 0.089591 | MRPL20 chr1     | - | 1337288  | 1342693  | 1693 |
| ENSG000001 | 8.267059 | 7.729568 | 0.097227 | 0.89447  | 0.92676  | RP11-270N chr14 | - | 76304500 | 76305457 | 958  |
| ENSG000001 | 276.4062 | 86.45136 | 1.668    | 1.84E-14 | 1.17E-13 | C15orf38 chr15  | - | 90443159 | 90456188 | 2670 |
| ENSG000001 | 0.342542 | 0.686276 | -0.48412 | 0.78604  | NA       | RP3-477O4 chr20 | - | 34108569 | 34117481 | 2087 |
| ENSG000001 | 0.705622 | 0        | 0.8807   | 0.6196   | NA       | NDUFB4P1 chr3   | + | 67564364 | 67564744 | 381  |
| ENSG000001 | 22.7196  | 23.10941 | -0.02496 | 0.95143  | 0.96962  | RP11-413E chr3  | + | 75721542 | 75728454 | 2126 |

|            |          |          |          |          |          |                  |   |          |          |      |
|------------|----------|----------|----------|----------|----------|------------------|---|----------|----------|------|
| ENSG000001 | 0.685084 | 0.594029 | 0.089218 | 0.95997  | NA       | RP5-1187J chr20  | + | 31938669 | 31941866 | 545  |
| ENSG000001 | 0        | 0.343138 | -0.41864 | 0.81278  | NA       | OR7E100P chr3    | - | 1.12E+08 | 1.12E+08 | 1015 |
| ENSG000001 | 0        | 0.357707 | -0.41864 | 0.81278  | NA       | RP11-159F chr11  | + | 27505397 | 27505675 | 279  |
| ENSG000001 | 1.555988 | 1.340997 | 0.20257  | 0.88271  | 0.91838  | RP11-299J chr3   | - | 1.22E+08 | 1.22E+08 | 131  |
| ENSG000001 | 0        | 0.700845 | -0.87835 | 0.62047  | NA       | RP11-290K chr3   | - | 1.58E+08 | 1.58E+08 | 716  |
| ENSG000001 | 193.814  | 80.11616 | 1.2657   | 2.96E-09 | 1.31E-08 | AC007620 chr3    | + | 1.79E+08 | 1.79E+08 | 1697 |
| ENSG000001 | 10.31115 | 11.01446 | -0.08247 | 0.90637  | 0.93551  | AC010729 chr2    | + | 5836352  | 5847791  | 763  |
| ENSG000001 | 14.10641 | 0        | 5.3871   | 1.50E-05 | 4.71E-05 | SERPINB10 chr18  | + | 61564408 | 61603345 | 2122 |
| ENSG000001 | 1.370168 | 0.343138 | 1.1145   | 0.52721  | NA       | POU5F1P6 chr3    | - | 1.28E+08 | 1.28E+08 | 990  |
| ENSG000001 | 6.256467 | 7.45766  | -0.24854 | 0.74495  | 0.81283  | AP001432 chr21   | + | 38593720 | 38610045 | 520  |
| ENSG000001 | 4.906837 | 1.326428 | 1.6772   | 0.13474  | 0.20775  | RP11-316N chr1   | - | 1.51E+08 | 1.51E+08 | 582  |
| ENSG000001 | 0        | 0.937167 | -1.2408  | 0.48662  | NA       | DCAF13P1 chr7    | + | 1.06E+08 | 1.06E+08 | 1330 |
| ENSG000001 | 0        | 0.594029 | -0.81444 | 0.64499  | NA       | RPL21P11 chr14   | - | 90833041 | 90833523 | 483  |
| ENSG000001 | 0.653381 | 3.426547 | -1.9672  | 0.13791  | 0.21135  | HLA-DMB chr6     | - | 32902406 | 32908847 | 4569 |
| ENSG000001 | 0        | 0.951736 | -1.2555  | 0.48145  | NA       | AC012501 chr2    | - | 1.54E+08 | 1.54E+08 | 1281 |
| ENSG000001 | 4.305697 | 1.029414 | 1.7642   | 0.16676  | 0.24801  | RP11-469J chr3   | + | 1.7E+08  | 1.7E+08  | 664  |
| ENSG000001 | 0        | 0.297015 | -0.41864 | 0.81278  | NA       | IGKV1D-43 chr2   | + | 90248739 | 90249395 | 532  |
| ENSG000001 | 0        | 0.343138 | -0.41864 | 0.81278  | NA       | RP11-379K chr3   | + | 1.7E+08  | 1.7E+08  | 708  |
| ENSG000001 | 351.3986 | 174.4518 | 1.0036   | 2.05E-07 | 7.80E-07 | RP11-274B chr7   | + | 1.28E+08 | 1.28E+08 | 1894 |
| ENSG000001 | 15.97682 | 10.08783 | 0.65366  | 0.28507  | 0.38646  | MBL1P chr10      | + | 81664654 | 81710092 | 1424 |
| ENSG000001 | 2.821674 | 1.698704 | 0.65344  | 0.60114  | 0.69476  | CTD-2339N chr5   | - | 72174695 | 72175012 | 318  |
| ENSG000001 | 0        | 8.150384 | -4.6075  | 0.000435 | 0.00114  | RPS3AP34 chr8    | - | 12427859 | 12428639 | 781  |
| ENSG000001 | 0        | 2.07098  | -2.4602  | 0.13507  | 0.20805  | OR5BH1P chrX     | - | 1.31E+08 | 1.31E+08 | 919  |
| ENSG000001 | 0        | 1.355566 | -1.9006  | 0.26573  | NA       | AC093627 chr7    | + | 77038    | 80418    | 605  |
| ENSG000001 | 181.1212 | 255.9006 | -0.49924 | 0.002143 | 0.005048 | DECR2 chr16      | + | 451826   | 462487   | 2062 |
| ENSG000001 | 5.394123 | 24.13238 | -2.0755  | 0.000572 | 0.001472 | CTC-359D2 chr19  | - | 12252621 | 12254137 | 1517 |
| ENSG000001 | 2.592987 | 3.541484 | -0.41163 | 0.69112  | 0.76973  | GNG10 chr9       | + | 1.14E+08 | 1.14E+08 | 1491 |
| ENSG000001 | 24.61715 | 48.32377 | -0.96977 | 0.005121 | 0.011391 | RP11-18H7 chr3   | + | 1.2E+08  | 1.2E+08  | 982  |
| ENSG000001 | 0.685084 | 0.654722 | 0.030656 | 0.98584  | NA       | AC009228 chr2    | + | 24437250 | 24444385 | 432  |
| ENSG000001 | 54.40153 | 27.50306 | 0.96686  | 0.006597 | 0.014341 | USP6NL-IT1 chr10 | - | 11605186 | 11615495 | 2491 |
| ENSG000001 | 0        | 0.343138 | -0.41864 | 0.81278  | NA       | RP11-342N chr15  | + | 67524784 | 67525175 | 392  |
| ENSG000001 | 0        | 0.654722 | -0.83442 | 0.63731  | NA       | RP11-358L chr10  | - | 46048560 | 46090046 | 559  |
| ENSG000001 | 2.261609 | 3.501809 | -0.52769 | 0.65471  | 0.73962  | RP11-271C chr3   | - | 1.13E+08 | 1.13E+08 | 303  |
| ENSG000001 | 0        | 7.846922 | -4.5787  | 0.000444 | 0.001163 | RP11-113C chr12  | - | 8511650  | 8512430  | 781  |
| ENSG000001 | 0.342542 | 0        | 0.4146   | 0.81455  | NA       | RP11-232N chr3   | + | 1.47E+08 | 1.47E+08 | 1829 |
| ENSG000001 | 0        | 0.357707 | -0.41864 | 0.81278  | NA       | CTB-46B19 chr5   | - | 1.38E+08 | 1.38E+08 | 518  |
| ENSG000001 | 0        | 2.041842 | -2.4837  | 0.12741  | 0.19837  | RP11-1191 chr4   | - | 646639   | 649434   | 1388 |
| ENSG000001 | 51.23389 | 46.96659 | 0.12239  | 0.70683  | 0.78206  | AC004893 chr7    | + | 98610788 | 98645863 | 3398 |
| ENSG000001 | 5.71694  | 10.19947 | -0.7744  | 0.40734  | 0.51207  | CNTF chr11       | + | 58390146 | 58393198 | 1886 |
| ENSG000001 | 3.185568 | 0        | 2.8683   | 0.083586 | 0.13872  | CTD-2015F chr5   | - | 79794353 | 79794790 | 438  |
| ENSG000001 | 6.027779 | 76.58838 | -3.628   | 2.30E-16 | 1.62E-15 | CCDC169 chr13    | - | 36801182 | 36871977 | 1632 |
| ENSG000001 | 0        | 0.594029 | -0.81444 | 0.64499  | NA       | FAM86LP chr7     | - | 6971315  | 6979234  | 853  |
| ENSG000001 | 651.1617 | 28.49522 | 4.4975   | 4.46E-85 | 2.04E-83 | RGAG4 chrX       | - | 71346958 | 71351758 | 4359 |
| ENSG000001 | 2.604151 | 2.635871 | -0.01171 | 0.9913   | 0.99536  | RP11-562A chr15  | + | 50758935 | 50759293 | 359  |
| ENSG000001 | 0        | 0.951736 | -1.2555  | 0.48145  | NA       | RP11-30K9 chr15  | + | 59161858 | 59162333 | 476  |
| ENSG000001 | 0.36308  | 0        | 0.4146   | 0.81455  | NA       | RP3-511B2 chr20  | + | 39825331 | 39825797 | 467  |
| ENSG000001 | 13.44285 | 9.861241 | 0.45089  | 0.49395  | 0.59782  | RP11-280F chr3   | - | 1.07E+08 | 1.07E+08 | 2718 |
| ENSG000001 | 0        | 0.700845 | -0.87835 | 0.62047  | NA       | RP11-180K chr3   | + | 1.13E+08 | 1.13E+08 | 592  |
| ENSG000001 | 1.306762 | 0        | 1.6479   | 0.35189  | NA       | AC105749 chr3    | - | 36810216 | 36825658 | 571  |
| ENSG000001 | 3.547834 | 30.68034 | -2.9989  | 6.00E-07 | 2.19E-06 | ZN7F02P chr19    | - | 53471504 | 53541151 | 2990 |
| ENSG000001 | 3.164216 | 3.083409 | 0.054888 | 0.96333  | 0.97842  | RP11-651P chr3   | + | 1.5E+08  | 1.5E+08  | 680  |
| ENSG000001 | 0.632843 | 2.667426 | -1.6558  | 0.2315   | 0.32499  | RP11-3K16 chr3   | - | 1.69E+08 | 1.69E+08 | 513  |
| ENSG000001 | 6.245302 | 5.052406 | 0.29671  | 0.72099  | 0.79355  | GLYCTK-AS1 chr3  | - | 52322596 | 52333083 | 697  |
| ENSG000001 | 20.67632 | 13.50867 | 0.59808  | 0.39496  | 0.49949  | RP11-506N chr7   | - | 99712837 | 99724762 | 572  |
| ENSG000001 | 812.8469 | 468.2041 | 0.79133  | 0.005428 | 0.012005 | AP5Z1 chr7       | + | 4815253  | 4833943  | 5660 |
| ENSG000001 | 6.722236 | 52.09984 | -2.9018  | 3.85E-08 | 1.55E-07 | SOX2-OT chr3     | + | 1.81E+08 | 1.82E+08 | 3576 |
| ENSG000001 | 1.317927 | 1.935026 | -0.46683 | 0.72846  | 0.79929  | RPS26P21 chr3    | + | 1.19E+08 | 1.19E+08 | 348  |
| ENSG000001 | 0        | 3.137654 | -3.0959  | 0.046868 | 0.084094 | KRT8P35 chr3     | - | 63082050 | 63083387 | 1338 |
| ENSG000001 | 1.95077  | 8.491106 | -1.925   | 0.052744 | 0.09316  | ZN7F09 chr19     | - | 12571998 | 12624668 | 4910 |
| ENSG000001 | 8.818564 | 18.58947 | -1.0618  | 0.066537 | 0.11406  | RP11-285F chr1   | - | 2.26E+08 | 2.26E+08 | 348  |
| ENSG000001 | 0.290301 | 4.006007 | -2.8604  | 0.039079 | 0.071887 | STRC chr15       | - | 43891596 | 44010458 | 5680 |
| ENSG000001 | 1.669842 | 0.98329  | 0.58109  | 0.69776  | 0.77479  | CTB-104F4 chr7   | - | 91321323 | 91510004 | 380  |
| ENSG000001 | 0.290301 | 1.029414 | -0.85389 | 0.63097  | NA       | AC068137 chr2    | + | 1.31E+08 | 1.31E+08 | 533  |
| ENSG000001 | 0.632843 | 0.343138 | 0.49756  | 0.77728  | NA       | RP11-190P chr3   | + | 1.15E+08 | 1.15E+08 | 533  |
| ENSG000001 | 0        | 1.416259 | -1.7181  | 0.33141  | NA       | RP11-489C chr4   | - | 1.74E+08 | 1.74E+08 | 893  |

|            |          |          |          |          |          |                 |   |          |          |      |
|------------|----------|----------|----------|----------|----------|-----------------|---|----------|----------|------|
| ENSG000001 | 0.290301 | 1.591889 | -1.5998  | 0.31468  | NA       | RP11-436A chr14 | - | 1E+08    | 1E+08    | 814  |
| ENSG000001 | 0        | 0.343138 | -0.41864 | 0.81278  | NA       | RP11-250B chr3  | - | 1.32E+08 | 1.32E+08 | 738  |
| ENSG000001 | 0.342542 | 0        | 0.4146   | 0.81455  | NA       | RP11-454C chr3  | - | 1.51E+08 | 1.52E+08 | 628  |
| ENSG000001 | 0.653381 | 0        | 0.82678  | 0.64037  | NA       | PLCH1-AS2 chr3  | + | 1.55E+08 | 1.55E+08 | 408  |
| ENSG000001 | 0.943682 | 5.62945  | -2.2502  | 0.043904 | 0.079448 | RP11-666A chr17 | - | 74426499 | 74427206 | 708  |
| ENSG000001 | 0.632843 | 1.606458 | -0.99581 | 0.5182   | 0.6209   | CTD-2325P chr14 | + | 69159807 | 69160300 | 494  |
| ENSG000001 | 0.342542 | 0        | 0.4146   | 0.81455  | NA       | EPS15P1 chr7    | + | 46820971 | 46823041 | 2071 |
| ENSG000001 | 15.34398 | 18.44385 | -0.25647 | 0.64829  | 0.73428  | ERVW-1 chr7     | - | 92097694 | 92107300 | 3352 |
| ENSG000001 | 0        | 1.234181 | -1.5727  | 0.37581  | NA       | RP11-507E chr14 | - | 76062148 | 76062549 | 402  |
| ENSG000001 | 0        | 0.297015 | -0.41864 | 0.81278  | NA       | RP11-803B chr3  | - | 75444555 | 75444687 | 133  |
| ENSG000001 | 0.653381 | 0.297015 | 0.51304  | 0.77085  | NA       | RP11-662B chr8  | + | 28667620 | 28667935 | 316  |
| ENSG000001 | 2.86275  | 1.043983 | 1.2674   | 0.324    | 0.42695  | FTH1P23 chr3    | + | 72978195 | 72978744 | 550  |
| ENSG000001 | 0.685084 | 0        | 0.85004  | 0.63064  | NA       | AC068522 chr8   | - | 59500979 | 59501323 | 345  |
| ENSG000001 | 1.161205 | 0        | 1.2509   | 0.47995  | NA       | RP11-446F chr6  | - | 46638181 | 46655902 | 374  |
| ENSG000001 | 0.943682 | 0.343138 | 0.89828  | 0.6031   | NA       | FTH1P4 chr3     | - | 1.28E+08 | 1.28E+08 | 553  |
| ENSG000001 | 0.290301 | 0.297015 | -0.00202 | 0.99909  | NA       | RP11-697F chr11 | + | 95696383 | 95696788 | 406  |
| ENSG000001 | 0.36308  | 0.654722 | -0.52647 | 0.7643   | NA       | RP11-504P chr1  | + | 2.24E+08 | 2.24E+08 | 343  |
| ENSG000001 | 0.632843 | 288.0089 | -8.1881  | 2.26E-23 | 2.21E-22 | AC005062 chr7   | - | 19958604 | 20180076 | 804  |
| ENSG000001 | 0.705622 | 0.297015 | 0.56864  | 0.74638  | NA       | RP5-1070C chr7  | + | 1.51E+08 | 1.51E+08 | 216  |
| ENSG000001 | 0.290301 | 0        | 0.4146   | 0.81455  | NA       | RP11-221E chr3  | - | 1.29E+08 | 1.29E+08 | 727  |
| ENSG000001 | 0.36308  | 0.715414 | -0.51558 | 0.77246  | NA       | UBA52P3 chr14   | + | 58607997 | 58608378 | 382  |
| ENSG000001 | 2.540746 | 3.959884 | -0.55777 | 0.61399  | 0.70597  | RPS11P6 chr12   | + | 64616117 | 64790845 | 1366 |
| ENSG000001 | 0        | 0.297015 | -0.41864 | 0.81278  | NA       | MTAPP1 chr3     | - | 1.58E+08 | 1.58E+08 | 819  |
| ENSG000001 | 0        | 0.297015 | -0.41864 | 0.81278  | NA       | RP11-58E2 chr14 | + | 50519575 | 50520287 | 713  |
| ENSG000001 | 0.975385 | 2.041842 | -0.85656 | 0.53188  | 0.63316  | RPL31P58 chr17  | + | 27129462 | 27129840 | 379  |
| ENSG000001 | 1.576526 | 0.997859 | 0.56486  | 0.67707  | 0.75822  | GK-AS1 chrX     | - | 30718115 | 30742291 | 651  |
| ENSG000001 | 8.786048 | 4.305438 | 0.98183  | 0.2073   | 0.29705  | EIF4EBP3 chr5   | + | 1.4E+08  | 1.4E+08  | 691  |
| ENSG000001 | 0        | 6.972863 | -4.3352  | 0.001498 | 0.003618 | ABCC13 chr21    | + | 15608527 | 15735075 | 4080 |
| ENSG000001 | 0.36308  | 2.855208 | -2.1905  | 0.1647   | 0.2456   | ARHGEF26 chr3   | - | 1.54E+08 | 1.54E+08 | 2598 |
| ENSG000001 | 0.36308  | 0.640152 | -0.51156 | 0.77091  | NA       | RP11-613A chr12 | + | 77054185 | 77054664 | 480  |
| ENSG000001 | 1.265686 | 1.995719 | -0.53067 | 0.68383  | 0.76386  | RP11-204J chr3  | - | 62246540 | 62248415 | 352  |
| ENSG000001 | 0        | 3.451653 | -3.0207  | 0.065133 | 0.11204  | RP11-231E chr3  | - | 1.12E+08 | 1.12E+08 | 1563 |
| ENSG000001 | 2.479946 | 0        | 2.5072   | 0.13961  | 0.21341  | LINC00870 chr3  | + | 72200408 | 72223483 | 2693 |
| ENSG000001 | 1.555988 | 0        | 1.8901   | 0.28116  | NA       | RP11-779P chr3  | - | 99226031 | 99245957 | 465  |
| ENSG000001 | 2.883288 | 1.995719 | 0.48629  | 0.66259  | 0.74612  | RP11-1084 chr15 | - | 34378112 | 34378515 | 404  |
| ENSG000001 | 0        | 0.343138 | -0.41864 | 0.81278  | NA       | RPS3P7 chr16    | + | 78859178 | 78859903 | 726  |
| ENSG000001 | 9.813674 | 7.420401 | 0.40131  | 0.54579  | 0.64597  | AC000120 chr7   | - | 91829328 | 91836171 | 1589 |
| ENSG000001 | 0        | 0.357707 | -0.41864 | 0.81278  | NA       | RP11-377C chr12 | - | 13174194 | 13174540 | 347  |
| ENSG000001 | 0        | 1.234181 | -1.5727  | 0.37581  | NA       | PSG11 chr19     | - | 43511808 | 43530664 | 1942 |
| ENSG000001 | 0.290301 | 0.297015 | -0.00202 | 0.99909  | NA       | PSG4 chr19      | - | 43696854 | 43711451 | 2294 |
| ENSG000001 | 0        | 0.343138 | -0.41864 | 0.81278  | NA       | RP11-757C chr12 | + | 12491710 | 12492188 | 479  |
| ENSG000001 | 0        | 0.700845 | -0.87835 | 0.62047  | NA       | RP11-115A chr7  | + | 90940683 | 91144724 | 681  |
| ENSG000001 | 290.2158 | 262.128  | 0.1478   | 0.3747   | 0.47893  | MRPL33 chr2     | + | 27994584 | 28210954 | 729  |
| ENSG000001 | 3.516945 | 1.828211 | 0.75593  | 0.55517  | 0.6544   | RP11-342A chr1  | - | 43300352 | 43312093 | 514  |
| ENSG000001 | 5.394936 | 4.020576 | 0.394    | 0.65281  | 0.73803  | RP11-46A1 chr1  | - | 1.81E+08 | 1.81E+08 | 2424 |
| ENSG000001 | 849.1808 | 492.0933 | 0.78503  | 2.31E-10 | 1.12E-09 | MICAL3 chr22    | - | 18270415 | 18507325 | 9445 |
| ENSG000001 | 0        | 0.715414 | -0.84936 | 0.6309   | NA       | RPS10P28 chr19  | + | 43174157 | 43174968 | 498  |
| ENSG000001 | 2.967231 | 2.681995 | 0.13817  | 0.89434  | 0.92676  | RP11-58H1 chr4  | + | 1.44E+08 | 1.44E+08 | 1261 |
| ENSG000001 | 9.825652 | 7.481093 | 0.37829  | 0.60051  | 0.69444  | RP11-550I chr3  | + | 1.57E+08 | 1.57E+08 | 567  |
| ENSG000001 | 0.290301 | 0        | 0.4146   | 0.81455  | NA       | RP11-734J chr8  | + | 34731677 | 34732151 | 475  |
| ENSG000001 | 0        | 0.357707 | -0.41864 | 0.81278  | NA       | CCDC39-AS chr3  | + | 1.8E+08  | 1.8E+08  | 283  |
| ENSG000001 | 0.653381 | 0.297015 | 0.51304  | 0.77085  | NA       | CTA-360L1 chr7  | - | 1.07E+08 | 1.07E+08 | 541  |
| ENSG000001 | 40.60335 | 69.23586 | -0.76223 | 0.010932 | 0.022785 | RP11-408P chr4  | + | 66439177 | 66440046 | 870  |
| ENSG000001 | 0.580602 | 0        | 0.8036   | 0.6494   | NA       | AC006159 chr7   | - | 1.16E+08 | 1.16E+08 | 692  |
| ENSG000001 | 8.766323 | 10.46339 | -0.26014 | 0.69891  | 0.77579  | RP5-1157A chr3  | + | 52273274 | 52275113 | 1101 |
| ENSG000001 | 3.341476 | 1.043983 | 1.4225   | 0.28017  | 0.38102  | RP11-7F17 chr14 | + | 77435026 | 77435488 | 463  |
| ENSG000001 | 3.205292 | 5.347004 | -0.67026 | 0.44704  | 0.55249  | RP11-286F chr7  | - | 1.29E+08 | 1.29E+08 | 535  |
| ENSG000001 | 266.5581 | 194.4744 | 0.45294  | 0.008875 | 0.018848 | PCDHAC2 chr5    | + | 1.4E+08  | 1.4E+08  | 5970 |
| ENSG000001 | 4.802355 | 0        | 3.8177   | 0.006955 | 0.015066 | AC073130 chr7   | - | 1.16E+08 | 1.16E+08 | 842  |
| ENSG000001 | 124.4699 | 189.8148 | -0.60428 | 0.096979 | 0.15742  | STON1 chr2      | + | 48756522 | 48826025 | 5802 |
| ENSG000001 | 0.632843 | 0.654722 | -0.02224 | 0.98935  | NA       | RPS6P16 chr11   | - | 1.12E+08 | 1.12E+08 | 655  |
| ENSG000001 | 0        | 0.594029 | -0.81444 | 0.64499  | NA       | RP11-567P chr3  | + | 1.2E+08  | 1.2E+08  | 189  |
| ENSG000001 | 1.068702 | 0.297015 | 0.9938   | 0.56435  | NA       | RP11-1149 chr8  | + | 23064431 | 23064882 | 452  |
| ENSG000001 | 0.870904 | 0        | 1.046    | 0.5544   | NA       | RP11-384F chr3  | - | 1.18E+08 | 1.18E+08 | 787  |
| ENSG000001 | 230.1235 | 50.32278 | 2.1822   | 3.05E-24 | 3.09E-23 | PRAF2 chrX      | - | 48928813 | 48931730 | 1336 |

|            |          |          |          |          |          |            |       |   |          |          |      |
|------------|----------|----------|----------|----------|----------|------------|-------|---|----------|----------|------|
| ENSG000001 | 0.36308  | 0        | 0.4146   | 0.81455  | NA       | RP11-477C  | chr4  | + | 1.13E+08 | 1.13E+08 | 313  |
| ENSG000001 | 3.278071 | 0.357707 | 2.5639   | 0.070715 | 0.12022  | VSI8       | chr1  | - | 1.6E+08  | 1.6E+08  | 1818 |
| ENSG000001 | 0.290301 | 0        | 0.4146   | 0.81455  | NA       | RP11-779P  | chr3  | + | 99219191 | 99224352 | 458  |
| ENSG000001 | 0.36308  | 0        | 0.4146   | 0.81455  | NA       | RPL31P61   | chr19 | + | 37392644 | 37393019 | 376  |
| ENSG000001 | 261.4037 | 142.5484 | 0.86825  | 2.76E-06 | 9.44E-06 | RP11-274B  | chr7  | + | 1.28E+08 | 1.28E+08 | 1150 |
| ENSG000001 | 1.016461 | 0.357707 | 0.95974  | 0.57727  | NA       | RP11-268I  | chr18 | - | 19434601 | 19434948 | 348  |
| ENSG000001 | 1.939605 | 2.307303 | -0.21295 | 0.8547   | 0.89785  | CTC-428G2  | chr5  | - | 1.15E+08 | 1.15E+08 | 796  |
| ENSG000001 | 0        | 0.343138 | -0.41864 | 0.81278  | NA       | RP11-239L  | chr6  | + | 26865674 | 26866556 | 883  |
| ENSG000001 | 0.36308  | 0        | 0.4146   | 0.81455  | NA       | RP11-397E  | chr4  | + | 87791344 | 87792557 | 861  |
| ENSG000001 | 0.995923 | 0.357707 | 1.0227   | 0.53712  | NA       | RP11-538P  | chr3  | + | 1.58E+08 | 1.58E+08 | 374  |
| ENSG000001 | 588.7863 | 637.8134 | -0.11509 | 0.43681  | 0.54231  | C7orf73    | chr7  | + | 1.35E+08 | 1.35E+08 | 2004 |
| ENSG000001 | 2.697468 | 0.343138 | 2.2792   | 0.12048  | 0.18946  | FGF14-IT1  | chr13 | - | 1.03E+08 | 1.03E+08 | 868  |
| ENSG000001 | 1.89853  | 0        | 2.1633   | 0.21098  | NA       | RP11-167F  | chr3  | - | 1.5E+08  | 1.5E+08  | 1967 |
| ENSG000001 | 1.027626 | 5.505649 | -2.0871  | 0.09558  | 0.15557  | PTPRVP     | chr1  | + | 2.02E+08 | 2.02E+08 | 5067 |
| ENSG000001 | 433.1749 | 128.0652 | 1.7528   | 1.11E-28 | 1.34E-27 | KCTD7      | chr7  | + | 66093868 | 66276446 | 4873 |
| ENSG000001 | 0.290301 | 0.715414 | -0.50514 | 0.77701  | NA       | RP11-667A  | chr11 | - | 1.14E+08 | 1.14E+08 | 171  |
| ENSG000001 | 4.430716 | 0.297015 | 2.9577   | 0.034269 | 0.063935 | RP11-57G2  | chr18 | + | 30359002 | 30359249 | 248  |
| ENSG000001 | 182.7887 | 210.7858 | -0.20438 | 0.33265  | 0.43595  | EFNA4      | chr1  | + | 1.55E+08 | 1.55E+08 | 1263 |
| ENSG000001 | 1.991846 | 1.012429 | 0.81391  | 0.54677  | 0.64697  | MCCC1-AS1  | chr3  | + | 1.83E+08 | 1.83E+08 | 765  |
| ENSG000001 | 1.08924  | 0.297015 | 0.89622  | 0.61378  | NA       | RP11-475C  | chr3  | + | 58558471 | 58560046 | 350  |
| ENSG000001 | 1.649304 | 0        | 2.1906   | 0.18857  | NA       | CTD-2110K  | chr5  | + | 82497048 | 82497960 | 584  |
| ENSG000001 | 0.632843 | 1.294874 | -0.78057 | 0.60302  | 0.69637  | AC012442   | chr2  | + | 1.13E+08 | 1.13E+08 | 425  |
| ENSG000001 | 0.290301 | 0        | 0.4146   | 0.81455  | NA       | RP11-454F  | chr3  | - | 1.01E+08 | 1.01E+08 | 402  |
| ENSG000001 | 0        | 0.594029 | -0.81444 | 0.64499  | NA       | RP11-473C  | chr8  | + | 1.31E+08 | 1.31E+08 | 575  |
| ENSG000001 | 1.887365 | 2.08555  | -0.09214 | 0.94865  | 0.96766  | RP11-330L  | chr15 | + | 64885178 | 64885525 | 348  |
| ENSG000001 | 4.399013 | 3.512346 | 0.27263  | 0.77547  | 0.8387   | RPL35AP3   | chr15 | - | 66738793 | 66739115 | 323  |
| ENSG000001 | 0.290301 | 0        | 0.4146   | 0.81455  | NA       | MRPS31P5   | chr13 | - | 52749774 | 52768513 | 920  |
| ENSG000001 | 0.632843 | 0        | 0.81931  | 0.64303  | NA       | TICAM2     | chr5  | - | 1.15E+08 | 1.15E+08 | 3509 |
| ENSG000001 | 2.789971 | 0        | 2.9376   | 0.061859 | 0.10714  | RP11-274F  | chr3  | + | 1.46E+08 | 1.46E+08 | 555  |
| ENSG000001 | 2.935529 | 0.343138 | 2.4054   | 0.096673 | 0.15699  | AC009518   | chr7  | + | 1.32E+08 | 1.32E+08 | 559  |
| ENSG000001 | 1.233984 | 0.297015 | 1.1901   | 0.48541  | NA       | RP11-555K  | chr4  | - | 1.53E+08 | 1.53E+08 | 777  |
| ENSG000001 | 8.547987 | 3.305162 | 1.3002   | 0.099641 | 0.16098  | RP11-413E  | chr3  | - | 75673837 | 75674304 | 468  |
| ENSG000001 | 0        | 0.297015 | -0.41864 | 0.81278  | NA       | GS1-388B5  | chr3  | + | 1.25E+08 | 1.25E+08 | 907  |
| ENSG000001 | 8.444319 | 3.916176 | 1.0317   | 0.20162  | 0.2903   | RPL5P30    | chr11 | + | 1.18E+08 | 1.18E+08 | 891  |
| ENSG000001 | 4.793796 | 2.514486 | 0.80114  | 0.46485  | 0.5697   | RP11-148K  | chr7  | - | 1.51E+08 | 1.51E+08 | 511  |
| ENSG000001 | 0        | 3.901607 | -3.4357  | 0.022057 | 0.043128 | AF165138   | chr21 | - | 15964251 | 16031142 | 1151 |
| ENSG000001 | 100.1414 | 9.455795 | 3.3506   | 7.02E-18 | 5.35E-17 | PALM2      | chr9  | + | 1.12E+08 | 1.13E+08 | 9292 |
| ENSG000001 | 0        | 0.715414 | -0.84936 | 0.6309   | NA       | RP11-715J  | chr16 | - | 2382314  | 2382733  | 420  |
| ENSG000001 | 465.7143 | 313.0159 | 0.57161  | 9.57E-05 | 0.000273 | C4orf48    | chr4  | + | 2043689  | 2045697  | 477  |
| ENSG000001 | 1186.247 | 143.608  | 3.0293   | 5.79E-34 | 8.55E-33 | NBPF15     | chr1  | + | 1.49E+08 | 1.49E+08 | 4707 |
| ENSG000001 | 0        | 0.343138 | -0.41864 | 0.81278  | NA       | INGX       | chrX  | - | 70711529 | 70712778 | 846  |
| ENSG000001 | 2.407167 | 2.711133 | -0.1621  | 0.8836   | 0.91879  | RP4-545L1  | chr20 | + | 1146924  | 1160596  | 326  |
| ENSG000001 | 130.8343 | 153.6926 | -0.23064 | 0.46981  | 0.57455  | NAT6       | chr3  | - | 50333833 | 50336852 | 1820 |
| ENSG000001 | 0        | 0.654722 | -0.83442 | 0.63731  | NA       | RP5-1121A  | chr7  | + | 1.57E+08 | 1.57E+08 | 1041 |
| ENSG000001 | 0.342542 | 0.686276 | -0.48412 | 0.78604  | NA       | RP11-572A  | chr3  | - | 1.13E+08 | 1.13E+08 | 425  |
| ENSG000001 | 0        | 2.010288 | -2.4674  | 0.13027  | 0.202    | KRTAP10-1  | chr21 | + | 46066331 | 46067564 | 1234 |
| ENSG000001 | 0.975385 | 2.232041 | -0.99026 | 0.46328  | 0.56844  | UBA52P5    | chr8  | + | 1.24E+08 | 1.24E+08 | 211  |
| ENSG000001 | 0.290301 | 0.343138 | -0.00202 | 0.99909  | NA       | KB-1589B1  | chr8  | + | 98877282 | 98877713 | 432  |
| ENSG000001 | 0.580602 | 0        | 0.8036   | 0.6494   | NA       | RP11-775J  | chr3  | - | 1.25E+08 | 1.25E+08 | 713  |
| ENSG000001 | 0.995923 | 0.357707 | 1.0227   | 0.53712  | NA       | RPL32P33   | chr17 | + | 70623370 | 70623763 | 394  |
| ENSG000001 | 0.632843 | 3.434668 | -1.9887  | 0.14186  | 0.21633  | RP11-627K  | chr12 | - | 31404926 | 31405531 | 606  |
| ENSG000001 | 0        | 0.654722 | -0.83442 | 0.63731  | NA       | RP11-639F  | chr3  | - | 1.55E+08 | 1.55E+08 | 840  |
| ENSG000001 | 0.36308  | 0.357707 | -0.00212 | 0.99905  | NA       | IGLVIVOR2  | chr22 | + | 32772669 | 32773122 | 330  |
| ENSG000001 | 0.653381 | 1.058552 | -0.47534 | 0.76821  | NA       | RP11-293G  | chr1  | + | 2.36E+08 | 2.36E+08 | 337  |
| ENSG000001 | 0        | 0.700845 | -0.87835 | 0.62047  | NA       | CTB-55B8.1 | chr5  | - | 16902403 | 16902750 | 348  |
| ENSG000001 | 0.653381 | 0.343138 | 0.51863  | 0.76794  | NA       | WFDC6      | chr20 | - | 44162835 | 44168134 | 792  |
| ENSG000001 | 0.995923 | 3.037286 | -1.3281  | 0.32294  | 0.42583  | HNRNPKP4   | chr3  | + | 96068398 | 96069783 | 1386 |
| ENSG000001 | 58.98392 | 45.10528 | 0.38276  | 0.2189   | 0.31055  | AC004967   | chr7  | - | 97598317 | 97601566 | 447  |
| ENSG000001 | 0.653381 | 0        | 0.82678  | 0.64037  | NA       | AC009950   | chr2  | + | 2.31E+08 | 2.31E+08 | 580  |
| ENSG000001 | 3.661688 | 33.35347 | -3.1077  | 1.44E-07 | 5.56E-07 | UPK3B      | chr7  | + | 76139745 | 76648340 | 1608 |
| ENSG000001 | 0.342542 | 0        | 0.4146   | 0.81455  | NA       | RP11-889C  | chr3  | + | 55212200 | 55223242 | 474  |
| ENSG000001 | 0        | 0.357707 | -0.41864 | 0.81278  | NA       | RP11-1412  | chr3  | + | 1.83E+08 | 1.83E+08 | 2426 |
| ENSG000001 | 16.97437 | 24.56535 | -0.53844 | 0.27649  | 0.37672  | C6orf183   | chr6  | + | 1.09E+08 | 1.1E+08  | 2469 |
| ENSG000001 | 0        | 0.343138 | -0.41864 | 0.81278  | NA       | RPL35AP2   | chr11 | - | 1.26E+08 | 1.26E+08 | 321  |
| ENSG000001 | 1.08924  | 1.309443 | -0.21092 | 0.89691  | 0.92854  | RPS2P44    | chr16 | - | 48611435 | 48612280 | 846  |

|            |          |          |          |          |          |                  |   |          |          |      |
|------------|----------|----------|----------|----------|----------|------------------|---|----------|----------|------|
| ENSG000001 | 0        | 0.343138 | -0.41864 | 0.81278  | NA       | RP11-216N chr1   | - | 1.54E+08 | 1.54E+08 | 235  |
| ENSG000001 | 1.411244 | 0        | 1.7307   | 0.32696  | NA       | RP11-649A chr3   | - | 1.47E+08 | 1.47E+08 | 570  |
| ENSG000001 | 0        | 1.340997 | -1.8899  | 0.26871  | NA       | AC003989. chr7   | + | 1.11E+08 | 1.11E+08 | 169  |
| ENSG000001 | 1.048164 | 8.112382 | -2.7094  | 0.010045 | 0.021118 | RP11-1811 chr10  | + | 1.04E+08 | 1.04E+08 | 723  |
| ENSG000001 | 1.774324 | 0        | 2.0349   | 0.24308  | NA       | RP11-6F2.4 chr3  | - | 1.57E+08 | 1.57E+08 | 2018 |
| ENSG000001 | 140.3071 | 40.98843 | 1.7518   | 1.44E-09 | 6.54E-09 | IL10RB chr21     | + | 34638663 | 34669539 | 1991 |
| ENSG000001 | 0.342542 | 0        | 0.4146   | 0.81455  | NA       | RP11-215P chr5   | + | 1.34E+08 | 1.34E+08 | 498  |
| ENSG000001 | 0.995923 | 0.297015 | 1.0163   | 0.54122  | NA       | CFB chr6         | + | 31895475 | 31919861 | 3874 |
| ENSG000001 | 0        | 0.594029 | -0.81444 | 0.64499  | NA       | MTND5P16 chr3    | + | 1.07E+08 | 1.07E+08 | 1703 |
| ENSG000001 | 1.608228 | 0.594029 | 0.97576  | 0.54887  | 0.64874  | RP11-4K3_ chr1   | + | 27637731 | 27638329 | 282  |
| ENSG000001 | 25.75782 | 11.44668 | 1.1403   | 0.019716 | 0.038961 | ZNF487 chr10     | + | 43932282 | 43991517 | 2745 |
| ENSG000001 | 0        | 0.654722 | -0.83442 | 0.63731  | NA       | WBP1LP1 chr7     | - | 1.42E+08 | 1.42E+08 | 896  |
| ENSG000001 | 0        | 2.309719 | -2.4138  | 0.15791  | 0.23724  | RP11-21K2 chr12  | - | 1866397  | 1867177  | 781  |
| ENSG000001 | 105.377  | 107.6337 | -0.02869 | 0.89122  | 0.92452  | WDR92 chr2       | - | 68350068 | 68384692 | 2626 |
| ENSG000001 | 0        | 1.309443 | -1.6539  | 0.35008  | NA       | RPS3AP40 chr11   | - | 67693122 | 67693902 | 781  |
| ENSG000001 | 0        | 0.357707 | -0.41864 | 0.81278  | NA       | RP11-379F chr3   | + | 1.58E+08 | 1.58E+08 | 323  |
| ENSG000001 | 14.38995 | 24.84121 | -0.7702  | 0.17046  | 0.25267  | NME1-NME chr17   | + | 49242796 | 49249108 | 866  |
| ENSG000001 | 287.2398 | 196.9089 | 0.54083  | 0.01089  | 0.022705 | RP11-274B chr7   | + | 1.28E+08 | 1.28E+08 | 754  |
| ENSG000001 | 1.846289 | 5.118803 | -1.2925  | 0.23251  | 0.326    | MUSTN1 chr3      | - | 52847298 | 52869745 | 5640 |
| ENSG000001 | 1.390706 | 0        | 1.6954   | 0.33813  | NA       | RP11-463C chr16  | + | 86559063 | 86559858 | 796  |
| ENSG000001 | 0.342542 | 0        | 0.4146   | 0.81455  | NA       | RP11-574K chr10  | - | 75570442 | 75571556 | 545  |
| ENSG000001 | 165.5965 | 9.127226 | 4.1261   | 1.71E-32 | 2.40E-31 | RP11-446F chr3   | + | 1.07E+08 | 1.07E+08 | 2737 |
| ENSG000001 | 7.59314  | 7.036845 | 0.08983  | 0.90606  | 0.93531  | PLA2G4B chr15    | + | 42129973 | 42140345 | 3035 |
| ENSG000001 | 1.027626 | 203.7446 | -6.4815  | 1.29E-07 | 4.98E-07 | LEFTY1 chr1      | - | 2.26E+08 | 2.26E+08 | 1626 |
| ENSG000001 | 3.373179 | 6.861215 | -0.92077 | 0.4069   | 0.51171  | WDR65 chr1       | + | 43637820 | 43720029 | 4244 |
| ENSG000001 | 0.36308  | 0.297015 | -0.00205 | 0.99908  | NA       | RPL21P116 chr15  | - | 79155589 | 79156071 | 483  |
| ENSG000001 | 0        | 2.993578 | -3.1081  | 0.040328 | 0.073907 | CACNA2D3 chr3    | - | 54908632 | 54935282 | 2078 |
| ENSG000001 | 147.7925 | 186.2995 | -0.3342  | 0.11034  | 0.17551  | 61E3.4 chr16     | + | 22490442 | 22547842 | 5708 |
| ENSG000001 | 0.653381 | 1.638012 | -1.0449  | 0.47153  | 0.57623  | RP11-472L chr11  | + | 43740226 | 43740696 | 471  |
| ENSG000001 | 3.879211 | 4.273883 | -0.12462 | 0.89012  | 0.92361  | TTC4 chr1        | + | 55181495 | 55208330 | 2395 |
| ENSG000001 | 322.4366 | 2.307303 | 6.9467   | 5.24E-38 | 8.71E-37 | RPLP0P2 chr11    | + | 61382508 | 61406921 | 3525 |
| ENSG000001 | 1.628766 | 0.357707 | 1.626    | 0.30064  | 0.40208  | EEF1A1P10 chr7   | - | 1.44E+08 | 1.44E+08 | 1390 |
| ENSG000001 | 0.342542 | 0        | 0.4146   | 0.81455  | NA       | ZMYM6NB chr1     | - | 35447136 | 35450954 | 922  |
| ENSG000001 | 30.9446  | 26.10057 | 0.23799  | 0.56131  | 0.65981  | HLA-L chr6       | + | 30227361 | 30260791 | 4587 |
| ENSG000001 | 2.055252 | 11.02587 | -2.1527  | 0.059976 | 0.10442  | RP11-125K chr9   | + | 4860454  | 4885917  | 1878 |
| ENSG000001 | 0        | 0.343138 | -0.41864 | 0.81278  | NA       | RP11-535A chr5   | - | 1.17E+08 | 1.17E+08 | 339  |
| ENSG000001 | 1.794862 | 1.828211 | -0.06076 | 0.96706  | 0.98124  | ST13P15 chr3     | - | 1.43E+08 | 1.43E+08 | 1107 |
| ENSG000001 | 38.45738 | 0.343138 | 6.0168   | 1.54E-08 | 6.46E-08 | HOTTIP chr7      | + | 27238194 | 27246878 | 4511 |
| ENSG000001 | 0        | 0.297015 | -0.41864 | 0.81278  | NA       | LLOXNC01- chrX   | + | 1.53E+08 | 1.53E+08 | 591  |
| ENSG000001 | 0        | 0.357707 | -0.41864 | 0.81278  | NA       | OSTCP1 chr6      | - | 1.59E+08 | 1.59E+08 | 1195 |
| ENSG000001 | 0.290301 | 9.874195 | -4.1336  | 0.000794 | 0.002001 | AC007390. chr2   | + | 37440610 | 37443336 | 367  |
| ENSG000001 | 11.67113 | 5.865772 | 0.95172  | 0.16647  | 0.24767  | JMJD7 chr15      | + | 42120283 | 42129779 | 1416 |
| ENSG000001 | 2.334388 | 0.715414 | 1.3854   | 0.33604  | 0.43971  | RP11-572N chr3   | - | 1.13E+08 | 1.13E+08 | 2502 |
| ENSG000001 | 0        | 0.357707 | -0.41864 | 0.81278  | NA       | PEX5L-AS1 chr3   | + | 1.8E+08  | 1.8E+08  | 827  |
| ENSG000001 | 0        | 0.594029 | -0.81444 | 0.64499  | NA       | RP11-390K chr11  | - | 47212732 | 47213093 | 362  |
| ENSG000001 | 0.342542 | 0        | 0.4146   | 0.81455  | NA       | CTC-484P3 chr5   | - | 94161666 | 94162399 | 734  |
| ENSG000001 | 0        | 1.234181 | -1.5727  | 0.37581  | NA       | RP5-1096J chr20  | - | 20239051 | 20248453 | 568  |
| ENSG000001 | 18.05082 | 144.2433 | -2.9593  | 1.72E-13 | 1.03E-12 | APOBEC3D chr22   | + | 39410368 | 39429256 | 2503 |
| ENSG000001 | 0.995923 | 1.782087 | -0.65869 | 0.66818  | 0.75085  | RP11-434C chr14  | - | 35209542 | 35210039 | 498  |
| ENSG000001 | 0.36308  | 4.654281 | -2.9516  | 0.038532 | 0.071016 | CTB-33G10 chr19  | - | 50222755 | 50223338 | 584  |
| ENSG000001 | 0.342542 | 33.74111 | -5.8347  | 6.72E-08 | 2.66E-07 | WDR86-AS chr7    | + | 1.51E+08 | 1.51E+08 | 751  |
| ENSG000001 | 3.64115  | 1.545765 | 1.0457   | 0.37449  | 0.47871  | AC108058. chr2   | + | 1.06E+08 | 1.06E+08 | 781  |
| ENSG000001 | 0.870904 | 0        | 1.046    | 0.5544   | NA       | WDR52-AS chr3    | + | 1.13E+08 | 1.13E+08 | 686  |
| ENSG000001 | 1.317927 | 13.15351 | -3.0561  | 0.001431 | 0.003466 | OR2A7 chr7       | - | 1.44E+08 | 1.44E+08 | 1116 |
| ENSG000001 | 1.161205 | 2.185918 | -0.6868  | 0.63968  | 0.72707  | RP1-63G5.1 chr22 | - | 37735624 | 37823505 | 1970 |
| ENSG000001 | 0        | 1.280305 | -1.6305  | 0.35731  | NA       | TUBA4B chr2      | + | 2.2E+08  | 2.2E+08  | 1380 |
| ENSG000001 | 0        | 1.234181 | -1.5727  | 0.37581  | NA       | CTD-2290C chr5   | + | 31847377 | 31848254 | 878  |
| ENSG000001 | 0        | 1.073121 | -1.1788  | 0.50551  | NA       | PRKRIRP2 chr3    | + | 86061711 | 86064270 | 2267 |
| ENSG000001 | 2.188831 | 1.773966 | 0.27553  | 0.84571  | 0.89174  | TIPARP-AS1 chr3  | - | 1.56E+08 | 1.56E+08 | 735  |
| ENSG000001 | 1306.01  | 525.0609 | 1.312    | 7.41E-23 | 7.11E-22 | MRPS6 chr21      | + | 35445524 | 35515334 | 3934 |
| ENSG000001 | 326.9642 | 339.4852 | -0.05469 | 0.70106  | 0.77757  | ZNF512 chr2      | + | 27805897 | 27858041 | 3422 |
| ENSG000001 | 0        | 1.248751 | -1.5848  | 0.37202  | NA       | RP11-167F chr3   | + | 1.5E+08  | 1.5E+08  | 557  |
| ENSG000001 | 0.36308  | 2.529055 | -2.1802  | 0.14682  | 0.22285  | GSTA1 chr6       | - | 52656462 | 52668708 | 1019 |
| ENSG000001 | 2.032922 | 4.629174 | -1.0528  | 0.36894  | 0.47352  | RP11-552N chr1   | - | 1.12E+08 | 1.12E+08 | 723  |
| ENSG000001 | 0.342542 | 0        | 0.4146   | 0.81455  | NA       | RP5-839B4 chr20  | + | 9966736  | 10023864 | 1036 |

|            |          |          |          |          |          |           |       |   |          |          |      |
|------------|----------|----------|----------|----------|----------|-----------|-------|---|----------|----------|------|
| ENSG000001 | 0.995923 | 0.686276 | 0.39213  | 0.8081   | NA       | RP11-16F1 | chr11 | + | 9627689  | 9628156  | 468  |
| ENSG000001 | 0.943682 | 0        | 1.2438   | 0.48556  | NA       | RP11-439C | chr3  | - | 1.55E+08 | 1.55E+08 | 351  |
| ENSG000001 | 1.233984 | 0.640152 | 0.69125  | 0.6636   | NA       | PPIEL     | chr1  | - | 39997510 | 40024379 | 813  |
| ENSG000001 | 30.1261  | 3.475086 | 3.0279   | 1.38E-05 | 4.37E-05 | RGAG1     | chrX  | + | 1.1E+08  | 1.1E+08  | 5426 |
| ENSG000001 | 1.016461 | 0        | 1.3167   | 0.46021  | NA       | RP11-347C | chr8  | + | 95903467 | 95904335 | 558  |
| ENSG000001 | 0.685084 | 6.240464 | -2.7533  | 0.025079 | 0.048389 | ENO1P3    | chr3  | - | 1.25E+08 | 1.25E+08 | 1224 |
| ENSG000001 | 8.932419 | 13.64388 | -0.60724 | 0.34852  | 0.45269  | ACY1      | chr3  | + | 52009066 | 52023213 | 1836 |
| ENSG000001 | 0        | 3.131949 | -2.8424  | 0.087454 | 0.14425  | RP11-1396 | chr4  | + | 9564791  | 9565570  | 780  |
| ENSG000001 | 258.9985 | 245.255  | 0.080483 | 0.59786  | 0.692    | NFS1      | chr20 | - | 34220262 | 34287281 | 3012 |
| ENSG000001 | 4.378475 | 10.24976 | -1.1743  | 0.15896  | 0.2384   | RP11-227J | chr3  | + | 1.6E+08  | 1.6E+08  | 806  |
| ENSG000001 | 0        | 1.043983 | -1.3473  | 0.44976  | NA       | RP11-50D9 | chr4  | - | 1.29E+08 | 1.29E+08 | 483  |
| ENSG000001 | 263.0251 | 148.0838 | 0.82712  | 3.50E-06 | 1.18E-05 | FAM86DP   | chr3  | - | 75470703 | 75484261 | 2425 |
| ENSG000001 | 0        | 0.357707 | -0.41864 | 0.81278  | NA       | AC090939  | chr3  | - | 11761930 | 11766453 | 453  |
| ENSG000001 | 0.36308  | 0.357707 | -0.00212 | 0.99905  | NA       | RP11-306C | chr7  | + | 1.3E+08  | 1.3E+08  | 832  |
| ENSG000001 | 5532.268 | 3996.441 | 0.46902  | 1.45E-05 | 4.58E-05 | DDOST     | chr1  | - | 20978270 | 20988000 | 2079 |
| ENSG000001 | 17.51985 | 0        | 5.7543   | 1.23E-06 | 4.36E-06 | CTD-2049J | chr3  | - | 1.6E+08  | 1.6E+08  | 2425 |
| ENSG000001 | 16.76378 | 35.48843 | -1.0544  | 0.02755  | 0.052649 | RP1-90J20 | chr6  | + | 2988201  | 2991401  | 2804 |
| ENSG000001 | 57.85165 | 75.7264  | -0.38466 | 0.26955  | 0.36858  | TMEM199   | chr17 | + | 26684604 | 26708716 | 3148 |
| ENSG000001 | 1.866827 | 0        | 2.3484   | 0.15622  | NA       | RP11-266K | chr12 | - | 8352195  | 8371507  | 509  |
| ENSG000001 | 0        | 0.594029 | -0.81444 | 0.64499  | NA       | RPL5P24   | chr8  | - | 1.04E+08 | 1.04E+08 | 885  |
| ENSG000001 | 2.729171 | 3.24447  | -0.24696 | 0.81713  | 0.87168  | LINC00539 | chr13 | + | 21872278 | 21878694 | 347  |
| ENSG000001 | 2.67693  | 3.823929 | -0.49127 | 0.6283   | 0.71806  | AC007566  | chr7  | + | 92086878 | 92120924 | 643  |
| ENSG000001 | 1.068702 | 0.937167 | 0.097081 | 0.9507   | 0.96919  | RPS2P41   | chr12 | - | 1.12E+08 | 1.12E+08 | 603  |
| ENSG000001 | 0        | 1.073121 | -1.1788  | 0.50551  | NA       | RP11-389C | chr5  | + | 71677621 | 71678220 | 600  |
| ENSG000001 | 0        | 1.935026 | -2.4284  | 0.13734  | 0.21062  | RP11-221E | chr3  | - | 1.29E+08 | 1.29E+08 | 841  |
| ENSG000001 | 0        | 1.340997 | -1.8899  | 0.26871  | NA       | GSTA2     | chr6  | - | 52614897 | 52628367 | 1303 |
| ENSG000001 | 3.785894 | 0        | 3.4396   | 0.020096 | 0.039632 | CTD-2284C | chr5  | + | 37085158 | 37085954 | 797  |
| ENSG000001 | 1.213446 | 2.24661  | -0.71313 | 0.59039  | 0.68545  | RPS20P35  | chr17 | + | 37011567 | 37011923 | 357  |
| ENSG000001 | 0        | 0.98329  | -1.2878  | 0.47019  | NA       | SPRR2F    | chr1  | - | 1.53E+08 | 1.53E+08 | 681  |
| ENSG000001 | 0.705622 | 0        | 0.8807   | 0.6196   | NA       | RPS4XP17  | chr17 | - | 560034   | 560787   | 754  |
| ENSG000001 | 0.36308  | 0        | 0.4146   | 0.81455  | NA       | RP11-793B | chr4  | + | 67296810 | 67297239 | 430  |
| ENSG000001 | 0.72616  | 0        | 0.85004  | 0.63064  | NA       | RP11-468F | chr8  | - | 17007810 | 17008397 | 588  |
| ENSG000001 | 3.382552 | 7.33057  | -1.0544  | 0.23186  | 0.32542  | PDCL3P4   | chr3  | + | 1.01E+08 | 1.01E+08 | 720  |
| ENSG000001 | 11.85776 | 7.807246 | 0.59673  | 0.34723  | 0.45142  | ATP1B3-AS | chr3  | - | 1.42E+08 | 1.42E+08 | 376  |
| ENSG000001 | 0        | 3.097978 | -2.8035  | 0.093924 | 0.15327  | RP11-648C | chr3  | + | 72055925 | 72056126 | 202  |
| ENSG000001 | 1.161205 | 2.024857 | -0.55582 | 0.7237   | 0.79553  | RPSAP51   | chr12 | + | 8895024  | 8895668  | 645  |
| ENSG000001 | 1.628766 | 1.355566 | 0.24127  | 0.85166  | 0.89565  | RPS12P20  | chr11 | + | 72419231 | 72419610 | 380  |
| ENSG000001 | 0        | 0.297015 | -0.41864 | 0.81278  | NA       | RP11-99J1 | chr1  | - | 2.31E+08 | 2.31E+08 | 850  |
| ENSG000001 | 6.5039   | 2.355842 | 1.3297   | 0.21088  | 0.30111  | RP11-757F | chr3  | - | 1.12E+08 | 1.12E+08 | 519  |
| ENSG000001 | 0        | 0.297015 | -0.41864 | 0.81278  | NA       | RP11-366A | chr4  | - | 1.66E+08 | 1.66E+08 | 446  |
| ENSG000001 | 0.705622 | 0.343138 | 0.57395  | 0.74355  | NA       | RP11-373L | chr3  | + | 88206039 | 88217879 | 433  |
| ENSG000001 | 1.991846 | 2.993578 | -0.53114 | 0.61953  | 0.71057  | RP11-148K | chr7  | - | 1.51E+08 | 1.51E+08 | 1230 |
| ENSG000001 | 1.048164 | 0.594029 | 0.49568  | 0.76966  | NA       | RP11-1070 | chr8  | - | 54799568 | 54799804 | 237  |
| ENSG000001 | 7.063965 | 26.42344 | -1.8383  | 0.000587 | 0.001508 | FLNB-AS1  | chr3  | - | 58148274 | 58156363 | 3709 |
| ENSG000001 | 0        | 0.343138 | -0.41864 | 0.81278  | NA       | RP11-206A | chr3  | - | 1.49E+08 | 1.49E+08 | 566  |
| ENSG000001 | 36.98453 | 97.07447 | -1.36    | 0.010651 | 0.022257 | P2RY11    | chr19 | + | 10222214 | 10226048 | 1943 |
| ENSG000001 | 5.249379 | 11.75827 | -1.1182  | 0.11217  | 0.17812  | PBX2P1    | chr3  | + | 1.43E+08 | 1.43E+08 | 2181 |
| ENSG000001 | 0.685084 | 0.715414 | -0.02805 | 0.98738  | NA       | RP11-315C | chr6  | + | 1.11E+08 | 1.11E+08 | 315  |
| ENSG000001 | 0.653381 | 2.589748 | -1.635   | 0.2266   | 0.31953  | RP11-314A | chr17 | + | 4607525  | 4608824  | 472  |
| ENSG000001 | 359.7515 | 440.687  | -0.29178 | 0.054496 | 0.095839 | TMEM141   | chr9  | + | 1.4E+08  | 1.4E+08  | 839  |
| ENSG000001 | 3.278071 | 124.6129 | -5.1352  | 2.84E-24 | 2.88E-23 | RP4-545C2 | chr7  | + | 1.44E+08 | 1.44E+08 | 856  |
| ENSG000001 | 0.342542 | 0        | 0.4146   | 0.81455  | NA       | RP11-139K | chr3  | - | 1.82E+08 | 1.82E+08 | 656  |
| ENSG000001 | 11.53657 | 5.274159 | 1.0586   | 0.19047  | 0.27718  | FOX1P-AS1 | chr3  | + | 71338920 | 71355004 | 700  |
| ENSG000001 | 0.290301 | 0.654722 | -0.51764 | 0.76892  | NA       | KB-1554H1 | chr8  | + | 95365151 | 95365881 | 731  |
| ENSG000001 | 3.184754 | 1.294874 | 1.1337   | 0.33767  | 0.44142  | GS1-259H1 | chr7  | + | 99195689 | 99208436 | 1314 |
| ENSG000001 | 0.36308  | 1.340997 | -1.3725  | 0.39447  | NA       | ILF2P1    | chr3  | + | 65672976 | 65674143 | 1168 |
| ENSG000001 | 0.36308  | 0        | 0.4146   | 0.81455  | NA       | RP11-298C | chr3  | + | 1.68E+08 | 1.68E+08 | 2350 |
| ENSG000001 | 0.975385 | 0.997859 | -0.01708 | 0.99089  | 0.99525  | RPL26P35  | chr18 | - | 74546385 | 74546844 | 460  |
| ENSG000001 | 0        | 1.058552 | -1.361   | 0.4451   | NA       | GMCL1P1   | chr5  | - | 1.78E+08 | 1.78E+08 | 1581 |
| ENSG000001 | 109.115  | 32.41234 | 1.7123   | 0.000892 | 0.002232 | IFITM10   | chr11 | - | 1753640  | 1771821  | 3807 |
| ENSG000001 | 0        | 0.997859 | -1.5018  | 0.39072  | NA       | RPS3AP42  | chr11 | - | 92231318 | 92232101 | 784  |
| ENSG000001 | 0        | 0.357707 | -0.41864 | 0.81278  | NA       | RP11-120B | chr5  | + | 1.08E+08 | 1.08E+08 | 359  |
| ENSG000001 | 1.306762 | 1.234181 | 0.043094 | 0.9771   | 0.98699  | PKD1P1    | chr16 | + | 16404198 | 16428047 | 6805 |
| ENSG000001 | 1.597063 | 0.700845 | 0.92163  | 0.54934  | 0.64913  | SLAH2-AS1 | chr3  | + | 1.5E+08  | 1.5E+08  | 441  |
| ENSG000001 | 1.701545 | 2.102535 | -0.25023 | 0.84755  | 0.89291  | RP11-529C | chr3  | - | 1.53E+08 | 1.53E+08 | 323  |

|            |          |          |          |          |          |            |       |   |          |          |      |
|------------|----------|----------|----------|----------|----------|------------|-------|---|----------|----------|------|
| ENSG000001 | 0        | 0.357707 | -0.41864 | 0.81278  | NA       | PGBD4P1    | chr7  | + | 1.42E+08 | 1.42E+08 | 407  |
| ENSG000001 | 3.257533 | 29.25434 | -3.0537  | 1.06E-06 | 3.76E-06 | DBNDD2     | chr20 | + | 44034697 | 44039250 | 1537 |
| ENSG000001 | 0        | 65.89753 | -7.5842  | 6.53E-12 | 3.50E-11 | ECEL1P2    | chr2  | - | 2.33E+08 | 2.33E+08 | 1295 |
| ENSG000001 | 2.116866 | 0        | 2.2857   | 0.18371  | 0.26889  | RP11-564P  | chr3  | - | 81416141 | 81417172 | 1032 |
| ENSG000001 | 6.048317 | 10.41968 | -0.77293 | 0.25486  | 0.35199  | ITGB5-AS1  | chr3  | + | 1.25E+08 | 1.25E+08 | 460  |
| ENSG000001 | 0        | 4.689867 | -3.6767  | 0.012926 | 0.026555 | RPS3AP35   | chr8  | - | 12485985 | 12486765 | 781  |
| ENSG000001 | 11.33796 | 18.86063 | -0.71616 | 0.16953  | 0.25141  | C7orf13    | chr7  | - | 1.56E+08 | 1.56E+08 | 2292 |
| ENSG000001 | 0.290301 | 3.624867 | -2.4846  | 0.11929  | 0.18793  | RP11-475N  | chr3  | + | 1.28E+08 | 1.28E+08 | 1578 |
| ENSG000001 | 9.388002 | 1.058552 | 2.8882   | 0.00557  | 0.012285 | CTD-2314B  | chr14 | - | 19854098 | 19925348 | 4264 |
| ENSG000001 | 82.95804 | 126.8309 | -0.6053  | 0.00547  | 0.012088 | RP11-425L  | chr11 | - | 46450163 | 46450700 | 498  |
| ENSG000001 | 4.627701 | 0.715414 | 2.2866   | 0.081899 | 0.13629  | RP11-383C  | chr3  | - | 1.42E+08 | 1.42E+08 | 765  |
| ENSG000001 | 1.887365 | 9.27775  | -2.0985  | 0.022627 | 0.044122 | RP11-119K  | chr10 | + | 96337196 | 96370995 | 645  |
| ENSG000001 | 0        | 66.24778 | -7.5047  | 6.62E-11 | 3.32E-10 | LINC00698  | chr3  | + | 62936105 | 63110738 | 1957 |
| ENSG000001 | 1.649304 | 1.188058 | 0.33221  | 0.82264  | 0.875    | RP11-531F  | chr3  | - | 1.83E+08 | 1.83E+08 | 543  |
| ENSG000001 | 0.342542 | 6.520493 | -3.5318  | 0.006051 | 0.013261 | HCG16      | chr6  | + | 28954577 | 28956313 | 317  |
| ENSG000001 | 0.342542 | 0        | 0.4146   | 0.81455  | NA       | LY6G6D     | chr6  | + | 31683133 | 31685581 | 523  |
| ENSG000001 | 3.10081  | 9.467948 | -1.4828  | 0.078724 | 0.1317   | RPL7P23p   | chr5  | + | 76878198 | 76879010 | 813  |
| ENSG000001 | 4.773664 | 4.273883 | 0.63515  | 0.42218  | 0.52764  | PFN1P8     | chr1  | - | 1.46E+08 | 1.46E+08 | 543  |
| ENSG000001 | 3.144492 | 3.114963 | 0.008809 | 0.99416  | 0.99669  | RPS2P45    | chr16 | + | 69067578 | 69069945 | 2057 |
| ENSG000001 | 0        | 1.058552 | -1.361   | 0.4451   | NA       | RP11-24C3  | chr3  | - | 48481762 | 48488060 | 885  |
| ENSG000001 | 0.290301 | 0.297015 | -0.00202 | 0.99909  | NA       | RP11-475C  | chr3  | + | 58592807 | 58620167 | 821  |
| ENSG000001 | 0.342542 | 0        | 0.4146   | 0.81455  | NA       | RPS6P22    | chr12 | + | 59413950 | 59414675 | 726  |
| ENSG000001 | 0.653381 | 0.654722 | -0.00313 | 0.9985   | NA       | RP11-592B  | chr10 | - | 51253146 | 51371338 | 980  |
| ENSG000001 | 125.8581 | 164.2697 | -0.38166 | 0.046287 | 0.083193 | RP11-466F  | chr11 | - | 16996240 | 16996560 | 321  |
| ENSG000001 | 1793.45  | 1467.324 | 0.28888  | 0.04135  | 0.075446 | ETV5       | chr3  | - | 1.86E+08 | 1.86E+08 | 4111 |
| ENSG000001 | 0.342542 | 1.355566 | -1.3789  | 0.3926   | NA       | CFHR1      | chr1  | + | 1.97E+08 | 1.97E+08 | 1271 |
| ENSG000001 | 0        | 0.997859 | -1.5018  | 0.39072  | NA       | RP11-52B1  | chr8  | + | 7953468  | 7954248  | 781  |
| ENSG000001 | 12.5197  | 9.981011 | 0.32887  | 0.59352  | 0.68821  | RP4-655L2  | chrX  | + | 1.2E+08  | 1.2E+08  | 632  |
| ENSG000001 | 4.315069 | 10.43425 | -1.2241  | 0.10462  | 0.16766  | RP11-1398  | chr4  | - | 1575789  | 1581980  | 579  |
| ENSG000001 | 1780.274 | 2318.474 | -0.38012 | 0.024562 | 0.047489 | RBM12      | chr20 | - | 34236847 | 34252878 | 6662 |
| ENSG000001 | 0        | 2.087966 | -2.2641  | 0.18897  | 0.27528  | RP11-206N  | chr3  | + | 1.49E+08 | 1.49E+08 | 551  |
| ENSG000001 | 0        | 0.357707 | -0.41864 | 0.81278  | NA       | RP1-302D9  | chr22 | - | 33562373 | 33617737 | 596  |
| ENSG000001 | 8.070074 | 5.150358 | 0.5912   | 0.48463  | 0.58867  | ERVFRD-1   | chr6  | - | 11102722 | 11111965 | 3198 |
| ENSG000001 | 9.669743 | 190.4563 | -4.2983  | 1.62E-30 | 2.09E-29 | RP4-798C1  | chr7  | - | 1.44E+08 | 1.44E+08 | 1268 |
| ENSG000001 | 5.560218 | 1.874334 | 1.3913   | 0.17788  | 0.26162  | AC005154.  | chr7  | - | 30562759 | 30564151 | 1393 |
| ENSG000001 | 4.399013 | 1.340997 | 1.5306   | 0.16209  | 0.2424   | LILRA6     | chr19 | - | 54720737 | 54746649 | 2238 |
| ENSG000001 | 1875.328 | 850.7352 | 1.1378   | 1.12E-13 | 6.74E-13 | SCARF2     | chr22 | - | 20778874 | 20792146 | 3460 |
| ENSG000001 | 2.044087 | 1.073121 | 0.74827  | 0.60996  | 0.70268  | RWDD4P1    | chr7  | + | 1.05E+08 | 1.05E+08 | 565  |
| ENSG000001 | 529.989  | 295.1757 | 0.84254  | 2.38E-05 | 7.31E-05 | APOBEC3C   | chr22 | + | 39410088 | 39414931 | 1309 |
| ENSG000001 | 0.36308  | 0        | 0.4146   | 0.81455  | NA       | GS1-124K5  | chr7  | - | 65947788 | 65955095 | 151  |
| ENSG000001 | 14.41904 | 4.884898 | 1.4876   | 0.037891 | 0.06995  | CTD-2013N  | chr3  | + | 69063092 | 69105773 | 962  |
| ENSG000001 | 5.104635 | 1.964165 | 1.2243   | 0.25422  | 0.35129  | KRT18P34   | chr3  | - | 1.57E+08 | 1.57E+08 | 1270 |
| ENSG000001 | 0        | 0.343138 | -0.41864 | 0.81278  | NA       | AC134873.  | chr2  | + | 2.43E+08 | 2.43E+08 | 183  |
| ENSG000001 | 0        | 0.297015 | -0.41864 | 0.81278  | NA       | RP1-181J2. | chr11 | + | 32779814 | 32780160 | 347  |
| ENSG000001 | 0        | 0.594029 | -0.81444 | 0.64499  | NA       | RP11-416A  | chr12 | + | 51500600 | 51500927 | 328  |
| ENSG000001 | 4.886299 | 19.09528 | -1.8926  | 0.002298 | 0.005384 | RP11-128A  | chr7  | + | 1.29E+08 | 1.29E+08 | 1639 |
| ENSG000001 | 1.338465 | 0.891044 | 0.39821  | 0.79657  | 0.85554  | RP11-445F  | chr20 | - | 43323533 | 43374662 | 862  |
| ENSG000001 | 23.50916 | 11.5592  | 0.98123  | 0.10926  | 0.17399  | RP4-800G7  | chr7  | + | 1.49E+08 | 1.49E+08 | 2804 |
| ENSG000001 | 2.044087 | 0        | 2.4801   | 0.12801  | 0.19906  | RP11-14D2  | chr3  | + | 64430907 | 64440508 | 565  |
| ENSG000001 | 44.22135 | 28.37471 | 0.62859  | 0.078702 | 0.13167  | AC096772.  | chr2  | - | 2.09E+08 | 2.09E+08 | 1262 |
| ENSG000001 | 0.653381 | 0.594029 | 0.059135 | 0.97278  | NA       | RP11-515B  | chr12 | - | 14509776 | 14518437 | 358  |
| ENSG000001 | 0        | 0.700845 | -0.87835 | 0.62047  | NA       | AC090505.  | chr3  | + | 1.94E+08 | 1.95E+08 | 432  |
| ENSG000001 | 0        | 11.51462 | -5.0653  | 8.72E-05 | 0.00025  | RP11-548C  | chr3  | - | 1.39E+08 | 1.39E+08 | 3538 |
| ENSG000001 | 0.290301 | 0.640152 | -0.50256 | 0.77558  | NA       | RPL21P12C  | chr17 | + | 21407884 | 21408385 | 502  |
| ENSG000001 | 397.9468 | 30.05401 | 3.7015   | 4.25E-58 | 1.18E-56 | WNT5A-AS.  | chr3  | + | 55521727 | 55522336 | 500  |
| ENSG000001 | 5.228841 | 3.434668 | 0.53554  | 0.58088  | 0.67737  | RAD21L1    | chr20 | + | 1206700  | 1277065  | 1808 |
| ENSG000001 | 0        | 0.343138 | -0.41864 | 0.81278  | NA       | RP11-685B  | chr8  | - | 18240784 | 18241427 | 644  |
| ENSG000001 | 0.290301 | 3.451653 | -2.4978  | 0.1073   | 0.17139  | RP11-713F  | chr17 | + | 8464548  | 8464894  | 347  |
| ENSG000001 | 1.213446 | 3.665285 | -1.3307  | 0.27491  | 0.37493  | CCDC13     | chr3  | - | 42734155 | 42814745 | 2943 |
| ENSG000001 | 9.026714 | 17.97121 | -0.9661  | 0.12442  | 0.19457  | ASPRV1     | chr2  | - | 70187226 | 70189397 | 2172 |
| ENSG000001 | 5.217676 | 19.58894 | -1.8346  | 0.003559 | 0.008109 | CTA-211A9  | chr22 | + | 27068730 | 27176170 | 1006 |
| ENSG000001 | 94.80047 | 155.1199 | -0.70685 | 0.001621 | 0.003889 | RP3-49Q1   | chr22 | - | 38731767 | 38794934 | 974  |
| ENSG000001 | 0.632843 | 2.292733 | -1.4905  | 0.27804  | 0.37845  | RP11-241J  | chr5  | - | 80151326 | 80151662 | 337  |
| ENSG000001 | 20.9042  | 3.322147 | 2.5594   | 0.000154 | 0.000429 | CTD-2377C  | chr17 | + | 46782565 | 46784708 | 1436 |
| ENSG000001 | 1.701545 | 0.951736 | 0.64713  | 0.64393  | 0.73093  | RP11-103C  | chr3  | - | 1.5E+08  | 1.5E+08  | 476  |

|            |          |          |          |          |          |                 |   |          |          |      |
|------------|----------|----------|----------|----------|----------|-----------------|---|----------|----------|------|
| ENSG000001 | 0        | 0.297015 | -0.41864 | 0.81278  | NA       | RP11-158C chr4  | - | 65632848 | 65633615 | 768  |
| ENSG000001 | 0.342542 | 0.357707 | -0.0021  | 0.99906  | NA       | RPS3AP15 chr3   | - | 75591300 | 75592080 | 781  |
| ENSG000001 | 1.338465 | 7.218922 | -2.219   | 0.030452 | 0.057512 | AC108676. chr3  | - | 1.94E+08 | 1.94E+08 | 2962 |
| ENSG000001 | 1.161205 | 2.056411 | -0.59864 | 0.68047  | 0.76103  | AL109761. chr21 | + | 19165805 | 19183162 | 422  |
| ENSG000001 | 9.285312 | 1.248751 | 2.5995   | 0.0083   | 0.017695 | FCGR2C chr1     | + | 1.62E+08 | 1.62E+08 | 1632 |
| ENSG000001 | 58.68489 | 47.01446 | 0.30884  | 0.38567  | 0.48992  | UBE2V1 chr20    | - | 48697661 | 48732496 | 2536 |
| ENSG000001 | 0.72616  | 1.387121 | -0.65389 | 0.69349  | 0.77146  | RP11-600F chr14 | - | 1.04E+08 | 1.04E+08 | 643  |
| ENSG000001 | 0        | 9.951873 | -4.8841  | 0.000156 | 0.000435 | CTAGE8 chr7     | - | 1.44E+08 | 1.44E+08 | 2588 |
| ENSG000001 | 143.2221 | 14.48638 | 3.2768   | 1.77E-26 | 1.97E-25 | PTCHD4 chr6     | - | 47845764 | 48036425 | 3232 |
| ENSG000001 | 2.375464 | 0.654722 | 1.4834   | 0.28894  | 0.3905   | RP11-378J chr1  | + | 2.23E+08 | 2.23E+08 | 1302 |
| ENSG000001 | 0        | 0.357707 | -0.41864 | 0.81278  | NA       | RP11-803B chr3  | - | 75433210 | 75440961 | 369  |
| ENSG000001 | 3.568372 | 9.744689 | -1.3614  | 0.081821 | 0.1362   | RP5-894A1 chr7  | - | 1.41E+08 | 1.41E+08 | 770  |
| ENSG000001 | 0        | 1.326428 | -1.6486  | 0.3523   | NA       | CD46P1 chr1     | + | 2.08E+08 | 2.08E+08 | 763  |
| ENSG000001 | 0.290301 | 0.700845 | -0.56655 | 0.74739  | NA       | RP11-874G chr12 | - | 28717611 | 28718074 | 464  |
| ENSG000001 | 36.86807 | 72.52974 | -0.96274 | 0.000888 | 0.002224 | RP11-2002 chr1  | + | 1.1E+08  | 1.1E+08  | 612  |
| ENSG000001 | 0.290301 | 0        | 0.4146   | 0.81455  | NA       | RP11-179A chr3  | - | 1.1E+08  | 1.1E+08  | 869  |
| ENSG000001 | 7.107646 | 11.86267 | -0.71035 | 0.3693   | 0.47392  | ASLP1 chr22     | - | 23991400 | 23995521 | 637  |
| ENSG000001 | 1.608228 | 1.248751 | 0.27398  | 0.85253  | 0.89637  | RP13-1056 chr3  | + | 49812718 | 49813047 | 330  |
| ENSG000001 | 11.07855 | 4.539343 | 1.224    | 0.11555  | 0.18287  | C4A chr6        | + | 31949801 | 31970458 | 5460 |
| ENSG000001 | 1.576526 | 1.073121 | 0.4605   | 0.76104  | 0.82661  | RP11-506N chr10 | + | 81420645 | 81436856 | 941  |
| ENSG000001 | 1.027626 | 0        | 1.1491   | 0.51623  | NA       | CRYBB2 chr22    | + | 25615489 | 25627836 | 886  |
| ENSG000001 | 0        | 0.654722 | -0.83442 | 0.63731  | NA       | RPL15P21 chr17  | - | 10763852 | 10764779 | 567  |
| ENSG000001 | 839.7224 | 503.7429 | 0.73691  | 6.18E-09 | 2.66E-08 | N4BP2L2 chr13   | - | 33006554 | 33112970 | 5317 |
| ENSG000001 | 1.068702 | 0        | 1.3672   | 0.44297  | NA       | RP11-1042 chr14 | - | 61038742 | 61039029 | 288  |
| ENSG000001 | 0.290301 | 1.188058 | -1.0232  | 0.56351  | NA       | RP11-45A1 chr9  | - | 1.19E+08 | 1.19E+08 | 728  |
| ENSG000001 | 0        | 0.357707 | -0.41864 | 0.81278  | NA       | RP11-65D1 chr8  | + | 1.27E+08 | 1.27E+08 | 1422 |
| ENSG000001 | 64.57747 | 251.5033 | -1.9451  | 4.64E-09 | 2.02E-08 | GABPB1-AS chr15 | + | 50647156 | 50659636 | 2310 |
| ENSG000001 | 0.923144 | 6.413677 | -2.4363  | 0.028847 | 0.05482  | CTB-3601.1 chr5 | - | 1.34E+08 | 1.34E+08 | 747  |
| ENSG000001 | 6.639271 | 2.696564 | 1.2124   | 0.21785  | 0.30934  | RP11-613C chr11 | - | 43930842 | 43942494 | 1906 |
| ENSG000001 | 49.26779 | 39.40702 | 0.31264  | 0.34632  | 0.45043  | RP11-529F chr3  | + | 1.29E+08 | 1.29E+08 | 517  |
| ENSG000001 | 13.94292 | 14.72183 | -0.07555 | 0.89702  | 0.92858  | RP11-1379 chr5  | - | 1.79E+08 | 1.79E+08 | 1966 |
| ENSG000001 | 1.681007 | 2.232041 | -0.37784 | 0.75648  | 0.82296  | RP11-1000 chr15 | + | 32905934 | 32907312 | 732  |
| ENSG000001 | 1.887365 | 0        | 2.1461   | 0.21553  | NA       | RP11-613C chr11 | - | 43965337 | 43968756 | 2045 |
| ENSG000001 | 7.697622 | 15.48827 | -0.97562 | 0.13824  | 0.21169  | LIFR-AS1 chr5   | + | 38556888 | 38671318 | 3803 |
| ENSG000001 | 0        | 1.606458 | -1.9287  | 0.27074  | NA       | CTD-3064N chr8  | - | 1.42E+08 | 1.42E+08 | 1380 |
| ENSG000001 | 0.975385 | 0        | 1.2767   | 0.47406  | NA       | RP11-744N chr11 | - | 1.28E+08 | 1.29E+08 | 1916 |
| ENSG000001 | 1.681007 | 10.67058 | -2.4979  | 0.006031 | 0.013222 | RP11-181C chr12 | - | 98879322 | 98897633 | 1825 |
| ENSG000001 | 2.914991 | 0.297015 | 2.4184   | 0.095671 | 0.15569  | RP11-875C chr8  | - | 22842109 | 22876848 | 1945 |
| ENSG000001 | 0.580602 | 1.043983 | -0.50894 | 0.7638   | NA       | RP11-303E chr16 | + | 81110924 | 81112466 | 1088 |
| ENSG000001 | 176.2548 | 134.0388 | 0.39217  | 0.13642  | 0.20963  | LINC00847 chr5  | + | 1.8E+08  | 1.8E+08  | 1871 |
| ENSG000001 | 18.19377 | 0        | 5.7996   | 1.04E-06 | 3.70E-06 | RP11-12A1 chr4  | + | 57975928 | 58071676 | 1389 |
| ENSG000001 | 0.290301 | 0        | 0.4146   | 0.81455  | NA       | RP11-320N chr8  | - | 96079036 | 96085410 | 2632 |
| ENSG000001 | 9.876101 | 5.361573 | 0.83536  | 0.26767  | 0.36641  | A2M-AS1 chr12   | + | 9217773  | 9220651  | 2187 |
| ENSG000001 | 0.632843 | 2.012704 | -1.2279  | 0.42566  | 0.53104  | SMARCA5-1 chr4  | - | 1.44E+08 | 1.44E+08 | 945  |
| ENSG000001 | 3.733653 | 4.928605 | -0.34849 | 0.70291  | 0.77902  | CTB-131B5 chr5  | - | 1.39E+08 | 1.39E+08 | 2769 |
| ENSG000001 | 5.145711 | 2.696564 | 0.85362  | 0.3751   | 0.47933  | ARAP1-AS2 chr11 | + | 72411519 | 72416652 | 1824 |
| ENSG000001 | 24.48113 | 21.96506 | 0.16508  | 0.71228  | 0.78644  | RP11-383J chr8  | - | 1.25E+08 | 1.25E+08 | 5654 |
| ENSG000001 | 11.14277 | 7.328154 | 0.58865  | 0.37486  | 0.47909  | RP11-867C chr11 | - | 66037303 | 66045996 | 2792 |
| ENSG000001 | 5.1766   | 10.2319  | -0.93314 | 0.18821  | 0.27444  | EEF1A1P4 chr12  | - | 19609178 | 19610582 | 1405 |
| ENSG000001 | 23.30957 | 43.03834 | -0.87515 | 0.022552 | 0.04399  | RP11-10K1 chr4  | - | 1.74E+08 | 1.74E+08 | 2036 |
| ENSG000001 | 1.733248 | 23.45497 | -3.6019  | 6.16E-06 | 2.03E-05 | RP11-305N chr11 | + | 1.19E+08 | 1.19E+08 | 2486 |
| ENSG000001 | 45.87343 | 11.11811 | 2.0048   | 2.07E-05 | 6.39E-05 | CTB-157D1 chr5  | - | 1.54E+08 | 1.54E+08 | 1039 |
| ENSG000001 | 2.334388 | 3.215331 | -0.43342 | 0.68588  | 0.76561  | CTD-2547L chr8  | + | 17942377 | 17953903 | 1052 |
| ENSG000001 | 0.975385 | 0.343138 | 0.92553  | 0.59174  | NA       | RP11-286E chr4  | - | 1.09E+08 | 1.09E+08 | 2810 |
| ENSG000001 | 0.632843 | 1.029414 | -0.43867 | 0.79644  | NA       | RP11-165P chr12 | - | 27542722 | 27599558 | 804  |
| ENSG000001 | 13.45482 | 9.032564 | 0.54687  | 0.36628  | 0.47091  | CTC-241N9 chr5  | + | 1.79E+08 | 1.79E+08 | 1454 |
| ENSG000001 | 2.064625 | 2.232041 | -0.13433 | 0.90896  | 0.9374   | RP11-15B1 chr4  | + | 1.01E+08 | 1.01E+08 | 769  |
| ENSG000001 | 0.290301 | 0.357707 | -0.00203 | 0.99908  | NA       | AC004053. chr4  | + | 1.05E+08 | 1.06E+08 | 2968 |
| ENSG000001 | 0        | 3.411978 | -3.2688  | 0.029797 | 0.056423 | CTD-2540L chr14 | - | 71075515 | 71108015 | 2941 |
| ENSG000001 | 0.342542 | 0.343138 | -0.00208 | 0.99906  | NA       | RP11-367J chr4  | - | 7102967  | 7105112  | 2146 |
| ENSG000001 | 0        | 1.012429 | -1.3162  | 0.46038  | NA       | RP11-387C chr15 | + | 91203465 | 91208198 | 1295 |
| ENSG000001 | 0        | 0.357707 | -0.41864 | 0.81278  | NA       | RP11-847F chr12 | - | 34175216 | 34199352 | 2179 |
| ENSG000001 | 10.75654 | 19.48455 | -0.81118 | 0.15815  | 0.23752  | RP11-677N chr11 | + | 1.25E+08 | 1.25E+08 | 2886 |
| ENSG000001 | 9.076349 | 2.618886 | 1.6672   | 0.065292 | 0.11227  | RP11-540A chr11 | - | 9776317  | 9781080  | 2311 |
| ENSG000001 | 6.722236 | 7.096664 | -0.07349 | 0.93552  | 0.95758  | LINC00461 chr5  | - | 87803363 | 87986858 | 3558 |

|                   |           |          |          |          |            |       |   |          |          |       |
|-------------------|-----------|----------|----------|----------|------------|-------|---|----------|----------|-------|
| ENSG000001834.399 | 258.0328  | 2.8147   | 2.80E-30 | 3.59E-29 | NEAT1      | chr11 | + | 65190245 | 65213011 | 22743 |
| ENSG000001576526  | 4.570898  | -1.364   | 0.19445  | 0.28208  | RP11-219B  | chr15 | + | 60771377 | 60922836 | 869   |
| ENSG000006306916  | 9.961609  | -0.63678 | 0.35648  | 0.46076  | RP11-712B  | chr11 | + | 94883703 | 94967268 | 1926  |
| ENSG0000054.12076 | 47.76372  | 0.182    | 0.52931  | 0.63075  | CTD-2037K  | chr5  | - | 77638189 | 77656331 | 1479  |
| ENSG000000685084  | 0.997859  | -0.39711 | 0.8057   | NA       | RP11-367J  | chr4  | - | 7096298  | 7105107  | 1500  |
| ENSG0000020.55131 | 23.52136  | -0.20072 | 0.63659  | 0.72482  | AP001258.  | chr11 | - | 58897606 | 58910488 | 2110  |
| ENSG0000010.15361 | 15.85081  | -0.60148 | 0.34763  | 0.45182  | BDNF-AS    | chr11 | + | 27528385 | 27719721 | 2324  |
| ENSG000006.556141 | 2.399549  | 1.3723   | 0.13217  | 0.20454  | DACT3-AS1  | chr19 | + | 47163621 | 47180704 | 1304  |
| ENSG0000010.63315 | 33.43759  | -1.6277  | 0.000431 | 0.00113  | DDX11-AS1  | chr12 | - | 31173697 | 31226781 | 2031  |
| ENSG0000002.90301 | 3.394993  | -2.4442  | 0.11867  | 0.18716  | RP11-277P  | chr12 | + | 10516368 | 10551105 | 2830  |
| ENSG000007.137557 | 6.518077  | 0.10726  | 0.89466  | 0.92691  | RP11-620J  | chr12 | - | 58263618 | 58290265 | 3507  |
| ENSG000000        | 0.715414  | -0.84936 | 0.6309   | NA       | RP11-184E  | chr5  | + | 25190791 | 25306281 | 937   |
| ENSG000002.044087 | 0.686276  | 1.2217   | 0.41207  | 0.51691  | RP5-940J5. | chr12 | + | 6652670  | 6654097  | 560   |
| ENSG0000042.02413 | 64.05233  | -0.59608 | 0.057135 | 0.099969 | ZNFS585B   | chr19 | - | 37672481 | 37709055 | 6210  |
| ENSG0000010.3849  | 3.558469  | 1.4499   | 0.076906 | 0.12916  | AF146191.  | chr4  | - | 1.91E+08 | 1.91E+08 | 979   |
| ENSG000000632843  | 1.995719  | -1.3071  | 0.35187  | 0.456    | CTB-26E19. | chr5  | - | 1.78E+08 | 1.78E+08 | 1458  |
| ENSG00000109.4514 | 27.10085  | 2.0026   | 7.18E-13 | 4.12E-12 | CRNDE      | chr16 | - | 54952775 | 54963101 | 735   |
| ENSG0000040.50228 | 2.529055  | 3.815    | 2.80E-09 | 1.24E-08 | NADKD1-A'  | chr5  | + | 36221157 | 36222004 | 720   |
| ENSG0000009.95923 | 1.485073  | -0.45968 | 0.76688  | 0.8314   | RP11-34F1  | chr15 | - | 68126648 | 68131217 | 1986  |
| ENSG000007.862903 | 4.083685  | 0.91157  | 0.25706  | 0.35458  | RP11-367J  | chr4  | - | 7032281  | 7047958  | 4300  |
| ENSG000000685084  | 3.662869  | -2.0084  | 0.13548  | 0.20857  | RP11-279F  | chr15 | + | 69755365 | 69863775 | 1358  |
| ENSG0000009.95923 | 0.997859  | -0.00349 | 0.99806  | 0.99911  | RP11-410C  | chr16 | + | 58767816 | 59142878 | 2296  |
| ENSG0000078.66334 | 0         | 7.8302   | 7.92E-13 | 4.53E-12 | RP11-175K  | chr5  | + | 1.59E+08 | 1.59E+08 | 2664  |
| ENSG0000012.65686 | 0         | 1.6147   | 0.36215  | NA       | RP11-179A  | chr11 | - | 81590893 | 82429124 | 1397  |
| ENSG000000        | 0.1949596 | -2.4359  | 0.13595  | 0.20899  | CEBPA      | chr19 | - | 33790840 | 33793470 | 2631  |
| ENSG0000086.80896 | 111.0113  | -0.35345 | 0.33593  | 0.43963  | CTD-2339L  | chr15 | - | 40978922 | 40987305 | 1151  |
| ENSG000006.5039   | 6.47437   | 0.001766 | 0.99809  | 0.99911  | GS1-24F4.2 | chr8  | + | 6693076  | 6742798  | 1110  |
| ENSG0000003.42542 | 0         | 0.4146   | 0.81455  | NA       | CTC-467M   | chr5  | + | 87972036 | 88018648 | 463   |
| ENSG0000003.6308  | 0.357707  | -0.00212 | 0.99905  | NA       | RP11-158I  | chr11 | - | 1.19E+08 | 1.19E+08 | 1646  |
| ENSG000000685084  | 3.861932  | -1.9111  | 0.20188  | 0.29053  | CTD-3203P  | chr16 | + | 27279526 | 27301813 | 2594  |
| ENSG000007.851738 | 15.46397  | -0.93765 | 0.14506  | 0.22052  | RP11-796E  | chr12 | + | 92539349 | 92583436 | 5699  |
| ENSG00000337.8343 | 681.0323  | -1.0093  | 9.38E-12 | 4.98E-11 | SNHG6      | chr8  | - | 67833919 | 67838633 | 648   |
| ENSG000002.282147 | 0.297015  | 2.0825   | 0.16536  | 0.24634  | RP11-630C  | chr4  | + | 76901943 | 76927095 | 1685  |
| ENSG00000108.0335 | 40.94392  | 1.3831   | 1.82E-05 | 5.66E-05 | CTC-228N2  | chr5  | - | 1.27E+08 | 1.27E+08 | 2977  |
| ENSG0000003.6308  | 0         | 0.4146   | 0.81455  | NA       | RP11-18H2  | chr4  | + | 1.53E+08 | 1.53E+08 | 1592  |
| ENSG00000164.0918 | 105.7287  | 0.63118  | 0.005222 | 0.011595 | RP11-33B1  | chr4  | + | 1.2E+08  | 1.2E+08  | 2376  |
| ENSG000002.177666 | 10.22304  | -2.0316  | 0.032967 | 0.061708 | KB-1208A1  | chr8  | + | 99053954 | 99056349 | 1989  |
| ENSG000002.976604 | 7.215633  | -1.1474  | 0.27891  | 0.37955  | RP11-30K9  | chr15 | - | 59060271 | 59063173 | 1396  |
| ENSG0000003.42542 | 0.951736  | -0.90924 | 0.59857  | NA       | ALDH1L1-A  | chr3  | + | 1.26E+08 | 1.26E+08 | 2324  |
| ENSG0000027.98772 | 44.19397  | -0.65446 | 0.053795 | 0.09481  | RP11-113K  | chr11 | + | 82783108 | 82817761 | 860   |
| ENSG0000016.28766 | 10.05715  | -2.3165  | 0.041536 | 0.075746 | NUDT16P    | chr3  | + | 1.31E+08 | 1.31E+08 | 2208  |
| ENSG000000        | 0.3717114 | -3.3236  | 0.03054  | 0.057622 | CTD-2506J  | chr14 | + | 97925153 | 98047938 | 1115  |
| ENSG0000081.51932 | 159.0137  | -0.96024 | 0.000507 | 0.001316 | RP11-115C  | chr8  | - | 6261072  | 6264663  | 2413  |
| ENSG0000040.70799 | 27.1073   | 0.58863  | 0.12816  | 0.19928  | RP11-696A  | chr4  | + | 1E+08    | 1E+08    | 4825  |
| ENSG0000003.42542 | 0         | 0.4146   | 0.81455  | NA       | AC006445.  | chr4  | - | 13547699 | 13549425 | 1263  |
| ENSG000008.869991 | 6.206494  | 0.4888   | 0.49214  | 0.59607  | CTC-774J1. | chr11 | - | 1.16E+08 | 1.16E+08 | 3322  |
| ENSG000003.797873 | 16.51695  | -2.0312  | 0.012637 | 0.026007 | RP11-875C  | chr8  | + | 22925742 | 22941132 | 2636  |
| ENSG000000580602  | 3.947731  | -2.169   | 0.11478  | 0.18184  | RP11-346I  | chr8  | - | 67331824 | 67341212 | 4366  |
| ENSG0000023.76434 | 36.00311  | -0.57835 | 0.23741  | 0.33173  | RP11-705C  | chr11 | + | 77850817 | 77886369 | 1789  |
| ENSG0000011.14179 | 14.77769  | -0.40249 | 0.48593  | 0.58987  | RP11-29H2  | chr1  | - | 1.56E+08 | 1.56E+08 | 2505  |
| ENSG0000007.2616  | 0.715414  | 0.009201 | 0.99586  | NA       | RP11-260E  | chr5  | + | 16616035 | 16630078 | 1674  |
| ENSG000002.946693 | 0         | 3.019    | 0.052361 | 0.092591 | RP11-17A1  | chr11 | + | 22850926 | 22966939 | 2029  |
| ENSG0000019.5077  | 0.951736  | 0.79535  | 0.59009  | 0.68516  | RP11-382A  | chr8  | - | 1.28E+08 | 1.28E+08 | 1420  |
| ENSG0000018.70681 | 17.28735  | 0.10869  | 0.83673  | 0.88548  | RP11-613C  | chr11 | - | 43851259 | 43902276 | 2190  |
| ENSG0000019.9073  | 108.2756  | -2.4247  | 9.10E-12 | 4.84E-11 | KB-431C1.  | chr8  | + | 1.03E+08 | 1.03E+08 | 2048  |
| ENSG000006.753939 | 16.19321  | -1.2436  | 0.04588  | 0.082534 | SBF2-AS1   | chr11 | + | 9779839  | 9832866  | 2709  |
| ENSG000008.64172  | 14.6126   | -0.73429 | 0.22431  | 0.31685  | RP11-685A  | chr11 | + | 10830844 | 10844478 | 2335  |
| ENSG000000        | 0.1416259 | -1.7181  | 0.33141  | NA       | RP11-492A  | chr5  | - | 1.14E+08 | 1.14E+08 | 592   |
| ENSG000000580602  | 4.36613   | -2.3302  | 0.076103 | 0.12799  | RP11-325L  | chr5  | + | 1.37E+08 | 1.37E+08 | 1253  |
| ENSG0000007.2616  | 1.309443  | -0.61368 | 0.71013  | 0.78467  | RP11-77I2. | chr12 | + | 30908008 | 30933673 | 1552  |
| ENSG000009.418891 | 16.53393  | -0.78888 | 0.18219  | 0.26698  | PRR7-AS1   | chr5  | - | 1.77E+08 | 1.77E+08 | 741   |
| ENSG000006.547582 | 13.07012  | -0.9787  | 0.17279  | 0.25543  | EXTL3-AS1  | chr8  | - | 28553718 | 28558981 | 3688  |
| ENSG0000003.6308  | 2.800964  | -2.0723  | 0.20056  | 0.28928  | RP5-1186A  | chr6  | + | 28555155 | 28559524 | 2874  |
| ENSG00000184.9547 | 0.700845  | 7.5786   | 5.73E-20 | 4.82E-19 | RP11-13A1  | chr12 | - | 89404458 | 89413456 | 2941  |
| ENSG000006.971462 | 4.320007  | 0.65403  | 0.40562  | 0.51047  | RP11-382J  | chr8  | + | 71520812 | 71575514 | 3716  |

|            |          |           |          |          |          |                         |   |          |          |      |
|------------|----------|-----------|----------|----------|----------|-------------------------|---|----------|----------|------|
| ENSG000001 | 0.290301 | 0         | 0.4146   | 0.81455  | NA       | RP11-10L7 chr4          | + | 89206094 | 89252573 | 1654 |
| ENSG000001 | 0        | 3.039702  | -3.1087  | 0.041329 | 0.075412 | RP11-461C chr16         | - | 56126899 | 56225006 | 2678 |
| ENSG000001 | 0.36308  | 0         | 0.4146   | 0.81455  | NA       | RP11-386I chr12         | - | 1.34E+08 | 1.34E+08 | 1151 |
| ENSG000001 | 4.242291 | 1.416259  | 1.4186   | 0.23129  | 0.32479  | CTD-2024I chr5          | + | 1.41E+08 | 1.41E+08 | 2480 |
| ENSG000001 | 0.290301 | 0         | 0.4146   | 0.81455  | NA       | RP11-16Ml chr8          | - | 57408805 | 57472382 | 2366 |
| ENSG000001 | 0.705622 | 0.297015  | 0.56864  | 0.74638  | NA       | RP13-578N chr4          | + | 1.45E+08 | 1.45E+08 | 566  |
| ENSG000001 | 163.5303 | 84.93312  | 0.93729  | 3.97E-05 | 0.000119 | RP11-894P chr14         | - | 1.04E+08 | 1.04E+08 | 1404 |
| ENSG000001 | 3.910914 | 92.03939  | -4.4568  | 4.14E-20 | 3.51E-19 | RP11-57A1 chr16         | - | 28296206 | 28303385 | 2481 |
| ENSG000001 | 21.34087 | 16.45538  | 0.36095  | 0.44154  | 0.5473   | AF131216. chr8          | - | 11173374 | 11182938 | 5850 |
| ENSG000001 | 4.564295 | 6.177355  | -0.41644 | 0.59884  | 0.69292  | RP11-736K chr11         | + | 86666661 | 86712001 | 1223 |
| ENSG000001 | 0.342542 | 0.594029  | -0.38792 | 0.8278   | NA       | RP11-539L chr4          | - | 6689175  | 6692246  | 1821 |
| ENSG000001 | 1.359003 | 5.49108   | -1.8432  | 0.082369 | 0.13695  | RP11-159F chr8          | + | 70746346 | 70767206 | 828  |
| ENSG000001 | 0        | 0.343138  | -0.41864 | 0.81278  | NA       | RP11-363C chr4          | - | 95038943 | 95128707 | 1042 |
| ENSG000001 | 0.342542 | 1.652581  | -1.6373  | 0.29704  | 0.39905  | RP11-7F17 chr14         | + | 77507407 | 77535846 | 2924 |
| ENSG000001 | 9.221906 | 10.70213  | -0.2173  | 0.72462  | 0.79626  | RP11-10L1 chr4          | + | 1.04E+08 | 1.04E+08 | 883  |
| ENSG000001 | 24.72082 | 7.143661  | 1.7359   | 0.001335 | 0.003248 | AC093162. chr2          | + | 85542164 | 85543652 | 704  |
| ENSG000001 | 21.72368 | 17.44029  | 0.31798  | 0.50116  | 0.60481  | RP11-1149 chr8          | + | 23081984 | 23088439 | 1970 |
| ENSG000001 | 42.06341 | 16.2725   | 1.3502   | 0.004174 | 0.009401 | RP11-1277 chr5          | - | 1.77E+08 | 1.77E+08 | 853  |
| ENSG000001 | 3.661688 | 6.194341  | -0.72196 | 0.40723  | 0.51202  | CACNA1C- <i>Δ</i> chr12 | - | 2785167  | 2800366  | 2191 |
| ENSG000001 | 0.943682 | 1.012429  | -0.05362 | 0.97279  | 0.98486  | RP11-1094 chr17         | - | 48127713 | 48133103 | 2533 |
| ENSG000001 | 4.834058 | 1.949596  | 1.1939   | 0.23287  | 0.32644  | LINC00535 chr8          | - | 94225531 | 94712661 | 1914 |
| ENSG000001 | 133.6421 | 67.63275  | 0.9754   | 5.83E-05 | 0.000171 | RP11-877E chr12         | - | 26092262 | 26112698 | 2610 |
| ENSG000001 | 762.2207 | 929.6876  | -0.28714 | 0.040489 | 0.074129 | H2AFJ chr12             | + | 14927270 | 14930936 | 3665 |
| ENSG000001 | 6.00545  | 8.574489  | -0.48802 | 0.56919  | 0.66647  | CTD-2514K chr17         | - | 72206119 | 72209481 | 2501 |
| ENSG000001 | 0.653381 | 0.594029  | 0.059135 | 0.97278  | NA       | CTD-2382E chr15         | + | 42264961 | 42291292 | 2499 |
| ENSG000001 | 41.02902 | 10.30958  | 1.9619   | 2.85E-05 | 8.67E-05 | CTC-463N1 chr5          | + | 98105322 | 98109173 | 2034 |
| ENSG000001 | 7.842365 | 0.951736  | 2.7085   | 0.009781 | 0.020594 | AC004051. chr4          | + | 1.1E+08  | 1.1E+08  | 1951 |
| ENSG000001 | 4.19005  | 5.380975  | -0.31892 | 0.75015  | 0.81726  | RP11-61A1 chr16         | + | 66785655 | 66788643 | 2894 |
| ENSG000001 | 0        | 3.993854  | -3.4305  | 0.023622 | 0.045871 | RP11-730K chr11         | - | 1.21E+08 | 1.21E+08 | 2908 |
| ENSG000001 | 1.628766 | 83.05165  | -5.4197  | 1.73E-14 | 1.10E-13 | RP11-68L1 chr8          | + | 91658669 | 91668826 | 3473 |
| ENSG000001 | 2.624689 | 2.589748  | 0.008762 | 0.99336  | 0.99653  | RP11-544A chr9          | - | 1.34E+08 | 1.34E+08 | 3084 |
| ENSG000001 | 468.2624 | 159.1283  | 1.5514   | 3.41E-20 | 2.90E-19 | STARD4-AS chr5          | + | 1.11E+08 | 1.11E+08 | 5525 |
| ENSG000001 | 1.306762 | 3.290593  | -1.1596  | 0.32961  | 0.43268  | RP11-325N chr15         | + | 40213243 | 40218081 | 4811 |
| ENSG000001 | 0        | 2.56061   | -2.5899  | 0.12437  | 0.19452  | RP11-519N chr4          | - | 1.31E+08 | 1.31E+08 | 1963 |
| ENSG000001 | 0.923144 | 5.865772  | -2.3178  | 0.037731 | 0.069687 | DNM1P35 chr15           | - | 76020011 | 76030964 | 3188 |
| ENSG000001 | 14.55523 | 22.82368  | -0.63401 | 0.18606  | 0.27176  | AP000487. chr11         | - | 70218352 | 70244594 | 2602 |
| ENSG000001 | 12.34505 | 0.343138  | 4.4306   | 0.000202 | 0.000554 | CTD-2258A chr16         | + | 66442427 | 66446038 | 2147 |
| ENSG000001 | 61.08106 | 82.77393  | -0.4369  | 0.11413  | 0.18087  | UBAP1L chr15            | - | 65385338 | 65407535 | 7377 |
| ENSG000001 | 4.253456 | 8.703995  | -0.97972 | 0.23212  | 0.32555  | RP1-179N1 chr6          | - | 36114475 | 36164982 | 1230 |
| ENSG000001 | 39.88835 | 56.22414  | -0.49203 | 0.11011  | 0.17517  | SOCS2-AS1 chr12         | - | 93936239 | 93965544 | 3325 |
| ENSG000001 | 0        | 0.937167  | -1.2408  | 0.48662  | NA       | RP11-700F chr17         | - | 49012350 | 49022074 | 2054 |
| ENSG000001 | 518.2509 | 1136.006  | -1.1315  | 2.30E-17 | 1.72E-16 | PGAM5 chr12             | + | 1.33E+08 | 1.33E+08 | 2742 |
| ENSG000001 | 43.70497 | 8.968582  | 2.2445   | 2.62E-06 | 8.98E-06 | RP11-318N chr8          | - | 1.04E+08 | 1.04E+08 | 1353 |
| ENSG000001 | 56.18441 | 75.88833  | -0.434   | 0.1538   | 0.23189  | SNHG10 chr14            | - | 95998634 | 96001209 | 1531 |
| ENSG000001 | 46.55655 | 110.9658  | -1.2339  | 0.005357 | 0.011862 | MIR210HG chr11          | - | 565660   | 568457   | 1965 |
| ENSG000001 | 13.25784 | 12.98433  | 0.029478 | 0.95805  | 0.97466  | CTD-2260A chr5          | - | 96149731 | 96271513 | 2245 |
| ENSG000001 | 62.48114 | 98.39808  | -0.65256 | 0.005021 | 0.011181 | RP11-11N9 chr8          | + | 32853696 | 32902373 | 737  |
| ENSG000001 | 29.76042 | 35.73516  | -0.24996 | 0.50841  | 0.6119   | RP11-727A chr11         | - | 82895533 | 82904836 | 2295 |
| ENSG000001 | 1.576526 | 1.727843  | -0.07828 | 0.95461  | 0.97192  | CSTF3-AS1 chr11         | + | 33183203 | 33213144 | 2031 |
| ENSG000001 | 19.33705 | 1.370136  | 3.6147   | 2.13E-05 | 6.56E-05 | RP11-434C chr12         | + | 11700964 | 11743303 | 3673 |
| ENSG000001 | 0        | 1.073121  | -1.1788  | 0.50551  | NA       | RP11-431N chr4          | + | 36245738 | 36275842 | 1448 |
| ENSG000001 | 1.701545 | 2.740271  | -0.58241 | 0.6523   | 0.73762  | RP11-373N chr5          | - | 1.48E+08 | 1.48E+08 | 2033 |
| ENSG000001 | 0.290301 | 1.387121  | -1.3028  | 0.4429   | NA       | RP11-13G1 chr12         | - | 1.09E+08 | 1.09E+08 | 2984 |
| ENSG000001 | 106.8995 | 171.9943  | -0.68513 | 0.004721 | 0.010553 | RP11-296I chr16         | - | 70190243 | 70207351 | 2242 |
| ENSG000001 | 36.58812 | 59.46699  | -0.68932 | 0.0333   | 0.062283 | RP11-100I chr15         | + | 74753606 | 74773643 | 1612 |
| ENSG000001 | 24.42114 | 15.44698  | 0.65725  | 0.14942  | 0.22627  | CTD-2003C chr11         | + | 10879806 | 10928349 | 1071 |
| ENSG000001 | 0        | 0.2010288 | -2.4674  | 0.13027  | 0.202    | RP11-902B chr14         | - | 61764882 | 61789536 | 4499 |
| ENSG000001 | 0.342542 | 0         | 0.4146   | 0.81455  | NA       | CTC-441N1 chr5          | - | 1.21E+08 | 1.21E+08 | 731  |
| ENSG000001 | 0.580602 | 4.522358  | -2.2453  | 0.12453  | 0.19472  | RP11-273C chr8          | - | 1.44E+08 | 1.44E+08 | 1781 |
| ENSG000001 | 0.36308  | 0.654722  | -0.52647 | 0.7643   | NA       | RP11-510N chr16         | + | 71496181 | 71499844 | 2793 |
| ENSG000001 | 3.309773 | 0.357707  | 2.5556   | 0.074349 | 0.12554  | RP11-266N chr5          | + | 58335588 | 58359330 | 729  |
| ENSG000001 | 1.048164 | 6.535062  | -2.4026  | 0.0278   | 0.053074 | RP11-637A chr12         | - | 69068151 | 69081535 | 1733 |
| ENSG000001 | 0.995923 | 0         | 1.4959   | 0.39264  | NA       | CTD-2235C chr5          | - | 74615980 | 74632739 | 527  |
| ENSG000001 | 20.62327 | 11.78982  | 0.78761  | 0.11476  | 0.18182  | RP11-486C chr12         | - | 1.24E+08 | 1.24E+08 | 1950 |
| ENSG000001 | 29.68927 | 30.39144  | -0.03496 | 0.92357  | 0.94853  | DNAJC3-AS chr13         | - | 96325089 | 96329179 | 2908 |

|            |          |          |          |          |          |                  |   |          |          |      |
|------------|----------|----------|----------|----------|----------|------------------|---|----------|----------|------|
| ENSG000001 | 1.576526 | 1.759397 | -0.09332 | 0.94476  | 0.9645   | CTD-2340E chr5   | + | 1.02E+08 | 1.02E+08 | 391  |
| ENSG000001 | 9.30585  | 0.640152 | 3.3975   | 0.001794 | 0.004278 | RP11-629C chr11  | - | 1.13E+08 | 1.13E+08 | 1934 |
| ENSG000001 | 2.282147 | 5.848787 | -1.2554  | 0.18204  | 0.26682  | CARS-AS1 chr11   | + | 3050624  | 3062490  | 2664 |
| ENSG000001 | 6.410584 | 1.370136 | 2.0256   | 0.060474 | 0.1051   | RP11-392P chr12  | + | 13080660 | 13137579 | 1746 |
| ENSG000001 | 0.342542 | 0        | 0.4146   | 0.81455  | NA       | RP11-480C chr5   | + | 8457606  | 8460776  | 1005 |
| ENSG000001 | 3239.735 | 3416.693 | -0.07678 | 0.58515  | 0.68092  | OIP5-AS1 chr15   | + | 41576188 | 41601901 | 8829 |
| ENSG000001 | 56.51579 | 54.49959 | 0.0485   | 0.88312  | 0.91853  | CTC-281B1 chr5   | - | 80499915 | 80597379 | 2463 |
| ENSG000001 | 17.93941 | 8.599595 | 0.99425  | 0.15919  | 0.23871  | SPTY2D1-A' chr11 | + | 18621334 | 18631802 | 1454 |
| ENSG000001 | 660.039  | 314.5756 | 1.0644   | 8.77E-09 | 3.74E-08 | TWF2 chr3        | - | 52262626 | 52273177 | 1619 |
| ENSG000001 | 0.290301 | 0.686276 | -0.47648 | 0.78935  | NA       | AC006296 chr4    | - | 14911585 | 15003669 | 1806 |
| ENSG000001 | 89.65957 | 675.7428 | -2.9078  | 7.24E-57 | 1.96E-55 | MARS2 chr2       | + | 1.99E+08 | 1.99E+08 | 3027 |
| ENSG000001 | 4.491516 | 4.960159 | -0.12242 | 0.88611  | 0.92043  | MTND4P12 chr5    | - | 1.34E+08 | 1.34E+08 | 1377 |
| ENSG000001 | 4.93854  | 9.586917 | -0.90841 | 0.24348  | 0.33895  | LRP4-AS1 chr11   | + | 46867963 | 46895947 | 1504 |
| ENSG000001 | 49.77741 | 24.09599 | 1.0247   | 0.011957 | 0.024724 | RP11-1277 chr5   | + | 1.77E+08 | 1.77E+08 | 1751 |
| ENSG000001 | 0        | 0.891044 | -1.0625  | 0.54819  | NA       | CTB-127C1 chr5   | - | 1.6E+08  | 1.6E+08  | 2686 |
| ENSG000001 | 17.0549  | 42.03316 | -1.2865  | 0.000742 | 0.001878 | RP11-323F chr4   | + | 4543858  | 4639631  | 724  |
| ENSG000001 | 2.551911 | 1.638012 | 0.56925  | 0.6266   | 0.71655  | RP11-932C chr15  | - | 30909201 | 30917976 | 970  |
| ENSG000001 | 0.290301 | 6.84423  | -3.3932  | 0.019778 | 0.039074 | RP11-404K chr5   | + | 7290936  | 7296458  | 203  |
| ENSG000001 | 16.03844 | 42.79315 | -1.3933  | 0.001778 | 0.004242 | CTD-2574C chr16  | + | 29938157 | 29940254 | 1762 |
| ENSG000001 | 52.70952 | 142.9822 | -1.4328  | 4.55E-09 | 1.98E-08 | USP51 chrX       | - | 55511049 | 55515635 | 4407 |
| ENSG000001 | 1.359003 | 2.010288 | -0.49244 | 0.69652  | 0.77377  | RP11-32B5 chr15  | - | 21941147 | 21968151 | 2161 |
| ENSG000001 | 3.049383 | 4.857375 | -0.58854 | 0.61418  | 0.70609  | PCED1B-AS chr12  | - | 47599681 | 47610239 | 2494 |
| ENSG000001 | 0.290301 | 0        | 0.4146   | 0.81455  | NA       | RP11-67M chr4    | + | 90757559 | 90763129 | 2646 |
| ENSG000001 | 13.25703 | 18.69387 | -0.47283 | 0.34426  | 0.44818  | CTD-2366F chr5   | + | 52405672 | 52410956 | 3137 |
| ENSG000001 | 97.45572 | 0        | 8.1109   | 1.01E-13 | 6.07E-13 | NR2F2-AS1 chr15  | - | 96670598 | 96870590 | 1930 |
| ENSG000001 | 77.6419  | 85.21073 | -0.13682 | 0.62644  | 0.71641  | TMEM161E chr5    | + | 87564712 | 87732502 | 1101 |
| ENSG000001 | 6.338619 | 6.001726 | 0.072928 | 0.92189  | 0.94749  | RP5-940J5 chr12  | + | 6687788  | 6693905  | 2196 |
| ENSG000001 | 0        | 0.343138 | -0.41864 | 0.81278  | NA       | SPCS2P3 chr5     | + | 816461   | 817116   | 656  |
| ENSG000001 | 1.213446 | 1.964165 | -0.52461 | 0.71664  | 0.79005  | CTD-2001C chr5   | - | 99785458 | 99870966 | 1569 |
| ENSG000001 | 130.7769 | 128.4813 | 0.024004 | 0.92512  | 0.9498   | RP11-421F chr12  | + | 27124519 | 27132515 | 2549 |
| ENSG000001 | 3.122162 | 0.640152 | 1.7494   | 0.23411  | 0.32777  | HMG1N1P1 chr5    | - | 70833479 | 70833673 | 195  |
| ENSG000001 | 3.931452 | 0        | 3.5246   | 0.015037 | 0.030454 | RP3-510L9 chr6   | + | 11173685 | 11259332 | 704  |
| ENSG000001 | 4.399013 | 2.292733 | 0.84543  | 0.38991  | 0.4942   | RP11-967K chr12  | - | 28316231 | 28343299 | 739  |
| ENSG000001 | 15.83127 | 16.14783 | -0.01477 | 0.97903  | 0.98833  | SEC24B-AS chr4   | - | 1.1E+08  | 1.1E+08  | 1433 |
| ENSG000001 | 0.36308  | 1.248751 | -1.1986  | 0.48045  | NA       | RP11-543C chr14  | + | 1E+08    | 1E+08    | 1039 |
| ENSG000001 | 32.41942 | 28.52677 | 0.18447  | 0.66669  | 0.74943  | RP11-358A chr15  | + | 57592563 | 57599959 | 2530 |
| ENSG000001 | 85.92185 | 90.73075 | -0.07294 | 0.77907  | 0.84148  | RP11-18C2 chr12  | - | 1.21E+08 | 1.21E+08 | 1901 |
| ENSG000001 | 4.357937 | 6.29874  | -0.50861 | 0.5389   | 0.63949  | AC005329 chr19   | - | 1392169  | 1396466  | 3571 |
| ENSG000001 | 12.31334 | 3.692007 | 1.6439   | 0.053092 | 0.093714 | FAM13A-AS chr4   | + | 89630940 | 89651254 | 3210 |
| ENSG000001 | 4.970243 | 9.706686 | -0.92015 | 0.2609   | 0.35889  | CTD-2383A chr11  | - | 1.01E+08 | 1.01E+08 | 1865 |
| ENSG000001 | 122.0091 | 43.676   | 1.4707   | 5.61E-07 | 2.05E-06 | CTD-2653A chr5   | - | 36864527 | 36876759 | 2589 |
| ENSG000001 | 59.365   | 61.93839 | -0.0596  | 0.87036  | 0.90959  | RP11-453E chr4   | + | 68566998 | 68946670 | 3352 |
| ENSG000001 | 0.36308  | 0        | 0.4146   | 0.81455  | NA       | RP11-422A chr8   | + | 1.11E+08 | 1.11E+08 | 3075 |
| ENSG000001 | 0.36308  | 1.234181 | -1.1893  | 0.48408  | NA       | ATPBD4-AS chr15  | + | 35838396 | 36151202 | 1477 |
| ENSG000001 | 55.50805 | 30.98547 | 0.83744  | 0.010047 | 0.02112  | RP11-159F chr5   | - | 43575425 | 43603332 | 1040 |
| ENSG000001 | 3.786708 | 2.711133 | 0.43211  | 0.67512  | 0.75664  | BCKDHA chr19     | + | 41856758 | 41930910 | 2103 |
| ENSG000001 | 0.36308  | 5.597895 | -3.3115  | 0.011797 | 0.024409 | INSL3 chr19      | - | 17927321 | 17932383 | 899  |
| ENSG000001 | 10.33266 | 1.326428 | 2.7079   | 0.006553 | 0.014257 | RP11-709A chr12  | - | 27699983 | 27705706 | 2639 |
| ENSG000001 | 77.05193 | 55.53947 | 0.46354  | 0.1563   | 0.2352   | CTC-338M1 chr5   | + | 1.81E+08 | 1.81E+08 | 549  |
| ENSG000001 | 0.342542 | 0        | 0.4146   | 0.81455  | NA       | CTD-2218K chr5   | + | 82120703 | 82121003 | 301  |
| ENSG000001 | 0        | 0.297015 | -0.41864 | 0.81278  | NA       | RP11-78C3 chr5   | - | 82215195 | 82216938 | 745  |
| ENSG000001 | 0.290301 | 1.073121 | -0.88899 | 0.61676  | NA       | RP11-791C chr4   | - | 83501270 | 83502537 | 1268 |
| ENSG000001 | 0.653381 | 1.012429 | -0.44082 | 0.78495  | NA       | RP11-752C chr4   | + | 53811816 | 53824254 | 2517 |
| ENSG000001 | 40.10245 | 30.13901 | 0.40562  | 0.40413  | 0.50897  | SMURF2P1 chr17   | + | 28927814 | 28942998 | 570  |
| ENSG000001 | 86.29095 | 73.40211 | 0.23223  | 0.45336  | 0.55883  | RRN3P1 chr16     | - | 21807951 | 21831731 | 2608 |
| ENSG000001 | 0.36308  | 0.357707 | -0.00212 | 0.99905  | NA       | CTB-73N10 chr5   | + | 1.45E+08 | 1.45E+08 | 654  |
| ENSG000001 | 0        | 0.343138 | -0.41864 | 0.81278  | NA       | CTD-2012J chr5   | + | 1598242  | 1598362  | 121  |
| ENSG000001 | 0        | 169.2591 | -8.8559  | 2.12E-16 | 1.50E-15 | CT49 chr5        | + | 12574969 | 12804475 | 1319 |
| ENSG000001 | 1.628766 | 0        | 2.1781   | 0.19145  | NA       | RP11-446J chr4   | + | 16402053 | 16513810 | 435  |
| ENSG000001 | 0.653381 | 0        | 0.82678  | 0.64037  | NA       | RP11-324J chr4   | - | 43459544 | 43494560 | 582  |
| ENSG000001 | 0.342542 | 3.466222 | -2.5888  | 0.074921 | 0.12637  | RP11-650J chr4   | - | 1.14E+08 | 1.14E+08 | 1176 |
| ENSG000001 | 0.72616  | 0        | 0.85004  | 0.63064  | NA       | HSPA8P11 chr8    | + | 30094898 | 30098513 | 1898 |
| ENSG000001 | 7.386782 | 3.798823 | 0.90464  | 0.32514  | 0.42805  | RP11-499E chr4   | - | 1.03E+08 | 1.03E+08 | 673  |
| ENSG000001 | 0.705622 | 0        | 0.8807   | 0.6196   | NA       | RP11-148L chr4   | - | 1.75E+08 | 1.75E+08 | 1328 |
| ENSG000001 | 47.26055 | 47.62367 | -0.00223 | 0.99456  | 0.99685  | CTC-428G2 chr5   | - | 1.15E+08 | 1.15E+08 | 2231 |

|            |          |          |          |          |          |                 |   |          |          |      |
|------------|----------|----------|----------|----------|----------|-----------------|---|----------|----------|------|
| ENSG000001 | 1.411244 | 1.66715  | -0.20807 | 0.88614  | 0.92043  | GAPDHP60 chr4   | + | 88128244 | 88129238 | 995  |
| ENSG000001 | 0.290301 | 0        | 0.4146   | 0.81455  | NA       | CTD-2049C chr5  | + | 62597350 | 62597883 | 300  |
| ENSG000001 | 11.64024 | 0        | 5.1661   | 2.74E-05 | 8.34E-05 | RP11-184N chr4  | - | 1.29E+08 | 1.29E+08 | 1623 |
| ENSG000001 | 0        | 1.188058 | -1.268   | 0.47398  | NA       | RP11-442P chr4  | + | 15744819 | 15745205 | 387  |
| ENSG000001 | 0.580602 | 0.297015 | 0.36801  | 0.83644  | NA       | ATG10-AS1 chr5  | - | 81368874 | 81369521 | 648  |
| ENSG000001 | 2.31385  | 3.336716 | -0.47454 | 0.65342  | 0.73848  | RP11-476C chr4  | + | 88087996 | 88088886 | 891  |
| ENSG000001 | 0        | 0.686276 | -0.84936 | 0.6309   | NA       | RP11-115A chr4  | + | 1.11E+08 | 1.11E+08 | 571  |
| ENSG000001 | 5.862498 | 2.543625 | 1.0673   | 0.28827  | 0.38985  | RP4-671G1 chr1  | + | 1.13E+08 | 1.13E+08 | 1459 |
| ENSG000001 | 8.059888 | 0.297015 | 3.8531   | 0.002191 | 0.00515  | RP11-455B chr5  | + | 97217124 | 97258399 | 705  |
| ENSG000001 | 0.653381 | 3.399825 | -1.9062  | 0.17215  | 0.25471  | RP11-739P chr4  | + | 1.85E+08 | 1.85E+08 | 622  |
| ENSG000001 | 0        | 0.343138 | -0.41864 | 0.81278  | NA       | RP11-153N chr4  | + | 1.55E+08 | 1.55E+08 | 1082 |
| ENSG000001 | 20.89124 | 17.21692 | 0.27804  | 0.55011  | 0.64986  | CICP16 chr4     | - | 1.2E+08  | 1.2E+08  | 2813 |
| ENSG000001 | 1.576526 | 19.10099 | -3.3576  | 3.22E-05 | 9.72E-05 | RP11-722N chr4  | - | 36498159 | 36643522 | 788  |
| ENSG000001 | 0.72616  | 0        | 0.85004  | 0.63064  | NA       | RP11-648N chr5  | - | 37505790 | 37506959 | 1170 |
| ENSG000001 | 0.975385 | 0.297015 | 0.91901  | 0.59525  | NA       | STX18-IT1 chr4  | - | 4477848  | 4483427  | 542  |
| ENSG000001 | 1.991846 | 0.937167 | 0.8641   | 0.52262  | 0.62516  | CTB-174D1 chr5  | + | 1.68E+08 | 1.68E+08 | 1489 |
| ENSG000001 | 0.342542 | 0        | 0.4146   | 0.81455  | NA       | RP11-83C7 chr4  | + | 38368535 | 38387380 | 500  |
| ENSG000001 | 0.653381 | 0        | 0.82678  | 0.64037  | NA       | RP11-366N chr4  | + | 1.66E+08 | 1.66E+08 | 523  |
| ENSG000001 | 0.72616  | 0.640152 | 0.083249 | 0.96152  | NA       | KRT8P4 chr8     | - | 90424850 | 90427300 | 1454 |
| ENSG000001 | 0.290301 | 0        | 0.4146   | 0.81455  | NA       | CTD-2108C chr5  | - | 38429994 | 38430262 | 269  |
| ENSG000001 | 2.520208 | 0.343138 | 2.1738   | 0.14875  | 0.22542  | RP11-159F chr5  | + | 43515376 | 43525412 | 512  |
| ENSG000001 | 0.72616  | 0        | 0.85004  | 0.63064  | NA       | RP11-556I chr4  | - | 1.06E+08 | 1.06E+08 | 575  |
| ENSG000001 | 0        | 3.631315 | -3.0853  | 0.058422 | 0.10205  | RP11-93K2 chr3  | - | 1.3E+08  | 1.3E+08  | 713  |
| ENSG000001 | 0        | 0.700845 | -0.87835 | 0.62047  | NA       | CTB-49A3.2 chr5 | + | 1.32E+08 | 1.33E+08 | 570  |
| ENSG000001 | 0        | 0.654722 | -0.83442 | 0.63731  | NA       | RP11-598C chr4  | + | 1.77E+08 | 1.77E+08 | 425  |
| ENSG000001 | 6.007242 | 0        | 4.1622   | 0.002187 | 0.005142 | AC092597 chr4   | - | 47558748 | 47562276 | 601  |
| ENSG000001 | 2.729171 | 4.022992 | -0.51865 | 0.61652  | 0.70787  | OCIAD1-AS chr4  | - | 48854025 | 48862220 | 265  |
| ENSG000001 | 1.213446 | 2.261179 | -0.69437 | 0.6263   | 0.71635  | RP11-834C chr12 | + | 54452038 | 54516018 | 3942 |
| ENSG000001 | 1.213446 | 0        | 1.5515   | 0.38249  | NA       | RP11-402C chr4  | + | 1.83E+08 | 1.83E+08 | 286  |
| ENSG000001 | 0.290301 | 12.21225 | -4.3479  | 0.000567 | 0.00146  | CTC-499J9 chr5  | - | 1.11E+08 | 1.11E+08 | 565  |
| ENSG000001 | 126.121  | 99.63958 | 0.34086  | 0.13676  | 0.21002  | CTC-338M1 chr5  | + | 1.81E+08 | 1.81E+08 | 807  |
| ENSG000001 | 4.294532 | 3.100394 | 0.44957  | 0.64498  | 0.73186  | RP11-463N chr17 | - | 46952222 | 46986345 | 738  |
| ENSG000001 | 0.342542 | 0        | 0.4146   | 0.81455  | NA       | CTD-2218C chr5  | + | 32947549 | 32962573 | 2008 |
| ENSG000001 | 1.576526 | 7.6106   | -2.0621  | 0.029532 | 0.055999 | RP11-33B1 chr4  | - | 1.2E+08  | 1.2E+08  | 356  |
| ENSG000001 | 0        | 0.343138 | -0.41864 | 0.81278  | NA       | RP11-112L chr4  | - | 82654539 | 82655361 | 823  |
| ENSG000001 | 0        | 3.792375 | -3.3785  | 0.025979 | 0.049955 | RP11-473C chr4  | - | 42563474 | 42564442 | 969  |
| ENSG000001 | 0        | 0.686276 | -0.84936 | 0.6309   | NA       | RP11-158J chr5  | - | 63253720 | 63276870 | 219  |
| ENSG000001 | 7.780752 | 2.338857 | 1.6302   | 0.066568 | 0.1141   | CTD-2194F chr5  | + | 64505748 | 64506775 | 737  |
| ENSG000001 | 0        | 1.995719 | -2.4883  | 0.12386  | 0.19391  | TNXA chr6       | - | 31976391 | 31980249 | 2038 |
| ENSG000001 | 13.44285 | 14.63449 | -0.10798 | 0.86802  | 0.90805  | CTC-454M5 chr5  | + | 88179145 | 88762215 | 1754 |
| ENSG000001 | 4.325421 | 3.397409 | 0.3386   | 0.75692  | 0.82323  | RP11-713N chr8  | + | 1.22E+08 | 1.22E+08 | 1973 |
| ENSG000001 | 0        | 0.343138 | -0.41864 | 0.81278  | NA       | RP11-205N chr4  | - | 1.71E+08 | 1.71E+08 | 4365 |
| ENSG000001 | 1.359003 | 0.357707 | 1.3815   | 0.39154  | NA       | RP11-213F chr5  | - | 90598846 | 90610219 | 2672 |
| ENSG000001 | 61.77649 | 266.3653 | -2.0762  | 1.00E-06 | 3.59E-06 | RP11-366N chr4  | + | 1.66E+08 | 1.66E+08 | 2602 |
| ENSG000001 | 691.8708 | 1018.408 | -0.55669 | 2.86E-06 | 9.76E-06 | CDK11B chr1     | - | 1570603  | 1590473  | 2384 |
| ENSG000001 | 29.76384 | 7.660012 | 1.8773   | 0.002868 | 0.006633 | WHAMMP2 chr15   | + | 28982729 | 29002537 | 2962 |
| ENSG000001 | 1.016461 | 2.56061  | -1.0842  | 0.44699  | 0.55246  | RP11-293A chr4  | - | 26875183 | 26875971 | 743  |
| ENSG000001 | 0        | 0.686276 | -0.84936 | 0.6309   | NA       | RP11-1134 chr8  | - | 48001195 | 48110484 | 1474 |
| ENSG000001 | 1.660469 | 7.6106   | -2.0007  | 0.049595 | 0.088364 | RP11-557J chr4  | - | 1.47E+08 | 1.47E+08 | 745  |
| ENSG000001 | 0        | 0.98329  | -1.2878  | 0.47019  | NA       | LINC00504 chr4  | - | 14475711 | 14889793 | 1050 |
| ENSG000001 | 11.53576 | 34.42417 | -1.5514  | 0.000711 | 0.001803 | CTB-129O4 chr5  | + | 1.8E+08  | 1.8E+08  | 393  |
| ENSG000001 | 0.36308  | 0        | 0.4146   | 0.81455  | NA       | CTC-347C2 chr5  | - | 71869947 | 71956496 | 594  |
| ENSG000001 | 1.016461 | 10.54349 | -3.1018  | 0.001854 | 0.004407 | RP11-177B chr4  | - | 53586248 | 53586998 | 751  |
| ENSG000001 | 101.7432 | 118.9469 | -0.22812 | 0.34845  | 0.45264  | PCDHAC1 chr5    | + | 1.4E+08  | 1.4E+08  | 5299 |
| ENSG000001 | 3.330311 | 0        | 3.2631   | 0.028727 | 0.054622 | RP11-313E chr4  | + | 1.78E+08 | 1.78E+08 | 332  |
| ENSG000001 | 0        | 0.654722 | -0.83442 | 0.63731  | NA       | CTD-2015A chr5  | - | 81841681 | 81842129 | 449  |
| ENSG000001 | 4.866575 | 6.162786 | -0.34515 | 0.6988   | 0.7757   | FOSL1P1 chr4    | + | 1.29E+08 | 1.29E+08 | 816  |
| ENSG000001 | 0        | 1.309443 | -1.6539  | 0.35008  | NA       | RP11-503N chr4  | + | 2465524  | 2465851  | 220  |
| ENSG000001 | 0.632843 | 0.357707 | 0.4993   | 0.77637  | NA       | RP11-576N chr4  | + | 84168332 | 84169359 | 1028 |
| ENSG000001 | 0        | 0.297015 | -0.41864 | 0.81278  | NA       | RP11-1902 chr5  | - | 16192197 | 16192818 | 622  |
| ENSG000001 | 0        | 2.66501  | -2.877   | 0.067583 | 0.11559  | PRR5-ARHC chr22 | + | 45098113 | 45258586 | 2043 |
| ENSG000001 | 0        | 0.640152 | -0.82869 | 0.63935  | NA       | RP11-452C chr4  | + | 80584915 | 80617991 | 741  |
| ENSG000001 | 0        | 0.654722 | -0.83442 | 0.63731  | NA       | KB-1269D1 chr22 | + | 23734958 | 23736026 | 629  |
| ENSG000001 | 3.579537 | 4.792651 | -0.39004 | 0.69956  | 0.7763   | GAPDHP61 chr15  | - | 64820866 | 64821870 | 1005 |
| ENSG000001 | 2.177666 | 2.652857 | -0.21968 | 0.87247  | 0.91093  | RP11-1191 chr4  | - | 716064   | 717823   | 569  |

|            |          |          |          |          |          |                 |   |          |          |      |
|------------|----------|----------|----------|----------|----------|-----------------|---|----------|----------|------|
| ENSG000001 | 1.681007 | 1.355566 | 0.2643   | 0.83989  | 0.88763  | RP11-235P chr8  | - | 15546423 | 15547071 | 649  |
| ENSG000001 | 9.84619  | 0.343138 | 4.0809   | 0.000988 | 0.002452 | RP11-597C chr4  | + | 1.59E+08 | 1.59E+08 | 2917 |
| ENSG000001 | 0        | 0.357707 | -0.41864 | 0.81278  | NA       | RP11-269F chr4  | - | 1.13E+08 | 1.13E+08 | 300  |
| ENSG000001 | 0.685084 | 0        | 0.85004  | 0.63064  | NA       | CTD-2536I chr15 | - | 95819690 | 95870358 | 1384 |
| ENSG000001 | 67.60648 | 151.3129 | -1.1533  | 2.65E-05 | 8.10E-05 | CTB-118N6 chr5  | + | 1.16E+08 | 1.16E+08 | 862  |
| ENSG000001 | 7.935682 | 6.671016 | 0.24219  | 0.73548  | 0.80486  | PCDHGB8P chr5   | + | 1.41E+08 | 1.41E+08 | 2367 |
| ENSG000001 | 0        | 2.696564 | -2.9337  | 0.058159 | 0.10164  | AC004510. chr19 | - | 15947287 | 15947865 | 579  |
| ENSG000001 | 0.685084 | 0        | 0.85004  | 0.63064  | NA       | RP11-321E chr5  | + | 17404128 | 17441803 | 687  |
| ENSG000001 | 0.632843 | 0        | 0.81931  | 0.64303  | NA       | RP11-553P chr4  | - | 1.36E+08 | 1.36E+08 | 770  |
| ENSG000001 | 0.580602 | 0        | 0.8036   | 0.6494   | NA       | RP11-419C chr5  | - | 12914180 | 13032998 | 270  |
| ENSG000001 | 9.555075 | 0.297015 | 4.0887   | 0.000899 | 0.002247 | AL139147. chr1  | - | 67131547 | 67142710 | 1156 |
| ENSG000001 | 0.342542 | 0        | 0.4146   | 0.81455  | NA       | RP11-640B chr4  | - | 36066682 | 36067348 | 667  |
| ENSG000001 | 0        | 0.997859 | -1.5018  | 0.39072  | NA       | RP11-517B chr3  | + | 1.31E+08 | 1.31E+08 | 575  |
| ENSG000001 | 0        | 0.297015 | -0.41864 | 0.81278  | NA       | DDX11L9 chr15   | - | 1.03E+08 | 1.03E+08 | 1653 |
| ENSG000001 | 0.342542 | 1.964165 | -1.7256  | 0.29003  | 0.39159  | RP11-479C chr5  | - | 58037408 | 58112926 | 641  |
| ENSG000001 | 16.41008 | 7.685861 | 1.0786   | 0.065222 | 0.11218  | BACH1-IT1 chr21 | + | 30723955 | 30734215 | 821  |
| ENSG000001 | 2.914991 | 2.696564 | 0.11957  | 0.90737  | 0.93619  | RP11-848C chr5  | + | 68902926 | 68919876 | 1073 |
| ENSG000001 | 0        | 0.297015 | -0.41864 | 0.81278  | NA       | RP11-3G2C chr8  | + | 1.23E+08 | 1.23E+08 | 339  |
| ENSG000001 | 2.012384 | 0        | 2.4635   | 0.13092  | 0.20286  | RP11-807F chr4  | + | 66567920 | 66571271 | 385  |
| ENSG000001 | 1.359003 | 1.326428 | 0.016616 | 0.99065  | 0.9952   | POU5F2 chr5     | - | 93075976 | 93077309 | 1334 |
| ENSG000001 | 0        | 14.83764 | -5.5056  | 5.89E-06 | 1.95E-05 | PCP4L1 chr1     | + | 1.61E+08 | 1.61E+08 | 1424 |
| ENSG000001 | 89.34213 | 33.50969 | 1.4011   | 1.09E-05 | 3.46E-05 | ABHD14A chr3    | + | 52005442 | 52015212 | 1064 |
| ENSG000001 | 7.386782 | 0.891044 | 2.6085   | 0.021269 | 0.04172  | CTD-2007F chr5  | + | 98264875 | 98330717 | 478  |
| ENSG000001 | 0.705622 | 0        | 0.8807   | 0.6196   | NA       | CTD-3007L chr5  | - | 27412720 | 27436518 | 491  |
| ENSG000001 | 1.8154   | 0        | 1.7256   | 0.33328  | NA       | RP11-125C chr4  | - | 1.28E+08 | 1.28E+08 | 645  |
| ENSG000001 | 0.580602 | 2.38498  | -1.515   | 0.30245  | 0.40372  | LNK1-AS2 chr4   | + | 54459123 | 54470214 | 628  |
| ENSG000001 | 4.326234 | 3.725978 | 0.20635  | 0.82342  | 0.87538  | RP5-1000K chrX  | + | 77166238 | 77220387 | 2363 |
| ENSG000001 | 20.80053 | 56.27684 | -1.4162  | 0.001462 | 0.003538 | RP11-521C chr15 | + | 40331512 | 40359491 | 2317 |
| ENSG000001 | 0        | 15.62832 | -5.5826  | 3.71E-06 | 1.25E-05 | RP11-9B6.1 chr4 | - | 93218402 | 93225329 | 592  |
| ENSG000001 | 1.991846 | 1.248751 | 0.53293  | 0.68733  | 0.7669   | CTC-338M1 chr5  | - | 1.81E+08 | 1.81E+08 | 456  |
| ENSG000001 | 0.705622 | 0        | 0.8807   | 0.6196   | NA       | RP11-265C chr4  | + | 4323689  | 4335909  | 1416 |
| ENSG000001 | 0        | 1.606458 | -1.9287  | 0.27074  | NA       | RP11-174F chr4  | - | 1.51E+08 | 1.51E+08 | 998  |
| ENSG000001 | 0        | 0.700845 | -0.87835 | 0.62047  | NA       | SBF1P1 chr8     | - | 56362069 | 56367699 | 5631 |
| ENSG000001 | 1084.018 | 2562.847 | -1.239   | 7.43E-18 | 5.66E-17 | MTATP6P1 chr1   | + | 569076   | 569756   | 681  |
| ENSG000001 | 0        | 2.482932 | -2.7317  | 0.090975 | 0.14912  | RP11-517B chr3  | + | 1.31E+08 | 1.31E+08 | 733  |
| ENSG000001 | 0.685084 | 0        | 0.85004  | 0.63064  | NA       | CTD-2130F chr5  | + | 37953504 | 37967066 | 487  |
| ENSG000001 | 0.705622 | 0        | 0.8807   | 0.6196   | NA       | CTD-2201E chr5  | + | 9363387  | 9422593  | 391  |
| ENSG000001 | 13.59182 | 4.05213  | 1.6721   | 0.023196 | 0.045133 | RP11-10A1 chr8  | + | 9046521  | 9060364  | 699  |
| ENSG000001 | 0.290301 | 0        | 0.4146   | 0.81455  | NA       | CTD-2194L chr5  | - | 37899465 | 37920971 | 540  |
| ENSG000001 | 9.906177 | 214.6017 | -4.365   | 4.80E-34 | 7.10E-33 | RP11-247C chr15 | - | 74418256 | 74421619 | 2924 |
| ENSG000001 | 0        | 1.280305 | -1.6305  | 0.35731  | NA       | NPM1P41 chr4    | - | 82931818 | 82934248 | 831  |
| ENSG000001 | 11.03649 | 3.50993  | 1.5321   | 0.07943  | 0.13268  | CTB-47B11 chr5  | - | 1.57E+08 | 1.57E+08 | 1932 |
| ENSG000001 | 0        | 0.686276 | -0.84936 | 0.6309   | NA       | ANP32C chr4     | - | 1.65E+08 | 1.65E+08 | 705  |
| ENSG000001 | 0        | 0.297015 | -0.41864 | 0.81278  | NA       | RP11-468N chr4  | - | 69749603 | 69750158 | 556  |
| ENSG000001 | 0        | 0.357707 | -0.41864 | 0.81278  | NA       | OTX2-AS1 chr14  | + | 57279901 | 57618895 | 2428 |
| ENSG000001 | 3.46389  | 2.621302 | 0.37226  | 0.73085  | 0.80122  | RP11-159F chr5  | + | 43511160 | 43521913 | 572  |
| ENSG000001 | 0        | 0.937167 | -1.2408  | 0.48662  | NA       | RP11-61G2 chr5  | - | 89454156 | 89585888 | 561  |
| ENSG000001 | 3.527296 | 0        | 3.2936   | 0.029826 | 0.056464 | RP11-390C chr3  | + | 1.26E+08 | 1.26E+08 | 528  |
| ENSG000001 | 6.607568 | 9.993164 | -0.54767 | 0.45047  | 0.55609  | RP11-215P chr5  | + | 1.34E+08 | 1.34E+08 | 520  |
| ENSG000001 | 0        | 0.700845 | -0.87835 | 0.62047  | NA       | CTB-14A14 chr5  | + | 1.81E+08 | 1.81E+08 | 1569 |
| ENSG000001 | 1.628766 | 4.80722  | -1.4135  | 0.17946  | 0.26353  | RP11-478C chr4  | - | 331886   | 332372   | 487  |
| ENSG000001 | 0.342542 | 0        | 0.4146   | 0.81455  | NA       | CTC-362D1 chr5  | - | 1.46E+08 | 1.46E+08 | 1220 |
| ENSG000001 | 2.789971 | 2.56061  | 0.11527  | 0.9238   | 0.94869  | CTC-512J1. chr5 | - | 79646840 | 79647775 | 936  |
| ENSG000001 | 0.290301 | 0.297015 | -0.00202 | 0.99909  | NA       | RP11-768B chr4  | + | 1.54E+08 | 1.54E+08 | 2371 |
| ENSG000001 | 1.555988 | 0        | 1.8901   | 0.28116  | NA       | EGFLAM-AS chr5  | - | 38399916 | 38403515 | 539  |
| ENSG000001 | 0        | 1.309443 | -1.6539  | 0.35008  | NA       | RP11-834C chr12 | + | 54556923 | 54562379 | 403  |
| ENSG000001 | 0.653381 | 0        | 0.82678  | 0.64037  | NA       | RP11-241F chr4  | - | 49488943 | 49491571 | 670  |
| ENSG000001 | 0.705622 | 2.529055 | -1.5471  | 0.26303  | 0.3612   | RP11-90P5 chr8  | - | 38059217 | 38061756 | 791  |
| ENSG000001 | 0        | 0.72616  | 0.85004  | 0.63064  | NA       | CTD-2516K chr5  | - | 56613816 | 56615847 | 2032 |
| ENSG000001 | 27.82244 | 11.82541 | 1.2146   | 0.023859 | 0.046265 | GDNF-AS1 chr5   | + | 37840540 | 37875901 | 2913 |
| ENSG000001 | 0.290301 | 8.440951 | -3.9171  | 0.001802 | 0.004295 | GLDCP1 chr4     | + | 57459170 | 57461847 | 2678 |
| ENSG000001 | 4.128436 | 8.689426 | -1.003   | 0.22258  | 0.31483  | TMEM110-1 chr3  | - | 52867137 | 52931578 | 5280 |
| ENSG000001 | 58.67291 | 37.36189 | 0.64582  | 0.031949 | 0.060005 | DSTNP2 chr12    | + | 6993846  | 6994950  | 1105 |
| ENSG000001 | 5.394936 | 3.930745 | 0.41373  | 0.62537  | 0.71554  | RP11-844P chr5  | - | 1.76E+08 | 1.76E+08 | 3632 |
| ENSG000001 | 0        | 1.073121 | -1.1788  | 0.50551  | NA       | RP11-259C chr5  | - | 1963723  | 1967268  | 490  |

|            |          |          |          |          |          |                 |   |          |          |       |
|------------|----------|----------|----------|----------|----------|-----------------|---|----------|----------|-------|
| ENSG000001 | 0.36308  | 0.640152 | -0.51156 | 0.77091  | NA       | RP11-302J chr8  | + | 1.02E+08 | 1.02E+08 | 1948  |
| ENSG000001 | 45.06397 | 9.001009 | 2.2573   | 7.84E-06 | 2.55E-05 | RP3-412A9 chr22 | + | 31497862 | 31500743 | 2608  |
| ENSG000001 | 0        | 108.7118 | -8.2486  | 4.93E-14 | 3.03E-13 | CTD-2306N chr5  | - | 25404842 | 25446034 | 638   |
| ENSG000001 | 0.632843 | 0.357707 | 0.4993   | 0.77637  | NA       | RP11-158I chr3  | + | 1.26E+08 | 1.26E+08 | 379   |
| ENSG000001 | 0.685084 | 0        | 0.85004  | 0.63064  | NA       | RP11-206P chr4  | + | 25506619 | 25508297 | 1679  |
| ENSG000001 | 6.483362 | 0        | 4.2961   | 0.001291 | 0.003148 | HSPA8P4 chr5    | + | 1.29E+08 | 1.29E+08 | 1920  |
| ENSG000001 | 0        | 0.357707 | -0.41864 | 0.81278  | NA       | RP11-468N chr4  | - | 69766369 | 69766628 | 260   |
| ENSG000001 | 0.342542 | 0        | 0.4146   | 0.81455  | NA       | CTB-1121.2 chr5 | + | 1.36E+08 | 1.36E+08 | 715   |
| ENSG000001 | 0        | 0.686276 | -0.84936 | 0.6309   | NA       | RP11-93K2 chr3  | - | 1.3E+08  | 1.3E+08  | 241   |
| ENSG000001 | 0        | 1.874334 | -2.1429  | 0.21634  | NA       | RP11-5N11 chr5  | + | 31657325 | 31665174 | 543   |
| ENSG000001 | 0.943682 | 0        | 1.2438   | 0.48556  | NA       | GAPDHP40 chr5   | - | 1.59E+08 | 1.59E+08 | 1006  |
| ENSG000001 | 0        | 1.387121 | -1.6961  | 0.33794  | NA       | RP11-428L chr4  | - | 93754836 | 93759993 | 349   |
| ENSG000001 | 3.22583  | 0.343138 | 2.5322   | 0.077141 | 0.12953  | RP11-154F chr4  | + | 1.58E+08 | 1.58E+08 | 267   |
| ENSG000001 | 0        | 0.343138 | -0.41864 | 0.81278  | NA       | RP11-425E chr5  | + | 1.25E+08 | 1.25E+08 | 643   |
| ENSG000001 | 1.411244 | 1.294874 | 0.066263 | 0.96225  | 0.97762  | RP11-366N chr4  | - | 1.66E+08 | 1.66E+08 | 1416  |
| ENSG000001 | 0        | 2.65044  | -2.9164  | 0.059842 | 0.10422  | RP11-768F chr12 | - | 1.2E+08  | 1.2E+08  | 695   |
| ENSG000001 | 9.327201 | 5.987157 | 0.5956   | 0.43516  | 0.54066  | HMGAP1P2 chr4   | + | 73964539 | 73964862 | 324   |
| ENSG000001 | 2.334388 | 1.744828 | 0.37734  | 0.76308  | 0.82803  | RP11-485N chr5  | + | 1.32E+08 | 1.32E+08 | 247   |
| ENSG000001 | 0        | 16.22067 | -5.604   | 4.20E-06 | 1.41E-05 | CTC-504A5 chr5  | + | 1.17E+08 | 1.17E+08 | 617   |
| ENSG000001 | 2.80195  | 0.654722 | 1.6163   | 0.27066  | 0.36979  | CTC-498J1 chr5  | - | 68408939 | 68432221 | 946   |
| ENSG000001 | 4.076195 | 4.675298 | -0.15875 | 0.86557  | 0.90642  | RP11-56D1 chr9  | - | 1.3E+08  | 1.3E+08  | 759   |
| ENSG000001 | 1.306762 | 6.861215 | -2.1486  | 0.044059 | 0.079664 | OXCT1-AS1 chr5  | + | 41870132 | 41871059 | 499   |
| ENSG000001 | 6.5039   | 14.93634 | -1.1551  | 0.055231 | 0.096979 | CTD-2313N chr11 | - | 71505409 | 71524905 | 2165  |
| ENSG000001 | 2.873915 | 0        | 2.7517   | 0.098835 | 0.15989  | CTD-2044J chr5  | - | 6686438  | 6707824  | 3364  |
| ENSG000001 | 0.653381 | 0        | 0.82678  | 0.64037  | NA       | ARHGAP22 chr10  | - | 49718568 | 49719632 | 470   |
| ENSG000001 | 13.91383 | 6.130359 | 1.0698   | 0.31068  | 0.4126   | HAS2-AS1 chr8   | + | 1.23E+08 | 1.23E+08 | 1656  |
| ENSG000001 | 9.131195 | 1.294874 | 2.548    | 0.010632 | 0.022222 | RP11-84A1 chr4  | - | 62937470 | 63031272 | 606   |
| ENSG000001 | 0.72616  | 0.357707 | 0.52227  | 0.76959  | NA       | RP11-18D7 chr4  | - | 1.84E+08 | 1.84E+08 | 444   |
| ENSG000001 | 0.342542 | 0.343138 | -0.00208 | 0.99906  | NA       | AC011406 chr5   | - | 1.49E+08 | 1.49E+08 | 370   |
| ENSG000001 | 0        | 0.343138 | -0.41864 | 0.81278  | NA       | TOX4P1 chr4     | + | 1.13E+08 | 1.13E+08 | 1862  |
| ENSG000001 | 0        | 0.357707 | -0.41864 | 0.81278  | NA       | RP11-341C chr4  | + | 14113592 | 14141676 | 1984  |
| ENSG000001 | 0.943682 | 0        | 1.2438   | 0.48556  | NA       | AC006023 chr7   | + | 40191212 | 40193750 | 1480  |
| ENSG000001 | 18.17405 | 34.09802 | -0.89669 | 0.034242 | 0.063899 | CCDC153 chr11   | - | 1.19E+08 | 1.19E+08 | 1701  |
| ENSG000001 | 0.685084 | 0        | 0.85004  | 0.63064  | NA       | RP11-766F chr4  | - | 1.01E+08 | 1.01E+08 | 10086 |
| ENSG000001 | 1.733248 | 3.426547 | -0.85245 | 0.4944   | 0.59822  | CTD-11079 chr17 | + | 47438527 | 47447360 | 601   |
| ENSG000001 | 5.871057 | 0        | 4.1364   | 0.002362 | 0.005526 | RP11-377C chr4  | - | 81104434 | 81111323 | 566   |
| ENSG000001 | 1.027626 | 0        | 1.1491   | 0.51623  | NA       | AC063976 chr5   | - | 1.32E+08 | 1.32E+08 | 463   |
| ENSG000001 | 0        | 0.997859 | -1.5018  | 0.39072  | NA       | NPHP3-AS1 chr3  | + | 1.32E+08 | 1.33E+08 | 2972  |
| ENSG000001 | 0.290301 | 0        | 0.4146   | 0.81455  | NA       | CTC-236F1 chr5  | - | 55753622 | 55777773 | 656   |
| ENSG000001 | 0.685084 | 0        | 0.85004  | 0.63064  | NA       | RP11-531A chr5  | - | 5395491  | 5396070  | 580   |
| ENSG000001 | 0.290301 | 1.355566 | -1.3811  | 0.39332  | NA       | EGFLAM-AS chr5  | - | 38282366 | 38291088 | 1579  |
| ENSG000001 | 0        | 2.058828 | -1.8947  | 0.28782  | 0.38931  | AC090103 chr8   | - | 25798739 | 25801385 | 2645  |
| ENSG000001 | 3.725094 | 3.037286 | 0.26002  | 0.8197   | 0.87328  | CTD-2260A chr5  | + | 96120481 | 96121703 | 993   |
| ENSG000001 | 1.286224 | 0.640152 | 0.76496  | 0.6103   | 0.70288  | R3HDM2P1 chr4   | + | 1.34E+08 | 1.34E+08 | 1960  |
| ENSG000001 | 0        | 0.343138 | -0.41864 | 0.81278  | NA       | RP11-87E2 chr8  | + | 22735485 | 22745535 | 3879  |
| ENSG000001 | 2.31385  | 10.91576 | -2.1121  | 0.010459 | 0.021902 | RP11-328K chr4  | + | 1.04E+08 | 1.04E+08 | 527   |
| ENSG000001 | 5.965187 | 563.6262 | -6.2213  | 1.17E-14 | 7.49E-14 | ACTN3 chr11     | + | 66313866 | 66330800 | 3084  |
| ENSG000001 | 0        | 2.338857 | -2.7203  | 0.085631 | 0.14161  | RP11-131K chr4  | + | 93805814 | 93806258 | 445   |
| ENSG000001 | 0        | 0.357707 | -0.41864 | 0.81278  | NA       | CTD-2193C chr5  | - | 1.03E+08 | 1.03E+08 | 432   |
| ENSG000001 | 0.36308  | 0.640152 | -0.51156 | 0.77091  | NA       | CTD-2215E chr5  | - | 96523794 | 96537584 | 193   |
| ENSG000001 | 0        | 0.357707 | -0.41864 | 0.81278  | NA       | RP11-292C chr4  | + | 1.48E+08 | 1.48E+08 | 524   |
| ENSG000001 | 1.359003 | 2.338857 | -0.69138 | 0.56978  | 0.66697  | RP11-231L chr3  | + | 1.41E+08 | 1.41E+08 | 393   |
| ENSG000001 | 9.0977   | 17.22424 | -0.89701 | 0.1755   | 0.25872  | RP11-798N chr4  | - | 1.74E+08 | 1.74E+08 | 521   |
| ENSG000001 | 3.64115  | 0        | 3.4049   | 0.020363 | 0.040101 | RP11-5301 chr5  | + | 44753051 | 44765846 | 591   |
| ENSG000001 | 0        | 8.767103 | -4.7478  | 0.000214 | 0.000584 | RP11-632F chr4  | + | 40788127 | 40788727 | 601   |
| ENSG000001 | 0.995923 | 0.357707 | 1.0227   | 0.53712  | NA       | HIGD1AP1 chr4   | + | 1.11E+08 | 1.11E+08 | 282   |
| ENSG000001 | 7.758422 | 2.618886 | 1.4409   | 0.13589  | 0.20899  | RP11-666A chr3  | - | 1.26E+08 | 1.26E+08 | 427   |
| ENSG000001 | 0        | 0.297015 | -0.41864 | 0.81278  | NA       | CTD-2165F chr5  | + | 14620129 | 14621422 | 1294  |
| ENSG000001 | 1.359003 | 0.640152 | 0.80743  | 0.58991  | 0.68514  | CTD-2248F chr5  | - | 80538149 | 80538418 | 270   |
| ENSG000001 | 1.048164 | 0.715414 | 0.37283  | 0.82507  | NA       | RP11-173E chr4  | + | 1.39E+08 | 1.39E+08 | 1238  |
| ENSG000001 | 0        | 14.89021 | -5.5299  | 4.02E-06 | 1.35E-05 | RP11-664C chr8  | - | 69215703 | 69243726 | 1600  |
| ENSG000001 | 0        | 1.043983 | -1.3473  | 0.44976  | NA       | RP11-287J chr5  | + | 65918696 | 65919005 | 310   |
| ENSG000001 | 71.42212 | 6.378834 | 3.4302   | 2.31E-12 | 1.28E-11 | RP11-362F chr4  | - | 1.42E+08 | 1.42E+08 | 2839  |
| ENSG000001 | 0.870904 | 0        | 1.046    | 0.5544   | NA       | RP11-18D7 chr4  | - | 1.84E+08 | 1.84E+08 | 518   |
| ENSG000001 | 0        | 1.638012 | -2.1885  | 0.18912  | NA       | RP11-562F chr4  | - | 93103628 | 93105203 | 1576  |

|            |          |          |          |          |          |                 |   |          |          |       |
|------------|----------|----------|----------|----------|----------|-----------------|---|----------|----------|-------|
| ENSG000001 | 0.290301 | 0        | 0.4146   | 0.81455  | NA       | RP11-673E chr4  | + | 1.45E+08 | 1.45E+08 | 832   |
| ENSG000001 | 39.80278 | 45.00895 | -0.1693  | 0.6505   | 0.73627  | RP5-955M: chr20 | - | 49620194 | 49624577 | 3722  |
| ENSG000001 | 69.47297 | 148.1503 | -1.0896  | 6.70E-05 | 0.000195 | AL357673. chr1  | - | 54635333 | 54637997 | 2665  |
| ENSG000001 | 3.257533 | 2.24661  | 0.47262  | 0.65654  | 0.74122  | RP11-357C chr4  | + | 3314239  | 3314785  | 324   |
| ENSG000001 | 0.342542 | 1.326428 | -1.2461  | 0.46257  | NA       | RP11-357C chr4  | - | 3325704  | 3326489  | 786   |
| ENSG000001 | 3.423628 | 0        | 3.2667   | 0.029951 | 0.056675 | RP11-626F chr11 | - | 69902336 | 69911477 | 1755  |
| ENSG000001 | 0        | 0.343138 | -0.41864 | 0.81278  | NA       | CTD-2016C chr5  | - | 65502040 | 65505275 | 562   |
| ENSG000001 | 0        | 0.343138 | -0.41864 | 0.81278  | NA       | PPBPP2 chr4     | - | 74919755 | 74921116 | 1362  |
| ENSG000001 | 0.580602 | 0.594029 | -0.01451 | 0.9935   | NA       | AC006427. chr4  | + | 16309079 | 16309790 | 712   |
| ENSG000001 | 4.721017 | 0.715414 | 2.3292   | 0.07091  | 0.12051  | RP11-100L chr8  | - | 93711970 | 93891730 | 4282  |
| ENSG000001 | 0        | 10.37598 | -4.9859  | 7.86E-05 | 0.000227 | RP11-375B chr5  | + | 1.76E+08 | 1.76E+08 | 560   |
| ENSG000001 | 5.964374 | 4.721421 | 0.32309  | 0.70313  | 0.77919  | RP11-83A2 chr4  | - | 1.4E+08  | 1.4E+08  | 997   |
| ENSG000001 | 0.36308  | 0.951736 | -0.91212 | 0.59701  | NA       | AC121336. chr12 | - | 40223927 | 40229562 | 436   |
| ENSG000001 | 28.95374 | 10.79679 | 1.3885   | 0.005348 | 0.011845 | USP46-AS1 chr4  | + | 53525573 | 53527835 | 1048  |
| ENSG000001 | 0        | 1.043983 | -1.3473  | 0.44976  | NA       | CTD-2015A chr5  | - | 81882595 | 81883230 | 636   |
| ENSG000001 | 0        | 0.357707 | -0.41864 | 0.81278  | NA       | RP11-344C chr4  | + | 1.72E+08 | 1.72E+08 | 3601  |
| ENSG000001 | 1.233984 | 2.200487 | -0.65347 | 0.64996  | 0.73586  | SERBP1P6 chr5   | - | 42465502 | 42468970 | 932   |
| ENSG000001 | 0.72616  | 0        | 0.85004  | 0.63064  | NA       | C5orf17 chr5    | + | 23951457 | 24178372 | 1984  |
| ENSG000001 | 0.870904 | 2.010288 | -0.88946 | 0.5446   | 0.64491  | RP11-950K chr5  | - | 1.18E+08 | 1.18E+08 | 1271  |
| ENSG000001 | 58.59158 | 4.68013  | 3.5596   | 2.53E-10 | 1.22E-09 | HHIP-AS1 chr4   | - | 1.46E+08 | 1.46E+08 | 1094  |
| ENSG000001 | 2.003011 | 4.573314 | -0.99379 | 0.4572   | 0.56251  | CTD-2135J. chr8 | + | 10586824 | 10628902 | 821   |
| ENSG000001 | 0.342542 | 1.029414 | -0.83909 | 0.63652  | NA       | CTD-2288C chr5  | - | 51971027 | 52083860 | 593   |
| ENSG000001 | 0.342542 | 0        | 0.4146   | 0.81455  | NA       | AP000867. chr11 | + | 71279726 | 71279980 | 255   |
| ENSG000001 | 352.7583 | 98.50328 | 1.8351   | 9.61E-27 | 1.08E-25 | FMN1 chr15      | - | 33057747 | 33486897 | 12355 |
| ENSG000001 | 4.180677 | 3.725978 | 0.17358  | 0.855    | 0.89801  | HMGB1P21 chr5   | - | 77940088 | 77940668 | 581   |
| ENSG000001 | 0.342542 | 0        | 0.4146   | 0.81455  | NA       | RP11-171N chr4  | + | 1.58E+08 | 1.58E+08 | 947   |
| ENSG000001 | 1.08924  | 1.387121 | -0.25589 | 0.87587  | 0.91383  | NUP210P3 chr3   | - | 1.29E+08 | 1.29E+08 | 388   |
| ENSG000001 | 1.048164 | 0.937167 | 0.082641 | 0.95805  | 0.97466  | ATP5J2-PTC chr7 | - | 99017372 | 99063787 | 2491  |
| ENSG000001 | 3.765356 | 14.99703 | -1.8732  | 0.009392 | 0.019829 | MTND5P11 chr5   | - | 1.34E+08 | 1.34E+08 | 1812  |
| ENSG000001 | 3.443352 | 0.700845 | 1.9629   | 0.13531  | 0.20832  | CTD-2083E chr5  | - | 269973   | 271631   | 522   |
| ENSG000001 | 0        | 0.343138 | -0.41864 | 0.81278  | NA       | RP11-777B chr4  | - | 78879154 | 78879934 | 781   |
| ENSG000001 | 2.250445 | 5.512097 | -1.1265  | 0.32061  | 0.42346  | CTD-2334C chr5  | + | 1.2E+08  | 1.2E+08  | 1114  |
| ENSG000001 | 26.73141 | 27.98377 | -0.06359 | 0.8799   | 0.91625  | RP11-319C chr3  | + | 1.39E+08 | 1.39E+08 | 602   |
| ENSG000001 | 0.36308  | 1.326428 | -1.249   | 0.46108  | NA       | RP11-36B1 chr4  | - | 37589709 | 37590497 | 534   |
| ENSG000001 | 1.016461 | 0        | 1.3167   | 0.46021  | NA       | RP11-661C chr5  | + | 946430   | 956635   | 559   |
| ENSG000001 | 0.290301 | 2.618886 | -2.1293  | 0.18113  | 0.26572  | RP11-304F chr17 | + | 47964961 | 47978257 | 1816  |
| ENSG000001 | 0.290301 | 0        | 0.4146   | 0.81455  | NA       | HMGB1P44 chr4   | + | 78885094 | 78885665 | 572   |
| ENSG000001 | 1.991846 | 0.297015 | 1.8936   | 0.2158   | 0.30683  | ZSWIM5P3 chr4   | - | 1.3E+08  | 1.3E+08  | 2743  |
| ENSG000001 | 2.738544 | 0.951736 | 1.2319   | 0.35651  | 0.46077  | RP11-94H1 chr8  | - | 29672520 | 29712059 | 1867  |
| ENSG000001 | 0.36308  | 0        | 0.4146   | 0.81455  | NA       | CTD-2089C chr5  | - | 1.1E+08  | 1.1E+08  | 2752  |
| ENSG000001 | 3.289235 | 2.117104 | 0.57283  | 0.64024  | 0.72738  | CTD-2256P chr5  | + | 10248437 | 10250027 | 688   |
| ENSG000001 | 0        | 0.343138 | -0.41864 | 0.81278  | NA       | CTD-2113L chr5  | - | 35678586 | 35827120 | 540   |
| ENSG000001 | 14.19215 | 9.369996 | 0.58897  | 0.29922  | 0.40085  | KRT8P46 chr4    | - | 1.04E+08 | 1.04E+08 | 1426  |
| ENSG000001 | 0        | 2.82607  | -2.9558  | 0.060048 | 0.10453  | RP11-445C chr5  | - | 4452043  | 4866334  | 721   |
| ENSG000001 | 0.36308  | 0        | 0.4146   | 0.81455  | NA       | CTD-2251F chr14 | - | 30421603 | 30766249 | 922   |
| ENSG000001 | 0.36308  | 3.823929 | -2.7569  | 0.050354 | 0.089485 | LAMTOR3P chr5   | - | 1.18E+08 | 1.18E+08 | 232   |
| ENSG000001 | 0        | 0.343138 | -0.41864 | 0.81278  | NA       | RP11-87F1 chr4  | - | 1.77E+08 | 1.77E+08 | 610   |
| ENSG000001 | 0.290301 | 0        | 0.4146   | 0.81455  | NA       | RP11-815N chr4  | + | 1.6E+08  | 1.6E+08  | 717   |
| ENSG000001 | 0        | 4.303021 | -3.6613  | 0.010513 | 0.022005 | RP11-259C chr5  | + | 1933977  | 1959290  | 718   |
| ENSG000001 | 4.035933 | 1.935026 | 0.93808  | 0.36613  | 0.47081  | RP11-1334 chr5  | + | 1.77E+08 | 1.77E+08 | 434   |
| ENSG000001 | 0        | 0.594029 | -0.81444 | 0.64499  | NA       | W12-2373I. chr7 | + | 330617   | 330787   | 171   |
| ENSG000001 | 0.632843 | 1.248751 | -0.71101 | 0.65451  | NA       | RP11-742B chr4  | - | 88489187 | 88655108 | 821   |
| ENSG000001 | 0.685084 | 0        | 0.85004  | 0.63064  | NA       | RP11-752L chr4  | - | 1.48E+08 | 1.48E+08 | 598   |
| ENSG000001 | 0        | 0.357707 | -0.41864 | 0.81278  | NA       | RP11-317B chr4  | - | 2090445  | 2092344  | 1900  |
| ENSG000001 | 4.035933 | 7.729568 | -0.89181 | 0.27092  | 0.37012  | RP11-731C chr4  | + | 1.52E+08 | 1.52E+08 | 486   |
| ENSG000001 | 0        | 0.686276 | -0.84936 | 0.6309   | NA       | FTH1P21 chr4    | + | 1.57E+08 | 1.57E+08 | 511   |
| ENSG000001 | 0.870904 | 1.340997 | -0.41857 | 0.78648  | 0.84735  | HMGN2P4 chr5    | - | 75537849 | 75538229 | 381   |
| ENSG000001 | 0        | 0.343138 | -0.41864 | 0.81278  | NA       | RP11-58B2 chr5  | + | 1.02E+08 | 1.02E+08 | 527   |
| ENSG000001 | 1.669842 | 2.041842 | -0.24116 | 0.85284  | 0.89662  | RP11-539C chr4  | - | 39715462 | 39716071 | 287   |
| ENSG000001 | 3.609448 | 1.638012 | 1.006    | 0.37248  | 0.47691  | SNORA58 chr3    | - | 1.31E+08 | 1.31E+08 | 137   |
| ENSG000001 | 0        | 0.357707 | -0.41864 | 0.81278  | NA       | RP11-285C chr4  | + | 1.54E+08 | 1.54E+08 | 562   |
| ENSG000001 | 0.342542 | 0        | 0.4146   | 0.81455  | NA       | RP11-2H3. chr4  | + | 387323   | 387447   | 125   |
| ENSG000001 | 2.976604 | 1.073121 | 1.1369   | 0.45486  | 0.5602   | RP5-951N9 chr12 | - | 1489226  | 1500668  | 2088  |
| ENSG000001 | 0        | 0.686276 | -0.84936 | 0.6309   | NA       | SUMO2P6 chr5    | + | 1.74E+08 | 1.74E+08 | 288   |
| ENSG000001 | 4.148974 | 11.08085 | -1.3283  | 0.075038 | 0.12655  | AC005609. chr5  | - | 1.4E+08  | 1.4E+08  | 2884  |

|            |          |          |          |          |          |                 |   |          |          |      |
|------------|----------|----------|----------|----------|----------|-----------------|---|----------|----------|------|
| ENSG000001 | 19.02702 | 0.357707 | 5.0322   | 9.07E-06 | 2.93E-05 | CTB-113P1 chr5  | + | 1.51E+08 | 1.51E+08 | 1973 |
| ENSG000001 | 0        | 0.343138 | -0.41864 | 0.81278  | NA       | RP11-21G2 chr4  | - | 1.56E+08 | 1.56E+08 | 525  |
| ENSG000001 | 84.71778 | 23.11915 | 1.8532   | 1.91E-06 | 6.66E-06 | CTD-2015F chr5  | - | 79778112 | 79783882 | 1151 |
| ENSG000001 | 76.14753 | 44.29025 | 0.77851  | 0.006471 | 0.014101 | RP11-330N chr9  | - | 99660348 | 99711867 | 548  |
| ENSG000001 | 0.342542 | 0.715414 | -0.51272 | 0.77372  | NA       | COX6B1P5 chr4   | + | 2235978  | 2236226  | 249  |
| ENSG000001 | 0        | 3.516378 | -2.9122  | 0.082888 | 0.13771  | RP11-419C chr5  | + | 12794843 | 12795634 | 792  |
| ENSG000001 | 0        | 0.343138 | -0.41864 | 0.81278  | NA       | MAST4-IT1 chr5  | + | 65958159 | 65958816 | 658  |
| ENSG000001 | 2.43887  | 0        | 2.4712   | 0.14712  | 0.22317  | RP11-72L2 chr5  | + | 86263138 | 86433529 | 602  |
| ENSG000001 | 0.580602 | 0        | 0.8036   | 0.6494   | NA       | PCNAP1 chr4     | - | 1E+08    | 1E+08    | 752  |
| ENSG000001 | 0.290301 | 0.640152 | -0.50256 | 0.77558  | NA       | CTC-287O8 chr5  | - | 1.09E+08 | 1.09E+08 | 565  |
| ENSG000001 | 3.817597 | 3.884622 | -0.01709 | 0.98581  | 0.99165  | RP11-376C chr4  | - | 1.78E+08 | 1.78E+08 | 753  |
| ENSG000001 | 46.30733 | 11.09468 | 1.9864   | 0.000722 | 0.001831 | C1orf213 chr1   | + | 23695490 | 23698332 | 2547 |
| ENSG000001 | 0        | 0.297015 | -0.41864 | 0.81278  | NA       | CTD-2325A chr5  | - | 42892421 | 42892919 | 499  |
| ENSG000001 | 0        | 0.937167 | -1.2408  | 0.48662  | NA       | RP1-7G5.6 chr12 | + | 1.1E+08  | 1.1E+08  | 728  |
| ENSG000001 | 0.653381 | 0.357707 | 0.52032  | 0.76705  | NA       | RP11-290F chr4  | - | 1.85E+08 | 1.85E+08 | 2040 |
| ENSG000001 | 0        | 1.638012 | -2.1885  | 0.18912  | NA       | RP11-39E3 chr3  | - | 1.31E+08 | 1.31E+08 | 572  |
| ENSG000001 | 0        | 0.297015 | -0.41864 | 0.81278  | NA       | CTD-2218K chr5  | + | 82061223 | 82062152 | 930  |
| ENSG000001 | 0.705622 | 1.234181 | -0.63076 | 0.69086  | 0.76952  | RP11-43D2 chr5  | + | 1.24E+08 | 1.24E+08 | 832  |
| ENSG000001 | 0        | 0.715414 | -0.84936 | 0.6309   | NA       | RP11-5N11 chr5  | + | 31738376 | 31738767 | 392  |
| ENSG000001 | 415.2326 | 606.6331 | -0.54588 | 0.000294 | 0.000788 | HAUS5 chr19     | + | 36103646 | 36116251 | 4462 |
| ENSG000001 | 0        | 25.0727  | -6.2497  | 7.14E-08 | 2.82E-07 | CTD-2194C chr5  | + | 1884080  | 1884763  | 425  |
| ENSG000001 | 0.342542 | 3.2299   | -2.536   | 0.076326 | 0.12833  | MTND6P4 chr5    | + | 1.34E+08 | 1.34E+08 | 522  |
| ENSG000001 | 3.443352 | 13.79037 | -1.8746  | 0.013963 | 0.028476 | SUDS3P1 chr5    | + | 1.77E+08 | 1.77E+08 | 966  |
| ENSG000001 | 3.869838 | 0.297015 | 2.7678   | 0.053667 | 0.094599 | CTB-35F21 chr5  | - | 1.39E+08 | 1.39E+08 | 412  |
| ENSG000001 | 0.290301 | 0        | 0.4146   | 0.81455  | NA       | RP11-701P chr4  | - | 1.86E+08 | 1.86E+08 | 751  |
| ENSG000001 | 2.427705 | 1.355566 | 0.71405  | 0.56662  | 0.66435  | PRDX2P3 chr5    | + | 1.79E+08 | 1.79E+08 | 586  |
| ENSG000001 | 0        | 0.343138 | -0.41864 | 0.81278  | NA       | RP11-514C chr6  | - | 1.67E+08 | 1.67E+08 | 600  |
| ENSG000001 | 1.016461 | 0        | 1.3167   | 0.46021  | NA       | CTD-2290P chr5  | + | 32522864 | 32523971 | 1108 |
| ENSG000001 | 0        | 1.66715  | -1.9695  | 0.25993  | NA       | AC006445 chr4   | - | 13633444 | 13634223 | 472  |
| ENSG000001 | 0        | 2.589748 | -2.8794  | 0.06476  | 0.11148  | CTC-472C2 chr5  | - | 1.16E+08 | 1.16E+08 | 553  |
| ENSG000001 | 0        | 222.0931 | -9.2122  | 1.12E-17 | 8.50E-17 | RP11-562F chr4  | - | 93189918 | 93198226 | 616  |
| ENSG000001 | 0        | 0.357707 | -0.41864 | 0.81278  | NA       | RP11-432N chr5  | + | 17611099 | 17611692 | 594  |
| ENSG000001 | 283.1312 | 231.662  | 0.28837  | 0.16644  | 0.24766  | PCDHA11 chr5    | + | 1.4E+08  | 1.4E+08  | 5257 |
| ENSG000001 | 1.048164 | 3.365854 | -1.4629  | 0.24412  | 0.33973  | CTB-118N6 chr5  | + | 1.16E+08 | 1.16E+08 | 482  |
| ENSG000001 | 0        | 0.357707 | -0.41864 | 0.81278  | NA       | RP11-124N chr5  | - | 18965970 | 19142455 | 660  |
| ENSG000001 | 0.36308  | 0        | 0.4146   | 0.81455  | NA       | CTC-484P3 chr5  | + | 94124494 | 94129304 | 1940 |
| ENSG000001 | 0.72616  | 0        | 0.85004  | 0.63064  | NA       | CTC-506B8 chr5  | - | 96076783 | 96078402 | 565  |
| ENSG000001 | 0        | 0.297015 | -0.41864 | 0.81278  | NA       | RP11-423F chr5  | - | 1.77E+08 | 1.77E+08 | 547  |
| ENSG000001 | 0.653381 | 2.855208 | -1.6714  | 0.25097  | 0.34763  | RP11-556C chr8  | + | 8011830  | 8074438  | 999  |
| ENSG000001 | 0.290301 | 3.008147 | -2.4546  | 0.090452 | 0.1484   | CTB-3601 chr5   | - | 1.34E+08 | 1.34E+08 | 135  |
| ENSG000001 | 0.870904 | 0.343138 | 0.71634  | 0.68735  | NA       | HSPD1P5 chr4    | + | 1.46E+08 | 1.46E+08 | 1720 |
| ENSG000001 | 0        | 1.372552 | -1.3974  | 0.43145  | NA       | AC010127 chr2   | - | 1.67E+08 | 1.67E+08 | 704  |
| ENSG000001 | 0        | 1.370136 | -1.6825  | 0.34201  | NA       | RP11-669N chr12 | + | 1.3E+08  | 1.3E+08  | 2271 |
| ENSG000001 | 0.580602 | 0        | 0.8036   | 0.6494   | NA       | OR10J9P chr1    | - | 1.59E+08 | 1.59E+08 | 987  |
| ENSG000001 | 0.580602 | 0        | 0.8036   | 0.6494   | NA       | RP11-473L chr5  | - | 44495720 | 44510384 | 584  |
| ENSG000001 | 4.501703 | 2.855208 | 0.53499  | 0.68164  | 0.76194  | RP11-360F chr4  | - | 39114297 | 39128438 | 946  |
| ENSG000001 | 1.390706 | 3.870053 | -1.3174  | 0.27178  | 0.37119  | ATP1B1P1 chr4   | + | 42031226 | 42032140 | 915  |
| ENSG000001 | 1.887365 | 1.248751 | 0.46259  | 0.75051  | 0.81757  | AC022558 chr15  | + | 83684154 | 83684448 | 132  |
| ENSG000001 | 0.342542 | 0        | 0.4146   | 0.81455  | NA       | RP11-227F chr4  | - | 41690875 | 41694814 | 435  |
| ENSG000001 | 1.027626 | 0.654722 | 0.41397  | 0.80758  | NA       | ATP5L2 chr22    | - | 43035809 | 43036607 | 799  |
| ENSG000001 | 0.290301 | 0        | 0.4146   | 0.81455  | NA       | RP11-769N chr4  | + | 29048213 | 29050387 | 1604 |
| ENSG000001 | 0.685084 | 0.357707 | 0.4822   | 0.78686  | NA       | RP11-452J chr4  | + | 16180562 | 16184743 | 414  |
| ENSG000001 | 0.290301 | 0        | 0.4146   | 0.81455  | NA       | RP11-376N chr1  | + | 84810361 | 84815622 | 905  |
| ENSG000001 | 0        | 3.723561 | -3.3938  | 0.022736 | 0.044303 | RP11-428L chr4  | - | 93743137 | 93744069 | 933  |
| ENSG000001 | 0.290301 | 0        | 0.4146   | 0.81455  | NA       | AC069368 chr15  | + | 65134082 | 65223118 | 1178 |
| ENSG000001 | 1.068702 | 0.357707 | 1.0016   | 0.56008  | NA       | AC195454 chr4   | + | 40318502 | 40332436 | 957  |
| ENSG000001 | 33.20377 | 39.96137 | -0.25673 | 0.50332  | 0.60679  | TMEM150C chr4   | - | 83405743 | 83483510 | 1990 |
| ENSG000001 | 0.943682 | 2.102535 | -0.87459 | 0.5508   | 0.65052  | RP11-548F chr4  | - | 1.2E+08  | 1.2E+08  | 3505 |
| ENSG000001 | 0.290301 | 1.058552 | -0.99174 | 0.56536  | NA       | RP11-557J chr4  | - | 1.47E+08 | 1.47E+08 | 1877 |
| ENSG000001 | 5.051581 | 2.027273 | 1.2115   | 0.25223  | 0.34905  | AC010226 chr5   | + | 1.15E+08 | 1.15E+08 | 765  |
| ENSG000001 | 0.342542 | 4.68013  | -2.9401  | 0.040199 | 0.073715 | RP11-665C chr4  | - | 15006566 | 15429538 | 630  |
| ENSG000001 | 0        | 3.694423 | -3.4244  | 0.019592 | 0.038739 | PGAM1P9 chr11   | - | 92099662 | 92100416 | 755  |
| ENSG000001 | 7.04424  | 1.248751 | 2.2069   | 0.034972 | 0.065101 | RP11-468F chr8  | + | 16988690 | 17007298 | 2292 |
| ENSG000001 | 2.302685 | 7.325738 | -1.5471  | 0.092498 | 0.15135  | EEF1A1P9 chr4   | + | 1.06E+08 | 1.06E+08 | 1383 |
| ENSG000001 | 0        | 1.012429 | -1.3162  | 0.46038  | NA       | RP5-916L7 chr12 | - | 1.26E+08 | 1.26E+08 | 4972 |

|            |          |          |          |          |          |                 |   |          |          |      |
|------------|----------|----------|----------|----------|----------|-----------------|---|----------|----------|------|
| ENSG000001 | 0.685084 | 0.594029 | 0.089218 | 0.95997  | NA       | RP11-319J chr3  | + | 98501032 | 98502037 | 1006 |
| ENSG000001 | 0.580602 | 0        | 0.8036   | 0.6494   | NA       | RP11-8L21 chr5  | + | 43874469 | 43886730 | 339  |
| ENSG000001 | 4.762093 | 1.370136 | 1.5934   | 0.16702  | 0.24832  | CTD-2210P chr5  | - | 43587020 | 43588325 | 994  |
| ENSG000001 | 0.705622 | 0        | 0.8807   | 0.6196   | NA       | CTC-575I1C chr5 | - | 73073864 | 73082316 | 556  |
| ENSG000001 | 0        | 0.700845 | -0.87835 | 0.62047  | NA       | RP11-241C chr5  | - | 68773299 | 68798293 | 326  |
| ENSG000001 | 0        | 0.654722 | -0.83442 | 0.63731  | NA       | FTH1P24 chr4    | + | 1.4E+08  | 1.4E+08  | 462  |
| ENSG000001 | 6.245302 | 0.997859 | 2.383    | 0.024843 | 0.047998 | RP11-26P1 chr4  | + | 1.15E+08 | 1.15E+08 | 441  |
| ENSG000001 | 0.580602 | 0        | 0.8036   | 0.6494   | NA       | RP11-267A chr5  | + | 1.74E+08 | 1.74E+08 | 844  |
| ENSG000001 | 1.338465 | 0.715414 | 0.69225  | 0.65865  | 0.74281  | RP11-438E chr4  | + | 79892902 | 80229952 | 973  |
| ENSG000001 | 0.290301 | 0.997859 | -1.0217  | 0.53916  | NA       | RP11-153N chr4  | + | 1.55E+08 | 1.55E+08 | 521  |
| ENSG000001 | 0.685084 | 3.198346 | -1.8076  | 0.19887  | 0.28721  | APOBEC3B chr22  | - | 39387564 | 39394214 | 691  |
| ENSG000001 | 0.580602 | 0        | 0.8036   | 0.6494   | NA       | ARL2BPP4 chr5   | + | 1.3E+08  | 1.3E+08  | 471  |
| ENSG000001 | 1.048164 | 0.297015 | 0.97802  | 0.57083  | NA       | AC010468 chr5   | - | 1.11E+08 | 1.11E+08 | 438  |
| ENSG000001 | 0        | 0.343138 | -0.41864 | 0.81278  | NA       | OR5H5P chr3     | + | 97916055 | 97916982 | 928  |
| ENSG000001 | 0        | 4.790235 | -3.78    | 0.008604 | 0.018309 | CTD-2194C chr5  | + | 1887446  | 1900607  | 1635 |
| ENSG000001 | 1.317927 | 0.297015 | 1.2497   | 0.46264  | NA       | RP11-26J3 chr8  | - | 80681607 | 80783994 | 2126 |
| ENSG000001 | 0        | 0.297015 | -0.41864 | 0.81278  | NA       | CTC-340D7 chr5  | - | 68128412 | 68257985 | 499  |
| ENSG000001 | 0        | 0.297015 | -0.41864 | 0.81278  | NA       | RP11-575F chr12 | - | 1.27E+08 | 1.28E+08 | 1344 |
| ENSG000001 | 0.685084 | 0        | 0.85004  | 0.63064  | NA       | RP3-468B3 chr6  | - | 33835283 | 33864691 | 3151 |
| ENSG000001 | 37.76986 | 17.71628 | 1.079    | 0.010166 | 0.021346 | UGDH-AS1 chr4   | + | 39529639 | 39596327 | 2787 |
| ENSG000001 | 84.95828 | 315.4895 | -1.8846  | 2.91E-22 | 2.72E-21 | NPM1P27 chr5    | - | 93018544 | 93019373 | 830  |
| ENSG000001 | 0        | 0.700845 | -0.87835 | 0.62047  | NA       | RP11-211I chr4  | - | 1.2E+08  | 1.2E+08  | 974  |
| ENSG000001 | 0        | 0.594029 | -0.81444 | 0.64499  | NA       | RP11-374A chr5  | - | 21323982 | 21341484 | 5454 |
| ENSG000001 | 2.717192 | 2.696564 | 0.045351 | 0.96954  | 0.9829   | CTB-78021 chr5  | - | 1.45E+08 | 1.45E+08 | 876  |
| ENSG000001 | 0        | 2.901332 | -3.0081  | 0.053293 | 0.094014 | RP11-434C chr5  | + | 66675206 | 67101066 | 1556 |
| ENSG000001 | 0        | 0.297015 | -0.41864 | 0.81278  | NA       | FABP5P12 chr4   | + | 1.6E+08  | 1.6E+08  | 389  |
| ENSG000001 | 0.36308  | 0        | 0.4146   | 0.81455  | NA       | ATP6V1G1 chr5   | + | 77518008 | 77518341 | 334  |
| ENSG000001 | 0        | 0.951736 | -1.2555  | 0.48145  | NA       | RP11-650J chr4  | - | 1.14E+08 | 1.14E+08 | 427  |
| ENSG000001 | 1.701545 | 3.215331 | -0.83962 | 0.46172  | 0.56685  | RP11-1136 chr8  | - | 1.29E+08 | 1.29E+08 | 3301 |
| ENSG000001 | 9.315223 | 2.788811 | 1.6336   | 0.081238 | 0.13534  | RP11-219C chr4  | + | 1.89E+08 | 1.9E+08  | 2435 |
| ENSG000001 | 2.13659  | 5.378559 | -1.1601  | 0.26988  | 0.36897  | RP1-27K12 chr6  | + | 53367983 | 53371717 | 547  |
| ENSG000001 | 0        | 1.66715  | -1.9695  | 0.25993  | NA       | RP11-834C chr12 | + | 54475902 | 54496477 | 528  |
| ENSG000001 | 0        | 0.297015 | -0.41864 | 0.81278  | NA       | RP11-725C chr4  | - | 60416860 | 60496042 | 558  |
| ENSG000001 | 69.89979 | 101.6029 | -0.53316 | 0.073944 | 0.12498  | RP11-697N chr8  | - | 76135639 | 76236976 | 1164 |
| ENSG000001 | 10.35222 | 2.38498  | 1.989    | 0.025909 | 0.049838 | RP11-893F chr17 | + | 48286333 | 48291820 | 839  |
| ENSG000001 | 0        | 0.297015 | -0.41864 | 0.81278  | NA       | IL20RB-AS1 chr3 | - | 1.37E+08 | 1.37E+08 | 562  |
| ENSG000001 | 0        | 0.343138 | -0.41864 | 0.81278  | NA       | RP11-501E chr4  | + | 1.22E+08 | 1.22E+08 | 544  |
| ENSG000001 | 0.72616  | 0        | 0.85004  | 0.63064  | NA       | RP11-391J chr4  | + | 1.76E+08 | 1.76E+08 | 2199 |
| ENSG000001 | 0        | 2.66501  | -2.877   | 0.067583 | 0.11559  | CTC-563A5 chr5  | + | 1.79E+08 | 1.79E+08 | 569  |
| ENSG000001 | 0.995923 | 0.951736 | 0.030362 | 0.98382  | 0.99083  | RP11-25H1 chr4  | + | 66864564 | 67015730 | 754  |
| ENSG000001 | 2.926156 | 1.652581 | 0.70763  | 0.57474  | 0.67168  | RP11-438C chr3  | - | 1.41E+08 | 1.41E+08 | 422  |
| ENSG000001 | 0        | 0.357707 | -0.41864 | 0.81278  | NA       | AC005741 chr5   | + | 1.3E+08  | 1.3E+08  | 432  |
| ENSG000001 | 1.919068 | 0        | 2.4151   | 0.13977  | 0.21349  | RP11-497K chr4  | + | 1.63E+08 | 1.63E+08 | 1105 |
| ENSG000001 | 0.290301 | 57.30947 | -6.5678  | 3.05E-10 | 1.46E-09 | RP11-346A chr5  | - | 1.29E+08 | 1.29E+08 | 786  |
| ENSG000001 | 0        | 0.700845 | -0.87835 | 0.62047  | NA       | RP11-502N chr4  | + | 1.61E+08 | 1.62E+08 | 1417 |
| ENSG000001 | 0        | 0.98329  | -1.2878  | 0.47019  | NA       | CTC-448D2 chr5  | - | 1.18E+08 | 1.18E+08 | 497  |
| ENSG000001 | 2.366091 | 1.964165 | 0.21645  | 0.86739  | 0.90758  | RP11-503N chr4  | + | 2451700  | 2464668  | 1398 |
| ENSG000001 | 133.7032 | 306.4007 | -1.1889  | 1.65E-09 | 7.50E-09 | CTD-2231F chr5  | + | 92266    | 139978   | 705  |
| ENSG000001 | 12.63616 | 15.02858 | -0.24522 | 0.63876  | 0.72643  | NAIP chr5       | - | 70264310 | 70320941 | 6124 |
| ENSG000001 | 0.342542 | 0        | 0.4146   | 0.81455  | NA       | CTC-512J1 chr5  | + | 79584268 | 79585600 | 1333 |
| ENSG000001 | 0        | 0.297015 | -0.41864 | 0.81278  | NA       | RP11-94C2 chr17 | - | 48580773 | 48585689 | 349  |
| ENSG000001 | 0.290301 | 0.297015 | -0.00202 | 0.99909  | NA       | RP13-497K chr4  | + | 23781213 | 23784183 | 442  |
| ENSG000001 | 46.45901 | 38.47798 | 0.26975  | 0.48317  | 0.58731  | RP11-298J chr10 | + | 1.27E+08 | 1.27E+08 | 555  |
| ENSG000001 | 145.4198 | 204.4908 | -0.48654 | 0.01948  | 0.038536 | ZNF286B chr17   | - | 18561742 | 18585575 | 5328 |
| ENSG000001 | 2.810509 | 9.482517 | -1.6191  | 0.055534 | 0.097425 | RP11-93L9 chr4  | + | 1.25E+08 | 1.25E+08 | 5262 |
| ENSG000001 | 1.669842 | 1.638012 | 0.012948 | 0.99221  | 0.99582  | RBMXP4 chr4     | - | 1.1E+08  | 1.1E+08  | 1134 |
| ENSG000001 | 86.64287 | 51.24934 | 0.75371  | 0.006684 | 0.014523 | ZNF324B chr19   | + | 58962971 | 58969200 | 3770 |
| ENSG000001 | 6.898683 | 2.604317 | 1.3042   | 0.13919  | 0.21287  | CTD-2587N chr5  | - | 1.09E+08 | 1.09E+08 | 5471 |
| ENSG000001 | 0        | 0.357707 | -0.41864 | 0.81278  | NA       | CTB-49A3 chr5   | + | 1.33E+08 | 1.33E+08 | 3142 |
| ENSG000001 | 1.722083 | 0        | 2.21     | 0.18654  | NA       | AC091969 chr5   | - | 1.52E+08 | 1.53E+08 | 2193 |
| ENSG000001 | 1.524285 | 1.280305 | 0.20655  | 0.88921  | 0.92287  | RBBP4P1 chr5    | - | 14797234 | 14798509 | 1276 |
| ENSG000001 | 0.290301 | 0        | 0.4146   | 0.81455  | NA       | RP11-9701 chr15 | - | 89128802 | 89148341 | 1835 |
| ENSG000001 | 1.027626 | 0.357707 | 0.84252  | 0.63507  | NA       | GAPDHP70 chr11  | - | 88141347 | 88142391 | 1045 |
| ENSG000001 | 0.36308  | 0        | 0.4146   | 0.81455  | NA       | EGFLAM-AS chr5  | - | 38425138 | 38427478 | 331  |
| ENSG000001 | 2.31385  | 5.497527 | -1.1227  | 0.2772   | 0.37747  | RP11-159F chr5  | + | 43484061 | 43509458 | 482  |

|            |          |          |          |          |          |                  |   |          |          |      |
|------------|----------|----------|----------|----------|----------|------------------|---|----------|----------|------|
| ENSG000001 | 3.785894 | 3.397409 | 0.174    | 0.85813  | 0.9004   | ANKRD20A chr21   | + | 15436646 | 15441408 | 492  |
| ENSG000001 | 0.72616  | 0.700845 | 0.022935 | 0.98937  | NA       | CTB-161M1 chr5   | - | 1.18E+08 | 1.18E+08 | 812  |
| ENSG000001 | 0.685084 | 0        | 0.85004  | 0.63064  | NA       | RP11-1079 chr17  | - | 47535223 | 47539111 | 1754 |
| ENSG000001 | 0.632843 | 0        | 0.81931  | 0.64303  | NA       | RP11-340B chr4   | + | 1.67E+08 | 1.67E+08 | 2163 |
| ENSG000001 | 3.58891  | 3.6483   | -0.01645 | 0.98597  | 0.99173  | AC006160. chr4   | - | 17589090 | 17616194 | 750  |
| ENSG000001 | 0        | 0.654722 | -0.83442 | 0.63731  | NA       | RP11-434F chr3   | + | 1.29E+08 | 1.29E+08 | 1159 |
| ENSG000001 | 3.983692 | 0        | 3.5462   | 0.014052 | 0.028626 | ZEB2P1 chr4      | - | 16362462 | 16398946 | 991  |
| ENSG000001 | 0        | 0.594029 | -0.81444 | 0.64499  | NA       | RP11-402J chr4   | + | 1.13E+08 | 1.13E+08 | 685  |
| ENSG000001 | 0.36308  | 0.357707 | -0.00212 | 0.99905  | NA       | RP11-404I chr4   | - | 1.34E+08 | 1.34E+08 | 462  |
| ENSG000001 | 0        | 1.248751 | -1.5848  | 0.37202  | NA       | CTD-2201E chr5   | + | 42917516 | 42918086 | 571  |
| ENSG000001 | 0        | 1.903472 | -2.1599  | 0.21236  | NA       | CTC-327F1 chr5   | - | 1.47E+08 | 1.47E+08 | 1016 |
| ENSG000001 | 0        | 0.297015 | -0.41864 | 0.81278  | NA       | RP11-718A chr4   | + | 3912010  | 3912331  | 322  |
| ENSG000001 | 7.003165 | 4.36613  | 0.64668  | 0.42898  | 0.53447  | CTB-35F21. chr5  | + | 1.39E+08 | 1.39E+08 | 568  |
| ENSG000001 | 0.685084 | 0        | 0.85004  | 0.63064  | NA       | RP11-642E chr4   | + | 69166043 | 69168177 | 868  |
| ENSG000001 | 1.213446 | 50.74843 | -5.0321  | 1.01E-11 | 5.34E-11 | RP11-148B chr4   | - | 1.14E+08 | 1.14E+08 | 640  |
| ENSG000001 | 0.72616  | 0        | 0.85004  | 0.63064  | NA       | RP11-83C7 chr4   | - | 38422283 | 38524801 | 2059 |
| ENSG000001 | 0.975385 | 0.357707 | 0.92752  | 0.59066  | NA       | RP11-789L chr3   | - | 1.41E+08 | 1.41E+08 | 322  |
| ENSG000001 | 2.520208 | 43.72132 | -3.9393  | 1.78E-10 | 8.67E-10 | RP11-438A chr12  | - | 1.14E+08 | 1.14E+08 | 2088 |
| ENSG000001 | 0.36308  | 1.355566 | -1.381   | 0.39134  | NA       | RCC2P4 chr3      | - | 1.26E+08 | 1.26E+08 | 1042 |
| ENSG000001 | 8.466649 | 21.09342 | -1.2935  | 0.024592 | 0.04754  | SERBP1P5 chr4    | - | 79102020 | 79103200 | 1181 |
| ENSG000001 | 1.503747 | 0        | 1.8221   | 0.30126  | NA       | RP11-234C chr4   | + | 1.62E+08 | 1.62E+08 | 2840 |
| ENSG000001 | 16.03925 | 6.566617 | 1.241    | 0.037946 | 0.070036 | CTD-2203K chr5   | - | 33424131 | 33440725 | 537  |
| ENSG000001 | 0        | 1.234181 | -1.5727  | 0.37581  | NA       | AC226118. chr7   | + | 419325   | 422678   | 2146 |
| ENSG000001 | 12.36819 | 3.504225 | 1.717    | 0.057505 | 0.10056  | CTD-2195A chr5   | + | 1.27E+08 | 1.27E+08 | 297  |
| ENSG000001 | 0        | 0.357707 | -0.41864 | 0.81278  | NA       | RP11-52L1 chr3   | - | 1.07E+08 | 1.07E+08 | 598  |
| ENSG000001 | 107.3158 | 60.08278 | 0.83353  | 0.002219 | 0.005212 | RP11-440L chr4   | - | 756175   | 775637   | 618  |
| ENSG000001 | 1.628766 | 6.267186 | -1.769   | 0.076029 | 0.1279   | CTB-46B19 chr5   | + | 1.38E+08 | 1.38E+08 | 1067 |
| ENSG000001 | 0        | 0.654722 | -0.83442 | 0.63731  | NA       | AC004878. chr7   | - | 74856621 | 74857439 | 307  |
| ENSG000001 | 10.70512 | 0        | 5.0465   | 5.06E-05 | 0.00015  | RP11-168E chr4   | - | 95664951 | 95678684 | 511  |
| ENSG000001 | 5.81963  | 19.22882 | -1.6711  | 0.016984 | 0.034013 | RP11-98D1 chr1   | - | 1.52E+08 | 1.52E+08 | 382  |
| ENSG000001 | 1.753786 | 1.058552 | 0.56901  | 0.70331  | 0.77933  | RP11-286E chr4   | - | 1.09E+08 | 1.09E+08 | 3147 |
| ENSG000001 | 0        | 0.297015 | -0.41864 | 0.81278  | NA       | TRAPP2P1 chrY    | - | 20817406 | 20818076 | 231  |
| ENSG000001 | 11.02793 | 2.292733 | 2.1293   | 0.008362 | 0.017813 | RP11-635L chr4   | - | 1.7E+08  | 1.7E+08  | 552  |
| ENSG000001 | 0        | 0.951736 | -1.2555  | 0.48145  | NA       | RP11-422J chr4   | + | 1.31E+08 | 1.31E+08 | 1777 |
| ENSG000001 | 2.831861 | 0        | 2.6192   | 0.12406  | 0.19414  | HMG1P1 chr5      | - | 1.11E+08 | 1.11E+08 | 138  |
| ENSG000001 | 1.411244 | 0.343138 | 1.3153   | 0.43451  | NA       | CTD-2544F chr5   | - | 1.22E+08 | 1.22E+08 | 583  |
| ENSG000001 | 4.741555 | 0        | 3.7845   | 0.007649 | 0.016425 | RP11-610J chr4   | - | 1.7E+08  | 1.7E+08  | 448  |
| ENSG000001 | 4.253456 | 0.594029 | 2.3033   | 0.075248 | 0.12681  | IFNAR2 chr21     | + | 34619079 | 34656082 | 1363 |
| ENSG000001 | 1.681007 | 15.08686 | -2.9825  | 0.000467 | 0.001218 | RP11-496F chr3   | + | 1.97E+08 | 1.97E+08 | 1497 |
| ENSG000001 | 11.72418 | 0.343138 | 4.3403   | 0.000323 | 0.000862 | RP3-340I3. chr12 | - | 1609691  | 1616484  | 2417 |
| ENSG000001 | 0.580602 | 1.188058 | -0.5972  | 0.73358  | NA       | RP11-281P chr4   | + | 11627338 | 11815582 | 747  |
| ENSG000001 | 0.36308  | 0.357707 | -0.00212 | 0.99905  | NA       | OR52V1P chr11    | - | 5548507  | 5549404  | 898  |
| ENSG000001 | 1.681007 | 0.357707 | 1.6359   | 0.30139  | 0.40279  | RP11-710F chr4   | - | 1.07E+08 | 1.07E+08 | 3526 |
| ENSG000001 | 4.782631 | 22.6796  | -2.1828  | 0.001068 | 0.002635 | CTC-329D1 chr5   | - | 1.4E+08  | 1.4E+08  | 549  |
| ENSG000001 | 0.342542 | 0        | 0.4146   | 0.81455  | NA       | CTB-138E5. chr5  | + | 1.35E+08 | 1.35E+08 | 504  |
| ENSG000001 | 0.290301 | 0        | 0.4146   | 0.81455  | NA       | HOXC-AS5 chr12   | - | 54329112 | 54333427 | 1408 |
| ENSG000001 | 0        | 1.012429 | -1.3162  | 0.46038  | NA       | RP11-436F chr5   | + | 1.24E+08 | 1.24E+08 | 607  |
| ENSG000001 | 0        | 0.343138 | -0.41864 | 0.81278  | NA       | MRPS33P2 chr4    | - | 38008405 | 38008726 | 322  |
| ENSG000001 | 0.923144 | 1.326428 | -0.36866 | 0.81128  | 0.86714  | RP11-310P chr5   | - | 602735   | 612325   | 591  |
| ENSG000001 | 10.1373  | 18.87192 | -0.8788  | 0.21202  | 0.3025   | CTC-325J2 chr5   | - | 79926132 | 79927409 | 549  |
| ENSG000001 | 13.74431 | 0.343138 | 4.5711   | 0.000118 | 0.000333 | TNRC18P1 chr4    | - | 1.42E+08 | 1.42E+08 | 3650 |
| ENSG000001 | 2.718006 | 0.715414 | 1.5707   | 0.26776  | 0.3665   | CTD-2227C chr5   | - | 82308104 | 82308928 | 825  |
| ENSG000001 | 68.19547 | 0        | 7.6388   | 3.39E-12 | 1.85E-11 | MIR143HG chr5    | + | 1.49E+08 | 1.49E+08 | 8398 |
| ENSG000001 | 183.8709 | 210.6389 | -0.19517 | 0.31742  | 0.42011  | NOP14-AS1 chr4   | + | 2936626  | 2963465  | 3860 |
| ENSG000001 | 0        | 1.40169  | -1.7271  | 0.32809  | NA       | RP11-217C chr4   | - | 1.67E+08 | 1.67E+08 | 934  |
| ENSG000001 | 0.342542 | 0        | 0.4146   | 0.81455  | NA       | RP11-619J chr4   | - | 30777879 | 30795592 | 180  |
| ENSG000001 | 2.229907 | 0.891044 | 1.0088   | 0.48585  | 0.58984  | RP11-279C chr4   | + | 1.86E+08 | 1.86E+08 | 394  |
| ENSG000001 | 1.411244 | 13.12511 | -3.0345  | 0.000961 | 0.00239  | RP11-423F chr5   | + | 1.77E+08 | 1.77E+08 | 613  |
| ENSG000001 | 4.285159 | 2.185918 | 0.84488  | 0.43199  | 0.53749  | RP11-360F chr4   | + | 39135533 | 39137228 | 455  |
| ENSG000001 | 1.741807 | 2.993578 | -0.60718 | 0.64932  | 0.73524  | RP11-1336 chr4   | + | 1.52E+08 | 1.52E+08 | 2209 |
| ENSG000001 | 0        | 1.073121 | -1.1788  | 0.50551  | NA       | RP11-445J chr3   | - | 1.34E+08 | 1.34E+08 | 883  |
| ENSG000001 | 2.976604 | 1.280305 | 0.98247  | 0.47338  | 0.57796  | THEGL chr4       | + | 57396775 | 57469673 | 1650 |
| ENSG000001 | 0        | 0.343138 | -0.41864 | 0.81278  | NA       | RP11-378A chr8   | - | 2447076  | 2480453  | 1705 |
| ENSG000001 | 0        | 4.066699 | -3.547   | 0.015001 | 0.030392 | RP11-598F chr12  | - | 246577   | 258335   | 4913 |
| ENSG000001 | 3.153051 | 0        | 3.1578   | 0.038297 | 0.070624 | RP11-415C chr4   | + | 27219101 | 27283847 | 2802 |

|            |          |          |          |           |           |            |       |   |          |          |      |
|------------|----------|----------|----------|-----------|-----------|------------|-------|---|----------|----------|------|
| ENSG000001 | 20.07518 | 14.92418 | 0.41453  | 0.39545   | 0.49993   | SRD5A3-AS  | chr4  | - | 56230138 | 56262009 | 1617 |
| ENSG000001 | 3.184754 | 5.911895 | -0.81633 | 0.36201   | 0.46627   | ZNF564     | chr19 | - | 12636184 | 12662356 | 2935 |
| ENSG000001 | 3.455331 | 0.357707 | 2.5619   | 0.07861   | 0.13158   | CTD-2236F  | chr5  | - | 75902433 | 75904795 | 1588 |
| ENSG000001 | 4.741555 | 29.01003 | -2.561   | 2.16E-05  | 6.65E-05  | FER1L5     | chr2  | + | 97308474 | 97370624 | 6477 |
| ENSG000001 | 0.923144 | 1.903472 | -0.79725 | 0.58941   | 0.6847    | RP3-486L4  | chr6  | + | 88360648 | 88362932 | 562  |
| ENSG000001 | 0        | 3.411978 | -3.2688  | 0.029797  | 0.056423  | RP11-83M:  | chr5  | - | 66988640 | 66989028 | 389  |
| ENSG000001 | 0.342542 | 0        | 0.4146   | 0.81455   | NA        | CTC-430J1: | chr5  | + | 1.74E+08 | 1.74E+08 | 558  |
| ENSG000001 | 0        | 0.640152 | -0.82869 | 0.63935   | NA        | RP11-469L  | chr3  | - | 1.33E+08 | 1.33E+08 | 384  |
| ENSG000001 | 0.342542 | 0        | 0.4146   | 0.81455   | NA        | RP11-332J  | chr5  | + | 6795993  | 6826841  | 552  |
| ENSG000001 | 0        | 1.309443 | -1.6539  | 0.35008   | NA        | RP11-83M:  | chr5  | - | 66928094 | 66942617 | 641  |
| ENSG000001 | 0        | 0.297015 | -0.41864 | 0.81278   | NA        | RP1-167G2  | chr5  | + | 16428645 | 16432545 | 458  |
| ENSG000001 | 1.265686 | 0.686276 | 0.62291  | 0.7066    | 0.7819    | AC008697.  | chr5  | + | 1.59E+08 | 1.59E+08 | 1580 |
| ENSG000001 | 6.027779 | 0.357707 | 3.4081   | 0.008977  | 0.019032  | CTD-2127F  | chr5  | - | 38736157 | 38845931 | 837  |
| ENSG000001 | 1.939605 | 1.012429 | 0.78452  | 0.56698   | 0.6646    | RP11-673E  | chr4  | - | 1.45E+08 | 1.45E+08 | 540  |
| ENSG000001 | 0.36308  | 0        | 0.4146   | 0.81455   | NA        | RP11-217E  | chr4  | - | 1.88E+08 | 1.88E+08 | 474  |
| ENSG000001 | 30.80165 | 0        | 6.5409   | 9.40E-09  | 4.00E-08  | RP11-60A8  | chr5  | + | 72509774 | 72590761 | 941  |
| ENSG000001 | 0.342542 | 0        | 0.4146   | 0.81455   | NA        | RP11-254I: | chr5  | - | 95549050 | 95550779 | 652  |
| ENSG000001 | 8.403243 | 8.968582 | -0.09753 | 0.88848   | 0.92227   | ECSCR      | chr5  | - | 1.39E+08 | 1.39E+08 | 450  |
| ENSG000001 | 1.971308 | 3.2299   | -0.64691 | 0.55093   | 0.65064   | RP11-415I: | chr12 | - | 64017568 | 64189498 | 275  |
| ENSG000001 | 5.113194 | 1.652581 | 1.4809   | 0.15865   | 0.23805   | RP11-466C  | chr4  | + | 89448311 | 89449321 | 657  |
| ENSG000001 | 0.36308  | 0        | 0.4146   | 0.81455   | NA        | CTD-2278B  | chr5  | - | 96672562 | 96672744 | 183  |
| ENSG000001 | 1.660469 | 0        | 1.9303   | 0.27163   | NA        | AC104650.  | chr4  | + | 8242571  | 8243530  | 514  |
| ENSG000001 | 1.08924  | 5.011988 | -1.9039  | 0.14278   | 0.21752   | RP11-1286  | chr4  | + | 9080749  | 9143334  | 933  |
| ENSG000001 | 0.290301 | 0.297015 | -0.00202 | 0.99909   | NA        | MRPS17     | chr7  | + | 55954970 | 56022932 | 1732 |
| ENSG000001 | 0.290301 | 0        | 0.4146   | 0.81455   | NA        | CTD-2206C  | chr5  | + | 31923473 | 31923638 | 166  |
| ENSG000001 | 0.995923 | 0        | 1.4959   | 0.39264   | NA        | SCARNA22   | chr4  | + | 1976363  | 1976487  | 125  |
| ENSG000001 | 0.923144 | 3.38284  | -1.5494  | 0.21715   | 0.3085    | EAF1-AS1   | chr3  | - | 15477678 | 15485576 | 950  |
| ENSG000001 | 0.653381 | 0        | 0.82678  | 0.64037   | NA        | RP11-346J  | chr5  | + | 99737145 | 99744603 | 563  |
| ENSG000001 | 1619.874 | 9193.068 | -2.5026  | 1.94E-146 | 2.13E-144 | RP11-20D1  | chr12 | + | 8940853  | 8948385  | 1972 |
| ENSG000001 | 0.36308  | 2.232041 | -2.0241  | 0.18269   | 0.26759   | CTC-428G2  | chr5  | + | 1.15E+08 | 1.15E+08 | 370  |
| ENSG000001 | 0.290301 | 0        | 0.4146   | 0.81455   | NA        | CTD-3179P  | chr5  | + | 1.17E+08 | 1.18E+08 | 807  |
| ENSG000001 | 0.342542 | 0        | 0.4146   | 0.81455   | NA        | HSD3BP3    | chr1  | + | 1.2E+08  | 1.2E+08  | 994  |
| ENSG000001 | 0        | 1.294874 | -1.8547  | 0.27869   | NA        | RP11-264E  | chr4  | - | 9585566  | 9585755  | 190  |
| ENSG000001 | 0.580602 | 0        | 0.8036   | 0.6494    | NA        | CTD-2199C  | chr5  | + | 10137250 | 10138477 | 943  |
| ENSG000001 | 0        | 0.297015 | -0.41864 | 0.81278   | NA        | CTD-2029E  | chr5  | + | 3178209  | 3181346  | 389  |
| ENSG000001 | 0.290301 | 0.594029 | -0.38058 | 0.83094   | NA        | RP11-269F  | chr4  | - | 1.13E+08 | 1.13E+08 | 583  |
| ENSG000001 | 4.947913 | 2.529055 | 0.86316  | 0.37783   | 0.48195   | RP11-311C  | chr4  | + | 1.07E+08 | 1.07E+08 | 744  |
| ENSG000001 | 6.494527 | 2.786395 | 1.1433   | 0.25373   | 0.35073   | CTD-2201I: | chr5  | - | 79348197 | 79379477 | 2705 |
| ENSG000001 | 0.342542 | 0.343138 | -0.00208 | 0.99906   | NA        | PGBD4P3    | chr5  | + | 1.48E+08 | 1.48E+08 | 581  |
| ENSG000001 | 10.58091 | 5.407697 | 0.9407   | 0.17745   | 0.26111   | VCAN-AS1   | chr5  | - | 82827171 | 82877139 | 453  |
| ENSG000001 | 0.923144 | 0        | 1.223    | 0.49292   | NA        | CTD-2325B  | chr4  | - | 1.25E+08 | 1.25E+08 | 430  |
| ENSG000001 | 2.718006 | 3.916176 | -0.50371 | 0.61398   | 0.70597   | AC011330.  | chr15 | - | 43955852 | 43976537 | 3235 |
| ENSG000001 | 0        | 0.951736 | -1.2555  | 0.48145   | NA        | AC020947.  | chr19 | + | 11696061 | 11697950 | 976  |
| ENSG000001 | 8.268851 | 27.028   | -1.6773  | 0.000984  | 0.002445  | RP11-77P1  | chr3  | + | 1.3E+08  | 1.3E+08  | 1608 |
| ENSG000001 | 0.580602 | 0        | 0.8036   | 0.6494    | NA        | RP11-212F  | chr8  | - | 10194292 | 10195187 | 575  |
| ENSG000001 | 0.72616  | 0.343138 | 0.52026  | 0.77047   | NA        | RP11-1101  | chr5  | + | 1.77E+08 | 1.77E+08 | 431  |
| ENSG000001 | 0.943682 | 0.343138 | 0.89828  | 0.6031    | NA        | CTD-2653N  | chr5  | + | 36885308 | 36886599 | 1292 |
| ENSG000001 | 7.31319  | 6.529357 | 0.17792  | 0.83254   | 0.88204   | AC145676.  | chr7  | - | 227554   | 229557   | 2004 |
| ENSG000001 | 49.11882 | 68.97294 | -0.48523 | 0.069617  | 0.11859   | HS3ST5     | chr6  | - | 1.14E+08 | 1.15E+08 | 3901 |
| ENSG000001 | 20.86296 | 29.84683 | -0.51964 | 0.25187   | 0.34866   | EEF1A1P19  | chr5  | - | 43495175 | 43496556 | 1382 |
| ENSG000001 | 0        | 0.594029 | -0.81444 | 0.64499   | NA        | CTD-2503C  | chr5  | - | 74213551 | 74319753 | 846  |
| ENSG000001 | 0        | 0.357707 | -0.41864 | 0.81278   | NA        | SNX5P1     | chr4  | + | 77265703 | 77266743 | 1041 |
| ENSG000001 | 102.3302 | 233.7082 | -1.1891  | 1.15E-09  | 5.28E-09  | PVT1       | chr8  | + | 1.29E+08 | 1.29E+08 | 1699 |
| ENSG000001 | 0        | 0.357707 | -0.41864 | 0.81278   | NA        | MTRNR2L5   | chr10 | + | 57358750 | 57360488 | 1739 |
| ENSG000001 | 13.41196 | 26.93496 | -0.97905 | 0.066296  | 0.11374   | RP11-177C  | chr4  | + | 37869913 | 37871599 | 1058 |
| ENSG000001 | 1.048164 | 0        | 1.348    | 0.44949   | NA        | RP11-39K2  | chr9  | - | 5131979  | 5164251  | 443  |
| ENSG000001 | 0.342542 | 0        | 0.4146   | 0.81455   | NA        | RP11-115J: | chr11 | + | 28724162 | 29085368 | 806  |
| ENSG000001 | 6.701698 | 5.317866 | 0.31194  | 0.68364   | 0.76376   | RP11-63E5  | chr8  | - | 255306   | 281026   | 880  |
| ENSG000001 | 0        | 0.715414 | -0.84936 | 0.6309    | NA        | RP11-481C  | chr17 | + | 49119885 | 49162832 | 332  |
| ENSG000001 | 0        | 0.997859 | -1.5018  | 0.39072   | NA        | RP11-51M:  | chr4  | - | 1.75E+08 | 1.75E+08 | 366  |
| ENSG000001 | 0        | 0.357707 | -0.41864 | 0.81278   | NA        | CTC-563A5  | chr5  | - | 1.79E+08 | 1.79E+08 | 676  |
| ENSG000001 | 0.36308  | 0        | 0.4146   | 0.81455   | NA        | RP11-460F  | chr4  | - | 1.82E+08 | 1.82E+08 | 529  |
| ENSG000001 | 0.36308  | 0.297015 | -0.00205 | 0.99908   | NA        | ALG1L11P   | chr8  | + | 12036206 | 12040228 | 450  |
| ENSG000001 | 0        | 1.66715  | -1.9695  | 0.25993   | NA        | RP11-434C  | chr5  | - | 67096568 | 67185924 | 566  |
| ENSG000001 | 0        | 12.14753 | -5.2232  | 2.31E-05  | 7.09E-05  | RP11-586C  | chr4  | + | 6202460  | 6240044  | 2547 |

|            |          |          |          |          |          |                 |   |          |          |      |
|------------|----------|----------|----------|----------|----------|-----------------|---|----------|----------|------|
| ENSG000001 | 35.17589 | 26.83223 | 0.37991  | 0.36214  | 0.46634  | CTD-2541N chr8  | - | 6475996  | 6565730  | 2147 |
| ENSG000001 | 0.36308  | 2.07098  | -1.8758  | 0.22851  | 0.32162  | RP5-1029K chr17 | - | 47583019 | 47651426 | 1221 |
| ENSG000001 | 0        | 0.594029 | -0.81444 | 0.64499  | NA       | CTD-2589F chr5  | - | 767512   | 769046   | 225  |
| ENSG000001 | 0.995923 | 0.997859 | -0.00349 | 0.99806  | 0.99911  | RP4-671G1 chr1  | - | 1.13E+08 | 1.13E+08 | 646  |
| ENSG000001 | 777.0676 | 683.3904 | 0.18533  | 0.18704  | 0.273    | PDCD6 chr5      | + | 271736   | 353971   | 3763 |
| ENSG000001 | 0.975385 | 1.531196 | -0.50931 | 0.73826  | 0.80696  | CTD-2280E chr5  | - | 1.22E+08 | 1.22E+08 | 563  |
| ENSG000001 | 6.068042 | 0        | 4.1805   | 0.002118 | 0.004992 | LINC00536 chr8  | - | 1.17E+08 | 1.17E+08 | 2692 |
| ENSG000001 | 0        | 0.357707 | -0.41864 | 0.81278  | NA       | FABP5P6 chr5    | - | 1.19E+08 | 1.19E+08 | 409  |
| ENSG000001 | 0.36308  | 0        | 0.4146   | 0.81455  | NA       | CTC-329H1 chr5  | + | 1.08E+08 | 1.08E+08 | 948  |
| ENSG000001 | 0        | 0.357707 | -0.41864 | 0.81278  | NA       | XXbac-B44 chr22 | - | 20186252 | 20192441 | 2228 |
| ENSG000001 | 0        | 0.297015 | -0.41864 | 0.81278  | NA       | RP11-495K chr12 | + | 1.32E+08 | 1.32E+08 | 1561 |
| ENSG000001 | 0.290301 | 0        | 0.4146   | 0.81455  | NA       | UQCRBP3 chr5    | - | 14874509 | 14874820 | 312  |
| ENSG000001 | 3.04001  | 5.215082 | -0.7016  | 0.4992   | 0.60295  | GOLGA8K chr15   | - | 32684983 | 32695396 | 1894 |
| ENSG000001 | 32.35503 | 34.87896 | -0.10686 | 0.7617   | 0.82702  | RAC1P2 chr4     | - | 46725793 | 46726625 | 833  |
| ENSG000001 | 0.685084 | 0        | 0.85004  | 0.63064  | NA       | RP11-454P chr5  | + | 17684693 | 17955966 | 781  |
| ENSG000001 | 1.317927 | 0        | 1.6383   | 0.35541  | NA       | AC142293 chr4   | - | 75418301 | 75514664 | 732  |
| ENSG000001 | 6.5647   | 2.56061  | 1.2201   | 0.25229  | 0.34913  | XBP1P1 chr5     | + | 1.12E+08 | 1.12E+08 | 652  |
| ENSG000001 | 2.105701 | 0        | 2.2286   | 0.1988   | 0.28717  | RP11-6E9 chr4   | + | 1.71E+08 | 1.71E+08 | 554  |
| ENSG000001 | 0.632843 | 0.686276 | -0.05496 | 0.97464  | NA       | CCDC79 chr16    | - | 66788879 | 66835523 | 2541 |
| ENSG000001 | 0.580602 | 0.715414 | -0.13184 | 0.94086  | NA       | CDC42P4 chr4    | + | 1.1E+08  | 1.1E+08  | 563  |
| ENSG000001 | 0.290301 | 0.98329  | -0.92952 | 0.59103  | NA       | CHCHD2P7 chr4   | - | 88707072 | 88707523 | 452  |
| ENSG000001 | 0.632843 | 0        | 0.81931  | 0.64303  | NA       | RP11-155G chr5  | - | 96785062 | 96785445 | 384  |
| ENSG000001 | 0.290301 | 1.995719 | -1.903   | 0.2133   | 0.3039   | TRGV7 chr7      | - | 38374642 | 38375115 | 353  |
| ENSG000001 | 1.628766 | 0        | 2.1781   | 0.19145  | NA       | YWHAQP6 chr3    | - | 1.41E+08 | 1.41E+08 | 304  |
| ENSG000001 | 0        | 0.343138 | -0.41864 | 0.81278  | NA       | RP11-669N chr4  | + | 14166079 | 14244437 | 499  |
| ENSG000001 | 252.3061 | 65.87677 | 1.916    | 7.75E-11 | 3.87E-10 | TMEM158 chr7    | - | 45265958 | 45267770 | 1813 |
| ENSG000001 | 0        | 2.431104 | -2.4718  | 0.14705  | 0.22313  | RP11-352E chr4  | + | 12640710 | 12642633 | 1577 |
| ENSG000001 | 7.915144 | 0.715414 | 3.1028   | 0.006764 | 0.014679 | RP11-359P chr5  | + | 1.22E+08 | 1.22E+08 | 561  |
| ENSG000001 | 1.161205 | 0        | 1.2509   | 0.47995  | NA       | RP11-141E chr4  | - | 16974898 | 17075526 | 451  |
| ENSG000001 | 7.395342 | 2.558194 | 1.3942   | 0.15457  | 0.23292  | CTD-2201E chr5  | - | 9519965  | 9523290  | 543  |
| ENSG000001 | 0.36308  | 1.591889 | -1.5911  | 0.31534  | 0.41792  | RP11-124N chr3  | + | 1.26E+08 | 1.26E+08 | 444  |
| ENSG000001 | 5.487439 | 2.788811 | 0.91439  | 0.37526  | 0.47947  | CTC-339F2 chr5  | - | 1.16E+08 | 1.16E+08 | 206  |
| ENSG000001 | 0        | 0.297015 | -0.41864 | 0.81278  | NA       | SNX18P23 chr4   | - | 49235306 | 49235982 | 677  |
| ENSG000001 | 1.503747 | 0        | 1.8221   | 0.30126  | NA       | RP11-484L chr5  | + | 45574692 | 45576714 | 2023 |
| ENSG000001 | 0        | 1.684135 | -2.1921  | 0.19067  | NA       | RP11-811I chr5  | + | 58313    | 59030    | 718  |
| ENSG000001 | 3.994857 | 4.167067 | -0.0728  | 0.93918  | 0.96001  | RP11-563E chr4  | + | 1.64E+08 | 1.64E+08 | 777  |
| ENSG000001 | 0.995923 | 1.370136 | -0.35234 | 0.80971  | 0.86587  | RP11-584P chr4  | + | 68311985 | 68312292 | 308  |
| ENSG000001 | 1.887365 | 3.870053 | -0.9034  | 0.42725  | 0.53263  | RP11-114N chr8  | - | 59337147 | 59339244 | 1779 |
| ENSG000001 | 2.177666 | 1.387121 | 0.54357  | 0.70605  | 0.78157  | SLC7A11-A chr4  | + | 1.39E+08 | 1.39E+08 | 4654 |
| ENSG000001 | 0        | 0.357707 | -0.41864 | 0.81278  | NA       | RP11-180C chr4  | - | 28363901 | 28404486 | 880  |
| ENSG000001 | 1.774324 | 1.698704 | 0.035399 | 0.97873  | 0.98819  | RP11-17E2 chr4  | + | 21950638 | 22331953 | 1874 |
| ENSG000001 | 1.794048 | 0        | 2.0507   | 0.24053  | NA       | CTD-2003C chr11 | + | 10906432 | 10920869 | 557  |
| ENSG000001 | 0        | 0.343138 | -0.41864 | 0.81278  | NA       | RP11-161C chr4  | - | 1.75E+08 | 1.75E+08 | 777  |
| ENSG000001 | 0.632843 | 1.623443 | -1.0053  | 0.51406  | 0.61709  | CBX3P3 chr5     | - | 1.12E+08 | 1.12E+08 | 532  |
| ENSG000001 | 0        | 25.9953  | -6.2989  | 5.41E-08 | 2.16E-07 | RP11-148B chr4  | - | 1.14E+08 | 1.14E+08 | 740  |
| ENSG000001 | 0        | 4.643743 | -3.4392  | 0.030646 | 0.057797 | RP11-348J chr5  | + | 91378414 | 91815133 | 2957 |
| ENSG000001 | 1.233984 | 0.297015 | 1.1901   | 0.48541  | NA       | MTND4P9 chr4    | - | 25719704 | 25721367 | 1346 |
| ENSG000001 | 0        | 9.243779 | -4.7449  | 0.000333 | 0.000887 | CTD-2195N chr5  | + | 6582249  | 6588612  | 3036 |
| ENSG000001 | 0.342542 | 0        | 0.4146   | 0.81455  | NA       | RP11-576N chr4  | - | 84154665 | 84168366 | 394  |
| ENSG000001 | 0.36308  | 0        | 0.4146   | 0.81455  | NA       | RP11-332J chr5  | + | 6868672  | 6886900  | 553  |
| ENSG000001 | 0        | 1.935026 | -2.4284  | 0.13734  | 0.21062  | RP11-541P chr5  | - | 1.62E+08 | 1.63E+08 | 630  |
| ENSG000001 | 1.233984 | 0        | 1.5686   | 0.37707  | NA       | RP11-123C chr4  | + | 28437071 | 28601897 | 712  |
| ENSG000001 | 24.57607 | 63.02714 | -1.3546  | 0.00015  | 0.000418 | YJEFN3 chr19    | + | 19639704 | 19648393 | 2769 |
| ENSG000001 | 1.741807 | 5.941033 | -1.4939  | 0.20441  | 0.29355  | RP11-576C chr9  | - | 1.15E+08 | 1.15E+08 | 260  |
| ENSG000001 | 0.290301 | 1.669566 | -1.5285  | 0.3621   | 0.46632  | CTB-131B5 chr5  | + | 1.4E+08  | 1.4E+08  | 3025 |
| ENSG000001 | 0        | 2.468363 | -2.5197  | 0.13799  | 0.21141  | CTD-2060C chr5  | + | 74094819 | 74095925 | 1107 |
| ENSG000001 | 2.987769 | 0        | 3.1007   | 0.040889 | 0.074766 | CTC-529P8 chr5  | + | 1.48E+08 | 1.48E+08 | 3091 |
| ENSG000001 | 3.350849 | 1.669566 | 0.87091  | 0.46963  | 0.57439  | RP11-677N chr11 | + | 1.25E+08 | 1.25E+08 | 1493 |
| ENSG000001 | 1.068702 | 3.616746 | -1.5357  | 0.22686  | 0.3198   | RP11-584P chr4  | - | 68283023 | 68333969 | 1991 |
| ENSG000001 | 0.342542 | 0        | 0.4146   | 0.81455  | NA       | CTB-88F18 chr5  | - | 1.27E+08 | 1.27E+08 | 1732 |
| ENSG000001 | 7.915958 | 3.022717 | 1.2851   | 0.1631   | 0.24359  | CTD-2116N chr5  | - | 64782271 | 64782875 | 365  |
| ENSG000001 | 0        | 0.297015 | -0.41864 | 0.81278  | NA       | RP13-401N chr20 | - | 25816621 | 25817468 | 222  |
| ENSG000001 | 86.611   | 6.131232 | 3.7363   | 9.43E-18 | 7.16E-17 | DNAH100S chr12  | - | 1.24E+08 | 1.24E+08 | 5040 |
| ENSG000001 | 1.306762 | 0        | 1.6479   | 0.35189  | NA       | RP4-639F2 chr1  | - | 95449106 | 95492759 | 159  |
| ENSG000001 | 0.72616  | 0.715414 | 0.009201 | 0.99586  | NA       | RP11-22A3 chr4  | - | 12949198 | 12950294 | 316  |

|            |          |          |          |          |          |                 |   |          |          |      |
|------------|----------|----------|----------|----------|----------|-----------------|---|----------|----------|------|
| ENSG000001 | 0.342542 | 1.577319 | -1.4728  | 0.37548  | 0.47961  | RP11-1252 chr5  | + | 1.77E+08 | 1.77E+08 | 547  |
| ENSG000001 | 8.910254 | 79.04124 | -3.0725  | 1.06E-12 | 6.01E-12 | RP11-380C chr4  | - | 1.12E+08 | 1.12E+08 | 493  |
| ENSG000001 | 0        | 0.297015 | -0.41864 | 0.81278  | NA       | CTD-3074C chr11 | - | 66326337 | 66327855 | 580  |
| ENSG000001 | 1.161205 | 0.297015 | 0.99731  | 0.57355  | NA       | ANKRD33B chr5   | - | 10627372 | 10628337 | 522  |
| ENSG000001 | 6.815553 | 2.740271 | 1.1927   | 0.26009  | 0.35805  | CACNA1G-7 chr17 | - | 48633568 | 48639469 | 1433 |
| ENSG000001 | 0.36308  | 0.357707 | -0.00212 | 0.99905  | NA       | AC107982. chr17 | + | 18739020 | 18745677 | 1300 |
| ENSG000001 | 0        | 0.357707 | -0.41864 | 0.81278  | NA       | CTB-95B16 chr5  | + | 1.63E+08 | 1.63E+08 | 207  |
| ENSG000001 | 10.52948 | 10.30475 | 0.019703 | 0.97587  | 0.9865   | RP11-417F chr2  | - | 46795395 | 46807377 | 1519 |
| ENSG000001 | 12.7175  | 90.2348  | -2.7928  | 1.18E-14 | 7.58E-14 | PCDHA10 chr5    | + | 1.4E+08  | 1.4E+08  | 5254 |
| ENSG000001 | 0        | 0.700845 | -0.87835 | 0.62047  | NA       | RP11-707A chr4  | - | 65779999 | 65870218 | 4079 |
| ENSG000001 | 0.342542 | 0.891044 | -0.73092 | 0.68123  | NA       | RP11-265F chr3  | - | 1.31E+08 | 1.31E+08 | 671  |
| ENSG000001 | 8.867386 | 4.799099 | 0.85642  | 0.31684  | 0.41951  | RP11-616K chr15 | + | 44646889 | 44647890 | 1002 |
| ENSG000001 | 21.72368 | 72.75075 | -1.731   | 5.98E-08 | 2.38E-07 | RP11-130F chr4  | + | 1.78E+08 | 1.79E+08 | 2161 |
| ENSG000001 | 10.44733 | 6.892769 | 0.56513  | 0.39509  | 0.49958  | RP11-359B chr12 | - | 1084464  | 1099207  | 2042 |
| ENSG000001 | 4.460627 | 0.343138 | 2.9181   | 0.037923 | 0.069998 | HOXC-AS2 chr12  | - | 54387594 | 54390569 | 2090 |
| ENSG000001 | 35.58005 | 38.05387 | -0.09584 | 0.78205  | 0.84377  | RP11-848C chr5  | + | 68927790 | 68932312 | 4437 |
| ENSG000001 | 0        | 0.654722 | -0.83442 | 0.63731  | NA       | CTD-2517C chr5  | - | 34860888 | 34861611 | 425  |
| ENSG000001 | 0        | 0.297015 | -0.41864 | 0.81278  | NA       | KRT8P31 chr5    | - | 60039390 | 60040797 | 1408 |
| ENSG000001 | 0        | 0.357707 | -0.41864 | 0.81278  | NA       | RP11-399F chr4  | + | 1.27E+08 | 1.27E+08 | 393  |
| ENSG000001 | 129.9607 | 29.45998 | 2.1179   | 1.40E-12 | 7.89E-12 | CTD-2353F chr5  | - | 36666316 | 36725297 | 681  |
| ENSG000001 | 0        | 0.594029 | -0.81444 | 0.64499  | NA       | CTC-498M1 chr5  | - | 87705664 | 87794514 | 761  |
| ENSG000001 | 0        | 2.024857 | -2.2291  | 0.19662  | 0.28458  | RP11-381K chr5  | - | 1.37E+08 | 1.37E+08 | 1148 |
| ENSG000001 | 0.342542 | 0        | 0.4146   | 0.81455  | NA       | CSNK1A1P chr5   | + | 98169086 | 98169415 | 330  |
| ENSG000001 | 0.923144 | 2.514486 | -1.1351  | 0.42754  | 0.53291  | RP11-476C chr4  | - | 88140676 | 88161466 | 1924 |
| ENSG000001 | 1.027626 | 0.343138 | 0.83995  | 0.63621  | NA       | CTC-321K1 chr5  | + | 1.35E+08 | 1.35E+08 | 634  |
| ENSG000001 | 0.72616  | 1.309443 | -0.61368 | 0.71013  | 0.78467  | RASA2-IT1 chr3  | + | 1.41E+08 | 1.41E+08 | 612  |
| ENSG000001 | 0        | 0.297015 | -0.41864 | 0.81278  | NA       | MYLK-AS2 chr3   | + | 1.23E+08 | 1.23E+08 | 754  |
| ENSG000001 | 0.290301 | 0        | 0.4146   | 0.81455  | NA       | RP11-138A chr4  | + | 1.6E+08  | 1.6E+08  | 565  |
| ENSG000001 | 22.18765 | 48.73089 | -1.1238  | 0.006548 | 0.014248 | EEF1A1P13 chr5  | - | 14652047 | 14653438 | 1389 |
| ENSG000001 | 0.342542 | 0        | 0.4146   | 0.81455  | NA       | RCC2P8 chr4     | - | 1.1E+08  | 1.1E+08  | 1035 |
| ENSG000001 | 0.36308  | 0        | 0.4146   | 0.81455  | NA       | RP11-292B chr4  | + | 28998146 | 29016216 | 687  |
| ENSG000001 | 1.286224 | 0        | 1.8436   | 0.2818   | NA       | RP11-300A chr4  | + | 58020743 | 58022618 | 560  |
| ENSG000001 | 1.068702 | 3.261455 | -1.4048  | 0.27448  | 0.37437  | HMGN1P1 chr5    | - | 1.15E+08 | 1.15E+08 | 295  |
| ENSG000001 | 1.016461 | 0        | 1.3167   | 0.46021  | NA       | RP11-143A chr5  | + | 8839844  | 8881637  | 2702 |
| ENSG000001 | 0.342542 | 1.340997 | -1.3704  | 0.39575  | NA       | RP11-436F chr5  | + | 1.24E+08 | 1.24E+08 | 563  |
| ENSG000001 | 50.43854 | 27.5839  | 0.86334  | 0.05126  | 0.090893 | RP11-143E chr12 | - | 1.31E+08 | 1.31E+08 | 4159 |
| ENSG000001 | 0.290301 | 0        | 0.4146   | 0.81455  | NA       | RP11-585F chr8  | - | 142091   | 150563   | 380  |
| ENSG000001 | 0        | 0.640152 | -0.82869 | 0.63935  | NA       | RP13-488F chr4  | - | 78785662 | 78785958 | 297  |
| ENSG000001 | 0        | 0.594029 | -0.81444 | 0.64499  | NA       | CIR1P2 chr4     | - | 1.16E+08 | 1.16E+08 | 1342 |
| ENSG000001 | 11.773   | 9.268013 | 0.33589  | 0.66559  | 0.7487   | RP11-692C chr4  | + | 74124926 | 74183670 | 685  |
| ENSG000001 | 0        | 0.98329  | -1.2878  | 0.47019  | NA       | KRT8P32 chr5    | - | 97727774 | 97729234 | 1461 |
| ENSG000001 | 1.919068 | 2.543625 | -0.35952 | 0.75671  | 0.82315  | CTC-338M1 chr5  | + | 1.81E+08 | 1.81E+08 | 392  |
| ENSG000001 | 1.048164 | 2.24661  | -0.94513 | 0.48382  | 0.58794  | RP11-855C chr11 | + | 61355966 | 61375022 | 2349 |
| ENSG000001 | 0.943682 | 2.840639 | -1.3144  | 0.32068  | 0.42351  | CTD-2024P chr5  | - | 34656517 | 34657355 | 407  |
| ENSG000001 | 2.770247 | 0.357707 | 2.2736   | 0.12716  | 0.1981   | CTD-2154I chr5  | - | 95036953 | 95067999 | 809  |
| ENSG000001 | 30.07468 | 8.599595 | 1.7416   | 0.000918 | 0.00229  | RP11-9G1 chr4   | - | 1.34E+08 | 1.34E+08 | 2820 |
| ENSG000001 | 0        | 0.654722 | -0.83442 | 0.63731  | NA       | RP11-30P2 chr4  | + | 63157280 | 63158055 | 353  |
| ENSG000001 | 0        | 0.343138 | -0.41864 | 0.81278  | NA       | CTD-2350J chr5  | - | 15602298 | 15607457 | 362  |
| ENSG000001 | 565.5481 | 484.1219 | 0.22208  | 0.35573  | 0.46     | PKD1P6 chr16    | - | 15219099 | 15248421 | 4769 |
| ENSG000001 | 0.632843 | 1.577319 | -0.98107 | 0.52471  | 0.62681  | CTC-431G1 chr5  | - | 79070171 | 79112013 | 460  |
| ENSG000001 | 0.653381 | 0        | 0.82678  | 0.64037  | NA       | RP11-460I chr4  | + | 1021466  | 1022760  | 272  |
| ENSG000001 | 1.027626 | 0        | 1.1491   | 0.51623  | NA       | RP11-325L chr5  | + | 1.37E+08 | 1.37E+08 | 646  |
| ENSG000001 | 0.290301 | 0.343138 | -0.00202 | 0.99909  | NA       | AC007050. chr22 | - | 20941783 | 20946505 | 1123 |
| ENSG000001 | 0        | 3.757532 | -3.3092  | 0.031863 | 0.059871 | RP11-789C chr4  | + | 1.71E+08 | 1.71E+08 | 469  |
| ENSG000001 | 1.286224 | 4.752975 | -1.664   | 0.12462  | 0.1948   | RP11-122A chr8  | + | 1.1E+08  | 1.1E+08  | 1643 |
| ENSG000001 | 1.306762 | 0.686276 | 0.64809  | 0.69497  | 0.77232  | PSMC1P5 chr5    | + | 1.07E+08 | 1.07E+08 | 177  |
| ENSG000001 | 0.290301 | 0        | 0.4146   | 0.81455  | NA       | CTB-114C7 chr5  | - | 1.7E+08  | 1.7E+08  | 2182 |
| ENSG000001 | 6.785642 | 0        | 4.3218   | 0.001344 | 0.003268 | RP11-305C chr12 | + | 65675437 | 65680508 | 3457 |
| ENSG000001 | 0.342542 | 0.715414 | -0.51272 | 0.77372  | NA       | RP5-875H1 chr17 | - | 48178068 | 48179284 | 430  |
| ENSG000001 | 0        | 0.343138 | -0.41864 | 0.81278  | NA       | CTB-1121.1 chr5 | + | 1.36E+08 | 1.36E+08 | 564  |
| ENSG000001 | 0        | 1.309443 | -1.6539  | 0.35008  | NA       | RP11-94C2 chr17 | - | 48614655 | 48616115 | 717  |
| ENSG000001 | 4.192656 | 1.326428 | 1.3517   | 0.32235  | 0.42525  | CTC-820M chr8   | - | 1.22E+08 | 1.22E+08 | 1814 |
| ENSG000001 | 10.13649 | 3.010564 | 1.6413   | 0.056672 | 0.099294 | RP11-434I chr8  | - | 74209946 | 74268696 | 3261 |
| ENSG000001 | 53.00382 | 5.424682 | 3.2205   | 1.70E-08 | 7.08E-08 | RP11-356J chr11 | + | 1.12E+08 | 1.12E+08 | 2749 |
| ENSG000001 | 6.535603 | 19.51865 | -1.5248  | 0.022427 | 0.043773 | KIAA1456 chr8   | + | 12803151 | 12889012 | 9587 |

|            |          |          |          |          |          |                 |   |          |          |      |
|------------|----------|----------|----------|----------|----------|-----------------|---|----------|----------|------|
| ENSG000001 | 0        | 0.357707 | -0.41864 | 0.81278  | NA       | RP5-1029K chr17 | - | 47622209 | 47655324 | 577  |
| ENSG000001 | 78.2018  | 174.0467 | -1.1518  | 3.42E-06 | 1.16E-05 | ZNF718 chr4     | + | 124386   | 157779   | 3214 |
| ENSG000001 | 295.8365 | 423.6665 | -0.51697 | 0.000158 | 0.00044  | SMIM20 chr4     | + | 25863452 | 25931435 | 935  |
| ENSG000001 | 20.43566 | 3.616746 | 2.3998   | 0.000392 | 0.001033 | CTA-963H5 chr22 | - | 31049864 | 31050801 | 612  |
| ENSG000001 | 29.63107 | 38.69073 | -0.38962 | 0.3098   | 0.41166  | CTD-2269F chr5  | + | 83680245 | 83786583 | 792  |
| ENSG000001 | 0.580602 | 0.937167 | -0.42674 | 0.8018   | NA       | RP11-478C chr4  | - | 336610   | 336751   | 142  |
| ENSG000001 | 0.342542 | 0        | 0.4146   | 0.81455  | NA       | CTB-51E13. chr4 | - | 1.24E+08 | 1.24E+08 | 170  |
| ENSG000001 | 0.342542 | 0.343138 | -0.00208 | 0.99906  | NA       | MRPL22P1 chr4   | - | 57186885 | 57187500 | 616  |
| ENSG000001 | 0        | 0.715414 | -0.84936 | 0.6309   | NA       | IGBP1P4 chr4    | - | 83322731 | 83323609 | 879  |
| ENSG000001 | 8.03935  | 5.271743 | 0.58952  | 0.42319  | 0.52855  | RP11-284N chr4  | - | 1.44E+08 | 1.44E+08 | 759  |
| ENSG000001 | 6.26584  | 4.646159 | 0.41117  | 0.59668  | 0.69101  | RP11-173N chr4  | + | 1.87E+08 | 1.87E+08 | 864  |
| ENSG000001 | 6.971462 | 20.01714 | -1.4925  | 0.010744 | 0.022432 | CTC-210G5 chr5  | - | 1.22E+08 | 1.22E+08 | 1424 |
| ENSG000001 | 0        | 0.686276 | -0.84936 | 0.6309   | NA       | CTC-422A1 chr5  | + | 78525727 | 78526411 | 359  |
| ENSG000001 | 3.475869 | 0        | 3.2363   | 0.034472 | 0.064269 | RP11-1E3.1 chr5 | + | 96840400 | 97006750 | 724  |
| ENSG000001 | 0        | 0.343138 | -0.41864 | 0.81278  | NA       | CTD-2272C chr5  | - | 23303674 | 23305252 | 1579 |
| ENSG000001 | 0        | 0.715414 | -0.84936 | 0.6309   | NA       | RP11-234K chr4  | + | 80413570 | 80497614 | 2080 |
| ENSG000001 | 22.09613 | 309.8589 | -3.7764  | 5.84E-29 | 7.14E-28 | RP11-46C2 chr5  | + | 27472399 | 27496508 | 1610 |
| ENSG000001 | 0        | 0.343138 | -0.41864 | 0.81278  | NA       | RP11-747F chr4  | - | 9053568  | 9053777  | 210  |
| ENSG000001 | 0        | 0.297015 | -0.41864 | 0.81278  | NA       | CTC-255N2 chr5  | - | 1.47E+08 | 1.47E+08 | 863  |
| ENSG000001 | 0        | 1.888903 | -2.3653  | 0.15293  | NA       | RP11-647P chr4  | + | 1.22E+08 | 1.22E+08 | 621  |
| ENSG000001 | 0        | 0.700845 | -0.87835 | 0.62047  | NA       | AC005740. chr5  | - | 1.41E+08 | 1.41E+08 | 419  |
| ENSG000001 | 0        | 1.355566 | -1.9006  | 0.26573  | NA       | RP11-466P chr5  | - | 75581367 | 75607287 | 756  |
| ENSG000001 | 0        | 0.594029 | -0.81444 | 0.64499  | NA       | RP11-731C chr4  | - | 1.52E+08 | 1.52E+08 | 163  |
| ENSG000001 | 1.027626 | 0        | 1.1491   | 0.51623  | NA       | AC008592. chr5  | + | 95197490 | 95210223 | 733  |
| ENSG000001 | 7.314004 | 6.116663 | 0.22889  | 0.75495  | 0.82164  | CTD-2213F chr14 | + | 31889492 | 31922089 | 1213 |
| ENSG000001 | 1.161205 | 787.8381 | -8.8762  | 7.84E-42 | 1.44E-40 | LINC00617 chr14 | + | 96342729 | 96391908 | 3197 |
| ENSG000001 | 0.36308  | 0.297015 | -0.00205 | 0.99908  | NA       | RP11-22A3 chr4  | - | 12860725 | 12866585 | 2694 |
| ENSG000001 | 1.027626 | 0        | 1.1491   | 0.51623  | NA       | RP11-119J chr5  | + | 1.35E+08 | 1.35E+08 | 377  |
| ENSG000001 | 0        | 1.355566 | -1.9006  | 0.26573  | NA       | UNC93B4 chr4    | - | 4145185  | 4152148  | 747  |
| ENSG000001 | 0.632843 | 0.297015 | 0.49183  | 0.78024  | NA       | CTD-2197I. chr5 | - | 1.08E+08 | 1.08E+08 | 398  |
| ENSG000001 | 5.435198 | 0        | 4.0127   | 0.003733 | 0.008471 | UBE2CP3 chr4    | + | 57938849 | 57939298 | 450  |
| ENSG000001 | 0        | 0.98329  | -1.2878  | 0.47019  | NA       | RP11-310P chr5  | + | 524820   | 526709   | 442  |
| ENSG000001 | 0        | 0.343138 | -0.41864 | 0.81278  | NA       | RP11-338F chr11 | + | 95215570 | 95230717 | 570  |
| ENSG000001 | 0        | 1.652581 | -2.1974  | 0.1871   | NA       | RP11-700N chr4  | + | 1.21E+08 | 1.21E+08 | 570  |
| ENSG000001 | 26.24771 | 24.38643 | 0.10517  | 0.80335  | 0.86089  | RP11-1391 chr11 | - | 856880   | 859795   | 2061 |
| ENSG000001 | 0.705622 | 0        | 0.8807   | 0.6196   | NA       | RP11-1057 chr8  | - | 1.3E+08  | 1.3E+08  | 1163 |
| ENSG000001 | 0        | 0.343138 | -0.41864 | 0.81278  | NA       | RP11-15B1 chr4  | - | 1.01E+08 | 1.01E+08 | 741  |
| ENSG000001 | 26.37452 | 22.42797 | 0.22448  | 0.62755  | 0.71748  | AC090587. chr11 | + | 3837982  | 3843130  | 2843 |
| ENSG000001 | 0.342542 | 0        | 0.4146   | 0.81455  | NA       | RP11-114F chr5  | + | 1.3E+08  | 1.3E+08  | 1912 |
| ENSG000001 | 1.286224 | 0        | 1.8436   | 0.2818   | NA       | RP13-539F chr4  | + | 1.46E+08 | 1.46E+08 | 2807 |
| ENSG000001 | 0        | 1.372552 | -1.3974  | 0.43145  | NA       | CTB-99A3.1 chr5 | + | 1.46E+08 | 1.46E+08 | 691  |
| ENSG000001 | 0        | 0.297015 | -0.41864 | 0.81278  | NA       | CTB-3M24. chr5  | + | 1.33E+08 | 1.33E+08 | 275  |
| ENSG000001 | 3.930638 | 2.436809 | 0.56429  | 0.67723  | 0.75838  | RP11-714C chr4  | + | 1.86E+08 | 1.86E+08 | 587  |
| ENSG000001 | 0.870904 | 1.698704 | -0.68674 | 0.64658  | 0.73297  | KLHL2P1 chr4    | + | 1.2E+08  | 1.2E+08  | 521  |
| ENSG000001 | 0.290301 | 1.012429 | -0.95336 | 0.58114  | NA       | CTC-461F2I chr5 | + | 16617334 | 16621385 | 704  |
| ENSG000001 | 0        | 0.700845 | -0.87835 | 0.62047  | NA       | CTD-2194C chr5  | - | 1856084  | 1856682  | 493  |
| ENSG000001 | 0        | 81.12363 | -7.8746  | 5.66E-13 | 3.27E-12 | AACSP1 chr5     | - | 1.78E+08 | 1.78E+08 | 2822 |
| ENSG000001 | 0        | 6.673433 | -4.3368  | 0.001115 | 0.002745 | RP11-83M. chr5  | - | 66995257 | 67198428 | 589  |
| ENSG000001 | 0.36308  | 0.343138 | -0.0021  | 0.99905  | NA       | RP11-484L chr5  | + | 45558021 | 45560088 | 2068 |
| ENSG000001 | 0.653381 | 0        | 0.82678  | 0.64037  | NA       | KIAA1210 chrX   | - | 1.18E+08 | 1.18E+08 | 7824 |
| ENSG000001 | 0.632843 | 1.713273 | -1.0898  | 0.4574   | 0.56257  | RP11-834C chr12 | - | 54478916 | 54519776 | 719  |
| ENSG000001 | 0        | 1.430828 | -1.4414  | 0.41759  | NA       | RP11-13L2 chr3  | - | 1.4E+08  | 1.4E+08  | 2693 |
| ENSG000001 | 0        | 0.343138 | -0.41864 | 0.81278  | NA       | RP11-622A chr4  | + | 74374520 | 74399845 | 763  |
| ENSG000001 | 0.290301 | 0        | 0.4146   | 0.81455  | NA       | FGD5P1 chr3     | + | 13974553 | 13978989 | 3377 |
| ENSG000001 | 0.632843 | 5.972588 | -2.7832  | 0.017438 | 0.034866 | AC128709. chr3  | - | 1.97E+08 | 1.97E+08 | 1715 |
| ENSG000001 | 0.685084 | 0        | 0.85004  | 0.63064  | NA       | CCT5P1 chr5     | + | 1.15E+08 | 1.15E+08 | 1618 |
| ENSG000001 | 0        | 0.343138 | -0.41864 | 0.81278  | NA       | CTD-2081C chr5  | - | 53072474 | 53115516 | 1003 |
| ENSG000001 | 0        | 8.421549 | -4.5777  | 0.000744 | 0.001883 | RP11-1902 chr5  | + | 16180347 | 16185694 | 2066 |
| ENSG000001 | 10.11416 | 0.686276 | 3.4315   | 0.002488 | 0.005802 | HOXC-AS1 chr12  | - | 54392806 | 54393794 | 548  |
| ENSG000001 | 0.72616  | 0        | 0.85004  | 0.63064  | NA       | RP11-648N chr5  | + | 37377151 | 37378073 | 323  |
| ENSG000001 | 13.13363 | 10.18578 | 0.34385  | 0.56263  | 0.66087  | RP11-631N chr5  | + | 60670939 | 60671682 | 744  |
| ENSG000001 | 1.95077  | 4.20507  | -0.91452 | 0.48535  | 0.58937  | GMPSP1 chr4     | + | 8176148  | 8176726  | 579  |
| ENSG000001 | 0        | 0.951736 | -1.2555  | 0.48145  | NA       | TRIM36-IT1 chr5 | - | 1.14E+08 | 1.14E+08 | 881  |
| ENSG000001 | 0.995923 | 0.951736 | 0.030362 | 0.98382  | 0.99083  | DUTP7 chr4      | - | 52731216 | 52731701 | 486  |
| ENSG000001 | 4.00423  | 0        | 3.5416   | 0.014566 | 0.029576 | WBP1LP2 chr7    | + | 1.07E+08 | 1.07E+08 | 946  |

|            |          |          |          |          |          |                  |   |          |          |      |
|------------|----------|----------|----------|----------|----------|------------------|---|----------|----------|------|
| ENSG000001 | 0        | 0.715414 | -0.84936 | 0.6309   | NA       | AC226119. chr4   | - | 3968761  | 3969387  | 627  |
| ENSG000001 | 31.40296 | 145.1043 | -2.191   | 8.34E-13 | 4.76E-12 | CHCHD10 chr22    | - | 24108021 | 24110630 | 1171 |
| ENSG000001 | 2.697468 | 0.686276 | 1.596    | 0.25714  | 0.35466  | PPM1AP1 chr8     | - | 15663658 | 15664792 | 1135 |
| ENSG000001 | 0.36308  | 0        | 0.4146   | 0.81455  | NA       | RP11-728C chr4   | + | 1.25E+08 | 1.25E+08 | 529  |
| ENSG000001 | 13.13543 | 12.43809 | 0.056448 | 0.92937  | 0.95316  | FAM218A chr4     | + | 1.66E+08 | 1.66E+08 | 2174 |
| ENSG000001 | 0        | 0.343138 | -0.41864 | 0.81278  | NA       | CTD-2324F chr5   | - | 6310554  | 6339997  | 2419 |
| ENSG000001 | 0.632843 | 3.212915 | -1.8378  | 0.20019  | 0.28889  | RP11-640N chr11  | - | 1.21E+08 | 1.21E+08 | 6314 |
| ENSG000001 | 0        | 0.343138 | -0.41864 | 0.81278  | NA       | AC007126. chr4   | - | 13779001 | 13783781 | 4781 |
| ENSG000001 | 0        | 9.41612  | -4.8391  | 0.000148 | 0.000413 | RP11-119F chr4   | - | 1.14E+08 | 1.14E+08 | 1352 |
| ENSG000001 | 0.36308  | 2.947455 | -2.4125  | 0.095031 | 0.15476  | CDK3 chr17       | + | 73996987 | 74002080 | 1582 |
| ENSG000001 | 0.870904 | 16.89077 | -3.7975  | 8.18E-05 | 0.000236 | RP11-757C chr11  | + | 68638132 | 68642010 | 3252 |
| ENSG000001 | 0        | 0.297015 | -0.41864 | 0.81278  | NA       | CTC-573N1 chr5   | + | 1.8E+08  | 1.8E+08  | 806  |
| ENSG000001 | 143.59   | 9.268886 | 3.874    | 8.16E-23 | 7.80E-22 | GPR162 chr12     | + | 6930711  | 6936586  | 2768 |
| ENSG000001 | 2.07579  | 6.145801 | -1.4227  | 0.19739  | 0.28545  | RP11-380C chr4   | - | 1.11E+08 | 1.11E+08 | 1447 |
| ENSG000001 | 0.36308  | 0        | 0.4146   | 0.81455  | NA       | CTC-349C3 chr5   | + | 1.34E+08 | 1.35E+08 | 561  |
| ENSG000001 | 0.685084 | 23.34573 | -4.6854  | 1.27E-06 | 4.50E-06 | RP11-680F chr11  | + | 93971316 | 94012372 | 570  |
| ENSG000001 | 0.685084 | 0        | 0.85004  | 0.63064  | NA       | RP11-756P chr4   | + | 1.9E+08  | 1.9E+08  | 336  |
| ENSG000001 | 0        | 0.343138 | -0.41864 | 0.81278  | NA       | CCT6P2 chr5      | - | 14639535 | 14641127 | 1593 |
| ENSG000001 | 0        | 1.058552 | -1.361   | 0.4451   | NA       | RP11-436F chr5   | + | 1.24E+08 | 1.24E+08 | 446  |
| ENSG000001 | 0        | 1.294874 | -1.8547  | 0.27869  | NA       | RP11-475C chrX   | + | 78003228 | 78010503 | 672  |
| ENSG000001 | 2.688095 | 5.762988 | -0.95304 | 0.43237  | 0.53785  | ABHD17AP chr1    | - | 2.15E+08 | 2.15E+08 | 1137 |
| ENSG000001 | 18.38399 | 19.83339 | -0.10606 | 0.82301  | 0.8752   | KRT8P33 chr5     | - | 1.23E+08 | 1.23E+08 | 1423 |
| ENSG000001 | 0        | 0.715414 | -0.84936 | 0.6309   | NA       | RP11-58H1 chr4   | - | 1.44E+08 | 1.44E+08 | 371  |
| ENSG000001 | 3.391925 | 0.951736 | 1.5113   | 0.24349  | 0.33895  | RP11-302F chr4   | + | 25771888 | 25775199 | 483  |
| ENSG000001 | 0        | 6.731709 | -4.3129  | 0.001415 | 0.003429 | RP11-8L2.1 chr4  | - | 84717589 | 85214565 | 2795 |
| ENSG000001 | 0        | 0.640152 | -0.82869 | 0.63935  | NA       | RP11-4712.1 chr5 | - | 62023031 | 62037371 | 5103 |
| ENSG000001 | 0.290301 | 0.343138 | -0.00202 | 0.99909  | NA       | RP11-254L chr5   | + | 95385819 | 95551223 | 704  |
| ENSG000001 | 0.36308  | 0.357707 | -0.00212 | 0.99905  | NA       | CCDC34P1 chr4    | + | 1.13E+08 | 1.13E+08 | 517  |
| ENSG000001 | 2.064625 | 3.884622 | -0.85731 | 0.41378  | 0.51866  | RP11-397C chr9   | + | 37432084 | 37433878 | 370  |
| ENSG000001 | 0        | 5.257174 | -3.9585  | 0.004476 | 0.010042 | RP11-215P chr5   | - | 1.34E+08 | 1.34E+08 | 669  |
| ENSG000001 | 68.90712 | 90.62152 | -0.39772 | 0.11885  | 0.18738  | ATP6V1E2 chr2    | - | 46717889 | 46769696 | 2334 |
| ENSG000001 | 1.628766 | 3.24447  | -0.88704 | 0.424    | 0.52942  | RP11-333E chr4   | - | 39974748 | 39975062 | 315  |
| ENSG000001 | 5.197138 | 10.02713 | -0.89617 | 0.21675  | 0.30805  | NTAN1P2 chr8     | - | 87493983 | 87495231 | 940  |
| ENSG000001 | 160.0552 | 92.70565 | 0.78117  | 0.001926 | 0.004568 | GLI4 chr8        | + | 1.44E+08 | 1.44E+08 | 2333 |
| ENSG000001 | 0        | 0.640152 | -0.82869 | 0.63935  | NA       | CTD-2275C chr5   | + | 75806265 | 75806591 | 327  |
| ENSG000001 | 3.745632 | 15.706   | -2.0131  | 0.003879 | 0.008777 | RP4-669L1 chr1   | + | 326096   | 328112   | 1239 |
| ENSG000001 | 0        | 0.937167 | -1.2408  | 0.48662  | NA       | RP11-577B chr4   | - | 1.4E+08  | 1.4E+08  | 303  |
| ENSG000001 | 2.479946 | 293.5113 | -6.8001  | 2.40E-34 | 3.58E-33 | CTD-2297C chr5   | - | 5132893  | 5140167  | 889  |
| ENSG000001 | 0        | 0.700845 | -0.87835 | 0.62047  | NA       | RP11-301F chr4   | - | 1.46E+08 | 1.46E+08 | 1090 |
| ENSG000001 | 0.290301 | 0        | 0.4146   | 0.81455  | NA       | CTD-2233C chr5   | - | 33519721 | 33522335 | 917  |
| ENSG000001 | 0        | 0.937167 | -1.2408  | 0.48662  | NA       | RP11-325L chr5   | - | 1363697  | 1380182  | 1616 |
| ENSG000001 | 332.6907 | 67.87243 | 2.2768   | 3.10E-18 | 2.40E-17 | IQGJ-SCHIP chr3  | + | 1.59E+08 | 1.6E+08  | 2633 |
| ENSG000001 | 7.136743 | 4.89705  | 0.5165   | 0.50018  | 0.6039   | RP11-517L chr5   | - | 1.26E+08 | 1.26E+08 | 747  |
| ENSG000001 | 0        | 0.357707 | -0.41864 | 0.81278  | NA       | CTC-228N2 chr5   | - | 1.27E+08 | 1.27E+08 | 388  |
| ENSG000001 | 0        | 0.343138 | -0.41864 | 0.81278  | NA       | PRSS3P2 chr7     | + | 1.42E+08 | 1.42E+08 | 905  |
| ENSG000001 | 6.785642 | 3.723561 | 0.81203  | 0.35402  | 0.45819  | RP11-933F chr3   | - | 1.31E+08 | 1.31E+08 | 2189 |
| ENSG000001 | 4.459813 | 0        | 3.6794   | 0.010998 | 0.022906 | RP11-738E chr4   | - | 57896939 | 57931769 | 1033 |
| ENSG000001 | 0.342542 | 0        | 0.4146   | 0.81455  | NA       | RP11-136L chr4   | + | 10412620 | 10413268 | 329  |
| ENSG000001 | 0.653381 | 1.326428 | -0.74096 | 0.63999  | 0.72726  | AC007078. chr7   | - | 76103904 | 76108173 | 453  |
| ENSG000001 | 3.466496 | 6.702571 | -0.87745 | 0.39533  | 0.49983  | RP11-455F chr16  | + | 30107751 | 30115437 | 1650 |
| ENSG000001 | 0        | 0.343138 | -0.41864 | 0.81278  | NA       | CTD-2215L chr5   | + | 9001886  | 9046052  | 805  |
| ENSG000001 | 0        | 0.357707 | -0.41864 | 0.81278  | NA       | RP11-317B chr4   | + | 2141400  | 2142785  | 581  |
| ENSG000001 | 0.870904 | 0.343138 | 0.71634  | 0.68735  | NA       | RP11-93M chr4    | - | 30886065 | 30886804 | 740  |
| ENSG000001 | 12.66526 | 8.460352 | 0.54307  | 0.53273  | 0.6338   | CTD-3224K chr5   | - | 1.39E+08 | 1.39E+08 | 577  |
| ENSG000001 | 0        | 0.297015 | -0.41864 | 0.81278  | NA       | RP11-702C chr11  | - | 15009217 | 15010240 | 1024 |
| ENSG000001 | 0        | 0.686276 | -0.84936 | 0.6309   | NA       | RP11-642E chr4   | - | 69148179 | 69151677 | 438  |
| ENSG000001 | 1.524285 | 0        | 1.8365   | 0.29722  | NA       | CTD-2228K chr5   | + | 418818   | 419224   | 407  |
| ENSG000001 | 1.306762 | 2.307303 | -0.68995 | 0.59412  | 0.68869  | RP11-530L chr4   | + | 55919227 | 55958701 | 455  |
| ENSG000001 | 0.580602 | 0.297015 | 0.36801  | 0.83644  | NA       | PABPC1P7 chr4    | + | 1.04E+08 | 1.04E+08 | 1513 |
| ENSG000001 | 0.975385 | 18.65587 | -3.9327  | 1.46E-05 | 4.59E-05 | RP11-834C chr12  | - | 54470622 | 54475687 | 564  |
| ENSG000001 | 1.233984 | 2.621302 | -0.88907 | 0.49257  | 0.59651  | ST3GAL1P1 chr4   | - | 68582093 | 68583106 | 1014 |
| ENSG000001 | 1.597063 | 0        | 1.9181   | 0.27352  | NA       | RP11-1E6.1 chr4  | + | 43342892 | 43347617 | 653  |
| ENSG000001 | 1.265686 | 2.08555  | -0.54055 | 0.71233  | 0.78646  | RP11-138B chr4   | - | 1.88E+08 | 1.88E+08 | 2114 |
| ENSG000001 | 6.785642 | 0.594029 | 2.9278   | 0.015546 | 0.031384 | RP11-864L chr11  | + | 62304784 | 62309490 | 264  |
| ENSG000001 | 3.330311 | 6.267186 | -0.86081 | 0.32371  | 0.42671  | RP11-458L chr1   | + | 1.5E+08  | 1.5E+08  | 484  |

|            |          |          |          |          |          |                 |   |          |          |      |
|------------|----------|----------|----------|----------|----------|-----------------|---|----------|----------|------|
| ENSG000001 | 0        | 0.297015 | -0.41864 | 0.81278  | NA       | HNRNP5P5 chr5   | - | 14877776 | 14878028 | 253  |
| ENSG000001 | 0        | 0.594029 | -0.81444 | 0.64499  | NA       | CTD-2296C chr5  | - | 7347099  | 7348090  | 885  |
| ENSG000001 | 0        | 1.638012 | -2.1885  | 0.18912  | NA       | RP11-83M1 chr5  | - | 66985861 | 66986265 | 405  |
| ENSG000001 | 0        | 0.357707 | -0.41864 | 0.81278  | NA       | RP11-576N chr4  | + | 84158456 | 84158597 | 142  |
| ENSG000001 | 0.290301 | 0.357707 | -0.00203 | 0.99908  | NA       | CTB-161M1 chr5  | + | 1.18E+08 | 1.18E+08 | 483  |
| ENSG000001 | 14.56639 | 43.65338 | -1.5606  | 0.000511 | 0.001326 | LINC00491 chr5  | - | 1.02E+08 | 1.02E+08 | 944  |
| ENSG000001 | 0        | 0.997859 | -1.5018  | 0.39072  | NA       | RP1-240B8 chr6  | - | 62340138 | 62390954 | 673  |
| ENSG000001 | 0.290301 | 0.343138 | -0.00202 | 0.99909  | NA       | RP11-497F chr5  | + | 69758071 | 69775042 | 1073 |
| ENSG000001 | 0.36308  | 0        | 0.4146   | 0.81455  | NA       | CTD-2066L chr5  | - | 32925745 | 33298016 | 619  |
| ENSG000001 | 0.685084 | 1.012429 | -0.37562 | 0.82411  | NA       | RP11-392B chr4  | + | 1.41E+08 | 1.41E+08 | 657  |
| ENSG000001 | 0.975385 | 0        | 1.2767   | 0.47406  | NA       | AP000892. chr11 | - | 1.17E+08 | 1.17E+08 | 488  |
| ENSG000001 | 0        | 0.357707 | -0.41864 | 0.81278  | NA       | RP11-161C chr4  | + | 1.75E+08 | 1.75E+08 | 511  |
| ENSG000001 | 0.290301 | 0        | 0.4146   | 0.81455  | NA       | CTD-2201E chr5  | + | 42972726 | 42973194 | 469  |
| ENSG000001 | 0.342542 | 0        | 0.4146   | 0.81455  | NA       | RP11-366N chr4  | + | 1.66E+08 | 1.66E+08 | 1393 |
| ENSG000001 | 0        | 107.4832 | -8.2373  | 4.72E-14 | 2.91E-13 | SEPP1 chr5      | - | 42799982 | 42887494 | 4175 |
| ENSG000001 | 0.36308  | 0        | 0.4146   | 0.81455  | NA       | RP11-79E3 chr4  | + | 33852213 | 33981558 | 578  |
| ENSG000001 | 0        | 0.997859 | -1.5018  | 0.39072  | NA       | RP11-616K chr4  | + | 1.85E+08 | 1.85E+08 | 637  |
| ENSG000001 | 8.091591 | 16.57677 | -0.99637 | 0.08076  | 0.1346   | TPM3P6 chr19    | + | 53982604 | 53983345 | 742  |
| ENSG000001 | 2.49967  | 0        | 2.7866   | 0.07964  | 0.13296  | RPEP1 chr5      | - | 64546954 | 64547611 | 658  |
| ENSG000001 | 0.72616  | 0.700845 | 0.022935 | 0.98937  | NA       | C8orf17 chr8    | + | 1.41E+08 | 1.41E+08 | 2775 |
| ENSG000001 | 2.86275  | 0.997859 | 1.3242   | 0.28185  | 0.38287  | RP11-404E chr1  | + | 1.52E+08 | 1.52E+08 | 535  |
| ENSG000001 | 0        | 0.343138 | -0.41864 | 0.81278  | NA       | RP11-567N chr4  | + | 76326405 | 76348233 | 777  |
| ENSG000001 | 0        | 0.297015 | -0.41864 | 0.81278  | NA       | RP11-710F chr4  | - | 1.07E+08 | 1.07E+08 | 483  |
| ENSG000001 | 2.987769 | 6.505924 | -1.0649  | 0.21528  | 0.30628  | RP11-834C chr12 | + | 54519882 | 54526627 | 1369 |
| ENSG000001 | 2.448243 | 0.357707 | 2.0706   | 0.17928  | 0.26333  | RP11-39C1 chr4  | + | 1.65E+08 | 1.65E+08 | 2057 |
| ENSG000001 | 52.74383 | 0        | 7.2848   | 5.20E-11 | 2.63E-10 | RP11-230C chr12 | - | 65860600 | 66036152 | 1072 |
| ENSG000001 | 1.681007 | 1.248751 | 0.31904  | 0.81873  | 0.87259  | RP11-451F chr5  | - | 1.8E+08  | 1.8E+08  | 459  |
| ENSG000001 | 0.36308  | 0.297015 | -0.00205 | 0.99908  | NA       | RP11-613C chr17 | + | 47785696 | 47797422 | 575  |
| ENSG000001 | 0        | 0.357707 | -0.41864 | 0.81278  | NA       | RP11-241F chr4  | + | 49581850 | 49582206 | 357  |
| ENSG000001 | 0        | 0.700845 | -0.87835 | 0.62047  | NA       | RP11-386B chr4  | + | 1.86E+08 | 1.86E+08 | 2186 |
| ENSG000001 | 0.72616  | 0.715414 | 0.009201 | 0.99586  | NA       | RP11-711C chr5  | - | 7707915  | 7749879  | 522  |
| ENSG000001 | 0.943682 | 0.700845 | 0.33849  | 0.83415  | NA       | RP1-313L4 chr1  | - | 1.68E+08 | 1.68E+08 | 266  |
| ENSG000001 | 10.99704 | 3.290593 | 1.6294   | 0.045111 | 0.081265 | RP11-974F chr5  | + | 69274357 | 69293569 | 3763 |
| ENSG000001 | 10.52867 | 9.066534 | 0.19873  | 0.76392  | 0.82871  | CTD-2152N chr5  | - | 32103551 | 32122047 | 834  |
| ENSG000001 | 0.342542 | 0        | 0.4146   | 0.81455  | NA       | RP11-1084 chr5  | - | 33997149 | 33997829 | 681  |
| ENSG000001 | 0.290301 | 0.357707 | -0.00203 | 0.99908  | NA       | RP11-204F chr4  | + | 65296627 | 65298933 | 2063 |
| ENSG000001 | 5.011318 | 1.355566 | 1.7077   | 0.11029  | 0.17543  | RP5-1063N chr12 | - | 3405368  | 3409390  | 2303 |
| ENSG000001 | 0.342542 | 2.635871 | -2.2612  | 0.12315  | 0.19299  | RP11-153N chr4  | + | 1.55E+08 | 1.55E+08 | 3034 |
| ENSG000001 | 0        | 0.357707 | -0.41864 | 0.81278  | NA       | RP11-236P chr4  | - | 1.21E+08 | 1.21E+08 | 637  |
| ENSG000001 | 11.30886 | 0        | 5.1101   | 4.04E-05 | 0.000121 | RP11-12K2 chr4  | - | 64334419 | 64359996 | 448  |
| ENSG000001 | 0        | 1.387121 | -1.6961  | 0.33794  | NA       | RP11-63A1 chr4  | - | 42283847 | 42393285 | 598  |
| ENSG000001 | 9.978955 | 2.07098  | 2.1495   | 0.016592 | 0.033308 | RP11-540C chr1  | + | 1.55E+08 | 1.55E+08 | 928  |
| ENSG000001 | 461.4885 | 207.0138 | 1.1475   | 0.00026  | 0.000701 | CTD-2001E chr5  | + | 9546312  | 9550721  | 1799 |
| ENSG000001 | 0.580602 | 1.949596 | -1.2854  | 0.38972  | 0.49401  | RP11-46H1 chr12 | + | 1.33E+08 | 1.33E+08 | 1118 |
| ENSG000001 | 0        | 5.24831  | -3.8094  | 0.010231 | 0.021463 | ALG1L12P chr8   | + | 12278541 | 12282509 | 434  |
| ENSG000001 | 12.6567  | 46.53362 | -1.8604  | 1.79E-05 | 5.58E-05 | ZBED3-AS1 chr5  | + | 76382565 | 76462734 | 1987 |
| ENSG000001 | 0.290301 | 0        | 0.4146   | 0.81455  | NA       | CTC-441N1 chr5  | + | 1.21E+08 | 1.22E+08 | 1035 |
| ENSG000001 | 0        | 0.297015 | -0.41864 | 0.81278  | NA       | RP11-89B1 chr4  | - | 54793666 | 54794305 | 640  |
| ENSG000001 | 0        | 0.343138 | -0.41864 | 0.81278  | NA       | DCAF13P2 chr5   | + | 17202383 | 17203254 | 555  |
| ENSG000001 | 0        | 1.577319 | -1.9089  | 0.27608  | NA       | RP11-91H1 chr5  | - | 1.75E+08 | 1.75E+08 | 568  |
| ENSG000001 | 0        | 0.997859 | -1.5018  | 0.39072  | NA       | RP11-345F chr4  | + | 56686169 | 56703548 | 554  |
| ENSG000001 | 0.685084 | 0        | 0.85004  | 0.63064  | NA       | PGAM1P12 chr15  | - | 96984796 | 96985543 | 748  |
| ENSG000001 | 0.870904 | 1.606458 | -0.60244 | 0.70794  | 0.78293  | RP11-11N5 chr4  | + | 1.88E+08 | 1.88E+08 | 188  |
| ENSG000001 | 0        | 0.654722 | -0.83442 | 0.63731  | NA       | DNM1P17 chr10   | + | 30642635 | 30646294 | 426  |
| ENSG000001 | 0        | 0.357707 | -0.41864 | 0.81278  | NA       | KRT18P54 chr4   | - | 1.36E+08 | 1.36E+08 | 748  |
| ENSG000001 | 1.370168 | 0        | 1.3929   | 0.43293  | NA       | LSM3P4 chr4     | + | 1.43E+08 | 1.43E+08 | 309  |
| ENSG000001 | 2.064625 | 24.53782 | -3.4425  | 4.38E-06 | 1.46E-05 | RP11-501C chr17 | - | 47072628 | 47074854 | 428  |
| ENSG000001 | 0.705622 | 0        | 0.8807   | 0.6196   | NA       | CTC-806A2 chr5  | - | 1.45E+08 | 1.45E+08 | 530  |
| ENSG000001 | 5.850519 | 0.297015 | 3.4016   | 0.009353 | 0.019752 | RP11-807F chr4  | + | 66535679 | 66563747 | 1177 |
| ENSG000001 | 9.253609 | 7.342723 | 0.32553  | 0.61539  | 0.70715  | CTD-2083E chr5  | - | 288948   | 290436   | 1203 |
| ENSG000001 | 0        | 0.297015 | -0.41864 | 0.81278  | NA       | RP11-297B chr9  | + | 37002694 | 37008037 | 739  |
| ENSG000001 | 0        | 2.24661  | -2.6365  | 0.10117  | 0.16301  | RNF138P1 chr5   | - | 54825984 | 54826529 | 546  |
| ENSG000001 | 0.36308  | 0        | 0.4146   | 0.81455  | NA       | HNRNP5P1 chr5   | - | 1.27E+08 | 1.27E+08 | 1379 |
| ENSG000001 | 0.580602 | 0.343138 | 0.37443  | 0.8337   | NA       | RP11-453N chr8  | - | 68045789 | 68048146 | 2358 |
| ENSG000001 | 0        | 1.248751 | -1.5848  | 0.37202  | NA       | CTC-480C2 chr5  | + | 84959050 | 84960502 | 1453 |

|            |          |          |          |          |          |                 |   |          |          |      |
|------------|----------|----------|----------|----------|----------|-----------------|---|----------|----------|------|
| ENSG000001 | 0.72616  | 0        | 0.85004  | 0.63064  | NA       | RP11-373J chr4  | + | 73188745 | 73196468 | 425  |
| ENSG000001 | 4.294532 | 1.949596 | 1.0242   | 0.31607  | 0.41881  | METTL21EF chr13 | + | 1.04E+08 | 1.04E+08 | 2312 |
| ENSG000001 | 1.016461 | 0        | 1.3167   | 0.46021  | NA       | CTD-2046J chr5  | + | 35081325 | 35082094 | 456  |
| ENSG000001 | 3.04001  | 3.10281  | -0.02182 | 0.98588  | 0.99169  | RP11-229C chr5  | - | 74343544 | 74348668 | 534  |
| ENSG000001 | 14.72988 | 0        | 5.5076   | 4.71E-06 | 1.57E-05 | CTD-2281N chr5  | - | 1.18E+08 | 1.18E+08 | 2803 |
| ENSG000001 | 5.209117 | 7.172799 | -0.44706 | 0.63316  | 0.72196  | RP11-1365 chr4  | - | 195198   | 198798   | 950  |
| ENSG000001 | 0        | 5.439251 | -3.9884  | 0.004243 | 0.009542 | RP11-588L chr4  | + | 40428136 | 40429602 | 862  |
| ENSG000001 | 6.741961 | 18.60404 | -1.4055  | 0.018806 | 0.037345 | RNPS1P1 chr4    | + | 11373599 | 11374516 | 918  |
| ENSG000001 | 98.87064 | 682.5025 | -2.7725  | 1.25E-37 | 2.06E-36 | RP11-253E chr12 | + | 3150603  | 3154116  | 3514 |
| ENSG000001 | 0        | 0.700845 | -0.87835 | 0.62047  | NA       | CTC-338M1 chr5  | + | 1.81E+08 | 1.81E+08 | 738  |
| ENSG000001 | 0.342542 | 0        | 0.4146   | 0.81455  | NA       | RP11-301F chr4  | - | 1.46E+08 | 1.46E+08 | 481  |
| ENSG000001 | 33.06066 | 17.41927 | 0.90688  | 0.027809 | 0.053086 | RP1-80B9 chr6   | + | 2245982  | 2413825  | 8217 |
| ENSG000001 | 2.987769 | 2.399549 | 0.29903  | 0.77914  | 0.84152  | RP11-632F chr4  | + | 40814796 | 40828168 | 477  |
| ENSG000001 | 0        | 0.715414 | -0.84936 | 0.6309   | NA       | RP11-703C chr4  | - | 94239774 | 94240937 | 441  |
| ENSG000001 | 4.543757 | 2.979009 | 0.57121  | 0.53794  | 0.6387   | RP11-843P chr5  | + | 1.76E+08 | 1.76E+08 | 504  |
| ENSG000001 | 2.479132 | 1.294874 | 0.79492  | 0.54439  | 0.64477  | AC097467 chr4   | + | 1.56E+08 | 1.56E+08 | 840  |
| ENSG000001 | 0.36308  | 0        | 0.4146   | 0.81455  | NA       | RP11-1084 chr5  | + | 33970968 | 33972733 | 1145 |
| ENSG000001 | 1.431782 | 1.949596 | -0.40792 | 0.76172  | 0.82702  | RP4-785G1 chr20 | - | 32822646 | 32868979 | 478  |
| ENSG000001 | 1.265686 | 3.541484 | -1.2766  | 0.28556  | 0.38699  | RP11-497F chr5  | + | 69825198 | 69826377 | 1180 |
| ENSG000001 | 0.342542 | 0        | 0.4146   | 0.81455  | NA       | RP11-813N chr4  | + | 69893549 | 69910296 | 1613 |
| ENSG000001 | 0.653381 | 0        | 0.82678  | 0.64037  | NA       | MESTP3 chr4     | - | 28824866 | 28825833 | 968  |
| ENSG000001 | 0.342542 | 0        | 0.4146   | 0.81455  | NA       | CTB-161M1 chr5  | + | 1.18E+08 | 1.18E+08 | 586  |
| ENSG000001 | 0.290301 | 0.715414 | -0.50514 | 0.77701  | NA       | LNx1-AS1 chr4   | + | 54362567 | 54415745 | 550  |
| ENSG000001 | 0.290301 | 3.541484 | -2.6843  | 0.059189 | 0.10324  | GAPDHP66 chr18  | - | 3977649  | 3978615  | 967  |
| ENSG000001 | 0        | 2.915901 | -2.7723  | 0.095997 | 0.15615  | RP11-71E1 chr3  | + | 1.26E+08 | 1.26E+08 | 501  |
| ENSG000001 | 2.987769 | 1.888903 | 0.55948  | 0.6164   | 0.70778  | RP11-679C chr4  | + | 1.21E+08 | 1.21E+08 | 2339 |
| ENSG000001 | 0        | 0.686276 | -0.84936 | 0.6309   | NA       | RP11-489N chr4  | + | 4088365  | 4088541  | 177  |
| ENSG000001 | 0        | 1.326428 | -1.6486  | 0.3523   | NA       | RP11-180A chr4  | + | 9678932  | 9679558  | 627  |
| ENSG000001 | 3.247181 | 0.357707 | 2.2385   | 0.16337  | 0.24392  | RP11-1079 chr17 | + | 47452742 | 47457456 | 245  |
| ENSG000001 | 0        | 0.343138 | -0.41864 | 0.81278  | NA       | RP11-492L chr5  | + | 1.16E+08 | 1.16E+08 | 420  |
| ENSG000001 | 3.257533 | 2.918317 | 0.13971  | 0.89116  | 0.9245   | RP11-33B1 chr4  | + | 1.2E+08  | 1.2E+08  | 573  |
| ENSG000001 | 0.870904 | 0        | 1.046    | 0.5544   | NA       | RP11-248N chr4  | - | 1.75E+08 | 1.75E+08 | 1144 |
| ENSG000001 | 0.653381 | 0.654722 | -0.00313 | 0.9985   | NA       | LINC00492 chr5  | + | 1.02E+08 | 1.02E+08 | 593  |
| ENSG000001 | 48.96551 | 24.96843 | 0.94422  | 0.021688 | 0.042464 | GLUD1P3 chr10   | + | 75490320 | 75497069 | 896  |
| ENSG000001 | 1.161205 | 0        | 1.2509   | 0.47995  | NA       | CTD-2023N chr5  | + | 56690887 | 56829251 | 897  |
| ENSG000001 | 0.342542 | 0.343138 | -0.00208 | 0.99906  | NA       | RP11-691I chr8  | + | 89497339 | 89498323 | 856  |
| ENSG000001 | 0.342542 | 1.949596 | -1.8486  | 0.23038  | 0.32372  | RP11-423F chr5  | + | 1.77E+08 | 1.77E+08 | 568  |
| ENSG000001 | 0        | 1.606458 | -1.9287  | 0.27074  | NA       | RP11-402J chr4  | + | 1.13E+08 | 1.13E+08 | 411  |
| ENSG000001 | 0.632843 | 0        | 0.81931  | 0.64303  | NA       | RP11-322J chr4  | - | 1.72E+08 | 1.72E+08 | 614  |
| ENSG000001 | 2.987769 | 0.640152 | 1.8256   | 0.16486  | 0.24575  | RP11-274N chr1  | - | 1.55E+08 | 1.55E+08 | 532  |
| ENSG000001 | 6.068042 | 0        | 4.1805   | 0.002118 | 0.004992 | RP11-696F chr4  | + | 1.88E+08 | 1.88E+08 | 421  |
| ENSG000001 | 14.86607 | 0        | 5.5283   | 3.80E-06 | 1.28E-05 | RP11-122F chr5  | + | 6933783  | 7190925  | 568  |
| ENSG000001 | 0.36308  | 0.594029 | -0.39069 | 0.82661  | NA       | RP11-94C2 chr17 | - | 48640564 | 48641144 | 156  |
| ENSG000001 | 1.286224 | 3.008147 | -1.0562  | 0.36624  | 0.4709   | RP11-656C chr8  | - | 73114986 | 73163800 | 3048 |
| ENSG000001 | 1.08924  | 0.700845 | 0.41139  | 0.80818  | NA       | RP11-529F chr4  | - | 1.54E+08 | 1.54E+08 | 769  |
| ENSG000001 | 0.580602 | 48.97695 | -5.731   | 4.97E-10 | 2.34E-09 | AC141928 chr4   | - | 3760475  | 3765117  | 4525 |
| ENSG000001 | 28.23955 | 21.16552 | 0.39986  | 0.35668  | 0.46097  | RP11-752C chr15 | + | 83419316 | 83425958 | 790  |
| ENSG000001 | 4.648238 | 2.292733 | 0.9271   | 0.3441   | 0.44811  | AC073635 chr7   | - | 76875657 | 76887440 | 570  |
| ENSG000001 | 13.2056  | 11.49684 | 0.19922  | 0.76687  | 0.8314   | MICE chr6       | - | 29709508 | 29716746 | 1157 |
| ENSG000001 | 9.055811 | 1.058552 | 2.8623   | 0.005315 | 0.011778 | RP11-404J chr4  | - | 1.8E+08  | 1.8E+08  | 539  |
| ENSG000001 | 0        | 25.85606 | -6.2206  | 2.18E-07 | 8.26E-07 | AC005355 chr5   | + | 1.34E+08 | 1.34E+08 | 714  |
| ENSG000001 | 1.233984 | 0        | 1.5686   | 0.37707  | NA       | RP13-128C chrX  | + | 1.18E+08 | 1.18E+08 | 1062 |
| ENSG000001 | 0.36308  | 0        | 0.4146   | 0.81455  | NA       | RP11-502N chr4  | - | 1.61E+08 | 1.61E+08 | 483  |
| ENSG000001 | 6.256467 | 11.28804 | -0.81657 | 0.23491  | 0.32875  | RP11-1379 chr5  | + | 1.79E+08 | 1.79E+08 | 485  |
| ENSG000001 | 3.745632 | 3.497777 | 0.064939 | 0.95267  | 0.97047  | AC008592 chr5   | - | 95170128 | 95170750 | 418  |
| ENSG000001 | 0        | 0.343138 | -0.41864 | 0.81278  | NA       | CTD-2193P chr5  | - | 80293002 | 80293866 | 536  |
| ENSG000001 | 82.1454  | 0        | 7.882    | 6.06E-13 | 3.49E-12 | RP11-152P chr8  | - | 1.07E+08 | 1.07E+08 | 801  |
| ENSG000001 | 0        | 2.903748 | -2.7679  | 0.096609 | 0.15691  | ORAOV1P1 chr4   | - | 1.87E+08 | 1.87E+08 | 395  |
| ENSG000001 | 1.628766 | 0.951736 | 0.6114   | 0.66255  | 0.7461   | RP13-494C chr4  | - | 25866503 | 25871172 | 762  |
| ENSG000001 | 19.40982 | 1.759397 | 3.3295   | 3.60E-05 | 0.000108 | RP11-402L chr3  | - | 1.33E+08 | 1.33E+08 | 2427 |
| ENSG000001 | 0.290301 | 0        | 0.4146   | 0.81455  | NA       | GAPDHP62 chr8   | - | 1.02E+08 | 1.02E+08 | 990  |
| ENSG000001 | 1.027626 | 1.485073 | -0.35071 | 0.83885  | 0.88692  | SLC25A30 chr13  | + | 45992297 | 45994506 | 701  |
| ENSG000001 | 2.012384 | 0.700845 | 1.242    | 0.38127  | 0.48537  | RP11-80G7 chr5  | - | 1.63E+08 | 1.63E+08 | 800  |
| ENSG000001 | 180.9456 | 290.0714 | -0.68178 | 0.000803 | 0.002021 | THAP9-AS1 chr4  | - | 83814639 | 83822113 | 2585 |
| ENSG000001 | 2.334388 | 2.117104 | 0.14094  | 0.90945  | 0.93774  | RP11-549J chr5  | - | 93196375 | 93199531 | 3157 |

|            |          |          |          |          |          |                 |   |          |          |      |
|------------|----------|----------|----------|----------|----------|-----------------|---|----------|----------|------|
| ENSG000001 | 0.342542 | 0        | 0.4146   | 0.81455  | NA       | RP11-751A chr4  | - | 1.81E+08 | 1.81E+08 | 564  |
| ENSG000001 | 0        | 0.891044 | -1.0625  | 0.54819  | NA       | RP11-138J chr5  | + | 1.03E+08 | 1.03E+08 | 574  |
| ENSG000001 | 0        | 78.46016 | -7.8134  | 1.33E-12 | 7.47E-12 | CTC-254B4 chr5  | - | 1.06E+08 | 1.06E+08 | 602  |
| ENSG000001 | 10.90291 | 2.367995 | 2.0921   | 0.011511 | 0.023877 | RP11-582J chr8  | - | 22398358 | 22402918 | 4076 |
| ENSG000001 | 1.027626 | 0.686276 | 0.33836  | 0.84758  | NA       | AC006157 chrY   | + | 2722771  | 2800041  | 454  |
| ENSG000001 | 0        | 0.297015 | -0.41864 | 0.81278  | NA       | ZNF969P chr4    | + | 1.11E+08 | 1.11E+08 | 2341 |
| ENSG000001 | 0.36308  | 3.738131 | -2.6573  | 0.067338 | 0.11525  | RP11-168A chr5  | + | 79315432 | 79315743 | 312  |
| ENSG000001 | 0.290301 | 0        | 0.4146   | 0.81455  | NA       | ANKRD20A chr4   | - | 49504162 | 49508039 | 1330 |
| ENSG000001 | 0        | 2.309719 | -2.4138  | 0.15791  | 0.23724  | U66061.31 chr7  | + | 1.42E+08 | 1.42E+08 | 2762 |
| ENSG000001 | 0        | 0.343138 | -0.41864 | 0.81278  | NA       | BMS1P6 chr10    | + | 48187416 | 48199256 | 1331 |
| ENSG000001 | 0        | 1.698704 | -2.2257  | 0.18075  | NA       | RP11-434C chr5  | - | 1.26E+08 | 1.26E+08 | 914  |
| ENSG000001 | 2.789971 | 0        | 2.9376   | 0.061859 | 0.10714  | NUDT19P5 chr4   | + | 1.59E+08 | 1.59E+08 | 569  |
| ENSG000001 | 0        | 0.343138 | -0.41864 | 0.81278  | NA       | HTT-AS1 chr4    | - | 3065198  | 3076241  | 515  |
| ENSG000001 | 0        | 1.416259 | -1.7181  | 0.33141  | NA       | RP11-526F chr5  | + | 1.12E+08 | 1.12E+08 | 711  |
| ENSG000001 | 3.330311 | 1.012429 | 1.4827   | 0.23118  | 0.32467  | BMS1P2 chr10    | - | 47228366 | 47241942 | 1858 |
| ENSG000001 | 49.94523 | 88.49341 | -0.80477 | 0.13254  | 0.20497  | RP11-115C chr4  | + | 90472507 | 90647654 | 1816 |
| ENSG000001 | 1.068702 | 0        | 1.3672   | 0.44297  | NA       | CTD-2367A chr5  | + | 1.11E+08 | 1.11E+08 | 163  |
| ENSG000001 | 0        | 1.606458 | -1.9287  | 0.27074  | NA       | CTBP2P4 chr5    | + | 97912045 | 97912964 | 920  |
| ENSG000001 | 0.705622 | 0.640152 | 0.062329 | 0.97007  | NA       | FCF1P8 chr4     | - | 56217979 | 56218575 | 597  |
| ENSG000001 | 0        | 1.684135 | -2.1921  | 0.19067  | NA       | RP11-419C chr5  | - | 12794212 | 12794843 | 632  |
| ENSG000001 | 0.290301 | 0        | 0.4146   | 0.81455  | NA       | RP11-454E chr5  | - | 45266826 | 45268115 | 418  |
| ENSG000001 | 0.290301 | 0.640152 | -0.50256 | 0.77558  | NA       | RP11-119F chr4  | - | 1.14E+08 | 1.14E+08 | 874  |
| ENSG000001 | 0.943682 | 0        | 1.2438   | 0.48556  | NA       | RP11-280C chr8  | - | 62671653 | 62678528 | 2750 |
| ENSG000001 | 0        | 0.951736 | -1.2555  | 0.48145  | NA       | WWC2-AS1 chr4   | - | 1.84E+08 | 1.84E+08 | 404  |
| ENSG000001 | 1.286224 | 3.619162 | -1.3075  | 0.24943  | 0.34578  | RP11-734I chr4  | + | 31999019 | 32157028 | 734  |
| ENSG000001 | 0.705622 | 1.698704 | -1.0273  | 0.47788  | 0.58224  | CTD-2035E chr5  | + | 43018531 | 43024349 | 472  |
| ENSG000001 | 0        | 0.297015 | -0.41864 | 0.81278  | NA       | AC008565 chr5   | + | 1.2E+08  | 1.2E+08  | 885  |
| ENSG000001 | 68.10395 | 40.01475 | 0.76464  | 0.006304 | 0.013767 | RP11-37B2 chr8  | - | 90621638 | 90769955 | 3802 |
| ENSG000001 | 0.36308  | 1.280305 | -1.2352  | 0.46421  | NA       | RP11-81H3 chr12 | - | 74526946 | 74796315 | 966  |
| ENSG000001 | 69.1041  | 16.01591 | 2.095    | 5.86E-07 | 2.14E-06 | RP11-5301 chr5  | - | 44745002 | 44808879 | 775  |
| ENSG000001 | 7.415066 | 5.133373 | 0.50326  | 0.56658  | 0.66435  | RP11-849F chr11 | + | 71725337 | 71731956 | 4233 |
| ENSG000001 | 5.966166 | 0        | 4.111    | 0.003034 | 0.006986 | CTD-2532K chr5  | + | 1.74E+08 | 1.74E+08 | 287  |
| ENSG000001 | 0        | 0.594029 | -0.81444 | 0.64499  | NA       | RP11-478C chr4  | + | 2297311  | 2320816  | 563  |
| ENSG000001 | 1.649304 | 0        | 2.1906   | 0.18857  | NA       | HOXC-AS3 chr12  | - | 54375293 | 54379303 | 2816 |
| ENSG000001 | 0        | 1.903472 | -2.1599  | 0.21236  | NA       | RP11-281P chr4  | + | 11470874 | 11479820 | 4019 |
| ENSG000001 | 2.012384 | 2.324288 | -0.18982 | 0.87172  | 0.91028  | RP11-384K chr4  | + | 1.2E+08  | 1.2E+08  | 186  |
| ENSG000001 | 1.048164 | 0.343138 | 0.98412  | 0.56751  | NA       | RP11-98J2 chr5  | - | 69194694 | 69199025 | 4332 |
| ENSG000001 | 1.628766 | 0        | 2.1781   | 0.19145  | NA       | RP11-399C chr4  | - | 35949843 | 36075457 | 1969 |
| ENSG000001 | 6.036339 | 4.660728 | 0.36794  | 0.66264  | 0.74614  | RP11-540C chr15 | + | 41199009 | 41201540 | 589  |
| ENSG000001 | 0        | 0.715414 | -0.84936 | 0.6309   | NA       | HULC chr6       | + | 8652370  | 8654079  | 556  |
| ENSG000001 | 0        | 3.022717 | -3.0495  | 0.04972  | 0.088547 | RP11-215A chr4  | - | 1.87E+08 | 1.87E+08 | 1512 |
| ENSG000001 | 0.580602 | 0.654722 | -0.07721 | 0.96449  | NA       | AC005355 chr5   | + | 1.34E+08 | 1.34E+08 | 602  |
| ENSG000001 | 0.943682 | 1.66715  | -0.61427 | 0.68153  | 0.7619   | RP11-327C chr4  | + | 1.7E+08  | 1.7E+08  | 637  |
| ENSG000001 | 0        | 0.297015 | -0.41864 | 0.81278  | NA       | RP11-529P chr3  | - | 97200021 | 97200350 | 330  |
| ENSG000001 | 1.068702 | 2.589748 | -1.1221  | 0.38805  | 0.49217  | RP11-45L9 chr4  | - | 1.07E+08 | 1.07E+08 | 481  |
| ENSG000001 | 8.443506 | 1.234181 | 2.474    | 0.014262 | 0.029032 | RP11-893F chr17 | - | 48358938 | 48365216 | 750  |
| ENSG000001 | 0        | 0.343138 | -0.41864 | 0.81278  | NA       | RP11-542C chr4  | - | 76194278 | 76286392 | 469  |
| ENSG000001 | 1.370168 | 0.357707 | 1.117    | 0.52614  | NA       | RP11-689P chr4  | - | 8455137  | 8456669  | 664  |
| ENSG000001 | 13.52939 | 87.97678 | -2.6729  | 1.20E-12 | 6.78E-12 | RP11-478C chr4  | - | 262771   | 263320   | 550  |
| ENSG000001 | 0        | 0.297015 | -0.41864 | 0.81278  | NA       | CTD-2196P chr5  | + | 38682172 | 38685228 | 554  |
| ENSG000001 | 6.878145 | 0        | 4.3828   | 0.000929 | 0.002316 | LINC00589 chr8  | - | 29531438 | 29605625 | 1404 |
| ENSG000001 | 92.1766  | 103.499  | -0.16718 | 0.54217  | 0.64269  | ZNF674 chrX     | - | 46357162 | 46404892 | 4073 |
| ENSG000001 | 24.1103  | 0        | 6.2094   | 7.14E-08 | 2.82E-07 | RP1-68D18 chr11 | + | 35234097 | 35235554 | 704  |
| ENSG000001 | 7.272928 | 69.11017 | -3.1179  | 8.19E-06 | 2.66E-05 | RP11-54F2 chr5  | - | 10652323 | 10656037 | 800  |
| ENSG000001 | 0        | 0.343138 | -0.41864 | 0.81278  | NA       | TMED7-TIC chr5  | - | 1.15E+08 | 1.15E+08 | 3491 |
| ENSG000001 | 0.342542 | 0        | 0.4146   | 0.81455  | NA       | RP11-141I chr8  | - | 26290545 | 26291581 | 669  |
| ENSG000001 | 0        | 0.594029 | -0.81444 | 0.64499  | NA       | RP11-168E chr4  | + | 12225075 | 12252910 | 610  |
| ENSG000001 | 0.342542 | 1.698704 | -1.6607  | 0.28969  | 0.39119  | RP11-889L chr5  | + | 1.78E+08 | 1.78E+08 | 861  |
| ENSG000001 | 0        | 0.98329  | -1.2878  | 0.47019  | NA       | RP11-161C chr4  | - | 1.75E+08 | 1.75E+08 | 1824 |
| ENSG000001 | 3.319146 | 3.336716 | -0.00743 | 0.99411  | 0.99669  | CTC-325J2 chr5  | - | 79904442 | 79918343 | 440  |
| ENSG000001 | 0.342542 | 1.043983 | -0.98163 | 0.56849  | NA       | CNOT10-AS chr3  | - | 32772127 | 32778946 | 466  |
| ENSG000001 | 0        | 1.98115  | -2.4527  | 0.13291  | 0.20539  | RP11-469N chr11 | + | 1.35E+08 | 1.35E+08 | 3684 |
| ENSG000001 | 17.91724 | 20.09798 | -0.16084 | 0.74322  | 0.81126  | RP11-503N chr4  | - | 2506808  | 2508006  | 900  |
| ENSG000001 | 0.632843 | 0        | 0.81931  | 0.64303  | NA       | RP11-701P chr4  | - | 1.86E+08 | 1.86E+08 | 729  |
| ENSG000001 | 0        | 0.594029 | -0.81444 | 0.64499  | NA       | PSMA2P2 chr8    | - | 94951592 | 94955105 | 686  |

|            |          |          |          |          |          |            |       |   |          |          |      |
|------------|----------|----------|----------|----------|----------|------------|-------|---|----------|----------|------|
| ENSG000001 | 0        | 0.654722 | -0.83442 | 0.63731  | NA       | RP11-156N  | chr5  | + | 75672500 | 75672974 | 475  |
| ENSG000001 | 38.39316 | 60.35791 | -0.64349 | 0.039444 | 0.0725   | ZNF345     | chr19 | + | 37341263 | 37403931 | 3527 |
| ENSG000001 | 0        | 0.357707 | -0.41864 | 0.81278  | NA       | RP11-73G1  | chr4  | + | 1.53E+08 | 1.53E+08 | 2652 |
| ENSG000001 | 0.290301 | 0        | 0.4146   | 0.81455  | NA       | RP11-404K  | chr5  | + | 7326177  | 7326722  | 332  |
| ENSG000001 | 8.330465 | 0        | 4.67     | 0.000281 | 0.000755 | GTF2F2P1   | chr4  | + | 1.48E+08 | 1.48E+08 | 675  |
| ENSG000001 | 4.979616 | 0        | 3.891    | 0.005132 | 0.011411 | CTD-2263F  | chr5  | - | 38461029 | 38468441 | 456  |
| ENSG000001 | 0.36308  | 0        | 0.4146   | 0.81455  | NA       | RFPL4B     | chr6  | + | 1.13E+08 | 1.13E+08 | 1900 |
| ENSG000001 | 0.923144 | 3.901607 | -1.7354  | 0.16748  | 0.2489   | AC004069   | chr4  | - | 1.06E+08 | 1.06E+08 | 549  |
| ENSG000001 | 0        | 0.297015 | -0.41864 | 0.81278  | NA       | WDFY3-AS1  | chr4  | + | 85724411 | 85731544 | 493  |
| ENSG000001 | 38.62446 | 35.43244 | 0.1285   | 0.74938  | 0.81663  | RP11-506.6 | chr22 | - | 38616982 | 38618939 | 1063 |
| ENSG000001 | 0        | 3.428963 | -3.2154  | 0.036505 | 0.067636 | RP11-231L  | chr3  | - | 1.41E+08 | 1.41E+08 | 392  |
| ENSG000001 | 1.939605 | 24.12755 | -3.4489  | 4.61E-06 | 1.54E-05 | ALG1L7P    | chr4  | + | 3937174  | 3944248  | 768  |
| ENSG000001 | 0.685084 | 0.640152 | 0.044759 | 0.97934  | NA       | RP11-436F  | chr5  | + | 1.24E+08 | 1.24E+08 | 526  |
| ENSG000001 | 4.140415 | 0.700845 | 2.1564   | 0.10093  | 0.16277  | CTC-436P1  | chr5  | + | 60457897 | 60527867 | 796  |
| ENSG000001 | 1.016461 | 0        | 1.3167   | 0.46021  | NA       | CTD-2066L  | chr5  | - | 33011428 | 33017713 | 425  |
| ENSG000001 | 3.661688 | 14.36903 | -1.8811  | 0.013995 | 0.02853  | ALG1L2     | chr3  | + | 1.3E+08  | 1.3E+08  | 969  |
| ENSG000001 | 1.016461 | 1.416259 | -0.35194 | 0.81908  | 0.87285  | RP11-10L1  | chr4  | + | 1.04E+08 | 1.04E+08 | 1241 |
| ENSG000001 | 0        | 4.556329 | -3.7229  | 0.009534 | 0.02011  | RP11-380P  | chr4  | - | 23724885 | 23735202 | 639  |
| ENSG000001 | 0.342542 | 1.370136 | -1.2729  | 0.45239  | NA       | TUBB7P     | chr4  | - | 1.91E+08 | 1.91E+08 | 1305 |
| ENSG000001 | 0        | 0.997859 | -1.5018  | 0.39072  | NA       | RP11-425A  | chr4  | - | 1.49E+08 | 1.49E+08 | 568  |
| ENSG000001 | 0.685084 | 0.98329  | -0.35409 | 0.8342   | NA       | RP11-81H1  | chr12 | - | 68726668 | 68845443 | 904  |
| ENSG000001 | 0.975385 | 3.06884  | -1.3786  | 0.28394  | 0.38526  | CTD-2003C  | chr5  | + | 59926341 | 59926800 | 460  |
| ENSG000001 | 0.975385 | 0        | 1.2767   | 0.47406  | NA       | RP11-506F  | chr5  | + | 54529762 | 54591029 | 770  |
| ENSG000001 | 0        | 0.594029 | -0.81444 | 0.64499  | NA       | RP11-747F  | chr4  | + | 9032012  | 9032792  | 781  |
| ENSG000001 | 0.290301 | 0        | 0.4146   | 0.81455  | NA       | CTD-2337A  | chr5  | + | 95297705 | 95966789 | 581  |
| ENSG000001 | 1.919068 | 0        | 2.4151   | 0.13977  | 0.21349  | GDEP       | chr4  | + | 80748625 | 80798924 | 2091 |
| ENSG000001 | 617.0477 | 719.5862 | -0.22163 | 0.29464  | 0.39672  | SHANK3     | chr22 | + | 51112843 | 51171726 | 7394 |
| ENSG000001 | 3.028845 | 8.750118 | -1.4469  | 0.1031   | 0.1656   | RP11-452F  | chr11 | - | 78135028 | 78140882 | 1642 |
| ENSG000001 | 0        | 0.357707 | -0.41864 | 0.81278  | NA       | RP11-79P5  | chr5  | - | 72750012 | 72768721 | 440  |
| ENSG000001 | 0.653381 | 0        | 0.82678  | 0.64037  | NA       | RP11-415C  | chr4  | - | 27264128 | 27268876 | 649  |
| ENSG000001 | 1.794862 | 1.684135 | 0.053392 | 0.96905  | 0.98264  | CTD-2283N  | chr5  | + | 1.48E+08 | 1.48E+08 | 514  |
| ENSG000001 | 0        | 22.06456 | -6.0607  | 2.59E-07 | 9.74E-07 | RP11-689K  | chr4  | - | 82380633 | 82965397 | 539  |
| ENSG000001 | 0.580602 | 4.150082 | -2.2407  | 0.10086  | 0.16266  | RP11-177C  | chr4  | - | 37997115 | 37997824 | 710  |
| ENSG000001 | 0.923144 | 1.40169  | -0.41652 | 0.7848   | 0.84587  | RTN3P1     | chr4  | + | 1.46E+08 | 1.46E+08 | 711  |
| ENSG000001 | 0        | 1.029414 | -1.1526  | 0.51496  | NA       | RP11-461C  | chr5  | + | 93905245 | 93906381 | 1137 |
| ENSG000001 | 17.63631 | 2.915901 | 2.4549   | 0.001217 | 0.002977 | HSPD1P11   | chr5  | + | 95104703 | 95106404 | 1702 |
| ENSG000001 | 0        | 0.297015 | -0.41864 | 0.81278  | NA       | RP11-328N  | chr4  | + | 44018878 | 44024080 | 2622 |
| ENSG000001 | 0.342542 | 0.297015 | -0.00202 | 0.99909  | NA       | MTND3P5    | chr4  | - | 25721721 | 25722053 | 333  |
| ENSG000001 | 0.342542 | 1.294874 | -1.342   | 0.40631  | NA       | RP11-697N  | chr8  | - | 48459366 | 48460488 | 779  |
| ENSG000001 | 0.705622 | 0        | 0.8807   | 0.6196   | NA       | RAB5CP2    | chr5  | + | 90772199 | 90772835 | 637  |
| ENSG000001 | 12.18914 | 32.77252 | -1.3997  | 0.011608 | 0.024056 | WWC2-AS2   | chr4  | - | 1.84E+08 | 1.84E+08 | 2183 |
| ENSG000001 | 2.334388 | 1.012429 | 1.0131   | 0.44308  | 0.54873  | CTD-2091N  | chr5  | - | 92355369 | 92404375 | 625  |
| ENSG000001 | 35.26228 | 68.03423 | -0.94756 | 0.008254 | 0.0176   | RP11-129N  | chr14 | + | 41424103 | 41445082 | 696  |
| ENSG000001 | 2.386629 | 13.3186  | -2.3465  | 0.00708  | 0.015317 | CTD-2516F  | chr11 | - | 7448497  | 7533746  | 4433 |
| ENSG000001 | 85.34467 | 131.4972 | -0.61594 | 0.008832 | 0.018763 | ZNF550     | chr19 | - | 58046625 | 58071231 | 4305 |
| ENSG000001 | 5.955001 | 1.713273 | 1.6649   | 0.095147 | 0.15493  | CTD-2201E  | chr5  | + | 9511445  | 9518198  | 1679 |
| ENSG000001 | 0.342542 | 1.355566 | -1.3789  | 0.3926   | NA       | RPS23P5    | chr5  | - | 81560976 | 81561078 | 103  |
| ENSG000001 | 0.685084 | 0        | 0.85004  | 0.63064  | NA       | RP11-484C  | chr4  | - | 15359765 | 15421656 | 871  |
| ENSG000001 | 10.14505 | 4.585467 | 1.0949   | 0.12121  | 0.1904   | CTC-497E2  | chr11 | - | 12984057 | 13011095 | 1558 |
| ENSG000001 | 2.334388 | 1.012429 | 1.0131   | 0.44308  | 0.54873  | CTB-35F21  | chr5  | - | 1.39E+08 | 1.39E+08 | 553  |
| ENSG000001 | 1.89853  | 0        | 2.1633   | 0.21098  | NA       | RP11-427N  | chr4  | - | 1.35E+08 | 1.35E+08 | 619  |
| ENSG000001 | 3.350036 | 0        | 2.9644   | 0.071997 | 0.12206  | RP11-276A  | chr20 | + | 825767   | 838106   | 1328 |
| ENSG000001 | 8.31074  | 7.812951 | 0.064322 | 0.93649  | 0.95814  | RP11-163N  | chr8  | - | 61297147 | 61429354 | 2444 |
| ENSG000001 | 0        | 0.357707 | -0.41864 | 0.81278  | NA       | RP11-234K  | chr4  | + | 80517696 | 80518327 | 355  |
| ENSG000001 | 0.870904 | 2.428687 | -1.0929  | 0.45913  | 0.56438  | ALDH7A1P   | chr5  | + | 76586093 | 76587625 | 1533 |
| ENSG000001 | 0.342542 | 1.591889 | -1.589   | 0.31649  | 0.41913  | FAM90A25   | chr8  | - | 12272593 | 12275599 | 1391 |
| ENSG000001 | 19.89874 | 7.415569 | 1.374    | 0.043541 | 0.078926 | CTB-109A1  | chr5  | - | 1.57E+08 | 1.57E+08 | 1992 |
| ENSG000001 | 0        | 3.867637 | -3.1827  | 0.049272 | 0.08784  | RP11-586C  | chr4  | + | 6204055  | 6208376  | 4121 |
| ENSG000001 | 0.342542 | 0.343138 | -0.00208 | 0.99906  | NA       | AC007106   | chr4  | - | 27969345 | 27986685 | 600  |
| ENSG000001 | 2.697468 | 5.941033 | -1.0788  | 0.22525  | 0.31795  | RP11-397E  | chr4  | - | 87834419 | 87835970 | 1110 |
| ENSG000001 | 15.27202 | 8.61658  | 0.77925  | 0.23032  | 0.32369  | RP11-843P  | chr5  | + | 1.76E+08 | 1.76E+08 | 528  |
| ENSG000001 | 0        | 0.937167 | -1.2408  | 0.48662  | NA       | RP11-140N  | chr4  | - | 1.79E+08 | 1.79E+08 | 255  |
| ENSG000001 | 4.750114 | 1.652581 | 1.3836   | 0.19405  | 0.28164  | RP11-1348  | chr16 | + | 28814097 | 28829149 | 1930 |
| ENSG000001 | 0        | 0.343138 | -0.41864 | 0.81278  | NA       | CTC-369A1  | chr5  | + | 1.24E+08 | 1.24E+08 | 675  |
| ENSG000001 | 2.302685 | 1.012429 | 0.99269  | 0.45904  | 0.56435  | RP11-597C  | chr4  | + | 1.59E+08 | 1.59E+08 | 3115 |

|                    |          |          |          |          |                 |   |          |          |      |
|--------------------|----------|----------|----------|----------|-----------------|---|----------|----------|------|
| ENSG000001362950   | 14.67658 | 1.2796   | 0.004481 | 0.010051 | RP11-420A chr4  | + | 1.29E+08 | 1.29E+08 | 2012 |
| ENSG000001225044   | 0.297015 | 1.9304   | 0.23204  | 0.32554  | RTKL1P1 chr4    | + | 1.13E+08 | 1.13E+08 | 3685 |
| ENSG000001351613   | 0        | 3.3327   | 0.025484 | 0.049108 | RP11-792C chr4  | + | 79567057 | 79603853 | 2186 |
| ENSG000001058060   | 0        | 0.8036   | 0.6494   | NA       | RP11-113I chr5  | + | 33229841 | 33255659 | 517  |
| ENSG0000010        | 1.043983 | -1.3473  | 0.44976  | NA       | RP11-517B chr3  | - | 1.31E+08 | 1.31E+08 | 115  |
| ENSG0000010        | 0.357707 | -0.41864 | 0.81278  | NA       | RP11-71E1 chr3  | - | 1.26E+08 | 1.26E+08 | 254  |
| ENSG0000010        | 2.742687 | -2.9066  | 0.064462 | 0.11107  | MTND1P19 chr4   | + | 93623496 | 93623810 | 315  |
| ENSG0000010        | 3.725978 | -3.3947  | 0.022703 | 0.044253 | CTC-459I6 chr5  | - | 80243516 | 80256726 | 665  |
| ENSG000001128622   | 2.321872 | -0.69909 | 0.59796  | 0.692    | GS1-124K5 chr7  | - | 65872275 | 65874226 | 301  |
| ENSG000001072616   | 6.327879 | -2.7373  | 0.026122 | 0.050187 | RP11-164P chr4  | + | 1.53E+08 | 1.53E+08 | 2565 |
| ENSG0000010        | 0.297015 | -0.41864 | 0.81278  | NA       | RP11-436F chr5  | - | 1.24E+08 | 1.24E+08 | 558  |
| ENSG000001063284   | 1.531196 | -0.9423  | 0.54724  | 0.64731  | RP11-501C chr17 | - | 47090299 | 47091087 | 271  |
| ENSG0000010        | 0.297015 | -0.41864 | 0.81278  | NA       | FKBP4P1 chr4    | - | 1.19E+08 | 1.19E+08 | 1347 |
| ENSG000001128622   | 2.367995 | -0.73376 | 0.55551  | 0.65469  | CTC-250P2 chr5  | + | 72292747 | 72293469 | 723  |
| ENSG000001036308   | 13.48524 | -4.5247  | 0.000147 | 0.00041  | RP11-369K chr8  | + | 12815896 | 12819709 | 1418 |
| ENSG000001258.3364 | 197.4907 | 0.38477  | 0.089426 | 0.14698  | RPL32P3 chr3    | - | 1.29E+08 | 1.29E+08 | 2816 |
| ENSG000001036308   | 0.297015 | -0.00205 | 0.99908  | NA       | RP11-531A chr5  | - | 5396590  | 5397081  | 492  |
| ENSG000001034254   | 0        | 0.4146   | 0.81455  | NA       | CTD-2122P chr5  | - | 41585984 | 41587889 | 1562 |
| ENSG000001027626   | 6.186219 | -2.223   | 0.074606 | 0.12591  | RP5-1065J chr1  | - | 1.1E+08  | 1.1E+08  | 609  |
| ENSG000001347505   | 0.640152 | 2.0141   | 0.12776  | 0.1988   | AC068134 chr2   | + | 2.33E+08 | 2.33E+08 | 788  |
| ENSG000001029030   | 0        | 0.4146   | 0.81455  | NA       | RP11-404I chr4  | - | 1.34E+08 | 1.34E+08 | 587  |
| ENSG00000115.206   | 0        | 5.5329   | 5.16E-06 | 1.71E-05 | FOXD1 chr5      | - | 72740654 | 72744352 | 2270 |
| ENSG000001335084   | 5.796958 | -0.73583 | 0.40924  | 0.5142   | PPIAP11 chr5    | - | 81305421 | 81305913 | 493  |
| ENSG000001328923   | 3.838499 | -0.21392 | 0.83418  | 0.88339  | RP11-197A chr12 | + | 1.24E+08 | 1.24E+08 | 2191 |
| ENSG0000010        | 2.012704 | -2.1825  | 0.20921  | 0.29918  | RP11-162C chr4  | - | 1.79E+08 | 1.79E+08 | 758  |
| ENSG0000010        | 0.594029 | -0.81444 | 0.64499  | NA       | RP5-862P8 chr1  | - | 2.33E+08 | 2.33E+08 | 324  |
| ENSG000001070562   | 0        | 0.8807   | 0.6196   | NA       | RP11-155C chr5  | + | 96519303 | 96772921 | 893  |
| ENSG000001104816   | 0        | 1.348    | 0.44949  | NA       | CTD-2130F chr5  | + | 37948593 | 37951157 | 546  |
| ENSG000001662892   | 3.010564 | 1.0612   | 0.24592  | 0.34175  | RP11-46A1 chr1  | + | 1.81E+08 | 1.81E+08 | 537  |
| ENSG000001063284   | 0        | 0.81931  | 0.64303  | NA       | IMPA1P chr8     | - | 82517804 | 82543369 | 842  |
| ENSG000001664008   | 1.294874 | 2.1273   | 0.035444 | 0.065915 | RP11-724A chr4  | + | 99417515 | 99431086 | 489  |
| ENSG000001029030   | 0        | 0.4146   | 0.81455  | NA       | RP11-381A chr4  | + | 1.24E+08 | 1.24E+08 | 584  |
| ENSG0000010        | 20.11026 | -5.7904  | 5.05E-06 | 1.68E-05 | LINC00605 chr14 | - | 1.04E+08 | 1.04E+08 | 1558 |
| ENSG000001309225   | 2.139794 | 0.41661  | 0.74159  | 0.80991  | RP11-478C chr4  | - | 330047   | 330575   | 529  |
| ENSG000001068508   | 11.76955 | -3.6811  | 0.000666 | 0.001696 | RP11-572C chr12 | - | 1.3E+08  | 1.3E+08  | 1986 |
| ENSG000001063284   | 0.343138 | 0.49756  | 0.77728  | NA       | TRIM16 chr17    | - | 15474805 | 15554967 | 5514 |
| ENSG000001036308   | 0        | 0.4146   | 0.81455  | NA       | RP11-166A chr5  | - | 1.22E+08 | 1.22E+08 | 1651 |
| ENSG000001197130   | 0.594029 | 1.2788   | 0.39194  | 0.49637  | RP11-32M chr9   | - | 1.15E+08 | 1.15E+08 | 584  |
| ENSG0000010        | 0.343138 | -0.41864 | 0.81278  | NA       | MTND5P12 chr5   | + | 93903166 | 93904614 | 1449 |
| ENSG000001087090   | 0.997859 | -0.09987 | 0.94993  | NA       | RP11-215C chr5  | - | 10664607 | 10665225 | 619  |
| ENSG000001551653   | 7.223754 | -0.33838 | 0.74035  | 0.80892  | RP11-501C chr17 | + | 47114484 | 47114791 | 308  |
| ENSG000001058060   | 1.40169  | -0.82024 | 0.6196   | 0.71057  | COQ10BP2 chr5   | - | 82575740 | 82576463 | 724  |
| ENSG000001143178   | 4.723837 | -1.552   | 0.18188  | 0.26667  | RP11-118A chr5  | + | 1.45E+08 | 1.45E+08 | 439  |
| ENSG0000017027.335 | 3987.9   | 0.81602  | 2.49E-10 | 1.20E-09 | MALAT1 chr11    | + | 65265233 | 65273940 | 8708 |
| ENSG0000010        | 2.278164 | -2.6634  | 0.096176 | 0.1563   | RP11-775F chr4  | - | 1.37E+08 | 1.37E+08 | 875  |
| ENSG0000010        | 0.654722 | -0.83442 | 0.63731  | NA       | ALG3P1 chr5     | - | 5375836  | 5376949  | 1114 |
| ENSG0000010        | 0.357707 | -0.41864 | 0.81278  | NA       | RP11-6N13 chr5  | - | 1.04E+08 | 1.05E+08 | 777  |
| ENSG000001029030   | 0        | 0.4146   | 0.81455  | NA       | CTD-2170C chr5  | - | 61028601 | 61031496 | 1265 |
| ENSG000001029030   | 0        | 0.4146   | 0.81455  | NA       | RP11-297P chr4  | + | 1.04E+08 | 1.05E+08 | 825  |
| ENSG000001094368   | 0.357707 | 0.90033  | 0.60199  | NA       | RP11-39E3 chr3  | - | 1.31E+08 | 1.31E+08 | 523  |
| ENSG000001145232   | 1.188058 | 0.15687  | 0.92737  | 0.95176  | RP11-539L chr4  | - | 6672452  | 6675557  | 422  |
| ENSG000001513633   | 2.217472 | 1.0537   | 0.33706  | 0.44087  | RP11-464F chr10 | - | 75432880 | 75435692 | 508  |
| ENSG000001070562   | 0.343138 | 0.57395  | 0.74355  | NA       | TET2-AS1 chr4   | - | 1.06E+08 | 1.06E+08 | 537  |
| ENSG0000010        | 0.297015 | -0.41864 | 0.81278  | NA       | RP11-698E chr4  | + | 36507665 | 36510491 | 2827 |
| ENSG000001312395   | 0.891044 | 1.3168   | 0.39198  | 0.4964   | MSNP1 chr5      | + | 25909612 | 25911343 | 1732 |
| ENSG000001470985   | 1.012429 | 1.9487   | 0.095182 | 0.15497  | RP11-728F chr11 | - | 1.18E+08 | 1.18E+08 | 2872 |
| ENSG000001118055   | 15.06014 | -0.33605 | 0.5259   | 0.62772  | ABCA11P chr4    | - | 419224   | 467918   | 2110 |
| ENSG000001157652   | 1.623443 | -0.02613 | 0.98452  | 0.99109  | HADHAP1 chr4    | - | 1.66E+08 | 1.66E+08 | 2284 |
| ENSG0000010        | 0.594029 | -0.81444 | 0.64499  | NA       | RP11-789C chr4  | - | 1.33E+08 | 1.33E+08 | 582  |
| ENSG000001065338   | 0.297015 | 0.51304  | 0.77085  | NA       | RP11-673E chr4  | + | 1.45E+08 | 1.45E+08 | 1303 |
| ENSG000001413988   | 7.439179 | -0.08016 | 0.84124  | 0.88851  | RP11-521B chr14 | - | 1.06E+08 | 1.06E+08 | 2279 |
| ENSG000001087090   | 80.63487 | -6.0125  | 1.57E-14 | 1.00E-13 | RP11-164P chr4  | + | 1.53E+08 | 1.53E+08 | 304  |
| ENSG000001220936   | 8.708827 | -1.8139  | 0.050285 | 0.089391 | RP11-79P5 chr5  | + | 72747323 | 72749220 | 780  |
| ENSG000001368401   | 13.29591 | -1.7468  | 0.038803 | 0.071456 | SETP12 chr4     | - | 1.22E+08 | 1.22E+08 | 805  |
| ENSG000001121344   | 17.45814 | -3.4266  | 0.000815 | 0.002051 | RP11-610P chr4  | - | 1.52E+08 | 1.52E+08 | 358  |

|            |          |          |          |          |          |            |       |   |          |          |      |
|------------|----------|----------|----------|----------|----------|------------|-------|---|----------|----------|------|
| ENSG000001 | 0.290301 | 0.937167 | -0.88973 | 0.60765  | NA       | HSPA8P19   | chr3  | + | 1.32E+08 | 1.32E+08 | 1517 |
| ENSG000001 | 9.232258 | 7.664844 | 0.25286  | 0.74651  | 0.81427  | RP11-774C  | chr4  | - | 8356817  | 8359103  | 2287 |
| ENSG000001 | 0        | 0.951736 | -1.2555  | 0.48145  | NA       | STPG2-AS1  | chr4  | + | 98288077 | 98411315 | 537  |
| ENSG000001 | 0        | 0.297015 | -0.41864 | 0.81278  | NA       | RP11-826A  | chr5  | + | 1.76E+08 | 1.76E+08 | 920  |
| ENSG000001 | 0        | 0.343138 | -0.41864 | 0.81278  | NA       | UNC93B7    | chr4  | + | 9495380  | 9499710  | 705  |
| ENSG000001 | 0        | 0.343138 | -0.41864 | 0.81278  | NA       | RP11-371A  | chr5  | + | 1.13E+08 | 1.13E+08 | 570  |
| ENSG000001 | 0.290301 | 0        | 0.4146   | 0.81455  | NA       | RP11-774C  | chr5  | + | 20611949 | 20937800 | 1687 |
| ENSG000001 | 0.72616  | 0        | 0.85004  | 0.63064  | NA       | RP11-714L  | chr4  | + | 1.38E+08 | 1.39E+08 | 2264 |
| ENSG000001 | 16.2157  | 11.04198 | 0.54019  | 0.38133  | 0.48542  | RP11-1280  | chr5  | - | 70398725 | 70424580 | 2851 |
| ENSG000001 | 0.36308  | 0        | 0.4146   | 0.81455  | NA       | EMCN-IT1   | chr4  | - | 1.02E+08 | 1.02E+08 | 481  |
| ENSG000001 | 0.290301 | 2.96444  | -2.4092  | 0.10342  | 0.16605  | RP11-119C  | chr11 | + | 67653948 | 67673821 | 3387 |
| ENSG000001 | 0        | 0.594029 | -0.81444 | 0.64499  | NA       | RP11-2012C | chr4  | + | 1107427  | 1126765  | 468  |
| ENSG000001 | 0        | 1.029414 | -1.1526  | 0.51496  | NA       | RP11-192F  | chr5  | - | 25219082 | 25298721 | 558  |
| ENSG000001 | 0.36308  | 0        | 0.4146   | 0.81455  | NA       | PRB1       | chr12 | - | 11504757 | 11548500 | 1173 |
| ENSG000001 | 1.233984 | 0.297015 | 1.1901   | 0.48541  | NA       | CTD-2154I  | chr5  | + | 94993766 | 95020477 | 725  |
| ENSG000001 | 8.892321 | 8.14152  | 0.11649  | 0.87892  | 0.91569  | RP11-326C  | chr11 | + | 318640   | 325631   | 1151 |
| ENSG000001 | 57.02703 | 65.53995 | -0.20793 | 0.46758  | 0.57244  | PCDHA12    | chr5  | + | 1.4E+08  | 1.4E+08  | 5233 |
| ENSG000001 | 0.36308  | 0        | 0.4146   | 0.81455  | NA       | RP11-700F  | chr17 | + | 49021465 | 49026111 | 789  |
| ENSG000001 | 9.201368 | 6.535062 | 0.46976  | 0.48298  | 0.58716  | ZNF346-IT1 | chr5  | + | 1.76E+08 | 1.76E+08 | 745  |
| ENSG000001 | 2.467967 | 4.317591 | -0.69066 | 0.53736  | 0.6382   | RP11-844P  | chr5  | + | 1.76E+08 | 1.76E+08 | 951  |
| ENSG000001 | 10.22981 | 36.36403 | -1.8192  | 0.000143 | 0.0004   | FAM86EP    | chr4  | - | 3943487  | 3957146  | 2845 |
| ENSG000001 | 0.290301 | 0        | 0.4146   | 0.81455  | NA       | CTD-2532K  | chr5  | + | 1.74E+08 | 1.74E+08 | 457  |
| ENSG000001 | 11.00739 | 30.72813 | -1.4684  | 0.001506 | 0.003637 | CTC-458I2  | chr5  | + | 79424184 | 79439706 | 664  |
| ENSG000001 | 0        | 0.343138 | -0.41864 | 0.81278  | NA       | RP11-669A  | chr4  | + | 14136560 | 14145216 | 457  |
| ENSG000001 | 1.555988 | 0        | 1.8901   | 0.28116  | NA       | CTC-575N7  | chr5  | - | 1.29E+08 | 1.29E+08 | 631  |
| ENSG000001 | 4.616536 | 2.24661  | 0.93456  | 0.34241  | 0.44633  | RP11-631A  | chr5  | + | 60642953 | 60643543 | 591  |
| ENSG000001 | 1.722083 | 22.8124  | -3.5849  | 3.26E-06 | 1.10E-05 | RP11-181K  | chr4  | + | 1.47E+08 | 1.47E+08 | 794  |
| ENSG000001 | 0.705622 | 0        | 0.8807   | 0.6196   | NA       | RP11-752L  | chr4  | + | 1.48E+08 | 1.49E+08 | 1028 |
| ENSG000001 | 5.197138 | 43.92447 | -3.0048  | 3.81E-09 | 1.67E-08 | RP11-478C  | chr4  | - | 263655   | 263964   | 310  |
| ENSG000001 | 2.023549 | 4.006007 | -0.89478 | 0.40324  | 0.50794  | PTX4       | chr16 | - | 1535887  | 1538982  | 1516 |
| ENSG000001 | 0.290301 | 0        | 0.4146   | 0.81455  | NA       | AC124890   | chr12 | + | 69186125 | 69187743 | 1619 |
| ENSG000001 | 0.290301 | 0.343138 | -0.00202 | 0.99909  | NA       | RP1-117B1  | chr17 | + | 48473799 | 48475249 | 715  |
| ENSG000001 | 26.28536 | 22.88692 | 0.1917   | 0.68151  | 0.7619   | RP11-158K  | chr8  | + | 1.26E+08 | 1.26E+08 | 2355 |
| ENSG000001 | 1.846289 | 0        | 2.122    | 0.22126  | NA       | RP11-136C  | chr8  | + | 1.26E+08 | 1.27E+08 | 785  |
| ENSG000001 | 1.971308 | 2.788811 | -0.41229 | 0.74154  | 0.80991  | CTD-2373A  | chr8  | + | 30454431 | 30455049 | 407  |
| ENSG000001 | 0.632843 | 0.357707 | 0.4993   | 0.77637  | NA       | RP11-648L  | chr8  | - | 59004001 | 59018853 | 625  |
| ENSG000001 | 1.628766 | 0.640152 | 1.0465   | 0.47122  | 0.57603  | CTB-4518.1 | chr5  | - | 1.54E+08 | 1.54E+08 | 982  |
| ENSG000001 | 1.390706 | 0.997859 | 0.36103  | 0.80506  | 0.8622   | RP11-659E  | chr8  | + | 63936931 | 63937853 | 667  |
| ENSG000001 | 0.290301 | 0.343138 | -0.00202 | 0.99909  | NA       | RP11-459E  | chr8  | + | 22547663 | 22656129 | 1630 |
| ENSG000001 | 0.653381 | 3.748668 | -2.018   | 0.15359  | 0.23162  | RP11-360L  | chr8  | - | 41391674 | 41435887 | 559  |
| ENSG000001 | 2.044087 | 0        | 2.4801   | 0.12801  | 0.19906  | CTC-436K1  | chr5  | + | 1.58E+08 | 1.58E+08 | 346  |
| ENSG000001 | 0        | 0.357707 | -0.41864 | 0.81278  | NA       | RP11-589C  | chr8  | - | 41986292 | 41986767 | 476  |
| ENSG000001 | 0.290301 | 0.357707 | -0.00203 | 0.99908  | NA       | CTB-164N1  | chr5  | + | 1.73E+08 | 1.73E+08 | 753  |
| ENSG000001 | 0        | 1.012429 | -1.3162  | 0.46038  | NA       | RP11-628E  | chr8  | + | 56438745 | 56446511 | 865  |
| ENSG000001 | 0        | 1.058552 | -1.361   | 0.4451   | NA       | KB-1562D1  | chr8  | - | 1.03E+08 | 1.03E+08 | 481  |
| ENSG000001 | 15.80975 | 0        | 5.618    | 2.29E-06 | 7.89E-06 | CTA-392E5  | chr8  | + | 86851934 | 86963312 | 517  |
| ENSG000001 | 9.388002 | 11.05742 | -0.2402  | 0.7239   | 0.79565  | PCDHGA12   | chr5  | + | 1.41E+08 | 1.41E+08 | 4747 |
| ENSG000001 | 73.90646 | 0.654722 | 6.3096   | 3.91E-13 | 2.28E-12 | RP11-150C  | chr8  | - | 37278859 | 37411701 | 1093 |
| ENSG000001 | 0.36308  | 0        | 0.4146   | 0.81455  | NA       | RP11-563A  | chr8  | + | 20207721 | 20230280 | 759  |
| ENSG000001 | 1.016461 | 0        | 1.3167   | 0.46021  | NA       | RP11-585F  | chr8  | - | 152660   | 152897   | 164  |
| ENSG000001 | 1.919068 | 0.343138 | 1.8342   | 0.23468  | 0.32849  | KIAA0196-7 | chr8  | + | 1.26E+08 | 1.26E+08 | 587  |
| ENSG000001 | 0        | 0.297015 | -0.41864 | 0.81278  | NA       | RP11-326L  | chr8  | + | 17561497 | 17563696 | 735  |
| ENSG000001 | 0        | 33.37844 | -6.6177  | 1.06E-08 | 4.51E-08 | RP11-431J  | chr4  | + | 98041852 | 98056210 | 525  |
| ENSG000001 | 3.028845 | 0        | 3.0462   | 0.050022 | 0.088995 | CTB-118P1  | chr8  | + | 88986393 | 89031341 | 647  |
| ENSG000001 | 0        | 0.640152 | -0.82869 | 0.63935  | NA       | RP11-152C  | chr8  | - | 71016028 | 71016414 | 387  |
| ENSG000001 | 3.807246 | 5.941033 | -0.62298 | 0.48825  | 0.59234  | RP11-360L  | chr8  | - | 41397900 | 41402563 | 884  |
| ENSG000001 | 0.290301 | 0.654722 | -0.51764 | 0.76892  | NA       | RP11-267A  | chr8  | + | 95577264 | 95577943 | 375  |
| ENSG000001 | 0        | 0.297015 | -0.41864 | 0.81278  | NA       | RP11-1149  | chr8  | + | 27695994 | 27697899 | 717  |
| ENSG000001 | 4.721017 | 0.700845 | 2.3857   | 0.053865 | 0.094907 | RP11-410L  | chr8  | - | 1E+08    | 1E+08    | 436  |
| ENSG000001 | 0.632843 | 0        | 0.81931  | 0.64303  | NA       | RP11-13N1  | chr8  | + | 16461764 | 16522388 | 458  |
| ENSG000001 | 56.3756  | 0.686276 | 5.9172   | 3.74E-11 | 1.91E-10 | HOXA-AS4   | chr7  | + | 27208238 | 27211534 | 1161 |
| ENSG000001 | 0.342542 | 0        | 0.4146   | 0.81455  | NA       | RP11-158A  | chr8  | - | 5893955  | 5894496  | 331  |
| ENSG000001 | 0.685084 | 1.370136 | -0.68229 | 0.68128  | 0.76172  | AC084082   | chr8  | + | 67024902 | 67027440 | 954  |
| ENSG000001 | 0.653381 | 0        | 0.82678  | 0.64037  | NA       | FCGR1C     | chr1  | + | 1.49E+08 | 1.49E+08 | 1122 |
| ENSG000001 | 0.36308  | 0.343138 | -0.0021  | 0.99905  | NA       | RP11-351A  | chr6  | + | 1.19E+08 | 1.19E+08 | 471  |

|            |          |          |          |           |           |                 |   |          |          |      |
|------------|----------|----------|----------|-----------|-----------|-----------------|---|----------|----------|------|
| ENSG000001 | 0        | 1.073121 | -1.1788  | 0.50551   | NA        | RP11-706C chr8  | + | 1.44E+08 | 1.44E+08 | 670  |
| ENSG000001 | 0.36308  | 0.357707 | -0.00212 | 0.99905   | NA        | CTD-3239E chr8  | + | 93895212 | 93977873 | 602  |
| ENSG000001 | 34.85389 | 8.311444 | 2.037    | 2.26E-05  | 6.97E-05  | RP11-582J chr8  | - | 22471421 | 22474170 | 2750 |
| ENSG000001 | 71.9385  | 51.0235  | 0.49897  | 0.10962   | 0.17445   | GUSBP3 chr5     | - | 68790040 | 69006341 | 1334 |
| ENSG000001 | 1.048164 | 0.297015 | 0.97802  | 0.57083   | NA        | RP5-1009N chr8  | + | 30778576 | 30778851 | 276  |
| ENSG000001 | 0.653381 | 0        | 0.82678  | 0.64037   | NA        | CTD-3046C chr8  | - | 64297397 | 64382763 | 1762 |
| ENSG000001 | 0        | 0.700845 | -0.87835 | 0.62047   | NA        | RP11-1G11 chr8  | + | 26405185 | 26405979 | 795  |
| ENSG000001 | 8.632745 | 14.98172 | -0.78608 | 0.27721   | 0.37747   | RP11-809C chr8  | - | 1.42E+08 | 1.42E+08 | 505  |
| ENSG000001 | 1.971308 | 4.305438 | -1.0158  | 0.33537   | 0.43902   | RP11-546B chr5  | + | 1.71E+08 | 1.71E+08 | 1117 |
| ENSG000001 | 2.540746 | 3.054271 | -0.21249 | 0.85389   | 0.89735   | KLF3P1 chr5     | - | 1.72E+08 | 1.72E+08 | 1022 |
| ENSG000001 | 0.342542 | 0        | 0.4146   | 0.81455   | NA        | HIGD1AP6 chr8   | + | 76214531 | 76214809 | 279  |
| ENSG000001 | 0        | 497.2429 | -10.212  | 1.08E-20  | 9.38E-20  | LINC00599 chr8  | - | 9757574  | 9762876  | 3334 |
| ENSG000001 | 0        | 0.343138 | -0.41864 | 0.81278   | NA        | RP11-32K4 chr8  | + | 65244484 | 65244709 | 226  |
| ENSG000001 | 0        | 0.297015 | -0.41864 | 0.81278   | NA        | RP11-359B chr8  | + | 33380672 | 33380809 | 138  |
| ENSG000001 | 1.431782 | 0        | 1.7261   | 0.329     | NA        | CTD-2313P chr5  | - | 1.64E+08 | 1.64E+08 | 520  |
| ENSG000001 | 0.36308  | 0        | 0.4146   | 0.81455   | NA        | MTND1P36 chr11  | - | 1.03E+08 | 1.03E+08 | 936  |
| ENSG000001 | 24.69172 | 36.66179 | -0.56316 | 0.16213   | 0.24244   | RP11-122A chr8  | - | 91970865 | 91997485 | 894  |
| ENSG000001 | 17.35457 | 16.5622  | 0.069098 | 0.88582   | 0.92025   | CTC-534A2 chr5  | + | 64920592 | 64926718 | 1766 |
| ENSG000001 | 0        | 10.03197 | -4.6681  | 0.001003  | 0.002486  | RP11-10A1 chr8  | - | 9037761  | 9040029  | 328  |
| ENSG000001 | 0.342542 | 0        | 0.4146   | 0.81455   | NA        | MTND4P7 chr8    | - | 13210910 | 13211039 | 130  |
| ENSG000001 | 3.682226 | 0.654722 | 2.055    | 0.12045   | 0.18944   | KB-1507C5 chr8  | + | 1.04E+08 | 1.04E+08 | 533  |
| ENSG000001 | 0.685084 | 0.715414 | -0.02805 | 0.98738   | NA        | PCAT2 chr8      | - | 1.28E+08 | 1.28E+08 | 575  |
| ENSG000001 | 0.923144 | 1.029414 | -0.08353 | 0.96007   | 0.97614   | RP11-128L chr8  | + | 1.42E+08 | 1.42E+08 | 1064 |
| ENSG000001 | 0        | 1.029414 | -1.1526  | 0.51496   | NA        | RP11-99A1 chr8  | + | 74743378 | 74744182 | 805  |
| ENSG000001 | 318.8352 | 89.54457 | 1.8193   | 2.17E-14  | 1.37E-13  | CCDC71L chr7    | - | 1.06E+08 | 1.06E+08 | 4232 |
| ENSG000001 | 0.36308  | 0        | 0.4146   | 0.81455   | NA        | KB-1410C5 chr8  | + | 1.02E+08 | 1.02E+08 | 731  |
| ENSG000001 | 4.023955 | 15.1168  | -1.7829  | 0.020243  | 0.039889  | RP11-282K chr12 | + | 19300008 | 19307593 | 5391 |
| ENSG000001 | 0.342542 | 0.357707 | -0.0021  | 0.99906   | NA        | RP11-298P chr8  | - | 87605983 | 87606817 | 835  |
| ENSG000001 | 285.4364 | 4.460793 | 4.6548   | 0.00138   | 0.00335   | HOXA10 chr7     | - | 27210210 | 27219880 | 2541 |
| ENSG000001 | 1.08924  | 0.297015 | 0.89622  | 0.61378   | NA        | RP11-779C chr5  | + | 1.72E+08 | 1.72E+08 | 472  |
| ENSG000001 | 0        | 0.594029 | -0.81444 | 0.64499   | NA        | RP11-513C chr8  | + | 58055248 | 58152857 | 2292 |
| ENSG000001 | 0.72616  | 0.357707 | 0.52227  | 0.76959   | NA        | STAU2-AS1 chr8  | + | 74332239 | 74353761 | 2076 |
| ENSG000001 | 253.7655 | 996.9385 | -1.9693  | 3.84E-28  | 4.57E-27  | TMEM200E chr1   | - | 29445940 | 29450447 | 2553 |
| ENSG000001 | 1687.861 | 129.2193 | 3.6985   | 2.69E-151 | 3.10E-149 | PCDHGB6 chr5    | + | 1.41E+08 | 1.41E+08 | 4599 |
| ENSG000001 | 2.116866 | 3.757532 | -0.72762 | 0.55685   | 0.65589   | RP11-10J2 chr8  | - | 1.42E+08 | 1.42E+08 | 397  |
| ENSG000001 | 1.524285 | 2.263595 | -0.44168 | 0.75464   | 0.82134   | RP1-170O1 chr7  | - | 27278862 | 27280847 | 757  |
| ENSG000001 | 32.51355 | 28.86508 | 0.16804  | 0.65212   | 0.73745   | SERPINE3 chr13  | + | 51909909 | 51938871 | 2293 |
| ENSG000001 | 0        | 172.1556 | -8.8586  | 3.63E-16  | 2.53E-15  | C1orf210 chr1   | - | 43747554 | 43751288 | 1478 |
| ENSG000001 | 1.681007 | 0.700845 | 1.0105   | 0.49021   | 0.59421   | RP11-142A chr8  | + | 73108569 | 73114504 | 798  |
| ENSG000001 | 23.47144 | 28.75914 | -0.27913 | 0.57356   | 0.67071   | KB-1507C5 chr8  | + | 1.04E+08 | 1.04E+08 | 756  |
| ENSG000001 | 0.72616  | 0.98329  | -0.3153  | 0.85196   | NA        | RP11-261C chr1  | - | 2.43E+08 | 2.43E+08 | 1243 |
| ENSG000001 | 0.290301 | 2.024857 | -1.7829  | 0.27658   | 0.3768    | RAD21-AS1 chr8  | + | 1.18E+08 | 1.18E+08 | 2010 |
| ENSG000001 | 0.290301 | 4.141961 | -2.8394  | 0.047653  | 0.085328  | KB-431C1.1 chr8 | - | 1.03E+08 | 1.03E+08 | 295  |
| ENSG000001 | 4.076195 | 6.191924 | -0.54745 | 0.5236    | 0.62598   | RP11-697N chr8  | - | 48423596 | 48424703 | 1108 |
| ENSG000001 | 0.36308  | 0.297015 | -0.00205 | 0.99908   | NA        | RP11-497F chr5  | - | 69790927 | 69796730 | 371  |
| ENSG000001 | 0.36308  | 0.357707 | -0.00212 | 0.99905   | NA        | RP13-923C chr8  | + | 82704058 | 82727949 | 478  |
| ENSG000001 | 1.722083 | 1.294874 | 0.31592  | 0.80921   | 0.8655    | RP11-420B chr8  | + | 18846789 | 18858462 | 545  |
| ENSG000001 | 3.536669 | 7.028723 | -0.90972 | 0.30588   | 0.40743   | RP11-730C chr8  | - | 75515479 | 75516479 | 1001 |
| ENSG000001 | 9.563635 | 4.288452 | 1.1139   | 0.13707   | 0.21039   | CTD-2026C chr17 | - | 45486688 | 45500892 | 513  |
| ENSG000001 | 0        | 8.886072 | -4.6935  | 0.000397  | 0.001044  | MIR4454 chr5    | - | 1.7E+08  | 1.7E+08  | 602  |
| ENSG000001 | 0        | 0.997859 | -1.5018  | 0.39072   | NA        | RP11-127F chr8  | + | 1.06E+08 | 1.06E+08 | 720  |
| ENSG000001 | 1809.408 | 1208.899 | 0.58109  | 0.000104  | 0.000296  | TUG1 chr22      | + | 31366663 | 31375381 | 5673 |
| ENSG000001 | 1.370168 | 0.297015 | 1.1469   | 0.51585   | NA        | KB-1460A1 chr8  | + | 1.02E+08 | 1.02E+08 | 498  |
| ENSG000001 | 0.36308  | 1.372552 | -1.1173  | 0.52587   | NA        | CTB-78F1.2 chr5 | + | 1.67E+08 | 1.67E+08 | 474  |
| ENSG000001 | 0.653381 | 0.98329  | -0.41986 | 0.79515   | NA        | GS1-251I9. chr8 | + | 92028816 | 92030883 | 398  |
| ENSG000001 | 2.914991 | 2.618886 | 0.13906  | 0.90327   | 0.93306   | RP11-675F chr8  | - | 38401170 | 38410198 | 379  |
| ENSG000001 | 8.974473 | 8.026583 | 0.15647  | 0.81952   | 0.87319   | RP11-589F chr5  | + | 70046954 | 70149508 | 640  |
| ENSG000001 | 91.42371 | 948.4121 | -3.3658  | 4.47E-70  | 1.61E-68  | TRNP1 chr1      | + | 27320198 | 27327389 | 1958 |
| ENSG000001 | 0        | 2.742687 | -2.9066  | 0.064462  | 0.11107   | RP11-1081 chr8  | - | 54307771 | 54308506 | 594  |
| ENSG000001 | 1.161205 | 0        | 1.2509   | 0.47995   | NA        | CTB-56J15. chr5 | - | 1.56E+08 | 1.56E+08 | 110  |
| ENSG000001 | 0.685084 | 0        | 0.85004  | 0.63064   | NA        | RP11-587F chr8  | - | 93512811 | 93522044 | 614  |
| ENSG000001 | 1.887365 | 5.332435 | -1.328   | 0.20418   | 0.29329   | RP11-44N1 chr8  | + | 1.24E+08 | 1.24E+08 | 758  |
| ENSG000001 | 1.068702 | 8.781672 | -2.8103  | 0.006947  | 0.01505   | RP11-1102 chr8  | - | 72315675 | 72504260 | 1797 |
| ENSG000001 | 0        | 0.686276 | -0.84936 | 0.6309    | NA        | RP11-116B chr8  | + | 74502809 | 74503118 | 310  |
| ENSG000001 | 0.342542 | 0        | 0.4146   | 0.81455   | NA        | CTD-2547L chr8  | - | 17946078 | 17947196 | 1119 |

|            |          |          |          |          |          |                  |   |          |          |      |
|------------|----------|----------|----------|----------|----------|------------------|---|----------|----------|------|
| ENSG000001 | 2.293312 | 1.949596 | 0.19548  | 0.878    | 0.91499  | KB-1254G8 chr8   | + | 1.04E+08 | 1.04E+08 | 770  |
| ENSG000001 | 0.290301 | 0.357707 | -0.00203 | 0.99908  | NA       | RP11-930P chr8   | + | 41518509 | 41523084 | 1088 |
| ENSG000001 | 2.354926 | 0.951736 | 1.0608   | 0.42205  | 0.52756  | CTC-756D1 chr8   | + | 23316114 | 23342484 | 630  |
| ENSG000001 | 2.540746 | 1.949596 | 0.33249  | 0.78919  | 0.84952  | AC006277. chr19  | - | 2915144  | 2926805  | 776  |
| ENSG000001 | 0.36308  | 0        | 0.4146   | 0.81455  | NA       | RANP9 chr8       | + | 32897041 | 32897311 | 271  |
| ENSG000001 | 1.08924  | 0.343138 | 0.88459  | 0.61802  | NA       | KB-1460A1 chr8   | - | 1.02E+08 | 1.02E+08 | 430  |
| ENSG000001 | 0.342542 | 0        | 0.4146   | 0.81455  | NA       | RP11-775B chr8   | - | 1.2E+08  | 1.2E+08  | 325  |
| ENSG000001 | 0.653381 | 2.742687 | -1.6733  | 0.22187  | 0.31403  | AC078852. chr4   | + | 1352267  | 1353249  | 441  |
| ENSG000001 | 0        | 1.713273 | -2.2094  | 0.18675  | NA       | RP11-337A chr9   | + | 26801731 | 26805860 | 371  |
| ENSG000001 | 0.290301 | 0        | 0.4146   | 0.81455  | NA       | AC034243. chr5   | - | 1.38E+08 | 1.38E+08 | 587  |
| ENSG000001 | 1.370168 | 0.686276 | 0.60093  | 0.73056  | 0.80108  | EVX1-AS chr7     | - | 27281048 | 27286848 | 576  |
| ENSG000001 | 0.36308  | 0.297015 | -0.00205 | 0.99908  | NA       | RP11-231C chr8   | - | 42091193 | 42128715 | 815  |
| ENSG000001 | 3.817597 | 0.343138 | 2.7249   | 0.056919 | 0.099662 | RP11-150C chr8   | - | 37373928 | 37374539 | 510  |
| ENSG000001 | 0.705622 | 0        | 0.8807   | 0.6196   | NA       | RP11-109J. chr5  | - | 1.6E+08  | 1.6E+08  | 2323 |
| ENSG000001 | 0        | 0.594029 | -0.81444 | 0.64499  | NA       | RP11-642C chr8   | - | 1.07E+08 | 1.07E+08 | 649  |
| ENSG000001 | 0.632843 | 0        | 0.81931  | 0.64303  | NA       | CTC-436K1 chr5   | + | 1.58E+08 | 1.58E+08 | 548  |
| ENSG000001 | 5.974725 | 45.28487 | -2.8185  | 2.74E-07 | 1.03E-06 | RP11-10A1 chr8   | + | 9009252  | 9025646  | 826  |
| ENSG000001 | 0        | 2.681995 | -2.9147  | 0.061147 | 0.10611  | CTB-43E15 chr5   | + | 1.73E+08 | 1.73E+08 | 513  |
| ENSG000001 | 0.36308  | 0.715414 | -0.51558 | 0.77246  | NA       | RP11-14I1. chr8  | + | 26280109 | 26281445 | 508  |
| ENSG000001 | 0        | 0.343138 | -0.41864 | 0.81278  | NA       | RP11-442A chr8   | - | 63775641 | 63776740 | 1100 |
| ENSG000001 | 0        | 0.343138 | -0.41864 | 0.81278  | NA       | AC083843. chr8   | + | 1.36E+08 | 1.36E+08 | 519  |
| ENSG000001 | 0        | 0.640152 | -0.82869 | 0.63935  | NA       | RP11-90P5 chr8   | + | 37979892 | 37979998 | 107  |
| ENSG000001 | 0.290301 | 0.997859 | -1.0217  | 0.53916  | NA       | PCAT1 chr8       | + | 1.28E+08 | 1.28E+08 | 1992 |
| ENSG000001 | 0.342542 | 0        | 0.4146   | 0.81455  | NA       | RP11-619L chr5   | - | 1.74E+08 | 1.74E+08 | 545  |
| ENSG000001 | 7.271136 | 0        | 4.4092   | 0.001072 | 0.002645 | RP11-473J. chr8  | + | 35719641 | 35828183 | 578  |
| ENSG000001 | 0.342542 | 0.700845 | -0.57269 | 0.74414  | NA       | CTD-2594K chr8   | + | 1.06E+08 | 1.06E+08 | 344  |
| ENSG000001 | 2.656392 | 0        | 2.8491   | 0.072291 | 0.12249  | RP11-770E chr8   | + | 49533025 | 49536455 | 289  |
| ENSG000001 | 1.722083 | 0        | 2.21     | 0.18654  | NA       | CTD-2363C chr5   | + | 1.58E+08 | 1.58E+08 | 542  |
| ENSG000001 | 0.632843 | 1.294874 | -0.78057 | 0.60302  | 0.69637  | SMIM18 chr8      | + | 30496117 | 30503581 | 905  |
| ENSG000001 | 3.527296 | 2.993578 | 0.23045  | 0.81892  | 0.87272  | AL139099. chr14  | - | 50064193 | 50065882 | 1690 |
| ENSG000001 | 1.555988 | 0.700845 | 0.90082  | 0.55876  | 0.65763  | HMGB1P15 chr8    | + | 1.24E+08 | 1.24E+08 | 577  |
| ENSG000001 | 1.317927 | 0        | 1.6383   | 0.35541  | NA       | KB-1517D1 chr8   | - | 99425110 | 99426012 | 587  |
| ENSG000001 | 0        | 0.640152 | -0.82869 | 0.63935  | NA       | RP11-175E chr8   | + | 23564654 | 23647000 | 252  |
| ENSG000001 | 0.943682 | 1.280305 | -0.32812 | 0.82999  | 0.88025  | RP11-110C chr8   | - | 52808517 | 52808934 | 283  |
| ENSG000001 | 6.753939 | 2.321872 | 1.4051   | 0.15635  | 0.23525  | RP11-395I. chr8  | - | 25283037 | 25284096 | 528  |
| ENSG000001 | 5.290455 | 18.65916 | -1.7635  | 0.007768 | 0.01665  | RP11-1C8.4 chr8  | - | 1.04E+08 | 1.05E+08 | 722  |
| ENSG000001 | 0.290301 | 0        | 0.4146   | 0.81455  | NA       | RP11-744J chr8   | - | 70337270 | 70360479 | 1134 |
| ENSG000001 | 0        | 0.686276 | -0.84936 | 0.6309   | NA       | RP11-39H3 chr5   | - | 1.8E+08  | 1.8E+08  | 1015 |
| ENSG000001 | 3.963155 | 1.058552 | 1.6916   | 0.15904  | 0.23848  | CTC-756D1 chr8   | - | 23340529 | 23341047 | 519  |
| ENSG000001 | 0        | 0.640152 | -0.82869 | 0.63935  | NA       | RP11-109P chr8   | - | 50730146 | 50733504 | 412  |
| ENSG000001 | 5.90276  | 8.978319 | -0.57511 | 0.42217  | 0.52764  | PCDHGA5 chr5     | + | 1.41E+08 | 1.41E+08 | 4602 |
| ENSG000001 | 0.943682 | 0        | 1.2438   | 0.48556  | NA       | AC145110. chr8   | + | 29605825 | 29656008 | 2980 |
| ENSG000001 | 0.36308  | 0.297015 | -0.00205 | 0.99908  | NA       | CDH12P3 chr5     | + | 69428506 | 69428800 | 295  |
| ENSG000001 | 30.63556 | 0.715414 | 5.0554   | 7.33E-08 | 2.89E-07 | RP11-13N1 chr8   | - | 16534414 | 16772553 | 543  |
| ENSG000001 | 0        | 1.995719 | -2.4883  | 0.12386  | 0.19391  | RP11-393K chr8   | - | 1.15E+08 | 1.15E+08 | 512  |
| ENSG000001 | 13.10372 | 0        | 5.3208   | 1.42E-05 | 4.48E-05 | AF121898. chr8   | - | 88554214 | 88767946 | 1044 |
| ENSG000001 | 0.290301 | 0.654722 | -0.51764 | 0.76892  | NA       | ATP6V1G1I chr8   | - | 48105625 | 48105970 | 346  |
| ENSG000001 | 0.705622 | 0        | 0.8807   | 0.6196   | NA       | RP11-653B chr8   | - | 83426803 | 83589388 | 544  |
| ENSG000001 | 0        | 545.7044 | -10.375  | 5.93E-22 | 5.44E-21 | CTD-2501N chr8   | + | 1.32E+08 | 1.32E+08 | 884  |
| ENSG000001 | 33.51803 | 0        | 6.6748   | 3.07E-09 | 1.36E-08 | RP1-170O1 chr7   | - | 27226192 | 27233067 | 556  |
| ENSG000001 | 0        | 0.357707 | -0.41864 | 0.81278  | NA       | RP11-6D1. chr8   | - | 1.26E+08 | 1.26E+08 | 412  |
| ENSG000001 | 0        | 0.297015 | -0.41864 | 0.81278  | NA       | RP11-417F chr2   | + | 46726870 | 46728417 | 399  |
| ENSG000001 | 0.995923 | 0.297015 | 1.0163   | 0.54122  | NA       | HMGB1P41 chr8    | - | 81724377 | 81724816 | 440  |
| ENSG000001 | 8.964122 | 3.183777 | 1.3628   | 0.12191  | 0.19139  | AC106801. chr5   | + | 1.57E+08 | 1.57E+08 | 1845 |
| ENSG000001 | 0.685084 | 3.526915 | -1.9658  | 0.14667  | 0.22265  | RP11-798K chr5   | - | 1.79E+08 | 1.79E+08 | 290  |
| ENSG000001 | 0.685084 | 0.297015 | 0.4735   | 0.79064  | NA       | hsa-mir-14I chr5 | + | 1.6E+08  | 1.6E+08  | 2301 |
| ENSG000001 | 0.36308  | 0        | 0.4146   | 0.81455  | NA       | RP11-152P chr8   | + | 1.07E+08 | 1.07E+08 | 445  |
| ENSG000001 | 1.233984 | 1.355566 | -0.07449 | 0.95815  | 0.97466  | RP11-347C chr8   | - | 95986801 | 95987081 | 281  |
| ENSG000001 | 0.290301 | 0.654722 | -0.51764 | 0.76892  | NA       | CTD-2340C chr8   | + | 1E+08    | 1E+08    | 595  |
| ENSG000001 | 0.36308  | 1.66715  | -1.5237  | 0.35755  | 0.46184  | RP11-624C chr8   | - | 24153327 | 24769586 | 741  |
| ENSG000001 | 0        | 0.594029 | -0.81444 | 0.64499  | NA       | RP11-1174 chr5   | - | 70771588 | 70772143 | 556  |
| ENSG000001 | 2.012384 | 3.526915 | -0.74973 | 0.48649  | 0.5904   | PCDHGA7 chr5     | + | 1.41E+08 | 1.41E+08 | 4605 |
| ENSG000001 | 1.919068 | 0.357707 | 1.8355   | 0.23402  | 0.3277   | RP11-402L chr8   | - | 1.01E+08 | 1.01E+08 | 648  |
| ENSG000001 | 32.08625 | 28.0744  | 0.19199  | 0.6155   | 0.70721  | FAM86HP chr3     | - | 1.3E+08  | 1.3E+08  | 959  |
| ENSG000001 | 0.36308  | 0        | 0.4146   | 0.81455  | NA       | PYDC2 chr3       | + | 1.91E+08 | 1.91E+08 | 294  |

|            |          |          |          |          |          |                 |   |          |          |      |
|------------|----------|----------|----------|----------|----------|-----------------|---|----------|----------|------|
| ENSG000001 | 3.019472 | 5.554188 | -0.82944 | 0.3702   | 0.47467  | RP11-317J chr8  | - | 86354080 | 86377144 | 591  |
| ENSG000001 | 0.72616  | 0        | 0.85004  | 0.63064  | NA       | RP11-115C chr8  | - | 6331366  | 6331809  | 444  |
| ENSG000001 | 75.9926  | 0        | 7.7798   | 1.26E-12 | 7.11E-12 | HOXA-AS2 chr7   | + | 27147396 | 27173921 | 2455 |
| ENSG000001 | 6.370321 | 3.792375 | 0.67029  | 0.45739  | 0.56257  | RP11-586K chr8  | + | 89339065 | 89749363 | 1469 |
| ENSG000001 | 0        | 14.5738  | -5.407   | 1.75E-05 | 5.45E-05 | RP11-32K4 chr8  | - | 64599737 | 65281115 | 581  |
| ENSG000001 | 0.580602 | 0        | 0.8036   | 0.6494   | NA       | KB-1639H6 chr8  | + | 1.04E+08 | 1.04E+08 | 1409 |
| ENSG000001 | 0.685084 | 1.073121 | -0.37207 | 0.83246  | NA       | CTD-2179L chr5  | - | 77337703 | 77339962 | 2260 |
| ENSG000001 | 2.49967  | 1.874334 | 0.35019  | 0.77971  | 0.84184  | OSGEPL1-A chr2  | + | 1.91E+08 | 1.91E+08 | 567  |
| ENSG000001 | 0.290301 | 0.297015 | -0.00202 | 0.99909  | NA       | RP11-181B chr8  | + | 28304781 | 28313419 | 443  |
| ENSG000001 | 3.362014 | 3.916176 | -0.21583 | 0.82691  | 0.87805  | RNF5P1 chr8     | - | 38458179 | 38458718 | 540  |
| ENSG000001 | 0        | 0.357707 | -0.41864 | 0.81278  | NA       | RP11-284F chr8  | + | 1.41E+08 | 1.41E+08 | 453  |
| ENSG000001 | 2.064625 | 0.343138 | 1.8971   | 0.21788  | 0.30936  | GS1-5L10.1 chr8 | + | 92988136 | 92989646 | 410  |
| ENSG000001 | 1.431782 | 0.343138 | 1.3118   | 0.43803  | NA       | RP11-473A chr8  | - | 30989055 | 30989318 | 264  |
| ENSG000001 | 2.044087 | 2.915901 | -0.46003 | 0.70829  | 0.78314  | RP11-649C chr8  | - | 1.08E+08 | 1.08E+08 | 504  |
| ENSG000001 | 0        | 2.024857 | -2.2291  | 0.19662  | 0.28458  | RP11-573J chr8  | + | 64498558 | 64501966 | 730  |
| ENSG000001 | 1.701545 | 0        | 2.2228   | 0.18134  | NA       | KB-1184D1 chr8  | - | 95109992 | 95116550 | 668  |
| ENSG000001 | 1.379541 | 0        | 1.686    | 0.34092  | NA       | RP11-723C chr8  | + | 38657161 | 38659814 | 356  |
| ENSG000001 | 22.12702 | 1.935026 | 3.332    | 6.46E-06 | 2.12E-05 | CTC-265N9 chr5  | - | 1.7E+08  | 1.7E+08  | 1571 |
| ENSG000001 | 0.653381 | 0.594029 | 0.059135 | 0.97278  | NA       | CTD-3064N chr8  | + | 1.42E+08 | 1.42E+08 | 796  |
| ENSG000001 | 0        | 2.976593 | -2.7957  | 0.092852 | 0.15184  | CTD-2320C chr8  | - | 75259992 | 75262285 | 590  |
| ENSG000001 | 2.293312 | 4.184053 | -0.73487 | 0.57024  | 0.66741  | SLC10A5 chr8    | - | 82605842 | 82608409 | 2568 |
| ENSG000001 | 0.36308  | 0.343138 | -0.0021  | 0.99905  | NA       | CTA-397H3 chr8  | + | 56987151 | 56987833 | 557  |
| ENSG000001 | 0.36308  | 0        | 0.4146   | 0.81455  | NA       | RP11-489E chr8  | + | 29763251 | 29766472 | 550  |
| ENSG000001 | 0.36308  | 0        | 0.4146   | 0.81455  | NA       | RP11-557C chr8  | + | 1.24E+08 | 1.24E+08 | 625  |
| ENSG000001 | 1.628766 | 0        | 2.1781   | 0.19145  | NA       | RP11-770E chr8  | + | 49464127 | 49611069 | 2372 |
| ENSG000001 | 1.016461 | 1.652581 | -0.58182 | 0.67755  | 0.75844  | RP11-875C chr8  | - | 22928890 | 22932001 | 484  |
| ENSG000001 | 0        | 1.591889 | -2.1342  | 0.20414  | NA       | RP11-394C chr5  | - | 1.49E+08 | 1.49E+08 | 401  |
| ENSG000001 | 0        | 0.357707 | -0.41864 | 0.81278  | NA       | AC144568 chr8   | - | 14091    | 14320    | 137  |
| ENSG000001 | 0.342542 | 0.700845 | -0.57269 | 0.74414  | NA       | RP11-255L chr8  | - | 90255630 | 90256022 | 393  |
| ENSG000001 | 20.16769 | 43.19356 | -1.08    | 0.010181 | 0.021375 | EIF5AL1 chr10   | + | 81272357 | 81276188 | 3832 |
| ENSG000001 | 0.632843 | 0        | 0.81931  | 0.64303  | NA       | CTC-370J7 chr5  | - | 1.57E+08 | 1.57E+08 | 204  |
| ENSG000001 | 1.016461 | 0        | 1.3167   | 0.46021  | NA       | RP11-486N chr8  | + | 29384829 | 29387840 | 642  |
| ENSG000001 | 1.213446 | 5.909479 | -1.9818  | 0.072587 | 0.12293  | KB-1980E6 chr8  | + | 1.04E+08 | 1.04E+08 | 740  |
| ENSG000001 | 0.290301 | 0        | 0.4146   | 0.81455  | NA       | RP11-587F chr8  | - | 93577671 | 93667722 | 587  |
| ENSG000001 | 10.66404 | 183.6917 | -4.0447  | 3.25E-28 | 3.87E-27 | RP11-531A chr8  | + | 73964413 | 73975296 | 3549 |
| ENSG000001 | 0        | 0.640152 | -0.82869 | 0.63935  | NA       | KB-1589B1 chr8  | - | 98870277 | 98871175 | 252  |
| ENSG000001 | 0        | 1.591889 | -2.1342  | 0.20414  | NA       | CTD-2281E chr8  | - | 1244292  | 1250829  | 3014 |
| ENSG000001 | 2.604151 | 2.012704 | 0.32312  | 0.80061  | 0.85881  | RP11-981G chr8  | + | 10332075 | 10339484 | 562  |
| ENSG000001 | 0.72616  | 0.297015 | 0.51367  | 0.77334  | NA       | RP11-317N chr8  | + | 33462374 | 33896526 | 784  |
| ENSG000001 | 0.632843 | 0.343138 | 0.49756  | 0.77728  | NA       | CTD-2270F chr5  | + | 1.7E+08  | 1.7E+08  | 1215 |
| ENSG000001 | 0.632843 | 1.995719 | -1.3071  | 0.35187  | 0.456    | PRSS51 chr8     | - | 10340388 | 10405095 | 1123 |
| ENSG000001 | 0        | 0.343138 | -0.41864 | 0.81278  | NA       | RP11-798K chr5  | - | 1.79E+08 | 1.79E+08 | 535  |
| ENSG000001 | 0        | 1.234181 | -1.5727  | 0.37581  | NA       | CTC-248O1 chr5  | - | 1.57E+08 | 1.57E+08 | 911  |
| ENSG000001 | 0.342542 | 0        | 0.4146   | 0.81455  | NA       | IGJP1 chr8      | - | 85892308 | 85892782 | 475  |
| ENSG000001 | 0.36308  | 0        | 0.4146   | 0.81455  | NA       | RP11-25P1 chr8  | + | 1.1E+08  | 1.1E+08  | 532  |
| ENSG000001 | 3.609448 | 0        | 3.3159   | 0.028634 | 0.054474 | RP11-600K chr8  | - | 69824038 | 70016425 | 2367 |
| ENSG000001 | 0.290301 | 0        | 0.4146   | 0.81455  | NA       | CTC-353G1 chr5  | - | 1.67E+08 | 1.67E+08 | 663  |
| ENSG000001 | 73.23507 | 0.343138 | 6.8946   | 1.52E-11 | 7.95E-11 | ZFH4-AS1 chr8   | - | 77403435 | 77595513 | 1711 |
| ENSG000001 | 8.930791 | 20.04702 | -1.1162  | 0.044371 | 0.080144 | RP11-30L1 chr8  | + | 54883791 | 54886770 | 2479 |
| ENSG000001 | 36.23441 | 1.294874 | 4.5377   | 3.93E-09 | 1.72E-08 | KB-1732A1 chr8  | + | 1.04E+08 | 1.04E+08 | 2770 |
| ENSG000001 | 1.370168 | 0.640152 | 0.71762  | 0.66877  | 0.75144  | TAGLN2P1 chr8   | - | 1.08E+08 | 1.08E+08 | 587  |
| ENSG000001 | 0.870904 | 0        | 1.046    | 0.5544   | NA       | RP11-981G chr8  | - | 10335001 | 10336885 | 489  |
| ENSG000001 | 11.39101 | 19.58491 | -0.77447 | 0.12578  | 0.19638  | CTB-79E8.3 chr5 | - | 1.72E+08 | 1.72E+08 | 192  |
| ENSG000001 | 0        | 21.55149 | -6.056   | 1.87E-07 | 7.12E-07 | CTB-43E15 chr5  | - | 1.73E+08 | 1.73E+08 | 2361 |
| ENSG000001 | 1.701545 | 0        | 2.2228   | 0.18134  | NA       | RP11-567J chr8  | - | 49464575 | 49469001 | 764  |
| ENSG000001 | 0.342542 | 0        | 0.4146   | 0.81455  | NA       | CTC-535M1 chr5  | + | 1.65E+08 | 1.65E+08 | 734  |
| ENSG000001 | 0        | 6.826372 | -4.3049  | 0.001617 | 0.003879 | RP11-439C chr8  | + | 1919563  | 1924644  | 815  |
| ENSG000001 | 2.064625 | 1.788535 | 0.17396  | 0.90424  | 0.93383  | RP11-1081 chr8  | - | 9515805  | 9515948  | 144  |
| ENSG000001 | 0        | 0.686276 | -0.84936 | 0.6309   | NA       | RP11-1259 chr5  | + | 1.78E+08 | 1.78E+08 | 666  |
| ENSG000001 | 6.930386 | 0        | 4.3858   | 0.000946 | 0.002356 | RP11-567J chr8  | - | 49510018 | 49533578 | 559  |
| ENSG000001 | 4.491516 | 2.261179 | 0.88785  | 0.40742  | 0.51213  | RP11-267N chr8  | + | 95565950 | 95581973 | 1789 |
| ENSG000001 | 0.290301 | 23.21214 | -5.2788  | 4.62E-06 | 1.54E-05 | RP11-758N chr8  | - | 75711019 | 75779174 | 2810 |
| ENSG000001 | 0.705622 | 1.623443 | -0.93459 | 0.54345  | 0.64389  | RP11-51J9 chr8  | - | 30034070 | 30038404 | 583  |
| ENSG000001 | 179.1437 | 97.26668 | 0.87697  | 5.48E-06 | 1.81E-05 | ALG11 chr13     | + | 52586534 | 52603800 | 4574 |
| ENSG000001 | 1.431782 | 0.98329  | 0.38238  | 0.80381  | 0.8613   | RP11-697N chr8  | - | 76079939 | 76088891 | 490  |

|            |          |          |          |          |          |                 |   |          |          |       |
|------------|----------|----------|----------|----------|----------|-----------------|---|----------|----------|-------|
| ENSG000001 | 27.19816 | 35.39289 | -0.37346 | 0.33922  | 0.44316  | RP13-582C chr8  | - | 1.44E+08 | 1.44E+08 | 689   |
| ENSG000001 | 0        | 1.355566 | -1.9006  | 0.26573  | NA       | RP11-281C chr5  | + | 1.78E+08 | 1.78E+08 | 358   |
| ENSG000001 | 1577.281 | 1509.873 | 0.062894 | 0.51626  | 0.61906  | ATXN7L3B chr12  | + | 74931551 | 74935223 | 3673  |
| ENSG000001 | 4.429902 | 8.03712  | -0.78668 | 0.40275  | 0.50749  | RP11-473C chr8  | + | 1.31E+08 | 1.31E+08 | 549   |
| ENSG000001 | 0        | 0.357707 | -0.41864 | 0.81278  | NA       | RP11-449A chr8  | - | 70899650 | 70899932 | 283   |
| ENSG000001 | 0        | 0.357707 | -0.41864 | 0.81278  | NA       | RP11-313C chr8  | + | 73644280 | 73664078 | 1722  |
| ENSG000001 | 8175.827 | 10222.11 | -0.322   | 0.000379 | 0.000999 | PRKDC chr8      | - | 48685669 | 48872743 | 13508 |
| ENSG000001 | 2.551911 | 5.468389 | -0.98253 | 0.31037  | 0.41234  | RP11-893F chr17 | - | 48235694 | 48238637 | 547   |
| ENSG000001 | 6.576679 | 12.02614 | -0.84682 | 0.19378  | 0.28129  | PCDHGA6 chr5    | + | 1.41E+08 | 1.41E+08 | 4605  |
| ENSG000001 | 7.811476 | 1.340997 | 2.3145   | 0.022004 | 0.043028 | LZTS1-AS1 chr8  | + | 20133284 | 20147969 | 892   |
| ENSG000001 | 0        | 0.654722 | -0.83442 | 0.63731  | NA       | RP11-579E chr8  | + | 64681988 | 64698058 | 3712  |
| ENSG000001 | 0.580602 | 0.297015 | 0.36801  | 0.83644  | NA       | RP11-779C chr5  | + | 1.72E+08 | 1.72E+08 | 352   |
| ENSG000001 | 267.9032 | 179.9213 | 0.57445  | 0.006699 | 0.014547 | GS1-251I9. chr8 | - | 92072137 | 92082417 | 4275  |
| ENSG000001 | 1.016461 | 3.025133 | -1.3407  | 0.29724  | 0.3992   | RP11-90P5 chr8  | - | 38023530 | 38023636 | 107   |
| ENSG000001 | 0        | 0.343138 | -0.41864 | 0.81278  | NA       | KB-1083B1 chr8  | + | 1.02E+08 | 1.02E+08 | 449   |
| ENSG000001 | 0.580602 | 0.951736 | -0.43779 | 0.79667  | NA       | CTD-2292P chr8  | - | 1.44E+08 | 1.44E+08 | 5684  |
| ENSG000001 | 0.290301 | 0        | 0.4146   | 0.81455  | NA       | AC025442. chr5  | - | 65439984 | 65440623 | 481   |
| ENSG000001 | 15.24113 | 0        | 5.5233   | 5.60E-06 | 1.85E-05 | RP11-527A chr8  | - | 37262957 | 37264242 | 578   |
| ENSG000001 | 3.278071 | 4.821789 | -0.52838 | 0.5587   | 0.65762  | RP11-35G2 chr8  | + | 1.09E+08 | 1.09E+08 | 447   |
| ENSG000001 | 0        | 0.297015 | -0.41864 | 0.81278  | NA       | RP11-579E chr8  | + | 64617314 | 64664235 | 566   |
| ENSG000001 | 0.580602 | 6.428247 | -2.8804  | 0.018111 | 0.036082 | RP11-439C chr8  | - | 1920736  | 1922803  | 557   |
| ENSG000001 | 9.54391  | 9.145827 | 0.069867 | 0.91613  | 0.9432   | PCDHGA8 chr5    | + | 1.41E+08 | 1.41E+08 | 4605  |
| ENSG000001 | 0.580602 | 0.654722 | -0.07721 | 0.96449  | NA       | HMGB1P2.1 chr8  | + | 29076422 | 29076989 | 568   |
| ENSG000001 | 2.67693  | 7.152525 | -1.3199  | 0.14328  | 0.2182   | TPTE2P1 chr13   | - | 25498815 | 25542625 | 770   |
| ENSG000001 | 0        | 0.715414 | -0.84936 | 0.6309   | NA       | RP11-34P1 chr5  | + | 1.6E+08  | 1.6E+08  | 701   |
| ENSG000001 | 1.048164 | 1.294874 | -0.27358 | 0.85003  | 0.89459  | KB-1047C1 chr8  | + | 96216684 | 96822364 | 617   |
| ENSG000001 | 0        | 1.340997 | -1.8899  | 0.26871  | NA       | RP11-1145 chr8  | - | 73787094 | 73793975 | 488   |
| ENSG000001 | 0.580602 | 0.297015 | 0.36801  | 0.83644  | NA       | CTC-308K2 chr5  | + | 1.72E+08 | 1.72E+08 | 864   |
| ENSG000001 | 2.116866 | 0        | 2.2857   | 0.18371  | 0.26889  | CTC-436K1 chr5  | - | 1.58E+08 | 1.58E+08 | 314   |
| ENSG000001 | 1.048164 | 0.357707 | 0.98599  | 0.56649  | NA       | RP11-293C chr8  | - | 30840975 | 30841837 | 863   |
| ENSG000001 | 0.685084 | 0        | 0.85004  | 0.63064  | NA       | MTND1P5 chr8    | + | 1.04E+08 | 1.04E+08 | 940   |
| ENSG000001 | 652.9879 | 455.0426 | 0.52091  | 7.08E-05 | 0.000205 | UTP14C chr13    | + | 52598827 | 52607736 | 5529  |
| ENSG000001 | 0.290301 | 2.056411 | -1.914   | 0.21479  | 0.3057   | AB015752. chr8  | - | 91605032 | 91618293 | 738   |
| ENSG000001 | 0        | 0.357707 | -0.41864 | 0.81278  | NA       | RP11-9307 chr5  | - | 1.24E+08 | 1.24E+08 | 285   |
| ENSG000001 | 1.555988 | 0        | 1.8901   | 0.28116  | NA       | CTD-2363C chr5  | + | 1.58E+08 | 1.58E+08 | 563   |
| ENSG000001 | 27.97337 | 32.76589 | -0.22403 | 0.63749  | 0.72566  | RP11-1415 chr5  | - | 69515745 | 69580686 | 593   |
| ENSG000001 | 0        | 0.357707 | -0.41864 | 0.81278  | NA       | RP11-246K chr8  | + | 58405443 | 58504118 | 567   |
| ENSG000001 | 0        | 1.043983 | -1.3473  | 0.44976  | NA       | RP11-96A1 chr4  | - | 1.21E+08 | 1.21E+08 | 474   |
| ENSG000001 | 2.137404 | 2.338857 | -0.13712 | 0.91194  | 0.93967  | RP11-723C chr8  | - | 38702384 | 38703957 | 387   |
| ENSG000001 | 9.087514 | 0        | 4.7983   | 0.000168 | 0.000466 | AC005895. chr5  | - | 1.5E+08  | 1.5E+08  | 1023  |
| ENSG000001 | 0.36308  | 0.640152 | -0.51156 | 0.77091  | NA       | RP11-367E chr8  | + | 74896728 | 74897118 | 391   |
| ENSG000001 | 0        | 0.297015 | -0.41864 | 0.81278  | NA       | RP11-705C chr8  | - | 62734040 | 62737811 | 606   |
| ENSG000001 | 0.72616  | 0        | 0.85004  | 0.63064  | NA       | RP11-731A chr8  | - | 83775014 | 83870931 | 814   |
| ENSG000001 | 42.39739 | 2.681995 | 3.8746   | 2.24E-10 | 1.09E-09 | RP11-177F chr8  | + | 23193684 | 23223638 | 4374  |
| ENSG000001 | 0        | 6.252617 | -4.2312  | 0.001721 | 0.004116 | RP11-44K6 chr8  | + | 39771748 | 39773240 | 102   |
| ENSG000001 | 52.56315 | 63.99889 | -0.27528 | 0.4294   | 0.53486  | PCDHGA10 chr5   | + | 1.41E+08 | 1.41E+08 | 4617  |
| ENSG000001 | 0.290301 | 1.966581 | -1.7552  | 0.28477  | 0.3861   | RP11-10N2 chr8  | + | 94753421 | 94756762 | 530   |
| ENSG000001 | 0.943682 | 0.343138 | 0.89828  | 0.6031   | NA       | CTB-140J7. chr5 | - | 1.5E+08  | 1.5E+08  | 617   |
| ENSG000001 | 29.66873 | 29.2965  | 0.015997 | 0.97002  | 0.98334  | RP11-10N2 chr8  | + | 94731802 | 94733395 | 939   |
| ENSG000001 | 0        | 0.640152 | -0.82869 | 0.63935  | NA       | RP11-386C chr8  | + | 56074043 | 56077287 | 496   |
| ENSG000001 | 0.342542 | 0        | 0.4146   | 0.81455  | NA       | CTB-147C1 chr5  | - | 1.7E+08  | 1.7E+08  | 567   |
| ENSG000001 | 0        | 0.343138 | -0.41864 | 0.81278  | NA       | RP11-157I4 chr8 | + | 82351671 | 82434053 | 546   |
| ENSG000001 | 36.17263 | 0        | 6.7765   | 1.63E-09 | 7.38E-09 | AC131025. chr5  | + | 1.49E+08 | 1.49E+08 | 5131  |
| ENSG000001 | 0        | 1.684135 | -2.1921  | 0.19067  | NA       | RP11-394C chr5  | + | 1.49E+08 | 1.49E+08 | 588   |
| ENSG000001 | 0.290301 | 0.594029 | -0.38058 | 0.83094  | NA       | PIGFP1 chr5     | + | 1.78E+08 | 1.78E+08 | 653   |
| ENSG000001 | 19.90648 | 50.73877 | -1.3306  | 0.000465 | 0.001214 | PCDHGA11 chr5   | + | 1.41E+08 | 1.41E+08 | 3936  |
| ENSG000001 | 1.265686 | 0        | 1.6147   | 0.36215  | NA       | RP11-16P2 chr8  | + | 27590855 | 27613943 | 584   |
| ENSG000001 | 8.878551 | 28.32946 | -1.6095  | 0.009879 | 0.020787 | RP11-347C chr8  | + | 95962265 | 95963624 | 709   |
| ENSG000001 | 3.289235 | 0.357707 | 2.5081   | 0.08672  | 0.14321  | RP11-61L2 chr7  | - | 1.43E+08 | 1.44E+08 | 2973  |
| ENSG000001 | 0.290301 | 0        | 0.4146   | 0.81455  | NA       | ARF1P3 chr8     | + | 1.25E+08 | 1.25E+08 | 511   |
| ENSG000001 | 0        | 0.594029 | -0.81444 | 0.64499  | NA       | RP11-770E chr8  | - | 49569820 | 49571454 | 594   |
| ENSG000001 | 0        | 2.024857 | -2.2291  | 0.19662  | 0.28458  | FAM85B chr8     | - | 8025341  | 8084136  | 792   |
| ENSG000001 | 0.342542 | 0        | 0.4146   | 0.81455  | NA       | RP11-45K1 chr8  | + | 64378407 | 64388040 | 3222  |
| ENSG000001 | 0.290301 | 0        | 0.4146   | 0.81455  | NA       | RP11-51M1 chr8  | + | 84315993 | 84321135 | 1521  |
| ENSG000001 | 0        | 0.594029 | -0.81444 | 0.64499  | NA       | RP11-613F chr8  | - | 26921513 | 26922795 | 1283  |

|            |          |          |          |          |          |                 |   |          |          |      |
|------------|----------|----------|----------|----------|----------|-----------------|---|----------|----------|------|
| ENSG000001 | 0        | 2.338857 | -2.7203  | 0.085631 | 0.14161  | RP11-122C chr8  | - | 92555152 | 92919847 | 577  |
| ENSG000001 | 3.879211 | 2.742687 | 0.47843  | 0.6401   | 0.72726  | RP11-252I chr5  | + | 1.8E+08  | 1.8E+08  | 687  |
| ENSG000001 | 18.765   | 22.13666 | -0.23305 | 0.6106   | 0.70317  | PCDHGB2 chr5    | + | 1.41E+08 | 1.41E+08 | 4602 |
| ENSG000001 | 0.653381 | 1.043983 | -0.46504 | 0.7732   | NA       | KB-1205A7 chr8  | + | 99615481 | 99618568 | 301  |
| ENSG000001 | 1.722083 | 0.715414 | 0.97286  | 0.52623  | 0.628    | MAPRE1P1 chr8   | - | 1.37E+08 | 1.37E+08 | 797  |
| ENSG000001 | 0        | 7.70043  | -4.5518  | 0.000476 | 0.001239 | AC226119 chr4   | - | 3916910  | 3957148  | 899  |
| ENSG000001 | 0.290301 | 0.640152 | -0.50256 | 0.77558  | NA       | PRKRIRP7 chr8   | - | 79672377 | 79674666 | 2290 |
| ENSG000001 | 0.943682 | 0.951736 | -0.00794 | 0.99598  | NA       | CTB-113P1 chr5  | + | 1.51E+08 | 1.51E+08 | 570  |
| ENSG000001 | 1.048164 | 0        | 1.348    | 0.44949  | NA       | KB-1980E6 chr8  | + | 1.03E+08 | 1.03E+08 | 975  |
| ENSG000001 | 0.290301 | 1.073121 | -0.88899 | 0.61676  | NA       | RP11-382A chr8  | + | 1.28E+08 | 1.28E+08 | 290  |
| ENSG000001 | 10.58091 | 4.850927 | 1.0612   | 0.14841  | 0.22499  | RP11-1149 chr8  | + | 23046792 | 23048188 | 637  |
| ENSG000001 | 0.685084 | 8.464384 | -3.1832  | 0.006297 | 0.013755 | RP11-909N chr8  | + | 1.44E+08 | 1.44E+08 | 544  |
| ENSG000001 | 6.524438 | 0        | 4.2895   | 0.001406 | 0.003408 | RP11-10C8 chr8  | + | 13196083 | 13200263 | 3488 |
| ENSG000001 | 1.669842 | 0        | 1.9671   | 0.26049  | NA       | MRPL49P2 chr8   | + | 16232127 | 16232591 | 465  |
| ENSG000001 | 0        | 3.368271 | -3.2288  | 0.033754 | 0.063065 | RP11-44K6 chr8  | - | 39761294 | 39852767 | 502  |
| ENSG000001 | 0.705622 | 2.131673 | -1.2067  | 0.43231  | 0.53783  | RP11-156K chr8  | + | 17658854 | 17718578 | 510  |
| ENSG000001 | 17.04634 | 16.0637  | 0.073964 | 0.88319  | 0.91853  | RP11-410L chr8  | - | 1E+08    | 1E+08    | 380  |
| ENSG000001 | 410.622  | 98.38922 | 2.0539   | 1.49E-35 | 2.31E-34 | PCDHGB4 chr5    | + | 1.41E+08 | 1.41E+08 | 4578 |
| ENSG000001 | 2.116866 | 6.085109 | -1.4145  | 0.18268  | 0.26759  | HMG1P3 chr15    | + | 93254977 | 93256105 | 1129 |
| ENSG000001 | 3.785894 | 2.514486 | 0.51718  | 0.64449  | 0.73136  | CTB-33O18 chr5  | + | 1.73E+08 | 1.73E+08 | 1777 |
| ENSG000001 | 0.685084 | 0        | 0.85004  | 0.63064  | NA       | RP11-211F chr8  | - | 1.11E+08 | 1.11E+08 | 773  |
| ENSG000001 | 0.580602 | 21.91819 | -4.5904  | 7.28E-06 | 2.38E-05 | CLDN23 chr8     | + | 8559448  | 8561616  | 2169 |
| ENSG000001 | 0        | 0.297015 | -0.41864 | 0.81278  | NA       | CTB-43E15 chr5  | + | 1.73E+08 | 1.73E+08 | 494  |
| ENSG000001 | 0.580602 | 4.403389 | -2.3192  | 0.087744 | 0.14464  | RP11-363L chr8  | - | 31024594 | 31034683 | 643  |
| ENSG000001 | 0        | 0.297015 | -0.41864 | 0.81278  | NA       | CTC-329D1 chr5  | - | 1.4E+08  | 1.4E+08  | 570  |
| ENSG000001 | 1.338465 | 6.742246 | -2.1333  | 0.038739 | 0.071342 | CTC-455F1 chr5  | + | 1.7E+08  | 1.7E+08  | 1337 |
| ENSG000001 | 0        | 12.76183 | -5.1238  | 0.000119 | 0.000335 | RP11-333A chr8  | + | 71383369 | 71397922 | 2367 |
| ENSG000001 | 0        | 0.343138 | -0.41864 | 0.81278  | NA       | CTB-32H22 chr5  | + | 1.73E+08 | 1.73E+08 | 539  |
| ENSG000001 | 0        | 5.539619 | -4.0001  | 0.004437 | 0.00996  | RP11-4K16 chr8  | - | 1.2E+08  | 1.2E+08  | 603  |
| ENSG000001 | 0.870904 | 1.309443 | -0.38061 | 0.81589  | 0.87074  | RP11-467K chr11 | + | 9025709  | 9086701  | 960  |
| ENSG000001 | 0        | 0.357707 | -0.41864 | 0.81278  | NA       | RP11-386C chr8  | - | 56047763 | 56054918 | 813  |
| ENSG000001 | 9.36665  | 6.558496 | 0.51284  | 0.50273  | 0.60623  | CTB-178M2 chr5  | - | 1.68E+08 | 1.68E+08 | 503  |
| ENSG000001 | 4.138623 | 34.63377 | -2.9756  | 1.73E-05 | 5.41E-05 | ALG1L13P chr8   | - | 8093525  | 8102189  | 765  |
| ENSG000001 | 212.2081 | 120.377  | 0.81091  | 8.11E-05 | 0.000234 | CTD-2336C chr8  | - | 1710156  | 1712668  | 978  |
| ENSG000001 | 0.342542 | 2.401965 | -1.7197  | 0.31783  | 0.42061  | RP1-16A9 chr8   | + | 75111631 | 75120676 | 993  |
| ENSG000001 | 4.439275 | 0.951736 | 1.9135   | 0.10873  | 0.17332  | CTC-756D1 chr8  | - | 23350522 | 23351711 | 715  |
| ENSG000001 | 0        | 1.669566 | -1.94    | 0.2691   | NA       | KB-1562D1 chr8  | - | 1.03E+08 | 1.03E+08 | 539  |
| ENSG000001 | 0.72616  | 0.686276 | 0.035772 | 0.98391  | NA       | RP11-737F chr8  | + | 1.32E+08 | 1.32E+08 | 411  |
| ENSG000001 | 0        | 0.343138 | -0.41864 | 0.81278  | NA       | RP11-91P1 chr8  | + | 79060336 | 79066148 | 558  |
| ENSG000001 | 0.580602 | 0        | 0.8036   | 0.6494   | NA       | RP11-213C chr8  | - | 23583844 | 23600555 | 443  |
| ENSG000001 | 0.342542 | 0.640152 | -0.50911 | 0.77219  | NA       | CTB-167B5 chr7  | + | 87845975 | 87848541 | 576  |
| ENSG000001 | 327.8031 | 351.1055 | -0.09717 | 0.60111  | 0.69476  | ZNF260 chr19    | + | 37001597 | 37019562 | 5666 |
| ENSG000001 | 0        | 0.343138 | -0.41864 | 0.81278  | NA       | RP11-281F chr8  | - | 5517201  | 5527599  | 923  |
| ENSG000001 | 0.342542 | 0.357707 | -0.0021  | 0.99906  | NA       | LINC00051 chr8  | + | 1.43E+08 | 1.43E+08 | 1046 |
| ENSG000001 | 0        | 6.154665 | -4.1622  | 0.002504 | 0.005837 | MAP2K1P1 chr8   | + | 29885229 | 29886416 | 1188 |
| ENSG000001 | 2.67693  | 19.06702 | -2.6946  | 0.000687 | 0.001745 | ALG1L10P chr12  | + | 8380330  | 8384360  | 424  |
| ENSG000001 | 1.317927 | 0.357707 | 1.2439   | 0.46333  | NA       | IGHEP2 chr9     | + | 5113549  | 5114804  | 1256 |
| ENSG000001 | 0        | 0.594029 | -0.81444 | 0.64499  | NA       | RP11-10J2 chr8  | + | 1.42E+08 | 1.42E+08 | 584  |
| ENSG000001 | 0.72616  | 0        | 0.85004  | 0.63064  | NA       | PKMP4 chr8      | + | 76288944 | 76289249 | 306  |
| ENSG000001 | 2.914991 | 2.742687 | 0.10272  | 0.92283  | 0.94809  | RP11-363E chr8  | - | 82192106 | 82193681 | 620  |
| ENSG000001 | 0        | 0.357707 | -0.41864 | 0.81278  | NA       | AC083843 chr8   | + | 1.36E+08 | 1.36E+08 | 849  |
| ENSG000001 | 0.632843 | 0.297015 | 0.49183  | 0.78024  | NA       | RP11-326E chr8  | + | 72067692 | 72116458 | 685  |
| ENSG000001 | 1.027626 | 1.98115  | -0.75505 | 0.60687  | 0.69991  | RP11-662B chr8  | + | 28655659 | 28656986 | 548  |
| ENSG000001 | 0.705622 | 8.542934 | -3.1751  | 0.007011 | 0.015179 | RP11-281C chr5  | + | 1.78E+08 | 1.78E+08 | 674  |
| ENSG000001 | 4.077009 | 0        | 3.5437   | 0.015141 | 0.030653 | RP11-419C chr8  | - | 36924959 | 36926936 | 639  |
| ENSG000001 | 0        | 0.654722 | -0.83442 | 0.63731  | NA       | RP11-304F chr17 | + | 47991767 | 48010282 | 395  |
| ENSG000001 | 3.246368 | 0.357707 | 2.5054   | 0.085543 | 0.14152  | CTC-558O2 chr5  | + | 1.68E+08 | 1.68E+08 | 3478 |
| ENSG000001 | 0.290301 | 0.357707 | -0.00203 | 0.99908  | NA       | RP11-328K chr8  | - | 59904279 | 59905497 | 551  |
| ENSG000001 | 0        | 0.343138 | -0.41864 | 0.81278  | NA       | RP11-403C chr8  | + | 69089003 | 69089456 | 454  |
| ENSG000001 | 0.685084 | 1.669566 | -0.89912 | 0.58359  | 0.67961  | RP11-156K chr8  | + | 17763265 | 17765396 | 634  |
| ENSG000001 | 0.342542 | 0.297015 | -0.00202 | 0.99909  | NA       | RP3-388N1 chr8  | - | 94846682 | 94858971 | 528  |
| ENSG000001 | 1.576526 | 2.621302 | -0.62177 | 0.60129  | 0.69487  | RP11-359B chr8  | - | 33293786 | 33294218 | 433  |
| ENSG000001 | 50.66885 | 27.03204 | 0.90105  | 0.008669 | 0.018443 | CTD-2530N chr8  | - | 22112089 | 22132675 | 515  |
| ENSG000001 | 1.338465 | 1.949596 | -0.4781  | 0.70486  | 0.78064  | RP11-697N chr8  | - | 48504709 | 48505171 | 463  |
| ENSG000001 | 0.580602 | 1.98115  | -1.2998  | 0.38421  | 0.4884   | CTB-181F2 chr5  | - | 1.65E+08 | 1.65E+08 | 1864 |

|            |          |          |          |          |          |            |       |   |          |          |      |
|------------|----------|----------|----------|----------|----------|------------|-------|---|----------|----------|------|
| ENSG000001 | 0        | 3.212915 | -2.9127  | 0.077518 | 0.13005  | RP11-730C  | chr8  | - | 75521933 | 75545555 | 677  |
| ENSG000001 | 126.4848 | 690.4258 | -2.4424  | 8.99E-48 | 1.93E-46 | LYN        | chr8  | + | 56792372 | 56923939 | 3020 |
| ENSG000001 | 1.628766 | 1.043983 | 0.54608  | 0.69636  | 0.77366  | CTD-3083F  | chr8  | + | 87515820 | 87517290 | 1471 |
| ENSG000001 | 0        | 0.715414 | -0.84936 | 0.6309   | NA       | MTND2P32   | chr8  | + | 32872779 | 32874561 | 1038 |
| ENSG000001 | 77.46106 | 268.3795 | -1.7844  | 5.18E-13 | 3.00E-12 | PINX1      | chr8  | - | 10622473 | 10697394 | 1545 |
| ENSG000001 | 1.555988 | 9.185503 | -2.3231  | 0.013722 | 0.02803  | AC078852.  | chr4  | + | 1350369  | 1351863  | 527  |
| ENSG000001 | 3.008307 | 1.606458 | 0.76828  | 0.52177  | 0.6243   | AC005740.  | chr5  | - | 1.41E+08 | 1.41E+08 | 344  |
| ENSG000001 | 1.359003 | 1.294874 | 0.032927 | 0.98035  | 0.98921  | RP11-675F  | chr8  | - | 38409766 | 38416538 | 537  |
| ENSG000001 | 0.36308  | 0        | 0.4146   | 0.81455  | NA       | VENTXP6    | chr8  | + | 74563524 | 74563837 | 314  |
| ENSG000001 | 0.36308  | 5.673157 | -3.304   | 0.012988 | 0.026665 | CTD-3107A  | chr8  | - | 30239635 | 30242917 | 1031 |
| ENSG000001 | 0.290301 | 0.686276 | -0.47648 | 0.78935  | NA       | KB-1205A7  | chr8  | + | 99645775 | 99646093 | 319  |
| ENSG000001 | 0        | 0.343138 | -0.41864 | 0.81278  | NA       | HMG1P21    | chr17 | + | 58928743 | 58929106 | 364  |
| ENSG000001 | 2.729171 | 0        | 2.877    | 0.069197 | 0.11795  | RP11-386C  | chr8  | + | 87719775 | 87777251 | 804  |
| ENSG000001 | 0        | 0.357707 | -0.41864 | 0.81278  | NA       | RP11-705C  | chr8  | + | 62697606 | 62856739 | 1173 |
| ENSG000001 | 904.4625 | 202.9209 | 2.1521   | 1.68E-58 | 4.68E-57 | PCDHGB7    | chr5  | + | 1.41E+08 | 1.41E+08 | 4596 |
| ENSG000001 | 1.161205 | 0        | 1.2509   | 0.47995  | NA       | RP11-99H2  | chr8  | - | 83010686 | 83072812 | 823  |
| ENSG000001 | 0        | 0.297015 | -0.41864 | 0.81278  | NA       | IGLCOR22-  | chr22 | + | 32595906 | 32596221 | 316  |
| ENSG000001 | 0        | 0.640152 | -0.82869 | 0.63935  | NA       | CTD-2647L  | chr8  | + | 28968090 | 28998246 | 478  |
| ENSG000001 | 5.778554 | 4.694699 | 0.27302  | 0.76206  | 0.82732  | RP11-1007  | chr8  | + | 42342118 | 42342537 | 420  |
| ENSG000001 | 0        | 0.343138 | -0.41864 | 0.81278  | NA       | MTND6P3    | chr5  | - | 93904634 | 93905175 | 542  |
| ENSG000001 | 0.36308  | 0        | 0.4146   | 0.81455  | NA       | RP11-32D1  | chr5  | + | 1.58E+08 | 1.58E+08 | 691  |
| ENSG000001 | 0.36308  | 0        | 0.4146   | 0.81455  | NA       | RP11-642C  | chr8  | + | 1.07E+08 | 1.07E+08 | 716  |
| ENSG000001 | 0.995923 | 0        | 1.4959   | 0.39264  | NA       | RP11-53M.  | chr8  | + | 55466921 | 55474487 | 787  |
| ENSG000001 | 14.76159 | 0.297015 | 4.7072   | 5.28E-05 | 0.000156 | RP4-798P1  | chr1  | - | 1.78E+08 | 1.78E+08 | 6212 |
| ENSG000001 | 10.60063 | 0.640152 | 3.5766   | 0.000951 | 0.002367 | RP11-48B3  | chr8  | - | 81447241 | 81451370 | 3766 |
| ENSG000001 | 0        | 0.343138 | -0.41864 | 0.81278  | NA       | CTC-340I2. | chr5  | - | 1.56E+08 | 1.56E+08 | 460  |
| ENSG000001 | 0.36308  | 0.343138 | -0.0021  | 0.99905  | NA       | CTB-33O18  | chr5  | + | 1.73E+08 | 1.73E+08 | 457  |
| ENSG000001 | 5.766575 | 5.758956 | -0.00102 | 0.99905  | 0.99973  | RP11-503E  | chr8  | - | 42392672 | 42393447 | 708  |
| ENSG000001 | 0        | 0.297015 | -0.41864 | 0.81278  | NA       | RP11-255B  | chr8  | - | 1.28E+08 | 1.28E+08 | 367  |
| ENSG000001 | 0.685084 | 0        | 0.85004  | 0.63064  | NA       | RP11-67M.  | chr5  | + | 1.66E+08 | 1.66E+08 | 533  |
| ENSG000001 | 0        | 0.297015 | -0.41864 | 0.81278  | NA       | RP11-299C  | chr8  | - | 25691645 | 25697651 | 485  |
| ENSG000001 | 0.632843 | 2.38498  | -1.5093  | 0.28075  | 0.38172  | AB015752.  | chr8  | - | 91546839 | 91632298 | 578  |
| ENSG000001 | 15.6941  | 13.30961 | 0.24286  | 0.69272  | 0.77091  | TYW1B      | chr7  | - | 72023729 | 72298765 | 2008 |
| ENSG000001 | 0        | 0.654722 | -0.83442 | 0.63731  | NA       | RP11-167P  | chr5  | - | 1.62E+08 | 1.62E+08 | 736  |
| ENSG000001 | 0.653381 | 1.531196 | -0.92317 | 0.55518  | 0.6544   | RP11-10J2  | chr8  | + | 1.42E+08 | 1.42E+08 | 294  |
| ENSG000001 | 59.56273 | 88.40405 | -0.5615  | 0.033716 | 0.062999 | RP11-598P  | chr8  | - | 42981138 | 42981540 | 403  |
| ENSG000001 | 0        | 1.903472 | -2.1599  | 0.21236  | NA       | RP11-92K1  | chr8  | + | 81035087 | 81039905 | 364  |
| ENSG000001 | 29.64819 | 38.38002 | -0.37239 | 0.29222  | 0.39412  | 61E3.4     | chr16 | - | 29392675 | 29415350 | 3653 |
| ENSG000001 | 5.621018 | 5.035421 | 0.1737   | 0.8431   | 0.8899   | RP11-43A1  | chr8  | - | 675188   | 675877   | 316  |
| ENSG000001 | 2.012384 | 3.587607 | -0.76958 | 0.46627  | 0.571    | RP11-219B  | chr8  | - | 86089757 | 86090385 | 468  |
| ENSG000001 | 0        | 0.343138 | -0.41864 | 0.81278  | NA       | RP11-98H4  | chr8  | - | 85776903 | 85777142 | 240  |
| ENSG000001 | 24.73198 | 18.90105 | 0.38284  | 0.37172  | 0.47612  | PCDHGB1    | chr5  | + | 1.41E+08 | 1.41E+08 | 4590 |
| ENSG000001 | 0        | 0.640152 | -0.82869 | 0.63935  | NA       | RP11-787C  | chr8  | - | 62177183 | 62204598 | 387  |
| ENSG000001 | 0        | 1.188058 | -1.268   | 0.47398  | NA       | RP11-419K  | chr8  | - | 1.31E+08 | 1.31E+08 | 683  |
| ENSG000001 | 0.36308  | 0        | 0.4146   | 0.81455  | NA       | KB-1043D8  | chr8  | + | 97247655 | 97250262 | 382  |
| ENSG000001 | 0.342542 | 0        | 0.4146   | 0.81455  | NA       | CTB-1202.  | chr5  | + | 1.51E+08 | 1.52E+08 | 3591 |
| ENSG000001 | 1.233984 | 1.043983 | 0.21511  | 0.88915  | 0.92285  | CTD-2284J  | chr8  | - | 87345503 | 87355543 | 1486 |
| ENSG000001 | 0        | 4.368546 | -3.2727  | 0.044895 | 0.080934 | RP11-242J  | chr4  | - | 1.86E+08 | 1.86E+08 | 802  |
| ENSG000001 | 1.161205 | 0.343138 | 0.97766  | 0.58067  | NA       | RP11-115J  | chr8  | + | 9106927  | 9271224  | 3442 |
| ENSG000001 | 0.290301 | 1.773966 | -1.5859  | 0.34314  | 0.44713  | KB-1639H6  | chr8  | - | 1.04E+08 | 1.04E+08 | 414  |
| ENSG000001 | 3.972527 | 2.027273 | 0.86735  | 0.4429   | 0.54863  | RP11-300E  | chr8  | - | 75938663 | 75941695 | 590  |
| ENSG000001 | 0.632843 | 0.297015 | 0.49183  | 0.78024  | NA       | PAICSP4    | chr8  | + | 4644854  | 4646106  | 1253 |
| ENSG000001 | 6.338619 | 7.01657  | -0.14231 | 0.84462  | 0.89103  | PCDHGA3    | chr5  | + | 1.41E+08 | 1.41E+08 | 4605 |
| ENSG000001 | 0        | 0.297015 | -0.41864 | 0.81278  | NA       | RP11-662C  | chr8  | - | 91818702 | 91871468 | 833  |
| ENSG000001 | 0        | 5.176207 | -3.4927  | 0.030539 | 0.057622 | CTC-438O3  | chr5  | - | 1.65E+08 | 1.65E+08 | 745  |
| ENSG000001 | 0        | 0.297015 | -0.41864 | 0.81278  | NA       | RP11-117L  | chr5  | + | 1.71E+08 | 1.71E+08 | 872  |
| ENSG000001 | 0        | 4.380699 | -3.6717  | 0.010523 | 0.022019 | RP11-18A1  | chr9  | + | 26746951 | 26786872 | 443  |
| ENSG000001 | 3.661688 | 4.960159 | -0.41418 | 0.64586  | 0.73251  | RP11-473C  | chr8  | + | 1.31E+08 | 1.31E+08 | 467  |
| ENSG000001 | 1.306762 | 10.14852 | -2.6904  | 0.006679 | 0.014513 | RP11-594N  | chr8  | - | 79338338 | 79470738 | 2011 |
| ENSG000001 | 1.359003 | 0        | 1.8987   | 0.26617  | NA       | KB-1458E1  | chr8  | - | 99383583 | 99400475 | 435  |
| ENSG000001 | 0        | 0.297015 | -0.41864 | 0.81278  | NA       | ERHP1      | chr7  | + | 1.39E+08 | 1.39E+08 | 310  |
| ENSG000001 | 0        | 1.234181 | -1.5727  | 0.37581  | NA       | RP11-131N  | chr10 | + | 62494100 | 62501586 | 434  |
| ENSG000001 | 0.72616  | 0        | 0.85004  | 0.63064  | NA       | RP11-382J. | chr8  | + | 22350144 | 22350557 | 414  |
| ENSG000001 | 0        | 1.888903 | -2.3653  | 0.15293  | NA       | RP11-181C  | chr8  | - | 74423511 | 74423889 | 379  |
| ENSG000001 | 1.576526 | 1.652581 | -0.03782 | 0.9761   | 0.98651  | TDGF1P5    | chr8  | + | 54985674 | 54986126 | 453  |

|            |          |          |          |          |          |                 |   |          |          |      |
|------------|----------|----------|----------|----------|----------|-----------------|---|----------|----------|------|
| ENSG000001 | 1.971308 | 20.85797 | -3.2209  | 4.48E-05 | 0.000133 | RP11-89M chr8   | - | 1.29E+08 | 1.3E+08  | 2055 |
| ENSG000001 | 0        | 804.9305 | -10.895  | 2.55E-24 | 2.59E-23 | RP11-1144 chr8  | + | 72587535 | 72615021 | 808  |
| ENSG000001 | 0.36308  | 2.840639 | -2.3224  | 0.11898  | 0.18755  | KB-1507C5 chr8  | + | 1.04E+08 | 1.04E+08 | 563  |
| ENSG000001 | 0        | 0.297015 | -0.41864 | 0.81278  | NA       | RP11-267A chr8  | + | 95606639 | 95606829 | 191  |
| ENSG000001 | 0.705622 | 11.52678 | -3.6747  | 0.000512 | 0.001329 | KRT8P3 chr8     | + | 62490779 | 62492230 | 1449 |
| ENSG000001 | 0        | 4.259314 | -3.6209  | 0.012522 | 0.025796 | RP11-89K1 chr8  | + | 1.28E+08 | 1.28E+08 | 574  |
| ENSG000001 | 0        | 0.357707 | -0.41864 | 0.81278  | NA       | RP11-44K6 chr8  | - | 39775595 | 39778409 | 605  |
| ENSG000001 | 1.411244 | 0        | 1.7307   | 0.32696  | NA       | RP11-150C chr8  | - | 37454998 | 37457376 | 2379 |
| ENSG000001 | 0.36308  | 0.640152 | -0.51156 | 0.77091  | NA       | IMPDH1P6 chr8   | + | 1.24E+08 | 1.24E+08 | 1514 |
| ENSG000001 | 0.36308  | 0        | 0.4146   | 0.81455  | NA       | CTC-308K2 chr5  | + | 1.72E+08 | 1.72E+08 | 489  |
| ENSG000001 | 0        | 3.504225 | -3.0154  | 0.066075 | 0.1134   | CTC-286N1 chr5  | - | 1.67E+08 | 1.67E+08 | 648  |
| ENSG000001 | 0.705622 | 0        | 0.8807   | 0.6196   | NA       | RP11-431A chr8  | + | 34032404 | 34042413 | 537  |
| ENSG000001 | 1.359003 | 0        | 1.8987   | 0.26617  | NA       | RP11-398C chr8  | - | 1.23E+08 | 1.23E+08 | 790  |
| ENSG000001 | 0.943682 | 0        | 1.2438   | 0.48556  | NA       | MRPL9P1 chr8    | - | 77515475 | 77516087 | 613  |
| ENSG000001 | 0.290301 | 0        | 0.4146   | 0.81455  | NA       | RP11-150C chr8  | - | 37458055 | 37483391 | 551  |
| ENSG000001 | 0        | 0.297015 | -0.41864 | 0.81278  | NA       | RP11-52B1 chr8  | - | 7974267  | 7974471  | 205  |
| ENSG000001 | 0.632843 | 0.654722 | -0.02224 | 0.98935  | NA       | RP11-267A chr8  | + | 95545856 | 95546619 | 491  |
| ENSG000001 | 1.555988 | 0.297015 | 1.4773   | 0.37579  | NA       | RP11-473C chr8  | + | 1.31E+08 | 1.31E+08 | 917  |
| ENSG000001 | 0        | 0.357707 | -0.41864 | 0.81278  | NA       | RP11-134C chr8  | - | 2523591  | 2585991  | 582  |
| ENSG000001 | 0.870904 | 0        | 1.046    | 0.5544   | NA       | RP11-495C chr8  | - | 38558144 | 38562373 | 735  |
| ENSG000001 | 0        | 2.696564 | -2.9337  | 0.058159 | 0.10164  | RP11-318K chr8  | + | 56806154 | 56808298 | 673  |
| ENSG000001 | 0        | 0.343138 | -0.41864 | 0.81278  | NA       | CTC-308K2 chr5  | + | 1.72E+08 | 1.72E+08 | 182  |
| ENSG000001 | 0.705622 | 1.234181 | -0.63076 | 0.69086  | 0.76952  | CKS1BP7 chr8    | - | 81557174 | 81557408 | 235  |
| ENSG000001 | 10.26926 | 4.648575 | 1.0972   | 0.15381  | 0.23189  | GS1-44D2C chr8  | + | 70041833 | 70042580 | 748  |
| ENSG000001 | 1.576526 | 3.725978 | -1.0694  | 0.34113  | 0.44506  | CTC-367J1 chr5  | - | 1.5E+08  | 1.5E+08  | 368  |
| ENSG000001 | 0.580602 | 0        | 0.8036   | 0.6494   | NA       | CDH12P1 chr5    | - | 70156112 | 70156406 | 295  |
| ENSG000001 | 7.354266 | 0        | 4.4728   | 0.000708 | 0.001797 | RP11-865I chr8  | - | 69760977 | 69764998 | 515  |
| ENSG000001 | 0.705622 | 12.1014  | -3.7335  | 0.000438 | 0.001148 | RP11-909A chr8  | + | 1.44E+08 | 1.45E+08 | 417  |
| ENSG000001 | 0        | 1453.104 | -11.658  | 1.11E-27 | 1.30E-26 | RP11-267L chr8  | + | 1.15E+08 | 1.15E+08 | 877  |
| ENSG000001 | 0.342542 | 0.937167 | -0.89746 | 0.60352  | NA       | RP11-10A1 chr8  | + | 8998934  | 9002945  | 651  |
| ENSG000001 | 1.048164 | 4.585467 | -1.9069  | 0.10157  | 0.16352  | RP11-760F chr8  | + | 1.21E+08 | 1.21E+08 | 522  |
| ENSG000001 | 0        | 0.357707 | -0.41864 | 0.81278  | NA       | MTND1P6 chr8    | + | 32871599 | 32872544 | 946  |
| ENSG000001 | 0        | 1.84278  | -2.0842  | 0.23234  | NA       | RP11-351E chr8  | + | 73374546 | 73383207 | 252  |
| ENSG000001 | 0        | 0.997859 | -1.5018  | 0.39072  | NA       | RP11-1134 chr8  | + | 48100928 | 48101183 | 256  |
| ENSG000001 | 0        | 6.330295 | -4.2612  | 0.001453 | 0.003518 | RP11-758A chr8  | + | 75512010 | 75735548 | 2125 |
| ENSG000001 | 74.92373 | 0        | 7.7576   | 1.55E-12 | 8.69E-12 | RP11-542A chr5  | + | 1.58E+08 | 1.58E+08 | 706  |
| ENSG000001 | 7.01433  | 5.361573 | 0.36764  | 0.65125  | 0.73678  | RP11-578C chr8  | - | 79636031 | 79636371 | 341  |
| ENSG000001 | 3.76617  | 2.932886 | 0.30656  | 0.75614  | 0.82265  | RP11-195E chr5  | - | 70328995 | 70330227 | 707  |
| ENSG000001 | 0        | 0.891044 | -1.0625  | 0.54819  | NA       | RP11-14I1 chr8  | + | 26298007 | 26300111 | 568  |
| ENSG000001 | 3.205292 | 0.297015 | 2.5481   | 0.075978 | 0.12782  | CTB-131B5 chr5  | + | 1.4E+08  | 1.4E+08  | 583  |
| ENSG000001 | 0        | 3.696839 | -3.2925  | 0.032817 | 0.061452 | CTB-180C1 chr5  | - | 1.67E+08 | 1.67E+08 | 523  |
| ENSG000001 | 11.72239 | 0        | 5.1586   | 3.24E-05 | 9.77E-05 | HOXA-AS3 chr7   | + | 27169596 | 27195542 | 3987 |
| ENSG000001 | 1.503747 | 3.495361 | -1.0119  | 0.41837  | 0.52363  | RP11-181B chr8  | - | 28273041 | 28277572 | 511  |
| ENSG000001 | 0.36308  | 0        | 0.4146   | 0.81455  | NA       | RP11-343P chr8  | - | 1.36E+08 | 1.36E+08 | 318  |
| ENSG000001 | 0.342542 | 0.594029 | -0.38792 | 0.8278   | NA       | RP11-34P1 chr5  | + | 1.6E+08  | 1.6E+08  | 333  |
| ENSG000001 | 0        | 94.69459 | -8.054   | 2.86E-13 | 1.68E-12 | RP11-32K4 chr8  | + | 65285885 | 65296344 | 2840 |
| ENSG000001 | 0.36308  | 3.025133 | -2.4192  | 0.097002 | 0.15744  | DUTP2 chr8      | + | 1.24E+08 | 1.24E+08 | 463  |
| ENSG000001 | 18.31879 | 29.05777 | -0.64883 | 0.22128  | 0.31334  | RHPN1-AS1 chr8  | - | 1.44E+08 | 1.44E+08 | 1918 |
| ENSG000001 | 1.048164 | 0        | 1.348    | 0.44949  | NA       | CTD-2272C chr8  | + | 83824339 | 83874161 | 616  |
| ENSG000001 | 5.185973 | 5.537203 | -0.08906 | 0.9151   | 0.94237  | CTD-2371C chr11 | - | 9451903  | 9455033  | 597  |
| ENSG000001 | 1.286224 | 0.640152 | 0.76496  | 0.6103   | 0.70288  | RP11-578F chr15 | - | 28924551 | 28927398 | 546  |
| ENSG000001 | 0        | 0.343138 | -0.41864 | 0.81278  | NA       | GLYATL1P4 chr11 | + | 58810210 | 58818444 | 906  |
| ENSG000001 | 0        | 0.297015 | -0.41864 | 0.81278  | NA       | RP11-215C chr11 | - | 1.2E+08  | 1.2E+08  | 826  |
| ENSG000001 | 0.705622 | 0        | 0.8807   | 0.6196   | NA       | RP11-109E chr11 | - | 1.23E+08 | 1.23E+08 | 541  |
| ENSG000001 | 0.580602 | 0.357707 | 0.37639  | 0.83285  | NA       | RP11-613C chr11 | + | 43942609 | 44022707 | 743  |
| ENSG000001 | 0.705622 | 2.261179 | -1.3323  | 0.37     | 0.47448  | RP11-182J chr15 | - | 85175129 | 85177218 | 845  |
| ENSG000001 | 0.685084 | 0.297015 | 0.4735   | 0.79064  | NA       | SIGLEC14 chr19  | - | 52145806 | 52150054 | 2035 |
| ENSG000001 | 0        | 0.357707 | -0.41864 | 0.81278  | NA       | RP11-347E chr11 | + | 1.1E+08  | 1.1E+08  | 720  |
| ENSG000001 | 20.15652 | 0        | 5.9626   | 3.05E-07 | 1.14E-06 | ANO1-AS2 chr11  | - | 69918540 | 69921539 | 1004 |
| ENSG000001 | 0        | 3.054271 | -3.1134  | 0.040994 | 0.074937 | RP11-21L1 chr11 | - | 14284392 | 14295237 | 240  |
| ENSG000001 | 5.342695 | 11.77767 | -1.1116  | 0.098165 | 0.15891  | RP11-261P chr20 | + | 57285851 | 57286689 | 577  |
| ENSG000001 | 0.36308  | 0.343138 | -0.0021  | 0.99905  | NA       | RP11-452F chr11 | + | 78035804 | 78155095 | 437  |
| ENSG000001 | 0.290301 | 0        | 0.4146   | 0.81455  | NA       | RP11-351I chr8  | - | 12231875 | 12233055 | 1181 |
| ENSG000001 | 0        | 0.343138 | -0.41864 | 0.81278  | NA       | RP11-480C chr8  | - | 13766740 | 13767289 | 550  |
| ENSG000001 | 0.685084 | 4.502084 | -2.232   | 0.099874 | 0.16129  | RP11-430F chr11 | + | 45376922 | 45387672 | 872  |

|            |          |          |          |          |          |                   |   |          |          |      |
|------------|----------|----------|----------|----------|----------|-------------------|---|----------|----------|------|
| ENSG000001 | 16.11122 | 31.05986 | -0.92849 | 0.034154 | 0.063755 | RP11-110I: chr11  | - | 1.19E+08 | 1.19E+08 | 523  |
| ENSG000001 | 35.7701  | 308.8444 | -3.0981  | 7.20E-26 | 7.81E-25 | CTD-2562J: chr11  | + | 74971171 | 74972069 | 506  |
| ENSG000001 | 0.653381 | 1.995719 | -1.2915  | 0.35733  | 0.46171  | RP11-550A: chr8   | - | 1.26E+08 | 1.26E+08 | 722  |
| ENSG000001 | 1.701545 | 3.541484 | -0.97282 | 0.37746  | 0.48155  | RP11-331I: chr8   | - | 61721294 | 61722165 | 301  |
| ENSG000001 | 3.309773 | 6.734125 | -0.95768 | 0.26349  | 0.36165  | RP11-677I: chr11  | - | 1.06E+08 | 1.06E+08 | 826  |
| ENSG000001 | 0.342542 | 1.84278  | -1.6267  | 0.32697  | 0.42994  | PBOV1: chr6       | - | 1.39E+08 | 1.39E+08 | 2499 |
| ENSG000001 | 0.705622 | 0.640152 | 0.062329 | 0.97007  | NA       | RP11-718B: chr11  | + | 82546551 | 82548264 | 915  |
| ENSG000001 | 0        | 2.482932 | -2.7317  | 0.090975 | 0.14912  | AP000859: chr11   | - | 1.34E+08 | 1.34E+08 | 307  |
| ENSG000001 | 0        | 1.188058 | -1.268   | 0.47398  | NA       | RP11-290F: chr11  | - | 6129365  | 6206806  | 816  |
| ENSG000001 | 0.36308  | 0.343138 | -0.0021  | 0.99905  | NA       | SF3A3P2: chr11    | - | 1.23E+08 | 1.23E+08 | 1507 |
| ENSG000001 | 0.290301 | 0        | 0.4146   | 0.81455  | NA       | ALG9-IT1: chr11   | - | 1.12E+08 | 1.12E+08 | 684  |
| ENSG000001 | 0.290301 | 0        | 0.4146   | 0.81455  | NA       | RP11-560G: chr12  | + | 75628520 | 75692288 | 1751 |
| ENSG000001 | 0.72616  | 1.043983 | -0.36115 | 0.83043  | NA       | NAV2-AS2: chr11   | - | 20065392 | 20070849 | 782  |
| ENSG000001 | 0        | 9.04626  | -4.6945  | 0.000442 | 0.001157 | RCC2P6: chr11     | + | 62138618 | 62140640 | 1557 |
| ENSG000001 | 2.386629 | 1.188058 | 0.7564   | 0.59795  | 0.692    | RP11-867C: chr11  | + | 66080324 | 66086708 | 544  |
| ENSG000001 | 2.282147 | 1.326428 | 0.66397  | 0.60818  | 0.70091  | RP11-91P2: chr11  | - | 77540700 | 77583308 | 585  |
| ENSG000001 | 13.67316 | 9.401551 | 0.52724  | 0.37552  | 0.47961  | RP11-755F: chr11  | - | 66027038 | 66029305 | 539  |
| ENSG000001 | 8.931605 | 5.171375 | 0.76738  | 0.32405  | 0.42697  | RP11-484C: chr11  | + | 43487942 | 43488421 | 480  |
| ENSG000001 | 31.80532 | 37.97049 | -0.25209 | 0.45466  | 0.55998  | RP11-849F: chr11  | - | 71576555 | 71639700 | 1781 |
| ENSG000001 | 338.784  | 257.7027 | 0.39017  | 0.25934  | 0.35728  | AP5B1: chr11      | - | 65543364 | 65548273 | 4811 |
| ENSG000001 | 0.653381 | 0        | 0.82678  | 0.64037  | NA       | RP11-885L: chr11  | + | 79698556 | 79700673 | 2118 |
| ENSG000001 | 6.463638 | 5.826096 | 0.14362  | 0.86153  | 0.90319  | RP11-522I: chr9   | + | 86322509 | 86328293 | 1017 |
| ENSG000001 | 0.580602 | 1.073121 | -0.47791 | 0.7862   | NA       | hsa-mir-21: chr11 | - | 568089   | 568198   | 110  |
| ENSG000001 | 2.354926 | 1.370136 | 0.66783  | 0.60646  | 0.6996   | AP000640: chr11   | - | 59520488 | 59522448 | 879  |
| ENSG000001 | 0.632843 | 0        | 0.81931  | 0.64303  | NA       | SLC25A1P1: chr11  | + | 85645780 | 85646706 | 927  |
| ENSG000001 | 0.36308  | 5.033005 | -3.1103  | 0.023163 | 0.04508  | RP11-23F2: chr11  | + | 4208370  | 4223885  | 462  |
| ENSG000001 | 0.580602 | 0        | 0.8036   | 0.6494   | NA       | PTP4A2P2: chr11   | - | 1.34E+08 | 1.34E+08 | 502  |
| ENSG000001 | 0        | 0.891044 | -1.0625  | 0.54819  | NA       | CTA-797E1: chr11  | + | 70166034 | 70167521 | 422  |
| ENSG000001 | 1.027626 | 3.24447  | -1.3898  | 0.30215  | 0.40343  | RP11-380C: chr3   | - | 9334272  | 9404987  | 829  |
| ENSG000001 | 0.580602 | 0        | 0.8036   | 0.6494   | NA       | RP13-631K: chr11  | + | 12052422 | 12083332 | 3308 |
| ENSG000001 | 0        | 0.343138 | -0.41864 | 0.81278  | NA       | RP5-1024C: chr11  | + | 30605677 | 30652055 | 541  |
| ENSG000001 | 0        | 0.640152 | -0.82869 | 0.63935  | NA       | AP000487: chr11   | - | 70204304 | 70204783 | 394  |
| ENSG000001 | 0        | 0.654722 | -0.83442 | 0.63731  | NA       | AC002056: chr22   | - | 51179021 | 51181948 | 284  |
| ENSG000001 | 0.342542 | 0.686276 | -0.48412 | 0.78604  | NA       | RANP3: chr11      | + | 74363681 | 74363956 | 276  |
| ENSG000001 | 1.08924  | 1.606458 | -0.43094 | 0.78817  | 0.84859  | CTD-2521N: chr19  | - | 17527840 | 17529097 | 1258 |
| ENSG000001 | 28.84925 | 28.19263 | 0.026047 | 0.94806  | 0.96719  | CHMP4A: chr14     | - | 24678789 | 24683075 | 1393 |
| ENSG000001 | 0        | 0.686276 | -0.84936 | 0.6309   | NA       | RP11-748F: chr11  | + | 1.01E+08 | 1.01E+08 | 2371 |
| ENSG000001 | 0        | 3.976869 | -3.5412  | 0.014529 | 0.029512 | RP11-481A: chr8   | - | 11860909 | 11861591 | 683  |
| ENSG000001 | 0        | 0.343138 | -0.41864 | 0.81278  | NA       | RP11-646J: chr11  | + | 33796245 | 33797216 | 386  |
| ENSG000001 | 22.04568 | 11.66273 | 0.90567  | 0.065101 | 0.112    | RP11-677N: chr11  | + | 1.25E+08 | 1.25E+08 | 433  |
| ENSG000001 | 2.520208 | 13.56694 | -2.2041  | 0.022356 | 0.043648 | RP11-867C: chr11  | + | 66176629 | 66184608 | 948  |
| ENSG000001 | 1.265686 | 2.947455 | -1.034   | 0.3972   | 0.50173  | RP11-472I: chr11  | + | 43755309 | 43756114 | 806  |
| ENSG000001 | 0        | 0.357707 | -0.41864 | 0.81278  | NA       | RP11-113K: chr11  | - | 82751848 | 82752445 | 286  |
| ENSG000001 | 0.342542 | 0        | 0.4146   | 0.81455  | NA       | RP11-466I: chr11  | + | 29181503 | 29288281 | 492  |
| ENSG000001 | 1.681007 | 4.585467 | -1.3245  | 0.20622  | 0.29586  | ABC11-484: chr8   | - | 12063268 | 12063898 | 631  |
| ENSG000001 | 17.82132 | 5.762988 | 1.5733   | 0.030787 | 0.058024 | RP11-728F: chr11  | + | 1.18E+08 | 1.18E+08 | 959  |
| ENSG000001 | 0.36308  | 0        | 0.4146   | 0.81455  | NA       | RP11-460B: chr11  | - | 29357425 | 29615842 | 448  |
| ENSG000001 | 51.12166 | 51.61121 | -0.02104 | 0.94786  | 0.96705  | AP001816: chr4    | + | 1.02E+08 | 1.02E+08 | 790  |
| ENSG000001 | 0        | 0.357707 | -0.41864 | 0.81278  | NA       | AF186192: chr8    | - | 1.46E+08 | 1.46E+08 | 572  |
| ENSG000001 | 255.7021 | 73.26784 | 1.7993   | 1.59E-20 | 1.38E-19 | PABPC4L: chr4     | - | 1.35E+08 | 1.35E+08 | 4944 |
| ENSG000001 | 1.649304 | 0        | 2.1906   | 0.18857  | NA       | RP1-130L2: chr11  | + | 33424762 | 33425151 | 390  |
| ENSG000001 | 2.624689 | 4.556329 | -0.73695 | 0.44525  | 0.55073  | RP11-463C: chr8   | + | 74582676 | 74645132 | 396  |
| ENSG000001 | 8.838288 | 1.935026 | 2.0309   | 0.020269 | 0.039939 | RP4-791M: chr1    | - | 1.45E+08 | 1.45E+08 | 869  |
| ENSG000001 | 0.36308  | 0.951736 | -0.91212 | 0.59701  | NA       | NAV2-AS3: chr11   | - | 20000245 | 20002883 | 598  |
| ENSG000001 | 4.023955 | 0        | 3.4909   | 0.019266 | 0.038158 | RP11-84A1: chr1   | + | 32254731 | 32256923 | 537  |
| ENSG000001 | 0.290301 | 0        | 0.4146   | 0.81455  | NA       | RP11-738C: chr11  | - | 55635045 | 55642013 | 1582 |
| ENSG000001 | 0        | 0.297015 | -0.41864 | 0.81278  | NA       | RP11-429J: chr8   | - | 1.45E+08 | 1.45E+08 | 299  |
| ENSG000001 | 0.36308  | 0.98329  | -0.93796 | 0.58624  | NA       | OMP: chr11        | + | 76813886 | 76814377 | 492  |
| ENSG000001 | 0        | 0.715414 | -0.84936 | 0.6309   | NA       | RP1-2705: chr1    | + | 32930658 | 33066393 | 3447 |
| ENSG000001 | 8.962494 | 8.69829  | 0.059555 | 0.92824  | 0.95245  | RP11-351I: chr11  | - | 10324204 | 10325251 | 803  |
| ENSG000001 | 6.939759 | 12.5999  | -0.83522 | 0.17828  | 0.26214  | AF131215: chr8    | - | 10994408 | 10996117 | 1710 |
| ENSG000001 | 0.685084 | 1.669566 | -0.89912 | 0.58359  | 0.67961  | RP11-102F: chr8   | + | 70625625 | 70631957 | 552  |
| ENSG000001 | 8.971867 | 34.06156 | -1.8683  | 0.00022  | 0.000598 | RP11-1L12: chr11  | - | 27068733 | 27241660 | 879  |
| ENSG000001 | 0        | 2.915901 | -2.7723  | 0.095997 | 0.15615  | RP11-196E: chr11  | + | 1.19E+08 | 1.2E+08  | 4476 |
| ENSG000001 | 1.306762 | 1.66715  | -0.27299 | 0.85098  | 0.89521  | RP11-673F: chr11  | + | 78460295 | 78467525 | 320  |

|            |          |          |          |          |          |           |       |   |          |          |       |
|------------|----------|----------|----------|----------|----------|-----------|-------|---|----------|----------|-------|
| ENSG000001 | 0.342542 | 1.012429 | -0.95691 | 0.57869  | NA       | MTND2P26  | chr11 | - | 1.03E+08 | 1.03E+08 | 1029  |
| ENSG000001 | 0        | 0.640152 | -0.82869 | 0.63935  | NA       | RP11-60I3 | chr9  | - | 1.03E+08 | 1.03E+08 | 336   |
| ENSG000001 | 0.290301 | 0        | 0.4146   | 0.81455  | NA       | GLULP3    | chr11 | - | 1.22E+08 | 1.22E+08 | 1043  |
| ENSG000001 | 0.290301 | 0        | 0.4146   | 0.81455  | NA       | RP11-429J | chr8  | - | 1.45E+08 | 1.45E+08 | 374   |
| ENSG000001 | 0.290301 | 0        | 0.4146   | 0.81455  | NA       | RP11-3G21 | chr8  | + | 14018806 | 14022868 | 488   |
| ENSG000001 | 7.366245 | 8.028999 | -0.12232 | 0.85841  | 0.90057  | RP11-484C | chr11 | + | 43411833 | 43417045 | 183   |
| ENSG000001 | 0.72616  | 0        | 0.85004  | 0.63064  | NA       | RP11-407P | chr11 | - | 40466854 | 40468691 | 1838  |
| ENSG000001 | 1.048164 | 0        | 1.348    | 0.44949  | NA       | PSMA2P1   | chr11 | - | 87040449 | 87041094 | 646   |
| ENSG000001 | 2.697468 | 7.850953 | -1.4389  | 0.11122  | 0.1768   | MAGEL2    | chr15 | - | 23888691 | 23891175 | 2485  |
| ENSG000001 | 0        | 1.40169  | -1.7271  | 0.32809  | NA       | RP11-360K | chr11 | + | 96461317 | 96584822 | 1647  |
| ENSG000001 | 0.290301 | 1.355566 | -1.3811  | 0.39332  | NA       | RP11-1007 | chr11 | + | 1.28E+08 | 1.28E+08 | 1387  |
| ENSG000001 | 0        | 0.297015 | -0.41864 | 0.81278  | NA       | RP11-334E | chr11 | + | 1.19E+08 | 1.19E+08 | 1297  |
| ENSG000001 | 0        | 0.343138 | -0.41864 | 0.81278  | NA       | RP5-1173A | chr11 | + | 3357951  | 3361860  | 783   |
| ENSG000001 | 3.205292 | 8.669151 | -1.339   | 0.092696 | 0.15163  | RP11-757C | chr11 | + | 71614240 | 71615127 | 888   |
| ENSG000001 | 36.61109 | 18.16382 | 0.99337  | 0.01654  | 0.033209 | CTD-2010I | chr11 | - | 6509416  | 6510607  | 686   |
| ENSG000001 | 0.580602 | 1.606458 | -0.99117 | 0.54267  | 0.64321  | CTD-3074C | chr11 | + | 66221705 | 66222052 | 348   |
| ENSG000001 | 4.003417 | 3.426547 | 0.23836  | 0.82074  | 0.87405  | CSNK2A3   | chr11 | - | 11373489 | 11374904 | 1416  |
| ENSG000001 | 0        | 0.343138 | -0.41864 | 0.81278  | NA       | RP11-115E | chr11 | + | 98547121 | 98554465 | 435   |
| ENSG000001 | 31.49188 | 85.28109 | -1.4211  | 6.00E-06 | 1.98E-05 | AP000662  | chr11 | + | 57405497 | 57420263 | 2790  |
| ENSG000001 | 4.117271 | 0.297015 | 2.8466   | 0.046758 | 0.083928 | AP000487  | chr11 | - | 70128473 | 70209474 | 539   |
| ENSG000001 | 17.52327 | 1.012429 | 3.8093   | 4.25E-05 | 0.000127 | RP11-626F | chr11 | - | 69860964 | 69867165 | 655   |
| ENSG000001 | 2.987769 | 0        | 3.1007   | 0.040889 | 0.074766 | RP11-22P4 | chr11 | + | 28538379 | 28540888 | 747   |
| ENSG000001 | 0.632843 | 0.297015 | 0.49183  | 0.78024  | NA       | RP11-115C | chr11 | + | 1.27E+08 | 1.27E+08 | 408   |
| ENSG000001 | 0        | 0.654722 | -0.83442 | 0.63731  | NA       | RP11-719K | chr16 | - | 14821139 | 14827204 | 355   |
| ENSG000001 | 0        | 4.380699 | -3.6717  | 0.010523 | 0.022019 | RP5-903G2 | chr11 | - | 67702034 | 67707245 | 455   |
| ENSG000001 | 21.64992 | 59.4784  | -1.4509  | 0.000188 | 0.000516 | RP11-676A | chr11 | - | 1.28E+08 | 1.28E+08 | 724   |
| ENSG000001 | 4.024768 | 7.160646 | -0.80108 | 0.3298   | 0.43287  | AP003068  | chr11 | - | 64945077 | 64949305 | 1454  |
| ENSG000001 | 97.49852 | 48.23965 | 1.0074   | 0.000184 | 0.000508 | RP11-395C | chr8  | + | 1.07E+08 | 1.07E+08 | 1318  |
| ENSG000001 | 0.923144 | 1.058552 | -0.1032  | 0.94763  | 0.96695  | RP11-700F | chr11 | + | 1.34E+08 | 1.34E+08 | 586   |
| ENSG000001 | 0.72616  | 0        | 0.85004  | 0.63064  | NA       | NAV2-AS4  | chr11 | - | 19532437 | 19541443 | 1181  |
| ENSG000001 | 0        | 1.416259 | -1.7181  | 0.33141  | NA       | RP11-702F | chr11 | + | 74108594 | 74196787 | 491   |
| ENSG000001 | 0.685084 | 1.012429 | -0.37562 | 0.82411  | NA       | RP11-21L2 | chr11 | - | 76470960 | 76479267 | 538   |
| ENSG000001 | 9.803322 | 13.58077 | -0.46905 | 0.43252  | 0.538    | RP11-231C | chr16 | - | 29437121 | 29465435 | 2930  |
| ENSG000001 | 220.2678 | 230.2983 | -0.06249 | 0.72135  | 0.79384  | WAC-AS1   | chr10 | - | 28811581 | 28821672 | 2608  |
| ENSG000001 | 0.290301 | 0        | 0.4146   | 0.81455  | NA       | ARMS2     | chr10 | + | 1.24E+08 | 1.24E+08 | 818   |
| ENSG000001 | 0.342542 | 0        | 0.4146   | 0.81455  | NA       | RP11-356J | chr11 | - | 1.12E+08 | 1.12E+08 | 594   |
| ENSG000001 | 7.749049 | 1.623443 | 2.056    | 0.03716  | 0.06874  | CTD-2589A | chr11 | + | 46259933 | 46260818 | 653   |
| ENSG000001 | 0        | 0.640152 | -0.82869 | 0.63935  | NA       | RP11-5A11 | chr8  | - | 1.05E+08 | 1.05E+08 | 376   |
| ENSG000001 | 0.342542 | 3.602177 | -2.6802  | 0.057474 | 0.10052  | RP11-713P | chr11 | - | 1.34E+08 | 1.34E+08 | 1130  |
| ENSG000001 | 0.290301 | 0.654722 | -0.51764 | 0.76892  | NA       | RP11-452F | chr11 | + | 78099107 | 78103451 | 365   |
| ENSG000001 | 0.36308  | 0        | 0.4146   | 0.81455  | NA       | RP11-702F | chr11 | + | 46138129 | 46138869 | 605   |
| ENSG000001 | 33.84345 | 0.640152 | 5.2038   | 2.97E-08 | 1.21E-07 | RTL1      | chr14 | - | 1.01E+08 | 1.01E+08 | 4193  |
| ENSG000001 | 0        | 1.387121 | -1.6961  | 0.33794  | NA       | RP11-872C | chr11 | + | 57093077 | 57095432 | 311   |
| ENSG000001 | 0        | 1.387121 | -1.6961  | 0.33794  | NA       | CTD-2560E | chr11 | - | 45237366 | 45256843 | 567   |
| ENSG000001 | 54.13274 | 71.77231 | -0.40109 | 0.2825   | 0.38356  | AP000783  | chr11 | + | 1.23E+08 | 1.23E+08 | 1103  |
| ENSG000001 | 0        | 0.357707 | -0.41864 | 0.81278  | NA       | RP5-945I1 | chr11 | - | 35600978 | 35606858 | 537   |
| ENSG000001 | 2.665765 | 5.62945  | -1.0074  | 0.27622  | 0.37648  | CTC-497E2 | chr11 | - | 13022637 | 13030706 | 670   |
| ENSG000001 | 1.939605 | 0.654722 | 1.2517   | 0.37851  | 0.48262  | STT3A-AS1 | chr11 | - | 1.25E+08 | 1.25E+08 | 429   |
| ENSG000001 | 1.016461 | 4.585467 | -1.9277  | 0.097723 | 0.15836  | RP5-916O1 | chr11 | - | 35988560 | 35990226 | 1667  |
| ENSG000001 | 0        | 0.715414 | -0.84936 | 0.6309   | NA       | RP11-7115 | chr11 | + | 77733979 | 77734767 | 277   |
| ENSG000001 | 2.697468 | 4.799099 | -0.76231 | 0.43603  | 0.54148  | RP11-727A | chr11 | + | 82891186 | 82895562 | 905   |
| ENSG000001 | 531.0214 | 295.0673 | 0.84523  | 9.02E-08 | 3.53E-07 | PKD1P5    | chr16 | - | 18458147 | 18495797 | 10291 |
| ENSG000001 | 73.72562 | 206.3295 | -1.479   | 1.54E-10 | 7.53E-10 | RP11-660L | chr11 | + | 71159720 | 71163203 | 680   |
| ENSG000001 | 0        | 4.882481 | -3.8624  | 0.005785 | 0.012715 | AF228730  | chr8  | - | 7001154  | 7001363  | 210   |
| ENSG000001 | 0        | 0.357707 | -0.41864 | 0.81278  | NA       | RP11-882I | chr11 | - | 85047119 | 85047616 | 498   |
| ENSG000001 | 63.47013 | 32.26007 | 0.96663  | 0.002679 | 0.006225 | FPGT      | chr1  | + | 74663922 | 74699770 | 3224  |
| ENSG000001 | 0        | 0.654722 | -0.83442 | 0.63731  | NA       | RP11-162C | chr8  | + | 54090131 | 54155243 | 826   |
| ENSG000001 | 1.887365 | 2.696564 | -0.4217  | 0.72628  | 0.79758  | RP11-47J1 | chr11 | - | 12843982 | 12845214 | 489   |
| ENSG000001 | 0.36308  | 0        | 0.4146   | 0.81455  | NA       | RP11-354A | chr8  | + | 82797612 | 82835428 | 466   |
| ENSG000001 | 54.89053 | 4.78453  | 3.456    | 1.73E-09 | 7.82E-09 | GS1-393G1 | chr8  | - | 1.46E+08 | 1.46E+08 | 444   |
| ENSG000001 | 5.644162 | 3.200762 | 0.73134  | 0.46571  | 0.57052  | RP11-91P2 | chr11 | + | 77561650 | 77562557 | 551   |
| ENSG000001 | 0.685084 | 0        | 0.85004  | 0.63064  | NA       | RP11-58K2 | chr11 | - | 44626058 | 44626887 | 543   |
| ENSG000001 | 3.278071 | 1.669566 | 0.85055  | 0.47938  | 0.5837   | RP11-50B3 | chr11 | - | 1.26E+08 | 1.26E+08 | 362   |
| ENSG000001 | 0.975385 | 0.357707 | 0.92752  | 0.59066  | NA       | RP11-396C | chr11 | + | 15665431 | 15726914 | 471   |
| ENSG000001 | 2.697468 | 2.24661  | 0.21091  | 0.84816  | 0.89328  | RP11-1415 | chr5  | - | 69435402 | 69503572 | 584   |

|            |          |          |          |          |          |                 |   |          |          |      |
|------------|----------|----------|----------|----------|----------|-----------------|---|----------|----------|------|
| ENSG000001 | 84.36505 | 0.343138 | 7.0808   | 3.39E-12 | 1.85E-11 | FLI1-AS1 chr11  | - | 1.29E+08 | 1.29E+08 | 1290 |
| ENSG000001 | 1.379541 | 5.15439  | -1.6634  | 0.16772  | 0.24917  | RP11-675A chr11 | - | 92133357 | 92141342 | 775  |
| ENSG000001 | 0        | 0.891044 | -1.0625  | 0.54819  | NA       | RP11-35J1 chr11 | + | 7726835  | 7731064  | 539  |
| ENSG000001 | 0.342542 | 1.730259 | -1.5292  | 0.35985  | 0.46403  | RP1-145M chr11  | - | 34356665 | 34357550 | 886  |
| ENSG000001 | 4.148974 | 0.98329  | 1.8036   | 0.13291  | 0.20539  | CTD-2216A chr11 | + | 1.23E+08 | 1.23E+08 | 701  |
| ENSG000001 | 0.705622 | 0.686276 | 0.017556 | 0.99188  | NA       | RP11-560B chr11 | - | 6864895  | 6865897  | 1003 |
| ENSG000001 | 0.290301 | 0        | 0.4146   | 0.81455  | NA       | RP11-851A chr11 | - | 84256174 | 84257889 | 967  |
| ENSG000001 | 8.423781 | 2.979009 | 1.4052   | 0.090641 | 0.14864  | GLYATL1P2 chr11 | + | 58645775 | 58660933 | 902  |
| ENSG000001 | 1.213446 | 3.307578 | -1.1888  | 0.34979  | 0.4541   | CTD-2184C chr14 | - | 60706839 | 60715483 | 2859 |
| ENSG000001 | 2.883288 | 1.713273 | 0.68396  | 0.56203  | 0.6604   | RP11-351I chr11 | - | 10293599 | 10293806 | 208  |
| ENSG000001 | 2632.434 | 3168.907 | -0.26723 | 0.040081 | 0.07352  | MEX3A chr1      | - | 1.56E+08 | 1.56E+08 | 6124 |
| ENSG000001 | 0        | 1.029414 | -1.1526  | 0.51496  | NA       | RP11-801C chr11 | - | 1.09E+08 | 1.09E+08 | 320  |
| ENSG000001 | 0        | 0.343138 | -0.41864 | 0.81278  | NA       | CTD-2005F chr11 | + | 86414141 | 86425134 | 432  |
| ENSG000001 | 4.19005  | 1.248751 | 1.4799   | 0.22742  | 0.32047  | RP11-691A chr11 | + | 57509635 | 57560715 | 580  |
| ENSG000001 | 0        | 0.297015 | -0.41864 | 0.81278  | NA       | RP11-867C chr11 | + | 66157080 | 66157639 | 560  |
| ENSG000001 | 0        | 0.343138 | -0.41864 | 0.81278  | NA       | OR10G4 chr11    | + | 1.24E+08 | 1.24E+08 | 936  |
| ENSG000001 | 2.032922 | 3.137654 | -0.56293 | 0.6507   | 0.73646  | RP13-46H2 chr11 | + | 528907   | 529659   | 547  |
| ENSG000001 | 0        | 0.297015 | -0.41864 | 0.81278  | NA       | RP11-334E chr11 | + | 1.19E+08 | 1.19E+08 | 778  |
| ENSG000001 | 0        | 2.024857 | -2.2291  | 0.19662  | 0.28458  | OR10V3P chr11   | + | 59508798 | 59509522 | 725  |
| ENSG000001 | 0.36308  | 0        | 0.4146   | 0.81455  | NA       | CTD-3076C chr15 | + | 1.01E+08 | 1.01E+08 | 572  |
| ENSG000001 | 0        | 0.357707 | -0.41864 | 0.81278  | NA       | RP11-736K chr11 | + | 86735625 | 86736819 | 888  |
| ENSG000001 | 1.306762 | 1.698704 | -0.30014 | 0.82439  | 0.87617  | RP11-867C chr11 | + | 66101965 | 66107346 | 516  |
| ENSG000001 | 0        | 0.715414 | -0.84936 | 0.6309   | NA       | RP13-726E chr11 | + | 3490549  | 3552558  | 450  |
| ENSG000001 | 0.653381 | 0.594029 | 0.059135 | 0.97278  | NA       | NAP1L1P1 chr11  | + | 1.26E+08 | 1.26E+08 | 1063 |
| ENSG000001 | 0        | 3.336716 | -3.2705  | 0.028298 | 0.053889 | CTD-2616J chr19 | + | 51917552 | 51918219 | 492  |
| ENSG000001 | 0.290301 | 0        | 0.4146   | 0.81455  | NA       | RP11-672A chr11 | - | 76423440 | 76430652 | 832  |
| ENSG000001 | 0        | 1.294874 | -1.8547  | 0.27869  | NA       | RP11-50B3 chr11 | - | 1.26E+08 | 1.26E+08 | 202  |
| ENSG000001 | 0        | 1.698704 | -2.2257  | 0.18075  | NA       | AC022182 chr8   | + | 61822612 | 61879116 | 926  |
| ENSG000001 | 0.342542 | 0.98329  | -0.93492 | 0.58786  | NA       | GVINP2 chr11    | + | 6769362  | 6771555  | 2194 |
| ENSG000001 | 3.76617  | 3.353702 | 0.14231  | 0.89244  | 0.9253   | RP11-320L chr11 | + | 85994969 | 85995710 | 742  |
| ENSG000001 | 0        | 0.343138 | -0.41864 | 0.81278  | NA       | RP11-142C chr11 | - | 58762912 | 58767162 | 1122 |
| ENSG000001 | 0.36308  | 0.343138 | -0.0021  | 0.99905  | NA       | CTD-2537C chr11 | + | 84431869 | 84511744 | 351  |
| ENSG000001 | 2.749709 | 7.893045 | -1.449   | 0.10061  | 0.16233  | FAR1-IT1 chr11  | + | 13690874 | 13691696 | 368  |
| ENSG000001 | 0        | 0.700845 | -0.87835 | 0.62047  | NA       | RP11-119C chr11 | + | 67608413 | 67608520 | 108  |
| ENSG000001 | 0.995923 | 0.640152 | 0.45774  | 0.76749  | NA       | FDPSP4 chr15    | - | 43231508 | 43232556 | 1049 |
| ENSG000001 | 0.36308  | 0        | 0.4146   | 0.81455  | NA       | RP11-665E chr11 | - | 87628840 | 87628891 | 52   |
| ENSG000001 | 0.342542 | 0.357707 | -0.0021  | 0.99906  | NA       | SYS1-DBND chr20 | + | 43991840 | 44039250 | 1313 |
| ENSG000001 | 1.068702 | 4.89705  | -1.9802  | 0.088513 | 0.14571  | RP11-661A chr8  | - | 1.45E+08 | 1.45E+08 | 701  |
| ENSG000001 | 0        | 0.343138 | -0.41864 | 0.81278  | NA       | RP11-252C chr8  | - | 12623358 | 12668987 | 1247 |
| ENSG000001 | 0.342542 | 0        | 0.4146   | 0.81455  | NA       | RP11-535A chr11 | - | 75511922 | 75514460 | 758  |
| ENSG000001 | 2.032922 | 9.145085 | -1.9433  | 0.08403  | 0.13941  | RP11-496I chr11 | + | 557595   | 560107   | 2210 |
| ENSG000001 | 0        | 0.343138 | -0.41864 | 0.81278  | NA       | RP3-400B1 chr6  | + | 4135657  | 4146287  | 640  |
| ENSG000001 | 0.342542 | 0        | 0.4146   | 0.81455  | NA       | RP11-375C chr11 | + | 41898184 | 41898628 | 270  |
| ENSG000001 | 0.342542 | 0.357707 | -0.0021  | 0.99906  | NA       | CTD-2530F chr11 | + | 75486949 | 75487974 | 842  |
| ENSG000001 | 5.769181 | 3.076961 | 0.78725  | 0.44378  | 0.54943  | SLC22A18A chr11 | - | 2909010  | 2924970  | 1659 |
| ENSG000001 | 0        | 0.297015 | -0.41864 | 0.81278  | NA       | RP11-451K chr11 | - | 6015106  | 6016225  | 1120 |
| ENSG000001 | 0.705622 | 2.24661  | -1.3953  | 0.31823  | 0.42103  | RP11-50B3 chr11 | + | 1.26E+08 | 1.26E+08 | 569  |
| ENSG000001 | 12.19851 | 36.47098 | -1.5467  | 0.005115 | 0.01138  | AP001372 chr11  | + | 74204411 | 74209578 | 2493 |
| ENSG000001 | 6.152799 | 1.935026 | 1.5007   | 0.12862  | 0.19991  | GVINP1 chr11    | - | 6735571  | 6767670  | 7057 |
| ENSG000001 | 0.290301 | 0.357707 | -0.00203 | 0.99908  | NA       | AF131215 chr8   | - | 10920157 | 10924599 | 639  |
| ENSG000001 | 0.72616  | 1.964165 | -1.0662  | 0.5037   | 0.60716  | RP11-890B chr11 | - | 1.31E+08 | 1.31E+08 | 2203 |
| ENSG000001 | 1.649304 | 0.700845 | 1.0034   | 0.48867  | 0.59272  | RP11-648C chr11 | - | 86805776 | 86807627 | 1852 |
| ENSG000001 | 1.753786 | 1.029414 | 0.55032  | 0.73107  | 0.80136  | RP11-203A chr14 | - | 20812392 | 20815047 | 468  |
| ENSG000001 | 3.40309  | 0        | 3.2692   | 0.029319 | 0.055626 | RP11-51B2 chr11 | - | 12559630 | 12562514 | 519  |
| ENSG000001 | 0        | 0.297015 | -0.41864 | 0.81278  | NA       | RP5-901A4 chr11 | + | 67703029 | 67703397 | 369  |
| ENSG000001 | 29.89563 | 22.08637 | 0.4276   | 0.46055  | 0.56587  | RP11-109L chr11 | + | 1.17E+08 | 1.17E+08 | 822  |
| ENSG000001 | 0        | 1.638012 | -2.1885  | 0.18912  | NA       | RP11-719K chr16 | + | 14841923 | 14859270 | 1110 |
| ENSG000001 | 2.157128 | 11.02828 | -2.1595  | 0.01363  | 0.027855 | CTD-2523C chr11 | + | 1.2E+08  | 1.2E+08  | 523  |
| ENSG000001 | 0.705622 | 0.951736 | -0.34312 | 0.83184  | NA       | RP11-867C chr11 | - | 66032248 | 66033137 | 479  |
| ENSG000001 | 0.995923 | 1.294874 | -0.32243 | 0.816    | 0.87078  | NDUFA3P2 chr11  | - | 68256077 | 68256308 | 232  |
| ENSG000001 | 467.6709 | 590.8343 | -0.33524 | 0.020074 | 0.039599 | MPV17L2 chr19   | + | 18303992 | 18307758 | 1959 |
| ENSG000001 | 0.870904 | 0.951736 | -0.06535 | 0.96887  | NA       | RP11-661A chr8  | - | 1.45E+08 | 1.45E+08 | 498  |
| ENSG000001 | 15.65303 | 33.3575  | -1.0665  | 0.017735 | 0.035407 | TMEM98-A chr11  | + | 8986222  | 8999074  | 1053 |
| ENSG000001 | 0.342542 | 0        | 0.4146   | 0.81455  | NA       | RP11-945A chr11 | - | 23782876 | 23826144 | 506  |
| ENSG000001 | 1.265686 | 4.744111 | -1.641   | 0.17327  | 0.25604  | RP11-159F chr11 | + | 27493276 | 27503980 | 1350 |

|            |          |          |          |          |          |                  |   |          |          |      |
|------------|----------|----------|----------|----------|----------|------------------|---|----------|----------|------|
| ENSG000001 | 0        | 0.357707 | -0.41864 | 0.81278  | NA       | RP11-831A chr11  | - | 1.2E+08  | 1.2E+08  | 518  |
| ENSG000001 | 0        | 1.730259 | -1.9792  | 0.25882  | NA       | RP11-748C chr11  | + | 10170739 | 10186656 | 522  |
| ENSG000001 | 0        | 3.636147 | -3.0614  | 0.062014 | 0.10732  | RP13-870F chr11  | + | 1049880  | 1055749  | 3139 |
| ENSG000001 | 2.468781 | 4.380699 | -0.74764 | 0.52092  | 0.62352  | RP11-770J chr11  | - | 1.18E+08 | 1.18E+08 | 2074 |
| ENSG000001 | 5.011318 | 12.46307 | -1.227   | 0.17151  | 0.25401  | RP11-23J9 chr9   | + | 1E+08    | 1E+08    | 3161 |
| ENSG000001 | 0        | 0.98329  | -1.2878  | 0.47019  | NA       | RP11-142C chr11  | - | 58735069 | 58735764 | 696  |
| ENSG000001 | 0.290301 | 0        | 0.4146   | 0.81455  | NA       | CTD-3096P chr11  | + | 16044736 | 16053061 | 197  |
| ENSG000001 | 0.290301 | 1.949596 | -1.8654  | 0.22752  | 0.32056  | AC103828 chr11   | - | 48035958 | 48037407 | 301  |
| ENSG000001 | 0        | 1.326428 | -1.6486  | 0.3523   | NA       | RP11-687A chr11  | - | 1.25E+08 | 1.25E+08 | 586  |
| ENSG000001 | 6.141634 | 5.096113 | 0.25128  | 0.76335  | 0.82823  | RP11-682B chr11  | - | 9332831  | 9333236  | 406  |
| ENSG000001 | 0.943682 | 0        | 1.2438   | 0.48556  | NA       | RP11-802F chr11  | + | 78902603 | 78904205 | 374  |
| ENSG000001 | 2.894453 | 0.640152 | 1.7742   | 0.18883  | 0.27515  | CTC-378H2 chr19  | + | 42636707 | 42641251 | 759  |
| ENSG000001 | 18.28032 | 7.627585 | 1.222    | 0.043573 | 0.078942 | RP11-466P chr5   | - | 75465911 | 75470171 | 1938 |
| ENSG000001 | 0        | 0.357707 | -0.41864 | 0.81278  | NA       | RP11-3701 chr11  | - | 1.03E+08 | 1.03E+08 | 586  |
| ENSG000001 | 0        | 5.45382  | -3.9907  | 0.004225 | 0.009507 | OPCML-IT1 chr11  | - | 1.33E+08 | 1.33E+08 | 2936 |
| ENSG000001 | 0        | 0.297015 | -0.41864 | 0.81278  | NA       | RP11-482L chr11  | - | 85163326 | 85164742 | 1417 |
| ENSG000001 | 0.290301 | 0.297015 | -0.00202 | 0.99909  | NA       | RP11-513C chr8   | + | 38193499 | 38195069 | 434  |
| ENSG000001 | 2.407167 | 1.684135 | 0.43834  | 0.71752  | 0.79084  | RP11-152F chr11  | + | 8700636  | 8702460  | 537  |
| ENSG000001 | 88.70831 | 47.9239  | 0.88309  | 0.005234 | 0.011619 | MEF2BNB chr19    | - | 19287712 | 19303425 | 3698 |
| ENSG000001 | 0        | 0.686276 | -0.84936 | 0.6309   | NA       | RP11-712L chr11  | - | 1.26E+08 | 1.26E+08 | 492  |
| ENSG000001 | 0        | 0.343138 | -0.41864 | 0.81278  | NA       | RP11-701I chr11  | - | 20691971 | 20692843 | 396  |
| ENSG000001 | 2.551911 | 0.686276 | 1.5235   | 0.28955  | 0.39111  | RP11-484C chr11  | - | 43350298 | 43380846 | 787  |
| ENSG000001 | 8.071866 | 7.085384 | 0.15989  | 0.82798  | 0.87881  | RP11-110I chr11  | - | 1.19E+08 | 1.19E+08 | 208  |
| ENSG000001 | 12.28245 | 14.45241 | -0.23212 | 0.71211  | 0.78631  | RP11-326C chr11  | - | 310139   | 311141   | 392  |
| ENSG000001 | 9.596151 | 18.83794 | -0.95589 | 0.063927 | 0.11026  | SCARNA9 chr11    | + | 93454679 | 93455031 | 353  |
| ENSG000001 | 0.870904 | 0        | 1.046    | 0.5544   | NA       | RP11-632K chr15  | - | 32786204 | 32792547 | 1226 |
| ENSG000001 | 0.975385 | 0        | 1.2767   | 0.47406  | NA       | RP11-263C chr11  | - | 75653173 | 75653479 | 307  |
| ENSG000001 | 0        | 1.012429 | -1.3162  | 0.46038  | NA       | RP11-529A chr11  | - | 89785005 | 89786904 | 1459 |
| ENSG000001 | 0.943682 | 77.77818 | -5.9521  | 4.52E-14 | 2.79E-13 | RP11-259P chr11  | - | 1.34E+08 | 1.34E+08 | 904  |
| ENSG000001 | 0        | 0.297015 | -0.41864 | 0.81278  | NA       | RP11-684B chr11  | - | 71217107 | 71217426 | 320  |
| ENSG000001 | 1.317927 | 0.640152 | 0.74499  | 0.63843  | 0.72627  | RP11-687A chr11  | - | 1.25E+08 | 1.25E+08 | 645  |
| ENSG000001 | 2.177666 | 0        | 2.3426   | 0.17197  | 0.25448  | RP11-619A chr11  | + | 75901769 | 75906115 | 613  |
| ENSG000001 | 0.290301 | 2448.955 | -11.634  | 4.85E-39 | 8.34E-38 | LINC00678 chr11  | - | 27639173 | 27656174 | 798  |
| ENSG000001 | 8.76551  | 13.75882 | -0.62882 | 0.28464  | 0.38597  | AF131215 chr8    | - | 10980891 | 10983574 | 1744 |
| ENSG000001 | 0.943682 | 9.467948 | -2.981   | 0.003371 | 0.007712 | RP11-677A chr11  | - | 1.25E+08 | 1.25E+08 | 448  |
| ENSG000001 | 1.379541 | 3.24447  | -1.0919  | 0.37511  | 0.47933  | ATP5F1P5 chr11   | + | 1.23E+08 | 1.23E+08 | 760  |
| ENSG000001 | 4.543757 | 0.343138 | 3.016    | 0.026315 | 0.050515 | RP11-531F chr11  | + | 15574401 | 15612644 | 571  |
| ENSG000001 | 0.36308  | 0        | 0.4146   | 0.81455  | NA       | OR7E158P chr8    | - | 11777409 | 11778318 | 910  |
| ENSG000001 | 0.685084 | 0        | 0.85004  | 0.63064  | NA       | GNG5P3 chr11     | + | 1.12E+08 | 1.12E+08 | 207  |
| ENSG000001 | 3.22583  | 7.405832 | -1.1079  | 0.19559  | 0.28352  | RP11-494A chr11  | - | 7726175  | 7927502  | 2503 |
| ENSG000001 | 0.653381 | 0        | 0.82678  | 0.64037  | NA       | AP001257 chr11   | - | 59927160 | 59928295 | 385  |
| ENSG000001 | 0.290301 | 0        | 0.4146   | 0.81455  | NA       | KIRREL3-AS chr11 | + | 1.27E+08 | 1.27E+08 | 492  |
| ENSG000001 | 1.068702 | 1.043983 | 0.01647  | 0.99161  | 0.99552  | RP11-831F chr11  | + | 62373633 | 62373877 | 92   |
| ENSG000001 | 0.653381 | 2.771825 | -1.6737  | 0.22612  | 0.31892  | RP11-1081 chr11  | + | 18728084 | 18762115 | 874  |
| ENSG000001 | 1.338465 | 0.297015 | 1.3634   | 0.39966  | NA       | RP11-680F chr11  | + | 1.26E+08 | 1.26E+08 | 838  |
| ENSG000001 | 0.36308  | 0        | 0.4146   | 0.81455  | NA       | RP11-65M chr11   | + | 1.12E+08 | 1.12E+08 | 855  |
| ENSG000001 | 0        | 0.357707 | -0.41864 | 0.81278  | NA       | RP11-167J chr11  | - | 71412314 | 71416450 | 347  |
| ENSG000001 | 0        | 6.603876 | -4.2475  | 0.002166 | 0.005099 | RP11-429J chr8   | - | 1.45E+08 | 1.45E+08 | 1809 |
| ENSG000001 | 0.290301 | 0        | 0.4146   | 0.81455  | NA       | RP11-702F chr11  | - | 74196625 | 74197096 | 472  |
| ENSG000001 | 0        | 0.357707 | -0.41864 | 0.81278  | NA       | RP11-672A chr11  | + | 76386123 | 76414239 | 452  |
| ENSG000001 | 0        | 0.357707 | -0.41864 | 0.81278  | NA       | AC004878 chr7    | + | 74862851 | 74863847 | 280  |
| ENSG000001 | 7.934868 | 22.22407 | -1.4284  | 0.013272 | 0.027207 | ALG1L9P chr11    | - | 71511587 | 71515691 | 549  |
| ENSG000001 | 0.342542 | 0        | 0.4146   | 0.81455  | NA       | RP11-872C chr11  | - | 57154838 | 57191532 | 1639 |
| ENSG000001 | 2.656392 | 0.997859 | 1.1979   | 0.34834  | 0.45262  | RP11-350A chr8   | - | 38258054 | 38259201 | 377  |
| ENSG000001 | 3.278071 | 6.410388 | -0.88089 | 0.36988  | 0.47443  | HMG1B2 chr17     | - | 35500531 | 35501387 | 685  |
| ENSG000001 | 1.794862 | 0        | 2.0156   | 0.24947  | NA       | FTLP6 chr11      | - | 66538717 | 66539138 | 422  |
| ENSG000001 | 1.919068 | 2.635871 | -0.3939  | 0.72384  | 0.79565  | RSF1-IT2 chr11   | - | 77428757 | 77429456 | 566  |
| ENSG000001 | 1164.398 | 1714.156 | -0.55667 | 3.28E-07 | 1.23E-06 | DPP3 chr11       | + | 66247484 | 66277130 | 3078 |
| ENSG000001 | 0.342542 | 0        | 0.4146   | 0.81455  | NA       | RP11-563P chr11  | - | 1.04E+08 | 1.04E+08 | 562  |
| ENSG000001 | 0.705622 | 1.949596 | -1.2155  | 0.39167  | 0.49611  | CTD-2547F chr11  | - | 76666461 | 76689663 | 568  |
| ENSG000001 | 0.342542 | 0.297015 | -0.00202 | 0.99909  | NA       | RP11-108C chr11  | - | 1.12E+08 | 1.12E+08 | 783  |
| ENSG000001 | 0.653381 | 0        | 0.82678  | 0.64037  | NA       | RP5-1042K chr22  | + | 40761043 | 40786467 | 315  |
| ENSG000001 | 4.430716 | 15.82738 | -1.7883  | 0.009537 | 0.020112 | STX16-NPEI chr20 | + | 57226490 | 57290466 | 3433 |
| ENSG000001 | 10.85923 | 9.99558  | 0.12887  | 0.84558  | 0.89167  | ANKHD1-EI chr5   | + | 1.4E+08  | 1.4E+08  | 8246 |
| ENSG000001 | 0.632843 | 0.357707 | 0.4993   | 0.77637  | NA       | KRTAP5-9 chr11   | + | 71259466 | 71260653 | 1188 |

|            |          |          |          |          |          |                  |   |          |          |      |
|------------|----------|----------|----------|----------|----------|------------------|---|----------|----------|------|
| ENSG000001 | 0        | 0.357707 | -0.41864 | 0.81278  | NA       | RP11-94P1 chr11  | - | 1.05E+08 | 1.05E+08 | 445  |
| ENSG000001 | 2327.137 | 1797.022 | 0.37297  | 0.000456 | 0.001191 | BRK1 chr3        | + | 10157276 | 10168874 | 1233 |
| ENSG000001 | 0.705622 | 0.937167 | -0.33246 | 0.83708  | NA       | AC139103. chr8   | + | 1.46E+08 | 1.46E+08 | 1030 |
| ENSG000001 | 0        | 1.280305 | -1.6305  | 0.35731  | NA       | CTD-2240C chr11  | + | 83039969 | 83040289 | 321  |
| ENSG000001 | 0.290301 | 0.297015 | -0.00202 | 0.99909  | NA       | RP1-68D18 chr11  | + | 35303360 | 35307556 | 776  |
| ENSG000001 | 1.068702 | 0.297015 | 0.9938   | 0.56435  | NA       | AP000442. chr11  | - | 59328619 | 59333547 | 769  |
| ENSG000001 | 1.359003 | 0        | 1.8987   | 0.26617  | NA       | ARL6IP1P3 chr11  | - | 80364473 | 80365032 | 560  |
| ENSG000001 | 0.290301 | 0        | 0.4146   | 0.81455  | NA       | RP11-716F chr11  | - | 1.22E+08 | 1.22E+08 | 507  |
| ENSG000001 | 1.016461 | 5.958019 | -2.2828  | 0.04131  | 0.075395 | AF131216. chr8   | - | 11203257 | 11205011 | 1099 |
| ENSG000001 | 0        | 0.297015 | -0.41864 | 0.81278  | NA       | RP11-536I chr3   | - | 14313873 | 14345345 | 613  |
| ENSG000001 | 6.338619 | 59.97864 | -3.1674  | 3.40E-08 | 1.38E-07 | RP11-326C chr11  | + | 287305   | 288987   | 812  |
| ENSG000001 | 0        | 1.416259 | -1.7181  | 0.33141  | NA       | RP11-680F chr11  | - | 1.26E+08 | 1.26E+08 | 569  |
| ENSG000001 | 0.685084 | 0        | 0.85004  | 0.63064  | NA       | RP11-708B chr11  | - | 1.09E+08 | 1.09E+08 | 803  |
| ENSG000001 | 15.7567  | 8.635181 | 0.85034  | 0.17155  | 0.25405  | RP11-802E chr11  | + | 67818207 | 67821229 | 791  |
| ENSG000001 | 0        | 0.98329  | -1.2878  | 0.47019  | NA       | RP11-45A1 chr11  | - | 44740942 | 44758242 | 628  |
| ENSG000001 | 0.342542 | 0        | 0.4146   | 0.81455  | NA       | RP11-23J9. chr9  | + | 1E+08    | 1E+08    | 6463 |
| ENSG000001 | 0.685084 | 0.640152 | 0.044759 | 0.97934  | NA       | RP11-1167 chr11  | - | 65834748 | 65837090 | 502  |
| ENSG000001 | 0.685084 | 0.686276 | -0.00148 | 0.99933  | NA       | RP11-677N chr11  | - | 14695152 | 14696101 | 950  |
| ENSG000001 | 1.71271  | 0        | 1.6606   | 0.35171  | NA       | NAV2-AS5 chr11   | - | 19524219 | 19528776 | 3307 |
| ENSG000001 | 1.048164 | 0        | 1.348    | 0.44949  | NA       | RP11-677N chr11  | - | 1.25E+08 | 1.25E+08 | 445  |
| ENSG000001 | 6.88931  | 2.56061  | 1.2873   | 0.20211  | 0.29083  | RP11-297N chr8   | - | 11655437 | 11660077 | 811  |
| ENSG000001 | 1.649304 | 3.916176 | -1.1271  | 0.2953   | 0.39729  | RP11-661A chr8   | + | 1.45E+08 | 1.45E+08 | 1173 |
| ENSG000001 | 0        | 0.343138 | -0.41864 | 0.81278  | NA       | AP000620. chr11  | + | 1.01E+08 | 1.01E+08 | 504  |
| ENSG000001 | 1.503747 | 0        | 1.8221   | 0.30126  | NA       | RP11-219C chr11  | - | 36446997 | 36447672 | 478  |
| ENSG000001 | 15.31049 | 11.80922 | 0.36517  | 0.51247  | 0.61557  | RP11-712L chr11  | - | 1.26E+08 | 1.26E+08 | 509  |
| ENSG000001 | 0.290301 | 0.937167 | -0.88973 | 0.60765  | NA       | RP11-47J1' chr11 | + | 12870342 | 12870980 | 419  |
| ENSG000001 | 0        | 0.297015 | -0.41864 | 0.81278  | NA       | RP11-140L chr11  | + | 14462333 | 14463223 | 512  |
| ENSG000001 | 0        | 1.058552 | -1.361   | 0.4451   | NA       | RP11-45A1 chr11  | - | 44716413 | 44717851 | 789  |
| ENSG000001 | 0        | 0.700845 | -0.87835 | 0.62047  | NA       | RP11-263C chr11  | + | 75625245 | 75626257 | 471  |
| ENSG000001 | 1.701545 | 1.98115  | -0.2068  | 0.86512  | 0.90618  | GRM5-AS1 chr11   | + | 88237744 | 88257222 | 4821 |
| ENSG000001 | 0.36308  | 0.937167 | -0.90039 | 0.60194  | NA       | RP11-843A chr11  | + | 78244222 | 78269611 | 717  |
| ENSG000001 | 0        | 1.309443 | -1.6539  | 0.35008  | NA       | AF186192. chr8   | + | 1.46E+08 | 1.46E+08 | 693  |
| ENSG000001 | 17.83167 | 0        | 5.7371   | 2.22E-06 | 7.68E-06 | RP11-820L chr11  | - | 1.22E+08 | 1.22E+08 | 959  |
| ENSG000001 | 3.879211 | 0        | 3.4813   | 0.017743 | 0.035421 | RP11-495C chr11  | + | 45673079 | 45674241 | 249  |
| ENSG000001 | 1.814586 | 0        | 2.063    | 0.23747  | NA       | RP11-58K2 chr11  | - | 44627720 | 44629651 | 567  |
| ENSG000001 | 1.016461 | 0        | 1.3167   | 0.46021  | NA       | RP11-406C chr11  | - | 28000216 | 28041122 | 806  |
| ENSG000001 | 0.342542 | 0        | 0.4146   | 0.81455  | NA       | OR5B10P chr11    | - | 58116389 | 58117298 | 910  |
| ENSG000001 | 1.233984 | 0.951736 | 0.28563  | 0.85343  | 0.89705  | RP11-5L12 chr11  | - | 9263995  | 9267056  | 561  |
| ENSG000001 | 1.027626 | 33.06216 | -4.715   | 4.84E-08 | 1.94E-07 | RP11-481A chr8   | - | 11870545 | 11873043 | 425  |
| ENSG000001 | 5.81963  | 6.376418 | -0.13505 | 0.87024  | 0.90956  | RP11-21L2 chr11  | - | 76493625 | 76494106 | 336  |
| ENSG000001 | 0        | 0.686276 | -0.84936 | 0.6309   | NA       | RP11-412B chr8   | - | 42560726 | 42577089 | 682  |
| ENSG000001 | 770.7176 | 303.44   | 1.3437   | 1.63E-27 | 1.89E-26 | KIAA0754 chr1    | + | 39876151 | 39882154 | 6004 |
| ENSG000001 | 0        | 0.654722 | -0.83442 | 0.63731  | NA       | RP11-5A11 chr8   | - | 1.05E+08 | 1.05E+08 | 291  |
| ENSG000001 | 0.342542 | 0.357707 | -0.0021  | 0.99906  | NA       | AP006621. chr11  | - | 823634   | 832883   | 536  |
| ENSG000001 | 0.290301 | 0        | 0.4146   | 0.81455  | NA       | CTD-2572N chr11  | - | 42204842 | 42275262 | 546  |
| ENSG000001 | 570.6745 | 625.3587 | -0.13259 | 0.35348  | 0.45773  | CHMP1B chr18     | + | 11851395 | 11854448 | 3054 |
| ENSG000001 | 0.36308  | 0.343138 | -0.0021  | 0.99905  | NA       | RP11-91P2 chr11  | - | 77626036 | 77626321 | 286  |
| ENSG000001 | 0        | 1.71569  | -1.6656  | 0.35029  | NA       | RP11-770C chr11  | - | 65556522 | 65558339 | 494  |
| ENSG000001 | 14.48245 | 32.08195 | -1.1175  | 0.042467 | 0.077224 | RP11-110I' chr11 | - | 1.19E+08 | 1.19E+08 | 1359 |
| ENSG000001 | 0.632843 | 15.48666 | -4.1296  | 4.27E-05 | 0.000127 | RP11-303C chr8   | + | 12437796 | 12438572 | 186  |
| ENSG000001 | 0.342542 | 0.297015 | -0.00202 | 0.99909  | NA       | RP11-680F chr11  | + | 1.26E+08 | 1.26E+08 | 496  |
| ENSG000001 | 3.516131 | 3.798823 | -0.07548 | 0.94321  | 0.96323  | RP11-839C chr11  | - | 1.13E+08 | 1.13E+08 | 743  |
| ENSG000001 | 0        | 3.054271 | -3.1134  | 0.040994 | 0.074937 | RP11-396Ji chr8  | + | 68644822 | 68647900 | 550  |
| ENSG000001 | 0.342542 | 0.343138 | -0.00208 | 0.99906  | NA       | RP11-63C8 chr11  | + | 41416145 | 41448054 | 578  |
| ENSG000001 | 0        | 0.357707 | -0.41864 | 0.81278  | NA       | RP11-646J. chr11 | - | 33836423 | 33843641 | 308  |
| ENSG000001 | 60.95523 | 162.9174 | -1.4065  | 4.22E-10 | 2.00E-09 | RP11-111N chr11  | - | 76152382 | 76155724 | 2608 |
| ENSG000001 | 0        | 0.715414 | -0.84936 | 0.6309   | NA       | CTD-2562J chr11  | - | 74919099 | 74952218 | 538  |
| ENSG000001 | 0.580602 | 0.343138 | 0.37443  | 0.8337   | NA       | RP11-290C chr13  | - | 45911615 | 45911744 | 130  |
| ENSG000001 | 4.088174 | 7.999861 | -0.92982 | 0.25551  | 0.35281  | AP000442. chr11  | + | 59383902 | 59407334 | 601  |
| ENSG000001 | 1.45232  | 1.012429 | 0.34872  | 0.83186  | 0.88143  | RP11-438N chr11  | - | 3994111  | 3995467  | 848  |
| ENSG000001 | 25.38618 | 24.49337 | 0.037563 | 0.93663  | 0.9582   | AP006621. chr11  | + | 781645   | 782105   | 284  |
| ENSG000001 | 4.45044  | 0        | 3.6273   | 0.014008 | 0.028552 | RP11-805J chr11  | + | 69975403 | 69995729 | 497  |
| ENSG000001 | 0.36308  | 4.813668 | -3.0432  | 0.027176 | 0.052016 | RP11-60I3. chr9  | - | 1.03E+08 | 1.03E+08 | 544  |
| ENSG000001 | 0.580602 | 0.343138 | 0.37443  | 0.8337   | NA       | RP11-659P chr11  | - | 57811582 | 57827610 | 1890 |
| ENSG000001 | 1.286224 | 0        | 1.8436   | 0.2818   | NA       | RP4-791M: chr1   | + | 1.45E+08 | 1.45E+08 | 573  |

|            |          |          |          |           |           |            |       |   |          |          |      |
|------------|----------|----------|----------|-----------|-----------|------------|-------|---|----------|----------|------|
| ENSG000001 | 9.151733 | 30.32263 | -1.7036  | 0.001366  | 0.00332   | EID3       | chr12 | + | 1.05E+08 | 1.05E+08 | 1464 |
| ENSG000001 | 0        | 4.127392 | -3.5283  | 0.016979  | 0.034009  | GLYATL1P3  | chr11 | + | 58853780 | 58862259 | 909  |
| ENSG000001 | 6.318081 | 24.47068 | -1.9133  | 0.000773  | 0.001951  | CTD-2245C  | chr11 | + | 1330999  | 1331937  | 939  |
| ENSG000001 | 0.290301 | 0.640152 | -0.50256 | 0.77558   | NA        | RPP14      | chr3  | + | 58291974 | 58305920 | 3264 |
| ENSG000001 | 1.306762 | 1.058552 | 0.25362  | 0.86786   | 0.90794   | KLHL22-IT1 | chr22 | - | 20829490 | 20829598 | 109  |
| ENSG000001 | 8.153204 | 3.731683 | 1.0267   | 0.2451    | 0.34091   | RP11-754B  | chr11 | + | 665910   | 678391   | 912  |
| ENSG000001 | 3.22583  | 0.700845 | 1.8842   | 0.14907   | 0.22584   | RP11-318C  | chr11 | + | 8790325  | 8831778  | 850  |
| ENSG000001 | 0        | 0.297015 | -0.41864 | 0.81278   | NA        | RP11-358A  | chr11 | + | 89519113 | 89521006 | 1454 |
| ENSG000001 | 0.342542 | 0        | 0.4146   | 0.81455   | NA        | RP11-832A  | chr11 | - | 1.18E+08 | 1.18E+08 | 280  |
| ENSG000001 | 0.580602 | 0.640152 | -0.06311 | 0.97099   | NA        | RP5-1047A  | chr8  | + | 1.46E+08 | 1.46E+08 | 439  |
| ENSG000001 | 0.36308  | 0.951736 | -0.91212 | 0.59701   | NA        | CTD-2609K  | chr11 | + | 44093012 | 44093953 | 464  |
| ENSG000001 | 0        | 0.343138 | -0.41864 | 0.81278   | NA        | RP11-481A  | chr8  | + | 11856596 | 11856977 | 382  |
| ENSG000001 | 30.92488 | 8.830212 | 1.755    | 0.00093   | 0.002319  | AP002954.  | chr11 | + | 1.19E+08 | 1.19E+08 | 1388 |
| ENSG000001 | 0.290301 | 0        | 0.4146   | 0.81455   | NA        | RP11-686C  | chr11 | - | 80462243 | 80473869 | 1571 |
| ENSG000001 | 0.290301 | 0        | 0.4146   | 0.81455   | NA        | CTD-2517A  | chr8  | - | 1.46E+08 | 1.46E+08 | 2625 |
| ENSG000001 | 1.048164 | 1.387121 | -0.30983 | 0.84043   | 0.88801   | RP11-106J  | chr16 | - | 70044654 | 70099848 | 1315 |
| ENSG000001 | 0.632843 | 0        | 0.81931  | 0.64303   | NA        | RP11-514F  | chr11 | + | 36408071 | 36409800 | 151  |
| ENSG000001 | 0        | 0.297015 | -0.41864 | 0.81278   | NA        | GLYATL1P1  | chr11 | + | 58746260 | 58761593 | 1607 |
| ENSG000001 | 9.171457 | 1.294874 | 2.5767   | 0.007742  | 0.016606  | RP11-626F  | chr11 | + | 69831982 | 69861921 | 432  |
| ENSG000001 | 0.580602 | 70.02176 | -6.2489  | 8.83E-13  | 5.03E-12  | NANOGP8    | chr15 | - | 35376394 | 35377311 | 916  |
| ENSG000001 | 0.685084 | 0        | 0.85004  | 0.63064   | NA        | RP11-945A  | chr11 | + | 23752134 | 23818516 | 683  |
| ENSG000001 | 5.644162 | 1.248751 | 1.8987   | 0.085799  | 0.14183   | RP11-750F  | chr11 | - | 47404699 | 47430741 | 851  |
| ENSG000001 | 25.91454 | 26.49064 | -0.03911 | 0.92796   | 0.95224   | SNHG9      | chr16 | + | 2014960  | 2015510  | 471  |
| ENSG000001 | 4.107898 | 3.475086 | 0.23649  | 0.8375    | 0.88597   | AP003068.  | chr11 | - | 64941588 | 64943941 | 2354 |
| ENSG000001 | 26.20223 | 35.27071 | -0.41744 | 0.40753   | 0.51224   | RP11-350A  | chr8  | + | 38279407 | 38283614 | 534  |
| ENSG000001 | 10.21783 | 1.370136 | 2.6879   | 0.005533  | 0.012213  | RP4-541C2  | chr11 | - | 33686766 | 33718247 | 648  |
| ENSG000001 | 3.205292 | 0.343138 | 2.5269   | 0.077779  | 0.13035   | OR7E2P     | chr11 | - | 86568101 | 86568989 | 889  |
| ENSG000001 | 0        | 1.416259 | -1.7181  | 0.33141   | NA        | RP11-403C  | chr8  | - | 68994439 | 69007316 | 774  |
| ENSG000001 | 0.36308  | 0        | 0.4146   | 0.81455   | NA        | RP1-305G2  | chr11 | + | 33472192 | 33472489 | 298  |
| ENSG000001 | 0        | 1.294874 | -1.8547  | 0.27869   | NA        | RP11-831A  | chr11 | - | 1.2E+08  | 1.2E+08  | 562  |
| ENSG000001 | 0.580602 | 3.870053 | -2.1824  | 0.10149   | 0.16343   | DDX18P5    | chr11 | + | 1.3E+08  | 1.3E+08  | 1306 |
| ENSG000001 | 0.36308  | 0        | 0.4146   | 0.81455   | NA        | SETP17     | chr11 | + | 86005802 | 86006618 | 817  |
| ENSG000001 | 8.995011 | 32.01892 | -1.8015  | 0.000252  | 0.000682  | CTD-3065J  | chr8  | - | 1.45E+08 | 1.45E+08 | 1264 |
| ENSG000001 | 0        | 0.357707 | -0.41864 | 0.81278   | NA        | RP5-901A4  | chr11 | - | 67733344 | 67733698 | 355  |
| ENSG000001 | 0.580602 | 0.937167 | -0.42674 | 0.8018    | NA        | RP11-727A  | chr11 | + | 82997171 | 83134559 | 2643 |
| ENSG000001 | 1.503747 | 4.995002 | -1.4166  | 0.28764   | 0.3893    | CTD-2655K  | chr11 | + | 67889520 | 67897985 | 551  |
| ENSG000001 | 0.72616  | 1.606458 | -0.84056 | 0.60475   | 0.69794   | RP13-317C  | chr11 | - | 462930   | 463899   | 664  |
| ENSG000001 | 0        | 4.974728 | -3.8898  | 0.005251  | 0.011651  | AP002954.  | chr11 | - | 1.19E+08 | 1.19E+08 | 465  |
| ENSG000001 | 1.027626 | 16.54521 | -3.7208  | 8.80E-05  | 0.000252  | RP11-142C  | chr11 | - | 58701116 | 58826132 | 2810 |
| ENSG000001 | 0.342542 | 2.24661  | -2.0278  | 0.18217   | 0.26698   | RP11-164A  | chr11 | + | 87831759 | 87849003 | 252  |
| ENSG000001 | 0.943682 | 3.365854 | -1.5324  | 0.22209   | 0.31428   | CTD-2523C  | chr11 | + | 1.2E+08  | 1.2E+08  | 559  |
| ENSG000001 | 1990.878 | 6.428247 | 8.1623   | 4.12E-131 | 3.79E-129 | RP11-166C  | chr11 | - | 1.22E+08 | 1.22E+08 | 3370 |
| ENSG000001 | 0.290301 | 0        | 0.4146   | 0.81455   | NA        | CTD-2005F  | chr11 | + | 86438397 | 86476307 | 503  |
| ENSG000001 | 0        | 2.024857 | -2.2291  | 0.19662   | 0.28458   | RP11-303C  | chr8  | + | 12495937 | 12496111 | 175  |
| ENSG000001 | 0.995923 | 0.343138 | 1.0212   | 0.53809   | NA        | RP5-916O1  | chr11 | + | 35993978 | 36010557 | 494  |
| ENSG000001 | 0        | 0.297015 | -0.41864 | 0.81278   | NA        | AC025016.  | chr11 | + | 5959981  | 5966214  | 573  |
| ENSG000001 | 0        | 0.98329  | -1.2878  | 0.47019   | NA        | RP11-430F  | chr11 | + | 45392948 | 45410059 | 2597 |
| ENSG000001 | 0        | 0.686276 | -0.84936 | 0.6309    | NA        | RP11-702F  | chr11 | - | 46235372 | 46237409 | 536  |
| ENSG000001 | 0.342542 | 0        | 0.4146   | 0.81455   | NA        | NAV2-IT1   | chr11 | + | 19402031 | 19406561 | 506  |
| ENSG000001 | 0        | 0.297015 | -0.41864 | 0.81278   | NA        | RP13-279A  | chr1  | - | 19175767 | 19247615 | 4369 |
| ENSG000001 | 1.048164 | 0.297015 | 0.97802  | 0.57083   | NA        | RRM1-AS1   | chr11 | - | 4158346  | 4159487  | 346  |
| ENSG000001 | 4.430716 | 2.855208 | 0.54152  | 0.62552   | 0.71563   | ABCC6P2    | chr16 | - | 14914649 | 14918563 | 717  |
| ENSG000001 | 6.742774 | 9.015578 | -0.41071 | 0.61918   | 0.7103    | WTAPP1     | chr11 | + | 1.03E+08 | 1.03E+08 | 2642 |
| ENSG000001 | 98.31709 | 84.29223 | 0.21313  | 0.47427   | 0.57888   | AP006621.  | chr11 | + | 777578   | 784297   | 765  |
| ENSG000001 | 0.342542 | 0        | 0.4146   | 0.81455   | NA        | RP11-708L  | chr11 | - | 1.12E+08 | 1.12E+08 | 353  |
| ENSG000001 | 1.431782 | 2.733823 | -0.77278 | 0.59617   | 0.69051   | RP11-757C  | chr11 | - | 71649717 | 71650590 | 560  |
| ENSG000001 | 0.653381 | 0.297015 | 0.51304  | 0.77085   | NA        | RP11-655C  | chr11 | - | 58265361 | 58273231 | 585  |
| ENSG000001 | 1050.227 | 477.4841 | 1.1349   | 2.66E-11  | 1.37E-10  | EID1       | chr15 | + | 49170083 | 49172380 | 2298 |
| ENSG000001 | 0        | 0.343138 | -0.41864 | 0.81278   | NA        | RP11-734C  | chr11 | - | 57633770 | 57634751 | 982  |
| ENSG000001 | 7.198357 | 13.17936 | -0.84125 | 0.19675   | 0.28474   | RP5-901A4  | chr11 | - | 67792277 | 67797928 | 739  |
| ENSG000001 | 0        | 0.297015 | -0.41864 | 0.81278   | NA        | OR52B2     | chr11 | - | 6190560  | 6191638  | 1079 |
| ENSG000001 | 2.987769 | 0        | 3.1007   | 0.040889  | 0.074766  | RP11-428C  | chr11 | + | 19218322 | 19302973 | 516  |
| ENSG000001 | 70.48283 | 143.1966 | -1.0206  | 4.31E-06  | 1.44E-05  | AF131215.  | chr8  | - | 10965298 | 10967236 | 1939 |
| ENSG000001 | 0.342542 | 1.073121 | -0.87093 | 0.62353   | NA        | RP11-160F  | chr11 | + | 83354645 | 83436433 | 908  |
| ENSG000001 | 0.705622 | 0        | 0.8807   | 0.6196    | NA        | RP11-688I  | chr11 | + | 1.27E+08 | 1.27E+08 | 462  |

|                    |           |          |          |          |                 |   |          |          |      |
|--------------------|-----------|----------|----------|----------|-----------------|---|----------|----------|------|
| ENSG0000017750556  | 270.4302  | -1.7702  | 0.00022  | 0.000598 | RP11-655N chr11 | - | 67385750 | 67394775 | 831  |
| ENSG000001036308   | 3.030838  | -2.1905  | 0.17246  | 0.25504  | CTD-2313N chr11 | + | 71422786 | 71492229 | 1345 |
| ENSG00000138.95306 | 6.179772  | 2.5757   | 3.11E-06 | 1.06E-05 | RP11-755F chr11 | - | 66012311 | 66013710 | 397  |
| ENSG0000010943682  | 0.297015  | 0.89158  | 0.60669  | NA       | RP11-9112I chr8 | - | 61464516 | 61465595 | 689  |
| ENSG000001485541   | 1.340997  | 1.6396   | 0.14395  | 0.21905  | RP11-22P4 chr11 | + | 28373654 | 28548588 | 687  |
| ENSG0000013754191  | 0         | 3.3629   | 0.026757 | 0.051291 | RP11-96B2 chr8  | - | 1.23E+08 | 1.24E+08 | 631  |
| ENSG0000015704962  | 3.541484  | 0.64239  | 0.4726   | 0.57724  | CTD-2530F chr11 | + | 75294241 | 75305710 | 651  |
| ENSG0000010342542  | 0         | 0.4146   | 0.81455  | NA       | RP11-555C chr11 | + | 1.35E+08 | 1.35E+08 | 762  |
| ENSG0000010        | 1.40169   | -1.7271  | 0.32809  | NA       | RP11-326C chr11 | + | 327171   | 330122   | 827  |
| ENSG0000010        | 2.635871  | -2.911   | 0.060379 | 0.10495  | H2AFZP4 chr11   | - | 70125027 | 70125403 | 377  |
| ENSG0000010685084  | 0         | 0.85004  | 0.63064  | NA       | RP11-201N chr11 | + | 91527528 | 91545460 | 1033 |
| ENSG0000010995923  | 0.594029  | 0.48398  | 0.76518  | NA       | RP11-708L chr11 | + | 1.12E+08 | 1.12E+08 | 322  |
| ENSG0000010342542  | 1.713273  | -1.6507  | 0.29668  | 0.39869  | RP11-315C chr11 | + | 1.02E+08 | 1.02E+08 | 692  |
| ENSG0000010653381  | 0.297015  | 0.51304  | 0.77085  | NA       | RP11-484C chr11 | - | 43400432 | 43407221 | 444  |
| ENSG0000014221753  | 0.686276  | 2.2192   | 0.087163 | 0.14386  | RP11-762B chr11 | - | 1.23E+08 | 1.23E+08 | 454  |
| ENSG0000010        | 0.343138  | -0.41864 | 0.81278  | NA       | RP11-299N chr8  | - | 1.45E+08 | 1.45E+08 | 316  |
| ENSG0000010943682  | 0.297015  | 0.89158  | 0.60669  | NA       | CTD-2337I chr11 | + | 78803893 | 78809048 | 1897 |
| ENSG0000016669182  | 0.891044  | 2.463    | 0.037057 | 0.068561 | NOX5 chr15      | + | 69222864 | 69355083 | 8592 |
| ENSG0000012096328  | 2.012704  | 0.036701 | 0.97955  | 0.9887   | RP11-700F chr11 | + | 1.34E+08 | 1.34E+08 | 334  |
| ENSG0000010975385  | 0.357707  | 0.92752  | 0.59066  | NA       | RP11-370I chr11 | - | 1.03E+08 | 1.03E+08 | 1526 |
| ENSG0000010        | 0.343138  | -0.41864 | 0.81278  | NA       | RP11-382N chr11 | + | 1.07E+08 | 1.07E+08 | 1245 |
| ENSG0000010        | 1.043983  | -1.3473  | 0.44976  | NA       | AP000640 chr11  | + | 59436785 | 59443514 | 683  |
| ENSG0000010        | 1.903472  | -2.1599  | 0.21236  | NA       | RP11-277E chr12 | - | 8049210  | 8049554  | 345  |
| ENSG000001072616   | 1.935026  | -1.1408  | 0.44406  | 0.54967  | RP11-567C chr11 | - | 1.3E+08  | 1.3E+08  | 510  |
| ENSG0000013661688  | 3.290593  | 0.13412  | 0.88839  | 0.92221  | RP11-619A chr11 | - | 75922000 | 75927069 | 388  |
| ENSG0000012665765  | 0         | 2.872    | 0.06812  | 0.11639  | RP11-94A2 chr8  | - | 1.23E+08 | 1.23E+08 | 553  |
| ENSG0000010        | 1.606458  | -1.9287  | 0.27074  | NA       | RP11-1134 chr8  | + | 48102395 | 48104885 | 2491 |
| ENSG00000113.43429 | 24.83081  | -0.87302 | 0.059043 | 0.10301  | RP13-726E chr11 | - | 3502750  | 3602441  | 983  |
| ENSG000001036308   | 0         | 0.4146   | 0.81455  | NA       | OPCML-IT2 chr11 | - | 1.33E+08 | 1.33E+08 | 398  |
| ENSG0000010        | 0.594029  | -0.81444 | 0.64499  | NA       | CTD-3064C chr11 | - | 22282755 | 22283802 | 516  |
| ENSG0000010        | 0.715414  | -0.84936 | 0.6309   | NA       | CYCSP29 chr11   | - | 1.09E+08 | 1.09E+08 | 318  |
| ENSG0000010580602  | 0.343138  | 0.37443  | 0.8337   | NA       | AP001258 chr11  | - | 58909594 | 58910083 | 490  |
| ENSG0000010290301  | 0.951736  | -0.90191 | 0.60254  | NA       | RP11-770J chr11 | - | 1.18E+08 | 1.18E+08 | 2086 |
| ENSG0000010        | 0.343138  | -0.41864 | 0.81278  | NA       | RP11-313I chr11 | + | 89433932 | 89434493 | 562  |
| ENSG0000012967231  | 0         | 3.0796   | 0.043507 | 0.078876 | RP11-124C chr11 | - | 41540445 | 41735998 | 859  |
| ENSG0000018.298762 | 15.97146  | -0.9281  | 0.1153   | 0.18251  | C6orf3 chr6     | + | 1.12E+08 | 1.12E+08 | 2421 |
| ENSG000001036308   | 0         | 0.4146   | 0.81455  | NA       | C8orf49 chr8    | + | 11618896 | 11620309 | 1414 |
| ENSG0000010975385  | 4.196206  | -1.8168  | 0.13363  | 0.20636  | AC022182 chr8   | - | 61850264 | 61852430 | 2167 |
| ENSG0000011016461  | 0         | 1.3167   | 0.46021  | NA       | HCAR3 chr12     | - | 1.23E+08 | 1.23E+08 | 2137 |
| ENSG0000010        | 34.77939  | -6.7078  | 3.60E-09 | 1.58E-08 | TBX5-AS1 chr12  | + | 1.15E+08 | 1.15E+08 | 3620 |
| ENSG0000011628766  | 0         | 2.1781   | 0.19145  | NA       | RP13-631K chr11 | + | 12108438 | 12110988 | 550  |
| ENSG0000010        | 1.713273  | -2.2094  | 0.18675  | NA       | AP000641 chr11  | + | 1.06E+08 | 1.06E+08 | 1639 |
| ENSG00000131.33955 | 20.06729  | 0.63434  | 0.14182  | 0.21628  | PCDHA3 chr5     | + | 1.4E+08  | 1.4E+08  | 5260 |
| ENSG000001036308   | 1.874334  | -1.6777  | 0.30573  | 0.40725  | RSF1-IT1 chr11  | - | 77449725 | 77450613 | 632  |
| ENSG0000011068702  | 0.686276  | 0.41528  | 0.80556  | NA       | RP11-732A chr11 | + | 6651834  | 6656439  | 487  |
| ENSG0000011431782  | 2.010288  | -0.43408 | 0.747    | 0.81465  | AP000783 chr11  | + | 1.23E+08 | 1.23E+08 | 2471 |
| ENSG0000010        | 0.297015  | -0.41864 | 0.81278  | NA       | RP11-370I chr11 | - | 1.03E+08 | 1.03E+08 | 656  |
| ENSG0000010975385  | 0         | 1.2767   | 0.47406  | NA       | RP11-266A chr11 | + | 23186446 | 23224707 | 685  |
| ENSG0000013.64115  | 2.915901  | 0.27785  | 0.79801  | 0.8569   | CTD-2011F chr11 | - | 75848359 | 75848775 | 285  |
| ENSG0000010        | 5.361573  | -3.9914  | 0.00392  | 0.008864 | AP002954 chr11  | + | 1.19E+08 | 1.19E+08 | 425  |
| ENSG00000138.73831 | 25.12453  | 0.61563  | 0.094802 | 0.15444  | EBLN2 chr3      | + | 73110810 | 73112488 | 1679 |
| ENSG0000010580602  | 0         | 0.8036   | 0.6494   | NA       | RP11-734C chr11 | - | 58111210 | 58112137 | 928  |
| ENSG0000012.738544 | 1.234181  | 0.92     | 0.48346  | 0.58754  | CTD-2530F chr11 | - | 75307189 | 75308315 | 546  |
| ENSG0000010923144  | 0.937167  | -0.01228 | 0.99379  | NA       | RP11-770J chr11 | - | 1.18E+08 | 1.18E+08 | 579  |
| ENSG0000010        | 0.343138  | -0.41864 | 0.81278  | NA       | Z95704.2 chr4   | + | 85621    | 87340    | 1716 |
| ENSG0000018.57969  | 4.135513  | 0.97592  | 0.21801  | 0.30947  | CTD-2653C chr20 | + | 46306645 | 46315041 | 2437 |
| ENSG0000010        | 0.1012429 | -1.3162  | 0.46038  | NA       | CTD-2616J chr19 | + | 51918978 | 51920679 | 729  |
| ENSG00000111.83543 | 0.297015  | 4.3777   | 0.000294 | 0.000789 | RP1-68D1E chr11 | - | 35231890 | 35236532 | 587  |
| ENSG0000013.974319 | 1.949596  | 0.90346  | 0.42065  | 0.526    | RP11-573N chr11 | + | 92885241 | 92885916 | 676  |
| ENSG0000011.939605 | 1.280305  | 0.49117  | 0.71065  | 0.78511  | RP11-91P2 chr11 | - | 77577458 | 77581137 | 712  |
| ENSG00000185.61345 | 44.4991   | 0.93422  | 0.000571 | 0.001469 | RP11-890B chr11 | - | 1.31E+08 | 1.31E+08 | 3994 |
| ENSG0000010685084  | 0.297015  | 0.4735   | 0.79064  | NA       | CTD-2517N chr8  | + | 1.46E+08 | 1.46E+08 | 398  |
| ENSG0000013.216457 | 11.55108  | -1.6964  | 0.068714 | 0.11724  | RP11-539C chr4  | + | 39640760 | 39668264 | 1061 |
| ENSG0000010        | 0.654722  | -0.83442 | 0.63731  | NA       | RP11-52B1 chr8  | - | 7943544  | 7944287  | 744  |
| ENSG0000010342542  | 0.297015  | -0.00202 | 0.99909  | NA       | RP11-144C chr11 | - | 1.08E+08 | 1.08E+08 | 964  |

|            |          |          |          |          |          |                  |   |          |          |      |
|------------|----------|----------|----------|----------|----------|------------------|---|----------|----------|------|
| ENSG000001 | 30.13548 | 24.50136 | 0.29726  | 0.45388  | 0.5593   | RP11-867C chr11  | + | 66115421 | 66132275 | 762  |
| ENSG000001 | 0        | 0.297015 | -0.41864 | 0.81278  | NA       | RP11-725K chr11  | + | 1.03E+08 | 1.03E+08 | 355  |
| ENSG000001 | 48.45525 | 12.26246 | 1.94     | 8.11E-06 | 2.63E-05 | RP11-736K chr11  | - | 86603256 | 86636079 | 1156 |
| ENSG000001 | 2.894453 | 22.36728 | -2.8164  | 3.89E-05 | 0.000117 | RP11-234B chr12  | - | 4809583  | 4829268  | 1249 |
| ENSG000001 | 0.342542 | 0.357707 | -0.0021  | 0.99906  | NA       | RP11-1H15 chr11  | + | 9860690  | 9950810  | 586  |
| ENSG000001 | 0.36308  | 0        | 0.4146   | 0.81455  | NA       | RP4-710M: chr11  | + | 30447099 | 30450815 | 365  |
| ENSG000001 | 0        | 0.297015 | -0.41864 | 0.81278  | NA       | RP11-290F chr11  | - | 6067037  | 6067977  | 941  |
| ENSG000001 | 1.390706 | 0        | 1.6954   | 0.33813  | NA       | RP11-513C chr8   | + | 38133406 | 38134198 | 256  |
| ENSG000001 | 0        | 0.343138 | -0.41864 | 0.81278  | NA       | CTC-830E2: chr11 | + | 24722821 | 24723121 | 301  |
| ENSG000001 | 11.70104 | 7.428522 | 0.62477  | 0.3455   | 0.4496   | AC145124. chr8   | + | 12051976 | 12053789 | 1361 |
| ENSG000001 | 0.685084 | 0        | 0.85004  | 0.63064  | NA       | CARD18 chr11     | - | 1.05E+08 | 1.05E+08 | 652  |
| ENSG000001 | 0.685084 | 1.788535 | -0.8553  | 0.62058  | 0.71136  | RP11-113K chr11  | - | 82783444 | 82808238 | 436  |
| ENSG000001 | 1.233984 | 1.355566 | -0.07449 | 0.95815  | 0.97466  | RP11-203F chr11  | - | 92481898 | 92500033 | 583  |
| ENSG000001 | 1.701545 | 2.010288 | -0.21791 | 0.85799  | 0.90036  | RP11-535A chr11  | - | 75514476 | 75526451 | 683  |
| ENSG000001 | 19.75237 | 10.67299 | 0.85596  | 0.10487  | 0.168    | MIR3654 chr11    | - | 62327075 | 62359003 | 5064 |
| ENSG000001 | 1.660469 | 18.47533 | -3.1491  | 0.002313 | 0.005415 | RP11-445F chr17  | - | 35218935 | 35293960 | 1462 |
| ENSG000001 | 0        | 0.297015 | -0.41864 | 0.81278  | NA       | RP11-164N chr11  | + | 87783274 | 87795278 | 572  |
| ENSG000001 | 8.622558 | 6.361849 | 0.41972  | 0.58993  | 0.68514  | CTD-3074C chr11  | - | 66240961 | 66247704 | 944  |
| ENSG000001 | 0        | 0.297015 | -0.41864 | 0.81278  | NA       | RP11-148C chr8   | - | 11413760 | 11415531 | 544  |
| ENSG000001 | 0.923144 | 0        | 1.223    | 0.49292  | NA       | RP11-390K chr11  | - | 47144655 | 47152352 | 332  |
| ENSG000001 | 1.317927 | 0.343138 | 1.2418   | 0.46439  | NA       | RP4-607I7. chr11 | - | 35154202 | 35159579 | 1102 |
| ENSG000001 | 0        | 1.012429 | -1.3162  | 0.46038  | NA       | RP13-726E chr11  | + | 3552650  | 3552838  | 189  |
| ENSG000001 | 0        | 0.357707 | -0.41864 | 0.81278  | NA       | RP11-780C chr11  | - | 58684488 | 58696162 | 643  |
| ENSG000001 | 2.656392 | 1.309443 | 0.85507  | 0.50826  | 0.61176  | A-575C2.4 chr16  | + | 28648975 | 28670003 | 2058 |
| ENSG000001 | 311.5558 | 306.886  | 0.022992 | 0.89067  | 0.92411  | POLR2M chr15     | + | 57884231 | 58074960 | 4199 |
| ENSG000001 | 0.290301 | 2.185918 | -1.9959  | 0.19817  | 0.28639  | RP11-326C chr11  | - | 303856   | 304144   | 289  |
| ENSG000001 | 0.580602 | 0        | 0.8036   | 0.6494   | NA       | AP000708. chr11  | + | 1.25E+08 | 1.25E+08 | 3423 |
| ENSG000001 | 0.36308  | 1.66715  | -1.5237  | 0.35755  | 0.46184  | OR10V2P chr11    | + | 59516284 | 59517047 | 764  |
| ENSG000001 | 0        | 0.343138 | -0.41864 | 0.81278  | NA       | CTA-797E1: chr11 | - | 70170977 | 70173315 | 367  |
| ENSG000001 | 0        | 0.715414 | -0.84936 | 0.6309   | NA       | RP11-313I: chr11 | + | 89464185 | 89467950 | 3766 |
| ENSG000001 | 0        | 30.44173 | -6.3692  | 2.38E-07 | 9.00E-07 | RP11-627C chr11  | + | 1.34E+08 | 1.34E+08 | 4435 |
| ENSG000001 | 0.632843 | 0.343138 | 0.49756  | 0.77728  | NA       | RP11-617B chr11  | + | 1.04E+08 | 1.04E+08 | 547  |
| ENSG000001 | 0.653381 | 2.399549 | -1.5036  | 0.27948  | 0.38024  | RP11-351I: chr8  | - | 12305522 | 12368787 | 929  |
| ENSG000001 | 0        | 0.297015 | -0.41864 | 0.81278  | NA       | OR7E1P chr11     | - | 67741757 | 67742714 | 958  |
| ENSG000001 | 0        | 0.715414 | -0.84936 | 0.6309   | NA       | AP000857. chr11  | + | 84647733 | 84666749 | 419  |
| ENSG000001 | 8.332257 | 2.079102 | 1.7112   | 0.14533  | 0.22089  | RP11-770C chr11  | + | 65513200 | 65539056 | 464  |
| ENSG000001 | 4.688501 | 7.43497  | -0.59506 | 0.48511  | 0.58911  | ZNF252P-A chr8   | + | 1.46E+08 | 1.46E+08 | 3236 |
| ENSG000001 | 14.12874 | 18.08124 | -0.34904 | 0.52193  | 0.62445  | FDXACB1 chr11    | - | 1.12E+08 | 1.12E+08 | 2789 |
| ENSG000001 | 0        | 0.343138 | -0.41864 | 0.81278  | NA       | UNC93B6 chr11    | + | 71314306 | 71319086 | 1143 |
| ENSG000001 | 1.774324 | 0        | 2.0349   | 0.24308  | NA       | RP11-6B19 chr12  | + | 15933002 | 15935054 | 465  |
| ENSG000001 | 6.390859 | 6.079404 | 0.068599 | 0.92887  | 0.9529   | RP11-114F chr12  | - | 64836290 | 64837110 | 504  |
| ENSG000001 | 9.232258 | 8.449815 | 0.14177  | 0.84615  | 0.892    | BRWD1-IT2 chr21  | - | 40685887 | 40686886 | 1000 |
| ENSG000001 | 0        | 5.334851 | -3.9056  | 0.006444 | 0.014052 | CTD-2335A chr15  | + | 89904810 | 89939471 | 2718 |
| ENSG000001 | 0.580602 | 0        | 0.8036   | 0.6494   | NA       | AP000462. chr11  | + | 1.15E+08 | 1.15E+08 | 818  |
| ENSG000001 | 0        | 4.943174 | -3.8842  | 0.005303 | 0.011756 | RP11-69M: chr12  | - | 8169797  | 8170456  | 660  |
| ENSG000001 | 4.627701 | 8.256457 | -0.798   | 0.34714  | 0.45138  | RP11-188C chr9   | - | 1.41E+08 | 1.41E+08 | 1023 |
| ENSG000001 | 3.755005 | 1.294874 | 1.3145   | 0.2697   | 0.36876  | RAB44 chr6       | + | 36688140 | 36699870 | 2238 |
| ENSG000001 | 0        | 1.234181 | -1.5727  | 0.37581  | NA       | RP4-809F1 chr12  | + | 1.27E+08 | 1.27E+08 | 1310 |
| ENSG000001 | 1.359003 | 0.640152 | 0.80743  | 0.58991  | 0.68514  | RP3-377H1 chr12  | + | 4948121  | 4951841  | 560  |
| ENSG000001 | 0        | 2.681995 | -2.9147  | 0.061147 | 0.10611  | RP11-357K chr12  | - | 1.19E+08 | 1.19E+08 | 680  |
| ENSG000001 | 2.188831 | 3.930745 | -0.73485 | 0.49947  | 0.60322  | RP11-377C chr12  | + | 13153385 | 13193613 | 2403 |
| ENSG000001 | 6.347178 | 3.380424 | 0.85446  | 0.38059  | 0.48464  | PCDHB17 chr5     | + | 1.41E+08 | 1.41E+08 | 3063 |
| ENSG000001 | 0.36308  | 0.715414 | -0.51558 | 0.77246  | NA       | RP11-564C chr10  | + | 1.25E+08 | 1.25E+08 | 1530 |
| ENSG000001 | 0        | 0.640152 | -0.82869 | 0.63935  | NA       | RP11-196F chr12  | - | 64540168 | 64541637 | 462  |
| ENSG000001 | 0        | 0.686276 | -0.84936 | 0.6309   | NA       | MTRNR2L9 chr6    | + | 62284008 | 62284534 | 527  |
| ENSG000001 | 0        | 0.357707 | -0.41864 | 0.81278  | NA       | AC109992. chr3   | + | 1.42E+08 | 1.42E+08 | 75   |
| ENSG000001 | 2.935529 | 1.577319 | 0.75924  | 0.52577  | 0.62766  | AC093510. chr5   | + | 89705817 | 89706485 | 662  |
| ENSG000001 | 0        | 1.591889 | -2.1342  | 0.20414  | NA       | RP11-502N chr12  | + | 14683085 | 14686163 | 427  |
| ENSG000001 | 0.943682 | 0.98329  | -0.03272 | 0.98341  | 0.99079  | FAM222A-7 chr12  | - | 1.1E+08  | 1.1E+08  | 871  |
| ENSG000001 | 4.305697 | 6.554464 | -0.5662  | 0.54488  | 0.64518  | RP11-466C chr11  | - | 63534956 | 63536113 | 229  |
| ENSG000001 | 0        | 0.297015 | -0.41864 | 0.81278  | NA       | RP11-313F chr12  | - | 34343972 | 34371788 | 743  |
| ENSG000001 | 1.866827 | 0        | 2.3484   | 0.15622  | NA       | RERG-AS1 chr12   | + | 15304857 | 15308217 | 337  |
| ENSG000001 | 3.278071 | 0.951736 | 1.5064   | 0.22333  | 0.31569  | RP11-59H1 chr12  | + | 12878851 | 12982909 | 2375 |
| ENSG000001 | 0.685084 | 0        | 0.85004  | 0.63064  | NA       | RP11-212C chr11  | + | 1.14E+08 | 1.14E+08 | 729  |
| ENSG000001 | 0.342542 | 40.9875  | -6.1081  | 8.13E-09 | 3.47E-08 | RP11-867C chr11  | + | 94375073 | 94384797 | 644  |

|            |          |          |          |          |          |                 |   |          |          |      |
|------------|----------|----------|----------|----------|----------|-----------------|---|----------|----------|------|
| ENSG000001 | 2.43887  | 0.937167 | 1.0504   | 0.47141  | 0.57615  | RP11-885B chr12 | - | 2870366  | 2879621  | 550  |
| ENSG000001 | 1.524285 | 2.719254 | -0.6582  | 0.649    | 0.73498  | RP11-253I chr12 | + | 12638287 | 12644515 | 412  |
| ENSG000001 | 0.580602 | 0.343138 | 0.37443  | 0.8337   | NA       | AC084125. chr8  | + | 1.46E+08 | 1.46E+08 | 165  |
| ENSG000001 | 47.87204 | 1.591889 | 4.6623   | 3.63E-11 | 1.86E-10 | AC005013. chr7  | - | 28992974 | 28998029 | 5050 |
| ENSG000001 | 1.774324 | 2.514486 | -0.44632 | 0.74515  | 0.81297  | RP1-127H1 chr12 | + | 1.2E+08  | 1.2E+08  | 451  |
| ENSG000001 | 0        | 0.686276 | -0.84936 | 0.6309   | NA       | RP11-766N chr12 | + | 65277174 | 65371302 | 3546 |
| ENSG000001 | 0.342542 | 0.357707 | -0.0021  | 0.99906  | NA       | RP11-46H1 chr12 | + | 1.33E+08 | 1.33E+08 | 385  |
| ENSG000001 | 9.221906 | 31.96547 | -1.7588  | 0.000256 | 0.000691 | RP11-667N chr11 | - | 1.14E+08 | 1.14E+08 | 1030 |
| ENSG000001 | 375.6884 | 1942.457 | -2.3645  | 9.05E-42 | 1.66E-40 | SNHG1 chr11     | - | 62619460 | 62623386 | 2768 |
| ENSG000001 | 0.290301 | 0        | 0.4146   | 0.81455  | NA       | RP11-529F chr4  | - | 88238322 | 88266362 | 349  |
| ENSG000001 | 0.653381 | 3.604593 | -2.0423  | 0.12249  | 0.19217  | RP11-443N chr12 | + | 25956137 | 25957460 | 1229 |
| ENSG000001 | 0.580602 | 0        | 0.8036   | 0.6494   | NA       | RP11-508P chr12 | + | 15154767 | 15159617 | 605  |
| ENSG000001 | 1.338465 | 0        | 1.8837   | 0.27037  | NA       | IFNG-AS1 chr12  | + | 68383225 | 68628466 | 1791 |
| ENSG000001 | 2.282147 | 0.357707 | 2.0705   | 0.1665   | 0.24767  | AC110619. chr2  | - | 2.41E+08 | 2.41E+08 | 1667 |
| ENSG000001 | 1.649304 | 0        | 2.1906   | 0.18857  | NA       | RP11-571N chr12 | + | 58120054 | 58122139 | 1500 |
| ENSG000001 | 2.551911 | 2.932886 | -0.1724  | 0.87003  | 0.90953  | RP11-757C chr11 | - | 68708971 | 68710320 | 569  |
| ENSG000001 | 0.342542 | 0.357707 | -0.0021  | 0.99906  | NA       | RP11-625L chr12 | + | 24857499 | 24927147 | 670  |
| ENSG000001 | 0        | 0.357707 | -0.41864 | 0.81278  | NA       | RP11-283I chr12 | - | 362608   | 366465   | 503  |
| ENSG000001 | 11.3585  | 6.581186 | 0.76422  | 0.23195  | 0.3255   | AC226150. chr12 | - | 1.34E+08 | 1.34E+08 | 527  |
| ENSG000001 | 0.36308  | 0        | 0.4146   | 0.81455  | NA       | RP11-283C chr12 | - | 26383752 | 26472653 | 708  |
| ENSG000001 | 3.371387 | 13.86322 | -1.9712  | 0.006276 | 0.013713 | RP11-22B2 chr12 | - | 9466998  | 9468769  | 586  |
| ENSG000001 | 0.923144 | 0.715414 | 0.27646  | 0.87032  | NA       | RP11-152F chr15 | - | 82765134 | 82798350 | 1349 |
| ENSG000001 | 0        | 1.759397 | -2.0294  | 0.24451  | NA       | RP4-765H1 chr12 | + | 1.27E+08 | 1.27E+08 | 280  |
| ENSG000001 | 0.342542 | 0.700845 | -0.57269 | 0.74414  | NA       | RP11-1029 chr12 | + | 64426192 | 64426445 | 254  |
| ENSG000001 | 1.431782 | 0.594029 | 0.81344  | 0.62449  | 0.71467  | RP11-809N chr11 | + | 73163065 | 73163389 | 325  |
| ENSG000001 | 0.923144 | 0.297015 | 0.87478  | 0.61377  | NA       | RP11-711K chr12 | - | 11552315 | 11639612 | 562  |
| ENSG000001 | 0        | 349.0946 | -9.7451  | 7.41E-19 | 5.90E-18 | RMST chr12      | + | 97825431 | 97958813 | 2598 |
| ENSG000001 | 0.36308  | 0        | 0.4146   | 0.81455  | NA       | RP11-817J chr11 | + | 1.03E+08 | 1.03E+08 | 721  |
| ENSG000001 | 0.36308  | 0.654722 | -0.52647 | 0.7643   | NA       | RP11-31L2 chr11 | + | 72354281 | 72370451 | 562  |
| ENSG000001 | 1.016461 | 0        | 1.3167   | 0.46021  | NA       | RP11-196F chr12 | - | 64502543 | 64514269 | 390  |
| ENSG000001 | 0.995923 | 0.98329  | 0.006667 | 0.99644  | 0.998    | MTRNR2L8 chr11  | - | 10529434 | 10530723 | 1290 |
| ENSG000001 | 10.54839 | 23.9883  | -1.1454  | 0.028844 | 0.054818 | RP11-157C chr12 | - | 7591376  | 7592586  | 1211 |
| ENSG000001 | 14.59549 | 5.395544 | 1.3911   | 0.049046 | 0.087502 | TAS2R20 chr12   | - | 11149094 | 11150474 | 1381 |
| ENSG000001 | 0        | 0.357707 | -0.41864 | 0.81278  | NA       | RP11-753B chr12 | - | 1.29E+08 | 1.29E+08 | 672  |
| ENSG000001 | 1.753786 | 0.951736 | 0.64986  | 0.66385  | 0.74709  | AP000593. chr11 | + | 72013183 | 72014009 | 578  |
| ENSG000001 | 0        | 0.343138 | -0.41864 | 0.81278  | NA       | RP11-804A chr11 | - | 60581405 | 60589212 | 355  |
| ENSG000001 | 0        | 0.686276 | -0.84936 | 0.6309   | NA       | RP11-167N chr11 | - | 73674702 | 73681332 | 1412 |
| ENSG000001 | 0.685084 | 0.594029 | 0.089218 | 0.95997  | NA       | AC061975. chr17 | - | 26525465 | 26525619 | 150  |
| ENSG000001 | 1.233984 | 0        | 1.5686   | 0.37707  | NA       | RP11-407A chr12 | - | 1.27E+08 | 1.27E+08 | 802  |
| ENSG000001 | 0        | 0.343138 | -0.41864 | 0.81278  | NA       | RP11-735A chr11 | + | 94782586 | 94784109 | 1524 |
| ENSG000001 | 0.36308  | 0.297015 | -0.00205 | 0.99908  | NA       | RP11-87C1 chr12 | - | 1.22E+08 | 1.22E+08 | 816  |
| ENSG000001 | 20.14454 | 40.14828 | -0.975   | 0.010415 | 0.021817 | PXN-AS1 chr12   | + | 1.21E+08 | 1.21E+08 | 1170 |
| ENSG000001 | 1.628766 | 0        | 2.1781   | 0.19145  | NA       | RP11-612B chr12 | + | 26468648 | 26470746 | 475  |
| ENSG000001 | 0.290301 | 0        | 0.4146   | 0.81455  | NA       | RP11-807F chr11 | + | 71883483 | 71889086 | 825  |
| ENSG000001 | 2.624689 | 4.069116 | -0.5657  | 0.57579  | 0.67257  | RP11-444C chr12 | - | 24366190 | 24715524 | 832  |
| ENSG000001 | 5.281082 | 0        | 3.9487   | 0.004755 | 0.010625 | RP11-221N chr12 | + | 65953371 | 65954669 | 443  |
| ENSG000001 | 3.22583  | 4.660728 | -0.47948 | 0.60208  | 0.69555  | DENND5B-7 chr12 | + | 31742857 | 31768600 | 1106 |
| ENSG000001 | 5.447177 | 1.773966 | 1.4612   | 0.1954   | 0.28332  | RP11-613N chr9  | - | 37588410 | 38068684 | 2591 |
| ENSG000001 | 4.616536 | 0.715414 | 2.3261   | 0.066836 | 0.11452  | LINC00346 chr13 | - | 1.12E+08 | 1.12E+08 | 585  |
| ENSG000001 | 0.290301 | 0.700845 | -0.56655 | 0.74739  | NA       | AC099522. chr5  | + | 72804510 | 72805079 | 570  |
| ENSG000001 | 0.342542 | 0        | 0.4146   | 0.81455  | NA       | RP11-196F chr12 | - | 64432342 | 64491398 | 671  |
| ENSG000001 | 4.887113 | 5.378559 | -0.14421 | 0.87529  | 0.91338  | RP11-685N chr11 | - | 94206074 | 94206736 | 581  |
| ENSG000001 | 2.427705 | 4.074821 | -0.7097  | 0.5142   | 0.61717  | U47924.19 chr12 | + | 7080084  | 7105520  | 1086 |
| ENSG000001 | 0        | 0.357707 | -0.41864 | 0.81278  | NA       | XXbac-BPG chr6  | - | 31192119 | 31192835 | 284  |
| ENSG000001 | 0.72616  | 4.129808 | -2.0804  | 0.13031  | 0.20203  | RP11-522N chr12 | + | 1.24E+08 | 1.25E+08 | 557  |
| ENSG000001 | 0.943682 | 0.297015 | 0.89158  | 0.60669  | NA       | RP11-405A chr12 | + | 19928385 | 20162871 | 718  |
| ENSG000001 | 1.338465 | 0        | 1.8837   | 0.27037  | NA       | RP11-264F chr12 | - | 4361901  | 4384231  | 495  |
| ENSG000001 | 0.290301 | 1.248751 | -1.2076  | 0.47886  | NA       | RP11-456I chr11 | + | 73433394 | 73433739 | 210  |
| ENSG000001 | 0        | 1.638012 | -2.1885  | 0.18912  | NA       | RP11-867C chr11 | - | 94278496 | 94473521 | 954  |
| ENSG000001 | 0        | 1.370136 | -1.6825  | 0.34201  | NA       | RP11-286N chr11 | + | 61263912 | 61267548 | 554  |
| ENSG000001 | 8.962494 | 5.932169 | 0.54566  | 0.52879  | 0.63034  | RP11-495K chr12 | - | 1.32E+08 | 1.32E+08 | 666  |
| ENSG000001 | 0        | 1.698704 | -2.2257  | 0.18075  | NA       | RP11-173P chr12 | - | 1.21E+08 | 1.21E+08 | 583  |
| ENSG000001 | 0.705622 | 0        | 0.8807   | 0.6196   | NA       | RP11-967K chr12 | + | 28317891 | 28318595 | 554  |
| ENSG000001 | 0.36308  | 0.686276 | -0.48701 | 0.78478  | NA       | RP11-804A chr11 | - | 60603469 | 60610438 | 501  |
| ENSG000001 | 0        | 0.343138 | -0.41864 | 0.81278  | NA       | RP11-459C chr12 | + | 18577597 | 18578074 | 478  |

|            |          |          |          |          |          |                  |   |          |          |      |
|------------|----------|----------|----------|----------|----------|------------------|---|----------|----------|------|
| ENSG000001 | 0        | 3.426547 | -3.2456  | 0.032755 | 0.06137  | RP11-69M: chr12  | + | 8167620  | 8169002  | 1069 |
| ENSG000001 | 0.923144 | 0        | 1.223    | 0.49292  | NA       | RP11-408I: chr12 | + | 1.25E+08 | 1.25E+08 | 130  |
| ENSG000001 | 2.697468 | 6.093973 | -1.0999  | 0.2246   | 0.31721  | RP5-940J5: chr12 | - | 6641456  | 6642664  | 477  |
| ENSG000001 | 0.342542 | 1.326428 | -1.2461  | 0.46257  | NA       | RP11-438L: chr12 | + | 8786963  | 8790204  | 2285 |
| ENSG000001 | 2.770247 | 6.583602 | -1.1819  | 0.21157  | 0.30194  | RP11-513G: chr12 | + | 26471886 | 26574395 | 775  |
| ENSG000001 | 5.2374   | 1.058552 | 2.0454   | 0.09133  | 0.14963  | RP11-43N5: chr12 | - | 68102827 | 68123255 | 3135 |
| ENSG000001 | 0        | 0.640152 | -0.82869 | 0.63935  | NA       | RP11-324E: chr12 | - | 1.23E+08 | 1.23E+08 | 28   |
| ENSG000001 | 2.976604 | 4.775666 | -0.62641 | 0.55958  | 0.65827  | CYP2A6: chr19    | - | 41349443 | 41356352 | 1764 |
| ENSG000001 | 0        | 0.343138 | -0.41864 | 0.81278  | NA       | RP11-444J: chr12 | + | 7759430  | 7759927  | 498  |
| ENSG000001 | 1.048164 | 0        | 1.348    | 0.44949  | NA       | NXPE2P1: chr11   | - | 1.14E+08 | 1.14E+08 | 726  |
| ENSG000001 | 0        | 5.583326 | -4.0741  | 0.002825 | 0.00654  | RP11-1038: chr12 | + | 5497755  | 5515817  | 1405 |
| ENSG000001 | 0        | 1.577319 | -1.9089  | 0.27608  | NA       | MT1JP: chr16     | + | 56669651 | 56670998 | 887  |
| ENSG000001 | 2.229907 | 10.43096 | -2.0539  | 0.019085 | 0.037841 | RP11-711A: chr2  | + | 74213653 | 74220867 | 710  |
| ENSG000001 | 5.341882 | 9.750394 | -0.81027 | 0.27951  | 0.38026  | RP11-417L: chr12 | - | 1.32E+08 | 1.32E+08 | 426  |
| ENSG000001 | 0.290301 | 0.343138 | -0.00202 | 0.99909  | NA       | PSMC1P9: chr12   | + | 18845696 | 18847030 | 1335 |
| ENSG000001 | 0        | 2.728118 | -2.8815  | 0.068704 | 0.11723  | CCDC177: chr14   | - | 70037483 | 70038032 | 550  |
| ENSG000001 | 0        | 1.903472 | -2.1599  | 0.21236  | NA       | RP11-575F: chr12 | - | 1.28E+08 | 1.28E+08 | 505  |
| ENSG000001 | 5.580756 | 2.759672 | 0.92113  | 0.4051   | 0.50997  | AC084117: chr11  | + | 18427156 | 18428278 | 270  |
| ENSG000001 | 0.290301 | 22.28792 | -5.2607  | 3.30E-06 | 1.12E-05 | RP11-728G: chr12 | - | 1.21E+08 | 1.21E+08 | 496  |
| ENSG000001 | 6.671788 | 43.88385 | -2.6129  | 0.000188 | 0.000517 | HIST1H3G: chr6   | - | 26271146 | 26271612 | 467  |
| ENSG000001 | 0.580602 | 0.686276 | -0.10523 | 0.9528   | NA       | TAS2R63P: chr12  | - | 11200931 | 11201855 | 925  |
| ENSG000001 | 2.479946 | 0        | 2.5072   | 0.13961  | 0.21341  | RP5-1154L: chr12 | - | 695031   | 695652   | 373  |
| ENSG000001 | 0.632843 | 0.640152 | -0.00865 | 0.99586  | NA       | RP11-501E: chr12 | - | 21600479 | 21601248 | 467  |
| ENSG000001 | 0        | 0.297015 | -0.41864 | 0.81278  | NA       | RP11-526P: chr12 | - | 1.28E+08 | 1.28E+08 | 959  |
| ENSG000001 | 1.016461 | 0        | 1.3167   | 0.46021  | NA       | CACNA1C-A: chr12 | - | 2329703  | 2332645  | 735  |
| ENSG000001 | 0.975385 | 2.024857 | -0.81092 | 0.58247  | 0.67863  | CBX3P4: chr12    | - | 2896097  | 2903461  | 423  |
| ENSG000001 | 0        | 1.623443 | -1.9406  | 0.26756  | NA       | RP11-364C: chr12 | + | 1.19E+08 | 1.19E+08 | 455  |
| ENSG000001 | 0.36308  | 0        | 0.4146   | 0.81455  | NA       | RP11-707G: chr11 | + | 73471608 | 73472115 | 428  |
| ENSG000001 | 0        | 0.715414 | -0.84936 | 0.6309   | NA       | AP000619: chr11  | - | 1.03E+08 | 1.03E+08 | 969  |
| ENSG000001 | 3.76617  | 2.232041 | 0.64775  | 0.53992  | 0.64049  | MRPL40P1: chr12  | + | 67745216 | 67745819 | 604  |
| ENSG000001 | 128.5024 | 39.91767 | 1.6758   | 5.48E-11 | 2.77E-10 | CTSO: chr4       | - | 1.57E+08 | 1.57E+08 | 2954 |
| ENSG000001 | 0        | 2.217472 | -2.3847  | 0.1626   | 0.243    | PADI6: chr1      | + | 17698691 | 17728195 | 2397 |
| ENSG000001 | 2.282147 | 0        | 2.6902   | 0.089639 | 0.14723  | RP11-982A: chr14 | + | 1.05E+08 | 1.05E+08 | 1307 |
| ENSG000001 | 202.1374 | 132.963  | 0.60249  | 0.000527 | 0.001364 | APOPT1: chr14    | + | 1.04E+08 | 1.04E+08 | 2523 |
| ENSG000001 | 2.375464 | 0        | 2.6887   | 0.093683 | 0.15293  | RP11-709A: chr12 | - | 27745394 | 27746972 | 928  |
| ENSG000001 | 22.2315  | 35.80484 | -0.67805 | 0.081893 | 0.13629  | TRAPPC2P1: chr19 | + | 57874879 | 57876721 | 1743 |
| ENSG000001 | 5.436012 | 2.932886 | 0.80598  | 0.38063  | 0.48465  | DYX1C1: chr15    | - | 55702723 | 55800432 | 1993 |
| ENSG000001 | 0        | 2.514486 | -2.5628  | 0.12928  | 0.20079  | A2MP1: chr12     | - | 9381129  | 9428413  | 4130 |
| ENSG000001 | 0        | 0.686276 | -0.84936 | 0.6309   | NA       | RP11-56H1: chr12 | + | 33607280 | 33608387 | 1108 |
| ENSG000001 | 2.810509 | 12.63232 | -1.9912  | 0.028756 | 0.054668 | C21orf119: chr21 | + | 33765439 | 33766254 | 816  |
| ENSG000001 | 37.70033 | 3.368271 | 3.3912   | 2.95E-08 | 1.20E-07 | RP11-366L: chr12 | - | 66328557 | 66342259 | 454  |
| ENSG000001 | 0        | 4.63159  | -3.7851  | 0.007148 | 0.015444 | RP11-337L: chr12 | - | 1.3E+08  | 1.3E+08  | 739  |
| ENSG000001 | 283.8614 | 122.396  | 1.2112   | 8.19E-11 | 4.08E-10 | ZNF432: chr19    | - | 52534632 | 52598991 | 4513 |
| ENSG000001 | 0        | 0.297015 | -0.41864 | 0.81278  | NA       | RP11-627G: chr11 | + | 1.14E+08 | 1.14E+08 | 679  |
| ENSG000001 | 19.30534 | 33.16327 | -0.76651 | 0.050083 | 0.089084 | RP13-942A: chr12 | + | 1.24E+08 | 1.24E+08 | 1920 |
| ENSG000001 | 0.580602 | 0.594029 | -0.01451 | 0.9935   | NA       | LINC00696: chr3  | - | 52097076 | 52097567 | 492  |
| ENSG000001 | 0.653381 | 5.583326 | -2.6828  | 0.023135 | 0.045034 | RP11-90D4: chr12 | + | 8474472  | 8482210  | 603  |
| ENSG000001 | 0.342542 | 1.188058 | -0.99414 | 0.57407  | NA       | RP13-672B: chr12 | + | 1.33E+08 | 1.33E+08 | 574  |
| ENSG000001 | 0        | 1.294874 | -1.8547  | 0.27869  | NA       | RP11-319E: chr12 | - | 5343163  | 5352317  | 754  |
| ENSG000001 | 1.359003 | 0.297015 | 1.3758   | 0.39512  | NA       | RP11-783K: chr11 | - | 63996686 | 64001824 | 923  |
| ENSG000001 | 5.923298 | 5.133373 | 0.181    | 0.82172  | 0.8745   | RP11-84E2: chr17 | + | 70026432 | 70034889 | 639  |
| ENSG000001 | 0        | 0.343138 | -0.41864 | 0.81278  | NA       | RP11-173C: chr12 | - | 1.27E+08 | 1.27E+08 | 888  |
| ENSG000001 | 0.923144 | 1.531196 | -0.5504  | 0.71821  | 0.79139  | RP11-674J: chr12 | - | 16124824 | 16125543 | 720  |
| ENSG000001 | 0        | 3.056687 | -2.9811  | 0.061557 | 0.10667  | RP11-174A: chr12 | - | 1.3E+08  | 1.3E+08  | 392  |
| ENSG000001 | 4.648238 | 7.766828 | -0.7036  | 0.41547  | 0.52055  | RP11-443C: chr12 | + | 1.1E+08  | 1.1E+08  | 539  |
| ENSG000001 | 2.386629 | 4.943174 | -0.98429 | 0.31512  | 0.41775  | Z95704.5: chr4   | - | 123966   | 125423   | 1452 |
| ENSG000001 | 0        | 3.351285 | -3.2746  | 0.028086 | 0.053569 | RP11-319E: chr12 | + | 5425127  | 5428513  | 3387 |
| ENSG000001 | 0.290301 | 0        | 0.4146   | 0.81455  | NA       | RP11-809A: chr11 | + | 73221703 | 73221865 | 163  |
| ENSG000001 | 0.342542 | 0        | 0.4146   | 0.81455  | NA       | RP11-76C1: chr12 | - | 1.31E+08 | 1.31E+08 | 1277 |
| ENSG000001 | 0        | 1.043983 | -1.3473  | 0.44976  | NA       | RP11-277P: chr12 | - | 10511063 | 10513644 | 562  |
| ENSG000001 | 0        | 0.357707 | -0.41864 | 0.81278  | NA       | RP11-820K: chr12 | + | 31630440 | 31630921 | 482  |
| ENSG000001 | 0        | 0.297015 | -0.41864 | 0.81278  | NA       | SMLR1: chr6      | + | 1.31E+08 | 1.31E+08 | 2512 |
| ENSG000001 | 1.722083 | 4.853343 | -1.3782  | 0.19771  | 0.28586  | RP11-264F: chr12 | - | 4357931  | 4385350  | 555  |
| ENSG000001 | 0.653381 | 0.937167 | -0.38446 | 0.8124   | NA       | ATF4P4: chr11    | + | 1.14E+08 | 1.14E+08 | 1930 |
| ENSG000001 | 0        | 0.297015 | -0.41864 | 0.81278  | NA       | GCSHP4: chr12    | - | 8293764  | 8295293  | 439  |

|            |          |          |          |          |          |                  |   |          |          |      |
|------------|----------|----------|----------|----------|----------|------------------|---|----------|----------|------|
| ENSG000001 | 0.342542 | 0        | 0.4146   | 0.81455  | NA       | RP11-473N chr12  | - | 67834778 | 67836339 | 741  |
| ENSG000001 | 1.597063 | 5.911895 | -1.6925  | 0.10397  | 0.16674  | RP11-627K chr12  | + | 31464551 | 31464963 | 316  |
| ENSG000001 | 15.26085 | 21.91162 | -0.51453 | 0.28631  | 0.38783  | RP11-612B chr12  | - | 26488797 | 26489883 | 172  |
| ENSG000001 | 2.822488 | 1.759397 | 0.5624   | 0.68159  | 0.76193  | TAS2R30 chr12    | - | 11285557 | 11287243 | 1687 |
| ENSG000001 | 0        | 0.357707 | -0.41864 | 0.81278  | NA       | RP11-167N chr11  | - | 73702328 | 73703225 | 898  |
| ENSG000001 | 0.632843 | 0        | 0.81931  | 0.64303  | NA       | LINC00507 chr12  | + | 1.28E+08 | 1.28E+08 | 1935 |
| ENSG000001 | 2.241072 | 0.594029 | 1.3613   | 0.38742  | 0.49154  | RP11-64D2 chr11  | - | 1.14E+08 | 1.14E+08 | 3837 |
| ENSG000001 | 3.028845 | 2.742687 | 0.13323  | 0.90386  | 0.93355  | RP11-881N chr11  | - | 60685941 | 60692869 | 864  |
| ENSG000001 | 0.36308  | 0.297015 | -0.00205 | 0.99908  | NA       | TSPAN9-IT1 chr12 | + | 3258963  | 3260642  | 562  |
| ENSG000001 | 0        | 0.297015 | -0.41864 | 0.81278  | NA       | RP11-897N chr12  | - | 1.32E+08 | 1.32E+08 | 493  |
| ENSG000001 | 0.36308  | 0.686276 | -0.48701 | 0.78478  | NA       | AC005255. chr19  | + | 14903121 | 14903589 | 469  |
| ENSG000001 | 0        | 0.343138 | -0.41864 | 0.81278  | NA       | RP11-1038 chr12  | - | 5475214  | 5476940  | 1727 |
| ENSG000001 | 0.653381 | 0.997859 | -0.4521  | 0.77012  | NA       | MTRNR2L3 chr20   | - | 55933496 | 55934878 | 1383 |
| ENSG000001 | 57.39785 | 94.05035 | -0.70539 | 0.021175 | 0.041558 | ZNF10 chr12      | + | 1.34E+08 | 1.34E+08 | 4441 |
| ENSG000001 | 154.3989 | 401.8125 | -1.3763  | 9.19E-17 | 6.63E-16 | ZNF486 chr19     | + | 20278037 | 20311299 | 3837 |
| ENSG000001 | 0        | 18.11683 | -5.7874  | 1.18E-06 | 4.19E-06 | RP11-771K chr12  | - | 31516415 | 31522235 | 868  |
| ENSG000001 | 1.991846 | 1.234181 | 0.54083  | 0.68295  | 0.76317  | RP11-283C chr12  | - | 26364097 | 26488789 | 699  |
| ENSG000001 | 0        | 0.640152 | -0.82869 | 0.63935  | NA       | SMIM3 chr5       | + | 1.5E+08  | 1.5E+08  | 2332 |
| ENSG000001 | 0.653381 | 0        | 0.82678  | 0.64037  | NA       | RP11-434C chr12  | - | 11694329 | 11708772 | 188  |
| ENSG000001 | 0.36308  | 2.742687 | -2.2668  | 0.1279   | 0.199    | RP11-473N chr12  | - | 16552208 | 16555340 | 3133 |
| ENSG000001 | 0.685084 | 0.654722 | 0.030656 | 0.98584  | NA       | RPL7AP3 chr14    | - | 35704386 | 35704857 | 472  |
| ENSG000001 | 2.946693 | 6.342448 | -1.01    | 0.29923  | 0.40085  | RP11-123C chr12  | - | 67285656 | 67462942 | 192  |
| ENSG000001 | 1.306762 | 0.997859 | 0.31266  | 0.82903  | 0.87958  | RP11-989F chr12  | + | 1.31E+08 | 1.31E+08 | 587  |
| ENSG000001 | 0.705622 | 1.727843 | -0.97254 | 0.53204  | 0.63323  | AP000647. chr11  | - | 1.03E+08 | 1.03E+08 | 1127 |
| ENSG000001 | 0.342542 | 0        | 0.4146   | 0.81455  | NA       | CACNA1C-I' chr12 | + | 2157518  | 2158629  | 589  |
| ENSG000001 | 0        | 0.297015 | -0.41864 | 0.81278  | NA       | RP11-495K chr12  | - | 1.32E+08 | 1.32E+08 | 617  |
| ENSG000001 | 0.36308  | 0        | 0.4146   | 0.81455  | NA       | RP11-366L chr12  | - | 66421505 | 66424846 | 376  |
| ENSG000001 | 0.290301 | 0        | 0.4146   | 0.81455  | NA       | USP30-AS1 chr12  | - | 1.09E+08 | 1.09E+08 | 656  |
| ENSG000001 | 0.580602 | 2.010288 | -1.3122  | 0.37946  | 0.48352  | DDX11L8 chr12    | - | 92239    | 93430    | 366  |
| ENSG000001 | 45.1872  | 0        | 7.0627   | 3.07E-10 | 1.47E-09 | RP11-221N chr12  | + | 65996649 | 66006777 | 612  |
| ENSG000001 | 552.0545 | 924.2127 | -0.74238 | 1.05E-11 | 5.53E-11 | HMBS chr11       | + | 1.19E+08 | 1.19E+08 | 2112 |
| ENSG000001 | 2.67693  | 6.71714  | -1.2413  | 0.16547  | 0.24648  | CACNA1C-A chr12  | - | 2777666  | 2781386  | 609  |
| ENSG000001 | 0        | 1.012429 | -1.3162  | 0.46038  | NA       | RP5-916L7 chr12  | + | 1.26E+08 | 1.26E+08 | 570  |
| ENSG000001 | 3.620613 | 12.8338  | -1.7521  | 0.013162 | 0.026997 | RP11-182J chr15  | - | 85154920 | 85158200 | 1018 |
| ENSG000001 | 0        | 0.343138 | -0.41864 | 0.81278  | NA       | RP11-466C chr11  | - | 63602139 | 63602415 | 277  |
| ENSG000001 | 10.56119 | 12.43239 | -0.24711 | 0.68849  | 0.76774  | RP11-504C chr11  | - | 18617006 | 18621230 | 943  |
| ENSG000001 | 0        | 0.343138 | -0.41864 | 0.81278  | NA       | RP11-754J. chr12 | + | 66957304 | 66957474 | 171  |
| ENSG000001 | 0        | 40.66376 | -6.9347  | 6.01E-10 | 2.82E-09 | RP11-277P chr12  | - | 10485460 | 10490891 | 649  |
| ENSG000001 | 0        | 0.343138 | -0.41864 | 0.81278  | NA       | RP11-114F chr12  | - | 64731958 | 64732577 | 620  |
| ENSG000001 | 72.29058 | 59.61181 | 0.28257  | 0.30445  | 0.40591  | ZNF225 chr19     | + | 44616334 | 44637027 | 2538 |
| ENSG000001 | 0        | 0.997859 | -1.5018  | 0.39072  | NA       | AC005086. chr7   | - | 1.02E+08 | 1.02E+08 | 219  |
| ENSG000001 | 0        | 0.357707 | -0.41864 | 0.81278  | NA       | RP11-989F chr12  | - | 1.31E+08 | 1.31E+08 | 317  |
| ENSG000001 | 8.975287 | 62.23869 | -2.7651  | 3.86E-08 | 1.56E-07 | RP11-512N chr12  | - | 1.23E+08 | 1.23E+08 | 2215 |
| ENSG000001 | 0.36308  | 0        | 0.4146   | 0.81455  | NA       | RP11-4N23 chr12  | + | 13679788 | 13700516 | 382  |
| ENSG000001 | 0.290301 | 0        | 0.4146   | 0.81455  | NA       | RP11-407A chr12  | + | 1.27E+08 | 1.27E+08 | 379  |
| ENSG000001 | 0        | 0.715414 | -0.84936 | 0.6309   | NA       | RP13-977J. chr12 | + | 1.33E+08 | 1.33E+08 | 391  |
| ENSG000001 | 1.338465 | 2.131673 | -0.53196 | 0.70133  | 0.77777  | RP11-338E chr12  | - | 65047840 | 65048799 | 482  |
| ENSG000001 | 1.048164 | 0        | 1.348    | 0.44949  | NA       | AP000462. chr11  | + | 1.15E+08 | 1.15E+08 | 715  |
| ENSG000001 | 0.632843 | 2.073397 | -1.2546  | 0.41518  | 0.52025  | HIST1H3F chr6    | - | 26250370 | 26250835 | 466  |
| ENSG000001 | 0        | 1.759397 | -2.0294  | 0.24451  | NA       | RP11-153K chr12  | + | 23252302 | 23344521 | 1629 |
| ENSG000001 | 13.59101 | 9.557779 | 0.48963  | 0.40697  | 0.51175  | AL049542. chr16  | + | 542366   | 542567   | 198  |
| ENSG000001 | 1.722083 | 1.966581 | -0.17946 | 0.89273  | 0.9255   | RP11-611C chr12  | + | 69221898 | 69222333 | 374  |
| ENSG000001 | 2.012384 | 1.828211 | 0.080466 | 0.95137  | 0.96962  | SCARNA10 chr12   | + | 6619441  | 6619688  | 248  |
| ENSG000001 | 5.249379 | 7.328154 | -0.45459 | 0.53688  | 0.63775  | RPL41P2 chr15    | + | 28560798 | 28561102 | 305  |
| ENSG000001 | 0.975385 | 11.89019 | -3.2774  | 0.001046 | 0.002586 | ABCC6P1 chr16    | + | 18582484 | 18609650 | 2943 |
| ENSG000001 | 0        | 0.357707 | -0.41864 | 0.81278  | NA       | RP11-21A7 chr11  | - | 63885744 | 63886682 | 575  |
| ENSG000001 | 2.86275  | 0.654722 | 1.7625   | 0.18738  | 0.27341  | RP1-7G5.5 chr12  | - | 1.1E+08  | 1.1E+08  | 343  |
| ENSG000001 | 0.36308  | 0.686276 | -0.48701 | 0.78478  | NA       | HSPA8P5 chr12    | + | 4206617  | 4208685  | 2069 |
| ENSG000001 | 5.922484 | 6.359433 | -0.07034 | 0.93202  | 0.95541  | RP11-707C chr11  | + | 73639578 | 73641417 | 383  |
| ENSG000001 | 4.160139 | 2.711133 | 0.58303  | 0.57163  | 0.66875  | RP11-613F chr11  | - | 18532590 | 18533022 | 433  |
| ENSG000001 | 0.705622 | 0.357707 | 0.57557  | 0.74268  | NA       | RP11-711K chr12  | + | 11365126 | 11404303 | 506  |
| ENSG000001 | 2.831861 | 0.343138 | 2.0959   | 0.196    | 0.28403  | RP11-1060 chr12  | - | 27849321 | 27863703 | 1110 |
| ENSG000001 | 0.705622 | 0.297015 | 0.56864  | 0.74638  | NA       | RP11-500N chr12  | + | 4754662  | 4757193  | 572  |
| ENSG000001 | 5.850519 | 13.64958 | -1.1802  | 0.064779 | 0.1115   | AC020910. chr19  | - | 35166998 | 35168486 | 1487 |
| ENSG000001 | 34.35723 | 72.85441 | -1.0768  | 0.000514 | 0.001333 | RP11-347I. chr12 | - | 1.22E+08 | 1.22E+08 | 1626 |

|            |          |          |          |          |          |                 |   |          |          |      |
|------------|----------|----------|----------|----------|----------|-----------------|---|----------|----------|------|
| ENSG000001 | 41.03758 | 49.84114 | -0.26928 | 0.40285  | 0.50755  | AC138123. chr12 | - | 93477374 | 93477451 | 78   |
| ENSG000001 | 0        | 0.343138 | -0.41864 | 0.81278  | NA       | ASIC5 chr4      | - | 1.57E+08 | 1.57E+08 | 1692 |
| ENSG000001 | 0.290301 | 0.715414 | -0.50514 | 0.77701  | NA       | RP11-274J chr12 | - | 64281159 | 64282378 | 1220 |
| ENSG000001 | 0.290301 | 0.297015 | -0.00202 | 0.99909  | NA       | AC109133. chr5  | + | 59960257 | 59960333 | 75   |
| ENSG000001 | 0.72616  | 0.297015 | 0.51367  | 0.77334  | NA       | CYB5RL chr1     | - | 54606897 | 54665746 | 2382 |
| ENSG000001 | 0        | 15.43167 | -5.5541  | 4.93E-06 | 1.64E-05 | RP11-1038 chr12 | + | 5399646  | 5492819  | 992  |
| ENSG000001 | 0.290301 | 0.357707 | -0.00203 | 0.99908  | NA       | RP11-144C chr12 | - | 11047767 | 11049551 | 297  |
| ENSG000001 | 0.290301 | 0.640152 | -0.50256 | 0.77558  | NA       | RP11-754J chr12 | - | 66957747 | 66962974 | 1800 |
| ENSG000001 | 0        | 3.336716 | -3.2705  | 0.028298 | 0.053889 | RP11-886C chr11 | - | 1.04E+08 | 1.04E+08 | 652  |
| ENSG000001 | 0        | 0.715414 | -0.84936 | 0.6309   | NA       | RP11-495K chr12 | - | 1.32E+08 | 1.32E+08 | 494  |
| ENSG000001 | 0        | 0.357707 | -0.41864 | 0.81278  | NA       | RP11-118B chr12 | + | 9399093  | 9410556  | 224  |
| ENSG000001 | 2.085163 | 0        | 2.4626   | 0.13461  | 0.20763  | RP11-467L chr11 | - | 61535973 | 61558075 | 921  |
| ENSG000001 | 0.342542 | 0.98329  | -0.93492 | 0.58786  | NA       | RP1-102E2 chr12 | + | 6503071  | 6504235  | 724  |
| ENSG000001 | 8.237148 | 4.957743 | 0.69943  | 0.3428   | 0.44674  | TAS2R31 chr12   | - | 11182986 | 11184006 | 1021 |
| ENSG000001 | 2.032922 | 2.80338  | -0.37816 | 0.78053  | 0.84239  | RP11-794C chr11 | - | 61306988 | 61309731 | 1831 |
| ENSG000001 | 1.681007 | 0        | 2.1857   | 0.19206  | NA       | RP11-809A chr11 | + | 73116342 | 73121727 | 334  |
| ENSG000001 | 5.976352 | 12.66871 | -1.0574  | 0.18253  | 0.26745  | RP11-667A chr11 | + | 1.14E+08 | 1.14E+08 | 158  |
| ENSG000001 | 1.379541 | 0.297015 | 1.2901   | 0.44742  | NA       | RP11-363J chr2  | - | 2.04E+08 | 2.04E+08 | 427  |
| ENSG000001 | 0.653381 | 3329.284 | -11.559  | 1.30E-51 | 3.11E-50 | SALL3 chr18     | + | 76740275 | 76762677 | 3997 |
| ENSG000001 | 2.177666 | 1.309443 | 0.59928  | 0.67306  | 0.75516  | RP11-613F chr11 | - | 18511790 | 18512502 | 713  |
| ENSG000001 | 0.72616  | 0        | 0.85004  | 0.63064  | NA       | RP11-856F chr11 | - | 94607217 | 94658686 | 593  |
| ENSG000001 | 0.290301 | 2.07098  | -1.8977  | 0.2248   | 0.3174   | RP11-21A7 chr11 | + | 63849162 | 63854647 | 732  |
| ENSG000001 | 0.290301 | 0        | 0.4146   | 0.81455  | NA       | RP11-1060 chr12 | + | 27857501 | 27861296 | 427  |
| ENSG000001 | 2.023549 | 1.485073 | 0.31502  | 0.83043  | 0.88055  | RP11-554A chr11 | + | 68779751 | 68785915 | 1490 |
| ENSG000001 | 202.5611 | 323.1781 | -0.67392 | 5.61E-05 | 0.000165 | POLG2 chr17     | - | 62473902 | 62493154 | 1731 |
| ENSG000001 | 0.72616  | 3.976869 | -2.1048  | 0.10844  | 0.17291  | AC019294. chr15 | + | 76030311 | 76031568 | 1258 |
| ENSG000001 | 3.278071 | 0.937167 | 1.5147   | 0.2208   | 0.31281  | RP11-212C chr11 | + | 1.14E+08 | 1.14E+08 | 1060 |
| ENSG000001 | 3.112789 | 4.395268 | -0.47132 | 0.63083  | 0.72011  | RP11-847F chr12 | + | 34190373 | 34209675 | 794  |
| ENSG000001 | 0        | 1.84278  | -2.0842  | 0.23234  | NA       | RP11-598F chr12 | - | 276022   | 291565   | 1063 |
| ENSG000001 | 0        | 0.686276 | -0.84936 | 0.6309   | NA       | RP13-895J chr12 | + | 1.33E+08 | 1.33E+08 | 1000 |
| ENSG000001 | 9.524186 | 72.5541  | -2.9185  | 2.00E-12 | 1.11E-11 | AC156455. chr12 | + | 1.23E+08 | 1.23E+08 | 893  |
| ENSG000001 | 4.656798 | 5.288728 | -0.14895 | 0.87364  | 0.91193  | RP11-113C chr12 | + | 8472977  | 8522151  | 620  |
| ENSG000001 | 0.72616  | 0        | 0.85004  | 0.63064  | NA       | RP11-1060 chr12 | - | 27761666 | 27761979 | 314  |
| ENSG000001 | 0.36308  | 4.144377 | -2.8019  | 0.049955 | 0.088889 | RP11-424A chr12 | + | 16720345 | 16726874 | 603  |
| ENSG000001 | 0.72616  | 1.188058 | -0.45174 | 0.79635  | 0.85544  | RP11-274J chr12 | + | 64272567 | 64273254 | 515  |
| ENSG000001 | 0.36308  | 2.460242 | -1.9822  | 0.21625  | 0.30739  | OR13A1 chr10    | - | 45798102 | 45811056 | 2078 |
| ENSG000001 | 8.75695  | 13.04502 | -0.56109 | 0.38719  | 0.49132  | RP13-977J chr12 | - | 1.33E+08 | 1.33E+08 | 1477 |
| ENSG000001 | 0        | 2.66501  | -2.877   | 0.067583 | 0.11559  | RP11-283I chr12 | + | 312808   | 314189   | 694  |
| ENSG000001 | 0        | 0.686276 | -0.84936 | 0.6309   | NA       | AC135776. chr16 | + | 34232106 | 34232469 | 360  |
| ENSG000001 | 1.359003 | 1.995719 | -0.49032 | 0.69346  | 0.77146  | RP11-613F chr11 | - | 18529155 | 18530367 | 630  |
| ENSG000001 | 0.632843 | 2.139794 | -1.3213  | 0.38798  | 0.49211  | RP11-266K chr12 | - | 8407123  | 8461445  | 1013 |
| ENSG000001 | 5.561032 | 2.010288 | 1.3202   | 0.20584  | 0.29535  | RP11-286A chr11 | + | 61196692 | 61253294 | 883  |
| ENSG000001 | 73.75732 | 38.65273 | 0.91929  | 0.001986 | 0.004704 | RP11-705C chr12 | + | 9787188  | 9811008  | 2612 |
| ENSG000001 | 1.359003 | 2.872193 | -0.96841 | 0.42063  | 0.526    | RP11-522A chr12 | + | 1.25E+08 | 1.25E+08 | 2256 |
| ENSG000001 | 0.580602 | 0        | 0.8036   | 0.6494   | NA       | RP11-749F chr12 | + | 1.28E+08 | 1.28E+08 | 406  |
| ENSG000001 | 1.722083 | 1.623443 | 0.046791 | 0.97229  | 0.98474  | RP11-667A chr11 | - | 1.14E+08 | 1.14E+08 | 586  |
| ENSG000001 | 2.635854 | 2.589748 | 0.01574  | 0.98958  | 0.99434  | AC093668. chr7  | - | 1.02E+08 | 1.02E+08 | 916  |
| ENSG000001 | 0        | 0.297015 | -0.41864 | 0.81278  | NA       | RP11-64B1 chr12 | - | 1.2E+08  | 1.2E+08  | 541  |
| ENSG000001 | 0.36308  | 3.212915 | -2.3408  | 0.13233  | 0.20477  | CYP2B7P1 chr19  | + | 41430124 | 41456565 | 2956 |
| ENSG000001 | 0        | 0.343138 | -0.41864 | 0.81278  | NA       | RP11-59N2 chr12 | + | 21815247 | 21912966 | 578  |
| ENSG000001 | 8.869991 | 1.638012 | 2.2589   | 0.012449 | 0.025658 | RP11-815J chr18 | - | 12073231 | 12076653 | 3365 |
| ENSG000001 | 0.36308  | 0.357707 | -0.00212 | 0.99905  | NA       | RP11-582E chr12 | + | 27274843 | 27300597 | 983  |
| ENSG000001 | 0.632843 | 0.654722 | -0.02224 | 0.98935  | NA       | RP11-454F chr3  | + | 1.01E+08 | 1.01E+08 | 1158 |
| ENSG000001 | 2.096328 | 0.997859 | 0.8528   | 0.54162  | 0.64216  | TAS2R67P chr12  | - | 11332272 | 11333061 | 790  |
| ENSG000001 | 0        | 2.621302 | -2.8604  | 0.069395 | 0.11824  | RP11-169C chr11 | + | 72295616 | 72299023 | 664  |
| ENSG000001 | 0        | 0.343138 | -0.41864 | 0.81278  | NA       | DKFZP686I chr7  | - | 42948872 | 42971773 | 2430 |
| ENSG000001 | 4.491516 | 0        | 3.7249   | 0.008883 | 0.018864 | RERG-IT1 chr12  | - | 15265297 | 15267632 | 301  |
| ENSG000001 | 3.693391 | 0        | 3.4184   | 0.01986  | 0.039228 | RP11-144C chr12 | - | 10983673 | 10984615 | 943  |
| ENSG000001 | 10.20846 | 0.357707 | 4.1621   | 0.000606 | 0.001554 | RP11-429A chr12 | + | 5132848  | 5134758  | 723  |
| ENSG000001 | 2.708633 | 8.265321 | -1.5084  | 0.10067  | 0.16241  | TMEM75 chr8     | - | 1.29E+08 | 1.29E+08 | 1466 |
| ENSG000001 | 1.774324 | 0.343138 | 1.5777   | 0.34013  | 0.44403  | RP11-144C chr12 | - | 11348987 | 11349908 | 922  |
| ENSG000001 | 0        | 0.357707 | -0.41864 | 0.81278  | NA       | RP11-180A chr12 | - | 12876231 | 12876945 | 150  |
| ENSG000001 | 0.342542 | 2.993578 | -2.4351  | 0.090323 | 0.14823  | A2ML1-AS1 chr12 | - | 8928815  | 8983543  | 452  |
| ENSG000001 | 476.4056 | 225.978  | 1.0689   | 0.000431 | 0.001131 | RP11-424C chr12 | + | 20704524 | 20705946 | 1423 |
| ENSG000001 | 40.31223 | 60.91313 | -0.58675 | 0.044516 | 0.080364 | KLRAP1 chr12    | - | 10741077 | 10752434 | 2118 |

|            |          |          |          |          |          |                 |   |          |          |      |
|------------|----------|----------|----------|----------|----------|-----------------|---|----------|----------|------|
| ENSG000001 | 0        | 0.357707 | -0.41864 | 0.81278  | NA       | RP11-338E chr12 | - | 64992858 | 65003239 | 254  |
| ENSG000001 | 6.887518 | 16.05155 | -1.1855  | 0.052158 | 0.092305 | RP11-599J chr12 | - | 9550951  | 9567447  | 400  |
| ENSG000001 | 0.342542 | 0.343138 | -0.00208 | 0.99906  | NA       | CCDC58P5 chr11  | - | 73561514 | 73562256 | 432  |
| ENSG000001 | 0.72616  | 0.357707 | 0.52227  | 0.76959  | NA       | TAS2R12 chr12   | - | 11047542 | 11048481 | 940  |
| ENSG000001 | 74.34746 | 95.18738 | -0.35064 | 0.29146  | 0.39328  | ZNF350 chr19    | - | 52467596 | 52490109 | 2338 |
| ENSG000001 | 0.632843 | 3.307578 | -1.9381  | 0.1491   | 0.22585  | RP11-727F chr11 | + | 62599706 | 62601515 | 565  |
| ENSG000001 | 0        | 0.654722 | -0.83442 | 0.63731  | NA       | RP11-476N chr12 | - | 3571884  | 3572752  | 530  |
| ENSG000001 | 0        | 0.654722 | -0.83442 | 0.63731  | NA       | RP11-598F chr12 | - | 273830   | 275487   | 1101 |
| ENSG000001 | 0        | 0.297015 | -0.41864 | 0.81278  | NA       | RP1-166H1 chr12 | + | 1.21E+08 | 1.21E+08 | 365  |
| ENSG000001 | 0        | 1.684135 | -2.1921  | 0.19067  | NA       | RP11-669N chr12 | + | 1.3E+08  | 1.3E+08  | 1568 |
| ENSG000001 | 3.661688 | 0.594029 | 2.0828   | 0.12208  | 0.19164  | CTD-2017C chr14 | - | 1.02E+08 | 1.02E+08 | 599  |
| ENSG000001 | 4.326234 | 4.539343 | -0.07951 | 0.92658  | 0.95111  | RP11-785F chr12 | - | 11318689 | 11323952 | 385  |
| ENSG000001 | 0.290301 | 0        | 0.4146   | 0.81455  | NA       | PGA5 chr11      | + | 61008514 | 61018920 | 1519 |
| ENSG000001 | 0.342542 | 0        | 0.4146   | 0.81455  | NA       | RP11-436I chr12 | + | 9287680  | 9288187  | 508  |
| ENSG000001 | 0.580602 | 0.891044 | -0.34198 | 0.84667  | NA       | CACNA1C-1 chr12 | + | 2378942  | 2398103  | 622  |
| ENSG000001 | 0.36308  | 0        | 0.4146   | 0.81455  | NA       | RP11-167N chr11 | - | 73706017 | 73707196 | 1180 |
| ENSG000001 | 0        | 1.387121 | -1.6961  | 0.33794  | NA       | AL591069. chr6  | + | 1.61E+08 | 1.61E+08 | 1232 |
| ENSG000001 | 0.36308  | 0        | 0.4146   | 0.81455  | NA       | RP11-881N chr11 | + | 60823209 | 60835007 | 452  |
| ENSG000001 | 0        | 0.357707 | -0.41864 | 0.81278  | NA       | RP11-45F1 chr11 | + | 72062391 | 72064254 | 560  |
| ENSG000001 | 4.107898 | 15.53278 | -1.8138  | 0.00963  | 0.0203   | RP13-941N chr12 | + | 1.22E+08 | 1.22E+08 | 544  |
| ENSG000001 | 6.765104 | 2.087966 | 1.5539   | 0.1366   | 0.20984  | RP11-680F chr11 | - | 93921615 | 93922163 | 549  |
| ENSG000001 | 2.645227 | 1.874334 | 0.40502  | 0.73638  | 0.80552  | RP11-17G1 chr11 | - | 47292208 | 47293661 | 492  |
| ENSG000001 | 1.265686 | 0.715414 | 0.59497  | 0.719    | 0.79207  | RP11-860B chr12 | - | 27932754 | 27934000 | 679  |
| ENSG000001 | 0        | 0.640152 | -0.82869 | 0.63935  | NA       | RP11-695J chr12 | + | 14720684 | 14772689 | 539  |
| ENSG000001 | 0.342542 | 1.029414 | -0.83909 | 0.63652  | NA       | RP11-159N chr11 | + | 1.13E+08 | 1.13E+08 | 524  |
| ENSG000001 | 0.72616  | 0        | 0.85004  | 0.63064  | NA       | STH chr17       | + | 44076616 | 44077060 | 445  |
| ENSG000001 | 64.40525 | 361.9714 | -2.4739  | 2.51E-14 | 1.58E-13 | ZNF253 chr19    | + | 19976695 | 20005483 | 3519 |
| ENSG000001 | 0.653381 | 0.640152 | 0.01046  | 0.99499  | NA       | RP11-697F chr11 | + | 63405149 | 63426434 | 423  |
| ENSG000001 | 10.83013 | 0.343138 | 4.2544   | 0.000402 | 0.001057 | RP11-429A chr12 | + | 5127631  | 5130879  | 604  |
| ENSG000001 | 80.02593 | 25.27506 | 1.6546   | 4.48E-08 | 1.80E-07 | RP11-680F chr15 | + | 29967194 | 29973161 | 2530 |
| ENSG000001 | 0.653381 | 1.40169  | -0.79346 | 0.61259  | 0.70485  | CAPNS2 chr16    | + | 55600584 | 55601599 | 1016 |
| ENSG000001 | 0        | 0.700845 | -0.87835 | 0.62047  | NA       | RP11-804A chr11 | - | 60609279 | 60618554 | 491  |
| ENSG000001 | 0        | 2.261179 | -2.4065  | 0.15834  | 0.23767  | RP11-21A7 chr11 | + | 63803442 | 63871125 | 650  |
| ENSG000001 | 0.290301 | 0.343138 | -0.00202 | 0.99909  | NA       | AC138744. chr17 | + | 62487640 | 62487906 | 267  |
| ENSG000001 | 1.628766 | 0.357707 | 1.626    | 0.30064  | 0.40208  | RP11-214K chr12 | - | 1.24E+08 | 1.24E+08 | 355  |
| ENSG000001 | 1.338465 | 1.188058 | 0.094053 | 0.95085  | 0.96922  | AC007401. chr2  | - | 36816784 | 36818696 | 1911 |
| ENSG000001 | 0        | 1.012429 | -1.3162  | 0.46038  | NA       | RP11-661I chr11 | - | 1.14E+08 | 1.14E+08 | 494  |
| ENSG000001 | 0.580602 | 0        | 0.8036   | 0.6494   | NA       | RP11-664C chr12 | + | 3980900  | 4019504  | 678  |
| ENSG000001 | 0        | 0.343138 | -0.41864 | 0.81278  | NA       | SLC5A8 chr12    | - | 1.02E+08 | 1.02E+08 | 4178 |
| ENSG000001 | 47.66731 | 56.10356 | -0.23635 | 0.41127  | 0.51604  | NOL12 chr22     | + | 38077680 | 38089483 | 2852 |
| ENSG000001 | 20.74748 | 11.74041 | 0.81543  | 0.12287  | 0.19263  | AP001877. chr11 | - | 95556681 | 95557336 | 654  |
| ENSG000001 | 0        | 0.640152 | -0.82869 | 0.63935  | NA       | AC093847. chr4  | + | 92949929 | 92950119 | 189  |
| ENSG000001 | 13.60894 | 1.606458 | 2.8559   | 0.001211 | 0.002964 | RP11-283C chr12 | - | 26278088 | 26279550 | 566  |
| ENSG000001 | 15.5725  | 19.89092 | -0.35704 | 0.56476  | 0.66268  | RP11-17G1 chr11 | - | 47241769 | 47243302 | 610  |
| ENSG000001 | 1.597063 | 1.684135 | -0.04655 | 0.97242  | 0.98479  | RP11-707C chr11 | - | 73632710 | 73633241 | 532  |
| ENSG000001 | 3.246368 | 0.951736 | 1.4754   | 0.25069  | 0.34726  | RP11-986C chr12 | - | 2861763  | 2862298  | 536  |
| ENSG000001 | 0.290301 | 2.779947 | -2.2957  | 0.13236  | 0.20479  | A2ML1-AS2 chr12 | - | 8972412  | 8973309  | 386  |
| ENSG000001 | 3.153865 | 0.654722 | 1.8249   | 0.18328  | 0.26837  | AC090571. chr8  | - | 41818758 | 41820184 | 138  |
| ENSG000001 | 0.342542 | 0        | 0.4146   | 0.81455  | NA       | RP1-102E2 chr12 | + | 6586880  | 6589373  | 2494 |
| ENSG000001 | 2.520208 | 1.340997 | 0.80715  | 0.51192  | 0.61506  | RP11-467L chr11 | - | 61580975 | 61582121 | 574  |
| ENSG000001 | 1.338465 | 0        | 1.8837   | 0.27037  | NA       | RP11-221N chr12 | + | 66038114 | 66057079 | 547  |
| ENSG000001 | 0        | 0.891044 | -1.0625  | 0.54819  | NA       | RP11-81H1 chr12 | + | 68881467 | 68881643 | 177  |
| ENSG000001 | 0        | 0.891044 | -1.0625  | 0.54819  | NA       | RP11-436I chr12 | + | 9280379  | 9281241  | 863  |
| ENSG000001 | 0.290301 | 0.343138 | -0.00202 | 0.99909  | NA       | RP11-783K chr11 | + | 64013436 | 64015689 | 431  |
| ENSG000001 | 0.943682 | 3.662869 | -1.6501  | 0.18078  | 0.2653   | RP13-895J chr12 | + | 1.33E+08 | 1.33E+08 | 1766 |
| ENSG000001 | 0        | 0.343138 | -0.41864 | 0.81278  | NA       | RP11-881N chr11 | - | 60680638 | 60681524 | 405  |
| ENSG000001 | 0        | 0.297015 | -0.41864 | 0.81278  | NA       | RP11-598F chr12 | - | 215690   | 221016   | 586  |
| ENSG000001 | 0.290301 | 0        | 0.4146   | 0.81455  | NA       | RP11-87C1 chr12 | + | 1.22E+08 | 1.22E+08 | 1361 |
| ENSG000001 | 5.197952 | 2.621302 | 0.87996  | 0.38306  | 0.48714  | RP11-417L chr12 | + | 1.32E+08 | 1.32E+08 | 283  |
| ENSG000001 | 17.71944 | 10.23519 | 0.7548   | 0.21905  | 0.31073  | RP11-273B chr12 | - | 7281675  | 7283794  | 749  |
| ENSG000001 | 0.342542 | 2.171348 | -1.8493  | 0.25398  | 0.35102  | SNRPEP2 chr9    | - | 6748703  | 6748981  | 279  |
| ENSG000001 | 0        | 14.01857 | -5.423   | 8.55E-06 | 2.77E-05 | RP11-320N chr12 | + | 4130143  | 4135824  | 542  |
| ENSG000001 | 0.36308  | 0        | 0.4146   | 0.81455  | NA       | LINC00508 chr12 | - | 1.28E+08 | 1.28E+08 | 194  |
| ENSG000001 | 1.669842 | 0.700845 | 0.95926  | 0.53255  | 0.63365  | AP000462. chr11 | + | 1.15E+08 | 1.15E+08 | 330  |
| ENSG000001 | 17.82393 | 14.45483 | 0.29217  | 0.57706  | 0.67374  | RP11-359J chr12 | - | 22613453 | 22616848 | 738  |

|            |          |          |          |          |          |                   |   |          |          |      |
|------------|----------|----------|----------|----------|----------|-------------------|---|----------|----------|------|
| ENSG000001 | 0.342542 | 1.66715  | -1.521   | 0.35886  | 0.46305  | RP11-525E chr12   | - | 9658943  | 9661036  | 2042 |
| ENSG000001 | 4.00423  | 4.706852 | -0.21773 | 0.8032   | 0.86085  | TAS2R18 chr12     | - | 11311384 | 11312293 | 910  |
| ENSG000001 | 0        | 0.357707 | -0.41864 | 0.81278  | NA       | RP11-551L chr12   | + | 31165437 | 31168601 | 348  |
| ENSG000001 | 0.290301 | 0.297015 | -0.00202 | 0.99909  | NA       | RP11-428C chr12   | + | 32106823 | 32108202 | 1380 |
| ENSG000001 | 0        | 1.326428 | -1.6486  | 0.3523   | NA       | RP11-234B chr12   | - | 4915708  | 4917807  | 449  |
| ENSG000001 | 0        | 2.367995 | -2.6905  | 0.093451 | 0.15263  | RP11-114G chr12   | + | 22852793 | 23327057 | 1920 |
| ENSG000001 | 0        | 6.267186 | -4.2087  | 0.002056 | 0.004856 | AP000438. chr11   | + | 62677018 | 62685833 | 749  |
| ENSG000001 | 0        | 1.248751 | -1.5848  | 0.37202  | NA       | RP11-180N chr12   | + | 12821916 | 12838009 | 241  |
| ENSG000001 | 0        | 0.594029 | -0.81444 | 0.64499  | NA       | GPR142 chr17      | + | 72363546 | 72368761 | 1608 |
| ENSG000001 | 0        | 3.9623   | -3.5074  | 0.016856 | 0.033786 | HP chr16          | + | 72088491 | 72094954 | 3024 |
| ENSG000001 | 0        | 2.012704 | -2.1825  | 0.20921  | 0.29918  | RP11-268P chr12   | - | 22762162 | 22777949 | 862  |
| ENSG000001 | 63.15506 | 30.07341 | 1.0558   | 0.000718 | 0.00182  | RP11-705C chr12   | + | 9811163  | 9814681  | 2508 |
| ENSG000001 | 1.068702 | 0.686276 | 0.41528  | 0.80556  | NA       | RP13-200J. chr12  | + | 27649870 | 27651522 | 1418 |
| ENSG000001 | 6.681161 | 0.640152 | 2.928    | 0.010884 | 0.022699 | RP11-800A chr11   | - | 73018280 | 73020406 | 1695 |
| ENSG000001 | 0.290301 | 0        | 0.4146   | 0.81455  | NA       | AC005477. chr14   | - | 72456191 | 72458326 | 2136 |
| ENSG000001 | 8.414408 | 0        | 4.6614   | 0.00033  | 0.000877 | RP11-993B chr12   | + | 28111450 | 28122746 | 792  |
| ENSG000001 | 0        | 0.700845 | -0.87835 | 0.62047  | NA       | RP11-137N chr11   | + | 18686597 | 18687095 | 499  |
| ENSG000001 | 0.36308  | 0.297015 | -0.00205 | 0.99908  | NA       | RP11-486F chr2    | + | 2E+08    | 2E+08    | 831  |
| ENSG000001 | 0        | 0.951736 | -1.2555  | 0.48145  | NA       | RP11-476N chr12   | + | 3476999  | 3480512  | 515  |
| ENSG000001 | 1.359003 | 0.357707 | 1.3815   | 0.39154  | NA       | RP11-881N chr11   | + | 60674261 | 60677214 | 810  |
| ENSG000001 | 0        | 0.297015 | -0.41864 | 0.81278  | NA       | Z98941.1 chr12    | + | 1.22E+08 | 1.22E+08 | 100  |
| ENSG000001 | 0        | 0.343138 | -0.41864 | 0.81278  | NA       | RP11-966I. chr14  | - | 29252697 | 29254993 | 1655 |
| ENSG000001 | 3.807246 | 1.234181 | 1.3431   | 0.28125  | 0.38231  | RP11-864K. chr11  | + | 62313471 | 62315171 | 391  |
| ENSG000001 | 0        | 0.343138 | -0.41864 | 0.81278  | NA       | RP11-266C chr15   | + | 93855786 | 94112712 | 2012 |
| ENSG000001 | 0        | 0.343138 | -0.41864 | 0.81278  | NA       | RP4-809F1 chr12   | + | 1.27E+08 | 1.27E+08 | 775  |
| ENSG000001 | 0        | 0.357707 | -0.41864 | 0.81278  | NA       | AP000797. chr11   | + | 1.16E+08 | 1.16E+08 | 548  |
| ENSG000001 | 0        | 0.297015 | -0.41864 | 0.81278  | NA       | RP11-783K chr11   | + | 64059194 | 64072241 | 2733 |
| ENSG000001 | 0.870904 | 0.98329  | -0.09044 | 0.95689  | NA       | RP11-667N chr11   | + | 1.14E+08 | 1.14E+08 | 335  |
| ENSG000001 | 1.451506 | 1.309443 | 0.1301   | 0.93534  | 0.95756  | RPL29P33 chr19    | - | 34787181 | 34787645 | 465  |
| ENSG000001 | 0        | 0.715414 | -0.84936 | 0.6309   | NA       | RP3-461F1 chr12   | - | 7148460  | 7148945  | 486  |
| ENSG000001 | 0        | 0.715414 | -0.84936 | 0.6309   | NA       | RP11-123C chr12   | - | 67429288 | 67490186 | 775  |
| ENSG000001 | 0        | 0.594029 | -0.81444 | 0.64499  | NA       | U47924.27 chr12   | + | 7072409  | 7073610  | 350  |
| ENSG000001 | 4.968451 | 19.674   | -1.9236  | 0.004036 | 0.009112 | RP11-783K chr11   | - | 64014411 | 64016966 | 853  |
| ENSG000001 | 3.713929 | 6.079404 | -0.6724  | 0.43482  | 0.54035  | PNMA6D chrX       | - | 1.52E+08 | 1.52E+08 | 1479 |
| ENSG000001 | 314.7379 | 919.2211 | -1.5444  | 4.22E-36 | 6.61E-35 | KIAA1147 chr7     | - | 1.41E+08 | 1.41E+08 | 7296 |
| ENSG000001 | 0        | 0.997859 | -1.5018  | 0.39072  | NA       | RP11-501I. chr12  | + | 32160061 | 32160369 | 309  |
| ENSG000001 | 0        | 0.594029 | -0.81444 | 0.64499  | NA       | RP11-364C chr12   | - | 1.19E+08 | 1.2E+08  | 607  |
| ENSG000001 | 0        | 0.686276 | -0.84936 | 0.6309   | NA       | RP11-450K chr12   | + | 1.23E+08 | 1.23E+08 | 1745 |
| ENSG000001 | 0        | 0.343138 | -0.41864 | 0.81278  | NA       | LRRC37A1.3 chr11  | + | 1.14E+08 | 1.14E+08 | 287  |
| ENSG000001 | 2264.363 | 3383.36  | -0.57908 | 3.00E-09 | 1.33E-08 | LSM14A chr19      | + | 34663409 | 34720420 | 3651 |
| ENSG000001 | 9.315223 | 8.597179 | 0.094822 | 0.90292  | 0.93282  | NHLRC4 chr16      | + | 616996   | 619495   | 2097 |
| ENSG000001 | 2.261609 | 3.899191 | -0.70962 | 0.49137  | 0.59535  | RP11-129B chr12   | + | 95494307 | 95494821 | 515  |
| ENSG000001 | 31.53816 | 43.62571 | -0.46094 | 0.32282  | 0.42571  | RRN3P3 chr16      | - | 22430090 | 22449036 | 3269 |
| ENSG000001 | 0.36308  | 0        | 0.4146   | 0.81455  | NA       | RP11-641A chr12   | - | 53145762 | 53147605 | 433  |
| ENSG000001 | 5.934463 | 0        | 4.1456   | 0.00233  | 0.005453 | CLLU1 chr12       | + | 92815307 | 92824778 | 3897 |
| ENSG000001 | 0.923144 | 0        | 1.223    | 0.49292  | NA       | RP11-2A1.1 chr12  | + | 42305058 | 42306014 | 465  |
| ENSG000001 | 7.377409 | 17.04861 | -1.163   | 0.10115  | 0.16301  | RP11-320N chr2    | + | 10588820 | 10591453 | 1737 |
| ENSG000001 | 0        | 1.073121 | -1.1788  | 0.50551  | NA       | TAS2R38 chr7      | - | 1.42E+08 | 1.42E+08 | 1143 |
| ENSG000001 | 0.870904 | 1.294874 | -0.38993 | 0.80097  | 0.85906  | RP11-320P chr12   | + | 70574118 | 70595784 | 578  |
| ENSG000001 | 0        | 0.297015 | -0.41864 | 0.81278  | NA       | RP11-554C chr12   | - | 1.08E+08 | 1.08E+08 | 452  |
| ENSG000001 | 0        | 13.22548 | -5.3542  | 1.09E-05 | 3.47E-05 | PGAM1P5 chr12     | + | 96043031 | 96067775 | 2148 |
| ENSG000001 | 166.2711 | 1786.322 | -3.4143  | 2.01E-59 | 5.77E-58 | RP11-701F chr15   | + | 25277020 | 25281637 | 4618 |
| ENSG000001 | 18.64242 | 0.357707 | 4.9709   | 1.66E-05 | 5.20E-05 | RP11-13A1 chr12   | - | 89441964 | 89703330 | 599  |
| ENSG000001 | 0        | 1.058552 | -1.361   | 0.4451   | NA       | RP11-58A1 chr12   | + | 58360841 | 58362182 | 633  |
| ENSG000001 | 39.26488 | 99.34237 | -1.3293  | 7.48E-06 | 2.44E-05 | TMPO-AS1 chr12    | - | 98906751 | 98910200 | 3357 |
| ENSG000001 | 0.342542 | 0.297015 | -0.00202 | 0.99909  | NA       | RP11-117N chr12   | - | 96780596 | 96780972 | 377  |
| ENSG000001 | 3.620613 | 3.443532 | 0.083778 | 0.93268  | 0.95581  | RP11-996F chr12   | - | 29433351 | 29470781 | 2380 |
| ENSG000001 | 3.059734 | 0        | 2.8383   | 0.087381 | 0.14416  | hsa-mir-10: chr17 | - | 46656992 | 46659621 | 2630 |
| ENSG000001 | 25.12416 | 0        | 6.2709   | 4.76E-08 | 1.91E-07 | RP1-170O1 chr7    | - | 27203154 | 27219632 | 765  |
| ENSG000001 | 0        | 2.010288 | -2.4674  | 0.13027  | 0.202    | RP11-626P chr14   | + | 27278623 | 27305664 | 574  |
| ENSG000001 | 0.580602 | 2.757256 | -1.6975  | 0.23786  | 0.33231  | RP11-390N chr12   | - | 79354038 | 79439424 | 716  |
| ENSG000001 | 2.105701 | 0        | 2.2286   | 0.1988   | 0.28717  | RP11-567C chr12   | + | 90501516 | 90506556 | 926  |
| ENSG000001 | 0.342542 | 0.98329  | -0.93492 | 0.58786  | NA       | RP11-603K chr12   | + | 93277549 | 93278476 | 928  |
| ENSG000001 | 0.342542 | 0        | 0.4146   | 0.81455  | NA       | RP11-850P chr12   | + | 94208912 | 94209885 | 434  |
| ENSG000001 | 0.36308  | 0.357707 | -0.00212 | 0.99905  | NA       | RP11-512N chr12   | - | 1.02E+08 | 1.02E+08 | 564  |

|            |          |          |          |          |          |            |       |   |          |          |      |
|------------|----------|----------|----------|----------|----------|------------|-------|---|----------|----------|------|
| ENSG000001 | 0.653381 | 0        | 0.82678  | 0.64037  | NA       | LIMS1      | chr2  | - | 1.11E+08 | 1.11E+08 | 3202 |
| ENSG000001 | 245.9898 | 249.4502 | -0.01786 | 0.92887  | 0.9529   | GATC       | chr12 | + | 1.21E+08 | 1.21E+08 | 2081 |
| ENSG000001 | 12.3981  | 0        | 5.2453   | 2.01E-05 | 6.24E-05 | RP11-54A9  | chr12 | + | 76653619 | 76698911 | 1083 |
| ENSG000001 | 1.048164 | 0        | 1.348    | 0.44949  | NA       | RP11-136F  | chr12 | - | 78524117 | 78524784 | 668  |
| ENSG000001 | 2.177666 | 1.058552 | 0.85332  | 0.55917  | 0.65795  | RP11-689B  | chr12 | + | 1.09E+08 | 1.09E+08 | 600  |
| ENSG000001 | 0.290301 | 2.010288 | -1.8931  | 0.2202   | 0.31208  | RP11-554E  | chr12 | + | 1.02E+08 | 1.02E+08 | 374  |
| ENSG000001 | 1.068702 | 0.686276 | 0.41528  | 0.80556  | NA       | RP11-328C  | chr12 | + | 42853168 | 42859930 | 2791 |
| ENSG000001 | 0.36308  | 0.700845 | -0.575   | 0.7429   | NA       | RP11-438N  | chr12 | - | 1.14E+08 | 1.14E+08 | 266  |
| ENSG000001 | 0.36308  | 0.357707 | -0.00212 | 0.99905  | NA       | RP11-630C  | chr12 | - | 42223700 | 42326394 | 499  |
| ENSG000001 | 7.095668 | 2.370411 | 1.4744   | 0.12587  | 0.19647  | RP11-2482  | chr12 | - | 92378756 | 92536690 | 2201 |
| ENSG000001 | 3.910914 | 5.938617 | -0.55435 | 0.55166  | 0.65125  | RP11-133N  | chr12 | + | 49988931 | 49989471 | 541  |
| ENSG000001 | 3.829576 | 5.064559 | -0.37379 | 0.72696  | 0.79815  | RP11-416A  | chr12 | - | 51518411 | 51519164 | 754  |
| ENSG000001 | 0.632843 | 2.307303 | -1.4851  | 0.2859   | 0.38738  | RP11-486A  | chr12 | - | 93710911 | 93771512 | 814  |
| ENSG000001 | 0.342542 | 0.343138 | -0.00208 | 0.99906  | NA       | RP3-405J1  | chr12 | + | 50613387 | 50623767 | 325  |
| ENSG000001 | 0        | 1.340997 | -1.8899  | 0.26871  | NA       | RP11-946L  | chr12 | - | 29296129 | 29301608 | 593  |
| ENSG000001 | 0.995923 | 0        | 1.4959   | 0.39264  | NA       | RP11-767L  | chr12 | - | 58959743 | 59175529 | 1975 |
| ENSG000001 | 15.81154 | 26.98833 | -0.75548 | 0.10352  | 0.16617  | RP11-96H1  | chr12 | + | 46777462 | 46850051 | 829  |
| ENSG000001 | 0.36308  | 0.357707 | -0.00212 | 0.99905  | NA       | MIR3179-1  | chr16 | + | 14995356 | 14996031 | 676  |
| ENSG000001 | 0        | 0.297015 | -0.41864 | 0.81278  | NA       | CTD-2021F  | chr12 | - | 71401553 | 71425863 | 541  |
| ENSG000001 | 395.7189 | 214.7654 | 0.88045  | 5.99E-06 | 1.98E-05 | ZNF271     | chr18 | + | 32870246 | 32890730 | 5124 |
| ENSG000001 | 17.06525 | 43.16206 | -1.3053  | 0.006724 | 0.014597 | RP11-521B  | chr14 | - | 1.06E+08 | 1.06E+08 | 445  |
| ENSG000001 | 2.137404 | 0.997859 | 0.8695   | 0.53365  | 0.63456  | KIRREL3-AS | chr11 | + | 1.26E+08 | 1.26E+08 | 586  |
| ENSG000001 | 0.653381 | 0.343138 | 0.51863  | 0.76794  | NA       | RP11-317N  | chr14 | + | 36343063 | 36344509 | 601  |
| ENSG000001 | 0        | 1.309443 | -1.6539  | 0.35008  | NA       | RP11-164F  | chr14 | + | 96178084 | 96223993 | 2738 |
| ENSG000001 | 7.448396 | 5.926464 | 0.3003   | 0.68975  | 0.76866  | RP11-231L  | chr12 | - | 1.17E+08 | 1.17E+08 | 4196 |
| ENSG000001 | 1.722083 | 0        | 2.21     | 0.18654  | NA       | RP11-1060  | chr12 | - | 94288741 | 94337379 | 540  |
| ENSG000001 | 4.637074 | 4.556329 | 0.013046 | 0.98795  | 0.99319  | RP11-298L  | chr14 | + | 23398818 | 23424771 | 591  |
| ENSG000001 | 0        | 0.343138 | -0.41864 | 0.81278  | NA       | RP11-316A  | chr12 | + | 60486645 | 60489632 | 769  |
| ENSG000001 | 0        | 5.04999  | -3.9028  | 0.00513  | 0.01141  | RP11-701B  | chr12 | + | 85065377 | 85065805 | 429  |
| ENSG000001 | 11.8492  | 5.840665 | 0.9804   | 0.20292  | 0.29179  | RP3-405J1  | chr12 | - | 50579363 | 50585146 | 4713 |
| ENSG000001 | 0        | 0.700845 | -0.87835 | 0.62047  | NA       | FAHD2P1    | chr12 | + | 71065698 | 71066636 | 939  |
| ENSG000001 | 20.80134 | 13.49577 | 0.59984  | 0.30858  | 0.41026  | RP11-977C  | chr12 | + | 56693926 | 56708592 | 437  |
| ENSG000001 | 0.72616  | 0.357707 | 0.52227  | 0.76959  | NA       | RP11-317N  | chr14 | + | 36350207 | 36350915 | 709  |
| ENSG000001 | 369.4871 | 25.69587 | 3.8384   | 3.94E-60 | 1.15E-58 | ZBED6      | chr1  | + | 2.04E+08 | 2.04E+08 | 4250 |
| ENSG000001 | 0        | 0.357707 | -0.41864 | 0.81278  | NA       | RP11-478B  | chr12 | + | 45444684 | 45496890 | 499  |
| ENSG000001 | 0.72616  | 0        | 0.85004  | 0.63064  | NA       | RP11-511B  | chr12 | - | 93397191 | 93609455 | 721  |
| ENSG000001 | 0        | 0.297015 | -0.41864 | 0.81278  | NA       | RP11-650K  | chr12 | + | 1.04E+08 | 1.04E+08 | 674  |
| ENSG000001 | 0        | 0.654722 | -0.83442 | 0.63731  | NA       | RP11-478B  | chr12 | - | 45457256 | 45459134 | 1879 |
| ENSG000001 | 0        | 4.242329 | -3.6422  | 0.011122 | 0.023147 | MGAM       | chr7  | + | 1.42E+08 | 1.42E+08 | 9172 |
| ENSG000001 | 66.48618 | 34.5148  | 0.93414  | 0.001595 | 0.00383  | RP11-983P  | chr12 | - | 53408380 | 53448222 | 2863 |
| ENSG000001 | 0        | 1.029414 | -1.1526  | 0.51496  | NA       | CRIP1      | chr14 | + | 1.06E+08 | 1.06E+08 | 980  |
| ENSG000001 | 0        | 2.278164 | -2.6634  | 0.096176 | 0.1563   | RP11-511B  | chr12 | + | 93392994 | 93413596 | 898  |
| ENSG000001 | 0.290301 | 0        | 0.4146   | 0.81455  | NA       | RP11-386C  | chr12 | + | 49483991 | 49487095 | 717  |
| ENSG000001 | 0        | 0.297015 | -0.41864 | 0.81278  | NA       | RP11-616L  | chr12 | - | 55516452 | 55517904 | 1453 |
| ENSG000001 | 17.99939 | 7.8388   | 1.1769   | 0.049904 | 0.088811 | RP11-631N  | chr12 | + | 62996532 | 63007855 | 555  |
| ENSG000001 | 0.290301 | 0.951736 | -0.90191 | 0.60254  | NA       | RP11-780K  | chr12 | + | 1.14E+08 | 1.14E+08 | 570  |
| ENSG000001 | 20.11447 | 13.04099 | 0.59806  | 0.25754  | 0.35516  | FNTB       | chr14 | + | 65453438 | 65529368 | 2834 |
| ENSG000001 | 0.290301 | 0.700845 | -0.56655 | 0.74739  | NA       | RP11-438E  | chr12 | + | 45838549 | 45839221 | 673  |
| ENSG000001 | 1.971308 | 3.24447  | -0.65059 | 0.54882  | 0.64874  | RP11-328C  | chr12 | - | 42825467 | 42827159 | 775  |
| ENSG000001 | 1.265686 | 0.654722 | 0.70633  | 0.65335  | 0.73847  | RP11-644F  | chr12 | - | 56126150 | 56126432 | 283  |
| ENSG000001 | 2.282147 | 0        | 2.6902   | 0.089639 | 0.14723  | RP11-153F  | chr12 | + | 53231187 | 53231523 | 337  |
| ENSG000001 | 0.705622 | 1.012429 | -0.38881 | 0.80945  | NA       | RP11-762L  | chr12 | - | 56151059 | 56221330 | 1807 |
| ENSG000001 | 0        | 3.183777 | -3.1728  | 0.037267 | 0.068902 | MIR3180-4  | chr16 | + | 15248760 | 15250877 | 2118 |
| ENSG000001 | 0        | 1.309443 | -1.6539  | 0.35008  | NA       | RP11-554C  | chr12 | - | 1.08E+08 | 1.08E+08 | 731  |
| ENSG000001 | 0.342542 | 0        | 0.4146   | 0.81455  | NA       | CTD-2547E  | chr16 | + | 21358460 | 21363459 | 255  |
| ENSG000001 | 13.42491 | 11.82137 | 0.17821  | 0.75317  | 0.81993  | RP11-2H8L  | chr12 | - | 72187635 | 72193407 | 1431 |
| ENSG000001 | 0.342542 | 0        | 0.4146   | 0.81455  | NA       | RP11-288C  | chr12 | - | 80849275 | 80852604 | 522  |
| ENSG000001 | 0        | 1.652581 | -2.1974  | 0.1871   | NA       | RP11-554C  | chr12 | + | 1.08E+08 | 1.08E+08 | 178  |
| ENSG000001 | 0.705622 | 0        | 0.8807   | 0.6196   | NA       | RP11-263K  | chr12 | + | 82906456 | 82909596 | 3141 |
| ENSG000001 | 5.33153  | 4.73599  | 0.16272  | 0.85998  | 0.90188  | RP1-197B1  | chr12 | + | 48099868 | 48136077 | 3299 |
| ENSG000001 | 5.549053 | 4.098254 | 0.42327  | 0.64132  | 0.72831  | RP11-114F  | chr12 | + | 1.06E+08 | 1.06E+08 | 753  |
| ENSG000001 | 0.632843 | 0.951736 | -0.41411 | 0.79829  | NA       | RP11-150C  | chr12 | + | 59314420 | 59458019 | 555  |
| ENSG000001 | 3.568372 | 77.18644 | -4.3246  | 1.68E-17 | 1.26E-16 | ZNF878     | chr19 | - | 12154620 | 12167127 | 1737 |
| ENSG000001 | 0        | 0.297015 | -0.41864 | 0.81278  | NA       | RP11-603J  | chr12 | - | 56423433 | 56435590 | 300  |
| ENSG000001 | 0        | 0.594029 | -0.81444 | 0.64499  | NA       | CTD-2021F  | chr12 | - | 71427902 | 71498306 | 544  |

|            |          |          |          |          |          |                 |   |          |          |      |
|------------|----------|----------|----------|----------|----------|-----------------|---|----------|----------|------|
| ENSG000001 | 0.342542 | 1.669566 | -1.4973  | 0.37069  | 0.4752   | RP11-310L chr12 | + | 29672664 | 29682907 | 349  |
| ENSG000001 | 0        | 0.640152 | -0.82869 | 0.63935  | NA       | RP11-473C chr12 | + | 99325460 | 99370434 | 512  |
| ENSG000001 | 0        | 0.891044 | -1.0625  | 0.54819  | NA       | RP11-161F chr12 | - | 49836207 | 49836435 | 229  |
| ENSG000001 | 0.36308  | 0.640152 | -0.51156 | 0.77091  | NA       | RP11-331C chr12 | - | 1.18E+08 | 1.18E+08 | 324  |
| ENSG000001 | 1.431782 | 0.357707 | 1.3137   | 0.43706  | NA       | RP11-121G chr12 | + | 81664454 | 81706201 | 1080 |
| ENSG000001 | 1.741807 | 297.7681 | -6.8076  | 2.40E-14 | 1.51E-13 | RP11-359A chr12 | + | 79933983 | 79944315 | 816  |
| ENSG000001 | 5.995263 | 13.67785 | -1.1165  | 0.12298  | 0.19278  | RP11-983P chr12 | + | 53405888 | 53407705 | 536  |
| ENSG000001 | 0        | 0.357707 | -0.41864 | 0.81278  | NA       | RP11-139B chr12 | - | 1.15E+08 | 1.15E+08 | 474  |
| ENSG000001 | 0.36308  | 0        | 0.4146   | 0.81455  | NA       | RP11-753F chr12 | + | 54822087 | 54823187 | 454  |
| ENSG000001 | 0.923144 | 22.7744  | -4.2278  | 1.98E-06 | 6.89E-06 | RP11-175P chr12 | - | 1.01E+08 | 1.01E+08 | 928  |
| ENSG000001 | 1.338465 | 3.198346 | -1.114   | 0.35049  | 0.45489  | RP11-474P chr12 | - | 46778016 | 46780774 | 562  |
| ENSG000001 | 13.96607 | 13.13485 | 0.081793 | 0.90459  | 0.93411  | RP11-585P chr12 | - | 75877904 | 75883600 | 812  |
| ENSG000001 | 7.426231 | 0.997859 | 2.5871   | 0.020047 | 0.039548 | RP11-571A chr12 | - | 58117544 | 58119448 | 1795 |
| ENSG000001 | 0        | 0.357707 | -0.41864 | 0.81278  | NA       | RP11-231C chr16 | + | 29490200 | 29493912 | 259  |
| ENSG000001 | 0.290301 | 0.654722 | -0.51764 | 0.76892  | NA       | RP11-956E chr12 | + | 69843250 | 69854504 | 423  |
| ENSG000001 | 21.77592 | 15.95044 | 0.42444  | 0.419    | 0.52433  | RP11-762L chr12 | - | 56155334 | 56156412 | 529  |
| ENSG000001 | 0.342542 | 0        | 0.4146   | 0.81455  | NA       | RP11-609L chr12 | - | 43009305 | 43040300 | 1212 |
| ENSG000001 | 9.015549 | 10.08299 | -0.15528 | 0.80997  | 0.86609  | RP11-278C chr12 | - | 32879317 | 32880321 | 1005 |
| ENSG000001 | 0.580602 | 1.40169  | -0.82024 | 0.6196   | 0.71057  | RP11-486A chr12 | + | 93708585 | 93709717 | 1133 |
| ENSG000001 | 0.653381 | 0.297015 | 0.51304  | 0.77085  | NA       | RP11-677C chr18 | - | 11619508 | 11639698 | 1129 |
| ENSG000001 | 1.939605 | 0        | 2.4257   | 0.13778  | 0.21116  | RP11-498A chr12 | - | 72102951 | 72104154 | 577  |
| ENSG000001 | 0.36308  | 0        | 0.4146   | 0.81455  | NA       | RP11-203J chr9  | - | 1.31E+08 | 1.31E+08 | 1071 |
| ENSG000001 | 0.36308  | 0        | 0.4146   | 0.81455  | NA       | RP11-20E2 chr12 | + | 76956074 | 77009211 | 250  |
| ENSG000001 | 1.794048 | 2.947455 | -0.58102 | 0.63463  | 0.72319  | RP3-405J1 chr12 | - | 50611445 | 50612126 | 354  |
| ENSG000001 | 1.939605 | 1.531196 | 0.25973  | 0.84502  | 0.89135  | RP11-834C chr12 | - | 54555849 | 54558236 | 754  |
| ENSG000001 | 0        | 1.606458 | -1.9287  | 0.27074  | NA       | HSPA8P14 chr12  | + | 1.12E+08 | 1.12E+08 | 1805 |
| ENSG000001 | 0.923144 | 0.343138 | 0.88162  | 0.61011  | NA       | OR7E47P chr12   | + | 52473480 | 52502045 | 1422 |
| ENSG000001 | 2.572449 | 6.116663 | -1.1577  | 0.20305  | 0.29188  | RP11-321F chr12 | - | 1.02E+08 | 1.02E+08 | 379  |
| ENSG000001 | 0.685084 | 0.357707 | 0.4822   | 0.78686  | NA       | RP11-144F chr12 | - | 1.07E+08 | 1.07E+08 | 570  |
| ENSG000001 | 0        | 0.297015 | -0.41864 | 0.81278  | NA       | RP11-797A chr12 | + | 1.07E+08 | 1.08E+08 | 502  |
| ENSG000001 | 1.503747 | 0.343138 | 1.4063   | 0.40279  | NA       | RP11-793F chr12 | + | 53907768 | 53911392 | 2297 |
| ENSG000001 | 16.9624  | 4.600036 | 1.8122   | 0.004557 | 0.010211 | RP11-44N2 chr14 | + | 1.06E+08 | 1.06E+08 | 965  |
| ENSG000001 | 4.419551 | 5.096113 | -0.19598 | 0.8225   | 0.87489  | RP11-84G2 chr12 | + | 80328681 | 80334448 | 1190 |
| ENSG000001 | 0.580602 | 1.012429 | -0.48451 | 0.77505  | NA       | RP11-863F chr12 | - | 62876129 | 62878712 | 848  |
| ENSG000001 | 0.36308  | 0.357707 | -0.00212 | 0.99905  | NA       | GSTP1P1 chr12   | + | 56294084 | 56294402 | 319  |
| ENSG000001 | 0.36308  | 0        | 0.4146   | 0.81455  | NA       | RP11-133A chr12 | + | 50103020 | 50103119 | 100  |
| ENSG000001 | 3.733653 | 1.248751 | 1.3438   | 0.27626  | 0.37651  | RP11-496L chr14 | - | 19719545 | 19720589 | 1045 |
| ENSG000001 | 0.72616  | 1.638012 | -0.93449 | 0.53888  | 0.63949  | RP11-153A chr12 | + | 56904786 | 56906487 | 1702 |
| ENSG000001 | 1.338465 | 0.297015 | 1.3634   | 0.39966  | NA       | RP11-128P chr12 | - | 1.08E+08 | 1.08E+08 | 507  |
| ENSG000001 | 0        | 0.594029 | -0.81444 | 0.64499  | NA       | RP11-129J chr10 | - | 1.01E+08 | 1.01E+08 | 766  |
| ENSG000001 | 0        | 0.297015 | -0.41864 | 0.81278  | NA       | LINC00609 chr14 | + | 36539633 | 36634494 | 583  |
| ENSG000001 | 2.012384 | 7.968307 | -1.8615  | 0.038435 | 0.070852 | ZNF625 chr19    | - | 12251032 | 12267546 | 1678 |
| ENSG000001 | 31.5878  | 4.290868 | 2.7898   | 5.27E-06 | 1.75E-05 | GALNT4 chr12    | - | 89913185 | 89918583 | 5399 |
| ENSG000001 | 0.342542 | 1.248751 | -1.1955  | 0.48202  | NA       | RP3-473L9 chr12 | + | 1.12E+08 | 1.12E+08 | 314  |
| ENSG000001 | 4.337399 | 13.75882 | -1.6     | 0.030543 | 0.057622 | RP11-968A chr12 | + | 54656399 | 54672847 | 735  |
| ENSG000001 | 0        | 0.357707 | -0.41864 | 0.81278  | NA       | RP11-677C chr12 | + | 29542227 | 29640421 | 963  |
| ENSG000001 | 0.632843 | 0.343138 | 0.49756  | 0.77728  | NA       | RP11-359A chr12 | - | 79893899 | 79894467 | 243  |
| ENSG000001 | 5.579942 | 3.259039 | 0.72402  | 0.46098  | 0.56623  | RP11-680A chr12 | - | 53692449 | 53694098 | 637  |
| ENSG000001 | 0.36308  | 0        | 0.4146   | 0.81455  | NA       | RP11-185A chr12 | + | 1.07E+08 | 1.07E+08 | 2434 |
| ENSG000001 | 2.188831 | 1.964165 | 0.14067  | 0.91755  | 0.94433  | RP11-320P chr12 | - | 70612912 | 70615642 | 629  |
| ENSG000001 | 371.3409 | 243.7196 | 0.60515  | 0.001971 | 0.00467  | RP11-349A chr14 | - | 58732083 | 58764852 | 2475 |
| ENSG000001 | 0        | 0.357707 | -0.41864 | 0.81278  | NA       | RP11-128M chr12 | - | 1.12E+08 | 1.12E+08 | 247  |
| ENSG000001 | 8.112942 | 0        | 4.6086   | 0.000404 | 0.001062 | RP11-13A1 chr12 | + | 89421534 | 89422299 | 219  |
| ENSG000001 | 0        | 7.850953 | -4.5139  | 0.000754 | 0.001905 | RP11-1103 chr14 | - | 30907198 | 31042835 | 609  |
| ENSG000001 | 0        | 0.997859 | -1.5018  | 0.39072  | NA       | CTB-31N19 chr16 | - | 21544266 | 21561694 | 576  |
| ENSG000001 | 0.36308  | 0        | 0.4146   | 0.81455  | NA       | RP11-474B chr12 | - | 1.06E+08 | 1.06E+08 | 549  |
| ENSG000001 | 32.79268 | 221.7327 | -2.7473  | 1.03E-28 | 1.24E-27 | RP11-701F chr15 | - | 25272883 | 25277194 | 427  |
| ENSG000001 | 0        | 1.606458 | -1.9287  | 0.27074  | NA       | RP11-497C chr12 | + | 1.17E+08 | 1.17E+08 | 366  |
| ENSG000001 | 0.705622 | 1.012429 | -0.38881 | 0.80945  | NA       | RP11-579C chr12 | + | 49182930 | 49184318 | 473  |
| ENSG000001 | 5.685237 | 0        | 4.0877   | 0.002724 | 0.006323 | EIF4A1P12 chr14 | + | 29062985 | 29063125 | 141  |
| ENSG000001 | 0.36308  | 0        | 0.4146   | 0.81455  | NA       | RSL24D1P5 chr12 | - | 63449055 | 63449545 | 491  |
| ENSG000001 | 1.317927 | 0        | 1.6383   | 0.35541  | NA       | CBX3P5 chr12    | - | 95680094 | 95680614 | 521  |
| ENSG000001 | 0        | 0.951736 | -1.2555  | 0.48145  | NA       | RP3-416H2 chr12 | - | 52638832 | 52641232 | 1693 |
| ENSG000001 | 3.445958 | 0.343138 | 2.3358   | 0.14436  | 0.2196   | RP11-76E1 chr12 | + | 42680713 | 42682362 | 1650 |
| ENSG000001 | 0        | 0.686276 | -0.84936 | 0.6309   | NA       | RP11-367C chr12 | + | 41122613 | 41123699 | 1087 |

|            |          |          |          |          |          |                  |   |          |          |       |
|------------|----------|----------|----------|----------|----------|------------------|---|----------|----------|-------|
| ENSG000001 | 1.048164 | 5.9176   | -2.2039  | 0.068174 | 0.11644  | RP11-341C chr12  | - | 1.04E+08 | 1.04E+08 | 738   |
| ENSG000001 | 1.068702 | 1.340997 | -0.28726 | 0.84245  | 0.8896   | RP11-175P chr12  | + | 1.01E+08 | 1.01E+08 | 418   |
| ENSG000001 | 89.34196 | 10.82593 | 3.0035   | 3.59E-16 | 2.51E-15 | RP11-620J chr12  | - | 58325311 | 58329958 | 759   |
| ENSG000001 | 28.00068 | 2.292733 | 3.4609   | 3.73E-07 | 1.39E-06 | LBX2-AS1 chr2    | + | 74729722 | 74731805 | 2083  |
| ENSG000001 | 681.3614 | 187.7866 | 1.8511   | 1.84E-22 | 1.73E-21 | PRR24 chr19      | + | 47778142 | 47778979 | 838   |
| ENSG000001 | 0.705622 | 0.357707 | 0.57557  | 0.74268  | NA       | RP11-482C chr12  | - | 1.07E+08 | 1.07E+08 | 863   |
| ENSG000001 | 0.653381 | 0.297015 | 0.51304  | 0.77085  | NA       | RP11-256L chr12  | + | 96419101 | 96421749 | 656   |
| ENSG000001 | 9.481318 | 4.502084 | 1.0181   | 0.24169  | 0.33678  | RP11-396F chr12  | + | 39300253 | 39303394 | 526   |
| ENSG000001 | 0.36308  | 0.357707 | -0.00212 | 0.99905  | NA       | CHCHD3P2 chr12   | + | 73004458 | 73005096 | 639   |
| ENSG000001 | 65.48945 | 79.95657 | -0.28574 | 0.3933   | 0.49768  | CNPY2 chr12      | - | 56703626 | 56710120 | 1209  |
| ENSG000001 | 0.705622 | 0        | 0.8807   | 0.6196   | NA       | RP11-818F chr12  | - | 1.05E+08 | 1.05E+08 | 701   |
| ENSG000001 | 0        | 0.654722 | -0.83442 | 0.63731  | NA       | RP11-370I chr12  | + | 48744728 | 48836194 | 562   |
| ENSG000001 | 1.669842 | 3.3343   | -0.82985 | 0.53659  | 0.63757  | RP11-139E chr12  | + | 45594600 | 45595334 | 735   |
| ENSG000001 | 25.85888 | 21.45354 | 0.27552  | 0.55673  | 0.65578  | RP11-977C chr12  | + | 56702652 | 56703233 | 437   |
| ENSG000001 | 78.39716 | 95.88339 | -0.28643 | 0.34684  | 0.45106  | RP11-350F chr12  | - | 44112796 | 44117803 | 5008  |
| ENSG000001 | 4.761279 | 0.98329  | 1.9835   | 0.094748 | 0.15436  | RP11-474L chr12  | - | 88451653 | 88452355 | 703   |
| ENSG000001 | 0.36308  | 1.012429 | -0.95988 | 0.57711  | NA       | RP11-650K chr12  | + | 1.04E+08 | 1.04E+08 | 413   |
| ENSG000001 | 0        | 1.623443 | -1.9406  | 0.26756  | NA       | RP11-486C chr14  | - | 70892529 | 71014181 | 565   |
| ENSG000001 | 0.290301 | 0        | 0.4146   | 0.81455  | NA       | RP11-478C chr12  | - | 1.11E+08 | 1.11E+08 | 638   |
| ENSG000001 | 0.580602 | 0        | 0.8036   | 0.6494   | NA       | RP11-186F chr12  | - | 71976073 | 71977632 | 527   |
| ENSG000001 | 0.685084 | 0.98329  | -0.35409 | 0.8342   | NA       | RP11-370I chr12  | - | 48749575 | 48750397 | 823   |
| ENSG000001 | 0.685084 | 0.343138 | 0.48017  | 0.78775  | NA       | CTB-193M1 chr16  | + | 15702331 | 15704420 | 530   |
| ENSG000001 | 0.290301 | 0        | 0.4146   | 0.81455  | NA       | RP11-70F1 chr12  | + | 50305736 | 50324103 | 3157  |
| ENSG000001 | 0        | 0.640152 | -0.82869 | 0.63935  | NA       | ST13P3 chr12     | + | 1.06E+08 | 1.06E+08 | 1110  |
| ENSG000001 | 6.556141 | 12.19607 | -0.86634 | 0.16383  | 0.24451  | FNBP1P1 chr2     | + | 74347807 | 74350345 | 1994  |
| ENSG000001 | 1.359003 | 1.669566 | -0.24979 | 0.85839  | 0.90057  | MRS2P2 chr12     | - | 72243008 | 72244208 | 1201  |
| ENSG000001 | 6.765104 | 3.06884  | 1.0684   | 0.24124  | 0.33623  | RP11-575C chr12  | + | 1.01E+08 | 1.01E+08 | 1454  |
| ENSG000001 | 0        | 0.357707 | -0.41864 | 0.81278  | NA       | RP1-90J4.3 chr12 | + | 47878472 | 47879505 | 1034  |
| ENSG000001 | 0.290301 | 3.008147 | -2.4546  | 0.090452 | 0.1484   | RP11-603J chr12  | - | 56544580 | 56552004 | 540   |
| ENSG000001 | 17.739   | 26.9843  | -0.60433 | 0.19345  | 0.28095  | RP11-611E chr12  | - | 70297813 | 70637140 | 883   |
| ENSG000001 | 0.342542 | 0.594029 | -0.38792 | 0.8278   | NA       | RP4-601P9 chr12  | + | 1.15E+08 | 1.15E+08 | 1330  |
| ENSG000001 | 1.45232  | 2.745103 | -0.6231  | 0.71035  | 0.78481  | RP11-1143 chr12  | + | 69678177 | 69679265 | 1089  |
| ENSG000001 | 2.43887  | 2.185918 | 0.10005  | 0.93851  | 0.95945  | RP11-596C chr14  | + | 31717834 | 31771945 | 975   |
| ENSG000001 | 0        | 0.357707 | -0.41864 | 0.81278  | NA       | RP1-97G4 chr12   | + | 77773600 | 77784644 | 597   |
| ENSG000001 | 0        | 0.654722 | -0.83442 | 0.63731  | NA       | RP11-368J chr16  | + | 22557019 | 22588186 | 2661  |
| ENSG000001 | 0        | 2.307303 | -2.6761  | 0.094365 | 0.15383  | NOVA1-AS1 chr14  | + | 27067618 | 27275673 | 818   |
| ENSG000001 | 0        | 0.891044 | -1.0625  | 0.54819  | NA       | RP11-626P chr14  | - | 27244701 | 27291313 | 497   |
| ENSG000001 | 0.653381 | 0        | 0.82678  | 0.64037  | NA       | RP11-547C chr12  | + | 43359925 | 43361156 | 256   |
| ENSG000001 | 0.632843 | 5.240188 | -2.6039  | 0.029749 | 0.05635  | RP11-199A chr12  | - | 52106253 | 52107390 | 1138  |
| ENSG000001 | 0        | 0.357707 | -0.41864 | 0.81278  | NA       | RP11-629C chr12  | + | 85961656 | 85962017 | 362   |
| ENSG000001 | 1.359003 | 0        | 1.8987   | 0.26617  | NA       | RP11-266E chr12  | + | 1.06E+08 | 1.06E+08 | 2503  |
| ENSG000001 | 0        | 2.261179 | -2.4065  | 0.15834  | 0.23767  | CTD-2591A chr14  | + | 28787347 | 28887818 | 508   |
| ENSG000001 | 0.36308  | 0        | 0.4146   | 0.81455  | NA       | RP11-263K chr12  | + | 82862235 | 82862727 | 493   |
| ENSG000001 | 11.78417 | 2.725702 | 2.0051   | 0.020541 | 0.040405 | RP3-462E2 chr12  | + | 1.12E+08 | 1.12E+08 | 569   |
| ENSG000001 | 0.290301 | 3.480792 | -2.6477  | 0.06613  | 0.11349  | RP11-497C chr12  | + | 1.17E+08 | 1.17E+08 | 876   |
| ENSG000001 | 0.342542 | 0        | 0.4146   | 0.81455  | NA       | RP11-597A chr14  | + | 20145996 | 20148263 | 2268  |
| ENSG000001 | 1.338465 | 0        | 1.8837   | 0.27037  | NA       | RP11-114F chr12  | - | 1.06E+08 | 1.06E+08 | 632   |
| ENSG000001 | 1.939605 | 2.041842 | -0.04401 | 0.97052  | 0.98365  | RP1-78O14 chr12  | - | 79734985 | 79897176 | 1155  |
| ENSG000001 | 3.953782 | 3.088241 | 0.28098  | 0.85021  | 0.89475  | RP11-210N chr12  | + | 44130431 | 44134870 | 582   |
| ENSG000001 | 0        | 0.297015 | -0.41864 | 0.81278  | NA       | RP11-812C chr12  | + | 86409475 | 86410219 | 745   |
| ENSG000001 | 0.632843 | 0.654722 | -0.02224 | 0.98935  | NA       | RP3-432I1 chr12  | + | 47986991 | 47987223 | 233   |
| ENSG000001 | 5.580756 | 2.901332 | 0.86277  | 0.34934  | 0.45356  | RP11-461F chr12  | + | 77271973 | 77274132 | 571   |
| ENSG000001 | 9.854749 | 2.96444  | 1.6341   | 0.045147 | 0.081323 | RP11-386C chr12  | + | 49392150 | 49412988 | 2114  |
| ENSG000001 | 0        | 0.343138 | -0.41864 | 0.81278  | NA       | RP11-482C chr12  | - | 1.07E+08 | 1.07E+08 | 809   |
| ENSG000001 | 2749.683 | 1943.831 | 0.49948  | 0.001027 | 0.002541 | CUX1 chr7        | + | 1.01E+08 | 1.02E+08 | 13762 |
| ENSG000001 | 0.72616  | 0        | 0.85004  | 0.63064  | NA       | RP11-493L chr12  | - | 47631517 | 47672804 | 663   |
| ENSG000001 | 0.705622 | 0        | 0.8807   | 0.6196   | NA       | MRPS36P5 chr12   | - | 43447892 | 43448189 | 298   |
| ENSG000001 | 0        | 13.7701  | -5.3334  | 2.30E-05 | 7.08E-05 | RP11-82C2 chr12  | + | 1.14E+08 | 1.14E+08 | 379   |
| ENSG000001 | 0.290301 | 0        | 0.4146   | 0.81455  | NA       | RP11-248E chr12  | + | 88210263 | 88211608 | 554   |
| ENSG000001 | 1.649304 | 4.334576 | -1.2608  | 0.22585  | 0.31859  | TEN1 chr17       | + | 73975301 | 73996667 | 994   |
| ENSG000001 | 10.18873 | 18.69629 | -0.8633  | 0.13939  | 0.21312  | RP11-48B1 chr17  | - | 3566357  | 3599488  | 5905  |
| ENSG000001 | 0.685084 | 13.76614 | -3.8114  | 0.000891 | 0.002229 | RP11-554C chr12  | + | 1.08E+08 | 1.08E+08 | 949   |
| ENSG000001 | 6.411397 | 4.914036 | 0.34807  | 0.66104  | 0.74485  | RP11-620J chr12  | + | 58230875 | 58236528 | 610   |
| ENSG000001 | 2.345553 | 2.324288 | 0.007925 | 0.99514  | 0.99722  | RP11-161F chr12  | + | 49783299 | 49783945 | 647   |
| ENSG000001 | 0.580602 | 0.594029 | -0.01451 | 0.9935   | NA       | RP11-359N chr12  | + | 79952562 | 79952946 | 385   |

|            |          |          |          |          |          |           |       |   |          |          |      |
|------------|----------|----------|----------|----------|----------|-----------|-------|---|----------|----------|------|
| ENSG000001 | 1.306762 | 1.280305 | 0.013753 | 0.99259  | 0.99598  | QRSL1P3   | chr14 | + | 36235001 | 36236316 | 1316 |
| ENSG000001 | 9.430056 | 7.238323 | 0.36938  | 0.59065  | 0.68559  | RP11-133N | chr12 | - | 49970623 | 49971288 | 570  |
| ENSG000001 | 0        | 0.343138 | -0.41864 | 0.81278  | NA       | RP11-579C | chr12 | + | 49121218 | 49159569 | 635  |
| ENSG000001 | 0        | 1.591889 | -2.1342  | 0.20414  | NA       | RP11-61E1 | chr12 | - | 1.05E+08 | 1.06E+08 | 641  |
| ENSG000001 | 0        | 0.640152 | -0.82869 | 0.63935  | NA       | RP11-756F | chr12 | + | 57824899 | 57827718 | 548  |
| ENSG000001 | 0.290301 | 0        | 0.4146   | 0.81455  | NA       | RP11-350C | chr12 | - | 1.01E+08 | 1.01E+08 | 557  |
| ENSG000001 | 0.705622 | 0.686276 | 0.017556 | 0.99188  | NA       | RP11-210N | chr15 | - | 80726136 | 80737493 | 1891 |
| ENSG000001 | 2.229907 | 0        | 2.6238   | 0.10304  | 0.16551  | HMG1P3    | chr12 | - | 1.11E+08 | 1.11E+08 | 324  |
| ENSG000001 | 0        | 0.997859 | -1.5018  | 0.39072  | NA       | RP11-603K | chr12 | + | 93251855 | 93253049 | 1195 |
| ENSG000001 | 0        | 0.297015 | -0.41864 | 0.81278  | NA       | HIGD1AP1  | chr12 | + | 53535837 | 53536111 | 275  |
| ENSG000001 | 3.205292 | 1.652581 | 0.86249  | 0.43685  | 0.54231  | RP11-386C | chr12 | + | 49521565 | 49541652 | 897  |
| ENSG000001 | 0.290301 | 0        | 0.4146   | 0.81455  | NA       | RP11-148B | chr12 | + | 1.17E+08 | 1.17E+08 | 596  |
| ENSG000001 | 1.317927 | 0        | 1.6383   | 0.35541  | NA       | RP11-1100 | chr12 | + | 52294349 | 52295120 | 772  |
| ENSG000001 | 0        | 0.297015 | -0.41864 | 0.81278  | NA       | RP11-543F | chr12 | - | 81488154 | 81519624 | 882  |
| ENSG000001 | 0        | 0.297015 | -0.41864 | 0.81278  | NA       | RP11-148E | chr14 | + | 29406095 | 29497969 | 741  |
| ENSG000001 | 0.36308  | 0.594029 | -0.39069 | 0.82661  | NA       | RP11-350C | chr12 | + | 1.01E+08 | 1.01E+08 | 1256 |
| ENSG000001 | 0.36308  | 0.715414 | -0.51558 | 0.77246  | NA       | RP11-493P | chr12 | + | 1.16E+08 | 1.16E+08 | 501  |
| ENSG000001 | 0.943682 | 0.700845 | 0.33849  | 0.83415  | NA       | RP11-74K1 | chr12 | - | 94561782 | 94579820 | 446  |
| ENSG000001 | 1.213446 | 2.779947 | -0.97393 | 0.46759  | 0.57244  | AC005086  | chr7  | + | 1.02E+08 | 1.02E+08 | 243  |
| ENSG000001 | 2.334388 | 2.993578 | -0.32879 | 0.75296  | 0.81973  | RP11-530C | chr12 | + | 80217558 | 80219276 | 667  |
| ENSG000001 | 0        | 1.355566 | -1.9006  | 0.26573  | NA       | RP11-530C | chr12 | + | 80083924 | 80172231 | 354  |
| ENSG000001 | 0.342542 | 31.81582 | -5.7629  | 9.61E-08 | 3.76E-07 | CTD-2021F | chr12 | - | 71441182 | 71512027 | 565  |
| ENSG000001 | 61.47405 | 43.96006 | 0.481    | 0.087304 | 0.14406  | RP11-644F | chr12 | + | 56122888 | 56124467 | 1274 |
| ENSG000001 | 6.378881 | 5.583326 | 0.19323  | 0.80287  | 0.86061  | BCDIN3D-A | chr12 | + | 50222325 | 50234926 | 3078 |
| ENSG000001 | 1.669842 | 0        | 1.9671   | 0.26049  | NA       | RP11-328C | chr12 | - | 42879155 | 42883821 | 447  |
| ENSG000001 | 0        | 6.792401 | -4.306   | 0.001562 | 0.003757 | RP11-554C | chr12 | - | 1.08E+08 | 1.08E+08 | 679  |
| ENSG000001 | 0        | 0.715414 | -0.84936 | 0.6309   | NA       | RP11-1079 | chr12 | - | 85333303 | 85333447 | 145  |
| ENSG000001 | 0.632843 | 0        | 0.81931  | 0.64303  | NA       | RP11-114F | chr12 | - | 75956982 | 76377795 | 748  |
| ENSG000001 | 0.342542 | 0        | 0.4146   | 0.81455  | NA       | RP11-443B | chr1  | - | 2.35E+08 | 2.35E+08 | 846  |
| ENSG000001 | 0        | 0.297015 | -0.41864 | 0.81278  | NA       | OR9A4     | chr7  | + | 1.42E+08 | 1.42E+08 | 1093 |
| ENSG000001 | 0        | 0.686276 | -0.84936 | 0.6309   | NA       | RP11-754N | chr12 | + | 78746299 | 78876799 | 693  |
| ENSG000001 | 1.887365 | 0        | 2.1461   | 0.21553  | NA       | RP11-753F | chr12 | + | 54747576 | 54860769 | 546  |
| ENSG000001 | 0        | 0.343138 | -0.41864 | 0.81278  | NA       | RP11-114F | chr12 | - | 76087790 | 76092596 | 742  |
| ENSG000001 | 0.72616  | 0        | 0.85004  | 0.63064  | NA       | RP11-734E | chr12 | + | 77150971 | 77151694 | 724  |
| ENSG000001 | 0        | 0.357707 | -0.41864 | 0.81278  | NA       | RP11-290L | chr12 | + | 76319993 | 76320247 | 255  |
| ENSG000001 | 0.580602 | 0.937167 | -0.42674 | 0.8018   | NA       | AC005086  | chr7  | - | 1.02E+08 | 1.02E+08 | 228  |
| ENSG000001 | 4.19005  | 1.40169  | 1.4018   | 0.24637  | 0.34228  | RP11-474P | chr12 | + | 46765246 | 46767561 | 627  |
| ENSG000001 | 1.866827 | 4.36613  | -1.0664  | 0.31983  | 0.42271  | RP11-686C | chr12 | + | 1.12E+08 | 1.12E+08 | 485  |
| ENSG000001 | 7.46812  | 8.564752 | -0.1854  | 0.80133  | 0.85937  | RP11-977B | chr12 | - | 49627352 | 49658539 | 674  |
| ENSG000001 | 1.027626 | 7.559644 | -2.3432  | 0.090498 | 0.14846  | RP11-809C | chr12 | + | 1.17E+08 | 1.17E+08 | 732  |
| ENSG000001 | 0.290301 | 0.654722 | -0.51764 | 0.76892  | NA       | HIGD1AP9  | chr12 | + | 50013117 | 50013395 | 279  |
| ENSG000001 | 0        | 0.686276 | -0.84936 | 0.6309   | NA       | RP11-43D4 | chr12 | + | 1.05E+08 | 1.05E+08 | 411  |
| ENSG000001 | 0.580602 | 1.188058 | -0.5972  | 0.73358  | NA       | RP11-61A1 | chr16 | - | 66875336 | 66887351 | 434  |
| ENSG000001 | 0        | 0.343138 | -0.41864 | 0.81278  | NA       | RP11-314C | chr12 | + | 73552970 | 73602097 | 1256 |
| ENSG000001 | 0.653381 | 0        | 0.82678  | 0.64037  | NA       | MKRN9P    | chr12 | - | 88175940 | 88178345 | 1451 |
| ENSG000001 | 11.3585  | 1.964165 | 2.3611   | 0.0073   | 0.01573  | RP11-347C | chr16 | - | 30215637 | 30220392 | 1693 |
| ENSG000001 | 0        | 0.654722 | -0.83442 | 0.63731  | NA       | RP11-541C | chr12 | + | 97379434 | 97579387 | 573  |
| ENSG000001 | 2.447429 | 3.945314 | -0.58959 | 0.57523  | 0.6721   | RP11-956A | chr12 | - | 32380344 | 32381088 | 745  |
| ENSG000001 | 0        | 0.686276 | -0.84936 | 0.6309   | NA       | RP11-70F1 | chr12 | - | 50302665 | 50305646 | 2324 |
| ENSG000001 | 10.40625 | 6.20891  | 0.70268  | 0.30384  | 0.40519  | RP11-864J | chr12 | + | 1.08E+08 | 1.08E+08 | 1680 |
| ENSG000001 | 0.36308  | 0.343138 | -0.0021  | 0.99905  | NA       | RP11-753F | chr12 | + | 54747445 | 54891472 | 564  |
| ENSG000001 | 0.870904 | 0.343138 | 0.71634  | 0.68735  | NA       | RP11-180I | chr12 | - | 1.03E+08 | 1.03E+08 | 507  |
| ENSG000001 | 0.653381 | 0.640152 | 0.01046  | 0.99499  | NA       | RP11-511F | chr12 | - | 1.02E+08 | 1.02E+08 | 308  |
| ENSG000001 | 0.342542 | 1.058552 | -0.99235 | 0.56407  | NA       | RP11-588F | chr12 | + | 70861860 | 70932859 | 1942 |
| ENSG000001 | 0        | 0.98329  | -1.2878  | 0.47019  | NA       | LINC00485 | chr12 | - | 1.03E+08 | 1.03E+08 | 3722 |
| ENSG000001 | 0        | 0.297015 | -0.41864 | 0.81278  | NA       | RP11-263K | chr12 | - | 82874897 | 82891339 | 459  |
| ENSG000001 | 1.306762 | 0        | 1.6479   | 0.35189  | NA       | RP11-511B | chr12 | + | 93568142 | 93575608 | 1269 |
| ENSG000001 | 2.023549 | 1.949596 | 0.029903 | 0.98046  | 0.98924  | RP11-1105 | chr12 | - | 94665926 | 94670971 | 493  |
| ENSG000001 | 7.479285 | 0        | 4.5144   | 0.000541 | 0.001397 | RP11-412F | chr14 | - | 29061429 | 29082829 | 665  |
| ENSG000001 | 2.261609 | 0        | 2.6509   | 0.097945 | 0.15859  | RP11-394J | chr12 | - | 96616575 | 96617751 | 525  |
| ENSG000001 | 0        | 0.343138 | -0.41864 | 0.81278  | NA       | RP11-18J9 | chr12 | + | 86352465 | 86354725 | 1258 |
| ENSG000001 | 0        | 2.058828 | -1.8947  | 0.28782  | 0.38931  | RP11-493L | chr12 | + | 47641907 | 47651322 | 329  |
| ENSG000001 | 4.119877 | 0.357707 | 2.7723   | 0.055371 | 0.097202 | RP11-753N | chr12 | + | 90674671 | 90694117 | 574  |
| ENSG000001 | 3.672853 | 9.101377 | -1.2452  | 0.15465  | 0.233    | RP11-977C | chr12 | - | 56556143 | 56584068 | 403  |
| ENSG000001 | 0        | 0.594029 | -0.81444 | 0.64499  | NA       | RP1-228P1 | chr12 | - | 48399060 | 48405010 | 550  |

|            |          |          |          |          |          |                 |   |          |          |      |
|------------|----------|----------|----------|----------|----------|-----------------|---|----------|----------|------|
| ENSG000001 | 0        | 0.357707 | -0.41864 | 0.81278  | NA       | RP13-619I chr12 | - | 86175670 | 86176222 | 553  |
| ENSG000001 | 1.753786 | 2.667426 | -0.53589 | 0.67381  | 0.75572  | RP11-478C chr12 | - | 1.11E+08 | 1.11E+08 | 946  |
| ENSG000001 | 0.72616  | 0        | 0.85004  | 0.63064  | NA       | RP11-624C chr12 | - | 44402423 | 44403946 | 1524 |
| ENSG000001 | 0.290301 | 0        | 0.4146   | 0.81455  | NA       | RP11-136F chr12 | - | 78445961 | 78485517 | 475  |
| ENSG000001 | 0        | 0.357707 | -0.41864 | 0.81278  | NA       | CLEC5A chr7     | - | 1.42E+08 | 1.42E+08 | 3511 |
| ENSG000001 | 2.790785 | 1.713273 | 0.60654  | 0.61683  | 0.70803  | RP11-511F chr12 | - | 1.02E+08 | 1.02E+08 | 568  |
| ENSG000001 | 0.290301 | 0        | 0.4146   | 0.81455  | NA       | RP11-362K chr12 | + | 58937907 | 59206842 | 1447 |
| ENSG000001 | 0        | 1.995719 | -2.4883  | 0.12386  | 0.19391  | RP1-46F2 chr12  | - | 1.11E+08 | 1.11E+08 | 590  |
| ENSG000001 | 0.580602 | 0        | 0.8036   | 0.6494   | NA       | RP11-114F chr12 | - | 76082574 | 76082876 | 303  |
| ENSG000001 | 0        | 0.357707 | -0.41864 | 0.81278  | NA       | RP11-497C chr12 | + | 1.17E+08 | 1.17E+08 | 486  |
| ENSG000001 | 0        | 0.297015 | -0.41864 | 0.81278  | NA       | RP11-219B chr8  | - | 86134675 | 86157946 | 790  |
| ENSG000001 | 0.342542 | 0.343138 | -0.00208 | 0.99906  | NA       | RP11-977C chr12 | - | 56661577 | 56663888 | 542  |
| ENSG000001 | 0        | 0.297015 | -0.41864 | 0.81278  | NA       | RP11-356C chr12 | - | 93923336 | 93923765 | 430  |
| ENSG000001 | 0.290301 | 0        | 0.4146   | 0.81455  | NA       | RP11-510I chr12 | - | 96816104 | 96879220 | 379  |
| ENSG000001 | 0.653381 | 0.357707 | 0.52032  | 0.76705  | NA       | RP11-370I chr12 | - | 48727538 | 48727684 | 147  |
| ENSG000001 | 0.943682 | 2.635871 | -1.2257  | 0.34201  | 0.44595  | RP11-887P chr12 | - | 94101567 | 94131599 | 1587 |
| ENSG000001 | 0.943682 | 2.460242 | -1.0626  | 0.46214  | 0.56722  | POLR2KP1 chr12  | + | 49987874 | 49988041 | 168  |
| ENSG000001 | 1.95077  | 5.347004 | -1.3033  | 0.21458  | 0.30552  | RP11-103B chr12 | + | 1.18E+08 | 1.18E+08 | 1053 |
| ENSG000001 | 427.6742 | 197.4176 | 1.1137   | 4.59E-14 | 2.83E-13 | CHURC1 chr14    | + | 65381079 | 65411309 | 3381 |
| ENSG000001 | 0        | 0.343138 | -0.41864 | 0.81278  | NA       | RP11-314C chr12 | - | 73509737 | 73537638 | 981  |
| ENSG000001 | 81.21786 | 98.81332 | -0.28555 | 0.22217  | 0.31439  | RP11-658F chr11 | + | 66433507 | 66435845 | 2339 |
| ENSG000001 | 0.342542 | 0        | 0.4146   | 0.81455  | NA       | RP11-317N chr14 | + | 36289043 | 36289426 | 384  |
| ENSG000001 | 22.65619 | 60.09419 | -1.3936  | 3.69E-05 | 0.000111 | RP11-488C chr14 | - | 77248083 | 77253067 | 1677 |
| ENSG000001 | 6.950924 | 2.185918 | 1.5048   | 0.10997  | 0.17497  | RP11-981P chr12 | + | 89954906 | 89987798 | 854  |
| ENSG000001 | 0.72616  | 1.623443 | -0.85011 | 0.60052  | 0.69444  | RP11-887P chr12 | + | 94229943 | 94231814 | 779  |
| ENSG000001 | 0        | 1.248751 | -1.5848  | 0.37202  | NA       | RP11-554E chr12 | - | 1.02E+08 | 1.02E+08 | 1034 |
| ENSG000001 | 6.245302 | 1.888903 | 1.554    | 0.10838  | 0.17282  | RP11-644F chr12 | + | 56109820 | 56118487 | 3382 |
| ENSG000001 | 5.943836 | 4.899467 | 0.25519  | 0.75806  | 0.82414  | C17orf49 chr17  | + | 6917814  | 6920844  | 2343 |
| ENSG000001 | 0        | 1.340997 | -1.8899  | 0.26871  | NA       | RP11-769N chr12 | - | 62628171 | 62629296 | 1126 |
| ENSG000001 | 6.910662 | 4.914036 | 0.44175  | 0.61001  | 0.70268  | RP11-603J chr12 | - | 56513817 | 56523403 | 882  |
| ENSG000001 | 1.016461 | 2.010288 | -0.81613 | 0.5513   | 0.65092  | RP1-267L1 chr12 | + | 1.13E+08 | 1.13E+08 | 596  |
| ENSG000001 | 1.317927 | 1.638012 | -0.25975 | 0.84991  | 0.89459  | RP4-816N1 chr12 | - | 2906043  | 2922068  | 439  |
| ENSG000001 | 1.338465 | 0.343138 | 1.368    | 0.39684  | NA       | RP11-118A chr12 | + | 43549118 | 43556913 | 836  |
| ENSG000001 | 2.023549 | 4.273883 | -0.98842 | 0.34846  | 0.45264  | RP11-161F chr12 | - | 49686414 | 49718359 | 4166 |
| ENSG000001 | 0.653381 | 0.594029 | 0.059135 | 0.97278  | NA       | RP11-115F chr12 | - | 1.17E+08 | 1.17E+08 | 493  |
| ENSG000001 | 0        | 1.294874 | -1.8547  | 0.27869  | NA       | RP11-536C chr12 | - | 96189123 | 96252617 | 467  |
| ENSG000001 | 4.253456 | 9.764963 | -1.1481  | 0.11682  | 0.18459  | RP11-968A chr12 | + | 54670415 | 54738867 | 567  |
| ENSG000001 | 0.653381 | 0        | 0.82678  | 0.64037  | NA       | RP11-603J chr12 | - | 56512752 | 56513723 | 470  |
| ENSG000001 | 1.628766 | 0.343138 | 1.6246   | 0.30143  | 0.40279  | RP11-148B chr12 | + | 1.17E+08 | 1.17E+08 | 600  |
| ENSG000001 | 0.72616  | 1.234181 | -0.55797 | 0.73769  | 0.80658  | RP11-23J1 chr12 | - | 47529281 | 47532153 | 404  |
| ENSG000001 | 0.580602 | 0.594029 | -0.01451 | 0.9935   | NA       | MIR3180-1 chr16 | - | 15003744 | 15005202 | 1459 |
| ENSG000001 | 4.886299 | 2.779947 | 0.713    | 0.48451  | 0.58859  | RP11-651L chr12 | - | 1.07E+08 | 1.07E+08 | 312  |
| ENSG000001 | 0        | 0.297015 | -0.41864 | 0.81278  | NA       | RP11-778J chr12 | - | 94914866 | 94915645 | 780  |
| ENSG000001 | 1.265686 | 4.244745 | -1.4949  | 0.21513  | 0.30611  | PCNPP1 chr12    | - | 1.12E+08 | 1.12E+08 | 511  |
| ENSG000001 | 7.262577 | 1.684135 | 1.9129   | 0.061929 | 0.10722  | RP11-1105 chr12 | - | 94671534 | 94676620 | 796  |
| ENSG000001 | 7.967385 | 6.71714  | 0.24052  | 0.73198  | 0.80198  | RTKL1 chr20     | + | 62289163 | 62328416 | 5030 |
| ENSG000001 | 0        | 9.061702 | -4.7217  | 0.000362 | 0.000958 | RP4-647C1 chr14 | - | 73710726 | 73712687 | 1683 |
| ENSG000001 | 0.705622 | 1.730259 | -0.97461 | 0.53116  | 0.6325   | RP11-517C chr14 | + | 58865275 | 58893843 | 436  |
| ENSG000001 | 0        | 2.010288 | -2.4674  | 0.13027  | 0.202    | RP11-33N1 chr14 | + | 89866339 | 89875813 | 341  |
| ENSG000001 | 1.555988 | 2.087966 | -0.31143 | 0.82536  | 0.87691  | CTD-2313J chr15 | - | 93331144 | 93331702 | 449  |
| ENSG000001 | 1.411244 | 6.330295 | -1.9996  | 0.056578 | 0.09915  | AC068831 chr15  | - | 91495469 | 91498455 | 1858 |
| ENSG000001 | 0.290301 | 0.297015 | -0.00202 | 0.99909  | NA       | RP11-629F chr14 | + | 41765489 | 41767937 | 2449 |
| ENSG000001 | 7.282301 | 6.480818 | 0.17187  | 0.81986  | 0.87341  | EGFL8 chr6      | + | 32121622 | 32139755 | 4181 |
| ENSG000001 | 0.290301 | 0        | 0.4146   | 0.81455  | NA       | RP11-58E2 chr14 | - | 50505863 | 50555913 | 534  |
| ENSG000001 | 1.048164 | 0.297015 | 0.97802  | 0.57083  | NA       | RP11-516J chr14 | - | 76747286 | 76776409 | 520  |
| ENSG000001 | 0        | 38.8058  | -6.8263  | 3.04E-09 | 1.34E-08 | ZNF578 chr19    | + | 52956829 | 53015407 | 5255 |
| ENSG000001 | 0.290301 | 0        | 0.4146   | 0.81455  | NA       | RP11-173C chr15 | - | 20333998 | 20353206 | 572  |
| ENSG000001 | 0        | 0.343138 | -0.41864 | 0.81278  | NA       | RP11-404P chr14 | + | 96677197 | 96681155 | 460  |
| ENSG000001 | 0        | 1.606458 | -1.9287  | 0.27074  | NA       | RP11-665C chr14 | - | 55729485 | 55738793 | 554  |
| ENSG000001 | 0.685084 | 0        | 0.85004  | 0.63064  | NA       | RP11-356C chr14 | + | 38033252 | 38048330 | 738  |
| ENSG000001 | 0.290301 | 0        | 0.4146   | 0.81455  | NA       | RP11-32B5 chr15 | - | 21987458 | 21987995 | 538  |
| ENSG000001 | 0        | 63.26333 | -7.5281  | 1.05E-11 | 5.59E-11 | OC90 chr8       | - | 1.33E+08 | 1.33E+08 | 2413 |
| ENSG000001 | 0        | 1.248751 | -1.5848  | 0.37202  | NA       | RP11-486C chr14 | + | 70653840 | 70696904 | 576  |
| ENSG000001 | 22.62889 | 5.758956 | 1.8869   | 0.002961 | 0.006831 | RP11-471B chr14 | - | 90868867 | 90871579 | 300  |
| ENSG000001 | 1.814586 | 0        | 2.063    | 0.23747  | NA       | CTD-2207P chr14 | + | 75018884 | 75026751 | 518  |

|            |          |          |          |          |          |                 |   |          |          |      |
|------------|----------|----------|----------|----------|----------|-----------------|---|----------|----------|------|
| ENSG000001 | 3.963155 | 5.45382  | -0.42039 | 0.62851  | 0.71824  | CTD-2568P chr14 | + | 60864475 | 60864999 | 525  |
| ENSG000001 | 1.431782 | 1.888903 | -0.37393 | 0.7855   | 0.84636  | RP11-1085 chr14 | - | 57099962 | 57115376 | 421  |
| ENSG000001 | 130.9328 | 292.2706 | -1.1469  | 0.000675 | 0.001719 | PDF chr16       | - | 69362524 | 69364498 | 1158 |
| ENSG000001 | 1.939605 | 10.8785  | -2.3011  | 0.009249 | 0.01956  | RP11-255A chr15 | - | 95577613 | 95578966 | 715  |
| ENSG000001 | 1.161205 | 0.654722 | 0.56875  | 0.73595  | NA       | RP11-661C chr14 | + | 91141462 | 91142638 | 539  |
| ENSG000001 | 2.13659  | 2.399549 | -0.10428 | 0.93335  | 0.95629  | RP11-173A chr14 | + | 75124752 | 75125293 | 542  |
| ENSG000001 | 939.2057 | 280.5374 | 1.7352   | 2.14E-12 | 1.19E-11 | LINC00641 chr14 | - | 21668238 | 21675059 | 5425 |
| ENSG000001 | 0.36308  | 1.727843 | -1.5299  | 0.35924  | 0.46337  | RP11-474A chr12 | + | 57390043 | 57392225 | 459  |
| ENSG000001 | 1.027626 | 1.782087 | -0.52334 | 0.76     | 0.82566  | RP3-414A1 chr14 | - | 73983937 | 73987352 | 937  |
| ENSG000001 | 2.604151 | 0.297015 | 2.2382   | 0.13478  | 0.20777  | RP11-307P chr14 | + | 61246696 | 61247313 | 618  |
| ENSG000001 | 0        | 0.700845 | -0.87835 | 0.62047  | NA       | RP11-895A chr14 | + | 91885793 | 91886095 | 303  |
| ENSG000001 | 1.741807 | 2.027273 | -0.13664 | 0.92564  | 0.95022  | RP11-109A chr14 | - | 73534816 | 73535326 | 511  |
| ENSG000001 | 2.67693  | 12.46797 | -2.1094  | 0.007678 | 0.016479 | RP11-649E chr14 | - | 50096009 | 50096608 | 401  |
| ENSG000001 | 0.580602 | 0.594029 | -0.01451 | 0.9935   | NA       | RP11-903F chr14 | - | 21161639 | 21175279 | 915  |
| ENSG000001 | 0.995923 | 3.945314 | -1.7539  | 0.12832  | 0.1995   | RP11-361F chr14 | + | 76702160 | 76729817 | 520  |
| ENSG000001 | 0.290301 | 0.343138 | -0.00202 | 0.99909  | NA       | RP11-665C chr14 | - | 55792552 | 55806219 | 363  |
| ENSG000001 | 11.02793 | 7.024692 | 0.60285  | 0.39778  | 0.5023   | RP11-298I chr14 | + | 23451907 | 23468287 | 1021 |
| ENSG000001 | 2.023549 | 5.963724 | -1.4304  | 0.17736  | 0.26101  | CTD-2555K chr14 | - | 23171820 | 23235771 | 662  |
| ENSG000001 | 0        | 0.891044 | -1.0625  | 0.54819  | NA       | RP11-164J chr15 | + | 42640301 | 42704515 | 3881 |
| ENSG000001 | 0        | 0.357707 | -0.41864 | 0.81278  | NA       | RP11-831F chr14 | + | 50148020 | 50148604 | 173  |
| ENSG000001 | 0        | 1.326428 | -1.6486  | 0.3523   | NA       | DCAF8 chr1      | - | 1.6E+08  | 1.6E+08  | 2635 |
| ENSG000001 | 3.423628 | 3.489656 | -0.02067 | 0.98549  | 0.99153  | RP11-1012 chr14 | - | 68126537 | 68157084 | 670  |
| ENSG000001 | 0.995923 | 2.757256 | -1.2411  | 0.326    | 0.42893  | CHMP4BP1 chr14  | + | 55765362 | 55765949 | 588  |
| ENSG000001 | 0.290301 | 1.40169  | -1.3255  | 0.43225  | NA       | RP11-84C1 chr14 | - | 21463996 | 21467322 | 1398 |
| ENSG000001 | 86.35517 | 207.5041 | -1.2624  | 7.48E-09 | 3.21E-08 | RP11-192F chr17 | - | 26782770 | 26941215 | 3604 |
| ENSG000001 | 0.580602 | 0        | 0.8036   | 0.6494   | NA       | RP11-187E chr14 | + | 32414059 | 32419588 | 550  |
| ENSG000001 | 2.012384 | 1.638012 | 0.24346  | 0.84146  | 0.88871  | PPIAP6 chr14    | - | 68888415 | 68888913 | 499  |
| ENSG000001 | 0.632843 | 2.976593 | -1.7348  | 0.2308   | 0.32423  | LINC00640 chr14 | + | 51800111 | 51832275 | 708  |
| ENSG000001 | 0        | 0.343138 | -0.41864 | 0.81278  | NA       | RP11-472A chr14 | - | 92719837 | 92730000 | 580  |
| ENSG000001 | 2.459408 | 0.343138 | 1.9801   | 0.21741  | 0.30879  | SPESP1 chr15    | + | 69110560 | 69239150 | 1431 |
| ENSG000001 | 1.939605 | 2.635871 | -0.38649 | 0.72892  | 0.79962  | RP11-193F chr14 | - | 61385958 | 61386873 | 916  |
| ENSG000001 | 1913.049 | 39328.27 | -4.2784  | 1.80E-18 | 1.40E-17 | RN7SL1 chr14    | + | 50053297 | 50053596 | 300  |
| ENSG000001 | 1.048164 | 1.188058 | -0.15879 | 0.92335  | 0.94839  | RP11-467L chr15 | + | 20721492 | 20725870 | 735  |
| ENSG000001 | 0        | 0.715414 | -0.84936 | 0.6309   | NA       | ZFP64P1 chr14   | - | 51171061 | 51172229 | 1169 |
| ENSG000001 | 2.49967  | 1.043983 | 1.0858   | 0.41614  | 0.52129  | DIO3OS chr14    | - | 1.02E+08 | 1.02E+08 | 3108 |
| ENSG000001 | 0.923144 | 0        | 1.223    | 0.49292  | NA       | CTD-2062F chr14 | + | 1.01E+08 | 1.01E+08 | 323  |
| ENSG000001 | 0.342542 | 0        | 0.4146   | 0.81455  | NA       | RP11-368P chr14 | + | 53478689 | 53478985 | 297  |
| ENSG000001 | 0        | 0.297015 | -0.41864 | 0.81278  | NA       | RP11-857B chr14 | - | 45356637 | 45356944 | 308  |
| ENSG000001 | 1.576526 | 0.594029 | 1.0157   | 0.51071  | 0.61399  | RP11-493C chr14 | + | 77825766 | 77826259 | 494  |
| ENSG000001 | 0.685084 | 0        | 0.85004  | 0.63064  | NA       | RP11-796C chr14 | + | 1.02E+08 | 1.02E+08 | 639  |
| ENSG000001 | 0.870904 | 0        | 1.046    | 0.5544   | NA       | RP5-892G5 chr14 | + | 74659292 | 74659526 | 235  |
| ENSG000001 | 8.725248 | 5.225619 | 0.69311  | 0.33675  | 0.44052  | RP11-203A chr14 | + | 20919464 | 20920077 | 478  |
| ENSG000001 | 1.649304 | 1.234181 | 0.31169  | 0.82043  | 0.87375  | RP11-363J chr14 | - | 69705883 | 69727284 | 578  |
| ENSG000001 | 4.222566 | 5.765404 | -0.43174 | 0.65142  | 0.73687  | RP11-638I chr14 | + | 1.01E+08 | 1.01E+08 | 552  |
| ENSG000001 | 2.407167 | 1.029414 | 0.97651  | 0.497    | 0.6007   | NT5CP1 chr14    | - | 74037863 | 74038371 | 509  |
| ENSG000001 | 6.087766 | 1.713273 | 1.6558   | 0.14222  | 0.21676  | RP11-829F chr14 | - | 31345385 | 31359014 | 1991 |
| ENSG000001 | 0.290301 | 2.947455 | -2.4361  | 0.092964 | 0.15198  | RP11-111A chr14 | + | 39944044 | 39982984 | 857  |
| ENSG000001 | 4.264621 | 3.772101 | 0.17284  | 0.87064  | 0.90976  | ASB9P1 chr15    | + | 93338877 | 93339669 | 793  |
| ENSG000001 | 2.32241  | 0        | 2.0672   | 0.24517  | 0.34095  | BANF1P1 chr14   | + | 69403319 | 69403581 | 263  |
| ENSG000001 | 0        | 10.74584 | -5.0284  | 6.80E-05 | 0.000198 | CTD-2134A chr14 | - | 1.04E+08 | 1.04E+08 | 582  |
| ENSG000001 | 3.309773 | 1.029414 | 1.4048   | 0.29727  | 0.3992   | RP11-1053 chr14 | + | 42211842 | 42212166 | 325  |
| ENSG000001 | 0.36308  | 0        | 0.4146   | 0.81455  | NA       | FRMD6-AS2 chr14 | - | 51921230 | 52066670 | 581  |
| ENSG000001 | 1.359003 | 3.656421 | -1.2287  | 0.34743  | 0.45161  | RP11-12J1 chr10 | - | 1.26E+08 | 1.26E+08 | 3422 |
| ENSG000001 | 0.580602 | 20.0009  | -4.4895  | 6.44E-06 | 2.12E-05 | RP4-755D9 chrX  | + | 1.19E+08 | 1.19E+08 | 2102 |
| ENSG000001 | 0.342542 | 0        | 0.4146   | 0.81455  | NA       | RP11-661P chr15 | + | 91951938 | 92148441 | 2140 |
| ENSG000001 | 0        | 0.715414 | -0.84936 | 0.6309   | NA       | RP11-463C chr14 | - | 77639418 | 77639995 | 578  |
| ENSG000001 | 0.290301 | 0        | 0.4146   | 0.81455  | NA       | RP11-16B1 chr14 | - | 60435834 | 60558501 | 502  |
| ENSG000001 | 0.342542 | 0        | 0.4146   | 0.81455  | NA       | SPECC1L chr22   | + | 24666866 | 24838324 | 6204 |
| ENSG000001 | 3.028845 | 8.669151 | -1.438   | 0.08884  | 0.14612  | AC005519 chr14  | - | 74755830 | 74761128 | 1367 |
| ENSG000001 | 0.923144 | 1.012429 | -0.06857 | 0.96524  | 0.97971  | CTD-2376I chr14 | - | 1.01E+08 | 1.01E+08 | 548  |
| ENSG000001 | 0.632843 | 2.872193 | -1.774   | 0.19049  | 0.2772   | RP11-72M chr14  | - | 66679528 | 66976112 | 1206 |
| ENSG000001 | 8.868199 | 2.278164 | 1.8076   | 0.050456 | 0.089638 | RP11-723P chr14 | - | 69334574 | 69336668 | 1130 |
| ENSG000001 | 0.342542 | 0.297015 | -0.00202 | 0.99909  | NA       | RP11-99E1 chr14 | - | 77156482 | 77157085 | 604  |
| ENSG000001 | 8.838288 | 17.41927 | -0.95485 | 0.077801 | 0.13038  | RHOQP1 chr14    | + | 50066712 | 50067290 | 579  |
| ENSG000001 | 9.616689 | 0.343138 | 4.0815   | 0.000831 | 0.002089 | RP11-99E1 chr14 | - | 77177001 | 77227731 | 540  |

|            |          |          |          |          |          |           |       |   |          |          |      |
|------------|----------|----------|----------|----------|----------|-----------|-------|---|----------|----------|------|
| ENSG000001 | 1.286224 | 1.043983 | 0.2681   | 0.85303  | 0.89671  | PTTG4P    | chr14 | - | 71552199 | 71552550 | 352  |
| ENSG000001 | 1.722083 | 0        | 2.21     | 0.18654  | NA       | RP11-1070 | chr14 | + | 95982473 | 95984248 | 993  |
| ENSG000001 | 0.342542 | 0        | 0.4146   | 0.81455  | NA       | SNRPGP1   | chr14 | - | 51038637 | 51038858 | 222  |
| ENSG000001 | 0.705622 | 1.012429 | -0.38881 | 0.80945  | NA       | RP11-638I | chr14 | + | 1.01E+08 | 1.01E+08 | 293  |
| ENSG000001 | 0.290301 | 0        | 0.4146   | 0.81455  | NA       | RP11-112J | chr14 | + | 59294952 | 59484046 | 786  |
| ENSG000001 | 0.290301 | 0        | 0.4146   | 0.81455  | NA       | RP5-1021I | chr14 | - | 74289262 | 74296838 | 1174 |
| ENSG000001 | 2.012384 | 0        | 2.4635   | 0.13092  | 0.20286  | NBEAP1    | chr15 | - | 20862967 | 20893737 | 3036 |
| ENSG000001 | 1.161205 | 0        | 1.2509   | 0.47995  | NA       | RP11-545A | chr14 | + | 39577546 | 39577911 | 366  |
| ENSG000001 | 0        | 10.55564 | -5.0167  | 6.33E-05 | 0.000185 | RP11-108A | chr14 | - | 57532978 | 57579378 | 1111 |
| ENSG000001 | 0        | 4.738406 | -3.7898  | 0.007532 | 0.016189 | CTD-3051C | chr14 | - | 1.05E+08 | 1.05E+08 | 1045 |
| ENSG000001 | 0.705622 | 0.343138 | 0.57395  | 0.74355  | NA       | RP11-84C1 | chr14 | - | 21451314 | 21453225 | 578  |
| ENSG000001 | 0        | 0.343138 | -0.41864 | 0.81278  | NA       | RP11-81F1 | chr14 | + | 37278076 | 37297934 | 554  |
| ENSG000001 | 4.253456 | 0.594029 | 2.3033   | 0.075248 | 0.12681  | RP11-7F17 | chr14 | + | 77425981 | 77432145 | 581  |
| ENSG000001 | 0.632843 | 3.24447  | -1.9457  | 0.13673  | 0.21     | RP3-414A1 | chr14 | - | 74083412 | 74100644 | 621  |
| ENSG000001 | 0.290301 | 2.414118 | -2.1169  | 0.16404  | 0.24477  | AL161668. | chr14 | + | 21492331 | 21497430 | 478  |
| ENSG000001 | 0        | 0.700845 | -0.87835 | 0.62047  | NA       | RP11-299L | chr14 | + | 81879314 | 81879583 | 270  |
| ENSG000001 | 0        | 0.640152 | -0.82869 | 0.63935  | NA       | DNAJC19P  | chr14 | + | 45759239 | 45759589 | 351  |
| ENSG000001 | 0        | 45.58343 | -7.0167  | 1.32E-09 | 6.04E-09 | LINC-ROR  | chr18 | - | 54721813 | 54739350 | 2580 |
| ENSG000001 | 2.946693 | 6.673433 | -1.0934  | 0.21973  | 0.31157  | RP11-368J | chr15 | - | 93608815 | 93609835 | 1021 |
| ENSG000001 | 0        | 0.297015 | -0.41864 | 0.81278  | NA       | RP11-671J | chr14 | - | 35013705 | 35015183 | 416  |
| ENSG000001 | 0        | 0.951736 | -1.2555  | 0.48145  | NA       | RP11-725C | chr14 | + | 95665376 | 95665682 | 181  |
| ENSG000001 | 0.290301 | 0        | 0.4146   | 0.81455  | NA       | RP11-369C | chr14 | - | 46175453 | 46185155 | 889  |
| ENSG000001 | 0.632843 | 1.234181 | -0.70218 | 0.65868  | NA       | RP11-362L | chr14 | + | 1.01E+08 | 1.01E+08 | 441  |
| ENSG000001 | 4.294532 | 10.79599 | -1.2477  | 0.13858  | 0.21213  | CTD-2325P | chr14 | - | 69150128 | 69152282 | 461  |
| ENSG000001 | 1.306762 | 0        | 1.6479   | 0.35189  | NA       | AC145436. | chr15 | + | 27585671 | 27585951 | 281  |
| ENSG000001 | 0.342542 | 1.98115  | -1.8626  | 0.22661  | 0.31953  | COX7A2P1  | chr14 | - | 68119017 | 68119331 | 315  |
| ENSG000001 | 0.580602 | 0        | 0.8036   | 0.6494   | NA       | RP11-492C | chr15 | - | 20433873 | 20482756 | 2512 |
| ENSG000001 | 0        | 0.357707 | -0.41864 | 0.81278  | NA       | RP11-725C | chr14 | + | 95795921 | 95801841 | 1701 |
| ENSG000001 | 0.72616  | 0        | 0.85004  | 0.63064  | NA       | RP11-739C | chr15 | + | 94133096 | 94304028 | 457  |
| ENSG000001 | 0        | 0.594029 | -0.81444 | 0.64499  | NA       | RP11-857B | chr14 | - | 45346077 | 45366280 | 693  |
| ENSG000001 | 144.8723 | 270.3129 | -0.89575 | 0.000646 | 0.001649 | RP4-773N1 | chr1  | + | 1.11E+08 | 1.11E+08 | 4216 |
| ENSG000001 | 44.36887 | 25.85693 | 0.77538  | 0.047973 | 0.085814 | CTD-2298J | chr14 | - | 42057064 | 42074059 | 530  |
| ENSG000001 | 0        | 0.686276 | -0.84936 | 0.6309   | NA       | RP11-242P | chr14 | - | 80128009 | 80257606 | 394  |
| ENSG000001 | 0.943682 | 0.343138 | 0.89828  | 0.6031   | NA       | RPL21P5   | chr14 | - | 31580775 | 31581445 | 472  |
| ENSG000001 | 5.072119 | 0.297015 | 3.1855   | 0.018555 | 0.036902 | BCL2L2-PA | chr14 | + | 23776044 | 23794578 | 1366 |
| ENSG000001 | 0.632843 | 0.891044 | -0.33035 | 0.84668  | NA       | CTD-2302E | chr14 | + | 64068227 | 64068532 | 306  |
| ENSG000001 | 1.338465 | 3.80936  | -1.3457  | 0.24848  | 0.34472  | RP11-950C | chr14 | - | 75471422 | 75475184 | 489  |
| ENSG000001 | 5.696402 | 2.010288 | 1.3766   | 0.16714  | 0.24848  | UBE2CP1   | chr14 | - | 31152251 | 31152804 | 554  |
| ENSG000001 | 0.995923 | 334.2643 | -7.9992  | 9.83E-29 | 1.19E-27 | CTD-2142C | chr14 | + | 38660188 | 38672128 | 531  |
| ENSG000001 | 0        | 0.686276 | -0.84936 | 0.6309   | NA       | RP11-517C | chr14 | + | 58930689 | 58930854 | 166  |
| ENSG000001 | 0        | 0.654722 | -0.83442 | 0.63731  | NA       | RP11-69H1 | chr15 | + | 22332815 | 22333350 | 536  |
| ENSG000001 | 0.290301 | 0.594029 | -0.38058 | 0.83094  | NA       | RP5-1021I | chr14 | + | 74318674 | 74398981 | 3695 |
| ENSG000001 | 14.37878 | 5.771109 | 1.2296   | 0.13206  | 0.20443  | RP11-509A | chr15 | + | 20549989 | 20564419 | 906  |
| ENSG000001 | 8.214818 | 8.273442 | -0.02213 | 0.97762  | 0.98744  | ARHGAP5-1 | chr14 | - | 32544625 | 32545999 | 1375 |
| ENSG000001 | 1.068702 | 1.355566 | -0.29535 | 0.83804  | 0.88621  | RP11-517C | chr14 | - | 58836741 | 58862359 | 399  |
| ENSG000001 | 0.342542 | 0.700845 | -0.57269 | 0.74414  | NA       | TRIM34    | chr11 | + | 5640994  | 5665628  | 2493 |
| ENSG000001 | 58.53592 | 28.55275 | 1.0176   | 0.005827 | 0.012804 | RP4-693M  | chr14 | - | 74164806 | 74167054 | 693  |
| ENSG000001 | 0        | 0.951736 | -1.2555  | 0.48145  | NA       | AC068831. | chr15 | - | 91574942 | 91575665 | 328  |
| ENSG000001 | 6.515065 | 5.320282 | 0.27687  | 0.75935  | 0.82514  | HIF1A-AS2 | chr14 | - | 62182276 | 62217815 | 533  |
| ENSG000001 | 0.290301 | 0        | 0.4146   | 0.81455  | NA       | CTD-2175A | chr14 | - | 78119170 | 78119398 | 229  |
| ENSG000001 | 0.685084 | 18.80713 | -4.3093  | 4.02E-05 | 0.00012  | RP11-1042 | chr14 | + | 60981837 | 61021634 | 868  |
| ENSG000001 | 0        | 0.357707 | -0.41864 | 0.81278  | NA       | RP11-543C | chr14 | - | 1E+08    | 1E+08    | 493  |
| ENSG000001 | 0.342542 | 0.297015 | -0.00202 | 0.99909  | NA       | RP4-773N1 | chr1  | + | 1.11E+08 | 1.11E+08 | 579  |
| ENSG000001 | 0        | 0.654722 | -0.83442 | 0.63731  | NA       | RP11-299L | chr14 | - | 81908331 | 81916501 | 637  |
| ENSG000001 | 0        | 1.638012 | -2.1885  | 0.18912  | NA       | RP11-386A | chr15 | + | 93124059 | 93143775 | 1980 |
| ENSG000001 | 0        | 0.343138 | -0.41864 | 0.81278  | NA       | RP11-74M  | chr12 | + | 57216769 | 57268052 | 3942 |
| ENSG000001 | 28.41519 | 25.95321 | 0.13877  | 0.74922  | 0.81649  | CTD-2002F | chr14 | + | 58731380 | 58736399 | 576  |
| ENSG000001 | 0.653381 | 0.343138 | 0.51863  | 0.76794  | NA       | RP11-854K | chr15 | + | 21365634 | 21372686 | 1147 |
| ENSG000001 | 13.15417 | 13.10738 | -0.01444 | 0.9818   | 0.98993  | RP4-773N1 | chr1  | + | 1.11E+08 | 1.11E+08 | 4870 |
| ENSG000001 | 1.08924  | 0        | 1.1858   | 0.50299  | NA       | RP11-81F1 | chr14 | + | 37257849 | 37276368 | 526  |
| ENSG000001 | 1.846289 | 0.937167 | 0.75758  | 0.60832  | 0.70103  | SALL4P7   | chr14 | - | 60960484 | 60963603 | 3120 |
| ENSG000001 | 0        | 0.891044 | -1.0625  | 0.54819  | NA       | RP11-436A | chr14 | - | 1E+08    | 1E+08    | 386  |
| ENSG000001 | 0.580602 | 0        | 0.8036   | 0.6494   | NA       | RP11-1033 | chr14 | - | 52577840 | 52596343 | 349  |
| ENSG000001 | 0        | 0.594029 | -0.81444 | 0.64499  | NA       | RP3-414A1 | chr14 | + | 73989582 | 73997314 | 519  |
| ENSG000001 | 6.254675 | 4.342697 | 0.45921  | 0.65016  | 0.73598  | CTD-2058B | chr14 | - | 38472318 | 38474052 | 364  |

|            |          |          |          |          |          |                 |   |          |          |      |
|------------|----------|----------|----------|----------|----------|-----------------|---|----------|----------|------|
| ENSG000001 | 0.342542 | 0.343138 | -0.00208 | 0.99906  | NA       | RP11-589N chr14 | - | 53259593 | 53286752 | 196  |
| ENSG000001 | 0        | 1.966581 | -2.1968  | 0.20389  | 0.29293  | RP11-356K chr14 | + | 89821404 | 89822915 | 458  |
| ENSG000001 | 1.233984 | 0        | 1.5686   | 0.37707  | NA       | LINC00871 chr14 | + | 46410146 | 46971026 | 866  |
| ENSG000001 | 5.934463 | 14.37957 | -1.2384  | 0.054219 | 0.095421 | LINC00638 chr14 | + | 1.05E+08 | 1.05E+08 | 2518 |
| ENSG000001 | 0        | 10.28535 | -4.7624  | 0.000585 | 0.001505 | RP11-433J chr14 | + | 97059070 | 97062099 | 3030 |
| ENSG000001 | 12.625   | 17.03001 | -0.43112 | 0.40731  | 0.51207  | RP11-85K1 chr14 | - | 35390064 | 35451738 | 603  |
| ENSG000001 | 2.810509 | 11.20633 | -1.8465  | 0.032539 | 0.061015 | RP11-537P chr14 | + | 37641093 | 37643016 | 1924 |
| ENSG000001 | 0        | 0.686276 | -0.84936 | 0.6309   | NA       | CT60 chr15      | + | 21145767 | 21198632 | 3401 |
| ENSG000001 | 0.342542 | 0        | 0.4146   | 0.81455  | NA       | RP11-218E chr14 | - | 51422977 | 51428720 | 4714 |
| ENSG000001 | 1.379541 | 0        | 1.686    | 0.34092  | NA       | RP11-566J chr14 | - | 1.01E+08 | 1.01E+08 | 722  |
| ENSG000001 | 0        | 0.357707 | -0.41864 | 0.81278  | NA       | RP11-332E chr14 | - | 78745915 | 78749719 | 525  |
| ENSG000001 | 9.0369   | 7.922183 | 0.16244  | 0.82949  | 0.87995  | AC068831. chr15 | + | 91509575 | 91531854 | 1525 |
| ENSG000001 | 1.669842 | 1.949596 | -0.20115 | 0.87692  | 0.91433  | RP11-66N2 chr14 | + | 24030306 | 24037282 | 3243 |
| ENSG000001 | 0.653381 | 11.72101 | -3.7132  | 0.000468 | 0.001222 | ITPK1-AS1 chr14 | + | 93533797 | 93538497 | 4701 |
| ENSG000001 | 0        | 0.686276 | -0.84936 | 0.6309   | NA       | RP11-547C chr14 | + | 53620072 | 53624246 | 1076 |
| ENSG000001 | 20.24128 | 12.63877 | 0.65278  | 0.31925  | 0.42215  | RP11-603B chr15 | + | 22566922 | 22570823 | 378  |
| ENSG000001 | 0.943682 | 5.317866 | -2.1651  | 0.057336 | 0.10031  | CTD-2341N chr14 | + | 86401054 | 86596117 | 736  |
| ENSG000001 | 0        | 0.343138 | -0.41864 | 0.81278  | NA       | RP11-112J chr14 | - | 59294397 | 59294894 | 498  |
| ENSG000001 | 0        | 1.012429 | -1.3162  | 0.46038  | NA       | LINC00637 chr14 | + | 1.04E+08 | 1.04E+08 | 2056 |
| ENSG000001 | 0.342542 | 0        | 0.4146   | 0.81455  | NA       | RP11-982N chr14 | - | 1.05E+08 | 1.05E+08 | 503  |
| ENSG000001 | 8.411803 | 21.17197 | -1.2859  | 0.027756 | 0.053002 | RP11-73E1 chr14 | + | 35343549 | 35345665 | 2117 |
| ENSG000001 | 2.665765 | 1.606458 | 0.60881  | 0.62686  | 0.71675  | ENO1P2 chr15    | + | 92964090 | 92965965 | 974  |
| ENSG000001 | 0.653381 | 0.700845 | -0.04855 | 0.97667  | NA       | RP11-386N chr15 | - | 93277053 | 93277425 | 373  |
| ENSG000001 | 3.391925 | 9.80867  | -1.4571  | 0.089233 | 0.14668  | RP11-406A chr14 | + | 83108964 | 83173169 | 789  |
| ENSG000001 | 1.971308 | 1.355566 | 0.47487  | 0.70683  | 0.78206  | RP11-80A1 chr14 | + | 24970800 | 24977894 | 698  |
| ENSG000001 | 0.36308  | 1.591889 | -1.5911  | 0.31534  | 0.41792  | RP11-218E chr14 | + | 51378944 | 51380076 | 535  |
| ENSG000001 | 0        | 6.641878 | -4.3367  | 0.001085 | 0.002676 | CTD-2223C chr14 | - | 1.05E+08 | 1.05E+08 | 462  |
| ENSG000001 | 1.048164 | 11.24433 | -3.1789  | 0.001244 | 0.003038 | RP11-356K chr14 | + | 89816629 | 89831043 | 601  |
| ENSG000001 | 0        | 0.297015 | -0.41864 | 0.81278  | NA       | RP11-794A chr14 | + | 54937427 | 54937936 | 385  |
| ENSG000001 | 3.350849 | 0.297015 | 2.6027   | 0.067337 | 0.11525  | CTD-3049N chr15 | - | 94261771 | 94614049 | 3480 |
| ENSG000001 | 1.597063 | 0.98329  | 0.54331  | 0.7168   | 0.79019  | RP11-1012 chr14 | + | 68265721 | 68266326 | 606  |
| ENSG000001 | 0.290301 | 0.297015 | -0.00202 | 0.99909  | NA       | RP11-1042 chr14 | + | 61011118 | 61011372 | 255  |
| ENSG000001 | 0.705622 | 0.686276 | 0.017556 | 0.99188  | NA       | DIO2-AS1 chr14  | + | 80677762 | 80921812 | 1597 |
| ENSG000001 | 14.11676 | 21.63172 | -0.59956 | 0.30828  | 0.41004  | CTD-2292N chr14 | - | 20728639 | 20732467 | 3829 |
| ENSG000001 | 2.105701 | 1.66715  | 0.25468  | 0.86013  | 0.90193  | RAP1AP chr14    | + | 74949688 | 74950138 | 451  |
| ENSG000001 | 0.342542 | 0        | 0.4146   | 0.81455  | NA       | RP11-84C1 chr14 | - | 21384925 | 21396739 | 449  |
| ENSG000001 | 5.35386  | 0        | 3.9701   | 0.004388 | 0.009857 | RP11-255N chr15 | - | 95623324 | 95676088 | 573  |
| ENSG000001 | 0        | 0.357707 | -0.41864 | 0.81278  | NA       | NANOGP7 chr14   | - | 92070746 | 92071663 | 918  |
| ENSG000001 | 0.290301 | 1.416259 | -1.3215  | 0.43596  | NA       | HIF1A-AS1 chr14 | - | 62147759 | 62162541 | 652  |
| ENSG000001 | 0.342542 | 0        | 0.4146   | 0.81455  | NA       | RP11-140I chr16 | + | 73420704 | 73455292 | 2544 |
| ENSG000001 | 5.787113 | 0        | 3.9861   | 0.005705 | 0.012557 | RP11-492C chr15 | + | 20359029 | 20366079 | 1141 |
| ENSG000001 | 0        | 0.343138 | -0.41864 | 0.81278  | NA       | RP11-164C chr15 | - | 93973888 | 93974446 | 559  |
| ENSG000001 | 4.793796 | 8.920043 | -0.87296 | 0.25592  | 0.35323  | RP11-507K chr14 | + | 89017941 | 89018837 | 718  |
| ENSG000001 | 4.210588 | 4.943174 | -0.20765 | 0.83602  | 0.88504  | KIAA0391 chr14  | + | 35591755 | 35786680 | 3857 |
| ENSG000001 | 0.36308  | 0        | 0.4146   | 0.81455  | NA       | LINC00520 chr14 | - | 56247864 | 56263406 | 883  |
| ENSG000001 | 12.84252 | 1.828211 | 2.5591   | 0.004128 | 0.009306 | RP11-944C chr14 | - | 90095265 | 90109015 | 698  |
| ENSG000001 | 0.290301 | 0        | 0.4146   | 0.81455  | NA       | RP11-404P chr14 | - | 96725748 | 96734961 | 738  |
| ENSG000001 | 0        | 0.357707 | -0.41864 | 0.81278  | NA       | RP11-313F chr12 | - | 34361350 | 34362610 | 1261 |
| ENSG000001 | 0        | 0.654722 | -0.83442 | 0.63731  | NA       | CTD-2560C chr14 | + | 67227250 | 67227736 | 487  |
| ENSG000001 | 0.290301 | 7.639738 | -3.7842  | 0.002648 | 0.006158 | RP11-895N chr14 | + | 91884610 | 91887520 | 303  |
| ENSG000001 | 0.342542 | 0        | 0.4146   | 0.81455  | NA       | RP11-589N chr14 | - | 53265622 | 53265779 | 158  |
| ENSG000001 | 0.36308  | 1.759397 | -1.5721  | 0.34136  | 0.44526  | OR11H7 chr14    | + | 20697561 | 20698500 | 940  |
| ENSG000001 | 0.290301 | 0        | 0.4146   | 0.81455  | NA       | RP11-1152 chr14 | - | 88176763 | 88338635 | 826  |
| ENSG000001 | 0.36308  | 0        | 0.4146   | 0.81455  | NA       | RP11-255C chr14 | - | 51858846 | 51863853 | 572  |
| ENSG000001 | 1.919068 | 2.338857 | -0.23286 | 0.83864  | 0.88677  | CTD-2555C chr14 | - | 64825486 | 64846036 | 572  |
| ENSG000001 | 0.36308  | 0        | 0.4146   | 0.81455  | NA       | RP11-219E chr14 | + | 21252047 | 21252452 | 294  |
| ENSG000001 | 0.632843 | 6.411261 | -2.8111  | 0.024581 | 0.047522 | CTD-3051C chr14 | + | 1.05E+08 | 1.05E+08 | 3254 |
| ENSG000001 | 0.870904 | 2.713549 | -1.2301  | 0.40069  | 0.50538  | RP11-109N chr14 | - | 73525139 | 73526123 | 494  |
| ENSG000001 | 2.842212 | 9.070566 | -1.5423  | 0.067494 | 0.1155   | RP11-408B chr12 | + | 85711838 | 85736690 | 519  |
| ENSG000001 | 0        | 6.861215 | -4.3394  | 0.001336 | 0.003251 | RP11-7F17 chr14 | - | 77535523 | 77542687 | 1817 |
| ENSG000001 | 0        | 0.297015 | -0.41864 | 0.81278  | NA       | RP11-293N chr14 | + | 75726114 | 75738653 | 704  |
| ENSG000001 | 2.935529 | 0.640152 | 1.8043   | 0.17272  | 0.25535  | AC005041. chr2  | - | 74725815 | 74726494 | 412  |
| ENSG000001 | 0        | 0.357707 | -0.41864 | 0.81278  | NA       | CTD-2555K chr14 | - | 23192685 | 23195781 | 767  |
| ENSG000001 | 5.519142 | 3.307578 | 0.68796  | 0.4638   | 0.5688   | CTD-2555C chr14 | - | 64889653 | 64915275 | 550  |
| ENSG000001 | 0        | 0.640152 | -0.82869 | 0.63935  | NA       | RP11-537P chr14 | - | 37566267 | 37567768 | 828  |

|            |          |          |          |          |          |                 |   |          |          |      |
|------------|----------|----------|----------|----------|----------|-----------------|---|----------|----------|------|
| ENSG000001 | 0        | 0.297015 | -0.41864 | 0.81278  | NA       | CTD-2566J chr14 | - | 68591721 | 68596913 | 537  |
| ENSG000001 | 63.26214 | 16.85276 | 1.8713   | 2.12E-06 | 7.35E-06 | MC1R chr16      | + | 89978527 | 89987385 | 3637 |
| ENSG000001 | 0.685084 | 0        | 0.85004  | 0.63064  | NA       | RP11-286C chr14 | + | 51288598 | 51290219 | 392  |
| ENSG000001 | 0.943682 | 0        | 1.2438   | 0.48556  | NA       | EEF1A1P33 chr12 | - | 97294475 | 97296476 | 1362 |
| ENSG000001 | 0.342542 | 0.937167 | -0.89746 | 0.60352  | NA       | CTD-2014B chr14 | - | 66424015 | 66471241 | 773  |
| ENSG000001 | 0.705622 | 1.043983 | -0.41302 | 0.79763  | NA       | RP11-894P chr14 | + | 1.04E+08 | 1.04E+08 | 553  |
| ENSG000001 | 0.290301 | 0        | 0.4146   | 0.81455  | NA       | RP11-30G8 chr15 | - | 27929644 | 27930914 | 209  |
| ENSG000001 | 0        | 0.357707 | -0.41864 | 0.81278  | NA       | RP11-463J chr14 | - | 52449238 | 52453937 | 467  |
| ENSG000001 | 0.36308  | 0        | 0.4146   | 0.81455  | NA       | CTD-2325K chr14 | + | 58096559 | 58097880 | 1322 |
| ENSG000001 | 1.887365 | 4.095838 | -0.94353 | 0.4358   | 0.54123  | RP11-247L chr14 | + | 50863731 | 50865063 | 501  |
| ENSG000001 | 2.956066 | 1.98115  | 0.51128  | 0.65077  | 0.7365   | RP11-982N chr14 | - | 1.05E+08 | 1.05E+08 | 716  |
| ENSG000001 | 0.342542 | 0        | 0.4146   | 0.81455  | NA       | RP11-594C chr14 | - | 87819414 | 88039366 | 544  |
| ENSG000001 | 0.685084 | 0        | 0.85004  | 0.63064  | NA       | RP11-300J chr14 | + | 88490894 | 88563276 | 833  |
| ENSG000001 | 3.858673 | 1.370136 | 1.3293   | 0.26255  | 0.36072  | EIF4EBP1P chr14 | + | 21887779 | 21888119 | 341  |
| ENSG000001 | 1.027626 | 0        | 1.1491   | 0.51623  | NA       | RP3-514A2 chr14 | - | 73019288 | 73061833 | 654  |
| ENSG000001 | 0.290301 | 0.297015 | -0.00202 | 0.99909  | NA       | RP11-304L chr14 | - | 55351567 | 55352931 | 1013 |
| ENSG000001 | 7.903979 | 0.343138 | 3.7743   | 0.003054 | 0.00703  | CTD-2547L chr14 | + | 91709103 | 91717426 | 611  |
| ENSG000001 | 0        | 1.248751 | -1.5848  | 0.37202  | NA       | CTD-2277K chr14 | + | 62278692 | 62437037 | 664  |
| ENSG000001 | 0.995923 | 0        | 1.4959   | 0.39264  | NA       | CTD-3035C chr14 | - | 91288709 | 91294472 | 384  |
| ENSG000001 | 0        | 0.357707 | -0.41864 | 0.81278  | NA       | RP11-344B chr9  | + | 36856552 | 36861372 | 520  |
| ENSG000001 | 334.1854 | 513.9042 | -0.61902 | 2.54E-05 | 7.77E-05 | CEP95 chr17     | + | 62502706 | 62538579 | 3641 |
| ENSG000001 | 4.418737 | 3.694423 | 0.26523  | 0.77332  | 0.83686  | RP5-1021I chr14 | - | 74362867 | 74404817 | 3548 |
| ENSG000001 | 0.36308  | 0        | 0.4146   | 0.81455  | NA       | CTD-2643K chr15 | + | 94576887 | 94577406 | 520  |
| ENSG000001 | 2.831047 | 1.949596 | 0.46984  | 0.70375  | 0.77967  | RP11-248B chr14 | + | 60625694 | 60626042 | 349  |
| ENSG000001 | 8.381892 | 7.619464 | 0.14756  | 0.86285  | 0.90423  | HNRPCP chr14    | + | 58987941 | 58988706 | 766  |
| ENSG000001 | 2.261609 | 0        | 2.6509   | 0.097945 | 0.15859  | CTD-2128A chr14 | - | 85828801 | 85983278 | 558  |
| ENSG000001 | 0.580602 | 5.249052 | -2.4156  | 0.095424 | 0.15534  | RP11-355I chr14 | - | 62570096 | 62583893 | 737  |
| ENSG000001 | 12.79109 | 15.62503 | -0.29008 | 0.59718  | 0.6915   | RP11-638I chr14 | + | 1.01E+08 | 1.01E+08 | 533  |
| ENSG000001 | 2.229907 | 0.654722 | 1.4291   | 0.30739  | 0.4091   | RP11-19E1 chr2  | - | 1.2E+08  | 1.2E+08  | 695  |
| ENSG000001 | 0        | 2.529055 | -2.8037  | 0.077578 | 0.13005  | CTD-2134A chr14 | + | 1.04E+08 | 1.04E+08 | 127  |
| ENSG000001 | 3.319146 | 3.428963 | -0.03327 | 0.97527  | 0.98625  | ZMYND19P chr14  | + | 78162934 | 78163720 | 787  |
| ENSG000001 | 0        | 0.357707 | -0.41864 | 0.81278  | NA       | RP11-219E chr14 | - | 21366144 | 21404414 | 351  |
| ENSG000001 | 0.290301 | 0        | 0.4146   | 0.81455  | NA       | RP11-1029 chr14 | - | 1.02E+08 | 1.02E+08 | 539  |
| ENSG000001 | 13.31864 | 28.65312 | -1.0806  | 0.045041 | 0.081163 | FOXN3-AS1 chr14 | + | 89883698 | 89886137 | 1077 |
| ENSG000001 | 1.628766 | 2.667426 | -0.61278 | 0.6062   | 0.69942  | CTD-2313J chr15 | - | 93349000 | 93351797 | 464  |
| ENSG000001 | 0        | 0.951736 | -1.2555  | 0.48145  | NA       | RP11-47I2 chr14 | - | 62004226 | 62012005 | 593  |
| ENSG000001 | 0        | 0.343138 | -0.41864 | 0.81278  | NA       | RP11-1070 chr14 | + | 96087251 | 96109622 | 1714 |
| ENSG000001 | 6.930386 | 1.355566 | 2.1656   | 0.0305   | 0.057593 | RP11-58E2 chr14 | - | 50474031 | 50507947 | 2301 |
| ENSG000001 | 0        | 2.474811 | -2.4918  | 0.14342  | 0.21836  | CTD-3006C chr14 | - | 27727923 | 28314492 | 674  |
| ENSG000001 | 3.423628 | 0.357707 | 2.5849   | 0.071128 | 0.12078  | RP11-1078 chr14 | + | 91033839 | 91036320 | 559  |
| ENSG000001 | 3.931452 | 0.654722 | 2.19     | 0.081277 | 0.13539  | RP11-317A chr14 | - | 36288430 | 36295971 | 2867 |
| ENSG000001 | 2.282147 | 0.654722 | 1.4654   | 0.28606  | 0.38753  | RP11-407A chr14 | - | 39734907 | 39736265 | 1359 |
| ENSG000001 | 0.290301 | 1.949596 | -1.8654  | 0.22752  | 0.32056  | RP11-255C chr14 | - | 51811632 | 51852321 | 813  |
| ENSG000001 | 14.50299 | 0        | 5.4932   | 4.63E-06 | 1.54E-05 | RP11-696C chr14 | - | 63764844 | 63766265 | 880  |
| ENSG000001 | 0.290301 | 3.054271 | -2.4686  | 0.088623 | 0.14586  | RP4-647C1 chr14 | - | 73738890 | 73740789 | 777  |
| ENSG000001 | 0.685084 | 0        | 0.85004  | 0.63064  | NA       | RP11-58E2 chr14 | - | 50394289 | 50428678 | 2460 |
| ENSG000001 | 93.455   | 35.19047 | 1.3924   | 0.000612 | 0.001569 | TUBB3 chr16     | + | 89987800 | 90005169 | 3715 |
| ENSG000001 | 2.116866 | 4.081268 | -0.85351 | 0.46136  | 0.56655  | RP11-857B chr14 | - | 45368111 | 45381066 | 360  |
| ENSG000001 | 4.326234 | 4.112823 | 0.079596 | 0.93022  | 0.95392  | CTD-2540L chr14 | + | 71061269 | 71062487 | 1219 |
| ENSG000001 | 32.00989 | 0.951736 | 4.6805   | 8.10E-08 | 3.18E-07 | RP11-1042 chr14 | + | 61107448 | 61109307 | 572  |
| ENSG000001 | 0.36308  | 0.297015 | -0.00205 | 0.99908  | NA       | AC004507 chr5   | - | 1.26E+08 | 1.26E+08 | 2977 |
| ENSG000001 | 0        | 0.357707 | -0.41864 | 0.81278  | NA       | LINC00519 chr14 | - | 51771134 | 51795104 | 682  |
| ENSG000001 | 1.71271  | 2.399549 | -0.39178 | 0.78277  | 0.8444   | RP11-363J chr14 | - | 69649737 | 69680809 | 1826 |
| ENSG000001 | 12.24219 | 2.414118 | 2.2205   | 0.008958 | 0.018999 | RP11-1017 chr14 | - | 1.03E+08 | 1.03E+08 | 566  |
| ENSG000001 | 1.733248 | 0.700845 | 0.97851  | 0.52957  | 0.63097  | RP5-1163L chr14 | - | 71511092 | 71511357 | 266  |
| ENSG000001 | 0.632843 | 0.951736 | -0.41411 | 0.79829  | NA       | RP11-829F chr14 | + | 31487652 | 31488002 | 351  |
| ENSG000001 | 0.290301 | 0        | 0.4146   | 0.81455  | NA       | RP11-305B chr14 | - | 44464984 | 44853748 | 257  |
| ENSG000001 | 0.36308  | 0        | 0.4146   | 0.81455  | NA       | RP11-100A chr15 | - | 27663942 | 27665881 | 380  |
| ENSG000001 | 0        | 0.297015 | -0.41864 | 0.81278  | NA       | NDUF8P1 chr14   | + | 74098179 | 74098723 | 545  |
| ENSG000001 | 8.403243 | 0        | 4.6711   | 0.000296 | 0.000793 | CTD-2207P chr14 | - | 75081396 | 75083350 | 667  |
| ENSG000001 | 0.342542 | 0.715414 | -0.51272 | 0.77372  | NA       | HIF1AP1 chr14   | - | 75583129 | 75583303 | 175  |
| ENSG000001 | 0        | 0.686276 | -0.84936 | 0.6309   | NA       | RP11-433J chr14 | + | 97207528 | 97256950 | 430  |
| ENSG000001 | 0        | 0.357707 | -0.41864 | 0.81278  | NA       | EIF1AXP2 chr14  | - | 65995548 | 65996292 | 413  |
| ENSG000001 | 3.289235 | 3.855484 | -0.2167  | 0.83585  | 0.88489  | RP11-638I chr14 | - | 1.01E+08 | 1.01E+08 | 331  |
| ENSG000001 | 3.257533 | 0.997859 | 1.4908   | 0.21289  | 0.30347  | RP11-507K chr14 | + | 88965678 | 88981433 | 492  |

|            |          |          |          |          |          |            |       |   |          |          |      |
|------------|----------|----------|----------|----------|----------|------------|-------|---|----------|----------|------|
| ENSG000001 | 1.524285 | 0.343138 | 1.4176   | 0.39874  | NA       | UBE2F      | chr2  | + | 2.39E+08 | 2.39E+08 | 2902 |
| ENSG000001 | 21.16442 | 25.42    | -0.26937 | 0.59524  | 0.68964  | RP11-368P  | chr14 | + | 53503473 | 53504969 | 366  |
| ENSG000001 | 0.290301 | 23.22193 | -5.3309  | 1.99E-06 | 6.92E-06 | TMEM179    | chr14 | - | 1.05E+08 | 1.05E+08 | 2510 |
| ENSG000001 | 0.290301 | 0.357707 | -0.00203 | 0.99908  | NA       | RP11-368P  | chr14 | + | 53489773 | 53490315 | 247  |
| ENSG000001 | 0        | 1.012429 | -1.3162  | 0.46038  | NA       | NF1P2      | chr15 | - | 22133181 | 22152165 | 2505 |
| ENSG000001 | 9.369256 | 1.949596 | 2.091    | 0.020193 | 0.039801 | RP11-398E  | chr14 | - | 45232360 | 45252032 | 2904 |
| ENSG000001 | 1.317927 | 1.370136 | -0.03203 | 0.98314  | 0.99064  | RP11-114N  | chr14 | - | 81573377 | 81636758 | 601  |
| ENSG000001 | 0.36308  | 0        | 0.4146   | 0.81455  | NA       | CTD-2373J  | chr14 | - | 45329519 | 45335450 | 5932 |
| ENSG000001 | 14.08767 | 16.58805 | -0.22034 | 0.70799  | 0.78295  | RPPH1      | chr14 | - | 20811207 | 20811844 | 638  |
| ENSG000001 | 14.58612 | 0        | 5.4736   | 7.03E-06 | 2.30E-05 | RP11-8L8.2 | chr14 | + | 1.02E+08 | 1.02E+08 | 943  |
| ENSG000001 | 2.366091 | 3.319731 | -0.43953 | 0.70122  | 0.77768  | RP3-449M   | chr14 | - | 74940710 | 74941567 | 589  |
| ENSG000001 | 1.576526 | 0        | 2.1197   | 0.20755  | NA       | RP11-566K  | chr16 | - | 89986235 | 89989070 | 985  |
| ENSG000001 | 0.290301 | 0.297015 | -0.00202 | 0.99909  | NA       | RP11-973N  | chr14 | - | 65066961 | 65068362 | 1402 |
| ENSG000001 | 1.701545 | 1.043983 | 0.58178  | 0.67742  | 0.75844  | RP11-1017  | chr14 | - | 1.02E+08 | 1.02E+08 | 238  |
| ENSG000001 | 3.652315 | 3.899191 | -0.09739 | 0.91927  | 0.94566  | RP11-109N  | chr14 | + | 73427303 | 73428701 | 289  |
| ENSG000001 | 2.624689 | 0        | 2.9014   | 0.06135  | 0.10638  | RP11-561B  | chr14 | - | 35916209 | 35916831 | 504  |
| ENSG000001 | 0.36308  | 0        | 0.4146   | 0.81455  | NA       | RP11-529F  | chr14 | + | 92492910 | 92493231 | 322  |
| ENSG000001 | 0        | 0.297015 | -0.41864 | 0.81278  | NA       | LINC00524  | chr14 | - | 1.02E+08 | 1.02E+08 | 418  |
| ENSG000001 | 0.342542 | 0        | 0.4146   | 0.81455  | NA       | RP11-907C  | chr14 | - | 97576753 | 97585584 | 750  |
| ENSG000001 | 7.148722 | 2.901332 | 1.186    | 0.19156  | 0.27852  | FPGT-TNNI  | chr1  | + | 74663926 | 75009666 | 7566 |
| ENSG000001 | 1.213446 | 0.297015 | 1.1759   | 0.49096  | NA       | CTD-2062F  | chr14 | + | 1.01E+08 | 1.01E+08 | 553  |
| ENSG000001 | 1.866827 | 4.127392 | -0.97947 | 0.37596  | 0.48003  | ENSAP2     | chr14 | - | 83159048 | 83159399 | 352  |
| ENSG000001 | 0        | 1.029414 | -1.1526  | 0.51496  | NA       | RP11-718C  | chr14 | + | 70742013 | 70758576 | 448  |
| ENSG000001 | 0.685084 | 0.594029 | 0.089218 | 0.95997  | NA       | RP11-404P  | chr14 | - | 96699768 | 96700438 | 572  |
| ENSG000001 | 0.342542 | 0.297015 | -0.00202 | 0.99909  | NA       | CTD-2325P  | chr14 | - | 69093883 | 69095162 | 279  |
| ENSG000001 | 1.390706 | 0.594029 | 0.78929  | 0.63522  | 0.72364  | RP11-409I  | chr14 | + | 58045350 | 58048038 | 708  |
| ENSG000001 | 12.0316  | 82.01938 | -2.6984  | 2.96E-09 | 1.31E-08 | CTD-2058B  | chr14 | - | 38503492 | 38663486 | 785  |
| ENSG000001 | 3.298608 | 0        | 3.2386   | 0.030975 | 0.05834  | CHORDC2P   | chr14 | - | 90203309 | 90204735 | 1090 |
| ENSG000001 | 0        | 0.640152 | -0.82869 | 0.63935  | NA       | RP11-736L  | chr14 | + | 43769466 | 43769798 | 333  |
| ENSG000001 | 0        | 0.700845 | -0.87835 | 0.62047  | NA       | RP11-488C  | chr14 | - | 77388183 | 77390992 | 756  |
| ENSG000001 | 0        | 0.357707 | -0.41864 | 0.81278  | NA       | PEBP1P1    | chr14 | - | 96890037 | 96890546 | 510  |
| ENSG000001 | 0.342542 | 0        | 0.4146   | 0.81455  | NA       | RP11-736P  | chr14 | + | 87402984 | 87455469 | 412  |
| ENSG000001 | 1.048164 | 1.638012 | -0.55101 | 0.6937   | 0.77158  | ACTN1-AS1  | chr14 | + | 69446399 | 69454180 | 599  |
| ENSG000001 | 0        | 1.355566 | -1.9006  | 0.26573  | NA       | RP11-386N  | chr15 | + | 93170303 | 93170644 | 342  |
| ENSG000001 | 9.584986 | 7.051414 | 0.40851  | 0.58581  | 0.68158  | RP5-1021I  | chr14 | + | 74254063 | 74269973 | 573  |
| ENSG000001 | 1.027626 | 1.66715  | -0.50795 | 0.75139  | 0.81835  | RP11-371E  | chr14 | + | 93651318 | 93684932 | 570  |
| ENSG000001 | 0.705622 | 2.681995 | -1.6216  | 0.22988  | 0.32324  | LINC00639  | chr14 | - | 39218545 | 39417477 | 4494 |
| ENSG000001 | 8.745785 | 12.64844 | -0.52242 | 0.41497  | 0.52004  | RP11-247L  | chr14 | - | 50793244 | 50794627 | 446  |
| ENSG000001 | 2.261609 | 0        | 2.6509   | 0.097945 | 0.15859  | RP11-96D2  | chr14 | + | 38760157 | 38781134 | 1044 |
| ENSG000001 | 0        | 2.681995 | -2.9147  | 0.061147 | 0.10611  | FOXN3-AS2  | chr14 | + | 90042560 | 90043821 | 1262 |
| ENSG000001 | 1.971308 | 2.443257 | -0.24282 | 0.85365  | 0.8972   | POC1B-GAL  | chr12 | - | 89913185 | 89920039 | 5436 |
| ENSG000001 | 1.068702 | 0.297015 | 0.9938   | 0.56435  | NA       | PTBP1P     | chr14 | + | 65745985 | 65747884 | 1601 |
| ENSG000001 | 0.72616  | 0.654722 | 0.069147 | 0.96802  | NA       | RP1-261D1  | chr14 | - | 71797059 | 71797455 | 397  |
| ENSG000001 | 32.39709 | 0.951736 | 4.7227   | 1.70E-08 | 7.10E-08 | RP11-488C  | chr14 | - | 77240627 | 77247861 | 749  |
| ENSG000001 | 1.286224 | 5.729818 | -1.9091  | 0.087554 | 0.14436  | RP11-407N  | chr14 | - | 39644089 | 39645084 | 530  |
| ENSG000001 | 1.338465 | 1.935026 | -0.47246 | 0.70817  | 0.78306  | RP11-134E  | chr14 | - | 32741061 | 32741510 | 450  |
| ENSG000001 | 0        | 0.715414 | -0.84936 | 0.6309   | NA       | RP11-356C  | chr14 | - | 38025363 | 38036300 | 379  |
| ENSG000001 | 2.624689 | 6.281755 | -1.1613  | 0.21809  | 0.30956  | CTD-2017C  | chr14 | - | 1.02E+08 | 1.02E+08 | 448  |
| ENSG000001 | 0.36308  | 0.357707 | -0.00212 | 0.99905  | NA       | RP11-173C  | chr14 | - | 35627110 | 35628305 | 1196 |
| ENSG000001 | 5.125173 | 0        | 3.89     | 0.00576  | 0.012666 | LINC00517  | chr14 | - | 38365265 | 38371577 | 3460 |
| ENSG000001 | 27.70777 | 18.15254 | 0.58973  | 0.31788  | 0.42064  | RP11-603B  | chr15 | + | 22546089 | 22546799 | 711  |
| ENSG000001 | 0.705622 | 0        | 0.8807   | 0.6196   | NA       | RP11-1074  | chr14 | - | 39854608 | 39856306 | 1699 |
| ENSG000001 | 4.337399 | 2.681995 | 0.6333   | 0.53498  | 0.63592  | RP11-270N  | chr14 | - | 76280845 | 76314041 | 448  |
| ENSG000001 | 0.72616  | 0        | 0.85004  | 0.63064  | NA       | RP11-406F  | chr14 | + | 50915525 | 50923460 | 502  |
| ENSG000001 | 5.072932 | 4.242329 | 0.22346  | 0.79499  | 0.85463  | RP11-973N  | chr14 | - | 64980872 | 65007086 | 558  |
| ENSG000001 | 8.466649 | 6.765679 | 0.30764  | 0.68532  | 0.76508  | RP11-840I  | chr14 | + | 65548752 | 65560930 | 796  |
| ENSG000001 | 1.866827 | 9.378118 | -2.127   | 0.020338 | 0.040065 | SMIM6      | chr17 | + | 73642323 | 73644057 | 957  |
| ENSG000001 | 4.543757 | 0        | 3.7462   | 0.008214 | 0.017521 | RP11-545N  | chr14 | + | 39560105 | 39560305 | 201  |
| ENSG000001 | 0.290301 | 0        | 0.4146   | 0.81455  | NA       | TVP23BP1   | chr15 | + | 27210064 | 27215532 | 617  |
| ENSG000001 | 0.975385 | 1.012429 | -0.02805 | 0.98575  | 0.99164  | RP11-187C  | chr14 | - | 76961706 | 77193055 | 632  |
| ENSG000001 | 0.705622 | 2.742687 | -1.6282  | 0.23411  | 0.32777  | RP11-545N  | chr12 | - | 57538403 | 57541402 | 645  |
| ENSG000001 | 0.653381 | 0        | 0.82678  | 0.64037  | NA       | RP11-99L1  | chr14 | - | 44861734 | 44862919 | 263  |
| ENSG000001 | 9.168852 | 33.45625 | -1.8059  | 0.000366 | 0.000967 | LINC00648  | chr14 | - | 48234157 | 48264295 | 2885 |
| ENSG000001 | 0.342542 | 1.058552 | -0.99235 | 0.56407  | NA       | RP11-219E  | chr14 | - | 21338437 | 21341751 | 549  |
| ENSG000001 | 0        | 0.357707 | -0.41864 | 0.81278  | NA       | RP11-1085  | chr14 | - | 57115683 | 57197253 | 570  |

|            |          |          |          |          |          |                 |   |          |          |      |
|------------|----------|----------|----------|----------|----------|-----------------|---|----------|----------|------|
| ENSG000001 | 0.342542 | 0        | 0.4146   | 0.81455  | NA       | RP11-398J chr15 | + | 95976324 | 96051076 | 2682 |
| ENSG000001 | 1.741807 | 1.012429 | 0.5793   | 0.72106  | 0.7936   | RP11-950C chr14 | + | 75593856 | 75603633 | 367  |
| ENSG000001 | 3.382552 | 6.503508 | -0.8993  | 0.31271  | 0.41487  | CTD-2240F chr14 | - | 95651454 | 95652191 | 594  |
| ENSG000001 | 6.089393 | 2.667426 | 1.091    | 0.25794  | 0.3556   | RP1-261D1 chr14 | - | 71759442 | 71788531 | 513  |
| ENSG000001 | 0.653381 | 13.5799  | -3.8548  | 0.0005   | 0.001297 | CAP2P1 chr14    | - | 89756549 | 89757938 | 1390 |
| ENSG000001 | 5.208303 | 102.0636 | -4.1868  | 1.88E-15 | 1.27E-14 | RP6-65G23 chr14 | + | 71276922 | 71282120 | 629  |
| ENSG000001 | 5.612459 | 5.110682 | 0.14077  | 0.86251  | 0.90395  | RP11-831F chr14 | + | 50144087 | 50144611 | 525  |
| ENSG000001 | 0.36308  | 0.594029 | -0.39069 | 0.82661  | NA       | ADAM20P1 chr14  | - | 70935598 | 70950473 | 3034 |
| ENSG000001 | 0.36308  | 0.297015 | -0.00205 | 0.99908  | NA       | RP11-973N chr14 | - | 65002420 | 65002597 | 178  |
| ENSG000001 | 0.705622 | 0        | 0.8807   | 0.6196   | NA       | CTD-2017C chr14 | - | 1.02E+08 | 1.02E+08 | 729  |
| ENSG000001 | 11.19582 | 0.654722 | 3.6114   | 0.001026 | 0.002539 | RP11-203N chr14 | + | 20906141 | 20909427 | 890  |
| ENSG000001 | 1.753786 | 1.782087 | -0.04722 | 0.976    | 0.9865   | RP11-1078 chr14 | + | 91108982 | 91115238 | 1237 |
| ENSG000001 | 2.789971 | 0.997859 | 1.2854   | 0.3099   | 0.41177  | DDX18P1 chr14   | + | 69550115 | 69552106 | 1992 |
| ENSG000001 | 18.902   | 0        | 5.8688   | 5.48E-07 | 2.00E-06 | RP11-100N chr15 | - | 27728181 | 27787137 | 1100 |
| ENSG000001 | 0        | 0.640152 | -0.82869 | 0.63935  | NA       | LOC39048 chr14  | - | 60865652 | 60866731 | 631  |
| ENSG000001 | 0        | 0.357707 | -0.41864 | 0.81278  | NA       | RP11-763K chr15 | - | 93013463 | 93014776 | 480  |
| ENSG000001 | 4.802355 | 6.177355 | -0.33734 | 0.67469  | 0.75631  | RP11-299C chr15 | + | 1.02E+08 | 1.02E+08 | 2590 |
| ENSG000001 | 1.068702 | 0.997859 | 0.04858  | 0.97403  | 0.98544  | RP11-379K chr15 | - | 80846950 | 80855285 | 2520 |
| ENSG000001 | 0        | 0.357707 | -0.41864 | 0.81278  | NA       | RP11-69H1 chr15 | + | 22278010 | 22413497 | 2317 |
| ENSG000001 | 0.36308  | 1.545765 | -1.432   | 0.39306  | 0.49747  | RP11-154B chr15 | - | 90936722 | 90941113 | 458  |
| ENSG000001 | 0        | 0.357707 | -0.41864 | 0.81278  | NA       | RP11-463L chr15 | + | 35285847 | 35295422 | 473  |
| ENSG000001 | 2.572449 | 5.200513 | -0.898   | 0.37986  | 0.48386  | RP11-424L chr15 | + | 1.02E+08 | 1.02E+08 | 645  |
| ENSG000001 | 0.36308  | 0        | 0.4146   | 0.81455  | NA       | CTD-2647E chr15 | + | 50171801 | 50175722 | 1284 |
| ENSG000001 | 2.656392 | 3.772101 | -0.44247 | 0.69055  | 0.7693   | RP11-253N chr15 | - | 69726805 | 69727459 | 655  |
| ENSG000001 | 0.36308  | 1.920457 | -1.7083  | 0.29495  | 0.39702  | AC109631 chr15  | - | 38750961 | 38751741 | 781  |
| ENSG000001 | 0        | 0.357707 | -0.41864 | 0.81278  | NA       | RP11-108K chr15 | + | 51659574 | 51661307 | 174  |
| ENSG000001 | 2.334388 | 2.414118 | -0.02988 | 0.97895  | 0.98832  | RP11-158N chr15 | + | 86314221 | 86314394 | 174  |
| ENSG000001 | 0.342542 | 0.715414 | -0.51272 | 0.77372  | NA       | HMBX1-1 chr8    | + | 28807193 | 28813472 | 347  |
| ENSG000001 | 0        | 0.343138 | -0.41864 | 0.81278  | NA       | CTD-2544N chr15 | - | 98589896 | 98836406 | 364  |
| ENSG000001 | 1.701545 | 2.786395 | -0.6103  | 0.61998  | 0.71081  | RP11-718C chr15 | + | 45997276 | 46223267 | 861  |
| ENSG000001 | 1.431782 | 0.640152 | 0.81272  | 0.60712  | 0.70004  | RP11-56B1 chr15 | - | 52179757 | 52193320 | 510  |
| ENSG000001 | 0.653381 | 1.669566 | -0.99654 | 0.52289  | 0.62541  | RP11-342N chr15 | - | 67435072 | 67439277 | 472  |
| ENSG000001 | 0        | 218.0351 | -9.1832  | 1.62E-17 | 1.22E-16 | RP11-209K chr15 | - | 53093811 | 53097139 | 572  |
| ENSG000001 | 0        | 0.891044 | -1.0625  | 0.54819  | NA       | RP11-394B chr15 | - | 51356806 | 51361783 | 308  |
| ENSG000001 | 1.359003 | 2.278164 | -0.66508 | 0.59006  | 0.68516  | PRKXP1 chr15    | - | 1.01E+08 | 1.01E+08 | 1122 |
| ENSG000001 | 64.07999 | 0.951736 | 5.6861   | 3.70E-13 | 2.16E-12 | ITGB3 chr17     | + | 45331212 | 45421658 | 3995 |
| ENSG000001 | 4.451254 | 3.259039 | 0.39203  | 0.69229  | 0.77062  | RP5-991G2 chr16 | + | 72840887 | 72843538 | 498  |
| ENSG000001 | 0        | 2.102535 | -2.2822  | 0.18452  | 0.26979  | RP11-64K1 chr15 | - | 40756392 | 40758925 | 729  |
| ENSG000001 | 6.982627 | 0.951736 | 2.5296   | 0.020484 | 0.040303 | CTD-3065B chr15 | - | 91139072 | 91139679 | 474  |
| ENSG000001 | 1.265686 | 0.686276 | 0.62291  | 0.7066   | 0.7819   | RP11-253N chr15 | - | 69750861 | 69754145 | 391  |
| ENSG000001 | 0        | 0.951736 | -1.2555  | 0.48145  | NA       | RP11-227C chr15 | + | 49017535 | 49018024 | 490  |
| ENSG000001 | 2.302685 | 2.087966 | 0.13808  | 0.91272  | 0.94036  | CTD-3076C chr15 | + | 1.01E+08 | 1.01E+08 | 2393 |
| ENSG000001 | 0        | 0.357707 | -0.41864 | 0.81278  | NA       | RP11-82L7 chr15 | - | 60365867 | 60410519 | 643  |
| ENSG000001 | 5.964374 | 2.056411 | 1.4269   | 0.14764  | 0.22392  | SLC35G6 chr17   | + | 7384721  | 7386383  | 1195 |
| ENSG000001 | 2.157128 | 0        | 2.543    | 0.11988  | 0.18865  | RP11-1008 chr15 | + | 38276967 | 38354541 | 1147 |
| ENSG000001 | 0        | 0.357707 | -0.41864 | 0.81278  | NA       | RP11-64K1 chr15 | + | 70894463 | 70894855 | 393  |
| ENSG000001 | 0.632843 | 0.357707 | 0.4993   | 0.77637  | NA       | AC022819 chr15  | - | 99824830 | 99825781 | 952  |
| ENSG000001 | 1.161205 | 19.95645 | -3.6882  | 6.42E-05 | 0.000187 | CTD-2555C chr14 | + | 1.03E+08 | 1.03E+08 | 1603 |
| ENSG000001 | 2.914991 | 1.326428 | 0.9798   | 0.43106  | 0.53657  | RP11-349C chr15 | - | 65767656 | 65767952 | 297  |
| ENSG000001 | 1.742621 | 1.370136 | 0.26375  | 0.86013  | 0.90193  | CTD-2611K chr15 | - | 1.02E+08 | 1.02E+08 | 1798 |
| ENSG000001 | 1.503747 | 0.297015 | 1.4237   | 0.39815  | NA       | RP11-361C chr15 | + | 59980716 | 59981617 | 402  |
| ENSG000001 | 0        | 2.932886 | -3.0734  | 0.043938 | 0.079479 | RP11-108K chr15 | + | 51329685 | 51586109 | 561  |
| ENSG000001 | 0        | 0.297015 | -0.41864 | 0.81278  | NA       | RP11-313P chr15 | - | 51985413 | 51987962 | 855  |
| ENSG000001 | 0        | 1.012429 | -1.3162  | 0.46038  | NA       | AC002306 chr19  | + | 19716690 | 19719991 | 1928 |
| ENSG000001 | 0.342542 | 0        | 0.4146   | 0.81455  | NA       | RP11-182J chr15 | - | 85056472 | 85070180 | 492  |
| ENSG000001 | 6.857607 | 9.294735 | -0.41598 | 0.5454   | 0.64566  | RP11-265N chr15 | - | 63836446 | 63893788 | 1807 |
| ENSG000001 | 21.9729  | 16.40926 | 0.41189  | 0.37356  | 0.47795  | RP11-50C1 chr15 | + | 58879706 | 58883875 | 542  |
| ENSG000001 | 0        | 1.788535 | -1.712   | 0.33711  | NA       | RP11-643N chr15 | + | 62352702 | 62354633 | 1921 |
| ENSG000001 | 0.705622 | 0.357707 | 0.57557  | 0.74268  | NA       | CTD-2339L chr15 | + | 40935131 | 40939055 | 516  |
| ENSG000001 | 0.36308  | 0        | 0.4146   | 0.81455  | NA       | RP11-838N chr18 | - | 3347774  | 3350557  | 404  |
| ENSG000001 | 0.342542 | 0        | 0.4146   | 0.81455  | NA       | RP11-616N chr15 | + | 99878062 | 99878686 | 625  |
| ENSG000001 | 1.317927 | 0.997859 | 0.31824  | 0.82798  | 0.87881  | RP11-325L chr15 | + | 65397872 | 65398138 | 267  |
| ENSG000001 | 3.341476 | 35.79015 | -3.2949  | 1.54E-06 | 5.41E-06 | RP11-60L3 chr15 | + | 74495046 | 74513896 | 1344 |
| ENSG000001 | 0.580602 | 0.715414 | -0.13184 | 0.94086  | NA       | RP11-432J chr10 | + | 72698810 | 72715398 | 534  |
| ENSG000001 | 0        | 0.937167 | -1.2408  | 0.48662  | NA       | CTD-2501E chr15 | + | 60822172 | 60837358 | 434  |

|            |          |          |          |          |          |                 |   |          |          |      |
|------------|----------|----------|----------|----------|----------|-----------------|---|----------|----------|------|
| ENSG000001 | 6.5647   | 0        | 4.2119   | 0.002617 | 0.006089 | RP11-522B chr15 | + | 96897466 | 96946964 | 563  |
| ENSG000001 | 0.705622 | 0.594029 | 0.11178  | 0.94848  | NA       | RP11-815J chr15 | - | 86164495 | 86170920 | 568  |
| ENSG000001 | 0.580602 | 0.654722 | -0.07721 | 0.96449  | NA       | RP13-126C chr15 | - | 29262399 | 29269667 | 751  |
| ENSG000001 | 1.338465 | 0        | 1.8837   | 0.27037  | NA       | RP11-122C chr15 | - | 37168580 | 37179236 | 750  |
| ENSG000001 | 0        | 0.343138 | -0.41864 | 0.81278  | NA       | RP11-143C chr15 | - | 97315235 | 97326542 | 465  |
| ENSG000001 | 1.814586 | 1.073121 | 0.57307  | 0.7219   | 0.79427  | RP11-696L chr15 | + | 69126169 | 69127088 | 920  |
| ENSG000001 | 18.97397 | 11.18605 | 0.74209  | 0.18898  | 0.27528  | RP11-3D4L chr15 | - | 34150918 | 34157026 | 447  |
| ENSG000001 | 0        | 0.357707 | -0.41864 | 0.81278  | NA       | RP11-133K chr15 | + | 40509629 | 40568597 | 2767 |
| ENSG000001 | 29.131   | 13.52578 | 1.0708   | 0.029944 | 0.056666 | RP11-617F chr15 | - | 90617747 | 90625439 | 1168 |
| ENSG000001 | 0        | 5.675573 | -4.0878  | 0.002764 | 0.006409 | CTA-339C1 chr7  | - | 1.01E+08 | 1.01E+08 | 622  |
| ENSG000001 | 5.943836 | 5.661004 | 0.068029 | 0.93099  | 0.95451  | RP11-561C chr15 | + | 85734669 | 85757136 | 7790 |
| ENSG000001 | 0        | 1.043983 | -1.3473  | 0.44976  | NA       | RP11-313P chr15 | - | 52000192 | 52007417 | 387  |
| ENSG000001 | 2.718006 | 1.577319 | 0.64346  | 0.60104  | 0.69476  | RP11-562A chr15 | - | 50789392 | 50790941 | 667  |
| ENSG000001 | 0.36308  | 0.951736 | -0.91212 | 0.59701  | NA       | RP11-37J1 chr15 | - | 29525877 | 29527341 | 1465 |
| ENSG000001 | 1.016461 | 0.891044 | 0.096278 | 0.95404  | 0.97142  | ZHX1-C80F chr8  | - | 1.24E+08 | 1.24E+08 | 1255 |
| ENSG000001 | 1.597063 | 0.297015 | 1.5007   | 0.36768  | NA       | RP11-382A chr15 | + | 83713120 | 83713523 | 404  |
| ENSG000001 | 3.341476 | 1.309443 | 1.139    | 0.37214  | 0.47659  | CTD-3065B chr15 | - | 91147457 | 91157790 | 807  |
| ENSG000001 | 4.273994 | 9.465532 | -1.0932  | 0.15963  | 0.23927  | RP11-752C chr15 | - | 83394625 | 83407656 | 1662 |
| ENSG000001 | 8.23894  | 1.326428 | 2.3323   | 0.038575 | 0.071078 | CTD-2116N chr15 | - | 64472547 | 64665980 | 1683 |
| ENSG000001 | 0.290301 | 0        | 0.4146   | 0.81455  | NA       | RP11-561C chr15 | + | 85815758 | 85816205 | 368  |
| ENSG000001 | 12.73804 | 7.428522 | 0.74113  | 0.26043  | 0.35839  | RP11-454L chr14 | - | 55861658 | 55861951 | 294  |
| ENSG000001 | 6.959483 | 7.03114  | 0.007945 | 0.99154  | 0.99549  | RP11-293N chr14 | - | 75890386 | 75894444 | 4059 |
| ENSG000001 | 0        | 2.24661  | -2.6365  | 0.10117  | 0.16301  | RP11-468E chr14 | + | 24608654 | 24609653 | 747  |
| ENSG000001 | 2.055252 | 1.669566 | 0.21455  | 0.89244  | 0.9253   | RP11-762F chr15 | + | 78585628 | 78588391 | 449  |
| ENSG000001 | 0.632843 | 3.336716 | -1.9803  | 0.12578  | 0.19638  | RP11-102L chr15 | + | 38795054 | 38797182 | 2129 |
| ENSG000001 | 1.068702 | 0.937167 | 0.097081 | 0.9507   | 0.96919  | CTD-2184C chr15 | + | 52408771 | 52414328 | 874  |
| ENSG000001 | 11.76265 | 26.88648 | -1.1675  | 0.036764 | 0.06807  | RP11-152F chr15 | + | 82944773 | 82974312 | 1160 |
| ENSG000001 | 108.3235 | 186.6444 | -0.78592 | 6.38E-05 | 0.000186 | RP11-64K1 chr15 | + | 40617417 | 40618916 | 594  |
| ENSG000001 | 0.580602 | 3.137654 | -1.8733  | 0.1895   | 0.27591  | RP11-516C chr15 | - | 44739775 | 44741542 | 1768 |
| ENSG000001 | 0        | 0.357707 | -0.41864 | 0.81278  | NA       | RP11-323I chr15 | - | 35391223 | 35461899 | 1342 |
| ENSG000001 | 0.342542 | 0        | 0.4146   | 0.81455  | NA       | CTD-2651B chr15 | + | 45507745 | 45508141 | 397  |
| ENSG000001 | 5.830795 | 0        | 4.0749   | 0.003328 | 0.007621 | RP11-20G1 chr15 | - | 99967214 | 99971233 | 395  |
| ENSG000001 | 0.342542 | 0        | 0.4146   | 0.81455  | NA       | RP11-519C chr15 | - | 45722850 | 45734006 | 729  |
| ENSG000001 | 4.741555 | 2.742687 | 0.73199  | 0.45753  | 0.56266  | RP11-761K chr15 | + | 81616718 | 81654378 | 769  |
| ENSG000001 | 2.635854 | 4.972312 | -0.81424 | 0.46347  | 0.56852  | RP11-566K chr15 | - | 23095170 | 23115256 | 608  |
| ENSG000001 | 11.73535 | 14.93801 | -0.35107 | 0.60183  | 0.69536  | RP11-624L chr15 | - | 39157523 | 39719396 | 1378 |
| ENSG000001 | 0.290301 | 0.343138 | -0.00202 | 0.99909  | NA       | RP11-798K chr15 | - | 67278699 | 67351591 | 741  |
| ENSG000001 | 0.923144 | 0        | 1.223    | 0.49292  | NA       | RP11-4G2L chr15 | - | 96571318 | 96590159 | 561  |
| ENSG000001 | 3.64115  | 6.313309 | -0.74878 | 0.37084  | 0.47532  | RP11-15E1 chr17 | + | 58603654 | 58628159 | 557  |
| ENSG000001 | 0.685084 | 0.343138 | 0.48017  | 0.78775  | NA       | RP11-111E chr15 | + | 64220473 | 64228152 | 1072 |
| ENSG000001 | 0        | 2.307303 | -2.6761  | 0.094365 | 0.15383  | RP11-30K9 chr15 | - | 59149030 | 59157262 | 450  |
| ENSG000001 | 0.632843 | 0        | 0.81931  | 0.64303  | NA       | RP11-519C chr15 | + | 45740625 | 45805965 | 2399 |
| ENSG000001 | 0        | 0.700845 | -0.87835 | 0.62047  | NA       | RP11-90E5 chr15 | + | 1.01E+08 | 1.01E+08 | 1781 |
| ENSG000001 | 0        | 1.012429 | -1.3162  | 0.46038  | NA       | RP11-456J chr15 | - | 32057946 | 32060404 | 2459 |
| ENSG000001 | 3.495593 | 0        | 3.3272   | 0.025746 | 0.049562 | RP11-327J chr15 | + | 96714810 | 96717568 | 639  |
| ENSG000001 | 0        | 0.357707 | -0.41864 | 0.81278  | NA       | RP11-142J chr15 | - | 47689698 | 47691751 | 581  |
| ENSG000001 | 0.975385 | 2.367995 | -1.0414  | 0.4405   | 0.54626  | RP11-307C chr15 | + | 77817882 | 77826452 | 3814 |
| ENSG000001 | 16.63102 | 5.943449 | 1.4304   | 0.026024 | 0.050026 | CTD-2054N chr15 | + | 1E+08    | 1E+08    | 665  |
| ENSG000001 | 1.317927 | 12.70913 | -3.0022  | 0.001737 | 0.004152 | RP11-64K1 chr15 | - | 40745643 | 40746838 | 584  |
| ENSG000001 | 0        | 1.545765 | -1.8556  | 0.29195  | NA       | RP11-424I chr15 | + | 1.02E+08 | 1.02E+08 | 556  |
| ENSG000001 | 44.79258 | 22.31062 | 1.0021   | 0.004961 | 0.011055 | CTD-2647L chr8  | + | 28913452 | 28914202 | 552  |
| ENSG000001 | 2.645227 | 0.700845 | 1.6153   | 0.22878  | 0.32193  | RP11-815J chr15 | - | 86162854 | 86214179 | 660  |
| ENSG000001 | 59.47976 | 1.043983 | 5.5614   | 3.18E-12 | 1.74E-11 | RP11-1069 chr15 | - | 63124323 | 63176233 | 2978 |
| ENSG000001 | 1.939605 | 0        | 2.4257   | 0.13778  | 0.21116  | CTD-2240J chr15 | + | 81702858 | 81711358 | 658  |
| ENSG000001 | 0        | 6.73983  | -4.3061  | 0.001571 | 0.003778 | RP11-736N chr14 | + | 1.04E+08 | 1.04E+08 | 2079 |
| ENSG000001 | 1.628766 | 6.60146  | -1.7655  | 0.13558  | 0.20871  | RP11-505E chr15 | - | 1.02E+08 | 1.02E+08 | 491  |
| ENSG000001 | 0        | 0.343138 | -0.41864 | 0.81278  | NA       | CTD-2308C chr15 | + | 52044682 | 52048672 | 581  |
| ENSG000001 | 6.451659 | 0.357707 | 3.5035   | 0.007013 | 0.015181 | DCAF13P3 chr15  | + | 51236860 | 51238193 | 1334 |
| ENSG000001 | 0.653381 | 0        | 0.82678  | 0.64037  | NA       | RP11-346C chr15 | - | 38431796 | 38519088 | 2471 |
| ENSG000001 | 5.415474 | 1.966581 | 1.3031   | 0.22066  | 0.31266  | RP11-192N chr15 | - | 1.01E+08 | 1.01E+08 | 1222 |
| ENSG000001 | 0        | 0.357707 | -0.41864 | 0.81278  | NA       | GH1 chr17       | - | 61994560 | 61996179 | 830  |
| ENSG000001 | 0.580602 | 0.997859 | -0.50233 | 0.75666  | NA       | H3F3AP1 chr15   | - | 40243576 | 40243909 | 334  |
| ENSG000001 | 2.718006 | 0.297015 | 2.295    | 0.12071  | 0.18974  | RP11-758N chr15 | - | 33129184 | 33129527 | 344  |
| ENSG000001 | 0        | 0.343138 | -0.41864 | 0.81278  | NA       | RP11-244F chr15 | + | 63245372 | 63246323 | 952  |
| ENSG000001 | 0.36308  | 1.234181 | -1.1893  | 0.48408  | NA       | RP11-160G chr15 | + | 41635278 | 41636423 | 476  |

|            |          |          |          |          |          |                 |   |          |          |      |
|------------|----------|----------|----------|----------|----------|-----------------|---|----------|----------|------|
| ENSG000001 | 0.632843 | 1.638012 | -1.0613  | 0.46491  | 0.5697   | RP11-323I chr15 | + | 35384682 | 35385413 | 732  |
| ENSG000001 | 2.37465  | 2.278164 | 0.077238 | 0.95196  | 0.97003  | RP11-430B chr15 | + | 52325904 | 52327822 | 381  |
| ENSG000001 | 1.265686 | 1.949596 | -0.50764 | 0.70138  | 0.77779  | RP11-30K9 chr15 | + | 59107471 | 59109927 | 526  |
| ENSG000001 | 0        | 0.654722 | -0.83442 | 0.63731  | NA       | RP11-315L chr15 | - | 97815407 | 97862518 | 454  |
| ENSG000001 | 0        | 1.355566 | -1.9006  | 0.26573  | NA       | EFTUD1P1 chr15  | + | 84748920 | 84795356 | 1798 |
| ENSG000001 | 0        | 0.654722 | -0.83442 | 0.63731  | NA       | ISCA1P4 chr15   | - | 41240934 | 41241067 | 134  |
| ENSG000001 | 4.148974 | 2.431104 | 0.71244  | 0.52642  | 0.62819  | RP11-158N chr15 | - | 86287340 | 86293512 | 964  |
| ENSG000001 | 7.35508  | 9.148243 | -0.30013 | 0.66331  | 0.74673  | RP11-3D4 chr15  | - | 34147101 | 34149010 | 543  |
| ENSG000001 | 0.342542 | 0        | 0.4146   | 0.81455  | NA       | RP11-34F1 chr15 | + | 68125063 | 68166204 | 346  |
| ENSG000001 | 0.342542 | 0.715414 | -0.51272 | 0.77372  | NA       | RP11-139F chr15 | + | 35692892 | 35693969 | 1078 |
| ENSG000001 | 2.86275  | 1.773966 | 0.62894  | 0.61565  | 0.70724  | HERC2P7 chr15   | + | 23388289 | 23392657 | 726  |
| ENSG000001 | 0        | 0.997859 | -1.5018  | 0.39072  | NA       | RP11-7M1 chr15  | + | 85296353 | 85297733 | 429  |
| ENSG000001 | 3.983692 | 7.495662 | -0.85515 | 0.29454  | 0.39662  | RP11-158N chr15 | - | 86298172 | 86299468 | 855  |
| ENSG000001 | 0.870904 | 3.602177 | -1.6411  | 0.21392  | 0.30468  | RP11-2E17 chr15 | - | 80487826 | 80544555 | 6890 |
| ENSG000001 | 1.338465 | 0.891044 | 0.39821  | 0.79657  | 0.85554  | RP11-109C chr15 | - | 45333914 | 45350905 | 542  |
| ENSG000001 | 0.36308  | 1.188058 | -0.99796 | 0.5724   | NA       | RP11-307C chr15 | + | 77861312 | 77901023 | 719  |
| ENSG000001 | 3.58891  | 4.181636 | -0.2127  | 0.81871  | 0.87259  | RP11-593F chr15 | - | 76467232 | 76473827 | 2354 |
| ENSG000001 | 2.531373 | 15.69713 | -2.453   | 0.003683 | 0.008367 | RP11-35O1 chr15 | - | 99190180 | 99190600 | 334  |
| ENSG000001 | 1.411244 | 3.959884 | -1.3401  | 0.25394  | 0.35099  | RP11-566K chr15 | + | 23096869 | 23105332 | 3940 |
| ENSG000001 | 9.119217 | 5.36399  | 0.741    | 0.32306  | 0.42597  | RP11-253N chr15 | - | 69689243 | 69707368 | 1778 |
| ENSG000001 | 5.33153  | 4.568482 | 0.19693  | 0.835    | 0.88407  | UBE2Q2P3 chr15  | + | 83023847 | 83088805 | 809  |
| ENSG000001 | 0        | 1.531196 | -1.8455  | 0.29475  | NA       | RP11-168C chr15 | + | 1.01E+08 | 1.01E+08 | 432  |
| ENSG000001 | 61.0007  | 105.8202 | -0.78655 | 0.012841 | 0.02641  | THTPA chr14     | + | 24025216 | 24029480 | 2860 |
| ENSG000001 | 0.342542 | 2.056411 | -1.8947  | 0.21814  | 0.30961  | RP11-37C7 chr15 | - | 40105424 | 40107630 | 567  |
| ENSG000001 | 2.096328 | 0        | 2.2646   | 0.18883  | 0.27515  | RP11-720L chr15 | - | 37657228 | 37783009 | 463  |
| ENSG000001 | 0        | 0.297015 | -0.41864 | 0.81278  | NA       | OR4N3P chr15    | + | 22413569 | 22414386 | 818  |
| ENSG000001 | 6.20162  | 2.292733 | 1.3233   | 0.1858   | 0.27142  | CTC-378H2 chr19 | + | 42656721 | 42661675 | 1955 |
| ENSG000001 | 1.359003 | 4.694699 | -1.5966  | 0.15972  | 0.23938  | CTD-2650P chr15 | - | 52303196 | 52311292 | 865  |
| ENSG000001 | 0        | 106.7928 | -8.2321  | 4.77E-14 | 2.94E-13 | RP11-89K2 chr2  | - | 45147332 | 45166338 | 2880 |
| ENSG000001 | 0        | 2.010288 | -2.4674  | 0.13027  | 0.202    | NPM1P43 chr15   | - | 73454120 | 73455269 | 786  |
| ENSG000001 | 0        | 0.297015 | -0.41864 | 0.81278  | NA       | MRPL15P1 chr15  | + | 90295527 | 90296724 | 878  |
| ENSG000001 | 1.317927 | 6.785954 | -2.1255  | 0.048059 | 0.085955 | RP11-752C chr15 | + | 83412975 | 83419041 | 1091 |
| ENSG000001 | 4.625909 | 11.16665 | -1.2154  | 0.11048  | 0.17571  | RP11-276N chr15 | - | 82245644 | 82288007 | 526  |
| ENSG000001 | 0.342542 | 0        | 0.4146   | 0.81455  | NA       | RP11-489C chr15 | - | 33595858 | 33602860 | 479  |
| ENSG000001 | 0        | 0.686276 | -0.84936 | 0.6309   | NA       | RP11-462P chr15 | - | 39592619 | 39602983 | 910  |
| ENSG000001 | 0        | 17.36428 | -5.7015  | 2.73E-06 | 9.34E-06 | RP11-16E1 chr15 | + | 31508223 | 31516648 | 468  |
| ENSG000001 | 1.846289 | 0.594029 | 1.1406   | 0.47787  | 0.58224  | RP11-265N chr15 | - | 39480639 | 39486510 | 1961 |
| ENSG000001 | 2.624689 | 0        | 2.9014   | 0.06135  | 0.10638  | RP11-561C chr15 | - | 85857898 | 85858747 | 470  |
| ENSG000001 | 2.334388 | 1.713273 | 0.40198  | 0.73577  | 0.80503  | RP11-815J chr15 | + | 86244340 | 86246002 | 746  |
| ENSG000001 | 10.03201 | 10.17121 | -0.0301  | 0.9614   | 0.977    | RP5-914P2 chr20 | + | 49547521 | 49561316 | 572  |
| ENSG000001 | 0.290301 | 0        | 0.4146   | 0.81455  | NA       | RP11-279F chr15 | - | 69857063 | 69858129 | 890  |
| ENSG000001 | 0.36308  | 0        | 0.4146   | 0.81455  | NA       | RP11-625F chr15 | - | 62929371 | 62937490 | 2425 |
| ENSG000001 | 1.669842 | 0        | 1.9671   | 0.26049  | NA       | RP11-321C chr15 | + | 63682335 | 63729347 | 816  |
| ENSG000001 | 0        | 1.684135 | -2.1921  | 0.19067  | NA       | RP11-752C chr15 | + | 83316521 | 83361572 | 2138 |
| ENSG000001 | 1.233984 | 0.686276 | 0.5937   | 0.72183  | 0.79426  | RP11-540C chr15 | + | 41303795 | 41305498 | 414  |
| ENSG000001 | 1.411244 | 0.357707 | 1.3172   | 0.43349  | NA       | NDUFAF4P chr15  | + | 49448526 | 49449044 | 519  |
| ENSG000001 | 1.742621 | 1.309443 | 0.30353  | 0.83748  | 0.88597  | RP11-227C chr15 | - | 49021277 | 49022041 | 540  |
| ENSG000001 | 0.36308  | 0        | 0.4146   | 0.81455  | NA       | KRT8P9 chr15    | + | 71151053 | 71152501 | 1449 |
| ENSG000001 | 0.36308  | 0        | 0.4146   | 0.81455  | NA       | RP11-321F chr15 | + | 66874528 | 66978132 | 833  |
| ENSG000001 | 1.742621 | 0.297015 | 1.5615   | 0.351    | 0.45536  | RP13-996F chr15 | - | 83141718 | 83182928 | 1349 |
| ENSG000001 | 1.016461 | 2.886762 | -1.2988  | 0.312    | 0.41408  | RP11-650L chr15 | - | 78772399 | 78774162 | 325  |
| ENSG000001 | 7.148722 | 6.162786 | 0.18154  | 0.81248  | 0.8682   | RP11-654A chr15 | - | 99497378 | 99646030 | 588  |
| ENSG000001 | 6.930386 | 13.61233 | -0.94422 | 0.12173  | 0.19116  | CTD-2008A chr15 | - | 45118569 | 45176892 | 1133 |
| ENSG000001 | 0.923144 | 4.407421 | -1.8055  | 0.18757  | 0.27359  | RP11-26F2 chr15 | - | 23128188 | 23145997 | 1064 |
| ENSG000001 | 1.306762 | 2.010288 | -0.5113  | 0.69939  | 0.77615  | RP11-39M chr15  | + | 61473448 | 61488137 | 476  |
| ENSG000001 | 0.342542 | 0.357707 | -0.0021  | 0.99906  | NA       | RP11-930C chr14 | - | 56770208 | 56777479 | 517  |
| ENSG000001 | 15.80975 | 20.07454 | -0.34104 | 0.46848  | 0.5732   | RP11-323F chr15 | - | 57151866 | 57210697 | 3017 |
| ENSG000001 | 0.705622 | 34.35133 | -5.2364  | 1.31E-08 | 5.51E-08 | CTD-2147F chr15 | + | 97839111 | 97975324 | 565  |
| ENSG000001 | 1.338465 | 4.694699 | -1.6064  | 0.15706  | 0.23618  | RP11-154J chr15 | - | 48604550 | 48624053 | 752  |
| ENSG000001 | 19.96989 | 35.96416 | -0.8306  | 0.070346 | 0.11969  | MRPL46 chr15    | - | 89002707 | 89010650 | 5561 |
| ENSG000001 | 3.454517 | 23.09243 | -2.5935  | 0.000238 | 0.000647 | RP11-210N chr15 | - | 80637195 | 80695917 | 436  |
| ENSG000001 | 202.1408 | 39.92982 | 2.3272   | 2.02E-19 | 1.65E-18 | RP11-244F chr15 | - | 63338233 | 63341586 | 3354 |
| ENSG000001 | 2.665765 | 2.041842 | 0.3471   | 0.76272  | 0.82784  | RP11-616K chr15 | - | 44679518 | 44682649 | 655  |
| ENSG000001 | 0        | 0.297015 | -0.41864 | 0.81278  | NA       | RP11-467N chr15 | + | 22646603 | 22647417 | 699  |
| ENSG000001 | 0.342542 | 0.686276 | -0.48412 | 0.78604  | NA       | RP11-643C chr14 | + | 68077703 | 68080581 | 619  |

|            |          |          |          |          |          |           |       |   |          |          |      |
|------------|----------|----------|----------|----------|----------|-----------|-------|---|----------|----------|------|
| ENSG000001 | 0        | 0.357707 | -0.41864 | 0.81278  | NA       | RP11-352C | chr15 | + | 69571014 | 69587661 | 561  |
| ENSG000001 | 3.185568 | 0.686276 | 1.6644   | 0.27627  | 0.37651  | RP11-182J | chr15 | + | 84841242 | 84850986 | 499  |
| ENSG000001 | 2.354926 | 1.073121 | 0.93505  | 0.50958  | 0.61297  | HNRNPA1P  | chr15 | + | 67920190 | 67921473 | 966  |
| ENSG000001 | 1.628766 | 0.297015 | 1.6275   | 0.30182  | 0.40306  | RP11-685C | chr15 | - | 76631950 | 76634404 | 758  |
| ENSG000001 | 4.947913 | 1.888903 | 1.2311   | 0.2315   | 0.32499  | RP11-365N | chr14 | + | 1.03E+08 | 1.03E+08 | 828  |
| ENSG000001 | 1.306762 | 2.087966 | -0.52469 | 0.71447  | 0.7884   | ANP32AP1  | chr15 | + | 35474000 | 35530398 | 1074 |
| ENSG000001 | 0        | 0.343138 | -0.41864 | 0.81278  | NA       | RP11-324C | chr16 | - | 54279456 | 54304658 | 538  |
| ENSG000001 | 8.124107 | 0        | 4.5946   | 0.000466 | 0.001217 | RP11-597K | chr15 | + | 82380935 | 82390035 | 2568 |
| ENSG000001 | 0.975385 | 0.594029 | 0.4404   | 0.79523  | NA       | RP11-519C | chr15 | + | 45462542 | 45492156 | 292  |
| ENSG000001 | 4.314256 | 3.501809 | 0.3013   | 0.78886  | 0.8492   | CTD-2651B | chr15 | - | 45543884 | 45571449 | 630  |
| ENSG000001 | 1.286224 | 2.024857 | -0.52347 | 0.69904  | 0.77588  | RP11-540C | chr15 | + | 41309005 | 41320091 | 444  |
| ENSG000001 | 21.59947 | 2.324288 | 3.0767   | 2.05E-05 | 6.34E-05 | RP11-680F | chr15 | + | 30114834 | 30116284 | 1451 |
| ENSG000001 | 10.75654 | 24.86062 | -1.1465  | 0.099702 | 0.16105  | RP11-330L | chr15 | - | 64982366 | 64995393 | 707  |
| ENSG000001 | 0.923144 | 0.343138 | 0.88162  | 0.61011  | NA       | LINC00052 | chr15 | + | 88120160 | 88122917 | 1786 |
| ENSG000001 | 0.975385 | 2.278164 | -1.0117  | 0.45048  | 0.55609  | RP11-272C | chr15 | - | 73547675 | 73548450 | 531  |
| ENSG000001 | 5.995263 | 1.874334 | 1.4923   | 0.15854  | 0.23792  | RNF31     | chr14 | + | 24620427 | 24636611 | 4798 |
| ENSG000001 | 1.286224 | 3.679854 | -1.3252  | 0.23943  | 0.33409  | RP11-295F | chr15 | - | 49657321 | 49658882 | 1562 |
| ENSG000001 | 0        | 1.340997 | -1.8899  | 0.26871  | NA       | RP11-138F | chr15 | + | 71041271 | 71046516 | 472  |
| ENSG000001 | 0        | 0.357707 | -0.41864 | 0.81278  | NA       | RP11-736N | chr14 | + | 1.04E+08 | 1.04E+08 | 515  |
| ENSG000001 | 0.72616  | 2.102535 | -1.1286  | 0.47797  | 0.58232  | RP11-111A | chr15 | + | 40780240 | 40850183 | 2242 |
| ENSG000001 | 0.975385 | 0        | 1.2767   | 0.47406  | NA       | RP13-262C | chr15 | - | 84967471 | 84976535 | 205  |
| ENSG000001 | 0.36308  | 0        | 0.4146   | 0.81455  | NA       | RP11-526I | chr15 | + | 1.01E+08 | 1.01E+08 | 632  |
| ENSG000001 | 0.290301 | 0        | 0.4146   | 0.81455  | NA       | RP11-778C | chr11 | - | 1.2E+08  | 1.2E+08  | 2128 |
| ENSG000001 | 3.652315 | 0        | 3.3699   | 0.02381  | 0.046182 | RP11-522B | chr15 | - | 96936375 | 96948419 | 562  |
| ENSG000001 | 0.653381 | 2.367995 | -1.4865  | 0.28785  | 0.38933  | CTD-2034I | chr15 | + | 81719789 | 82047558 | 564  |
| ENSG000001 | 0.290301 | 0        | 0.4146   | 0.81455  | NA       | RP11-158N | chr15 | - | 86269346 | 86270458 | 569  |
| ENSG000001 | 0.653381 | 0.297015 | 0.51304  | 0.77085  | NA       | RP11-325E | chr15 | - | 49469807 | 49470938 | 598  |
| ENSG000001 | 0.36308  | 0.343138 | -0.0021  | 0.99905  | NA       | CYCSP2    | chr15 | + | 41401076 | 41401376 | 301  |
| ENSG000001 | 0.290301 | 0.640152 | -0.50256 | 0.77558  | NA       | RP11-38G5 | chr15 | - | 80124808 | 80125896 | 539  |
| ENSG000001 | 1.068702 | 0        | 1.3672   | 0.44297  | NA       | RP11-182J | chr15 | + | 85043609 | 85045612 | 546  |
| ENSG000001 | 0.342542 | 3.945314 | -2.8194  | 0.041375 | 0.075474 | AC140725. | chr15 | - | 1.03E+08 | 1.03E+08 | 712  |
| ENSG000001 | 0        | 3.039702 | -3.1087  | 0.041329 | 0.075412 | RP11-335K | chr15 | + | 78918237 | 78920535 | 1980 |
| ENSG000001 | 21.90012 | 33.7289  | -0.60447 | 0.16163  | 0.24185  | RP11-56B1 | chr15 | - | 52211270 | 52222824 | 1041 |
| ENSG000001 | 15.79777 | 12.45824 | 0.34584  | 0.5639   | 0.66199  | RP11-762F | chr15 | - | 78582869 | 78583563 | 695  |
| ENSG000001 | 3.713929 | 4.943174 | -0.40106 | 0.64665  | 0.73297  | CTD-2329K | chr15 | - | 44808848 | 44809681 | 498  |
| ENSG000001 | 0.632843 | 0        | 0.81931  | 0.64303  | NA       | RP11-16B9 | chr15 | + | 62126951 | 62144351 | 399  |
| ENSG000001 | 0.36308  | 0.715414 | -0.51558 | 0.77246  | NA       | DNM1P38   | chr15 | - | 82816060 | 82818549 | 415  |
| ENSG000001 | 0.685084 | 0.297015 | 0.4735   | 0.79064  | NA       | RP11-671N | chr15 | + | 84949210 | 84950212 | 389  |
| ENSG000001 | 1.161205 | 0        | 1.2509   | 0.47995  | NA       | BLID      | chr11 | - | 1.22E+08 | 1.22E+08 | 862  |
| ENSG000001 | 4.439275 | 0.297015 | 2.9972   | 0.029726 | 0.056318 | RP11-39M  | chr15 | + | 61504112 | 61506430 | 481  |
| ENSG000001 | 2.883288 | 10.35899 | -1.7304  | 0.034702 | 0.064649 | RP11-430B | chr15 | + | 52472290 | 52498071 | 1972 |
| ENSG000001 | 2.302685 | 4.516653 | -0.85863 | 0.42483  | 0.5302   | TYRO3P    | chr15 | - | 76551327 | 76554031 | 2705 |
| ENSG000001 | 40.00816 | 3.183777 | 3.505    | 1.11E-08 | 4.69E-08 | RP11-66B2 | chr15 | - | 1.01E+08 | 1.01E+08 | 3213 |
| ENSG000001 | 0.870904 | 1.652581 | -0.66289 | 0.65825  | 0.74249  | RP11-521C | chr15 | - | 40367405 | 40370905 | 864  |
| ENSG000001 | 0        | 0.297015 | -0.41864 | 0.81278  | NA       | RP11-150L | chr15 | - | 35590450 | 35591641 | 1192 |
| ENSG000001 | 0        | 1.713273 | -2.2094  | 0.18675  | NA       | RP11-463I | chr15 | + | 35300670 | 35303383 | 468  |
| ENSG000001 | 0.923144 | 0        | 1.223    | 0.49292  | NA       | RP11-20G1 | chr15 | - | 99935384 | 99936798 | 323  |
| ENSG000001 | 0.870904 | 0.686276 | 0.21904  | 0.90128  | NA       | RP11-554C | chr15 | + | 61056105 | 61057824 | 806  |
| ENSG000001 | 1.317927 | 7.028723 | -2.1627  | 0.043982 | 0.079543 | PRELID1P4 | chr15 | - | 35413774 | 35414285 | 512  |
| ENSG000001 | 0.923144 | 5.401249 | -2.1868  | 0.063172 | 0.10912  | CTD-2034I | chr15 | + | 81846344 | 81989121 | 684  |
| ENSG000001 | 1.628766 | 1.606458 | 0.009937 | 0.99402  | 0.99669  | RP11-516C | chr15 | - | 44694883 | 44719342 | 625  |
| ENSG000001 | 0        | 0.357707 | -0.41864 | 0.81278  | NA       | RP11-275I | chr15 | + | 38816271 | 38826856 | 553  |
| ENSG000001 | 12.1686  | 4.89705  | 1.2566   | 0.062515 | 0.10812  | CTD-2647L | chr8  | + | 28910034 | 28911276 | 307  |
| ENSG000001 | 47.23308 | 63.00365 | -0.4194  | 0.17091  | 0.25326  | AC074212. | chr19 | + | 46268043 | 46273064 | 1420 |
| ENSG000001 | 9.098679 | 1.248751 | 2.5568   | 0.013019 | 0.026721 | YLP1M1    | chr14 | + | 75283941 | 75322378 | 696  |
| ENSG000001 | 2.085163 | 0.937167 | 0.89024  | 0.52421  | 0.62641  | RP11-499F | chr15 | - | 81926228 | 81934531 | 476  |
| ENSG000001 | 2.718006 | 0        | 2.9226   | 0.060365 | 0.10495  | RP11-522B | chr15 | - | 96931443 | 96932285 | 843  |
| ENSG000001 | 0.290301 | 2.058828 | -1.609   | 0.35461  | 0.45882  | RP11-429B | chr15 | - | 90122996 | 90125528 | 459  |
| ENSG000001 | 0.342542 | 1.638012 | -1.6301  | 0.29933  | 0.40091  | RP11-540C | chr15 | + | 41291472 | 41297063 | 500  |
| ENSG000001 | 0.290301 | 2.38498  | -2.1058  | 0.1664   | 0.24762  | RP11-562A | chr15 | - | 50786215 | 50789277 | 297  |
| ENSG000001 | 0        | 0.297015 | -0.41864 | 0.81278  | NA       | RP11-654A | chr15 | - | 99423888 | 99436764 | 263  |
| ENSG000001 | 81.72405 | 111.9424 | -0.44962 | 0.044462 | 0.080278 | RP11-156E | chr17 | - | 40004770 | 40007699 | 2930 |
| ENSG000001 | 0.290301 | 1.713273 | -1.665   | 0.29391  | 0.39595  | CTD-2262B | chr15 | + | 85958459 | 85958864 | 406  |
| ENSG000001 | 1.048164 | 0        | 1.348    | 0.44949  | NA       | RP11-557C | chr8  | - | 1.24E+08 | 1.24E+08 | 326  |
| ENSG000001 | 0.290301 | 0.654722 | -0.51764 | 0.76892  | NA       | RP11-56B1 | chr15 | - | 52151382 | 52153490 | 1800 |

|            |          |          |          |          |          |                 |   |          |          |       |
|------------|----------|----------|----------|----------|----------|-----------------|---|----------|----------|-------|
| ENSG000001 | 4.822893 | 37.21211 | -2.8493  | 4.63E-07 | 1.70E-06 | AC100830. chr15 | + | 64993447 | 65011801 | 1609  |
| ENSG000001 | 0.72616  | 0        | 0.85004  | 0.63064  | NA       | RP11-184C chr15 | - | 36231368 | 36544458 | 701   |
| ENSG000001 | 0.923144 | 0.297015 | 0.87478  | 0.61377  | NA       | RP6-33F8.1 chrX | - | 83755033 | 83757461 | 475   |
| ENSG000001 | 14.51497 | 9.304472 | 0.61297  | 0.36722  | 0.47183  | C15orf37 chr15  | + | 80215113 | 80217194 | 2082  |
| ENSG000001 | 6.349784 | 4.380699 | 0.5086   | 0.53924  | 0.63983  | RP11-680F chr15 | - | 30020390 | 30021735 | 1346  |
| ENSG000001 | 0        | 1.058552 | -1.361   | 0.4451   | NA       | RP11-253A chr15 | + | 69683531 | 69684488 | 694   |
| ENSG000001 | 0.943682 | 0.594029 | 0.4146   | 0.80719  | NA       | RP11-351A chr15 | - | 81188532 | 81202118 | 638   |
| ENSG000001 | 0        | 0.654722 | -0.83442 | 0.63731  | NA       | RP11-272C chr15 | + | 73627601 | 73634728 | 341   |
| ENSG000001 | 0.342542 | 1.684135 | -1.6365  | 0.30118  | 0.40267  | RP11-797A chr15 | + | 77336022 | 77337502 | 264   |
| ENSG000001 | 1.390706 | 0.343138 | 1.2873   | 0.44716  | NA       | RP11-245C chr15 | + | 85229115 | 85230177 | 487   |
| ENSG000001 | 1.722083 | 0.891044 | 0.67478  | 0.65587  | 0.74063  | RP11-325E chr15 | + | 49393988 | 49395461 | 743   |
| ENSG000001 | 10.50894 | 5.384264 | 0.88765  | 0.26063  | 0.35863  | PIGHP1 chr15    | + | 59968956 | 59969520 | 565   |
| ENSG000001 | 20.6747  | 14.75755 | 0.46665  | 0.45584  | 0.5611   | RP11-89K1 chr15 | - | 1.02E+08 | 1.02E+08 | 625   |
| ENSG000001 | 12.03323 | 10.32415 | 0.21053  | 0.7387   | 0.80733  | RP11-151A chr15 | + | 44850027 | 44851386 | 653   |
| ENSG000001 | 2.810509 | 1.280305 | 0.96074  | 0.45297  | 0.55841  | DNM1P47 chr15   | + | 1.02E+08 | 1.02E+08 | 15043 |
| ENSG000001 | 1.359003 | 1.043983 | 0.31069  | 0.82982  | 0.88011  | CTD-2314C chr5  | - | 50668570 | 50679166 | 6762  |
| ENSG000001 | 0        | 5.079128 | -3.8741  | 0.006223 | 0.01361  | CTD-2147F chr15 | - | 97913601 | 97971182 | 1357  |
| ENSG000001 | 0        | 3.777806 | -3.4072  | 0.023088 | 0.044955 | RP11-323I chr15 | + | 35373345 | 35373714 | 370   |
| ENSG000001 | 0        | 1.782087 | -1.7295  | 0.3322   | NA       | RP11-307C chr15 | + | 77934106 | 77943997 | 1720  |
| ENSG000001 | 7.813268 | 2.947455 | 1.2998   | 0.13934  | 0.21307  | RP11-707P chr15 | + | 51749483 | 51752779 | 1053  |
| ENSG000001 | 23.71373 | 15.90593 | 0.55283  | 0.3792   | 0.48329  | IQCH-AS1 chr15  | - | 67695957 | 67814182 | 5753  |
| ENSG000001 | 0.632843 | 0        | 0.81931  | 0.64303  | NA       | RP11-356A chr15 | - | 59699162 | 59700353 | 802   |
| ENSG000001 | 17.19108 | 0.357707 | 4.887    | 2.11E-05 | 6.50E-05 | RP11-343B chr15 | - | 89340644 | 89341965 | 571   |
| ENSG000001 | 2.209369 | 1.355566 | 0.63473  | 0.60977  | 0.7025   | RP11-493E chr15 | + | 90419772 | 90420517 | 746   |
| ENSG000001 | 0.342542 | 0        | 0.4146   | 0.81455  | NA       | RP11-707P chr15 | + | 51706294 | 51791030 | 560   |
| ENSG000001 | 2.261609 | 1.294874 | 0.6887   | 0.57684  | 0.67356  | RP11-702L chr15 | + | 64762452 | 64763563 | 391   |
| ENSG000001 | 3.319146 | 0.297015 | 2.5516   | 0.080676 | 0.1345   | RP11-182J chr15 | + | 84944427 | 84950601 | 970   |
| ENSG000001 | 10.50992 | 6.970447 | 0.57366  | 0.39434  | 0.49882  | RP11-120K chr15 | + | 50849798 | 50852697 | 606   |
| ENSG000001 | 0        | 0.594029 | -0.81444 | 0.64499  | NA       | CTD-2315E chr15 | + | 90645881 | 90676674 | 352   |
| ENSG000001 | 0.685084 | 0        | 0.85004  | 0.63064  | NA       | RP11-250G chr15 | + | 33304320 | 33305269 | 950   |
| ENSG000001 | 1.45232  | 3.24447  | -0.99989 | 0.45667  | 0.56192  | RP11-293A chr14 | + | 75761107 | 75763341 | 715   |
| ENSG000001 | 0        | 0.654722 | -0.83442 | 0.63731  | NA       | RP11-139F chr15 | + | 35688422 | 35688645 | 224   |
| ENSG000001 | 2.085163 | 9.009873 | -1.9949  | 0.029308 | 0.055609 | ABCB10P1 chr15  | - | 22691016 | 22693200 | 2185  |
| ENSG000001 | 0        | 3.259039 | -3.1766  | 0.038239 | 0.070534 | CTD-3118C chr15 | - | 29665806 | 29669160 | 3355  |
| ENSG000001 | 0        | 1.370136 | -1.6825  | 0.34201  | NA       | FKBP1AP2 chr15  | - | 73435577 | 73435859 | 283   |
| ENSG000001 | 1.628766 | 11.28804 | -2.6043  | 0.00253  | 0.005895 | RP11-499F chr15 | - | 81952823 | 82163466 | 569   |
| ENSG000001 | 0        | 0.297015 | -0.41864 | 0.81278  | NA       | RP11-126F chr15 | - | 31745404 | 31746342 | 939   |
| ENSG000001 | 1.338465 | 0.343138 | 1.368    | 0.39684  | NA       | HMGB1P8 chr15   | - | 89678778 | 89679726 | 949   |
| ENSG000001 | 0.342542 | 0        | 0.4146   | 0.81455  | NA       | RP11-485C chr15 | + | 49102898 | 49104106 | 1198  |
| ENSG000001 | 0        | 0.654722 | -0.83442 | 0.63731  | NA       | RP11-108K chr15 | - | 51571124 | 51572212 | 363   |
| ENSG000001 | 0        | 3.06884  | -3.0961  | 0.043807 | 0.079295 | CTD-3094K chr15 | + | 91382954 | 91384608 | 402   |
| ENSG000001 | 14.81464 | 1.874334 | 2.7474   | 0.001235 | 0.003019 | RP11-227C chr15 | + | 48938148 | 48944213 | 1943  |
| ENSG000001 | 1.597063 | 2.073397 | -0.28127 | 0.84566  | 0.89172  | HSP90B2P chr15  | + | 99797837 | 99800220 | 2384  |
| ENSG000001 | 0        | 1.029414 | -1.1526  | 0.51496  | NA       | RP11-752C chr15 | - | 83360475 | 83361110 | 636   |
| ENSG000001 | 4.637074 | 2.292733 | 0.92788  | 0.33265  | 0.43595  | CTD-2184C chr15 | + | 52416758 | 52432443 | 895   |
| ENSG000001 | 0.632843 | 0.357707 | 0.4993   | 0.77637  | NA       | RP11-150L chr15 | + | 35574797 | 35575181 | 385   |
| ENSG000001 | 3.76617  | 3.976869 | -0.09016 | 0.92299  | 0.94822  | CTD-2184C chr15 | - | 52348872 | 52392720 | 635   |
| ENSG000001 | 0.36308  | 1.387121 | -1.2869  | 0.44679  | NA       | RP11-429B chr15 | + | 90061754 | 90135187 | 501   |
| ENSG000001 | 0        | 1.012429 | -1.3162  | 0.46038  | NA       | LINC00594 chr15 | + | 40664026 | 40664677 | 401   |
| ENSG000001 | 11.90919 | 40.19448 | -1.691   | 0.006701 | 0.014549 | CTD-3110F chr15 | - | 50651647 | 50652391 | 612   |
| ENSG000001 | 0.685084 | 0        | 0.85004  | 0.63064  | NA       | RP5-977B1 chr20 | - | 35177530 | 35232932 | 714   |
| ENSG000001 | 0.870904 | 1.577319 | -0.58719 | 0.7152   | 0.78899  | LINC00677 chr14 | - | 1.04E+08 | 1.04E+08 | 486   |
| ENSG000001 | 0        | 0.357707 | -0.41864 | 0.81278  | NA       | RP11-930C chr14 | + | 56777598 | 56811719 | 573   |
| ENSG000001 | 49.8356  | 0        | 7.2175   | 7.03E-11 | 3.53E-10 | RP11-758A chr15 | - | 33009471 | 33011208 | 1738  |
| ENSG000001 | 0.342542 | 0.997859 | -1.0273  | 0.53559  | NA       | RP11-94P1 chr15 | + | 77496920 | 77497442 | 245   |
| ENSG000001 | 2.023549 | 6.076987 | -1.4527  | 0.15038  | 0.22758  | RP5-823G1 chr20 | - | 52069597 | 52120853 | 542   |
| ENSG000001 | 0.36308  | 0        | 0.4146   | 0.81455  | NA       | CTD-2643K chr15 | - | 94448634 | 94651167 | 3173  |
| ENSG000001 | 0.290301 | 0        | 0.4146   | 0.81455  | NA       | CTD-3032F chr16 | - | 54971698 | 54972583 | 557   |
| ENSG000001 | 42.31443 | 21.38486 | 0.9643   | 0.026487 | 0.050824 | RP11-671A chr15 | + | 84855504 | 84866136 | 4910  |
| ENSG000001 | 8.141226 | 0.343138 | 3.7797   | 0.003699 | 0.008401 | RP11-1069 chr15 | + | 63188011 | 63191742 | 1225  |
| ENSG000001 | 0.923144 | 0.98329  | -0.04766 | 0.97585  | 0.9865   | RP11-182J chr15 | + | 85113880 | 85123406 | 2606  |
| ENSG000001 | 1.701545 | 0.700845 | 1.0292   | 0.47721  | 0.58171  | RP5-977B1 chr20 | - | 35141012 | 35154533 | 593   |
| ENSG000001 | 9.648392 | 2.993578 | 1.6029   | 0.040483 | 0.074125 | RP11-59H7 chr15 | + | 59413233 | 59425449 | 633   |
| ENSG000001 | 1.213446 | 0.686276 | 0.58081  | 0.72779  | NA       | RP11-356A chr15 | - | 59640847 | 59652088 | 497   |
| ENSG000001 | 7.086295 | 8.96375  | -0.31125 | 0.70142  | 0.77779  | RP11-387C chr15 | - | 91163239 | 91260372 | 657   |

|            |          |          |          |          |          |                 |   |          |          |      |
|------------|----------|----------|----------|----------|----------|-----------------|---|----------|----------|------|
| ENSG000001 | 0.290301 | 1.326428 | -1.262   | 0.45814  | NA       | RP11-315C chr15 | - | 46391391 | 46392590 | 800  |
| ENSG000001 | 0.995923 | 3.054271 | -1.392   | 0.25296  | 0.34982  | RP11-138F chr15 | - | 71141222 | 71142109 | 755  |
| ENSG000001 | 0.36308  | 0        | 0.4146   | 0.81455  | NA       | RP11-809F chr15 | + | 69314569 | 69316516 | 1948 |
| ENSG000001 | 1.233984 | 1.294874 | -0.03877 | 0.97823  | 0.98789  | CTD-3065B chr15 | + | 91177957 | 91178265 | 309  |
| ENSG000001 | 0.342542 | 0        | 0.4146   | 0.81455  | NA       | RP11-356A chr15 | - | 59693420 | 59694203 | 784  |
| ENSG000001 | 1.068702 | 1.713273 | -0.5685  | 0.68809  | 0.76744  | RP11-83J1 chr15 | - | 35141338 | 35142596 | 1259 |
| ENSG000001 | 1.265686 | 2.840639 | -0.98243 | 0.4428   | 0.54853  | FKSG62 chr15    | - | 47425693 | 47426320 | 628  |
| ENSG000001 | 0.943682 | 1.355566 | -0.38497 | 0.79038  | 0.85061  | RP11-505E chr15 | - | 1.02E+08 | 1.02E+08 | 720  |
| ENSG000001 | 0.342542 | 0        | 0.4146   | 0.81455  | NA       | RP11-625F chr15 | - | 62975115 | 62982647 | 577  |
| ENSG000001 | 0        | 0.715414 | -0.84936 | 0.6309   | NA       | RP11-129I chr5  | - | 2736776  | 2737873  | 688  |
| ENSG000001 | 1332.406 | 2283.719 | -0.77721 | 1.25E-12 | 7.04E-12 | CTA-204B4 chr8  | - | 1.42E+08 | 1.42E+08 | 9346 |
| ENSG000001 | 1.742621 | 0        | 1.9826   | 0.25789  | NA       | RP11-20G1 chr15 | - | 99936818 | 99941520 | 198  |
| ENSG000001 | 0.36308  | 0        | 0.4146   | 0.81455  | NA       | RP11-138F chr15 | + | 87585285 | 87590392 | 509  |
| ENSG000001 | 2.407167 | 4.181636 | -0.75818 | 0.45709  | 0.56241  | RP11-158A chr15 | - | 86293567 | 86296132 | 494  |
| ENSG000001 | 4.047098 | 0        | 3.4698   | 0.020597 | 0.040509 | RP11-327J chr15 | + | 96779014 | 96779932 | 447  |
| ENSG000001 | 0        | 0.594029 | -0.81444 | 0.64499  | NA       | RP11-299C chr15 | + | 1.02E+08 | 1.02E+08 | 639  |
| ENSG000001 | 4.700479 | 4.22776  | 0.12734  | 0.88745  | 0.92143  | RP11-90B9 chr15 | - | 83690988 | 83693088 | 454  |
| ENSG000001 | 7.356872 | 15.23906 | -1.0192  | 0.14599  | 0.22177  | RP5-991G2 chr16 | + | 72699069 | 72821143 | 462  |
| ENSG000001 | 1.555988 | 1.713273 | -0.08009 | 0.95257  | 0.97041  | RP11-429C chr15 | - | 59558919 | 59563361 | 448  |
| ENSG000001 | 0        | 5.359157 | -3.6368  | 0.020692 | 0.040677 | RP11-16E1 chr15 | - | 31514202 | 31523041 | 954  |
| ENSG000001 | 0.36308  | 0.700845 | -0.575   | 0.7429   | NA       | RP11-182J chr15 | + | 84977316 | 84980581 | 1212 |
| ENSG000001 | 5.000153 | 1.920457 | 1.2238   | 0.2456   | 0.3414   | RP11-45P1 chr14 | - | 1.04E+08 | 1.04E+08 | 694  |
| ENSG000001 | 369.4008 | 428.9091 | -0.21344 | 0.31771  | 0.42047  | RP11-673C chr15 | - | 71457109 | 71457754 | 646  |
| ENSG000001 | 2.366091 | 0.297015 | 2.0628   | 0.18261  | 0.26753  | CTD-2270L chr16 | - | 23457791 | 23458603 | 813  |
| ENSG000001 | 0.342542 | 0        | 0.4146   | 0.81455  | NA       | RP11-1006 chr15 | - | 72900828 | 72929260 | 439  |
| ENSG000001 | 0        | 0.357707 | -0.41864 | 0.81278  | NA       | RP13-98N2 chr15 | + | 82590891 | 82626963 | 5002 |
| ENSG000001 | 1.068702 | 0        | 1.3672   | 0.44297  | NA       | CTB-85P21 chr5  | + | 1.44E+08 | 1.44E+08 | 3379 |
| ENSG000001 | 0.36308  | 0        | 0.4146   | 0.81455  | NA       | RP11-359K chr1  | - | 1.63E+08 | 1.63E+08 | 1082 |
| ENSG000001 | 0.290301 | 0.357707 | -0.00203 | 0.99908  | NA       | ANP32BP1 chr15  | - | 75613738 | 75615034 | 1297 |
| ENSG000001 | 4.148974 | 2.529055 | 0.63927  | 0.52864  | 0.63026  | RP11-114F chr15 | + | 78285747 | 78287631 | 483  |
| ENSG000001 | 0.580602 | 2.041842 | -1.3263  | 0.37412  | 0.47837  | RP11-400A chr2  | - | 2.34E+08 | 2.34E+08 | 2285 |
| ENSG000001 | 0.36308  | 7.702846 | -3.7453  | 0.003178 | 0.007299 | RP11-355I chr14 | + | 62577593 | 62579268 | 1676 |
| ENSG000001 | 8.208051 | 4.646159 | 0.76343  | 0.36249  | 0.46665  | RP11-96D1 chr16 | + | 68350704 | 68352939 | 428  |
| ENSG000001 | 0        | 1.684135 | -2.1921  | 0.19067  | NA       | RP11-23E1 chr16 | + | 71147255 | 71147903 | 483  |
| ENSG000001 | 7.06657  | 12.30376 | -0.75157 | 0.41065  | 0.51547  | RP11-554A chr11 | + | 68923378 | 68927220 | 573  |
| ENSG000001 | 18.26834 | 41.13083 | -1.1554  | 0.003497 | 0.007979 | CTD-2256P chr5  | - | 10352813 | 10353713 | 901  |
| ENSG000001 | 0.705622 | 81.98492 | -6.4405  | 1.95E-13 | 1.15E-12 | SLC22A31 chr16  | - | 89262406 | 89268072 | 1672 |
| ENSG000001 | 5.623624 | 7.313585 | -0.36025 | 0.64006  | 0.72726  | CTD-2012K chr16 | - | 67595314 | 67596212 | 899  |
| ENSG000001 | 82.23269 | 41.60979 | 0.98359  | 0.001161 | 0.002853 | CTD-2196E chr16 | + | 23683453 | 23686820 | 372  |
| ENSG000001 | 68.84469 | 0        | 7.6473   | 3.37E-12 | 1.84E-11 | RP11-426C chr16 | - | 29228491 | 29231352 | 2099 |
| ENSG000001 | 0.72616  | 0.357707 | 0.52227  | 0.76959  | NA       | AC002519 chr16  | + | 31799523 | 31801961 | 2439 |
| ENSG000001 | 2.064625 | 0        | 2.4902   | 0.12625  | 0.19686  | RP11-863P chr16 | - | 88211655 | 88212547 | 756  |
| ENSG000001 | 0        | 5.407697 | -3.9989  | 0.00387  | 0.008761 | RP11-5N23 chr10 | + | 6628186  | 6628882  | 697  |
| ENSG000001 | 0.580602 | 0.686276 | -0.10523 | 0.9528   | NA       | RP11-300A chr15 | - | 29901880 | 29903416 | 1537 |
| ENSG000001 | 1.016461 | 0        | 1.3167   | 0.46021  | NA       | RP11-565A chr1  | - | 2.09E+08 | 2.09E+08 | 285  |
| ENSG000001 | 1.628766 | 1.043983 | 0.54608  | 0.69636  | 0.77366  | RP5-1024C chr1  | + | 53686335 | 53689925 | 3591 |
| ENSG000001 | 18.17845 | 61.65211 | -1.746   | 5.79E-05 | 0.00017  | AC083843 chr8   | - | 1.36E+08 | 1.36E+08 | 6253 |
| ENSG000001 | 0        | 0.343138 | -0.41864 | 0.81278  | NA       | RP11-169E chr16 | + | 47038424 | 47069296 | 744  |
| ENSG000001 | 0.290301 | 0        | 0.4146   | 0.81455  | NA       | RP11-1292 chr16 | + | 32290187 | 32290436 | 250  |
| ENSG000001 | 6.306916 | 9.972147 | -0.64743 | 0.36745  | 0.47206  | RP11-467C chr7  | - | 39987121 | 39989354 | 2234 |
| ENSG000001 | 0        | 0.297015 | -0.41864 | 0.81278  | NA       | RP11-63E9 chr6  | + | 1.42E+08 | 1.42E+08 | 3996 |
| ENSG000001 | 0        | 2.606733 | -2.6037  | 0.12251  | 0.19218  | LINC00567 chr13 | - | 1.11E+08 | 1.11E+08 | 3409 |
| ENSG000001 | 0        | 0.686276 | -0.84936 | 0.6309   | NA       | RP11-23E1 chr16 | + | 71114769 | 71127570 | 586  |
| ENSG000001 | 0        | 6.16037  | -4.1471  | 0.002907 | 0.006713 | RP11-284A chr1  | - | 1.11E+08 | 1.11E+08 | 3481 |
| ENSG000001 | 0        | 0.297015 | -0.41864 | 0.81278  | NA       | TCEB1P2 chr15   | + | 41849225 | 41849633 | 332  |
| ENSG000001 | 1.846289 | 0.594029 | 1.1406   | 0.47787  | 0.58224  | LA16c-380 chr16 | - | 760746   | 761277   | 446  |
| ENSG000001 | 6.318081 | 15.56118 | -1.2673  | 0.062888 | 0.10869  | HERC2P10 chr15  | + | 31107474 | 31136356 | 2393 |
| ENSG000001 | 1.317927 | 0        | 1.6383   | 0.35541  | NA       | RP11-467L chr16 | + | 64398684 | 64634150 | 548  |
| ENSG000001 | 1.265686 | 0.654722 | 0.70633  | 0.65335  | 0.73847  | RP11-95H3 chr16 | - | 65175659 | 65210616 | 750  |
| ENSG000001 | 0        | 1.012429 | -1.3162  | 0.46038  | NA       | AC097374 chr2   | - | 95533231 | 95613086 | 6624 |
| ENSG000001 | 5.612459 | 3.899191 | 0.48362  | 0.56817  | 0.66559  | RAB43P1 chr16   | - | 46660316 | 46660904 | 589  |
| ENSG000001 | 1.628766 | 0        | 2.1781   | 0.19145  | NA       | RP11-439I chr16 | + | 64769828 | 64770707 | 456  |
| ENSG000001 | 258.0183 | 6.093973 | 5.3684   | 9.12E-44 | 1.77E-42 | SH3RF3-AS chr2  | - | 1.1E+08  | 1.1E+08  | 1604 |
| ENSG000001 | 61.51952 | 62.81666 | -0.03574 | 0.89968  | 0.93053  | RP11-488L chr1  | - | 2.47E+08 | 2.47E+08 | 1246 |
| ENSG000001 | 0.342542 | 0        | 0.4146   | 0.81455  | NA       | RP11-177A chr16 | - | 47595218 | 47596391 | 1174 |

|            |          |          |          |          |          |                 |   |          |          |      |
|------------|----------|----------|----------|----------|----------|-----------------|---|----------|----------|------|
| ENSG000001 | 1.027626 | 0        | 1.1491   | 0.51623  | NA       | RP11-525K chr16 | - | 80188950 | 80597032 | 1476 |
| ENSG000001 | 0        | 0.715414 | -0.84936 | 0.6309   | NA       | AL022344. chr10 | - | 43246626 | 43247593 | 968  |
| ENSG000001 | 0.943682 | 0.343138 | 0.89828  | 0.6031   | NA       | CTD-3037C chr16 | - | 12650210 | 12651551 | 563  |
| ENSG000001 | 30.04379 | 27.93603 | 0.095195 | 0.80854  | 0.86493  | RP11-46C2 chr16 | - | 89281638 | 89284061 | 2424 |
| ENSG000001 | 0.290301 | 1.949596 | -1.8654  | 0.22752  | 0.32056  | RP11-830F chr16 | + | 88947446 | 88953544 | 2566 |
| ENSG000001 | 8.931605 | 1.029414 | 2.8072   | 0.009775 | 0.020584 | CTD-2382E chr15 | + | 42213615 | 42221081 | 771  |
| ENSG000001 | 0        | 0.297015 | -0.41864 | 0.81278  | NA       | RP11-1100 chr12 | - | 52452243 | 52453287 | 687  |
| ENSG000001 | 0        | 0.951736 | -1.2555  | 0.48145  | NA       | U82695.1C chrX  | + | 1.53E+08 | 1.53E+08 | 2725 |
| ENSG000001 | 10.58091 | 5.62945  | 0.8755   | 0.19351  | 0.28099  | RP11-923I chr12 | + | 52242007 | 52246513 | 427  |
| ENSG000001 | 0        | 5.702295 | -3.9481  | 0.006566 | 0.014282 | CTD-2540A chr16 | + | 24621587 | 24652278 | 293  |
| ENSG000001 | 0.290301 | 0        | 0.4146   | 0.81455  | NA       | RP11-932C chr15 | - | 30860025 | 30863292 | 508  |
| ENSG000001 | 55.43771 | 38.79681 | 0.50335  | 0.11133  | 0.17692  | CTA-204B4 chr8  | - | 1.42E+08 | 1.42E+08 | 2231 |
| ENSG000001 | 0.580602 | 0.297015 | 0.36801  | 0.83644  | NA       | RP11-1H8. chr15 | + | 34848071 | 34849021 | 951  |
| ENSG000001 | 2.665765 | 2.087966 | 0.31617  | 0.79939  | 0.85793  | RP11-697E chr15 | + | 90788645 | 90789043 | 399  |
| ENSG000001 | 5.923298 | 7.413953 | -0.31638 | 0.6912   | 0.76974  | RP11-715J chr16 | - | 2514951  | 2518214  | 3264 |
| ENSG000001 | 0.705622 | 0        | 0.8807   | 0.6196   | NA       | CTD-3037C chr16 | - | 12654613 | 12704901 | 698  |
| ENSG000001 | 65.49222 | 33.88922 | 0.94264  | 0.002277 | 0.005339 | RP5-991G2 chr16 | + | 72823142 | 72825522 | 2381 |
| ENSG000001 | 2.520208 | 1.744828 | 0.48568  | 0.70221  | 0.77846  | RP11-602A chr15 | - | 34665742 | 34666804 | 1063 |
| ENSG000001 | 0        | 7.451955 | -4.4441  | 0.000953 | 0.002372 | PWRN1 chr15     | + | 24738284 | 24897277 | 1443 |
| ENSG000001 | 0        | 2.367995 | -2.6905  | 0.093451 | 0.15263  | RP11-1006 chr15 | + | 72931162 | 72932466 | 382  |
| ENSG000001 | 0        | 3.010564 | -3.0207  | 0.053991 | 0.095102 | RP11-616A chr16 | - | 1209548  | 1210176  | 476  |
| ENSG000001 | 1.265686 | 2.979009 | -1.0437  | 0.39303  | 0.49747  | RP11-410E chr2  | - | 1.87E+08 | 1.87E+08 | 2202 |
| ENSG000001 | 12.89476 | 22.27503 | -0.78076 | 0.102    | 0.16407  | RP11-1H8. chr15 | - | 34781203 | 34782772 | 1570 |
| ENSG000001 | 0.705622 | 0.343138 | 0.57395  | 0.74355  | NA       | RP11-637I chr16 | - | 47632565 | 47632907 | 343  |
| ENSG000001 | 1.359003 | 1.387121 | -0.01892 | 0.98935  | 0.99424  | RP11-2E11 chr7  | - | 1.3E+08  | 1.3E+08  | 2902 |
| ENSG000001 | 2.665765 | 0.937167 | 1.2227   | 0.35461  | 0.45882  | AC022819. chr15 | - | 99697436 | 99701345 | 3910 |
| ENSG000001 | 0.290301 | 0        | 0.4146   | 0.81455  | NA       | RP11-322C chr16 | - | 57046983 | 57048012 | 1030 |
| ENSG000001 | 0.975385 | 0.357707 | 0.92752  | 0.59066  | NA       | RP11-16E2 chr15 | - | 66063514 | 66064477 | 964  |
| ENSG000001 | 2.843026 | 2.010288 | 0.41109  | 0.74272  | 0.81095  | RP11-44F1 chr16 | + | 53482660 | 53483502 | 706  |
| ENSG000001 | 0.36308  | 0        | 0.4146   | 0.81455  | NA       | RP11-218A chr17 | - | 28891075 | 28892594 | 1520 |
| ENSG000001 | 0.632843 | 1.387121 | -0.79676 | 0.61465  | 0.70643  | CTD-2323K chr15 | - | 75805111 | 75805381 | 271  |
| ENSG000001 | 4.00423  | 0.654722 | 2.2059   | 0.079381 | 0.13262  | RP11-304L chr16 | + | 2141437  | 2145426  | 600  |
| ENSG000001 | 0        | 3.056687 | -2.9811  | 0.061557 | 0.10667  | RP11-438C chr12 | - | 33557810 | 33558831 | 1022 |
| ENSG000001 | 1.359003 | 0        | 1.8987   | 0.26617  | NA       | CTD-3203P chr16 | - | 27224631 | 27226314 | 1684 |
| ENSG000001 | 0        | 1.531196 | -1.8455  | 0.29475  | NA       | RP11-292F chr10 | + | 47656084 | 47657233 | 1150 |
| ENSG000001 | 59.88897 | 64.38519 | -0.10898 | 0.74951  | 0.81674  | RP1-39G22 chr1  | - | 40722099 | 40723639 | 1541 |
| ENSG000001 | 11.80633 | 0        | 5.1671   | 3.11E-05 | 9.41E-05 | RP11-490C chr1  | - | 98432561 | 98434370 | 1810 |
| ENSG000001 | 0.342542 | 0        | 0.4146   | 0.81455  | NA       | RP11-170L chr16 | - | 31905863 | 31906304 | 442  |
| ENSG000001 | 48.98263 | 23.12969 | 1.0646   | 0.006419 | 0.014001 | RP11-401. chr9  | - | 1.15E+08 | 1.15E+08 | 4488 |
| ENSG000001 | 0.342542 | 0.594029 | -0.38792 | 0.8278   | NA       | IL21R-AS1 chr16 | - | 27458990 | 27464714 | 2615 |
| ENSG000001 | 73.00981 | 163.3658 | -1.1571  | 1.94E-08 | 8.02E-08 | RP11-121C chr4  | - | 47842139 | 47846356 | 4218 |
| ENSG000001 | 0        | 0.937167 | -1.2408  | 0.48662  | NA       | RP11-673C chr15 | - | 71439989 | 71481381 | 823  |
| ENSG000001 | 0.290301 | 1.073121 | -0.88899 | 0.61676  | NA       | RP11-2E17 chr15 | + | 80458265 | 80459322 | 556  |
| ENSG000001 | 96.97969 | 10.14852 | 3.2342   | 1.57E-15 | 1.06E-14 | RP11-999E chr14 | - | 58460263 | 58461243 | 981  |
| ENSG000001 | 20.26875 | 10.91818 | 0.87896  | 0.10571  | 0.16923  | AC009120. chr16 | - | 74339100 | 74369244 | 679  |
| ENSG000001 | 0        | 6.860342 | -4.1204  | 0.005144 | 0.011435 | LINC00261 chr20 | - | 22541191 | 22559280 | 4912 |
| ENSG000001 | 26.82652 | 2.428687 | 3.3582   | 2.97E-06 | 1.01E-05 | RP11-553L chr3  | - | 1.14E+08 | 1.14E+08 | 1679 |
| ENSG000001 | 8.993219 | 0.343138 | 3.9378   | 0.001867 | 0.004437 | AL121578. chrX  | + | 37765400 | 37808658 | 710  |
| ENSG000001 | 0.995923 | 1.744828 | -0.63617 | 0.65342  | 0.73848  | MRPS21P8 chr16  | + | 49798365 | 49798599 | 235  |
| ENSG000001 | 5.052394 | 0.594029 | 2.5302   | 0.044462 | 0.080278 | CDC37P1 chr16   | - | 28711615 | 28712861 | 959  |
| ENSG000001 | 0        | 1.744828 | -2.0203  | 0.24683  | NA       | RP11-335C chr1  | - | 25662920 | 25663956 | 459  |
| ENSG000001 | 18.91912 | 32.93748 | -0.77695 | 0.073248 | 0.12392  | RP11-549B chr18 | + | 29265618 | 29266786 | 1169 |
| ENSG000001 | 2.551911 | 3.930745 | -0.55729 | 0.57444  | 0.67152  | RP11-382A chr15 | + | 83847934 | 84108197 | 418  |
| ENSG000001 | 0        | 0.594029 | -0.81444 | 0.64499  | NA       | CTD-2522B chr16 | - | 33943723 | 33944473 | 751  |
| ENSG000001 | 1.555988 | 1.355566 | 0.19452  | 0.88733  | 0.92135  | RP11-261B chr15 | + | 30515220 | 30517767 | 2548 |
| ENSG000001 | 34.949   | 32.44302 | 0.10961  | 0.77445  | 0.83779  | RP11-305E chr10 | - | 30591755 | 30594995 | 3241 |
| ENSG000001 | 1.608228 | 0.997859 | 0.56388  | 0.69104  | 0.76968  | RP11-252K chr16 | - | 75355788 | 75358946 | 427  |
| ENSG000001 | 23.372   | 26.57248 | -0.19385 | 0.7063   | 0.78175  | RP3-467N1 chr6  | + | 1.01E+08 | 1.01E+08 | 1517 |
| ENSG000001 | 6.637479 | 31.06805 | -2.125   | 0.001617 | 0.003879 | TGFB3L chr19    | + | 7981030  | 7983982  | 1260 |
| ENSG000001 | 4.668776 | 10.87205 | -1.1772  | 0.10056  | 0.16227  | AC027601. chr17 | + | 79202507 | 79207783 | 4506 |
| ENSG000001 | 48.42338 | 40.03086 | 0.27378  | 0.46763  | 0.57244  | RP11-469A chr2  | + | 2.02E+08 | 2.02E+08 | 2666 |
| ENSG000001 | 3.910914 | 3.085825 | 0.33351  | 0.73711  | 0.80625  | RP11-732A chr11 | + | 1.02E+08 | 1.02E+08 | 1957 |
| ENSG000001 | 1.306762 | 2.125225 | -0.57128 | 0.69492  | 0.77231  | RP13-20L1 chr17 | - | 80338986 | 80340566 | 360  |
| ENSG000001 | 0.923144 | 0.357707 | 0.88371  | 0.60898  | NA       | RP11-329J chr16 | + | 47296652 | 47297411 | 760  |
| ENSG000001 | 0        | 16.49667 | -5.6715  | 1.94E-06 | 6.76E-06 | RP11-510A chr16 | - | 71573737 | 71575728 | 409  |

|            |          |          |          |          |          |                  |   |          |          |      |
|------------|----------|----------|----------|----------|----------|------------------|---|----------|----------|------|
| ENSG000001 | 0.290301 | 0.343138 | -0.00202 | 0.99909  | NA       | RP11-1035 chr16  | + | 18814405 | 18823503 | 361  |
| ENSG000001 | 9.824839 | 14.08255 | -0.50573 | 0.38882  | 0.49303  | RP11-505K chr16  | + | 84150656 | 84151176 | 521  |
| ENSG000001 | 0        | 0.715414 | -0.84936 | 0.6309   | NA       | RP11-218F chr17  | - | 26256574 | 26301249 | 1340 |
| ENSG000001 | 0        | 0.357707 | -0.41864 | 0.81278  | NA       | RP11-480I chr1   | - | 2.03E+08 | 2.03E+08 | 592  |
| ENSG000001 | 3.382552 | 0        | 3.2551   | 0.030587 | 0.057696 | LA16c-306 chr16  | + | 933780   | 935090   | 530  |
| ENSG000001 | 15.51945 | 36.36974 | -1.2175  | 0.002966 | 0.006843 | RP11-49C2 chr16  | + | 70610204 | 70611571 | 399  |
| ENSG000001 | 0.36308  | 1.920457 | -1.7083  | 0.29495  | 0.39702  | MRPS21P7 chr16   | + | 49741917 | 49742154 | 238  |
| ENSG000001 | 27.32416 | 44.4642  | -0.68351 | 0.080844 | 0.13472  | RP11-490N chr2   | - | 36581892 | 36582257 | 366  |
| ENSG000001 | 0        | 0.343138 | -0.41864 | 0.81278  | NA       | CTD-2015C chr16  | - | 86754294 | 86755560 | 506  |
| ENSG000001 | 89.94066 | 4.117655 | 3.5048   | 0.015007 | 0.030402 | HOXB7 chr17      | - | 46684594 | 46724385 | 3929 |
| ENSG000001 | 2.976604 | 1.416259 | 0.88929  | 0.5238   | 0.62614  | RP11-401P chr16  | - | 50585735 | 50587851 | 1146 |
| ENSG000001 | 0        | 0.937167 | -1.2408  | 0.48662  | NA       | RP11-686F chr12  | + | 54148142 | 54155888 | 429  |
| ENSG000001 | 8565.651 | 3830.43  | 1.1596   | 6.10E-25 | 6.35E-24 | LINC00657 chr20  | - | 34633544 | 34638882 | 5339 |
| ENSG000001 | 1.359003 | 2.012704 | -0.46954 | 0.73499  | 0.80443  | CTC-527H2 chr16  | + | 48634087 | 48634555 | 469  |
| ENSG000001 | 17.84349 | 23.61764 | -0.40474 | 0.39729  | 0.50176  | RP11-266L chr16  | - | 25151898 | 25160353 | 5666 |
| ENSG000001 | 1.71271  | 1.372552 | 0.20629  | 0.90383  | 0.93355  | RP11-178C chr15  | - | 55734833 | 55735555 | 723  |
| ENSG000001 | 2.044087 | 0        | 2.4801   | 0.12801  | 0.19906  | CTD-2524L chr15  | + | 72110737 | 72115725 | 630  |
| ENSG000001 | 5.382958 | 1.920457 | 1.3302   | 0.21386  | 0.30462  | RP11-407C chr16  | + | 57281262 | 57282404 | 358  |
| ENSG000001 | 0        | 0.357707 | -0.41864 | 0.81278  | NA       | RP11-454K chr14  | + | 45838418 | 45840042 | 1625 |
| ENSG000001 | 0.290301 | 0        | 0.4146   | 0.81455  | NA       | RP3-404K8 chr6   | + | 22260653 | 22318027 | 341  |
| ENSG000001 | 5.084097 | 12.27133 | -1.2389  | 0.070897 | 0.1205   | LA16c-390I chr16 | + | 1501761  | 1502654  | 570  |
| ENSG000001 | 1.286224 | 2.010288 | -0.53151 | 0.67377  | 0.75571  | CTC-527H2 chr16  | + | 48671054 | 48672630 | 539  |
| ENSG000001 | 1.048164 | 1.355566 | -0.30898 | 0.83074  | 0.88062  | ABCB10P4 chr15   | - | 28751771 | 28753954 | 2184 |
| ENSG000001 | 393.5966 | 229.5564 | 0.7764   | 5.01E-08 | 2.00E-07 | RP11-611L chr7   | + | 6694495  | 6696063  | 1569 |
| ENSG000001 | 0.290301 | 0        | 0.4146   | 0.81455  | NA       | RP11-7014 chr16  | + | 51796430 | 51807084 | 812  |
| ENSG000001 | 7.976758 | 14.77125 | -0.8696  | 0.15975  | 0.23938  | RP11-388N chr16  | + | 31207452 | 31208284 | 833  |
| ENSG000001 | 10.25809 | 5.380975 | 0.8907   | 0.28071  | 0.38168  | RP5-968P1 chr1   | - | 27018623 | 27020622 | 2000 |
| ENSG000001 | 0.685084 | 0        | 0.85004  | 0.63064  | NA       | RP11-18F1 chr16  | - | 80661448 | 80662276 | 829  |
| ENSG000001 | 141.3646 | 80.50617 | 0.81024  | 7.60E-05 | 0.00022  | CTA-445C9 chr22  | - | 26917949 | 26921002 | 3054 |
| ENSG000001 | 0        | 3.899191 | -3.4919  | 0.017349 | 0.034702 | CTD-2587A chr5   | + | 1725264  | 1728287  | 3024 |
| ENSG000001 | 0.653381 | 0        | 0.82678  | 0.64037  | NA       | RP11-439I chr16  | + | 64772226 | 64772467 | 242  |
| ENSG000001 | 0.72616  | 0.640152 | 0.083249 | 0.96152  | NA       | RP11-182J chr7   | + | 36359384 | 36360088 | 705  |
| ENSG000001 | 0        | 0.715414 | -0.84936 | 0.6309   | NA       | RP11-418I chr16  | + | 9560512  | 9611421  | 796  |
| ENSG000001 | 0.342542 | 0        | 0.4146   | 0.81455  | NA       | NSFP1 chr17      | + | 44450221 | 44564507 | 1471 |
| ENSG000001 | 29.47272 | 81.3237  | -1.4497  | 2.65E-05 | 8.09E-05 | RP11-254F chr2   | - | 10179219 | 10180790 | 1572 |
| ENSG000001 | 0.580602 | 0.357707 | 0.37639  | 0.83285  | NA       | RP11-44F1 chr16  | - | 53398894 | 53406995 | 3792 |
| ENSG000001 | 10.75915 | 13.63905 | -0.32401 | 0.62554  | 0.71563  | RP11-66N1 chrX   | + | 1.53E+08 | 1.53E+08 | 755  |
| ENSG000001 | 0.870904 | 0.594029 | 0.31055  | 0.86063  | NA       | RP11-2C24 chr16  | - | 30832389 | 30833431 | 600  |
| ENSG000001 | 5.414661 | 12.0577  | -1.0967  | 0.10783  | 0.17212  | MIR4519 chr16    | + | 30886543 | 30906541 | 1429 |
| ENSG000001 | 1.08924  | 2.321872 | -0.83495 | 0.59179  | 0.68668  | RP11-615I chr16  | - | 68607685 | 68623415 | 547  |
| ENSG000001 | 10.00968 | 13.27489 | -0.40405 | 0.54748  | 0.6475   | RP11-421I chr16  | + | 48657347 | 48778553 | 854  |
| ENSG000001 | 0.632843 | 4.006007 | -2.2257  | 0.076731 | 0.12896  | RP11-92G1 chr1   | + | 2.01E+08 | 2.01E+08 | 736  |
| ENSG000001 | 0.36308  | 1.591889 | -1.5911  | 0.31534  | 0.41792  | ADAM3B chr16     | - | 49551673 | 49552512 | 840  |
| ENSG000001 | 0        | 0.715414 | -0.84936 | 0.6309   | NA       | RP11-292C chr4   | + | 1.48E+08 | 1.48E+08 | 3654 |
| ENSG000001 | 4.491516 | 10.06601 | -1.0849  | 0.17519  | 0.2584   | RP11-33B1 chr4   | + | 1.2E+08  | 1.2E+08  | 901  |
| ENSG000001 | 1.161205 | 1.280305 | -0.0789  | 0.96112  | 0.97695  | RP11-1E4.1 chr8  | - | 9907995  | 9911764  | 3770 |
| ENSG000001 | 1.576526 | 7.532922 | -2.0511  | 0.030702 | 0.057891 | RP11-715J chr16  | - | 2502582  | 2502978  | 397  |
| ENSG000001 | 0        | 0.297015 | -0.41864 | 0.81278  | NA       | DNM1P33 chr15    | + | 74355121 | 74356126 | 270  |
| ENSG000001 | 1.286224 | 1.652581 | -0.2937  | 0.81996  | 0.87349  | RP11-220I chr9   | - | 37078810 | 37079773 | 964  |
| ENSG000001 | 4.512054 | 0.951736 | 1.9373   | 0.099876 | 0.16129  | RP11-568N chr2   | - | 64749321 | 64751227 | 1907 |
| ENSG000001 | 8.588249 | 14.09954 | -0.67969 | 0.25999  | 0.35794  | RP11-1001 chr15  | - | 74770411 | 74782627 | 3385 |
| ENSG000001 | 0        | 3.556053 | -3.3014  | 0.029657 | 0.056206 | AOC4 chr17       | + | 41017939 | 41026386 | 2289 |
| ENSG000001 | 0.342542 | 0        | 0.4146   | 0.81455  | NA       | CTC-543D1 chr19  | + | 9628826  | 9630017  | 1192 |
| ENSG000001 | 35.64525 | 15.84437 | 1.1559   | 0.004441 | 0.009968 | CTD-2574C chr16  | - | 29930957 | 29933226 | 2270 |
| ENSG000001 | 2.572449 | 1.935026 | 0.36197  | 0.74751  | 0.8151   | RP6-201G1 chrX   | - | 67233312 | 67234743 | 1432 |
| ENSG000001 | 11.78498 | 6.079404 | 0.93474  | 0.15999  | 0.23967  | RP5-1142A chr16  | + | 88785023 | 88786867 | 1845 |
| ENSG000001 | 0.290301 | 0        | 0.4146   | 0.81455  | NA       | RP11-923I chr12  | - | 52203489 | 52204384 | 896  |
| ENSG000001 | 0.580602 | 3.319731 | -1.947   | 0.16412  | 0.24487  | RP11-326A chr15  | + | 89584454 | 89626050 | 597  |
| ENSG000001 | 0.290301 | 16.78073 | -4.7915  | 8.48E-05 | 0.000244 | RP4-791K1 chr20  | - | 47980414 | 47984296 | 3883 |
| ENSG000001 | 0        | 0.297015 | -0.41864 | 0.81278  | NA       | RP11-14N5 chr16  | + | 16752084 | 16757992 | 674  |
| ENSG000001 | 0.580602 | 0        | 0.8036   | 0.6494   | NA       | ULK4P2 chr15     | + | 30864941 | 30892918 | 798  |
| ENSG000001 | 3.184754 | 0.640152 | 1.9003   | 0.15449  | 0.23282  | LA16c-312I chr16 | + | 1458835  | 1462249  | 379  |
| ENSG000001 | 0.290301 | 0        | 0.4146   | 0.81455  | NA       | CA5AP1 chr16     | - | 29630106 | 29647649 | 576  |
| ENSG000001 | 3.382552 | 4.663145 | -0.43881 | 0.63966  | 0.72707  | CTD-2270L chr16  | + | 23464079 | 23468927 | 730  |
| ENSG000001 | 0        | 0.594029 | -0.81444 | 0.64499  | NA       | RP11-258F chr10  | + | 38080508 | 38080865 | 358  |

|            |          |          |          |          |          |                 |   |          |          |      |
|------------|----------|----------|----------|----------|----------|-----------------|---|----------|----------|------|
| ENSG000001 | 9.161106 | 0        | 4.7806   | 0.000204 | 0.000559 | RP11-114F chr15 | + | 78187026 | 78197016 | 4801 |
| ENSG000001 | 1.306762 | 0.297015 | 1.2542   | 0.45876  | NA       | RP11-764E chr2  | + | 1.95E+08 | 1.95E+08 | 1028 |
| ENSG000001 | 2.718006 | 4.271467 | -0.60821 | 0.55668  | 0.65578  | RP11-361N chr15 | + | 72897524 | 72904667 | 1194 |
| ENSG000001 | 3.04001  | 0        | 3.1035   | 0.041741 | 0.076064 | RP11-322C chr16 | - | 57086417 | 57092409 | 672  |
| ENSG000001 | 1.027626 | 0.594029 | 0.4306   | 0.80706  | NA       | RP11-407C chr16 | - | 57125125 | 57126215 | 472  |
| ENSG000001 | 0        | 0.654722 | -0.83442 | 0.63731  | NA       | RP11-69H7 chr15 | + | 75406602 | 75407209 | 608  |
| ENSG000001 | 0.290301 | 1.234181 | -1.1976  | 0.48275  | NA       | RP11-394B chr16 | + | 70780960 | 70781829 | 551  |
| ENSG000001 | 1.286224 | 0        | 1.8436   | 0.2818   | NA       | RP11-483E chr15 | - | 28699806 | 28702929 | 760  |
| ENSG000001 | 20.94348 | 9.713134 | 1.0932   | 0.037882 | 0.069939 | CTC-471J1 chr19 | - | 52561743 | 52566956 | 675  |
| ENSG000001 | 0        | 0.594029 | -0.81444 | 0.64499  | NA       | CTD-2588J chr16 | - | 82154243 | 82155374 | 1132 |
| ENSG000001 | 0.290301 | 1.355566 | -1.3811  | 0.39332  | NA       | RP11-521C chr2  | + | 1.28E+08 | 1.28E+08 | 4476 |
| ENSG000001 | 2.334388 | 7.968307 | -1.6684  | 0.052424 | 0.092688 | CTD-2323K chr15 | + | 75773002 | 75773177 | 176  |
| ENSG000001 | 0.290301 | 0        | 0.4146   | 0.81455  | NA       | RP11-863P chr16 | + | 88120993 | 88121538 | 213  |
| ENSG000001 | 3.455331 | 14.89834 | -2.0434  | 0.007304 | 0.015739 | RP11-146F chr16 | + | 30597228 | 30619914 | 482  |
| ENSG000001 | 0        | 1.012429 | -1.3162  | 0.46038  | NA       | RP11-95H1 chr2  | - | 2.08E+08 | 2.08E+08 | 1105 |
| ENSG000001 | 0        | 0.357707 | -0.41864 | 0.81278  | NA       | RP11-358N chr15 | + | 57611336 | 57616106 | 772  |
| ENSG000001 | 0.342542 | 0        | 0.4146   | 0.81455  | NA       | RP11-124C chr14 | - | 23744696 | 23768656 | 1906 |
| ENSG000001 | 10.40544 | 3.008147 | 1.7074   | 0.032188 | 0.060421 | CTD-3126B chr16 | - | 2694085  | 2695215  | 572  |
| ENSG000001 | 5.715148 | 10.99914 | -0.90939 | 0.25564  | 0.35296  | RP5-902P8 chr1  | - | 1185157  | 1186714  | 1558 |
| ENSG000001 | 0        | 0.297015 | -0.41864 | 0.81278  | NA       | RP11-616N chr16 | + | 1307340  | 1308075  | 249  |
| ENSG000001 | 0.632843 | 2.307303 | -1.4851  | 0.2859   | 0.38738  | RP11-432I chr16 | + | 71688930 | 71698115 | 406  |
| ENSG000001 | 0.342542 | 0.357707 | -0.0021  | 0.99906  | NA       | RP11-481J chr16 | + | 58455230 | 58496374 | 930  |
| ENSG000001 | 1.379541 | 0        | 1.686    | 0.34092  | NA       | RP11-439I chr16 | + | 64770691 | 64771183 | 493  |
| ENSG000001 | 0        | 0.343138 | -0.41864 | 0.81278  | NA       | CTA-331P3 chr6  | + | 1.11E+08 | 1.11E+08 | 1530 |
| ENSG000001 | 7.769587 | 2.338857 | 1.635    | 0.059533 | 0.10379  | RP11-229P chr9  | - | 1.4E+08  | 1.4E+08  | 820  |
| ENSG000001 | 3.22583  | 8.903057 | -1.3743  | 0.086262 | 0.14254  | RP11-83NS chr9  | - | 1.39E+08 | 1.39E+08 | 1274 |
| ENSG000001 | 1.068702 | 1.248751 | -0.20946 | 0.89196  | 0.92501  | RP11-357N chr16 | - | 54032225 | 54033881 | 739  |
| ENSG000001 | 106.6862 | 7.593614 | 3.7628   | 7.60E-22 | 6.96E-21 | RP1-239B2 chr11 | + | 17402196 | 17405078 | 2883 |
| ENSG000001 | 12.14725 | 18.25204 | -0.56454 | 0.30566  | 0.4072   | RP11-424C chrY  | - | 21853827 | 21856492 | 2666 |
| ENSG000001 | 0.290301 | 0.997859 | -1.0217  | 0.53916  | NA       | RP11-441F chr16 | + | 56334528 | 56336816 | 1777 |
| ENSG000001 | 0.580602 | 1.058552 | -0.51948 | 0.75894  | NA       | CTD-2026K chr15 | + | 75928480 | 75931580 | 572  |
| ENSG000001 | 0.36308  | 3.694423 | -2.7206  | 0.051458 | 0.091219 | RP11-680F chr11 | - | 1.26E+08 | 1.26E+08 | 1080 |
| ENSG000001 | 5.446363 | 6.142512 | -0.14286 | 0.87683  | 0.91429  | RP13-395E chr15 | - | 32605327 | 32607855 | 2529 |
| ENSG000001 | 4.584833 | 8.1528   | -0.77377 | 0.34215  | 0.44603  | RP11-303E chr16 | - | 81050397 | 81069364 | 789  |
| ENSG000001 | 37.49056 | 3.677438 | 3.2647   | 3.43E-08 | 1.39E-07 | GS1-465N1 chr7  | + | 19037466 | 19042039 | 4574 |
| ENSG000001 | 13.90103 | 25.22161 | -0.83049 | 0.13198  | 0.20432  | RP11-347C chr16 | + | 30366762 | 30367848 | 415  |
| ENSG000001 | 1.753786 | 0        | 2.0221   | 0.24632  | NA       | RP11-483P chr16 | - | 83823572 | 83841439 | 577  |
| ENSG000001 | 0.36308  | 1.995719 | -1.8894  | 0.2148   | 0.3057   | RP11-391L chr16 | - | 81509628 | 81510124 | 497  |
| ENSG000001 | 16.15229 | 7.783813 | 1.0126   | 0.080963 | 0.1349   | RP11-526J chr9  | - | 1.12E+08 | 1.12E+08 | 5646 |
| ENSG000001 | 26.01658 | 72.60439 | -1.4544  | 0.000302 | 0.000808 | RP4-659J6 chr7  | + | 1.4E+08  | 1.4E+08  | 2380 |
| ENSG000001 | 27.22147 | 19.23694 | 0.49814  | 0.29762  | 0.39953  | RP11-856B chr11 | - | 65335953 | 65337894 | 1942 |
| ENSG000001 | 22.8839  | 8.028999 | 1.4803   | 0.006199 | 0.013564 | RP11-708J chr3  | - | 47420579 | 47422489 | 1911 |
| ENSG000001 | 5.838541 | 0        | 4.0156   | 0.005149 | 0.011447 | RP11-588K chr4  | + | 1.57E+08 | 1.57E+08 | 2615 |
| ENSG000001 | 3.019472 | 4.244745 | -0.45852 | 0.65608  | 0.74084  | SUB1P4 chr16    | + | 23548382 | 23548877 | 339  |
| ENSG000001 | 9.12003  | 11.63118 | -0.35009 | 0.57177  | 0.66885  | RP11-143K chr17 | + | 71171622 | 71172772 | 1151 |
| ENSG000001 | 4.741555 | 2.932886 | 0.6222   | 0.50535  | 0.60876  | RP11-401P chr16 | + | 50700122 | 50705550 | 5214 |
| ENSG000001 | 0.342542 | 0        | 0.4146   | 0.81455  | NA       | RP11-46D6 chr16 | + | 46607675 | 46609006 | 733  |
| ENSG000001 | 0.290301 | 0.700845 | -0.56655 | 0.74739  | NA       | RP11-384N chr16 | + | 72118756 | 72121342 | 369  |
| ENSG000001 | 5.446363 | 2.117104 | 1.2545   | 0.25361  | 0.35058  | RP4-676L2 chr8  | - | 29209937 | 29210687 | 751  |
| ENSG000001 | 0        | 4.395268 | -3.6807  | 0.010138 | 0.021291 | RP11-185C chr16 | - | 25836031 | 25837651 | 1094 |
| ENSG000001 | 44.31386 | 92.98951 | -1.0578  | 0.000132 | 0.000371 | RP5-1085F chr20 | + | 31444848 | 31446557 | 1710 |
| ENSG000001 | 0.342542 | 0        | 0.4146   | 0.81455  | NA       | RP11-467J chr16 | + | 52976051 | 52977376 | 867  |
| ENSG000001 | 4.387848 | 4.853343 | -0.15464 | 0.86609  | 0.90673  | RP11-368I chr16 | - | 89749028 | 89752977 | 721  |
| ENSG000001 | 184.3578 | 404.8939 | -1.1352  | 3.52E-11 | 1.80E-10 | RP11-304L chr16 | - | 2204798  | 2205359  | 342  |
| ENSG000001 | 10.24953 | 43.58624 | -2.0582  | 7.94E-06 | 2.58E-05 | RP11-480A chr3  | - | 1.96E+08 | 1.96E+08 | 3508 |
| ENSG000001 | 0.995923 | 0.594029 | 0.48398  | 0.76518  | NA       | RP11-440L chr4  | - | 830300   | 831012   | 713  |
| ENSG000001 | 7.488658 | 7.388847 | 0.028876 | 0.96889  | 0.98261  | RP11-666N chr18 | - | 18526867 | 18528428 | 1562 |
| ENSG000001 | 0        | 43.75932 | -7.034   | 3.03E-10 | 1.45E-09 | RP11-44F2 chr4  | - | 76006912 | 76009927 | 785  |
| ENSG000001 | 0.36308  | 50.48364 | -6.3158  | 5.43E-09 | 2.35E-08 | CTD-2311N chr15 | + | 74643109 | 74656961 | 3337 |
| ENSG000001 | 84.15257 | 52.0135  | 0.68279  | 0.06172  | 0.10694  | RP11-452L chr16 | - | 31468032 | 31471057 | 3026 |
| ENSG000001 | 6.992    | 5.242605 | 0.38439  | 0.62839  | 0.71813  | CTD-2323K chr15 | - | 75819491 | 75893546 | 789  |
| ENSG000001 | 0        | 0.343138 | -0.41864 | 0.81278  | NA       | RP1-45N11 chr6  | + | 91054938 | 91072351 | 1431 |
| ENSG000001 | 2.032922 | 3.336716 | -0.63987 | 0.58081  | 0.67732  | RP11-425C chr6  | + | 1.1E+08  | 1.1E+08  | 872  |
| ENSG000001 | 4.81352  | 2.263595 | 0.97325  | 0.36827  | 0.47292  | RP11-817C chr15 | + | 75660496 | 75661925 | 1430 |
| ENSG000001 | 34.43424 | 49.48994 | -0.52643 | 0.17405  | 0.25701  | RP11-77H9 chr16 | + | 8941962  | 8954274  | 2288 |

|            |          |          |          |          |          |                  |   |          |          |      |
|------------|----------|----------|----------|----------|----------|------------------|---|----------|----------|------|
| ENSG000001 | 1.794862 | 0.937167 | 0.67331  | 0.65755  | 0.74208  | RP11-101E chr16  | - | 22094577 | 22103552 | 515  |
| ENSG000001 | 2.448243 | 6.035696 | -1.202   | 0.25156  | 0.34832  | RP11-109C chr4   | - | 79694808 | 79697127 | 2320 |
| ENSG000001 | 53.04252 | 27.16396 | 0.95574  | 0.00334  | 0.007645 | AC137932. chr16  | + | 89363916 | 89364724 | 402  |
| ENSG000001 | 2.665765 | 2.589748 | 0.021716 | 0.98403  | 0.99093  | RP11-329J chr16  | + | 47178234 | 47196658 | 494  |
| ENSG000001 | 1.016461 | 0.594029 | 0.47076  | 0.78115  | NA       | RP11-265N chr15  | - | 42873354 | 42873686 | 333  |
| ENSG000001 | 0        | 0.640152 | -0.82869 | 0.63935  | NA       | TPSP2 chr16      | - | 1336352  | 1338838  | 610  |
| ENSG000001 | 18.2452  | 46.49644 | -1.3171  | 0.001966 | 0.004659 | RP11-600F chr14  | - | 1.04E+08 | 1.04E+08 | 4063 |
| ENSG000001 | 0        | 0.343138 | -0.41864 | 0.81278  | NA       | RP3-369A1 chr6   | - | 24797549 | 24799117 | 814  |
| ENSG000001 | 0.705622 | 0.951736 | -0.34312 | 0.83184  | NA       | RP11-24M: chr15  | + | 76030161 | 76055662 | 1597 |
| ENSG000001 | 3.713116 | 7.919767 | -0.99182 | 0.2604   | 0.35838  | CTD-2033A chr16  | - | 69790439 | 69791840 | 1402 |
| ENSG000001 | 9.274147 | 3.322147 | 1.4051   | 0.074542 | 0.12583  | RP11-715J: chr16 | + | 2526559  | 2527062  | 504  |
| ENSG000001 | 28.44331 | 23.16682 | 0.30042  | 0.48188  | 0.58615  | RP11-395I: chr4  | + | 40168295 | 40169451 | 1157 |
| ENSG000001 | 0.342542 | 0        | 0.4146   | 0.81455  | NA       | RP11-429P chr16  | - | 50092061 | 50093142 | 1082 |
| ENSG000001 | 2.894453 | 5.113098 | -0.72944 | 0.46715  | 0.57199  | RP11-505K chr16  | + | 83941738 | 83985058 | 730  |
| ENSG000001 | 0        | 1.387121 | -1.6961  | 0.33794  | NA       | NTRK3-AS1 chr15  | + | 88795961 | 88814297 | 2663 |
| ENSG000001 | 5.663886 | 2.027273 | 1.3485   | 0.21544  | 0.30648  | RP11-645C chr16  | - | 21805416 | 21807080 | 1665 |
| ENSG000001 | 1.576526 | 0.654722 | 0.99964  | 0.49628  | 0.60008  | RP11-27M: chr16  | - | 10670356 | 10672040 | 435  |
| ENSG000001 | 1.846289 | 1.294874 | 0.43718  | 0.7468   | 0.81448  | LA16c-306. chr16 | - | 950520   | 955224   | 3175 |
| ENSG000001 | 8.547987 | 0.640152 | 3.2826   | 0.002848 | 0.006589 | RP11-48B3 chr8   | + | 81453535 | 81455339 | 1805 |
| ENSG000001 | 7.59314  | 2.543625 | 1.4451   | 0.10677  | 0.17067  | COX6CP1 chr16    | - | 11997780 | 11997994 | 215  |
| ENSG000001 | 1.390706 | 0        | 1.6954   | 0.33813  | NA       | RP11-467J chr16  | + | 52968725 | 52969547 | 823  |
| ENSG000001 | 9.348718 | 4.273883 | 1.0643   | 0.17394  | 0.25686  | RP11-412C chr12  | - | 1.07E+08 | 1.07E+08 | 1469 |
| ENSG000001 | 0.580602 | 2.027273 | -1.3051  | 0.38962  | 0.49392  | RP11-111J: chr2  | - | 18728652 | 18729470 | 819  |
| ENSG000001 | 0        | 0.937167 | -1.2408  | 0.48662  | NA       | RP11-345J: chr16 | + | 29460512 | 29460946 | 152  |
| ENSG000001 | 292.2879 | 185.9066 | 0.64714  | 0.006084 | 0.01333  | RP11-395B chr7   | + | 1.01E+08 | 1.01E+08 | 3921 |
| ENSG000001 | 0        | 4.634006 | -3.6512  | 0.014076 | 0.028671 | RP11-386A chr15  | - | 93135809 | 93139692 | 3810 |
| ENSG000001 | 0        | 0.937167 | -1.2408  | 0.48662  | NA       | RP11-124K chr16  | - | 5651170  | 5666197  | 732  |
| ENSG000001 | 0.342542 | 1.370136 | -1.2729  | 0.45239  | NA       | HEXA-AS1 chr15   | + | 72668454 | 72671129 | 2676 |
| ENSG000001 | 30.30076 | 23.59414 | 0.35088  | 0.54042  | 0.64097  | RP11-473I: chr16 | - | 9199691  | 9201031  | 731  |
| ENSG000001 | 1.048164 | 0.594029 | 0.49568  | 0.76966  | NA       | RP11-152P chr16  | - | 8941507  | 8942581  | 430  |
| ENSG000001 | 0.36308  | 1.012429 | -0.95988 | 0.57711  | NA       | RP11-382A chr15  | + | 83691323 | 83759534 | 499  |
| ENSG000001 | 0.290301 | 3.322147 | -2.5887  | 0.071184 | 0.12086  | CTD-2288F chr16  | + | 18938185 | 18948365 | 463  |
| ENSG000001 | 17.04455 | 17.67902 | -0.05495 | 0.90893  | 0.9374   | RP11-436A chr3   | + | 1.81E+08 | 1.81E+08 | 2312 |
| ENSG000001 | 0        | 0.594029 | -0.81444 | 0.64499  | NA       | DNM1P34 chr15    | - | 75592294 | 75595306 | 2276 |
| ENSG000001 | 105.5987 | 16.43356 | 2.6521   | 8.16E-14 | 4.94E-13 | RP11-4F5.2 chr15 | + | 95024040 | 95027181 | 3142 |
| ENSG000001 | 1.161205 | 1.372552 | -0.13042 | 0.93969  | 0.96044  | RP11-533E chr1   | - | 1.8E+08  | 1.8E+08  | 1257 |
| ENSG000001 | 2.790785 | 11.87878 | -1.978   | 0.025842 | 0.049723 | CTD-2313J chr15  | - | 93322987 | 93324722 | 1736 |
| ENSG000001 | 0        | 433.8278 | -10.049  | 2.83E-20 | 2.42E-19 | RP11-297A chr16  | - | 9760742  | 9770700  | 660  |
| ENSG000001 | 0        | 3.428963 | -3.2154  | 0.036505 | 0.067636 | RP11-256I: chr16 | + | 65266959 | 65466723 | 781  |
| ENSG000001 | 2.31385  | 1.043983 | 0.97094  | 0.47209  | 0.57671  | CTD-2639E chr19  | + | 49429428 | 49429701 | 274  |
| ENSG000001 | 5.031856 | 2.993578 | 0.69327  | 0.44212  | 0.54794  | RP11-264B chr16  | - | 28986294 | 28990145 | 467  |
| ENSG000001 | 2.842212 | 0.686276 | 1.6611   | 0.24251  | 0.3378   | RP11-521I: chr8  | - | 1.02E+08 | 1.02E+08 | 1142 |
| ENSG000001 | 1.286224 | 6.497803 | -2.0838  | 0.046423 | 0.083412 | CTD-2526A chr17  | - | 78427535 | 78428529 | 995  |
| ENSG000001 | 0        | 7.625169 | -4.5475  | 0.000465 | 0.001213 | AQP4-AS1 chr18   | + | 24235706 | 24770662 | 2392 |
| ENSG000001 | 1.068702 | 1.485073 | -0.36872 | 0.82146  | 0.87444  | CTD-2583P chr16  | + | 12839730 | 12851692 | 786  |
| ENSG000001 | 0.342542 | 0        | 0.4146   | 0.81455  | NA       | RP11-429P chr16  | - | 50134250 | 50155854 | 666  |
| ENSG000001 | 2.749709 | 0.654722 | 1.6699   | 0.22294  | 0.31533  | RP11-540B chr15  | - | 31174470 | 31175434 | 965  |
| ENSG000001 | 4.949705 | 12.55377 | -1.2765  | 0.099128 | 0.16025  | LINC00562 chr13  | - | 48504290 | 48506757 | 2468 |
| ENSG000001 | 0.290301 | 0        | 0.4146   | 0.81455  | NA       | WBP11P1 chr18    | + | 30091626 | 30094597 | 2972 |
| ENSG000001 | 0        | 0.343138 | -0.41864 | 0.81278  | NA       | RP11-575I: chr9  | + | 27829274 | 27844479 | 2084 |
| ENSG000001 | 6.462824 | 0.343138 | 3.5116   | 0.00669  | 0.014532 | RP11-71H1 chr3   | + | 1.24E+08 | 1.24E+08 | 2538 |
| ENSG000001 | 1.08924  | 0.343138 | 0.88459  | 0.61802  | NA       | RP11-1129 chr15  | - | 56835150 | 56921790 | 1495 |
| ENSG000001 | 1.359003 | 0.937167 | 0.38688  | 0.7894   | 0.84971  | LA16c-313: chr16 | - | 728504   | 729777   | 1220 |
| ENSG000001 | 0        | 0.343138 | -0.41864 | 0.81278  | NA       | CTD-2649C chr16  | + | 22009631 | 22010977 | 934  |
| ENSG000001 | 10.24872 | 6.708276 | 0.57354  | 0.47779  | 0.58224  | AC012065. chr2   | + | 20877569 | 20879005 | 1437 |
| ENSG000001 | 3.350849 | 3.322147 | 0.00478  | 0.99609  | 0.99778  | RP11-594A chr8   | + | 79518187 | 79521940 | 3754 |
| ENSG000001 | 13.77504 | 125.0911 | -3.1531  | 4.05E-21 | 3.59E-20 | RP11-119F chr10  | + | 70458257 | 70460551 | 2295 |
| ENSG000001 | 0        | 12.50765 | -5.2833  | 1.45E-05 | 4.56E-05 | RP11-800A chr11  | + | 72950020 | 72953380 | 3361 |
| ENSG000001 | 0.342542 | 4.213191 | -2.8952  | 0.036487 | 0.067618 | RP11-616A chr16  | - | 1206976  | 1207974  | 542  |
| ENSG000001 | 137.3306 | 158.3974 | -0.20255 | 0.31711  | 0.41982  | RP11-384K chr4   | + | 1.2E+08  | 1.2E+08  | 4395 |
| ENSG000001 | 2.012384 | 1.888903 | 0.049018 | 0.96794  | 0.98191  | RP11-403B chr15  | - | 20935076 | 20961512 | 1602 |
| ENSG000001 | 2.209369 | 3.319731 | -0.50285 | 0.64815  | 0.73416  | RP11-505K chr16  | + | 84152898 | 84154758 | 1015 |
| ENSG000001 | 0        | 5.361573 | -3.9914  | 0.00392  | 0.008864 | RP11-420A chr16  | + | 5289803  | 6826015  | 1580 |
| ENSG000001 | 16.86729 | 12.84837 | 0.38026  | 0.46585  | 0.57062  | RP11-438B chr9   | - | 27937615 | 27944495 | 6881 |
| ENSG000001 | 100.412  | 49.80563 | 1.0049   | 0.001203 | 0.002947 | RP11-923I: chr12 | + | 52203789 | 52206648 | 2860 |

|            |          |          |          |          |          |                  |   |          |          |      |
|------------|----------|----------|----------|----------|----------|------------------|---|----------|----------|------|
| ENSG000001 | 1.919068 | 6.102094 | -1.5228  | 0.1187   | 0.18719  | CTD-2542L chr16  | + | 85625872 | 85629326 | 3455 |
| ENSG000001 | 0        | 10.42855 | -4.9953  | 6.95E-05 | 0.000202 | RP3-406A7 chr6   | - | 1.37E+08 | 1.37E+08 | 374  |
| ENSG000001 | 5.156062 | 0        | 3.8991   | 0.005851 | 0.012849 | RP1-155D2 chr6   | - | 1.65E+08 | 1.65E+08 | 1639 |
| ENSG000001 | 0.685084 | 5.254758 | -2.5206  | 0.044609 | 0.080508 | RP13-735L chr12  | + | 9520060  | 9550213  | 4388 |
| ENSG000001 | 6.556141 | 3.976869 | 0.68576  | 0.3915   | 0.49597  | LA16c-316i chr16 | - | 1408901  | 1411406  | 435  |
| ENSG000001 | 0.290301 | 0        | 0.4146   | 0.81455  | NA       | RP5-912I1i chr7  | + | 1.55E+08 | 1.55E+08 | 1861 |
| ENSG000001 | 3.10081  | 0        | 3.0786   | 0.048272 | 0.086284 | RP11-626C chr16  | + | 19098178 | 19109432 | 841  |
| ENSG000001 | 0        | 0.297015 | -0.41864 | 0.81278  | NA       | RP11-382N chr16  | + | 5257089  | 5257440  | 352  |
| ENSG000001 | 8.631931 | 20.34242 | -1.2118  | 0.03275  | 0.06137  | RP11-297N chr16  | - | 9847272  | 9851895  | 4624 |
| ENSG000001 | 0        | 0.700845 | -0.87835 | 0.62047  | NA       | RP11-20I2i chr16 | - | 2621571  | 2622354  | 287  |
| ENSG000001 | 0        | 0.357707 | -0.41864 | 0.81278  | NA       | RP11-405F chr16  | + | 57747694 | 57748869 | 811  |
| ENSG000001 | 8.538614 | 1.698704 | 2.1754   | 0.019924 | 0.03934  | LA16c-366i chr16 | + | 971033   | 984495   | 1408 |
| ENSG000001 | 0.36308  | 0.343138 | -0.0021  | 0.99905  | NA       | RP11-1096 chr18  | + | 59415409 | 59421928 | 3217 |
| ENSG000001 | 0.580602 | 1.652581 | -1.0812  | 0.47855  | 0.58285  | RP11-96D1 chr16  | - | 68290065 | 68294346 | 457  |
| ENSG000001 | 5.850519 | 23.99804 | -1.9746  | 0.000581 | 0.001493 | RP11-22P6 chr16  | - | 28890278 | 28891241 | 558  |
| ENSG000001 | 0        | 0.640152 | -0.82869 | 0.63935  | NA       | CTD-3057C chr16  | - | 87978664 | 87978808 | 145  |
| ENSG000001 | 1.213446 | 0.343138 | 1.1732   | 0.4909   | NA       | RP11-304L chr16  | + | 2169208  | 2170249  | 627  |
| ENSG000001 | 7.427045 | 6.581186 | 0.17392  | 0.80471  | 0.86193  | RP11-449F chr16  | + | 25096913 | 25122876 | 766  |
| ENSG000001 | 0        | 0.343138 | -0.41864 | 0.81278  | NA       | TPRKBP2 chr16    | - | 28122494 | 28122968 | 475  |
| ENSG000001 | 0        | 0.343138 | -0.41864 | 0.81278  | NA       | RP11-367F chr9   | + | 93759336 | 93764153 | 1395 |
| ENSG000001 | 6.214413 | 17.24693 | -1.4219  | 0.065344 | 0.11234  | RP1-67M1i chr6   | - | 22135186 | 22147422 | 1940 |
| ENSG000001 | 14.34708 | 13.69571 | 0.052776 | 0.92078  | 0.94686  | C16orf95 chr16   | - | 87117168 | 87351022 | 1650 |
| ENSG000001 | 0        | 44.32905 | -7.05    | 2.83E-10 | 1.36E-09 | FTLP14 chr16     | + | 68856490 | 68856973 | 484  |
| ENSG000001 | 0        | 0.357707 | -0.41864 | 0.81278  | NA       | RP11-284F chr1   | + | 1.56E+08 | 1.56E+08 | 1828 |
| ENSG000001 | 36.02789 | 26.57725 | 0.43341  | 0.30387  | 0.40521  | RP11-541N chr10  | - | 1.06E+08 | 1.06E+08 | 2388 |
| ENSG000001 | 8.330465 | 2.027273 | 1.9018   | 0.038665 | 0.071217 | RP4-561L2 chr1   | + | 94312730 | 94314495 | 1766 |
| ENSG000001 | 1.286224 | 1.355566 | -0.04027 | 0.97597  | 0.9865   | RP4-536B2 chr16  | + | 87870138 | 87871269 | 522  |
| ENSG000001 | 1.411244 | 0        | 1.7307   | 0.32696  | NA       | RP11-27M1i chr16 | - | 10608699 | 10622059 | 502  |
| ENSG000001 | 0        | 16.73299 | -5.6918  | 1.76E-06 | 6.14E-06 | RP11-8P11 chr15  | + | 74060555 | 74061978 | 519  |
| ENSG000001 | 1.794862 | 3.867637 | -0.94248 | 0.48644  | 0.5904   | RP11-834C chr12  | - | 54538853 | 54541009 | 2157 |
| ENSG000001 | 6.681161 | 3.414394 | 0.90844  | 0.32555  | 0.42842  | RP11-923Ii chr12 | + | 52217287 | 52229280 | 1027 |
| ENSG000001 | 2.613524 | 0.937167 | 1.1585   | 0.41627  | 0.52143  | RP11-85A1 chr10  | + | 1.01E+08 | 1.01E+08 | 864  |
| ENSG000001 | 239.7727 | 99.86939 | 1.2567   | 3.61E-11 | 1.85E-10 | CTD-2196E chr16  | + | 23681332 | 23684448 | 2463 |
| ENSG000001 | 0.342542 | 0        | 0.4146   | 0.81455  | NA       | RP11-151F chr15  | + | 75315321 | 75315597 | 277  |
| ENSG000001 | 0        | 1.545765 | -1.8556  | 0.29195  | NA       | RP11-1081 chr8   | - | 54301261 | 54303432 | 2172 |
| ENSG000001 | 0.705622 | 1.531196 | -0.87037 | 0.57758  | 0.67416  | RP11-166B chr16  | - | 12070708 | 12071707 | 601  |
| ENSG000001 | 1.576526 | 0.98329  | 0.55672  | 0.69492  | 0.77231  | RP11-265N chr15  | + | 42864125 | 42864631 | 507  |
| ENSG000001 | 0        | 2.82607  | -2.9558  | 0.060048 | 0.10453  | RP11-686F chr12  | - | 54144231 | 54145619 | 581  |
| ENSG000001 | 0.923144 | 3.290593 | -1.5313  | 0.21566  | 0.30671  | RP11-219B chr8   | - | 86084312 | 86089297 | 1264 |
| ENSG000001 | 0        | 1.638012 | -2.1885  | 0.18912  | NA       | AC002310i chr16  | - | 30548523 | 30549552 | 723  |
| ENSG000001 | 1.919068 | 10.8405  | -2.325   | 0.005937 | 0.013024 | RP11-55K1 chr16  | - | 81344336 | 81347028 | 2693 |
| ENSG000001 | 0.975385 | 0        | 1.2767   | 0.47406  | NA       | RP11-161N chr16  | - | 1041148  | 1050926  | 984  |
| ENSG000001 | 0.290301 | 0.640152 | -0.50256 | 0.77558  | NA       | RP4-536B2 chr16  | - | 87807094 | 87812980 | 575  |
| ENSG000001 | 0        | 0.891044 | -1.0625  | 0.54819  | NA       | RP11-7005 chr16  | + | 69201007 | 69265033 | 366  |
| ENSG000001 | 0        | 0.357707 | -0.41864 | 0.81278  | NA       | CTD-2524L chr15  | + | 72109801 | 72110589 | 391  |
| ENSG000001 | 0        | 0.343138 | -0.41864 | 0.81278  | NA       | RP11-410C chr1   | + | 2.21E+08 | 2.21E+08 | 2912 |
| ENSG000001 | 0        | 0.594029 | -0.81444 | 0.64499  | NA       | RP11-271N chr13  | - | 25874262 | 25875576 | 1315 |
| ENSG000001 | 0        | 0.654722 | -0.83442 | 0.63731  | NA       | AC004381i chr16  | - | 20754985 | 20777942 | 351  |
| ENSG000001 | 46.9198  | 4.449513 | 3.2818   | 1.97E-09 | 8.87E-09 | RP13-259F chr11  | - | 1.07E+08 | 1.07E+08 | 5329 |
| ENSG000001 | 1.681007 | 1.949596 | -0.2004  | 0.87121  | 0.91007  | CTD-2199C chr5   | - | 10195233 | 10197740 | 2508 |
| ENSG000001 | 18.70339 | 0        | 5.8425   | 7.94E-07 | 2.86E-06 | RP11-426C chr16  | + | 29127448 | 29229181 | 580  |
| ENSG000001 | 1.016461 | 0        | 1.3167   | 0.46021  | NA       | RP11-293B chr16  | - | 33489492 | 33500971 | 1178 |
| ENSG000001 | 0.290301 | 0        | 0.4146   | 0.81455  | NA       | RP11-109E chr4   | + | 42659513 | 42659945 | 433  |
| ENSG000001 | 0        | 0.343138 | -0.41864 | 0.81278  | NA       | CTD-2576F chr15  | + | 95398703 | 95400143 | 1441 |
| ENSG000001 | 1.161205 | 0        | 1.2509   | 0.47995  | NA       | RP11-483P chr16  | + | 83831266 | 83834245 | 2980 |
| ENSG000001 | 5.726313 | 19.69743 | -1.7489  | 0.003598 | 0.008194 | RP11-73K9 chr4   | - | 1.13E+08 | 1.13E+08 | 2036 |
| ENSG000001 | 49.42452 | 116.9811 | -1.245   | 1.32E-06 | 4.68E-06 | FAM157C chr16    | + | 90168679 | 90244752 | 2184 |
| ENSG000001 | 0        | 0.654722 | -0.83442 | 0.63731  | NA       | LA16c-381i chr16 | + | 1161627  | 1163399  | 1773 |
| ENSG000001 | 51.28532 | 9.955161 | 2.3078   | 2.86E-07 | 1.07E-06 | RP11-1006 chr15  | + | 72882032 | 72884186 | 2155 |
| ENSG000001 | 4.273994 | 10.69642 | -1.2625  | 0.079697 | 0.13304  | RP5-1085F chr20  | - | 31430934 | 31442063 | 459  |
| ENSG000001 | 880.1416 | 705.0711 | 0.31882  | 0.006236 | 0.013636 | RP11-252A chr16  | - | 74481325 | 74483790 | 2466 |
| ENSG000001 | 0.870904 | 0.594029 | 0.31055  | 0.86063  | NA       | LA16c-429i chr16 | - | 1891021  | 1893548  | 220  |
| ENSG000001 | 1.431782 | 2.635871 | -0.78939 | 0.53336  | 0.63427  | CTB-134F1i chr16 | + | 58150789 | 58153257 | 415  |
| ENSG000001 | 10.15703 | 3.008147 | 1.6589   | 0.03954  | 0.072654 | MT1L chr16       | + | 56651388 | 56652730 | 411  |
| ENSG000001 | 0        | 0.357707 | -0.41864 | 0.81278  | NA       | RP11-457Ii chr16 | - | 18581770 | 18583005 | 621  |

|            |          |          |          |          |          |            |       |   |          |          |      |
|------------|----------|----------|----------|----------|----------|------------|-------|---|----------|----------|------|
| ENSG000001 | 0        | 0.297015 | -0.41864 | 0.81278  | NA       | PWRN2      | chr15 | - | 24407901 | 24415095 | 4295 |
| ENSG000001 | 24.55733 | 34.08754 | -0.47601 | 0.24953  | 0.34587  | RP11-49I1  | chr18 | - | 33759959 | 33767411 | 609  |
| ENSG000001 | 0.705622 | 0.297015 | 0.56864  | 0.74638  | NA       | RP11-728K  | chr7  | + | 1.5E+08  | 1.5E+08  | 3044 |
| ENSG000001 | 148.9895 | 9.060829 | 4.0044   | 4.41E-25 | 4.62E-24 | CTD-2382E  | chr15 | + | 42189688 | 42190773 | 441  |
| ENSG000001 | 2.624689 | 2.65044  | -0.00983 | 0.99249  | 0.99592  | RP11-63M   | chr16 | + | 66772166 | 66773229 | 536  |
| ENSG000001 | 25.88544 | 22.96621 | 0.16167  | 0.76003  | 0.82566  | RP13-516A  | chr17 | + | 80251592 | 80252786 | 1195 |
| ENSG000001 | 150.8652 | 23.85235 | 2.6364   | 2.91E-19 | 2.36E-18 | ERVK13-1   | chr16 | - | 2710350  | 2723445  | 5578 |
| ENSG000001 | 0        | 0.686276 | -0.84936 | 0.6309   | NA       | CTD-2358C  | chr16 | - | 31710997 | 31711786 | 538  |
| ENSG000001 | 1.08924  | 0.343138 | 0.88459  | 0.61802  | NA       | RP11-546B  | chr15 | + | 42605885 | 42606584 | 498  |
| ENSG000001 | 1.649304 | 1.029414 | 0.5358   | 0.72024  | 0.79307  | RP11-16N1  | chr3  | - | 1.6E+08  | 1.6E+08  | 1715 |
| ENSG000001 | 0.632843 | 5.164927 | -2.5797  | 0.033294 | 0.062277 | RP11-615I  | chr16 | - | 68679283 | 68680071 | 550  |
| ENSG000001 | 47.78198 | 30.75077 | 0.63001  | 0.11062  | 0.17592  | CTD-2541J  | chr18 | - | 65149028 | 65152203 | 3176 |
| ENSG000001 | 16.21488 | 7.316001 | 1.1104   | 0.10437  | 0.16732  | RP11-382A  | chr15 | - | 83782369 | 83783318 | 396  |
| ENSG000001 | 1.411244 | 0.715414 | 0.68507  | 0.67745  | 0.75844  | CTB-113P1  | chr5  | + | 1.51E+08 | 1.51E+08 | 1567 |
| ENSG000001 | 0.685084 | 1.340997 | -0.72382 | 0.64437  | 0.73126  | TPST2P1    | chr15 | - | 36918875 | 36919976 | 1102 |
| ENSG000001 | 10.18613 | 5.271743 | 0.90926  | 0.1997   | 0.28827  | LINC00515  | chr21 | - | 26955082 | 26955638 | 557  |
| ENSG000001 | 0        | 0.594029 | -0.81444 | 0.64499  | NA       | RP11-592N  | chr15 | + | 71634663 | 71640810 | 698  |
| ENSG000001 | 6.494527 | 25.02987 | -1.8891  | 0.000666 | 0.001696 | RP11-930P  | chr8  | - | 41685683 | 41687452 | 1770 |
| ENSG000001 | 9.440242 | 10.87534 | -0.21595 | 0.7565   | 0.82296  | RP11-390B  | chr10 | - | 17683283 | 17685877 | 2595 |
| ENSG000001 | 0.975385 | 4.357266 | -1.8386  | 0.14679  | 0.22282  | RP11-817C  | chr15 | - | 75647551 | 75648087 | 343  |
| ENSG000001 | 0        | 0.297015 | -0.41864 | 0.81278  | NA       | CTA-363E6  | chr16 | - | 19488238 | 19499221 | 633  |
| ENSG000001 | 0        | 4.120944 | -3.5578  | 0.015435 | 0.031191 | RP11-432I  | chr16 | - | 71657611 | 71660719 | 465  |
| ENSG000001 | 0.290301 | 0        | 0.4146   | 0.81455  | NA       | CTD-2055C  | chr16 | + | 80770257 | 80776202 | 452  |
| ENSG000001 | 67.49767 | 0.343138 | 6.7768   | 4.47E-11 | 2.27E-10 | AC012531   | chr12 | + | 54413694 | 54416373 | 2680 |
| ENSG000001 | 0        | 0.343138 | -0.41864 | 0.81278  | NA       | RP11-109C  | chr16 | - | 61725660 | 61727654 | 1995 |
| ENSG000001 | 0.580602 | 0.357707 | 0.37639  | 0.83285  | NA       | RP11-552C  | chr16 | + | 12639339 | 12640541 | 520  |
| ENSG000001 | 0        | 1.012429 | -1.3162  | 0.46038  | NA       | HMG2P4I    | chr15 | + | 68546887 | 68547277 | 391  |
| ENSG000001 | 915.4084 | 0.700845 | 9.7825   | 1.39E-35 | 2.15E-34 | RP1-140K8  | chr6  | - | 3905144  | 3912213  | 7070 |
| ENSG000001 | 2.323223 | 6.148217 | -1.2867  | 0.20978  | 0.29981  | RP11-382A  | chr15 | + | 83681413 | 83730597 | 421  |
| ENSG000001 | 0        | 0.594029 | -0.81444 | 0.64499  | NA       | RP11-432I  | chr16 | + | 71760878 | 71761895 | 1018 |
| ENSG000001 | 0.342542 | 0.951736 | -0.90924 | 0.59857  | NA       | RP3-522J7  | chr22 | - | 50226264 | 50231434 | 1567 |
| ENSG000001 | 0.975385 | 14.98413 | -3.588   | 0.000286 | 0.000769 | RP11-491F  | chr16 | + | 49321341 | 49324138 | 654  |
| ENSG000001 | 0.36308  | 0        | 0.4146   | 0.81455  | NA       | RP11-327F  | chr16 | - | 50817770 | 50837249 | 787  |
| ENSG000001 | 6.878145 | 3.276024 | 1.0043   | 0.22774  | 0.3208   | RP11-23N2  | chr15 | + | 52870039 | 52890906 | 635  |
| ENSG000001 | 0.342542 | 0.357707 | -0.0021  | 0.99906  | NA       | RP11-775C  | chr15 | - | 81283145 | 81285599 | 2455 |
| ENSG000001 | 1.338465 | 2.07098  | -0.52304 | 0.68526  | 0.76508  | RP11-452L  | chr16 | + | 31519792 | 31520569 | 647  |
| ENSG000001 | 0.36308  | 0        | 0.4146   | 0.81455  | NA       | RP11-23E1  | chr16 | - | 33336283 | 33337443 | 560  |
| ENSG000001 | 21.88896 | 8.984767 | 1.2605   | 0.052538 | 0.092845 | RP11-1166  | chr16 | + | 31987124 | 32015049 | 1670 |
| ENSG000001 | 215.3487 | 36.97021 | 2.5299   | 2.43E-22 | 2.28E-21 | SNAI3-AS1  | chr16 | + | 88729706 | 88753594 | 2096 |
| ENSG000001 | 1.555988 | 27.71918 | -3.8676  | 1.75E-06 | 6.11E-06 | RP11-375I  | chr3  | - | 1.34E+08 | 1.34E+08 | 1946 |
| ENSG000001 | 0.923144 | 1.012429 | -0.06857 | 0.96524  | 0.97971  | RP11-521C  | chr2  | - | 1.28E+08 | 1.28E+08 | 1472 |
| ENSG000001 | 7.613678 | 2.604317 | 1.4303   | 0.11163  | 0.17734  | RP11-21M   | chr16 | + | 22376442 | 22380368 | 423  |
| ENSG000001 | 1.887365 | 3.792375 | -0.86826 | 0.47078  | 0.57554  | RP11-46C2  | chr16 | - | 89323587 | 89333938 | 555  |
| ENSG000001 | 18.05082 | 3.80936  | 2.1285   | 0.001917 | 0.004549 | RP11-1299  | chr4  | + | 99580055 | 99585701 | 5647 |
| ENSG000001 | 0.975385 | 1.698704 | -0.63147 | 0.65184  | 0.7372   | RP11-303E  | chr16 | - | 81087270 | 81121256 | 773  |
| ENSG000001 | 0        | 0.357707 | -0.41864 | 0.81278  | NA       | HERC2P5    | chr16 | + | 32752635 | 32787517 | 3825 |
| ENSG000001 | 15.46721 | 14.06557 | 0.12947  | 0.81303  | 0.86864  | RP11-250B  | chr6  | + | 81176675 | 81178797 | 2123 |
| ENSG000001 | 0.705622 | 1.995719 | -1.2463  | 0.37371  | 0.47808  | LA16c-385I | chr16 | + | 1562980  | 1564676  | 682  |
| ENSG000001 | 1.919068 | 0.997859 | 0.80627  | 0.53827  | 0.63896  | RP1-178F1  | chr17 | + | 18171394 | 18172142 | 749  |
| ENSG000001 | 2.012384 | 5.704711 | -1.389   | 0.15205  | 0.22966  | RP11-133K  | chr15 | + | 40524283 | 40528308 | 4026 |
| ENSG000001 | 0.72616  | 0        | 0.85004  | 0.63064  | NA       | RP11-403P  | chr16 | - | 66613886 | 66614619 | 555  |
| ENSG000001 | 3.081086 | 1.234181 | 1.0779   | 0.39329  | 0.49768  | AF213884   | chr4  | - | 1.03E+08 | 1.03E+08 | 479  |
| ENSG000001 | 8.527449 | 9.214641 | -0.10798 | 0.86953  | 0.90924  | CTA-250D1  | chr22 | - | 42318027 | 42319104 | 1078 |
| ENSG000001 | 1.213446 | 0        | 1.5515   | 0.38249  | NA       | RP11-368L  | chr16 | - | 63348168 | 63651950 | 571  |
| ENSG000001 | 1.08924  | 1.248751 | -0.16943 | 0.91784  | 0.94451  | RP11-69H7  | chr15 | - | 75519094 | 75526292 | 720  |
| ENSG000001 | 6.048317 | 0        | 4.176    | 0.002039 | 0.00482  | RP11-152L  | chr15 | - | 92691982 | 92874267 | 1304 |
| ENSG000001 | 2.085163 | 1.012429 | 0.8372   | 0.54898  | 0.64881  | AC004158   | chr16 | + | 72459847 | 72463072 | 3226 |
| ENSG000001 | 0        | 0.297015 | -0.41864 | 0.81278  | NA       | RP11-744C  | chr16 | - | 64294474 | 64295143 | 554  |
| ENSG000001 | 1.95077  | 5.026557 | -1.2115  | 0.28947  | 0.39109  | AL136419   | chr14 | - | 24678852 | 24685193 | 2108 |
| ENSG000001 | 1.265686 | 4.828237 | -1.6583  | 0.15537  | 0.23396  | RP11-278A  | chr16 | - | 87773369 | 87781312 | 346  |
| ENSG000001 | 2.084349 | 0.700845 | 1.2275   | 0.42257  | 0.52797  | RP11-1006  | chr15 | + | 72908151 | 72910591 | 2441 |
| ENSG000001 | 0.36308  | 0        | 0.4146   | 0.81455  | NA       | RP11-146F  | chr16 | - | 30626577 | 30627000 | 424  |
| ENSG000001 | 0        | 0.357707 | -0.41864 | 0.81278  | NA       | CTA-363E6  | chr16 | - | 19422051 | 19422984 | 665  |
| ENSG000001 | 3.931452 | 20.26965 | -2.2556  | 0.002591 | 0.006032 | RP11-510J  | chr16 | + | 81993524 | 81996298 | 2775 |
| ENSG000001 | 0.342542 | 0.654722 | -0.52406 | 0.76557  | NA       | RP11-326L  | chr15 | - | 76242805 | 76243485 | 681  |

|            |          |          |          |          |          |                   |   |          |          |      |
|------------|----------|----------|----------|----------|----------|-------------------|---|----------|----------|------|
| ENSG000001 | 10.43535 | 10.92059 | -0.06012 | 0.93044  | 0.95402  | CTB-36H16 chr5    | + | 1.22E+08 | 1.22E+08 | 2178 |
| ENSG000001 | 2.354926 | 2.80338  | -0.20825 | 0.86208  | 0.90363  | RP11-358N chr15   | - | 57539158 | 57540091 | 934  |
| ENSG000001 | 4.337399 | 0        | 3.6014   | 0.014246 | 0.029004 | AC026150. chr15   | + | 30832296 | 30838172 | 701  |
| ENSG000001 | 0.342542 | 0        | 0.4146   | 0.81455  | NA       | RP11-513N chr16   | - | 65895015 | 65897687 | 2673 |
| ENSG000001 | 6.86698  | 1.280305 | 2.1725   | 0.03515  | 0.065398 | RP11-439E chr1    | + | 2.47E+08 | 2.47E+08 | 2968 |
| ENSG000001 | 0.342542 | 0.98329  | -0.93492 | 0.58786  | NA       | LA16c-349I chr16  | - | 1153280  | 1155461  | 661  |
| ENSG000001 | 35.72561 | 110.9132 | -1.6209  | 6.54E-07 | 2.37E-06 | CTA-29F11. chr22  | - | 47157791 | 47158460 | 670  |
| ENSG000001 | 0        | 0.357707 | -0.41864 | 0.81278  | NA       | RP11-616N chr16   | - | 1344552  | 1349167  | 320  |
| ENSG000001 | 0.36308  | 25.90634 | -5.4765  | 6.05E-07 | 2.20E-06 | RP11-747F chr14   | - | 92223103 | 92226142 | 3040 |
| ENSG000001 | 1.048164 | 0.715414 | 0.37283  | 0.82507  | NA       | RP11-266L chr16   | + | 25027299 | 25032344 | 4007 |
| ENSG000001 | 0.342542 | 0        | 0.4146   | 0.81455  | NA       | RP11-744C chr16   | + | 64189073 | 64190478 | 1406 |
| ENSG000001 | 0        | 85.51425 | -7.9306  | 5.78E-13 | 3.34E-12 | AC009133. chr16   | + | 29756568 | 29759620 | 1656 |
| ENSG000001 | 0.705622 | 0        | 0.8807   | 0.6196   | NA       | RP11-165N chr16   | + | 12466669 | 12467756 | 435  |
| ENSG000001 | 1.068702 | 24.26753 | -4.2204  | 6.72E-06 | 2.20E-05 | AC005307. chr19   | - | 28909390 | 28920397 | 1570 |
| ENSG000001 | 18.6725  | 34.55844 | -0.86727 | 0.10592  | 0.16952  | SLC7A5P1 chr16    | - | 29624425 | 29624961 | 537  |
| ENSG000001 | 2.447429 | 0.891044 | 1.1142   | 0.44745  | 0.55294  | RP11-106N chr15   | - | 72577068 | 72668322 | 4374 |
| ENSG000001 | 0.290301 | 0.594029 | -0.38058 | 0.83094  | NA       | RP11-264L chr16   | - | 78529823 | 78540465 | 719  |
| ENSG000001 | 0        | 0.715414 | -0.84936 | 0.6309   | NA       | RP11-510N chr16   | - | 71464165 | 71466185 | 649  |
| ENSG000001 | 1.390706 | 3.010564 | -0.95486 | 0.46438  | 0.56937  | RP11-72I8. chr16  | + | 15188268 | 15203054 | 2598 |
| ENSG000001 | 0.72616  | 0        | 0.85004  | 0.63064  | NA       | RP11-18F1 chr16   | - | 80600691 | 80606705 | 1338 |
| ENSG000001 | 0        | 0.98329  | -1.2878  | 0.47019  | NA       | LINC00554 chr13   | - | 1.01E+08 | 1.01E+08 | 3011 |
| ENSG000001 | 0.995923 | 0        | 1.4959   | 0.39264  | NA       | RP11-366L chr2    | - | 1.83E+08 | 1.83E+08 | 3813 |
| ENSG000001 | 6.256467 | 6.71714  | -0.09039 | 0.9085   | 0.93711  | RP11-255C chr3    | + | 1.79E+08 | 1.79E+08 | 1566 |
| ENSG000001 | 1.971308 | 2.618886 | -0.35382 | 0.77529  | 0.83858  | RP11-329J chr16   | + | 47230222 | 47236340 | 764  |
| ENSG000001 | 0.870904 | 2.027273 | -0.88826 | 0.55209  | 0.65153  | RP11-421N chr18   | - | 65945039 | 65945480 | 442  |
| ENSG000001 | 43.62461 | 35.42129 | 0.29025  | 0.46216  | 0.56722  | RP11-482N chr16   | + | 87526161 | 87549241 | 555  |
| ENSG000001 | 20.63525 | 13.34928 | 0.61461  | 0.24503  | 0.34085  | CTD-2196E chr16   | + | 23579994 | 23581017 | 1024 |
| ENSG000001 | 0        | 1.935026 | -2.4284  | 0.13734  | 0.21062  | RP11-580I. chr15  | + | 24686274 | 24693114 | 849  |
| ENSG000001 | 0        | 2.543625 | -2.8094  | 0.076886 | 0.12916  | RP11-445C chr5    | - | 4436963  | 4440372  | 3300 |
| ENSG000001 | 0        | 0.297015 | -0.41864 | 0.81278  | NA       | CES1P2 chr16      | + | 55762027 | 55784023 | 1242 |
| ENSG000001 | 28.92203 | 18.8501  | 0.61006  | 0.13974  | 0.21349  | RP11-226L chr1    | - | 1.6E+08  | 1.6E+08  | 1842 |
| ENSG000001 | 2.334388 | 5.271743 | -1.0968  | 0.24188  | 0.33702  | RP11-352C chr15   | - | 66607252 | 66624041 | 500  |
| ENSG000001 | 13.08318 | 16.70057 | -0.34779 | 0.53217  | 0.63332  | CTD-2083E chr5    | - | 214013   | 217394   | 2881 |
| ENSG000001 | 0.705622 | 31.73573 | -5.106   | 6.55E-08 | 2.59E-07 | RP11-114F chr15   | - | 78206559 | 78219188 | 2123 |
| ENSG000001 | 1.286224 | 0.937167 | 0.34426  | 0.81238  | 0.86814  | CTD-2008P chr17   | - | 26590660 | 26593395 | 2736 |
| ENSG000001 | 10.07309 | 15.84108 | -0.63515 | 0.31325  | 0.41552  | hsa-mir-94I chr16 | + | 2318156  | 2323419  | 543  |
| ENSG000001 | 4.55313  | 4.074821 | 0.13078  | 0.89686  | 0.92852  | ARHGAP23 chr16    | - | 33709886 | 33739634 | 1937 |
| ENSG000001 | 1.338465 | 1.759397 | -0.30821 | 0.8223   | 0.87483  | RP11-480C chr16   | + | 46823810 | 46825952 | 1836 |
| ENSG000001 | 0.290301 | 0        | 0.4146   | 0.81455  | NA       | AC026150. chr15   | + | 30808282 | 30810070 | 1156 |
| ENSG000001 | 0        | 0.686276 | -0.84936 | 0.6309   | NA       | RP11-879C chr17   | - | 69093916 | 69198318 | 2059 |
| ENSG000001 | 6.753126 | 1.623443 | 1.8628   | 0.068167 | 0.11644  | RP11-797A chr15   | - | 77334178 | 77335533 | 1356 |
| ENSG000001 | 1.233984 | 1.591889 | -0.28597 | 0.83731  | 0.8859   | RP11-21M. chr16   | + | 22386180 | 22389501 | 1415 |
| ENSG000001 | 2.749709 | 0.297015 | 2.2887   | 0.12577  | 0.19638  | RP11-982N chr14   | - | 1.05E+08 | 1.05E+08 | 3816 |
| ENSG000001 | 79.7296  | 23.54405 | 1.7312   | 1.10E-06 | 3.91E-06 | RP5-882C2 chr17   | + | 42298769 | 42301078 | 1796 |
| ENSG000001 | 0.685084 | 0        | 0.85004  | 0.63064  | NA       | RP11-107C chr16   | - | 86939781 | 86940078 | 298  |
| ENSG000001 | 2.67693  | 7.451955 | -1.374   | 0.133    | 0.2055   | RP11-1348 chr16   | - | 28831891 | 28833354 | 540  |
| ENSG000001 | 0        | 3.976869 | -3.5412  | 0.014529 | 0.029512 | RP11-354N chr16   | - | 68848233 | 68857429 | 562  |
| ENSG000001 | 0.685084 | 1.40169  | -0.7101  | 0.66663  | 0.74943  | RP11-90M. chr15   | - | 43093166 | 43094603 | 1438 |
| ENSG000001 | 2.345553 | 0.951736 | 0.98812  | 0.50756  | 0.61112  | RP11-294K chr1    | + | 2.02E+08 | 2.02E+08 | 1395 |
| ENSG000001 | 0        | 11.03473 | -5.0638  | 5.64E-05 | 0.000166 | RP6-170F5 chrX    | + | 1.11E+08 | 1.11E+08 | 4595 |
| ENSG000001 | 1.016461 | 1.355566 | -0.33317 | 0.81779  | 0.87209  | Z84812.4 chr16    | - | 67514    | 85195    | 773  |
| ENSG000001 | 274.2759 | 149.9464 | 0.86072  | 0.036373 | 0.067438 | RP11-566E chr2    | + | 2.17E+08 | 2.17E+08 | 3148 |
| ENSG000001 | 10.27863 | 23.7027  | -1.1674  | 0.052276 | 0.092466 | RP11-61J1. chr1   | + | 2.13E+08 | 2.13E+08 | 1899 |
| ENSG000001 | 10.26926 | 23.52136 | -1.1598  | 0.023235 | 0.045198 | RP11-872J. chr14  | - | 96967147 | 96968658 | 1512 |
| ENSG000001 | 376.0234 | 149.6753 | 1.3203   | 3.06E-08 | 1.25E-07 | RP11-161N chr16   | - | 1025761  | 1031596  | 3726 |
| ENSG000001 | 4.140415 | 5.407697 | -0.36766 | 0.69395  | 0.77179  | CTD-2007L chr11   | - | 68380367 | 68384179 | 563  |
| ENSG000001 | 2.531373 | 0.297015 | 2.0889   | 0.19033  | 0.27703  | CTD-2547L chr14   | + | 91724643 | 91725347 | 705  |
| ENSG000001 | 4.721017 | 4.083685 | 0.19738  | 0.83014  | 0.88029  | RP11-107F chr15   | - | 42063130 | 42064930 | 334  |
| ENSG000001 | 0        | 0.357707 | -0.41864 | 0.81278  | NA       | RP11-319C chr16   | + | 78931062 | 78933541 | 2480 |
| ENSG000001 | 0        | 0.343138 | -0.41864 | 0.81278  | NA       | RP11-382N chr16   | - | 5310687  | 5311044  | 358  |
| ENSG000001 | 0.72616  | 0        | 0.85004  | 0.63064  | NA       | UNGP1 chr16       | + | 51311763 | 51313023 | 1261 |
| ENSG000001 | 247.1113 | 548.6592 | -1.1484  | 5.01E-10 | 2.36E-09 | GS1-358P8 chrX    | + | 24563633 | 24568583 | 4951 |
| ENSG000001 | 0        | 0.297015 | -0.41864 | 0.81278  | NA       | HMGB3P3.2 chr16   | + | 57637049 | 57637609 | 561  |
| ENSG000001 | 0.342542 | 4.443808 | -2.8431  | 0.051031 | 0.09056  | RP11-524C chr14   | + | 21852451 | 21853079 | 629  |
| ENSG000001 | 5.507977 | 4.256898 | 0.35125  | 0.67927  | 0.75991  | GHC-362H1 chrX    | + | 1.03E+08 | 1.03E+08 | 4484 |

|            |          |          |          |          |          |                  |   |          |          |      |
|------------|----------|----------|----------|----------|----------|------------------|---|----------|----------|------|
| ENSG000001 | 0.290301 | 0        | 0.4146   | 0.81455  | NA       | CTD-3253I: chr16 | - | 82986835 | 83023903 | 1493 |
| ENSG000001 | 54.60707 | 65.61354 | -0.2623  | 0.32082  | 0.42363  | AC124789. chr17  | - | 36606638 | 36608688 | 702  |
| ENSG000001 | 0        | 2402.353 | -12.324  | 2.49E-31 | 3.35E-30 | RP11-256I: chr16 | - | 65224876 | 65268817 | 1337 |
| ENSG000001 | 13.39142 | 7.143661 | 0.86921  | 0.1758   | 0.2591   | RP11-434B chr2   | - | 8861264  | 8862816  | 1553 |
| ENSG000001 | 0        | 0.891044 | -1.0625  | 0.54819  | NA       | RP11-531A chr8   | + | 73859385 | 73862680 | 3296 |
| ENSG000001 | 37.91623 | 10.52892 | 1.8178   | 4.48E-05 | 0.000133 | CTC-205M: chr5   | - | 1.8E+08  | 1.8E+08  | 3088 |
| ENSG000001 | 87.83399 | 31.3237  | 1.4723   | 2.89E-05 | 8.78E-05 | FBXL19-AS: chr16 | - | 30930640 | 30934590 | 3951 |
| ENSG000001 | 33.6644  | 38.80729 | -0.20761 | 0.54705  | 0.6472   | RP11-264B chr16  | - | 28968008 | 28978204 | 573  |
| ENSG000001 | 12.04277 | 5.972588 | 0.9864   | 0.15516  | 0.23368  | RP11-439E chr1   | + | 2.47E+08 | 2.47E+08 | 3472 |
| ENSG000001 | 0        | 7.627585 | -4.4969  | 0.000735 | 0.001862 | RP11-615I: chr16 | - | 68684959 | 68685851 | 893  |
| ENSG000001 | 0.72616  | 0        | 0.85004  | 0.63064  | NA       | RP11-22H5 chr16  | + | 82806924 | 82863243 | 4037 |
| ENSG000001 | 0.36308  | 1.416259 | -1.3043  | 0.44028  | NA       | CTA-331F8. chr16 | - | 58631493 | 58631849 | 357  |
| ENSG000001 | 0.290301 | 0.594029 | -0.38058 | 0.83094  | NA       | RP11-459F chr16  | + | 58231016 | 58251709 | 330  |
| ENSG000001 | 3.184754 | 0.686276 | 1.8075   | 0.19627  | 0.2843   | RP11-394I: chr2  | + | 1.75E+08 | 1.75E+08 | 1884 |
| ENSG000001 | 0        | 1.828211 | -2.0755  | 0.23445  | NA       | CTD-2373J: chr5  | - | 89684285 | 89685180 | 896  |
| ENSG000001 | 22.37526 | 10.50952 | 1.0625   | 0.043029 | 0.078101 | RP11-680G chr16  | - | 15111963 | 15114345 | 2383 |
| ENSG000001 | 3.071713 | 3.319731 | -0.11081 | 0.91969  | 0.94599  | RP11-715J: chr16 | - | 2506253  | 2509980  | 789  |
| ENSG000001 | 1.597063 | 0.715414 | 0.84373  | 0.60354  | 0.69691  | RP11-345N chr16  | + | 79710005 | 79841819 | 1494 |
| ENSG000001 | 3.786708 | 1.248751 | 1.3382   | 0.27365  | 0.37338  | RP11-211G chr11  | + | 69186231 | 69187279 | 371  |
| ENSG000001 | 2.656392 | 1.280305 | 0.87096  | 0.5003   | 0.60396  | RP11-483I: chr1  | + | 1.09E+08 | 1.09E+08 | 1566 |
| ENSG000001 | 0.975385 | 0        | 1.2767   | 0.47406  | NA       | RP11-346C chr16  | + | 73126248 | 73127673 | 1079 |
| ENSG000001 | 0.632843 | 1.782087 | -1.029   | 0.53301  | 0.63407  | RP11-10K1 chr16  | - | 5128169  | 5128606  | 438  |
| ENSG000001 | 27.08772 | 13.78312 | 0.94647  | 0.067093 | 0.1149   | AC009120. chr16  | + | 74347235 | 74349532 | 513  |
| ENSG000001 | 2.31385  | 2.431104 | -0.04684 | 0.97041  | 0.98357  | RP11-96D1 chr16  | - | 68246304 | 68255574 | 460  |
| ENSG000001 | 3.257533 | 3.631315 | -0.13621 | 0.90174  | 0.93215  | RP11-554A chr11  | + | 68870961 | 68876562 | 622  |
| ENSG000001 | 2.781412 | 0.686276 | 1.4865   | 0.34165  | 0.44552  | RP11-314C chr16  | - | 80862632 | 80926492 | 2218 |
| ENSG000001 | 4.015395 | 4.213191 | -0.08038 | 0.93033  | 0.95399  | ADPGK-AS1 chr15  | + | 73075176 | 73090540 | 2730 |
| ENSG000001 | 0        | 0.357707 | -0.41864 | 0.81278  | NA       | RP11-2C24 chr16  | + | 30751988 | 30762702 | 883  |
| ENSG000001 | 0        | 0.297015 | -0.41864 | 0.81278  | NA       | RP11-95M: chr3   | - | 14840838 | 14852921 | 3830 |
| ENSG000001 | 0        | 128.5226 | -8.4549  | 1.51E-14 | 9.65E-14 | RP1-310O1 chr20  | + | 30586850 | 30591190 | 4341 |
| ENSG000001 | 0.36308  | 0        | 0.4146   | 0.81455  | NA       | RP11-105C chr16  | - | 22623864 | 22624804 | 375  |
| ENSG000001 | 2.770247 | 2.66501  | 0.032889 | 0.9764   | 0.9867   | AC008088. chr17  | - | 20433355 | 20434194 | 840  |
| ENSG000001 | 0        | 3.769685 | -3.4058  | 0.022243 | 0.043455 | CTB-134H2 chr16  | - | 29065053 | 29119429 | 1840 |
| ENSG000001 | 0.342542 | 0        | 0.4146   | 0.81455  | NA       | RP11-93O1 chr16  | + | 46683038 | 46683761 | 398  |
| ENSG000001 | 39.04834 | 0.640152 | 5.4223   | 2.88E-09 | 1.28E-08 | LINC00565 chr13  | - | 1.15E+08 | 1.15E+08 | 2331 |
| ENSG000001 | 1.628766 | 1.188058 | 0.32187  | 0.82811  | 0.87889  | RP11-196G chr16  | + | 31054471 | 31061201 | 461  |
| ENSG000001 | 5.726313 | 72.71994 | -3.6274  | 2.58E-15 | 1.72E-14 | RP11-363E chr9   | + | 19453207 | 19455171 | 1965 |
| ENSG000001 | 180.4626 | 38.4957  | 2.2229   | 5.14E-22 | 4.73E-21 | CCPG1 chr15      | - | 55632230 | 55700708 | 6822 |
| ENSG000001 | 169.0263 | 63.57982 | 1.4033   | 5.44E-11 | 2.75E-10 | RP11-57H1 chr10  | + | 1.15E+08 | 1.15E+08 | 4237 |
| ENSG000001 | 0        | 0.297015 | -0.41864 | 0.81278  | NA       | RP11-731J: chr4  | + | 47433977 | 47440976 | 7000 |
| ENSG000001 | 0        | 1.340997 | -1.8899  | 0.26871  | NA       | CTD-3154N chr15  | - | 74905535 | 74907937 | 498  |
| ENSG000001 | 74.00573 | 56.43945 | 0.38559  | 0.1546   | 0.23295  | RP1-228H1 chr1   | + | 40929991 | 40932436 | 2446 |
| ENSG000001 | 0.580602 | 0        | 0.8036   | 0.6494   | NA       | RP11-538I: chr16 | + | 77268774 | 77324831 | 652  |
| ENSG000001 | 1.233984 | 1.623443 | -0.29416 | 0.84179  | 0.88902  | AC137934. chr16  | + | 90252405 | 90289086 | 2056 |
| ENSG000001 | 22.52359 | 63.59996 | -1.4741  | 0.000119 | 0.000337 | AC004463. chr22  | + | 19158908 | 19160345 | 1438 |
| ENSG000001 | 3.963155 | 4.242329 | -0.09933 | 0.91075  | 0.93876  | RP11-459F chr16  | + | 58163433 | 58193037 | 577  |
| ENSG000001 | 2.188831 | 1.355566 | 0.60428  | 0.64855  | 0.73454  | RP11-214L chr18  | - | 53548919 | 53587430 | 2310 |
| ENSG000001 | 5.955001 | 0.686276 | 2.7059   | 0.025559 | 0.049233 | RP11-65L3 chr2   | + | 1.79E+08 | 1.79E+08 | 2058 |
| ENSG000001 | 3.725094 | 3.47267  | 0.10059  | 0.92303  | 0.94822  | RP11-483P chr16  | - | 83963401 | 83964828 | 388  |
| ENSG000001 | 5.095262 | 3.154639 | 0.59395  | 0.59292  | 0.68773  | FTO-IT1 chr16    | + | 54073305 | 54074638 | 1223 |
| ENSG000001 | 0        | 0.357707 | -0.41864 | 0.81278  | NA       | RP11-548N chr15  | + | 55348945 | 55384371 | 483  |
| ENSG000001 | 3.350849 | 4.242329 | -0.33155 | 0.71767  | 0.7909   | RP4-593C1 chr1   | + | 1.78E+08 | 1.78E+08 | 600  |
| ENSG000001 | 0.342542 | 0        | 0.4146   | 0.81455  | NA       | RP11-467J chr16  | - | 53044307 | 53045198 | 892  |
| ENSG000001 | 0.36308  | 0        | 0.4146   | 0.81455  | NA       | RP4-575N: chr1   | + | 1.02E+08 | 1.02E+08 | 592  |
| ENSG000001 | 15.06207 | 23.74157 | -0.63705 | 0.37255  | 0.47693  | LINC00622 chr1   | - | 1.2E+08  | 1.2E+08  | 1570 |
| ENSG000001 | 73.91421 | 63.42043 | 0.21566  | 0.41127  | 0.51604  | RP11-27M: chr2   | - | 2.42E+08 | 2.42E+08 | 4000 |
| ENSG000001 | 0.653381 | 0        | 0.82678  | 0.64037  | NA       | RP11-463C chr16  | - | 86598751 | 86601367 | 319  |
| ENSG000001 | 12.2611  | 15.63718 | -0.33022 | 0.53101  | 0.63243  | RP11-384P chr9   | + | 33697457 | 33700984 | 3528 |
| ENSG000001 | 7.582953 | 22.35358 | -1.4915  | 0.02037  | 0.040111 | RP11-552N chr1   | - | 1.12E+08 | 1.12E+08 | 2023 |
| ENSG000001 | 3.983692 | 6.566617 | -0.69118 | 0.38627  | 0.49051  | KB-1836B5 chr8   | + | 37920399 | 37921309 | 911  |
| ENSG000001 | 0.632843 | 0.594029 | 0.039277 | 0.98194  | NA       | RP11-426C chr16  | - | 29273594 | 29275800 | 561  |
| ENSG000001 | 0.943682 | 0.594029 | 0.4146   | 0.80719  | NA       | LA16c-425: chr16 | - | 1629243  | 1630309  | 404  |
| ENSG000001 | 1.016461 | 1.370136 | -0.32394 | 0.83338  | 0.88274  | RP11-30L1 chr8   | - | 54955549 | 54958189 | 440  |
| ENSG000001 | 0        | 0.686276 | -0.84936 | 0.6309   | NA       | LINC00557 chr13  | + | 95612295 | 95613573 | 1279 |
| ENSG000001 | 23.04242 | 75.15171 | -1.688   | 2.21E-05 | 6.82E-05 | RP11-690C chr11  | - | 1.03E+08 | 1.03E+08 | 5113 |

|            |          |          |          |          |          |                  |   |          |          |       |
|------------|----------|----------|----------|----------|----------|------------------|---|----------|----------|-------|
| ENSG000001 | 2.334388 | 0.357707 | 2.0901   | 0.16231  | 0.24267  | RP11-504A chr1   | - | 56713966 | 56724243 | 1352  |
| ENSG000001 | 2.261609 | 3.411978 | -0.51212 | 0.63052  | 0.71982  | RP11-333I chr2   | + | 47004922 | 47007384 | 2463  |
| ENSG000001 | 1.306762 | 3.353702 | -1.1475  | 0.36846  | 0.47314  | RP11-77H9 chr16  | + | 9056563  | 9060847  | 427   |
| ENSG000001 | 0.685084 | 4.256898 | -2.2163  | 0.091723 | 0.15019  | RP11-285A chr15  | + | 78433585 | 78435515 | 1931  |
| ENSG000001 | 0.975385 | 2.962024 | -1.3399  | 0.30255  | 0.40378  | LA16c-395I chr16 | + | 1630528  | 1660329  | 485   |
| ENSG000001 | 0        | 0.297015 | -0.41864 | 0.81278  | NA       | RP11-616A chr16  | - | 1330162  | 1330545  | 299   |
| ENSG000001 | 6.617755 | 6.327879 | 0.061783 | 0.93895  | 0.95985  | DOCK9-AS2 chr13  | + | 99740073 | 99740879 | 807   |
| ENSG000001 | 0        | 0.357707 | -0.41864 | 0.81278  | NA       | RP11-165F chr9   | - | 81750337 | 81760589 | 2432  |
| ENSG000001 | 0.290301 | 1.698704 | -1.6722  | 0.28779  | 0.38931  | RP13-122B chr9   | - | 1.4E+08  | 1.4E+08  | 1854  |
| ENSG000001 | 0        | 0.357707 | -0.41864 | 0.81278  | NA       | RP4-647J2 chr7   | - | 44998598 | 45000508 | 1911  |
| ENSG000001 | 0.342542 | 0        | 0.4146   | 0.81455  | NA       | RP11-534L chr1   | + | 2.07E+08 | 2.07E+08 | 509   |
| ENSG000001 | 4.564295 | 2.232041 | 0.92773  | 0.34724  | 0.45142  | RP11-546B chr15  | + | 42500611 | 42519188 | 823   |
| ENSG000001 | 0.36308  | 0        | 0.4146   | 0.81455  | NA       | RP1-140C1 chr6   | + | 1.71E+08 | 1.71E+08 | 5187  |
| ENSG000001 | 16.69182 | 36.61734 | -1.1167  | 0.004556 | 0.010211 | CTB-58E17 chr17  | + | 36858705 | 36861000 | 2296  |
| ENSG000001 | 6.14082  | 17.8425  | -1.4824  | 0.013449 | 0.027535 | AC004158 chr16   | - | 72459384 | 72698908 | 2194  |
| ENSG000001 | 0        | 1.387121 | -1.6961  | 0.33794  | NA       | CTD-2050B chr16  | - | 56217638 | 56220218 | 795   |
| ENSG000001 | 0.290301 | 0        | 0.4146   | 0.81455  | NA       | RP11-370P chr16  | + | 63764181 | 63788661 | 443   |
| ENSG000001 | 11.93054 | 22.23461 | -0.89068 | 0.086789 | 0.14331  | RP1-90J20 chr6   | + | 3025025  | 3027659  | 2635  |
| ENSG000001 | 0.72616  | 0        | 0.85004  | 0.63064  | NA       | LL09NC01 chr9    | - | 1.36E+08 | 1.36E+08 | 1990  |
| ENSG000001 | 2.188831 | 0.700845 | 1.3057   | 0.38012  | 0.48411  | RP11-111K chr7   | - | 42940871 | 42942238 | 1368  |
| ENSG000001 | 4.315069 | 1.949596 | 1.0238   | 0.32749  | 0.43052  | GS1-279B7 chr1   | - | 1.85E+08 | 1.85E+08 | 635   |
| ENSG000001 | 41.42282 | 0        | 6.9589   | 4.77E-10 | 2.25E-09 | CTD-3247F chr8   | - | 22536526 | 22541522 | 4997  |
| ENSG000001 | 0        | 0.297015 | -0.41864 | 0.81278  | NA       | CTD-2588Ji chr16 | + | 82203901 | 82209408 | 424   |
| ENSG000001 | 3.661688 | 3.455685 | 0.08302  | 0.94285  | 0.963    | RP11-209C chr17  | - | 19911364 | 19912547 | 1184  |
| ENSG000001 | 0.705622 | 0        | 0.8807   | 0.6196   | NA       | RP11-574F chr5   | - | 1.2E+08  | 1.2E+08  | 517   |
| ENSG000001 | 3.289235 | 0        | 3.1681   | 0.03967  | 0.072843 | RP11-417E chr6   | - | 1.7E+08  | 1.7E+08  | 542   |
| ENSG000001 | 15.55034 | 2.681995 | 2.4322   | 0.001184 | 0.002905 | CTD-2319I chr17  | - | 58160927 | 58169246 | 630   |
| ENSG000001 | 0        | 1.531196 | -1.8455  | 0.29475  | NA       | RP11-810K chr15  | - | 21095535 | 21095935 | 401   |
| ENSG000001 | 1.628766 | 0.700845 | 0.99377  | 0.49299  | 0.59687  | RP11-357A chr16  | - | 54067909 | 54088495 | 281   |
| ENSG000001 | 71.36392 | 16.09526 | 2.1207   | 9.36E-10 | 4.33E-09 | RP11-145F chr3   | + | 1.5E+08  | 1.5E+08  | 2974  |
| ENSG000001 | 8.827937 | 3.190225 | 1.3561   | 0.18442  | 0.26973  | RP11-274F chr3   | - | 1.46E+08 | 1.46E+08 | 2095  |
| ENSG000001 | 0.72616  | 1.043983 | -0.36115 | 0.83043  | NA       | SULT1A3 chr16    | + | 30205754 | 30215631 | 2369  |
| ENSG000001 | 2.044087 | 0.343138 | 1.8886   | 0.22009  | 0.31195  | RP11-602A chr15  | - | 99669037 | 99672011 | 2562  |
| ENSG000001 | 0        | 4.271467 | -3.5605  | 0.016618 | 0.033355 | RP11-195A chr1   | + | 1.1E+08  | 1.1E+08  | 1889  |
| ENSG000001 | 17.87356 | 2.324288 | 2.8107   | 0.000182 | 0.000501 | RP11-454F chr16  | + | 53332136 | 53333704 | 1569  |
| ENSG000001 | 0.36308  | 0        | 0.4146   | 0.81455  | NA       | RP11-252E chr16  | + | 75153456 | 75178098 | 510   |
| ENSG000001 | 109.4198 | 110.4895 | -0.0106  | 0.97089  | 0.9839   | RP11-303E chr16  | + | 81064375 | 81065090 | 716   |
| ENSG000001 | 3.910914 | 0.715414 | 2.094    | 0.11019  | 0.17529  | RP5-931K2 chr20  | - | 10381657 | 10384178 | 2522  |
| ENSG000001 | 9.740895 | 0.997859 | 3.0097   | 0.002314 | 0.005417 | RP11-1000 chr15  | + | 32828248 | 32879814 | 543   |
| ENSG000001 | 5.737478 | 6.148217 | -0.11499 | 0.88501  | 0.91968  | RP11-264B chr16  | + | 28986125 | 29002096 | 5296  |
| ENSG000001 | 0.685084 | 45.80217 | -5.5337  | 2.11E-08 | 8.72E-08 | RP11-7K24 chr6   | - | 42059976 | 42061997 | 2022  |
| ENSG000001 | 73.49456 | 200.0039 | -1.439   | 9.35E-08 | 3.66E-07 | RP11-701F chr15  | + | 25332808 | 25334043 | 1236  |
| ENSG000001 | 1.597063 | 0.357707 | 1.4855   | 0.37096  | 0.47542  | RP11-554A chr11  | - | 68914696 | 68939032 | 990   |
| ENSG000001 | 20.7465  | 12.08113 | 0.77145  | 0.12923  | 0.20075  | RP1-223E5 chr6   | - | 13614343 | 13615387 | 1045  |
| ENSG000001 | 4.015395 | 5.286312 | -0.38092 | 0.65545  | 0.7403   | RP11-5N19 chr15  | - | 56484551 | 56485460 | 910   |
| ENSG000001 | 2.697468 | 6.154665 | -1.1052  | 0.23357  | 0.32724  | RP11-252A chr16  | + | 74401360 | 74403724 | 2365  |
| ENSG000001 | 0.705622 | 0        | 0.8807   | 0.6196   | NA       | RP1-166H4 chr6   | - | 45541083 | 45544507 | 1513  |
| ENSG000001 | 0        | 0.357707 | -0.41864 | 0.81278  | NA       | RP11-1H8I chr15  | + | 34701826 | 34702795 | 970   |
| ENSG000001 | 1.701545 | 0        | 2.2228   | 0.18134  | NA       | RP11-93I2 chr4   | - | 1.25E+08 | 1.25E+08 | 1771  |
| ENSG000001 | 15.85164 | 33.70796 | -1.0637  | 0.071064 | 0.12072  | KB-1460A1 chr8   | - | 1.02E+08 | 1.02E+08 | 2825  |
| ENSG000001 | 94.62044 | 140.4282 | -0.56903 | 0.022463 | 0.043841 | RP11-61A1 chr16  | + | 66923072 | 66924996 | 1903  |
| ENSG000001 | 0.632843 | 2.08555  | -1.2591  | 0.4134   | 0.51826  | RP11-435I chr16  | + | 28425024 | 28426339 | 1029  |
| ENSG000001 | 33.40401 | 34.16596 | -0.03715 | 0.92003  | 0.94625  | RP11-355C chr9   | + | 1.26E+08 | 1.26E+08 | 1993  |
| ENSG000001 | 6.949132 | 8.009598 | -0.18955 | 0.83773  | 0.886    | RP11-690I chr2   | + | 2.33E+08 | 2.33E+08 | 2507  |
| ENSG000001 | 24.74477 | 31.97675 | -0.36705 | 0.4577   | 0.56284  | RP11-819C chr11  | - | 1.07E+08 | 1.07E+08 | 4140  |
| ENSG000001 | 18.9945  | 3.755116 | 2.2814   | 0.000572 | 0.001473 | RP4-545K1 chrX   | + | 1.01E+08 | 1.01E+08 | 651   |
| ENSG000001 | 0        | 1.309443 | -1.6539  | 0.35008  | NA       | ATP5J2P6 chr15   | - | 66707271 | 66707536 | 266   |
| ENSG000001 | 2.987769 | 0        | 3.1007   | 0.040889 | 0.074766 | RP11-298C chr16  | - | 83743784 | 83751503 | 566   |
| ENSG000001 | 0        | 6.174939 | -4.0797  | 0.004418 | 0.00992  | RP11-734K chr2   | + | 9246722  | 9249994  | 3273  |
| ENSG000001 | 4.875134 | 1.606458 | 1.4204   | 0.19271  | 0.28     | RP11-173B chr13  | - | 76178836 | 76210130 | 549   |
| ENSG000001 | 22.87551 | 18.34832 | 0.32004  | 0.48648  | 0.5904   | RP11-141C chr16  | - | 22298029 | 22300059 | 669   |
| ENSG000001 | 1.608228 | 0.654722 | 0.97404  | 0.52721  | 0.62898  | RP11-325K chr16  | + | 56974940 | 56975638 | 699   |
| ENSG000001 | 8.486374 | 763.1345 | -6.4262  | 4.66E-87 | 2.21E-85 | TMEM178E chr7    | + | 1.41E+08 | 1.41E+08 | 10558 |
| ENSG000001 | 5.850519 | 26.93979 | -2.1387  | 8.38E-05 | 0.000241 | RP3-523K2 chr6   | + | 54807965 | 54809897 | 1933  |
| ENSG000001 | 15.55034 | 0.98329  | 3.6617   | 9.97E-05 | 0.000284 | RP11-333C chr2   | + | 12855541 | 12856353 | 813   |

|            |          |          |          |          |          |                  |   |          |          |      |
|------------|----------|----------|----------|----------|----------|------------------|---|----------|----------|------|
| ENSG000001 | 8.881156 | 6.924324 | 0.3442   | 0.62101  | 0.71166  | RP11-104N chr16  | - | 89558425 | 89570868 | 871  |
| ENSG000001 | 0.580602 | 3.838499 | -2.1653  | 0.10747  | 0.17165  | RP11-62H2 chr14  | - | 60386141 | 60387057 | 507  |
| ENSG000001 | 0        | 5.101818 | -3.8074  | 0.009321 | 0.019693 | RP11-496C chr4   | + | 24661479 | 24673191 | 2195 |
| ENSG000001 | 1.379541 | 0.654722 | 0.76746  | 0.62759  | 0.71748  | RP11-304L chr16  | - | 2144831  | 2147027  | 596  |
| ENSG000001 | 4.512054 | 5.456236 | -0.2362  | 0.79587  | 0.85526  | AC135050. chr16  | + | 31076816 | 31080567 | 504  |
| ENSG000001 | 10.16999 | 2.292733 | 1.9688   | 0.039659 | 0.072834 | RP11-795F chr18  | + | 77797387 | 77853362 | 5187 |
| ENSG000001 | 364.8684 | 64.41675 | 2.482    | 1.30E-20 | 1.13E-19 | RP11-18F1 chr16  | - | 80631803 | 80636416 | 4614 |
| ENSG000001 | 2.998934 | 1.370136 | 0.96225  | 0.46078  | 0.56609  | RP11-93O1 chr16  | - | 46694608 | 46695503 | 321  |
| ENSG000001 | 1.338465 | 4.006007 | -1.4158  | 0.2008   | 0.28951  | RP4-798A1 chr1   | + | 16841140 | 16842249 | 1110 |
| ENSG000001 | 16.4452  | 18.42029 | -0.15608 | 0.79121  | 0.85132  | RP11-37C7 chr15  | + | 40074772 | 40077818 | 3047 |
| ENSG000001 | 1.555988 | 2.840639 | -0.73103 | 0.56087  | 0.65951  | CTD-2517N chr8   | - | 1.46E+08 | 1.46E+08 | 3368 |
| ENSG000001 | 13.16631 | 11.94518 | 0.13819  | 0.81706  | 0.87164  | RP11-20I2: chr16 | - | 2619044  | 2621937  | 459  |
| ENSG000001 | 4.201215 | 1.058552 | 1.7784   | 0.13427  | 0.20725  | RP11-303E chr16  | + | 81088906 | 81090031 | 593  |
| ENSG000001 | 3.298608 | 7.919767 | -1.1911  | 0.15627  | 0.23515  | RP11-114F chr15  | + | 78268384 | 78285399 | 3716 |
| ENSG000001 | 0.685084 | 0.343138 | 0.48017  | 0.78775  | NA       | RP11-296I: chr16 | + | 70236257 | 70236362 | 106  |
| ENSG000001 | 0.36308  | 0.700845 | -0.575   | 0.7429   | NA       | RP11-697E chr15  | + | 90792788 | 90815440 | 3838 |
| ENSG000001 | 1.608228 | 2.324288 | -0.43899 | 0.73189  | 0.80197  | RP11-215E chr17  | - | 32496391 | 32522956 | 1081 |
| ENSG000001 | 0.995923 | 0.686276 | 0.39213  | 0.8081   | NA       | CTD-2583P chr16  | + | 12853139 | 12855019 | 927  |
| ENSG000001 | 0.290301 | 2.635871 | -2.2835  | 0.1205   | 0.18946  | RP11-723C chr3   | - | 1.29E+08 | 1.29E+08 | 811  |
| ENSG000001 | 0.342542 | 0        | 0.4146   | 0.81455  | NA       | RP11-58A1 chr16  | + | 86679907 | 86702529 | 508  |
| ENSG000001 | 0        | 2.056411 | -2.4909  | 0.12616  | 0.19678  | RP11-775F chr4   | - | 1.37E+08 | 1.37E+08 | 1444 |
| ENSG000001 | 37.49993 | 55.51027 | -0.55952 | 0.074041 | 0.12511  | RP11-517B chr3   | - | 1.31E+08 | 1.31E+08 | 3473 |
| ENSG000001 | 3.350849 | 2.635871 | 0.30602  | 0.75974  | 0.82549  | RP11-68I1: chr1  | - | 1.51E+08 | 1.51E+08 | 1536 |
| ENSG000001 | 0.632843 | 0        | 0.81931  | 0.64303  | NA       | RP11-252A chr16  | + | 74456018 | 74469152 | 574  |
| ENSG000001 | 25.09506 | 30.5282  | -0.28319 | 0.48901  | 0.59305  | RP11-356C chr16  | - | 90176982 | 90234633 | 589  |
| ENSG000001 | 1.669842 | 6.978568 | -1.8663  | 0.08515  | 0.1409   | RP11-169E chr16  | + | 47007900 | 47012894 | 516  |
| ENSG000001 | 0.870904 | 12.60963 | -3.3489  | 0.001775 | 0.004237 | CTD-2015C chr16  | + | 86755697 | 86771432 | 550  |
| ENSG000001 | 282.3816 | 3.823929 | 6.0611   | 6.08E-43 | 1.16E-41 | RP11-13L2 chr3   | + | 1.4E+08  | 1.4E+08  | 5692 |
| ENSG000001 | 0.290301 | 29.01486 | -5.6434  | 2.55E-07 | 9.62E-07 | RP11-532F chr15  | - | 41128006 | 41136585 | 643  |
| ENSG000001 | 1.411244 | 2.949871 | -0.89201 | 0.51876  | 0.62139  | RP11-317P chr1   | - | 1.83E+08 | 1.83E+08 | 1492 |
| ENSG000001 | 3.008307 | 10.85507 | -1.774   | 0.020996 | 0.041227 | RP11-341N chr2   | - | 2.43E+08 | 2.43E+08 | 1104 |
| ENSG000001 | 0.653381 | 0.640152 | 0.01046  | 0.99499  | NA       | RP11-1007 chr15  | - | 72757469 | 72758603 | 1135 |
| ENSG000001 | 37.18746 | 69.30896 | -0.88398 | 0.030425 | 0.05747  | CTA-445C9 chr22  | + | 26908503 | 26910534 | 2032 |
| ENSG000001 | 28.66164 | 50.19482 | -0.79971 | 0.021268 | 0.04172  | RP3-512B1 chr6   | - | 7540684  | 7541571  | 888  |
| ENSG000001 | 1.338465 | 1.531196 | -0.19013 | 0.89206  | 0.92504  | CTD-2380F chr16  | - | 19772494 | 19777421 | 686  |
| ENSG000001 | 0.36308  | 0        | 0.4146   | 0.81455  | NA       | UBE2FP2 chr16    | - | 63214514 | 63214975 | 462  |
| ENSG000001 | 0.72616  | 0        | 0.85004  | 0.63064  | NA       | RP11-989E chr16  | - | 33344309 | 33348279 | 3971 |
| ENSG000001 | 1.576526 | 8.095397 | -2.1426  | 0.02699  | 0.051693 | RP3-496C2 chr22  | - | 40439072 | 40440534 | 1463 |
| ENSG000001 | 0        | 0.357707 | -0.41864 | 0.81278  | NA       | AC004449. chr19  | - | 637105   | 637537   | 433  |
| ENSG000001 | 13.38286 | 8.187643 | 0.67654  | 0.2583   | 0.35598  | LA16c-361. chr16 | - | 1801560  | 1802263  | 565  |
| ENSG000001 | 0        | 0.343138 | -0.41864 | 0.81278  | NA       | CLEC19A chr16    | + | 19297061 | 19333467 | 782  |
| ENSG000001 | 6.62892  | 7.38643  | -0.14553 | 0.84445  | 0.89091  | RP1-80N2.: chr6  | - | 6680542  | 6683866  | 3325 |
| ENSG000001 | 1.306762 | 1.652581 | -0.27733 | 0.83754  | 0.88597  | RP3-507I1: chrX  | - | 1.4E+08  | 1.4E+08  | 354  |
| ENSG000001 | 2.407167 | 0        | 2.7149   | 0.089055 | 0.14641  | RP11-510C chr1   | - | 75588203 | 75589612 | 1410 |
| ENSG000001 | 0.290301 | 0.594029 | -0.38058 | 0.83094  | NA       | RP11-195F chr9   | - | 34661900 | 34666026 | 3264 |
| ENSG000001 | 1.660469 | 7.238323 | -1.9215  | 0.067993 | 0.1162   | RP11-166B chr16  | + | 12002065 | 12002773 | 384  |
| ENSG000001 | 0.36308  | 0.640152 | -0.51156 | 0.77091  | NA       | RP11-960L chr16  | + | 81771853 | 81801311 | 756  |
| ENSG000001 | 16.74145 | 9.116689 | 0.87054  | 0.13913  | 0.2128   | RP11-629C chr8   | + | 1.35E+08 | 1.35E+08 | 679  |
| ENSG000001 | 754.0768 | 616.8103 | 0.28866  | 0.11512  | 0.18228  | ZNF865 chr19     | + | 56116771 | 56128635 | 4005 |
| ENSG000001 | 0.342542 | 0        | 0.4146   | 0.81455  | NA       | CTD-2006K chr17  | + | 72595979 | 72603368 | 3493 |
| ENSG000001 | 0.290301 | 9.421825 | -4.0767  | 0.000956 | 0.002379 | RP11-830F chr16  | - | 89003187 | 89006059 | 2873 |
| ENSG000001 | 0.580602 | 1.029414 | -0.44707 | 0.79987  | NA       | RP11-38G5 chr15  | - | 80135889 | 80136646 | 758  |
| ENSG000001 | 0        | 0.343138 | -0.41864 | 0.81278  | NA       | RP11-523L chr16  | + | 47758479 | 47942342 | 2626 |
| ENSG000001 | 0.632843 | 9.139379 | -3.377   | 0.002175 | 0.005117 | RP11-510J chr16  | - | 82077941 | 82173236 | 829  |
| ENSG000001 | 5.302433 | 6.658863 | -0.31963 | 0.74488  | 0.81283  | AC009166. chr16  | + | 51183150 | 51183730 | 487  |
| ENSG000001 | 1.338465 | 0.297015 | 1.3634   | 0.39966  | NA       | RP11-304L chr16  | + | 2162336  | 2163343  | 456  |
| ENSG000001 | 0        | 1.652581 | -2.1974  | 0.1871   | NA       | RP11-883C chr16  | + | 50918120 | 50934962 | 1171 |
| ENSG000001 | 1.390706 | 1.372552 | 0.010227 | 0.99497  | 0.99714  | CTD-2302E chr14  | + | 64010287 | 64011382 | 1096 |
| ENSG000001 | 0.36308  | 1.309443 | -1.2534  | 0.45722  | NA       | RP11-517C chr16  | + | 84529205 | 84531101 | 596  |
| ENSG000001 | 0        | 0.343138 | -0.41864 | 0.81278  | NA       | RP11-114F chr15  | + | 78208864 | 78214361 | 353  |
| ENSG000001 | 0        | 1.903472 | -2.1599  | 0.21236  | NA       | GOLGA8T chr15    | + | 30427352 | 30437770 | 1896 |
| ENSG000001 | 0        | 1.294874 | -1.8547  | 0.27869  | NA       | AC009120. chr16  | + | 74316313 | 74321417 | 475  |
| ENSG000001 | 0        | 0.297015 | -0.41864 | 0.81278  | NA       | RP11-545A chr1   | - | 1.8E+08  | 1.8E+08  | 3294 |
| ENSG000001 | 4.346772 | 9.970473 | -1.1304  | 0.15865  | 0.23805  | RP3-388M: chr22  | + | 44208336 | 44213274 | 1463 |
| ENSG000001 | 1.390706 | 5.585742 | -1.7953  | 0.11934  | 0.18798  | RP11-318L chr1   | + | 2.12E+08 | 2.12E+08 | 262  |

|            |          |          |          |          |          |                  |   |          |          |      |
|------------|----------|----------|----------|----------|----------|------------------|---|----------|----------|------|
| ENSG000001 | 18.03803 | 2.338857 | 2.8114   | 0.000345 | 0.000916 | AC137932. chr16  | + | 89387541 | 89391518 | 1205 |
| ENSG000001 | 31.98177 | 13.83811 | 1.2025   | 0.008971 | 0.019023 | RP4-714D9 chr1   | + | 1E+08    | 1.01E+08 | 5067 |
| ENSG000001 | 0        | 0.297015 | -0.41864 | 0.81278  | NA       | RP11-673E chr11  | - | 1.26E+08 | 1.26E+08 | 1909 |
| ENSG000001 | 0.705622 | 3.662869 | -2.0427  | 0.11208  | 0.17799  | CTD-2515F chr15  | - | 57819385 | 57821207 | 800  |
| ENSG000001 | 1.390706 | 4.020576 | -1.3525  | 0.2606   | 0.35861  | CTD-2196E chr16  | - | 23698370 | 23699665 | 473  |
| ENSG000001 | 1.576526 | 2.041842 | -0.28866 | 0.81535  | 0.87039  | RP11-441I chr16  | + | 48593572 | 48621314 | 438  |
| ENSG000001 | 4.709852 | 4.738406 | -0.00783 | 0.99273  | 0.99603  | RP11-325K chr16  | + | 56974190 | 56975254 | 601  |
| ENSG000001 | 0.290301 | 0        | 0.4146   | 0.81455  | NA       | MUC22 chr6       | + | 30978251 | 31003179 | 6019 |
| ENSG000001 | 0        | 0.343138 | -0.41864 | 0.81278  | NA       | LA16c-444I chr16 | + | 88268391 | 88336117 | 434  |
| ENSG000001 | 1.08924  | 3.723561 | -1.5079  | 0.25941  | 0.35733  | ULK4P1 chr15     | - | 32698798 | 32727193 | 875  |
| ENSG000001 | 0        | 8.501643 | -4.7054  | 0.00025  | 0.000676 | CTD-3105F chr19  | - | 12456763 | 12458752 | 1990 |
| ENSG000001 | 5.810257 | 2.886762 | 0.9056   | 0.33032  | 0.43349  | RP11-517C chr16  | - | 84492865 | 84500967 | 2998 |
| ENSG000001 | 2.229907 | 0        | 2.6238   | 0.10304  | 0.16551  | RP11-295N chr16  | + | 53202434 | 53203362 | 510  |
| ENSG000001 | 0        | 0.343138 | -0.41864 | 0.81278  | NA       | RP11-389C chr3   | + | 97478367 | 97480374 | 2008 |
| ENSG000001 | 0.870904 | 0.297015 | 0.71032  | 0.69005  | NA       | RP11-276F chr16  | - | 12187484 | 12189164 | 502  |
| ENSG000001 | 360.7138 | 0.343138 | 9.0509   | 1.17E-21 | 1.07E-20 | RP11-524C chrX   | + | 99928327 | 99928978 | 652  |
| ENSG000001 | 0.290301 | 0        | 0.4146   | 0.81455  | NA       | RP11-309N chr2   | + | 2.35E+08 | 2.35E+08 | 1201 |
| ENSG000001 | 2.645227 | 1.355566 | 0.85379  | 0.47236  | 0.57698  | RP11-343F chr16  | - | 56742684 | 56763880 | 1018 |
| ENSG000001 | 0        | 2.056411 | -2.4909  | 0.12616  | 0.19678  | RP4-584D1 chr7   | + | 1.5E+08  | 1.5E+08  | 837  |
| ENSG000001 | 69.97836 | 261.4846 | -1.8854  | 1.15E-08 | 4.84E-08 | RP11-923I chr12  | - | 52214243 | 52216199 | 1957 |
| ENSG000001 | 0        | 0.640152 | -0.82869 | 0.63935  | NA       | RP11-354I chr16  | - | 60520723 | 60557154 | 565  |
| ENSG000001 | 31.838   | 8.233767 | 1.9126   | 0.000152 | 0.000422 | RP5-1014C chr1   | + | 92864531 | 92867613 | 3083 |
| ENSG000001 | 0        | 3.38284  | -3.2606  | 0.030247 | 0.057159 | AC002550. chr16  | + | 19717673 | 19726705 | 1379 |
| ENSG000001 | 0        | 0.297015 | -0.41864 | 0.81278  | NA       | RP11-359E chr1   | - | 2.12E+08 | 2.12E+08 | 711  |
| ENSG000001 | 0        | 1.012429 | -1.3162  | 0.46038  | NA       | LARP4P chr15     | + | 36909290 | 36911466 | 2177 |
| ENSG000001 | 22.81112 | 53.50561 | -1.2119  | 0.007597 | 0.016323 | RP11-174G chr12  | - | 14915438 | 14920865 | 5428 |
| ENSG000001 | 0        | 0.343138 | -0.41864 | 0.81278  | NA       | AC140542. chr16  | - | 47883225 | 47921041 | 1325 |
| ENSG000001 | 105.8913 | 41.962   | 1.3101   | 0.005446 | 0.01204  | RP5-1057J chr1   | - | 23607802 | 23613245 | 5444 |
| ENSG000001 | 19.15979 | 0        | 5.8888   | 5.13E-07 | 1.88E-06 | RP11-863P chr16  | - | 88210904 | 88219696 | 1313 |
| ENSG000001 | 3.537482 | 0.343138 | 2.5085   | 0.096482 | 0.15674  | CTD-2049C chr16  | - | 27690261 | 27730104 | 679  |
| ENSG000001 | 5.674072 | 0        | 4.0508   | 0.003472 | 0.007928 | RP11-281J chr16  | + | 77926319 | 77926812 | 494  |
| ENSG000001 | 0        | 0.343138 | -0.41864 | 0.81278  | NA       | CD24P2 chr15     | + | 56363619 | 56363837 | 219  |
| ENSG000001 | 1.068702 | 0.357707 | 1.0016   | 0.56008  | NA       | RP11-65J3 chr9   | - | 1.32E+08 | 1.32E+08 | 1934 |
| ENSG000001 | 2.13659  | 4.602452 | -0.95367 | 0.39085  | 0.4953   | RP11-318A chr17  | + | 74668024 | 74669740 | 1717 |
| ENSG000001 | 0        | 0.715414 | -0.84936 | 0.6309   | NA       | EIF4BP5 chr16    | - | 47599001 | 47600795 | 1795 |
| ENSG000001 | 14.15107 | 10.04499 | 0.47103  | 0.44029  | 0.54605  | RP11-498C chr16  | - | 71952815 | 71959638 | 762  |
| ENSG000001 | 37.15143 | 15.86377 | 1.2019   | 0.009337 | 0.019723 | RP11-378A chr2   | + | 2.19E+08 | 2.19E+08 | 2046 |
| ENSG000001 | 0.290301 | 0        | 0.4146   | 0.81455  | NA       | RP11-215F chr11  | - | 30001660 | 30003939 | 2280 |
| ENSG000001 | 0.36308  | 2.278164 | -2.0508  | 0.17475  | 0.25787  | CTD-2568A chr19  | - | 51279398 | 51289467 | 495  |
| ENSG000001 | 5.810257 | 25.66928 | -2.1028  | 0.00089  | 0.002227 | AC006538. chr19  | - | 2727741  | 2729325  | 1585 |
| ENSG000001 | 0        | 1.058552 | -1.361   | 0.4451   | NA       | RP11-510N chr16  | - | 71444343 | 71460367 | 530  |
| ENSG000001 | 10.90291 | 9.421825 | 0.1939   | 0.74804  | 0.81551  | RP3-465N2 chr1   | - | 25592593 | 25593627 | 459  |
| ENSG000001 | 5.612459 | 8.179522 | -0.5076  | 0.50023  | 0.60394  | CTD-3185P chr15  | - | 66782086 | 66784447 | 1078 |
| ENSG000001 | 17.01122 | 9.450963 | 0.82508  | 0.16451  | 0.24536  | CTA-14H9.1 chr6  | + | 26527291 | 26527632 | 342  |
| ENSG000001 | 31.9543  | 18.20995 | 0.79252  | 0.075453 | 0.1271   | RP11-698N chr11  | + | 35835882 | 35839557 | 3676 |
| ENSG000001 | 0.290301 | 0.343138 | -0.00202 | 0.99909  | NA       | RP11-626C chr16  | + | 19077313 | 19078016 | 704  |
| ENSG000001 | 0        | 0.997859 | -1.5018  | 0.39072  | NA       | C16orf98 chr16   | + | 31213206 | 31214773 | 1095 |
| ENSG000001 | 7.999088 | 4.037561 | 0.94196  | 0.22831  | 0.3214   | CTD-2165F chr5   | - | 14661917 | 14664713 | 2797 |
| ENSG000001 | 5.487439 | 2.353426 | 1.149    | 0.21831  | 0.3098   | MANEA-AS1 chr6   | - | 96023059 | 96025326 | 2268 |
| ENSG000001 | 6.131447 | 1.340997 | 1.9862   | 0.062616 | 0.10826  | RP11-474B chr16  | + | 47333358 | 47351725 | 870  |
| ENSG000001 | 12.82198 | 11.30831 | 0.16721  | 0.79171  | 0.85179  | RP11-529F chr14  | - | 92511119 | 92516990 | 671  |
| ENSG000001 | 50.34603 | 62.19491 | -0.29881 | 0.47708  | 0.58159  | RP11-368I chr16  | + | 89778264 | 89784573 | 1753 |
| ENSG000001 | 0.632843 | 0.700845 | -0.06767 | 0.96753  | NA       | RP11-64K1 chr15  | + | 40666599 | 40668192 | 1594 |
| ENSG000001 | 0.36308  | 0        | 0.4146   | 0.81455  | NA       | RP11-632K chr15  | - | 32781468 | 32783787 | 1262 |
| ENSG000001 | 7.209522 | 8.403691 | -0.20352 | 0.77018  | 0.83416  | RP11-578F chr15  | + | 29034810 | 29101361 | 1069 |
| ENSG000001 | 1.794048 | 0        | 2.0507   | 0.24053  | NA       | RP11-395N chr2   | + | 2.28E+08 | 2.28E+08 | 1026 |
| ENSG000001 | 0        | 0.891044 | -1.0625  | 0.54819  | NA       | RP11-60L3 chr15  | + | 74595346 | 74596684 | 382  |
| ENSG000001 | 9.625248 | 16.22389 | -0.716   | 0.29033  | 0.39194  | CTD-2012K chr16  | - | 67583117 | 67597861 | 798  |
| ENSG000001 | 1.431782 | 2.635871 | -0.78939 | 0.53336  | 0.63427  | RP11-345N chr16  | - | 79750622 | 79804460 | 772  |
| ENSG000001 | 0.72616  | 0        | 0.85004  | 0.63064  | NA       | RP11-473I chr16  | + | 9162411  | 9166269  | 753  |
| ENSG000001 | 0        | 0.686276 | -0.84936 | 0.6309   | NA       | RP11-21B2 chr16  | + | 50402491 | 50405391 | 478  |
| ENSG000001 | 1.628766 | 0.297015 | 1.6275   | 0.30182  | 0.40306  | RP11-165N chr16  | - | 12460839 | 12466439 | 539  |
| ENSG000001 | 0        | 2.993578 | -3.1081  | 0.040328 | 0.073907 | RP11-354N chr16  | + | 68720302 | 68720573 | 272  |
| ENSG000001 | 0        | 1.326428 | -1.6486  | 0.3523   | NA       | CTD-2012K chr16  | - | 67572460 | 67574009 | 530  |
| ENSG000001 | 1.451506 | 2.232041 | -0.46636 | 0.74375  | 0.81176  | LA16c-329I chr16 | - | 1763528  | 1764209  | 468  |

|            |          |          |          |          |          |                  |   |          |          |      |
|------------|----------|----------|----------|----------|----------|------------------|---|----------|----------|------|
| ENSG000001 | 2.375464 | 0.654722 | 1.4834   | 0.28894  | 0.3905   | RP11-578F chr15  | + | 28577383 | 28581755 | 716  |
| ENSG000001 | 1.379541 | 1.372552 | 0.002312 | 0.99886  | 0.99961  | RP11-378I chr9   | + | 19926092 | 19929935 | 3844 |
| ENSG000001 | 0        | 0.357707 | -0.41864 | 0.81278  | NA       | RP11-114F chr15  | - | 78246417 | 78255996 | 571  |
| ENSG000001 | 0.36308  | 1.98115  | -1.8644  | 0.22572  | 0.31845  | AC009120. chr16  | - | 74088050 | 74330660 | 966  |
| ENSG000001 | 0.342542 | 0        | 0.4146   | 0.81455  | NA       | RP11-326A chr15  | - | 89630309 | 89631498 | 460  |
| ENSG000001 | 5.830795 | 10.87205 | -0.88263 | 0.2214   | 0.3135   | TEN1-CDK3 chr17  | + | 73975312 | 74002080 | 3897 |
| ENSG000001 | 2.531373 | 111.9763 | -5.2612  | 1.16E-18 | 9.09E-18 | RP6-24A23 chrX   | - | 1.08E+08 | 1.08E+08 | 4996 |
| ENSG000001 | 0        | 0.343138 | -0.41864 | 0.81278  | NA       | RP11-529J chr15  | + | 23675986 | 23680359 | 736  |
| ENSG000001 | 2.229907 | 1.949596 | 0.17588  | 0.88071  | 0.91677  | RP11-57A1 chr16  | - | 28671017 | 28752102 | 361  |
| ENSG000001 | 2.645227 | 13.63502 | -2.2617  | 0.002911 | 0.006723 | RP1-168L1 chr6   | + | 1.67E+08 | 1.67E+08 | 1636 |
| ENSG000001 | 0        | 0.594029 | -0.81444 | 0.64499  | NA       | RP11-1021 chr16  | + | 15506577 | 15507125 | 549  |
| ENSG000001 | 5.580756 | 6.424958 | -0.1826  | 0.83438  | 0.88356  | RP11-1007 chr15  | - | 72700119 | 72767509 | 2325 |
| ENSG000001 | 0        | 0.357707 | -0.41864 | 0.81278  | NA       | ATP5F1P7 chr16   | - | 75742954 | 75743713 | 760  |
| ENSG000001 | 34.65609 | 1.058552 | 4.7901   | 1.22E-08 | 5.14E-08 | RP11-709B chr15  | - | 68591128 | 68593343 | 2216 |
| ENSG000001 | 19.95954 | 0        | 5.9413   | 3.73E-07 | 1.38E-06 | AC144833. chr15  | + | 27607456 | 27611544 | 4089 |
| ENSG000001 | 0.580602 | 0        | 0.8036   | 0.6494   | NA       | CTD-2349B chr16  | + | 19125324 | 19184900 | 809  |
| ENSG000001 | 12.78172 | 14.67329 | -0.20054 | 0.71696  | 0.79029  | RP11-16P6 chr2   | - | 2.23E+08 | 2.23E+08 | 2815 |
| ENSG000001 | 0.685084 | 0.715414 | -0.02805 | 0.98738  | NA       | LA16c-390I chr16 | - | 1517674  | 1522685  | 307  |
| ENSG000001 | 0        | 1.294874 | -1.8547  | 0.27869  | NA       | RP4-616B8 chr20  | - | 37590568 | 37590754 | 187  |
| ENSG000001 | 0.995923 | 1.40169  | -0.37389 | 0.79593  | 0.85527  | CTC-297N7 chr17  | - | 10561859 | 10562399 | 541  |
| ENSG000001 | 0.705622 | 0.997859 | -0.40316 | 0.79396  | NA       | CTD-2083E chr5   | + | 195893   | 196456   | 564  |
| ENSG000001 | 0        | 0.654722 | -0.83442 | 0.63731  | NA       | MIR1587 chrX     | - | 39696790 | 39707612 | 1976 |
| ENSG000001 | 0        | 0.357707 | -0.41864 | 0.81278  | NA       | RP11-354I chr16  | + | 60393746 | 60476149 | 800  |
| ENSG000001 | 0        | 39.3989  | -6.8884  | 8.96E-10 | 4.15E-09 | RP11-22C1 chr8   | - | 95649513 | 95651695 | 2183 |
| ENSG000001 | 5.321344 | 0.357707 | 3.156    | 0.02311  | 0.04499  | RP11-399C chr10  | + | 90775593 | 90776816 | 1224 |
| ENSG000001 | 0        | 0.715414 | -0.84936 | 0.6309   | NA       | CTD-2050B chr16  | - | 56226526 | 56228430 | 1905 |
| ENSG000001 | 0.923144 | 4.706852 | -2.0037  | 0.085834 | 0.14188  | RP11-217B chr15  | + | 89878284 | 89879392 | 1109 |
| ENSG000001 | 2.656392 | 4.035145 | -0.53732 | 0.62219  | 0.71258  | RP11-709C chr16  | - | 4684330  | 4690624  | 1543 |
| ENSG000001 | 2.023549 | 0.297015 | 1.8694   | 0.23235  | 0.32579  | RP11-109C chr9   | + | 72287665 | 72288629 | 965  |
| ENSG000001 | 0.72616  | 0        | 0.85004  | 0.63064  | NA       | CTD-2576C chr16  | + | 17228361 | 17232593 | 641  |
| ENSG000001 | 0.290301 | 0        | 0.4146   | 0.81455  | NA       | RP11-589C chr8   | - | 42009290 | 42010281 | 992  |
| ENSG000001 | 1.555988 | 0.700845 | 0.90082  | 0.55876  | 0.65763  | RP11-981C chr8   | + | 10291182 | 10295822 | 4641 |
| ENSG000001 | 238.4524 | 164.5791 | 0.53063  | 0.003848 | 0.008716 | RP11-509E chr2   | + | 25380063 | 25382006 | 1944 |
| ENSG000001 | 0.342542 | 0        | 0.4146   | 0.81455  | NA       | RP11-565N chr1   | - | 2.09E+08 | 2.09E+08 | 279  |
| ENSG000001 | 39.46863 | 27.93362 | 0.49305  | 0.19727  | 0.2853   | RP5-1129J chr7   | + | 1.52E+08 | 1.52E+08 | 1764 |
| ENSG000001 | 0        | 0.343138 | -0.41864 | 0.81278  | NA       | RP11-787C chr16  | + | 74876485 | 74877781 | 320  |
| ENSG000001 | 2.583614 | 6.529357 | -1.1864  | 0.26762  | 0.36637  | RP11-106N chr15  | + | 72571208 | 72644135 | 3148 |
| ENSG000001 | 1.701545 | 3.633731 | -1.0038  | 0.35084  | 0.45522  | UBE2MP1 chr16    | - | 34404063 | 34404612 | 550  |
| ENSG000001 | 0        | 0.98329  | -1.2878  | 0.47019  | NA       | CTA-254O6 chr7   | + | 86738855 | 86740598 | 1744 |
| ENSG000001 | 0.290301 | 0        | 0.4146   | 0.81455  | NA       | RP11-23E1 chr16  | - | 33350764 | 33356875 | 660  |
| ENSG000001 | 6.701698 | 2.399549 | 1.3921   | 0.12924  | 0.20075  | RP11-1024 chr3   | + | 30739153 | 30741068 | 1916 |
| ENSG000001 | 1.286224 | 10.35899 | -2.7657  | 0.003092 | 0.007112 | RP11-96D1 chr16  | + | 68270748 | 68271570 | 533  |
| ENSG000001 | 1.939605 | 0.640152 | 1.2632   | 0.37435  | 0.47861  | RP11-61F1 chr16  | + | 84627999 | 84630432 | 2434 |
| ENSG000001 | 0.342542 | 0        | 0.4146   | 0.81455  | NA       | RP11-467I chr16  | + | 79539500 | 79550190 | 419  |
| ENSG000001 | 30.14746 | 20.58123 | 0.53244  | 0.3465   | 0.45064  | RP11-452L chr16  | - | 31460856 | 31464814 | 449  |
| ENSG000001 | 5.507977 | 6.106126 | -0.12412 | 0.88565  | 0.92019  | RP11-77K1 chr16  | - | 75492150 | 75493915 | 852  |
| ENSG000001 | 0.290301 | 0        | 0.4146   | 0.81455  | NA       | RP11-578F chr15  | - | 28964523 | 28983577 | 557  |
| ENSG000001 | 0        | 1.326428 | -1.6486  | 0.3523   | NA       | RP11-77H9 chr16  | + | 8963108  | 8963889  | 498  |
| ENSG000001 | 20.1976  | 9.409672 | 1.0615   | 0.059763 | 0.10415  | PAN3-AS1 chr13   | - | 28710980 | 28712330 | 1351 |
| ENSG000001 | 0.72616  | 0        | 0.85004  | 0.63064  | NA       | AC135048. chr16  | + | 30959707 | 30967832 | 1318 |
| ENSG000001 | 4.273994 | 9.589333 | -1.1152  | 0.12213  | 0.19167  | RP11-757F chr3   | + | 1.12E+08 | 1.12E+08 | 1937 |
| ENSG000001 | 0        | 2.056411 | -2.4909  | 0.12616  | 0.19678  | CTD-2515F chr15  | - | 57769682 | 57770527 | 255  |
| ENSG000001 | 25.90435 | 45.06789 | -0.78261 | 0.044395 | 0.080175 | RP11-448C chr4   | - | 10069713 | 10074643 | 3510 |
| ENSG000001 | 0.290301 | 0.357707 | -0.00203 | 0.99908  | NA       | RP13-514E chr4   | - | 86933449 | 86935027 | 1579 |
| ENSG000001 | 28.68153 | 5.330019 | 2.3582   | 0.000231 | 0.000627 | RP11-317P chr1   | + | 1.83E+08 | 1.83E+08 | 1376 |
| ENSG000001 | 132.2122 | 142.5304 | -0.10356 | 0.63379  | 0.72255  | LA16c-358I chr16 | - | 1367892  | 1372846  | 3107 |
| ENSG000001 | 68.94054 | 58.12358 | 0.24617  | 0.38403  | 0.48822  | RP11-46D6 chr16  | - | 46656773 | 46658363 | 1591 |
| ENSG000001 | 4.357937 | 7.927888 | -0.82735 | 0.34333  | 0.44733  | RP11-432I chr16  | + | 71757083 | 71758133 | 777  |
| ENSG000001 | 0        | 1.355566 | -1.9006  | 0.26573  | NA       | RP11-527L chr17  | + | 42015731 | 42016327 | 434  |
| ENSG000001 | 1.286224 | 2.774242 | -0.90063 | 0.49894  | 0.60279  | RP11-403P chr16  | + | 66583183 | 66585092 | 1910 |
| ENSG000001 | 0.342542 | 3.322147 | -2.5604  | 0.073563 | 0.1244   | DLGAP1-AS chr18  | + | 4264602  | 4295405  | 2594 |
| ENSG000001 | 1.555988 | 3.212915 | -0.85416 | 0.5233   | 0.62577  | RP11-408F chr18  | - | 28638806 | 28639359 | 554  |
| ENSG000001 | 0.705622 | 0        | 0.8807   | 0.6196   | NA       | ABC10P3 chr15    | + | 28648014 | 28650179 | 2166 |
| ENSG000001 | 4.201215 | 8.14152  | -0.902   | 0.24517  | 0.34095  | CTB-31020 chr19  | - | 1874881  | 1876168  | 1288 |
| ENSG000001 | 0.290301 | 1.372552 | -1.154   | 0.51326  | NA       | RP11-343C chr16  | - | 69477143 | 69478193 | 722  |

|            |          |          |          |          |          |                  |   |          |          |      |
|------------|----------|----------|----------|----------|----------|------------------|---|----------|----------|------|
| ENSG000001 | 1.576526 | 2.514486 | -0.56815 | 0.65913  | 0.74304  | AC002400. chr16  | + | 23512226 | 23512951 | 726  |
| ENSG000001 | 2.613524 | 1.698704 | 0.54236  | 0.66796  | 0.75071  | RP13-487P chr15  | - | 25590780 | 25592382 | 1603 |
| ENSG000001 | 5.975539 | 6.018711 | -0.00882 | 0.99072  | 0.9952   | RP11-15N2 chr3   | + | 99898411 | 99900574 | 2164 |
| ENSG000001 | 56.09728 | 2.24661  | 4.45     | 3.09E-12 | 1.69E-11 | RP11-244C chr9   | - | 1.25E+08 | 1.25E+08 | 3779 |
| ENSG000001 | 0.580602 | 0        | 0.8036   | 0.6494   | NA       | RP11-319C chr16  | + | 79028242 | 79038627 | 793  |
| ENSG000001 | 4.003417 | 11.18364 | -1.369   | 0.085758 | 0.14179  | RP11-16E1 chr8   | + | 64128539 | 64130592 | 2054 |
| ENSG000001 | 0.870904 | 0        | 1.046    | 0.5544   | NA       | RP11-665J chr15  | - | 74445141 | 74471567 | 554  |
| ENSG000001 | 1.016461 | 0        | 1.3167   | 0.46021  | NA       | RP11-16E2 chr15  | - | 66058798 | 66059736 | 428  |
| ENSG000001 | 2.012384 | 4.449513 | -1.0492  | 0.33297  | 0.4363   | CTD-2555A chr16  | - | 89179583 | 89181687 | 2105 |
| ENSG000001 | 0        | 1.309443 | -1.6539  | 0.35008  | NA       | RP11-320A chr15  | - | 89532750 | 89533476 | 727  |
| ENSG000001 | 6.007242 | 0        | 4.1622   | 0.002187 | 0.005142 | RP11-467J chr16  | - | 53069602 | 53086785 | 464  |
| ENSG000001 | 12.34586 | 3.131949 | 1.8783   | 0.030058 | 0.056851 | RP11-29G8 chr13  | + | 76123909 | 76381256 | 4128 |
| ENSG000001 | 0        | 0.357707 | -0.41864 | 0.81278  | NA       | RP11-810K chr15  | - | 21098712 | 21099309 | 598  |
| ENSG000001 | 0.342542 | 0        | 0.4146   | 0.81455  | NA       | CTD-3229J chr16  | + | 17919109 | 17920763 | 1655 |
| ENSG000001 | 109.519  | 114.4619 | -0.06527 | 0.79679  | 0.85571  | RP11-296I chr16  | - | 70253477 | 70279519 | 2631 |
| ENSG000001 | 2.105701 | 2.96444  | -0.44288 | 0.7275   | 0.79848  | RP11-1H8 chr15   | + | 34786621 | 34788101 | 1481 |
| ENSG000001 | 12.33649 | 13.53062 | -0.14204 | 0.82099  | 0.87413  | RP11-166B chr16  | - | 11974932 | 11976426 | 1495 |
| ENSG000001 | 0        | 0.343138 | -0.41864 | 0.81278  | NA       | RP11-616A chr16  | - | 1323752  | 1326523  | 330  |
| ENSG000001 | 1.390706 | 1.577319 | -0.17072 | 0.90775  | 0.93646  | RP11-680C chr16  | + | 85391069 | 85393055 | 289  |
| ENSG000001 | 3.588096 | 12.10624 | -1.5887  | 0.084105 | 0.13951  | RP11-524C chr6   | + | 22221010 | 22222624 | 1615 |
| ENSG000001 | 0.290301 | 2.185918 | -1.9959  | 0.19817  | 0.28639  | RP11-744I chr7   | - | 1.41E+08 | 1.41E+08 | 474  |
| ENSG000001 | 2.697468 | 5.162511 | -0.87302 | 0.38682  | 0.49106  | RP11-384L chr3   | - | 32278180 | 32280070 | 1891 |
| ENSG000001 | 3.818411 | 3.870053 | -0.04813 | 0.96135  | 0.977    | RP11-168P1 chr16 | - | 89458783 | 89478972 | 420  |
| ENSG000001 | 0.943682 | 2.681995 | -1.2372  | 0.34143  | 0.44528  | RP11-259C chr17  | + | 44344403 | 44346060 | 491  |
| ENSG000001 | 275.8461 | 45.64661 | 2.5861   | 7.29E-35 | 1.10E-33 | RP11-21L2 chr11  | + | 76511408 | 76515599 | 4192 |
| ENSG000001 | 0.943682 | 0        | 1.2438   | 0.48556  | NA       | RP11-665A chr15  | - | 28820165 | 28824546 | 725  |
| ENSG000001 | 3.994857 | 2.012704 | 0.86135  | 0.47439  | 0.57897  | RP4-614O4 chr20  | - | 33855688 | 33867846 | 529  |
| ENSG000001 | 15.94593 | 9.185503 | 0.76791  | 0.16926  | 0.25107  | RP11-457A chr6   | + | 26686469 | 26688192 | 1724 |
| ENSG000001 | 60.81048 | 182.5609 | -1.5771  | 8.59E-10 | 3.99E-09 | RP11-923I chr12  | + | 52211683 | 52213934 | 2094 |
| ENSG000001 | 1.960143 | 5.332435 | -1.303   | 0.20874  | 0.29872  | AC002310. chr16  | - | 30598983 | 30599241 | 259  |
| ENSG000001 | 24.58545 | 31.40132 | -0.34139 | 0.49958  | 0.60329  | CTC-462L7 chr17  | + | 53246184 | 53250993 | 4810 |
| ENSG000001 | 2.044087 | 0.594029 | 1.3107   | 0.3797   | 0.48372  | RP11-178L chr16  | - | 87430310 | 87433901 | 513  |
| ENSG000001 | 16.80486 | 17.60302 | -0.07017 | 0.89663  | 0.92836  | TPBGL chr11      | + | 74951950 | 74954742 | 2793 |
| ENSG000001 | 1.027626 | 0        | 1.1491   | 0.51623  | NA       | RP11-426L chr1   | + | 1.13E+08 | 1.13E+08 | 2125 |
| ENSG000001 | 9.699819 | 5.003866 | 0.92471  | 0.20701  | 0.29672  | CTB-31N19 chr16  | + | 21638063 | 21638723 | 661  |
| ENSG000001 | 25.09588 | 18.24633 | 0.44759  | 0.32101  | 0.42382  | RP11-353B chr15  | + | 49944336 | 49948429 | 4094 |
| ENSG000001 | 0        | 2.558194 | -2.582   | 0.12605  | 0.1967   | PRSS46 chr3      | - | 46761073 | 46777919 | 982  |
| ENSG000001 | 22.31446 | 13.94089 | 0.66379  | 0.15932  | 0.23885  | CTD-2636A chr5   | + | 43287703 | 43290941 | 2125 |
| ENSG000001 | 0        | 0.686276 | -0.84936 | 0.6309   | NA       | RP11-414J chr15  | + | 75108564 | 75124136 | 5356 |
| ENSG000001 | 220.6557 | 656.7582 | -1.5728  | 3.26E-24 | 3.31E-23 | MIR4720 chr16    | + | 81416874 | 81424489 | 7616 |
| ENSG000001 | 0.705622 | 3.215331 | -1.8601  | 0.16276  | 0.24315  | AP000265. chr21  | - | 33632115 | 33633896 | 1782 |
| ENSG000001 | 1.048164 | 0.343138 | 0.98412  | 0.56751  | NA       | RP11-20I2 chr16  | - | 2604061  | 2606061  | 2001 |
| ENSG000001 | 0.653381 | 0.297015 | 0.51304  | 0.77085  | NA       | YBX3P1 chr16     | - | 31579707 | 31580796 | 1090 |
| ENSG000001 | 14.1708  | 3.945314 | 1.7696   | 0.01362  | 0.027846 | RP11-602 chr15   | + | 99679522 | 99685575 | 2677 |
| ENSG000001 | 0        | 0.891044 | -1.0625  | 0.54819  | NA       | RP11-243A chr16  | + | 9449445  | 9501950  | 5298 |
| ENSG000001 | 1.681007 | 2.38498  | -0.43426 | 0.7221   | 0.79438  | HMG2N2P4 chr16   | - | 35037240 | 35037651 | 412  |
| ENSG000001 | 0        | 0.357707 | -0.41864 | 0.81278  | NA       | RP11-189E chr16  | + | 49500017 | 49503786 | 3673 |
| ENSG000001 | 0        | 1.964165 | -2.2052  | 0.20143  | 0.2901   | RP5-914M chr7    | + | 1.41E+08 | 1.41E+08 | 478  |
| ENSG000001 | 1.919068 | 4.49322  | -1.1043  | 0.29026  | 0.39188  | RP11-554A chr11  | - | 68768233 | 68769516 | 1284 |
| ENSG000001 | 0.290301 | 1.073121 | -0.88899 | 0.61676  | NA       | RP11-540B chr15  | + | 31191683 | 31192530 | 330  |
| ENSG000001 | 0        | 2.010288 | -2.4674  | 0.13027  | 0.202    | RP5-842K1 chr7   | - | 1.41E+08 | 1.41E+08 | 596  |
| ENSG000001 | 2.749709 | 2.38498  | 0.17763  | 0.87604  | 0.91398  | RP11-357A chr16  | - | 54015141 | 54015824 | 547  |
| ENSG000001 | 0.705622 | 0        | 0.8807   | 0.6196   | NA       | RP11-390C chr15  | + | 72264547 | 72332606 | 781  |
| ENSG000001 | 0.36308  | 0        | 0.4146   | 0.81455  | NA       | RP11-405F chr16  | - | 57655946 | 57665559 | 556  |
| ENSG000001 | 0        | 2.65044  | -2.9164  | 0.059842 | 0.10422  | RP11-352C chr15  | - | 69570667 | 69591102 | 2419 |
| ENSG000001 | 0        | 0.357707 | -0.41864 | 0.81278  | NA       | RP11-618A chr15  | + | 36905675 | 36906399 | 725  |
| ENSG000001 | 0        | 2.445673 | -2.4958  | 0.14169  | 0.21611  | RP11-700F chr16  | - | 58881711 | 58914117 | 505  |
| ENSG000001 | 0.72616  | 0        | 0.85004  | 0.63064  | NA       | RP11-309F chr1   | + | 1.91E+08 | 1.91E+08 | 3125 |
| ENSG000001 | 16.52572 | 17.51393 | -0.07532 | 0.87905  | 0.91579  | RP11-529E chr4   | - | 3505324  | 3506184  | 861  |
| ENSG000001 | 0.632843 | 1.372552 | -0.72827 | 0.66417  | 0.74737  | RP11-327F chr16  | - | 50769624 | 50774627 | 1150 |
| ENSG000001 | 0.36308  | 0        | 0.4146   | 0.81455  | NA       | RP11-489C chr4   | - | 1.74E+08 | 1.74E+08 | 2209 |
| ENSG000001 | 2.468781 | 0.891044 | 1.0253   | 0.519    | 0.62164  | GOLGA6L7 chr15   | - | 29087381 | 29093821 | 1984 |
| ENSG000001 | 8.184907 | 4.850927 | 0.70863  | 0.35505  | 0.45932  | FLJ27352 chr15   | + | 55700746 | 55710962 | 729  |
| ENSG000001 | 0.290301 | 0        | 0.4146   | 0.81455  | NA       | RP11-21L1 chr16  | + | 63969682 | 63970810 | 1129 |
| ENSG000001 | 6.452473 | 6.198372 | 0.057745 | 0.94663  | 0.96609  | RP11-96K1 chr1   | - | 1.11E+08 | 1.11E+08 | 5985 |

|            |          |          |          |          |          |                   |   |          |          |      |
|------------|----------|----------|----------|----------|----------|-------------------|---|----------|----------|------|
| ENSG000001 | 8.360376 | 3.602177 | 1.1283   | 0.19274  | 0.28004  | CTD-3064N chr8    | - | 1.42E+08 | 1.42E+08 | 1963 |
| ENSG000001 | 1.390706 | 0.715414 | 0.66481  | 0.68868  | 0.76789  | CTD-2258A chr16   | - | 66503699 | 66515133 | 533  |
| ENSG000001 | 11.80471 | 86.11943 | -2.8089  | 2.72E-13 | 1.60E-12 | RP11-102F chr8    | - | 70579284 | 70582549 | 3266 |
| ENSG000001 | 17.92499 | 5.427098 | 1.6514   | 0.034793 | 0.064803 | LA16c-313I chr16  | + | 739001   | 742554   | 3413 |
| ENSG000001 | 13.78799 | 2.309719 | 2.4119   | 0.005331 | 0.011811 | RP5-1042I chr1    | - | 1.2E+08  | 1.2E+08  | 1359 |
| ENSG000001 | 14.77275 | 29.0634  | -0.96333 | 0.032852 | 0.061508 | RP11-304L chr16   | + | 2290488  | 2291819  | 788  |
| ENSG000001 | 0.290301 | 0        | 0.4146   | 0.81455  | NA       | TUBA8P2 chr15     | + | 84408536 | 84408951 | 416  |
| ENSG000001 | 0        | 6.131232 | -4.1953  | 0.002044 | 0.004829 | RP11-520P chr8    | + | 1.44E+08 | 1.44E+08 | 988  |
| ENSG000001 | 2.914991 | 3.556053 | -0.26238 | 0.79717  | 0.85607  | RP11-50D5 chr4    | - | 1.29E+08 | 1.29E+08 | 3843 |
| ENSG000001 | 4.595998 | 11.02499 | -1.2015  | 0.10073  | 0.16247  | CTD-2515A chr16   | - | 24814772 | 24831060 | 579  |
| ENSG000001 | 0        | 0.951736 | -1.2555  | 0.48145  | NA       | RP11-1C8.1 chr8   | + | 1.04E+08 | 1.04E+08 | 4597 |
| ENSG000001 | 0.685084 | 0        | 0.85004  | 0.63064  | NA       | RP11-475B chr4    | + | 1.75E+08 | 1.75E+08 | 885  |
| ENSG000001 | 1.016461 | 1.248751 | -0.24927 | 0.8717   | 0.91028  | RP11-328J chr16   | - | 72258464 | 72259043 | 391  |
| ENSG000001 | 0        | 0.297015 | -0.41864 | 0.81278  | NA       | RP5-1119A chr22   | - | 36956917 | 36958962 | 2046 |
| ENSG000001 | 0        | 0.357707 | -0.41864 | 0.81278  | NA       | RP11-146F chr16   | - | 30635606 | 30636035 | 430  |
| ENSG000001 | 193.0551 | 74.21804 | 1.3708   | 2.87E-08 | 1.17E-07 | RP11-401P chr16   | + | 50679720 | 50683160 | 3441 |
| ENSG000001 | 0.36308  | 0        | 0.4146   | 0.81455  | NA       | RP11-473C chr15   | - | 43476277 | 43477339 | 532  |
| ENSG000001 | 41.62918 | 59.61752 | -0.51788 | 0.084002 | 0.13937  | AC009133. chr16   | - | 29829301 | 29832573 | 970  |
| ENSG000001 | 0.705622 | 2.399549 | -1.4579  | 0.29376  | 0.39582  | RP1-168P1 chr16   | - | 89486483 | 89488634 | 415  |
| ENSG000001 | 0        | 3.290593 | -3.2571  | 0.028994 | 0.055057 | RP13-467F chr8    | + | 1.43E+08 | 1.43E+08 | 3377 |
| ENSG000001 | 0        | 0.357707 | -0.41864 | 0.81278  | NA       | RP11-354P chr9    | - | 21394887 | 21396345 | 1459 |
| ENSG000001 | 0.342542 | 0        | 0.4146   | 0.81455  | NA       | RP11-178L chr16   | - | 87296365 | 87326044 | 1718 |
| ENSG000001 | 1.306762 | 0.297015 | 1.2542   | 0.45876  | NA       | HPR chr16         | + | 72088522 | 72111145 | 1244 |
| ENSG000001 | 48.87301 | 75.4312  | -0.62756 | 0.041118 | 0.075141 | RP11-61A1 chr16   | + | 66921918 | 66922834 | 762  |
| ENSG000001 | 0        | 2.307303 | -2.6761  | 0.094365 | 0.15383  | RP11-264N chr16   | - | 77775365 | 77776897 | 800  |
| ENSG000001 | 14.60747 | 0.700845 | 4.012    | 8.22E-05 | 0.000237 | RP11-358L chr15   | + | 79705700 | 79706228 | 529  |
| ENSG000001 | 0.653381 | 1.294874 | -0.76351 | 0.61066  | 0.70317  | CTD-2562C chr15   | + | 75707590 | 75708361 | 466  |
| ENSG000001 | 87.95061 | 98.73148 | -0.16389 | 0.4786   | 0.58289  | RP11-196C chr1    | - | 1.5E+08  | 1.5E+08  | 4527 |
| ENSG000001 | 2.282147 | 6.558496 | -1.3805  | 0.15688  | 0.23594  | CTD-2196E chr16   | + | 23617162 | 23635428 | 627  |
| ENSG000001 | 0        | 0.357707 | -0.41864 | 0.81278  | NA       | RP11-307C chr13   | - | 35499971 | 35502213 | 2243 |
| ENSG000001 | 0.342542 | 0        | 0.4146   | 0.81455  | NA       | GS1-204I1.1 chr1  | + | 1.86E+08 | 1.86E+08 | 901  |
| ENSG000001 | 2.209369 | 11.80922 | -2.2472  | 0.006909 | 0.014975 | CTD-2358C chr16   | - | 31720434 | 31723305 | 441  |
| ENSG000001 | 14.84553 | 18.71085 | -0.32419 | 0.51078  | 0.61399  | LA16c-431I chr16  | + | 1682260  | 1736716  | 5326 |
| ENSG000001 | 0.580602 | 1.058552 | -0.51948 | 0.75894  | NA       | AC002551. chr16   | + | 27654520 | 27655984 | 592  |
| ENSG000001 | 7.522153 | 3.466222 | 1.0178   | 0.26642  | 0.36514  | RP4-612B1 chr1    | - | 87169185 | 87170145 | 961  |
| ENSG000001 | 0.290301 | 0.297015 | -0.00202 | 0.99909  | NA       | GOLGA8S chr15     | + | 23599895 | 23612378 | 4349 |
| ENSG000001 | 2.842212 | 2.96444  | -0.03909 | 0.97123  | 0.98416  | BOLA2B chr16      | - | 29454551 | 29465972 | 3103 |
| ENSG000001 | 3.22583  | 3.558469 | -0.13008 | 0.89709  | 0.9286   | RP11-256I chr16   | - | 65318402 | 65610203 | 1760 |
| ENSG000001 | 6.741961 | 7.036845 | -0.06153 | 0.93793  | 0.95905  | RP11-21B2 chr16   | - | 88579368 | 88597461 | 733  |
| ENSG000001 | 0.342542 | 0.343138 | -0.00208 | 0.99906  | NA       | IST1 chr16        | + | 71879899 | 71950997 | 503  |
| ENSG000001 | 0        | 16.47881 | -5.6476  | 2.71E-06 | 9.27E-06 | CTC-523E2.1 chr19 | - | 35302493 | 35305249 | 2757 |
| ENSG000001 | 3.942617 | 3.039702 | 0.35597  | 0.71606  | 0.78964  | AC005592. chr5    | + | 1.42E+08 | 1.42E+08 | 1640 |
| ENSG000001 | 2.645227 | 1.309443 | 0.86383  | 0.48715  | 0.59112  | RP11-102N chr3    | + | 1.36E+08 | 1.36E+08 | 3151 |
| ENSG000001 | 0.685084 | 0        | 0.85004  | 0.63064  | NA       | RP11-626C chr16   | - | 19131298 | 19132951 | 1137 |
| ENSG000001 | 1.597063 | 8.326014 | -2.1687  | 0.023853 | 0.046258 | RP11-1223 chr2    | + | 1.11E+08 | 1.11E+08 | 857  |
| ENSG000001 | 5.310179 | 24.06269 | -2.0667  | 0.002215 | 0.005203 | RP11-650L chr15   | - | 78881465 | 78883618 | 2154 |
| ENSG000001 | 0        | 0.640152 | -0.82869 | 0.63935  | NA       | KRT18P18 chr16    | + | 72762515 | 72763793 | 1279 |
| ENSG000001 | 0.342542 | 0        | 0.4146   | 0.81455  | NA       | RP11-498C chr16   | - | 71915456 | 71916176 | 426  |
| ENSG000001 | 8.268851 | 6.985016 | 0.23522  | 0.73165  | 0.80182  | RP11-22P6 chr16   | - | 28873487 | 28874661 | 544  |
| ENSG000001 | 7.158095 | 3.916176 | 0.79817  | 0.34837  | 0.45262  | CTC-459F4. chr19  | - | 28248092 | 28251757 | 3666 |
| ENSG000001 | 0.72616  | 1.698704 | -0.96528 | 0.52511  | 0.62708  | WI2-89031 chrX    | - | 1.54E+08 | 1.54E+08 | 792  |
| ENSG000001 | 0.72616  | 0        | 0.85004  | 0.63064  | NA       | RP11-328J chr16   | + | 72312167 | 72312467 | 301  |
| ENSG000001 | 1.338465 | 5.554188 | -1.8676  | 0.075769 | 0.12751  | RP11-100I chr15   | + | 74781943 | 74809300 | 361  |
| ENSG000001 | 3.382552 | 5.424682 | -0.63615 | 0.49121  | 0.59522  | RP11-529K chr16   | - | 70349543 | 70380650 | 1471 |
| ENSG000001 | 0        | 0.343138 | -0.41864 | 0.81278  | NA       | RP5-1173P chr7    | - | 1.41E+08 | 1.41E+08 | 174  |
| ENSG000001 | 0.72616  | 7.097537 | -2.9011  | 0.016793 | 0.033675 | CTD-2354A chr18   | + | 70992176 | 71017113 | 1165 |
| ENSG000001 | 2.375464 | 2.353426 | 0.005331 | 0.99624  | 0.99783  | RP11-252K chr16   | - | 75413716 | 75415158 | 374  |
| ENSG000001 | 2.645227 | 18.87924 | -2.7147  | 0.000182 | 0.000501 | RP4-555D2 chr3    | + | 44158791 | 44163857 | 5067 |
| ENSG000001 | 0        | 30.93619 | -6.5153  | 2.18E-08 | 9.01E-08 | TCF24 chr8        | - | 67858736 | 67874825 | 2450 |
| ENSG000001 | 0.342542 | 1.84278  | -1.6267  | 0.32697  | 0.42994  | RP11-480C chr16   | - | 46737281 | 46737937 | 657  |
| ENSG000001 | 0.342542 | 0        | 0.4146   | 0.81455  | NA       | DNM1P28 chr15     | - | 30391029 | 30394296 | 474  |
| ENSG000001 | 8.185721 | 10.6503  | -0.38021 | 0.56621  | 0.66407  | GOLGA8H chr15     | + | 30896329 | 30906764 | 1899 |
| ENSG000001 | 0        | 0.297015 | -0.41864 | 0.81278  | NA       | RP11-90P1 chr7    | - | 161765   | 164972   | 3208 |
| ENSG000001 | 0        | 2.073397 | -2.2159  | 0.20168  | 0.2903   | RP11-744I chr7    | - | 1.41E+08 | 1.41E+08 | 385  |
| ENSG000001 | 0        | 0.997859 | -1.5018  | 0.39072  | NA       | RP1-118J2 chr1    | + | 40254648 | 40255843 | 1196 |

|            |          |          |          |          |          |                  |   |          |          |      |
|------------|----------|----------|----------|----------|----------|------------------|---|----------|----------|------|
| ENSG000001 | 97.91489 | 90.33591 | 0.11063  | 0.6464   | 0.73288  | RP11-283I: chr12 | - | 383120   | 386289   | 3170 |
| ENSG000001 | 140.3173 | 96.76572 | 0.53523  | 0.019413 | 0.038425 | LOXL1-AS1 chr15  | - | 74200424 | 74220589 | 2358 |
| ENSG000001 | 0        | 3.022717 | -3.0495  | 0.04972  | 0.088547 | RP11-44F1 chr16  | + | 53407405 | 53418657 | 721  |
| ENSG000001 | 0        | 0.343138 | -0.41864 | 0.81278  | NA       | RP11-430C chr16  | + | 59889257 | 60087875 | 6584 |
| ENSG000001 | 0        | 54.91382 | -7.348   | 2.93E-11 | 1.51E-10 | TUBB8P7 chr16    | + | 90159562 | 90162762 | 2115 |
| ENSG000001 | 0        | 0.715414 | -0.84936 | 0.6309   | NA       | RP11-151F chr15  | - | 75268581 | 75268914 | 334  |
| ENSG000001 | 0.342542 | 0.357707 | -0.0021  | 0.99906  | NA       | RP11-502F chr1   | - | 1.8E+08  | 1.8E+08  | 506  |
| ENSG000001 | 0.943682 | 0        | 1.2438   | 0.48556  | NA       | RP11-351A chr16  | + | 65614571 | 65680850 | 428  |
| ENSG000001 | 10.12451 | 9.344147 | 0.10406  | 0.87576  | 0.91376  | RP11-680C chr16  | - | 15082116 | 15084017 | 1902 |
| ENSG000001 | 0        | 0.594029 | -0.81444 | 0.64499  | NA       | DNM1P35 chr15    | - | 76083811 | 76085024 | 474  |
| ENSG000001 | 0.705622 | 5.108266 | -2.4252  | 0.061333 | 0.10638  | CTD-2311N chr15  | + | 74657776 | 74659391 | 785  |
| ENSG000001 | 1.08924  | 1.012429 | 0.056203 | 0.97303  | 0.98493  | RP11-48G1 chr15  | - | 56700681 | 56702384 | 839  |
| ENSG000001 | 111.7347 | 154.5746 | -0.46654 | 0.068754 | 0.11729  | LINC00662 chr19  | - | 28175488 | 28284848 | 2480 |
| ENSG000001 | 0.290301 | 0.686276 | -0.47648 | 0.78935  | NA       | RP11-340F chr12  | + | 1.22E+08 | 1.22E+08 | 477  |
| ENSG000001 | 0.36308  | 0.951736 | -0.91212 | 0.59701  | NA       | RP11-223I: chr2  | + | 2.32E+08 | 2.32E+08 | 598  |
| ENSG000001 | 0.36308  | 0        | 0.4146   | 0.81455  | NA       | RP11-533E chr1   | - | 1.8E+08  | 1.8E+08  | 447  |
| ENSG000001 | 0.943682 | 1.012429 | -0.05362 | 0.97279  | 0.98486  | RP11-264L chr16  | + | 78568271 | 78569545 | 707  |
| ENSG000001 | 2.738544 | 1.531196 | 0.66404  | 0.6096   | 0.70234  | RP11-303E chr16  | + | 81103459 | 81110203 | 408  |
| ENSG000001 | 6.26584  | 14.63288 | -1.1937  | 0.052435 | 0.092701 | RP11-146F chr16  | - | 30709030 | 30710379 | 1142 |
| ENSG000001 | 0.580602 | 0.297015 | 0.36801  | 0.83644  | NA       | RP11-143I: chr7  | + | 1.49E+08 | 1.49E+08 | 2216 |
| ENSG000001 | 0        | 4.317591 | -3.6334  | 0.012226 | 0.025232 | CTD-2309C chr17  | - | 3038263  | 3080325  | 534  |
| ENSG000001 | 2.718006 | 0        | 2.9226   | 0.060365 | 0.10495  | MIA chr19        | + | 41277553 | 41283395 | 632  |
| ENSG000001 | 0.72616  | 1.043983 | -0.36115 | 0.83043  | NA       | RP11-67A1 chr16  | + | 68111243 | 68156174 | 549  |
| ENSG000001 | 3.04001  | 8.501643 | -1.4215  | 0.08243  | 0.13703  | RP11-104C chr17  | + | 4204667  | 4205993  | 1327 |
| ENSG000001 | 0.705622 | 0        | 0.8807   | 0.6196   | NA       | RP5-867C2 chr17  | + | 45247192 | 45248415 | 673  |
| ENSG000001 | 0        | 0.937167 | -1.2408  | 0.48662  | NA       | RP11-515E chr17  | - | 53545427 | 53588299 | 566  |
| ENSG000001 | 4.729577 | 2.840639 | 0.66425  | 0.50899  | 0.61238  | RP11-333E chr17  | + | 5095379  | 5151364  | 1715 |
| ENSG000001 | 14.39851 | 14.54949 | -0.01189 | 0.98104  | 0.98953  | CTC-479C5 chr16  | - | 67963517 | 67969920 | 5685 |
| ENSG000001 | 2.188831 | 1.606458 | 0.36924  | 0.78944  | 0.84972  | RP11-63A1 chr17  | - | 44994136 | 45000400 | 395  |
| ENSG000001 | 19.49295 | 6.629725 | 1.5092   | 0.017732 | 0.035406 | AC144831. chr17  | + | 81061205 | 81063860 | 2656 |
| ENSG000001 | 7.200149 | 7.079679 | 0.031857 | 0.96843  | 0.9823   | RP11-473N chr16  | - | 3206737  | 3207484  | 748  |
| ENSG000001 | 53.83551 | 27.43096 | 0.95665  | 0.033002 | 0.061759 | RP1-59D14 chr17  | - | 2292560  | 2295372  | 2813 |
| ENSG000001 | 0        | 0.357707 | -0.41864 | 0.81278  | NA       | RP11-109N chr16  | - | 10813872 | 10815321 | 1450 |
| ENSG000001 | 7.239433 | 3.6483   | 0.91585  | 0.32799  | 0.43104  | RP11-235E chr17  | - | 3505055  | 3505566  | 512  |
| ENSG000001 | 2.73773  | 2.949871 | -0.07302 | 0.95353  | 0.97114  | CTD-2561B chr17  | - | 78940039 | 78945013 | 3133 |
| ENSG000001 | 0        | 8.856934 | -4.7449  | 0.000237 | 0.000644 | RP11-388N chr16  | + | 31237281 | 31238481 | 1201 |
| ENSG000001 | 20.63264 | 5.347004 | 1.9037   | 0.001166 | 0.002865 | PCDHGA9 chr5     | + | 1.41E+08 | 1.41E+08 | 4605 |
| ENSG000001 | 0.975385 | 0.891044 | 0.066016 | 0.96851  | NA       | CTC-496I2: chr16 | - | 19830826 | 19830950 | 125  |
| ENSG000001 | 4.886299 | 29.79829 | -2.5187  | 6.11E-05 | 0.000179 | CTD-3148I: chr19 | + | 49927006 | 49932075 | 1876 |
| ENSG000001 | 3.661688 | 0        | 3.386    | 0.022371 | 0.043672 | RP11-893F chr17  | - | 48240884 | 48242677 | 1794 |
| ENSG000001 | 0        | 215.7584 | -9.1049  | 2.12E-16 | 1.50E-15 | RP11-74E2 chr17  | - | 2627714  | 2652714  | 792  |
| ENSG000001 | 1.866827 | 0        | 2.3484   | 0.15622  | NA       | RP11-342L chr6   | + | 80262511 | 80262877 | 367  |
| ENSG000001 | 46.16617 | 78.47163 | -0.76435 | 0.021895 | 0.042841 | RP11-473N chr16  | - | 3101992  | 3109371  | 2163 |
| ENSG000001 | 2.987769 | 4.441392 | -0.51847 | 0.58879  | 0.68423  | CTD-2529C chr17  | + | 77997693 | 77999906 | 415  |
| ENSG000001 | 2.334388 | 5.811527 | -1.2086  | 0.20676  | 0.29652  | CTC-281F2: chr17 | - | 6556783  | 6558328  | 879  |
| ENSG000001 | 6.753939 | 1.40169  | 2.0801   | 0.047324 | 0.084819 | RP11-212I: chr16 | + | 55572112 | 55575939 | 3828 |
| ENSG000001 | 129.0205 | 299.7503 | -1.2122  | 2.48E-12 | 1.37E-11 | DLGAP1-AS chr18  | + | 3602998  | 3608334  | 2261 |
| ENSG000001 | 3.330311 | 2.652857 | 0.28626  | 0.80357  | 0.86109  | RP11-676J chr17  | + | 812872   | 814452   | 820  |
| ENSG000001 | 0        | 3.50993  | -3.0391  | 0.063282 | 0.10928  | AC003009. chr16  | - | 13425225 | 13426440 | 686  |
| ENSG000001 | 0        | 0.343138 | -0.41864 | 0.81278  | NA       | RP11-66H6 chr16  | - | 11160353 | 11164959 | 610  |
| ENSG000001 | 0.580602 | 0        | 0.8036   | 0.6494   | NA       | RP11-63A1 chr17  | - | 44987108 | 44988878 | 494  |
| ENSG000001 | 0.290301 | 0        | 0.4146   | 0.81455  | NA       | RP11-177N chr16  | + | 47563101 | 47563827 | 493  |
| ENSG000001 | 2.104887 | 1.188058 | 0.5899   | 0.71024  | 0.78476  | RP11-81K2 chr17  | + | 47448102 | 47554350 | 382  |
| ENSG000001 | 10.94578 | 37.08998 | -1.7387  | 0.000131 | 0.000367 | RP13-1032 chr17  | - | 79668354 | 79670330 | 1977 |
| ENSG000001 | 0.36308  | 1.66715  | -1.5237  | 0.35755  | 0.46184  | RP11-74E2 chr17  | + | 2615603  | 2616127  | 443  |
| ENSG000001 | 0.290301 | 0        | 0.4146   | 0.81455  | NA       | RP11-1260 chr17  | + | 180996   | 183279   | 2252 |
| ENSG000001 | 1.379541 | 8.567168 | -2.3282  | 0.046899 | 0.084144 | SNORD3B-2 chr17  | - | 18966762 | 18967449 | 688  |
| ENSG000001 | 0        | 0.357707 | -0.41864 | 0.81278  | NA       | IL9RP4 chr18     | - | 80140    | 88570    | 1248 |
| ENSG000001 | 0        | 2.529055 | -2.8037  | 0.077578 | 0.13005  | OR1P1 chr17      | - | 3057183  | 3058176  | 994  |
| ENSG000001 | 8.196886 | 5.461941 | 0.52989  | 0.50422  | 0.6077   | RP11-510N chr16  | - | 71481500 | 71486552 | 5053 |
| ENSG000001 | 3.682226 | 2.24661  | 0.61727  | 0.57373  | 0.67088  | RP11-589P chr17  | - | 6897961  | 6898508  | 343  |
| ENSG000001 | 11.29688 | 3.763237 | 1.4764   | 0.065563 | 0.11265  | PCDHB19P chr5    | + | 1.41E+08 | 1.41E+08 | 2347 |
| ENSG000001 | 1.701545 | 1.248751 | 0.32998  | 0.81004  | 0.86609  | CTD-2561B chr17  | - | 78997345 | 78999303 | 368  |
| ENSG000001 | 0        | 0.357707 | -0.41864 | 0.81278  | NA       | CTC-524C5 chr17  | + | 5372412  | 5373680  | 398  |
| ENSG000001 | 1.608228 | 0        | 1.9264   | 0.27132  | NA       | RP11-455C chr17  | + | 79171193 | 79174088 | 805  |

|            |          |          |          |          |          |            |       |   |          |          |      |
|------------|----------|----------|----------|----------|----------|------------|-------|---|----------|----------|------|
| ENSG000001 | 0.705622 | 0        | 0.8807   | 0.6196   | NA       | BCAR4      | chr16 | - | 11913686 | 11922702 | 1273 |
| ENSG000001 | 0.36308  | 2.292733 | -2.0767  | 0.16466  | 0.24554  | RP11-483C  | chr14 | - | 27061953 | 27063723 | 1771 |
| ENSG000001 | 0        | 0.357707 | -0.41864 | 0.81278  | NA       | RP11-510N  | chr16 | + | 71454386 | 71455421 | 333  |
| ENSG000001 | 0.943682 | 0.640152 | 0.39749  | 0.80623  | NA       | RP11-676J  | chr17 | + | 781142   | 783333   | 585  |
| ENSG000001 | 2.479132 | 0.343138 | 2.0251   | 0.20437  | 0.29351  | CTD-2033A  | chr16 | + | 69760916 | 69776466 | 592  |
| ENSG000001 | 1.608228 | 0.343138 | 1.4905   | 0.36958  | 0.47408  | RP11-417N  | chr16 | + | 71867690 | 71869835 | 881  |
| ENSG000001 | 0.975385 | 0.951736 | 0.017636 | 0.99106  | 0.99529  | CTC-479C5  | chr16 | - | 67889858 | 67890014 | 157  |
| ENSG000001 | 15.2104  | 9.531057 | 0.6496   | 0.29208  | 0.39398  | RP13-638C  | chr17 | - | 80545189 | 80546287 | 318  |
| ENSG000001 | 0        | 0.594029 | -0.81444 | 0.64499  | NA       | RP11-876N  | chr16 | - | 10958771 | 10982609 | 575  |
| ENSG000001 | 0        | 5.133373 | -3.9127  | 0.00541  | 0.01197  | LINC00514  | chr16 | + | 3038962  | 3044510  | 3385 |
| ENSG000001 | 1.846289 | 6.639462 | -1.6214  | 0.13146  | 0.2036   | RP11-266L  | chr16 | + | 25078258 | 25080264 | 1875 |
| ENSG000001 | 4.459813 | 4.150082 | 0.093828 | 0.92332  | 0.94839  | RP11-81A2  | chr17 | - | 4704454  | 4710308  | 562  |
| ENSG000001 | 4.637074 | 3.861932 | 0.25717  | 0.80445  | 0.86177  | CTA-972D3  | chr16 | + | 15978886 | 15980015 | 536  |
| ENSG000001 | 11.27537 | 10.13966 | 0.14007  | 0.82403  | 0.87591  | CTD-2529C  | chr17 | - | 77965743 | 77966640 | 443  |
| ENSG000001 | 1.919068 | 48.94049 | -4.473   | 7.47E-12 | 3.99E-11 | RP1-302G2  | chr6  | + | 44184676 | 44185973 | 817  |
| ENSG000001 | 16.03665 | 11.48468 | 0.48068  | 0.39982  | 0.50456  | OCLM       | chr1  | + | 1.86E+08 | 1.86E+08 | 884  |
| ENSG000001 | 1.794048 | 1.591889 | 0.16044  | 0.90632  | 0.9355   | RP11-462C  | chr16 | - | 3997610  | 4000445  | 1394 |
| ENSG000001 | 0.290301 | 0.640152 | -0.50256 | 0.77558  | NA       | RP11-353N  | chr17 | + | 77893156 | 77899261 | 1540 |
| ENSG000001 | 26.00867 | 23.22193 | 0.14811  | 0.74799  | 0.81551  | CTD-3195I  | chr17 | - | 3705459  | 3706676  | 518  |
| ENSG000001 | 0        | 6.399108 | -4.2399  | 0.001901 | 0.004513 | RP11-124N  | chr13 | + | 23492730 | 23498741 | 585  |
| ENSG000001 | 0        | 12.36841 | -5.1709  | 5.25E-05 | 0.000155 | RP11-160E  | chr17 | - | 19015313 | 19015949 | 637  |
| ENSG000001 | 3.682226 | 11.36497 | -1.5422  | 0.075357 | 0.12696  | PCDHGB3    | chr5  | + | 1.41E+08 | 1.41E+08 | 4727 |
| ENSG000001 | 0        | 0.357707 | -0.41864 | 0.81278  | NA       | AC144836   | chr17 | - | 1145233  | 1157294  | 340  |
| ENSG000001 | 10.62117 | 7.045709 | 0.58554  | 0.38713  | 0.49129  | RP11-876N  | chr16 | + | 11034576 | 11036878 | 2147 |
| ENSG000001 | 6.991186 | 0.937167 | 2.5465   | 0.020292 | 0.039977 | RP11-1055  | chr17 | - | 79349801 | 79359160 | 702  |
| ENSG000001 | 7.491264 | 3.823929 | 0.88086  | 0.30418  | 0.40558  | RP5-1050C  | chr17 | + | 4891001  | 4891741  | 551  |
| ENSG000001 | 0        | 0.297015 | -0.41864 | 0.81278  | NA       | RP11-960B  | chr17 | - | 6092681  | 6093861  | 503  |
| ENSG000001 | 0        | 0.654722 | -0.83442 | 0.63731  | NA       | AC003009   | chr16 | + | 13552183 | 13552555 | 373  |
| ENSG000001 | 37.73978 | 97.41821 | -1.3582  | 3.39E-05 | 0.000102 | CORO7      | chr16 | - | 4404543  | 4475706  | 3578 |
| ENSG000001 | 5.561032 | 6.912171 | -0.3112  | 0.73252  | 0.80237  | RP11-235E  | chr17 | - | 3522550  | 3523207  | 344  |
| ENSG000001 | 10.11595 | 22.45952 | -1.1371  | 0.035091 | 0.065304 | RP11-199F  | chr17 | - | 7588578  | 7589689  | 1112 |
| ENSG000001 | 2.967231 | 1.949596 | 0.53216  | 0.62792  | 0.71773  | RP5-867C2  | chr17 | - | 45238441 | 45239430 | 401  |
| ENSG000001 | 0        | 1.012429 | -1.3162  | 0.46038  | NA       | U95743.1   | chr16 | - | 13823994 | 13873617 | 1001 |
| ENSG000001 | 0        | 0.297015 | -0.41864 | 0.81278  | NA       | RP11-1260  | chr17 | + | 202429   | 207372   | 748  |
| ENSG000001 | 0.923144 | 0        | 1.223    | 0.49292  | NA       | RP11-55L4  | chr17 | - | 9550337  | 9550977  | 195  |
| ENSG000001 | 0.685084 | 4.334576 | -2.2574  | 0.079522 | 0.1328   | RP5-1107A  | chr17 | + | 55017293 | 55018636 | 549  |
| ENSG000001 | 0.995923 | 0.357707 | 1.0227   | 0.53712  | NA       | SHPK       | chr17 | - | 3468738  | 3539543  | 4753 |
| ENSG000001 | 0.943682 | 0.357707 | 0.90033  | 0.60199  | NA       | LA16c-390I | chr16 | + | 3594431  | 3595785  | 480  |
| ENSG000001 | 0.923144 | 0.891044 | 0.024713 | 0.98823  | NA       | CTD-2561B  | chr17 | - | 78914218 | 78915833 | 494  |
| ENSG000001 | 2.012384 | 3.441116 | -0.67691 | 0.55892  | 0.65775  | CTC-457L1  | chr17 | - | 19044330 | 19047002 | 2673 |
| ENSG000001 | 0        | 0.594029 | -0.81444 | 0.64499  | NA       | RP11-517A  | chr16 | + | 16316884 | 16318118 | 542  |
| ENSG000001 | 14.02687 | 11.96545 | 0.20793  | 0.7165   | 0.79003  | HNRNP1P    | chr17 | + | 2210055  | 2211009  | 955  |
| ENSG000001 | 0.36308  | 0.951736 | -0.91212 | 0.59701  | NA       | RP11-1197  | chr17 | + | 80936401 | 80939614 | 401  |
| ENSG000001 | 1.08924  | 0.700845 | 0.41139  | 0.80818  | NA       | AP005530   | chr18 | + | 11103    | 15928    | 920  |
| ENSG000001 | 1.286224 | 0.343138 | 1.3346   | 0.40921  | NA       | CTD-3195I  | chr17 | + | 3632655  | 3633787  | 398  |
| ENSG000001 | 15.82092 | 19.86582 | -0.32162 | 0.6064   | 0.69958  | DOC2B      | chr17 | - | 5810     | 31427    | 1281 |
| ENSG000001 | 0        | 5.439251 | -3.9884  | 0.004243 | 0.009542 | LA16c-380I | chr16 | - | 3053432  | 3055102  | 608  |
| ENSG000001 | 0        | 18.68568 | -5.5021  | 5.85E-05 | 0.000171 | RP11-473N  | chr16 | - | 3126912  | 3137101  | 1207 |
| ENSG000001 | 6.14082  | 5.254758 | 0.21828  | 0.7813   | 0.84307  | RP11-669E  | chr17 | + | 44112679 | 44113136 | 304  |
| ENSG000001 | 0.923144 | 1.012429 | -0.06857 | 0.96524  | 0.97971  | CTB-193M1  | chr16 | + | 15777147 | 15778427 | 503  |
| ENSG000001 | 1.628766 | 0.937167 | 0.62094  | 0.6577   | 0.74212  | RP11-667K  | chr17 | - | 2030724  | 2031198  | 475  |
| ENSG000001 | 0.72616  | 0.357707 | 0.52227  | 0.76959  | NA       | RP11-670E  | chr17 | - | 54962000 | 54962180 | 181  |
| ENSG000001 | 3.620613 | 5.673157 | -0.60265 | 0.48831  | 0.59238  | RP11-388C  | chr17 | + | 80702944 | 80703585 | 642  |
| ENSG000001 | 0.290301 | 0        | 0.4146   | 0.81455  | NA       | RP11-85G1  | chr10 | + | 27532059 | 27539733 | 1002 |
| ENSG000001 | 1.265686 | 3.933161 | -1.3399  | 0.31788  | 0.42064  | RP11-490C  | chr16 | + | 11835766 | 11838362 | 2597 |
| ENSG000001 | 7.749862 | 7.936752 | -0.0443  | 0.94781  | 0.96705  | RP11-676J  | chr17 | - | 692984   | 693765   | 486  |
| ENSG000001 | 0.72616  | 1.073121 | -0.33426 | 0.84917  | NA       | CTD-2545F  | chr17 | + | 1898908  | 1906832  | 737  |
| ENSG000001 | 14.37797 | 6.087525 | 1.1798   | 0.075492 | 0.12715  | RP11-65J2  | chr16 | + | 14396145 | 14420210 | 651  |
| ENSG000001 | 12.0025  | 22.69833 | -0.88592 | 0.1554   | 0.234    | RP11-95P2  | chr16 | - | 4295826  | 4303790  | 2093 |
| ENSG000001 | 0        | 1.073121 | -1.1788  | 0.50551  | NA       | TVP23CP2   | chr16 | + | 14294214 | 14294836 | 623  |
| ENSG000001 | 0.36308  | 0.594029 | -0.39069 | 0.82661  | NA       | SAMD11P1   | chr17 | - | 2516578  | 2517238  | 661  |
| ENSG000001 | 1.742621 | 3.974453 | -1.0467  | 0.39593  | 0.50049  | LA16c-321I | chr16 | - | 2989715  | 3004277  | 510  |
| ENSG000001 | 0.290301 | 5.34942  | -3.2412  | 0.016741 | 0.033576 | CTC-360G5  | chr19 | - | 39399620 | 39402798 | 1057 |
| ENSG000001 | 0.36308  | 0        | 0.4146   | 0.81455  | NA       | RP11-876N  | chr16 | - | 10934241 | 10935401 | 1161 |
| ENSG000001 | 0        | 0.686276 | -0.84936 | 0.6309   | NA       | RP11-4618  | chr17 | + | 4963651  | 4965418  | 416  |

|            |          |          |          |          |          |                  |   |          |          |      |
|------------|----------|----------|----------|----------|----------|------------------|---|----------|----------|------|
| ENSG000001 | 0        | 4.614605 | -3.7344  | 0.009326 | 0.019701 | AC002128. chr19  | - | 35723194 | 35723906 | 713  |
| ENSG000001 | 0        | 0.937167 | -1.2408  | 0.48662  | NA       | RP11-259G chr17  | + | 44320972 | 44322410 | 1439 |
| ENSG000001 | 0        | 4.799099 | -3.771   | 0.008702 | 0.018506 | RP11-530N chr17  | - | 6830791  | 6831510  | 720  |
| ENSG000001 | 1.991846 | 2.041842 | -0.02216 | 0.98492  | 0.99129  | RP11-96D1 chr16  | + | 68233698 | 68234884 | 1187 |
| ENSG000001 | 0.72616  | 0.937167 | -0.27927 | 0.86891  | NA       | RP11-95J1 chr16  | + | 3890529  | 3891011  | 483  |
| ENSG000001 | 0        | 1.355566 | -1.9006  | 0.26573  | NA       | RP11-141J chr17  | + | 4475501  | 4475810  | 310  |
| ENSG000001 | 0        | 1.355566 | -1.9006  | 0.26573  | NA       | AJ003147.1 chr16 | - | 3231233  | 3234018  | 454  |
| ENSG000001 | 1.576526 | 1.058552 | 0.50409  | 0.72225  | 0.79444  | CTA-276F8. chr16 | - | 14285677 | 14294134 | 415  |
| ENSG000001 | 0.685084 | 0        | 0.85004  | 0.63064  | NA       | RP11-259G chr17  | - | 44336917 | 44337972 | 1056 |
| ENSG000001 | 0        | 0.937167 | -1.2408  | 0.48662  | NA       | RP3-422G2 chr6   | + | 1.39E+08 | 1.39E+08 | 855  |
| ENSG000001 | 6.399419 | 2.947455 | 1.0466   | 0.24403  | 0.33965  | RP11-44F1 chr16  | - | 53524952 | 53527880 | 2929 |
| ENSG000001 | 0        | 0.297015 | -0.41864 | 0.81278  | NA       | RP11-1260 chr17  | + | 204528   | 206673   | 913  |
| ENSG000001 | 15.48954 | 13.38171 | 0.20017  | 0.71184  | 0.78615  | PCDHGA4 chr5     | + | 1.41E+08 | 1.41E+08 | 4602 |
| ENSG000001 | 4.345959 | 24.24248 | -2.3491  | 0.000679 | 0.001728 | RP11-334C chr17  | - | 78174472 | 78179748 | 4399 |
| ENSG000001 | 11.02793 | 20.36357 | -0.86848 | 0.17908  | 0.26311  | RP11-77K1 chr16  | - | 75533686 | 75550178 | 637  |
| ENSG000001 | 3.081086 | 2.353426 | 0.34079  | 0.75172  | 0.8186   | RP11-353N chr17  | - | 77889051 | 77900524 | 5271 |
| ENSG000001 | 6.483362 | 10.46339 | -0.65933 | 0.34415  | 0.44811  | RP11-266L chr16  | + | 25043202 | 25069430 | 574  |
| ENSG000001 | 39.43456 | 36.02331 | 0.12657  | 0.71491  | 0.78872  | CTC-786C1 chr16  | + | 85204882 | 85218969 | 777  |
| ENSG000001 | 0        | 5.644019 | -4.0878  | 0.002692 | 0.006253 | LINC00621 chr13  | - | 23468795 | 23490508 | 1177 |
| ENSG000001 | 0        | 0.297015 | -0.41864 | 0.81278  | NA       | LA16c-306I chr16 | + | 3415099  | 3536953  | 2238 |
| ENSG000001 | 0.290301 | 1.043983 | -0.98014 | 0.57012  | NA       | RP5-1107A chr17  | + | 55029025 | 55029765 | 410  |
| ENSG000001 | 1.939605 | 2.915901 | -0.50669 | 0.67941  | 0.76001  | CTD-3088G chr16  | - | 11474716 | 11474975 | 260  |
| ENSG000001 | 9.151733 | 3.480792 | 1.2769   | 0.1383   | 0.21176  | RP13-638C chr17  | + | 80535899 | 80536492 | 594  |
| ENSG000001 | 0.290301 | 1.744828 | -1.592   | 0.3373   | 0.44103  | RP11-170L chr16  | + | 31923175 | 31928172 | 4998 |
| ENSG000001 | 0.290301 | 0.640152 | -0.50256 | 0.77558  | NA       | CTD-2561B chr17  | - | 78934566 | 78935513 | 549  |
| ENSG000001 | 7.304631 | 16.28875 | -1.1127  | 0.13847  | 0.21199  | RP11-497F chr17  | + | 80876158 | 80876661 | 504  |
| ENSG000001 | 1.555988 | 2.353426 | -0.47924 | 0.70093  | 0.77756  | AJ003147.1 chr16 | + | 3238212  | 3274779  | 629  |
| ENSG000001 | 0        | 0.297015 | -0.41864 | 0.81278  | NA       | RP11-64J4. chr17 | - | 3182069  | 3289633  | 586  |
| ENSG000001 | 3.402276 | 0.297015 | 2.4758   | 0.11076  | 0.17613  | RP5-1050C chr17  | + | 4889761  | 4890619  | 542  |
| ENSG000001 | 0.290301 | 1.234181 | -1.1976  | 0.48275  | NA       | RP11-311F chr17  | + | 19622372 | 19625741 | 3370 |
| ENSG000001 | 10.16559 | 9.767379 | 0.050123 | 0.9376   | 0.9588   | AC005356. chr16  | - | 4374668  | 4378341  | 340  |
| ENSG000001 | 14.49264 | 5.208634 | 1.4015   | 0.045417 | 0.081755 | CTC-277H1 chr16  | + | 67295011 | 67297687 | 2677 |
| ENSG000001 | 12.62418 | 9.932471 | 0.34515  | 0.54554  | 0.64577  | CTD-3195I! chr17 | + | 3624922  | 3625782  | 291  |
| ENSG000001 | 0        | 1.012429 | -1.3162  | 0.46038  | NA       | RP11-4618. chr17 | - | 4978973  | 4981408  | 490  |
| ENSG000001 | 2.116866 | 0        | 2.2857   | 0.18371  | 0.26889  | RP11-266L chr16  | + | 25104708 | 25106576 | 1869 |
| ENSG000001 | 14.38913 | 31.48725 | -1.1111  | 0.01157  | 0.023985 | RP11-485G chr16  | - | 11442000 | 11443178 | 1095 |
| ENSG000001 | 0.943682 | 0.357707 | 0.90033  | 0.60199  | NA       | RP11-411G chr17  | + | 519242   | 519835   | 594  |
| ENSG000001 | 5.984098 | 4.273883 | 0.46634  | 0.59796  | 0.692    | RP11-295C chr16  | - | 4385871  | 4387819  | 1949 |
| ENSG000001 | 0        | 2.604317 | -2.8535  | 0.070151 | 0.11941  | RP11-44F1 chr16  | + | 53420856 | 53422997 | 2142 |
| ENSG000001 | 4.657611 | 1.903472 | 1.1311   | 0.29982  | 0.4014   | AC123768. chr15  | - | 32898619 | 32907361 | 966  |
| ENSG000001 | 2.261609 | 1.652581 | 0.40343  | 0.73433  | 0.80389  | CTD-2135C chr16  | - | 14024534 | 14029492 | 4934 |
| ENSG000001 | 12.04358 | 0.654722 | 3.7624   | 0.000322 | 0.000859 | CTD-2377C chr17  | + | 46760729 | 46781844 | 618  |
| ENSG000001 | 217.6954 | 154.9264 | 0.4914   | 0.005409 | 0.011969 | CTD-3195I! chr17 | - | 3710042  | 3712148  | 2107 |
| ENSG000001 | 11.31823 | 8.966166 | 0.32343  | 0.58737  | 0.68295  | RP11-196G chr16  | + | 31129399 | 31130068 | 543  |
| ENSG000001 | 0.36308  | 0.357707 | -0.00212 | 0.99905  | NA       | RP11-353N chr17  | + | 77774397 | 77776326 | 605  |
| ENSG000001 | 0        | 0.297015 | -0.41864 | 0.81278  | NA       | RP11-1113 chr17  | - | 19463424 | 19501235 | 730  |
| ENSG000001 | 0.995923 | 0.343138 | 1.0212   | 0.53809  | NA       | RP11-353N chr17  | + | 77797251 | 77801503 | 1788 |
| ENSG000001 | 8.03935  | 6.067251 | 0.39339  | 0.64749  | 0.73364  | RP11-818C chr17  | + | 1327767  | 1329778  | 570  |
| ENSG000001 | 2.241072 | 0.357707 | 1.8948   | 0.23936  | 0.33403  | RP11-214C chr17  | - | 14198829 | 14200917 | 1885 |
| ENSG000001 | 0.342542 | 9.413704 | -4.0391  | 0.001043 | 0.002579 | U91319.1 chr16   | + | 13340173 | 13656775 | 764  |
| ENSG000001 | 0        | 1.623443 | -1.9406  | 0.26756  | NA       | RP11-160A chr6   | + | 71403542 | 71404322 | 781  |
| ENSG000001 | 0.943682 | 0.654722 | 0.38398  | 0.81258  | NA       | RP11-667K chr17  | + | 1992975  | 2004854  | 528  |
| ENSG000001 | 44.50391 | 104.9697 | -1.2356  | 0.000108 | 0.000306 | MRPL12 chr17     | + | 79670387 | 79674556 | 1028 |
| ENSG000001 | 2.946693 | 0.937167 | 1.3561   | 0.29905  | 0.40075  | RP11-565F chr17  | + | 9368059  | 9370739  | 513  |
| ENSG000001 | 0        | 0.297015 | -0.41864 | 0.81278  | NA       | RP11-636N chr17  | + | 6321005  | 6321584  | 278  |
| ENSG000001 | 5.923298 | 4.464082 | 0.36631  | 0.66019  | 0.74414  | RP11-615I! chr16 | + | 68595964 | 68601032 | 5069 |
| ENSG000001 | 3.620613 | 3.80936  | -0.08473 | 0.93048  | 0.95402  | RP11-28G8 chr17  | - | 78775440 | 78779432 | 3204 |
| ENSG000001 | 0        | 0.343138 | -0.41864 | 0.81278  | NA       | AC108004. chr17  | - | 33615    | 41378    | 1185 |
| ENSG000001 | 1.628766 | 19.82527 | -3.3945  | 2.11E-05 | 6.52E-05 | RP11-304F chr17  | + | 47911601 | 47913816 | 416  |
| ENSG000001 | 1.379541 | 0.357707 | 1.2814   | 0.44909  | NA       | CYCSP40 chr17    | - | 75195032 | 75195625 | 294  |
| ENSG000001 | 3.007494 | 3.327852 | -0.11775 | 0.93208  | 0.95543  | CTD-2561B chr17  | - | 78991769 | 78993811 | 869  |
| ENSG000001 | 0        | 93.50278 | -8.0446  | 2.67E-13 | 1.57E-12 | CTD-2616J chr19  | - | 51891543 | 51893828 | 1318 |
| ENSG000001 | 29.00337 | 86.31063 | -1.5572  | 9.79E-06 | 3.15E-05 | RP11-1055 chr17  | - | 79361930 | 79364056 | 1561 |
| ENSG000001 | 147.2624 | 77.17683 | 0.92276  | 5.00E-05 | 0.000148 | RP11-156P chr17  | - | 45061411 | 45177689 | 1081 |
| ENSG000001 | 0        | 0.297015 | -0.41864 | 0.81278  | NA       | RP11-104F chr17  | + | 7323422  | 7347400  | 1975 |

|            |          |          |          |          |          |                  |   |          |          |      |
|------------|----------|----------|----------|----------|----------|------------------|---|----------|----------|------|
| ENSG000001 | 0        | 0.715414 | -0.84936 | 0.6309   | NA       | RP11-669E chr17  | - | 43985036 | 43988145 | 759  |
| ENSG000001 | 3.257533 | 6.564201 | -0.94218 | 0.2813   | 0.38233  | CTD-3060P chr17  | - | 2865542  | 2869189  | 2546 |
| ENSG000001 | 0.290301 | 0.951736 | -0.90191 | 0.60254  | NA       | RP11-462C chr16  | - | 3981218  | 3996306  | 774  |
| ENSG000001 | 0        | 0.357707 | -0.41864 | 0.81278  | NA       | AC139099. chr17  | + | 81091900 | 81125376 | 641  |
| ENSG000001 | 0.290301 | 1.043983 | -0.98014 | 0.57012  | NA       | RP11-750B chr17  | + | 51183095 | 51183719 | 625  |
| ENSG000001 | 34.31355 | 13.64146 | 1.319    | 0.00293  | 0.006764 | RP11-235E chr17  | - | 3558915  | 3561386  | 874  |
| ENSG000001 | 2.229907 | 0.700845 | 1.389    | 0.32063  | 0.42347  | RP11-144N chr16  | + | 74701404 | 74702604 | 1201 |
| ENSG000001 | 0.36308  | 0        | 0.4146   | 0.81455  | NA       | RP5-1029F chr17  | + | 455806   | 456657   | 592  |
| ENSG000001 | 0.342542 | 0.700845 | -0.57269 | 0.74414  | NA       | RP11-1260 chr17  | + | 171183   | 172244   | 411  |
| ENSG000001 | 0.36308  | 1.073121 | -0.87448 | 0.62195  | NA       | RP11-141J chr17  | + | 4469047  | 4475055  | 537  |
| ENSG000001 | 1.919068 | 96.80935 | -5.4417  | 4.47E-19 | 3.59E-18 | ALOX12P2 chr17   | + | 6757180  | 6857426  | 4326 |
| ENSG000001 | 288.1973 | 221.3083 | 0.3783   | 0.26386  | 0.36212  | RP11-473I chr16  | + | 9198705  | 9200618  | 1914 |
| ENSG000001 | 0.36308  | 0        | 0.4146   | 0.81455  | NA       | RP11-189E chr16  | - | 49476821 | 49487989 | 674  |
| ENSG000001 | 0        | 3.694423 | -3.4244  | 0.019592 | 0.038739 | RP11-670E chr17  | + | 54946308 | 54946925 | 618  |
| ENSG000001 | 3.278071 | 1.058552 | 1.4389   | 0.24506  | 0.34087  | LA16c-321I chr16 | - | 2972663  | 2973203  | 541  |
| ENSG000001 | 0.342542 | 2.681995 | -2.2664  | 0.1242   | 0.1943   | RP11-85B7 chr17  | - | 9074386  | 9082435  | 5671 |
| ENSG000001 | 0.290301 | 3.466222 | -2.6244  | 0.071757 | 0.12167  | CTD-2047F chr17  | + | 78289451 | 78290433 | 653  |
| ENSG000001 | 0        | 4.600036 | -3.763   | 0.007915 | 0.016934 | CTD-3088C chr16  | + | 11559116 | 11567030 | 2279 |
| ENSG000001 | 149.3954 | 102.4606 | 0.54393  | 0.010131 | 0.02128  | ZNF234 chr19     | + | 44645710 | 44663156 | 3245 |
| ENSG000001 | 3.028032 | 9.675132 | -1.5203  | 0.096904 | 0.15731  | RP11-166P chr17  | - | 55155659 | 55162385 | 713  |
| ENSG000001 | 1.660469 | 4.943174 | -1.4045  | 0.20704  | 0.29675  | ROCK1P1 chr18    | + | 112367   | 118504   | 560  |
| ENSG000001 | 0.923144 | 4.167067 | -1.8439  | 0.12766  | 0.19867  | RP11-473N chr16  | + | 3156765  | 3159577  | 302  |
| ENSG000001 | 24.25586 | 12.39513 | 0.9538   | 0.051896 | 0.091908 | RP11-876N chr16  | - | 11032743 | 11033901 | 1159 |
| ENSG000001 | 0.705622 | 4.346729 | -2.1381  | 0.12623  | 0.19686  | RP11-356I chr17  | + | 862274   | 862606   | 333  |
| ENSG000001 | 1.048164 | 0        | 1.348    | 0.44949  | NA       | RP11-396B chr16  | + | 11290034 | 11318373 | 602  |
| ENSG000001 | 14.51236 | 8.715275 | 0.72153  | 0.21867  | 0.31028  | RP11-667K chr17  | - | 1946769  | 1948262  | 443  |
| ENSG000001 | 39.84386 | 80.45198 | -1.0011  | 0.000798 | 0.002009 | RP11-1055 chr17  | + | 79369275 | 79376779 | 1890 |
| ENSG000001 | 0.705622 | 1.727843 | -0.97254 | 0.53204  | 0.63323  | RP11-388C chr17  | - | 80671784 | 80674131 | 898  |
| ENSG000001 | 0.685084 | 0        | 0.85004  | 0.63064  | NA       | AF001548. chr16  | + | 15835008 | 15835648 | 550  |
| ENSG000001 | 17.16875 | 13.72001 | 0.30755  | 0.65412  | 0.73913  | CTD-2047F chr17  | - | 78325628 | 78388968 | 3651 |
| ENSG000001 | 93.62973 | 130.671  | -0.48023 | 0.044938 | 0.080995 | RP11-473N chr16  | - | 3166043  | 3184883  | 1592 |
| ENSG000001 | 2.282147 | 14.47181 | -2.5289  | 0.000894 | 0.002235 | RP11-485C chr16  | - | 11435666 | 11439068 | 714  |
| ENSG000001 | 0        | 15.82255 | -5.5172  | 1.09E-05 | 3.47E-05 | CTD-2034I chr16  | + | 50914120 | 50918012 | 2248 |
| ENSG000001 | 1.286224 | 4.76996  | -1.6553  | 0.13886  | 0.21251  | RP11-166P chr17  | + | 55169506 | 55173786 | 4281 |
| ENSG000001 | 0        | 0.343138 | -0.41864 | 0.81278  | NA       | RP11-515C chr17  | - | 53348865 | 53351014 | 1740 |
| ENSG000001 | 0.870904 | 2.788811 | -1.2126  | 0.43017  | 0.5356   | RP11-567C chr17  | - | 80753362 | 80753971 | 413  |
| ENSG000001 | 1.233984 | 6.511629 | -2.0693  | 0.080279 | 0.13394  | RP11-95P2 chr16  | - | 4230118  | 4233516  | 318  |
| ENSG000001 | 0        | 0.654722 | -0.83442 | 0.63731  | NA       | RP11-1113 chr17  | - | 19485429 | 19485588 | 160  |
| ENSG000001 | 1.068702 | 0.654722 | 0.47824  | 0.76676  | NA       | RP5-1107A chr17  | + | 55060110 | 55062465 | 2356 |
| ENSG000001 | 2.790785 | 2.886762 | -0.07977 | 0.94205  | 0.96246  | CTC-479C5 chr16  | + | 67916364 | 67920270 | 3907 |
| ENSG000001 | 171.9353 | 74.16539 | 1.2063   | 1.49E-08 | 6.25E-08 | RP11-156P chr17  | + | 45055847 | 45131935 | 4693 |
| ENSG000001 | 0        | 489.9595 | -10.245  | 1.42E-21 | 1.28E-20 | RP11-849I chr18  | - | 76736555 | 76739074 | 1256 |
| ENSG000001 | 0.705622 | 0.343138 | 0.57395  | 0.74355  | NA       | RP11-1055 chr17  | + | 79336072 | 79348014 | 665  |
| ENSG000001 | 0        | 0.357707 | -0.41864 | 0.81278  | NA       | RP11-462C chr16  | + | 4082013  | 4082937  | 244  |
| ENSG000001 | 1.991846 | 0        | 2.4814   | 0.12503  | 0.19536  | RP11-333E chr17  | - | 5143803  | 5144838  | 498  |
| ENSG000001 | 2.842212 | 0.700845 | 1.7047   | 0.20788  | 0.29769  | RP11-149I chr17  | + | 79109571 | 79110056 | 362  |
| ENSG000001 | 2.479132 | 0        | 2.5423   | 0.13274  | 0.20523  | RP11-893F chr17  | - | 48290294 | 48292718 | 578  |
| ENSG000001 | 0        | 2.171348 | -2.344   | 0.17175  | 0.25427  | RP11-485C chr16  | + | 11336510 | 11337409 | 900  |
| ENSG000001 | 1.265686 | 2.962024 | -1.0287  | 0.41225  | 0.51711  | ZNF205-AS chr16  | - | 3160461  | 3165599  | 1219 |
| ENSG000001 | 3.16503  | 3.305162 | -0.07669 | 0.94586  | 0.96542  | RYKP1 chr17      | + | 4125386  | 4127123  | 1738 |
| ENSG000001 | 2.697468 | 1.577319 | 0.63833  | 0.60044  | 0.69444  | RP11-420A chr17  | - | 5267610  | 5274921  | 512  |
| ENSG000001 | 0.653381 | 0.594029 | 0.059135 | 0.97278  | NA       | ATP5A1P3 chr16   | - | 72038936 | 72040442 | 1507 |
| ENSG000001 | 3.060548 | 4.816084 | -0.59537 | 0.56445  | 0.66248  | RP11-461A chr16  | - | 3700637  | 3701704  | 1068 |
| ENSG000001 | 0        | 0.594029 | -0.81444 | 0.64499  | NA       | RP11-429K chr16  | + | 20397279 | 20402486 | 615  |
| ENSG000001 | 1047.669 | 785.6607 | 0.41278  | 0.13841  | 0.21191  | RP11-473I chr16  | + | 9201098  | 9207038  | 5941 |
| ENSG000001 | 0        | 1.012429 | -1.3162  | 0.46038  | NA       | RP11-65J2 chr16  | - | 14501896 | 14512729 | 580  |
| ENSG000001 | 4.564295 | 1.66715  | 1.3075   | 0.23204  | 0.32554  | CTB-133G6 chr19  | + | 7413848  | 7448271  | 1558 |
| ENSG000001 | 45.27987 | 93.31962 | -1.0306  | 0.00071  | 0.001802 | CTC-524C5 chr17  | - | 5328459  | 5336196  | 1938 |
| ENSG000001 | 4.822893 | 2.529055 | 0.83427  | 0.40826  | 0.51311  | RP11-96D1 chr16  | + | 68258616 | 68261637 | 3022 |
| ENSG000001 | 0.290301 | 0.715414 | -0.50514 | 0.77701  | NA       | RP11-109N chr16  | + | 10785130 | 10786830 | 483  |
| ENSG000001 | 0.290301 | 1.669566 | -1.5285  | 0.3621   | 0.46632  | LA16c-325I chr16 | - | 2916349  | 2917619  | 667  |
| ENSG000001 | 3.185568 | 0        | 2.8683   | 0.083586 | 0.13872  | RP11-290F chr17  | - | 45380832 | 45400979 | 535  |
| ENSG000001 | 2.116866 | 1.577319 | 0.31082  | 0.82457  | 0.8763   | RP5-1029F chr17  | + | 426380   | 443816   | 478  |
| ENSG000001 | 7.522967 | 7.045709 | 0.081994 | 0.91602  | 0.94312  | RP11-166B chr16  | + | 11945506 | 11989468 | 562  |
| ENSG000001 | 0.36308  | 0.297015 | -0.00205 | 0.99908  | NA       | RP11-498C chr16  | - | 72038138 | 72038702 | 403  |

|            |          |          |          |          |          |                  |   |          |          |      |
|------------|----------|----------|----------|----------|----------|------------------|---|----------|----------|------|
| ENSG000001 | 0        | 2.915901 | -2.7723  | 0.095997 | 0.15615  | RP11-530N chr17  | - | 6857417  | 6882279  | 539  |
| ENSG000001 | 6.14082  | 13.97574 | -1.1414  | 0.077409 | 0.1299   | RP11-498C chr16  | + | 71963914 | 71965102 | 1189 |
| ENSG000001 | 0.72616  | 2.307303 | -1.3535  | 0.35359  | 0.45776  | RP11-388C chr17  | - | 80687040 | 80692019 | 333  |
| ENSG000001 | 3.609448 | 1.652581 | 0.99986  | 0.37554  | 0.47961  | RP11-266L chr16  | - | 25082811 | 25084048 | 676  |
| ENSG000001 | 38.61248 | 38.59607 | 0.00236  | 0.99429  | 0.99669  | TAPT1-AS1 chr4   | + | 16228286 | 16321763 | 2165 |
| ENSG000001 | 0        | 0.594029 | -0.81444 | 0.64499  | NA       | CTC-508F8 chr16  | + | 21132079 | 21141429 | 405  |
| ENSG000001 | 7.272928 | 4.478651 | 0.64342  | 0.42499  | 0.53036  | AF001548 chr16   | + | 15820531 | 15826850 | 836  |
| ENSG000001 | 0.36308  | 0.297015 | -0.00205 | 0.99908  | NA       | RP11-235E chr17  | - | 3481249  | 3482147  | 560  |
| ENSG000001 | 0        | 0.594029 | -0.81444 | 0.64499  | NA       | RP1-4G17 chr17   | - | 7186266  | 7187390  | 415  |
| ENSG000001 | 0        | 0.343138 | -0.41864 | 0.81278  | NA       | RP11-388N chr16  | + | 31176969 | 31177248 | 280  |
| ENSG000001 | 10.16738 | 6.535062 | 0.609    | 0.37339  | 0.47775  | RP1-59D14 chr17  | - | 2278355  | 2282600  | 846  |
| ENSG000001 | 8.64049  | 13.7758  | -0.64069 | 0.31615  | 0.41888  | RP11-13N1 chr18  | + | 19210099 | 19213485 | 745  |
| ENSG000001 | 0        | 2.024857 | -2.2291  | 0.19662  | 0.28458  | RP11-640N chr17  | - | 30433349 | 30441144 | 447  |
| ENSG000001 | 0.923144 | 0.297015 | 0.87478  | 0.61377  | NA       | RP11-68I3 chr17  | + | 27966645 | 27967843 | 270  |
| ENSG000001 | 1.379541 | 1.326428 | 0.030095 | 0.98415  | 0.99101  | CTC-297N7 chr17  | + | 10584051 | 10587305 | 171  |
| ENSG000001 | 1.338465 | 2.719254 | -0.86839 | 0.52393  | 0.62622  | RP11-53I6 chr18  | - | 29702363 | 29704441 | 553  |
| ENSG000001 | 3.257533 | 46.16384 | -3.7108  | 1.57E-10 | 7.66E-10 | CTC-297N7 chr17  | + | 10633094 | 10672323 | 876  |
| ENSG000001 | 20.30289 | 40.53667 | -0.99065 | 0.025157 | 0.048516 | RP5-890E1 chr17  | - | 46122503 | 46125435 | 2910 |
| ENSG000001 | 0        | 0.715414 | -0.84936 | 0.6309   | NA       | RP11-599B chr17  | - | 7959543  | 7960939  | 517  |
| ENSG000001 | 1.048164 | 3.290593 | -1.4522  | 0.24061  | 0.33547  | LINC00675 chr17  | - | 10698230 | 10707416 | 2266 |
| ENSG000001 | 0        | 0.715414 | -0.84936 | 0.6309   | NA       | RP11-17M chr17   | + | 32303550 | 32307870 | 323  |
| ENSG000001 | 0.653381 | 0        | 0.82678  | 0.64037  | NA       | RP11-202C chr18  | + | 51094817 | 51124221 | 598  |
| ENSG000001 | 2.903826 | 0        | 2.7629   | 0.097266 | 0.1578   | RP11-680N chr18  | + | 30534039 | 30537962 | 558  |
| ENSG000001 | 8.745785 | 4.198622 | 0.9809   | 0.22758  | 0.32062  | RP1-56K13 chr17  | - | 37059957 | 37060853 | 437  |
| ENSG000001 | 9.044646 | 60.37348 | -2.6801  | 1.09E-08 | 4.62E-08 | RP11-160C chr17  | + | 63096930 | 63107176 | 664  |
| ENSG000001 | 0.580602 | 1.234181 | -0.70728 | 0.67231  | NA       | RP11-338L chr17  | + | 28190420 | 28193110 | 893  |
| ENSG000001 | 0        | 0.640152 | -0.82869 | 0.63935  | NA       | CTC-304I17 chr17 | - | 32407901 | 32409243 | 299  |
| ENSG000001 | 0.36308  | 0.640152 | -0.51156 | 0.77091  | NA       | AC004702 chr17   | + | 20088395 | 20226286 | 195  |
| ENSG000001 | 2.624689 | 0.98329  | 1.1903   | 0.35623  | 0.46052  | RP11-118E chr17  | - | 55678217 | 55685773 | 1412 |
| ENSG000001 | 0        | 0.357707 | -0.41864 | 0.81278  | NA       | CTB-104H1 chr17  | - | 10034216 | 10034704 | 489  |
| ENSG000001 | 0.705622 | 0        | 0.8807   | 0.6196   | NA       | RP11-269C chr17  | - | 61382623 | 61390882 | 562  |
| ENSG000001 | 0        | 0.98329  | -1.2878  | 0.47019  | NA       | RP11-707C chr17  | - | 43678235 | 43679706 | 1472 |
| ENSG000001 | 0        | 0.654722 | -0.83442 | 0.63731  | NA       | RP11-78F1 chr18  | - | 1159199  | 1160405  | 872  |
| ENSG000001 | 0        | 2.558194 | -2.582   | 0.12605  | 0.1967   | RP11-963F chr17  | + | 10752858 | 10784212 | 756  |
| ENSG000001 | 0.705622 | 1.370136 | -0.71417 | 0.6513   | 0.73678  | TMEM220 chr17    | + | 10633113 | 10718481 | 561  |
| ENSG000001 | 2.604151 | 3.2299   | -0.28543 | 0.78452  | 0.84576  | RP13-753N chr17  | - | 29190939 | 29191958 | 831  |
| ENSG000001 | 3.319146 | 10.91818 | -1.63    | 0.043839 | 0.079348 | AK4P1 chr17      | + | 29672539 | 29673205 | 667  |
| ENSG000001 | 0        | 10.80082 | -5.0412  | 5.79E-05 | 0.00017  | RP11-78F1 chr18  | + | 976590   | 1174824  | 776  |
| ENSG000001 | 69.47835 | 33.32104 | 1.0527   | 0.000927 | 0.002311 | UBBP4 chr17      | + | 21729601 | 21731762 | 1459 |
| ENSG000001 | 0.290301 | 0        | 0.4146   | 0.81455  | NA       | RP11-805L chr17  | + | 30089459 | 30096067 | 505  |
| ENSG000001 | 0.342542 | 33.26035 | -5.818   | 6.86E-08 | 2.71E-07 | CTC-304I17 chr17 | + | 32488756 | 32491270 | 803  |
| ENSG000001 | 0        | 1.416259 | -1.7181  | 0.33141  | NA       | RP11-309N chr17  | + | 72966799 | 72971823 | 815  |
| ENSG000001 | 19.41064 | 31.22334 | -0.68013 | 0.13809  | 0.21152  | CTD-2349P chr17  | + | 29056487 | 29058220 | 789  |
| ENSG000001 | 4.512868 | 1.340997 | 1.5373   | 0.17833  | 0.26217  | RP11-737C chr18  | - | 2945548  | 2946888  | 1264 |
| ENSG000001 | 1.939605 | 1.188058 | 0.52541  | 0.71795  | 0.79117  | AF186192 chr8    | + | 1.46E+08 | 1.46E+08 | 947  |
| ENSG000001 | 8.019626 | 2.696564 | 1.4868   | 0.077099 | 0.12947  | RP11-45M chr17   | - | 17071260 | 17088868 | 1231 |
| ENSG000001 | 1.048164 | 0.98329  | 0.047263 | 0.97597  | 0.9865   | RP11-692N chr18  | + | 9615262  | 9619361  | 379  |
| ENSG000001 | 0.685084 | 2.711133 | -1.5975  | 0.2597   | 0.35763  | RP11-471L chr17  | + | 12018864 | 12019202 | 339  |
| ENSG000001 | 5.310179 | 2.779947 | 0.83003  | 0.42838  | 0.53377  | RP11-82O1 chr17  | + | 28088121 | 28114854 | 576  |
| ENSG000001 | 0.290301 | 2.232041 | -2.0446  | 0.17992  | 0.26411  | SNORA70D chr16   | - | 71732470 | 71732604 | 135  |
| ENSG000001 | 0        | 4.305438 | -3.621   | 0.012893 | 0.026493 | RP11-443C chr17  | - | 30607406 | 30607972 | 326  |
| ENSG000001 | 0.705622 | 0.686276 | 0.017556 | 0.99188  | NA       | RP11-57A1 chr17  | + | 70422080 | 70424796 | 636  |
| ENSG000001 | 0.36308  | 0.297015 | -0.00205 | 0.99908  | NA       | RP4-777O2 chr7   | + | 30589833 | 30591185 | 427  |
| ENSG000001 | 0        | 0.297015 | -0.41864 | 0.81278  | NA       | RP11-408F chr18  | + | 28711419 | 28712457 | 1039 |
| ENSG000001 | 0.632843 | 0.98329  | -0.43885 | 0.78628  | NA       | RP11-85B7 chr17  | + | 9186491  | 9208968  | 260  |
| ENSG000001 | 0        | 0.343138 | -0.41864 | 0.81278  | NA       | RP11-321A chr17  | + | 27467501 | 27482507 | 323  |
| ENSG000001 | 1.681007 | 0.297015 | 1.641    | 0.30141  | 0.40279  | RP11-169F chr18  | - | 70818476 | 70931715 | 3608 |
| ENSG000001 | 1.338465 | 0.640152 | 0.7961   | 0.59534  | 0.68965  | RP11-466A chr17  | - | 30839887 | 30846368 | 420  |
| ENSG000001 | 0        | 0.98329  | -1.2878  | 0.47019  | NA       | RP11-285E chr17  | - | 75253819 | 75277979 | 749  |
| ENSG000001 | 0.580602 | 0.686276 | -0.10523 | 0.9528   | NA       | DLGAP1-AS chr18  | + | 3878180  | 3897069  | 1258 |
| ENSG000001 | 0        | 0.297015 | -0.41864 | 0.81278  | NA       | CTB-187M2 chr17  | - | 19374432 | 19396273 | 485  |
| ENSG000001 | 3.153865 | 7.530506 | -1.1797  | 0.23133  | 0.32482  | RP11-806L chr18  | - | 653985   | 657259   | 268  |
| ENSG000001 | 0        | 1.759397 | -2.0294  | 0.24451  | NA       | RP11-746N chr17  | + | 20887215 | 20887359 | 145  |
| ENSG000001 | 34.54728 | 48.67007 | -0.49189 | 0.18386  | 0.26906  | RP11-498C chr17  | - | 79836301 | 79838982 | 2682 |
| ENSG000001 | 2.229907 | 3.867637 | -0.68838 | 0.56135  | 0.65982  | RP11-161I chr18  | - | 1883525  | 2240847  | 779  |

|            |          |          |          |          |          |                 |   |          |          |      |
|------------|----------|----------|----------|----------|----------|-----------------|---|----------|----------|------|
| ENSG000001 | 176.166  | 131.2537 | 0.4247   | 0.062486 | 0.10808  | LINC00667 chr18 | + | 5232875  | 5246507  | 3979 |
| ENSG000001 | 2.334388 | 5.127667 | -1.0329  | 0.30231  | 0.40358  | RP11-580L chr17 | - | 45681226 | 45726786 | 733  |
| ENSG000001 | 32.65389 | 41.31848 | -0.3303  | 0.36772  | 0.47235  | RP11-649A chr17 | - | 73141356 | 73142641 | 717  |
| ENSG000001 | 0.870904 | 0.715414 | 0.19229  | 0.91324  | NA       | RP11-146C chr18 | - | 6873398  | 6875023  | 544  |
| ENSG000001 | 2.479946 | 4.248777 | -0.65423 | 0.62134  | 0.71187  | RPL26 chr17     | - | 8271956  | 8286505  | 3087 |
| ENSG000001 | 0.995923 | 3.025133 | -1.3777  | 0.26352  | 0.36167  | RP11-111F chr18 | + | 74240612 | 74322925 | 2242 |
| ENSG000001 | 2.354926 | 5.627034 | -1.1653  | 0.23332  | 0.32698  | CTD-2206N chr17 | + | 37213272 | 37269443 | 2305 |
| ENSG000001 | 4.399013 | 38.84213 | -3.0856  | 5.35E-08 | 2.13E-07 | RP11-326K chr18 | + | 29522538 | 29524119 | 1582 |
| ENSG000001 | 17.17992 | 22.99044 | -0.4187  | 0.34163  | 0.44552  | RP11-573C chr3  | - | 1.86E+08 | 1.87E+08 | 2400 |
| ENSG000001 | 18.31977 | 39.54868 | -1.0831  | 0.021456 | 0.042039 | RP11-649A chr17 | + | 73267450 | 73269976 | 2527 |
| ENSG000001 | 0        | 1.073121 | -1.1788  | 0.50551  | NA       | CIAPIN1P chr18  | + | 24179372 | 24180302 | 931  |
| ENSG000001 | 12.28164 | 18.81451 | -0.60005 | 0.25108  | 0.34773  | RP11-143J chr18 | - | 9112402  | 9115875  | 544  |
| ENSG000001 | 28.88438 | 24.18253 | 0.24641  | 0.56289  | 0.661    | LINC00672 chr17 | + | 37081421 | 37084310 | 2365 |
| ENSG000001 | 1.794048 | 2.817949 | -0.48954 | 0.72538  | 0.79684  | RP11-51F1 chr17 | + | 61713961 | 61714473 | 513  |
| ENSG000001 | 2.624689 | 7.985292 | -1.4997  | 0.083161 | 0.13812  | RP11-705C chr18 | + | 268148   | 270278   | 2131 |
| ENSG000001 | 0        | 0.297015 | -0.41864 | 0.81278  | NA       | RP11-51L5 chr17 | - | 60359748 | 60374387 | 1815 |
| ENSG000001 | 0.342542 | 0        | 0.4146   | 0.81455  | NA       | CTD-3010C chr17 | + | 70638870 | 70640152 | 412  |
| ENSG000001 | 0.685084 | 0        | 0.85004  | 0.63064  | NA       | RP11-110F chr18 | - | 46958114 | 46973790 | 332  |
| ENSG000001 | 74.52374 | 24.62121 | 1.5776   | 1.12E-05 | 3.56E-05 | RP11-214C chr17 | - | 62116510 | 62119203 | 2694 |
| ENSG000001 | 0.975385 | 0.343138 | 0.92553  | 0.59174  | NA       | RP11-344B chr18 | - | 29825909 | 29828995 | 468  |
| ENSG000001 | 0        | 3.273608 | -2.9384  | 0.074324 | 0.12551  | RP11-680F chr11 | + | 1.26E+08 | 1.26E+08 | 1714 |
| ENSG000001 | 6.286378 | 3.353702 | 0.84398  | 0.36484  | 0.46925  | RP11-110F chr18 | - | 47010906 | 47012519 | 483  |
| ENSG000001 | 0.342542 | 0.654722 | -0.52406 | 0.76557  | NA       | RP11-571L chr4  | + | 99850048 | 99916145 | 622  |
| ENSG000001 | 2.096328 | 0.700845 | 1.2139   | 0.4222   | 0.52764  | RP11-210K chr18 | + | 29424351 | 29425141 | 348  |
| ENSG000001 | 18.60151 | 2.589748 | 2.7016   | 0.000232 | 0.000629 | RP11-180P chr17 | - | 61012763 | 61044171 | 498  |
| ENSG000001 | 0.290301 | 14.61589 | -4.6872  | 6.73E-05 | 0.000196 | SNORD3A chr17   | + | 19091329 | 19092027 | 699  |
| ENSG000001 | 0        | 0.297015 | -0.41864 | 0.81278  | NA       | RP11-579C chr17 | + | 57043313 | 57044088 | 776  |
| ENSG000001 | 0        | 0.297015 | -0.41864 | 0.81278  | NA       | RP11-513N chr18 | + | 10893615 | 10908781 | 506  |
| ENSG000001 | 8.008461 | 23.82724 | -1.548   | 0.00304  | 0.007    | RP11-676J chr18 | + | 70535623 | 70548634 | 457  |
| ENSG000001 | 1.555988 | 2.65044  | -0.63639 | 0.60098  | 0.69474  | CTB-58E17 chr17 | - | 36871581 | 36876525 | 563  |
| ENSG000001 | 6.141634 | 4.553913 | 0.38423  | 0.65469  | 0.73962  | RP11-504I chr18 | + | 74084672 | 74090230 | 398  |
| ENSG000001 | 4.128436 | 2.355842 | 0.72254  | 0.54013  | 0.64067  | CTC-542B2 chr17 | + | 30200945 | 30213685 | 488  |
| ENSG000001 | 0.580602 | 0        | 0.8036   | 0.6494   | NA       | RP11-286N chr18 | + | 5567129  | 5570941  | 456  |
| ENSG000001 | 0        | 3.319731 | -3.1951  | 0.03702  | 0.068503 | RP11-68I3 chr17 | + | 27948635 | 27949272 | 638  |
| ENSG000001 | 0.580602 | 0.297015 | 0.36801  | 0.83644  | NA       | RP11-627C chr18 | - | 19755426 | 19756623 | 359  |
| ENSG000001 | 0        | 10.12509 | -4.9521  | 8.95E-05 | 0.000257 | RP11-176N chr18 | + | 75133575 | 75272719 | 562  |
| ENSG000001 | 1.048164 | 14.18051 | -3.4829  | 0.00043  | 0.001128 | CTC-297N7 chr17 | - | 10644584 | 10672333 | 667  |
| ENSG000001 | 0        | 0.343138 | -0.41864 | 0.81278  | NA       | CTD-2008P chr17 | - | 26601683 | 26602742 | 244  |
| ENSG000001 | 0.36308  | 2.436809 | -1.9465  | 0.23206  | 0.32554  | RP11-68I3 chr17 | + | 27887565 | 28034108 | 187  |
| ENSG000001 | 11.54692 | 0.98329  | 3.2368   | 0.000985 | 0.002447 | RP11-423C chr12 | - | 1.09E+08 | 1.09E+08 | 2227 |
| ENSG000001 | 0.580602 | 3.818224 | -1.9968  | 0.18636  | 0.27212  | RP11-192F chr17 | + | 26960224 | 26962968 | 1316 |
| ENSG000001 | 1.649304 | 0.654722 | 1.0443   | 0.47174  | 0.57637  | RP11-583F chr17 | + | 62923752 | 62930321 | 599  |
| ENSG000001 | 29.48389 | 19.93376 | 0.553    | 0.18846  | 0.27475  | KRT222 chr17    | - | 38785049 | 38821393 | 2502 |
| ENSG000001 | 0        | 0.343138 | -0.41864 | 0.81278  | NA       | FGF7P1 chr18    | - | 14888708 | 14890085 | 288  |
| ENSG000001 | 54.14391 | 89.72323 | -0.72598 | 0.004118 | 0.009285 | DND1P1 chr17    | + | 43663237 | 43664295 | 1059 |
| ENSG000001 | 0        | 0.343138 | -0.41864 | 0.81278  | NA       | RP11-73M chr1   | + | 32110295 | 32114972 | 480  |
| ENSG000001 | 15.90388 | 3.947731 | 1.9057   | 0.011363 | 0.023604 | CTD-2350C chr17 | + | 26729128 | 26731067 | 1940 |
| ENSG000001 | 7.043427 | 9.009873 | -0.32376 | 0.63897  | 0.72652  | RP11-848P chr17 | - | 29417805 | 29422468 | 492  |
| ENSG000001 | 175.8298 | 526.7007 | -1.581   | 6.06E-14 | 3.71E-13 | RP11-159C chr17 | - | 56066400 | 56072211 | 4722 |
| ENSG000001 | 3.049383 | 1.638012 | 0.75179  | 0.55162  | 0.65123  | RP11-848P chr17 | - | 29335172 | 29335337 | 166  |
| ENSG000001 | 0        | 1.029414 | -1.1526  | 0.51496  | NA       | RP11-739N chr18 | - | 24916343 | 25175128 | 1352 |
| ENSG000001 | 1.286224 | 37.02849 | -4.5659  | 4.23E-09 | 1.85E-08 | RP11-640N chr17 | + | 30410198 | 30424084 | 431  |
| ENSG000001 | 0        | 0.343138 | -0.41864 | 0.81278  | NA       | RP11-212E chr17 | - | 33052528 | 33053189 | 662  |
| ENSG000001 | 2.967231 | 3.677438 | -0.27697 | 0.78763  | 0.84816  | MAGO2 chr17     | - | 10619319 | 10619828 | 436  |
| ENSG000001 | 0        | 0.715414 | -0.84936 | 0.6309   | NA       | RP1-37N7 chr17  | - | 18283169 | 18292298 | 4955 |
| ENSG000001 | 1.213446 | 0        | 1.5515   | 0.38249  | NA       | RP11-737C chr18 | + | 2990650  | 2991076  | 427  |
| ENSG000001 | 0.975385 | 0        | 1.2767   | 0.47406  | NA       | FLCN chr17      | - | 17105963 | 17140499 | 1693 |
| ENSG000001 | 2.749709 | 3.455685 | -0.28479 | 0.81726  | 0.87175  | RP11-13N1 chr18 | - | 19241748 | 19242356 | 336  |
| ENSG000001 | 0        | 0.640152 | -0.82869 | 0.63935  | NA       | RP11-737C chr18 | - | 23533180 | 23533432 | 253  |
| ENSG000001 | 0        | 0.594029 | -0.81444 | 0.64499  | NA       | CTB-104H1 chr17 | + | 10048831 | 10050277 | 1447 |
| ENSG000001 | 1.027626 | 0.891044 | 0.10231  | 0.95337  | 0.97102  | RP11-171C chr17 | + | 70835178 | 70835857 | 624  |
| ENSG000001 | 0.342542 | 18.73758 | -5.0205  | 9.92E-06 | 3.18E-05 | RP11-94L1 chr17 | - | 37913974 | 37920089 | 6116 |
| ENSG000001 | 0.36308  | 0.700845 | -0.575   | 0.7429   | NA       | RP11-196C chr1  | - | 1.5E+08  | 1.5E+08  | 1234 |
| ENSG000001 | 0        | 0.654722 | -0.83442 | 0.63731  | NA       | RP11-757C chr18 | + | 14244624 | 14252139 | 566  |
| ENSG000001 | 0.653381 | 0        | 0.82678  | 0.64037  | NA       | RNU4ATAC chr2   | + | 1.22E+08 | 1.22E+08 | 127  |

|            |          |          |          |          |          |                 |   |          |          |      |
|------------|----------|----------|----------|----------|----------|-----------------|---|----------|----------|------|
| ENSG000001 | 0        | 0.297015 | -0.41864 | 0.81278  | NA       | RP11-271K chr17 | + | 28880715 | 28885980 | 627  |
| ENSG000001 | 0        | 0.357707 | -0.41864 | 0.81278  | NA       | RP11-6N17 chr17 | + | 45940708 | 45942556 | 816  |
| ENSG000001 | 92.53642 | 69.55395 | 0.41257  | 0.14409  | 0.21924  | RP11-231E chr18 | - | 72259010 | 72265744 | 3463 |
| ENSG000001 | 0.342542 | 0        | 0.4146   | 0.81455  | NA       | RP11-671P chr18 | - | 51007205 | 51094653 | 457  |
| ENSG000001 | 0        | 0.297015 | -0.41864 | 0.81278  | NA       | RP11-14P2 chr18 | - | 508568   | 515294   | 500  |
| ENSG000001 | 3.059734 | 1.40169  | 0.9572   | 0.48551  | 0.58951  | RP11-15F1 chr18 | + | 46550073 | 46574844 | 659  |
| ENSG000001 | 2.926156 | 3.38284  | -0.17303 | 0.87962  | 0.91622  | RP11-474I chr17 | - | 73679623 | 73680879 | 566  |
| ENSG000001 | 0        | 0.640152 | -0.82869 | 0.63935  | NA       | CTD-2514K chr17 | - | 72253035 | 72258159 | 513  |
| ENSG000001 | 0.632843 | 2.24661  | -1.4573  | 0.29805  | 0.39992  | CTD-2145A chr17 | - | 18762667 | 18764779 | 463  |
| ENSG000001 | 48.53659 | 23.88793 | 1.02     | 0.004444 | 0.009974 | RP11-162A chr18 | - | 74506688 | 74534251 | 1295 |
| ENSG000001 | 7.095668 | 11.38599 | -0.65291 | 0.32784  | 0.43087  | CTD-2031P chr5  | + | 55240458 | 55240856 | 399  |
| ENSG000001 | 4.544571 | 3.512346 | 0.30577  | 0.76765  | 0.83205  | RP11-68I3 chr17 | + | 27896598 | 27897537 | 465  |
| ENSG000001 | 0.580602 | 0        | 0.8036   | 0.6494   | NA       | RP11-116K chr18 | + | 51668503 | 51668947 | 445  |
| ENSG000001 | 0.580602 | 1.309443 | -0.76283 | 0.64523  | NA       | RP11-640N chr17 | - | 30330129 | 30333707 | 217  |
| ENSG000001 | 10.25035 | 12.4097  | -0.27732 | 0.66082  | 0.74468  | RP11-20B2 chr17 | + | 27219487 | 27220360 | 562  |
| ENSG000001 | 1.379541 | 1.98115  | -0.45309 | 0.73621  | 0.80537  | RP11-287C chr2  | - | 74438731 | 74590504 | 5059 |
| ENSG000001 | 12.1369  | 0        | 5.232    | 1.93E-05 | 5.99E-05 | RP11-958F chr18 | - | 22513451 | 22567646 | 487  |
| ENSG000001 | 6.640085 | 13.95788 | -1.0387  | 0.10638  | 0.17014  | SNRPGP2 chr18   | - | 51933259 | 51933484 | 226  |
| ENSG000001 | 153.5735 | 157.7783 | -0.03858 | 0.84791  | 0.89316  | RP11-159C chr17 | + | 56168909 | 56172897 | 3989 |
| ENSG000001 | 3.257533 | 4.05213  | -0.27629 | 0.76825  | 0.83251  | RP11-621L chr18 | + | 21944751 | 21947948 | 567  |
| ENSG000001 | 0        | 0.343138 | -0.41864 | 0.81278  | NA       | RP11-401F chr17 | + | 65220419 | 65221657 | 380  |
| ENSG000001 | 1.027626 | 0.640152 | 0.42826  | 0.80114  | NA       | RP11-720L chr18 | - | 316740   | 317366   | 492  |
| ENSG000001 | 0.653381 | 0.343138 | 0.51863  | 0.76794  | NA       | CTD-2006C chr18 | + | 22882090 | 22882920 | 464  |
| ENSG000001 | 0.36308  | 0        | 0.4146   | 0.81455  | NA       | RP11-338L chr17 | + | 28299532 | 28300045 | 514  |
| ENSG000001 | 30.18853 | 86.89877 | -1.5173  | 4.03E-07 | 1.49E-06 | RP4-594I1 chr1  | - | 24865292 | 24882515 | 1445 |
| ENSG000001 | 7.862903 | 2.711133 | 1.4602   | 0.086955 | 0.14357  | RP11-945C chr18 | + | 5887486  | 5909121  | 620  |
| ENSG000001 | 0        | 1.029414 | -1.1526  | 0.51496  | NA       | RP11-433N chr17 | + | 46537732 | 46543402 | 701  |
| ENSG000001 | 9.877079 | 13.06442 | -0.38634 | 0.52084  | 0.62349  | RP11-848P chr17 | + | 29298670 | 29300330 | 1661 |
| ENSG000001 | 0.580602 | 0        | 0.8036   | 0.6494   | NA       | RP11-220C chr17 | + | 30954757 | 31013502 | 373  |
| ENSG000001 | 29.82366 | 24.41228 | 0.28789  | 0.57115  | 0.66835  | RP11-173N chr17 | + | 25641669 | 25642952 | 1284 |
| ENSG000001 | 0.995923 | 0        | 1.4959   | 0.39264  | NA       | RP11-861L chr18 | - | 66567018 | 66569492 | 559  |
| ENSG000001 | 0        | 2.010288 | -2.4674  | 0.13027  | 0.202    | RP11-76K1 chr18 | + | 7076816  | 7080122  | 607  |
| ENSG000001 | 0        | 0.997859 | -1.5018  | 0.39072  | NA       | RP11-349A chr17 | - | 65016050 | 65017859 | 460  |
| ENSG000001 | 2.375464 | 0        | 2.6887   | 0.093683 | 0.15293  | RP11-556C chr17 | - | 61194380 | 61208308 | 478  |
| ENSG000001 | 1.359003 | 0        | 1.8987   | 0.26617  | NA       | RP11-720L chr18 | + | 316737   | 319165   | 548  |
| ENSG000001 | 0        | 3.570622 | -3.0664  | 0.060201 | 0.10472  | CTC-525D6 chr19 | - | 29777918 | 30016659 | 2582 |
| ENSG000001 | 4.480351 | 4.020576 | 0.15841  | 0.87096  | 0.90992  | RP4-777O2 chr7  | + | 30565347 | 30573229 | 368  |
| ENSG000001 | 0        | 0.686276 | -0.84936 | 0.6309   | NA       | RP11-158I chr11 | - | 1.19E+08 | 1.19E+08 | 2576 |
| ENSG000001 | 1.753786 | 1.40169  | 0.25651  | 0.85985  | 0.90178  | RP11-556C chr17 | + | 61259527 | 61260178 | 652  |
| ENSG000001 | 166.4794 | 333.8278 | -1.0031  | 4.39E-08 | 1.76E-07 | SUZ12P chr17    | + | 29036317 | 29117926 | 1560 |
| ENSG000001 | 1.628766 | 3.24447  | -0.88704 | 0.424    | 0.52942  | RP11-464C chr17 | + | 60627087 | 60629482 | 1707 |
| ENSG000001 | 1.628766 | 5.444956 | -1.5763  | 0.13248  | 0.20492  | RP13-516N chr17 | + | 80172103 | 80175228 | 2368 |
| ENSG000001 | 1.317927 | 1.964165 | -0.45768 | 0.75158  | 0.81849  | RP13-650J chr17 | + | 79995781 | 79997256 | 709  |
| ENSG000001 | 0        | 0.98329  | -1.2878  | 0.47019  | NA       | SNX19P3 chr18   | - | 14629831 | 14632805 | 2975 |
| ENSG000001 | 14.43958 | 46.90356 | -1.6706  | 0.000326 | 0.000868 | LINC00526 chr18 | - | 5236723  | 5238597  | 1875 |
| ENSG000001 | 64.14161 | 141.2832 | -1.1314  | 6.64E-05 | 0.000193 | AC010761 chr17  | - | 27048505 | 27049895 | 899  |
| ENSG000001 | 0        | 0.357707 | -0.41864 | 0.81278  | NA       | MAPT-AS1 chr17  | - | 43921017 | 43972966 | 1190 |
| ENSG000001 | 0        | 0.297015 | -0.41864 | 0.81278  | NA       | RP11-678C chr18 | + | 7814116  | 7815728  | 1613 |
| ENSG000001 | 0.290301 | 0        | 0.4146   | 0.81455  | NA       | RP1-29G21 chr17 | - | 31379125 | 31379885 | 427  |
| ENSG000001 | 8.384498 | 18.8315  | -1.1358  | 0.089662 | 0.14726  | RP11-192F chr17 | - | 26928845 | 26929302 | 458  |
| ENSG000001 | 1.411244 | 0.297015 | 1.325    | 0.43226  | NA       | RP11-4F22 chr17 | - | 64394187 | 64412972 | 2113 |
| ENSG000001 | 5.943836 | 3.587607 | 0.67549  | 0.42397  | 0.52942  | RP11-769C chr18 | - | 738058   | 739662   | 1605 |
| ENSG000001 | 0        | 0.357707 | -0.41864 | 0.81278  | NA       | RP11-118C chr17 | + | 32007596 | 32007902 | 307  |
| ENSG000001 | 0        | 0.343138 | -0.41864 | 0.81278  | NA       | KRT18P8 chr18   | - | 9678245  | 9679490  | 1246 |
| ENSG000001 | 1.338465 | 1.326428 | 0.005155 | 0.9971   | 0.99837  | RP11-68I3 chr17 | - | 27918721 | 27919259 | 278  |
| ENSG000001 | 0.632843 | 0        | 0.81931  | 0.64303  | NA       | CTD-2267C chr17 | + | 38524204 | 38524690 | 487  |
| ENSG000001 | 0.36308  | 0        | 0.4146   | 0.81455  | NA       | CTD-2006K chr17 | - | 72668851 | 72673739 | 523  |
| ENSG000001 | 0        | 2.428687 | -2.6709  | 0.10016  | 0.16168  | RP11-381P chr17 | + | 20841851 | 20885670 | 1670 |
| ENSG000001 | 0        | 1.248751 | -1.5848  | 0.37202  | NA       | KRT8P34 chr17   | - | 37991290 | 37992333 | 1044 |
| ENSG000001 | 0.36308  | 1.029414 | -0.84272 | 0.63492  | NA       | RP11-524F chr17 | + | 17494742 | 17513799 | 425  |
| ENSG000001 | 0        | 0.297015 | -0.41864 | 0.81278  | NA       | RP11-760N chr18 | + | 6256746  | 6260933  | 2044 |
| ENSG000001 | 0.36308  | 5.376142 | -3.224   | 0.016273 | 0.032729 | RP11-21G1 chr18 | + | 10724617 | 10728537 | 1908 |
| ENSG000001 | 51.44465 | 2.872193 | 4.0086   | 4.28E-12 | 2.33E-11 | RP11-680C chr17 | + | 11191522 | 11194128 | 2607 |
| ENSG000001 | 0        | 2.399549 | -2.7165  | 0.088838 | 0.14612  | BDP1P chr18     | - | 75147209 | 75149198 | 1990 |
| ENSG000001 | 0        | 0.715414 | -0.84936 | 0.6309   | NA       | RP11-138I chr17 | - | 16317838 | 16320003 | 2166 |

|            |          |          |          |          |          |            |       |   |          |          |      |
|------------|----------|----------|----------|----------|----------|------------|-------|---|----------|----------|------|
| ENSG000001 | 3.080272 | 3.411978 | -0.09435 | 0.92895  | 0.95293  | DPRXP4     | chr17 | + | 29302405 | 29302972 | 568  |
| ENSG000001 | 0.685084 | 2.278164 | -1.3784  | 0.34519  | 0.44925  | RP11-403A  | chr18 | - | 21574177 | 21595303 | 817  |
| ENSG000001 | 1.161205 | 0.343138 | 0.97766  | 0.58067  | NA       | RP11-277J  | chr17 | + | 71637165 | 71639245 | 173  |
| ENSG000001 | 0        | 0.343138 | -0.41864 | 0.81278  | NA       | CTD-2653B  | chr17 | + | 65520597 | 65521538 | 612  |
| ENSG000001 | 27.44657 | 14.74856 | 0.89317  | 0.058488 | 0.10216  | RP11-498C  | chr17 | + | 79880775 | 79882387 | 563  |
| ENSG000001 | 0.290301 | 0.357707 | -0.00203 | 0.99908  | NA       | RP11-186B  | chr17 | + | 7476144  | 7485342  | 4554 |
| ENSG000001 | 0        | 4.112823 | -3.5428  | 0.015768 | 0.031795 | PPIAP14    | chr18 | - | 5002758  | 5003253  | 496  |
| ENSG000001 | 2.31385  | 1.340997 | 0.68091  | 0.58435  | 0.68018  | RP11-149I  | chr9  | + | 21929456 | 21931072 | 1617 |
| ENSG000001 | 0.290301 | 1.280305 | -1.2436  | 0.46304  | NA       | MIR4523    | chr17 | - | 27696735 | 27717795 | 762  |
| ENSG000001 | 1.576526 | 0.594029 | 1.0157   | 0.51071  | 0.61399  | RP13-20L1  | chr17 | - | 80358579 | 80359258 | 680  |
| ENSG000001 | 3.22583  | 0.951736 | 1.4843   | 0.23634  | 0.33037  | RP11-474I  | chr17 | - | 73675554 | 73676047 | 352  |
| ENSG000001 | 0        | 0.343138 | -0.41864 | 0.81278  | NA       | RP11-856A  | chr18 | + | 10704295 | 10709597 | 823  |
| ENSG000001 | 1.068702 | 2.324288 | -0.96169 | 0.47624  | 0.58082  | RP11-16C1  | chr17 | - | 73367028 | 73369817 | 2790 |
| ENSG000001 | 4.75272  | 6.581186 | -0.45516 | 0.59446  | 0.68896  | RP11-75N4  | chr18 | - | 29122109 | 29136874 | 2024 |
| ENSG000001 | 0        | 2.278164 | -2.6634  | 0.096176 | 0.1563   | RP11-143K  | chr17 | + | 71161116 | 71192732 | 588  |
| ENSG000001 | 98.14774 | 93.11727 | 0.076606 | 0.78498  | 0.84599  | RP11-815I  | chr17 | - | 18570942 | 18572774 | 1833 |
| ENSG000001 | 3.972527 | 7.267462 | -0.82361 | 0.32917  | 0.43232  | RP11-421E  | chr17 | - | 49326940 | 49329109 | 2170 |
| ENSG000001 | 0        | 0.686276 | -0.84936 | 0.6309   | NA       | RP11-107K  | chr18 | + | 23928311 | 23928968 | 658  |
| ENSG000001 | 1.722083 | 0.640152 | 1.0837   | 0.45982  | 0.56512  | RP11-343K  | chr17 | + | 55989694 | 55999942 | 335  |
| ENSG000001 | 59.17055 | 36.30575 | 0.70131  | 0.019028 | 0.037739 | RP11-6N17  | chr17 | - | 45968621 | 45973178 | 3939 |
| ENSG000001 | 5.528515 | 9.026859 | -0.66688 | 0.35347  | 0.45773  | RP11-799B  | chr18 | - | 21693601 | 21700967 | 507  |
| ENSG000001 | 1.265686 | 5.081544 | -1.7474  | 0.11836  | 0.18676  | CTD-2104P  | chr17 | - | 19552686 | 19553248 | 563  |
| ENSG000001 | 7.667711 | 22.89491 | -1.5391  | 0.009409 | 0.019864 | AC100830   | chr15 | + | 64988821 | 64989060 | 240  |
| ENSG000001 | 0        | 0.343138 | -0.41864 | 0.81278  | NA       | SNORD3C    | chr17 | - | 19092978 | 19093558 | 581  |
| ENSG000001 | 17.12768 | 13.69403 | 0.32763  | 0.56636  | 0.66418  | SH3GL1P2   | chr17 | + | 28951431 | 28952512 | 1082 |
| ENSG000001 | 7.520361 | 18.05701 | -1.2262  | 0.039213 | 0.072117 | RP11-888C  | chr18 | - | 9315192  | 9334439  | 466  |
| ENSG000001 | 0.36308  | 2.024857 | -1.7472  | 0.2845   | 0.38587  | RP11-387F  | chr17 | + | 38083995 | 38095854 | 632  |
| ENSG000001 | 0        | 1.012429 | -1.3162  | 0.46038  | NA       | RP11-449L  | chr17 | + | 71509824 | 71514909 | 2276 |
| ENSG000001 | 0.870904 | 1.280305 | -0.36285 | 0.82446  | 0.87622  | RP11-53I6  | chr18 | - | 29671258 | 29672082 | 473  |
| ENSG000001 | 4.107898 | 4.974728 | -0.23743 | 0.79294  | 0.85287  | RP11-661C  | chr17 | + | 71239232 | 71240845 | 321  |
| ENSG000001 | 0        | 1.012429 | -1.3162  | 0.46038  | NA       | NCOR1P2    | chr17 | + | 21536014 | 21544603 | 294  |
| ENSG000001 | 0        | 0.297015 | -0.41864 | 0.81278  | NA       | RP11-728E  | chr17 | - | 21359825 | 21363527 | 3703 |
| ENSG000001 | 1.960143 | 4.89705  | -1.1891  | 0.26605  | 0.3648   | AC145343   | chr17 | - | 66092187 | 66097615 | 650  |
| ENSG000001 | 0        | 1.280305 | -1.6305  | 0.35731  | NA       | RP11-781P  | chr18 | + | 6954676  | 6957418  | 2295 |
| ENSG000001 | 1.213446 | 1.744828 | -0.36909 | 0.80209  | 0.85994  | RP11-178F  | chr18 | + | 22015328 | 22019602 | 281  |
| ENSG000001 | 0.290301 | 7.486798 | -3.7492  | 0.00321  | 0.007368 | FTLP12     | chr17 | + | 16294748 | 16295196 | 449  |
| ENSG000001 | 0.290301 | 0        | 0.4146   | 0.81455  | NA       | AC073624   | chr17 | - | 77015291 | 77023737 | 865  |
| ENSG000001 | 6.204226 | 5.909479 | 0.067424 | 0.93316  | 0.95618  | RP11-147L  | chr17 | - | 66242770 | 66244079 | 1310 |
| ENSG000001 | 0        | 0.715414 | -0.84936 | 0.6309   | NA       | RP11-7005  | chr16 | + | 69274452 | 69275832 | 428  |
| ENSG000001 | 0        | 0.951736 | -1.2555  | 0.48145  | NA       | RP11-31I2  | chr17 | + | 31954046 | 31962076 | 561  |
| ENSG000001 | 0.342542 | 0        | 0.4146   | 0.81455  | NA       | CTD-2370A  | chr17 | - | 29632231 | 29645849 | 1008 |
| ENSG000001 | 0        | 0.715414 | -0.84936 | 0.6309   | NA       | RP11-31I2  | chr17 | + | 31892783 | 31951141 | 633  |
| ENSG000001 | 0        | 0.357707 | -0.41864 | 0.81278  | NA       | RP11-15F1  | chr18 | + | 46642671 | 46652849 | 502  |
| ENSG000001 | 0        | 0.654722 | -0.83442 | 0.63731  | NA       | CTB-58E17  | chr17 | + | 36757302 | 36758954 | 571  |
| ENSG000001 | 12.85368 | 6.177355 | 1.0121   | 0.10898  | 0.17364  | RP13-638C  | chr17 | - | 80534492 | 80535267 | 456  |
| ENSG000001 | 7.177819 | 8.238599 | -0.18663 | 0.81954  | 0.87319  | RP11-227C  | chr17 | + | 30655460 | 30656414 | 271  |
| ENSG000001 | 3.205292 | 4.05213  | -0.28965 | 0.75864  | 0.82459  | hsa-mir-13 | chr18 | - | 19405448 | 19411371 | 4226 |
| ENSG000001 | 5.031856 | 2.728118 | 0.81942  | 0.40264  | 0.5074   | BZRAP1-AS  | chr17 | + | 56402811 | 56493127 | 2337 |
| ENSG000001 | 0        | 0.343138 | -0.41864 | 0.81278  | NA       | CTD-2124B  | chr18 | + | 6557821  | 6558653  | 658  |
| ENSG000001 | 1.89853  | 6.857926 | -1.6314  | 0.13339  | 0.20603  | SNORD3B-1  | chr17 | + | 18965225 | 18965807 | 583  |
| ENSG000001 | 20.71577 | 28.31717 | -0.4339  | 0.31055  | 0.41248  | RP11-70L8  | chr9  | - | 21858909 | 21861925 | 3017 |
| ENSG000001 | 3.080272 | 7.625169 | -1.1848  | 0.17628  | 0.25971  | RP11-403A  | chr18 | - | 21656758 | 21679284 | 564  |
| ENSG000001 | 10.39428 | 7.108817 | 0.54253  | 0.43221  | 0.53773  | AC010761   | chr17 | - | 26997072 | 26999822 | 499  |
| ENSG000001 | 1.681007 | 0.343138 | 1.6345   | 0.30214  | 0.40343  | hsa-mir-14 | chr17 | - | 56408245 | 56409869 | 1625 |
| ENSG000001 | 4.688501 | 2.771825 | 0.71738  | 0.50146  | 0.60503  | RP11-927P  | chr17 | + | 62888847 | 62906298 | 631  |
| ENSG000001 | 2.116866 | 2.117104 | -0.00087 | 0.9995   | 0.99975  | RP11-466A  | chr17 | - | 30836972 | 30850442 | 927  |
| ENSG000001 | 0.342542 | 0        | 0.4146   | 0.81455  | NA       | RP11-638L  | chr18 | - | 65497908 | 65499204 | 1297 |
| ENSG000001 | 19.13843 | 54.17572 | -1.4625  | 0.000401 | 0.001055 | RP11-649A  | chr17 | - | 73161681 | 73163344 | 1664 |
| ENSG000001 | 0        | 0.715414 | -0.84936 | 0.6309   | NA       | RP11-663A  | chr17 | - | 25564885 | 25568687 | 614  |
| ENSG000001 | 2.012384 | 2.774242 | -0.38808 | 0.76014  | 0.82575  | RP11-162A  | chr18 | - | 74596891 | 74600680 | 2747 |
| ENSG000001 | 0.342542 | 0        | 0.4146   | 0.81455  | NA       | RP11-180P  | chr17 | - | 61028192 | 61028549 | 358  |
| ENSG000001 | 0.342542 | 0        | 0.4146   | 0.81455  | NA       | RP11-822E  | chr17 | + | 21422775 | 21424530 | 396  |
| ENSG000001 | 0.342542 | 0        | 0.4146   | 0.81455  | NA       | PGDP1      | chr18 | + | 29542141 | 29543581 | 1441 |
| ENSG000001 | 2.044087 | 1.759397 | 0.194    | 0.88153  | 0.91747  | RP11-53I6  | chr18 | - | 29775989 | 29776929 | 941  |
| ENSG000001 | 4.047098 | 0.297015 | 2.81     | 0.050191 | 0.089244 | RP11-269C  | chr17 | - | 61507829 | 61509572 | 552  |

|            |          |          |          |          |          |            |       |   |          |          |      |
|------------|----------|----------|----------|----------|----------|------------|-------|---|----------|----------|------|
| ENSG000001 | 3.112789 | 4.926189 | -0.62234 | 0.54689  | 0.64706  | ARGFXP2    | chr17 | - | 30477452 | 30478523 | 949  |
| ENSG000001 | 0        | 1.188058 | -1.268   | 0.47398  | NA       | FEM1AP2    | chr18 | - | 14391912 | 14393908 | 1997 |
| ENSG000001 | 11.32003 | 2.681995 | 1.9616   | 0.018916 | 0.037544 | RP13-104F  | chr17 | + | 62746538 | 62747429 | 892  |
| ENSG000001 | 0.36308  | 0        | 0.4146   | 0.81455  | NA       | RP11-565F  | chr17 | + | 9397314  | 9398337  | 692  |
| ENSG000001 | 1.027626 | 0        | 1.1491   | 0.51623  | NA       | RP11-286A  | chr18 | + | 5463626  | 5480974  | 578  |
| ENSG000001 | 0.995923 | 2.024857 | -0.82593 | 0.55446  | 0.65379  | CTD-2349P  | chr17 | - | 29161343 | 29190046 | 638  |
| ENSG000001 | 1.597063 | 0.654722 | 0.96706  | 0.53025  | 0.63165  | RP11-466A  | chr17 | - | 30856026 | 30857067 | 475  |
| ENSG000001 | 0.290301 | 3.5439   | -2.5303  | 0.10164  | 0.1636   | RP11-16C1  | chr17 | + | 73390204 | 73391044 | 372  |
| ENSG000001 | 0        | 3.322147 | -3.2429  | 0.031225 | 0.058731 | RP11-17M1  | chr17 | - | 32258151 | 32263225 | 535  |
| ENSG000001 | 0        | 1.652581 | -2.1974  | 0.1871   | NA       | RP11-57J11 | chr18 | + | 24805706 | 24827152 | 555  |
| ENSG000001 | 0.290301 | 0.343138 | -0.00202 | 0.99909  | NA       | RP11-1148  | chr17 | - | 28417384 | 28444515 | 385  |
| ENSG000001 | 14.22125 | 28.59566 | -0.98024 | 0.054186 | 0.095397 | RP13-270P  | chr18 | + | 3190395  | 3247275  | 1771 |
| ENSG000001 | 7.915144 | 3.91376  | 0.95095  | 0.24779  | 0.34395  | RP11-789C  | chr18 | + | 8402845  | 8405159  | 2315 |
| ENSG000001 | 97.18514 | 91.78441 | 0.083904 | 0.74079  | 0.80929  | CTD-2510F  | chr17 | - | 57280038 | 57281190 | 321  |
| ENSG000001 | 10.40544 | 19.97659 | -0.90921 | 0.10061  | 0.16233  | CTD-2349P  | chr17 | - | 29053323 | 29054582 | 460  |
| ENSG000001 | 0.580602 | 0        | 0.8036   | 0.6494   | NA       | RP11-849A  | chr17 | + | 15164332 | 15169024 | 373  |
| ENSG000001 | 1.939605 | 4.694699 | -1.1337  | 0.2899   | 0.39145  | RP11-204L  | chr2  | + | 1.22E+08 | 1.22E+08 | 682  |
| ENSG000001 | 5.051581 | 7.403416 | -0.49568 | 0.5326   | 0.63368  | RP13-20L1  | chr17 | - | 80412149 | 80416397 | 357  |
| ENSG000001 | 1.317927 | 3.290593 | -1.1435  | 0.34558  | 0.44969  | RP11-690C  | chr17 | + | 37394719 | 37407071 | 975  |
| ENSG000001 | 1.286224 | 1.684135 | -0.30783 | 0.81401  | 0.86935  | AC010761   | chr17 | - | 27072587 | 27074670 | 521  |
| ENSG000001 | 2.241072 | 1.355566 | 0.62488  | 0.6375   | 0.72566  | CTD-2145A  | chr17 | - | 18713269 | 18714253 | 985  |
| ENSG000001 | 0.36308  | 1.326428 | -1.249   | 0.46108  | NA       | KRT18P55   | chr17 | - | 26603012 | 26644809 | 1950 |
| ENSG000001 | 2.302685 | 0        | 2.6689   | 0.095357 | 0.15524  | RP11-449C  | chr18 | + | 22208146 | 22242162 | 2321 |
| ENSG000001 | 0        | 1.355566 | -1.9006  | 0.26573  | NA       | RP11-1090  | chr17 | - | 12663457 | 12693559 | 3679 |
| ENSG000001 | 2.551911 | 2.932886 | -0.1724  | 0.87003  | 0.90953  | RP11-806L  | chr18 | + | 706523   | 707648   | 326  |
| ENSG000001 | 0.342542 | 0        | 0.4146   | 0.81455  | NA       | RP11-131K  | chr17 | + | 13812548 | 13814529 | 1982 |
| ENSG000001 | 1.068702 | 4.290868 | -1.7494  | 0.16505  | 0.246    | hsa-mir-15 | chr18 | + | 47013709 | 47018248 | 582  |
| ENSG000001 | 0.72616  | 3.993854 | -2.0363  | 0.1421   | 0.21662  | SEN3-EIF4  | chr17 | + | 7466604  | 7482033  | 3520 |
| ENSG000001 | 8.911067 | 26.10944 | -1.5169  | 0.002698 | 0.006266 | RP11-524F  | chr17 | + | 17410665 | 17411622 | 795  |
| ENSG000001 | 0.653381 | 0.343138 | 0.51863  | 0.76794  | NA       | RP11-638L  | chr18 | + | 65183783 | 65566856 | 2991 |
| ENSG000001 | 0.36308  | 0.297015 | -0.00205 | 0.99908  | NA       | RP11-60A2  | chr17 | - | 55849307 | 55912110 | 505  |
| ENSG000001 | 0        | 1.012429 | -1.3162  | 0.46038  | NA       | RP11-958F  | chr18 | + | 22635564 | 22636724 | 663  |
| ENSG000001 | 0        | 0.297015 | -0.41864 | 0.81278  | NA       | RP11-434C  | chr17 | + | 20336519 | 20337598 | 301  |
| ENSG000001 | 0.290301 | 0        | 0.4146   | 0.81455  | NA       | PIGPP4     | chr18 | - | 9880577  | 9880883  | 307  |
| ENSG000001 | 0        | 5.398833 | -3.8832  | 0.007759 | 0.016637 | CTD-2095E  | chr17 | - | 30438581 | 30439609 | 1029 |
| ENSG000001 | 184.1028 | 78.75329 | 1.2179   | 1.26E-05 | 4.00E-05 | RP11-713C  | chr18 | - | 70410991 | 70413196 | 2206 |
| ENSG000001 | 0.36308  | 0.654722 | -0.52647 | 0.7643   | NA       | AP000275   | chr21 | - | 33949158 | 33984591 | 929  |
| ENSG000001 | 3.008307 | 1.652581 | 0.76056  | 0.49902  | 0.60281  | RP11-6813  | chr17 | - | 27971814 | 27972865 | 1052 |
| ENSG000001 | 0.342542 | 0.343138 | -0.00208 | 0.99906  | NA       | RP11-4651  | chr18 | - | 67150863 | 67285930 | 432  |
| ENSG000001 | 0        | 0.297015 | -0.41864 | 0.81278  | NA       | TUFMP1     | chr17 | - | 25409716 | 25411062 | 1347 |
| ENSG000001 | 7.769587 | 3.899191 | 0.93865  | 0.23866  | 0.3333   | RP11-13N1  | chr18 | + | 19253589 | 19262522 | 447  |
| ENSG000001 | 16.06916 | 2.901332 | 2.3311   | 0.001803 | 0.004297 | CTD-2267C  | chr17 | - | 38497119 | 38499388 | 1790 |
| ENSG000001 | 4.253456 | 4.106375 | 0.030414 | 0.97433  | 0.98556  | RP11-1376  | chr17 | + | 80111306 | 80112691 | 555  |
| ENSG000001 | 30.05414 | 62.6499  | -1.0545  | 0.000779 | 0.001965 | RPL17      | chr18 | - | 47014851 | 47018893 | 914  |
| ENSG000001 | 1.753786 | 5.62945  | -1.5559  | 0.1387   | 0.21229  | RP11-173A  | chr17 | - | 25678884 | 25679610 | 727  |
| ENSG000001 | 258.2399 | 74.99662 | 1.7709   | 8.40E-17 | 6.08E-16 | MAFG-AS1   | chr17 | + | 79885705 | 79888629 | 1895 |
| ENSG000001 | 0        | 0.297015 | -0.41864 | 0.81278  | NA       | RP11-118C  | chr17 | + | 32015822 | 32016193 | 372  |
| ENSG000001 | 2.770247 | 23.25919 | -2.9723  | 6.40E-05 | 0.000187 | RP13-516A  | chr17 | - | 80247922 | 80250690 | 1810 |
| ENSG000001 | 0.290301 | 1.387121 | -1.3028  | 0.4429   | NA       | RP11-156L  | chr17 | + | 60776605 | 60815283 | 3145 |
| ENSG000001 | 4.253456 | 5.733849 | -0.3929  | 0.64772  | 0.73383  | RP11-8201  | chr17 | - | 28102765 | 28103719 | 955  |
| ENSG000001 | 0.580602 | 0        | 0.8036   | 0.6494   | NA       | RP11-94B1  | chr18 | - | 73966247 | 73967169 | 598  |
| ENSG000001 | 1.431782 | 4.395268 | -1.4588  | 0.21073  | 0.30094  | RP11-354P  | chr17 | - | 28449447 | 28453136 | 546  |
| ENSG000001 | 0.290301 | 0.297015 | -0.00202 | 0.99909  | NA       | RP11-848P  | chr17 | - | 29291953 | 29292518 | 409  |
| ENSG000001 | 43.64156 | 39.31149 | 0.14709  | 0.65002  | 0.73589  | RP11-849F  | chr17 | + | 8268881  | 8284646  | 579  |
| ENSG000001 | 11.25662 | 13.94418 | -0.30894 | 0.60739  | 0.70029  | RP11-799B  | chr18 | - | 21739473 | 21742175 | 735  |
| ENSG000001 | 0.36308  | 0.343138 | -0.0021  | 0.99905  | NA       | RP11-296E  | chr18 | - | 18960247 | 19030978 | 679  |
| ENSG000001 | 0        | 2.995994 | -2.7659  | 0.099017 | 0.16011  | CXADRP3    | chr18 | - | 14477954 | 14499277 | 1955 |
| ENSG000001 | 0        | 2.355842 | -2.3895  | 0.16517  | 0.24613  | CTC-30417  | chr17 | - | 32445366 | 32445901 | 536  |
| ENSG000001 | 6.619547 | 24.30318 | -1.8286  | 0.002465 | 0.005751 | RP11-17M1  | chr18 | + | 74203608 | 74205487 | 813  |
| ENSG000001 | 1.016461 | 0.951736 | 0.04702  | 0.97613  | 0.98651  | RP11-449L  | chr17 | + | 71515985 | 71517546 | 1562 |
| ENSG000001 | 0        | 0.951736 | -1.2555  | 0.48145  | NA       | CYP4F35P   | chr18 | + | 14337422 | 14342524 | 2876 |
| ENSG000001 | 0        | 7.742278 | -4.482   | 0.000647 | 0.001651 | RNA5EH1P   | chr17 | - | 20805252 | 20805993 | 742  |
| ENSG000001 | 8.995011 | 16.85847 | -0.89114 | 0.1675   | 0.24892  | CTD-2349P  | chr17 | - | 29108511 | 29109239 | 308  |
| ENSG000001 | 5.394936 | 1.234181 | 1.8406   | 0.097376 | 0.15792  | RP11-271K  | chr17 | - | 29365593 | 29386139 | 1967 |
| ENSG000001 | 0        | 2.757256 | -2.912   | 0.06391  | 0.11024  | RP11-387F  | chr17 | - | 38168479 | 38170958 | 784  |

|            |          |          |          |          |          |                  |   |          |          |      |
|------------|----------|----------|----------|----------|----------|------------------|---|----------|----------|------|
| ENSG000001 | 34.55584 | 31.5131  | 0.12891  | 0.71325  | 0.78728  | RP11-649A chr17  | - | 73134511 | 73137445 | 400  |
| ENSG000001 | 0        | 1.638012 | -2.1885  | 0.18912  | NA       | RP11-720N chr17  | + | 25792138 | 25792567 | 430  |
| ENSG000001 | 13.56786 | 18.09172 | -0.3874  | 0.50389  | 0.60735  | FSBP chr8        | - | 95390605 | 95449180 | 2472 |
| ENSG000001 | 0        | 0.357707 | -0.41864 | 0.81278  | NA       | RP11-751F chr18  | + | 74892062 | 74947386 | 560  |
| ENSG000001 | 4.067636 | 2.232041 | 0.75252  | 0.47921  | 0.58354  | RP11-20B2 chr17  | + | 27253293 | 27271767 | 683  |
| ENSG000001 | 0        | 0.357707 | -0.41864 | 0.81278  | NA       | RP11-76K1 chr18  | + | 7064031  | 7064196  | 166  |
| ENSG000001 | 0        | 0.297015 | -0.41864 | 0.81278  | NA       | RP11-728E chr17  | - | 21348145 | 21348751 | 607  |
| ENSG000001 | 0.290301 | 1.485073 | -1.262   | 0.4732   | NA       | RP11-408F chr18  | + | 28681551 | 28742752 | 553  |
| ENSG000001 | 2.323223 | 0.654722 | 1.4033   | 0.34505  | 0.44915  | RP11-737C chr18  | + | 2948236  | 2960754  | 673  |
| ENSG000001 | 1.338465 | 1.759397 | -0.30821 | 0.8223   | 0.87483  | RP11-20B2 chr17  | + | 27271814 | 27272412 | 599  |
| ENSG000001 | 1.576526 | 1.073121 | 0.4605   | 0.76104  | 0.82661  | RP11-583F chr17  | + | 62939380 | 62947172 | 2474 |
| ENSG000001 | 2.023549 | 4.006007 | -0.89478 | 0.40324  | 0.50794  | RP11-434C chr17  | - | 20435561 | 20436194 | 634  |
| ENSG000001 | 0        | 6.654031 | -4.1705  | 0.003516 | 0.00802  | LINC00668 chr18  | - | 6919495  | 6929965  | 2343 |
| ENSG000001 | 0.975385 | 0.297015 | 0.91901  | 0.59525  | NA       | RP11-563F chr18  | + | 65042370 | 65042542 | 173  |
| ENSG000001 | 1.846289 | 1.294874 | 0.43718  | 0.7468   | 0.81448  | UBE2CP2 chr18    | - | 20480449 | 20480958 | 510  |
| ENSG000001 | 1.608228 | 3.365854 | -0.91191 | 0.44222  | 0.54797  | RP11-739L chr18  | - | 20279444 | 20513727 | 570  |
| ENSG000001 | 0.36308  | 0        | 0.4146   | 0.81455  | NA       | RP11-865B chr18  | + | 6511415  | 6590652  | 603  |
| ENSG000001 | 2.894453 | 9.026859 | -1.5281  | 0.0636   | 0.10976  | RP11-674N chr18  | - | 8695854  | 8707619  | 818  |
| ENSG000001 | 0        | 0.357707 | -0.41864 | 0.81278  | NA       | RP11-293E chr17  | - | 43810719 | 43812035 | 560  |
| ENSG000001 | 0        | 0.297015 | -0.41864 | 0.81278  | NA       | RP11-269C chr17  | + | 61532354 | 61533178 | 355  |
| ENSG000001 | 0        | 8.277474 | -4.6241  | 0.000434 | 0.001137 | CTB-41I6.2 chr17 | + | 8870840  | 8880312  | 557  |
| ENSG000001 | 0.342542 | 0        | 0.4146   | 0.81455  | NA       | CTD-2515C chr18  | - | 26858474 | 26941928 | 471  |
| ENSG000001 | 20.53077 | 7.844505 | 1.3453   | 0.01392  | 0.028395 | RP11-927P chr17  | - | 62774960 | 62775055 | 96   |
| ENSG000001 | 0        | 14653.55 | -14.678  | 9.97E-47 | 2.08E-45 | ESRG chr3        | - | 54666149 | 54673884 | 3140 |
| ENSG000001 | 1.359003 | 1.043983 | 0.31069  | 0.82982  | 0.88011  | RP11-627C chr18  | - | 19746859 | 19748929 | 1788 |
| ENSG000001 | 6.887518 | 5.36399  | 0.34945  | 0.65765  | 0.74209  | CTB-58E17 chr17  | - | 36859733 | 36862514 | 486  |
| ENSG000001 | 0        | 0.640152 | -0.82869 | 0.63935  | NA       | RP11-466P chr5   | + | 75627662 | 75629781 | 2120 |
| ENSG000001 | 0.36308  | 0.715414 | -0.51558 | 0.77246  | NA       | RP11-703N chr18  | - | 2688562  | 2833063  | 690  |
| ENSG000001 | 5.850519 | 9.453379 | -0.66469 | 0.33243  | 0.43573  | RP11-143J chr18  | - | 9121263  | 9136643  | 770  |
| ENSG000001 | 4.088174 | 3.259039 | 0.2804   | 0.77961  | 0.84184  | POLRMT1 chr17    | - | 60214333 | 60218000 | 3668 |
| ENSG000001 | 0        | 0.297015 | -0.41864 | 0.81278  | NA       | CTD-2535L chr17  | - | 63534220 | 63637151 | 1616 |
| ENSG000001 | 0        | 0.343138 | -0.41864 | 0.81278  | NA       | SNORA59B chr17   | + | 19460524 | 19461224 | 701  |
| ENSG000001 | 0.923144 | 1.234181 | -0.3108  | 0.84078  | 0.88823  | RP11-118E chr17  | - | 55599609 | 55600958 | 563  |
| ENSG000001 | 0        | 0.357707 | -0.41864 | 0.81278  | NA       | RP5-906A2 chr17  | + | 37329543 | 37333756 | 573  |
| ENSG000001 | 0.342542 | 0.640152 | -0.50911 | 0.77219  | NA       | RP11-296K chr17  | + | 27679087 | 27731118 | 414  |
| ENSG000001 | 0        | 0.357707 | -0.41864 | 0.81278  | NA       | RP11-963F chr17  | + | 10695376 | 10698302 | 575  |
| ENSG000001 | 0        | 0.715414 | -0.84936 | 0.6309   | NA       | LOC732531 chr17  | + | 66091209 | 66091898 | 471  |
| ENSG000001 | 1.016461 | 0.297015 | 0.95157  | 0.5817   | NA       | RP11-354P chr17  | + | 28565759 | 28579255 | 224  |
| ENSG000001 | 1.753786 | 1.248751 | 0.34916  | 0.81254  | 0.86823  | RP11-209C chr17  | - | 19832685 | 19833050 | 366  |
| ENSG000001 | 1.233984 | 0.997859 | 0.26626  | 0.85596  | 0.89874  | RP11-474N chr18  | + | 9785105  | 9787802  | 1166 |
| ENSG000001 | 0        | 2.08555  | -2.222   | 0.20032  | 0.289    | RHOT1P1 chr18    | + | 14222007 | 14222330 | 324  |
| ENSG000001 | 1.068702 | 1.073121 | -0.00382 | 0.99817  | 0.99912  | RP11-789C chr18  | - | 8360818  | 8367032  | 616  |
| ENSG000001 | 0.72616  | 0        | 0.85004  | 0.63064  | NA       | RP11-927P chr17  | - | 62932603 | 62936347 | 255  |
| ENSG000001 | 6.504714 | 2.261179 | 1.3623   | 0.18606  | 0.27176  | RP11-769C chr18  | + | 735746   | 737459   | 1714 |
| ENSG000001 | 64.91659 | 76.145   | -0.22934 | 0.40928  | 0.51423  | STRADA chr17     | - | 61780192 | 61819330 | 3685 |
| ENSG000001 | 0.290301 | 22.89907 | -5.2595  | 5.74E-06 | 1.90E-05 | RP11-855A chr17  | - | 65989996 | 65992547 | 414  |
| ENSG000001 | 0        | 1.40169  | -1.7271  | 0.32809  | NA       | RP11-1113 chr17  | + | 19504173 | 19505569 | 913  |
| ENSG000001 | 37.13685 | 28.10683 | 0.39261  | 0.28248  | 0.38356  | CTD-2267C chr17  | + | 38516907 | 38520945 | 2094 |
| ENSG000001 | 0        | 0.640152 | -0.82869 | 0.63935  | NA       | RP11-100K chr18  | + | 75897223 | 75900887 | 2727 |
| ENSG000001 | 0        | 0.357707 | -0.41864 | 0.81278  | NA       | RP11-746E chr17  | + | 12620322 | 12622491 | 2170 |
| ENSG000001 | 7.095668 | 3.633731 | 0.91953  | 0.2599   | 0.35784  | NARF-IT1 chr17   | + | 80439974 | 80441264 | 769  |
| ENSG000001 | 0        | 0.343138 | -0.41864 | 0.81278  | NA       | CTD-2594A chr18  | + | 14485805 | 14487500 | 1232 |
| ENSG000001 | 0        | 0.937167 | -1.2408  | 0.48662  | NA       | CTC-525D6 chr19  | - | 29980682 | 30017855 | 543  |
| ENSG000001 | 0        | 1.188058 | -1.268   | 0.47398  | NA       | COX6CP3 chr18    | - | 1176791  | 1177013  | 223  |
| ENSG000001 | 2.914991 | 4.259314 | -0.49981 | 0.60223  | 0.69569  | LINC00683 chr18  | + | 74327169 | 74337897 | 3510 |
| ENSG000001 | 1.265686 | 2.056411 | -0.55329 | 0.67612  | 0.75745  | RP11-41O4 chr18  | + | 68002675 | 68019695 | 815  |
| ENSG000001 | 1.939605 | 1.355566 | 0.46104  | 0.71492  | 0.78872  | RP11-640I chr17  | + | 15554904 | 15557803 | 571  |
| ENSG000001 | 0.342542 | 0.951736 | -0.90924 | 0.59857  | NA       | RP11-172F chr18  | - | 4775053  | 5004536  | 561  |
| ENSG000001 | 2.044087 | 0        | 2.4801   | 0.12801  | 0.19906  | RP11-41O4 chr18  | - | 68047376 | 68051827 | 2637 |
| ENSG000001 | 0.632843 | 0.357707 | 0.4993   | 0.77637  | NA       | UBL5P2 chr17     | - | 30554909 | 30555127 | 219  |
| ENSG000001 | 0.685084 | 0        | 0.85004  | 0.63064  | NA       | RP11-627C chr18  | - | 19780582 | 19785192 | 770  |
| ENSG000001 | 0.705622 | 2.431104 | -1.3893  | 0.3527   | 0.45699  | RP11-1C8.I chr8  | - | 1.04E+08 | 1.04E+08 | 777  |
| ENSG000001 | 0.342542 | 0.700845 | -0.57269 | 0.74414  | NA       | RP11-159C chr17  | - | 56154252 | 56160565 | 6113 |
| ENSG000001 | 1.338465 | 0        | 1.8837   | 0.27037  | NA       | ARIH2P1 chr18    | + | 26231696 | 26233172 | 1477 |
| ENSG000001 | 0.685084 | 0        | 0.85004  | 0.63064  | NA       | hsa-mir-74 chr17 | + | 11985216 | 11985313 | 98   |

|            |          |          |          |          |          |                  |   |          |          |      |
|------------|----------|----------|----------|----------|----------|------------------|---|----------|----------|------|
| ENSG000001 | 0.653381 | 0        | 0.82678  | 0.64037  | NA       | RP11-484N chr18  | - | 68003165 | 68004546 | 384  |
| ENSG000001 | 1.08924  | 0.297015 | 0.89622  | 0.61378  | NA       | CTD-2008P chr17  | - | 26596229 | 26599391 | 1441 |
| ENSG000001 | 1.649304 | 0.686276 | 0.97287  | 0.52262  | 0.62516  | RP11-173N chr17  | + | 25660282 | 25675517 | 454  |
| ENSG000001 | 0.342542 | 0        | 0.4146   | 0.81455  | NA       | RP11-2503 chr18  | - | 49862731 | 49865395 | 714  |
| ENSG000001 | 0.943682 | 2.200487 | -0.95411 | 0.51359  | 0.61662  | RP11-848P chr17  | - | 29305628 | 29307268 | 668  |
| ENSG000001 | 0        | 0.640152 | -0.82869 | 0.63935  | NA       | RP11-101C chr17  | - | 72039591 | 72150351 | 573  |
| ENSG000001 | 0.72616  | 1.591889 | -0.89909 | 0.55896  | 0.65777  | RP11-1096 chr17  | - | 11857206 | 11880911 | 463  |
| ENSG000001 | 0        | 0.700845 | -0.87835 | 0.62047  | NA       | RP11-344E chr17  | + | 20759259 | 20760630 | 1372 |
| ENSG000001 | 1.742621 | 1.888903 | -0.13084 | 0.92332  | 0.94839  | RP11-142C chr17  | + | 29460200 | 29465536 | 2780 |
| ENSG000001 | 0.685084 | 1.280305 | -0.63506 | 0.70102  | 0.77757  | RP11-710N chr18  | + | 3580167  | 3580752  | 586  |
| ENSG000001 | 8.672193 | 3.025133 | 1.446    | 0.087146 | 0.14385  | RP11-214C chr17  | + | 14230652 | 14232791 | 2140 |
| ENSG000001 | 0.685084 | 1.591889 | -0.93637 | 0.54313  | 0.64363  | RP11-640N chr17  | - | 30415179 | 30421952 | 299  |
| ENSG000001 | 0.580602 | 0.357707 | 0.37639  | 0.83285  | NA       | RP11-227C chr17  | + | 30738236 | 30739439 | 552  |
| ENSG000001 | 0        | 13.38574 | -5.2831  | 3.15E-05 | 9.53E-05 | CTB-4116.1 chr17 | + | 8869213  | 8870387  | 402  |
| ENSG000001 | 0.290301 | 0.700845 | -0.56655 | 0.74739  | NA       | RP11-737C chr18  | + | 2967016  | 2985408  | 568  |
| ENSG000001 | 0        | 3.755116 | -3.416   | 0.021122 | 0.041462 | RP11-874J chr18  | + | 3653410  | 3656282  | 1455 |
| ENSG000001 | 28.18471 | 126.0613 | -2.1408  | 1.03E-10 | 5.10E-10 | RP11-329L chr17  | + | 62223330 | 62223836 | 278  |
| ENSG000001 | 9.524186 | 6.664569 | 0.46317  | 0.53877  | 0.63946  | CBX3P2 chr18     | - | 2652169  | 2655394  | 1429 |
| ENSG000001 | 1.233984 | 0.343138 | 1.1864   | 0.48571  | NA       | RP11-180P chr17  | - | 61044178 | 61045910 | 912  |
| ENSG000001 | 0.290301 | 0.891044 | -0.7342  | 0.68015  | NA       | RP11-88L2 chr2   | + | 1.8E+08  | 1.8E+08  | 1956 |
| ENSG000001 | 0.342542 | 0.98329  | -0.93492 | 0.58786  | NA       | RP11-9118. chr18 | - | 6728820  | 6729861  | 491  |
| ENSG000001 | 3.443352 | 2.468363 | 0.40998  | 0.72724  | 0.79827  | RP13-991F chr17  | - | 80434473 | 80435800 | 838  |
| ENSG000001 | 2.987769 | 0        | 3.1007   | 0.040889 | 0.074766 | RP11-149I. chr9  | + | 21995481 | 21996012 | 435  |
| ENSG000001 | 1.991846 | 21.33632 | -3.2208  | 0.000145 | 0.000404 | RP11-806L chr18  | + | 650229   | 652843   | 2106 |
| ENSG000001 | 0.653381 | 0.297015 | 0.51304  | 0.77085  | NA       | RP11-822E chr17  | + | 21436235 | 21446049 | 965  |
| ENSG000001 | 173.6452 | 179.0069 | -0.0435  | 0.85235  | 0.89626  | CTB-131K1 chr17  | + | 37558046 | 37562486 | 860  |
| ENSG000001 | 1.576526 | 5.600312 | -1.6327  | 0.11232  | 0.17834  | RP11-401F chr17  | + | 65240953 | 65241922 | 689  |
| ENSG000001 | 0.36308  | 0        | 0.4146   | 0.81455  | NA       | CTD-2515C chr18  | - | 26836782 | 26837025 | 244  |
| ENSG000001 | 5.560218 | 4.383115 | 0.32398  | 0.73722  | 0.80634  | CTD-2349P chr17  | + | 29119390 | 29119851 | 462  |
| ENSG000001 | 0.705622 | 0.343138 | 0.57395  | 0.74355  | NA       | RP11-995C chr17  | + | 44581312 | 44586705 | 470  |
| ENSG000001 | 0.632843 | 2.263595 | -1.4042  | 0.34518  | 0.44925  | RP11-45M. chr17  | - | 17138747 | 17139432 | 686  |
| ENSG000001 | 0.290301 | 0.297015 | -0.00202 | 0.99909  | NA       | RP11-766F chr17  | - | 71064009 | 71064427 | 419  |
| ENSG000001 | 0        | 1.043983 | -1.3473  | 0.44976  | NA       | RP11-874J chr18  | - | 3770017  | 3771430  | 557  |
| ENSG000001 | 0        | 0.343138 | -0.41864 | 0.81278  | NA       | RP11-650P chr18  | - | 29076608 | 29077158 | 433  |
| ENSG000001 | 0.342542 | 0.297015 | -0.00202 | 0.99909  | NA       | RP11-805F chr18  | - | 15003974 | 15006351 | 1175 |
| ENSG000001 | 0.290301 | 0        | 0.4146   | 0.81455  | NA       | RP11-138P chr17  | + | 26201671 | 26208263 | 2266 |
| ENSG000001 | 0.342542 | 0        | 0.4146   | 0.81455  | NA       | RP11-40A1 chr17  | + | 31438876 | 31458761 | 557  |
| ENSG000001 | 1.608228 | 2.307303 | -0.43322 | 0.73306  | 0.80275  | CTD-2510F chr17  | - | 57252344 | 57259148 | 798  |
| ENSG000001 | 14.5038  | 8.695874 | 0.71083  | 0.27197  | 0.37141  | RP11-385C chr17  | - | 15434087 | 15434403 | 317  |
| ENSG000001 | 2.064625 | 3.305162 | -0.63232 | 0.55939  | 0.65812  | RP11-881L chr18  | + | 9587384  | 9590180  | 534  |
| ENSG000001 | 7.552064 | 0.654722 | 3.1018   | 0.005703 | 0.012553 | RP11-449C chr18  | + | 22305745 | 22509040 | 592  |
| ENSG000001 | 0.632843 | 2.65044  | -1.6752  | 0.21263  | 0.30317  | RP11-838N chr18  | + | 3284143  | 3327290  | 864  |
| ENSG000001 | 0.342542 | 0        | 0.4146   | 0.81455  | NA       | RP1-71H19 chr6   | + | 57358736 | 57362565 | 345  |
| ENSG000001 | 0        | 0.594029 | -0.81444 | 0.64499  | NA       | RP11-583F chr17  | + | 63048027 | 63049426 | 537  |
| ENSG000001 | 0.342542 | 0        | 0.4146   | 0.81455  | NA       | RP11-466A chr17  | + | 30845971 | 30858510 | 408  |
| ENSG000001 | 2.012384 | 4.259314 | -0.99331 | 0.34212  | 0.44602  | RP11-6N17 chr17  | - | 46007048 | 46010472 | 335  |
| ENSG000001 | 0.290301 | 0.297015 | -0.00202 | 0.99909  | NA       | RFWD2P1 chr18    | + | 8412127  | 8414302  | 2176 |
| ENSG000001 | 1.016461 | 0.297015 | 0.95157  | 0.5817   | NA       | RP11-94B1 chr18  | + | 73971121 | 73972069 | 462  |
| ENSG000001 | 2.86275  | 1.043983 | 1.2674   | 0.324    | 0.42695  | RP11-927P chr17  | + | 62895884 | 62896834 | 560  |
| ENSG000001 | 9.658579 | 27.86876 | -1.4834  | 0.031302 | 0.058862 | RP11-138I. chr17 | - | 16343793 | 16344266 | 304  |
| ENSG000001 | 1.379541 | 0        | 1.686    | 0.34092  | NA       | RP11-1376 chr17  | + | 80117932 | 80118328 | 345  |
| ENSG000001 | 1.016461 | 1.012429 | 0.001343 | 0.99932  | 0.99973  | RP11-849N chr17  | - | 15283181 | 15321195 | 538  |
| ENSG000001 | 0.342542 | 1.058552 | -0.99235 | 0.56407  | NA       | RP11-258F chr17  | - | 18075939 | 18088067 | 2158 |
| ENSG000001 | 2.914991 | 4.533638 | -0.54744 | 0.6256   | 0.71564  | RP5-1148A chr6   | - | 64280910 | 64282313 | 1404 |
| ENSG000001 | 0        | 1.309443 | -1.6539  | 0.35008  | NA       | RP11-30L3 chr18  | + | 46732282 | 46735151 | 472  |
| ENSG000001 | 1.068702 | 6.815092 | -2.4065  | 0.035776 | 0.066477 | RP11-661C chr18  | - | 8635177  | 8636345  | 780  |
| ENSG000001 | 75.63531 | 118.7017 | -0.65028 | 0.003853 | 0.008727 | RP11-214C chr17  | + | 14207171 | 14208822 | 1652 |
| ENSG000001 | 0        | 0.297015 | -0.41864 | 0.81278  | NA       | RP11-398J. chr17 | + | 77128804 | 77132484 | 547  |
| ENSG000001 | 3.236995 | 17.21779 | -2.2799  | 0.003593 | 0.008183 | MYO15B chr17     | + | 73584139 | 73622929 | 9407 |
| ENSG000001 | 11.25743 | 15.97387 | -0.51077 | 0.38558  | 0.48989  | RP11-855A chr17  | - | 65947001 | 65947862 | 709  |
| ENSG000001 | 6.349784 | 1.606458 | 1.7732   | 0.087927 | 0.14489  | RP11-466A chr17  | + | 30822554 | 30826351 | 2480 |
| ENSG000001 | 0.943682 | 1.84278  | -0.74197 | 0.62261  | 0.71299  | RP11-131K chr17  | - | 13861065 | 13870269 | 511  |
| ENSG000001 | 57.5245  | 44.24096 | 0.36802  | 0.30339  | 0.40468  | RP11-690C chr17  | - | 37408897 | 37410550 | 1654 |
| ENSG000001 | 0.290301 | 0.98329  | -0.92952 | 0.59103  | NA       | RP11-678C chr18  | - | 7741308  | 7754829  | 1057 |
| ENSG000001 | 0.705622 | 0        | 0.8807   | 0.6196   | NA       | RP11-321N chr18  | - | 73144658 | 73148912 | 748  |

|            |          |          |          |          |          |                  |   |          |          |      |
|------------|----------|----------|----------|----------|----------|------------------|---|----------|----------|------|
| ENSG000001 | 40.05363 | 25.67889 | 0.6407   | 0.070069 | 0.11931  | SH3GL1P1 chr17   | + | 30366993 | 30369847 | 1945 |
| ENSG000001 | 3.350849 | 4.709268 | -0.45664 | 0.62675  | 0.71666  | RP11-715F chr18  | - | 2561171  | 2562219  | 1049 |
| ENSG000001 | 0.653381 | 1.355566 | -0.7988  | 0.59369  | 0.68833  | RP11-521L chr16  | + | 68967723 | 68971628 | 641  |
| ENSG000001 | 1.649304 | 0        | 2.1906   | 0.18857  | NA       | RP1-77H15 chr17  | - | 16461299 | 16462583 | 689  |
| ENSG000001 | 0.870904 | 0.594029 | 0.31055  | 0.86063  | NA       | RP11-61L1 chr18  | + | 9506240  | 9509724  | 3485 |
| ENSG000001 | 0        | 0.297015 | -0.41864 | 0.81278  | NA       | RP11-744K chr17  | + | 21858203 | 21859016 | 229  |
| ENSG000001 | 1.649304 | 0        | 2.1906   | 0.18857  | NA       | RP11-6N17 chr17  | - | 45956838 | 45959764 | 2927 |
| ENSG000001 | 0.705622 | 3.3343   | -1.8031  | 0.20849  | 0.29847  | RP11-599B chr17  | + | 8080130  | 8086130  | 465  |
| ENSG000001 | 0        | 0.700845 | -0.87835 | 0.62047  | NA       | CTD-2008P chr17  | - | 26573480 | 26575032 | 1553 |
| ENSG000001 | 27.3764  | 0.937167 | 4.4847   | 1.78E-07 | 6.82E-07 | RP11-838N chr18  | + | 3466248  | 3478976  | 643  |
| ENSG000001 | 0        | 0.357707 | -0.41864 | 0.81278  | NA       | RP11-121A chr17  | + | 20226371 | 20226650 | 280  |
| ENSG000001 | 0.36308  | 0.715414 | -0.51558 | 0.77246  | NA       | RP11-543F chr18  | - | 67372214 | 67392211 | 483  |
| ENSG000001 | 1.233984 | 0.343138 | 1.1864   | 0.48571  | NA       | RP11-862L chr18  | + | 74686646 | 74696118 | 812  |
| ENSG000001 | 0.290301 | 0.357707 | -0.00203 | 0.99908  | NA       | RP11-370A chr18  | - | 20303454 | 20487684 | 571  |
| ENSG000001 | 0.580602 | 0.357707 | 0.37639  | 0.83285  | NA       | ITM2BP1 chr17    | - | 25939614 | 25940277 | 664  |
| ENSG000001 | 30.49774 | 25.16341 | 0.28009  | 0.48759  | 0.59159  | RP11-848P chr17  | + | 29335515 | 29420145 | 739  |
| ENSG000001 | 0.342542 | 7.271493 | -3.5775  | 0.007501 | 0.016134 | RP6-114E2 chr14  | + | 72315323 | 72375147 | 397  |
| ENSG000001 | 3.434793 | 0.343138 | 2.5462   | 0.082107 | 0.1366   | RP1-41C23 chr17  | + | 29910181 | 29964562 | 568  |
| ENSG000001 | 1.027626 | 11.33987 | -3.1376  | 0.003233 | 0.007417 | RP11-1090 chr17  | + | 12721314 | 12726571 | 5258 |
| ENSG000001 | 3.362014 | 2.96444  | 0.15426  | 0.88489  | 0.91965  | RP11-692N chr18  | - | 9734879  | 9735599  | 368  |
| ENSG000001 | 0        | 1.727843 | -1.9772  | 0.25933  | NA       | AC005616. chr19  | - | 28982771 | 29123635 | 1269 |
| ENSG000001 | 3.236995 | 2.468363 | 0.3218   | 0.78765  | 0.84816  | CTC-268N1 chr17  | - | 35402760 | 35410075 | 718  |
| ENSG000001 | 16.53591 | 11.5786  | 0.48631  | 0.3757   | 0.47975  | RP1-266L2 chr6   | + | 1.7E+08  | 1.7E+08  | 1630 |
| ENSG000001 | 4.834872 | 11.28475 | -1.1614  | 0.17131  | 0.25375  | AC005546. chr19  | + | 13242385 | 13243224 | 391  |
| ENSG000001 | 0.342542 | 1.698704 | -1.6607  | 0.28969  | 0.39119  | RP11-173A chr18  | + | 59913043 | 59914645 | 1603 |
| ENSG000001 | 0.290301 | 0.297015 | -0.00202 | 0.99909  | NA       | RP11-567N chr18  | - | 77462721 | 77463651 | 474  |
| ENSG000001 | 0.632843 | 39.51713 | -5.4148  | 9.34E-09 | 3.98E-08 | CTB-171A8 chr19  | - | 45135500 | 45222031 | 829  |
| ENSG000001 | 9.06779  | 25.27277 | -1.4276  | 0.046284 | 0.083193 | LINC00663 chr19  | - | 19868175 | 19887232 | 2546 |
| ENSG000001 | 0.36308  | 2.027273 | -1.8576  | 0.23341  | 0.32704  | RP11-1058 chr18  | - | 46489321 | 46490311 | 352  |
| ENSG000001 | 1.068702 | 0.937167 | 0.097081 | 0.9507   | 0.96919  | AC006116. chr19  | - | 56831159 | 56833679 | 2171 |
| ENSG000001 | 0.290301 | 0.357707 | -0.00203 | 0.99908  | NA       | SLC25A6P4 chr18  | + | 77835609 | 77836161 | 553  |
| ENSG000001 | 3.092251 | 5.118803 | -0.69896 | 0.47262  | 0.57724  | CTC-448F2 chr19  | + | 30528330 | 30529063 | 734  |
| ENSG000001 | 1.576526 | 0.297015 | 1.5836   | 0.31987  | NA       | RP1-161P9 chr17  | - | 34084218 | 34085344 | 480  |
| ENSG000001 | 4.201215 | 3.319731 | 0.32265  | 0.73757  | 0.80653  | CTC-325H2 chr19  | + | 9455460  | 9456574  | 1115 |
| ENSG000001 | 0.975385 | 6.116663 | -2.344   | 0.0361   | 0.067003 | CTC-548K1 chr19  | - | 14416270 | 14481008 | 573  |
| ENSG000001 | 4.242291 | 28.73074 | -2.6708  | 6.90E-06 | 2.26E-05 | CTD-3064F chr19  | - | 37988063 | 37997948 | 670  |
| ENSG000001 | 2.375464 | 4.692283 | -0.91143 | 0.3585   | 0.46278  | RP11-798G chr17  | + | 43608943 | 43611204 | 2262 |
| ENSG000001 | 5.040416 | 1.713273 | 1.4284   | 0.1874   | 0.27341  | RP11-15A1 chr19  | - | 44501048 | 44506988 | 2550 |
| ENSG000001 | 0.342542 | 0        | 0.4146   | 0.81455  | NA       | CTC-499B1 chr19  | - | 11836776 | 11841598 | 491  |
| ENSG000001 | 4.729577 | 9.756842 | -0.96625 | 0.20081  | 0.28951  | AC005943. chr19  | - | 1581789  | 1582322  | 534  |
| ENSG000001 | 0.580602 | 1.280305 | -0.74494 | 0.65331  | NA       | AC006273. chr19  | + | 786650   | 787037   | 388  |
| ENSG000001 | 0.290301 | 0        | 0.4146   | 0.81455  | NA       | CTB-70G10 chr19  | - | 28785000 | 28804407 | 575  |
| ENSG000001 | 68.5372  | 32.45189 | 1.0773   | 0.00117  | 0.002873 | CTD-2085J. chr19 | - | 33366831 | 33369327 | 495  |
| ENSG000001 | 0.580602 | 0.951736 | -0.43779 | 0.79667  | NA       | AC006116. chr19  | - | 56853801 | 56854788 | 988  |
| ENSG000001 | 0.653381 | 4.752975 | -2.4359  | 0.047938 | 0.085782 | AC005775. chr19  | - | 490046   | 507813   | 830  |
| ENSG000001 | 13.44447 | 2.713549 | 2.1761   | 0.01101  | 0.02293  | RP11-332F chr17  | + | 59460146 | 59462041 | 716  |
| ENSG000001 | 4.023955 | 2.338857 | 0.73394  | 0.48588  | 0.58984  | CTD-3234P chr19  | + | 37119695 | 37121092 | 550  |
| ENSG000001 | 4.119877 | 5.317866 | -0.35411 | 0.70918  | 0.78392  | CTC-215O4 chr19  | - | 11121593 | 11126687 | 366  |
| ENSG000001 | 27.74868 | 29.04312 | -0.07029 | 0.88063  | 0.91673  | CTC-479C5 chr16  | + | 67903863 | 67906470 | 2608 |
| ENSG000001 | 2.07579  | 1.531196 | 0.31317  | 0.83139  | 0.88112  | AC104532. chr19  | + | 5899906  | 5901522  | 341  |
| ENSG000001 | 1.068702 | 2.514486 | -1.0243  | 0.4743   | 0.57889  | RP11-378E chr17  | + | 35743821 | 35744861 | 735  |
| ENSG000001 | 8.3193   | 0.640152 | 3.2237   | 0.004205 | 0.009464 | MRPL37P1 chr18   | + | 56357588 | 56359385 | 1337 |
| ENSG000001 | 13.00861 | 9.854793 | 0.38053  | 0.52606  | 0.62788  | RP11-799C chr17  | - | 33558469 | 33569982 | 2658 |
| ENSG000001 | 0.995923 | 3.466222 | -1.5675  | 0.20244  | 0.29126  | CTD-2623N chr19  | + | 9904297  | 9912977  | 408  |
| ENSG000001 | 0.995923 | 0        | 1.4959   | 0.39264  | NA       | RP11-701F chr18  | - | 13644814 | 13645684 | 538  |
| ENSG000001 | 0        | 4.120944 | -3.5578  | 0.015435 | 0.031191 | RP11-820I. chr18 | - | 11993987 | 11994937 | 528  |
| ENSG000001 | 0.653381 | 0.343138 | 0.51863  | 0.76794  | NA       | RP11-49K2 chr18  | - | 44603732 | 44617651 | 200  |
| ENSG000001 | 0.290301 | 0.297015 | -0.00202 | 0.99909  | NA       | AC006126. chr19  | + | 45690646 | 45720191 | 540  |
| ENSG000001 | 0        | 0.297015 | -0.41864 | 0.81278  | NA       | AC005786. chr19  | - | 3568118  | 3568271  | 154  |
| ENSG000001 | 0.342542 | 0        | 0.4146   | 0.81455  | NA       | FAM106DP chr17   | + | 58250683 | 58251183 | 501  |
| ENSG000001 | 0        | 14.52123 | -5.3802  | 2.42E-05 | 7.41E-05 | FXVD1 chr19      | + | 35629712 | 35634013 | 959  |
| ENSG000001 | 2.572449 | 3.587607 | -0.43279 | 0.66317  | 0.7466   | RP11-712P chr18  | + | 33175865 | 33177563 | 1699 |
| ENSG000001 | 18.36166 | 16.76126 | 0.1364   | 0.78264  | 0.84429  | AARSD1 chr17     | - | 41102543 | 41116515 | 1322 |
| ENSG000001 | 1.919068 | 0        | 2.4151   | 0.13977  | 0.21349  | RP11-116C chr18  | + | 43226118 | 43227895 | 1778 |
| ENSG000001 | 3.869838 | 2.681995 | 0.49366  | 0.63475  | 0.72324  | RP11-773F chr18  | - | 12984693 | 12991172 | 474  |

|            |          |          |          |          |          |                  |   |          |          |      |
|------------|----------|----------|----------|----------|----------|------------------|---|----------|----------|------|
| ENSG000001 | 7.987109 | 43.35637 | -2.3694  | 2.75E-06 | 9.41E-06 | RP11-806F chr17  | + | 76356534 | 76369992 | 777  |
| ENSG000001 | 0        | 0.343138 | -0.41864 | 0.81278  | NA       | OR4F8P chr19     | - | 156279   | 157215   | 937  |
| ENSG000001 | 0        | 16.53393 | -5.6455  | 3.18E-06 | 1.08E-05 | AC015849. chr17  | - | 34239639 | 34245014 | 5376 |
| ENSG000001 | 0.580602 | 0.297015 | 0.36801  | 0.83644  | NA       | CTD-3162L chr19  | + | 36868930 | 36869734 | 566  |
| ENSG000001 | 1.265686 | 6.272018 | -2.0225  | 0.071466 | 0.12125  | CTC-425F1. chr19 | + | 13041336 | 13044110 | 241  |
| ENSG000001 | 1.919068 | 21.68429 | -3.3031  | 1.58E-05 | 4.96E-05 | AC079466. chr19  | + | 29097595 | 29106136 | 4453 |
| ENSG000001 | 1.939605 | 1.248751 | 0.50699  | 0.70611  | 0.78157  | RP11-552F chr17  | - | 73814896 | 73816136 | 890  |
| ENSG000001 | 7.61547  | 9.453379 | -0.3088  | 0.64629  | 0.7328   | CTC-232P5 chr19  | + | 5978414  | 6020374  | 639  |
| ENSG000001 | 1.338465 | 0.686276 | 0.71882  | 0.64669  | 0.73297  | RP11-354P chr17  | - | 28471080 | 28471808 | 360  |
| ENSG000001 | 0        | 1.40169  | -1.7271  | 0.32809  | NA       | AC004528. chr19  | - | 999795   | 1002756  | 641  |
| ENSG000001 | 16.94267 | 6.800523 | 1.2522   | 0.057473 | 0.10052  | RP4-657D1 chr1   | + | 52259637 | 52264824 | 1288 |
| ENSG000001 | 0.290301 | 0        | 0.4146   | 0.81455  | NA       | RP11-127I. chr16 | - | 4780116  | 4802566  | 556  |
| ENSG000001 | 1.939605 | 0        | 2.4257   | 0.13778  | 0.21116  | RP11-703I. chr18 | - | 12040100 | 12040299 | 200  |
| ENSG000001 | 4.584833 | 3.556053 | 0.33055  | 0.7258   | 0.79716  | RP11-936I. chr17 | - | 75369900 | 75373318 | 3419 |
| ENSG000001 | 0.290301 | 15.99247 | -4.7999  | 4.13E-05 | 0.000123 | AC015849. chr17  | - | 34220711 | 34238027 | 5473 |
| ENSG000001 | 0        | 0.700845 | -0.87835 | 0.62047  | NA       | RP11-27G2 chr18  | + | 57126304 | 57132914 | 487  |
| ENSG000001 | 26.19547 | 32.13224 | -0.29832 | 0.43283  | 0.53826  | RP11-242C chr17  | - | 41316200 | 41322420 | 1191 |
| ENSG000001 | 6.484176 | 3.480792 | 0.80219  | 0.37363  | 0.47802  | CTC-507E2. chr17 | - | 34006411 | 34011922 | 3329 |
| ENSG000001 | 0.342542 | 0.297015 | -0.00202 | 0.99909  | NA       | CTD-2659N chr19  | - | 12836331 | 12836700 | 97   |
| ENSG000001 | 0        | 0.297015 | -0.41864 | 0.81278  | NA       | AC002984. chr19  | - | 36664308 | 36664755 | 448  |
| ENSG000001 | 1.814586 | 1.577319 | 0.16857  | 0.90715  | 0.93617  | CTC-448F2. chr19 | - | 30519648 | 30520823 | 1176 |
| ENSG000001 | 4.637074 | 2.679579 | 0.71885  | 0.49526  | 0.59911  | RP11-120N chr17  | + | 66409783 | 66489811 | 773  |
| ENSG000001 | 25.25953 | 5.300881 | 2.1994   | 0.000123 | 0.000347 | RP11-108P chr18  | + | 56419380 | 56421709 | 2330 |
| ENSG000001 | 1.971308 | 0.891044 | 0.85363  | 0.56108  | 0.65963  | CTB-50L17. chr19 | - | 4457959  | 4471490  | 478  |
| ENSG000001 | 13.27838 | 0        | 5.356    | 1.05E-05 | 3.35E-05 | CTD-2171N chr18  | - | 52773135 | 52791537 | 3067 |
| ENSG000001 | 0.342542 | 0.594029 | -0.38792 | 0.8278   | NA       | RP11-800A chr18  | - | 77100258 | 77103972 | 502  |
| ENSG000001 | 6.773664 | 4.152498 | 0.65289  | 0.44485  | 0.5504   | RP11-75C1 chr17  | - | 75465244 | 75468852 | 1132 |
| ENSG000001 | 3.76617  | 2.667426 | 0.4385   | 0.6775   | 0.75844  | AC010525. chr19  | + | 56207681 | 56208795 | 1115 |
| ENSG000001 | 458.9154 | 114.0644 | 2.0051   | 6.15E-38 | 1.02E-36 | LRRC37A1f chr17  | - | 66121918 | 66148609 | 3725 |
| ENSG000001 | 0        | 0.297015 | -0.41864 | 0.81278  | NA       | CTD-2588C chr19  | - | 34917017 | 34919178 | 442  |
| ENSG000001 | 45.57538 | 50.90063 | -0.16399 | 0.61359  | 0.70567  | AC015849. chr17  | - | 34143721 | 34157297 | 488  |
| ENSG000001 | 0.342542 | 1.309443 | -1.2504  | 0.45877  | NA       | RP11-92C4 chr9   | - | 1.02E+08 | 1.02E+08 | 885  |
| ENSG000001 | 0        | 0.343138 | -0.41864 | 0.81278  | NA       | AC011524. chr19  | - | 29440344 | 29441107 | 240  |
| ENSG000001 | 0        | 2.171348 | -2.344   | 0.17175  | 0.25427  | RP11-619L chr18  | + | 53119764 | 53150171 | 396  |
| ENSG000001 | 3.298608 | 16.54763 | -2.2339  | 0.001477 | 0.003571 | AC092299. chr19  | + | 197955   | 200775   | 381  |
| ENSG000001 | 2.032922 | 0.937167 | 0.8414   | 0.56845  | 0.66579  | CTD-2562J chr19  | - | 16297087 | 16300269 | 578  |
| ENSG000001 | 1.08924  | 0        | 1.1858   | 0.50299  | NA       | RP11-384C chr2   | - | 2.23E+08 | 2.23E+08 | 1412 |
| ENSG000001 | 0.580602 | 1.545765 | -0.94378 | 0.56695  | 0.6646   | AC005559. chr19  | - | 590277   | 591603   | 1327 |
| ENSG000001 | 0.290301 | 0.997859 | -1.0217  | 0.53916  | NA       | RP11-58G1 chr18  | - | 34481909 | 34503777 | 688  |
| ENSG000001 | 6.14082  | 13.02642 | -1.0436  | 0.10391  | 0.16666  | RP11-35G9 chr18  | + | 55297534 | 55405276 | 1976 |
| ENSG000001 | 76.20556 | 573.6977 | -2.9061  | 4.23E-45 | 8.45E-44 | ZNF850 chr19     | - | 37205285 | 37263727 | 7714 |
| ENSG000001 | 0.705622 | 2.292733 | -1.4312  | 0.29668  | 0.39869  | CTD-3193K chr17  | + | 40831981 | 40834038 | 542  |
| ENSG000001 | 0.705622 | 1.623443 | -0.93459 | 0.54345  | 0.64389  | AC005757. chr19  | - | 45639251 | 45640235 | 472  |
| ENSG000001 | 3.371387 | 2.855208 | 0.19006  | 0.86746  | 0.90758  | AC006126. chr19  | - | 45741890 | 45748628 | 460  |
| ENSG000001 | 0.685084 | 0        | 0.85004  | 0.63064  | NA       | RP11-566K chr16  | + | 89972565 | 89984641 | 559  |
| ENSG000001 | 3.725094 | 2.171348 | 0.65085  | 0.57472  | 0.67168  | AC002398. chr19  | - | 36260046 | 36261930 | 427  |
| ENSG000001 | 0.36308  | 26.28265 | -5.4787  | 7.06E-07 | 2.55E-06 | CTD-3162L chr19  | + | 36795482 | 36803570 | 2305 |
| ENSG000001 | 0        | 0.297015 | -0.41864 | 0.81278  | NA       | CTD-2540B chr19  | + | 33668962 | 33669557 | 375  |
| ENSG000001 | 0        | 31.98179 | -6.5113  | 4.32E-08 | 1.74E-07 | RP11-486P chr7   | + | 20135760 | 20170098 | 670  |
| ENSG000001 | 0.342542 | 0        | 0.4146   | 0.81455  | NA       | AC005336. chr19  | - | 16021393 | 16022634 | 1242 |
| ENSG000001 | 0.653381 | 0        | 0.82678  | 0.64037  | NA       | RP11-456C chr18  | + | 53709366 | 53763550 | 620  |
| ENSG000001 | 22.324   | 6.610324 | 1.7143   | 0.002849 | 0.00659  | RP11-15A1 chr19  | - | 44395956 | 44405957 | 2193 |
| ENSG000001 | 3.953782 | 4.083685 | -0.03341 | 0.97626  | 0.9866   | UQCR11 chr19     | - | 1578011  | 1605483  | 1335 |
| ENSG000001 | 4.264621 | 5.675573 | -0.37824 | 0.67632  | 0.7576   | PTGES3L chr17    | - | 41120105 | 41132545 | 1905 |
| ENSG000001 | 0        | 0.343138 | -0.41864 | 0.81278  | NA       | AC006130. chr19  | - | 2847225  | 2858714  | 555  |
| ENSG000001 | 0.72616  | 1.387121 | -0.65389 | 0.69349  | 0.77146  | RP1-212Gf chrX   | + | 47518232 | 47519776 | 1525 |
| ENSG000001 | 3.516131 | 0.715414 | 1.9347   | 0.15326  | 0.23122  | CTD-2246P chr17  | + | 74795126 | 74802035 | 2270 |
| ENSG000001 | 0.653381 | 2.010288 | -1.2874  | 0.36461  | 0.469    | CTB-75G16 chr17  | + | 34990527 | 34991156 | 630  |
| ENSG000001 | 0        | 6.809387 | -4.3308  | 0.001307 | 0.003184 | RP11-64C1 chr18  | + | 12288307 | 12291487 | 733  |
| ENSG000001 | 0        | 2.80338  | -2.6928  | 0.10826  | 0.17265  | RP11-10K1 chr16  | + | 5148740  | 5192596  | 531  |
| ENSG000001 | 0.995923 | 0        | 1.4959   | 0.39264  | NA       | AC005256. chr19  | + | 1748055  | 1748744  | 415  |
| ENSG000001 | 0        | 0.686276 | -0.84936 | 0.6309   | NA       | CCDC58P3 chr18   | + | 12211377 | 12211806 | 430  |
| ENSG000001 | 83.13709 | 84.35515 | -0.01583 | 0.95024  | 0.96892  | ASB16-AS1 chr17  | - | 42253341 | 42264085 | 2213 |
| ENSG000001 | 3.76617  | 12.77882 | -1.6939  | 0.037749 | 0.069704 | CTC-510F1. chr19 | + | 11314304 | 11326844 | 569  |
| ENSG000001 | 0        | 0.700845 | -0.87835 | 0.62047  | NA       | AC079005. chr17  | + | 58887526 | 58888823 | 1298 |

|            |          |          |          |          |          |                   |   |          |          |      |
|------------|----------|----------|----------|----------|----------|-------------------|---|----------|----------|------|
| ENSG000001 | 0        | 0.343138 | -0.41864 | 0.81278  | NA       | RP11-115N chr18   | + | 39669276 | 39669716 | 441  |
| ENSG000001 | 0.653381 | 0        | 0.82678  | 0.64037  | NA       | CTC-499B1 chr19   | - | 11952056 | 11953254 | 442  |
| ENSG000001 | 3.475869 | 1.294874 | 1.2124   | 0.30761  | 0.40932  | CTBP2P7 chr19     | - | 36987818 | 36989061 | 1244 |
| ENSG000001 | 0        | 0.357707 | -0.41864 | 0.81278  | NA       | CTB-25B13 chr19   | + | 1508381  | 1508962  | 450  |
| ENSG000001 | 3.568372 | 6.846646 | -0.8831  | 0.28733  | 0.38898  | CTD-2105E chr19   | - | 55911113 | 55911787 | 675  |
| ENSG000001 | 5.704962 | 13.51921 | -1.1615  | 0.13584  | 0.20899  | CTD-2537I chr19   | + | 56181998 | 56183435 | 802  |
| ENSG000001 | 0.290301 | 0.343138 | -0.00202 | 0.99909  | NA       | RP11-325K chr18   | - | 58297400 | 58569959 | 558  |
| ENSG000001 | 163.7025 | 428.4276 | -1.3802  | 8.20E-16 | 5.62E-15 | ILF3-AS1 chr19    | - | 10762538 | 10764520 | 1983 |
| ENSG000001 | 4.781817 | 14.089   | -1.4731  | 0.033781 | 0.063112 | RP11-686C chr17   | - | 33736621 | 33737247 | 627  |
| ENSG000001 | 83.31256 | 85.89056 | -0.04629 | 0.8638   | 0.90507  | CTD-3116E chr19   | + | 9731967  | 9756572  | 2461 |
| ENSG000001 | 0.290301 | 1.012429 | -0.95336 | 0.58114  | NA       | AC011526. chr19   | - | 41960074 | 42006559 | 3472 |
| ENSG000001 | 5.000153 | 5.150358 | -0.0579  | 0.94555  | 0.96514  | RP11-861E chr18   | + | 12432896 | 12437634 | 168  |
| ENSG000001 | 0.36308  | 0        | 0.4146   | 0.81455  | NA       | AC008993. chr19   | + | 68403    | 69146    | 744  |
| ENSG000001 | 0        | 0.297015 | -0.41864 | 0.81278  | NA       | AF038458. chr19   | - | 36448023 | 36448284 | 262  |
| ENSG000001 | 4.512054 | 6.099678 | -0.4086  | 0.63939  | 0.72686  | CTB-129P6 chr19   | - | 45453301 | 45457264 | 361  |
| ENSG000001 | 0.290301 | 2.872193 | -2.3798  | 0.10788  | 0.17217  | CTD-3064F chr19   | - | 37994808 | 37995367 | 560  |
| ENSG000001 | 3.10081  | 1.966581 | 0.57691  | 0.64196  | 0.72893  | AC010525. chr19   | - | 56205484 | 56205924 | 441  |
| ENSG000001 | 1.338465 | 4.648575 | -1.6048  | 0.15057  | 0.22784  | RPL10P15 chr19    | + | 9930817  | 9931131  | 315  |
| ENSG000001 | 1.649304 | 1.698704 | -0.02525 | 0.98381  | 0.99083  | CTD-2020K chr17   | - | 43268298 | 43299589 | 2238 |
| ENSG000001 | 1.233984 | 1.012429 | 0.23966  | 0.87666  | 0.91427  | AC004490. chr19   | - | 2212028  | 2215564  | 2738 |
| ENSG000001 | 0.36308  | 0.715414 | -0.51558 | 0.77246  | NA       | CTD-2357A chr17   | - | 76613471 | 76628139 | 877  |
| ENSG000001 | 21.45391 | 14.89505 | 0.51594  | 0.28453  | 0.38589  | RP11-795F chr18   | + | 77794346 | 77854968 | 2218 |
| ENSG000001 | 7.261763 | 12.61205 | -0.77174 | 0.21183  | 0.30224  | RNF157-AS chr17   | + | 74136637 | 74150731 | 1812 |
| ENSG000001 | 0        | 2.139794 | -2.2809  | 0.18733  | 0.27337  | CTD-2540B chr19   | + | 33795942 | 33800293 | 404  |
| ENSG000001 | 2.531373 | 0.997859 | 1.1231   | 0.40526  | 0.51012  | RP11-332F chr17   | - | 59439029 | 59477604 | 470  |
| ENSG000001 | 16.40828 | 0        | 5.604    | 5.10E-06 | 1.69E-05 | RP11-53B2 chr18   | - | 13514519 | 13522887 | 4745 |
| ENSG000001 | 6.960297 | 0.343138 | 3.5992   | 0.005285 | 0.011722 | RP11-15K2 chr17   | - | 59537585 | 59540745 | 552  |
| ENSG000001 | 0.290301 | 0.640152 | -0.50256 | 0.77558  | NA       | AC005954. chr19   | - | 3754618  | 3756657  | 337  |
| ENSG000001 | 13.01717 | 14.71867 | -0.1775  | 0.78449  | 0.84576  | CTB-31020 chr19   | + | 1860249  | 1862018  | 607  |
| ENSG000001 | 0        | 0.343138 | -0.41864 | 0.81278  | NA       | CTD-3162L chr19   | + | 36912438 | 36913436 | 999  |
| ENSG000001 | 0.36308  | 0        | 0.4146   | 0.81455  | NA       | AC067968. chr19   | - | 44527756 | 44529414 | 566  |
| ENSG000001 | 0        | 1.788535 | -1.712   | 0.33711  | NA       | CTC-548K1 chr19   | + | 14444555 | 14454725 | 765  |
| ENSG000001 | 0.36308  | 5.271743 | -3.2296  | 0.014706 | 0.029841 | CTC-550B1 chr19   | - | 55538961 | 55565296 | 1271 |
| ENSG000001 | 2.604151 | 11.67972 | -2.0341  | 0.012303 | 0.025378 | RP11-411B chr18   | + | 14089934 | 14091018 | 1085 |
| ENSG000001 | 12.61302 | 23.98589 | -0.90259 | 0.063817 | 0.11011  | CTD-2528L chr19   | - | 38219487 | 38221544 | 1360 |
| ENSG000001 | 1.027626 | 3.685559 | -1.4176  | 0.35002  | 0.45435  | AC005391. chr19   | - | 928257   | 928817   | 330  |
| ENSG000001 | 1.774324 | 2.041842 | -0.1887  | 0.88476  | 0.91958  | RP11-1072 chr17   | - | 42751057 | 42753625 | 2569 |
| ENSG000001 | 51.63405 | 37.71624 | 0.44532  | 0.38271  | 0.48685  | AC005943. chr19   | - | 1573595  | 1575474  | 1880 |
| ENSG000001 | 3.516131 | 1.029414 | 1.4922   | 0.2633   | 0.36145  | AC084219. chr19   | - | 44598503 | 44603864 | 2139 |
| ENSG000001 | 0        | 2.543625 | -2.8094  | 0.076886 | 0.12916  | RP11-527L chr17   | - | 41991801 | 42000369 | 725  |
| ENSG000001 | 1.265686 | 3.616746 | -1.2856  | 0.29411  | 0.39611  | RP11-687F chr18   | - | 44383187 | 44383857 | 671  |
| ENSG000001 | 62.25685 | 69.40021 | -0.15667 | 0.55114  | 0.65079  | CTB-5506. chr19   | + | 14247991 | 14282079 | 2861 |
| ENSG000001 | 0.632843 | 1.995719 | -1.3071  | 0.35187  | 0.456    | CTC-260F2i chr19  | + | 19615087 | 19615463 | 377  |
| ENSG000001 | 0        | 2.087966 | -2.2641  | 0.18897  | 0.27528  | RP11-397A chr18   | + | 53484398 | 53486990 | 2593 |
| ENSG000001 | 0.290301 | 4.210775 | -2.8838  | 0.042806 | 0.077736 | CTC-510F1. chr19  | - | 11411453 | 11435117 | 655  |
| ENSG000001 | 4.00423  | 9.355427 | -1.1712  | 0.12245  | 0.19213  | CTB-179K2 chr19   | - | 45588587 | 45593632 | 618  |
| ENSG000001 | 0.995923 | 0        | 1.4959   | 0.39264  | NA       | RP11-756J chr18   | - | 13234944 | 13236469 | 228  |
| ENSG000001 | 0.36308  | 0.640152 | -0.51156 | 0.77091  | NA       | CTC-260F2i chr19  | - | 19698901 | 19699225 | 325  |
| ENSG000001 | 0        | 0.594029 | -0.81444 | 0.64499  | NA       | AC007136. chr19   | - | 2030852  | 2031050  | 199  |
| ENSG000001 | 0        | 0.343138 | -0.41864 | 0.81278  | NA       | RP11-382N chr16   | - | 5339201  | 5339410  | 210  |
| ENSG000001 | 3.734467 | 7.6106   | -0.98633 | 0.2327   | 0.32625  | AC010525. chr19   | + | 56207251 | 56209196 | 537  |
| ENSG000001 | 1.370168 | 0.343138 | 1.1145   | 0.52721  | NA       | PTP4A2P1 chr17    | + | 40685550 | 40686027 | 478  |
| ENSG000001 | 2.448243 | 5.788094 | -1.1663  | 0.25482  | 0.35198  | RP11-15A1 chr19   | + | 44406153 | 44430697 | 517  |
| ENSG000001 | 0.632843 | 0.594029 | 0.039277 | 0.98194  | NA       | AC006116. chr19   | + | 56898781 | 56899793 | 452  |
| ENSG000001 | 0.72616  | 0        | 0.85004  | 0.63064  | NA       | RP11-116C chr18   | - | 43249332 | 43327180 | 547  |
| ENSG000001 | 47.24522 | 185.9636 | -1.9682  | 2.88E-16 | 2.02E-15 | RP1-193H1 chr17   | + | 67547499 | 67550002 | 2504 |
| ENSG000001 | 1.45232  | 0        | 1.4544   | 0.41354  | NA       | hsa-mir-21. chr17 | - | 1953565  | 1953674  | 110  |
| ENSG000001 | 0        | 0.297015 | -0.41864 | 0.81278  | NA       | RP11-813F chr18   | - | 47496091 | 47497327 | 375  |
| ENSG000001 | 4.49233  | 13.13807 | -1.4819  | 0.075156 | 0.12671  | CTC-429L1. chr19  | - | 10601015 | 10601676 | 357  |
| ENSG000001 | 0.870904 | 4.120944 | -1.815   | 0.16628  | 0.24748  | RP11-798C chr17   | + | 43623170 | 43640596 | 630  |
| ENSG000001 | 6.826718 | 6.313309 | 0.094599 | 0.90257  | 0.93263  | RP11-861E chr18   | + | 12438889 | 12448204 | 4910 |
| ENSG000001 | 1.048164 | 0        | 1.348    | 0.44949  | NA       | hsa-mir-13. chr17 | - | 1953202  | 1953302  | 101  |
| ENSG000001 | 17.51211 | 5.011988 | 1.6945   | 0.017001 | 0.034046 | AC005624. chr19   | - | 2458933  | 2462183  | 371  |
| ENSG000001 | 0.290301 | 0.654722 | -0.51764 | 0.76892  | NA       | RP11-264B chr17   | - | 59111997 | 59147483 | 429  |
| ENSG000001 | 0        | 0.937167 | -1.2408  | 0.48662  | NA       | CTD-2659N chr19   | - | 12895353 | 12895915 | 388  |

|            |          |          |          |          |          |                  |   |          |          |      |
|------------|----------|----------|----------|----------|----------|------------------|---|----------|----------|------|
| ENSG000001 | 2.003011 | 8.357568 | -1.8814  | 0.062721 | 0.10842  | AC007773. chr19  | - | 32880956 | 32896445 | 951  |
| ENSG000001 | 0        | 0.297015 | -0.41864 | 0.81278  | NA       | CTC-265F1. chr19 | + | 2631952  | 2632847  | 454  |
| ENSG000001 | 18.84976 | 12.62259 | 0.55352  | 0.27782  | 0.37819  | AC010642. chr19  | + | 58790332 | 58826563 | 4227 |
| ENSG000001 | 0        | 0.357707 | -0.41864 | 0.81278  | NA       | AC005336. chr19  | - | 16013133 | 16014048 | 916  |
| ENSG000001 | 6.692325 | 2.947455 | 1.0949   | 0.21308  | 0.30368  | AC010504. chr19  | - | 34839261 | 34850317 | 585  |
| ENSG000001 | 0        | 0.654722 | -0.83442 | 0.63731  | NA       | CTC-260E6. chr19 | - | 20242703 | 20262717 | 283  |
| ENSG000001 | 3.527296 | 27.37363 | -2.8002  | 0.000195 | 0.000536 | CTD-2132N. chr17 | - | 40192731 | 40195135 | 761  |
| ENSG000001 | 1.576526 | 1.623443 | -0.02613 | 0.98452  | 0.99109  | RP11-194N. chr17 | + | 40647885 | 40648568 | 684  |
| ENSG000001 | 0.290301 | 0        | 0.4146   | 0.81455  | NA       | AC005498. chr19  | + | 57046668 | 57047132 | 465  |
| ENSG000001 | 4.119877 | 6.225895 | -0.56353 | 0.56511  | 0.66302  | RP11-126C. chr18 | - | 56337712 | 56339109 | 738  |
| ENSG000001 | 1.265686 | 1.591889 | -0.26775 | 0.8454   | 0.89157  | IER3IP1. chr18   | - | 44661027 | 44702652 | 561  |
| ENSG000001 | 0        | 0.594029 | -0.81444 | 0.64499  | NA       | RP11-376N. chr17 | - | 41127706 | 41129292 | 1587 |
| ENSG000001 | 0.36308  | 0.343138 | -0.0021  | 0.99905  | NA       | AC005786. chr19  | + | 3558013  | 3558484  | 369  |
| ENSG000001 | 12.94619 | 6.970447 | 0.87443  | 0.15803  | 0.23738  | RP11-618P. chr19 | + | 34873966 | 34893064 | 425  |
| ENSG000001 | 8.040164 | 5.334851 | 0.5569   | 0.4912   | 0.59522  | AC069278. chr19  | - | 44978645 | 44979403 | 759  |
| ENSG000001 | 4.906837 | 61.69662 | -3.5787  | 1.51E-13 | 9.03E-13 | AC005307. chr19  | - | 28926295 | 29218684 | 3113 |
| ENSG000001 | 34.05837 | 51.09157 | -0.58437 | 0.060726 | 0.10549  | CTB-31020. chr19 | + | 1822088  | 1824544  | 2400 |
| ENSG000001 | 0        | 0.594029 | -0.81444 | 0.64499  | NA       | CTD-2085J. chr19 | - | 33315048 | 33315411 | 364  |
| ENSG000001 | 7.427045 | 5.378559 | 0.46041  | 0.54004  | 0.6406   | RP11-798C. chr17 | - | 43627147 | 43636104 | 826  |
| ENSG000001 | 13.984   | 13.06771 | 0.086164 | 0.88292  | 0.91846  | CTD-2319I. chr17 | - | 58203896 | 58213005 | 1023 |
| ENSG000001 | 9.410332 | 20.5966  | -1.1181  | 0.052539 | 0.092845 | RP11-973F. chr18 | - | 12670425 | 12671144 | 720  |
| ENSG000001 | 12.4298  | 7.060278 | 0.7889   | 0.23198  | 0.32553  | AC139100. chr18  | + | 77941563 | 77960875 | 2035 |
| ENSG000001 | 1.213446 | 0.715414 | 0.55281  | 0.74025  | 0.80889  | RP11-209N. chr17 | - | 41795682 | 41797804 | 2123 |
| ENSG000001 | 5.467715 | 7.039261 | -0.37182 | 0.65034  | 0.73612  | CTD-2162K. chr19 | + | 37288420 | 37319017 | 850  |
| ENSG000001 | 1.286224 | 3.677438 | -1.3084  | 0.26582  | 0.36456  | CTB-50L17. chr19 | - | 4429686  | 4430931  | 569  |
| ENSG000001 | 3.983692 | 0        | 3.5462   | 0.014052 | 0.028626 | RP11-1151. chr18 | + | 56202647 | 56205784 | 2553 |
| ENSG000001 | 0        | 0.937167 | -1.2408  | 0.48662  | NA       | CTD-2008P. chr17 | - | 26559616 | 26562307 | 2692 |
| ENSG000001 | 0.72616  | 12.30859 | -3.7332  | 0.000518 | 0.001342 | CTD-2162K. chr19 | + | 37264055 | 37267980 | 1850 |
| ENSG000001 | 0.290301 | 0.594029 | -0.38058 | 0.83094  | NA       | RP11-75C1. chr17 | + | 75465150 | 75467127 | 768  |
| ENSG000001 | 1.991846 | 1.638012 | 0.23662  | 0.84339  | 0.89009  | CTC-459F4. chr19 | + | 28294446 | 28294968 | 523  |
| ENSG000001 | 6.544976 | 19.51777 | -1.5292  | 0.013539 | 0.027694 | CTC-550B1. chr19 | + | 55517561 | 55559454 | 786  |
| ENSG000001 | 0.36308  | 2.474811 | -1.9734  | 0.22066  | 0.31266  | AC007204. chr19  | + | 20011777 | 20074273 | 763  |
| ENSG000001 | 38.63122 | 44.00297 | -0.18123 | 0.62316  | 0.71356  | AC139100. chr18  | + | 77905807 | 77936315 | 3333 |
| ENSG000001 | 2.831047 | 7.942457 | -1.3358  | 0.20264  | 0.29147  | RP5-1052I. chr18 | + | 87595448 | 87634881 | 3368 |
| ENSG000001 | 0.342542 | 0.654722 | -0.52406 | 0.76557  | NA       | CTC-543D1. chr19 | + | 9609354  | 9620755  | 656  |
| ENSG000001 | 10.3849  | 5.142237 | 0.98444  | 0.20683  | 0.29652  | CTD-2006C. chr19 | + | 12050774 | 12064196 | 468  |
| ENSG000001 | 0.580602 | 0        | 0.8036   | 0.6494   | NA       | CTD-2562J. chr19 | - | 16394170 | 16435325 | 593  |
| ENSG000001 | 0.975385 | 2.575179 | -1.1698  | 0.37551  | 0.47961  | CTD-2342J. chr19 | - | 11478799 | 11485611 | 682  |
| ENSG000001 | 30.46865 | 39.87    | -0.38073 | 0.45415  | 0.55948  | MAP3K14-7. chr17 | + | 43325292 | 43345997 | 2475 |
| ENSG000001 | 41.59234 | 9.790812 | 2.0461   | 0.000107 | 0.000303 | RP11-879F. chr18 | - | 59252979 | 59274149 | 735  |
| ENSG000001 | 156.7104 | 0.654722 | 7.3546   | 1.10E-18 | 8.64E-18 | RP11-332F. chr17 | - | 59470817 | 59488916 | 861  |
| ENSG000001 | 1.213446 | 1.073121 | 0.15695  | 0.92394  | 0.9488   | CTB-129P6. chr19 | - | 45385284 | 45394133 | 426  |
| ENSG000001 | 7.250598 | 12.81279 | -0.80159 | 0.23877  | 0.3334   | AC005306. chr19  | + | 1989400  | 1990369  | 661  |
| ENSG000001 | 0.342542 | 22.18681 | -5.2605  | 2.43E-06 | 8.36E-06 | RP11-397A. chr18 | + | 53388294 | 53455992 | 565  |
| ENSG000001 | 0.36308  | 0        | 0.4146   | 0.81455  | NA       | RP5-951N9. chr12 | + | 1494999  | 1496153  | 574  |
| ENSG000001 | 62.48293 | 1.234181 | 5.3185   | 1.86E-13 | 1.11E-12 | RP11-567N. chr18 | + | 77336460 | 77349010 | 4167 |
| ENSG000001 | 1.338465 | 1.606458 | -0.23208 | 0.86574  | 0.90652  | RP13-890F. chr17 | - | 43246172 | 43248951 | 2048 |
| ENSG000001 | 0.36308  | 1.294874 | -1.3442  | 0.40498  | NA       | CTD-2623N. chr19 | - | 9944755  | 9945689  | 750  |
| ENSG000001 | 0.653381 | 0        | 0.82678  | 0.64037  | NA       | RP11-703I. chr18 | - | 12050308 | 12050671 | 364  |
| ENSG000001 | 5.799092 | 1.995719 | 1.4024   | 0.15322  | 0.23117  | RP11-8H2. chr18  | + | 43608272 | 43609795 | 1524 |
| ENSG000001 | 0.290301 | 0.357707 | -0.00203 | 0.99908  | NA       | CTD-2319I. chr17 | - | 58191154 | 58198048 | 569  |
| ENSG000001 | 0.923144 | 3.008147 | -1.4024  | 0.26935  | 0.36835  | CEBPA-AS1. chr19 | + | 33793763 | 33795960 | 2198 |
| ENSG000001 | 0.705622 | 0.686276 | 0.017556 | 0.99188  | NA       | AC006116. chr19  | - | 56823297 | 56823855 | 559  |
| ENSG000001 | 0        | 1.058552 | -1.361   | 0.4451   | NA       | RPL23AP7. chr18  | - | 21289789 | 21290251 | 463  |
| ENSG000001 | 0.923144 | 2.07098  | -0.89793 | 0.52066  | 0.62335  | RP11-178C. chr17 | + | 58042193 | 58074333 | 1603 |
| ENSG000001 | 4.616536 | 3.290593 | 0.45248  | 0.61104  | 0.70344  | AC004637. chr19  | + | 3672580  | 3674293  | 482  |
| ENSG000001 | 0        | 2.307303 | -2.6761  | 0.094365 | 0.15383  | CTD-3113P. chr19 | - | 239145   | 239247   | 103  |
| ENSG000001 | 0        | 0.297015 | -0.41864 | 0.81278  | NA       | AC004510. chr19  | - | 15937855 | 15946663 | 441  |
| ENSG000001 | 7.851738 | 27.77256 | -1.7764  | 0.001032 | 0.002553 | CTD-2630F. chr19 | + | 36980551 | 36981942 | 1392 |
| ENSG000001 | 0.290301 | 0        | 0.4146   | 0.81455  | NA       | RP11-99A1. chr18 | + | 52546688 | 52548040 | 1100 |
| ENSG000001 | 92.33088 | 57.12083 | 0.68886  | 0.060857 | 0.10568  | RP11-142I. chr18 | - | 39047395 | 39212149 | 1710 |
| ENSG000001 | 0.290301 | 0        | 0.4146   | 0.81455  | NA       | RP11-686C. chr17 | - | 33704435 | 33704697 | 263  |
| ENSG000001 | 0.632843 | 0.700845 | -0.06767 | 0.96753  | NA       | RP11-879F. chr18 | - | 59238575 | 59246689 | 604  |
| ENSG000001 | 40.42869 | 27.87709 | 0.51548  | 0.36669  | 0.47131  | CTB-25B13. chr19 | - | 1457664  | 1462764  | 927  |
| ENSG000001 | 0.943682 | 1.387121 | -0.39048 | 0.80001  | 0.85834  | CTD-2528L. chr19 | - | 38184181 | 38184465 | 285  |

|            |          |          |          |          |          |                   |   |          |          |      |
|------------|----------|----------|----------|----------|----------|-------------------|---|----------|----------|------|
| ENSG000001 | 0        | 1.964165 | -2.2052  | 0.20143  | 0.2901   | AC005780. chr19   | - | 28807612 | 28877111 | 583  |
| ENSG000001 | 86.02103 | 165.5525 | -0.94444 | 2.74E-06 | 9.37E-06 | RP11-1094 chr17   | + | 33895139 | 33901811 | 1298 |
| ENSG000001 | 7.49045  | 17.82552 | -1.2108  | 0.036181 | 0.067117 | SCARNA17 chr18    | + | 47340393 | 47377429 | 1615 |
| ENSG000001 | 2.334388 | 0.297015 | 2.1031   | 0.16099  | 0.24101  | SLC25A1P5 chr19   | - | 28296331 | 28297113 | 783  |
| ENSG000001 | 94.92289 | 47.6375  | 0.99081  | 9.34E-05 | 0.000267 | RP11-397A chr18   | - | 53443958 | 53448952 | 4071 |
| ENSG000001 | 5.103821 | 14.04529 | -1.3823  | 0.041301 | 0.075385 | CTD-2008L chr18   | + | 53560269 | 53690753 | 518  |
| ENSG000001 | 4.387035 | 8.654582 | -0.90085 | 0.25994  | 0.35788  | AC005258. chr19   | - | 2329111  | 2355778  | 593  |
| ENSG000001 | 0        | 1.606458 | -1.9287  | 0.27074  | NA       | RP11-677C chr18   | + | 11745625 | 11747580 | 1618 |
| ENSG000001 | 0        | 0.343138 | -0.41864 | 0.81278  | NA       | CTD-2534I chr17   | + | 43025280 | 43026307 | 1028 |
| ENSG000001 | 0        | 0.594029 | -0.81444 | 0.64499  | NA       | RP11-773F chr18   | + | 12912843 | 12913905 | 1063 |
| ENSG000001 | 0.580602 | 0.357707 | 0.37639  | 0.83285  | NA       | CTD-2081K chr19   | + | 29456038 | 29461781 | 3444 |
| ENSG000001 | 3.049383 | 1.98115  | 0.52467  | 0.67258  | 0.75482  | RP11-242C chr17   | - | 41321897 | 41322094 | 198  |
| ENSG000001 | 3.568372 | 7.668876 | -1.0315  | 0.20267  | 0.2915   | RP11-552F chr17   | + | 73893141 | 73896229 | 1419 |
| ENSG000001 | 0.36308  | 0.297015 | -0.00205 | 0.99908  | NA       | CTD-2293F chr19   | - | 37566015 | 37569507 | 572  |
| ENSG000001 | 1.628766 | 5.020852 | -1.4641  | 0.15296  | 0.23083  | EIF5AP3 chr19     | + | 45631827 | 45632288 | 462  |
| ENSG000001 | 5.133732 | 6.725261 | -0.36494 | 0.67964  | 0.76024  | AC015849. chr17   | + | 34145403 | 34150717 | 421  |
| ENSG000001 | 0.36308  | 4.943174 | -3.1395  | 0.018704 | 0.037154 | CTB-179K2 chr19   | - | 45579768 | 45593649 | 690  |
| ENSG000001 | 397.1951 | 451.1649 | -0.18269 | 0.37249  | 0.47691  | RP1-178F1 chr17   | + | 18227536 | 18231369 | 2480 |
| ENSG000001 | 39.62633 | 14.65631 | 1.4251   | 0.000499 | 0.001296 | SH3GL1P3 chr17    | - | 66130816 | 66131745 | 930  |
| ENSG000001 | 0.36308  | 0.700845 | -0.575   | 0.7429   | NA       | CTD-2162K chr19   | - | 37264614 | 37266810 | 2197 |
| ENSG000001 | 2.447429 | 3.633731 | -0.47991 | 0.65246  | 0.7377   | RPL9P29 chr17     | - | 76842035 | 76842950 | 593  |
| ENSG000001 | 0.36308  | 0.343138 | -0.0021  | 0.99905  | NA       | RNU6-2 chr19      | + | 1021521  | 1021627  | 107  |
| ENSG000001 | 0        | 0.343138 | -0.41864 | 0.81278  | NA       | ZNF585B chr19     | - | 37583921 | 37701414 | 965  |
| ENSG000001 | 0.290301 | 0        | 0.4146   | 0.81455  | NA       | CTD-3162L chr19   | - | 36870253 | 36871814 | 249  |
| ENSG000001 | 0        | 1.949596 | -2.4359  | 0.13595  | 0.20899  | RP11-47L3 chr17   | + | 33640521 | 33651919 | 540  |
| ENSG000001 | 2.345553 | 3.989022 | -0.63557 | 0.63741  | 0.72563  | KCNJ2-AS1 chr17   | - | 68163102 | 68165543 | 2442 |
| ENSG000001 | 4.543757 | 0        | 3.7462   | 0.008214 | 0.017521 | RP11-53B2 chr18   | - | 13500640 | 13501288 | 487  |
| ENSG000001 | 5.673259 | 7.775692 | -0.40436 | 0.61     | 0.70268  | CTD-2623N chr19   | - | 9866828  | 9867539  | 712  |
| ENSG000001 | 0        | 3.169208 | -3.1358  | 0.041917 | 0.076354 | AC005330. chr19   | + | 1321224  | 1322863  | 1256 |
| ENSG000001 | 1.161205 | 1.698704 | -0.3785  | 0.79837  | 0.85717  | CTD-2231E chr19   | - | 16214571 | 16215064 | 367  |
| ENSG000001 | 11.59656 | 54.90416 | -2.1934  | 5.08E-07 | 1.86E-06 | LINC00669 chr18   | - | 36786888 | 37380282 | 2306 |
| ENSG000001 | 4.399013 | 0.654722 | 2.3272   | 0.06123  | 0.10624  | CTB-186G2 chr19   | - | 39174513 | 39184246 | 242  |
| ENSG000001 | 0        | 0.997859 | -1.5018  | 0.39072  | NA       | ATP5LP6 chr17     | - | 74198725 | 74198877 | 153  |
| ENSG000001 | 11.76526 | 12.11027 | -0.04208 | 0.94295  | 0.96305  | CTD-2086C chr19   | + | 37978901 | 37979554 | 654  |
| ENSG000001 | 17.8016  | 256.5622 | -3.8201  | 4.84E-34 | 7.17E-33 | CTC-260E6. chr19  | - | 20236186 | 20432114 | 1268 |
| ENSG000001 | 0        | 0.654722 | -0.83442 | 0.63731  | NA       | CTB-50L17. chr19  | - | 4528439  | 4540079  | 1803 |
| ENSG000001 | 0.36308  | 0        | 0.4146   | 0.81455  | NA       | CTD-2240E chr19   | - | 10199708 | 10201053 | 1346 |
| ENSG000001 | 0.975385 | 0.594029 | 0.4404   | 0.79523  | NA       | AF038458. chr19   | + | 36451414 | 36454965 | 600  |
| ENSG000001 | 7.59314  | 5.390712 | 0.47464  | 0.55765  | 0.65661  | RP11-635N chr18   | + | 61034561 | 61048862 | 785  |
| ENSG000001 | 0.870904 | 0        | 1.046    | 0.5544   | NA       | RP11-691F chr18   | - | 13362202 | 13366242 | 480  |
| ENSG000001 | 10.69656 | 9.545626 | 0.15019  | 0.8056   | 0.86251  | CTB-175E5. chr17  | + | 42276250 | 42293933 | 528  |
| ENSG000001 | 4.834058 | 3.708992 | 0.37648  | 0.67122  | 0.75379  | AC074212. chr19   | + | 46271054 | 46275762 | 822  |
| ENSG000001 | 9.596151 | 0.686276 | 3.3971   | 0.002136 | 0.005032 | RP11-873E chr18   | + | 33296334 | 33297942 | 1609 |
| ENSG000001 | 8.641304 | 0        | 4.7215   | 0.00023  | 0.000624 | RP11-456C chr18   | - | 53728340 | 53730309 | 552  |
| ENSG000001 | 0        | 0.715414 | -0.84936 | 0.6309   | NA       | RP11-619L chr18   | + | 53159406 | 53163623 | 445  |
| ENSG000001 | 0.342542 | 1.188058 | -0.99414 | 0.57407  | NA       | RP11-491I. chr18  | + | 33853537 | 33854562 | 1026 |
| ENSG000001 | 3.890376 | 10.09998 | -1.2948  | 0.087498 | 0.14429  | CTC-296K1 chr17   | - | 42872115 | 42875151 | 587  |
| ENSG000001 | 0        | 3.838499 | -3.4584  | 0.01936  | 0.038332 | CTD-2189E chr19   | - | 14378619 | 14380189 | 164  |
| ENSG000001 | 0.632843 | 0.297015 | 0.49183  | 0.78024  | NA       | CTB-50L17. chr19  | + | 4621206  | 4622319  | 486  |
| ENSG000001 | 0.995923 | 0.715414 | 0.36543  | 0.82075  | NA       | RP11-973F chr18   | + | 12658709 | 12725739 | 1011 |
| ENSG000001 | 0        | 1.058552 | -1.361   | 0.4451   | NA       | CTC-265F1. chr19  | - | 2610153  | 2611860  | 1708 |
| ENSG000001 | 0.342542 | 18.69957 | -5.0263  | 9.23E-06 | 2.97E-05 | RP11-636C chr18   | - | 37421138 | 37504804 | 1115 |
| ENSG000001 | 22.3667  | 10.11622 | 1.0883   | 0.067344 | 0.11526  | RP11-456K chr18   | - | 42256892 | 42259682 | 2065 |
| ENSG000001 | 3.880024 | 2.947455 | 0.32986  | 0.75991  | 0.82564  | CTD-2319I. chr17  | + | 58156670 | 58166056 | 699  |
| ENSG000001 | 0.580602 | 0        | 0.8036   | 0.6494   | NA       | CTC-239J1I. chr19 | - | 13124476 | 13125325 | 523  |
| ENSG000001 | 7.821827 | 6.330295 | 0.30184  | 0.66506  | 0.74828  | CTC-559E9. chr19  | + | 19887411 | 19945736 | 803  |
| ENSG000001 | 1.317927 | 0.357707 | 1.2439   | 0.46333  | NA       | AC005498. chr19   | - | 57047525 | 57049944 | 784  |
| ENSG000001 | 1.939605 | 3.305162 | -0.68091 | 0.52798  | 0.62959  | CTD-2554C chr19   | + | 38270326 | 38283505 | 1094 |
| ENSG000001 | 0        | 13.16808 | -5.307   | 2.07E-05 | 6.41E-05 | CTD-2265C chr19   | + | 12936525 | 12943797 | 739  |
| ENSG000001 | 0        | 0.297015 | -0.41864 | 0.81278  | NA       | RP11-552F chr17   | - | 73894726 | 73926210 | 4270 |
| ENSG000001 | 1308.94  | 963.1987 | 0.44214  | 8.40E-05 | 0.000242 | CTC-503J8. chr19  | - | 6210390  | 6212492  | 2103 |
| ENSG000001 | 0        | 0.357707 | -0.41864 | 0.81278  | NA       | RP11-289E chr18   | + | 52234228 | 52234534 | 307  |
| ENSG000001 | 0.36308  | 2.382564 | -1.9373  | 0.2299   | 0.32324  | AC006116. chr19   | - | 56858450 | 56859552 | 1103 |
| ENSG000001 | 2.80195  | 2.66501  | 0.046979 | 0.9691   | 0.98264  | RP11-635N chr18   | - | 61082550 | 61083702 | 1153 |
| ENSG000001 | 0        | 1.652581 | -2.1974  | 0.1871   | NA       | RP11-559N chr17   | + | 76480964 | 76495428 | 932  |

|            |          |          |          |          |          |                  |   |          |          |      |
|------------|----------|----------|----------|----------|----------|------------------|---|----------|----------|------|
| ENSG000001 | 0        | 0.357707 | -0.41864 | 0.81278  | NA       | CTC-454I21 chr19 | - | 37619581 | 37632542 | 319  |
| ENSG000001 | 5.083283 | 8.311444 | -0.65279 | 0.41691  | 0.52203  | AC002398. chr19  | - | 36237958 | 36244316 | 1712 |
| ENSG000001 | 0.632843 | 0        | 0.81931  | 0.64303  | NA       | CTC-501O1 chr17  | + | 41757641 | 41783252 | 549  |
| ENSG000001 | 7.583767 | 5.257174 | 0.50005  | 0.50448  | 0.60786  | AC005391. chr19  | + | 961827   | 962424   | 598  |
| ENSG000001 | 0.36308  | 0        | 0.4146   | 0.81455  | NA       | AC010641. chr19  | + | 397589   | 398941   | 297  |
| ENSG000001 | 0        | 0.654722 | -0.83442 | 0.63731  | NA       | CTB-39G8. chr17  | - | 43448768 | 43449423 | 386  |
| ENSG000001 | 0        | 0.357707 | -0.41864 | 0.81278  | NA       | VN2R11P chr19    | + | 279495   | 280170   | 676  |
| ENSG000001 | 0        | 0.343138 | -0.41864 | 0.81278  | NA       | AC004791. chr19  | - | 15962803 | 15975734 | 425  |
| ENSG000001 | 5.71694  | 12.40083 | -1.0932  | 0.10291  | 0.16534  | ZNF582-AS chr19  | + | 56905025 | 56910541 | 1606 |
| ENSG000001 | 0        | 0.297015 | -0.41864 | 0.81278  | NA       | RP11-78A1 chr18  | - | 11810405 | 11811483 | 568  |
| ENSG000001 | 0.995923 | 0        | 1.4959   | 0.39264  | NA       | RP5-837J1. chr17 | - | 33400850 | 33401393 | 544  |
| ENSG000001 | 0        | 3.158671 | -2.7702  | 0.10135  | 0.16325  | RP11-120A chr17  | + | 66553657 | 66578718 | 384  |
| ENSG000001 | 0        | 1.606458 | -1.9287  | 0.27074  | NA       | UBE2V2P2 chr17   | - | 76062339 | 76062842 | 504  |
| ENSG000001 | 0.580602 | 9.260764 | -3.3964  | 0.002663 | 0.006191 | RP11-13K1 chr17  | - | 75559450 | 75564777 | 1767 |
| ENSG000001 | 4.637074 | 20.56263 | -2.0787  | 0.002162 | 0.005091 | CTD-3064F chr19  | + | 38039816 | 38078249 | 2777 |
| ENSG000001 | 0.36308  | 0.686276 | -0.48701 | 0.78478  | NA       | LOC44046. chr17  | + | 66195062 | 66195737 | 676  |
| ENSG000001 | 200.8442 | 14.36741 | 3.7663   | 1.21E-36 | 1.94E-35 | AC005789. chr19  | + | 38888821 | 38890521 | 1701 |
| ENSG000001 | 1.681007 | 3.025133 | -0.74943 | 0.51913  | 0.62177  | CTC-548K1 chr19  | + | 14569213 | 14570178 | 889  |
| ENSG000001 | 9.555075 | 4.816084 | 0.94752  | 0.25642  | 0.35383  | CTD-2538C chr19  | - | 33177995 | 33182656 | 568  |
| ENSG000001 | 4.169512 | 0.654722 | 2.2601   | 0.074098 | 0.12519  | RP11-126C chr18  | - | 56339845 | 56419962 | 398  |
| ENSG000001 | 0.290301 | 0        | 0.4146   | 0.81455  | NA       | RP11-815J. chr18 | - | 12091673 | 12093140 | 1468 |
| ENSG000001 | 0        | 1.372552 | -1.3974  | 0.43145  | NA       | CTC-268N1 chr17  | + | 35391965 | 35400550 | 411  |
| ENSG000001 | 8.278224 | 28.15208 | -1.73    | 0.001057 | 0.002611 | RP11-703I. chr18 | - | 12031177 | 12032180 | 527  |
| ENSG000001 | 2.334388 | 1.966581 | 0.20436  | 0.8686   | 0.90849  | CTC-559E9. chr19 | - | 19899564 | 19901340 | 921  |
| ENSG000001 | 0        | 0.343138 | -0.41864 | 0.81278  | NA       | AC131056. chr17  | + | 34510615 | 34523870 | 1059 |
| ENSG000001 | 8.764696 | 1.949596 | 2.0005   | 0.035884 | 0.066648 | CTD-2373F chr17  | + | 76899345 | 76901106 | 945  |
| ENSG000001 | 12.57536 | 18.79424 | -0.57968 | 0.29908  | 0.40077  | CIRBP-AS1 chr19  | - | 1268165  | 1270240  | 642  |
| ENSG000001 | 0        | 7.221338 | -4.466   | 0.000655 | 0.001672 | FAM215A chr17    | + | 41994576 | 41995326 | 751  |
| ENSG000001 | 0.685084 | 0        | 0.85004  | 0.63064  | NA       | CTB-32O4. chr19  | + | 29704142 | 29706722 | 709  |
| ENSG000001 | 0        | 0.594029 | -0.81444 | 0.64499  | NA       | CTD-3194G chr17  | + | 35041203 | 35041578 | 376  |
| ENSG000001 | 4.688501 | 20.29791 | -2.0014  | 0.002695 | 0.006259 | CTD-2006C chr19  | + | 11759179 | 11763692 | 1407 |
| ENSG000001 | 2.479132 | 0.343138 | 2.0251   | 0.20437  | 0.29351  | RP11-108P chr18  | - | 56422091 | 56425074 | 740  |
| ENSG000001 | 2.946693 | 0        | 3.019    | 0.052361 | 0.092591 | RP11-53B2 chr18  | - | 13561398 | 13565034 | 665  |
| ENSG000001 | 1.233984 | 0.654722 | 0.67769  | 0.66965  | NA       | RP11-845C chr18  | + | 56038798 | 56039898 | 1101 |
| ENSG000001 | 3.350849 | 10.23519 | -1.5364  | 0.065687 | 0.11283  | CTC-296K1 chr17  | + | 42870567 | 42871842 | 562  |
| ENSG000001 | 0        | 14.25409 | -5.3751  | 1.97E-05 | 6.10E-05 | RP11-13K1 chr17  | + | 75543022 | 75559325 | 4902 |
| ENSG000001 | 1.317927 | 0        | 1.6383   | 0.35541  | NA       | CTD-2587F chr19  | - | 55630618 | 55631751 | 488  |
| ENSG000001 | 48.32069 | 53.66031 | -0.14709 | 0.73088  | 0.80122  | ZNF285 chr19     | - | 44886459 | 44905774 | 6013 |
| ENSG000001 | 0.36308  | 0        | 0.4146   | 0.81455  | NA       | CTD-2043I. chr19 | + | 28556174 | 28616337 | 573  |
| ENSG000001 | 7.80129  | 8.089692 | -0.03558 | 0.95859  | 0.97496  | CTC-325H2 chr19  | + | 9402191  | 9405158  | 405  |
| ENSG000001 | 0.653381 | 0        | 0.82678  | 0.64037  | NA       | RP11-861E chr18  | + | 12450446 | 12451041 | 596  |
| ENSG000001 | 0.580602 | 0.343138 | 0.37443  | 0.8337   | NA       | RP11-794C chr17  | + | 74341842 | 74342162 | 321  |
| ENSG000001 | 185.5348 | 14.8085  | 3.5932   | 3.35E-29 | 4.14E-28 | CTD-3252C chr19  | - | 13945330 | 13947103 | 1774 |
| ENSG000001 | 42.16194 | 24.6349  | 0.76786  | 0.032739 | 0.061357 | RP11-373L chr2   | + | 61153044 | 61155287 | 2244 |
| ENSG000001 | 0        | 16.53393 | -5.6455  | 3.18E-06 | 1.08E-05 | RP11-87G2 chr17  | - | 74953105 | 74954304 | 722  |
| ENSG000001 | 0        | 0.686276 | -0.84936 | 0.6309   | NA       | CTD-2621I. chr19 | + | 56578050 | 56590167 | 1661 |
| ENSG000001 | 8.289389 | 11.65299 | -0.47011 | 0.52573  | 0.62766  | CTD-2537I. chr19 | - | 56173267 | 56186081 | 549  |
| ENSG000001 | 2.085163 | 1.309443 | 0.53279  | 0.69403  | 0.77183  | RP11-178C chr17  | - | 58140365 | 58142143 | 1447 |
| ENSG000001 | 0        | 0.640152 | -0.82869 | 0.63935  | NA       | AC011524. chr19  | + | 29374337 | 29444152 | 537  |
| ENSG000001 | 8.266245 | 0        | 4.6141   | 0.000479 | 0.001247 | RP11-53B2 chr18  | - | 13471011 | 13472708 | 1698 |
| ENSG000001 | 0.923144 | 12.23977 | -3.3493  | 0.000551 | 0.001422 | AC006273. chr19  | + | 782796   | 785080   | 829  |
| ENSG000001 | 0        | 1.012429 | -1.3162  | 0.46038  | NA       | MIR497HG chr17   | - | 6919137  | 6922978  | 3838 |
| ENSG000001 | 1.048164 | 0        | 1.348    | 0.44949  | NA       | RP11-815J. chr18 | - | 12067172 | 12068416 | 1148 |
| ENSG000001 | 181.1622 | 89.08723 | 1.0172   | 8.93E-06 | 2.88E-05 | S1PR2 chr19      | - | 10334520 | 10341948 | 1173 |
| ENSG000001 | 0.653381 | 0        | 0.82678  | 0.64037  | NA       | LINC00868 chr17  | + | 74846258 | 74857918 | 853  |
| ENSG000001 | 0.36308  | 5.369695 | -3.2123  | 0.018092 | 0.03605  | AC005394. chr19  | - | 29093286 | 29139210 | 185  |
| ENSG000001 | 1.503747 | 0        | 1.8221   | 0.30126  | NA       | RP11-138F chr15  | - | 71121469 | 71123745 | 2277 |
| ENSG000001 | 0.632843 | 0.997859 | -0.46957 | 0.76172  | NA       | RP11-380A chr18  | - | 45379604 | 45379828 | 225  |
| ENSG000001 | 8.443506 | 0.654722 | 3.2548   | 0.003384 | 0.007739 | RP11-666A chr17  | + | 74546033 | 74546908 | 570  |
| ENSG000001 | 0.653381 | 0.343138 | 0.51863  | 0.76794  | NA       | AC007229. chr19  | + | 10952515 | 10952926 | 412  |
| ENSG000001 | 5.519956 | 4.271467 | 0.32477  | 0.73393  | 0.80353  | RP11-666A chr17  | - | 74541750 | 74553765 | 578  |
| ENSG000001 | 2.467967 | 5.159222 | -0.90177 | 0.44446  | 0.55     | RP11-686C chr17  | - | 33730856 | 33731392 | 537  |
| ENSG000001 | 39.8961  | 20.24776 | 0.96491  | 0.013446 | 0.027531 | RP11-229E chr17  | + | 40127182 | 40129749 | 2568 |
| ENSG000001 | 1.286224 | 2.012704 | -0.51342 | 0.71126  | 0.78575  | AC006116. chr19  | + | 56826072 | 56852656 | 1550 |
| ENSG000001 | 2.520208 | 8.269353 | -1.5447  | 0.10905  | 0.17371  | AC008992. chr19  | + | 31910835 | 31912101 | 549  |

|            |          |          |          |          |          |                  |   |          |          |      |
|------------|----------|----------|----------|----------|----------|------------------|---|----------|----------|------|
| ENSG000001 | 0.290301 | 0.357707 | -0.00203 | 0.99908  | NA       | CTC-379B2 chr19  | + | 33157204 | 33164116 | 573  |
| ENSG000001 | 2.354926 | 1.652581 | 0.43838  | 0.70817  | 0.78306  | RP11-173A chr18  | - | 59967269 | 59968231 | 637  |
| ENSG000001 | 0.632843 | 0        | 0.81931  | 0.64303  | NA       | CTC-421K2 chr17  | + | 35814273 | 35815033 | 443  |
| ENSG000001 | 0.36308  | 0.357707 | -0.00212 | 0.99905  | NA       | CTC-503J8. chr19 | + | 6259168  | 6259810  | 523  |
| ENSG000001 | 6.08002  | 36.03217 | -2.5277  | 1.67E-06 | 5.85E-06 | CTC-559E9. chr19 | - | 20003242 | 20006656 | 403  |
| ENSG000001 | 0.36308  | 0        | 0.4146   | 0.81455  | NA       | CTD-2538C chr19  | - | 33209204 | 33210501 | 516  |
| ENSG000001 | 0.290301 | 30.59541 | -5.6552  | 5.39E-07 | 1.97E-06 | RP11-87G2 chr17  | - | 74946399 | 74965238 | 623  |
| ENSG000001 | 0        | 0.700845 | -0.87835 | 0.62047  | NA       | RP11-773F chr18  | + | 12911185 | 12912022 | 838  |
| ENSG000001 | 2.665765 | 2.232041 | 0.20489  | 0.85627  | 0.89903  | AC104532. chr19  | - | 5911589  | 5913910  | 589  |
| ENSG000001 | 62.01276 | 44.03291 | 0.49477  | 0.084599 | 0.1402   | CTC-459F4. chr19 | + | 28284371 | 28475892 | 2401 |
| ENSG000001 | 0.290301 | 0        | 0.4146   | 0.81455  | NA       | CTD-2587F chr19  | + | 55670307 | 55688908 | 1643 |
| ENSG000001 | 1.08924  | 0        | 1.1858   | 0.50299  | NA       | RP11-126C chr18  | + | 56224302 | 56233909 | 335  |
| ENSG000001 | 13.78799 | 14.37957 | -0.06247 | 0.90918  | 0.93757  | CTD-3252C chr19  | - | 13907388 | 13907747 | 360  |
| ENSG000001 | 0.72616  | 0.700845 | 0.022935 | 0.98937  | NA       | RP11-322E chr18  | - | 33023833 | 33047052 | 697  |
| ENSG000001 | 1.338465 | 0.343138 | 1.368    | 0.39684  | NA       | RP11-21F1 chr18  | + | 39739247 | 40271387 | 3376 |
| ENSG000001 | 0.36308  | 4.943174 | -3.1395  | 0.018704 | 0.037154 | RP11-687F chr18  | - | 44432595 | 44433845 | 621  |
| ENSG000001 | 0.72616  | 0.357707 | 0.52227  | 0.76959  | NA       | MIR1302-2 chr19  | + | 71161    | 72719    | 712  |
| ENSG000001 | 3.693391 | 1.66715  | 1.0109   | 0.37857  | 0.48266  | NDUFA3P1 chr19   | + | 44801257 | 44801508 | 252  |
| ENSG000001 | 0.72616  | 0.343138 | 0.52026  | 0.77047  | NA       | CTC-507E2. chr17 | - | 33923923 | 33924147 | 225  |
| ENSG000001 | 1.338465 | 2.65044  | -0.86808 | 0.46487  | 0.5697   | RP11-242C chr17  | - | 41320187 | 41320266 | 80   |
| ENSG000001 | 0.290301 | 0        | 0.4146   | 0.81455  | NA       | RPIAP1 chr18     | - | 59624506 | 59625247 | 742  |
| ENSG000001 | 0        | 0.357707 | -0.41864 | 0.81278  | NA       | AC098474. chr19  | - | 229640   | 230165   | 152  |
| ENSG000001 | 0.705622 | 6.327879 | -2.7941  | 0.018503 | 0.036811 | CTD-3220F chr19  | - | 37756841 | 37762420 | 813  |
| ENSG000001 | 0        | 2.102535 | -2.2822  | 0.18452  | 0.26979  | AC006116. chr19  | - | 56865862 | 56879422 | 649  |
| ENSG000001 | 3.869838 | 0        | 3.4223   | 0.022651 | 0.044165 | AC007787. chr19  | - | 13180610 | 13182188 | 1579 |
| ENSG000001 | 0.580602 | 0        | 0.8036   | 0.6494   | NA       | CTC-461H2 chr19  | + | 33542421 | 33542607 | 187  |
| ENSG000001 | 0.290301 | 0.640152 | -0.50256 | 0.77558  | NA       | CTD-3116E chr19  | + | 9841529  | 9842619  | 600  |
| ENSG000001 | 0        | 1.545765 | -1.8556  | 0.29195  | NA       | RP11-378E chr17  | - | 35768023 | 35768681 | 293  |
| ENSG000001 | 45.7652  | 59.4161  | -0.377   | 0.34403  | 0.44805  | AC004152. chr19  | - | 2270133  | 2270945  | 813  |
| ENSG000001 | 0        | 0.297015 | -0.41864 | 0.81278  | NA       | AC002115. chr19  | - | 36099187 | 36103568 | 568  |
| ENSG000001 | 0        | 1.935026 | -2.4284  | 0.13734  | 0.21062  | RP11-905K chr18  | - | 33531766 | 33546081 | 609  |
| ENSG000001 | 0        | 1.949596 | -2.4359  | 0.13595  | 0.20899  | AC138430. chr19  | - | 19365557 | 19384178 | 5409 |
| ENSG000001 | 12.93763 | 5.393128 | 1.2251   | 0.068288 | 0.11662  | RP11-400F chr17  | + | 40661802 | 40663537 | 1736 |
| ENSG000001 | 1.233984 | 2.263595 | -0.68358 | 0.63171  | 0.72092  | AC008992. chr19  | + | 31912903 | 31918208 | 446  |
| ENSG000001 | 0.36308  | 0        | 0.4146   | 0.81455  | NA       | RP11-619I. chr17 | + | 57862174 | 57862396 | 223  |
| ENSG000001 | 1.08924  | 1.043983 | 0.031782 | 0.98474  | 0.99115  | RP11-546A chr17  | + | 42193280 | 42197963 | 359  |
| ENSG000001 | 0        | 0.343138 | -0.41864 | 0.81278  | NA       | AC092299. chr19  | + | 193236   | 196008   | 2067 |
| ENSG000001 | 0        | 7.486798 | -4.5056  | 0.000609 | 0.00156  | CTD-2554C chr19  | + | 38307999 | 38317278 | 1058 |
| ENSG000001 | 0.36308  | 5.597895 | -3.3115  | 0.011797 | 0.024409 | CTC-260E6. chr19 | - | 20285822 | 20287872 | 534  |
| ENSG000001 | 0.943682 | 0        | 1.2438   | 0.48556  | NA       | RP11-258B chr18  | - | 31132087 | 31158151 | 2492 |
| ENSG000001 | 0.653381 | 0        | 0.82678  | 0.64037  | NA       | CTC-499B1 chr19  | - | 11906899 | 11909413 | 2515 |
| ENSG000001 | 1.338465 | 1.591889 | -0.23409 | 0.85802  | 0.90036  | RP11-686C chr17  | - | 33733967 | 33734837 | 871  |
| ENSG000001 | 0.36308  | 0.937167 | -0.90039 | 0.60194  | NA       | CTD-2587F chr19  | + | 55728028 | 55732984 | 857  |
| ENSG000001 | 1.161205 | 0        | 1.2509   | 0.47995  | NA       | CTD-2553C chr19  | + | 10106673 | 10107839 | 1167 |
| ENSG000001 | 3.330311 | 0.700845 | 1.9236   | 0.13651  | 0.20974  | RP11-95O2 chr18  | - | 34814082 | 34816205 | 2124 |
| ENSG000001 | 0.705622 | 1.416259 | -0.74205 | 0.63826  | 0.72626  | RP1-193H1 chr17  | - | 67473280 | 67497896 | 584  |
| ENSG000001 | 4.584833 | 11.0881  | -1.2013  | 0.1301   | 0.20192  | CTD-2286A chr18  | + | 76877207 | 76877920 | 714  |
| ENSG000001 | 1.742621 | 0.98329  | 0.61068  | 0.6877   | 0.76717  | RP11-358B chr17  | + | 40306618 | 40307990 | 425  |
| ENSG000001 | 0        | 2.399549 | -2.7165  | 0.088838 | 0.14612  | RP11-118B chr17  | + | 66587937 | 66760023 | 2616 |
| ENSG000001 | 10.54921 | 16.08398 | -0.59651 | 0.35354  | 0.45773  | AC007796. chr19  | + | 31839787 | 31908700 | 560  |
| ENSG000001 | 0        | 1.713273 | -2.2094  | 0.18675  | NA       | RP11-13K1 chr17  | + | 75523080 | 75532674 | 4440 |
| ENSG000001 | 0.72616  | 0.951736 | -0.29027 | 0.86373  | NA       | AC004156. chr19  | + | 663482   | 668063   | 1882 |
| ENSG000001 | 1.722083 | 0.997859 | 0.63405  | 0.63972  | 0.72707  | RP11-136F chr17  | - | 59208065 | 59213325 | 286  |
| ENSG000001 | 0.290301 | 0.357707 | -0.00203 | 0.99908  | NA       | RP11-697E chr17  | + | 36002976 | 36044255 | 628  |
| ENSG000001 | 0        | 0.594029 | -0.81444 | 0.64499  | NA       | RP11-824A chr18  | + | 57488272 | 57492493 | 959  |
| ENSG000001 | 0        | 0.297015 | -0.41864 | 0.81278  | NA       | CTB-55O6. chr19  | - | 14141667 | 14142369 | 518  |
| ENSG000001 | 0.342542 | 1.294874 | -1.342   | 0.40631  | NA       | CTD-2293F chr19  | + | 37582243 | 37583466 | 1224 |
| ENSG000001 | 0.290301 | 0.343138 | -0.00202 | 0.99909  | NA       | FDX1L chr19      | - | 10416103 | 10426691 | 1956 |
| ENSG000001 | 0.580602 | 0        | 0.8036   | 0.6494   | NA       | RP11-813F chr18  | - | 47266193 | 47268433 | 340  |
| ENSG000001 | 5.934463 | 7.146077 | -0.26371 | 0.7262   | 0.79753  | THA1P chr17      | - | 76244574 | 76250497 | 1145 |
| ENSG000001 | 0.685084 | 0        | 0.85004  | 0.63064  | NA       | RP11-27G2 chr18  | + | 57027932 | 57053981 | 417  |
| ENSG000001 | 22.89425 | 9.817534 | 1.2108   | 0.020649 | 0.040602 | ZNF224 chr19     | + | 44598492 | 44612479 | 2994 |
| ENSG000001 | 2.49967  | 1.995719 | 0.31261  | 0.7842   | 0.84548  | CTD-3199J. chr17 | + | 41296973 | 41297272 | 300  |
| ENSG000001 | 8.808378 | 4.455961 | 0.94849  | 0.24809  | 0.34428  | CTD-3220F chr19  | + | 37828138 | 37828645 | 375  |
| ENSG000001 | 0        | 0.343138 | -0.41864 | 0.81278  | NA       | AC008991. chr19  | + | 29383838 | 29386856 | 487  |

|            |          |          |          |          |          |                  |   |          |          |      |
|------------|----------|----------|----------|----------|----------|------------------|---|----------|----------|------|
| ENSG000001 | 0.342542 | 0        | 0.4146   | 0.81455  | NA       | AC010525. chr19  | - | 56217344 | 56217538 | 195  |
| ENSG000001 | 2.810509 | 0.343138 | 2.3098   | 0.12171  | 0.19114  | RP11-691F chr18  | - | 13419420 | 13427479 | 2190 |
| ENSG000001 | 1.306762 | 1.903472 | -0.44154 | 0.75824  | 0.82423  | SHC1P2 chr17     | - | 42306128 | 42307596 | 1469 |
| ENSG000001 | 0.36308  | 0.997859 | -1.0294  | 0.53423  | NA       | TAF9P3 chr19     | + | 30528192 | 30528318 | 127  |
| ENSG000001 | 6.524438 | 2.012704 | 1.5349   | 0.15028  | 0.22748  | RP11-691F chr18  | - | 13461019 | 13470822 | 498  |
| ENSG000001 | 0        | 0.700845 | -0.87835 | 0.62047  | NA       | CTB-151G2 chr19  | - | 28129391 | 28137391 | 457  |
| ENSG000001 | 1.939605 | 5.13982  | -1.2515  | 0.23     | 0.32334  | AC002116. chr19  | + | 36505410 | 36536874 | 643  |
| ENSG000001 | 0.290301 | 0.357707 | -0.00203 | 0.99908  | NA       | RP11-28F1 chr18  | - | 60981035 | 60981315 | 281  |
| ENSG000001 | 20.10249 | 0.98329  | 4.0074   | 1.53E-05 | 4.82E-05 | RP11-53B2 chr18  | + | 13486461 | 13490675 | 4215 |
| ENSG000001 | 0.342542 | 0        | 0.4146   | 0.81455  | NA       | CTD-2013N chr19  | + | 16551757 | 16554395 | 401  |
| ENSG000001 | 0        | 1.012429 | -1.3162  | 0.46038  | NA       | RP11-95O2 chr18  | + | 34823739 | 34827179 | 411  |
| ENSG000001 | 2.293312 | 1.416259 | 0.5744   | 0.69021  | 0.7691   | RP11-147L chr17  | - | 66148917 | 66155184 | 579  |
| ENSG000001 | 0.290301 | 1.188058 | -1.0232  | 0.56351  | NA       | AC024592. chr19  | + | 5847478  | 5858250  | 1188 |
| ENSG000001 | 20.71659 | 19.71684 | 0.067615 | 0.88055  | 0.91672  | AC006116. chr19  | + | 56784138 | 56821819 | 632  |
| ENSG000001 | 0        | 2.514486 | -2.5628  | 0.12928  | 0.20079  | RP11-686C chr17  | - | 33727897 | 33730025 | 394  |
| ENSG000001 | 0        | 1.043983 | -1.3473  | 0.44976  | NA       | RP11-10I6. chr18 | + | 48195880 | 48196585 | 398  |
| ENSG000001 | 0        | 3.67099  | -3.2464  | 0.038558 | 0.071052 | CTD-2540B chr19  | + | 33708723 | 33712076 | 700  |
| ENSG000001 | 3.257533 | 6.603876 | -0.95739 | 0.29647  | 0.39856  | CTB-25B13 chr19  | + | 1484535  | 1485273  | 412  |
| ENSG000001 | 2.085163 | 0.715414 | 1.1949   | 0.42947  | 0.53486  | SRSF10P1 chr18   | - | 48684652 | 48685753 | 764  |
| ENSG000001 | 0        | 15.81852 | -5.5824  | 4.49E-06 | 1.50E-05 | CTD-2189E chr19  | - | 14365001 | 14404017 | 627  |
| ENSG000001 | 4.315069 | 2.08555  | 0.93582  | 0.42681  | 0.53222  | RP11-49K2 chr18  | + | 44632317 | 44634433 | 2117 |
| ENSG000001 | 0.36308  | 5.427098 | -3.131   | 0.026204 | 0.050329 | AC010761. chr17  | + | 27054276 | 27054757 | 197  |
| ENSG000001 | 2.261609 | 5.597895 | -1.1974  | 0.20446  | 0.29359  | CTD-2537I chr19  | - | 56088136 | 56088780 | 645  |
| ENSG000001 | 1.555988 | 1.073121 | 0.41435  | 0.79637  | 0.85544  | RP11-147L chr17  | + | 66186025 | 66188943 | 2919 |
| ENSG000001 | 0        | 8.652166 | -4.729   | 0.000222 | 0.000605 | RP11-64C1 chr18  | + | 12201981 | 12223538 | 1050 |
| ENSG000001 | 1.608228 | 4.349145 | -1.2615  | 0.25426  | 0.35133  | RP4-604K5 chr1   | - | 87397882 | 87400574 | 746  |
| ENSG000001 | 2.894453 | 1.66715  | 0.69716  | 0.57171  | 0.66881  | AC061992. chr17  | + | 76311810 | 76343879 | 799  |
| ENSG000001 | 1.597063 | 1.920457 | -0.21603 | 0.87747  | 0.91468  | UBE2L4 chr19     | + | 9885173  | 9885636  | 464  |
| ENSG000001 | 0.290301 | 4.960159 | -3.157   | 0.019466 | 0.038513 | FAM60CP chr18    | - | 57684010 | 57684673 | 664  |
| ENSG000001 | 0.632843 | 0.700845 | -0.06767 | 0.96753  | NA       | RP11-718I chr18  | - | 55857066 | 55862928 | 548  |
| ENSG000001 | 1.286224 | 2.589748 | -0.87367 | 0.4652   | 0.57     | RP11-686C chr17  | - | 33733703 | 33736787 | 1212 |
| ENSG000001 | 0        | 0.357707 | -0.41864 | 0.81278  | NA       | RP11-379L chr18  | + | 31802929 | 31804725 | 507  |
| ENSG000001 | 1.359003 | 1.40169  | -0.02683 | 0.9847   | 0.99115  | RP11-392C chr17  | + | 41622153 | 41687706 | 561  |
| ENSG000001 | 0        | 1.652581 | -2.1974  | 0.1871   | NA       | CTC-265F1 chr19  | - | 2641836  | 2643851  | 2016 |
| ENSG000001 | 7.91433  | 38.42615 | -2.2074  | 1.06E-05 | 3.38E-05 | AC003102. chr17  | - | 42376942 | 42392683 | 5203 |
| ENSG000001 | 13.88212 | 21.33545 | -0.62317 | 0.21868  | 0.31028  | AC009005. chr19  | - | 567212   | 572215   | 719  |
| ENSG000001 | 8.40243  | 13.06684 | -0.60299 | 0.3383   | 0.44207  | CTC-439O9 chr19  | - | 31827904 | 31829830 | 1927 |
| ENSG000001 | 12.6884  | 14.80038 | -0.22666 | 0.66624  | 0.74916  | RP11-411B chr18  | - | 14074911 | 14075740 | 830  |
| ENSG000001 | 0.632843 | 1.531196 | -0.9423  | 0.54724  | 0.64731  | RP11-358B chr17  | + | 40420605 | 40421825 | 496  |
| ENSG000001 | 6.733401 | 9.265597 | -0.45117 | 0.53131  | 0.63264  | CTB-25B13 chr19  | + | 1413900  | 1414734  | 230  |
| ENSG000001 | 0        | 1.935026 | -2.4284  | 0.13734  | 0.21062  | CTC-565M2 chr19  | - | 31156181 | 31159554 | 554  |
| ENSG000001 | 0.653381 | 0.297015 | 0.51304  | 0.77085  | NA       | CTD-2130C chr18  | + | 44812096 | 45120914 | 704  |
| ENSG000001 | 0.580602 | 0.937167 | -0.42674 | 0.8018   | NA       | RP11-426J chr18  | - | 46199946 | 46214790 | 465  |
| ENSG000001 | 4.242291 | 0.640152 | 2.2899   | 0.069207 | 0.11796  | RP11-484L chr18  | - | 46352422 | 46361141 | 877  |
| ENSG000001 | 4.221753 | 3.792375 | 0.12878  | 0.89432  | 0.92676  | CTD-3193K chr17  | - | 40835205 | 40851484 | 719  |
| ENSG000001 | 0        | 12.49953 | -5.2523  | 2.09E-05 | 6.47E-05 | CTC-523E2 chr19  | - | 35282724 | 35323773 | 2077 |
| ENSG000001 | 10.00031 | 9.441226 | 0.068984 | 0.92125  | 0.94706  | CTB-50L17. chr19 | + | 4454011  | 4455283  | 510  |
| ENSG000001 | 0        | 6.342448 | -4.1729  | 0.002773 | 0.006426 | CTC-260E6. chr19 | - | 20317653 | 20317763 | 111  |
| ENSG000001 | 0.923144 | 3.039702 | -1.412   | 0.26625  | 0.36497  | AC006116. chr19  | - | 56888073 | 56888653 | 581  |
| ENSG000001 | 1.971308 | 3.420099 | -0.7209  | 0.52931  | 0.63075  | AC004221. chr19  | + | 1238178  | 1239521  | 844  |
| ENSG000001 | 1.359003 | 2.370411 | -0.68834 | 0.59027  | 0.68533  | AC006116. chr19  | + | 56897595 | 56898059 | 465  |
| ENSG000001 | 0.36308  | 0.357707 | -0.00212 | 0.99905  | NA       | CTB-55O6. chr19  | + | 14229918 | 14230349 | 315  |
| ENSG000001 | 0.342542 | 0        | 0.4146   | 0.81455  | NA       | RP11-171I chr2   | + | 1.8E+08  | 1.8E+08  | 3590 |
| ENSG000001 | 5.052394 | 3.290593 | 0.56506  | 0.52332  | 0.62577  | AF038458. chr19  | + | 36438017 | 36450094 | 500  |
| ENSG000001 | 0.685084 | 0        | 0.85004  | 0.63064  | NA       | RP11-35G9 chr18  | + | 55306687 | 55405276 | 1976 |
| ENSG000001 | 0.36308  | 0        | 0.4146   | 0.81455  | NA       | CTD-2534I chr17  | + | 43059882 | 43060140 | 259  |
| ENSG000001 | 3.22583  | 3.694423 | -0.16344 | 0.864    | 0.90524  | RP11-576C chrY   | + | 21760074 | 21760643 | 570  |
| ENSG000001 | 0        | 0.686276 | -0.84936 | 0.6309   | NA       | RP11-127I chr16  | + | 4838398  | 4846492  | 862  |
| ENSG000001 | 7.758422 | 4.305438 | 0.80699  | 0.33059  | 0.43373  | LIN37 chr19      | + | 36239262 | 36245420 | 1635 |
| ENSG000001 | 0        | 5.813943 | -4.0268  | 0.004534 | 0.010165 | NRBF2P1 chr18    | + | 33421723 | 33422581 | 859  |
| ENSG000001 | 1.379541 | 1.043983 | 0.30494  | 0.84294  | 0.88985  | RP11-333J chr17  | + | 35355897 | 35357333 | 710  |
| ENSG000001 | 0        | 1.874334 | -2.1429  | 0.21634  | NA       | CTC-478M chr19   | - | 29281719 | 29283778 | 1400 |
| ENSG000001 | 1.233984 | 0.686276 | 0.5937   | 0.72183  | 0.79426  | RP11-49K2 chr18  | + | 44663389 | 44663661 | 273  |
| ENSG000001 | 0.36308  | 0.937167 | -0.90039 | 0.60194  | NA       | RP11-552F chr17  | + | 73872453 | 73875627 | 3175 |
| ENSG000001 | 0        | 0.700845 | -0.87835 | 0.62047  | NA       | RP11-665N chr11  | - | 64658158 | 64658547 | 390  |

|            |          |          |          |          |          |                   |   |          |          |      |
|------------|----------|----------|----------|----------|----------|-------------------|---|----------|----------|------|
| ENSG000001 | 0.36308  | 0.297015 | -0.00205 | 0.99908  | NA       | AC018755. chr19   | + | 52102542 | 52103723 | 1182 |
| ENSG000001 | 49.15313 | 59.80846 | -0.28022 | 0.31959  | 0.42251  | NDUFV2P1 chr19    | - | 53727226 | 53728132 | 907  |
| ENSG000001 | 0.342542 | 0        | 0.4146   | 0.81455  | NA       | FKSG68 chr21      | - | 37270353 | 37270727 | 375  |
| ENSG000001 | 0.870904 | 1.638012 | -0.65561 | 0.66184  | 0.74558  | RP11-167N chr9    | - | 1.32E+08 | 1.32E+08 | 497  |
| ENSG000001 | 3.765356 | 0.937167 | 1.6853   | 0.18201  | 0.26681  | AC008746. chr19   | - | 54949847 | 54950362 | 516  |
| ENSG000001 | 0.36308  | 0        | 0.4146   | 0.81455  | NA       | DKFZP434I chr9    | - | 1.39E+08 | 1.39E+08 | 552  |
| ENSG000001 | 4.948726 | 7.566892 | -0.58937 | 0.5366   | 0.63757  | AL118506. chr20   | + | 62585007 | 62585495 | 489  |
| ENSG000001 | 0.685084 | 0.715414 | -0.02805 | 0.98738  | NA       | AL133262. chr6    | - | 44400472 | 44400720 | 249  |
| ENSG000001 | 1.306762 | 0.951736 | 0.33398  | 0.82688  | 0.87805  | CTB-133G6 chr19   | - | 7455408  | 7459925  | 363  |
| ENSG000001 | 7.844157 | 11.09381 | -0.47582 | 0.53948  | 0.64005  | NDUFA7 chr19      | - | 8373490  | 8386280  | 601  |
| ENSG000001 | 2.003011 | 3.037286 | -0.48713 | 0.72558  | 0.79699  | PRED58 chr21      | - | 46520728 | 46534873 | 735  |
| ENSG000001 | 30.4944  | 14.98729 | 0.9999   | 0.062793 | 0.10853  | AC016629. chr19   | + | 59070496 | 59086164 | 2567 |
| ENSG000001 | 0.705622 | 5.066975 | -2.4784  | 0.043956 | 0.079506 | RP11-120K chr13   | - | 1.14E+08 | 1.14E+08 | 1297 |
| ENSG000001 | 3.350849 | 5.309002 | -0.63844 | 0.50769  | 0.61121  | CTC-444N2 chr19   | - | 57778588 | 57791702 | 712  |
| ENSG000001 | 0.632843 | 0        | 0.81931  | 0.64303  | NA       | CTD-2527I chr19   | + | 35527238 | 35527964 | 405  |
| ENSG000001 | 0        | 0.654722 | -0.83442 | 0.63731  | NA       | CTB-147C2 chr19   | + | 51471466 | 51515385 | 536  |
| ENSG000001 | 5.871057 | 12.25347 | -0.99864 | 0.19561  | 0.28353  | AL031666. chr20   | + | 45947246 | 45949467 | 2222 |
| ENSG000001 | 0        | 0.297015 | -0.41864 | 0.81278  | NA       | PRED60 chr21      | - | 47183565 | 47190005 | 354  |
| ENSG000001 | 0.36308  | 0.357707 | -0.00212 | 0.99905  | NA       | FKSG48 chr1       | + | 33439268 | 33439642 | 375  |
| ENSG000001 | 51.84717 | 125.884  | -1.2667  | 1.83E-05 | 5.70E-05 | CTD-2291C chr19   | + | 23258003 | 23283163 | 581  |
| ENSG000001 | 0.342542 | 0.654722 | -0.52406 | 0.76557  | NA       | AC079354. chr2    | + | 2.03E+08 | 2.03E+08 | 144  |
| ENSG000001 | 0        | 5.271743 | -3.9817  | 0.003898 | 0.008819 | CTD-2126E chr19   | + | 50578380 | 50579159 | 575  |
| ENSG000001 | 0.632843 | 1.638012 | -1.0613  | 0.46491  | 0.5697   | CTD-2540F chr19   | + | 39228924 | 39230503 | 1580 |
| ENSG000001 | 1.524285 | 0.951736 | 0.52168  | 0.73226  | 0.80216  | AC007461. chr17   | + | 70036164 | 70036872 | 709  |
| ENSG000001 | 3.185568 | 3.414394 | -0.09797 | 0.93557  | 0.95758  | AC018766. chr19   | - | 50363139 | 50363771 | 548  |
| ENSG000001 | 0.943682 | 2.48938  | -1.0522  | 0.47982  | 0.58402  | CTD-2639E chr19   | + | 49467232 | 49468415 | 819  |
| ENSG000001 | 93.59721 | 79.33993 | 0.23723  | 0.32891  | 0.43204  | CTC-429P9 chr19   | - | 16750778 | 16751479 | 546  |
| ENSG000001 | 0        | 3.455685 | -2.9508  | 0.075529 | 0.12719  | CTD-2616J chr19   | + | 51843949 | 51847371 | 437  |
| ENSG000001 | 2.366091 | 2.012704 | 0.1909   | 0.88681  | 0.92093  | ZSCAN5D chr19     | + | 56751773 | 56758863 | 1491 |
| ENSG000001 | 0.685084 | 29.23574 | -4.9635  | 4.02E-07 | 1.49E-06 | CCDC177 chr14     | - | 70038216 | 70040339 | 2124 |
| ENSG000001 | 5.166249 | 4.865496 | 0.05897  | 0.95115  | 0.96949  | AP001055. chr21   | - | 45587818 | 45593580 | 621  |
| ENSG000001 | 1.338465 | 2.232041 | -0.65585 | 0.59792  | 0.692    | RP11-256I chr2    | + | 2.21E+08 | 2.21E+08 | 542  |
| ENSG000001 | 1.016461 | 4.663145 | -1.9342  | 0.10143  | 0.16335  | SNX6P1 chr19      | - | 23309371 | 23310594 | 1224 |
| ENSG000001 | 2.624689 | 0        | 2.9014   | 0.06135  | 0.10638  | AC007193. chr19   | + | 46604380 | 46699475 | 332  |
| ENSG000001 | 0.36308  | 8.576905 | -3.9247  | 0.001489 | 0.003598 | RP11-255F chr19   | - | 24000401 | 24057503 | 2291 |
| ENSG000001 | 1.971308 | 0.98329  | 0.81782  | 0.55072  | 0.65045  | CTD-2525I chr19   | + | 52674411 | 52680255 | 578  |
| ENSG000001 | 9.20316  | 9.497086 | -0.04581 | 0.94784  | 0.96705  | CTB-176F2I chr19  | + | 23506770 | 23511903 | 5134 |
| ENSG000001 | 1.08924  | 1.248751 | -0.16943 | 0.91784  | 0.94451  | AP001421. chr21   | + | 38888740 | 38888973 | 234  |
| ENSG000001 | 3.111975 | 0.686276 | 1.6683   | 0.2724   | 0.37189  | AC007292. chr19   | - | 4347777  | 4349058  | 334  |
| ENSG000001 | 7.375617 | 15.84437 | -1.0837  | 0.068301 | 0.11663  | CTD-2325N chr19   | + | 8073613  | 8080909  | 421  |
| ENSG000001 | 8.257686 | 9.27775  | -0.16353 | 0.79408  | 0.8538   | RP11-290F chr11   | - | 6223131  | 6224483  | 1353 |
| ENSG000001 | 2.407167 | 4.417959 | -0.82949 | 0.42755  | 0.53291  | AC008267. chr7    | + | 65939543 | 65940709 | 1167 |
| ENSG000001 | 22.20159 | 5.003866 | 2.0913   | 0.000744 | 0.001883 | AC090673. chr12   | - | 66291518 | 66317967 | 204  |
| ENSG000001 | 52.51156 | 33.84068 | 0.62423  | 0.053883 | 0.094932 | RP11-178C chr10   | - | 75880013 | 75880621 | 609  |
| ENSG000001 | 5.031856 | 15.75374 | -1.5787  | 0.032535 | 0.061011 | MIR3188 chr19     | + | 18392659 | 18393560 | 902  |
| ENSG000001 | 0.36308  | 0        | 0.4146   | 0.81455  | NA       | AP000695. chr21   | + | 37858165 | 37860058 | 1894 |
| ENSG000001 | 0.72616  | 1.029414 | -0.30375 | 0.86291  | NA       | AC092964. chr3    | - | 1.72E+08 | 1.72E+08 | 249  |
| ENSG000001 | 3.95199  | 7.527217 | -0.8609  | 0.32197  | 0.42489  | AC007292. chr19   | + | 4363786  | 4364637  | 746  |
| ENSG000001 | 0        | 0.951736 | -1.2555  | 0.48145  | NA       | AP003041. chr11   | + | 1.3E+08  | 1.3E+08  | 348  |
| ENSG000001 | 5.383771 | 6.162786 | -0.203   | 0.80155  | 0.85957  | AC005488. chr7    | + | 72459478 | 72464996 | 78   |
| ENSG000001 | 1.411244 | 0        | 1.7307   | 0.32696  | NA       | AC130469. chr19   | + | 8646044  | 8647599  | 388  |
| ENSG000001 | 0.36308  | 0.654722 | -0.52647 | 0.7643   | NA       | CTB-189B5 chr19   | + | 39521076 | 39521963 | 797  |
| ENSG000001 | 0.290301 | 0        | 0.4146   | 0.81455  | NA       | hsa-mir-15I chr19 | + | 50003781 | 50004614 | 834  |
| ENSG000001 | 21.09939 | 5.830929 | 1.7837   | 0.018962 | 0.037626 | CTC-241F2I chr19  | + | 48758932 | 48761456 | 1969 |
| ENSG000001 | 148.1982 | 140.1293 | 0.078361 | 0.70726  | 0.78242  | PTOV1-AS1 chr19   | - | 50341896 | 50354933 | 3181 |
| ENSG000001 | 0.632843 | 0.715414 | -0.08242 | 0.96193  | NA       | AC016559. chr5    | - | 78523714 | 78523911 | 198  |
| ENSG000001 | 4.491516 | 9.017994 | -0.9521  | 0.21315  | 0.30377  | CTD-2525I chr19   | - | 52725478 | 52734547 | 595  |
| ENSG000001 | 0        | 1.043983 | -1.3473  | 0.44976  | NA       | AC006129. chr19   | + | 42051554 | 42061832 | 661  |
| ENSG000001 | 24.20183 | 29.69872 | -0.30024 | 0.45453  | 0.5599   | AC005253. chr19   | - | 18668585 | 18672370 | 2001 |
| ENSG000001 | 3.019472 | 18.79344 | -2.5182  | 0.001001 | 0.002483 | CTB-52I2.4 chr19  | + | 18133212 | 18142839 | 1402 |
| ENSG000001 | 4.792982 | 9.430689 | -0.90444 | 0.25659  | 0.35402  | AC005795. chr19   | + | 42012068 | 42012814 | 747  |
| ENSG000001 | 3.95199  | 7.336275 | -0.85035 | 0.32117  | 0.424    | PRED62 chr21      | - | 47347679 | 47352477 | 351  |
| ENSG000001 | 4.897464 | 5.568757 | -0.17231 | 0.8473   | 0.8929   | CTD-2575K chr19   | - | 42412671 | 42414249 | 675  |
| ENSG000001 | 5.882222 | 14.19179 | -1.2265  | 0.048625 | 0.086845 | AC018766. chr19   | - | 50356144 | 50358224 | 484  |
| ENSG000001 | 17.91724 | 8.158505 | 1.0954   | 0.051082 | 0.090631 | CTD-2619J chr19   | + | 58869365 | 58870969 | 1154 |

|            |          |          |          |          |          |                  |   |          |          |      |
|------------|----------|----------|----------|----------|----------|------------------|---|----------|----------|------|
| ENSG000001 | 0.290301 | 1.759397 | -1.5998  | 0.33475  | 0.4383   | CTC-244M1 chr19  | + | 38454493 | 38455430 | 607  |
| ENSG000001 | 0.290301 | 0        | 0.4146   | 0.81455  | NA       | CTC-344H1 chr19  | - | 46614337 | 46617121 | 1916 |
| ENSG000001 | 0        | 0.951736 | -1.2555  | 0.48145  | NA       | AC067969. chr19  | - | 39026157 | 39027768 | 552  |
| ENSG000001 | 4.024768 | 0.297015 | 2.8377   | 0.043441 | 0.078784 | CTD-3032J chr19  | - | 17263398 | 17278861 | 467  |
| ENSG000001 | 1.338465 | 0.98329  | 0.34221  | 0.81313  | 0.8687   | CTD-2017C chr19  | - | 24281227 | 24281782 | 556  |
| ENSG000001 | 5.125173 | 2.217472 | 1.0571   | 0.3207   | 0.42351  | NAPA-AS1 chr19   | + | 47987539 | 48004854 | 1753 |
| ENSG000001 | 0.36308  | 3.91376  | -2.7502  | 0.054214 | 0.095421 | FMR1-AS1 chrX    | - | 1.47E+08 | 1.47E+08 | 2387 |
| ENSG000001 | 2.104887 | 0.654722 | 1.2825   | 0.40219  | 0.50697  | AC004466. chr12  | + | 48178706 | 48179787 | 1082 |
| ENSG000001 | 1.338465 | 5.31545  | -1.7999  | 0.090345 | 0.14825  | AC006539. chr19  | + | 20144253 | 20145141 | 572  |
| ENSG000001 | 1.939605 | 0.997859 | 0.81425  | 0.53422  | 0.63511  | AC087239. chr12  | + | 25381515 | 25390840 | 111  |
| ENSG000001 | 0.923144 | 2.382564 | -1.0413  | 0.47531  | 0.57989  | AC051642. chr8   | - | 23412287 | 23420651 | 45   |
| ENSG000001 | 62.81945 | 59.7056  | 0.079904 | 0.80424  | 0.86162  | CTC-429P9 chr19  | + | 16721222 | 16747342 | 376  |
| ENSG000001 | 5.726313 | 4.507789 | 0.30264  | 0.73786  | 0.80668  | AC022154. chr19  | - | 49122529 | 49127389 | 766  |
| ENSG000001 | 1.016461 | 5.196481 | -2.0804  | 0.076402 | 0.12844  | CTC-429C1 chr19  | + | 52391278 | 52403716 | 579  |
| ENSG000001 | 2.67693  | 7.365413 | -1.3812  | 0.1226   | 0.19232  | AP000688. chr21  | + | 37402368 | 37417818 | 114  |
| ENSG000001 | 0.705622 | 7.01657  | -2.9614  | 0.009619 | 0.020278 | RP11-369C chr19  | + | 23308467 | 23311345 | 896  |
| ENSG000001 | 2.531373 | 1.66715  | 0.50827  | 0.70969  | 0.78441  | CTB-60B18 chr19  | + | 49563870 | 49564389 | 520  |
| ENSG000001 | 0        | 3.870053 | -3.485   | 0.017579 | 0.035131 | AL031663. chr20  | - | 44095910 | 44107452 | 60   |
| ENSG000001 | 0.290301 | 2.65044  | -2.2884  | 0.11968  | 0.18842  | VN1R84P chr19    | - | 21902603 | 21902837 | 235  |
| ENSG000001 | 6.567306 | 401.2905 | -5.8639  | 1.33E-55 | 3.49E-54 | CTD-2561J chr19  | - | 21627043 | 21646710 | 4690 |
| ENSG000001 | 0.342542 | 0        | 0.4146   | 0.81455  | NA       | AC091948. chr5   | + | 1.48E+08 | 1.48E+08 | 123  |
| ENSG000001 | 0        | 0.640152 | -0.82869 | 0.63935  | NA       | AL137002. chr13  | - | 1.14E+08 | 1.14E+08 | 60   |
| ENSG000001 | 0        | 1.713273 | -2.2094  | 0.18675  | NA       | PCGF7P chr19     | + | 22320733 | 22321783 | 1051 |
| ENSG000001 | 0        | 0.654722 | -0.83442 | 0.63731  | NA       | AL606500. chr1   | + | 1.55E+08 | 1.55E+08 | 21   |
| ENSG000001 | 0        | 2.07098  | -2.4602  | 0.13507  | 0.20805  | CTD-2616J chr19  | - | 51900009 | 51906780 | 845  |
| ENSG000001 | 0        | 0.98329  | -1.2878  | 0.47019  | NA       | FKSG61 chr14     | + | 77882741 | 77883115 | 375  |
| ENSG000001 | 7.987923 | 5.035421 | 0.6394   | 0.38698  | 0.49117  | AC010524. chr19  | + | 49859409 | 49861026 | 494  |
| ENSG000001 | 0.653381 | 2.915901 | -1.6974  | 0.24107  | 0.33603  | HBCBP chr12      | + | 57390745 | 57391335 | 591  |
| ENSG000001 | 0.290301 | 0        | 0.4146   | 0.81455  | NA       | AC004076. chr19  | - | 57949338 | 57988904 | 664  |
| ENSG000001 | 0        | 0.297015 | -0.41864 | 0.81278  | NA       | CTD-2337J chr19  | - | 54753289 | 54753907 | 619  |
| ENSG000001 | 7.003165 | 8.40698  | -0.26414 | 0.726    | 0.79734  | CTC-471F3. chr19 | + | 40526292 | 40526948 | 657  |
| ENSG000001 | 1.233984 | 0.654722 | 0.67769  | 0.66965  | NA       | AC068620. chr4   | + | 57276682 | 57277131 | 450  |
| ENSG000001 | 17.05409 | 19.90778 | -0.20354 | 0.70497  | 0.78064  | AL590452. chr1   | + | 1.45E+08 | 1.45E+08 | 2057 |
| ENSG000001 | 0.632843 | 5.101818 | -2.5122  | 0.049562 | 0.088312 | CTC-513N1 chr19  | + | 20599320 | 20599875 | 556  |
| ENSG000001 | 57.48971 | 47.1811  | 0.28557  | 0.37407  | 0.47837  | AC117395. chr3   | + | 1.5E+08  | 1.5E+08  | 1470 |
| ENSG000001 | 15.70608 | 1.309443 | 3.327    | 0.000168 | 0.000466 | AL645608. chr1   | - | 861264   | 866445   | 336  |
| ENSG000001 | 4.91621  | 1.66715  | 1.3725   | 0.24051  | 0.33538  | SMIM17 chr19     | + | 57154513 | 57167134 | 1076 |
| ENSG000001 | 0        | 2.436809 | -2.4534  | 0.15276  | 0.23056  | CTC-241F2I chr19 | - | 48766157 | 48774540 | 437  |
| ENSG000001 | 10.28124 | 9.392687 | 0.11317  | 0.85561  | 0.89842  | AC005785. chr19  | + | 15489887 | 15492004 | 1771 |
| ENSG000001 | 2.157942 | 5.393128 | -1.2107  | 0.27683  | 0.37707  | CTD-3137F chr19  | + | 18551920 | 18555242 | 1743 |
| ENSG000001 | 10.04317 | 19.35759 | -0.927   | 0.14856  | 0.22519  | CTD-3138B chr19  | + | 58778001 | 58779051 | 550  |
| ENSG000001 | 0        | 1.759397 | -2.0294  | 0.24451  | NA       | CTD-3214F chr19  | - | 7698652  | 7701876  | 843  |
| ENSG000001 | 179.7045 | 253.7625 | -0.50062 | 0.021408 | 0.041962 | CTC-444N2 chr19  | + | 57815673 | 57819930 | 4258 |
| ENSG000001 | 4.015395 | 1.012429 | 1.7263   | 0.15465  | 0.233    | AC008372. chr14  | - | 78227711 | 78228033 | 33   |
| ENSG000001 | 10.56119 | 3.884622 | 1.3473   | 0.082877 | 0.1377   | AL359091. chr9   | + | 1.31E+08 | 1.31E+08 | 1846 |
| ENSG000001 | 0.290301 | 0        | 0.4146   | 0.81455  | NA       | AC008387. chr5   | + | 72894203 | 72896845 | 45   |
| ENSG000001 | 40.01158 | 35.33703 | 0.17494  | 0.59353  | 0.68821  | AC137932. chr16  | + | 89334512 | 89339452 | 3660 |
| ENSG000001 | 50.64571 | 38.85012 | 0.38554  | 0.22932  | 0.32256  | RP11-379K chr3   | + | 1.7E+08  | 1.7E+08  | 1781 |
| ENSG000001 | 0.36308  | 0.594029 | -0.39069 | 0.82661  | NA       | EEF1A1P7 chr19   | + | 35873074 | 35874954 | 1394 |
| ENSG000001 | 3.76617  | 42.7859  | -3.3869  | 1.78E-06 | 6.24E-06 | CTD-2331F chr19  | - | 53365060 | 53366119 | 1060 |
| ENSG000001 | 29.00337 | 8.654582 | 1.7173   | 0.000593 | 0.001521 | CTD-2619J chr19  | - | 58858220 | 58874117 | 3322 |
| ENSG000001 | 0        | 0.297015 | -0.41864 | 0.81278  | NA       | CTD-2560K chr19  | - | 51058627 | 51061226 | 813  |
| ENSG000001 | 0        | 1.280305 | -1.6305  | 0.35731  | NA       | AIRN chr6        | - | 1.6E+08  | 1.6E+08  | 4374 |
| ENSG000001 | 0.342542 | 2.794516 | -2.1503  | 0.17675  | 0.26028  | CTC-246B1 chr19  | - | 39805291 | 39811498 | 877  |
| ENSG000001 | 2.032922 | 1.935026 | 0.040002 | 0.97515  | 0.98621  | AP000304. chr21  | - | 34947431 | 34947645 | 36   |
| ENSG000001 | 0.290301 | 0.594029 | -0.38058 | 0.83094  | NA       | AC003005. chr19  | + | 57989017 | 57994364 | 539  |
| ENSG000001 | 0        | 0.357707 | -0.41864 | 0.81278  | NA       | VN1R78P chr19    | - | 20765890 | 20766453 | 564  |
| ENSG000001 | 0        | 2.058828 | -1.8947  | 0.28782  | 0.38931  | RP11-420K chr19  | + | 21820776 | 21839102 | 1367 |
| ENSG000001 | 9.853936 | 6.188636 | 0.64672  | 0.46196  | 0.56703  | RP11-434C chr3   | + | 14178644 | 14189548 | 787  |
| ENSG000001 | 0.923144 | 0.357707 | 0.88371  | 0.60898  | NA       | CTB-60B18 chr19  | + | 49567516 | 49568113 | 598  |
| ENSG000001 | 0.653381 | 0.297015 | 0.51304  | 0.77085  | NA       | CTD-2528A chr19  | + | 17162804 | 17165897 | 280  |
| ENSG000001 | 0.632843 | 0        | 0.81931  | 0.64303  | NA       | CTD-2623F chr19  | + | 58648080 | 58648421 | 342  |
| ENSG000001 | 0        | 0.357707 | -0.41864 | 0.81278  | NA       | RP11-248B chr14  | - | 92069517 | 92069777 | 261  |
| ENSG000001 | 0        | 6.532646 | -4.1567  | 0.003563 | 0.008118 | CLEC4GP1 chr19   | + | 7852435  | 7855507  | 870  |
| ENSG000001 | 0.36308  | 0.640152 | -0.51156 | 0.77091  | NA       | CTB-5212.5 chr19 | - | 18122108 | 18142348 | 367  |

|            |          |          |          |          |          |                   |   |          |          |      |
|------------|----------|----------|----------|----------|----------|-------------------|---|----------|----------|------|
| ENSG000001 | 0.580602 | 0        | 0.8036   | 0.6494   | NA       | AC018630. chr12   | + | 11187087 | 11187275 | 189  |
| ENSG000001 | 1.576526 | 3.495361 | -1.0002  | 0.38915  | 0.49337  | CTD-2619J chr19   | + | 58911588 | 58912046 | 459  |
| ENSG000001 | 0        | 2.200487 | -2.3588  | 0.16874  | 0.25044  | AC006272. chr19   | - | 52343024 | 52344198 | 552  |
| ENSG000001 | 0        | 1.188058 | -1.268   | 0.47398  | NA       | CTD-3187F chr19   | + | 51774520 | 51784488 | 915  |
| ENSG000001 | 1.555988 | 0.891044 | 0.55677  | 0.72941  | 0.80008  | CTD-3030C chr19   | + | 21500963 | 21501521 | 559  |
| ENSG000001 | 0        | 6.505924 | -4.2937  | 0.001377 | 0.003343 | LUZPP1 chr3       | + | 46598888 | 46601178 | 2291 |
| ENSG000001 | 0.342542 | 0        | 0.4146   | 0.81455  | NA       | CTD-2542C chr19   | + | 21155068 | 21166016 | 575  |
| ENSG000001 | 1.742621 | 1.043983 | 0.56463  | 0.70998  | 0.78467  | C15ORF31 chr15    | + | 59439899 | 59440054 | 156  |
| ENSG000001 | 0.923144 | 0.937167 | -0.01228 | 0.99379  | NA       | AC019206. chr2    | - | 70129482 | 70129841 | 192  |
| ENSG000001 | 5.114986 | 10.2505  | -0.91352 | 0.32407  | 0.42698  | RP4-806M1 chr20   | - | 57408864 | 57411584 | 1153 |
| ENSG000001 | 2.003011 | 0.997859 | 0.80224  | 0.5742   | 0.6713   | RP3-477O4 chr20   | + | 34106682 | 34107108 | 427  |
| ENSG000001 | 0        | 14.77453 | -5.4618  | 1.04E-05 | 3.34E-05 | AP001888. chr11   | - | 69587254 | 69587718 | 465  |
| ENSG000001 | 10.89354 | 17.90319 | -0.70059 | 0.19091  | 0.27771  | VN1R81P chr19     | + | 21306620 | 21306991 | 372  |
| ENSG000001 | 0        | 42.94442 | -6.984   | 6.91E-10 | 3.23E-09 | FLJ11235 chr5     | + | 1.12E+08 | 1.12E+08 | 1031 |
| ENSG000001 | 44.23512 | 62.28636 | -0.48511 | 0.2095   | 0.29949  | CTD-2017C chr19   | + | 24216247 | 24249711 | 1966 |
| ENSG000001 | 25.55227 | 7.12097  | 1.8053   | 0.001555 | 0.003743 | RP11-373A chr9    | - | 72808913 | 72873782 | 1818 |
| ENSG000001 | 6.390859 | 4.721421 | 0.41399  | 0.61122  | 0.70359  | CTC-492K1 chr19   | + | 40949343 | 40949994 | 558  |
| ENSG000001 | 0.923144 | 0.997859 | -0.05562 | 0.97039  | 0.98357  | AC126614. chr12   | + | 57810198 | 57810536 | 339  |
| ENSG000001 | 0.36308  | 0.357707 | -0.00212 | 0.99905  | NA       | CTD-2568A chr19   | - | 51295942 | 51296841 | 260  |
| ENSG000001 | 0        | 2.436809 | -2.4534  | 0.15276  | 0.23056  | CTC-360J11 chr19  | + | 57686601 | 57689289 | 2072 |
| ENSG000001 | 0        | 1.029414 | -1.1526  | 0.51496  | NA       | FENDRR chr16      | - | 86508135 | 86542705 | 3095 |
| ENSG000001 | 4.273994 | 2.681995 | 0.62739  | 0.51302  | 0.61611  | AC003682. chr19   | + | 58136400 | 58138318 | 462  |
| ENSG000001 | 0.685084 | 0.357707 | 0.4822   | 0.78686  | NA       | AC012485. chr2    | + | 2.39E+08 | 2.39E+08 | 75   |
| ENSG000001 | 1.649304 | 3.054271 | -0.78002 | 0.48846  | 0.59253  | CTC-344H1 chr19   | + | 46530912 | 46533419 | 544  |
| ENSG000001 | 4.378475 | 7.282031 | -0.70897 | 0.36427  | 0.46864  | AL031320. chr6    | + | 1.44E+08 | 1.44E+08 | 48   |
| ENSG000001 | 2.624689 | 5.464357 | -0.95078 | 0.38709  | 0.49127  | AC132192. chr11   | - | 9481747  | 9482010  | 264  |
| ENSG000001 | 2.604151 | 2.635871 | -0.01171 | 0.9913   | 0.99536  | AL138781. chr9    | + | 1.39E+08 | 1.39E+08 | 1843 |
| ENSG000001 | 1.681007 | 5.347004 | -1.5279  | 0.13371  | 0.20646  | AC013449. chr2    | - | 26251074 | 26251481 | 408  |
| ENSG000001 | 0        | 0.297015 | -0.41864 | 0.81278  | NA       | AC003043. chr17   | + | 42335297 | 42355825 | 57   |
| ENSG000001 | 0.72616  | 0.640152 | 0.083249 | 0.96152  | NA       | AL355531. chr10   | - | 1.31E+08 | 1.31E+08 | 642  |
| ENSG000001 | 0.342542 | 1.355566 | -1.3789  | 0.3926   | NA       | AC011551. chr19   | - | 47050313 | 47104118 | 495  |
| ENSG000001 | 0        | 0.357707 | -0.41864 | 0.81278  | NA       | RP11-420K chr19   | - | 21860352 | 21861023 | 672  |
| ENSG000001 | 0.870904 | 5.836634 | -2.2784  | 0.064923 | 0.11173  | CTD-2607J chr19   | + | 22009315 | 22010081 | 412  |
| ENSG000001 | 3.133327 | 1.98115  | 0.56356  | 0.62146  | 0.71198  | HAVCR1P1 chr19    | + | 24345172 | 24346227 | 1056 |
| ENSG000001 | 0        | 1.012429 | -1.3162  | 0.46038  | NA       | AL160175. chr20   | + | 30309001 | 30309134 | 51   |
| ENSG000001 | 0        | 0.891044 | -1.0625  | 0.54819  | NA       | CTC-471J11. chr19 | + | 52645879 | 52647409 | 332  |
| ENSG000001 | 2.645227 | 0.997859 | 1.2099   | 0.32762  | 0.43063  | AC006262. chr19   | + | 46706683 | 46718094 | 3346 |
| ENSG000001 | 0.290301 | 2.431104 | -2.0027  | 0.21582  | 0.30684  | AC007204. chr19   | - | 20047769 | 20048639 | 237  |
| ENSG000001 | 4.948726 | 4.36613  | 0.14846  | 0.88401  | 0.91907  | AL132989. chr14   | + | 58754751 | 58755865 | 1115 |
| ENSG000001 | 0        | 1.326428 | -1.6486  | 0.3523   | NA       | RP11-15H2 chr19   | + | 23419110 | 23419653 | 544  |
| ENSG000001 | 0.342542 | 0        | 0.4146   | 0.81455  | NA       | AC016182. chr17   | + | 76494911 | 76499138 | 4228 |
| ENSG000001 | 67.29368 | 50.9395  | 0.39318  | 0.19369  | 0.28119  | MIR4453 chr4      | + | 1.53E+08 | 1.53E+08 | 3000 |
| ENSG000001 | 1.370168 | 0.654722 | 0.70321  | 0.67494  | 0.75646  | AP002884. chr11   | + | 1.12E+08 | 1.12E+08 | 1130 |
| ENSG000001 | 1.286224 | 0        | 1.8436   | 0.2818   | NA       | AC087477. chr15   | + | 96904487 | 96904900 | 414  |
| ENSG000001 | 1.431782 | 18.1565  | -3.4828  | 9.75E-05 | 0.000278 | CTD-2587F chr19   | + | 54945363 | 54945845 | 483  |
| ENSG000001 | 2.116866 | 1.294874 | 0.55658  | 0.67909  | 0.75982  | CTB-102L5 chr19   | + | 38690476 | 38691574 | 432  |
| ENSG000001 | 0.36308  | 0.297015 | -0.00205 | 0.99908  | NA       | IFNL3P1 chr19     | - | 39727073 | 39727933 | 501  |
| ENSG000001 | 56.20495 | 85.77858 | -0.60471 | 0.05352  | 0.09438  | CTD-3138B chr19   | - | 58768639 | 58790174 | 2705 |
| ENSG000001 | 4.616536 | 5.240188 | -0.17815 | 0.82654  | 0.87785  | CTD-2545N chr19   | - | 50990067 | 50990895 | 626  |
| ENSG000001 | 2.426891 | 2.635871 | -0.07496 | 0.94972  | 0.96863  | CTD-2616J chr19   | - | 51864966 | 51868798 | 473  |
| ENSG000001 | 9.493297 | 20.15464 | -1.0538  | 0.16368  | 0.24431  | VN1R83P chr19     | - | 21472356 | 21472800 | 445  |
| ENSG000001 | 0        | 3.305162 | -3.2461  | 0.030518 | 0.057606 | CYP2T3P chr19     | + | 41640627 | 41643213 | 817  |
| ENSG000001 | 0        | 0.654722 | -0.83442 | 0.63731  | NA       | RP11-514C chr16   | + | 86320033 | 86326995 | 2065 |
| ENSG000001 | 0.290301 | 0.343138 | -0.00202 | 0.99909  | NA       | AC004076. chr19   | + | 57905551 | 57949825 | 521  |
| ENSG000001 | 0        | 0.297015 | -0.41864 | 0.81278  | NA       | RP11-420K chr19   | + | 21892324 | 21892993 | 670  |
| ENSG000001 | 0.995923 | 3.380424 | -1.509   | 0.22373  | 0.31611  | AC005523. chr19   | - | 4785132  | 4791219  | 418  |
| ENSG000001 | 0.290301 | 1.326428 | -1.262   | 0.45814  | NA       | AC109583. chr3    | - | 46927699 | 46930171 | 69   |
| ENSG000001 | 2.551911 | 1.043983 | 1.1116   | 0.39983  | 0.50456  | KIAA1658 chr22    | - | 30814212 | 30814469 | 258  |
| ENSG000001 | 5.986704 | 1.995719 | 1.4601   | 0.12826  | 0.19943  | CTD-2619J chr19   | + | 58929927 | 58930677 | 495  |
| ENSG000001 | 1.233984 | 2.811501 | -0.9508  | 0.49677  | 0.60059  | VN1R107P chr19    | + | 57971280 | 57971488 | 209  |
| ENSG000001 | 68.87216 | 9.202488 | 2.8628   | 1.56E-12 | 8.71E-12 | RP11-295P chr10   | + | 13724521 | 13726874 | 1978 |
| ENSG000001 | 0.870904 | 0.297015 | 0.71032  | 0.69005  | NA       | AC090427. chr19   | + | 14834747 | 14835121 | 285  |
| ENSG000001 | 0        | 0.343138 | -0.41864 | 0.81278  | NA       | RP11-353N chr1    | + | 1.5E+08  | 1.5E+08  | 777  |
| ENSG000001 | 0        | 8.112382 | -4.6318  | 0.000353 | 0.000936 | RP11-678C chr19   | - | 21753624 | 21770124 | 1178 |
| ENSG000001 | 0.580602 | 0        | 0.8036   | 0.6494   | NA       | AC012360. chr2    | + | 1.06E+08 | 1.06E+08 | 30   |

|            |          |          |          |          |          |                   |   |          |          |      |
|------------|----------|----------|----------|----------|----------|-------------------|---|----------|----------|------|
| ENSG000001 | 0.36308  | 0        | 0.4146   | 0.81455  | NA       | CTD-2332E chr19   | + | 20794365 | 20798195 | 628  |
| ENSG000001 | 1.669842 | 0.594029 | 1.0076   | 0.53526  | 0.63622  | AC003956. chr19   | + | 15234971 | 15236985 | 356  |
| ENSG000001 | 0.580602 | 1.638012 | -1.0739  | 0.48163  | 0.58594  | AC007228. chr19   | - | 57183942 | 57185269 | 1328 |
| ENSG000001 | 11.12044 | 44.44727 | -1.9687  | 1.70E-06 | 5.94E-06 | RP11-158F chr18   | - | 32860831 | 32870165 | 4382 |
| ENSG000001 | 76.32496 | 72.70308 | 0.067452 | 0.82903  | 0.87958  | RP1-283E3 chr1    | - | 1634175  | 1669127  | 5079 |
| ENSG000001 | 11.3902  | 6.924324 | 0.6985   | 0.26475  | 0.36321  | AL354718. chr9    | - | 45441273 | 45441542 | 270  |
| ENSG000001 | 0.995923 | 0.715414 | 0.36543  | 0.82075  | NA       | CTC-453G2 chr19   | + | 48707340 | 48716411 | 566  |
| ENSG000001 | 6.596403 | 10.68756 | -0.65236 | 0.36235  | 0.46653  | RP11-464F chr10   | + | 75385754 | 75386548 | 795  |
| ENSG000001 | 37.96668 | 38.09033 | -0.00482 | 0.99119  | 0.99535  | AL355312. chr6    | + | 1.5E+08  | 1.5E+08  | 1740 |
| ENSG000001 | 2.375464 | 3.397409 | -0.46918 | 0.66173  | 0.74549  | CTD-2611C chr19   | + | 56218707 | 56219330 | 462  |
| ENSG000001 | 1.628766 | 1.652581 | -0.01266 | 0.99188  | 0.99563  | VN1R80P chr19     | + | 21246730 | 21247067 | 338  |
| ENSG000001 | 0        | 0.357707 | -0.41864 | 0.81278  | NA       | AC115522. chr19   | - | 44298461 | 44299810 | 556  |
| ENSG000001 | 0.632843 | 0.654722 | -0.02224 | 0.98935  | NA       | RP11-316C chr2    | - | 2.2E+08  | 2.2E+08  | 636  |
| ENSG000001 | 1.08924  | 3.708992 | -1.5183  | 0.24854  | 0.34479  | CTD-2620I chr19   | - | 53638190 | 53638575 | 386  |
| ENSG000001 | 0.975385 | 0.357707 | 0.92752  | 0.59066  | NA       | RP11-65J3. chr9   | + | 1.32E+08 | 1.32E+08 | 141  |
| ENSG000001 | 0        | 0.686276 | -0.84936 | 0.6309   | NA       | AC078899. chr19   | + | 20359861 | 20361104 | 212  |
| ENSG000001 | 0.632843 | 0        | 0.81931  | 0.64303  | NA       | AC006262. chr19   | - | 46692423 | 46706340 | 1037 |
| ENSG000001 | 0.342542 | 0        | 0.4146   | 0.81455  | NA       | AL121761. chr20   | - | 19738296 | 19738679 | 384  |
| ENSG000001 | 6.173337 | 2.728118 | 1.0844   | 0.2675   | 0.36624  | AC073657. chr15   | - | 42073346 | 42076229 | 183  |
| ENSG000001 | 0        | 1.545765 | -1.8556  | 0.29195  | NA       | DKFZP434E chr11   | + | 77184416 | 77188074 | 3659 |
| ENSG000001 | 12.82198 | 38.74418 | -1.5713  | 0.000212 | 0.000578 | hsa-mir-29I chr20 | - | 57392187 | 57392780 | 594  |
| ENSG000001 | 1.306762 | 2.185918 | -0.63129 | 0.63764  | 0.72578  | AC068499. chr19   | + | 18315540 | 18331346 | 911  |
| ENSG000001 | 0.632843 | 2.131673 | -1.2793  | 0.40563  | 0.51047  | CTB-60B18 chr19   | - | 49521504 | 49522741 | 493  |
| ENSG000001 | 2.116866 | 1.188058 | 0.57887  | 0.71136  | 0.78582  | AC110084. chr2    | - | 27998851 | 28009186 | 63   |
| ENSG000001 | 0.36308  | 0.640152 | -0.51156 | 0.77091  | NA       | AL133373. chr14   | - | 92038788 | 92041383 | 2596 |
| ENSG000001 | 0        | 16.86895 | -5.6922  | 1.94E-06 | 6.75E-06 | CTD-2561J chr19   | + | 21666176 | 21686040 | 3760 |
| ENSG000001 | 0        | 0.297015 | -0.41864 | 0.81278  | NA       | CTD-2623F chr19   | + | 58555960 | 58558137 | 2178 |
| ENSG000001 | 0.632843 | 0        | 0.81931  | 0.64303  | NA       | AL596220. chr1    | - | 1.86E+08 | 1.86E+08 | 135  |
| ENSG000001 | 30.031   | 21.43252 | 0.48073  | 0.26692  | 0.36562  | CTD-2622I chr19   | - | 4061613  | 4062747  | 684  |
| ENSG000001 | 0        | 0.297015 | -0.41864 | 0.81278  | NA       | AL355149. chr1    | + | 16865561 | 16866070 | 510  |
| ENSG000001 | 2.334388 | 2.728118 | -0.19323 | 0.86338  | 0.90467  | CTC-444N2 chr19   | - | 57862216 | 57863380 | 1045 |
| ENSG000001 | 0.342542 | 0        | 0.4146   | 0.81455  | NA       | CTD-2553L chr19   | - | 35129027 | 35131594 | 413  |
| ENSG000001 | 1.359003 | 4.317591 | -1.5017  | 0.17743  | 0.26111  | AC010524. chr19   | - | 49871962 | 49891338 | 3263 |
| ENSG000001 | 11.77642 | 3.541484 | 1.6235   | 0.037175 | 0.068758 | AC007382. chr2    | - | 37068327 | 37068530 | 204  |
| ENSG000001 | 0        | 0.891044 | -1.0625  | 0.54819  | NA       | CTD-2561J chr19   | - | 21704145 | 21704698 | 554  |
| ENSG000001 | 1.379541 | 1.012429 | 0.32949  | 0.83056  | 0.88058  | RP11-247A chr9    | + | 1.32E+08 | 1.32E+08 | 507  |
| ENSG000001 | 0        | 0.297015 | -0.41864 | 0.81278  | NA       | CTD-2616J chr19   | - | 51929601 | 51929922 | 322  |
| ENSG000001 | 26.8975  | 46.43487 | -0.78162 | 0.044342 | 0.080098 | CTC-444N2 chr19   | + | 57772722 | 57774106 | 1385 |
| ENSG000001 | 0.975385 | 0.997859 | -0.01708 | 0.99089  | 0.99525  | RP11-588F chr12   | - | 70840240 | 70841365 | 1126 |
| ENSG000001 | 0.36308  | 0.357707 | -0.00212 | 0.99905  | NA       | CTC-444N2 chr19   | - | 57828576 | 57828930 | 355  |
| ENSG000001 | 0        | 0.297015 | -0.41864 | 0.81278  | NA       | AC022819. chr15   | - | 99859300 | 99859828 | 81   |
| ENSG000001 | 0.36308  | 1.40169  | -1.3114  | 0.43536  | NA       | CTD-2561J chr19   | - | 21564022 | 21564723 | 394  |
| ENSG000001 | 0.995923 | 0.297015 | 1.0163   | 0.54122  | NA       | AL139080. chr13   | + | 24322243 | 24323901 | 96   |
| ENSG000001 | 4.201215 | 6.907338 | -0.67069 | 0.40387  | 0.50869  | CTD-2538C chr19   | + | 16954836 | 16957284 | 371  |
| ENSG000001 | 0.632843 | 0        | 0.81931  | 0.64303  | NA       | CTD-3105F chr19   | - | 12490003 | 12512088 | 2593 |
| ENSG000001 | 4.253456 | 1.309443 | 1.4992   | 0.1868   | 0.27269  | CTD-2571L chr19   | + | 48110781 | 48236355 | 344  |
| ENSG000001 | 2.656392 | 0.343138 | 2.221    | 0.13966  | 0.21347  | CTD-3030C chr19   | - | 21458825 | 21459134 | 310  |
| ENSG000001 | 0        | 14.51311 | -5.405   | 1.72E-05 | 5.37E-05 | SCGB1B2P chr19    | - | 35067638 | 35068606 | 612  |
| ENSG000001 | 3.309773 | 2.278164 | 0.47571  | 0.65418  | 0.73917  | AC104534. chr19   | + | 39310806 | 39313863 | 566  |
| ENSG000001 | 0        | 0.343138 | -0.41864 | 0.81278  | NA       | EMR4P chr19       | - | 6952511  | 6990857  | 2732 |
| ENSG000001 | 0.342542 | 0        | 0.4146   | 0.81455  | NA       | AC135983. chr15   | + | 32774822 | 32780287 | 5466 |
| ENSG000001 | 3.008307 | 1.591889 | 0.78384  | 0.49291  | 0.59683  | CTC-450M5 chr19   | - | 38599140 | 38600173 | 328  |
| ENSG000001 | 0.342542 | 0        | 0.4146   | 0.81455  | NA       | RPL7P50 chr19     | + | 6593340  | 6594066  | 727  |
| ENSG000001 | 0.705622 | 0.343138 | 0.57395  | 0.74355  | NA       | SMIM7 chr19       | - | 16688453 | 16770926 | 956  |
| ENSG000001 | 16.18318 | 58.58569 | -1.8242  | 2.59E-06 | 8.90E-06 | AC027307. chr19   | + | 1440838  | 1441937  | 1100 |
| ENSG000001 | 1.866827 | 1.40169  | 0.38292  | 0.77738  | 0.83999  | AC112205. chr5    | - | 1.63E+08 | 1.63E+08 | 99   |
| ENSG000001 | 0        | 0.654722 | -0.83442 | 0.63731  | NA       | CTD-2587F chr19   | - | 54862991 | 54864894 | 1904 |
| ENSG000001 | 0.290301 | 6.054722 | -0.51764 | 0.76892  | NA       | PRED57 chr21      | - | 46511596 | 46515493 | 345  |
| ENSG000001 | 6.938945 | 3.608147 | 1.1465   | 0.19641  | 0.28445  | MGC20647 chr22    | + | 30641984 | 30642907 | 723  |
| ENSG000001 | 9.230466 | 7.59603  | 0.27806  | 0.71164  | 0.78602  | CTD-3093A chr19   | + | 54697731 | 54698394 | 664  |
| ENSG000001 | 0.36308  | 2.558194 | -2.0563  | 0.19625  | 0.2843   | AC068039. chr2    | - | 1.73E+08 | 1.73E+08 | 66   |
| ENSG000001 | 3.64115  | 4.634006 | -0.32185 | 0.74274  | 0.81095  | LA16c-OS1 chr16   | - | 235747   | 236293   | 547  |
| ENSG000001 | 0.685084 | 1.012429 | -0.37562 | 0.82411  | NA       | AC027228. chr15   | + | 78830023 | 78831288 | 1266 |
| ENSG000001 | 0.653381 | 3.50993  | -1.9307  | 0.17495  | 0.25813  | CTD-2245F chr19   | + | 53665681 | 53666816 | 359  |
| ENSG000001 | 0        | 1.545765 | -1.8556  | 0.29195  | NA       | SIGLEC31P chr19   | - | 57100863 | 57101649 | 551  |

|            |          |          |          |          |          |                 |   |          |          |      |
|------------|----------|----------|----------|----------|----------|-----------------|---|----------|----------|------|
| ENSG000001 | 0.36308  | 0        | 0.4146   | 0.81455  | NA       | SIGLEC22P chr19 | + | 51714336 | 51715344 | 714  |
| ENSG000001 | 10.47822 | 4.022992 | 1.3269   | 0.077543 | 0.13005  | AC132872. chr17 | + | 80214131 | 80216080 | 1950 |
| ENSG000001 | 2.261609 | 2.679579 | -0.19982 | 0.87006  | 0.90953  | AP001579. chr21 | - | 46492796 | 46492927 | 132  |
| ENSG000001 | 0        | 1.531196 | -1.8455  | 0.29475  | NA       | CTB-167G5 chr19 | - | 54102882 | 54106751 | 1228 |
| ENSG000001 | 7.208709 | 6.004142 | 0.27025  | 0.73836  | 0.80703  | AC026310. chr12 | + | 25055243 | 25057615 | 2373 |
| ENSG000001 | 0        | 0.357707 | -0.41864 | 0.81278  | NA       | AC020915. chr19 | + | 58735872 | 58736835 | 964  |
| ENSG000001 | 1.681007 | 50.182   | -4.7109  | 3.82E-11 | 1.95E-10 | ESPNP chr1      | - | 17013834 | 17046652 | 2015 |
| ENSG000001 | 0.342542 | 0.343138 | -0.00208 | 0.99906  | NA       | RP11-138F chr18 | - | 32317759 | 32347627 | 577  |
| ENSG000001 | 0.36308  | 0        | 0.4146   | 0.81455  | NA       | IGFL1P1 chr19   | + | 46699495 | 46700580 | 360  |
| ENSG000001 | 2.282147 | 0.357707 | 2.0705   | 0.1665   | 0.24767  | CTD-2550C chr19 | + | 8411401  | 8412571  | 594  |
| ENSG000001 | 8.278224 | 24.66243 | -1.5433  | 0.004493 | 0.010077 | AC026740. chr5  | + | 667759   | 668839   | 744  |
| ENSG000001 | 0        | 1.888903 | -2.3653  | 0.15293  | NA       | CTD-2616J chr19 | + | 51897742 | 51906904 | 559  |
| ENSG000001 | 8.434133 | 6.269602 | 0.41604  | 0.55345  | 0.65286  | AC006014. chr7  | - | 74999908 | 75005425 | 78   |
| ENSG000001 | 5.466901 | 0        | 4.0189   | 0.003673 | 0.008348 | PLCE1-AS1 chr10 | - | 96039034 | 96046828 | 1683 |
| ENSG000001 | 24.77485 | 5.788094 | 2.0183   | 0.000646 | 0.00165  | A1BG-AS1 chr19  | + | 58859117 | 58866549 | 2130 |
| ENSG000001 | 1.016461 | 1.638012 | -0.57497 | 0.68118  | 0.76164  | RP11-256I chr2  | - | 2.2E+08  | 2.2E+08  | 448  |
| ENSG000001 | 3.019472 | 26.15965 | -3.0209  | 5.34E-06 | 1.77E-05 | RP11-34P1 chr1  | - | 135141   | 135895   | 755  |
| ENSG000001 | 4.648238 | 5.76782  | -0.28548 | 0.74222  | 0.81051  | CTD-2619J chr19 | - | 58939999 | 58942515 | 2517 |
| ENSG000001 | 22.63468 | 27.80902 | -0.29317 | 0.58003  | 0.67643  | AC026806. chr19 | + | 38822274 | 38822716 | 443  |
| ENSG000001 | 0.36308  | 2.073397 | -1.7369  | 0.29246  | 0.39434  | AL161645. chr10 | - | 1.35E+08 | 1.35E+08 | 60   |
| ENSG000001 | 4.387848 | 1.995719 | 1.0236   | 0.32473  | 0.42764  | FLJ00418 chr16  | + | 70695570 | 70699739 | 4170 |
| ENSG000001 | 0.342542 | 1.713273 | -1.6507  | 0.29668  | 0.39869  | RP11-886P chr19 | - | 8488239  | 8492711  | 511  |
| ENSG000001 | 0.632843 | 5.055695 | -2.41    | 0.080265 | 0.13394  | AC005387. chr19 | + | 18642228 | 18643440 | 421  |
| ENSG000001 | 14.37797 | 0        | 5.4813   | 5.02E-06 | 1.67E-05 | MGC4294 chr20   | + | 57209828 | 57210772 | 945  |
| ENSG000001 | 5.1766   | 11.50979 | -1.1009  | 0.1029   | 0.16534  | CKS1B chr5      | - | 61808070 | 61808309 | 240  |
| ENSG000001 | 2.624689 | 5.147942 | -0.90265 | 0.34829  | 0.45259  | CTD-2192J chr19 | - | 12793507 | 12798093 | 635  |
| ENSG000001 | 4.140415 | 12.51007 | -1.5383  | 0.051595 | 0.091414 | AD000684 chr19  | + | 35753749 | 35755707 | 1016 |
| ENSG000001 | 4.294532 | 13.86805 | -1.6204  | 0.026157 | 0.050247 | AC004017. chr19 | - | 58203868 | 58204128 | 261  |
| ENSG000001 | 0.580602 | 0.951736 | -0.43779 | 0.79667  | NA       | MRPS17P1 chr1   | - | 45454377 | 45457506 | 3130 |
| ENSG000001 | 1.89853  | 5.003866 | -1.237   | 0.23985  | 0.3346   | AC114494. chr1  | - | 31902192 | 31902614 | 423  |
| ENSG000001 | 0        | 0.640152 | -0.82869 | 0.63935  | NA       | AC020952. chr19 | + | 31640362 | 31640757 | 396  |
| ENSG000001 | 0        | 3.426547 | -3.2456  | 0.032755 | 0.06137  | ERVV-2 chr19    | + | 53547991 | 53554329 | 2431 |
| ENSG000001 | 0.685084 | 0.357707 | 0.4822   | 0.78686  | NA       | AC061992. chr17 | + | 76422409 | 76422834 | 426  |
| ENSG000001 | 22.31186 | 73.17473 | -1.6935  | 2.20E-06 | 7.61E-06 | CTD-3099C chr19 | - | 53100952 | 53102140 | 644  |
| ENSG000001 | 0.705622 | 0        | 0.8807   | 0.6196   | NA       | PIH1 chr16      | - | 79015647 | 79015739 | 93   |
| ENSG000001 | 0        | 0.343138 | -0.41864 | 0.81278  | NA       | CTD-2528A chr19 | + | 17119999 | 17124270 | 405  |
| ENSG000001 | 0.36308  | 0.343138 | -0.0021  | 0.99905  | NA       | CTC-435M1 chr19 | + | 41905277 | 41906270 | 540  |
| ENSG000001 | 0.632843 | 2.232041 | -1.452   | 0.29987  | 0.40144  | CTB-175P5 chr19 | + | 23567332 | 23568095 | 764  |
| ENSG000001 | 9.532745 | 13.07167 | -0.43044 | 0.57652  | 0.67327  | VN1R82P chr19   | + | 21371401 | 21371756 | 356  |
| ENSG000001 | 15.01    | 23.04543 | -0.58928 | 0.2492   | 0.34549  | AL807752. chr9  | - | 1.4E+08  | 1.4E+08  | 315  |
| ENSG000001 | 0        | 2.529055 | -2.8037  | 0.077578 | 0.13005  | ZNF818P chr19   | + | 53716241 | 53716649 | 409  |
| ENSG000001 | 0.342542 | 0.951736 | -0.90924 | 0.59857  | NA       | SLC6A21P chr19  | - | 49758729 | 49759359 | 369  |
| ENSG000001 | 0.632843 | 0.640152 | -0.00865 | 0.99586  | NA       | CTD-2542C chr19 | + | 21143914 | 21146176 | 1267 |
| ENSG000001 | 3.101624 | 4.127392 | -0.37697 | 0.72335  | 0.7954   | AC005932. chr19 | + | 19051131 | 19057640 | 957  |
| ENSG000001 | 0        | 1.012429 | -1.3162  | 0.46038  | NA       | CTD-3187F chr19 | + | 51784116 | 51786276 | 974  |
| ENSG000001 | 1.048164 | 0.654722 | 0.46381  | 0.77376  | NA       | AC003006. chr19 | + | 58193403 | 58264943 | 612  |
| ENSG000001 | 7.520361 | 16.15192 | -1.0696  | 0.097122 | 0.15759  | MTRNR2L1 chr3   | - | 96335981 | 96337000 | 1020 |
| ENSG000001 | 0        | 8.438535 | -4.6747  | 0.000321 | 0.000857 | CTC-523E2 chr19 | + | 35396219 | 35399092 | 1657 |
| ENSG000001 | 5.260544 | 8.051689 | -0.58873 | 0.46461  | 0.56959  | AP001462. chr11 | + | 64546426 | 64546877 | 452  |
| ENSG000001 | 0.870904 | 3.24447  | -1.5067  | 0.2623   | 0.36049  | CTD-2626C chr19 | - | 20967402 | 20967958 | 557  |
| ENSG000001 | 130.7667 | 114.0513 | 0.19674  | 0.44322  | 0.54885  | CTC-429P9 chr19 | - | 16744614 | 16746080 | 1467 |
| ENSG000001 | 0        | 0.357707 | -0.41864 | 0.81278  | NA       | AC009041. chr16 | + | 1031252  | 1031663  | 39   |
| ENSG000001 | 0.580602 | 1.84278  | -1.1359  | 0.48565  | 0.58962  | Z98049.1 chr6   | + | 1.67E+08 | 1.67E+08 | 2341 |
| ENSG000001 | 0        | 0.343138 | -0.41864 | 0.81278  | NA       | AC092291. chr16 | + | 14564842 | 14565054 | 213  |
| ENSG000001 | 0.580602 | 12.4761  | -3.828   | 0.000323 | 0.000862 | CTD-2245F chr19 | + | 53700364 | 53714268 | 545  |
| ENSG000001 | 7.106833 | 8.363273 | -0.22475 | 0.77258  | 0.83628  | CTD-2619J chr19 | + | 58873951 | 58877958 | 790  |
| ENSG000001 | 0        | 0.357707 | -0.41864 | 0.81278  | NA       | AC078899. chr19 | + | 20378626 | 20379200 | 575  |
| ENSG000001 | 0        | 0.297015 | -0.41864 | 0.81278  | NA       | CALR3 chr19     | - | 16589868 | 16607003 | 1292 |
| ENSG000001 | 1.161205 | 0        | 1.2509   | 0.47995  | NA       | AL160286. chr1  | - | 1.79E+08 | 1.79E+08 | 129  |
| ENSG000001 | 5.798278 | 3.025133 | 0.88915  | 0.32882  | 0.43195  | CTD-2528A chr19 | - | 17206228 | 17210117 | 610  |
| ENSG000001 | 0        | 0.686276 | -0.84936 | 0.6309   | NA       | RP11-256I chr2  | + | 2.2E+08  | 2.2E+08  | 544  |
| ENSG000001 | 23.0099  | 26.19685 | -0.17794 | 0.69906  | 0.77588  | CTC-471F3 chr19 | - | 40529291 | 40531409 | 2039 |
| ENSG000001 | 0        | 1.370136 | -1.6825  | 0.34201  | NA       | CTD-3187F chr19 | - | 51656180 | 51685222 | 1763 |
| ENSG000001 | 0.975385 | 0        | 1.2767   | 0.47406  | NA       | AC099344. chr2  | + | 11603927 | 11606274 | 36   |
| ENSG000001 | 0.342542 | 0        | 0.4146   | 0.81455  | NA       | AC009977. chrY  | - | 21737895 | 21738068 | 99   |

|            |          |          |          |          |          |                  |   |          |          |      |
|------------|----------|----------|----------|----------|----------|------------------|---|----------|----------|------|
| ENSG000001 | 0        | 16.80826 | -5.6896  | 1.93E-06 | 6.73E-06 | CTC-523E2 chr19  | + | 35328793 | 35346208 | 5302 |
| ENSG000001 | 3.330311 | 11.62231 | -1.7295  | 0.024642 | 0.047625 | AP003733 chr11   | + | 61735453 | 61736755 | 1303 |
| ENSG000001 | 0.72616  | 0.715414 | 0.009201 | 0.99586  | NA       | CTD-2126E chr19  | - | 50546453 | 50554319 | 570  |
| ENSG000001 | 0.36308  | 3.541484 | -2.656   | 0.061068 | 0.10602  | AC003682 chr19   | + | 58175648 | 58176407 | 760  |
| ENSG000001 | 2.998934 | 6.315726 | -0.99898 | 0.28355  | 0.38481  | CTD-2525I chr19  | - | 52788033 | 52801173 | 447  |
| ENSG000001 | 1.286224 | 2.338857 | -0.72903 | 0.54883  | 0.64874  | AC002472 chr22   | - | 21358030 | 21360736 | 192  |
| ENSG000001 | 1.027626 | 1.387121 | -0.30059 | 0.85454  | 0.89775  | AL035681 chr22   | - | 41685388 | 41685686 | 39   |
| ENSG000001 | 0.72616  | 7.56206  | -3.0096  | 0.010777 | 0.022497 | FLJ00388 chr1    | - | 48226979 | 48227290 | 312  |
| ENSG000001 | 0        | 1.058552 | -1.361   | 0.4451   | NA       | FAM90A28 chr19   | - | 53802304 | 53811897 | 1374 |
| ENSG000001 | 0        | 1.340997 | -1.8899  | 0.26871  | NA       | AL133318 chr13   | - | 41111138 | 41111323 | 186  |
| ENSG000001 | 0        | 0.297015 | -0.41864 | 0.81278  | NA       | AC007193 chr19   | - | 46823454 | 46843261 | 472  |
| ENSG000001 | 0        | 0.997859 | -1.5018  | 0.39072  | NA       | RP11-98F1 chr13  | - | 1.14E+08 | 1.14E+08 | 182  |
| ENSG000001 | 75.82471 | 83.8114  | -0.14325 | 0.62921  | 0.71886  | AC004447 chr19   | + | 19101702 | 19104419 | 2416 |
| ENSG000001 | 0.580602 | 0        | 0.8036   | 0.6494   | NA       | RP11-420K chr19  | + | 21983282 | 21984068 | 787  |
| ENSG000001 | 0.580602 | 2.903748 | -1.6902  | 0.2702   | 0.36934  | CTD-3193C chr19  | + | 7990886  | 7991648  | 317  |
| ENSG000001 | 8.309113 | 7.235907 | 0.20188  | 0.77372  | 0.83722  | AC092301 chr19   | + | 46333422 | 46334366 | 764  |
| ENSG000001 | 0.653381 | 3.100394 | -1.8302  | 0.17511  | 0.25829  | CTD-3193C chr19  | - | 7944330  | 7945005  | 676  |
| ENSG000001 | 6.950924 | 8.143936 | -0.22917 | 0.7403   | 0.8089   | CTD-3131K chr19  | - | 17629139 | 17631374 | 460  |
| ENSG000001 | 5.414661 | 7.342723 | -0.39791 | 0.59751  | 0.69176  | AC069547 chr10   | + | 52094298 | 52095876 | 1579 |
| ENSG000001 | 3.081086 | 1.043983 | 1.3329   | 0.30056  | 0.40208  | CTC-218B8 chr19  | - | 39625522 | 39627103 | 365  |
| ENSG000001 | 5.144897 | 5.395544 | -0.04793 | 0.95637  | 0.97322  | AC093157 chr1    | + | 1.01E+08 | 1.01E+08 | 1893 |
| ENSG000001 | 1.068702 | 0.640152 | 0.49176  | 0.76049  | NA       | RP11-727F chr11  | - | 62553498 | 62554257 | 760  |
| ENSG000001 | 0.632843 | 0.343138 | 0.49756  | 0.77728  | NA       | L34079.3 chr19   | + | 44057597 | 44059646 | 561  |
| ENSG000001 | 4.480351 | 6.63543  | -0.52717 | 0.57466  | 0.67168  | RP11-573A chr13  | + | 98885904 | 98886954 | 1051 |
| ENSG000001 | 327.8319 | 167.6997 | 0.96143  | 4.24E-08 | 1.71E-07 | FBXO17 chr19     | - | 39432044 | 39466550 | 2383 |
| ENSG000001 | 4.035933 | 6.756815 | -0.72313 | 0.38162  | 0.48575  | AC005387 chr19   | + | 18643718 | 18646998 | 440  |
| ENSG000001 | 0        | 0.357707 | -0.41864 | 0.81278  | NA       | AC006942 chr19   | + | 50312190 | 50312995 | 520  |
| ENSG000001 | 2.572449 | 1.309443 | 0.83661  | 0.50433  | 0.60777  | RP4-614O4 chr20  | - | 33789550 | 33791091 | 1542 |
| ENSG000001 | 0.36308  | 1.248751 | -1.1986  | 0.48045  | NA       | AC019171 chr2    | - | 39186764 | 39187483 | 720  |
| ENSG000001 | 0        | 2.575179 | -2.8423  | 0.071415 | 0.1212   | LINC00528 chr22  | + | 18260088 | 18262247 | 2160 |
| ENSG000001 | 0        | 1.248751 | -1.5848  | 0.37202  | NA       | RP11-15E1 chr9   | - | 43007105 | 43008297 | 1193 |
| ENSG000001 | 15.79859 | 6.863631 | 1.1608   | 0.050743 | 0.090101 | RP11-345P chr1   | + | 1604714  | 1605836  | 502  |
| ENSG000001 | 3.974319 | 8.903057 | -1.0952  | 0.19927  | 0.28769  | CTC-429C1 chr19  | + | 52452387 | 52484620 | 698  |
| ENSG000001 | 0.342542 | 0        | 0.4146   | 0.81455  | NA       | CTD-2619J chr19  | + | 58677533 | 58678512 | 980  |
| ENSG000001 | 6.596403 | 8.951597 | -0.39917 | 0.58499  | 0.68079  | CTD-2231E chr19  | - | 16234471 | 16250702 | 2987 |
| ENSG000001 | 0.72616  | 1.043983 | -0.36115 | 0.83043  | NA       | CTC-246B1 chr19  | - | 39832413 | 39832585 | 173  |
| ENSG000001 | 0.290301 | 0        | 0.4146   | 0.81455  | NA       | AC008498 chr5    | - | 60411538 | 60411762 | 225  |
| ENSG000001 | 0.342542 | 0        | 0.4146   | 0.81455  | NA       | CTB-83J4.2 chr19 | + | 55100906 | 55101752 | 847  |
| ENSG000001 | 1.016461 | 0.297015 | 0.95157  | 0.5817   | NA       | AC024257 chr12   | + | 48759919 | 48761738 | 1820 |
| ENSG000001 | 0        | 2.07098  | -2.4602  | 0.13507  | 0.20805  | CTB-92J24 chr19  | - | 24101883 | 24140732 | 1585 |
| ENSG000001 | 5.197138 | 2.353426 | 1.0729   | 0.25338  | 0.35033  | RP11-869B chr11  | - | 64552393 | 64553092 | 700  |
| ENSG000001 | 0        | 0.297015 | -0.41864 | 0.81278  | NA       | AC010877 chrY    | + | 15418467 | 15429181 | 267  |
| ENSG000001 | 61.25392 | 24.3015  | 1.3237   | 0.000393 | 0.001035 | RP1-265C2 chr6   | - | 28089573 | 28105071 | 2163 |
| ENSG000001 | 1.701545 | 12.88234 | -2.7711  | 0.001067 | 0.002633 | AC110771 chr4    | - | 1.87E+08 | 1.87E+08 | 714  |
| ENSG000001 | 0.685084 | 1.294874 | -0.6954  | 0.65782  | 0.74221  | CTD-2527I chr19  | - | 35489137 | 35491074 | 565  |
| ENSG000001 | 3.681413 | 5.819648 | -0.58749 | 0.53582  | 0.63683  | AC010522 chr19   | - | 58337829 | 58338146 | 318  |
| ENSG000001 | 0.943682 | 2.711133 | -1.2465  | 0.33791  | 0.44163  | AL158147 chr9    | - | 4859120  | 4859260  | 141  |
| ENSG000001 | 9.741709 | 3.976869 | 1.2265   | 0.10126  | 0.16312  | AC007292 chr19   | - | 4356634  | 4358445  | 1812 |
| ENSG000001 | 0        | 0.997859 | -1.5018  | 0.39072  | NA       | VN1R93P chr19    | + | 23785369 | 23785908 | 540  |
| ENSG000001 | 0.995923 | 1.043983 | -0.03651 | 0.9805   | 0.98924  | CTC-453G2 chr19  | + | 48649165 | 48650670 | 359  |
| ENSG000001 | 27.17004 | 20.35457 | 0.40974  | 0.32479  | 0.42767  | AL591479 chr9    | + | 70646589 | 70648956 | 2368 |
| ENSG000001 | 0.995923 | 0.594029 | 0.48398  | 0.76518  | NA       | AC139768 chr12   | + | 51619860 | 51620085 | 57   |
| ENSG000001 | 128.5677 | 749.3148 | -2.5285  | 1.84E-21 | 1.66E-20 | ZNF587B chr19    | + | 58331099 | 58370018 | 3339 |
| ENSG000001 | 0        | 11.9112  | -5.1929  | 2.68E-05 | 8.17E-05 | CTD-3099C chr19  | - | 53014535 | 53015595 | 880  |
| ENSG000001 | 12.38873 | 14.27758 | -0.21022 | 0.73553  | 0.80488  | AC018766 chr19   | - | 50360227 | 50362546 | 719  |
| ENSG000001 | 0        | 0.357707 | -0.41864 | 0.81278  | NA       | AC092071 chr19   | + | 41452252 | 41453355 | 549  |
| ENSG000001 | 0.685084 | 0.343138 | 0.48017  | 0.78775  | NA       | RP11-120K chr13  | + | 1.14E+08 | 1.14E+08 | 647  |
| ENSG000001 | 4.337399 | 0.297015 | 2.9246   | 0.037836 | 0.069858 | AC138393 chr1    | - | 2.24E+08 | 2.24E+08 | 135  |
| ENSG000001 | 0        | 0.343138 | -0.41864 | 0.81278  | NA       | AC112693 chr15   | + | 93749295 | 93751277 | 1983 |
| ENSG000001 | 3.133327 | 1.370136 | 1.0099   | 0.43264  | 0.53812  | MGC4771 chr2     | - | 2.33E+08 | 2.33E+08 | 105  |
| ENSG000001 | 2.293312 | 3.215331 | -0.4295  | 0.72079  | 0.79337  | RP11-380A chr18  | - | 45404666 | 45408815 | 282  |
| ENSG000001 | 1.555988 | 0        | 1.8901   | 0.28116  | NA       | AC020629 chr12   | + | 42624050 | 42628075 | 135  |
| ENSG000001 | 0.342542 | 2.278164 | -2.0492  | 0.17547  | 0.25871  | CTC-513N1 chr19  | + | 20585356 | 20585532 | 177  |
| ENSG000001 | 0.290301 | 0.343138 | -0.00202 | 0.99909  | NA       | CTD-2542C chr19  | - | 21021321 | 21030223 | 317  |
| ENSG000001 | 0.342542 | 0        | 0.4146   | 0.81455  | NA       | CTB-50E14 chr19  | - | 42989228 | 42989866 | 639  |

|            |          |          |          |          |          |                  |   |          |          |      |
|------------|----------|----------|----------|----------|----------|------------------|---|----------|----------|------|
| ENSG000001 | 0.290301 | 1.744828 | -1.592   | 0.3373   | 0.44103  | RP11-120K chr13  | + | 1.14E+08 | 1.14E+08 | 649  |
| ENSG000001 | 95.9497  | 36.66991 | 1.3854   | 8.38E-07 | 3.01E-06 | ITGB1P1 chr19    | - | 14732446 | 14733054 | 609  |
| ENSG000001 | 0        | 0.297015 | -0.41864 | 0.81278  | NA       | AC012493. chr2   | - | 1.01E+08 | 1.01E+08 | 303  |
| ENSG000001 | 14.12874 | 23.3926  | -0.70369 | 0.16499  | 0.24593  | RAB11B-AS chr19  | - | 8439257  | 8455569  | 1013 |
| ENSG000001 | 0        | 0.700845 | -0.87835 | 0.62047  | NA       | RP11-298J. chr6  | - | 41732030 | 41732198 | 169  |
| ENSG000001 | 14.18954 | 40.71492 | -1.4726  | 0.013524 | 0.027672 | AC018755. chr19  | + | 52097814 | 52109403 | 929  |
| ENSG000001 | 0.580602 | 0.297015 | 0.36801  | 0.83644  | NA       | CTB-191K2 chr19  | - | 50869137 | 50872588 | 304  |
| ENSG000001 | 9.699819 | 3.717114 | 1.2679   | 0.14709  | 0.22316  | AC187652. chr7   | + | 302918   | 304070   | 501  |
| ENSG000001 | 3.994857 | 17.32132 | -2.0398  | 0.002925 | 0.006753 | CTB-92J24. chr19 | + | 24110590 | 24112089 | 1500 |
| ENSG000001 | 28.29775 | 46.59519 | -0.71144 | 0.050147 | 0.089172 | CTD-3222C chr19  | - | 16653434 | 16655625 | 1931 |
| ENSG000001 | 7.86209  | 8.03712  | -0.02371 | 0.97485  | 0.98595  | AC116407. chr17  | - | 30506379 | 30506885 | 507  |
| ENSG000001 | 0        | 0.297015 | -0.41864 | 0.81278  | NA       | CTD-2616J chr19  | - | 51853627 | 51871353 | 551  |
| ENSG000001 | 4.886299 | 28.30831 | -2.4614  | 1.31E-05 | 4.14E-05 | SPIB chr19       | + | 50922195 | 50934570 | 3791 |
| ENSG000001 | 1.431782 | 0        | 1.7261   | 0.329    | NA       | AL096677. chr20  | - | 23330015 | 23334066 | 57   |
| ENSG000001 | 0        | 0.297015 | -0.41864 | 0.81278  | NA       | AC099780. chr3   | - | 59957215 | 59957583 | 321  |
| ENSG000001 | 0.36308  | 741.4264 | -10.019  | 2.55E-27 | 2.93E-26 | CTB-175P5 chr19  | - | 23582035 | 23598877 | 2766 |
| ENSG000001 | 0        | 2.382564 | -2.4485  | 0.15134  | 0.22879  | ZNF92P3 chr19    | + | 24118022 | 24118975 | 954  |
| ENSG000001 | 0        | 0.654722 | -0.83442 | 0.63731  | NA       | AC092384. chr16  | + | 88894366 | 88894545 | 48   |
| ENSG000001 | 0        | 0.297015 | -0.41864 | 0.81278  | NA       | CTC-273B1 chr19  | + | 48969623 | 48970237 | 615  |
| ENSG000001 | 1.286224 | 3.633731 | -1.3161  | 0.23943  | 0.33409  | AC007292. chr19  | + | 4339574  | 4343488  | 279  |
| ENSG000001 | 84.211   | 83.45604 | 0.012532 | 0.96119  | 0.97699  | CTC-429P9 chr19  | + | 16741554 | 16754753 | 453  |
| ENSG000001 | 53.73535 | 100.7305 | -0.90158 | 0.000201 | 0.000551 | LRR3CDN chr21    | + | 45879814 | 45882078 | 2265 |
| ENSG000001 | 1.233984 | 0        | 1.5686   | 0.37707  | NA       | CTB-175P5 chr19  | + | 23563119 | 23563678 | 560  |
| ENSG000001 | 34.27671 | 6.503508 | 2.3289   | 9.98E-06 | 3.20E-05 | CTD-3131K chr19  | - | 17599799 | 17622698 | 775  |
| ENSG000001 | 2.334388 | 1.340997 | 0.6942   | 0.56823  | 0.6656   | CTB-180A7 chr19  | - | 6386773  | 6390411  | 447  |
| ENSG000001 | 0        | 0.654722 | -0.83442 | 0.63731  | NA       | CTD-2579N chr19  | + | 23108179 | 23108349 | 171  |
| ENSG000001 | 3.04001  | 0.951736 | 1.3902   | 0.27387  | 0.37364  | RP11-727F chr11  | - | 62575154 | 62575535 | 382  |
| ENSG000001 | 0.653381 | 0.343138 | 0.51863  | 0.76794  | NA       | RP11-432N chr5   | - | 17655237 | 17655647 | 411  |
| ENSG000001 | 0        | 0.357707 | -0.41864 | 0.81278  | NA       | RP11-15H2 chr19  | + | 23386812 | 23387358 | 547  |
| ENSG000001 | 6.225578 | 2.779947 | 1.0133   | 0.33049  | 0.43365  | CTD-2619J chr19  | + | 58951815 | 58957216 | 5402 |
| ENSG000001 | 0.290301 | 1.638012 | -1.64    | 0.2979   | 0.3998   | CTD-3032J chr19  | - | 17317947 | 17318819 | 629  |
| ENSG000001 | 4.918815 | 2.307303 | 0.94243  | 0.42192  | 0.52745  | CTD-2521N chr19  | - | 17525066 | 17533133 | 691  |
| ENSG000001 | 1.649304 | 8.718564 | -2.1972  | 0.028689 | 0.054567 | AC006272. chr19  | - | 52343177 | 52346577 | 423  |
| ENSG000001 | 5.528515 | 2.278164 | 1.1717   | 0.22326  | 0.31569  | CTC-360G5 chr19  | - | 39425976 | 39429272 | 3297 |
| ENSG000001 | 0.653381 | 8.721293 | -1.7587  | 0.19413  | 0.28174  | CTB-174O2 chr19  | + | 47231860 | 47235957 | 562  |
| ENSG000001 | 0        | 0.686276 | -0.84936 | 0.6309   | NA       | RP11-98D1 chr1   | + | 1.52E+08 | 1.52E+08 | 549  |
| ENSG000001 | 6.857607 | 5.052406 | 0.426    | 0.60929  | 0.70202  | SBP1 chr6        | - | 33663196 | 33663474 | 279  |
| ENSG000001 | 0.632843 | 0.654722 | -0.02224 | 0.98935  | NA       | AC007919. chr3   | + | 1.72E+08 | 1.72E+08 | 258  |
| ENSG000001 | 5.601294 | 4.836358 | 0.18703  | 0.82341  | 0.87538  | RP11-353N chr1   | + | 1.5E+08  | 1.5E+08  | 2081 |
| ENSG000001 | 3.487034 | 6.064834 | -0.73782 | 0.47941  | 0.5837   | DKFZP779I chr12  | + | 48592170 | 48595814 | 3645 |
| ENSG000001 | 1.233984 | 4.943174 | -1.7368  | 0.12054  | 0.18949  | AL137026. chr10  | + | 44873687 | 44878739 | 78   |
| ENSG000001 | 0        | 0.640152 | -0.82869 | 0.63935  | NA       | CYP4F23P chr19   | + | 15674884 | 15695530 | 1788 |
| ENSG000001 | 1.027626 | 0.640152 | 0.42826  | 0.80114  | NA       | CTB-83J4.1 chr19 | + | 54728395 | 54728753 | 359  |
| ENSG000001 | 0.632843 | 0        | 0.81931  | 0.64303  | NA       | AC140061. chr12  | + | 50690489 | 50691718 | 369  |
| ENSG000001 | 0.36308  | 0        | 0.4146   | 0.81455  | NA       | AC073569. chr12  | + | 80198742 | 80202321 | 30   |
| ENSG000001 | 2.967231 | 5.317866 | -0.78242 | 0.38613  | 0.49044  | CTC-453G2 chr19  | + | 48621689 | 48630963 | 852  |
| ENSG000001 | 2.012384 | 5.644019 | -1.3805  | 0.15186  | 0.22946  | CTD-2525I chr19  | - | 52803946 | 52848482 | 1905 |
| ENSG000001 | 1.919068 | 0.357707 | 1.8355   | 0.23402  | 0.3277   | CTD-2126E chr19  | - | 50562139 | 50563489 | 1351 |
| ENSG000001 | 0.342542 | 0.297015 | -0.00202 | 0.99909  | NA       | CTD-3138B chr19  | + | 58740831 | 58798173 | 1463 |
| ENSG000001 | 1.048164 | 3.09153  | -1.2771  | 0.37143  | 0.47583  | AL031663. chr20  | + | 44074071 | 44077220 | 3150 |
| ENSG000001 | 92.18613 | 89.30817 | 0.042452 | 0.87666  | 0.91427  | AL590822. chr1   | + | 2121237  | 2123179  | 1943 |
| ENSG000001 | 0        | 0.343138 | -0.41864 | 0.81278  | NA       | AC104057. chr7   | - | 65112081 | 65113280 | 906  |
| ENSG000001 | 0        | 1.623443 | -1.9406  | 0.26756  | NA       | AC093677. chr4   | - | 75023327 | 75024085 | 759  |
| ENSG000001 | 0        | 2.010288 | -2.4674  | 0.13027  | 0.202    | CTD-2192J chr19  | - | 12640582 | 12643787 | 533  |
| ENSG000001 | 2.064625 | 2.307303 | -0.16224 | 0.88933  | 0.92296  | AC138655. chr2   | + | 47799601 | 47801998 | 2398 |
| ENSG000001 | 0        | 3.261455 | -3.1777  | 0.038177 | 0.070435 | AC008753. chr19  | + | 54292036 | 54292422 | 387  |
| ENSG000001 | 0        | 0.654722 | -0.83442 | 0.63731  | NA       | AP001350. chr11  | - | 58378589 | 58378759 | 171  |
| ENSG000001 | 1.338465 | 1.280305 | 0.03222  | 0.98165  | 0.98992  | CTD-3222C chr19  | - | 16697716 | 16698796 | 1081 |
| ENSG000001 | 0.36308  | 1.309443 | -1.2534  | 0.45722  | NA       | TDGF1P7 chr19    | + | 40025103 | 40025661 | 559  |
| ENSG000001 | 8.75695  | 15.26007 | -0.78141 | 0.23395  | 0.32766  | AC006128. chr19  | + | 15509507 | 15511167 | 1661 |
| ENSG000001 | 2.407167 | 4.317591 | -0.78619 | 0.44395  | 0.5496   | AL354808. chr13  | + | 20268547 | 20269240 | 694  |
| ENSG000001 | 1.919068 | 0.640152 | 1.2549   | 0.37766  | 0.48176  | AC016629. chr19  | - | 59105263 | 59110722 | 890  |
| ENSG000001 | 0.342542 | 0.297015 | -0.00202 | 0.99909  | NA       | Z97053.1 chr20   | - | 43234346 | 43248126 | 72   |
| ENSG000001 | 0        | 0.297015 | -0.41864 | 0.81278  | NA       | CTB-167G5 chr19  | + | 54120056 | 54120508 | 453  |
| ENSG000001 | 28.5803  | 217.3773 | -2.9212  | 4.86E-33 | 6.94E-32 | RP11-181I chr10  | + | 1.04E+08 | 1.04E+08 | 2453 |

|            |          |          |          |          |          |                  |   |          |          |       |
|------------|----------|----------|----------|----------|----------|------------------|---|----------|----------|-------|
| ENSG000001 | 0.342542 | 0.297015 | -0.00202 | 0.99909  | NA       | RP11-98D1 chr1   | + | 1.52E+08 | 1.52E+08 | 629   |
| ENSG000001 | 1.411244 | 1.355566 | 0.031008 | 0.98232  | 0.99011  | AL138847. chr1   | + | 63073437 | 63075249 | 1813  |
| ENSG000001 | 0.342542 | 0        | 0.4146   | 0.81455  | NA       | AC004257. chr19  | - | 15331826 | 15333108 | 277   |
| ENSG000001 | 1.286224 | 13.30403 | -3.1002  | 0.000837 | 0.002104 | CTD-2521A chr19  | + | 17516503 | 17529713 | 1806  |
| ENSG000001 | 0        | 0.343138 | -0.41864 | 0.81278  | NA       | CTB-167G5 chr19  | - | 54107656 | 54111705 | 766   |
| ENSG000001 | 0.342542 | 3.619162 | -2.6845  | 0.057098 | 0.099911 | CTD-2331F chr19  | + | 53426635 | 53427328 | 486   |
| ENSG000001 | 0.342542 | 0        | 0.4146   | 0.81455  | NA       | AL121895. chr20  | - | 34756461 | 34758180 | 66    |
| ENSG000001 | 12.72866 | 1.485073 | 2.7644   | 0.004802 | 0.010723 | CTD-2195B chr19  | - | 41727331 | 41727956 | 286   |
| ENSG000001 | 6.463638 | 5.512097 | 0.21845  | 0.80819  | 0.8646   | CTB-102L5. chr19 | + | 38675016 | 38676905 | 1890  |
| ENSG000001 | 0.632843 | 5.568757 | -2.6884  | 0.023387 | 0.045459 | CTD-2571L chr19  | - | 48260293 | 48272097 | 540   |
| ENSG000001 | 10.7488  | 22.04287 | -0.99044 | 0.21265  | 0.30318  | AC079210. chr17  | + | 66539369 | 66542970 | 3602  |
| ENSG000001 | 0        | 1.370136 | -1.6825  | 0.34201  | NA       | RP11-255F chr19  | - | 23981726 | 23982279 | 554   |
| ENSG000001 | 1.887365 | 0.343138 | 1.6811   | 0.30529  | 0.40686  | AC018445. chr18  | - | 77275812 | 77276057 | 246   |
| ENSG000001 | 2.407167 | 5.505649 | -1.1198  | 0.26266  | 0.36085  | CTD-3128C chr19  | - | 6748304  | 6751478  | 686   |
| ENSG000001 | 19.51431 | 28.83191 | -0.55718 | 0.24909  | 0.34541  | AC008982. chr19  | - | 39335369 | 39336139 | 493   |
| ENSG000001 | 185.8884 | 19.52106 | 3.2018   | 4.88E-23 | 4.73E-22 | AC096677. chr1   | + | 2.02E+08 | 2.02E+08 | 726   |
| ENSG000001 | 6.474803 | 10.91576 | -0.73953 | 0.2923   | 0.39416  | CTD-2192J chr19  | - | 12636534 | 12691789 | 5857  |
| ENSG000001 | 2.831861 | 4.926189 | -0.71394 | 0.55579  | 0.65486  | AC005197. chr19  | + | 18992489 | 18994185 | 683   |
| ENSG000001 | 4.315069 | 4.271467 | 0.007848 | 0.9935   | 0.99653  | AC007228. chr19  | - | 57056935 | 57078780 | 2045  |
| ENSG000001 | 0.36308  | 0        | 0.4146   | 0.81455  | NA       | AC069547. chr10  | + | 52152766 | 52154321 | 1556  |
| ENSG000001 | 25.09506 | 0        | 6.2711   | 4.44E-08 | 1.78E-07 | RP11-13J1 chr2   | + | 1.05E+08 | 1.06E+08 | 443   |
| ENSG000001 | 0        | 0.297015 | -0.41864 | 0.81278  | NA       | CTD-2521A chr19  | - | 17502238 | 17503093 | 856   |
| ENSG000001 | 299.4545 | 155.7975 | 0.93786  | 6.48E-06 | 2.13E-05 | RP11-145A chr3   | - | 1.79E+08 | 1.79E+08 | 2089  |
| ENSG000001 | 14.48326 | 0        | 5.4654   | 6.62E-06 | 2.17E-05 | AC006262. chr19  | - | 46667150 | 46683904 | 612   |
| ENSG000001 | 0        | 0.297015 | -0.41864 | 0.81278  | NA       | CTD-2521A chr19  | - | 17563020 | 17563778 | 759   |
| ENSG000001 | 35.14761 | 23.61932 | 0.55376  | 0.17245  | 0.25504  | RP11-345P chr1   | + | 1603429  | 1604850  | 1422  |
| ENSG000001 | 0.923144 | 1.234181 | -0.3108  | 0.84078  | 0.88823  | AC009060. chr16  | - | 70239303 | 70239683 | 381   |
| ENSG000001 | 2.665765 | 3.24447  | -0.27073 | 0.79588  | 0.85526  | CTD-3149C chr19  | + | 17724531 | 17725239 | 419   |
| ENSG000001 | 0        | 0.297015 | -0.41864 | 0.81278  | NA       | AL589739. chr1   | + | 2258581  | 2259042  | 462   |
| ENSG000001 | 0.290301 | 0.997859 | -1.0217  | 0.53916  | NA       | CTD-3105F chr19  | - | 12543917 | 12595630 | 588   |
| ENSG000001 | 0.342542 | 0        | 0.4146   | 0.81455  | NA       | AL356215. chr11  | - | 35150091 | 35150215 | 30    |
| ENSG000001 | 34.34786 | 21.26502 | 0.67851  | 0.11692  | 0.18466  | RP11-178C chr10  | + | 75880800 | 75881121 | 322   |
| ENSG000001 | 0        | 0.297015 | -0.41864 | 0.81278  | NA       | AC005399. chr22  | + | 17690773 | 17691374 | 300   |
| ENSG000001 | 0        | 0.297015 | -0.41864 | 0.81278  | NA       | CTD-2542C chr19  | + | 20874142 | 20880421 | 2737  |
| ENSG000001 | 32.76017 | 6.153922 | 2.2877   | 0.000629 | 0.001608 | FLJ20306 chr7    | + | 6522922  | 6524873  | 1952  |
| ENSG000001 | 0        | 0.357707 | -0.41864 | 0.81278  | NA       | GOLGA7B chr10    | + | 99627889 | 99631294 | 3406  |
| ENSG000001 | 0.36308  | 0.640152 | -0.51156 | 0.77091  | NA       | RP11-399F chr9   | + | 43009842 | 43010747 | 906   |
| ENSG000001 | 0        | 0.297015 | -0.41864 | 0.81278  | NA       | CTB-60E11. chr19 | + | 40023052 | 40025062 | 647   |
| ENSG000001 | 6.161358 | 2.292733 | 1.3236   | 0.14844  | 0.22503  | AC010642. chr19  | + | 58830643 | 58831855 | 1213  |
| ENSG000001 | 0.632843 | 0        | 0.81931  | 0.64303  | NA       | AC092782. chr1   | + | 2.43E+08 | 2.43E+08 | 63    |
| ENSG000001 | 0.72616  | 0        | 0.85004  | 0.63064  | NA       | AC005795. chr19  | - | 42027403 | 42028349 | 894   |
| ENSG000001 | 0        | 0.297015 | -0.41864 | 0.81278  | NA       | CTB-180A7 chr19  | - | 6343772  | 6362160  | 559   |
| ENSG000001 | 0.36308  | 1.888903 | -1.7962  | 0.25037  | 0.34685  | CTD-3001F chr19  | - | 48118956 | 48129652 | 547   |
| ENSG000001 | 0.632843 | 1.058552 | -0.49434 | 0.7594   | NA       | AC007292. chr19  | - | 4347241  | 4354054  | 357   |
| ENSG000001 | 0.72616  | 0        | 0.85004  | 0.63064  | NA       | AC015660. chr15  | - | 1E+08    | 1E+08    | 132   |
| ENSG000001 | 0.342542 | 0.937167 | -0.89746 | 0.60352  | NA       | SCGB2B3P chr19   | + | 35136567 | 35136975 | 409   |
| ENSG000001 | 1.701545 | 3.6483   | -1.0071  | 0.34945  | 0.45368  | CTC-273B1 chr19  | - | 49016464 | 49016917 | 454   |
| ENSG000001 | 8.143832 | 6.20891  | 0.37354  | 0.60155  | 0.6951   | CTD-2278I chr19  | - | 17407005 | 17407504 | 500   |
| ENSG000001 | 910.2314 | 255.2244 | 1.832    | 3.36E-21 | 2.99E-20 | KCNQ10T1 chr11   | - | 2629558  | 2721224  | 91667 |
| ENSG000001 | 104.9643 | 50.02328 | 1.0607   | 0.000112 | 0.000318 | CTD-3099C chr19  | - | 53153690 | 53156537 | 2848  |
| ENSG000001 | 2.07579  | 1.387121 | 0.45467  | 0.75928  | 0.8251   | AL669831. chr1   | - | 738532   | 739137   | 129   |
| ENSG000001 | 1.576526 | 1.234181 | 0.27355  | 0.84432  | 0.89081  | AL627171. chr14  | + | 50291993 | 50293258 | 1266  |
| ENSG000001 | 1.608228 | 5.512097 | -1.5389  | 0.18566  | 0.27129  | CTD-3018C chr19  | - | 52892095 | 52901019 | 2732  |
| ENSG000001 | 5.508791 | 1.888903 | 1.3548   | 0.19661  | 0.28458  | CTD-3032J chr19  | - | 17288320 | 17289285 | 125   |
| ENSG000001 | 38.38037 | 130.8636 | -1.7438  | 3.84E-06 | 1.29E-05 | RP11-15H2 chr19  | - | 23437855 | 23440741 | 2887  |
| ENSG000001 | 0        | 18.61129 | -5.7111  | 5.60E-06 | 1.85E-05 | hsa-mir-51 chr19 | + | 54265215 | 54267453 | 2239  |
| ENSG000001 | 11.71041 | 0.951736 | 3.2557   | 0.001229 | 0.003005 | CTC-490E2 chr19  | - | 41337126 | 41343115 | 482   |
| ENSG000001 | 2.302685 | 6.434694 | -1.3591  | 0.15469  | 0.23301  | RP11-420K chr19  | + | 21933549 | 21936240 | 2692  |
| ENSG000001 | 0        | 3.458101 | -3.2363  | 0.034439 | 0.064218 | RBL1 chr20       | + | 35724188 | 35725581 | 1394  |
| ENSG000001 | 0        | 9.205777 | -4.6142  | 0.00096  | 0.002387 | AC012313. chr19  | + | 58907457 | 58908407 | 951   |
| ENSG000001 | 289.3255 | 188.194  | 0.61816  | 0.001612 | 0.003868 | EGLN2 chr19      | + | 41304901 | 41314338 | 3894  |
| ENSG000001 | 0.342542 | 0        | 0.4146   | 0.81455  | NA       | CTD-2537I chr19  | - | 55987350 | 55987849 | 500   |
| ENSG000001 | 0.342542 | 0.297015 | -0.00202 | 0.99909  | NA       | FKSG63 chr16     | + | 70258261 | 70258641 | 381   |
| ENSG000001 | 59.26468 | 41.44799 | 0.51357  | 0.078891 | 0.13194  | CTD-2583A chr19  | - | 58378406 | 58379540 | 679   |
| ENSG000001 | 0.290301 | 1.935026 | -1.8589  | 0.22928  | 0.32254  | CTD-2587F chr19  | - | 54949192 | 54949528 | 337   |

|            |          |          |          |          |          |            |       |   |          |          |      |
|------------|----------|----------|----------|----------|----------|------------|-------|---|----------|----------|------|
| ENSG000001 | 0        | 1.759397 | -2.0294  | 0.24451  | NA       | MIR371B    | chr19 | - | 54290851 | 54291423 | 446  |
| ENSG000001 | 1.016461 | 0.951736 | 0.04702  | 0.97613  | 0.98651  | AL353583.  | chr10 | - | 24770273 | 24770632 | 360  |
| ENSG000001 | 0        | 41.33157 | -6.9381  | 9.27E-10 | 4.29E-09 | AC007375.  | chr14 | + | 77607026 | 77609339 | 2314 |
| ENSG000001 | 1.338465 | 5.378559 | -1.8157  | 0.084786 | 0.14042  | RP11-477F  | chr1  | + | 1.65E+08 | 1.65E+08 | 715  |
| ENSG000001 | 0        | 0.715414 | -0.84936 | 0.6309   | NA       | RP11-816J  | chr3  | + | 1.69E+08 | 1.69E+08 | 843  |
| ENSG000001 | 20.62066 | 4.135513 | 2.2087   | 0.001132 | 0.002786 | RP5-1139B  | chr1  | - | 2.28E+08 | 2.28E+08 | 3955 |
| ENSG000001 | 0        | 0.640152 | -0.82869 | 0.63935  | NA       | ARHGAP19   | chr10 | - | 98757795 | 99052413 | 8956 |
| ENSG000001 | 5.436012 | 1.935026 | 1.335    | 0.18134  | 0.26599  | RP4-761J1. | chr12 | + | 6852151  | 6852807  | 657  |
| ENSG000001 | 234.3514 | 644.3359 | -1.4544  | 1.88E-26 | 2.09E-25 | SNHG8      | chr4  | + | 1.19E+08 | 1.19E+08 | 672  |
| ENSG000001 | 3.257533 | 3.830377 | -0.18872 | 0.85501  | 0.89801  | RP11-1020  | chr3  | + | 9977390  | 9977942  | 553  |
| ENSG000001 | 2.967231 | 0.297015 | 2.4346   | 0.09342  | 0.15262  | AP000654.  | chr11 | + | 86544110 | 86548657 | 1192 |
| ENSG000001 | 12.46909 | 27.86722 | -1.1481  | 0.023061 | 0.044906 | RP4-740C4  | chr1  | - | 2281853  | 2284259  | 2407 |
| ENSG000001 | 0.36308  | 1.370136 | -1.2757  | 0.45095  | NA       | RP11-568J  | chr16 | + | 85776893 | 85777831 | 498  |
| ENSG000001 | 20.14715 | 7.255309 | 1.4208   | 0.027887 | 0.053227 | RP11-589N  | chr8  | - | 11703663 | 11703900 | 238  |
| ENSG000001 | 0.72616  | 13.51766 | -3.8596  | 0.00029  | 0.000779 | RP11-331F  | chr9  | - | 35657748 | 35658015 | 268  |
| ENSG000001 | 3.04001  | 0.594029 | 1.8332   | 0.1864   | 0.27216  | RP11-178L  | chr16 | + | 87396142 | 87401082 | 450  |
| ENSG000001 | 6.628106 | 0.654722 | 2.8988   | 0.014145 | 0.028808 | RP6-99M1.  | chrX  | - | 45624175 | 45624702 | 528  |
| ENSG000001 | 2.811323 | 2.307303 | 0.22551  | 0.84908  | 0.89409  | RP11-571N  | chr12 | + | 58208277 | 58208709 | 433  |
| ENSG000001 | 0        | 1.730259 | -1.9792  | 0.25882  | NA       | MAP2K4P1   | chrX  | - | 72744111 | 72782921 | 2539 |
| ENSG000001 | 13.18506 | 18.46567 | -0.47898 | 0.32425  | 0.42712  | RP11-248J  | chr14 | - | 51129229 | 51129896 | 668  |
| ENSG000001 | 13.22532 | 6.725261 | 0.93057  | 0.16112  | 0.24118  | RP11-330N  | chr9  | + | 99672358 | 99672687 | 330  |
| ENSG000001 | 0        | 2.66501  | -2.877   | 0.067583 | 0.11559  | RP11-1406  | chr4  | + | 6241168  | 6241664  | 497  |
| ENSG000001 | 6.515879 | 1.744828 | 1.7278   | 0.10686  | 0.17079  | RP11-73M   | chr14 | - | 1.04E+08 | 1.04E+08 | 535  |
| ENSG000001 | 0        | 2.497501 | -2.5327  | 0.1357   | 0.20884  | FAM226A    | chrX  | + | 71997432 | 71998921 | 1490 |
| ENSG000001 | 0.290301 | 0.297015 | -0.00202 | 0.99909  | NA       | CTC-1337H  | chr11 | + | 67227339 | 67227784 | 446  |
| ENSG000001 | 0.36308  | 0.357707 | -0.00212 | 0.99905  | NA       | RP11-193N  | chr12 | + | 85657322 | 85658235 | 914  |
| ENSG000001 | 35.29154 | 85.9179  | -1.2689  | 9.44E-06 | 3.04E-05 | AF131215.  | chr8  | - | 10962201 | 10964214 | 2014 |
| ENSG000001 | 1.628766 | 4.081268 | -1.167   | 0.28908  | 0.39061  | RP11-646I  | chr4  | + | 57253791 | 57254319 | 529  |
| ENSG000001 | 1.774324 | 0.937167 | 0.67035  | 0.6539   | 0.73897  | RP11-214K  | chr12 | + | 1.25E+08 | 1.25E+08 | 2835 |
| ENSG000001 | 1.338465 | 2.024857 | -0.49199 | 0.71638  | 0.78994  | RP11-697N  | chr8  | + | 48439959 | 48440710 | 752  |
| ENSG000001 | 6.825904 | 5.104234 | 0.38486  | 0.63036  | 0.71982  | RP3-467L1  | chr1  | + | 7836443  | 7836835  | 393  |
| ENSG000001 | 6.524438 | 16.32272 | -1.2813  | 0.051187 | 0.090797 | RP11-849F  | chr17 | - | 8128139  | 8128798  | 660  |
| ENSG000001 | 4.584833 | 3.870053 | 0.21763  | 0.80742  | 0.86404  | RP11-2B6   | chr9  | + | 96938740 | 96940174 | 1435 |
| ENSG000001 | 0.36308  | 0.357707 | -0.00212 | 0.99905  | NA       | RP5-1069C  | chr20 | + | 12915525 | 12916431 | 907  |
| ENSG000001 | 149.4749 | 133.2788 | 0.16342  | 0.45973  | 0.56502  | RP5-1086C  | chr15 | + | 31061535 | 31065196 | 3662 |
| ENSG000001 | 6.212785 | 0.357707 | 3.3962   | 0.011678 | 0.024183 | RP5-1139B  | chr1  | - | 2.28E+08 | 2.28E+08 | 1483 |
| ENSG000001 | 0        | 7.515937 | -4.4664  | 0.00087  | 0.002181 | RP11-482N  | chr16 | - | 87634132 | 87635796 | 1665 |
| ENSG000001 | 69.08177 | 1.684135 | 5.1735   | 9.61E-15 | 6.20E-14 | hsa-mir-14 | chr5  | + | 1.49E+08 | 1.49E+08 | 2549 |
| ENSG000001 | 10.40544 | 5.970172 | 0.77445  | 0.27822  | 0.37867  | RP11-20I2  | chr16 | - | 2611472  | 2615097  | 3626 |
| ENSG000001 | 1.919068 | 1.387121 | 0.41655  | 0.75679  | 0.82315  | RP11-214K  | chr12 | - | 1.24E+08 | 1.24E+08 | 557  |
| ENSG000001 | 2.407167 | 1.058552 | 0.99999  | 0.45591  | 0.56112  | RP11-73M   | chr14 | + | 1.04E+08 | 1.04E+08 | 611  |
| ENSG000001 | 0        | 3.399825 | -3.1197  | 0.048716 | 0.087002 | RP11-29B2  | chr13 | + | 1.03E+08 | 1.03E+08 | 533  |
| ENSG000001 | 0.870904 | 0.700845 | 0.24359  | 0.88646  | NA       | RP11-770J  | chr11 | + | 1.18E+08 | 1.18E+08 | 545  |
| ENSG000001 | 0        | 0.357707 | -0.41864 | 0.81278  | NA       | RP6-91H8   | chr14 | + | 71685817 | 71689441 | 3625 |
| ENSG000001 | 3.931452 | 4.931021 | -0.30238 | 0.75094  | 0.81793  | RP11-2B6   | chr9  | + | 96928571 | 96962909 | 235  |
| ENSG000001 | 11.14179 | 36.23707 | -1.6814  | 0.001382 | 0.003354 | RP11-849F  | chr17 | + | 8181081  | 8181754  | 674  |
| ENSG000001 | 0        | 0.891044 | -1.0625  | 0.54819  | NA       | RP11-248J  | chr10 | + | 97709725 | 97744785 | 2133 |
| ENSG000001 | 2.354926 | 7.074847 | -1.484   | 0.10184  | 0.16386  | RP11-738E  | chr4  | - | 57827093 | 57827539 | 447  |
| ENSG000001 | 0.290301 | 0        | 0.4146   | 0.81455  | NA       | AP000962.  | chr21 | - | 17947038 | 17954957 | 729  |
| ENSG000001 | 10.20585 | 2.041842 | 2.1871   | 0.015516 | 0.031328 | RP11-797A  | chr15 | - | 77359996 | 77360667 | 672  |
| ENSG000001 | 3.382552 | 1.340997 | 1.1722   | 0.3116   | 0.41364  | RP11-324I  | chr10 | + | 35499344 | 35499678 | 335  |
| ENSG000001 | 5.77774  | 5.583326 | 0.055755 | 0.94254  | 0.96283  | MKNK1-AS   | chr1  | + | 47004368 | 47035927 | 2445 |
| ENSG000001 | 198.4207 | 106.7815 | 0.89189  | 1.94E-06 | 6.75E-06 | RP11-73M   | chr14 | + | 1.04E+08 | 1.04E+08 | 811  |
| ENSG000001 | 5.996077 | 4.617021 | 0.34975  | 0.66338  | 0.74676  | hsa-mir-12 | chr19 | - | 52188616 | 52196709 | 3962 |
| ENSG000001 | 5.072932 | 1.372552 | 1.628    | 0.18884  | 0.27515  | CTD-2033C  | chr5  | - | 65220457 | 65220963 | 507  |
| ENSG000001 | 0        | 209.5621 | -8.7128  | 3.87E-12 | 2.11E-11 | RP13-238F  | chr10 | - | 1.26E+08 | 1.26E+08 | 537  |
| ENSG000001 | 20.82286 | 48.75184 | -1.2109  | 0.003996 | 0.009027 | RP11-73M   | chr14 | + | 1.04E+08 | 1.04E+08 | 683  |
| ENSG000001 | 0        | 4.037561 | -3.5553  | 0.014151 | 0.028818 | RP11-321C  | chr6  | + | 78400375 | 78636691 | 4800 |
| ENSG000001 | 0.705622 | 0.997859 | -0.40316 | 0.79396  | NA       | RP11-24B1  | chr13 | - | 51935701 | 51936371 | 671  |
| ENSG000001 | 3.579537 | 2.102535 | 0.6948   | 0.56046  | 0.65913  | RP11-84A1  | chr1  | - | 32317514 | 32387442 | 587  |
| ENSG000001 | 1.95077  | 0        | 2.1837   | 0.20683  | 0.29652  | RP3-426I6  | chr1  | + | 28100369 | 28100552 | 184  |
| ENSG000001 | 52.71971 | 48.09148 | 0.13548  | 0.6531   | 0.73829  | RP11-95D1  | chr2  | + | 10076489 | 10079719 | 3231 |
| ENSG000001 | 9.627854 | 7.87606  | 0.27249  | 0.67109  | 0.75367  | RP11-932C  | chr15 | + | 30941000 | 30941732 | 733  |
| ENSG000001 | 0.36308  | 193.0048 | -8.2032  | 4.29E-17 | 3.16E-16 | RP11-58B1  | chr3  | - | 9540045  | 9541253  | 1209 |
| ENSG000001 | 1.555988 | 0.715414 | 0.82216  | 0.6132   | 0.70526  | RP11-130L  | chr2  | - | 20786008 | 20786446 | 439  |

|            |          |          |          |          |          |                  |   |          |          |      |
|------------|----------|----------|----------|----------|----------|------------------|---|----------|----------|------|
| ENSG000001 | 0.290301 | 1.995719 | -1.903   | 0.2133   | 0.3039   | RP11-338N chr1   | - | 7760764  | 7761030  | 267  |
| ENSG000001 | 20.39719 | 20.29388 | -0.00368 | 0.99363  | 0.99661  | RP11-498E chr9   | + | 1.25E+08 | 1.25E+08 | 708  |
| ENSG000001 | 3.019472 | 2.918317 | 0.028237 | 0.97877  | 0.98819  | RP11-282C chr12  | + | 1.24E+08 | 1.24E+08 | 343  |
| ENSG000001 | 43.18338 | 26.40242 | 0.70014  | 0.06417  | 0.11062  | RP11-1020 chr3   | + | 10000401 | 10004223 | 3823 |
| ENSG000001 | 0        | 1.309443 | -1.6539  | 0.35008  | NA       | RP11-497F chr5   | + | 69745463 | 69746180 | 718  |
| ENSG000001 | 21.94201 | 18.20262 | 0.26105  | 0.59125  | 0.68615  | RP11-362K chr3   | - | 1.69E+08 | 1.69E+08 | 3143 |
| ENSG000001 | 0.580602 | 0.297015 | 0.36801  | 0.83644  | NA       | RP11-232P2 chr6  | - | 5451916  | 5458308  | 1291 |
| ENSG000001 | 1.048164 | 0.997859 | 0.034858 | 0.98138  | 0.98968  | RP11-395P chr9   | - | 1.31E+08 | 1.31E+08 | 745  |
| ENSG000001 | 89.64343 | 65.30928 | 0.45407  | 0.086397 | 0.14275  | CTD-3074C chr11  | - | 66303369 | 66305407 | 2039 |
| ENSG000001 | 3.755005 | 2.681995 | 0.42895  | 0.68973  | 0.76866  | RP11-521C chr10  | - | 52102202 | 52102561 | 360  |
| ENSG000001 | 0        | 70.77994 | -7.6294  | 1.43E-11 | 7.47E-11 | AF003625. chrX   | + | 1.5E+08  | 1.5E+08  | 470  |
| ENSG000001 | 1.027626 | 24.46901 | -4.2608  | 3.51E-06 | 1.19E-05 | RP11-276F chr9   | - | 89623370 | 89657041 | 2012 |
| ENSG000001 | 212.1967 | 183.5912 | 0.20637  | 0.39709  | 0.50162  | RP11-343N chr1   | + | 1.21E+08 | 1.21E+08 | 1326 |
| ENSG000001 | 6.515879 | 0.700845 | 2.8195   | 0.017749 | 0.03543  | RP11-214K chr12  | - | 1.24E+08 | 1.24E+08 | 553  |
| ENSG000001 | 5.30162  | 0        | 3.9758   | 0.004065 | 0.009174 | RP11-272L chr1   | - | 98399030 | 98407302 | 870  |
| ENSG000001 | 3.516131 | 5.003866 | -0.45607 | 0.60903  | 0.70178  | CTD-3185P chr15  | - | 66780996 | 66781427 | 432  |
| ENSG000001 | 0        | 3.022717 | -3.0495  | 0.04972  | 0.088547 | RP3-449M chr14   | - | 74938633 | 74939063 | 431  |
| ENSG000001 | 5.041229 | 1.606458 | 1.4418   | 0.20091  | 0.28963  | RP11-218C chr20  | - | 23612463 | 23612953 | 491  |
| ENSG000001 | 6.245302 | 8.608459 | -0.44385 | 0.51717  | 0.6199   | RP11-178L chr16  | + | 87351115 | 87351643 | 395  |
| ENSG000001 | 3.765356 | 0.937167 | 1.6853   | 0.18201  | 0.26681  | RP11-127C7 chr1  | - | 1.84E+08 | 1.84E+08 | 646  |
| ENSG000001 | 0.72616  | 7.426106 | -2.9932  | 0.011087 | 0.023079 | CTD-2132N chr17  | - | 40190250 | 40190752 | 503  |
| ENSG000001 | 0.580602 | 0.937167 | -0.42674 | 0.8018   | NA       | ZNF177 chr19     | + | 9434850  | 9493293  | 2470 |
| ENSG000001 | 38.71598 | 38.02473 | 0.019361 | 0.95285  | 0.97057  | LLOXNC01- chrX   | + | 49129517 | 49132231 | 2715 |
| ENSG000001 | 94.72313 | 98.80037 | -0.06275 | 0.79516  | 0.85477  | RP11-540B chr15  | + | 31218717 | 31220610 | 1894 |
| ENSG000001 | 1.597063 | 0.700845 | 0.92163  | 0.54934  | 0.64913  | RP11-932C chr15  | - | 30899898 | 30900396 | 499  |
| ENSG000001 | 12.62418 | 27.72723 | -1.1044  | 0.042334 | 0.077034 | RP3-462E2 chr12  | + | 1.12E+08 | 1.12E+08 | 571  |
| ENSG000001 | 3.330311 | 5.614881 | -0.71345 | 0.40968  | 0.51457  | RP11-141B chr2   | - | 1.15E+08 | 1.15E+08 | 1548 |
| ENSG000001 | 3.879211 | 2.558194 | 0.5276   | 0.63433  | 0.72301  | RP11-463C chr16  | - | 86553989 | 86557503 | 3515 |
| ENSG000001 | 4.180677 | 0.297015 | 2.9112   | 0.036127 | 0.067038 | CTC-203F4 chr5   | + | 1.35E+08 | 1.35E+08 | 2017 |
| ENSG000001 | 1.08924  | 1.012429 | 0.056203 | 0.97303  | 0.98493  | RNU12 chr22      | + | 43011250 | 43011913 | 664  |
| ENSG000001 | 0.36308  | 0.297015 | -0.00205 | 0.99908  | NA       | SGKL chr8        | + | 67579831 | 67772707 | 2949 |
| ENSG000001 | 24.45961 | 0.937167 | 4.3204   | 8.62E-07 | 3.09E-06 | RP11-380L chr12  | - | 1.24E+08 | 1.24E+08 | 623  |
| ENSG000001 | 0.342542 | 0.594029 | -0.38792 | 0.8278   | NA       | RP11-326C chr11  | - | 325703   | 326294   | 592  |
| ENSG000001 | 1.576526 | 0.640152 | 1.0117   | 0.49133  | 0.59533  | RP3-426I6 chr1   | + | 28146494 | 28146852 | 359  |
| ENSG000001 | 3.04001  | 0        | 3.1035   | 0.041741 | 0.076064 | C12ORF55 chr12   | + | 97041753 | 97269333 | 5096 |
| ENSG000001 | 0        | 4.80722  | -3.7994  | 0.007855 | 0.016817 | RP11-338N chr1   | - | 7758363  | 7758932  | 570  |
| ENSG000001 | 8.620766 | 6.064834 | 0.49207  | 0.49419  | 0.59803  | RP11-571N chr12  | + | 58197621 | 58198198 | 578  |
| ENSG000001 | 0        | 0.594029 | -0.81444 | 0.64499  | NA       | RP11-416A chr1   | + | 39672184 | 39672629 | 446  |
| ENSG000001 | 24.52302 | 3.388545 | 2.6766   | 0.000361 | 0.000955 | LL22NC03- chr22  | - | 24080865 | 24081476 | 612  |
| ENSG000001 | 1.379541 | 0        | 1.686    | 0.34092  | NA       | RP11-214K chr12  | - | 1.24E+08 | 1.24E+08 | 263  |
| ENSG000001 | 17.00347 | 6.206494 | 1.3973   | 0.023896 | 0.046315 | RP11-297C chr16  | + | 67515217 | 67521153 | 696  |
| ENSG000001 | 0.36308  | 0.715414 | -0.51558 | 0.77246  | NA       | WI2-80269 chrX   | + | 1.51E+08 | 1.51E+08 | 435  |
| ENSG000001 | 51.36763 | 4.320007 | 3.4967   | 7.74E-11 | 3.87E-10 | CTD-3092A chr15  | + | 30780166 | 30782516 | 2351 |
| ENSG000001 | 0.36308  | 1.713273 | -1.6527  | 0.29564  | 0.39767  | RP11-88H1 chr3   | - | 65344943 | 65345392 | 450  |
| ENSG000001 | 14.17161 | 10.26346 | 0.45236  | 0.44439  | 0.54995  | RP11-390K chr11  | - | 47189832 | 47191114 | 574  |
| ENSG000001 | 4.470978 | 0.98329  | 1.8995   | 0.11177  | 0.17753  | RP11-214K chr12  | - | 1.24E+08 | 1.24E+08 | 355  |
| ENSG000001 | 15.35156 | 7.520769 | 0.98942  | 0.13263  | 0.20508  | RP11-248J chr14  | - | 51190495 | 51190990 | 496  |
| ENSG000001 | 4.470978 | 19.78082 | -2.0547  | 0.001609 | 0.003862 | SCARNA2 chr1     | + | 1.1E+08  | 1.1E+08  | 427  |
| ENSG000001 | 16.3082  | 12.57559 | 0.36227  | 0.60089  | 0.69467  | CTC-487M2 chr5   | + | 1.12E+08 | 1.12E+08 | 669  |
| ENSG000001 | 0.290301 | 0.654722 | -0.51764 | 0.76892  | NA       | RP4-761J1- chr12 | + | 6832399  | 6832853  | 455  |
| ENSG000001 | 167.5504 | 28.61419 | 2.5361   | 2.20E-19 | 1.79E-18 | RP6-99M1. chrX   | - | 45604639 | 45629677 | 1758 |
| ENSG000001 | 0.653381 | 0        | 0.82678  | 0.64037  | NA       | AP001172. chr21  | - | 17664112 | 17680454 | 581  |
| ENSG000001 | 2.302685 | 1.234181 | 0.72064  | 0.58384  | 0.67975  | RP11-750F chr11  | - | 47535157 | 47536441 | 430  |
| ENSG000001 | 0.72616  | 8.547767 | -3.2073  | 0.004767 | 0.010648 | AF131215. chr8   | + | 11060474 | 11061180 | 707  |
| ENSG000001 | 0.36308  | 0        | 0.4146   | 0.81455  | NA       | KB-1958F4 chr8   | + | 98156398 | 98156951 | 554  |
| ENSG000001 | 0.36308  | 7.888213 | -3.7126  | 0.004597 | 0.010295 | AC004152. chr19  | - | 2287163  | 2287942  | 780  |
| ENSG000001 | 369.8268 | 339.2513 | 0.12358  | 0.38219  | 0.48637  | RP5-935K1 chr2   | - | 1.29E+08 | 1.29E+08 | 2135 |
| ENSG000001 | 14.5963  | 6.035696 | 1.2297   | 0.072645 | 0.12302  | RP1-257I2I chr22 | - | 42485634 | 42486032 | 399  |
| ENSG000001 | 17.38628 | 14.49122 | 0.25663  | 0.61278  | 0.70497  | GAS5-AS1 chr1    | + | 1.74E+08 | 1.74E+08 | 694  |
| ENSG000001 | 2.624689 | 3.261455 | -0.28804 | 0.783    | 0.84456  | RP11-7807 chr17  | - | 19799903 | 19800600 | 681  |
| ENSG000001 | 2.521021 | 0        | 2.4615   | 0.15149  | 0.22899  | RP11-318K chr9   | + | 66836662 | 66836791 | 130  |
| ENSG000001 | 2.157128 | 0.297015 | 1.9761   | 0.20305  | 0.29188  | RP11-214K chr12  | - | 1.24E+08 | 1.24E+08 | 258  |
| ENSG000001 | 0        | 1.326428 | -1.6486  | 0.3523   | NA       | LA16c-380I chr16 | + | 3049903  | 3050390  | 346  |
| ENSG000001 | 31.44305 | 46.55135 | -0.56062 | 0.1349   | 0.20791  | RP11-24B1 chr13  | - | 51936795 | 51937579 | 785  |
| ENSG000001 | 4.762093 | 10.69159 | -1.1261  | 0.13581  | 0.20898  | RP11-498E chr9   | + | 1.25E+08 | 1.25E+08 | 477  |

|            |          |          |          |          |          |            |       |   |          |          |      |
|------------|----------|----------|----------|----------|----------|------------|-------|---|----------|----------|------|
| ENSG000001 | 0        | 0.997859 | -1.5018  | 0.39072  | NA       | RNU11      | chr1  | + | 28975112 | 28975242 | 131  |
| ENSG000001 | 1.233984 | 1.248751 | -0.01102 | 0.99422  | 0.99669  | RP11-245P  | chr1  | - | 2.29E+08 | 2.29E+08 | 574  |
| ENSG000001 | 0.36308  | 0        | 0.4146   | 0.81455  | NA       | RP11-326C  | chr11 | - | 322186   | 322727   | 386  |
| ENSG000001 | 36.64459 | 11.70644 | 1.6218   | 0.000495 | 0.001287 | RP11-73M   | chr14 | + | 1.04E+08 | 1.04E+08 | 552  |
| ENSG000001 | 3.994857 | 8.654582 | -1.0582  | 0.19009  | 0.27675  | RP11-393N  | chr4  | + | 57330324 | 57330745 | 422  |
| ENSG000001 | 10.8078  | 4.974728 | 1.0686   | 0.15924  | 0.23875  | RP5-1139B  | chr1  | - | 2.28E+08 | 2.28E+08 | 764  |
| ENSG000001 | 0.705622 | 5.627034 | -2.618   | 0.032197 | 0.060433 | RP11-742C  | chr18 | + | 44336450 | 44344371 | 4685 |
| ENSG000001 | 7.084503 | 6.405556 | 0.15769  | 0.8308   | 0.88065  | RP11-415J  | chr1  | + | 33726813 | 33727281 | 469  |
| ENSG000001 | 8.848475 | 0.997859 | 2.8219   | 0.007998 | 0.017095 | AP001429   | chr21 | + | 38473114 | 38473643 | 530  |
| ENSG000001 | 0.36308  | 0.357707 | -0.00212 | 0.99905  | NA       | RP11-327F  | chr16 | + | 50746755 | 50747500 | 746  |
| ENSG000001 | 4.180677 | 2.742687 | 0.58112  | 0.56465  | 0.66259  | RP11-118F  | chr16 | - | 85613615 | 85617177 | 601  |
| ENSG000001 | 0        | 2.232041 | -2.63    | 0.10215  | 0.16421  | RP11-501C  | chr17 | - | 47082093 | 47089888 | 160  |
| ENSG000001 | 2.822488 | 4.899467 | -0.74301 | 0.49347  | 0.59737  | RP11-526I  | chr15 | - | 1.01E+08 | 1.01E+08 | 2387 |
| ENSG000001 | 3.40309  | 0.343138 | 2.585    | 0.070278 | 0.11959  | RP11-214K  | chr12 | - | 1.24E+08 | 1.24E+08 | 528  |
| ENSG000001 | 0.632843 | 0        | 0.81931  | 0.64303  | NA       | KB-1043D8  | chr8  | - | 97152800 | 97153172 | 373  |
| ENSG000001 | 1.338465 | 5.066975 | -1.7226  | 0.11309  | 0.17938  | CTC-303L1  | chr5  | - | 93947611 | 93953827 | 409  |
| ENSG000001 | 0.580602 | 0        | 0.8036   | 0.6494   | NA       | NBL1       | chr1  | + | 19923473 | 19984549 | 1623 |
| ENSG000001 | 0.36308  | 0.297015 | -0.00205 | 0.99908  | NA       | CTC-137K3  | chr8  | + | 1.34E+08 | 1.34E+08 | 725  |
| ENSG000001 | 1.265686 | 0.640152 | 0.71969  | 0.64739  | NA       | RP5-1021I  | chr14 | + | 74371970 | 74372339 | 370  |
| ENSG000001 | 12.47944 | 9.798933 | 0.33283  | 0.59511  | 0.68957  | TERC       | chr3  | - | 1.69E+08 | 1.69E+08 | 541  |
| ENSG000001 | 44.89788 | 31.09141 | 0.52816  | 0.14603  | 0.22181  | AC004257   | chr19 | - | 15346330 | 15346819 | 490  |
| ENSG000001 | 49.49469 | 69.97302 | -0.49313 | 0.22583  | 0.31859  | CTD-2267C  | chr17 | + | 38459457 | 38460909 | 1453 |
| ENSG000001 | 0.72616  | 2.278164 | -1.3424  | 0.35775  | 0.46203  | RP11-646I  | chr4  | + | 57262478 | 57263037 | 560  |
| ENSG000001 | 0        | 0.997859 | -1.5018  | 0.39072  | NA       | F11R       | chr1  | - | 1.61E+08 | 1.61E+08 | 2096 |
| ENSG000001 | 0        | 2.543625 | -2.8094  | 0.076886 | 0.12916  | RP11-419I  | chr8  | + | 12333971 | 12334631 | 661  |
| ENSG000001 | 11.84741 | 20.11254 | -0.75375 | 0.17179  | 0.25431  | RP5-1172N  | chrX  | + | 41095109 | 41095832 | 724  |
| ENSG000001 | 16.184   | 15.06584 | 0.095195 | 0.84703  | 0.89272  | RP5-894A1  | chr7  | - | 1.41E+08 | 1.41E+08 | 925  |
| ENSG000001 | 1.681007 | 2.041842 | -0.23867 | 0.84705  | 0.89272  | RP11-568J  | chr16 | + | 85826021 | 85826539 | 408  |
| ENSG000001 | 0        | 2.087966 | -2.2641  | 0.18897  | 0.27528  | RP11-1085  | chr14 | - | 57266623 | 57267306 | 684  |
| ENSG000001 | 0        | 1.370136 | -1.6825  | 0.34201  | NA       | AC006129   | chr19 | + | 42041545 | 42043266 | 1718 |
| ENSG000001 | 6.982627 | 6.096389 | 0.19042  | 0.81697  | 0.87163  | RP11-167P  | chr16 | - | 67772491 | 67773825 | 569  |
| ENSG000001 | 0        | 0.951736 | -1.2555  | 0.48145  | NA       | LA16c-380I | chr16 | + | 3051301  | 3052017  | 491  |
| ENSG000001 | 0        | 0.715414 | -0.84936 | 0.6309   | NA       | CTC-1337H  | chr11 | - | 67229181 | 67229791 | 611  |
| ENSG000001 | 322.0968 | 857.4025 | -1.4104  | 8.54E-16 | 5.85E-15 | RP11-21N3  | chr3  | + | 1.97E+08 | 1.97E+08 | 918  |
| ENSG000001 | 0        | 6.586891 | -4.1437  | 0.004056 | 0.009155 | RP11-338N  | chr1  | - | 7753184  | 7754904  | 1721 |
| ENSG000001 | 187.5752 | 93.71613 | 0.99583  | 0.000524 | 0.001356 | RP5-1024C  | chr1  | - | 53708036 | 53710212 | 2177 |
| ENSG000001 | 1.576526 | 1.949596 | -0.25036 | 0.83934  | 0.88732  | RP11-382B  | chr15 | - | 30649969 | 30650976 | 1008 |
| ENSG000001 | 1.286224 | 1.029414 | 0.25867  | 0.8668   | 0.90724  | RP1-256G2  | chr6  | - | 5665218  | 5695505  | 806  |
| ENSG000001 | 2.67693  | 6.165202 | -1.1114  | 0.26878  | 0.36769  | RP11-793F  | chr12 | - | 53893946 | 53894720 | 775  |
| ENSG000001 | 4.221753 | 5.836634 | -0.43953 | 0.61218  | 0.70451  | CTD-2410N  | chr5  | + | 1.34E+08 | 1.34E+08 | 1418 |
| ENSG000001 | 1.887365 | 1.012429 | 0.71921  | 0.62624  | 0.71631  | RP11-494F  | chr3  | + | 1.8E+08  | 1.8E+08  | 304  |
| ENSG000001 | 0.36308  | 1.98115  | -1.8644  | 0.22572  | 0.31845  | RP11-159N  | chr11 | + | 1.13E+08 | 1.13E+08 | 640  |
| ENSG000001 | 0.342542 | 0        | 0.4146   | 0.81455  | NA       | RP1-170O1  | chr7  | + | 27197963 | 27198595 | 633  |
| ENSG000001 | 15.32328 | 13.86563 | 0.12729  | 0.82338  | 0.87538  | RP11-568J  | chr16 | + | 85817988 | 85821223 | 689  |
| ENSG000001 | 88.06413 | 46.31765 | 0.91197  | 0.011205 | 0.023296 | RP11-258C  | chrX  | + | 53198279 | 53200096 | 1818 |
| ENSG000001 | 2.987769 | 0        | 3.1007   | 0.040889 | 0.074766 | RP11-803C  | chr2  | - | 1.12E+08 | 1.12E+08 | 606  |
| ENSG000001 | 19.26427 | 14.99461 | 0.36076  | 0.47969  | 0.58397  | RP11-572C  | chr4  | + | 1714548  | 1715349  | 802  |
| ENSG000001 | 0.342542 | 0.997859 | -1.0273  | 0.53559  | NA       | RP11-550A  | chr7  | + | 29591137 | 29591767 | 631  |
| ENSG000001 | 0.342542 | 0.654722 | -0.52406 | 0.76557  | NA       | RP11-325L  | chr15 | + | 65318426 | 65319014 | 589  |
| ENSG000001 | 0        | 0.357707 | -0.41864 | 0.81278  | NA       | RP11-105C  | chr16 | + | 59689506 | 59690240 | 526  |
| ENSG000001 | 31.71265 | 13.31531 | 1.2236   | 0.014369 | 0.029217 | RP13-36G1  | chrX  | - | 73229224 | 73231303 | 905  |
| ENSG000001 | 0.290301 | 0        | 0.4146   | 0.81455  | NA       | RP11-475J  | chr5  | - | 99388563 | 99389243 | 681  |
| ENSG000001 | 7.946847 | 3.368271 | 1.1736   | 0.16252  | 0.24291  | RP11-453E  | chr4  | - | 68584714 | 68589980 | 2046 |
| ENSG000001 | 1.390706 | 2.185918 | -0.57339 | 0.67349  | 0.75553  | RP11-265B  | chr9  | - | 71722842 | 71723133 | 292  |
| ENSG000001 | 1.265686 | 0.951736 | 0.30973  | 0.83942  | 0.88733  | RP11-381K  | chr5  | - | 1.37E+08 | 1.37E+08 | 501  |
| ENSG000001 | 0        | 0.357707 | -0.41864 | 0.81278  | NA       | RP11-123J  | chr4  | - | 77807182 | 77807523 | 342  |
| ENSG000001 | 23.77795 | 113.6653 | -2.2493  | 8.37E-13 | 4.78E-12 | RP11-701F  | chr15 | + | 25287065 | 25287575 | 511  |
| ENSG000001 | 1.887365 | 1.623443 | 0.18117  | 0.89785  | 0.92907  | CTC-471J1  | chr19 | - | 52613571 | 52613979 | 409  |
| ENSG000001 | 0.705622 | 1.355566 | -0.75056 | 0.61553  | 0.70721  | RP11-420B  | chr8  | + | 18859137 | 18859460 | 324  |
| ENSG000001 | 6.56812  | 4.56036  | 0.48519  | 0.63616  | 0.72446  | RP11-17P1  | chr4  | + | 68503895 | 68504077 | 183  |
| ENSG000001 | 1.887365 | 4.380699 | -1.0553  | 0.34093  | 0.44487  | NDUF8P2    | chr17 | + | 57962376 | 57962913 | 538  |
| ENSG000001 | 0        | 5.58091  | -3.9368  | 0.006512 | 0.014184 | RP11-731C  | chr4  | - | 1.52E+08 | 1.52E+08 | 540  |
| ENSG000001 | 0.36308  | 1.903472 | -1.6912  | 0.30152  | 0.40282  | RP11-697F  | chr11 | + | 63399705 | 63400192 | 488  |
| ENSG000001 | 0.342542 | 3.085825 | -2.4144  | 0.10157  | 0.16352  | CTC-559E9  | chr19 | - | 19981532 | 19982108 | 577  |
| ENSG000001 | 0.72616  | 0.700845 | 0.022935 | 0.98937  | NA       | RP11-65L3  | chr2  | + | 1.79E+08 | 1.79E+08 | 1798 |

|            |          |          |          |          |          |                  |   |          |          |      |
|------------|----------|----------|----------|----------|----------|------------------|---|----------|----------|------|
| ENSG000001 | 0        | 1.669566 | -1.94    | 0.2691   | NA       | RP4-806M: chr20  | + | 57329407 | 57331894 | 1619 |
| ENSG000001 | 0        | 0.297015 | -0.41864 | 0.81278  | NA       | LOC10041: chr19  | - | 35270316 | 35270925 | 610  |
| ENSG000001 | 0.36308  | 0.951736 | -0.91212 | 0.59701  | NA       | RP5-1115A chr1   | + | 8572712  | 8573080  | 369  |
| ENSG000001 | 1.681007 | 1.355566 | 0.2643   | 0.83989  | 0.88763  | RP11-1029 chr3   | + | 48080757 | 48080980 | 224  |
| ENSG000001 | 0.943682 | 0        | 1.2438   | 0.48556  | NA       | RP11-453E chr4   | - | 68590901 | 68592113 | 1213 |
| ENSG000001 | 0.290301 | 0.297015 | -0.00202 | 0.99909  | NA       | RP11-566F chr10  | + | 1.11E+08 | 1.11E+08 | 600  |
| ENSG000001 | 1.08924  | 0        | 1.1858   | 0.50299  | NA       | RP11-554C chr6   | - | 75239964 | 75443995 | 618  |
| ENSG000001 | 1.048164 | 2.728118 | -1.1643  | 0.38354  | 0.48765  | RP5-850E9 chr20  | - | 627270   | 656444   | 2714 |
| ENSG000001 | 10.81816 | 2.07098  | 2.2553   | 0.012846 | 0.026414 | RP11-359E chr10  | - | 1.22E+08 | 1.22E+08 | 1414 |
| ENSG000001 | 1.068702 | 0.951736 | 0.086473 | 0.95607  | 0.97299  | WI2-2334C chr15  | - | 29103028 | 29103544 | 517  |
| ENSG000001 | 0.342542 | 0        | 0.4146   | 0.81455  | NA       | RP11-461L chr4   | - | 1.53E+08 | 1.53E+08 | 410  |
| ENSG000001 | 0        | 0.357707 | -0.41864 | 0.81278  | NA       | CTC-786C1 chr16  | - | 85312426 | 85312641 | 216  |
| ENSG000001 | 0        | 0.297015 | -0.41864 | 0.81278  | NA       | GS1-165B1 chr7   | - | 7775374  | 7776482  | 1109 |
| ENSG000001 | 1.919068 | 0        | 2.4151   | 0.13977  | 0.21349  | RP11-218.2 chr3  | - | 1.78E+08 | 1.78E+08 | 193  |
| ENSG000001 | 3.206105 | 0        | 2.8643   | 0.084706 | 0.14033  | RP11-697E chr15  | - | 90825080 | 90825263 | 184  |
| ENSG000001 | 0        | 0.343138 | -0.41864 | 0.81278  | NA       | RP11-180P chr17  | - | 61055855 | 61056202 | 348  |
| ENSG000001 | 0.342542 | 1.66715  | -1.521   | 0.35886  | 0.46305  | CTC-559E9: chr19 | + | 19967784 | 19968336 | 553  |
| ENSG000001 | 0        | 0.297015 | -0.41864 | 0.81278  | NA       | RP5-874C2 chr6   | - | 28287437 | 28287629 | 193  |
| ENSG000001 | 0.943682 | 3.336716 | -1.5322  | 0.21573  | 0.30678  | RP11-82L2 chr9   | - | 1.07E+08 | 1.07E+08 | 7020 |
| ENSG000001 | 0.36308  | 0        | 0.4146   | 0.81455  | NA       | RP11-642C chr2   | - | 62576083 | 62577874 | 636  |
| ENSG000001 | 0        | 2.681995 | -2.9147  | 0.061147 | 0.10611  | CTD-2506P chr14  | - | 81725909 | 81726583 | 675  |
| ENSG000001 | 8.267059 | 3.2299   | 1.2593   | 0.1353   | 0.20832  | RP11-734K chr12  | + | 89919431 | 89934079 | 338  |
| ENSG000001 | 27.5433  | 22.3276  | 0.29929  | 0.45586  | 0.5611   | RP1-90J20: chr6  | + | 3020388  | 3022984  | 2597 |
| ENSG000001 | 0        | 402.2862 | -9.973   | 2.63E-20 | 2.24E-19 | RP11-436F chr2   | - | 70883916 | 70885457 | 1542 |
| ENSG000001 | 0        | 4.68013  | -3.6379  | 0.015266 | 0.03089  | RP11-547A chr2   | - | 64435632 | 64435850 | 219  |
| ENSG000001 | 0        | 0.594029 | -0.81444 | 0.64499  | NA       | IGHV1OR1: chr15  | - | 22482836 | 22483268 | 348  |
| ENSG000001 | 0        | 0.937167 | -1.2408  | 0.48662  | NA       | RP11-307C chr1   | + | 1.55E+08 | 1.55E+08 | 690  |
| ENSG000001 | 12.60364 | 15.68089 | -0.29536 | 0.58826  | 0.68382  | RP11-46B1 chr6   | + | 79943435 | 79946514 | 2946 |
| ENSG000001 | 0.342542 | 1.058552 | -0.99235 | 0.56407  | NA       | RP11-384L chr3   | - | 32285339 | 32285510 | 172  |
| ENSG000001 | 0        | 0.297015 | -0.41864 | 0.81278  | NA       | RP11-108K chr15  | - | 51643297 | 51643389 | 93   |
| ENSG000001 | 0.290301 | 0.640152 | -0.50256 | 0.77558  | NA       | RP11-290C chr13  | + | 45837825 | 45838050 | 226  |
| ENSG000001 | 0.290301 | 0        | 0.4146   | 0.81455  | NA       | RP11-315C chr4   | - | 1.49E+08 | 1.49E+08 | 858  |
| ENSG000001 | 0.36308  | 6.114247 | -3.3268  | 0.015441 | 0.031199 | AC000095: chr22  | - | 19005556 | 19006429 | 874  |
| ENSG000001 | 0        | 0.343138 | -0.41864 | 0.81278  | NA       | RP11-627K chr12  | - | 31407295 | 31407379 | 85   |
| ENSG000001 | 1.016461 | 1.949596 | -0.79031 | 0.56403  | 0.66208  | CTC-412M1: chr19 | + | 19819774 | 19821274 | 617  |
| ENSG000001 | 0        | 1.294874 | -1.8547  | 0.27869  | NA       | JAG1 chr20       | - | 10625847 | 10627014 | 568  |
| ENSG000001 | 1.306762 | 2.428687 | -0.72494 | 0.58892  | 0.68432  | RP11-44D5 chr3   | + | 15773759 | 15774977 | 830  |
| ENSG000001 | 0.290301 | 0        | 0.4146   | 0.81455  | NA       | RP13-379L chr20  | + | 56672323 | 56672647 | 325  |
| ENSG000001 | 0        | 1.012429 | -1.3162  | 0.46038  | NA       | RP11-810C chrX   | - | 1.14E+08 | 1.14E+08 | 216  |
| ENSG000001 | 0.580602 | 0        | 0.8036   | 0.6494   | NA       | RP11-521J: chr13 | - | 81689001 | 81689430 | 430  |
| ENSG000001 | 23.98268 | 24.97247 | -0.05841 | 0.90044  | 0.93109  | CAHM chr6        | - | 1.64E+08 | 1.64E+08 | 896  |
| ENSG000001 | 0.975385 | 1.326428 | -0.32787 | 0.83166  | 0.88129  | RP11-351C chr10  | + | 65118505 | 65118864 | 360  |
| ENSG000001 | 2.926156 | 1.058552 | 1.2021   | 0.39693  | 0.50145  | RP11-1348 chr16  | - | 28761280 | 28761916 | 637  |
| ENSG000001 | 4.076195 | 2.903748 | 0.44137  | 0.68968  | 0.76866  | RP11-326I: chr4  | - | 1.85E+08 | 1.85E+08 | 686  |
| ENSG000001 | 11.6488  | 8.372137 | 0.47532  | 0.4419   | 0.54769  | NRBF2P5 chr10    | + | 5818034  | 5818821  | 788  |
| ENSG000001 | 1.379541 | 5.033005 | -1.6564  | 0.15753  | 0.23678  | RP11-19E1 chr12  | - | 46274733 | 46276049 | 1317 |
| ENSG000001 | 1.649304 | 0.654722 | 1.0443   | 0.47174  | 0.57637  | RP11-124C chr14  | + | 23763061 | 23765007 | 1875 |
| ENSG000001 | 0.580602 | 0        | 0.8036   | 0.6494   | NA       | RP11-175I: chr10 | - | 46308096 | 46308392 | 297  |
| ENSG000001 | 16.83738 | 37.42265 | -1.1202  | 0.057454 | 0.1005   | RP11-694I: chr3  | - | 49177519 | 49198284 | 1799 |
| ENSG000001 | 0.36308  | 0        | 0.4146   | 0.81455  | NA       | RP1-223H1 chr1   | - | 1.82E+08 | 1.82E+08 | 195  |
| ENSG000001 | 0.36308  | 0        | 0.4146   | 0.81455  | NA       | RP11-972P chr12  | - | 1.24E+08 | 1.24E+08 | 336  |
| ENSG000001 | 0        | 0.297015 | -0.41864 | 0.81278  | NA       | RP11-467C chr1   | - | 59754975 | 59755312 | 338  |
| ENSG000001 | 0        | 3.305162 | -3.2461  | 0.030518 | 0.057606 | RP11-796E chr2   | + | 1.75E+08 | 1.75E+08 | 317  |
| ENSG000001 | 2.883288 | 2.07098  | 0.44733  | 0.70163  | 0.77792  | RP11-342K chr2   | + | 75924709 | 75925122 | 414  |
| ENSG000001 | 0.975385 | 1.903472 | -0.75645 | 0.60848  | 0.70118  | RP11-411B chr18  | + | 14053950 | 14054760 | 811  |
| ENSG000001 | 1.338465 | 2.367995 | -0.70493 | 0.57125  | 0.66844  | RP11-369C chr19  | - | 23305990 | 23306890 | 901  |
| ENSG000001 | 0.580602 | 2.338857 | -1.5142  | 0.29397  | 0.39595  | RP11-57B2 chr4   | + | 83612890 | 83613621 | 732  |
| ENSG000001 | 0.36308  | 1.920457 | -1.7083  | 0.29495  | 0.39702  | RP11-131L chr12  | - | 1.19E+08 | 1.19E+08 | 611  |
| ENSG000001 | 0.290301 | 1.698704 | -1.6722  | 0.28779  | 0.38931  | RP11-230C chr6   | - | 1.57E+08 | 1.57E+08 | 129  |
| ENSG000001 | 2.044087 | 0        | 2.4801   | 0.12801  | 0.19906  | RP11-622C chr15  | + | 67100742 | 67102898 | 2157 |
| ENSG000001 | 0.290301 | 0        | 0.4146   | 0.81455  | NA       | RP4-743O1 chr11  | + | 34764453 | 34764746 | 294  |
| ENSG000001 | 2.468781 | 0.594029 | 1.4177   | 0.37656  | 0.48058  | RP13-685P chr3   | + | 1.29E+08 | 1.29E+08 | 489  |
| ENSG000001 | 22.9517  | 1.294874 | 3.8522   | 8.09E-06 | 2.63E-05 | RP1-290F1 chrX   | - | 53094235 | 53094730 | 496  |
| ENSG000001 | 1.681007 | 1.294874 | 0.29761  | 0.82009  | 0.87355  | RP1-71L16 chrX   | - | 46420363 | 46422184 | 1460 |
| ENSG000001 | 0        | 0.640152 | -0.82869 | 0.63935  | NA       | RP11-407A chr14  | + | 39684269 | 39685539 | 1271 |

|            |          |          |          |           |           |                  |   |          |          |       |
|------------|----------|----------|----------|-----------|-----------|------------------|---|----------|----------|-------|
| ENSG000001 | 303.7765 | 10.49253 | 4.804    | 1.59E-45  | 3.23E-44  | RP11-420L chr6   | + | 3751345  | 3754105  | 2761  |
| ENSG000001 | 2.656392 | 2.65044  | 0.00091  | 0.99934   | 0.99973   | RP11-777F chr11  | - | 87034751 | 87035401 | 651   |
| ENSG000001 | 2.261609 | 0        | 2.6509   | 0.097945  | 0.15859   | RP11-168P chr13  | + | 44361727 | 44361988 | 262   |
| ENSG000001 | 0.72616  | 5.185944 | -2.4113  | 0.065584  | 0.11268   | RP11-145P chr15  | + | 25376125 | 25376484 | 360   |
| ENSG000001 | 0        | 1.029414 | -1.1526  | 0.51496   | NA        | RP1-290B4 chrX   | + | 1.13E+08 | 1.13E+08 | 1078  |
| ENSG000001 | 0.580602 | 0        | 0.8036   | 0.6494    | NA        | RP11-674I: chr2  | - | 28238644 | 28239349 | 706   |
| ENSG000001 | 2.023549 | 0.343138 | 1.8536   | 0.2352    | 0.32906   | RP11-169K chr3   | - | 11570962 | 11571229 | 268   |
| ENSG000001 | 0.290301 | 1.370136 | -1.2908  | 0.44733   | NA        | PEBP1P2 chr2     | - | 85568404 | 85568961 | 558   |
| ENSG000001 | 0        | 1.234181 | -1.5727  | 0.37581   | NA        | RP11-785C chr2   | + | 2.37E+08 | 2.37E+08 | 1543  |
| ENSG000001 | 0        | 0.357707 | -0.41864 | 0.81278   | NA        | RP11-478B chr10  | + | 57506311 | 57506668 | 358   |
| ENSG000001 | 0.290301 | 0        | 0.4146   | 0.81455   | NA        | RP11-536C chr9   | - | 13406379 | 13433052 | 2328  |
| ENSG000001 | 0.580602 | 0.297015 | 0.36801  | 0.83644   | NA        | RP11-293K chr1   | + | 62996307 | 62996544 | 238   |
| ENSG000001 | 1.286224 | 1.294874 | -0.00705 | 0.99579   | 0.99763   | RP11-15E1 chr17  | + | 58590551 | 58590911 | 361   |
| ENSG000001 | 0.36308  | 0.343138 | -0.0021  | 0.99905   | NA        | RP11-225N chr3   | - | 1.83E+08 | 1.83E+08 | 1099  |
| ENSG000001 | 4.782631 | 2.728118 | 0.73972  | 0.46561   | 0.57042   | RP11-546J chr2   | + | 1.59E+08 | 1.59E+08 | 883   |
| ENSG000001 | 6.059482 | 12.31416 | -0.96843 | 0.23032   | 0.32369   | CTD-2124B chr5   | - | 37286551 | 37287079 | 529   |
| ENSG000001 | 38.73587 | 1.713273 | 4.3269   | 5.89E-09  | 2.55E-08  | RP11-154F chr3   | + | 71634094 | 71636560 | 2467  |
| ENSG000001 | 0        | 0.357707 | -0.41864 | 0.81278   | NA        | RP11-379K chr3   | - | 1.7E+08  | 1.7E+08  | 1267  |
| ENSG000001 | 1.669842 | 5.228035 | -1.4548  | 0.21246   | 0.30302   | RP11-355F chr2   | + | 75381516 | 75417075 | 3414  |
| ENSG000001 | 0        | 0.654722 | -0.83442 | 0.63731   | NA        | RP11-171I: chr2  | + | 1.79E+08 | 1.79E+08 | 2117  |
| ENSG000001 | 3.206105 | 2.725702 | 0.19052  | 0.87676   | 0.91429   | RP5-1021I: chr14 | - | 74307223 | 74307312 | 90    |
| ENSG000001 | 0.923144 | 0        | 1.223    | 0.49292   | NA        | RP5-1147A chr7   | + | 40155284 | 40155542 | 259   |
| ENSG000001 | 1.774324 | 0        | 2.0349   | 0.24308   | NA        | RP11-712B chr11  | + | 94878601 | 94879168 | 568   |
| ENSG000001 | 27.01494 | 23.70989 | 0.1849   | 0.65466   | 0.73962   | RP11-1186 chr16  | - | 15198580 | 15225458 | 2902  |
| ENSG000001 | 31.21274 | 0.357707 | 5.7254   | 1.28E-07  | 4.94E-07  | RP11-811P chr13  | - | 1.03E+08 | 1.03E+08 | 459   |
| ENSG000001 | 3.600075 | 4.363714 | -0.24767 | 0.78779   | 0.84828   | RP11-568C chr1   | + | 2.2E+08  | 2.2E+08  | 665   |
| ENSG000001 | 6.451659 | 5.378559 | 0.26528  | 0.73541   | 0.80482   | RP11-51F1 chr17  | - | 61688132 | 61688544 | 413   |
| ENSG000001 | 9.895825 | 5.972588 | 0.70036  | 0.31304   | 0.41529   | RP11-348N chr10  | + | 1.13E+08 | 1.13E+08 | 1649  |
| ENSG000001 | 0.342542 | 0.357707 | -0.0021  | 0.99906   | NA        | RP11-73M: chr14  | + | 1.04E+08 | 1.04E+08 | 345   |
| ENSG000001 | 0.342542 | 0.357707 | -0.0021  | 0.99906   | NA        | RP11-324C chr10  | - | 1.14E+08 | 1.14E+08 | 551   |
| ENSG000001 | 1.390706 | 0        | 1.6954   | 0.33813   | NA        | HCG17 chr6       | - | 30201816 | 30293911 | 732   |
| ENSG000001 | 9.323782 | 36.25567 | -1.8852  | 0.00363   | 0.008263  | RP5-1092A chr1   | - | 28566020 | 28567964 | 1945  |
| ENSG000001 | 1.628766 | 4.181636 | -1.2289  | 0.24752   | 0.34361   | RP11-713F chr17  | + | 8463789  | 8464280  | 492   |
| ENSG000001 | 4.221753 | 2.575179 | 0.64445  | 0.5124    | 0.61552   | RP11-359E chr11  | - | 19732480 | 19734165 | 1686  |
| ENSG000001 | 2.229907 | 7.790261 | -1.6443  | 0.076591  | 0.12874   | CTC-325H2 chr19  | - | 9458782  | 9459379  | 598   |
| ENSG000001 | 0        | 0.343138 | -0.41864 | 0.81278   | NA        | RP11-316N chr10  | - | 1.02E+08 | 1.02E+08 | 608   |
| ENSG000001 | 0        | 0.640152 | -0.82869 | 0.63935   | NA        | LOC40191: chr19  | + | 35357256 | 35357823 | 568   |
| ENSG000001 | 0        | 0.297015 | -0.41864 | 0.81278   | NA        | RP11-26F2 chr15  | + | 23116383 | 23116940 | 254   |
| ENSG000001 | 0.685084 | 2.027273 | -1.2005  | 0.42783   | 0.53316   | RP3-466P1 chr6   | + | 1.46E+08 | 1.46E+08 | 1649  |
| ENSG000001 | 0        | 0.594029 | -0.81444 | 0.64499   | NA        | RP11-307I: chr9  | - | 4768617  | 4769895  | 1279  |
| ENSG000001 | 0.705622 | 0        | 0.8807   | 0.6196    | NA        | RP11-373C chr2   | + | 28619682 | 28619977 | 296   |
| ENSG000001 | 0        | 0.700845 | -0.87835 | 0.62047   | NA        | TSIX chrX        | + | 73012040 | 73049066 | 37027 |
| ENSG000001 | 0.36308  | 0.654722 | -0.52647 | 0.7643    | NA        | DPRXP5 chr21     | + | 38315567 | 38316425 | 539   |
| ENSG000001 | 0.685084 | 0        | 0.85004  | 0.63064   | NA        | RP1-20N2: chr6   | + | 1.44E+08 | 1.44E+08 | 357   |
| ENSG000001 | 0.705622 | 7.233491 | -2.955   | 0.013237  | 0.027146  | RP11-105N chr2   | + | 2.14E+08 | 2.14E+08 | 690   |
| ENSG000001 | 0.36308  | 0        | 0.4146   | 0.81455   | NA        | RP11-53C1 chr4   | + | 73672984 | 73673909 | 926   |
| ENSG000001 | 0        | 0.343138 | -0.41864 | 0.81278   | NA        | XXbac-BPG chr6   | - | 27482818 | 27483053 | 236   |
| ENSG000001 | 12.3955  | 20.97532 | -0.74167 | 0.14839   | 0.22498   | RP11-16E1 chr8   | - | 64080284 | 64081001 | 718   |
| ENSG000001 | 47.58516 | 946.6151 | -4.3016  | 4.27E-131 | 3.93E-129 | RP11-216F chr3   | + | 38532215 | 38534633 | 2419  |
| ENSG000001 | 1.068702 | 0.640152 | 0.49176  | 0.76049   | NA        | CTC-512J1: chr19 | + | 44794234 | 44795064 | 526   |
| ENSG000001 | 5.632997 | 6.520493 | -0.21176 | 0.77653   | 0.83945   | RP11-372K chr4   | + | 1.52E+08 | 1.52E+08 | 1113  |
| ENSG000001 | 0.685084 | 1.652581 | -0.9784  | 0.5202    | 0.62293   | KB-1907C4 chr8   | - | 98800438 | 98800585 | 148   |
| ENSG000001 | 0        | 0.357707 | -0.41864 | 0.81278   | NA        | RP11-507C chr9   | + | 88843730 | 88843898 | 169   |
| ENSG000001 | 0.995923 | 0        | 1.4959   | 0.39264   | NA        | RP11-712B chr11  | + | 94876801 | 94878289 | 1489  |
| ENSG000001 | 1.016461 | 1.294874 | -0.29777 | 0.83702   | 0.88567   | RP11-349C chr15  | + | 65750912 | 65751872 | 485   |
| ENSG000001 | 0.632843 | 0.343138 | 0.49756  | 0.77728   | NA        | RP11-89F1 chr3   | + | 51469985 | 51470468 | 484   |
| ENSG000001 | 0        | 0.686276 | -0.84936 | 0.6309    | NA        | RP11-535E chr7   | + | 72187850 | 72188054 | 205   |
| ENSG000001 | 147.7701 | 201.1616 | -0.44659 | 0.026618  | 0.051047  | RP11-342K chr2   | + | 75887588 | 75889334 | 1747  |
| ENSG000001 | 0        | 0.640152 | -0.82869 | 0.63935   | NA        | RP11-107F chr15  | - | 42010568 | 42010870 | 303   |
| ENSG000001 | 42.15852 | 280.8954 | -2.7197  | 1.52E-35  | 2.35E-34  | RP11-701F chr15  | + | 25230011 | 25230320 | 310   |
| ENSG000001 | 0        | 0.98329  | -1.2878  | 0.47019   | NA        | RP11-736N chr14  | + | 1.04E+08 | 1.04E+08 | 42    |
| ENSG000001 | 0.580602 | 3.169208 | -1.8978  | 0.17781   | 0.26153   | CTD-2301A chr5   | - | 1.77E+08 | 1.77E+08 | 1009  |
| ENSG000001 | 0        | 0.594029 | -0.81444 | 0.64499   | NA        | RP11-293C chr1   | + | 2.36E+08 | 2.36E+08 | 708   |
| ENSG000001 | 2.770247 | 3.6483   | -0.38496 | 0.70495   | 0.78064   | RP11-46A1 chr1   | + | 1.81E+08 | 1.81E+08 | 411   |
| ENSG000001 | 0        | 0.297015 | -0.41864 | 0.81278   | NA        | RP11-378I: chr9  | - | 19957392 | 19958145 | 754   |

|            |          |          |          |          |          |                  |   |          |          |      |
|------------|----------|----------|----------|----------|----------|------------------|---|----------|----------|------|
| ENSG000001 | 0.36308  | 0        | 0.4146   | 0.81455  | NA       | RP11-506K chr14  | - | 39442603 | 39443289 | 687  |
| ENSG000001 | 2.104887 | 1.638012 | 0.32525  | 0.80756  | 0.86414  | RP11-84C1 chr4   | + | 90040435 | 90041022 | 588  |
| ENSG000001 | 1.016461 | 0.640152 | 0.45247  | 0.77949  | NA       | RP11-401N chr2   | - | 70100697 | 70100951 | 255  |
| ENSG000001 | 35.47899 | 22.28477 | 0.65561  | 0.098726 | 0.15974  | RP4-657E1 chr1   | + | 19623574 | 19624397 | 525  |
| ENSG000001 | 1.649304 | 3.117379 | -0.76675 | 0.55117  | 0.65079  | RP11-231P chr1   | - | 26589532 | 26589889 | 358  |
| ENSG000001 | 0        | 0.640152 | -0.82869 | 0.63935  | NA       | RP11-719K chr16  | - | 14956237 | 14956606 | 370  |
| ENSG000001 | 1.649304 | 4.495636 | -1.3027  | 0.23618  | 0.3302   | RP11-608C chr3   | - | 16316567 | 16318139 | 1092 |
| ENSG000001 | 1.286224 | 1.370136 | -0.05085 | 0.97141  | 0.98426  | RP4-802A1 chr1   | + | 61590405 | 61590874 | 470  |
| ENSG000001 | 0.36308  | 0        | 0.4146   | 0.81455  | NA       | RP11-461L chr4   | - | 1.53E+08 | 1.53E+08 | 501  |
| ENSG000001 | 1.016461 | 0        | 1.3167   | 0.46021  | NA       | RP11-461L chr4   | + | 1.53E+08 | 1.53E+08 | 372  |
| ENSG000001 | 0.72616  | 0        | 0.85004  | 0.63064  | NA       | RP11-138E chr9   | + | 1.33E+08 | 1.33E+08 | 369  |
| ENSG000001 | 9.649206 | 7.094248 | 0.41504  | 0.60106  | 0.69476  | AD001527 chr19   | - | 36634983 | 36639250 | 379  |
| ENSG000001 | 1.555988 | 12.52222 | -2.762   | 0.001624 | 0.003894 | RP11-385F chr6   | - | 47444979 | 47445308 | 330  |
| ENSG000001 | 0.290301 | 0        | 0.4146   | 0.81455  | NA       | CTB-152G1 chr7   | + | 1.05E+08 | 1.05E+08 | 365  |
| ENSG000001 | 0        | 0.297015 | -0.41864 | 0.81278  | NA       | RP11-733C chr10  | - | 44983783 | 44983893 | 111  |
| ENSG000001 | 0.36308  | 0.98329  | -0.93796 | 0.58624  | NA       | RP11-332F chr3   | - | 57785783 | 57787175 | 1070 |
| ENSG000001 | 0.653381 | 2.261179 | -1.3841  | 0.35194  | 0.45606  | RP13-685P chr3   | + | 1.29E+08 | 1.29E+08 | 754  |
| ENSG000001 | 0.72616  | 1.309443 | -0.61368 | 0.71013  | 0.78467  | RP4-590F2 chr1   | - | 1.15E+08 | 1.15E+08 | 565  |
| ENSG000001 | 0.36308  | 2.96444  | -2.3798  | 0.10651  | 0.17028  | RP11-501C chr17  | + | 46976493 | 46977110 | 301  |
| ENSG000001 | 0.290301 | 0.343138 | -0.00202 | 0.99909  | NA       | RP11-500K chr3   | - | 1.21E+08 | 1.21E+08 | 201  |
| ENSG000001 | 0.290301 | 0.343138 | -0.00202 | 0.99909  | NA       | RP11-58E2 chr14  | + | 50517086 | 50518054 | 969  |
| ENSG000001 | 0.36308  | 0        | 0.4146   | 0.81455  | NA       | DPRXP6 chrX      | + | 40617736 | 40618303 | 568  |
| ENSG000001 | 0        | 0.357707 | -0.41864 | 0.81278  | NA       | RP11-103Ji chr20 | + | 10653576 | 10975572 | 558  |
| ENSG000001 | 0.342542 | 0.357707 | -0.0021  | 0.99906  | NA       | RP5-1173Li chr7  | - | 39828566 | 39828903 | 338  |
| ENSG000001 | 0.995923 | 0.654722 | 0.44529  | 0.7735   | NA       | RP11-451F chr2   | + | 1.75E+08 | 1.75E+08 | 835  |
| ENSG000001 | 2.32241  | 1.935026 | 0.23215  | 0.87066  | 0.90976  | AC005776 chr19   | + | 15449742 | 15450048 | 307  |
| ENSG000001 | 17.41798 | 7.769244 | 1.1221   | 0.047733 | 0.085451 | CTD-2583A chr19  | + | 58379253 | 58380202 | 891  |
| ENSG000001 | 10.84049 | 1.698704 | 2.5035   | 0.006927 | 0.01501  | RP11-574K chr10  | - | 75500296 | 75500581 | 286  |
| ENSG000001 | 0        | 0.297015 | -0.41864 | 0.81278  | NA       | RP11-84N7 chr13  | - | 42755601 | 42756057 | 457  |
| ENSG000001 | 2.551911 | 0.700845 | 1.5653   | 0.25296  | 0.34982  | RP11-274B chr7   | + | 1.28E+08 | 1.28E+08 | 585  |
| ENSG000001 | 0.705622 | 1.416259 | -0.74205 | 0.63826  | 0.72626  | NANOGNBf chrX    | - | 1.01E+08 | 1.01E+08 | 487  |
| ENSG000001 | 22.22294 | 15.46397 | 0.51842  | 0.28671  | 0.38829  | RP11-355B chr2   | + | 61698323 | 61711265 | 569  |
| ENSG000001 | 7.842365 | 2.696564 | 1.4653   | 0.080459 | 0.13421  | RP11-730B chr7   | - | 5048795  | 5048959  | 165  |
| ENSG000001 | 12.05214 | 1.949596 | 2.4543   | 0.004841 | 0.010804 | hsa-mir-33i chr7 | - | 1.3E+08  | 1.3E+08  | 2634 |
| ENSG000001 | 0        | 0.297015 | -0.41864 | 0.81278  | NA       | NF1P1 chr15      | - | 21122015 | 21140987 | 2645 |
| ENSG000001 | 0.342542 | 1.713273 | -1.6507  | 0.29668  | 0.39869  | RP1-168P1 chr16  | + | 89525278 | 89525845 | 568  |
| ENSG000001 | 0.975385 | 0.640152 | 0.42301  | 0.79383  | NA       | CTC-571O2 chr5   | - | 1.75E+08 | 1.75E+08 | 598  |
| ENSG000001 | 0.36308  | 0.297015 | -0.00205 | 0.99908  | NA       | RP11-57B2 chr4   | + | 83696614 | 83697254 | 360  |
| ENSG000001 | 0        | 1.043983 | -1.3473  | 0.44976  | NA       | RP11-674Li chr2  | - | 28118983 | 28120062 | 1080 |
| ENSG000001 | 0        | 0.297015 | -0.41864 | 0.81278  | NA       | RP11-757C chr12  | + | 12401925 | 12402361 | 437  |
| ENSG000001 | 0        | 0.343138 | -0.41864 | 0.81278  | NA       | KB-1589B1 chr8   | - | 98865249 | 98865481 | 233  |
| ENSG000001 | 1.919068 | 0        | 2.4151   | 0.13977  | 0.21349  | RP11-434C chr12  | + | 11665657 | 11667070 | 1414 |
| ENSG000001 | 0.290301 | 0        | 0.4146   | 0.81455  | NA       | GS1-531Li chr17  | + | 63651032 | 63651513 | 482  |
| ENSG000001 | 0.943682 | 7.893045 | -2.7173  | 0.010417 | 0.021817 | RP11-420K chr10  | - | 88614453 | 88615993 | 1168 |
| ENSG000001 | 0        | 2.200487 | -2.3588  | 0.16874  | 0.25044  | CTC-523E2i chr19 | - | 35414203 | 35417716 | 625  |
| ENSG000001 | 4.543757 | 12.24219 | -1.3656  | 0.045327 | 0.081599 | CTD-2302E chr14  | - | 64060749 | 64062009 | 1261 |
| ENSG000001 | 0        | 0.297015 | -0.41864 | 0.81278  | NA       | RP11-255E chr3   | + | 1.14E+08 | 1.14E+08 | 619  |
| ENSG000001 | 0        | 0.594029 | -0.81444 | 0.64499  | NA       | RP11-461L chr4   | - | 1.53E+08 | 1.53E+08 | 463  |
| ENSG000001 | 7.427045 | 8.506475 | -0.17892 | 0.85131  | 0.89543  | RP3-468K1 chr6   | - | 1.44E+08 | 1.44E+08 | 628  |
| ENSG000001 | 0.36308  | 1.248751 | -1.1986  | 0.48045  | NA       | RP11-311B chr2   | + | 1.6E+08  | 1.6E+08  | 797  |
| ENSG000001 | 0        | 0.297015 | -0.41864 | 0.81278  | NA       | XXbac-BPG chr6   | - | 29731035 | 29731169 | 135  |
| ENSG000001 | 3.82697  | 4.020576 | -0.04798 | 0.96128  | 0.977    | ASB3 chr2        | - | 53897430 | 54087297 | 2113 |
| ENSG000001 | 1.08924  | 0.951736 | 0.10279  | 0.95077  | 0.96921  | NUDT19P4 chr6    | + | 44866448 | 44867032 | 585  |
| ENSG000001 | 1.048164 | 0        | 1.348    | 0.44949  | NA       | RP11-592P chr3   | + | 1.22E+08 | 1.22E+08 | 240  |
| ENSG000001 | 0.685084 | 0        | 0.85004  | 0.63064  | NA       | RP11-338C chr10  | - | 1.25E+08 | 1.25E+08 | 165  |
| ENSG000001 | 6.337805 | 7.131508 | -0.15353 | 0.84602  | 0.89199  | RP1-69B10 chr11  | - | 32613339 | 32614317 | 979  |
| ENSG000001 | 0        | 0.297015 | -0.41864 | 0.81278  | NA       | CTC-224D3 chr5   | + | 1.51E+08 | 1.51E+08 | 355  |
| ENSG000001 | 0        | 4.020576 | -3.521   | 0.016426 | 0.033004 | RP11-628E chr8   | + | 56449431 | 56454613 | 5183 |
| ENSG000001 | 0.870904 | 0        | 1.046    | 0.5544   | NA       | RP11-272L chr1   | + | 98321131 | 98322381 | 1251 |
| ENSG000001 | 1.048164 | 0.357707 | 0.98599  | 0.56649  | NA       | RP5-1077B chr1   | - | 12077273 | 12077365 | 93   |
| ENSG000001 | 1.233984 | 0.343138 | 1.1864   | 0.48571  | NA       | RP11-27Ml chr2   | - | 2.03E+08 | 2.03E+08 | 332  |
| ENSG000001 | 4.616536 | 2.041842 | 1.0914   | 0.27646  | 0.37672  | RP11-27I1 chr9   | - | 1.24E+08 | 1.24E+08 | 371  |
| ENSG000001 | 0        | 0.357707 | -0.41864 | 0.81278  | NA       | RP11-379K chr15  | - | 80872370 | 80872907 | 538  |
| ENSG000001 | 0        | 1.340997 | -1.8899  | 0.26871  | NA       | RP11-304N chr11  | + | 123312   | 126123   | 2741 |
| ENSG000001 | 1.048164 | 5.459525 | -2.0899  | 0.086669 | 0.14315  | TAS2R6 chr7      | + | 1.41E+08 | 1.41E+08 | 826  |

|            |          |           |          |          |          |                 |   |          |          |      |
|------------|----------|-----------|----------|----------|----------|-----------------|---|----------|----------|------|
| ENSG000001 | 1.681007 | 6.376418  | -1.7678  | 0.074919 | 0.12637  | RP11-551L chr12 | - | 31258039 | 31259764 | 675  |
| ENSG000001 | 0        | 0.343138  | -0.41864 | 0.81278  | NA       | CTD-2514A chr11 | + | 59665658 | 59666606 | 949  |
| ENSG000001 | 2.624689 | 13.52411  | -2.2276  | 0.005761 | 0.012668 | CTD-2227E chr7  | - | 25988277 | 25989023 | 747  |
| ENSG000001 | 0.72616  | 14.40058  | -3.9399  | 0.000208 | 0.000569 | RP11-45P1 chr14 | + | 1.04E+08 | 1.04E+08 | 643  |
| ENSG000001 | 1.265686 | 3.336716  | -1.1922  | 0.31634  | 0.41904  | RP5-966M chr3   | + | 52768751 | 52769029 | 279  |
| ENSG000001 | 1.681007 | 5.31545   | -1.5148  | 0.1447   | 0.22004  | RP11-460N chr7  | - | 64402521 | 64403304 | 784  |
| ENSG000001 | 60.9963  | 55.18821  | 0.14378  | 0.64055  | 0.72764  | RP11-288F chr6  | + | 1.61E+08 | 1.61E+08 | 3131 |
| ENSG000001 | 0        | 1.40169   | -1.7271  | 0.32809  | NA       | RP1-309F2 chr20 | - | 57451647 | 57452036 | 390  |
| ENSG000001 | 2.31385  | 0         | 2.6622   | 0.097433 | 0.15798  | RP11-2E11 chr7  | + | 1.3E+08  | 1.3E+08  | 623  |
| ENSG000001 | 0.36308  | 0         | 0.4146   | 0.81455  | NA       | RP11-261B chr15 | + | 30574736 | 30580592 | 2098 |
| ENSG000001 | 0        | 0.357707  | -0.41864 | 0.81278  | NA       | RP11-65L3 chr2  | + | 1.79E+08 | 1.79E+08 | 675  |
| ENSG000001 | 26.71446 | 2.918317  | 3.0611   | 3.44E-06 | 1.16E-05 | LPP-AS2 chr3    | - | 1.88E+08 | 1.88E+08 | 2852 |
| ENSG000001 | 1.411244 | 2.292733  | -0.6299  | 0.62123  | 0.71181  | RP11-403L chr1  | + | 1.49E+08 | 1.49E+08 | 296  |
| ENSG000001 | 2.604151 | 5.303297  | -0.93722 | 0.33116  | 0.43435  | RP11-502L chr15 | - | 67833410 | 67834942 | 1533 |
| ENSG000001 | 0.290301 | 0         | 0.4146   | 0.81455  | NA       | RP11-62H7 chr8  | - | 8791231  | 8791516  | 286  |
| ENSG000001 | 0.653381 | 0.343138  | 0.51863  | 0.76794  | NA       | RP11-723P chr14 | + | 69328479 | 69329242 | 447  |
| ENSG000001 | 0.632843 | 0         | 0.81931  | 0.64303  | NA       | RP11-550L chr3  | - | 1.57E+08 | 1.57E+08 | 889  |
| ENSG000001 | 0        | 0.297015  | -0.41864 | 0.81278  | NA       | RP11-137J chr6  | + | 1.42E+08 | 1.42E+08 | 337  |
| ENSG000001 | 0        | 0.700845  | -0.87835 | 0.62047  | NA       | RP11-123C chr15 | + | 58964495 | 58965132 | 638  |
| ENSG000001 | 0.632843 | 0.937167  | -0.40344 | 0.80349  | NA       | RP3-467N1 chr6  | + | 1.01E+08 | 1.01E+08 | 736  |
| ENSG000001 | 0        | 2.575179  | -2.8423  | 0.071415 | 0.1212   | RP11-439C chr8  | + | 1922984  | 1923480  | 497  |
| ENSG000001 | 3.423628 | 1.40169   | 1.1322   | 0.35111  | 0.45545  | RP11-1112 chr17 | - | 73056586 | 73056715 | 130  |
| ENSG000001 | 0.36308  | 0.357707  | -0.00212 | 0.99905  | NA       | RP11-293B chr1  | - | 1.84E+08 | 1.84E+08 | 936  |
| ENSG000001 | 0        | 0.357707  | -0.41864 | 0.81278  | NA       | RP11-29B1 chr9  | - | 1.03E+08 | 1.03E+08 | 466  |
| ENSG000001 | 1.306762 | 1.234181  | 0.043094 | 0.9771   | 0.98699  | RP11-342K chr2  | + | 75946246 | 75947144 | 899  |
| ENSG000001 | 0.923144 | 0.594029  | 0.399    | 0.81445  | NA       | RP11-599B chr17 | - | 8102441  | 8102755  | 315  |
| ENSG000001 | 12.04439 | 1.029414  | 3.239    | 0.001542 | 0.003715 | RP11-346C chr16 | + | 73094279 | 73096215 | 1937 |
| ENSG000001 | 0        | 0.357707  | -0.41864 | 0.81278  | NA       | CTC-539A1 chr19 | - | 10708677 | 10709641 | 965  |
| ENSG000001 | 0        | 0.654722  | -0.83442 | 0.63731  | NA       | RP11-717A chr2  | - | 85587921 | 85588048 | 128  |
| ENSG000001 | 0.36308  | 0.343138  | -0.0021  | 0.99905  | NA       | RP11-60E8 chr12 | + | 51150675 | 51151216 | 193  |
| ENSG000001 | 9.087514 | 4.039977  | 1.1032   | 0.21257  | 0.30314  | RP11-10C2 chr3  | - | 33838641 | 33839173 | 533  |
| ENSG000001 | 0.36308  | 0         | 0.4146   | 0.81455  | NA       | RP5-878I1 chrX  | - | 1.15E+08 | 1.15E+08 | 462  |
| ENSG000001 | 0        | 0.297015  | -0.41864 | 0.81278  | NA       | RP11-142L chr11 | - | 1.21E+08 | 1.21E+08 | 772  |
| ENSG000001 | 0.290301 | 0.343138  | -0.00202 | 0.99909  | NA       | RP11-708L chr11 | - | 1.12E+08 | 1.12E+08 | 237  |
| ENSG000001 | 4.709852 | 26.20168  | -2.4172  | 5.20E-05 | 0.000154 | CTD-2527L chr19 | - | 35505865 | 35516239 | 526  |
| ENSG000001 | 5.996077 | 4.288452  | 0.45078  | 0.57467  | 0.67168  | RP5-933K2 chr6  | + | 1.58E+08 | 1.58E+08 | 514  |
| ENSG000001 | 2.157942 | 2.947455  | -0.42158 | 0.73263  | 0.80242  | MTRNR2L2 chr5   | - | 79945819 | 79946855 | 1037 |
| ENSG000001 | 0.290301 | 0.686276  | -0.47648 | 0.78935  | NA       | RP11-1113 chr5  | + | 68645763 | 68646272 | 510  |
| ENSG000001 | 0        | 0.357707  | -0.41864 | 0.81278  | NA       | CTD-2342N chr8  | + | 1.36E+08 | 1.36E+08 | 382  |
| ENSG000001 | 1.774324 | 0.715414  | 0.93655  | 0.56276  | 0.66097  | CTD-2553L chr19 | + | 35125749 | 35126622 | 874  |
| ENSG000001 | 0        | 0.1618258 | -11.812  | 1.15E-28 | 1.39E-27 | RP11-301L chr3  | + | 32938576 | 32939318 | 743  |
| ENSG000001 | 0.580602 | 0.640152  | -0.06311 | 0.97099  | NA       | RP11-479L chr3  | - | 1.61E+08 | 1.61E+08 | 237  |
| ENSG000001 | 0        | 0.297015  | -0.41864 | 0.81278  | NA       | RP11-747F chr4  | - | 9022583  | 9022887  | 305  |
| ENSG000001 | 0.705622 | 0.594029  | 0.11178  | 0.94848  | NA       | RP11-567L chr17 | + | 57358491 | 57358704 | 214  |
| ENSG000001 | 7.813268 | 2.947455  | 1.2998   | 0.13934  | 0.21307  | RP11-792A chr7  | - | 66213825 | 66214064 | 240  |
| ENSG000001 | 0        | 1.309443  | -1.6539  | 0.35008  | NA       | RP11-607P chr12 | - | 51815740 | 51818395 | 347  |
| ENSG000001 | 0.290301 | 0.297015  | -0.00202 | 0.99909  | NA       | RP11-457N chr6  | - | 26612131 | 26613337 | 1207 |
| ENSG000001 | 15.66501 | 2.292733  | 2.6287   | 0.000477 | 0.001243 | RP11-589N chr14 | + | 53338176 | 53338935 | 760  |
| ENSG000001 | 0        | 0.357707  | -0.41864 | 0.81278  | NA       | AC096553 chr7   | + | 9673900  | 9675333  | 829  |
| ENSG000001 | 0.36308  | 0.357707  | -0.00212 | 0.99905  | NA       | RP13-395E chr15 | - | 32542503 | 32548326 | 2059 |
| ENSG000001 | 1.213446 | 2.200487  | -0.66598 | 0.64371  | 0.73072  | RP11-13B9 chr9  | - | 1.02E+08 | 1.02E+08 | 2133 |
| ENSG000001 | 0        | 0.654722  | -0.83442 | 0.63731  | NA       | TMEM56 chr1     | + | 95583479 | 95712781 | 1491 |
| ENSG000001 | 0        | 0.594029  | -0.81444 | 0.64499  | NA       | RP5-1125K chr7  | + | 2327550  | 2328063  | 224  |
| ENSG000001 | 0        | 0.343138  | -0.41864 | 0.81278  | NA       | RP11-697F chr11 | - | 63466068 | 63466236 | 169  |
| ENSG000001 | 1.576526 | 2.558194  | -0.58301 | 0.65093  | 0.73665  | SCML2P2 chr16   | + | 25080891 | 25081430 | 540  |
| ENSG000001 | 0        | 54.78519  | -7.3399  | 3.49E-11 | 1.79E-10 | CTC-523E2 chr19 | - | 35340182 | 35351480 | 570  |
| ENSG000001 | 0        | 0.594029  | -0.81444 | 0.64499  | NA       | RP11-159F chr8  | + | 70706297 | 70706969 | 673  |
| ENSG000001 | 0        | 4.931021  | -3.7514  | 0.01078  | 0.022498 | CTD-2012J chr5  | + | 1594741  | 1611582  | 1661 |
| ENSG000001 | 91.57089 | 40.80139  | 1.154    | 3.32E-05 | 0.0001   | RP11-379F chr7  | + | 35734824 | 35739023 | 4200 |
| ENSG000001 | 0.72616  | 0         | 0.85004  | 0.63064  | NA       | CTB-113I2C chr5 | - | 1.33E+08 | 1.33E+08 | 127  |
| ENSG000001 | 0        | 0.357707  | -0.41864 | 0.81278  | NA       | RP11-33A1 chr3  | - | 1.78E+08 | 1.78E+08 | 484  |
| ENSG000001 | 7.199171 | 17.27036  | -1.2217  | 0.096287 | 0.15645  | CTA-293F1 chr7  | - | 20367922 | 20371370 | 737  |
| ENSG000001 | 0.943682 | 1.188058  | -0.24043 | 0.88441  | 0.91933  | RP5-966M chr3   | + | 52787542 | 52788706 | 884  |
| ENSG000001 | 0        | 0.951736  | -1.2555  | 0.48145  | NA       | IGLVIVOR2 chr22 | - | 25833273 | 25833790 | 397  |
| ENSG000001 | 0.632843 | 0         | 0.81931  | 0.64303  | NA       | RP11-479F chr2  | + | 61476915 | 61477756 | 397  |

|            |          |          |          |          |          |                 |   |          |          |      |
|------------|----------|----------|----------|----------|----------|-----------------|---|----------|----------|------|
| ENSG000001 | 0        | 0.343138 | -0.41864 | 0.81278  | NA       | RP11-401N chr8  | - | 50819423 | 50820006 | 584  |
| ENSG000001 | 4.119877 | 1.355566 | 1.4001   | 0.23871  | 0.33333  | RP11-394I chr2  | + | 1.75E+08 | 1.75E+08 | 1068 |
| ENSG000001 | 1.753786 | 0.937167 | 0.66042  | 0.65879  | 0.74287  | ABC7-4304 chr2  | - | 2.43E+08 | 2.43E+08 | 454  |
| ENSG000001 | 1.451506 | 1.012429 | 0.39118  | 0.81108  | 0.86704  | RP11-435C chr9  | + | 98268517 | 98269918 | 1402 |
| ENSG000001 | 1.359003 | 0        | 1.8987   | 0.26617  | NA       | RP11-642C chr8  | - | 89820547 | 89821137 | 591  |
| ENSG000001 | 12.78091 | 14.0704  | -0.13819 | 0.79465  | 0.8543   | RP11-708J chr3  | + | 47541331 | 47541897 | 567  |
| ENSG000001 | 0        | 0.297015 | -0.41864 | 0.81278  | NA       | RP11-409C chr9  | + | 74419199 | 74419742 | 544  |
| ENSG000001 | 0        | 1.248751 | -1.5848  | 0.37202  | NA       | CTC-523E2 chr19 | - | 35395296 | 35395961 | 458  |
| ENSG000001 | 0.72616  | 0.640152 | 0.083249 | 0.96152  | NA       | RP11-660N chr4  | + | 25222025 | 25222535 | 511  |
| ENSG000001 | 1.068702 | 1.058552 | 0.006167 | 0.99686  | 0.99826  | CTA-221G9 chr22 | - | 25575276 | 25575521 | 246  |
| ENSG000001 | 0.653381 | 1.370136 | -0.76661 | 0.62804  | 0.71784  | RP5-855F1 chr7  | + | 10980050 | 10980362 | 313  |
| ENSG000001 | 0        | 0.686276 | -0.84936 | 0.6309   | NA       | RP11-524F chr13 | + | 59836814 | 59837525 | 712  |
| ENSG000001 | 0        | 0.343138 | -0.41864 | 0.81278  | NA       | RP11-436N chr14 | + | 1E+08    | 1E+08    | 850  |
| ENSG000001 | 2.023549 | 1.995719 | 0.010266 | 0.99319  | 0.99643  | RP13-216E chrX  | - | 73177894 | 73189320 | 347  |
| ENSG000001 | 0        | 0.640152 | -0.82869 | 0.63935  | NA       | RP11-430C chr1  | - | 62207670 | 62208096 | 427  |
| ENSG000001 | 3.423628 | 0.654722 | 1.9728   | 0.13174  | 0.20397  | RP11-138A chr7  | - | 1.31E+08 | 1.31E+08 | 1998 |
| ENSG000001 | 0.342542 | 0        | 0.4146   | 0.81455  | NA       | RP1-142L7 chr6  | - | 1.13E+08 | 1.13E+08 | 594  |
| ENSG000001 | 1.027626 | 0.297015 | 0.84706  | 0.63368  | NA       | RP11-180N chr12 | - | 12767293 | 12768841 | 396  |
| ENSG000001 | 0        | 17.49782 | -5.6219  | 9.07E-06 | 2.93E-05 | RP11-366C chr13 | - | 43384502 | 43386698 | 760  |
| ENSG000001 | 2.282147 | 1.355566 | 0.66828  | 0.58255  | 0.67866  | RP3-523E1 chr6  | - | 53783772 | 53785586 | 456  |
| ENSG000001 | 0.342542 | 0        | 0.4146   | 0.81455  | NA       | RP11-1072 chr17 | + | 42673714 | 42674712 | 325  |
| ENSG000001 | 2.718006 | 0        | 2.9226   | 0.060365 | 0.10495  | RP11-460N chr9  | - | 69823283 | 69823847 | 565  |
| ENSG000001 | 0.632843 | 0.357707 | 0.4993   | 0.77637  | NA       | RP1-152L7 chr6  | + | 52553459 | 52553796 | 338  |
| ENSG000001 | 1.068702 | 3.685559 | -1.4723  | 0.29816  | 0.40002  | CTC-336P1 chr2  | + | 32238130 | 32238437 | 308  |
| ENSG000001 | 0        | 0.640152 | -0.82869 | 0.63935  | NA       | RP5-894D1 chr6  | - | 1.71E+08 | 1.71E+08 | 500  |
| ENSG000001 | 1.411244 | 1.430828 | -0.01203 | 0.99403  | 0.99669  | RP11-532F chr15 | + | 41052795 | 41053072 | 278  |
| ENSG000001 | 0        | 0.343138 | -0.41864 | 0.81278  | NA       | RP11-140C chr10 | + | 50759354 | 50760698 | 607  |
| ENSG000001 | 0        | 0.357707 | -0.41864 | 0.81278  | NA       | RP11-457C chr13 | + | 51770017 | 51770217 | 201  |
| ENSG000001 | 0        | 0.357707 | -0.41864 | 0.81278  | NA       | RP11-424I chr3  | - | 1.09E+08 | 1.09E+08 | 763  |
| ENSG000001 | 0.705622 | 0.297015 | 0.56864  | 0.74638  | NA       | RP11-286B chr1  | + | 96208652 | 96225026 | 287  |
| ENSG000001 | 0.72616  | 0        | 0.85004  | 0.63064  | NA       | CTD-2320J chr7  | + | 12725262 | 12725658 | 397  |
| ENSG000001 | 4.762093 | 0.640152 | 2.44     | 0.047806 | 0.085564 | RP11-1109 chr12 | + | 89765597 | 89766136 | 540  |
| ENSG000001 | 0        | 0.700845 | -0.87835 | 0.62047  | NA       | RP11-558F chr1  | + | 9840880  | 9841298  | 246  |
| ENSG000001 | 1.89853  | 0.357707 | 1.6975   | 0.29865  | 0.40041  | RP11-230C chr6  | - | 1.57E+08 | 1.57E+08 | 446  |
| ENSG000001 | 3.092251 | 4.692283 | -0.56908 | 0.55504  | 0.65431  | RP11-29H2 chr1  | - | 1.56E+08 | 1.56E+08 | 257  |
| ENSG000001 | 11.22231 | 19.96618 | -0.79612 | 0.24904  | 0.34537  | AL449209 chr3   | + | 1.3E+08  | 1.3E+08  | 3496 |
| ENSG000001 | 0.342542 | 0        | 0.4146   | 0.81455  | NA       | RP11-510P chr12 | - | 43323651 | 43324382 | 732  |
| ENSG000001 | 0        | 0.951736 | -1.2555  | 0.48145  | NA       | AC007326 chr22  | - | 18984651 | 18985108 | 458  |
| ENSG000001 | 0.36308  | 1.372552 | -1.1173  | 0.52587  | NA       | RP13-339P chr4  | + | 39934074 | 39935181 | 632  |
| ENSG000001 | 0.36308  | 0.937167 | -0.90039 | 0.60194  | NA       | CTC-412M1 chr19 | - | 19810012 | 19810218 | 207  |
| ENSG000001 | 0.342542 | 0.891044 | -0.73092 | 0.68123  | NA       | RP11-248N chr13 | + | 68364539 | 68364926 | 388  |
| ENSG000001 | 12.49998 | 20.59418 | -0.7114  | 0.19295  | 0.28027  | SRXN1 chr20     | - | 627259   | 634014   | 2698 |
| ENSG000001 | 0.290301 | 0        | 0.4146   | 0.81455  | NA       | AP003900 chr21  | + | 11169720 | 11184046 | 859  |
| ENSG000001 | 1.286224 | 1.888903 | -0.47697 | 0.71154  | 0.78598  | RP11-435C chr9  | + | 98257206 | 98257661 | 456  |
| ENSG000001 | 0.632843 | 0        | 0.81931  | 0.64303  | NA       | AP000654 chr11  | - | 86532185 | 86532770 | 586  |
| ENSG000001 | 0        | 0.343138 | -0.41864 | 0.81278  | NA       | CTAGE6 chr7     | - | 1.43E+08 | 1.43E+08 | 2608 |
| ENSG000001 | 2.31385  | 0        | 2.6622   | 0.097433 | 0.15798  | RP11-10C2 chr3  | - | 33835136 | 33835637 | 502  |
| ENSG000001 | 16.66012 | 3.008147 | 2.3805   | 0.000697 | 0.00177  | RP11-1109 chr12 | + | 89761584 | 89763078 | 1495 |
| ENSG000001 | 0.342542 | 1.485073 | -1.2139  | 0.48947  | NA       | RP11-797J chr11 | - | 28166454 | 28166751 | 298  |
| ENSG000001 | 13.94292 | 0        | 5.4324   | 6.59E-06 | 2.16E-05 | CTD-2078B chr5  | + | 39520533 | 39524810 | 599  |
| ENSG000001 | 15.77805 | 11.81493 | 0.39129  | 0.49969  | 0.60339  | RP11-324I chr10 | - | 35603480 | 35625329 | 1107 |
| ENSG000001 | 0.290301 | 0        | 0.4146   | 0.81455  | NA       | RP11-197L chr13 | - | 37378335 | 37379439 | 1105 |
| ENSG000001 | 20.85179 | 33.17709 | -0.6728  | 0.13603  | 0.20909  | RP11-474P chr9  | - | 1.28E+08 | 1.28E+08 | 888  |
| ENSG000001 | 1.265686 | 0        | 1.6147   | 0.36215  | NA       | RP11-274B chr7  | + | 1.28E+08 | 1.28E+08 | 1267 |
| ENSG000001 | 20.1976  | 112.465  | -2.4513  | 8.88E-11 | 4.40E-10 | RP11-701F chr15 | + | 25236633 | 25236900 | 268  |
| ENSG000001 | 1.016461 | 0.343138 | 0.95782  | 0.57832  | NA       | CTD-2384B chr11 | - | 47062578 | 47063496 | 919  |
| ENSG000001 | 0        | 0.343138 | -0.41864 | 0.81278  | NA       | RP11-843B chr12 | - | 32253419 | 32253669 | 251  |
| ENSG000001 | 19.86622 | 29.49228 | -0.56    | 0.1769   | 0.26046  | RP11-84C1 chr4  | + | 90032651 | 90033519 | 686  |
| ENSG000001 | 14.90894 | 6.442816 | 1.1516   | 0.082155 | 0.13665  | HTATS1P2 chr6   | - | 3023376  | 3024006  | 631  |
| ENSG000001 | 0        | 0.357707 | -0.41864 | 0.81278  | NA       | RP11-81A1 chr15 | + | 80276493 | 80278066 | 948  |
| ENSG000001 | 0        | 10.56047 | -4.9982  | 7.93E-05 | 0.000229 | AC002128 chr19  | - | 35742343 | 35744542 | 618  |
| ENSG000001 | 1.669842 | 0.686276 | 0.91057  | 0.57469  | 0.67168  | RP3-483K1 chr6  | + | 53214956 | 53215503 | 548  |
| ENSG000001 | 22.63565 | 23.90895 | -0.06865 | 0.87367  | 0.91193  | RP11-350C chr11 | + | 34731147 | 34731708 | 562  |
| ENSG000001 | 0        | 0.297015 | -0.41864 | 0.81278  | NA       | RP11-253I chr12 | - | 12605037 | 12605415 | 379  |
| ENSG000001 | 0.342542 | 0        | 0.4146   | 0.81455  | NA       | CTD-2284C chr5  | + | 37130532 | 37130802 | 271  |

|            |          |          |          |          |          |                 |   |          |          |      |
|------------|----------|----------|----------|----------|----------|-----------------|---|----------|----------|------|
| ENSG000001 | 0.342542 | 0.297015 | -0.00202 | 0.99909  | NA       | RP11-307C chr1  | + | 1.55E+08 | 1.55E+08 | 799  |
| ENSG000001 | 0.36308  | 0        | 0.4146   | 0.81455  | NA       | RP11-1060 chr12 | + | 94338817 | 94341589 | 2773 |
| ENSG000001 | 0.705622 | 1.294874 | -0.71528 | 0.63274  | 0.72172  | RP11-435C chr9  | - | 98169272 | 98169944 | 673  |
| ENSG000001 | 2.572449 | 3.054271 | -0.2011  | 0.84655  | 0.89236  | RP11-382C chr1  | - | 1.84E+08 | 1.84E+08 | 952  |
| ENSG000001 | 0        | 0.297015 | -0.41864 | 0.81278  | NA       | RP11-89C3 chr11 | - | 1.11E+08 | 1.11E+08 | 499  |
| ENSG000001 | 5.737478 | 1.029414 | 2.1583   | 0.073784 | 0.12473  | RP11-697E chr15 | - | 90827608 | 90828812 | 894  |
| ENSG000001 | 0.290301 | 1.355566 | -1.3811  | 0.39332  | NA       | RP5-1092A chr1  | + | 28573655 | 28574079 | 425  |
| ENSG000001 | 0.290301 | 0        | 0.4146   | 0.81455  | NA       | RP13-266I chrX  | + | 1.12E+08 | 1.12E+08 | 829  |
| ENSG000001 | 0        | 0.297015 | -0.41864 | 0.81278  | NA       | RP11-171I chr2  | + | 1.8E+08  | 1.8E+08  | 463  |
| ENSG000001 | 0.580602 | 0.297015 | 0.36801  | 0.83644  | NA       | RP11-432J chr10 | + | 72689682 | 72691814 | 1963 |
| ENSG000001 | 0.36308  | 4.472946 | -2.8909  | 0.042758 | 0.077678 | RP11-506F chr5  | - | 54652136 | 54653351 | 1216 |
| ENSG000001 | 0        | 1.591889 | -2.1342  | 0.20414  | NA       | AP000892 chr11  | - | 1.17E+08 | 1.17E+08 | 376  |
| ENSG000001 | 0.923144 | 0.98329  | -0.04766 | 0.97585  | 0.9865   | RP11-751K chr7  | + | 1.35E+08 | 1.35E+08 | 445  |
| ENSG000001 | 0.632843 | 0.937167 | -0.40344 | 0.80349  | NA       | RP11-305E chr1  | + | 1.01E+08 | 1.01E+08 | 236  |
| ENSG000001 | 0.342542 | 0        | 0.4146   | 0.81455  | NA       | RP11-909N chr14 | + | 1.01E+08 | 1.01E+08 | 1004 |
| ENSG000001 | 0.580602 | 0        | 0.8036   | 0.6494   | NA       | RP5-1057J chr1  | - | 23704873 | 23705522 | 650  |
| ENSG000001 | 0        | 0.357707 | -0.41864 | 0.81278  | NA       | RP1-269O5 chrX  | + | 1.11E+08 | 1.11E+08 | 358  |
| ENSG000001 | 0.705622 | 0.297015 | 0.56864  | 0.74638  | NA       | RP11-647C chr14 | - | 39839483 | 39839960 | 478  |
| ENSG000001 | 0.943682 | 0.297015 | 0.89158  | 0.60669  | NA       | RP11-188C chr1  | - | 1.18E+08 | 1.18E+08 | 575  |
| ENSG000001 | 0.705622 | 0.640152 | 0.062329 | 0.97007  | NA       | RP1-224A6 chr1  | - | 22394833 | 22395320 | 488  |
| ENSG000001 | 148.4262 | 42.56562 | 1.7891   | 1.09E-10 | 5.37E-10 | RP3-368A4 chrX  | - | 73420064 | 73461983 | 3897 |
| ENSG000001 | 0        | 3.774517 | -2.6958  | 0.1237   | 0.19381  | RP13-238F chr10 | + | 1.26E+08 | 1.26E+08 | 1359 |
| ENSG000001 | 0.705622 | 1.98115  | -1.2292  | 0.3862   | 0.49045  | RP11-295B chr13 | + | 99205497 | 99206034 | 538  |
| ENSG000001 | 0.653381 | 0        | 0.82678  | 0.64037  | NA       | RP11-541E chr2  | - | 38762400 | 38763391 | 570  |
| ENSG000001 | 9.233071 | 7.73769  | 0.23303  | 0.73237  | 0.80225  | RP11-342K chr2  | + | 75897115 | 75897580 | 466  |
| ENSG000001 | 0.685084 | 0.640152 | 0.044759 | 0.97934  | NA       | RP11-290L chr9  | + | 39159068 | 39160316 | 1249 |
| ENSG000001 | 0        | 0.297015 | -0.41864 | 0.81278  | NA       | FAM22D chr10    | + | 89124746 | 89126248 | 1018 |
| ENSG000001 | 9.700633 | 2.482932 | 1.7908   | 0.043629 | 0.079026 | RP11-710C chr4  | + | 96470280 | 96473608 | 3329 |
| ENSG000001 | 0.342542 | 0.343138 | -0.00208 | 0.99906  | NA       | CTB-152G1 chr7  | + | 1.05E+08 | 1.05E+08 | 260  |
| ENSG000001 | 0        | 0.343138 | -0.41864 | 0.81278  | NA       | RP11-384A chr3  | + | 1.94E+08 | 1.94E+08 | 163  |
| ENSG000001 | 0        | 1.545765 | -1.8556  | 0.29195  | NA       | RP11-132J chr14 | + | 56013392 | 56014841 | 1120 |
| ENSG000001 | 0        | 0.686276 | -0.84936 | 0.6309   | NA       | RP1-55C23 chr6  | + | 1.33E+08 | 1.33E+08 | 799  |
| ENSG000001 | 0.342542 | 0        | 0.4146   | 0.81455  | NA       | RP11-60E8 chr12 | - | 51200118 | 51200220 | 103  |
| ENSG000001 | 0        | 0.594029 | -0.81444 | 0.64499  | NA       | CTB-2317.3 chr5 | + | 1.51E+08 | 1.51E+08 | 1376 |
| ENSG000001 | 0.685084 | 0.357707 | 0.4822   | 0.78686  | NA       | CTC-559E9 chr19 | + | 19861427 | 19863353 | 1927 |
| ENSG000001 | 2.821674 | 5.721697 | -0.90276 | 0.37113  | 0.47552  | RP11-288K chr12 | - | 1804996  | 1807210  | 1979 |
| ENSG000001 | 1.742621 | 1.727843 | 0.006357 | 0.99658  | 0.99809  | RP11-712C chr14 | + | 64828110 | 64828355 | 246  |
| ENSG000001 | 6.504714 | 152.7038 | -4.4915  | 3.22E-19 | 2.60E-18 | CTC-260E6 chr19 | + | 20332678 | 20333272 | 595  |
| ENSG000001 | 0.290301 | 0.594029 | -0.38058 | 0.83094  | NA       | RP11-7G12 chr1  | - | 1.66E+08 | 1.66E+08 | 535  |
| ENSG000001 | 694.2446 | 116.3455 | 2.5547   | 2.29E-14 | 1.44E-13 | RP11-274B chr7  | - | 1.28E+08 | 1.28E+08 | 2732 |
| ENSG000001 | 0        | 0.640152 | -0.82869 | 0.63935  | NA       | RP11-426K chr2  | + | 1.02E+08 | 1.02E+08 | 279  |
| ENSG000001 | 115.3704 | 49.93573 | 1.1945   | 0.003039 | 0.006998 | RP3-368A4 chrX  | - | 73429811 | 73433495 | 3685 |
| ENSG000001 | 2.914991 | 1.730259 | 0.67089  | 0.58705  | 0.6827   | RP11-365F chr7  | - | 1.39E+08 | 1.39E+08 | 586  |
| ENSG000001 | 0.685084 | 0        | 0.85004  | 0.63064  | NA       | RP11-326I chr4  | - | 1.85E+08 | 1.85E+08 | 1059 |
| ENSG000001 | 0.705622 | 1.355566 | -0.75056 | 0.61553  | 0.70721  | RP11-692N chr11 | + | 47817721 | 47817931 | 211  |
| ENSG000001 | 0.580602 | 0        | 0.8036   | 0.6494   | NA       | RP4-725K1 chr1  | - | 1.45E+08 | 1.45E+08 | 529  |
| ENSG000001 | 1.265686 | 0        | 1.6147   | 0.36215  | NA       | RP11-579C chr12 | - | 49194359 | 49194869 | 511  |
| ENSG000001 | 7.655732 | 6.566617 | 0.22108  | 0.76656  | 0.83117  | RP11-561N chr7  | - | 64139332 | 64147771 | 563  |
| ENSG000001 | 5.975539 | 9.338442 | -0.62111 | 0.35937  | 0.46351  | RP11-230C chr6  | - | 1.57E+08 | 1.57E+08 | 718  |
| ENSG000001 | 6.463638 | 0.343138 | 3.4849   | 0.007627 | 0.016382 | RP11-274B chr7  | + | 1.28E+08 | 1.28E+08 | 1114 |
| ENSG000001 | 2.604151 | 3.38284  | -0.32648 | 0.75581  | 0.82246  | RP4-665N4 chr1  | - | 36457710 | 36479231 | 385  |
| ENSG000001 | 1.431782 | 2.618886 | -0.73039 | 0.60419  | 0.69752  | CTD-3214K chr8  | + | 53635463 | 53635701 | 239  |
| ENSG000001 | 2.613524 | 2.529055 | 0.027597 | 0.98186  | 0.98993  | RP11-692N chr11 | + | 47862876 | 47863234 | 359  |
| ENSG000001 | 22.80436 | 59.62813 | -1.3726  | 0.002175 | 0.005116 | RP11-486C chr1  | - | 84542014 | 84543614 | 1601 |
| ENSG000001 | 7.385969 | 8.309028 | -0.14903 | 0.83062  | 0.88058  | RP11-536L chr1  | + | 2.05E+08 | 2.05E+08 | 784  |
| ENSG000001 | 0        | 2.232041 | -2.63    | 0.10215  | 0.16421  | RP11-89C3 chr11 | - | 1.11E+08 | 1.11E+08 | 508  |
| ENSG000001 | 0.72616  | 0        | 0.85004  | 0.63064  | NA       | RP11-52M chr7   | + | 44640631 | 44641086 | 456  |
| ENSG000001 | 0.290301 | 0        | 0.4146   | 0.81455  | NA       | GS1-531I1 chr17 | + | 63640426 | 63640735 | 310  |
| ENSG000001 | 21.55839 | 0        | 6.0506   | 1.93E-07 | 7.36E-07 | RP11-181E chr2  | - | 1.12E+08 | 1.12E+08 | 1482 |
| ENSG000001 | 0.653381 | 0        | 0.82678  | 0.64037  | NA       | CTD-2542C chr19 | - | 21208721 | 21208847 | 127  |
| ENSG000001 | 8.860618 | 0        | 4.7084   | 0.000331 | 0.00088  | MILR1 chr17     | + | 62461569 | 62464760 | 631  |
| ENSG000001 | 1.265686 | 0        | 1.6147   | 0.36215  | NA       | RP3-418A9 chr6  | + | 1.11E+08 | 1.11E+08 | 311  |
| ENSG000001 | 0        | 0.357707 | -0.41864 | 0.81278  | NA       | KB-1980E6 chr8  | + | 1.03E+08 | 1.03E+08 | 302  |
| ENSG000001 | 30.1552  | 10.71099 | 1.479    | 0.001865 | 0.004432 | RP11-591N chr12 | + | 90102736 | 90106367 | 3632 |
| ENSG000001 | 0        | 0.343138 | -0.41864 | 0.81278  | NA       | CTD-2026C chr2  | + | 57982563 | 57993187 | 1099 |

|                  |          |          |          |                |                 |          |          |          |      |
|------------------|----------|----------|----------|----------------|-----------------|----------|----------|----------|------|
| ENSG000001034254 | 0        | 0.4146   | 0.81455  | NA             | RP11-175C chr1  | +        | 72203856 | 72204037 | 182  |
| ENSG000001035770 | 0.357707 | -0.41864 | 0.81278  | NA             | RP11-60E8 chr12 | -        | 51241708 | 51242095 | 388  |
| ENSG000001034313 | 0.343138 | -0.41864 | 0.81278  | NA             | RP11-435I chr16 | +        | 28376021 | 28376654 | 634  |
| ENSG000001034254 | 0.686276 | -0.48412 | 0.78604  | NA             | RP11-3K24 chr17 | +        | 58393195 | 58393576 | 382  |
| ENSG000001070562 | 0        | 0.8807   | 0.6196   | NA             | RP11-408C chr9  | +        | 1.16E+08 | 1.16E+08 | 610  |
| ENSG000001036308 | 0.297015 | -0.00205 | 0.99908  | NA             | RP11-289A chr2  | +        | 2.34E+08 | 2.34E+08 | 1551 |
| ENSG000001029030 | 0.343138 | -0.00202 | 0.99909  | NA             | RP11-66E2 chr12 | -        | 47075854 | 47076496 | 643  |
| ENSG000001155391 | 4.351561 | 1.7712   | 0.012948 | 0.026596       | RP11-10C2 chr3  | -        | 33837180 | 33838442 | 1263 |
| ENSG000001072616 | 0        | 0.85004  | 0.63064  | NA             | RP3-365I1 chr1  | -        | 1.44E+08 | 1.44E+08 | 111  |
| ENSG000001197130 | 16.62047 | 0.24379  | 0.64455  | 0.7314         | RP11-326I chr4  | +        | 1.85E+08 | 1.85E+08 | 2503 |
| ENSG000001016671 | 0        | -1.9695  | 0.25993  | NA             | RP11-168P chr13 | +        | 54690611 | 54690986 | 376  |
| ENSG000001072616 | 0        | 0.85004  | 0.63064  | NA             | RP11-259K chr3  | +        | 37258270 | 37259479 | 1210 |
| ENSG000001034254 | 3.008147 | -2.4289  | 0.093002 | 0.15202        | RP11-685B chr8  | -        | 18244618 | 18245287 | 670  |
| ENSG000001106870 | 0        | 1.3672   | 0.44297  | NA             | RP11-270B chr2  | +        | 62395997 | 62398298 | 395  |
| ENSG000001333968 | 4.711133 | 0.2678   | 0.81819  | 0.87233        | RP11-435C chr9  | +        | 98276327 | 98276802 | 476  |
| ENSG000001029701 | 0.41864  | 0.81278  | NA       | RP11-141C chr3 | -               | 1.95E+08 | 1.95E+08 | 1070     |      |
| ENSG000001678482 | 5.984741 | 0.18     | 0.82853  | 0.87924        | RP4-800G7 chr7  | -        | 1.49E+08 | 1.49E+08 | 1095 |
| ENSG000001010124 | 0.12429  | -1.3162  | 0.46038  | NA             | RP11-95I1 chr10 | -        | 1.23E+08 | 1.23E+08 | 625  |
| ENSG000001058060 | 0        | 0.8036   | 0.6494   | NA             | RP11-1E1.2 chr4 | -        | 78033648 | 78034611 | 964  |
| ENSG000001034313 | 0.41864  | 0.81278  | NA       | CTD-2230 chrX  | +               | 1.14E+08 | 1.14E+08 | 820      |      |
| ENSG000001065338 | 0        | 0.82678  | 0.64037  | NA             | RP11-1012 chr14 | +        | 68201912 | 68202067 | 156  |
| ENSG000001068508 | 0.297015 | 0.4735   | 0.79064  | NA             | ATP1B3P1 chr2   | -        | 60962030 | 60962850 | 821  |
| ENSG000001393145 | 3.604593 | 0.11258  | 0.90727  | 0.93617        | RP11-297J chr2  | -        | 1.22E+08 | 1.22E+08 | 708  |
| ENSG000001036308 | 0.343138 | -0.0021  | 0.99905  | NA             | RP11-392C chr3  | -        | 1.5E+08  | 1.5E+08  | 616  |

| GeneType   | GeneDescri   | CBM_1_rea | CBM_2_rea | CBM_3_rea | WT_1_read | WT_2_read | WT_3_read | CBM_1_fpk | CBM_2_fpk | CBM_3_fpk | WT_1_fpk |
|------------|--------------|-----------|-----------|-----------|-----------|-----------|-----------|-----------|-----------|-----------|----------|
| protein_co | tetraspanin  | 1451      | 1198      | 1210      | 853       | 912       | 1154      | 30.84198  | 32.65435  | 31.0319   | 28.14196 |
| protein_co | tenomodul    | 2469      | 1546      | 1575      | 53        | 28        | 58        | 86.46113  | 69.42544  | 66.54699  | 2.880754 |
| protein_co | dolichyl-ph  | 575       | 494       | 467       | 483       | 587       | 690       | 23.22288  | 25.58494  | 22.7569   | 30.2779  |
| protein_co | SCY1-like_3  | 165       | 119       | 136       | 72        | 96        | 71        | 2.225152  | 2.057937  | 2.212904  | 1.507088 |
| protein_co | chromosom    | 223       | 162       | 165       | 291       | 321       | 283       | 2.401027  | 2.236746  | 2.143504  | 4.863128 |
| protein_co | Gardner-Ra   | 15        | 15        | 8         | 5         | 13        | 4         | 0.257732  | 0.330505  | 0.16585   | 0.133345 |
| protein_co | compleme     | 245       | 179       | 167       | 0         | 0         | 0         | 1.644675  | 1.540907  | 1.352628  | 0        |
| protein_co | fucosidase   | 592       | 561       | 542       | 469       | 551       | 538       | 16.42538  | 19.96025  | 18.14433  | 20.19747 |
| protein_co | glutamate-i  | 320       | 251       | 277       | 581       | 807       | 858       | 3.935171  | 3.95819   | 4.109996  | 11.08971 |
| protein_co | nuclear_tra  | 1429      | 1016      | 1086      | 576       | 671       | 581       | 17.58222  | 16.0304   | 16.12201  | 11.00004 |
| protein_co | sperm-tail_  | 90        | 87        | 96        | 245       | 248       | 98        | 0.70148   | 0.869563  | 0.902801  | 2.963938 |
| protein_co | NIPA-like_c  | 242       | 236       | 235       | 207       | 237       | 194       | 2.070313  | 2.589059  | 2.425697  | 2.748662 |
| protein_co | LAS1-like_() | 926       | 753       | 773       | 1638      | 1750      | 1644      | 8.342009  | 8.698893  | 8.402087  | 22.90361 |
| protein_co | ectonucleo   | 37        | 26        | 25        | 43        | 52        | 24        | 0.373023  | 0.336137  | 0.304104  | 0.672873 |
| protein_co | sema_dom     | 2145      | 1517      | 1576      | 1788      | 2361      | 942       | 26.45426  | 23.99182  | 23.4516   | 34.2268  |
| protein_co | cystic_fibr  | 4         | 12        | 4         | 7         | 7         | 11        | 0.030607  | 0.117748  | 0.036929  | 0.083136 |
| protein_co | ankyrin_rej  | 1782      | 1486      | 1473      | 667       | 805       | 608       | 13.74083  | 14.69378  | 13.70428  | 7.982919 |
| protein_co | cytochrom    | 115       | 118       | 110       | 49        | 73        | 48        | 1.67986   | 2.210379  | 1.938724  | 1.110969 |
| protein_co | KRIT1_anky   | 327       | 254       | 333       | 293       | 318       | 303       | 3.219873  | 3.207259  | 3.956246  | 4.478052 |
| protein_co | RAD52_hoi    | 207       | 147       | 178       | 124       | 135       | 166       | 3.434619  | 3.127771  | 3.563496  | 3.193452 |
| pseudogen  | myosin_he    | 7         | 8         | 13        | 11        | 22        | 3         | 0.05215   | 0.076428  | 0.116854  | 0.127197 |
| protein_co | BCL2-assoc   | 55        | 34        | 33        | 24        | 46        | 29        | 2.228998  | 1.766995  | 1.613649  | 1.509693 |
| protein_co | leucine_ar   | 1154      | 892       | 958       | 1041      | 1246      | 1275      | 24.45146  | 24.23668  | 24.49134  | 34.23578 |
| protein_co | CD99_mol     | 12498     | 9346      | 9609      | 1093      | 1320      | 1073      | 470.708   | 451.384   | 436.6538  | 63.89424 |
| protein_co | heparan_su   | 23        | 10        | 15        | 22        | 33        | 18        | 0.134288  | 0.074872  | 0.10567   | 0.199372 |
| protein_co | amiloride_l  | 0         | 0         | 0         | 0         | 6         | 3         | 0         | 0         | 0         | 0        |
| protein_co | wingless-ty  | 12        | 3         | 8         | 0         | 1         | 8         | 0.178799  | 0.057321  | 0.143821  | 0        |
| protein_co | HECT_C2_a    | 594       | 472       | 499       | 89        | 91        | 69        | 4.072623  | 4.149914  | 4.127969  | 0.947127 |
| protein_co | MAD1_mit     | 1027      | 785       | 868       | 751       | 932       | 646       | 16.10032  | 15.78131  | 16.41843  | 18.27403 |
| protein_co | LIM_and_Sl   | 10159     | 7834      | 8445      | 4398      | 5134      | 5008      | 115.9298  | 114.6403  | 116.2765  | 77.89865 |
| protein_co | sorting_ne   | 538       | 364       | 380       | 322       | 460       | 429       | 9.230453  | 8.008506  | 7.866334  | 8.574861 |
| protein_co | transmembr   | 1         | 2         | 1         | 5         | 2         | 2         | 0.022707  | 0.058237  | 0.027397  | 0.176222 |
| protein_co | mannose-6    | 1020      | 807       | 855       | 1058      | 1186      | 1098      | 17.35407  | 17.60695  | 17.55154  | 27.93942 |
| protein_co | kelch-like_f | 4         | 3         | 1         | 127       | 133       | 107       | 0.035183  | 0.033838  | 0.010613  | 1.733828 |
| protein_co | cytochrom    | 49        | 17        | 28        | 0         | 2         | 5         | 0.485548  | 0.21602   | 0.334766  | 0        |
| protein_co | islet_cell_a | 45        | 30        | 48        | 225       | 320       | 220       | 0.858442  | 0.733887  | 1.104811  | 6.662105 |
| protein_co | dysbindin_   | 938       | 772       | 760       | 1971      | 2589      | 2373      | 15.22424  | 16.06791  | 14.88314  | 49.65351 |
| protein_co | amyotroph    | 961       | 835       | 889       | 783       | 917       | 737       | 6.782256  | 7.556951  | 7.570082  | 8.57715  |
| protein_co | caspase_10   | 4         | 1         | 4         | 25        | 67        | 38        | 0.03164   | 0.010143  | 0.038175  | 0.306932 |
| protein_co | CASP8_and    | 307       | 269       | 265       | 198       | 197       | 215       | 3.260529  | 3.663627  | 3.395812  | 3.263964 |
| protein_co | tissue_fact  | 164       | 130       | 143       | 49        | 68        | 117       | 0.999995  | 1.016499  | 1.052054  | 0.463746 |
| protein_co | NADH_deh     | 240       | 164       | 173       | 540       | 718       | 546       | 3.783996  | 3.315833  | 3.291043  | 13.21489 |
| protein_co | RNA_bindin   | 1395      | 1319      | 1305      | 610       | 601       | 758       | 11.64736  | 14.12236  | 13.14655  | 7.905213 |
| protein_co | myotubula    | 14        | 19        | 14        | 82        | 79        | 53        | 0.170509  | 0.296744  | 0.205729  | 1.550115 |
| protein_co | solute_carr  | 187       | 151       | 170       | 430       | 563       | 466       | 1.148001  | 1.18874   | 1.259209  | 4.097318 |
| protein_co | ADP-ribosy   | 1564      | 1138      | 1271      | 1494      | 1740      | 1231      | 48.59906  | 45.34639  | 47.6524   | 72.05634 |
| protein_co | sterile_alph | 240       | 168       | 205       | 24        | 48        | 19        | 1.540745  | 1.383051  | 1.587894  | 0.239145 |
| processed_ | polymerase   | 2022      | 1597      | 1586      | 1631      | 1994      | 2230      | 36.63509  | 37.10482  | 34.67108  | 45.86702 |
| protein_co | plexin_D1    | 10458     | 7982      | 8554      | 2150      | 2974      | 1684      | 69.05729  | 67.58992  | 68.15193  | 22.03585 |
| protein_co | adenylate_l  | 1700      | 1377      | 1387      | 1248      | 1410      | 1556      | 22.22895  | 23.08944  | 21.88238  | 25.32883 |
| protein_co | CD38_mol     | 1         | 0         | 1         | 5         | 8         | 1         | 0.024889  | 0         | 0.030029  | 0.193152 |
| protein_co | FK506_bin    | 1996      | 1667      | 1750      | 5205      | 5812      | 4847      | 41.28473  | 44.21543  | 43.6732   | 167.1014 |
| protein_co | lysine_(K)-s | 4173      | 3345      | 3542      | 5602      | 7373      | 5840      | 63.96602  | 65.75161  | 65.50848  | 133.2829 |
| protein_co | RNA_bindin   | 1944      | 1632      | 1751      | 1208      | 1500      | 1345      | 21.08099  | 22.69469  | 22.9102   | 20.33256 |
| protein_co | calcium/ca   | 350       | 283       | 303       | 335       | 361       | 150       | 4.210238  | 4.365503  | 4.397737  | 6.254806 |
| protein_co | RecQ_prot    | 1292      | 1092      | 1083      | 378       | 340       | 491       | 16.36464  | 17.73683  | 16.55086  | 7.431325 |
| protein_co | coiled-coil  | 245       | 210       | 189       | 86        | 71        | 161       | 3.178764  | 3.493984  | 2.958708  | 1.731893 |
| protein_co | heat_shock   | 3         | 5         | 4         | 18        | 20        | 10        | 0.086089  | 0.183996  | 0.138496  | 0.801736 |
| protein_co | Rho_GTPas    | 285       | 198       | 210       | 528       | 683       | 398       | 3.036504  | 2.705226  | 2.699581  | 8.731592 |
| protein_co | NADH_deh     | 748       | 646       | 686       | 1183      | 1301      | 1317      | 39.63134  | 43.89135  | 43.85401  | 97.28645 |
| protein_co | pyruvate_d   | 1         | 1         | 3         | 0         | 0         | 2         | 0.013112  | 0.016815  | 0.047463  | 0        |
| protein_co | solute_carr  | 0         | 0         | 0         | 1         | 0         | 0         | 0         | 0         | 0         | 0.036628 |
| protein_co | zinc_finger  | 15        | 19        | 18        | 3         | 10        | 4         | 0.24287   | 0.394498  | 0.351643  | 0.075393 |
| protein_co | ATP-bindin   | 3         | 0         | 1         | 4         | 2         | 13        | 0.024208  | 0         | 0.009736  | 0.050098 |

|                         |      |      |      |      |      |      |          |          |          |          |
|-------------------------|------|------|------|------|------|------|----------|----------|----------|----------|
| protein_co aristaless_r | 2    | 0    | 0    | 0    | 0    | 4    | 0.032608 | 0        | 0        | 0        |
| protein_co solute_carr  | 502  | 377  | 382  | 883  | 1055 | 1164 | 7.374307 | 7.101796 | 6.770627 | 20.13301 |
| protein_co suppressor   | 298  | 244  | 248  | 148  | 136  | 185  | 4.820016 | 5.060942 | 4.83985  | 3.715561 |
| protein_co cell_divisio | 1679 | 1345 | 1378 | 581  | 704  | 510  | 13.57151 | 13.94149 | 13.43924 | 7.289272 |
| protein_co solute_carr  | 0    | 0    | 0    | 1    | 2    | 1    | 0        | 0        | 0        | 0.014659 |
| protein_co calcitonin_  | 0    | 0    | 0    | 3    | 4    | 9    | 0        | 0        | 0        | 0.059075 |
| protein_co holocytoch   | 374  | 331  | 319  | 284  | 428  | 589  | 7.701742 | 8.740871 | 7.926037 | 9.077498 |
| protein_co dishevelled  | 2176 | 1446 | 1561 | 1291 | 1648 | 1397 | 33.80804 | 28.8097  | 29.26255 | 31.13278 |
| protein_co protease_sc  | 0    | 0    | 1    | 11   | 15   | 6    | 0        | 0        | 0.040819 | 0.577617 |
| protein_co UPF1_regul   | 3650 | 2693 | 2911 | 3729 | 5386 | 4117 | 32.00235 | 30.27852 | 30.79493 | 50.74717 |
| protein_co src_kinase_  | 308  | 264  | 261  | 45   | 76   | 74   | 3.612337 | 3.970552 | 3.693398 | 0.819182 |
| protein_co solute_carr  | 3789 | 2983 | 3048 | 5927 | 5851 | 5269 | 139.4555 | 140.7906 | 135.3549 | 338.5917 |
| protein_co coiled-coil_ | 808  | 647  | 719  | 243  | 299  | 305  | 16.69037 | 17.13832 | 17.91973 | 7.790966 |
| protein_co homeobox_    | 379  | 268  | 278  | 0    | 0    | 10   | 7.743493 | 7.021693 | 6.853155 | 0        |
| protein_co polymerase   | 699  | 532  | 507  | 539  | 678  | 701  | 35.16751 | 34.32302 | 30.77659 | 42.09046 |
| protein_co DEAH_(Asp    | 659  | 548  | 544  | 1244 | 1562 | 1948 | 5.500271 | 5.865277 | 5.478297 | 16.11571 |
| protein_co mesenchyn    | 460  | 320  | 370  | 1    | 0    | 4    | 7.968012 | 7.108066 | 7.732891 | 0.026886 |
| protein_co thrombosp    | 131  | 74   | 94   | 6    | 10   | 13   | 0.962035 | 0.696884 | 0.832905 | 0.068391 |
| protein_co ligase_III_D | 1106 | 836  | 997  | 1548 | 1726 | 1309 | 11.11929 | 10.77798 | 12.09386 | 24.1559  |
| protein_co RNA_polym    | 454  | 354  | 405  | 305  | 235  | 392  | 9.128674 | 9.127765 | 9.825506 | 9.518799 |
| protein_co acyl-CoA_s   | 2    | 3    | 2    | 75   | 69   | 28   | 0.032963 | 0.063406 | 0.039772 | 1.918624 |
| protein_co Putative_Ri  | 67   | 69   | 73   | 121  | 133  | 99   | 1.155436 | 1.525912 | 1.518945 | 3.238822 |
| protein_co cytokine_ir  | 773  | 631  | 658  | 1029 | 1176 | 1297 | 16.61136 | 17.38859 | 17.06081 | 34.32191 |
| processed_ signal_pept  | 1599 | 1225 | 1317 | 1184 | 1613 | 1266 | 19.67387 | 19.328   | 19.55128 | 22.6112  |
| protein_co family_witl  | 1151 | 897  | 923  | 132  | 171  | 121  | 9.352003 | 9.346115 | 9.048552 | 1.664691 |
| protein_co coatomer_    | 539  | 386  | 373  | 5    | 2    | 2    | 28.36557 | 26.0495  | 23.68425 | 0.408416 |
| protein_co protein_kir  | 471  | 407  | 411  | 603  | 852  | 693  | 5.897249 | 6.5348   | 6.208954 | 11.71862 |
| protein_co male-specif  | 488  | 367  | 444  | 171  | 197  | 244  | 6.640258 | 6.403841 | 7.289473 | 3.611534 |
| protein_co CREB_bindi   | 3353 | 2569 | 2847 | 1786 | 2449 | 2934 | 14.55357 | 14.29912 | 14.90979 | 12.03228 |
| protein_co benzodiaza   | 39   | 29   | 23   | 71   | 86   | 31   | 0.239799 | 0.22866  | 0.170632 | 0.677598 |
| protein_co myeloperoc   | 0    | 0    | 0    | 220  | 1    | 0    | 0        | 0        | 0        | 4.835867 |
| protein_co paraoxonas   | 0    | 0    | 0    | 3    | 4    | 6    | 0        | 0        | 0        | 0.085023 |
| protein_co GC-rich_ser  | 284  | 211  | 256  | 201  | 265  | 267  | 2.999271 | 2.85752  | 3.262011 | 3.294761 |
| protein_co WD_repeat    | 456  | 348  | 358  | 943  | 872  | 554  | 9.075487 | 8.881651 | 8.596787 | 29.13046 |
| protein_co carnitine_C  | 136  | 105  | 104  | 43   | 53   | 24   | 2.008517 | 1.988544 | 1.853182 | 0.985679 |
| protein_co ATP-bindin   | 5    | 3    | 4    | 22   | 29   | 17   | 0.058321 | 0.044873 | 0.056294 | 0.398297 |
| protein_co myeloid/ly   | 1084 | 896  | 1006 | 751  | 726  | 379  | 7.247794 | 7.682347 | 8.115636 | 7.793759 |
| protein_co rhomboid_    | 1242 | 990  | 972  | 642  | 837  | 796  | 31.01033 | 31.69782 | 29.28189 | 24.88    |
| protein_co SRV_(sex_d   | 2589 | 1883 | 1944 | 439  | 659  | 297  | 29.23146 | 27.26328 | 26.48273 | 7.693314 |
| protein_co inhibitor_c  | 1751 | 1324 | 1455 | 439  | 398  | 470  | 13.56201 | 13.15029 | 13.59719 | 5.277557 |
| protein_co zinc_finger  | 317  | 288  | 295  | 715  | 698  | 1014 | 5.004759 | 5.830768 | 5.619453 | 17.52106 |
| protein_co MYC_bindi    | 1913 | 1586 | 1728 | 495  | 449  | 485  | 5.97009  | 6.347145 | 6.506654 | 2.397737 |
| protein_co F-box_and_   | 787  | 616  | 635  | 161  | 191  | 262  | 10.53453 | 10.57378 | 10.25562 | 3.345004 |
| protein_co integrin_al  | 6    | 6    | 7    | 1    | 2    | 2    | 0.053969 | 0.069208 | 0.075969 | 0.013961 |
| protein_co pyruvate_d   | 283  | 182  | 251  | 126  | 147  | 116  | 3.857522 | 3.181286 | 4.128038 | 2.665772 |
| protein_co integrin_al  | 913  | 738  | 765  | 788  | 995  | 629  | 7.813577 | 8.09925  | 7.899299 | 10.46733 |
| protein_co zinc_finger  | 576  | 492  | 483  | 202  | 234  | 359  | 3.573518 | 3.914244 | 3.615503 | 1.94516  |
| protein_co lysosomal-i  | 1895 | 1560 | 1702 | 570  | 719  | 545  | 22.04878 | 23.27605 | 23.89367 | 10.29392 |
| protein_co gametogen    | 1360 | 1149 | 1203 | 790  | 914  | 719  | 18.23575 | 19.75669 | 19.46249 | 16.44153 |
| protein_co integrin_al  | 13   | 14   | 17   | 233  | 301  | 176  | 0.182889 | 0.25257  | 0.288564 | 5.087817 |
| protein_co ankyrin_rej  | 0    | 0    | 0    | 2    | 0    | 0    | 0        | 0        | 0        | 0.038055 |
| protein_co glyceropho   | 993  | 789  | 826  | 729  | 908  | 832  | 15.76228 | 16.0604  | 15.81969 | 17.96089 |
| protein_co chromosom    | 1047 | 770  | 759  | 648  | 955  | 920  | 19.91637 | 18.78294 | 17.42021 | 19.13238 |
| protein_co cytokine_re  | 808  | 596  | 715  | 1364 | 1632 | 663  | 21.14237 | 19.99853 | 22.57337 | 55.39713 |
| protein_co oxysterol_k  | 286  | 233  | 226  | 113  | 160  | 101  | 2.982109 | 3.115464 | 2.843243 | 1.828801 |
| protein_co transmemt    | 2056 | 1502 | 1659 | 1061 | 1209 | 1502 | 21.74242 | 20.36873 | 21.16797 | 17.41528 |
| protein_co Y_box_binc   | 3    | 2    | 1    | 494  | 620  | 336  | 0.030896 | 0.026413 | 0.012426 | 7.8966   |
| processed_ mitogen-ac   | 546  | 393  | 491  | 62   | 62   | 53   | 5.733919 | 5.292499 | 6.221405 | 1.010604 |
| protein_co ATP-bindin   | 0    | 0    | 0    | 12   | 16   | 10   | 0        | 0        | 0        | 0.175338 |
| protein_co chemokine    | 0    | 0    | 0    | 2    | 0    | 0    | 0        | 0        | 0        | 0.097429 |
| protein_co synergini_g  | 1225 | 1025 | 1025 | 656  | 799  | 643  | 6.980225 | 7.489736 | 7.047016 | 5.801865 |
| protein_co calcium_ch   | 0    | 0    | 0    | 0    | 0    | 1    | 0        | 0        | 0        | 0        |
| protein_co transmemt    | 5483 | 3658 | 4002 | 1839 | 2914 | 2544 | 64.58125 | 55.25114 | 56.87394 | 33.62021 |
| protein_co adaptor-rel  | 7677 | 6362 | 6738 | 4802 | 5205 | 4653 | 59.15771 | 62.86701 | 62.6468  | 57.43445 |
| protein_co tachykinin_  | 24   | 27   | 17   | 4    | 3    | 14   | 0.908281 | 1.310335 | 0.776258 | 0.234963 |

|                          |      |      |      |      |      |      |          |          |          |          |
|--------------------------|------|------|------|------|------|------|----------|----------|----------|----------|
| protein_co zinc_finger   | 664  | 557  | 598  | 641  | 780  | 1121 | 8.129235 | 8.744725 | 8.83346  | 12.18064 |
| protein_co chemokine     | 115  | 93   | 109  | 16   | 20   | 17   | 0.930357 | 0.964816 | 1.063963 | 0.20091  |
| protein_co spermatog     | 1766 | 1309 | 1419 | 532  | 688  | 465  | 23.39864 | 22.24072 | 22.68456 | 10.94062 |
| protein_co calcium_ch    | 535  | 368  | 394  | 633  | 838  | 488  | 3.196503 | 2.819542 | 2.84031  | 5.870236 |
| protein_co tumor_nec     | 3314 | 2670 | 2844 | 1325 | 1631 | 1443 | 92.60639 | 95.67733 | 95.8884  | 57.46915 |
| protein_co distal-less_l | 4    | 1    | 2    | 1    | 0    | 5    | 0.081406 | 0.026098 | 0.049111 | 0.031588 |
| protein_co mitogen-ac    | 147  | 125  | 121  | 925  | 1032 | 651  | 0.61714  | 0.672954 | 0.612914 | 6.027515 |
| protein_co v-ral_simia   | 1190 | 1004 | 1106 | 1233 | 1537 | 1392 | 19.37469 | 20.96192 | 21.72657 | 31.15885 |
| protein_co BAI1-associ   | 165  | 139  | 128  | 515  | 687  | 404  | 2.136072 | 2.307576 | 1.999355 | 10.34832 |
| protein_co jumonji_C     | 251  | 197  | 253  | 374  | 434  | 197  | 1.269348 | 1.277564 | 1.543745 | 2.935682 |
| protein_co ets_variant   | 1380 | 1098 | 1109 | 934  | 995  | 1091 | 9.583564 | 9.778216 | 9.292393 | 10.06759 |
| protein_co acylglycero   | 400  | 396  | 390  | 418  | 429  | 436  | 4.872956 | 6.186386 | 5.732514 | 7.90386  |
| protein_co aldehyde_d    | 54   | 60   | 54   | 34   | 59   | 27   | 0.430916 | 0.613987 | 0.519925 | 0.421122 |
| protein_co tetratricop   | 0    | 0    | 0    | 24   | 33   | 12   | 0        | 0        | 0        | 0.522187 |
| protein_co putative_h    | 1849 | 1436 | 1604 | 301  | 293  | 279  | 17.32261 | 17.25203 | 18.13129 | 4.376967 |
| protein_co chemokine     | 0    | 0    | 0    | 8    | 5    | 14   | 0        | 0        | 0        | 0.82822  |
| protein_co FERM_Rho      | 455  | 334  | 368  | 181  | 204  | 166  | 5.26659  | 4.957628 | 5.139419 | 3.251825 |
| protein_co Usher_sync    | 0    | 0    | 0    | 45   | 41   | 11   | 0        | 0        | 0        | 1.212997 |
| protein_co gamma-glu     | 460  | 430  | 433  | 973  | 1147 | 1045 | 18.38824 | 22.04247 | 20.88422 | 60.37063 |
| protein_co DBF4_hom      | 419  | 364  | 347  | 440  | 530  | 735  | 5.028645 | 5.602059 | 5.024751 | 8.196343 |
| protein_co thromboxa     | 105  | 108  | 94   | 18   | 19   | 9    | 1.887827 | 2.490038 | 2.039148 | 0.502315 |
| protein_co interferon-i  | 648  | 503  | 508  | 189  | 254  | 456  | 13.26844 | 13.20755 | 12.55037 | 6.006717 |
| protein_co cytochrom     | 310  | 259  | 269  | 417  | 446  | 468  | 5.059487 | 5.420681 | 5.297184 | 10.56358 |
| protein_co GTF2I_repe    | 869  | 743  | 746  | 808  | 1171 | 667  | 6.944006 | 7.613572 | 7.192455 | 10.02149 |
| protein_co Paf1_RNA_l    | 1496 | 1177 | 1240 | 560  | 655  | 921  | 33.95327 | 34.25594 | 33.95626 | 19.72734 |
| protein_co vacuolar_p    | 1207 | 1035 | 974  | 482  | 530  | 666  | 9.58771  | 10.54283 | 9.335006 | 5.942718 |
| protein_co Rho_GTPas     | 35   | 33   | 30   | 667  | 884  | 431  | 0.37063  | 0.448122 | 0.383303 | 10.96299 |
| protein_co elaC_homo     | 1276 | 1060 | 1071 | 1936 | 2523 | 2571 | 16.00633 | 17.05125 | 16.20984 | 37.69441 |
| protein_co scinderin     | 28   | 37   | 27   | 6    | 6    | 6    | 0.418527 | 0.709213 | 0.486943 | 0.139203 |
| protein_co arylsulfatas  | 230  | 194  | 199  | 80   | 75   | 80   | 2.090464 | 2.261132 | 2.182308 | 1.128588 |
| protein_co patatin-like  | 127  | 81   | 84   | 224  | 246  | 200  | 1.766024 | 1.444399 | 1.409354 | 4.83472  |
| protein_co myosin_he     | 2    | 0    | 0    | 1    | 0    | 1    | 0.014895 | 0        | 0        | 0.01156  |
| protein_co adiponectin   | 1767 | 1517 | 1513 | 818  | 1015 | 1114 | 20.62087 | 22.70207 | 21.30382 | 14.81679 |
| protein_co cyclin-depe   | 33   | 23   | 27   | 50   | 31   | 31   | 0.716375 | 0.640271 | 0.707194 | 1.684718 |
| protein_co uridine_ph    | 3    | 2    | 3    | 0    | 1    | 7    | 0.05777  | 0.049388 | 0.069703 | 0        |
| protein_co protease_s    | 0    | 0    | 0    | 9    | 0    | 0    | 0        | 0        | 0        | 0.565158 |
| protein_co MAP/micrc     | 1787 | 1329 | 1426 | 1610 | 2143 | 907  | 16.08609 | 15.34124 | 15.48794 | 22.49481 |
| protein_co prominin_     | 1730 | 1352 | 1327 | 1109 | 1423 | 1539 | 18.6525  | 18.69291 | 17.26275 | 18.55893 |
| protein_co coiled-coil   | 2311 | 1696 | 1822 | 1921 | 2589 | 2013 | 102.7136 | 96.66363 | 97.7067  | 132.5213 |
| protein_co carcinoeml    | 0    | 0    | 0    | 0    | 0    | 1    | 0        | 0        | 0        | 0        |
| protein_co platelet-act  | 3225 | 2396 | 2700 | 1483 | 1725 | 1469 | 27.50961 | 26.20902 | 27.78859 | 19.63479 |
| protein_co nitric_oxid   | 2    | 0    | 1    | 18   | 32   | 33   | 0.022457 | 0        | 0.013548 | 0.313706 |
| protein_co dynein_axc    | 15   | 9    | 9    | 16   | 20   | 35   | 0.049637 | 0.038191 | 0.035934 | 0.082179 |
| protein_co KIAA0100      | 3115 | 2455 | 2871 | 1385 | 1800 | 1745 | 19.71951 | 19.92961 | 21.92902 | 13.60875 |
| protein_co growth_arr    | 149  | 140  | 186  | 378  | 460  | 289  | 0.854005 | 1.028991 | 1.286278 | 3.362763 |
| protein_co trafficking_  | 193  | 152  | 149  | 790  | 1046 | 444  | 11.24195 | 11.3537  | 10.47174 | 71.42366 |
| protein_co megakaryoi    | 0    | 2    | 0    | 522  | 694  | 422  | 0        | 0.05638  | 0        | 17.81109 |
| protein_co carcinoeml    | 0    | 0    | 0    | 0    | 0    | 1    | 0        | 0        | 0        | 0        |
| protein_co CD79b_mo      | 0    | 0    | 1    | 12   | 16   | 0    | 0        | 0        | 0.044583 | 0.688225 |
| protein_co sodium_ch     | 1    | 0    | 1    | 178  | 249  | 139  | 0.006008 | 0        | 0.007249 | 1.659808 |
| protein_co suppressor    | 161  | 135  | 136  | 121  | 131  | 127  | 1.667247 | 1.792739 | 1.699264 | 1.944867 |
| protein_co transketola   | 0    | 0    | 0    | 2    | 7    | 1    | 0        | 0        | 0        | 0.055094 |
| protein_co paired_box    | 93   | 92   | 85   | 17   | 29   | 74   | 0.629987 | 0.799182 | 0.69473  | 0.178743 |
| protein_co RNA_pseud     | 790  | 606  | 546  | 776  | 959  | 1002 | 17.15753 | 16.87756 | 14.30765 | 26.15893 |
| protein_co rhomboid_     | 2123 | 1659 | 1635 | 810  | 1150 | 828  | 33.27123 | 33.34069 | 30.91609 | 19.70309 |
| protein_co LUC7-like_l   | 1237 | 997  | 1026 | 924  | 1229 | 1380 | 21.19216 | 21.90333 | 21.20806 | 24.57016 |
| protein_co calcium_ch    | 42   | 34   | 29   | 805  | 1011 | 563  | 0.358069 | 0.371711 | 0.298307 | 10.65232 |
| protein_co BAI1-associ   | 17   | 7    | 5    | 240  | 396  | 169  | 0.1704   | 0.089976 | 0.06047  | 3.733893 |
| protein_co TSR3_20S_l    | 1334 | 991  | 1059 | 790  | 1171 | 965  | 50.32283 | 47.93936 | 48.20069 | 46.25587 |
| protein_co phosphatic    | 1679 | 1119 | 1172 | 533  | 703  | 810  | 26.1904  | 22.38365 | 22.05805 | 12.90474 |
| protein_co Crm_cram      | 449  | 346  | 428  | 307  | 423  | 352  | 2.708906 | 2.676905 | 3.115584 | 2.874858 |
| protein_co TEA_domai     | 1209 | 990  | 980  | 1182 | 1416 | 1116 | 19.00437 | 19.95592 | 18.58666 | 28.83866 |
| protein_co DnaJ_(Hsp4    | 967  | 784  | 886  | 1062 | 1350 | 1572 | 13.69455 | 14.23792 | 15.1392  | 23.34405 |
| protein_co flavin_cont   | 0    | 0    | 0    | 0    | 0    | 1    | 0        | 0        | 0        | 0        |
| protein_co myosin_re     | 270  | 179  | 220  | 830  | 1027 | 1017 | 4.528006 | 3.849511 | 4.451578 | 21.60488 |

|                         |       |      |      |       |       |       |          |          |          |          |
|-------------------------|-------|------|------|-------|-------|-------|----------|----------|----------|----------|
| protein_co NADPH_oxi    | 4     | 0    | 3    | 4     | 2     | 8     | 0.074164 | 0        | 0.067112 | 0.115112 |
| protein_co E2F_transci  | 179   | 106  | 119  | 251   | 356   | 262   | 1.616897 | 1.227848 | 1.296953 | 3.519116 |
| protein_co proteasom    | 2170  | 1815 | 1807 | 2000  | 2238  | 2362  | 52.47619 | 56.28447 | 52.72405 | 75.06942 |
| protein_co synapsin_I   | 46    | 26   | 39   | 97    | 123   | 118   | 0.673413 | 0.488097 | 0.688868 | 2.204071 |
| protein_co jumonji_A1   | 979   | 793  | 874  | 9719  | 12241 | 10375 | 7.976599 | 8.285478 | 8.592005 | 122.91   |
| protein_co cyclin-depe  | 310   | 305  | 382  | 57    | 71    | 78    | 4.202343 | 5.301991 | 6.248003 | 1.19932  |
| protein_co calcium/ca   | 4     | 4    | 12   | 7     | 8     | 8     | 0.071807 | 0.092082 | 0.259918 | 0.195045 |
| protein_co cyclin-depe  | 3     | 8    | 5    | 7     | 13    | 4     | 0.053023 | 0.181319 | 0.106626 | 0.192031 |
| protein_co NAD_kinase   | 1285  | 940  | 1026 | 1888  | 2252  | 1809  | 16.44927 | 15.43052 | 15.8467  | 37.51249 |
| protein_co transcriptic | 422   | 349  | 424  | 0     | 0     | 1     | 3.413419 | 3.620027 | 4.138005 | 0        |
| protein_co transcriptic | 0     | 0    | 2    | 0     | 0     | 0     | 0        | 0        | 0.066132 | 0        |
| protein_co deleted_in   | 5     | 3    | 6    | 17    | 14    | 8     | 0.036485 | 0.028072 | 0.052825 | 0.192539 |
| protein_co cytohesin_   | 1284  | 981  | 1057 | 539   | 631   | 319   | 13.36444 | 13.09375 | 13.27421 | 8.707728 |
| protein_co ADAM_met     | 107   | 101  | 101  | 237   | 285   | 208   | 0.537522 | 0.650644 | 0.612184 | 1.847955 |
| protein_co synaptophy   | 912   | 718  | 701  | 770   | 879   | 745   | 19.88084 | 20.07122 | 18.43767 | 26.05321 |
| protein_co cytochrom    | 251   | 193  | 203  | 708   | 905   | 994   | 3.677936 | 3.626578 | 3.589009 | 16.10253 |
| protein_co sperm_assc   | 2201  | 1848 | 1905 | 698   | 793   | 567   | 12.47491 | 13.43163 | 13.02748 | 6.140493 |
| protein_co cadherin_E   | 315   | 269  | 240  | 1601  | 2128  | 1226  | 1.233845 | 1.351175 | 1.134251 | 9.733561 |
| protein_co aminoadipi   | 653   | 549  | 536  | 2076  | 2468  | 1848  | 9.470826 | 10.21072 | 9.379669 | 46.73395 |
| protein_co plectstrin_  | 15    | 11   | 9    | 649   | 774   | 342   | 0.226085 | 0.212609 | 0.163671 | 15.18293 |
| protein_co synovial_sa  | 191   | 164  | 155  | 279   | 384   | 425   | 8.553957 | 9.418612 | 8.375552 | 19.39404 |
| protein_co MPN_dom      | 128   | 88   | 108  | 103   | 231   | 115   | 3.725588 | 3.284557 | 3.792771 | 4.653209 |
| protein_co microsoma    | 334   | 282  | 302  | 1981  | 2397  | 2669  | 7.27754  | 7.879462 | 7.939499 | 66.99665 |
| protein_co cryptochro   | 435   | 386  | 429  | 374   | 417   | 309   | 5.320072 | 6.053756 | 6.330436 | 7.099542 |
| protein_co peptidogly   | 11    | 3    | 8    | 8     | 8     | 9     | 0.716375 | 0.250541 | 0.628617 | 0.808664 |
| protein_co nuclear_fac  | 4076  | 3152 | 3360 | 14    | 18    | 9     | 34.56125 | 34.2729  | 34.37499 | 0.184253 |
| protein_co ST3_beta-g   | 1303  | 969  | 1026 | 138   | 161   | 137   | 8.769584 | 8.363108 | 8.33163  | 1.441598 |
| protein_co matrix_me    | 37    | 27   | 24   | 1207  | 1724  | 1245  | 0.488163 | 0.45681  | 0.382052 | 24.71728 |
| protein_co interleukin  | 17    | 7    | 7    | 14    | 23    | 25    | 0.577212 | 0.304785 | 0.286769 | 0.737811 |
| protein_co polycystic_  | 6005  | 4094 | 4793 | 1445  | 2110  | 907   | 19.91615 | 17.41204 | 19.17997 | 7.438592 |
| protein_co mitogen-ac   | 20    | 12   | 15   | 75    | 119   | 159   | 0.167614 | 0.128965 | 0.151677 | 0.975601 |
| protein_co mediator_c   | 2425  | 1926 | 2077 | 2526  | 3020  | 2673  | 29.18591 | 29.72536 | 30.16102 | 47.18731 |
| protein_co Rho-relate   | 908   | 738  | 790  | 142   | 219   | 122   | 7.810702 | 8.140853 | 8.199349 | 1.895933 |
| protein_co HEAT_repe    | 578   | 412  | 478  | 332   | 389   | 281   | 3.925044 | 3.587759 | 3.916451 | 3.499333 |
| protein_co SEC62_hon    | 2231  | 1803 | 1928 | 831   | 834   | 1478  | 15.92747 | 16.5064  | 16.60743 | 9.208285 |
| protein_co ribosomal_   | 8553  | 6696 | 6806 | 10874 | 11939 | 10496 | 219.6333 | 220.4979 | 210.8723 | 433.4105 |
| protein_co cold_shock   | 11473 | 9302 | 9703 | 10949 | 11037 | 10846 | 129.1023 | 134.2278 | 131.738  | 191.2326 |
| protein_co ubiquitin_I  | 2749  | 2150 | 2278 | 1439  | 1742  | 1630  | 24.65111 | 24.72348 | 24.64697 | 20.02871 |
| protein_co REV3-like_I  | 578   | 424  | 524  | 159   | 108   | 128   | 2.471947 | 2.325341 | 2.7039   | 1.055453 |
| protein_co teneurin_tr  | 41    | 31   | 20   | 200   | 202   | 124   | 0.149134 | 0.144599 | 0.087775 | 1.129157 |
| protein_co paired_box   | 4     | 13   | 2    | 71    | 86    | 139   | 0.033868 | 0.14115  | 0.020432 | 0.933074 |
| protein_co mannan-bii   | 67    | 44   | 54   | 103   | 114   | 82    | 1.288082 | 1.084752 | 1.252594 | 3.073522 |
| protein_co family_witl  | 160   | 112  | 114  | 168   | 220   | 130   | 2.103281 | 1.888012 | 1.808132 | 3.427812 |
| protein_co TRAF3_inte   | 49    | 46   | 27   | 43    | 41    | 22    | 0.695824 | 0.837665 | 0.46261  | 0.947768 |
| protein_co protein-O-r  | 937   | 732  | 790  | 569   | 627   | 600   | 7.780405 | 7.794406 | 7.91476  | 7.333399 |
| protein_co Vps20-asso   | 918   | 726  | 851  | 674   | 705   | 860   | 13.09554 | 13.28087 | 14.64732 | 14.92351 |
| protein_co MLX_intera   | 0     | 1    | 0    | 119   | 145   | 46    | 0        | 0.018343 | 0        | 2.642098 |
| protein_co bromodom     | 3548  | 2719 | 2943 | 1929  | 2411  | 2339  | 27.26414 | 26.79333 | 27.28642 | 23.00758 |
| protein_co RAN_bindin   | 1071  | 740  | 766  | 652   | 832   | 544   | 16.13209 | 14.29362 | 13.92125 | 15.24331 |
| protein_co ets_variant  | 0     | 1    | 1    | 21    | 15    | 10    | 0        | 0.027877 | 0.026229 | 0.708566 |
| protein_co SprT-like_N  | 275   | 188  | 219  | 134   | 180   | 252   | 3.62314  | 3.176286 | 3.481325 | 2.740234 |
| protein_co methyltran   | 828   | 633  | 689  | 1135  | 1363  | 1564  | 11.66965 | 11.44039 | 11.71642 | 24.8287  |
| protein_co dual-specifi | 254   | 182  | 201  | 45    | 75    | 76    | 6.558405 | 6.026224 | 6.261936 | 1.803464 |
| protein_co zinc_finger  | 2132  | 1810 | 1815 | 2053  | 2223  | 2952  | 7.254155 | 7.897463 | 7.451168 | 10.84224 |
| protein_co ubiquinol-c  | 4325  | 3514 | 3575 | 4097  | 4520  | 4202  | 102.1659 | 106.4464 | 101.8929 | 150.216  |
| protein_co STARD3_N-    | 786   | 646  | 665  | 439   | 466   | 454   | 10.08912 | 10.63341 | 10.29913 | 8.746327 |
| protein_co CD9_molec    | 677   | 636  | 557  | 3663  | 3892  | 3391  | 20.42763 | 24.60911 | 20.27835 | 171.5524 |
| protein_co hedgehog_i   | 0     | 0    | 0    | 1     | 0     | 1     | 0        | 0        | 0        | 0.039024 |
| protein_co non-SMC_c    | 2962  | 2369 | 2444 | 5236  | 5620  | 3920  | 25.03393 | 25.67547 | 24.92259 | 68.68692 |
| protein_co intermedia   | 824   | 551  | 629  | 216   | 235   | 221   | 12.45965 | 10.68414 | 11.47565 | 5.069473 |
| protein_co gastric_inh  | 2     | 3    | 3    | 11    | 14    | 6     | 0.028513 | 0.054846 | 0.051604 | 0.243411 |
| protein_co PHD_finger   | 101   | 63   | 91   | 163   | 275   | 64    | 2.223423 | 1.778487 | 2.417076 | 5.569534 |
| protein_co sema_dom     | 12    | 8    | 8    | 42    | 65    | 46    | 0.114856 | 0.098191 | 0.092387 | 0.623954 |
| protein_co nischarin    | 4766  | 3758 | 3965 | 2221  | 2695  | 1862  | 41.77156 | 42.23697 | 41.92932 | 30.21382 |
| protein_co stabilin_1   | 8     | 7    | 9    | 17    | 27    | 13    | 0.047316 | 0.053091 | 0.064225 | 0.156062 |

|                         |       |       |       |       |       |       |          |          |          |          |
|-------------------------|-------|-------|-------|-------|-------|-------|----------|----------|----------|----------|
| protein_co fuzzy_plana  | 170   | 135   | 99    | 355   | 400   | 290   | 4.758987 | 4.846282 | 3.343866 | 15.42497 |
| protein_co solute_carr  | 1     | 0     | 1     | 5     | 1     | 0     | 0.02146  | 0        | 0.025893 | 0.166544 |
| protein_co iduronate_   | 2991  | 2322  | 2482  | 281   | 323   | 183   | 18.40767 | 18.32542 | 18.43029 | 2.684227 |
| protein_co protease_s   | 0     | 4     | 1     | 0     | 1     | 2     | 0        | 0.248985 | 0.058567 | 0        |
| protein_co zinc_finger  | 192   | 156   | 131   | 165   | 204   | 277   | 2.089806 | 2.177402 | 1.720379 | 2.787527 |
| protein_co CD4_molec    | 54    | 45    | 42    | 18    | 22    | 8     | 0.813122 | 0.868928 | 0.763061 | 0.420692 |
| protein_co leucine_ri   | 89    | 80    | 76    | 38    | 30    | 13    | 2.561824 | 2.952967 | 2.639496 | 1.697749 |
| protein_co Bruton_ag    | 3     | 0     | 2     | 3     | 5     | 1     | 0.054544 | 0        | 0.043874 | 0.08466  |
| protein_co hemochror    | 288   | 225   | 255   | 21    | 25    | 18    | 2.554734 | 2.559441 | 2.729238 | 0.289137 |
| protein_co sex_comb_    | 770   | 656   | 648   | 292   | 380   | 333   | 10.79059 | 11.78875 | 10.95664 | 6.351375 |
| protein_co FYN_oncog    | 632   | 524   | 446   | 931   | 1196  | 740   | 8.168272 | 8.684678 | 6.954982 | 18.6764  |
| protein_co human_im     | 685   | 549   | 633   | 386   | 393   | 231   | 3.303472 | 3.395172 | 3.683256 | 2.889335 |
| protein_co flavin_cont  | 0     | 0     | 0     | 0     | 2     | 0     | 0        | 0        | 0        | 0        |
| protein_co transcripti  | 1013  | 794   | 834   | 753   | 886   | 1199  | 9.216063 | 9.263302 | 9.154826 | 10.63314 |
| protein_co lysophosph   | 1431  | 1086  | 1113  | 2553  | 3078  | 3049  | 37.07161 | 36.07788 | 34.78925 | 102.6557 |
| protein_co chloride_cl  | 1337  | 1190  | 1209  | 421   | 480   | 731   | 11.22908 | 12.81649 | 12.25144 | 5.488142 |
| protein_co mannose_r    | 25721 | 18093 | 19562 | 1205  | 1564  | 1179  | 201.4125 | 181.6848 | 184.8247 | 14.6459  |
| protein_co solute_carr  | 4     | 1     | 1     | 0     | 2     | 0     | 0.050163 | 0.016082 | 0.015131 | 0        |
| protein_co tetraspanir  | 4756  | 3587  | 3847  | 712   | 1048  | 819   | 51.58661 | 49.89257 | 50.34605 | 11.98687 |
| protein_co BTB_(POZ)_   | 1202  | 1019  | 1150  | 455   | 577   | 483   | 6.68586  | 7.268359 | 7.717892 | 3.92821  |
| protein_co amyloid_be   | 417   | 277   | 305   | 314   | 439   | 277   | 4.600738 | 3.919048 | 4.060124 | 5.377143 |
| protein_co Meckel_syr   | 231   | 188   | 204   | 323   | 342   | 337   | 4.528258 | 4.72592  | 4.825001 | 9.827707 |
| protein_co abhydrolas   | 97    | 65    | 78    | 96    | 121   | 129   | 2.691321 | 2.312684 | 2.611177 | 4.134237 |
| protein_co Kallmann_s   | 4422  | 3282  | 3650  | 542   | 528   | 956   | 32.83935 | 31.2553  | 32.70519 | 6.24749  |
| protein_co A_kinase_(F  | 498   | 442   | 505   | 722   | 910   | 569   | 8.494445 | 9.668014 | 10.3931  | 19.11496 |
| protein_co mbt_doma     | 432   | 333   | 329   | 1264  | 1338  | 1282  | 3.763747 | 3.720405 | 3.458443 | 17.09284 |
| protein_co UTP18_sma    | 799   | 660   | 682   | 1185  | 1522  | 1287  | 19.78095 | 20.95336 | 20.37196 | 45.53541 |
| protein_co ring_finger  | 1715  | 1322  | 1469  | 1173  | 1390  | 884   | 14.26075 | 14.09675 | 14.73833 | 15.13933 |
| protein_co tetratricop  | 796   | 637   | 655   | 1293  | 1677  | 1424  | 12.13803 | 12.45616 | 12.05104 | 30.60302 |
| protein_co polypyrimi   | 11443 | 8574  | 9642  | 13433 | 16467 | 17979 | 115.1175 | 110.6099 | 117.0352 | 209.7514 |
| protein_co D4_zinc_ar   | 152   | 95    | 100   | 112   | 167   | 292   | 3.044546 | 2.440124 | 2.416724 | 3.48199  |
| protein_co synaptotag   | 355   | 273   | 286   | 595   | 903   | 316   | 3.429328 | 3.381836 | 3.333456 | 8.921298 |
| protein_co leucyl-tRNA  | 910   | 723   | 786   | 1128  | 1396  | 1448  | 8.994502 | 9.163963 | 9.373598 | 17.30515 |
| protein_co phosphatic   | 1798  | 1614  | 1645  | 1172  | 809   | 1371  | 10.24775 | 11.79646 | 11.31235 | 10.36805 |
| protein_co plasminoge   | 2694  | 2330  | 2436  | 251   | 308   | 213   | 78.46069 | 87.02014 | 85.6012  | 11.34642 |
| protein_co anillin_acti | 1770  | 1436  | 1459  | 1238  | 1086  | 1270  | 17.33765 | 18.03768 | 17.2433  | 18.8221  |
| protein_co widely_inte  | 2796  | 2055  | 2165  | 1257  | 1691  | 1536  | 19.45748 | 18.33878 | 18.17839 | 13.57735 |
| protein_co RAB_GTPas    | 1239  | 1006  | 1005  | 622   | 729   | 585   | 11.62632 | 12.10538 | 11.3785  | 9.059243 |
| protein_co decorin      | 4565  | 3232  | 3213  | 0     | 0     | 0     | 73.20552 | 66.46358 | 62.16727 | 0        |
| protein_co glutaminy    | 371   | 282   | 284   | 351   | 338   | 340   | 7.530821 | 7.340521 | 6.955603 | 11.05875 |
| protein_co protein_ph   | 1882  | 1457  | 1528  | 1667  | 1977  | 1888  | 18.87637 | 18.73992 | 18.49142 | 25.95164 |
| protein_co centrosom    | 385   | 313   | 297   | 580   | 660   | 728   | 3.087508 | 3.218852 | 2.873769 | 7.219477 |
| protein_co mitogen-ac   | 608   | 508   | 461   | 796   | 966   | 683   | 6.535793 | 7.002736 | 5.979209 | 13.38123 |
| protein_co zinc_finger  | 1     | 1     | 3     | 8     | 15    | 16    | 0.022674 | 0.029076 | 0.082073 | 0.281547 |
| protein_co TYRO_prot    | 10    | 11    | 11    | 0     | 0     | 0     | 0.762439 | 1.075492 | 1.01192  | 0        |
| protein_co transmem     | 255   | 210   | 196   | 556   | 692   | 354   | 5.936919 | 6.26974  | 5.505858 | 20.09214 |
| protein_co gamma-am     | 4     | 5     | 5     | 92    | 120   | 118   | 0.050528 | 0.080994 | 0.076206 | 1.80381  |
| protein_co breast_cani  | 473   | 379   | 413   | 686   | 662   | 697   | 3.117652 | 3.203429 | 3.284465 | 7.018125 |
| protein_co excision_re  | 1790  | 1427  | 1474  | 549   | 681   | 460   | 21.92611 | 22.41516 | 21.78482 | 10.43786 |
| protein_co CD22_mole    | 0     | 0     | 0     | 6     | 7     | 0     | 0        | 0        | 0        | 0.133623 |
| processed_sema_dom      | 262   | 203   | 208   | 93    | 186   | 109   | 3.74206  | 3.718047 | 3.584437 | 2.061688 |
| protein_co membrane     | 637   | 462   | 499   | 196   | 212   | 174   | 6.70158  | 6.232884 | 6.334121 | 3.200548 |
| protein_co prickly_hor  | 221   | 206   | 167   | 179   | 223   | 73    | 3.682549 | 4.401826 | 3.357537 | 4.629561 |
| protein_co lactotransf  | 1     | 0     | 0     | 0     | 0     | 1     | 0.01574  | 0        | 0        | 0        |
| protein_co exostosin-li | 3274  | 2614  | 2688  | 3159  | 3905  | 2580  | 18.59246 | 19.03588 | 18.4177  | 27.84442 |
| protein_co ELOVL_fatt   | 3711  | 2986  | 3267  | 2844  | 3154  | 2422  | 56.68041 | 58.48455 | 60.20592 | 67.42207 |
| protein_co arachidona   | 3     | 2     | 4     | 26    | 55    | 13    | 0.056178 | 0.048027 | 0.090376 | 0.755701 |
| protein_co lysine_(K)-s | 1197  | 999   | 1064  | 789   | 939   | 776   | 10.06047 | 10.7671  | 10.78981 | 10.29275 |
| protein_co calcium_bi   | 1065  | 794   | 949   | 254   | 305   | 195   | 12.8441  | 12.27959 | 13.8092  | 4.754648 |
| protein_co ubiquitin_j  | 421   | 399   | 387   | 496   | 480   | 568   | 5.34399  | 6.494799 | 5.927104 | 9.772274 |
| protein_co mitogen-ac   | 1483  | 1087  | 1144  | 362   | 365   | 473   | 14.45093 | 13.58294 | 13.4502  | 5.475122 |
| protein_co EH-domain    | 1866  | 1505  | 1668  | 429   | 526   | 404   | 18.87333 | 19.52013 | 20.35547 | 6.7348   |
| protein_co proteasom    | 2571  | 1885  | 2078  | 1593  | 1670  | 2292  | 74.27864 | 69.83652 | 72.43617 | 71.43452 |
| protein_co mannosida    | 1898  | 1472  | 1520  | 291   | 353   | 226   | 11.52964 | 11.46665 | 11.14066 | 2.743739 |
| protein_co solute_carr  | 0     | 1     | 0     | 7     | 3     | 6     | 0        | 0.01174  | 0        | 0.099465 |

|                         |      |      |      |      |      |      |          |          |          |          |
|-------------------------|------|------|------|------|------|------|----------|----------|----------|----------|
| protein_co claudin_11   | 61   | 38   | 62   | 203  | 276  | 152  | 1.318714 | 1.05345  | 1.617188 | 6.811572 |
| protein_co solute_carr  | 2020 | 1518 | 1689 | 3834 | 4596 | 3786 | 42.72343 | 41.17142 | 43.1015  | 125.8628 |
| protein_co major_vaul   | 3797 | 3153 | 3269 | 326  | 425  | 71   | 62.14359 | 66.17426 | 64.55334 | 8.281401 |
| protein_co negative_re  | 733  | 640  | 626  | 501  | 563  | 581  | 10.70728 | 11.9885  | 11.0331  | 11.35909 |
| protein_co phosphogl    | 1922 | 1556 | 1601 | 633  | 571  | 487  | 14.75726 | 15.32045 | 14.83173 | 7.543739 |
| protein_co RWD_dom      | 140  | 119  | 120  | 113  | 93   | 58   | 2.9948   | 3.264346 | 3.097199 | 3.751878 |
| protein_co CDC-like_ki  | 358  | 295  | 345  | 128  | 152  | 386  | 5.232739 | 5.529392 | 6.084336 | 2.903932 |
| protein_co polymerase   | 196  | 137  | 136  | 151  | 171  | 285  | 2.150818 | 1.927868 | 1.800671 | 2.571905 |
| protein_co angel_hom    | 459  | 374  | 426  | 728  | 711  | 529  | 5.237897 | 5.472997 | 5.865458 | 12.89455 |
| protein_co ring_finger  | 595  | 534  | 522  | 211  | 223  | 150  | 6.587854 | 7.581892 | 6.973415 | 3.626101 |
| protein_co deoxyribon   | 137  | 119  | 112  | 42   | 46   | 45   | 2.135616 | 2.378805 | 2.106535 | 1.016207 |
| protein_co DEAD/H_1A    | 822  | 624  | 694  | 1439 | 1788 | 1820 | 9.216546 | 8.972021 | 9.388666 | 25.04307 |
| protein_co heme_bind    | 332  | 262  | 316  | 402  | 461  | 227  | 7.571734 | 7.662455 | 8.695457 | 14.23029 |
| protein_co G_protein+   | 7    | 5    | 3    | 18   | 15   | 10   | 0.044584 | 0.040838 | 0.023054 | 0.177946 |
| protein_co mastermini   | 447  | 357  | 397  | 8    | 4    | 5    | 4.318055 | 4.422402 | 4.62721  | 0.11995  |
| protein_co CD6_molec    | 30   | 22   | 10   | 10   | 12   | 2    | 0.432565 | 0.406782 | 0.173971 | 0.2238   |
| protein_co transformin  | 1763 | 1363 | 1382 | 2857 | 3589 | 3129 | 29.72567 | 29.4703  | 28.11483 | 74.76875 |
| protein_co UFM1-spec    | 890  | 703  | 766  | 323  | 278  | 283  | 9.879762 | 10.0074  | 10.25967 | 5.565312 |
| protein_co polymerase   | 678  | 611  | 646  | 665  | 685  | 721  | 8.491301 | 9.812849 | 9.761692 | 12.92697 |
| protein_co zinc_finger  | 687  | 539  | 648  | 733  | 937  | 677  | 9.821171 | 9.881085 | 11.17711 | 16.26451 |
| protein_co calpain_1_   | 3626 | 2879 | 3022 | 3942 | 4965 | 3932 | 55.09501 | 56.09646 | 55.4022  | 92.96759 |
| protein_co acid_phosp   | 3    | 4    | 5    | 22   | 21   | 23   | 0.045014 | 0.076966 | 0.090521 | 0.51237  |
| protein_co malate_def   | 1930 | 1588 | 1613 | 2102 | 2080 | 2081 | 54.84711 | 57.87037 | 55.30684 | 92.71706 |
| protein_co solute_carr  | 1393 | 1129 | 1144 | 1116 | 997  | 1252 | 19.82331 | 20.6029  | 19.6426  | 24.65015 |
| protein_co myotubula    | 433  | 406  | 377  | 105  | 146  | 65   | 6.093451 | 7.32674  | 6.40125  | 2.293481 |
| protein_co cytochrom    | 618  | 505  | 543  | 586  | 604  | 557  | 10.39384 | 10.89152 | 11.01883 | 15.29733 |
| protein_co coiled-coil  | 52   | 44   | 47   | 1827 | 2453 | 1698 | 0.326235 | 0.353989 | 0.355773 | 17.79083 |
| protein_co YY1_associ   | 305  | 226  | 212  | 6    | 13   | 16   | 2.806959 | 2.66719  | 2.354074 | 0.085707 |
| protein_co zinc_finger  | 1583 | 1292 | 1466 | 503  | 566  | 565  | 16.89663 | 17.68443 | 18.87997 | 8.333312 |
| protein_co Wiskott-Al   | 8    | 9    | 6    | 12   | 14   | 3    | 0.202877 | 0.292682 | 0.183587 | 0.472341 |
| protein_co dipeptidase  | 0    | 0    | 0    | 13   | 20   | 3    | 0        | 0        | 0        | 0.533938 |
| protein_co BH3_intera   | 604  | 528  | 493  | 486  | 534  | 517  | 11.36044 | 12.73507 | 11.18802 | 14.18812 |
| protein_co matrin_3     | 5597 | 4486 | 4796 | 7230 | 6292 | 8683 | 35.92163 | 36.92065 | 37.13881 | 72.02272 |
| protein_co NPC1-like_   | 9    | 4    | 3    | 5    | 4    | 7    | 0.083599 | 0.047646 | 0.033623 | 0.072088 |
| protein_co xylosyltran  | 1791 | 1461 | 1378 | 1183 | 1472 | 668  | 23.9464  | 25.0498  | 22.23012 | 24.55047 |
| protein_co RANBP2-lik   | 19   | 14   | 21   | 13   | 16   | 10   | 0.122833 | 0.116065 | 0.163806 | 0.130448 |
| protein_co stathmin-li  | 0    | 2    | 0    | 0    | 1    | 1    | 0        | 0.052561 | 0        | 0        |
| protein_co NudC_dom     | 2252 | 1850 | 1921 | 1286 | 1419 | 1308 | 21.08974 | 22.21692 | 21.70592 | 18.69279 |
| protein_co ISL_LIM_hc   | 17   | 9    | 10   | 1    | 2    | 7    | 0.289339 | 0.196431 | 0.205356 | 0.026417 |
| protein_co choline_de   | 68   | 50   | 43   | 213  | 270  | 188  | 0.875967 | 0.825959 | 0.668337 | 4.258818 |
| protein_co interleukin  | 0    | 4    | 2    | 17   | 15   | 28   | 0        | 0.068661 | 0.032301 | 0.353199 |
| protein_co chloride_cl  | 0    | 1    | 0    | 0    | 0    | 0    | 0        | 0.018166 | 0        | 0        |
| protein_co glycosyltra  | 1137 | 1076 | 997  | 445  | 491  | 465  | 22.98015 | 27.88778 | 24.31284 | 13.95992 |
| protein_co ATPase_Ca    | 1593 | 1267 | 1350 | 1234 | 1328 | 1282 | 14.74162 | 15.03542 | 15.0734  | 17.72455 |
| protein_co SRC_kinase   | 15   | 10   | 6    | 324  | 381  | 284  | 0.099653 | 0.085194 | 0.048095 | 3.340983 |
| protein_co insulin-like | 3    | 1    | 2    | 3    | 3    | 1    | 0.019087 | 0.008159 | 0.015353 | 0.029625 |
| protein_co solute_carr  | 72   | 51   | 73   | 375  | 445  | 765  | 1.26825  | 1.151998 | 1.55147  | 10.2526  |
| protein_co MAGI_fami    | 34   | 31   | 32   | 14   | 11   | 3    | 0.533019 | 0.623211 | 0.605288 | 0.340661 |
| protein_co rala_bindir  | 2015 | 1716 | 1836 | 2813 | 3477 | 2239 | 21.63081 | 23.62242 | 23.78036 | 46.87033 |
| protein_co RUN_and_F    | 1181 | 932  | 1002 | 659  | 928  | 501  | 13.08224 | 13.23907 | 13.39208 | 11.33047 |
| protein_co contactin_   | 520  | 394  | 434  | 109  | 140  | 100  | 4.387765 | 4.263297 | 4.41853  | 1.427569 |
| protein_co solute_carr  | 7    | 8    | 7    | 1    | 8    | 2    | 0.056866 | 0.08334  | 0.068612 | 0.012609 |
| protein_co WW_doma      | 7346 | 6310 | 6403 | 304  | 386  | 365  | 68.47993 | 75.43122 | 72.01848 | 4.39862  |
| protein_co alkylglycer  | 1007 | 836  | 846  | 585  | 706  | 724  | 6.081691 | 6.474563 | 6.164719 | 5.483795 |
| pseudogen: zinc_finger  | 0    | 0    | 0    | 3    | 2    | 0    | 0        | 0        | 0        | 0.123077 |
| protein_co chromosom    | 241  | 184  | 201  | 290  | 397  | 393  | 4.764121 | 4.664369 | 4.79413  | 8.898036 |
| protein_co ATPase_Na    | 28   | 4    | 5    | 395  | 550  | 292  | 0.242192 | 0.044368 | 0.052182 | 5.303085 |
| protein_co tetratricop  | 462  | 372  | 369  | 399  | 483  | 466  | 7.532402 | 7.777568 | 7.258818 | 10.09706 |
| protein_co zinc_finger  | 36   | 18   | 22   | 36   | 64   | 76   | 0.597748 | 0.383264 | 0.440744 | 0.927788 |
| protein_co V-set_and_i  | 5    | 3    | 1    | 0    | 0    | 0    | 0.196851 | 0.15146  | 0.047503 | 0        |
| protein_co pleckstrin_  | 4504 | 3461 | 3990 | 1203 | 1543 | 1148 | 35.52441 | 35.00576 | 37.97078 | 14.72735 |
| protein_co macrophag    | 1    | 0    | 0    | 0    | 0    | 0    | 0.025442 | 0        | 0        | 0        |
| protein_co cytochrom    | 12   | 4    | 9    | 0    | 0    | 0    | 0.172495 | 0.073734 | 0.156094 | 0        |
| protein_co PR_domair    | 158  | 105  | 119  | 55   | 64   | 127  | 2.381428 | 2.029453 | 2.16409  | 1.286689 |
| protein_co synaptotag   | 21   | 7    | 10   | 300  | 362  | 130  | 0.191425 | 0.081825 | 0.109983 | 4.244545 |

|                         |       |       |       |      |      |      |          |          |          |          |
|-------------------------|-------|-------|-------|------|------|------|----------|----------|----------|----------|
| protein_co snail_homc   | 1764  | 1431  | 1469  | 4    | 3    | 14   | 37.52903 | 39.04072 | 37.70845 | 0.132087 |
| protein_co CD74_mol     | 75    | 84    | 75    | 355  | 384  | 228  | 2.036335 | 2.924669 | 2.456956 | 14.96053 |
| protein_co hepatocyte   | 84    | 63    | 70    | 3    | 5    | 1    | 0.657666 | 0.632522 | 0.66126  | 0.036457 |
| protein_co zinc_finger  | 679   | 512   | 555   | 439  | 536  | 409  | 5.590574 | 5.405875 | 5.513504 | 5.610243 |
| protein_co neurochon    | 1076  | 715   | 676   | 706  | 923  | 1462 | 13.69907 | 11.67331 | 10.38421 | 13.95127 |
| protein_co G_protein+   | 5936  | 4152  | 4508  | 288  | 421  | 341  | 44.39221 | 39.81801 | 40.67662 | 3.342996 |
| pseudogen: chaperonin   | 1     | 0     | 0     | 0    | 2    | 1    | 0.028011 | 0        | 0        | 0        |
| protein_co ZFP64_zinc   | 1007  | 678   | 885   | 532  | 710  | 404  | 14.46637 | 12.4902  | 15.33987 | 11.86239 |
| protein_co menage_a     | 326   | 274   | 305   | 263  | 297  | 303  | 5.801194 | 6.252586 | 6.548588 | 7.26417  |
| protein_co sterile_alph | 821   | 603   | 679   | 186  | 235  | 408  | 5.863931 | 5.522965 | 5.85145  | 2.062002 |
| protein_co runt-related | 12    | 9     | 17    | 53   | 69   | 22   | 0.12965  | 0.124693 | 0.221609 | 0.888786 |
| protein_co MRE11_me     | 272   | 254   | 260   | 339  | 311  | 353  | 4.644605 | 5.561897 | 5.356748 | 8.984833 |
| protein_co plectstrin_  | 51    | 44    | 40    | 28   | 29   | 36   | 1.004786 | 1.111643 | 0.950849 | 0.856233 |
| protein_co serpin_pep   | 97    | 100   | 93    | 221  | 298  | 161  | 1.736667 | 2.295907 | 2.008981 | 6.141404 |
| protein_co cytochrom    | 0     | 0     | 0     | 1    | 3    | 5    | 0        | 0        | 0        | 0.039383 |
| protein_co solute_carr  | 0     | 2     | 2     | 2    | 3    | 0    | 0        | 0.06019  | 0.056632 | 0.072853 |
| protein_co spastin      | 443   | 384   | 382   | 364  | 481  | 497  | 4.059464 | 4.512379 | 4.223538 | 5.177223 |
| protein_co neurexin_3   | 104   | 82    | 84    | 61   | 66   | 82   | 0.756525 | 0.764915 | 0.737254 | 0.688732 |
| protein_co oxysterol_k  | 1373  | 1030  | 1061  | 325  | 410  | 217  | 16.55438 | 15.92535 | 15.43497 | 6.082138 |
| protein_co aquarius_h   | 912   | 784   | 839   | 1450 | 1603 | 1371 | 7.19322  | 7.929648 | 7.984331 | 17.75117 |
| protein_co carbamoyl-   | 130   | 99    | 105   | 43   | 59   | 44   | 1.047192 | 1.022651 | 1.020517 | 0.537628 |
| protein_co compleme     | 0     | 1     | 0     | 0    | 0    | 0    | 0        | 0.025275 | 0        | 0        |
| protein_co four_and_a   | 1603  | 1372  | 1347  | 645  | 686  | 527  | 26.02656 | 28.56582 | 26.38754 | 16.25449 |
| protein_co replication  | 1059  | 875   | 927   | 632  | 776  | 739  | 22.6432  | 23.9916  | 23.91495 | 20.97439 |
| protein_co gamma-am     | 1     | 15    | 7     | 12   | 13   | 19   | 0.010974 | 0.21108  | 0.092682 | 0.20439  |
| protein_co NLR_family   | 17    | 16    | 28    | 2129 | 2326 | 2529 | 0.212909 | 0.256965 | 0.423107 | 41.38574 |
| protein_co solute_carr  | 538   | 378   | 358   | 696  | 831  | 539  | 3.371219 | 3.037427 | 2.706673 | 6.769309 |
| protein_co ring_finger  | 2737  | 2212  | 2402  | 2724 | 3064 | 2714 | 33.55241 | 34.7731  | 35.52794 | 51.83063 |
| protein_co zinc_finger  | 271   | 235   | 217   | 254  | 389  | 244  | 3.821713 | 4.249775 | 3.692296 | 5.55972  |
| protein_co zinc_finger  | 435   | 333   | 370   | 235  | 260  | 460  | 9.399612 | 9.227291 | 9.646515 | 7.881684 |
| protein_co GRAM_don     | 462   | 336   | 371   | 201  | 253  | 129  | 2.805022 | 2.616032 | 2.717793 | 1.894178 |
| protein_co ribonuclea   | 3745  | 2737  | 2860  | 1170 | 1508 | 1069 | 53.52122 | 50.16009 | 49.31605 | 25.95318 |
| protein_co NADH_deh     | 1848  | 1592  | 1679  | 1256 | 1452 | 1431 | 16.62881 | 18.37011 | 18.2288  | 17.54201 |
| protein_co RB1-induci   | 1100  | 909   | 994   | 1065 | 731  | 992  | 7.773778 | 8.237827 | 8.475667 | 11.68206 |
| protein_co endoplasm    | 952   | 721   | 765   | 484  | 590  | 498  | 9.196394 | 8.931517 | 8.916411 | 7.256989 |
| protein_co aminolevul   | 1102  | 928   | 949   | 589  | 762  | 403  | 21.26453 | 22.96315 | 22.09471 | 17.64087 |
| protein_co baculoviral  | 1     | 2     | 0     | 6    | 1    | 2    | 0.009023 | 0.02314  | 0        | 0.084025 |
| protein_co A_kinase(F   | 1711  | 1359  | 1571  | 441  | 418  | 661  | 8.093294 | 8.243357 | 8.966016 | 3.237758 |
| protein_co glutaredoxi  | 210   | 156   | 162   | 31   | 54   | 68   | 8.706369 | 8.293765 | 8.103653 | 1.994849 |
| protein_co small_nucl   | 77    | 48    | 46    | 88   | 83   | 66   | 1.359387 | 1.086683 | 0.979847 | 2.411379 |
| protein_co deoxyribos   | 518   | 432   | 441   | 302  | 354  | 249  | 14.21242 | 15.19957 | 14.59906 | 12.86103 |
| protein_co serine/thre  | 2971  | 2517  | 2571  | 2828 | 3541 | 3429 | 74.65715 | 81.10755 | 77.95049 | 110.3008 |
| protein_co ATP-bindin   | 20    | 10    | 14    | 4    | 4    | 9    | 0.176544 | 0.113196 | 0.149107 | 0.054804 |
| protein_co differential | 234   | 128   | 171   | 279  | 335  | 162  | 4.850691 | 3.40257  | 4.276928 | 8.976819 |
| protein_co plectstrin_  | 1337  | 1020  | 1112  | 345  | 555  | 532  | 16.74912 | 16.38589 | 16.8079  | 6.708264 |
| protein_co glutamate+   | 469   | 343   | 425   | 192  | 341  | 257  | 4.527778 | 4.24635  | 4.950502 | 2.877027 |
| protein_co ubiquitin_U  | 745   | 612   | 594   | 566  | 585  | 432  | 4.446107 | 4.68365  | 4.277186 | 5.242888 |
| protein_co EH-domain    | 12172 | 9347  | 9755  | 285  | 368  | 158  | 159.2037 | 156.7736 | 153.9453 | 5.785842 |
| protein_co DEP_domai    | 648   | 534   | 586   | 601  | 463  | 472  | 5.699631 | 6.023131 | 6.218954 | 8.204964 |
| protein_co coiled-coil  | 144   | 139   | 130   | 133  | 151  | 132  | 4.513478 | 5.586926 | 4.916321 | 6.470397 |
| protein_co Ras-related  | 18    | 32    | 20    | 324  | 462  | 289  | 0.172249 | 0.392684 | 0.23092  | 4.812379 |
| protein_co heat_shock   | 277   | 213   | 268   | 170  | 169  | 120  | 4.914315 | 4.845875 | 5.736752 | 4.681258 |
| protein_co PHD_finger   | 1132  | 924   | 904   | 1519 | 1711 | 920  | 8.963104 | 9.381954 | 8.636315 | 18.66811 |
| protein_co hydroxyste   | 6     | 6     | 4     | 27   | 60   | 53   | 0.160674 | 0.206042 | 0.129242 | 1.122247 |
| protein_co nuclear_re   | 168   | 135   | 149   | 314  | 350  | 225  | 2.884483 | 2.972363 | 3.08669  | 8.367945 |
| protein_co thymidine_   | 25    | 17    | 30    | 7    | 13   | 5    | 0.572109 | 0.498881 | 0.828338 | 0.248638 |
| protein_co non-SMC_c    | 1257  | 883   | 973   | 1043 | 1328 | 1260 | 28.37783 | 25.56312 | 26.50359 | 36.54758 |
| protein_co translocase  | 1307  | 1010  | 1111  | 803  | 920  | 814  | 29.72127 | 29.45252 | 30.48273 | 28.34247 |
| protein_co SEC63_hon    | 2693  | 2162  | 2275  | 1249 | 1320 | 1529 | 19.69659 | 20.27774 | 20.07632 | 14.17906 |
| protein_co karyopheri   | 2251  | 1959  | 2000  | 2028 | 2276 | 2072 | 14.30597 | 15.96561 | 15.33627 | 20.00507 |
| protein_co vimentin     | 41504 | 34795 | 35127 | 192  | 217  | 312  | 729.9787 | 784.7773 | 745.4343 | 5.241456 |
| protein_co RTEL1-TNFF   | 36    | 36    | 30    | 22   | 31   | 38   | 0.293521 | 0.376399 | 0.295125 | 0.278413 |
| protein_co Fas_(TNF_r   | 129   | 98    | 78    | 16   | 22   | 8    | 2.360052 | 2.299149 | 1.721767 | 0.454341 |
| protein_co ribonuclea   | 165   | 116   | 111   | 385  | 629  | 225  | 3.164357 | 2.852784 | 2.568459 | 11.46021 |
| protein_co CD44_mol     | 7868  | 6835  | 7271  | 34   | 24   | 42   | 80.39456 | 89.5592  | 89.64055 | 0.539227 |

|                         |       |       |       |      |      |      |          |          |          |          |
|-------------------------|-------|-------|-------|------|------|------|----------|----------|----------|----------|
| protein_co potassium_   | 467   | 304   | 380   | 267  | 450  | 215  | 9.903952 | 8.267507 | 9.723515 | 8.788877 |
| protein_co 1-acylglyce  | 797   | 629   | 684   | 548  | 716  | 596  | 4.751601 | 4.808855 | 4.920235 | 5.070989 |
| protein_co SLAM_fami    | 1     | 0     | 2     | 0    | 0    | 0    | 0.013238 | 0        | 0.031946 | 0        |
| protein_co butyrophili  | 443   | 431   | 439   | 70   | 78   | 30   | 6.034944 | 7.529327 | 7.21576  | 1.480124 |
| protein_co mitochond    | 365   | 282   | 298   | 328  | 352  | 337  | 7.13119  | 7.065251 | 7.024792 | 9.946573 |
| protein_co protein_kir  | 7     | 18    | 11    | 262  | 341  | 216  | 0.091633 | 0.30216  | 0.173738 | 5.323369 |
| protein_co insulin_rec  | 0     | 6     | 6     | 2    | 2    | 0    | 0        | 0.070727 | 0.066546 | 0.028536 |
| protein_co interferon_  | 333   | 274   | 258   | 197  | 213  | 314  | 7.299848 | 7.702461 | 6.823974 | 6.702955 |
| protein_co xylosylprot  | 879   | 617   | 663   | 262  | 353  | 402  | 15.53574 | 13.9842  | 14.13854 | 7.187451 |
| protein_co SH2_domai    | 15    | 6     | 9     | 95   | 83   | 72   | 0.420413 | 0.215648 | 0.304351 | 4.132744 |
| protein_co vaccinia_re  | 255   | 223   | 256   | 152  | 122  | 148  | 4.888371 | 5.481989 | 5.92123  | 4.522702 |
| protein_co tumor_nec    | 23    | 19    | 21    | 26   | 41   | 27   | 0.292824 | 0.3102   | 0.322586 | 0.513786 |
| protein_co vezatin_adl  | 934   | 712   | 736   | 488  | 436  | 565  | 9.600017 | 9.384571 | 9.127482 | 7.785301 |
| protein_co POU_class_   | 546   | 472   | 487   | 192  | 261  | 102  | 3.70989  | 4.112631 | 3.992504 | 2.024884 |
| protein_co bromodom     | 1341  | 1083  | 1097  | 814  | 1005 | 1243 | 12.92487 | 13.38552 | 12.75711 | 12.17734 |
| protein_co sorting_ne   | 1853  | 1474  | 1567  | 634  | 738  | 787  | 10.70171 | 10.91653 | 10.9193  | 5.683261 |
| protein_co TBP-like_1   | 304   | 210   | 244   | 239  | 273  | 338  | 11.00739 | 9.750778 | 10.65979 | 13.43195 |
| protein_co aryl_hydro   | 500   | 410   | 432   | 190  | 252  | 295  | 4.88031  | 5.13181  | 5.087556 | 2.878468 |
| protein_co BCL2-assoc   | 3109  | 2483  | 2678  | 1567 | 1267 | 4023 | 20.07174 | 20.55656 | 20.86042 | 15.70232 |
| protein_co solute_carr  | 1405  | 1192  | 1174  | 623  | 658  | 711  | 12.68884 | 13.80484 | 12.79269 | 8.733015 |
| protein_co ankyrin_1_   | 18    | 11    | 15    | 244  | 372  | 127  | 0.100887 | 0.079061 | 0.101438 | 2.122672 |
| protein_co integrin-bi  | 7     | 5     | 1     | 0    | 1    | 0    | 0.317745 | 0.291045 | 0.054768 | 0        |
| protein_co transcriptic | 506   | 433   | 435   | 288  | 332  | 241  | 16.66176 | 18.28385 | 17.28255 | 14.71951 |
| protein_co rabaptin_R   | 1258  | 1052  | 1092  | 681  | 760  | 776  | 10.95    | 11.74244 | 11.46843 | 9.200491 |
| protein_co high_mobil   | 1959  | 1426  | 1545  | 5763 | 6822 | 7282 | 25.80268 | 24.0857  | 24.55313 | 117.8174 |
| protein_co nucleopori   | 1245  | 1003  | 1135  | 2122 | 2375 | 2546 | 10.85902 | 11.21841 | 11.94442 | 28.72744 |
| protein_co BCL2-antag   | 733   | 600   | 561   | 875  | 1205 | 978  | 16.091   | 16.89039 | 14.85902 | 29.81382 |
| protein_co muscle_ske   | 5     | 3     | 6     | 2    | 0    | 0    | 0.070981 | 0.054614 | 0.102771 | 0.044069 |
| protein_co IKAROS_fan   | 17    | 13    | 10    | 76   | 68   | 58   | 0.084756 | 0.083114 | 0.060155 | 0.58812  |
| protein_co granulin     | 5339  | 3987  | 4071  | 2500 | 2671 | 2191 | 116.5483 | 111.6096 | 107.2248 | 84.70647 |
| protein_co family_witl  | 188   | 156   | 150   | 99   | 129  | 269  | 1.613051 | 1.716422 | 1.55285  | 1.318426 |
| protein_co Rho_GTPas    | 2074  | 1538  | 1684  | 381  | 464  | 218  | 10.4379  | 9.925902 | 10.22573 | 2.976184 |
| processed_nuclear_rec   | 2     | 4     | 7     | 13   | 18   | 6    | 0.044615 | 0.114424 | 0.188406 | 0.450113 |
| protein_co centromere   | 112   | 111   | 68    | 146  | 139  | 225  | 3.030399 | 3.85136  | 2.219927 | 6.131478 |
| protein_co seryl-tRNA_  | 3120  | 2172  | 2439  | 2194 | 2484 | 2050 | 77.73478 | 69.39528 | 73.31969 | 84.84532 |
| protein_co RAN_bindin   | 1762  | 1274  | 1358  | 1331 | 1697 | 1736 | 25.55528 | 23.69482 | 23.76416 | 29.96286 |
| protein_co AT_rich_int  | 457   | 360   | 379   | 168  | 156  | 221  | 3.637538 | 3.674542 | 3.639809 | 2.07554  |
| protein_co tumor_sup    | 520   | 406   | 416   | 376  | 521  | 425  | 8.316101 | 8.326295 | 8.027084 | 9.33329  |
| protein_co patatin-like | 1853  | 1440  | 1604  | 2278 | 3120 | 1774 | 18.81897 | 18.75393 | 19.65499 | 35.90912 |
| protein_co intraflagell | 157   | 109   | 124   | 55   | 47   | 47   | 1.872738 | 1.667298 | 1.784625 | 1.018288 |
| protein_co ALG1_chitc   | 355   | 255   | 304   | 182  | 256  | 373  | 6.232106 | 5.740583 | 6.439144 | 4.959163 |
| protein_co zinc_finger  | 405   | 274   | 322   | 429  | 488  | 485  | 4.32289  | 3.750413 | 4.146896 | 7.107338 |
| protein_co ATP-bindin   | 1417  | 1115  | 1239  | 770  | 1026 | 1263 | 18.73749 | 18.90714 | 19.76792 | 15.80385 |
| protein_co chondroitin  | 3853  | 2860  | 3139  | 398  | 638  | 695  | 45.47376 | 43.28498 | 44.69935 | 7.290803 |
| protein_co leucine_ric  | 10    | 15    | 8     | 21   | 21   | 16   | 0.072061 | 0.138612 | 0.069556 | 0.234882 |
| protein_co fucosyltran  | 1021  | 883   | 905   | 349  | 411  | 334  | 9.267268 | 10.2777  | 9.911117 | 4.916793 |
| protein_co ubiquitin-li | 1299  | 1056  | 1115  | 544  | 587  | 542  | 9.436117 | 9.836881 | 9.772531 | 6.133573 |
| protein_co GRB2-assoc   | 1027  | 849   | 898   | 532  | 586  | 285  | 7.904801 | 8.379875 | 8.339593 | 6.355688 |
| protein_co ATPase_H+    | 727   | 636   | 576   | 506  | 621  | 459  | 7.327825 | 8.220669 | 7.00505  | 7.91629  |
| protein_co protein_inl  | 473   | 352   | 369   | 441  | 384  | 273  | 7.564454 | 7.218857 | 7.120178 | 10.94676 |
| protein_co solute_carr  | 1843  | 1618  | 1656  | 1362 | 1713 | 822  | 11.14069 | 12.54222 | 12.078   | 12.77892 |
| protein_co amyloid_be   | 926   | 687   | 801   | 650  | 810  | 722  | 10.77156 | 10.24787 | 11.24212 | 11.73577 |
| processed_ubiquitin-li  | 3214  | 2433  | 2745  | 764  | 1161 | 2111 | 34.98248 | 33.9591  | 36.04916 | 12.9071  |
| protein_co mitogen-ac   | 680   | 493   | 520   | 718  | 940  | 794  | 13.27997 | 12.34652 | 12.25292 | 21.76422 |
| protein_co EF-hand_ca   | 7     | 3     | 3     | 1    | 0    | 9    | 0.143583 | 0.07891  | 0.074246 | 0.031837 |
| protein_co thymosin_I   | 30242 | 22321 | 22858 | 7153 | 8636 | 7435 | 2882.211 | 2727.962 | 2628.461 | 1058.118 |
| protein_co asteroid_hc  | 81    | 82    | 90    | 70   | 73   | 93   | 1.423039 | 1.847375 | 1.907754 | 1.9088   |
| protein_co ring_finger  | 323   | 270   | 290   | 148  | 140  | 103  | 3.4978   | 3.749433 | 3.789122 | 2.487624 |
| protein_co peroxisoma   | 139   | 112   | 136   | 86   | 75   | 125  | 3.310164 | 3.420283 | 3.907704 | 3.178803 |
| protein_co GABA(A)_re   | 1665  | 1348  | 1369  | 511  | 605  | 502  | 34.3324  | 35.64422 | 34.05975 | 16.35465 |
| protein_co myocilin_ti  | 0     | 0     | 0     | 0    | 0    | 1    | 0        | 0        | 0        | 0        |
| protein_co SH3_domai    | 437   | 426   | 462   | 177  | 277  | 195  | 5.7884   | 7.235959 | 7.383583 | 3.63899  |
| protein_co family_witl  | 580   | 449   | 473   | 805  | 940  | 1214 | 11.34121 | 11.25866 | 11.15939 | 24.43192 |
| protein_co vinculin     | 8840  | 7185  | 7702  | 5773 | 6462 | 7405 | 75.61251 | 78.8093  | 79.48642 | 76.64316 |
| protein_co DEP_domai    | 167   | 122   | 160   | 695  | 710  | 801  | 3.133507 | 2.935508 | 3.622281 | 20.24088 |

|                         |       |       |       |      |      |      |          |          |          |          |
|-------------------------|-------|-------|-------|------|------|------|----------|----------|----------|----------|
| protein_co death-assoc  | 5     | 5     | 10    | 6    | 11   | 6    | 0.04849  | 0.062182 | 0.117012 | 0.090316 |
| protein_co neutral_spl  | 740   | 569   | 625   | 433  | 502  | 683  | 9.722223 | 9.586398 | 9.90745  | 8.829827 |
| protein_co adenylosuc   | 585   | 466   | 449   | 914  | 1131 | 1094 | 9.867144 | 10.07931 | 9.137555 | 23.92832 |
| protein_co signal_tran  | 2     | 0     | 1     | 2    | 0    | 2    | 0.062065 | 0        | 0.037442 | 0.096333 |
| protein_co TIMP_meta    | 15262 | 12127 | 12014 | 640  | 853  | 891  | 195.9571 | 199.6698 | 186.1167 | 12.7544  |
| protein_co replication  | 1397  | 1085  | 1180  | 1664 | 1644 | 1680 | 13.40674 | 13.35261 | 13.66334 | 24.78624 |
| protein_co TBC1_dom     | 785   | 633   | 701   | 574  | 544  | 742  | 9.079591 | 9.388792 | 9.78279  | 10.30479 |
| protein_co cullin_3     | 1663  | 1329  | 1494  | 1453 | 1706 | 1753 | 11.56773 | 11.8547  | 12.53876 | 15.68744 |
| protein_co myomesin     | 13    | 9     | 19    | 11   | 15   | 13   | 0.121574 | 0.107931 | 0.214387 | 0.159668 |
| protein_co cytochrom    | 13    | 18    | 16    | 7    | 11   | 7    | 0.092233 | 0.163767 | 0.136966 | 0.077086 |
| protein_co zinc_finger  | 686   | 579   | 591   | 562  | 497  | 742  | 6.79049  | 7.34962  | 7.058502 | 8.634631 |
| protein_co ubiquitin_s  | 18    | 9     | 14    | 98   | 140  | 72   | 0.226158 | 0.145008 | 0.212234 | 1.911152 |
| protein_co calcium-ser  | 0     | 0     | 0     | 6    | 16   | 1    | 0        | 0        | 0        | 0.087179 |
| protein_co tubulin_ga   | 487   | 401   | 439   | 288  | 339  | 155  | 12.85779 | 13.5766  | 13.9846  | 11.80213 |
| protein_co ribosomal    | 358   | 305   | 320   | 341  | 348  | 375  | 22.62349 | 24.71643 | 24.39914 | 33.44732 |
| protein_co fms-related  | 24    | 17    | 15    | 575  | 717  | 371  | 0.192139 | 0.174527 | 0.144892 | 7.145021 |
| protein_co NOP2/Sun     | 1603  | 1167  | 1330  | 1335 | 1936 | 2714 | 21.12555 | 19.72217 | 21.14824 | 27.30777 |
| protein_co F-box_prot   | 622   | 478   | 492   | 496  | 531  | 415  | 4.702611 | 4.634318 | 4.488092 | 5.820507 |
| protein_co microfibrill | 815   | 657   | 602   | 294  | 355  | 389  | 7.568898 | 7.824376 | 6.745584 | 4.237921 |
| protein_co methylthio   | 279   | 208   | 248   | 165  | 261  | 128  | 4.321875 | 4.131813 | 4.635192 | 3.967184 |
| protein_co methyltran   | 210   | 149   | 188   | 119  | 119  | 249  | 4.766168 | 4.336563 | 5.148207 | 4.19206  |
| protein_co homeobox     | 150   | 120   | 115   | 0    | 0    | 7    | 2.086474 | 2.140485 | 1.930045 | 0        |
| protein_co aspartylglu  | 188   | 182   | 182   | 88   | 79   | 93   | 4.183827 | 5.193936 | 4.886921 | 3.039688 |
| protein_co phosphatic   | 497   | 423   | 351   | 305  | 431  | 402  | 6.583146 | 7.185001 | 5.609605 | 6.270576 |
| protein_co biorientati  | 1653  | 1442  | 1493  | 1267 | 960  | 1609 | 7.336413 | 8.20702  | 7.995005 | 8.728065 |
| protein_co methionine   | 717   | 571   | 642   | 1124 | 1306 | 988  | 9.862171 | 10.07161 | 10.65458 | 23.99663 |
| protein_co tolloid-like | 136   | 103   | 134   | 7    | 18   | 13   | 0.950662 | 0.923281 | 1.130161 | 0.075948 |
| protein_co enhancer_c   | 1602  | 1247  | 1348  | 934  | 1240 | 1121 | 14.26197 | 14.23616 | 14.47955 | 12.90608 |
| protein_co trio_Rho_g   | 5136  | 3962  | 4507  | 1381 | 1679 | 1394 | 21.69614 | 21.46255 | 22.97169 | 9.054856 |
| protein_co versican     | 10722 | 8722  | 9775  | 3875 | 3584 | 4492 | 39.82216 | 41.54076 | 43.804   | 22.33835 |
| protein_co C-type_lect  | 1155  | 923   | 970   | 394  | 564  | 439  | 7.859232 | 8.053955 | 7.963756 | 4.16126  |
| protein_co macrophag    | 116   | 117   | 107   | 0    | 0    | 0    | 1.522744 | 1.969537 | 1.694731 | 0        |
| protein_co cadherin_1   | 4     | 2     | 1     | 6053 | 6886 | 5197 | 0.038474 | 0.024669 | 0.011605 | 90.36639 |
| protein_co superkiller  | 1307  | 1088  | 1142  | 1507 | 1216 | 1798 | 14.61957 | 15.60621 | 15.41251 | 26.16392 |
| protein_co dynein_axc   | 14    | 7     | 10    | 5    | 15   | 13   | 0.041992 | 0.026924 | 0.03619  | 0.023278 |
| protein_co zinc_finger  | 1125  | 964   | 1026  | 318  | 324  | 170  | 7.788464 | 8.558264 | 8.570274 | 3.417094 |
| protein_co family_witl  | 1395  | 1099  | 1242  | 220  | 331  | 141  | 15.35483 | 15.51236 | 16.49455 | 3.758581 |
| protein_co compleme     | 1     | 0     | 0     | 0    | 0    | 0    | 0.012808 | 0        | 0        | 0        |
| protein_co retinoic_ac  | 3101  | 2509  | 2681  | 1646 | 1700 | 1891 | 28.55576 | 29.62798 | 29.78769 | 23.52623 |
| protein_co SRY_(sex_d   | 8     | 7     | 4     | 0    | 2    | 0    | 0.114891 | 0.128915 | 0.069311 | 0        |
| protein_co polynucleo   | 1308  | 969   | 1018  | 1143 | 1575 | 1015 | 29.17799 | 27.71921 | 27.39955 | 39.57532 |
| protein_co bestrophin   | 1     | 1     | 1     | 63   | 73   | 26   | 0.02148  | 0.027545 | 0.025916 | 2.100379 |
| protein_co PH_domair    | 437   | 364   | 361   | 835  | 925  | 629  | 2.420094 | 2.585006 | 2.41216  | 7.17741  |
| protein_co spindle_ap   | 1069  | 785   | 896   | 485  | 455  | 656  | 18.78764 | 17.69186 | 18.99987 | 13.23021 |
| protein_co staufer_RN   | 430   | 374   | 435   | 587  | 661  | 692  | 4.964961 | 5.537686 | 6.060169 | 10.52001 |
| protein_co PQ_loop_re   | 571   | 383   | 436   | 234  | 345  | 261  | 12.43576 | 10.69657 | 11.457   | 7.910113 |
| protein_co cystinosis   | 382   | 349   | 332   | 200  | 244  | 341  | 6.249821 | 7.322156 | 6.553757 | 5.078842 |
| protein_co reticulon_4  | 365   | 288   | 278   | 702  | 738  | 497  | 7.934565 | 8.028457 | 7.291604 | 23.68633 |
| protein_co PHD_finger   | 1429  | 1090  | 1223  | 939  | 1192 | 1211 | 32.89437 | 32.17549 | 33.96752 | 33.54945 |
| protein_co cadherin_1   | 3     | 5     | 3     | 1    | 1    | 3    | 0.040916 | 0.087449 | 0.049368 | 0.021169 |
| protein_co inositol_pc  | 1079  | 907   | 853   | 670  | 808  | 522  | 7.493236 | 8.07727  | 7.14735  | 7.221929 |
| protein_co RAB27B_m     | 196   | 157   | 124   | 5    | 7    | 8    | 1.26225  | 1.296577 | 0.963516 | 0.049979 |
| protein_co proteasom    | 2204  | 1650  | 1796  | 2144 | 2148 | 2594 | 37.70361 | 36.19634 | 37.07027 | 56.92809 |
| protein_co myosin_XV    | 0     | 0     | 1     | 1    | 2    | 1    | 0        | 0        | 0.00823  | 0.010588 |
| protein_co large_subu   | 889   | 684   | 772   | 711  | 826  | 1137 | 11.67    | 11.51422 | 12.2274  | 14.48668 |
| protein_co poly_(ADP    | 88    | 76    | 90    | 38   | 37   | 24   | 1.669224 | 1.848651 | 2.059788 | 1.118783 |
| protein_co tenascin_C   | 51852 | 40059 | 41853 | 98   | 71   | 299  | 318.1967 | 315.2388 | 309.8881 | 0.933441 |
| protein_co THAP_dom     | 259   | 190   | 207   | 178  | 212  | 125  | 5.915497 | 5.564862 | 5.704398 | 6.310182 |
| protein_co family_witl  | 436   | 275   | 298   | 145  | 222  | 112  | 4.67079  | 3.77786  | 3.851839 | 2.411028 |
| protein_co tyrosyl-DN   | 628   | 464   | 469   | 884  | 1160 | 860  | 7.967243 | 7.548762 | 7.179089 | 17.40729 |
| protein_co apoptosis-i  | 252   | 197   | 219   | 143  | 187  | 201  | 3.647001 | 3.65604  | 3.824085 | 3.212195 |
| protein_co spermatog    | 110   | 80    | 71    | 104  | 103  | 51   | 1.428782 | 1.332516 | 1.112704 | 2.096703 |
| protein_co mediator_c   | 542   | 377   | 387   | 255  | 328  | 463  | 5.214278 | 4.650992 | 4.492146 | 3.807725 |
| protein_co retinol_sat  | 639   | 517   | 525   | 321  | 295  | 196  | 9.665394 | 10.0281  | 9.581336 | 7.536231 |
| protein_co capping_pr   | 2642  | 2033  | 2167  | 1740 | 2216 | 1234 | 85.91084 | 84.77384 | 85.02019 | 87.82029 |

|                          |       |       |       |      |      |       |          |          |          |          |
|--------------------------|-------|-------|-------|------|------|-------|----------|----------|----------|----------|
| protein_co adaptor-rel   | 2040  | 1565  | 1657  | 1282 | 1520 | 1459  | 102.3055 | 100.6451 | 100.2627 | 99.79006 |
| protein_co Usher_sync    | 1     | 8     | 1     | 2    | 6    | 5     | 0.002474 | 0.025378 | 0.002985 | 0.007679 |
| protein_co zona_pellu    | 0     | 0     | 0     | 0    | 1    | 1     | 0        | 0        | 0        | 0        |
| protein_co thyroglobu    | 136   | 85    | 108   | 0    | 0    | 0     | 0.75468  | 0.604856 | 0.723095 | 0        |
| protein_co ADAM_met      | 1     | 0     | 0     | 3    | 6    | 22    | 0.006649 | 0        | 0        | 0.030961 |
| protein_co DCN1_defe     | 629   | 473   | 509   | 458  | 408  | 620   | 3.708049 | 3.575735 | 3.620434 | 4.19074  |
| protein_co PHD_finger    | 466   | 372   | 417   | 796  | 1028 | 1750  | 3.380899 | 3.460975 | 3.650315 | 8.963751 |
| protein_co Zic_family    | 7     | 8     | 4     | 5024 | 7167 | 4120  | 0.110367 | 0.161748 | 0.076093 | 122.9475 |
| protein_co lymphocyt     | 1     | 2     | 1     | 6    | 6    | 2     | 0.010024 | 0.025707 | 0.012094 | 0.093347 |
| protein_co tRNA_isope    | 247   | 205   | 220   | 247  | 285  | 294   | 5.483823 | 5.836462 | 5.893282 | 8.511653 |
| protein_co adrenocept    | 8     | 0     | 2     | 1    | 5    | 6     | 0.131069 | 0        | 0.039536 | 0.02543  |
| protein_co cullin_7      | 3012  | 2296  | 2437  | 1348 | 1572 | 655   | 25.66002 | 25.08321 | 25.04987 | 17.8247  |
| protein_co catenin_(ca   | 9111  | 7721  | 7952  | 7317 | 8065 | 7136  | 113.742  | 123.6055 | 119.7786 | 141.7811 |
| protein_co phosphoryl    | 662   | 516   | 594   | 400  | 425  | 342   | 5.583952 | 5.581395 | 6.045305 | 5.236899 |
| protein_co centlein_ce   | 426   | 287   | 398   | 471  | 386  | 452   | 3.582343 | 3.094916 | 4.038209 | 6.147648 |
| protein_co EPH_recept    | 418   | 300   | 315   | 7    | 6    | 26    | 3.374079 | 3.105343 | 3.067875 | 0.087702 |
| protein_co heat_shock    | 24777 | 19177 | 20472 | 6059 | 6823 | 10487 | 297.2861 | 295.0637 | 296.3699 | 112.8385 |
| protein_co desmoglein    | 1696  | 1401  | 1497  | 2532 | 2741 | 2538  | 13.63839 | 14.44724 | 14.5247  | 31.60323 |
| protein_co gem_(nucle    | 192   | 168   | 177   | 220  | 271  | 184   | 5.352487 | 6.00583  | 5.953546 | 9.519356 |
| protein_co oral-facial-r | 286   | 257   | 259   | 347  | 326  | 426   | 3.148754 | 3.6284   | 3.440492 | 5.9297   |
| protein_co glycoprotei   | 37    | 23    | 33    | 1310 | 1599 | 1566  | 0.438446 | 0.349503 | 0.47182  | 24.0944  |
| protein_co melanoma_     | 0     | 1     | 0     | 0    | 0    | 0     | 0        | 0.030201 | 0        | 0        |
| protein_co phosphatic    | 265   | 196   | 217   | 679  | 677  | 757   | 1.155893 | 1.09632  | 1.142036 | 4.596975 |
| protein_co WD_repeat     | 790   | 606   | 638   | 306  | 382  | 274   | 8.084486 | 7.952566 | 7.877602 | 4.860458 |
| protein_co YTH_domai     | 574   | 490   | 579   | 431  | 466  | 504   | 4.012354 | 4.392308 | 4.883306 | 4.676222 |
| protein_co CTP_synth     | 498   | 413   | 419   | 822  | 958  | 810   | 5.406629 | 5.749851 | 5.488571 | 13.85159 |
| protein_co ATPase_H+     | 545   | 463   | 455   | 699  | 884  | 810   | 10.80552 | 11.77171 | 10.88451 | 21.51082 |
| protein_co polymerase    | 2135  | 1839  | 1921  | 1460 | 1721 | 1984  | 24.36957 | 26.91789 | 26.45607 | 25.86624 |
| protein_co family_witl   | 269   | 214   | 150   | 155  | 152  | 78    | 2.748021 | 2.803437 | 1.848873 | 2.457706 |
| protein_co ArfGAP_wit    | 107   | 75    | 87    | 8    | 15   | 9     | 0.667718 | 0.600178 | 0.655053 | 0.077487 |
| protein_co translocate   | 3186  | 2732  | 2844  | 2251 | 1057 | 2414  | 19.81847 | 21.79286 | 21.34528 | 21.73353 |
| protein_co ceruloplas    | 3     | 0     | 0     | 11   | 9    | 16    | 0.030083 | 0        | 0        | 0.17121  |
| protein_co KIAA0556      | 844   | 672   | 675   | 411  | 558  | 378   | 5.981737 | 6.1075   | 5.772138 | 4.521236 |
| protein_co dystrobrevi   | 233   | 186   | 188   | 189  | 223  | 143   | 5.811369 | 5.949012 | 5.657551 | 7.316693 |
| protein_co X-linked_K    | 0     | 3     | 0     | 46   | 50   | 69    | 0        | 0.03465  | 0        | 0.643079 |
| protein_co anoctamin     | 0     | 1     | 0     | 50   | 51   | 52    | 0        | 0.016177 | 0        | 0.979013 |
| protein_co chromosom     | 350   | 297   | 266   | 122  | 121  | 184   | 4.289468 | 4.667682 | 3.933373 | 2.320736 |
| protein_co sex_comb_     | 241   | 187   | 194   | 22   | 14   | 30    | 2.448644 | 2.436462 | 2.378255 | 0.346946 |
| protein_co WWC_fami      | 1915  | 1535  | 1488  | 933  | 1231 | 845   | 13.50901 | 13.88585 | 12.66501 | 10.21567 |
| protein_co Rho_GTPas     | 798   | 567   | 589   | 14   | 23   | 12    | 5.940345 | 5.412541 | 5.2902   | 0.161759 |
| protein_co family_witl   | 257   | 208   | 236   | 174  | 254  | 183   | 1.819803 | 1.888704 | 2.016282 | 1.912366 |
| protein_co microtubul    | 15451 | 11897 | 12739 | 7559 | 9177 | 7017  | 81.22171 | 80.19778 | 80.79769 | 61.67517 |
| protein_co golgi-associ  | 1154  | 877   | 946   | 425  | 437  | 317   | 11.75306 | 11.45392 | 11.62477 | 6.718379 |
| protein_co ubiquitin_s   | 578   | 466   | 474   | 2117 | 2368 | 1764  | 5.804761 | 6.001389 | 5.743583 | 32.99954 |
| protein_co histone_de    | 147   | 120   | 108   | 189  | 162  | 194   | 1.479466 | 1.548739 | 1.311473 | 2.952432 |
| protein_co tetraspanin   | 1826  | 1409  | 1516  | 1086 | 1366 | 1188  | 19.26236 | 19.06027 | 19.29549 | 17.78152 |
| protein_co NOP16_nu      | 206   | 187   | 226   | 312  | 332  | 622   | 7.69056  | 8.952446 | 10.17999 | 18.07906 |
| protein_co coiled-coil   | 515   | 377   | 502   | 203  | 237  | 256   | 4.600564 | 4.318715 | 5.410727 | 2.814688 |
| protein_co ribonucleo    | 713   | 596   | 683   | 1541 | 1696 | 998   | 6.780082 | 7.267767 | 7.836356 | 22.74461 |
| protein_co zinc_finger   | 337   | 273   | 313   | 47   | 56   | 68    | 3.62596  | 3.766736 | 4.063362 | 0.784913 |
| protein_co tumor_nec     | 0     | 1     | 0     | 0    | 0    | 0     | 0        | 0.060493 | 0        | 0        |
| protein_co sorting_ne    | 563   | 393   | 445   | 145  | 178  | 176   | 3.230826 | 2.892058 | 3.081153 | 1.291527 |
| protein_co LIM_domai     | 5     | 1     | 5     | 342  | 348  | 255   | 0.06237  | 0.015996 | 0.075253 | 6.621626 |
| protein_co mitochond     | 704   | 539   | 634   | 383  | 448  | 492   | 15.64482 | 15.36017 | 16.99946 | 13.21074 |
| protein_co guanylate_    | 26    | 28    | 30    | 203  | 217  | 164   | 0.545965 | 0.753979 | 0.760083 | 6.616346 |
| protein_co remodeling    | 1688  | 1350  | 1460  | 1721 | 1295 | 1646  | 6.852844 | 7.028158 | 7.151536 | 10.84451 |
| protein_co vacuolar_p    | 1377  | 1071  | 1197  | 786  | 943  | 663   | 3.95683  | 3.946502 | 4.150072 | 3.505633 |
| protein_co CUGBP_Ela     | 444   | 359   | 356   | 384  | 445  | 488   | 2.254865 | 2.337983 | 2.181401 | 3.026908 |
| protein_co family_witl   | 3368  | 2580  | 2882  | 1163 | 1446 | 1162  | 30.85689 | 30.31162 | 31.85827 | 16.53828 |
| protein_co R3H_doma      | 1328  | 1162  | 1250  | 787  | 838  | 916   | 13.39715 | 15.03245 | 15.21501 | 12.32309 |
| protein_co collagen_ty   | 1733  | 1240  | 1433  | 228  | 312  | 236   | 28.147   | 25.82645 | 28.08199 | 5.747764 |
| protein_co KIT_ligand    | 394   | 349   | 328   | 266  | 188  | 172   | 3.55898  | 4.042631 | 3.574796 | 3.729422 |
| protein_co excision_re   | 136   | 116   | 98    | 89   | 100  | 153   | 1.862454 | 2.037108 | 1.619276 | 1.891765 |
| protein_co ADAM_met      | 1140  | 929   | 1047  | 47   | 48   | 49    | 7.311533 | 7.640621 | 8.102114 | 0.467877 |
| protein_co hexose-6-pl   | 5553  | 4590  | 4554  | 1096 | 1403 | 521   | 28.46931 | 30.17666 | 28.17022 | 8.721481 |

|                          |       |       |       |      |      |      |          |          |          |          |
|--------------------------|-------|-------|-------|------|------|------|----------|----------|----------|----------|
| protein_co vesicle-assc  | 1434  | 1202  | 1272  | 516  | 577  | 507  | 30.49446 | 32.77824 | 32.63675 | 17.03146 |
| protein_co period_circ   | 84    | 84    | 81    | 137  | 230  | 61   | 0.627291 | 0.804412 | 0.729832 | 1.587965 |
| protein_co tumor_nec     | 0     | 0     | 0     | 0    | 0    | 1    | 0        | 0        | 0        | 0        |
| protein_co epsin_3       | 3     | 3     | 1     | 201  | 275  | 216  | 0.034554 | 0.044311 | 0.013897 | 3.593402 |
| processed_steroid-5-al   | 6     | 1     | 7     | 1    | 0    | 2    | 0.060542 | 0.012939 | 0.085222 | 0.015662 |
| protein_co latent_tran   | 23234 | 17980 | 19291 | 1870 | 2194 | 1822 | 172.0263 | 170.7143 | 172.3351 | 21.49033 |
| protein_co reticulocal   | 4834  | 3742  | 4051  | 1640 | 1944 | 1966 | 85.43775 | 84.8118  | 86.388   | 44.99015 |
| protein_co elastin       | 740   | 532   | 513   | 171  | 218  | 134  | 9.177099 | 8.460474 | 7.676074 | 3.291549 |
| protein_co replication   | 577   | 491   | 442   | 805  | 999  | 1095 | 15.96197 | 17.41813 | 14.75302 | 34.56504 |
| protein_co AT_rich_int   | 3326  | 2526  | 2903  | 2081 | 2387 | 1737 | 18.91295 | 18.41958 | 19.91738 | 18.36706 |
| protein_co CLPTM1-lik    | 2150  | 1714  | 1798  | 1366 | 1813 | 2161 | 28.4784  | 29.11369 | 28.73524 | 28.08396 |
| protein_co neural_pre    | 1100  | 890   | 945   | 1456 | 1803 | 1450 | 6.114156 | 6.343708 | 6.337583 | 12.56133 |
| protein_co forkhead_b    | 11    | 5     | 7     | 10   | 22   | 9    | 0.216537 | 0.126217 | 0.166259 | 0.305541 |
| protein_co protein_ph    | 328   | 235   | 238   | 196  | 354  | 139  | 4.49574  | 4.130518 | 3.935975 | 4.169787 |
| protein_co hexosamini    | 1662  | 1305  | 1316  | 777  | 1066 | 677  | 38.56072 | 38.82701 | 36.83986 | 27.98115 |
| protein_co pentatricoi   | 116   | 78    | 95    | 135  | 137  | 116  | 2.054094 | 1.771195 | 2.02971  | 3.710451 |
| protein_co KIAA2022      | 0     | 0     | 1     | 17   | 9    | 11   | 0        | 0        | 0.004811 | 0.105218 |
| protein_co JNK1/MAPI     | 608   | 502   | 466   | 302  | 281  | 335  | 12.3845  | 13.11258 | 11.45273 | 9.548002 |
| protein_co dickkopf_3    | 3215  | 2573  | 2698  | 311  | 421  | 253  | 56.88732 | 58.38263 | 57.60027 | 8.541328 |
| protein_co Rho_guanin    | 36    | 24    | 26    | 356  | 534  | 466  | 0.304481 | 0.260302 | 0.265325 | 4.67345  |
| protein_co nuclear_fac   | 90    | 81    | 75    | 1429 | 1955 | 1496 | 1.1449   | 1.321355 | 1.151157 | 28.2155  |
| protein_co mitochond     | 461   | 371   | 370   | 350  | 482  | 393  | 11.83806 | 12.21695 | 11.46382 | 13.95013 |
| protein_co LIM_domai     | 1887  | 1477  | 1528  | 807  | 892  | 742  | 22.5718  | 22.65605 | 22.0529  | 14.98298 |
| protein_co LETM1_dor     | 251   | 191   | 222   | 466  | 514  | 302  | 3.992332 | 3.895791 | 4.260435 | 11.50454 |
| protein_co solute_carr   | 164   | 104   | 130   | 165  | 190  | 130  | 1.749707 | 1.422867 | 1.673451 | 2.732347 |
| protein_co laminin_ga    | 23    | 12    | 23    | 1207 | 1476 | 1399 | 0.175847 | 0.117652 | 0.21217  | 14.32337 |
| protein_co prostaglan    | 2     | 2     | 4     | 5    | 2    | 3    | 0.013432 | 0.017224 | 0.032412 | 0.05212  |
| protein_co TNFAIP3_in    | 10    | 14    | 8     | 1    | 0    | 0    | 0.193042 | 0.346569 | 0.186333 | 0.029963 |
| protein_co mitogen-ac    | 878   | 648   | 701   | 647  | 812  | 804  | 8.550246 | 8.092234 | 8.236642 | 9.77955  |
| protein_co collagen_ty   | 13    | 18    | 25    | 260  | 439  | 204  | 0.199141 | 0.353589 | 0.462067 | 6.181884 |
| protein_co breast_cani   | 4711  | 3271  | 3618  | 2270 | 2850 | 2473 | 47.41337 | 42.21605 | 43.93436 | 35.46043 |
| protein_co family_witl   | 489   | 450   | 475   | 323  | 360  | 336  | 6.586963 | 7.773171 | 7.720013 | 6.753196 |
| protein_co homocyste     | 1169  | 935   | 1019  | 164  | 180  | 274  | 24.92698 | 25.56678 | 26.21666 | 5.427871 |
| protein_co homer_hor     | 1009  | 670   | 726   | 267  | 526  | 232  | 23.90704 | 20.35723 | 20.75483 | 9.819205 |
| protein_co RAD51_hoi     | 357   | 296   | 318   | 537  | 589  | 535  | 7.38735  | 7.854554 | 7.939546 | 17.24746 |
| protein_co polymerase    | 331   | 276   | 327   | 531  | 481  | 492  | 1.768729 | 1.891262 | 2.108284 | 4.404111 |
| protein_co phosphatic    | 352   | 267   | 330   | 734  | 841  | 545  | 3.476993 | 3.382064 | 3.932993 | 11.2535  |
| protein_co cytochrom     | 610   | 438   | 432   | 2350 | 3034 | 1788 | 20.21407 | 18.61262 | 17.27252 | 120.871  |
| protein_co THO_comp      | 456   | 324   | 386   | 664  | 837  | 708  | 11.90526 | 10.84747 | 12.15932 | 26.90745 |
| protein_co heme_bind     | 800   | 688   | 747   | 789  | 993  | 908  | 37.89092 | 41.78717 | 42.68879 | 58.0033  |
| protein_co M-phase_pl    | 629   | 509   | 574   | 517  | 513  | 395  | 5.086018 | 5.277818 | 5.59999  | 6.48856  |
| protein_co pleckstrin_   | 1002  | 782   | 854   | 856  | 881  | 877  | 7.242762 | 7.248574 | 7.448047 | 9.603747 |
| protein_co protease_se   | 0     | 0     | 0     | 2269 | 2811 | 1637 | 0        | 0        | 0        | 88.30875 |
| protein_co suppressor    | 796   | 608   | 565   | 639  | 766  | 687  | 6.778869 | 6.639832 | 5.805514 | 8.446475 |
| protein_co ribosomal_    | 1104  | 789   | 915   | 1041 | 1340 | 1915 | 11.76781 | 10.78482 | 11.76781 | 17.22295 |
| protein_co folliculin_i  | 236   | 180   | 221   | 207  | 254  | 199  | 1.597985 | 1.562941 | 1.805514 | 2.175512 |
| protein_co methylster    | 4561  | 3774  | 4007  | 1244 | 1317 | 2280 | 94.25534 | 100.0132 | 99.911   | 39.90219 |
| protein_co tetratricop   | 1298  | 1055  | 1159  | 739  | 820  | 653  | 13.61898 | 14.19488 | 14.67241 | 12.03497 |
| protein_co ALX_homer     | 27    | 23    | 27    | 5    | 5    | 2    | 0.220179 | 0.240519 | 0.265659 | 0.063287 |
| protein_co follistatin-l | 0     | 1     | 0     | 45   | 56   | 35   | 0        | 0.011096 | 0        | 0.604372 |
| protein_co forkhead_b    | 1565  | 1195  | 1221  | 2358 | 2814 | 1705 | 9.369622 | 9.174554 | 8.820058 | 21.912   |
| protein_co methyltran    | 0     | 0     | 0     | 1    | 6    | 4    | 0        | 0        | 0        | 0.06504  |
| protein_co aldo-keto_r   | 1072  | 851   | 833   | 697  | 836  | 572  | 36.90609 | 37.57009 | 34.60161 | 37.24488 |
| protein_co mRNA_turr     | 1099  | 816   | 859   | 819  | 962  | 2073 | 22.2601  | 21.19478 | 20.99281 | 25.74802 |
| protein_co neuronatin    | 42    | 17    | 18    | 77   | 94   | 103  | 1.521933 | 0.789959 | 0.786985 | 4.330792 |
| protein_co unconventi    | 311   | 258   | 289   | 124  | 172  | 176  | 8.211033 | 8.735072 | 9.206262 | 5.081473 |
| protein_co MCF_2_cell    | 6     | 11    | 3     | 128  | 131  | 58   | 0.036009 | 0.084657 | 0.021724 | 1.192348 |
| protein_co nuclear_rex   | 121   | 85    | 74    | 90   | 112  | 125  | 2.066166 | 1.861265 | 1.524613 | 2.385354 |
| protein_co laminin_alj   | 88    | 70    | 65    | 18   | 35   | 22   | 0.387048 | 0.394812 | 0.34494  | 0.122881 |
| protein_co adaptor-rel   | 566   | 450   | 456   | 413  | 494  | 590  | 8.633621 | 8.802345 | 8.392463 | 9.778158 |
| protein_co anaphase_f    | 364   | 295   | 288   | 313  | 339  | 507  | 4.483311 | 4.659388 | 4.279944 | 5.983735 |
| protein_co potassium_    | 2     | 3     | 0     | 84   | 151  | 61   | 0.0289   | 0.05559  | 0        | 1.883976 |
| protein_co trafficking_  | 1123  | 899   | 893   | 582  | 699  | 533  | 21.6876  | 22.26387 | 20.80804 | 17.44557 |
| protein_co thyroid_ho    | 4374  | 3489  | 3892  | 3542 | 4256 | 5201 | 46.27638 | 47.33593 | 49.68228 | 58.16472 |
| protein_co phosphohi:    | 1373  | 968   | 1070  | 712  | 943  | 689  | 48.92097 | 44.22921 | 45.99984 | 39.37631 |

|                         |       |      |      |      |      |      |          |          |          |          |
|-------------------------|-------|------|------|------|------|------|----------|----------|----------|----------|
| protein_co ectonucleo   | 3     | 0    | 1    | 179  | 279  | 79   | 0.067146 | 0        | 0.027005 | 6.218417 |
| protein_co lymphocyt    | 0     | 0    | 1    | 10   | 21   | 10   | 0        | 0        | 0.008216 | 0.105692 |
| protein_co AT_rich_int  | 965   | 753  | 770  | 577  | 557  | 722  | 7.458195 | 7.462953 | 7.180343 | 6.921699 |
| protein_co opsin_3      | 366   | 291  | 301  | 225  | 299  | 141  | 6.550285 | 6.678538 | 6.499705 | 6.250174 |
| protein_co serological  | 385   | 309  | 362  | 122  | 135  | 98   | 7.032589 | 7.238063 | 7.978314 | 3.458954 |
| protein_co protein_ty   | 113   | 98   | 80   | 17   | 18   | 11   | 1.039139 | 1.155662 | 0.887633 | 0.242647 |
| protein_co hedgehog_i   | 297   | 207  | 249  | 17   | 13   | 15   | 3.840688 | 3.432672 | 3.88508  | 0.341218 |
| protein_co kinesin_fan  | 2245  | 1736 | 1864 | 3426 | 3855 | 2230 | 9.866725 | 9.783984 | 9.884407 | 23.37085 |
| protein_co forkhead_b   | 338   | 261  | 247  | 250  | 284  | 300  | 4.597861 | 4.552909 | 4.054003 | 5.278489 |
| protein_co TBC1_dom     | 770   | 549  | 638  | 463  | 573  | 527  | 9.534015 | 8.716994 | 9.531337 | 8.898085 |
| protein_co spectrin_re  | 1010  | 779  | 882  | 3166 | 2094 | 3030 | 2.164682 | 2.141014 | 2.280812 | 10.53208 |
| protein_co pleckstrin_  | 48    | 43   | 53   | 620  | 811  | 623  | 0.340812 | 0.391517 | 0.454043 | 6.832749 |
| protein_co ATPase_cla   | 1829  | 1510 | 1524 | 196  | 255  | 237  | 10.58004 | 11.20108 | 10.6367  | 1.759788 |
| protein_co SPO11_me     | 0     | 1    | 0    | 0    | 0    | 0    | 0        | 0.032786 | 0        | 0        |
| protein_co cerebellin_  | 0     | 0    | 0    | 0    | 1    | 1    | 0        | 0        | 0        | 0        |
| protein_co chordin-lik  | 0     | 0    | 0    | 2    | 2    | 7    | 0        | 0        | 0        | 0.073851 |
| protein_co family_witl  | 2225  | 1791 | 1801 | 535  | 598  | 468  | 14.29966 | 14.76048 | 13.96553 | 5.336786 |
| protein_co RELT_tumo    | 197   | 138  | 148  | 93   | 136  | 93   | 2.125479 | 1.909322 | 1.926639 | 1.557414 |
| protein_co galactosylc  | 477   | 393  | 382  | 252  | 255  | 212  | 5.760118 | 6.085761 | 5.565759 | 4.723284 |
| protein_co NOP58_rib    | 1066  | 896  | 885  | 1406 | 1389 | 2771 | 24.43048 | 26.3325  | 24.47181 | 50.01388 |
| protein_co SUZ_RNA_t    | 3584  | 2831 | 2972 | 1693 | 2186 | 1963 | 46.21942 | 46.81723 | 46.24378 | 33.88784 |
| protein_co potassium_   | 18    | 10   | 13   | 648  | 837  | 324  | 0.178932 | 0.127475 | 0.155921 | 9.998158 |
| protein_co cullin_1     | 1520  | 1149 | 1314 | 1412 | 1551 | 1616 | 23.26137 | 22.54867 | 24.26247 | 33.53952 |
| protein_co family_witl  | 416   | 314  | 293  | 124  | 157  | 137  | 4.390332 | 4.249551 | 3.730953 | 2.031217 |
| protein_co cytoplasmic  | 563   | 439  | 471  | 1810 | 1913 | 1544 | 3.887363 | 3.887054 | 3.923879 | 19.39794 |
| protein_co TGF-beta_a   | 1225  | 1065 | 1055 | 967  | 1051 | 1096 | 12.61592 | 14.06506 | 13.10941 | 15.45752 |
| protein_co glycoprotei  | 509   | 387  | 438  | 231  | 277  | 298  | 11.79201 | 11.49715 | 12.24312 | 8.30639  |
| protein_co eukaryotic_  | 1581  | 1259 | 1407 | 1068 | 1424 | 980  | 7.382306 | 7.538679 | 7.926881 | 7.740373 |
| protein_co ubiquitin_s  | 1167  | 958  | 1091 | 1096 | 1392 | 1608 | 9.298326 | 9.788334 | 10.48834 | 13.55423 |
| protein_co myeloid/ly   | 1275  | 962  | 1057 | 680  | 758  | 634  | 3.510762 | 3.396844 | 3.511675 | 2.906234 |
| protein_co mucolipin_   | 7     | 10   | 3    | 81   | 74   | 77   | 0.111151 | 0.203623 | 0.057476 | 1.99633  |
| protein_co coiled-coil_ | 22    | 14   | 14   | 3    | 3    | 4    | 0.259061 | 0.211406 | 0.198909 | 0.054832 |
| protein_co pumilio_hc   | 2007  | 1611 | 1727 | 1598 | 1745 | 1324 | 15.38471 | 15.83605 | 15.97285 | 19.01293 |
| protein_co mitochond    | 888   | 708  | 690  | 789  | 984  | 784  | 19.51187 | 19.94934 | 18.29292 | 26.90875 |
| protein_co inter-alpha  | 0     | 2    | 1    | 3    | 2    | 2    | 0        | 0.036049 | 0.016959 | 0.065449 |
| protein_co inter-alpha  | 0     | 0    | 0    | 0    | 0    | 1    | 0        | 0        | 0        | 0        |
| protein_co chromosom    | 505   | 399  | 415  | 318  | 382  | 332  | 19.25159 | 19.50552 | 19.08848 | 18.81624 |
| protein_co zinc_finger  | 2005  | 1613 | 1687 | 1866 | 1890 | 1360 | 19.84265 | 20.47053 | 20.14413 | 28.66338 |
| protein_co zinc_finger  | 208   | 176  | 175  | 162  | 183  | 133  | 2.104688 | 2.283738 | 2.136537 | 2.544309 |
| protein_co neuropepti   | 11    | 7    | 4    | 32   | 34   | 101  | 0.268361 | 0.218995 | 0.117743 | 1.211734 |
| protein_co PHD_finger   | 19    | 14   | 5    | 1055 | 1462 | 628  | 0.242689 | 0.229315 | 0.077057 | 20.91601 |
| protein_co TNF_recept   | 55    | 26   | 46   | 84   | 76   | 36   | 0.407804 | 0.247213 | 0.411523 | 0.966715 |
| protein_co ring_finger  | 1173  | 1017 | 1086 | 489  | 576  | 695  | 5.947447 | 6.612457 | 6.643707 | 3.848326 |
| protein_co polycomb_    | 1579  | 1131 | 1233 | 1356 | 1625 | 1364 | 24.18006 | 22.20993 | 22.78171 | 32.23038 |
| protein_co interleukin  | 54    | 51   | 78   | 119  | 130  | 111  | 0.897258 | 1.086683 | 1.563745 | 3.069028 |
| protein_co TRAF3_inte   | 300   | 259  | 259  | 739  | 715  | 398  | 2.743176 | 3.036977 | 2.85746  | 10.48835 |
| protein_co glycogenin   | 338   | 244  | 273  | 983  | 1136 | 1117 | 4.671036 | 4.3241   | 4.552052 | 21.08534 |
| protein_co discoidin_c  | 8762  | 7448 | 8195 | 996  | 1276 | 1188 | 67.11048 | 73.15366 | 75.73281 | 11.84069 |
| protein_co serpin_pep   | 0     | 1    | 1    | 0    | 0    | 0    | 0        | 0.033838 | 0.031838 | 0        |
| protein_co sterol_O-ac  | 1050  | 769  | 871  | 22   | 40   | 60   | 7.203295 | 6.765152 | 7.209549 | 0.234258 |
| protein_co plakophilin  | 13    | 2    | 4    | 397  | 434  | 436  | 0.141695 | 0.027954 | 0.052604 | 6.716314 |
| protein_co mutS_hom     | 0     | 2    | 1    | 8    | 3    | 11   | 0        | 0.036822 | 0.017323 | 0.178273 |
| protein_co coagulation  | 0     | 0    | 0    | 7    | 14   | 9    | 0        | 0        | 0        | 0.163866 |
| protein_co GDP_dissoc   | 6133  | 5082 | 5188 | 5714 | 6252 | 6108 | 115.0766 | 122.2808 | 117.4525 | 166.4121 |
| protein_co PR_domair    | 117   | 120  | 134  | 26   | 21   | 13   | 1.06238  | 1.397284 | 1.468071 | 0.366436 |
| protein_co autophagy_   | 539   | 421  | 456  | 400  | 397  | 501  | 7.858744 | 7.871469 | 8.0219   | 9.052214 |
| protein_co transmembr   | 120   | 135  | 127  | 70   | 76   | 45   | 0.957428 | 1.381236 | 1.222578 | 0.866868 |
| protein_co PITH_(C-ter  | 778   | 656  | 690  | 789  | 955  | 1155 | 22.7576  | 24.60708 | 24.35253 | 35.82237 |
| protein_co metastasis_  | 702   | 578  | 614  | 1748 | 2083 | 1753 | 5.644169 | 5.959366 | 5.956337 | 21.81397 |
| protein_co ubiquitin_s  | 943   | 801  | 829  | 906  | 1090 | 819  | 5.312662 | 5.786852 | 5.635119 | 7.922444 |
| protein_co ATPase_cla   | 1553  | 1284 | 1440 | 398  | 441  | 291  | 9.941324 | 10.54016 | 11.12201 | 3.954452 |
| protein_co laminin_ga   | 2722  | 2356 | 2552 | 194  | 215  | 177  | 24.79787 | 27.52396 | 28.05143 | 2.743206 |
| protein_co cyclin-depe  | 787   | 652  | 698  | 759  | 979  | 967  | 7.147481 | 7.593381 | 7.648596 | 10.69918 |
| protein_co Sec61_alph   | 11028 | 8374 | 9131 | 2399 | 3040 | 3531 | 142.2567 | 138.5218 | 142.1158 | 48.03267 |
| protein_co protein_ph   | 1682  | 1436 | 1524 | 1238 | 1158 | 1206 | 13.78588 | 15.09288 | 15.07098 | 15.74924 |

|                         |       |       |       |       |       |       |          |          |          |          |
|-------------------------|-------|-------|-------|-------|-------|-------|----------|----------|----------|----------|
| protein_co Ras_protein  | 8     | 7     | 2     | 50    | 60    | 18    | 0.0596   | 0.066875 | 0.017978 | 0.578168 |
| protein_co calcium/ca   | 6     | 3     | 4     | 10    | 6     | 1     | 0.063265 | 0.040564 | 0.050889 | 0.16366  |
| protein_co ciliary_roo  | 2339  | 1780  | 1924  | 1844  | 3144  | 1876  | 16.47773 | 16.08038 | 16.35386 | 20.16315 |
| protein_co polymerase   | 932   | 729   | 768   | 1560  | 2125  | 1713  | 9.104478 | 9.132213 | 9.052081 | 23.65344 |
| protein_co ATPase_Ca+   | 1712  | 1493  | 1622  | 724   | 732   | 438   | 8.95135  | 10.01046 | 10.23255 | 5.875622 |
| protein_co zinc_finger  | 3280  | 2748  | 2787  | 1600  | 1818  | 1665  | 18.30072 | 19.66167 | 18.76201 | 13.85622 |
| protein_co RIO_kinase   | 296   | 264   | 247   | 211   | 200   | 317   | 3.538869 | 4.047493 | 3.563016 | 3.915487 |
| protein_co Yip1_doma    | 316   | 250   | 273   | 291   | 370   | 362   | 8.218106 | 8.337465 | 8.566341 | 11.74649 |
| protein_co transmembr   | 609   | 544   | 565   | 1340  | 1502  | 1681  | 5.562139 | 6.371369 | 6.226171 | 18.9959  |
| protein_co diacylglyce  | 5     | 4     | 3     | 4     | 5     | 8     | 0.038726 | 0.039729 | 0.028035 | 0.048087 |
| protein_co FLYWCH-ty    | 1356  | 987   | 1195  | 558   | 809   | 309   | 12.3678  | 11.54408 | 13.1507  | 7.899461 |
| protein_co unkempt_h    | 607   | 473   | 515   | 458   | 682   | 684   | 5.60501  | 5.600905 | 5.737768 | 6.564228 |
| protein_co thromboxa    | 31    | 24    | 29    | 24    | 37    | 30    | 0.614107 | 0.609681 | 0.693152 | 0.737945 |
| protein_co poly_(ADP-   | 112   | 112   | 130   | 105   | 155   | 106   | 1.383478 | 1.774114 | 1.937517 | 2.01314  |
| protein_co aldehyde_d   | 4979  | 3952  | 4100  | 2598  | 2804  | 2509  | 69.71197 | 70.95639 | 69.26234 | 56.45922 |
| protein_co TAR_(HIV-1   | 611   | 492   | 541   | 437   | 645   | 409   | 5.584756 | 5.766834 | 5.966345 | 6.199761 |
| protein_co PET112_ho    | 341   | 268   | 273   | 259   | 335   | 291   | 2.440399 | 2.459522 | 2.357313 | 2.876979 |
| protein_co MAX_dime     | 231   | 192   | 196   | 42    | 45    | 69    | 1.938714 | 2.06639  | 1.98475  | 0.547119 |
| protein_co cyclin-depe  | 566   | 489   | 486   | 405   | 388   | 260   | 6.384352 | 7.073243 | 6.614312 | 7.090647 |
| protein_co DnaJ_(Hsp4   | 150   | 121   | 118   | 96    | 111   | 115   | 2.734643 | 2.828812 | 2.59561  | 2.716509 |
| protein_co solute_carr  | 1600  | 1450  | 1392  | 18461 | 17947 | 11132 | 16.99683 | 19.75265 | 17.84166 | 304.3924 |
| protein_co pleckstrin_  | 136   | 91    | 106   | 234   | 276   | 88    | 1.524514 | 1.308107 | 1.433661 | 4.071354 |
| protein_co CTD_(carbc   | 959   | 753   | 822   | 1134  | 1568  | 1431  | 11.98176 | 12.06441 | 12.39144 | 21.99102 |
| protein_co Y_box_binc   | 2972  | 2371  | 2508  | 4815  | 6928  | 5172  | 21.79839 | 22.3006  | 22.1948  | 54.81538 |
| protein_co serine/thre  | 6     | 1     | 8     | 28    | 27    | 29    | 0.093937 | 0.020077 | 0.15112  | 0.680412 |
| protein_co WNK_lysin    | 19010 | 14281 | 15403 | 3053  | 3555  | 2514  | 79.36069 | 76.45242 | 77.5848  | 19.78247 |
| protein_co cell_divisio | 1431  | 1100  | 1209  | 1548  | 1303  | 2122  | 14.32834 | 14.12402 | 14.60598 | 24.0579  |
| protein_co opioid_gro   | 1663  | 1253  | 1326  | 1312  | 1616  | 998   | 17.30539 | 16.72051 | 16.64872 | 21.1911  |
| protein_co guanine_nu   | 0     | 0     | 2     | 3     | 7     | 12    | 0        | 0        | 0.053048 | 0.102363 |
| protein_co phosphatic   | 89    | 93    | 89    | 226   | 239   | 115   | 1.538228 | 2.061213 | 1.85596  | 6.062748 |
| protein_co protein_ty   | 2693  | 2083  | 2253  | 2830  | 3358  | 1994  | 22.63395 | 22.45033 | 22.84722 | 36.91824 |
| protein_co small_nucl   | 850   | 630   | 783   | 1084  | 1255  | 1491  | 20.67247 | 19.64822 | 22.97646 | 40.91976 |
| protein_co RIMS_bindi   | 2     | 0     | 0     | 32    | 13    | 18    | 0.014836 | 0        | 0        | 0.368447 |
| protein_co collagen_ty  | 66920 | 49697 | 52726 | 304   | 285   | 346   | 428.2626 | 407.8437 | 407.1243 | 3.019661 |
| protein_co glutamine_   | 1996  | 1602  | 1777  | 1521  | 1687  | 2208  | 10.02597 | 10.31901 | 10.76965 | 11.85839 |
| protein_co mitochond    | 298   | 251   | 224   | 73    | 100   | 132   | 14.52518 | 15.68875 | 13.17351 | 5.522792 |
| protein_co acetyl-CoA_  | 448   | 391   | 411   | 249   | 339   | 330   | 4.450578 | 4.981091 | 4.926384 | 3.839443 |
| protein_co branched_c   | 5831  | 4274  | 5006  | 3835  | 3629  | 5055  | 32.80332 | 30.8332  | 33.97924 | 33.48657 |
| protein_co histone_de   | 3356  | 2505  | 2703  | 1839  | 2450  | 1726  | 24.53428 | 23.48381 | 23.84216 | 20.86717 |
| protein_co leucine_zip  | 2831  | 2046  | 2176  | 235   | 327   | 504   | 23.26422 | 21.56074 | 21.57524 | 2.997416 |
| protein_co PR_domair    | 64    | 64    | 78    | 1     | 0     | 1     | 0.983277 | 1.260913 | 1.445901 | 0.023847 |
| protein_co wingless-ty  | 0     | 0     | 0     | 0     | 0     | 3     | 0        | 0        | 0        | 0        |
| protein_co sperm_assc   | 37    | 32    | 38    | 99    | 93    | 60    | 1.194033 | 1.324263 | 1.479607 | 4.958844 |
| protein_co NCK-associ   | 3447  | 2752  | 3037  | 2822  | 2830  | 2833  | 32.39725 | 33.16841 | 34.43973 | 41.16749 |
| protein_co mitochond    | 622   | 411   | 473   | 637   | 713   | 762   | 15.44788 | 13.0897  | 14.17384 | 24.55547 |
| protein_co guanylate_   | 136   | 100   | 110   | 126   | 137   | 87    | 2.041307 | 1.924769 | 1.992095 | 2.935421 |
| protein_co splicing_fa  | 1317  | 1090  | 1134  | 1399  | 1739  | 1188  | 11.04133 | 11.71848 | 11.47088 | 18.20471 |
| protein_co tyrosine_ki  | 1923  | 1490  | 1574  | 1237  | 1612  | 1174  | 15.18005 | 15.08306 | 14.99156 | 15.15633 |
| protein_co MON2_hon     | 1433  | 1074  | 1188  | 381   | 399   | 344   | 6.472105 | 6.220324 | 6.473868 | 2.670883 |
| protein_co cadherin_3   | 235   | 204   | 213   | 3930  | 4516  | 3542  | 2.976541 | 3.313473 | 3.255155 | 77.26219 |
| protein_co GC-rich_pr   | 1174  | 982   | 990   | 1396  | 1274  | 1328  | 11.75505 | 12.6089  | 11.96023 | 21.69562 |
| protein_co diacylglyce  | 2     | 2     | 5     | 29    | 27    | 8     | 0.015825 | 0.020294 | 0.047735 | 0.356162 |
| protein_co zinc_finger  | 69    | 61    | 66    | 38    | 18    | 41    | 0.885444 | 1.003809 | 1.021889 | 0.756878 |
| protein_co citrate_syn  | 2478  | 2076  | 2079  | 2494  | 2806  | 2956  | 38.00898 | 40.83397 | 38.47579 | 59.37613 |
| protein_co leukocyte_   | 31    | 15    | 15    | 4     | 3     | 2     | 0.422065 | 0.261889 | 0.246409 | 0.084529 |
| protein_co mitochond    | 3     | 4     | 5     | 3     | 3     | 3     | 0.081453 | 0.13927  | 0.163797 | 0.126427 |
| protein_co engulfment   | 1156  | 959   | 1012  | 459   | 539   | 340   | 13.15333 | 13.99284 | 13.89333 | 8.106268 |
| protein_co wings_apar   | 1386  | 1096  | 1222  | 1393  | 1614  | 1295  | 10.26205 | 10.40617 | 10.91667 | 16.00857 |
| protein_co vacuole_mi   | 2640  | 2204  | 2529  | 595   | 768   | 750   | 28.62188 | 30.64187 | 33.08195 | 10.01248 |
| protein_co amyloid_be   | 1024  | 849   | 915   | 202   | 266   | 223   | 7.423528 | 7.892733 | 8.003492 | 2.272962 |
| protein_co polymerase   | 1254  | 1020  | 1041  | 2547  | 3406  | 2483  | 16.92576 | 17.65469 | 16.95311 | 53.35928 |
| protein_co seizure_rek  | 3     | 3     | 4     | 12    | 19    | 17    | 0.031463 | 0.040347 | 0.050616 | 0.195338 |
| protein_co eukaryotic   | 6780  | 5442  | 5676  | 12009 | 12994 | 9861  | 76.6428  | 78.88774 | 77.41624 | 210.707  |
| protein_co solute_carr  | 143   | 90    | 112   | 43    | 50    | 14    | 2.247829 | 1.814174 | 2.124189 | 1.049122 |
| protein_co glioma_tun   | 878   | 583   | 715   | 876   | 1140  | 811   | 7.243039 | 6.16743  | 7.116729 | 11.21659 |

|                          |      |      |      |       |       |       |          |          |          |          |
|--------------------------|------|------|------|-------|-------|-------|----------|----------|----------|----------|
| protein_co sphingosin    | 621  | 439  | 523  | 377   | 635   | 613   | 9.417432 | 8.537186 | 9.569531 | 8.873863 |
| protein_co ribosomal_    | 9675 | 7330 | 7837 | 11021 | 12862 | 10207 | 118.0179 | 114.6596 | 115.344  | 208.6645 |
| protein_co carbonic_a    | 61   | 40   | 49   | 309   | 360   | 341   | 1.551134 | 1.304334 | 1.503362 | 12.19575 |
| protein_co isochorism    | 1231 | 894  | 1005 | 1075  | 1478  | 1116  | 25.28323 | 23.54623 | 24.90512 | 34.26995 |
| protein_co U2_small_r    | 4740 | 3539 | 3735 | 3578  | 4002  | 5611  | 73.54688 | 70.41673 | 69.92373 | 86.17013 |
| protein_co epsin_1       | 5138 | 3584 | 3908 | 5142  | 6353  | 4965  | 91.91946 | 82.22251 | 84.356   | 142.7828 |
| protein_co mediator_c    | 984  | 787  | 773  | 822   | 998   | 1058  | 12.63065 | 12.95433 | 11.97177 | 16.37695 |
| protein_co aryl-hydroc   | 146  | 128  | 123  | 89    | 77    | 30    | 1.209317 | 1.359586 | 1.229251 | 1.144215 |
| protein_co goosecoid_    | 0    | 0    | 0    | 5     | 7     | 11    | 0        | 0        | 0        | 0.352274 |
| protein_co zinc_finger   | 1303 | 978  | 968  | 307   | 411   | 274   | 9.51974  | 9.162814 | 8.533046 | 3.481365 |
| protein_co myotubula     | 414  | 323  | 303  | 388   | 400   | 448   | 4.298598 | 4.300692 | 3.795921 | 6.253003 |
| protein_co glypican_1    | 5953 | 4410 | 4859 | 1590  | 2074  | 1526  | 75.21861 | 71.45578 | 74.07717 | 31.18294 |
| protein_co aarF_doma     | 152  | 160  | 148  | 176   | 201   | 216   | 2.002046 | 2.702463 | 2.352015 | 3.598103 |
| protein_co hydroxyacy    | 662  | 531  | 505  | 407   | 557   | 306   | 17.79885 | 18.30787 | 16.38224 | 16.98474 |
| protein_co ring_finger   | 1890 | 1485 | 1710 | 1945  | 2070  | 2258  | 21.49457 | 21.65723 | 23.4645  | 34.33343 |
| protein_co caspase_8_    | 260  | 180  | 231  | 33    | 35    | 58    | 4.160889 | 3.693981 | 4.46039  | 0.819704 |
| protein_co LIM_and_c     | 655  | 566  | 574  | 14    | 4     | 36    | 4.981827 | 5.520432 | 5.267533 | 0.165274 |
| protein_co asunder_sp    | 482  | 443  | 442  | 956   | 838   | 820   | 7.599525 | 8.956792 | 8.40833  | 23.39526 |
| protein_co transmemt     | 1176 | 1018 | 951  | 880   | 1065  | 646   | 20.35536 | 22.59584 | 19.86095 | 23.64202 |
| protein_co distal-less_l | 0    | 0    | 1    | 14    | 19    | 13    | 0        | 0        | 0.021743 | 0.39159  |
| protein_co sperm_aut     | 23   | 31   | 28   | 5     | 19    | 9     | 0.217917 | 0.376647 | 0.320088 | 0.07353  |
| protein_co tetraspanir   | 17   | 15   | 22   | 20    | 22    | 6     | 0.239738 | 0.271262 | 0.374334 | 0.437773 |
| protein_co WNT1_indi     | 0    | 1    | 4    | 0     | 5     | 0     | 0        | 0.021794 | 0.082023 | 0        |
| protein_co doublesex_    | 0    | 0    | 0    | 0     | 0     | 1     | 0        | 0        | 0        | 0        |
| protein_co ST3_beta-g    | 111  | 76   | 92   | 126   | 151   | 63    | 1.653365 | 1.451672 | 1.653414 | 2.913042 |
| protein_co ATPase_Ca     | 3    | 5    | 7    | 19    | 28    | 9     | 0.039075 | 0.083514 | 0.110008 | 0.384116 |
| protein_co nerve_grow    | 343  | 234  | 251  | 995   | 1372  | 648   | 4.706841 | 4.117756 | 4.155824 | 21.19283 |
| protein_co cell_adhesi   | 711  | 538  | 604  | 403   | 461   | 248   | 3.64837  | 3.540143 | 3.739506 | 3.209702 |
| protein_co TAF2_RNA_     | 908  | 761  | 808  | 487   | 559   | 636   | 8.434258 | 9.064734 | 9.055667 | 7.021348 |
| protein_co homeodon      | 2241 | 1773 | 2018 | 1423  | 1916  | 1618  | 6.982559 | 7.0842   | 7.586509 | 6.881896 |
| protein_co transportir   | 1787 | 1461 | 1408 | 2271  | 2719  | 2372  | 22.22022 | 23.29611 | 21.12392 | 43.83    |
| protein_co MEF2BNB-I     | 0    | 0    | 0    | 0     | 2     | 0     | 0        | 0        | 0        | 0        |
| protein_co regulatory_   | 928  | 678  | 662  | 404   | 494   | 436   | 31.28248 | 29.30841 | 26.92522 | 21.13806 |
| protein_co transmemt     | 656  | 515  | 539  | 964   | 1204  | 642   | 15.93775 | 16.045   | 15.8001  | 36.35219 |
| protein_co lysophosph    | 93   | 85   | 79   | 528   | 643   | 558   | 1.712793 | 2.007476 | 1.755485 | 15.09338 |
| protein_co cathepsin_    | 2394 | 1702 | 1852 | 534   | 624   | 742   | 51.32817 | 46.79511 | 47.90939 | 17.77065 |
| protein_co SURP_and_     | 1949 | 1623 | 1658 | 1702  | 2247  | 1547  | 16.42204 | 17.53651 | 16.85574 | 22.25898 |
| protein_co solute_carr   | 742  | 585  | 595  | 156   | 201   | 213   | 5.053361 | 5.109068 | 4.889241 | 1.649041 |
| protein_co sorting_ne    | 236  | 192  | 203  | 136   | 181   | 142   | 5.127917 | 5.349824 | 5.321978 | 4.586679 |
| protein_co eyes_absen    | 0    | 4    | 0    | 27    | 35    | 28    | 0        | 0.089015 | 0        | 0.727259 |
| protein_co calponin_2    | 8653 | 6492 | 7029 | 6769  | 8239  | 7433  | 159.2384 | 153.2035 | 156.0711 | 193.3463 |
| protein_co ATP-bindin    | 90   | 52   | 98   | 571   | 755   | 333   | 0.619146 | 0.458737 | 0.813439 | 6.097017 |
| protein_co synuclein_i   | 1104 | 815  | 877  | 101   | 143   | 80    | 10.38239 | 9.828677 | 9.951207 | 1.47428  |
| protein_co DEAD_(Asp     | 403  | 287  | 358  | 518   | 642   | 846   | 4.362114 | 3.983668 | 4.675446 | 8.702663 |
| protein_co BTB_(POZ)_    | 1644 | 1227 | 1365 | 653   | 862   | 709   | 23.38101 | 22.37769 | 23.42298 | 14.41468 |
| protein_co fatty_acyl_l  | 146  | 135  | 115  | 288   | 271   | 251   | 3.267753 | 3.874712 | 3.105577 | 10.00505 |
| protein_co breast_carc   | 1    | 3    | 4    | 6     | 15    | 3     | 0.007672 | 0.029514 | 0.037026 | 0.071446 |
| protein_co POU_class_    | 0    | 0    | 1    | 0     | 1     | 0     | 0        | 0        | 0.037945 | 0        |
| protein_co chitinase_3   | 0    | 0    | 2    | 1     | 0     | 0     | 0        | 0        | 0.052167 | 0.033555 |
| protein_co strawberry    | 2739 | 1971 | 2231 | 1542  | 2119  | 1041  | 26.09341 | 24.07879 | 25.64404 | 22.80099 |
| protein_co PMS1_post     | 375  | 296  | 332  | 460   | 425   | 443   | 5.452328 | 5.51889  | 5.824207 | 10.38099 |
| protein_co high_mobil    | 2174 | 1559 | 1667 | 1688  | 2156  | 1315  | 41.88122 | 38.5137  | 38.74748 | 50.47342 |
| protein_co calcitonin_   | 20   | 11   | 17   | 13    | 6     | 9     | 0.179552 | 0.126638 | 0.184144 | 0.181148 |
| protein_co TAF11_RNA     | 322  | 240  | 277  | 376   | 398   | 369   | 9.556067 | 9.13364  | 9.918617 | 17.31975 |
| protein_co ankyrin_rej   | 1206 | 959  | 972  | 1511  | 1842  | 1358  | 8.925089 | 9.101085 | 8.679197 | 17.35642 |
| protein_co adaptor-rel   | 6292 | 4796 | 5335 | 4707  | 6231  | 6082  | 58.60786 | 57.28695 | 59.95835 | 68.05215 |
| protein_co zinc_finger   | 547  | 423  | 448  | 444   | 526   | 469   | 5.514693 | 5.468696 | 5.449543 | 6.947803 |
| protein_co solute_carr   | 860  | 614  | 696  | 383   | 597   | 298   | 18.37986 | 16.82757 | 17.94738 | 12.70495 |
| protein_co nth_endon     | 221  | 190  | 172  | 502   | 592   | 497   | 9.71199  | 10.70727 | 9.11995  | 34.24129 |
| protein_co UHRF1_bin     | 423  | 328  | 420  | 779   | 1012  | 621   | 2.072568 | 2.060875 | 2.482938 | 5.924291 |
| protein_co guanine_nu    | 2343 | 1952 | 2040 | 1047  | 1171  | 1378  | 34.26803 | 36.61053 | 35.99939 | 23.76808 |
| protein_co importin_5    | 4678 | 3769 | 4187 | 7276  | 7929  | 7501  | 36.54031 | 37.75266 | 39.46054 | 88.21353 |
| protein_co ornithine_i   | 1969 | 1623 | 1707 | 1334  | 1625  | 1757  | 45.08127 | 47.65169 | 47.15546 | 47.40637 |
| protein_co WD_repeat     | 613  | 513  | 536  | 754   | 795   | 982   | 7.450384 | 7.995486 | 7.860153 | 14.22394 |
| protein_co protein_kir   | 990  | 707  | 707  | 501   | 480   | 441   | 7.583911 | 6.945232 | 6.534697 | 5.956981 |

|                         |       |       |       |       |       |       |          |          |          |          |
|-------------------------|-------|-------|-------|-------|-------|-------|----------|----------|----------|----------|
| protein_co WD_repeat    | 1102  | 885   | 893   | 2008  | 2141  | 1884  | 33.38036 | 34.37653 | 32.6369  | 94.40687 |
| protein_co translocati  | 5959  | 4709  | 5216  | 389   | 463   | 654   | 40.44841 | 40.98888 | 42.71827 | 4.098341 |
| protein_co netrin_1     | 79    | 40    | 54    | 110   | 169   | 212   | 0.622155 | 0.403962 | 0.513113 | 1.344605 |
| protein_co glucagon-li  | 3     | 0     | 2     | 0     | 0     | 0     | 0.030768 | 0        | 0.024749 | 0        |
| protein_co minichrom    | 502   | 399   | 435   | 621   | 755   | 1052  | 5.13163  | 5.230388 | 5.365238 | 9.853119 |
| protein_co diacylglyce  | 466   | 451   | 426   | 216   | 255   | 144   | 4.019637 | 4.988694 | 4.433621 | 2.891913 |
| protein_co v-erb-b2_er  | 39    | 22    | 37    | 1484  | 1796  | 1558  | 0.308956 | 0.223493 | 0.353657 | 18.24721 |
| protein_co rhophilin_i  | 0     | 1     | 1     | 3     | 1     | 0     | 0        | 0.029246 | 0.027517 | 0.106196 |
| protein_co ankyrin_rej  | 532   | 382   | 408   | 5     | 5     | 5     | 6.767631 | 6.231574 | 6.262291 | 0.098725 |
| protein_co lysyl-tRNA_  | 2700  | 2076  | 2214  | 3445  | 3345  | 3413  | 58.31554 | 57.4986  | 57.69607 | 115.4889 |
| protein_co adenosine_   | 890   | 733   | 777   | 341   | 375   | 429   | 15.07663 | 15.9231  | 15.8812  | 8.966009 |
| protein_co protein_dis  | 1932  | 1580  | 1644  | 502   | 553   | 400   | 40.5876  | 42.565   | 41.67121 | 16.36893 |
| protein_co TBC1_dom     | 158   | 134   | 133   | 410   | 437   | 293   | 2.139983 | 2.327381 | 2.173467 | 8.619214 |
| protein_co NADH_deh     | 1402  | 1053  | 1133  | 1531  | 1954  | 1404  | 46.10084 | 44.4016  | 44.95094 | 78.13876 |
| protein_co spen_homo    | 2311  | 1843  | 1859  | 1717  | 2060  | 1719  | 8.858963 | 9.059779 | 8.598256 | 10.21607 |
| protein_co myosin_lig   | 1056  | 754   | 830   | 506   | 715   | 459   | 4.938253 | 4.521578 | 4.683122 | 3.672742 |
| protein_co zinc_finger  | 1003  | 745   | 829   | 873   | 680   | 1380  | 21.99752 | 20.95262 | 21.9369  | 29.71785 |
| protein_co mitogen-ac   | 700   | 562   | 569   | 454   | 525   | 594   | 8.512192 | 8.763731 | 8.348408 | 8.568991 |
| protein_co transmembr   | 389   | 344   | 262   | 303   | 298   | 152   | 7.369785 | 8.357434 | 5.989003 | 8.910012 |
| protein_co synaptosom   | 5     | 5     | 4     | 12    | 10    | 4     | 0.049609 | 0.063616 | 0.047884 | 0.184798 |
| protein_co STE20-like_  | 1731  | 1464  | 1553  | 935   | 827   | 752   | 10.45153 | 11.33531 | 11.31364 | 8.762441 |
| protein_co cytochrom    | 194   | 140   | 168   | 117   | 105   | 115   | 4.033997 | 3.733114 | 4.214938 | 3.776158 |
| protein_co collagen_ty  | 14    | 6     | 7     | 6     | 12    | 11    | 0.114486 | 0.062919 | 0.069067 | 0.076156 |
| protein_co glutathione  | 18    | 12    | 14    | 230   | 246   | 125   | 0.313296 | 0.267839 | 0.294008 | 6.213569 |
| protein_co Sec61_alph   | 221   | 197   | 191   | 213   | 250   | 182   | 4.209055 | 4.811361 | 4.389083 | 6.296547 |
| protein_co protein_kir  | 3     | 3     | 4     | 509   | 490   | 512   | 0.042822 | 0.054913 | 0.06889  | 11.27699 |
| protein_co transducin   | 83    | 33    | 52    | 407   | 470   | 389   | 1.438769 | 0.733561 | 1.087588 | 10.9506  |
| protein_co ankyrin_rej  | 1325  | 1126  | 1096  | 672   | 809   | 791   | 8.883225 | 9.680605 | 8.865707 | 6.992855 |
| protein_co family_witl  | 713   | 580   | 591   | 440   | 552   | 622   | 8.832915 | 9.214077 | 8.83385  | 8.460532 |
| protein_co malic_enz    | 737   | 678   | 677   | 75    | 94    | 123   | 10.25154 | 12.09374 | 11.36209 | 1.619248 |
| protein_co TBC1_(tre-2  | 1920  | 1559  | 1750  | 2816  | 3031  | 2144  | 15.79453 | 16.44603 | 17.36967 | 35.95578 |
| protein_co cyclin-depe  | 1848  | 1394  | 1476  | 1091  | 1423  | 865   | 11.87349 | 11.48547 | 11.44224 | 10.88007 |
| protein_co methylenet   | 874   | 631   | 668   | 1486  | 2046  | 1252  | 9.19701  | 8.514789 | 8.481247 | 24.27082 |
| protein_co solute_carr  | 302   | 253   | 253   | 284   | 309   | 175   | 3.689626 | 3.963741 | 3.729443 | 5.385478 |
| protein_co forkhead_b   | 904   | 740   | 733   | 388   | 501   | 266   | 7.674919 | 8.0565   | 7.508572 | 5.112903 |
| protein_co Y_box_binc   | 19157 | 15013 | 15479 | 19965 | 22397 | 19884 | 589.4174 | 592.3416 | 574.6275 | 953.444  |
| protein_co phosphodi    | 338   | 313   | 327   | 276   | 349   | 101   | 3.443151 | 4.088774 | 4.019159 | 4.363942 |
| protein_co protein_ph   | 242   | 175   | 165   | 523   | 721   | 342   | 3.633488 | 3.369425 | 2.9891   | 12.18823 |
| protein_co catenin_(ca  | 0     | 1     | 0     | 80    | 116   | 70    | 0        | 0.013826 | 0        | 1.338787 |
| protein_co ELAV_(emb    | 2455  | 1972  | 2190  | 2337  | 2907  | 2605  | 19.13799 | 19.71338 | 20.59856 | 28.27704 |
| protein_co tyrosine_ki  | 23    | 25    | 35    | 25    | 15    | 25    | 0.277813 | 0.387235 | 0.510083 | 0.4687   |
| protein_co DIP2_disco   | 1711  | 1385  | 1459  | 751   | 864   | 576   | 9.336532 | 9.691582 | 9.605919 | 6.360716 |
| protein_co SWI/SNF_re   | 1812  | 1543  | 1501  | 2994  | 3600  | 3108  | 23.22709 | 25.36366 | 23.21483 | 59.56881 |
| protein_co lysine_(K)-s | 1360  | 1037  | 1125  | 1388  | 1571  | 1205  | 14.25356 | 13.9371  | 14.22607 | 22.57898 |
| protein_co nuclear_tra  | 908   | 626   | 690   | 781   | 912   | 1151  | 18.01783 | 15.92943 | 16.52014 | 24.0546  |
| protein_co zinc_finger  | 0     | 0     | 1     | 8     | 5     | 3     | 0        | 0        | 0.031874 | 0.328022 |
| protein_co solute_carr  | 259   | 180   | 205   | 259   | 429   | 144   | 4.69989  | 4.188608 | 4.488382 | 7.294879 |
| protein_co neuronal_g   | 168   | 159   | 182   | 118   | 116   | 52    | 2.45024  | 2.97376  | 3.202719 | 2.671234 |
| protein_co asp_(abnor   | 2003  | 1604  | 1834  | 1072  | 604   | 1343  | 8.626867 | 8.859024 | 9.530585 | 7.16634  |
| protein_co CD84_mole    | 0     | 0     | 0     | 0     | 1     | 0     | 0        | 0        | 0        | 0        |
| protein_co ELOVL_fatt   | 1625  | 1343  | 1415  | 295   | 328   | 353   | 51.58854 | 54.67455 | 54.20064 | 14.53625 |
| protein_co spleen_foci  | 9     | 8     | 7     | 12    | 7     | 6     | 0.300791 | 0.342864 | 0.282273 | 0.622493 |
| protein_co zinc_ribbo   | 99    | 58    | 76    | 111   | 105   | 122   | 1.264192 | 0.949763 | 1.170953 | 2.200043 |
| protein_co metalloph    | 9     | 3     | 5     | 15    | 10    | 17    | 0.07548  | 0.032264 | 0.050595 | 0.19526  |
| protein_co claudin_18   | 51    | 46    | 56    | 8     | 8     | 0     | 0.679372 | 0.785787 | 0.900065 | 0.165409 |
| protein_co zinc_finger  | 365   | 331   | 310   | 193   | 170   | 242   | 2.842999 | 3.30614  | 2.913357 | 2.333306 |
| protein_co ataxin_3     | 223   | 187   | 197   | 339   | 394   | 274   | 1.504529 | 1.617881 | 1.603651 | 3.549979 |
| protein_co golgin_A5    | 1161  | 997   | 1010  | 486   | 422   | 432   | 18.33591 | 20.19178 | 19.24596 | 11.91343 |
| protein_co fibroblast_j | 29    | 14    | 20    | 1420  | 1681  | 1946  | 0.319579 | 0.197842 | 0.265925 | 24.28844 |
| protein_co leucine_ric  | 443   | 321   | 353   | 487   | 403   | 585   | 7.202593 | 6.692671 | 6.92481  | 12.28979 |
| protein_co isochorism   | 363   | 254   | 320   | 391   | 440   | 362   | 8.773751 | 7.872664 | 9.332042 | 14.66851 |
| protein_co echinoderm   | 784   | 632   | 683   | 309   | 346   | 436   | 8.106235 | 8.37972  | 8.520633 | 4.958977 |
| protein_co tRNA_meth    | 260   | 159   | 173   | 273   | 253   | 234   | 5.060774 | 3.968716 | 4.062915 | 8.247773 |
| protein_co THUMP_do     | 976   | 766   | 774   | 927   | 971   | 1120  | 11.10254 | 11.17405 | 10.62335 | 16.36751 |
| protein_co Myb/SANT-    | 469   | 382   | 403   | 193   | 276   | 216   | 11.04541 | 11.53671 | 11.4515  | 7.054998 |

|                         |       |       |       |       |       |       |          |          |          |          |
|-------------------------|-------|-------|-------|-------|-------|-------|----------|----------|----------|----------|
| protein_co kinesin_fan  | 22    | 23    | 13    | 2335  | 2944  | 2222  | 0.153646 | 0.205985 | 0.109544 | 25.31141 |
| protein_co autophagy    | 717   | 627   | 654   | 272   | 319   | 206   | 2.891309 | 3.242293 | 3.182007 | 1.702451 |
| protein_co ADP-ribosy   | 1119  | 915   | 1072  | 2029  | 2162  | 1825  | 7.262274 | 7.615054 | 8.394317 | 20.43878 |
| protein_co zinc_finger  | 188   | 128   | 167   | 183   | 202   | 192   | 1.610987 | 1.406545 | 1.726628 | 2.433974 |
| protein_co mitochond    | 652   | 531   | 570   | 466   | 556   | 318   | 11.58041 | 12.09429 | 12.21517 | 12.84674 |
| protein_co stromal_an   | 64    | 52    | 61    | 218   | 248   | 139   | 0.674373 | 0.70264  | 0.775529 | 3.565393 |
| protein_co ferrochelate | 536   | 380   | 420   | 313   | 366   | 365   | 6.522982 | 5.930268 | 6.167068 | 5.912296 |
| protein_co myosin_IXA   | 1026  | 812   | 846   | 353   | 405   | 251   | 3.876957 | 3.934676 | 3.85711  | 2.070374 |
| protein_co DEAD_(Asp    | 1407  | 1201  | 1231  | 1415  | 1278  | 1764  | 14.84235 | 16.24654 | 15.66804 | 23.16837 |
| protein_co phosphofru   | 3536  | 2786  | 2968  | 2797  | 3215  | 2283  | 59.87833 | 60.49896 | 60.64142 | 73.51575 |
| protein_co isopentenyl  | 2534  | 1980  | 2182  | 710   | 681   | 1458  | 51.63812 | 51.74142 | 53.64961 | 22.45704 |
| protein_co SP100_nuc    | 492   | 406   | 414   | 2     | 2     | 3     | 5.942784 | 6.288691 | 6.033555 | 0.037496 |
| protein_co Kruppel-like | 3045  | 2412  | 2517  | 349   | 407   | 410   | 30.66583 | 31.14971 | 30.58431 | 5.455359 |
| protein_co phosphatic   | 305   | 220   | 277   | 358   | 558   | 343   | 8.955201 | 8.283378 | 9.813034 | 16.31507 |
| protein_co neogenin_1   | 1034  | 820   | 916   | 1186  | 1299  | 1104  | 6.603688 | 6.715668 | 7.058453 | 11.75658 |
| protein_co translocati  | 2290  | 1776  | 1863  | 938   | 1017  | 1063  | 31.63764 | 31.4645  | 31.05485 | 20.11416 |
| protein_co phosphoryl   | 200   | 184   | 167   | 301   | 379   | 274   | 1.519197 | 1.792302 | 1.530554 | 3.548796 |
| protein_co tumor_nec    | 1895  | 1527  | 1506  | 594   | 707   | 582   | 39.97147 | 41.30373 | 38.32781 | 19.44723 |
| protein_co calcium_ch   | 302   | 234   | 254   | 122   | 138   | 147   | 2.667819 | 2.650786 | 2.707268 | 1.672784 |
| protein_co ecotropic_   | 809   | 653   | 627   | 146   | 182   | 91    | 5.124142 | 5.303898 | 4.791685 | 1.435344 |
| protein_co stomatin_(   | 205   | 154   | 169   | 122   | 129   | 100   | 3.141325 | 3.02614  | 3.124595 | 2.901678 |
| protein_co pyruvate_k   | 38318 | 30154 | 31707 | 21099 | 18926 | 15689 | 595.7333 | 601.1783 | 594.7744 | 509.1449 |
| protein_co DEAH_(Asp    | 849   | 600   | 634   | 482   | 470   | 732   | 8.735928 | 7.917024 | 7.871159 | 7.698017 |
| protein_co deoxynucle   | 798   | 646   | 726   | 868   | 635   | 1608  | 8.576263 | 8.903014 | 9.414123 | 14.47923 |
| protein_co methyltran   | 545   | 528   | 450   | 530   | 537   | 450   | 15.28413 | 18.98836 | 15.22666 | 23.07015 |
| protein_co tumor_pro    | 2758  | 2289  | 2320  | 863   | 1029  | 1379  | 20.37861 | 21.6888  | 20.68313 | 9.897411 |
| protein_co trophinin    | 2172  | 1767  | 1757  | 951   | 984   | 895   | 21.91632 | 22.86407 | 21.39082 | 14.89425 |
| protein_co ribosomal_   | 423   | 338   | 370   | 388   | 472   | 822   | 2.552371 | 2.615348 | 2.693725 | 3.633839 |
| protein_co ras_homolo   | 10936 | 8460  | 8877  | 5802  | 6891  | 5831  | 252.4812 | 250.4668 | 247.2776 | 207.9116 |
| protein_co DEAH_(Asp    | 1312  | 1139  | 1158  | 1078  | 1259  | 1386  | 9.898584 | 11.01976 | 10.54134 | 12.62375 |
| pseudogen: postmeioti   | 21    | 36    | 32    | 15    | 9     | 12    | 0.936017 | 2.057674 | 1.720928 | 1.037735 |
| protein_co protein_kir  | 15    | 10    | 10    | 703   | 880   | 505   | 0.302386 | 0.258512 | 0.243231 | 21.99665 |
| protein_co zinc_finger  | 225   | 165   | 161   | 113   | 119   | 213   | 2.013792 | 1.893761 | 1.738625 | 1.569788 |
| protein_co isoleucyl-tf | 1496  | 1203  | 1306  | 1714  | 1837  | 1571  | 19.72096 | 20.33628 | 20.77245 | 35.07017 |
| protein_co synaptotag   | 433   | 329   | 417   | 688   | 728   | 765   | 4.222832 | 4.114539 | 4.906819 | 10.41441 |
| protein_co neuron_na    | 793   | 671   | 683   | 8     | 15    | 11    | 3.78615  | 4.108247 | 3.934535 | 0.059285 |
| protein_co isocitrate_c | 1064  | 810   | 759   | 589   | 695   | 554   | 29.14193 | 28.44926 | 25.08225 | 25.03931 |
| protein_co rogdi_hom    | 691   | 522   | 515   | 470   | 560   | 433   | 12.07191 | 11.69439 | 10.85558 | 12.7446  |
| protein_co PDZ_domai    | 75    | 57    | 62    | 6761  | 9464  | 6721  | 0.953307 | 0.929086 | 0.950849 | 133.3869 |
| protein_co ATPase_Ca    | 4     | 6     | 5     | 7     | 12    | 4     | 0.02782  | 0.053512 | 0.041958 | 0.075565 |
| protein_co Rho-associ   | 2140  | 1910  | 1878  | 1218  | 922   | 1050  | 15.08942 | 17.27036 | 15.97726 | 13.3302  |
| protein_co core-bindir  | 2383  | 1853  | 1919  | 634   | 950   | 661   | 35.63103 | 35.5295  | 34.62002 | 14.71377 |
| protein_co pyruvate_d   | 203   | 147   | 164   | 338   | 298   | 221   | 4.955062 | 4.601291 | 4.829975 | 12.80561 |
| protein_co hyaluronog   | 1110  | 835   | 856   | 758   | 894   | 1034  | 12.83866 | 12.3849  | 11.94589 | 13.60806 |
| protein_co histone_de   | 655   | 517   | 592   | 629   | 805   | 524   | 3.421676 | 3.463358 | 3.731361 | 5.1001   |
| protein_co Ras_associa  | 573   | 448   | 506   | 136   | 172   | 191   | 13.04271 | 13.07677 | 13.8967  | 4.80488  |
| protein_co fibroblast_  | 127   | 106   | 103   | 764   | 1088  | 756   | 1.387149 | 1.484686 | 1.35739  | 12.95219 |
| protein_co interferon-i | 150   | 97    | 117   | 44    | 54    | 35    | 5.667609 | 4.699912 | 5.333871 | 2.580428 |
| protein_co HEAT_repe    | 585   | 474   | 461   | 356   | 450   | 416   | 6.976261 | 7.248607 | 6.633089 | 6.589422 |
| protein_co CoA_syntha   | 1295  | 1021  | 1106  | 1618  | 2015  | 1634  | 24.70406 | 24.97662 | 25.45668 | 47.90794 |
| protein_co pleckstrin_  | 1075  | 746   | 807   | 1330  | 1663  | 558   | 11.61714 | 10.33806 | 10.52234 | 22.30863 |
| protein_co myocyte_ei   | 1759  | 1307  | 1519  | 343   | 412   | 324   | 14.16201 | 13.4941  | 14.75587 | 4.28631  |
| protein_co OTU_doma     | 1869  | 1334  | 1525  | 1347  | 1783  | 1461  | 31.98447 | 29.27487 | 31.48819 | 35.77898 |
| protein_co transcriptic | 1600  | 1189  | 1290  | 1527  | 1691  | 1750  | 21.96897 | 20.93538 | 21.37113 | 32.54312 |
| protein_co TBC1_dom     | 451   | 364   | 384   | 216   | 312   | 138   | 5.231914 | 5.414954 | 5.374813 | 3.889272 |
| protein_co acyl-CoA_s   | 1616  | 1300  | 1549  | 1047  | 897   | 1041  | 14.20856 | 14.65755 | 16.43268 | 14.28848 |
| protein_co inositol_pc  | 829   | 666   | 691   | 411   | 486   | 425   | 13.12351 | 13.52007 | 13.1984  | 10.09875 |
| protein_co G_patch_di   | 703   | 538   | 555   | 389   | 500   | 395   | 18.99924 | 18.64544 | 18.09764 | 16.31778 |
| protein_co GRIP1_assc   | 1085  | 767   | 811   | 976   | 1055  | 994   | 15.52034 | 14.06942 | 13.99717 | 21.66964 |
| protein_co FtsJ_RNA_n   | 962   | 736   | 840   | 558   | 621   | 628   | 22.71309 | 22.28375 | 23.92922 | 20.44871 |
| protein_co proline_ric  | 1168  | 1025  | 1092  | 1011  | 1111  | 988   | 23.4651  | 26.40662 | 26.46977 | 31.52544 |
| protein_co receptor_a   | 15    | 12    | 5     | 17    | 14    | 10    | 0.182357 | 0.187077 | 0.073341 | 0.320782 |
| protein_co ATPase_cla   | 788   | 626   | 655   | 2391  | 2830  | 2056  | 4.171295 | 4.249408 | 4.183445 | 19.64512 |
| protein_co polymerase   | 2549  | 1795  | 2076  | 1475  | 2045  | 2753  | 9.375061 | 8.465996 | 9.212546 | 8.420284 |
| protein_co lysosomal_   | 4950  | 4048  | 4149  | 3304  | 3787  | 3356  | 131.5046 | 137.9068 | 132.9925 | 136.2405 |

|                          |      |      |      |      |      |      |          |          |          |          |
|--------------------------|------|------|------|------|------|------|----------|----------|----------|----------|
| protein_co tetratricop   | 482  | 464  | 445  | 560  | 622  | 477  | 4.382585 | 5.410166 | 4.881927 | 7.903178 |
| protein_co inositol_he   | 1356 | 1109 | 1139 | 1357 | 1526 | 1356 | 25.53529 | 26.7807  | 25.87932 | 39.66353 |
| protein_co STON1-GTF     | 0    | 1    | 0    | 0    | 0    | 1    | 0        | 0.015724 | 0        | 0        |
| protein_co S1_RNA_bii    | 467  | 332  | 380  | 423  | 359  | 410  | 5.948829 | 5.42328  | 5.840449 | 8.363449 |
| protein_co cytoplasmic   | 3731 | 2883 | 3155 | 3325 | 3719 | 2884 | 25.49128 | 25.25925 | 26.00841 | 35.2605  |
| protein_co kinesin_he    | 1125 | 999  | 929  | 791  | 735  | 815  | 15.69978 | 17.87788 | 15.64245 | 17.13358 |
| protein_co RAS_guany     | 8    | 8    | 11   | 298  | 413  | 160  | 0.125753 | 0.16126  | 0.208626 | 7.270661 |
| protein_co proteasom     | 2196 | 1789 | 1939 | 1662 | 1988 | 1918 | 14.50493 | 15.15315 | 15.45287 | 17.03902 |
| protein_co intraflagell  | 212  | 195  | 211  | 94   | 117  | 89   | 2.308566 | 2.723017 | 2.772279 | 1.588783 |
| protein_co sirtuin_2     | 967  | 706  | 710  | 186  | 183  | 113  | 9.578083 | 8.967393 | 8.485131 | 2.859536 |
| protein_co endoplasm     | 1468 | 1238 | 1154 | 464  | 607  | 413  | 28.29204 | 30.59625 | 26.83442 | 13.87991 |
| protein_co protein_ph    | 460  | 361  | 337  | 100  | 135  | 70   | 7.857708 | 7.90778  | 6.9457   | 2.651359 |
| protein_co phosphoryl    | 3    | 2    | 0    | 143  | 155  | 93   | 0.043987 | 0.037605 | 0        | 3.254381 |
| protein_co paired-like   | 388  | 302  | 310  | 0    | 2    | 8    | 5.657129 | 5.646517 | 5.453485 | 0        |
| protein_co transient_r   | 0    | 0    | 0    | 0    | 0    | 1    | 0        | 0        | 0        | 0        |
| protein_co microtubul    | 363  | 259  | 336  | 168  | 201  | 133  | 1.585864 | 1.451003 | 1.771114 | 1.139197 |
| protein_co G_protein-i   | 330  | 260  | 291  | 0    | 0    | 0    | 2.663288 | 2.690834 | 2.833644 | 0        |
| protein_co sidekick_ce   | 771  | 581  | 652  | 1184 | 1558 | 735  | 3.371464 | 3.257989 | 3.44001  | 8.036117 |
| protein_co nucleopori    | 1041 | 848  | 880  | 1230 | 1371 | 1414 | 11.70845 | 12.23077 | 11.94206 | 21.47257 |
| protein_co nuclear_ca    | 8217 | 6571 | 6930 | 7415 | 8829 | 7655 | 59.3127  | 60.82403 | 60.35533 | 83.07608 |
| protein_co vacuolar_p    | 2338 | 1876 | 1952 | 1255 | 1149 | 1229 | 16.16945 | 16.63768 | 16.2884  | 13.47178 |
| protein_co DnaJ_(Hsp4    | 1269 | 949  | 1053 | 2168 | 2633 | 2281 | 19.21325 | 18.42531 | 19.23604 | 50.94821 |
| protein_co B-cell_CLL/   | 307  | 276  | 269  | 138  | 201  | 57   | 7.063413 | 8.143191 | 7.467523 | 4.928171 |
| protein_co potassium_    | 294  | 262  | 215  | 129  | 190  | 75   | 3.226226 | 3.686873 | 2.84665  | 2.19719  |
| protein_co ATP-bindin    | 8    | 6    | 11   | 1    | 0    | 0    | 0.045233 | 0.043504 | 0.075043 | 0.008776 |
| protein_co galanin/GM    | 151  | 142  | 148  | 943  | 1436 | 1205 | 8.655737 | 10.43818 | 10.23615 | 83.90141 |
| protein_co C-type_lect   | 95   | 83   | 75   | 64   | 53   | 34   | 2.401376 | 2.690444 | 2.287419 | 2.511001 |
| protein_co FUN14_doi     | 182  | 147  | 151  | 179  | 208  | 239  | 7.135437 | 7.390535 | 7.142894 | 10.89263 |
| protein_co monoamin      | 21   | 20   | 27   | 31   | 36   | 19   | 0.383745 | 0.468666 | 0.5953   | 0.879257 |
| protein_co RAR-relatec   | 116  | 110  | 95   | 147  | 115  | 73   | 0.50159  | 0.609948 | 0.495636 | 0.986595 |
| protein_co dopamine_     | 39   | 26   | 39   | 191  | 234  | 107  | 1.329971 | 1.137    | 1.604687 | 10.10978 |
| protein_co transformin   | 92   | 78   | 70   | 40   | 60   | 59   | 0.672363 | 0.731004 | 0.617251 | 0.453739 |
| protein_co KIAA1107      | 29   | 24   | 29   | 58   | 37   | 20   | 0.294204 | 0.312227 | 0.354974 | 0.91329  |
| protein_co phospholip    | 1    | 0    | 2    | 3    | 4    | 0    | 0.047031 | 0        | 0.113491 | 0.218996 |
| protein_co hairy_and_    | 11   | 13   | 22   | 33   | 45   | 12   | 0.121021 | 0.183409 | 0.292037 | 0.563523 |
| protein_co ATPase_Na     | 1474 | 1266 | 1329 | 2008 | 2463 | 2171 | 35.42588 | 39.0181  | 38.53862 | 74.90612 |
| protein_co neural_pre    | 706  | 556  | 617  | 69   | 73   | 98   | 4.575584 | 4.620894 | 4.824753 | 0.694099 |
| protein_co phosphatic    | 89   | 85   | 89   | 32   | 35   | 45   | 1.921368 | 2.353146 | 2.318241 | 1.072262 |
| protein_co mitogen-ac    | 1914 | 1442 | 1606 | 1938 | 1551 | 2326 | 21.17685 | 20.45945 | 21.43942 | 33.28156 |
| protein_co guanine_nu    | 410  | 356  | 323  | 430  | 471  | 301  | 6.21964  | 6.925334 | 5.911966 | 10.12466 |
| protein_co RAB27A_m      | 358  | 281  | 340  | 50   | 62   | 51   | 4.853029 | 4.884785 | 5.56105  | 1.052035 |
| protein_co cat_eye_syl   | 516  | 379  | 435  | 2035 | 2253 | 1748 | 6.694867 | 6.305809 | 6.809725 | 40.98143 |
| protein_co ubiquitin_f   | 1569 | 1243 | 1277 | 787  | 922  | 1022 | 14.6031  | 14.83552 | 14.3404  | 11.36914 |
| protein_co low_densit    | 1049 | 825  | 925  | 935  | 1091 | 889  | 4.908945 | 4.950807 | 5.222789 | 6.791329 |
| protein_co guanylate_    | 0    | 0    | 1    | 77   | 112  | 74   | 0        | 0        | 0.014756 | 1.46167  |
| protein_co secretin      | 5    | 5    | 4    | 65   | 59   | 38   | 0.640574 | 0.821445 | 0.618312 | 12.92537 |
| protein_co PHD_and_r     | 2827 | 2056 | 2296 | 2339 | 2949 | 2693 | 24.0011  | 22.38401 | 23.51935 | 30.82237 |
| protein_co inhibitor_c   | 1322 | 1003 | 1041 | 978  | 1001 | 1035 | 10.49765 | 10.21341 | 9.973768 | 12.05396 |
| protein_co nucleobind    | 1370 | 1062 | 1109 | 108  | 102  | 132  | 18.88281 | 18.77068 | 18.44275 | 2.31047  |
| protein_co profilin_2    | 3015 | 2462 | 2475 | 1452 | 1873 | 1328 | 62.52694 | 65.47526 | 61.93029 | 46.73873 |
| protein_co protein_ty    | 300  | 249  | 243  | 65   | 90   | 56   | 1.604906 | 1.708194 | 1.568494 | 0.539725 |
| protein_co spectrin_be   | 61   | 45   | 43   | 228  | 275  | 246  | 0.284238 | 0.26889  | 0.241752 | 1.648991 |
| protein_co dual_adapt    | 0    | 2    | 2    | 0    | 0    | 0    | 0        | 0.040697 | 0.038291 | 0        |
| protein_co fibroblast_   | 13   | 9    | 6    | 1    | 2    | 4    | 0.277962 | 0.246771 | 0.154789 | 0.033187 |
| protein_co solute_carr   | 780  | 550  | 625  | 1260 | 1592 | 1470 | 3.479613 | 3.14636  | 3.364065 | 8.724436 |
| protein_co transmemt     | 261  | 208  | 197  | 131  | 164  | 146  | 2.870144 | 2.933161 | 2.613831 | 2.235965 |
| protein_co smg-6_horr    | 1677 | 1356 | 1491 | 932  | 1221 | 1038 | 12.42056 | 12.87885 | 13.32397 | 10.71407 |
| protein_co exocyst_co    | 1792 | 1437 | 1496 | 1053 | 822  | 1109 | 11.51685 | 11.843   | 11.60046 | 10.50399 |
| protein_co clathrin_he   | 443  | 342  | 376  | 265  | 298  | 195  | 3.767872 | 3.730163 | 3.858587 | 3.498394 |
| protein_co fibroblast_   | 0    | 3    | 2    | 14   | 15   | 7    | 0        | 0.105368 | 0.066093 | 0.595162 |
| protein_co follistatin-l | 301  | 176  | 241  | 201  | 285  | 100  | 5.643301 | 4.231445 | 5.451698 | 5.849156 |
| protein_co DiGeorge_s    | 2678 | 1996 | 2086 | 1965 | 2709 | 2684 | 26.08464 | 24.93126 | 24.51527 | 29.70758 |
| protein_co ring_finger   | 1458 | 981  | 1039 | 1486 | 1981 | 1752 | 32.67956 | 28.19662 | 28.09845 | 51.69732 |
| protein_co MNT_MAX_      | 671  | 484  | 629  | 269  | 337  | 481  | 6.297678 | 5.825224 | 7.122897 | 3.918688 |
| protein_co ZXD_family    | 637  | 502  | 531  | 644  | 782  | 718  | 6.438659 | 6.506824 | 6.475877 | 10.10351 |

|                         |       |       |       |       |       |       |          |          |          |          |
|-------------------------|-------|-------|-------|-------|-------|-------|----------|----------|----------|----------|
| protein_co jumonji_dc   | 691   | 542   | 567   | 261   | 346   | 222   | 6.115704 | 6.151444 | 6.054796 | 3.585415 |
| protein_co polymerase   | 277   | 239   | 253   | 325   | 417   | 369   | 9.685708 | 10.71665 | 10.67383 | 17.63865 |
| protein_co ST6_(alpha   | 0     | 0     | 0     | 1     | 0     | 1     | 0        | 0        | 0        | 0.027392 |
| protein_co WD_repeat    | 1093  | 934   | 956   | 197   | 220   | 140   | 27.17433 | 29.77796 | 28.67772 | 7.602132 |
| protein_co FERM_and_    | 0     | 0     | 0     | 5     | 11    | 2     | 0        | 0        | 0        | 0.066587 |
| protein_co glucosidase  | 1255  | 952   | 1045  | 1857  | 2369  | 1972  | 15.66329 | 15.23651 | 15.73633 | 35.97341 |
| protein_co N-deacetyl   | 4974  | 3711  | 4256  | 1834  | 2372  | 2895  | 29.04495 | 27.7885  | 29.98572 | 16.62244 |
| protein_co asparagine_  | 950   | 675   | 745   | 1731  | 2222  | 1681  | 18.90727 | 17.22734 | 17.88996 | 53.47277 |
| protein_co adaptor-rel  | 351   | 226   | 296   | 196   | 274   | 242   | 4.485799 | 3.703825 | 4.564282 | 3.887937 |
| protein_co cyclic_nucl  | 0     | 0     | 0     | 2     | 2     | 1     | 0        | 0        | 0        | 0.033355 |
| protein_co ST6_(alpha   | 11    | 7     | 12    | 38    | 39    | 22    | 0.091226 | 0.074444 | 0.120075 | 0.489146 |
| protein_co choline_O-   | 2     | 2     | 4     | 0     | 0     | 0     | 0.037097 | 0.047571 | 0.089518 | 0        |
| protein_co poly(A)_bir  | 10955 | 9126  | 9172  | 20313 | 24244 | 19925 | 147.3975 | 157.459  | 148.8983 | 424.2112 |
| protein_co testis-speci | 62    | 69    | 40    | 407   | 420   | 190   | 0.945732 | 1.349693 | 0.736181 | 9.636103 |
| protein_co chromosom    | 366   | 317   | 287   | 337   | 441   | 444   | 10.69268 | 11.8761  | 10.11662 | 15.28149 |
| protein_co casein_kina  | 1389  | 1086  | 1202  | 1903  | 2168  | 1959  | 13.08361 | 13.11791 | 13.66086 | 27.82241 |
| protein_co protein_tyri | 1149  | 834   | 920   | 193   | 219   | 255   | 8.737695 | 8.133028 | 8.441366 | 2.278057 |
| protein_co eukaryotic_  | 536   | 391   | 454   | 378   | 472   | 404   | 15.14952 | 14.17164 | 15.48239 | 16.58274 |
| protein_co calcium/ca   | 11    | 17    | 9     | 7     | 16    | 0     | 0.096917 | 0.192072 | 0.095674 | 0.095727 |
| protein_co Treacher_C   | 2294  | 1780  | 2056  | 5086  | 6600  | 6276  | 20.52781 | 20.42577 | 22.19833 | 70.64085 |
| protein_co cell_divisio | 5742  | 4738  | 4939  | 2948  | 3278  | 3103  | 119.451  | 126.3953 | 123.9691 | 95.18849 |
| protein_co oxysterol_t  | 552   | 472   | 518   | 326   | 422   | 338   | 3.828889 | 4.198412 | 4.335224 | 3.509795 |
| protein_co EPH_recept   | 0     | 0     | 0     | 102   | 104   | 51    | 0        | 0        | 0        | 1.501829 |
| protein_co solute_carr  | 2     | 0     | 0     | 0     | 0     | 0     | 0.016846 | 0        | 0        | 0        |
| protein_co RAD18_hoi    | 352   | 328   | 328   | 401   | 466   | 493   | 2.80416  | 3.35076  | 3.152695 | 4.958325 |
| protein_co ATPase_Ca+   | 1647  | 1383  | 1483  | 599   | 554   | 694   | 10.98235 | 11.82587 | 11.93138 | 6.199531 |
| protein_co transient_r  | 2     | 0     | 0     | 1     | 5     | 2     | 0.02385  | 0        | 0        | 0.01851  |
| protein_co NCK_adapt    | 2166  | 1575  | 1729  | 1590  | 2039  | 1417  | 37.85456 | 35.29796 | 36.45883 | 43.13078 |
| protein_co mitogen-ac   | 13219 | 10756 | 11436 | 2708  | 3198  | 3397  | 89.08295 | 92.95144 | 92.98613 | 28.32534 |
| protein_co mannosyl_l   | 269   | 228   | 235   | 91    | 114   | 49    | 1.504822 | 1.635599 | 1.586166 | 0.790141 |
| protein_co ribosomal_   | 7534  | 6195  | 6402  | 9599  | 10039 | 9187  | 151.748  | 160.0103 | 155.5826 | 300.0916 |
| protein_co WD_repeat    | 9474  | 7109  | 7820  | 6396  | 7262  | 8179  | 99.11558 | 95.37321 | 98.7105  | 103.8598 |
| protein_co sorting_ne   | 585   | 460   | 538   | 340   | 278   | 284   | 4.024451 | 4.058055 | 4.465614 | 3.630448 |
| protein_co membrane     | 0     | 0     | 0     | 0     | 3     | 2     | 0        | 0        | 0        | 0        |
| protein_co Rho_GTPas    | 990   | 730   | 718   | 168   | 196   | 207   | 5.669409 | 5.360864 | 4.961067 | 1.493284 |
| protein_co ribosomal_   | 1453  | 1051  | 1230  | 810   | 1077  | 688   | 11.37036 | 10.5468  | 11.61346 | 9.838391 |
| protein_co inhibitor_c  | 248   | 180   | 182   | 132   | 160   | 394   | 3.078826 | 2.865598 | 2.726169 | 2.543536 |
| protein_co vasohibin_   | 5160  | 3660  | 4172  | 269   | 402   | 177   | 42.26983 | 38.44777 | 41.23568 | 3.420295 |
| protein_co LIM_and_c    | 798   | 595   | 654   | 61    | 94    | 113   | 20.21515 | 19.32859 | 19.9894  | 2.39847  |
| protein_co Williams_B   | 1685  | 1277  | 1339  | 1136  | 1412  | 1568  | 20.33188 | 19.75959 | 19.49424 | 21.27582 |
| protein_co sel-1_suppr  | 2211  | 1763  | 1879  | 406   | 495   | 441   | 13.08187 | 13.37651 | 13.41393 | 3.72853  |
| protein_co thyroid_ho   | 810   | 668   | 667   | 700   | 875   | 1008  | 14.21441 | 15.03245 | 14.1227  | 19.06656 |
| protein_co ATPase_H+    | 3217  | 2533  | 2644  | 988   | 1184  | 1113  | 33.40979 | 33.73395 | 33.13082 | 15.92612 |
| protein_co transcriptic | 8335  | 6133  | 6818  | 6953  | 8958  | 7254  | 82.75001 | 78.08089 | 81.67093 | 107.1433 |
| protein_co tribbles_hc  | 9381  | 7361  | 7793  | 1699  | 2129  | 1646  | 100.1766 | 100.8006 | 100.4083 | 28.16053 |
| protein_co DAZ_associ   | 3270  | 2550  | 2698  | 5344  | 7092  | 5991  | 38.91633 | 38.91649 | 38.7413  | 98.71453 |
| protein_co methyl-CpG   | 2089  | 1478  | 1530  | 1245  | 1807  | 2002  | 35.20965 | 31.94531 | 31.11449 | 32.5704  |
| protein_co helicase-lik | 923   | 674   | 719   | 1155  | 1272  | 827   | 8.139832 | 7.622246 | 7.650515 | 15.80979 |
| protein_co family_witl  | 1787  | 1432  | 1571  | 613   | 791   | 740   | 57.00167 | 58.57542 | 60.46267 | 30.34967 |
| protein_co family_witl  | 609   | 463   | 503   | 420   | 528   | 404   | 7.144363 | 6.965248 | 7.11971  | 7.647615 |
| protein_co cleavage_ar  | 4669  | 3479  | 3833  | 3858  | 4694  | 3402  | 48.54312 | 46.38394 | 48.08291 | 62.2582  |
| protein_co myosin_III   | 4     | 3     | 6     | 5     | 10    | 12    | 0.030828 | 0.02965  | 0.055794 | 0.059812 |
| protein_co cytochrom    | 1773  | 1443  | 1477  | 130   | 116   | 93    | 19.04605 | 19.87796 | 19.14365 | 2.167554 |
| protein_co cadherin_1   | 0     | 0     | 0     | 1     | 0     | 0     | 0        | 0        | 0        | 0.011478 |
| protein_co programme    | 797   | 631   | 686   | 1489  | 1943  | 1707  | 11.06316 | 11.23206 | 11.48928 | 32.08085 |
| protein_co solute_carr  | 216   | 159   | 178   | 403   | 525   | 431   | 2.39495  | 2.260732 | 2.381282 | 6.935507 |
| protein_co retinol_def  | 2649  | 2209  | 2311  | 1390  | 1628  | 1819  | 30.78356 | 32.91864 | 32.40297 | 25.0716  |
| protein_co protein_kir  | 2568  | 2104  | 2135  | 655   | 998   | 664   | 38.78054 | 40.74496 | 38.90135 | 15.3529  |
| protein_co latrophilin  | 1258  | 754   | 957   | 3482  | 4767  | 2982  | 10.42553 | 8.013055 | 9.56924  | 44.78955 |
| protein_co secreted_pi  | 0     | 0     | 1     | 0     | 0     | 0     | 0        | 0        | 0.05525  | 0        |
| protein_co actinin_alp  | 18421 | 13911 | 15359 | 4971  | 5947  | 5538  | 184.8012 | 178.9614 | 185.91   | 77.40445 |
| protein_co zinc_finger  | 1150  | 824   | 916   | 640   | 747   | 879   | 5.57349  | 5.121132 | 5.356399 | 4.814374 |
| protein_co ribosomal_   | 41    | 35    | 32    | 199   | 173   | 132   | 0.754806 | 0.826283 | 0.710803 | 5.686368 |
| protein_co epsin_2      | 837   | 702   | 675   | 748   | 910   | 433   | 8.057266 | 8.665801 | 7.839964 | 11.1762  |
| protein_co protein_tyri | 586   | 438   | 534   | 339   | 462   | 252   | 7.489112 | 7.17821  | 8.234211 | 6.724544 |

|                         |      |      |      |      |      |      |          |          |          |          |
|-------------------------|------|------|------|------|------|------|----------|----------|----------|----------|
| protein_co LIM_and_s    | 193  | 122  | 141  | 30   | 42   | 38   | 1.882624 | 1.526073 | 1.659485 | 0.454211 |
| protein_co acid-sensin  | 1    | 0    | 1    | 13   | 32   | 4    | 0.014039 | 0        | 0.016939 | 0.283275 |
| protein_co SPEG_com     | 3107 | 2603 | 2651 | 1251 | 1821 | 705  | 13.51208 | 14.51659 | 13.91038 | 8.444401 |
| protein_co ligand_of_r  | 33   | 19   | 21   | 128  | 119  | 82   | 0.411863 | 0.30409  | 0.316233 | 2.479589 |
| protein_co aldehyde_c   | 505  | 411  | 419  | 1113 | 1467 | 1530 | 6.028375 | 6.291585 | 6.034913 | 20.62218 |
| protein_co transferrin_ | 1030 | 872  | 934  | 821  | 1167 | 852  | 9.449563 | 10.25889 | 10.33878 | 11.69091 |
| protein_co sterol_regu  | 4796 | 3491 | 3698 | 1834 | 2677 | 3922 | 48.33108 | 45.1135  | 44.96373 | 28.68647 |
| protein_co transient_r  | 0    | 0    | 0    | 13   | 29   | 12   | 0        | 0        | 0        | 0.162038 |
| protein_co AF4/FMR2_    | 4721 | 3814 | 4055 | 1369 | 1675 | 1388 | 23.17502 | 24.00911 | 24.01734 | 10.43086 |
| protein_co ubiquitin-c  | 342  | 256  | 265  | 347  | 506  | 505  | 10.35273 | 9.937526 | 9.678831 | 16.3038  |
| protein_co membrane     | 560  | 447  | 499  | 474  | 511  | 558  | 4.729541 | 4.841142 | 5.084866 | 6.213549 |
| protein_co Rho-relate   | 840  | 705  | 729  | 301  | 347  | 298  | 8.805637 | 9.477198 | 9.220555 | 4.897545 |
| protein_co N-acylsphir  | 3    | 2    | 0    | 0    | 0    | 0    | 0.06862  | 0.058663 | 0        | 0        |
| protein_co structural_  | 3294 | 2522 | 2883 | 3107 | 3477 | 3541 | 15.78656 | 15.49952 | 16.67081 | 23.1119  |
| protein_co hydroxyste   | 931  | 701  | 685  | 1112 | 1169 | 1325 | 45.47355 | 43.90728 | 40.36898 | 84.30327 |
| protein_co MAP/micrc    | 1206 | 918  | 891  | 1842 | 2602 | 1525 | 11.96052 | 11.67495 | 10.66175 | 28.35457 |
| protein_co hyaluronan   | 423  | 353  | 398  | 860  | 650  | 834  | 6.396155 | 6.84483  | 7.261223 | 20.18401 |
| protein_co checkpoint   | 417  | 319  | 370  | 420  | 589  | 608  | 6.001577 | 5.887479 | 6.425088 | 9.382295 |
| protein_co thyrotropin  | 110  | 91   | 104  | 55   | 90   | 70   | 0.918103 | 0.973979 | 1.047322 | 0.712511 |
| protein_co prolyl_4-hy  | 2050 | 1691 | 1704 | 215  | 172  | 91   | 28.70246 | 30.36115 | 28.7861  | 4.672337 |
| protein_co Fc_fragmen   | 1    | 1    | 0    | 0    | 0    | 0    | 0.010019 | 0.012848 | 0        | 0        |
| protein_co nuclear_fac  | 446  | 362  | 402  | 251  | 359  | 241  | 3.304827 | 3.439789 | 3.594082 | 2.886809 |
| protein_co tRNA_nucl    | 373  | 294  | 336  | 226  | 260  | 471  | 7.684524 | 7.767206 | 8.352096 | 7.226817 |
| protein_co acyl-CoA_d   | 3896 | 3055 | 3263 | 1386 | 1905 | 1385 | 77.67156 | 78.10227 | 78.48889 | 42.8881  |
| protein_co serine/thre  | 2399 | 1840 | 2039 | 531  | 759  | 491  | 18.56257 | 18.25723 | 19.03588 | 6.37724  |
| protein_co F-box_and_   | 1373 | 1096 | 1152 | 747  | 926  | 681  | 14.18374 | 14.51911 | 14.35889 | 11.97764 |
| protein_co ArfGAP_wit   | 103  | 69   | 69   | 349  | 432  | 231  | 0.98605  | 0.847071 | 0.797001 | 5.185821 |
| protein_co collapsin_r  | 2500 | 1899 | 1935 | 3268 | 4122 | 3910 | 37.26162 | 36.29577 | 34.79771 | 75.60216 |
| protein_co Ellis_van_C  | 2078 | 1567 | 1823 | 225  | 297  | 195  | 13.79548 | 13.34042 | 14.60246 | 2.318484 |
| protein_co derlin_2     | 737  | 606  | 712  | 283  | 338  | 511  | 8.210488 | 8.657319 | 9.570387 | 4.893486 |
| protein_co SID1_transi  | 5    | 2    | 6    | 9    | 0    | 2    | 0.046152 | 0.023673 | 0.066821 | 0.128941 |
| protein_co nudE_nucl    | 745  | 615  | 603  | 418  | 427  | 324  | 8.87527  | 9.395281 | 8.667436 | 7.729156 |
| protein_co murine_ret   | 14   | 19   | 17   | 142  | 188  | 77   | 0.105744 | 0.184031 | 0.154926 | 1.664744 |
| protein_co transmem     | 8    | 8    | 18   | 175  | 266  | 143  | 0.141608 | 0.181592 | 0.384432 | 4.808028 |
| protein_co adaptor-rel  | 2155 | 1656 | 1751 | 541  | 580  | 709  | 38.34838 | 37.78935 | 37.59534 | 14.94265 |
| protein_co poliovirus_  | 1433 | 1065 | 1241 | 277  | 373  | 444  | 20.20854 | 19.25962 | 21.11585 | 6.063159 |
| protein_co inhibitor_c  | 203  | 157  | 148  | 70   | 102  | 107  | 1.741752 | 1.727425 | 1.532145 | 0.932221 |
| protein_co X-ray_repai  | 626  | 482  | 523  | 496  | 607  | 454  | 10.47579 | 10.34353 | 10.55995 | 12.88322 |
| protein_co scavenger_   | 2676 | 2073 | 2314 | 1396 | 1674 | 1365 | 22.70268 | 22.55275 | 23.68658 | 18.38259 |
| protein_co cytochrom    | 6    | 6    | 13   | 14   | 29   | 6    | 0.119161 | 0.152808 | 0.311513 | 0.431562 |
| protein_co minichrom    | 2354 | 1716 | 1891 | 3761 | 4380 | 6116 | 30.49989 | 28.51139 | 29.56183 | 75.63549 |
| protein_co Mov10l1_M    | 4    | 1    | 0    | 4    | 6    | 3    | 0.047364 | 0.015184 | 0        | 0.073515 |
| protein_co pannexin_2   | 61   | 43   | 49   | 238  | 395  | 238  | 0.937493 | 0.847454 | 0.90862  | 5.677349 |
| protein_co Selenoprot   | 707  | 575  | 603  | 668  | 973  | 632  | 14.32019 | 14.93505 | 14.73651 | 21.00082 |
| protein_co tumor_pro    | 1    | 1    | 4    | 4    | 2    | 2    | 0.009552 | 0.012249 | 0.046099 | 0.059303 |
| protein_co alpha-kinas  | 258  | 218  | 212  | 8    | 8    | 15   | 2.147634 | 2.327054 | 2.12924  | 0.103362 |
| protein_co lethal_gian  | 29   | 8    | 14   | 1916 | 2594 | 1540 | 0.385543 | 0.136387 | 0.22457  | 39.53674 |
| protein_co phosphodi    | 567  | 386  | 466  | 98   | 154  | 85   | 5.700394 | 4.976437 | 5.652698 | 1.52925  |
| protein_co chloride_cl  | 201  | 152  | 166  | 104  | 150  | 127  | 1.396281 | 1.354034 | 1.391338 | 1.121348 |
| protein_co notchless_l  | 538  | 357  | 416  | 847  | 939  | 962  | 4.772385 | 4.060979 | 4.452404 | 11.66184 |
| protein_co succinate_c  | 1891 | 1513 | 1623 | 2447 | 2628 | 1534 | 29.54649 | 30.31536 | 30.59715 | 59.34428 |
| protein_co SWI/SNF_re   | 774  | 617  | 588  | 523  | 691  | 621  | 6.214533 | 6.352754 | 5.696301 | 6.51778  |
| protein_co fibronectin  | 3    | 6    | 3    | 6    | 1    | 3    | 0.101347 | 0.259927 | 0.122281 | 0.31461  |
| protein_co gasdermin_   | 258  | 199  | 232  | 308  | 394  | 133  | 2.598845 | 2.570533 | 2.81966  | 4.815506 |
| protein_co lysine_(K)-s | 1409 | 1104 | 1183 | 686  | 727  | 754  | 6.13844  | 6.167732 | 6.218417 | 4.638757 |
| protein_co ADAM_met     | 44   | 19   | 28   | 117  | 107  | 64   | 0.451359 | 0.249938 | 0.346557 | 1.862883 |
| protein_co protein_ph   | 775  | 632  | 645  | 277  | 260  | 282  | 5.348015 | 5.592646 | 5.370302 | 2.966888 |
| protein_co fermitin_fa  | 3005 | 2223 | 2368 | 1246 | 1476 | 1362 | 23.48017 | 22.27438 | 22.32475 | 15.11142 |
| protein_co ATP-bindin   | 2    | 1    | 4    | 0    | 0    | 1    | 0.01964  | 0.012593 | 0.047393 | 0        |
| protein_co dehydroge    | 84   | 75   | 101  | 0    | 2    | 1    | 1.375266 | 1.574628 | 1.995156 | 0        |
| protein_co prostaglan   | 275  | 194  | 190  | 13   | 13   | 32   | 2.856614 | 2.584223 | 2.381335 | 0.209601 |
| protein_co insulin-like | 2970 | 2454 | 2499 | 3014 | 3783 | 2425 | 37.76121 | 40.01044 | 38.33573 | 59.47894 |
| protein_co mitogen-ac   | 174  | 140  | 138  | 102  | 116  | 129  | 0.82613  | 0.852387 | 0.790545 | 0.751675 |
| protein_co ST6_beta-g   | 522  | 466  | 443  | 2165 | 2550 | 1802 | 5.002368 | 5.726647 | 5.122205 | 32.20279 |
| protein_co T-box_21     | 0    | 0    | 0    | 1    | 0    | 0    | 0        | 0        | 0        | 0.028297 |

|                         |       |       |       |       |       |       |          |          |          |          |
|-------------------------|-------|-------|-------|-------|-------|-------|----------|----------|----------|----------|
| pseudogen; voltage-dep  | 2     | 2     | 3     | 3     | 4     | 0     | 0.11059  | 0.141816 | 0.200149 | 0.257476 |
| protein_co furry_homo   | 415   | 341   | 338   | 107   | 108   | 78    | 1.812702 | 1.910038 | 1.781325 | 0.725425 |
| protein_co phosphatic   | 3565  | 2851  | 3157  | 750   | 901   | 844   | 46.26707 | 47.44812 | 49.43506 | 15.1079  |
| protein_co N-ethylmal   | 676   | 575   | 619   | 261   | 318   | 317   | 7.958235 | 8.680551 | 8.792427 | 4.769151 |
| protein_co GLI_family   | 1357  | 1045  | 1172  | 1205  | 1621  | 1198  | 9.358693 | 9.241894 | 9.752389 | 12.89891 |
| protein_co cytoplasmic  | 2246  | 1758  | 1846  | 1237  | 1416  | 1256  | 13.01792 | 13.06652 | 12.90957 | 11.12838 |
| protein_co mitochond    | 1669  | 1210  | 1303  | 2661  | 3488  | 3125  | 75.24946 | 69.95871 | 70.88258 | 186.2183 |
| protein_co notch_3      | 6925  | 4771  | 5468  | 6755  | 8351  | 5694  | 40.23211 | 35.54445 | 38.32919 | 60.91284 |
| protein_co chloride_cl  | 854   | 711   | 732   | 1371  | 1456  | 1566  | 13.37924 | 14.28409 | 13.83671 | 33.33816 |
| protein_co protein_ph   | 1     | 2     | 0     | 346   | 327   | 271   | 0.010333 | 0.026501 | 0        | 5.549099 |
| protein_co TEA_domai    | 2399  | 1891  | 1893  | 1927  | 2123  | 2209  | 46.10211 | 46.60059 | 43.89239 | 57.47815 |
| protein_co embryonic    | 370   | 317   | 363   | 372   | 482   | 392   | 6.270078 | 6.888741 | 7.422085 | 9.784635 |
| protein_co cadherin-re  | 42    | 34    | 26    | 13    | 12    | 24    | 0.436767 | 0.453407 | 0.326228 | 0.209833 |
| protein_co synuclein_I  | 1     | 1     | 2     | 169   | 182   | 103   | 0.033905 | 0.043478 | 0.081816 | 8.893555 |
| protein_co tumor_sus    | 1087  | 845   | 883   | 696   | 716   | 804   | 24.25961 | 24.18357 | 23.77733 | 24.10982 |
| protein_co chromosom    | 1164  | 904   | 1026  | 474   | 581   | 696   | 13.32519 | 13.27083 | 14.1715  | 8.422272 |
| protein_co ATPase_Ca+   | 57    | 48    | 55    | 1440  | 1915  | 1266  | 0.556935 | 0.601423 | 0.648396 | 21.83849 |
| protein_co carbonic_a   | 499   | 486   | 491   | 41    | 49    | 48    | 3.648545 | 4.55685  | 4.331603 | 0.4653   |
| protein_co monoglyce    | 1282  | 971   | 1063  | 18    | 21    | 26    | 12.16616 | 11.81664 | 12.17158 | 0.265136 |
| protein_co netrin_4     | 86    | 53    | 59    | 51    | 83    | 21    | 1.115502 | 0.881571 | 0.923362 | 1.026769 |
| protein_co BC1_(ubiqu   | 456   | 373   | 446   | 358   | 393   | 406   | 10.61134 | 11.13073 | 12.52242 | 12.9306  |
| protein_co NUAKE_fami   | 1557  | 1101  | 1302  | 529   | 581   | 1029  | 10.69241 | 9.695798 | 10.78812 | 5.638623 |
| protein_co dipeptidyl   | 947   | 702   | 838   | 353   | 510   | 475   | 5.104592 | 4.85241  | 5.450083 | 2.953359 |
| protein_co solute_carr  | 194   | 160   | 185   | 154   | 214   | 148   | 1.577091 | 1.667956 | 1.814575 | 1.94315  |
| protein_co zinc_finger  | 4415  | 3589  | 3913  | 2694  | 3184  | 3450  | 30.91688 | 32.22907 | 33.06152 | 29.28148 |
| protein_co scavenger_I  | 425   | 299   | 321   | 65    | 77    | 28    | 5.78805  | 5.221844 | 5.274684 | 1.374001 |
| protein_co lectin_man   | 6504  | 5493  | 5812  | 1206  | 1062  | 1009  | 55.23867 | 59.82485 | 59.55748 | 15.89792 |
| protein_co protein_ty   | 3400  | 2834  | 2863  | 2627  | 3232  | 2907  | 49.43444 | 52.83964 | 50.22501 | 59.28451 |
| protein_co interaction  | 1     | 3     | 0     | 14    | 20    | 13    | 0.00701  | 0.026968 | 0        | 0.152327 |
| protein_co zinc_finger  | 1564  | 1187  | 1254  | 631   | 796   | 787   | 6.401535 | 6.230278 | 6.192884 | 4.008734 |
| protein_co enolase_1    | 32054 | 25314 | 27082 | 46941 | 41960 | 37901 | 663.2889 | 671.7236 | 676.1597 | 1507.66  |
| protein_co solute_carr  | 6     | 8     | 17    | 6     | 14    | 42    | 0.032593 | 0.055727 | 0.111421 | 0.050588 |
| protein_co chromosom    | 4985  | 3821  | 4066  | 1006  | 1186  | 1046  | 229.6137 | 225.6935 | 225.9686 | 71.92189 |
| protein_co anoctamin    | 1121  | 856   | 919   | 858   | 1055  | 707   | 11.38235 | 11.14576 | 11.25875 | 13.5221  |
| protein_co tubulin_ep   | 144   | 103   | 110   | 159   | 220   | 143   | 1.870405 | 1.715615 | 1.723907 | 3.205537 |
| protein_co Rho_guanin   | 521   | 347   | 411   | 1286  | 1709  | 1139  | 5.328179 | 4.550717 | 5.071436 | 20.41327 |
| protein_co TXK_tyrosin  | 1     | 0     | 0     | 1     | 11    | 4     | 0.016091 | 0        | 0        | 0.024976 |
| protein_co WSC_domai    | 0     | 0     | 0     | 30    | 46    | 13    | 0        | 0        | 0        | 0.463566 |
| protein_co potassium    | 110   | 59    | 63    | 1901  | 2428  | 1528  | 1.574932 | 1.083254 | 1.088323 | 42.24562 |
| protein_co tachykinin   | 8     | 1     | 4     | 1     | 5     | 8     | 0.180086 | 0.028867 | 0.108642 | 0.03494  |
| protein_co ARP6_actin   | 279   | 234   | 243   | 351   | 377   | 283   | 5.309381 | 5.710378 | 5.579484 | 10.36758 |
| protein_co TIMELESS_I   | 170   | 131   | 138   | 211   | 234   | 340   | 4.570701 | 4.51663  | 4.476731 | 8.805354 |
| protein_co sorcin       | 918   | 729   | 792   | 713   | 739   | 709   | 21.41544 | 21.80827 | 22.29244 | 25.81691 |
| protein_co eukaryotic   | 3539  | 2788  | 3059  | 1540  | 1924  | 1616  | 26.7824  | 27.05647 | 27.93164 | 18.08923 |
| protein_co nucleopori   | 178   | 152   | 151   | 335   | 360   | 374   | 6.49022  | 7.107099 | 6.643003 | 18.95897 |
| protein_co sema_dom     | 3602  | 2839  | 3121  | 313   | 302   | 505   | 29.84588 | 30.16584 | 31.20201 | 4.02546  |
| protein_co G-2_and_S-   | 1373  | 1024  | 1235  | 1173  | 1389  | 962   | 20.68766 | 19.78564 | 22.45204 | 27.43275 |
| protein_co sema_dom     | 11352 | 8448  | 8955  | 52    | 40    | 121   | 102.8789 | 98.17869 | 97.91914 | 0.731455 |
| protein_co tetratricop  | 722   | 554   | 557   | 319   | 388   | 312   | 12.97111 | 12.76318 | 12.07378 | 8.895309 |
| protein_co acetyl-CoA   | 486   | 331   | 398   | 287   | 363   | 227   | 10.09236 | 8.814421 | 9.972122 | 9.250577 |
| protein_co GRAM_don     | 941   | 732   | 775   | 750   | 1112  | 578   | 9.840211 | 9.816015 | 9.778327 | 12.17325 |
| protein_co cadherin_E   | 626   | 427   | 521   | 1156  | 1590  | 1127  | 2.577325 | 2.254405 | 2.588097 | 7.387255 |
| protein_co wingless-ty  | 2     | 1     | 1     | 12    | 7     | 3     | 0.044403 | 0.028471 | 0.026788 | 0.413522 |
| protein_co zinc_finger  | 1736  | 1405  | 1428  | 1576  | 1083  | 1552  | 11.93389 | 12.38563 | 11.84428 | 16.81586 |
| protein_co solute_carr  | 250   | 204   | 240   | 141   | 134   | 131   | 2.898023 | 3.032504 | 3.356767 | 2.536947 |
| protein_co translocase  | 391   | 312   | 371   | 377   | 456   | 471   | 7.263866 | 7.432843 | 8.315972 | 10.87083 |
| protein_co adducin_2    | 0     | 1     | 4     | 5498  | 5953  | 5119  | 0        | 0.010268 | 0.038644 | 68.33049 |
| protein_co fibroblast_I | 0     | 0     | 0     | 38    | 71    | 27    | 0        | 0        | 0        | 2.266912 |
| protein_co RAS_protei   | 656   | 490   | 534   | 505   | 597   | 515   | 2.822523 | 2.703579 | 2.772189 | 3.372527 |
| protein_co VPS9_dom     | 304   | 231   | 259   | 52    | 68    | 61    | 5.107333 | 4.976705 | 5.25011  | 1.355983 |
| protein_co zinc_finger  | 300   | 252   | 277   | 132   | 181   | 147   | 2.001851 | 2.156355 | 2.230171 | 1.367146 |
| protein_co MAP/micro    | 1713  | 1285  | 1388  | 1145  | 1489  | 1024  | 22.41144 | 21.55881 | 21.91038 | 23.25136 |
| protein_co solute_carr  | 7777  | 6318  | 6504  | 6574  | 7479  | 6984  | 112.6896 | 117.398  | 113.7105 | 147.8537 |
| protein_co fibronectin  | 3734  | 2895  | 3230  | 676   | 738   | 527   | 22.15174 | 22.02376 | 23.1198  | 6.224588 |
| protein_co FOS-like_ar  | 2062  | 1504  | 1590  | 190   | 191   | 108   | 14.41372 | 13.4817  | 13.41012 | 2.061443 |

|                         |        |        |        |       |       |       |          |          |          |          |
|-------------------------|--------|--------|--------|-------|-------|-------|----------|----------|----------|----------|
| protein_co calcium_ch   | 0      | 0      | 0      | 16    | 21    | 10    | 0        | 0        | 0        | 0.888236 |
| protein_co calcium_ch   | 60     | 45     | 57     | 76    | 113   | 67    | 0.832367 | 0.800545 | 0.954084 | 1.636469 |
| protein_co FRY-like     | 1474   | 1197   | 1353   | 495   | 406   | 290   | 5.904313 | 6.148588 | 6.539096 | 3.077567 |
| protein_co transmemt    | 1374   | 1059   | 1206   | 493   | 628   | 403   | 8.621288 | 8.521003 | 9.13021  | 4.801344 |
| protein_co fascin_hom   | 28738  | 21309  | 23351  | 17877 | 23184 | 22818 | 485.245  | 461.3993 | 475.7273 | 468.5216 |
| protein_co actin_beta   | 136889 | 111024 | 117788 | 67717 | 81600 | 91074 | 2859.121 | 2973.653 | 2968.337 | 2195.292 |
| protein_co molybdenu    | 90     | 83     | 75     | 136   | 223   | 135   | 0.685081 | 0.81019  | 0.688825 | 1.606827 |
| protein_co phospholip   | 91     | 73     | 72     | 12    | 17    | 16    | 0.728777 | 0.749697 | 0.695719 | 0.149164 |
| protein_co ATPase_H+    | 2      | 1      | 2      | 56    | 74    | 17    | 0.025129 | 0.016112 | 0.030319 | 1.092087 |
| protein_co WD_repeat    | 767    | 574    | 633    | 1013  | 1407  | 1106  | 6.023219 | 5.780356 | 5.997705 | 12.34734 |
| protein_co discs_large  | 1295   | 1049   | 1160   | 735   | 873   | 799   | 12.06249 | 12.53003 | 13.03687 | 10.62637 |
| protein_co RAB7A_me     | 3993   | 3258   | 3428   | 2845  | 3294  | 2916  | 83.43665 | 87.30075 | 86.4264  | 92.27207 |
| protein_co B-cell_rece  | 1015   | 708    | 781    | 174   | 198   | 202   | 8.244131 | 7.374311 | 7.653814 | 2.193606 |
| protein_co SEC31_hon    | 111    | 98     | 96     | 54    | 64    | 30    | 1.023155 | 1.158388 | 1.067672 | 0.772579 |
| protein_co squamous_    | 1515   | 1335   | 1266   | 1960  | 2513  | 2097  | 17.74185 | 20.04827 | 17.88826 | 35.62648 |
| protein_co Rho_GTPas    | 0      | 0      | 3      | 3     | 1     | 0     | 0        | 0        | 0.057185 | 0.073564 |
| protein_co tubulin_al   | 34     | 17     | 30     | 10    | 14    | 9     | 1.031216 | 0.661194 | 1.097843 | 0.470762 |
| protein_co paired_box   | 0      | 0      | 0      | 1     | 2     | 7     | 0        | 0        | 0        | 0.017291 |
| protein_co exosome_c    | 305    | 281    | 307    | 757   | 965   | 701   | 8.683337 | 10.25894 | 10.54565 | 33.45131 |
| protein_co kinesin-ass  | 844    | 655    | 728    | 32    | 44    | 32    | 9.626654 | 9.580398 | 10.01872 | 0.566518 |
| protein_co makorin_ri   | 943    | 775    | 829    | 419   | 464   | 346   | 15.52573 | 16.36257 | 16.46808 | 10.70742 |
| protein_co minichrom    | 1858   | 1520   | 1640   | 2781  | 2944  | 4352  | 23.3195  | 24.46394 | 24.83507 | 54.17576 |
| protein_co REX2_RNA_    | 449    | 386    | 392    | 263   | 332   | 327   | 18.13404 | 19.99147 | 19.10215 | 16.48672 |
| protein_co RNA_bindir   | 255    | 201    | 203    | 314   | 376   | 305   | 1.777986 | 1.797188 | 1.707781 | 3.398194 |
| protein_co RNA_bindir   | 868    | 685    | 713    | 111   | 91    | 85    | 12.93312 | 13.08831 | 12.81803 | 2.567066 |
| protein_co bromodom     | 2691   | 2249   | 2333   | 2206  | 2811  | 2041  | 14.26742 | 15.29081 | 14.92432 | 18.1538  |
| protein_co protein_ty   | 2975   | 2097   | 2346   | 1711  | 2323  | 1389  | 26.60141 | 24.04504 | 25.31009 | 23.74642 |
| protein_co mutL_hom     | 731    | 614    | 630    | 621   | 632   | 856   | 12.45516 | 13.41559 | 12.95151 | 16.42306 |
| protein_co uracil-DNA   | 701    | 487    | 558    | 2167  | 2679  | 3500  | 14.71347 | 13.10797 | 14.13121 | 70.59706 |
| protein_co flavin_cont  | 11     | 8      | 15     | 37    | 35    | 14    | 0.229036 | 0.213605 | 0.376835 | 1.19576  |
| protein_co kelch-like_f | 510    | 417    | 420    | 135   | 130   | 182   | 6.990327 | 7.329472 | 6.945838 | 2.872047 |
| protein_co regulator_c  | 5      | 4      | 6      | 11    | 21    | 12    | 0.054599 | 0.056013 | 0.079053 | 0.186441 |
| protein_co solute_carr  | 39     | 40     | 33     | 40    | 52    | 46    | 0.281904 | 0.370771 | 0.287805 | 0.448773 |
| protein_co plexin_A2    | 555    | 427    | 450    | 76    | 102   | 81    | 2.274027 | 2.243571 | 2.224657 | 0.883333 |
| protein_co sperm_assc   | 376    | 341    | 373    | 479   | 486   | 507   | 4.364021 | 5.075312 | 5.223432 | 8.62909  |
| protein_co ankyrin_req  | 597    | 501    | 477    | 274   | 335   | 333   | 6.748636 | 7.262543 | 6.50591  | 4.807537 |
| protein_co tumor_pro    | 17     | 32     | 32     | 743   | 958   | 724   | 0.203453 | 0.491106 | 0.462077 | 13.80178 |
| protein_co acetyl-CoA   | 141    | 123    | 151    | 329   | 400   | 192   | 0.706356 | 0.790167 | 0.912703 | 2.558179 |
| protein_co TNF_recept   | 1670   | 1165   | 1264   | 3081  | 3538  | 3360  | 26.80806 | 23.98193 | 24.48183 | 76.76637 |
| protein_co phosphopr    | 28     | 22     | 21     | 3     | 3     | 23    | 0.299275 | 0.30154  | 0.27082  | 0.04977  |
| protein_co G_patch_d    | 220    | 183    | 188    | 209   | 257   | 263   | 2.954125 | 3.151132 | 3.045875 | 4.35595  |
| protein_co intercellula | 353    | 290    | 271    | 332   | 379   | 304   | 6.644792 | 7.000257 | 6.154943 | 9.700078 |
| protein_co 5'-nucleoti  | 1282   | 1087   | 1072   | 1068  | 1468  | 1190  | 11.42181 | 12.41898 | 11.52364 | 14.76892 |
| protein_co melanoma_    | 979    | 780    | 809    | 494   | 644   | 597   | 9.435833 | 9.640543 | 9.407931 | 7.390179 |
| protein_co glypican_4   | 2332   | 1768   | 1845   | 3775  | 4396  | 4130  | 22.04587 | 21.43336 | 21.04472 | 55.39188 |
| protein_co muscleblin   | 52     | 76     | 66     | 53    | 53    | 147   | 0.215892 | 0.404628 | 0.330617 | 0.341538 |
| protein_co calmodulin   | 1      | 3      | 2      | 1223  | 1769  | 782   | 0.01122  | 0.043166 | 0.027076 | 21.29928 |
| protein_co RAP1_GTPa    | 33     | 24     | 21     | 285   | 365   | 200   | 0.360356 | 0.336077 | 0.276685 | 4.830518 |
| protein_co XPA_bindir   | 1334   | 1064   | 1053   | 1991  | 2435  | 1718  | 13.73244 | 14.04569 | 13.07882 | 31.8122  |
| protein_co Rho_guanin   | 3633   | 2522   | 2979   | 1780  | 2302  | 1583  | 49.53517 | 44.09635 | 49.00798 | 37.67027 |
| protein_co syntaxin_bi  | 13     | 7      | 9      | 457   | 560   | 385   | 0.3088   | 0.213226 | 0.257943 | 16.84922 |
| protein_co mitogen-ac   | 835    | 570    | 642    | 1046  | 1411  | 917   | 11.19622 | 9.800968 | 10.38647 | 21.76942 |
| protein_co nicotinami   | 0      | 0      | 0      | 577   | 688   | 529   | 0        | 0        | 0        | 37.2948  |
| protein_co diacylglyce  | 826    | 685    | 736    | 712   | 896   | 604   | 6.150731 | 6.541037 | 6.612605 | 8.229191 |
| protein_co cortactin_k  | 440    | 383    | 410    | 367   | 385   | 434   | 3.455881 | 3.857573 | 3.88542  | 4.474068 |
| protein_co actin-like_f | 0      | 0      | 1      | 20    | 15    | 7     | 0        | 0        | 0.036809 | 0.947037 |
| protein_co retinoic_ac  | 24     | 21     | 15     | 6     | 4     | 4     | 0.364903 | 0.409444 | 0.275173 | 0.141595 |
| protein_co topoisome    | 4296   | 3630   | 3714   | 4785  | 5082  | 4048  | 37.37976 | 40.50309 | 38.9908  | 64.62263 |
| protein_co transmemt    | 4573   | 3582   | 3826   | 2225  | 2641  | 2727  | 34.91745 | 35.07327 | 35.24799 | 26.36949 |
| protein_co nuclear_fac  | 986    | 735    | 810    | 695   | 800   | 323   | 14.90924 | 14.25198 | 14.77786 | 16.3115  |
| protein_co ubiquitin-c  | 446    | 369    | 366    | 543   | 467   | 638   | 22.68216 | 24.06496 | 22.45839 | 42.86272 |
| protein_co protein_ph   | 237    | 256    | 253    | 446   | 510   | 249   | 1.000174 | 1.385404 | 1.288237 | 2.92141  |
| protein_co DnaJ_(Hsp4   | 3400   | 2627   | 2846   | 1036  | 1157  | 1449  | 30.24015 | 29.96225 | 30.54133 | 14.30195 |
| protein_co general_tra  | 4492   | 3397   | 3753   | 3531  | 4349  | 3908  | 30.01282 | 29.10529 | 30.25475 | 36.61805 |
| protein_co interleukin  | 1768   | 1434   | 1430   | 674   | 890   | 889   | 22.49703 | 23.39922 | 21.95467 | 13.31169 |

|                         |       |       |       |       |       |      |          |          |          |          |
|-------------------------|-------|-------|-------|-------|-------|------|----------|----------|----------|----------|
| protein_co ubiquitin_s  | 954   | 821   | 832   | 978   | 1086  | 1054 | 9.936268 | 10.96547 | 10.45554 | 15.81045 |
| protein_co p21_protei   | 306   | 238   | 264   | 57    | 62    | 39   | 5.4391   | 5.424902 | 5.66184  | 1.572573 |
| protein_co calpain_6    | 358   | 308   | 292   | 88    | 118   | 133  | 4.704772 | 5.190577 | 4.630058 | 1.795018 |
| protein_co doublecort   | 20    | 11    | 14    | 34    | 62    | 34   | 0.099713 | 0.070327 | 0.084217 | 0.263106 |
| protein_co small_nucl   | 1527  | 1135  | 1217  | 2895  | 3453  | 2381 | 44.17092 | 42.10199 | 42.47526 | 129.98   |
| protein_co exosome_c    | 217   | 143   | 146   | 756   | 969   | 740  | 9.101193 | 7.69102  | 7.388214 | 49.21425 |
| protein_co dynein_cyt   | 2858  | 2452  | 2555  | 1430  | 1510  | 1393 | 51.44402 | 56.59818 | 55.4896  | 39.95206 |
| protein_co amyloid_br   | 56    | 41    | 48    | 8     | 6     | 6    | 0.947615 | 0.889687 | 0.980016 | 0.210119 |
| protein_co leucine-ricl | 1085  | 807   | 834   | 1001  | 1369  | 783  | 10.70166 | 10.20714 | 9.92511  | 15.32448 |
| protein_co family_witl  | 247   | 205   | 204   | 229   | 217   | 368  | 2.930626 | 3.119081 | 2.920396 | 4.217251 |
| protein_co sirtuin_6    | 559   | 377   | 437   | 467   | 619   | 398  | 15.97289 | 13.8141  | 15.06612 | 20.71186 |
| protein_co tyrosinase   | 5     | 0     | 2     | 0     | 0     | 0    | 0.094346 | 0        | 0.045534 | 0        |
| protein_co polymerase   | 435   | 327   | 349   | 366   | 527   | 536  | 5.338173 | 5.145889 | 5.167456 | 6.971318 |
| protein_co actinin_alp  | 41    | 62    | 56    | 40    | 41    | 18   | 0.39533  | 0.766615 | 0.651497 | 0.598641 |
| protein_co capping_pr   | 5007  | 3901  | 4197  | 4504  | 5226  | 4298 | 113.5292 | 113.4267 | 114.8198 | 158.5107 |
| protein_co G_protein-i  | 384   | 298   | 337   | 166   | 212   | 133  | 8.830685 | 8.787974 | 9.350635 | 5.925182 |
| protein_co N-acetylate  | 30    | 35    | 25    | 83    | 85    | 150  | 0.39075  | 0.584595 | 0.392885 | 1.677979 |
| protein_co PHD_finger   | 1114  | 880   | 889   | 2308  | 2688  | 2868 | 9.051374 | 9.168986 | 8.715235 | 29.10688 |
| protein_co solute_carr  | 386   | 322   | 332   | 97    | 109   | 83   | 6.50361  | 6.957166 | 6.749216 | 2.536702 |
| protein_co ubiquitin-c  | 946   | 756   | 861   | 445   | 589   | 556  | 16.78318 | 17.19944 | 18.43039 | 12.25388 |
| protein_co fibroblast_  | 10861 | 7715  | 8471  | 10176 | 11856 | 9215 | 86.31737 | 78.62735 | 81.229   | 125.5267 |
| protein_co FK506_bin    | 0     | 0     | 1     | 0     | 2     | 0    | 0        | 0        | 0.029268 | 0        |
| protein_co general_tra  | 1651  | 1310  | 1347  | 1530  | 1897  | 1948 | 17.02186 | 17.31971 | 16.7562  | 24.48397 |
| protein_co structural_  | 4     | 1     | 1     | 5     | 8     | 2    | 0.044647 | 0.014313 | 0.013467 | 0.086622 |
| protein_co fibulin_1    | 6210  | 4545  | 4753  | 5651  | 6856  | 5839 | 98.80794 | 92.73496 | 91.24648 | 139.5584 |
| protein_co integrin_al  | 107   | 104   | 92    | 0     | 0     | 3    | 0.742743 | 0.925759 | 0.770532 | 0        |
| protein_co cystatin_F   | 1     | 1     | 0     | 1     | 0     | 2    | 0.050419 | 0.064656 | 0        | 0.078258 |
| protein_co microtubul   | 1287  | 994   | 982   | 24    | 21    | 40   | 6.21434  | 6.154775 | 5.721053 | 0.17987  |
| protein_co protein_inl  | 557   | 415   | 447   | 648   | 737   | 660  | 4.419993 | 4.223027 | 4.279785 | 7.981268 |
| protein_co amphiphys    | 250   | 236   | 267   | 163   | 168   | 122  | 3.429638 | 4.151735 | 4.419444 | 3.470775 |
| protein_co v-raf_murir  | 1095  | 819   | 902   | 803   | 956   | 695  | 20.88876 | 20.03511 | 20.76123 | 23.77631 |
| protein_co methylcrot   | 319   | 276   | 259   | 241   | 334   | 242  | 5.204564 | 5.774469 | 5.098488 | 6.102969 |
| protein_co lysosomal-i  | 4     | 0     | 1     | 3     | 1     | 4    | 0.055573 | 0        | 0.016763 | 0.064693 |
| protein_co fibroblast_  | 1392  | 1205  | 1181  | 0     | 0     | 0    | 23.47874 | 26.06345 | 24.03441 | 0        |
| protein_co nebulette    | 13    | 11    | 12    | 55    | 61    | 72   | 0.066143 | 0.07177  | 0.073666 | 0.434341 |
| protein_co alkaline_ce  | 371   | 286   | 290   | 313   | 304   | 254  | 2.357847 | 2.330865 | 2.223759 | 3.087568 |
| protein_co ubiquitin-c  | 2164  | 1642  | 1819  | 2169  | 2870  | 2700 | 19.34604 | 18.82424 | 19.62075 | 30.09712 |
| protein_co phosphatic   | 711   | 597   | 631   | 400   | 376   | 453  | 3.530531 | 3.801492 | 3.780488 | 3.08291  |
| protein_co NEDD4_bin    | 841   | 641   | 672   | 718   | 470   | 853  | 4.045809 | 3.954365 | 3.900558 | 5.361229 |
| protein_co chromosom    | 472   | 351   | 388   | 277   | 318   | 251  | 16.26164 | 15.50739 | 16.1288  | 14.81264 |
| protein_co tubby_like   | 1516  | 1156  | 1249  | 363   | 458   | 344  | 23.10964 | 22.59754 | 22.9723  | 8.588774 |
| protein_co synaptojan   | 1329  | 1124  | 1284  | 282   | 372   | 539  | 8.446304 | 9.160462 | 9.845886 | 2.781771 |
| protein_co adenylate_   | 862   | 742   | 739   | 2064  | 2398  | 2050 | 4.07945  | 4.503059 | 4.219752 | 15.16123 |
| protein_co protein_ph   | 1789  | 1523  | 1575  | 1252  | 1337  | 1224 | 18.72043 | 20.43688 | 19.88539 | 20.33482 |
| pseudogen: postmeioti   | 142   | 102   | 106   | 112   | 125   | 91   | 6.377761 | 5.87475  | 5.744256 | 7.807795 |
| protein_co RNA_bindir   | 0     | 0     | 1     | 0     | 4     | 0    | 0        | 0        | 0.013802 | 0        |
| protein_co guanine_nu   | 14001 | 11235 | 12044 | 6758  | 8531  | 7087 | 209.8808 | 215.9713 | 217.8374 | 157.2397 |
| protein_co homeobox     | 181   | 150   | 151   | 0     | 1     | 9    | 4.119948 | 4.378383 | 4.147039 | 0        |
| protein_co endothelin   | 15    | 9     | 11    | 4     | 2     | 2    | 0.345967 | 0.266192 | 0.306114 | 0.143197 |
| protein_co myeloid/ly   | 705   | 594   | 606   | 824   | 882   | 663  | 6.448978 | 6.96783  | 6.688403 | 11.69929 |
| protein_co zinc_finger  | 23    | 8     | 14    | 31    | 24    | 21   | 0.457755 | 0.204176 | 0.336187 | 0.957629 |
| protein_co adenylate_   | 5     | 1     | 0     | 237   | 319   | 196  | 0.036142 | 0.009269 | 0        | 2.658981 |
| protein_co fibroblast_  | 0     | 1     | 4     | 3     | 9     | 2    | 0        | 0.035622 | 0.134065 | 0.129348 |
| protein_co purinergic_  | 0     | 0     | 1     | 0     | 0     | 0    | 0        | 0        | 0.033008 | 0        |
| protein_co integral_m   | 110   | 75    | 87    | 409   | 416   | 360  | 3.037634 | 2.65591  | 2.898745 | 17.53059 |
| protein_co nardilysin_  | 3213  | 2717  | 2885  | 2563  | 2980  | 2505 | 38.67975 | 41.9442  | 41.90509 | 47.89079 |
| protein_co voltage-dep  | 1452  | 1126  | 1117  | 1097  | 1228  | 1386 | 47.64472 | 47.38009 | 44.22312 | 55.87085 |
| protein_co pericentrio  | 2384  | 2013  | 2045  | 1642  | 1087  | 1659 | 16.39088 | 17.74799 | 16.96436 | 17.52264 |
| protein_co trinucleoti  | 550   | 437   | 523   | 1366  | 1377  | 635  | 2.647794 | 2.697815 | 3.037884 | 10.20711 |
| protein_co core-bindir  | 1070  | 779   | 922   | 654   | 760   | 313  | 6.429875 | 6.002962 | 6.684944 | 6.09996  |
| protein_co deleted_in_  | 6     | 5     | 9     | 187   | 187   | 203  | 0.087864 | 0.093894 | 0.159019 | 4.250413 |
| protein_co itchy_E3_u   | 1345  | 1070  | 1104  | 549   | 621   | 419  | 9.852691 | 10.05138 | 9.75775  | 6.242167 |
| protein_co polycystic_  | 0     | 1     | 1     | 8     | 3     | 4    | 0        | 0.025774 | 0.02425  | 0.249566 |
| protein_co tumor_pro    | 1010  | 795   | 871   | 112   | 139   | 168  | 11.31905 | 11.42524 | 11.77755 | 1.948216 |
| protein_co stromal_ce   | 4621  | 3318  | 3624  | 1842  | 2433  | 1978 | 61.6265  | 56.74365 | 58.31332 | 38.12867 |

|                          |       |       |       |       |       |       |          |          |          |          |
|--------------------------|-------|-------|-------|-------|-------|-------|----------|----------|----------|----------|
| protein_co myosin_he     | 39    | 44    | 39    | 22    | 24    | 18    | 0.290594 | 0.420421 | 0.350619 | 0.254434 |
| protein_co tumor_pro     | 11    | 5     | 2     | 196   | 235   | 65    | 0.09942  | 0.057951 | 0.02181  | 2.749584 |
| protein_co toll_intera   | 1412  | 1061  | 1104  | 540   | 720   | 505   | 18.0602  | 17.40254 | 17.03747 | 10.72043 |
| protein_co ubiquitin-c   | 35    | 24    | 18    | 4     | 12    | 9     | 1.168079 | 1.027128 | 0.724811 | 0.207202 |
| protein_co clusterin-lil | 0     | 1     | 1     | 3     | 6     | 2     | 0        | 0.024553 | 0.023101 | 0.089155 |
| protein_co runt-relate   | 739   | 501   | 518   | 534   | 584   | 741   | 4.597548 | 3.996952 | 3.888299 | 5.156483 |
| protein_co cadherin_1    | 5     | 9     | 7     | 1     | 6     | 0     | 0.063485 | 0.146539 | 0.107238 | 0.019708 |
| protein_co THO_comp      | 345   | 283   | 290   | 392   | 425   | 569   | 5.79615  | 6.097002 | 5.878501 | 10.22203 |
| protein_co FK506_bin     | 672   | 516   | 600   | 55    | 52    | 35    | 11.11859 | 10.94812 | 11.97788 | 1.412452 |
| protein_co oxysterol_t   | 777   | 655   | 638   | 266   | 312   | 188   | 5.164216 | 5.582568 | 5.116254 | 2.744072 |
| protein_co solute_carr   | 2210  | 1976  | 1902  | 741   | 928   | 734   | 24.85058 | 28.49316 | 25.80494 | 12.93281 |
| protein_co X-ray_repai   | 6623  | 5527  | 5863  | 10736 | 11583 | 12342 | 82.57181 | 88.3641  | 88.19521 | 207.7543 |
| protein_co latexin       | 39    | 36    | 35    | 50    | 54    | 64    | 1.63863  | 1.939671 | 1.774321 | 3.260744 |
| protein_co SP140_nuc     | 3     | 4     | 2     | 3     | 3     | 2     | 0.043336 | 0.074097 | 0.034859 | 0.067264 |
| protein_co MAP_kinas     | 247   | 212   | 231   | 210   | 258   | 173   | 3.398426 | 3.740469 | 3.834783 | 4.484671 |
| protein_co tensin_1      | 4820  | 3583  | 4048  | 88    | 123   | 116   | 21.87686 | 20.85423 | 22.168   | 0.619942 |
| protein_co REX1_RNA      | 1561  | 1210  | 1256  | 1431  | 2070  | 1485  | 15.98849 | 15.89276 | 15.52181 | 22.74965 |
| protein_co SAR1_hom      | 3458  | 2785  | 2922  | 1349  | 1860  | 1749  | 50.24657 | 51.89386 | 51.22827 | 30.42453 |
| protein_co cell_divisio  | 109   | 74    | 82    | 118   | 172   | 100   | 1.222438 | 1.064244 | 1.109589 | 2.054058 |
| protein_co Rap_guanir    | 282   | 205   | 239   | 134   | 194   | 72    | 2.29925  | 2.143385 | 2.351164 | 1.695791 |
| protein_co carcinoeml    | 42    | 42    | 60    | 12    | 23    | 10    | 0.559642 | 0.717662 | 0.964629 | 0.248183 |
| protein_co SUMO1/ser     | 483   | 408   | 418   | 320   | 344   | 345   | 4.557834 | 4.937202 | 4.759219 | 4.686966 |
| protein_co dual_specif   | 3     | 2     | 1     | 28    | 18    | 19    | 0.079565 | 0.06802  | 0.032    | 1.152621 |
| protein_co capicua_tr    | 5933  | 4200  | 4683  | 1264  | 1879  | 1459  | 33.85233 | 30.73073 | 32.23936 | 11.19417 |
| protein_co lipase_horr   | 184   | 144   | 193   | 207   | 305   | 153   | 2.262723 | 2.270834 | 2.863643 | 3.951067 |
| protein_co farnesyl-di   | 12465 | 10139 | 10639 | 8723  | 8367  | 8844  | 268.6048 | 280.1728 | 276.6116 | 291.7547 |
| protein_co platelet-act  | 483   | 378   | 434   | 478   | 598   | 489   | 20.62648 | 20.70042 | 22.36227 | 31.68374 |
| protein_co oligophren    | 360   | 249   | 283   | 139   | 158   | 81    | 2.142455 | 1.900282 | 2.032094 | 1.283969 |
| protein_co kinesin_fan   | 1773  | 1371  | 1489  | 2849  | 3542  | 2742  | 33.18802 | 32.90936 | 33.62911 | 82.77431 |
| protein_co secretagogi   | 1     | 1     | 2     | 0     | 0     | 0     | 0.032405 | 0.041555 | 0.078197 | 0        |
| protein_co leucine_ri    | 604   | 474   | 552   | 707   | 860   | 739   | 5.214798 | 5.247933 | 5.750263 | 9.474373 |
| protein_co phosphogl     | 1072  | 870   | 874   | 2292  | 2231  | 1293  | 18.91837 | 19.68872 | 18.61008 | 62.78182 |
| protein_co DEAD_(Asp     | 2256  | 1779  | 1913  | 1707  | 1596  | 2472  | 37.55196 | 37.97334 | 38.41993 | 44.10192 |
| protein_co dynamin_2     | 4999  | 3811  | 4096  | 3839  | 4822  | 3925  | 41.47995 | 40.55117 | 41.00748 | 49.44287 |
| protein_co erythrocyt    | 3198  | 2496  | 2468  | 2415  | 2577  | 2321  | 33.64467 | 33.67377 | 31.32788 | 39.43532 |
| protein_co regulating_   | 511   | 455   | 432   | 13    | 10    | 10    | 3.396286 | 3.877967 | 3.464297 | 0.134109 |
| protein_co monooxyge     | 1351  | 1071  | 1124  | 64    | 76    | 60    | 20.70886 | 21.05231 | 20.78812 | 1.52269  |
| protein_co syntaxin_7    | 931   | 778   | 773   | 353   | 408   | 323   | 11.83372 | 12.68121 | 11.85494 | 6.964291 |
| protein_co RAB_memt      | 500   | 377   | 472   | 233   | 270   | 340   | 9.385512 | 9.074833 | 10.69001 | 6.788508 |
| protein_co kelch-like_I  | 1498  | 1069  | 1169  | 1376  | 1745  | 1546  | 23.7703  | 21.75254 | 22.38131 | 33.89002 |
| protein_co DEAD_(Asp     | 1     | 0     | 0     | 5     | 4     | 2     | 0.018659 | 0        | 0        | 0.144807 |
| protein_co protein_ty    | 4     | 4     | 3     | 2     | 5     | 0     | 0.048378 | 0.062037 | 0.043778 | 0.037544 |
| protein_co dopachron     | 0     | 0     | 1     | 0     | 1     | 0     | 0        | 0        | 0.012385 | 0        |
| protein_co solute_carr   | 1344  | 1018  | 1175  | 842   | 1088  | 1050  | 25.10764 | 24.3873  | 26.48455 | 24.41458 |
| protein_co beta-gamm     | 469   | 365   | 394   | 227   | 152   | 207   | 4.598791 | 4.589581 | 4.661386 | 3.454834 |
| protein_co EPH_recept    | 3     | 4     | 2     | 8     | 12    | 9     | 0.035424 | 0.060569 | 0.028494 | 0.146623 |
| protein_co secretin_re   | 0     | 0     | 0     | 2     | 13    | 6     | 0        | 0        | 0        | 0.063982 |
| protein_co regulatory_   | 208   | 174   | 179   | 197   | 194   | 153   | 1.047934 | 1.124163 | 1.088107 | 1.54052  |
| protein_co RAP1_inter    | 1116  | 878   | 966   | 1286  | 823   | 2138  | 5.140399 | 5.186047 | 5.36856  | 9.193991 |
| protein_co RAB21_me      | 864   | 686   | 766   | 547   | 701   | 776   | 6.555498 | 6.674602 | 7.012433 | 6.441837 |
| protein_co solute_carr   | 42    | 29    | 28    | 16    | 33    | 24    | 0.257772 | 0.228241 | 0.207345 | 0.152418 |
| protein_co SWI/SNF_r     | 1899  | 1483  | 1541  | 173   | 228   | 285   | 15.17712 | 15.19899 | 14.85987 | 2.146055 |
| protein_co retinol_def   | 0     | 0     | 0     | 2     | 1     | 0     | 0        | 0        | 0        | 0.084874 |
| protein_co sestrin_1     | 301   | 198   | 220   | 386   | 482   | 194   | 4.022199 | 3.392904 | 3.547054 | 8.005986 |
| protein_co midline_2     | 130   | 92    | 101   | 68    | 75    | 28    | 2.119507 | 1.923484 | 1.986831 | 1.720802 |
| protein_co collagen_ty   | 209   | 128   | 175   | 55    | 70    | 27    | 1.587304 | 1.246617 | 1.603614 | 0.648346 |
| protein_co Snf2-relate   | 4071  | 3142  | 3482  | 2029  | 2856  | 4007  | 17.66839 | 17.48684 | 18.23361 | 13.66811 |
| protein_co KIAA0020      | 942   | 739   | 762   | 643   | 610   | 1201  | 19.03076 | 19.14516 | 18.57412 | 20.16261 |
| protein_co carboxypep    | 4     | 2     | 4     | 0     | 0     | 3     | 0.109237 | 0.070041 | 0.131801 | 0        |
| protein_co cholinergic   | 14    | 9     | 20    | 149   | 176   | 81    | 0.205016 | 0.169009 | 0.353376 | 3.386693 |
| protein_co potassium_    | 3     | 6     | 5     | 162   | 232   | 240   | 0.043741 | 0.112182 | 0.087959 | 3.666147 |
| protein_co CCR4-NOT_     | 447   | 321   | 338   | 283   | 329   | 365   | 4.51526  | 4.158049 | 4.119457 | 4.437028 |
| protein_co presenilin_   | 1100  | 831   | 967   | 602   | 727   | 602   | 8.486183 | 8.221102 | 9.001072 | 7.208529 |
| protein_co coproporpi    | 797   | 570   | 653   | 674   | 934   | 472   | 13.22879 | 12.13238 | 13.07745 | 17.3641  |
| protein_co claudin_do    | 528   | 407   | 469   | 334   | 393   | 319   | 8.785638 | 8.684467 | 9.415867 | 8.626137 |

|                         |       |       |       |       |       |       |          |          |          |          |
|-------------------------|-------|-------|-------|-------|-------|-------|----------|----------|----------|----------|
| protein_co MOK_prot     | 240   | 180   | 194   | 20    | 16    | 31    | 2.954477 | 2.841524 | 2.881504 | 0.382147 |
| protein_co heat_shock   | 17783 | 14818 | 15537 | 30363 | 24747 | 32365 | 237.5627 | 253.8471 | 250.4312 | 629.5764 |
| protein_co retinoblast  | 226   | 206   | 215   | 139   | 186   | 246   | 1.864381 | 2.179229 | 2.139995 | 1.779802 |
| protein_co discs_large  | 2196  | 1722  | 1948  | 1094  | 1494  | 784   | 20.366   | 20.47933 | 21.79768 | 15.74784 |
| protein_co immunogl     | 6     | 2     | 4     | 446   | 583   | 284   | 0.038492 | 0.016454 | 0.030962 | 4.441071 |
| pseudogen: ciliary_roo  | 265   | 254   | 281   | 150   | 190   | 81    | 2.314802 | 2.845188 | 2.961572 | 2.033713 |
| protein_co NDC80_kin    | 567   | 465   | 490   | 618   | 614   | 655   | 12.24063 | 12.87309 | 12.76335 | 20.70806 |
| protein_co adaptor-rel  | 374   | 292   | 264   | 213   | 243   | 299   | 2.594979 | 2.598091 | 2.210111 | 2.293888 |
| protein_co round_sper   | 318   | 235   | 334   | 376   | 478   | 291   | 2.252081 | 2.134195 | 2.853983 | 4.133092 |
| protein_co membrane     | 585   | 475   | 534   | 180   | 238   | 118   | 4.214914 | 4.388699 | 4.642182 | 2.012963 |
| protein_co chemokine    | 1     | 1     | 0     | 3     | 6     | 6     | 0.038498 | 0.049368 | 0        | 0.179261 |
| protein_co alpha-fetop  | 0     | 3     | 0     | 3     | 5     | 13    | 0        | 0.072621 | 0        | 0.087898 |
| protein_co collagen_ty  | 39    | 26    | 29    | 40    | 58    | 20    | 0.184812 | 0.157996 | 0.16581  | 0.294208 |
| protein_co transcriptic | 210   | 147   | 147   | 302   | 373   | 331   | 1.843989 | 1.655258 | 1.557416 | 4.116011 |
| protein_co osteopetro   | 390   | 285   | 320   | 226   | 298   | 332   | 4.093823 | 3.836354 | 4.052868 | 3.682166 |
| protein_co cadherin_7   | 13    | 8     | 12    | 19    | 19    | 21    | 0.161861 | 0.127732 | 0.180272 | 0.367184 |
| protein_co interphoto   | 7     | 6     | 9     | 0     | 1     | 2     | 0.078958 | 0.086788 | 0.122487 | 0        |
| protein_co PEST_prot    | 2142  | 1771  | 1910  | 1787  | 2141  | 1925  | 42.88575 | 45.46963 | 46.13972 | 55.53267 |
| protein_co exonucleas   | 406   | 319   | 292   | 443   | 474   | 336   | 5.59264  | 5.63496  | 4.853128 | 9.471637 |
| protein_co arginase_ty  | 105   | 78    | 99    | 182   | 201   | 138   | 2.407556 | 2.293459 | 2.738863 | 6.477224 |
| protein_co myocyte_ei   | 631   | 541   | 591   | 32    | 18    | 26    | 4.581542 | 5.037197 | 5.177473 | 0.360631 |
| protein_co protein_ty   | 19    | 14    | 12    | 5     | 1     | 1     | 0.167433 | 0.158207 | 0.12759  | 0.068389 |
| protein_co calcium_ch   | 0     | 1     | 0     | 5     | 5     | 2     | 0        | 0.009752 | 0        | 0.059017 |
| protein_co plakophilin  | 1     | 0     | 0     | 7     | 2     | 2     | 0.008608 | 0        | 0        | 0.09353  |
| protein_co ubiquitin-li | 528   | 480   | 457   | 363   | 432   | 442   | 6.344933 | 7.396797 | 6.626091 | 6.770648 |
| protein_co serine/thre  | 1489  | 1219  | 1263  | 273   | 300   | 241   | 13.20583 | 13.86386 | 13.5152  | 3.758064 |
| protein_co cell_divisio | 476   | 405   | 466   | 2205  | 2798  | 1828  | 3.993496 | 4.357232 | 4.717156 | 28.71345 |
| protein_co zinc_finger  | 227   | 180   | 214   | 206   | 198   | 241   | 1.895305 | 1.927237 | 2.155833 | 2.669629 |
| protein_co low_densit   | 3     | 6     | 0     | 14    | 11    | 32    | 0.008899 | 0.022823 | 0        | 0.064456 |
| protein_co zinc_finger  | 19    | 12    | 20    | 30    | 18    | 23    | 0.215196 | 0.174289 | 0.273312 | 0.52739  |
| protein_co jumonji_dc   | 51    | 35    | 60    | 36    | 56    | 64    | 0.637874 | 0.561361 | 0.90545  | 0.698872 |
| protein_co dual_specif  | 296   | 259   | 300   | 215   | 247   | 313   | 10.9287  | 12.26269 | 13.36429 | 12.32099 |
| protein_co acetoacetyl  | 927   | 765   | 832   | 1999  | 2202  | 2339  | 6.546242 | 6.927605 | 7.088979 | 21.91067 |
| protein_co KIAA0141     | 992   | 825   | 860   | 834   | 964   | 872   | 9.359134 | 9.981304 | 9.789725 | 12.21295 |
| protein_co Ca++-depen   | 428   | 275   | 347   | 367   | 415   | 341   | 3.319922 | 2.735433 | 3.247593 | 4.418559 |
| protein_co protocadhe   | 33    | 34    | 35    | 60    | 47    | 8     | 0.427332 | 0.564599 | 0.54685  | 1.205962 |
| protein_co protocadhe   | 14    | 2     | 7     | 12    | 15    | 7     | 0.122155 | 0.022378 | 0.073693 | 0.162515 |
| protein_co protocadhe   | 17    | 7     | 13    | 0     | 3     | 8     | 0.173101 | 0.091403 | 0.159714 | 0        |
| protein_co heat_shock   | 372   | 297   | 283   | 164   | 212   | 186   | 19.06348 | 19.51754 | 17.49822 | 13.04469 |
| protein_co PH_domair    | 359   | 250   | 304   | 1561  | 1964  | 1284  | 2.629826 | 2.348453 | 2.686917 | 17.74868 |
| protein_co ATPase_am    | 365   | 276   | 274   | 187   | 207   | 114   | 2.883716 | 2.796263 | 2.61191  | 2.293146 |
| protein_co interleukin  | 6     | 5     | 2     | 18    | 24    | 27    | 0.069639 | 0.074418 | 0.028008 | 0.324266 |
| protein_co SWI/SNF_re   | 994   | 822   | 806   | 144   | 208   | 121   | 19.29966 | 20.46654 | 18.88193 | 4.339665 |
| protein_co WD_repeat    | 536   | 422   | 397   | 434   | 507   | 466   | 4.396965 | 4.439254 | 3.929404 | 5.525968 |
| protein_co FYN_bindin   | 9     | 7     | 6     | 0     | 0     | 0     | 0.088844 | 0.088612 | 0.071464 | 0        |
| protein_co membrane     | 62    | 53    | 43    | 2     | 0     | 0     | 1.180821 | 1.294427 | 0.988118 | 0.059123 |
| protein_co STE20-relat  | 434   | 383   | 418   | 458   | 529   | 540   | 8.874953 | 10.04349 | 10.31337 | 14.53692 |
| protein_co basic_leuci  | 4287  | 3402  | 3696  | 1860  | 1802  | 3318  | 59.41989 | 60.4675  | 61.80995 | 40.01491 |
| protein_co progesteron  | 0     | 0     | 0     | 0     | 0     | 5     | 0        | 0        | 0        | 0        |
| protein_co C1q_and_ti   | 5534  | 4143  | 4357  | 26    | 21    | 12    | 75.78544 | 72.75635 | 71.99167 | 0.55265  |
| protein_co malic_enzy   | 700   | 458   | 541   | 1077  | 1186  | 799   | 10.3739  | 8.703997 | 9.673625 | 24.77366 |
| protein_co chromosom    | 489   | 408   | 444   | 418   | 485   | 460   | 6.035593 | 6.457741 | 6.612141 | 8.007885 |
| protein_co cyclin_T2    | 658   | 513   | 571   | 661   | 680   | 876   | 4.460551 | 4.459532 | 4.670321 | 6.954959 |
| protein_co family_witl  | 189   | 175   | 176   | 316   | 296   | 311   | 1.381483 | 1.64033  | 1.552188 | 3.5851   |
| protein_co collagen_ty  | 244   | 183   | 216   | 0     | 0     | 0     | 1.835874 | 1.765686 | 1.960897 | 0        |
| protein_co erythrocyte  | 2289  | 1958  | 2112  | 545   | 671   | 583   | 21.86863 | 23.98821 | 24.34545 | 8.081702 |
| protein_co cordon-ble   | 73    | 73    | 72    | 71    | 51    | 43    | 0.365429 | 0.468611 | 0.434871 | 0.551656 |
| protein_co discs_large  | 802   | 725   | 761   | 748   | 849   | 885   | 6.155802 | 7.136046 | 7.047628 | 8.911326 |
| protein_co potassium_   | 89    | 54    | 45    | 11    | 4     | 12    | 1.235043 | 0.960938 | 0.753447 | 0.236927 |
| protein_co SERTA_dor    | 2598  | 2062  | 2198  | 86    | 107   | 136   | 23.34169 | 23.75697 | 23.82697 | 1.199284 |
| protein_co TNF_recept   | 337   | 317   | 308   | 336   | 391   | 244   | 3.187159 | 3.844523 | 3.514574 | 4.932233 |
| protein_co mitochond    | 584   | 435   | 471   | 483   | 537   | 561   | 8.622094 | 8.235662 | 8.390133 | 11.06821 |
| protein_co gem_(nucle   | 600   | 482   | 520   | 708   | 718   | 936   | 5.212898 | 5.370124 | 5.45104  | 9.547545 |
| protein_co opioid_rec   | 0     | 0     | 0     | 27    | 43    | 13    | 0        | 0        | 0        | 0.391914 |
| protein_co nuclear_fac  | 8821  | 6711  | 7236  | 4201  | 4911  | 5052  | 86.63947 | 84.52682 | 85.75206 | 64.0444  |

|                         |       |       |       |       |       |       |          |          |          |          |
|-------------------------|-------|-------|-------|-------|-------|-------|----------|----------|----------|----------|
| protein_co sema_dom     | 0     | 1     | 4     | 802   | 1086  | 605   | 0        | 0.012444 | 0.046834 | 12.07976 |
| protein_co glycogen_s   | 2076  | 1627  | 1721  | 1187  | 1383  | 861   | 12.624   | 12.68722 | 12.62695 | 11.20343 |
| protein_co integrin_be  | 6150  | 4420  | 4741  | 7224  | 8953  | 8953  | 65.9592  | 60.78996 | 61.35052 | 120.2565 |
| protein_co ELKS/RAB6    | 2271  | 1804  | 2095  | 928   | 1090  | 1070  | 11.2673  | 11.47753 | 12.54107 | 7.146297 |
| protein_co exportin_1   | 3296  | 2648  | 2781  | 4127  | 5009  | 4434  | 22.80837 | 23.49818 | 23.21967 | 44.32737 |
| protein_co chromosom    | 10    | 6     | 7     | 1     | 3     | 2     | 0.537114 | 0.413263 | 0.453641 | 0.083367 |
| protein_co ring_finger  | 145   | 124   | 128   | 165   | 202   | 253   | 2.372314 | 2.601568 | 2.52675  | 4.190044 |
| protein_co transient_r  | 3     | 2     | 1     | 72    | 74    | 94    | 0.022439 | 0.019183 | 0.009025 | 0.835882 |
| protein_co partner_an   | 170   | 143   | 189   | 388   | 438   | 567   | 1.991332 | 2.148029 | 2.671189 | 7.05435  |
| protein_co dopey_fam    | 183   | 133   | 149   | 205   | 172   | 207   | 1.045173 | 0.974088 | 1.026766 | 1.817279 |
| protein_co LYR_motif    | 674   | 519   | 602   | 186   | 226   | 280   | 5.903955 | 5.829883 | 6.362498 | 2.52887  |
| protein_co branched_c   | 323   | 259   | 260   | 225   | 293   | 239   | 4.020567 | 4.134223 | 3.904866 | 4.347081 |
| protein_co K(lysine)_ac | 1543  | 1300  | 1402  | 726   | 847   | 592   | 7.792278 | 8.418819 | 8.542688 | 5.690699 |
| protein_co zinc_finger  | 717   | 635   | 672   | 216   | 248   | 190   | 5.87354  | 6.670584 | 6.641988 | 2.746408 |
| protein_co unc-51-like  | 900   | 662   | 715   | 273   | 356   | 204   | 7.0218   | 6.623282 | 6.730697 | 3.305971 |
| protein_co grainyhead   | 0     | 0     | 0     | 754   | 811   | 717   | 0        | 0        | 0        | 10.47451 |
| protein_co transportir  | 3073  | 2402  | 2665  | 2584  | 2842  | 3413  | 12.88501 | 12.9153  | 13.4824  | 16.81687 |
| protein_co procollagen  | 8660  | 6459  | 6858  | 1458  | 1636  | 1355  | 138.1182 | 132.1015 | 131.971  | 36.09284 |
| protein_co purinergic   | 1     | 0     | 0     | 10    | 13    | 10    | 0.020307 | 0        | 0        | 0.315201 |
| protein_co integrin_al  | 373   | 279   | 308   | 169   | 214   | 264   | 4.533431 | 4.348422 | 4.516655 | 3.188125 |
| protein_co DIS3_mitot   | 1243  | 999   | 997   | 635   | 555   | 897   | 7.907243 | 8.14946  | 7.652392 | 6.269865 |
| protein_co progesteron  | 291   | 249   | 285   | 115   | 75    | 100   | 4.337252 | 4.759161 | 5.125244 | 2.660419 |
| protein_co tudor_dom    | 256   | 244   | 227   | 255   | 206   | 174   | 3.9761   | 4.859778 | 4.253938 | 6.14735  |
| protein_co nuclear_fra  | 196   | 137   | 148   | 283   | 391   | 298   | 2.631857 | 2.359044 | 2.397816 | 5.898248 |
| protein_co PDS5_regul   | 1363  | 1157  | 1210  | 562   | 433   | 668   | 8.524889 | 9.279735 | 9.131167 | 5.455815 |
| protein_co 3-oxoacid    | 901   | 800   | 841   | 403   | 394   | 476   | 12.46987 | 14.1983  | 14.04368 | 8.657102 |
| protein_co Ras-related  | 247   | 202   | 194   | 89    | 96    | 112   | 5.619522 | 5.893362 | 5.325399 | 3.142844 |
| protein_co epiphycan    | 119   | 74    | 57    | 0     | 1     | 0     | 3.625674 | 2.891231 | 2.095389 | 0        |
| protein_co cylindroma   | 408   | 320   | 297   | 117   | 153   | 209   | 2.195699 | 2.208371 | 1.928489 | 0.977303 |
| protein_co solute_carr  | 35    | 27    | 30    | 143   | 188   | 129   | 0.326143 | 0.322636 | 0.337294 | 2.068265 |
| protein_co zinc_finger  | 267   | 201   | 224   | 68    | 85    | 229   | 3.298981 | 3.18474  | 3.339371 | 1.304091 |
| protein_co zinc_finger  | 88    | 49    | 66    | 107   | 129   | 120   | 1.421399 | 1.014936 | 1.28625  | 2.682549 |
| protein_co zinc_finger  | 81    | 66    | 55    | 92    | 100   | 137   | 1.48305  | 1.549616 | 1.215015 | 2.614503 |
| protein_co zinc_finger  | 104   | 105   | 96    | 147   | 168   | 205   | 2.153007 | 2.787474 | 2.397902 | 4.723457 |
| protein_co zinc_finger  | 99    | 88    | 79    | 23    | 40    | 35    | 1.183608 | 1.349164 | 1.139588 | 0.426807 |
| protein_co zinc_finger  | 17    | 17    | 18    | 17    | 47    | 23    | 0.360529 | 0.462328 | 0.460588 | 0.559591 |
| protein_co zinc_finger  | 208   | 180   | 168   | 160   | 223   | 155   | 3.648756 | 4.049145 | 3.555812 | 4.356442 |
| protein_co ribosomal    | 7699  | 6060  | 6398  | 11964 | 12515 | 11155 | 206.6435 | 208.5785 | 207.1952 | 498.4187 |
| protein_co FAT_tumor    | 18593 | 14650 | 15991 | 4027  | 4511  | 4304  | 58.96294 | 59.57673 | 61.18618 | 19.82174 |
| protein_co YTH_domai    | 1309  | 1035  | 1093  | 1536  | 2077  | 2139  | 9.84901  | 9.986255 | 9.922501 | 17.93803 |
| protein_co charged_m    | 607   | 453   | 470   | 545   | 666   | 575   | 10.92181 | 10.45234 | 10.20356 | 15.22064 |
| protein_co small_ArfG   | 1029  | 849   | 931   | 112   | 156   | 142   | 16.41709 | 17.36992 | 17.92167 | 2.773507 |
| protein_co peptidylpro  | 608   | 519   | 538   | 470   | 536   | 465   | 6.129678 | 6.709818 | 6.544318 | 7.354656 |
| protein_co zinc_metall  | 1199  | 912   | 940   | 392   | 529   | 934   | 18.08917 | 17.64426 | 17.111   | 9.179434 |
| protein_co StAR-relate  | 1530  | 1270  | 1437  | 2564  | 3173  | 3460  | 21.30099 | 22.67365 | 24.13866 | 55.406   |
| protein_co nitric_oxid  | 608   | 447   | 505   | 1639  | 1806  | 1000  | 8.348208 | 7.870577 | 8.366217 | 34.93004 |
| protein_co RE1-silenci  | 1751  | 1351  | 1480  | 1465  | 1727  | 1921  | 11.24718 | 11.12813 | 11.4701  | 14.60581 |
| protein_co histidine_a  | 6     | 1     | 0     | 3     | 3     | 7     | 0.071899 | 0.015367 | 0        | 0.055798 |
| protein_co slingshot_f  | 1894  | 1467  | 1557  | 431   | 620   | 479   | 10.4017  | 10.33151 | 10.31718 | 3.673939 |
| protein_co glutathione  | 10478 | 7913  | 8191  | 13778 | 15923 | 13643 | 292.2746 | 283.05   | 275.6752 | 596.5259 |
| protein_co amyloid_be   | 5947  | 4764  | 4948  | 10438 | 11392 | 10166 | 74.961   | 77.00493 | 75.25151 | 204.2139 |
| protein_co KIAA1467     | 207   | 171   | 152   | 435   | 495   | 265   | 2.018767 | 2.13856  | 1.788577 | 6.584695 |
| protein_co solute_carr  | 1     | 0     | 1     | 173   | 159   | 101   | 0.006104 | 0        | 0.007365 | 1.639014 |
| protein_co WW_doma      | 1840  | 1440  | 1665  | 2180  | 2439  | 2238  | 31.3851  | 31.4976  | 34.26636 | 57.71552 |
| protein_co eukaryotic   | 3217  | 2503  | 2638  | 2831  | 3030  | 3013  | 103.4603 | 103.2269 | 102.3636 | 141.3166 |
| protein_co Na+/K+_tra   | 77    | 40    | 54    | 1567  | 1802  | 1522  | 1.394566 | 0.929004 | 1.180022 | 44.05019 |
| protein_co collagen_ty  | 5561  | 4145  | 4610  | 123   | 212   | 165   | 45.45945 | 43.45154 | 45.4695  | 1.560655 |
| protein_co taxilin_alp  | 2774  | 2238  | 2262  | 1436  | 1826  | 2001  | 25.9523  | 26.84966 | 25.53348 | 20.85231 |
| protein_co apolipopro   | 1     | 1     | 0     | 6     | 4     | 13    | 0.003321 | 0.004258 | 0        | 0.030924 |
| protein_co nuclear_rec  | 496   | 453   | 459   | 376   | 461   | 365   | 3.140776 | 3.678433 | 3.506841 | 3.695504 |
| protein_co ATP/GTP_b    | 913   | 760   | 790   | 1248  | 1431  | 1128  | 13.12805 | 14.01369 | 13.70581 | 27.85317 |
| protein_co EFR3_homo    | 520   | 399   | 494   | 262   | 320   | 162   | 4.72352  | 4.64777  | 5.414239 | 3.693977 |
| protein_co kinesin_fan  | 2964  | 2324  | 2504  | 2009  | 2577  | 1529  | 25.44526 | 25.58434 | 25.93648 | 26.76943 |
| protein_co RAB10_me     | 3198  | 2510  | 2717  | 2180  | 2962  | 2004  | 42.41988 | 42.69471 | 43.48392 | 44.88259 |
| protein_co glucokinase  | 2     | 1     | 1     | 4     | 7     | 1     | 0.0429   | 0.027507 | 0.025881 | 0.133174 |

|                         |      |      |      |       |       |       |          |          |          |          |
|-------------------------|------|------|------|-------|-------|-------|----------|----------|----------|----------|
| protein_co hydroxyacy   | 4469 | 3781 | 3985 | 2910  | 3204  | 2638  | 68.9995  | 74.86031 | 74.23556 | 69.73633 |
| protein_co microtubul   | 177  | 129  | 187  | 91    | 115   | 75    | 4.386645 | 4.099759 | 5.591765 | 3.500508 |
| protein_co carbamoyl-   | 5497 | 4199 | 4512 | 5306  | 6450  | 5572  | 35.47893 | 34.75362 | 35.13678 | 53.1548  |
| protein_co CD59_mole    | 2447 | 2100 | 2104 | 450   | 482   | 370   | 30.87725 | 33.98078 | 32.03306 | 8.813485 |
| protein_co CD82_mole    | 924  | 685  | 764  | 98    | 162   | 68    | 18.92808 | 17.99428 | 18.88322 | 3.115955 |
| protein_co BCL6_core    | 730  | 568  | 609  | 247   | 313   | 137   | 4.802822 | 4.79216  | 4.83436  | 2.522325 |
| protein_co alpha_thal   | 2658 | 2209 | 2460 | 1530  | 766   | 1762  | 11.06085 | 11.78796 | 12.35141 | 9.882241 |
| protein_co TAF9_RNA_    | 691  | 598  | 594  | 662   | 621   | 812   | 19.6608  | 21.81894 | 20.3919  | 29.23558 |
| protein_co ficolin_(col | 39   | 38   | 43   | 0     | 0     | 0     | 1.422015 | 1.776775 | 1.891716 | 0        |
| protein_co myoneurin    | 279  | 215  | 177  | 180   | 196   | 258   | 2.616986 | 2.586098 | 2.003174 | 2.620597 |
| protein_co MDS1_and     | 349  | 276  | 308  | 189   | 201   | 234   | 2.854957 | 2.895294 | 3.039996 | 2.399753 |
| processed_secretory_c   | 670  | 519  | 564  | 595   | 643   | 547   | 5.030634 | 4.997176 | 5.109461 | 6.934184 |
| protein_co prolyl_end   | 1171 | 993  | 1015 | 1344  | 1440  | 1183  | 18.90128 | 20.55383 | 19.76735 | 33.67162 |
| protein_co HECT_dom     | 547  | 464  | 459  | 337   | 367   | 277   | 4.823024 | 5.246376 | 4.883068 | 4.612033 |
| protein_co SEH1-like_   | 980  | 827  | 836  | 687   | 984   | 1064  | 8.82678  | 9.551929 | 9.085118 | 9.60425  |
| protein_co WD_repeat    | 540  | 462  | 471  | 73    | 117   | 118   | 5.938229 | 6.515001 | 6.249311 | 1.245996 |
| protein_co WD_repeat    | 1973 | 1578 | 1641 | 1434  | 1731  | 1304  | 19.85279 | 20.36155 | 19.92283 | 22.39619 |
| protein_co oviductal_   | 16   | 16   | 16   | 58    | 95    | 11    | 0.334481 | 0.428924 | 0.40357  | 1.881957 |
| protein_co solute_carr  | 1143 | 1020 | 1027 | 473   | 623   | 831   | 12.54865 | 14.36019 | 13.60408 | 8.060137 |
| protein_co mitogen-ac   | 1622 | 1181 | 1391 | 981   | 1108  | 1184  | 13.85348 | 12.93503 | 14.33452 | 13.00492 |
| protein_co paired_imn   | 4    | 7    | 11   | 15    | 17    | 9     | 0.142848 | 0.32057  | 0.473976 | 0.831452 |
| protein_co immunogl     | 131  | 103  | 109  | 433   | 585   | 736   | 1.460783 | 1.472858 | 1.466523 | 7.494329 |
| protein_co ATP-bindin   | 7    | 5    | 0    | 4     | 1     | 6     | 0.070663 | 0.064725 | 0        | 0.062674 |
| protein_co zinc_finger  | 620  | 459  | 486  | 388   | 431   | 317   | 4.936629 | 4.686632 | 4.668992 | 4.795137 |
| protein_co aldo-keto_   | 1116 | 885  | 903  | 1984  | 1969  | 2100  | 27.11361 | 27.57247 | 26.4703  | 74.81613 |
| protein_co copine_III   | 1465 | 1247 | 1322 | 817   | 895   | 704   | 14.12292 | 15.41568 | 15.37681 | 12.22473 |
| protein_co RRN3_RNA     | 664  | 512  | 568  | 476   | 559   | 732   | 8.276175 | 8.183534 | 8.541969 | 9.208715 |
| protein_co cortactin    | 7258 | 5493 | 6053 | 3869  | 5248  | 5129  | 104.0121 | 100.9453 | 104.6612 | 86.059   |
| protein_co wingless-ty  | 77   | 50   | 53   | 11    | 12    | 9     | 1.870742 | 1.557767 | 1.553628 | 0.414807 |
| protein_co mitochond    | 438  | 387  | 341  | 761   | 711   | 757   | 6.969063 | 7.896244 | 6.546402 | 18.79383 |
| protein_co DDHD_don     | 1160 | 933  | 912  | 466   | 594   | 428   | 11.05312 | 11.40035 | 10.48504 | 6.891971 |
| protein_co tetratricop  | 22   | 13   | 17   | 50    | 96    | 83    | 0.164081 | 0.124334 | 0.15298  | 0.578812 |
| protein_co epidermal_   | 898  | 745  | 687  | 580   | 643   | 545   | 8.058801 | 8.573531 | 7.438731 | 8.078906 |
| protein_co origin_recc  | 340  | 286  | 292  | 1068  | 1113  | 1517  | 5.049923 | 5.447299 | 5.232831 | 24.6211  |
| protein_co microsoma    | 86   | 76   | 77   | 68    | 71    | 67    | 2.265473 | 2.56734  | 2.447367 | 2.780352 |
| protein_co calcium_hc   | 1313 | 841  | 965  | 1644  | 2027  | 1879  | 14.75356 | 12.11818 | 13.083   | 28.67242 |
| protein_co autophagy_   | 505  | 487  | 477  | 510   | 540   | 530   | 5.627248 | 6.958938 | 6.413145 | 8.820746 |
| protein_co ubiquitin_s  | 579  | 417  | 520  | 147   | 168   | 184   | 4.769733 | 4.405152 | 5.168528 | 1.879591 |
| protein_co protein_O-   | 1707 | 1278 | 1430 | 659   | 741   | 619   | 23.00036 | 22.08215 | 23.24798 | 13.78215 |
| protein_co RAD54-like   | 310  | 269  | 281  | 662   | 727   | 659   | 4.676932 | 5.204284 | 5.115096 | 15.502   |
| protein_co microtubul   | 3064 | 2518 | 2819 | 1526  | 1969  | 1170  | 25.03852 | 26.38669 | 27.79476 | 19.35552 |
| protein_co Dnal_(Hsp4   | 3812 | 3033 | 3221 | 1950  | 2096  | 3245  | 75.07129 | 76.59541 | 76.53494 | 59.60547 |
| protein_co UDP-Gal:be   | 1756 | 1519 | 1487 | 472   | 660   | 399   | 19.59983 | 21.74177 | 20.02565 | 8.177116 |
| protein_co charged_m    | 1131 | 868  | 964  | 655   | 702   | 576   | 31.06773 | 30.57567 | 31.95008 | 27.92664 |
| protein_co nuclear_tra  | 901  | 733  | 837  | 696   | 722   | 817   | 9.176348 | 9.573228 | 10.28534 | 11.00233 |
| protein_co aquaporin_   | 4    | 2    | 3    | 2     | 7     | 0     | 0.036569 | 0.023447 | 0.033092 | 0.02838  |
| protein_co DIM1_dime    | 875  | 670  | 725  | 625   | 733   | 734   | 14.35074 | 14.09128 | 14.34671 | 15.91024 |
| protein_co importin_1   | 318  | 292  | 303  | 716   | 679   | 803   | 3.4231   | 4.030739 | 3.935348 | 11.96289 |
| protein_co folate_hyd   | 1    | 0    | 0    | 8     | 8     | 13    | 0.017386 | 0        | 0        | 0.215884 |
| protein_co eukaryotic   | 3030 | 2459 | 2539 | 2026  | 2249  | 1988  | 31.83436 | 33.13    | 32.1858  | 33.03874 |
| protein_co NME/NM23     | 0    | 0    | 1    | 11    | 6     | 2     | 0        | 0        | 0.02447  | 0.346271 |
| protein_co ependymin    | 150  | 107  | 121  | 44    | 66    | 73    | 2.706234 | 2.475525 | 2.63395  | 1.232132 |
| protein_co sorting_ne   | 3    | 1    | 2    | 123   | 112   | 96    | 0.055251 | 0.023617 | 0.044443 | 3.516071 |
| protein_co selenophos   | 1641 | 1303 | 1354 | 12564 | 13106 | 19313 | 23.50948 | 23.93802 | 23.40459 | 279.3784 |
| protein_co mitochond    | 1502 | 1056 | 1053 | 1650  | 1922  | 1287  | 31.59659 | 28.48679 | 26.72679 | 53.87468 |
| protein_co hemoglobi    | 9    | 1    | 6    | 22    | 23    | 11    | 0.787332 | 0.112182 | 0.633308 | 2.987231 |
| protein_co inositol-tri | 375  | 315  | 271  | 367   | 493   | 317   | 5.19461  | 5.595535 | 4.529383 | 7.890749 |
| protein_co FAT_tumor    | 33   | 36   | 64   | 31    | 49    | 13    | 0.106466 | 0.148939 | 0.249128 | 0.155234 |
| protein_co RNA_bindi    | 639  | 589  | 583  | 506   | 612   | 744   | 12.79365 | 15.12231 | 14.08348 | 15.72441 |
| protein_co transmemt    | 3673 | 2982 | 2968 | 1559  | 2022  | 2223  | 67.48708 | 70.26138 | 65.79784 | 44.4607  |
| protein_co ERO1-like_I  | 190  | 136  | 150  | 74    | 109   | 36    | 1.950756 | 1.790596 | 1.858184 | 1.179265 |
| protein_co zinc_finger  | 956  | 800  | 803  | 1486  | 1774  | 1531  | 17.28098 | 18.54427 | 17.51354 | 41.69267 |
| protein_co hydroxyste   | 1    | 2    | 0    | 5     | 2     | 4     | 0.011138 | 0.028565 | 0        | 0.086437 |
| protein_co taxilin_gar  | 231  | 189  | 219  | 699   | 810   | 975   | 2.461167 | 2.582261 | 2.815277 | 11.55944 |
| protein_co protein_ph   | 63   | 56   | 36   | 6     | 6     | 1     | 1.02217  | 1.165145 | 0.704747 | 0.1511   |

|                         |       |       |       |       |       |       |          |          |          |          |
|-------------------------|-------|-------|-------|-------|-------|-------|----------|----------|----------|----------|
| protein_co linker_for_  | 38    | 24    | 25    | 11    | 45    | 39    | 0.705113 | 0.571078 | 0.55971  | 0.31681  |
| protein_co HECT_UBA_    | 10279 | 8224  | 9053  | 8329  | 9776  | 8166  | 32.57519 | 33.4217  | 34.61598 | 40.96938 |
| protein_co zw10_kinet   | 392   | 293   | 340   | 319   | 399   | 466   | 6.143345 | 5.888379 | 6.429035 | 7.759611 |
| protein_co ALG9_alpha   | 96    | 74    | 87    | 52    | 56    | 60    | 1.003666 | 0.992108 | 1.097451 | 0.843824 |
| protein_co myosin_bir   | 58    | 29    | 36    | 139   | 180   | 69    | 0.756922 | 0.485323 | 0.566857 | 2.815584 |
| protein_co NADPH_oxi    | 469   | 334   | 444   | 13    | 23    | 37    | 5.025461 | 4.589431 | 5.740293 | 0.216211 |
| protein_co acyl-CoA_o   | 509   | 425   | 427   | 154   | 194   | 166   | 8.345111 | 8.935372 | 8.446762 | 3.918912 |
| protein_co myotubula    | 1351  | 1140  | 1133  | 984   | 981   | 965   | 13.23343 | 14.31961 | 13.39044 | 14.96038 |
| protein_co protein_ph   | 754   | 529   | 608   | 405   | 457   | 343   | 14.86757 | 13.37622 | 14.46506 | 12.39521 |
| protein_co hydroxyste   | 601   | 471   | 467   | 231   | 304   | 75    | 22.76325 | 22.87652 | 21.34149 | 13.58008 |
| protein_co thyroid_ho   | 1809  | 1433  | 1498  | 2110  | 2635  | 2041  | 43.6787  | 44.36972 | 43.64063 | 79.07589 |
| protein_co acetylcholi  | 12    | 13    | 9     | 113   | 123   | 97    | 0.190352 | 0.264441 | 0.172253 | 2.782178 |
| protein_co ferritin_lig | 20992 | 16615 | 17242 | 11968 | 13120 | 11686 | 1121.088 | 1137.878 | 1111.019 | 992.06   |
| protein_co serrate_RN   | 2814  | 2112  | 2275  | 2003  | 2882  | 4444  | 44.53206 | 42.85998 | 43.43884 | 49.19944 |
| protein_co BCL2-assoc   | 2282  | 1729  | 1790  | 2392  | 3424  | 1989  | 78.79457 | 76.55701 | 74.57301 | 128.1953 |
| protein_co nemo-like_   | 312   | 232   | 257   | 465   | 566   | 493   | 3.614946 | 3.447026 | 3.592761 | 8.362394 |
| protein_co phosphatic   | 1149  | 961   | 1022  | 889   | 1050  | 816   | 17.4471  | 18.71267 | 18.72415 | 20.95248 |
| protein_co ADAM_met     | 19    | 10    | 17    | 281   | 390   | 244   | 0.131909 | 0.089028 | 0.142402 | 3.028002 |
| protein_co transmembr   | 0     | 0     | 0     | 11    | 12    | 28    | 0        | 0        | 0        | 0.374802 |
| protein_co ataxin_7-il  | 3153  | 2362  | 2537  | 2349  | 3122  | 2659  | 38.79408 | 37.26754 | 37.66257 | 44.85955 |
| protein_co phosphatic   | 768   | 619   | 602   | 665   | 916   | 765   | 11.76079 | 12.15557 | 11.12294 | 15.80619 |
| protein_co proteasome   | 1686  | 1283  | 1313  | 1225  | 1404  | 1696  | 30.57099 | 29.83238 | 28.7253  | 34.47612 |
| protein_co ubiquitin_i  | 492   | 437   | 439   | 562   | 587   | 449   | 8.859404 | 10.09091 | 9.537883 | 15.70747 |
| protein_co cholesteryl  | 1     | 3     | 3     | 0     | 0     | 0     | 0.026181 | 0.10072  | 0.094766 | 0        |
| protein_co matrix_me    | 36978 | 27552 | 29310 | 1805  | 2039  | 1673  | 463.4854 | 442.8485 | 443.258  | 35.11562 |
| protein_co metallothe   | 0     | 0     | 0     | 0     | 1     | 1     | 0        | 0        | 0        | 0        |
| protein_co lysosphosph  | 550   | 493   | 503   | 102   | 112   | 61    | 4.783808 | 5.498792 | 5.278701 | 1.377025 |
| protein_co guanine_nu   | 20    | 8     | 11    | 635   | 856   | 518   | 0.168245 | 0.0863   | 0.111649 | 8.291204 |
| protein_co 2-oxoglutar  | 1056  | 834   | 893   | 608   | 713   | 706   | 10.65545 | 10.79153 | 10.87194 | 9.522298 |
| protein_co SH3-domai    | 2156  | 1630  | 1710  | 1096  | 1428  | 902   | 10.97545 | 10.64071 | 10.50311 | 8.659935 |
| protein_co NOP14_nu     | 492   | 401   | 448   | 483   | 558   | 701   | 6.520602 | 6.815163 | 7.163885 | 9.935739 |
| protein_co adducin_1_   | 5526  | 4174  | 4672  | 2723  | 3177  | 3242  | 50.03171 | 48.46143 | 51.03703 | 38.26596 |
| protein_co L-2-hydrox   | 132   | 126   | 99    | 435   | 539   | 414   | 1.796135 | 2.198594 | 1.625355 | 9.187235 |
| protein_co thioredoxin  | 192   | 111   | 115   | 235   | 240   | 267   | 1.972586 | 1.462403 | 1.425544 | 3.747426 |
| protein_co chromosom    | 1703  | 1376  | 1385  | 1851  | 1916  | 2307  | 73.93861 | 76.60981 | 72.55285 | 124.7365 |
| protein_co nidogen_2_   | 1242  | 887   | 1016  | 193   | 280   | 209   | 12.10505 | 11.08608 | 11.94777 | 2.919664 |
| protein_co germ_cell-l  | 498   | 380   | 370   | 382   | 510   | 399   | 5.571756 | 5.451998 | 4.994736 | 6.633711 |
| protein_co splicing_fac | 5938  | 4714  | 4869  | 5620  | 6400  | 5501  | 70.81204 | 72.08847 | 70.05751 | 104.024  |
| protein_co kelch-like_f | 1161  | 1010  | 1017  | 285   | 411   | 342   | 8.121634 | 9.060286 | 8.583812 | 3.094472 |
| protein_co GNAS_com     | 42200 | 32993 | 34186 | 15572 | 16230 | 16483 | 491.129  | 492.3957 | 480.0422 | 281.2924 |
| protein_co dynamin_1    | 1890  | 1535  | 1687  | 1232  | 1222  | 1207  | 19.96444 | 20.7928  | 21.50099 | 20.19931 |
| protein_co parathyroid  | 1255  | 938   | 973   | 0     | 0     | 0     | 31.1195  | 29.82641 | 29.11051 | 0        |
| protein_co phosphatas   | 40    | 39    | 25    | 2     | 0     | 5     | 0.687537 | 0.859627 | 0.518471 | 0.053358 |
| protein_co ERGIC_and    | 723   | 504   | 547   | 287   | 279   | 383   | 6.761365 | 6.04416  | 6.172078 | 4.165896 |
| protein_co transcriptio | 1     | 3     | 2     | 786   | 886   | 1051  | 0.016361 | 0.062941 | 0.03948  | 19.95985 |
| protein_co aurora_kin   | 1044  | 808   | 954   | 1768  | 1784  | 1781  | 19.21994 | 19.07533 | 21.19083 | 50.5201  |
| protein_co Cas_scaffol  | 65    | 50    | 48    | 2     | 2     | 1     | 0.966038 | 0.952929 | 0.860737 | 0.046136 |
| protein_co pirin_(iron  | 237   | 180   | 183   | 149   | 162   | 134   | 7.22088  | 7.032725 | 6.727302 | 7.046258 |
| protein_co adipogenes   | 33    | 28    | 39    | 23    | 54    | 23    | 2.131364 | 2.319055 | 3.03918  | 2.305696 |
| protein_co regulatory_  | 103   | 89    | 103   | 96    | 125   | 72    | 1.209535 | 1.340233 | 1.459373 | 1.749777 |
| protein_co methyltran   | 351   | 338   | 379   | 474   | 587   | 569   | 6.487346 | 8.010986 | 8.451761 | 13.5978  |
| protein_co sulfotransf  | 1     | 0     | 0     | 28    | 26    | 6     | 0.032405 | 0        | 0        | 1.408317 |
| protein_co ALG6_alpha   | 110   | 106   | 113   | 227   | 210   | 245   | 1.530081 | 1.890762 | 1.896479 | 4.900924 |
| protein_co CCR4-NOT_    | 1474  | 1046  | 1213  | 1679  | 2018  | 2084  | 15.30128 | 13.92423 | 15.19285 | 27.05275 |
| protein_co glycoprotei  | 2     | 2     | 1     | 12    | 19    | 13    | 0.041349 | 0.053025 | 0.024945 | 0.385078 |
| protein_co protein_ty   | 231   | 186   | 176   | 403   | 448   | 351   | 1.051611 | 1.085839 | 0.966727 | 2.847598 |
| protein_co DEAD_(Asp    | 1233  | 988   | 946   | 1960  | 1936  | 2844  | 10.18953 | 10.47026 | 9.432575 | 25.14071 |
| protein_co KH-type_sp   | 8783  | 6411  | 7120  | 9970  | 12810 | 12443 | 137.5994 | 128.7979 | 134.5866 | 242.4372 |
| protein_co guanine_nu   | 2353  | 1668  | 1836  | 668   | 832   | 790   | 26.60531 | 24.18531 | 25.04766 | 11.72339 |
| protein_co ArfGAP_wit   | 880   | 657   | 721   | 1546  | 1834  | 1238  | 10.18845 | 9.754389 | 10.07184 | 27.78212 |
| protein_co ER_degrad    | 389   | 361   | 357   | 321   | 332   | 283   | 7.574841 | 9.014475 | 8.387648 | 9.701959 |
| protein_co DNA_(cyto    | 288   | 294   | 269   | 21475 | 27689 | 34470 | 3.114466 | 4.077066 | 3.509873 | 360.4581 |
| protein_co TPX2_micr    | 2909  | 2301  | 2514  | 3818  | 4211  | 3402  | 37.83719 | 38.37966 | 39.45376 | 77.07997 |
| pseudogen: fer-1-like_4 | 59    | 62    | 71    | 91    | 99    | 40    | 0.46147  | 0.621859 | 0.670035 | 1.104748 |
| protein_co p53_and_C    | 299   | 234   | 244   | 357   | 359   | 322   | 10.12283 | 10.15911 | 9.967093 | 18.75985 |

|                         |       |       |       |       |       |       |          |          |          |          |
|-------------------------|-------|-------|-------|-------|-------|-------|----------|----------|----------|----------|
| protein_co erythrocyte  | 985   | 819   | 832   | 608   | 735   | 453   | 7.370997 | 7.859289 | 7.5121   | 7.06194  |
| protein_co solute_carr  | 98    | 65    | 89    | 27    | 24    | 39    | 1.479466 | 1.258351 | 1.621127 | 0.632664 |
| protein_co dedicator_1  | 944   | 781   | 941   | 470   | 569   | 348   | 5.863581 | 6.220873 | 7.052265 | 4.531263 |
| protein_co ankyrin_rej  | 1428  | 1295  | 1311  | 1470  | 1947  | 1427  | 25.87285 | 30.08813 | 28.65938 | 41.33938 |
| protein_co TDP-glucos   | 189   | 132   | 127   | 187   | 157   | 160   | 4.659418 | 4.173046 | 3.777649 | 7.155533 |
| protein_co dedicator_1  | 12    | 13    | 15    | 135   | 224   | 154   | 0.06427  | 0.089285 | 0.096931 | 1.122247 |
| protein_co chromosom    | 338   | 278   | 269   | 204   | 256   | 71    | 5.969426 | 6.296077 | 5.732132 | 5.59212  |
| protein_co coenzyme_    | 504   | 437   | 489   | 455   | 532   | 387   | 12.93518 | 14.38244 | 15.14254 | 18.12524 |
| protein_co transmembr   | 0     | 1     | 0     | 1     | 2     | 1     | 0        | 0.026053 | 0        | 0.031534 |
| protein_co kinesin_fan  | 109   | 76    | 89    | 53    | 89    | 90    | 1.522494 | 1.361294 | 1.499917 | 1.149041 |
| protein_co Rho_GTPas    | 627   | 507   | 500   | 159   | 179   | 283   | 5.353249 | 5.550948 | 5.15072  | 2.107063 |
| protein_co cardiolipin  | 824   | 698   | 730   | 555   | 723   | 734   | 9.761843 | 10.60399 | 10.43459 | 10.20535 |
| protein_co protein_ph   | 196   | 112   | 144   | 132   | 172   | 100   | 1.853659 | 1.358317 | 1.643177 | 1.937663 |
| protein_co attractin    | 1894  | 1404  | 1502  | 642   | 755   | 489   | 10.28723 | 9.779015 | 9.843207 | 5.412329 |
| protein_co spermine_c   | 911   | 659   | 704   | 227   | 278   | 201   | 19.12978 | 17.74543 | 17.83661 | 7.398574 |
| protein_co sialic_acid_ | 2     | 3     | 3     | 1     | 3     | 0     | 0.013955 | 0.026844 | 0.025257 | 0.01083  |
| protein_co FK506_bin    | 3431  | 2834  | 2991  | 2274  | 2379  | 2646  | 99.18597 | 105.0603 | 104.3263 | 102.0353 |
| protein_co NSFL1_(p9)   | 821   | 661   | 710   | 548   | 660   | 711   | 10.13338 | 10.46217 | 10.57347 | 10.49838 |
| protein_co solute_carr  | 97    | 87    | 98    | 309   | 406   | 297   | 1.408588 | 1.620097 | 1.717064 | 6.964682 |
| protein_co chromosom    | 779   | 673   | 705   | 242   | 298   | 163   | 5.317706 | 5.891302 | 5.806628 | 2.564087 |
| protein_co zinc_finger  | 185   | 146   | 141   | 113   | 107   | 56    | 2.388396 | 2.417112 | 2.196351 | 2.26435  |
| protein_co early_B-cell | 72    | 68    | 63    | 26    | 36    | 17    | 1.160165 | 1.405095 | 1.224831 | 0.650266 |
| protein_co carboxypep   | 3119  | 2333  | 2285  | 652   | 822   | 780   | 61.16686 | 58.67119 | 54.06735 | 19.84627 |
| protein_co mitochond    | 1775  | 1380  | 1459  | 643   | 848   | 592   | 19.64356 | 19.5844  | 19.48163 | 11.04494 |
| protein_co ProSAP-int   | 144   | 92    | 117   | 1273  | 1887  | 927   | 1.284414 | 1.0523   | 1.259147 | 17.62387 |
| protein_co coagulation  | 0     | 0     | 0     | 15    | 27    | 39    | 0        | 0        | 0        | 0.349679 |
| protein_co 5'-3'-exon   | 1983  | 1560  | 1658  | 2661  | 3037  | 3200  | 27.06926 | 27.30786 | 27.30777 | 56.38051 |
| processed_polo-like_k   | 168   | 131   | 147   | 437   | 401   | 271   | 2.043456 | 2.043321 | 2.157354 | 8.250265 |
| protein_co dynein_lig   | 3607  | 2937  | 2998  | 2144  | 2540  | 3127  | 122.9159 | 128.3439 | 123.2655 | 113.4011 |
| protein_co tescalcin    | 4     | 3     | 2     | 72    | 97    | 49    | 0.177446 | 0.170662 | 0.107049 | 4.957565 |
| protein_co sorting_ne   | 1191  | 1025  | 1040  | 1561  | 1759  | 2422  | 18.09071 | 19.96535 | 19.0601  | 36.80248 |
| protein_co ribosomal_   | 14772 | 11541 | 11859 | 16659 | 16605 | 16856 | 344.9499 | 345.5966 | 334.1279 | 603.8041 |
| protein_co signal-regul | 0     | 0     | 0     | 0     | 1     | 0     | 0        | 0        | 0        | 0        |
| protein_co mitogen-ac   | 465   | 431   | 475   | 645   | 814   | 729   | 8.628357 | 10.25562 | 10.63449 | 18.57656 |
| protein_co purinergic_  | 3     | 1     | 2     | 7     | 6     | 7     | 0.046843 | 0.020023 | 0.037679 | 0.16965  |
| protein_co ESF1_nucle   | 477   | 371   | 405   | 745   | 711   | 1114  | 6.954769 | 6.936615 | 7.124714 | 16.85975 |
| protein_co retinoblast  | 478   | 363   | 399   | 190   | 268   | 238   | 5.805084 | 5.653229 | 5.846575 | 3.581498 |
| protein_co anaphase_1   | 2800  | 2345  | 2602  | 1663  | 2060  | 2100  | 21.35177 | 22.93127 | 23.94039 | 19.68333 |
| protein_co solute_carr  | 573   | 449   | 478   | 337   | 362   | 460   | 3.859233 | 3.877949 | 3.884385 | 3.522952 |
| protein_co solute_carr  | 307   | 273   | 309   | 336   | 447   | 242   | 4.376782 | 4.991011 | 5.315242 | 7.435091 |
| protein_co transmembr   | 1688  | 1461  | 1415  | 1040  | 1194  | 1284  | 45.6198  | 50.63379 | 46.14083 | 43.62593 |
| protein_co double_zin   | 71    | 54    | 69    | 81    | 108   | 113   | 0.890396 | 0.868416 | 1.044052 | 1.576669 |
| protein_co lysine_(K)-s | 1172  | 799   | 925   | 3248  | 3756  | 2936  | 8.231741 | 7.196481 | 7.838877 | 35.40875 |
| protein_co chromosom    | 3     | 1     | 0     | 2     | 2     | 3     | 0.034461 | 0.01473  | 0        | 0.035659 |
| protein_co LIM_homer    | 0     | 0     | 0     | 57    | 60    | 121   | 0        | 0        | 0        | 1.411037 |
| protein_co caspase_thi  | 101   | 92    | 89    | 126   | 159   | 112   | 2.013559 | 2.352016 | 2.140825 | 3.898918 |
| protein_co 2'-5'-oligoa | 11    | 6     | 8     | 0     | 0     | 1     | 0.259191 | 0.181296 | 0.227439 | 0        |
| protein_co GCN1_gene    | 6850  | 5439  | 5866  | 6480  | 7628  | 6033  | 37.02555 | 37.69982 | 38.25613 | 54.36462 |
| protein_co ribosomal_   | 24758 | 19789 | 20239 | 38426 | 37947 | 34344 | 448.0521 | 459.2468 | 441.9265 | 1079.366 |
| protein_co paxillin     | 3543  | 2756  | 3127  | 2270  | 3062  | 1907  | 30.44371 | 30.36792 | 32.41921 | 30.2749  |
| protein_co sirtuin_4    | 22    | 17    | 23    | 58    | 64    | 25    | 0.847642 | 0.83994  | 1.069217 | 3.468553 |
| protein_co rabphilin_3  | 3     | 0     | 3     | 0     | 0     | 2     | 0.027115 | 0        | 0.032715 | 0        |
| protein_co kinesin_fan  | 242   | 198   | 179   | 191   | 240   | 175   | 2.156887 | 2.263011 | 1.924922 | 2.642262 |
| protein_co tRNA_meth    | 393   | 375   | 370   | 320   | 367   | 593   | 6.091827 | 7.454107 | 6.919979 | 7.69902  |
| protein_co chromogra    | 109   | 77    | 81    | 36    | 30    | 35    | 2.004318 | 1.815684 | 1.797104 | 1.02748  |
| protein_co phosphatic   | 2692  | 2170  | 2178  | 5396  | 6195  | 6226  | 74.38299 | 76.8896  | 72.61134 | 231.42   |
| protein_co T-box_5      | 0     | 4     | 1     | 34    | 63    | 75    | 0        | 0.062881 | 0.014791 | 0.646932 |
| protein_co BRCA1_ass    | 529   | 437   | 411   | 449   | 529   | 570   | 6.161157 | 6.526756 | 5.775592 | 8.116774 |
| protein_co endoplasm    | 2026  | 1742  | 1632  | 2122  | 2336  | 2443  | 54.75457 | 60.37239 | 53.21684 | 89.01368 |
| protein_co nitric_oxid  | 196   | 174   | 198   | 394   | 468   | 204   | 0.755917 | 0.860551 | 0.921365 | 2.358549 |
| protein_co fused_in_sc  | 8035  | 6404  | 6858  | 8279  | 11308 | 12860 | 76.5775  | 78.26651 | 78.86073 | 122.4683 |
| protein_co immunoglob   | 466   | 352   | 342   | 569   | 564   | 405   | 11.7351  | 11.36718 | 10.39142 | 22.24044 |
| protein_co FXYD_dom     | 1214  | 911   | 993   | 1203  | 1194  | 784   | 36.02815 | 34.66977 | 35.55663 | 55.41399 |
| protein_co zinc_finger  | 311   | 258   | 247   | 337   | 387   | 405   | 3.798592 | 4.041023 | 3.640049 | 6.388849 |
| protein_co GRAM_don     | 2429  | 1859  | 1996  | 8039  | 9466  | 4478  | 40.31712 | 39.5686  | 39.97335 | 207.1068 |

|                         |       |       |       |       |       |       |          |          |          |          |
|-------------------------|-------|-------|-------|-------|-------|-------|----------|----------|----------|----------|
| protein_co FXYP_dom     | 0     | 1     | 0     | 2     | 5     | 5     | 0        | 0.040988 | 0        | 0.099223 |
| protein_co hephaestin   | 302   | 252   | 269   | 1079  | 1069  | 885   | 2.355028 | 2.519991 | 2.530985 | 13.05994 |
| protein_co cell_death   | 179   | 170   | 149   | 1139  | 1454  | 783   | 2.789403 | 3.397164 | 2.801512 | 27.54942 |
| protein_co CKLF-like    | 77    | 61    | 56    | 22    | 12    | 12    | 3.393357 | 3.447291 | 2.977658 | 1.504846 |
| protein_co potassium    | 1     | 0     | 3     | 24    | 36    | 18    | 0.011962 | 0        | 0.043298 | 0.445591 |
| protein_co glucosidase  | 15583 | 12606 | 12572 | 10030 | 10669 | 10121 | 187.0679 | 194.0594 | 182.0961 | 186.8872 |
| protein_co GEM_inter    | 884   | 650   | 757   | 543   | 771   | 521   | 11.71588 | 11.04702 | 12.10505 | 11.16999 |
| protein_co RNA_bindi    | 251   | 181   | 211   | 199   | 172   | 201   | 3.550345 | 3.283105 | 3.601035 | 4.368984 |
| protein_co baculoviral  | 260   | 218   | 224   | 338   | 426   | 407   | 4.497014 | 4.835225 | 4.674627 | 9.073985 |
| protein_co lymphocyt    | 21    | 22    | 25    | 26    | 46    | 19    | 0.38063  | 0.511347 | 0.546729 | 0.731455 |
| protein_co myeloid_le   | 5839  | 4428  | 4598  | 3338  | 4194  | 3510  | 139.8319 | 135.983  | 132.8571 | 124.0751 |
| protein_co OTU_doma     | 60    | 49    | 42    | 86    | 99    | 34    | 0.717338 | 0.751239 | 0.605857 | 1.595885 |
| protein_co DEAD_(Asp    | 2152  | 1783  | 1780  | 2287  | 2244  | 2531  | 18.10646 | 19.23765 | 18.07005 | 29.86675 |
| protein_co zinc_finger  | 68    | 63    | 67    | 74    | 86    | 51    | 1.522694 | 1.809063 | 1.8102   | 2.57197  |
| protein_co NECAP_enc    | 629   | 483   | 521   | 281   | 344   | 320   | 9.425957 | 9.281781 | 9.42021  | 6.535994 |
| protein_co Rho_GTPas    | 35    | 31    | 31    | 877   | 1246  | 794   | 0.486699 | 0.552795 | 0.520119 | 18.92879 |
| protein_co ankyrin_rej  | 18    | 10    | 11    | 293   | 414   | 143   | 0.209642 | 0.149354 | 0.154578 | 5.296692 |
| protein_co DEAH_(Asp    | 418   | 377   | 364   | 309   | 370   | 215   | 6.384374 | 7.384017 | 6.707975 | 7.325394 |
| protein_co REST_core    | 1010  | 837   | 897   | 634   | 731   | 516   | 8.230608 | 8.746722 | 8.819643 | 8.019186 |
| protein_co G_patch_d    | 1324  | 1125  | 1320  | 1240  | 1371  | 886   | 4.43224  | 4.829444 | 5.331596 | 6.442989 |
| protein_co latent_tran  | 15713 | 10852 | 11536 | 1818  | 2523  | 1123  | 143.2872 | 126.9017 | 126.9263 | 25.73195 |
| protein_co biliverdin   | 447   | 385   | 380   | 330   | 365   | 174   | 15.05735 | 16.63073 | 15.44446 | 17.25383 |
| protein_co solute_carr  | 1319  | 954   | 1088  | 767   | 978   | 890   | 13.69529 | 12.70235 | 13.63024 | 12.36096 |
| protein_co serine_palr  | 1255  | 969   | 1018  | 725   | 800   | 915   | 31.07021 | 30.76334 | 30.40859 | 27.85922 |
| protein_co poly(A)_pol  | 3116  | 2768  | 2868  | 2883  | 3106  | 3645  | 32.33222 | 36.831   | 35.90585 | 46.43155 |
| protein_co cyclin_K     | 1693  | 1303  | 1399  | 1268  | 1497  | 1328  | 14.10784 | 13.92378 | 14.06596 | 16.40035 |
| protein_co poly(rC)_bi  | 1395  | 1046  | 1051  | 518   | 692   | 488   | 25.16798 | 24.19999 | 22.87836 | 14.50555 |
| protein_co regulator_c  | 4     | 0     | 0     | 2     | 0     | 0     | 0.070697 | 0        | 0        | 0.054866 |
| protein_co yippee-like  | 328   | 248   | 269   | 470   | 552   | 281   | 7.923712 | 7.682735 | 7.840706 | 17.62314 |
| protein_co mitochond    | 344   | 228   | 258   | 353   | 332   | 377   | 18.90992 | 16.07221 | 17.11193 | 30.11872 |
| protein_co NADH_deh     | 551   | 458   | 468   | 365   | 430   | 261   | 15.50804 | 16.53028 | 15.89276 | 15.94515 |
| protein_co nuclear_dis  | 3270  | 2598  | 2779  | 2981  | 3900  | 3962  | 85.18353 | 86.78734 | 87.34629 | 120.5314 |
| protein_co macrophag    | 1792  | 1431  | 1521  | 1325  | 1638  | 1920  | 15.64456 | 16.02043 | 16.02148 | 17.95443 |
| protein_co intercellula | 10    | 9     | 8     | 101   | 80    | 18    | 0.144188 | 0.166411 | 0.139177 | 2.260381 |
| protein_co striatin_cal | 3106  | 2513  | 2555  | 3381  | 4299  | 3326  | 40.14344 | 41.64999 | 39.843   | 67.82484 |
| protein_co interleukin  | 12    | 5     | 7     | 11    | 8     | 19    | 0.064952 | 0.034705 | 0.045715 | 0.092413 |
| protein_co lysozyme     | 111   | 81    | 102   | 1     | 2     | 3     | 3.401825 | 3.183342 | 3.7717   | 0.047568 |
| protein_co sucrase-iso  | 0     | 0     | 0     | 0     | 0     | 1     | 0        | 0        | 0        | 0        |
| protein_co mitochond    | 639   | 463   | 516   | 512   | 564   | 659   | 12.29997 | 11.42861 | 11.98397 | 15.2969  |
| protein_co transcriptio | 258   | 196   | 223   | 500   | 565   | 768   | 1.863754 | 1.815659 | 1.943666 | 5.606209 |
| protein_co programme    | 620   | 518   | 495   | 605   | 835   | 450   | 10.19706 | 10.92502 | 9.822825 | 15.44433 |
| protein_co spastic_par  | 1333  | 1130  | 1154  | 905   | 1245  | 949   | 30.35667 | 32.99984 | 31.70866 | 31.98918 |
| protein_co fetuin_B     | 0     | 0     | 0     | 0     | 5     | 0     | 0        | 0        | 0        | 0        |
| protein_co DnaJ_(Hsp4   | 2177  | 1630  | 1766  | 695   | 902   | 1287  | 25.02564 | 24.02833 | 24.49432 | 12.40058 |
| protein_co leprecan-lil | 754   | 623   | 659   | 258   | 267   | 294   | 10.07554 | 10.67565 | 10.62504 | 5.351151 |
| protein_co thrombopo    | 6     | 1     | 3     | 3     | 7     | 9     | 0.151666 | 0.032415 | 0.091497 | 0.117703 |
| protein_co chordin      | 122   | 95    | 106   | 35    | 32    | 57    | 1.212245 | 1.210496 | 1.270821 | 0.539795 |
| protein_co fms-related  | 4     | 1     | 9     | 12    | 13    | 14    | 0.131992 | 0.042315 | 0.358325 | 0.614608 |
| protein_co RAB11_fam    | 1931  | 1487  | 1488  | 1184  | 1531  | 1350  | 18.74242 | 18.50818 | 17.42586 | 17.83715 |
| protein_co N-acetylglu  | 675   | 486   | 506   | 249   | 335   | 358   | 13.18782 | 12.17628 | 11.928   | 7.550904 |
| protein_co zinc_finger  | 259   | 181   | 178   | 175   | 155   | 490   | 2.109888 | 1.890808 | 1.749555 | 2.212728 |
| protein_co golgin_A3    | 6652  | 5471  | 5769  | 1076  | 1535  | 1344  | 33.71297 | 35.55665 | 35.27714 | 8.464231 |
| protein_co poly(A)_bir  | 2118  | 1784  | 1877  | 2485  | 3376  | 3717  | 27.6484  | 29.86402 | 29.56354 | 50.35017 |
| protein_co CD209_mo     | 0     | 0     | 0     | 6     | 4     | 7     | 0        | 0        | 0        | 0.102028 |
| protein_co ceramide_s   | 18    | 10    | 13    | 1667  | 2191  | 1167  | 0.351529 | 0.250436 | 0.306323 | 50.53058 |
| protein_co mucolipin    | 344   | 224   | 300   | 159   | 240   | 268   | 7.159417 | 5.978284 | 7.533356 | 5.136258 |
| protein_co ubiquitin_s  | 2134  | 1760  | 1791  | 1473  | 1752  | 1720  | 21.77656 | 23.03122 | 22.05152 | 23.33072 |
| protein_co ephrin-B1    | 847   | 619   | 642   | 807   | 952   | 738   | 11.98426 | 11.23124 | 10.96001 | 17.72278 |
| protein_co pyruvate_d   | 991   | 800   | 897   | 934   | 1141  | 1126  | 5.809227 | 6.013731 | 6.344322 | 8.498104 |
| protein_co alanyl-tRNA  | 6222  | 4892  | 5135  | 6504  | 9035  | 5645  | 83.90845 | 84.60022 | 83.55341 | 136.1403 |
| protein_co golgi_glyco  | 6892  | 5555  | 6062  | 3867  | 4354  | 3018  | 68.06361 | 70.34984 | 72.23267 | 59.27538 |
| protein_co kinesin_fan  | 891   | 701   | 789   | 968   | 965   | 954   | 9.608787 | 9.694339 | 10.26635 | 16.20305 |
| protein_co trinucleoti  | 2184  | 1734  | 1829  | 2096  | 2470  | 2929  | 12.1365  | 12.35661 | 12.26317 | 18.07851 |
| protein_co Fc_fragmen   | 76    | 44    | 43    | 19    | 15    | 8     | 0.217428 | 0.161422 | 0.148429 | 0.08437  |
| protein_co plectstrin   | 2802  | 2067  | 2390  | 900   | 1275  | 1447  | 17.47384 | 16.5299  | 17.98317 | 8.711507 |

|                         |       |       |       |       |       |       |          |          |          |          |
|-------------------------|-------|-------|-------|-------|-------|-------|----------|----------|----------|----------|
| protein_co delta-like_3 | 27    | 32    | 19    | 490   | 633   | 125   | 0.542895 | 0.825109 | 0.46095  | 15.2925  |
| protein_co N-acetyltra  | 1533  | 1148  | 1166  | 822   | 1193  | 963   | 46.79844 | 44.94076 | 42.94729 | 38.94857 |
| protein_co phosphatic   | 549   | 396   | 409   | 260   | 348   | 275   | 3.794049 | 3.509418 | 3.410373 | 2.788909 |
| protein_co exocyst_co   | 653   | 494   | 583   | 386   | 394   | 349   | 8.622693 | 8.365001 | 9.288516 | 7.911294 |
| protein_co RNA_bindin   | 950   | 705   | 781   | 870   | 1033  | 789   | 6.905211 | 6.571308 | 6.849398 | 9.815289 |
| protein_co POU_class_   | 0     | 0     | 3     | 0     | 0     | 0     | 0        | 0        | 0        | 0.143593 |
| protein_co oxysterol_k  | 2107  | 1681  | 1799  | 976   | 757   | 1033  | 13.64792 | 13.963   | 14.05986 | 9.812555 |
| protein_co deltex_hon   | 507   | 334   | 417   | 917   | 1134  | 749   | 8.585496 | 7.252926 | 8.520038 | 24.10223 |
| protein_co NLR_family   | 16    | 4     | 8     | 12    | 12    | 7     | 0.209506 | 0.067165 | 0.12639  | 0.243887 |
| protein_co pseudouric   | 289   | 234   | 266   | 741   | 851   | 1010  | 3.894027 | 4.04321  | 4.32445  | 15.49708 |
| protein_co laminin_be   | 16    | 12    | 9     | 0     | 0     | 0     | 0.128071 | 0.123175 | 0.08692  | 0        |
| protein_co neuronal_c   | 98    | 70    | 69    | 71    | 67    | 45    | 0.690077 | 0.63209  | 0.586231 | 0.775997 |
| protein_co laminin_be   | 17708 | 14245 | 14928 | 2724  | 3155  | 2447  | 144.0042 | 148.5517 | 146.4723 | 34.38297 |
| protein_co solute_carr  | 12    | 12    | 18    | 2     | 0     | 0     | 0.114134 | 0.146361 | 0.206564 | 0.029525 |
| protein_co solute_carr  | 0     | 0     | 0     | 3     | 2     | 3     | 0        | 0        | 0        | 0.076262 |
| protein_co dihydrolip   | 1070  | 894   | 908   | 643   | 684   | 873   | 13.36147 | 14.31586 | 13.68057 | 12.46269 |
| protein_co WD_repeat    | 337   | 268   | 310   | 167   | 258   | 225   | 1.741452 | 1.77593  | 1.93282  | 1.339456 |
| protein_co thioredoxin  | 1076  | 923   | 962   | 937   | 1039  | 1099  | 7.318488 | 8.05045  | 7.894638 | 9.891888 |
| protein_co ATP-bindin   | 9     | 20    | 24    | 38    | 59    | 18    | 0.073431 | 0.209256 | 0.236265 | 0.481231 |
| protein_co CKLF-like_M  | 1203  | 949   | 1046  | 664   | 1018  | 867   | 14.6023  | 14.77173 | 15.31918 | 12.50991 |
| protein_co integrin_al  | 1296  | 1220  | 1167  | 1202  | 1430  | 1273  | 10.25299 | 12.37698 | 11.13947 | 14.7598  |
| protein_co Rap_guanin   | 29    | 21    | 24    | 23    | 28    | 20    | 0.313465 | 0.291085 | 0.313004 | 0.385877 |
| protein_co Mitogen-ac   | 1674  | 1379  | 1527  | 501   | 608   | 338   | 10.93382 | 11.55021 | 12.03382 | 5.079075 |
| protein_co small_musc   | 1     | 1     | 0     | 0     | 0     | 1     | 0.049989 | 0.064104 | 0        | 0        |
| protein_co fumarate_h   | 913   | 782   | 793   | 888   | 912   | 987   | 23.82336 | 26.16667 | 24.96626 | 35.96464 |
| protein_co sel-1_suppl  | 2506  | 1949  | 2215  | 1124  | 1395  | 1197  | 26.03154 | 25.96211 | 27.76135 | 18.1224  |
| protein_co transferrin  | 8     | 2     | 5     | 1     | 2     | 0     | 0.081512 | 0.026132 | 0.061468 | 0.015815 |
| protein_co CDV3_hom     | 3444  | 2727  | 2881  | 2166  | 2750  | 2669  | 44.59796 | 45.28416 | 45.01354 | 43.53522 |
| protein_co myosin_XV    | 35    | 14    | 18    | 59    | 55    | 25    | 0.138342 | 0.070962 | 0.085843 | 0.361966 |
| protein_co alkB_alkyla  | 1260  | 924   | 1032  | 1203  | 1341  | 1097  | 21.49979 | 20.21832 | 21.2467  | 31.86103 |
| protein_co apolipopro   | 1     | 0     | 0     | 0     | 0     | 0     | 0.039872 | 0        | 0        | 0        |
| protein_co NLR_family   | 1099  | 971   | 974   | 241   | 430   | 258   | 9.403673 | 10.65439 | 10.05557 | 3.200718 |
| protein_co PITPNM_fai   | 198   | 187   | 184   | 114   | 143   | 45    | 1.310221 | 1.586829 | 1.469079 | 1.170886 |
| protein_co sperm_assc   | 1384  | 988   | 1047  | 1209  | 1445  | 1221  | 38.90635 | 35.61645 | 35.51232 | 52.75227 |
| protein_co origin_recc  | 540   | 455   | 473   | 674   | 891   | 977   | 13.81375 | 14.92584 | 14.59913 | 26.76137 |
| protein_co zinc_finger  | 2385  | 1823  | 1946  | 83    | 93    | 70    | 7.977223 | 7.819147 | 7.853337 | 0.430895 |
| protein_co solute_carr  | 3     | 0     | 0     | 4     | 1     | 14    | 0.035622 | 0        | 0        | 0.07372  |
| protein_co carboxypep   | 2     | 0     | 4     | 0     | 0     | 0     | 0.048566 | 0        | 0.117194 | 0        |
| protein_co zinc_finger  | 493   | 326   | 423   | 362   | 407   | 464   | 11.7225  | 9.940321 | 12.13562 | 13.36019 |
| protein_co estrogen_r   | 11    | 18    | 16    | 6     | 4     | 11    | 0.07977  | 0.167389 | 0.139995 | 0.067535 |
| protein_co regulator_c  | 65    | 48    | 66    | 75    | 77    | 47    | 1.86299  | 1.764199 | 2.282386 | 3.336482 |
| protein_co angiopoiet   | 11    | 5     | 16    | 4     | 4     | 4     | 0.095235 | 0.055511 | 0.167136 | 0.053752 |
| protein_co transmembr   | 517   | 409   | 460   | 598   | 652   | 322   | 13.24707 | 13.43885 | 14.22117 | 23.78269 |
| protein_co CD200_mo     | 223   | 160   | 145   | 725   | 697   | 726   | 4.911448 | 4.518914 | 3.853193 | 24.7841  |
| protein_co coiled-coil  | 15530 | 12510 | 13166 | 123   | 191   | 261   | 156.1325 | 161.283  | 159.7069 | 1.919364 |
| protein_co chymase_1    | 2     | 1     | 0     | 1     | 0     | 1     | 0.100085 | 0.064173 | 0        | 0.077673 |
| protein_co proteasom    | 858   | 753   | 763   | 637   | 675   | 514   | 35.41517 | 39.85716 | 37.99922 | 40.8105  |
| protein_co protein_ph   | 215   | 190   | 225   | 120   | 114   | 209   | 5.461188 | 6.188874 | 6.895714 | 4.731081 |
| protein_co HAUS_augm    | 83    | 64    | 68    | 156   | 176   | 141   | 2.370202 | 2.34367  | 2.342956 | 6.914524 |
| protein_co junctophili  | 0     | 5     | 3     | 1664  | 2300  | 726   | 0        | 0.068547 | 0.038697 | 27.61185 |
| protein_co myosin_he    | 1     | 0     | 0     | 0     | 2     | 0     | 0.007703 | 0        | 0        | 0        |
| protein_co CCAAT/enh    | 0     | 0     | 0     | 1     | 0     | 0     | 0        | 0        | 0        | 0.046834 |
| protein_co solute_carr  | 2007  | 1656  | 1742  | 4971  | 5586  | 5693  | 22.32169 | 23.61834 | 23.37631 | 85.81319 |
| protein_co O-sialoglyc  | 461   | 369   | 367   | 315   | 374   | 500   | 6.634837 | 6.810281 | 6.372993 | 7.036721 |
| protein_co solute_carr  | 3257  | 2327  | 2449  | 902   | 1247  | 606   | 63.39593 | 58.08304 | 57.51491 | 27.25088 |
| protein_co ring_finger  | 500   | 364   | 409   | 433   | 499   | 408   | 6.464022 | 6.034532 | 6.379758 | 8.688628 |
| protein_co sec1_famil   | 844   | 701   | 711   | 553   | 478   | 636   | 16.77625 | 17.86816 | 17.05179 | 17.06114 |
| protein_co G2/M-phas    | 649   | 556   | 538   | 727   | 611   | 638   | 5.243215 | 5.760194 | 5.244249 | 9.116285 |
| protein_co HECT_dom     | 3309  | 2646  | 2893  | 1561  | 1713  | 1483  | 16.98698 | 17.41881 | 17.91909 | 12.43806 |
| protein_co heterogene   | 10406 | 8397  | 8530  | 15423 | 17232 | 17528 | 108.4065 | 112.1773 | 107.2182 | 249.3852 |
| protein_co retinitis_pi | 1     | 3     | 0     | 15    | 20    | 25    | 0.011889 | 0.045738 | 0        | 0.276799 |
| protein_co suppressor   | 3797  | 3044  | 3360  | 5659  | 6037  | 7451  | 38.01055 | 39.07667 | 40.58362 | 87.92931 |
| protein_co TOX_high_I   | 1296  | 1007  | 1094  | 799   | 874   | 906   | 12.93793 | 12.89136 | 13.17726 | 12.38047 |
| protein_co gem_(nucle   | 170   | 139   | 165   | 257   | 293   | 235   | 5.400612 | 5.66263  | 6.324498 | 12.67236 |
| protein_co transglutar  | 21    | 11    | 14    | 37    | 38    | 16    | 0.354588 | 0.238181 | 0.28522  | 0.969698 |

|                         |      |      |      |       |       |       |          |          |          |          |
|-------------------------|------|------|------|-------|-------|-------|----------|----------|----------|----------|
| protein_co TERF1_(TRF   | 785  | 596  | 667  | 388   | 475   | 387   | 16.97817 | 16.53015 | 17.40584 | 13.02517 |
| protein_co deleted_in   | 0    | 1    | 0    | 9     | 16    | 19    | 0        | 0.019372 | 0        | 0.211024 |
| protein_co transducin   | 0    | 0    | 0    | 84    | 88    | 65    | 0        | 0        | 0        | 2.539885 |
| protein_co sema_dom     | 2338 | 1952 | 2030 | 11640 | 14988 | 12940 | 15.93906 | 17.06504 | 16.69792 | 123.1691 |
| protein_co transient_r  | 707  | 544  | 574  | 438   | 460   | 514   | 4.564401 | 4.503732 | 4.471202 | 4.389034 |
| protein_co TYRO3_pro    | 797  | 615  | 680  | 2123  | 2599  | 2405  | 9.463496 | 9.364352 | 9.742047 | 39.12675 |
| protein_co WD_repeat    | 408  | 315  | 379  | 238   | 295   | 258   | 4.809233 | 4.761409 | 5.390175 | 4.354347 |
| protein_co calpain_3_   | 2    | 0    | 0    | 1     | 4     | 2     | 0.029052 | 0        | 0        | 0.022546 |
| protein_co synaptosor   | 1151 | 889  | 934  | 445   | 516   | 488   | 20.08575 | 19.89408 | 19.66562 | 12.05322 |
| protein_co T-box_15     | 405  | 342  | 363  | 217   | 218   | 93    | 5.419651 | 5.868833 | 5.86099  | 4.507197 |
| protein_co phosphogl    | 4280 | 3158 | 3417 | 10219 | 12848 | 8632  | 63.10983 | 59.7138  | 60.79198 | 233.8795 |
| protein_co collagen_ty  | 957  | 682  | 699  | 2543  | 3805  | 2424  | 18.05785 | 16.50242 | 15.914   | 74.47848 |
| protein_co ezrin        | 2854 | 2431 | 2484 | 4908  | 5996  | 7295  | 43.22484 | 47.21432 | 45.39197 | 115.3757 |
| protein_co myosin_lig   | 5863 | 4486 | 4783 | 2219  | 2163  | 2554  | 175.7776 | 172.4695 | 173.0183 | 103.2598 |
| protein_co argonaute_   | 1692 | 1406 | 1414 | 3010  | 3630  | 3533  | 6.20312  | 6.610046 | 6.254712 | 17.12801 |
| protein_co tektin_2_(t  | 26   | 15   | 19   | 27    | 36    | 10    | 0.701462 | 0.518957 | 0.618489 | 1.130641 |
| protein_co claspin      | 919  | 774  | 820  | 656   | 800   | 991   | 9.035841 | 9.758956 | 9.727808 | 10.01123 |
| protein_co ring_finger  | 290  | 219  | 245  | 247   | 221   | 177   | 1.864542 | 1.805625 | 1.900589 | 2.464913 |
| protein_co unc-13_hoi   | 12   | 6    | 13   | 166   | 244   | 135   | 0.128086 | 0.082126 | 0.167421 | 2.750159 |
| protein_co major_facil  | 336  | 264  | 239  | 135   | 229   | 242   | 4.361862 | 4.394869 | 3.743507 | 2.720175 |
| protein_co dihydropyr   | 5267 | 4359 | 4541 | 4093  | 5139  | 5357  | 53.65408 | 56.94238 | 55.81346 | 64.716   |
| protein_co transformi   | 648  | 527  | 537  | 38    | 35    | 41    | 6.013206 | 6.271206 | 6.012477 | 0.547325 |
| protein_co G_patch_di   | 316  | 286  | 297  | 168   | 204   | 229   | 2.53243  | 2.939177 | 2.871804 | 2.089729 |
| protein_co nucleopori   | 1787 | 1386 | 1436 | 1657  | 2117  | 2167  | 16.02457 | 15.93802 | 15.5369  | 23.06294 |
| protein_co cell_divisio | 566  | 419  | 488  | 447   | 514   | 699   | 12.69844 | 12.05473 | 13.20997 | 15.56582 |
| protein_co catechol-O   | 65   | 59   | 43   | 258   | 298   | 228   | 1.250657 | 1.455748 | 0.998255 | 7.705043 |
| protein_co cat_eye_syr  | 13   | 12   | 16   | 610   | 672   | 530   | 0.152928 | 0.181023 | 0.227097 | 1.11379  |
| processed_ -            | 6    | 5    | 12   | 1     | 5     | 1     | 0.065005 | 0.069466 | 0.156864 | 0.016816 |
| protein_co vanin_3      | 1    | 0    | 0    | 0     | 0     | 0     | 0.026627 | 0        | 0        | 0        |
| protein_co enoyl_CoA    | 956  | 809  | 847  | 567   | 640   | 1058  | 17.34114 | 18.81818 | 18.53751 | 15.96369 |
| protein_co leucine_ri   | 724  | 566  | 582  | 288   | 365   | 291   | 8.900989 | 8.9233   | 8.633179 | 5.495696 |
| protein_co SEC22_vesi   | 902  | 770  | 839  | 532   | 499   | 470   | 7.102401 | 7.774969 | 7.970923 | 6.501907 |
| protein_co xylulokinas  | 103  | 76   | 77   | 26    | 42    | 33    | 1.318142 | 1.247234 | 1.18895  | 0.516451 |
| protein_co histone_de   | 1452 | 1222 | 1234 | 613   | 696   | 600   | 14.09029 | 15.20667 | 14.4483  | 9.233034 |
| protein_co gamma-am     | 0    | 0    | 0    | 100   | 158   | 51    | 0        | 0        | 0        | 2.035229 |
| protein_co cell_divisio | 1667 | 1329 | 1436 | 1174  | 1317  | 2705  | 25.44455 | 26.01318 | 26.4461  | 27.81363 |
| protein_co uracil_pho   | 171  | 120  | 124  | 241   | 275   | 295   | 3.589164 | 3.229891 | 3.14027  | 7.851357 |
| protein_co cell_divisio | 765  | 648  | 679  | 859   | 927   | 725   | 11.37674 | 12.35779 | 12.18356 | 19.82805 |
| protein_co achalasia_a  | 1269 | 932  | 1002 | 1471  | 1604  | 1434  | 29.51559 | 27.7981  | 28.11937 | 53.10471 |
| protein_co chromobo     | 7969 | 6348 | 6984 | 6784  | 7993  | 6367  | 32.41382 | 33.11103 | 34.2751  | 42.82947 |
| protein_co SUN_doma     | 1261 | 935  | 1063 | 758   | 601   | 698   | 9.992954 | 9.501666 | 10.16389 | 9.32349  |
| protein_co mutS_hom     | 1010 | 811  | 848  | 4742  | 4789  | 4995  | 13.05373 | 13.44136 | 13.22382 | 95.12729 |
| protein_co mitogen-ac   | 296  | 202  | 214  | 410   | 466   | 346   | 1.979667 | 1.732452 | 1.72688  | 4.56129  |
| protein_co deoxyhyphu   | 1027 | 750  | 824  | 978   | 1144  | 827   | 35.33092 | 33.08683 | 34.20265 | 52.22204 |
| protein_co hook_hom     | 284  | 209  | 259  | 963   | 1348  | 991   | 5.11593  | 4.82794  | 5.629295 | 26.92545 |
| protein_co neurexophi   | 1    | 0    | 0    | 1     | 0     | 0     | 0.020485 | 0        | 0        | 0.031795 |
| protein_co archain_1    | 5612 | 4827 | 5042 | 2446  | 2723  | 2234  | 65.1676  | 71.87878 | 70.64232 | 44.08603 |
| protein_co erythrocyte  | 17   | 22   | 12   | 590   | 706   | 416   | 0.137436 | 0.228079 | 0.117053 | 7.403463 |
| protein_co transmembr   | 100  | 112  | 88   | 204   | 208   | 186   | 1.185289 | 1.70236  | 1.258505 | 3.753053 |
| protein_co proteasom    | 721  | 562  | 603  | 487   | 616   | 708   | 9.819257 | 9.814971 | 9.908519 | 10.29444 |
| protein_co prostaglan   | 9    | 2    | 8    | 13    | 14    | 12    | 0.085014 | 0.024226 | 0.091177 | 0.1906   |
| protein_co nucleopori   | 2328 | 2018 | 2015 | 2185  | 2381  | 2702  | 19.1879  | 21.32922 | 20.03861 | 27.95287 |
| protein_co carnitine_C  | 1302 | 953  | 1034 | 444   | 564   | 190   | 22.09584 | 20.73967 | 21.1723  | 11.69534 |
| protein_co SH2_domai    | 40   | 24   | 33   | 61    | 92    | 32    | 0.600384 | 0.461945 | 0.597629 | 1.421116 |
| protein_co N-acetylnei  | 761  | 557  | 599  | 427   | 513   | 367   | 11.78834 | 11.06452 | 11.19548 | 10.26659 |
| protein_co TBC1_dom     | 197  | 163  | 207  | 205   | 211   | 171   | 2.888472 | 3.064777 | 3.662017 | 4.665372 |
| protein_co deafness_ar  | 212  | 170  | 195  | 974   | 1247  | 468   | 2.787629 | 2.866535 | 3.093725 | 19.87872 |
| protein_co phosphodi    | 9    | 8    | 10   | 2     | 7     | 3     | 0.127611 | 0.145461 | 0.171078 | 0.044016 |
| protein_co CWF19-like   | 414  | 352  | 303  | 478   | 504   | 485   | 7.205816 | 7.856603 | 6.363169 | 12.91342 |
| protein_co sema_dom     | 146  | 131  | 117  | 191   | 213   | 124   | 1.470348 | 1.691796 | 1.421678 | 2.985598 |
| protein_co BTAF1_RNA    | 1242 | 1102 | 1182 | 1002  | 1126  | 818   | 8.032745 | 9.139729 | 9.223758 | 10.05867 |
| protein_co IKAROS_far   | 188  | 165  | 176  | 113   | 129   | 190   | 1.935307 | 2.178138 | 2.186013 | 1.805514 |
| protein_co B-cell_linke | 0    | 0    | 0    | 0     | 1     | 0     | 0        | 0        | 0        | 0        |
| protein_co tolloid-like | 55   | 30   | 40   | 202   | 228   | 244   | 0.381727 | 0.267006 | 0.334965 | 2.176069 |
| protein_co cytochrom    | 0    | 0    | 3    | 63    | 76    | 165   | 0        | 0        | 0.075602 | 2.042373 |

|                         |       |       |       |       |       |       |          |          |          |          |
|-------------------------|-------|-------|-------|-------|-------|-------|----------|----------|----------|----------|
| protein_co tudor_dom    | 0     | 0     | 0     | 5     | 12    | 16    | 0        | 0        | 0        | 0.080687 |
| protein_co sorbin_and   | 406   | 268   | 315   | 889   | 1053  | 769   | 2.588706 | 2.191295 | 2.423346 | 8.798102 |
| protein_co cartilage_a  | 3     | 4     | 4     | 61    | 72    | 28    | 0.048675 | 0.083225 | 0.078305 | 1.536183 |
| protein_co BMP_and_i    | 281   | 180   | 230   | 542   | 702   | 559   | 6.993681 | 5.744885 | 6.906776 | 20.93771 |
| protein_co interleukin  | 592   | 508   | 539   | 15    | 24    | 3     | 12.16961 | 13.39147 | 13.36878 | 0.478605 |
| protein_co myosin_III/  | 0     | 0     | 0     | 99    | 113   | 85    | 0        | 0        | 0        | 1.291023 |
| protein_co WW_doma      | 2414  | 1864  | 1930  | 2033  | 2398  | 1950  | 25.00939 | 24.76402 | 24.12522 | 32.69141 |
| protein_co cAMP_resp    | 337   | 317   | 281   | 185   | 187   | 179   | 5.945047 | 7.171236 | 5.981082 | 5.065562 |
| protein_co nucleotide   | 1667  | 1134  | 1354  | 1549  | 2114  | 1825  | 34.97345 | 30.50881 | 34.27438 | 50.44112 |
| protein_co tryptase_de  | 0     | 0     | 0     | 0     | 1     | 0     | 0        | 0        | 0        | 0        |
| protein_co chromosom    | 1     | 0     | 0     | 85    | 79    | 20    | 0.051641 | 0        | 0        | 6.813087 |
| protein_co human_imi    | 532   | 430   | 479   | 310   | 326   | 379   | 2.763431 | 2.864275 | 3.002068 | 2.499362 |
| protein_co triggering_  | 2     | 2     | 2     | 0     | 1     | 2     | 0.089828 | 0.115191 | 0.108382 | 0        |
| protein_co potassium_   | 0     | 0     | 0     | 1     | 0     | 0     | 0        | 0        | 0        | 0.057217 |
| protein_co FK506_bin    | 601   | 465   | 497   | 913   | 1124  | 901   | 3.816482 | 3.786614 | 3.807967 | 8.998911 |
| protein_co SRSF_prote   | 1027  | 861   | 1036  | 1702  | 2250  | 1864  | 10.11257 | 10.87185 | 12.30832 | 26.01244 |
| protein_co bromodom     | 1156  | 864   | 985   | 930   | 1066  | 1296  | 8.95652  | 8.584293 | 9.208009 | 11.18394 |
| protein_co mitochond    | 272   | 217   | 201   | 283   | 400   | 329   | 12.0095  | 12.28641 | 10.70779 | 19.39424 |
| protein_co progastrics  | 0     | 0     | 0     | 1     | 1     | 1     | 0        | 0        | 0        | 0.053085 |
| protein_co transmemt    | 333   | 270   | 264   | 94    | 123   | 126   | 15.7403  | 16.36597 | 15.05638 | 6.896473 |
| protein_co EF-hand_dc   | 416   | 334   | 339   | 99    | 98    | 111   | 3.582415 | 3.688403 | 3.522332 | 1.323269 |
| protein_co natural_cyl  | 0     | 0     | 0     | 1     | 0     | 0     | 0        | 0        | 0        | 0.063067 |
| protein_co heat_shock   | 27817 | 22707 | 23570 | 55343 | 54851 | 51987 | 487.7859 | 510.6086 | 498.6854 | 1506.302 |
| protein_co motilin      | 6     | 0     | 5     | 2     | 1     | 0     | 0.497067 | 0        | 0.499784 | 0.257172 |
| protein_co cell_divisio | 1282  | 1025  | 1080  | 929   | 969   | 1190  | 9.359023 | 9.595678 | 9.512929 | 10.52661 |
| protein_co inositol_14  | 355   | 278   | 315   | 1974  | 2686  | 1844  | 1.721758 | 1.729012 | 1.843327 | 14.86009 |
| protein_co zinc_finger  | 139   | 104   | 133   | 119   | 108   | 88    | 2.10181  | 2.016607 | 2.426489 | 2.792904 |
| protein_co desmoplaki   | 4047  | 3228  | 3714  | 6883  | 7578  | 5541  | 19.37157 | 19.81411 | 21.44972 | 51.13754 |
| protein_co sirtuin_1    | 624   | 438   | 518   | 961   | 1136  | 1533  | 7.146891 | 6.433036 | 7.158308 | 17.08388 |
| protein_co heterogene   | 2627  | 2172  | 2245  | 2622  | 3001  | 2928  | 36.70443 | 38.91595 | 37.84625 | 56.86193 |
| protein_co intraflagell | 131   | 131   | 121   | 217   | 139   | 158   | 2.839848 | 3.641703 | 3.16488  | 7.301533 |
| protein_co Janus_kina   | 312   | 242   | 308   | 69    | 54    | 53    | 2.768152 | 2.753342 | 3.297116 | 0.9502   |
| protein_co interleukin  | 2     | 0     | 0     | 1     | 1     | 0     | 0.032271 | 0        | 0        | 0.025045 |
| protein_co c-abl_onco   | 6374  | 5117  | 5406  | 3659  | 4527  | 3442  | 51.83437 | 53.3618  | 53.04322 | 46.18475 |
| protein_co acyl-CoA_tl  | 2319  | 1738  | 1905  | 2769  | 3146  | 2543  | 44.76655 | 43.02412 | 44.37066 | 82.96718 |
| protein_co SH3-domai    | 1803  | 1489  | 1485  | 437   | 496   | 330   | 13.26993 | 14.05325 | 13.18704 | 4.992116 |
| protein_co cell_divisio | 240   | 198   | 168   | 690   | 741   | 809   | 3.396802 | 3.593631 | 2.868906 | 15.15788 |
| protein_co synapse_de   | 78    | 69    | 65    | 180   | 278   | 222   | 0.663538 | 0.752713 | 0.667164 | 2.376699 |
| protein_co proprotein   | 1467  | 1235  | 1215  | 590   | 628   | 578   | 7.211958 | 7.785731 | 7.206882 | 4.502001 |
| protein_co stearoyl-Co  | 24711 | 20206 | 21752 | 11510 | 11612 | 15073 | 216.0946 | 226.5913 | 229.5096 | 156.2282 |
| protein_co transmemt    | 224   | 173   | 154   | 138   | 228   | 169   | 7.838331 | 7.763026 | 6.501961 | 7.495233 |
| protein_co actin_bindi  | 291   | 224   | 242   | 1536  | 1846  | 1809  | 1.793978 | 1.770849 | 1.800062 | 14.69758 |
| protein_co endoplasm    | 419   | 353   | 366   | 717   | 855   | 499   | 3.65456  | 3.948255 | 3.851681 | 9.706681 |
| protein_co RAB18_me     | 1223  | 915   | 900   | 470   | 631   | 699   | 11.7369  | 11.26049 | 10.42119 | 7.000922 |
| protein_co neuropilin_  | 1960  | 1643  | 1750  | 1     | 2     | 12    | 15.62469 | 16.79586 | 16.83222 | 0.012373 |
| pseudogen: hydroxyste   | 4     | 2     | 0     | 0     | 2     | 0     | 0.133876 | 0.085838 | 0        | 0        |
| protein_co phosphorik   | 230   | 156   | 150   | 75    | 86    | 155   | 5.547687 | 4.825231 | 4.365394 | 2.807863 |
| protein_co palmdelphi   | 7     | 17    | 14    | 0     | 0     | 2     | 0.062    | 0.193088 | 0.149614 | 0        |
| protein_co tetraspanir  | 76    | 48    | 71    | 143   | 188   | 134   | 2.098729 | 1.699782 | 2.365642 | 6.129277 |
| protein_co H2A_histor   | 2008  | 1475  | 1582  | 2126  | 2719  | 1949  | 47.55311 | 44.79366 | 45.20326 | 78.14639 |
| protein_co family_witl  | 625   | 546   | 585   | 363   | 386   | 398   | 6.313283 | 7.07257  | 7.12983  | 5.691311 |
| protein_co microtubul   | 340   | 254   | 285   | 290   | 357   | 146   | 2.707644 | 2.593914 | 2.738454 | 3.584603 |
| protein_co myeloid_zi   | 320   | 253   | 287   | 239   | 349   | 226   | 4.60129  | 4.665084 | 4.9792   | 5.334061 |
| protein_co occludin/Ei  | 219   | 188   | 167   | 345   | 461   | 227   | 6.915093 | 7.612392 | 6.362363 | 16.90844 |
| protein_co myosin_IXE   | 6670  | 4999  | 5581  | 2259  | 3094  | 2131  | 41.028   | 39.43183 | 41.42042 | 21.56757 |
| protein_co potassium_   | 371   | 252   | 266   | 323   | 428   | 159   | 6.525205 | 5.683687 | 5.644818 | 8.817658 |
| protein_co catsper_ch   | 5     | 7     | 5     | 30    | 31    | 5     | 0.061942 | 0.111204 | 0.074736 | 0.576854 |
| protein_co proteasom    | 4069  | 3084  | 3175  | 2149  | 2343  | 2248  | 120.6803 | 117.293  | 113.6162 | 98.92713 |
| protein_co F-box_and    | 2221  | 1601  | 1816  | 3031  | 3871  | 3278  | 26.26551 | 24.2794  | 25.91201 | 55.63571 |
| protein_co syntaxin_1   | 269   | 235   | 240   | 230   | 326   | 163   | 2.70442  | 3.029696 | 2.911261 | 3.589055 |
| protein_co hydroxy-de   | 146   | 107   | 120   | 65    | 66    | 61    | 3.111792 | 2.924495 | 3.085937 | 2.150312 |
| protein_co SET_domai    | 1161  | 819   | 896   | 1102  | 1478  | 1672  | 7.886326 | 7.134044 | 7.343424 | 11.61862 |
| protein_co B-cell_CLL/  | 882   | 672   | 717   | 231   | 389   | 211   | 17.1677  | 16.77344 | 16.83879 | 6.978885 |
| protein_co melanoma_    | 0     | 0     | 0     | 2     | 3     | 8     | 0        | 0        | 0        | 0.09041  |
| protein_co ephrin-A2    | 479   | 282   | 317   | 531   | 755   | 350   | 10.48078 | 7.912554 | 8.368845 | 18.03363 |

|                         |      |      |      |      |       |       |          |          |          |          |
|-------------------------|------|------|------|------|-------|-------|----------|----------|----------|----------|
| protein_co cold_induc   | 4008 | 3120 | 3147 | 2670 | 3439  | 3900  | 53.26961 | 53.17601 | 50.46574 | 55.07995 |
| protein_co ATP_syntha   | 1611 | 1292 | 1264 | 1396 | 1751  | 1443  | 47.59913 | 48.95255 | 45.06077 | 64.02054 |
| protein_co chromosom    | 910  | 642  | 739  | 673  | 892   | 389   | 10.01406 | 9.059688 | 9.812086 | 11.49514 |
| protein_co protocadhe   | 56   | 36   | 47   | 57   | 63    | 71    | 0.31867  | 0.262703 | 0.3227   | 0.503453 |
| protein_co amelogenin   | 0    | 0    | 0    | 2    | 3     | 1     | 0        | 0        | 0        | 0.181496 |
| pseudogen protein_kir   | 313  | 228  | 275  | 234  | 293   | 216   | 2.03333  | 1.899362 | 2.155481 | 2.359445 |
| protein_co insulin-like | 4    | 2    | 2    | 4    | 7     | 6     | 0.087809 | 0.056301 | 0.052973 | 0.136292 |
| protein_co heterogene   | 9218 | 6969 | 7645 | 8607 | 10317 | 15755 | 168.3147 | 163.1793 | 168.4267 | 243.9314 |
| protein_co membrane     | 322  | 270  | 291  | 267  | 341   | 175   | 9.05734  | 9.739079 | 9.876108 | 11.65699 |
| protein_co NADH_deh     | 1158 | 994  | 1080 | 1288 | 1473  | 1320  | 102.2573 | 112.5594 | 115.0688 | 176.5356 |
| protein_co trans-23-er  | 1806 | 1531 | 1577 | 1338 | 1549  | 1337  | 29.21124 | 31.75534 | 30.77598 | 33.59068 |
| protein_co translocase  | 1579 | 1149 | 1200 | 2592 | 3380  | 3580  | 37.52627 | 35.0173  | 34.40984 | 95.6134  |
| protein_co cell_divisio | 2098 | 1571 | 1567 | 2457 | 3297  | 2305  | 67.19621 | 64.52453 | 60.55589 | 122.1448 |
| protein_co methylthio   | 555  | 446  | 538  | 529  | 638   | 722   | 4.250892 | 4.380576 | 4.971843 | 6.288879 |
| protein_co chromosom    | 2    | 0    | 3    | 21   | 26    | 15    | 0.032665 | 0        | 0.059118 | 0.53235  |
| protein_co centrosom    | 2481 | 1788 | 1993 | 1994 | 2621  | 2078  | 17.14831 | 15.84789 | 16.62072 | 21.39194 |
| protein_co polymerase   | 3946 | 3009 | 3053 | 4130 | 5487  | 4486  | 75.80009 | 74.12149 | 70.75994 | 123.1383 |
| protein_co polymerase   | 1874 | 1392 | 1414 | 3755 | 4863  | 3067  | 23.12418 | 22.02649 | 21.05204 | 71.91794 |
| protein_co hyperpolar   | 41   | 29   | 30   | 231  | 326   | 140   | 0.564111 | 0.511668 | 0.498024 | 4.933138 |
| protein_co cadherin-re  | 60   | 62   | 47   | 51   | 68    | 11    | 0.773976 | 1.025598 | 0.731513 | 1.02112  |
| protein_co IZUMO_fam    | 8    | 4    | 7    | 2    | 5     | 6     | 0.174963 | 0.112182 | 0.184715 | 0.067892 |
| protein_co Ras_associa  | 392  | 293  | 317  | 429  | 581   | 314   | 9.533655 | 9.137983 | 9.302093 | 16.19426 |
| protein_co growth_arr   | 870  | 606  | 628  | 117  | 125   | 139   | 20.32602 | 18.15578 | 17.70275 | 4.242769 |
| protein_co paralemmii   | 1190 | 811  | 920  | 778  | 960   | 394   | 20.36464 | 17.79754 | 18.99615 | 20.66521 |
| protein_co mucosal_v    | 12   | 9    | 14   | 161  | 209   | 38    | 0.32657  | 0.314085 | 0.459697 | 6.800666 |
| antisense IGF2_antise   | 42   | 20   | 20   | 1    | 1     | 2     | 0.955546 | 0.583501 | 0.54901  | 0.035313 |
| protein_co MAP_kinase   | 1495 | 1123 | 1217 | 2890 | 3702  | 2795  | 17.12694 | 16.49786 | 16.82199 | 51.38862 |
| protein_co armadillo_   | 729  | 462  | 521  | 1097 | 1534  | 902   | 8.459001 | 6.874528 | 7.294194 | 19.75735 |
| protein_co tRNA_meth    | 580  | 443  | 466  | 465  | 633   | 577   | 9.175509 | 8.987011 | 8.894799 | 11.41788 |
| protein_co RAN_bindin   | 2768 | 2139 | 2284 | 3752 | 4701  | 5904  | 59.61946 | 59.08022 | 59.3562  | 125.434  |
| protein_co zinc_finger  | 1783 | 1264 | 1363 | 888  | 1105  | 736   | 16.56855 | 15.06224 | 15.28189 | 12.80786 |
| protein_co kelch-like_f | 941  | 707  | 760  | 194  | 265   | 116   | 16.86678 | 16.25068 | 16.43631 | 5.397279 |
| protein_co mediator_c   | 2294 | 1761 | 1864 | 1124 | 1380  | 1055  | 22.88145 | 22.52469 | 22.43283 | 17.40151 |
| protein_co serpin_pep   | 5    | 2    | 4    | 3    | 3     | 2     | 0.096204 | 0.049347 | 0.092861 | 0.089594 |
| protein_co synaptosom   | 378  | 306  | 316  | 138  | 164   | 160   | 4.13832  | 4.295988 | 4.174144 | 2.344995 |
| protein_co v-crk_sarco  | 1763 | 1382 | 1679 | 3056 | 3528  | 2921  | 15.52434 | 15.60552 | 17.83855 | 41.76809 |
| protein_co leucine-zip  | 2013 | 1566 | 1607 | 646  | 887   | 626   | 20.64515 | 20.59564 | 19.88557 | 10.28341 |
| protein_co matrix_me    | 1756 | 1124 | 1066 | 199  | 293   | 111   | 21.53776 | 17.67876 | 15.77544 | 3.788433 |
| protein_co cat_eye_sy   | 0    | 0    | 0    | 2351 | 2796  | 2323  | 0        | 0        | 0        | 30.35397 |
| protein_co SWI/SNF_re   | 2728 | 2059 | 2246 | 2692 | 3157  | 2539  | 74.02544 | 71.64771 | 73.53506 | 113.3815 |
| protein_co purinergic   | 9    | 5    | 1    | 3    | 4     | 2     | 0.114459 | 0.081543 | 0.015345 | 0.059219 |
| protein_co derlin_3     | 152  | 147  | 91   | 141  | 195   | 195   | 2.021924 | 2.50754  | 1.460531 | 2.911192 |
| protein_co solute_carr  | 0    | 0    | 0    | 5    | 4     | 0     | 0        | 0        | 0        | 0.157328 |
| protein_co BCL2-like_1  | 788  | 632  | 710  | 797  | 862   | 718   | 8.288321 | 8.524457 | 9.010455 | 13.01155 |
| protein_co D-dopachro   | 12   | 8    | 4    | 26   | 35    | 37    | 0.364194 | 0.311352 | 0.146474 | 1.224773 |
| protein_co D-dopachro   | 3    | 9    | 3    | 11   | 6     | 11    | 0.134227 | 0.516382 | 0.161953 | 0.76391  |
| protein_co glutathione  | 0    | 1    | 0    | 19   | 24    | 9     | 0        | 0.054963 | 0        | 1.264    |
| protein_co oncostatin   | 0    | 0    | 0    | 2    | 4     | 0     | 0        | 0        | 0        | 0.078511 |
| protein_co calcineurin  | 3751 | 2832 | 2977 | 2919 | 3413  | 2242  | 23.51396 | 22.76572 | 22.51675 | 28.40164 |
| protein_co TBC1_dom     | 227  | 194  | 162  | 55   | 90    | 38    | 1.913706 | 2.0973   | 1.64783  | 0.719685 |
| protein_co sushi_dom    | 22   | 20   | 20   | 24   | 49    | 14    | 0.208907 | 0.243539 | 0.229143 | 0.353729 |
| protein_co splicing_fac | 3157 | 2471 | 2547 | 3442 | 3719  | 4088  | 30.06943 | 30.18093 | 29.27033 | 50.88525 |
| protein_co gamma-glu    | 69   | 34   | 34   | 1    | 0     | 1     | 1.297278 | 0.819733 | 0.771278 | 0.029182 |
| protein_co ring_finger  | 533  | 376  | 401  | 309  | 294   | 145   | 12.54638 | 11.3498  | 11.38894 | 11.28964 |
| protein_co SEC14-like   | 179  | 151  | 159  | 25   | 34    | 23    | 1.915844 | 2.072495 | 2.0533   | 0.415315 |
| protein_co SEC14-like   | 0    | 0    | 0    | 0    | 2     | 0     | 0        | 0        | 0        | 0        |
| protein_co sperm_anti   | 651  | 511  | 584  | 492  | 600   | 597   | 4.518265 | 4.548006 | 4.890482 | 5.300128 |
| protein_co peptidylpro  | 1108 | 794  | 946  | 568  | 747   | 851   | 12.33186 | 11.33232 | 12.70364 | 9.81223  |
| protein_co ureidoprop   | 2    | 0    | 1    | 2    | 4     | 0     | 0.027437 | 0        | 0.016552 | 0.042586 |
| protein_co yippee-like  | 144  | 113  | 108  | 361  | 425   | 103   | 1.559751 | 1.56957  | 1.411447 | 6.069186 |
| protein_co small_nucl   | 1615 | 1289 | 1443 | 1812 | 1956  | 2562  | 42.9537  | 43.96331 | 46.30655 | 74.80261 |
| protein_co pescadillo   | 2103 | 1458 | 1754 | 2397 | 2775  | 3533  | 35.72815 | 31.76422 | 35.95414 | 63.20768 |
| protein_co mitogen-ac   | 2532 | 2203 | 2184 | 1516 | 1825  | 1499  | 10.77169 | 12.01832 | 11.21039 | 10.01036 |
| protein_co gamma-glu    | 18   | 6    | 13   | 104  | 136   | 69    | 0.320676 | 0.137074 | 0.279438 | 2.875798 |
| protein_co proline_del  | 0    | 0    | 2    | 1046 | 1556  | 1101  | 0        | 0        | 0.024198 | 16.28051 |

|                         |       |       |       |      |      |      |          |          |          |          |
|-------------------------|-------|-------|-------|------|------|------|----------|----------|----------|----------|
| protein_co protein_ph   | 1772  | 1426  | 1470  | 748  | 911  | 432  | 14.87187 | 15.34725 | 14.88563 | 9.743922 |
| protein_co solute_carr  | 388   | 255   | 291   | 172  | 225  | 108  | 6.70351  | 5.649631 | 6.066128 | 4.612427 |
| protein_co topoisome    | 582   | 470   | 538   | 537  | 634  | 709  | 6.555366 | 6.788615 | 7.311463 | 9.388122 |
| protein_co crystallin_k | 4     | 3     | 3     | 8    | 4    | 2    | 0.216332 | 0.208062 | 0.195763 | 0.671555 |
| protein_co cytohesin_   | 3     | 4     | 0     | 1    | 0    | 0    | 0.038361 | 0.06559  | 0        | 0.019847 |
| protein_co DiGeorge_s   | 432   | 341   | 377   | 399  | 466  | 474  | 3.756767 | 3.802719 | 3.955669 | 5.385597 |
| pseudogen: crystallin_k | 314   | 223   | 245   | 155  | 193  | 232  | 9.438119 | 8.595477 | 8.885256 | 7.231326 |
| protein_co MFNG_O-fu    | 12    | 6     | 5     | 50   | 50   | 17   | 0.269483 | 0.172787 | 0.135478 | 1.742811 |
| protein_co caspase_rex  | 857   | 683   | 673   | 627  | 920  | 683  | 9.770179 | 9.985084 | 9.25731  | 11.09481 |
| protein_co low_densit   | 182   | 154   | 191   | 123  | 155  | 162  | 2.367263 | 2.568651 | 2.997482 | 2.483194 |
| protein_co solute_carr  | 5558  | 4220  | 4392  | 4434 | 4878 | 4240 | 158.8146 | 154.6299 | 151.4196 | 196.6518 |
| protein_co adrenergic_  | 117   | 108   | 94    | 638  | 808  | 497  | 0.602805 | 0.71355  | 0.584342 | 5.102023 |
| protein_co phospholip   | 1209  | 883   | 925   | 403  | 430  | 449  | 21.01966 | 19.68654 | 19.40391 | 10.87514 |
| protein_co lectin_gala  | 20    | 14    | 18    | 0    | 6    | 0    | 1.592191 | 1.429231 | 1.728963 | 0        |
| protein_co golgi-associ | 1190  | 933   | 955   | 1234 | 1437 | 1189 | 17.41002 | 17.50424 | 16.85791 | 28.02193 |
| protein_co HIR_histon   | 172   | 154   | 160   | 168  | 297  | 322  | 1.989905 | 2.284725 | 2.233427 | 3.016779 |
| protein_co SH3-domai    | 168   | 110   | 107   | 205  | 333  | 159  | 2.522422 | 2.117924 | 1.938386 | 4.777413 |
| protein_co seizure_rek  | 0     | 1     | 1     | 25   | 20   | 16   | 0        | 0.009205 | 0.008661 | 0.278551 |
| protein_co lectin_gala  | 36720 | 29130 | 29500 | 290  | 373  | 169  | 2702.985 | 2749.735 | 2620.059 | 33.13366 |
| protein_co Hermansky    | 814   | 633   | 754   | 954  | 1101 | 697  | 6.220416 | 6.20309  | 6.952075 | 11.3155  |
| protein_co phosphoin    | 349   | 235   | 250   | 109  | 110  | 74   | 5.400863 | 4.663532 | 4.667946 | 2.618151 |
| protein_co SRR1_dom     | 212   | 168   | 192   | 78   | 130  | 132  | 7.676204 | 7.800622 | 8.388029 | 4.383648 |
| protein_co POZ_(BTB)_   | 901   | 657   | 801   | 2410 | 3040 | 3580 | 11.17374 | 10.44837 | 11.98545 | 46.38966 |
| protein_co TRIO_and_I   | 311   | 302   | 297   | 148  | 230  | 138  | 1.439707 | 1.792793 | 1.658893 | 1.063423 |
| protein_co tuftelin_int | 1159  | 916   | 989   | 570  | 683  | 736  | 15.15492 | 15.35942 | 15.60323 | 11.56846 |
| protein_co glycine_C-a  | 604   | 453   | 490   | 605  | 663  | 429  | 17.1024  | 16.44855 | 16.74034 | 26.58924 |
| protein_co crystallin_k | 28    | 20    | 13    | 20   | 11   | 6    | 1.191398 | 1.091285 | 0.667406 | 1.320868 |
| protein_co ankyrin_req  | 470   | 305   | 365   | 155  | 217  | 172  | 9.171164 | 7.631955 | 8.59345  | 4.694494 |
| protein_co eukaryotic_  | 44    | 29    | 31    | 71   | 88   | 101  | 0.640733 | 0.541542 | 0.544671 | 1.604772 |
| protein_co NHP2_non-    | 1614  | 1213  | 1250  | 1829 | 1885 | 2073 | 45.31766 | 43.67512 | 42.34693 | 79.70914 |
| protein_co MICAL-like   | 1342  | 1054  | 1216  | 1027 | 1454 | 980  | 13.36017 | 13.4558  | 14.60633 | 15.8694  |
| protein_co polymerase   | 1090  | 797   | 850   | 1042 | 1213 | 1322 | 24.26881 | 22.75567 | 22.83437 | 36.00976 |
| protein_co SRY_(sex_d   | 6     | 2     | 6     | 60   | 95   | 37   | 0.097721 | 0.041771 | 0.117907 | 1.516773 |
| protein_co coiled-coil  | 116   | 102   | 107   | 109  | 112  | 106  | 4.282868 | 4.829322 | 4.766598 | 6.246455 |
| protein_co DEP_domai    | 350   | 310   | 293   | 345  | 447  | 262  | 3.03355  | 3.445515 | 3.064071 | 4.641226 |
| protein_co protein_int  | 238   | 168   | 189   | 360  | 510  | 505  | 4.409255 | 3.991231 | 4.224722 | 10.35193 |
| protein_co tetratricop  | 1500  | 1286  | 1382  | 326  | 429  | 321  | 5.964133 | 6.557018 | 6.629979 | 2.01189  |
| protein_co solute_carr  | 6     | 2     | 4     | 13   | 17   | 17   | 0.149808 | 0.064036 | 0.120502 | 0.503801 |
| protein_co centromer    | 272   | 200   | 237   | 448  | 483  | 502  | 12.72863 | 12.00196 | 13.38163 | 32.54027 |
| protein_co septin_3     | 34    | 25    | 29    | 814  | 918  | 720  | 0.342925 | 0.323348 | 0.352912 | 12.74312 |
| protein_co solute_carr  | 2     | 1     | 0     | 4    | 0    | 0    | 0.01853  | 0.011881 | 0        | 0.057522 |
| lincRNA transmemt       | 1     | 0     | 0     | 5    | 5    | 8    | 0.00819  | 0        | 0        | 0.063563 |
| protein_co solute_carr  | 1     | 3     | 4     | 12   | 15   | 2    | 0.023121 | 0.088949 | 0.111589 | 0.43065  |
| protein_co KDEL_(Lys-)  | 2447  | 2052  | 2018  | 89   | 122  | 73   | 66.40039 | 71.40413 | 66.07024 | 3.748497 |
| protein_co cytochrom    | 7     | 13    | 18    | 4    | 11   | 6    | 0.145428 | 0.346339 | 0.4512   | 0.128985 |
| protein_co DEAD_(Asp    | 10588 | 8846  | 9194  | 7272 | 9260 | 7706 | 77.07988 | 82.58161 | 80.7569  | 82.16965 |
| protein_co DMC1_dosi    | 7     | 6     | 16    | 57   | 52   | 41   | 0.138435 | 0.152163 | 0.381783 | 1.749662 |
| protein_co transcripti  | 1643  | 1298  | 1405  | 1286 | 1415 | 1119 | 10.3968  | 10.53286 | 10.7272  | 12.63088 |
| protein_co HscB_iron-   | 128   | 100   | 105   | 67   | 85   | 80   | 5.387722 | 5.397648 | 5.332521 | 4.377241 |
| protein_co chibby_hoi   | 230   | 199   | 211   | 145  | 143  | 133  | 8.498585 | 9.429338 | 9.406959 | 8.316053 |
| protein_co translocase  | 996   | 816   | 873   | 1265 | 1463 | 1711 | 32.61345 | 34.26391 | 34.49051 | 64.29221 |
| protein_co rhabdoid_t   | 8     | 7     | 4     | 1    | 5    | 1    | 0.290566 | 0.326033 | 0.175292 | 0.056375 |
| protein_co X-box_binc   | 2902  | 2316  | 2599  | 1712 | 2442 | 1844 | 62.62072 | 64.0868  | 67.6667  | 57.33963 |
| protein_co chromosom    | 2030  | 1713  | 1714  | 2151 | 2290 | 2236 | 46.95942 | 50.81517 | 47.83938 | 77.23204 |
| protein_co Josephin_d   | 2011  | 1627  | 1598  | 692  | 880  | 494  | 25.84864 | 26.81776 | 24.7828  | 13.80582 |
| protein_co F-box_prot   | 1810  | 1561  | 1642  | 1206 | 1364 | 1140 | 12.32872 | 13.63489 | 13.49462 | 12.75021 |
| protein_co GTP_bindir   | 1610  | 1302  | 1453  | 3078 | 3464 | 2134 | 14.72745 | 15.27292 | 16.03672 | 43.70196 |
| protein_co polymerase   | 2513  | 1905  | 2091  | 2863 | 3146 | 2551 | 34.24429 | 33.28895 | 34.37936 | 60.55466 |
| protein_co RAB36_me     | 392   | 294   | 253   | 26   | 33   | 58   | 4.801695 | 4.618119 | 3.739186 | 0.494325 |
| protein_co TIMP_meta    | 15486 | 12251 | 12703 | 119  | 158  | 171  | 157.7534 | 160.037  | 156.1327 | 1.881555 |
| protein_co protein_ph   | 1809  | 1403  | 1588  | 1041 | 1335 | 881  | 21.04815 | 20.93352 | 22.29328 | 18.79994 |
| protein_co SET_bindin   | 5473  | 4079  | 4541  | 2865 | 4104 | 2455 | 41.04095 | 39.22428 | 41.08578 | 33.34625 |
| protein_co Sad1_and_I   | 1521  | 1069  | 1166  | 451  | 541  | 418  | 17.58809 | 15.85173 | 16.26807 | 8.094622 |
| protein_co cytochrom    | 7185  | 5325  | 5290  | 2207 | 2695 | 2148 | 85.55225 | 81.30807 | 75.99909 | 40.78848 |
| protein_co dynein_axc   | 348   | 298   | 284   | 227  | 288  | 191  | 10.84955 | 11.91402 | 10.68314 | 10.98472 |

|                         |       |       |       |       |       |       |          |          |          |          |
|-------------------------|-------|-------|-------|-------|-------|-------|----------|----------|----------|----------|
| protein_co myo-inosit   | 2     | 1     | 0     | 3     | 5     | 2     | 0.056562 | 0.036266 | 0        | 0.131688 |
| protein_co lipase_mati  | 3382  | 2429  | 2723  | 740   | 1076  | 793   | 59.66217 | 54.94931 | 57.95903 | 20.26225 |
| protein_co rhomboid_    | 614   | 443   | 540   | 672   | 883   | 931   | 16.0482  | 14.8481  | 17.02942 | 27.262   |
| protein_co protein_kir  | 1729  | 1268  | 1549  | 1548  | 1933  | 1655  | 24.95317 | 23.46709 | 26.97306 | 34.67625 |
| protein_co tubulin_ty   | 225   | 193   | 203   | 121   | 156   | 75    | 6.257565 | 6.883185 | 6.811879 | 5.223224 |
| protein_co RAS-like_fa  | 30    | 21    | 21    | 21    | 36    | 24    | 0.817849 | 0.734143 | 0.690747 | 0.888591 |
| protein_co adaptor-rel  | 2585  | 2018  | 2131  | 2403  | 2977  | 2722  | 29.02555 | 29.05698 | 28.87031 | 41.87976 |
| protein_co HMG_box_     | 986   | 761   | 810   | 847   | 928   | 917   | 10.96621 | 10.8536  | 10.86958 | 14.62156 |
| protein_co target_of_r  | 759   | 572   | 620   | 513   | 626   | 468   | 13.57343 | 13.11756 | 13.37788 | 14.23953 |
| protein_co neurofilam   | 51    | 39    | 49    | 107   | 160   | 161   | 0.632141 | 0.619895 | 0.732805 | 2.058535 |
| protein_co choline_kir  | 2     | 2     | 3     | 4     | 8     | 4     | 0.044361 | 0.056887 | 0.080287 | 0.13771  |
| protein_co BCL2-inter   | 8     | 9     | 14    | 19    | 36    | 22    | 0.39362  | 0.567857 | 0.83112  | 1.451014 |
| protein_co heme_oxyg    | 336   | 277   | 298   | 166   | 227   | 214   | 8.647116 | 9.141577 | 9.253293 | 6.630871 |
| protein_co malonyl_C    | 331   | 276   | 277   | 261   | 385   | 389   | 11.25496 | 12.03468 | 11.36433 | 13.77486 |
| protein_co THO_comp     | 1036  | 796   | 965   | 791   | 836   | 1131  | 10.2205  | 10.07013 | 11.48651 | 12.1121  |
| protein_co minichrom    | 2464  | 1770  | 2025  | 4585  | 5205  | 8143  | 25.1222  | 23.14193 | 24.91094 | 72.55825 |
| protein_co apolipopro   | 0     | 0     | 0     | 6     | 4     | 0     | 0        | 0        | 0        | 0.417076 |
| protein_co arylsulfatas | 714   | 501   | 592   | 121   | 146   | 112   | 16.30759 | 14.67366 | 16.31403 | 4.289506 |
| protein_co translocatc  | 2629  | 2002  | 1978  | 249   | 331   | 185   | 129.0826 | 126.0522 | 117.1794 | 18.97609 |
| protein_co RASD_famil   | 172   | 108   | 100   | 79    | 81    | 29    | 2.363741 | 1.903288 | 1.658133 | 1.685113 |
| protein_co tubulin_ty   | 1527  | 1179  | 1273  | 4612  | 5784  | 5241  | 21.15245 | 20.94329 | 21.2764  | 99.16114 |
| protein_co chromobo     | 72    | 65    | 72    | 315   | 321   | 119   | 0.827268 | 0.957715 | 0.998147 | 5.617652 |
| protein_co platelet-de  | 382   | 322   | 306   | 146   | 147   | 68    | 5.122101 | 5.536687 | 4.950559 | 3.038562 |
| protein_co acrosin      | 1     | 0     | 1     | 2     | 4     | 1     | 0.032722 | 0        | 0.03948  | 0.101577 |
| protein_co calcium_bi   | 11    | 8     | 7     | 9     | 9     | 10    | 0.158266 | 0.147603 | 0.121518 | 0.200987 |
| protein_co ribosomal_   | 33391 | 26439 | 27385 | 48710 | 53228 | 42454 | 742.7441 | 754.1611 | 734.9716 | 1681.738 |
| protein_co zinc_finger  | 151   | 125   | 131   | 117   | 105   | 50    | 2.868879 | 3.045472 | 3.002995 | 3.450258 |
| protein_co RNA_bindin   | 8265  | 6624  | 7008  | 2988  | 3415  | 2583  | 55.90681 | 57.45813 | 57.19578 | 31.37133 |
| protein_co synaptogyr   | 787   | 606   | 599   | 698   | 903   | 499   | 8.404109 | 8.298487 | 7.71777  | 11.56919 |
| protein_co TGF-beta_a   | 993   | 732   | 820   | 852   | 1048  | 654   | 14.38424 | 13.59747 | 14.33176 | 19.15613 |
| protein_co activating_  | 1337  | 1026  | 1079  | 758   | 888   | 857   | 22.20756 | 21.85376 | 21.62415 | 19.54201 |
| protein_co myotubula    | 1184  | 963   | 1033  | 548   | 603   | 364   | 6.23375  | 6.501796 | 6.562149 | 4.478254 |
| protein_co Smith-Magi   | 1293  | 998   | 1133  | 1138  | 1446  | 1204  | 10.77845 | 10.66836 | 11.39556 | 14.72416 |
| protein_co apolipopro   | 13    | 22    | 12    | 1     | 1     | 0     | 0.17855  | 0.38748  | 0.198859 | 0.021318 |
| protein_co patatin-like | 1     | 0     | 0     | 123   | 145   | 95    | 0.018468 | 0        | 0        | 3.525764 |
| protein_co apolipopro   | 8     | 1     | 4     | 0     | 0     | 2     | 0.12504  | 0.020043 | 0.075434 | 0        |
| protein_co patatin-like | 1448  | 1183  | 1168  | 405   | 520   | 572   | 24.20561 | 25.35955 | 23.558   | 10.50831 |
| protein_co myosin_he    | 36783 | 28178 | 31732 | 15547 | 20119 | 14658 | 229.9367 | 225.8815 | 239.3353 | 150.8476 |
| protein_co calcium_ch   | 4     | 2     | 6     | 120   | 84    | 33    | 0.018728 | 0.012008 | 0.033894 | 0.87205  |
| protein_co sorting_anc  | 930   | 714   | 755   | 1058  | 1277  | 1231  | 13.42602 | 13.21819 | 13.15102 | 23.70721 |
| protein_co thioredoxin  | 1097  | 845   | 819   | 871   | 920   | 939   | 29.63039 | 29.26825 | 26.69086 | 36.51567 |
| protein_co FAD-depen    | 515   | 357   | 387   | 437   | 591   | 474   | 4.861759 | 4.321791 | 4.408037 | 6.403216 |
| protein_co GRB2-relat   | 9     | 11    | 8     | 3     | 1     | 3     | 0.108402 | 0.169902 | 0.116261 | 0.056085 |
| protein_co eukaryotic_  | 3118  | 2589  | 2711  | 4237  | 4062  | 3632  | 67.84365 | 72.23946 | 71.17225 | 143.0942 |
| protein_co trinucleoti  | 1650  | 1408  | 1453  | 1414  | 1615  | 1285  | 4.232646 | 4.631695 | 4.497194 | 5.629993 |
| protein_co small_G_pr   | 1946  | 1532  | 1642  | 1233  | 1602  | 1037  | 21.633   | 21.83946 | 22.02394 | 21.27489 |
| protein_co intraflagell | 623   | 498   | 590   | 363   | 444   | 275   | 4.51158  | 4.624655 | 5.155143 | 4.080165 |
| protein_co parvalbumi   | 0     | 0     | 0     | 18    | 38    | 16    | 0        | 0        | 0        | 2.201742 |
| protein_co KIAA0930     | 2606  | 1915  | 1984  | 1632  | 2035  | 1169  | 19.63293 | 18.50073 | 18.03435 | 19.08365 |
| protein_co neutrophil   | 0     | 1     | 4     | 1     | 0     | 0     | 0        | 0.036642 | 0.137905 | 0.044351 |
| protein_co colony_stir  | 2     | 2     | 1     | 2     | 3     | 0     | 0.019273 | 0.024714 | 0.011627 | 0.029914 |
| protein_co solute_carr  | 454   | 315   | 360   | 366   | 356   | 467   | 8.414256 | 7.486516 | 8.050269 | 10.52862 |
| protein_co uroplakin_   | 0     | 0     | 0     | 3     | 8     | 2     | 0        | 0        | 0        | 0.207744 |
| protein_co family_witl  | 404   | 298   | 308   | 312   | 411   | 292   | 5.478186 | 5.181804 | 5.039114 | 6.566599 |
| protein_co potassium_   | 1270  | 925   | 959   | 448   | 537   | 456   | 33.77783 | 31.54853 | 30.77476 | 18.49424 |
| protein_co suppressor   | 4947  | 4247  | 4247  | 4803  | 5338  | 4937  | 64.52432 | 71.03512 | 66.83621 | 97.23543 |
| protein_co interleukin  | 70    | 47    | 51    | 8     | 15    | 17    | 0.798031 | 0.687114 | 0.70152  | 0.141561 |
| protein_co ring-box_1   | 40    | 48    | 27    | 30    | 23    | 25    | 1.002459 | 1.542614 | 0.816429 | 1.166966 |
| protein_co E1A_bindin   | 3309  | 2450  | 2815  | 2857  | 3646  | 3921  | 16.1877  | 15.36964 | 16.61555 | 21.69347 |
| protein_co I(3)mbt-like | 509   | 367   | 423   | 306   | 397   | 563   | 4.062471 | 3.756193 | 4.073436 | 3.790744 |
| protein_co chondroad    | 10    | 2     | 4     | 12    | 6     | 6     | 0.185117 | 0.047477 | 0.089342 | 0.344792 |
| protein_co Ran_GTPasi   | 3322  | 2543  | 2850  | 3951  | 4980  | 5275  | 36.89451 | 36.21745 | 38.19048 | 68.10824 |
| protein_co zinc_finger  | 4475  | 3473  | 3591  | 3042  | 3781  | 2943  | 35.51072 | 35.34114 | 34.3819  | 37.46762 |
| protein_co PHD_finger   | 543   | 448   | 489   | 838   | 960   | 1118  | 23.44501 | 24.80493 | 25.47461 | 56.15974 |
| protein_co aconitase_   | 1952  | 1542  | 1623  | 1481  | 1757  | 1347  | 32.56112 | 32.98475 | 32.66526 | 38.34468 |

|                         |      |      |      |      |      |      |          |          |          |          |
|-------------------------|------|------|------|------|------|------|----------|----------|----------|----------|
| protein_co polymerase   | 1077 | 759  | 847  | 321  | 444  | 783  | 11.43581 | 10.33481 | 10.85133 | 5.29038  |
| protein_co tRNA_5-me    | 719  | 558  | 608  | 667  | 892  | 999  | 11.49469 | 11.43963 | 11.72789 | 16.55102 |
| protein_co phosphom     | 460  | 328  | 339  | 82   | 128  | 77   | 8.498585 | 7.770911 | 7.556775 | 2.351436 |
| protein_co desumoyla    | 796  | 687  | 726  | 542  | 809  | 844  | 9.737661 | 10.77724 | 10.71584 | 10.29133 |
| protein_co ceramide_k   | 2643 | 2032 | 2183 | 1627 | 1931 | 1680 | 27.84951 | 27.45702 | 27.75378 | 26.6096  |
| protein_co bromodom     | 1201 | 975  | 1053 | 969  | 1282 | 1373 | 12.20523 | 12.70623 | 12.91157 | 15.2847  |
| protein_co zinc_finger  | 1493 | 1002 | 1157 | 1170 | 1547 | 953  | 13.31687 | 11.46092 | 12.45156 | 16.1979  |
| protein_co megalence    | 3    | 2    | 3    | 5    | 7    | 5    | 0.035767 | 0.030577 | 0.043154 | 0.092525 |
| protein_co histone_de   | 5    | 4    | 3    | 4    | 5    | 2    | 0.087253 | 0.089512 | 0.063166 | 0.108344 |
| protein_co potassium_   | 1    | 2    | 1    | 21   | 25   | 19   | 0.009698 | 0.024873 | 0.011701 | 0.316107 |
| protein_co abhydrolas   | 690  | 604  | 621  | 725  | 730  | 716  | 12.89008 | 14.46948 | 13.99737 | 21.02205 |
| protein_co KH_and_NH    | 1344 | 1036 | 1148 | 627  | 669  | 345  | 10.12372 | 10.00714 | 10.43352 | 7.330592 |
| protein_co FK506_bin    | 900  | 732  | 776  | 811  | 870  | 983  | 25.05999 | 26.13718 | 26.07042 | 35.05013 |
| protein_co short_chai   | 113  | 67   | 93   | 109  | 159  | 118  | 2.268224 | 1.724613 | 2.252364 | 3.395975 |
| protein_co cathepsin_   | 0    | 0    | 0    | 1    | 3    | 0    | 0        | 0        | 0        | 0.053358 |
| protein_co granzyme_I   | 0    | 0    | 0    | 1    | 0    | 0    | 0        | 0        | 0        | 0.075186 |
| protein_co RNA_bindin   | 1043 | 898  | 907  | 675  | 764  | 952  | 11.5345  | 12.73504 | 12.10235 | 11.58641 |
| protein_co protein_ar   | 390  | 310  | 349  | 558  | 651  | 678  | 7.22525  | 7.364772 | 7.801206 | 16.04549 |
| protein_co coagulation  | 733  | 607  | 662  | 86   | 112  | 76   | 12.7866  | 13.57842 | 13.9334  | 2.32852  |
| protein_co adaptor-rel  | 89   | 66   | 73   | 68   | 72   | 98   | 1.849828 | 1.759116 | 1.830679 | 2.193717 |
| protein_co polymerase   | 142  | 148  | 115  | 195  | 222  | 230  | 3.715615 | 4.966077 | 3.630683 | 7.919677 |
| protein_co methyltran   | 176  | 135  | 137  | 99   | 168  | 187  | 4.463301 | 4.390223 | 4.191911 | 3.896809 |
| protein_co son_of_sev   | 539  | 488  | 478  | 200  | 218  | 179  | 4.604431 | 5.345845 | 4.926779 | 2.651842 |
| protein_co cyclin-depe  | 81   | 53   | 54   | 37   | 61   | 43   | 1.273673 | 1.068705 | 1.024506 | 0.903036 |
| protein_co ninein_(GS   | 2673 | 2092 | 2322 | 955  | 935  | 809  | 12.17692 | 12.22108 | 12.76288 | 6.752619 |
| protein_co phosphoryl   | 989  | 817  | 825  | 2059 | 2294 | 1207 | 15.21464 | 16.11747 | 15.31325 | 49.16457 |
| protein_co tripartite_r | 32   | 23   | 20   | 81   | 86   | 43   | 0.283967 | 0.261731 | 0.214139 | 1.115663 |
| protein_co proteasom    | 996  | 806  | 820  | 1015 | 888  | 1342 | 15.89059 | 16.49017 | 15.78493 | 25.13491 |
| protein_co glucosamin   | 614  | 472  | 529  | 381  | 536  | 395  | 7.458671 | 7.352659 | 7.753482 | 7.183706 |
| protein_co DDHD_don     | 489  | 365  | 428  | 220  | 239  | 218  | 4.092311 | 3.917076 | 4.32167  | 2.857676 |
| protein_co cyclin-depe  | 391  | 349  | 371  | 368  | 354  | 355  | 17.13458 | 19.61243 | 19.61637 | 25.03081 |
| protein_co cornichon_   | 914  | 668  | 763  | 466  | 580  | 457  | 30.24522 | 28.3463  | 30.46373 | 23.93464 |
| protein_co cell_growtl  | 125  | 102  | 110  | 102  | 116  | 123  | 2.538437 | 2.656232 | 2.695238 | 3.215045 |
| protein_co ATPase_H+    | 902  | 712  | 803  | 616  | 615  | 986  | 22.92401 | 23.20456 | 24.62338 | 24.29938 |
| protein_co chromosom    | 8    | 2    | 2    | 0    | 0    | 0    | 0.121713 | 0.03902  | 0.036714 | 0        |
| protein_co plectstrin_  | 20   | 11   | 11   | 7    | 1    | 9    | 0.605423 | 0.427003 | 0.401763 | 0.328895 |
| protein_co phosphatic   | 128  | 80   | 109  | 44   | 41   | 53   | 4.226706 | 3.387594 | 4.342768 | 2.255149 |
| protein_co proteasom    | 1181 | 934  | 971  | 1216 | 1201 | 1578 | 43.29719 | 43.91027 | 42.95138 | 69.19487 |
| protein_co vesicle_tra  | 325  | 252  | 224  | 287  | 403  | 352  | 2.847927 | 2.831753 | 2.368326 | 3.903533 |
| protein_co translocase  | 107  | 90   | 112  | 179  | 159  | 185  | 3.755413 | 4.05066  | 4.742857 | 9.751186 |
| protein_co glutathione  | 213  | 145  | 174  | 458  | 544  | 344  | 1.864745 | 1.62786  | 1.837965 | 6.223515 |
| protein_co KIAA0586     | 523  | 422  | 448  | 339  | 371  | 320  | 4.593272 | 4.75272  | 4.747298 | 4.621156 |
| protein_co transmem     | 713  | 596  | 668  | 607  | 779  | 440  | 4.295039 | 4.603977 | 4.855144 | 5.675403 |
| protein_co sterile_alph | 51   | 37   | 45   | 4    | 5    | 22   | 0.93268  | 0.867708 | 0.99294  | 0.113541 |
| protein_co AHA1_activ   | 1800 | 1366 | 1498 | 1555 | 1851 | 1706 | 60.20116 | 58.58581 | 60.44943 | 80.72225 |
| protein_co dishevelled  | 729  | 544  | 572  | 387  | 439  | 386  | 5.8875   | 5.633932 | 5.573749 | 4.851151 |
| protein_co isthmin_2_   | 2    | 0    | 3    | 41   | 40   | 9    | 0.030828 | 0        | 0.055794 | 0.980924 |
| protein_co serine_paln  | 1751 | 1412 | 1506 | 1207 | 1453 | 1053 | 10.0495  | 10.39208 | 10.42873 | 10.75217 |
| protein_co Ras_and_R    | 672  | 540  | 567  | 71   | 102  | 73   | 7.724955 | 7.960306 | 7.864259 | 1.266822 |
| protein_co legumain     | 557  | 511  | 492  | 938  | 1150 | 851  | 12.34881 | 14.52781 | 13.16083 | 32.27776 |
| protein_co alkB_alkyla  | 165  | 138  | 152  | 174  | 186  | 182  | 2.982596 | 3.198887 | 3.315141 | 4.881914 |
| protein_co SNW_dom      | 671  | 589  | 577  | 778  | 756  | 754  | 14.54609 | 16.37376 | 15.09203 | 26.17785 |
| protein_co chromogra    | 3    | 2    | 0    | 170  | 197  | 210  | 0.068187 | 0.058294 | 0        | 5.997366 |
| protein_co inositol-tet | 905  | 697  | 753  | 3353 | 3798 | 2954 | 6.995626 | 6.909078 | 7.022973 | 40.22926 |
| protein_co dehydroge    | 612  | 503  | 535  | 459  | 548  | 383  | 12.35861 | 13.02553 | 13.03527 | 14.3867  |
| protein_co protein_ph   | 761  | 662  | 729  | 682  | 771  | 522  | 4.36013  | 4.863872 | 5.039534 | 6.064983 |
| protein_co SIX_homeo    | 1556 | 1217 | 1371 | 750  | 929  | 812  | 11.60873 | 11.64327 | 12.34129 | 8.68494  |
| protein_co UDP-N-acet   | 449  | 329  | 357  | 130  | 178  | 111  | 3.794812 | 3.565736 | 3.640493 | 1.705367 |
| protein_co ankyrin_re   | 0    | 0    | 0    | 3    | 6    | 0    | 0        | 0        | 0        | 0.076826 |
| protein_co centrosom    | 279  | 265  | 260  | 155  | 168  | 139  | 2.806159 | 3.417931 | 3.155219 | 2.419749 |
| protein_co enhancer_c   | 1157 | 905  | 987  | 1377 | 1638 | 1778 | 48.61268 | 48.76117 | 50.03586 | 89.80088 |
| protein_co hypoxia_in   | 2836 | 2367 | 2476 | 1694 | 1455 | 2213 | 33.90619 | 36.28945 | 35.71671 | 31.43523 |
| protein_co KIAA0247     | 1290 | 884  | 1050 | 125  | 140  | 55   | 11.22645 | 9.865393 | 11.02529 | 1.68847  |
| protein_co serine/argi  | 2735 | 2271 | 2394 | 2269 | 2814 | 4146 | 42.13016 | 44.8603  | 44.49466 | 54.25012 |
| protein_co solute_carr  | 2    | 0    | 1    | 5    | 3    | 5    | 0.045769 | 0        | 0.027611 | 0.177598 |

|                         |      |      |      |      |      |      |          |          |          |          |
|-------------------------|------|------|------|------|------|------|----------|----------|----------|----------|
| protein_co eukaryotic   | 3446 | 2654 | 2913 | 2346 | 2810 | 3252 | 27.17965 | 26.84348 | 27.72152 | 28.72017 |
| protein_co solute_carr  | 0    | 0    | 1    | 7    | 2    | 4    | 0        | 0        | 0.010739 | 0.096708 |
| protein_co dicer_1_rib  | 1771 | 1413 | 1482 | 1175 | 1352 | 1105 | 8.038159 | 8.224122 | 8.115855 | 8.277637 |
| protein_co zinc_finger  | 915  | 722  | 764  | 891  | 1103 | 858  | 9.634935 | 9.749318 | 9.706644 | 14.5625  |
| protein_co methylenet   | 1703 | 1397 | 1541 | 2476 | 2705 | 2982 | 23.15943 | 24.36233 | 25.28505 | 52.26299 |
| protein_co T-cell_leuke | 0    | 0    | 0    | 1    | 3    | 0    | 0        | 0        | 0        | 0.052172 |
| protein_co zinc_finger  | 822  | 657  | 718  | 717  | 811  | 751  | 9.190175 | 9.419475 | 9.685554 | 12.44233 |
| protein_co TEL2_telom   | 1158 | 829  | 956  | 1306 | 1900 | 2211 | 16.38462 | 15.04152 | 16.32051 | 28.68148 |
| protein_co pecanex_hc   | 2351 | 1950 | 2079 | 936  | 1030 | 786  | 8.533047 | 9.07602  | 9.104457 | 5.273001 |
| protein_co bradykinin   | 0    | 3    | 1    | 1    | 0    | 0    | 0        | 0.106929 | 0.033536 | 0.043142 |
| protein_co GSK3B_inte   | 305  | 290  | 264  | 389  | 360  | 437  | 3.730166 | 4.548159 | 3.895653 | 7.384283 |
| protein_co vaccinia_re  | 364  | 282  | 352  | 803  | 798  | 832  | 9.78107  | 9.717251 | 11.41237 | 33.49122 |
| protein_co proteasome   | 2333 | 1896 | 2039 | 1431 | 1416 | 1772 | 48.70633 | 50.75961 | 51.36129 | 46.37039 |
| protein_co papilin_pro  | 11   | 3    | 14   | 71   | 95   | 47   | 0.087245 | 0.030512 | 0.133974 | 0.874047 |
| protein_co ribosomal    | 20   | 14   | 24   | 39   | 39   | 33   | 0.22318  | 0.200337 | 0.323135 | 0.675491 |
| protein_co SMEK_hom     | 1381 | 1171 | 1148 | 1513 | 1772 | 1955 | 15.76317 | 17.14021 | 15.81029 | 26.80522 |
| protein_co chromosom    | 99   | 70   | 71   | 169  | 206  | 99   | 1.966163 | 1.782755 | 1.701339 | 5.209566 |
| protein_co proteasome   | 3145 | 2410 | 2484 | 2092 | 2628 | 2728 | 113.9638 | 111.9883 | 108.604  | 117.6626 |
| protein_co YY1_transc   | 2857 | 2276 | 2441 | 2811 | 3632 | 2872 | 20.0037  | 20.43533 | 20.62129 | 30.54861 |
| protein_co apoptotic    | 4924 | 3892 | 4164 | 4673 | 6002 | 5339 | 46.7855  | 47.42151 | 47.73666 | 68.91591 |
| protein_co cyclin_B1_i  | 624  | 569  | 525  | 1760 | 1933 | 1471 | 17.93953 | 20.97723 | 18.211   | 78.53614 |
| protein_co thyroid_ho   | 1142 | 921  | 1041 | 320  | 211  | 434  | 5.356983 | 5.54017  | 5.891867 | 2.329886 |
| protein_co APEX_nucle   | 4092 | 3186 | 3407 | 5299 | 6053 | 7197 | 106.4193 | 106.2527 | 106.9067 | 213.8991 |
| protein_co poly(A)_bin  | 762  | 601  | 637  | 863  | 1006 | 1314 | 12.90831 | 13.05564 | 13.01972 | 22.6911  |
| protein_co embryonal    | 2329 | 1678 | 1905 | 1178 | 1756 | 618  | 35.02465 | 32.35978 | 34.56586 | 27.49667 |
| protein_co Rho_GTPas    | 1003 | 907  | 924  | 686  | 506  | 699  | 4.89699  | 5.678647 | 5.443124 | 5.198557 |
| protein_co cyclin-depe  | 598  | 433  | 483  | 497  | 584  | 559  | 11.95236 | 11.09813 | 11.6479  | 15.4184  |
| protein_co dehydrogen   | 29   | 27   | 20   | 334  | 318  | 763  | 0.2557   | 0.305285 | 0.21277  | 4.570977 |
| protein_co signal_reco  | 1256 | 1115 | 1098 | 817  | 856  | 847  | 25.30892 | 28.81166 | 26.69527 | 25.55268 |
| protein_co copine_VI    | 4    | 1    | 0    | 2    | 4    | 2    | 0.041313 | 0.013244 | 0        | 0.032062 |
| protein_co chromodoi    | 2478 | 2094 | 2192 | 1947 | 2403 | 2160 | 14.12    | 15.30098 | 15.0703  | 17.21987 |
| protein_co phosphoen    | 390  | 254  | 305  | 977  | 1287 | 753  | 7.300242 | 6.096993 | 6.888435 | 28.38558 |
| protein_co KIAA0391     | 3    | 0    | 0    | 1    | 0    | 1    | 0.053794 | 0        | 0        | 0.027832 |
| protein_co DDB1_and     | 820  | 701  | 706  | 1039 | 1213 | 906  | 8.943897 | 9.804835 | 9.291069 | 17.58972 |
| protein_co proteasome   | 31   | 28   | 31   | 23   | 35   | 21   | 0.307313 | 0.355948 | 0.370791 | 0.353898 |
| protein_co nuclear_fac  | 337  | 268  | 288  | 312  | 366  | 346  | 10.14245 | 10.34325 | 10.45812 | 14.57465 |
| protein_co ER_membr     | 259  | 213  | 189  | 328  | 454  | 335  | 12.74346 | 13.43929 | 11.22012 | 25.04908 |
| protein_co proteasome   | 972  | 784  | 832  | 709  | 837  | 705  | 16.54942 | 17.11756 | 17.0918  | 18.7367  |
| protein_co breast_canc  | 201  | 159  | 144  | 120  | 155  | 121  | 3.547194 | 3.598283 | 3.066192 | 3.287006 |
| protein_co REC8_hom     | 80   | 82   | 71   | 363  | 416  | 382  | 1.380641 | 1.814738 | 1.478418 | 9.723617 |
| protein_co transmembr   | 112  | 71   | 82   | 33   | 60   | 38   | 1.916672 | 1.558108 | 1.693136 | 0.876545 |
| protein_co Sec23_hom    | 6421 | 5273 | 5707 | 1008 | 1123 | 842  | 71.43079 | 75.22287 | 76.60176 | 17.40499 |
| protein_co guanosine    | 879  | 685  | 703  | 1021 | 1059 | 1131 | 19.08163 | 19.06894 | 18.41323 | 34.40193 |
| protein_co pinin_desm   | 2272 | 1813 | 1860 | 3398 | 3353 | 3910 | 29.79142 | 30.48527 | 29.42686 | 69.15709 |
| protein_co Rab_gerany   | 589  | 478  | 482  | 279  | 340  | 285  | 12.19347 | 12.68964 | 12.03947 | 8.964929 |
| protein_co nuclear_fac  | 2286 | 1734 | 1815 | 566  | 715  | 245  | 18.80536 | 18.29212 | 18.01483 | 7.226907 |
| protein_co phospholip   | 1114 | 915  | 885  | 2206 | 2453 | 1781 | 23.16429 | 24.39856 | 22.20369 | 71.19833 |
| protein_co PDX1_C-ter   | 980  | 758  | 763  | 1078 | 1176 | 741  | 16.72815 | 16.59206 | 15.71427 | 28.56084 |
| protein_co glutathione  | 920  | 735  | 811  | 685  | 734  | 605  | 22.47984 | 23.03043 | 23.90971 | 25.97924 |
| protein_co matrix_mer   | 80   | 70   | 54   | 223  | 254  | 158  | 1.605823 | 1.801835 | 1.307824 | 6.947729 |
| protein_co visual_syste | 0    | 0    | 0    | 0    | 1    | 1    | 0        | 0        | 0        | 0        |
| protein_co transient_r  | 3032 | 2289 | 2543 | 1433 | 1841 | 1774 | 44.07022 | 42.66494 | 44.59749 | 32.32903 |
| protein_co phosphoryl   | 4927 | 3741 | 4096 | 1470 | 1740 | 1896 | 55.88464 | 54.41354 | 56.05546 | 25.87961 |
| protein_co abhydrolas   | 1071 | 885  | 891  | 1634 | 2156 | 1560 | 23.72187 | 25.13692 | 23.81142 | 56.17487 |
| protein_co protein_C    | 340  | 301  | 352  | 297  | 359  | 217  | 11.82686 | 13.42661 | 14.77343 | 16.03531 |
| protein_co GINS_compr   | 722  | 598  | 605  | 1562 | 2180 | 2027 | 10.42    | 11.06729 | 10.53499 | 34.98986 |
| protein_co ninein-like  | 909  | 849  | 838  | 1350 | 1721 | 1362 | 8.577787 | 10.27374 | 9.54121  | 19.77314 |
| protein_co CD40_mole    | 106  | 102  | 83   | 200  | 237  | 129  | 2.868056 | 3.539088 | 2.709617 | 8.399285 |
| protein_co ubiquinol-c  | 618  | 480  | 507  | 718  | 903  | 678  | 7.965374 | 7.933563 | 7.884492 | 14.36391 |
| protein_co zinc_finger  | 1188 | 910  | 972  | 2031 | 2439 | 2414 | 10.38891 | 10.2048  | 10.25576 | 27.56728 |
| protein_co serum/gluc   | 8    | 7    | 4    | 11   | 17   | 2    | 0.156626 | 0.175745 | 0.094489 | 0.33427  |
| protein_co intraflagell | 503  | 408  | 400  | 394  | 416  | 386  | 13.42384 | 13.96298 | 12.88002 | 16.32057 |
| protein_co v-myb_myb    | 2539 | 1990 | 2076 | 4672 | 5491 | 6558 | 45.11321 | 45.34229 | 44.50578 | 128.847  |
| protein_co R3H_doma     | 0    | 0    | 0    | 0    | 2    | 0    | 0        | 0        | 0        | 0        |
| protein_co hepatocyte   | 0    | 0    | 0    | 0    | 3    | 8    | 0        | 0        | 0        | 0        |

|                         |      |      |      |      |      |      |          |          |          |          |
|-------------------------|------|------|------|------|------|------|----------|----------|----------|----------|
| protein_co NDRG_fami    | 780  | 676  | 632  | 485  | 572  | 477  | 12.28147 | 13.64934 | 12.00662 | 11.85299 |
| protein_co Src-like-ada | 3    | 0    | 9    | 2    | 2    | 8    | 0.051023 | 0        | 0.184686 | 0.052796 |
| protein_co chromosom    | 79   | 42   | 76   | 69   | 172  | 100  | 3.166078 | 2.158506 | 3.67499  | 4.292142 |
| protein_co nuclear_fac  | 145  | 111  | 102  | 69   | 76   | 30   | 0.903529 | 0.886964 | 0.766871 | 0.66735  |
| protein_co regulating_  | 398  | 272  | 263  | 1142 | 1398 | 631  | 3.58682  | 3.143437 | 2.859765 | 15.97435 |
| protein_co poly(A)_bir  | 465  | 366  | 430  | 400  | 527  | 469  | 9.808303 | 9.899912 | 10.94353 | 13.09578 |
| protein_co serine/thre  | 847  | 728  | 775  | 779  | 968  | 778  | 6.262353 | 6.902317 | 6.913595 | 8.939682 |
| protein_co sal-like_4_( | 104  | 111  | 134  | 2204 | 2750 | 3353 | 1.394499 | 1.908609 | 2.167892 | 45.8698  |
| protein_co activity-dep | 2561 | 2100 | 2223 | 2596 | 2946 | 3524 | 19.26297 | 20.25547 | 20.17442 | 30.30741 |
| protein_co prefoldin_s  | 346  | 312  | 305  | 495  | 618  | 538  | 11.09709 | 12.83208 | 11.80269 | 24.64159 |
| protein_co docking_pr   | 114  | 100  | 83   | 183  | 240  | 132  | 2.723108 | 3.063158 | 2.392138 | 6.784872 |
| protein_co cleavage_st  | 493  | 374  | 392  | 661  | 725  | 803  | 9.700704 | 9.437073 | 9.306587 | 20.18777 |
| protein_co bone_morfe   | 520  | 383  | 368  | 2028 | 2405 | 1350 | 6.075955 | 5.738777 | 5.188085 | 36.77982 |
| protein_co RAE1_RNA_    | 580  | 469  | 500  | 453  | 508  | 730  | 8.365491 | 8.674523 | 8.701247 | 10.14126 |
| protein_co tumor_pro    | 1829 | 1504 | 1565 | 1001 | 1222 | 1439 | 36.30899 | 38.28756 | 37.48546 | 30.8436  |
| protein_co DnaJ_(Hsp4   | 2307 | 1698 | 1786 | 1109 | 1479 | 1484 | 20.46061 | 19.31159 | 19.11176 | 15.26628 |
| protein_co negative_el  | 1711 | 1279 | 1331 | 810  | 860  | 1081 | 22.40403 | 21.47613 | 21.0282  | 16.46234 |
| protein_co cathepsin_   | 1229 | 986  | 980  | 346  | 485  | 317  | 38.54704 | 39.65751 | 37.08628 | 16.84402 |
| protein_co PRP6_pre-r   | 2416 | 1926 | 1992 | 2353 | 2814 | 2682 | 37.21626 | 38.04533 | 37.02313 | 56.2585  |
| protein_co tubulin_be   | 16   | 13   | 27   | 2    | 3    | 3    | 0.2146   | 0.223595 | 0.436939 | 0.041636 |
| protein_co slowmo_hc    | 787  | 628  | 652  | 454  | 491  | 433  | 14.05272 | 14.37986 | 14.04693 | 12.58265 |
| protein_co histamine_   | 0    | 0    | 2    | 162  | 235  | 158  | 0        | 0        | 0.042554 | 4.434121 |
| protein_co GTP_bindir   | 694  | 471  | 541  | 396  | 461  | 490  | 11.11016 | 9.669216 | 10.44976 | 9.839809 |
| protein_co proteasom    | 5190 | 4041 | 4136 | 4335 | 5035 | 4768 | 237.8878 | 237.5215 | 228.7354 | 308.4071 |
| protein_co solute_carr  | 126  | 128  | 125  | 299  | 430  | 274  | 1.910783 | 2.489202 | 2.287173 | 7.037892 |
| protein_co neurotensi   | 1923 | 1604 | 1758 | 13   | 22   | 10   | 21.82224 | 23.34177 | 24.0706  | 0.228978 |
| protein_co MRG/MORI     | 840  | 577  | 680  | 698  | 849  | 511  | 24.07556 | 21.20715 | 23.51549 | 31.05153 |
| protein_co transcriptic | 418  | 316  | 402  | 654  | 815  | 411  | 7.980467 | 7.73657  | 9.260323 | 19.38029 |
| protein_co death_indu   | 2453 | 1881 | 2031 | 2283 | 2770 | 4700 | 13.46222 | 13.23784 | 13.4486  | 19.44713 |
| protein_co GID_compl    | 865  | 716  | 778  | 1291 | 1528 | 1326 | 25.9003  | 27.4923  | 28.10712 | 59.99918 |
| protein_co solute_carr  | 10   | 4    | 4    | 333  | 478  | 368  | 0.11746  | 0.06025  | 0.056689 | 6.071061 |
| protein_co baculoviral  | 0    | 0    | 0    | 2    | 3    | 2    | 0        | 0        | 0        | 0.106403 |
| protein_co Na+/K+_tra   | 2    | 2    | 0    | 134  | 193  | 117  | 0.06558  | 0.084098 | 0        | 6.819925 |
| protein_co ADP-ribosy   | 5793 | 4331 | 4821 | 2077 | 2946 | 2329 | 78.34839 | 75.11455 | 78.67047 | 43.60071 |
| protein_co arginine_va  | 0    | 0    | 0    | 4    | 6    | 2    | 0        | 0        | 0        | 0.470306 |
| protein_co collagen_ty  | 2    | 0    | 0    | 24   | 27   | 4    | 0.011582 | 0        | 0        | 0.215724 |
| protein_co cholinergic  | 0    | 0    | 0    | 107  | 129  | 40   | 0        | 0        | 0        | 1.497296 |
| protein_co eukaryotic_  | 43   | 31   | 33   | 1160 | 1558 | 789  | 1.094016 | 1.011407 | 1.013018 | 45.80823 |
| protein_co protein_ty   | 14   | 16   | 17   | 21   | 24   | 14   | 0.26311  | 0.385602 | 0.385484 | 0.612575 |
| protein_co glucocortic  | 865  | 600  | 685  | 787  | 853  | 789  | 8.896658 | 7.913551 | 8.500597 | 12.56366 |
| protein_co chromosom    | 915  | 683  | 719  | 1503 | 1981 | 1463 | 22.74887 | 21.77553 | 21.56829 | 58.00002 |
| protein_co sperm_flag   | 10   | 10   | 5    | 7    | 18   | 8    | 0.243585 | 0.312363 | 0.146949 | 0.264654 |
| protein_co cell_divisio | 2020 | 1534 | 1676 | 624  | 723  | 571  | 26.35443 | 25.66475 | 26.38301 | 12.63623 |
| protein_co isthmin_1_   | 91   | 83   | 71   | 9    | 15   | 15   | 1.646216 | 1.925453 | 1.549715 | 0.252708 |
| protein_co ring_finger  | 721  | 559  | 575  | 154  | 206  | 272  | 10.11904 | 10.06063 | 9.73688  | 3.354711 |
| protein_co ADP-ribosy   | 923  | 681  | 677  | 212  | 327  | 368  | 14.59679 | 13.81059 | 12.91791 | 5.203817 |
| protein_co NADH_deh     | 227  | 190  | 165  | 159  | 247  | 196  | 4.418445 | 4.742491 | 3.875035 | 4.803648 |
| protein_co tribbles_hc  | 1004 | 672  | 769  | 153  | 228  | 224  | 18.83857 | 16.16936 | 17.40959 | 4.455906 |
| protein_co Ras_associa  | 37   | 27   | 32   | 371  | 403  | 228  | 0.319685 | 0.299153 | 0.333594 | 4.975365 |
| protein_co casein_kina  | 2505 | 2133 | 2195 | 3331 | 3622 | 3224 | 26.59862 | 29.04367 | 28.1212  | 54.89799 |
| protein_co solute_carr  | 0    | 0    | 0    | 337  | 403  | 251  | 0        | 0        | 0        | 8.015292 |
| pseudogen -             | 3    | 2    | 1    | 3    | 1    | 5    | 0.264915 | 0.226478 | 0.106545 | 0.411185 |
| protein_co angiopoieti  | 0    | 0    | 0    | 5    | 2    | 1    | 0        | 0        | 0        | 0.189334 |
| protein_co R-spondin_   | 0    | 0    | 0    | 47   | 66   | 70   | 0        | 0        | 0        | 1.263632 |
| protein_co CDP-diacylg  | 875  | 790  | 803  | 1272 | 1581 | 1237 | 4.412644 | 5.108899 | 4.886011 | 9.95654  |
| protein_co prokinetici  | 7    | 8    | 7    | 23   | 14   | 6    | 0.185336 | 0.27162  | 0.223619 | 0.945192 |
| protein_co histocomp    | 2909 | 2163 | 2433 | 1002 | 1152 | 1301 | 68.47543 | 65.29154 | 69.1005  | 36.60912 |
| protein_co syntaphilin  | 491  | 369  | 379  | 84   | 116  | 35   | 4.161034 | 4.010102 | 3.875315 | 1.104917 |
| protein_co myosin_ligi  | 18   | 21   | 25   | 2    | 2    | 0    | 0.285528 | 0.427174 | 0.47848  | 0.049242 |
| protein_co signal-regul | 5    | 3    | 4    | 0    | 0    | 1    | 0.072339 | 0.055659 | 0.069825 | 0        |
| protein_co Sec23_horr   | 1385 | 1155 | 1186 | 1151 | 1308 | 1244 | 19.03919 | 20.36057 | 19.67123 | 24.55865 |
| protein_co fermitin_fa  | 274  | 216  | 235  | 472  | 626  | 911  | 2.494247 | 2.521459 | 2.5811   | 6.669009 |
| protein_co XK_Kell_blo  | 0    | 1    | 0    | 83   | 98   | 41   | 0        | 0.020663 | 0        | 2.07585  |
| protein_co prodynorphi  | 0    | 0    | 0    | 4    | 2    | 2    | 0        | 0        | 0        | 0.113941 |
| protein_co cerebral_cc  | 1    | 0    | 0    | 148  | 246  | 61   | 0.018062 | 0        | 0        | 4.149234 |

|                         |      |      |      |      |      |      |          |          |          |          |
|-------------------------|------|------|------|------|------|------|----------|----------|----------|----------|
| protein_co phospholip   | 124  | 84   | 101  | 120  | 125  | 175  | 0.996805 | 0.865919 | 0.97962  | 1.49727  |
| protein_co myosin_lig   | 1554 | 1131 | 1209 | 61   | 105  | 203  | 60.77322 | 56.7196  | 57.04736 | 3.702725 |
| protein_co hemopoiet    | 7    | 8    | 9    | 45   | 25   | 8    | 0.148051 | 0.216977 | 0.229671 | 1.477263 |
| protein_co transmembr   | 2386 | 1935 | 1876 | 1432 | 1487 | 1177 | 27.74791 | 28.85693 | 26.32333 | 25.84838 |
| protein_co TBC/LysM-e   | 6    | 2    | 8    | 12   | 14   | 17   | 0.135065 | 0.057734 | 0.217285 | 0.419279 |
| protein_co crooked_ne   | 665  | 522  | 551  | 506  | 558  | 698  | 7.077136 | 7.123866 | 7.075148 | 8.358279 |
| protein_co protein_O-   | 1821 | 1374 | 1421 | 670  | 778  | 826  | 16.31074 | 15.78192 | 15.35698 | 9.314702 |
| protein_co SAM_doma     | 284  | 245  | 274  | 740  | 952  | 953  | 2.783605 | 3.07939  | 3.240319 | 11.25775 |
| protein_co p21_protei   | 1    | 0    | 0    | 14   | 12   | 8    | 0.00981  | 0        | 0        | 0.213163 |
| protein_co kinesin_fan  | 1765 | 1492 | 1540 | 697  | 742  | 828  | 13.56069 | 14.69993 | 14.27598 | 8.311899 |
| protein_co maestro_hc   | 31   | 22   | 28   | 33   | 64   | 35   | 0.424406 | 0.386235 | 0.462515 | 0.701236 |
| protein_co NOP56_rib    | 1964 | 1500 | 1660 | 2938 | 3569 | 5756 | 38.37166 | 37.58112 | 39.13139 | 89.09461 |
| protein_co mannosida    | 729  | 548  | 560  | 607  | 752  | 650  | 17.85004 | 17.20686 | 16.54427 | 23.06911 |
| protein_co isocitrate_c | 1088 | 842  | 829  | 1388 | 1591 | 1411 | 31.49157 | 31.25265 | 28.95129 | 62.35701 |
| protein_co microtubul   | 3113 | 2420 | 2705 | 2582 | 2964 | 3243 | 55.64949 | 55.47621 | 58.34416 | 71.64218 |
| protein_co jagged_1     | 691  | 530  | 569  | 799  | 965  | 874  | 5.411893 | 5.322998 | 5.376894 | 9.712888 |
| protein_co CDK5_regu    | 383  | 353  | 328  | 560  | 574  | 545  | 6.776935 | 8.009743 | 7.002553 | 15.37988 |
| protein_co syntrophin   | 239  | 176  | 188  | 227  | 206  | 121  | 4.785104 | 4.518721 | 4.541501 | 7.054234 |
| protein_co oxytocin/n   | 0    | 0    | 0    | 6    | 5    | 1    | 0        | 0        | 0        | 0.851226 |
| protein_co TLO2_inte    | 626  | 495  | 502  | 1000 | 1045 | 881  | 7.416157 | 7.520023 | 7.175569 | 18.38802 |
| protein_co E2F_transci  | 1238 | 913  | 1031 | 1181 | 1839 | 1713 | 23.19211 | 21.93308 | 23.30377 | 34.33997 |
| protein_co regulation_  | 554  | 434  | 461  | 454  | 529  | 720  | 6.70549  | 6.736276 | 6.732397 | 8.529176 |
| protein_co peroxisoma   | 35   | 18   | 25   | 29   | 54   | 25   | 0.947547 | 0.624906 | 0.816621 | 1.218599 |
| protein_co charged_m    | 1554 | 1274 | 1287 | 1270 | 1537 | 1467 | 44.26919 | 46.54032 | 44.23613 | 56.15452 |
| protein_co bactericida  | 1    | 0    | 0    | 0    | 0    | 0    | 0.016412 | 0        | 0        | 0        |
| protein_co cystatin_9-  | 0    | 0    | 2    | 0    | 0    | 0    | 0        | 0        | 0.117989 | 0        |
| protein_co solute_carr  | 0    | 0    | 0    | 6    | 2    | 4    | 0        | 0        | 0        | 0.16965  |
| protein_co cystatin_C   | 3417 | 2493 | 2594 | 314  | 423  | 337  | 76.47885 | 71.55302 | 70.05101 | 10.90829 |
| protein_co agouti_sigr  | 2    | 6    | 2    | 13   | 18   | 3    | 0.153738 | 0.591441 | 0.185493 | 1.551045 |
| protein_co cystatin_S   | 0    | 0    | 0    | 0    | 0    | 2    | 0        | 0        | 0        | 0        |
| protein_co ARP5_actin   | 226  | 198  | 185  | 225  | 284  | 341  | 4.739331 | 5.324553 | 4.680889 | 7.323549 |
| protein_co WAP_four-i   | 0    | 0    | 0    | 514  | 575  | 555  | 0        | 0        | 0        | 45.73205 |
| protein_co adenosylhc   | 2161 | 1693 | 1799 | 5986 | 6707 | 5444 | 42.82727 | 43.0261  | 43.01747 | 184.1335 |
| protein_co protein_ph   | 1    | 3    | 1    | 455  | 448  | 679  | 0.007501 | 0.028858 | 0.009051 | 5.297522 |
| protein_co family_witl  | 749  | 624  | 644  | 1314 | 1456 | 1583 | 14.45888 | 15.44709 | 14.99985 | 39.37121 |
| protein_co epididymal   | 0    | 0    | 0    | 11   | 12   | 2    | 0        | 0        | 0        | 0.199297 |
| protein_co DEAH_(Asp    | 320  | 243  | 292  | 418  | 500  | 535  | 4.512723 | 4.394448 | 4.968435 | 9.149461 |
| protein_co deoxynucle   | 639  | 505  | 570  | 594  | 744  | 758  | 23.22692 | 23.53918 | 24.99848 | 33.51256 |
| protein_co microtubul   | 364  | 255  | 258  | 50   | 84   | 44   | 10.84369 | 9.741485 | 9.273494 | 2.311938 |
| protein_co synapse_di   | 402  | 230  | 300  | 134  | 185  | 143  | 7.474142 | 5.483685 | 6.729838 | 3.866968 |
| protein_co phosphatic   | 557  | 380  | 416  | 441  | 508  | 504  | 16.00352 | 14.00081 | 14.42121 | 19.6666  |
| protein_co troponin_C   | 1    | 4    | 1    | 48   | 79   | 33   | 0.060115 | 0.308358 | 0.072533 | 4.478757 |
| protein_co acyl-CoA_tl  | 252  | 181  | 219  | 391  | 455  | 328  | 3.862793 | 3.55786  | 4.050355 | 9.302681 |
| protein_co adipocyte_   | 1843 | 1524 | 1518 | 1300 | 1595 | 1546 | 35.56309 | 37.71103 | 35.34223 | 38.9357  |
| protein_co CUGBP_Ela    | 9    | 1    | 4    | 58   | 62   | 49   | 0.104149 | 0.01484  | 0.055849 | 1.041764 |
| protein_co zinc_finger  | 2061 | 1498 | 1649 | 2183 | 2937 | 1272 | 11.21248 | 10.45068 | 10.82411 | 18.4335  |
| protein_co cadherin_2   | 39   | 34   | 41   | 3    | 4    | 13   | 0.471074 | 0.526639 | 0.597526 | 0.056244 |
| protein_co ADNP_horr    | 981  | 771  | 741  | 1446 | 1673 | 1640 | 8.52941  | 8.596342 | 7.773493 | 19.51411 |
| protein_co ribosome_l   | 99   | 80   | 81   | 55   | 66   | 69   | 2.925086 | 3.031118 | 2.887597 | 2.522299 |
| protein_co ubiquitin_s  | 2031 | 1653 | 1725 | 1316 | 1629 | 1825 | 19.38006 | 20.22681 | 19.86014 | 19.49089 |
| protein_co VAMP_(vesi   | 1832 | 1366 | 1480 | 1297 | 1695 | 1333 | 12.60492 | 12.05243 | 12.28639 | 13.85112 |
| protein_co methyltran   | 242  | 187  | 209  | 168  | 181  | 156  | 2.186394 | 2.166526 | 2.278281 | 2.355878 |
| protein_co lipin_2      | 1666 | 1410 | 1395 | 284  | 326  | 250  | 12.54114 | 13.61102 | 12.67022 | 3.318264 |
| protein_co structural_  | 1477 | 1171 | 1286 | 754  | 668  | 847  | 7.851327 | 7.982314 | 8.248056 | 6.22106  |
| protein_co myomesin_    | 33   | 27   | 22   | 22   | 39   | 9    | 0.264644 | 0.277665 | 0.212872 | 0.273842 |
| protein_co myosin_lig   | 3959 | 3174 | 3231 | 1095 | 1213 | 1036 | 151.0477 | 155.2905 | 148.7351 | 64.84449 |
| protein_co centrosom    | 104  | 78   | 87   | 130  | 139  | 127  | 1.473727 | 1.417384 | 1.487479 | 2.859285 |
| protein_co ST8_alpha-l  | 4    | 2    | 2    | 74   | 102  | 66   | 0.069057 | 0.044278 | 0.041661 | 1.982955 |
| protein_co centrosom    | 902  | 738  | 776  | 585  | 661  | 580  | 4.898065 | 5.139061 | 5.084261 | 4.930652 |
| protein_co RNA_(guani   | 953  | 719  | 768  | 1385 | 1352 | 1399 | 7.14979  | 6.917332 | 6.951998 | 16.128   |
| protein_co SMAD_fami    | 995  | 719  | 751  | 904  | 1213 | 1690 | 15.11356 | 14.00496 | 13.76359 | 21.31291 |
| protein_co lipase_endo  | 1381 | 1177 | 1279 | 84   | 96   | 235  | 15.56239 | 17.0086  | 17.39007 | 1.469239 |
| protein_co laminin_al   | 288  | 193  | 226  | 3030 | 3755 | 2362 | 1.301747 | 1.118667 | 1.232511 | 21.25726 |
| protein_co ring_finger  | 64   | 60   | 62   | 499  | 631  | 436  | 0.498499 | 0.5993   | 0.582671 | 6.032744 |
| protein_co ankyrin_rej  | 809  | 651  | 702  | 933  | 520  | 782  | 3.626926 | 3.742662 | 3.797304 | 6.492356 |

|                         |       |       |       |      |      |      |          |          |          |          |
|-------------------------|-------|-------|-------|------|------|------|----------|----------|----------|----------|
| protein_co nucleolar_   | 1     | 0     | 0     | 9    | 9    | 16   | 0.01185  | 0        | 0        | 0.165534 |
| protein_co polymerase   | 343   | 310   | 320   | 620  | 684  | 562  | 2.623271 | 3.040326 | 2.952889 | 7.359889 |
| protein_co mindbomb     | 2902  | 2357  | 2513  | 1746 | 1866 | 1197 | 14.20999 | 14.80012 | 14.84693 | 13.27    |
| protein_co retinoblast  | 513   | 475   | 492   | 330  | 388  | 670  | 7.304761 | 8.673445 | 8.452824 | 7.293451 |
| protein_co RIO_kinase   | 525   | 504   | 492   | 331  | 338  | 350  | 6.096399 | 7.505056 | 6.893301 | 5.965853 |
| protein_co cleavage_st  | 453   | 333   | 408   | 454  | 501  | 676  | 9.215262 | 8.686864 | 10.01423 | 14.33494 |
| protein_co H2B_histor   | 0     | 0     | 0     | 1    | 1    | 2    | 0        | 0        | 0        | 0.033663 |
| protein_co matrix-rem   | 19489 | 14854 | 16568 | 225  | 320  | 218  | 93.31559 | 91.20474 | 95.71561 | 1.672159 |
| protein_co V-set_and_i  | 12    | 0     | 8     | 5    | 13   | 6    | 0.173881 | 0        | 0.139865 | 0.112453 |
| protein_co proteasomi   | 805   | 676   | 706   | 750  | 776  | 748  | 24.41557 | 26.2922  | 25.8359  | 35.30715 |
| protein_co autophagy    | 148   | 124   | 97    | 40   | 27   | 31   | 2.774779 | 2.981245 | 2.194252 | 1.164011 |
| protein_co steroid_sul  | 262   | 196   | 191   | 6    | 20   | 39   | 1.883942 | 1.807306 | 1.657096 | 0.066965 |
| protein_co transducin   | 919   | 713   | 797   | 1166 | 1353 | 1134 | 7.346049 | 7.308651 | 7.686784 | 14.46663 |
| protein_co G_protein+   | 10    | 7     | 11    | 206  | 269  | 227  | 0.266118 | 0.238881 | 0.353196 | 8.508876 |
| protein_co progesteron  | 3082  | 2421  | 2519  | 3734 | 4496 | 4550 | 75.62273 | 76.17699 | 74.57546 | 142.2082 |
| protein_co polymerase   | 510   | 398   | 430   | 657  | 659  | 955  | 4.359079 | 4.362315 | 4.434464 | 8.716064 |
| protein_co midline_1    | 1538  | 1225  | 1359  | 939  | 1211 | 1052 | 11.15842 | 11.39703 | 11.89635 | 10.57407 |
| protein_co NFkB_activ   | 357   | 309   | 289   | 382  | 432  | 339  | 7.13848  | 7.923287 | 6.972418 | 11.85581 |
| protein_co Rhox_homi    | 0     | 0     | 0     | 6    | 5    | 2    | 0        | 0        | 0        | 0.567853 |
| protein_co nuclear_tra  | 96    | 81    | 85    | 168  | 133  | 171  | 1.672155 | 1.809255 | 1.786374 | 4.541979 |
| protein_co guanylate_   | 4     | 0     | 0     | 0    | 0    | 1    | 0.050501 | 0        | 0        | 0        |
| pseudogen-              | 18    | 16    | 12    | 11   | 9    | 13   | 1.545825 | 1.762045 | 1.243418 | 1.46626  |
| protein_co ALG13_UD     | 446   | 413   | 431   | 524  | 578  | 537  | 5.137054 | 6.100124 | 5.989694 | 9.367874 |
| protein_co phosphorit   | 465   | 392   | 387   | 638  | 718  | 588  | 8.683337 | 9.387049 | 8.719522 | 18.49204 |
| protein_co toll-like_re | 0     | 3     | 2     | 2    | 3    | 0    | 0        | 0.042787 | 0.026838 | 0.034526 |
| protein_co motile_spe   | 199   | 152   | 181   | 199  | 187  | 149  | 3.947172 | 3.866214 | 4.331712 | 6.126557 |
| protein_co Alport_syn   | 443   | 366   | 343   | 521  | 696  | 585  | 3.774033 | 3.998457 | 3.52569  | 6.889222 |
| protein_co chordin-lik  | 42    | 29    | 27    | 255  | 304  | 260  | 0.500478 | 0.443142 | 0.388193 | 4.716353 |
| protein_co WD_repeat    | 1836  | 1448  | 1495  | 441  | 531  | 436  | 32.95945 | 33.33382 | 32.38146 | 12.28786 |
| protein_co suppressor   | 240   | 224   | 229   | 273  | 315  | 332  | 3.919751 | 4.691423 | 4.51264  | 6.920545 |
| protein_co P_antigen_   | 0     | 0     | 0     | 1    | 2    | 0    | 0        | 0        | 0        | 0.048715 |
| protein_co sushi-repea  | 2600  | 2149  | 2347  | 109  | 141  | 85   | 65.05552 | 68.95354 | 70.85523 | 4.23319  |
| protein_co glycine_rec  | 5     | 0     | 1     | 6    | 1    | 0    | 0.072901 | 0        | 0.017592 | 0.135783 |
| protein_co X-linked_in  | 1444  | 1092  | 1258  | 617  | 816  | 671  | 7.881409 | 7.643084 | 8.284482 | 5.226998 |
| protein_co stromal_an   | 1218  | 1054  | 1110  | 1571 | 1036 | 1784 | 9.447815 | 10.48417 | 10.38855 | 18.91432 |
| protein_co ATPase_cla   | 1042  | 878   | 885   | 918  | 881  | 992  | 7.056528 | 7.624778 | 7.231271 | 9.649315 |
| protein_co MCF_2_cell   | 17    | 6     | 18    | 7    | 6    | 8    | 0.202061 | 0.091452 | 0.258139 | 0.12914  |
| protein_co ATP-bindin   | 669   | 449   | 472   | 268  | 361  | 353  | 8.561523 | 7.368526 | 7.288111 | 5.323413 |
| protein_co coiled-coil  | 296   | 254   | 268   | 245  | 269  | 253  | 5.985099 | 6.586015 | 6.538264 | 7.689112 |
| protein_co calcium_ch   | 0     | 0     | 2     | 58   | 54   | 12   | 0        | 0        | 0.018641 | 0.695425 |
| protein_co synaptophy   | 23    | 10    | 10    | 34   | 60   | 35   | 0.433818 | 0.241874 | 0.227576 | 0.995379 |
| protein_co proteolipic  | 1300  | 1097  | 1107  | 62   | 59   | 41   | 56.494   | 61.13289 | 58.04364 | 4.181972 |
| protein_co BMX_non-r    | 0     | 0     | 1     | 0    | 0    | 0    | 0        | 0        | 0.021777 | 0        |
| protein_co leucine_zip  | 0     | 0     | 0     | 0    | 0    | 1    | 0        | 0        | 0        | 0        |
| protein_co plastin_3    | 5760  | 4756  | 5081  | 1625 | 1526 | 2036 | 81.18019 | 85.95651 | 86.40221 | 35.54769 |
| protein_co N(alpha)-ac  | 314   | 247   | 259   | 255  | 360  | 290  | 8.308953 | 8.381524 | 8.269219 | 10.47339 |
| protein_co renin_bind   | 3     | 8     | 2     | 235  | 327  | 90   | 0.101347 | 0.346569 | 0.081521 | 12.32223 |
| protein_co E74-like_fa  | 1071  | 805   | 896   | 55   | 63   | 23   | 12.05743 | 11.62173 | 12.17086 | 0.961078 |
| protein_co SWI/SNF_r    | 2644  | 2198  | 2303  | 877  | 921  | 994  | 30.24572 | 32.2433  | 31.78663 | 15.57157 |
| protein_co myotubula    | 4     | 2     | 4     | 53   | 64   | 51   | 0.071072 | 0.04557  | 0.085753 | 1.461663 |
| protein_co ankyrin_rej  | 9     | 5     | 0     | 3    | 3    | 7    | 0.216749 | 0.154417 | 0        | 0.112141 |
| protein_co zinc_finger  | 3     | 6     | 5     | 24   | 58   | 50   | 0.019387 | 0.049721 | 0.038985 | 0.240727 |
| protein_co retinoblast  | 2086  | 1694  | 1662  | 2149 | 2604 | 2133 | 24.26509 | 25.26913 | 23.32634 | 38.80025 |
| protein_co potassium_   | 280   | 226   | 240   | 116  | 166  | 98   | 2.959027 | 3.06273  | 3.060203 | 1.90274  |
| protein_co ubiquitin-c  | 0     | 2     | 0     | 2    | 0    | 0    | 0        | 0.101656 | 0        | 0.123043 |
| protein_co solute_carr  | 252   | 165   | 197   | 141  | 165  | 221  | 7.289503 | 6.120553 | 6.875617 | 6.33063  |
| protein_co fragile_X_r  | 626   | 533   | 517   | 515  | 715  | 597  | 6.774325 | 7.396534 | 6.750412 | 8.650265 |
| protein_co pim-2_onc    | 179   | 120   | 170   | 2876 | 3782 | 4459 | 4.04497  | 3.477386 | 4.635102 | 100.8746 |
| protein_co sex_comb_    | 198   | 147   | 150   | 194  | 279  | 202  | 2.210529 | 2.104543 | 2.020554 | 3.361734 |
| protein_co solute_carr  | 1023  | 756   | 794   | 223  | 327  | 458  | 18.31557 | 17.35705 | 17.15195 | 6.196982 |
| protein_co polyglutam   | 703   | 525   | 557   | 731  | 922  | 812  | 23.08381 | 22.10654 | 22.06762 | 37.25633 |
| protein_co retinoschis  | 1     | 3     | 6     | 1    | 1    | 3    | 0.016687 | 0.064196 | 0.120802 | 0.0259   |
| protein_co proprotein   | 136   | 96    | 66    | 183  | 213  | 83   | 6.073374 | 5.497581 | 3.556175 | 12.68448 |
| protein_co emerlin      | 1091  | 820   | 891   | 1024 | 1099 | 1011 | 37.09718 | 35.75521 | 36.55459 | 54.04388 |
| protein_co tafazzin     | 215   | 210   | 216   | 338  | 488  | 260  | 4.410041 | 5.523735 | 5.345717 | 10.76097 |

|                         |      |      |      |       |       |      |          |          |          |          |
|-------------------------|------|------|------|-------|-------|------|----------|----------|----------|----------|
| protein_co RAB40A_m     | 0    | 3    | 0    | 1     | 0     | 0    | 0        | 0.175306 | 0        | 0.070729 |
| protein_co phosphogly   | 4780 | 4012 | 4057 | 13993 | 10163 | 9126 | 45.86337 | 49.36377 | 46.96681 | 208.3912 |
| protein_co GATA_bind    | 0    | 0    | 0    | 3     | 2     | 2    | 0        | 0        | 0        | 0.145851 |
| protein_co magnesium    | 1909 | 1479 | 1655 | 639   | 730   | 853  | 22.11837 | 21.97479 | 23.13626 | 11.49155 |
| protein_co spermine_s   | 2298 | 1662 | 1828 | 2396  | 2641  | 2697 | 58.65719 | 54.40159 | 56.29833 | 94.92673 |
| protein_co phosphate    | 59   | 29   | 31   | 4     | 4     | 4    | 0.448236 | 0.282528 | 0.284161 | 0.047168 |
| protein_co ubiquitin-li | 975  | 745  | 808  | 769   | 978   | 642  | 19.19302 | 18.80634 | 19.19102 | 23.49608 |
| protein_co CD99_mole    | 2050 | 1558 | 1665 | 289   | 322   | 293  | 19.47812 | 18.98323 | 19.08778 | 4.26208  |
| protein_co early_endo   | 659  | 562  | 569  | 267   | 135   | 216  | 3.129167 | 3.42207  | 3.259895 | 1.967818 |
| protein_co G_protein-i  | 0    | 0    | 0    | 347   | 298   | 511  | 0        | 0        | 0        | 12.94443 |
| protein_co retinitis_pi | 428  | 388  | 407  | 169   | 230   | 145  | 5.277131 | 6.134725 | 6.054754 | 3.234233 |
| protein_co PHD_finger   | 152  | 136  | 135  | 513   | 517   | 386  | 1.445403 | 1.658417 | 1.548914 | 7.571697 |
| protein_co cyclin-depe  | 3464 | 2594 | 2740 | 2810  | 3338  | 2375 | 51.43351 | 49.39097 | 49.08704 | 64.75973 |
| protein_co ubiquitin_s  | 3426 | 2699 | 2812 | 2187  | 2531  | 1876 | 45.70276 | 46.17079 | 45.2604  | 45.28291 |
| protein_co phosphate    | 407  | 332  | 341  | 639   | 623   | 677  | 3.59605  | 3.761653 | 3.635245 | 8.763198 |
| protein_co bombesin-l   | 0    | 0    | 2    | 1     | 0     | 1    | 0        | 0        | 0.03994  | 0.02569  |
| protein_co HIV-1_Tat_   | 1318 | 1073 | 1069 | 1234  | 1374  | 1517 | 20.4707  | 21.37107 | 20.03286 | 29.74835 |
| protein_co TIMP_meta    | 8504 | 6603 | 6590 | 335   | 345   | 295  | 281.804  | 280.5916 | 263.4859 | 17.23055 |
| protein_co kelch-like_f | 290  | 254  | 236  | 225   | 198   | 392  | 2.337247 | 2.625123 | 2.294916 | 2.814619 |
| protein_co gamma-am     | 14   | 15   | 13   | 79    | 96    | 109  | 0.106292 | 0.146041 | 0.119087 | 0.930959 |
| protein_co protocadhe   | 37   | 36   | 43   | 475   | 400   | 265  | 0.189073 | 0.235906 | 0.265121 | 3.767481 |
| protein_co FYVE_RhoG    | 2686 | 1966 | 2172 | 1314  | 1801  | 1124 | 29.46119 | 27.65267 | 28.74433 | 22.37021 |
| protein_co protein_(pe  | 432  | 337  | 382  | 510   | 509   | 571  | 11.38005 | 11.38412 | 12.14148 | 20.85264 |
| protein_co porcupine_   | 187  | 131  | 140  | 248   | 251   | 157  | 4.15172  | 3.729642 | 3.75027  | 8.546113 |
| protein_co inter-alpha  | 1    | 0    | 0    | 0     | 1     | 0    | 0.009438 | 0        | 0        | 0        |
| protein_co melanoma_    | 8604 | 6935 | 7080 | 2424  | 2619  | 2232 | 184.3041 | 190.498  | 182.9852 | 80.59307 |
| protein_co RNA_bindi    | 3365 | 2535 | 2566 | 1218  | 1601  | 2258 | 72.98099 | 70.50372 | 67.14743 | 41.00176 |
| protein_co Kruppel-lik  | 1    | 2    | 3    | 198   | 212   | 129  | 0.005231 | 0.013416 | 0.018934 | 1.607586 |
| protein_co sushi-repea  | 3972 | 3093 | 3274 | 0     | 1     | 4    | 87.11279 | 86.98852 | 86.6362  | 0        |
| protein_co synaptotag   | 1154 | 954  | 1011 | 4     | 1     | 5    | 11.16383 | 11.83491 | 11.80067 | 0.060062 |
| protein_co zinc_finger  | 1    | 0    | 0    | 65    | 49    | 69   | 0.007799 | 0        | 0        | 0.786874 |
| protein_co centromere   | 421  | 319  | 355  | 172   | 181   | 191  | 6.051716 | 5.880259 | 6.157052 | 3.837562 |
| protein_co dystrophin   | 389  | 309  | 438  | 9     | 15    | 7    | 2.506557 | 2.553265 | 3.405259 | 0.090012 |
| protein_co TAF7-like_F  | 10   | 3    | 6    | 3     | 1     | 1    | 0.200299 | 0.077057 | 0.145003 | 0.093268 |
| protein_co polysaccha   | 472  | 325  | 410  | 421   | 343   | 719  | 18.42805 | 16.27159 | 19.31387 | 25.51232 |
| protein_co galactosida  | 353  | 280  | 310  | 311   | 334   | 425  | 12.55856 | 12.77416 | 13.30683 | 17.17338 |
| protein_co armadillo_   | 1438 | 1143 | 1220 | 307   | 374   | 311  | 18.07717 | 18.42583 | 18.50459 | 5.990187 |
| protein_co brain_expr   | 802  | 606  | 621  | 624   | 798   | 634  | 28.31762 | 27.43875 | 26.45586 | 34.19774 |
| protein_co KIAA0226-l   | 1    | 4    | 2    | 2     | 13    | 8    | 0.011796 | 0.060508 | 0.028466 | 0.036619 |
| protein_co sodium_lea   | 381  | 326  | 320  | 8     | 6     | 10   | 2.621053 | 2.875926 | 2.656127 | 0.085422 |
| protein_co fibroblast_  | 895  | 789  | 771  | 9     | 5     | 8    | 10.75514 | 12.15849 | 11.17881 | 0.167867 |
| protein_co 5-hydroxyt   | 8    | 13   | 9    | 0     | 0     | 0    | 0.105253 | 0.219329 | 0.142867 | 0        |
| protein_co Nedd4_fam    | 658  | 544  | 617  | 229   | 252   | 240  | 6.671055 | 7.072564 | 7.547478 | 3.603584 |
| protein_co tumor_nec    | 5    | 9    | 4    | 4     | 1     | 0    | 0.090802 | 0.209593 | 0.087646 | 0.112749 |
| protein_co fibronectin  | 1769 | 1522 | 1670 | 446   | 431   | 504  | 13.19574 | 14.55895 | 15.0304  | 5.163823 |
| protein_co motilin_re   | 0    | 0    | 0    | 2     | 0     | 0    | 0        | 0        | 0        | 0.104719 |
| protein_co cytidine_ar  | 77   | 75   | 64   | 31    | 39    | 46   | 1.067257 | 1.333058 | 1.070302 | 0.666915 |
| protein_co calcium_bi   | 151  | 114  | 147  | 107   | 126   | 68   | 1.926113 | 1.864743 | 2.262405 | 2.118454 |
| protein_co Kruppel-lik  | 199  | 184  | 141  | 38    | 22    | 93   | 2.619628 | 3.106087 | 2.239513 | 0.776427 |
| protein_co serine/thre  | 1598 | 1278 | 1384 | 2698  | 3266  | 2508 | 17.24517 | 17.68605 | 18.02083 | 45.19215 |
| protein_co acid_phosp   | 22   | 10   | 8    | 103   | 111   | 43   | 0.607169 | 0.353913 | 0.266394 | 4.412195 |
| protein_co DnaJ_(Hsp4   | 1618 | 1230 | 1259 | 327   | 399   | 462  | 13.56967 | 13.22834 | 12.73986 | 4.256662 |
| protein_co UDP-glucos   | 952  | 707  | 726  | 206   | 249   | 226  | 9.238265 | 8.797965 | 8.500376 | 3.102781 |
| protein_co Rho_guanin   | 1257 | 998  | 1137 | 1016  | 1047  | 995  | 10.66801 | 10.86145 | 11.64278 | 13.38358 |
| protein_co fibroblast_  | 35   | 18   | 20   | 2     | 8     | 3    | 0.388898 | 0.256478 | 0.26813  | 0.034493 |
| protein_co sarcoglycar  | 4    | 3    | 5    | 3     | 0     | 1    | 0.115493 | 0.111077 | 0.174186 | 0.134445 |
| protein_co poly_(ADP-   | 2577 | 2145 | 2335 | 825   | 910   | 741  | 22.07446 | 23.562   | 24.13296 | 10.96882 |
| protein_co suppressor   | 1080 | 913  | 999  | 842   | 800   | 748  | 13.28817 | 14.40528 | 14.83047 | 16.07992 |
| protein_co mitochond    | 290  | 248  | 241  | 353   | 355   | 404  | 10.51671 | 11.53302 | 10.54501 | 19.8695  |
| protein_co solute_carr  | 296  | 283  | 289  | 341   | 491   | 319  | 8.751226 | 10.72934 | 10.30916 | 15.64812 |
| protein_co karyopheri   | 1460 | 1212 | 1294 | 1195  | 1389  | 1196 | 15.31531 | 16.30365 | 16.37779 | 19.45679 |
| protein_co fms-related  | 1062 | 825  | 898  | 1030  | 1313  | 1029 | 7.029531 | 7.002694 | 7.171768 | 10.58204 |
| protein_co regulator_c  | 255  | 163  | 172  | 3     | 1     | 3    | 12.45516 | 10.20954 | 10.13644 | 0.227437 |
| protein_co von_Willeb   | 390  | 384  | 415  | 450   | 504   | 483  | 2.558711 | 3.230704 | 3.285131 | 4.58247  |
| protein_co diacylglyce  | 306  | 253  | 254  | 123   | 149   | 58   | 3.244764 | 3.440262 | 3.249701 | 2.024404 |

|                         |      |      |      |      |      |      |          |          |          |          |
|-------------------------|------|------|------|------|------|------|----------|----------|----------|----------|
| protein_co katanin_p6   | 970  | 783  | 805  | 156  | 178  | 109  | 6.023483 | 6.235152 | 6.031424 | 1.503595 |
| protein_co integrator_  | 601  | 409  | 455  | 268  | 284  | 536  | 7.480993 | 6.52856  | 6.833516 | 5.177857 |
| protein_co dehydroge    | 98   | 66   | 70   | 123  | 142  | 68   | 2.3326   | 2.014501 | 2.010297 | 4.54412  |
| protein_co mesenteric   | 2    | 0    | 0    | 12   | 21   | 16   | 0.039503 | 0        | 0        | 0.367884 |
| protein_co TSC22_don    | 3593 | 2772 | 2904 | 1542 | 1710 | 1244 | 34.95349 | 34.58087 | 34.08615 | 23.2835  |
| protein_co ceroid-lipo  | 228  | 201  | 197  | 64   | 107  | 107  | 2.630641 | 2.973939 | 2.742464 | 1.146139 |
| protein_co mesothelin   | 0    | 0    | 0    | 2    | 6    | 3    | 0        | 0        | 0        | 0.060198 |
| protein_co mahogunin    | 2707 | 1990 | 2145 | 2298 | 2948 | 2295 | 19.75584 | 18.62386 | 18.88785 | 26.03081 |
| protein_co zinc_finger  | 874  | 613  | 719  | 397  | 588  | 497  | 6.741549 | 6.063426 | 6.691526 | 4.753015 |
| protein_co TNFRSF1A-i   | 391  | 327  | 301  | 3    | 12   | 7    | 9.767713 | 10.47546 | 9.072577 | 0.116324 |
| protein_co heat_shock   | 27   | 15   | 14   | 1    | 3    | 0    | 0.486187 | 0.34637  | 0.304169 | 0.027949 |
| protein_co coronin_ac   | 333  | 266  | 266  | 109  | 114  | 114  | 5.401029 | 5.532524 | 5.205494 | 2.744033 |
| protein_co mitogen-ac   | 1146 | 908  | 868  | 867  | 891  | 830  | 20.93337 | 21.26913 | 19.13032 | 24.58126 |
| protein_co glyceropho   | 26   | 22   | 28   | 17   | 25   | 10   | 0.872685 | 0.946926 | 1.13394  | 0.885653 |
| protein_co engulfment   | 49   | 39   | 56   | 229  | 268  | 163  | 0.907788 | 0.926536 | 1.251769 | 6.584976 |
| protein_co phosphoryl   | 809  | 684  | 734  | 678  | 732  | 711  | 6.770306 | 7.340493 | 7.411462 | 8.806837 |
| protein_co LYR_motif    | 238  | 180  | 215  | 224  | 255  | 186  | 6.583967 | 6.385465 | 7.176244 | 9.618098 |
| protein_co nuclear_tra  | 453  | 353  | 378  | 422  | 549  | 422  | 9.151735 | 9.145118 | 9.213934 | 13.23269 |
| protein_co nucleopori   | 1620 | 1321 | 1480 | 2268 | 2448 | 2347 | 26.42151 | 27.62833 | 29.12409 | 57.41377 |
| protein_co centromere   | 427  | 371  | 347  | 374  | 508  | 455  | 6.771064 | 7.544185 | 6.63906  | 9.205156 |
| protein_co translin-ass | 29   | 16   | 19   | 1    | 5    | 9    | 0.54025  | 0.382232 | 0.42707  | 0.028915 |
| protein_co nuclear_fac  | 1325 | 1276 | 1393 | 576  | 656  | 387  | 4.369454 | 5.395993 | 5.542561 | 2.94825  |
| protein_co lon_peptid   | 1484 | 1210 | 1312 | 715  | 795  | 566  | 8.486984 | 8.873894 | 9.053185 | 6.346818 |
| protein_co NEDD4_bin    | 978  | 773  | 777  | 886  | 1119 | 818  | 6.453481 | 6.540998 | 6.186204 | 9.074431 |
| protein_co cerebellin   | 71   | 56   | 48   | 145  | 215  | 201  | 1.367224 | 1.382862 | 1.115246 | 4.33391  |
| protein_co ADP-ribosy   | 445  | 323  | 367  | 89   | 137  | 75   | 9.940952 | 9.252941 | 9.891953 | 3.085947 |
| protein_co plasmolipi   | 9    | 10   | 10   | 46   | 53   | 28   | 0.278187 | 0.396373 | 0.372943 | 2.206902 |
| protein_co zinc_finger  | 521  | 342  | 408  | 1041 | 1506 | 1276 | 3.189256 | 2.684646 | 3.013421 | 9.890832 |
| protein_co chemokine    | 0    | 0    | 1    | 3    | 2    | 1    | 0        | 0        | 0.019316 | 0.074544 |
| protein_co dihydroorc   | 218  | 156  | 192  | 341  | 413  | 313  | 4.627444 | 4.246378 | 4.917382 | 11.23491 |
| protein_co chemokine    | 0    | 0    | 1    | 5    | 10   | 4    | 0        | 0        | 0.091993 | 0.591706 |
| protein_co CCCTC-binc   | 1337 | 1037 | 1136 | 1596 | 1914 | 2208 | 15.9157  | 15.83006 | 16.31627 | 29.48885 |
| protein_co adrenocort   | 475  | 353  | 372  | 595  | 789  | 496  | 8.817402 | 8.402937 | 8.331785 | 17.1433  |
| protein_co polymerase   | 1289 | 1018 | 1101 | 954  | 960  | 1204 | 29.3832  | 29.75796 | 30.28178 | 33.75398 |
| protein_co par-6_parti  | 12   | 14   | 24   | 166  | 186  | 140  | 0.439251 | 0.657156 | 1.059963 | 9.431262 |
| protein_co zinc_finger  | 214  | 173  | 141  | 216  | 261  | 189  | 5.135345 | 5.323672 | 4.08247  | 8.04526  |
| protein_co matrix_me    | 201  | 170  | 162  | 3842 | 5182 | 2673 | 2.217622 | 2.405192 | 2.156525 | 65.79294 |
| protein_co U6_snRNA_    | 1707 | 1308 | 1391 | 1007 | 1299 | 1394 | 20.58674 | 20.22885 | 20.24088 | 18.85012 |
| protein_co cytochrom    | 2041 | 1595 | 1705 | 969  | 1180 | 1543 | 21.96019 | 22.00712 | 22.13429 | 16.18257 |
| protein_co coiled-coil  | 49   | 40   | 27   | 195  | 264  | 94   | 0.435814 | 0.45622  | 0.289746 | 2.691969 |
| protein_co NME/NM25     | 711  | 543  | 539  | 930  | 1323 | 930  | 31.18691 | 30.54301 | 28.52591 | 63.31638 |
| protein_co NDRG_fami    | 758  | 567  | 618  | 587  | 696  | 441  | 6.947348 | 6.664111 | 6.834179 | 8.350614 |
| protein_co proteasom    | 1197 | 904  | 922  | 930  | 1237 | 1417 | 33.60919 | 32.5493  | 31.2351  | 40.53007 |
| protein_co SET_domai    | 146  | 124  | 158  | 334  | 462  | 566  | 2.472352 | 2.692703 | 3.228216 | 8.778784 |
| protein_co solute_carr  | 843  | 595  | 629  | 375  | 604  | 690  | 8.689445 | 7.864856 | 7.822817 | 5.999654 |
| protein_co Vac14_hon    | 1394 | 1012 | 1065 | 1103 | 1472 | 1438 | 18.11158 | 16.861   | 16.69518 | 22.24331 |
| protein_co hyaluronan   | 27   | 19   | 28   | 829  | 1031 | 1763 | 0.300007 | 0.270727 | 0.375382 | 14.29726 |
| protein_co transport_i  | 310  | 259  | 282  | 233  | 250  | 274  | 3.018253 | 3.233725 | 3.312768 | 3.521116 |
| protein_co componen     | 1011 | 893  | 827  | 1132 | 1195 | 1049 | 13.59111 | 15.39447 | 13.41397 | 23.62005 |
| protein_co sphingomy    | 24   | 28   | 33   | 45   | 53   | 26   | 0.206488 | 0.308924 | 0.342567 | 0.600934 |
| protein_co solute_carr  | 166  | 171  | 157  | 146  | 188  | 173  | 1.862139 | 2.459855 | 2.124965 | 2.54207  |
| protein_co solute_carr  | 757  | 559  | 601  | 188  | 305  | 201  | 5.627099 | 5.32856  | 5.390279 | 2.169087 |
| protein_co phospholip   | 395  | 300  | 303  | 106  | 149  | 124  | 5.934494 | 5.779859 | 5.492591 | 2.471855 |
| protein_co epithelial_s | 12   | 11   | 13   | 1222 | 1447 | 1264 | 0.148347 | 0.174381 | 0.193905 | 23.44764 |
| protein_co fatty_acid_  | 0    | 0    | 0    | 51   | 69   | 46   | 0        | 0        | 0        | 1.531258 |
| protein_co WD_repeat    | 616  | 521  | 606  | 949  | 1096 | 824  | 7.817118 | 8.478383 | 9.278689 | 18.6923  |
| protein_co MON1_hon     | 1198 | 946  | 945  | 705  | 911  | 791  | 9.222499 | 9.338826 | 8.777516 | 8.423865 |
| protein_co COX_assem    | 257  | 243  | 252  | 165  | 185  | 180  | 5.77419  | 7.001217 | 6.83135  | 5.754033 |
| protein_co axin_1       | 973  | 684  | 858  | 1476 | 1879 | 1227 | 7.196212 | 6.487189 | 7.656433 | 16.94369 |
| protein_co host_cell_fi | 548  | 430  | 455  | 475  | 581  | 494  | 18.82471 | 18.94199 | 18.8585  | 25.3263  |
| protein_co nitrogen_p   | 1466 | 1048 | 1156 | 791  | 931  | 722  | 22.85265 | 20.94948 | 21.74245 | 19.13857 |
| protein_co malonyl-Cc   | 212  | 135  | 187  | 210  | 286  | 197  | 2.214454 | 1.808314 | 2.356788 | 3.404713 |
| protein_co N-methylp    | 876  | 657  | 694  | 419  | 559  | 264  | 34.08768 | 32.78446 | 32.58373 | 25.30684 |
| protein_co N-terminal   | 7    | 4    | 15   | 53   | 49   | 27   | 0.159026 | 0.116531 | 0.411159 | 1.868861 |
| protein_co hydroxyste   | 467  | 456  | 507  | 793  | 973  | 692  | 6.222688 | 7.791755 | 8.151117 | 16.40079 |

|                         |      |      |      |      |      |      |          |          |          |          |
|-------------------------|------|------|------|------|------|------|----------|----------|----------|----------|
| protein_co TATA_box_    | 1062 | 748  | 850  | 1141 | 1524 | 1305 | 10.7391  | 9.699609 | 10.37075 | 17.90851 |
| protein_co N-acetylglu  | 159  | 121  | 149  | 120  | 154  | 240  | 2.268872 | 2.214153 | 2.565353 | 2.657814 |
| protein_co WAP_four-    | 48   | 43   | 38   | 1    | 0    | 4    | 0.538837 | 0.619004 | 0.514692 | 0.017424 |
| protein_co SEC14-like_  | 1    | 1    | 0    | 78   | 97   | 52   | 0.00726  | 0.009309 | 0        | 0.878901 |
| protein_co coactosin-l  | 5548 | 4051 | 4520 | 1915 | 2468 | 2052 | 48.80785 | 45.7009  | 47.97773 | 26.14884 |
| protein_co ubiquitin_s  | 2059 | 1548 | 1719 | 2513 | 3096 | 2790 | 31.44839 | 30.31952 | 31.6786  | 59.57513 |
| protein_co cysteine-ric | 16   | 15   | 11   | 217  | 250  | 122  | 0.163665 | 0.19676  | 0.135761 | 3.445292 |
| protein_co tuberous_s   | 3352 | 2531 | 2657 | 1484 | 1905 | 1862 | 25.53206 | 24.72198 | 24.41863 | 17.54471 |
| protein_co zinc_finger  | 316  | 211  | 227  | 299  | 396  | 260  | 2.51994  | 2.157719 | 2.184122 | 3.700878 |
| pseudogen-              | 0    | 0    | 0    | 2    | 0    | 2    | 0        | 0        | 0        | 0.308389 |
| protein_co NME/NM23     | 4868 | 3593 | 4094 | 5875 | 7530 | 5578 | 122.6548 | 116.0915 | 124.46   | 229.7589 |
| protein_co ATP-bindin   | 1728 | 1350 | 1543 | 2989 | 3280 | 2107 | 12.28783 | 12.31047 | 13.2387  | 32.99042 |
| protein_co NODAL_mc     | 149  | 103  | 128  | 101  | 125  | 139  | 1.605011 | 1.422782 | 1.663603 | 1.688665 |
| protein_co lipase_mat   | 756  | 578  | 567  | 195  | 256  | 120  | 10.55654 | 10.34992 | 9.552803 | 4.226343 |
| protein_co forkhead_b   | 26   | 19   | 18   | 0    | 0    | 8    | 0.474743 | 0.444886 | 0.396557 | 0        |
| protein_co nuclear_pr   | 371  | 278  | 291  | 325  | 454  | 308  | 5.416001 | 5.20426  | 5.125614 | 7.364083 |
| protein_co methenylte   | 318  | 249  | 296  | 235  | 283  | 168  | 4.115657 | 4.132575 | 4.622233 | 4.720743 |
| protein_co chloride_cl  | 1340 | 987  | 1116 | 837  | 1129 | 1081 | 13.312   | 12.57375 | 13.37675 | 12.90608 |
| protein_co hydroxyacy   | 277  | 206  | 223  | 328  | 515  | 198  | 5.906564 | 5.632896 | 5.737307 | 10.85574 |
| protein_co family_witl  | 547  | 418  | 393  | 238  | 447  | 304  | 15.21283 | 14.90762 | 13.18753 | 10.27378 |
| protein_co solute_carr  | 7198 | 4470 | 5165 | 4151 | 6934 | 6991 | 74.39152 | 59.24183 | 64.40654 | 66.58782 |
| protein_co meteorin_f   | 929  | 674  | 717  | 440  | 734  | 265  | 13.101   | 12.18872 | 12.19989 | 9.631011 |
| protein_co F-box_prot   | 702  | 558  | 615  | 372  | 442  | 338  | 5.547151 | 5.654268 | 5.863488 | 4.562536 |
| protein_co STIP1_hom    | 1018 | 753  | 849  | 424  | 833  | 572  | 25.76041 | 24.43483 | 25.92153 | 16.65334 |
| protein_co rhomboid_    | 36   | 34   | 23   | 75   | 117  | 52   | 1.077931 | 1.3055   | 0.83093  | 3.485623 |
| protein_co nucleotide   | 156  | 154  | 134  | 109  | 157  | 188  | 5.956712 | 7.540707 | 6.173549 | 6.460096 |
| protein_co ubiquitin-c  | 1845 | 1331 | 1462 | 1686 | 2461 | 2156 | 26.59455 | 24.60275 | 25.4268  | 37.7211  |
| protein_co Mediterran   | 5    | 2    | 1    | 2    | 1    | 1    | 0.063194 | 0.032415 | 0.015249 | 0.039234 |
| protein_co crystallin_r | 2    | 1    | 5    | 159  | 187  | 149  | 0.06223  | 0.0399   | 0.187709 | 7.678824 |
| protein_co eukaryotic_  | 1089 | 795  | 936  | 642  | 841  | 530  | 9.654609 | 9.038228 | 10.01223 | 8.834304 |
| protein_co small_optic  | 2282 | 1587 | 1777 | 2526 | 3467 | 2390 | 22.55544 | 20.11509 | 21.19196 | 38.75248 |
| protein_co piezo-type_  | 4184 | 3095 | 3614 | 1068 | 1367 | 1205 | 24.30474 | 23.05522 | 25.33001 | 9.629439 |
| protein_co G1_to_S_pl   | 3835 | 3156 | 3493 | 3415 | 4617 | 3885 | 25.30939 | 26.70931 | 27.81397 | 34.98142 |
| protein_co zinc_finger  | 125  | 97   | 81   | 151  | 166  | 112  | 2.593474 | 2.580792 | 2.027706 | 4.862721 |
| protein_co clusterin_a  | 161  | 149  | 160  | 92   | 128  | 93   | 1.472745 | 1.747823 | 1.765915 | 1.306231 |
| protein_co ubiquitin_f  | 2887 | 2214 | 2469 | 1724 | 2034 | 2355 | 26.49148 | 26.05232 | 27.3356  | 24.55428 |
| protein_co protease_sc  | 1    | 4    | 2    | 1    | 0    | 1    | 0.026718 | 0.137048 | 0.064474 | 0.04147  |
| protein_co glutamyl-tf  | 830  | 676  | 650  | 1021 | 1184 | 1122 | 9.825477 | 10.26199 | 9.284039 | 18.75995 |
| protein_co transcriptic | 2700 | 2058 | 2051 | 2098 | 2732 | 2083 | 126.984  | 124.1195 | 116.3855 | 153.1515 |
| protein_co golgi-associ | 1242 | 1101 | 1073 | 1828 | 2045 | 1772 | 9.750109 | 11.08369 | 10.16332 | 22.27381 |
| protein_co aquaporin_   | 0    | 0    | 0    | 0    | 2    | 0    | 0        | 0        | 0        | 0        |
| protein_co calcineurin  | 312  | 227  | 278  | 118  | 147  | 130  | 4.860361 | 4.534706 | 5.225246 | 2.853162 |
| protein_co ubiquitin_s  | 542  | 401  | 459  | 388  | 549  | 357  | 2.375399 | 2.253673 | 2.427157 | 2.639365 |
| protein_co heme_oxyg    | 983  | 759  | 764  | 575  | 689  | 704  | 21.46851 | 21.25688 | 20.13213 | 19.49156 |
| protein_co DnaJ_(Hsp4   | 994  | 752  | 814  | 1154 | 1380 | 1370 | 13.90889 | 13.49377 | 13.7429  | 25.06353 |
| protein_co bifunction   | 1092 | 940  | 973  | 1401 | 1444 | 1543 | 16.84893 | 18.59888 | 18.11384 | 33.55199 |
| protein_co sal-like_1_  | 692  | 474  | 542  | 2259 | 2713 | 1997 | 6.177021 | 5.425761 | 5.837412 | 31.29822 |
| protein_co TOX_high_r   | 53   | 40   | 32   | 376  | 437  | 297  | 0.727935 | 0.704508 | 0.530292 | 8.015584 |
| pseudogen- RNA_polym    | 1    | 0    | 0    | 3    | 7    | 1    | 0.021993 | 0        | 0        | 0.102411 |
| protein_co retinoblast  | 1042 | 854  | 898  | 402  | 430  | 269  | 9.959111 | 10.46695 | 10.35565 | 5.963612 |
| protein_co quinolinat   | 1268 | 988  | 935  | 2773 | 3419 | 2506 | 25.37624 | 25.35563 | 22.57708 | 86.13674 |
| protein_co xylosyltran  | 5553 | 4015 | 4790 | 645  | 766  | 528  | 26.32497 | 24.40816 | 27.39831 | 4.746029 |
| protein_co PYD_and_C    | 59   | 49   | 42   | 165  | 216  | 137  | 2.433167 | 2.591346 | 2.08986  | 10.56171 |
| protein_co RPGRIP1-il   | 426  | 364  | 405  | 133  | 116  | 174  | 2.43748  | 2.670805 | 2.795983 | 1.181173 |
| protein_co MYC-associ   | 1148 | 772  | 753  | 720  | 1157 | 544  | 19.95172 | 17.20541 | 15.78998 | 19.42233 |
| protein_co syntaxin_4   | 911  | 660  | 722  | 400  | 538  | 443  | 26.89975 | 24.99097 | 25.72262 | 18.33244 |
| protein_co CDP-diacyl   | 1772 | 1335 | 1471 | 1712 | 2247 | 1551 | 35.31199 | 34.11529 | 35.36871 | 52.95326 |
| protein_co branched_c   | 1418 | 992  | 1097 | 1187 | 1355 | 1072 | 25.99298 | 23.31851 | 24.26244 | 33.77233 |
| protein_co K(lysine)_ac | 497  | 443  | 414  | 766  | 906  | 678  | 9.321735 | 10.655   | 9.368904 | 22.29973 |
| protein_co NODAL_mc     | 2150 | 1706 | 1901 | 1453 | 1695 | 1624 | 23.14892 | 23.55486 | 24.69576 | 24.28222 |
| protein_co interleukin  | 49   | 42   | 39   | 4    | 5    | 20   | 0.682797 | 0.750506 | 0.655704 | 0.086514 |
| protein_co synaptotag   | 32   | 26   | 25   | 67   | 88   | 45   | 0.294674 | 0.307026 | 0.277767 | 0.957629 |
| protein_co transmembr   | 2    | 6    | 2    | 44   | 48   | 70   | 0.019073 | 0.073374 | 0.023012 | 0.651273 |
| protein_co centriolar_  | 500  | 431  | 428  | 208  | 203  | 247  | 4.225087 | 4.670381 | 4.363726 | 2.728095 |
| protein_co chromosom    | 1372 | 1062 | 1213 | 1287 | 1384 | 1030 | 16.68822 | 16.56494 | 17.80184 | 24.29769 |

|                         |      |      |      |      |      |      |          |          |          |          |
|-------------------------|------|------|------|------|------|------|----------|----------|----------|----------|
| protein_co solute_carr  | 0    | 0    | 0    | 0    | 0    | 3    | 0        | 0        | 0        | 0        |
| protein_co ring_finger  | 2755 | 1939 | 2280 | 1259 | 1676 | 1919 | 22.929   | 20.6943  | 22.89531 | 16.26371 |
| protein_co lysine-rich  | 309  | 255  | 283  | 742  | 1007 | 1027 | 3.027375 | 3.20374  | 3.345355 | 11.28345 |
| protein_co aquaporin    | 1    | 0    | 1    | 0    | 0    | 0    | 0.015455 | 0        | 0.018647 | 0        |
| protein_co alpha_and    | 790  | 634  | 663  | 537  | 604  | 640  | 13.03876 | 13.41862 | 13.20294 | 13.75669 |
| protein_co IQ_motif_c   | 36   | 18   | 24   | 16   | 20   | 6    | 0.40115  | 0.257209 | 0.322674 | 0.276729 |
| protein_co lactamase    | 110  | 93   | 102  | 151  | 180  | 116  | 2.54963  | 2.764247 | 2.852546 | 5.432402 |
| protein_co coronin_ac   | 575  | 426  | 457  | 171  | 195  | 133  | 7.466563 | 7.093684 | 7.160068 | 3.44651  |
| protein_co c-src_tyrosi | 1778 | 1322 | 1403 | 1122 | 1540 | 1026 | 30.13027 | 28.72844 | 28.68646 | 29.51172 |
| protein_co HECT_and     | 1809 | 1479 | 1580 | 689  | 867  | 740  | 5.603755 | 5.875138 | 5.905351 | 3.312762 |
| protein_co thyroid_ho   | 449  | 424  | 402  | 170  | 193  | 222  | 10.29517 | 12.46701 | 11.12144 | 6.050155 |
| protein_co mitochond    | 230  | 183  | 189  | 237  | 285  | 167  | 6.20167  | 6.327632 | 6.148804 | 9.918811 |
| protein_co RAS-like_fai | 97   | 104  | 91   | 222  | 311  | 150  | 1.725467 | 2.372344 | 1.9531   | 6.129407 |
| protein_co adaptor-rel  | 3    | 2    | 4    | 177  | 191  | 104  | 0.037653 | 0.032189 | 0.060573 | 3.448079 |
| protein_co acyl-CoA_s   | 39   | 29   | 23   | 31   | 52   | 46   | 0.287669 | 0.274306 | 0.204694 | 0.354912 |
| protein_co immunoglc    | 1849 | 1475 | 1590 | 478  | 680  | 421  | 13.32201 | 13.62807 | 13.82223 | 5.345535 |
| protein_co RAB11A_m     | 1851 | 1532 | 1567 | 1674 | 2094 | 1802 | 17.60516 | 18.68536 | 17.98252 | 24.71265 |
| protein_co cathepsin_l  | 55   | 65   | 63   | 208  | 274  | 187  | 1.177603 | 1.784674 | 1.627515 | 6.912419 |
| pseudogen: golgin_A8    | 5    | 3    | 2    | 5    | 17   | 5    | 0.13359  | 0.102786 | 0.064474 | 0.20735  |
| protein_co tetratricop  | 514  | 384  | 413  | 318  | 357  | 189  | 6.261748 | 5.99892  | 6.070585 | 6.012984 |
| protein_co CD276_mo     | 7437 | 5395 | 5815 | 3263 | 4061 | 3255 | 100.525  | 93.51405 | 94.83614 | 68.45791 |
| protein_co fumarylase   | 266  | 257  | 245  | 229  | 277  | 252  | 3.639552 | 4.509296 | 4.044645 | 4.863313 |
| protein_co KIAA1199     | 114  | 83   | 102  | 48   | 39   | 17   | 0.726582 | 0.678371 | 0.784382 | 0.474844 |
| protein_co RNA_polym    | 965  | 672  | 781  | 1534 | 1924 | 1263 | 7.673201 | 6.852166 | 7.492873 | 18.93237 |
| protein_co homer_hor    | 66   | 55   | 57   | 219  | 257  | 237  | 0.499071 | 0.533323 | 0.520046 | 2.570356 |
| protein_co EH-domain    | 4591 | 3584 | 3661 | 1066 | 1414 | 1150 | 59.74801 | 59.81271 | 57.48624 | 21.53296 |
| protein_co transmembr   | 513  | 401  | 442  | 336  | 301  | 477  | 7.737079 | 7.755564 | 8.043221 | 7.865556 |
| protein_co zinc_finger  | 3253 | 2491 | 2846 | 1692 | 1985 | 1666 | 14.58253 | 14.31963 | 15.3933  | 11.77279 |
| protein_co centrosom    | 267  | 228  | 254  | 234  | 138  | 226  | 2.221763 | 2.432936 | 2.550165 | 3.022267 |
| protein_co ATPase_cla   | 7    | 4    | 1    | 2    | 5    | 1    | 0.056758 | 0.041591 | 0.009783 | 0.02517  |
| protein_co oculocutan   | 216  | 167  | 187  | 3    | 4    | 5    | 3.178984 | 3.151813 | 3.320659 | 0.068531 |
| protein_co DTW_dom      | 342  | 296  | 275  | 225  | 290  | 205  | 5.983726 | 6.641201 | 5.805322 | 6.110245 |
| protein_co transglutar  | 0    | 0    | 2    | 0    | 0    | 0    | 0        | 0        | 0.040893 | 0        |
| protein_co family_witl  | 154  | 120  | 125  | 381  | 417  | 323  | 1.534764 | 1.533597 | 1.503069 | 5.89354  |
| protein_co GA_binding   | 652  | 487  | 503  | 551  | 743  | 686  | 10.1367  | 9.709287 | 9.435504 | 13.29631 |
| protein_co tight_junct  | 3727 | 2945 | 3323 | 2345 | 2695 | 2682 | 21.98228 | 22.2745  | 23.64785 | 21.46775 |
| protein_co Bcl2_modi    | 275  | 196  | 216  | 1114 | 1247 | 494  | 2.751174 | 2.514495 | 2.607277 | 17.29821 |
| protein_co Dmx-like_2   | 427  | 322  | 361  | 245  | 184  | 114  | 1.876128 | 1.814261 | 1.91377  | 1.670826 |
| protein_co secretograr  | 0    | 1    | 0    | 583  | 451  | 802  | 0        | 0.018166 | 0        | 12.81892 |
| protein_co DnaJ_(Hsp4   | 182  | 135  | 143  | 146  | 217  | 162  | 6.363895 | 6.053335 | 6.033033 | 7.923826 |
| protein_co eukaryotic   | 1534 | 1152 | 1258 | 910  | 1293 | 1497 | 27.99894 | 26.96361 | 27.70416 | 25.78031 |
| protein_co spastic_par  | 1051 | 888  | 881  | 753  | 787  | 604  | 6.33926  | 6.868441 | 6.411502 | 7.049549 |
| protein_co ras_homolo   | 11   | 16   | 7    | 103  | 149  | 41   | 0.302516 | 0.564268 | 0.232275 | 4.396668 |
| protein_co vacuolar_p   | 1484 | 1078 | 1157 | 872  | 1183 | 1327 | 17.86516 | 16.64183 | 16.80561 | 16.29371 |
| protein_co Opa_intera   | 106  | 84   | 104  | 269  | 305  | 317  | 4.021312 | 4.086491 | 4.760398 | 15.83962 |
| protein_co solute_carr  | 172  | 146  | 140  | 0    | 0    | 2    | 1.12688  | 1.226624 | 1.106689 | 0        |
| protein_co biogenesis   | 1096 | 862  | 897  | 318  | 409  | 493  | 12.73011 | 12.83921 | 12.57078 | 5.732964 |
| protein_co myelin_exp   | 387  | 309  | 320  | 807  | 958  | 1024 | 3.261988 | 3.339944 | 3.254388 | 10.55785 |
| protein_co serum/gluc   | 36   | 39   | 39   | 50   | 59   | 53   | 0.408232 | 0.567125 | 0.533602 | 0.880046 |
| protein_co platelet-de  | 288  | 165  | 198  | 47   | 65   | 76   | 7.088884 | 5.208093 | 5.880289 | 1.795617 |
| protein_co centrosom    | 256  | 207  | 220  | 168  | 211  | 293  | 2.748762 | 2.85021  | 2.850151 | 2.799864 |
| protein_co zinc_finger  | 965  | 782  | 857  | 392  | 497  | 374  | 7.095635 | 7.373608 | 7.603137 | 4.473841 |
| protein_co BRF2_subu    | 135  | 106  | 108  | 66   | 116  | 156  | 2.431868 | 2.44862  | 2.347351 | 1.845358 |
| protein_co tripartite_r | 427  | 324  | 341  | 351  | 479  | 501  | 4.734461 | 4.606776 | 4.561893 | 6.040603 |
| protein_co zinc_finger  | 305  | 252  | 256  | 305  | 326  | 322  | 5.259822 | 5.572898 | 5.326712 | 8.163972 |
| protein_co retinitis_pi | 0    | 1    | 1    | 0    | 0    | 0    | 0        | 0.008469 | 0.007968 | 0        |
| protein_co carbonic_a   | 89   | 66   | 79   | 121  | 145  | 221  | 2.430525 | 2.311338 | 2.603066 | 5.12892  |
| protein_co frizzled_fan | 99   | 72   | 60   | 1234 | 1438 | 1061 | 0.338198 | 0.315412 | 0.247307 | 6.543077 |
| protein_co integrator   | 326  | 259  | 292  | 234  | 261  | 368  | 5.540466 | 5.64466  | 5.987694 | 6.172698 |
| protein_co receptor-in  | 328  | 252  | 278  | 215  | 243  | 198  | 5.951984 | 5.864051 | 6.086684 | 6.055595 |
| protein_co eyes_absen   | 68   | 66   | 89   | 25   | 18   | 45   | 0.73706  | 0.917376 | 1.163944 | 0.420595 |
| protein_co nihrin       | 1107 | 899  | 959  | 302  | 323  | 593  | 10.5782  | 11.01624 | 11.05684 | 4.479213 |
| protein_co transient_r  | 104  | 107  | 102  | 12   | 21   | 28   | 0.933671 | 1.231838 | 1.104863 | 0.167214 |
| protein_co carboxypep   | 295  | 222  | 204  | 10   | 21   | 9    | 7.104548 | 6.856094 | 5.927788 | 0.373805 |
| protein_co 24-dienoyl   | 591  | 509  | 509  | 307  | 335  | 318  | 15.69196 | 17.33073 | 16.3063  | 12.65198 |

|                        |      |      |      |      |       |       |          |          |          |          |
|------------------------|------|------|------|------|-------|-------|----------|----------|----------|----------|
| protein_co calbindin_  | 5    | 1    | 1    | 170  | 207   | 328   | 0.043481 | 0.011152 | 0.010492 | 2.294615 |
| protein_co inositol_m  | 3339 | 2620 | 2757 | 799  | 1013  | 852   | 21.74827 | 21.8836  | 21.66671 | 8.077658 |
| protein_co secreted_fr | 894  | 713  | 723  | 2075 | 2425  | 2473  | 9.340391 | 9.552706 | 9.114102 | 33.64931 |
| protein_co lysosomal_  | 4270 | 3411 | 3604 | 9733 | 11230 | 10437 | 63.10128 | 64.64    | 64.26036 | 223.248  |
| protein_co ubiquitin-c | 263  | 214  | 219  | 239  | 285   | 335   | 1.463574 | 1.527151 | 1.470453 | 2.064369 |
| protein_co processing_ | 305  | 204  | 275  | 232  | 244   | 273   | 3.030611 | 2.599381 | 3.296941 | 3.57807  |
| protein_co NIPA-like_c | 131  | 141  | 145  | 23   | 26    | 20    | 1.340885 | 1.850753 | 1.790755 | 0.365408 |
| protein_co inhibitor_c | 586  | 486  | 516  | 431  | 598   | 389   | 5.493313 | 5.842279 | 5.836258 | 6.27111  |
| protein_co plasminoge  | 6196 | 4840 | 5154 | 40   | 35    | 113   | 83.91986 | 84.06361 | 84.22593 | 0.840899 |
| protein_co junctophil  | 47   | 42   | 42   | 314  | 368   | 355   | 0.503388 | 0.57685  | 0.542753 | 5.219931 |
| protein_co dickkopf_h  | 0    | 1    | 0    | 2    | 0     | 3     | 0        | 0.067259 | 0        | 0.162818 |
| protein_co serine/thre | 481  | 359  | 380  | 213  | 188   | 125   | 4.229158 | 4.04774  | 4.031257 | 2.906825 |
| protein_co ganglioside | 67   | 42   | 39   | 188  | 218   | 382   | 0.856964 | 0.688885 | 0.601867 | 3.732297 |
| protein_co RAB2A_me    | 3158 | 2504 | 2670 | 1023 | 1506  | 957   | 38.48198 | 39.12812 | 39.25587 | 19.34868 |
| protein_co eukaryotic_ | 3510 | 2817 | 2873 | 5276 | 3622  | 5615  | 82.70551 | 85.11841 | 81.67911 | 192.9579 |
| protein_co ER_membr    | 353  | 293  | 320  | 307  | 261   | 339   | 6.054198 | 6.444049 | 6.621859 | 8.172421 |
| protein_co epithelial_ | 0    | 0    | 0    | 2688 | 2814  | 2451  | 0        | 0        | 0        | 51.89181 |
| protein_co WNT1_indu   | 694  | 494  | 549  | 0    | 0     | 1     | 8.465575 | 7.727398 | 8.080112 | 0        |
| protein_co N-myc_dov   | 2179 | 1640 | 1833 | 138  | 136   | 106   | 25.65236 | 24.75844 | 26.03638 | 2.52162  |
| protein_co zinc_finger | 127  | 108  | 135  | 50   | 54    | 42    | 4.627065 | 5.045857 | 5.934494 | 2.827498 |
| protein_co interleukin | 57   | 53   | 43   | 28   | 33    | 29    | 1.287443 | 1.535106 | 1.171843 | 0.981616 |
| protein_co stathmin-li | 183  | 178  | 187  | 126  | 188   | 95    | 3.860042 | 4.814712 | 4.759163 | 4.125171 |
| protein_co armadillo_  | 689  | 549  | 630  | 718  | 861   | 691   | 10.66597 | 10.8984  | 11.76711 | 17.25186 |
| protein_co trichorhinc | 1965 | 1514 | 1636 | 235  | 231   | 115   | 9.223112 | 9.112764 | 9.265018 | 1.712037 |
| protein_co sperm_assc  | 33   | 20   | 34   | 18   | 27    | 14    | 0.401706 | 0.3122   | 0.499368 | 0.340093 |
| protein_co chromatin_  | 476  | 384  | 375  | 450  | 541   | 581   | 8.97092  | 9.280483 | 8.527257 | 13.16355 |
| protein_co neurocalci  | 53   | 40   | 38   | 15   | 13    | 21    | 0.652618 | 0.631616 | 0.564566 | 0.286685 |
| protein_co sorting_ne  | 170  | 110  | 148  | 82   | 72    | 84    | 2.309184 | 1.916071 | 2.425601 | 1.728837 |
| protein_co ubiquitin_  | 2668 | 2167 | 2475 | 3607 | 3776  | 3401  | 12.14942 | 12.65429 | 13.59856 | 25.49449 |
| protein_co gasdermin_  | 5    | 0    | 3    | 181  | 216   | 103   | 0.067721 | 0        | 0.049026 | 3.805068 |
| protein_co tissue_spec | 1677 | 1258 | 1351 | 945  | 1023  | 1210  | 35.42097 | 34.07355 | 34.42951 | 30.98059 |
| protein_co pyrroline-5 | 460  | 323  | 388  | 230  | 275   | 467   | 8.054297 | 7.252399 | 8.196899 | 6.250692 |
| protein_co eukaryotic_ | 2639 | 2171 | 2288 | 2414 | 2974  | 3330  | 33.28208 | 35.11076 | 34.8157  | 47.25402 |
| protein_co annexin_A1  | 2    | 0    | 4    | 0    | 1     | 0     | 0.04775  | 0        | 0.115225 | 0        |
| protein_co squalene_e  | 4673 | 3727 | 3831 | 2177 | 2271  | 3780  | 74.00103 | 75.68516 | 73.1985  | 53.5095  |
| protein_co SH2_domai   | 323  | 257  | 264  | 96   | 127   | 130   | 4.51834  | 4.61019  | 4.455827 | 2.084386 |
| protein_co integrator_ | 865  | 755  | 779  | 462  | 543   | 463   | 14.465   | 16.19044 | 15.71766 | 11.99154 |
| protein_co exoribonuc  | 551  | 421  | 502  | 230  | 291   | 408   | 5.133399 | 5.029733 | 5.642937 | 3.32592  |
| protein_co solute_carr | 1972 | 1519 | 1803 | 2613 | 3424  | 3911  | 19.92396 | 19.68049 | 21.97924 | 40.97686 |
| protein_co myotubula   | 579  | 542  | 507  | 589  | 809   | 700   | 3.633474 | 4.361663 | 3.838836 | 5.737059 |
| protein_co leptin_rece | 620  | 469  | 459  | 572  | 759   | 676   | 9.162247 | 8.887764 | 8.184102 | 13.12009 |
| protein_co dynactin_6  | 185  | 123  | 161  | 105  | 120   | 136   | 7.697119 | 6.562524 | 8.082215 | 6.780727 |
| protein_co R3H_doma    | 622  | 460  | 487  | 244  | 334   | 362   | 16.44985 | 15.60051 | 15.53992 | 10.01595 |
| protein_co glutathione | 1178 | 927  | 932  | 1569 | 2144  | 1593  | 17.7381  | 17.89991 | 16.93268 | 36.67036 |
| protein_co tumor_nec   | 414  | 325  | 354  | 105  | 121   | 67    | 7.152714 | 7.20051  | 7.379414 | 2.815726 |
| processed_UBX_doma     | 96   | 79   | 73   | 43   | 48    | 151   | 2.773532 | 2.926835 | 2.544678 | 1.928239 |
| protein_co protein_ph  | 1410 | 1094 | 1127 | 1001 | 1235  | 1050  | 32.95859 | 32.79262 | 31.78494 | 36.31734 |
| protein_co glutamate-i | 381  | 333  | 319  | 604  | 790   | 697   | 4.921514 | 5.516039 | 4.971787 | 12.10992 |
| protein_co neurofilam  | 389  | 350  | 307  | 1622 | 1839  | 1868  | 4.537367 | 5.235181 | 4.320567 | 29.36538 |
| protein_co tumor_sup   | 2244 | 1805 | 1897 | 769  | 870   | 844   | 28.56943 | 29.46899 | 29.1403  | 15.19622 |
| processed_neurofilam   | 695  | 665  | 619  | 1854 | 1931  | 1262  | 7.981524 | 9.793366 | 8.577085 | 33.0477  |
| protein_co Rho_guanin  | 2161 | 1706 | 1873 | 2822 | 3805  | 2143  | 17.94074 | 18.16243 | 18.76167 | 36.36413 |
| protein_co kelch_dom   | 425  | 315  | 354  | 472  | 564   | 648   | 4.358761 | 4.142801 | 4.380518 | 7.513575 |
| protein_co minichrom   | 2997 | 2345 | 2590 | 5816 | 6370  | 9271  | 33.59536 | 33.70891 | 35.03002 | 101.1923 |
| protein_co potassium_  | 585  | 494  | 520  | 311  | 335   | 249   | 8.07259  | 8.741648 | 8.657817 | 6.66113  |
| protein_co N-acylsphir | 700  | 545  | 571  | 739  | 870   | 625   | 12.58069 | 12.56065 | 12.38199 | 20.6149  |
| protein_co BCL2/adeno  | 1089 | 837  | 863  | 1026 | 806   | 597   | 14.14494 | 13.94145 | 13.52484 | 20.68479 |
| protein_co mannosida   | 1150 | 856  | 906  | 852  | 968   | 666   | 14.63325 | 13.96774 | 13.90974 | 16.82724 |
| protein_co potassium_  | 377  | 307  | 351  | 14   | 22    | 2     | 7.891757 | 8.241003 | 8.86518  | 0.454874 |
| protein_co tubby_like  | 0    | 0    | 0    | 28   | 53    | 7     | 0        | 0        | 0        | 1.161821 |
| protein_co nucleobind  | 4905 | 3571 | 3902 | 2397 | 2695  | 2213  | 86.20522 | 80.48107 | 82.74274 | 65.38725 |
| protein_co dihydrodio  | 5    | 4    | 0    | 23   | 36    | 14    | 0.216883 | 0.222497 | 0        | 1.548506 |
| protein_co glycogen_s  | 1555 | 1236 | 1314 | 1198 | 1376  | 1096  | 20.40122 | 20.79475 | 20.80028 | 24.39569 |
| protein_co mitogen-ac  | 3    | 2    | 0    | 128  | 148   | 83    | 0.0521   | 0.044541 | 0        | 3.450302 |
| protein_co chorionic_  | 0    | 0    | 0    | 3    | 0     | 1     | 0        | 0        | 0        | 0.281728 |

|                         |      |      |      |      |       |      |          |          |          |          |
|-------------------------|------|------|------|------|-------|------|----------|----------|----------|----------|
| protein_co enoyl_CoA    | 911  | 687  | 716  | 695  | 749   | 489  | 30.27414 | 29.27652 | 28.70876 | 35.84831 |
| protein_co heterogene   | 4800 | 3600 | 3923 | 6440 | 7572  | 6608 | 72.74469 | 69.96356 | 71.73423 | 151.4874 |
| protein_co nuclear_fac  | 472  | 309  | 367  | 361  | 533   | 546  | 10.04634 | 8.434002 | 9.424971 | 11.92624 |
| protein_co luteinizing  | 1    | 1    | 2    | 2    | 4     | 5    | 0.091226 | 0.116984 | 0.220138 | 0.28319  |
| protein_co chorionic_   | 0    | 0    | 0    | 1    | 0     | 0    | 0        | 0        | 0        | 0.082987 |
| protein_co tubulin_be   | 0    | 0    | 1    | 424  | 533   | 205  | 0        | 0        | 0.022169 | 12.09194 |
| protein_co seryl-tRNA   | 14   | 9    | 5    | 20   | 23    | 32   | 0.319135 | 0.263086 | 0.137519 | 0.707631 |
| protein_co potassium    | 5    | 9    | 15   | 6    | 9     | 0    | 0.053625 | 0.12378  | 0.194106 | 0.099881 |
| protein_co small_nucl   | 6505 | 5088 | 5556 | 7727 | 11137 | 7659 | 94.69716 | 94.98305 | 97.58879 | 174.5947 |
| protein_co cleft_lip_ar | 2675 | 1926 | 2178 | 1456 | 1729  | 1951 | 45.91171 | 42.39019 | 45.10302 | 38.78748 |
| protein_co v-rel_reticu | 389  | 268  | 294  | 127  | 220   | 128  | 7.951271 | 7.024754 | 7.25074  | 4.029222 |
| protein_co CLK4-assoc   | 918  | 673  | 612  | 1050 | 1325  | 1206 | 15.54534 | 14.61443 | 12.50423 | 27.59797 |
| protein_co lin-7_homo   | 118  | 101  | 107  | 24   | 38    | 12   | 5.234647 | 5.74561  | 5.727132 | 1.652522 |
| protein_co protein_ph   | 1415 | 1026 | 1036 | 787  | 1202  | 969  | 11.16429 | 10.38081 | 9.862397 | 9.637843 |
| protein_co Fc_fragmen   | 1334 | 1034 | 966  | 799  | 980   | 512  | 23.33133 | 23.19068 | 20.38491 | 21.69006 |
| protein_co PIH1_dom     | 936  | 685  | 680  | 1733 | 1989  | 1687 | 36.81968 | 34.55446 | 32.27462 | 105.8116 |
| protein_co creatine_ki  | 2    | 4    | 7    | 3    | 4     | 1    | 0.056596 | 0.145153 | 0.239003 | 0.131768 |
| protein_co Rho/Rac_gu   | 546  | 491  | 480  | 727  | 935   | 637  | 4.465716 | 5.149787 | 4.736829 | 9.229185 |
| protein_co protein_ph   | 329  | 225  | 297  | 301  | 397   | 213  | 4.947664 | 4.339065 | 5.389007 | 7.025888 |
| protein_co peroxisom    | 23   | 11   | 7    | 62   | 96    | 35   | 0.801837 | 0.491768 | 0.294445 | 3.354905 |
| protein_co excision_re  | 1190 | 969  | 1077 | 1747 | 1988  | 1542 | 13.43586 | 14.0298  | 14.67176 | 30.61553 |
| protein_co DOT1-like_   | 1971 | 1455 | 1538 | 2670 | 4013  | 2588 | 12.42876 | 11.76558 | 11.7016  | 26.13261 |
| protein_co pleckstrin   | 1564 | 1149 | 1248 | 2199 | 2842  | 2663 | 25.6599  | 24.17395 | 24.70477 | 55.99817 |
| protein_co solute_carr  | 12   | 5    | 11   | 61   | 67    | 17   | 0.189263 | 0.101126 | 0.209327 | 1.493296 |
| protein_co ribonuclea   | 991  | 815  | 845  | 1610 | 2024  | 1533 | 31.2495  | 32.95614 | 32.1495  | 78.79992 |
| protein_co kinesin_lig  | 2    | 0    | 0    | 66   | 135   | 65   | 0.04675  | 0        | 0        | 2.39455  |
| protein_co CD37_mole    | 336  | 254  | 297  | 75   | 156   | 63   | 4.966912 | 4.814933 | 5.297265 | 1.720834 |
| protein_co splicing_fac | 2174 | 1502 | 1714 | 2536 | 3239  | 2386 | 51.4583  | 45.59059 | 48.95024 | 93.1699  |
| protein_co anti-Muller  | 166  | 106  | 157  | 90   | 108   | 233  | 3.157705 | 2.585703 | 3.603389 | 2.657275 |
| protein_co dickkopf-il  | 38   | 26   | 31   | 55   | 63    | 29   | 1.458118 | 1.279357 | 1.435221 | 3.275687 |
| protein_co lymphobla    | 25   | 27   | 25   | 25   | 33    | 8    | 0.757757 | 1.049453 | 0.914278 | 1.176144 |
| protein_co ornithine_c  | 4675 | 3719 | 3709 | 3803 | 4637  | 4089 | 77.51444 | 79.07451 | 74.20034 | 97.87185 |
| protein_co tRNA_meth    | 902  | 663  | 776  | 1295 | 1680  | 1807 | 16.39969 | 15.45795 | 17.02311 | 36.54511 |
| protein_co syntaxin_1   | 1298 | 1001 | 984  | 472  | 707   | 503  | 49.04371 | 48.50115 | 44.85922 | 27.68096 |
| protein_co resistin     | 2    | 0    | 0    | 2    | 0     | 0    | 0.182451 | 0        | 0        | 0.28319  |
| protein_co Fc_fragmen   | 0    | 0    | 1    | 0    | 2     | 0    | 0        | 0        | 0.029621 | 0        |
| protein_co dystrophin   | 770  | 590  | 634  | 200  | 331   | 263  | 10.75523 | 10.56794 | 10.6848  | 4.336002 |
| protein_co C-type_lect  | 0    | 0    | 0    | 0    | 0     | 1    | 0        | 0        | 0        | 0        |
| protein_co radial_spok  | 1    | 1    | 0    | 4    | 2     | 2    | 0.019092 | 0.024483 | 0        | 0.118534 |
| protein_co TBC1_dom     | 834  | 616  | 601  | 724  | 775   | 723  | 13.81359 | 13.0837  | 12.01055 | 18.61271 |
| protein_co interleukin  | 5    | 14   | 7    | 10   | 8     | 7    | 0.097403 | 0.349737 | 0.164532 | 0.302367 |
| protein_co transducin   | 15   | 3    | 5    | 27   | 39    | 35   | 0.335728 | 0.086105 | 0.135025 | 0.937974 |
| protein_co coiled-coil  | 643  | 448  | 549  | 285  | 368   | 284  | 15.68693 | 14.01569 | 16.16022 | 10.79201 |
| protein_co prostate_tu  | 767  | 571  | 613  | 570  | 855   | 575  | 19.13013 | 18.26283 | 18.44723 | 22.06622 |
| protein_co amino-tern   | 3941 | 3179 | 3194 | 2339 | 3333  | 2547 | 56.44275 | 58.38504 | 55.19309 | 51.9951  |
| protein_co neuro-oncc   | 20   | 19   | 16   | 313  | 460   | 151  | 0.120185 | 0.146414 | 0.116008 | 2.9194   |
| protein_co small_gluta  | 2452 | 1691 | 1975 | 2557 | 3104  | 3360 | 49.3452  | 43.63926 | 47.95563 | 79.87037 |
| protein_co leukocyte_i  | 5    | 3    | 4    | 0    | 0     | 0    | 0.079206 | 0.060942 | 0.076453 | 0        |
| protein_co mediator_c   | 1094 | 757  | 930  | 1424 | 1612  | 1147 | 15.36319 | 13.6323  | 15.75778 | 31.03877 |
| protein_co leukocyte_i  | 5    | 1    | 2    | 0    | 0     | 0    | 0.090872 | 0.023306 | 0.043857 | 0        |
| protein_co small_nucl   | 770  | 577  | 628  | 719  | 750   | 455  | 23.4146  | 22.49993 | 23.04113 | 33.93559 |
| protein_co chromosom    | 1722 | 1268 | 1357 | 1129 | 1346  | 1383 | 92.49096 | 87.33629 | 87.94154 | 94.12187 |
| protein_co translocase  | 947  | 713  | 818  | 1307 | 1762  | 1861 | 19.93931 | 19.25125 | 20.78076 | 42.71361 |
| protein_co coiled-coil  | 239  | 169  | 183  | 407  | 504   | 288  | 6.140665 | 5.568184 | 5.673051 | 16.23089 |
| protein_co interleukin  | 634  | 497  | 514  | 293  | 408   | 216  | 11.10507 | 11.16343 | 10.86284 | 7.965813 |
| protein_co ASF1_anti-s  | 829  | 604  | 612  | 739  | 909   | 753  | 18.87898 | 17.63885 | 16.81603 | 26.12155 |
| protein_co troponin_T   | 11   | 8    | 18   | 626  | 774   | 429  | 0.4435   | 0.413619 | 0.875631 | 39.17468 |
| protein_co vaccinia_re  | 397  | 288  | 306  | 496  | 629   | 413  | 8.473071 | 7.882286 | 7.879884 | 16.43094 |
| protein_co family_witl  | 1287 | 929  | 985  | 960  | 969   | 1455 | 41.47591 | 38.39215 | 38.30026 | 48.01966 |
| protein_co protein_ph   | 3556 | 2579 | 2757 | 2413 | 3441  | 2448 | 42.09566 | 39.1504  | 39.37861 | 44.3367  |
| protein_co chromosom    | 101  | 82   | 89   | 62   | 66    | 58   | 1.381935 | 1.438764 | 1.469279 | 1.316705 |
| protein_co mediator_c   | 152  | 96   | 98   | 105  | 162   | 218  | 1.841199 | 1.491207 | 1.432291 | 1.974136 |
| protein_co olfactomec   | 271  | 213  | 257  | 2222 | 2738  | 1241 | 6.293806 | 6.343559 | 7.201538 | 80.09743 |
| protein_co RAS_protei   | 0    | 2    | 0    | 14   | 18    | 4    | 0        | 0.028164 | 0        | 0.238622 |
| protein_co A_kinase_F   | 769  | 580  | 619  | 717  | 863   | 1136 | 9.74552  | 9.425752 | 9.464929 | 14.10355 |

|                         |       |       |       |       |       |       |          |          |          |          |
|-------------------------|-------|-------|-------|-------|-------|-------|----------|----------|----------|----------|
| protein_co epoxide_hy   | 5     | 1     | 2     | 405   | 425   | 456   | 0.128677 | 0.033002 | 0.062103 | 16.17773 |
| protein_co ilvB_(bacte  | 1273  | 928   | 988   | 1019  | 1067  | 894   | 14.05155 | 13.1357  | 13.15833 | 17.45824 |
| protein_co zinc_finger  | 86    | 63    | 65    | 85    | 97    | 111   | 0.727633 | 0.68354  | 0.663552 | 1.116255 |
| protein_co synapse_de   | 2600  | 1639  | 1926  | 174   | 226   | 184   | 31.81473 | 25.71835 | 28.43539 | 3.30472  |
| protein_co solute_carr  | 0     | 0     | 0     | 308   | 334   | 230   | 0        | 0        | 0        | 6.867702 |
| protein_co aurora_kin   | 9     | 10    | 7     | 27    | 44    | 13    | 0.262118 | 0.373477 | 0.24598  | 1.220531 |
| protein_co processing   | 510   | 375   | 429   | 327   | 376   | 395   | 7.06467  | 6.661351 | 7.17013  | 7.030722 |
| protein_co cyclin_E1    | 232   | 128   | 134   | 569   | 860   | 598   | 5.32476  | 3.76731  | 3.710777 | 20.27005 |
| protein_co URI1_prefo   | 938   | 765   | 771   | 972   | 1337  | 884   | 17.31608 | 18.10996 | 17.17312 | 27.85117 |
| protein_co programme    | 804   | 616   | 751   | 673   | 753   | 783   | 10.88639 | 10.69592 | 12.26919 | 14.14404 |
| protein_co ankyrin_rej  | 598   | 505   | 504   | 786   | 894   | 564   | 6.301175 | 6.823718 | 6.407653 | 12.85504 |
| protein_co ribosomal    | 10542 | 8325  | 8640  | 16110 | 17056 | 14925 | 206.9128 | 209.5356 | 204.6096 | 490.7838 |
| protein_co translocase  | 1855  | 1366  | 1560  | 2600  | 3136  | 3085  | 33.76591 | 31.8856  | 34.26156 | 73.45787 |
| protein_co fibrillar    | 2526  | 1945  | 2147  | 5340  | 5503  | 4745  | 84.60299 | 83.53747 | 86.76258 | 277.603  |
| protein_co dual-specifi | 577   | 443   | 436   | 184   | 250   | 234   | 9.932283 | 9.778818 | 9.055404 | 4.91611  |
| protein_co cyclin_N-te  | 5     | 4     | 4     | 3     | 3     | 1     | 0.129031 | 0.132372 | 0.124547 | 0.120165 |
| protein_co glucose-6-ph | 4667  | 3803  | 3974  | 7328  | 7235  | 5926  | 54.70893 | 57.1684  | 56.20776 | 133.3326 |
| protein_co v-akt_mur    | 3818  | 2803  | 2962  | 2422  | 2843  | 2742  | 33.77851 | 31.80072 | 31.61824 | 33.259   |
| protein_co phospholip   | 16961 | 12368 | 12669 | 4173  | 4706  | 3923  | 364.8172 | 341.1401 | 328.7867 | 139.3166 |
| protein_co periaxin     | 228   | 168   | 173   | 369   | 558   | 157   | 1.943098 | 1.836024 | 1.77891  | 4.881088 |
| protein_co protein_inl  | 1151  | 849   | 883   | 1032  | 1486  | 1194  | 17.08465 | 16.16024 | 15.81392 | 23.77612 |
| protein_co numb_hon     | 1754  | 1341  | 1437  | 522   | 682   | 349   | 29.63787 | 29.05732 | 29.29694 | 13.69047 |
| protein_co Epstein-Bar  | 1     | 0     | 0     | 4     | 4     | 3     | 0.039536 | 0        | 0        | 0.245463 |
| protein_co coiled-coil  | 385   | 295   | 312   | 510   | 658   | 795   | 12.58902 | 12.3698  | 12.30931 | 25.88403 |
| protein_co Src_homolo   | 0     | 1     | 0     | 38    | 70    | 25    | 0        | 0.023333 | 0        | 1.073198 |
| protein_co tubulin_fol  | 2215  | 1752  | 1785  | 1294  | 1667  | 1319  | 70.51011 | 71.51894 | 68.55891 | 63.93555 |
| protein_co fibronectin  | 728   | 530   | 576   | 891   | 1023  | 645   | 18.64333 | 17.40513 | 17.79765 | 35.41606 |
| protein_co polymerase   | 59    | 53    | 42    | 63    | 124   | 77    | 2.786013 | 3.209345 | 2.392922 | 4.61745  |
| protein_co ovo-like_3   | 0     | 1     | 2     | 8     | 1     | 8     | 0        | 0.074603 | 0.140386 | 0.72238  |
| protein_co CAP-GLY_di   | 1259  | 955   | 985   | 308   | 410   | 201   | 17.51767 | 17.03975 | 16.53616 | 6.651685 |
| protein_co zinc_finger  | 3     | 1     | 1     | 284   | 333   | 201   | 0.029577 | 0.012643 | 0.011896 | 4.345976 |
| protein_co solute_carr  | 3936  | 2856  | 3230  | 4574  | 6580  | 5816  | 64.03855 | 59.58733 | 63.40697 | 115.5083 |
| protein_co protein_kir  | 1079  | 778   | 932   | 1423  | 1756  | 798   | 15.23467 | 14.08641 | 15.87726 | 31.18508 |
| protein_co tight_junct  | 0     | 2     | 4     | 914   | 1191  | 469   | 0        | 0.035898 | 0.067553 | 19.85694 |
| protein_co amyloid_be   | 895   | 637   | 607   | 235   | 347   | 141   | 16.82027 | 15.35178 | 13.76406 | 6.855011 |
| protein_co cactin_spli  | 822   | 583   | 622   | 598   | 1006  | 850   | 10.67098 | 9.705335 | 9.742515 | 12.04937 |
| protein_co coiled-coil  | 1396  | 1030  | 1124  | 803   | 1014  | 785   | 31.27495 | 29.59087 | 30.38264 | 27.92269 |
| protein_co heterogene   | 7914  | 6003  | 6593  | 7536  | 8837  | 7394  | 104.3847 | 101.5356 | 104.9233 | 154.2809 |
| protein_co fizzy/cell_d | 1804  | 1341  | 1415  | 929   | 1156  | 736   | 16.22978 | 15.47085 | 15.35962 | 12.97245 |
| protein_co BCL2_bindi   | 207   | 168   | 172   | 934   | 1139  | 385   | 5.280867 | 5.496086 | 5.294335 | 36.98386 |
| protein_co transformi   | 6986  | 5198  | 5711  | 253   | 333   | 272   | 118.3003 | 112.8764 | 116.6857 | 6.649798 |
| protein_co DENN/MAC     | 243   | 156   | 230   | 150   | 157   | 101   | 2.078489 | 1.7111   | 2.373653 | 1.991421 |
| protein_co ATP5S-like   | 1185  | 943   | 977   | 1340  | 1434  | 1383  | 23.9813  | 24.47233 | 23.85596 | 42.09104 |
| protein_co carcinoeml   | 0     | 0     | 1     | 0     | 0     | 0     | 0        | 0        | 0.046951 | 0        |
| protein_co perilipin_3  | 3829  | 2931  | 3227  | 1134  | 1386  | 903   | 76.95751 | 75.54241 | 78.2551  | 35.37604 |
| protein_co myosin_he    | 0     | 0     | 0     | 1025  | 1569  | 720   | 0        | 0        | 0        | 10.79585 |
| protein_co mitochond    | 631   | 454   | 484   | 792   | 997   | 713   | 18.26395 | 16.85119 | 16.90281 | 35.58124 |
| protein_co CD79a_mo     | 4     | 0     | 0     | 4     | 6     | 5     | 0.149094 | 0        | 0        | 0.231414 |
| protein_co ribosomal    | 10060 | 7549  | 8068  | 15919 | 18227 | 15266 | 199.9634 | 192.4204 | 193.4935 | 491.1325 |
| protein_co glioma_tur   | 4326  | 3384  | 3501  | 7410  | 9956  | 6515  | 48.46982 | 48.62108 | 47.32876 | 128.8646 |
| protein_co natural_kill | 0     | 1     | 0     | 0     | 5     | 0     | 0        | 0.071328 | 0        | 0        |
| protein_co intercellula | 50    | 42    | 50    | 54    | 69    | 11    | 0.7815   | 0.841817 | 0.942925 | 1.310036 |
| protein_co electron-tr  | 52    | 45    | 42    | 53    | 125   | 48    | 0.686646 | 0.761994 | 0.669156 | 1.086266 |
| protein_co CD33_mole    | 2     | 3     | 2     | 1     | 1     | 3     | 0.019835 | 0.038153 | 0.023932 | 0.015393 |
| protein_co cone-rod_h   | 0     | 0     | 0     | 1     | 0     | 1     | 0        | 0        | 0        | 0.016307 |
| protein_co BRISC_and    | 305   | 210   | 227   | 265   | 319   | 293   | 9.715663 | 8.5783   | 8.724619 | 13.10234 |
| protein_co tyrosine_ki  | 3132  | 2406  | 2563  | 493   | 599   | 435   | 33.78411 | 33.28095 | 33.35703 | 8.25407  |
| protein_co sulfotransf  | 0     | 0     | 0     | 0     | 0     | 1     | 0        | 0        | 0        | 0        |
| protein_co cell_divisio | 3983  | 2849  | 3187  | 2521  | 2958  | 3084  | 116.1461 | 106.5359 | 112.1307 | 114.1032 |
| protein_co N-ethylmal   | 1152  | 801   | 859   | 785   | 1001  | 862   | 13.8577  | 12.35607 | 12.46751 | 14.65678 |
| protein_co Rab_accept   | 3876  | 2943  | 3006  | 1275  | 1633  | 1091  | 221.3711 | 215.5444 | 207.1449 | 113.0259 |
| protein_co ATPase_Na    | 7     | 3     | 1     | 1072  | 1231  | 718   | 0.085969 | 0.047247 | 0.014818 | 20.43477 |
| protein_co Meis_home    | 2677  | 2098  | 2303  | 266   | 384   | 299   | 57.1866  | 57.47258 | 59.35917 | 8.819785 |
| protein_co protein_ty   | 6653  | 5112  | 5430  | 5960  | 8087  | 5448  | 42.44344 | 41.82089 | 41.7966  | 59.016   |
| protein_co cornifelin   | 10    | 7     | 9     | 110   | 112   | 73    | 0.896559 | 0.804797 | 0.973575 | 15.30742 |

|                          |       |       |       |       |       |       |          |          |          |          |
|--------------------------|-------|-------|-------|-------|-------|-------|----------|----------|----------|----------|
| protein_co multiple_Ei   | 6058  | 4154  | 4716  | 3275  | 4700  | 3164  | 25.90368 | 22.7776  | 24.33067 | 21.73571 |
| protein_co KDEP1_Lys-1   | 3572  | 2759  | 2865  | 2470  | 2867  | 2156  | 105.076  | 104.0766 | 101.6868 | 112.7767 |
| protein_co cytohesin_1   | 1429  | 1159  | 1310  | 660   | 860   | 981   | 14.40366 | 14.98075 | 15.93162 | 10.3256  |
| protein_co glutamate_1   | 1441  | 1018  | 1178  | 1378  | 1659  | 2674  | 12.12862 | 10.98764 | 11.96301 | 18.00226 |
| protein_co glutamate_2   | 350   | 242   | 234   | 919   | 1388  | 281   | 3.222365 | 2.857139 | 2.599385 | 13.13266 |
| protein_co synaptogyr    | 4     | 4     | 0     | 6     | 2     | 2     | 0.18756  | 0.240519 | 0        | 0.436679 |
| protein_co C-type_lect   | 31    | 26    | 23    | 156   | 197   | 101   | 1.024377 | 1.101744 | 0.91701  | 8.001162 |
| protein_co coiled-coil_1 | 15    | 11    | 15    | 51    | 49    | 19    | 0.218771 | 0.205732 | 0.26396  | 1.154516 |
| protein_co caspase_re    | 532   | 439   | 447   | 169   | 195   | 116   | 4.739785 | 5.015577 | 4.805102 | 2.33703  |
| protein_co ligase_1_DN   | 1192  | 1008  | 1062  | 1521  | 1820  | 1753  | 13.62577 | 14.77592 | 14.64729 | 26.98637 |
| protein_co zinc_finger   | 140   | 140   | 105   | 84    | 116   | 111   | 1.754303 | 2.249645 | 1.587501 | 1.633753 |
| protein_co phospholip    | 6     | 2     | 1     | 6     | 4     | 3     | 0.112716 | 0.048181 | 0.022666 | 0.174951 |
| protein_co sialic_acid_1 | 1     | 0     | 1     | 0     | 0     | 0     | 0.018771 | 0        | 0.022648 | 0        |
| protein_co hyaluronan    | 3     | 6     | 7     | 18    | 18    | 3     | 0.066668 | 0.170985 | 0.187691 | 0.62087  |
| protein_co RAB3D_me      | 50    | 42    | 41    | 326   | 376   | 200   | 0.548678 | 0.591025 | 0.542849 | 5.55259  |
| protein_co D_site_of_e   | 20    | 22    | 14    | 181   | 156   | 79    | 0.162926 | 0.229822 | 0.137605 | 2.288593 |
| protein_co transmembr    | 38    | 31    | 33    | 77    | 114   | 76    | 1.360168 | 1.422919 | 1.425184 | 4.277897 |
| protein_co calyphosin    | 133   | 103   | 80    | 43    | 49    | 28    | 1.774217 | 1.761983 | 1.287636 | 0.890336 |
| protein_co Lipid_phos    | 1208  | 909   | 972   | 217   | 232   | 158   | 20.77123 | 20.04327 | 20.16553 | 5.791425 |
| protein_co family_witl   | 1     | 0     | 1     | 82    | 100   | 196   | 0.024346 | 0        | 0.029375 | 3.098621 |
| protein_co Ras_interac   | 26    | 19    | 32    | 223   | 284   | 70    | 0.368543 | 0.345365 | 0.547284 | 4.906256 |
| protein_co theg_sperr    | 0     | 1     | 0     | 0     | 1     | 0     | 0        | 0.036822 | 0        | 0        |
| protein_co fibroblast_1  | 0     | 0     | 0     | 4     | 4     | 4     | 0        | 0        | 0        | 0.22189  |
| protein_co branched_c    | 778   | 563   | 615   | 392   | 545   | 267   | 16.18475 | 15.01911 | 15.43653 | 12.65736 |
| protein_co mesoderm_1    | 978   | 817   | 818   | 674   | 720   | 732   | 16.59133 | 17.77353 | 16.7434  | 17.74732 |
| protein_co pleckstrin_1  | 1604  | 1111  | 1301  | 363   | 475   | 177   | 24.35608 | 21.63349 | 23.83573 | 8.555398 |
| protein_co protein_ph    | 5299  | 3978  | 4210  | 8173  | 9385  | 7703  | 75.73002 | 72.90348 | 72.5946  | 181.2951 |
| protein_co transportir   | 3088  | 2448  | 2577  | 1716  | 2268  | 2836  | 28.2695  | 28.73833 | 28.46448 | 24.38308 |
| protein_co WD_repeat     | 206   | 114   | 155   | 151   | 149   | 156   | 3.770236 | 2.675565 | 3.422796 | 4.28952  |
| protein_co calcium_ch    | 2     | 3     | 0     | 1717  | 2015  | 789   | 0.034888 | 0.067109 | 0        | 46.48918 |
| protein_co glutaryl-Co   | 412   | 303   | 365   | 737   | 874   | 759   | 9.876629 | 9.314585 | 10.55729 | 27.42266 |
| protein_co leukocyte_1   | 0     | 0     | 0     | 0     | 1     | 0     | 0        | 0        | 0        | 0        |
| protein_co Kruppel-lik   | 1     | 0     | 0     | 10    | 12    | 12    | 0.029454 | 0        | 0        | 0.45716  |
| protein_co deoxyribon    | 429   | 338   | 331   | 317   | 411   | 221   | 10.28942 | 10.39584 | 9.578768 | 11.80112 |
| protein_co microtubul    | 26    | 26    | 29    | 500   | 644   | 176   | 0.252253 | 0.323479 | 0.339476 | 7.529464 |
| protein_co leukocyte_2   | 244   | 205   | 213   | 149   | 205   | 175   | 7.419691 | 7.993909 | 7.814904 | 7.032549 |
| protein_co PRP31_pre     | 840   | 599   | 595   | 597   | 908   | 845   | 18.52663 | 16.94156 | 15.83369 | 20.43723 |
| protein_co TCF3_(E2A)    | 582   | 374   | 346   | 272   | 354   | 292   | 22.64729 | 18.66269 | 16.24492 | 16.4283  |
| protein_co Janus_kina    | 205   | 137   | 167   | 226   | 286   | 86    | 1.769597 | 1.516528 | 1.739343 | 3.028026 |
| protein_co ribosomal_1   | 13956 | 10403 | 10897 | 20462 | 23336 | 18131 | 470.4508 | 449.6983 | 443.2087 | 1070.611 |
| protein_co solute_carr   | 0     | 2     | 1     | 61    | 82    | 26    | 0        | 0.03363  | 0.015821 | 1.24149  |
| pseudogen_1              | 0     | 0     | 0     | 306   | 420   | 234   | 0        | 0        | 0        | 8.381866 |
| protein_co arrestin_dc   | 114   | 104   | 107   | 168   | 202   | 76    | 1.426217 | 1.66849  | 1.615149 | 3.262275 |
| protein_co phosphoin     | 7     | 2     | 5     | 6     | 7     | 6     | 0.075716 | 0.027742 | 0.065254 | 0.100733 |
| protein_co RAB3A_me      | 75    | 43    | 57    | 147   | 187   | 35    | 2.301539 | 1.692134 | 2.110474 | 7.001722 |
| protein_co phosphodi     | 1     | 1     | 3     | 34    | 41    | 24    | 0.007842 | 0.010057 | 0.028387 | 0.413867 |
| protein_co inositol-3-ph | 2292  | 1665  | 1723  | 4213  | 5417  | 3477  | 52.70815 | 49.10059 | 47.80755 | 150.3783 |
| protein_co elongation_1  | 342   | 209   | 267   | 273   | 340   | 301   | 3.982217 | 3.120717 | 3.751095 | 4.933917 |
| protein_co CREB_regul    | 1087  | 797   | 888   | 535   | 782   | 349   | 7.506546 | 7.057945 | 7.398976 | 5.734491 |
| protein_co Histone-lys   | 1921  | 1511  | 1645  | 1808  | 2323  | 1485  | 10.63593 | 10.72808 | 10.9891  | 15.53736 |
| protein_co cartilage_o   | 123   | 98    | 93    | 5     | 10    | 6     | 2.130577 | 2.176845 | 1.943673 | 0.134429 |
| protein_co uroplakin_1   | 0     | 1     | 0     | 16    | 20    | 7     | 0        | 0.049166 | 0        | 0.952148 |
| protein_co coatomer_1    | 2196  | 1649  | 1777  | 1153  | 1320  | 1028  | 58.17541 | 56.01923 | 56.79925 | 47.40967 |
| protein_co DEAD_(Asp     | 826   | 646   | 675   | 477   | 467   | 819   | 20.57978 | 20.63966 | 20.29143 | 18.44632 |
| protein_co ets_variant   | 27    | 20    | 20    | 16    | 20    | 5     | 0.805876 | 0.765497 | 0.720248 | 0.741233 |
| protein_co ATPase_H+     | 0     | 0     | 0     | 28    | 21    | 6     | 0        | 0        | 0        | 0.54943  |
| protein_co armadillo_1   | 842   | 536   | 651   | 860   | 1188  | 1424  | 15.86873 | 12.95401 | 14.80332 | 25.15701 |
| protein_co transmembr    | 698   | 559   | 573   | 834   | 980   | 892   | 18.35627 | 18.85169 | 18.18158 | 34.04282 |
| protein_co glyceraldeh   | 0     | 1     | 1     | 3     | 1     | 0     | 0        | 0.040383 | 0.037996 | 0.146635 |
| pseudogen_2              | 0     | 0     | 0     | 1     | 0     | 0     | 0        | 0        | 0        | 0.200495 |
| protein_co myelin_ass    | 0     | 0     | 0     | 7     | 5     | 1     | 0        | 0        | 0        | 0.209999 |
| protein_co transmembr    | 126   | 88    | 108   | 413   | 524   | 238   | 3.440968 | 3.081783 | 3.558622 | 17.50615 |
| protein_co hepcidin_a    | 1     | 0     | 0     | 0     | 0     | 0     | 0.01787  | 0        | 0        | 0        |
| protein_co upstream_t    | 2344  | 1690  | 1724  | 2230  | 2699  | 2125  | 40.08395 | 37.0603  | 35.57118 | 59.18999 |
| protein_co lipolysis_st  | 23    | 25    | 27    | 3133  | 3789  | 3830  | 0.434867 | 0.606147 | 0.615943 | 91.94319 |

|                          |      |      |      |      |       |      |          |          |          |          |
|--------------------------|------|------|------|------|-------|------|----------|----------|----------|----------|
| protein_co KxDL_moti     | 670  | 533  | 611  | 715  | 788   | 516  | 11.47418 | 11.70533 | 12.62514 | 19.00568 |
| protein_co FK506_bin     | 6482 | 4789 | 5073 | 8274 | 10501 | 6487 | 171.3309 | 162.3233 | 161.7855 | 339.4476 |
| protein_co SURP_and      | 657  | 505  | 522  | 680  | 842   | 920  | 12.70381 | 12.52188 | 12.17831 | 20.40836 |
| protein_co hepsin        | 0    | 0    | 0    | 258  | 405   | 97   | 0        | 0        | 0        | 7.946335 |
| protein_co zinc_finger   | 33   | 36   | 41   | 61   | 59    | 94   | 0.52471  | 0.734036 | 0.78657  | 1.505449 |
| protein_co sodium_ch     | 328  | 295  | 289  | 132  | 220   | 59   | 4.445065 | 5.126673 | 4.725526 | 2.77657  |
| protein_co pre-B-cell_l  | 0    | 1    | 0    | 25   | 30    | 15   | 0        | 0.034757 | 0        | 1.051731 |
| protein_co Ets2_repres   | 2332 | 1672 | 1898 | 1484 | 1808  | 1402 | 40.5291  | 37.26354 | 39.79997 | 40.03159 |
| protein_co glycogen_s    | 898  | 721  | 721  | 742  | 973   | 722  | 11.9487  | 12.30238 | 11.57518 | 15.32424 |
| protein_co ATPase_typ    | 1975 | 1555 | 1621 | 1679 | 1985  | 2390 | 19.58295 | 19.77201 | 19.39287 | 25.83998 |
| protein_co zinc_finger   | 410  | 232  | 224  | 541  | 573   | 597  | 5.34322  | 3.877185 | 3.52221  | 10.94327 |
| protein_co glutamate_    | 6    | 2    | 5    | 1387 | 1885  | 1026 | 0.080544 | 0.034429 | 0.080984 | 28.89939 |
| protein_co signal-indu   | 1813 | 1465 | 1520 | 1156 | 1610  | 1067 | 10.64375 | 11.02919 | 10.76684 | 10.5338  |
| protein_co zinc_finger   | 121  | 66   | 82   | 185  | 184   | 298  | 2.139401 | 1.496443 | 1.749318 | 5.077022 |
| protein_co ethylmalon    | 148  | 126  | 130  | 48   | 46    | 61   | 6.596694 | 7.201858 | 6.99127  | 3.320751 |
| protein_co cell_adhesi   | 593  | 465  | 414  | 411  | 599   | 316  | 12.76666 | 12.83763 | 10.75402 | 13.73393 |
| protein_co smg-9_hom     | 833  | 684  | 729  | 263  | 280   | 420  | 16.36338 | 17.23032 | 17.2784  | 8.018889 |
| protein_co AVL9_hom      | 822  | 783  | 777  | 1080 | 1246  | 932  | 4.856192 | 5.931918 | 5.538512 | 9.903261 |
| protein_co RUN_doma      | 14   | 14   | 14   | 6    | 8     | 13   | 0.160151 | 0.205371 | 0.193232 | 0.106533 |
| protein_co chromosom     | 19   | 28   | 17   | 20   | 25    | 27   | 0.127894 | 0.241693 | 0.138068 | 0.208957 |
| protein_co GTP-bindin    | 229  | 159  | 167  | 174  | 238   | 229  | 1.425815 | 1.269504 | 1.254562 | 1.681541 |
| protein_co RAS_p21_p     | 11   | 13   | 13   | 15   | 16    | 5    | 0.092023 | 0.139463 | 0.131219 | 0.194772 |
| protein_co cyclin-depe   | 3606 | 2854 | 3061 | 1052 | 1289  | 993  | 14.56126 | 14.77871 | 14.91368 | 6.593554 |
| protein_co peptidase_l   | 806  | 648  | 693  | 1003 | 1132  | 975  | 15.28857 | 15.76218 | 15.86037 | 29.52999 |
| protein_co DnaJ_(Hsp4    | 390  | 293  | 303  | 517  | 405   | 804  | 6.029379 | 5.80878  | 5.651955 | 12.40592 |
| protein_co tissue_fact   | 191  | 188  | 201  | 44   | 63    | 98   | 3.664482 | 4.625369 | 4.652895 | 1.310275 |
| protein_co Bet1_golgi    | 556  | 399  | 444  | 304  | 330   | 322  | 7.270176 | 6.690404 | 7.004887 | 6.169844 |
| protein_co nicotinami    | 677  | 613  | 587  | 1191 | 1256  | 1110 | 6.928097 | 8.044427 | 7.247888 | 18.91767 |
| protein_co TWIST_neig    | 393  | 338  | 309  | 454  | 446   | 609  | 4.674728 | 5.155726 | 4.434762 | 8.382047 |
| protein_co phosphatic    | 0    | 1    | 2    | 4    | 0     | 0    | 0        | 0.011183 | 0.021044 | 0.054142 |
| protein_co paraoxonas    | 0    | 0    | 1    | 0    | 0     | 0    | 0        | 0        | 0.023253 | 0        |
| protein_co paraoxonas    | 589  | 496  | 497  | 188  | 185   | 273  | 15.52458 | 16.76469 | 15.80552 | 7.691176 |
| protein_co integrin_be   | 158  | 107  | 123  | 37   | 35    | 49   | 1.329378 | 1.154475 | 1.248661 | 0.483196 |
| protein_co HMG-box_t     | 721  | 625  | 685  | 460  | 433   | 298  | 11.95041 | 13.28424 | 13.69891 | 11.83411 |
| protein_co dihydrouri    | 104  | 77   | 80   | 105  | 130   | 89   | 2.138843 | 2.030699 | 1.985105 | 3.351701 |
| protein_co Sp4_transc    | 196  | 134  | 170  | 350  | 382   | 440  | 1.500236 | 1.315278 | 1.570003 | 4.158167 |
| protein_co WD_repeat     | 425  | 367  | 345  | 239  | 290   | 213  | 4.343561 | 4.809859 | 4.254261 | 3.791276 |
| protein_co dynein_axc    | 61   | 55   | 63   | 170  | 202   | 170  | 0.201599 | 0.233094 | 0.251216 | 0.872044 |
| protein_co Cbl_proto-    | 320  | 223  | 267  | 292  | 361   | 326  | 6.387742 | 5.708363 | 6.430677 | 9.047127 |
| protein_co distal-less_l | 45   | 29   | 40   | 2    | 0     | 11   | 1.25003  | 1.033036 | 1.340652 | 0.086232 |
| protein_co myotrophil    | 2591 | 2172 | 2351 | 890  | 1056  | 997  | 32.50188 | 34.93898 | 35.58294 | 17.32852 |
| protein_co STEAP_fami    | 308  | 214  | 251  | 30   | 42    | 54   | 9.532756 | 8.493582 | 9.373235 | 1.441184 |
| protein_co pleiotrophil  | 430  | 307  | 323  | 346  | 347   | 457  | 12.49238 | 11.43733 | 11.32211 | 15.60211 |
| protein_co membrane      | 274  | 256  | 261  | 575  | 590   | 806  | 3.338842 | 4.000319 | 3.837372 | 10.87536 |
| protein_co deafness_at   | 730  | 597  | 634  | 67   | 78    | 72   | 8.18501  | 8.583809 | 8.576966 | 1.166008 |
| protein_co ATPase_H+     | 2    | 3    | 0    | 25   | 25    | 31   | 0.029914 | 0.05754  | 0        | 0.580381 |
| protein_co zinc_finger   | 978  | 823  | 885  | 1033 | 1376  | 1218 | 6.458935 | 6.969975 | 7.052017 | 10.58895 |
| protein_co tetratricop   | 178  | 137  | 157  | 126  | 132   | 153  | 1.94148  | 1.916209 | 2.066144 | 2.133114 |
| protein_co oxoglutarat   | 4777 | 3773 | 3861 | 2210 | 2966  | 2659 | 53.57417 | 54.26207 | 52.2454  | 38.47007 |
| protein_co ArfGAP_wit    | 13   | 8    | 17   | 42   | 37    | 18   | 0.257965 | 0.203571 | 0.407018 | 1.293589 |
| protein_co transcriptic  | 0    | 0    | 1    | 0    | 1     | 0    | 0        | 0        | 0.008536 | 0        |
| protein_co H2A_histor    | 3887 | 3280 | 3334 | 2059 | 2712  | 2558 | 47.91312 | 51.84693 | 49.58537 | 39.39369 |
| protein_co caveolin_2    | 621  | 455  | 559  | 21   | 29    | 38   | 8.821176 | 8.288112 | 9.580644 | 0.463004 |
| protein_co caveolin_1    | 2338 | 1973 | 2088 | 137  | 159   | 408  | 40.54322 | 43.87429 | 43.687   | 3.687438 |
| protein_co met_proto-    | 920  | 680  | 804  | 284  | 374   | 299  | 6.501705 | 6.162511 | 6.85557  | 3.115217 |
| protein_co ring_finger   | 12   | 12   | 16   | 32   | 31    | 15   | 0.248974 | 0.319273 | 0.400535 | 1.03051  |
| protein_co limb_regio    | 627  | 488  | 553  | 480  | 635   | 739  | 5.986569 | 5.975024 | 6.370648 | 7.113481 |
| pseudogen: NHP2_ribo     | 2    | 1    | 1    | 0    | 1     | 2    | 0.202987 | 0.130151 | 0.122458 | 0        |
| protein_co wingless-ty   | 0    | 1    | 0    | 0    | 0     | 0    | 0        | 0.020684 | 0        | 0        |
| protein_co homeobox      | 31   | 37   | 35   | 0    | 0     | 3    | 0.577509 | 0.88391  | 0.786707 | 0        |
| protein_co DnaJ_(Hsp4    | 2911 | 2483 | 2541 | 5597 | 7220  | 6599 | 17.07918 | 18.68147 | 17.98778 | 50.96954 |
| protein_co homeobox      | 58   | 63   | 48   | 0    | 0     | 2    | 1.31637  | 1.83358  | 1.314436 | 0        |
| protein_co homeobox      | 387  | 263  | 304  | 0    | 0     | 4    | 5.561274 | 4.846502 | 5.270902 | 0        |
| protein_co LFNG_O-fuc    | 1121 | 806  | 814  | 157  | 247   | 232  | 22.11347 | 20.38898 | 19.37419 | 4.80708  |
| protein_co homeobox      | 58   | 47   | 57   | 0    | 0     | 4    | 1.641292 | 1.705552 | 1.94617  | 0        |

|                         |       |      |      |      |      |       |          |          |          |          |
|-------------------------|-------|------|------|------|------|-------|----------|----------|----------|----------|
| protein_co homeobox     | 15    | 13   | 6    | 0    | 0    | 0     | 0.711173 | 0.790382 | 0.343229 | 0        |
| protein_co BRCA1-assc   | 1182  | 874  | 1001 | 1237 | 1781 | 1311  | 10.3403  | 9.804747 | 10.56569 | 16.79638 |
| protein_co IQ_motif_c   | 942   | 701  | 819  | 191  | 251  | 173   | 6.453886 | 6.158823 | 6.770213 | 2.031114 |
| protein_co vasoactive_  | 0     | 0    | 0    | 82   | 129  | 71    | 0        | 0        | 0        | 1.51317  |
| protein_co tetraspanin  | 410   | 308  | 339  | 247  | 275  | 231   | 6.875861 | 6.62374  | 6.859476 | 6.429403 |
| protein_co single-stran | 1348  | 1073 | 1104 | 1412 | 1602 | 1910  | 24.12509 | 24.62568 | 23.83945 | 39.22331 |
| protein_co homeobox     | 811   | 608  | 643  | 0    | 1    | 7     | 8.690083 | 8.354414 | 8.313083 | 0        |
| protein_co cadherin-lil | 519   | 445  | 492  | 1    | 0    | 2     | 4.557288 | 5.010816 | 5.212575 | 0.013629 |
| protein_co even-skipp   | 8     | 8    | 6    | 0    | 2    | 10    | 0.138319 | 0.177374 | 0.125167 | 0        |
| protein_co 3-hydroxyli  | 599   | 460  | 467  | 606  | 673  | 500   | 14.11413 | 13.89935 | 13.27676 | 22.1631  |
| protein_co Tax1_(hum    | 1854  | 1491 | 1630 | 888  | 812  | 1067  | 30.081   | 31.02198 | 31.90937 | 22.36279 |
| protein_co carboxypep   | 81    | 70   | 50   | 437  | 512  | 469   | 1.716264 | 1.901982 | 1.278254 | 14.37179 |
| protein_co chimerin_2   | 68    | 50   | 49   | 48   | 78   | 51    | 0.903264 | 0.851697 | 0.785326 | 0.98964  |
| protein_co growth_fac   | 1459  | 1068 | 1157 | 1868 | 2509 | 2011  | 12.59435 | 11.82228 | 12.05042 | 25.02811 |
| protein_co abhydrolas   | 293   | 213  | 248  | 198  | 270  | 244   | 8.795631 | 8.199518 | 8.982539 | 9.225609 |
| protein_co cordon-ble   | 0     | 2    | 0    | 657  | 928  | 344   | 0        | 0.015624 | 0        | 6.212333 |
| protein_co FK506_bin    | 1883  | 1458 | 1506 | 274  | 275  | 281   | 17.80119 | 17.67525 | 17.17797 | 4.020497 |
| protein_co pleckstrin_  | 317   | 285  | 285  | 419  | 549  | 491   | 4.873487 | 5.618686 | 5.286564 | 9.998274 |
| protein_co syntaxin_1.  | 294   | 255  | 255  | 81   | 106  | 41    | 6.58027  | 7.318901 | 6.886279 | 2.813921 |
| protein_co nucleotide   | 305   | 253  | 274  | 207  | 288  | 130   | 3.102268 | 3.299965 | 3.362622 | 3.267987 |
| protein_co glycyl-tRNA  | 4441  | 3373 | 3452 | 2525 | 3230 | 3594  | 79.05792 | 76.99993 | 74.14527 | 69.76803 |
| protein_co corticotro   | 0     | 0    | 1    | 14   | 14   | 12    | 0        | 0        | 0.022362 | 0.402734 |
| protein_co EPH_recept   | 112   | 82   | 87   | 354  | 531  | 279   | 1.191939 | 1.119075 | 1.117129 | 5.847492 |
| protein_co family_witl  | 3     | 6    | 6    | 0    | 4    | 3     | 0.03937  | 0.100974 | 0.095005 | 0        |
| protein_co growth_ho    | 1     | 0    | 1    | 7    | 15   | 18    | 0.02907  | 0        | 0.035075 | 0.315845 |
| pseudogen: NOP2/Sun     | 8     | 11   | 19   | 27   | 31   | 17    | 0.209681 | 0.369719 | 0.600858 | 1.09841  |
| protein_co caspase_2_   | 1024  | 832  | 1018 | 543  | 667  | 823   | 8.322998 | 8.671865 | 9.983336 | 6.850309 |
| protein_co coiled-coil  | 1580  | 1175 | 1260 | 1222 | 1322 | 1294  | 82.22667 | 78.41566 | 79.1178  | 98.70912 |
| protein_co heat_shock   | 9469  | 7121 | 7388 | 3154 | 4007 | 2457  | 305.1557 | 294.2847 | 287.2714 | 157.7646 |
| protein_co neuronal_f   | 3676  | 2694 | 2518 | 649  | 928  | 391   | 63.83989 | 59.99617 | 52.7619  | 17.49411 |
| protein_co PDGFA_ass    | 3650  | 2920 | 3077 | 3379 | 4003 | 4293  | 67.22253 | 68.96269 | 68.37503 | 96.59189 |
| protein_co BUD31_ho     | 480   | 359  | 417  | 382  | 458  | 459   | 19.7605  | 18.95224 | 20.71289 | 24.40903 |
| protein_co pentatricoi  | 33    | 21   | 12   | 30   | 53   | 32    | 0.277207 | 0.226214 | 0.121624 | 0.391149 |
| protein_co cytochrom    | 14    | 21   | 15   | 11   | 14   | 16    | 0.197729 | 0.380339 | 0.255612 | 0.241138 |
| protein_co zinc_finger  | 2556  | 2139 | 2242 | 1107 | 1236 | 589   | 12.72573 | 13.65658 | 13.46807 | 8.554602 |
| protein_co eukaryotic_  | 4598  | 3711 | 3983 | 7663 | 9822 | 10284 | 57.57017 | 59.58389 | 60.17096 | 148.9217 |
| protein_co sorting_ne   | 1213  | 864  | 1014 | 930  | 1386 | 1155  | 12.03249 | 10.99051 | 12.13615 | 14.31885 |
| protein_co nudix_(nuc   | 506   | 426  | 397  | 878  | 1084 | 781   | 27.20912 | 29.37534 | 25.75743 | 73.28058 |
| protein_co protein_ty   | 134   | 88   | 119  | 2506 | 2553 | 2947  | 0.768595 | 0.647269 | 0.823546 | 22.31024 |
| protein_co TAF6_RNA_    | 1131  | 899  | 1078 | 1376 | 1531 | 1094  | 19.44723 | 19.82277 | 22.36465 | 36.72351 |
| protein_co Wiskott-Al   | 673   | 513  | 584  | 665  | 885  | 879   | 7.115441 | 6.955262 | 7.449852 | 10.91287 |
| protein_co sperm_adh    | 0     | 0    | 0    | 1    | 0    | 0     | 0        | 0        | 0        | 0.030983 |
| protein_co aminoacyl_   | 304   | 231  | 301  | 368  | 468  | 526   | 11.63638 | 11.33876 | 13.90141 | 21.86365 |
| protein_co transferrin  | 6     | 6    | 4    | 74   | 84   | 34    | 0.089856 | 0.115228 | 0.072278 | 1.720123 |
| protein_co fascin_hom   | 1     | 0    | 0    | 3    | 0    | 0     | 0.020952 | 0        | 0        | 0.09756  |
| protein_co motile_spe   | 549   | 387  | 392  | 294  | 430  | 282   | 21.61429 | 19.5384  | 18.62099 | 17.96579 |
| protein_co paired_box   | 0     | 0    | 1    | 0    | 0    | 0     | 0        | 0        | 0.028147 | 0        |
| protein_co procollagen  | 10023 | 7146 | 7492 | 585  | 663  | 450   | 276.1332 | 252.4604 | 249.0386 | 25.01538 |
| protein_co F-box_prot   | 11    | 10   | 8    | 44   | 32   | 18    | 0.226621 | 0.264191 | 0.198859 | 1.406991 |
| protein_co protein_ph   | 0     | 0    | 0    | 1    | 0    | 5     | 0        | 0        | 0        | 0.03209  |
| protein_co RNA_bindi    | 716   | 542  | 618  | 482  | 573  | 692   | 11.95629 | 11.60625 | 12.45145 | 12.49283 |
| protein_co ubiquitin_s  | 622   | 496  | 485  | 525  | 620  | 456   | 5.657729 | 5.785525 | 5.322817 | 7.412104 |
| protein_co IMP_(inosi   | 2465  | 1913 | 2020 | 1561 | 1955 | 1518  | 40.11937 | 39.92652 | 39.66766 | 39.43397 |
| protein_co ArfGAP_wit   | 149   | 120  | 123  | 95   | 120  | 179   | 1.456758 | 1.504499 | 1.450956 | 1.441635 |
| protein_co LSM5_hom     | 334   | 248  | 274  | 458  | 589  | 681   | 6.95747  | 6.624695 | 6.886579 | 14.80815 |
| protein_co serpin_pep   | 2936  | 2312 | 2636 | 26   | 11   | 28    | 43.15645 | 43.57997 | 46.75017 | 0.59319  |
| protein_co adaptor-rel  | 1485  | 1169 | 1210 | 856  | 1026 | 676   | 53.31675 | 53.82215 | 52.41682 | 47.70253 |
| protein_co monoacylg    | 0     | 0    | 0    | 5    | 11   | 2     | 0        | 0        | 0        | 0.170684 |
| protein_co core_1_syn   | 443   | 366  | 368  | 1043 | 1078 | 842   | 3.34605  | 3.545023 | 3.353703 | 12.22766 |
| protein_co procollagen  | 5809  | 4201 | 4520 | 1026 | 1135 | 864   | 93.28223 | 86.50866 | 87.57578 | 25.57263 |
| protein_co replication  | 286   | 208  | 206  | 520  | 604  | 541   | 6.638884 | 6.191583 | 5.769581 | 18.73539 |
| protein_co zinc_finger  | 1534  | 1154 | 1309 | 770  | 982  | 979   | 18.17314 | 17.53153 | 18.7108  | 14.15878 |
| protein_co claudin_15   | 107   | 66   | 81   | 79   | 96   | 53    | 2.354403 | 1.862302 | 2.150453 | 2.698078 |
| protein_co NOBOX_oo     | 0     | 0    | 0    | 0    | 1    | 0     | 0        | 0        | 0        | 0        |
| protein_co glucocortic  | 98    | 83   | 92   | 341  | 395  | 236   | 0.968843 | 1.05224  | 1.097395 | 5.232535 |

|                         |       |       |       |      |      |      |          |          |          |          |
|-------------------------|-------|-------|-------|------|------|------|----------|----------|----------|----------|
| protein_co myosin_lig   | 89    | 57    | 47    | 0    | 1    | 0    | 4.135988 | 3.396827 | 2.635331 | 0        |
| protein_co PHD_finger   | 679   | 533   | 513   | 912  | 999  | 1093 | 7.445819 | 7.495131 | 6.787473 | 15.52273 |
| protein_co nuclear_re   | 345   | 299   | 347   | 382  | 455  | 320  | 4.585333 | 5.096034 | 5.564541 | 7.880353 |
| protein_co transmemt    | 743   | 522   | 532   | 386  | 367  | 267  | 5.416555 | 4.879937 | 4.679442 | 4.367693 |
| protein_co enhancer_c   | 855   | 688   | 709   | 677  | 722  | 1095 | 11.01098 | 11.36207 | 11.01676 | 13.53253 |
| protein_co centrosom    | 372   | 273   | 286   | 124  | 160  | 184  | 4.65149  | 4.377449 | 4.314825 | 2.406585 |
| protein_co zinc_finger  | 350   | 299   | 271   | 168  | 186  | 33   | 2.361368 | 2.586879 | 2.206038 | 1.759282 |
| protein_co secreted_fr  | 19    | 13    | 11    | 0    | 0    | 1    | 0.301289 | 0.264351 | 0.21046  | 0        |
| protein_co mesoderm     | 12754 | 9622  | 10260 | 1307 | 1494 | 1691 | 242.6107 | 234.7135 | 235.4826 | 38.58953 |
| protein_co mesenchyn    | 2884  | 2285  | 2264  | 3    | 1    | 1    | 54.09232 | 54.95863 | 51.23478 | 0.087336 |
| protein_co ankyrin_re   | 414   | 357   | 365   | 173  | 170  | 170  | 7.469206 | 8.25946  | 7.945386 | 4.844519 |
| protein_co ARP3_actin   | 0     | 0     | 1     | 1    | 0    | 1    | 0        | 0        | 0.009931 | 0.012775 |
| protein_co POU_class    | 14    | 11    | 5     | 60   | 74   | 24   | 0.110795 | 0.111633 | 0.047743 | 0.737011 |
| protein_co tetraspanir  | 328   | 258   | 279   | 601  | 729  | 659  | 7.348268 | 7.412082 | 7.541599 | 20.89855 |
| protein_co retinoic_ac  | 87    | 54    | 84    | 3510 | 4878 | 3152 | 2.141434 | 1.704467 | 2.494668 | 134.0982 |
| protein_co anterior_gr  | 3     | 1     | 1     | 1    | 0    | 1    | 0.079117 | 0.033819 | 0.03182  | 0.040934 |
| protein_co aryl_hydro   | 1272  | 1146  | 1020  | 113  | 166  | 115  | 9.503522 | 10.97972 | 9.194872 | 1.310408 |
| protein_co coiled-coil  | 1211  | 986   | 1095  | 1505 | 1836 | 1860 | 35.5343  | 37.10136 | 38.76732 | 68.54418 |
| protein_co GTPase_IM    | 1     | 0     | 2     | 1    | 0    | 0    | 0.03236  | 0        | 0.078089 | 0.050228 |
| protein_co transmemt    | 1     | 3     | 4     | 3    | 7    | 14   | 0.03279  | 0.126146 | 0.158253 | 0.152685 |
| protein_co GLI_family   | 1594  | 1196  | 1370  | 790  | 955  | 621  | 9.106078 | 8.761603 | 9.443036 | 7.004879 |
| protein_co proteasom    | 44    | 43    | 53    | 70   | 73   | 81   | 0.485335 | 0.608229 | 0.705364 | 1.198444 |
| protein_co mitochond    | 615   | 495   | 537   | 672  | 725  | 955  | 10.54768 | 10.8867  | 11.11231 | 17.88882 |
| protein_co cytochrom    | 913   | 772   | 857   | 1120 | 1241 | 1139 | 13.28284 | 14.40279 | 15.0435  | 25.29115 |
| protein_co biliverdin_  | 796   | 611   | 592   | 327  | 328  | 285  | 32.20402 | 31.69914 | 28.89793 | 20.53408 |
| protein_co upregulato   | 592   | 497   | 524   | 509  | 527  | 386  | 4.906131 | 5.281815 | 5.239584 | 6.547352 |
| protein_co transmemt    | 2270  | 1832  | 1800  | 834  | 1083 | 1068 | 25.16915 | 26.04819 | 24.08038 | 14.35289 |
| pseudogen: stromal_an   | 123   | 70    | 92    | 76   | 90   | 98   | 2.691308 | 1.964109 | 2.428813 | 2.581085 |
| protein_co Ras_homol    | 1426  | 1130  | 1194  | 1683 | 2321 | 1816 | 32.22418 | 32.74538 | 32.55477 | 59.03056 |
| protein_co protein_kir  | 239   | 172   | 217   | 255  | 322  | 265  | 3.390836 | 3.129297 | 3.71464  | 5.615386 |
| protein_co AE_binding   | 45113 | 32622 | 35109 | 1282 | 1800 | 1071 | 518.3409 | 480.6553 | 486.7212 | 22.86295 |
| protein_co polymerase   | 2412  | 1769  | 1873  | 2966 | 3380 | 3123 | 52.40905 | 49.29083 | 49.10376 | 100.0301 |
| protein_co myosin_lig   | 2     | 0     | 1     | 1    | 4    | 10   | 0.118559 | 0        | 0.071524 | 0.09201  |
| protein_co glucokinase  | 47    | 35    | 41    | 105  | 145  | 51   | 0.80756  | 0.771177 | 0.84998  | 2.800249 |
| protein_co B-cell_CLL/  | 799   | 611   | 641   | 382  | 463  | 697  | 18.96968 | 18.60218 | 18.36197 | 14.0769  |
| protein_co YKT6_v-SNA   | 6140  | 4667  | 4935  | 1853 | 2350 | 2788 | 106.7896 | 104.0897 | 103.5609 | 50.02262 |
| protein_co transducin   | 1449  | 1134  | 1198  | 506  | 599  | 293  | 27.96034 | 28.06057 | 27.89196 | 15.15497 |
| protein_co UDP-N-acet   | 0     | 0     | 0     | 0    | 0    | 1    | 0        | 0        | 0        | 0        |
| protein_co CAP-GLY_di   | 6836  | 5109  | 5387  | 3387 | 4372 | 1438 | 57.62002 | 55.22256 | 54.78559 | 44.31156 |
| protein_co eukaryotic   | 9685  | 7909  | 8376  | 8586 | 9585 | 8997 | 169.5147 | 177.5164 | 176.8856 | 233.254  |
| protein_co LIM_domai    | 1091  | 830   | 915   | 664  | 956  | 635  | 15.16212 | 14.79186 | 15.34279 | 14.323   |
| protein_co spermatog    | 8     | 8     | 4     | 12   | 12   | 18   | 0.092099 | 0.118104 | 0.055562 | 0.214426 |
| protein_co solute_carr  | 13    | 12    | 10    | 138  | 121  | 158  | 0.163775 | 0.193863 | 0.152003 | 2.698445 |
| protein_co LIM_homer    | 20    | 14    | 9     | 1    | 1    | 7    | 0.367189 | 0.329607 | 0.199366 | 0.028496 |
| protein_co fukutin      | 489   | 446   | 433   | 171  | 177  | 244  | 3.113691 | 3.641756 | 3.326615 | 1.690025 |
| protein_co fibronectin  | 114   | 116   | 96    | 60   | 65   | 31   | 0.701228 | 0.915001 | 0.712482 | 0.572844 |
| protein_co contactin_i  | 312   | 265   | 263   | 72   | 87   | 113  | 2.888958 | 3.146603 | 2.938262 | 1.034784 |
| protein_co spindlin_1   | 2016  | 1654  | 1834  | 2143 | 2556 | 2259 | 21.08168 | 22.1799  | 23.13994 | 34.78303 |
| protein_co nicotinami   | 201   | 154   | 169   | 115  | 124  | 95   | 4.597509 | 4.517068 | 4.664029 | 4.082769 |
| protein_co transmemt    | 1169  | 976   | 976   | 1627 | 2090 | 1318 | 6.868976 | 7.354221 | 6.91951  | 14.83869 |
| protein_co prune_hor    | 48    | 41    | 49    | 193  | 179  | 167  | 0.178813 | 0.195863 | 0.220243 | 1.115953 |
| protein_co multiple_Ei  | 425   | 305   | 326   | 30   | 49   | 37   | 3.16422  | 2.91197  | 2.928488 | 0.346681 |
| protein_co tripartite_r | 101   | 122   | 104   | 248  | 298  | 217  | 1.06329  | 1.647022 | 1.321027 | 4.0524   |
| protein_co coronin_ac   | 499   | 444   | 423   | 1344 | 1619 | 970  | 4.152284 | 4.737822 | 4.246928 | 17.35866 |
| protein_co transformi   | 1867  | 1510  | 1581  | 861  | 1033 | 1062 | 13.43518 | 13.93431 | 13.72711 | 9.616852 |
| protein_co Sec61_beta   | 2733  | 2138  | 2227  | 1020 | 1150 | 1244 | 186.5363 | 187.1288 | 183.3969 | 108.0573 |
| protein_co complemer    | 75    | 75    | 77    | 5    | 8    | 8    | 0.643858 | 0.825656 | 0.797568 | 0.066624 |
| protein_co osteoglycin  | 943   | 704   | 712   | 4    | 8    | 2    | 14.88296 | 14.24819 | 13.55832 | 0.097987 |
| protein_co asporin      | 93    | 50    | 67    | 0    | 7    | 3    | 1.765495 | 1.217202 | 1.534639 | 0        |
| protein_co extracellul  | 45    | 23    | 28    | 9    | 3    | 3    | 0.648648 | 0.425142 | 0.48697  | 0.201358 |
| protein_co transducin   | 1238  | 980   | 1061  | 937  | 1224 | 494  | 11.98139 | 12.16248 | 12.38939 | 14.07527 |
| protein_co LIM_homer    | 0     | 0     | 0     | 8    | 11   | 5    | 0        | 0        | 0        | 0.162319 |
| protein_co prostaglan   | 694   | 579   | 585   | 906  | 977  | 843  | 14.16087 | 15.1502  | 14.40238 | 28.69386 |
| protein_co sushi_dom    | 283   | 243   | 239   | 93   | 94   | 58   | 4.247719 | 4.67719  | 4.32828  | 2.16662  |
| protein_co alpha-1-mi   | 2     | 0     | 1     | 16   | 17   | 12   | 0.065398 | 0        | 0.039453 | 0.812048 |

|                          |      |      |      |      |      |      |          |          |          |          |
|--------------------------|------|------|------|------|------|------|----------|----------|----------|----------|
| protein_co AT-hook_tr    | 697  | 557  | 607  | 980  | 1196 | 717  | 4.428502 | 4.538252 | 4.653297 | 9.664526 |
| protein_co tumor_nec     | 0    | 1    | 1    | 0    | 0    | 0    | 0        | 0.031548 | 0.029683 | 0        |
| protein_co dynamin_1     | 6155 | 5062 | 5421 | 851  | 1311 | 735  | 87.8296  | 92.62843 | 93.33409 | 18.84833 |
| protein_co endoglin      | 2538 | 1870 | 2024 | 118  | 126  | 42   | 38.90385 | 36.758   | 37.43342 | 2.807459 |
| protein_co adenylate_l   | 93   | 91   | 98   | 24   | 34   | 22   | 1.924436 | 2.414745 | 2.446778 | 0.770836 |
| protein_co cell_divisio  | 217  | 183  | 181  | 214  | 258  | 281  | 2.905521 | 3.142134 | 2.924091 | 4.447424 |
| protein_co relaxin_2     | 9    | 5    | 3    | 23   | 14   | 8    | 0.358547 | 0.255437 | 0.144203 | 1.422205 |
| protein_co relaxin_1     | 0    | 0    | 1    | 0    | 4    | 0    | 0        | 0        | 0.052973 | 0        |
| protein_co plasminoge    | 215  | 173  | 172  | 210  | 252  | 171  | 10.8169  | 11.16143 | 10.44097 | 16.39888 |
| protein_co TBC1_dom      | 1081 | 869  | 925  | 680  | 885  | 1023 | 12.97699 | 13.37757 | 13.39794 | 12.67032 |
| protein_co KIAA1432      | 1037 | 877  | 938  | 361  | 435  | 349  | 7.178174 | 7.78474  | 7.834045 | 3.878581 |
| protein_co lysine_(K)-s  | 276  | 250  | 239  | 652  | 719  | 537  | 2.78016  | 3.229312 | 2.904736 | 10.19386 |
| protein_co dedicator_l   | 8    | 8    | 5    | 65   | 60   | 79   | 0.040436 | 0.051853 | 0.030492 | 0.509937 |
| protein_co KN_motif_2    | 1364 | 1176 | 1286 | 748  | 883  | 635  | 8.891698 | 9.830758 | 10.11485 | 7.568371 |
| protein_co ELAV_(emb     | 1099 | 851  | 938  | 549  | 590  | 405  | 13.54327 | 13.44821 | 13.94687 | 10.50095 |
| protein_co neuronal_c    | 4799 | 3644 | 3966 | 1227 | 1793 | 1266 | 45.08619 | 43.90162 | 44.95661 | 17.89237 |
| protein_co testis-speci  | 758  | 566  | 573  | 234  | 292  | 155  | 14.68097 | 14.05761 | 13.39024 | 7.034479 |
| protein_co potassium_    | 1    | 1    | 3    | 5    | 8    | 3    | 0.009708 | 0.012449 | 0.03514  | 0.075341 |
| protein_co carbonic_a    | 3    | 3    | 3    | 14   | 17   | 9    | 0.086941 | 0.111489 | 0.104899 | 0.629739 |
| protein_co far_upstrea   | 2442 | 1829 | 1973 | 1707 | 2226 | 2078 | 36.65346 | 35.20403 | 35.73094 | 39.76796 |
| protein_co tyrosinase-   | 1    | 2    | 3    | 0    | 2    | 3    | 0.016447 | 0.042182 | 0.059532 | 0        |
| protein_co cAMP_resp     | 1052 | 871  | 871  | 375  | 446  | 447  | 26.92593 | 28.58791 | 26.89807 | 14.89761 |
| protein_co RGP1_retr     | 903  | 688  | 746  | 552  | 630  | 413  | 6.033298 | 5.894742 | 6.013868 | 5.724487 |
| protein_co multiple_P    | 1638 | 1389 | 1517 | 922  | 970  | 837  | 9.946367 | 10.81589 | 11.11435 | 8.689844 |
| protein_co LIM_homer     | 0    | 0    | 0    | 1    | 3    | 2    | 0        | 0        | 0        | 0.030287 |
| protein_co DEAD_(Asp     | 136  | 130  | 110  | 199  | 209  | 202  | 1.380013 | 1.691598 | 1.346744 | 3.134209 |
| protein_co endothelial   | 3134 | 2376 | 2454 | 2447 | 3100 | 2812 | 181.6481 | 176.5988 | 171.6147 | 220.1387 |
| protein_co phosphatic    | 1    | 0    | 0    | 83   | 79   | 64   | 0.01406  | 0        | 0        | 1.811311 |
| protein_co GLIS_famil    | 391  | 346  | 322  | 4    | 5    | 1    | 2.749962 | 3.12058  | 2.73246  | 0.043666 |
| protein_co BCL2-assoc    | 629  | 514  | 473  | 411  | 593  | 1082 | 7.631002 | 7.996563 | 6.923729 | 7.739327 |
| protein_co Rap_guanin    | 2340 | 1676 | 1913 | 1929 | 2564 | 2534 | 17.53879 | 16.10894 | 17.30002 | 22.44121 |
| protein_co neural_pro    | 1421 | 1034 | 1082 | 819  | 1096 | 505  | 30.46672 | 28.42899 | 27.99026 | 27.25499 |
| protein_co amyloid_be    | 356  | 232  | 252  | 6    | 15   | 13   | 2.554767 | 2.135003 | 2.181975 | 0.066832 |
| protein_co senataxin     | 2950 | 2194 | 2544 | 844  | 784  | 1139 | 12.45839 | 11.8819  | 12.96299 | 5.532392 |
| protein_co SH3-domai     | 0    | 0    | 0    | 64   | 81   | 57   | 0        | 0        | 0        | 1.815948 |
| protein_co prostaglan    | 33   | 21   | 22   | 14   | 34   | 5    | 1.564581 | 1.27677  | 1.258505 | 1.03025  |
| protein_co ATP-bindin    | 2289 | 1593 | 1795 | 793  | 1002 | 467  | 13.16302 | 11.74721 | 12.45438 | 7.078045 |
| protein_co Src_homol     | 209  | 149  | 168  | 93   | 143  | 97   | 3.521385 | 3.21931  | 3.415266 | 2.432095 |
| protein_co ubiquitin-c   | 2418 | 1938 | 2147 | 2032 | 2826 | 1898 | 27.82333 | 28.5967  | 29.808   | 36.29167 |
| protein_co abhydrolas    | 335  | 257  | 295  | 852  | 1151 | 1253 | 6.009241 | 5.911766 | 6.384764 | 23.72165 |
| protein_co exosome_c     | 188  | 135  | 136  | 216  | 364  | 285  | 5.424814 | 4.995398 | 4.734935 | 9.674115 |
| protein_co zinc_finger   | 3565 | 2778 | 3090 | 2129 | 3088 | 3200 | 29.18347 | 29.16211 | 30.51996 | 27.05101 |
| protein_co dishevelled   | 1742 | 1249 | 1331 | 1429 | 2110 | 1386 | 25.2184  | 23.18682 | 23.24853 | 32.1094  |
| protein_co PDZ_and_L     | 731  | 558  | 568  | 4198 | 4774 | 3403 | 23.60648 | 23.10773 | 22.13146 | 210.4198 |
| protein_co cyclin_J      | 375  | 302  | 322  | 591  | 839  | 1116 | 4.273088 | 4.412928 | 4.42705  | 10.4527  |
| protein_co deoxynucle    | 0    | 0    | 0    | 0    | 1    | 2    | 0        | 0        | 0        | 0        |
| protein_co GATA_bind     | 178  | 131  | 136  | 11   | 21   | 80   | 2.711638 | 2.55913  | 2.499762 | 0.260097 |
| protein_co attractin-lil | 146  | 106  | 151  | 535  | 741  | 407  | 0.8074   | 0.751711 | 1.007536 | 4.592192 |
| protein_co Hermansky     | 623  | 501  | 496  | 577  | 802  | 646  | 7.888869 | 8.135303 | 7.578031 | 11.34052 |
| protein_co phytanoyl-    | 210  | 165  | 168  | 451  | 556  | 310  | 5.383764 | 5.424503 | 5.196657 | 17.94625 |
| protein_co Ras_associa   | 68   | 60   | 55   | 319  | 442  | 249  | 0.732993 | 0.829376 | 0.715322 | 5.337185 |
| protein_co dynamin_b     | 844  | 778  | 763  | 549  | 668  | 750  | 6.114829 | 7.228211 | 6.669825 | 6.173688 |
| protein_co RAB11_fam     | 248  | 237  | 220  | 197  | 217  | 198  | 1.918615 | 2.351223 | 2.053557 | 2.365554 |
| protein_co chemokine     | 630  | 498  | 564  | 878  | 1033 | 1561 | 8.363735 | 8.478097 | 9.034141 | 18.09192 |
| protein_co ER_lipid_ra   | 1084 | 841  | 900  | 698  | 826  | 604  | 8.775687 | 8.730863 | 8.791083 | 8.77077  |
| protein_co eukaryotic    | 8732 | 6820 | 7357 | 9594 | 9708 | 8927 | 74.82522 | 74.94247 | 76.06469 | 127.6041 |
| protein_co polycystic    | 1    | 1    | 0    | 0    | 2    | 5    | 0.015409 | 0.01976  | 0        | 0        |
| protein_co cubilin_(ini  | 461  | 386  | 359  | 6    | 7    | 3    | 1.809047 | 1.94243  | 1.699775 | 0.036545 |
| protein_co tRNA_aspar    | 162  | 162  | 181  | 162  | 184  | 301  | 0.922987 | 1.1836   | 1.244249 | 1.432604 |
| protein_co retinol_bin   | 0    | 0    | 0    | 2    | 6    | 0    | 0        | 0        | 0        | 0.034041 |
| protein_co growth_dif    | 1    | 5    | 3    | 1    | 3    | 3    | 0.019076 | 0.122314 | 0.069051 | 0.029609 |
| protein_co DEAD_(Asp     | 835  | 679  | 730  | 942  | 915  | 751  | 15.42678 | 16.08673 | 16.2727  | 27.01283 |
| protein_co mitogen-ac    | 681  | 513  | 599  | 636  | 840  | 750  | 5.509334 | 5.322047 | 5.846916 | 7.986189 |
| protein_co SEC23_inte    | 1670 | 1303 | 1356 | 879  | 965  | 1164 | 16.81837 | 16.82756 | 16.47689 | 13.74    |
| protein_co arginyltran   | 453  | 330  | 375  | 317  | 400  | 313  | 4.334934 | 4.049558 | 4.329758 | 4.708408 |

|                         |       |       |       |       |       |       |          |          |          |          |
|-------------------------|-------|-------|-------|-------|-------|-------|----------|----------|----------|----------|
| protein_co non-SMC_e    | 392   | 306   | 363   | 664   | 887   | 749   | 7.661895 | 7.669745 | 8.560612 | 20.14414 |
| protein_co plectstrin_  | 563   | 513   | 574   | 611   | 710   | 617   | 3.062894 | 3.578905 | 3.767762 | 5.159352 |
| protein_co phosphata    | 363   | 305   | 290   | 1362  | 1782  | 1313  | 3.73679  | 4.026254 | 3.601953 | 21.76204 |
| protein_co unc-5_hom    | 6641  | 4587  | 5297  | 3192  | 3860  | 2740  | 45.51916 | 40.31799 | 43.80653 | 33.95894 |
| protein_co cadherin-re  | 198   | 171   | 197   | 109   | 145   | 70    | 0.920597 | 1.019553 | 1.105144 | 0.786614 |
| protein_co chromosom    | 19    | 10    | 12    | 2     | 2     | 1     | 0.19     | 0.128236 | 0.144787 | 0.031043 |
| protein_co sparc/ostec  | 8     | 6     | 3     | 327   | 366   | 156   | 0.068893 | 0.066259 | 0.031171 | 4.370798 |
| protein_co mitochond    | 1269  | 1026  | 969   | 492   | 579   | 470   | 24.5375  | 25.44048 | 22.60687 | 14.76605 |
| protein_co protein_ph   | 1379  | 1165  | 1253  | 455   | 587   | 581   | 18.46939 | 20.00892 | 20.24825 | 9.458672 |
| protein_co coiled-coil_ | 1026  | 837   | 887   | 296   | 330   | 199   | 6.277291 | 6.566889 | 6.547817 | 2.810911 |
| protein_co bone_mor     | 856   | 667   | 764   | 1915  | 2409  | 1901  | 11.13394 | 11.12526 | 11.98993 | 38.66111 |
| protein_co multiple_ir  | 522   | 434   | 439   | 357   | 445   | 336   | 10.13523 | 10.80593 | 10.28433 | 10.75875 |
| protein_co actin_alpha  | 333   | 253   | 297   | 5     | 12    | 31    | 8.892014 | 8.663348 | 9.568864 | 0.207232 |
| protein_co lipase_A_ly  | 686   | 620   | 661   | 218   | 251   | 278   | 11.56238 | 13.4006  | 13.44227 | 5.70309  |
| protein_co T-cell_leuk  | 2     | 0     | 0     | 2     | 1     | 0     | 0.023985 | 0        | 0        | 0.037228 |
| protein_co chromosom    | 398   | 279   | 290   | 815   | 1109  | 1269  | 5.877867 | 5.283847 | 5.167526 | 18.68206 |
| protein_co leucine_zip  | 3191  | 2390  | 2545  | 3154  | 4438  | 2439  | 26.06271 | 25.03226 | 25.08007 | 39.98389 |
| protein_co sideroflexir | 3133  | 2533  | 2505  | 82    | 88    | 79    | 47.46573 | 49.21124 | 45.79051 | 1.928253 |
| protein_co Kazal-type_  | 1517  | 1022  | 1161  | 209   | 308   | 242   | 37.18356 | 32.12371 | 34.33568 | 7.951374 |
| protein_co F-box_and_   | 550   | 423   | 445   | 977   | 1310  | 811   | 8.102265 | 7.990859 | 7.909551 | 22.33926 |
| protein_co fibroblast_  | 0     | 2     | 0     | 126   | 186   | 416   | 0        | 0.100467 | 0        | 7.661032 |
| protein_co nucleopho    | 618   | 540   | 529   | 1826  | 2257  | 1771  | 33.04222 | 37.02405 | 34.12593 | 151.5347 |
| protein_co tankyrase_   | 1904  | 1508  | 1607  | 1462  | 1670  | 1393  | 14.50034 | 14.72726 | 14.76642 | 17.2818  |
| protein_co paired-like_ | 9     | 6     | 15    | 11    | 8     | 3     | 0.303386 | 0.259366 | 0.610088 | 0.575541 |
| protein_co golgi_brefe  | 3769  | 3059  | 3423  | 1278  | 1404  | 1137  | 27.60089 | 28.7267  | 30.24488 | 14.52641 |
| protein_co Rho_GTPas    | 3137  | 2615  | 2924  | 775   | 713   | 950   | 20.52379 | 21.93936 | 23.08173 | 7.870008 |
| protein_co cytoplasm    | 35    | 29    | 34    | 54    | 62    | 17    | 0.214138 | 0.227527 | 0.250987 | 0.512801 |
| protein_co F-box_and_   | 239   | 175   | 182   | 354   | 448   | 221   | 4.744587 | 4.455002 | 4.359332 | 10.90773 |
| protein_co CUE_domai    | 1452  | 1048  | 1156  | 828   | 979   | 588   | 57.16566 | 52.91018 | 54.91292 | 50.59754 |
| protein_co suppressor_  | 819   | 636   | 651   | 389   | 465   | 199   | 7.679049 | 7.646981 | 7.364658 | 5.661136 |
| protein_co ankyrin_re   | 419   | 347   | 318   | 187   | 181   | 227   | 2.98087  | 3.165686 | 2.729633 | 2.06491  |
| protein_co acyl-CoA_b   | 431   | 363   | 383   | 350   | 367   | 255   | 5.158141 | 5.570984 | 5.530479 | 6.501514 |
| protein_co phospholy    | 180   | 162   | 144   | 502   | 589   | 290   | 5.203578 | 6.005565 | 5.022733 | 22.52494 |
| protein_co La_ribonuc   | 1411  | 1118  | 1237  | 1071  | 1256  | 1016  | 11.73082 | 11.91935 | 12.40849 | 13.82042 |
| protein_co GTP_bindir   | 1582  | 1210  | 1421  | 1382  | 1644  | 2019  | 15.79642 | 15.49341 | 17.11963 | 21.41859 |
| protein_co chromosom    | 410   | 299   | 397   | 370   | 360   | 414   | 4.382245 | 4.098201 | 5.11978  | 6.138255 |
| protein_co BRCA2_anc    | 771   | 583   | 722   | 960   | 858   | 1244  | 15.46288 | 14.99387 | 17.47114 | 29.88392 |
| protein_co mitochond    | 446   | 318   | 338   | 464   | 565   | 557   | 3.516554 | 3.215281 | 3.21549  | 5.678464 |
| protein_co neuralized_  | 17    | 10    | 8     | 73    | 126   | 23    | 0.184778 | 0.139383 | 0.104915 | 1.231554 |
| protein_co SH3_and_P    | 5737  | 4506  | 4879  | 626   | 784   | 371   | 23.45727 | 23.62617 | 24.06975 | 3.972807 |
| protein_co pitrilysin_n | 1239  | 1081  | 1140  | 445   | 505   | 437   | 16.80553 | 18.80252 | 18.65666 | 9.368531 |
| protein_co oligonucle   | 362   | 337   | 284   | 218   | 285   | 158   | 11.97896 | 14.30045 | 11.33906 | 1.19689  |
| protein_co mitogen-ac   | 23    | 14    | 19    | 147   | 212   | 107   | 0.348343 | 0.271905 | 0.347201 | 3.45563  |
| protein_co dickkopf_1   | 1767  | 1389  | 1484  | 2     | 3     | 30    | 46.28752 | 46.65938 | 46.90394 | 0.081318 |
| protein_co early_B-cell | 1750  | 1343  | 1417  | 77    | 106   | 46    | 18.75601 | 18.45813 | 18.324   | 1.280925 |
| protein_co glutaredoxi  | 1269  | 1055  | 1111  | 1296  | 1527  | 1523  | 30.97524 | 33.02287 | 32.72014 | 49.10079 |
| protein_co sortilin-rel | 95    | 73    | 71    | 110   | 137   | 103   | 0.612562 | 0.603613 | 0.552374 | 1.100905 |
| protein_co family_witl  | 1886  | 1484  | 1633  | 856   | 904   | 965   | 10.2521  | 10.34461 | 10.71039 | 7.222294 |
| protein_co X-prolyl_an  | 2535  | 1988  | 2058  | 862   | 837   | 913   | 27.11364 | 27.26689 | 26.55848 | 14.31026 |
| protein_co structural_  | 1315  | 1122  | 1178  | 1570  | 1183  | 2404  | 14.98794 | 16.39904 | 16.19979 | 27.7745  |
| protein_co soc-2_supp   | 819   | 654   | 642   | 279   | 269   | 248   | 9.739519 | 9.973342 | 9.211634 | 5.149775 |
| protein_co transcripti  | 541   | 422   | 471   | 936   | 1162  | 1632  | 4.685537 | 4.686881 | 4.921881 | 12.58254 |
| protein_co coiled-coil_ | 1483  | 1206  | 1258  | 1032  | 1291  | 1551  | 11.9666  | 12.47918 | 12.2478  | 12.92527 |
| protein_co cullin_2     | 759   | 715   | 664   | 482   | 472   | 570   | 8.015658 | 9.683064 | 8.460841 | 7.90087  |
| protein_co cyclin_Y     | 2022  | 1649  | 1723  | 1095  | 1521  | 1045  | 23.94233 | 25.0389  | 24.61606 | 20.12472 |
| protein_co ubiquitin-c  | 4738  | 3743  | 3898  | 6566  | 9377  | 6245  | 220.1833 | 223.0583 | 218.5642 | 473.6097 |
| protein_co ribosomal_   | 13757 | 10505 | 10933 | 13694 | 16429 | 12683 | 114.7804 | 112.3956 | 110.0605 | 177.3393 |
| protein_co zinc_finger  | 7074  | 5086  | 5759  | 2250  | 2926  | 2116  | 43.95706 | 40.52745 | 43.17762 | 21.70084 |
| protein_co DnaJ_(Hsp    | 102   | 84    | 76    | 11    | 24    | 8     | 3.995641 | 4.219635 | 3.592096 | 0.66882  |
| protein_co peptidylpro  | 969   | 776   | 785   | 1266  | 1547  | 1653  | 20.74723 | 21.30627 | 20.27935 | 42.07271 |
| protein_co phenazine_   | 161   | 95    | 119   | 48    | 45    | 82    | 2.918165 | 2.208091 | 2.602429 | 1.350379 |
| protein_co tetraspanir  | 2502  | 2081  | 2195  | 1773  | 2103  | 1843  | 20.6148  | 21.98737 | 21.82099 | 22.67415 |
| protein_co leucine-ricl | 2     | 2     | 2     | 2     | 0     | 2     | 0.040952 | 0.052515 | 0.049411 | 0.063563 |
| protein_co TBC1_dom     | 348   | 253   | 296   | 84    | 81    | 61    | 3.095168 | 2.885592 | 3.17647  | 1.159617 |
| protein_co cytochrom    | 0     | 0     | 0     | 1     | 1     | 0     | 0        | 0        | 0        | 0.030099 |

|                         |       |      |       |       |       |       |          |          |          |          |
|-------------------------|-------|------|-------|-------|-------|-------|----------|----------|----------|----------|
| protein_co crystallin_k | 1     | 1    | 0     | 0     | 0     | 1     | 0.059885 | 0.076794 | 0        | 0        |
| protein_co nuclear_fra  | 1650  | 1351 | 1372  | 2577  | 3084  | 2693  | 7.13074  | 7.487129 | 7.154064 | 17.28604 |
| protein_co G_protein-i  | 1734  | 1290 | 1417  | 1498  | 1933  | 1285  | 21.57837 | 20.58584 | 21.27587 | 28.93422 |
| protein_co transcriptio | 288   | 240  | 251   | 222   | 327   | 310   | 3.175247 | 3.39317  | 3.338926 | 3.798993 |
| protein_co apoptosis_i  | 988   | 816  | 804   | 943   | 1078  | 1076  | 21.63818 | 22.91729 | 21.24554 | 32.05575 |
| protein_co dehydrogen   | 234   | 203  | 178   | 675   | 737   | 507   | 2.435575 | 2.709511 | 2.235392 | 10.90485 |
| protein_co zinc_finger  | 298   | 209  | 214   | 421   | 492   | 456   | 3.160648 | 2.842598 | 2.738556 | 6.930626 |
| protein_co myeloid/ly   | 2036  | 1778 | 1835  | 855   | 1124  | 1266  | 12.59806 | 14.10805 | 13.69966 | 8.211498 |
| protein_co proteasom    | 1846  | 1490 | 1452  | 1722  | 1856  | 1831  | 111.978  | 115.9035 | 106.2712 | 162.1304 |
| protein_co CWC25_spi    | 401   | 325  | 325   | 225   | 249   | 385   | 7.285121 | 7.571555 | 7.123998 | 6.344617 |
| protein_co ribosomal_   | 9639  | 7763 | 7990  | 11811 | 12395 | 11875 | 346.871  | 358.2407 | 346.9212 | 659.7101 |
| protein_co F-box_and_   | 192   | 141  | 163   | 137   | 169   | 89    | 3.682161 | 3.467608 | 3.7717   | 4.07805  |
| protein_co RUN_doma     | 8     | 3    | 0     | 67    | 85    | 36    | 0.101769 | 0.048939 | 0        | 1.32291  |
| protein_co upstream_l   | 2811  | 1960 | 2217  | 1995  | 2703  | 3519  | 26.37739 | 23.58503 | 25.10064 | 29.05657 |
| protein_co colony_stir  | 0     | 0    | 2     | 1     | 0     | 0     | 0        | 0        | 0.067634 | 0.043503 |
| protein_co proteasom    | 3997  | 2818 | 3238  | 4362  | 5590  | 5012  | 64.89591 | 58.67236 | 63.43195 | 109.9257 |
| protein_co cancer_sus   | 2403  | 2072 | 2176  | 2490  | 2933  | 2593  | 27.37529 | 30.26942 | 29.90969 | 44.0286  |
| protein_co Rap_guanir   | 211   | 199  | 233   | 291   | 396   | 317   | 2.654627 | 3.210579 | 3.536918 | 5.682566 |
| protein_co regulator_c  | 20    | 14   | 23    | 14    | 10    | 11    | 0.392878 | 0.352667 | 0.545135 | 0.426861 |
| protein_co ring_finger  | 0     | 0    | 0     | 146   | 133   | 33    | 0        | 0        | 0        | 1.905982 |
| protein_co wingless-ty  | 74    | 58   | 55    | 251   | 301   | 517   | 1.034236 | 1.039502 | 0.927467 | 5.444927 |
| protein_co aspartoacyl  | 0     | 0    | 0     | 0     | 2     | 0     | 0        | 0        | 0        | 0        |
| protein_co RAD51_hoi    | 185   | 130  | 111   | 160   | 165   | 198   | 4.17653  | 3.76354  | 3.023534 | 5.606533 |
| protein_co septin_4     | 35    | 28   | 28    | 50    | 66    | 29    | 0.463079 | 0.475066 | 0.446985 | 1.026803 |
| protein_co myotubula    | 1316  | 1182 | 1118  | 586   | 719   | 584   | 10.56812 | 12.17219 | 10.83258 | 7.304155 |
| protein_co tripartite_r | 643   | 524  | 517   | 1195  | 1440  | 1135  | 6.866381 | 7.175589 | 6.661247 | 19.80685 |
| protein_co purinergic_c | 4     | 1    | 1     | 6     | 8     | 5     | 0.063688 | 0.020418 | 0.019211 | 0.148278 |
| protein_co DEAH_(Asp    | 579   | 459  | 467   | 632   | 622   | 769   | 7.290365 | 7.411272 | 7.094726 | 12.35146 |
| protein_co tubulin_de   | 88    | 86   | 93    | 141   | 136   | 152   | 1.669224 | 2.091894 | 2.128447 | 4.151275 |
| protein_co karyopheri   | 7123  | 5940 | 6376  | 4861  | 5204  | 7981  | 54.40586 | 58.18065 | 58.75964 | 57.6287  |
| protein_co golgi_SNAP   | 533   | 383  | 365   | 174   | 168   | 247   | 11.34985 | 10.45854 | 9.377865 | 5.750992 |
| protein_co pyridoxami   | 54    | 33   | 44    | 47    | 67    | 50    | 1.056346 | 0.827819 | 1.038516 | 1.427055 |
| protein_co ribosomal_   | 557   | 441  | 467   | 256   | 270   | 320   | 4.859114 | 4.93344  | 4.91549  | 3.46635  |
| protein_co tripartite_r | 136   | 119  | 101   | 123   | 135   | 73    | 1.9997   | 2.24379  | 1.791824 | 2.807123 |
| pseudogen: zinc_finger  | 2     | 3    | 5     | 1     | 2     | 0     | 0.558214 | 1.073746 | 1.683795 | 0.433213 |
| protein_co CDK5_regu    | 773   | 618  | 683   | 425   | 606   | 412   | 13.13736 | 13.46873 | 14.00546 | 11.2111  |
| protein_co chromobo     | 3813  | 2954 | 3261  | 3607  | 4357  | 3914  | 73.81983 | 73.3375  | 76.17371 | 108.3884 |
| protein_co RecQ_prot    | 332   | 274  | 261   | 526   | 688   | 551   | 4.196088 | 4.440853 | 3.98011  | 10.31865 |
| protein_co phosphatic   | 212   | 158  | 160   | 192   | 239   | 177   | 7.390843 | 7.063575 | 6.730172 | 10.38938 |
| protein_co galactokin   | 790   | 592  | 647   | 634   | 836   | 436   | 19.85162 | 19.07655 | 19.61648 | 24.72797 |
| protein_co integrator_  | 393   | 307  | 329   | 479   | 623   | 364   | 3.135042 | 3.140498 | 3.166611 | 5.930848 |
| protein_co calmodulin   | 341   | 267  | 276   | 85    | 134   | 71    | 3.347184 | 3.360824 | 3.268754 | 1.295014 |
| protein_co mediator_c   | 1562  | 1211 | 1312  | 561   | 611   | 805   | 6.998778 | 6.958164 | 7.092887 | 3.901526 |
| protein_co homeobox     | 13    | 23   | 20    | 0     | 0     | 8     | 0.17751  | 0.402733 | 0.329502 | 0        |
| protein_co enolase_3_   | 65    | 45   | 43    | 214   | 308   | 235   | 2.003847 | 1.778988 | 1.599439 | 10.23989 |
| protein_co profilin_1   | 12242 | 9471 | 10075 | 12883 | 12676 | 13883 | 444.6379 | 441.1226 | 441.5168 | 726.2759 |
| protein_co ring_finger  | 823   | 513  | 575   | 1728  | 1958  | 1829  | 20.15169 | 16.10788 | 16.98742 | 65.67284 |
| protein_co solute_carr  | 1519  | 1203 | 1267  | 1200  | 1639  | 1434  | 32.73251 | 33.24271 | 32.94171 | 40.13592 |
| protein_co RAS_dexam    | 5     | 11   | 10    | 138   | 132   | 65    | 0.134278 | 0.378825 | 0.324029 | 5.752355 |
| protein_co cholinergic  | 7     | 3    | 9     | 8     | 24    | 2     | 0.133699 | 0.073478 | 0.207405 | 0.237164 |
| protein_co retinoic_ac  | 3712  | 2730 | 3045  | 867   | 1264  | 638   | 22.71675 | 21.42448 | 22.484   | 8.235459 |
| protein_co nucleopori   | 770   | 649  | 670   | 825   | 946   | 1142  | 12.38179 | 13.3828  | 12.99917 | 20.59099 |
| protein_co compleme     | 2095  | 1569 | 1694  | 3486  | 3788  | 4509  | 84.03301 | 80.70458 | 81.98367 | 217.032  |
| protein_co solute_carr  | 0     | 1    | 0     | 3     | 5     | 4     | 0        | 0.00919  | 0        | 0.03337  |
| protein_co bleomycin_   | 1258  | 984  | 1029  | 1022  | 1290  | 1086  | 24.99476 | 25.07107 | 24.66788 | 31.51735 |
| protein_co carboxypep   | 2706  | 2332 | 2198  | 1454  | 1687  | 1118  | 13.50696 | 14.92683 | 13.23749 | 11.26483 |
| protein_co golgi_SNAP   | 1150  | 937  | 985   | 701   | 921   | 902   | 8.929213 | 9.329627 | 9.227831 | 8.448194 |
| protein_co coiled-coil  | 1031  | 791  | 869   | 830   | 1057  | 1225  | 13.94795 | 13.72264 | 14.18468 | 17.42852 |
| protein_co mediator_c   | 71    | 68   | 68    | 29    | 17    | 34    | 2.012812 | 2.472084 | 2.325958 | 1.276067 |
| protein_co developme    | 774   | 594  | 697   | 691   | 865   | 783   | 6.793874 | 6.686091 | 7.381716 | 9.414235 |
| protein_co FtsJ_homol   | 1718  | 1444 | 1507  | 1609  | 1895  | 2336  | 22.63474 | 24.39658 | 23.95597 | 32.90326 |
| protein_co A_kinase_(f  | 524   | 373  | 388   | 321   | 381   | 254   | 6.033981 | 5.50796  | 5.39079  | 5.737308 |
| protein_co aldehyde_c   | 3     | 1    | 1     | 2     | 5     | 8     | 0.065611 | 0.028046 | 0.026388 | 0.067892 |
| protein_co SWI/SNF_r    | 2017  | 1569 | 1714  | 2795  | 3218  | 2283  | 34.82223 | 34.73625 | 35.70339 | 74.89674 |
| protein_co synaptogyr   | 288   | 214  | 256   | 724   | 947   | 763   | 4.448065 | 4.238398 | 4.77053  | 17.35592 |

|                         |        |        |        |       |       |       |          |          |          |          |
|-------------------------|--------|--------|--------|-------|-------|-------|----------|----------|----------|----------|
| protein_co B9_protein   | 177    | 178    | 176    | 220   | 223   | 132   | 6.134171 | 7.910646 | 7.359415 | 11.83411 |
| protein_co UTP6_smal    | 878    | 745    | 764    | 965   | 1075  | 1157  | 9.384416 | 10.21124 | 9.852675 | 16.00923 |
| protein_co DEAD_(Asp    | 10145  | 8348   | 8772   | 4154  | 5190  | 8400  | 133.6985 | 141.0803 | 139.4829 | 84.97113 |
| protein_co chromosom    | 260    | 191    | 190    | 362   | 443   | 454   | 7.424729 | 6.994392 | 6.546496 | 16.04524 |
| protein_co cytohesin_   | 1371   | 1051   | 1081   | 433   | 694   | 331   | 14.53453 | 14.28813 | 13.82729 | 7.12495  |
| protein_co proteasom    | 2617   | 2196   | 2195   | 2336  | 2724  | 3281  | 29.94416 | 32.22182 | 30.30338 | 41.48697 |
| protein_co lectin_gala  | 867    | 678    | 737    | 703   | 863   | 679   | 16.9038  | 16.95135 | 17.33728 | 21.2741  |
| protein_co acid-sensin  | 316    | 213    | 204    | 28    | 52    | 66    | 4.303586 | 3.719909 | 3.352136 | 0.591878 |
| protein_co chemokine    | 18     | 13     | 10     | 0     | 0     | 0     | 1.042    | 0.965046 | 0.698463 | 0        |
| protein_co chemokine    | 347    | 274    | 280    | 26    | 24    | 21    | 16.33618 | 16.54173 | 15.90476 | 1.899874 |
| protein_co chemokine    | 0      | 0      | 0      | 0     | 0     | 1     | 0        | 0        | 0        | 0        |
| protein_co peroxisom    | 91     | 53     | 63     | 86    | 128   | 114   | 1.595137 | 1.191357 | 1.332432 | 2.339837 |
| protein_co HNF1_hom     | 5      | 3      | 2      | 2     | 4     | 0     | 0.067351 | 0.051821 | 0.032505 | 0.041815 |
| protein_co DEXH_(Asp    | 9      | 9      | 6      | 66    | 79    | 30    | 0.161257 | 0.20679  | 0.129711 | 1.835486 |
| protein_co K(lysine)_a  | 566    | 450    | 520    | 776   | 922   | 714   | 8.536426 | 8.703251 | 9.462613 | 18.16569 |
| protein_co RAB5C_me     | 522    | 414    | 447    | 272   | 351   | 363   | 13.82077 | 14.05632 | 14.27964 | 11.17793 |
| protein_co N-acetylglu  | 646    | 470    | 498    | 314   | 420   | 330   | 11.90682 | 11.10889 | 11.07492 | 8.983042 |
| pseudogen hydroxyste    | 16     | 9      | 16     | 16    | 19    | 5     | 0.785592 | 0.566668 | 0.947862 | 1.219347 |
| protein_co hydroxyste   | 50     | 39     | 33     | 21    | 48    | 17    | 0.470594 | 0.470707 | 0.374747 | 0.30678  |
| protein_co MLX_MAX_     | 769    | 588    | 662    | 344   | 431   | 566   | 13.94371 | 13.6722  | 14.48298 | 9.681458 |
| protein_co contactin_   | 1629   | 1302   | 1347   | 351   | 370   | 153   | 14.4776  | 14.8387  | 14.44413 | 4.841871 |
| protein_co ABL_family_  | 24     | 25     | 22     | 12    | 9     | 25    | 0.533599 | 0.712776 | 0.590166 | 0.41411  |
| protein_co enhancer_c   | 419    | 384    | 385    | 402   | 466   | 160   | 4.24982  | 4.994558 | 4.711566 | 6.328678 |
| protein_co distal-less_ | 0      | 0      | 0      | 7     | 11    | 8     | 0        | 0        | 0        | 0.250718 |
| processed_ protein_ph   | 3702   | 2700   | 2972   | 508   | 613   | 239   | 41.74768 | 39.04532 | 40.43829 | 8.891808 |
| protein_co collagen_ty  | 819324 | 581963 | 625136 | 576   | 787   | 759   | 5711.033 | 5201.92  | 5257.527 | 6.231777 |
| protein_co sarcoglycar  | 7      | 3      | 5      | 2     | 7     | 2     | 0.229211 | 0.12597  | 0.19754  | 0.101648 |
| protein_co mitochond    | 764    | 540    | 603    | 502   | 664   | 787   | 14.67594 | 13.30196 | 13.97584 | 14.96742 |
| protein_co vesicle_ami  | 7307   | 5786   | 6069   | 6810  | 8123  | 5581  | 125.3202 | 127.2535 | 125.5877 | 181.284  |
| protein_co leucine_ric  | 5114   | 4097   | 4362   | 1725  | 2149  | 1940  | 82.40397 | 84.65697 | 84.80493 | 43.14267 |
| protein_co Rho_family   | 171    | 156    | 191    | 1759  | 2164  | 1697  | 1.930234 | 2.258124 | 2.601329 | 30.81841 |
| protein_co arachidona   | 37     | 40     | 29     | 29    | 37    | 40    | 0.735764 | 1.020014 | 0.695797 | 0.895087 |
| protein_co histone_de   | 2281   | 1879   | 1927   | 3035  | 3582  | 2162  | 20.08189 | 21.21365 | 20.46958 | 41.47328 |
| protein_co ATP-bindin   | 30     | 21     | 19     | 4     | 3     | 1     | 0.246099 | 0.220911 | 0.188057 | 0.050931 |
| protein_co LUC7-like_   | 2211   | 1749   | 1857   | 2165  | 2525  | 2631  | 14.7264  | 14.9385  | 14.9234  | 22.38186 |
| protein_co pancreatic_  | 0      | 0      | 0      | 0     | 2     | 0     | 0        | 0        | 0        | 0        |
| protein_co membrane     | 359    | 247    | 222    | 784   | 1025  | 765   | 3.813665 | 3.364762 | 2.845438 | 12.92691 |
| protein_co SMAD_spec    | 1166   | 912    | 962    | 495   | 604   | 476   | 9.279321 | 9.30726  | 9.237209 | 6.114393 |
| protein_co dual_specif  | 716    | 564    | 597    | 584   | 600   | 543   | 8.168675 | 8.251388 | 8.217902 | 10.34146 |
| protein_co calcium_ch   | 0      | 1      | 0      | 0     | 1     | 0     | 0        | 0.047646 | 0        | 0        |
| protein_co elongation_  | 3056   | 2345   | 2527   | 2893  | 3072  | 3688  | 31.50745 | 31.0036  | 31.43498 | 46.29551 |
| protein_co hepatic_leu  | 2      | 0      | 1      | 5     | 6     | 9     | 0.016906 | 0        | 0.010199 | 0.065603 |
| protein_co solute_carr  | 6      | 0      | 7      | 7     | 4     | 10    | 0.073901 | 0        | 0.104026 | 0.133822 |
| protein_co protein_kir  | 6774   | 5339   | 5556   | 1912  | 2249  | 2115  | 74.63181 | 75.43068 | 73.85656 | 32.69619 |
| protein_co ephrin-B3    | 508    | 413    | 393    | 417   | 555   | 366   | 7.392964 | 7.707513 | 6.900737 | 9.41936  |
| protein_co family_witl  | 132    | 67     | 58     | 47    | 78    | 57    | 1.687427 | 1.098336 | 0.894596 | 0.932566 |
| protein_co tyrosine_3-  | 10063  | 8004   | 8298   | 11890 | 13277 | 12478 | 213.4121 | 217.6748 | 212.3309 | 391.3848 |
| pseudogen_ -            | 4      | 5      | 7      | 5     | 2     | 10    | 0.459706 | 0.736885 | 0.970658 | 0.891909 |
| protein_co monocyte_    | 404    | 265    | 269    | 394   | 567   | 303   | 6.92635  | 5.826105 | 5.564465 | 10.48455 |
| protein_co RAN_guanil   | 4      | 3      | 0      | 5     | 3     | 2     | 0.164526 | 0.158236 | 0        | 0.31921  |
| protein_co DPH1_hom     | 302    | 239    | 250    | 277   | 410   | 332   | 5.431832 | 5.512475 | 5.425346 | 7.733028 |
| protein_co mitogen-ac   | 123    | 129    | 125    | 390   | 394   | 357   | 1.874991 | 2.521698 | 2.29907  | 9.227608 |
| protein_co dehydroger   | 191    | 157    | 155    | 227   | 230   | 208   | 4.117698 | 4.340404 | 4.031818 | 7.595869 |
| protein_co WD_repeat    | 2685   | 2396   | 2366   | 1317  | 1493  | 1336  | 30.06919 | 34.40912 | 31.96982 | 22.89252 |
| protein_co myosin_he    | 0      | 0      | 0      | 0     | 1     | 0     | 0        | 0        | 0        | 0        |
| protein_co solute_carr  | 1283   | 1030   | 1033   | 2050  | 2381  | 2016  | 30.55353 | 31.45439 | 29.68131 | 75.77379 |
| protein_co myosin_he    | 35     | 28     | 20     | 34    | 67    | 30    | 0.271849 | 0.278886 | 0.187429 | 0.409891 |
| protein_co N-acetyltra  | 643    | 493    | 524    | 667   | 836   | 542   | 15.12809 | 14.87405 | 14.87484 | 24.35731 |
| protein_co transmemt    | 1464   | 1133   | 1269   | 325   | 455   | 549   | 14.46723 | 14.35765 | 15.13052 | 4.984918 |
| protein_co SEBOX_hor    | 9      | 7      | 10     | 11    | 17    | 3     | 0.196375 | 0.195863 | 0.263264 | 0.372535 |
| protein_co tumor_nec    | 1742   | 1412   | 1424   | 390   | 478   | 296   | 22.52065 | 23.40868 | 22.21216 | 7.825785 |
| protein_co intraflagell | 388    | 255    | 264    | 125   | 118   | 145   | 12.2514  | 10.32532 | 10.05787 | 6.126246 |
| protein_co transmemt    | 1180   | 922    | 1042   | 1079  | 1211  | 2074  | 21.57965 | 21.62234 | 22.99207 | 30.62769 |
| protein_co cerebellar_  | 1879   | 1412   | 1554   | 1021  | 1399  | 910   | 24.91695 | 24.01111 | 24.86378 | 21.01476 |
| protein_co peripheral_  | 990    | 742    | 877    | 26    | 41    | 53    | 25.54822 | 24.55493 | 27.30694 | 1.041428 |

|                         |      |      |      |      |      |      |          |          |          |          |
|-------------------------|------|------|------|------|------|------|----------|----------|----------|----------|
| protein_co forkhead_b   | 2    | 0    | 0    | 0    | 0    | 0    | 0.027293 | 0        | 0        | 0        |
| protein_co unc-119_h    | 670  | 494  | 546  | 832  | 965  | 625  | 7.499716 | 7.090981 | 7.374129 | 14.45519 |
| protein_co aldolase_C   | 498  | 407  | 366  | 1040 | 896  | 534  | 11.78165 | 12.34754 | 10.44734 | 38.1892  |
| protein_co suppressor   | 3709 | 3008 | 3191 | 2191 | 2448 | 3334 | 26.68228 | 27.74938 | 27.69752 | 24.46464 |
| protein_co RAB34_me     | 3159 | 2555 | 2606 | 2212 | 2597 | 2952 | 85.32579 | 88.49748 | 84.92844 | 92.73555 |
| protein_co PHD_finger   | 987  | 833  | 906  | 803  | 958  | 1073 | 6.026885 | 6.52274  | 6.675011 | 7.61065  |
| protein_co transmemt    | 1215 | 983  | 1016 | 1136 | 1560 | 1435 | 7.614457 | 7.899972 | 7.682533 | 11.05023 |
| protein_co gamma-am     | 0    | 0    | 0    | 0    | 3    | 3    | 0        | 0        | 0        | 0        |
| protein_co gonadotro    | 2    | 5    | 1    | 0    | 0    | 1    | 0.043336 | 0.138932 | 0.026144 | 0        |
| protein_co SLAIN_mot    | 1501 | 1193 | 1257 | 438  | 550  | 323  | 11.17351 | 11.38829 | 11.28995 | 5.060732 |
| protein_co OCIA_dom     | 1215 | 853  | 955  | 1082 | 1277 | 1339 | 29.73454 | 26.76968 | 28.19917 | 41.10008 |
| protein_co cell_wall_b  | 1    | 0    | 0    | 0    | 0    | 1    | 0.018968 | 0        | 0        | 0        |
| protein_co DCN1_defe    | 522  | 420  | 471  | 333  | 341  | 378  | 5.057146 | 5.217875 | 5.505592 | 5.007371 |
| protein_co ubiquitin_s  | 1279 | 979  | 1061 | 882  | 1114 | 1035 | 12.62044 | 12.38785 | 12.63186 | 13.50837 |
| protein_co odontogen    | 1    | 0    | 1    | 0    | 0    | 3    | 0.03555  | 0        | 0.042893 | 0        |
| protein_co cysteine-ric | 257  | 161  | 183  | 96   | 115  | 138  | 10.09274 | 8.107954 | 8.67112  | 5.851642 |
| protein_co neuromedi    | 2    | 2    | 3    | 792  | 679  | 492  | 0.114927 | 0.147377 | 0.207998 | 70.63922 |
| protein_co KIAA1211     | 2020 | 1441 | 1551 | 827  | 1068 | 669  | 20.46626 | 18.72235 | 18.96037 | 13.00538 |
| protein_co late_endos   | 351  | 301  | 315  | 261  | 233  | 321  | 3.894557 | 4.28279  | 4.217057 | 4.494919 |
| protein_co nuclear_fac  | 920  | 728  | 815  | 155  | 214  | 137  | 10.5603  | 10.71591 | 11.2874  | 2.761535 |
| protein_co amphiregul   | 5    | 5    | 5    | 0    | 0    | 0    | 0.189073 | 0.242459 | 0.228127 | 0        |
| protein_co mannosida    | 964  | 821  | 841  | 764  | 811  | 523  | 6.08453  | 6.645115 | 6.40463  | 7.484691 |
| protein_co ubiquitin-c  | 5026 | 3888 | 4039 | 4411 | 5287 | 4884 | 48.90418 | 48.5131  | 47.41823 | 66.61791 |
| protein_co mitogen-ac   | 9    | 9    | 4    | 31   | 27   | 32   | 0.102754 | 0.131767 | 0.055102 | 0.549348 |
| protein_co E74-like_fa  | 540  | 433  | 451  | 457  | 530  | 444  | 6.311219 | 6.489582 | 6.359809 | 8.290222 |
| protein_co NADH_deh     | 499  | 456  | 438  | 572  | 642  | 553  | 18.61426 | 21.8132  | 19.71366 | 33.11857 |
| protein_co uncoupling   | 0    | 0    | 0    | 4    | 3    | 3    | 0        | 0        | 0        | 0.199124 |
| protein_co TBC1_dom     | 1332 | 973  | 1145 | 13   | 22   | 38   | 11.77111 | 11.02644 | 12.20862 | 0.178315 |
| protein_co zinc_finger  | 393  | 378  | 329  | 640  | 821  | 514  | 9.703937 | 11.96896 | 9.801654 | 24.52821 |
| protein_co inositol_pc  | 1242 | 989  | 953  | 11   | 10   | 13   | 6.594655 | 6.734047 | 6.105363 | 0.090655 |
| protein_co GRB2-assoc   | 224  | 196  | 224  | 267  | 308  | 201  | 1.316046 | 1.476687 | 1.587885 | 2.434809 |
| protein_co kelch-like_f | 415  | 358  | 352  | 153  | 161  | 149  | 6.209112 | 6.868688 | 6.354364 | 3.553066 |
| protein_co carboxypep   | 2332 | 1681 | 1748 | 267  | 345  | 351  | 45.16626 | 41.75059 | 40.8484  | 8.026521 |
| protein_co ribosomal_   | 4994 | 4166 | 4023 | 5345 | 5847 | 5032 | 89.13923 | 95.3562  | 86.63999 | 148.0807 |
| protein_co Wolfram_s    | 1481 | 1138 | 1241 | 1011 | 1251 | 781  | 18.99976 | 18.72167 | 19.20936 | 20.13143 |
| protein_co annexin_A1   | 2    | 1    | 5    | 0    | 0    | 0    | 0.066182 | 0.042435 | 0.199631 | 0        |
| protein_co GrpE-like_1  | 544  | 470  | 486  | 459  | 536  | 644  | 9.192133 | 10.18415 | 9.908359 | 12.03817 |
| protein_co GAR1_ribo    | 781  | 656  | 682  | 523  | 652  | 937  | 29.9192  | 32.22643 | 31.52328 | 31.09791 |
| protein_co FSHD_regic   | 542  | 368  | 380  | 427  | 402  | 443  | 23.6633  | 20.60313 | 20.0174  | 28.93573 |
| protein_co chloride_cl  | 1239 | 1089 | 1038 | 878  | 902  | 687  | 8.68152  | 9.785019 | 8.775459 | 9.548814 |
| protein_co aminoadip    | 908  | 728  | 726  | 163  | 169  | 242  | 18.83067 | 19.36068 | 18.16622 | 5.246841 |
| protein_co UDP-N-acet   | 965  | 751  | 854  | 1174 | 1262 | 1588 | 10.50589 | 10.48467 | 11.2179  | 19.83828 |
| protein_co DEAH_(Asp    | 2845 | 2444 | 2454 | 3332 | 3708 | 4462 | 44.05618 | 48.53277 | 45.85082 | 80.08662 |
| protein_co superoxide   | 41   | 36   | 22   | 100  | 131  | 74   | 1.259824 | 1.418527 | 0.815636 | 4.769319 |
| protein_co Sep_(O-phc   | 106  | 97   | 92   | 103  | 115  | 79   | 0.904356 | 1.061243 | 0.947043 | 1.363959 |
| protein_co carboxypep   | 7    | 8    | 6    | 41   | 39   | 21   | 0.088281 | 0.129381 | 0.0913   | 0.802574 |
| protein_co tripartite_r | 879  | 689  | 706  | 986  | 950  | 1374 | 6.119722 | 6.151363 | 5.930558 | 10.65492 |
| protein_co solute_carr  | 4    | 4    | 3    | 4    | 1    | 1    | 0.086235 | 0.110584 | 0.078035 | 0.133848 |
| protein_co F-box_and    | 503  | 367  | 386  | 357  | 479  | 294  | 4.738935 | 4.433923 | 4.387813 | 5.220492 |
| protein_co nei_endon    | 122  | 115  | 90   | 112  | 143  | 91   | 2.375657 | 2.871647 | 2.114533 | 3.385107 |
| protein_co TBC1_dom     | 153  | 141  | 151  | 26   | 30   | 22   | 3.170204 | 3.746488 | 3.775034 | 0.83618  |
| protein_co cytokine-d   | 0    | 0    | 0    | 1    | 0    | 0    | 0        | 0        | 0        | 0.012999 |
| protein_co Wolf-Hirsch  | 4604 | 3690 | 4084 | 3257 | 4124 | 3176 | 25.19627 | 25.89624 | 26.96713 | 27.66618 |
| protein_co SH3_domai    | 1350 | 1142 | 1207 | 1035 | 1315 | 1085 | 11.97985 | 12.9955  | 12.92328 | 14.2557  |
| protein_co stromal_in   | 842  | 645  | 735  | 247  | 295  | 235  | 7.624835 | 7.490096 | 8.030706 | 3.471729 |
| protein_co NK3_home     | 13   | 8    | 3    | 0    | 3    | 2    | 0.217626 | 0.171738 | 0.060595 | 0        |
| protein_co major_facil  | 1249 | 897  | 1053 | 1696 | 1990 | 1782 | 26.95151 | 24.82118 | 27.41556 | 56.80375 |
| protein_co glycine_rec  | 84   | 69   | 70   | 9    | 4    | 5    | 1.26     | 1.327241 | 1.266886 | 0.209539 |
| protein_co bone_marr    | 58   | 52   | 65   | 12   | 17   | 17   | 1.364587 | 1.568866 | 1.845162 | 0.438213 |
| protein_co Rap_guanir   | 1186 | 982  | 1008 | 805  | 856  | 598  | 8.002815 | 8.49726  | 8.206664 | 8.431104 |
| protein_co HGF_activa   | 1    | 5    | 4    | 4    | 3    | 4    | 0.02183  | 0.139967 | 0.105355 | 0.13553  |
| protein_co sorting_ne   | 564  | 460  | 502  | 385  | 446  | 198  | 7.958462 | 8.323715 | 8.546766 | 8.432207 |
| protein_co LRP2_bindi   | 56   | 47   | 54   | 33   | 37   | 15   | 0.50849  | 0.54727  | 0.591611 | 0.465092 |
| protein_co UFM1-spec    | 306  | 239  | 254  | 297  | 266  | 225  | 6.11088  | 6.120537 | 6.120178 | 9.205963 |
| protein_co Kruppel-lik  | 708  | 534  | 618  | 273  | 321  | 196  | 6.481478 | 6.268901 | 6.826174 | 3.879126 |

|                         |       |       |       |       |       |       |          |          |          |          |
|-------------------------|-------|-------|-------|-------|-------|-------|----------|----------|----------|----------|
| protein_co kelch-like_f | 414   | 354   | 360   | 296   | 370   | 260   | 5.667874 | 6.214875 | 5.946622 | 6.289875 |
| protein_co family_witl  | 58    | 40    | 49    | 169   | 259   | 160   | 0.907448 | 0.802533 | 0.924992 | 4.104033 |
| protein_co non-SMC_c    | 944   | 728   | 824   | 855   | 865   | 929   | 9.496712 | 9.391652 | 10.00176 | 13.35051 |
| protein_co UDP-glucos   | 2266  | 1839  | 1933  | 1204  | 1468  | 1435  | 33.0388  | 34.38392 | 34.00512 | 27.24716 |
| protein_co peroxisome   | 15    | 21    | 6     | 54    | 54    | 32    | 0.111325 | 0.199862 | 0.053728 | 0.62205  |
| protein_co DEAD_(Asp    | 0     | 0     | 0     | 169   | 189   | 82    | 0        | 0        | 0        | 5.404124 |
| protein_co crystallin_e | 2     | 2     | 3     | 8     | 10    | 3     | 0.083807 | 0.107471 | 0.151677 | 0.52032  |
| protein_co developing   | 0     | 0     | 0     | 0     | 1     | 2     | 0        | 0        | 0        | 0        |
| protein_co HIV-1_Tat_i  | 77    | 74    | 83    | 395   | 549   | 453   | 2.065521 | 2.545541 | 2.686366 | 16.44624 |
| protein_co cathepsin_i  | 2155  | 1711  | 1905  | 3082  | 3797  | 3976  | 16.49763 | 16.79707 | 17.59614 | 36.62161 |
| protein_co coiled-coil  | 410   | 277   | 319   | 396   | 513   | 441   | 9.115651 | 7.89756  | 8.557414 | 13.66562 |
| protein_co zinc_finger  | 0     | 0     | 0     | 2     | 11    | 4     | 0        | 0        | 0        | 0.03288  |
| protein_co elongator_i  | 139   | 123   | 135   | 189   | 206   | 137   | 3.323668 | 3.771527 | 3.894795 | 7.014473 |
| protein_co zinc_finger  | 927   | 700   | 701   | 761   | 767   | 950   | 16.43367 | 15.91337 | 14.99411 | 20.93967 |
| protein_co mitochond    | 1281  | 954   | 1063  | 1052  | 1156  | 1199  | 23.21844 | 22.17388 | 23.24691 | 29.59581 |
| protein_co formin_bin   | 1312  | 1133  | 1260  | 875   | 1005  | 942   | 15.50005 | 17.16479 | 17.96048 | 16.04493 |
| protein_co tectorin_al  | 27    | 20    | 19    | 23    | 26    | 32    | 0.170486 | 0.161944 | 0.144753 | 0.225415 |
| protein_co sterol-C5-d  | 1130  | 917   | 1004  | 956   | 823   | 1403  | 21.57399 | 22.45074 | 23.12777 | 28.3296  |
| protein_co cytotoxic_i  | 0     | 0     | 4     | 0     | 0     | 1     | 0        | 0        | 0.091657 | 0        |
| protein_co chromosom    | 90    | 58    | 56    | 32    | 39    | 22    | 1.450207 | 1.198463 | 1.088738 | 0.800328 |
| protein_co beta-13-glu  | 1     | 0     | 2     | 749   | 834   | 657   | 0.007612 | 0        | 0.018369 | 8.849362 |
| protein_co heat_shock   | 20763 | 16423 | 17200 | 17070 | 17297 | 21275 | 395.2811 | 400.9385 | 395.0868 | 504.4057 |
| protein_co purinergic_c | 0     | 1     | 0     | 1     | 2     | 1     | 0        | 0.03284  | 0        | 0.039749 |
| protein_co von_Willeb   | 293   | 268   | 235   | 415   | 461   | 285   | 3.130988 | 3.672467 | 3.02991  | 6.883231 |
| protein_co DnaJ_(Hsp4   | 271   | 196   | 201   | 268   | 252   | 139   | 9.482981 | 8.795105 | 8.486326 | 14.55596 |
| protein_co sialic_acid  | 193   | 134   | 161   | 42    | 47    | 57    | 1.620952 | 1.443201 | 1.631499 | 0.547511 |
| protein_co sorting_ne   | 424   | 318   | 347   | 216   | 285   | 207   | 4.21841  | 4.057135 | 4.165436 | 3.335548 |
| protein_co leupaxin     | 93    | 88    | 84    | 29    | 28    | 19    | 2.077547 | 2.520925 | 2.264098 | 1.005533 |
| protein_co dextex_hon   | 46    | 53    | 67    | 654   | 721   | 445   | 0.382301 | 0.564849 | 0.671847 | 8.436368 |
| protein_co autophagy    | 1010  | 750   | 733   | 778   | 1180  | 771   | 7.427685 | 7.072984 | 6.504054 | 8.880597 |
| protein_co EH-domain    | 2423  | 1626  | 1741  | 932   | 1296  | 1083  | 24.96474 | 21.48342 | 21.64315 | 14.90459 |
| protein_co oxysterol_k  | 2459  | 1994  | 2083  | 1434  | 1722  | 1354  | 22.68396 | 23.5882  | 23.18449 | 20.53241 |
| protein_co unc-93_hoi   | 188   | 157   | 200   | 494   | 646   | 425   | 3.807915 | 4.077917 | 4.887733 | 15.53055 |
| protein_co pseudouric   | 127   | 117   | 133   | 276   | 243   | 230   | 3.231162 | 3.817247 | 4.082768 | 10.8992  |
| protein_co decapping    | 311   | 244   | 255   | 289   | 311   | 279   | 5.911145 | 5.947171 | 5.847894 | 8.525887 |
| protein_co suppressor   | 865   | 751   | 747   | 834   | 976   | 947   | 6.948752 | 7.736419 | 7.240346 | 10.3989  |
| protein_co FAD-depen    | 491   | 397   | 387   | 814   | 1056  | 909   | 7.560919 | 7.839583 | 7.190384 | 19.45575 |
| protein_co protein_ph   | 1729  | 1330  | 1390  | 1525  | 1879  | 2040  | 15.83763 | 15.62271 | 15.36237 | 21.68181 |
| protein_co neurexin_2   | 44    | 50    | 42    | 174   | 200   | 48    | 0.311609 | 0.454084 | 0.358884 | 1.912654 |
| protein_co membrane     | 3     | 3     | 7     | 0     | 2     | 1     | 0.058224 | 0.074664 | 0.163919 | 0        |
| protein_co membrane     | 1     | 0     | 0     | 0     | 0     | 0     | 0.027977 | 0        | 0        | 0        |
| protein_co ST3_beta-g   | 1397  | 1147  | 1239  | 214   | 306   | 175   | 33.30216 | 35.06298 | 35.63653 | 7.918087 |
| protein_co carnitine_f  | 1600  | 1287  | 1249  | 1722  | 2397  | 1756  | 14.33945 | 14.7911  | 13.50589 | 23.9539  |
| protein_co cyclin_D1    | 13203 | 10315 | 11081 | 4255  | 5982  | 6996  | 143.7402 | 144.0072 | 145.5568 | 71.9011  |
| protein_co coiled-coil  | 439   | 335   | 359   | 482   | 843   | 885   | 10.87412 | 10.64104 | 10.72932 | 18.53136 |
| protein_co PRP19/PSC    | 2381  | 1744  | 1905  | 2209  | 2615  | 3378  | 51.75945 | 48.61677 | 49.96585 | 74.53434 |
| protein_co transmembr   | 2067  | 1492  | 1592  | 836   | 899   | 1022  | 40.16646 | 37.1793  | 37.32623 | 25.21505 |
| protein_co cholecystol  | 1     | 0     | 1     | 76    | 108   | 200   | 0.021932 | 0        | 0.026462 | 2.587121 |
| protein_co hemopexin    | 10    | 8     | 9     | 9     | 7     | 9     | 0.283838 | 0.291185 | 0.30822  | 0.3965   |
| protein_co tripartite_r | 656   | 549   | 587   | 217   | 267   | 147   | 6.960817 | 7.470301 | 7.515235 | 3.573935 |
| protein_co cysteine_ar  | 622   | 493   | 558   | 636   | 656   | 820   | 5.440327 | 5.529563 | 5.888665 | 8.634201 |
| protein_co folate_rece  | 0     | 0     | 0     | 3     | 1     | 5     | 0        | 0        | 0        | 0.164042 |
| protein_co anaphase_f   | 27    | 25    | 30    | 51    | 63    | 55    | 0.854848 | 1.01502  | 1.146026 | 2.506259 |
| protein_co folate_rece  | 5     | 1     | 0     | 0     | 0     | 0     | 0.236818 | 0.060737 | 0        | 0        |
| protein_co pannexin_1   | 667   | 534   | 598   | 468   | 592   | 721   | 11.29492 | 11.596   | 12.21818 | 12.30081 |
| protein_co Rho_guanin   | 2563  | 1919  | 2131  | 413   | 474   | 231   | 15.30359 | 14.69363 | 15.3524  | 3.827589 |
| protein_co apolipopro   | 0     | 1     | 0     | 5     | 7     | 2     | 0        | 0.031171 | 0        | 0.188646 |
| protein_co apolipopro   | 0     | 0     | 0     | 0     | 0     | 1     | 0        | 0        | 0        | 0        |
| protein_co centrosom    | 1022  | 843   | 929   | 296   | 410   | 350   | 8.422073 | 8.908509 | 9.23702  | 3.786085 |
| protein_co ring_finger  | 285   | 264   | 217   | 343   | 410   | 429   | 2.29695  | 2.728475 | 2.110155 | 4.290731 |
| protein_co KIAA1377     | 122   | 90    | 111   | 49    | 39    | 35    | 0.812698 | 0.768814 | 0.892155 | 0.506636 |
| protein_co eukaryotic   | 21777 | 17665 | 18919 | 9537  | 11239 | 16499 | 150.853  | 156.9202 | 158.1256 | 102.5411 |
| protein_co interleukin  | 7     | 10    | 6     | 1     | 3     | 1     | 0.063672 | 0.116644 | 0.065849 | 0.014118 |
| protein_co UDP-N-acet   | 3     | 6     | 5     | 109   | 105   | 57    | 0.056178 | 0.144081 | 0.11297  | 3.16813  |
| protein_co baculoviral  | 924   | 764   | 841   | 350   | 390   | 378   | 10.63746 | 11.27895 | 11.68181 | 6.254095 |

|                         |      |      |      |       |       |       |          |          |          |          |
|-------------------------|------|------|------|-------|-------|-------|----------|----------|----------|----------|
| protein_co ubiquitinat  | 1008 | 838  | 962  | 436   | 452   | 559   | 7.744574 | 8.256393 | 8.91785  | 5.199409 |
| processed_matrix_me     | 4    | 1    | 1    | 4     | 3     | 0     | 0.100139 | 0.032103 | 0.030206 | 0.155429 |
| protein_co DEAD_(Asp    | 2765 | 2249 | 2281 | 2012  | 2469  | 2124  | 28.57005 | 29.79989 | 28.43736 | 32.26817 |
| protein_co uroplakin_   | 2    | 3    | 9    | 5     | 3     | 6     | 0.097891 | 0.188298 | 0.531503 | 0.379853 |
| protein_co Cbl_prot     | 2011 | 1652 | 1770 | 1755  | 2091  | 1450  | 8.224669 | 8.664145 | 8.734291 | 11.14074 |
| protein_co poliovirus_  | 737  | 552  | 634  | 2102  | 2867  | 2635  | 5.917456 | 5.683501 | 6.14193  | 26.19574 |
| protein_co homeodor     | 1036 | 784  | 841  | 293   | 321   | 288   | 6.557513 | 6.363629 | 6.422786 | 2.878575 |
| protein_co KIAA1549-I   | 2539 | 2067 | 2217 | 90    | 93    | 67    | 10.1947  | 10.64294 | 10.74053 | 0.560899 |
| protein_co F-box_prot   | 374  | 319  | 292  | 271   | 272   | 297   | 2.366649 | 2.588584 | 2.229426 | 2.661717 |
| protein_co pyruvate_d   | 451  | 366  | 385  | 456   | 458   | 548   | 8.448821 | 8.792451 | 8.702185 | 13.25912 |
| protein_co solute_carr  | 4    | 2    | 4    | 6     | 9     | 15    | 0.016036 | 0.010282 | 0.019349 | 0.037336 |
| protein_co COMM_doi     | 458  | 318  | 373  | 161   | 188   | 313   | 12.30695 | 10.95775 | 12.09322 | 6.714927 |
| protein_co solute_carr  | 3    | 2    | 3    | 257   | 268   | 150   | 0.030721 | 0.026263 | 0.037066 | 4.084824 |
| protein_co CD5_molec    | 3    | 2    | 3    | 10    | 13    | 5     | 0.043673 | 0.037336 | 0.052694 | 0.225954 |
| protein_co 1-aminocyc   | 69   | 41   | 71   | 51    | 65    | 60    | 0.959209 | 0.730899 | 1.190887 | 1.100436 |
| protein_co midkine_(n   | 6696 | 4889 | 5009 | 8376  | 10234 | 8571  | 234.4851 | 219.5479 | 211.6406 | 455.2678 |
| protein_co autophagy    | 940  | 710  | 803  | 826   | 1027  | 921   | 8.23708  | 7.978351 | 8.490026 | 11.23456 |
| protein_co MAP-kinase   | 1207 | 934  | 986  | 836   | 1061  | 635   | 9.424854 | 9.352411 | 9.2895   | 10.13221 |
| protein_co protein_ty   | 12   | 13   | 11   | 5     | 10    | 5     | 0.247659 | 0.344053 | 0.273913 | 0.160167 |
| protein_co N(alpha)-ac  | 759  | 534  | 608  | 479   | 488   | 887   | 7.560978 | 6.821608 | 7.30782  | 7.406315 |
| protein_co cysteinyl-tf | 897  | 691  | 689  | 879   | 1239  | 1016  | 7.337813 | 7.248725 | 6.80051  | 11.16075 |
| protein_co solute_carr  | 221  | 191  | 221  | 148   | 147   | 60    | 3.932711 | 4.358554 | 4.745042 | 4.087822 |
| protein_co CD81_mole    | 4844 | 3861 | 3912 | 2543  | 2791  | 2687  | 43.38782 | 44.34788 | 42.27763 | 35.35416 |
| protein_co solute_carr  | 926  | 844  | 865  | 464   | 549   | 611   | 13.03517 | 15.23553 | 14.69163 | 10.13804 |
| protein_co chromosom    | 3    | 0    | 2    | 0     | 0     | 0     | 0.047588 | 0        | 0.038278 | 0        |
| protein_co ELMO/CED-    | 19   | 14   | 8    | 10    | 4     | 15    | 0.312381 | 0.295167 | 0.158697 | 0.255189 |
| protein_co calcitonin-  | 0    | 0    | 0    | 10    | 3     | 2     | 0        | 0        | 0        | 0.396188 |
| protein_co SRY_(sex_d   | 335  | 247  | 331  | 3     | 12    | 20    | 1.760017 | 1.664096 | 2.098206 | 0.024464 |
| protein_co chromosom    | 2867 | 2219 | 2397 | 1913  | 1917  | 2698  | 31.57202 | 31.33584 | 31.84863 | 32.69792 |
| protein_co phosphatic   | 2792 | 2051 | 2326 | 1158  | 1659  | 1130  | 30.98626 | 29.18964 | 31.14666 | 19.94769 |
| protein_co ribosomal_   | 4293 | 3539 | 3580 | 5253  | 5440  | 5285  | 259.0719 | 273.873  | 260.6696 | 492.0364 |
| protein_co aryl_hydro   | 1236 | 974  | 935  | 393   | 597   | 263   | 47.46606 | 47.96595 | 43.32358 | 23.42544 |
| protein_co nucleopori   | 2101 | 1695 | 1887 | 1888  | 2091  | 2084  | 14.1282  | 14.61638 | 15.31019 | 19.70576 |
| protein_co NADH_deh     | 1399 | 1064 | 1217 | 1423  | 1575  | 1395  | 21.35388 | 20.82621 | 22.41289 | 33.71278 |
| protein_co T-cell_imm   | 1381 | 1056 | 1206 | 350   | 461   | 276   | 24.18943 | 23.71949 | 25.48751 | 9.515476 |
| protein_co choline_kir  | 260  | 209  | 197  | 426   | 699   | 592   | 4.818737 | 4.967244 | 4.405286 | 12.25462 |
| protein_co exophilin_   | 11   | 8    | 13   | 176   | 220   | 114   | 0.050632 | 0.047221 | 0.072198 | 1.257411 |
| protein_co Hermansky    | 599  | 500  | 538  | 322   | 384   | 397   | 5.954446 | 6.373733 | 6.45275  | 4.96822  |
| protein_co general_tra  | 613  | 507  | 515  | 221   | 318   | 346   | 9.639028 | 10.22328 | 9.770753 | 5.393808 |
| protein_co protein_ty   | 1    | 3    | 3    | 282   | 373   | 142   | 0.012113 | 0.0466   | 0.043846 | 5.301964 |
| protein_co von_Willek   | 6    | 5    | 6    | 33    | 52    | 40    | 0.031833 | 0.034018 | 0.038408 | 0.271751 |
| protein_co proteasom    | 70   | 63   | 62   | 20    | 18    | 32    | 1.075812 | 1.241618 | 1.149683 | 0.477088 |
| protein_co leprecan-lil | 4736 | 3472 | 3670 | 442   | 614   | 409   | 68.83792 | 64.71502 | 64.36209 | 9.97169  |
| protein_co PTPRF_inte   | 1924 | 1625 | 1669 | 192   | 225   | 165   | 15.03356 | 16.28244 | 15.7348  | 2.328566 |
| protein_co PRP40_pre    | 384  | 301  | 335  | 314   | 422   | 203   | 4.998825 | 5.024728 | 5.261742 | 6.344491 |
| protein_co CD69_mole    | 0    | 0    | 0    | 1     | 0     | 2     | 0        | 0        | 0        | 0.043425 |
| protein_co PR_domair    | 917  | 779  | 787  | 365   | 412   | 405   | 10.21334 | 11.12615 | 10.57599 | 6.309888 |
| protein_co C-type_lect  | 1    | 0    | 0    | 0     | 0     | 2     | 0.027582 | 0        | 0        | 0        |
| protein_co coenzyme_    | 255  | 274  | 254  | 557   | 603   | 478   | 7.789547 | 10.73327 | 9.36168  | 26.40935 |
| protein_co selectin_P_  | 24   | 22   | 17   | 4     | 3     | 1     | 0.445158 | 0.523281 | 0.380452 | 0.115158 |
| protein_co coronin_ac   | 5309 | 4352 | 4587 | 2062  | 2327  | 2051  | 63.96174 | 67.23661 | 66.67827 | 38.55908 |
| protein_co acid-sensin  | 328  | 332  | 314  | 93    | 160   | 78    | 3.776995 | 4.902528 | 4.362649 | 1.662211 |
| protein_co D-amino-ac   | 0    | 0    | 0    | 1     | 0     | 0     | 0        | 0        | 0        | 0.030516 |
| protein_co caprin_fam   | 838  | 714  | 852  | 729   | 784   | 686   | 6.005477 | 6.561619 | 7.367008 | 8.108891 |
| protein_co tetraspanir  | 185  | 176  | 150  | 149   | 225   | 120   | 1.575777 | 1.922406 | 1.541567 | 1.96988  |
| protein_co potassium_   | 2589 | 2030 | 2126 | 1003  | 1216  | 1246  | 22.67008 | 22.7943  | 22.46116 | 13.63177 |
| protein_co solute_carr  | 694  | 555  | 595  | 724   | 888   | 832   | 7.830046 | 8.029845 | 8.099717 | 12.67868 |
| protein_co malectin     | 6132 | 4918 | 5285 | 6800  | 8437  | 9073  | 43.39414 | 44.62999 | 45.1255  | 74.69101 |
| protein_co mevalonat    | 1560 | 1115 | 1225 | 336   | 347   | 773   | 17.802   | 16.31655 | 16.86663 | 5.95133  |
| protein_co cysteine-sei | 1457 | 1083 | 1283 | 563   | 677   | 597   | 15.28726 | 14.57162 | 16.2422  | 9.168724 |
| protein_co calcium/ca   | 1092 | 842  | 848  | 1066  | 1579  | 998   | 9.14682  | 9.044174 | 8.570209 | 13.8591  |
| protein_co bridging_in  | 6    | 5    | 3    | 0     | 3     | 1     | 0.101165 | 0.108108 | 0.061031 | 0        |
| protein_co interleukin  | 16   | 9    | 9    | 27    | 35    | 47    | 0.720692 | 0.519854 | 0.489125 | 1.887661 |
| protein_co ATP_syntha   | 9139 | 7605 | 7724 | 13358 | 13880 | 13143 | 239.5349 | 255.6105 | 244.2645 | 543.4279 |
| protein_co prostaglan   | 3579 | 2986 | 3094 | 5639  | 7073  | 6597  | 57.31536 | 61.32089 | 59.783   | 140.1657 |

|                         |      |      |      |      |      |      |          |          |          |          |
|-------------------------|------|------|------|------|------|------|----------|----------|----------|----------|
| protein_co synaptotag   | 0    | 0    | 0    | 10   | 11   | 34   | 0        | 0        | 0        | 0.163147 |
| protein_co B-cell_CLL/  | 289  | 208  | 287  | 541  | 653  | 380  | 2.16993  | 2.002722 | 2.600027 | 6.304863 |
| protein_co arginine/se  | 1228 | 1028 | 1088 | 1285 | 1153 | 1325 | 18.24491 | 19.586   | 19.50385 | 29.63309 |
| protein_co cytochrom    | 4    | 3    | 10   | 15   | 12   | 13   | 0.073843 | 0.071019 | 0.222738 | 0.429802 |
| protein_co myogenic_1   | 0    | 0    | 0    | 2    | 1    | 3    | 0        | 0        | 0        | 0.099358 |
| protein_co myogenic_1   | 0    | 0    | 0    | 0    | 0    | 2    | 0        | 0        | 0        | 0        |
| protein_co lin-7_homo   | 165  | 165  | 162  | 140  | 144  | 120  | 1.265846 | 1.623268 | 1.499547 | 1.667077 |
| protein_co keratin_18   | 880  | 731  | 754  | 4148 | 4656 | 3467 | 19.76208 | 21.05119 | 20.43004 | 144.5836 |
| protein_co acyl-CoA_s   | 74   | 71   | 60   | 402  | 406  | 242  | 0.722436 | 0.888864 | 0.706752 | 6.091501 |
| protein_co tensin_like  | 1952 | 1491 | 1582 | 76   | 100  | 122  | 18.26932 | 17.89492 | 17.86476 | 1.104045 |
| protein_co GLI_family   | 249  | 160  | 159  | 242  | 296  | 366  | 3.231557 | 2.66282  | 2.489761 | 4.874816 |
| protein_co protein_ph   | 276  | 226  | 193  | 1072 | 1312 | 743  | 2.037092 | 2.139042 | 1.718727 | 12.2808  |
| protein_co methionyl_   | 1753 | 1408 | 1447 | 2117 | 2076 | 2580 | 22.82649 | 23.5109  | 22.73389 | 42.78668 |
| protein_co leukotriene  | 635  | 604  | 579  | 1751 | 1839 | 1461 | 4.873983 | 5.945064 | 5.362124 | 20.8606  |
| protein_co ELK3_ETS-d   | 3607 | 2860 | 3077 | 372  | 472  | 340  | 40.22171 | 40.89684 | 41.39901 | 6.438546 |
| protein_co solute_carr  | 0    | 0    | 0    | 19   | 15   | 7    | 0        | 0        | 0        | 0.387235 |
| protein_co wingless-ty  | 819  | 590  | 654  | 247  | 244  | 189  | 16.67517 | 15.40451 | 16.06617 | 7.805736 |
| protein_co mago-nashi   | 436  | 346  | 361  | 177  | 252  | 387  | 7.65408  | 7.789184 | 7.646483 | 4.822922 |
| protein_co transient_r  | 309  | 230  | 267  | 133  | 165  | 37   | 4.462278 | 4.259271 | 4.65219  | 2.981125 |
| protein_co integrin_al  | 412  | 310  | 334  | 221  | 199  | 469  | 8.182417 | 7.89506  | 8.003481 | 6.81251  |
| protein_co forkhead_b   | 1692 | 1357 | 1460 | 1357 | 1636 | 1828 | 22.83105 | 23.4809  | 23.76985 | 28.42077 |
| protein_co proline_ric  | 98   | 56   | 77   | 36   | 39   | 49   | 2.955126 | 2.165446 | 2.801488 | 1.684934 |
| protein_co protein_ar   | 0    | 0    | 0    | 41   | 48   | 43   | 0        | 0        | 0        | 0.505844 |
| protein_co poly_(ADP-   | 246  | 180  | 179  | 181  | 193  | 148  | 2.607356 | 2.446511 | 2.289108 | 2.977655 |
| protein_co actin_relat  | 1589 | 1359 | 1365 | 798  | 818  | 893  | 67.85814 | 74.42294 | 70.33294 | 52.89461 |
| protein_co GPN-loop_1   | 359  | 254  | 315  | 488  | 578  | 446  | 10.49471 | 9.521801 | 11.11053 | 22.14248 |
| protein_co vacuolar_p   | 822  | 680  | 696  | 398  | 519  | 606  | 25.30768 | 26.84718 | 25.8546  | 19.01928 |
| protein_co fibroblast_1 | 0    | 0    | 0    | 0    | 0    | 1    | 0        | 0        | 0        | 0        |
| protein_co RAD51_ass    | 247  | 213  | 234  | 597  | 541  | 718  | 5.182029 | 5.730491 | 5.923341 | 19.44051 |
| protein_co cut-like_ho  | 2    | 1    | 1    | 332  | 476  | 294  | 0.013703 | 0.008786 | 0.008266 | 3.530522 |
| protein_co SH2B_adap    | 5604 | 4398 | 4869 | 758  | 963  | 835  | 48.60741 | 48.91803 | 50.95563 | 10.20479 |
| protein_co A_kinase(F   | 16   | 12   | 8    | 70   | 90   | 29   | 0.226112 | 0.217468 | 0.136409 | 1.535439 |
| protein_co MANSC_do     | 45   | 33   | 22   | 110  | 125  | 117  | 0.804442 | 0.756494 | 0.474518 | 3.052146 |
| protein_co potassium_   | 251  | 169  | 207  | 0    | 3    | 1    | 1.475601 | 1.274064 | 1.468296 | 0        |
| protein_co dual_specif  | 230  | 191  | 195  | 750  | 796  | 456  | 3.022619 | 3.218832 | 3.091991 | 15.29844 |
| protein_co cAMP_resp    | 479  | 374  | 405  | 387  | 539  | 313  | 5.983036 | 5.990555 | 6.103644 | 7.502872 |
| protein_co acyl-CoA_d   | 435  | 311  | 351  | 431  | 469  | 281  | 5.010356 | 4.593556 | 4.877918 | 7.705255 |
| protein_co aldehyde_c   | 976  | 797  | 745  | 398  | 496  | 381  | 22.67822 | 23.74799 | 20.8864  | 14.35399 |
| protein_co cyclin-depe  | 761  | 547  | 596  | 655  | 849  | 392  | 13.42992 | 12.379   | 12.69063 | 17.94158 |
| protein_co G_protein-i  | 0    | 0    | 0    | 1    | 0    | 0    | 0        | 0        | 0        | 0.070115 |
| protein_co N(alpha)-ac  | 560  | 502  | 499  | 560  | 711  | 728  | 4.374215 | 5.028345 | 4.702845 | 6.789387 |
| protein_co germ_cell_1  | 10   | 4    | 6    | 1    | 5    | 5    | 0.196193 | 0.100636 | 0.142031 | 0.030452 |
| protein_co sodium_ch    | 0    | 1    | 1    | 1615 | 1758 | 2381 | 0        | 0.016962 | 0.015959 | 33.15638 |
| protein_co lymphotox    | 383  | 281  | 302  | 66   | 114  | 86   | 7.730898 | 7.273557 | 7.355059 | 2.067786 |
| protein_co 2-oxoglutar  | 41   | 10   | 21   | 4    | 4    | 2    | 0.832968 | 0.260528 | 0.514768 | 0.126135 |
| protein_co cyclin-depe  | 3536 | 2711 | 3063 | 1283 | 1558 | 1720 | 91.50282 | 89.9624  | 95.63508 | 51.53228 |
| protein_co 2'-5'-oligoa | 77   | 41   | 63   | 9    | 6    | 2    | 0.537361 | 0.366918 | 0.530474 | 0.097487 |
| protein_co 2'-5'-oligoa | 39   | 21   | 36   | 0    | 0    | 0    | 0.386293 | 0.266735 | 0.430232 | 0        |
| protein_co ADP-ribosy   | 3    | 1    | 1    | 2    | 1    | 0    | 0.027426 | 0.011723 | 0.011031 | 0.02838  |
| protein_co matrix_Gla   | 832  | 755  | 632  | 0    | 0    | 5    | 27.7669  | 32.31174 | 25.44891 | 0        |
| protein_co RAS_protei   | 0    | 0    | 0    | 180  | 250  | 109  | 0        | 0        | 0        | 3.43211  |
| protein_co Rho_GDP_(    | 268  | 222  | 263  | 28   | 7    | 12   | 10.00519 | 10.62804 | 11.84662 | 1.62248  |
| protein_co general_tra  | 549  | 439  | 503  | 466  | 583  | 589  | 7.732839 | 7.929402 | 8.548357 | 10.18786 |
| protein_co eukaryotic_  | 910  | 726  | 823  | 679  | 769  | 1108 | 17.22645 | 17.62383 | 18.79759 | 19.95054 |
| protein_co DEAD_(Asp    | 413  | 343  | 365  | 503  | 552  | 682  | 6.998763 | 7.453748 | 7.462978 | 13.2303  |
| protein_co solute_carr  | 2840 | 2317 | 2391 | 3374 | 4686 | 5567 | 16.50975 | 17.27259 | 16.77065 | 30.44372 |
| protein_co RERG/RAS-I   | 1    | 2    | 0    | 0    | 0    | 0    | 0.040881 | 0.104847 | 0        | 0        |
| protein_co endonuclea   | 4    | 3    | 8    | 0    | 2    | 0    | 0.077729 | 0.074757 | 0.187569 | 0        |
| protein_co chromosom    | 1008 | 802  | 810  | 740  | 995  | 770  | 16.87438 | 17.21674 | 16.36064 | 19.22779 |
| protein_co vitamin_D_   | 162  | 128  | 129  | 4    | 10   | 8    | 1.59149  | 1.612532 | 1.529068 | 0.060993 |
| protein_co frizzled_fan | 137  | 90   | 114  | 50   | 73   | 310  | 1.957322 | 1.648898 | 1.965146 | 1.108772 |
| protein_co replication  | 506  | 331  | 375  | 490  | 587  | 692  | 9.71595  | 8.150271 | 8.687885 | 14.60365 |
| protein_co syntaxin_2   | 917  | 703  | 786  | 367  | 526  | 301  | 12.90848 | 12.69026 | 13.34985 | 8.018669 |
| protein_co G_protein-i  | 9    | 3    | 10   | 9    | 10   | 0    | 0.059564 | 0.025461 | 0.079853 | 0.092451 |
| protein_co coatomer_1   | 2674 | 2179 | 2295 | 1635 | 1736 | 1572 | 66.09589 | 69.06844 | 68.44533 | 62.72798 |

|                          |       |       |       |       |       |       |          |          |          |          |
|--------------------------|-------|-------|-------|-------|-------|-------|----------|----------|----------|----------|
| protein_co TBC1_dom      | 34    | 25    | 39    | 23    | 51    | 27    | 0.214484 | 0.202239 | 0.296844 | 0.225203 |
| protein_co cullin-assoc  | 4191  | 3241  | 3646  | 2456  | 2813  | 2957  | 17.46654 | 17.32119 | 18.33386 | 15.88723 |
| protein_co RAB5B_me      | 303   | 261   | 253   | 147   | 181   | 118   | 4.225959 | 4.668018 | 4.257467 | 3.182222 |
| protein_co Mdm1_nuc      | 183   | 167   | 167   | 123   | 108   | 125   | 2.940669 | 3.441287 | 3.237872 | 3.067826 |
| protein_co nucleopori    | 849   | 731   | 739   | 1160  | 1177  | 1453  | 10.89779 | 12.03254 | 11.4452  | 23.11102 |
| protein_co CCR4-NOT_     | 1197  | 938   | 1021  | 1021  | 1163  | 1171  | 11.80883 | 11.86656 | 12.15308 | 15.63395 |
| protein_co timeless_ci   | 1218  | 1125  | 1085  | 1911  | 2308  | 2083  | 13.0512  | 15.45841 | 14.02752 | 31.78295 |
| protein_co cleavage_ar   | 2007  | 1500  | 1590  | 2705  | 3185  | 3278  | 14.22434 | 13.63281 | 13.59659 | 29.75655 |
| protein_co KRR1_smal     | 353   | 279   | 296   | 253   | 248   | 338   | 4.061884 | 4.116862 | 4.109534 | 4.518599 |
| protein_co mitochond     | 1388  | 1210  | 1263  | 1371  | 1473  | 1528  | 57.29168 | 64.0467  | 62.90041 | 87.83548 |
| protein_co glyceraldeh   | 26392 | 19754 | 20704 | 33314 | 29149 | 27687 | 660.0114 | 633.4955 | 624.7143 | 1293.113 |
| protein_co NOP2_nucl     | 822   | 645   | 758   | 949   | 1129  | 1389  | 12.68716 | 12.7662  | 14.11594 | 22.7347  |
| protein_co chromodor     | 9547  | 7944  | 8017  | 6555  | 7934  | 6673  | 68.03328 | 72.59439 | 68.93098 | 72.50328 |
| protein_co acrosin_bir   | 4     | 5     | 4     | 35    | 47    | 7     | 0.097031 | 0.155535 | 0.117073 | 1.317793 |
| protein_co UHRF1_bin     | 342   | 311   | 354   | 308   | 247   | 294   | 3.103016 | 3.618492 | 3.875335 | 4.337496 |
| protein_co COP9_signa    | 1423  | 1160  | 1192  | 561   | 559   | 490   | 31.37024 | 32.79293 | 31.70569 | 19.1958  |
| protein_co inhibitor_c   | 386   | 318   | 373   | 275   | 309   | 264   | 10.59072 | 11.18858 | 12.34796 | 11.7112  |
| protein_co guanine_nu    | 130   | 117   | 108   | 27    | 51    | 34    | 2.124678 | 2.452139 | 2.129716 | 0.684927 |
| protein_co cell_divisio  | 474   | 411   | 434   | 643   | 627   | 608   | 7.619427 | 8.472179 | 8.417473 | 16.04299 |
| protein_co choline_ph    | 228   | 191   | 230   | 234   | 315   | 219   | 2.462212 | 2.645046 | 2.99686  | 3.922265 |
| protein_co ubiquitin_s   | 3241  | 2508  | 2611  | 3100  | 3513  | 2970  | 47.77446 | 47.40821 | 46.4378  | 70.92656 |
| protein_co triosephos    | 7842  | 6298  | 6615  | 10949 | 9752  | 10152 | 208.5715 | 214.8029 | 212.2785 | 451.9944 |
| protein_co N-acetylglu   | 843   | 679   | 712   | 554   | 616   | 666   | 6.93357  | 7.161574 | 7.065736 | 7.072445 |
| protein_co splA/ryano    | 153   | 125   | 114   | 127   | 224   | 177   | 4.79557  | 5.024214 | 4.311235 | 6.178499 |
| protein_co enolase_2     | 477   | 415   | 422   | 1675  | 1802  | 991   | 7.911757 | 8.826978 | 8.4453   | 43.1221  |
| protein_co atrophin_1    | 6346  | 4803  | 5340  | 1762  | 2305  | 2224  | 69.31378 | 67.2731  | 70.37344 | 29.87142 |
| protein_co chromosor     | 2202  | 1616  | 1682  | 603   | 727   | 560   | 105.359  | 99.15281 | 97.10204 | 44.78186 |
| protein_co protein_ty    | 24    | 15    | 21    | 408   | 477   | 282   | 0.466567 | 0.373942 | 0.492573 | 12.31101 |
| protein_co lysophosph    | 689   | 606   | 600   | 606   | 725   | 870   | 11.13274 | 12.55639 | 11.69721 | 15.19799 |
| protein_co 5'-nucleoti   | 399   | 378   | 403   | 244   | 334   | 286   | 2.595965 | 3.153748 | 3.163581 | 2.464031 |
| protein_co Nanog_hon     | 0     | 0     | 0     | 3339  | 3777  | 3455  | 0        | 0        | 0        | 115.6648 |
| protein_co suppressor    | 1239  | 1063  | 1144  | 1841  | 2287  | 1753  | 11.86374 | 13.05248 | 13.21674 | 27.36116 |
| protein_co golgi_trans   | 1668  | 1216  | 1382  | 331   | 436   | 508   | 24.23692 | 22.65814 | 24.22911 | 7.465173 |
| protein_co glycogen_s    | 0     | 2     | 1     | 0     | 0     | 0     | 0        | 0.038397 | 0.018064 | 0        |
| protein_co lactate_def   | 8608  | 7175  | 7373  | 14826 | 14258 | 15679 | 262.4378 | 280.5145 | 271.2166 | 701.5821 |
| protein_co protein_kir   | 429   | 353   | 367   | 434   | 490   | 565   | 5.00518  | 5.281368 | 5.166263 | 7.859277 |
| protein_co cytidine_m    | 481   | 368   | 393   | 1126  | 1644  | 1192  | 12.62121 | 12.38263 | 12.44218 | 45.85901 |
| protein_co host_cell_f   | 232   | 194   | 180   | 12    | 8     | 15    | 2.67219  | 2.865434 | 2.501496 | 0.214531 |
| protein_co ST8_alpha-I   | 80    | 56    | 60    | 8     | 8     | 7     | 1.609958 | 1.44518  | 1.45688  | 0.249888 |
| protein_co C-type_lect   | 5     | 9     | 2     | 0     | 0     | 2     | 0.183021 | 0.422458 | 0.08833  | 0        |
| protein_co C2_calcium    | 644   | 534   | 570   | 1091  | 1177  | 1019  | 6.807297 | 7.238348 | 7.269621 | 17.89963 |
| protein_co activation-i  | 2     | 0     | 0     | 0     | 1     | 3     | 0.033267 | 0        | 0        | 0        |
| protein_co RAB35_me      | 1532  | 1046  | 1240  | 859   | 1083  | 1205  | 24.39236 | 21.3568  | 23.82127 | 21.22847 |
| protein_co polyhomec     | 889   | 708   | 786   | 8955  | 9699  | 7158  | 8.056673 | 8.228043 | 8.594578 | 125.965  |
| protein_co cytochrom     | 87    | 77    | 74    | 117   | 187   | 107   | 5.318685 | 6.036498 | 5.458393 | 11.102   |
| protein_co regulatory_   | 1     | 1     | 1     | 0     | 0     | 7     | 0.011856 | 0.015203 | 0.014305 | 0        |
| protein_co resistance_   | 354   | 357   | 353   | 178   | 238   | 238   | 3.235055 | 4.183656 | 3.892254 | 2.524811 |
| protein_co serine/argir  | 4512  | 3462  | 3624  | 3992  | 5215  | 4866  | 124.1595 | 122.1651 | 120.3226 | 170.5029 |
| pseudogen-1              | 275   | 212   | 238   | 392   | 464   | 409   | 3.290318 | 3.252747 | 3.435818 | 7.279837 |
| protein_co FGFR1_onc     | 583   | 472   | 527   | 260   | 260   | 287   | 9.282472 | 9.637101 | 10.12404 | 6.425381 |
| protein_co killer_cell_I | 0     | 0     | 1     | 5     | 5     | 1     | 0        | 0        | 0.039071 | 0.251311 |
| protein_co collagen_ty   | 94705 | 72125 | 76822 | 61    | 73    | 213   | 378.804  | 369.9447 | 370.745  | 0.378706 |
| protein_co butyrophili   | 194   | 171   | 176   | 35    | 52    | 11    | 2.000586 | 2.261314 | 2.189859 | 0.560214 |
| protein_co tyrosyl-DN    | 670   | 474   | 495   | 779   | 867   | 962   | 14.81901 | 13.44411 | 13.20985 | 26.74314 |
| protein_co fyn-related   | 23    | 39    | 28    | 6     | 6     | 3     | 0.378543 | 0.823118 | 0.556025 | 0.153274 |
| protein_co dermatan_     | 1713  | 1286  | 1494  | 1132  | 1307  | 1338  | 18.87723 | 18.17319 | 19.86458 | 19.36233 |
| protein_co RWD_dom       | 665   | 559   | 564   | 406   | 505   | 536   | 5.646842 | 6.087026 | 5.778447 | 5.351068 |
| protein_co radial_spo    | 5     | 3     | 1     | 4     | 8     | 17    | 0.082991 | 0.063855 | 0.020027 | 0.103051 |
| protein_co male_germ     | 17    | 14    | 17    | 20    | 31    | 22    | 0.200083 | 0.211299 | 0.241412 | 0.36536  |
| protein_co transmemt     | 981   | 835   | 795   | 1226  | 1519  | 1179  | 39.08165 | 42.65793 | 38.2137  | 75.80972 |
| protein_co PAK1_inter    | 356   | 267   | 314   | 478   | 477   | 835   | 9.273803 | 8.919253 | 9.869283 | 19.32708 |
| protein_co glucosamin    | 0     | 0     | 1     | 1284  | 1282  | 1141  | 0        | 0        | 0.012503 | 20.65177 |
| protein_co small_integ   | 78    | 82    | 66    | 93    | 119   | 82    | 1.502638 | 2.025737 | 1.534093 | 2.780822 |
| protein_co neural_pre    | 1646  | 1207  | 1453  | 233   | 211   | 186   | 15.64268 | 14.7095  | 16.66076 | 3.436906 |
| protein_co centrosom     | 200   | 140   | 144   | 80    | 76    | 42    | 1.222208 | 1.097116 | 1.061758 | 0.758815 |

|                         |      |      |      |      |      |       |          |          |          |          |
|-------------------------|------|------|------|------|------|-------|----------|----------|----------|----------|
| protein_co androgen-c   | 33   | 22   | 29   | 2    | 7    | 4     | 0.802995 | 0.686484 | 0.851422 | 0.075537 |
| protein_co ASF1_anti-s  | 432  | 313  | 354  | 284  | 320  | 361   | 8.57599  | 7.968089 | 8.47914  | 8.750831 |
| protein_co minichrom    | 215  | 165  | 182  | 127  | 152  | 202   | 1.327892 | 1.306825 | 1.356262 | 1.21747  |
| protein_co family_witl  | 7    | 5    | 2    | 134  | 132  | 85    | 0.079263 | 0.072603 | 0.027325 | 2.355106 |
| protein_co RNA_guany    | 588  | 433  | 512  | 435  | 458  | 392   | 6.218162 | 5.871944 | 6.53285  | 7.140102 |
| protein_co mannosida    | 1669 | 1248 | 1321 | 202  | 301  | 204   | 15.60818 | 14.96649 | 14.90551 | 2.932094 |
| protein_co gamma-am     | 11   | 13   | 9    | 0    | 1    | 5     | 0.305021 | 0.462263 | 0.301111 | 0        |
| protein_co serine_incc  | 2134 | 1810 | 1893 | 545  | 509  | 717   | 29.58702 | 32.18064 | 31.66689 | 11.72826 |
| protein_co HD_domai     | 675  | 508  | 531  | 726  | 758  | 690   | 19.59799 | 18.91389 | 18.60161 | 32.71711 |
| protein_co tumor_pro    | 97   | 65   | 53   | 251  | 262  | 175   | 1.827373 | 1.570284 | 1.204701 | 7.339385 |
| protein_co histidine_t  | 387  | 346  | 307  | 223  | 303  | 172   | 5.480651 | 6.283573 | 5.245751 | 4.901811 |
| protein_co nuclear_rec  | 203  | 138  | 156  | 99   | 116  | 64    | 1.724085 | 1.502973 | 1.598583 | 1.305053 |
| protein_co family_witl  | 24   | 24   | 20   | 152  | 163  | 127   | 0.205696 | 0.263775 | 0.20682  | 2.022031 |
| protein_co SAM_and_s    | 5095 | 4101 | 4385 | 606  | 640  | 565   | 30.98232 | 31.97929 | 32.17269 | 5.719694 |
| protein_co uronyl-2-su  | 472  | 373  | 357  | 686  | 841  | 512   | 5.272055 | 5.342643 | 4.811209 | 11.89303 |
| protein_co UL16_bind    | 56   | 35   | 41   | 8    | 9    | 8     | 0.836255 | 0.670237 | 0.738725 | 0.185426 |
| protein_co F-box_prot   | 544  | 418  | 419  | 582  | 608  | 608   | 9.810834 | 9.667021 | 9.11736  | 16.29148 |
| protein_co mitochond    | 295  | 210  | 253  | 164  | 227  | 315   | 3.762937 | 3.435054 | 3.893798 | 3.246977 |
| protein_co peroxisom    | 4046 | 3091 | 3329 | 496  | 651  | 406   | 50.26948 | 49.2478  | 49.90457 | 9.565125 |
| protein_co opioid_rec   | 0    | 0    | 0    | 0    | 1    | 0     | 0        | 0        | 0        | 0        |
| protein_co Fanconi_ar   | 339  | 270  | 283  | 416  | 491  | 316   | 6.223851 | 6.356713 | 6.268938 | 11.8545  |
| protein_co tubby_like   | 3    | 5    | 4    | 80   | 128  | 75    | 0.065065 | 0.139061 | 0.104673 | 2.693055 |
| protein_co solute_carr  | 0    | 1    | 0    | 4    | 4    | 9     | 0        | 0.01646  | 0        | 0.079693 |
| protein_co mitogen-ac   | 1062 | 881  | 1000 | 724  | 923  | 711   | 11.5298  | 12.26542 | 13.09921 | 12.20018 |
| protein_co potassium    | 1748 | 1487 | 1525 | 796  | 964  | 697   | 14.58689 | 15.91262 | 15.35463 | 10.31015 |
| protein_co serine/thre  | 758  | 546  | 687  | 252  | 307  | 257   | 9.939215 | 9.180892 | 10.86895 | 5.128778 |
| protein_co serine/argi  | 5337 | 4031 | 4500 | 6526 | 7821 | 10462 | 121.8364 | 118.0055 | 123.9483 | 231.2371 |
| protein_co superoxide   | 769  | 588  | 703  | 1387 | 1707 | 1379  | 8.381781 | 8.218577 | 9.245137 | 23.4648  |
| protein_co mitochond    | 964  | 722  | 803  | 896  | 1238 | 1070  | 42.04835 | 40.38485 | 42.26059 | 60.66112 |
| protein_co minichrom    | 2447 | 1914 | 2021 | 6591 | 6844 | 8640  | 36.20697 | 36.31695 | 36.0805  | 151.37   |
| protein_co ring_finger  | 425  | 342  | 366  | 593  | 623  | 490   | 3.539026 | 3.651996 | 3.677257 | 7.664433 |
| protein_co phosphata    | 155  | 93   | 94   | 97   | 127  | 84    | 1.519221 | 1.168911 | 1.111642 | 1.475677 |
| protein_co MAM_dom      | 1202 | 901  | 991  | 67   | 117  | 35    | 5.249795 | 5.046288 | 5.222273 | 0.454196 |
| protein_co intestinal_c | 799  | 641  | 718  | 264  | 331  | 276   | 6.016561 | 6.18969  | 6.5234   | 3.085574 |
| protein_co F-box_prot   | 695  | 534  | 604  | 238  | 320  | 403   | 7.148182 | 7.04306  | 7.495417 | 3.799428 |
| protein_co CD83_mole    | 24   | 20   | 15   | 82   | 119  | 133   | 0.455427 | 0.486684 | 0.343437 | 2.415194 |
| protein_co MDN1_mid     | 1806 | 1392 | 1726 | 5289 | 5900 | 6420  | 4.599108 | 4.545738 | 5.303281 | 20.90547 |
| protein_co glucagon-li  | 0    | 0    | 0    | 16   | 24   | 12    | 0        | 0        | 0        | 0.375033 |
| protein_co SAYSVFN_r    | 298  | 210  | 237  | 100  | 117  | 109   | 6.917438 | 6.251117 | 6.637819 | 3.60296  |
| protein_co bone_morp    | 124  | 50   | 69   | 0    | 0    | 2     | 1.471245 | 0.760751 | 0.987781 | 0        |
| protein_co BTB_and_C    | 216  | 208  | 185  | 80   | 156  | 79    | 1.111406 | 1.372435 | 1.148521 | 0.63891  |
| protein_co RNA_bindi    | 148  | 129  | 141  | 27   | 41   | 28    | 2.567415 | 2.86968  | 2.951219 | 0.72699  |
| protein_co CAP_adeny    | 926  | 752  | 697  | 207  | 226  | 206   | 13.09414 | 13.63619 | 11.89178 | 4.543251 |
| protein_co triggering_  | 2    | 1    | 3    | 0    | 1    | 1     | 0.028401 | 0.01821  | 0.051401 | 0        |
| protein_co zinc_finger  | 615  | 462  | 433  | 427  | 455  | 517   | 3.042558 | 2.930994 | 2.584637 | 3.278854 |
| protein_co BCL2-assoc   | 542  | 401  | 452  | 175  | 172  | 216   | 14.48113 | 13.73906 | 14.57101 | 7.257245 |
| protein_co RAB23_me     | 1057 | 781  | 834  | 231  | 270  | 280   | 16.59838 | 15.72718 | 15.80173 | 5.63032  |
| protein_co translocat   | 0    | 1    | 2    | 20   | 10   | 4     | 0        | 0.062766 | 0.118112 | 1.519411 |
| protein_co G_protein-i  | 19   | 20   | 17   | 103  | 110  | 65    | 0.405328 | 0.547132 | 0.437572 | 3.410518 |
| protein_co KH_domair    | 0    | 3    | 1    | 69   | 76   | 51    | 0        | 0.087653 | 0.027491 | 2.440139 |
| protein_co F-box_and_   | 247  | 220  | 201  | 139  | 176  | 92    | 3.718085 | 4.246727 | 3.650618 | 3.247638 |
| protein_co cyclin_C     | 720  | 575  | 571  | 1051 | 1126 | 1438  | 13.65176 | 13.98085 | 13.06292 | 30.93068 |
| protein_co PR_domair    | 1    | 0    | 0    | 1    | 0    | 4     | 0.014499 | 0        | 0        | 0.022505 |
| protein_co E2F_transc   | 862  | 656  | 794  | 797  | 1042 | 1269  | 8.520066 | 8.314744 | 9.469003 | 12.22713 |
| protein_co protein_ty   | 2254 | 1738 | 1729 | 1386 | 1770 | 1446  | 20.77243 | 20.53962 | 19.22544 | 19.82563 |
| protein_co single-min   | 0    | 0    | 0    | 1    | 1    | 10    | 0        | 0        | 0        | 0.008633 |
| protein_co activating_  | 1439 | 1168 | 1198 | 1316 | 1415 | 1101  | 8.283174 | 8.621606 | 8.320336 | 11.7577  |
| protein_co hepatoma_    | 0    | 0    | 0    | 4    | 4    | 0     | 0        | 0        | 0        | 0.143126 |
| protein_co blood_vess   | 579  | 500  | 481  | 43   | 69   | 42    | 4.876831 | 5.400557 | 4.888237 | 0.562158 |
| protein_co collagen_ty  | 2    | 1    | 0    | 145  | 130  | 95    | 0.019698 | 0.01263  | 0        | 2.216566 |
| protein_co mediator_c   | 708  | 507  | 613  | 297  | 327  | 246   | 6.329482 | 5.812356 | 6.612161 | 4.121182 |
| protein_co WAS_prote    | 553  | 462  | 431  | 324  | 384  | 368   | 8.052851 | 8.627319 | 7.572684 | 7.323185 |
| protein_co glycosylph   | 30   | 22   | 26   | 74   | 75   | 88    | 0.403182 | 0.37915  | 0.4216   | 1.543624 |
| protein_co aldehyde_d   | 193  | 157  | 178  | 82   | 102  | 72    | 1.724423 | 1.798853 | 1.91891  | 1.137184 |
| protein_co absent_in_   | 2294 | 2113 | 2156 | 493  | 575  | 285   | 14.25844 | 16.84176 | 16.16872 | 4.756156 |

|                         |       |      |       |       |       |       |          |          |          |          |
|-------------------------|-------|------|-------|-------|-------|-------|----------|----------|----------|----------|
| protein_co vanin_1      | 2     | 6    | 1     | 0     | 0     | 0     | 0.030193 | 0.116155 | 0.018215 | 0        |
| protein_co vanin_2      | 0     | 0    | 1     | 0     | 0     | 0     | 0        | 0        | 0.026712 | 0        |
| protein_co acyl-CoA_tl  | 514   | 421  | 415   | 786   | 917   | 651   | 5.488834 | 5.765121 | 5.347036 | 13.02777 |
| protein_co small_ArfG   | 165   | 146  | 103   | 196   | 220   | 146   | 2.321288 | 2.633948 | 1.748358 | 4.27988  |
| protein_co ribosomal_   | 9093  | 7712 | 7928  | 12938 | 12918 | 13415 | 667.2471 | 725.6979 | 701.9258 | 1473.592 |
| protein_co chromosom    | 3075  | 2291 | 2431  | 1711  | 2270  | 2482  | 34.87828 | 33.32302 | 33.26924 | 30.12246 |
| protein_co beta-13-glu  | 5     | 2    | 9     | 10    | 2     | 14    | 0.035712 | 0.018318 | 0.07756  | 0.11086  |
| protein_co geminin_Dl   | 539   | 426  | 438   | 905   | 1167  | 1245  | 20.02672 | 20.29738 | 19.63556 | 52.19154 |
| protein_co eyes_absen   | 105   | 107  | 79    | 2     | 1     | 1     | 0.863915 | 1.12895  | 0.784254 | 0.025541 |
| protein_co sine_oculis  | 1226  | 861  | 909   | 261   | 364   | 142   | 10.98971 | 9.897105 | 9.831224 | 3.631338 |
| protein_co nuclear_rex  | 1     | 0    | 0     | 0     | 0     | 1     | 0.014598 | 0        | 0        | 0        |
| protein_co sorting_ne   | 2515  | 2022 | 2079  | 940   | 1315  | 974   | 67.19567 | 69.27775 | 67.02021 | 38.98177 |
| protein_co HBS1-like_(  | 1259  | 984  | 1098  | 1072  | 1098  | 1114  | 8.241593 | 8.260187 | 8.672331 | 10.89208 |
| protein_co tripartite_r | 575   | 473  | 488   | 86    | 82    | 43    | 8.283183 | 8.737755 | 8.48198  | 1.922907 |
| protein_co peroxisom    | 110   | 85   | 78    | 115   | 149   | 109   | 3.351463 | 3.321009 | 2.867375 | 5.438387 |
| protein_co zinc_finger  | 236   | 173  | 209   | 381   | 513   | 555   | 2.005081 | 1.884844 | 2.142468 | 5.024299 |
| protein_co FIG4_homc    | 294   | 216  | 230   | 478   | 531   | 355   | 4.578434 | 4.313529 | 4.321609 | 11.55388 |
| protein_co PERP_TP53    | 761   | 640  | 714   | 1019  | 1262  | 1223  | 17.76172 | 19.15534 | 20.10697 | 36.91519 |
| protein_co KIAA1244     | 549   | 458  | 491   | 1253  | 1499  | 1089  | 1.730364 | 1.851142 | 1.867216 | 6.129804 |
| protein_co solute_carr  | 2     | 0    | 0     | 289   | 294   | 397   | 0.037392 | 0        | 0        | 8.386508 |
| protein_co headcase_h   | 397   | 291  | 339   | 224   | 246   | 60    | 3.315878 | 3.11681  | 3.416298 | 2.903932 |
| protein_co G_protein-i  | 825   | 639  | 768   | 143   | 203   | 116   | 5.505873 | 5.468679 | 6.184171 | 1.481285 |
| protein_co phosphata    | 542   | 470  | 494   | 386   | 460   | 796   | 2.666498 | 2.965167 | 2.932358 | 2.94754  |
| protein_co epilepsy_pr  | 79    | 53   | 60    | 55    | 64    | 120   | 1.019629 | 0.877203 | 0.93436  | 1.101814 |
| protein_co solute_carr  | 5777  | 4548 | 4756  | 2317  | 2910  | 2445  | 112.4465 | 113.5203 | 111.6949 | 70.00033 |
| protein_co chemokine    | 0     | 0    | 0     | 0     | 1     | 0     | 0        | 0        | 0        | 0        |
| protein_co unc-93_hoi   | 0     | 0    | 0     | 5     | 12    | 7     | 0        | 0        | 0        | 0.171975 |
| protein_co solute_carr  | 1     | 0    | 0     | 7     | 6     | 26    | 0.012548 | 0        | 0        | 0.136328 |
| protein_co PHD_finger   | 938   | 706  | 726   | 752   | 933   | 517   | 18.87675 | 18.21959 | 17.62825 | 23.48945 |
| protein_co cutA_divale  | 1791  | 1392 | 1484  | 1675  | 1987  | 1948  | 60.94341 | 60.74069 | 60.92747 | 88.46601 |
| protein_co PARK2_co-i   | 11    | 16   | 10    | 1     | 0     | 2     | 0.318586 | 0.594241 | 0.349447 | 0.044954 |
| protein_co QKI_KH_do    | 3904  | 3227 | 3437  | 1942  | 2669  | 1797  | 19.34467 | 20.505   | 20.54845 | 14.93589 |
| protein_co chromosom    | 1     | 1    | 2     | 6     | 6     | 5     | 0.025511 | 0.032715 | 0.061562 | 0.237584 |
| protein_co phosphodi    | 568   | 410  | 474   | 120   | 157   | 112   | 3.234973 | 2.994439 | 3.257232 | 1.060801 |
| protein_co MyoD_fami    | 9813  | 7161 | 7887  | 1930  | 2532  | 1560  | 282.4627 | 264.3275 | 273.9171 | 86.22776 |
| protein_co transcripti  | 422   | 358  | 366   | 21    | 37    | 22    | 7.625274 | 8.295363 | 7.979435 | 0.588969 |
| protein_co SPARC_rela   | 3     | 7    | 2     | 59    | 76    | 31    | 0.044657 | 0.133622 | 0.035921 | 1.363177 |
| protein_co cyclin_D3    | 1613  | 1205 | 1209  | 776   | 1012  | 737   | 31.59298 | 30.26583 | 28.57134 | 23.59111 |
| protein_co bystin-like  | 615   | 501  | 531   | 690   | 911   | 1213  | 14.2126  | 14.84723 | 14.80611 | 24.75015 |
| protein_co family_witl  | 962   | 764  | 762   | 350   | 396   | 306   | 8.750378 | 8.911574 | 8.362858 | 4.941403 |
| protein_co TATA_box_    | 324   | 267  | 266   | 304   | 391   | 385   | 7.983377 | 8.436498 | 7.908084 | 11.62641 |
| protein_co guanylate_   | 17    | 6    | 24    | 45    | 46    | 11    | 0.7162   | 0.32415  | 1.219957 | 2.94258  |
| protein_co peripherin   | 194   | 133  | 146   | 31    | 29    | 30    | 3.05873  | 2.689059 | 2.777412 | 0.758633 |
| protein_co GLTSCR1-lil  | 237   | 203  | 191   | 213   | 253   | 189   | 1.701828 | 1.869272 | 1.654812 | 2.373981 |
| protein_co protein_ph   | 1591  | 1369 | 1324  | 1334  | 1467  | 1139  | 24.50789 | 27.04261 | 24.60774 | 31.89496 |
| protein_co mitochond    | 488   | 382  | 447   | 853   | 983   | 656   | 14.40953 | 14.46447 | 15.92522 | 39.09394 |
| protein_co protein_ty   | 13215 | 9775 | 10879 | 4761  | 5808  | 3853  | 117.3138 | 111.2777 | 116.525  | 65.60103 |
| protein_co serum_res    | 1702  | 1218 | 1325  | 2005  | 2335  | 2145  | 19.00162 | 17.43764 | 17.84822 | 34.74369 |
| protein_co cullin_9     | 751   | 582  | 670   | 196   | 256   | 109   | 4.320786 | 4.293931 | 4.650992 | 1.750287 |
| protein_co nudix_(nuc   | 307   | 201  | 243   | 241   | 460   | 243   | 10.55369 | 8.860769 | 10.07907 | 12.85919 |
| protein_co 2'-deoxynu   | 543   | 436  | 458   | 665   | 937   | 464   | 30.52911 | 31.43476 | 31.06904 | 58.03186 |
| protein_co dual_specif  | 442   | 416  | 342   | 678   | 817   | 558   | 5.419819 | 6.541317 | 5.059839 | 12.90395 |
| protein_co exocyst_co   | 656   | 527  | 564   | 1127  | 1257  | 1068  | 6.91388  | 7.12259  | 7.17208  | 18.43624 |
| protein_co cytochrom    | 2314  | 1864 | 1915  | 1704  | 1651  | 1513  | 118.7128 | 122.6279 | 118.5362 | 135.6858 |
| protein_co transmem     | 3642  | 2927 | 3174  | 1221  | 1593  | 1172  | 37.17315 | 38.31082 | 39.08808 | 19.34352 |
| protein_co GDP-mann     | 238   | 198  | 190   | 491   | 477   | 456   | 6.369763 | 6.795491 | 6.135471 | 20.39662 |
| protein_co SUMO1/ser    | 1419  | 1087 | 1255  | 1030  | 1117  | 1147  | 10.01308 | 9.836131 | 10.68507 | 11.28114 |
| protein_co interphoto   | 7     | 5    | 4     | 15    | 13    | 5     | 0.05664  | 0.051881 | 0.039051 | 0.188386 |
| protein_co vascular_er  | 1059  | 823  | 872   | 752   | 870   | 561   | 4.081247 | 4.067299 | 4.054725 | 4.498267 |
| protein_co PRP4_pre-r   | 1297  | 1134 | 1190  | 1018  | 1093  | 1614  | 8.976583 | 10.06453 | 9.937247 | 10.93577 |
| protein_co TTK_protei   | 444   | 352  | 363   | 746   | 497   | 879   | 5.589038 | 5.682064 | 5.513264 | 14.5755  |
| protein_co solute_carr  | 2057  | 1422 | 1634  | 3766  | 3885  | 3775  | 38.81399 | 34.40828 | 37.20096 | 110.2973 |
| protein_co WNT1_ind     | 1     | 0    | 0     | 2     | 4     | 4     | 0.018666 | 0        | 0        | 0.057946 |
| protein_co butyrophili  | 978   | 764  | 797   | 179   | 226   | 243   | 14.73127 | 14.7572  | 14.48464 | 4.184897 |
| protein_co laminin_al   | 1318  | 1011 | 1135  | 26    | 27    | 25    | 9.439597 | 9.285356 | 9.808034 | 0.289029 |

|                         |       |       |       |      |      |      |          |          |          |          |
|-------------------------|-------|-------|-------|------|------|------|----------|----------|----------|----------|
| protein_co family_witl  | 737   | 541   | 631   | 107  | 148  | 71   | 6.101332 | 5.74333  | 6.302815 | 1.374901 |
| protein_co chloride_in  | 6     | 2     | 4     | 4    | 3    | 6    | 0.103701 | 0.044327 | 0.083414 | 0.107305 |
| protein_co fibrosin-lik | 2283  | 1653  | 1886  | 2233 | 3250 | 3037 | 19.22592 | 17.85103 | 19.16333 | 29.18773 |
| protein_co ectonucleo   | 1     | 1     | 0     | 108  | 119  | 87   | 0.01223  | 0.015683 | 0        | 2.050135 |
| protein_co lymphocyt    | 1     | 0     | 2     | 0    | 1    | 0    | 0.039173 | 0        | 0.094529 | 0        |
| protein_co protease_se  | 6     | 5     | 4     | 224  | 288  | 134  | 0.08248  | 0.088141 | 0.066345 | 4.779442 |
| protein_co meprin_A_i   | 4     | 3     | 3     | 1    | 0    | 0    | 0.064855 | 0.062375 | 0.058688 | 0.025166 |
| protein_co T-box_18     | 1246  | 940   | 1000  | 0    | 1    | 3    | 13.2543  | 12.8226  | 12.83473 | 0        |
| protein_co erbb2_inte   | 2083  | 1680  | 1739  | 488  | 482  | 481  | 11.29547 | 11.68244 | 11.37791 | 4.107383 |
| protein_co protocadhe   | 1642  | 1204  | 1377  | 573  | 698  | 564  | 28.14087 | 26.46063 | 28.47386 | 15.24226 |
| protein_co histidyl-tR  | 599   | 524   | 528   | 284  | 353  | 304  | 11.31177 | 12.68949 | 12.03055 | 8.324391 |
| protein_co nudix_(nuc   | 151   | 130   | 140   | 250  | 250  | 217  | 2.027604 | 2.238509 | 2.268205 | 5.210467 |
| protein_co centrosom    | 165   | 136   | 136   | 299  | 362  | 295  | 3.178658 | 3.359759 | 3.161162 | 8.940493 |
| protein_co mannosida    | 1625  | 1251  | 1400  | 1625 | 1682 | 1220 | 13.60891 | 13.43497 | 14.1464  | 21.12291 |
| protein_co sema_dom     | 1771  | 1267  | 1387  | 592  | 761  | 436  | 7.060213 | 6.477168 | 6.671504 | 3.663122 |
| protein_co compleme     | 3     | 3     | 3     | 1    | 0    | 7    | 0.033044 | 0.042375 | 0.03987  | 0.017097 |
| protein_co PAP_associ   | 1115  | 930   | 1019  | 699  | 784  | 518  | 13.54115 | 14.48348 | 14.93148 | 13.17614 |
| protein_co growth_ho    | 32    | 23    | 29    | 13   | 19   | 7    | 0.329053 | 0.303286 | 0.3598   | 0.207486 |
| protein_co 3-hydroxy-   | 12115 | 10091 | 10684 | 3448 | 3388 | 6465 | 162.0287 | 173.0661 | 172.4052 | 71.5758  |
| protein_co death-assoc  | 5952  | 4475  | 4644  | 820  | 1022 | 884  | 119.32   | 115.041  | 112.3286 | 25.51494 |
| protein_co NME/NM2E     | 7     | 1     | 5     | 1    | 4    | 6    | 0.27513  | 0.050402 | 0.237114 | 0.061006 |
| protein_co bromodom     | 1104  | 896   | 979   | 872  | 999  | 1262 | 11.79731 | 12.2781  | 12.62247 | 14.46308 |
| protein_co kinesin_fan  | 1627  | 1300  | 1325  | 2019 | 2097 | 1570 | 23.8332  | 24.4201  | 23.41848 | 45.90516 |
| protein_co nicotinami   | 1383  | 1134  | 1158  | 545  | 562  | 424  | 10.00291 | 10.51784 | 10.10557 | 6.118308 |
| protein_co mitochond    | 868   | 726   | 804   | 1012 | 1248 | 1125 | 9.397491 | 10.07948 | 10.50259 | 17.00604 |
| protein_co heat_shock   | 3889  | 3154  | 3094  | 5313 | 6265 | 7750 | 54.90975 | 57.10611 | 52.7084  | 116.4345 |
| protein_co mitochond    | 1001  | 845   | 882   | 1416 | 1592 | 1621 | 10.58329 | 11.45652 | 11.25132 | 23.23702 |
| protein_co prefoldin_s  | 849   | 623   | 719   | 466  | 461  | 504  | 29.44499 | 27.70774 | 30.08712 | 25.08535 |
| protein_co heparin-bir  | 695   | 514   | 573   | 29   | 65   | 25   | 13.65824 | 12.95336 | 13.58666 | 0.884583 |
| protein_co solute_carr  | 1     | 1     | 1     | 3    | 3    | 4    | 0.014026 | 0.017987 | 0.016924 | 0.065312 |
| protein_co lysyl_oxida  | 4048  | 2896  | 3224  | 19   | 26   | 36   | 37.20321 | 34.13091 | 35.75057 | 0.271034 |
| protein_co granzyme_I   | 1     | 1     | 1     | 0    | 0    | 0    | 0.031074 | 0.039847 | 0.037492 | 0        |
| protein_co cadherin_9   | 2     | 0     | 0     | 2    | 3    | 17   | 0.030458 | 0        | 0        | 0.047275 |
| protein_co amyloid_be   | 241   | 191   | 246   | 123  | 169  | 117  | 4.03445  | 4.100247 | 4.968788 | 3.195971 |
| protein_co transmembr   | 138   | 96    | 117   | 277  | 313  | 247  | 3.313273 | 2.955689 | 3.389316 | 10.32258 |
| protein_co secreted_pi  | 84340 | 63763 | 67017 | 3531 | 3838 | 3852 | 1068.55  | 1035.951 | 1024.458 | 69.43677 |
| protein_co IK_cytokine  | 1895  | 1524  | 1676  | 1392 | 1350 | 1585 | 45.24266 | 46.65876 | 48.2793  | 51.58324 |
| protein_co 3-hydroxy-   | 6251  | 4990  | 5366  | 2780 | 2662 | 5063 | 63.92792 | 65.44115 | 66.21247 | 44.12821 |
| protein_co collagen_ty  | 625   | 551   | 551   | 1023 | 1201 | 1160 | 5.186031 | 5.862948 | 5.516387 | 13.17532 |
| protein_co Fas_associa  | 1600  | 1307  | 1354  | 712  | 816  | 1169 | 16.61662 | 17.40634 | 16.96639 | 11.47712 |
| protein_co heart_and_   | 0     | 0     | 0     | 1    | 0    | 26   | 0        | 0        | 0        | 0.041876 |
| protein_co protocadhe   | 142   | 114   | 107   | 80   | 92   | 54   | 2.09845  | 2.160352 | 1.907841 | 1.834978 |
| protein_co protocadhe   | 133   | 105   | 136   | 179  | 230  | 192  | 2.147511 | 2.174115 | 2.649542 | 4.486083 |
| protein_co protocadhe   | 24    | 20    | 10    | 5    | 5    | 3    | 0.371406 | 0.396896 | 0.186718 | 0.120099 |
| protein_co protocadhe   | 30    | 23    | 20    | 18   | 5    | 10   | 0.378654 | 0.372271 | 0.304579 | 0.352634 |
| protein_co phosphodi    | 73    | 74    | 79    | 46   | 72   | 34   | 0.57471  | 0.747079 | 0.750414 | 0.562101 |
| protein_co CDC-like_ki  | 135   | 130   | 154   | 110  | 118  | 125  | 1.700739 | 2.100181 | 2.340846 | 2.150934 |
| protein_co protocadhe   | 434   | 392   | 320   | 199  | 295  | 147  | 7.670662 | 8.884614 | 6.824034 | 5.459171 |
| protein_co glutamate_   | 2     | 0     | 0     | 14   | 11   | 11   | 0.015266 | 0        | 0        | 0.165866 |
| protein_co IL2-inducib  | 1     | 1     | 0     | 2    | 0    | 4    | 0.007989 | 0.010245 | 0        | 0.024801 |
| protein_co ring_finger  | 641   | 447   | 562   | 1459 | 1695 | 1244 | 3.022273 | 2.702667 | 3.197128 | 10.6773  |
| protein_co tRNA-histic  | 169   | 123   | 137   | 181  | 206  | 142  | 2.550503 | 2.38042  | 2.494639 | 4.239827 |
| protein_co arylsulfatas | 1447  | 1170  | 1185  | 243  | 295  | 313  | 12.73697 | 13.20666 | 12.58532 | 3.319972 |
| protein_co clathrin_in  | 2927  | 2230  | 2453  | 1165 | 1308 | 1542 | 34.42365 | 33.63166 | 34.80805 | 21.26623 |
| protein_co thrombosp    | 276   | 173   | 218   | 253  | 267  | 139  | 4.01665  | 3.228571 | 3.82789  | 5.714863 |
| protein_co CCR4-NOT_    | 1460  | 1128  | 1156  | 858  | 1103 | 1011 | 10.8614  | 10.76097 | 10.37622 | 9.907198 |
| protein_co interleukin  | 0     | 0     | 1     | 0    | 0    | 0    | 0        | 0        | 0.020491 | 0        |
| protein_co butyrophili  | 0     | 0     | 0     | 17   | 18   | 10   | 0        | 0        | 0        | 0.555073 |
| protein_co tetratricop  | 772   | 586   | 652   | 688  | 772  | 1007 | 24.67559 | 24.01913 | 25.14467 | 34.13259 |
| protein_co mutS_hom     | 319   | 261   | 266   | 290  | 274  | 262  | 3.655405 | 3.835258 | 3.677684 | 5.157904 |
| protein_co Ras_protei   | 70    | 46    | 79    | 132  | 183  | 458  | 0.401898 | 0.338676 | 0.547259 | 1.176311 |
| protein_co gamma-am     | 0     | 0     | 0     | 23   | 25   | 27   | 0        | 0        | 0        | 0.412706 |
| protein_co cyclin_G1    | 1488  | 1338  | 1323  | 3275 | 2999 | 2705 | 28.38582 | 32.73135 | 30.45134 | 96.97065 |
| protein_co polymerase   | 80    | 66    | 80    | 2139 | 2195 | 2499 | 1.141918 | 1.208087 | 1.37779  | 47.38995 |
| protein_co drossha_rib  | 1815  | 1448  | 1576  | 1666 | 1900 | 1785 | 16.04248 | 16.41243 | 16.80735 | 22.85601 |

|                         |       |      |       |       |       |       |          |          |          |          |
|-------------------------|-------|------|-------|-------|-------|-------|----------|----------|----------|----------|
| protein_co cadherin_6   | 52    | 51   | 46    | 31    | 32    | 180   | 0.287669 | 0.3618   | 0.30704  | 0.266184 |
| protein_co lamin_B1     | 3490  | 2702 | 2815  | 3995  | 5146  | 4943  | 47.09242 | 46.75416 | 45.83023 | 83.67059 |
| protein_co arrestin_dc  | 429   | 370  | 375   | 118   | 123   | 221   | 4.803204 | 5.312327 | 5.065858 | 2.050625 |
| protein_co golgi_phos   | 2104  | 1625 | 1756  | 1524  | 2024  | 1682  | 36.25748 | 35.90993 | 36.51106 | 40.76311 |
| protein_co SUB1_hom     | 1994  | 1644 | 1745  | 1421  | 1603  | 1989  | 21.88128 | 23.13442 | 23.1042  | 24.20316 |
| protein_co natriuretic  | 2228  | 1911 | 2135  | 2     | 0     | 0     | 14.23892 | 15.66145 | 16.46296 | 0.019839 |
| protein_co family_witl  | 711   | 617  | 585   | 138   | 166   | 139   | 7.731633 | 8.603916 | 7.67548  | 2.329224 |
| protein_co solute_carr  | 47    | 37   | 37    | 42    | 50    | 44    | 0.684632 | 0.691147 | 0.650293 | 0.949597 |
| protein_co threonyl-tF  | 3125  | 2480 | 2841  | 2686  | 3349  | 4936  | 33.96646 | 34.56697 | 37.258   | 45.31445 |
| protein_co iroquois_h   | 1     | 0    | 0     | 556   | 782   | 658   | 0.018475 | 0        | 0        | 15.94388 |
| protein_co leucyl/cysti | 696   | 566  | 577   | 102   | 136   | 93    | 2.559242 | 2.668873 | 2.559917 | 0.582147 |
| protein_co phosphodi    | 665   | 584  | 598   | 47    | 46    | 114   | 3.787884 | 4.265768 | 4.109834 | 0.415531 |
| protein_co RAD1_hom     | 514   | 417  | 457   | 408   | 556   | 564   | 4.177031 | 4.345602 | 4.480937 | 5.146301 |
| protein_co BRX1_biog    | 323   | 233  | 294   | 425   | 470   | 671   | 6.363645 | 5.886657 | 6.988739 | 12.99639 |
| protein_co alanine-gly  | 0     | 0    | 0     | 0     | 1     | 0     | 0        | 0        | 0        | 0        |
| protein_co prolactin_r  | 59    | 54   | 85    | 30    | 36    | 48    | 0.236859 | 0.277997 | 0.411722 | 0.186934 |
| protein_co solute_carr  | 1140  | 789  | 879   | 1082  | 1382  | 1041  | 10.13934 | 8.99894  | 9.432828 | 14.93698 |
| protein_co interleukin  | 1     | 0    | 0     | 0     | 0     | 0     | 0.07612  | 0        | 0        | 0        |
| protein_co RAD50_ho     | 564   | 422  | 443   | 723   | 557   | 676   | 4.008787 | 3.846411 | 3.799143 | 7.976322 |
| protein_co interleukin  | 0     | 0    | 0     | 1     | 1     | 1     | 0        | 0        | 0        | 0.08042  |
| protein_co ST8_alpha-l  | 181   | 158  | 138   | 16    | 10    | 12    | 2.36739  | 2.650072 | 2.177802 | 0.324819 |
| protein_co glucosamin   | 850   | 735  | 725   | 988   | 1184  | 1158  | 13.37467 | 14.83067 | 13.76417 | 24.12968 |
| protein_co protocadhe   | 19    | 9    | 22    | 19    | 28    | 15    | 0.135768 | 0.08247  | 0.189677 | 0.210731 |
| protein_co S-phase_kir  | 2917  | 2516 | 2501  | 2169  | 2142  | 2338  | 67.27899 | 74.41543 | 69.59928 | 77.64849 |
| protein_co nucleopori   | 1288  | 1094 | 1127  | 2306  | 2448  | 2526  | 7.416719 | 8.078349 | 7.830111 | 20.61037 |
| protein_co protein_ph   | 1537  | 1319 | 1289  | 1378  | 1571  | 2140  | 15.50225 | 17.05984 | 15.68635 | 21.5725  |
| protein_co fibroblast_j | 1237  | 1128 | 1120  | 3     | 5     | 4     | 15.8478  | 18.53181 | 17.31272 | 0.059656 |
| protein_co nuclear_rec  | 792   | 680  | 685   | 137   | 179   | 295   | 5.097021 | 5.611894 | 5.318998 | 1.368492 |
| protein_co chromosom    | 1348  | 1042 | 1160  | 436   | 553   | 498   | 26.89691 | 26.66181 | 27.92663 | 13.50298 |
| protein_co peptidylpro  | 543   | 428  | 498   | 366   | 435   | 571   | 11.75498 | 11.8816  | 13.00766 | 12.29797 |
| protein_co leukemia_i   | 586   | 472  | 514   | 308   | 282   | 216   | 2.723516 | 2.81309  | 2.882328 | 2.221843 |
| protein_co tripartite_r | 245   | 192  | 194   | 114   | 80    | 165   | 2.744399 | 2.757984 | 2.621989 | 1.982059 |
| protein_co trafficking  | 292   | 241  | 275   | 159   | 201   | 200   | 2.284265 | 2.417631 | 2.59564  | 1.930595 |
| protein_co compleme     | 2     | 0    | 1     | 0     | 0     | 0     | 0.034567 | 0        | 0.020853 | 0        |
| protein_co SEC24_fam    | 1076  | 926  | 986   | 496   | 580   | 522   | 8.009789 | 8.839529 | 8.855921 | 5.730875 |
| protein_co thioredoxin  | 1314  | 988  | 1011  | 409   | 503   | 378   | 17.36569 | 16.74415 | 16.12115 | 8.38978  |
| protein_co tetratricop  | 147   | 175  | 162   | 87    | 76    | 44    | 2.63891  | 4.028604 | 3.508894 | 2.424136 |
| protein_co arginyl-tRN  | 2009  | 1586 | 1626  | 1072  | 1265  | 1721  | 43.89657 | 44.43889 | 42.86662 | 36.35599 |
| protein_co WW_and_C     | 71    | 49   | 62    | 957   | 1234  | 908   | 0.466927 | 0.413234 | 0.491961 | 9.768621 |
| protein_co H2A_histor   | 3014  | 2472 | 2586  | 856   | 921   | 1489  | 12.86892 | 13.53495 | 13.32219 | 5.672875 |
| protein_co transcriptic | 2289  | 1682 | 1864  | 1915  | 2220  | 2283  | 23.06215 | 21.73148 | 22.65938 | 29.947   |
| protein_co dihydropyr   | 10797 | 8521 | 9107  | 12631 | 13439 | 12422 | 92.4528  | 93.56574 | 94.08932 | 167.8747 |
| protein_co SMAD_fam     | 1425  | 1281 | 1299  | 919   | 1085  | 762   | 9.530491 | 10.98649 | 10.48233 | 9.539957 |
| protein_co casein_kin   | 2392  | 1979 | 2194  | 1815  | 2274  | 1772  | 18.48705 | 19.61379 | 20.45931 | 21.77276 |
| protein_co HMG_box      | 1885  | 1503 | 1595  | 745   | 838   | 724   | 16.75596 | 17.13272 | 17.10672 | 10.27885 |
| protein_co endoplasm    | 3834  | 2871 | 3025  | 2377  | 2895  | 2347  | 31.6118  | 30.35566 | 30.09335 | 30.41983 |
| protein_co platelet-de  | 5162  | 3877 | 4171  | 100   | 132   | 122   | 42.33799 | 40.77719 | 41.27627 | 1.273042 |
| protein_co caudal_typ   | 1     | 2    | 2     | 1     | 0     | 3     | 0.026688 | 0.068446 | 0.0644   | 0.041423 |
| protein_co ATPase_H+    | 917   | 722  | 849   | 356   | 476   | 551   | 30.00568 | 30.29568 | 33.51891 | 18.08068 |
| protein_co BCL2/adeno   | 162   | 127  | 150   | 111   | 152   | 120   | 5.673027 | 5.703125 | 6.337809 | 6.033277 |
| protein_co stanniocalc  | 127   | 107  | 112   | 935   | 1114  | 907   | 1.112466 | 1.201922 | 1.183721 | 12.71233 |
| protein_co cytoplasmic  | 267   | 194  | 256   | 175   | 257   | 262   | 1.320219 | 1.230115 | 1.527294 | 1.343084 |
| protein_co histamine    | 744   | 596  | 622   | 97    | 136   | 103   | 11.27178 | 11.57911 | 11.36994 | 2.280982 |
| protein_co drebrin_1    | 13181 | 9773 | 10233 | 7346  | 9654  | 11687 | 201.1905 | 191.2918 | 188.4561 | 174.0366 |
| protein_co zinc_finger  | 410   | 269  | 273   | 249   | 340   | 241   | 6.930392 | 5.830899 | 5.567813 | 6.532866 |
| protein_co unc-5_hom    | 10    | 3    | 16    | 273   | 334   | 113   | 0.123006 | 0.047321 | 0.237463 | 5.212195 |
| protein_co enoyl-CoA    | 54    | 34   | 34    | 27    | 27    | 33    | 0.657678 | 0.531016 | 0.499628 | 0.510404 |
| protein_co contactin_j  | 196   | 127  | 132   | 3     | 1     | 3     | 1.857406 | 1.543348 | 1.50929  | 0.044127 |
| protein_co structural   | 3404  | 2595 | 2952  | 1798  | 1504  | 2002  | 29.17449 | 28.52071 | 30.52657 | 23.91849 |
| protein_co Selenoprot   | 645   | 519  | 512   | 331   | 389   | 446   | 18.52055 | 19.11045 | 17.73831 | 14.75206 |
| protein_co ARP8_actin   | 588   | 454  | 518   | 348   | 389   | 363   | 7.597501 | 7.522438 | 8.075534 | 6.97916  |
| protein_co TBCC_dom     | 235   | 243  | 222   | 145   | 141   | 113   | 3.603386 | 4.778136 | 4.107182 | 3.450972 |
| protein_co translocase  | 911   | 733  | 804   | 745   | 982   | 912   | 17.84328 | 18.41067 | 19.00029 | 22.64869 |
| protein_co cereblon     | 317   | 269  | 253   | 252   | 237   | 329   | 2.641104 | 2.874008 | 2.543284 | 3.258797 |
| protein_co histidine-ri | 0     | 0    | 0     | 0     | 1     | 0     | 0        | 0        | 0        | 0        |

|                         |       |       |       |       |       |       |          |          |          |          |
|-------------------------|-------|-------|-------|-------|-------|-------|----------|----------|----------|----------|
| protein_co B-cell_CLL/  | 615   | 476   | 546   | 135   | 180   | 55    | 6.902193 | 6.850594 | 7.393544 | 2.351669 |
| protein_co homogenti    | 11    | 15    | 15    | 3     | 3     | 4     | 0.257252 | 0.449849 | 0.423258 | 0.108897 |
| protein_co claudin_16   | 1     | 0     | 1     | 3     | 0     | 2     | 0.014326 | 0        | 0.017286 | 0.066709 |
| protein_co ADP-ribosy   | 81    | 59    | 72    | 33    | 22    | 31    | 2.22762  | 2.080738 | 2.389112 | 1.408641 |
| protein_co nephronop    | 785   | 627   | 658   | 197   | 202   | 145   | 4.728759 | 4.843446 | 4.782462 | 1.841935 |
| protein_co CD86_mole    | 1     | 1     | 2     | 6     | 10    | 4     | 0.017315 | 0.022205 | 0.041784 | 0.161255 |
| protein_co angiomotir   | 1477  | 1006  | 1134  | 2012  | 2186  | 2131  | 15.31886 | 13.37991 | 14.1908  | 32.38951 |
| protein_co nitrilase_fa | 318   | 243   | 280   | 202   | 248   | 206   | 9.009683 | 8.828725 | 9.571687 | 8.883094 |
| protein_co family_witl  | 300   | 242   | 252   | 1073  | 686   | 706   | 4.60911  | 4.767828 | 4.671372 | 25.58739 |
| protein_co 8-oxoguani   | 594   | 428   | 481   | 227   | 302   | 339   | 5.596277 | 5.170897 | 5.467715 | 3.319473 |
| protein_co karyopherin  | 1640  | 1272  | 1284  | 940   | 1198  | 1070  | 11.2591  | 11.1984  | 10.63586 | 10.01655 |
| protein_co propionyl_   | 903   | 655   | 691   | 1258  | 1442  | 993   | 6.952658 | 6.467162 | 6.419322 | 15.03399 |
| protein_co ubiquitin_   | 1541  | 1264  | 1333  | 1187  | 1631  | 1414  | 13.95202 | 14.67543 | 14.56172 | 16.68075 |
| protein_co armadillo_   | 405   | 369   | 404   | 430   | 457   | 634   | 3.964605 | 4.632128 | 4.771713 | 6.533469 |
| protein_co centrosom    | 141   | 120   | 140   | 349   | 314   | 306   | 2.420019 | 2.641133 | 2.899184 | 9.297273 |
| protein_co retinol_bin  | 1     | 0     | 2     | 4     | 3     | 0     | 0.067565 | 0        | 0.163042 | 0.41948  |
| protein_co retinol_bin  | 863   | 671   | 687   | 410   | 491   | 523   | 20.91271 | 20.85121 | 20.0865  | 15.42104 |
| protein_co solute_carr  | 965   | 821   | 839   | 993   | 1019  | 877   | 9.756116 | 10.64393 | 10.23434 | 15.58222 |
| protein_co G_protein+   | 0     | 1     | 1     | 2     | 3     | 1     | 0        | 0.018564 | 0.017467 | 0.04494  |
| protein_co ring_finger  | 1254  | 972   | 993   | 868   | 1004  | 905   | 21.28125 | 21.15315 | 20.33278 | 22.86387 |
| protein_co transcriptio | 735   | 582   | 596   | 822   | 974   | 1128  | 3.477365 | 3.53098  | 3.402179 | 6.036222 |
| protein_co 5'-3'_exorik | 828   | 679   | 771   | 282   | 249   | 184   | 3.827757 | 4.025252 | 4.300475 | 2.023455 |
| protein_co K(lysine)_ac | 254   | 164   | 223   | 17    | 17    | 26    | 2.464321 | 2.040407 | 2.610457 | 0.256002 |
| protein_co butyrylcho   | 99    | 78    | 80    | 26    | 28    | 53    | 1.837005 | 1.856005 | 1.791073 | 0.748823 |
| protein_co serpin_pep   | 0     | 0     | 0     | 1     | 0     | 0     | 0        | 0        | 0        | 0.039619 |
| protein_co programme    | 493   | 416   | 407   | 463   | 416   | 553   | 11.18373 | 12.10159 | 11.13993 | 16.30239 |
| protein_co leucine_ric  | 1     | 0     | 0     | 2     | 1     | 0     | 0.018607 | 0        | 0        | 0.057762 |
| protein_co wingless-ty  | 4825  | 3798  | 4124  | 227   | 268   | 260   | 37.44527 | 37.79758 | 38.61592 | 2.734362 |
| protein_co 6-phosphoi   | 446   | 373   | 382   | 377   | 248   | 333   | 5.831831 | 6.254438 | 6.026727 | 7.651418 |
| protein_co collagen_ty  | 197   | 130   | 173   | 125   | 245   | 97    | 0.995832 | 0.842699 | 1.055149 | 0.980754 |
| protein_co fibroblast_  | 368   | 326   | 331   | 317   | 414   | 300   | 5.642749 | 6.410174 | 6.123771 | 7.544538 |
| protein_co protein_kir  | 1419  | 1160  | 1186  | 820   | 950   | 798   | 10.28233 | 10.77895 | 10.36912 | 9.222599 |
| protein_co hairy_and_   | 1391  | 1120  | 1157  | 315   | 409   | 464   | 41.33334 | 42.67768 | 41.48153 | 14.52829 |
| protein_co ubiquitin_   | 1308  | 1075  | 1193  | 640   | 673   | 589   | 17.32057 | 18.2546  | 19.06088 | 13.15421 |
| protein_co ArfGAP_wit   | 1018  | 962   | 979   | 590   | 765   | 500   | 6.666765 | 8.078892 | 7.735673 | 5.997218 |
| protein_co epithelial_c | 1076  | 836   | 905   | 1357  | 1124  | 1490  | 11.56398 | 11.52155 | 11.73524 | 22.6363  |
| protein_co guanine_nu   | 1     | 0     | 0     | 0     | 1     | 0     | 0.0194   | 0        | 0        | 0        |
| protein_co guanine_nu   | 14429 | 11352 | 11713 | 5107  | 6121  | 5067  | 174.106  | 175.6545 | 170.5272 | 95.64757 |
| protein_co TRK-fused_   | 2490  | 2059  | 2018  | 869   | 990   | 1027  | 35.69433 | 37.84997 | 34.90351 | 19.33526 |
| protein_co ubiquitin_   | 977   | 856   | 855   | 755   | 669   | 596   | 4.564722 | 5.128647 | 4.819854 | 5.475164 |
| protein_co hyaluronog   | 39    | 36    | 38    | 83    | 84    | 57    | 0.726544 | 0.860021 | 0.85414  | 2.39997  |
| protein_co tumor_sup    | 628   | 463   | 495   | 681   | 895   | 786   | 17.41392 | 16.46369 | 16.56113 | 23.3099  |
| protein_co nitrogen_p   | 215   | 177   | 189   | 201   | 219   | 182   | 3.238469 | 3.41888  | 3.434876 | 4.699242 |
| protein_co ribosomal_   | 8474  | 6562  | 6810  | 12265 | 12081 | 11578 | 213.972  | 212.478  | 207.474  | 480.6916 |
| protein_co cytochrom    | 213   | 155   | 186   | 57    | 89    | 116   | 6.515051 | 6.07966  | 6.864347 | 2.706098 |
| protein_co chromosom    | 154   | 137   | 128   | 34    | 55    | 71    | 2.048528 | 2.336959 | 2.054373 | 0.70199  |
| protein_co fragile_X_r  | 2295  | 1881  | 2014  | 3505  | 3528  | 2796  | 32.83875 | 34.51454 | 34.77054 | 77.84352 |
| protein_co Cbl_proto-   | 1440  | 1102  | 1182  | 256   | 253   | 146   | 9.958942 | 9.773309 | 9.863163 | 2.748028 |
| protein_co bobby_sox    | 1806  | 1350  | 1506  | 1558  | 1552  | 1153  | 9.48302  | 9.090171 | 9.541177 | 12.69775 |
| protein_co intraflagell | 710   | 628   | 654   | 271   | 278   | 328   | 10.39398 | 11.78942 | 11.55179 | 6.157767 |
| protein_co guanine_nu   | 1903  | 1567  | 1632  | 582   | 743   | 428   | 26.86893 | 28.37199 | 27.80224 | 12.75455 |
| protein_co HERV-H_LTI   | 1     | 0     | 0     | 1     | 2     | 0     | 0.017588 | 0        | 0        | 0.027299 |
| protein_co IQ_motif_c   | 143   | 112   | 100   | 76    | 79    | 101   | 2.063161 | 2.072165 | 1.740785 | 1.701928 |
| protein_co glucan_(14   | 578   | 454   | 482   | 171   | 121   | 146   | 7.830809 | 7.887584 | 7.87905  | 3.595882 |
| protein_co uridine_mc   | 462   | 348   | 415   | 548   | 693   | 981   | 8.150184 | 7.872524 | 8.833271 | 15.00502 |
| protein_co nuclear_cal  | 1792  | 1495  | 1554  | 1298  | 1618  | 1867  | 20.19392 | 21.60395 | 21.12914 | 22.70324 |
| protein_co sorting_ne   | 452   | 327   | 378   | 277   | 289   | 277   | 8.457417 | 7.846147 | 8.533735 | 8.044695 |
| protein_co chromosom    | 104   | 69    | 85    | 151   | 172   | 231   | 1.310199 | 1.114711 | 1.292025 | 2.952646 |
| protein_co FERM_dom     | 191   | 204   | 178   | 92    | 119   | 87    | 1.702337 | 2.331587 | 1.914168 | 1.272713 |
| protein_co solute_carr  | 524   | 447   | 500   | 428   | 428   | 391   | 6.418592 | 7.021426 | 7.389695 | 8.137345 |
| protein_co rhophilin_   | 1     | 1     | 0     | 0     | 1     | 2     | 0.022873 | 0.029332 | 0        | 0        |
| protein_co plexin_A1    | 9367  | 6814  | 7463  | 3051  | 4041  | 2941  | 48.44681 | 45.19352 | 46.57214 | 24.49274 |
| protein_co ATPase_H+    | 921   | 710   | 784   | 827   | 947   | 851   | 9.406601 | 9.299097 | 9.661337 | 13.11019 |
| protein_co ankyrin_re   | 408   | 355   | 307   | 181   | 210   | 95    | 3.780108 | 4.217759 | 3.431867 | 2.602874 |
| protein_co podocalyxi   | 327   | 246   | 237   | 843   | 1128  | 694   | 7.014197 | 6.766665 | 6.133758 | 28.0665  |

|                         |       |       |       |       |       |       |          |          |          |          |
|-------------------------|-------|-------|-------|-------|-------|-------|----------|----------|----------|----------|
| protein_co uroplakin_i  | 3     | 0     | 0     | 4     | 3     | 6     | 0.066416 | 0        | 0        | 0.13745  |
| protein_co chondroitin  | 1     | 13    | 9     | 78    | 127   | 60    | 0.011269 | 0.18786  | 0.12237  | 1.364293 |
| protein_co kelch-like_f | 769   | 587   | 650   | 325   | 425   | 639   | 7.804854 | 7.639868 | 7.959757 | 5.119791 |
| protein_co SREBF_cha    | 1493  | 1101  | 1187  | 2672  | 3345  | 2375  | 15.93236 | 15.06666 | 15.28337 | 44.25754 |
| protein_co EF-hand_ar   | 1     | 0     | 0     | 34    | 69    | 13    | 0.017425 | 0        | 0        | 0.919552 |
| protein_co KIAA1257     | 0     | 0     | 0     | 76    | 87    | 17    | 0        | 0        | 0        | 0.916683 |
| protein_co NIMA-relat   | 76    | 78    | 80    | 27    | 28    | 27    | 1.222938 | 1.609514 | 1.553205 | 0.67435  |
| protein_co mitochond    | 1631  | 1368  | 1451  | 1920  | 2313  | 2655  | 44.82862 | 48.21662 | 48.11903 | 81.90927 |
| protein_co phospholip   | 1341  | 986   | 1009  | 19    | 20    | 23    | 19.03709 | 17.94974 | 17.28268 | 0.418655 |
| protein_co HemK_met     | 424   | 343   | 283   | 212   | 251   | 192   | 3.266201 | 3.38829  | 2.630338 | 2.534798 |
| protein_co cytokine_ir  | 125   | 108   | 94    | 25    | 31    | 50    | 1.162486 | 1.287985 | 1.05476  | 0.360868 |
| protein_co mitogen-ac   | 504   | 343   | 372   | 1143  | 1353  | 1151  | 7.90916  | 6.90245  | 7.043537 | 27.84047 |
| protein_co activin_A_r  | 89    | 61    | 89    | 582   | 587   | 397   | 0.777134 | 0.683039 | 0.937657 | 7.887867 |
| protein_co WD_repeat    | 695   | 511   | 559   | 703   | 788   | 746   | 6.616967 | 6.238848 | 6.421463 | 10.38867 |
| protein_co COMM_doi     | 546   | 466   | 485   | 434   | 533   | 568   | 6.908243 | 7.560843 | 7.403972 | 8.523053 |
| protein_co golgi_reass  | 1210  | 890   | 947   | 715   | 835   | 520   | 15.24366 | 14.37816 | 14.39468 | 13.98107 |
| protein_co peroxisoma   | 32    | 30    | 22    | 23    | 32    | 16    | 0.165215 | 0.198623 | 0.137047 | 0.184314 |
| protein_co ribosomal_   | 647   | 517   | 550   | 960   | 1096  | 1397  | 19.2255  | 19.70032 | 19.71897 | 44.27669 |
| protein_co ATP-bindin   | 841   | 656   | 675   | 732   | 966   | 649   | 6.660109 | 6.661906 | 6.449665 | 8.997604 |
| protein_co abhydrolas   | 250   | 196   | 225   | 191   | 183   | 102   | 5.242623 | 5.270769 | 5.692973 | 6.216879 |
| protein_co eukaryotic_  | 492   | 349   | 328   | 921   | 1054  | 1061  | 22.84147 | 20.77752 | 18.37304 | 66.36653 |
| protein_co ABHD14A-/    | 1     | 0     | 2     | 2     | 0     | 0     | 0.025539 | 0        | 0.061629 | 0.079281 |
| protein_co Rho_guanin   | 116   | 112   | 103   | 422   | 498   | 371   | 1.035257 | 1.281792 | 1.109112 | 5.845656 |
| protein_co kelch-like_f | 301   | 211   | 272   | 523   | 471   | 208   | 3.667852 | 3.297138 | 3.9991   | 9.891849 |
| protein_co phospholip   | 360   | 279   | 283   | 225   | 250   | 244   | 2.632217 | 2.61597  | 2.496627 | 2.553478 |
| protein_co vasoactive_  | 0     | 1     | 0     | 32    | 57    | 36    | 0        | 0.015996 | 0        | 0.619567 |
| protein_co dynein_axc   | 212   | 147   | 184   | 22    | 58    | 33    | 0.74742  | 0.664592 | 0.782699 | 0.120388 |
| protein_co signal_sequ  | 7398  | 5457  | 6299  | 1719  | 2081  | 2502  | 93.35101 | 88.30148 | 95.90127 | 33.66751 |
| protein_co zinc_finger  | 558   | 451   | 460   | 146   | 220   | 140   | 4.751158 | 4.924376 | 4.725755 | 1.929517 |
| protein_co troponin_C   | 48    | 31    | 36    | 14    | 9     | 9     | 3.095902 | 2.563994 | 2.801538 | 1.401537 |
| protein_co natural_kill | 2613  | 2446  | 2455  | 1364  | 1362  | 1339  | 15.38468 | 18.46779 | 17.44009 | 12.46505 |
| protein_co chloride_cl  | 125   | 102   | 109   | 229   | 307   | 251   | 1.781536 | 1.864206 | 1.874386 | 5.065828 |
| protein_co forkhead_b   | 3347  | 2859  | 3072  | 218   | 261   | 280   | 22.06085 | 24.16518 | 24.43069 | 2.23025  |
| protein_co eukaryotic_  | 13424 | 9923  | 10999 | 8426  | 11596 | 15087 | 111.0732 | 105.2882 | 109.8066 | 108.2129 |
| protein_co signal_pept  | 823   | 601   | 720   | 653   | 726   | 792   | 30.2908  | 28.36578 | 31.9736  | 37.30393 |
| protein_co NIMA-relat   | 421   | 400   | 360   | 372   | 462   | 523   | 5.303788 | 6.462095 | 5.472107 | 7.274069 |
| protein_co solute_carr  | 609   | 511   | 567   | 223   | 278   | 197   | 6.41132  | 6.898591 | 7.202135 | 3.643892 |
| protein_co INO80_con    | 305   | 239   | 288   | 362   | 520   | 790   | 1.011705 | 1.016626 | 1.152642 | 1.863772 |
| protein_co eukaryotic_  | 4419  | 3727  | 3701  | 3927  | 3996  | 5049  | 188.7131 | 204.1018 | 190.6976 | 260.2972 |
| protein_co ADAM_met     | 324   | 252   | 274   | 315   | 363   | 404   | 2.401196 | 2.394928 | 2.450085 | 3.623461 |
| protein_co deoxyguan    | 559   | 404   | 430   | 452   | 586   | 452   | 22.91217 | 21.23465 | 21.26527 | 28.75566 |
| protein_co MOB_kinas    | 1419  | 1158  | 1231  | 728   | 963   | 776   | 28.01555 | 29.31802 | 29.32398 | 22.30892 |
| protein_co KAT8_regul   | 1254  | 1046  | 1013  | 871   | 938   | 855   | 11.19362 | 11.9733  | 10.91014 | 12.06762 |
| protein_co lectin_man   | 511   | 467   | 459   | 299   | 308   | 337   | 9.94224  | 11.65171 | 10.77517 | 9.029527 |
| protein_co rhotekin     | 1125  | 734   | 835   | 847   | 1239  | 887   | 19.93623 | 16.68    | 17.85357 | 23.29724 |
| protein_co tubulin_ty   | 2068  | 1574  | 1686  | 668   | 877   | 699   | 18.7198  | 18.2711  | 18.41434 | 9.385503 |
| protein_co interleukin  | 0     | 1     | 2     | 4     | 3     | 4     | 0        | 0.02831  | 0.053273 | 0.137062 |
| protein_co chemokine    | 19    | 22    | 36    | 0     | 0     | 0     | 1.072094 | 1.591884 | 2.450924 | 0        |
| protein_co phosphoin    | 1635  | 1334  | 1363  | 876   | 913   | 678   | 7.743175 | 8.10152  | 7.788346 | 6.439259 |
| protein_co Kv_channel   | 154   | 108   | 120   | 40    | 77    | 26    | 1.974047 | 1.775292 | 1.855949 | 0.795843 |
| protein_co fumarylase   | 713   | 570   | 601   | 566   | 560   | 524   | 7.028081 | 7.204958 | 7.147757 | 8.659526 |
| protein_co nucleolin    | 13038 | 10700 | 11400 | 20917 | 23952 | 29870 | 151.5498 | 159.4915 | 159.8812 | 377.3761 |
| protein_co ARP1_actin   | 1295  | 1021  | 1117  | 639   | 799   | 672   | 27.13252 | 27.43187 | 28.23719 | 20.78029 |
| protein_co solute_carr  | 825   | 599   | 665   | 177   | 229   | 181   | 8.767966 | 8.163587 | 8.52736  | 2.91977  |
| protein_co zeta-chain_  | 0     | 0     | 0     | 1     | 1     | 5     | 0        | 0        | 0        | 0.022236 |
| protein_co ARP3_actin   | 4109  | 3361  | 3503  | 1383  | 1750  | 1827  | 28.67983 | 30.0828  | 29.50045 | 14.9828  |
| protein_co STEAP_fami   | 862   | 656   | 810   | 332   | 470   | 289   | 9.439326 | 9.211851 | 10.70205 | 5.642899 |
| protein_co erythrocyt   | 280   | 244   | 212   | 593   | 549   | 631   | 1.98087  | 2.213589 | 1.809597 | 6.51153  |
| protein_co transcripti  | 0     | 0     | 0     | 156   | 206   | 99    | 0        | 0        | 0        | 1.221874 |
| protein_co Pre-mRNA_    | 837   | 605   | 700   | 807   | 833   | 725   | 50.97006 | 47.24484 | 51.43228 | 76.27701 |
| protein_co tumor_pro    | 2044  | 1526  | 1630  | 199   | 239   | 365   | 47.96957 | 45.92496 | 46.15519 | 7.248839 |
| protein_co DnaJ_(Hsp4   | 78    | 73    | 79    | 45    | 69    | 74    | 0.732657 | 0.879302 | 0.895326 | 0.656068 |
| protein_co proopiome    | 1     | 0     | 0     | 49    | 93    | 41    | 0.032882 | 0        | 0        | 2.500849 |
| protein_co signal_tran  | 704   | 674   | 649   | 114   | 137   | 157   | 5.790313 | 7.108838 | 6.440537 | 1.455341 |
| protein_co otoferlin    | 9     | 4     | 2     | 3     | 4     | 3     | 0.058973 | 0.033611 | 0.015812 | 0.030511 |

|                          |        |        |        |       |       |       |          |          |          |          |
|--------------------------|--------|--------|--------|-------|-------|-------|----------|----------|----------|----------|
| protein_co glycerol-3-ph | 677    | 536    | 564    | 410   | 521   | 578   | 5.254849 | 5.335138 | 5.282004 | 4.939533 |
| protein_co centromere    | 249    | 184    | 219    | 352   | 384   | 239   | 8.041057 | 7.619754 | 8.533082 | 17.64359 |
| protein_co cytohesin_1   | 2      | 2      | 3      | 3     | 4     | 6     | 0.041496 | 0.053212 | 0.0751   | 0.09661  |
| protein_co activin_A_r   | 958    | 745    | 827    | 229   | 278   | 233   | 14.75226 | 14.71156 | 15.3655  | 5.473423 |
| protein_co tetratricop   | 3102   | 2312   | 2570   | 294   | 379   | 326   | 19.17385 | 18.32588 | 19.16676 | 2.820625 |
| protein_co solute_carr   | 7      | 4      | 9      | 112   | 152   | 70    | 0.095194 | 0.069756 | 0.147674 | 2.364077 |
| protein_co MpV17_mi      | 861    | 706    | 725    | 519   | 550   | 545   | 20.07574 | 21.10971 | 20.39644 | 18.78305 |
| protein_co general_tra   | 1044   | 864    | 900    | 1381  | 1693  | 1898  | 12.26282 | 13.01406 | 12.755   | 25.17758 |
| protein_co eukaryotic    | 672    | 603    | 544    | 571   | 703   | 662   | 7.339877 | 8.445904 | 7.16913  | 9.680239 |
| protein_co nuclear_rex   | 4290   | 3271   | 3562   | 2218  | 2502  | 2365  | 69.67723 | 68.12766 | 69.80324 | 55.91465 |
| protein_co integrin_be   | 9      | 10     | 9      | 2     | 1     | 1     | 0.09027  | 0.12862  | 0.108915 | 0.031136 |
| protein_co fibronectin   | 575    | 406    | 440    | 285   | 355   | 226   | 16.27143 | 14.73307 | 15.02307 | 12.51795 |
| protein_co integrin_al   | 1563   | 1212   | 1388   | 27    | 25    | 26    | 17.49561 | 17.39731 | 18.74595 | 0.469099 |
| protein_co proteasome    | 1437   | 1186   | 1243   | 899   | 928   | 1334  | 13.77934 | 14.58363 | 14.38105 | 13.38017 |
| protein_co sorting_ne    | 2699   | 2137   | 2231   | 1340  | 1447  | 1401  | 61.91593 | 62.86564 | 61.75144 | 47.71279 |
| protein_co GPR75-ASB     | 17     | 22     | 13     | 14    | 18    | 8     | 0.301031 | 0.499568 | 0.27775  | 0.384787 |
| protein_co protein_ph    | 3202   | 2514   | 2687   | 4209  | 5132  | 5528  | 40.01648 | 40.28953 | 40.51663 | 81.64451 |
| protein_co phosphodi     | 2      | 0      | 4      | 1     | 1     | 0     | 0.019198 | 0        | 0.046326 | 0.014899 |
| protein_co receptor_a    | 139    | 122    | 110    | 449   | 529   | 249   | 4.740154 | 5.335153 | 4.52604  | 23.76591 |
| protein_co proprotein    | 56     | 44     | 64     | 177   | 222   | 84    | 0.919734 | 0.926694 | 1.268242 | 4.512093 |
| protein_co glucagon      | 4      | 2      | 0      | 0     | 0     | 0     | 0.146531 | 0.093953 | 0        | 0        |
| protein_co adenomatc     | 232    | 169    | 151    | 140   | 211   | 47    | 0.933775 | 0.872269 | 0.733296 | 0.874607 |
| protein_co interferon_   | 24     | 19     | 37     | 24    | 23    | 16    | 0.313035 | 0.317793 | 0.582279 | 0.485873 |
| protein_co ribosomal_    | 8783   | 6601   | 6957   | 10976 | 13447 | 10429 | 255.7982 | 246.5322 | 244.4694 | 496.1684 |
| protein_co grancalcin    | 50     | 36     | 50     | 314   | 370   | 317   | 1.176958 | 1.086683 | 1.420068 | 11.47232 |
| protein_co INO80_con     | 501    | 387    | 403    | 188   | 242   | 247   | 11.51564 | 11.40698 | 11.17644 | 6.707158 |
| protein_co mannosyl-c    | 2918   | 2167   | 2291   | 1306  | 1818  | 1280  | 47.26255 | 45.00907 | 44.77184 | 32.83261 |
| protein_co tetratricop   | 594    | 488    | 511    | 395   | 471   | 406   | 6.919918 | 7.290271 | 7.182629 | 7.142366 |
| protein_co NADH_deh      | 653    | 430    | 470    | 711   | 974   | 545   | 8.180385 | 6.907778 | 7.104058 | 13.82486 |
| protein_co polycomb_     | 246    | 155    | 187    | 66    | 85    | 140   | 6.436911 | 5.200959 | 5.903805 | 2.680506 |
| protein_co growth_fac    | 16     | 5      | 12     | 107   | 141   | 147   | 0.314962 | 0.126217 | 0.285015 | 3.269286 |
| protein_co CAP-GLY_d     | 298    | 236    | 263    | 5     | 6     | 4     | 3.254886 | 3.305528 | 3.465958 | 0.084766 |
| protein_co T-cell_Leuk   | 4      | 2      | 4      | 3     | 2     | 2     | 0.087809 | 0.056301 | 0.105947 | 0.102219 |
| protein_co spectrin_be   | 16134  | 12953  | 13903  | 6847  | 7802  | 7003  | 83.36348 | 85.82493 | 86.6743  | 54.91166 |
| protein_co ancient_ub    | 1097   | 850    | 904    | 591   | 720   | 960   | 30.34711 | 30.15359 | 30.1736  | 25.37632 |
| protein_co reticulon_4   | 11691  | 8467   | 9115   | 4861  | 6114  | 5099  | 114.4449 | 106.2879 | 107.6588 | 73.85858 |
| protein_co HtrA_serine   | 295    | 223    | 252    | 156   | 231   | 188   | 5.843919 | 5.664953 | 6.023248 | 4.796641 |
| protein_co lysyl_oxida   | 6736   | 4922   | 5271   | 40    | 70    | 93    | 90.19165 | 84.51138 | 85.15405 | 0.831294 |
| protein_co docking_pr    | 2946   | 2152   | 2125   | 41    | 58    | 53    | 54.06575 | 50.64553 | 47.05399 | 1.167895 |
| protein_co UDP-N-acet    | 5      | 1      | 4      | 278   | 325   | 196   | 0.060613 | 0.015545 | 0.058506 | 5.230813 |
| protein_co polymerase    | 481    | 343    | 348    | 149   | 186   | 182   | 18.07219 | 16.52606 | 15.77586 | 8.689255 |
| protein_co tachykinin_   | 0      | 1      | 2      | 0     | 1     | 2     | 0        | 0.02594  | 0.048814 | 0        |
| protein_co coiled-coil   | 3367   | 2753   | 2936   | 1426  | 970   | 1627  | 16.09201 | 16.87263 | 16.93056 | 10.57833 |
| protein_co acyl-CoA_d    | 1      | 0      | 0      | 2     | 3     | 2     | 0.018439 | 0        | 0        | 0.057239 |
| protein_co eva-1_hom     | 593    | 442    | 488    | 51    | 38    | 17    | 15.31999 | 14.64318 | 15.21149 | 2.045052 |
| protein_co mitochond     | 570    | 397    | 479    | 504   | 586   | 499   | 7.682469 | 6.861607 | 7.789499 | 10.54355 |
| protein_co LanC_lantil   | 1223   | 1051   | 1064   | 650   | 747   | 525   | 11.99466 | 13.21824 | 12.59074 | 9.894765 |
| protein_co WD_repeat     | 662    | 586    | 602    | 810   | 843   | 1118  | 7.223922 | 8.200154 | 7.926101 | 13.71926 |
| protein_co EGF_contai    | 319    | 260    | 317    | 603   | 670   | 542   | 4.946401 | 5.16989  | 5.930699 | 14.51264 |
| protein_co regenerati    | 0      | 0      | 0      | 9     | 22    | 16    | 0        | 0        | 0        | 0.72699  |
| protein_co Fanconi_ar    | 219    | 182    | 217    | 169   | 177   | 170   | 6.047652 | 6.445008 | 7.230203 | 7.24369  |
| protein_co fibronectin   | 750314 | 599965 | 629846 | 4855  | 5758  | 6525  | 3836.249 | 3933.679 | 3885.493 | 38.52862 |
| protein_co signal_tran   | 1858   | 1542   | 1656   | 904   | 1087  | 823   | 20.21384 | 21.51279 | 21.7376  | 15.26518 |
| protein_co glutamintas   | 3516   | 2772   | 3087   | 738   | 1001  | 1191  | 34.10536 | 34.48072 | 36.12921 | 11.11119 |
| protein_co poly(A)_pol   | 321    | 322    | 296    | 390   | 433   | 326   | 2.478053 | 3.187651 | 2.757055 | 4.673053 |
| protein_co dynein_axc    | 1      | 3      | 1      | 1     | 1     | 0     | 0.003665 | 0.014098 | 0.004422 | 0.005688 |
| protein_co peroxisome    | 81     | 59     | 77     | 152   | 174   | 114   | 2.049699 | 1.914548 | 2.350952 | 5.970065 |
| protein_co unc-50_hoi    | 375    | 283    | 295    | 266   | 313   | 267   | 8.095652 | 7.834591 | 7.684058 | 8.91318  |
| protein_co insulin-like  | 15294  | 10748  | 11519  | 13378 | 13450 | 8754  | 162.4685 | 146.4148 | 147.6423 | 220.5818 |
| protein_co ELMO/CED-     | 298    | 266    | 279    | 128   | 183   | 92    | 2.934935 | 3.359489 | 3.315389 | 1.956693 |
| protein_co insulin-like  | 30417  | 22887  | 25571  | 132   | 130   | 192   | 229.4857 | 221.4305 | 232.7743 | 1.545766 |
| protein_co ubiquitin_5   | 3832   | 3266   | 3360   | 1783  | 1393  | 1626  | 15.8213  | 17.29188 | 16.73802 | 11.42611 |
| protein_co EF-hand_dc    | 156    | 113    | 121    | 459   | 575   | 267   | 3.238089 | 3.007821 | 3.030383 | 14.78793 |
| protein_co potassium_    | 0      | 0      | 1      | 6     | 2     | 1     | 0        | 0        | 0.019178 | 0.148027 |
| protein_co chaperonin    | 3507   | 2905   | 3181   | 4936  | 5480  | 4545  | 65.25527 | 69.31629 | 71.41535 | 142.556  |

|                          |       |       |       |      |      |      |          |          |          |          |
|--------------------------|-------|-------|-------|------|------|------|----------|----------|----------|----------|
| protein_co gamma-glu     | 1449  | 1126  | 1204  | 412  | 412  | 400  | 21.08741 | 21.0137  | 21.14119 | 9.306418 |
| protein_co sialidase_2   | 0     | 1     | 0     | 0    | 0    | 0    | 0        | 0.052607 | 0        | 0        |
| protein_co EH_domain     | 734   | 616   | 706   | 285  | 332  | 313  | 6.663557 | 7.171337 | 7.733264 | 4.015923 |
| protein_co orthodenti    | 1     | 2     | 0     | 1    | 5    | 4    | 0.016389 | 0.042034 | 0        | 0.025439 |
| protein_co thioredoxin   | 406   | 304   | 345   | 177  | 175  | 263  | 11.62941 | 11.16644 | 11.92337 | 7.869288 |
| protein_co coenzyme_     | 453   | 354   | 360   | 218  | 245  | 237  | 9.486904 | 9.506899 | 9.096553 | 7.086198 |
| protein_co granulysin    | 0     | 0     | 0     | 5    | 4    | 3    | 0        | 0        | 0        | 0.17708  |
| protein_co splicing_fac  | 5935  | 4985  | 5319  | 5382 | 5284 | 5397 | 64.18179 | 69.12985 | 69.40155 | 90.33692 |
| protein_co ST3_beta-g    | 906   | 663   | 679   | 47   | 70   | 21   | 12.18307 | 11.43277 | 11.01657 | 0.980972 |
| protein_co carbohydr     | 351   | 241   | 258   | 522  | 607  | 735  | 5.801338 | 5.107959 | 5.145041 | 13.39128 |
| protein_co phosducin     | 428   | 373   | 414   | 379  | 400  | 483  | 15.01042 | 16.77518 | 17.51852 | 20.63092 |
| protein_co MOB_famil     | 216   | 171   | 185   | 375  | 405  | 374  | 2.540954 | 2.579577 | 2.625807 | 6.847071 |
| protein_co heat_shock    | 156   | 129   | 129   | 352  | 412  | 359  | 7.699834 | 8.164993 | 7.682358 | 26.96683 |
| protein_co lysine_(K)-s  | 592   | 462   | 450   | 929  | 622  | 516  | 3.175711 | 3.178122 | 2.912593 | 7.735092 |
| protein_co phospholip    | 430   | 365   | 386   | 54   | 90   | 156  | 4.635105 | 5.045374 | 5.020263 | 0.903473 |
| protein_co charged_m     | 795   | 612   | 632   | 147  | 174  | 178  | 11.75578 | 11.60499 | 11.27585 | 3.373898 |
| protein_co zinc_finger   | 701   | 545   | 614   | 431  | 532  | 846  | 5.447448 | 5.431014 | 5.756937 | 5.198557 |
| protein_co SET_and_M     | 0     | 0     | 0     | 0    | 0    | 1    | 0        | 0        | 0        | 0        |
| protein_co interleukin   | 171   | 136   | 135   | 5    | 9    | 6    | 1.55905  | 1.590055 | 1.485066 | 0.070756 |
| protein_co wingless-ty   | 0     | 2     | 0     | 1    | 0    | 0    | 0        | 0.070616 | 0        | 0.042736 |
| protein_co interleukin   | 1     | 1     | 1     | 0    | 0    | 0    | 0.017931 | 0.022994 | 0.021635 | 0        |
| protein_co interleukin   | 4     | 0     | 2     | 2    | 0    | 4    | 0.048666 | 0        | 0.029359 | 0.037768 |
| protein_co solute_carr   | 4     | 0     | 0     | 0    | 0    | 0    | 0.034669 | 0        | 0        | 0        |
| protein_co four_and_a    | 499   | 424   | 461   | 267  | 254  | 324  | 4.793714 | 5.223322 | 5.343435 | 3.981194 |
| protein_co melanophil    | 196   | 180   | 224   | 79   | 132  | 93   | 2.403987 | 2.831118 | 3.314913 | 1.503951 |
| protein_co cyclin_Pas1   | 748   | 531   | 611   | 504  | 508  | 525  | 16.91931 | 15.40228 | 16.67517 | 17.69465 |
| protein_co UDP-glucur    | 1265  | 890   | 949   | 617  | 675  | 785  | 20.4045  | 18.40919 | 18.46927 | 15.44724 |
| protein_co ATP-bindin    | 8     | 3     | 10    | 2    | 8    | 9    | 0.124377 | 0.059811 | 0.187585 | 0.048262 |
| protein_co serine/thre   | 445   | 316   | 334   | 337  | 350  | 316  | 7.275473 | 6.62518  | 6.58864  | 8.55188  |
| protein_co solute_carr   | 0     | 0     | 0     | 0    | 0    | 3    | 0        | 0        | 0        | 0        |
| protein_co high_densi    | 26382 | 21178 | 22793 | 6886 | 7914 | 7426 | 194.1388 | 199.8476 | 202.3737 | 78.65061 |
| protein_co protein_ph    | 951   | 773   | 863   | 651  | 715  | 714  | 18.68919 | 19.48044 | 20.46298 | 19.85736 |
| protein_co PAS_domai     | 564   | 501   | 530   | 1526 | 2067 | 1389 | 5.11132  | 5.822387 | 5.795326 | 21.4654  |
| protein_co serine/thre   | 3876  | 3025  | 3312  | 2976 | 3457 | 3468 | 39.34741 | 39.37922 | 40.56681 | 46.89168 |
| protein_co thyroid_pe    | 8     | 9     | 8     | 40   | 60   | 44   | 0.069583 | 0.100384 | 0.083955 | 0.54001  |
| protein_co protein_C_    | 4     | 8     | 8     | 7    | 14   | 9    | 0.10122  | 0.2596   | 0.244255 | 0.274937 |
| protein_co inhibitor_c   | 555   | 429   | 431   | 799  | 797  | 627  | 12.75059 | 12.63875 | 11.94711 | 28.49146 |
| protein_co TATA_box_I    | 273   | 260   | 253   | 218  | 250  | 318  | 5.362788 | 6.549538 | 5.996482 | 6.646836 |
| protein_co hippocalcin   | 753   | 572   | 595   | 330  | 445  | 259  | 7.385104 | 7.193943 | 7.040875 | 5.023496 |
| protein_co ornithine_c   | 1766  | 1326  | 1456  | 1415 | 1292 | 2933 | 31.21288 | 30.05357 | 31.04935 | 38.81772 |
| protein_co baculoviral   | 2684  | 2302  | 2454  | 1229 | 1338 | 1229 | 8.014571 | 8.814799 | 8.841386 | 5.696133 |
| protein_co nucleolar_I   | 401   | 316   | 341   | 392  | 415  | 533  | 5.641433 | 5.700875 | 5.788253 | 8.559761 |
| protein_co pleckstrin_   | 2030  | 1628  | 1790  | 2147 | 2607 | 2143 | 22.10047 | 22.72842 | 23.51292 | 36.28006 |
| protein_co golgi_reass   | 2701  | 2252  | 2315  | 1563 | 1756 | 1691 | 39.91489 | 42.67643 | 41.27712 | 35.85088 |
| protein_co striatin_cal  | 777   | 671   | 733   | 693  | 888  | 704  | 4.460522 | 4.939654 | 5.077111 | 6.174878 |
| protein_co CCAAT/enh     | 640   | 472   | 509   | 2474 | 2001 | 2724 | 8.665784 | 8.195571 | 8.315603 | 51.99458 |
| protein_co protein_kir   | 1477  | 1264  | 1333  | 912  | 904  | 801  | 11.3331  | 12.43725 | 12.34088 | 10.86159 |
| protein_co DDB1_and_     | 327   | 230   | 282   | 436  | 627  | 383  | 2.630926 | 2.373002 | 2.737524 | 5.444748 |
| protein_co glutaminyl-   | 88    | 98    | 82    | 30   | 29   | 43   | 2.372813 | 3.388568 | 2.667735 | 1.255546 |
| protein_co RAB3_GTPa     | 1079  | 907   | 927   | 674  | 755  | 692  | 10.29596 | 11.09844 | 10.67267 | 9.982415 |
| protein_co solute_carr   | 312   | 238   | 254   | 117  | 132  | 168  | 4.910938 | 4.803925 | 4.823826 | 2.858421 |
| protein_co regulator_c   | 35    | 31    | 51    | 17   | 14   | 15   | 0.719803 | 0.817554 | 1.265505 | 0.542656 |
| protein_co distal-less_I | 1342  | 973   | 1041  | 2    | 0    | 4    | 25.65283 | 23.85091 | 24.00942 | 0.059339 |
| protein_co lactase       | 8     | 4     | 3     | 1    | 0    | 6    | 0.059742 | 0.038305 | 0.027031 | 0.011591 |
| protein_co aspartyl-tRi  | 552   | 427   | 431   | 1240 | 1281 | 1233 | 10.96285 | 10.87481 | 10.32785 | 38.22404 |
| protein_co serine/argin  | 2599  | 2052  | 2128  | 3385 | 4069 | 5754 | 42.65564 | 43.18738 | 42.13954 | 86.23018 |
| protein_co syndecan_1    | 7689  | 5604  | 6049  | 1478 | 2136 | 1311 | 109.5525 | 102.3906 | 103.9882 | 32.68567 |
| protein_co phospholip    | 127   | 66    | 84    | 2    | 0    | 0    | 0.893478 | 0.595434 | 0.71303  | 0.021839 |
| protein_co solute_carr   | 890   | 695   | 765   | 43   | 52   | 48   | 7.208864 | 7.218899 | 7.476293 | 0.5406   |
| protein_co son_of_sev    | 1086  | 955   | 1016  | 671  | 762  | 339  | 5.978931 | 6.742275 | 6.748939 | 5.733855 |
| protein_co kynurenina    | 9     | 1     | 2     | 2    | 1    | 6    | 0.233801 | 0.033313 | 0.062688 | 0.080642 |
| protein_co WAS/WASL      | 2264  | 1786  | 1829  | 99   | 164  | 98   | 23.14345 | 23.41221 | 22.55867 | 1.570787 |
| protein_co origin_recc   | 445   | 346   | 395   | 652  | 802  | 722  | 4.839067 | 4.824886 | 5.182589 | 11.00474 |
| protein_co cytochrom     | 1546  | 1202  | 1287  | 1299 | 1566 | 1316 | 23.72119 | 23.65053 | 23.82614 | 30.93618 |
| protein_co partner_of_   | 251   | 190   | 226   | 258  | 326  | 603  | 5.148466 | 4.997665 | 5.593204 | 8.213993 |

|                         |       |      |       |      |      |       |          |          |          |          |
|-------------------------|-------|------|-------|------|------|-------|----------|----------|----------|----------|
| protein_co origin_recc  | 316   | 248  | 245   | 581  | 463  | 538   | 4.793674 | 4.82439  | 4.484309 | 13.68006 |
| protein_co plectstrin   | 6     | 4    | 4     | 6    | 1    | 1     | 0.098062 | 0.083834 | 0.078878 | 0.152206 |
| protein_co Rho_family   | 1817  | 1410 | 1449  | 1222 | 1012 | 1703  | 30.68029 | 30.53043 | 29.52031 | 32.02626 |
| protein_co activating_  | 831   | 663  | 667   | 268  | 216  | 247   | 9.330844 | 9.546469 | 9.036365 | 4.670734 |
| protein_co thyroid_ad   | 579   | 509  | 550   | 402  | 428  | 436   | 3.91257  | 4.410732 | 4.484296 | 4.216383 |
| protein_co AP2_associ   | 631   | 477  | 507   | 151  | 233  | 147   | 6.576484 | 6.375175 | 6.37559  | 2.442709 |
| protein_co trafficking_ | 1577  | 1192 | 1297  | 146  | 231  | 259   | 11.35876 | 11.00994 | 11.27165 | 1.632235 |
| protein_co chromosom    | 153   | 115  | 133   | 48   | 75   | 118   | 2.77961  | 2.679166 | 2.915359 | 1.353518 |
| protein_co TIA1_cytot   | 1657  | 1372 | 1463  | 1051 | 1131 | 1513  | 16.71977 | 17.75298 | 17.81148 | 16.46042 |
| protein_co prenylcyste  | 1787  | 1428 | 1467  | 902  | 1094 | 854   | 15.67679 | 16.06461 | 15.52783 | 12.28202 |
| protein_co KISS1_rece   | 0     | 0    | 1     | 86   | 84   | 62    | 0        | 0        | 0.033676 | 3.725633 |
| protein_co endothelial  | 628   | 479  | 547   | 63   | 73   | 72    | 5.70677  | 5.581816 | 5.997442 | 0.888591 |
| protein_co AT_rich_int  | 1408  | 1063 | 1130  | 3131 | 4403 | 2758  | 11.03479 | 10.68326 | 10.68533 | 38.08684 |
| protein_co SMT3_suppr   | 1778  | 1407 | 1516  | 1999 | 2268 | 2385  | 54.27764 | 55.07983 | 55.83884 | 94.71798 |
| protein_co glutamate_   | 3     | 5    | 6     | 23   | 39   | 9     | 0.042874 | 0.091633 | 0.10346  | 0.510191 |
| protein_co ventral_ant  | 4     | 1    | 8     | 0    | 1    | 1     | 0.163522 | 0.052424 | 0.394598 | 0        |
| protein_co ATPase_H+    | 4     | 2    | 2     | 1    | 0    | 0     | 0.098457 | 0.063128 | 0.059397 | 0.038205 |
| protein_co nuclear_fac  | 756   | 592  | 561   | 295  | 267  | 243   | 12.42511 | 12.47699 | 11.12473 | 7.525426 |
| protein_co mutS_hom     | 2019  | 1694 | 1773  | 4004 | 4653 | 4089  | 21.87406 | 23.53509 | 23.17661 | 67.33141 |
| protein_co plectstrin_  | 297   | 214  | 239   | 131  | 182  | 125   | 5.002276 | 4.622046 | 4.856877 | 3.424624 |
| protein_co sepiapterin  | 271   | 198  | 243   | 80   | 107  | 83    | 8.585942 | 8.044392 | 9.289086 | 3.934043 |
| protein_co EPH_recept   | 939   | 639  | 714   | 136  | 96   | 140   | 6.938186 | 6.054671 | 6.365413 | 1.559731 |
| protein_co par-3_parti  | 141   | 96   | 87    | 53   | 35   | 46    | 0.808844 | 0.706198 | 0.602162 | 0.471902 |
| protein_co phenylalan   | 716   | 645  | 553   | 708  | 925  | 1133  | 9.965347 | 11.51194 | 9.286511 | 15.29478 |
| protein_co Alstrom_sy   | 1020  | 850  | 884   | 810  | 655  | 799   | 3.701271 | 3.955295 | 3.870356 | 4.562114 |
| protein_co B-cell_CLL/  | 1556  | 1178 | 1269  | 1733 | 2009 | 1475  | 11.62167 | 11.28272 | 11.43586 | 20.09038 |
| protein_co paired_rela  | 10392 | 8485 | 8952  | 0    | 0    | 18    | 113.7444 | 119.0946 | 118.2222 | 0        |
| protein_co 24-dehydro   | 12684 | 9882 | 10850 | 7697 | 7764 | 15284 | 139.9419 | 139.8124 | 144.4339 | 131.8085 |
| protein_co DnaJ_(Hsp4   | 492   | 375  | 421   | 242  | 313  | 330   | 3.662468 | 3.579723 | 3.781281 | 2.796112 |
| protein_co MAP/micro    | 27    | 15   | 27    | 427  | 549  | 280   | 0.242071 | 0.172456 | 0.292072 | 5.94206  |
| protein_co MORN_repe    | 50    | 45   | 64    | 73   | 120  | 79    | 1.229418 | 1.418899 | 1.898706 | 2.786012 |
| protein_co glutathione  | 971   | 647  | 717   | 188  | 212  | 158   | 37.07672 | 31.68076 | 33.03309 | 11.14218 |
| protein_co calcyclin_b  | 1336  | 1028 | 1086  | 1792 | 2320 | 2219  | 22.10482 | 21.81137 | 21.67996 | 46.02026 |
| protein_co sterol_carri | 1240  | 975  | 1022  | 488  | 512  | 528   | 11.17287 | 11.26567 | 11.11072 | 6.824855 |
| protein_co tryptase_ga  | 1     | 4    | 2     | 53   | 86   | 117   | 0.04232  | 0.217075 | 0.102122 | 3.481344 |
| protein_co pappalysin_  | 22    | 17   | 22    | 34   | 31   | 48    | 0.106513 | 0.105545 | 0.128514 | 0.2555   |
| protein_co Ral_GEF_wi   | 406   | 394  | 383   | 797  | 912  | 641   | 3.263172 | 4.060874 | 3.714162 | 9.942664 |
| protein_co angiopoieti  | 34    | 25   | 18    | 3    | 4    | 5     | 0.476183 | 0.448998 | 0.304169 | 0.065215 |
| protein_co centrosom    | 773   | 626  | 578   | 425  | 636  | 461   | 5.642276 | 5.859473 | 5.090386 | 4.814978 |
| protein_co family_witl  | 1566  | 1355 | 1416  | 1125 | 1390 | 1102  | 12.27102 | 13.61562 | 13.38752 | 13.6827  |
| protein_co transcriptic | 197   | 132  | 149   | 230  | 204  | 141   | 2.254658 | 1.937304 | 2.057542 | 4.085759 |
| protein_co transmembr   | 1145  | 863  | 879   | 1006 | 1188 | 969   | 21.7101  | 20.98343 | 20.10913 | 29.60634 |
| protein_co leucine_ric  | 801   | 569  | 569   | 530  | 637  | 429   | 18.43834 | 16.7962  | 15.80337 | 18.93633 |
| protein_co WD_repeat    | 405   | 340  | 372   | 461  | 601  | 452   | 3.118814 | 3.357551 | 3.456411 | 5.51018  |
| protein_co nephrosis_   | 0     | 0    | 0     | 0    | 0    | 2     | 0        | 0        | 0        | 0        |
| protein_co mitochond    | 2305  | 1745 | 1865  | 2239 | 2722 | 2499  | 68.31953 | 66.32522 | 66.69615 | 103.005  |
| protein_co isoprenylcy  | 2546  | 1975 | 2223  | 3061 | 4054 | 4672  | 25.02242 | 24.89129 | 26.36079 | 46.6944  |
| protein_co ribosomal_   | 4530  | 3610 | 3653  | 5498 | 6033 | 5748  | 93.20394 | 95.24729 | 90.68465 | 175.5785 |
| protein_co chromodor    | 4     | 0    | 0     | 159  | 193  | 75    | 0.019444 | 0        | 0        | 1.199667 |
| protein_co quiescin_Q   | 8250  | 6114 | 6340  | 3316 | 4280 | 3280  | 41.54684 | 39.48379 | 38.52311 | 25.91965 |
| protein_co syntaxin_bi  | 369   | 342  | 341   | 361  | 315  | 399   | 6.822719 | 8.108987 | 7.607353 | 10.36022 |
| protein_co PHD_finger   | 1136  | 937  | 972   | 1379 | 1632 | 1200  | 14.47081 | 15.30606 | 14.93925 | 27.26524 |
| protein_co ERBB_recep   | 3153  | 2649 | 2812  | 818  | 981  | 1249  | 47.63023 | 51.31567 | 51.25332 | 19.17973 |
| protein_co parkinson_   | 3550  | 2894 | 2930  | 2847 | 2861 | 3020  | 152.9959 | 159.9408 | 152.3587 | 190.4449 |
| protein_co KIAA1324     | 58    | 31   | 28    | 7    | 18   | 4     | 0.455853 | 0.312441 | 0.265524 | 0.085394 |
| protein_co opioid_rece  | 6     | 8    | 9     | 27   | 21   | 11    | 0.158591 | 0.27116  | 0.287023 | 1.107697 |
| protein_co adenosine_   | 1889  | 1535 | 1699  | 552  | 712  | 508   | 22.71743 | 23.67254 | 24.65293 | 10.30378 |
| protein_co serine/argi  | 2500  | 1965 | 2062  | 2861 | 3248 | 2910  | 49.10978 | 49.49939 | 48.87251 | 87.2321  |
| protein_co mitochond    | 569   | 456  | 419   | 559  | 673  | 542   | 11.04322 | 11.349   | 9.811729 | 16.83937 |
| protein_co potassium_   | 250   | 182  | 241   | 364  | 510  | 185   | 1.543044 | 1.440519 | 1.794747 | 3.487146 |
| protein_co ER_degrad    | 1624  | 1302 | 1356  | 253  | 282  | 187   | 11.03934 | 11.34952 | 11.12154 | 2.669366 |
| protein_co WD_repeat    | 328   | 247  | 300   | 330  | 339  | 611   | 5.970468 | 5.765551 | 6.588762 | 9.323499 |
| protein_co ATP_syntha   | 1519  | 1250 | 1360  | 1678 | 1648 | 2114  | 22.56842 | 23.81567 | 24.37981 | 38.69598 |
| protein_co RAP1A_me     | 788   | 641  | 698   | 361  | 422  | 446   | 7.354565 | 7.671815 | 7.860211 | 5.2296   |
| protein_co histone_de   | 1732  | 1440 | 1578  | 1579 | 1834 | 1549  | 33.71254 | 35.94309 | 37.05942 | 47.70415 |

|                         |      |      |      |      |       |       |          |          |          |          |
|-------------------------|------|------|------|------|-------|-------|----------|----------|----------|----------|
| protein_co capping_pr   | 2530 | 1977 | 2077 | 1180 | 1194  | 1532  | 39.28203 | 39.36311 | 38.90971 | 28.43714 |
| protein_co S100P_bin    | 670  | 571  | 571  | 603  | 748   | 567   | 7.275663 | 7.951393 | 7.481383 | 10.16355 |
| protein_co ring_finger  | 455  | 363  | 346  | 522  | 632   | 221   | 8.21207  | 8.401507 | 7.53469  | 14.62319 |
| protein_co secretory_c  | 1291 | 1056 | 1090 | 636  | 814   | 693   | 39.38517 | 41.31234 | 40.12186 | 30.11578 |
| protein_co tripartite_r | 566  | 418  | 481  | 259  | 302   | 250   | 7.721778 | 7.312847 | 7.917608 | 5.484425 |
| protein_co ash1_(abse   | 1745 | 1422 | 1582 | 545  | 572   | 417   | 6.851707 | 7.159987 | 7.494762 | 3.32147  |
| protein_co discs_large  | 8    | 4    | 1    | 350  | 504   | 404   | 0.097282 | 0.062375 | 0.014672 | 6.60605  |
| protein_co splicing_fac | 9428 | 7224 | 7864 | 7024 | 10164 | 12822 | 117.9821 | 115.9268 | 118.7376 | 136.4306 |
| protein_co ras_homolo   | 573  | 395  | 394  | 253  | 311   | 81    | 6.145467 | 5.432587 | 5.098524 | 4.21164  |
| protein_co gon-4-like_  | 1266 | 1108 | 1201 | 758  | 842   | 851   | 7.696456 | 8.63786  | 8.809436 | 7.152481 |
| protein_co Rho/Rac_gi   | 2905 | 2087 | 2151 | 1361 | 1696  | 1067  | 30.71375 | 28.29558 | 27.43944 | 22.33446 |
| protein_co late_endos   | 650  | 500  | 510  | 406  | 515   | 403   | 35.11349 | 34.63698 | 33.24137 | 34.04217 |
| protein_co myocyte_ei   | 1962 | 1573 | 1587 | 575  | 647   | 485   | 15.423   | 15.85652 | 15.05202 | 7.015656 |
| protein_co dedicator_   | 1947 | 1651 | 1635 | 512  | 514   | 548   | 12.84035 | 13.96263 | 13.00998 | 5.240965 |
| protein_co spermidine   | 3246 | 2411 | 2573 | 2195 | 2421  | 3073  | 120.2251 | 114.5126 | 114.9832 | 126.1861 |
| protein_co deleted_in   | 2    | 4    | 7    | 2    | 2     | 2     | 0.1334   | 0.342133 | 0.563341 | 0.207055 |
| protein_co F-box_prot   | 74   | 51   | 51   | 1162 | 1569  | 875   | 2.22427  | 1.965782 | 1.849584 | 54.21162 |
| protein_co F-box_prot   | 99   | 81   | 62   | 61   | 86    | 106   | 3.054021 | 3.204285 | 2.307685 | 2.920768 |
| protein_co chromosom    | 336  | 271  | 255  | 357  | 508   | 287   | 1.534832 | 1.58745  | 1.405431 | 2.531163 |
| protein_co SWT1_RNA     | 160  | 105  | 124  | 100  | 83    | 69    | 1.958852 | 1.648467 | 1.831687 | 1.900256 |
| protein_co MAD2_miti    | 1672 | 1250 | 1425 | 4947 | 5628  | 5483  | 42.1506  | 40.40981 | 43.34414 | 193.5708 |
| protein_co DnaJ_(Hsp4   | 31   | 26   | 35   | 156  | 170   | 76    | 0.253106 | 0.272223 | 0.344792 | 1.976954 |
| protein_co leptin_rece  | 395  | 330  | 328  | 124  | 99    | 44    | 2.251314 | 2.411916 | 2.255593 | 1.096961 |
| protein_co influenza_v  | 3520 | 3064 | 3148 | 3231 | 4152  | 3335  | 39.30766 | 43.87656 | 42.41479 | 56.0018  |
| protein_co KIAA2013     | 2593 | 2018 | 2088 | 1918 | 2671  | 1883  | 43.19212 | 43.10548 | 41.96435 | 49.58851 |
| protein_co mitofusin_   | 2693 | 2095 | 2262 | 1819 | 2337  | 2498  | 27.81996 | 27.75323 | 28.19427 | 29.16644 |
| protein_co proteoglyc   | 2407 | 1783 | 1815 | 13   | 13    | 17    | 22.37595 | 21.25524 | 20.35776 | 0.187577 |
| protein_co migration_   | 930  | 715  | 767  | 1118 | 1405  | 993   | 25.51651 | 25.1567  | 25.39111 | 47.61136 |
| protein_co smg-7_hom    | 1228 | 1011 | 1038 | 1239 | 1397  | 1322  | 9.645049 | 10.18278 | 9.836746 | 15.10455 |
| protein_co neutrophil   | 26   | 21   | 19   | 7    | 1     | 1     | 0.53565  | 0.5548   | 0.472291 | 0.223839 |
| protein_co phosducin    | 2    | 2    | 0    | 0    | 0     | 0     | 0.075507 | 0.096827 | 0        | 0        |
| protein_co solute_carr  | 572  | 491  | 487  | 79   | 70    | 155   | 4.35266  | 4.791258 | 4.47132  | 0.933074 |
| protein_co phospholip   | 277  | 219  | 252  | 16   | 11    | 13    | 4.517751 | 4.580322 | 4.958966 | 0.405035 |
| protein_co growth_arr   | 937  | 705  | 741  | 540  | 572   | 269   | 29.36895 | 28.33657 | 28.02303 | 26.27078 |
| protein_co PRAME_fan    | 0    | 0    | 0    | 0    | 0     | 1     | 0        | 0        | 0        | 0        |
| protein_co wntless_ho   | 3779 | 3125 | 3189 | 93   | 131   | 101   | 64.48231 | 68.37904 | 65.65476 | 2.463072 |
| protein_co PR_domair    | 1126 | 884  | 849  | 439  | 491   | 445   | 6.635435 | 6.680249 | 6.036522 | 4.015374 |
| protein_co regulator_c  | 4237 | 3370 | 3552 | 172  | 136   | 214   | 147.8222 | 150.7719 | 149.521  | 9.314082 |
| protein_co retinal_pig  | 2    | 1    | 1    | 0    | 0     | 0     | 0.035931 | 0.023038 | 0.021676 | 0        |
| protein_co TROVE_dor    | 1213 | 993  | 1059 | 690  | 712   | 689   | 7.247399 | 7.608166 | 7.634233 | 6.398836 |
| protein_co ubiquitin_   | 529  | 404  | 461  | 359  | 371   | 505   | 12.98002 | 12.7119  | 13.64799 | 13.6724  |
| protein_co breast_carc  | 530  | 378  | 485  | 467  | 438   | 768   | 19.13142 | 17.49735 | 21.12326 | 26.16487 |
| protein_co serine/argi  | 3374 | 2850 | 3080 | 3063 | 3184  | 3489  | 39.47278 | 42.75697 | 43.47619 | 55.61989 |
| protein_co cystathion   | 101  | 77   | 85   | 248  | 309   | 195   | 2.316972 | 2.265164 | 2.3527   | 8.830426 |
| protein_co agmatine_u   | 22   | 20   | 30   | 51   | 99    | 108   | 0.412632 | 0.481038 | 0.678906 | 1.484708 |
| protein_co olfactomed   | 5490 | 4251 | 4213 | 744  | 889   | 1158  | 124.7825 | 123.9029 | 115.5369 | 26.2473  |
| protein_co TNNT3_inte   | 1    | 1    | 0    | 1    | 0     | 0     | 0.014344 | 0.018394 | 0        | 0.022264 |
| protein_co compleme     | 0    | 0    | 0    | 1    | 7     | 2     | 0        | 0        | 0        | 0.037038 |
| protein_co pleckstrin   | 2001 | 1597 | 1663 | 1299 | 1626  | 968   | 22.76248 | 23.29628 | 22.8251  | 22.9357  |
| protein_co crystallin_z | 485  | 434  | 448  | 336  | 346   | 353   | 7.844656 | 9.001839 | 8.742955 | 8.435327 |
| protein_co putative_h   | 1217 | 1014 | 1086 | 391  | 423   | 494   | 13.2279  | 14.13343 | 14.24223 | 6.596408 |
| protein_co zinc_finger  | 865  | 695  | 701  | 487  | 717   | 471   | 14.64255 | 15.08672 | 14.31748 | 12.79558 |
| protein_co CD58_mole    | 121  | 77   | 86   | 22   | 31    | 37    | 4.272359 | 3.486441 | 3.663775 | 1.205689 |
| protein_co transcriptic | 27   | 26   | 22   | 37   | 35    | 8     | 0.57836  | 0.714196 | 0.568598 | 1.230175 |
| protein_co CD2_molec    | 0    | 0    | 0    | 0    | 0     | 1     | 0        | 0        | 0        | 0        |
| protein_co transcriptic | 444  | 384  | 418  | 1026 | 1081  | 1095  | 4.267097 | 4.732495 | 4.84701  | 15.30479 |
| protein_co nuclear_re   | 0    | 0    | 0    | 626  | 670   | 638   | 0        | 0        | 0        | 8.957954 |
| protein_co kinesin_fan  | 629  | 536  | 588  | 1023 | 1254  | 630   | 2.980679 | 3.257157 | 3.36194  | 7.52438  |
| protein_co transmem     | 1173 | 976  | 962  | 1343 | 1675  | 1180  | 19.01867 | 20.29277 | 18.81938 | 33.79781 |
| protein_co ADP-ribosy   | 768  | 511  | 653  | 598  | 688   | 729   | 21.58965 | 18.42106 | 22.14856 | 26.09252 |
| protein_co MAP7_dorr    | 8304 | 5861 | 6546 | 2143 | 2979  | 1772  | 112.6663 | 101.9736 | 107.1595 | 45.12937 |
| protein_co tryptophar   | 187  | 165  | 139  | 159  | 116   | 168   | 3.119329 | 3.529497 | 2.797579 | 4.11668  |
| protein_co hydroxyaci   | 0    | 0    | 0    | 10   | 12    | 2     | 0        | 0        | 0        | 0.43633  |
| protein_co -            | 83   | 82   | 70   | 271  | 225   | 110   | 2.117449 | 2.682613 | 2.154671 | 10.73086 |
| protein_co organic_sol  | 71   | 74   | 79   | 23   | 28    | 27    | 2.275592 | 3.041425 | 3.055    | 1.14418  |

|                         |      |      |      |      |      |      |          |          |          |          |
|-------------------------|------|------|------|------|------|------|----------|----------|----------|----------|
| protein_co mitochond    | 1276 | 1072 | 1036 | 1033 | 1223 | 1401 | 28.1296  | 30.30519 | 27.55629 | 35.34628 |
| protein_co exocyst_co   | 235  | 168  | 204  | 151  | 183  | 216  | 2.160618 | 1.980746 | 2.26302  | 2.154853 |
| protein_co glyceronep   | 1087 | 876  | 898  | 550  | 606  | 693  | 19.28469 | 19.92951 | 19.2224  | 15.14525 |
| protein_co translin-ass | 329  | 253  | 234  | 176  | 252  | 296  | 2.740596 | 2.702583 | 2.351869 | 2.275581 |
| protein_co chromosom    | 342  | 223  | 205  | 393  | 521  | 572  | 6.239839 | 5.217488 | 4.512832 | 11.12936 |
| protein_co Ras-related  | 556  | 495  | 455  | 155  | 238  | 255  | 9.542771 | 10.89467 | 9.422348 | 4.129161 |
| protein_co tubulin_fol  | 506  | 357  | 418  | 483  | 564  | 617  | 11.983   | 10.84158 | 11.94372 | 17.75386 |
| protein_co nidogen_1    | 8673 | 6314 | 6889 | 1354 | 1826 | 1007 | 69.35149 | 64.74412 | 66.46464 | 16.80489 |
| protein_co lectin_gala  | 421  | 327  | 338  | 89   | 112  | 157  | 3.074875 | 3.062686 | 2.978586 | 1.008941 |
| protein_co hippocalcii  | 0    | 0    | 0    | 5    | 5    | 1    | 0        | 0        | 0        | 0.074938 |
| protein_co 5-methylte   | 2309 | 1690 | 1895 | 871  | 938  | 809  | 10.28294 | 9.651378 | 10.18241 | 6.020629 |
| protein_co bone_mor     | 113  | 104  | 100  | 31   | 31   | 10   | 1.098833 | 1.296868 | 1.173279 | 0.467892 |
| protein_co v-myc_mye    | 16   | 12   | 9    | 851  | 1125 | 468  | 0.230418 | 0.221609 | 0.156382 | 19.02199 |
| protein_co signal-indu  | 1400 | 1013 | 1051 | 561  | 612  | 508  | 9.81256  | 9.104856 | 8.88802  | 6.10306  |
| protein_co zona_pellu   | 9    | 1    | 2    | 0    | 2    | 0    | 0.23458  | 0.033424 | 0.062897 | 0        |
| protein_co rearranged   | 547  | 401  | 426  | 420  | 353  | 448  | 4.106442 | 3.860398 | 3.858656 | 4.893935 |
| protein_co kynurenine   | 11   | 10   | 6    | 3    | 3    | 0    | 0.09804  | 0.114293 | 0.064523 | 0.041502 |
| protein_co zinc_finger  | 72   | 61   | 76   | 62   | 59   | 51   | 1.609958 | 1.749126 | 2.050424 | 2.151811 |
| protein_co potassium_   | 5    | 9    | 6    | 156  | 219  | 88   | 0.057197 | 0.132024 | 0.082814 | 2.769858 |
| protein_co regulating_  | 270  | 186  | 213  | 947  | 1324 | 515  | 1.749869 | 1.545839 | 1.665595 | 9.526257 |
| protein_co v-akt_murii  | 1246 | 1147 | 1161 | 329  | 347  | 202  | 11.39555 | 13.45209 | 12.81142 | 4.670286 |
| protein_co ets_variant  | 872  | 613  | 649  | 496  | 580  | 570  | 7.782279 | 7.015524 | 6.988485 | 6.870724 |
| protein_co acyl-CoA_d   | 613  | 451  | 497  | 370  | 406  | 499  | 10.97502 | 10.35454 | 10.73617 | 10.28199 |
| protein_co ST6_(alpha   | 446  | 320  | 358  | 102  | 117  | 93   | 5.575299 | 5.129708 | 5.399635 | 1.979083 |
| protein_co signaling_l  | 0    | 0    | 0    | 5    | 0    | 1    | 0        | 0        | 0        | 0.090838 |
| protein_co CD48_mole    | 5    | 3    | 3    | 7    | 7    | 1    | 0.130759 | 0.100608 | 0.094661 | 0.284138 |
| protein_co latrophilin  | 2507 | 2000 | 2106 | 1295 | 1371 | 1592 | 18.65333 | 19.08277 | 18.90638 | 14.95554 |
| protein_co peptidyl_ar  | 4    | 2    | 3    | 117  | 145  | 70   | 0.043167 | 0.027678 | 0.039062 | 1.959778 |
| protein_co succinate_c  | 878  | 802  | 859  | 597  | 711  | 627  | 35.70636 | 41.82489 | 42.14949 | 37.6839  |
| protein_co microfibrill | 7620 | 5688 | 6079 | 1995 | 2233 | 2148 | 150.6967 | 144.2506 | 145.0538 | 61.23817 |
| protein_co ribosome_l   | 534  | 430  | 431  | 438  | 465  | 664  | 18.07889 | 18.66846 | 17.60581 | 23.01628 |
| protein_co lysine_(K)-s | 3410 | 2857 | 3006 | 4785 | 4789 | 3038 | 21.49704 | 23.09637 | 22.86448 | 46.82056 |
| protein_co UDP-N-act    | 1734 | 1344 | 1507 | 470  | 515  | 408  | 34.68741 | 34.47715 | 36.37342 | 14.59322 |
| protein_co actin-like_  | 0    | 0    | 0    | 6    | 5    | 10   | 0        | 0        | 0        | 0.234647 |
| protein_co chitobiase_  | 169  | 138  | 154  | 68   | 61   | 34   | 2.571192 | 2.692379 | 2.82694  | 1.605784 |
| protein_co regulator_c  | 946  | 731  | 848  | 3    | 1    | 18   | 11.75357 | 11.64676 | 12.71225 | 0.057854 |
| protein_co kelch-like_f | 574  | 487  | 525  | 770  | 815  | 716  | 8.012763 | 8.717836 | 8.842554 | 16.68367 |
| protein_co immunoglob   | 0    | 0    | 0    | 634  | 894  | 414  | 0        | 0        | 0        | 23.74802 |
| protein_co synovial_sa  | 483  | 409  | 444  | 269  | 275  | 372  | 3.87607  | 4.208983 | 4.29908  | 3.350636 |
| protein_co zinc_finger  | 551  | 459  | 477  | 257  | 280  | 322  | 4.249408 | 4.539404 | 4.438572 | 3.076383 |
| protein_co retinoblast  | 565  | 464  | 494  | 415  | 516  | 436  | 6.015636 | 6.335201 | 6.346117 | 6.858224 |
| protein_co guanylate_l  | 356  | 312  | 347  | 2    | 2    | 0    | 4.538566 | 5.100733 | 5.337602 | 0.039576 |
| protein_co guanylate_l  | 78   | 57   | 61   | 0    | 0    | 1    | 1.205081 | 1.129291 | 1.137102 | 0        |
| processed_PINK1_anti    | 79   | 70   | 48   | 19   | 26   | 42   | 0.833741 | 0.947352 | 0.611214 | 0.311235 |
| protein_co kinesin_fan  | 51   | 37   | 39   | 295  | 375  | 87   | 0.602517 | 0.560545 | 0.55592  | 5.409433 |
| protein_co G_protein-i  | 111  | 78   | 110  | 92   | 91   | 102  | 1.928415 | 1.737727 | 2.305782 | 2.480823 |
| protein_co cyclin-depe  | 9    | 13   | 13   | 1210 | 1426 | 646  | 0.106407 | 0.197097 | 0.185447 | 22.20463 |
| protein_co RAB7_mern    | 281  | 229  | 177  | 151  | 233  | 88   | 4.026924 | 4.208351 | 3.060472 | 3.358726 |
| protein_co CD160_mo     | 31   | 15   | 25   | 5    | 2    | 9    | 0.428914 | 0.26614  | 0.417347 | 0.107377 |
| protein_co thioredoxin  | 895  | 616  | 599  | 1227 | 947  | 189  | 14.33774 | 12.65458 | 11.57797 | 30.50933 |
| protein_co endothelin   | 1786 | 1350 | 1547 | 1695 | 2204 | 1589 | 16.42392 | 15.91983 | 17.1646  | 24.19332 |
| protein_co 3-hydroxyn   | 494  | 421  | 402  | 403  | 421  | 204  | 10.76879 | 11.76878 | 10.57339 | 13.63564 |
| protein_co UDP-galact   | 929  | 721  | 696  | 230  | 301  | 352  | 21.01342 | 20.91345 | 18.99496 | 8.074942 |
| protein_co inhibitor_c  | 1619 | 1047 | 1110 | 1114 | 1395 | 1811 | 60.6834  | 50.32446 | 50.19889 | 64.80951 |
| protein_co compleme     | 0    | 0    | 0    | 52   | 65   | 98   | 0        | 0        | 0        | 0.892582 |
| protein_co CD46_mole    | 1943 | 1627 | 1725 | 1526 | 1874 | 1784 | 11.64162 | 12.50079 | 12.47032 | 14.19141 |
| protein_co PRP3_pre-r   | 830  | 716  | 754  | 706  | 726  | 758  | 14.99758 | 16.59073 | 16.43851 | 19.80059 |
| protein_co anterior_pl  | 1878 | 1407 | 1507 | 1381 | 1666 | 1616 | 37.42433 | 35.95522 | 36.23429 | 42.71522 |
| protein_co leucine_pro  | 9914 | 7765 | 8007 | 798  | 1009 | 685  | 154.9042 | 155.5841 | 150.9497 | 19.35298 |
| protein_co solute_carr  | 2319 | 1816 | 2051 | 5286 | 3665 | 4082 | 32.77214 | 32.9101  | 34.97178 | 115.9476 |
| protein_co EBNA1_bin    | 690  | 552  | 561  | 625  | 689  | 1101 | 21.52636 | 22.0836  | 21.117   | 30.26439 |
| protein_co cell_divisio | 2073 | 1592 | 1727 | 4192 | 4333 | 3877 | 54.70062 | 53.8698  | 54.98362 | 171.6899 |
| protein_co myeloprolif  | 4    | 3    | 0    | 11   | 8    | 2    | 0.096185 | 0.092507 | 0        | 0.410553 |
| protein_co artemin      | 32   | 25   | 31   | 143  | 222  | 71   | 0.772249 | 0.773672 | 0.902646 | 5.356414 |
| protein_co importin_1   | 660  | 584  | 593  | 372  | 492  | 385  | 7.947461 | 9.017925 | 8.615633 | 6.95277  |

|                         |       |      |      |      |      |      |          |          |          |          |
|-------------------------|-------|------|------|------|------|------|----------|----------|----------|----------|
| protein_co ATPase_H+    | 1221  | 944  | 977  | 904  | 1191 | 1214 | 23.54141 | 23.33986 | 22.72791 | 27.05302 |
| protein_co UDP-Gal:be   | 4178  | 2976 | 3212 | 2436 | 2744 | 1686 | 74.51749 | 68.06629 | 69.12154 | 67.43689 |
| protein_co ERI1_exoril  | 1111  | 790  | 907  | 804  | 1073 | 886  | 30.93516 | 28.20816 | 30.47149 | 34.7476  |
| protein_co patched_2    | 59    | 51   | 49   | 16   | 14   | 26   | 0.643674 | 0.713499 | 0.644998 | 0.270935 |
| protein_co aldo-keto_1  | 2273  | 1769 | 2055 | 2695 | 3028 | 2065 | 58.62542 | 58.50914 | 63.95086 | 107.8886 |
| protein_co peroxiredo   | 4779  | 3943 | 4178 | 8691 | 9403 | 9219 | 181.7416 | 192.2886 | 191.7052 | 513.0002 |
| protein_co phosphoin    | 1367  | 1033 | 1127 | 364  | 404  | 500  | 11.42782 | 11.074   | 11.36755 | 4.723096 |
| protein_co tetraspanin  | 8     | 7    | 9    | 0    | 4    | 3    | 0.232273 | 0.260625 | 0.315281 | 0        |
| protein_co basic_leuci  | 367   | 276  | 292  | 95   | 81   | 177  | 6.259962 | 6.03704  | 6.009475 | 2.515126 |
| protein_co coiled-coil  | 28    | 25   | 15   | 38   | 48   | 23   | 0.64517  | 0.738695 | 0.417018 | 1.359033 |
| protein_co solute_carr  | 299   | 204  | 238  | 391  | 436  | 475  | 3.819154 | 3.341454 | 3.66793  | 7.751812 |
| protein_co fatty_acid_  | 8     | 14   | 21   | 109  | 210  | 156  | 0.17914  | 0.402014 | 0.567376 | 3.788442 |
| protein_co NOP2/Sun_    | 450   | 348  | 368  | 280  | 310  | 362  | 4.857391 | 4.817028 | 4.792768 | 4.691147 |
| protein_co transmembr   | 612   | 521  | 561  | 236  | 256  | 399  | 4.701293 | 5.132311 | 5.199682 | 2.813898 |
| protein_co maestro_hc   | 0     | 0    | 2    | 0    | 0    | 0    | 0        | 0        | 0.035751 | 0        |
| protein_co down-regul   | 1869  | 1401 | 1527 | 1180 | 1319 | 1075 | 27.03191 | 25.98453 | 26.64738 | 26.48987 |
| protein_co calponin_3   | 10376 | 8444 | 8600 | 2857 | 3378 | 3519 | 224.7256 | 234.5201 | 224.7341 | 96.04244 |
| protein_co proline-ricl | 5764  | 4776 | 5011 | 5193 | 6110 | 6068 | 26.07313 | 27.70402 | 27.34901 | 36.46011 |
| protein_co coagulation  | 336   | 250  | 252  | 62   | 79   | 102  | 6.888957 | 6.572999 | 6.233943 | 1.973042 |
| protein_co ATP-bindin   | 683   | 609  | 589  | 402  | 426  | 467  | 7.333612 | 8.385401 | 7.630633 | 6.699675 |
| protein_co vesicle-assc | 247   | 220  | 205  | 200  | 217  | 139  | 2.244977 | 2.56417  | 2.248106 | 2.821469 |
| protein_co DPH5_hom     | 170   | 181  | 165  | 338  | 367  | 252  | 3.692127 | 5.040988 | 4.323742 | 11.39397 |
| protein_co Fas_ligand_  | 0     | 0    | 0    | 2    | 0    | 0    | 0        | 0        | 0        | 0.077097 |
| protein_co polypyrimi   | 341   | 285  | 314  | 519  | 518  | 988  | 5.210002 | 5.583901 | 5.788436 | 12.30783 |
| protein_co tumor_nec    | 80    | 60   | 72   | 6    | 10   | 2    | 1.081038 | 1.039708 | 1.173901 | 0.125844 |
| protein_co peroxiredo   | 3561  | 2827 | 2986 | 3430 | 4176 | 4257 | 95.36    | 97.07992 | 96.47885 | 142.5669 |
| protein_co aspartyl-tR  | 562   | 409  | 476  | 560  | 573  | 782  | 7.516312 | 7.014571 | 7.681101 | 11.62484 |
| protein_co hydroxyste   | 1     | 0    | 1    | 1    | 0    | 0    | 0.031747 | 0        | 0.038304 | 0.049275 |
| protein_co interferon_  | 6     | 1    | 1    | 292  | 338  | 161  | 0.065337 | 0.013964 | 0.013139 | 4.93537  |
| protein_co digestive_o  | 312   | 243  | 225  | 215  | 229  | 504  | 1.732144 | 1.729995 | 1.507162 | 1.852671 |
| protein_co Lipid_phos   | 4     | 5    | 5    | 11   | 17   | 11   | 0.04537  | 0.072726 | 0.068427 | 0.193657 |
| protein_co Lipid_phos   | 114   | 106  | 124  | 20   | 19   | 67   | 0.995616 | 1.187141 | 1.306642 | 0.271111 |
| protein_co serpin_pep   | 1     | 5    | 2    | 0    | 1    | 3    | 0.029417 | 0.188613 | 0.070986 | 0        |
| protein_co RCAN_fami    | 112   | 113  | 99   | 353  | 454  | 373  | 1.890454 | 2.445884 | 2.01619  | 9.248117 |
| protein_co SYF2_homc    | 534   | 411  | 401  | 561  | 594  | 660  | 12.76211 | 12.596   | 11.56309 | 20.81013 |
| protein_co chromosom    | 472   | 405  | 416  | 298  | 383  | 262  | 7.29469  | 8.026555 | 7.757222 | 7.148445 |
| protein_co solute_carr  | 360   | 276  | 328  | 200  | 231  | 278  | 3.05086  | 2.999426 | 3.353834 | 2.630754 |
| protein_co REST_corep   | 528   | 363  | 460  | 359  | 382  | 503  | 5.830883 | 5.14063  | 6.129235 | 6.153544 |
| protein_co stathmin_1   | 7068  | 5491 | 5652 | 7093 | 7343 | 7585 | 112.4597 | 112.0369 | 108.5052 | 175.1704 |
| protein_co mitochond    | 397   | 329  | 301  | 172  | 189  | 183  | 5.706725 | 6.064593 | 5.220487 | 3.837562 |
| protein_co mannosida    | 48    | 29   | 31   | 583  | 786  | 448  | 0.484965 | 0.37573  | 0.377901 | 9.142561 |
| protein_co NIMA-relat   | 372   | 328  | 280  | 460  | 376  | 311  | 8.1854   | 9.255079 | 7.433666 | 15.71033 |
| protein_co ribosomal_   | 301   | 260  | 294  | 1470 | 1796 | 1130 | 4.407837 | 4.882494 | 5.194628 | 33.41234 |
| protein_co dehydrodo    | 1158  | 930  | 1010 | 467  | 663  | 764  | 16.26682 | 16.75276 | 17.11841 | 10.1822  |
| protein_co neudesin_r   | 363   | 263  | 287  | 231  | 214  | 193  | 18.06908 | 16.78783 | 17.23691 | 17.84728 |
| protein_co NSL1_MINI    | 435   | 362  | 415  | 523  | 636  | 534  | 8.803262 | 9.39447  | 10.13329 | 16.42807 |
| protein_co prospero_h   | 316   | 262  | 274  | 54   | 47   | 60   | 1.743616 | 1.853849 | 1.824157 | 0.462475 |
| protein_co AT_rich_int  | 4756  | 3459 | 3723 | 4423 | 5570 | 5226 | 26.00081 | 24.24962 | 24.55761 | 37.5312  |
| protein_co centromer    | 3402  | 2895 | 3241 | 4142 | 1964 | 4299 | 15.47684 | 16.88908 | 17.78997 | 29.2475  |
| protein_co replication  | 584   | 444  | 419  | 679  | 789  | 958  | 15.63001 | 15.23837 | 13.53033 | 28.20633 |
| protein_co protein_ph   | 701   | 601  | 592  | 523  | 573  | 624  | 12.39906 | 13.63184 | 12.63399 | 14.35829 |
| protein_co syntaxin_1   | 558   | 495  | 495  | 141  | 183  | 73   | 8.497769 | 9.666856 | 9.095445 | 3.332885 |
| protein_co mitochond    | 82    | 79   | 46   | 166  | 231  | 136  | 1.807702 | 2.233312 | 1.223542 | 5.680041 |
| protein_co solute_carr  | 4     | 5    | 0    | 4    | 3    | 10   | 0.049764 | 0.079769 | 0        | 0.07724  |
| protein_co oxysterol_k  | 1363  | 1145 | 1328 | 954  | 882  | 934  | 14.13962 | 15.23199 | 16.62218 | 15.36105 |
| protein_co thioredoxin  | 895   | 712  | 719  | 1117 | 1357 | 1019 | 17.51526 | 17.86829 | 16.97737 | 33.92948 |
| protein_co extended_s   | 2367  | 1863 | 1953 | 1389 | 1584 | 839  | 18.62226 | 18.79561 | 18.53892 | 16.9616  |
| protein_co CD3e_mole    | 70    | 56   | 67   | 153  | 133  | 182  | 0.998874 | 1.024732 | 1.153548 | 3.388713 |
| protein_co mesoderm_    | 1298  | 932  | 1023 | 660  | 754  | 1088 | 14.29721 | 13.16443 | 13.59566 | 11.28369 |
| protein_co reticulocal  | 1916  | 1597 | 1584 | 1784 | 2201 | 2138 | 22.82553 | 24.39718 | 22.76819 | 32.98759 |
| protein_co cholinergic  | 4     | 1    | 0    | 106  | 119  | 111  | 0.071506 | 0.022924 | 0        | 2.941159 |
| protein_co mucin_5B_    | 10    | 8    | 10   | 10   | 29   | 7    | 0.02616  | 0.026838 | 0.031564 | 0.040605 |
| protein_co cathepsin_1  | 1866  | 1261 | 1340 | 1054 | 1293 | 1114 | 41.21374 | 35.71534 | 35.70946 | 36.13279 |
| protein_co collectin_si | 3     | 2    | 2    | 20   | 11   | 17   | 0.090347 | 0.077238 | 0.072672 | 0.934872 |
| protein_co stromal_an   | 870   | 678  | 762  | 233  | 173  | 351  | 6.73952  | 6.735173 | 7.122177 | 2.801535 |

|                         |      |      |      |      |      |      |          |          |          |          |
|-------------------------|------|------|------|------|------|------|----------|----------|----------|----------|
| protein_co serine/thre  | 2524 | 1952 | 2018 | 2928 | 4407 | 2326 | 33.30999 | 33.035   | 32.13323 | 59.97727 |
| protein_co myeloid/ly   | 1877 | 1508 | 1629 | 1056 | 1179 | 850  | 5.303879 | 5.464369 | 5.553905 | 4.631522 |
| protein_co trehalase_(  | 25   | 18   | 13   | 6    | 6    | 3    | 0.423195 | 0.390735 | 0.265517 | 0.157646 |
| protein_co intraflagell | 256  | 219  | 248  | 156  | 143  | 157  | 6.599145 | 7.239376 | 7.713428 | 6.241698 |
| protein_co matrix_me    | 57   | 63   | 55   | 0    | 0    | 0    | 0.874585 | 1.239587 | 1.018211 | 0        |
| protein_co apolipoppro  | 0    | 2    | 0    | 2    | 3    | 7    | 0        | 0.098011 | 0        | 0.11863  |
| protein_co zinc_finger  | 0    | 0    | 0    | 0    | 1    | 1    | 0        | 0        | 0        | 0        |
| protein_co solute_carr  | 4    | 2    | 3    | 94   | 143  | 75   | 0.035835 | 0.022977 | 0.032428 | 1.307089 |
| protein_co kaptin_(act  | 230  | 172  | 194  | 263  | 303  | 283  | 6.377708 | 6.1161   | 6.490626 | 11.31939 |
| protein_co ribosomal_   | 6226 | 4925 | 5171 | 9252 | 9434 | 7680 | 199.6835 | 202.5576 | 200.1039 | 460.5737 |
| protein_co kinesin_fan  | 721  | 637  | 691  | 570  | 422  | 608  | 4.647746 | 5.265697 | 5.37444  | 5.703119 |
| protein_co troponin_T   | 30   | 19   | 23   | 16   | 26   | 15   | 0.466722 | 0.379053 | 0.431731 | 0.386356 |
| protein_co DEAD_(Asp    | 175  | 169  | 153  | 252  | 265  | 182  | 2.82957  | 3.504116 | 2.984846 | 6.324314 |
| protein_co calmodulin   | 1320 | 1046 | 1090 | 545  | 581  | 598  | 8.418774 | 8.554919 | 8.387827 | 5.395129 |
| protein_co activating_  | 1120 | 964  | 932  | 492  | 548  | 387  | 7.005979 | 7.732807 | 7.034201 | 4.776903 |
| protein_co crystallin_  | 0    | 0    | 0    | 52   | 45   | 40   | 0        | 0        | 0        | 6.113974 |
| protein_co melanoreg    | 37   | 24   | 37   | 189  | 228  | 201  | 1.320343 | 1.098261 | 1.59307  | 10.46833 |
| protein_co FAST_kinase  | 512  | 347  | 340  | 488  | 487  | 732  | 4.802498 | 4.173843 | 3.847904 | 7.10473  |
| protein_co neuropilin_  | 9790 | 8033 | 8553 | 473  | 523  | 652  | 68.90622 | 72.50415 | 72.63439 | 5.167344 |
| protein_co cAMP_resp    | 751  | 560  | 641  | 643  | 677  | 681  | 4.60319  | 4.401658 | 4.74051  | 6.117309 |
| protein_co Kruppel-lik  | 716  | 641  | 679  | 288  | 377  | 463  | 4.014979 | 4.609328 | 4.593969 | 2.506647 |
| protein_co transthyret  | 2    | 0    | 0    | 0    | 0    | 0    | 0.097994 | 0        | 0        | 0        |
| protein_co UDP-Gal:be   | 543  | 420  | 448  | 471  | 573  | 360  | 5.751362 | 5.704657 | 5.725283 | 7.743232 |
| protein_co chromosom    | 173  | 184  | 185  | 68   | 80   | 55   | 6.484391 | 8.844031 | 8.366482 | 3.956056 |
| protein_co carbonic_a   | 29   | 24   | 13   | 474  | 596  | 442  | 0.76052  | 0.807111 | 0.411343 | 19.29397 |
| protein_co cancer_sus   | 0    | 2    | 1    | 0    | 0    | 0    | 0        | 0.049186 | 0.023139 | 0        |
| protein_co lymphoid-r   | 2    | 2    | 1    | 2    | 1    | 1    | 0.034541 | 0.044295 | 0.020838 | 0.053613 |
| protein_co ATPase_cla   | 0    | 2    | 2    | 3    | 3    | 2    | 0        | 0.015895 | 0.014955 | 0.028858 |
| protein_co signal_pept  | 1531 | 1164 | 1312 | 797  | 998  | 1275 | 26.50983 | 25.84604 | 27.41029 | 21.42005 |
| protein_co ubiquitin_s  | 434  | 319  | 357  | 191  | 259  | 115  | 4.826914 | 4.549669 | 4.790668 | 3.297187 |
| protein_co ELOVL_fatt   | 250  | 245  | 203  | 166  | 178  | 165  | 3.853552 | 4.842801 | 3.77542  | 3.971547 |
| protein_co filamin_A_i  | 1    | 0    | 1    | 146  | 83   | 128  | 0.010238 | 0        | 0.012353 | 2.320055 |
| processed_caspase_8_    | 370  | 331  | 344  | 300  | 210  | 412  | 2.362378 | 2.710098 | 2.650051 | 2.973031 |
| protein_co high_mobil   | 355  | 270  | 274  | 382  | 550  | 609  | 19.0894  | 18.61817 | 17.77717 | 31.88289 |
| protein_co ubiquitin_J  | 56   | 65   | 67   | 134  | 163  | 137  | 0.80671  | 1.200749 | 1.164534 | 2.996158 |
| protein_co cannabinoi   | 0    | 0    | 0    | 34   | 35   | 38   | 0        | 0        | 0        | 0.275743 |
| protein_co ankyrin_rej  | 617  | 448  | 542  | 399  | 465  | 455  | 7.110135 | 6.620336 | 7.535985 | 7.136677 |
| protein_co SH3-domai    | 205  | 165  | 161  | 4    | 4    | 2    | 1.321663 | 1.364144 | 1.252393 | 0.040027 |
| protein_co PHD_finger   | 913  | 876  | 914  | 1168 | 749  | 1005 | 5.199877 | 6.397875 | 6.280822 | 10.32513 |
| protein_co zinc_finger  | 0    | 0    | 1    | 0    | 0    | 0    | 0        | 0        | 0.057032 | 0        |
| protein_co pleiomorpl   | 609  | 499  | 551  | 15   | 23   | 24   | 6.446054 | 6.773085 | 7.036818 | 0.246433 |
| protein_co F-box_prot   | 393  | 299  | 306  | 437  | 513  | 515  | 4.211101 | 4.108503 | 3.956148 | 7.268001 |
| protein_co tumor_nec    | 178  | 126  | 125  | 59   | 55   | 61   | 1.883218 | 1.709466 | 1.595654 | 0.968865 |
| protein_co A_kinase_(F  | 117  | 88   | 98   | 241  | 246  | 261  | 1.857188 | 1.791274 | 1.876912 | 5.937689 |
| protein_co RAB32_me     | 654  | 549  | 555  | 98   | 136  | 39   | 25.19809 | 27.12511 | 25.80066 | 5.860658 |
| protein_co v-myb_mye    | 53   | 41   | 39   | 64   | 61   | 65   | 0.676789 | 0.671384 | 0.600884 | 1.268493 |
| protein_co aldehyde_c   | 0    | 1    | 4    | 2    | 6    | 2    | 0        | 0.023507 | 0.088468 | 0.056904 |
| protein_co serum/gluc   | 1236 | 899  | 1008 | 414  | 493  | 478  | 10.58752 | 9.875171 | 10.418   | 5.504355 |
| protein_co ring_finger  | 663  | 585  | 648  | 414  | 519  | 394  | 13.12287 | 14.84843 | 15.47528 | 12.7188  |
| protein_co arginase_liv | 2    | 0    | 0    | 7    | 7    | 2    | 0.061214 | 0        | 0        | 0.332545 |
| protein_co connective   | 7544 | 5345 | 5995 | 447  | 465  | 479  | 151.2348 | 137.4065 | 145.0065 | 13.90875 |
| protein_co transcriptic | 25   | 15   | 23   | 6    | 8    | 7    | 0.257581 | 0.198187 | 0.285923 | 0.095952 |
| protein_co polyamine_   | 17   | 16   | 10   | 35   | 18   | 25   | 0.202574 | 0.244492 | 0.143775 | 0.647343 |
| protein_co F-box_and_   | 1443 | 1271 | 1227 | 957  | 1148 | 854  | 19.98886 | 22.57754 | 20.50758 | 20.57615 |
| protein_co mediator_c   | 909  | 702  | 758  | 1209 | 1370 | 1395 | 17.8041  | 17.63205 | 17.91321 | 36.75471 |
| protein_co solute_carr  | 106  | 60   | 77   | 16   | 7    | 19   | 1.095754 | 0.795368 | 0.960387 | 0.256719 |
| protein_co transmembr   | 288  | 184  | 195  | 122  | 174  | 103  | 2.980429 | 2.441819 | 2.434832 | 1.959642 |
| protein_co zinc_finger  | 146  | 98   | 118  | 121  | 136  | 163  | 1.745078 | 1.502095 | 1.701736 | 2.244801 |
| protein_co vesicle-assc | 5    | 7    | 5    | 540  | 590  | 477  | 0.291242 | 0.522868 | 0.351401 | 48.82123 |
| protein_co DNA_cross-   | 367  | 339  | 284  | 210  | 219  | 257  | 4.367674 | 5.173604 | 4.078031 | 3.879126 |
| protein_co myosin_lig   | 4716 | 3765 | 3862 | 1798 | 1726 | 1985 | 177.0483 | 181.256  | 174.9356 | 104.7703 |
| protein_co forkhead_b   | 1542 | 1158 | 1210 | 494  | 548  | 408  | 9.849395 | 9.485125 | 9.325209 | 4.897592 |
| protein_co armadillo_J  | 85   | 48   | 74   | 32   | 19   | 24   | 1.22976  | 0.890537 | 1.291758 | 0.718591 |
| protein_co growth_ho    | 1    | 0    | 0    | 0    | 0    | 1    | 0.082845 | 0        | 0        | 0        |
| protein_co ribophorin   | 4848 | 3971 | 4083 | 3181 | 3332 | 3444 | 90.53079 | 95.09176 | 91.99434 | 92.19934 |

|                         |      |      |      |       |       |       |          |          |          |          |
|-------------------------|------|------|------|-------|-------|-------|----------|----------|----------|----------|
| protein_co TGFb-induc   | 824  | 623  | 634  | 1601  | 1760  | 1716  | 10.69399 | 10.36835 | 9.927725 | 32.25034 |
| protein_co calsequestr  | 0    | 1    | 0    | 0     | 0     | 1     | 0        | 0.022487 | 0        | 0        |
| protein_co olfactomec   | 38   | 28   | 24   | 4     | 5     | 6     | 0.54741  | 0.517246 | 0.417147 | 0.089438 |
| protein_co polycystic_  | 2179 | 1646 | 1837 | 458   | 624   | 627   | 20.20834 | 19.57548 | 20.55562 | 6.592791 |
| protein_co ATP-bindin   | 3    | 4    | 1    | 80    | 83    | 64    | 0.031407 | 0.053699 | 0.012631 | 1.299929 |
| protein_co secreted_pi  | 3123 | 2161 | 2299 | 247   | 225   | 417   | 88.00332 | 78.08924 | 78.16532 | 10.80325 |
| protein_co FAM47E-ST    | 38   | 15   | 16   | 18    | 23    | 9     | 0.521    | 0.263727 | 0.264681 | 0.383052 |
| protein_co cyclin_I     | 5895 | 5096 | 5100 | 3111  | 3996  | 2894  | 99.71741 | 110.5416 | 104.0891 | 81.68036 |
| protein_co retinoic_ac  | 8    | 1    | 6    | 2     | 1     | 3     | 0.192172 | 0.030804 | 0.1739   | 0.074569 |
| protein_co major_facil  | 435  | 358  | 405  | 91    | 87    | 155   | 8.418142 | 8.884221 | 9.456492 | 2.733373 |
| protein_co RAB3_GTPa    | 836  | 749  | 745  | 994   | 1150  | 1038  | 5.401689 | 6.206038 | 5.808013 | 9.968737 |
| protein_co family_witl  | 172  | 123  | 140  | 160   | 195   | 236   | 3.374512 | 3.094546 | 3.314046 | 4.872288 |
| protein_co periplakin   | 95   | 66   | 39   | 1251  | 1572  | 990   | 0.714099 | 0.636192 | 0.35371  | 14.59563 |
| protein_co ubinuclein   | 2289 | 1842 | 1900 | 1404  | 1848  | 1313  | 16.93991 | 17.48092 | 16.96551 | 16.12734 |
| protein_co Kruppel-lik  | 942  | 799  | 817  | 255   | 264   | 230   | 4.152524 | 4.51666  | 4.345416 | 1.744745 |
| protein_co ubiquitin_c  | 6    | 3    | 1    | 2     | 5     | 3     | 0.333341 | 0.213732 | 0.067033 | 0.172464 |
| protein_co protocadhe   | 691  | 601  | 614  | 31    | 42    | 65    | 4.306926 | 4.80367  | 4.617488 | 0.299903 |
| protein_co HCLS1_bin    | 659  | 529  | 542  | 652   | 721   | 329   | 7.090528 | 7.298913 | 7.036238 | 10.88858 |
| protein_co chromosor    | 320  | 222  | 272  | 315   | 307   | 382   | 5.168724 | 4.598283 | 5.300908 | 7.897223 |
| protein_co WD_repeat    | 424  | 319  | 322  | 227   | 286   | 375   | 2.856518 | 2.755949 | 2.61743  | 2.373709 |
| protein_co cyclin_D2    | 2467 | 1808 | 1849 | 4155  | 5019  | 3303  | 17.85149 | 16.77696 | 16.14323 | 46.66668 |
| protein_co fibroblast_  | 4    | 4    | 0    | 8     | 6     | 5     | 0.062147 | 0.079695 | 0        | 0.192922 |
| pseudogen: -            | 2    | 2    | 5    | 1     | 2     | 2     | 0.030577 | 0.039211 | 0.092233 | 0.023373 |
| protein_co elongation   | 490  | 361  | 387  | 357   | 298   | 301   | 3.800216 | 3.590284 | 3.621356 | 4.297451 |
| protein_co dynein_axc   | 11   | 22   | 14   | 1     | 4     | 8     | 0.041616 | 0.106734 | 0.063906 | 0.005872 |
| protein_co cytochrom    | 329  | 232  | 266  | 154   | 176   | 289   | 5.852358 | 5.292152 | 5.709061 | 4.251931 |
| protein_co NADH_deh     | 432  | 288  | 356  | 286   | 341   | 339   | 26.82978 | 22.93693 | 26.67666 | 27.56957 |
| protein_co general_tra  | 774  | 723  | 700  | 775   | 927   | 708   | 8.475683 | 10.1527  | 9.248681 | 13.17243 |
| protein_co SATB_home    | 503  | 444  | 442  | 367   | 573   | 452   | 3.807827 | 4.31024  | 4.037193 | 4.312268 |
| protein_co ubiquitin-c  | 551  | 362  | 400  | 266   | 363   | 356   | 10.27292 | 8.654865 | 8.998092 | 7.697585 |
| protein_co transient_r  | 1    | 1    | 1    | 24    | 28    | 22    | 0.005558 | 0.007127 | 0.006706 | 0.20703  |
| protein_co guanine_de   | 36   | 28   | 24   | 157   | 210   | 102   | 0.316112 | 0.315287 | 0.254272 | 2.139781 |
| protein_co Kruppel-lik  | 26   | 18   | 33   | 6     | 19    | 3     | 0.235128 | 0.208744 | 0.360076 | 0.08422  |
| protein_co tight_junct  | 264  | 181  | 218  | 2904  | 3770  | 2968  | 2.684659 | 2.360332 | 2.674791 | 45.8366  |
| protein_co chromosor    | 22   | 8    | 14   | 11    | 2     | 3     | 1.291089 | 0.602051 | 0.99131  | 1.001975 |
| protein_co integrin_be  | 1008 | 801  | 919  | 175   | 236   | 212   | 9.727338 | 9.912321 | 10.70033 | 2.621211 |
| protein_co cleavage_ar  | 763  | 606  | 633  | 1335  | 1447  | 1484  | 11.33262 | 11.54218 | 11.34377 | 30.77638 |
| protein_co phosphatic   | 25   | 21   | 20   | 20    | 25    | 8     | 0.434006 | 0.467503 | 0.418923 | 0.53891  |
| protein_co SUMO1/ser    | 1284 | 1050 | 1149 | 596   | 723   | 540   | 9.544512 | 10.00892 | 10.30521 | 6.876468 |
| protein_co coiled-coil  | 856  | 666  | 713  | 30    | 33    | 77    | 8.219917 | 8.201197 | 8.260974 | 0.447142 |
| protein_co chromosor    | 2216 | 1648 | 1853 | 1035  | 1433  | 1226  | 26.9332  | 25.6853  | 27.17325 | 19.52491 |
| protein_co tripartite_r | 5    | 2    | 1    | 0     | 0     | 0     | 0.025156 | 0.012903 | 0.00607  | 0        |
| protein_co HEAT_repe    | 1312 | 1086 | 1211 | 1595  | 1836  | 2005  | 7.283024 | 7.730669 | 8.110919 | 13.7426  |
| protein_co polypyrimi   | 1306 | 1076 | 1144 | 2340  | 2864  | 1765  | 8.422275 | 8.898317 | 8.901441 | 23.42246 |
| protein_co RAD23_hoi    | 3560 | 2592 | 2892 | 3538  | 4583  | 4383  | 40.52645 | 37.83842 | 39.72235 | 62.51394 |
| protein_co FK506_bin    | 894  | 727  | 739  | 335   | 369   | 443   | 4.759813 | 4.963593 | 4.74728  | 2.768393 |
| protein_co catenin_ca   | 940  | 879  | 872  | 977   | 886   | 1125  | 17.49072 | 20.97385 | 19.57692 | 28.21661 |
| protein_co family_witl  | 163  | 127  | 135  | 67    | 98    | 155   | 3.603523 | 3.600417 | 3.600987 | 2.299032 |
| protein_co WD_repeat    | 1957 | 1483 | 1565 | 1563  | 1995  | 1662  | 52.28704 | 50.81053 | 50.45052 | 64.81757 |
| protein_co SET_nuclea   | 7832 | 6105 | 6467 | 17451 | 19944 | 20727 | 125.9837 | 125.9322 | 125.5142 | 435.7051 |
| protein_co protein_ph   | 4372 | 3429 | 3538 | 4724  | 6133  | 4396  | 72.59319 | 73.01171 | 70.87965 | 121.7464 |
| protein_co GLE1_RNA     | 559  | 463  | 513  | 390   | 518   | 385   | 7.892659 | 8.383046 | 8.739306 | 8.54686  |
| protein_co RAB14_me     | 1499 | 1184 | 1211 | 668   | 945   | 671   | 16.95733 | 17.1758  | 16.52906 | 11.72905 |
| protein_co centriolin   | 538  | 441  | 462  | 330   | 229   | 227   | 3.29332  | 3.461781 | 3.412256 | 3.135422 |
| protein_co tripartite_r | 527  | 453  | 458  | 316   | 337   | 213   | 6.648114 | 7.328167 | 6.971101 | 6.18736  |
| protein_co F-box_and    | 822  | 700  | 732  | 425   | 489   | 523   | 17.89396 | 19.54079 | 19.22622 | 14.35999 |
| protein_co PHD_finger   | 1350 | 1115 | 1197 | 453   | 635   | 613   | 14.92608 | 15.80871 | 15.96814 | 7.773933 |
| protein_co NIMA-relat   | 2848 | 2224 | 2302 | 542   | 626   | 631   | 36.90046 | 36.95183 | 35.98696 | 10.89988 |
| protein_co B-box_and    | 0    | 0    | 0    | 187   | 211   | 87    | 0        | 0        | 0        | 5.81865  |
| protein_co protein_ph   | 548  | 483  | 497  | 688   | 878   | 813   | 5.908423 | 6.678016 | 6.4654   | 11.51357 |
| protein_co NADH_deh     | 1022 | 808  | 876  | 816   | 1005  | 833   | 47.9216  | 48.58488 | 49.56014 | 59.38832 |
| protein_co haloacid_d   | 172  | 103  | 127  | 216   | 260   | 103   | 4.397537 | 3.376973 | 3.917715 | 8.571667 |
| pseudogen: lipocalin_1  | 0    | 0    | 0    | 0     | 1     | 0     | 0        | 0        | 0        | 0        |
| protein_co RNA_bindir   | 377  | 338  | 318  | 127   | 126   | 156   | 3.553988 | 4.086022 | 3.617011 | 1.85827  |
| protein_co solute_carr  | 1    | 3    | 3    | 0     | 1     | 0     | 0.018741 | 0.072098 | 0.067836 | 0        |

|                         |       |       |       |      |       |      |          |          |          |          |
|-------------------------|-------|-------|-------|------|-------|------|----------|----------|----------|----------|
| protein_co hydroxyste   | 405   | 360   | 337   | 304  | 343   | 253  | 5.668793 | 6.461709 | 5.691327 | 6.604495 |
| protein_co mitogen-ac   | 2269  | 1819  | 1863  | 2271 | 2924  | 2094 | 31.33828 | 32.21682 | 31.0457  | 48.68422 |
| protein_co nuclear_re   | 18    | 17    | 17    | 4    | 13    | 15   | 0.169414 | 0.20518  | 0.193052 | 0.058434 |
| protein_co inversin     | 371   | 314   | 343   | 122  | 144   | 97   | 4.690266 | 5.090525 | 5.231976 | 2.393943 |
| protein_co UDP-N-acet   | 43    | 36    | 52    | 379  | 520   | 272  | 0.737211 | 0.791471 | 1.075659 | 10.08539 |
| protein_co DENN/MAC     | 417   | 298   | 351   | 510  | 666   | 363  | 3.902822 | 3.576583 | 3.963673 | 7.408722 |
| protein_co ALG2_alph    | 696   | 548   | 598   | 398  | 495   | 521  | 11.00319 | 11.10962 | 11.40666 | 9.766137 |
| protein_co colony_stir  | 8     | 8     | 6     | 7    | 2     | 2    | 0.061758 | 0.079196 | 0.055886 | 0.083875 |
| protein_co 3-ketodihy   | 985   | 802   | 864   | 626  | 795   | 590  | 8.479285 | 8.853331 | 8.973974 | 8.364266 |
| protein_co vacuolar_p   | 866   | 666   | 743   | 477  | 534   | 662  | 12.21623 | 12.04767 | 12.64609 | 10.44403 |
| protein_co one_cut_h    | 5     | 5     | 4     | 31   | 26    | 43   | 0.014542 | 0.018648 | 0.014037 | 0.139944 |
| protein_co chromosom    | 750   | 558   | 560   | 810  | 1098  | 854  | 13.60972 | 12.98469 | 12.26095 | 22.8141  |
| protein_co zinc_finger  | 524   | 426   | 450   | 494  | 591   | 468  | 9.669567 | 10.08079 | 10.01927 | 14.14924 |
| protein_co YLP_motif    | 2451  | 2069  | 2379  | 1807 | 2231  | 2070 | 16.37843 | 17.72959 | 19.18101 | 18.74207 |
| protein_co DDB1_and     | 182   | 153   | 154   | 238  | 277   | 325  | 2.946817 | 3.176747 | 3.008504 | 5.981213 |
| protein_co prospero_h   | 25    | 26    | 18    | 6    | 7     | 10   | 0.366672 | 0.489013 | 0.318536 | 0.13659  |
| protein_co visual_syste | 0     | 0     | 0     | 0    | 1     | 1    | 0        | 0        | 0        | 0        |
| protein_co FCF1_small   | 870   | 671   | 719   | 901  | 993   | 1145 | 16.91307 | 16.72765 | 16.86475 | 27.18682 |
| protein_co placental_   | 716   | 576   | 637   | 78   | 128   | 38   | 9.459919 | 9.75902  | 10.15458 | 1.599556 |
| protein_co interferon_  | 447   | 313   | 306   | 109  | 120   | 94   | 22.34524 | 20.06463 | 18.4564  | 8.457354 |
| protein_co coiled-coil  | 22    | 11    | 20    | 1    | 8     | 3    | 0.332125 | 0.212952 | 0.364298 | 0.023432 |
| protein_co NIMA-relat   | 850   | 741   | 788   | 929  | 1204  | 997  | 7.189126 | 8.036829 | 8.041396 | 12.19561 |
| protein_co acylphosph   | 131   | 132   | 111   | 118  | 194   | 81   | 7.785288 | 10.05974 | 7.959292 | 10.88469 |
| protein_co intraflagell | 312   | 258   | 288   | 169  | 172   | 112  | 8.288774 | 8.789511 | 9.231584 | 6.968718 |
| protein_co Niemann-P    | 1473  | 1181  | 1230  | 1097 | 1251  | 991  | 48.09819 | 49.45215 | 48.45952 | 55.5985  |
| protein_co dynein_axc   | 170   | 137   | 150   | 80   | 92    | 63   | 3.447795 | 3.563055 | 3.670556 | 2.518332 |
| protein_co interferon_  | 3991  | 2839  | 3070  | 8844 | 11699 | 6415 | 45.12613 | 41.16433 | 41.88252 | 155.2121 |
| protein_co acyl-CoA_tl  | 545   | 337   | 376   | 228  | 290   | 291  | 14.40533 | 11.42263 | 11.9912  | 9.353887 |
| protein_co latent_tran  | 28729 | 20567 | 23548 | 61   | 89    | 61   | 157.2433 | 144.355  | 155.5083 | 0.518217 |
| protein_co apoptosis_   | 1351  | 1120  | 1203  | 764  | 889   | 934  | 11.61078 | 12.34336 | 12.4744  | 10.19131 |
| protein_co mutL_hom     | 235   | 189   | 200   | 188  | 228   | 136  | 1.395536 | 1.439277 | 1.433017 | 1.732852 |
| protein_co tubulin_ty   | 774   | 665   | 686   | 519  | 518   | 549  | 7.74992  | 8.538611 | 8.287593 | 8.065923 |
| protein_co feline_leuk  | 6     | 7     | 7     | 118  | 117   | 102  | 0.077526 | 0.115985 | 0.109129 | 2.366497 |
| protein_co ATP-bindin   | 501   | 401   | 395   | 737  | 912   | 783  | 7.809807 | 8.015973 | 7.429297 | 17.83202 |
| protein_co dihydrolip   | 1865  | 1488  | 1745  | 1921 | 2228  | 2128 | 30.81391 | 31.52683 | 34.78656 | 49.26357 |
| protein_co protein_ph   | 0     | 5     | 1     | 68   | 71    | 47   | 0        | 0.077727 | 0.014627 | 1.279479 |
| protein_co transformin  | 420   | 374   | 379   | 22   | 20    | 25   | 7.272455 | 8.304484 | 7.918064 | 0.591269 |
| protein_co zinc_finger  | 3     | 3     | 5     | 17   | 30    | 19   | 0.058809 | 0.075414 | 0.11826  | 0.517248 |
| protein_co SRA_stem-l   | 654   | 498   | 504   | 1217 | 1465  | 1443 | 35.45211 | 34.61808 | 32.96422 | 102.3966 |
| protein_co RNA_bindin   | 3077  | 2581  | 2574  | 2653 | 2952  | 3372 | 21.06901 | 22.66282 | 21.26538 | 28.1958  |
| protein_co aldehyde_d   | 335   | 287   | 266   | 421  | 484   | 259  | 2.856548 | 3.138253 | 2.736695 | 5.571976 |
| protein_co G_protein-i  | 297   | 191   | 270   | 19   | 21    | 9    | 4.871051 | 4.017066 | 5.342912 | 0.483671 |
| protein_co estrogen-re  | 0     | 2     | 2     | 64   | 60    | 17   | 0        | 0.044327 | 0.041707 | 1.716884 |
| protein_co eukaryotic_  | 552   | 439   | 440   | 298  | 428   | 396  | 16.84014 | 17.17435 | 16.19598 | 14.11085 |
| protein_co NRDE-2_ne    | 386   | 313   | 333   | 177  | 235   | 317  | 3.105619 | 3.229346 | 3.232609 | 2.210368 |
| protein_co coenzyme_    | 30    | 32    | 34    | 18   | 21    | 26   | 0.45101  | 0.616914 | 0.616726 | 0.420018 |
| protein_co zinc_finger  | 22    | 18    | 14    | 6    | 18    | 7    | 0.396609 | 0.416123 | 0.30452  | 0.167889 |
| protein_co ras_homolo   | 934   | 696   | 762   | 559  | 636   | 393  | 14.7211  | 14.06734 | 14.49094 | 13.67526 |
| protein_co G_protein-i  | 60    | 55    | 56    | 34   | 33    | 58   | 1.330213 | 1.563659 | 1.49798  | 1.169983 |
| protein_co suppressor   | 727   | 559   | 607   | 396  | 398   | 461  | 7.595598 | 7.489429 | 7.651812 | 6.421747 |
| protein_co kelch-like_f | 838   | 621   | 675   | 296  | 466   | 320  | 6.154085 | 5.848176 | 5.980966 | 3.373974 |
| protein_co DNA_(cytos   | 1768  | 1412  | 1581  | 2974 | 4042  | 4299 | 18.51721 | 18.96432 | 19.97898 | 48.34647 |
| protein_co transmembr   | 3766  | 3136  | 3231  | 897  | 1089  | 911  | 59.05947 | 63.0659  | 61.1356  | 21.83394 |
| protein_co ATPase_fan   | 427   | 337   | 302   | 295  | 335   | 275  | 2.470941 | 2.50077  | 2.108577 | 2.649641 |
| protein_co FK506_bin    | 23    | 25    | 20    | 60   | 74    | 46   | 0.673623 | 0.938941 | 0.706752 | 2.727538 |
| protein_co atlastin_GT  | 619   | 493   | 507   | 823  | 891   | 760  | 10.12027 | 10.33612 | 10.00132 | 20.88486 |
| protein_co yippee-like  | 1001  | 845   | 822   | 399  | 359   | 390  | 18.33473 | 19.84753 | 18.16604 | 11.34341 |
| protein_co family_witl  | 2405  | 1882  | 2080  | 1119 | 1568  | 1578 | 31.80217 | 31.91322 | 33.18586 | 22.96689 |
| protein_co Yip1_doma    | 884   | 769   | 776   | 394  | 597   | 484  | 5.687538 | 6.344651 | 6.023956 | 3.934583 |
| protein_co aftiphilin   | 265   | 224   | 271   | 280  | 340   | 213  | 2.658505 | 2.881702 | 3.280266 | 4.359937 |
| protein_co lectin_gala  | 245   | 204   | 207   | 342  | 446   | 179  | 3.24613  | 3.466086 | 3.309163 | 7.033256 |
| protein_co cannabinoi   | 333   | 301   | 299   | 22   | 29    | 16   | 7.995072 | 9.267316 | 8.661585 | 0.819844 |
| protein_co B-cell_CLL/  | 257   | 174   | 218   | 297  | 393   | 403  | 2.02806  | 1.760785 | 2.075641 | 3.637765 |
| protein_co cysteine-ric | 237   | 210   | 167   | 131  | 175   | 177  | 5.690186 | 6.465569 | 4.837742 | 4.881799 |
| protein_co epithelial_c | 16    | 4     | 7     | 2635 | 3151  | 2739 | 0.435174 | 0.139512 | 0.229715 | 111.2383 |

|                          |      |      |      |      |      |      |          |          |          |          |
|--------------------------|------|------|------|------|------|------|----------|----------|----------|----------|
| protein_co solute_carr   | 889  | 769  | 794  | 223  | 312  | 205  | 12.06519 | 13.38345 | 13.00172 | 4.69751  |
| protein_co opioid_gro    | 343  | 226  | 256  | 95   | 106  | 89   | 9.399927 | 7.942334 | 8.464833 | 4.040959 |
| protein_co family_witl   | 636  | 592  | 582  | 273  | 408  | 324  | 4.325798 | 5.163452 | 4.776174 | 2.882055 |
| protein_co insulin-deg   | 798  | 674  | 814  | 642  | 673  | 757  | 6.366894 | 6.895947 | 7.836049 | 7.950422 |
| protein_co ELOVL_fatt    | 9    | 4    | 3    | 7    | 5    | 1    | 0.307812 | 0.175433 | 0.123798 | 0.371596 |
| protein_co interferon-i  | 80   | 48   | 74   | 7    | 4    | 21   | 1.502885 | 1.156342 | 1.677319 | 0.20411  |
| protein_co interferon-i  | 39   | 30   | 33   | 2    | 0    | 1    | 0.524136 | 0.517023 | 0.535108 | 0.04172  |
| protein_co glycerol-3-ph | 493  | 349  | 424  | 293  | 341  | 548  | 3.629577 | 3.294913 | 3.766371 | 3.348168 |
| protein_co cutC_copp     | 247  | 183  | 253  | 349  | 383  | 315  | 8.604632 | 8.175151 | 10.63418 | 18.87084 |
| protein_co protein_ph    | 173  | 116  | 130  | 23   | 15   | 15   | 3.213935 | 2.763493 | 2.913952 | 0.663207 |
| protein_co pyridine_ni   | 216  | 150  | 128  | 133  | 132  | 60   | 3.535164 | 3.148157 | 2.527632 | 3.378609 |
| protein_co cyclin_M1     | 0    | 0    | 1    | 25   | 43   | 15   | 0        | 0        | 0.009494 | 0.305336 |
| protein_co MAX_intera    | 180  | 149  | 143  | 339  | 387  | 165  | 2.432335 | 2.581942 | 2.331498 | 7.110188 |
| protein_co survival_mi   | 421  | 353  | 370  | 430  | 560  | 584  | 9.719693 | 10.45092 | 10.30671 | 15.40882 |
| protein_co chromosom     | 299  | 214  | 240  | 105  | 120  | 127  | 4.687434 | 4.302165 | 4.539659 | 2.554958 |
| protein_co helicase_ly   | 574  | 488  | 514  | 2427 | 3010 | 2847 | 5.397006 | 5.883966 | 5.831123 | 35.41941 |
| protein_co prolactin_r   | 0    | 0    | 0    | 1    | 0    | 0    | 0        | 0        | 0        | 0.036757 |
| protein_co tectonic_fa   | 741  | 609  | 582  | 510  | 584  | 583  | 12.68547 | 13.36949 | 12.02152 | 13.55155 |
| protein_co family_witl   | 649  | 491  | 493  | 632  | 613  | 572  | 11.76783 | 11.41676 | 10.78566 | 17.78687 |
| protein_co arginine_va   | 100  | 75   | 74   | 160  | 191  | 87   | 3.218258 | 3.095219 | 2.87343  | 7.992291 |
| protein_co WD_repeat     | 1228 | 976  | 1051 | 865  | 944  | 990  | 11.62312 | 11.84632 | 12.0026  | 12.70782 |
| protein_co chromosom     | 548  | 400  | 492  | 310  | 351  | 337  | 6.238342 | 5.839262 | 6.757744 | 5.47748  |
| protein_co Kv_channel    | 17   | 27   | 25   | 53   | 68   | 40   | 0.304597 | 0.620369 | 0.540461 | 1.473951 |
| protein_co coiled-coil_  | 30   | 14   | 20   | 38   | 42   | 21   | 0.4246   | 0.254095 | 0.341536 | 0.834782 |
| protein_co glutamic-ac   | 818  | 599  | 618  | 857  | 1000 | 852  | 19.70007 | 18.4991  | 17.95771 | 32.03507 |
| protein_co carboxypep    | 0    | 0    | 0    | 3    | 2    | 1    | 0        | 0        | 0        | 0.117198 |
| protein_co chromosom     | 3    | 3    | 3    | 13   | 25   | 7    | 0.095759 | 0.122797 | 0.115539 | 0.644069 |
| protein_co secreted_fr   | 40   | 34   | 21   | 90   | 112  | 48   | 1.021569 | 1.113515 | 0.647105 | 3.567637 |
| protein_co guanine_nu    | 1169 | 880  | 973  | 925  | 1108 | 968  | 11.13662 | 10.75055 | 11.18406 | 13.67763 |
| protein_co homeobox_     | 5    | 8    | 2    | 0    | 0    | 4    | 0.128607 | 0.263872 | 0.062069 | 0        |
| protein_co KAT8_regul    | 793  | 658  | 730  | 891  | 963  | 1043 | 4.088376 | 4.350237 | 4.54097  | 7.12994  |
| protein_co homeobox_     | 161  | 109  | 137  | 0    | 0    | 0    | 3.698821 | 3.211243 | 3.797572 | 0        |
| protein_co corticotrop   | 0    | 0    | 1    | 39   | 45   | 18   | 0        | 0        | 0.022318 | 1.119689 |
| protein_co homeobox_     | 1517 | 1295 | 1339 | 15   | 23   | 22   | 16.90403 | 18.50477 | 18.00252 | 0.259434 |
| protein_co homeobox_     | 0    | 0    | 0    | 45   | 54   | 65   | 0        | 0        | 0        | 1.621332 |
| protein_co dual_specif   | 240  | 205  | 170  | 151  | 203  | 179  | 5.57385  | 6.105304 | 4.763663 | 5.443165 |
| protein_co pantothenic   | 2127 | 1804 | 1970 | 1756 | 1763 | 1938 | 9.493153 | 10.32497 | 10.60858 | 12.1646  |
| protein_co msh_home      | 673  | 448  | 504  | 5    | 9    | 13   | 14.08165 | 12.02059 | 12.72381 | 0.162382 |
| protein_co TEK_tyrosin   | 712  | 539  | 622  | 17   | 21   | 34   | 7.013801 | 6.808815 | 7.39285  | 0.259928 |
| protein_co RNA_termi     | 135  | 73   | 100  | 186  | 193  | 216  | 2.966332 | 2.056924 | 2.651148 | 6.343507 |
| protein_co caspase_act   | 313  | 250  | 250  | 413  | 595  | 508  | 5.258537 | 5.386044 | 5.067673 | 10.76964 |
| protein_co equatorin_    | 0    | 0    | 0    | 6    | 5    | 2    | 0        | 0        | 0        | 0.423549 |
| protein_co MOB_kinas     | 52   | 31   | 31   | 1081 | 1240 | 923  | 0.377794 | 0.288817 | 0.271745 | 12.19011 |
| protein_co insulin-like  | 0    | 0    | 1    | 0    | 0    | 0    | 0        | 0        | 0.074638 | 0        |
| protein_co insulin-like  | 0    | 0    | 1    | 0    | 0    | 0    | 0        | 0        | 0.028983 | 0        |
| protein_co melan-A       | 11   | 14   | 13   | 5    | 11   | 6    | 0.213578 | 0.348579 | 0.304547 | 0.150683 |
| protein_co CD274_mo      | 42   | 36   | 37   | 0    | 0    | 0    | 0.540445 | 0.594038 | 0.574449 | 0        |
| protein_co interferon_   | 1    | 0    | 0    | 0    | 0    | 0    | 0.04513  | 0        | 0        | 0        |
| protein_co glutamate_    | 5    | 1    | 8    | 0    | 0    | 0    | 0.04171  | 0.010697 | 0.08052  | 0        |
| protein_co nucleopori    | 863  | 698  | 759  | 952  | 1253 | 1141 | 10.44556 | 10.83392 | 11.08436 | 17.88497 |
| protein_co methylenet    | 1286 | 1116 | 1219 | 1640 | 2043 | 1823 | 16.73157 | 18.61955 | 19.13583 | 33.11844 |
| protein_co low_densit    | 785  | 616  | 682  | 296  | 418  | 181  | 11.291   | 11.36195 | 11.83573 | 6.608227 |
| protein_co coiled-coil_  | 16   | 8    | 6    | 0    | 5    | 2    | 0.141448 | 0.090694 | 0.063999 | 0        |
| protein_co protein-L-iso | 1238 | 991  | 1066 | 976  | 1221 | 1108 | 29.25899 | 30.03459 | 30.39793 | 35.80297 |
| protein_co pleckstrin_   | 268  | 195  | 266  | 88   | 86   | 62   | 1.736427 | 1.620189 | 2.079464 | 0.884983 |
| protein_co myc_target    | 31   | 22   | 34   | 4    | 3    | 6    | 0.479733 | 0.436586 | 0.634841 | 0.096079 |
| protein_co chromosom     | 0    | 0    | 0    | 1    | 1    | 2    | 0        | 0        | 0        | 0.039234 |
| protein_co cysteine-ric  | 257  | 185  | 199  | 275  | 287  | 231  | 9.033534 | 8.33884  | 8.439674 | 15.00333 |
| protein_co WD_repeat     | 731  | 589  | 674  | 370  | 431  | 487  | 8.401128 | 8.680502 | 9.346052 | 6.600129 |
| protein_co ArfGAP_wit    | 2040 | 1595 | 1648 | 1831 | 2377 | 1484 | 18.22012 | 18.268   | 17.75932 | 25.38282 |
| protein_co protocadhe    | 12   | 12   | 5    | 5    | 4    | 8    | 0.207554 | 0.266159 | 0.104344 | 0.134231 |
| protein_co protocadhe    | 242  | 164  | 182  | 37   | 61   | 34   | 3.465908 | 3.012    | 3.145004 | 0.822496 |
| protein_co protocadhe    | 132  | 100  | 127  | 46   | 69   | 31   | 2.225632 | 2.162165 | 2.583635 | 1.203837 |
| protein_co protocadhe    | 45   | 31   | 31   | 11   | 13   | 14   | 0.61951  | 0.547276 | 0.514927 | 0.235049 |
| protein_co solute_carr   | 0    | 1    | 1    | 1    | 1    | 3    | 0        | 0.042435 | 0.039926 | 0.051362 |

|                          |       |       |       |      |      |      |          |          |          |          |
|--------------------------|-------|-------|-------|------|------|------|----------|----------|----------|----------|
| protein_co tenascin_N    | 2     | 0     | 0     | 21   | 13   | 14   | 0.018726 | 0        | 0        | 0.305187 |
| protein_co mitochond     | 410   | 312   | 310   | 367  | 384  | 360  | 9.089791 | 8.870211 | 8.292391 | 12.62893 |
| protein_co centromer     | 273   | 165   | 231   | 197  | 235  | 185  | 5.176294 | 4.011895 | 5.284651 | 5.797663 |
| protein_co tumor_nec     | 1     | 2     | 0     | 0    | 0    | 0    | 0.023352 | 0.05989  | 0        | 0        |
| protein_co SEC16_hon     | 13    | 2     | 11    | 1    | 0    | 0    | 0.152966 | 0.030178 | 0.156168 | 0.018263 |
| protein_co golgin_RAB    | 267   | 257   | 224   | 80   | 134  | 99   | 5.074842 | 6.264028 | 5.136973 | 2.360107 |
| protein_co G_protein+    | 0     | 0     | 0     | 0    | 0    | 1    | 0        | 0        | 0        | 0        |
| protein_co acetyl-CoA    | 2637  | 2080  | 2307  | 1126 | 976  | 1630 | 38.88333 | 39.33018 | 41.04393 | 25.77046 |
| protein_co t-complex     | 3414  | 2799  | 3087  | 4176 | 4748 | 5088 | 64.05863 | 67.34826 | 69.88739 | 121.62   |
| protein_co tubulin_ty    | 0     | 0     | 0     | 5    | 9    | 3    | 0        | 0        | 0        | 0.135783 |
| protein_co sorting_ne    | 1727  | 1412  | 1504  | 546  | 676  | 634  | 12.39159 | 12.99208 | 13.02059 | 6.080761 |
| protein_co potassium_    | 20    | 4     | 13    | 6    | 5    | 5    | 0.157879 | 0.040491 | 0.123818 | 0.073515 |
| protein_co Myb/SANT-     | 367   | 283   | 275   | 170  | 170  | 240  | 5.576357 | 5.514171 | 5.041563 | 4.009257 |
| protein_co tumor_pro     | 0     | 0     | 1     | 0    | 0    | 1    | 0        | 0        | 0.019678 | 0        |
| protein_co testis_expr   | 0     | 0     | 0     | 2    | 4    | 6    | 0        | 0        | 0        | 0.04646  |
| protein_co arrestin_3_   | 17    | 20    | 13    | 6    | 5    | 3    | 0.614122 | 0.926499 | 0.566627 | 0.336424 |
| protein_co PDZ_domai     | 625   | 477   | 480   | 221  | 242  | 303  | 28.09804 | 27.49944 | 26.03667 | 15.42122 |
| protein_co solute_carr   | 151   | 109   | 127   | 28   | 29   | 30   | 1.889616 | 1.749172 | 1.917558 | 0.543858 |
| protein_co NudC_dom      | 368   | 314   | 323   | 1060 | 1047 | 906  | 4.091896 | 4.477296 | 4.333386 | 18.29419 |
| protein_co enhancer_c    | 1020  | 807   | 868   | 1175 | 1306 | 1629 | 16.12536 | 16.36033 | 16.55682 | 28.83219 |
| protein_co microtubul    | 421   | 357   | 343   | 633  | 675  | 741  | 5.448716 | 5.925017 | 5.356168 | 12.71587 |
| protein_co KIAA1217      | 1173  | 985   | 1015  | 756  | 852  | 548  | 7.449816 | 8.022193 | 7.777887 | 7.452462 |
| pseudogen: septin_7_p    | 0     | 0     | 1     | 0    | 0    | 1    | 0        | 0        | 0.076145 | 0        |
| protein_co mannose_r     | 1     | 1     | 0     | 0    | 0    | 0    | 0.009068 | 0.011628 | 0        | 0        |
| protein_co plexin_don    | 346   | 226   | 237   | 404  | 469  | 359  | 5.464448 | 4.577074 | 4.516132 | 9.903348 |
| protein_co enhancer_c    | 332   | 283   | 301   | 189  | 237  | 385  | 2.107702 | 2.303917 | 2.305609 | 1.862359 |
| protein_co IQ_motif_a    | 1     | 1     | 0     | 44   | 90   | 20   | 0.00661  | 0.008476 | 0        | 0.451411 |
| protein_co coiled-coil_  | 240   | 186   | 175   | 396  | 361  | 234  | 4.746353 | 4.717057 | 4.175754 | 12.15555 |
| protein_co TAF12_RNA     | 305   | 280   | 278   | 319  | 297  | 240  | 10.52351 | 12.38877 | 11.57321 | 17.08371 |
| protein_co ecto-NOX_c    | 305   | 211   | 229   | 6    | 0    | 3    | 4.795927 | 4.254657 | 4.344665 | 0.146438 |
| protein_co tumor_nec     | 0     | 0     | 0     | 63   | 68   | 89   | 0        | 0        | 0        | 2.086045 |
| protein_co mitochond     | 87    | 90    | 105   | 113  | 169  | 105  | 1.867017 | 2.476742 | 2.718731 | 3.763898 |
| protein_co SPG20_opr     | 8     | 4     | 13    | 4    | 1    | 12   | 0.662756 | 0.429496 | 1.299437 | 0.514345 |
| protein_co spermatog     | 0     | 2     | 6     | 32   | 29   | 31   | 0        | 0.054838 | 0.154789 | 1.061994 |
| protein_co DnaJ_(Hsp4    | 287   | 198   | 220   | 193  | 188  | 223  | 5.302378 | 4.690977 | 4.904102 | 5.534477 |
| protein_co proline_an    | 983   | 861   | 867   | 1886 | 2234 | 1810 | 8.918902 | 10.01775 | 9.491285 | 26.56012 |
| protein_co ubiquitin-fi  | 1457  | 1175  | 1264  | 648  | 676  | 595  | 26.96083 | 27.88181 | 28.22077 | 18.61141 |
| protein_co WW_doma       | 347   | 268   | 302   | 303  | 278  | 352  | 6.214987 | 6.15538  | 6.526281 | 8.423331 |
| protein_co E74-like_fa   | 673   | 582   | 616   | 196  | 295  | 148  | 8.849406 | 9.813668 | 9.772998 | 4.000236 |
| protein_co SMAD_fami     | 333   | 247   | 243   | 35   | 38   | 27   | 2.79227  | 2.655948 | 2.458485 | 0.455525 |
| protein_co heat_shock    | 2996  | 2357  | 2688  | 1735 | 2037 | 2339 | 38.89327 | 39.23752 | 42.1027  | 34.95929 |
| protein_co kelch_repe    | 204   | 179   | 187   | 466  | 651  | 418  | 2.020609 | 2.273602 | 2.234816 | 7.164214 |
| protein_co ALG5_dolic    | 339   | 324   | 270   | 160  | 151  | 279  | 13.77445 | 16.8822  | 13.2369  | 10.09079 |
| protein_co exosome_c     | 531   | 441   | 495   | 630  | 644  | 803  | 10.27594 | 10.94397 | 11.55793 | 18.92335 |
| protein_co eukaryotic_   | 2019  | 1594  | 1685  | 2303 | 2793 | 3520 | 24.43752 | 24.74107 | 24.60757 | 43.26584 |
| protein_co transformi    | 75260 | 62834 | 66795 | 131  | 141  | 305  | 757.1214 | 810.5976 | 810.7618 | 2.045517 |
| protein_co family_witl   | 1136  | 800   | 980   | 1341 | 1382 | 1586 | 12.17533 | 10.99516 | 12.67291 | 22.30805 |
| protein_co SIL1_homo     | 450   | 346   | 362   | 118  | 177  | 120  | 10.9727  | 10.81899 | 10.6502  | 4.465947 |
| protein_co poly(A)_bir   | 516   | 417   | 470   | 825  | 765  | 813  | 10.54719 | 10.93031 | 11.59132 | 26.17408 |
| protein_co myotilin      | 0     | 0     | 0     | 5    | 5    | 3    | 0        | 0        | 0        | 0.155712 |
| protein_co lysine_(K)-s  | 2352  | 1943  | 1961  | 3075 | 3240 | 2386 | 16.18748 | 17.14842 | 16.28425 | 32.84866 |
| protein_co early_grow    | 1714  | 1071  | 1167  | 45   | 55   | 61   | 25.61169 | 20.52231 | 21.04003 | 1.043687 |
| protein_co stress-associ | 4783  | 3722  | 4079  | 2328 | 3373 | 2417 | 57.00939 | 56.88945 | 58.66077 | 43.06847 |
| protein_co plastin_1     | 49    | 51    | 43    | 446  | 452  | 397  | 0.61188  | 0.816676 | 0.647869 | 8.644418 |
| protein_co ZFP30_zinc    | 208   | 172   | 169   | 102  | 160  | 83   | 1.601498 | 1.698247 | 1.569993 | 1.218972 |
| protein_co nuclear_rex   | 307   | 285   | 276   | 361  | 446  | 351  | 5.760398 | 6.85754  | 6.248435 | 10.51361 |
| protein_co UTP20_sm      | 1019  | 833   | 844   | 690  | 802  | 1357 | 5.294286 | 5.54993  | 5.290828 | 5.564328 |
| protein_co thymopoie     | 2959  | 2442  | 2434  | 2266 | 3050 | 3633 | 32.70805 | 34.61503 | 32.46223 | 38.87766 |
| protein_co ADP-ribosy    | 1600  | 1304  | 1286  | 655  | 756  | 662  | 23.14842 | 24.19292 | 22.44866 | 14.70866 |
| protein_co glycosyltra   | 1080  | 836   | 920   | 62   | 63   | 72   | 26.93682 | 26.73857 | 27.68589 | 2.400185 |
| protein_co MTERF_dor     | 89    | 89    | 97    | 42   | 62   | 28   | 1.290019 | 1.654266 | 1.696391 | 0.9449   |
| protein_co suppressor    | 258   | 222   | 228   | 773  | 982  | 1167 | 3.240724 | 3.575895 | 3.455455 | 15.07066 |
| protein_co nuclear_tra   | 566   | 419   | 423   | 718  | 689  | 797  | 7.556876 | 7.1738   | 6.814191 | 14.87924 |
| protein_co coiled-coil_  | 159   | 132   | 153   | 38   | 31   | 46   | 7.889431 | 8.399083 | 9.159844 | 2.926595 |
| protein_co apoptotic_    | 1472  | 1069  | 1246  | 472  | 517  | 242  | 9.783431 | 9.111092 | 9.991932 | 4.86918  |

|                         |      |      |      |       |       |       |          |          |          |          |
|-------------------------|------|------|------|-------|-------|-------|----------|----------|----------|----------|
| protein_co dual_specif  | 7669 | 6303 | 6435 | 311   | 336   | 273   | 64.94483 | 68.44828 | 65.75102 | 4.087867 |
| protein_co clusterin    | 1407 | 1211 | 1178 | 2747  | 3180  | 2783  | 21.42021 | 23.64194 | 21.63829 | 64.91108 |
| protein_co tumor_nec    | 3003 | 2396 | 2536 | 1485  | 1819  | 929   | 33.96303 | 34.74939 | 34.60576 | 26.06802 |
| protein_co sorbin_and   | 2084 | 1625 | 1591 | 1392  | 1662  | 980   | 28.25059 | 28.24831 | 26.02244 | 29.28866 |
| protein_co protein_ty   | 46   | 28   | 28   | 90    | 119   | 82    | 0.457464 | 0.35708  | 0.335973 | 1.389222 |
| protein_co adrenocept   | 0    | 0    | 0    | 3     | 2     | 10    | 0        | 0        | 0        | 0.085691 |
| protein_co protein_ph   | 225  | 165  | 204  | 37    | 66    | 30    | 4.819668 | 4.532397 | 5.272455 | 1.230175 |
| protein_co PDZ_and_L    | 379  | 270  | 275  | 270   | 235   | 147   | 3.87006  | 3.535506 | 3.388124 | 4.2793   |
| protein_co epoxide_hy   | 1    | 1    | 1    | 158   | 177   | 121   | 0.014933 | 0.01915  | 0.018018 | 3.662168 |
| protein_co ring_finger  | 342  | 315  | 294  | 253   | 280   | 204   | 3.896109 | 4.60177  | 4.041108 | 4.473588 |
| protein_co natriuretic  | 1    | 0    | 0    | 0     | 2     | 12    | 0.067565 | 0        | 0        | 0        |
| protein_co UbiA_pren    | 390  | 278  | 295  | 499   | 606   | 701   | 5.015663 | 4.584773 | 4.577557 | 9.960812 |
| protein_co TAR_DNA_t    | 3225 | 2485 | 2796 | 2443  | 3074  | 3716  | 55.02922 | 54.37502 | 57.56372 | 64.70198 |
| protein_co tumor_nec    | 60   | 39   | 41   | 902   | 1501  | 1063  | 0.763267 | 0.636208 | 0.629299 | 17.80992 |
| protein_co zinc_finger  | 812  | 630  | 646  | 607   | 668   | 568   | 10.87227 | 10.81718 | 10.43626 | 12.61489 |
| protein_co lysophosph   | 981  | 823  | 810  | 1716  | 2227  | 1728  | 17.87067 | 19.22565 | 17.80348 | 48.51987 |
| protein_co cysteine-ric | 798  | 568  | 547  | 318   | 355   | 514   | 8.728303 | 7.966812 | 7.218755 | 5.398642 |
| protein_co COP9_signi   | 670  | 563  | 531  | 525   | 541   | 649   | 5.52035  | 5.948528 | 5.27879  | 6.714004 |
| protein_co retinol_def  | 806  | 549  | 628  | 256   | 405   | 268   | 9.570361 | 8.359397 | 8.997067 | 4.718063 |
| protein_co eosinophil   | 0    | 3    | 1    | 16    | 16    | 2     | 0        | 0.066614 | 0.020892 | 0.430014 |
| protein_co A_kinase_(F  | 244  | 226  | 215  | 1204  | 1475  | 1552  | 2.798035 | 3.323388 | 2.974745 | 21.4299  |
| protein_co coilin       | 429  | 337  | 367  | 547   | 575   | 536   | 7.590874 | 7.646695 | 7.835174 | 15.02285 |
| protein_co tripartite_r | 785  | 609  | 700  | 766   | 958   | 856   | 6.419369 | 6.3863   | 6.906671 | 9.722589 |
| protein_co serine_carb  | 620  | 495  | 496  | 398   | 466   | 393   | 14.97004 | 15.3266  | 14.44977 | 14.91574 |
| protein_co speckle-typ  | 843  | 721  | 689  | 224   | 313   | 262   | 12.80061 | 14.03937 | 12.62323 | 5.279364 |
| protein_co T-box_2      | 4178 | 3025 | 3252 | 0     | 2     | 1     | 37.54436 | 34.85869 | 35.2594  | 0        |
| protein_co solute_carr  | 1039 | 789  | 844  | 517   | 565   | 729   | 19.58936 | 19.07616 | 19.19973 | 15.12954 |
| protein_co T-box_4      | 466  | 398  | 408  | 0     | 0     | 12    | 6.430473 | 7.042866 | 6.793057 | 0        |
| protein_co dynein_lig   | 1615 | 1218 | 1309 | 2067  | 2733  | 2737  | 30.29095 | 29.29524 | 29.62293 | 60.17434 |
| protein_co testis_expr  | 1    | 4    | 0    | 20    | 21    | 19    | 0.009517 | 0.048817 | 0        | 0.295433 |
| protein_co family_witl  | 106  | 82   | 79   | 554   | 607   | 456   | 2.101624 | 2.084839 | 1.889837 | 17.04863 |
| protein_co non-SMC_c    | 650  | 500  | 559  | 836   | 1036  | 986   | 10.3247  | 10.18459 | 10.71332 | 20.61108 |
| protein_co lecithin_re  | 0    | 0    | 2    | 544   | 680   | 1208  | 0        | 0        | 0.022621 | 7.915276 |
| protein_co KIAA0922     | 1207 | 969  | 1048 | 489   | 556   | 555   | 11.2809  | 11.61367 | 11.81804 | 7.093746 |
| protein_co meiotic_nu   | 98   | 76   | 92   | 356   | 391   | 235   | 4.74713  | 4.720934 | 5.377011 | 26.76613 |
| protein_co tripartite_r | 48   | 51   | 47   | 235   | 292   | 303   | 0.661393 | 0.901152 | 0.781384 | 5.025934 |
| protein_co ATP-bindin   | 7    | 1    | 1    | 1     | 2     | 1     | 0.067509 | 0.012367 | 0.011636 | 0.014969 |
| protein_co PAP_associ   | 265  | 195  | 194  | 358   | 474   | 328   | 1.584526 | 1.495194 | 1.399598 | 3.322516 |
| protein_co adenylate_i  | 595  | 436  | 487  | 94    | 98    | 37    | 4.490513 | 4.219635 | 4.434616 | 1.101127 |
| protein_co centrosom    | 861  | 656  | 692  | 348   | 423   | 426   | 13.9071  | 13.58772 | 13.48613 | 8.724551 |
| protein_co teashirt_zir | 1099 | 839  | 922  | 411   | 509   | 512   | 9.955975 | 9.746696 | 10.07779 | 5.779076 |
| protein_co enoyl_CoA    | 67   | 60   | 83   | 524   | 631   | 272   | 0.540078 | 0.620215 | 0.807249 | 6.556063 |
| protein_co phospholip   | 12   | 10   | 11   | 634   | 785   | 690   | 0.231937 | 0.247856 | 0.256525 | 19.01995 |
| protein_co taste_recep  | 6    | 7    | 10   | 0     | 0     | 0     | 0.27     | 0.403943 | 0.542951 | 0        |
| protein_co proline-ric  | 8    | 5    | 8    | 0     | 0     | 0     | 0.262873 | 0.210686 | 0.317172 | 0        |
| protein_co pyridine_ni  | 112  | 81   | 96   | 48    | 45    | 64    | 1.443166 | 1.338421 | 1.492511 | 0.959997 |
| protein_co islet_amylc  | 0    | 0    | 1    | 2     | 1     | 1     | 0        | 0        | 0.028077 | 0.072238 |
| protein_co potassium_   | 8    | 8    | 4    | 6     | 9     | 11    | 0.15702  | 0.201356 | 0.094727 | 0.182787 |
| protein_co BCL2-like_1  | 2    | 1    | 2    | 11    | 12    | 23    | 0.045993 | 0.02949  | 0.055493 | 0.392633 |
| protein_co -            | 0    | 0    | 0    | 1     | 0     | 0     | 0        | 0        | 0        | 0.156516 |
| protein_co paraspeckle  | 878  | 646  | 715  | 1064  | 1532  | 2093  | 17.10404 | 16.13787 | 16.80577 | 32.17188 |
| protein_co zinc_finger  | 156  | 132  | 112  | 182   | 186   | 218   | 1.328763 | 1.441804 | 1.151037 | 2.406162 |
| protein_co alpha-1-B_   | 18   | 18   | 14   | 4     | 9     | 1     | 0.366806 | 0.470377 | 0.344223 | 0.126519 |
| protein_co zinc_finger  | 116  | 70   | 85   | 262   | 389   | 226   | 0.949423 | 0.734698 | 0.839399 | 3.328383 |
| protein_co zinc_finger  | 145  | 137  | 131  | 188   | 194   | 154   | 2.464318 | 2.985785 | 2.68626  | 4.959262 |
| protein_co PDZ_domai    | 400  | 316  | 344  | 184   | 278   | 187   | 4.415256 | 4.472932 | 4.581444 | 3.152421 |
| protein_co LIM_homer    | 32   | 33   | 25   | 82    | 70    | 181   | 0.211843 | 0.280147 | 0.199688 | 0.842573 |
| protein_co ring_finger  | 561  | 435  | 424  | 498   | 589   | 718   | 7.29487  | 7.253594 | 6.65225  | 10.05112 |
| protein_co tRNA_meth    | 383  | 335  | 306  | 603   | 550   | 381   | 4.017646 | 4.506372 | 3.872954 | 9.817946 |
| protein_co SEC22_vesi   | 142  | 106  | 107  | 73    | 76    | 53    | 1.57483  | 1.507511 | 1.431783 | 1.256605 |
| protein_co cystatin_A   | 1    | 3    | 3    | 2     | 0     | 0     | 0.057113 | 0.219719 | 0.206731 | 0.177295 |
| protein_co developme    | 24   | 14   | 17   | 10773 | 12830 | 13005 | 0.369819 | 0.276641 | 0.316064 | 257.6592 |
| protein_co popeye_do    | 6    | 5    | 4    | 3     | 2     | 5     | 0.143687 | 0.153549 | 0.115578 | 0.111511 |
| protein_co UDP-Gal:be   | 381  | 292  | 331  | 310   | 374   | 272   | 3.083379 | 3.030359 | 3.232049 | 3.893983 |
| protein_co N(alpha)-ac  | 2159 | 1851 | 1847 | 2202  | 2975  | 3098  | 28.11318 | 30.90815 | 29.01832 | 44.50462 |

|                         |      |      |      |      |      |      |          |          |          |          |
|-------------------------|------|------|------|------|------|------|----------|----------|----------|----------|
| protein_co CD80_mole    | 0    | 0    | 0    | 1    | 1    | 0    | 0        | 0        | 0        | 0.026708 |
| protein_co kinesin_fan  | 275  | 257  | 255  | 222  | 144  | 264  | 3.614001 | 4.331098 | 4.043373 | 4.52834  |
| protein_co desumoylat   | 1568 | 1249 | 1322 | 1565 | 1937 | 1608 | 17.47233 | 17.84746 | 17.77396 | 27.06758 |
| protein_co mitogen-ac   | 524  | 383  | 443  | 1098 | 1217 | 867  | 7.726531 | 7.242048 | 7.88143  | 25.12963 |
| protein_co cryptochro   | 346  | 257  | 266  | 504  | 467  | 325  | 3.860087 | 3.676745 | 3.580558 | 8.727342 |
| protein_co peroxisoma   | 340  | 260  | 271  | 557  | 794  | 416  | 9.727032 | 9.538589 | 9.354461 | 24.73359 |
| protein_co DEP_domai    | 94   | 103  | 95   | 54   | 41   | 29   | 2.190687 | 3.078215 | 2.671309 | 1.953335 |
| protein_co catalase     | 293  | 239  | 233  | 85   | 99   | 59   | 5.968191 | 6.242842 | 5.726365 | 2.687351 |
| protein_co paired_imn   | 520  | 361  | 416  | 416  | 616  | 530  | 5.611694 | 4.995824 | 5.416665 | 6.968101 |
| protein_co zinc_finger  | 1699 | 1394 | 1410 | 1957 | 1781 | 2116 | 7.811172 | 8.218545 | 7.821498 | 13.9651  |
| protein_co gap_junctio  | 18   | 8    | 18   | 18   | 29   | 4    | 0.161969 | 0.092312 | 0.195425 | 0.251398 |
| protein_co TBC1_dom     | 586  | 530  | 507  | 477  | 389  | 540  | 4.749793 | 5.508866 | 4.958303 | 6.001031 |
| protein_co brain-speci  | 2109 | 1583 | 1758 | 1127 | 1575 | 861  | 18.30299 | 17.61715 | 18.40824 | 15.18098 |
| protein_co hypocretin   | 4    | 0    | 3    | 11   | 6    | 8    | 0.093733 | 0        | 0.084821 | 0.400089 |
| protein_co zinc_finger  | 398  | 317  | 365  | 454  | 507  | 509  | 10.78741 | 11.018   | 11.93645 | 19.09944 |
| protein_co fatty_acid_  | 1151 | 1010 | 982  | 125  | 98   | 97   | 74.44194 | 83.76703 | 76.63055 | 12.54824 |
| protein_co KH_domair    | 5227 | 4131 | 4411 | 5079 | 6759 | 5846 | 88.89885 | 90.09655 | 90.5167  | 134.0764 |
| protein_co transmemt    | 428  | 294  | 325  | 292  | 335  | 393  | 9.616161 | 8.470609 | 8.810273 | 10.1829  |
| protein_co chemokine    | 0    | 3    | 1    | 1    | 1    | 3    | 0        | 0.067536 | 0.021181 | 0.027248 |
| protein_co ring_finger  | 842  | 704  | 679  | 295  | 485  | 430  | 11.09028 | 11.89084 | 10.79067 | 6.03091  |
| protein_co polymerase   | 366  | 278  | 297  | 82   | 69   | 33   | 10.70602 | 10.428   | 10.48217 | 3.722984 |
| protein_co tumor_nec    | 12   | 10   | 13   | 3    | 0    | 1    | 0.288111 | 0.307884 | 0.376591 | 0.111797 |
| protein_co zinc_finger  | 394  | 335  | 334  | 352  | 393  | 394  | 6.125553 | 6.678873 | 6.265324 | 8.494194 |
| protein_co SLIT_and_N   | 0    | 6    | 3    | 224  | 269  | 206  | 0        | 0.079205 | 0.037262 | 3.579073 |
| protein_co phosphatic   | 639  | 533  | 544  | 195  | 189  | 139  | 3.295141 | 3.524599 | 3.3847   | 1.560768 |
| protein_co PDS5_regul   | 2310 | 1844 | 2063 | 1743 | 1897 | 1579 | 15.09419 | 15.45141 | 16.26467 | 17.6777  |
| protein_co transmemt    | 0    | 0    | 0    | 0    | 0    | 1    | 0        | 0        | 0        | 0        |
| protein_co lipoic_acid  | 66   | 55   | 53   | 140  | 177  | 176  | 1.743516 | 1.863177 | 1.689297 | 5.740379 |
| protein_co carboxypep   | 0    | 0    | 1    | 167  | 203  | 121  | 0        | 0        | 0.015919 | 3.419872 |
| protein_co transmemt    | 169  | 78   | 90   | 180  | 244  | 108  | 7.932345 | 4.694819 | 5.096892 | 13.11348 |
| protein_co zinc_finger  | 141  | 101  | 139  | 36   | 64   | 51   | 1.531856 | 1.407115 | 1.822056 | 0.60706  |
| protein_co CUB_and_S    | 1221 | 1077 | 1067 | 439  | 448  | 396  | 4.183916 | 4.732519 | 4.411434 | 2.334868 |
| protein_co hippocalcir  | 1    | 4    | 4    | 22   | 29   | 19   | 0.031941 | 0.163841 | 0.154157 | 1.090705 |
| protein_co ligand_dep   | 206  | 166  | 173  | 201  | 268  | 212  | 2.779667 | 2.872387 | 2.816565 | 4.209709 |
| protein_co chloride_cl  | 581  | 523  | 520  | 417  | 534  | 335  | 5.646238 | 6.517696 | 6.097257 | 6.289985 |
| protein_co G-protein_   | 467  | 350  | 356  | 337  | 331  | 136  | 6.615601 | 6.358136 | 6.084858 | 7.409907 |
| protein_co glycosyltra  | 239  | 189  | 221  | 139  | 172  | 170  | 3.793742 | 3.847167 | 4.232629 | 3.424642 |
| protein_co chemokine    | 3    | 2    | 1    | 11   | 17   | 24   | 0.074232 | 0.063462 | 0.029855 | 0.422469 |
| protein_co zinc_finger  | 191  | 165  | 162  | 170  | 200  | 164  | 1.313195 | 1.454753 | 1.343876 | 1.814159 |
| protein_co activin_A_r  | 307  | 245  | 233  | 113  | 158  | 167  | 2.513135 | 2.571892 | 2.301343 | 1.435775 |
| protein_co polymerase   | 361  | 300  | 326  | 76   | 77   | 71   | 2.863694 | 3.051758 | 3.120219 | 0.935758 |
| protein_co synaptic_vt  | 0    | 0    | 0    | 3    | 7    | 3    | 0        | 0        | 0        | 0.030503 |
| protein_co fms-related  | 0    | 0    | 0    | 0    | 0    | 2    | 0        | 0        | 0        | 0        |
| protein_co ribosomal_   | 5925 | 4743 | 4844 | 7196 | 7985 | 6993 | 340.8875 | 349.9333 | 336.2598 | 642.6055 |
| protein_co mitochond    | 272  | 196  | 223  | 274  | 264  | 224  | 11.55261 | 10.67522 | 11.42784 | 18.0631  |
| protein_co general_tra  | 986  | 831  | 728  | 607  | 808  | 685  | 24.09253 | 26.03849 | 21.46272 | 23.02102 |
| protein_co RAS-like_fai | 6    | 2    | 8    | 32   | 35   | 40   | 0.182333 | 0.077939 | 0.293327 | 1.509367 |
| protein_co ubiquitin-li | 1007 | 758  | 829  | 531  | 513  | 574  | 10.77059 | 10.39653 | 10.69824 | 8.815254 |
| protein_co forty-two-t  | 1554 | 1206 | 1267 | 745  | 838  | 781  | 19.94173 | 19.84579 | 19.61718 | 14.83879 |
| protein_co MTERF_dor    | 378  | 246  | 277  | 223  | 270  | 385  | 3.913541 | 3.266048 | 3.460237 | 3.583549 |
| protein_co X-prolyl_an  | 0    | 0    | 2    | 1    | 4    | 0    | 0        | 0        | 0.034603 | 0.022257 |
| protein_co SAM_and_S    | 2    | 6    | 6    | 1    | 1    | 0    | 0.035712 | 0.137387 | 0.129266 | 0.027715 |
| protein_co oculocereb   | 993  | 893  | 858  | 531  | 662  | 432  | 9.020106 | 10.40215 | 9.403678 | 7.486648 |
| protein_co mitochond    | 290  | 199  | 221  | 535  | 747  | 605  | 8.291527 | 7.296237 | 7.623894 | 23.74219 |
| protein_co T-box_22     | 0    | 0    | 0    | 2    | 3    | 19   | 0        | 0        | 0        | 0.061914 |
| protein_co fibromodul   | 1955 | 1284 | 1242 | 1    | 2    | 5    | 27.69486 | 23.32527 | 21.22863 | 0.021988 |
| protein_co myogenin_    | 0    | 0    | 0    | 1    | 0    | 1    | 0        | 0        | 0        | 0.047631 |
| protein_co lymphocyti   | 0    | 0    | 0    | 0    | 0    | 1    | 0        | 0        | 0        | 0        |
| protein_co KIAA1191     | 2025 | 1610 | 1740 | 1654 | 1844 | 1481 | 31.746   | 32.36676 | 32.91253 | 40.24667 |
| protein_co coatomer_    | 9994 | 8253 | 8639 | 2928 | 3194 | 2604 | 97.85317 | 103.6231 | 102.058  | 44.49765 |
| protein_co CD244_mo     | 2    | 0    | 1    | 0    | 0    | 1    | 0.038076 | 0        | 0.02297  | 0        |
| protein_co heparan_su   | 0    | 0    | 0    | 9    | 12   | 33   | 0        | 0        | 0        | 0.283068 |
| protein_co retinoblast  | 1673 | 1352 | 1479 | 1944 | 1998 | 2065 | 12.10228 | 12.54173 | 12.90885 | 21.8272  |
| protein_co zinc_finger  | 1134 | 912  | 935  | 499  | 607  | 709  | 13.8292  | 14.26226 | 13.75763 | 9.445285 |
| protein_co serine_acti  | 152  | 136  | 126  | 289  | 402  | 162  | 1.776048 | 2.03779  | 1.776355 | 5.241306 |

|                         |       |       |       |       |       |       |          |          |          |          |
|-------------------------|-------|-------|-------|-------|-------|-------|----------|----------|----------|----------|
| protein_co annexin_A1   | 1728  | 1388  | 1433  | 1806  | 2095  | 1726  | 11.6333  | 11.98279 | 11.64001 | 18.87155 |
| protein_co LIM_domai    | 11    | 13    | 14    | 12    | 32    | 25    | 0.094884 | 0.143798 | 0.145706 | 0.160662 |
| protein_co family_witl  | 398   | 315   | 362   | 358   | 416   | 420   | 5.171024 | 5.248237 | 5.674794 | 7.219498 |
| protein_co family_witl  | 1573  | 1333  | 1296  | 874   | 1077  | 1047  | 35.83965 | 38.94704 | 35.62772 | 30.90843 |
| protein_co zinc_finger  | 289   | 227   | 221   | 391   | 545   | 398   | 6.571879 | 6.619527 | 6.063621 | 13.80063 |
| protein_co N(alpha)-ac  | 174   | 158   | 174   | 140   | 234   | 178   | 2.983131 | 3.473677 | 3.599319 | 3.725474 |
| protein_co ribosomal_   | 11236 | 9030  | 9239  | 14209 | 14220 | 14257 | 435.4184 | 448.7372 | 431.9844 | 854.6514 |
| protein_co outer_dens   | 524   | 483   | 518   | 157   | 149   | 156   | 4.293267 | 5.074732 | 5.12076  | 1.99658  |
| protein_co prostaglan   | 227   | 185   | 169   | 0     | 0     | 2     | 2.391918 | 2.499778 | 2.148598 | 0        |
| pseudogen spermatog     | 13    | 12    | 9     | 2     | 3     | 2     | 0.307708 | 0.364239 | 0.257032 | 0.073478 |
| protein_co tRNA_meth    | 150   | 116   | 147   | 91    | 98    | 172   | 2.247844 | 2.229165 | 2.65791  | 2.116639 |
| protein_co leucine_ri   | 9     | 6     | 5     | 2     | 0     | 5     | 0.287865 | 0.246097 | 0.192959 | 0.09929  |
| protein_co RWD_dom      | 97    | 71    | 77    | 29    | 39    | 23    | 2.957303 | 2.775823 | 2.832454 | 1.372311 |
| protein_co zinc_finger  | 641   | 496   | 532   | 547   | 451   | 1014  | 5.274921 | 5.234184 | 5.282234 | 6.986759 |
| protein_co coiled-coil  | 185   | 121   | 149   | 153   | 155   | 199   | 1.782341 | 1.494906 | 1.732022 | 2.287921 |
| protein_co RNA_polym    | 174   | 141   | 132   | 178   | 173   | 185   | 2.623429 | 2.726142 | 2.401275 | 4.165532 |
| protein_co PQ_loop_r    | 1110  | 841   | 908   | 490   | 680   | 548   | 18.02838 | 17.51616 | 17.79375 | 12.35265 |
| protein_co neuroblast   | 569   | 490   | 457   | 80    | 105   | 142   | 7.232426 | 7.98688  | 7.008676 | 1.57831  |
| protein_co Bardet-Bie   | 324   | 243   | 263   | 480   | 564   | 246   | 3.772626 | 3.628393 | 3.694899 | 8.67502  |
| protein_co PMS2_post    | 263   | 179   | 203   | 211   | 224   | 223   | 4.319466 | 3.769959 | 4.022707 | 5.378822 |
| protein_co zinc_finger  | 1388  | 1048  | 1216  | 1047  | 1309  | 1458  | 12.65967 | 12.25754 | 13.3818  | 14.82211 |
| protein_co oncomodu     | 1     | 0     | 0     | 1     | 0     | 0     | 0.067468 | 0        | 0        | 0.104719 |
| protein_co septin_7     | 3369  | 2615  | 2837  | 1521  | 1050  | 1710  | 22.64514 | 22.54005 | 23.00813 | 15.86842 |
| protein_co endonucle    | 199   | 140   | 153   | 280   | 343   | 171   | 1.958261 | 1.766668 | 1.81659  | 4.276672 |
| protein_co kelch-like_f | 695   | 548   | 576   | 1139  | 1333  | 1446  | 9.863366 | 9.973102 | 9.863042 | 25.08965 |
| protein_co HERPUD_fa    | 429   | 347   | 356   | 283   | 384   | 156   | 6.580248 | 6.825332 | 6.588446 | 6.737548 |
| protein_co chromobo     | 2846  | 2054  | 2265  | 2139  | 2200  | 3225  | 62.71099 | 58.03882 | 60.21782 | 73.15601 |
| protein_co heterogene   | 19392 | 15897 | 17118 | 19678 | 23277 | 25549 | 144.6994 | 152.1138 | 154.1151 | 227.9059 |
| protein_co WAS/WASL     | 5     | 5     | 5     | 318   | 405   | 271   | 0.058583 | 0.075125 | 0.070684 | 5.783103 |
| protein_co neurexophi   | 0     | 0     | 0     | 5     | 4     | 3     | 0        | 0        | 0        | 0.12458  |
| protein_co neuropepti   | 14    | 10    | 9     | 4     | 7     | 21    | 0.931149 | 0.852905 | 0.72224  | 0.412935 |
| protein_co family_witl  | 942   | 707   | 784   | 1322  | 1324  | 1634  | 6.970238 | 6.7085   | 6.9994   | 15.18304 |
| protein_co homeobox     | 45    | 36    | 36    | 0     | 0     | 0     | 1.04458  | 1.07162  | 1.008276 | 0        |
| protein_co inhibin_be   | 6187  | 4817  | 5274  | 2     | 2     | 21    | 47.84112 | 47.76471 | 49.20502 | 0.024004 |
| protein_co FK506_bin    | 5446  | 4109  | 4258  | 229   | 246   | 167   | 73.76171 | 71.36722 | 69.58362 | 4.814146 |
| protein_co 5'-nucleoti  | 236   | 192   | 216   | 193   | 199   | 254   | 6.189063 | 6.456891 | 6.834625 | 7.855985 |
| protein_co ADP-ribosy   | 304   | 225   | 229   | 120   | 147   | 231   | 4.508085 | 4.278686 | 4.09734  | 2.762042 |
| protein_co CCZ1_vacu    | 283   | 204   | 222   | 224   | 246   | 288   | 4.628488 | 4.278507 | 4.380803 | 5.686319 |
| protein_co polymerase   | 569   | 370   | 465   | 405   | 461   | 269   | 8.290994 | 6.913619 | 8.175143 | 9.15967  |
| protein_co receptor_(C  | 0     | 0     | 0     | 4     | 5     | 8     | 0        | 0        | 0        | 0.220045 |
| protein_co FtsJ_RNA_n   | 579   | 465   | 520   | 679   | 852   | 976   | 10.81215 | 11.13515 | 11.71615 | 19.6804  |
| protein_co twist_basic  | 950   | 712   | 678   | 1     | 1     | 19    | 26.73801 | 25.69773 | 23.02413 | 0.043685 |
| protein_co smu-1_sup    | 1416  | 1080  | 1163  | 1157  | 1330  | 1426  | 9.322699 | 9.11825  | 9.2386   | 11.8234  |
| protein_co GLI_pathog   | 1560  | 1212  | 1315  | 54    | 62    | 60    | 27.07196 | 26.97162 | 27.53397 | 1.454519 |
| protein_co solute_carr  | 154   | 132   | 131   | 74    | 77    | 79    | 3.865665 | 4.249001 | 3.967554 | 2.88314  |
| protein_co clathrin_lig | 3196  | 2530  | 2684  | 2197  | 2462  | 2526  | 79.29127 | 80.49121 | 80.3432  | 84.60171 |
| protein_co reversion-i  | 446   | 356   | 394   | 177   | 210   | 151   | 4.278426 | 4.379339 | 4.560301 | 2.635439 |
| protein_co serine_pep   | 1     | 0     | 0     | 2     | 2     | 3     | 0.087974 | 0        | 0        | 0.273095 |
| protein_co olfactory_r  | 2     | 0     | 0     | 0     | 0     | 0     | 0.08957  | 0        | 0        | 0        |
| protein_co aconitase_   | 1476  | 1152  | 1333  | 1320  | 1580  | 1090  | 19.21957 | 19.23619 | 20.94283 | 26.67852 |
| protein_co KIAA1045     | 1     | 3     | 2     | 8     | 11    | 2     | 0.0082   | 0.031548 | 0.019789 | 0.101826 |
| protein_co dynein_axc   | 3     | 1     | 3     | 6     | 12    | 5     | 0.056291 | 0.024062 | 0.067918 | 0.174741 |
| protein_co DDB1_and     | 868   | 730   | 704   | 381   | 478   | 221   | 5.217348 | 5.626811 | 5.105647 | 3.554558 |
| protein_co ciliary_neu  | 4     | 0     | 1     | 997   | 1318  | 795   | 0.091404 | 0        | 0.027571 | 35.36134 |
| protein_co KIAA1549     | 1296  | 1070  | 1021  | 871   | 962   | 560   | 4.909077 | 5.197422 | 4.666257 | 5.120867 |
| protein_co tripartite_r | 1128  | 914   | 981   | 2699  | 3294  | 2933  | 6.289172 | 6.534915 | 6.599354 | 23.35704 |
| protein_co chromosom    | 633   | 434   | 475   | 333   | 426   | 516   | 11.52228 | 10.13056 | 10.43221 | 9.408258 |
| protein_co caldesmon    | 11872 | 9220  | 9905  | 2936  | 2925  | 4483  | 122.5084 | 122.0063 | 123.3231 | 47.02498 |
| protein_co aldo-keto_r  | 0     | 1     | 0     | 0     | 0     | 1     | 0        | 0.02562  | 0        | 0        |
| protein_co nudix_(nuc   | 77    | 60    | 52    | 368   | 410   | 342   | 1.804363 | 1.802992 | 1.470228 | 13.38479 |
| protein_co surfactant_  | 0     | 0     | 1     | 0     | 0     | 0     | 0        | 0        | 0.025577 | 0        |
| protein_co neurogenin   | 0     | 0     | 0     | 40    | 52    | 104   | 0        | 0        | 0        | 2.115692 |
| protein_co plasminoge   | 1130  | 934   | 975   | 218   | 318   | 188   | 19.93443 | 21.12913 | 20.75287 | 5.969148 |
| protein_co serglycin    | 26    | 32    | 21    | 7     | 14    | 9     | 1.009222 | 1.592842 | 0.983515 | 0.421737 |
| protein_co carbohydr    | 909   | 677   | 718   | 320   | 365   | 170   | 6.115212 | 5.840441 | 5.828008 | 3.341397 |

|                         |       |       |       |      |      |      |          |          |          |          |
|-------------------------|-------|-------|-------|------|------|------|----------|----------|----------|----------|
| protein_co bicaudal_C   | 2924  | 2375  | 2356  | 22   | 18   | 20   | 25.05142 | 26.09323 | 24.35445 | 0.292555 |
| pseudogen: ADP-ribosy   | 0     | 0     | 0     | 2    | 0    | 2    | 0        | 0        | 0        | 0.206468 |
| protein_co CDGSH_iro    | 269   | 223   | 215   | 328  | 393  | 450  | 5.088106 | 5.409014 | 4.90671  | 9.629599 |
| protein_co early_grow   | 1623  | 1134  | 1331  | 7    | 10   | 9    | 25.641   | 22.97412 | 25.37129 | 0.17165  |
| protein_co ecdysonele   | 787   | 659   | 693   | 620  | 607  | 766  | 12.02426 | 12.91155 | 12.77511 | 14.70299 |
| protein_co prolyl_4-hy  | 2509  | 1909  | 2055  | 1187 | 938  | 715  | 40.05688 | 39.08334 | 39.58552 | 29.41424 |
| protein_co solute_carr  | 210   | 199   | 168   | 33   | 82   | 112  | 5.575823 | 6.775668 | 5.382041 | 1.359985 |
| protein_co ZW10_inte    | 1190  | 896   | 883   | 833  | 1080 | 1769 | 28.45442 | 27.47389 | 25.47484 | 30.91564 |
| protein_co vacuolar_p   | 799   | 661   | 696   | 478  | 533  | 552  | 11.6027  | 12.30901 | 12.19466 | 10.77384 |
| protein_co RNA_bindin   | 1034  | 768   | 830   | 833  | 983  | 1275 | 10.96433 | 10.44317 | 10.6191  | 13.70999 |
| protein_co citron_(rhc  | 1489  | 1280  | 1317  | 1319 | 1687 | 1233 | 8.017827 | 8.838555 | 8.556493 | 11.02395 |
| protein_co intraflagell | 294   | 241   | 262   | 186  | 190  | 181  | 4.435542 | 4.662574 | 4.769235 | 4.355548 |
| protein_co acyl-CoA_d   | 131   | 96    | 124   | 204  | 288  | 144  | 3.150047 | 2.960236 | 3.597622 | 7.613887 |
| protein_co hydrogen_v   | 57    | 42    | 51    | 59   | 97   | 35   | 1.220983 | 1.153701 | 1.318114 | 1.96163  |
| pseudogen: NME/NM23     | 0     | 4     | 1     | 1    | 3    | 3    | 0        | 0.34707  | 0.081639 | 0.105021 |
| protein_co DEAD_(Asp    | 1635  | 1277  | 1310  | 2756 | 3225 | 2548 | 17.50347 | 17.53099 | 16.92098 | 45.79478 |
| protein_co mediator_c   | 2275  | 1824  | 1995  | 1023 | 1076 | 679  | 11.19358 | 11.50858 | 11.84346 | 7.812564 |
| protein_co cyclin-depe  | 602   | 457   | 479   | 4    | 1    | 6    | 9.720313 | 9.462575 | 9.331841 | 0.100248 |
| protein_co ring_finger  | 1187  | 1017  | 1005  | 622  | 863  | 675  | 18.04749 | 19.82879 | 18.43657 | 14.67868 |
| protein_co Ras_associa  | 1010  | 837   | 845   | 313  | 360  | 345  | 8.595085 | 9.134054 | 8.67628  | 4.134315 |
| protein_co basic_helix  | 250   | 207   | 222   | 54   | 77   | 44   | 3.055122 | 3.243906 | 3.273329 | 1.024266 |
| protein_co sarcospan    | 156   | 147   | 176   | 8    | 11   | 4    | 2.623688 | 3.170402 | 3.571481 | 0.208837 |
| protein_co inositol_14  | 1278  | 1098  | 1201  | 660  | 682  | 904  | 5.701212 | 6.281278 | 6.464388 | 4.569943 |
| protein_co coiled-coil  | 152   | 125   | 153   | 172  | 209  | 190  | 2.603098 | 2.745151 | 3.161451 | 4.571996 |
| protein_co N-terminal   | 28    | 19    | 30    | 61   | 80   | 126  | 0.248236 | 0.216008 | 0.320905 | 0.839396 |
| protein_co WW_doma      | 689   | 573   | 602   | 686  | 818  | 576  | 6.894414 | 7.352619 | 7.268129 | 10.65449 |
| protein_co acyl-CoA_tl  | 869   | 708   | 797   | 435  | 549  | 425  | 13.07264 | 13.65797 | 14.46605 | 10.15695 |
| protein_co peroxiredo   | 1844  | 1397  | 1416  | 1203 | 1421 | 1500 | 86.03502 | 83.58341 | 79.71235 | 87.11851 |
| protein_co DEAD_(Asp    | 1956  | 1450  | 1701  | 1613 | 2024 | 2484 | 48.19594 | 45.81619 | 50.57012 | 61.68882 |
| protein_co protein_kir  | 3171  | 2363  | 2595  | 4746 | 6154 | 3657 | 42.26499 | 40.38849 | 41.73207 | 98.18446 |
| protein_co chromosom    | 4063  | 3198  | 3363  | 2559 | 3679 | 3316 | 192.8281 | 194.6307 | 192.5743 | 188.5056 |
| protein_co CD97_mole    | 207   | 148   | 169   | 80   | 118  | 67   | 3.044615 | 2.791471 | 2.999141 | 1.826344 |
| protein_co WD_repeat    | 60    | 53    | 79    | 74   | 93   | 82   | 1.900947 | 2.153297 | 3.019909 | 3.63899  |
| protein_co GIPC_PDZ_    | 2550  | 1926  | 2001  | 1313 | 1818 | 1458 | 57.73517 | 55.91984 | 54.66325 | 46.1419  |
| protein_co actin-relate | 0     | 2     | 0     | 0    | 0    | 0    | 0        | 0.083514 | 0        | 0        |
| protein_co SPRY_doma    | 292   | 247   | 271   | 110  | 108  | 72   | 4.436774 | 4.812722 | 4.968231 | 2.594225 |
| protein_co emopamil_    | 658   | 554   | 595   | 1290 | 1609 | 1418 | 30.07177 | 32.46775 | 32.80938 | 91.50677 |
| protein_co ATPase_Cu-   | 525   | 402   | 445   | 231  | 275  | 206  | 3.708536 | 3.641485 | 3.792724 | 2.532711 |
| protein_co zinc_finger  | 3171  | 2583  | 2881  | 2407 | 2009 | 2571 | 18.54431 | 19.37082 | 20.32851 | 21.84846 |
| pseudogen: guanylate_v  | 0     | 0     | 0     | 15   | 4    | 8    | 0        | 0        | 0        | 0.38025  |
| protein_co neurolysin   | 1548  | 1272  | 1367  | 2470 | 2878 | 2956 | 8.380758 | 8.830978 | 8.929536 | 20.75581 |
| protein_co centromere   | 355   | 282   | 304   | 238  | 286  | 313  | 9.599744 | 9.778894 | 9.918658 | 9.989384 |
| protein_co optineurin   | 751   | 615   | 613   | 219  | 268  | 131  | 10.00125 | 10.50265 | 9.849697 | 4.526775 |
| protein_co inter-alpha  | 3060  | 2724  | 2576  | 146  | 160  | 121  | 20.65996 | 23.58439 | 20.98467 | 1.53     |
| protein_co activating_  | 307   | 257   | 265   | 276  | 295  | 389  | 6.600291 | 7.085446 | 6.874144 | 9.210099 |
| protein_co Ts_translati | 232   | 176   | 184   | 203  | 237  | 301  | 4.962812 | 4.82794  | 4.749039 | 6.7401   |
| protein_co neuronal_c   | 0     | 0     | 0     | 0    | 0    | 1    | 0        | 0        | 0        | 0        |
| protein_co Rho_GTPas    | 14    | 7     | 8     | 22   | 28   | 13   | 0.225433 | 0.144543 | 0.155427 | 0.549847 |
| protein_co NCK-associ   | 1     | 5     | 6     | 4    | 5    | 3    | 0.009934 | 0.063697 | 0.071918 | 0.061678 |
| protein_co matrix_me    | 73    | 50    | 47    | 3    | 7    | 10   | 0.891399 | 0.78294  | 0.692461 | 0.056859 |
| protein_co prefoldin_s  | 1947  | 1559  | 1590  | 1297 | 1321 | 1163 | 46.10852 | 47.34462 | 45.43184 | 47.67445 |
| protein_co spermatog    | 1351  | 1130  | 1151  | 650  | 735  | 444  | 19.09235 | 20.4782  | 19.6258  | 14.25765 |
| protein_co ORM1-like_   | 101   | 64    | 78    | 71   | 84   | 85   | 2.212    | 1.797434 | 2.061135 | 2.413529 |
| protein_co nuclear_rex  | 139   | 93    | 93    | 582  | 718  | 277  | 1.34747  | 1.156103 | 1.087766 | 8.757049 |
| protein_co phosphodi    | 0     | 1     | 0     | 5    | 14   | 60   | 0        | 0.012702 | 0        | 0.076869 |
| protein_co homeobox     | 1     | 0     | 0     | 0    | 2    | 0    | 0.019241 | 0        | 0        | 0        |
| protein_co cyclin-depe  | 569   | 464   | 460   | 381  | 445  | 371  | 10.2696  | 10.73912 | 10.01722 | 10.67325 |
| protein_co low_densit   | 43414 | 30774 | 34043 | 6477 | 8149 | 5764 | 136.6505 | 124.2152 | 129.2878 | 31.6436  |
| protein_co homeobox     | 72    | 47    | 53    | 0    | 0    | 2    | 1.03529  | 0.866636 | 0.919504 | 0        |
| protein_co chromosom    | 565   | 485   | 463   | 367  | 514  | 402  | 18.4106  | 20.26612 | 18.20324 | 18.56163 |
| protein_co nuclear_fac  | 5     | 6     | 0     | 70   | 98   | 41   | 0.127905 | 0.196824 | 0        | 2.77937  |
| protein_co IKAROS_far   | 287   | 173   | 234   | 317  | 374  | 304  | 2.573615 | 1.989377 | 2.531778 | 4.412162 |
| protein_co single-stran | 317   | 242   | 247   | 303  | 355  | 328  | 5.701625 | 5.581669 | 5.360242 | 8.458872 |
| protein_co tubulin_alp  | 3750  | 2622  | 2858  | 3023 | 3475 | 2738 | 54.9836  | 49.29966 | 50.5606  | 68.79717 |
| protein_co methyltran   | 92    | 111   | 92    | 24   | 40   | 6    | 1.561869 | 2.416512 | 1.884485 | 0.63241  |

|                         |      |      |      |      |      |      |          |          |          |          |
|-------------------------|------|------|------|------|------|------|----------|----------|----------|----------|
| protein_co kelch_repe   | 80   | 76   | 75   | 48   | 67   | 58   | 1.218318 | 1.484204 | 1.378098 | 1.134599 |
| protein_co sarcosine_c  | 222  | 157  | 173  | 292  | 340  | 157  | 3.112914 | 2.82308  | 2.926903 | 6.355174 |
| protein_co dopamine_    | 15   | 7    | 12   | 25   | 22   | 7    | 0.25456  | 0.152338 | 0.245713 | 0.658522 |
| protein_co ATP_syntha   | 389  | 293  | 317  | 564  | 731  | 667  | 4.386777 | 4.237141 | 4.313236 | 9.872008 |
| protein_co SCL/TAL1_i   | 490  | 423  | 445  | 575  | 637  | 792  | 4.397341 | 4.867924 | 4.818392 | 8.00926  |
| protein_co Holliday_ju  | 1033 | 859  | 923  | 1365 | 1416 | 1275 | 15.88111 | 16.93492 | 17.12105 | 32.57194 |
| protein_co collagen_ty  | 106  | 90   | 70   | 2    | 5    | 0    | 1.42091  | 1.547079 | 1.132157 | 0.041612 |
| protein_co adenosylm    | 1350 | 990  | 1103 | 1491 | 1501 | 3210 | 18.41231 | 17.31486 | 18.1509  | 31.56332 |
| protein_co NADH_deh     | 200  | 141  | 168  | 281  | 335  | 455  | 3.90913  | 3.534098 | 3.961936 | 8.524854 |
| protein_co ubiquitin_s  | 258  | 242  | 273  | 294  | 329  | 208  | 1.934073 | 2.326365 | 2.469243 | 3.420825 |
| protein_co proteolipic  | 55   | 36   | 32   | 936  | 1179 | 981  | 0.823157 | 0.690926 | 0.577854 | 21.74334 |
| protein_co mortality_f  | 6323 | 5359 | 5578 | 2877 | 3024 | 2867 | 107.8522 | 117.2192 | 114.7974 | 76.1686  |
| protein_co H2B_histor   | 0    | 0    | 0    | 1    | 0    | 1    | 0        | 0        | 0        | 0.081409 |
| protein_co RAB9B_me     | 47   | 38   | 43   | 1    | 6    | 3    | 0.588002 | 0.60964  | 0.649079 | 0.019418 |
| protein_co Nik_related  | 176  | 154  | 200  | 108  | 73   | 98   | 1.023393 | 1.148312 | 1.403162 | 0.974729 |
| protein_co family_witl  | 607  | 552  | 539  | 456  | 606  | 463  | 3.816849 | 4.451072 | 4.089339 | 4.450528 |
| protein_co ESX_homec    | 4    | 1    | 1    | 1    | 1    | 1    | 0.125458 | 0.040221 | 0.037843 | 0.048682 |
| protein_co RAB9A_me     | 185  | 139  | 151  | 269  | 378  | 240  | 4.254366 | 4.099089 | 4.18975  | 9.601651 |
| protein_co methyltran   | 231  | 211  | 205  | 206  | 252  | 215  | 4.822615 | 5.648881 | 5.163837 | 6.675262 |
| protein_co tetratricop  | 449  | 389  | 407  | 297  | 246  | 351  | 3.840499 | 4.266781 | 4.200334 | 3.943014 |
| protein_co N-myc_(anc   | 75   | 59   | 79   | 88   | 100  | 141  | 1.679442 | 1.694202 | 2.134415 | 3.058559 |
| protein_co tumor_nec    | 413  | 347  | 398  | 0    | 0    | 4    | 13.61855 | 14.67302 | 15.83478 | 0        |
| protein_co activin_A_r  | 3    | 1    | 1    | 16   | 23   | 9    | 0.041557 | 0.017764 | 0.016714 | 0.344011 |
| protein_co bromodom     | 556  | 462  | 483  | 368  | 245  | 403  | 3.145235 | 3.351425 | 3.296654 | 3.231146 |
| protein_co solute_carr  | 762  | 628  | 647  | 175  | 164  | 228  | 6.180625 | 6.532003 | 6.331837 | 2.20316  |
| protein_co lysophosph   | 978  | 758  | 864  | 304  | 386  | 293  | 5.892886 | 5.856899 | 6.281321 | 2.843107 |
| protein_co basic_leuci  | 23   | 23   | 24   | 35   | 28   | 29   | 0.457561 | 0.586757 | 0.576076 | 1.080735 |
| protein_co G0/G1swit    | 13   | 8    | 9    | 1    | 5    | 3    | 0.703892 | 0.555472 | 0.587967 | 0.084041 |
| protein_co potassium_   | 12   | 3    | 4    | 16   | 27   | 7    | 0.104355 | 0.033455 | 0.04197  | 0.215964 |
| protein_co RAP2C_me     | 830  | 652  | 721  | 357  | 586  | 458  | 9.989403 | 10.06279 | 10.46995 | 6.668991 |
| protein_co exosome_c    | 657  | 470  | 505  | 551  | 628  | 889  | 7.935791 | 7.280011 | 7.359771 | 10.33016 |
| protein_co phospholip   | 531  | 421  | 408  | 551  | 753  | 352  | 4.76437  | 4.843981 | 4.416917 | 7.673492 |
| protein_co B9_protein   | 131  | 98   | 99   | 62   | 64   | 62   | 5.981102 | 5.737799 | 5.453724 | 4.393717 |
| protein_co aarF_doma    | 483  | 418  | 487  | 772  | 1130 | 763  | 9.270519 | 10.28827 | 11.27805 | 22.99877 |
| protein_co 6-phospho    | 243  | 195  | 225  | 416  | 524  | 378  | 1.606185 | 1.652849 | 1.794402 | 4.267888 |
| pseudogen: zinc_finger  | 22   | 21   | 34   | 60   | 84   | 69   | 0.537281 | 0.65767  | 1.001858 | 2.274369 |
| protein_co RAB38_me     | 44   | 51   | 45   | 109  | 94   | 107  | 1.408301 | 2.093256 | 1.737814 | 5.415016 |
| protein_co G_protein-i  | 1    | 0    | 0    | 0    | 6    | 2    | 0.01095  | 0        | 0        | 0        |
| protein_co argonaute_   | 1041 | 788  | 871  | 976  | 1165 | 808  | 13.66532 | 13.26492 | 13.79543 | 19.88608 |
| protein_co MAX_dime     | 2806 | 1983 | 2177 | 460  | 656  | 412  | 31.11953 | 28.20184 | 29.13077 | 7.918332 |
| pseudogen: postmeioti   | 43   | 43   | 54   | 34   | 49   | 25   | 1.652681 | 2.119329 | 2.504162 | 2.02829  |
| protein_co CDC28_prc    | 967  | 761  | 766  | 2053 | 2546 | 1624 | 73.96843 | 74.64727 | 70.69631 | 243.747  |
| protein_co dynein_ass   | 1    | 4    | 1    | 4    | 8    | 6    | 0.018938 | 0.09714  | 0.02285  | 0.117576 |
| protein_co acyl-CoA_s   | 4406 | 3571 | 3711 | 1282 | 1292 | 1661 | 36.37919 | 37.81009 | 36.96984 | 16.4296  |
| protein_co chondroitin  | 9223 | 6621 | 6652 | 2848 | 3274 | 2393 | 143.5336 | 132.1339 | 124.9055 | 68.79418 |
| protein_co aspartyl_an  | 729  | 614  | 625  | 1074 | 1293 | 811  | 14.09601 | 15.22462 | 14.58132 | 32.2332  |
| protein_co inhibin_alp  | 13   | 8    | 14   | 16   | 20   | 8    | 0.415239 | 0.327683 | 0.539548 | 0.79324  |
| protein_co monoacylg    | 0    | 0    | 0    | 3    | 5    | 0    | 0        | 0        | 0        | 0.208339 |
| protein_co obscurin-lil | 4031 | 2958 | 3126 | 3566 | 4725 | 2695 | 32.35981 | 30.45094 | 30.27821 | 44.43293 |
| protein_co family_witl  | 1    | 0    | 0    | 68   | 81   | 39   | 0.018076 | 0        | 0        | 1.907875 |
| protein_co solute_carr  | 2636 | 1906 | 2176 | 1177 | 1597 | 644  | 26.46726 | 24.5412  | 26.36152 | 18.343   |
| protein_co enkurin_dc   | 195  | 139  | 173  | 133  | 224  | 132  | 5.790724 | 5.29325  | 6.198583 | 6.130281 |
| protein_co melanocori   | 0    | 0    | 0    | 0    | 0    | 2    | 0        | 0        | 0        | 0        |
| protein_co glucosamin   | 15   | 10   | 8    | 8    | 14   | 9    | 0.34077  | 0.291327 | 0.219285 | 0.282092 |
| protein_co CCCTC-binc   | 0    | 0    | 0    | 54   | 90   | 21   | 0        | 0        | 0        | 0.983511 |
| pseudogen: high_mobil   | 0    | 1    | 0    | 0    | 1    | 0    | 0        | 0.094544 | 0        | 0        |
| protein_co family_witl  | 929  | 697  | 788  | 482  | 647  | 571  | 14.30099 | 13.75918 | 14.63608 | 11.5167  |
| protein_co peptidase_i  | 3    | 1    | 4    | 0    | 0    | 0    | 0.243796 | 0.104211 | 0.392205 | 0        |
| protein_co family_witl  | 4    | 0    | 0    | 2    | 1    | 0    | 0.205884 | 0        | 0        | 0.15978  |
| protein_co sorting_ne   | 564  | 337  | 469  | 336  | 431  | 290  | 8.514478 | 6.524064 | 8.542792 | 7.873153 |
| protein_co secretory_I  | 0    | 0    | 0    | 0    | 0    | 1    | 0        | 0        | 0        | 0        |
| protein_co WAP_four-i   | 7    | 2    | 5    | 1    | 6    | 6    | 0.32823  | 0.12026  | 0.282878 | 0.07278  |
| protein_co tocopherol   | 567  | 451  | 541  | 200  | 285  | 376  | 4.26478  | 4.350102 | 4.909745 | 2.334931 |
| protein_co phosphatic   | 2577 | 1872 | 2000 | 784  | 1001 | 641  | 17.93611 | 16.70818 | 16.79546 | 8.469551 |
| protein_co potassium_   | 74   | 61   | 76   | 79   | 103  | 69   | 0.764623 | 0.808267 | 0.947496 | 1.266991 |

|                         |       |      |      |      |      |      |          |          |          |          |
|-------------------------|-------|------|------|------|------|------|----------|----------|----------|----------|
| protein_co solute_carr  | 21    | 7    | 19   | 9    | 12   | 10   | 0.163001 | 0.069675 | 0.17794  | 0.108429 |
| protein_co Rho_GTPas    | 1     | 1    | 0    | 27   | 12   | 14   | 0.016505 | 0.021165 | 0        | 0.691677 |
| protein_co syndecan_4   | 573   | 433  | 469  | 1564 | 1841 | 1608 | 10.28243 | 9.964103 | 10.15458 | 43.56204 |
| protein_co nuclear_rex  | 1188  | 975  | 1003 | 469  | 579  | 353  | 7.01667  | 7.384627 | 7.147655 | 4.2995   |
| protein_co phosphatic   | 1923  | 1469 | 1569 | 1164 | 1095 | 1162 | 40.3443  | 39.52155 | 39.71676 | 37.90411 |
| protein_co matrilin_4   | 2     | 5    | 2    | 62   | 68   | 24   | 0.041096 | 0.131748 | 0.049584 | 1.977365 |
| protein_co nuclear_rex  | 1045  | 811  | 857  | 363  | 553  | 1601 | 15.21741 | 15.14449 | 15.05752 | 8.204679 |
| protein_co VAMP_(vesi   | 947   | 769  | 817  | 884  | 1078 | 1140 | 5.595369 | 5.826589 | 5.824368 | 8.107024 |
| protein_co par-6_parti  | 33    | 21   | 20   | 215  | 318  | 186  | 0.335292 | 0.273613 | 0.245181 | 3.390608 |
| protein_co ATP_syntha   | 2594  | 1960 | 2016 | 412  | 462  | 438  | 33.18764 | 32.15673 | 31.12039 | 8.181522 |
| protein_co chromodor    | 1548  | 1308 | 1377 | 1127 | 1251 | 939  | 6.70972  | 7.270269 | 7.201375 | 7.58207  |
| protein_co phospholip   | 4405  | 3433 | 3767 | 3239 | 3904 | 3418 | 37.6025  | 37.57975 | 38.79846 | 42.91531 |
| protein_co TOX_high_I   | 27    | 16   | 22   | 102  | 122  | 91   | 0.486    | 0.369319 | 0.477797 | 2.849727 |
| protein_co serine/argi  | 3322  | 2538 | 2706 | 1680 | 2294 | 5635 | 42.29396 | 41.43617 | 41.56756 | 33.1985  |
| protein_co ganglioside  | 10    | 2    | 11   | 147  | 121  | 69   | 0.20702  | 0.053095 | 0.27476  | 4.723457 |
| protein_co ADP-ribosy   | 1001  | 1010 | 962  | 580  | 752  | 668  | 5.302407 | 6.86072  | 6.1484   | 4.768672 |
| protein_co zinc_finger  | 597   | 528  | 564  | 274  | 351  | 526  | 3.797767 | 4.307222 | 4.328936 | 2.705422 |
| protein_co endothelin   | 60    | 33   | 50   | 6    | 3    | 4    | 1.059661 | 0.747376 | 1.065452 | 0.164474 |
| protein_co CSE1_chrom   | 2291  | 1853 | 1998 | 4231 | 3606 | 5546 | 30.23502 | 31.35956 | 31.81476 | 86.66798 |
| protein_co RAB22A_m     | 1190  | 977  | 1006 | 184  | 295  | 248  | 6.435885 | 6.775872 | 6.564586 | 1.544577 |
| protein_co prostaglan   | 2793  | 2061 | 2262 | 971  | 1227 | 610  | 23.47443 | 22.21321 | 22.93848 | 12.667   |
| protein_co staufer_RN   | 3005  | 2574 | 2482 | 2797 | 3067 | 2759 | 39.87111 | 43.79573 | 39.73413 | 57.6019  |
| protein_co cadherin_2   | 17    | 13   | 10   | 21   | 18   | 19   | 0.250512 | 0.245659 | 0.177799 | 0.480319 |
| protein_co snail_homo   | 151   | 101  | 110  | 167  | 175  | 88   | 4.199521 | 3.602082 | 3.691166 | 7.208913 |
| protein_co molybdenu    | 237   | 201  | 250  | 268  | 340  | 474  | 4.521129 | 4.917042 | 5.754221 | 7.935308 |
| protein_co syntaxin_1   | 1074  | 909  | 974  | 1206 | 1596 | 901  | 10.2005  | 11.07109 | 11.16154 | 17.7785  |
| protein_co protein_ph   | 137   | 126  | 125  | 121  | 103  | 74   | 1.787902 | 2.108643 | 1.968254 | 2.450976 |
| protein_co prostate_tr  | 10670 | 7891 | 8866 | 916  | 1232 | 1399 | 103.2645 | 97.93276 | 103.5291 | 13.75981 |
| protein_co ring_finger  | 1394  | 1140 | 1088 | 1444 | 1739 | 1533 | 26.7888  | 28.09343 | 25.22711 | 43.07132 |
| protein_co ankyrin_rej  | 0     | 0    | 0    | 0    | 2    | 0    | 0        | 0        | 0        | 0        |
| protein_co DEAD_(Asp    | 885   | 729  | 760  | 1011 | 1155 | 1307 | 8.419084 | 8.893208 | 8.723348 | 14.92805 |
| protein_co recombinar   | 0     | 0    | 0    | 21   | 43   | 16   | 0        | 0        | 0        | 0.835178 |
| protein_co semenogeli   | 0     | 0    | 0    | 8    | 4    | 32   | 0        | 0        | 0        | 0.350324 |
| protein_co breast_carc  | 205   | 145  | 142  | 323  | 444  | 200  | 6.416858 | 5.820307 | 5.362965 | 15.69284 |
| protein_co potassium_   | 6     | 0    | 0    | 4    | 8    | 1    | 0.213136 | 0        | 0        | 0.220545 |
| protein_co TP53_targe   | 14    | 12   | 11   | 11   | 8    | 4    | 0.624605 | 0.686544 | 0.592132 | 0.76173  |
| protein_co Z-DNA_binc   | 1     | 1    | 0    | 0    | 0    | 0    | 0.01113  | 0.014272 | 0        | 0        |
| protein_co neuralized_  | 23    | 25   | 17   | 36   | 88   | 23   | 0.843874 | 1.176248 | 0.752569 | 2.050135 |
| protein_co melanoma_    | 0     | 0    | 0    | 0    | 1    | 0    | 0        | 0        | 0        | 0        |
| protein_co 5-methylte   | 347   | 297  | 291  | 225  | 318  | 461  | 4.969712 | 5.454658 | 5.02855  | 5.001666 |
| protein_co FAST_kinas   | 97    | 88   | 57   | 85   | 91   | 156  | 1.89356  | 2.202923 | 1.342549 | 2.575472 |
| protein_co peptidase_I  | 1208  | 917  | 983  | 1086 | 1381 | 1322 | 29.7965  | 29.00527 | 29.25498 | 41.57752 |
| protein_co carbohydra   | 11    | 12   | 15   | 1403 | 1739 | 849  | 0.208148 | 0.291185 | 0.342467 | 41.20664 |
| protein_co IQ_motif_a   | 363   | 263  | 264  | 1126 | 1477 | 1478 | 2.831655 | 2.630866 | 2.484767 | 13.63335 |
| protein_co vesicle-assc | 586   | 489  | 506  | 340  | 316  | 354  | 10.38456 | 11.11242 | 10.81905 | 9.351902 |
| protein_co interleukin  | 0     | 0    | 0    | 9    | 15   | 11   | 0        | 0        | 0        | 0.287541 |
| protein_co Xg_blood_f   | 6     | 6    | 8    | 20   | 27   | 6    | 0.097451 | 0.124967 | 0.156773 | 0.50419  |
| protein_co STAM_bind    | 758   | 558  | 621  | 564  | 599  | 697  | 5.312006 | 5.014561 | 5.250843 | 6.134779 |
| protein_co N-acetylglu  | 1896  | 1627 | 1683 | 308  | 403  | 561  | 20.26059 | 22.29516 | 21.69931 | 5.108518 |
| protein_co methylmal    | 186   | 169  | 152  | 77   | 129  | 66   | 10.43247 | 12.15543 | 10.28646 | 6.703403 |
| protein_co poly(A)_bir  | 10    | 11   | 22   | 503  | 585  | 398  | 0.074678 | 0.10534  | 0.198226 | 5.830266 |
| protein_co small_nucl   | 286   | 179  | 209  | 183  | 225  | 183  | 7.442034 | 5.972938 | 6.561754 | 7.391067 |
| protein_co M-phase_pl   | 699   | 600  | 582  | 458  | 431  | 609  | 13.1949  | 14.52411 | 13.25561 | 13.41914 |
| protein_co interleukin  | 2     | 1    | 2    | 4    | 7    | 3    | 0.089828 | 0.057596 | 0.108382 | 0.27885  |
| pseudogen -             | 0     | 0    | 0    | 1    | 0    | 0    | 0        | 0        | 0        | 0.186615 |
| protein_co ATPase_am    | 127   | 78   | 95   | 420  | 488  | 369  | 0.720076 | 0.567125 | 0.6499   | 3.696193 |
| protein_co ubiquitin_5  | 6758  | 5161 | 5312 | 4393 | 5593 | 6452 | 60.75206 | 59.49576 | 57.61677 | 61.29633 |
| protein_co premature    | 1     | 2    | 0    | 2    | 3    | 0    | 0.011898 | 0.030515 | 0        | 0.036935 |
| protein_co hypoxia_in   | 85    | 60   | 64   | 396  | 627  | 216  | 0.674619 | 0.610661 | 0.612869 | 4.878267 |
| protein_co zinc_finger  | 121   | 102  | 100  | 102  | 139  | 126  | 2.211104 | 2.390195 | 2.204813 | 2.89304  |
| protein_co zinc_finger  | 264   | 243  | 242  | 148  | 174  | 255  | 3.175722 | 3.748471 | 3.512384 | 2.763317 |
| protein_co LY6/PLAUR    | 6     | 3    | 4    | 99   | 105  | 34   | 0.16608  | 0.106487 | 0.13359  | 4.253365 |
| protein_co pregnancy_   | 0     | 0    | 0    | 2    | 0    | 0    | 0        | 0        | 0        | 0.058741 |
| protein_co Norrie_dise  | 9     | 3    | 7    | 1    | 3    | 0    | 0.230229 | 0.098412 | 0.216055 | 0.039705 |
| protein_co ubiquitin_5  | 3157  | 2599 | 2770 | 5251 | 5877 | 3491 | 14.45482 | 15.25997 | 15.30262 | 37.31733 |

|                         |      |      |      |       |       |      |          |          |          |          |
|-------------------------|------|------|------|-------|-------|------|----------|----------|----------|----------|
| protein_co coagulation  | 95   | 68   | 101  | 2     | 2     | 2    | 1.113916 | 1.022462 | 1.428889 | 0.036399 |
| protein_co glutamate    | 104  | 45   | 65   | 1389  | 1715  | 914  | 1.25717  | 0.697561 | 0.94803  | 26.06114 |
| protein_co transcriptic | 656  | 530  | 528  | 1141  | 1206  | 757  | 4.022999 | 4.168035 | 3.906862 | 10.86081 |
| protein_co protein_kir  | 35   | 22   | 40   | 483   | 588   | 247  | 0.384254 | 0.30973  | 0.529857 | 8.230542 |
| protein_co butyrophili  | 400  | 321  | 354  | 181   | 245   | 154  | 5.224514 | 5.376508 | 5.578755 | 3.669399 |
| protein_co sirtuin_5    | 150  | 137  | 124  | 256   | 311   | 213  | 3.007055 | 3.521925 | 2.9993   | 7.965639 |
| protein_co histone_cl   | 4    | 0    | 2    | 1     | 1     | 1    | 0.525378 | 0        | 0.31695  | 0.203865 |
| protein_co MRS2_mag     | 327  | 248  | 264  | 1054  | 1511  | 1902 | 4.628142 | 4.501114 | 4.508281 | 23.15421 |
| protein_co Werner_he    | 1201 | 870  | 991  | 814   | 1076  | 876  | 17.38651 | 16.15095 | 17.30976 | 18.29045 |
| protein_co ribosomal    | 1365 | 1076 | 1098 | 670   | 752   | 1380 | 55.22422 | 55.82369 | 53.59785 | 42.07288 |
| pseudogen: butyrophili  | 151  | 106  | 156  | 38    | 36    | 24   | 2.766859 | 2.490722 | 3.448917 | 1.080747 |
| protein_co butyrophili  | 2    | 1    | 0    | 1     | 0     | 3    | 0.032394 | 0.02077  | 0        | 0.02514  |
| protein_co small_nucl   | 1102 | 887  | 946  | 1338  | 1360  | 1639 | 49.02543 | 50.60259 | 50.77839 | 92.3903  |
| protein_co serpin_pep   | 1221 | 985  | 1090 | 312   | 363   | 338  | 17.53529 | 18.14023 | 18.88738 | 6.954762 |
| protein_co exportin_5   | 1266 | 1047 | 1130 | 2283  | 2394  | 2477 | 11.07514 | 11.7455  | 11.9273  | 30.99931 |
| protein_co ATP-bindin   | 856  | 713  | 738  | 335   | 457   | 438  | 7.888729 | 8.426208 | 8.206117 | 4.791909 |
| protein_co histone_cl   | 0    | 1    | 0    | 16    | 7     | 4    | 0        | 0.077387 | 0        | 1.498683 |
| protein_co histone_cl   | 0    | 0    | 0    | 1     | 0     | 1    | 0        | 0        | 0        | 0.194598 |
| protein_co peroxisom    | 1065 | 887  | 874  | 705   | 872   | 420  | 14.35821 | 15.335   | 14.21708 | 14.75266 |
| protein_co NAD(P)H_d    | 379  | 299  | 257  | 588   | 693   | 613  | 11.73024 | 11.8672  | 9.597297 | 28.24721 |
| protein_co prickly_hor  | 162  | 125  | 118  | 36    | 48    | 36   | 1.924546 | 1.904288 | 1.691388 | 0.663814 |
| protein_co O-acyl-ADP   | 226  | 199  | 203  | 412   | 500   | 563  | 3.182325 | 3.593342 | 3.448897 | 9.004588 |
| protein_co unc-5_hom    | 9    | 4    | 3    | 112   | 124   | 40   | 0.14133  | 0.080549 | 0.056841 | 2.729852 |
| protein_co alanyl-tRNA  | 738  | 585  | 677  | 560   | 877   | 751  | 8.978939 | 9.127123 | 9.938147 | 10.57517 |
| protein_co histone_cl   | 0    | 0    | 0    | 0     | 1     | 1    | 0        | 0        | 0        | 0        |
| protein_co zinc_finger  | 59   | 48   | 62   | 142   | 178   | 84   | 0.678233 | 0.707583 | 0.859937 | 2.533643 |
| protein_co ribosomal    | 17   | 11   | 11   | 26    | 36    | 50   | 1.020653 | 0.846899 | 0.796838 | 2.422887 |
| protein_co molybdenu    | 184  | 154  | 168  | 416   | 497   | 418  | 2.0272   | 2.175749 | 2.233244 | 7.113815 |
| protein_co histone_cl   | 25   | 11   | 16   | 59    | 51    | 120  | 1.632661 | 0.921209 | 1.260735 | 5.980513 |
| protein_co mediator_c   | 443  | 299  | 357  | 457   | 548   | 635  | 7.983197 | 6.909611 | 7.762281 | 12.78262 |
| protein_co olfactory_r  | 0    | 0    | 0    | 4     | 3     | 15   | 0        | 0        | 0        | 0.309044 |
| protein_co tubulin_fol  | 423  | 290  | 317  | 410   | 526   | 589  | 9.281459 | 8.159869 | 8.392342 | 13.96337 |
| protein_co SAM_point    | 4    | 2    | 6    | 9     | 6     | 0    | 0.098976 | 0.063462 | 0.179131 | 0.345656 |
| protein_co t-complex    | 1    | 0    | 1    | 9     | 2     | 0    | 0.021648 | 0        | 0.02612  | 0.302409 |
| protein_co MAD2L1_b     | 307  | 243  | 244  | 314   | 314   | 483  | 9.489278 | 9.631866 | 9.099818 | 15.06451 |
| protein_co histone_cl   | 2    | 5    | 5    | 4     | 5     | 6    | 0.198687 | 0.636968 | 0.599317 | 0.616778 |
| protein_co apolipoppro  | 2    | 2    | 4    | 15    | 28    | 8    | 0.081477 | 0.104483 | 0.196613 | 0.948477 |
| protein_co kelch_dom    | 2791 | 2162 | 2286 | 3482  | 3850  | 3309 | 68.55424 | 68.09881 | 67.74835 | 132.7497 |
| protein_co glycine_N-r  | 6    | 5    | 5    | 12    | 22    | 8    | 0.262444 | 0.280456 | 0.263878 | 0.814699 |
| protein_co dynein_axc   | 0    | 0    | 0    | 1     | 0     | 2    | 0        | 0        | 0        | 0.00512  |
| protein_co triggering_  | 73   | 51   | 55   | 0     | 0     | 0    | 1.671373 | 1.497373 | 1.519362 | 0        |
| protein_co male-enhar   | 853  | 617  | 670  | 630   | 676   | 676  | 36.72836 | 34.06803 | 34.8077  | 42.10402 |
| protein_co kelch-like_f | 9    | 10   | 13   | 16    | 10    | 5    | 0.073483 | 0.104701 | 0.128066 | 0.202765 |
| protein_co collagen_ty  | 18   | 14   | 18   | 112   | 106   | 154  | 0.19452  | 0.194012 | 0.234699 | 1.878621 |
| protein_co cyclin-depe  | 7226 | 5695 | 5796 | 1036  | 1176  | 160  | 149.8573 | 151.4547 | 145.0295 | 33.34802 |
| protein_co SRY(sex_d    | 7854 | 5666 | 6084 | 11641 | 16972 | 9047 | 75.52793 | 69.87191 | 70.59175 | 173.7551 |
| protein_co glyoxalase   | 2674 | 2159 | 2242 | 2252  | 2584  | 2275 | 62.31804 | 64.52298 | 63.04288 | 81.46129 |
| protein_co copine_V     | 67   | 62   | 60   | 10    | 14    | 4    | 0.806167 | 0.956645 | 0.871062 | 0.186759 |
| protein_co potassium    | 0    | 0    | 0    | 13    | 19    | 5    | 0        | 0        | 0        | 0.554594 |
| protein_co ras_respon   | 1226 | 868  | 1009 | 1335  | 1709  | 1097 | 6.340263 | 5.756332 | 6.295873 | 10.7159  |
| protein_co signal_sequ  | 4702 | 3779 | 3976 | 1325  | 1468  | 1330 | 22.80245 | 23.50093 | 23.26447 | 9.973445 |
| protein_co RIO_kinase   | 324  | 251  | 268  | 380   | 384   | 561  | 5.406536 | 5.371024 | 5.395813 | 9.842108 |
| protein_co neuritin_1   | 117  | 108  | 109  | 3     | 3     | 3    | 3.37816  | 3.99878  | 3.797248 | 0.134445 |
| protein_co solute_carr  | 407  | 297  | 322  | 129   | 149   | 140  | 8.930387 | 8.356832 | 8.524713 | 4.393353 |
| protein_co ribonuclea   | 96   | 68   | 78   | 90    | 118   | 118  | 3.035362 | 2.757132 | 2.97565  | 4.416846 |
| protein_co ataxin_1     | 1005 | 811  | 893  | 142   | 167   | 107  | 4.444866 | 4.599629 | 4.76532  | 0.974791 |
| protein_co nucleopori   | 1190 | 974  | 1023 | 1461  | 1645  | 1958 | 10.16933 | 10.67367 | 10.54798 | 19.37877 |
| protein_co DEK_oncog    | 2443 | 1886 | 2078 | 3669  | 3097  | 4727 | 33.42641 | 33.09157 | 34.30519 | 77.9192  |
| protein_co eukaryotic   | 63   | 53   | 44   | 100   | 154   | 169  | 2.74287  | 2.959034 | 2.311348 | 6.757642 |
| protein_co runt-relate  | 740  | 527  | 597  | 7     | 9     | 13   | 6.089613 | 5.56132  | 5.92762  | 0.08941  |
| protein_co opsin_5      | 1    | 0    | 0    | 0     | 0     | 0    | 0.013397 | 0        | 0        | 0        |
| protein_co glial_cells_ | 1    | 2    | 2    | 0     | 2     | 3    | 0.019209 | 0.049267 | 0.046354 | 0        |
| protein_co leucine_ric  | 2011 | 1580 | 1633 | 1469  | 1710  | 1336 | 21.57799 | 21.74029 | 21.14137 | 24.46534 |
| antisense -             | 0    | 1    | 1    | 2     | 1     | 0    | 0        | 0.026952 | 0.025359 | 0.065244 |
| protein_co RAB17_me     | 3    | 2    | 5    | 245   | 271   | 170  | 0.043809 | 0.037452 | 0.088096 | 5.553115 |

|                         |       |       |       |      |      |      |          |          |          |          |
|-------------------------|-------|-------|-------|------|------|------|----------|----------|----------|----------|
| protein_co chemokine    | 9     | 4     | 8     | 41   | 82   | 49   | 0.24564  | 0.14     | 0.263448 | 1.736887 |
| protein_co epiregulin   | 98    | 90    | 72    | 1    | 0    | 0    | 0.994852 | 1.171613 | 0.881887 | 0.015757 |
| lincRNA -               | 1     | 0     | 3     | 1    | 0    | 0    | 0.019015 | 0        | 0.068827 | 0.029513 |
| protein_co myelin_reg   | 213   | 181   | 195   | 187  | 187  | 83   | 1.685098 | 1.836257 | 1.86135  | 2.296241 |
| protein_co AHNAK_nu     | 32819 | 26611 | 28711 | 1063 | 1067 | 678  | 81.91215 | 85.17134 | 86.46081 | 4.118003 |
| protein_co ER_membr     | 547   | 414   | 420   | 351  | 417  | 418  | 9.236168 | 8.964255 | 8.556612 | 9.199031 |
| protein_co ssu-2_hom    | 5     | 3     | 9     | 2    | 3    | 7    | 0.072833 | 0.056039 | 0.158179 | 0.045219 |
| protein_co wingless-ty  | 0     | 0     | 0     | 0    | 1    | 0    | 0        | 0        | 0        | 0        |
| protein_co SH3_domai    | 768   | 585   | 710   | 3    | 7    | 6    | 6.177995 | 6.034642 | 6.891166 | 0.037457 |
| protein_co CCR4-NOT_    | 3657  | 2973  | 3257  | 5447 | 6191 | 4795 | 20.2428  | 21.10328 | 21.75262 | 46.79868 |
| protein_co leucine_ri   | 17    | 10    | 16    | 4    | 2    | 7    | 0.410892 | 0.309947 | 0.466602 | 0.150061 |
| protein_co Bardet-Bie   | 689   | 572   | 638   | 365  | 389  | 209  | 5.319813 | 5.663468 | 5.943549 | 4.374218 |
| protein_co metallothi   | 1     | 0     | 2     | 340  | 308  | 169  | 0.074666 | 0        | 0.180177 | 39.40308 |
| protein_co metallothi   | 2288  | 1718  | 1918  | 280  | 257  | 310  | 118.8088 | 114.3998 | 120.1681 | 22.56738 |
| protein_co chromoso     | 318   | 215   | 225   | 247  | 239  | 232  | 5.204546 | 4.512358 | 4.443102 | 6.274559 |
| protein_co glutamic-o   | 1594  | 1223  | 1300  | 2365 | 2598 | 2914 | 30.35852 | 29.86951 | 29.87334 | 69.91236 |
| protein_co docking_pr   | 870   | 680   | 672   | 453  | 586  | 455  | 14.45582 | 14.48911 | 13.47227 | 11.68294 |
| protein_co G_protein-   | 2     | 2     | 1     | 7    | 12   | 3    | 0.05523  | 0.070824 | 0.033319 | 0.300035 |
| protein_co citrate_lya  | 24    | 23    | 13    | 91   | 145  | 55   | 0.198581 | 0.244042 | 0.129783 | 1.168689 |
| protein_co transmemt    | 1408  | 1179  | 1128  | 898  | 1114 | 634  | 18.32902 | 19.68157 | 17.71715 | 18.14444 |
| protein_co RAP2A_me     | 1061  | 840   | 909   | 625  | 765  | 658  | 9.066942 | 9.205218 | 9.372541 | 8.290027 |
| protein_co ATP-bindin   | 329   | 271   | 295   | 134  | 150  | 158  | 2.642936 | 2.791704 | 2.859307 | 1.670806 |
| protein_co ephrin-B2    | 1106  | 751   | 843   | 675  | 714  | 1158 | 11.62528 | 10.12273 | 10.69113 | 11.01241 |
| protein_co SRY_(sex_d   | 1     | 1     | 1     | 172  | 263  | 499  | 0.018726 | 0.024013 | 0.022594 | 4.999252 |
| protein_co transmemt    | 3188  | 2583  | 2740  | 1545 | 1855 | 1924 | 43.58174 | 45.28142 | 45.19443 | 32.78274 |
| protein_co chromoso     | 222   | 213   | 226   | 332  | 417  | 383  | 3.820031 | 4.700054 | 4.692134 | 8.867117 |
| protein_co kinesin_fan  | 0     | 0     | 1     | 33   | 37   | 16   | 0        | 0        | 0.035075 | 1.488985 |
| protein_co interferon_  | 184   | 167   | 158   | 67   | 57   | 24   | 1.674318 | 1.948705 | 1.734704 | 0.946293 |
| protein_co UPF3_regul   | 329   | 268   | 307   | 612  | 655  | 859  | 6.487307 | 6.776613 | 7.303902 | 18.73055 |
| protein_co ring_finger  | 128   | 99    | 107   | 203  | 200  | 122  | 4.634689 | 4.596795 | 4.674578 | 11.40873 |
| protein_co septin_6     | 3704  | 3027  | 3140  | 1188 | 1249 | 978  | 37.00056 | 38.77565 | 37.84557 | 18.41977 |
| protein_co transmemt    | 0     | 1     | 3     | 1    | 1    | 1    | 0        | 0.017556 | 0.049555 | 0.02125  |
| protein_co NADH_deh     | 812   | 621   | 736   | 596  | 629  | 501  | 49.70587 | 48.74752 | 54.35975 | 56.62763 |
| protein_co amelogenir   | 5     | 1     | 0     | 0    | 0    | 0    | 0.280779 | 0.072012 | 0        | 0        |
| protein_co ATP_syntha   | 88    | 66    | 86    | 92   | 139  | 132  | 2.054941 | 1.976378 | 2.423054 | 3.334533 |
| protein_co bone_mor     | 754   | 646   | 695   | 99   | 150  | 341  | 18.44292 | 20.26283 | 20.5112  | 3.758581 |
| protein_co prostaglan   | 3     | 1     | 4     | 8    | 8    | 19   | 0.059031 | 0.025233 | 0.094965 | 0.24433  |
| protein_co family_witl  | 898   | 724   | 774   | 542  | 609  | 572  | 8.68907  | 8.983486 | 9.036203 | 8.140044 |
| protein_co G_protein-   | 194   | 149   | 175   | 38   | 51   | 55   | 4.131091 | 4.068728 | 4.496237 | 1.255964 |
| protein_co SRY_(sex_d   | 2232  | 1685  | 1871  | 157  | 203  | 232  | 26.59683 | 25.74808 | 26.90032 | 2.903794 |
| protein_co tektin_3     | 5     | 5     | 5     | 13   | 14   | 12   | 0.128819 | 0.165192 | 0.155427 | 0.519856 |
| protein_co myosin_he    | 0     | 0     | 0     | 7    | 4    | 6    | 0        | 0        | 0        | 0.080369 |
| protein_co heparan_su   | 1399  | 1030  | 997   | 299  | 296  | 239  | 12.22268 | 11.53972 | 10.50974 | 4.054623 |
| protein_co solute_carr  | 61    | 40    | 53    | 59   | 60   | 41   | 1.027034 | 0.863624 | 1.076661 | 1.541834 |
| protein_co mitochond    | 611   | 482   | 591   | 803  | 839  | 1242 | 16.68596 | 16.87977 | 19.47357 | 34.03738 |
| protein_co golgi-associ | 926   | 685   | 736   | 1029 | 1245 | 1152 | 8.444215 | 8.01029  | 8.097933 | 14.56445 |
| protein_co armadillo_   | 157   | 137   | 128   | 180  | 215  | 210  | 3.462715 | 3.87478  | 3.406239 | 6.161978 |
| protein_co nucleopori   | 924   | 732   | 743   | 890  | 946  | 1201 | 19.40277 | 19.71116 | 18.82472 | 29.00762 |
| protein_co solute_carr  | 72    | 50    | 54    | 105  | 143  | 128  | 1.44834  | 1.289785 | 1.310629 | 3.278369 |
| protein_co MIF4G_dor    | 93    | 80    | 83    | 298  | 370  | 191  | 2.848316 | 3.141988 | 3.067124 | 14.16615 |
| protein_co 5'-3'-nucl   | 443   | 360   | 330   | 602  | 736  | 606  | 15.79641 | 16.46139 | 14.19766 | 33.31821 |
| protein_co misato_ho    | 538   | 368   | 422   | 201  | 230  | 315  | 10.13126 | 8.886653 | 9.588298 | 5.874996 |
| protein_co chromoso     | 3     | 0     | 0     | 30   | 25   | 22   | 0.052158 | 0        | 0        | 0.809564 |
| protein_co transcripti  | 405   | 382   | 371   | 498  | 654  | 813  | 6.222299 | 7.526075 | 6.877298 | 11.8756  |
| protein_co general_tra  | 1171  | 879   | 973   | 1343 | 1614 | 1808 | 6.071902 | 5.844752 | 6.087357 | 10.80872 |
| protein_co DEAD_(Asp    | 338   | 241   | 283   | 457  | 520  | 526  | 3.46271  | 3.166109 | 3.498114 | 7.266849 |
| protein_co BarH-like_h  | 4     | 0     | 1     | 1    | 0    | 0    | 0.08012  | 0        | 0.024167 | 0.031089 |
| protein_co protein_ph   | 2137  | 1606  | 1686  | 1083 | 1506 | 1267 | 24.19801 | 23.32008 | 23.03461 | 19.03418 |
| protein_co membrane     | 3450  | 2701  | 2843  | 2152 | 2661 | 2044 | 53.23151 | 53.44211 | 52.92667 | 51.53739 |
| protein_co src-related  | 2     | 0     | 0     | 5    | 6    | 1    | 0.06186  | 0        | 0        | 0.240039 |
| protein_co opiate_rece  | 193   | 186   | 196   | 89   | 115  | 26   | 2.68619  | 3.319722 | 3.291421 | 1.922648 |
| lincRNA long_interg     | 0     | 0     | 0     | 5    | 3    | 2    | 0        | 0        | 0        | 0.223114 |
| protein_co SLC2A4_re    | 2464  | 1707  | 1818  | 701  | 975  | 498  | 66.74581 | 59.29611 | 59.41899 | 29.47351 |
| protein_co neuropepti   | 0     | 0     | 0     | 1    | 3    | 0    | 0        | 0        | 0        | 0.053831 |
| protein_co chromoso     | 10    | 16    | 17    | 33   | 48   | 17   | 0.412401 | 0.846154 | 0.845896 | 2.112343 |

|                         |       |       |       |       |       |       |          |          |          |          |
|-------------------------|-------|-------|-------|-------|-------|-------|----------|----------|----------|----------|
| protein_co basic_helix  | 2     | 0     | 1     | 29    | 31    | 14    | 0.088723 | 0        | 0.053525 | 1.996797 |
| protein_co pancreatic   | 2471  | 1747  | 1746  | 1209  | 1548  | 951   | 133.4853 | 121.0216 | 113.8028 | 101.3719 |
| protein_co interleukin  | 0     | 1     | 2     | 3     | 2     | 1     | 0        | 0.036867 | 0.069375 | 0.133868 |
| protein_co plasminoge   | 3     | 3     | 2     | 0     | 0     | 0     | 0.067728 | 0.086851 | 0.054478 | 0        |
| protein_co interleukin  | 1     | 0     | 2     | 0     | 4     | 1     | 0.060738 | 0        | 0.146569 | 0        |
| protein_co coiled-coil  | 315   | 233   | 249   | 294   | 285   | 326   | 4.514167 | 4.281859 | 4.30541  | 6.539505 |
| protein_co paired_box   | 216   | 174   | 185   | 48    | 53    | 27    | 2.479981 | 2.561847 | 2.562798 | 0.855394 |
| protein_co insulin_ind  | 218   | 180   | 225   | 144   | 101   | 104   | 3.209427 | 3.39823  | 3.9967   | 3.290515 |
| protein_co polymerase   | 358   | 289   | 276   | 656   | 655   | 817   | 3.682893 | 3.81253  | 3.425809 | 10.47467 |
| pseudogen_5-hydroxyt    | 2     | 2     | 2     | 2     | 0     | 1     | 0.078609 | 0.100804 | 0.094846 | 0.122011 |
| protein_co coiled-coil  | 918   | 754   | 790   | 421   | 467   | 239   | 6.239315 | 6.571658 | 6.478424 | 4.441266 |
| protein_co plectstrin_  | 243   | 179   | 171   | 32    | 42    | 28    | 2.034692 | 1.922006 | 1.727573 | 0.415885 |
| protein_co solute_carr  | 1780  | 1463  | 1569  | 1129  | 1452  | 1181  | 24.36912 | 25.68464 | 25.91736 | 23.99077 |
| protein_co persephin    | 100   | 65    | 90    | 59    | 91    | 57    | 1.198927 | 0.999345 | 1.301917 | 1.097931 |
| protein_co general_tra  | 2856  | 2107  | 2267  | 1789  | 2154  | 1939  | 49.03621 | 46.39088 | 46.96326 | 47.67597 |
| protein_co alkB_alkyla  | 988   | 763   | 780   | 1076  | 1469  | 767   | 41.73634 | 41.33246 | 39.75576 | 70.55051 |
| protein_co ClpP_casein  | 1336  | 1061  | 1118  | 955   | 1081  | 849   | 46.54165 | 47.398   | 46.99214 | 51.63797 |
| protein_co tumor_nec    | 244   | 200   | 210   | 14    | 21    | 14    | 6.904746 | 7.25767  | 7.1701   | 0.614917 |
| protein_co glutamate_   | 129   | 112   | 146   | 22    | 19    | 27    | 1.169531 | 1.302115 | 1.597066 | 0.309582 |
| protein_co THO_comp     | 1327  | 1076  | 1182  | 839   | 652   | 1107  | 11.09343 | 11.53497 | 11.92231 | 10.88648 |
| protein_co mediator_c   | 1723  | 1398  | 1528  | 958   | 1198  | 1279  | 13.82469 | 14.38423 | 14.7925  | 11.93071 |
| protein_co ribosomal_   | 8857  | 7187  | 7293  | 11757 | 12240 | 11195 | 134.7955 | 140.2638 | 133.9192 | 277.7255 |
| protein_co autophagy_   | 143   | 119   | 132   | 210   | 238   | 198   | 2.282257 | 2.435482 | 2.541854 | 5.202096 |
| protein_co CD70_mole    | 151   | 146   | 164   | 1     | 10    | 4     | 7.755085 | 9.615499 | 10.16252 | 0.079715 |
| protein_co complemer    | 1     | 0     | 3     | 148   | 200   | 27    | 0.008909 | 0        | 0.032249 | 2.046629 |
| protein_co SH2_domai    | 14    | 9     | 6     | 398   | 463   | 389   | 0.187936 | 0.154929 | 0.097181 | 8.292688 |
| protein_co thyroid_ho   | 958   | 743   | 829   | 1441  | 1793  | 964   | 19.9736  | 19.86502 | 20.8542  | 46.63214 |
| protein_co G_protein-i  | 569   | 448   | 497   | 687   | 824   | 493   | 12.97055 | 13.09584 | 13.66943 | 24.30711 |
| protein_co tumor_nec    | 0     | 0     | 0     | 1     | 0     | 1     | 0        | 0        | 0        | 0.026123 |
| protein_co FBJ_murine   | 16    | 15    | 10    | 18    | 15    | 14    | 0.198739 | 0.238926 | 0.149869 | 0.34703  |
| protein_co optic_atro   | 822   | 659   | 776   | 540   | 727   | 637   | 4.923811 | 5.062026 | 5.608405 | 5.020579 |
| protein_co small_nucl   | 2543  | 2038  | 2180  | 3040  | 3274  | 2949  | 132.3433 | 136.0095 | 136.8863 | 245.5611 |
| protein_co reticulon_2  | 102   | 63    | 59    | 316   | 426   | 205   | 2.029182 | 1.607203 | 1.416188 | 9.757496 |
| protein_co echinoderm   | 338   | 334   | 363   | 474   | 552   | 151   | 5.678547 | 7.195755 | 7.358262 | 12.36031 |
| protein_co vasodilator  | 2055  | 1542  | 1603  | 1809  | 2271  | 1786  | 41.80433 | 40.22566 | 39.34513 | 57.11872 |
| protein_co symplekin    | 2953  | 2171  | 2405  | 2226  | 2943  | 2240  | 21.18192 | 19.96968 | 20.81445 | 24.78321 |
| protein_co glyceropho   | 334   | 332   | 295   | 175   | 211   | 207   | 2.355432 | 3.00242  | 2.510118 | 1.915546 |
| protein_co syndecan_t   | 20    | 9     | 11    | 30    | 44    | 27    | 0.61738  | 0.356266 | 0.409698 | 1.437389 |
| protein_co pantothen    | 994   | 758   | 856   | 818   | 1053  | 1037  | 9.679891 | 9.465916 | 10.05787 | 12.36425 |
| protein_co transglutar  | 0     | 0     | 0     | 0     | 2     | 4     | 0        | 0        | 0        | 0        |
| protein_co gonadotro    | 3     | 3     | 1     | 3     | 2     | 9     | 0.185581 | 0.237981 | 0.074638 | 0.288047 |
| protein_co forkhead_b   | 0     | 0     | 0     | 30    | 41    | 247   | 0        | 0        | 0        | 0.901484 |
| processed_family_wit    | 0     | 0     | 2     | 5     | 8     | 0     | 0        | 0        | 0.022318 | 0.071775 |
| protein_co CD93_mole    | 6     | 7     | 8     | 0     | 0     | 0     | 0.041941 | 0.062747 | 0.067472 | 0        |
| protein_co GDNF-indu    | 403   | 372   | 317   | 228   | 304   | 343   | 3.90831  | 4.626326 | 3.709294 | 3.432015 |
| protein_co N-ethylmal   | 110   | 101   | 119   | 188   | 227   | 177   | 1.344254 | 1.582775 | 1.754622 | 3.565964 |
| protein_co NK2_home     | 0     | 0     | 0     | 1     | 1     | 4     | 0        | 0        | 0        | 0.03252  |
| protein_co centromer    | 3198  | 2249  | 2557  | 1254  | 2031  | 1623  | 52.8008  | 47.61687 | 50.93788 | 32.13587 |
| protein_co proteasom    | 1917  | 1453  | 1553  | 1099  | 1169  | 1353  | 20.95295 | 20.36564 | 20.4806  | 18.64452 |
| protein_co NK2_home     | 0     | 0     | 0     | 0     | 2     | 0     | 0        | 0        | 0        | 0        |
| protein_co D-tyrosyl-tl | 775   | 690   | 582   | 1160  | 1396  | 1065  | 15.24319 | 17.40334 | 13.81164 | 35.41299 |
| protein_co RanBP-type   | 1899  | 1301  | 1385  | 792   | 1034  | 797   | 32.09955 | 28.20074 | 28.24696 | 20.77924 |
| protein_co thioredoxin  | 961   | 735   | 823   | 134   | 173   | 202   | 7.304475 | 7.164111 | 7.54768  | 1.580887 |
| protein_co serine/thre  | 1355  | 1059  | 1104  | 1441  | 2010  | 2117  | 9.504259 | 9.525423 | 9.34321  | 15.68821 |
| protein_co small_nucl   | 2596  | 1992  | 2006  | 3653  | 4324  | 4310  | 83.9493  | 82.6059  | 78.26928 | 183.3549 |
| protein_co neurensin_   | 1454  | 1144  | 1237  | 346   | 417   | 335   | 32.65234 | 32.94468 | 33.51719 | 12.06025 |
| protein_co adaptor-rel  | 392   | 280   | 334   | 40    | 62    | 98    | 9.946367 | 9.110575 | 10.22523 | 1.57532  |
| protein_co ribosome_l   | 15923 | 12579 | 13388 | 4033  | 6077  | 4224  | 148.1114 | 150.0442 | 150.2545 | 58.22673 |
| protein_co bone_mor     | 263   | 197   | 186   | 39    | 45    | 302   | 3.424625 | 3.289522 | 2.922256 | 0.788229 |
| protein_co zinc_finger  | 331   | 293   | 297   | 393   | 403   | 197   | 3.822807 | 4.339416 | 4.138651 | 7.044941 |
| protein_co fibronectin  | 127   | 66    | 113   | 6     | 3     | 20    | 1.246866 | 0.830939 | 1.338575 | 0.091432 |
| protein_co ovo-like_2_  | 0     | 0     | 1     | 291   | 310   | 182   | 0        | 0        | 0.036383 | 13.61989 |
| protein_co proprotein   | 2     | 0     | 1     | 7     | 7     | 5     | 0.019785 | 0        | 0.011936 | 0.107481 |
| protein_co GDNF_fami    | 0     | 0     | 0     | 1     | 0     | 0     | 0        | 0        | 0        | 0.051002 |
| protein_co McKusick-k   | 456   | 334   | 410   | 568   | 773   | 611   | 8.029233 | 7.541627 | 8.710461 | 15.52344 |

|                         |      |      |      |      |      |      |          |          |          |          |
|-------------------------|------|------|------|------|------|------|----------|----------|----------|----------|
| protein_co beaded_fil   | 149  | 111  | 127  | 66   | 83   | 75   | 3.16566  | 3.024199 | 3.255591 | 2.176469 |
| protein_co destrin_(ac  | 4218 | 3457 | 3603 | 1607 | 2086 | 2014 | 101.9495 | 107.1488 | 105.073  | 60.28719 |
| protein_co lysosomal-i  | 5    | 3    | 4    | 9    | 20   | 29   | 0.114983 | 0.08847  | 0.110987 | 0.321245 |
| protein_co small_nucl   | 1012 | 817  | 812  | 832  | 902  | 1254 | 28.50012 | 29.50513 | 27.59118 | 36.36804 |
| protein_co mitochond    | 523  | 478  | 443  | 888  | 868  | 723  | 10.49806 | 12.30396 | 10.729   | 27.66629 |
| protein_co leucine_ri   | 26   | 15   | 13   | 5    | 8    | 26   | 0.452875 | 0.335047 | 0.27321  | 0.135178 |
| protein_co TBC1_dom     | 1664 | 1303 | 1387 | 380  | 429  | 335  | 15.01925 | 15.08164 | 15.10495 | 5.323643 |
| protein_co inosine_tri  | 1001 | 758  | 839  | 876  | 1098 | 1193 | 39.6092  | 38.46277 | 40.05641 | 53.80178 |
| protein_co transcripti  | 0    | 0    | 1    | 75   | 137  | 50   | 0        | 0        | 0.036383 | 3.51028  |
| protein_co minichrom    | 531  | 416  | 481  | 434  | 516  | 592  | 6.70218  | 6.733242 | 7.325119 | 8.502405 |
| protein_co transmem     | 5    | 2    | 1    | 99   | 122  | 34   | 0.13552  | 0.069514 | 0.032703 | 4.164856 |
| protein_co family_witl  | 79   | 78   | 56   | 182  | 202  | 114  | 1.995857 | 2.527007 | 1.70702  | 7.136812 |
| protein_co mitochond    | 698  | 491  | 539  | 1122 | 1460 | 1213 | 29.04102 | 26.19674 | 27.05785 | 72.45691 |
| protein_co sphingosin   | 0    | 1    | 1    | 1    | 4    | 1    | 0        | 0.037723 | 0.035493 | 0.045659 |
| protein_co nicalin      | 3927 | 2754 | 3021 | 2277 | 3057 | 3721 | 45.9768  | 41.34768 | 42.67531 | 41.37818 |
| protein_co Cbp/p300-i   | 15   | 16   | 12   | 9    | 20   | 9    | 0.571365 | 0.781541 | 0.551508 | 0.532103 |
| protein_co heterogene   | 3938 | 3230 | 3359 | 2369 | 2684 | 3831 | 24.15026 | 25.40142 | 24.85445 | 22.54974 |
| protein_co zinc_finger  | 403  | 308  | 320  | 18   | 19   | 16   | 4.641778 | 4.549245 | 4.447104 | 0.321797 |
| protein_co MYC_associ   | 588  | 484  | 463  | 251  | 316  | 323  | 8.738932 | 9.224349 | 8.302523 | 5.790089 |
| protein_co armadillo_   | 270  | 195  | 257  | 194  | 230  | 218  | 2.728514 | 2.527007 | 3.1336   | 3.042949 |
| protein_co growth_dif   | 12   | 6    | 7    | 3    | 1    | 0    | 0.218771 | 0.140272 | 0.153977 | 0.084891 |
| protein_co matrix_me    | 61   | 42   | 38   | 353  | 507  | 504  | 0.648298 | 0.572405 | 0.487278 | 5.823044 |
| protein_co N-terminal   | 375  | 289  | 300  | 281  | 357  | 169  | 8.209037 | 8.11275  | 7.92374  | 9.547677 |
| protein_co inhibitor_c  | 540  | 439  | 433  | 975  | 1629 | 2397 | 20.72063 | 21.60146 | 20.0468  | 58.06899 |
| protein_co RNA_bindin   | 4740 | 3667 | 3826 | 4516 | 6126 | 4281 | 122.3218 | 121.3517 | 119.1293 | 180.888  |
| protein_co dynein_lig   | 1774 | 1451 | 1436 | 936  | 923  | 874  | 56.81891 | 59.59586 | 55.49346 | 46.53135 |
| protein_co eukaryotic   | 2704 | 2055 | 2106 | 3325 | 3685 | 3916 | 47.73743 | 46.52362 | 44.85994 | 91.11176 |
| protein_co ERGIC_and    | 3412 | 2767 | 2778 | 2025 | 2178 | 1902 | 56.17582 | 58.41964 | 55.18496 | 51.74828 |
| protein_co reactive_o   | 927  | 709  | 745  | 819  | 1021 | 744  | 87.28322 | 85.60648 | 84.63605 | 119.6921 |
| pseudogen: BPI_fold_c   | 1    | 1    | 0    | 0    | 2    | 3    | 0.039805 | 0.051044 | 0        | 0        |
| protein_co family_witl  | 2    | 0    | 0    | 0    | 0    | 0    | 0.029819 | 0        | 0        | 0        |
| protein_co BPI_fold_c   | 0    | 1    | 0    | 0    | 0    | 0    | 0        | 0.031107 | 0        | 0        |
| protein_co centrosom    | 956  | 764  | 823  | 1146 | 1387 | 703  | 5.337801 | 5.470251 | 5.544373 | 9.931609 |
| protein_co pleiomorpl   | 722  | 550  | 607  | 738  | 906  | 882  | 5.934197 | 5.796913 | 6.019515 | 9.41481  |
| antisense MMP24_ar      | 404  | 279  | 310  | 144  | 170  | 134  | 12.504   | 11.07341 | 11.57651 | 6.917684 |
| protein_co gastrin-rele | 5    | 9    | 12   | 54   | 56   | 66   | 0.12154  | 0.280543 | 0.351947 | 2.037382 |
| protein_co lysine_(K)-s | 4109 | 3084 | 3283 | 3356 | 3989 | 3066 | 31.60615 | 30.42    | 30.46873 | 40.0671  |
| protein_co angiomotir   | 1038 | 803  | 825  | 128  | 120  | 100  | 7.008184 | 6.952372 | 6.720632 | 1.34137  |
| protein_co transmem     | 730  | 565  | 576  | 413  | 514  | 435  | 15.58021 | 15.46351 | 14.83272 | 13.68141 |
| protein_co proteasom    | 2602 | 2025 | 2168 | 1923 | 2070 | 2375 | 45.17135 | 45.08065 | 45.41122 | 51.8162  |
| protein_co argonaute_   | 376  | 298  | 324  | 241  | 268  | 176  | 4.831638 | 4.910573 | 5.023421 | 4.806778 |
| protein_co uroporphy    | 1398 | 1024 | 1068 | 1139 | 1203 | 1339 | 35.47199 | 33.31867 | 32.69623 | 44.85725 |
| protein_co ST3_beta-g   | 453  | 453  | 444  | 77   | 68   | 53   | 8.673409 | 11.12242 | 10.25705 | 2.288299 |
| protein_co transmem     | 245  | 153  | 171  | 88   | 107  | 90   | 4.973184 | 3.982623 | 4.188057 | 2.772564 |
| protein_co HECT_dom     | 941  | 763  | 819  | 968  | 1134 | 1087 | 12.22258 | 12.70887 | 12.83527 | 19.51547 |
| protein_co kinesin_lig  | 678  | 539  | 620  | 350  | 509  | 374  | 9.781979 | 9.972295 | 10.79287 | 7.837825 |
| protein_co X-ray_repai  | 925  | 725  | 766  | 1049 | 1309 | 1175 | 11.82477 | 11.88498 | 11.81484 | 20.81407 |
| protein_co tubulin_ga   | 637  | 515  | 520  | 466  | 506  | 496  | 7.672474 | 7.954494 | 7.556964 | 8.71189  |
| protein_co MCF.2_cell   | 260  | 207  | 181  | 447  | 738  | 498  | 1.852797 | 1.891621 | 1.556256 | 4.94416  |
| protein_co coagulation  | 6    | 2    | 6    | 6    | 21   | 6    | 0.185458 | 0.079275 | 0.223766 | 0.287857 |
| protein_co PCI_domai    | 577  | 494  | 507  | 614  | 702  | 742  | 6.438729 | 7.069043 | 6.826221 | 10.63465 |
| protein_co protein_Z_   | 4    | 4    | 1    | 10   | 18   | 9    | 0.120928 | 0.155074 | 0.036477 | 0.469244 |
| protein_co secreted_L   | 0    | 0    | 0    | 0    | 1    | 0    | 0        | 0        | 0        | 0        |
| protein_co leucine_ri   | 704  | 498  | 574  | 419  | 606  | 334  | 8.94838  | 8.117278 | 8.80302  | 8.266397 |
| protein_co IGF-like_far | 0    | 1    | 1    | 1    | 3    | 2    | 0        | 0.050318 | 0.047344 | 0.060904 |
| protein_co calpain_sm   | 6186 | 4764 | 5093 | 2095 | 2296 | 2198 | 151.2313 | 149.3526 | 150.2289 | 79.49619 |
| protein_co programm     | 26   | 17   | 24   | 96   | 98   | 79   | 0.879611 | 0.737523 | 0.979662 | 5.041025 |
| protein_co RNA_bindin   | 2464 | 1781 | 1912 | 1860 | 2384 | 2034 | 68.77203 | 63.74474 | 64.38831 | 80.57764 |
| protein_co kin_of_IRRI  | 1    | 0    | 1    | 82   | 167  | 66   | 0.015938 | 0        | 0.01923  | 2.028533 |
| protein_co ubiquitin-li | 1761 | 1464 | 1536 | 2644 | 2687 | 2907 | 29.46942 | 31.41685 | 31.01355 | 68.67587 |
| protein_co free_fatty_  | 2    | 0    | 0    | 0    | 0    | 0    | 0.044008 | 0        | 0        | 0        |
| protein_co hematopoi    | 3    | 1    | 1    | 14   | 5    | 8    | 0.229478 | 0.098091 | 0.092293 | 1.662181 |
| protein_co free_fatty_  | 0    | 0    | 0    | 0    | 1    | 0    | 0        | 0        | 0        | 0        |
| protein_co cytochrom    | 2163 | 1680 | 1814 | 2225 | 2287 | 2026 | 152.0586 | 151.4514 | 153.865  | 242.7812 |
| protein_co thyroid_ho   | 830  | 610  | 652  | 436  | 507  | 352  | 7.950708 | 7.493192 | 7.535695 | 6.482532 |

|                         |       |      |       |      |      |      |          |          |          |          |
|-------------------------|-------|------|-------|------|------|------|----------|----------|----------|----------|
| protein_co chemokine    | 0     | 0    | 0     | 4    | 5    | 6    | 0        | 0        | 0        | 0.133971 |
| protein_co nuclear_rex  | 128   | 86   | 98    | 128  | 186  | 85   | 2.165196 | 1.865499 | 2.000144 | 3.360683 |
| protein_co FERM_dom     | 1521  | 1126 | 1145  | 446  | 662  | 392  | 19.15652 | 18.18591 | 17.39967 | 8.718719 |
| protein_co peroxiredo   | 6628  | 5031 | 5235  | 3315 | 3830 | 2833 | 348.0258 | 338.7604 | 331.6604 | 270.1736 |
| protein_co BCL2-like_1  | 759   | 636  | 615   | 1300 | 1705 | 1542 | 24.87039 | 26.72435 | 24.31442 | 66.11722 |
| protein_co interferon_  | 1480  | 1135 | 1224  | 1298 | 1662 | 1310 | 24.14656 | 23.74646 | 24.09479 | 32.86993 |
| protein_co protein_ar   | 4601  | 3571 | 3808  | 8295 | 9066 | 8722 | 127.9602 | 127.3568 | 127.7814 | 358.0714 |
| protein_co related_RA   | 1189  | 935  | 956   | 291  | 330  | 141  | 53.40252 | 53.85188 | 51.80669 | 20.28632 |
| protein_co proline_ri   | 4     | 4    | 7     | 40   | 70   | 47   | 0.118484 | 0.151939 | 0.250176 | 1.839035 |
| protein_co SR-related_  | 4877  | 3458 | 3800  | 3919 | 5355 | 3472 | 53.1079  | 48.28816 | 49.92729 | 66.23875 |
| protein_co proline_ri   | 2402  | 1700 | 1942  | 2650 | 4027 | 3207 | 16.19408 | 14.69743 | 15.79722 | 27.73062 |
| protein_co testis-speci | 1     | 0    | 0     | 24   | 42   | 11   | 0.024902 | 0        | 0        | 0.927624 |
| protein_co fibronectin  | 4     | 6    | 4     | 23   | 54   | 13   | 0.047496 | 0.09136  | 0.057306 | 0.423888 |
| protein_co argininosuc  | 280   | 191  | 214   | 181  | 223  | 162  | 6.126554 | 5.359212 | 5.64963  | 6.147057 |
| protein_co Shwachma     | 441   | 360  | 392   | 191  | 205  | 267  | 12.67842 | 13.27206 | 13.59755 | 8.522956 |
| protein_co histatin_1   | 1     | 0    | 0     | 0    | 0    | 0    | 0.012595 | 0        | 0        | 0        |
| protein_co signal_tran  | 249   | 185  | 197   | 258  | 329  | 106  | 2.714628 | 2.586378 | 2.591345 | 4.365773 |
| protein_co WNK_lysin    | 271   | 243  | 266   | 35   | 66   | 18   | 3.176005 | 3.651972 | 3.761331 | 0.636664 |
| protein_co beclin_1_a   | 769   | 622  | 713   | 396  | 457  | 470  | 14.40033 | 14.9364  | 16.10956 | 11.5099  |
| protein_co protein_kir  | 0     | 2    | 1     | 390  | 493  | 302  | 0        | 0.038385 | 0.018058 | 9.059726 |
| protein_co TNF_recept   | 507   | 373  | 379   | 1284 | 1614 | 1049 | 10.2959  | 9.713475 | 9.286322 | 40.47175 |
| protein_co GLIS_famil   | 1139  | 848  | 846   | 587  | 752  | 374  | 11.95071 | 11.40973 | 10.70997 | 9.559576 |
| protein_co nuclear_sp   | 574   | 490  | 566   | 389  | 386  | 651  | 10.59224 | 11.59528 | 12.60202 | 11.14181 |
| protein_co DnaJ_(Hsp    | 1827  | 1470 | 1599  | 1490 | 1651 | 1782 | 53.54254 | 55.24425 | 56.54015 | 67.77619 |
| protein_co AT_hook_D    | 2108  | 1469 | 1527  | 1055 | 1405 | 604  | 15.35324 | 13.7202  | 13.41889 | 11.92648 |
| protein_co interferon_  | 219   | 209  | 228   | 14   | 15   | 32   | 12.21036 | 14.94308 | 15.33795 | 1.211554 |
| protein_co dachshund    | 0     | 0    | 0     | 34   | 43   | 29   | 0        | 0        | 0        | 0.443302 |
| protein_co zinc_finger  | 867   | 713  | 700   | 672  | 832  | 833  | 12.37177 | 13.04703 | 12.05199 | 14.88376 |
| processed_EMG1_nucl     | 25    | 15   | 22    | 36   | 47   | 70   | 0.744286 | 0.572665 | 0.790261 | 1.663538 |
| protein_co synovial_sa  | 0     | 0    | 0     | 0    | 1    | 0    | 0        | 0        | 0        | 0        |
| protein_co ubiquitous   | 265   | 215  | 251   | 166  | 177  | 148  | 13.89917 | 14.46075 | 15.88417 | 13.51392 |
| protein_co compleme     | 12    | 7    | 10    | 23   | 20   | 13   | 0.139277 | 0.104185 | 0.140038 | 0.41434  |
| protein_co ELK1_mem     | 1386  | 1050 | 1091  | 804  | 1085 | 795  | 24.11487 | 23.42719 | 22.90311 | 21.71242 |
| protein_co translocase  | 933   | 675  | 725   | 1149 | 1363 | 955  | 28.63114 | 26.56257 | 26.84374 | 54.72774 |
| protein_co pecanex-lik  | 1197  | 958  | 991   | 419  | 514  | 368  | 12.02901 | 12.34555 | 12.01593 | 6.53552  |
| protein_co autophagy_   | 406   | 308  | 362   | 280  | 377  | 552  | 4.014624 | 3.90552  | 4.318923 | 4.297416 |
| protein_co kinectin_1   | 4236  | 3666 | 3880  | 2637 | 1663 | 2846 | 31.82601 | 35.32059 | 35.17272 | 30.75154 |
| protein_co SIX_homeo    | 2635  | 2080 | 2067  | 7    | 4    | 16   | 30.91198 | 31.29096 | 29.25734 | 0.12746  |
| protein_co ras_homolo   | 1672  | 1416 | 1516  | 0    | 0    | 0    | 23.74322 | 25.78552 | 25.9747  | 0        |
| protein_co discs_large  | 1090  | 932  | 945   | 2327 | 1904 | 2049 | 17.19143 | 18.84997 | 17.98313 | 56.96556 |
| protein_co L-3-hydrox   | 545   | 402  | 456   | 59   | 99   | 93   | 16.73547 | 15.82985 | 16.89485 | 2.812055 |
| protein_co heat_shock   | 97    | 96   | 84    | 963  | 1272 | 389  | 1.643777 | 2.08618  | 1.717507 | 25.32958 |
| protein_co zinc_finger  | 677   | 586  | 585   | 284  | 376  | 559  | 7.706856 | 8.554518 | 8.035123 | 5.018078 |
| protein_co tRNA_meth    | 305   | 237  | 237   | 395  | 441  | 408  | 2.566204 | 2.557108 | 2.405956 | 5.158446 |
| protein_co sphingosin   | 497   | 351  | 388   | 181  | 256  | 127  | 7.036334 | 6.372451 | 6.627807 | 3.977399 |
| protein_co plectstrin_  | 743   | 568  | 595   | 1584 | 1729 | 1344 | 4.984874 | 4.886783 | 4.816487 | 16.49495 |
| protein_co pregnancy-   | 0     | 0    | 0     | 9    | 6    | 3    | 0        | 0        | 0        | 0.142086 |
| protein_co PR_domain    | 0     | 2    | 0     | 1    | 2    | 3    | 0        | 0.040946 | 0        | 0.02478  |
| protein_co ras_homolo   | 445   | 317  | 317   | 510  | 525  | 353  | 6.328801 | 5.78136  | 5.439622 | 11.25802 |
| protein_co ecotropic_   | 5     | 6    | 6     | 2    | 4    | 1    | 0.126048 | 0.193967 | 0.182502 | 0.078258 |
| protein_co oligodendr   | 7     | 13   | 11    | 3    | 6    | 2    | 0.110702 | 0.263638 | 0.209892 | 0.073639 |
| protein_co WD_repeat    | 581   | 475  | 517   | 490  | 584  | 329  | 5.035693 | 5.279418 | 5.406569 | 6.591886 |
| protein_co allograft_in | 21    | 19   | 9     | 2470 | 2954 | 3355 | 0.28014  | 0.325026 | 0.144859 | 51.14256 |
| protein_co family_witl  | 60    | 46   | 34    | 114  | 169  | 49   | 0.616974 | 0.606573 | 0.421835 | 1.819495 |
| protein_co nucleopori   | 1442  | 1138 | 1334  | 939  | 1145 | 1202 | 8.896764 | 9.003646 | 9.93049  | 8.992136 |
| protein_co arginine_va  | 0     | 0    | 0     | 6    | 7    | 10   | 0        | 0        | 0        | 0.247691 |
| protein_co solute_carr  | 656   | 507  | 487   | 217  | 316  | 238  | 14.46161 | 14.33277 | 12.95358 | 7.425114 |
| protein_co mitogen-ac   | 4431  | 3286 | 3615  | 3155 | 4131 | 2915 | 71.00809 | 67.52786 | 69.89762 | 78.47583 |
| protein_co heterogene   | 1185  | 956  | 993   | 809  | 843  | 1153 | 24.99535 | 25.85879 | 25.27192 | 26.48622 |
| protein_co armadillo_   | 593   | 429  | 524   | 404  | 528  | 457  | 12.98729 | 12.04843 | 13.8466  | 13.73332 |
| protein_co transmembr   | 366   | 312  | 361   | 108  | 95   | 69   | 7.818563 | 8.546923 | 9.304673 | 3.580965 |
| protein_co translocase  | 189   | 132  | 145   | 222  | 231  | 324  | 5.325849 | 4.769912 | 4.929957 | 9.709805 |
| protein_co zinc_finger  | 317   | 219  | 262   | 444  | 420  | 515  | 3.58431  | 3.17541  | 3.574339 | 7.792195 |
| protein_co calnexin     | 12583 | 9796 | 10852 | 6328 | 7318 | 8618 | 138.5017 | 138.2703 | 144.1215 | 108.1105 |
| protein_co cleavage_ar  | 2407  | 1759 | 1937  | 1847 | 2467 | 2173 | 36.65615 | 34.35151 | 35.59167 | 43.65843 |

|                         |       |      |      |       |       |       |          |          |          |          |
|-------------------------|-------|------|------|-------|-------|-------|----------|----------|----------|----------|
| protein_co regulator_c  | 0     | 1    | 0    | 0     | 0     | 0     | 0        | 0.011746 | 0        | 0        |
| protein_co inositol_13  | 95    | 58   | 69   | 74    | 98    | 96    | 1.012168 | 0.79244  | 0.887005 | 1.223746 |
| protein_co zinc_finger  | 88    | 74   | 83   | 114   | 106   | 74    | 1.297585 | 1.399247 | 1.476656 | 2.609087 |
| protein_co osteomodul   | 35    | 23   | 21   | 2     | 3     | 1     | 0.670131 | 0.564714 | 0.485131 | 0.059436 |
| protein_co FYVE_RhoG    | 2     | 0    | 2    | 47    | 56    | 25    | 0.019966 | 0        | 0.02409  | 0.728263 |
| protein_co human_imi    | 1566  | 1197 | 1346 | 12    | 11    | 14    | 5.960692 | 5.842631 | 6.181559 | 0.070895 |
| protein_co phosphopa    | 563   | 407  | 445  | 454   | 568   | 321   | 16.32596 | 15.13471 | 15.56963 | 20.43416 |
| protein_co endothelin   | 1     | 0    | 0    | 0     | 0     | 0     | 0.037784 | 0        | 0        | 0        |
| protein_co B-cell_CLL/  | 22    | 26   | 35   | 326   | 445   | 264   | 0.135681 | 0.205626 | 0.260442 | 3.120639 |
| protein_co cytochrom    | 3422  | 2606 | 2702 | 4868  | 4597  | 4256  | 101.299  | 98.92566 | 96.50695 | 223.6692 |
| protein_co TNF_recept   | 429   | 343  | 339  | 804   | 1078  | 619   | 8.336435 | 8.547252 | 7.948237 | 24.24988 |
| protein_co abhydrolas   | 359   | 253  | 283  | 317   | 432   | 247   | 8.054314 | 7.27887  | 7.660702 | 11.03885 |
| protein_co mannan-bi    | 3     | 2    | 6    | 40    | 66    | 19    | 0.023516 | 0.020104 | 0.056746 | 0.486659 |
| protein_co HRAS-like_s  | 16    | 13   | 19   | 44    | 65    | 60    | 0.70379  | 0.73329  | 1.008381 | 3.004044 |
| protein_co helicase_(D  | 54    | 47   | 42   | 124   | 121   | 98    | 0.706096 | 0.788093 | 0.662624 | 2.516647 |
| protein_co RAP1B_me     | 1981  | 1533 | 1715 | 692   | 766   | 863   | 43.6304  | 43.29684 | 45.57397 | 23.656   |
| protein_co tetraspanin  | 56    | 36   | 37   | 0     | 4     | 1     | 1.732085 | 1.427884 | 1.380801 | 0        |
| protein_co bestrophin   | 0     | 1    | 2    | 0     | 0     | 0     | 0        | 0.017024 | 0.032036 | 0        |
| protein_co RAB3A_inte   | 118   | 97   | 100  | 556   | 557   | 401   | 0.573608 | 0.604664 | 0.586518 | 4.195062 |
| protein_co protein_ty   | 20    | 15   | 18   | 127   | 113   | 48    | 0.082757 | 0.079593 | 0.089866 | 0.815658 |
| protein_co dual-specifi | 1671  | 1246 | 1446 | 917   | 1115  | 943   | 8.791878 | 8.406836 | 9.179553 | 7.488676 |
| protein_co YEATS_dom    | 153   | 104  | 117  | 396   | 477   | 437   | 5.00291  | 4.360878 | 4.615993 | 20.09819 |
| protein_co taste_recep  | 3     | 0    | 2    | 7     | 7     | 1     | 0.127766 | 0        | 0.102771 | 0.462724 |
| protein_co taste_recep  | 0     | 4    | 2    | 7     | 7     | 9     | 0        | 0.241971 | 0.113834 | 0.512534 |
| protein_co taste_recep  | 5     | 6    | 4    | 13    | 24    | 7     | 0.20387  | 0.313721 | 0.196784 | 0.822728 |
| protein_co crystallin_ξ | 1     | 0    | 0    | 24    | 26    | 11    | 0.01981  | 0        | 0        | 0.737945 |
| protein_co leucine_ric  | 0     | 0    | 0    | 10    | 13    | 23    | 0        | 0        | 0        | 0.387745 |
| protein_co iduronidas   | 385   | 306  | 313  | 31    | 70    | 22    | 8.019839 | 8.174019 | 7.866785 | 1.002298 |
| protein_co fibroblast_  | 3759  | 2820 | 3151 | 633   | 795   | 548   | 48.43627 | 46.59687 | 48.98857 | 12.65997 |
| protein_co transmembr   | 340   | 207  | 242  | 56    | 83    | 87    | 7.129967 | 5.566578 | 6.123109 | 1.82275  |
| protein_co aurora_kin   | 84    | 83   | 79   | 224   | 268   | 293   | 1.861418 | 2.358588 | 2.112223 | 7.704478 |
| protein_co peptidylpro  | 2048  | 1490 | 1605 | 1400  | 1876  | 1697  | 23.87637 | 22.27583 | 22.57675 | 25.3336  |
| protein_co F-box_and_   | 758   | 538  | 596  | 428   | 596   | 599   | 18.51179 | 16.84887 | 17.56198 | 16.22383 |
| protein_co ER_membr     | 3072  | 2435 | 2557 | 1175  | 1263  | 1569  | 21.61557 | 21.9712  | 21.70822 | 12.83257 |
| protein_co phospholip   | 0     | 0    | 0    | 1     | 5     | 2     | 0        | 0        | 0        | 0.038899 |
| protein_co ubiquitin_   | 6697  | 5160 | 5652 | 5508  | 6839  | 5407  | 19.6941  | 19.45875 | 20.05423 | 25.14087 |
| protein_co heterochro   | 3845  | 3354 | 3330 | 1042  | 1317  | 1221  | 37.38949 | 41.824   | 39.07018 | 15.7272  |
| protein_co egf-like_mc  | 7     | 5    | 10   | 62    | 70    | 44    | 0.048505 | 0.044429 | 0.083605 | 0.666817 |
| protein_co SIN3_trans   | 2119  | 1598 | 1705 | 1723  | 2242  | 1704  | 19.37219 | 18.73414 | 18.80703 | 24.44913 |
| protein_co solute_carr  | 1635  | 1231 | 1317 | 482   | 636   | 668   | 15.03534 | 14.51653 | 14.61266 | 6.879754 |
| protein_co epidermal_   | 751   | 553  | 645  | 770   | 841   | 590   | 8.994739 | 8.49343  | 9.320869 | 14.31429 |
| protein_co Kruppel-lik  | 303   | 191  | 204  | 3     | 7     | 12    | 7.040473 | 5.691175 | 5.719228 | 0.108196 |
| protein_co olfactory_r  | 0     | 0    | 0    | 1     | 0     | 0     | 0        | 0        | 0        | 0.068274 |
| protein_co coagulation  | 2     | 1    | 1    | 2     | 7     | 3     | 0.027003 | 0.017314 | 0.01629  | 0.041912 |
| protein_co ubiquinol-α  | 15    | 4    | 14   | 10    | 15    | 12    | 0.534867 | 0.182904 | 0.602325 | 0.553459 |
| protein_co growth_fac   | 379   | 237  | 250  | 525   | 780   | 480   | 7.578387 | 6.077084 | 6.031504 | 16.29399 |
| protein_co synaptogyr   | 41    | 45   | 24   | 679   | 962   | 431   | 0.937343 | 1.319279 | 0.662024 | 24.09434 |
| protein_co protein_kir  | 563   | 349  | 443  | 1310  | 1813  | 1410  | 11.43808 | 9.092417 | 10.85916 | 41.30916 |
| protein_co WAP_follis   | 10    | 5    | 4    | 90    | 208   | 42    | 0.096125 | 0.061634 | 0.046392 | 1.342801 |
| protein_co WD_repeat    | 392   | 308  | 289  | 478   | 623   | 448   | 5.664372 | 5.707235 | 5.03862  | 10.72072 |
| protein_co F-box_and_   | 114   | 57   | 67   | 753   | 1064  | 292   | 1.507037 | 0.966281 | 1.068666 | 15.45058 |
| protein_co CTF18_chro   | 1039  | 757  | 896  | 1566  | 2235  | 1480  | 10.84084 | 10.12867 | 11.27985 | 25.36119 |
| protein_co guanine_nu   | 3     | 0    | 2    | 5     | 2     | 7     | 0.142957 | 0        | 0.114991 | 0.369816 |
| pseudogen: tubulin_be   | 24    | 13   | 13   | 20    | 14    | 21    | 0.683694 | 0.474901 | 0.44683  | 0.884323 |
| protein_co microtubul   | 10076 | 8581 | 9338 | 4766  | 5442  | 4792  | 19.02948 | 20.78193 | 21.27848 | 13.97086 |
| protein_co SWI/SNF_r    | 8967  | 6896 | 7324 | 10552 | 13093 | 10633 | 72.61879 | 71.61573 | 71.56459 | 132.6377 |
| protein_co lysine_(K)-s | 1556  | 1200 | 1371 | 2606  | 2530  | 1422  | 13.04503 | 12.90108 | 13.86823 | 33.91099 |
| protein_co toll-like_re | 3     | 1    | 2    | 19    | 19    | 0     | 0.052567 | 0.02247  | 0.042284 | 0.516747 |
| protein_co gigaxonin    | 129   | 89   | 107  | 157   | 197   | 155   | 1.288352 | 1.139841 | 1.289367 | 2.433744 |
| protein_co methyltran   | 32    | 21   | 31   | 23    | 23    | 58    | 0.716904 | 0.603309 | 0.837955 | 0.799778 |
| protein_co interleukin  | 6     | 1    | 4    | 2     | 0     | 0     | 0.404224 | 0.086393 | 0.325147 | 0.209137 |
| protein_co ER_membr     | 2     | 1    | 3    | 1     | 4     | 2     | 0.123071 | 0.07891  | 0.222738 | 0.095512 |
| protein_co methyltran   | 674   | 577  | 573  | 970   | 1228  | 1258  | 7.399642 | 8.123365 | 7.590205 | 16.52925 |
| protein_co tubulin_alp  | 219   | 162  | 219  | 644   | 610   | 670   | 4.109209 | 3.89797  | 4.957997 | 18.75558 |
| protein_co villin_1     | 0     | 0    | 0    | 3     | 13    | 16    | 0        | 0        | 0        | 0.033431 |

|                         |      |      |      |      |      |       |          |          |          |          |
|-------------------------|------|------|------|------|------|-------|----------|----------|----------|----------|
| protein_co angio-assoc  | 1507 | 1168 | 1186 | 1915 | 2195 | 1992  | 31.12919 | 30.93903 | 29.55883 | 61.39794 |
| protein_co paroxysmal   | 1029 | 793  | 764  | 732  | 873  | 587   | 15.97148 | 15.78382 | 14.30774 | 17.63483 |
| protein_co tumor_nec    | 1548 | 1208 | 1255 | 3    | 0    | 23    | 17.48633 | 17.49863 | 17.10486 | 0.052599 |
| protein_co ring_finger  | 712  | 608  | 602  | 210  | 179  | 262   | 8.633486 | 9.454077 | 8.807462 | 3.952355 |
| protein_co enoyl_CoA    | 1961 | 1554 | 1535 | 1323 | 1499 | 1714  | 56.86538 | 57.78708 | 53.70649 | 59.54711 |
| protein_co zinc_finger  | 0    | 0    | 1    | 0    | 0    | 0     | 0        | 0        | 0.020358 | 0        |
| protein_co A_kinase(F   | 1977 | 1681 | 1887 | 874  | 358  | 757   | 7.430987 | 8.10246  | 8.557754 | 5.098962 |
| protein_co guanine_nu   | 1255 | 1007 | 1080 | 50   | 87   | 81    | 61.04458 | 62.81193 | 63.38335 | 3.774886 |
| protein_co split_hand   | 1696 | 1278 | 1406 | 1390 | 1166 | 1582  | 28.6785  | 27.71218 | 28.6856  | 36.48176 |
| protein_co guanine_nu   | 3    | 1    | 0    | 18   | 25   | 28    | 0.072398 | 0.030947 | 0        | 0.674234 |
| protein_co huntingtin   | 2736 | 2147 | 2420 | 2655 | 3104 | 2506  | 16.01037 | 16.11115 | 17.08632 | 24.11461 |
| protein_co protein_ty   | 1165 | 1044 | 1052 | 1091 | 1473 | 1463  | 16.03842 | 18.43086 | 17.47429 | 23.31261 |
| protein_co P450_(cytc   | 1434 | 1144 | 1220 | 2641 | 3351 | 2407  | 26.55619 | 27.16765 | 27.25992 | 75.9129  |
| protein_co fibrinogen-  | 30   | 28   | 24   | 5    | 5    | 1     | 0.330134 | 0.395127 | 0.31866  | 0.085402 |
| protein_co serine/thre  | 323  | 275  | 269  | 267  | 297  | 215   | 9.6468   | 10.53229 | 9.69351  | 12.3772  |
| protein_co STEAP_fami   | 1    | 0    | 0    | 2    | 1    | 0     | 0.010535 | 0        | 0        | 0.032703 |
| protein_co guanine_nu   | 1970 | 1542 | 1620 | 468  | 546  | 349   | 27.59884 | 27.70246 | 27.38342 | 10.17656 |
| pseudogen: postmeioti   | 143  | 85   | 110  | 89   | 134  | 92    | 4.500183 | 3.430223 | 4.176715 | 4.34725  |
| protein_co peroxisom:   | 244  | 174  | 199  | 454  | 633  | 369   | 2.145352 | 1.961857 | 2.111105 | 6.195768 |
| protein_co mitochond    | 105  | 103  | 98   | 107  | 93   | 211   | 1.268277 | 1.595407 | 1.428233 | 2.006038 |
| protein_co sarcoglycar  | 716  | 549  | 530  | 269  | 281  | 232   | 17.94402 | 17.64364 | 16.0262  | 10.4638  |
| protein_co RNA_bindin   | 172  | 145  | 162  | 98   | 108  | 152   | 1.970458 | 2.130178 | 2.239245 | 1.74259  |
| protein_co CAS1_dom:    | 478  | 328  | 338  | 289  | 347  | 369   | 5.685801 | 5.00319  | 4.850969 | 5.335708 |
| protein_co zinc_finger  | 177  | 153  | 145  | 92   | 98   | 249   | 0.957823 | 1.061726 | 0.946734 | 0.772734 |
| protein_co leucine_ri   | 109  | 95   | 82   | 220  | 280  | 127   | 1.511686 | 1.689539 | 1.372136 | 4.735746 |
| protein_co ZFP36_ring   | 190  | 143  | 144  | 116  | 125  | 123   | 4.9883   | 4.814424 | 4.561519 | 4.72702  |
| protein_co steroid_5_i  | 318  | 197  | 214  | 247  | 413  | 280   | 3.558717 | 2.827105 | 2.889537 | 4.290361 |
| protein_co serine_pep   | 1    | 0    | 2    | 12   | 13   | 11    | 0.061455 | 0        | 0.148298 | 1.144636 |
| protein_co RAS-like_fai | 2219 | 1719 | 1936 | 710  | 827  | 502   | 52.2072  | 51.86308 | 54.95744 | 25.92758 |
| protein_co phosphorik   | 3387 | 2721 | 2917 | 8624 | 9125 | 10446 | 47.54985 | 48.98598 | 49.4104  | 187.9201 |
| protein_co kinase_inse  | 1308 | 873  | 971  | 2475 | 3654 | 2871  | 10.51829 | 9.002454 | 9.421165 | 30.89179 |
| protein_co phosphorik   | 462  | 375  | 434  | 1079 | 1210 | 1083  | 5.358196 | 5.577213 | 6.073156 | 19.42355 |
| protein_co tubulin_ga   | 1315 | 1000 | 1087 | 821  | 1121 | 928   | 10.18675 | 9.933883 | 10.15985 | 9.871505 |
| protein_co adrenomec    | 300  | 211  | 240  | 318  | 455  | 185   | 3.289758 | 2.967116 | 3.175426 | 5.41253  |
| protein_co DiGeorge_s   | 847  | 600  | 685  | 630  | 793  | 825   | 34.41581 | 31.26333 | 33.58251 | 39.73247 |
| protein_co DiGeorge_s   | 963  | 765  | 881  | 581  | 793  | 1536  | 9.617697 | 9.797507 | 10.61619 | 9.006404 |
| protein_co aspartate_k  | 447  | 311  | 329  | 236  | 278  | 113   | 6.243622 | 5.570559 | 5.544635 | 5.116483 |
| protein_co pre-B_lymp   | 1    | 2    | 0    | 1    | 6    | 1     | 0.076869 | 0.197147 | 0        | 0.119311 |
| protein_co stromal_ce   | 1149 | 729  | 909  | 455  | 831  | 561   | 62.28512 | 50.67586 | 59.45333 | 38.28302 |
| protein_co galactose-3  | 1    | 2    | 2    | 172  | 184  | 84    | 0.024575 | 0.063029 | 0.059303 | 6.560863 |
| protein_co tyrosine_3-  | 2559 | 2190 | 2349 | 3226 | 3892 | 3929  | 63.85926 | 70.08209 | 70.72691 | 124.9535 |
| protein_co ret_finger_  | 0    | 0    | 2    | 6    | 5    | 3     | 0        | 0        | 0.046951 | 0.181195 |
| protein_co chromosom    | 4    | 1    | 3    | 1    | 0    | 3     | 0.150409 | 0.04822  | 0.136108 | 0.058364 |
| pseudogen: POM121_t     | 1    | 4    | 1    | 2    | 3    | 1     | 0.009344 | 0.047931 | 0.011275 | 0.029007 |
| protein_co guanine_nu   | 161  | 103  | 97   | 229  | 292  | 92    | 2.260267 | 1.854302 | 1.643061 | 4.989992 |
| protein_co mannosyl_    | 402  | 300  | 253  | 611  | 934  | 358   | 3.723782 | 3.563599 | 2.827658 | 8.784761 |
| protein_co adenosine_   | 17   | 22   | 12   | 9    | 7    | 0     | 0.310288 | 0.51493  | 0.264269 | 0.25497  |
| protein_co activating_  | 4748 | 3323 | 3562 | 5297 | 5506 | 7084  | 110.2693 | 98.96548 | 99.81275 | 190.9433 |
| protein_co alpha_14-g   | 20   | 17   | 12   | 588  | 824  | 352   | 0.40405  | 0.440416 | 0.292506 | 18.43797 |
| protein_co ret_finger_  | 0    | 0    | 0    | 1    | 0    | 0     | 0        | 0        | 0        | 0.048911 |
| protein_co CDC42_eff    | 1755 | 1215 | 1351 | 344  | 475  | 266   | 37.73131 | 33.49734 | 35.04517 | 11.47925 |
| protein_co apolipopro   | 2    | 7    | 4    | 1    | 0    | 0     | 0.025806 | 0.115825 | 0.062274 | 0.020027 |
| protein_co melanin-co   | 31   | 22   | 36   | 24   | 46   | 37    | 0.509853 | 0.463997 | 0.714387 | 0.612668 |
| protein_co tyrosylprot  | 1335 | 966  | 1067 | 1103 | 1513 | 787   | 28.60977 | 26.54725 | 27.58961 | 36.68927 |
| protein_co BAI1-associ  | 8    | 9    | 6    | 149  | 170  | 85    | 0.1748   | 0.252175 | 0.158179 | 5.053211 |
| protein_co mercaptop    | 2823 | 2005 | 2204 | 1448 | 2110 | 1570  | 22.54266 | 20.53138 | 21.23508 | 17.94706 |
| protein_co galanin_rec  | 1    | 0    | 0    | 13   | 13   | 3     | 0.040527 | 0        | 0        | 0.817751 |
| protein_co thiosulfate  | 590  | 466  | 483  | 404  | 539  | 305   | 15.39516 | 15.59292 | 15.20644 | 16.36229 |
| protein_co apolipopro   | 0    | 2    | 0    | 0    | 0    | 0     | 0        | 0.08363  | 0        | 0        |
| protein_co apolipopro   | 386  | 306  | 364  | 184  | 211  | 130   | 6.740986 | 6.852781 | 7.669826 | 4.987517 |
| protein_co ras-related_ | 72   | 63   | 56   | 26   | 27   | 15    | 2.278058 | 2.556125 | 2.137806 | 1.276839 |
| protein_co leukemia_i   | 474  | 291  | 359  | 152  | 118  | 52    | 5.599866 | 4.408609 | 5.117311 | 2.787234 |
| protein_co chromosom    | 230  | 203  | 187  | 146  | 273  | 87    | 6.913272 | 7.824582 | 6.781807 | 6.811443 |
| protein_co apolipopro   | 1    | 6    | 4    | 2    | 0    | 0     | 0.031725 | 0.244099 | 0.153114 | 0.098484 |
| protein_co apolipopro   | 91   | 70   | 70   | 97   | 138  | 37    | 1.583887 | 1.562393 | 1.470039 | 2.620505 |

|                         |       |       |       |       |       |       |          |          |          |          |
|-------------------------|-------|-------|-------|-------|-------|-------|----------|----------|----------|----------|
| protein_co RIB43A_do    | 29    | 22    | 21    | 11    | 20    | 17    | 0.920034 | 0.895031 | 0.803847 | 0.541663 |
| protein_co keratin_17   | 3     | 0     | 1     | 0     | 1     | 1     | 0.076701 | 0        | 0.030848 | 0        |
| pseudogen: TBC1_dom     | 0     | 0     | 0     | 0     | 0     | 1     | 0        | 0        | 0        | 0        |
| protein_co ER_membr     | 1275  | 1046  | 1066  | 683   | 769   | 842   | 29.61108 | 31.15194 | 29.87097 | 24.62041 |
| protein_co ring_finger  | 68    | 52    | 77    | 27    | 49    | 8     | 0.99269  | 0.973459 | 1.356262 | 0.611785 |
| protein_co sperm_anti   | 1101  | 865   | 939   | 2291  | 2521  | 1862  | 6.347708 | 6.395214 | 6.531956 | 20.50148 |
| protein_co carboxypep   | 395   | 353   | 381   | 0     | 1     | 1     | 6.621937 | 7.58878  | 7.706567 | 0        |
| protein_co dedicator_1  | 2254  | 1733  | 1933  | 408   | 416   | 436   | 13.21622 | 13.0305  | 13.67518 | 3.713162 |
| protein_co protection   | 239   | 233   | 232   | 336   | 197   | 226   | 2.746744 | 3.433883 | 3.217039 | 5.993631 |
| protein_co ATPase_H+    | 671   | 508   | 531   | 490   | 561   | 433   | 44.25204 | 42.96194 | 42.25259 | 50.15767 |
| protein_co N(alpha)-ac  | 398   | 284   | 376   | 334   | 417   | 495   | 4.630826 | 4.237435 | 5.278509 | 6.031874 |
| protein_co cadherin-re  | 5     | 4     | 8     | 150   | 195   | 86    | 0.036069 | 0.037003 | 0.069631 | 1.679534 |
| protein_co PRKR_inter   | 614   | 524   | 522   | 413   | 530   | 667   | 8.393723 | 9.18601  | 8.610033 | 8.763282 |
| protein_co VGF_nerve    | 846   | 743   | 806   | 127   | 183   | 191   | 15.40542 | 17.35007 | 17.70868 | 3.589528 |
| protein_co podocalyxi   | 458   | 348   | 376   | 21676 | 27137 | 23706 | 3.480653 | 3.391437 | 3.447713 | 255.6848 |
| protein_co forkhead_b   | 143   | 117   | 117   | 8     | 5     | 52    | 0.807767 | 0.847511 | 0.797414 | 0.070141 |
| protein_co striatin_int | 227   | 186   | 192   | 167   | 217   | 159   | 2.080945 | 2.186538 | 2.123655 | 2.376193 |
| protein_co RAB_memt     | 488   | 388   | 359   | 205   | 251   | 268   | 12.81923 | 13.07023 | 11.37849 | 8.358465 |
| protein_co muskelin_1   | 1172  | 1021  | 1065  | 792   | 722   | 569   | 4.926058 | 5.503094 | 5.400942 | 5.16687  |
| protein_co DnaJ_(Hsp4   | 411   | 257   | 307   | 106   | 131   | 145   | 7.098268 | 5.691844 | 6.397304 | 2.841495 |
| protein_co filamin_C_f  | 7069  | 5232  | 6210  | 338   | 489   | 675   | 36.07592 | 34.24021 | 38.23834 | 2.677359 |
| protein_co leucine_ric  | 36    | 27    | 35    | 363   | 500   | 631   | 0.440972 | 0.424113 | 0.517279 | 6.901533 |
| protein_co calumenin    | 13463 | 11021 | 11713 | 3078  | 3938  | 2981  | 142.8883 | 149.9978 | 149.993  | 50.70535 |
| protein_co coiled-coil  | 374   | 357   | 345   | 467   | 530   | 246   | 4.206492 | 5.149037 | 4.68183  | 8.152595 |
| protein_co smoothene    | 2340  | 1636  | 1819  | 2281  | 2885  | 2541  | 29.3533  | 26.31684 | 27.53099 | 44.41164 |
| protein_co interferon_  | 9     | 1     | 6     | 33    | 40    | 12    | 0.151475 | 0.021583 | 0.121842 | 0.862072 |
| protein_co leucine_ric  | 4524  | 3454  | 3836  | 6     | 8     | 33    | 105.9593 | 103.7404 | 108.4034 | 0.218121 |
| protein_co kelch_dom    | 1293  | 1024  | 1068  | 229   | 249   | 222   | 13.55439 | 13.76546 | 13.5083  | 3.726039 |
| protein_co NADH_deh     | 558   | 443   | 459   | 541   | 649   | 784   | 4.66559  | 4.749911 | 4.630556 | 7.021019 |
| protein_co FEZ_family   | 0     | 0     | 0     | 140   | 234   | 325   | 0        | 0        | 0        | 4.854298 |
| protein_co opsin_1_(c   | 195   | 205   | 191   | 79    | 98    | 78    | 8.342658 | 11.24691 | 9.859417 | 5.245989 |
| protein_co mitochond    | 615   | 436   | 469   | 708   | 943   | 997   | 23.63718 | 21.48901 | 21.74911 | 42.23615 |
| protein_co myosin_1B    | 6864  | 5691  | 5814  | 1070  | 1167  | 1419  | 63.33197 | 67.33543 | 64.72452 | 15.32357 |
| protein_co homeobox     | 148   | 86    | 122   | 0     | 0     | 8     | 3.421954 | 2.549883 | 3.403457 | 0        |
| protein_co homeobox     | 203   | 184   | 148   | 0     | 0     | 4     | 2.259894 | 2.626753 | 1.987933 | 0        |
| protein_co metaxin_2    | 528   | 465   | 440   | 525   | 606   | 595   | 15.55146 | 17.56304 | 15.63645 | 24.00088 |
| protein_co phosphodi    | 114   | 112   | 99    | 5     | 4     | 7     | 1.199072 | 1.510663 | 1.256387 | 0.081628 |
| protein_co chimerin_1   | 1584  | 1326  | 1261  | 294   | 327   | 464   | 30.353   | 32.58362 | 29.15477 | 8.744283 |
| protein_co glutamate_   | 27    | 18    | 23    | 11    | 16    | 51    | 0.31746  | 0.271398 | 0.326288 | 0.200747 |
| pseudogen: eukaryotic   | 16    | 15    | 21    | 26    | 27    | 38    | 0.559046 | 0.672092 | 0.88531  | 1.410041 |
| protein_co O-sialoglyc  | 85    | 68    | 83    | 131   | 136   | 67    | 1.798579 | 1.845138 | 2.119028 | 4.302416 |
| protein_co ORM1-like    | 613   | 485   | 492   | 261   | 351   | 454   | 10.67741 | 10.83319 | 10.33995 | 7.056288 |
| protein_co histone_ac   | 1045  | 826   | 843   | 721   | 729   | 1089  | 12.74384 | 12.91735 | 12.40394 | 13.6474  |
| protein_co homeobox     | 568   | 419   | 469   | 0     | 0     | 27    | 11.01469 | 10.41951 | 10.9735  | 0        |
| protein_co homeobox     | 632   | 498   | 517   | 0     | 0     | 8     | 14.89919 | 15.05512 | 14.70565 | 0        |
| protein_co homeobox     | 447   | 329   | 368   | 0     | 0     | 7     | 10.80961 | 10.20253 | 10.73738 | 0        |
| protein_co homeobox     | 116   | 97    | 96    | 1     | 0     | 8     | 2.428233 | 2.603835 | 2.424665 | 0.032491 |
| protein_co HECT_and_    | 3898  | 3136  | 3294  | 2557  | 3243  | 2884  | 11.91741 | 12.29491 | 12.15099 | 12.13392 |
| protein_co small_nucl   | 26    | 23    | 29    | 135   | 179   | 152   | 0.640305 | 0.726358 | 0.861707 | 5.160333 |
| protein_co proteasom    | 13    | 6     | 7     | 5     | 6     | 10    | 0.361548 | 0.213985 | 0.234892 | 0.215836 |
| protein_co twisted_ga   | 1808  | 1504  | 1670  | 389   | 510   | 418   | 22.57113 | 24.07753 | 25.15471 | 7.537631 |
| protein_co Rho_GTPas    | 142   | 123   | 166   | 154   | 235   | 268   | 2.408966 | 2.675819 | 3.397805 | 4.055025 |
| protein_co WDFY_fami    | 0     | 4     | 0     | 1     | 5     | 0     | 0        | 0.024144 | 0        | 0.007306 |
| protein_co eukaryotic   | 3318  | 2750  | 2873  | 3384  | 3576  | 2775  | 28.29261 | 30.07037 | 29.55836 | 44.78757 |
| protein_co myosin_VC    | 59    | 26    | 44    | 286   | 287   | 335   | 0.39686  | 0.224268 | 0.357097 | 2.985945 |
| protein_co cingulin-lik | 213   | 172   | 195   | 3012  | 3533  | 2682  | 1.382554 | 1.431662 | 1.527163 | 30.34507 |
| protein_co tropomod     | 100   | 78    | 89    | 111   | 152   | 71    | 0.510173 | 0.510295 | 0.547842 | 0.878964 |
| protein_co tau_tubuli   | 387   | 314   | 331   | 173   | 221   | 105   | 1.664047 | 1.731385 | 1.717239 | 1.154599 |
| protein_co elongation   | 0     | 2     | 0     | 2     | 5     | 4     | 0        | 0.051131 | 0        | 0.061888 |
| protein_co chromosom    | 67    | 64    | 68    | 21    | 34    | 22    | 0.512417 | 0.62768  | 0.627489 | 0.249287 |
| protein_co INO80_hor    | 684   | 520   | 537   | 498   | 573   | 953   | 4.981018 | 4.855955 | 4.718286 | 5.628877 |
| protein_co NMDA_rec     | 502   | 469   | 384   | 759   | 826   | 911   | 3.265195 | 3.911898 | 3.013593 | 7.662626 |
| protein_co delta-like_4 | 0     | 1     | 0     | 3     | 3     | 2     | 0        | 0.018008 | 0        | 0.065391 |
| protein_co aldehyde_d   | 12    | 8     | 9     | 0     | 2     | 2     | 0.137306 | 0.117384 | 0.124251 | 0        |
| protein_co family_witl  | 748   | 582   | 655   | 898   | 900   | 791   | 3.79668  | 3.788216 | 4.011361 | 7.07472  |

|                         |       |       |       |       |       |       |          |          |          |          |
|-------------------------|-------|-------|-------|-------|-------|-------|----------|----------|----------|----------|
| protein_co isovaleryl-C | 1299  | 1052  | 1071  | 1150  | 1351  | 1489  | 13.05683 | 13.55982 | 12.98872 | 17.94143 |
| protein_co kinetochor   | 709   | 651   | 664   | 896   | 937   | 824   | 17.50659 | 20.61322 | 19.78206 | 34.3395  |
| protein_co deoxyuridil  | 917   | 740   | 780   | 1239  | 1874  | 1981  | 20.02708 | 20.72476 | 20.55375 | 42.00008 |
| protein_co ChaC_catio   | 141   | 85    | 113   | 446   | 507   | 592   | 3.589301 | 2.774719 | 3.470701 | 17.62204 |
| protein_co ceroid-lipo  | 509   | 348   | 410   | 653   | 768   | 1204  | 10.64541 | 9.33326  | 10.3461  | 21.19769 |
| protein_co cAMP-regul   | 2864  | 2463  | 2570  | 2563  | 3382  | 3175  | 25.04532 | 27.62023 | 27.11657 | 34.78826 |
| protein_co vacuolar_p   | 1110  | 1003  | 987   | 479   | 374   | 260   | 3.884173 | 4.50076  | 4.167166 | 2.601606 |
| protein_co calmodulin   | 118   | 94    | 85    | 154   | 216   | 155   | 1.331654 | 1.360337 | 1.157381 | 2.697494 |
| protein_co immunoglc    | 1988  | 1364  | 1372  | 55    | 76    | 96    | 39.31563 | 34.59175 | 32.73791 | 1.68827  |
| protein_co THAP_dom     | 63    | 52    | 47    | 40    | 64    | 48    | 1.231376 | 1.303355 | 1.108399 | 1.213502 |
| protein_co lysyl_oxida  | 2362  | 1768  | 1908  | 196   | 270   | 132   | 39.75385 | 38.15846 | 38.7459  | 5.120187 |
| protein_co chemokine    | 2     | 4     | 2     | 8     | 10    | 9     | 0.048997 | 0.125663 | 0.059118 | 0.3042   |
| protein_co anaphase_f   | 487   | 410   | 441   | 288   | 308   | 410   | 12.41056 | 13.39849 | 13.55967 | 11.39162 |
| protein_co methyl-CpC   | 502   | 434   | 470   | 508   | 558   | 469   | 9.499108 | 10.53121 | 10.73062 | 14.92015 |
| protein_co coatomer_U   | 3382  | 2827  | 2979  | 1246  | 1104  | 1030  | 45.55646 | 48.83279 | 48.41667 | 26.05103 |
| protein_co proteasom    | 137   | 97    | 98    | 102   | 112   | 108   | 4.206897 | 3.81964  | 3.63091  | 4.861519 |
| protein_co sulfatase_r  | 2274  | 1661  | 1842  | 1315  | 1344  | 776   | 51.96291 | 48.67232 | 50.78561 | 46.64008 |
| protein_co palladin_cy  | 13330 | 10496 | 11159 | 228   | 296   | 303   | 97.13192 | 98.07651 | 98.10817 | 2.578678 |
| protein_co signal_pept  | 2609  | 2171  | 2216  | 956   | 1503  | 1294  | 26.76352 | 28.55869 | 27.42755 | 15.2215  |
| protein_co butyrobeta   | 55    | 45    | 42    | 3     | 3     | 1     | 1.367418 | 1.434698 | 1.2599   | 0.115769 |
| protein_co myogenic_U   | 0     | 0     | 2     | 0     | 3     | 0     | 0        | 0        | 0.062827 | 0        |
| protein_co secretion_r  | 107   | 106   | 93    | 178   | 206   | 106   | 3.203852 | 4.070088 | 3.359848 | 8.272544 |
| protein_co potassium_U  | 16    | 11    | 19    | 2     | 1     | 10    | 0.110884 | 0.097758 | 0.158873 | 0.021513 |
| protein_co tryptophar   | 4     | 3     | 1     | 0     | 1     | 13    | 0.035223 | 0.033876 | 0.010625 | 0        |
| protein_co cysteine_ar  | 1     | 1     | 2     | 0     | 1     | 0     | 0.032205 | 0.041298 | 0.077714 | 0        |
| protein_co E2F_transci  | 293   | 289   | 275   | 168   | 193   | 362   | 4.00314  | 5.063377 | 4.533294 | 3.562648 |
| protein_co dCMP_dear    | 1445  | 1192  | 1242  | 839   | 1059  | 997   | 34.35906 | 36.34621 | 35.63224 | 30.96463 |
| protein_co SRY_(sex_d   | 38    | 28    | 21    | 491   | 518   | 448   | 1.276376 | 1.206042 | 0.851064 | 25.59805 |
| protein_co family_witl  | 799   | 623   | 729   | 1569  | 1928  | 1829  | 19.23261 | 19.23042 | 21.17225 | 58.61987 |
| protein_co RPA_intera   | 449   | 406   | 411   | 654   | 741   | 725   | 5.51575  | 6.395781 | 6.091835 | 12.47    |
| protein_co ubiquitin_s  | 8     | 3     | 6     | 8     | 11    | 6     | 0.044319 | 0.021313 | 0.040106 | 0.06879  |
| protein_co sex_hormo    | 6     | 6     | 6     | 11    | 12    | 13    | 0.203575 | 0.261056 | 0.245624 | 0.579289 |
| protein_co phospholip   | 655   | 524   | 470   | 1241  | 1428  | 1028  | 8.767617 | 8.99458  | 7.590776 | 25.78354 |
| protein_co aryl_hydro   | 0     | 0     | 0     | 3     | 25    | 9     | 0        | 0        | 0        | 0.073664 |
| protein_co thioredoxin  | 801   | 697   | 735   | 754   | 790   | 831   | 16.92605 | 18.8871  | 18.73952 | 24.73005 |
| protein_co ATPase_Na    | 24    | 21    | 11    | 1292  | 1667  | 684   | 0.356917 | 0.400484 | 0.197377 | 29.82287 |
| protein_co fragile_X_r  | 1774  | 1327  | 1371  | 876   | 1182  | 478   | 28.13084 | 26.98419 | 26.23098 | 21.56074 |
| protein_co kinesin_fan  | 4378  | 3364  | 3562  | 3069  | 4362  | 3092  | 25.92303 | 25.5432  | 25.4479  | 28.20573 |
| protein_co mannose-P    | 909   | 676   | 766   | 594   | 606   | 911   | 25.91065 | 24.70987 | 26.34458 | 26.28037 |
| protein_co matrix_me    | 984   | 722   | 726   | 2     | 1     | 3     | 18.76363 | 17.65503 | 16.70346 | 0.059195 |
| protein_co mitochond    | 154   | 115   | 105   | 171   | 259   | 274   | 3.888564 | 3.723708 | 3.198938 | 6.701856 |
| protein_co PHD_finger   | 1237  | 999   | 992   | 331   | 400   | 438   | 7.427705 | 7.692363 | 7.186951 | 3.084917 |
| protein_co leucine_ric  | 4     | 2     | 7     | 17    | 16    | 23    | 0.108166 | 0.069354 | 0.22839  | 0.713527 |
| protein_co cyclin_T1    | 781   | 607   | 663   | 685   | 758   | 849   | 5.251843 | 5.234302 | 5.379257 | 7.1496   |
| protein_co pseudouric   | 125   | 107   | 120   | 132   | 131   | 177   | 1.343092 | 1.47431  | 1.555697 | 2.201406 |
| protein_co KRI1_homc    | 712   | 577   | 618   | 576   | 762   | 894   | 8.917119 | 9.266798 | 9.338585 | 11.19689 |
| protein_co interleukin  | 13274 | 10589 | 11635 | 15957 | 20551 | 21629 | 101.7189 | 104.0553 | 107.5757 | 189.7936 |
| protein_co solute_carr  | 2668  | 2037  | 2144  | 2753  | 3193  | 3221  | 33.06093 | 32.36903 | 32.05547 | 52.95    |
| protein_co adaptor-rel  | 5     | 3     | 4     | 2454  | 2599  | 1670  | 0.133438 | 0.102669 | 0.1288   | 101.6515 |
| protein_co cyclin-depe  | 377   | 273   | 258   | 39    | 37    | 45    | 12.43146 | 11.54391 | 10.26475 | 1.99607  |
| protein_co microtubul   | 289   | 205   | 209   | 126   | 165   | 132   | 2.166115 | 1.970366 | 1.89007  | 1.465834 |
| protein_co kallikrein-r | 4     | 1     | 7     | 11    | 18    | 7     | 0.165543 | 0.053071 | 0.34954  | 0.7066   |
| protein_co sialic_acid_ | 0     | 1     | 1     | 0     | 2     | 0     | 0        | 0.030678 | 0.028865 | 0        |
| protein_co kallikrein-r | 0     | 0     | 0     | 76    | 90    | 28    | 0        | 0        | 0        | 1.77797  |
| protein_co kallikrein-r | 0     | 0     | 0     | 19    | 23    | 6     | 0        | 0        | 0        | 1.044423 |
| protein_co neuroguidi   | 380   | 261   | 291   | 541   | 555   | 644   | 6.448862 | 5.680013 | 5.958549 | 14.25041 |
| protein_co receptor-in  | 14    | 8     | 3     | 2     | 5     | 1     | 0.340135 | 0.249243 | 0.087941 | 0.075419 |
| protein_co adenylate_U  | 48    | 39    | 28    | 4     | 10    | 5     | 0.426596 | 0.444477 | 0.300249 | 0.055178 |
| protein_co RAB2B_me     | 625   | 502   | 480   | 299   | 314   | 248   | 10.00897 | 10.30914 | 9.274673 | 7.43209  |
| protein_co BCL2-like_2  | 763   | 637   | 633   | 349   | 386   | 199   | 9.924295 | 10.62488 | 9.934062 | 7.045812 |
| protein_co ajuba_LIM_   | 1431  | 1054  | 1092  | 710   | 867   | 843   | 15.74369 | 14.8702  | 14.49565 | 12.12427 |
| protein_co D-tyrosyl-tl | 158   | 119   | 120   | 123   | 161   | 118   | 2.726766 | 2.633583 | 2.498734 | 3.294779 |
| protein_co poly_(ADP-   | 370   | 320   | 326   | 488   | 438   | 381   | 8.762276 | 9.717947 | 9.314957 | 17.93765 |
| protein_co HEAT_reper   | 493   | 463   | 483   | 245   | 329   | 175   | 2.948569 | 3.551033 | 3.485455 | 2.274369 |
| protein_co forkhead_b   | 11    | 9     | 9     | 14    | 33    | 53    | 0.18022  | 0.189087 | 0.17791  | 0.356016 |

|                         |      |      |      |      |      |      |          |          |          |          |
|-------------------------|------|------|------|------|------|------|----------|----------|----------|----------|
| protein_co sorting_ne   | 1090 | 961  | 981  | 712  | 788  | 770  | 15.04124 | 17.00551 | 16.33331 | 15.24992 |
| protein_co E2F-associa  | 267  | 195  | 229  | 268  | 268  | 328  | 9.477392 | 8.876086 | 9.807563 | 14.76532 |
| protein_co egl_nine_h   | 143  | 109  | 81   | 318  | 401  | 332  | 2.353553 | 2.300508 | 1.6085   | 8.123544 |
| protein_co MIS18_bin    | 647  | 559  | 574  | 761  | 620  | 898  | 6.350815 | 7.036332 | 6.798062 | 11.59419 |
| protein_co neural_reti  | 17   | 15   | 9    | 15   | 16   | 17   | 0.379044 | 0.428886 | 0.242121 | 0.519114 |
| protein_co ribonuclea   | 0    | 0    | 1    | 6    | 11   | 3    | 0        | 0        | 0.04197  | 0.323946 |
| protein_co neural_pre   | 357  | 297  | 304  | 333  | 310  | 344  | 7.278146 | 7.764587 | 7.477806 | 10.53725 |
| protein_co defender_a   | 2946 | 2410 | 2445 | 1107 | 1208 | 1179 | 188.9713 | 198.2391 | 189.23   | 110.2151 |
| protein_co telomerase   | 1604 | 1308 | 1343 | 485  | 584  | 309  | 7.032407 | 7.353883 | 7.104339 | 3.30044  |
| protein_co erythrocyt   | 2    | 5    | 0    | 117  | 167  | 101  | 0.019924 | 0.063873 | 0        | 1.809058 |
| protein_co cysteine_di  | 45   | 37   | 42   | 174  | 185  | 149  | 1.134436 | 1.19613  | 1.277511 | 6.808433 |
| protein_co receptor_a   | 950  | 808  | 839  | 719  | 795  | 918  | 13.42541 | 14.64282 | 14.30586 | 15.77115 |
| protein_co integrin_al  | 723  | 616  | 605  | 227  | 298  | 225  | 9.971024 | 10.8941  | 10.06711 | 4.859122 |
| protein_co glutamine_   | 109  | 78   | 100  | 40   | 85   | 81   | 0.953725 | 0.875186 | 1.05571  | 0.543234 |
| protein_co forkhead_b   | 0    | 0    | 0    | 185  | 243  | 153  | 0        | 0        | 0        | 5.098169 |
| protein_co SEC14-like_  | 3670 | 2685 | 2928 | 1648 | 2146 | 1282 | 31.65098 | 29.69441 | 30.46774 | 22.06016 |
| protein_co rhomboid_    | 741  | 532  | 600  | 503  | 735  | 310  | 9.65421  | 8.888317 | 9.431871 | 10.17178 |
| protein_co aralkylamir  | 0    | 0    | 1    | 5    | 3    | 10   | 0        | 0        | 0.029574 | 0.109224 |
| protein_co Rac/Cdc42    | 607  | 506  | 558  | 133  | 145  | 89   | 4.728732 | 5.054939 | 5.244913 | 1.608193 |
| protein_co MAP7_dorr    | 338  | 278  | 338  | 386  | 354  | 388  | 3.470292 | 3.660189 | 4.187108 | 6.151304 |
| protein_co fibroblast_  | 852  | 709  | 704  | 591  | 741  | 642  | 14.92911 | 15.93125 | 14.88384 | 16.07357 |
| protein_co ash2_(abse   | 1073 | 801  | 886  | 1391 | 1578 | 1356 | 16.28252 | 15.58704 | 16.22197 | 32.76269 |
| protein_co TLO2_inte    | 211  | 139  | 173  | 315  | 323  | 226  | 4.186963 | 3.537047 | 4.142007 | 9.70192  |
| protein_co ADP-ribosy   | 0    | 0    | 1    | 0    | 1    | 0    | 0        | 0        | 0.043122 | 0        |
| protein_co cholinergic  | 7    | 13   | 13   | 3    | 3    | 31   | 0.168756 | 0.401896 | 0.37814  | 0.112257 |
| protein_co cyclin-depe  | 887  | 603  | 604  | 1104 | 1464 | 810  | 20.27862 | 17.67834 | 16.66095 | 39.17548 |
| protein_co shugoshin-   | 126  | 107  | 106  | 167  | 175  | 183  | 2.283781 | 2.487007 | 2.31813  | 4.698194 |
| protein_co ribosomal_   | 1788 | 1464 | 1401 | 1536 | 1583 | 1400 | 84.00737 | 88.20643 | 79.42112 | 112.0138 |
| protein_co variable_ch  | 0    | 0    | 0    | 1    | 0    | 0    | 0        | 0        | 0        | 0.132327 |
| protein_co cadherin_1   | 0    | 0    | 0    | 7    | 8    | 3    | 0        | 0        | 0        | 0.178946 |
| protein_co Kruppel-lik  | 918  | 641  | 651  | 985  | 1270 | 870  | 14.90479 | 13.34598 | 12.753   | 24.82275 |
| protein_co transmemt    | 3971 | 2670 | 3174 | 3966 | 5059 | 4191 | 50.4471  | 43.49676 | 48.65095 | 78.2023  |
| protein_co deoxyhyphu   | 791  | 565  | 598  | 509  | 782  | 813  | 18.26194 | 16.72739 | 16.65788 | 18.23974 |
| protein_co MAU2_chrc    | 1445 | 1116 | 1152 | 979  | 1112 | 1275 | 13.5675  | 13.4371  | 13.05066 | 14.26741 |
| protein_co SHC_(Src_h   | 172  | 120  | 163  | 198  | 348  | 177  | 3.043428 | 2.722859 | 3.479927 | 5.437887 |
| protein_co hsa-mir-31i  | 77   | 57   | 77   | 2748 | 4387 | 2185 | 1.531833 | 1.454136 | 1.848245 | 84.85316 |
| protein_co abhydrolas   | 2491 | 1720 | 1876 | 1537 | 2149 | 1572 | 20.77237 | 18.3929  | 18.87527 | 19.89375 |
| protein_co lipopolysac  | 0    | 0    | 0    | 0    | 2    | 4    | 0        | 0        | 0        | 0        |
| protein_co synaptotag   | 2    | 3    | 9    | 5    | 14   | 4    | 0.024731 | 0.047571 | 0.134277 | 0.095965 |
| protein_co troponin_I   | 0    | 0    | 0    | 37   | 34   | 7    | 0        | 0        | 0        | 2.714569 |
| protein_co core-bindir  | 24   | 10   | 6    | 73   | 101  | 38   | 0.251365 | 0.134308 | 0.075822 | 1.186716 |
| protein_co guanidinoa   | 731  | 526  | 559  | 408  | 480  | 319  | 25.83015 | 23.83442 | 23.83248 | 22.37691 |
| protein_co haloacid_d   | 256  | 225  | 189  | 299  | 344  | 409  | 5.609273 | 6.322058 | 4.996622 | 10.16877 |
| protein_co chromosor    | 219  | 184  | 244  | 165  | 194  | 202  | 4.654993 | 5.015359 | 6.257671 | 5.443639 |
| protein_co PHD_finger   | 860  | 667  | 710  | 638  | 795  | 755  | 9.410832 | 9.359761 | 9.374238 | 10.83629 |
| protein_co proline_ric  | 1    | 0    | 2    | 108  | 141  | 64   | 0.007845 | 0        | 0.018931 | 1.315078 |
| protein_co UDP-N-acet   | 2    | 0    | 1    | 32   | 32   | 20   | 0.039403 | 0        | 0.023771 | 0.978552 |
| protein_co potassium_   | 7    | 10   | 10   | 6    | 4    | 11   | 0.114565 | 0.209877 | 0.197471 | 0.152418 |
| protein_co EF-hand_ca   | 15   | 12   | 14   | 30   | 26   | 34   | 0.09311  | 0.09552  | 0.104853 | 0.289038 |
| protein_co nucleoredc   | 5    | 2    | 6    | 35   | 51   | 6    | 0.160913 | 0.082539 | 0.232981 | 1.748314 |
| protein_co StAR-relate  | 911  | 650  | 738  | 243  | 283  | 126  | 8.782238 | 8.035437 | 8.58403  | 3.635997 |
| protein_co family_witl  | 1    | 1    | 0    | 621  | 813  | 480  | 0.011685 | 0.014984 | 0        | 11.26246 |
| protein_co glyceropho   | 9    | 7    | 11   | 116  | 131  | 160  | 0.173097 | 0.172645 | 0.255263 | 3.462862 |
| protein_co spermidine   | 424  | 353  | 346  | 742  | 953  | 670  | 17.51662 | 18.70116 | 17.24681 | 47.57939 |
| protein_co guanine_nu   | 792  | 579  | 708  | 676  | 906  | 1017 | 15.756   | 14.77096 | 16.99425 | 20.87363 |
| protein_co SH3-domai    | 2768 | 2060 | 2294 | 1401 | 1448 | 1195 | 24.812   | 23.67948 | 24.81059 | 19.49235 |
| protein_co motile_spe   | 360  | 269  | 245  | 161  | 146  | 143  | 4.054866 | 3.885399 | 3.32957  | 2.814688 |
| protein_co dedicator_   | 858  | 660  | 725  | 1100 | 1457 | 901  | 6.327719 | 6.241847 | 6.45128  | 12.59166 |
| protein_co ECSIT_hom    | 653  | 494  | 522  | 780  | 970  | 800  | 18.01128 | 17.47301 | 17.37201 | 33.39309 |
| protein_co low_densit   | 2421 | 1886 | 1937 | 749  | 745  | 1692 | 21.27051 | 21.24879 | 20.5334  | 10.21399 |
| protein_co elongation_  | 932  | 695  | 773  | 759  | 972  | 1065 | 20.28853 | 19.40121 | 20.30309 | 25.64525 |
| protein_co chromosor    | 0    | 2    | 4    | 6    | 10   | 3    | 0        | 0.137912 | 0.259521 | 0.500778 |
| protein_co protein_kir  | 7820 | 5958 | 6248 | 5782 | 6812 | 5397 | 162.1043 | 158.379  | 156.2704 | 186.0357 |
| protein_co calponin_1   | 88   | 71   | 83   | 251  | 290  | 207  | 2.232858 | 2.310182 | 2.540999 | 9.885135 |
| protein_co cell_divisio | 1020 | 922  | 890  | 688  | 999  | 1215 | 21.63176 | 25.07448 | 22.7735  | 22.64699 |

|                         |       |       |       |      |       |      |          |          |          |          |
|-------------------------|-------|-------|-------|------|-------|------|----------|----------|----------|----------|
| protein_co zinc_finger  | 0     | 0     | 0     | 6320 | 8174  | 7066 | 0        | 0        | 0        | 186.4485 |
| protein_co thioesteras  | 104   | 67    | 90    | 43   | 68    | 94   | 2.139781 | 1.767747 | 2.234224 | 1.373204 |
| protein_co exocyst_co   | 8     | 14    | 7     | 106  | 105   | 31   | 0.21822  | 0.489713 | 0.230383 | 4.487876 |
| protein_co poliovirus_  | 2521  | 1934  | 2042  | 2640 | 3464  | 2761 | 47.93582 | 47.15776 | 46.84801 | 77.91512 |
| protein_co apolipopro   | 113   | 71    | 90    | 8891 | 12640 | 7388 | 4.386235 | 3.534119 | 4.215062 | 535.6666 |
| protein_co translocase  | 2193  | 1638  | 1779  | 2988 | 4205  | 5219 | 30.11122 | 28.84117 | 29.47228 | 63.67966 |
| protein_co apolipopro   | 38    | 32    | 34    | 249  | 271   | 310  | 2.586097 | 2.792676 | 2.791825 | 26.30213 |
| protein_co growth_arr   | 77    | 61    | 65    | 63   | 159   | 178  | 3.39017  | 3.444054 | 3.452965 | 4.305284 |
| protein_co leucine-ricl | 245   | 195   | 188   | 48   | 49    | 58   | 2.333547 | 2.381741 | 2.160511 | 0.709614 |
| protein_co dipeptidyl-  | 83    | 76    | 76    | 84   | 68    | 52   | 0.811145 | 0.952452 | 0.896152 | 1.274177 |
| protein_co exportin_7   | 1962  | 1640  | 1627  | 2052 | 2411  | 2115 | 18.81739 | 20.17036 | 18.82764 | 30.54697 |
| protein_co angiotensir  | 1     | 1     | 2     | 2    | 0     | 0    | 0.01337  | 0.017146 | 0.032264 | 0.041505 |
| protein_co family_witl  | 217   | 175   | 213   | 147  | 211   | 67   | 2.461924 | 2.546023 | 2.915699 | 2.588587 |
| protein_co scaffold_at  | 1633  | 1320  | 1379  | 1160 | 1518  | 2169 | 22.71474 | 23.54534 | 23.14376 | 25.04437 |
| protein_co ribosomal_   | 4780  | 3747  | 3904  | 5566 | 5761  | 5574 | 247.1161 | 248.4083 | 243.5179 | 446.6289 |
| protein_co ATPase_am    | 87    | 109   | 98    | 101  | 126   | 31   | 0.778963 | 1.251508 | 1.058698 | 1.40362  |
| protein_co neurocan     | 0     | 1     | 0     | 160  | 221   | 144  | 0        | 0.008711 | 0        | 1.686914 |
| protein_co kinesin_fan  | 17    | 8     | 11    | 8359 | 12139 | 8648 | 0.087004 | 0.052504 | 0.067925 | 66.40104 |
| protein_co GTP_bindir   | 609   | 482   | 495   | 1074 | 1304  | 899  | 9.789517 | 9.935743 | 9.600574 | 26.79654 |
| protein_co plasmalemi   | 0     | 0     | 0     | 4    | 3     | 19   | 0        | 0        | 0        | 0.126299 |
| protein_co bone_marr    | 21    | 13    | 21    | 479  | 583   | 311  | 0.96633  | 0.767112 | 1.165933 | 34.21151 |
| protein_co solute_carr  | 615   | 462   | 506   | 225  | 295   | 130  | 6.639963 | 6.396492 | 6.591574 | 3.77054  |
| protein_co NOP2/Sun_    | 377   | 251   | 316   | 1080 | 1299  | 1079 | 7.732956 | 6.602178 | 7.820586 | 34.38416 |
| protein_co Usher_sync   | 5     | 13    | 8     | 191  | 305   | 111  | 0.065161 | 0.217256 | 0.125793 | 3.863519 |
| protein_co collagen_bi  | 7158  | 5327  | 5652  | 1950 | 2341  | 1537 | 90.61521 | 86.47717 | 86.32958 | 38.3155  |
| protein_co DET1_and_    | 1487  | 1042  | 1198  | 628  | 766   | 757  | 17.09795 | 15.36421 | 16.62027 | 11.20788 |
| protein_co mitochond    | 516   | 402   | 468   | 744  | 1089  | 772  | 24.99509 | 24.97126 | 27.35262 | 55.93819 |
| protein_co 6-phospho    | 773   | 564   | 533   | 571  | 637   | 490  | 22.63959 | 21.18251 | 18.83494 | 25.95707 |
| protein_co LSM7_hom     | 1892  | 1347  | 1566  | 1904 | 2354  | 2012 | 124.952  | 114.0772 | 124.7848 | 195.1729 |
| protein_co tubby_like   | 1425  | 1073  | 1189  | 453  | 614   | 426  | 6.007217 | 5.800528 | 6.047674 | 2.964061 |
| protein_co sorting_ne   | 1985  | 1688  | 1779  | 708  | 961   | 967  | 22.17167 | 24.17796 | 23.97518 | 12.27444 |
| protein_co reticulon_4  | 183   | 145   | 116   | 194  | 320   | 224  | 3.786793 | 3.84767  | 2.896186 | 6.230927 |
| protein_co glutaminyl-  | 326   | 259   | 287   | 313  | 362   | 379  | 3.72288  | 3.792893 | 3.954498 | 5.547998 |
| protein_co chromosor    | 152   | 98    | 110   | 146  | 181   | 156  | 4.698275 | 3.884456 | 4.102377 | 7.004516 |
| protein_co radial_spok  | 188   | 127   | 147   | 58   | 83    | 64   | 2.79674  | 2.422742 | 2.638515 | 1.339222 |
| protein_co MAS1_oncc    | 0     | 0     | 0     | 0    | 0     | 2    | 0        | 0        | 0        | 0        |
| protein_co acyl-CoA_s   | 8     | 7     | 10    | 6    | 3     | 3    | 0.135962 | 0.152558 | 0.205058 | 0.158274 |
| protein_co myeloid/ly   | 1356  | 928   | 1066  | 773  | 891   | 689  | 32.92743 | 28.89718 | 31.23226 | 29.13453 |
| protein_co fucosyltran  | 0     | 0     | 0     | 3    | 3     | 0    | 0        | 0        | 0        | 0.103088 |
| protein_co myeloid/ly   | 1781  | 1448  | 1554  | 2672 | 3516  | 3190 | 10.83997 | 11.30165 | 11.41204 | 25.24242 |
| protein_co actinin_alp  | 29895 | 23316 | 25212 | 8630 | 10538 | 7947 | 282.4455 | 282.4877 | 287.4031 | 126.5544 |
| protein_co serine/thre  | 90    | 71    | 80    | 171  | 202   | 212  | 0.90231  | 0.912811 | 0.967723 | 2.660968 |
| protein_co NADH_deh     | 1664  | 1350  | 1405  | 1248 | 1256  | 1281 | 15.87487 | 16.51581 | 16.17265 | 18.48    |
| protein_co erythropoi   | 0     | 1     | 1     | 7    | 11    | 5    | 0        | 0.04521  | 0.042538 | 0.383052 |
| protein_co actin_relat  | 1353  | 1206  | 1136  | 299  | 470   | 319  | 36.99253 | 42.28369 | 37.47509 | 12.68872 |
| protein_co calcium_ch   | 0     | 0     | 0     | 84   | 107   | 44   | 0        | 0        | 0        | 3.299246 |
| protein_co zinc_finger  | 1277  | 965   | 1050  | 552  | 605   | 304  | 10.88503 | 10.54813 | 10.79881 | 7.303118 |
| protein_co FCH_domai    | 46    | 38    | 50    | 642  | 735   | 404  | 0.671108 | 0.710931 | 0.880142 | 14.53784 |
| protein_co unc-13_hoi   | 1828  | 1422  | 1641  | 1316 | 1745  | 1597 | 8.485789 | 8.464961 | 9.191209 | 9.482053 |
| protein_co microtubul   | 1677  | 1214  | 1354  | 2481 | 3127  | 1923 | 22.99929 | 21.35056 | 22.40516 | 52.81272 |
| protein_co kelch_dom    | 0     | 1     | 0     | 0    | 0     | 0    | 0        | 0.02011  | 0        | 0        |
| protein_co SCO2_cyto    | 485   | 326   | 404   | 284  | 358   | 298  | 21.63811 | 18.65111 | 21.74739 | 19.66647 |
| protein_co peroxidasir  | 42327 | 32640 | 35507 | 5081 | 6374  | 5732 | 291.5267 | 288.2839 | 295.0685 | 54.31759 |
| protein_co single_strai | 3409  | 2451  | 2788  | 826  | 1133  | 803  | 94.36132 | 87.00008 | 93.11246 | 35.48767 |
| protein_co growth_dif   | 346   | 249   | 267   | 257  | 405   | 27   | 9.432527 | 8.704837 | 8.78236  | 10.87466 |
| protein_co pyroglutar   | 811   | 682   | 734   | 712  | 1030  | 759  | 5.362071 | 5.782363 | 5.855389 | 7.306714 |
| protein_co KIAA1683     | 73    | 90    | 73    | 8    | 18    | 9    | 0.619991 | 0.9802   | 0.748055 | 0.105459 |
| protein_co LSM4_hom     | 1872  | 1383  | 1425  | 5229 | 7099  | 4828 | 46.0053  | 43.58465 | 42.25372 | 199.4579 |
| protein_co jun_D_prot   | 6747  | 4686  | 5092  | 3291 | 4559  | 2331 | 169.1802 | 150.6782 | 154.0548 | 128.0847 |
| protein_co histidine_ri | 0     | 0     | 0     | 83   | 120   | 17   | 0        | 0        | 0        | 2.532798 |
| protein_co transient_r  | 608   | 491   | 517   | 376  | 440   | 204  | 6.938216 | 7.185137 | 7.118407 | 6.659821 |
| protein_co sulfotransf  | 3     | 2     | 2     | 187  | 262   | 209  | 0.054928 | 0.046958 | 0.044182 | 5.314261 |
| protein_co zinc_finger  | 134   | 115   | 101   | 96   | 135   | 172  | 1.048959 | 1.154412 | 0.953944 | 1.166421 |
| protein_co crumbs_ho    | 0     | 1     | 2     | 222  | 310   | 175  | 0        | 0.04167  | 0.078414 | 11.19689 |
| protein_co olfactomec   | 5     | 3     | 4     | 546  | 642   | 431  | 0.089348 | 0.068746 | 0.086243 | 15.14397 |

|                         |        |       |       |       |       |       |          |          |          |          |
|-------------------------|--------|-------|-------|-------|-------|-------|----------|----------|----------|----------|
| protein_co calmodulin   | 1889   | 1446  | 1587  | 1178  | 1490  | 1422  | 11.50926 | 11.29778 | 11.66649 | 11.14015 |
| protein_co UBA_doma     | 806    | 649   | 707   | 789   | 996   | 1005  | 20.24282 | 20.90211 | 21.42415 | 30.75697 |
| protein_co zinc_finger  | 328    | 211   | 244   | 604   | 859   | 326   | 2.966234 | 2.446941 | 2.662377 | 8.47811  |
| protein_co helicase_wi  | 874    | 739   | 779   | 719   | 1172  | 423   | 5.082078 | 5.510407 | 5.465317 | 6.489171 |
| protein_co sterile_alph | 80     | 62    | 70    | 114   | 130   | 76    | 1.719946 | 1.709329 | 1.815812 | 3.804171 |
| protein_co lymphocyt    | 521    | 358   | 390   | 7     | 5     | 3     | 9.253674 | 8.153965 | 8.357745 | 0.192977 |
| protein_co troponin_T   | 4      | 5     | 10    | 0     | 0     | 0     | 0.15053  | 0.241291 | 0.454057 | 0        |
| protein_co troponin_I   | 6      | 3     | 4     | 0     | 0     | 0     | 0.377638 | 0.242133 | 0.303761 | 0        |
| processed_H19_impri     | 3      | 1     | 1     | 108   | 130   | 292   | 0.059911 | 0.025609 | 0.024095 | 3.347623 |
| pseudogen cytochrom     | 0      | 1     | 1     | 0     | 0     | 0     | 0        | 0.023947 | 0.022531 | 0        |
| protein_co collagen_ty  | 112958 | 83216 | 90084 | 452   | 690   | 668   | 625.4845 | 590.9024 | 601.8597 | 3.884798 |
| protein_co ataxin_10    | 1698   | 1448  | 1471  | 1561  | 1881  | 1665  | 23.91687 | 26.15438 | 24.99927 | 34.12715 |
| protein_co tubulin_ga   | 2217   | 1768  | 1828  | 1490  | 1762  | 1671  | 29.25842 | 29.92105 | 29.1078  | 30.52122 |
| protein_co calcyon_ne   | 33     | 18    | 21    | 15    | 30    | 15    | 1.681925 | 1.176453 | 1.291397 | 1.186627 |
| protein_co cytochrom    | 4      | 16    | 7     | 11    | 30    | 11    | 0.023688 | 0.121505 | 0.050016 | 0.101109 |
| protein_co patatin-like | 89     | 61    | 57    | 40    | 50    | 18    | 0.786212 | 0.691017 | 0.607537 | 0.548454 |
| protein_co hemoglobi    | 0      | 0     | 0     | 0     | 1     | 0     | 0        | 0        | 0        | 0        |
| protein_co p21_protei   | 3693   | 2681  | 2929  | 2503  | 3270  | 2180  | 30.19439 | 28.1095  | 28.89445 | 31.76423 |
| protein_co motor_neu    | 2      | 1     | 0     | 4     | 5     | 8     | 0.043137 | 0.027659 | 0        | 0.133909 |
| protein_co zinc_finger  | 28     | 31    | 33    | 19    | 20    | 17    | 0.363388 | 0.515921 | 0.516743 | 0.382734 |
| protein_co centrosom    | 585    | 537   | 491   | 992   | 978   | 636   | 6.970943 | 8.205769 | 7.059358 | 18.34754 |
| protein_co TAF4_RNA_    | 411    | 358   | 387   | 605   | 837   | 566   | 4.162375 | 4.649345 | 4.728881 | 9.510104 |
| protein_co GATA_bind    | 0      | 0     | 0     | 93    | 95    | 19    | 0        | 0        | 0        | 2.608293 |
| protein_co RBBP8_N-t    | 0      | 0     | 0     | 72    | 124   | 82    | 0        | 0        | 0        | 1.876171 |
| protein_co laminin_alj  | 1431   | 931   | 1124  | 4805  | 6948  | 4577  | 5.872538 | 4.899426 | 5.565453 | 30.60624 |
| protein_co oxysterol_t  | 895    | 758   | 697   | 646   | 798   | 499   | 10.57092 | 11.4807  | 9.932778 | 11.84276 |
| protein_co adhesion_r   | 783    | 530   | 580   | 688   | 980   | 874   | 26.77964 | 23.24492 | 23.9342  | 36.52261 |
| protein_co argininosuc  | 1383   | 908   | 971   | 1535  | 1738  | 1243  | 32.86817 | 27.67251 | 27.84329 | 56.62291 |
| protein_co PR_domair    | 3      | 1     | 3     | 1     | 6     | 1     | 0.056813 | 0.024285 | 0.068549 | 0.029394 |
| protein_co exosome_c    | 794    | 600   | 707   | 733   | 888   | 1137  | 13.46011 | 13.04334 | 14.46091 | 19.28691 |
| protein_co protein-O-r  | 511    | 424   | 395   | 351   | 423   | 332   | 7.006082 | 7.454688 | 6.534305 | 7.469506 |
| protein_co uridine-cyt  | 615    | 450   | 531   | 588   | 792   | 895   | 12.89109 | 12.09585 | 13.42941 | 19.13032 |
| protein_co fibrinogen_  | 526    | 369   | 390   | 252   | 378   | 120   | 7.58197  | 6.820748 | 6.7828   | 5.638029 |
| protein_co proline-ricl | 10792  | 8183  | 9026  | 7958  | 10146 | 7178  | 45.82839 | 44.56096 | 46.2462  | 52.4526  |
| protein_co charged_m    | 1311   | 1068  | 1066  | 1204  | 1297  | 880   | 52.18405 | 54.51496 | 51.19651 | 74.38615 |
| protein_co ubiquitin-c  | 2073   | 1475  | 1512  | 1866  | 2618  | 1991  | 64.45823 | 58.81396 | 56.72557 | 90.05776 |
| protein_co tripartite_r | 11441  | 8535  | 9443  | 25377 | 31691 | 27617 | 181.2394 | 173.381  | 180.4873 | 623.9639 |
| protein_co chromosom    | 704    | 552   | 535   | 677   | 923   | 648   | 19.30443 | 19.41032 | 17.70052 | 28.81399 |
| protein_co Yip1_doma    | 1402   | 1011  | 1111  | 933   | 1132  | 710   | 42.41278 | 39.22014 | 40.55186 | 43.80874 |
| protein_co autophagy_   | 272    | 188   | 211   | 711   | 873   | 507   | 6.543912 | 5.800103 | 6.124901 | 26.55025 |
| protein_co eukaryotic   | 1948   | 1633  | 1675  | 2933  | 3645  | 3550  | 31.96003 | 34.35688 | 33.15744 | 74.6897  |
| protein_co transmemt    | 516    | 366   | 426   | 728   | 1044  | 748   | 36.49359 | 33.19382 | 36.35168 | 79.91508 |
| protein_co zinc_finger  | 1500   | 1114  | 1239  | 1411  | 2318  | 2967  | 11.49453 | 10.94698 | 11.45564 | 16.78253 |
| protein_co neuronal_F   | 26     | 4     | 11    | 97    | 138   | 63    | 0.575881 | 0.113613 | 0.293968 | 3.334738 |
| protein_co glia_matur   | 3      | 6     | 5     | 17    | 4     | 3     | 0.136839 | 0.350952 | 0.275173 | 1.203557 |
| protein_co mitogen-ac   | 528    | 408   | 438   | 474   | 728   | 364   | 7.205451 | 7.139976 | 7.211895 | 10.04005 |
| protein_co Rho_guanil   | 4      | 0     | 2     | 689   | 844   | 869   | 0.061274 | 0        | 0.036965 | 16.38199 |
| protein_co leucine_ric  | 1646   | 1287  | 1333  | 3360  | 4397  | 3421  | 29.14689 | 29.22472 | 28.48004 | 92.34899 |
| protein_co sestrin_2    | 405    | 296   | 300   | 1010  | 1358  | 596   | 5.499698 | 5.15448  | 4.915335 | 21.28804 |
| protein_co sphingomy    | 3      | 3     | 1     | 224   | 272   | 307   | 0.073534 | 0.094297 | 0.029574 | 8.522047 |
| protein_co ATPase_inh   | 1603   | 1247  | 1300  | 1441  | 1622  | 1624  | 40.52005 | 40.42149 | 39.6486  | 56.53676 |
| protein_co mediator_c   | 330    | 283   | 271   | 400   | 447   | 260   | 8.450959 | 9.293682 | 8.373546 | 15.89947 |
| protein_co thymocyte    | 265    | 273   | 252   | 301   | 326   | 213   | 4.343186 | 5.737656 | 4.983232 | 7.657015 |
| protein_co CAP-GLY_di   | 1205   | 1029  | 990   | 421   | 436   | 473   | 9.609264 | 10.52271 | 9.525468 | 5.210935 |
| protein_co coiled-coil  | 10     | 8     | 7     | 10    | 4     | 3     | 0.132234 | 0.135657 | 0.111683 | 0.205245 |
| protein_co huntingtin   | 1622   | 1102  | 1154  | 1306  | 1878  | 1308  | 16.75603 | 14.5986  | 14.38381 | 20.94083 |
| protein_co zinc_finger  | 572    | 450   | 477   | 659   | 889   | 883   | 6.407332 | 6.464025 | 6.44685  | 11.45769 |
| protein_co peter_pan_   | 47     | 34    | 31    | 50    | 88    | 147   | 0.913694 | 0.847601 | 0.727131 | 1.508702 |
| protein_co eukaryotic   | 3119   | 2285  | 2483  | 3493  | 3782  | 3424  | 96.09065 | 90.27371 | 92.29762 | 167.0301 |
| protein_co angiopoieti  | 1      | 1     | 3     | 2     | 6     | 6     | 0.024679 | 0.031647 | 0.08933  | 0.07661  |
| protein_co chromosom    | 47     | 36    | 33    | 67    | 84    | 51    | 1.029827 | 1.011529 | 0.872426 | 2.27862  |
| protein_co DNA_(cyto    | 4417   | 3449  | 3953  | 4135  | 5106  | 5152  | 38.29756 | 38.34831 | 41.3541  | 55.64802 |
| protein_co zinc_finger  | 212    | 142   | 165   | 260   | 308   | 297   | 4.138503 | 3.554717 | 3.886327 | 7.877914 |
| protein_co solute_carr  | 1400   | 1031  | 1076  | 2502  | 3164  | 2411  | 17.44513 | 16.47457 | 16.17732 | 48.39093 |
| protein_co pregnancy_   | 3      | 2     | 2     | 47    | 55    | 26    | 0.065642 | 0.056117 | 0.0528   | 1.596197 |

|                           |       |      |      |       |       |      |          |          |          |          |
|---------------------------|-------|------|------|-------|-------|------|----------|----------|----------|----------|
| protein_co dyskeratosi    | 1247  | 982  | 1046 | 2077  | 2397  | 3088 | 22.68989 | 22.91326 | 22.9639  | 58.65877 |
| protein_co plexin_A3      | 2393  | 1801 | 1922 | 344   | 429   | 314  | 16.61846 | 16.03877 | 16.10458 | 3.707976 |
| protein_co dual_specif    | 12    | 3    | 11   | 147   | 170   | 115  | 0.23127  | 0.074143 | 0.255787 | 4.3973   |
| protein_co membrane       | 107   | 82   | 83   | 271   | 316   | 203  | 2.109854 | 2.073441 | 1.974671 | 8.294082 |
| protein_co zinc_finger    | 196   | 185  | 140  | 673   | 855   | 668  | 1.822777 | 2.20627  | 1.570918 | 9.714559 |
| protein_co zinc_finger    | 488   | 375  | 367  | 345   | 430   | 298  | 2.788487 | 2.747828 | 2.530247 | 3.059838 |
| protein_co solute_carr    | 10    | 21   | 7    | 117   | 169   | 92   | 0.24108  | 0.649216 | 0.203614 | 4.378014 |
| protein_co low_densit     | 1553  | 1065 | 1221 | 2403  | 3308  | 2217 | 22.21483 | 19.53576 | 21.07343 | 53.35261 |
| protein_co chromosom      | 560   | 432  | 463  | 272   | 345   | 277  | 7.034131 | 6.958498 | 7.016999 | 5.303002 |
| protein_co nucleolar_l    | 684   | 608  | 587  | 699   | 783   | 1374 | 10.88319 | 12.40547 | 11.26903 | 17.26267 |
| protein_co ubiquitinat    | 2044  | 1494 | 1719 | 1906  | 2292  | 1904 | 17.35661 | 16.26837 | 17.61197 | 25.12103 |
| protein_co castor_zinc    | 25    | 12   | 18   | 270   | 347   | 137  | 0.147713 | 0.090922 | 0.128321 | 2.476127 |
| protein_co polycystic_    | 14    | 12   | 9    | 14    | 15    | 9    | 0.0857   | 0.094198 | 0.066473 | 0.133018 |
| protein_co hydroxyste     | 1     | 6    | 3    | 0     | 2     | 0    | 0.041313 | 0.317867 | 0.149539 | 0        |
| protein_co NUT_family     | 2     | 5    | 3    | 6     | 16    | 11   | 0.022355 | 0.071668 | 0.040459 | 0.104095 |
| protein_co hyaluronan     | 766   | 615  | 649  | 385   | 544   | 275  | 11.40246 | 11.73963 | 11.65635 | 8.895309 |
| protein_co fructose-16    | 1     | 0    | 3    | 7     | 4     | 3    | 0.035931 | 0        | 0.130059 | 0.39039  |
| protein_co solute_carr    | 358   | 319  | 300  | 255   | 310   | 206  | 10.40708 | 11.89176 | 10.52241 | 11.5058  |
| protein_co proline_ric    | 178   | 184  | 169  | 94    | 113   | 72   | 1.81444  | 2.405192 | 2.078535 | 1.487239 |
| protein_co ubiquitin-li   | 10841 | 8661 | 9415 | 11274 | 12508 | 9173 | 142.8308 | 146.3288 | 149.6652 | 230.5478 |
| protein_co regucalcin     | 0     | 1    | 0    | 2     | 3     | 7    | 0        | 0.026904 | 0        | 0.065127 |
| protein_co polymerase     | 6     | 5    | 6    | 3     | 5     | 5    | 0.070724 | 0.075578 | 0.085333 | 0.054887 |
| pseudogen: taxilin_gar    | 889   | 752  | 835  | 596   | 558   | 626  | 5.711087 | 6.195041 | 6.472194 | 5.942836 |
| antisense testis-speci    | 0     | 0    | 0    | 1     | 0     | 0    | 0        | 0        | 0        | 0.044459 |
| protein_co peptidylpro    | 517   | 398  | 496  | 300   | 311   | 426  | 10.86117 | 10.72207 | 12.57233 | 9.782231 |
| protein_co UL16_bind      | 99    | 90   | 116  | 0     | 0     | 0    | 3.44115  | 4.011625 | 4.864906 | 0        |
| protein_co A_kinase_(F    | 3360  | 2757 | 3020 | 3522  | 3953  | 3628 | 18.68483 | 19.66056 | 20.26305 | 30.39972 |
| protein_co spectrin_re    | 2081  | 1638 | 1898 | 107   | 90    | 50   | 3.516582 | 3.549539 | 3.86984  | 0.280649 |
| protein_co UL16_bind      | 123   | 83   | 90   | 29    | 47    | 65   | 5.970468 | 5.166432 | 5.27101  | 2.184901 |
| protein_co large_tumc     | 743   | 576  | 711  | 345   | 414   | 475  | 4.634732 | 4.607525 | 5.351228 | 3.3403   |
| protein_co EPS8-like_1    | 89    | 85   | 76   | 583   | 871   | 338  | 1.645588 | 2.015391 | 1.69548  | 16.73132 |
| protein_co leukocyte_l    | 10    | 7    | 6    | 0     | 0     | 0    | 0.166336 | 0.149311 | 0.120416 | 0        |
| protein_co AAR2_splic     | 840   | 683  | 746  | 626   | 689   | 799  | 14.64768 | 15.27283 | 15.69555 | 16.94316 |
| protein_co tubulin_ty     | 2     | 2    | 5    | 2     | 3     | 0    | 0.035753 | 0.045848 | 0.107845 | 0.055494 |
| protein_co RNA_bindin     | 2875  | 2343 | 2575 | 2685  | 2820  | 4060 | 29.43424 | 30.76072 | 31.80828 | 42.66676 |
| protein_co cytochrom      | 0     | 1    | 0    | 0     | 0     | 1    | 0        | 0.086767 | 0        | 0        |
| protein_co zinc_finger    | 154   | 150  | 153  | 252   | 333   | 200  | 1.961179 | 2.449611 | 2.35091  | 4.981127 |
| protein_co gamma-glu      | 810   | 708  | 706  | 511   | 612   | 429  | 14.37582 | 16.11351 | 15.11821 | 14.07664 |
| protein_co acyl-CoA_s     | 2873  | 2497 | 2523 | 724   | 718   | 545  | 43.9527  | 48.98666 | 46.57096 | 17.19171 |
| protein_co ectodyspla     | 249   | 193  | 214  | 192   | 251   | 91   | 3.41592  | 3.395275 | 3.542176 | 4.088274 |
| protein_co Cdc42_gua      | 498   | 420  | 476  | 583   | 604   | 614  | 4.313916 | 4.66553  | 4.975049 | 7.838652 |
| protein_co compleme       | 110   | 96   | 91   | 539   | 677   | 244  | 3.982936 | 4.457498 | 3.975576 | 30.29213 |
| protein_co glial_fibrilli | 4     | 12   | 3    | 16    | 12    | 12   | 0.060778 | 0.233816 | 0.054999 | 0.377342 |
| protein_co peptide_YY     | 1     | 0    | 0    | 4     | 5     | 5    | 0.04453  | 0        | 0        | 0.276466 |
| protein_co HIG1_hypo      | 2     | 4    | 0    | 0     | 1     | 5    | 0.147685 | 0.37877  | 0        | 0        |
| protein_co ATPase_H+      | 1457  | 1172 | 1304 | 958   | 1051  | 1198 | 48.7295  | 50.26542 | 52.62087 | 49.73113 |
| protein_co zinc_finger    | 126   | 105  | 97   | 119   | 132   | 133  | 1.941552 | 2.074804 | 1.803426 | 2.846137 |
| protein_co zinc_finger    | 480   | 347  | 360  | 144   | 242   | 157  | 15.93995 | 14.77694 | 14.42435 | 7.422303 |
| protein_co testis_expr    | 0     | 0    | 1    | 0     | 5     | 0    | 0        | 0        | 0.039126 | 0        |
| protein_co zinc_finger    | 125   | 94   | 115  | 209   | 194   | 274  | 1.973486 | 1.903098 | 2.190634 | 5.121542 |
| protein_co chemokine      | 0     | 0    | 0    | 1     | 2     | 1    | 0        | 0        | 0        | 0.076369 |
| protein_co cytochrom      | 3292  | 2566 | 2693 | 3483  | 4249  | 3675 | 39.11859 | 39.10113 | 38.6107  | 64.24026 |
| protein_co ER_membr       | 570   | 430  | 470  | 485   | 682   | 674  | 13.62248 | 13.17829 | 13.55275 | 17.99093 |
| protein_co Gse1_coile     | 1055  | 818  | 882  | 2628  | 3536  | 2648 | 6.600263 | 6.562531 | 6.657718 | 25.51906 |
| protein_co GINS_com       | 443   | 379  | 428  | 593   | 725   | 943  | 7.771148 | 8.525699 | 9.058854 | 16.14606 |
| protein_co charged_m      | 2127  | 1488 | 1664 | 1299  | 1592  | 1710 | 40.16716 | 36.03429 | 37.91447 | 38.0753  |
| protein_co SH3_domai      | 1486  | 1184 | 1169 | 543   | 412   | 577  | 36.2343  | 37.02219 | 34.39249 | 20.55093 |
| protein_co cytochrom      | 743   | 633  | 573  | 713   | 755   | 782  | 14.09926 | 15.40355 | 13.11929 | 21.0004  |
| protein_co solute_carr    | 0     | 0    | 0    | 0     | 0     | 1    | 0        | 0        | 0        | 0        |
| protein_co coagulation    | 28    | 16   | 18   | 155   | 200   | 65   | 0.640762 | 0.469535 | 0.497003 | 5.505549 |
| protein_co proline_ric    | 317   | 258  | 291  | 376   | 433   | 167  | 10.07055 | 10.51049 | 11.15411 | 18.54011 |
| protein_co nuclear_fac    | 1057  | 689  | 747  | 950   | 1165  | 817  | 10.67702 | 8.924909 | 9.104244 | 14.89462 |
| protein_co indoleamir     | 3     | 0    | 1    | 53    | 81    | 71   | 0.067082 | 0        | 0.026979 | 1.839451 |
| protein_co gap_junctic    | 0     | 2    | 0    | 0     | 1     | 0    | 0        | 0.050593 | 0        | 0        |
| protein_co CAP_adeny      | 7888  | 6390 | 6929 | 3345  | 3656  | 4077 | 119.1203 | 123.7454 | 126.2517 | 78.40529 |

|                          |       |       |       |      |       |       |          |          |          |          |
|--------------------------|-------|-------|-------|------|-------|-------|----------|----------|----------|----------|
| protein_co palmitoyl-r   | 1427  | 1251  | 1305  | 1586 | 1692  | 1849  | 24.42046 | 27.45342 | 26.94563 | 42.12729 |
| protein_co RAB11_fam     | 106   | 88    | 115   | 2527 | 3044  | 1595  | 0.576004 | 0.613214 | 0.75399  | 21.31354 |
| protein_co ring_finger   | 1661  | 1386  | 1413  | 1103 | 1237  | 1239  | 9.364473 | 10.02043 | 9.611782 | 9.652053 |
| protein_co caudal_typ    | 0     | 0     | 0     | 8    | 8     | 23    | 0        | 0        | 0        | 0.384316 |
| protein_co ATP-bindin    | 324   | 249   | 268   | 660  | 702   | 478   | 6.391403 | 6.29883  | 6.378728 | 20.20811 |
| protein_co TNF_recept    | 996   | 778   | 855   | 473  | 626   | 350   | 6.112887 | 6.123165 | 6.331421 | 4.50587  |
| protein_co HAUS_augn     | 305   | 199   | 243   | 345  | 418   | 456   | 4.502977 | 3.767579 | 4.328667 | 7.905866 |
| protein_co egf-like_mc   | 1     | 0     | 1     | 0    | 0     | 0     | 0.020803 | 0        | 0.0251   | 0        |
| protein_co mitochond     | 654   | 536   | 572   | 585  | 766   | 654   | 6.686889 | 7.027817 | 7.056517 | 9.283948 |
| protein_co SH3-domai     | 384   | 297   | 299   | 81   | 97    | 53    | 6.380498 | 6.328331 | 5.994357 | 2.089002 |
| protein_co 2-hydroxya    | 206   | 185   | 176   | 456  | 464   | 512   | 4.262729 | 4.909096 | 4.394214 | 14.64589 |
| protein_co TBC1_dom      | 886   | 811   | 823   | 573  | 672   | 416   | 6.286058 | 7.378615 | 7.045187 | 6.310005 |
| protein_co calpain_7     | 585   | 486   | 482   | 197  | 268   | 163   | 6.301553 | 6.71332  | 6.264506 | 3.293733 |
| protein_co raftlin_lipic | 1329  | 1054  | 1083  | 87   | 90    | 89    | 20.89766 | 21.25312 | 20.54704 | 2.123354 |
| protein_co chromosom     | 0     | 0     | 1     | 3    | 2     | 0     | 0        | 0        | 0.01701  | 0.065646 |
| protein_co zinc_finger   | 1186  | 947   | 967   | 597  | 685   | 601   | 8.327577 | 8.526942 | 8.19235  | 6.50637  |
| protein_co UDP-N-acet    | 7     | 13    | 7     | 1    | 0     | 0     | 0.0703   | 0.167421 | 0.084821 | 0.015588 |
| protein_co solute_carr   | 1820  | 1567  | 1624  | 3568 | 4588  | 3346  | 13.06089 | 14.42048 | 14.06162 | 39.74263 |
| protein_co potassium_    | 3     | 0     | 0     | 50   | 102   | 93    | 0.025825 | 0        | 0        | 0.668072 |
| protein_co napsin_A_a    | 0     | 0     | 0     | 10   | 5     | 1     | 0        | 0        | 0        | 0.22135  |
| pseudogen: napsin_B_a    | 0     | 1     | 2     | 3    | 10    | 5     | 0        | 0.044773 | 0.084252 | 0.162576 |
| protein_co nuclear_rex   | 1337  | 1089  | 1062  | 931  | 1291  | 951   | 26.34116 | 27.51317 | 25.24504 | 28.46975 |
| protein_co leucine_ric   | 9     | 4     | 6     | 192  | 216   | 66    | 0.139785 | 0.079668 | 0.112439 | 4.628593 |
| protein_co PDZ_and_L     | 2831  | 2009  | 2223  | 223  | 278   | 155   | 58.17074 | 52.93635 | 55.11277 | 7.112137 |
| protein_co kinesin_fan   | 430   | 313   | 374   | 212  | 256   | 196   | 3.18778  | 2.975593 | 3.345334 | 2.439418 |
| protein_co mannosyl_     | 4395  | 3194  | 3369  | 2360 | 2946  | 2300  | 64.9076  | 60.48963 | 60.0324  | 54.09774 |
| protein_co glutamine-i   | 2637  | 2303  | 2479  | 2528 | 3335  | 2772  | 39.97704 | 44.77172 | 45.34454 | 59.48508 |
| protein_co tubulin_ga    | 1517  | 1158  | 1273  | 1689 | 2036  | 1389  | 44.15404 | 43.22179 | 44.70554 | 76.30359 |
| protein_co proteasom     | 2485  | 1814  | 2034  | 1889 | 2354  | 4145  | 37.06161 | 34.69321 | 36.60133 | 43.72807 |
| protein_co ribosomal_    | 9393  | 7558  | 7925  | 9798 | 10530 | 9711  | 235.2767 | 242.7676 | 239.509  | 380.9276 |
| protein_co PSMC3_int     | 202   | 179   | 177   | 147  | 178   | 260   | 6.689113 | 7.601154 | 7.071938 | 7.55553  |
| protein_co amine_oxic    | 4     | 2     | 7     | 120  | 181   | 41    | 0.046587 | 0.029871 | 0.098368 | 2.169294 |
| protein_co ATP_citrate   | 18588 | 14553 | 15933 | 9130 | 10222 | 10839 | 200.8739 | 201.6753 | 207.7478 | 153.1412 |
| protein_co vacuolar_p    | 650   | 551   | 524   | 1162 | 1342  | 1422  | 27.68257 | 30.0922  | 26.92604 | 76.81211 |
| protein_co receptor_(C   | 47    | 45    | 30    | 66   | 53    | 61    | 2.568567 | 3.153661 | 1.978165 | 5.598446 |
| protein_co amine_oxic    | 22    | 19    | 19    | 158  | 221   | 101   | 0.38825  | 0.429983 | 0.404567 | 4.327892 |
| antisense -              | 9     | 8     | 7     | 5    | 6     | 5     | 0.771499 | 0.879412 | 0.724001 | 0.665263 |
| protein_co NADH_deh      | 92    | 81    | 107   | 79   | 135   | 118   | 5.365524 | 6.057853 | 7.529327 | 7.151249 |
| protein_co ankyrin_rej   | 34    | 35    | 29    | 38   | 42    | 41    | 0.191641 | 0.25298  | 0.197222 | 0.332448 |
| protein_co diaphanous    | 3757  | 2734  | 3247  | 2857 | 3239  | 3830  | 30.41537 | 28.38309 | 31.71628 | 35.89984 |
| protein_co Nedd4_fam     | 1391  | 1074  | 1080  | 664  | 876   | 703   | 15.66379 | 15.50898 | 14.67376 | 11.60562 |
| protein_co ubiquitin-c   | 1588  | 1267  | 1344  | 2069 | 2717  | 1903  | 25.99907 | 26.60072 | 26.5494  | 52.57731 |
| protein_co exocyst_co    | 1274  | 1041  | 1124  | 1103 | 1107  | 862   | 14.27428 | 14.95702 | 15.19495 | 19.18187 |
| protein_co ArfGAP_wit    | 1346  | 1052  | 1140  | 663  | 1067  | 684   | 11.86576 | 11.89256 | 12.1256  | 9.07182  |
| protein_co chromosom     | 414   | 308   | 328   | 171  | 255   | 227   | 5.855948 | 5.58672  | 5.597818 | 3.754252 |
| protein_co anoctamin     | 7646  | 5489  | 6088  | 46   | 55    | 28    | 74.84782 | 68.90448 | 71.9064  | 0.698929 |
| protein_co protein_ty    | 957   | 801   | 765   | 717  | 946   | 809   | 8.573509 | 9.202133 | 8.26906  | 9.970026 |
| protein_co transmembr    | 603   | 443   | 450   | 3    | 7     | 7     | 14.58962 | 13.74484 | 13.13673 | 0.112662 |
| protein_co kringle_cor   | 31    | 24    | 22    | 120  | 212   | 101   | 0.621458 | 0.61698  | 0.532134 | 3.733893 |
| protein_co THO_comp      | 531   | 381   | 365   | 1238 | 1420  | 1103  | 17.54658 | 16.14479 | 14.55254 | 63.4964  |
| protein_co TNF_recept    | 2529  | 2020  | 2078  | 2949 | 3733  | 2670  | 32.04996 | 32.82762 | 31.77403 | 58.00747 |
| protein_co BARX_hom      | 1     | 0     | 0     | 102  | 117   | 65    | 0.030607 | 0        | 0        | 4.845653 |
| protein_co ninjurin_1    | 327   | 275   | 273   | 584  | 689   | 380   | 7.568132 | 8.161744 | 7.623452 | 20.97898 |
| protein_co nephronop     | 632   | 471   | 497   | 345  | 411   | 395   | 5.341473 | 5.104747 | 5.068137 | 4.525781 |
| protein_co microtubul    | 16958 | 13831 | 14716 | 1602 | 2367  | 2121  | 66.07619 | 69.10879 | 69.18441 | 9.688652 |
| protein_co Rhox_hom      | 0     | 0     | 0     | 0    | 1     | 0     | 0        | 0        | 0        | 0        |
| protein_co interleukin   | 1713  | 1531  | 1690  | 206  | 252   | 195   | 19.90154 | 22.80939 | 23.68994 | 3.714727 |
| protein_co WD_repeat     | 320   | 249   | 254   | 248  | 294   | 347   | 3.649916 | 3.642014 | 3.495543 | 4.390511 |
| protein_co creatine_ki   | 20    | 16    | 24    | 31   | 20    | 32    | 0.572877 | 0.587707 | 0.829452 | 1.378237 |
| protein_co zinc_finger   | 198   | 186   | 177   | 222  | 241   | 217   | 2.01568  | 2.428168 | 2.174091 | 3.507841 |
| protein_co keratin_34    | 1     | 1     | 0     | 0    | 0     | 0     | 0.026779 | 0.03434  | 0        | 0        |
| protein_co tensin_4      | 1     | 1     | 1     | 10   | 6     | 2     | 0.011529 | 0.014785 | 0.013911 | 0.178952 |
| protein_co topoisome     | 4317  | 3562  | 3775  | 8206 | 5438  | 6071  | 35.1553  | 37.19735 | 37.09144 | 103.722  |
| protein_co StAR-relate   | 992   | 741   | 853   | 1165 | 1499  | 1051  | 13.47867 | 12.91109 | 13.98404 | 24.56925 |
| protein_co retinoic_ac   | 1243  | 867   | 916   | 362  | 446   | 384   | 24.14428 | 21.59591 | 21.46776 | 10.91396 |

|                         |      |      |      |       |       |       |          |          |          |          |
|-------------------------|------|------|------|-------|-------|-------|----------|----------|----------|----------|
| protein_co protein_ph   | 0    | 0    | 0    | 674   | 856   | 334   | 0        | 0        | 0        | 17.03841 |
| protein_co KH_domain    | 545  | 424  | 406  | 609   | 816   | 440   | 4.675276 | 4.664294 | 4.202279 | 8.108836 |
| protein_co chromodom    | 1018 | 822  | 851  | 1120  | 1064  | 1270  | 16.08832 | 16.65881 | 16.22708 | 27.47333 |
| protein_co peroxisome   | 412  | 328  | 333  | 180   | 225   | 110   | 11.10269 | 11.33481 | 10.82738 | 7.528945 |
| protein_co flavin_cont  | 17   | 17   | 18   | 29    | 28    | 20    | 0.302861 | 0.388376 | 0.386915 | 0.801905 |
| protein_co protein_inl  | 1799 | 1448 | 1609 | 715   | 829   | 584   | 29.07795 | 30.01308 | 31.37883 | 17.9378  |
| protein_co protein_kir  | 386  | 368  | 421  | 793   | 864   | 511   | 3.341249 | 4.084874 | 4.396952 | 10.65431 |
| protein_co RNA_bindin   | 686  | 475  | 527  | 608   | 744   | 855   | 11.37833 | 10.10317 | 10.54662 | 15.65268 |
| pseudogen: clustered_r  | 49   | 46   | 46   | 106   | 115   | 123   | 1.20483  | 1.45043  | 1.364695 | 4.045443 |
| protein_co pyruvate_d   | 1333 | 1082 | 1143 | 1225  | 1399  | 1357  | 17.94041 | 18.67406 | 18.56079 | 25.58991 |
| protein_co retinoic_ac  | 1    | 2    | 2    | 3     | 8     | 7     | 0.019368 | 0.049674 | 0.046737 | 0.090186 |
| protein_co methylcro    | 667  | 569  | 593  | 1025  | 1241  | 1237  | 8.533599 | 9.335294 | 9.153963 | 20.35451 |
| protein_co zinc_finger  | 197  | 128  | 155  | 216   | 215   | 331   | 2.141742 | 1.784515 | 2.033203 | 3.644896 |
| protein_co zinc_finger  | 71   | 56   | 48   | 41    | 64    | 89    | 1.358854 | 1.374395 | 1.108418 | 1.217948 |
| protein_co zinc_finger  | 16   | 11   | 9    | 11    | 10    | 13    | 0.247522 | 0.218221 | 0.167991 | 0.26413  |
| protein_co VCP-intera   | 1116 | 779  | 898  | 356   | 507   | 528   | 21.41132 | 19.16576 | 20.78756 | 10.60131 |
| protein_co chondroitin  | 2402 | 1886 | 1975 | 1725  | 2290  | 1713  | 24.75381 | 24.92413 | 24.5575  | 27.59234 |
| protein_co small_nucl   | 1068 | 735  | 931  | 1514  | 1774  | 1494  | 20.52399 | 18.11287 | 21.5868  | 45.15927 |
| pseudogen: keratin_17   | 0    | 1    | 0    | 1     | 0     | 0     | 0        | 0.038894 | 0        | 0.047076 |
| protein_co lethal_glan  | 3132 | 2520 | 2681 | 3390  | 3788  | 3501  | 24.46028 | 25.23769 | 25.26298 | 41.09319 |
| protein_co nuclear_rec  | 0    | 0    | 0    | 0     | 0     | 3     | 0        | 0        | 0        | 0        |
| protein_co lin-28_hom   | 0    | 0    | 0    | 28999 | 32143 | 35167 | 0        | 0        | 0        | 526.5822 |
| protein_co THAP_dom     | 125  | 95   | 101  | 126   | 107   | 183   | 2.712287 | 2.643374 | 2.644205 | 4.243524 |
| protein_co rhophilin_I  | 156  | 109  | 100  | 692   | 758   | 477   | 1.928511 | 1.727959 | 1.491577 | 13.27804 |
| protein_co chromosom    | 813  | 647  | 696  | 246   | 311   | 231   | 15.47142 | 15.78895 | 15.98074 | 7.266165 |
| protein_co chromosom    | 93   | 77   | 70   | 85    | 105   | 84    | 1.897638 | 2.014793 | 1.723362 | 2.692029 |
| protein_co leucine_ri   | 1    | 1    | 0    | 21    | 19    | 7     | 0.00954  | 0.012234 | 0        | 0.310962 |
| protein_co actin-relate | 644  | 561  | 573  | 257   | 344   | 321   | 16.63756 | 18.58557 | 17.86103 | 10.30546 |
| protein_co abhydrolas   | 6    | 10   | 15   | 146   | 228   | 121   | 0.098268 | 0.210024 | 0.296414 | 3.711439 |
| protein_co GTP_cyclo    | 24   | 28   | 29   | 202   | 284   | 170   | 0.382385 | 0.572081 | 0.557489 | 4.99542  |
| protein_co lectin_gala  | 785  | 633  | 650  | 62    | 58    | 46    | 21.28899 | 22.01397 | 21.26899 | 2.609802 |
| pseudogen: ubiquitin-c  | 0    | 1    | 0    | 0     | 0     | 0     | 0        | 0.140163 | 0        | 0        |
| protein_co podocan-il   | 162  | 110  | 112  | 7     | 12    | 8     | 2.768288 | 2.410451 | 2.309204 | 0.185663 |
| protein_co DnaJ_(Hsp    | 2344 | 1870 | 1988 | 1555  | 1938  | 1155  | 48.54691 | 49.66551 | 49.67849 | 49.98789 |
| protein_co zinc_finger  | 805  | 600  | 636  | 1851  | 2327  | 1944  | 8.699346 | 8.314791 | 8.292699 | 31.04757 |
| protein_co F-box_and    | 210  | 155  | 155  | 200   | 260   | 184   | 5.4614   | 5.169228 | 4.863673 | 8.073189 |
| protein_co regulatory   | 749  | 583  | 648  | 523   | 765   | 379   | 8.107254 | 8.09226  | 8.462818 | 8.786666 |
| protein_co zinc_finger  | 2    | 0    | 2    | 11    | 3     | 7     | 0.030637 | 0        | 0.036965 | 0.261541 |
| protein_co chromosom    | 36   | 17   | 16   | 89    | 136   | 77    | 0.671723 | 0.406767 | 0.36021  | 2.577558 |
| protein_co DDB1_and     | 1284 | 968  | 997  | 1505  | 1902  | 1638  | 26.51113 | 25.62996 | 24.83742 | 48.23144 |
| protein_co coiled-coil  | 865  | 672  | 749  | 789   | 1167  | 644   | 11.32641 | 11.28378 | 11.8333  | 16.03554 |
| protein_co retbindin    | 0    | 1    | 0    | 22    | 23    | 10    | 0        | 0.028964 | 0        | 0.77127  |
| protein_co matrilin_3   | 252  | 163  | 146  | 93    | 169   | 125   | 4.681571 | 3.883184 | 3.272593 | 2.681665 |
| protein_co tripartite_r | 233  | 178  | 219  | 211   | 232   | 204   | 5.678469 | 5.562944 | 6.439727 | 7.981569 |
| protein_co spermatog    | 86   | 47   | 52   | 130   | 157   | 104   | 0.810887 | 0.568289 | 0.59158  | 1.902549 |
| protein_co leucine_ri   | 2729 | 2185 | 2288 | 1152  | 1361  | 952   | 28.72342 | 29.49127 | 29.05606 | 18.81983 |
| protein_co LIM_home     | 6    | 6    | 5    | 33    | 53    | 85    | 0.06827  | 0.087546 | 0.068643 | 0.582804 |
| protein_co growth_arr   | 2    | 3    | 0    | 1     | 2     | 0     | 0.031115 | 0.05985  | 0        | 0.024147 |
| protein_co chaperonin   | 8    | 7    | 6    | 21    | 27    | 18    | 0.111876 | 0.125532 | 0.101239 | 0.455823 |
| protein_co acetyl-CoA   | 7327 | 6199 | 6473 | 4593  | 5047  | 4339  | 34.48737 | 37.41664 | 36.76102 | 33.55527 |
| protein_co DEAH_(Asp    | 3111 | 2293 | 2504 | 2881  | 3742  | 2868  | 35.44954 | 33.50611 | 34.4265  | 50.9547  |
| protein_co v-raf-1_mu   | 1929 | 1678 | 1724 | 1879  | 2253  | 2158  | 27.40935 | 30.57509 | 29.55642 | 41.44038 |
| protein_co solute_carr  | 0    | 0    | 0    | 25    | 22    | 28    | 0        | 0        | 0        | 0.423532 |
| protein_co peroxisome   | 217  | 213  | 166  | 3     | 4     | 5     | 5.014852 | 6.312295 | 4.628651 | 0.107609 |
| protein_co nucleopori   | 9    | 7    | 5    | 3504  | 4488  | 2817  | 0.058686 | 0.058533 | 0.039338 | 35.46383 |
| protein_co Fc_recepto   | 4    | 4    | 1    | 0     | 0     | 0     | 0.064609 | 0.082852 | 0.019489 | 0        |
| protein_co hydroxyste   | 305  | 260  | 318  | 239   | 234   | 285   | 5.628278 | 6.152596 | 7.080288 | 6.845483 |
| protein_co enolase_su   | 426  | 388  | 376  | 501   | 561   | 741   | 4.84716  | 5.661335 | 5.161949 | 8.848018 |
| lincRNA long_interg     | 0    | 0    | 0    | 1     | 2     | 2     | 0        | 0        | 0        | 0.035834 |
| protein_co elastin_mic  | 86   | 58   | 74   | 416   | 512   | 507   | 0.682325 | 0.590106 | 0.70839  | 5.12291  |
| protein_co ADP-ribosy   | 1076 | 920  | 860  | 556   | 661   | 866   | 19.84021 | 21.7536  | 19.13289 | 15.91253 |
| protein_co tripartite_r | 912  | 753  | 803  | 232   | 365   | 394   | 12.58126 | 13.3209  | 13.36573 | 4.967612 |
| protein_co cyclic_nucl  | 1    | 3    | 4    | 7     | 9     | 6     | 0.025169 | 0.096827 | 0.121472 | 0.273461 |
| protein_co tripartite_r | 380  | 316  | 288  | 182   | 185   | 195   | 5.96126  | 6.356981 | 5.451236 | 4.431557 |
| protein_co ribosomal_   | 306  | 275  | 289  | 208   | 249   | 255   | 2.187248 | 2.520685 | 2.492427 | 2.307652 |

|                         |       |      |      |       |       |       |          |          |          |          |
|-------------------------|-------|------|------|-------|-------|-------|----------|----------|----------|----------|
| protein_co translocase  | 550   | 401  | 453  | 240   | 293   | 538   | 9.080813 | 8.490158 | 9.024191 | 6.150406 |
| protein_co EFR3_homo    | 1523  | 1258 | 1255 | 317   | 325   | 962   | 13.13231 | 13.91013 | 13.05669 | 4.242589 |
| protein_co HERV-H_LTI   | 0     | 0    | 0    | 990   | 1258  | 1433  | 0        | 0        | 0        | 17.55225 |
| protein_co pentatricope | 901   | 839  | 842  | 1467  | 1411  | 1592  | 6.27382  | 7.491669 | 7.074038 | 15.85506 |
| protein_co inner_memb   | 1847  | 1543 | 1539 | 1583  | 1587  | 1734  | 28.859   | 30.91645 | 29.01356 | 38.39068 |
| protein_co mitochondr   | 680   | 602  | 572  | 531   | 580   | 670   | 8.555195 | 9.712406 | 8.682906 | 10.36922 |
| protein_co IQ_motif_c   | 12    | 10   | 12   | 56    | 93    | 58    | 0.168669 | 0.180245 | 0.203509 | 1.221723 |
| protein_co integrin-lin | 418   | 325  | 345  | 244   | 286   | 387   | 7.393447 | 7.371627 | 7.362712 | 6.698707 |
| protein_co period_circ  | 123   | 91   | 120  | 132   | 131   | 153   | 0.903285 | 0.856979 | 1.063283 | 1.50461  |
| protein_co receptor_(C  | 550   | 390  | 392  | 5     | 7     | 16    | 28.34012 | 25.76991 | 24.37099 | 0.399889 |
| protein_co selenocyste  | 63    | 49   | 76   | 152   | 131   | 132   | 0.521184 | 0.519824 | 0.758599 | 1.951752 |
| protein_co protein_tyri | 349   | 326  | 341  | 20    | 27    | 11    | 2.852967 | 3.417419 | 3.363362 | 0.253765 |
| protein_co RAN_membr    | 6200  | 4926 | 5308 | 10653 | 11246 | 13704 | 109.2514 | 111.3113 | 112.8534 | 291.3654 |
| protein_co protein_kin  | 991   | 771  | 784  | 345   | 412   | 404   | 9.132863 | 9.11165  | 8.717609 | 4.934951 |
| protein_co caspase_re   | 6     | 2    | 3    | 1     | 6     | 3     | 0.066652 | 0.028491 | 0.04021  | 0.017242 |
| protein_co RAP1_GTPase  | 527   | 409  | 430  | 1823  | 2235  | 1303  | 3.709809 | 3.692101 | 3.652224 | 19.91857 |
| protein_co clustered_r  | 2377  | 1648 | 1828 | 2042  | 2876  | 3187  | 21.26241 | 18.90384 | 19.72912 | 28.35108 |
| protein_co inositol_pc  | 450   | 349  | 344  | 401   | 483   | 444   | 6.606295 | 6.570225 | 6.093292 | 9.137351 |
| protein_co MYB_bindin   | 2324  | 1655 | 1951 | 2653  | 3485  | 4014  | 22.66952 | 20.70206 | 22.9621  | 40.16743 |
| protein_co replication  | 2163  | 1795 | 1842 | 2604  | 2966  | 2760  | 23.36938 | 24.86935 | 24.012   | 43.66788 |
| protein_co serpin_pep   | 4053  | 3082 | 3117 | 239   | 304   | 316   | 122.7682 | 119.7158 | 113.9185 | 11.23667 |
| protein_co ubiquitin-c  | 1409  | 1093 | 1180 | 2381  | 3514  | 2700  | 16.62507 | 16.53796 | 16.79897 | 43.60561 |
| protein_co eukaryotic   | 335   | 281  | 280  | 201   | 313   | 241   | 7.050339 | 7.583695 | 7.110028 | 6.565862 |
| protein_co TBC1_domai   | 564   | 431  | 479  | 607   | 749   | 602   | 5.36974  | 5.26212  | 5.50247  | 8.970018 |
| protein_co transmembr   | 260   | 185  | 194  | 285   | 347   | 294   | 7.018655 | 6.404152 | 6.318738 | 11.94142 |
| protein_co coenzyme_    | 119   | 112  | 110  | 215   | 197   | 177   | 4.179709 | 5.044597 | 4.661652 | 11.72109 |
| protein_co PNN-intera   | 1833  | 1589 | 1595 | 2436  | 2490  | 2551  | 16.81326 | 18.69058 | 17.65218 | 34.68145 |
| protein_co popeye_dom   | 183   | 135  | 148  | 10    | 40    | 21    | 6.379831 | 6.035333 | 6.225409 | 0.541114 |
| protein_co Sec61_gam    | 2251  | 1841 | 1943 | 1075  | 925   | 968   | 86.02235 | 90.2192  | 89.58941 | 63.76388 |
| protein_co LanC_lantil  | 363   | 263  | 323  | 203   | 249   | 560   | 3.910194 | 3.632928 | 4.197999 | 3.39405  |
| protein_co fidgetin-lik | 158   | 124  | 115  | 162   | 153   | 225   | 2.00233  | 2.015161 | 1.758428 | 3.186575 |
| protein_co dopa_decar   | 0     | 0    | 0    | 1     | 0     | 1     | 0        | 0        | 0        | 0.035659 |
| protein_co G-rich_RNA   | 2383  | 1910 | 2105 | 2147  | 2666  | 2452  | 16.76251 | 17.22891 | 17.8655  | 23.44108 |
| protein_co immunoglob   | 0     | 0    | 1    | 0     | 0     | 0     | 0        | 0        | 0.039343 | 0        |
| protein_co ankyrin_re   | 3080  | 2571 | 2764 | 1866  | 2004  | 1786  | 13.39218 | 14.33547 | 14.50062 | 12.59339 |
| protein_co UTP3_small   | 833   | 630  | 697  | 672   | 856   | 1006  | 18.85105 | 18.28271 | 19.03143 | 23.60426 |
| protein_co integrin_be  | 26    | 16   | 15   | 364   | 446   | 163   | 0.205971 | 0.16254  | 0.143374 | 4.47573  |
| protein_co WW_domai     | 2302  | 1788 | 1847 | 1437  | 1684  | 1182  | 29.03196 | 28.91664 | 28.10515 | 28.12926 |
| protein_co H3_histone   | 10570 | 8214 | 8667 | 9687  | 12098 | 10701 | 177.8355 | 177.2178 | 175.9382 | 252.9666 |
| protein_co unkempt_h    | 958   | 737  | 782  | 640   | 781   | 675   | 11.09425 | 10.94484 | 10.92666 | 11.50385 |
| protein_co tripartite_r | 231   | 189  | 158  | 70    | 103   | 24    | 4.78005  | 5.015239 | 3.944806 | 2.248273 |
| protein_co zinc_finger  | 1548  | 1133 | 1233 | 906   | 1019  | 1367  | 19.74048 | 18.52789 | 18.97133 | 17.93269 |
| protein_co ankyrin_re   | 0     | 1    | 0    | 1     | 6     | 2     | 0        | 0.015169 | 0        | 0.01836  |
| protein_co eukaryotic   | 5694  | 4126 | 4382 | 7784  | 11285 | 9947  | 176.6987 | 164.1929 | 164.0727 | 374.9292 |
| protein_co lysine_(K)-s | 1520  | 1140 | 1247 | 521   | 581   | 229   | 10.61713 | 10.21123 | 10.50941 | 5.648484 |
| protein_co C-type_lect  | 4     | 0    | 1    | 0     | 0     | 0     | 0.1042   | 0        | 0.031431 | 0        |
| protein_co solute_carr  | 2     | 0    | 0    | 14    | 16    | 2     | 0.031375 | 0        | 0        | 0.340889 |
| protein_co guanylate_   | 1     | 0    | 0    | 12    | 19    | 8     | 0.01268  | 0        | 0        | 0.23617  |
| protein_co G_protein_   | 4     | 4    | 8    | 3     | 9     | 4     | 0.094871 | 0.121659 | 0.228935 | 0.11044  |
| protein_co XIAP_assoc   | 5     | 7    | 6    | 1     | 0     | 0     | 0.064712 | 0.116177 | 0.093694 | 0.020088 |
| protein_co discs_large  | 1615  | 1323 | 1380 | 683   | 781   | 402   | 19.05091 | 20.01301 | 19.64131 | 12.50531 |
| protein_co heat-respor  | 168   | 127  | 115  | 346   | 337   | 374   | 7.452718 | 7.224677 | 6.155329 | 23.82385 |
| protein_co vacuolar_p   | 1206  | 920  | 996  | 238   | 265   | 307   | 3.993599 | 3.906738 | 3.979463 | 1.223276 |
| protein_co regulator_c  | 0     | 0    | 1    | 0     | 1     | 0     | 0        | 0        | 0.013169 | 0        |
| protein_co matrilin_2   | 835   | 675  | 722  | 264   | 307   | 207   | 9.528636 | 9.877735 | 9.940987 | 4.676045 |
| protein_co receptor_a   | 692   | 568  | 552  | 712   | 932   | 545   | 14.95295 | 15.73904 | 14.39156 | 23.87982 |
| protein_co pterin-4_al  | 102   | 97   | 109  | 135   | 181   | 157   | 0.850877 | 1.037643 | 1.097088 | 1.747958 |
| protein_co stromal_ce   | 518   | 452  | 456  | 322   | 349   | 375   | 15.49045 | 17.33333 | 16.45308 | 14.94585 |
| protein_co flotillin_2  | 2443  | 2004 | 2074 | 3384  | 3781  | 2930  | 41.5647  | 43.72283 | 42.57533 | 89.36388 |
| protein_co Era_G-prote  | 801   | 646  | 638  | 952   | 1046  | 1079  | 19.51112 | 20.17862 | 18.75074 | 35.99292 |
| protein_co protein_ar   | 718   | 530  | 618  | 802   | 1053  | 1103  | 7.944085 | 7.519772 | 8.250038 | 13.77286 |
| protein_co NIP7_nucle   | 622   | 436  | 501  | 529   | 689   | 1121  | 12.14221 | 10.91448 | 11.8003  | 16.02852 |
| protein_co telomeric_   | 620   | 436  | 454  | 569   | 660   | 526   | 9.74583  | 8.788666 | 8.610553 | 13.88257 |
| protein_co vacuolar_p   | 1258  | 983  | 997  | 987   | 1249  | 1068  | 25.32745 | 25.37896 | 24.21888 | 30.84314 |
| protein_co metastasis   | 448   | 360  | 371  | 235   | 297   | 207   | 4.208078 | 4.336283 | 4.20463  | 3.426132 |

|                         |       |       |       |       |       |       |          |          |          |          |
|-------------------------|-------|-------|-------|-------|-------|-------|----------|----------|----------|----------|
| protein_co heat_shock   | 51    | 23    | 42    | 172   | 237   | 125   | 0.758931 | 0.438904 | 0.754101 | 3.972747 |
| protein_co ankyrin_re   | 7     | 7     | 8     | 98    | 148   | 96    | 0.087249 | 0.111884 | 0.120309 | 1.895912 |
| protein_co PC-esterase  | 823   | 614   | 596   | 289   | 358   | 221   | 19.14211 | 18.31334 | 16.72569 | 10.43322 |
| protein_co synaptosor   | 17    | 8     | 18    | 8     | 7     | 9     | 0.353338 | 0.213226 | 0.4514   | 0.258084 |
| protein_co BTB_(POZ)_   | 1357  | 1127  | 1221  | 738   | 880   | 684   | 12.38656 | 13.1918  | 13.44728 | 10.45581 |
| protein_co proliferatin | 2328  | 1793  | 1914  | 3590  | 4248  | 4877  | 80.32374 | 79.33239 | 79.68029 | 192.2586 |
| protein_co NTF2-like_ε  | 340   | 275   | 266   | 183   | 254   | 287   | 14.19644 | 14.72457 | 13.40079 | 11.85993 |
| protein_co polymerase   | 210   | 181   | 201   | 154   | 218   | 279   | 4.075705 | 4.504757 | 4.70682  | 4.63911  |
| protein_co Ras_and_Ra   | 1842  | 1439  | 1574  | 32    | 36    | 22    | 19.17234 | 19.20683 | 19.76689 | 0.516971 |
| protein_co protein_ty   | 1397  | 1170  | 1214  | 1182  | 1256  | 1078  | 17.58533 | 18.88641 | 18.4383  | 23.09415 |
| protein_co death_asso   | 1297  | 1025  | 927   | 981   | 1043  | 964   | 29.11266 | 29.50361 | 25.10555 | 34.17759 |
| protein_co Rh_family_   | 1     | 0     | 0     | 28    | 57    | 29    | 0.019336 | 0        | 0        | 0.840344 |
| protein_co KIAA0907     | 728   | 621   | 650   | 684   | 848   | 568   | 7.587449 | 8.299756 | 8.173834 | 11.06499 |
| protein_co ATPase_Na    | 1     | 0     | 0     | 8     | 5     | 17    | 0.011974 | 0        | 0        | 0.148682 |
| protein_co nestin       | 17773 | 13486 | 14830 | 6143  | 8910  | 9539  | 149.9418 | 145.8997 | 150.9562 | 80.44014 |
| protein_co brevican     | 9     | 10    | 6     | 81    | 101   | 49    | 0.121933 | 0.173735 | 0.098079 | 1.703312 |
| protein_co Rho_guanin   | 1461  | 1121  | 1214  | 975   | 1233  | 1086  | 9.944305 | 9.784512 | 9.969903 | 10.30052 |
| protein_co RAB25_me     | 6     | 6     | 8     | 913   | 930   | 507   | 0.255764 | 0.327981 | 0.411458 | 60.40724 |
| protein_co hyaluronan   | 19    | 11    | 7     | 16    | 22    | 5     | 0.503055 | 0.373477 | 0.223619 | 0.657525 |
| protein_co DDB1_and_    | 489   | 477   | 480   | 637   | 726   | 608   | 5.58432  | 6.985366 | 6.613795 | 11.29097 |
| protein_co synaptotag   | 983   | 748   | 784   | 328   | 419   | 308   | 8.796352 | 8.583414 | 8.464732 | 4.555682 |
| protein_co immunoglo    | 507   | 335   | 365   | 388   | 497   | 360   | 6.001828 | 5.085454 | 5.213345 | 7.12915  |
| protein_co aspartoacyl  | 0     | 0     | 0     | 0     | 2     | 0     | 0        | 0        | 0        | 0        |
| protein_co aldehyde_d   | 0     | 0     | 0     | 18    | 14    | 7     | 0        | 0        | 0        | 0.49454  |
| protein_co metallothio  | 15    | 18    | 15    | 1009  | 1261  | 633   | 0.201245 | 0.309681 | 0.242813 | 21.01139 |
| protein_co methylmal    | 217   | 155   | 180   | 139   | 177   | 181   | 3.413329 | 3.126507 | 3.416166 | 3.393624 |
| protein_co DPH2_hom     | 525   | 465   | 469   | 858   | 1169  | 1461  | 9.958438 | 11.31082 | 10.73378 | 25.26095 |
| protein_co target_of_E  | 198   | 138   | 156   | 85    | 119   | 386   | 3.886238 | 3.473383 | 3.69434  | 2.589486 |
| protein_co nuclear_au   | 3803  | 3133  | 3312  | 11624 | 12504 | 14115 | 48.73537 | 51.48583 | 51.21019 | 231.2086 |
| protein_co mutY_hom     | 166   | 146   | 107   | 673   | 825   | 554   | 4.035118 | 4.551037 | 3.138195 | 25.39181 |
| protein_co catenin_be   | 813   | 690   | 686   | 781   | 899   | 804   | 12.74969 | 13.87611 | 12.9802  | 19.01038 |
| protein_co lipin_3      | 60    | 36    | 61    | 100   | 172   | 86    | 0.644832 | 0.496143 | 0.790994 | 1.668114 |
| protein_co zinc_finger  | 78    | 56    | 62    | 73    | 75    | 149   | 1.31894  | 1.214305 | 1.264941 | 1.915949 |
| protein_co RNA_bindin   | 420   | 291   | 282   | 1385  | 1908  | 1620  | 8.267761 | 7.345832 | 6.697856 | 42.31739 |
| protein_co V-set_and_   | 57    | 29    | 29    | 28    | 45    | 13    | 1.364334 | 0.89013  | 0.837514 | 1.40242  |
| protein_co chromosom    | 346   | 277   | 250   | 411   | 392   | 484   | 10.03957 | 10.3069  | 8.752399 | 18.51021 |
| protein_co serine_incc  | 1676  | 1218  | 1386  | 815   | 888   | 762   | 17.68002 | 16.47651 | 17.64087 | 13.34433 |
| protein_co protein_ph   | 265   | 237   | 222   | 62    | 95    | 36    | 3.592326 | 4.119908 | 3.631038 | 1.304524 |
| antisense -             | 2     | 0     | 2     | 1     | 0     | 0     | 0.066229 | 0        | 0.079909 | 0.051398 |
| protein_co dimethylgl   | 9     | 3     | 7     | 6     | 4     | 2     | 0.136264 | 0.058246 | 0.127875 | 0.141001 |
| protein_co betaine-hc   | 0     | 1     | 0     | 0     | 0     | 0     | 0        | 0.029332 | 0        | 0        |
| protein_co adaptor-rel  | 2045  | 1643  | 1631  | 925   | 1017  | 996   | 16.42516 | 16.92245 | 15.80587 | 11.53157 |
| protein_co zinc_finger  | 236   | 172   | 213   | 90    | 151   | 241   | 1.792943 | 1.675685 | 1.95246  | 1.061274 |
| protein_co lnaD-like_(l | 766   | 636   | 656   | 1076  | 1145  | 787   | 4.223134 | 4.496479 | 4.363731 | 9.20765  |
| protein_co KN_motif_ε   | 1956  | 1536  | 1647  | 8     | 18    | 9     | 19.66064 | 19.79836 | 19.97425 | 0.12481  |
| protein_co angiopoieti  | 0     | 1     | 1     | 2     | 3     | 0     | 0        | 0.021437 | 0.02017  | 0.051893 |
| protein_co synaptotag   | 0     | 0     | 0     | 49    | 35    | 51    | 0        | 0        | 0        | 0.867691 |
| protein_co solute_carr  | 4     | 3     | 7     | 4     | 2     | 9     | 0.045011 | 0.04329  | 0.095039 | 0.069863 |
| protein_co F-box_prot   | 226   | 158   | 169   | 345   | 406   | 295   | 3.191911 | 2.861599 | 2.879898 | 7.562961 |
| protein_co REM2_and_    | 154   | 102   | 122   | 82    | 120   | 57    | 4.673827 | 3.969734 | 4.467451 | 3.862747 |
| protein_co caspase_9_   | 144   | 122   | 130   | 158   | 207   | 205   | 1.51292  | 1.6437   | 1.647953 | 2.576565 |
| protein_co neuromedi    | 1     | 1     | 0     | 0     | 4     | 0     | 0.022619 | 0.029006 | 0        | 0        |
| protein_co dynactin_4   | 1356  | 1010  | 1008  | 812   | 949   | 889   | 15.11    | 14.43229 | 13.55231 | 14.04401 |
| protein_co phosphodi    | 1     | 0     | 0     | 3     | 1     | 5     | 0.008218 | 0        | 0        | 0.038265 |
| protein_co ATPase_am    | 40    | 21    | 30    | 69    | 89    | 106   | 0.195885 | 0.131877 | 0.17726  | 0.524471 |
| protein_co microtubul   | 6     | 1     | 4     | 6     | 10    | 10    | 0.059267 | 0.012667 | 0.047673 | 0.09199  |
| protein_co zinc_finger  | 219   | 170   | 181   | 155   | 160   | 161   | 3.142262 | 3.127927 | 3.133466 | 3.451918 |
| protein_co ubiquitin_ε  | 243   | 230   | 235   | 187   | 234   | 223   | 2.987487 | 3.626076 | 3.485906 | 3.568386 |
| protein_co exportin_4   | 889   | 709   | 781   | 907   | 1010  | 1221  | 4.217445 | 4.313236 | 4.470404 | 6.6786   |
| protein_co transmembr   | 0     | 1     | 0     | 0     | 0     | 0     | 0        | 0.033536 | 0        | 0        |
| protein_co proteasom    | 2041  | 1519  | 1575  | 1196  | 1092  | 1637  | 67.01858 | 63.9616  | 62.39945 | 60.95563 |
| protein_co cyclin-depe  | 472   | 403   | 415   | 486   | 606   | 239   | 7.244546 | 7.932016 | 7.68538  | 11.57806 |
| protein_co arachidona   | 2     | 1     | 2     | 0     | 0     | 0     | 0.104549 | 0.067034 | 0.126144 | 0        |
| pseudogen: high_mobil   | 209   | 154   | 196   | 206   | 265   | 299   | 9.949252 | 9.401004 | 11.25766 | 15.22095 |
| protein_co WAS_prote    | 540   | 446   | 496   | 706   | 801   | 599   | 5.269638 | 5.581246 | 5.840052 | 10.69356 |

|                         |       |       |       |       |       |       |          |          |          |          |
|-------------------------|-------|-------|-------|-------|-------|-------|----------|----------|----------|----------|
| protein_co ring_finger  | 0     | 1     | 0     | 1     | 0     | 0     | 0        | 0.011746 | 0        | 0.014218 |
| protein_co G_protein+   | 0     | 0     | 0     | 2     | 4     | 1     | 0        | 0        | 0        | 0.030037 |
| protein_co cholinergic  | 55    | 34    | 33    | 146   | 142   | 87    | 0.293797 | 0.232902 | 0.21269  | 1.210509 |
| protein_co myosin_he    | 0     | 1     | 0     | 0     | 0     | 0     | 0        | 0.009954 | 0        | 0        |
| protein_co myosin_he    | 7910  | 6532  | 6852  | 6494  | 7399  | 6921  | 47.78408 | 50.60137 | 49.94272 | 60.8905  |
| protein_co phosphatic   | 302   | 221   | 266   | 286   | 308   | 256   | 13.48646 | 12.65589 | 14.33246 | 19.82383 |
| protein_co SCO1_cyto    | 396   | 292   | 329   | 511   | 561   | 685   | 10.61661 | 10.03882 | 10.64228 | 21.26385 |
| protein_co myosin_ph    | 7971  | 6114  | 6803  | 3470  | 4438  | 3341  | 34.10222 | 33.54321 | 35.11708 | 23.04251 |
| protein_co chitinase_3  | 0     | 0     | 0     | 0     | 1     | 2     | 0        | 0        | 0        | 0        |
| protein_co phosphatic   | 564   | 435   | 463   | 609   | 739   | 642   | 3.440798 | 3.403131 | 3.408074 | 5.766706 |
| protein_co dual_serine  | 806   | 581   | 614   | 564   | 593   | 393   | 4.799766 | 4.436806 | 4.411654 | 5.213082 |
| protein_co chitinase_1  | 0     | 1     | 0     | 1     | 2     | 0     | 0        | 0.010724 | 0        | 0.01298  |
| protein_co solute_carr  | 998   | 751   | 861   | 688   | 812   | 507   | 9.364866 | 9.036918 | 9.748151 | 10.02051 |
| protein_co leucine-ricl | 6     | 6     | 6     | 22    | 40    | 17    | 0.078873 | 0.101143 | 0.095165 | 0.44888  |
| protein_co transmembr   | 239   | 164   | 194   | 385   | 497   | 270   | 2.998051 | 2.638118 | 2.936235 | 7.496047 |
| protein_co doublecort   | 279   | 223   | 229   | 604   | 628   | 653   | 2.293936 | 2.351209 | 2.27175  | 7.708048 |
| protein_co cyclin_A1    | 571   | 489   | 542   | 93    | 64    | 54    | 13.64638 | 14.98648 | 15.62891 | 3.449807 |
| protein_co componen     | 834   | 766   | 793   | 211   | 231   | 186   | 7.438896 | 8.761542 | 8.534216 | 2.92116  |
| protein_co spastic_par  | 1614  | 1371  | 1432  | 1157  | 1349  | 1427  | 15.30754 | 16.67434 | 16.38676 | 17.032   |
| protein_co epithelial_s | 33    | 28    | 26    | 17    | 18    | 33    | 0.336166 | 0.365769 | 0.319566 | 0.268794 |
| protein_co transient_r  | 32    | 22    | 21    | 24    | 16    | 18    | 0.369668 | 0.325907 | 0.292704 | 0.430331 |
| protein_co periostin_c  | 91440 | 74900 | 75783 | 2     | 4     | 27    | 1271.16  | 1335.227 | 1271.112 | 0.043154 |
| protein_co regulatory_  | 238   | 192   | 191   | 143   | 200   | 98    | 4.843674 | 5.010816 | 4.69007  | 4.517149 |
| protein_co tumor_pro    | 26512 | 21321 | 21029 | 14531 | 14676 | 15769 | 671.6089 | 692.6134 | 642.7479 | 571.347  |
| protein_co KIAA1704     | 537   | 486   | 450   | 354   | 511   | 312   | 5.863982 | 6.805561 | 5.928965 | 6.000012 |
| protein_co klotho       | 24    | 25    | 27    | 0     | 0     | 1     | 0.224802 | 0.300289 | 0.305142 | 0        |
| protein_co replication  | 427   | 278   | 326   | 486   | 644   | 972   | 8.335569 | 6.959235 | 7.678441 | 14.72564 |
| protein_co StAR-relate  | 1917  | 1428  | 1548  | 59    | 45    | 36    | 15.19151 | 14.51164 | 14.80123 | 0.725707 |
| protein_co insulin_rec  | 5     | 11    | 5     | 102   | 119   | 101   | 0.059505 | 0.167875 | 0.071796 | 1.884147 |
| protein_co MORC_fam     | 604   | 537   | 584   | 91    | 76    | 104   | 7.386951 | 8.421935 | 8.617656 | 1.727429 |
| protein_co brain_expr   | 19    | 16    | 10    | 171   | 212   | 239   | 0.827215 | 0.893293 | 0.525306 | 11.55557 |
| protein_co ring_finger  | 25    | 25    | 28    | 6     | 16    | 10    | 0.416134 | 0.533633 | 0.562341 | 0.155016 |
| protein_co TBC1_dom     | 506   | 407   | 478   | 73    | 66    | 67    | 4.15014  | 4.280711 | 4.730294 | 0.929321 |
| protein_co transcriptic | 1412  | 1084  | 1186  | 721   | 831   | 745   | 42.14431 | 41.48994 | 42.71073 | 33.40181 |
| protein_co testis_expr  | 0     | 0     | 0     | 1     | 0     | 1     | 0        | 0        | 0        | 0.052777 |
| protein_co brain_expr   | 188   | 155   | 151   | 277   | 322   | 379   | 10.20292 | 10.78717 | 9.887617 | 23.33334 |
| protein_co family_witl  | 319   | 252   | 272   | 260   | 356   | 281   | 5.220913 | 5.288904 | 5.371217 | 6.604799 |
| protein_co solute_carr  | 568   | 478   | 429   | 179   | 218   | 245   | 9.677881 | 10.44406 | 8.819365 | 4.733861 |
| protein_co EPH_recept   | 1596  | 1226  | 1302  | 505   | 608   | 497   | 16.12507 | 15.88432 | 15.87186 | 7.919371 |
| protein_co serine/argir | 2370  | 1984  | 2143  | 3423  | 4070  | 4037  | 27.70614 | 29.74259 | 30.2272  | 62.11051 |
| protein_co BTB_(POZ)_   | 2623  | 1989  | 2135  | 2524  | 3199  | 1557  | 44.67581 | 43.44285 | 43.8753  | 66.72583 |
| protein_co PML-RARA_    | 4     | 3     | 2     | 12    | 12    | 2     | 0.070326 | 0.067638 | 0.042426 | 0.327468 |
| protein_co suppressor   | 212   | 134   | 200   | 612   | 791   | 304   | 4.307055 | 3.491071 | 4.902557 | 19.29863 |
| protein_co zinc_finger  | 244   | 172   | 183   | 313   | 404   | 334   | 8.17226  | 7.387375 | 7.395227 | 16.27148 |
| protein_co phosphodi    | 1     | 3     | 1     | 117   | 149   | 84    | 0.014296 | 0.054997 | 0.017249 | 2.596109 |
| protein_co HSPA_(heat   | 1460  | 1038  | 1056  | 1374  | 1842  | 1621  | 38.72139 | 35.30245 | 33.7917  | 56.56077 |
| protein_co casein_kin   | 5521  | 3934  | 4383  | 3134  | 4787  | 3949  | 89.95128 | 82.19271 | 86.16068 | 79.25361 |
| protein_co ankyrin_rej  | 322   | 260   | 280   | 266   | 194   | 243   | 2.556915 | 2.647544 | 2.682666 | 3.27848  |
| protein_co CNDP_dipe    | 2070  | 1634  | 1686  | 2911  | 3633  | 3911  | 21.45972 | 21.72277 | 21.08917 | 46.84104 |
| protein_co MACRO_do     | 300   | 260   | 273   | 452   | 734   | 240   | 11.67386 | 12.97406 | 12.81752 | 27.29998 |
| protein_co WD_repeat    | 437   | 341   | 366   | 727   | 956   | 991   | 11.80354 | 11.81121 | 11.92779 | 30.47864 |
| protein_co lectin_gala  | 0     | 0     | 0     | 6     | 3     | 8     | 0        | 0        | 0        | 0.240462 |
| protein_co reticulon_3  | 1862  | 1579  | 1668  | 3414  | 3902  | 3038  | 17.68467 | 19.2313  | 19.11443 | 50.32818 |
| protein_co retinoic_ac  | 0     | 0     | 0     | 7     | 5     | 8     | 0        | 0        | 0        | 0.543133 |
| protein_co HRAS-like_s  | 0     | 0     | 0     | 1     | 1     | 0     | 0        | 0        | 0        | 0.098086 |
| protein_co myosin_he    | 63    | 52    | 61    | 38    | 50    | 19    | 0.426827 | 0.451777 | 0.498643 | 0.3996   |
| protein_co FGFR1OP_f    | 506   | 362   | 363   | 470   | 622   | 536   | 10.42916 | 9.567906 | 9.027212 | 15.03583 |
| protein_co mediator_c   | 622   | 434   | 460   | 193   | 245   | 311   | 25.56143 | 22.87146 | 22.8087  | 12.31069 |
| protein_co PDZ_domai    | 1033  | 726   | 822   | 294   | 384   | 241   | 4.138533 | 3.729856 | 3.973433 | 1.828201 |
| protein_co MORC_fam     | 1052  | 849   | 905   | 994   | 1207  | 1005  | 11.03788 | 11.42318 | 11.45689 | 16.18777 |
| protein_co like-glycosy | 410   | 331   | 375   | 1727  | 2047  | 1267  | 4.360378 | 4.514167 | 4.811933 | 28.50776 |
| protein_co glutathione  | 0     | 0     | 0     | 1     | 3     | 1     | 0        | 0        | 0        | 0.066224 |
| protein_co myosin_XV    | 2     | 0     | 0     | 10    | 20    | 8     | 0.010949 | 0        | 0        | 0.084973 |
| protein_co solute_carr  | 157   | 100   | 134   | 158   | 260   | 174   | 2.286963 | 1.867965 | 2.355116 | 3.572292 |
| protein_co C1q_and_t    | 958   | 695   | 759   | 203   | 273   | 117   | 8.97874  | 8.35303  | 8.583012 | 2.953088 |

|                         |       |       |       |      |      |      |          |          |          |          |
|-------------------------|-------|-------|-------|------|------|------|----------|----------|----------|----------|
| protein_co family_witl  | 6     | 2     | 3     | 811  | 1090 | 767  | 0.135847 | 0.058068 | 0.081954 | 28.50044 |
| protein_co SEC14-like   | 2     | 0     | 0     | 7    | 10   | 0    | 0.036419 | 0        | 0        | 0.197848 |
| pseudogen: zinc_finger  | 11    | 8     | 6     | 14   | 12   | 11   | 0.216537 | 0.201947 | 0.142508 | 0.427757 |
| protein_co GTPase_IM    | 3     | 1     | 0     | 0    | 2    | 0    | 0.040892 | 0.01748  | 0        | 0        |
| protein_co GTPase_IM    | 3     | 5     | 3     | 1    | 6    | 5    | 0.068353 | 0.146088 | 0.082472 | 0.035364 |
| protein_co aarF_doma    | 321   | 232   | 276   | 259  | 305  | 178  | 6.332224 | 5.86879  | 6.569137 | 7.930151 |
| protein_co makorin_ri   | 1486  | 1221  | 1267  | 2683 | 3165 | 2336 | 20.09765 | 21.17637 | 20.67527 | 56.32195 |
| protein_co ArfGAP_wit   | 2524  | 2018  | 2091  | 2213 | 2887 | 1424 | 31.55169 | 32.34922 | 31.53809 | 42.93834 |
| protein_co KRAB-A_do    | 403   | 327   | 359   | 268  | 392  | 271  | 4.701836 | 4.892372 | 5.053647 | 4.853194 |
| pseudogen: zinc_finger  | 220   | 196   | 194   | 120  | 149  | 85   | 2.930626 | 3.348136 | 3.118082 | 2.48113  |
| protein_co ARP3_actin   | 188   | 135   | 178   | 492  | 535  | 479  | 1.590352 | 1.464464 | 1.816785 | 6.459979 |
| protein_co neurotensi   | 41    | 35    | 24    | 205  | 209  | 458  | 1.554156 | 1.701328 | 1.097665 | 12.06133 |
| protein_co B-cell_tran  | 754   | 607   | 612   | 296  | 458  | 423  | 14.44243 | 14.90963 | 14.14388 | 8.800172 |
| protein_co leucine-ricl | 50    | 28    | 40    | 10   | 5    | 21   | 0.43465  | 0.312131 | 0.419544 | 0.134927 |
| protein_co chromosom    | 323   | 263   | 271   | 140  | 183  | 132  | 4.918959 | 5.136127 | 4.979526 | 3.309247 |
| protein_co ATPase_typ   | 1122  | 880   | 938   | 1228 | 1670 | 1436 | 6.814844 | 6.854174 | 6.87407  | 11.57689 |
| protein_co surfactant_  | 1     | 0     | 0     | 1    | 2    | 1    | 0.036604 | 0        | 0        | 0.056815 |
| protein_co DPY30_dor    | 0     | 0     | 0     | 27   | 34   | 32   | 0        | 0        | 0        | 0.871808 |
| protein_co transmemt    | 253   | 196   | 198   | 333  | 338  | 306  | 5.719949 | 5.682469 | 5.401133 | 11.68547 |
| protein_co transmemt    | 403   | 297   | 311   | 340  | 396  | 349  | 2.14613  | 2.028228 | 1.998294 | 2.81035  |
| protein_co v-Ki-ras2_K  | 1238  | 953   | 958   | 1387 | 1820 | 1105 | 10.06936 | 9.93993  | 9.401446 | 17.51008 |
| protein_co importin_8   | 930   | 822   | 761   | 1022 | 1199 | 969  | 8.189242 | 9.282008 | 8.085251 | 13.96825 |
| protein_co leucyl-tRNA  | 2573  | 2050  | 2030  | 4118 | 4810 | 4284 | 25.31431 | 25.86363 | 24.09741 | 62.88444 |
| protein_co serine_pep   | 24    | 25    | 17    | 156  | 156  | 103  | 0.307812 | 0.411172 | 0.26307  | 3.105484 |
| protein_co inositol(my  | 343   | 232   | 242   | 163  | 151  | 238  | 5.978913 | 5.185916 | 5.089692 | 4.410077 |
| protein_co leucine_ric  | 213   | 198   | 201   | 208  | 167  | 230  | 2.222919 | 2.649833 | 2.530976 | 3.369285 |
| protein_co E2F_transci  | 200   | 153   | 220   | 293  | 349  | 386  | 1.862193 | 1.826819 | 2.471527 | 4.234409 |
| protein_co carbonic_a   | 2     | 1     | 0     | 0    | 0    | 0    | 0.033673 | 0.021591 | 0        | 0        |
| protein_co coiled-coil  | 309   | 259   | 259   | 316  | 413  | 558  | 6.896247 | 7.412478 | 6.974325 | 10.94641 |
| protein_co SWAP_swit    | 1282  | 1072  | 1077  | 763  | 899  | 719  | 12.31319 | 13.20343 | 12.48091 | 11.37464 |
| protein_co aryl_hydro   | 134   | 96    | 113   | 63   | 75   | 128  | 1.626945 | 1.494682 | 1.655368 | 1.187242 |
| protein_co lymphatic_   | 33    | 31    | 21    | 0    | 1    | 11   | 0.472768 | 0.569515 | 0.362996 | 0        |
| protein_co adenosine    | 45    | 34    | 40    | 79   | 92   | 68   | 0.528305 | 0.511871 | 0.566605 | 1.43956  |
| protein_co MICAL_C-te   | 99    | 83    | 94    | 1    | 2    | 4    | 1.525004 | 1.639544 | 1.747075 | 0.023909 |
| protein_co SET_bindin   | 602   | 582   | 528   | 527  | 591  | 371  | 3.794568 | 4.704334 | 4.015576 | 5.155929 |
| protein_co microtubul   | 5013  | 3946  | 4484  | 16   | 14   | 50   | 37.26965 | 37.62045 | 40.2227  | 0.184632 |
| protein_co related_RA   | 359   | 287   | 321   | 2281 | 3002 | 2475 | 7.138896 | 7.318597 | 7.701755 | 70.40319 |
| protein_co hydroxyste   | 1787  | 1528  | 1550  | 3792 | 4058 | 3671 | 15.12499 | 16.58454 | 15.82889 | 49.81607 |
| protein_co zinc_finger  | 916   | 762   | 857   | 489  | 529  | 266  | 5.653713 | 6.031184 | 6.382152 | 4.684655 |
| protein_co testis_expr  | 30    | 18    | 22    | 77   | 46   | 154  | 0.138088 | 0.106247 | 0.122181 | 0.550117 |
| protein_co transmemt    | 2839  | 2174  | 2276  | 1342 | 1512 | 1316 | 61.80165 | 60.6881  | 59.77987 | 45.34378 |
| protein_co ring_finger  | 263   | 196   | 200   | 556  | 670  | 266  | 6.601753 | 6.309122 | 6.057335 | 2.166251 |
| protein_co dual_specif  | 0     | 1     | 1     | 41   | 56   | 31   | 0        | 0.032876 | 0.030932 | 1.631477 |
| protein_co D4_zinc_an   | 1729  | 1354  | 1412  | 1909 | 2047 | 1480 | 16.75059 | 16.82143 | 16.50509 | 28.70592 |
| protein_co multiple_ei  | 1434  | 1013  | 1177  | 1270 | 1845 | 1318 | 21.26511 | 19.26359 | 21.05926 | 29.23161 |
| protein_co chromosom    | 1231  | 1014  | 1067  | 784  | 869  | 1045 | 21.92237 | 23.15671 | 22.92672 | 21.67086 |
| protein_co goosecoid_   | 4     | 8     | 1     | 10   | 19   | 16   | 0.148975 | 0.38208  | 0.044937 | 0.578076 |
| protein_co chromosom    | 208   | 161   | 165   | 260  | 345  | 350  | 3.171748 | 3.148259 | 3.035759 | 6.153739 |
| protein_co unc-79_hoi   | 13    | 3     | 5     | 45   | 74   | 107  | 0.066986 | 0.019823 | 0.031085 | 0.3599   |
| protein_co numb_hon     | 1075  | 965   | 980   | 693  | 705  | 521  | 9.746088 | 11.21911 | 10.72003 | 9.751818 |
| protein_co catsper_chi  | 1     | 0     | 0     | 5    | 8    | 3    | 0.012942 | 0        | 0        | 0.100441 |
| protein_co vertebrae_c  | 0     | 0     | 0     | 4355 | 5370 | 6623 | 0        | 0        | 0        | 91.44721 |
| protein_co COX16_cyt    | 68    | 46    | 51    | 55   | 74   | 75   | 1.85703  | 1.610932 | 1.680461 | 2.331327 |
| protein_co tetratricop  | 85    | 71    | 68    | 1269 | 1571 | 990  | 0.763974 | 0.818328 | 0.737423 | 17.70319 |
| protein_co mediator_c   | 301   | 258   | 256   | 230  | 268  | 371  | 7.074634 | 7.776184 | 7.259814 | 8.390654 |
| protein_co eukaryotic_  | 1467  | 1198  | 1295  | 1005 | 1108 | 1447 | 15.33727 | 16.06143 | 16.33563 | 16.30852 |
| protein_co ADAM_met     | 1     | 0     | 0     | 3    | 0    | 1    | 0.016776 | 0        | 0        | 0.078118 |
| protein_co lysyl_oxida  | 18157 | 13305 | 14144 | 972  | 1192 | 935  | 239.8935 | 225.4232 | 225.4731 | 19.93293 |
| protein_co elongator_i  | 678   | 541   | 573   | 592  | 697  | 614  | 9.209569 | 9.423586 | 9.391009 | 12.48136 |
| protein_co phosphatic   | 4     | 2     | 1     | 2    | 1    | 0    | 0.210742 | 0.135123 | 0.063568 | 0.16355  |
| protein_co CBP80/20-i   | 1650  | 1233  | 1306  | 421  | 540  | 429  | 13.4554  | 12.89392 | 12.85002 | 5.328747 |
| protein_co maestro      | 0     | 0     | 0     | 11   | 2    | 5    | 0        | 0        | 0        | 0.376035 |
| protein_co methyl-CpC   | 584   | 434   | 496   | 388  | 530  | 333  | 6.711708 | 6.39616  | 6.877806 | 6.921216 |
| protein_co immediate    | 372   | 288   | 262   | 111  | 94   | 108  | 11.77791 | 11.69303 | 10.00863 | 5.454799 |
| protein_co mitochond    | 243   | 233   | 225   | 198  | 256  | 225  | 8.860244 | 10.89443 | 9.898514 | 11.2056  |

|                         |       |      |       |       |      |       |          |          |          |          |
|-------------------------|-------|------|-------|-------|------|-------|----------|----------|----------|----------|
| protein_co cyclin_B1    | 2472  | 1872 | 2036  | 3789  | 4215 | 4242  | 53.44035 | 51.89626 | 53.10638 | 127.1382 |
| protein_co cyclin-depe  | 403   | 324  | 331   | 787   | 766  | 770   | 12.98741 | 13.38973 | 12.87044 | 39.36612 |
| protein_co CD180_mo     | 1     | 2    | 0     | 2     | 0    | 0     | 0.017201 | 0.044116 | 0        | 0.053397 |
| protein_co interleukin  | 50    | 53   | 44    | 40    | 63   | 29    | 0.673127 | 0.914981 | 0.714706 | 0.835829 |
| protein_co calcium/ca   | 23    | 14   | 33    | 4     | 16   | 7     | 0.724778 | 0.565737 | 1.254699 | 0.195645 |
| protein_co THUMP_do     | 459   | 384  | 377   | 625   | 602  | 612   | 5.433607 | 5.829296 | 5.384743 | 11.48381 |
| protein_co von_Hippel   | 1541  | 1082 | 1209  | 875   | 1369 | 1052  | 19.3357  | 17.4098  | 18.30339 | 17.04103 |
| protein_co basic_helix  | 3855  | 3077 | 3176  | 92    | 97   | 127   | 52.04751 | 53.27365 | 51.73735 | 1.927942 |
| protein_co ADP-ribosy   | 1108  | 856  | 861   | 445   | 564  | 688   | 17.28923 | 17.12849 | 16.21015 | 10.77771 |
| protein_co ER_degrad    | 2226  | 1818 | 1855  | 407   | 472  | 262   | 16.98294 | 17.78652 | 17.07575 | 4.819619 |
| protein_co contactin_1  | 1     | 0    | 2     | 0     | 0    | 0     | 0.01039  | 0        | 0.025072 | 0        |
| protein_co cell_adhesi  | 0     | 0    | 0     | 5     | 1    | 2     | 0        | 0        | 0        | 0.045414 |
| protein_co Meis_home    | 472   | 341  | 401   | 3     | 5    | 24    | 4.593626 | 4.255762 | 4.708754 | 0.045317 |
| protein_co ATP_bindin   | 16    | 14   | 14    | 154   | 177  | 150   | 0.21822  | 0.244857 | 0.230383 | 3.260061 |
| protein_co katanin_p8   | 539   | 499  | 512   | 281   | 326  | 283   | 9.281572 | 11.01901 | 10.63777 | 7.510512 |
| protein_co ER_membr     | 782   | 633  | 667   | 386   | 409  | 495   | 31.74718 | 32.95425 | 32.67174 | 24.32295 |
| protein_co transient_r  | 0     | 0    | 0     | 10    | 12   | 6     | 0        | 0        | 0        | 0.127349 |
| protein_co guanine_nu   | 37    | 31   | 30    | 11    | 28   | 25    | 1.295691 | 1.392101 | 1.267562 | 0.597892 |
| protein_co glutathione  | 0     | 0    | 0     | 42    | 50   | 36    | 0        | 0        | 0        | 2.632861 |
| protein_co PRP38_pre    | 1100  | 909  | 964   | 1179  | 1392 | 1586  | 13.83557 | 14.66148 | 14.6295  | 23.017   |
| protein_co tetraspanin  | 202   | 136  | 194   | 130   | 144  | 121   | 2.981361 | 2.574017 | 3.454721 | 2.978084 |
| protein_co thyroid_sti  | 0     | 1    | 0     | 0     | 0    | 0     | 0        | 0.104031 | 0        | 0        |
| protein_co glutathione  | 0     | 0    | 0     | 2     | 4    | 2     | 0        | 0        | 0        | 0.033309 |
| protein_co glutathione  | 667   | 503  | 521   | 21    | 17   | 13    | 7.576464 | 7.326862 | 7.140465 | 0.370246 |
| protein_co synaptotag   | 211   | 131  | 162   | 1009  | 1246 | 1223  | 2.221827 | 1.768921 | 2.058215 | 16.49109 |
| protein_co vav_3_guar   | 118   | 120  | 99    | 256   | 257  | 214   | 1.108822 | 1.446007 | 1.12244  | 3.733793 |
| protein_co proline/ser  | 545   | 406  | 435   | 1195  | 1273 | 1052  | 13.66581 | 13.05492 | 13.16061 | 46.50902 |
| protein_co 3-hydroxy-   | 2     | 0    | 0     | 0     | 0    | 0     | 0.038624 | 0        | 0        | 0        |
| protein_co protein_ty   | 9     | 3    | 7     | 0     | 0    | 0     | 0.115493 | 0.049368 | 0.108382 | 0        |
| protein_co sortilin_1   | 2049  | 1487 | 1562  | 1273  | 1630 | 1208  | 13.6707  | 12.7224  | 12.57412 | 13.1828  |
| protein_co wingless-ty  | 15    | 20   | 13    | 5     | 14   | 4     | 0.18422  | 0.314981 | 0.192635 | 0.095311 |
| protein_co prostaglan   | 13303 | 9515 | 10541 | 1155  | 1369 | 1159  | 100.9676 | 92.60845 | 96.53001 | 13.60645 |
| protein_co late_endos   | 378   | 346  | 302   | 252   | 301  | 288   | 9.685479 | 11.3688  | 9.336504 | 10.02214 |
| protein_co ADAM_met     | 0     | 1    | 0     | 0     | 0    | 0     | 0        | 0.020294 | 0        | 0        |
| protein_co notch_2      | 6301  | 4816 | 5224  | 1418  | 1728 | 1847  | 25.94205 | 25.42674 | 25.95052 | 9.061529 |
| protein_co tripartite_r | 128   | 111  | 114   | 176   | 207  | 147   | 1.707517 | 1.898836 | 1.834881 | 3.644166 |
| protein_co choline/eth  | 349   | 276  | 348   | 290   | 399  | 304   | 3.087663 | 3.131287 | 3.714769 | 3.982291 |
| protein_co CD101_mo     | 33    | 39   | 39    | 8     | 18   | 23    | 0.436248 | 0.66114  | 0.622059 | 0.16415  |
| protein_co V-set_dom    | 0     | 0    | 0     | 4     | 1    | 2     | 0        | 0        | 0        | 0.111455 |
| protein_co nerve_grow   | 85    | 72   | 80    | 14    | 12   | 5     | 3.806735 | 4.135    | 4.322866 | 0.973178 |
| protein_co adaptor-rel  | 267   | 246  | 289   | 50    | 93   | 135   | 4.442738 | 5.249088 | 5.802101 | 1.291338 |
| protein_co N-ethylmal   | 608   | 492  | 538   | 323   | 445  | 339   | 7.385785 | 7.664212 | 7.885394 | 6.090123 |
| protein_co spire_homo   | 663   | 532  | 627   | 286   | 399  | 283   | 5.487746 | 5.646788 | 6.261755 | 3.67432  |
| protein_co periphilin_  | 1021  | 778  | 892   | 704   | 820  | 827   | 8.012503 | 7.829453 | 8.446084 | 8.575227 |
| protein_co FK506_bin    | 979   | 793  | 853   | 321   | 386  | 361   | 9.260707 | 9.619312 | 9.735507 | 4.712995 |
| protein_co ADP-ribosy   | 4250  | 3597 | 3682  | 3515  | 4020 | 4548  | 48.5463  | 52.68864 | 50.74568 | 62.31937 |
| protein_co transmembr   | 674   | 561  | 560   | 409   | 423  | 269   | 20.86064 | 22.26588 | 20.9124  | 19.64814 |
| protein_co solute_carr  | 4575  | 3584 | 3822  | 3577  | 4496 | 5364  | 43.88744 | 44.08862 | 44.23723 | 53.25969 |
| pseudogen: pleckstrin_  | 128   | 107  | 111   | 154   | 198  | 137   | 3.263688 | 3.49858  | 3.414835 | 6.094665 |
| protein_co tyrosine_3-  | 6991  | 5510 | 6196  | 6737  | 7939 | 8119  | 147.9278 | 149.5105 | 158.1867 | 221.2624 |
| protein_co kinase_D-in  | 2100  | 1643 | 1856  | 845   | 865  | 804   | 13.37713 | 13.42117 | 14.26493 | 8.354698 |
| protein_co grainyhead   | 5     | 3    | 2     | 55    | 91   | 52    | 0.043417 | 0.033405 | 0.020954 | 0.741276 |
| protein_co Rho-associ   | 2311  | 1988 | 2099  | 511   | 500  | 603   | 13.06836 | 14.41607 | 14.32127 | 4.485104 |
| protein_co radical_S-a  | 5     | 12   | 17    | 1     | 0    | 2     | 0.066624 | 0.205046 | 0.273312 | 0.020682 |
| protein_co v-myc_myc    | 1     | 3    | 0     | 1301  | 1654 | 1781  | 0.018021 | 0.069327 | 0        | 36.3899  |
| protein_co lipin_1      | 2662  | 2196 | 2231  | 392   | 432  | 335   | 22.97887 | 24.30873 | 23.23637 | 5.252151 |
| protein_co cytidine_m   | 15    | 26   | 29    | 12    | 9    | 14    | 0.24388  | 0.542086 | 0.568894 | 0.302829 |
| protein_co isoamyl_ac   | 423   | 303  | 390   | 170   | 159  | 137   | 7.101496 | 6.523211 | 7.899909 | 4.429848 |
| protein_co lactate_def  | 10420 | 9119 | 9577  | 13326 | 8760 | 10190 | 202.2326 | 226.9551 | 224.2647 | 401.4336 |
| protein_co serum_amy    | 0     | 0    | 0     | 1     | 0    | 0     | 0        | 0        | 0        | 0.071213 |
| protein_co anoctamin_   | 7     | 2    | 1     | 1     | 1    | 3     | 0.049417 | 0.018106 | 0.008518 | 0.010958 |
| protein_co interleukin  | 1103  | 826  | 890   | 56    | 47   | 66    | 5.710466 | 5.483848 | 5.559479 | 0.450002 |
| protein_co follistatin  | 620   | 512  | 543   | 161   | 224  | 535   | 11.45461 | 12.1302  | 12.10422 | 4.616843 |
| protein_co compleme     | 0     | 0    | 0     | 0     | 0    | 1     | 0        | 0        | 0        | 0        |
| protein_co neuron_na    | 4461  | 3514 | 4005  | 1470  | 2114 | 1588  | 15.97864 | 16.14056 | 17.30845 | 8.172508 |

|                         |       |       |       |      |      |      |          |          |          |          |
|-------------------------|-------|-------|-------|------|------|------|----------|----------|----------|----------|
| protein_co cell_divisio | 1003  | 810   | 887   | 677  | 627  | 838  | 9.464819 | 9.801798 | 10.09911 | 9.915863 |
| protein_co translocase  | 1523  | 1293  | 1321  | 603  | 666  | 911  | 28.30499 | 30.81563 | 29.62197 | 17.39446 |
| protein_co crumbs_ho    | 1     | 1     | 1     | 0    | 0    | 1    | 0.005197 | 0.006664 | 0.00627  | 0        |
| protein_co endoplasm    | 3     | 4     | 2     | 34   | 39   | 15   | 0.039637 | 0.067771 | 0.031883 | 0.697242 |
| protein_co ribosomal_   | 379   | 265   | 318   | 555  | 861  | 625  | 4.642455 | 4.16259  | 4.699846 | 10.55193 |
| protein_co retina_and   | 0     | 0     | 0     | 4    | 3    | 1    | 0        | 0        | 0        | 0.09106  |
| protein_co asparaginy   | 2331  | 1937  | 2005  | 3136 | 3094 | 3460 | 35.26965 | 37.58355 | 36.60338 | 73.64874 |
| protein_co gastrin-rele | 1     | 2     | 0     | 0    | 0    | 0    | 0.055295 | 0.141816 | 0        | 0        |
| protein_co KIAA1468     | 482   | 354   | 390   | 286  | 327  | 487  | 4.051082 | 3.81537  | 3.954911 | 3.73096  |
| protein_co F-box_prot   | 1746  | 1323  | 1427  | 740  | 902  | 652  | 22.11506 | 21.48885 | 21.80801 | 14.5481  |
| protein_co RNA_bindin   | 1177  | 993   | 1013  | 1595 | 1891 | 1886 | 14.71329 | 15.91813 | 15.27886 | 30.94742 |
| protein_co interleukin  | 0     | 0     | 0     | 4    | 5    | 4    | 0        | 0        | 0        | 0.091662 |
| protein_co ankyrin_rej  | 129   | 93    | 103   | 169  | 233  | 149  | 2.209208 | 2.042393 | 2.128297 | 4.492252 |
| protein_co enoyl_CoA    | 35    | 44    | 37    | 377  | 459  | 162  | 0.928778 | 1.49729  | 1.18466  | 15.52801 |
| protein_co interleukin  | 2     | 1     | 4     | 53   | 51   | 18   | 0.055003 | 0.035267 | 0.132728 | 2.262363 |
| protein_co cyclin_H     | 456   | 353   | 341   | 329  | 323  | 311  | 8.942638 | 8.877381 | 8.068694 | 10.01445 |
| protein_co histamine_   | 0     | 0     | 0     | 0    | 2    | 1    | 0        | 0        | 0        | 0        |
| protein_co transmembr   | 278   | 257   | 249   | 131  | 185  | 135  | 4.43231  | 5.254457 | 4.78997  | 3.241807 |
| protein_co potassium_   | 299   | 275   | 298   | 506  | 543  | 290  | 3.054491 | 3.602548 | 3.673094 | 8.02322  |
| protein_co Cdk5_and_    | 1016  | 766   | 760   | 449  | 615  | 698  | 9.524242 | 9.208201 | 8.596038 | 6.533013 |
| protein_co dedicator_   | 80    | 70    | 71    | 63   | 77   | 63   | 0.615254 | 0.690354 | 0.658826 | 0.75203  |
| protein_co epithelial_  | 15608 | 12620 | 13428 | 15   | 18   | 7    | 265.5513 | 275.3404 | 275.6516 | 0.396116 |
| protein_co SRY_(sex_d   | 202   | 142   | 137   | 30   | 23   | 27   | 1.359131 | 1.225202 | 1.112189 | 0.313301 |
| protein_co RAS-like_es  | 115   | 95    | 91    | 1    | 1    | 9    | 2.381781 | 2.523114 | 2.274015 | 0.032147 |
| protein_co solute_carr  | 0     | 0     | 0     | 8    | 5    | 2    | 0        | 0        | 0        | 0.261211 |
| protein_co killer_cell_ | 0     | 1     | 0     | 0    | 2    | 0    | 0        | 0.018439 | 0        | 0        |
| protein_co chromosom    | 2     | 4     | 1     | 6    | 10   | 15   | 0.050829 | 0.130363 | 0.030664 | 0.236682 |
| protein_co proline-ric  | 3     | 2     | 2     | 3    | 1    | 3    | 0.209019 | 0.178692 | 0.168129 | 0.324427 |
| protein_co low_densit   | 452   | 379   | 420   | 1189 | 1375 | 1438 | 2.624355 | 2.821842 | 2.942263 | 10.7151  |
| protein_co myosin_bir   | 0     | 0     | 0     | 2    | 0    | 0    | 0        | 0        | 0        | 0.034517 |
| protein_co damage-spe   | 460   | 392   | 431   | 1307 | 1751 | 553  | 11.6844  | 12.76862 | 13.20912 | 51.52936 |
| protein_co acid_phosp   | 582   | 455   | 460   | 235  | 225  | 309  | 12.38765 | 12.419   | 11.81331 | 7.763619 |
| protein_co ubiquitin_   | 0     | 0     | 0     | 0    | 2    | 2    | 0        | 0        | 0        | 0        |
| protein_co family_witl  | 5404  | 3869  | 4154  | 1029 | 1278 | 1116 | 205.011  | 188.2218 | 190.1413 | 60.59095 |
| protein_co RAB33A_m     | 42    | 34    | 31    | 60   | 58   | 25   | 1.565485 | 1.62513  | 1.39415  | 3.471215 |
| protein_co SRY_(sex_d   | 0     | 0     | 0     | 849  | 827  | 807  | 0        | 0        | 0        | 29.7927  |
| protein_co RNA_bindin   | 343   | 322   | 303   | 416  | 505  | 361  | 10.5257  | 12.67133 | 11.21883 | 19.8144  |
| protein_co Serine/thre  | 568   | 432   | 463   | 1582 | 1734 | 1563 | 8.100222 | 7.900265 | 7.966685 | 35.01753 |
| protein_co piwi-like_R  | 12    | 22    | 26    | 2    | 7    | 5    | 0.149689 | 0.351917 | 0.391318 | 0.038723 |
| protein_co melatonin_   | 0     | 0     | 0     | 1    | 0    | 0    | 0        | 0        | 0        | 0.046505 |
| protein_co pumilio_hc   | 2502  | 1937  | 2077  | 2019 | 2233 | 1603 | 21.82676 | 21.6691  | 21.86183 | 27.33812 |
| protein_co SPOC_dom     | 267   | 210   | 227   | 57   | 77   | 19   | 3.161524 | 3.188701 | 3.243091 | 1.047588 |
| protein_co tyrosyl-trN  | 2509  | 1905  | 1991  | 3480 | 4307 | 3678 | 36.33325 | 35.37593 | 34.78747 | 78.21918 |
| protein_co polyhomec    | 3537  | 2676  | 2841  | 279  | 315  | 322  | 42.85529 | 41.57812 | 41.53256 | 5.246916 |
| protein_co cell_divisio | 894   | 767   | 849   | 1182 | 1263 | 1366 | 16.9784  | 18.67945 | 19.45427 | 34.84233 |
| protein_co guanine_nu   | 1508  | 1256  | 1432  | 1355 | 1377 | 1709 | 29.35249 | 31.35036 | 33.6306  | 40.93675 |
| protein_co argonaute_   | 499   | 428   | 423   | 480  | 563  | 297  | 3.2881   | 3.616576 | 3.363046 | 4.909261 |
| protein_co hook_hom     | 0     | 0     | 0     | 606  | 489  | 607  | 0        | 0        | 0        | 7.53023  |
| protein_co cytochrom    | 1     | 4     | 5     | 7    | 7    | 12   | 0.018395 | 0.094358 | 0.110976 | 0.199866 |
| protein_co basic_trans  | 949   | 769   | 771   | 1391 | 1611 | 1733 | 9.461753 | 9.831982 | 9.27487  | 21.52598 |
| protein_co zinc_finger  | 1309  | 1197  | 1195  | 846  | 943  | 643  | 10.47781 | 12.28668 | 11.54109 | 10.51071 |
| protein_co PRP38_pre    | 834   | 707   | 758   | 881  | 829  | 1066 | 14.19465 | 15.43077 | 15.56596 | 23.27369 |
| protein_co desmocolli   | 461   | 390   | 392   | 679  | 888  | 891  | 4.218637 | 4.576624 | 4.328181 | 9.644318 |
| protein_co desmoglein   | 0     | 0     | 1     | 0    | 0    | 0    | 0        | 0        | 0.01024  | 0        |
| protein_co ring_finger  | 169   | 165   | 146   | 609  | 779  | 765  | 2.219724 | 2.779108 | 2.313732 | 12.41538 |
| protein_co elongator_   | 1285  | 1143  | 1156  | 1706 | 1872 | 1520 | 10.30153 | 11.75045 | 11.18162 | 21.22796 |
| protein_co desmoglein   | 0     | 0     | 0     | 0    | 2    | 0    | 0        | 0        | 0        | 0        |
| protein_co desmocolli   | 704   | 560   | 598   | 128  | 147  | 73   | 4.730664 | 4.82555  | 4.848402 | 1.335026 |
| protein_co desmocolli   | 4     | 1     | 2     | 0    | 1    | 0    | 0.043915 | 0.014079 | 0.026493 | 0        |
| protein_co dystrobrevi  | 241   | 190   | 233   | 175  | 119  | 215  | 1.732673 | 1.751711 | 2.021173 | 1.952847 |
| protein_co formin_hoi   | 974   | 790   | 774   | 56   | 99   | 53   | 9.194861 | 9.563628 | 8.816074 | 0.820549 |
| protein_co tubulin_po   | 2468  | 1982  | 2162  | 1256 | 1378 | 1459 | 28.71577 | 29.57252 | 30.35142 | 22.68274 |
| protein_co diacylglyce  | 385   | 263   | 300   | 80   | 95   | 78   | 3.135775 | 2.74694  | 2.948176 | 1.011357 |
| protein_co solute_carr  | 366   | 316   | 324   | 79   | 116  | 135  | 6.552786 | 7.255065 | 6.999032 | 2.195343 |
| protein_co translocase  | 590   | 420   | 512   | 603  | 684  | 791  | 40.68399 | 37.13899 | 42.59803 | 64.53856 |

|                         |       |       |       |      |      |      |          |          |          |          |
|-------------------------|-------|-------|-------|------|------|------|----------|----------|----------|----------|
| protein_co gastric_intr | 1     | 1     | 0     | 2    | 0    | 0    | 0.028891 | 0.037049 | 0        | 0.089686 |
| protein_co DEAH_(Asp    | 557   | 385   | 500   | 545  | 684  | 921  | 5.973865 | 5.295053 | 6.470209 | 9.072505 |
| protein_co apelin_rece  | 0     | 1     | 0     | 2    | 12   | 13   | 0        | 0.034838 | 0        | 0.084333 |
| protein_co fatty_acid_  | 25944 | 20101 | 21457 | 5997 | 6716 | 9712 | 239.8018 | 238.2553 | 239.2944 | 86.03597 |
| protein_co transmemt    | 34    | 18    | 32    | 30   | 38   | 31   | 0.942234 | 0.639679 | 1.069986 | 1.290422 |
| protein_co complemei    | 3     | 3     | 1     | 0    | 1    | 0    | 0.05082  | 0.06517  | 0.020439 | 0        |
| protein_co transmemt    | 1987  | 1460  | 1582  | 861  | 1157 | 1015 | 48.32493 | 45.53397 | 46.42243 | 32.50177 |
| protein_co clock_circa  | 882   | 721   | 785   | 439  | 436  | 391  | 4.013684 | 4.207452 | 4.310149 | 3.10077  |
| protein_co platelet-dei | 855   | 633   | 722   | 17   | 19   | 75   | 6.096558 | 5.788042 | 6.211605 | 0.188147 |
| protein_co gamma-glu    | 42    | 46    | 42    | 24   | 29   | 30   | 1.376227 | 1.932894 | 1.660497 | 1.220626 |
| protein_co collagen_ty  | 70941 | 52372 | 56453 | 4699 | 6685 | 4720 | 529.6011 | 501.372  | 508.495  | 54.4487  |
| protein_co claudin_10   | 6     | 5     | 5     | 200  | 293  | 189  | 0.105926 | 0.113196 | 0.106505 | 5.480407 |
| protein_co DAZ_intera   | 2455  | 1897  | 2154  | 663  | 890  | 599  | 16.28678 | 16.1384  | 17.2416  | 6.826968 |
| protein_co UBA_doma     | 968   | 742   | 763   | 803  | 1015 | 710  | 17.97605 | 17.66983 | 17.09589 | 23.14542 |
| protein_co arginine_ar  | 1706  | 1399  | 1414  | 1614 | 2438 | 1852 | 23.59716 | 24.81463 | 23.59816 | 34.65091 |
| protein_co basic_immi   | 433   | 325   | 369   | 75   | 114  | 83   | 5.264034 | 5.06668  | 5.41259  | 1.415215 |
| protein_co excision_re  | 207   | 160   | 183   | 131  | 116  | 132  | 1.912182 | 1.895344 | 2.039661 | 1.878281 |
| protein_co tripeptidyl  | 998   | 825   | 920   | 888  | 959  | 1186 | 10.04211 | 10.6453  | 11.16941 | 13.86877 |
| protein_co KDEL_(Lys-/  | 878   | 697   | 758   | 384  | 487  | 523  | 19.76449 | 20.12024 | 20.58773 | 13.41692 |
| protein_co cysteinyl-tf | 939   | 811   | 828   | 655  | 792  | 754  | 12.52268 | 13.86953 | 13.32324 | 13.55824 |
| protein_co Rho_GTPas    | 1004  | 824   | 880   | 551  | 600  | 393  | 4.656075 | 4.900302 | 4.923988 | 3.966143 |
| protein_co STT3A_subi   | 5690  | 4718  | 4748  | 1944 | 1950 | 2264 | 58.53537 | 62.24054 | 58.93385 | 31.04079 |
| protein_co ADAM_met     | 0     | 0     | 0     | 291  | 361  | 266  | 0        | 0        | 0        | 5.281527 |
| protein_co acrosomal_   | 7     | 10    | 3     | 18   | 9    | 32   | 0.148386 | 0.271835 | 0.07673  | 0.592241 |
| protein_co v-ets_eryth  | 1285  | 978   | 1093  | 623  | 792  | 992  | 11.7614  | 11.479   | 12.07047 | 8.850638 |
| protein_co solute_carr  | 9     | 7     | 7     | 15   | 13   | 9    | 0.090677 | 0.09044  | 0.085094 | 0.234572 |
| protein_co klotho_bet   | 2     | 2     | 6     | 15   | 19   | 19   | 0.015419 | 0.019773 | 0.055813 | 0.179496 |
| protein_co transmemt    | 1199  | 889   | 957   | 384  | 470  | 474  | 14.96437 | 14.22821 | 14.41117 | 7.438766 |
| protein_co adenomatc    | 1039  | 873   | 933   | 333  | 198  | 515  | 4.418932 | 4.761298 | 4.78775  | 2.198247 |
| protein_co neuronal_r   | 2733  | 2087  | 2337  | 1594 | 1796 | 2046 | 35.95691 | 35.21069 | 37.09791 | 32.55079 |
| protein_co WD_repeat    | 732   | 595   | 615   | 675  | 749  | 787  | 4.869962 | 5.076224 | 4.93671  | 6.970256 |
| protein_co osteoclast   | 505   | 413   | 415   | 186  | 220  | 217  | 17.95258 | 18.8276  | 17.80048 | 10.26311 |
| protein_co riboflavin_  | 334   | 219   | 283   | 158  | 233  | 180  | 5.835047 | 4.906269 | 5.965301 | 4.284355 |
| protein_co ubiquilin_1  | 2314  | 1942  | 2021  | 2030 | 2619 | 2200 | 17.91965 | 19.28523 | 18.88342 | 24.40016 |
| protein_co N(alpha)-ac  | 490   | 392   | 426   | 355  | 400  | 482  | 8.673503 | 8.898029 | 9.098213 | 9.753427 |
| protein_co chromosom    | 235   | 160   | 184   | 295  | 442  | 243  | 4.735348 | 4.134408 | 4.473525 | 9.22649  |
| protein_co annexin_A1   | 4967  | 4097  | 4239  | 4    | 3    | 24   | 105.4336 | 111.5219 | 108.5666 | 0.131788 |
| protein_co cathepsin_   | 1178  | 994   | 1055  | 266  | 285  | 276  | 25.37273 | 27.45476 | 27.41716 | 8.892709 |
| protein_co transmemt    | 3417  | 2691  | 2915  | 766  | 913  | 1873 | 24.56281 | 24.80596 | 25.28248 | 8.546578 |
| protein_co ATP/GTP_b    | 286   | 248   | 265   | 739  | 740  | 738  | 3.052708 | 3.394534 | 3.412818 | 12.24318 |
| protein_co golgi_mem    | 3918  | 3090  | 3266  | 2212 | 2612 | 2807 | 60.31355 | 60.99838 | 60.66172 | 52.85257 |
| protein_co family_witl  | 5     | 7     | 1     | 208  | 248  | 441  | 0.09676  | 0.173714 | 0.023349 | 6.247709 |
| protein_co phosphosei   | 1715  | 1021  | 1306  | 2969 | 4460 | 4238 | 36.75337 | 28.05874 | 33.76947 | 98.75833 |
| protein_co iron-sulfur_ | 370   | 244   | 278   | 547  | 565  | 541  | 8.860728 | 7.493192 | 8.032682 | 20.33225 |
| protein_co ADAM_met     | 14283 | 11300 | 12234 | 749  | 1015 | 1430 | 103.3375 | 104.8398 | 106.796  | 8.411059 |
| protein_co hepatitis_A  | 2     | 3     | 13    | 1    | 4    | 1    | 0.03226  | 0.062053 | 0.253004 | 0.025036 |
| protein_co cyclin_J-lik | 614   | 466   | 468   | 921  | 1209 | 780  | 8.36446  | 8.140757 | 7.692428 | 19.4742  |
| protein_co TAO_kinase   | 527   | 432   | 411   | 322  | 378  | 265  | 5.636642 | 5.925199 | 5.303954 | 5.345597 |
| protein_co ubiquitin_s  | 235   | 202   | 183   | 134  | 141  | 81   | 2.944723 | 3.245916 | 2.766787 | 2.606225 |
| protein_co serine_deh   | 2     | 1     | 2     | 10   | 6    | 3    | 0.058394 | 0.037441 | 0.070455 | 0.453174 |
| protein_co musashi_RI   | 136   | 89    | 96    | 1372 | 1955 | 1293 | 2.143544 | 1.798841 | 1.825563 | 33.56433 |
| protein_co HNF1_hom     | 35    | 19    | 16    | 27   | 39   | 38   | 0.407638 | 0.283772 | 0.224841 | 0.488091 |
| protein_co F-box_prot   | 1046  | 817   | 882   | 1484 | 1613 | 1181 | 10.46447 | 10.48134 | 10.64638 | 23.04357 |
| protein_co T-box_3      | 1163  | 927   | 1059  | 21   | 33   | 87   | 11.54628 | 11.80189 | 12.68547 | 0.323603 |
| protein_co 2'-5'-oligoa | 0     | 0     | 2     | 0    | 0    | 0    | 0        | 0        | 0.054269 | 0        |
| protein_co harakiri_BC  | 5     | 1     | 0     | 80   | 146  | 114  | 0.040499 | 0.010387 | 0        | 1.005767 |
| protein_co ring_finger  | 92    | 77    | 75    | 450  | 516  | 349  | 1.111252 | 1.192683 | 1.093035 | 8.436608 |
| protein_co purinergic   | 254   | 195   | 199   | 198  | 216  | 131  | 2.556905 | 2.517241 | 2.41703  | 3.093688 |
| protein_co coiled-coil  | 16    | 16    | 17    | 304  | 409  | 265  | 0.245578 | 0.314919 | 0.314823 | 7.242245 |
| protein_co deltex_hon   | 11    | 6     | 4     | 179  | 244  | 111  | 0.149288 | 0.104422 | 0.0655   | 3.770647 |
| protein_co TRAF-type_   | 832   | 656   | 636   | 598  | 700  | 674  | 12.2758  | 12.41194 | 11.32222 | 13.69488 |
| protein_co cyclin_D_b   | 935   | 824   | 815   | 786  | 710  | 1082 | 9.830082 | 11.10918 | 10.33835 | 12.82622 |
| protein_co transmemt    | 311   | 246   | 244   | 228  | 341  | 183  | 11.45546 | 11.61974 | 10.84401 | 13.03519 |
| protein_co coiled-coil  | 44    | 45    | 39    | 11   | 27   | 8    | 0.61901  | 0.811833 | 0.662    | 0.240197 |
| protein_co transmemt    | 247   | 212   | 183   | 218  | 229  | 156  | 11.32144 | 12.46092 | 10.12054 | 15.50928 |

|                         |       |       |       |       |       |       |          |          |          |          |
|-------------------------|-------|-------|-------|-------|-------|-------|----------|----------|----------|----------|
| protein_co POM121_t     | 1676  | 1341  | 1414  | 1233  | 1616  | 1840  | 13.4591  | 13.80957 | 13.70059 | 15.36864 |
| protein_co CD36_mol     | 68    | 40    | 56    | 1     | 0     | 1     | 0.516025 | 0.389253 | 0.512741 | 0.011779 |
| protein_co patatin-like | 463   | 397   | 361   | 142   | 124   | 187   | 5.08671  | 5.593142 | 4.785323 | 2.421446 |
| protein_co hypoxia_in   | 256   | 223   | 214   | 284   | 371   | 289   | 8.76193  | 9.787551 | 8.837342 | 15.0872  |
| protein_co family_witl  | 0     | 0     | 0     | 0     | 0     | 6     | 0        | 0        | 0        | 0        |
| protein_co RAD50_int    | 434   | 377   | 390   | 254   | 241   | 255   | 6.838128 | 7.617249 | 7.414129 | 6.211717 |
| protein_co SRSF_prote   | 1024  | 871   | 918   | 934   | 1137  | 682   | 12.97713 | 14.15488 | 14.03684 | 18.37198 |
| processed_kielin/chor   | 2     | 4     | 3     | 94    | 131   | 127   | 0.018359 | 0.047087 | 0.033228 | 1.339331 |
| protein_co testis_deriv | 1551  | 1122  | 1295  | 990   | 1127  | 1012  | 26.14177 | 24.25077 | 26.33547 | 25.89935 |
| protein_co MyoD_fami    | 1648  | 1378  | 1539  | 308   | 353   | 363   | 16.80617 | 18.02063 | 18.93643 | 4.875202 |
| protein_co mitochond    | 270   | 235   | 214   | 280   | 306   | 317   | 1.166096 | 1.301511 | 1.115148 | 1.876977 |
| protein_co brain-speci  | 21    | 30    | 21    | 46    | 60    | 38    | 0.163842 | 0.300149 | 0.197685 | 0.55705  |
| protein_co ankyrin_rej  | 184   | 131   | 122   | 78    | 114   | 90    | 1.640883 | 1.498099 | 1.312707 | 1.079655 |
| protein_co 5-hydroxyt   | 20    | 20    | 14    | 8     | 11    | 3     | 0.607777 | 0.779388 | 0.513323 | 0.377342 |
| protein_co KH_homol     | 87    | 56    | 72    | 73    | 88    | 68    | 1.987059 | 1.64017  | 1.984139 | 2.587884 |
| protein_co KIAA1009     | 267   | 257   | 231   | 109   | 59    | 152   | 2.428168 | 2.99716  | 2.534706 | 1.538595 |
| protein_co synaptotag   | 4480  | 3517  | 3876  | 3505  | 4222  | 5956  | 32.60395 | 32.82267 | 34.03487 | 39.5923  |
| protein_co sorting_ne   | 644   | 629   | 532   | 248   | 276   | 222   | 8.353298 | 10.46242 | 8.325911 | 4.992916 |
| protein_co 5'-nucleoti  | 3458  | 2963  | 3096  | 4     | 7     | 1     | 45.70059 | 50.2155  | 49.36803 | 0.082052 |
| protein_co melanocori   | 19    | 17    | 14    | 105   | 121   | 105   | 0.4138   | 0.474782 | 0.367885 | 3.54941  |
| protein_co EPH_recept   | 738   | 609   | 612   | 257   | 248   | 178   | 5.252707 | 5.558447 | 5.255648 | 2.839163 |
| protein_co akirin_2     | 965   | 814   | 933   | 1396  | 1777  | 1022  | 27.22555 | 29.44985 | 31.7599  | 61.13153 |
| protein_co origin_recc  | 312   | 258   | 273   | 513   | 378   | 512   | 5.823919 | 6.175751 | 6.148532 | 14.86307 |
| protein_co Leber_cong   | 83    | 84    | 79    | 83    | 58    | 40    | 0.824724 | 1.070333 | 0.947121 | 1.280086 |
| protein_co mitogen-ac   | 1628  | 1220  | 1272  | 789   | 869   | 908   | 15.54407 | 14.93756 | 14.65364 | 11.69278 |
| protein_co proline_ri   | 440   | 368   | 372   | 32    | 47    | 21    | 5.249773 | 5.630475 | 5.355239 | 0.592609 |
| protein_co LIM_domai    | 92    | 104   | 77    | 15    | 26    | 15    | 1.880506 | 2.726024 | 1.899003 | 0.475892 |
| protein_co PHD_finger   | 1013  | 868   | 892   | 554   | 663   | 308   | 5.304846 | 5.828977 | 5.636068 | 4.503017 |
| protein_co N-acetyltra  | 1188  | 848   | 975   | 1856  | 1982  | 2593  | 13.91938 | 12.74115 | 13.78339 | 33.75295 |
| protein_co ets_homol    | 0     | 0     | 0     | 0     | 2     | 0     | 0        | 0        | 0        | 0        |
| protein_co proline_ri   | 16    | 9     | 9     | 49    | 87    | 21    | 0.135667 | 0.09786  | 0.092076 | 0.644884 |
| protein_co cell_cycle_  | 6865  | 5332  | 5992  | 6178  | 6563  | 6830  | 78.35929 | 78.04578 | 82.52201 | 109.4532 |
| protein_co ATP_syntha   | 2429  | 1624  | 1867  | 3002  | 2972  | 2895  | 57.6396  | 49.41842 | 53.45469 | 110.5693 |
| protein_co Dnal_(Hsp4   | 425   | 318   | 348   | 278   | 376   | 257   | 5.833799 | 5.597563 | 5.763547 | 5.922946 |
| protein_co CD63_mol     | 13778 | 11460 | 11115 | 2767  | 3486  | 3020  | 523.9665 | 558.8706 | 510.0055 | 163.3266 |
| protein_co peripherin   | 1     | 3     | 0     | 3     | 7     | 1     | 0.014468 | 0.055659 | 0        | 0.067368 |
| protein_co advillin     | 59    | 67    | 63    | 38    | 46    | 42    | 0.94131  | 1.370771 | 1.212745 | 0.941011 |
| protein_co anti-Muller  | 0     | 2     | 3     | 0     | 2     | 1     | 0        | 0.055624 | 0.078504 | 0        |
| protein_co growth_dif   | 1658  | 1287  | 1330  | 280   | 361   | 474   | 20.83721 | 20.74164 | 20.16763 | 5.461899 |
| protein_co glutaminas   | 33    | 44    | 32    | 211   | 263   | 129   | 0.574377 | 0.982075 | 0.672018 | 5.700274 |
| protein_co integrin_al  | 802   | 613   | 668   | 630   | 917   | 645   | 8.648987 | 8.477361 | 8.691913 | 10.54537 |
| protein_co thymocyte    | 0     | 0     | 0     | 0     | 1     | 2     | 0        | 0        | 0        | 0        |
| protein_co family_witl  | 31    | 27    | 22    | 22    | 28    | 16    | 0.470722 | 0.525746 | 0.403064 | 0.518509 |
| protein_co retinol_def  | 8     | 6     | 15    | 6     | 9     | 10    | 0.264355 | 0.254249 | 0.59805  | 0.307737 |
| protein_co ArfGAP_wit   | 316   | 191   | 197   | 15    | 22    | 17    | 3.319275 | 2.572758 | 2.496724 | 0.244556 |
| protein_co biogenesis_  | 14    | 8     | 14    | 15    | 29    | 13    | 0.534142 | 0.391406 | 0.644473 | 0.888281 |
| protein_co cyclin-depe  | 1510  | 1131  | 1219  | 876   | 968   | 1228  | 34.10594 | 32.75857 | 33.2204  | 30.71055 |
| protein_co protein_ph   | 0     | 0     | 0     | 261   | 361   | 301   | 0        | 0        | 0        | 7.625664 |
| protein_co trophinin_   | 697   | 563   | 566   | 635   | 758   | 666   | 11.79442 | 12.21692 | 11.55602 | 16.67816 |
| protein_co tetraspanin  | 367   | 329   | 307   | 162   | 192   | 156   | 5.011251 | 5.760834 | 5.057857 | 3.433409 |
| protein_co beta-14-Na   | 135   | 86    | 87    | 3     | 6     | 1     | 1.134436 | 0.926732 | 0.882091 | 0.039129 |
| protein_co transcripti  | 808   | 654   | 690   | 744   | 1045  | 905   | 10.63648 | 11.04011 | 10.95932 | 15.20162 |
| protein_co coenzyme_    | 96    | 97    | 98    | 137   | 152   | 84    | 2.724844 | 3.530624 | 3.356174 | 6.035613 |
| protein_co Fas_apopto   | 102   | 57    | 82    | 1     | 5     | 1     | 1.027671 | 0.736441 | 0.996818 | 0.015638 |
| protein_co PAN2_poly    | 480   | 414   | 430   | 660   | 760   | 415   | 4.189726 | 4.633979 | 4.528568 | 8.941673 |
| protein_co extra_spinc  | 722   | 576   | 646   | 1299  | 1507  | 1390  | 5.081746 | 5.198854 | 5.486007 | 14.19108 |
| pseudogen: keratin_12   | 0     | 3     | 0     | 1     | 1     | 0     | 0        | 0.101973 | 0        | 0.041142 |
| protein_co keratin_7    | 8     | 3     | 2     | 145   | 173   | 130   | 0.213866 | 0.102845 | 0.06451  | 6.016574 |
| protein_co zinc_finger  | 67    | 62    | 69    | 184   | 155   | 125   | 1.42284  | 1.688427 | 1.767985 | 6.064983 |
| protein_co heterogene   | 26639 | 21646 | 22605 | 41275 | 43985 | 43018 | 303.1068 | 315.8383 | 310.3347 | 728.946  |
| protein_co solute_carr  | 15    | 8     | 8     | 3     | 3     | 3     | 0.279662 | 0.191268 | 0.179962 | 0.086815 |
| protein_co activin_A_r  | 540   | 418   | 422   | 935   | 1148  | 640   | 5.549114 | 5.508274 | 5.232273 | 14.91324 |
| protein_co osteosarco   | 2901  | 2234  | 2303  | 1098  | 1177  | 1080  | 35.14934 | 34.71059 | 33.66754 | 20.64915 |
| protein_co major_intri  | 0     | 1     | 0     | 1     | 0     | 6     | 0        | 0.023136 | 0        | 0.028003 |
| protein_co potassium_   | 7     | 17    | 20    | 7     | 14    | 8     | 0.08488  | 0.264341 | 0.292607 | 0.131745 |

|                         |       |       |       |      |      |      |          |          |          |          |
|-------------------------|-------|-------|-------|------|------|------|----------|----------|----------|----------|
| protein_co LTV1_homo    | 389   | 348   | 323   | 391  | 364  | 803  | 9.875591 | 11.32927 | 9.893821 | 15.40709 |
| protein_co microtubul   | 5     | 3     | 7     | 1616 | 1836 | 1402 | 0.061039 | 0.046964 | 0.103106 | 30.62019 |
| protein_co CD164_mo     | 4024  | 2958  | 3253  | 913  | 1131 | 1236 | 38.01842 | 35.83799 | 37.08243 | 13.38867 |
| protein_co lactation_e  | 79    | 103   | 107   | 80   | 91   | 58   | 0.779035 | 1.302496 | 1.273098 | 1.224476 |
| protein_co NHS-like_1   | 970   | 785   | 817   | 779  | 1265 | 1154 | 6.064442 | 6.293585 | 6.162958 | 7.559395 |
| protein_co Abelson_he   | 612   | 464   | 498   | 210  | 173  | 158  | 4.846595 | 4.71208  | 4.758419 | 2.58128  |
| protein_co hairy/enhai  | 2     | 0     | 1     | 338  | 454  | 569  | 0.035019 | 0        | 0.021126 | 9.1858   |
| protein_co protein_kir  | 71    | 58    | 76    | 176  | 242  | 182  | 1.775569 | 1.860015 | 2.293194 | 6.831597 |
| protein_co neuromedi    | 1     | 2     | 0     | 0    | 0    | 0    | 0.034631 | 0.088818 | 0        | 0        |
| protein_co sphingomy    | 100   | 85    | 82    | 85   | 107  | 84   | 2.850457 | 3.107011 | 2.820177 | 3.760658 |
| protein_co microtubul   | 2841  | 2292  | 2319  | 1408 | 1748 | 1438 | 30.40734 | 31.458   | 29.94718 | 23.39054 |
| protein_co RALBP1_as    | 752   | 585   | 641   | 1180 | 1540 | 1143 | 5.810066 | 5.796001 | 5.975432 | 14.15063 |
| protein_co syntaxin_1   | 1     | 8     | 6     | 1    | 3    | 1    | 0.024346 | 0.24976  | 0.176248 | 0.037788 |
| protein_co tec_protein  | 7     | 5     | 0     | 148  | 134  | 34   | 0.089024 | 0.081543 | 0        | 2.921457 |
| protein_co protease-as  | 302   | 256   | 260   | 95   | 138  | 109  | 13.07552 | 14.21351 | 13.5823  | 6.384193 |
| protein_co sema_dom     | 2279  | 1639  | 1715  | 120  | 102  | 61   | 24.78255 | 22.85546 | 22.50162 | 2.025412 |
| protein_co chaperonin   | 6471  | 5217  | 5709  | 6963 | 7782 | 7177 | 149.397  | 154.4545 | 159.0298 | 249.5154 |
| protein_co early_grow   | 1     | 0     | 0     | 0    | 0    | 2    | 0.019768 | 0        | 0        | 0        |
| protein_co RAB11_fam    | 1091  | 896   | 967   | 329  | 365  | 143  | 11.7819  | 12.40818 | 12.59984 | 5.514637 |
| protein_co SMYD_fami    | 679   | 556   | 542   | 856  | 986  | 1277 | 12.27857 | 12.89324 | 11.82566 | 24.02604 |
| protein_co dysferlin_li | 43    | 26    | 27    | 540  | 688  | 447  | 0.296685 | 0.230043 | 0.22477  | 5.782974 |
| protein_co coiled-coil  | 293   | 274   | 255   | 72   | 125  | 132  | 4.033698 | 4.837218 | 4.235688 | 1.538504 |
| protein_co empty_spir   | 0     | 0     | 1     | 13   | 22   | 5    | 0        | 0        | 0.025857 | 0.432421 |
| protein_co potassium_   | 445   | 292   | 352   | 813  | 936  | 662  | 4.410496 | 3.711245 | 4.20938  | 12.50687 |
| protein_co ubiquitin_s  | 507   | 426   | 434   | 227  | 152  | 314  | 5.007001 | 5.394965 | 5.171392 | 3.479573 |
| protein_co glucosamin   | 3184  | 2581  | 2783  | 728  | 775  | 717  | 29.14834 | 30.29969 | 30.73987 | 10.34434 |
| protein_co carboxypep   | 1     | 1     | 3     | 3    | 2    | 4    | 0.007046 | 0.009035 | 0.025504 | 0.032808 |
| protein_co MDM2_onc     | 1157  | 972   | 1003  | 949  | 1341 | 1005 | 7.35019  | 7.918461 | 7.688014 | 9.357544 |
| protein_co kelch-like_f | 1154  | 930   | 1019  | 1290 | 1616 | 700  | 8.340179 | 8.619098 | 8.885703 | 14.47071 |
| protein_co beta-carote  | 1     | 0     | 0     | 10   | 3    | 3    | 0.017562 | 0        | 0        | 0.272584 |
| protein_co M-phase_pl   | 464   | 310   | 391   | 299  | 332  | 413  | 19.72527 | 16.89958 | 20.05532 | 19.72907 |
| protein_co carbohydr    | 8     | 1     | 5     | 2    | 3    | 1    | 0.115599 | 0.01853  | 0.087173 | 0.044857 |
| protein_co KIAA0513     | 511   | 428   | 475   | 185  | 286  | 129  | 3.082964 | 3.311317 | 3.457716 | 1.732406 |
| protein_co dynein_cyt   | 3148  | 2516  | 2695  | 972  | 1326 | 1402 | 32.69319 | 33.50755 | 33.76988 | 15.66821 |
| protein_co F-box_and    | 40    | 38    | 25    | 1    | 1    | 0    | 1.131243 | 1.378126 | 0.853069 | 0.043896 |
| protein_co formin_ho    | 2983  | 2321  | 2416  | 725  | 909  | 790  | 32.3705  | 32.29837 | 31.63305 | 12.21138 |
| protein_co coiled-coil  | 619   | 473   | 508   | 232  | 383  | 244  | 11.78438 | 11.54746 | 11.66884 | 6.855426 |
| protein_co solute_carr  | 160   | 123   | 147   | 162  | 180  | 59   | 1.624952 | 1.601898 | 1.801299 | 2.553677 |
| protein_co angiotensin  | 8     | 9     | 10    | 1    | 0    | 0    | 0.163736 | 0.236215 | 0.246947 | 0.031768 |
| protein_co zinc_finger  | 67    | 54    | 78    | 139  | 173  | 141  | 1.141996 | 1.180301 | 1.604104 | 3.677351 |
| protein_co pecanex-lik  | 668   | 527   | 578   | 1243 | 1555 | 939  | 4.594768 | 4.648438 | 4.796926 | 13.27054 |
| protein_co potassium_   | 377   | 256   | 274   | 266  | 338  | 148  | 8.180258 | 7.123197 | 7.173387 | 8.95855  |
| protein_co URB2_ribo    | 366   | 282   | 326   | 489  | 633  | 1058 | 3.0575   | 3.020952 | 3.285875 | 6.340517 |
| protein_co egl_nine_h   | 726   | 562   | 603   | 774  | 734  | 345  | 4.796696 | 4.761582 | 4.806965 | 7.937377 |
| protein_co calpain_9    | 2     | 5     | 3     | 0    | 3    | 3    | 0.037754 | 0.121034 | 0.068328 | 0        |
| protein_co componen     | 433   | 343   | 422   | 452  | 481  | 618  | 2.591038 | 2.632021 | 3.046818 | 4.19812  |
| protein_co ATP-bindin   | 346   | 239   | 273   | 239  | 314  | 242  | 4.206364 | 3.725958 | 4.004437 | 4.509819 |
| protein_co nucleoside   | 249   | 228   | 267   | 532  | 638  | 410  | 1.341254 | 1.57491  | 1.735285 | 4.447887 |
| protein_co TAF5-like_F  | 643   | 530   | 493   | 376  | 461  | 645  | 7.422521 | 7.845591 | 6.8665   | 6.73688  |
| protein_co glutamate-i  | 4219  | 3299  | 3462  | 4538 | 5079 | 4863 | 32.26174 | 32.34967 | 31.94136 | 53.86085 |
| protein_co syntaxin_6   | 694   | 537   | 607   | 755  | 927  | 714  | 6.70824  | 6.656298 | 7.079227 | 11.3273  |
| protein_co regulator_c  | 1     | 3     | 1     | 0    | 0    | 4    | 0.032744 | 0.12597  | 0.039508 | 0        |
| protein_co ribonuclea   | 232   | 212   | 189   | 21   | 27   | 29   | 2.566891 | 3.007909 | 2.52307  | 0.360636 |
| protein_co DEAH_(Asp    | 3956  | 3267  | 3461  | 3704 | 4290 | 6570 | 43.74927 | 46.33114 | 46.18109 | 63.57934 |
| protein_co KIAA1614     | 390   | 273   | 270   | 79   | 94   | 58   | 1.894252 | 1.700376 | 1.582286 | 0.595567 |
| protein_co centrosom    | 1037  | 817   | 877   | 605  | 305  | 502  | 3.604251 | 3.641394 | 3.677764 | 3.263789 |
| protein_co N-acetylnei  | 74    | 66    | 74    | 20   | 18   | 19   | 1.435013 | 1.64126  | 1.731426 | 0.601983 |
| protein_co family_witl  | 2454  | 1865  | 1995  | 126  | 152  | 176  | 16.60914 | 16.18679 | 16.29159 | 1.323651 |
| protein_co phosphatic   | 505   | 412   | 390   | 246  | 251  | 236  | 9.003596 | 9.419573 | 8.389524 | 6.80754  |
| protein_co acyl-CoA_b   | 877   | 681   | 765   | 883  | 1063 | 917  | 24.62428 | 24.51999 | 25.91632 | 38.48178 |
| protein_co laminin_ga   | 15910 | 12872 | 13885 | 4035 | 5197 | 3432 | 94.56461 | 98.11012 | 99.57547 | 37.22481 |
| protein_co ring_finger  | 540   | 414   | 408   | 317  | 420  | 449  | 2.248522 | 2.210615 | 2.049801 | 2.04877  |
| protein_co G_protein-i  | 0     | 2     | 2     | 0    | 0    | 1    | 0        | 0.031416 | 0.029559 | 0        |
| protein_co SP110_nuc    | 121   | 97    | 92    | 12   | 38   | 45   | 2.082089 | 2.1404   | 1.910072 | 0.320498 |
| protein_co mitochond    | 407   | 312   | 351   | 575  | 587  | 677  | 10.91776 | 10.73255 | 11.36041 | 23.94072 |

|                         |       |       |       |      |      |      |          |          |          |          |
|-------------------------|-------|-------|-------|------|------|------|----------|----------|----------|----------|
| protein_co cholinergic  | 2     | 2     | 1     | 8    | 5    | 2    | 0.031032 | 0.039795 | 0.018721 | 0.192667 |
| protein_co paired_box   | 291   | 212   | 254   | 0    | 7    | 4    | 3.779777 | 3.531168 | 3.980659 | 0        |
| protein_co dedicator_1  | 717   | 678   | 638   | 21   | 14   | 16   | 4.613082 | 5.593853 | 4.952686 | 0.209711 |
| protein_co tubulin_ty   | 700   | 546   | 564   | 1048 | 1115 | 1015 | 6.608217 | 6.609798 | 6.424116 | 15.356   |
| protein_co ubiquitin_5  | 223   | 160   | 191   | 237  | 206  | 299  | 1.301852 | 1.197805 | 1.345359 | 2.147512 |
| protein_co 5-hydroxyt   | 1     | 4     | 2     | 4    | 2    | 9    | 0.020877 | 0.107088 | 0.050379 | 0.129617 |
| protein_co integral_m   | 22764 | 16453 | 16959 | 7084 | 8729 | 8076 | 513.6691 | 476.0902 | 461.7247 | 248.1098 |
| protein_co solute_carr  | 4     | 10    | 10    | 48   | 67   | 43   | 0.05333  | 0.170969 | 0.160863 | 0.993298 |
| protein_co serpin_pep   | 18755 | 14713 | 16377 | 1258 | 1517 | 1515 | 146.8396 | 147.7191 | 154.7065 | 15.28753 |
| protein_co DnaJ_(Hsp4   | 1300  | 889   | 900   | 538  | 727  | 767  | 13.58525 | 11.91339 | 11.34788 | 8.726439 |
| protein_co transmembr   | 610   | 534   | 496   | 526  | 606  | 294  | 9.742136 | 10.93641 | 9.557715 | 13.03889 |
| protein_co cytochrom    | 77    | 45    | 54    | 345  | 381  | 138  | 1.407066 | 1.054498 | 1.190599 | 9.785281 |
| protein_co eukaryotic_  | 2139  | 1754  | 1712  | 1175 | 1540 | 1427 | 28.45326 | 29.9199  | 27.47724 | 24.25993 |
| protein_co armadillo_1  | 1315  | 988   | 1084  | 558  | 721  | 533  | 10.70864 | 10.31751 | 10.65089 | 7.052992 |
| protein_co calcium_bi   | 977   | 804   | 849   | 841  | 1178 | 846  | 11.97374 | 12.63574 | 12.55426 | 15.99786 |
| protein_co cytochrom    | 1379  | 1019  | 1189  | 1602 | 1799 | 1537 | 87.61698 | 83.02475 | 91.14942 | 157.9854 |
| protein_co REV1_polyr   | 570   | 492   | 479   | 383  | 479  | 547  | 5.625618 | 6.22687  | 5.703992 | 5.867115 |
| protein_co testis_speci | 13    | 10    | 11    | 46   | 52   | 33   | 0.157187 | 0.155054 | 0.160477 | 0.863298 |
| protein_co major_facil  | 221   | 174   | 193   | 215  | 222  | 216  | 2.559322 | 2.583992 | 2.696733 | 3.864573 |
| protein_co transmembr   | 1303  | 1036  | 1050  | 609  | 799  | 754  | 14.51941 | 14.80382 | 14.11699 | 10.53301 |
| protein_co ectodysplasi | 0     | 3     | 1     | 1    | 0    | 1    | 0        | 0.041728 | 0.013087 | 0.016835 |
| protein_co transformin  | 687   | 513   | 553   | 387  | 566  | 559  | 5.387764 | 5.159155 | 5.23269  | 4.710785 |
| protein_co GRIP_and_1   | 743   | 638   | 697   | 785  | 458  | 944  | 5.144608 | 5.664916 | 5.822966 | 8.436525 |
| protein_co mitochondri  | 210   | 175   | 173   | 490  | 489  | 550  | 6.564602 | 7.015143 | 6.525042 | 23.77474 |
| protein_co G_protein-i  | 1     | 2     | 0     | 1    | 5    | 6    | 0.027183 | 0.069716 | 0        | 0.042191 |
| protein_co chromosom    | 276   | 237   | 238   | 227  | 284  | 285  | 2.714271 | 2.988834 | 2.824029 | 3.464978 |
| protein_co ankyrin_rej  | 289   | 237   | 267   | 71   | 86   | 67   | 2.161623 | 2.273211 | 2.40958  | 0.824273 |
| protein_co enhancer_c   | 357   | 301   | 271   | 231  | 273  | 452  | 4.596303 | 4.969541 | 4.209764 | 4.616182 |
| protein_co Rho_guanin   | 168   | 142   | 115   | 431  | 616  | 450  | 1.645264 | 1.783298 | 1.358852 | 6.551398 |
| protein_co iron-sulfur_ | 1300  | 1067  | 1157  | 968  | 1041 | 957  | 16.54193 | 17.41072 | 17.76333 | 19.11828 |
| protein_co aldehyde_d   | 1952  | 1496  | 1582  | 137  | 200  | 99   | 12.12791 | 11.9192  | 11.85934 | 1.321165 |
| protein_co stabilin_2   | 6     | 0     | 5     | 2    | 4    | 2    | 0.034098 | 0        | 0.034284 | 0.017641 |
| protein_co ubiquitin_5  | 0     | 1     | 4     | 753  | 767  | 939  | 0        | 0.01495  | 0.056266 | 13.62586 |
| protein_co SCY1-like_2  | 1486  | 1188  | 1204  | 419  | 379  | 550  | 12.0572  | 12.361   | 11.78697 | 5.276819 |
| protein_co cytoskeletc  | 13040 | 10159 | 10839 | 2089 | 2881 | 2263 | 197.687  | 197.4971 | 198.2612 | 49.15519 |
| protein_co plexin_C1    | 2292  | 1781  | 1867  | 74   | 94   | 76   | 14.62999 | 14.57816 | 14.37877 | 0.733148 |
| protein_co adaptor_pr   | 914   | 740   | 784   | 298  | 344  | 265  | 13.2317  | 13.73759 | 13.6941  | 6.696011 |
| protein_co PWP1_hon     | 1022  | 864   | 914   | 805  | 776  | 1122 | 18.28371 | 19.8215  | 19.72912 | 22.3532  |
| protein_co DNA-damag    | 99    | 67    | 74    | 132  | 148  | 74   | 1.319156 | 1.144841 | 1.189709 | 2.730018 |
| protein_co KIAA1033     | 986   | 720   | 779   | 528  | 437  | 712  | 7.945275 | 7.440016 | 7.573865 | 6.603838 |
| protein_co solute_carr  | 173   | 130   | 164   | 6    | 12   | 5    | 1.823325 | 1.756996 | 2.085499 | 0.098152 |
| protein_co villin-like  | 171   | 92    | 130   | 81   | 103  | 81   | 1.806306 | 1.246213 | 1.656863 | 1.328039 |
| protein_co filamin_B_1  | 2155  | 1816  | 1979  | 5700 | 6570 | 4788 | 10.59536 | 11.44969 | 11.73985 | 43.49847 |
| protein_co NIMA-relati  | 305   | 279   | 290   | 558  | 604  | 421  | 4.393688 | 5.153983 | 5.040521 | 12.47654 |
| protein_co protocadhe   | 0     | 0     | 0     | 3    | 7    | 96   | 0        | 0        | 0        | 0.054544 |
| protein_co vacuolar_p   | 759   | 641   | 652   | 282  | 303  | 340  | 8.057397 | 8.726104 | 8.351195 | 4.646571 |
| protein_co ribonuclea   | 250   | 264   | 237   | 345  | 383  | 449  | 7.196135 | 9.744792 | 8.231059 | 15.41377 |
| protein_co cytoskeletc  | 1439  | 1169  | 1351  | 1136 | 974  | 1192 | 18.5932  | 19.36945 | 21.06186 | 22.78254 |
| protein_co leukocyte_1  | 0     | 0     | 0     | 1136 | 1401 | 1472 | 0        | 0        | 0        | 57.25613 |
| protein_co TBC1_dom     | 1081  | 809   | 836   | 976  | 1278 | 837  | 7.964819 | 7.643778 | 7.43198  | 11.1617  |
| protein_co thrombosp    | 208   | 134   | 153   | 5    | 4    | 11   | 3.061244 | 2.529    | 2.716903 | 0.114218 |
| protein_co bora_auror   | 192   | 152   | 164   | 159  | 155  | 228  | 3.263097 | 3.312696 | 3.362951 | 4.194269 |
| protein_co leucine-ricl | 809   | 692   | 700   | 281  | 299  | 103  | 8.053933 | 8.834356 | 8.408249 | 4.342065 |
| protein_co succinate-C  | 644   | 541   | 548   | 635  | 502  | 751  | 13.95433 | 15.03245 | 14.32688 | 21.35636 |
| protein_co regulator_c  | 680   | 604   | 564   | 694  | 812  | 602  | 7.921792 | 9.023204 | 7.927599 | 12.54887 |
| protein_co mediator_c   | 328   | 255   | 242   | 265  | 289  | 301  | 7.606294 | 7.583135 | 6.771153 | 9.538401 |
| protein_co PHD_finger   | 144   | 101   | 121   | 77   | 94   | 75   | 4.152621 | 3.735    | 4.210108 | 3.446522 |
| pseudogen_1 ribosomal_  | 21    | 21    | 22    | 41   | 75   | 37   | 1.608971 | 2.063277 | 2.03376  | 4.875771 |
| protein_co componen     | 642   | 535   | 578   | 208  | 273  | 254  | 6.692617 | 7.151943 | 7.27004  | 3.36554  |
| protein_co LIM_domai    | 2553  | 1966  | 2207  | 303  | 397  | 388  | 14.72813 | 14.54419 | 15.36198 | 2.713125 |
| protein_co sciellin     | 13    | 3     | 7     | 1    | 0    | 1    | 0.19689  | 0.058265 | 0.127916 | 0.023508 |
| protein_co integral_m   | 3360  | 2590  | 2689  | 1775 | 2044 | 2164 | 83.98212 | 83.01502 | 81.09357 | 68.86149 |
| protein_co sprouty_hc   | 3321  | 2623  | 2586  | 1080 | 1457 | 1453 | 57.50434 | 58.24241 | 54.02668 | 29.02592 |
| protein_co nudix_(nuc   | 312   | 248   | 251   | 512  | 588  | 755  | 6.973158 | 7.107812 | 6.768566 | 17.76132 |
| protein_co endothelin   | 1     | 0     | 0     | 174  | 223  | 238  | 0.010488 | 0        | 0        | 2.832406 |

|                         |       |       |       |      |       |      |          |          |          |          |
|-------------------------|-------|-------|-------|------|-------|------|----------|----------|----------|----------|
| protein_co regulator_c  | 347   | 251   | 276   | 148  | 134   | 167  | 5.034293 | 4.669734 | 4.831324 | 3.332738 |
| protein_co lymphocyt    | 193   | 152   | 212   | 51   | 52    | 68   | 2.294567 | 2.317376 | 3.041077 | 0.941118 |
| protein_co SET_domai    | 208   | 158   | 188   | 110  | 142   | 94   | 1.57741  | 1.536553 | 1.720232 | 1.294805 |
| protein_co secernin_1   | 6475  | 5401  | 5649  | 3672 | 4178  | 3437 | 57.55694 | 61.56607 | 60.58674 | 50.66302 |
| protein_co chromosom    | 8     | 5     | 11    | 6    | 9     | 10   | 0.153048 | 0.122664 | 0.253909 | 0.178164 |
| protein_co tensin_3     | 1741  | 1332  | 1489  | 1532 | 1673  | 1506 | 10.7063  | 10.50399 | 11.04799 | 14.62277 |
| protein_co speedy_ho    | 28    | 19    | 22    | 14   | 9     | 9    | 0.495629 | 0.431282 | 0.469861 | 0.384642 |
| protein_co carbohydr    | 638   | 510   | 509   | 256  | 375   | 269  | 14.22531 | 14.58212 | 13.69326 | 8.859548 |
| protein_co insulin-like | 1248  | 1047  | 1042  | 2616 | 3018  | 2346 | 13.76912 | 14.81315 | 13.87098 | 44.79811 |
| protein_co glycoprotei  | 267   | 167   | 200   | 10   | 4     | 16   | 4.374436 | 3.508622 | 3.953564 | 0.254297 |
| protein_co Rap_guanir   | 525   | 452   | 423   | 111  | 150   | 107  | 3.718058 | 4.104919 | 3.614475 | 1.220142 |
| protein_co ras-related_ | 6012  | 4894  | 4797  | 4338 | 5527  | 4844 | 121.3529 | 126.679  | 116.8285 | 135.9099 |
| protein_co KDEL_(Lys-   | 7047  | 5811  | 6297  | 1040 | 1223  | 1084 | 114.5749 | 121.1561 | 123.5284 | 26.24514 |
| protein_co nucleopori   | 300   | 272   | 266   | 247  | 362   | 367  | 5.56228  | 6.467103 | 5.950607 | 7.108189 |
| protein_co interleukin  | 0     | 2     | 0     | 2    | 1     | 0    | 0        | 0.078755 | 0        | 0.095324 |
| protein_co zinc_finger  | 157   | 130   | 154   | 259  | 304   | 229  | 3.7908   | 4.025167 | 4.48642  | 9.706472 |
| protein_co acyloxyacyl  | 5     | 6     | 11    | 0    | 3     | 1    | 0.097851 | 0.150575 | 0.259737 | 0        |
| protein_co basic_leuci  | 929   | 774   | 775   | 1063 | 1132  | 978  | 20.73338 | 22.15158 | 20.86912 | 36.82291 |
| protein_co diacylglyce  | 14    | 13    | 18    | 32   | 20    | 18   | 0.094905 | 0.11301  | 0.147226 | 0.3367   |
| protein_co transformin  | 1164  | 879   | 941   | 2021 | 2311  | 2111 | 16.01055 | 15.50428 | 15.61676 | 43.14696 |
| protein_co DEAD_(Asp-   | 1317  | 1001  | 1112  | 900  | 1102  | 1352 | 20.39437 | 19.87778 | 20.77674 | 21.63204 |
| protein_co HUS1_chec    | 237   | 197   | 225   | 213  | 259   | 291  | 3.786349 | 4.035969 | 4.337134 | 5.281805 |
| protein_co NAC_alpha    | 486   | 339   | 385   | 129  | 199   | 67   | 4.767479 | 4.264435 | 4.556814 | 1.964141 |
| protein_co drebrin-like | 2980  | 2266  | 2390  | 531  | 694   | 1128 | 14.5282  | 14.16657 | 14.05858 | 4.018099 |
| protein_co cerebral_ca  | 1386  | 1089  | 1186  | 508  | 675   | 482  | 12.25293 | 12.34565 | 12.65056 | 6.970614 |
| protein_co myosin_IG    | 9     | 7     | 10    | 12   | 8     | 6    | 0.074402 | 0.074208 | 0.099745 | 0.153977 |
| protein_co tweety_ho    | 21476 | 15801 | 17058 | 7818 | 11066 | 6891 | 208.0599 | 196.3039 | 199.3936 | 117.5604 |
| protein_co monocyte_    | 0     | 0     | 0     | 8    | 9     | 3    | 0        | 0        | 0        | 0.241093 |
| protein_co tetratricop  | 285   | 235   | 255   | 205  | 213   | 222  | 2.665268 | 2.818209 | 2.877294 | 2.97564  |
| protein_co NK2_home     | 0     | 0     | 0     | 0    | 0     | 1    | 0        | 0        | 0        | 0        |
| protein_co zinc_finger  | 36    | 36    | 24    | 429  | 773   | 417  | 0.190631 | 0.244458 | 0.153338 | 3.525978 |
| protein_co 510-methe    | 0     | 0     | 4     | 4    | 10    | 6    | 0        | 0        | 0.249506 | 0.320969 |
| protein_co ADAM_met     | 2292  | 1673  | 1813  | 3915 | 5157  | 3088 | 19.57594 | 18.32371 | 18.68331 | 51.90035 |
| protein_co abhydrolas   | 198   | 167   | 170   | 657  | 869   | 521  | 3.812823 | 4.123892 | 3.94983  | 19.6371  |
| protein_co iron-respor  | 1554  | 1325  | 1399  | 1698 | 1916  | 1651 | 11.46791 | 12.53887 | 12.45658 | 19.44918 |
| protein_co alpha-kinas  | 41    | 34    | 36    | 146  | 181   | 99   | 0.176101 | 0.187269 | 0.186564 | 0.973331 |
| protein_co transmemt    | 119   | 110   | 127   | 98   | 100   | 87   | 2.690411 | 3.189141 | 3.464363 | 3.438968 |
| protein_co calcium_ar   | 108   | 90    | 108   | 597  | 772   | 525  | 3.169037 | 3.386534 | 3.823626 | 27.18995 |
| protein_co calcium_bi   | 537   | 461   | 472   | 309  | 362   | 221  | 6.838658 | 7.528473 | 7.252482 | 6.107811 |
| protein_co radical_S-a  | 790   | 590   | 634   | 615  | 761   | 568  | 14.65313 | 14.03346 | 14.18864 | 17.70553 |
| protein_co N-myristoy   | 2878  | 2174  | 2508  | 2599 | 3103  | 2939 | 26.99529 | 26.14967 | 28.38395 | 37.83851 |
| protein_co MYCBP_ass    | 8     | 5     | 4     | 37   | 57    | 5    | 0.11774  | 0.094366 | 0.07103  | 0.845214 |
| protein_co serine/argi  | 3811  | 2817  | 3121  | 2943 | 4095  | 5812 | 59.90542 | 56.78365 | 59.19281 | 71.80387 |
| protein_co vascular_er  | 723   | 586   | 642   | 758  | 900   | 771  | 8.591354 | 8.929564 | 9.204631 | 13.98051 |
| protein_co chondroad    | 25    | 19    | 28    | 4    | 3     | 0    | 0.655255 | 0.638606 | 0.885475 | 0.162727 |
| protein_co translation  | 434   | 361   | 379   | 407  | 489   | 535  | 8.832581 | 9.421379 | 9.306474 | 12.8565  |
| protein_co testis_expr  | 716   | 563   | 581   | 277  | 351   | 216  | 6.416906 | 6.470389 | 6.282563 | 3.853212 |
| protein_co DDB1_and_    | 3599  | 2801  | 2968  | 2812 | 3179  | 2228 | 26.57175 | 26.51922 | 26.43932 | 32.22434 |
| protein_co growth_ho    | 0     | 0     | 0     | 17   | 15    | 10   | 0        | 0        | 0        | 1.08722  |
| protein_co chorionic_   | 0     | 0     | 0     | 0    | 0     | 2    | 0        | 0        | 0        | 0        |
| protein_co LIM_domai    | 1162  | 837   | 856   | 954  | 1280  | 1301 | 17.06427 | 15.76218 | 15.16713 | 21.74505 |
| protein_co BRCA1_inte   | 339   | 279   | 333   | 268  | 301   | 370  | 2.62826  | 2.773845 | 3.11502  | 3.225031 |
| protein_co K(lysine)_a  | 670   | 514   | 578   | 4705 | 4988  | 4490 | 7.86194  | 7.734413 | 8.183344 | 85.69293 |
| protein_co receptor_(c  | 0     | 0     | 0     | 1    | 0     | 1    | 0        | 0        | 0        | 0.046834 |
| protein_co actin-like_f | 1083  | 892   | 965   | 1088 | 1220  | 1307 | 26.71325 | 28.21451 | 28.71929 | 41.65409 |
| protein_co NADH_deh     | 706   | 501   | 519   | 720  | 869   | 778  | 8.181995 | 7.445632 | 7.257214 | 12.95142 |
| protein_co mitochond    | 535   | 449   | 451   | 521  | 546   | 820  | 18.31107 | 19.70677 | 18.62449 | 27.67757 |
| protein_co transforme   | 3592  | 2953  | 3075  | 2603 | 3432  | 5440 | 37.55383 | 39.59048 | 38.78923 | 42.23987 |
| protein_co sodium_ch    | 13    | 18    | 25    | 12   | 9     | 1    | 0.069332 | 0.123105 | 0.160872 | 0.099335 |
| protein_co T-box_brain  | 1     | 0     | 0     | 0    | 0     | 2    | 0.006526 | 0        | 0        | 0        |
| protein_co membrane     | 1377  | 1152  | 1198  | 1016 | 936   | 1167 | 17.25021 | 18.50642 | 18.10779 | 19.75535 |
| protein_co ermin_ERV    | 1     | 0     | 0     | 6    | 5     | 5    | 0.012362 | 0        | 0        | 0.115128 |
| protein_co UDP-N-acet   | 301   | 251   | 255   | 0    | 0     | 3    | 2.287133 | 2.445727 | 2.337831 | 0        |
| protein_co sodium_ch    | 0     | 1     | 0     | 1    | 1     | 0    | 0        | 0.008371 | 0        | 0.010132 |
| protein_co TRAF_famil   | 649   | 534   | 541   | 126  | 125   | 103  | 14.01733 | 14.7901  | 14.09827 | 4.223977 |

|                         |       |       |       |      |      |      |          |          |          |          |
|-------------------------|-------|-------|-------|------|------|------|----------|----------|----------|----------|
| protein_co B_lymphoi    | 0     | 0     | 0     | 0    | 1    | 0    | 0        | 0        | 0        | 0        |
| protein_co GATA_bind    | 37    | 18    | 27    | 11   | 15   | 46   | 0.508181 | 0.317029 | 0.447434 | 0.234498 |
| protein_co SKI-like_on  | 2282  | 1860  | 1976  | 2112 | 2067 | 3224 | 14.89878 | 15.57246 | 15.56575 | 21.40225 |
| protein_co glutamyl-pi  | 3307  | 2746  | 2693  | 3626 | 3522 | 3271 | 30.92646 | 32.93108 | 30.38648 | 52.63254 |
| protein_co H2.O-like_h  | 1436  | 1187  | 1199  | 3    | 12   | 23   | 20.26303 | 21.4788  | 20.41349 | 0.065706 |
| protein_co vacuolar_p   | 603   | 463   | 495   | 283  | 388  | 359  | 10.13429 | 9.978529 | 10.03759 | 7.382324 |
| protein_co interleukin  | 1     | 0     | 0     | 0    | 0    | 0    | 0.028767 | 0        | 0        | 0        |
| protein_co potassium_   | 1046  | 837   | 873   | 918  | 1079 | 1102 | 12.47697 | 12.80301 | 12.56434 | 16.99615 |
| protein_co ribosomal_   | 779   | 611   | 661   | 268  | 313  | 252  | 6.653429 | 6.692041 | 6.811732 | 3.552821 |
| protein_co Ras_assoc    | 72    | 55    | 64    | 22   | 28   | 15   | 0.750407 | 0.735083 | 0.804808 | 0.355891 |
| protein_co COBW_dor     | 298   | 276   | 287   | 227  | 268  | 332  | 4.227905 | 5.021429 | 4.912911 | 4.998794 |
| protein_co interleukin  | 0     | 0     | 0     | 5    | 0    | 1    | 0        | 0        | 0        | 0.304518 |
| protein_co interleukin  | 0     | 0     | 1     | 0    | 0    | 0    | 0        | 0        | 0.029436 | 0        |
| protein_co cripto_FRL   | 0     | 0     | 0     | 1    | 0    | 0    | 0        | 0        | 0        | 0.069579 |
| protein_co sphingomy    | 2422  | 1850  | 1955  | 2030 | 2502 | 2935 | 23.196   | 22.72061 | 22.59091 | 30.17627 |
| protein_co WD_repeat    | 1418  | 1120  | 1206  | 2208 | 2596 | 2174 | 7.020383 | 7.110693 | 7.204103 | 16.96735 |
| protein_co coiled-coil  | 417   | 347   | 378   | 311  | 423  | 386  | 5.48937  | 5.857675 | 6.003801 | 6.354441 |
| protein_co Sin3A-assoc  | 1145  | 975   | 995   | 1050 | 1137 | 1036 | 12.86582 | 14.04902 | 13.48973 | 18.31267 |
| protein_co bridging_in  | 3149  | 2409  | 2598  | 962  | 1194 | 893  | 28.72139 | 28.17597 | 28.59038 | 13.61878 |
| protein_co IMP4_U3_s    | 999   | 763   | 847   | 978  | 1135 | 1302 | 19.69026 | 19.28501 | 20.14269 | 29.91957 |
| protein_co heparan_su   | 1452  | 1097  | 1140  | 2218 | 2892 | 2389 | 17.31544 | 16.77578 | 16.40287 | 41.05432 |
| protein_co UDP-glucos   | 5178  | 3990  | 4492  | 1920 | 2254 | 2650 | 22.21377 | 21.9504  | 23.25134 | 12.78474 |
| protein_co glycophori   | 1178  | 941   | 910   | 365  | 456  | 463  | 30.60191 | 31.34744 | 28.52283 | 14.71725 |
| protein_co signal_tran  | 427   | 351   | 408   | 308  | 383  | 349  | 6.73689  | 7.101467 | 7.766758 | 7.542456 |
| protein_co glutamate_   | 0     | 0     | 0     | 37   | 64   | 139  | 0        | 0        | 0        | 0.459688 |
| protein_co abl-interac  | 882   | 754   | 817   | 576  | 682  | 464  | 11.09361 | 12.16144 | 12.39866 | 11.24495 |
| protein_co YME1-like_   | 3892  | 2974  | 3152  | 2134 | 2285 | 2544 | 45.69253 | 44.77366 | 44.64847 | 38.88635 |
| protein_co DnaJ_(Hsp4   | 616   | 503   | 495   | 181  | 195  | 243  | 13.71522 | 14.36149 | 13.29766 | 6.255054 |
| protein_co nipsnap_hc   | 356   | 350   | 347   | 101  | 119  | 116  | 10.2222  | 12.88759 | 12.02186 | 4.501384 |
| protein_co leucine_ri   | 2507  | 1842  | 2173  | 2572 | 3458 | 4091 | 25.44994 | 23.97902 | 26.61584 | 40.52601 |
| protein_co ferric-chela | 11    | 8     | 9     | 1    | 9    | 5    | 0.321766 | 0.300086 | 0.317642 | 0.045402 |
| protein_co cyclin-depe  | 1609  | 1283  | 1335  | 1640 | 2276 | 1730 | 27.94298 | 28.57279 | 27.97344 | 44.20699 |
| protein_co thioredoxin  | 2182  | 1714  | 1764  | 1700 | 1946 | 1621 | 117.7376 | 118.5989 | 114.8437 | 142.3771 |
| protein_co outer_dens   | 1637  | 1367  | 1501  | 382  | 431  | 223  | 20.70649 | 22.17357 | 22.90797 | 7.499834 |
| protein_co KIAA0368     | 2405  | 1982  | 2128  | 3147 | 3335 | 3265 | 15.25781 | 16.12465 | 16.28909 | 30.98877 |
| protein_co torsin_fam   | 908   | 679   | 736   | 355  | 424  | 367  | 15.376   | 14.74472 | 15.03777 | 9.330744 |
| protein_co chromosom    | 873   | 644   | 719   | 548  | 656  | 821  | 17.12761 | 16.20234 | 17.02    | 16.68759 |
| protein_co structural_  | 1322  | 959   | 1115  | 901  | 588  | 1369 | 10.37293 | 9.649343 | 10.55584 | 10.97299 |
| protein_co Kruppel-lik  | 240   | 143   | 159   | 75   | 97   | 156  | 4.00057  | 3.056723 | 3.197833 | 1.94045  |
| protein_co torsin_fam   | 1329  | 968   | 1124  | 619  | 673  | 668  | 30.01774 | 28.0374  | 30.63144 | 21.70072 |
| protein_co Ral_GEF_wi   | 76    | 65    | 90    | 382  | 498  | 247  | 0.562443 | 0.616862 | 0.803629 | 4.387924 |
| protein_co family_witl  | 18862 | 14534 | 15640 | 1748 | 2323 | 1630 | 223.5126 | 220.8558 | 223.6141 | 32.15039 |
| protein_co ST6_alpha    | 494   | 389   | 405   | 405  | 467  | 303  | 13.69821 | 13.83234 | 13.55002 | 17.431   |
| protein_co tropomod     | 3     | 1     | 0     | 7    | 26   | 6    | 0.043164 | 0.01845  | 0        | 0.156324 |
| protein_co DAB2_inter   | 3442  | 2624  | 2678  | 1688 | 2240 | 1461 | 23.7906  | 23.25775 | 22.33331 | 18.10913 |
| protein_co syntaxin_bi  | 1359  | 1154  | 1188  | 1016 | 1156 | 545  | 16.30175 | 17.75129 | 17.19409 | 18.91642 |
| protein_co solute_carr  | 123   | 93    | 92    | 373  | 462  | 469  | 2.655374 | 2.574618 | 2.396384 | 12.49856 |
| protein_co angiopoiet   | 2597  | 1819  | 1993  | 89   | 123  | 149  | 32.84958 | 29.50529 | 30.41677 | 1.747343 |
| protein_co CDK5_regu    | 1845  | 1538  | 1609  | 992  | 1182 | 1288 | 13.87523 | 14.83234 | 14.59984 | 11.5794  |
| protein_co ZFP37_zinc   | 97    | 47    | 52    | 76   | 51   | 68   | 0.725875 | 0.451021 | 0.469506 | 0.882743 |
| protein_co solute_carr  | 2     | 1     | 2     | 0    | 0    | 0    | 0.052538 | 0.033686 | 0.06339  | 0        |
| protein_co solute_carr  | 1304  | 1074  | 1172  | 1119 | 1240 | 1176 | 12.88882 | 13.61286 | 13.97692 | 17.16707 |
| protein_co toll-like_re | 257   | 254   | 288   | 0    | 0    | 2    | 2.487765 | 3.152966 | 3.363696 | 0        |
| protein_co zinc_finger  | 353   | 310   | 303   | 155  | 172  | 176  | 5.281486 | 5.947746 | 5.469808 | 3.599512 |
| protein_co aldolase_B   | 1     | 0     | 1     | 2    | 0    | 0    | 0.019131 | 0        | 0.023083 | 0.059388 |
| protein_co syntaxin_1   | 226   | 221   | 214   | 187  | 206  | 128  | 3.913273 | 4.907195 | 4.470886 | 5.025784 |
| protein_co PRP4_pre-r   | 967   | 785   | 839   | 716  | 803  | 1043 | 14.11664 | 14.69548 | 14.77797 | 16.22364 |
| protein_co folylpolygl  | 1489  | 1031  | 1170  | 1279 | 1607 | 1410 | 29.85004 | 26.50441 | 28.29985 | 39.79708 |
| protein_co ubiquitin_s  | 870   | 677   | 758   | 585  | 696  | 372  | 9.150811 | 9.13142  | 9.619613 | 9.550512 |
| protein_co bile_acid_C  | 1     | 1     | 2     | 1    | 2    | 9    | 0.013885 | 0.017806 | 0.033506 | 0.021552 |
| protein_co kinesin_fan  | 3     | 2     | 4     | 14   | 21   | 14   | 0.054864 | 0.046903 | 0.088261 | 0.397394 |
| protein_co ATPase_H+    | 1245  | 980   | 977   | 1273 | 1564 | 2015 | 54.05377 | 54.56222 | 51.17988 | 85.78582 |
| protein_co testis_expr  | 707   | 579   | 644   | 1121 | 1126 | 1350 | 7.438017 | 7.811342 | 8.174697 | 18.30517 |
| protein_co GTPase_act   | 35    | 28    | 17    | 140  | 189  | 79   | 0.34077  | 0.349592 | 0.199706 | 2.115692 |
| protein_co mitochond    | 385   | 257   | 279   | 515  | 550  | 624  | 5.417964 | 4.637862 | 4.737265 | 11.24898 |

|                         |       |       |       |       |       |       |          |          |          |          |
|-------------------------|-------|-------|-------|-------|-------|-------|----------|----------|----------|----------|
| protein_co dolichyl-ph  | 873   | 584   | 661   | 654   | 666   | 683   | 24.62995 | 21.12864 | 22.50085 | 28.63898 |
| protein_co WD_repeat    | 1     | 0     | 1     | 1     | 7     | 4     | 0.037452 | 0        | 0.045188 | 0.058131 |
| protein_co thiosulfate  | 413   | 381   | 378   | 268   | 307   | 326   | 4.482772 | 5.303114 | 4.950357 | 4.515043 |
| protein_co gamma-am     | 405   | 300   | 364   | 25    | 20    | 14    | 3.296382 | 3.131217 | 3.574637 | 0.31583  |
| protein_co proteasom    | 2965  | 2340  | 2358  | 1839  | 1955  | 2300  | 140.7175 | 142.4127 | 135.0253 | 135.4677 |
| protein_co nuclear_re   | 0     | 0     | 0     | 18    | 31    | 4     | 0        | 0        | 0        | 0.422048 |
| protein_co chromosom    | 74    | 64    | 84    | 64    | 55    | 142   | 1.16791  | 1.29529  | 1.599577 | 1.567791 |
| protein_co Rab9_effec   | 718   | 610   | 554   | 461   | 536   | 487   | 13.74165 | 14.97109 | 12.79299 | 13.69449 |
| protein_co golgin_A1    | 368   | 330   | 308   | 171   | 241   | 162   | 3.594153 | 4.133062 | 3.629505 | 2.59224  |
| protein_co xeroderma    | 164   | 120   | 133   | 52    | 86    | 84    | 4.854775 | 4.555288 | 4.750342 | 2.389236 |
| protein_co nuclear_caj  | 1200  | 990   | 1080  | 800   | 924   | 1168  | 10.86675 | 11.49643 | 11.80022 | 11.24447 |
| protein_co acidic_(leu  | 2577  | 1949  | 2092  | 2725  | 2954  | 2746  | 82.59438 | 80.10456 | 80.89949 | 135.5605 |
| protein_co olfactory_r  | 0     | 0     | 0     | 0     | 1     | 0     | 0        | 0        | 0        | 0        |
| protein_co phosducin-   | 760   | 583   | 647   | 431   | 487   | 415   | 12.66847 | 12.46202 | 13.01257 | 11.15112 |
| protein_co ribosomal_   | 8104  | 6229  | 6561  | 10051 | 12630 | 9638  | 484.0722 | 477.1318 | 472.8559 | 931.8596 |
| protein_co cathepsin_   | 14    | 16    | 17    | 871   | 912   | 1005  | 0.424619 | 0.622301 | 0.622111 | 41.00337 |
| protein_co LIM_homer    | 31    | 15    | 15    | 314   | 401   | 310   | 0.250231 | 0.155267 | 0.146089 | 3.934043 |
| protein_co actin_relat  | 1056  | 826   | 867   | 667   | 997   | 1225  | 19.8222  | 19.88279 | 19.63609 | 19.4332  |
| protein_co ectonucleo   | 113   | 82    | 60    | 122   | 160   | 188   | 1.452858 | 1.351972 | 0.930773 | 2.434641 |
| protein_co defective_i  | 228   | 196   | 198   | 605   | 695   | 905   | 4.620105 | 5.093103 | 4.840946 | 19.02843 |
| protein_co derlin_1     | 1131  | 973   | 1010  | 473   | 645   | 658   | 9.619556 | 10.61242 | 10.36482 | 6.244304 |
| protein_co v-myc_myc    | 966   | 687   | 789   | 1772  | 1751  | 2289  | 19.31589 | 17.61585 | 19.03543 | 54.99608 |
| protein_co nephroblas   | 136   | 107   | 116   | 14    | 18    | 14    | 2.528566 | 2.551106 | 2.602204 | 0.404012 |
| protein_co interleukin  | 103   | 89    | 102   | 0     | 0     | 0     | 1.828728 | 2.026335 | 2.185044 | 0        |
| protein_co chromosom    | 376   | 288   | 312   | 530   | 677   | 566   | 6.399509 | 6.285801 | 6.407099 | 14.0012  |
| protein_co RAN_bindi    | 779   | 605   | 604   | 422   | 432   | 491   | 7.98237  | 7.949853 | 7.467571 | 6.711774 |
| protein_co polymerase   | 295   | 278   | 311   | 519   | 519   | 551   | 6.205722 | 7.499364 | 7.893666 | 16.94604 |
| protein_co phospholip   | 799   | 672   | 653   | 747   | 947   | 965   | 8.848636 | 9.54351  | 8.725509 | 12.84046 |
| protein_co interleukin  | 342   | 286   | 305   | 66    | 63    | 40    | 5.331245 | 5.717128 | 5.736546 | 1.596897 |
| protein_co ubiquitin_   | 1465  | 1118  | 1222  | 1259  | 1463  | 1508  | 15.02491 | 14.70366 | 15.12145 | 20.04151 |
| protein_co aprataxin    | 573   | 500   | 588   | 506   | 563   | 614   | 12.75783 | 14.27583 | 15.79601 | 17.4865  |
| protein_co ring_finger  | 494   | 438   | 424   | 848   | 1058  | 922   | 4.408768 | 5.012724 | 4.565667 | 11.74672 |
| protein_co talin_1      | 17740 | 13615 | 14895 | 3283  | 4035  | 3198  | 94.2796  | 92.78785 | 95.51084 | 27.08105 |
| protein_co signaling_ti | 0     | 1     | 0     | 23    | 55    | 33    | 0        | 0.048846 | 0        | 1.359818 |
| protein_co interferon_  | 0     | 0     | 0     | 0     | 1     | 0     | 0        | 0        | 0        | 0        |
| protein_co DnaJ_(Hsp4   | 472   | 341   | 356   | 685   | 832   | 542   | 4.233376 | 3.922009 | 3.852502 | 9.535992 |
| protein_co sperm_assc   | 10    | 9     | 12    | 7     | 4     | 4     | 0.188996 | 0.218125 | 0.273642 | 0.205344 |
| protein_co dynactin_3   | 1002  | 814   | 806   | 274   | 322   | 319   | 12.1186  | 12.62462 | 11.76163 | 5.143582 |
| protein_co CD72_mole    | 3     | 2     | 4     | 34    | 40    | 5     | 0.069125 | 0.059096 | 0.111205 | 1.215977 |
| protein_co transmembr   | 454   | 353   | 415   | 255   | 311   | 142   | 5.733388 | 5.716622 | 6.323414 | 4.998343 |
| protein_co glyoxylate_  | 1379  | 1109  | 1141  | 1130  | 1308  | 1067  | 13.57861 | 14.00335 | 13.55579 | 17.2703  |
| protein_co aldehyde_c   | 857   | 680   | 716   | 1170  | 1371  | 1185  | 13.10657 | 13.33603 | 13.21202 | 27.77311 |
| protein_co histidine_ti | 173   | 141   | 136   | 153   | 147   | 137   | 3.743412 | 3.91246  | 3.550655 | 5.138583 |
| protein_co Rho_guanin   | 70    | 65    | 69    | 339   | 369   | 295   | 0.729725 | 0.868928 | 0.867877 | 5.485183 |
| protein_co insulin-like | 1     | 5     | 7     | 315   | 510   | 358   | 0.0429   | 0.275068 | 0.362332 | 20.97497 |
| protein_co DENN/MAC     | 616   | 479   | 569   | 436   | 403   | 295   | 4.03355  | 4.022088 | 4.495386 | 4.431224 |
| protein_co ribosomal_   | 15124 | 11536 | 12509 | 18145 | 18238 | 18821 | 511.2939 | 500.1134 | 510.2401 | 952.1193 |
| protein_co canopy_3_    | 1754  | 1385  | 1512  | 1818  | 2157  | 1829  | 48.2659  | 48.8731  | 50.2008  | 77.64887 |
| protein_co forkhead_b   | 1718  | 1212  | 1348  | 1913  | 2543  | 1527  | 13.54355 | 12.25241 | 12.82175 | 23.40749 |
| protein_co peptidylpro  | 525   | 375   | 456   | 747   | 891   | 1130  | 14.15599 | 12.96646 | 14.83521 | 31.26309 |
| protein_co kinesin_ligl | 548   | 437   | 444   | 399   | 503   | 394   | 7.129781 | 7.290988 | 6.969901 | 8.057475 |
| protein_co kinesin_fan  | 1191  | 944   | 1029  | 812   | 902   | 617   | 8.065571 | 8.197939 | 8.407885 | 8.535124 |
| protein_co zinc_finger  | 300   | 209   | 207   | 179   | 185   | 173   | 6.82202  | 6.09463  | 5.6795   | 6.317936 |
| protein_co pim-1_onc    | 881   | 655   | 746   | 2359  | 2911  | 1215  | 15.58872 | 14.86227 | 15.92654 | 64.78776 |
| protein_co guanosine_   | 113   | 105   | 97    | 4     | 6     | 15    | 3.497407 | 4.167412 | 3.622326 | 0.192158 |
| protein_co FtsJ_methy   | 1111  | 936   | 875   | 952   | 1044  | 949   | 12.91714 | 13.95524 | 12.27463 | 17.17986 |
| protein_co transcriptic | 195   | 174   | 188   | 14    | 17    | 12    | 2.756573 | 3.154231 | 3.206571 | 0.30718  |
| protein_co solute_carr  | 0     | 0     | 1     | 11    | 28    | 4     | 0        | 0        | 0.022143 | 0.313338 |
| protein_co Yip1_doma    | 2938  | 2256  | 2363  | 1428  | 1419  | 1371  | 82.29562 | 81.03514 | 79.86136 | 62.08456 |
| protein_co transmembr   | 249   | 207   | 228   | 355   | 358   | 384   | 7.347775 | 7.833145 | 8.117819 | 16.2598  |
| protein_co transmembr   | 903   | 733   | 776   | 1214  | 1383  | 917   | 12.76121 | 13.28365 | 13.23164 | 26.6289  |
| protein_co fibroblast_  | 188   | 165   | 146   | 86    | 91    | 66    | 4.054886 | 4.563669 | 3.799459 | 2.879054 |
| protein_co tight_junct  | 604   | 452   | 490   | 502   | 630   | 704   | 8.166543 | 7.836986 | 7.993656 | 10.53502 |
| protein_co calpain_11   | 8     | 6     | 7     | 53    | 46    | 29    | 0.137507 | 0.13225  | 0.145172 | 1.413977 |
| protein_co tubulointe   | 4     | 3     | 5     | 0     | 0     | 0     | 0.106933 | 0.102845 | 0.161276 | 0        |

|                         |      |      |      |       |       |       |          |          |          |          |
|-------------------------|------|------|------|-------|-------|-------|----------|----------|----------|----------|
| protein_co hypocretin   | 0    | 0    | 2    | 0     | 1     | 2     | 0        | 0        | 0.061596 | 0        |
| protein_co histone_clu  | 0    | 0    | 1    | 0     | 0     | 0     | 0        | 0        | 0.118607 | 0        |
| protein_co KIAA0319     | 5    | 2    | 0    | 35    | 46    | 33    | 0.033998 | 0.017439 | 0        | 0.369387 |
| protein_co interferon_  | 0    | 1    | 1    | 8     | 19    | 21    | 0        | 0.011279 | 0.010613 | 0.109217 |
| protein_co solute_carr  | 87   | 62   | 78   | 2042  | 2674  | 1341  | 0.61428  | 0.561368 | 0.664492 | 22.37861 |
| protein_co tubulin_be   | 1968 | 1467 | 1601 | 1383  | 1688  | 2584  | 57.85552 | 55.30433 | 56.78833 | 63.10625 |
| protein_co leucine_ri   | 264  | 214  | 211  | 260   | 343   | 197   | 3.892756 | 4.046471 | 3.753909 | 5.95055  |
| protein_co glial_cells_ | 1    | 0    | 0    | 1     | 0     | 0     | 0.016958 | 0        | 0        | 0.026322 |
| protein_co forkhead_b   | 2    | 1    | 1    | 0     | 2     | 3     | 0.042881 | 0.027494 | 0.025869 | 0        |
| protein_co biphenyl_h   | 251  | 180  | 189  | 230   | 282   | 226   | 3.161266 | 2.907162 | 2.872084 | 4.4962   |
| protein_co receptor_(l  | 844  | 623  | 694  | 202   | 273   | 517   | 9.513263 | 9.005015 | 9.438317 | 3.534019 |
| protein_co tubulin_be   | 1747 | 1373 | 1421 | 11223 | 12026 | 11965 | 40.5529  | 40.8704  | 39.79891 | 404.3603 |
| protein_co mitochond    | 889  | 739  | 727  | 654   | 775   | 576   | 82.21938 | 87.64481 | 81.12503 | 93.88164 |
| protein_co high_mobil   | 6479 | 5500 | 5863 | 45453 | 55296 | 47435 | 140.7135 | 153.1792 | 153.637  | 1532.219 |
| protein_co transcripti  | 464  | 366  | 385  | 160   | 169   | 171   | 6.61306  | 6.689211 | 6.620538 | 3.539443 |
| protein_co flotillin_1  | 3663 | 2928 | 3147 | 2702  | 3262  | 2185  | 89.83166 | 92.08161 | 93.11878 | 102.851  |
| protein_co immediate    | 2056 | 1643 | 1794 | 2315  | 2962  | 1178  | 71.41176 | 73.18019 | 75.18256 | 124.8039 |
| protein_co mediator_c   | 1198 | 996  | 1062 | 1564  | 1887  | 1732  | 7.414762 | 7.905132 | 7.930727 | 15.02476 |
| protein_co piggyBac_t   | 240  | 197  | 227  | 98    | 160   | 162   | 3.613874 | 3.803972 | 4.124162 | 2.290437 |
| protein_co alpha_tubu   | 475  | 381  | 474  | 231   | 268   | 253   | 8.41752  | 8.658145 | 10.13484 | 6.353792 |
| protein_co thiopurine   | 327  | 257  | 262  | 307   | 415   | 428   | 4.820194 | 4.858019 | 4.659787 | 7.024017 |
| protein_co ring_finger  | 12   | 23   | 10   | 56    | 82    | 78    | 0.111732 | 0.27462  | 0.112342 | 0.809307 |
| protein_co nurim_(nu    | 591  | 473  | 519  | 568   | 510   | 490   | 15.79031 | 16.20592 | 16.73088 | 23.55494 |
| protein_co mitochond    | 5699 | 4456 | 4828 | 3889  | 4944  | 4168  | 129.9107 | 130.2569 | 132.7888 | 137.5988 |
| protein_co valyl-tRNA   | 840  | 640  | 732  | 1496  | 1727  | 1102  | 6.506048 | 6.356635 | 6.840646 | 17.98457 |
| protein_co TAF8_RNA     | 508  | 434  | 460  | 523   | 619   | 545   | 3.565888 | 3.906636 | 3.895918 | 5.698179 |
| protein_co family_wit   | 702  | 605  | 605  | 331   | 398   | 248   | 7.038014 | 7.778175 | 7.318405 | 5.150762 |
| protein_co chromosom    | 8    | 2    | 2    | 9     | 7     | 10    | 0.55003  | 0.176334 | 0.165911 | 0.960437 |
| protein_co fibroblast_  | 0    | 0    | 0    | 0     | 1     | 1     | 0        | 0        | 0        | 0        |
| protein_co fibroblast_  | 7    | 0    | 2    | 0     | 1     | 3     | 0.281019 | 0        | 0.096876 | 0        |
| protein_co cytoplasm    | 351  | 308  | 273  | 65    | 61    | 55    | 2.392904 | 2.69264  | 2.245582 | 0.6878   |
| protein_co FH2_domai    | 23   | 21   | 28   | 750   | 934   | 833   | 0.163827 | 0.191816 | 0.240637 | 8.29179  |
| protein_co toll-like_re | 5    | 5    | 8    | 10    | 17    | 17    | 0.055821 | 0.071583 | 0.107763 | 0.173285 |
| protein_co mitochond    | 0    | 3    | 2    | 7     | 5     | 2     | 0        | 0.134719 | 0.084504 | 0.380477 |
| protein_co tetraatricop | 9    | 15   | 10   | 0     | 0     | 0     | 0.189582 | 0.405187 | 0.254158 | 0        |
| protein_co myosin_VII   | 12   | 15   | 6    | 29    | 25    | 20    | 0.075406 | 0.120872 | 0.045491 | 0.282848 |
| protein_co FCH_and_d    | 473  | 381  | 327  | 127   | 146   | 80    | 4.918824 | 5.080828 | 4.102947 | 2.049908 |
| protein_co arrestin_be  | 325  | 240  | 252  | 1589  | 2270  | 1301  | 4.568122 | 4.325885 | 4.273689 | 34.6664  |
| protein_co solute_carr  | 2    | 4    | 8    | 1     | 4     | 1     | 0.015963 | 0.040939 | 0.077039 | 0.012388 |
| protein_co protein-kin  | 745  | 623  | 606  | 531   | 642   | 615   | 5.140995 | 5.513004 | 5.045586 | 5.687428 |
| protein_co ankyrin_re   | 253  | 180  | 208  | 77    | 99    | 89    | 2.917652 | 2.661919 | 2.894172 | 1.37827  |
| protein_co interleukin  | 144  | 105  | 100  | 110   | 126   | 137   | 1.654942 | 1.547458 | 1.386655 | 1.962201 |
| protein_co nuclear_mi   | 4231 | 3262 | 3485 | 2473  | 2960  | 2433  | 27.01779 | 26.71162 | 26.85083 | 24.51102 |
| protein_co coiled-coil  | 815  | 593  | 690  | 515   | 602   | 463   | 9.520519 | 8.883151 | 9.725236 | 9.337717 |
| protein_co synaptotag   | 437  | 375  | 372  | 38    | 46    | 79    | 3.245318 | 3.571218 | 3.333242 | 0.438016 |
| protein_co RAB30_me     | 321  | 287  | 280  | 103   | 107   | 132   | 1.515933 | 1.738065 | 1.595442 | 0.754992 |
| protein_co CREB/ATF_l   | 1235 | 997  | 1106 | 829   | 1143  | 1127  | 13.37703 | 13.84833 | 14.45426 | 13.93727 |
| protein_co leucine_ri   | 90   | 59   | 89   | 25    | 28    | 13    | 0.978915 | 0.822932 | 1.167993 | 0.422059 |
| protein_co prolylcarb   | 896  | 721  | 768  | 827   | 823   | 727   | 5.940817 | 6.130314 | 6.143946 | 8.510873 |
| protein_co asparaginy   | 264  | 231  | 191  | 609   | 785   | 493   | 4.914238 | 5.514086 | 4.289766 | 17.59543 |
| protein_co ring_finger  | 573  | 447  | 478  | 276   | 327   | 422   | 10.23542 | 10.23925 | 10.30213 | 7.652276 |
| protein_co mitochond    | 614  | 495  | 534  | 766   | 947   | 1117  | 25.10067 | 25.94965 | 26.33942 | 48.60447 |
| protein_co peptidase_j  | 205  | 124  | 136  | 21    | 20    | 12    | 1.427875 | 1.10756  | 1.142939 | 0.227031 |
| protein_co tocopherol   | 0    | 2    | 0    | 3     | 4     | 3     | 0        | 0.051437 | 0        | 0.093387 |
| protein_co gamma-glu    | 795  | 597  | 643  | 294   | 321   | 371   | 23.19699 | 22.3382  | 22.63724 | 13.31504 |
| protein_co solute_carr  | 52   | 45   | 40   | 147   | 201   | 202   | 0.643346 | 0.713942 | 0.597103 | 2.822858 |
| protein_co sulfatase_1  | 3097 | 2481 | 2508 | 381   | 457   | 186   | 25.43229 | 26.12645 | 24.84963 | 4.856235 |
| protein_co trimethylg   | 480  | 355  | 402  | 601   | 713   | 747   | 5.951139 | 5.644124 | 6.013578 | 11.56548 |
| protein_co syndecan_t   | 2055 | 1817 | 1733 | 1293  | 1172  | 1493  | 26.84842 | 30.44186 | 27.31829 | 26.2202  |
| protein_co NIMA-relat   | 403  | 326  | 364  | 208   | 182   | 203   | 3.34277  | 3.467595 | 3.64293  | 2.677905 |
| protein_co DEAD_(Asp    | 194  | 144  | 198  | 117   | 104   | 76    | 1.49838  | 1.426238 | 1.845157 | 1.402609 |
| protein_co neurexophi   | 0    | 0    | 2    | 0     | 0     | 0     | 0        | 0        | 0.062103 | 0        |
| protein_co sortilin-rel | 280  | 190  | 211  | 2955  | 3188  | 2093  | 1.204072 | 1.04775  | 1.094775 | 19.72343 |
| protein_co transmemt    | 0    | 0    | 0    | 14    | 18    | 21    | 0        | 0        | 0        | 0.183589 |
| protein_co BUD13_ho     | 529  | 351  | 398  | 476   | 475   | 608   | 11.29545 | 9.61091  | 10.25367 | 15.77559 |

|                         |       |       |       |       |       |       |          |          |          |          |
|-------------------------|-------|-------|-------|-------|-------|-------|----------|----------|----------|----------|
| protein_co transient_r  | 0     | 0     | 0     | 40    | 62    | 54    | 0        | 0        | 0        | 0.631221 |
| protein_co matrix_me    | 1     | 0     | 2     | 0     | 0     | 0     | 0.035442 | 0        | 0.085526 | 0        |
| protein_co chromosom    | 32    | 39    | 22    | 4     | 22    | 10    | 0.684214 | 1.06934  | 0.567561 | 0.132749 |
| protein_co DCN1_defe    | 802   | 687   | 675   | 1158  | 1521  | 1462  | 24.49889 | 26.91151 | 24.87848 | 54.90489 |
| protein_co Yes-associ   | 3409  | 2587  | 2816  | 2290  | 2861  | 2378  | 29.67844 | 28.8815  | 29.57977 | 30.94425 |
| protein_co tripartite_r | 8     | 6     | 5     | 1     | 0     | 0     | 0.112716 | 0.108407 | 0.084999 | 0.021869 |
| processed_solute_carr   | 273   | 238   | 186   | 815   | 985   | 831   | 2.183721 | 2.441298 | 1.795129 | 10.11865 |
| protein_co B-cell_tran  | 0     | 0     | 0     | 0     | 1     | 0     | 0        | 0        | 0        | 0        |
| protein_co POU_class    | 1     | 4     | 1     | 5     | 5     | 2     | 0.015563 | 0.079827 | 0.018777 | 0.120776 |
| protein_co radixin      | 2072  | 1652  | 1726  | 1103  | 1032  | 1177  | 21.63351 | 22.11855 | 21.74334 | 17.87489 |
| protein_co protein_ph   | 739   | 631   | 689   | 1174  | 1411  | 2014  | 6.202206 | 6.791105 | 6.977004 | 15.29327 |
| protein_co ferredoxin   | 248   | 152   | 185   | 257   | 313   | 332   | 3.627175 | 2.85082  | 3.26465  | 5.834189 |
| protein_co chromosom    | 24    | 25    | 21    | 74    | 72    | 101   | 0.390073 | 0.521055 | 0.411815 | 1.866796 |
| protein_co FXYD_dom     | 384   | 342   | 296   | 94    | 74    | 55    | 8.293766 | 9.472312 | 7.713657 | 3.151221 |
| protein_co Rho_GTPas    | 6     | 4     | 5     | 1     | 2     | 4     | 0.045458 | 0.038862 | 0.045706 | 0.01176  |
| protein_co FXYD_dom     | 12    | 9     | 4     | 3     | 0     | 0     | 0.359081 | 0.345353 | 0.144417 | 0.139336 |
| protein_co matrix_me    | 2778  | 2377  | 2153  | 0     | 0     | 1     | 47.96041 | 52.62464 | 44.84796 | 0        |
| protein_co transmemt    | 6     | 3     | 6     | 30    | 46    | 33    | 0.086063 | 0.055182 | 0.10384  | 0.667909 |
| protein_co caspase_1    | 8     | 4     | 7     | 0     | 0     | 0     | 0.187466 | 0.120199 | 0.197915 | 0        |
| protein_co alkB_alkyla  | 273   | 181   | 218   | 99    | 93    | 214   | 3.138263 | 2.668177 | 3.023648 | 1.766413 |
| protein_co mitogen-ac   | 358   | 250   | 312   | 334   | 377   | 238   | 7.152376 | 6.404963 | 7.520902 | 10.35724 |
| protein_co sulfide_qui  | 6     | 11    | 2     | 1     | 0     | 1     | 0.140459 | 0.330219 | 0.056491 | 0.036335 |
| protein_co CTD_(carbc   | 892   | 720   | 711   | 606   | 552   | 781   | 6.125644 | 6.340576 | 5.89121  | 6.459367 |
| protein_co SAFB-like_t  | 1541  | 1284  | 1352  | 1318  | 1437  | 2355  | 17.42405 | 18.61747 | 18.44468 | 23.13088 |
| protein_co thrombosp    | 27432 | 19986 | 23284 | 230   | 276   | 659   | 165.4388 | 154.5664 | 169.4282 | 2.152972 |
| protein_co mitogen-ac   | 907   | 713   | 803   | 196   | 232   | 196   | 5.880703 | 5.928173 | 6.281821 | 1.972461 |
| protein_co nucleolar_i  | 1026  | 934   | 926   | 1789  | 1693  | 1512  | 19.97059 | 23.31309 | 21.74716 | 54.04859 |
| protein_co NADH_deh     | 315   | 234   | 306   | 193   | 288   | 178   | 9.318836 | 8.877207 | 10.92246 | 8.862146 |
| protein_co kinesin_fan  | 991   | 749   | 872   | 1123  | 1038  | 1162  | 12.87202 | 12.47568 | 13.66588 | 22.64036 |
| protein_co integrin_al  | 1649  | 1176  | 1301  | 1     | 3     | 7     | 15.42422 | 14.10585 | 14.68277 | 0.014518 |
| protein_co cancer_sus   | 885   | 689   | 915   | 492   | 295   | 485   | 4.334865 | 4.327737 | 5.407562 | 3.740485 |
| protein_co HAUS_augn    | 528   | 388   | 410   | 355   | 391   | 539   | 6.269417 | 5.907916 | 5.873881 | 6.542626 |
| protein_co Rtf1_Paf1/I  | 1940  | 1602  | 1665  | 2214  | 2728  | 2058  | 18.11723 | 19.18501 | 18.76085 | 32.09211 |
| protein_co poly_(ADP-   | 393   | 347   | 381   | 194   | 268   | 352   | 5.039042 | 5.705507 | 5.894249 | 3.608892 |
| protein_co ribosomal    | 16500 | 13989 | 14001 | 18088 | 20530 | 18506 | 394.335  | 428.7236 | 403.7276 | 670.9689 |
| protein_co progester_i  | 6     | 8     | 8     | 129   | 174   | 117   | 0.051339 | 0.087781 | 0.082592 | 1.713247 |
| protein_co leucine_ri   | 78    | 59    | 76    | 73    | 57    | 132   | 1.194845 | 1.158987 | 1.404684 | 1.735683 |
| protein_co tubulin_ga   | 779   | 593   | 704   | 568   | 664   | 621   | 8.341476 | 8.14272  | 9.095491 | 9.440267 |
| protein_co regulator_c  | 730   | 534   | 545   | 525   | 727   | 726   | 10.90813 | 10.23241 | 9.825892 | 12.17635 |
| protein_co inositol-tri | 184   | 141   | 155   | 3     | 11    | 13    | 4.735326 | 4.653294 | 4.812955 | 0.119835 |
| protein_co uveal_auto   | 934   | 764   | 852   | 644   | 504   | 531   | 6.311468 | 6.62043  | 6.946582 | 6.754603 |
| protein_co SMAD_fam     | 280   | 204   | 208   | 318   | 424   | 195   | 4.395449 | 4.106621 | 3.93964  | 7.748235 |
| protein_co phospholip   | 55    | 47    | 42    | 246   | 343   | 174   | 0.555449 | 0.60868  | 0.511775 | 3.856091 |
| protein_co transmemt    | 69    | 57    | 50    | 17    | 37    | 27    | 1.167597 | 1.236881 | 1.02085  | 0.446502 |
| protein_co p21_protei   | 3     | 0     | 3     | 59    | 64    | 42    | 0.033374 | 0        | 0.040267 | 1.018745 |
| protein_co ADAM_met     | 2694  | 2116  | 2406  | 1387  | 1335  | 1487  | 25.0937  | 25.27506 | 27.04026 | 20.05276 |
| protein_co dual_oxida   | 67    | 78    | 46    | 18    | 35    | 11    | 0.547513 | 0.81738  | 0.453551 | 0.228309 |
| protein_co solute_carr  | 5     | 1     | 3     | 2     | 6     | 1     | 0.09515  | 0.024403 | 0.068883 | 0.059075 |
| protein_co stimulated   | 416   | 323   | 349   | 322   | 424   | 572   | 6.75658  | 6.727372 | 6.839228 | 8.117456 |
| protein_co cytochrom    | 1     | 0     | 0     | 2     | 3     | 3     | 0.010616 | 0        | 0        | 0.032954 |
| protein_co zinc_finger  | 379   | 314   | 329   | 299   | 259   | 260   | 3.62532  | 3.851643 | 3.797091 | 4.439241 |
| protein_co sema_dom     | 13    | 11    | 9     | 25    | 16    | 32    | 0.099946 | 0.108449 | 0.083486 | 0.298327 |
| protein_co BCL2-like_1  | 2     | 2     | 0     | 21    | 33    | 16    | 0.075084 | 0.096285 | 0        | 1.22368  |
| protein_co ribosomal    | 1114  | 769   | 840   | 1623  | 1873  | 1708  | 25.92331 | 22.9478  | 23.58483 | 58.62115 |
| protein_co spectrin_bo  | 457   | 351   | 389   | 32    | 37    | 23    | 1.828079 | 1.800508 | 1.877484 | 0.198682 |
| protein_co GRINL1A_c    | 1     | 2     | 0     | 1     | 1     | 0     | 0.014857 | 0.038105 | 0        | 0.023061 |
| protein_co GTP_cyclo    | 216   | 178   | 174   | 409   | 424   | 271   | 12.90222 | 13.63453 | 12.5403  | 37.91967 |
| protein_co breast_canc  | 552   | 404   | 439   | 247   | 356   | 182   | 8.045785 | 7.551271 | 7.720437 | 5.588005 |
| protein_co tubulin_ty   | 206   | 202   | 213   | 73    | 39    | 55    | 1.142847 | 1.437082 | 1.425767 | 0.6286   |
| protein_co formin_bin   | 1812  | 1434  | 1617  | 2213  | 2428  | 2555  | 15.90802 | 16.14419 | 17.12836 | 30.15572 |
| protein_co cysteine_cc  | 267   | 227   | 220   | 331   | 360   | 365   | 6.048133 | 6.593944 | 6.012856 | 11.63774 |
| protein_co general_tra  | 262   | 234   | 236   | 130   | 136   | 148   | 9.093401 | 10.41478 | 9.882916 | 7.003238 |
| protein_co bromodom     | 0     | 1     | 0     | 3     | 0     | 1     | 0        | 0.016269 | 0        | 0.059075 |
| protein_co Rab_gerany   | 769   | 621   | 648   | 793   | 855   | 1215  | 9.334306 | 9.666219 | 9.490274 | 14.9403  |
| protein_co interferon-i | 216   | 165   | 183   | 0     | 0     | 0     | 1.965886 | 1.925741 | 2.009572 | 0        |

|                         |       |       |       |      |      |      |          |          |          |          |
|-------------------------|-------|-------|-------|------|------|------|----------|----------|----------|----------|
| protein_co GIPC_PDZ_    | 1     | 0     | 0     | 35   | 44   | 26   | 0.012189 | 0        | 0        | 0.662151 |
| protein_co Rho_GTPas    | 954   | 831   | 904   | 72   | 74   | 53   | 5.275127 | 5.892436 | 6.031162 | 0.617942 |
| protein_co interferon-i | 345   | 316   | 316   | 0    | 0    | 0    | 9.589245 | 11.2632  | 10.59743 | 0        |
| protein_co solute_carr  | 30    | 32    | 38    | 55   | 56   | 42   | 0.319269 | 0.436712 | 0.487941 | 0.908509 |
| pseudogen-              | 69    | 61    | 67    | 142  | 88   | 101  | 4.331206 | 4.910198 | 5.074376 | 13.83498 |
| protein_co chloride_cl  | 2     | 1     | 1     | 0    | 0    | 1    | 0.023299 | 0.014939 | 0.014056 | 0        |
| protein_co deoxyribon   | 0     | 0     | 0     | 0    | 4    | 0    | 0        | 0        | 0        | 0        |
| protein_co dihydrolip   | 321   | 280   | 286   | 339  | 405  | 315  | 4.254295 | 4.758718 | 4.573373 | 6.973531 |
| protein_co RNA_3'-ter   | 807   | 652   | 671   | 417  | 543  | 457  | 14.92712 | 15.46534 | 14.97521 | 11.97206 |
| protein_co intraflagell | 618   | 559   | 552   | 363  | 446  | 410  | 5.207193 | 6.039992 | 5.611802 | 4.747362 |
| protein_co ethanolami   | 1251  | 1025  | 1059  | 912  | 1037 | 1023 | 7.241009 | 7.608078 | 7.39581  | 8.193455 |
| protein_co cell_growtl  | 20    | 6     | 10    | 62   | 98   | 86   | 0.49306  | 0.189684 | 0.297453 | 2.372423 |
| protein_co hydroxyacy   | 1803  | 1475  | 1553  | 688  | 753  | 676  | 29.32456 | 30.7636  | 30.47581 | 17.36819 |
| protein_co ketohexoki   | 40    | 27    | 30    | 129  | 131  | 110  | 0.777935 | 0.673374 | 0.703967 | 3.894067 |
| protein_co adenylate_u  | 1169  | 882   | 1048  | 530  | 770  | 565  | 10.85434 | 10.50188 | 11.74082 | 7.638276 |
| protein_co protein_ph   | 912   | 762   | 780   | 1323 | 1813 | 1693 | 11.0301  | 11.81813 | 11.38223 | 24.83561 |
| protein_co polyribonu   | 402   | 362   | 362   | 557  | 674  | 837  | 4.273359 | 4.934706 | 4.643014 | 9.190285 |
| protein_co dynein_cyt   | 165   | 133   | 147   | 60   | 67   | 74   | 2.665123 | 2.754827 | 2.864829 | 1.504233 |
| protein_co luteinizing  | 0     | 0     | 0     | 1    | 1    | 5    | 0        | 0        | 0        | 0.023909 |
| protein_co SMEK_hom     | 1230  | 1045  | 1069  | 848  | 1016 | 910  | 11.00243 | 11.98696 | 11.53743 | 11.77361 |
| protein_co THUMP_do     | 177   | 167   | 187   | 187  | 217  | 210  | 2.636446 | 3.189859 | 3.360743 | 4.323324 |
| protein_co cytochrom    | 793   | 570   | 634   | 64   | 77   | 75   | 7.086675 | 6.532111 | 6.836072 | 0.887728 |
| protein_co sulfotransf  | 0     | 0     | 0     | 0    | 1    | 2    | 0        | 0        | 0        | 0        |
| protein_co RAB1A_me     | 4585  | 3571  | 3874  | 1575 | 1831 | 1773 | 87.8589  | 87.74969 | 89.56825 | 46.84438 |
| protein_co ARP2_actin   | 11374 | 9040  | 9621  | 3326 | 3810 | 3399 | 138.1318 | 140.7856 | 140.9772 | 62.69506 |
| protein_co prolactin_r  | 1653  | 1272  | 1383  | 931  | 1243 | 868  | 25.35466 | 25.01966 | 25.595   | 22.16487 |
| protein_co solute_carr  | 742   | 668   | 730   | 1286 | 1693 | 2586 | 10.7683  | 12.43166 | 12.78246 | 28.96776 |
| protein_co ATP-bindin   | 0     | 1     | 2     | 1    | 0    | 0    | 0        | 0.019825 | 0.037307 | 0.023996 |
| protein_co prolyl_end   | 741   | 631   | 630   | 341  | 344  | 440  | 5.538897 | 6.048446 | 5.681902 | 3.956307 |
| protein_co solute_carr  | 2     | 2     | 4     | 2    | 4    | 1    | 0.031375 | 0.040234 | 0.075712 | 0.048698 |
| protein_co elastin_mic  | 38152 | 27501 | 29560 | 157  | 244  | 149  | 454.2783 | 419.9161 | 424.6755 | 2.901582 |
| protein_co F-box_prot   | 1031  | 918   | 924   | 597  | 764  | 617  | 11.92197 | 13.61261 | 12.89168 | 10.71505 |
| protein_co SIX_homeo    | 1     | 0     | 0     | 166  | 199  | 238  | 0.017641 | 0        | 0        | 4.545315 |
| protein_co all-trans_re | 577   | 433   | 436   | 679  | 646  | 670  | 21.81898 | 20.99694 | 19.89268 | 39.85281 |
| protein_co centromere   | 546   | 426   | 436   | 315  | 352  | 463  | 5.837198 | 5.84024  | 5.624013 | 5.227004 |
| protein_co leucine-ricl | 2039  | 1685  | 1802  | 4224 | 4145 | 4507 | 15.09215 | 15.99348 | 16.09299 | 48.52753 |
| protein_co tripartite_r | 2     | 0     | 2     | 8    | 16   | 45   | 0.046265 | 0        | 0.055822 | 0.287241 |
| protein_co dystrobrevi  | 186   | 137   | 167   | 465  | 568  | 373  | 3.52528  | 3.329742 | 3.818961 | 13.67931 |
| protein_co ARP1_actin   | 4386  | 3525  | 3704  | 1988 | 2343 | 1937 | 58.44263 | 60.23232 | 59.54978 | 41.11573 |
| protein_co transmembr   | 31    | 16    | 19    | 117  | 155  | 160  | 0.512911 | 0.339477 | 0.379299 | 3.004671 |
| protein_co cytochrom    | 0     | 0     | 0     | 5    | 13   | 5    | 0        | 0        | 0        | 0.171894 |
| protein_co myoferlin    | 3784  | 3124  | 3505  | 10   | 14   | 31   | 25.93274 | 27.45476 | 28.98234 | 0.106372 |
| protein_co lysyl_oxida  | 1472  | 1132  | 1190  | 8    | 26   | 21   | 18.89464 | 18.63316 | 18.43002 | 0.159386 |
| protein_co STAM_bind    | 142   | 128   | 130   | 23   | 35   | 22   | 1.591392 | 1.839535 | 1.757843 | 0.40008  |
| protein_co cholesterol  | 58    | 42    | 52    | 0    | 0    | 1    | 1.9736   | 1.832693 | 2.134925 | 0        |
| protein_co ATPase_farr  | 673   | 616   | 640   | 501  | 624  | 557  | 6.801074 | 7.982749 | 7.803518 | 7.858336 |
| protein_co BTB_(POZ)_   | 3     | 0     | 2     | 2    | 1    | 0    | 0.075997 | 0        | 0.06113  | 0.078638 |
| protein_co kinesin_fan  | 1570  | 1192  | 1314  | 1413 | 1280 | 1649 | 15.15383 | 14.75396 | 15.30264 | 21.16876 |
| protein_co CUB_and_z    | 0     | 0     | 0     | 5    | 4    | 15   | 0        | 0        | 0        | 0.125353 |
| protein_co transformin  | 616   | 493   | 526   | 538  | 679  | 1053 | 2.98607  | 3.064612 | 3.076472 | 4.04792  |
| protein_co dual_specif  | 449   | 386   | 390   | 1007 | 1290 | 779  | 8.233718 | 9.077083 | 8.629037 | 28.66221 |
| protein_co calcium_hc   | 80    | 66    | 77    | 68   | 113  | 136  | 1.851531 | 1.958819 | 2.150204 | 2.442757 |
| protein_co ADP-ribosy   | 844   | 700   | 720   | 372  | 491  | 402  | 38.91364 | 41.38727 | 40.05345 | 26.62152 |
| protein_co centrosom    | 805   | 663   | 765   | 331  | 381  | 281  | 14.30874 | 15.11223 | 16.40647 | 9.131961 |
| protein_co kinesin_fan  | 800   | 648   | 679   | 817  | 533  | 1208 | 5.753376 | 5.97609  | 5.891836 | 9.1198   |
| protein_co ectonucleo   | 346   | 292   | 257   | 287  | 396  | 261  | 1.28874  | 1.394702 | 1.154969 | 1.659211 |
| protein_co exocyst_co   | 110   | 111   | 113   | 87   | 88   | 122  | 1.446006 | 1.871154 | 1.792271 | 1.775117 |
| protein_co phospholip   | 424   | 304   | 346   | 9    | 8    | 11   | 2.487659 | 2.287219 | 2.44934  | 0.081959 |
| protein_co retinol_bin  | 3     | 1     | 0     | 9    | 8    | 13   | 0.107055 | 0.045761 | 0        | 0.498492 |
| protein_co debranchin   | 336   | 265   | 311   | 334  | 385  | 484  | 5.90962  | 5.976893 | 6.599768 | 9.11795  |
| protein_co DnaJ_(Hsp4   | 1746  | 1436  | 1537  | 520  | 476  | 588  | 10.5912  | 11.1703  | 11.24923 | 4.895925 |
| protein_co G_protein-i  | 13    | 14    | 16    | 1    | 2    | 6    | 0.379086 | 0.523518 | 0.56294  | 0.045261 |
| protein_co annexin_A7   | 1156  | 977   | 940   | 567  | 667  | 636  | 24.93324 | 27.02245 | 24.46227 | 18.98167 |
| protein_co family_witl  | 461   | 326   | 374   | 282  | 314  | 313  | 3.997097 | 3.624688 | 3.912581 | 3.795101 |
| protein_co nuclear_rec  | 2047  | 1578  | 1635  | 1541 | 1819 | 1572 | 25.69849 | 25.40424 | 24.76598 | 30.02776 |

|                         |       |       |       |       |       |       |          |          |          |          |
|-------------------------|-------|-------|-------|-------|-------|-------|----------|----------|----------|----------|
| protein_co translocase  | 732   | 595   | 613   | 537   | 643   | 812   | 20.40636 | 21.27065 | 20.61878 | 23.23588 |
| protein_co activating_  | 384   | 320   | 313   | 438   | 407   | 389   | 7.434255 | 7.944482 | 7.311368 | 13.16167 |
| protein_co phospholip   | 0     | 0     | 0     | 0     | 5     | 0     | 0        | 0        | 0        | 0        |
| protein_co zinc_finger  | 677   | 587   | 615   | 4     | 6     | 5     | 7.607127 | 8.458229 | 8.337871 | 0.069763 |
| protein_co oncoprotei   | 0     | 0     | 1     | 0     | 3     | 1     | 0        | 0        | 0.023922 | 0        |
| protein_co ADAM_met     | 873   | 785   | 767   | 135   | 130   | 62    | 7.769024 | 8.958415 | 8.235607 | 1.864732 |
| protein_co ribosomal_   | 8290  | 6759  | 7094  | 10215 | 10259 | 10603 | 138.1373 | 144.4269 | 142.625  | 264.1953 |
| protein_co tet_methyl   | 205   | 148   | 155   | 1634  | 1846  | 1369  | 1.034933 | 0.958141 | 0.944143 | 12.80385 |
| protein_co DNA_replic   | 294   | 237   | 236   | 590   | 699   | 698   | 3.121754 | 3.227075 | 3.02351  | 9.723751 |
| protein_co myopalladi   | 16    | 10    | 15    | 0     | 0     | 1     | 0.12477  | 0.1      | 0.141133 | 0        |
| protein_co aldehyde_c   | 7     | 2     | 6     | 66    | 70    | 49    | 0.06474  | 0.02372  | 0.066953 | 0.947429 |
| protein_co 5-aminoim    | 1164  | 994   | 1052  | 2264  | 2589  | 2519  | 23.9912  | 26.2721  | 26.16151 | 72.4279  |
| protein_co SWI/SNF_r    | 563   | 446   | 529   | 387   | 381   | 294   | 8.070645 | 8.198682 | 9.149631 | 8.610756 |
| protein_co BRCA1_ass    | 481   | 357   | 405   | 467   | 579   | 530   | 4.101491 | 3.90368  | 4.166772 | 6.180791 |
| protein_co signal_tran  | 6     | 10    | 9     | 4     | 6     | 2     | 0.099695 | 0.213075 | 0.180432 | 0.103161 |
| protein_co myostatin    | 1     | 0     | 0     | 0     | 0     | 0     | 0.016616 | 0        | 0        | 0        |
| protein_co amyotroph    | 137   | 84    | 90    | 56    | 77    | 37    | 1.082564 | 0.85118  | 0.858071 | 0.686833 |
| protein_co asparagine   | 508   | 422   | 434   | 487   | 420   | 712   | 9.722502 | 10.35705 | 10.02195 | 14.46684 |
| protein_co methyltran   | 394   | 308   | 295   | 435   | 523   | 390   | 13.48516 | 13.51823 | 12.18232 | 23.10891 |
| protein_co Sjogren_sy   | 1236  | 1003  | 1067  | 2046  | 1950  | 2504  | 23.53068 | 24.48647 | 24.50916 | 60.45776 |
| protein_co NGFI-A_bin   | 722   | 561   | 633   | 495   | 572   | 507   | 7.768378 | 7.740435 | 8.217599 | 8.266636 |
| protein_co cyclin-depe  | 0     | 6     | 6     | 0     | 1     | 0     | 0        | 0.0986   | 0.092772 | 0        |
| protein_co peptidylpro  | 1404  | 1125  | 1178  | 2041  | 1396  | 2305  | 10.33819 | 10.6228  | 10.46576 | 23.32657 |
| protein_co FAST_kinase  | 219   | 193   | 202   | 414   | 479   | 475   | 3.461043 | 3.911375 | 3.851787 | 10.15532 |
| protein_co malate_def   | 10    | 11    | 4     | 19    | 22    | 26    | 0.183666 | 0.259079 | 0.088642 | 0.541644 |
| protein_co HECT_C2_a    | 557   | 516   | 487   | 102   | 105   | 71    | 3.77097  | 4.479783 | 3.978093 | 1.071837 |
| protein_co isocitrate_c | 2563  | 2139  | 2293  | 4139  | 4523  | 5686  | 49.23356 | 52.69055 | 53.14528 | 123.4066 |
| protein_co Obg-like_A   | 1098  | 888   | 883   | 1163  | 1481  | 1251  | 11.65616 | 12.08858 | 11.30998 | 19.16299 |
| protein_co corepresso   | 449   | 341   | 351   | 353   | 294   | 367   | 10.95972 | 10.67374 | 10.33733 | 13.3739  |
| protein_co sperm_spe    | 1434  | 1201  | 1247  | 139   | 135   | 137   | 10.38781 | 11.15648 | 10.89907 | 1.56286  |
| protein_co cholinergic  | 4205  | 3121  | 3137  | 0     | 0     | 1     | 99.38131 | 94.58926 | 89.45431 | 0        |
| protein_co family_witl  | 259   | 173   | 203   | 672   | 802   | 686   | 2.104039 | 1.802227 | 1.989748 | 8.473324 |
| protein_co WD_repeat    | 465   | 342   | 440   | 859   | 1000  | 916   | 9.554714 | 9.011565 | 10.90851 | 27.39608 |
| protein_co abl-interac  | 2000  | 1628  | 1560  | 1707  | 2010  | 1375  | 14.0832  | 14.7006  | 13.25391 | 18.65672 |
| protein_co integrin_al  | 5911  | 4697  | 4910  | 671   | 812   | 724   | 39.4263  | 40.17492 | 39.51433 | 6.946692 |
| protein_co solute_carr  | 145   | 112   | 132   | 1     | 4     | 15    | 1.97532  | 1.956577 | 2.169659 | 0.021145 |
| protein_co solute_carr  | 485   | 361   | 368   | 499   | 558   | 560   | 5.169734 | 4.934498 | 4.732845 | 8.255767 |
| protein_co disrupted_i  | 176   | 114   | 143   | 146   | 203   | 235   | 2.294951 | 1.906228 | 2.249805 | 2.954909 |
| protein_co SUMO1/ser    | 414   | 401   | 380   | 127   | 88    | 79    | 3.925676 | 4.876046 | 4.347562 | 1.869168 |
| protein_co guanylate_c  | 2     | 3     | 4     | 0     | 0     | 0     | 0.095499 | 0.183696 | 0.23045  | 0        |
| protein_co cytochrom    | 357   | 247   | 270   | 355   | 430   | 396   | 24.4733  | 21.71354 | 22.33244 | 37.77314 |
| protein_co poly_(ADP-   | 105   | 110   | 108   | 36    | 60    | 44    | 0.727353 | 0.977142 | 0.902667 | 0.387069 |
| protein_co meiosis-spe  | 63    | 46    | 53    | 75    | 68    | 90    | 1.460243 | 1.367262 | 1.482206 | 2.698213 |
| protein_co ubiquitin_s  | 751   | 610   | 636   | 743   | 624   | 711   | 6.021615 | 6.272089 | 6.152876 | 9.246818 |
| protein_co SECIS_bind   | 1172  | 978   | 1055  | 558   | 638   | 401   | 7.65818  | 8.194947 | 8.317608 | 5.659299 |
| protein_co tropomodu    | 1562  | 1309  | 1359  | 834   | 991   | 856   | 15.69028 | 16.86159 | 16.47089 | 13.00308 |
| protein_co signal_pept  | 348   | 279   | 298   | 86    | 180   | 205   | 7.006323 | 7.203183 | 7.238944 | 2.687447 |
| protein_co glucuronic   | 657   | 562   | 583   | 155   | 181   | 141   | 6.116089 | 6.708943 | 6.548247 | 2.239601 |
| protein_co Src_homolo   | 469   | 331   | 381   | 584   | 775   | 494   | 8.796567 | 7.961185 | 8.622107 | 17.00136 |
| protein_co anterior_pl  | 167   | 165   | 182   | 281   | 398   | 249   | 1.869332 | 2.368445 | 2.458043 | 4.882102 |
| protein_co von_Willek   | 645   | 498   | 579   | 469   | 591   | 543   | 11.56561 | 11.4511  | 12.52666 | 13.05305 |
| protein_co cartilage_ir | 22410 | 15565 | 17017 | 0     | 0     | 2     | 235.924  | 210.1303 | 216.153  | 0        |
| protein_co poly_(ADP-   | 261   | 221   | 238   | 152   | 156   | 113   | 4.48125  | 4.865868 | 4.930418 | 4.050725 |
| protein_co phosphopa    | 104   | 80    | 95    | 211   | 226   | 264   | 2.167361 | 2.137948 | 2.388744 | 6.825128 |
| protein_co hyperpolar   | 0     | 0     | 0     | 610   | 776   | 351   | 0        | 0        | 0        | 6.14218  |
| protein_co semaphori    | 8984  | 7343  | 8072  | 723   | 865   | 477   | 108.4324 | 113.6507 | 117.5489 | 13.54435 |
| protein_co ubiquitin-li | 780   | 577   | 678   | 803   | 848   | 840   | 21.26408 | 20.17145 | 22.30127 | 33.97801 |
| protein_co Rho_GTPas    | 429   | 314   | 269   | 32    | 28    | 23    | 4.315773 | 4.050795 | 3.265139 | 0.499668 |
| protein_co family_witl  | 274   | 254   | 242   | 246   | 240   | 224   | 2.193217 | 2.607198 | 2.337192 | 3.056304 |
| protein_co HECT_and_    | 376   | 352   | 320   | 36    | 41    | 19    | 3.544561 | 4.255265 | 3.639759 | 0.526754 |
| protein_co HECT_and_    | 22    | 17    | 41    | 88    | 128   | 76    | 0.272833 | 0.270353 | 0.613487 | 1.693896 |
| protein_co HECT_and_    | 4     | 9     | 4     | 167   | 225   | 133   | 0.05339  | 0.154047 | 0.064418 | 3.459786 |
| protein_co protocadhe   | 1546  | 1158  | 1204  | 194   | 181   | 367   | 13.5095  | 12.9762  | 12.69417 | 2.631249 |
| protein_co N-deacetyl   | 2     | 0     | 1     | 0     | 0     | 0     | 0.027986 | 0        | 0.016883 | 0        |
| protein_co chromosom    | 222   | 231   | 228   | 540   | 470   | 508   | 1.56488  | 2.088091 | 1.939148 | 5.908162 |

|                        |       |       |       |       |       |       |          |          |          |          |
|------------------------|-------|-------|-------|-------|-------|-------|----------|----------|----------|----------|
| protein_co adaptor-rel | 428   | 336   | 329   | 275   | 346   | 473   | 6.91555  | 6.961961 | 6.41397  | 6.896776 |
| protein_co COP9_signi  | 664   | 517   | 533   | 415   | 406   | 493   | 13.69774 | 13.67668 | 13.2665  | 13.288   |
| protein_co heterogene  | 8085  | 6335  | 6840  | 10557 | 15116 | 15379 | 82.46809 | 82.86323 | 84.18022 | 167.1386 |
| protein_co protein_kir | 0     | 1     | 1     | 64    | 55    | 34    | 0        | 0.017525 | 0.01649  | 1.357595 |
| protein_co RasGEF_doi  | 15    | 18    | 19    | 23    | 23    | 49    | 0.111237 | 0.171174 | 0.170004 | 0.264738 |
| protein_co SEC31_hon   | 7858  | 6293  | 6777  | 1684  | 1793  | 1543  | 86.12944 | 88.4518  | 89.62417 | 28.64918 |
| protein_co fibroblast_ | 1051  | 799   | 831   | 0     | 0     | 0     | 9.41563  | 9.179157 | 8.982469 | 0        |
| protein_co 1-acylglyce | 25    | 23    | 18    | 1     | 4     | 9     | 0.445553 | 0.52565  | 0.387062 | 0.027662 |
| protein_co fibroblast_ | 99    | 78    | 71    | 802   | 1285  | 1452  | 0.685183 | 0.692269 | 0.592895 | 8.61541  |
| protein_co Bardet-Biec | 313   | 268   | 279   | 207   | 200   | 187   | 3.911667 | 4.294985 | 4.206974 | 4.015304 |
| protein_co KIAA1109    | 1429  | 1219  | 1349  | 630   | 442   | 516   | 4.215264 | 4.611111 | 4.80123  | 2.884454 |
| protein_co bone_mor    | 308   | 302   | 283   | 8     | 6     | 18    | 2.594238 | 3.261936 | 2.876032 | 0.104587 |
| protein_co RAP1_GTP-   | 692   | 610   | 665   | 344   | 363   | 326   | 8.814967 | 9.96446  | 10.22079 | 6.801481 |
| protein_co La_ribonuc  | 408   | 350   | 385   | 472   | 605   | 542   | 3.911496 | 4.302889 | 4.453398 | 7.023526 |
| protein_co multimerin  | 8     | 9     | 8     | 0     | 0     | 1     | 0.071903 | 0.103732 | 0.086756 | 0        |
| protein_co phosphodi   | 90    | 80    | 76    | 554   | 581   | 372   | 0.589894 | 0.672405 | 0.601026 | 5.636009 |
| protein_co PR_domain   | 198   | 183   | 160   | 458   | 612   | 476   | 1.741881 | 2.064494 | 1.698327 | 6.253874 |
| protein_co transient_r | 52    | 32    | 50    | 6     | 6     | 4     | 0.663478 | 0.523579 | 0.769735 | 0.118824 |
| protein_co N-acyletha  | 136   | 111   | 134   | 107   | 119   | 75    | 3.361646 | 3.518401 | 3.996372 | 4.105134 |
| protein_co nucleopori  | 568   | 461   | 585   | 829   | 879   | 968   | 11.25202 | 11.71096 | 13.98254 | 25.48984 |
| protein_co BMP2_indu   | 216   | 185   | 180   | 110   | 158   | 154   | 1.467436 | 1.611709 | 1.475455 | 1.159921 |
| protein_co GTPase_act  | 3487  | 2924  | 3048  | 4365  | 5314  | 6579  | 33.48464 | 36.00646 | 35.31479 | 65.05915 |
| protein_co septin_11   | 8000  | 6571  | 7065  | 2405  | 2789  | 2871  | 67.06958 | 70.64418 | 71.46539 | 31.29544 |
| protein_co Fraser_sync | 1056  | 755   | 844   | 3409  | 3586  | 3166  | 3.967935 | 3.637951 | 3.826406 | 19.88191 |
| protein_co scavenger_  | 2834  | 2476  | 2532  | 855   | 1058  | 654   | 27.89971 | 31.2579  | 30.07541 | 13.06461 |
| protein_co cyclin_G2   | 801   | 657   | 702   | 264   | 277   | 161   | 6.796761 | 7.148982 | 7.187116 | 3.476994 |
| protein_co CCR4-NOT_   | 454   | 391   | 423   | 437   | 541   | 224   | 2.407336 | 2.658685 | 2.706258 | 3.596604 |
| protein_co USO1_vesic  | 2761  | 2242  | 2383  | 3174  | 2469  | 3695  | 36.07226 | 37.56227 | 37.56462 | 64.36419 |
| protein_co cyclin-depe | 5     | 3     | 4     | 5     | 7     | 4     | 0.069302 | 0.053322 | 0.066894 | 0.107567 |
| protein_co shroom_fa   | 632   | 433   | 513   | 2209  | 2456  | 1433  | 2.689155 | 2.362632 | 2.633687 | 14.58898 |
| protein_co annexin_A   | 132   | 101   | 116   | 106   | 152   | 250   | 2.116786 | 2.076987 | 2.244445 | 2.638392 |
| protein_co pyrophosph  | 545   | 459   | 465   | 331   | 420   | 396   | 15.17521 | 16.3893  | 15.6221  | 14.30529 |
| protein_co centromere  | 1101  | 891   | 989   | 564   | 335   | 973   | 5.994648 | 6.221046 | 6.497117 | 4.76635  |
| protein_co glutathione | 221   | 178   | 194   | 295   | 302   | 317   | 2.425157 | 2.504822 | 2.568605 | 5.024583 |
| protein_co integrator_ | 134   | 91    | 120   | 74    | 76    | 94    | 3.181399 | 2.770537 | 3.437499 | 2.726939 |
| protein_co glutamyl_a  | 25    | 8     | 7     | 3     | 4     | 8     | 0.168839 | 0.069284 | 0.05704  | 0.031447 |
| protein_co caspase_6_  | 376   | 286   | 312   | 285   | 400   | 502   | 11.38931 | 11.10925 | 11.40281 | 13.39938 |
| protein_co lymphoid_   | 1153  | 876   | 927   | 9     | 18    | 30    | 15.54909 | 15.14918 | 15.08355 | 0.188386 |
| protein_co hydroxyacy  | 576   | 503   | 507   | 702   | 758   | 698   | 13.21363 | 14.79711 | 14.03316 | 24.9958  |
| protein_co epidermal_  | 46    | 36    | 29    | 38    | 43    | 48    | 0.441996 | 0.44358  | 0.336207 | 0.566728 |
| protein_co 3'-phospho  | 3539  | 2833  | 3000  | 1607  | 1895  | 1384  | 60.76301 | 62.37558 | 62.14812 | 42.82576 |
| protein_co SEC24_fam   | 888   | 755   | 777   | 515   | 496   | 307   | 8.191685 | 8.931339 | 8.648272 | 7.373913 |
| protein_co chromosom   | 0     | 0     | 2     | 0     | 0     | 0     | 0        | 0        | 0.044513 | 0        |
| protein_co protein_ph  | 2461  | 1903  | 2049  | 1550  | 2130  | 1670  | 24.63102 | 24.42412 | 24.74348 | 24.0787  |
| protein_co solute_carr | 350   | 336   | 321   | 386   | 457   | 655   | 4.070314 | 5.010816 | 4.504151 | 6.967511 |
| protein_co microsoma   | 0     | 0     | 0     | 1     | 1     | 5     | 0        | 0        | 0        | 0.017786 |
| protein_co fibrillin_2 | 89410 | 68255 | 74133 | 2618  | 3023  | 2702  | 376.6113 | 368.6812 | 376.7618 | 17.1162  |
| protein_co mitogen-ac  | 4682  | 3597  | 3702  | 1356  | 1646  | 1065  | 38.78097 | 38.20648 | 36.99744 | 17.43321 |
| protein_co regulator_c | 2052  | 1680  | 1692  | 222   | 252   | 98    | 20.95803 | 22.0035  | 20.85074 | 3.519302 |
| protein_co guanylyl_c  | 1923  | 1443  | 1596  | 1166  | 1507  | 1685  | 24.95696 | 24.0153  | 24.99156 | 23.48775 |
| protein_co tubulin_ty  | 0     | 0     | 0     | 4     | 1     | 1     | 0        | 0        | 0        | 0.114209 |
| protein_co ring_finger | 715   | 557   | 627   | 357   | 417   | 432   | 10.59285 | 10.58208 | 11.20785 | 8.209286 |
| protein_co KIAA1644    | 2     | 1     | 3     | 70    | 84    | 139   | 0.013891 | 0.008907 | 0.025141 | 0.754642 |
| protein_co parvin_gar  | 21    | 17    | 15    | 4     | 6     | 2     | 0.194257 | 0.201658 | 0.167416 | 0.057431 |
| protein_co beta-14-N   | 286   | 216   | 230   | 511   | 728   | 448   | 2.646122 | 2.562754 | 2.567554 | 7.338295 |
| protein_co phosphodi   | 0     | 0     | 0     | 0     | 0     | 1     | 0        | 0        | 0        | 0        |
| protein_co endoplasm   | 4     | 1     | 1     | 2     | 0     | 1     | 0.089485 | 0.028688 | 0.026992 | 0.069446 |
| protein_co ets_variant | 649   | 433   | 449   | 136   | 190   | 146   | 13.76374 | 11.77576 | 11.4891  | 4.476731 |
| protein_co GABA(A)_re  | 1710  | 1233  | 1418  | 1572  | 1993  | 1371  | 24.94771 | 23.06784 | 24.96082 | 35.59734 |
| protein_co kinesin_fan | 188   | 138   | 162   | 974   | 818   | 1267  | 1.327009 | 1.249121 | 1.379683 | 10.67101 |
| protein_co copine_VIII | 227   | 193   | 200   | 62    | 70    | 60    | 3.050741 | 3.326182 | 3.243079 | 1.293307 |
| protein_co tyrosyl-tRN | 515   | 397   | 387   | 703   | 816   | 904   | 11.38    | 11.24954 | 10.31796 | 24.11131 |
| protein_co FYVE_RhoG   | 54    | 46    | 43    | 414   | 462   | 779   | 0.307214 | 0.335595 | 0.295165 | 3.655768 |
| protein_co ALG10_alp   | 51    | 38    | 48    | 33    | 60    | 43    | 0.999328 | 0.95484  | 1.13482  | 1.00365  |
| protein_co phosphatic  | 1     | 2     | 0     | 0     | 0     | 1     | 0.009688 | 0.024847 | 0        | 0        |

|                          |       |      |      |      |      |      |          |          |          |          |
|--------------------------|-------|------|------|------|------|------|----------|----------|----------|----------|
| protein_co family_witl   | 695   | 573  | 593  | 5958 | 6884 | 5721 | 10.30305 | 10.89294 | 10.60679 | 137.092  |
| protein_co phospholip    | 0     | 0    | 0    | 0    | 0    | 1    | 0        | 0        | 0        | 0        |
| protein_co AE_binding    | 614   | 546  | 534  | 777  | 1097 | 675  | 7.953169 | 9.069301 | 8.345668 | 15.62152 |
| protein_co solute_carr   | 1     | 0    | 0    | 0    | 0    | 0    | 0.013529 | 0        | 0        | 0        |
| protein_co methyltran    | 33    | 20   | 28   | 20   | 15   | 17   | 0.252508 | 0.196246 | 0.258504 | 0.237532 |
| protein_co ethanolami    | 826   | 689  | 741  | 874  | 1046 | 792  | 5.410135 | 5.787041 | 5.855909 | 8.885256 |
| protein_co zinc_finger   | 732   | 592  | 618  | 584  | 635  | 568  | 18.7868  | 19.48377 | 19.1372  | 23.26404 |
| protein_co transmemt     | 272   | 222  | 212  | 14   | 7    | 11   | 4.624396 | 4.840034 | 4.348806 | 0.369441 |
| protein_co prickler_hor  | 352   | 261  | 313  | 6    | 23   | 166  | 3.880857 | 3.690072 | 4.16368  | 0.102675 |
| protein_co compleme      | 242   | 196  | 219  | 192  | 276  | 142  | 3.343366 | 3.472434 | 3.65057  | 4.117184 |
| protein_co NADH_deh      | 185   | 105  | 147  | 133  | 152  | 153  | 2.601876 | 1.89371  | 2.494481 | 2.903333 |
| protein_co calsyntenin   | 2414  | 1758 | 1822 | 732  | 889  | 508  | 26.34835 | 24.60619 | 23.99455 | 12.40103 |
| protein_co killer_cell_l | 26    | 15   | 11   | 27   | 32   | 30   | 0.913214 | 0.675616 | 0.466165 | 1.471951 |
| protein_co vesicle-assc  | 152   | 105  | 111  | 118  | 147  | 81   | 2.066478 | 1.830568 | 1.820783 | 2.490002 |
| protein_co TAP_bindin    | 40    | 26   | 45   | 41   | 46   | 26   | 0.800171 | 0.666969 | 1.086134 | 1.273026 |
| protein_co CD27_mole     | 3     | 1    | 1    | 4    | 5    | 1    | 0.105135 | 0.04494  | 0.042284 | 0.217578 |
| protein_co retinol_bin   | 33    | 39   | 46   | 23   | 33   | 23   | 1.529022 | 2.317255 | 2.571614 | 1.654086 |
| protein_co peroxisoma    | 829   | 628  | 599  | 1276 | 1695 | 1273 | 11.95321 | 11.61178 | 10.42089 | 28.5569  |
| protein_co PILR_alpha    | 475   | 396  | 404  | 107  | 142  | 117  | 8.264474 | 8.835399 | 8.481078 | 2.889588 |
| protein_co solute_carr   | 18    | 8    | 14   | 78   | 92   | 62   | 0.222755 | 0.126957 | 0.209041 | 1.498238 |
| protein_co adhesion_n    | 725   | 594  | 676  | 118  | 163  | 169  | 9.034085 | 9.491655 | 10.16344 | 2.282226 |
| protein_co SR-related    | 1408  | 1243 | 1412 | 781  | 660  | 834  | 12.46623 | 14.11279 | 15.08395 | 10.73282 |
| protein_co collagen_ty   | 3749  | 2216 | 2354 | 215  | 265  | 387  | 34.66588 | 26.2764  | 26.26282 | 3.085714 |
| protein_co protein_ty    | 35    | 47   | 40   | 6    | 4    | 5    | 0.303636 | 0.522868 | 0.41869  | 0.080792 |
| protein_co LLP_homol     | 137   | 112  | 119  | 121  | 140  | 193  | 5.184772 | 5.435462 | 5.433806 | 7.107632 |
| pseudogen_ribosomal      | 56    | 48   | 37   | 89   | 95   | 112  | 3.919166 | 4.307806 | 3.124319 | 9.667765 |
| protein_co leucine-ricl  | 1744  | 1415 | 1470 | 129  | 209  | 158  | 20.09243 | 20.90508 | 20.4339  | 2.30678  |
| protein_co membrane      | 58    | 55   | 45   | 58   | 73   | 43   | 0.912012 | 1.109034 | 0.853755 | 1.41557  |
| protein_co inhibin_be    | 95    | 59   | 58   | 49   | 96   | 101  | 1.833904 | 1.460543 | 1.350918 | 1.46818  |
| protein_co GLI_pathog    | 885   | 649  | 693  | 22   | 18   | 21   | 7.061029 | 6.640163 | 6.671231 | 0.272444 |
| protein_co tryptophar    | 0     | 0    | 2    | 2    | 6    | 3    | 0        | 0        | 0.037818 | 0.04865  |
| protein_co pleckstrin    | 2040  | 1896 | 1875 | 343  | 364  | 307  | 11.85471 | 14.1289  | 13.1465  | 3.09375  |
| protein_co transmemt     | 253   | 213  | 224  | 81   | 95   | 101  | 2.542472 | 2.744888 | 2.716012 | 1.26343  |
| protein_co leucine-ricl  | 262   | 179  | 220  | 19   | 20   | 17   | 2.664321 | 2.334251 | 2.69933  | 0.299895 |
| protein_co protein_ty    | 0     | 0    | 1    | 2    | 1    | 0    | 0        | 0        | 0.007857 | 0.020214 |
| protein_co dual_specif   | 10811 | 8420 | 8920 | 2940 | 2652 | 1878 | 115.2109 | 115.0666 | 114.694  | 48.63014 |
| protein_co POC1_cent     | 505   | 409  | 447  | 249  | 361  | 199  | 4.054702 | 4.211145 | 4.330351 | 3.103111 |
| protein_co transmemt     | 924   | 701  | 852  | 401  | 325  | 484  | 6.015046 | 5.851865 | 6.69198  | 4.051742 |
| protein_co lumican       | 3407  | 2517 | 2336 | 1    | 0    | 6    | 53.1098  | 50.31473 | 43.9363  | 0.024195 |
| protein_co keratocan     | 24    | 11   | 10   | 0    | 0    | 0    | 0.520518 | 0.305933 | 0.261681 | 0        |
| protein_co small_nucl    | 1110  | 907  | 942  | 1768 | 1968 | 2094 | 37.4715  | 39.26402 | 38.3687  | 92.63836 |
| protein_co amidohydr     | 5     | 4    | 4    | 10   | 14   | 6    | 0.109761 | 0.112603 | 0.105947 | 0.340729 |
| protein_co neural_pre    | 685   | 510  | 563  | 389  | 313  | 327  | 8.872835 | 8.471325 | 8.798898 | 7.820813 |
| protein_co synaptoner    | 5     | 4    | 8    | 4    | 8    | 8    | 0.063537 | 0.065181 | 0.122657 | 0.078894 |
| protein_co achaete-sc    | 0     | 0    | 0    | 2    | 0    | 2    | 0        | 0        | 0        | 0.058883 |
| protein_co growth_arr    | 558   | 536  | 495  | 256  | 237  | 164  | 6.627312 | 8.163518 | 7.093433 | 4.719258 |
| protein_co transmemt     | 332   | 289  | 319  | 2048 | 2335 | 1571 | 1.427424 | 1.59339  | 1.654831 | 13.66707 |
| protein_co solute_carr   | 516   | 428  | 396  | 438  | 600  | 417  | 8.715868 | 9.270732 | 8.070569 | 11.48327 |
| protein_co thymine-DI    | 951   | 757  | 756  | 733  | 1053 | 1606 | 13.71652 | 14.00131 | 13.15628 | 16.4096  |
| protein_co chromosom     | 420   | 279  | 307  | 524  | 674  | 433  | 9.592697 | 8.17156  | 8.460146 | 18.57604 |
| protein_co serine_deh    | 45    | 37   | 33   | 18   | 17   | 10   | 1.456212 | 1.535405 | 1.288469 | 0.904097 |
| protein_co methylmal     | 869   | 699  | 693  | 265  | 290  | 446  | 14.95318 | 15.42412 | 14.38783 | 7.077669 |
| protein_co glycolipid    | 916   | 706  | 649  | 559  | 649  | 358  | 18.23058 | 18.01852 | 15.58468 | 17.26821 |
| protein_co G_protein-i   | 423   | 312  | 317  | 154  | 189  | 117  | 3.625384 | 3.42908  | 3.278091 | 2.048636 |
| protein_co trichoplein   | 667   | 540  | 582  | 124  | 125  | 120  | 9.123583 | 9.472022 | 9.605293 | 2.632642 |
| protein_co family_witl   | 112   | 85   | 71   | 33   | 74   | 200  | 1.594318 | 1.551619 | 1.219448 | 0.729124 |
| protein_co forkhead_b    | 0     | 0    | 0    | 9    | 10   | 3    | 0        | 0        | 0        | 0.195528 |
| protein_co nucleopori    | 1086  | 862  | 982  | 778  | 988  | 940  | 8.006692 | 8.149667 | 8.7354   | 8.902938 |
| protein_co myotubula     | 813   | 630  | 688  | 188  | 269  | 200  | 6.736452 | 6.694075 | 6.878238 | 2.417848 |
| protein_co solute_carr   | 165   | 133  | 122  | 3    | 3    | 10   | 2.434504 | 2.516445 | 2.171873 | 0.068703 |
| protein_co solute_carr   | 2421  | 1947 | 1976 | 1643 | 2208 | 2374 | 15.4513  | 15.93476 | 15.21617 | 16.27565 |
| protein_co pancreatic    | 0     | 0    | 0    | 0    | 0    | 4    | 0        | 0        | 0        | 0        |
| protein_co ligand_of_r   | 244   | 200  | 223  | 269  | 323  | 270  | 2.473765 | 2.600207 | 2.727857 | 4.233031 |
| protein_co sulfite_oxi   | 533   | 360  | 370  | 305  | 403  | 390  | 8.738594 | 7.568786 | 7.319209 | 7.761482 |
| protein_co coiled-coil   | 125   | 90   | 117  | 66   | 82   | 69   | 2.812501 | 2.596776 | 3.176264 | 2.304927 |

|                         |      |      |      |      |      |      |          |          |          |          |
|-------------------------|------|------|------|------|------|------|----------|----------|----------|----------|
| protein_co solute_carr  | 7    | 4    | 4    | 4    | 13   | 1    | 0.16161  | 0.118424 | 0.111424 | 0.143338 |
| protein_co TAR_(HIV-1   | 860  | 641  | 712  | 988  | 1142 | 1211 | 21.59904 | 20.64446 | 21.57566 | 38.51443 |
| protein_co retinol_def  | 5    | 3    | 8    | 42   | 52   | 7    | 0.073311 | 0.056407 | 0.141527 | 0.955832 |
| protein_co desert_hed   | 4    | 0    | 2    | 1    | 0    | 1    | 0.09688  | 0        | 0.058446 | 0.037593 |
| protein_co activin_A_r  | 3    | 3    | 10   | 3    | 3    | 4    | 0.034135 | 0.043773 | 0.137286 | 0.052982 |
| protein_co G_protein-i  | 2    | 0    | 3    | 0    | 2    | 0    | 0.045948 | 0        | 0.083159 | 0        |
| protein_co neuropepti   | 23   | 16   | 11   | 5    | 3    | 6    | 0.767049 | 0.684265 | 0.442625 | 0.258819 |
| protein_co nucleic_aci  | 745  | 578  | 582  | 396  | 425  | 416  | 19.6806  | 19.58029 | 18.55039 | 16.23707 |
| protein_co NEDD4_bir    | 9    | 6    | 4    | 42   | 47   | 11   | 0.138546 | 0.118443 | 0.074295 | 1.00353  |
| protein_co SWI/SNF_re   | 2491 | 2014 | 2083 | 995  | 1354 | 1165 | 27.34794 | 28.35435 | 27.59231 | 16.95526 |
| protein_co breast_cani  | 274  | 215  | 259  | 237  | 121  | 293  | 1.169689 | 1.176976 | 1.334036 | 1.570358 |
| protein_co KAT8_regul   | 379  | 336  | 327  | 294  | 330  | 587  | 6.548016 | 7.444219 | 6.816577 | 7.884032 |
| protein_co ceramide_s   | 958  | 819  | 896  | 467  | 537  | 553  | 14.98353 | 16.42639 | 16.90849 | 11.33695 |
| protein_co mitogen-ac   | 702  | 571  | 604  | 300  | 450  | 153  | 5.849794 | 6.101673 | 6.072793 | 3.88021  |
| protein_co integrin_be  | 6    | 6    | 6    | 1    | 8    | 3    | 0.09813  | 0.125838 | 0.1184   | 0.025385 |
| protein_co UDP-N-acet   | 208  | 191  | 190  | 279  | 328  | 248  | 1.873079 | 2.205645 | 2.064403 | 3.899667 |
| protein_co cysteine_su  | 450  | 332  | 367  | 54   | 95   | 59   | 7.977508 | 7.547483 | 7.849985 | 1.485864 |
| protein_co limb_regio   | 464  | 383  | 399  | 743  | 872  | 368  | 7.770346 | 8.224897 | 8.062009 | 1.931264 |
| protein_co chromosor    | 643  | 414  | 454  | 556  | 604  | 655  | 22.02358 | 18.18388 | 18.76207 | 29.55849 |
| protein_co extended_s   | 4460 | 3648 | 3876 | 2260 | 2342 | 2360 | 47.65941 | 49.9894  | 49.97417 | 37.48458 |
| protein_co transmembr   | 8061 | 6505 | 6835 | 7235 | 7841 | 8194 | 116.1587 | 120.2042 | 118.8364 | 161.8199 |
| protein_co ankyrin_rej  | 5268 | 3993 | 4511 | 1001 | 1332 | 722  | 28.43193 | 27.63562 | 29.37524 | 8.385426 |
| protein_co zinc_finger  | 761  | 602  | 596  | 396  | 530  | 377  | 8.398047 | 8.519213 | 7.93575  | 6.782961 |
| protein_co WD_repeat    | 719  | 522  | 660  | 466  | 552  | 460  | 9.239222 | 8.601741 | 10.23289 | 9.294433 |
| protein_co heterogene   | 122  | 77   | 120  | 105  | 86   | 144  | 2.418851 | 1.957714 | 2.870639 | 3.231239 |
| protein_co lysophosph   | 328  | 247  | 274  | 44   | 40   | 68   | 5.119815 | 4.944094 | 5.160349 | 1.066016 |
| protein_co esterase_D   | 1083 | 835  | 828  | 635  | 649  | 609  | 42.60226 | 42.12112 | 39.29909 | 38.77112 |
| protein_co retinoblast  | 846  | 693  | 803  | 209  | 245  | 290  | 8.196065 | 8.609494 | 9.386391 | 3.142764 |
| protein_co strawberry   | 1348 | 1113 | 1094 | 1221 | 1316 | 1198 | 5.756101 | 6.094569 | 5.636427 | 8.092536 |
| protein_co MORN_repi    | 13   | 11   | 9    | 14   | 25   | 19   | 0.427169 | 0.463509 | 0.356818 | 0.714027 |
| protein_co SET_domai    | 1267 | 920  | 1022 | 623  | 845  | 1159 | 7.2495   | 6.750386 | 7.055542 | 5.532863 |
| protein_co vacuolar_p   | 165  | 132  | 146  | 193  | 234  | 326  | 1.687059 | 1.730731 | 1.801139 | 3.062909 |
| protein_co vacuolar_p   | 849  | 694  | 679  | 378  | 501  | 490  | 13.17763 | 13.81333 | 12.71591 | 9.106509 |
| protein_co ras_homol    | 7    | 3    | 5    | 11   | 22   | 11   | 0.109228 | 0.06003  | 0.094136 | 0.266415 |
| protein_co density-reg  | 1818 | 1403 | 1481 | 1311 | 1537 | 2170 | 30.78586 | 30.46663 | 30.25942 | 34.45804 |
| protein_co diaphanou    | 701  | 530  | 615  | 422  | 503  | 459  | 6.842194 | 6.633803 | 7.242701 | 6.39323  |
| protein_co SLAIN_mot    | 9    | 9    | 7    | 487  | 643  | 478  | 0.160034 | 0.205221 | 0.150181 | 13.44094 |
| protein_co RNA_bindi    | 1056 | 918  | 953  | 1024 | 1137 | 1019 | 11.98351 | 13.35894 | 13.04851 | 18.03643 |
| protein_co serine/argi  | 1    | 1    | 0    | 55   | 89   | 95   | 0.005531 | 0.007093 | 0        | 0.472206 |
| protein_co methyltran   | 0    | 1    | 2    | 0    | 0    | 0    | 0        | 0.055266 | 0.103999 | 0        |
| protein_co muscleblin   | 799  | 612  | 704  | 12   | 9    | 46   | 8.024229 | 7.881652 | 8.530554 | 0.187055 |
| protein_co ring_finger  | 3    | 2    | 4    | 1    | 0    | 3    | 0.102231 | 0.087398 | 0.164464 | 0.052892 |
| protein_co Zic_family   | 1    | 0    | 0    | 1166 | 1593 | 1348 | 0.010108 | 0        | 0        | 18.293   |
| protein_co abhydrolas   | 326  | 242  | 265  | 135  | 159  | 180  | 2.863647 | 2.726004 | 2.808638 | 1.840628 |
| protein_co RAB20_me     | 49   | 36   | 34   | 157  | 181  | 96   | 1.517577 | 1.429771 | 1.27052  | 7.547179 |
| protein_co growth_ho    | 13   | 11   | 11   | 576  | 605  | 551  | 0.421556 | 0.457419 | 0.430381 | 28.99112 |
| protein_co cullin_4A    | 1667 | 1356 | 1522 | 1659 | 2049 | 2060 | 20.9897  | 21.89474 | 23.12243 | 32.42258 |
| protein_co tetratricop  | 6    | 4    | 3    | 4    | 6    | 0    | 0.048232 | 0.041234 | 0.029098 | 0.049909 |
| protein_co somatostat   | 1813 | 1436 | 1437 | 184  | 149  | 119  | 19.79316 | 20.10393 | 18.92875 | 3.117924 |
| protein_co cadherin_2   | 560  | 437  | 446  | 641  | 695  | 601  | 7.39257  | 7.397725 | 7.263794 | 13.13397 |
| protein_co RAS_(RAD_i   | 4    | 1    | 9    | 63   | 69   | 43   | 0.097535 | 0.031269 | 0.264784 | 2.384362 |
| protein_co cerebellin   | 21   | 19   | 16   | 6    | 8    | 8    | 0.419732 | 0.486985 | 0.385852 | 0.186138 |
| protein_co testis-speci | 68   | 49   | 66   | 56   | 70   | 73   | 2.287318 | 2.113601 | 2.678611 | 2.923722 |
| protein_co neuro-oncc   | 52   | 58   | 46   | 159  | 164  | 179  | 0.370841 | 0.530423 | 0.395813 | 1.759998 |
| protein_co fat_storage  | 1    | 1    | 0    | 5    | 3    | 0    | 0.039271 | 0.05036  | 0        | 0.304773 |
| protein_co MAM_dom      | 2    | 0    | 1    | 7    | 4    | 2    | 0.0179   | 0        | 0.010799 | 0.097243 |
| protein_co thioredoxi   | 782  | 649  | 608  | 769  | 925  | 1241 | 14.7261  | 15.67238 | 13.81442 | 22.47697 |
| protein_co FERM_dom     | 2456 | 1828 | 2059 | 331  | 349  | 309  | 22.47938 | 21.45564 | 22.73843 | 4.702345 |
| protein_co pellino_E3   | 255  | 203  | 209  | 305  | 375  | 243  | 2.023516 | 2.065722 | 2.001063 | 3.756615 |
| protein_co reticulon_1  | 11   | 15   | 4    | 23   | 31   | 15   | 0.150157 | 0.262576 | 0.065881 | 0.487317 |
| protein_co chromosor    | 1454 | 1235 | 1298 | 198  | 219  | 170  | 10.49701 | 11.43346 | 11.30639 | 2.218691 |
| protein_co synaptotag   | 1    | 0    | 1    | 9    | 7    | 4    | 0.014567 | 0        | 0.017575 | 0.203485 |
| protein_co solute_carr  | 112  | 78   | 105  | 21   | 31   | 34   | 1.884349 | 1.682858 | 2.131478 | 0.548395 |
| protein_co N(alpha)-ac  | 697  | 526  | 571  | 507  | 643  | 459  | 4.275555 | 4.13766  | 4.22614  | 4.827232 |
| protein_co ADAM_met     | 4    | 1    | 4    | 0    | 1    | 1    | 0.070564 | 0.022622 | 0.08514  | 0        |

|                         |       |       |       |      |      |      |          |          |          |          |
|-------------------------|-------|-------|-------|------|------|------|----------|----------|----------|----------|
| protein_co retinol_def  | 1     | 1     | 0     | 13   | 34   | 9    | 0.024955 | 0.032001 | 0        | 0.503532 |
| protein_co DDB1_and     | 1523  | 1069  | 1302  | 755  | 842  | 777  | 11.99622 | 10.79771 | 12.37381 | 9.23043  |
| protein_co RAB15_me     | 3987  | 2971  | 3157  | 1160 | 1478 | 1743 | 53.18649 | 50.82379 | 50.81333 | 24.01837 |
| protein_co WD_repeat    | 100   | 79    | 93    | 242  | 279  | 259  | 1.566656 | 1.587121 | 1.757943 | 5.884635 |
| protein_co estrogen_r   | 2     | 5     | 5     | 15   | 14   | 18   | 0.017182 | 0.055084 | 0.051828 | 0.200018 |
| protein_co potassium_   | 0     | 0     | 0     | 24   | 28   | 29   | 0        | 0        | 0        | 0.418375 |
| protein_co stonin_2     | 12    | 7     | 8     | 325  | 388  | 311  | 0.130795 | 0.09784  | 0.105208 | 5.498242 |
| protein_co EF-hand_ca   | 89    | 61    | 53    | 83   | 91   | 92   | 1.348372 | 1.185111 | 0.968821 | 1.951768 |
| protein_co G_protein-i  | 1     | 1     | 0     | 0    | 0    | 0    | 0.026254 | 0.033667 | 0        | 0        |
| protein_co prostaglan   | 71    | 60    | 57    | 140  | 183  | 116  | 0.68516  | 0.742496 | 0.663676 | 2.096969 |
| protein_co Jun_dimeri   | 343   | 259   | 245   | 367  | 606  | 281  | 2.977833 | 2.883469 | 2.566376 | 4.945415 |
| protein_co adenylate_   | 51    | 57    | 45    | 107  | 122  | 70   | 0.724664 | 1.038606 | 0.771484 | 2.35983  |
| protein_co solute_carr  | 0     | 3     | 0     | 3    | 5    | 3    | 0        | 0.038001 | 0        | 0.045995 |
| protein_co fibulin_5    | 8546  | 6895  | 7510  | 156  | 202  | 202  | 165.3826 | 171.1081 | 175.3537 | 4.685782 |
| protein_co serpin_pep   | 0     | 0     | 0     | 1    | 2    | 0    | 0        | 0        | 0        | 0.028812 |
| protein_co chromosom    | 201   | 177   | 196   | 88   | 110  | 84   | 3.765439 | 4.252087 | 4.430203 | 2.558778 |
| protein_co tryptophar   | 1709  | 1234  | 1300  | 1113 | 1437 | 1552 | 25.9169  | 23.99747 | 23.7866  | 26.1979  |
| protein_co solute_carr  | 0     | 0     | 0     | 1    | 1    | 0    | 0        | 0        | 0        | 0.041876 |
| protein_co WD_repeat    | 438   | 366   | 398   | 313  | 378  | 417  | 6.711708 | 7.191995 | 7.358513 | 7.44447  |
| protein_co non_imprim   | 1250  | 1007  | 1102  | 885  | 1190 | 1176 | 18.12945 | 18.72895 | 19.28432 | 19.92271 |
| pseudogen: hect_doma    | 769   | 759   | 763   | 415  | 476  | 462  | 6.039937 | 7.644642 | 7.230672 | 5.059232 |
| protein_co solute_carr  | 389   | 341   | 407   | 248  | 245  | 163  | 3.373445 | 3.79217  | 4.258596 | 3.338153 |
| protein_co dual_oxida   | 1     | 0     | 0     | 0    | 1    | 0    | 0.01747  | 0        | 0        | 0        |
| protein_co microfibrill | 720   | 619   | 633   | 738  | 775  | 898  | 15.66627 | 17.27162 | 16.61823 | 24.92413 |
| protein_co transcriptic | 3558  | 2803  | 3065  | 1225 | 1262 | 769  | 27.52593 | 27.80792 | 28.60979 | 14.70966 |
| protein_co sorbitol_de  | 380   | 267   | 292   | 678  | 714  | 744  | 3.629702 | 3.270453 | 3.365257 | 10.05189 |
| protein_co small_EDRF   | 9258  | 6603  | 6860  | 4427 | 4903 | 3867 | 155.4827 | 142.2052 | 139.0072 | 115.3998 |
| protein_co zinc_finger  | 386   | 316   | 346   | 467  | 548  | 590  | 3.23495  | 3.396071 | 3.498682 | 6.074739 |
| protein_co dual_oxida   | 2     | 0     | 0     | 0    | 0    | 0    | 0.053284 | 0        | 0        | 0        |
| protein_co dual_oxida   | 2     | 1     | 0     | 0    | 0    | 0    | 0.014121 | 0.009054 | 0        | 0        |
| protein_co LysM_puta    | 33    | 20    | 32    | 37   | 38   | 35   | 0.879688 | 0.683682 | 1.02923  | 1.5309   |
| protein_co solute_carr  | 1     | 0     | 0     | 67   | 58   | 73   | 0.019586 | 0        | 0        | 2.036862 |
| protein_co fibroblast_  | 239   | 203   | 163   | 0    | 0    | 3    | 2.049884 | 2.232733 | 1.686813 | 0        |
| protein_co histidine_d  | 4     | 0     | 1     | 0    | 0    | 0    | 0.069338 | 0        | 0.020915 | 0        |
| protein_co glucosamin   | 0     | 2     | 1     | 1    | 2    | 3    | 0        | 0.039637 | 0.018647 | 0.023988 |
| protein_co BCL2/adenu   | 871   | 664   | 807   | 433  | 427  | 494  | 6.457108 | 6.31244  | 7.218408 | 4.982396 |
| protein_co general_tra  | 1039  | 840   | 870   | 656  | 872  | 719  | 30.79566 | 31.92733 | 31.11295 | 30.17923 |
| protein_co signal_reco  | 4075  | 3254  | 3302  | 2653 | 2427 | 3156 | 177.4158 | 181.6735 | 173.4562 | 179.2802 |
| protein_co bromo_adj    | 607   | 423   | 484   | 1258 | 1619 | 1226 | 6.058374 | 5.413985 | 5.828554 | 19.4885  |
| protein_co dispatched   | 30    | 18    | 18    | 13   | 27   | 7    | 0.279607 | 0.215133 | 0.202417 | 0.188062 |
| protein_co codanin_1    | 615   | 505   | 554   | 321  | 428  | 284  | 6.218969 | 6.548533 | 6.75929  | 5.038239 |
| protein_co transducin   | 1822  | 1274  | 1415  | 2664 | 3081 | 2462 | 10.9404  | 9.809881 | 10.25155 | 24.82845 |
| protein_co acidic(leu   | 2666  | 2147  | 2326  | 3302 | 3658 | 3646 | 33.68601 | 34.78811 | 35.46069 | 64.75853 |
| protein_co COMM_doi     | 987   | 753   | 787   | 987  | 1134 | 1460 | 11.00867 | 10.77016 | 10.59109 | 17.08698 |
| protein_co ubiquitin-c  | 1013  | 830   | 939   | 436  | 520  | 499  | 15.17559 | 15.94496 | 16.97265 | 10.13802 |
| protein_co proline-seri | 5     | 3     | 3     | 10   | 13   | 7    | 0.119495 | 0.091942 | 0.086507 | 0.370947 |
| protein_co electron-tr  | 1480  | 1175  | 1278  | 797  | 976  | 814  | 30.34422 | 30.8931  | 31.615   | 25.36314 |
| protein_co BCL2-relate  | 62    | 55    | 52    | 1    | 0    | 0    | 2.814309 | 3.20149  | 2.847944 | 0.070455 |
| protein_co high_mobil   | 1140  | 925   | 968   | 1470 | 1467 | 890  | 12.99966 | 13.52628 | 13.31836 | 26.01807 |
| protein_co S-phase_cy   | 169   | 152   | 160   | 282  | 269  | 180  | 1.457229 | 1.680715 | 1.664597 | 3.774164 |
| protein_co tetraspanin  | 2731  | 2159  | 2244  | 1426 | 1677 | 1660 | 33.22694 | 33.68454 | 32.94121 | 26.9289  |
| protein_co WD_repeat    | 423   | 374   | 389   | 398  | 402  | 554  | 5.465549 | 6.196898 | 6.064445 | 7.981913 |
| protein_co nuclear_rec  | 738   | 597   | 700   | 493  | 551  | 448  | 4.096701 | 4.249732 | 4.688393 | 4.247714 |
| protein_co nei_endonu   | 41    | 53    | 56    | 218  | 289  | 116  | 0.587738 | 0.974283 | 0.968581 | 4.850503 |
| protein_co mannosida    | 1380  | 1052  | 1197  | 765  | 936  | 698  | 13.42494 | 13.12376 | 14.04998 | 11.55115 |
| protein_co DnaJ_(Hsp4   | 21    | 28    | 24    | 73   | 93   | 54   | 0.303448 | 0.51884  | 0.418432 | 1.637265 |
| protein_co mesoderm     | 2636  | 1788  | 1904  | 1485 | 2264 | 1276 | 40.55187 | 35.27299 | 35.34113 | 35.45866 |
| protein_co tropomyos    | 20890 | 16922 | 18194 | 1453 | 1606 | 2235 | 343.0937 | 356.398  | 360.5376 | 37.03995 |
| protein_co insulin-like | 3397  | 2717  | 2852  | 4384 | 5298 | 3488 | 13.49533 | 13.84162 | 13.67054 | 27.03267 |
| protein_co arrestin_dc  | 342   | 265   | 267   | 234  | 284  | 46   | 3.938209 | 3.913162 | 3.709641 | 4.182336 |
| protein_co PIF1_5'-to-  | 349   | 269   | 316   | 2444 | 3160 | 1780 | 6.090293 | 6.019693 | 6.653465 | 66.19793 |
| protein_co ubiquitin_s  | 379   | 307   | 329   | 233  | 274  | 162  | 3.231736 | 3.356946 | 3.384859 | 3.083778 |
| protein_co cytochrom    | 1     | 1     | 0     | 91   | 99   | 68   | 0.023433 | 0.03005  | 0        | 3.309826 |
| protein_co Bardet-Biec  | 418   | 352   | 436   | 642  | 711  | 746  | 7.871497 | 8.500276 | 9.906394 | 18.76491 |
| protein_co promyeloc    | 1597  | 1287  | 1307  | 1262 | 1505 | 775  | 13.88529 | 14.34954 | 13.71114 | 17.03099 |

|                        |       |       |       |      |      |      |          |          |          |          |
|------------------------|-------|-------|-------|------|------|------|----------|----------|----------|----------|
| protein_co cytochrom   | 2     | 0     | 0     | 0    | 0    | 1    | 0.034927 | 0        | 0        | 0        |
| protein_co ADAM_met    | 52    | 34    | 44    | 26   | 33   | 53   | 0.392828 | 0.329372 | 0.401051 | 0.304861 |
| protein_co lines_homc  | 170   | 122   | 133   | 79   | 108  | 119  | 1.653454 | 1.521642 | 1.560785 | 1.192617 |
| protein_co unc-51-like | 583   | 466   | 503   | 626  | 792  | 617  | 9.263599 | 9.495251 | 9.643334 | 15.43889 |
| protein_co golgin_A6_  | 0     | 0     | 0     | 18   | 17   | 0    | 0        | 0        | 0        | 0.617068 |
| protein_co proprotein  | 23    | 32    | 16    | 85   | 117  | 93   | 0.244718 | 0.436613 | 0.205402 | 1.40374  |
| protein_co coiled-coil | 0     | 0     | 1     | 15   | 20   | 4    | 0        | 0        | 0.018339 | 0.353873 |
| protein_co CUGBP_Ela   | 0     | 1     | 0     | 0    | 0    | 0    | 0        | 0.017976 | 0        | 0        |
| protein_co secretory_c | 1311  | 1031  | 1062  | 638  | 773  | 674  | 19.44112 | 19.60589 | 19.00164 | 14.68486 |
| protein_co hyaluronan  | 1729  | 1218  | 1329  | 684  | 849  | 509  | 26.39949 | 23.84829 | 24.48351 | 16.21015 |
| protein_co Rh_family_  | 0     | 1     | 0     | 5    | 9    | 2    | 0        | 0.030338 | 0        | 0.183602 |
| protein_co polymerase  | 2044  | 1753  | 1879  | 1378 | 1776 | 1139 | 21.28903 | 23.41349 | 23.61292 | 22.27689 |
| protein_co retinaldehy | 2     | 9     | 3     | 2    | 0    | 1    | 0.051812 | 0.298988 | 0.093772 | 0.08042  |
| protein_co Fanconi_ar  | 1168  | 982   | 1036  | 1304 | 1381 | 1599 | 11.54703 | 12.44939 | 12.35763 | 20.00946 |
| protein_co abhydrolas  | 5786  | 5113  | 5186  | 550  | 690  | 449  | 31.0596  | 35.19675 | 33.58907 | 4.582586 |
| protein_co WD_repeat   | 0     | 1     | 3     | 5    | 3    | 4    | 0        | 0.02496  | 0.070455 | 0.151058 |
| protein_co TOPBP1-int  | 521   | 417   | 406   | 918  | 903  | 1080 | 3.60799  | 3.703164 | 3.392358 | 9.867355 |
| protein_co neurotrop   | 60    | 49    | 38    | 313  | 293  | 282  | 0.140783 | 0.147436 | 0.10758  | 1.139916 |
| protein_co de-etiolate | 115   | 82    | 127   | 119  | 125  | 98   | 2.32931  | 2.129868 | 3.10371  | 3.741165 |
| protein_co milk_fat_gl | 3140  | 2280  | 2344  | 4748 | 5816 | 3575 | 74.09897 | 68.99644 | 66.7403  | 173.9097 |
| protein_co zinc_finger | 981   | 682   | 847   | 593  | 890  | 572  | 9.962986 | 8.882071 | 10.37892 | 9.34772  |
| protein_co unc-45_hoi  | 2025  | 1594  | 1681  | 2137 | 2987 | 1856 | 23.72621 | 23.94975 | 23.76397 | 38.86318 |
| protein_co ST8_alpha-l | 488   | 417   | 398   | 79   | 89   | 76   | 4.008817 | 4.392804 | 3.944823 | 1.007289 |
| protein_co multiple_C  | 404   | 329   | 366   | 93   | 85   | 55   | 4.21624  | 4.403005 | 4.608643 | 1.506459 |
| protein_co furin(pair  | 7472  | 5518  | 6403  | 1916 | 2671 | 1625 | 82.55471 | 78.18007 | 85.35649 | 32.85723 |
| protein_co IQ_motif_c  | 6318  | 5435  | 5651  | 3348 | 3850 | 3116 | 40.95826 | 45.18256 | 44.20132 | 33.6882  |
| protein_co CREB_regul  | 854   | 645   | 650   | 225  | 267  | 107  | 7.687478 | 7.445521 | 7.059719 | 3.143685 |
| protein_co elongation  | 268   | 175   | 207   | 545  | 496  | 491  | 3.419462 | 2.863324 | 3.186702 | 10.7932  |
| protein_co SH3-domai   | 9     | 5     | 6     | 138  | 157  | 186  | 0.209747 | 0.149428 | 0.168714 | 4.991855 |
| protein_co SEC11_hon   | 2265  | 1811  | 1776  | 1985 | 2196 | 2234 | 29.2901  | 30.03173 | 27.71045 | 39.84222 |
| protein_co septin_12   | 0     | 1     | 0     | 0    | 2    | 1    | 0        | 0.040932 | 0        | 0        |
| protein_co glyoxylate_ | 1184  | 897   | 959   | 1050 | 1218 | 1358 | 14.71839 | 14.29916 | 14.38386 | 20.25949 |
| protein_co phosphom    | 336   | 252   | 209   | 163  | 197  | 268  | 2.912746 | 2.801388 | 2.186038 | 2.193216 |
| protein_co solute_carr | 0     | 1     | 3     | 8    | 3    | 2    | 0        | 0.024374 | 0.068799 | 0.236011 |
| protein_co integrin_al | 1     | 3     | 9     | 0    | 0    | 0    | 0.00997  | 0.038356 | 0.108267 | 0        |
| protein_co transformi  | 2646  | 1975  | 2155  | 80   | 111  | 51   | 24.94892 | 23.88022 | 24.51643 | 1.170799 |
| protein_co chromosom   | 1160  | 953   | 925   | 417  | 578  | 289  | 19.47455 | 20.5169  | 18.73696 | 10.86616 |
| protein_co armadillo_l | 426   | 307   | 357   | 368  | 478  | 534  | 4.123689 | 3.810869 | 4.169582 | 5.529101 |
| protein_co poly(A)-spe | 727   | 526   | 573   | 723  | 792  | 942  | 11.07506 | 10.27559 | 10.53209 | 17.09545 |
| protein_co fat_mass_a  | 753   | 669   | 660   | 381  | 392  | 365  | 3.000865 | 3.418905 | 3.173537 | 2.356715 |
| protein_co ubiquinol-c | 2243  | 1834  | 1954  | 2272 | 2372 | 2225 | 40.21962 | 42.17134 | 42.27478 | 63.23354 |
| protein_co cerebellar_ | 1389  | 1075  | 1194  | 657  | 817  | 571  | 24.10445 | 23.92285 | 25.00043 | 17.69664 |
| protein_co immunoglo   | 19    | 30    | 38    | 2    | 9    | 8    | 0.752458 | 1.523559 | 1.815768 | 0.122939 |
| protein_co Rho_GTPas   | 950   | 809   | 845   | 710  | 907  | 899  | 8.9701   | 9.795611 | 9.626722 | 10.40549 |
| protein_co myosin_lig  | 2     | 2     | 3     | 15   | 13   | 9    | 0.02841  | 0.036431 | 0.051417 | 0.330717 |
| protein_co ATP-bindin  | 0     | 0     | 0     | 0    | 0    | 2    | 0        | 0        | 0        | 0        |
| protein_co naked_cuti  | 297   | 234   | 289   | 125  | 160  | 98   | 3.032738 | 3.064105 | 3.56061  | 1.981157 |
| protein_co DEAH_(Asp   | 2208  | 1779  | 1829  | 1263 | 1663 | 1602 | 22.46813 | 23.21417 | 22.45586 | 19.94811 |
| protein_co thioredoxin | 188   | 110   | 127   | 69   | 69   | 115  | 3.448875 | 2.587746 | 2.811068 | 1.964713 |
| protein_co MARVEL_dc   | 4     | 7     | 4     | 486  | 721  | 440  | 0.064409 | 0.144543 | 0.077714 | 1.214663 |
| protein_co carbohydr   | 1     | 0     | 1     | 51   | 47   | 41   | 0.01944  | 0        | 0.023456 | 1.538876 |
| protein_co zinc_finger | 4581  | 3543  | 3931  | 379  | 399  | 350  | 13.37171 | 13.26194 | 13.84452 | 1.717103 |
| protein_co C-type_lect | 30    | 33    | 28    | 4    | 1    | 3    | 0.754263 | 1.063959 | 0.849391 | 0.156096 |
| protein_co copine_II   | 2320  | 1770  | 1824  | 476  | 545  | 413  | 31.56844 | 30.88501 | 29.94594 | 10.05316 |
| protein_co NLR_family  | 818   | 744   | 677   | 20   | 27   | 22   | 5.570147 | 6.496742 | 5.562245 | 0.211385 |
| protein_co katanin_p8  | 801   | 602   | 691   | 1345 | 1617 | 1504 | 9.745434 | 9.392355 | 10.14366 | 25.39928 |
| protein_co kinesin_fan | 1429  | 1067  | 1256  | 212  | 289  | 279  | 19.55233 | 18.72147 | 20.735   | 4.502281 |
| protein_co ADAM_met    | 7     | 4     | 1     | 10   | 3    | 11   | 0.05551  | 0.040676 | 0.009568 | 0.123084 |
| protein_co nudix_(nuc  | 3     | 3     | 0     | 21   | 16   | 11   | 0.128349 | 0.164589 | 0        | 1.394503 |
| protein_co glycine_cle | 92    | 56    | 59    | 144  | 238  | 143  | 2.779563 | 2.169632 | 2.150744 | 6.752765 |
| protein_co CKLF-like_M | 1496  | 1223  | 1405  | 499  | 682  | 793  | 30.10621 | 31.56169 | 34.11527 | 15.58675 |
| protein_co CKLF-like_M | 3     | 3     | 2     | 2    | 0    | 0    | 0.133463 | 0.171147 | 0.107354 | 0.138102 |
| protein_co cadherin_1  | 18956 | 15050 | 16079 | 201  | 211  | 191  | 129.3057 | 131.6487 | 132.336  | 2.128126 |
| protein_co nucleolar_l | 222   | 154   | 157   | 34   | 42   | 24   | 5.522326 | 4.912461 | 4.712124 | 1.312739 |
| protein_co microtubul  | 2026  | 1654  | 1675  | 808  | 969  | 1013 | 30.7939  | 32.23815 | 30.71766 | 19.06194 |

|                         |       |       |       |       |       |       |          |          |          |          |
|-------------------------|-------|-------|-------|-------|-------|-------|----------|----------|----------|----------|
| protein_co membrane     | 3550  | 2683  | 3039  | 1036  | 1273  | 1122  | 38.37242 | 37.18954 | 39.63415 | 17.38125 |
| protein_co cadherin_1   | 582   | 517   | 559   | 2     | 3     | 19    | 6.820792 | 7.769834 | 7.904451 | 0.036381 |
| protein_co zinc_finger  | 1691  | 1246  | 1363  | 742   | 1054  | 663   | 11.1646  | 10.54938 | 10.85784 | 7.60386  |
| protein_co TBC/LysM-e   | 557   | 409   | 395   | 305   | 370   | 227   | 7.699805 | 7.25032  | 6.588244 | 6.544174 |
| protein_co adenosine_   | 0     | 0     | 0     | 6     | 9     | 2     | 0        | 0        | 0        | 0.170711 |
| protein_co oxidative_s  | 107   | 84    | 86    | 32    | 28    | 11    | 2.098382 | 2.112465 | 2.03492  | 0.97405  |
| protein_co interferon_  | 3     | 3     | 5     | 9     | 11    | 9     | 0.046426 | 0.059534 | 0.093359 | 0.216178 |
| protein_co ras_homolo   | 2870  | 2030  | 2285  | 2639  | 3409  | 3273  | 30.8586  | 27.98979 | 29.64344 | 44.04171 |
| protein_co ribosomal_   | 0     | 0     | 4     | 21    | 17    | 7     | 0        | 0        | 0.103713 | 0.700447 |
| protein_co zinc_finger  | 217   | 173   | 193   | 178   | 217   | 188   | 3.210834 | 3.282567 | 3.445589 | 4.087979 |
| protein_co ribosomal_   | 30643 | 23728 | 24795 | 39996 | 44352 | 38288 | 928.1982 | 921.6795 | 906.1949 | 1880.427 |
| protein_co NADH_deh     | 1144  | 943   | 895   | 1369  | 1621  | 1326  | 55.99392 | 59.18831 | 52.85499 | 104.0037 |
| protein_co 3-phosphoi   | 727   | 613   | 613   | 390   | 474   | 508   | 4.707781 | 5.090397 | 4.789502 | 3.919917 |
| protein_co tigger_tran  | 25    | 21    | 31    | 27    | 31    | 14    | 0.324543 | 0.349592 | 0.485559 | 0.544035 |
| protein_co differential | 1378  | 1084  | 1227  | 1332  | 1771  | 1351  | 14.5201  | 14.64735 | 15.59958 | 21.78488 |
| protein_co transcriptic | 2692  | 2132  | 2214  | 879   | 928   | 1208  | 56.5284  | 57.41009 | 56.09412 | 28.6491  |
| protein_co galactosam   | 1138  | 799   | 851   | 271   | 365   | 314   | 9.391207 | 8.455422 | 8.473382 | 3.471194 |
| protein_co growth_arr   | 75    | 53    | 80    | 112   | 163   | 149   | 0.912021 | 0.826473 | 1.173766 | 2.113936 |
| protein_co mediator_c   | 267   | 208   | 212   | 418   | 476   | 386   | 3.736089 | 3.732318 | 3.579232 | 9.078471 |
| protein_co nuclear_rec  | 3245  | 2589  | 2965  | 2190  | 2456  | 2181  | 14.19385 | 14.52202 | 15.64798 | 14.86826 |
| pseudogen: CMT1A_du     | 9     | 7     | 12    | 4     | 3     | 6     | 0.549492 | 0.548058 | 0.883992 | 0.379061 |
| protein_co COP9_signi   | 1025  | 853   | 839   | 855   | 982   | 1378  | 28.4056  | 30.31366 | 28.05369 | 36.77703 |
| protein_co GID_compl    | 248   | 204   | 174   | 262   | 322   | 181   | 2.744566 | 2.895086 | 2.323375 | 4.500427 |
| protein_co zinc_finger  | 247   | 159   | 183   | 52    | 54    | 47    | 3.433689 | 2.834461 | 3.069469 | 1.122013 |
| protein_co myocardin    | 1     | 2     | 1     | 11    | 13    | 14    | 0.005539 | 0.014205 | 0.006683 | 0.094564 |
| protein_co kinase_sup   | 872   | 665   | 737   | 901   | 1025  | 784   | 5.652211 | 5.527552 | 5.763913 | 9.064778 |
| protein_co cirrhosis_a  | 719   | 555   | 627   | 920   | 1104  | 1344  | 8.059747 | 7.978015 | 8.480239 | 16.00703 |
| protein_co RAN_bindir   | 529   | 428   | 474   | 308   | 433   | 436   | 4.675743 | 4.851188 | 5.055003 | 4.225481 |
| protein_co dipeptidase  | 0     | 0     | 1     | 25    | 48    | 21    | 0        | 0        | 0.028035 | 0.901633 |
| protein_co glucose-fru  | 797   | 663   | 684   | 479   | 591   | 376   | 12.66396 | 13.50934 | 13.1134  | 11.81346 |
| protein_co NIN1/RPN1    | 482   | 342   | 390   | 939   | 989   | 966   | 13.03402 | 11.85951 | 12.72459 | 39.4119  |
| protein_co phosphorik   | 393   | 311   | 349   | 578   | 666   | 576   | 9.648051 | 9.790768 | 10.33762 | 22.02446 |
| protein_co myosin_XI    | 1049  | 896   | 918   | 1188  | 1337  | 1451  | 8.535073 | 9.348655 | 9.012027 | 15.00302 |
| protein_co DEAD_(Asp    | 605   | 536   | 506   | 455   | 580   | 905   | 4.461151 | 5.068339 | 4.501841 | 5.20755  |
| protein_co RAS-like_fa  | 454   | 319   | 373   | 632   | 1016  | 480   | 6.642143 | 5.984838 | 6.584294 | 14.35159 |
| protein_co unc-45_hoi   | 0     | 0     | 0     | 0     | 2     | 1     | 0        | 0        | 0        | 0        |
| protein_co phosphatic   | 223   | 144   | 176   | 176   | 179   | 283   | 2.659327 | 2.202109 | 2.532373 | 3.257692 |
| protein_co target_of_r  | 97    | 88    | 70    | 647   | 691   | 477   | 1.819333 | 2.116569 | 1.584114 | 18.83541 |
| protein_co chromosom    | 277   | 227   | 253   | 310   | 362   | 387   | 3.573187 | 3.755011 | 3.937717 | 6.206806 |
| protein_co transducer   | 305   | 243   | 261   | 185   | 276   | 163   | 6.416086 | 6.5552   | 6.624588 | 6.040495 |
| protein_co vacuolar_p   | 1491  | 1137  | 1226  | 722   | 871   | 797   | 5.334428 | 5.21651  | 5.292352 | 4.009386 |
| protein_co spermatog    | 0     | 1     | 0     | 0     | 0     | 0     | 0        | 0.035287 | 0        | 0        |
| protein_co small_G_pr   | 1140  | 862   | 968   | 505   | 742   | 516   | 10.99211 | 10.65842 | 11.26159 | 7.557845 |
| protein_co aminopept    | 1153  | 962   | 970   | 1190  | 1373  | 1247  | 10.65514 | 11.40025 | 10.81558 | 17.06897 |
| protein_co src_kinase_  | 0     | 1     | 0     | 0     | 2     | 0     | 0        | 0.035643 | 0        | 0        |
| protein_co leucine_ri   | 19    | 6     | 16    | 4     | 10    | 9     | 0.397905 | 0.161134 | 0.404291 | 0.130022 |
| protein_co secernin_2   | 724   | 509   | 542   | 555   | 713   | 400   | 19.08284 | 17.20408 | 17.23661 | 22.70533 |
| protein_co slingshot_c  | 562   | 407   | 505   | 285   | 312   | 215   | 2.825366 | 2.623869 | 3.063218 | 2.223892 |
| protein_co rhomboid_    | 3     | 2     | 5     | 407   | 515   | 442   | 0.03018  | 0.025801 | 0.06069  | 6.355155 |
| protein_co arylsulfatas | 90    | 95    | 97    | 106   | 145   | 95    | 0.909113 | 1.230575 | 1.182211 | 1.661926 |
| protein_co ATP-bindin   | 13    | 9     | 7     | 0     | 0     | 1     | 0.107375 | 0.095326 | 0.06976  | 0        |
| protein_co glucose_6_   | 2293  | 1673  | 1923  | 1965  | 2078  | 1925  | 35.51992 | 33.23328 | 35.94143 | 47.24556 |
| protein_co clathrin_he  | 10282 | 8713  | 9276  | 5508  | 6364  | 5983  | 62.12927 | 67.51429 | 67.62814 | 51.65865 |
| protein_co chromosom    | 0     | 0     | 0     | 3     | 1     | 1     | 0        | 0        | 0        | 0.229831 |
| protein_co breast_carc  | 466   | 336   | 317   | 255   | 361   | 230   | 4.796038 | 4.434506 | 3.936443 | 4.073496 |
| protein_co peptidyl-tr  | 406   | 328   | 345   | 299   | 309   | 446   | 4.627454 | 4.794014 | 4.744421 | 5.289538 |
| protein_co synovial_sa  | 1903  | 1504  | 1555  | 1010  | 1160  | 1286  | 29.22755 | 29.62175 | 28.81589 | 24.07717 |
| protein_co TAF4b_RNA    | 8     | 11    | 7     | 433   | 443   | 332   | 0.071316 | 0.125747 | 0.075291 | 5.991189 |
| protein_co AFG3_ATPa    | 752   | 583   | 699   | 1333  | 1548  | 1540  | 10.47261 | 10.41154 | 11.74526 | 28.81362 |
| protein_co slowmo_hc    | 70    | 54    | 64    | 76    | 92    | 60    | 1.64033  | 1.622693 | 1.809511 | 2.76425  |
| protein_co inositol(my  | 487   | 392   | 425   | 2023  | 2732  | 2304  | 14.13084 | 14.58594 | 14.87908 | 91.10986 |
| protein_co guanine_nu   | 31    | 35    | 31    | 547   | 692   | 366   | 0.222432 | 0.322042 | 0.268377 | 6.091898 |
| protein_co solute_carr  | 1878  | 1561  | 1663  | 685   | 821   | 748   | 24.85449 | 26.49241 | 26.5552  | 14.07117 |
| protein_co regulation_  | 1138  | 897   | 992   | 1640  | 2091  | 1674  | 12.02362 | 12.15332 | 12.64599 | 26.89474 |
| protein_co chromosom    | 185   | 176   | 147   | 215   | 267   | 348   | 5.486814 | 6.693766 | 5.260341 | 9.897316 |

|                         |      |      |      |      |      |      |          |          |          |          |
|-------------------------|------|------|------|------|------|------|----------|----------|----------|----------|
| protein_co UDP-N-acet   | 3699 | 2971 | 3071 | 866  | 859  | 1240 | 45.08609 | 46.43765 | 45.16334 | 16.3835  |
| protein_co additional_  | 118  | 94   | 144  | 27   | 47   | 27   | 0.487749 | 0.498255 | 0.718166 | 0.173224 |
| protein_co adenylate_   | 0    | 0    | 0    | 0    | 0    | 7    | 0        | 0        | 0        | 0        |
| protein_co meprin_A_    | 3    | 4    | 0    | 0    | 2    | 0    | 0.060843 | 0.104031 | 0        | 0        |
| protein_co solute_carr  | 0    | 0    | 0    | 0    | 1    | 0    | 0        | 0        | 0        | 0        |
| protein_co GRB2_asso    | 521  | 379  | 405  | 124  | 147  | 82   | 3.473582 | 3.240323 | 3.257938 | 1.283193 |
| protein_co establishm   | 268  | 212  | 213  | 562  | 426  | 524  | 2.632836 | 2.670756 | 2.52474  | 8.569505 |
| protein_co oxysterol_k  | 649  | 583  | 556  | 1373 | 1583 | 866  | 7.25426  | 8.356537 | 7.498446 | 23.82042 |
| protein_co GATA_bind    | 111  | 59   | 62   | 8    | 12   | 22   | 1.380581 | 0.941023 | 0.930419 | 0.15444  |
| protein_co growth_reg   | 64   | 37   | 42   | 6    | 2    | 16   | 0.474986 | 0.352137 | 0.376095 | 0.069117 |
| protein_co chromosom    | 270  | 241  | 265  | 97   | 148  | 113  | 5.85583  | 6.70272  | 6.934555 | 3.265329 |
| protein_co proline_glu  | 2594 | 1973 | 2148 | 3865 | 4607 | 4132 | 29.63038 | 28.90039 | 29.60394 | 68.52471 |
| protein_co Niemann-P    | 1327 | 1163 | 1251 | 509  | 571  | 681  | 12.06575 | 13.56039 | 13.72425 | 7.183424 |
| protein_co solute_carr  | 12   | 8    | 8    | 2    | 1    | 2    | 0.141697 | 0.121138 | 0.113977 | 0.036656 |
| protein_co arrestin_be  | 217  | 170  | 194  | 1217 | 1455 | 927  | 5.369464 | 5.39423  | 5.791899 | 46.74038 |
| protein_co solute_carr  | 1    | 0    | 2    | 28   | 42   | 21   | 0.008748 | 0        | 0.02111  | 0.380193 |
| protein_co zinc_finger  | 0    | 1    | 0    | 7    | 9    | 1    | 0        | 0.02494  | 0        | 0.211306 |
| protein_co WD_repeat    | 427  | 304  | 355  | 611  | 624  | 656  | 4.991782 | 4.557332 | 5.007306 | 11.08663 |
| protein_co misshapen    | 1659 | 1378 | 1436 | 1705 | 2253 | 1424 | 14.68023 | 15.6367  | 15.33165 | 23.41754 |
| protein_co spermidine   | 681  | 536  | 544  | 529  | 701  | 391  | 20.43001 | 20.62033 | 19.69103 | 24.63245 |
| protein_co asialoglyco  | 127  | 119  | 101  | 174  | 204  | 71   | 2.858873 | 3.435164 | 2.743219 | 6.079542 |
| protein_co phosphoin    | 10   | 3    | 4    | 168  | 179  | 86   | 0.104479 | 0.040194 | 0.050424 | 2.724378 |
| protein_co tumor_pro    | 2028 | 1586 | 1781 | 2189 | 2354 | 2744 | 35.84356 | 35.94642 | 37.98001 | 60.05088 |
| protein_co coiled-coil  | 193  | 136  | 177  | 174  | 250  | 129  | 2.107539 | 1.904437 | 2.33206  | 2.949158 |
| protein_co Rho_GDP_     | 6525 | 4891 | 5262 | 1923 | 2569 | 2470 | 160.5233 | 154.2995 | 156.1911 | 73.42894 |
| protein_co transmem     | 419  | 346  | 350  | 1504 | 2007 | 1016 | 3.729483 | 3.949299 | 3.758813 | 20.77844 |
| protein_co solute_carr  | 888  | 713  | 684  | 1307 | 1040 | 799  | 8.620773 | 8.876303 | 8.011935 | 19.69424 |
| protein_co caspase_rec  | 1    | 2    | 0    | 10   | 23   | 8    | 0.010335 | 0.026506 | 0        | 0.160414 |
| protein_co tweety_hoi   | 105  | 52   | 73   | 123  | 170  | 157  | 1.344838 | 0.85407  | 1.12811  | 2.44521  |
| protein_co RAB40B_m     | 168  | 179  | 156  | 65   | 76   | 35   | 2.041338 | 2.789125 | 2.287064 | 1.225884 |
| protein_co eukaryotic   | 1572 | 1263 | 1281 | 2020 | 2664 | 2988 | 20.5152  | 21.13664 | 20.17067 | 40.91712 |
| protein_co casein_kin   | 3364 | 2559 | 2690 | 2034 | 2785 | 2816 | 25.88415 | 25.24978 | 24.97343 | 24.29178 |
| protein_co anaphase_f   | 1488 | 1198 | 1182 | 1686 | 2063 | 1638 | 32.66496 | 33.72448 | 31.30723 | 57.44698 |
| protein_co tubulin_fol  | 2405 | 1978 | 1967 | 4413 | 5811 | 4172 | 27.54531 | 29.05147 | 27.18222 | 78.45072 |
| protein_co fructosami   | 844  | 649  | 746  | 493  | 631  | 436  | 21.40356 | 21.10559 | 22.82603 | 19.40532 |
| protein_co nuclear_pr   | 902  | 792  | 768  | 1443 | 1461 | 1129 | 16.27975 | 18.33056 | 16.7244  | 40.42388 |
| protein_co regulatory   | 1234 | 961  | 1088 | 863  | 1197 | 964  | 9.029694 | 9.017593 | 9.605829 | 9.801649 |
| protein_co forkhead_b   | 2657 | 2028 | 2151 | 1393 | 1588 | 1269 | 23.66321 | 23.16111 | 23.11375 | 19.25589 |
| protein_co tripartite_r | 1004 | 819  | 815  | 1255 | 1614 | 939  | 13.68932 | 14.31995 | 13.40769 | 26.55965 |
| protein_co chromobo     | 174  | 155  | 161  | 41   | 49   | 41   | 2.152166 | 2.458485 | 2.402705 | 0.78712  |
| protein_co secreted_ar  | 13   | 7    | 10   | 13   | 19   | 18   | 0.272738 | 0.188326 | 0.253134 | 0.423328 |
| protein_co ring_finger  | 178  | 131  | 127  | 186  | 318  | 158  | 1.684445 | 1.589708 | 1.450068 | 2.731997 |
| protein_co 5-azacytid   | 566  | 417  | 491  | 666  | 885  | 650  | 7.225633 | 6.826606 | 7.562911 | 13.19666 |
| protein_co zinc_finger  | 9    | 1    | 4    | 10   | 22   | 20   | 0.113657 | 0.016194 | 0.060949 | 0.196013 |
| protein_co WD_repeat    | 1460 | 1180 | 1172 | 1859 | 2054 | 2055 | 26.46286 | 27.42681 | 25.63065 | 52.29905 |
| protein_co chromobo     | 564  | 405  | 451  | 48   | 70   | 143  | 9.927166 | 9.141354 | 9.57791  | 1.311348 |
| protein_co ring_finger  | 4    | 2    | 1    | 209  | 226  | 98   | 0.024692 | 0.015832 | 0.007448 | 2.002498 |
| protein_co dymeclin     | 565  | 471  | 504  | 528  | 578  | 516  | 9.80128  | 10.47767 | 10.54904 | 14.2167  |
| protein_co mitogen-ac   | 0    | 5    | 5    | 256  | 311  | 169  | 0        | 0.063029 | 0.059303 | 3.906002 |
| protein_co elac_homo    | 36   | 37   | 37   | 21   | 19   | 42   | 0.755275 | 0.995437 | 0.936597 | 0.683837 |
| protein_co methyl-Cp    | 1643 | 1184 | 1261 | 846  | 1074 | 983  | 15.70648 | 14.51451 | 14.54469 | 12.55285 |
| protein_co SMAD_fami    | 1019 | 874  | 941  | 975  | 1264 | 935  | 5.448846 | 5.993094 | 6.071108 | 8.092178 |
| protein_co tumor_nec    | 17   | 5    | 4    | 53   | 49   | 73   | 0.097952 | 0.036944 | 0.027808 | 0.47399  |
| protein_co zinc_finger  | 264  | 185  | 235  | 355  | 460  | 254  | 2.077356 | 1.866758 | 2.23112  | 4.335766 |
| protein_co F-box_prot   | 4    | 7    | 5    | 1    | 6    | 5    | 0.058852 | 0.13207  | 0.08876  | 0.022836 |
| protein_co cerebellin   | 2    | 0    | 0    | 0    | 1    | 0    | 0.028112 | 0        | 0        | 0        |
| protein_co phorbol-12   | 954  | 809  | 816  | 2314 | 2949 | 2174 | 22.96359 | 24.97177 | 23.69898 | 86.45403 |
| protein_co leprecan-il  | 5041 | 3844 | 4021 | 826  | 1154 | 650  | 84.691   | 82.81581 | 81.50846 | 21.53927 |
| protein_co 5'-nucleoti  | 987  | 731  | 794  | 873  | 1034 | 889  | 26.76718 | 25.42214 | 25.98089 | 36.7477  |
| protein_co family_witl  | 973  | 872  | 891  | 713  | 872  | 634  | 10.99638 | 12.63755 | 12.14962 | 12.50711 |
| protein_co phosphatic   | 3207 | 2652 | 2787 | 1546 | 1958 | 1746 | 26.22537 | 27.81029 | 27.49842 | 19.62288 |
| protein_co v-erb-b2_er  | 577  | 472  | 492  | 5103 | 6269 | 6739 | 5.487939 | 5.756849 | 5.646075 | 75.33374 |
| protein_co growth_fac   | 2    | 0    | 0    | 1162 | 1357 | 680  | 0.04181  | 0        | 0        | 37.70403 |
| protein_co migration    | 213  | 117  | 144  | 212  | 202  | 172  | 4.996285 | 3.519353 | 4.075474 | 7.718518 |
| protein_co phenyletha   | 0    | 0    | 0    | 77   | 112  | 65   | 0        | 0        | 0        | 4.472502 |

|                         |        |       |       |       |       |       |          |          |          |          |
|-------------------------|--------|-------|-------|-------|-------|-------|----------|----------|----------|----------|
| protein_co ADP-ribosy   | 7      | 8     | 8     | 14    | 12    | 0     | 0.118196 | 0.173222 | 0.162983 | 0.366913 |
| protein_co SH3_and_c    | 14     | 15    | 16    | 101   | 192   | 97    | 0.195259 | 0.268277 | 0.269247 | 2.186425 |
| protein_co insulin-like | 3465   | 2507  | 2655  | 2439  | 3492  | 1988  | 73.85178 | 68.52064 | 68.27635 | 80.68633 |
| protein_co FK506_bin    | 24391  | 17997 | 19197 | 3168  | 3602  | 3654  | 404.7043 | 382.9285 | 384.317  | 81.58755 |
| protein_co thioredoxi   | 1399   | 1043  | 1125  | 877   | 1095  | 1227  | 45.30327 | 43.31172 | 43.95542 | 44.08003 |
| protein_co calcium_ch   | 27     | 27    | 31    | 370   | 447   | 281   | 0.150862 | 0.193459 | 0.20899  | 3.208833 |
| protein_co Uncharacte   | 89     | 73    | 62    | 116   | 155   | 31    | 1.90819  | 2.007076 | 1.603878 | 3.860291 |
| protein_co sterile_alph | 1888   | 1202  | 1461  | 2250  | 3175  | 1689  | 40.90959 | 33.39927 | 38.19631 | 75.67216 |
| protein_co bromodom     | 3335   | 2520  | 2708  | 2705  | 3751  | 3547  | 26.72218 | 25.89321 | 26.18019 | 33.64138 |
| protein_co solute_carr  | 374    | 271   | 238   | 388   | 539   | 459   | 5.964921 | 5.542576 | 4.579922 | 9.604953 |
| protein_co nuclear_fac  | 4175   | 3122  | 3551  | 78    | 137   | 132   | 24.26448 | 23.26788 | 24.9008  | 0.703622 |
| protein_co tubulin_po   | 350    | 239   | 276   | 66    | 137   | 75    | 5.712324 | 5.002096 | 5.435029 | 1.671934 |
| protein_co phosphatic   | 25     | 14    | 13    | 898   | 1188  | 924   | 0.928883 | 0.66705  | 0.58279  | 51.78785 |
| protein_co PR_domair    | 492    | 414   | 469   | 303   | 300   | 406   | 3.262145 | 3.520042 | 3.751967 | 3.118252 |
| protein_co phosphofu    | 4971   | 3680  | 4019  | 4594  | 5358  | 3710  | 38.80311 | 36.83663 | 37.852   | 55.66013 |
| protein_co fem-1_hom    | 2      | 0     | 6     | 2     | 6     | 10    | 0.024396 | 0        | 0.088307 | 0.037867 |
| protein_co vav_1_guar   | 3      | 2     | 0     | 27    | 40    | 5     | 0.049795 | 0.04257  | 0        | 0.695595 |
| protein_co multivesic   | 838    | 701   | 667   | 614   | 769   | 451   | 17.73187 | 19.0212  | 17.02882 | 20.16552 |
| protein_co calcium_ar   | 0      | 0     | 0     | 0     | 1     | 1     | 0        | 0        | 0        | 0        |
| protein_co Uncharacte   | 0      | 0     | 0     | 1     | 0     | 0     | 0        | 0        | 0        | 0.028352 |
| protein_co SH3-domai    | 4106   | 2927  | 3168  | 2167  | 2597  | 2372  | 76.52242 | 69.95227 | 71.23657 | 62.68435 |
| protein_co dihydrouri   | 402    | 288   | 311   | 414   | 577   | 692   | 8.191998 | 7.526024 | 7.646668 | 13.09467 |
| protein_co dipeptidyl-  | 1814   | 1352  | 1449  | 832   | 1058  | 1235  | 19.80407 | 18.92794 | 19.08682 | 14.09844 |
| protein_co coiled-coil  | 1053   | 849   | 899   | 703   | 950   | 917   | 14.86309 | 15.36731 | 15.31047 | 15.40163 |
| protein_co transmembr   | 84     | 44    | 73    | 29    | 40    | 25    | 2.137147 | 1.435546 | 2.240918 | 1.145206 |
| protein_co ZFP14_zinc   | 115    | 106   | 111   | 171   | 156   | 94    | 0.949024 | 1.121746 | 1.105224 | 2.190311 |
| protein_co sirtuin_3    | 464    | 356   | 347   | 386   | 387   | 241   | 8.282059 | 8.148537 | 7.473049 | 10.69395 |
| protein_co interferon_  | 3055   | 2355  | 2493  | 4878  | 5236  | 4497  | 177.2884 | 175.2545 | 174.5578 | 439.381  |
| protein_co ATH1_acid_   | 421    | 366   | 367   | 604   | 904   | 510   | 4.468243 | 4.981328 | 4.699685 | 9.949977 |
| protein_co hormonall    | 199    | 145   | 150   | 309   | 415   | 296   | 1.263522 | 1.180612 | 1.14913  | 3.045221 |
| protein_co collagen_ty  | 109747 | 85304 | 89831 | 9764  | 12737 | 8588  | 1214.261 | 1210.314 | 1199.206 | 167.6786 |
| protein_co interferon_  | 657    | 536   | 568   | 148   | 173   | 202   | 5.018202 | 5.249971 | 5.234547 | 1.754587 |
| protein_co superoxide   | 2124   | 1689  | 1680  | 1790  | 1723  | 1616  | 57.04146 | 58.1668  | 54.43691 | 74.61389 |
| protein_co collagen_ty  | 93423  | 72113 | 76209 | 3001  | 3971  | 2388  | 1265.705 | 1252.858 | 1245.756 | 63.10667 |
| protein_co salt-inducil | 186    | 174   | 155   | 308   | 385   | 281   | 1.850922 | 2.220413 | 1.861036 | 4.757254 |
| protein_co DNA_(cytos   | 2      | 0     | 0     | 2     | 6     | 0     | 0.054971 | 0        | 0        | 0.085322 |
| protein_co transient_r  | 1      | 0     | 1     | 8     | 8     | 3     | 0.007537 | 0        | 0.009094 | 0.093592 |
| protein_co SCY1-like_1  | 2678   | 1960  | 2159  | 1156  | 1593  | 1052  | 46.251   | 43.40862 | 44.98951 | 30.98838 |
| protein_co transmembr   | 486    | 425   | 421   | 150   | 178   | 119   | 7.442374 | 8.345906 | 7.77867  | 3.565307 |
| protein_co amyloid_br   | 19322  | 15128 | 15697 | 16273 | 16387 | 14416 | 253.2166 | 254.2324 | 248.2017 | 331.0077 |
| protein_co dopey_fam    | 473    | 386   | 420   | 334   | 431   | 232   | 2.886009 | 3.020182 | 3.09196  | 3.163104 |
| protein_co URB1_ribo    | 1549   | 1234  | 1278  | 1323  | 1745  | 1818  | 6.705376 | 6.850089 | 6.67499  | 8.889187 |
| protein_co v-akt_muri   | 5219   | 3988  | 4281  | 2483  | 2950  | 1991  | 29.14709 | 28.56094 | 28.84704 | 21.52361 |
| protein_co interleukin  | 1      | 0     | 0     | 0     | 0     | 0     | 0.031833 | 0        | 0        | 0        |
| protein_co epithelial_r | 2367   | 1852  | 1933  | 50    | 48    | 33    | 126.6994 | 127.1237 | 124.8407 | 4.154098 |
| protein_co SUMO1_ac     | 4499   | 3507  | 3705  | 4773  | 5423  | 5398  | 91.4823  | 91.44631 | 90.89863 | 150.6409 |
| protein_co netrin_5     | 9      | 7     | 3     | 0     | 2     | 0     | 0.173953 | 0.173499 | 0.069961 | 0        |
| protein_co lemur_tyro   | 31     | 31    | 36    | 372   | 543   | 246   | 0.284293 | 0.364566 | 0.398341 | 5.295147 |
| protein_co gem_(nucle   | 85     | 77    | 77    | 169   | 187   | 219   | 2.405342 | 2.794203 | 2.629037 | 7.422925 |
| protein_co Cbl_proto-   | 1      | 0     | 0     | 385   | 477   | 165   | 0.029696 | 0        | 0        | 17.74555 |
| protein_co Wilms_tur    | 1723   | 1131  | 1284  | 692   | 958   | 653   | 10.47336 | 8.816023 | 9.417027 | 6.52886  |
| protein_co ADAM_met     | 727    | 485   | 590   | 180   | 256   | 306   | 8.058875 | 6.894315 | 7.891146 | 3.097013 |
| protein_co solute_carr  | 0      | 0     | 0     | 23    | 26    | 20    | 0        | 0        | 0        | 0.425721 |
| protein_co arginyl_am   | 1534   | 1182  | 1172  | 478   | 625   | 344   | 18.23765 | 18.02064 | 16.81199 | 8.820676 |
| protein_co calpain_10   | 872    | 638   | 682   | 745   | 1055  | 669   | 9.280094 | 8.706947 | 8.757262 | 12.30616 |
| protein_co myosin_IF    | 13     | 10    | 9     | 64    | 100   | 29    | 0.141662 | 0.139739 | 0.118331 | 1.082479 |
| processed_endogenou     | 157    | 112   | 141   | 84    | 130   | 139   | 1.892963 | 1.731689 | 2.051208 | 1.571999 |
| protein_co NLR_family   | 3      | 1     | 1     | 120   | 150   | 176   | 0.037009 | 0.015819 | 0.014884 | 2.297705 |
| protein_co calcium_ch   | 4      | 1     | 2     | 277   | 440   | 274   | 0.021443 | 0.006874 | 0.012936 | 2.304791 |
| protein_co zinc_finger  | 837    | 502   | 596   | 1464  | 2414  | 1629  | 20.3563  | 15.6562  | 17.48911 | 55.26433 |
| protein_co chromosom    | 516    | 426   | 411   | 453   | 623   | 420   | 16.97912 | 17.97564 | 16.31757 | 23.13632 |
| protein_co fibrillin_3  | 0      | 0     | 0     | 1779  | 2453  | 1975  | 0        | 0        | 0        | 13.82987 |
| protein_co coactivator  | 3528   | 2595  | 2690  | 4687  | 6186  | 4412  | 54.56068 | 51.46333 | 50.19397 | 112.5062 |
| protein_co ecotropic_   | 941    | 752   | 729   | 312   | 489   | 216   | 11.44579 | 11.7296  | 10.69871 | 5.89035  |
| protein_co solute_carr  | 3      | 1     | 0     | 17    | 26    | 21    | 0.042887 | 0.018332 | 0        | 0.377212 |

|                         |       |       |       |       |       |       |          |          |          |          |
|-------------------------|-------|-------|-------|-------|-------|-------|----------|----------|----------|----------|
| protein_co proteasom    | 2513  | 1911  | 1924  | 2412  | 2770  | 2388  | 139.6145 | 136.147  | 128.9707 | 207.9916 |
| protein_co G_protein-   | 0     | 0     | 0     | 0     | 1     | 0     | 0        | 0        | 0        | 0        |
| protein_co sialic_acid_ | 2     | 1     | 0     | 23    | 39    | 24    | 0.030164 | 0.019341 | 0        | 0.538416 |
| protein_co acid_phosp   | 10    | 9     | 6     | 8     | 11    | 13    | 0.348107 | 0.401758 | 0.252007 | 0.432248 |
| protein_co kallikrein-r | 0     | 0     | 0     | 1     | 0     | 0     | 0        | 0        | 0        | 0.026936 |
| protein_co zinc_finger  | 222   | 164   | 176   | 129   | 152   | 131   | 2.156086 | 2.04252  | 2.062404 | 1.944614 |
| protein_co family_witl  | 7     | 10    | 5     | 112   | 199   | 81    | 0.25623  | 0.469397 | 0.220826 | 6.363261 |
| protein_co ribosomal_   | 19115 | 14804 | 15366 | 20731 | 20665 | 17657 | 791.088  | 785.6677 | 767.2897 | 1331.684 |
| protein_co parathyroid  | 0     | 3     | 2     | 1     | 4     | 1     | 0        | 0.393005 | 0.246516 | 0.158562 |
| protein_co ribosomal_   | 22830 | 17750 | 18492 | 36729 | 40938 | 30751 | 463.0186 | 461.6366 | 452.5062 | 1156.198 |
| protein_co cytosolic_t  | 257   | 173   | 218   | 308   | 466   | 330   | 5.77419  | 4.984406 | 5.90966  | 10.74086 |
| protein_co nitric_oxid  | 1599  | 1123  | 1265  | 1373  | 1736  | 1439  | 28.67195 | 25.82247 | 27.36827 | 38.21287 |
| protein_co IgLON_fami   | 1     | 0     | 0     | 1222  | 1466  | 1132  | 0.017993 | 0        | 0        | 34.12775 |
| protein_co reticulocal  | 6296  | 4515  | 4743  | 434   | 541   | 194   | 158.8056 | 146.0387 | 144.3451 | 16.99109 |
| protein_co zinc_finger  | 185   | 170   | 158   | 235   | 260   | 422   | 1.800468 | 2.121641 | 1.85532  | 3.549866 |
| protein_co solute_carr  | 0     | 0     | 1     | 0     | 3     | 2     | 0        | 0        | 0.013584 | 0        |
| protein_co arginine-gl  | 4213  | 3018  | 3457  | 3229  | 4126  | 3644  | 24.61346 | 22.61048 | 24.36849 | 29.28059 |
| protein_co membrane     | 0     | 0     | 0     | 10    | 13    | 2     | 0        | 0        | 0        | 0.250792 |
| protein_co chromosom    | 0     | 0     | 0     | 2     | 4     | 0     | 0        | 0        | 0        | 0.030904 |
| protein_co PR_domair    | 828   | 670   | 673   | 51    | 84    | 15    | 4.45189  | 4.619535 | 4.365935 | 0.425613 |
| protein_co chymotryp    | 0     | 0     | 0     | 0     | 1     | 0     | 0        | 0        | 0        | 0        |
| protein_co peptidyl_ar  | 0     | 0     | 1     | 22    | 58    | 10    | 0        | 0        | 0.017741 | 0.502087 |
| protein_co forkhead-as  | 22    | 8     | 20    | 16    | 23    | 16    | 0.202668 | 0.094507 | 0.222301 | 0.228777 |
| protein_co peptidyl_ar  | 2     | 2     | 1     | 0     | 5     | 3     | 0.024384 | 0.031269 | 0.01471  | 0        |
| protein_co EPH_recept   | 5266  | 3968  | 4210  | 1222  | 1443  | 948   | 62.29133 | 60.19047 | 60.0865  | 22.43615 |
| protein_co Rho_guanir   | 247   | 161   | 186   | 1780  | 2380  | 1679  | 3.823649 | 3.19607  | 3.474098 | 42.76925 |
| protein_co EF-hand_dc   | 2072  | 1621  | 1717  | 983   | 1313  | 1108  | 40.16375 | 40.29367 | 40.15715 | 29.57526 |
| protein_co peroxisom    | 592   | 414   | 437   | 728   | 860   | 475   | 13.98433 | 12.54092 | 12.45516 | 26.69204 |
| protein_co phosphoglu   | 7695  | 6082  | 6564  | 5724  | 6243  | 6643  | 184.1851 | 186.6817 | 189.5669 | 212.6552 |
| protein_co myomesin_    | 5     | 9     | 4     | 3     | 6     | 2     | 0.04036  | 0.09316  | 0.038957 | 0.037586 |
| protein_co SH3_domai    | 4421  | 3287  | 3499  | 625   | 666   | 436   | 125.2573 | 119.424  | 119.6119 | 27.48482 |
| protein_co connector_   | 8     | 7     | 6     | 286   | 361   | 237   | 0.140337 | 0.157467 | 0.126993 | 7.787139 |
| protein_co ribosomal_   | 8192  | 6312  | 6440  | 11308 | 12058 | 11130 | 386.4417 | 381.8303 | 366.5455 | 827.9618 |
| protein_co interleukin  | 0     | 0     | 0     | 5     | 3     | 3     | 0        | 0        | 0        | 0.130057 |
| protein_co zinc_finger  | 1     | 0     | 0     | 1     | 2     | 0     | 0.024875 | 0        | 0        | 0.03861  |
| protein_co chromosom    | 809   | 630   | 686   | 198   | 289   | 262   | 11.78807 | 11.77184 | 12.06053 | 4.478061 |
| protein_co KIAA0319-I   | 997   | 791   | 867   | 1759  | 1951  | 1579  | 9.761818 | 9.931649 | 10.24242 | 26.73203 |
| protein_co eva-1_hom    | 543   | 392   | 411   | 245   | 449   | 132   | 24.15681 | 22.36326 | 22.06123 | 16.91751 |
| protein_co chromosom    | 5     | 10    | 6     | 58    | 53    | 78    | 0.102514 | 0.26292  | 0.148427 | 1.845749 |
| protein_co DMRT-like_   | 1     | 0     | 0     | 1     | 1     | 4     | 0.014947 | 0        | 0        | 0.0232   |
| protein_co polo-like_k  | 420   | 359   | 367   | 514   | 532   | 696   | 5.12726  | 5.620046 | 5.405678 | 9.739343 |
| protein_co mitogen-ac   | 1017  | 849   | 888   | 329   | 403   | 182   | 11.06687 | 11.84734 | 11.6591  | 5.55687  |
| protein_co ficolin_(col | 5     | 1     | 2     | 12    | 11    | 2     | 0.227621 | 0.058378 | 0.109855 | 0.84792  |
| protein_co GPN-loop_    | 599   | 454   | 515   | 491   | 554   | 597   | 18.3696  | 17.85411 | 19.05584 | 23.37141 |
| protein_co synaptotag   | 185   | 140   | 181   | 190   | 222   | 84    | 3.235604 | 3.139937 | 3.819532 | 5.157837 |
| protein_co WD_and_te    | 1179  | 1059  | 1014  | 955   | 1155  | 740   | 10.73671 | 12.36696 | 11.1415  | 13.49868 |
| protein_co neuroblast   | 216   | 225   | 235   | 239   | 271   | 117   | 2.301351 | 3.07412  | 3.02096  | 3.952368 |
| protein_co heparan_su   | 14571 | 9855  | 11140 | 4182  | 6042  | 3028  | 47.68859 | 41.36101 | 43.99045 | 21.24416 |
| protein_co integrin_be  | 228   | 211   | 187   | 288   | 350   | 334   | 8.319785 | 9.873453 | 8.233167 | 16.31174 |
| protein_co SERPINE1_I   | 7440  | 5944  | 6550  | 13478 | 14304 | 14120 | 52.2561  | 53.53677 | 55.50772 | 146.9332 |
| protein_co B-cell_CLL/  | 343   | 282   | 271   | 157   | 244   | 224   | 5.705312 | 6.015113 | 5.438795 | 4.053362 |
| protein_co cysteine-ric | 3541  | 2591  | 2961  | 549   | 651   | 353   | 72.50548 | 68.03332 | 73.15287 | 17.44808 |
| protein_co protein_kir  | 578   | 450   | 486   | 259   | 287   | 319   | 6.005413 | 5.995659 | 6.092554 | 4.176816 |
| protein_co phosphatic   | 423   | 323   | 325   | 210   | 226   | 254   | 4.315596 | 4.225832 | 4.000661 | 3.325448 |
| protein_co tubulointe   | 1     | 0     | 0     | 181   | 202   | 90    | 0.009853 | 0        | 0        | 2.768049 |
| protein_co arginine_dc  | 481   | 408   | 437   | 20    | 24    | 9     | 3.85672  | 4.195102 | 4.227684 | 0.248905 |
| protein_co ribosomal_   | 11563 | 9194  | 9519  | 13763 | 14938 | 12885 | 486.2684 | 495.8147 | 482.9975 | 898.3573 |
| protein_co kinesin_fan  | 1172  | 992   | 1023  | 2193  | 2218  | 1539  | 18.59733 | 20.1857  | 19.58604 | 54.01222 |
| protein_co protein_ty   | 4500  | 3477  | 3919  | 11806 | 13515 | 9345  | 27.3075  | 27.05724 | 28.69411 | 111.1995 |
| protein_co bestrophin   | 9     | 4     | 8     | 45    | 60    | 27    | 0.20616  | 0.117498 | 0.221106 | 1.599947 |
| protein_co MOB_kinas    | 294   | 245   | 186   | 50    | 42    | 26    | 2.407976 | 2.57324  | 1.838086 | 0.635631 |
| protein_co cytochrom    | 0     | 0     | 0     | 1     | 1     | 1     | 0        | 0        | 0        | 0.033524 |
| protein_co transmembr   | 0     | 0     | 1     | 2     | 3     | 0     | 0        | 0        | 0.051573 | 0.132689 |
| protein_co DMRT-like_   | 0     | 0     | 0     | 4     | 1     | 0     | 0        | 0        | 0        | 0.152418 |
| protein_co LIM_domai    | 1651  | 1234  | 1333  | 1931  | 2648  | 1909  | 21.58222 | 20.68586 | 21.02457 | 39.17976 |

|                         |      |      |      |      |      |      |          |          |          |          |
|-------------------------|------|------|------|------|------|------|----------|----------|----------|----------|
| protein_co synaptoph    | 0    | 0    | 0    | 80   | 87   | 70   | 0        | 0        | 0        | 1.606618 |
| protein_co BarH-like_h  | 0    | 0    | 0    | 0    | 0    | 1    | 0        | 0        | 0        | 0        |
| protein_co metal_resp   | 846  | 768  | 791  | 1601 | 1731 | 1462 | 9.616716 | 11.19507 | 10.84878 | 28.24738 |
| protein_co solute_carr  | 86   | 54   | 50   | 45   | 72   | 47   | 1.688669 | 1.359719 | 1.184579 | 1.371479 |
| protein_co immunogl     | 1286 | 930  | 1051 | 1477 | 1843 | 1203 | 8.312733 | 7.708948 | 8.196975 | 14.81883 |
| protein_co zinc_finger  | 623  | 543  | 578  | 507  | 658  | 570  | 5.794977 | 6.476985 | 6.486936 | 7.319849 |
| protein_co CTTNBP2_M    | 665  | 512  | 550  | 322  | 301  | 315  | 5.28775  | 5.220698 | 5.276671 | 3.974071 |
| protein_co striatin_int | 187  | 126  | 153  | 74   | 116  | 97   | 2.607325 | 2.252856 | 2.573908 | 1.601459 |
| protein_co potassium_   | 0    | 0    | 0    | 0    | 0    | 2    | 0        | 0        | 0        | 0        |
| protein_co proteasom    | 1801 | 1455 | 1421 | 1480 | 1508 | 1923 | 22.64653 | 23.46175 | 21.55908 | 28.88552 |
| protein_co fibronectin  | 1    | 0    | 0    | 0    | 0    | 2    | 0.014073 | 0        | 0        | 0        |
| protein_co chromosom    | 5    | 11   | 5    | 12   | 7    | 8    | 0.101581 | 0.28658  | 0.122564 | 0.378405 |
| protein_co CD53_mole    | 5    | 4    | 4    | 13   | 6    | 17   | 0.155781 | 0.159813 | 0.150367 | 0.628663 |
| protein_co prokinetic   | 0    | 0    | 0    | 1    | 0    | 0    | 0        | 0        | 0        | 0.054394 |
| protein_co cadherin_E   | 1094 | 787  | 829  | 979  | 1418 | 1071 | 4.869725 | 4.492325 | 4.452354 | 6.763948 |
| protein_co integrin_al  | 3291 | 2577 | 2656 | 3    | 8    | 3    | 29.28735 | 29.40871 | 28.51861 | 0.041438 |
| protein_co gap_juncti   | 0    | 0    | 0    | 0    | 2    | 8    | 0        | 0        | 0        | 0        |
| protein_co G_protein+   | 1272 | 969  | 1122 | 341  | 451  | 248  | 22.28853 | 21.77346 | 23.72112 | 9.274257 |
| protein_co aldehyde_d   | 855  | 715  | 740  | 1134 | 1158 | 1220 | 14.87054 | 15.94689 | 15.52888 | 30.61287 |
| protein_co ATPase_Na    | 1006 | 772  | 798  | 646  | 949  | 821  | 18.08718 | 17.79916 | 17.31106 | 18.02751 |
| protein_co TIP41_TOR    | 708  | 570  | 503  | 291  | 347  | 232  | 20.36695 | 21.02698 | 17.45858 | 12.9932  |
| protein_co NME/NM2B     | 240  | 166  | 177  | 131  | 112  | 130  | 2.618335 | 2.32237  | 2.329889 | 2.218277 |
| protein_co pogo_trans   | 1372 | 1024 | 1153 | 901  | 1170 | 1054 | 10.28671 | 9.845365 | 10.43037 | 10.48523 |
| protein_co mitochond    | 204  | 170  | 124  | 166  | 187  | 138  | 4.39392  | 4.695482 | 3.222491 | 5.549585 |
| protein_co cellular_re  | 466  | 352  | 303  | 310  | 403  | 304  | 11.06927 | 10.72223 | 8.684082 | 11.42945 |
| protein_co DDB1_and     | 893  | 745  | 716  | 216  | 244  | 213  | 12.50307 | 13.37614 | 12.09557 | 4.694069 |
| protein_co glycoprote   | 12   | 7    | 8    | 3    | 3    | 2    | 0.200814 | 0.150217 | 0.161529 | 0.077923 |
| protein_co retinoid_X   | 0    | 0    | 0    | 0    | 1    | 1    | 0        | 0        | 0        | 0        |
| protein_co T-box_19     | 47   | 41   | 61   | 13   | 19   | 9    | 0.780946 | 0.873608 | 1.222929 | 0.335272 |
| protein_co uridine-cyt  | 1255 | 986  | 1081 | 1626 | 1904 | 1740 | 12.60376 | 12.69822 | 13.09876 | 25.34589 |
| protein_co transmembr   | 886  | 703  | 721  | 388  | 522  | 760  | 18.68011 | 19.00686 | 18.34125 | 12.6972  |
| protein_co chemokine    | 3    | 0    | 0    | 6    | 6    | 8    | 0.102904 | 0        | 0        | 0.319443 |
| protein_co chemokine    | 0    | 0    | 0    | 0    | 0    | 3    | 0        | 0        | 0        | 0        |
| protein_co POU_class    | 489  | 396  | 451  | 2209 | 2499 | 2404 | 1.599862 | 1.661415 | 1.78032  | 11.2176  |
| protein_co maelstrom    | 1    | 3    | 1    | 1    | 1    | 1    | 0.019911 | 0.076598 | 0.024024 | 0.030904 |
| protein_co immunogl     | 82   | 63   | 52   | 1    | 2    | 3    | 1.494938 | 1.472853 | 1.143828 | 0.028297 |
| protein_co dermatopo    | 22   | 12   | 13   | 0    | 0    | 0    | 0.577593 | 0.404008 | 0.411804 | 0        |
| protein_co microsoma    | 850  | 798  | 764  | 767  | 845  | 805  | 16.22822 | 19.53729 | 17.59922 | 22.72887 |
| protein_co adenylate_c  | 2    | 3    | 2    | 2    | 1    | 4    | 0.018552 | 0.035685 | 0.022384 | 0.028795 |
| protein_co ring_finger  | 824  | 680  | 656  | 676  | 838  | 689  | 12.739   | 13.48113 | 12.23657 | 16.22128 |
| protein_co poliovirus_  | 0    | 2    | 0    | 4    | 6    | 1    | 0        | 0.03434  | 0        | 0.083129 |
| protein_co ubiquitin-fi | 895  | 723  | 661  | 507  | 427  | 479  | 37.67196 | 39.02499 | 33.56949 | 33.1233  |
| protein_co protoporpl   | 281  | 233  | 211  | 392  | 513  | 295  | 5.332293 | 5.669867 | 4.831012 | 11.5458  |
| protein_co Fc_fragmen   | 6    | 6    | 1    | 6    | 2    | 1    | 0.116642 | 0.149577 | 0.023456 | 0.181044 |
| protein_co NUF2_NDC     | 432  | 344  | 340  | 491  | 414  | 436  | 10.2877  | 10.50515 | 9.769259 | 18.14875 |
| protein_co regulator_c  | 319  | 227  | 247  | 41   | 39   | 94   | 2.551674 | 2.328465 | 2.383854 | 0.509036 |
| protein_co succinate_c  | 1328 | 1031 | 1064 | 856  | 911  | 1041 | 43.85207 | 43.65762 | 42.39179 | 43.87289 |
| protein_co prefoldin_s  | 1862 | 1495 | 1490 | 879  | 1133 | 815  | 128.9649 | 132.7829 | 124.5163 | 94.49549 |
| protein_co nuclear_re   | 4    | 9    | 4    | 35   | 51   | 19   | 0.127332 | 0.367392 | 0.153633 | 1.729323 |
| protein_co ubiquitin_s  | 627  | 474  | 503  | 463  | 579  | 360  | 11.69453 | 11.33712 | 11.3196  | 13.40376 |
| protein_co coagulation  | 0    | 0    | 0    | 0    | 0    | 1    | 0        | 0        | 0        | 0        |
| protein_co papillary_r  | 1909 | 1425 | 1486 | 1816 | 2261 | 2298 | 42.56445 | 40.74416 | 39.9768  | 62.84742 |
| protein_co Fc_recepto   | 0    | 0    | 0    | 0    | 1    | 5    | 0        | 0        | 0        | 0        |
| protein_co ribosomal_   | 168  | 144  | 166  | 429  | 507  | 299  | 3.494908 | 3.841478 | 4.166608 | 13.85206 |
| protein_co mitochond    | 680  | 531  | 538  | 283  | 356  | 267  | 32.20728 | 32.25144 | 30.74507 | 20.80473 |
| protein_co phosphatic   | 371  | 278  | 282  | 145  | 211  | 287  | 4.025034 | 3.867673 | 3.691414 | 2.44171  |
| protein_co calsequestr  | 2    | 2    | 2    | 6    | 15   | 16   | 0.047945 | 0.061482 | 0.057848 | 0.223251 |
| protein_co interferon_  | 859  | 657  | 683  | 723  | 856  | 1106 | 12.19453 | 11.96042 | 11.69878 | 15.93091 |
| protein_co cellular_ret | 3143 | 2290 | 2449 | 1919 | 1854 | 1411 | 148.5638 | 138.8077 | 139.6708 | 140.7908 |
| protein_co hepatoma+    | 6229 | 4808 | 5192 | 7332 | 8729 | 7801 | 122.7218 | 121.4723 | 123.4202 | 224.2107 |
| protein_co v-abl_Abels  | 1981 | 1692 | 1879 | 548  | 721  | 472  | 7.648973 | 8.377768 | 8.753736 | 3.284201 |
| protein_co xenotropic   | 818  | 638  | 748  | 940  | 1124 | 896  | 4.52632  | 4.527119 | 4.99392  | 8.073285 |
| protein_co regulator_c  | 3695 | 3056 | 3155 | 170  | 208  | 438  | 71.38797 | 75.7135  | 73.54583 | 5.097885 |
| protein_co torsin_A_ir  | 943  | 732  | 794  | 276  | 269  | 387  | 14.52605 | 14.4596  | 14.75721 | 6.598957 |
| protein_co family_witl  | 0    | 1    | 0    | 2    | 4    | 4    | 0        | 0.02067  | 0        | 0.050038 |

|                         |       |      |      |      |      |       |          |          |          |          |
|-------------------------|-------|------|------|------|------|-------|----------|----------|----------|----------|
| protein_co hemicentin   | 3034  | 2334 | 2722 | 508  | 569  | 545   | 7.813286 | 7.707763 | 8.457774 | 2.030544 |
| protein_co ral_guanine  | 400   | 353  | 352  | 36   | 34   | 78    | 3.668298 | 4.151343 | 3.894891 | 0.512434 |
| protein_co lysophosph   | 74    | 49   | 67   | 89   | 102  | 60    | 1.599752 | 1.358396 | 1.747607 | 2.986354 |
| protein_co LIM_home     | 2208  | 1599 | 1722 | 0    | 3    | 3     | 13.96643 | 12.97013 | 13.14219 | 0        |
| protein_co prune_exo    | 247   | 184  | 191  | 533  | 585  | 417   | 3.864476 | 3.691652 | 3.605579 | 12.94349 |
| protein_co RAR-relate   | 2     | 0    | 1    | 6    | 4    | 2     | 0.022647 | 0        | 0.013662 | 0.105453 |
| protein_co tuftelin_1   | 329   | 274  | 271  | 145  | 183  | 189   | 4.958796 | 5.295906 | 4.928307 | 3.39218  |
| protein_co splicing_fa  | 1565  | 1135 | 1265 | 1425 | 1534 | 1846  | 35.19562 | 32.73253 | 34.32519 | 49.74159 |
| protein_co extracellu   | 2865  | 2235 | 2333 | 7    | 11   | 18    | 43.81601 | 43.83239 | 43.04979 | 0.166164 |
| protein_co zinc_finger  | 813   | 641  | 723  | 1724 | 2239 | 1565  | 7.088431 | 7.166828 | 7.605818 | 23.33068 |
| protein_co threonyl-tF  | 566   | 419  | 404  | 851  | 1013 | 689   | 9.725082 | 9.232094 | 8.375414 | 22.69535 |
| protein_co cingulin     | 14    | 8    | 14   | 2571 | 3323 | 2619  | 0.128945 | 0.094488 | 0.15558  | 36.75444 |
| protein_co sorting_ne   | 1228  | 944  | 1073 | 1345 | 1520 | 1189  | 8.000687 | 7.886971 | 8.434836 | 13.60134 |
| protein_co SET_domain   | 589   | 501  | 505  | 647  | 662  | 561   | 6.224526 | 6.789504 | 6.439177 | 10.6127  |
| protein_co ADAMTS-lik   | 59    | 49   | 60   | 119  | 173  | 92    | 0.659164 | 0.702016 | 0.808799 | 2.063568 |
| protein_co myeloid_ce   | 5292  | 4199 | 4417 | 5638 | 6533 | 6703  | 63.10833 | 64.21287 | 63.55392 | 104.3572 |
| protein_co cathepsin_   | 311   | 202  | 269  | 171  | 184  | 175   | 8.618673 | 7.178616 | 8.994569 | 7.355405 |
| protein_co regulatory   | 802   | 579  | 628  | 845  | 1030 | 701   | 10.51616 | 9.735781 | 9.935519 | 17.19769 |
| protein_co phosphatic   | 1424  | 1161 | 1191 | 599  | 682  | 658   | 16.76409 | 17.52716 | 16.91725 | 10.94529 |
| protein_co phosphatic   | 2108  | 1619 | 1833 | 1197 | 1414 | 1229  | 26.23949 | 25.84288 | 27.52931 | 23.12647 |
| protein_co acidic_(leu  | 2407  | 1970 | 2155 | 2231 | 2512 | 3185  | 32.68586 | 34.30515 | 35.30849 | 47.02338 |
| protein_co family_witl  | 221   | 233  | 216  | 318  | 300  | 160   | 3.678628 | 4.973462 | 4.338058 | 8.215824 |
| protein_co annexin_A    | 61    | 71   | 48   | 105  | 136  | 73    | 1.566424 | 2.338015 | 1.487198 | 4.185038 |
| protein_co selenium_t   | 166   | 112  | 92   | 247  | 315  | 243   | 2.740755 | 2.371316 | 1.832728 | 6.329793 |
| protein_co ceramide_s   | 1320  | 1038 | 1030 | 1582 | 1962 | 1412  | 24.70851 | 24.91606 | 23.26258 | 45.96313 |
| protein_co endosulfine  | 1936  | 1437 | 1532 | 2976 | 3232 | 3670  | 32.21401 | 30.66236 | 30.75716 | 76.86043 |
| pseudogen -             | 479   | 358  | 408  | 21   | 30   | 17    | 20.34449 | 19.49861 | 20.90834 | 1.384398 |
| protein_co sema_dom     | 342   | 259  | 298  | 632  | 923  | 407   | 3.047584 | 2.959638 | 3.20401  | 8.741322 |
| protein_co mitochond    | 421   | 344  | 386  | 448  | 443  | 393   | 15.23202 | 15.96038 | 16.85042 | 25.15845 |
| protein_co aryl_hydro   | 1012  | 832  | 878  | 718  | 748  | 475   | 9.709985 | 10.23695 | 10.16437 | 10.69284 |
| protein_co pogo_trans   | 1807  | 1587 | 1579 | 1407 | 1603 | 1232  | 12.78754 | 14.40175 | 13.48215 | 15.45445 |
| protein_co chromosom    | 73    | 71   | 57   | 76   | 115  | 64    | 1.633097 | 2.036839 | 1.538551 | 2.638962 |
| protein_co ornithine_   | 1     | 4    | 4    | 6    | 11   | 3     | 0.012372 | 0.063462 | 0.05971  | 0.115219 |
| protein_co golgi_phos   | 356   | 334  | 315  | 537  | 580  | 444   | 5.566137 | 6.696683 | 5.942409 | 13.03193 |
| protein_co GA_binding   | 203   | 168  | 156  | 43   | 64   | 40    | 1.061878 | 1.126931 | 0.98458  | 0.349122 |
| protein_co inhibitor_c  | 378   | 322  | 282  | 83   | 84   | 122   | 5.421972 | 5.922849 | 4.880481 | 1.847881 |
| protein_co synaptotag   | 210   | 158  | 187  | 78   | 79   | 90    | 1.89765  | 1.830894 | 2.038855 | 1.094011 |
| protein_co potassium_   | 46    | 29   | 41   | 1    | 2    | 0     | 0.695339 | 0.562142 | 0.747774 | 0.023462 |
| protein_co denticles    | 632   | 445  | 541  | 815  | 924  | 1225  | 6.480317 | 5.851248 | 6.693057 | 12.97082 |
| protein_co dual-specifi | 376   | 307  | 350  | 74   | 63   | 64    | 7.57005  | 7.926083 | 8.502115 | 2.312454 |
| protein_co eukaryotic   | 835   | 639  | 702  | 623  | 646  | 638   | 18.69779 | 18.34906 | 18.96657 | 21.65321 |
| protein_co integrator_  | 373   | 280  | 302  | 232  | 256  | 396   | 3.932983 | 3.786    | 3.842096 | 3.796922 |
| protein_co vasohibin_   | 516   | 417  | 447  | 3821 | 4917 | 3384  | 5.728042 | 5.936109 | 5.987039 | 65.83608 |
| protein_co TATA_box_    | 98    | 79   | 79   | 85   | 84   | 102   | 2.404616 | 2.485742 | 2.338809 | 3.237197 |
| protein_co SET_and_M    | 503   | 446  | 472  | 90   | 117  | 232   | 4.984294 | 5.667348 | 5.643203 | 1.384231 |
| protein_co sushi_dom    | 118   | 98   | 102  | 21   | 48   | 23    | 1.589949 | 1.69331  | 1.658248 | 0.439188 |
| protein_co dual_specif  | 91    | 68   | 68   | 9    | 24   | 39    | 1.594541 | 1.527962 | 1.437644 | 0.244775 |
| protein_co HHIP-like_2  | 2     | 1    | 5    | 0    | 2    | 0     | 0.036419 | 0.023351 | 0.109855 | 0        |
| protein_co tumor_pro    | 1083  | 851  | 883  | 903  | 981  | 899   | 10.71122 | 10.79318 | 10.53705 | 13.86209 |
| protein_co ATPase_am    | 3026  | 2231 | 2572 | 1100 | 1255 | 1236  | 24.20904 | 22.88851 | 24.8272  | 13.65941 |
| protein_co ADAM_met     | 1546  | 1169 | 1321 | 706  | 829  | 481   | 16.08074 | 15.59266 | 16.57858 | 11.39808 |
| protein_co jumping_tr   | 1475  | 1121 | 1156 | 920  | 1212 | 1218  | 53.73953 | 52.37413 | 50.81685 | 52.02597 |
| protein_co RAB13_me     | 4527  | 3769 | 3782 | 1480 | 1630 | 1621  | 99.98639 | 106.7495 | 100.7859 | 50.73674 |
| protein_co S100_calci   | 22    | 24   | 29   | 0    | 0    | 0     | 1.438745 | 2.012713 | 2.28827  | 0        |
| protein_co tropomyos    | 11613 | 9337 | 9502 | 7795 | 8969 | 10126 | 134.7522 | 138.9339 | 133.0315 | 140.3906 |
| protein_co nucleopori   | 5     | 5    | 4    | 4    | 7    | 16    | 0.039812 | 0.051053 | 0.038428 | 0.049434 |
| protein_co SNAP-assoc   | 563   | 396  | 425  | 280  | 388  | 311   | 21.90795 | 19.7605  | 19.95402 | 16.91149 |
| protein_co solute_carr  | 465   | 338  | 399  | 906  | 1118 | 821   | 4.840999 | 4.512405 | 5.011906 | 14.63999 |
| protein_co ubiquitin_   | 4927  | 4050 | 4127 | 3104 | 3588 | 4146  | 57.93057 | 61.06461 | 58.54742 | 56.64707 |
| protein_co solute_carr  | 2635  | 1998 | 2099 | 3204 | 3778 | 3829  | 45.37466 | 44.12021 | 43.61072 | 85.63587 |
| protein_co HCLS1_assc   | 1057  | 739  | 813  | 951  | 1126 | 855   | 38.60027 | 34.60741 | 35.82234 | 53.90467 |
| protein_co cAMP_resp    | 106   | 81   | 75   | 453  | 612  | 439   | 2.836953 | 2.779973 | 2.421897 | 18.81807 |
| protein_co ephrin-A3    | 21    | 16   | 22   | 107  | 124  | 56    | 0.552576 | 0.539886 | 0.698463 | 4.370055 |
| protein_co aquaporin_   | 0     | 0    | 1    | 0    | 0    | 0     | 0        | 0        | 0.025011 | 0        |
| protein_co potassium_   | 71    | 45   | 52   | 41   | 34   | 16    | 1.123967 | 0.913518 | 0.993223 | 1.007418 |

|                         |       |      |      |       |       |       |          |          |          |          |
|-------------------------|-------|------|------|-------|-------|-------|----------|----------|----------|----------|
| protein_co chromosom    | 2276  | 1762 | 1838 | 2221  | 2396  | 1681  | 62.48342 | 62.03086 | 60.8816  | 94.63931 |
| protein_co GATA_zinc    | 1034  | 868  | 920  | 612   | 832   | 449   | 6.483589 | 6.979495 | 6.960346 | 5.956304 |
| protein_co interleukin  | 5052  | 3935 | 4160 | 5105  | 5154  | 6203  | 142.7899 | 142.6225 | 141.865  | 223.9547 |
| protein_co Ras-like_wi  | 767   | 511  | 629  | 314   | 397   | 268   | 10.43966 | 8.919108 | 10.32975 | 6.633631 |
| protein_co integrator_  | 1506  | 1231 | 1315 | 1229  | 1490  | 1368  | 12.30036 | 12.89319 | 12.95886 | 15.58028 |
| protein_co pyruvate_k   | 0     | 0    | 1    | 14    | 32    | 11    | 0        | 0        | 0.022822 | 0.411019 |
| protein_co hyperpolar   | 138   | 93   | 116  | 89    | 111   | 79    | 1.740404 | 1.504054 | 1.765131 | 1.742174 |
| protein_co filaggrin    | 0     | 0    | 0    | 0     | 4     | 3     | 0        | 0        | 0        | 0        |
| protein_co actin_alpha  | 2     | 1    | 0    | 3     | 7     | 18    | 0.062897 | 0.040329 | 0        | 0.146438 |
| protein_co chromosom    | 205   | 186  | 155  | 140   | 163   | 148   | 3.617785 | 4.209312 | 3.300415 | 3.834841 |
| protein_co UDP-N-acet   | 7281  | 5361 | 5895 | 1738  | 2235  | 1645  | 76.6516  | 72.37446 | 74.87934 | 28.39948 |
| protein_co tetratricop  | 333   | 233  | 271  | 79    | 110   | 131   | 4.799993 | 4.306868 | 4.713176 | 1.767477 |
| protein_co saccharopi   | 742   | 622  | 649  | 253   | 243   | 290   | 13.90028 | 14.94236 | 14.6694  | 7.356488 |
| protein_co lysosomal_   | 242   | 203  | 196  | 9     | 11    | 9     | 0.841794 | 0.905515 | 0.822611 | 0.048592 |
| protein_co Mitogen-ac   | 76    | 66   | 69   | 740   | 940   | 472   | 0.613469 | 0.683176 | 0.672011 | 9.271312 |
| protein_co centrosom    | 5906  | 4841 | 5233 | 698   | 606   | 596   | 40.55835 | 42.63157 | 43.35964 | 7.439997 |
| protein_co acid_phosp   | 1363  | 1112 | 1157 | 1462  | 1661  | 1668  | 41.17983 | 43.08269 | 42.17646 | 68.55932 |
| protein_co synaptosom   | 753   | 680  | 696  | 685   | 893   | 668   | 14.69338 | 17.01551 | 16.38641 | 20.74663 |
| protein_co signal_reco  | 3465  | 2800 | 2905 | 3775  | 4241  | 4350  | 101.8007 | 105.4909 | 102.9773 | 172.1452 |
| protein_co nuclear_VC   | 350   | 286  | 308  | 377   | 398   | 658   | 5.255045 | 5.506603 | 5.579653 | 8.785778 |
| protein_co SDE2_telom   | 708   | 522  | 577  | 415   | 510   | 703   | 8.351731 | 7.89629  | 8.212344 | 7.598394 |
| protein_co delta(4)-de  | 1345  | 1046 | 1095 | 320   | 453   | 423   | 30.01765 | 29.93611 | 29.48604 | 11.08498 |
| protein_co F-box_prot   | 578   | 413  | 475  | 494   | 623   | 638   | 4.972011 | 4.555789 | 4.929988 | 6.595711 |
| protein_co ADP-ribosy   | 11607 | 8844 | 9431 | 5528  | 6446  | 4931  | 271.3123 | 265.0987 | 265.9838 | 200.5617 |
| protein_co left-right_d | 0     | 1    | 0    | 53    | 56    | 225   | 0        | 0.026292 | 0        | 1.686633 |
| protein_co cornichon_   | 756   | 564  | 622  | 782   | 981   | 867   | 8.593661 | 8.221383 | 8.5309   | 13.79729 |
| protein_co inositol-tri | 1456  | 1151 | 1267 | 843   | 1091  | 376   | 11.10112 | 11.25356 | 11.65547 | 9.976158 |
| protein_co guanylate_   | 3500  | 2677 | 2785 | 1337  | 1445  | 1197  | 64.3841  | 63.14926 | 61.81357 | 38.17442 |
| protein_co CDC42_bin    | 1997  | 1665 | 1691 | 536   | 679   | 591   | 8.626381 | 9.223041 | 8.813374 | 3.593733 |
| protein_co cornichon_   | 1508  | 1264 | 1339 | 97    | 131   | 98    | 27.64275 | 29.7123  | 29.61478 | 2.759828 |
| protein_co chromosom    | 572   | 461  | 479  | 626   | 876   | 693   | 7.546733 | 7.799616 | 7.625117 | 12.8194  |
| protein_co membrane     | 1046  | 911  | 985  | 316   | 358   | 216   | 6.327823 | 7.067249 | 7.189636 | 2.967155 |
| protein_co poly_(ADP-   | 4027  | 3280 | 3435 | 12206 | 13799 | 13092 | 47.70745 | 49.82964 | 49.09976 | 224.4442 |
| protein_co presenilin_  | 110   | 82   | 104  | 264   | 341   | 327   | 2.092455 | 2.000261 | 2.386958 | 7.794672 |
| protein_co pyrroline-5  | 165   | 132  | 145  | 187   | 240   | 339   | 2.456924 | 2.520525 | 2.605096 | 4.321951 |
| protein_co lamin_B_re   | 1293  | 1009 | 1047 | 1159  | 1302  | 1722  | 16.06486 | 16.07604 | 15.69543 | 22.35077 |
| protein_co wingless-ty  | 157   | 135  | 137  | 74    | 102   | 39    | 1.853874 | 2.044201 | 1.951862 | 1.356259 |
| protein_co epoxide_hy   | 541   | 446  | 444  | 888   | 1113  | 964   | 14.2835  | 15.10016 | 14.14388 | 36.3899  |
| protein_co SRY_(sex_d   | 9     | 10   | 10   | 3333  | 3920  | 2629  | 0.117913 | 0.168007 | 0.158076 | 67.77733 |
| protein_co ethanolami   | 100   | 67   | 66   | 329   | 471   | 211   | 1.886163 | 1.620554 | 1.502005 | 9.63176  |
| protein_co protein_ty   | 47    | 57   | 47   | 268   | 248   | 70    | 0.342529 | 0.532701 | 0.413281 | 3.031549 |
| protein_co pleckstrin_  | 1     | 1    | 2    | 602   | 703   | 516   | 0.00921  | 0.011811 | 0.022226 | 8.606058 |
| protein_co protein_ty   | 12    | 10   | 8    | 17    | 5     | 1     | 0.14945  | 0.159707 | 0.120214 | 0.328621 |
| protein_co synaptotag   | 4     | 3    | 3    | 509   | 726   | 710   | 0.024634 | 0.023692 | 0.022291 | 4.865369 |
| protein_co ADP-ribosy   | 862   | 636  | 704  | 694   | 915   | 373   | 22.54277 | 21.32881 | 22.2137  | 28.17021 |
| protein_co odd-skippe   | 2     | 0    | 1    | 0     | 0     | 2     | 0.022462 | 0        | 0.013551 | 0        |
| protein_co growth_dif   | 70    | 45   | 56   | 34    | 75    | 14    | 0.788636 | 0.65013  | 0.761227 | 0.594549 |
| protein_co protein_dis  | 7476  | 5785 | 6174 | 4244  | 4650  | 4850  | 130.7046 | 129.6983 | 130.2376 | 115.1668 |
| protein_co ras_homolo   | 3087  | 2083 | 2435 | 451   | 516   | 462   | 61.17899 | 52.9376  | 58.22542 | 13.87307 |
| protein_co ATPase_H+    | 32    | 28   | 21   | 25    | 24    | 22    | 0.483714 | 0.542758 | 0.383006 | 0.586555 |
| protein_co heterogene   | 1016  | 772  | 926  | 857   | 958   | 933   | 11.41631 | 11.12394 | 12.55426 | 14.94663 |
| protein_co galactose_r  | 173   | 122  | 155  | 309   | 361   | 299   | 3.26569  | 2.953235 | 3.530275 | 9.053526 |
| protein_co calmodulin   | 80    | 51   | 56   | 192   | 234   | 181   | 2.509165 | 2.051251 | 2.119216 | 9.346971 |
| protein_co ATP-bindin   | 0     | 0    | 0    | 1     | 0     | 0     | 0        | 0        | 0        | 0.027309 |
| protein_co echinoderm   | 1413  | 1136 | 1194 | 1448  | 1682  | 1507  | 11.9401  | 12.30987 | 12.17357 | 18.99174 |
| protein_co calmodulin   | 5565  | 4567 | 4509 | 3527  | 3729  | 4399  | 57.96156 | 60.99795 | 56.66347 | 57.01785 |
| protein_co ChaC_catio   | 59    | 35   | 38   | 67    | 92    | 111   | 2.094255 | 1.593144 | 1.627456 | 3.69133  |
| protein_co ribosomal_   | 6067  | 4881 | 4797 | 9658  | 9761  | 10474 | 245.4545 | 253.23   | 234.1611 | 606.4774 |
| protein_co WD_repeat    | 138   | 86   | 99   | 57    | 49    | 62    | 1.196528 | 0.956206 | 1.035683 | 0.767095 |
| protein_co vacuolar_p   | 509   | 430  | 469  | 268   | 327   | 206   | 6.640795 | 7.19416  | 7.382836 | 5.427097 |
| protein_co additional_  | 976   | 857  | 810  | 575   | 789   | 707   | 5.117372 | 5.762187 | 5.124249 | 4.679457 |
| protein_co Ewing_tum    | 298   | 241  | 231  | 416   | 327   | 295   | 4.088129 | 4.239696 | 3.823564 | 8.857928 |
| protein_co small_nucl   | 1130  | 962  | 966  | 1287  | 1473  | 1433  | 48.47733 | 52.92302 | 50.00177 | 85.69772 |
| protein_co abhydrolas   | 1     | 1    | 0    | 1     | 2     | 4     | 0.033493 | 0.04295  | 0        | 0.051986 |
| protein_co Meis_home    | 206   | 194  | 178  | 16    | 20    | 40    | 1.889913 | 2.282368 | 1.970346 | 0.227837 |

|                          |      |      |      |       |       |       |          |          |          |          |
|--------------------------|------|------|------|-------|-------|-------|----------|----------|----------|----------|
| pseudogen: tripartite_r  | 2    | 0    | 1    | 0     | 3     | 2     | 0.056223 | 0        | 0.033918 | 0        |
| protein_co tripartite_r  | 6    | 0    | 3    | 0     | 0     | 0     | 0.167265 | 0        | 0.100908 | 0        |
| protein_co cytosolic_i   | 1638 | 1244 | 1273 | 1119  | 1313  | 1108  | 21.40631 | 20.84768 | 20.07264 | 22.69805 |
| protein_co zinc_finger   | 294  | 295  | 268  | 208   | 277   | 122   | 2.464807 | 3.171516 | 2.710931 | 2.706633 |
| protein_co small_nucl    | 7299 | 5791 | 6263 | 8346  | 8657  | 7886  | 47.76696 | 48.59897 | 49.45323 | 84.77603 |
| protein_co mitochond     | 835  | 703  | 769  | 1082  | 1106  | 1042  | 10.63945 | 11.48675 | 11.82244 | 21.39884 |
| protein_co ankyrin_re    | 17   | 17   | 15   | 8     | 15    | 5     | 0.365321 | 0.468472 | 0.388924 | 0.266837 |
| protein_co TP53RK_bii    | 337  | 273  | 305  | 277   | 312   | 349   | 19.29418 | 20.04327 | 21.06902 | 24.61539 |
| protein_co N-acetyltra   | 0    | 1    | 0    | 0     | 0     | 0     | 0        | 0.063495 | 0        | 0        |
| protein_co exocyst_co    | 596  | 476  | 497  | 682   | 766   | 640   | 4.72228  | 4.836395 | 4.751272 | 8.387263 |
| protein_co sideroflexir  | 716  | 532  | 610  | 406   | 561   | 525   | 8.109481 | 7.726824 | 8.336004 | 7.137343 |
| protein_co testis_expr   | 1252 | 920  | 1004 | 294   | 301   | 592   | 16.40299 | 15.45667 | 15.87086 | 5.978559 |
| protein_co DEAQ_box_     | 1    | 1    | 3    | 11    | 10    | 7     | 0.017438 | 0.022361 | 0.063119 | 0.297723 |
| protein_co dual_specif   | 343  | 298  | 290  | 167   | 196   | 249   | 7.39461  | 8.238473 | 7.543401 | 5.58815  |
| protein_co ST6_beta-g    | 4021 | 3151 | 3603 | 689   | 758   | 615   | 25.91681 | 26.04385 | 28.01946 | 6.892822 |
| protein_co nephronop     | 90   | 79   | 79   | 32    | 51    | 45    | 0.421757 | 0.474741 | 0.446678 | 0.232756 |
| protein_co mal_T-cell    | 23   | 27   | 23   | 11    | 18    | 9     | 0.352326 | 0.530384 | 0.425102 | 0.261541 |
| protein_co threonine_    | 27   | 26   | 21   | 90    | 114   | 45    | 0.346953 | 0.428439 | 0.325592 | 1.795062 |
| protein_co v-ral_simia   | 1801 | 1400 | 1562 | 396   | 492   | 363   | 36.0277  | 35.9137  | 37.70091 | 12.29556 |
| protein_co compleme      | 1    | 2    | 1    | 57    | 82    | 47    | 0.022952 | 0.058864 | 0.027692 | 2.030567 |
| protein_co transmemt     | 158  | 93   | 134  | 364   | 500   | 339   | 4.262729 | 3.217532 | 4.361978 | 15.24272 |
| protein_co 5'-nucleoti   | 1    | 0    | 0    | 0     | 1     | 0     | 0.019154 | 0        | 0        | 0        |
| protein_co RAB_memt      | 171  | 166  | 163  | 77    | 88    | 66    | 2.761086 | 3.437172 | 3.175553 | 1.929767 |
| protein_co solute_carr   | 5521 | 4708 | 4724 | 530   | 679   | 1429  | 76.569   | 83.72999 | 79.04841 | 11.40884 |
| pseudogen: -             | 0    | 1    | 0    | 0     | 0     | 0     | 0        | 0.175306 | 0        | 0        |
| protein_co fibulin_7     | 26   | 17   | 18   | 4     | 9     | 8     | 0.265146 | 0.222315 | 0.221479 | 0.063314 |
| pseudogen: -             | 10   | 0    | 2    | 5     | 12    | 10    | 0.610547 | 0        | 0.147332 | 0.473827 |
| protein_co zinc_finger   | 63   | 47   | 46   | 66    | 73    | 88    | 1.629383 | 1.558798 | 1.435451 | 2.649458 |
| protein_co lipoyltrans   | 17   | 18   | 31   | 31    | 55    | 39    | 0.516611 | 0.701449 | 1.136643 | 1.4622   |
| pseudogen: tripartite_r  | 0    | 0    | 0    | 0     | 0     | 1     | 0        | 0        | 0        | 0        |
| protein_co cyclic_nucl   | 1    | 1    | 0    | 0     | 0     | 2     | 0.012208 | 0.015655 | 0        | 0        |
| protein_co fumarylase    | 223  | 227  | 173  | 519   | 559   | 363   | 7.533483 | 9.833908 | 7.051558 | 27.21377 |
| protein_co lysozyme_C    | 14   | 14   | 9    | 7     | 11    | 6     | 0.632428 | 0.810999 | 0.490539 | 0.490808 |
| protein_co AF4/FMR2_     | 4956 | 3922 | 4378 | 51    | 46    | 47    | 28.56631 | 28.98944 | 30.44715 | 0.456272 |
| protein_co UBX_doma      | 2687 | 2255 | 2336 | 1383  | 1559  | 1419  | 31.45119 | 33.8474  | 32.99061 | 25.12593 |
| protein_co neurexophi    | 9    | 11   | 13   | 6     | 4     | 22    | 0.40115  | 0.628734 | 0.699127 | 0.415094 |
| protein_co speckle-typ   | 360  | 293  | 332  | 128   | 146   | 120   | 2.801727 | 2.924154 | 3.117522 | 1.546193 |
| protein_co thrombosp     | 0    | 0    | 0    | 49    | 51    | 34    | 0        | 0        | 0        | 0.583572 |
| protein_co G_protein-i   | 4    | 11   | 4    | 0     | 2     | 1     | 0.072194 | 0.254591 | 0.087106 | 0        |
| protein_co polymerase    | 693  | 531  | 556  | 777   | 1012  | 798   | 13.96424 | 13.72107 | 13.51783 | 24.30164 |
| protein_co AMMECR1-      | 920  | 710  | 763  | 481   | 582   | 522   | 9.261231 | 9.16534  | 9.267306 | 7.515475 |
| protein_co UDP-N-acet    | 14   | 10   | 11   | 190   | 229   | 182   | 0.11858  | 0.108616 | 0.112415 | 2.497862 |
| protein_co plakophilin   | 834  | 607  | 651  | 1307  | 1414  | 1312  | 6.769305 | 6.317948 | 6.375394 | 16.46585 |
| protein_co sodium_ch     | 2    | 0    | 0    | 9     | 7     | 11    | 0.011531 | 0        | 0        | 0.080538 |
| protein_co solute_carr   | 0    | 0    | 0    | 4     | 5     | 5     | 0        | 0        | 0        | 0.050984 |
| protein_co secernin_3    | 227  | 194  | 184  | 78    | 111   | 75    | 3.504786 | 3.841021 | 3.427689 | 1.869221 |
| protein_co KIAA1715      | 584  | 517  | 491  | 148   | 167   | 181   | 3.598393 | 4.085033 | 3.650272 | 1.415428 |
| protein_co zinc_finger   | 9    | 6    | 4    | 23    | 37    | 33    | 0.128349 | 0.109726 | 0.068827 | 0.509104 |
| protein_co transmemt     | 292  | 193  | 201  | 7     | 14    | 24    | 4.07012  | 3.449777 | 3.380403 | 0.151444 |
| protein_co cell_divisio  | 466  | 380  | 421  | 1213  | 1444  | 1553  | 6.879958 | 7.194371 | 7.499461 | 27.79657 |
| protein_co distal-less_l | 3293 | 2309 | 2573 | 0     | 1     | 6     | 58.48819 | 52.5908  | 55.13969 | 0        |
| protein_co ubiquitin_l   | 740  | 637  | 698  | 286   | 342   | 296   | 4.334617 | 4.784844 | 4.93313  | 2.600253 |
| protein_co phosphata     | 4    | 1    | 12   | 20    | 35    | 17    | 0.16672  | 0.053449 | 0.603472 | 1.293863 |
| protein_co GULP_engu     | 210  | 183  | 194  | 682   | 608   | 894   | 1.325825 | 1.481588 | 1.477804 | 6.683159 |
| protein_co family_witl   | 330  | 232  | 246  | 434   | 419   | 253   | 2.659169 | 2.397338 | 2.391747 | 5.428155 |
| protein_co heat_shock    | 5667 | 4750 | 5123 | 15761 | 16615 | 18051 | 108.2386 | 116.3407 | 118.0596 | 467.2434 |
| protein_co coiled-coil   | 131  | 95   | 80   | 270   | 245   | 228   | 1.666918 | 1.550158 | 1.228233 | 5.332577 |
| protein_co methyltran    | 303  | 215  | 207  | 531   | 795   | 577   | 2.956852 | 2.690511 | 2.43728  | 8.042888 |
| protein_co unc-80_hoi    | 4    | 8    | 5    | 4     | 0     | 1     | 0.01383  | 0.03547  | 0.020858 | 0.021466 |
| protein_co parathyroi    | 5    | 3    | 5    | 9     | 10    | 5     | 0.086417 | 0.066491 | 0.104267 | 0.241437 |
| protein_co carboxypep    | 1    | 0    | 0    | 31    | 31    | 21    | 0.038784 | 0        | 0        | 1.866149 |
| protein_co neurobeacl    | 352  | 313  | 326  | 47    | 55    | 59    | 1.508986 | 1.720664 | 1.686196 | 0.312731 |
| protein_co KAT8_regul    | 281  | 205  | 216  | 167   | 214   | 177   | 2.771581 | 2.592892 | 2.570532 | 2.556632 |
| protein_co sperm_assc    | 190  | 184  | 176  | 204   | 222   | 184   | 1.875206 | 2.328748 | 2.09583  | 3.125043 |
| protein_co ATP-bindin    | 19   | 17   | 37   | 6     | 3     | 2     | 0.097902 | 0.11233  | 0.230032 | 0.047987 |

|                          |       |      |      |      |      |      |          |          |          |          |
|--------------------------|-------|------|------|------|------|------|----------|----------|----------|----------|
| protein_co sulfatase_r   | 391   | 286  | 319  | 170  | 153  | 235  | 5.820316 | 5.459404 | 5.729392 | 3.927799 |
| protein_co neuronal_t    | 1     | 0    | 0    | 0    | 0    | 0    | 0.009712 | 0        | 0        | 0        |
| protein_co rhomboid_     | 481   | 392  | 406  | 310  | 333  | 213  | 4.378586 | 4.575981 | 4.459261 | 4.38007  |
| protein_co chemokine     | 181   | 149  | 184  | 20   | 29   | 54   | 3.852516 | 4.066881 | 4.725326 | 0.660734 |
| protein_co transient_r   | 36    | 35   | 42   | 1    | 1    | 2    | 0.30031  | 0.374407 | 0.422731 | 0.012948 |
| protein_co hairy_and_    | 390   | 299  | 332  | 1390 | 1782 | 1229 | 11.42944 | 11.23676 | 11.73942 | 63.22745 |
| protein_co espin-like    | 1     | 0    | 0    | 14   | 15   | 6    | 0.009696 | 0        | 0        | 0.210694 |
| protein_co ankyrin_rej   | 196   | 146  | 198  | 71   | 114  | 70   | 1.980699 | 1.892015 | 2.414213 | 1.113656 |
| protein_co COP9_signa    | 1134  | 873  | 919  | 940  | 1113 | 1091 | 16.118   | 15.91189 | 15.7602  | 20.7375  |
| protein_co DIS3_mito     | 487   | 363  | 332  | 311  | 370  | 309  | 4.888769 | 4.6729   | 4.021209 | 4.845754 |
| protein_co copine_fam    | 1     | 1    | 2    | 47   | 60   | 33   | 0.022674 | 0.029076 | 0.054715 | 1.654086 |
| protein_co Fanconi_an    | 641   | 530  | 547  | 1391 | 1507 | 1651 | 5.759054 | 6.106302 | 5.929642 | 19.39772 |
| protein_co TAM41_mi      | 260   | 196  | 208  | 205  | 271  | 295  | 4.404409 | 4.257746 | 4.251339 | 5.390123 |
| protein_co vestigial_lil | 1383  | 984  | 1075 | 520  | 600  | 466  | 17.4091  | 15.88395 | 16.32716 | 10.15986 |
| protein_co RAB5A_me      | 1030  | 808  | 832  | 1050 | 1234 | 1065 | 19.04445 | 19.15807 | 18.56105 | 30.13359 |
| protein_co family_witl   | 1472  | 1239 | 1150 | 973  | 1187 | 935  | 14.94632 | 16.1327  | 14.08875 | 15.33451 |
| protein_co CTD_(carbc    | 1341  | 1006 | 1105 | 278  | 335  | 251  | 23.83606 | 22.93047 | 23.69823 | 7.669744 |
| protein_co RCD1_requ     | 1245  | 1058 | 1036 | 985  | 1264 | 1657 | 14.31186 | 15.5963  | 14.36926 | 17.57492 |
| protein_co membrane      | 315   | 236  | 260  | 23   | 38   | 20   | 3.32142  | 3.191057 | 3.307765 | 0.376419 |
| protein_co serine/thre   | 621   | 463  | 508  | 408  | 558  | 603  | 8.054966 | 7.701271 | 7.950306 | 8.214152 |
| protein_co GDP-mann      | 1240  | 1040 | 1079 | 543  | 609  | 556  | 11.7652  | 12.65378 | 12.35228 | 7.996648 |
| processed_glutamate_     | 3     | 10   | 4    | 251  | 325  | 105  | 0.018149 | 0.077577 | 0.029196 | 2.356822 |
| protein_co ELL_associa   | 332   | 265  | 247  | 326  | 390  | 402  | 3.319293 | 3.397526 | 2.979563 | 5.058894 |
| protein_co contactin_    | 0     | 0    | 0    | 7    | 6    | 8    | 0        | 0        | 0        | 0.098011 |
| protein_co dynein_cyt    | 901   | 686  | 748  | 964  | 1156 | 1204 | 8.818181 | 8.609693 | 8.832911 | 14.64407 |
| protein_co RNA_bindin    | 574   | 517  | 504  | 115  | 140  | 95   | 3.279102 | 3.787415 | 3.473935 | 1.019698 |
| protein_co glutamate_    | 4     | 2    | 3    | 0    | 2    | 7    | 0.041597 | 0.026671 | 0.037642 | 0        |
| protein_co oxysterol_k   | 627   | 496  | 555  | 1200 | 1388 | 895  | 3.806816 | 3.861761 | 4.065701 | 11.30853 |
| protein_co glycosyltra   | 286   | 208  | 234  | 380  | 405  | 316  | 5.271441 | 4.916273 | 5.203879 | 10.8712  |
| protein_co chemokine     | 0     | 0    | 1    | 4    | 5    | 1    | 0        | 0        | 0.015694 | 0.080754 |
| protein_co family_witl   | 0     | 0    | 0    | 67   | 85   | 80   | 0        | 0        | 0        | 1.562399 |
| protein_co cysteine-se   | 819   | 538  | 681  | 187  | 235  | 259  | 12.19915 | 10.27631 | 12.23886 | 4.323324 |
| protein_co solute_carr   | 538   | 427  | 413  | 573  | 681  | 820  | 11.88263 | 12.09393 | 11.00597 | 19.64335 |
| protein_co integrin_al   | 50    | 44   | 51   | 103  | 147  | 135  | 0.297186 | 0.335367 | 0.365744 | 0.950224 |
| protein_co solute_carr   | 0     | 1    | 2    | 0    | 0    | 1    | 0        | 0.026407 | 0.049693 | 0        |
| protein_co golgin_A4     | 2448  | 2170 | 2360 | 1380 | 652  | 1228 | 14.76927 | 16.78868 | 17.17939 | 12.92282 |
| protein_co CTD_(carbc    | 1167  | 953  | 927  | 635  | 734  | 512  | 11.79324 | 12.34993 | 11.30291 | 9.960167 |
| protein_co SH3_and_c     | 133   | 107  | 109  | 126  | 131  | 176  | 1.93256  | 1.993768 | 1.910979 | 2.841728 |
| protein_co IQ_motif_a    | 1464  | 1092 | 1297 | 999  | 1455 | 697  | 13.00379 | 12.43829 | 13.90006 | 13.77288 |
| protein_co cullin-assoc  | 446   | 346  | 398  | 455  | 529  | 315  | 4.573135 | 4.54951  | 4.923912 | 7.241375 |
| protein_co ribosomal_    | 7237  | 5661 | 5892 | 8383 | 8060 | 7832 | 160.2943 | 160.7911 | 157.46   | 288.197  |
| protein_co protein_ty    | 3048  | 2343 | 2507 | 1908 | 2119 | 1750 | 15.84312 | 15.61735 | 15.72273 | 15.3934  |
| protein_co interleukin   | 10430 | 8211 | 8658 | 3144 | 3577 | 3429 | 56.08519 | 56.61993 | 56.17325 | 26.24079 |
| protein_co SHQ1_H/A      | 318   | 255  | 310  | 298  | 353  | 395  | 3.705523 | 3.810412 | 4.358451 | 5.389757 |
| protein_co solute_carr   | 243   | 234  | 230  | 362  | 458  | 465  | 2.945018 | 3.636695 | 3.363238 | 6.809586 |
| protein_co ubiquitin-li  | 887   | 720  | 750  | 664  | 717  | 690  | 19.30893 | 20.0991  | 19.69899 | 22.43537 |
| protein_co ADP-ribosy    | 1667  | 1302 | 1373 | 524  | 546  | 417  | 37.20403 | 37.26273 | 36.972   | 18.15165 |
| protein_co TATA_eleme    | 909   | 743  | 786  | 267  | 204  | 249  | 6.189809 | 6.48801  | 6.457791 | 2.821988 |
| protein_co leucine-ricl  | 905   | 695  | 743  | 2067 | 2384 | 1759 | 8.032456 | 7.910318 | 7.956767 | 28.47546 |
| protein_co leucine-ricl  | 1     | 0    | 2    | 0    | 1    | 0    | 0.032952 | 0        | 0.079516 | 0        |
| protein_co LIM_domai     | 1199  | 950  | 1005 | 852  | 1020 | 967  | 4.96171  | 5.04133  | 5.017949 | 5.472455 |
| protein_co zinc_finger   | 199   | 147  | 174  | 150  | 197  | 244  | 1.599437 | 1.515098 | 1.687374 | 1.871267 |
| protein_co nuclear_fac   | 193   | 126  | 192  | 72   | 112  | 78   | 2.30685  | 1.931265 | 2.768926 | 1.33575  |
| protein_co collagen_ty   | 11756 | 9002 | 9654 | 9    | 18   | 42   | 96.62385 | 94.87965 | 95.73706 | 0.114815 |
| protein_co neurexophi    | 872   | 804  | 795  | 307  | 423  | 285  | 5.015713 | 5.930368 | 5.517361 | 2.740849 |
| protein_co G_protein-i   | 0     | 0    | 0    | 0    | 1    | 4    | 0        | 0        | 0        | 0        |
| protein_co myosin_he     | 322   | 292  | 296  | 10   | 12   | 1    | 2.134377 | 2.482033 | 2.36731  | 0.102884 |
| protein_co pleckstrin_   | 1538  | 1210 | 1357 | 869  | 877  | 1140 | 11.77034 | 11.87483 | 12.53027 | 10.32245 |
| protein_co abhydrolas    | 590   | 475  | 545  | 248  | 322  | 239  | 10.68151 | 11.02767 | 11.90488 | 6.968877 |
| protein_co transgelin_   | 191   | 144  | 120  | 43   | 31   | 29   | 6.018813 | 5.819013 | 4.562541 | 2.10318  |
| protein_co phospholip    | 8     | 8    | 6    | 0    | 0    | 0    | 0.210034 | 0.269338 | 0.190063 | 0        |
| protein_co RAB_membr     | 615   | 474  | 495  | 205  | 211  | 294  | 7.426567 | 7.340078 | 7.212175 | 3.842354 |
| protein_co ADP-ribosy    | 48    | 36   | 46   | 58   | 65   | 60   | 0.495099 | 0.476171 | 0.572475 | 0.928559 |
| protein_co immunoglc     | 0     | 1    | 0    | 31   | 23   | 18   | 0        | 0.0169   | 0        | 0.634113 |
| protein_co autophagy_    | 529   | 401  | 483  | 495  | 543  | 731  | 8.240804 | 8.010647 | 9.078395 | 11.96877 |

|                         |      |      |      |      |      |      |          |          |          |          |
|-------------------------|------|------|------|------|------|------|----------|----------|----------|----------|
| protein_co nuclear_re   | 0    | 0    | 0    | 5    | 2    | 2    | 0        | 0        | 0        | 0.082386 |
| protein_co BOC_cell_a   | 1752 | 1213 | 1309 | 101  | 108  | 117  | 14.28718 | 12.68477 | 12.87954 | 1.278393 |
| protein_co signal_reco  | 1130 | 844  | 910  | 453  | 555  | 675  | 26.2826  | 25.17339 | 25.53755 | 16.35379 |
| protein_co transmemt    | 105  | 81   | 101  | 228  | 265  | 170  | 1.018715 | 1.007762 | 1.182315 | 3.433436 |
| protein_co angiotensir  | 155  | 100  | 122  | 0    | 1    | 1    | 3.013247 | 2.492943 | 2.861613 | 0        |
| protein_co mediator_c   | 47   | 34   | 43   | 203  | 254  | 143  | 0.205122 | 0.190284 | 0.226428 | 1.375121 |
| protein_co eukaryotic   | 1055 | 794  | 863  | 942  | 976  | 1071 | 22.50635 | 21.72114 | 22.21322 | 31.19134 |
| protein_co aldehyde_c   | 1    | 0    | 0    | 25   | 27   | 7    | 0.010185 | 0        | 0        | 0.395199 |
| protein_co oxysterol_k  | 496  | 373  | 414  | 344  | 387  | 385  | 5.549379 | 5.351566 | 5.588704 | 5.973813 |
| protein_co transient_r  | 146  | 154  | 130  | 124  | 162  | 125  | 1.583243 | 2.141533 | 1.700929 | 2.087117 |
| protein_co neutral_ch   | 85   | 65   | 65   | 36   | 75   | 51   | 0.850363 | 0.833889 | 0.784597 | 0.559009 |
| protein_co spermatogr   | 1    | 0    | 1    | 0    | 0    | 1    | 0.022265 | 0        | 0.026864 | 0        |
| protein_co family_witl  | 0    | 0    | 1    | 5    | 3    | 9    | 0        | 0        | 0.044618 | 0.286987 |
| protein_co LIM_domai    | 3625 | 2907 | 3119 | 758  | 941  | 807  | 9.299503 | 9.563263 | 9.654174 | 3.018224 |
| protein_co transmemt    | 476  | 347  | 377  | 174  | 254  | 173  | 8.963714 | 8.379534 | 8.56585  | 5.085817 |
| protein_co KIAA0226     | 812  | 608  | 642  | 400  | 473  | 319  | 5.474435 | 5.256494 | 5.222354 | 4.185754 |
| protein_co aminomett    | 53   | 55   | 71   | 506  | 676  | 561  | 0.759527 | 1.010739 | 1.227647 | 11.25507 |
| protein_co T-cell_leuk  | 239  | 192  | 188  | 74   | 83   | 150  | 5.222141 | 5.379739 | 4.956288 | 2.509648 |
| protein_co nicotin_1    | 200  | 141  | 170  | 83   | 116  | 90   | 3.584864 | 3.240941 | 3.676543 | 2.309145 |
| protein_co urocortin_   | 4    | 1    | 1    | 0    | 0    | 0    | 0.126644 | 0.040601 | 0.038201 | 0        |
| protein_co Vpr_(HIV-1   | 735  | 629  | 599  | 648  | 645  | 865  | 7.609663 | 8.350992 | 7.482607 | 10.41318 |
| protein_co mesenceph    | 3058 | 2254 | 2486 | 918  | 1043 | 1138 | 95.02298 | 89.81614 | 93.20524 | 44.27558 |
| lincRNA -               | 0    | 0    | 0    | 2    | 2    | 2    | 0        | 0        | 0        | 0.089027 |
| protein_co coiled-coil  | 53   | 36   | 29   | 30   | 27   | 59   | 0.55834  | 0.486334 | 0.368611 | 0.49054  |
| protein_co syntaxin_bi  | 4    | 7    | 5    | 41   | 53   | 74   | 0.019751 | 0.044325 | 0.029789 | 0.314235 |
| protein_co ELL_associa  | 34   | 23   | 28   | 67   | 69   | 51   | 1.607118 | 1.394138 | 1.596889 | 4.915571 |
| protein_co immunoglc    | 0    | 0    | 0    | 59   | 71   | 20   | 0        | 0        | 0        | 1.614896 |
| protein_co transmemt    | 6    | 3    | 1    | 5    | 5    | 1    | 0.177838 | 0.114026 | 0.035762 | 0.230025 |
| protein_co mucin_4_c    | 1    | 0    | 0    | 29   | 41   | 44   | 0.002741 | 0        | 0        | 0.123356 |
| protein_co slit_homoli  | 749  | 561  | 562  | 257  | 307  | 280  | 5.496185 | 5.279001 | 4.975811 | 2.927138 |
| protein_co eukaryotic   | 867  | 712  | 689  | 686  | 737  | 886  | 11.74961 | 12.37353 | 11.26605 | 14.42975 |
| protein_co alpha-2-HS   | 0    | 0    | 0    | 0    | 1    | 0    | 0        | 0        | 0        | 0        |
| protein_co endothelin   | 72   | 33   | 61   | 213  | 205  | 193  | 0.979995 | 0.575989 | 1.001772 | 4.499883 |
| protein_co von_Willeb   | 12   | 8    | 11   | 38   | 72   | 19   | 0.136573 | 0.116757 | 0.151051 | 0.67127  |
| protein_co diacylglyce  | 1117 | 822  | 859  | 607  | 976  | 636  | 11.2977  | 10.6615  | 10.48282 | 9.529193 |
| protein_co FIP1_like_1  | 640  | 557  | 579  | 619  | 672  | 631  | 9.436985 | 10.53217 | 10.30101 | 14.16689 |
| protein_co solute_carr  | 63   | 40   | 59   | 15   | 20   | 16   | 0.807123 | 0.657156 | 0.91201  | 0.298278 |
| protein_co Ly1_antibo   | 367  | 294  | 324  | 715  | 786  | 1263 | 10.9679  | 11.26715 | 11.6829  | 33.16607 |
| protein_co centromere   | 286  | 246  | 220  | 195  | 194  | 233  | 3.451878 | 3.807447 | 3.203761 | 3.65304  |
| protein_co EPH_recept   | 61   | 52   | 64   | 0    | 1    | 1    | 0.346031 | 0.378266 | 0.438039 | 0        |
| protein_co corin_serin  | 33   | 32   | 16   | 0    | 9    | 2    | 0.287722 | 0.357782 | 0.168317 | 0        |
| protein_co ATPase_cla   | 761  | 693  | 703  | 20   | 35   | 35   | 5.361879 | 6.26145  | 5.976346 | 0.218722 |
| protein_co OCIA_dom     | 1126 | 957  | 1025 | 809  | 913  | 847  | 27.99478 | 30.51125 | 30.74756 | 31.21891 |
| protein_co solute_carr  | 40   | 31   | 35   | 66   | 99   | 68   | 1.047822 | 1.041354 | 1.106225 | 2.683501 |
| protein_co solute_carr  | 0    | 0    | 0    | 1    | 0    | 0    | 0        | 0        | 0        | 0.048455 |
| protein_co stearoyl-Co  | 434  | 341  | 341  | 148  | 194  | 173  | 6.562485 | 6.612145 | 6.221299 | 3.473528 |
| protein_co placenta-sp  | 12   | 19   | 16   | 10   | 16   | 11   | 0.249747 | 0.507087 | 0.401779 | 0.323035 |
| protein_co enolase-ph   | 784  | 666  | 700  | 1136 | 1367 | 1335 | 18.15396 | 19.77602 | 19.55696 | 40.82857 |
| protein_co group-spec   | 0    | 0    | 0    | 1    | 0    | 5    | 0        | 0        | 0        | 0.036907 |
| protein_co tRNA_meth    | 85   | 75   | 76   | 26   | 37   | 63   | 1.078953 | 1.220827 | 1.163979 | 0.512256 |
| protein_co kelch-like_f | 484  | 375  | 362  | 145  | 179  | 139  | 4.037497 | 4.011506 | 3.643539 | 1.877437 |
| protein_co synuclein_i  | 542  | 503  | 489  | 59   | 52   | 23   | 8.009577 | 9.532079 | 8.719011 | 1.353296 |
| protein_co PIGY_upstr   | 0    | 0    | 1    | 0    | 0    | 0    | 0        | 0        | 0.041569 | 0        |
| protein_co TBC1_dom     | 467  | 418  | 404  | 209  | 220  | 218  | 4.067925 | 4.669191 | 4.246053 | 2.825744 |
| protein_co calcium/ca   | 1648 | 1297 | 1354 | 409  | 534  | 287  | 12.9939  | 13.1139  | 12.88099 | 5.005371 |
| protein_co CDGSH_iro    | 310  | 264  | 229  | 167  | 225  | 303  | 6.246629 | 6.821773 | 5.567594 | 5.223131 |
| protein_co DNA-damag    | 14   | 8    | 12   | 75   | 88   | 81   | 0.252097 | 0.184731 | 0.260717 | 2.096192 |
| protein_co ankyrin_2_   | 387  | 273  | 299  | 371  | 405  | 839  | 1.278278 | 1.156342 | 1.191609 | 1.902036 |
| protein_co TRAF-intera  | 81   | 81   | 87   | 25   | 25   | 24   | 1.236358 | 1.585454 | 1.602236 | 0.592284 |
| protein_co spermatogr   | 257  | 173  | 196  | 147  | 221  | 170  | 3.606924 | 3.113575 | 3.319006 | 3.202224 |
| protein_co fatty_acid_  | 1    | 0    | 0    | 0    | 1    | 0    | 0.018923 | 0        | 0        | 0        |
| protein_co cyclin_A2    | 1390 | 1128 | 1164 | 2003 | 2381 | 2279 | 23.30251 | 24.2497  | 23.54447 | 52.11939 |
| protein_co methyltran   | 382  | 319  | 321  | 339  | 362  | 393  | 4.608178 | 4.934758 | 4.672173 | 6.347402 |
| protein_co ubiquitin_s  | 1026 | 766  | 905  | 344  | 275  | 492  | 7.923116 | 7.585544 | 8.432285 | 4.12323  |
| protein_co SET_domai    | 1737 | 1312 | 1346 | 201  | 277  | 144  | 11.05879 | 10.71151 | 10.33953 | 1.986251 |

|                         |      |      |      |       |       |       |          |          |          |          |
|-------------------------|------|------|------|-------|-------|-------|----------|----------|----------|----------|
| protein_co nuclear_as   | 281  | 213  | 242  | 332   | 440   | 345   | 5.657404 | 5.499204 | 5.878606 | 10.37479 |
| protein_co membrane     | 143  | 113  | 140  | 79    | 85    | 83    | 1.140935 | 1.156145 | 1.347723 | 0.978323 |
| protein_co secreted_fr  | 18   | 18   | 22   | 13016 | 15469 | 11754 | 0.415364 | 0.532646 | 0.61253  | 466.1919 |
| protein_co ribosomal_   | 3557 | 2853 | 2884 | 4838  | 4946  | 4176  | 109.2974 | 112.4183 | 106.9225 | 230.7396 |
| protein_co ring_finger  | 12   | 13   | 13   | 111   | 154   | 111   | 0.175673 | 0.244049 | 0.229623 | 2.522185 |
| protein_co platelet_de  | 1466 | 1174 | 1270 | 73    | 64    | 109   | 16.50439 | 16.94895 | 17.25111 | 1.275612 |
| protein_co carbonyl_r   | 309  | 244  | 276  | 574   | 742   | 482   | 4.208253 | 4.261304 | 4.535242 | 12.13349 |
| protein_co glycine_rec  | 0    | 0    | 0    | 3     | 1     | 5     | 0        | 0        | 0        | 0.024896 |
| protein_co cytochrom    | 228  | 176  | 181  | 112   | 190   | 66    | 1.236517 | 1.224016 | 1.184382 | 0.942787 |
| protein_co rhophilin_i  | 3    | 2    | 1    | 1     | 2     | 2     | 0.108962 | 0.093152 | 0.043823 | 0.056375 |
| protein_co NADH_deh     | 1761 | 1356 | 1320 | 2587  | 3380  | 2560  | 76.31545 | 75.35675 | 69.02002 | 174.0123 |
| protein_co membrane     | 2055 | 1625 | 1850 | 1085  | 1328  | 1127  | 20.35467 | 20.64024 | 22.10914 | 16.68063 |
| protein_co naked_cuti   | 294  | 199  | 216  | 349   | 467   | 172   | 6.39706  | 5.552589 | 5.670677 | 11.78661 |
| protein_co cadherin_1   | 20   | 16   | 21   | 1     | 0     | 1     | 0.264766 | 0.27162  | 0.335428 | 0.020548 |
| protein_co ADAM_met     | 66   | 36   | 48   | 492   | 580   | 573   | 0.621559 | 0.434761 | 0.545416 | 7.191738 |
| protein_co steroid-5-al | 340  | 232  | 258  | 367   | 448   | 397   | 6.907542 | 6.044243 | 6.324298 | 11.57287 |
| protein_co myosin_X     | 5376 | 4234 | 5022 | 4575  | 5659  | 5138  | 31.36113 | 31.67325 | 35.34737 | 41.42418 |
| protein_co family_witl  | 9    | 11   | 9    | 104   | 132   | 117   | 0.117323 | 0.183883 | 0.141557 | 2.104281 |
| protein_co ribosomal_   | 6343 | 5022 | 5092 | 7487  | 7833  | 6642  | 38.69677 | 39.28856 | 37.48146 | 70.89544 |
| protein_co S-phase_kir  | 1084 | 819  | 987  | 856   | 979   | 1219  | 13.52189 | 13.10091 | 14.85502 | 16.57343 |
| protein_co oncostatin   | 762  | 652  | 713  | 30    | 52    | 60    | 6.450658 | 7.077925 | 7.282602 | 0.394186 |
| protein_co UDP_glyco    | 0    | 0    | 0    | 59    | 70    | 33    | 0        | 0        | 0        | 0.838346 |
| protein_co polo-like_k  | 1607 | 1159 | 1288 | 245   | 265   | 299   | 25.45684 | 23.54407 | 24.61799 | 6.024004 |
| protein_co family_witl  | 3    | 0    | 3    | 154   | 208   | 190   | 0.16608  | 0        | 0.200385 | 13.23269 |
| protein_co granzyme_    | 35   | 64   | 42   | 0     | 0     | 1     | 1.835739 | 4.304594 | 2.65791  | 0        |
| protein_co phosphoin    | 621  | 446  | 444  | 183   | 197   | 308   | 4.153288 | 3.825116 | 3.582873 | 1.899687 |
| protein_co hyaluronar   | 3130 | 2640 | 2828 | 188   | 198   | 225   | 26.17545 | 28.31151 | 28.53496 | 2.440272 |
| protein_co lipoma_HN    | 1437 | 1094 | 1242 | 944   | 1300  | 780   | 13.36128 | 13.04422 | 13.93353 | 13.62366 |
| protein_co single-stran | 322  | 255  | 241  | 274   | 340   | 206   | 1.719657 | 1.746367 | 1.552927 | 2.27126  |
| protein_co betaine-hc   | 0    | 0    | 0    | 9     | 8     | 11    | 0        | 0        | 0        | 0.262322 |
| protein_co ankyrin_rej  | 0    | 2    | 2    | 4     | 1     | 5     | 0        | 0.019924 | 0.018746 | 0.04823  |
| protein_co IQ_motif_c   | 296  | 245  | 218  | 2159  | 1904  | 1774  | 2.374991 | 2.520842 | 2.110448 | 26.88768 |
| protein_co corticotro   | 7    | 4    | 2    | 2     | 2     | 3     | 0.165773 | 0.121474 | 0.057147 | 0.073515 |
| protein_co RAS_p21_p    | 2447 | 2050 | 2084 | 659   | 789   | 511   | 23.04476 | 24.7572  | 23.68013 | 9.632836 |
| protein_co Lix1_homo    | 7    | 4    | 5    | 1     | 0     | 8     | 0.081588 | 0.059786 | 0.070315 | 0.018091 |
| protein_co gypsy_retrc  | 23   | 25   | 22   | 67    | 56    | 68    | 0.324352 | 0.452104 | 0.374334 | 1.46654  |
| protein_co diphosphoi   | 1195 | 926  | 1012 | 324   | 296   | 408   | 9.632727 | 9.571977 | 9.842601 | 4.053749 |
| protein_co peptidylgly  | 2945 | 2688 | 2576 | 775   | 800   | 743   | 25.42178 | 29.75495 | 26.82962 | 10.38372 |
| protein_co B_double_l   | 1117 | 846  | 941  | 557   | 314   | 730   | 4.730078 | 4.59404  | 4.807871 | 3.661009 |
| protein_co general_tra  | 121  | 91   | 97   | 130   | 166   | 171   | 2.731676 | 2.634478 | 2.642188 | 4.555308 |
| protein_co solute_carr  | 888  | 661  | 678  | 382   | 509   | 360   | 9.550077 | 9.116008 | 8.797751 | 6.376579 |
| protein_co basic_trans  | 5643 | 4423 | 4746 | 6842  | 6980  | 7162  | 213.9049 | 214.9993 | 217.0633 | 402.5541 |
| protein_co F-box_and    | 534  | 434  | 382  | 97    | 92    | 53    | 4.826382 | 5.030133 | 4.165737 | 1.360763 |
| protein_co spermatog    | 6    | 3    | 12   | 2     | 2     | 0     | 0.12971  | 0.083167 | 0.313004 | 0.067109 |
| protein_co thymic_str   | 0    | 0    | 0    | 5     | 11    | 7     | 0        | 0        | 0        | 0.13884  |
| protein_co tumor_nec    | 199  | 162  | 160  | 210   | 270   | 194   | 2.598472 | 2.712622 | 2.520769 | 4.256129 |
| protein_co fem-1_horr   | 560  | 434  | 520  | 316   | 395   | 373   | 4.517187 | 4.489305 | 5.060943 | 3.956377 |
| protein_co COMM_doi     | 309  | 261  | 296  | 328   | 270   | 338   | 9.863183 | 10.68337 | 11.39983 | 16.25036 |
| protein_co autophagy    | 846  | 667  | 640  | 381   | 462   | 441   | 9.155078 | 9.256075 | 8.35641  | 6.399516 |
| protein_co multiple_E   | 1556 | 1057 | 1269 | 557   | 527   | 412   | 9.607699 | 8.369396 | 9.454084 | 5.338208 |
| protein_co ADAM_met     | 15   | 15   | 22   | 677   | 778   | 675   | 0.134381 | 0.172325 | 0.237803 | 9.413818 |
| protein_co Yip1_doma    | 1500 | 1127 | 1205 | 397   | 453   | 482   | 22.34987 | 21.53361 | 21.66301 | 9.18131  |
| protein_co Rho_GTPas    | 178  | 133  | 178  | 320   | 385   | 356   | 0.90722  | 0.869268 | 1.094613 | 2.531471 |
| protein_co chemokine    | 81   | 65   | 67   | 1     | 0     | 4     | 1.926987 | 1.982971 | 1.923165 | 0.036925 |
| protein_co leukocyte_i  | 3    | 0    | 2    | 4     | 0     | 8     | 0.130613 | 0        | 0.105061 | 0.270306 |
| protein_co solute_carr  | 0    | 0    | 0    | 4     | 9     | 15    | 0        | 0        | 0        | 0.141183 |
| protein_co DEAD_(Asp    | 1994 | 1706 | 1850 | 2384  | 2301  | 3087  | 16.435   | 18.03154 | 18.39773 | 30.49869 |
| protein_co interleukin  | 0    | 0    | 0    | 2     | 0     | 0     | 0        | 0        | 0        | 0.246294 |
| protein_co T-cell_imm   | 0    | 0    | 1    | 0     | 0     | 0     | 0        | 0        | 0.041326 | 0        |
| protein_co ring_finger  | 721  | 606  | 554  | 446   | 604   | 577   | 9.357238 | 10.08543 | 8.675015 | 8.984166 |
| protein_co C1q_and_ti   | 44   | 28   | 32   | 5     | 5     | 9     | 0.854665 | 0.697446 | 0.749965 | 0.150745 |
| protein_co gamma-am     | 43   | 37   | 25   | 26    | 16    | 33    | 0.273022 | 0.30126  | 0.191522 | 0.256232 |
| protein_co F-box_prot   | 673  | 634  | 611  | 451   | 421   | 398   | 7.133133 | 8.617154 | 7.81366  | 7.41946  |
| protein_co prenylcyste  | 222  | 163  | 175  | 196   | 216   | 116   | 2.130056 | 2.005557 | 2.025929 | 2.918936 |
| protein_co glycine_rec  | 1    | 1    | 0    | 0     | 2     | 2     | 0.026007 | 0.03335  | 0        | 0        |

|                         |      |      |      |      |      |      |          |          |          |          |
|-------------------------|------|------|------|------|------|------|----------|----------|----------|----------|
| protein_co TNFAIP3_in   | 1133 | 845  | 896  | 1006 | 903  | 657  | 16.25655 | 15.54764 | 15.51152 | 22.40406 |
| protein_co GTPase_act   | 4125 | 3358 | 3638 | 5353 | 6874 | 7467 | 18.8888  | 19.71835 | 20.09977 | 38.04593 |
| protein_co zinc_finger  | 168  | 157  | 165  | 98   | 100  | 150  | 1.895914 | 2.272052 | 2.246681 | 1.716587 |
| protein_co NEDD4_bin    | 13   | 14   | 12   | 2566 | 3525 | 2096 | 0.100258 | 0.138457 | 0.111662 | 30.71595 |
| protein_co NHP2_ribo    | 809  | 570  | 545  | 960  | 1342 | 933  | 43.85436 | 39.6231  | 35.64584 | 80.77296 |
| protein_co required_fc  | 468  | 363  | 394  | 1251 | 1795 | 1637 | 5.163418 | 5.135792 | 5.244882 | 21.42295 |
| protein_co biorientati  | 1097 | 899  | 943  | 1749 | 1956 | 1745 | 32.93108 | 34.60735 | 34.15538 | 81.49288 |
| protein_co complexin_   | 1    | 0    | 0    | 27   | 27   | 50   | 0.009335 | 0        | 0        | 0.391211 |
| protein_co teneurin_tr  | 165  | 129  | 137  | 27   | 31   | 23   | 0.820712 | 0.822822 | 0.822196 | 0.20845  |
| protein_co potassium_   | 7    | 1    | 3    | 4    | 9    | 8    | 0.1894   | 0.034697 | 0.097938 | 0.167986 |
| protein_co family_witl  | 2    | 2    | 5    | 74   | 86   | 63   | 0.04854  | 0.062246 | 0.146417 | 2.787632 |
| protein_co myosin_lig   | 2    | 6    | 11   | 4    | 1    | 7    | 0.016175 | 0.062225 | 0.107335 | 0.05021  |
| protein_co -            | 7    | 9    | 5    | 7    | 4    | 2    | 0.224201 | 0.36965  | 0.193222 | 0.347991 |
| protein_co family_witl  | 2    | 2    | 1    | 2    | 6    | 7    | 0.041404 | 0.053095 | 0.024978 | 0.064265 |
| protein_co TBC1_dom     | 371  | 343  | 323  | 451  | 572  | 462  | 11.26697 | 13.35785 | 11.83542 | 21.25887 |
| protein_co phenylalan   | 250  | 225  | 230  | 149  | 195  | 243  | 6.928194 | 7.995984 | 7.690524 | 6.409096 |
| protein_co glucose-fru  | 135  | 142  | 115  | 192  | 260  | 143  | 0.723363 | 0.975709 | 0.743479 | 1.596814 |
| protein_co CDK5_regu    | 328  | 223  | 289  | 343  | 367  | 324  | 4.700466 | 4.098088 | 4.997042 | 7.629423 |
| pseudogen: protocadhe   | 21   | 8    | 10   | 5    | 6    | 1    | 0.311217 | 0.152035 | 0.17881  | 0.115012 |
| protein_co pleckstrin_  | 30   | 26   | 24   | 10   | 27   | 2    | 0.3117   | 0.346416 | 0.300867 | 0.161267 |
| protein_co leucine_ri   | 3    | 5    | 3    | 1    | 3    | 3    | 0.063479 | 0.135672 | 0.076591 | 0.032843 |
| protein_co zinc_finger  | 1144 | 983  | 970  | 971  | 1029 | 1338 | 32.82875 | 36.17356 | 33.58521 | 43.2492  |
| protein_co GDNF_fami    | 3    | 3    | 3    | 20   | 26   | 29   | 0.06899  | 0.08847  | 0.08324  | 0.713877 |
| protein_co kelch-like_f | 57   | 47   | 57   | 286  | 303  | 243  | 0.382858 | 0.404827 | 0.46194  | 2.981668 |
| protein_co doublecort   | 6    | 6    | 4    | 2    | 3    | 1    | 0.059771 | 0.076647 | 0.048078 | 0.030924 |
| protein_co tripartite_r | 31   | 17   | 23   | 18   | 32   | 7    | 0.333622 | 0.234612 | 0.298654 | 0.300674 |
| protein_co tripartite_r | 768  | 568  | 627  | 598  | 948  | 859  | 5.133504 | 4.868671 | 5.056713 | 6.20418  |
| protein_co HIG1_hypo    | 217  | 182  | 191  | 221  | 267  | 228  | 15.23224 | 16.38267 | 16.17653 | 24.07835 |
| protein_co family_witl  | 946  | 744  | 785  | 921  | 1109 | 801  | 9.634656 | 9.716891 | 9.646345 | 14.55912 |
| protein_co phospholip   | 268  | 291  | 266  | 68   | 68   | 48   | 6.677218 | 9.297434 | 7.996325 | 2.629663 |
| protein_co tumor_nec    | 4770 | 3947 | 4012 | 1373 | 1710 | 1217 | 62.21568 | 66.01733 | 63.13795 | 27.79601 |
| protein_co ring_finger  | 836  | 612  | 659  | 3999 | 5504 | 4644 | 9.434429 | 8.856663 | 8.973107 | 70.04727 |
| protein_co methylmal    | 492  | 396  | 428  | 248  | 258  | 288  | 6.153611 | 6.3514   | 6.458873 | 4.814455 |
| protein_co RasGEF_doi   | 0    | 2    | 1    | 21   | 35   | 16   | 0        | 0.050213 | 0.023622 | 0.638153 |
| protein_co docking_pr   | 36   | 26   | 21   | 59   | 48   | 239  | 0.736492 | 0.682101 | 0.518362 | 1.873477 |
| protein_co activator_c  | 711  | 519  | 557  | 680  | 779  | 896  | 14.78439 | 13.83919 | 13.97453 | 21.9469  |
| protein_co protein_ph   | 3826 | 3073 | 3156 | 1123 | 1348 | 587  | 39.00874 | 40.17805 | 38.82416 | 17.77163 |
| protein_co dishevelled  | 2845 | 2088 | 2276 | 57   | 60   | 72   | 21.44384 | 20.18181 | 20.69858 | 0.666846 |
| processed_primase_DI    | 235  | 204  | 213  | 300  | 320  | 323  | 4.811858 | 5.356541 | 5.262263 | 9.534472 |
| protein_co muscular_L   | 16   | 17   | 25   | 0    | 1    | 0    | 0.130636 | 0.177992 | 0.24628  | 0        |
| protein_co 3-hydroxyn   | 8    | 6    | 8    | 1    | 1    | 0    | 0.148152 | 0.142488 | 0.178754 | 0.028744 |
| protein_co lengsin_len  | 0    | 0    | 0    | 2    | 3    | 8    | 0        | 0        | 0        | 0.027922 |
| protein_co FYVE_RhoG    | 2    | 2    | 4    | 1    | 4    | 4    | 0.01625  | 0.020839 | 0.039214 | 0.012611 |
| protein_co signal_pept  | 283  | 202  | 229  | 117  | 165  | 139  | 1.803953 | 1.651199 | 1.761255 | 1.157591 |
| protein_co anoctamin    | 17   | 12   | 18   | 45   | 41   | 40   | 0.193103 | 0.174796 | 0.246696 | 0.793384 |
| protein_co cysteine-ric | 1    | 0    | 2    | 223  | 289  | 147  | 0.048742 | 0        | 0.117621 | 16.87099 |
| protein_co tau_tubulin  | 1    | 0    | 0    | 13   | 13   | 11   | 0.006764 | 0        | 0        | 0.136488 |
| protein_co t-complex-   | 2    | 0    | 3    | 10   | 9    | 4    | 0.030577 | 0        | 0.05534  | 0.2373   |
| protein_co ribosomal_   | 2844 | 2226 | 2399 | 2059 | 2462 | 2994 | 29.79339 | 29.90369 | 30.32275 | 33.47936 |
| protein_co nuclear_fac  | 258  | 189  | 228  | 201  | 308  | 136  | 4.73303  | 4.446217 | 5.046641 | 5.723294 |
| protein_co cytochrom    | 36   | 26   | 24   | 25   | 19   | 19   | 0.775754 | 0.718463 | 0.623995 | 0.836165 |
| protein_co trophoblas   | 7079 | 5339 | 5506 | 800  | 997  | 551  | 51.19285 | 49.51156 | 48.04206 | 8.979618 |
| protein_co interleukin  | 53   | 31   | 37   | 63   | 81   | 46   | 2.147944 | 1.611084 | 1.809243 | 3.962945 |
| protein_co pleckstrin_  | 1008 | 829  | 913  | 993  | 538  | 958  | 8.175945 | 8.622661 | 8.935035 | 12.50136 |
| protein_co protease_se  | 462  | 271  | 310  | 75   | 80   | 81   | 8.319197 | 6.257748 | 6.735179 | 2.096192 |
| protein_co MMS22-lik    | 435  | 360  | 404  | 377  | 405  | 568  | 2.359963 | 2.504539 | 2.64451  | 3.17459  |
| protein_co failed_axor  | 116  | 85   | 82   | 175  | 221  | 169  | 2.696699 | 2.533978 | 2.300045 | 6.314559 |
| protein_co gamma-am     | 101  | 49   | 71   | 6    | 6    | 7    | 1.522795 | 0.947383 | 1.291595 | 0.140411 |
| protein_co proline-ric  | 583  | 432  | 481  | 383  | 468  | 196  | 13.2382  | 12.57921 | 13.17812 | 13.49863 |
| protein_co peptidase_   | 156  | 100  | 102  | 112  | 134  | 119  | 1.553705 | 1.277183 | 1.225722 | 1.73138  |
| protein_co arginyl-trN  | 832  | 688  | 706  | 497  | 579  | 579  | 21.45902 | 22.75539 | 21.97047 | 19.89635 |
| protein_co sex_comb_    | 37   | 32   | 28   | 0    | 0    | 0    | 0.403754 | 0.44779  | 0.368656 | 0        |
| protein_co chromosom    | 111  | 114  | 120  | 67   | 61   | 35   | 0.977793 | 1.287769 | 1.27542  | 0.916071 |
| protein_co clavesin_2   | 2    | 1    | 2    | 6    | 8    | 9    | 0.031002 | 0.019878 | 0.037405 | 0.144357 |
| protein_co G_protein-   | 0    | 0    | 0    | 1    | 1    | 6    | 0        | 0        | 0        | 0.042536 |

|                         |      |      |      |      |      |      |          |          |          |          |
|-------------------------|------|------|------|------|------|------|----------|----------|----------|----------|
| protein_co ring_finger  | 756  | 545  | 625  | 123  | 150  | 74   | 3.130142 | 2.893663 | 3.122268 | 0.790456 |
| protein_co R-spondin_   | 95   | 57   | 62   | 0    | 0    | 3    | 1.651669 | 1.270819 | 1.300586 | 0        |
| protein_co Rho_GTPas    | 743  | 680  | 693  | 57   | 70   | 113  | 7.807997 | 9.163662 | 8.786828 | 0.929729 |
| protein_co ABRA_C-ter   | 458  | 346  | 354  | 854  | 1207 | 1080 | 25.41494 | 24.62119 | 23.70145 | 73.55497 |
| protein_co trace_amin   | 1    | 2    | 0    | 0    | 0    | 0    | 0.045971 | 0.117902 | 0        | 0        |
| protein_co solute_carr  | 252  | 151  | 179  | 406  | 578  | 493  | 4.989985 | 3.83429  | 4.276611 | 12.47829 |
| protein_co mitochond    | 75   | 52   | 62   | 114  | 126  | 139  | 1.961378 | 1.743865 | 1.95632  | 4.627383 |
| protein_co solute_carr  | 51   | 52   | 34   | 104  | 119  | 59   | 0.535226 | 0.69981  | 0.430521 | 1.694069 |
| protein_co SNF2_histo   | 342  | 244  | 301  | 402  | 447  | 429  | 1.375333 | 1.258291 | 1.460483 | 2.509218 |
| protein_co androgen-i   | 331  | 286  | 284  | 232  | 244  | 271  | 4.574299 | 5.068412 | 4.735468 | 4.976397 |
| protein_co dynein_lig   | 1100 | 933  | 996  | 505  | 617  | 561  | 17.84124 | 19.40543 | 19.49125 | 12.71318 |
| protein_co T-cell_lymp  | 654  | 506  | 533  | 205  | 218  | 209  | 4.392791 | 4.358355 | 4.319545 | 2.137209 |
| protein_co transmemt    | 1451 | 1127 | 1274 | 604  | 809  | 739  | 12.6229  | 12.57259 | 13.37239 | 8.155659 |
| protein_co poly(A)-spe  | 0    | 0    | 1    | 3    | 1    | 4    | 0        | 0        | 0.029451 | 0.113659 |
| protein_co Wilms_turr   | 965  | 745  | 804  | 787  | 1014 | 1295 | 12.3766  | 12.25293 | 12.44166 | 15.66677 |
| protein_co zinc_finger  | 1542 | 1182 | 1241 | 1345 | 1341 | 1187 | 10.33806 | 10.16206 | 10.03863 | 13.99612 |
| protein_co vasoactive_  | 1    | 0    | 0    | 0    | 0    | 0    | 0.029602 | 0        | 0        | 0        |
| protein_co chromosor    | 469  | 383  | 437  | 902  | 1018 | 1323 | 8.537041 | 8.940106 | 9.59763  | 25.48423 |
| protein_co solute_carr  | 3    | 9    | 6    | 66   | 125  | 240  | 0.024999 | 0.096173 | 0.060326 | 0.853646 |
| protein_co von_Willeb   | 15   | 7    | 8    | 528  | 510  | 333  | 0.118489 | 0.070908 | 0.076247 | 6.473675 |
| protein_co guanine_nu   | 3182 | 2614 | 2817 | 2795 | 3521 | 2660 | 34.08041 | 35.90208 | 36.4032  | 46.46403 |
| protein_co chromosor    | 2409 | 1650 | 1874 | 1087 | 1422 | 1213 | 43.09731 | 37.85355 | 40.45116 | 30.18376 |
| protein_co sidekick_ce  | 44   | 54   | 44   | 395  | 592  | 323  | 0.198438 | 0.312302 | 0.239427 | 2.76503  |
| pseudogen WAS_prote     | 160  | 126  | 149  | 106  | 164  | 132  | 2.67943  | 2.705841 | 3.010625 | 2.755235 |
| protein_co CCZ1_vacu    | 288  | 218  | 248  | 232  | 201  | 250  | 4.680875 | 4.543603 | 4.863336 | 5.852656 |
| protein_co chromosor    | 894  | 713  | 728  | 479  | 701  | 528  | 19.21158 | 19.64828 | 18.87579 | 15.97687 |
| protein_co RB-associat  | 384  | 356  | 366  | 380  | 350  | 399  | 2.748552 | 3.267624 | 3.160836 | 4.221695 |
| protein_co cAMP_resp    | 343  | 250  | 257  | 21   | 24   | 53   | 1.885053 | 1.76189  | 1.704161 | 0.179135 |
| protein_co epidermal_   | 5051 | 3888 | 4053 | 194  | 259  | 143  | 24.11582 | 23.80457 | 23.34798 | 1.437662 |
| protein_co cell_divisio | 1156 | 843  | 915  | 2054 | 2231 | 2514 | 20.95279 | 19.5939  | 20.01028 | 57.78497 |
| protein_co insulin-like | 7226 | 5058 | 6047 | 67   | 75   | 179  | 149.791  | 134.4547 | 151.2432 | 2.155724 |
| protein_co purine-rich  | 1739 | 1397 | 1488 | 1285 | 1794 | 1188 | 8.995228 | 9.266555 | 9.286746 | 10.31683 |
| pseudogen -             | 12   | 7    | 8    | 14   | 13   | 6    | 1.127616 | 0.843504 | 0.907022 | 2.041918 |
| protein_co insulin-like | 0    | 0    | 0    | 0    | 1    | 2    | 0        | 0        | 0        | 0        |
| protein_co scavenger_   | 68   | 30   | 49   | 365  | 541  | 266  | 1.138351 | 0.644018 | 0.989718 | 9.48398  |
| protein_co malate_def   | 4085 | 3208 | 3389 | 5471 | 5933 | 4869 | 86.71151 | 87.32295 | 86.79692 | 180.2527 |
| protein_co POM121_a     | 348  | 274  | 332  | 206  | 202  | 258  | 10.28212 | 10.38158 | 11.83558 | 9.447158 |
| pseudogen -             | 3    | 7    | 6    | 1    | 2    | 0    | 0.143541 | 0.429499 | 0.346381 | 0.074265 |
| protein_co glioblaston  | 855  | 709  | 717  | 663  | 741  | 581  | 9.422083 | 10.01928 | 9.533405 | 11.34031 |
| protein_co chaperonin   | 5173 | 3938 | 4314 | 6224 | 6724 | 8384 | 89.21003 | 87.08758 | 89.76342 | 166.5986 |
| protein_co phosphosei   | 423  | 320  | 419  | 574  | 881  | 724  | 9.106739 | 8.834497 | 10.8839  | 19.18072 |
| protein_co tripartite_r | 0    | 0    | 0    | 2    | 5    | 0    | 0        | 0        | 0        | 0.071109 |
| protein_co zinc_finger  | 159  | 105  | 144  | 343  | 267  | 378  | 2.32259  | 1.966862 | 2.537967 | 7.776782 |
| protein_co ataxin_7-lil | 152  | 132  | 121  | 835  | 963  | 1151 | 1.315725 | 1.465227 | 1.263732 | 11.2186  |
| protein_co transmemt    | 504  | 408  | 414  | 219  | 250  | 197  | 5.641578 | 5.856519 | 5.591372 | 3.804912 |
| protein_co chromosor    | 198  | 167  | 178  | 211  | 327  | 301  | 3.684216 | 3.984792 | 3.996206 | 6.093864 |
| protein_co solute_carr  | 859  | 662  | 657  | 717  | 989  | 964  | 9.027011 | 8.921095 | 8.330369 | 11.69501 |
| protein_co GRB10_int    | 1139 | 863  | 914  | 2459 | 3306 | 3297 | 8.178825 | 7.94671  | 7.918838 | 27.40667 |
| protein_co tripartite_r | 188  | 174  | 145  | 194  | 203  | 152  | 2.605771 | 3.092694 | 2.424903 | 4.173598 |
| protein_co methylpho    | 1166 | 853  | 934  | 1421 | 1846 | 2465 | 18.09191 | 16.97244 | 17.48561 | 34.2224  |
| polymorph zonadhesin    | 1    | 0    | 0    | 6    | 9    | 2    | 0.005308 | 0        | 0        | 0.049432 |
| protein_co transmemt    | 260  | 211  | 240  | 215  | 284  | 323  | 3.439042 | 3.578953 | 3.830218 | 4.414008 |
| protein_co ATP/GTP_b    | 19   | 20   | 22   | 25   | 32   | 34   | 0.236504 | 0.319245 | 0.330412 | 0.483009 |
| protein_co stimulated   | 0    | 0    | 0    | 1    | 0    | 0    | 0        | 0        | 0        | 0.073293 |
| protein_co zinc_finger  | 309  | 221  | 225  | 70   | 91   | 51   | 8.265268 | 7.580539 | 7.261545 | 2.90621  |
| protein_co transmemt    | 146  | 100  | 117  | 101  | 158  | 134  | 4.074966 | 3.579155 | 3.94008  | 4.375452 |
| protein_co tousled-like | 898  | 710  | 734  | 720  | 877  | 818  | 11.67052 | 11.83264 | 11.50954 | 14.52369 |
| protein_co EPH_recept   | 33   | 24   | 24   | 4296 | 5503 | 5499 | 0.460116 | 0.429115 | 0.40375  | 92.97116 |
| protein_co nucleolar_   | 761  | 564  | 653  | 823  | 1145 | 1163 | 5.871862 | 5.580583 | 6.079283 | 9.856471 |
| protein_co canopy_1_    | 0    | 0    | 0    | 12   | 9    | 5    | 0        | 0        | 0        | 0.367266 |
| protein_co non-SMC_c    | 1253 | 988  | 987  | 1304 | 1527 | 1309 | 11.18469 | 11.30939 | 10.63012 | 18.06679 |
| protein_co neuroligin_  | 58   | 46   | 54   | 1346 | 1402 | 1421 | 0.463309 | 0.471205 | 0.520456 | 16.68852 |
| protein_co shroom_fai   | 1237 | 929  | 948  | 661  | 801  | 894  | 7.788767 | 7.501085 | 7.202038 | 6.459977 |
| protein_co RAB19_me     | 0    | 0    | 0    | 44   | 48   | 40   | 0        | 0        | 0        | 2.929836 |
| protein_co C7orf55-LU   | 607  | 502  | 469  | 458  | 638  | 441  | 10.03251 | 10.63982 | 9.352806 | 11.74944 |

|                         |       |       |       |       |       |       |          |          |          |          |
|-------------------------|-------|-------|-------|-------|-------|-------|----------|----------|----------|----------|
| protein_co DENN/MAC     | 1423  | 1104  | 1108  | 426   | 614   | 438   | 17.86466 | 17.77331 | 16.78331 | 8.300989 |
| protein_co transmemt    | 1     | 4     | 5     | 25    | 32    | 12    | 0.029715 | 0.15242  | 0.179263 | 1.153039 |
| protein_co SH3-domai    | 1548  | 1207  | 1320  | 522   | 631   | 393   | 15.34258 | 15.34066 | 15.78518 | 8.030238 |
| protein_co transmemt    | 457   | 313   | 365   | 391   | 412   | 390   | 5.285826 | 4.642483 | 5.093749 | 7.019463 |
| protein_co LanC_lantil  | 18    | 14    | 12    | 16    | 14    | 8     | 0.08196  | 0.081746 | 0.065926 | 0.113078 |
| protein_co synaptotag   | 342   | 324   | 310   | 4     | 5     | 12    | 3.321538 | 4.035222 | 3.632644 | 0.060298 |
| protein_co calcium/ca   | 650   | 591   | 515   | 880   | 1061  | 773   | 3.672995 | 4.282563 | 3.511254 | 7.718272 |
| protein_co lysine_(K)-s | 381   | 315   | 332   | 838   | 855   | 1139  | 3.285233 | 3.483061 | 3.45404  | 11.21542 |
| protein_co spindlin_fa  | 21    | 17    | 15    | 26    | 32    | 35    | 0.398983 | 0.414184 | 0.343854 | 0.766724 |
| protein_co moesin       | 20043 | 16203 | 17035 | 4002  | 4377  | 3455  | 238.4111 | 247.1545 | 244.486  | 73.88756 |
| protein_co A_kinase_(f  | 0     | 0     | 0     | 0     | 0     | 1     | 0        | 0        | 0        | 0        |
| protein_co cyclin_B3    | 0     | 1     | 1     | 1     | 4     | 2     | 0        | 0.012813 | 0.012055 | 0.015508 |
| protein_co histone_de   | 430   | 351   | 369   | 169   | 177   | 173   | 8.623912 | 9.027185 | 8.929154 | 5.260815 |
| protein_co solute_carr  | 1344  | 1064  | 1231  | 1270  | 1510  | 1177  | 14.44423 | 14.66379 | 15.96251 | 21.18504 |
| protein_co zinc_finger  | 3     | 1     | 2     | 15    | 32    | 17    | 0.060686 | 0.02594  | 0.048814 | 0.470965 |
| protein_co zinc_finger  | 70    | 61    | 50    | 98    | 101   | 56    | 0.91531  | 1.022844 | 0.788839 | 1.988963 |
| protein_co carbohydra   | 186   | 141   | 185   | 408   | 552   | 398   | 3.810198 | 3.703932 | 4.572507 | 12.97255 |
| protein_co KRAB_box_    | 165   | 118   | 139   | 77    | 96    | 129   | 2.78906  | 2.557792 | 2.834894 | 2.020204 |
| protein_co NADH_deh     | 1641  | 1247  | 1266  | 1319  | 1544  | 1354  | 55.43697 | 54.02151 | 51.60273 | 69.16179 |
| protein_co zinc_finger  | 165   | 131   | 151   | 85    | 91    | 63    | 1.707538 | 1.738469 | 1.885434 | 1.365324 |
| protein_co RAB41_me     | 11    | 8     | 3     | 4     | 3     | 4     | 0.480252 | 0.447894 | 0.158032 | 0.271061 |
| protein_co zinc_finger  | 1866  | 1485  | 1638  | 2101  | 2276  | 1744  | 14.42175 | 14.71778 | 15.27455 | 25.20362 |
| protein_co TAF1_RNA_    | 886   | 781   | 853   | 691   | 791   | 690   | 5.389797 | 6.092549 | 6.260886 | 6.5245   |
| protein_co non-POU_c    | 7543  | 5973  | 6398  | 7732  | 8389  | 8923  | 110.0129 | 111.7124 | 112.5879 | 175.0337 |
| protein_co coiled-coil  | 262   | 216   | 238   | 369   | 432   | 386   | 3.092168 | 3.269075 | 3.389119 | 6.759564 |
| protein_co lysophosph   | 4     | 2     | 8     | 53    | 45    | 77    | 0.071835 | 0.046059 | 0.173345 | 1.477338 |
| protein_co emopamil_    | 1458  | 1077  | 1174  | 1224  | 1249  | 1445  | 38.51586 | 36.48439 | 37.41952 | 50.18731 |
| protein_co acyl-CoA_w   | 0     | 0     | 0     | 2     | 1     | 0     | 0        | 0        | 0        | 0.068531 |
| protein_co O-linked_N   | 2866  | 2500  | 2668  | 1584  | 1875  | 1470  | 18.55402 | 20.75445 | 20.83991 | 15.9165  |
| protein_co sorting_ne   | 1257  | 976   | 1052  | 1343  | 1678  | 1346  | 24.80671 | 24.69978 | 25.04942 | 41.13774 |
| protein_co integrin_be  | 14    | 14    | 17    | 30    | 27    | 43    | 0.456192 | 0.585001 | 0.668369 | 1.5173   |
| protein_co interleukin  | 0     | 1     | 0     | 8     | 3     | 1     | 0        | 0.029548 | 0        | 0.286112 |
| protein_co acidic_repe  | 23    | 16    | 18    | 16    | 29    | 16    | 0.335658 | 0.299433 | 0.31695  | 0.362427 |
| protein_co zinc_finger  | 406   | 282   | 334   | 316   | 302   | 327   | 3.930088 | 3.500537 | 3.900953 | 4.747815 |
| protein_co diaphanou    | 230   | 179   | 210   | 605   | 590   | 546   | 1.155545 | 1.153245 | 1.272994 | 4.717859 |
| protein_co ripply1_ho   | 0     | 1     | 1     | 0     | 0     | 1     | 0        | 0.051305 | 0.048273 | 0        |
| protein_co phosphorit   | 834   | 655   | 706   | 1942  | 2137  | 1982  | 18.86458 | 18.99904 | 19.26788 | 68.1806  |
| protein_co chromosom    | 30    | 15    | 15    | 85    | 69    | 118   | 0.364336 | 0.233604 | 0.219796 | 1.602249 |
| protein_co FERM_and_    | 16    | 17    | 15    | 147   | 157   | 150   | 0.104855 | 0.142866 | 0.118607 | 1.495266 |
| protein_co 5-hydroxyt   | 0     | 0     | 0     | 40    | 59    | 35    | 0        | 0        | 0        | 0.612754 |
| protein_co dedicator_   | 1307  | 1092  | 1080  | 305   | 327   | 228   | 9.196466 | 9.853202 | 9.168899 | 3.331008 |
| protein_co immunoglc    | 149   | 125   | 123   | 279   | 291   | 253   | 1.348767 | 1.451009 | 1.343395 | 3.919993 |
| protein_co Rho_GTPas    | 0     | 0     | 0     | 2     | 4     | 5     | 0        | 0        | 0        | 0.047214 |
| protein_co glypican_3   | 51    | 35    | 40    | 587   | 630   | 519   | 0.931227 | 0.819526 | 0.881238 | 16.63619 |
| protein_co RNA_bindin   | 4097  | 3278  | 3521  | 5476  | 6285  | 6683  | 39.31009 | 40.33261 | 40.76168 | 81.5515  |
| protein_co microceph    | 247   | 214   | 228   | 211   | 253   | 257   | 3.667459 | 4.07466  | 4.084615 | 4.862742 |
| protein_co malignant_   | 853   | 622   | 701   | 1704  | 2124  | 1456  | 6.235919 | 5.831109 | 6.18326  | 19.33533 |
| protein_co F-box_prot   | 79    | 75    | 61    | 171   | 204   | 177   | 1.569623 | 1.910905 | 1.462333 | 5.273452 |
| protein_co fetal_and_ε  | 0     | 0     | 0     | 0     | 2     | 1     | 0        | 0        | 0        | 0        |
| protein_co melanoma_    | 0     | 0     | 0     | 18    | 24    | 4     | 0        | 0        | 0        | 0.738881 |
| protein_co family_witl  | 389   | 319   | 350   | 223   | 320   | 253   | 13.99863 | 14.72096 | 15.1968  | 12.45579 |
| protein_co NAD(P)_de    | 1115  | 823   | 952   | 474   | 522   | 717   | 27.10335 | 25.65413 | 27.92114 | 17.88368 |
| protein_co zinc_finger  | 3953  | 2809  | 2966  | 327   | 422   | 162   | 41.92631 | 38.20507 | 37.95588 | 5.38317  |
| protein_co centrin_EF   | 820   | 680   | 710   | 316   | 242   | 348   | 26.44416 | 28.12123 | 27.62628 | 15.81734 |
| protein_co gamma-am     | 18    | 20    | 20    | 358   | 394   | 456   | 0.136706 | 0.194784 | 0.18327  | 4.220144 |
| protein_co ribosomal_   | 19818 | 15545 | 16416 | 16692 | 17284 | 17061 | 400.8914 | 403.2432 | 400.6659 | 524.0899 |
| protein_co chondroitin  | 62    | 64    | 54    | 8     | 10    | 8     | 0.686952 | 0.909335 | 0.721899 | 0.13758  |
| protein_co ATPase_H+    | 1417  | 1200  | 1169  | 1055  | 1262  | 1366  | 9.619684 | 10.44676 | 9.575324 | 11.11665 |
| protein_co coiled-coil  | 833   | 650   | 726   | 797   | 973   | 821   | 10.79287 | 10.79977 | 11.34949 | 16.02805 |
| protein_co homeobox     | 307   | 284   | 304   | 226   | 210   | 138   | 3.526515 | 4.183455 | 4.213364 | 4.029455 |
| protein_co cholinergic  | 0     | 0     | 0     | 1     | 0     | 0     | 0        | 0        | 0        | 0.031726 |
| protein_co cholinergic  | 0     | 1     | 0     | 1     | 0     | 1     | 0        | 0.025054 | 0        | 0.030325 |
| protein_co gonadotro    | 15    | 12    | 13    | 8     | 21    | 20    | 0.399631 | 0.409976 | 0.417887 | 0.330817 |
| protein_co bridging_in  | 889   | 647   | 716   | 177   | 181   | 224   | 11.61472 | 10.83978 | 11.28673 | 3.589308 |
| protein_co docking_pr   | 0     | 3     | 6     | 3     | 10    | 6     | 0        | 0.093176 | 0.175337 | 0.112779 |

|                         |       |       |       |       |       |       |          |          |          |          |
|-------------------------|-------|-------|-------|-------|-------|-------|----------|----------|----------|----------|
| protein_co solute_carr  | 962   | 764   | 770   | 836   | 774   | 352   | 9.352726 | 9.525019 | 9.032374 | 12.61537 |
| protein_co charged_m    | 1227  | 910   | 981   | 692   | 898   | 573   | 16.90686 | 16.07938 | 16.30931 | 14.79977 |
| protein_co dedicator_c  | 446   | 442   | 450   | 379   | 497   | 361   | 2.075727 | 2.637952 | 2.526946 | 2.737821 |
| protein_co steroidoge   | 4     | 4     | 5     | 43    | 48    | 46    | 0.054397 | 0.069756 | 0.082041 | 0.907637 |
| protein_co proline_syr  | 676   | 540   | 561   | 380   | 466   | 426   | 12.40127 | 12.70348 | 12.41739 | 10.82016 |
| protein_co ER_lipid_ra  | 935   | 814   | 866   | 898   | 1083  | 1114  | 7.219194 | 8.059551 | 8.067576 | 10.76178 |
| protein_co syntrophin   | 3     | 3     | 2     | 83    | 92    | 63    | 0.040146 | 0.051481 | 0.032292 | 1.723951 |
| protein_co peroxidasi   | 3     | 5     | 4     | 0     | 3     | 5     | 0.029276 | 0.06257  | 0.047097 | 0        |
| protein_co suppressio   | 0     | 1     | 0     | 1     | 2     | 0     | 0        | 0.009719 | 0        | 0.011763 |
| protein_co regulator_c  | 60    | 48    | 64    | 11    | 26    | 20    | 1.337168 | 1.371782 | 1.720928 | 0.380503 |
| protein_co transformi   | 1567  | 1307  | 1358  | 221   | 293   | 300   | 9.374414 | 10.02675 | 9.802186 | 2.052097 |
| protein_co golgin_A7    | 927   | 835   | 865   | 541   | 704   | 747   | 21.44403 | 24.7698  | 24.14298 | 19.4247  |
| protein_co phosphatic   | 1029  | 845   | 914   | 636   | 864   | 533   | 22.0823  | 23.25386 | 23.66591 | 21.18442 |
| protein_co GINS_com     | 257   | 180   | 245   | 485   | 587   | 756   | 3.111473 | 2.794568 | 3.578879 | 9.113918 |
| protein_co Wolf-Hirsch  | 1374  | 1203  | 1230  | 805   | 1022  | 628   | 11.8628  | 13.31912 | 12.81309 | 10.78765 |
| protein_co corticotro   | 1     | 0     | 0     | 1     | 3     | 4     | 0.030448 | 0        | 0        | 0.04726  |
| protein_co tripartite_r | 2     | 1     | 1     | 4     | 7     | 2     | 0.032205 | 0.020649 | 0.019428 | 0.099972 |
| protein_co alcohol_de   | 19    | 13    | 14    | 19    | 39    | 24    | 0.399691 | 0.35069  | 0.355342 | 0.620375 |
| protein_co mitochond    | 41    | 23    | 37    | 71    | 124   | 97    | 2.261754 | 1.627042 | 2.462698 | 6.079254 |
| protein_co lactamase_   | 42    | 20    | 32    | 41    | 67    | 54    | 1.305955 | 0.797477 | 1.200541 | 1.978761 |
| protein_co PR_domair    | 0     | 0     | 0     | 1368  | 1850  | 4352  | 0        | 0        | 0        | 42.47558 |
| protein_co telomeric_c  | 513   | 395   | 414   | 6043  | 7447  | 8863  | 6.685542 | 6.601242 | 6.5098   | 122.2369 |
| protein_co ribosomal_   | 12876 | 10997 | 11067 | 16153 | 14176 | 15917 | 395.646  | 433.3207 | 410.3022 | 770.388  |
| protein_co solute_carr  | 3     | 7     | 6     | 5     | 4     | 3     | 0.026728 | 0.079975 | 0.064498 | 0.069143 |
| protein_co protein_ser  | 0     | 0     | 0     | 5     | 4     | 1     | 0        | 0        | 0        | 0.275264 |
| protein_co ATPase_H+    | 0     | 3     | 2     | 0     | 0     | 0     | 0        | 0.073749 | 0.04626  | 0        |
| protein_co syntabulin   | 0     | 0     | 0     | 3     | 3     | 7     | 0        | 0        | 0        | 0.063563 |
| protein_co dihydropyr   | 3     | 0     | 0     | 7     | 9     | 4     | 0.066135 | 0        | 0        | 0.23952  |
| protein_co metadherin   | 3359  | 2579  | 2800  | 1205  | 1409  | 1314  | 25.49839 | 25.10519 | 25.64536 | 14.19778 |
| protein_co low_densit   | 1217  | 953   | 1072  | 175   | 208   | 204   | 11.3948  | 11.44243 | 12.11041 | 2.543224 |
| protein_co estrogen_re  | 160   | 105   | 130   | 170   | 189   | 213   | 3.153595 | 2.6539   | 3.091558 | 5.200742 |
| protein_co R-spondin_   | 25    | 16    | 12    | 1     | 1     | 0     | 0.376808 | 0.30925  | 0.218228 | 0.023394 |
| protein_co polymerase   | 582   | 436   | 463   | 423   | 546   | 595   | 26.72869 | 25.67737 | 25.65569 | 30.15265 |
| processed_mal_T-cell_   | 1     | 0     | 0     | 888   | 956   | 1004  | 0.016634 | 0        | 0        | 22.92602 |
| protein_co eukaryotic   | 2788  | 2245  | 2305  | 2833  | 2786  | 2853  | 33.02081 | 34.09735 | 32.93926 | 52.08012 |
| protein_co UTP23_sma    | 234   | 181   | 244   | 132   | 133   | 184   | 2.971098 | 2.94706  | 3.737997 | 2.60139  |
| protein_co NADH_deh     | 631   | 453   | 450   | 750   | 845   | 850   | 22.43184 | 20.6511  | 19.30173 | 41.38351 |
| protein_co TatD_DNas    | 168   | 137   | 154   | 202   | 216   | 242   | 3.907501 | 4.086201 | 4.32174  | 7.292421 |
| protein_co family_witl  | 0     | 0     | 0     | 0     | 0     | 1     | 0        | 0        | 0        | 0        |
| protein_co gasdermin_   | 2     | 0     | 4     | 0     | 0     | 1     | 0.034554 | 0        | 0.083383 | 0        |
| protein_co family_witl  | 3     | 6     | 2     | 0     | 3     | 4     | 0.020205 | 0.051821 | 0.016253 | 0        |
| protein_co zinc_finger  | 269   | 242   | 195   | 215   | 270   | 335   | 2.236025 | 2.57958  | 1.955721 | 2.773915 |
| protein_co Rho_GTPas    | 528   | 400   | 443   | 535   | 669   | 483   | 5.271009 | 5.120698 | 5.335948 | 8.289801 |
| protein_co solute_carr  | 16    | 15    | 23    | 72    | 108   | 45    | 0.270065 | 0.324675 | 0.468408 | 1.886302 |
| protein_co nicotinate_  | 238   | 187   | 154   | 252   | 398   | 164   | 5.6793   | 5.722276 | 4.433907 | 9.333593 |
| protein_co very_low_c   | 176   | 126   | 146   | 514   | 478   | 184   | 2.298786 | 2.110405 | 2.300842 | 10.42028 |
| protein_co adenylate_l  | 274   | 201   | 234   | 307   | 422   | 337   | 4.695857 | 4.41743  | 4.838695 | 8.166447 |
| protein_co ubiquitin-li | 2019  | 1751  | 1864  | 654   | 639   | 506   | 25.42867 | 28.28022 | 28.32574 | 12.78485 |
| protein_co nuclear_fac  | 233   | 206   | 219   | 237   | 267   | 127   | 1.332688 | 1.510946 | 1.511349 | 2.104027 |
| protein_co cerberus_1   | 0     | 0     | 0     | 6     | 8     | 52    | 0        | 0        | 0        | 0.359406 |
| protein_co perilipin_2  | 496   | 457   | 437   | 638   | 720   | 941   | 11.79384 | 13.93474 | 12.53727 | 23.54641 |
| protein_co HAUS_augn    | 685   | 624   | 571   | 965   | 796   | 941   | 4.914269 | 5.740666 | 4.942566 | 10.74549 |
| protein_co cyclin-depe  | 495   | 321   | 368   | 2     | 1     | 14    | 5.934686 | 4.935225 | 5.323392 | 0.037218 |
| protein_co cyclin-depe  | 391   | 287   | 323   | 5     | 6     | 4     | 14.28994 | 13.4507  | 14.24309 | 0.283631 |
| protein_co chromosom    | 121   | 110   | 94    | 249   | 275   | 195   | 1.180052 | 1.375682 | 1.106093 | 3.76917  |
| protein_co interferon_  | 2     | 0     | 0     | 1     | 3     | 2     | 0.082263 | 0        | 0        | 0.063842 |
| protein_co zinc_finger  | 387   | 354   | 325   | 467   | 513   | 266   | 6.497113 | 7.621177 | 6.583258 | 12.16905 |
| protein_co F-box_prot   | 172   | 147   | 139   | 126   | 120   | 120   | 1.76286  | 1.932039 | 1.718906 | 2.004427 |
| protein_co SPATA31_si   | 0     | 0     | 0     | 0     | 0     | 3     | 0        | 0        | 0        | 0        |
| protein_co sigma_non-   | 2099  | 1626  | 1746  | 1438  | 1724  | 1708  | 56.46709 | 56.09354 | 56.67288 | 60.04438 |
| protein_co COBW_dor     | 83    | 78    | 70    | 50    | 42    | 68    | 1.170136 | 1.41014  | 1.190705 | 1.094104 |
| protein_co centrosom    | 1759  | 1287  | 1472  | 726   | 874   | 953   | 7.36556  | 6.910792 | 7.436966 | 4.718533 |
| protein_co neurotropl   | 130   | 96    | 112   | 0     | 0     | 1     | 0.741029 | 0.701734 | 0.770296 | 0        |
| protein_co idnK_gluco   | 24    | 26    | 16    | 15    | 25    | 14    | 0.693383 | 0.963262 | 0.557738 | 0.672641 |
| protein_co SHC_(Src_h   | 416   | 372   | 395   | 193   | 269   | 182   | 8.147973 | 9.343477 | 9.334722 | 5.867377 |

|                         |       |       |       |       |       |       |          |          |          |          |
|-------------------------|-------|-------|-------|-------|-------|-------|----------|----------|----------|----------|
| protein_co AU_RNA_bi    | 186   | 160   | 153   | 343   | 399   | 447   | 5.530465 | 6.100677 | 5.488936 | 15.82972 |
| protein_co hippocamp    | 1418  | 1153  | 1280  | 658   | 914   | 877   | 19.44153 | 20.27183 | 21.17446 | 14.00266 |
| protein_co chromosom    | 678   | 493   | 555   | 111   | 160   | 183   | 10.80974 | 10.07956 | 10.67644 | 2.746875 |
| protein_co Lipid_phos   | 0     | 0     | 0     | 27    | 22    | 16    | 0        | 0        | 0        | 0.787597 |
| protein_co olfactory_r  | 0     | 0     | 0     | 0     | 0     | 1     | 0        | 0        | 0        | 0        |
| protein_co zinc_finger  | 1417  | 1104  | 1103  | 1271  | 1491  | 1635  | 6.380176 | 6.374428 | 5.992201 | 8.882574 |
| protein_co INTS3_and    | 669   | 514   | 531   | 209   | 273   | 275   | 7.410683 | 7.301374 | 7.096998 | 3.593427 |
| protein_co UDP-glucos   | 919   | 743   | 818   | 542   | 780   | 551   | 10.75416 | 11.1496  | 11.54948 | 9.844435 |
| protein_co sorting_ne   | 800   | 636   | 589   | 563   | 691   | 308   | 4.921545 | 5.01739  | 4.371946 | 5.375889 |
| protein_co stomatin     | 208   | 195   | 174   | 547   | 778   | 738   | 3.24024  | 3.895452 | 3.270478 | 13.2261  |
| protein_co gelsolin     | 18756 | 15221 | 15954 | 1388  | 1487  | 786   | 136.2673 | 141.8091 | 139.8521 | 15.65206 |
| protein_co mitochond    | 195   | 171   | 185   | 295   | 302   | 399   | 4.696227 | 5.281045 | 5.37569  | 11.02724 |
| protein_co nuclear_re   | 9     | 13    | 10    | 3785  | 4361  | 3190  | 0.060021 | 0.111177 | 0.080466 | 39.17957 |
| protein_co crumbs_ho    | 10    | 5     | 4     | 73    | 111   | 73    | 0.084487 | 0.054171 | 0.040775 | 0.957284 |
| protein_co aminolevul   | 627   | 466   | 471   | 289   | 316   | 211   | 9.054524 | 8.629654 | 8.206672 | 6.477783 |
| protein_co astrotactin  | 444   | 374   | 325   | 363   | 421   | 309   | 4.385753 | 4.737422 | 3.873402 | 5.565424 |
| protein_co WD_repeat    | 26    | 17    | 12    | 18    | 27    | 15    | 0.249926 | 0.209554 | 0.139177 | 0.26856  |
| protein_co polymerase   | 676   | 601   | 659   | 598   | 652   | 951   | 13.2294  | 15.08264 | 15.56063 | 18.16457 |
| protein_co surfeit_4    | 12035 | 9124  | 10027 | 3915  | 4838  | 3987  | 189.1157 | 183.8553 | 190.1081 | 95.4869  |
| protein_co globoside_   | 236   | 171   | 190   | 70    | 94    | 49    | 3.753746 | 3.487855 | 3.646318 | 1.72815  |
| protein_co surfeit_1    | 444   | 321   | 335   | 483   | 492   | 479   | 19.04773 | 17.65935 | 17.34016 | 32.16161 |
| protein_co surfeit_2    | 125   | 97    | 83    | 195   | 263   | 312   | 6.961107 | 6.927067 | 5.57692  | 16.85518 |
| protein_co surfeit_6    | 1068  | 829   | 882   | 1958  | 2561  | 2682  | 19.99143 | 19.89924 | 19.92    | 56.88737 |
| protein_co mediator_c   | 1266  | 887   | 978   | 1069  | 1495  | 1938  | 13.55314 | 12.17697 | 12.63261 | 17.76292 |
| protein_co REX4_RNA     | 699   | 559   | 531   | 786   | 1063  | 1025  | 13.88819 | 14.24261 | 12.72949 | 24.23937 |
| protein_co ribosomal_   | 15789 | 12940 | 13047 | 21591 | 22628 | 19946 | 636.0365 | 668.4532 | 634.1414 | 1349.99  |
| protein_co general_tra  | 1725  | 1263  | 1424  | 1734  | 2285  | 1984  | 33.64612 | 31.59065 | 33.51228 | 52.49591 |
| protein_co ankyrin_re   | 522   | 381   | 416   | 255   | 383   | 365   | 10.50497 | 9.832383 | 10.10103 | 7.965171 |
| protein_co prostaglan   | 1178  | 808   | 916   | 1442  | 1807  | 1771  | 23.69646 | 20.84293 | 22.23216 | 45.02294 |
| protein_co N-terminal   | 1228  | 1030  | 915   | 877   | 1076  | 1054  | 38.72289 | 41.65009 | 34.81277 | 42.92393 |
| protein_co CDKN1A_ir    | 3409  | 2645  | 2818  | 1385  | 1732  | 1383  | 50.68106 | 50.42591 | 50.54844 | 31.95942 |
| protein_co solute_carr  | 470   | 372   | 406   | 266   | 337   | 347   | 5.933847 | 6.022694 | 6.184614 | 5.212554 |
| protein_co SH3-domai    | 1244  | 918   | 917   | 960   | 1244  | 966   | 12.08185 | 11.43313 | 10.7456  | 14.47154 |
| protein_co family_witl  | 635   | 495   | 512   | 483   | 753   | 659   | 6.852741 | 6.85023  | 6.666665 | 8.090367 |
| protein_co prostaglan   | 7     | 4     | 4     | 8     | 11    | 4     | 0.175712 | 0.128758 | 0.121147 | 0.311691 |
| protein_co lipocalin_2  | 0     | 0     | 0     | 2     | 9     | 2     | 0        | 0        | 0        | 0.131253 |
| protein_co leucine_ri   | 443   | 373   | 363   | 467   | 558   | 471   | 6.152926 | 6.643488 | 6.083207 | 10.06759 |
| protein_co hemicentir   | 6     | 3     | 2     | 333   | 572   | 292   | 0.058588 | 0.037565 | 0.023563 | 5.046996 |
| protein_co G_protein+   | 3760  | 2843  | 3083  | 1531  | 1725  | 1339  | 23.97749 | 23.24888 | 23.72124 | 15.1538  |
| protein_co chromosom    | 399   | 264   | 304   | 336   | 458   | 362   | 19.52935 | 16.57022 | 17.95298 | 25.52611 |
| protein_co inositol_pc  | 855   | 593   | 634   | 579   | 834   | 358   | 11.81231 | 10.50588 | 10.56832 | 12.41588 |
| protein_co SEC16_hon    | 5894  | 4388  | 4902  | 1843  | 2505  | 2175  | 31.38426 | 29.96247 | 31.49365 | 15.23202 |
| protein_co WD_repeat    | 465   | 386   | 344   | 423   | 577   | 673   | 11.80501 | 12.56638 | 10.53707 | 16.66803 |
| protein_co notch_1      | 3947  | 3047  | 3392  | 4094  | 5285  | 2497  | 19.74975 | 19.55133 | 20.47851 | 31.79602 |
| protein_co calcium_ch   | 6     | 3     | 2     | 443   | 524   | 361   | 0.02872  | 0.018415 | 0.011551 | 3.291287 |
| protein_co NACC_fami    | 1569  | 1171  | 1276  | 854   | 1182  | 843   | 10.816   | 10.35166 | 10.61311 | 9.137599 |
| protein_co proline_an   | 57    | 32    | 52    | 186   | 325   | 127   | 0.801899 | 0.577304 | 0.882666 | 4.061519 |
| protein_co USP6_N-ter   | 530   | 444   | 422   | 519   | 578   | 510   | 5.165602 | 5.549289 | 4.962557 | 7.851323 |
| protein_co COMM_dor     | 103   | 89    | 61    | 2     | 6     | 4     | 2.109027 | 2.336922 | 1.507033 | 0.063563 |
| protein_co methionine   | 393   | 294   | 274   | 226   | 276   | 187   | 10.22062 | 9.804859 | 8.59772  | 9.122704 |
| protein_co prenyl_(dex  | 120   | 86    | 92    | 98    | 123   | 181   | 3.460518 | 3.180297 | 3.201074 | 4.386482 |
| protein_co family_witl  | 2226  | 1663  | 1791  | 1132  | 1495  | 1236  | 26.41123 | 25.30259 | 25.63935 | 20.84685 |
| protein_co family_witl  | 290   | 241   | 266   | 111   | 158   | 177   | 5.54572  | 5.909984 | 6.137473 | 3.294681 |
| protein_co solute_carr  | 0     | 0     | 1     | 0     | 0     | 1     | 0        | 0        | 0.020148 | 0        |
| protein_co transmembr   | 1     | 0     | 0     | 0     | 0     | 1     | 0.008582 | 0        | 0        | 0        |
| protein_co Ras_suppre   | 2111  | 1745  | 1864  | 642   | 731   | 801   | 25.25767 | 26.77379 | 26.90909 | 11.92259 |
| protein_co ST8_alpha-l  | 31    | 11    | 24    | 54    | 100   | 37    | 0.63866  | 0.29061  | 0.596578 | 1.726762 |
| protein_co par-3_parti  | 1544  | 1279  | 1325  | 1342  | 1458  | 1212  | 12.05632 | 12.807   | 12.48335 | 16.26486 |
| protein_co zinc_finger  | 2221  | 1981  | 2057  | 5     | 3     | 8     | 16.61764 | 19.00704 | 18.56962 | 0.058066 |
| protein_co family_witl  | 13    | 8     | 12    | 9     | 11    | 8     | 0.17638  | 0.139189 | 0.196443 | 0.189531 |
| protein_co nuclear_re   | 544   | 421   | 471   | 351   | 410   | 406   | 13.7882  | 13.68359 | 14.40382 | 13.80849 |
| protein_co APOBEC1_c    | 0     | 0     | 1     | 0     | 2     | 0     | 0        | 0        | 0.02537  | 0        |
| protein_co cadherin-re  | 63    | 40    | 47    | 104   | 132   | 98    | 0.544228 | 0.443108 | 0.489876 | 1.394455 |
| protein_co leucine-ricl | 0     | 0     | 0     | 0     | 3     | 2     | 0        | 0        | 0        | 0        |
| protein_co retinal_G_f  | 0     | 0     | 0     | 0     | 4     | 1     | 0        | 0        | 0        | 0        |

|                         |      |      |      |      |      |      |          |          |          |          |
|-------------------------|------|------|------|------|------|------|----------|----------|----------|----------|
| protein_co polymerase   | 1185 | 975  | 1040 | 1059 | 1277 | 1402 | 8.368173 | 8.8293   | 8.861224 | 11.6075  |
| protein_co HECT_and_    | 1040 | 896  | 940  | 505  | 546  | 307  | 7.630358 | 8.430026 | 8.321229 | 5.750868 |
| protein_co chromosom    | 0    | 1    | 2    | 1    | 4    | 0    | 0        | 0.015328 | 0.028843 | 0.018552 |
| protein_co calcium/ca   | 685  | 591  | 599  | 665  | 841  | 656  | 8.218951 | 9.093324 | 8.671629 | 12.38449 |
| protein_co adipogenes   | 3    | 4    | 7    | 3    | 6    | 0    | 0.153402 | 0.262289 | 0.431874 | 0.238102 |
| protein_co glutamate_   | 1902 | 1519 | 1468 | 1588 | 1829 | 1609 | 29.34676 | 30.05501 | 27.329   | 38.03038 |
| protein_co ankyrin_rej  | 329  | 256  | 317  | 4    | 1    | 27   | 7.795258 | 7.778286 | 9.062372 | 0.147104 |
| protein_co 5-hydroxyt   | 96   | 67   | 65   | 467  | 668  | 509  | 1.346125 | 1.204754 | 1.099703 | 10.16393 |
| protein_co ribonuclea   | 408  | 339  | 324  | 508  | 536  | 783  | 4.47826  | 4.771536 | 4.290839 | 8.654527 |
| protein_co fragile_site | 489  | 439  | 384  | 322  | 400  | 229  | 4.796908 | 5.522381 | 4.544978 | 4.90274  |
| protein_co adducin_3_   | 2949 | 2291 | 2436 | 1469 | 1557 | 1277 | 31.88348 | 31.76328 | 31.77725 | 24.65149 |
| protein_co ventral_ant  | 12   | 18   | 13   | 0    | 0    | 0    | 0.125207 | 0.24084  | 0.163659 | 0        |
| protein_co DnaJ_(Hsp4   | 917  | 671  | 746  | 406  | 515  | 728  | 9.86196  | 9.25392  | 9.680121 | 6.777202 |
| protein_co eukaryotic_  | 5375 | 4247 | 4618 | 7254 | 8704 | 7462 | 34.72976 | 35.18964 | 36.00189 | 72.74971 |
| protein_co pleckstrin_  | 0    | 0    | 1    | 0    | 0    | 0    | 0        | 0        | 0.016625 | 0        |
| protein_co transcriptic | 706  | 562  | 610  | 532  | 626  | 849  | 8.127756 | 8.296819 | 8.47313  | 9.506225 |
| protein_co antigen_idc  | 7111 | 5800 | 6491 | 5151 | 4652 | 4565 | 26.30028 | 27.5085  | 28.96605 | 29.57002 |
| protein_co cytochrom    | 3    | 4    | 1    | 0    | 2    | 0    | 0.063081 | 0.107856 | 0.02537  | 0        |
| protein_co internexin_  | 236  | 169  | 139  | 1295 | 1478 | 1204 | 3.424959 | 3.145136 | 2.43392  | 29.17049 |
| protein_co fucose_mu    | 173  | 129  | 149  | 136  | 199  | 158  | 9.35637  | 8.946648 | 9.722895 | 11.41644 |
| protein_co leucine_ric  | 225  | 160  | 161  | 66   | 59   | 19   | 1.294986 | 1.180897 | 1.118038 | 0.589599 |
| protein_co mitochond    | 44   | 41   | 40   | 22   | 48   | 61   | 0.755737 | 0.903048 | 0.828945 | 0.586504 |
| protein_co NK6_home     | 1    | 0    | 4    | 31   | 27   | 8    | 0.044194 | 0        | 0.213291 | 2.12646  |
| protein_co polyamine_   | 102  | 83   | 80   | 55   | 72   | 43   | 2.574156 | 2.6861   | 2.435974 | 2.154407 |
| protein_co glutathione  | 1889 | 1561 | 1596 | 983  | 1074 | 875  | 84.197   | 89.22302 | 85.83128 | 68.00622 |
| protein_co TAF5_RNA_    | 158  | 128  | 154  | 272  | 384  | 261  | 2.26702  | 2.355145 | 2.666043 | 6.05756  |
| protein_co peroxisome   | 1865 | 1518 | 1647 | 1739 | 2368 | 2989 | 16.40711 | 17.12515 | 17.48215 | 23.7456  |
| protein_co inositol_14  | 2038 | 1580 | 1686 | 327  | 386  | 499  | 21.90781 | 21.78016 | 21.86756 | 5.455982 |
| protein_co cyclin_M2    | 144  | 126  | 116  | 660  | 734  | 404  | 1.665967 | 1.86932  | 1.619235 | 11.85163 |
| protein_co programme    | 2118 | 1665 | 1852 | 2514 | 3209 | 3483 | 15.39021 | 15.51466 | 16.23707 | 28.35401 |
| protein_co ADAM_met     | 8297 | 6458 | 6883 | 5    | 4    | 7    | 49.01064 | 48.9189  | 49.05634 | 0.045843 |
| protein_co regulator_c  | 399  | 318  | 375  | 235  | 287  | 190  | 21.95906 | 22.44281 | 24.90119 | 20.07424 |
| protein_co BTB_(POZ)_   | 616  | 501  | 470  | 221  | 272  | 262  | 11.53524 | 12.03076 | 10.6192  | 6.423457 |
| protein_co adrenomec    | 1233 | 939  | 1004 | 463  | 598  | 878  | 30.60635 | 29.88982 | 30.06978 | 17.83856 |
| protein_co growth_arr   | 336  | 277  | 269  | 16   | 13   | 10   | 6.891971 | 7.286069 | 6.657398 | 0.509395 |
| protein_co solute_carr  | 2    | 4    | 4    | 44   | 64   | 48   | 0.015005 | 0.038483 | 0.036208 | 0.51237  |
| protein_co lin-7_homo   | 473  | 363  | 378  | 453  | 602  | 629  | 4.731011 | 4.655955 | 4.561762 | 7.03269  |
| protein_co leucine_ric  | 510  | 377  | 382  | 1    | 3    | 1    | 5.898843 | 5.591745 | 5.330992 | 0.017953 |
| protein_co IMP1_inne    | 170  | 108  | 121  | 123  | 156  | 152  | 7.470762 | 6.08624  | 6.415779 | 8.389799 |
| protein_co post-GPI_a   | 267  | 200  | 229  | 429  | 476  | 485  | 6.071598 | 5.832182 | 6.283119 | 15.14187 |
| protein_co terminal_u   | 230  | 177  | 162  | 302  | 320  | 241  | 3.20687  | 3.164726 | 2.725314 | 6.535682 |
| protein_co secretoglo   | 0    | 0    | 0    | 0    | 1    | 0    | 0        | 0        | 0        | 0        |
| protein_co synaptotag   | 1    | 0    | 2    | 1    | 0    | 0    | 0.013268 | 0        | 0.032018 | 0.020594 |
| protein_co zinc_finger  | 42   | 33   | 22   | 20   | 27   | 33   | 0.734569 | 0.740128 | 0.464253 | 0.54293  |
| protein_co zinc_finger  | 78   | 52   | 59   | 128  | 193  | 195  | 1.060737 | 0.90683  | 0.968084 | 2.701802 |
| protein_co hydroxyste   | 1727 | 1336 | 1345 | 1263 | 1432 | 1247 | 18.86744 | 18.71701 | 17.72928 | 21.4168  |
| protein_co APAF1_inte   | 203  | 152  | 182  | 253  | 268  | 243  | 2.076953 | 1.994268 | 2.246725 | 4.017737 |
| protein_co peptidase_   | 213  | 168  | 152  | 35   | 63   | 58   | 3.17772  | 3.214065 | 2.736073 | 0.810465 |
| protein_co diacylglyce  | 2620 | 1805 | 1910 | 3389 | 4600 | 3000 | 21.41395 | 18.9183  | 18.83549 | 42.99298 |
| protein_co eukaryotic_  | 1398 | 1075 | 1126 | 2050 | 2097 | 2324 | 12.97807 | 12.79737 | 12.61216 | 29.53843 |
| protein_co tankyrase_   | 5806 | 4487 | 4754 | 4277 | 6359 | 4884 | 45.73983 | 45.3297  | 45.18816 | 52.29825 |
| protein_co serpin_pep   | 3    | 3    | 4    | 693  | 751  | 734  | 0.063052 | 0.080856 | 0.101435 | 22.60708 |
| protein_co structure_s  | 3388 | 2748 | 2935 | 5076 | 5286 | 5538 | 25.23243 | 26.24471 | 26.37375 | 58.67698 |
| protein_co solute_carr  | 225  | 201  | 220  | 474  | 452  | 420  | 4.060914 | 4.652074 | 4.790843 | 13.27853 |
| protein_co protein_ty   | 259  | 201  | 239  | 505  | 594  | 348  | 2.371049 | 2.359643 | 2.639896 | 7.175673 |
| protein_co chromosom    | 773  | 623  | 581  | 370  | 438  | 359  | 16.92946 | 17.4969  | 15.35281 | 12.57755 |
| protein_co ADP-ribosy   | 1356 | 1098 | 1183 | 1094 | 1288 | 1608 | 21.36521 | 22.18499 | 22.48952 | 26.7544  |
| protein_co CUGBP_Ela    | 2431 | 2015 | 2156 | 3724 | 4479 | 3404 | 14.86951 | 15.80505 | 15.9114  | 35.35507 |
| protein_co chromosom    | 466  | 363  | 402  | 438  | 544  | 506  | 12.89891 | 12.88496 | 13.42583 | 18.81792 |
| protein_co coiled-coil_ | 5    | 6    | 6    | 2    | 5    | 6    | 0.088942 | 0.136866 | 0.128776 | 0.05522  |
| protein_co sestrin_3    | 581  | 431  | 516  | 565  | 556  | 368  | 2.858367 | 2.719121 | 3.062948 | 4.314404 |
| protein_co endonucle    | 1163 | 952  | 947  | 138  | 139  | 76   | 11.63497 | 12.21326 | 11.43098 | 2.142866 |
| protein_co coiled-coil_ | 545  | 405  | 429  | 126  | 149  | 204  | 6.823781 | 6.502688 | 6.480879 | 2.448666 |
| protein_co kelch-like_f | 43   | 26   | 40   | 24   | 25   | 16   | 0.807477 | 0.626101 | 0.906296 | 0.699526 |
| protein_co teneurin_tr  | 2448 | 1964 | 2030 | 359  | 426  | 416  | 8.199054 | 8.435351 | 8.203448 | 1.866282 |

|                         |       |       |       |       |       |       |          |          |          |          |
|-------------------------|-------|-------|-------|-------|-------|-------|----------|----------|----------|----------|
| protein_co serpin_pep   | 43670 | 33417 | 34805 | 11469 | 14908 | 11547 | 603.8593 | 592.556  | 580.6872 | 246.155  |
| protein_co calpain_5    | 1161  | 900   | 1078  | 762   | 1066  | 836   | 12.38101 | 12.30767 | 13.87046 | 12.61274 |
| protein_co integrator_  | 521   | 390   | 450   | 339   | 438   | 418   | 7.062648 | 6.779595 | 7.360213 | 7.132799 |
| protein_co p21_protei   | 2321  | 1953  | 2083  | 3846  | 4113  | 3276  | 29.12275 | 31.42454 | 31.53513 | 74.90263 |
| protein_co ribosomal_   | 24020 | 18955 | 19460 | 34498 | 38389 | 31479 | 537.0998 | 543.5194 | 525.0164 | 1197.309 |
| protein_co zinc_finger  | 317   | 235   | 248   | 66    | 68    | 88    | 1.557759 | 1.480874 | 1.470418 | 0.503403 |
| protein_co tetratricop  | 96    | 59    | 76    | 80    | 101   | 92    | 1.508021 | 1.188495 | 1.440448 | 1.950547 |
| protein_co neural_cell  | 4131  | 2929  | 3229  | 112   | 107   | 141   | 33.18531 | 30.17306 | 31.29729 | 1.396494 |
| protein_co dopamine_    | 10    | 11    | 9     | 5     | 6     | 7     | 0.168125 | 0.237156 | 0.182567 | 0.130477 |
| protein_co 5-hydroxyt   | 0     | 0     | 0     | 0     | 0     | 1     | 0        | 0        | 0        | 0        |
| protein_co nuclear_pr   | 336   | 275   | 304   | 266   | 183   | 423   | 2.575616 | 2.703236 | 2.811665 | 3.164856 |
| protein_co ataxia_tela  | 1725  | 1514  | 1502  | 656   | 682   | 607   | 6.152375 | 6.924508 | 6.463559 | 3.631517 |
| protein_co aminoadip    | 338   | 285   | 299   | 332   | 327   | 377   | 3.080433 | 3.330805 | 3.287867 | 4.696384 |
| protein_co galactosida  | 1     | 2     | 1     | 198   | 244   | 208   | 0.008342 | 0.021395 | 0.010065 | 2.563672 |
| protein_co SLX4_inter   | 36    | 35    | 29    | 40    | 37    | 26    | 1.199745 | 1.495766 | 1.166091 | 2.069078 |
| protein_co late_endos   | 1379  | 1059  | 1078  | 945   | 1003  | 1250  | 48.03962 | 47.30866 | 45.31084 | 51.09726 |
| protein_co prolyl_4-hy  | 960   | 838   | 932   | 4     | 2     | 1     | 17.13529 | 19.18111 | 20.07171 | 0.110818 |
| protein_co glutamate_   | 10    | 16    | 13    | 45    | 50    | 45    | 0.080817 | 0.165818 | 0.126763 | 0.564476 |
| protein_co suppressio   | 1     | 4     | 1     | 1171  | 1500  | 1165  | 0.01325  | 0.067962 | 0.015986 | 24.0817  |
| protein_co hypoxia_u    | 7541  | 5733  | 6172  | 4299  | 5218  | 5095  | 78.05687 | 76.09804 | 77.08256 | 69.06851 |
| protein_co chromosom    | 0     | 1     | 0     | 0     | 0     | 0     | 0        | 0.099224 | 0        | 0        |
| protein_co ADAM_met     | 243   | 209   | 245   | 101   | 127   | 73    | 3.098796 | 3.417766 | 3.769649 | 1.999119 |
| protein_co solute_carr  | 0     | 0     | 0     | 2     | 0     | 0     | 0        | 0        | 0        | 0.019208 |
| protein_co CSRP2_bin    | 218   | 205   | 230   | 360   | 373   | 306   | 2.603011 | 3.138938 | 3.313564 | 6.671945 |
| protein_co dihydroxya   | 410   | 338   | 367   | 753   | 965   | 649   | 4.09389  | 4.327911 | 4.421467 | 11.67019 |
| protein_co metastasis_  | 3316  | 2565  | 2707  | 2598  | 3258  | 2943  | 50.84607 | 50.43588 | 50.08172 | 61.83189 |
| protein_co transmemt    | 329   | 273   | 291   | 237   | 224   | 288   | 5.433891 | 5.782118 | 5.799039 | 6.075665 |
| protein_co fatty_acid_  | 7504  | 6231  | 6386  | 2080  | 2371  | 3077  | 77.79409 | 82.83634 | 79.87866 | 33.46938 |
| protein_co transmemt    | 3     | 0     | 1     | 7     | 5     | 1     | 0.044389 | 0        | 0.017853 | 0.160763 |
| protein_co retinal_out  | 29    | 36    | 32    | 11    | 23    | 12    | 0.724074 | 1.152648 | 0.964013 | 0.426293 |
| protein_co echinoderm   | 1085  | 845   | 979   | 600   | 835   | 512   | 13.88149 | 13.86349 | 15.11253 | 11.91484 |
| protein_co inner_cent   | 1990  | 1519  | 1735  | 2563  | 3496  | 2535  | 23.53964 | 23.04167 | 24.76249 | 47.05717 |
| protein_co zona_pellu   | 0     | 4     | 0     | 0     | 1     | 2     | 0        | 0.123091 | 0        | 0        |
| protein_co membrane     | 0     | 0     | 0     | 0     | 1     | 1     | 0        | 0        | 0        | 0        |
| protein_co phospholip   | 433   | 397   | 487   | 10    | 5     | 9     | 2.906295 | 3.417053 | 3.943927 | 0.10418  |
| protein_co FSHD_regic   | 206   | 170   | 185   | 262   | 323   | 216   | 9.387117 | 9.93398  | 10.1715  | 18.53091 |
| protein_co cleavage_ar  | 1488  | 1184  | 1244  | 1200  | 1523  | 2024  | 18.92388 | 19.30938 | 19.08867 | 23.68749 |
| protein_co beta-13-glu  | 1025  | 784   | 760   | 513   | 648   | 388   | 23.37659 | 22.92887 | 20.91312 | 18.15955 |
| protein_co etoposide_   | 1742  | 1374  | 1488  | 1878  | 2107  | 1908  | 33.38063 | 33.76311 | 34.40309 | 55.85634 |
| protein_co coiled-coil  | 61    | 78    | 66    | 30    | 41    | 36    | 0.728922 | 1.195241 | 0.951576 | 0.55642  |
| protein_co checkpoint   | 825   | 650   | 653   | 1050  | 1087  | 1341  | 11.04633 | 11.16058 | 10.54934 | 21.82147 |
| protein_co fasciculatic | 200   | 191   | 183   | 566   | 588   | 583   | 4.869161 | 5.963028 | 5.375554 | 21.38804 |
| protein_co endothelial  | 4     | 2     | 1     | 0     | 0     | 2     | 0.080291 | 0.051481 | 0.024219 | 0        |
| protein_co kin_of_IRRI  | 138   | 113   | 127   | 9     | 27    | 17    | 1.699271 | 1.784314 | 1.886841 | 0.172011 |
| protein_co myelin_prc   | 1     | 0     | 2     | 6     | 10    | 14    | 0.017897 | 0        | 0.043187 | 0.166671 |
| protein_co sodium_ch    | 2     | 0     | 0     | 3     | 3     | 2     | 0.016097 | 0        | 0        | 0.037477 |
| protein_co SID1_transi  | 775   | 605   | 610   | 404   | 489   | 360   | 8.24779  | 8.256588 | 7.832741 | 6.673409 |
| protein_co transmemt    | 520   | 446   | 452   | 202   | 204   | 187   | 7.523236 | 8.274572 | 7.890197 | 4.536106 |
| protein_co transgelin   | 3645  | 2895  | 2909  | 168   | 176   | 421   | 51.82356 | 52.78222 | 49.90241 | 3.7074   |
| protein_co junctophil   | 340   | 240   | 256   | 10    | 18    | 17    | 3.330396 | 3.014654 | 3.025554 | 0.152036 |
| protein_co dual_specif  | 147   | 109   | 135   | 37    | 72    | 27    | 3.979695 | 3.78415  | 4.409754 | 1.554765 |
| protein_co COMM_doi     | 719   | 555   | 542   | 671   | 823   | 793   | 17.67904 | 17.49976 | 16.07967 | 25.60841 |
| protein_co chromosom    | 2     | 2     | 0     | 0     | 1     | 0     | 0.164238 | 0.210612 | 0        | 0        |
| protein_co KIAA1755     | 50    | 29    | 45    | 3     | 4     | 6     | 0.364676 | 0.271234 | 0.396002 | 0.033962 |
| protein_co spermatog    | 8     | 8     | 11    | 26    | 32    | 25    | 0.495535 | 0.635454 | 0.822101 | 2.499703 |
| protein_co osteoclast_  | 0     | 0     | 0     | 2     | 1     | 6     | 0        | 0        | 0        | 0.071248 |
| protein_co DSN1_MINI    | 429   | 349   | 336   | 332   | 434   | 332   | 8.220604 | 8.575929 | 7.768439 | 9.874497 |
| protein_co suppressor_  | 4125  | 3245  | 3557  | 1579  | 2173  | 991   | 13.45914 | 13.57743 | 14.00314 | 7.996612 |
| protein_co cyclic_nucl  | 3     | 2     | 1     | 1     | 3     | 0     | 0.055579 | 0.047515 | 0.022353 | 0.028755 |
| protein_co serine_pep   | 2     | 0     | 0     | 0     | 0     | 0     | 0.183164 | 0        | 0        | 0        |
| protein_co cadherin_2   | 0     | 0     | 0     | 2     | 4     | 4     | 0        | 0        | 0        | 0.03976  |
| processed_long_inter    | 0     | 0     | 0     | 2     | 0     | 0     | 0        | 0        | 0        | 0.156853 |
| protein_co LSM14B_SC    | 1239  | 1019  | 1087  | 1416  | 1793  | 1464  | 22.39658 | 23.62076 | 23.70762 | 39.72868 |
| protein_co YTH_domai    | 1597  | 1134  | 1214  | 1249  | 1601  | 1887  | 22.68505 | 20.65652 | 20.80662 | 27.53771 |
| protein_co Cdk5_and_    | 493   | 430   | 456   | 211   | 294   | 195   | 6.107471 | 6.831126 | 6.815966 | 4.05721  |

|                         |       |       |       |       |       |       |          |          |          |          |
|-------------------------|-------|-------|-------|-------|-------|-------|----------|----------|----------|----------|
| protein_co oral_cance   | 387   | 287   | 344   | 254   | 322   | 369   | 4.80573  | 4.570247 | 5.154124 | 4.895675 |
| protein_co glycoprotei  | 0     | 0     | 1     | 7     | 9     | 6     | 0        | 0        | 0.075737 | 0.682006 |
| protein_co solute_carr  | 0     | 0     | 0     | 0     | 0     | 1     | 0        | 0        | 0        | 0        |
| protein_co tRNA_phos    | 393   | 295   | 277   | 431   | 411   | 261   | 10.18672 | 9.805578 | 8.663026 | 17.34002 |
| protein_co nudix_(nuc   | 487   | 379   | 328   | 311   | 470   | 285   | 11.11214 | 11.08963 | 9.030056 | 11.01436 |
| protein_co fermitin_fa  | 58    | 39    | 41    | 40    | 69    | 53    | 1.092656 | 0.94217  | 0.931939 | 1.169623 |
| protein_co phospholip   | 2044  | 1551  | 1672  | 1972  | 2541  | 2647  | 21.44623 | 20.8685  | 21.16676 | 32.11496 |
| protein_co mitochond    | 1074  | 797   | 857   | 772   | 839   | 1146  | 19.93661 | 18.97207 | 19.19446 | 22.24307 |
| protein_co CDC42_eff    | 671   | 524   | 573   | 209   | 291   | 138   | 14.78534 | 14.8064  | 15.23391 | 7.148016 |
| protein_co Finkel-Biski | 1532  | 1195  | 1165  | 2096  | 2531  | 1958  | 48.40668 | 48.41988 | 44.41406 | 102.7941 |
| protein_co transmembr   | 706   | 552   | 548   | 755   | 974   | 845   | 15.80915 | 15.85083 | 14.80582 | 26.24105 |
| protein_co vacuolar_p   | 2529  | 1756  | 2011  | 2341  | 2931  | 2325  | 43.69376 | 38.90491 | 41.92091 | 62.77727 |
| protein_co T-box_6      | 12    | 14    | 2     | 67    | 104   | 34    | 0.260259 | 0.38937  | 0.052336 | 2.255433 |
| protein_co protein_ph   | 2712  | 1986  | 2120  | 2347  | 3186  | 2747  | 85.34613 | 80.14616 | 80.49669 | 114.6404 |
| protein_co aldolase_A   | 18629 | 14623 | 15378 | 24634 | 22353 | 18806 | 344.7175 | 346.9921 | 343.3379 | 707.5208 |
| protein_co family_witl  | 5     | 7     | 6     | 379   | 462   | 184   | 0.101362 | 0.181975 | 0.146759 | 11.92544 |
| protein_co double_C2    | 9     | 9     | 10    | 78    | 155   | 45    | 0.112566 | 0.14435  | 0.150908 | 1.514224 |
| protein_co HIRA_inter   | 296   | 218   | 254   | 415   | 511   | 367   | 4.100279 | 3.872465 | 4.245252 | 8.922782 |
| protein_co TAO_kinase   | 2409  | 1783  | 1899  | 1013  | 1540  | 1192  | 21.85298 | 20.74123 | 20.78485 | 14.2631  |
| protein_co transmembr   | 1038  | 789   | 868   | 667   | 717   | 606   | 37.6717  | 36.72013 | 38.00893 | 37.57285 |
| protein_co high_mobil   | 10408 | 8625  | 9057  | 3001  | 4057  | 3367  | 60.29544 | 64.07456 | 63.30669 | 26.98446 |
| protein_co matrix_me    | 1     | 0     | 1     | 2     | 2     | 0     | 0.023259 | 0        | 0.028063 | 0.072202 |
| protein_co connector_   | 105   | 48    | 52    | 83    | 92    | 94    | 0.86864  | 0.509215 | 0.519041 | 1.065759 |
| protein_co contactin_   | 0     | 0     | 1     | 3     | 0     | 2     | 0        | 0        | 0.009041 | 0.03489  |
| protein_co killer_cell_ | 2     | 1     | 1     | 2     | 0     | 0     | 0.075386 | 0.048336 | 0.045479 | 0.117009 |
| protein_co C-type_lect  | 7     | 9     | 3     | 0     | 0     | 2     | 0.122246 | 0.201552 | 0.063213 | 0        |
| protein_co mohawk_h     | 2417  | 1712  | 1864  | 32    | 41    | 33    | 29.46014 | 26.75909 | 27.41272 | 0.605395 |
| protein_co membrane     | 87    | 59    | 66    | 143   | 216   | 157   | 0.803038 | 0.698358 | 0.735036 | 2.048723 |
| protein_co chromosom    | 7     | 0     | 1     | 1     | 1     | 1     | 0.120275 | 0        | 0.020731 | 0.026669 |
| protein_co glutamate_   | 2     | 2     | 3     | 3     | 5     | 4     | 0.015034 | 0.019279 | 0.027208 | 0.035002 |
| protein_co integrin_be  | 28156 | 22467 | 24345 | 6620  | 7020  | 5652  | 348.8994 | 357.0127 | 363.988  | 127.3262 |
| protein_co annexin_A&   | 0     | 0     | 0     | 2     | 0     | 0     | 0        | 0        | 0        | 0.074493 |
| protein_co protocadhe   | 4     | 4     | 5     | 10    | 8     | 4     | 0.020259 | 0.02598  | 0.030555 | 0.078613 |
| protein_co cardiotropi  | 111   | 69    | 84    | 24    | 31    | 19    | 3.12788  | 2.493363 | 2.855975 | 1.049709 |
| processed_CWC15_spl     | 727   | 566   | 581   | 408   | 463   | 606   | 21.64384 | 21.60855 | 20.87008 | 18.85343 |
| protein_co Fc_fragmen   | 2     | 2     | 1     | 2     | 5     | 0     | 0.043018 | 0.055165 | 0.025952 | 0.06677  |
| protein_co AT_rich_int  | 1162  | 898   | 943   | 40    | 51    | 40    | 6.904854 | 6.842803 | 6.760956 | 0.368926 |
| protein_co kelch-like_f | 4     | 0     | 0     | 0     | 0     | 0     | 0.04558  | 0        | 0        | 0        |
| protein_co cadherin_8   | 2     | 1     | 0     | 66    | 91    | 55    | 0.009647 | 0.006186 | 0        | 0.494133 |
| protein_co DCN1_defe    | 304   | 286   | 265   | 440   | 569   | 452   | 4.505236 | 5.435247 | 4.738467 | 10.12108 |
| protein_co transmembr   | 2014  | 1604  | 1737  | 799   | 1050  | 791   | 30.96279 | 31.62236 | 32.22021 | 19.06592 |
| protein_co transmembr   | 219   | 190   | 217   | 150   | 188   | 167   | 2.258393 | 2.512571 | 2.699997 | 2.400917 |
| protein_co toll-interle | 123   | 98    | 128   | 43    | 90    | 58    | 2.56903  | 2.62482  | 3.225686 | 1.394001 |
| protein_co N-6_adenin   | 81    | 55    | 57    | 18    | 30    | 37    | 3.645001 | 3.173838 | 3.094821 | 1.257233 |
| protein_co large_tumc   | 1219  | 839   | 1040  | 608   | 686   | 420   | 10.37179 | 9.154219 | 10.67656 | 8.029417 |
| protein_co Sin3A-assoc  | 1788  | 1489  | 1541  | 2268  | 2692  | 2232  | 36.48362 | 38.96139 | 37.93858 | 71.82967 |
| protein_co latrophilin  | 990   | 710   | 759   | 414   | 370   | 275   | 6.859926 | 6.308875 | 6.34562  | 4.452614 |
| protein_co KIAA1328     | 122   | 95    | 104   | 47    | 80    | 68    | 0.972723 | 0.97132  | 1.000485 | 0.581644 |
| protein_co family_witl  | 21    | 13    | 26    | 1429  | 1655  | 1551  | 0.206824 | 0.164186 | 0.308961 | 21.84464 |
| protein_co CTAGE_fam    | 22    | 21    | 17    | 4     | 10    | 0     | 0.267249 | 0.327131 | 0.249167 | 0.075419 |
| protein_co histamine_   | 4     | 6     | 1     | 22    | 18    | 40    | 0.056992 | 0.109626 | 0.017191 | 0.486526 |
| protein_co LY6/PLAUR    | 333   | 253   | 238   | 13    | 22    | 11    | 8.257206 | 8.044864 | 7.120555 | 0.500337 |
| protein_co LY6/PLAUR    | 12    | 8     | 9     | 17    | 19    | 17    | 0.32733  | 0.279836 | 0.296207 | 0.719754 |
| protein_co programme    | 1288  | 997   | 1117  | 468   | 487   | 241   | 16.52828 | 16.40652 | 17.2947  | 9.321551 |
| protein_co adrenocept   | 14    | 2     | 9     | 23    | 43    | 94    | 0.169672 | 0.031083 | 0.131605 | 0.432653 |
| protein_co glycoprotei  | 6     | 6     | 0     | 61    | 63    | 62    | 0.098577 | 0.126412 | 0        | 1.55556  |
| protein_co WD_repeat    | 13    | 22    | 5     | 34    | 34    | 17    | 0.082408 | 0.178837 | 0.038242 | 0.334529 |
| protein_co spermatog    | 6     | 1     | 0     | 0     | 0     | 2     | 0.133021 | 0.02843  | 0        | 0        |
| protein_co vascular_er  | 365   | 296   | 356   | 22    | 31    | 13    | 8.280047 | 8.61075  | 9.744015 | 0.774628 |
| protein_co coiled-coil_ | 56    | 56    | 50    | 11    | 11    | 9     | 0.968588 | 1.242076 | 1.043443 | 0.295307 |
| protein_co CD226_mo     | 1     | 1     | 0     | 0     | 0     | 0     | 0.017775 | 0.022794 | 0        | 0        |
| protein_co carnosine_   | 0     | 0     | 1     | 0     | 1     | 0     | 0        | 0        | 0.013762 | 0        |
| protein_co fibrous_she  | 17    | 8     | 16    | 6     | 1     | 10    | 0.284182 | 0.171493 | 0.322712 | 0.155679 |
| protein_co discs_large  | 107   | 55    | 70    | 100   | 103   | 52    | 0.635898 | 0.419156 | 0.501937 | 0.922431 |
| protein_co regulator_c  | 1     | 2     | 1     | 0     | 0     | 0     | 0.021809 | 0.055935 | 0.026314 | 0        |

|                        |       |       |       |      |      |      |          |          |          |          |
|------------------------|-------|-------|-------|------|------|------|----------|----------|----------|----------|
| protein_co protease_s  | 3203  | 2686  | 2995  | 107  | 139  | 196  | 28.21505 | 30.34166 | 31.83236 | 1.462979 |
| protein_co myotubula   | 668   | 501   | 573   | 824  | 979  | 904  | 6.03866  | 5.807794 | 6.24981  | 11.5617  |
| protein_co protein_ph  | 12    | 3     | 2     | 26   | 19   | 24   | 0.18731  | 0.06005  | 0.037667 | 0.629918 |
| protein_co chaperonin  | 4367  | 3709  | 3913  | 7469 | 7654 | 8573 | 55.71938 | 60.6861  | 60.23944 | 147.9163 |
| protein_co family_witl | 196   | 166   | 174   | 64   | 66   | 109  | 4.766827 | 5.177151 | 5.105881 | 2.415927 |
| protein_co dedicator_  | 2719  | 2166  | 2282  | 1073 | 1191 | 1087 | 18.75739 | 19.16156 | 18.99445 | 11.48929 |
| protein_co DIX_domai   | 788   | 576   | 611   | 404  | 519  | 357  | 6.266848 | 5.874281 | 5.862896 | 4.986947 |
| protein_co dihydrolip  | 874   | 677   | 797   | 1295 | 1545 | 1651 | 9.192884 | 9.13142  | 10.11455 | 21.14173 |
| protein_co PIH1_dom    | 6     | 2     | 5     | 2    | 2    | 2    | 0.153069 | 0.06543  | 0.153905 | 0.079195 |
| protein_co chromosor   | 621   | 515   | 551   | 385  | 511  | 525  | 7.787831 | 8.28212  | 8.337284 | 7.494042 |
| protein_co translocase | 806   | 580   | 644   | 725  | 814  | 1193 | 32.72152 | 30.19505 | 31.54513 | 45.68429 |
| protein_co interleukin | 1     | 0     | 1     | 4    | 2    | 3    | 0.027631 | 0        | 0.033339 | 0.171549 |
| protein_co 6-pyruvoyl  | 409   | 299   | 353   | 161  | 168  | 189  | 17.94015 | 16.81834 | 18.68209 | 10.96122 |
| protein_co phosphatic  | 1083  | 879   | 890   | 734  | 922  | 653  | 13.35663 | 13.90165 | 13.24361 | 14.0506  |
| protein_co chromosor   | 1     | 0     | 0     | 5    | 5    | 6    | 0.01747  | 0        | 0        | 0.135581 |
| protein_co FRAS1_rela  | 602   | 484   | 502   | 1400 | 1538 | 922  | 1.897539 | 1.956361 | 1.909176 | 6.849403 |
| protein_co forkhead_b  | 208   | 162   | 181   | 856  | 1070 | 1299 | 1.700632 | 1.698523 | 1.785556 | 10.86304 |
| protein_co cysteine_rh | 2198  | 1699  | 1964  | 619  | 663  | 573  | 17.43306 | 17.2802  | 18.7947  | 7.620213 |
| protein_co SEC24_fam   | 5245  | 4002  | 4490  | 713  | 829  | 835  | 60.50139 | 59.1979  | 62.49053 | 12.76556 |
| protein_co ATP-bindin  | 410   | 324   | 314   | 94   | 137  | 105  | 3.177145 | 3.219642 | 2.93583  | 1.130607 |
| protein_co Rab_intera  | 203   | 170   | 175   | 101  | 123  | 77   | 6.633222 | 7.12339  | 6.899452 | 5.122481 |
| protein_co DEAH_(Asp   | 1154  | 848   | 944   | 1082 | 1419 | 2144 | 11.89255 | 11.20661 | 11.73786 | 17.3072  |
| protein_co ubiquitin_( | 14396 | 11739 | 12370 | 8304 | 8622 | 8677 | 180.248  | 188.4816 | 186.8729 | 161.3788 |
| protein_co inositol_14 | 478   | 359   | 378   | 98   | 106  | 64   | 2.198041 | 2.116956 | 2.097238 | 0.699463 |
| protein_co protease_s  | 24    | 25    | 35    | 10   | 23   | 9    | 0.205021 | 0.273865 | 0.360747 | 0.132592 |
| protein_co solute_carr | 360   | 270   | 331   | 134  | 225  | 419  | 1.750172 | 1.68326  | 1.941575 | 1.011145 |
| protein_co CCR4_carb   | 301   | 217   | 208   | 400  | 490  | 386  | 7.98749  | 7.384361 | 6.659709 | 16.47534 |
| protein_co enkurin_TR  | 15    | 10    | 15    | 3    | 6    | 0    | 0.207969 | 0.177794 | 0.250926 | 0.064559 |
| protein_co G_protein-i | 3     | 1     | 3     | 10   | 9    | 3    | 0.020214 | 0.008641 | 0.024389 | 0.104584 |
| protein_co calcium_ch  | 20    | 21    | 14    | 1    | 3    | 3    | 0.157985 | 0.212723 | 0.133433 | 0.012261 |
| protein_co DCP1_deca   | 237   | 200   | 210   | 404  | 359  | 163  | 5.327389 | 5.765081 | 5.695521 | 14.09542 |
| protein_co calcium_ch  | 375   | 267   | 292   | 56   | 75   | 45   | 2.087093 | 1.905597 | 1.960836 | 0.483759 |
| protein_co potassium_  | 81    | 67    | 54    | 86   | 126  | 80   | 0.635451 | 0.674033 | 0.511139 | 1.047191 |
| protein_co thyroid_ho  | 39    | 12    | 28    | 136  | 169  | 82   | 0.245168 | 0.096737 | 0.212376 | 1.326995 |
| protein_co N-glycanas  | 302   | 253   | 226   | 239  | 342  | 297  | 4.430784 | 4.759962 | 4.000646 | 5.442545 |
| protein_co 3-oxoacyl-A | 75    | 77    | 58    | 31   | 28   | 21   | 2.315175 | 3.048054 | 2.160223 | 1.485302 |
| protein_co UEV_and_k   | 531   | 369   | 421   | 109  | 114  | 95   | 5.991001 | 5.338762 | 5.731061 | 1.908806 |
| protein_co transmemt   | 36    | 23    | 18    | 41   | 53   | 23   | 0.469552 | 0.384697 | 0.283271 | 0.830034 |
| protein_co chromosor   | 121   | 92    | 101   | 271  | 320  | 256  | 5.016527 | 4.891195 | 5.052278 | 17.43884 |
| protein_co chromosor   | 2865  | 2310  | 2398  | 172  | 234  | 165  | 39.95833 | 41.31464 | 40.35338 | 3.723416 |
| protein_co BTB_(POZ)_  | 1452  | 1076  | 1187  | 234  | 274  | 279  | 11.80584 | 11.21895 | 11.64472 | 2.953091 |
| protein_co ubiquitin_  | 913   | 760   | 803   | 433  | 480  | 512  | 7.481752 | 7.986481 | 7.939554 | 5.507454 |
| protein_co ankyrin_3_  | 1193  | 962   | 1064  | 970  | 975  | 1053 | 3.787136 | 3.91611  | 4.075305 | 4.779393 |
| protein_co inositol_pc | 129   | 117   | 112   | 379  | 461  | 404  | 0.986273 | 1.147104 | 1.033174 | 4.497561 |
| protein_co RAD9_hom    | 21    | 4     | 11    | 11   | 13   | 6    | 0.346356 | 0.0846   | 0.218899 | 0.281596 |
| protein_co phospholip  | 1306  | 968   | 1014  | 708  | 809  | 645  | 23.80037 | 22.6217  | 22.29598 | 20.02647 |
| protein_co discs_large | 4455  | 3292  | 3732  | 1408 | 1731 | 1777 | 28.17195 | 26.69552 | 28.47468 | 13.81982 |
| protein_co methionine  | 0     | 0     | 0     | 16   | 20   | 12   | 0        | 0        | 0        | 0.341489 |
| protein_co solute_carr | 274   | 250   | 260   | 257  | 271  | 212  | 1.834623 | 2.146573 | 2.100476 | 2.670914 |
| protein_co glucoside_  | 836   | 630   | 754   | 317  | 394  | 310  | 5.228765 | 5.052924 | 5.69     | 3.077391 |
| protein_co twinfilin_a | 1616  | 1211  | 1262  | 360  | 336  | 438  | 22.82357 | 21.93289 | 21.50551 | 7.891786 |
| protein_co DIP2_disco  | 2404  | 1787  | 1927  | 584  | 716  | 433  | 14.27966 | 13.61185 | 13.81062 | 5.384267 |
| protein_co eukaryotic_ | 992   | 791   | 874   | 1249 | 1186 | 1346 | 4.0367   | 4.127629 | 4.291156 | 7.888742 |
| protein_co membrane    | 548   | 451   | 476   | 1290 | 1567 | 1298 | 3.465371 | 3.657254 | 3.631819 | 12.66162 |
| protein_co testis_expr | 201   | 154   | 162   | 92   | 103  | 107  | 5.580162 | 5.482527 | 5.426425 | 3.964323 |
| protein_co casein_kin  | 774   | 582   | 696   | 492  | 517  | 399  | 8.133768 | 7.843017 | 8.824866 | 8.025025 |
| processed_ankyrin_rej  | 1     | 1     | 0     | 1    | 0    | 2    | 0.010283 | 0.013186 | 0        | 0.01596  |
| protein_co serum_resp  | 225   | 158   | 172   | 207  | 184  | 327  | 3.69536  | 3.327673 | 3.408402 | 5.276854 |
| protein_co A_kinase_(F | 119   | 96    | 99    | 2    | 4    | 10   | 0.642403 | 0.664571 | 0.644828 | 0.016758 |
| protein_co neuronal_F  | 130   | 100   | 90    | 116  | 126  | 81   | 1.042535 | 1.028387 | 0.870839 | 1.443895 |
| protein_co family_witl | 912   | 709   | 868   | 387  | 468  | 396  | 12.59608 | 12.5573  | 14.46467 | 8.296254 |
| protein_co MAP3K12_    | 277   | 225   | 254   | 193  | 210  | 254  | 7.910192 | 8.239467 | 8.751631 | 8.554508 |
| protein_co mirror-ima  | 112   | 99    | 133   | 110  | 102  | 123  | 0.706441 | 0.80076  | 1.012179 | 1.076914 |
| protein_co exostosin_f | 2568  | 2085  | 2063  | 833  | 880  | 786  | 34.86206 | 36.29723 | 33.79133 | 17.55228 |
| protein_co transmemt   | 373   | 302   | 326   | 245  | 321  | 339  | 6.332359 | 6.574655 | 6.67763  | 6.455848 |

|                         |      |      |      |      |      |      |          |          |          |          |
|-------------------------|------|------|------|------|------|------|----------|----------|----------|----------|
| protein_co allantoicase | 0    | 0    | 0    | 0    | 1    | 0    | 0        | 0        | 0        | 0        |
| protein_co potassium_   | 0    | 2    | 0    | 11   | 34   | 12   | 0        | 0.071117 | 0        | 0.473435 |
| protein_co thyroid_ho   | 1    | 0    | 0    | 1    | 0    | 1    | 0.03994  | 0        | 0        | 0.061993 |
| protein_co NADH_deh     | 73   | 62   | 58   | 41   | 63   | 82   | 1.359401 | 1.480559 | 1.303169 | 1.185056 |
| protein_co malic_enz    | 223  | 187  | 190  | 7    | 9    | 13   | 4.524653 | 4.865544 | 4.651383 | 0.220449 |
| protein_co mesogenin    | 2    | 2    | 5    | 0    | 0    | 0    | 0.154753 | 0.198448 | 0.466795 | 0        |
| protein_co ADAM_met     | 2660 | 2095 | 2224 | 289  | 344  | 285  | 14.21557 | 14.35741 | 14.34054 | 2.397238 |
| protein_co nucleotide   | 194  | 131  | 169  | 216  | 236  | 166  | 1.807763 | 1.565382 | 1.900091 | 3.124093 |
| protein_co NIMA-relat   | 2303 | 1751 | 1966 | 190  | 179  | 122  | 26.02741 | 25.37654 | 26.80825 | 3.33289  |
| protein_co fer_(fps/fes | 647  | 575  | 611  | 157  | 130  | 224  | 2.503329 | 2.852928 | 2.85235  | 0.942852 |
| protein_co VPS33B_in    | 475  | 390  | 401  | 348  | 350  | 353  | 7.59126  | 7.992713 | 7.732371 | 8.632369 |
| protein_co ankyrin_re   | 1893 | 1572 | 1770 | 594  | 646  | 636  | 10.09356 | 10.7487  | 11.38716 | 4.915988 |
| protein_co UPF2_regul   | 802  | 642  | 723  | 528  | 523  | 946  | 6.752701 | 6.931824 | 7.344961 | 6.900294 |
| protein_co cell_divisio | 1063 | 809  | 804  | 1202 | 1272 | 1477 | 32.32431 | 31.5467  | 29.49851 | 56.73237 |
| protein_co sodium_ch    | 338  | 309  | 274  | 140  | 136  | 163  | 4.314954 | 5.058564 | 4.220443 | 2.774074 |
| protein_co coiled-coil  | 9    | 7    | 8    | 26   | 33   | 20   | 0.132708 | 0.132361 | 0.142328 | 0.595055 |
| protein_co chromosom    | 49   | 45   | 54   | 26   | 23   | 37   | 0.802799 | 0.945437 | 1.067462 | 0.661172 |
| protein_co FERM_dom     | 2982 | 2459 | 2459 | 323  | 412  | 361  | 20.51739 | 21.69614 | 20.41367 | 3.449432 |
| protein_co protein_ty   | 10   | 3    | 2    | 14   | 3    | 8    | 0.088455 | 0.034029 | 0.021345 | 0.192212 |
| protein_co epidermal    | 1355 | 1077 | 1157 | 147  | 175  | 125  | 15.6454  | 15.94676 | 16.11866 | 2.634482 |
| protein_co acyl-CoA_d   | 398  | 307  | 358  | 1060 | 1346 | 1514 | 5.629631 | 5.568581 | 6.109813 | 23.27197 |
| protein_co thymocyte    | 404  | 321  | 386  | 741  | 637  | 741  | 14.58319 | 14.85886 | 16.8115  | 41.51642 |
| protein_co vacuolar_p   | 1344 | 1082 | 1068 | 788  | 927  | 753  | 17.07401 | 17.62678 | 16.37026 | 15.53793 |
| protein_co non-SMC_c    | 1092 | 854  | 948  | 1361 | 1657 | 1225 | 9.25762  | 9.284188 | 9.696904 | 17.90875 |
| protein_co vesicle_tra  | 437  | 347  | 347  | 137  | 205  | 219  | 4.960285 | 5.050845 | 4.752288 | 2.413661 |
| protein_co quinoid_di   | 409  | 358  | 362  | 404  | 512  | 529  | 11.63715 | 13.06218 | 12.42739 | 17.84165 |
| protein_co family_wit   | 819  | 570  | 654  | 333  | 404  | 219  | 6.614351 | 5.903201 | 6.372783 | 4.174246 |
| protein_co anoctamin    | 108  | 97   | 98   | 13   | 20   | 25   | 1.295503 | 1.492093 | 1.418368 | 0.242041 |
| protein_co testis_expr  | 35   | 31   | 29   | 27   | 72   | 40   | 0.369629 | 0.419825 | 0.369525 | 0.44258  |
| protein_co queueine_tf  | 508  | 410  | 449  | 525  | 642  | 967  | 5.920987 | 6.128068 | 6.314293 | 9.497737 |
| protein_co methylmal    | 95   | 70   | 69   | 68   | 76   | 55   | 0.630242 | 0.595513 | 0.552308 | 0.700202 |
| protein_co zinc_finger  | 1518 | 1219 | 1363 | 854  | 952  | 683  | 9.537592 | 9.821549 | 10.33263 | 8.32828  |
| protein_co POU_class    | 0    | 0    | 2    | 0    | 0    | 0    | 0        | 0        | 0.03599  | 0        |
| protein_co endothelin   | 2069 | 1638 | 1709 | 21   | 40   | 22   | 23.46202 | 23.81925 | 23.38272 | 0.369619 |
| protein_co nuclear_re   | 14   | 4    | 13   | 29   | 24   | 17   | 0.111095 | 0.040704 | 0.124468 | 0.357186 |
| pseudogen: aldo-keto_   | 1    | 0    | 0    | 0    | 0    | 0    | 0.047701 | 0        | 0        | 0        |
| protein_co aldo-keto_   | 7    | 5    | 9    | 4    | 11   | 4    | 0.097081 | 0.088923 | 0.1506   | 0.086104 |
| protein_co dihydropyr   | 146  | 102  | 111  | 521  | 778  | 614  | 2.50859  | 2.247431 | 2.301166 | 13.89457 |
| protein_co VENT_hom     | 0    | 0    | 1    | 1065 | 1431 | 1505 | 0        | 0        | 0.019435 | 26.62676 |
| protein_co ADAM_met     | 19   | 26   | 26   | 80   | 106  | 40   | 0.271702 | 0.476784 | 0.448601 | 1.775658 |
| protein_co inter-alpha  | 3    | 2    | 1    | 8    | 5    | 2    | 0.044056 | 0.037664 | 0.017719 | 0.182348 |
| protein_co KIN_antige   | 250  | 232  | 227  | 212  | 248  | 305  | 5.633111 | 6.703562 | 6.171379 | 7.414377 |
| protein_co phosphatic   | 64   | 60   | 65   | 58   | 70   | 49   | 0.868836 | 1.044525 | 1.064681 | 1.222128 |
| protein_co ankyrin_an   | 41   | 32   | 29   | 20   | 32   | 17   | 0.435939 | 0.436316 | 0.372038 | 0.330067 |
| protein_co inositol_pc  | 259  | 223  | 204  | 32   | 33   | 21   | 5.617259 | 6.202102 | 5.338299 | 1.077222 |
| protein_co major_facil  | 81   | 60   | 75   | 108  | 142  | 94   | 0.791764 | 0.752093 | 0.884545 | 1.63857  |
| protein_co ring_finger  | 1260 | 1048 | 1043 | 643  | 742  | 520  | 10.28755 | 10.97267 | 10.27481 | 8.1486   |
| protein_co ArfGAP_wit   | 1400 | 1072 | 1248 | 449  | 539  | 292  | 11.49265 | 11.28486 | 12.36103 | 5.720961 |
| protein_co ADAM_met     | 884  | 704  | 731  | 387  | 413  | 308  | 9.531105 | 9.733589 | 9.509472 | 6.476381 |
| protein_co Friend_leul  | 1105 | 916  | 921  | 4    | 2    | 14   | 9.648691 | 10.25678 | 9.703173 | 0.054212 |
| protein_co potassium_   | 0    | 0    | 1    | 2    | 2    | 7    | 0        | 0        | 0.013887 | 0.035729 |
| protein_co transmembr   | 3    | 4    | 3    | 6    | 2    | 9    | 0.062968 | 0.107663 | 0.075974 | 0.195469 |
| protein_co WW_and_C     | 1555 | 1251 | 1342 | 1850 | 2088 | 1528 | 8.261271 | 8.522816 | 8.602348 | 15.25523 |
| protein_co MLF1_inter   | 627  | 471  | 507  | 1147 | 927  | 1571 | 14.71474 | 14.17474 | 14.35625 | 41.781   |
| protein_co acyl-CoA_s   | 586  | 518  | 533  | 268  | 304  | 200  | 6.959866 | 7.88937  | 7.63798  | 4.940473 |
| protein_co solute_carr  | 430  | 303  | 346  | 726  | 1046 | 797  | 12.10247 | 10.93597 | 11.74977 | 31.71557 |
| protein_co antagonist   | 65   | 46   | 52   | 60   | 44   | 33   | 1.444479 | 1.310887 | 1.394278 | 2.069568 |
| protein_co bicaudal_D   | 844  | 663  | 691  | 502  | 659  | 619  | 4.491564 | 4.524578 | 4.436917 | 4.146574 |
| protein_co salvador_h   | 749  | 627  | 674  | 1077 | 1485 | 1106 | 11.46609 | 12.30865 | 12.4492  | 25.59055 |
| protein_co coiled-coil  | 8    | 15   | 10   | 64   | 80   | 30   | 0.108197 | 0.260152 | 0.163183 | 1.343498 |
| protein_co stress-assoc | 26   | 17   | 30   | 14   | 13   | 19   | 1.267298 | 1.062585 | 1.764309 | 1.059166 |
| protein_co neuroblast   | 2260 | 1916 | 2050 | 982  | 996  | 629  | 14.55452 | 15.8232  | 15.9291  | 9.815927 |
| protein_co zinc_finger  | 86   | 56   | 70   | 75   | 79   | 61   | 0.896519 | 0.748615 | 0.880455 | 1.213536 |
| protein_co tryptophar   | 0    | 2    | 3    | 1    | 0    | 5    | 0        | 0.038311 | 0.05407  | 0.023186 |
| protein_co GUF1_GTPa    | 427  | 323  | 364  | 630  | 651  | 743  | 4.500346 | 4.365458 | 4.628789 | 10.30597 |

|                         |      |      |      |       |       |       |          |          |          |          |
|-------------------------|------|------|------|-------|-------|-------|----------|----------|----------|----------|
| protein_co solute_carr  | 14   | 10   | 10   | 1     | 1     | 1     | 0.243133 | 0.222703 | 0.209539 | 0.026955 |
| protein_co gamma-am     | 2    | 1    | 2    | 18    | 8     | 13    | 0.016136 | 0.010346 | 0.019469 | 0.225402 |
| protein_co spastic_ata  | 3781 | 3208 | 3381 | 400   | 283   | 682   | 11.33648 | 12.33432 | 12.23108 | 1.861495 |
| protein_co poly(A)_bin  | 2    | 3    | 0    | 2     | 6     | 6     | 0.03035  | 0.058378 | 0        | 0.047107 |
| protein_co centromere   | 608  | 535  | 517  | 539   | 487   | 469   | 6.558346 | 7.400377 | 6.728672 | 9.024227 |
| protein_co F-box_prot   | 81   | 62   | 56   | 16    | 17    | 10    | 2.19416  | 2.153696 | 1.830288 | 0.672719 |
| protein_co chromosom    | 151  | 103  | 109  | 90    | 96    | 44    | 2.400133 | 2.099447 | 2.090417 | 2.220401 |
| protein_co chemokine    | 3    | 0    | 3    | 20    | 20    | 17    | 0.045    | 0        | 0.054295 | 0.465642 |
| protein_co poly_(ADP-   | 595  | 501  | 513  | 342   | 351   | 438   | 3.887357 | 4.19744  | 4.043923 | 3.468119 |
| protein_co GDNF_fami    | 3648 | 2581 | 2754 | 247   | 215   | 165   | 18.56063 | 16.83974 | 16.90635 | 1.950587 |
| protein_co CDK2-assoc   | 1263 | 1047 | 1063 | 835   | 1242  | 1168  | 8.795796 | 9.350349 | 8.93209  | 9.025863 |
| protein_co dystonin     | 6307 | 5450 | 6007 | 1600  | 706   | 1786  | 12.18572 | 13.50313 | 14.00342 | 4.798207 |
| protein_co BEN_domai    | 248  | 166  | 218  | 21    | 44    | 24    | 3.325343 | 2.854317 | 3.526869 | 0.437053 |
| protein_co TIA1_cytop   | 1201 | 938  | 1049 | 924   | 1103  | 1118  | 24.26321 | 24.30062 | 25.56989 | 28.97395 |
| protein_co BCL2-assoc   | 2683 | 2021 | 2156 | 668   | 876   | 439   | 48.93268 | 47.26656 | 47.44333 | 18.90973 |
| protein_co glycosyltra  | 1    | 0    | 2    | 355   | 458   | 350   | 0.015578 | 0        | 0.037592 | 8.583664 |
| protein_co transmembr   | 11   | 20   | 18   | 361   | 415   | 372   | 0.089299 | 0.208206 | 0.176309 | 4.548738 |
| protein_co RNA_bindi    | 0    | 0    | 0    | 3     | 10    | 5     | 0        | 0        | 0        | 0.060215 |
| protein_co schwannor    | 85   | 85   | 63   | 17    | 13    | 12    | 0.66997  | 0.859141 | 0.599135 | 0.207977 |
| protein_co Lix1_homo    | 1022 | 799  | 805  | 15    | 22    | 17    | 12.04363 | 12.07432 | 11.44591 | 0.274365 |
| protein_co melanin-co   | 2    | 6    | 2    | 0     | 0     | 0     | 0.039603 | 0.152356 | 0.047783 | 0        |
| protein_co neuroblast   | 23   | 32   | 32   | 9     | 12    | 5     | 0.19115  | 0.341041 | 0.320882 | 0.116097 |
| protein_co potassium_   | 428  | 395  | 367  | 0     | 0     | 4     | 6.098124 | 7.217037 | 6.309089 | 0        |
| protein_co adaptor-rel  | 27   | 31   | 32   | 174   | 238   | 209   | 0.503392 | 0.741162 | 0.719847 | 5.035263 |
| protein_co RAB_GTPas    | 470  | 335  | 390  | 1057  | 1237  | 1050  | 3.23095  | 2.953157 | 3.234782 | 11.27815 |
| protein_co coiled-coil  | 120  | 141  | 113  | 108   | 116   | 100   | 1.662275 | 2.504668 | 1.888636 | 2.322073 |
| protein_co transmembr   | 223  | 161  | 201  | 79    | 106   | 37    | 1.532758 | 1.41907  | 1.666912 | 0.842803 |
| protein_co mitotic_spi  | 214  | 175  | 168  | 90    | 158   | 96    | 10.75505 | 11.27836 | 10.18723 | 7.02056  |
| protein_co tubulin_alp  | 1    | 0    | 3    | 1     | 2     | 0     | 0.030448 | 0        | 0.110212 | 0.04726  |
| protein_co astrotactin  | 27   | 21   | 44   | 71    | 78    | 78    | 0.177763 | 0.177299 | 0.349526 | 0.72555  |
| protein_co family_witl  | 4802 | 3893 | 4094 | 2049  | 2565  | 2759  | 42.6047  | 44.29239 | 43.82594 | 28.2168  |
| protein_co protein_tyri | 2255 | 1711 | 1991 | 742   | 850   | 605   | 19.04485 | 18.53063 | 20.28851 | 9.726695 |
| pseudogen-              | 435  | 327  | 386  | 425   | 501   | 543   | 5.388945 | 5.194833 | 5.769655 | 8.172104 |
| protein_co mannosyl_    | 2147 | 1816 | 1962 | 1016  | 1252  | 1133  | 12.19981 | 13.23264 | 13.45142 | 8.96077  |
| protein_co transmembr   | 73   | 71   | 42   | 9     | 9     | 8     | 0.674079 | 0.840728 | 0.467934 | 0.128991 |
| protein_co G_patch_di   | 319  | 271  | 259  | 91    | 94    | 72    | 3.829471 | 4.171832 | 3.751422 | 1.695587 |
| protein_co heat_shock   | 98   | 57   | 64   | 99    | 136   | 106   | 2.137312 | 1.594139 | 1.684108 | 3.351256 |
| protein_co gem_(nucle   | 122  | 94   | 117  | 143   | 173   | 168   | 4.727754 | 4.67124  | 5.470524 | 8.601249 |
| protein_co transmembr   | 62   | 39   | 47   | 192   | 248   | 141   | 1.749206 | 1.410988 | 1.599909 | 8.407775 |
| protein_co POU_class_   | 0    | 0    | 1    | 2     | 2     | 24    | 0        | 0        | 0.014908 | 0.038356 |
| protein_co ring_finger  | 165  | 122  | 164  | 123   | 180   | 285   | 2.192364 | 2.078729 | 2.629182 | 2.536672 |
| protein_co cysteinyl_   | 3    | 1    | 0    | 0     | 0     | 0     | 0.055208 | 0.023599 | 0        | 0        |
| protein_co glutamate_   | 1    | 3    | 4    | 578   | 554   | 633   | 0.008781 | 0.033781 | 0.042379 | 7.877664 |
| protein_co ADP-ribosy   | 0    | 2    | 1    | 8     | 20    | 12    | 0        | 0.031984 | 0.015047 | 0.154851 |
| protein_co Ras-like_wi  | 0    | 0    | 0    | 4     | 14    | 13    | 0        | 0        | 0        | 0.251833 |
| protein_co SET_bindin   | 554  | 457  | 498  | 197   | 219   | 125   | 2.624211 | 2.775969 | 2.846207 | 1.448391 |
| protein_co ADP-ribosy   | 312  | 245  | 253  | 209   | 256   | 266   | 4.281441 | 4.311326 | 4.188938 | 4.451559 |
| protein_co ectopic_P-   | 905  | 722  | 761  | 554   | 552   | 492   | 3.359096 | 3.436532 | 3.408055 | 3.191642 |
| protein_co proline-seri | 147  | 126  | 121  | 54    | 52    | 55    | 2.297611 | 2.525451 | 2.281879 | 1.310036 |
| protein_co ATP_syntha   | 8025 | 6832 | 6877 | 10553 | 10599 | 10258 | 82.75619 | 90.34677 | 85.56625 | 168.9125 |
| protein_co HAUS_augn    | 518  | 408  | 440  | 638   | 734   | 759   | 21.59025 | 21.80707 | 22.12731 | 41.27423 |
| protein_co chromosom    | 391  | 293  | 315  | 466   | 616   | 413   | 3.361569 | 3.230295 | 3.267562 | 6.218443 |
| protein_co SPC25_ND     | 229  | 185  | 186  | 298   | 392   | 353   | 7.930439 | 8.215666 | 7.77182  | 16.01801 |
| protein_co glucose-6-p  | 0    | 0    | 0    | 0     | 1     | 0     | 0        | 0        | 0        | 0        |
| protein_co pyruvate_d   | 168  | 141  | 142  | 250   | 187   | 275   | 2.637269 | 2.8384   | 2.689562 | 6.091379 |
| protein_co parathyroid  | 0    | 0    | 0    | 0     | 0     | 1     | 0        | 0        | 0        | 0        |
| processed_spondin_1     | 270  | 200  | 201  | 291   | 372   | 395   | 2.356721 | 2.238637 | 2.116842 | 3.942465 |
| protein_co phosphodi    | 143  | 113  | 132  | 235   | 284   | 322   | 1.214503 | 1.230695 | 1.352647 | 3.097854 |
| protein_co transcriptic | 967  | 726  | 740  | 3997  | 4582  | 4522  | 15.27717 | 14.7083  | 14.10575 | 98.01242 |
| protein_co trans-golgi  | 4302 | 3393 | 3601 | 1533  | 1636  | 1836  | 31.08659 | 31.44096 | 31.39596 | 17.19393 |
| protein_co SH2_domai    | 1    | 0    | 2    | 2     | 6     | 1     | 0.023742 | 0        | 0.057292 | 0.073701 |
| protein_co potassium_   | 12   | 15   | 7    | 8     | 14    | 6     | 0.223109 | 0.357632 | 0.15703  | 0.230864 |
| protein_co U2AF_hom     | 1321 | 1035 | 1113 | 720   | 895   | 499   | 7.30617  | 7.340686 | 7.427287 | 6.180875 |
| protein_co autophagy_   | 127  | 98   | 121  | 197   | 232   | 137   | 1.963413 | 1.942868 | 2.257051 | 4.727208 |
| protein_co POC5_cent    | 168  | 157  | 180  | 120   | 116   | 180   | 3.534106 | 4.235253 | 4.568681 | 3.918159 |

|                          |      |      |      |      |      |       |          |          |          |          |
|--------------------------|------|------|------|------|------|-------|----------|----------|----------|----------|
| protein_co sparc/oste    | 1565 | 1318 | 1511 | 268  | 300  | 220   | 15.14298 | 16.35391 | 17.64044 | 4.024966 |
| protein_co family_witl   | 32   | 39   | 36   | 2    | 3    | 6     | 0.686719 | 1.073255 | 0.932136 | 0.066618 |
| protein_co transcriptic  | 235  | 201  | 235  | 380  | 400  | 350   | 4.339958 | 4.760177 | 5.236409 | 10.89261 |
| protein_co guanylate_u   | 117  | 80   | 101  | 17   | 16   | 12    | 0.946701 | 0.830092 | 0.986044 | 0.213504 |
| protein_co CWF19-like    | 222  | 173  | 203  | 400  | 341  | 438   | 3.17559  | 3.173415 | 3.503608 | 8.881001 |
| protein_co junction_r    | 381  | 334  | 341  | 562  | 512  | 461   | 1.97579  | 2.221118 | 2.133626 | 4.523584 |
| protein_co homer_hor     | 852  | 646  | 637  | 809  | 1031 | 880   | 6.793113 | 6.604973 | 6.127971 | 10.01171 |
| protein_co X-ray_repai   | 124  | 87   | 72   | 142  | 104  | 157   | 3.42828  | 3.084488 | 2.40179  | 6.093592 |
| protein_co bol_boule-l   | 0    | 0    | 0    | 2    | 7    | 1     | 0        | 0        | 0        | 0.04643  |
| protein_co zinc_finger   | 9    | 17   | 12   | 6    | 8    | 34    | 0.154075 | 0.373204 | 0.247866 | 0.15943  |
| protein_co zinc_finger   | 67   | 55   | 64   | 52   | 84   | 83    | 0.538688 | 0.567068 | 0.620856 | 0.648928 |
| protein_co zinc_finger   | 204  | 165  | 185  | 235  | 271  | 376   | 1.807552 | 1.874795 | 1.977791 | 3.231907 |
| protein_co zinc_finger   | 92   | 79   | 74   | 208  | 275  | 200   | 1.986133 | 2.187041 | 1.927526 | 6.969705 |
| protein_co suppressor    | 265  | 231  | 249  | 241  | 270  | 408   | 4.02522  | 4.499509 | 4.563428 | 5.68187  |
| protein_co DNA_cross-    | 364  | 264  | 313  | 115  | 141  | 163   | 4.645609 | 4.320704 | 4.819851 | 2.278083 |
| protein_co oleoyl-ACP    | 0    | 0    | 0    | 0    | 2    | 0     | 0        | 0        | 0        | 0        |
| protein_co ribonuclea    | 84   | 48   | 60   | 104  | 121  | 109   | 2.703337 | 1.98094  | 2.329808 | 5.194989 |
| protein_co N-myristoy    | 366  | 318  | 320  | 282  | 322  | 232   | 5.903594 | 6.577666 | 6.227782 | 7.060166 |
| protein_co zinc_finger   | 0    | 0    | 0    | 7    | 6    | 0     | 0        | 0        | 0        | 0.248032 |
| protein_co zinc_finger   | 191  | 135  | 136  | 170  | 244  | 221   | 4.394501 | 3.983083 | 3.775402 | 6.070935 |
| protein_co ubiquitin_s   | 677  | 504  | 532  | 458  | 616  | 432   | 7.059049 | 6.73903  | 6.692944 | 7.412308 |
| processed_ARL5B_anti     | 12   | 1    | 3    | 3    | 10   | 7     | 0.816662 | 0.087271 | 0.246337 | 0.316893 |
| protein_co coiled-coil   | 1180 | 1069 | 1112 | 540  | 592  | 453   | 6.564269 | 7.625905 | 7.463752 | 4.662604 |
| protein_co calcium/ca    | 994  | 710  | 862  | 103  | 95   | 155   | 3.807898 | 3.487921 | 3.984321 | 0.612444 |
| protein_co tripartite_r  | 15   | 14   | 8    | 200  | 209  | 227   | 0.16675  | 0.199577 | 0.107303 | 3.450915 |
| protein_co ZFP36_ring    | 1683 | 1240 | 1343 | 931  | 1457 | 2932  | 21.3517  | 20.17342 | 20.5576  | 18.33279 |
| protein_co PAN3_poly     | 606  | 535  | 602  | 472  | 612  | 532   | 5.752095 | 6.512033 | 6.894424 | 6.95386  |
| protein_co pleckstrin_   | 337  | 245  | 263  | 173  | 173  | 84    | 2.263563 | 2.110271 | 2.131408 | 1.803596 |
| protein_co phosphofru    | 1632 | 1399 | 1505 | 1994 | 2123 | 1512  | 21.38153 | 23.50421 | 23.79048 | 40.54846 |
| protein_co transmemt     | 1716 | 1273 | 1341 | 1772 | 1756 | 1791  | 22.48205 | 21.38732 | 21.19803 | 36.03403 |
| protein_co glutamate_    | 3    | 0    | 9    | 235  | 261  | 177   | 0.025026 | 0        | 0.090585 | 3.042742 |
| protein_co immunoglc     | 59   | 53   | 58   | 19   | 14   | 17    | 0.249978 | 0.287962 | 0.296501 | 0.12495  |
| protein_co sperm_flag    | 48   | 43   | 50   | 7    | 7    | 5     | 0.360346 | 0.413958 | 0.452894 | 0.081566 |
| protein_co SPARC-like    | 9    | 2    | 1    | 8    | 10   | 8     | 0.140952 | 0.040167 | 0.018896 | 0.194468 |
| protein_co dentin_ma     | 10   | 1    | 2    | 3    | 4    | 2     | 0.174832 | 0.02242  | 0.042189 | 0.081409 |
| protein_co matrix_ext    | 0    | 0    | 0    | 2    | 1    | 2     | 0        | 0        | 0        | 0.065391 |
| protein_co muscleblin    | 1767 | 1512 | 1636 | 118  | 144  | 162   | 12.90169 | 14.157   | 14.41257 | 1.337281 |
| protein_co calcyphosi    | 0    | 1    | 0    | 0    | 0    | 0     | 0        | 0.05989  | 0        | 0        |
| protein_co NAD_kinase    | 1416 | 1132 | 1109 | 189  | 239  | 157   | 18.37196 | 18.83424 | 17.36088 | 3.806138 |
| protein_co glycerol-3-ph | 165  | 127  | 139  | 55   | 86   | 63    | 1.905629 | 1.880907 | 1.936945 | 0.985933 |
| protein_co gap_junctio   | 4620 | 3499 | 3746 | 8440 | 9509 | 11556 | 71.33088 | 69.27697 | 69.78329 | 202.2593 |
| protein_co cyclin_O      | 2    | 5    | 4    | 4    | 4    | 1     | 0.054334 | 0.174188 | 0.131114 | 0.168667 |
| protein_co DEAD_(Asp     | 0    | 0    | 0    | 2    | 4    | 1     | 0        | 0        | 0        | 0.050471 |
| protein_co solute_carr   | 520  | 484  | 448  | 368  | 433  | 509   | 4.791277 | 5.71877  | 4.980512 | 5.262914 |
| protein_co pelota_hon    | 610  | 505  | 533  | 368  | 471  | 449   | 6.576894 | 6.982191 | 6.933719 | 6.15842  |
| protein_co RAS_guanyl    | 79   | 51   | 66   | 4    | 8    | 2     | 0.770608 | 0.637949 | 0.77678  | 0.060562 |
| protein_co SAR1_homi     | 846  | 658  | 695  | 269  | 352  | 378   | 5.936689 | 5.921192 | 5.884462 | 2.929926 |
| protein_co cation_cha    | 1    | 4    | 1    | 1    | 4    | 2     | 0.034427 | 0.176593 | 0.041539 | 0.053436 |
| protein_co family_witl   | 21   | 16   | 23   | 12   | 9    | 13    | 0.232732 | 0.227388 | 0.307548 | 0.206419 |
| protein_co G_protein-i   | 706  | 563  | 632  | 211  | 209  | 197   | 3.752477 | 3.837347 | 4.053017 | 1.740709 |
| protein_co Tctex1_dor    | 19   | 16   | 18   | 10   | 8    | 12    | 0.445233 | 0.480798 | 0.508925 | 0.363717 |
| protein_co WD_repeat     | 32   | 27   | 23   | 5    | 15   | 16    | 0.356748 | 0.385997 | 0.309376 | 0.086519 |
| protein_co ankyrin_rej   | 0    | 0    | 0    | 0    | 0    | 2     | 0        | 0        | 0        | 0        |
| protein_co FERM_Rho      | 6572 | 5334 | 5802 | 2790 | 3653 | 3079  | 37.53943 | 39.07082 | 39.98673 | 24.73573 |
| protein_co interferon-i  | 260  | 186  | 213  | 73   | 55   | 39    | 3.036464 | 2.78559  | 3.00139  | 1.323269 |
| protein_co solute_carr   | 0    | 0    | 0    | 191  | 283  | 147   | 0        | 0        | 0        | 3.00756  |
| protein_co pantothenic   | 195  | 159  | 171  | 318  | 426  | 327   | 2.715638 | 2.839512 | 2.873303 | 6.873768 |
| protein_co PR_domain     | 847  | 635  | 676  | 4    | 2    | 3     | 9.698619 | 9.324156 | 9.339448 | 0.071091 |
| protein_co bone_morp     | 5    | 3    | 7    | 19   | 18   | 8     | 0.040888 | 0.03146  | 0.069067 | 0.241161 |
| protein_co heterogene    | 5068 | 4035 | 4392 | 3036 | 3905 | 6453  | 62.85073 | 64.1692  | 65.71796 | 58.43943 |
| protein_co hematopoi     | 70   | 46   | 51   | 87   | 103  | 74    | 0.940487 | 0.792542 | 0.826748 | 1.814282 |
| protein_co utrophin      | 2920 | 2363 | 2585 | 2253 | 1749 | 1523  | 11.09643 | 11.51525 | 11.85247 | 13.28899 |
| protein_co glutamate_    | 21   | 9    | 9    | 3    | 10   | 8     | 0.141907 | 0.077989 | 0.073379 | 0.031466 |
| protein_co protein_ty    | 1426 | 1178 | 1275 | 848  | 915  | 990   | 10.80562 | 11.44682 | 11.65704 | 9.973703 |
| protein_co geranylgera   | 626  | 558  | 555  | 619  | 760  | 526   | 10.13926 | 11.58978 | 10.84608 | 15.56155 |

|                         |      |      |      |      |      |       |          |          |          |          |
|-------------------------|------|------|------|------|------|-------|----------|----------|----------|----------|
| protein_co zinc_finger  | 102  | 83   | 133  | 91   | 83   | 91    | 1.664155 | 1.736525 | 2.618143 | 2.30444  |
| processed_prostate_ar   | 5    | 0    | 1    | 1    | 1    | 0     | 0.101231 | 0        | 0.024428 | 0.031425 |
| protein_co RAB3C_me     | 17   | 25   | 22   | 97   | 87   | 82    | 0.089686 | 0.169132 | 0.140038 | 0.794289 |
| protein_co intermedia   | 0    | 0    | 0    | 0    | 0    | 2     | 0        | 0        | 0        | 0        |
| protein_co MARVEL_d     | 28   | 10   | 17   | 419  | 555  | 304   | 0.300028 | 0.137408 | 0.219786 | 6.968633 |
| protein_co RAD17_hoi    | 330  | 270  | 271  | 327  | 341  | 373   | 4.786176 | 5.021666 | 4.742333 | 7.361273 |
| protein_co mediator_c   | 389  | 336  | 360  | 256  | 284  | 362   | 10.40514 | 11.52516 | 11.61847 | 10.62843 |
| protein_co procollagen  | 3947 | 3074 | 3432 | 419  | 421  | 554   | 48.25943 | 48.19791 | 50.63028 | 7.951691 |
| protein_co serine/thre  | 1479 | 1192 | 1270 | 22   | 10   | 17    | 19.36079 | 20.00969 | 20.05888 | 0.447    |
| protein_co neurensin_   | 0    | 0    | 1    | 0    | 3    | 3     | 0        | 0        | 0.024034 | 0        |
| protein_co janus_kina   | 0    | 0    | 0    | 62   | 121  | 32    | 0        | 0        | 0        | 1.516756 |
| protein_co Zic_family_  | 3074 | 2682 | 2582 | 867  | 1125 | 1240  | 27.50237 | 30.77049 | 27.87215 | 12.0397  |
| protein_co G_protein-i  | 2056 | 1621 | 1727 | 1115 | 1439 | 1282  | 21.15556 | 21.38916 | 21.44084 | 17.80765 |
| protein_co carboxypep   | 1    | 2    | 1    | 0    | 0    | 0     | 0.01312  | 0.033648 | 0.01583  | 0        |
| protein_co SREK1-inte   | 611  | 487  | 490  | 365  | 479  | 455   | 6.353915 | 6.494391 | 6.148148 | 5.891468 |
| protein_co leucine-ricl | 135  | 83   | 95   | 245  | 294  | 241   | 0.984778 | 0.776411 | 0.836135 | 2.773966 |
| protein_co CWC27_sp     | 855  | 716  | 698  | 866  | 710  | 748   | 19.0637  | 20.47215 | 18.77779 | 29.97019 |
| protein_co major_histi  | 13   | 2    | 16   | 2    | 3    | 1     | 0.079124 | 0.01561  | 0.117498 | 0.018894 |
| protein_co signal_reco  | 127  | 85   | 93   | 67   | 85   | 122   | 2.096104 | 1.799026 | 1.851996 | 1.716384 |
| protein_co centromere   | 297  | 286  | 257  | 968  | 1232 | 851   | 10.02616 | 12.38094 | 10.46789 | 50.72055 |
| protein_co chromodor    | 555  | 426  | 465  | 1382 | 1346 | 1206  | 7.611571 | 7.492042 | 7.694533 | 29.41845 |
| protein_co calcium_re   | 702  | 573  | 575  | 1830 | 2447 | 1522  | 10.87799 | 11.38611 | 10.75047 | 44.01422 |
| protein_co tektin_5     | 0    | 1    | 2    | 4    | 5    | 4     | 0        | 0.037301 | 0.070193 | 0.180595 |
| protein_co B-cell_scaff | 14   | 11   | 31   | 5    | 14   | 11    | 0.185231 | 0.186633 | 0.494876 | 0.10268  |
| protein_co thioredoxin  | 518  | 384  | 473  | 144  | 152  | 146   | 7.642866 | 7.265526 | 8.420457 | 3.297763 |
| protein_co Dab_mitog    | 1489 | 1223 | 1490 | 83   | 72   | 116   | 15.39904 | 16.2194  | 18.5923  | 1.332317 |
| protein_co aminocarbi   | 11   | 7    | 8    | 4    | 1    | 1     | 0.266421 | 0.217411 | 0.233783 | 0.150371 |
| protein_co acyl-CoA_o   | 5    | 1    | 3    | 59   | 93   | 88    | 0.086385 | 0.022155 | 0.062537 | 1.58217  |
| protein_co BCL2-like_1  | 439  | 396  | 406  | 413  | 505  | 421   | 4.047329 | 4.681754 | 4.516251 | 5.90996  |
| protein_co anaphase_f   | 1047 | 791  | 899  | 1658 | 1915 | 1792  | 5.944285 | 5.75889  | 6.158297 | 14.6106  |
| protein_co calpastatin  | 1946 | 1559 | 1632 | 334  | 378  | 344   | 19.71224 | 20.2511  | 19.94626 | 5.25134  |
| protein_co short_coile  | 736  | 635  | 603  | 394  | 414  | 345   | 15.73691 | 17.41104 | 15.55633 | 13.07581 |
| protein_co calmegin     | 54   | 33   | 61   | 70   | 56   | 54    | 0.832094 | 0.652081 | 1.134113 | 1.674199 |
| protein_co centrin_EF-  | 166  | 134  | 104  | 301  | 417  | 241   | 3.200552 | 3.313073 | 2.419347 | 9.007697 |
| protein_co SWI/SNF_re   | 2093 | 1752 | 1780 | 3154 | 3264 | 3906  | 12.38682 | 13.2964  | 12.71039 | 28.97229 |
| protein_co synaptoner   | 18   | 13   | 8    | 50   | 84   | 43    | 0.269655 | 0.24974  | 0.144602 | 1.162617 |
| protein_co bone_morp    | 40   | 18   | 18   | 23   | 25   | 15    | 0.674677 | 0.38933  | 0.366316 | 0.602135 |
| protein_co RANBP2-lik   | 4    | 9    | 3    | 3    | 2    | 1     | 0.033529 | 0.096741 | 0.030341 | 0.039031 |
| protein_co Ras_associa  | 531  | 471  | 506  | 769  | 924  | 617   | 7.130183 | 8.11029  | 8.19794  | 16.0274  |
| protein_co heterogene   | 8533 | 6586 | 7223 | 7360 | 9583 | 13355 | 67.35901 | 66.66916 | 68.79543 | 90.17834 |
| protein_co RAN_bindin   | 3134 | 2563 | 2831 | 2432 | 1301 | 2952  | 12.54831 | 13.15965 | 13.67648 | 15.11404 |
| protein_co AT_hook_co   | 1392 | 1091 | 1242 | 1037 | 874  | 965   | 7.458679 | 7.49647  | 8.029571 | 8.624461 |
| protein_co c-mer_prot   | 235  | 153  | 181  | 161  | 204  | 90    | 2.786837 | 2.326722 | 2.589825 | 2.963467 |
| protein_co transmembr   | 1858 | 1399 | 1494 | 244  | 290  | 181   | 16.71559 | 16.13998 | 16.21715 | 3.407189 |
| protein_co protein_ty   | 10   | 6    | 2    | 24   | 7    | 4     | 0.132871 | 0.102233 | 0.032063 | 0.49496  |
| protein_co nuclear_re   | 45   | 31   | 23   | 12   | 18   | 17    | 0.607734 | 0.536873 | 0.37478  | 0.251543 |
| protein_co coiled-coil  | 3    | 4    | 3    | 7    | 13   | 2     | 0.045058 | 0.07704  | 0.054365 | 0.163183 |
| protein_co phospholip   | 276  | 208  | 244  | 43   | 45   | 39    | 1.517903 | 1.466924 | 1.619097 | 0.367057 |
| protein_co RNA_bindin   | 1921 | 1480 | 1500 | 1374 | 1709 | 1396  | 21.08021 | 20.82661 | 19.86035 | 23.40263 |
| protein_co sodium_ch    | 5    | 3    | 5    | 0    | 0    | 3     | 0.025699 | 0.019773 | 0.031007 | 0        |
| protein_co FEZ_family   | 0    | 0    | 0    | 0    | 3    | 3     | 0        | 0        | 0        | 0        |
| protein_co CD96_mole    | 2    | 0    | 3    | 3    | 3    | 0     | 0.021688 | 0        | 0.039252 | 0.050495 |
| protein_co solute_carr  | 69   | 54   | 62   | 79   | 102  | 33    | 1.091938 | 1.095852 | 1.183828 | 1.940467 |
| protein_co G_protein-i  | 179  | 180  | 150  | 0    | 0    | 0     | 0.919311 | 1.185472 | 0.929499 | 0        |
| protein_co FERM_dom     | 0    | 0    | 0    | 1    | 1    | 1     | 0        | 0        | 0        | 0.015561 |
| protein_co family_witl  | 607  | 443  | 507  | 890  | 1062 | 1075  | 6.252689 | 5.851823 | 6.301358 | 14.22979 |
| protein_co ArfGAP_wit   | 2362 | 1946 | 2025 | 663  | 875  | 672   | 18.33072 | 19.36653 | 18.9615  | 7.986264 |
| protein_co trafficking_ | 584  | 507  | 477  | 675  | 715  | 668   | 4.398293 | 4.896532 | 4.334487 | 7.890518 |
| processed_long_interf   | 22   | 19   | 20   | 45   | 48   | 92    | 1.450887 | 1.606844 | 1.591435 | 4.606317 |
| protein_co INO80_con    | 263  | 194  | 182  | 216  | 249  | 210   | 3.800331 | 3.594817 | 3.17311  | 4.844511 |
| protein_co lysophosph   | 2796 | 2321 | 2360 | 5452 | 7692 | 7095  | 23.36978 | 24.87723 | 23.80003 | 70.73003 |
| protein_co pleckstrin_  | 509  | 427  | 428  | 910  | 1309 | 1058  | 2.073049 | 2.230124 | 2.103215 | 5.752594 |
| protein_co NmrA-like_   | 853  | 678  | 640  | 795  | 983  | 888   | 23.2677  | 23.71612 | 21.0636  | 33.65907 |
| protein_co UBA-like_d   | 747  | 543  | 591  | 1053 | 1307 | 1168  | 13.26272 | 12.36292 | 12.6604  | 29.01822 |
| protein_co chromosom    | 5    | 1    | 1    | 6    | 7    | 9     | 0.12524  | 0.032121 | 0.030222 | 0.233269 |

|                         |      |      |      |      |      |      |          |          |          |          |
|-------------------------|------|------|------|------|------|------|----------|----------|----------|----------|
| protein_co transmembr   | 39   | 39   | 53   | 79   | 118  | 83   | 1.403462 | 1.799741 | 2.301229 | 4.41259  |
| protein_co inhibitor_c  | 598  | 457  | 471  | 565  | 771  | 548  | 9.770115 | 9.574675 | 9.284691 | 14.32773 |
| protein_co testis_expr  | 8    | 6    | 8    | 1    | 1    | 3    | 0.449246 | 0.43207  | 0.542041 | 0.087161 |
| protein_co ADP-ribosy   | 25   | 18   | 17   | 13   | 12   | 21   | 0.626202 | 0.578171 | 0.513773 | 0.505415 |
| protein_co CKLF-like_M  | 542  | 432  | 446  | 363  | 431  | 343  | 12.30125 | 12.57312 | 12.2133  | 12.78754 |
| protein_co F-box_and_   | 226  | 214  | 199  | 56   | 56   | 55   | 2.754651 | 3.344886 | 2.926573 | 1.059441 |
| protein_co upstream_l   | 1751 | 1352 | 1441 | 670  | 897  | 1158 | 11.1042  | 10.99479 | 11.02587 | 6.59487  |
| protein_co required_fc  | 580  | 485  | 496  | 1567 | 1959 | 1590 | 4.316174 | 4.628305 | 4.453492 | 18.09966 |
| protein_co CD8a_mole    | 0    | 1    | 0    | 2    | 5    | 7    | 0        | 0.019728 | 0        | 0.047756 |
| protein_co ribose_5-pl  | 511  | 445  | 431  | 358  | 481  | 442  | 12.9658  | 14.47931 | 13.19483 | 14.09912 |
| protein_co tubulin_ga   | 383  | 310  | 303  | 358  | 397  | 464  | 4.665855 | 4.842878 | 4.453723 | 6.769335 |
| protein_co golgin_A8_   | 0    | 2    | 0    | 7    | 4    | 1    | 0        | 0.022846 | 0        | 0.096782 |
| protein_co protein_ty   | 867  | 679  | 756  | 681  | 841  | 676  | 4.101871 | 4.119477 | 4.315516 | 5.000812 |
| protein_co leucine_ri   | 309  | 206  | 191  | 8    | 9    | 4    | 8.265268 | 7.066023 | 6.164245 | 0.332138 |
| protein_co CNKSR_fam    | 343  | 265  | 260  | 84   | 153  | 107  | 4.921443 | 4.875886 | 4.501111 | 1.870717 |
| protein_co general_tra  | 246  | 238  | 225  | 576  | 759  | 662  | 3.829663 | 4.751292 | 4.226258 | 13.91805 |
| protein_co craniofacia  | 702  | 626  | 614  | 611  | 584  | 574  | 25.81709 | 29.52255 | 27.24499 | 34.87722 |
| protein_co zinc_finger  | 1167 | 928  | 956  | 1085 | 1270 | 1068 | 15.89792 | 16.21164 | 15.71359 | 22.94192 |
| protein_co family_witl  | 1    | 0    | 0    | 1    | 1    | 0    | 0.024718 | 0        | 0        | 0.038366 |
| protein_co chromosom    | 49   | 30   | 29   | 45   | 35   | 24   | 0.684424 | 0.537353 | 0.488737 | 0.975601 |
| protein_co transmembr   | 1    | 1    | 1    | 0    | 0    | 0    | 0.016645 | 0.021345 | 0.020084 | 0        |
| protein_co JAZF_zinc_f  | 276  | 214  | 206  | 96   | 135  | 94   | 4.141326 | 4.117688 | 3.729457 | 2.235795 |
| protein_co c-Maf_indu   | 1566 | 1162 | 1281 | 1881 | 2419 | 1607 | 16.85329 | 16.03645 | 16.63374 | 31.42043 |
| protein_co SPHK1_inte   | 28   | 30   | 31   | 0    | 0    | 1    | 0.189811 | 0.260791 | 0.253555 | 0        |
| protein_co potassium_   | 0    | 0    | 2    | 0    | 0    | 2    | 0        | 0        | 0.028189 | 0        |
| protein_co phosphoty    | 89   | 79   | 48   | 23   | 41   | 25   | 1.520296 | 1.730511 | 0.989298 | 0.609813 |
| protein_co thyroid_ho   | 5274 | 4499 | 4744 | 2114 | 2458 | 2206 | 25.04537 | 27.39761 | 27.18191 | 15.58198 |
| protein_co F-box_prot   | 132  | 93   | 114  | 109  | 155  | 79   | 1.983808 | 1.79233  | 2.067182 | 2.542628 |
| protein_co CCAAT/enh    | 848  | 634  | 626  | 788  | 1061 | 808  | 9.679341 | 9.280012 | 8.621292 | 13.96068 |
| protein_co potassium_   | 2223 | 1697 | 1938 | 972  | 1389 | 1911 | 21.20352 | 20.75677 | 22.30336 | 14.39015 |
| protein_co zinc_finger  | 136  | 98   | 111  | 73   | 96   | 65   | 1.877257 | 1.734684 | 1.848655 | 1.564005 |
| protein_co mucolipin_   | 14   | 22   | 6    | 57   | 82   | 50   | 0.228812 | 0.461086 | 0.118318 | 1.445956 |
| protein_co leucine-ricl | 0    | 2    | 1    | 179  | 223  | 49   | 0        | 0.041598 | 0.01957  | 4.506255 |
| protein_co dimethylar   | 1509 | 1192 | 1330 | 430  | 514  | 558  | 18.05026 | 18.28437 | 19.19526 | 7.983499 |
| protein_co splicing_re  | 1594 | 1313 | 1402 | 667  | 507  | 994  | 7.991306 | 8.441187 | 8.480579 | 5.19022  |
| protein_co chromosom    | 1036 | 836  | 910  | 802  | 687  | 788  | 8.208526 | 8.494172 | 8.699512 | 9.863028 |
| pseudogen: chloride_cl  | 0    | 0    | 0    | 1    | 0    | 0    | 0        | 0        | 0        | 0.021331 |
| protein_co ankyrin-rep  | 0    | 0    | 0    | 0    | 2    | 0    | 0        | 0        | 0        | 0        |
| protein_co diacylglyce  | 139  | 122  | 117  | 184  | 240  | 173  | 0.839046 | 0.944366 | 0.852128 | 1.723929 |
| protein_co heparan_su   | 1101 | 918  | 909  | 453  | 579  | 540  | 7.664179 | 8.194649 | 7.63467  | 4.894485 |
| protein_co musashi_RI   | 1471 | 1131 | 1135 | 1301 | 1547 | 1237 | 9.061379 | 8.934157 | 8.435785 | 12.43911 |
| protein_co calcium_ch   | 794  | 583  | 669  | 425  | 431  | 548  | 4.922739 | 4.635154 | 5.004497 | 4.089834 |
| protein_co zinc_finger  | 205  | 191  | 171  | 173  | 193  | 182  | 4.37925  | 5.232251 | 4.407477 | 5.736176 |
| protein_co heparan_su   | 1289 | 941  | 1048 | 116  | 193  | 98   | 23.91818 | 22.39103 | 23.46305 | 3.340901 |
| protein_co glyceropho   | 40   | 41   | 26   | 86   | 107  | 60   | 1.029984 | 1.353828 | 0.807778 | 3.437157 |
| protein_co nuclear_un   | 1501 | 1047 | 1184 | 1031 | 1468 | 1410 | 15.05174 | 13.46362 | 14.32536 | 16.04704 |
| protein_co sema_dom     | 96   | 78   | 70   | 38   | 19   | 44   | 0.718506 | 0.748623 | 0.632129 | 0.441442 |
| protein_co protein_ph   | 1141 | 920  | 906  | 1085 | 1469 | 1101 | 8.034466 | 8.307465 | 7.697463 | 11.85855 |
| protein_co GRB2-relat   | 0    | 0    | 3    | 3    | 0    | 0    | 0        | 0        | 0.064024 | 0.082361 |
| protein_co solute_carr  | 1    | 0    | 1    | 4    | 7    | 2    | 0.01057  | 0        | 0.012754 | 0.065627 |
| protein_co adenylate_l  | 340  | 261  | 251  | 90   | 104  | 64   | 4.057675 | 3.994369 | 3.614266 | 1.667137 |
| protein_co chromosom    | 310  | 258  | 199  | 694  | 803  | 577  | 2.951453 | 3.149947 | 2.285995 | 10.25567 |
| protein_co calcium_bi   | 135  | 94   | 101  | 105  | 139  | 129  | 2.813401 | 2.512089 | 2.539612 | 3.396391 |
| protein_co impact_RV    | 465  | 371  | 412  | 584  | 627  | 690  | 5.749963 | 5.882952 | 6.146917 | 11.2087  |
| protein_co ankyrin_re   | 18   | 20   | 12   | 46   | 54   | 24   | 0.234646 | 0.334333 | 0.188742 | 0.93074  |
| protein_co chromosom    | 152  | 112  | 98   | 226  | 280  | 87   | 5.959266 | 5.630884 | 4.635786 | 13.7527  |
| protein_co carbohydr    | 0    | 0    | 0    | 168  | 141  | 188  | 0        | 0        | 0        | 5.463363 |
| protein_co Thy-1_cell   | 3171 | 2471 | 2505 | 4988 | 6035 | 2977 | 41.83687 | 41.80662 | 39.87666 | 102.1457 |
| protein_co dynein_axc   | 1    | 1    | 4    | 8    | 11   | 9    | 0.00996  | 0.012772 | 0.048068 | 0.12367  |
| protein_co chromosom    | 40   | 25   | 26   | 80   | 123  | 51   | 1.51625  | 1.215234 | 1.189138 | 4.706859 |
| protein_co tubulin_fol  | 373  | 305  | 306  | 181  | 215  | 169  | 3.401396 | 3.566625 | 3.366804 | 2.561872 |
| protein_co junctophil   | 39   | 43   | 45   | 1341 | 2064 | 1049 | 0.454564 | 0.6427   | 0.632836 | 24.25993 |
| protein_co ankylosis_f  | 3325 | 2599 | 2721 | 358  | 445  | 292  | 19.00638 | 19.05124 | 18.76654 | 3.176298 |
| protein_co family_witl  | 794  | 606  | 621  | 274  | 365  | 279  | 4.773163 | 4.671623 | 4.504281 | 2.556624 |
| protein_co ubiquitin_z  | 2090 | 1561 | 1677 | 439  | 526  | 254  | 14.17826 | 13.57966 | 13.72644 | 4.622444 |

|                         |      |      |      |      |      |      |          |          |          |          |
|-------------------------|------|------|------|------|------|------|----------|----------|----------|----------|
| protein_co roundabou    | 20   | 18   | 22   | 3    | 3    | 2    | 0.199108 | 0.229795 | 0.264259 | 0.046357 |
| protein_co roundabou    | 279  | 241  | 216  | 143  | 194  | 116  | 2.863277 | 3.171653 | 2.674614 | 2.277853 |
| protein_co pannexin_3   | 0    | 0    | 4    | 0    | 1    | 0    | 0        | 0        | 0.135754 | 0        |
| protein_co transformin  | 745  | 552  | 589  | 319  | 462  | 335  | 7.83077  | 7.440405 | 7.469844 | 5.204384 |
| protein_co neurograni   | 146  | 91   | 117  | 3    | 0    | 5    | 3.473335 | 2.77616  | 3.358363 | 0.110776 |
| protein_co family_witl  | 44   | 42   | 27   | 21   | 22   | 20   | 0.631322 | 0.772782 | 0.467423 | 0.467679 |
| protein_co cadherin_1   | 1    | 0    | 1    | 0    | 0    | 1    | 0.011261 | 0        | 0.013587 | 0        |
| protein_co G_protein-i  | 0    | 0    | 0    | 1    | 0    | 0    | 0        | 0        | 0        | 0.059754 |
| protein_co translocase  | 1306 | 1034 | 1095 | 1200 | 1489 | 1342 | 13.8894  | 14.10166 | 14.05085 | 19.80852 |
| protein_co ABL_family_  | 622  | 488  | 529  | 3    | 4    | 13   | 4.299807 | 4.326012 | 4.412272 | 0.032189 |
| protein_co angiopoieti  | 782  | 578  | 618  | 23   | 26   | 54   | 8.423614 | 7.984154 | 8.032084 | 0.384548 |
| protein_co phosphatic   | 447  | 401  | 423  | 1055 | 1368 | 912  | 3.390462 | 3.900364 | 3.871148 | 12.42036 |
| protein_co coiled-coil_ | 872  | 654  | 683  | 261  | 327  | 442  | 7.252234 | 6.974971 | 6.853684 | 3.369196 |
| protein_co ceramide_s   | 0    | 0    | 0    | 7    | 8    | 5    | 0        | 0        | 0        | 0.130832 |
| protein_co protein_kir  | 1115 | 943  | 1003 | 662  | 926  | 680  | 5.974445 | 6.479534 | 6.484428 | 5.505683 |
| protein_co leucine-ricl | 536  | 446  | 480  | 131  | 174  | 96   | 3.263609 | 3.48239  | 3.526327 | 1.238041 |
| protein_co centrosom:   | 214  | 209  | 194  | 44   | 24   | 30   | 2.853132 | 3.573252 | 3.120742 | 0.910524 |
| protein_co galactose-3  | 2    | 7    | 6    | 5    | 16   | 1    | 0.068453 | 0.307233 | 0.247776 | 0.26562  |
| protein_co ATP-bindin   | 2    | 0    | 0    | 3    | 3    | 1    | 0.014397 | 0        | 0        | 0.033518 |
| protein_co ATP-bindin   | 2    | 1    | 0    | 0    | 0    | 0    | 0.014741 | 0.009451 | 0        | 0        |
| protein_co ATP-bindin   | 76   | 61   | 72   | 15   | 10   | 17   | 0.433533 | 0.446219 | 0.495552 | 0.13281  |
| protein_co ectonucleo   | 4    | 0    | 2    | 3    | 0    | 1    | 0.054955 | 0        | 0.033153 | 0.063973 |
| protein_co chromosom    | 6    | 7    | 4    | 3    | 8    | 9    | 0.144351 | 0.215961 | 0.116112 | 0.112026 |
| protein_co ubiquitin_c  | 7858 | 6048 | 6546 | 4886 | 5507 | 6623 | 233.4992 | 230.4594 | 234.6915 | 225.3499 |
| protein_co melanoma_    | 1931 | 1640 | 1696 | 886  | 972  | 736  | 11.12069 | 12.11163 | 11.78483 | 7.919787 |
| protein_co dispatched   | 220  | 194  | 188  | 61   | 60   | 43   | 2.166275 | 2.449639 | 2.233556 | 0.932291 |
| protein_co TRAF2_and    | 226  | 190  | 206  | 1235 | 1427 | 1454 | 1.520394 | 1.639119 | 1.672102 | 12.8957  |
| pseudogen: L-threonine  | 0    | 1    | 0    | 19   | 14   | 19   | 0        | 0.041699 | 0        | 0.958957 |
| protein_co family_witl  | 4    | 2    | 1    | 9    | 9    | 10   | 0.045813 | 0.029375 | 0.013819 | 0.159995 |
| protein_co nei_endom    | 466  | 389  | 383  | 423  | 443  | 346  | 8.180737 | 8.757204 | 8.112474 | 11.52597 |
| protein_co phosphogl    | 0    | 0    | 0    | 1    | 0    | 0    | 0        | 0        | 0        | 0.018051 |
| protein_co wingless-ty  | 0    | 0    | 0    | 2    | 2    | 5    | 0        | 0        | 0        | 0.049645 |
| protein_co obscurin_c   | 1088 | 834  | 928  | 1076 | 1602 | 874  | 1.894617 | 1.862378 | 1.949793 | 2.908273 |
| protein_co LON_peptid   | 502  | 356  | 388  | 868  | 1151 | 752  | 6.549468 | 5.956096 | 6.107762 | 17.57731 |
| protein_co tripartite_r | 617  | 441  | 469  | 516  | 592  | 634  | 5.010589 | 4.592525 | 4.595413 | 6.504049 |
| protein_co enabled_hc   | 4422 | 3364 | 3908 | 4896 | 5909 | 4786 | 28.93089 | 28.22333 | 30.84932 | 49.71814 |
| protein_co centriole_c  | 276  | 238  | 287  | 218  | 311  | 84   | 2.50953  | 2.775042 | 3.148569 | 3.076594 |
| protein_co SH3_domai    | 694  | 552  | 649  | 283  | 389  | 354  | 6.172548 | 6.295836 | 6.964625 | 3.906806 |
| protein_co guanylate_l  | 4    | 6    | 10   | 0    | 1    | 0    | 0.039915 | 0.076778 | 0.120399 | 0        |
| protein_co BUB3_mitc    | 1696 | 1537 | 1505 | 2106 | 2489 | 2234 | 29.11954 | 33.8409  | 31.17764 | 56.12386 |
| protein_co G_protein-i  | 0    | 0    | 0    | 0    | 3    | 1    | 0        | 0        | 0        | 0        |
| protein_co coiled-coil_ | 10   | 6    | 7    | 6    | 11   | 5    | 0.214993 | 0.165419 | 0.181581 | 0.20022  |
| protein_co matrix_me    | 0    | 3    | 2    | 0    | 0    | 1    | 0        | 0.094002 | 0.058964 | 0        |
| protein_co chromosom    | 11   | 9    | 16   | 7    | 2    | 15   | 0.167682 | 0.175932 | 0.294281 | 0.165624 |
| protein_co family_witl  | 109  | 82   | 74   | 86   | 93   | 58   | 1.98563  | 1.915557 | 1.626491 | 2.431648 |
| protein_co ATP_syntha   | 2410 | 1867 | 1938 | 2554 | 2719 | 2808 | 20.6063  | 20.47088 | 19.99331 | 33.8949  |
| protein_co contactin_i  | 5    | 7    | 10   | 21   | 25   | 33   | 0.029531 | 0.053018 | 0.071263 | 0.192515 |
| protein_co family_witl  | 1    | 0    | 0    | 2    | 4    | 3    | 0.07612  | 0        | 0        | 0.236298 |
| protein_co melanoma_    | 69   | 35   | 50   | 25   | 33   | 38   | 1.073105 | 0.698024 | 0.938234 | 0.603481 |
| protein_co serine/argi  | 69   | 45   | 54   | 101  | 100  | 73   | 0.898975 | 0.751831 | 0.848868 | 2.042445 |
| protein_co PDZ_and_L    | 597  | 500  | 537  | 25   | 47   | 32   | 5.449356 | 5.852618 | 5.914161 | 0.354194 |
| protein_co sorbin_and   | 267  | 229  | 229  | 111  | 122  | 153  | 2.069361 | 2.275987 | 2.141453 | 1.335299 |
| protein_co transcriptic | 1101 | 858  | 863  | 829  | 961  | 1060 | 18.57047 | 18.55805 | 17.56283 | 21.70304 |
| protein_co lymphocyti   | 2    | 4    | 3    | 0    | 0    | 0    | 0.154498 | 0.396242 | 0.279615 | 0        |
| pseudogen: centrosom:   | 79   | 52   | 68   | 11   | 6    | 7    | 0.807567 | 0.681655 | 0.838704 | 0.174532 |
| protein_co proteasom    | 0    | 0    | 0    | 0    | 1    | 0    | 0        | 0        | 0        | 0        |
| protein_co thymosin_l   | 8    | 8    | 4    | 36   | 48   | 61   | 0.224757 | 0.28822  | 0.135591 | 1.569846 |
| protein_co coxsackie_v  | 126  | 113  | 99   | 1975 | 2134 | 2545 | 0.944698 | 1.086451 | 0.895583 | 22.98371 |
| protein_co BTG_family   | 588  | 427  | 472  | 251  | 358  | 282  | 18.56655 | 17.28985 | 17.98225 | 12.3015  |
| protein_co chromosom    | 203  | 158  | 191  | 361  | 367  | 382  | 1.752011 | 1.748667 | 1.988942 | 4.835912 |
| protein_co chondrolec   | 0    | 0    | 0    | 20   | 42   | 40   | 0        | 0        | 0        | 0.57127  |
| protein_co transmembr   | 0    | 0    | 1    | 0    | 0    | 0    | 0        | 0        | 0.014334 | 0        |
| protein_co neural_cell  | 46   | 50   | 49   | 15   | 10   | 20   | 0.265143 | 0.369575 | 0.340774 | 0.134198 |
| protein_co l(3)mbt-like | 0    | 0    | 0    | 14   | 25   | 13   | 0        | 0        | 0        | 0.224728 |
| protein_co phosphodi    | 63   | 41   | 55   | 5    | 5    | 4    | 0.333718 | 0.278504 | 0.35152  | 0.041109 |

|                        |       |       |       |      |      |      |          |          |          |          |
|------------------------|-------|-------|-------|------|------|------|----------|----------|----------|----------|
| protein_co RAB_guanin  | 3     | 8     | 4     | 2    | 7    | 3    | 0.037683 | 0.128861 | 0.060622 | 0.038993 |
| protein_co mitochond   | 345   | 276   | 294   | 452  | 456  | 510  | 13.49212 | 13.84139 | 13.87256 | 27.43659 |
| protein_co junctional  | 276   | 181   | 213   | 74   | 97   | 76   | 2.984008 | 2.509452 | 2.778553 | 1.241804 |
| protein_co ATP_syntha  | 426   | 322   | 348   | 372  | 399  | 457  | 16.94245 | 16.42222 | 16.69913 | 22.9636  |
| protein_co GA_binding  | 658   | 568   | 592   | 513  | 345  | 524  | 6.0261   | 6.670649 | 6.541543 | 7.292195 |
| protein_co ADAM_met    | 763   | 601   | 666   | 396  | 498  | 993  | 7.583104 | 7.659603 | 7.986284 | 6.10869  |
| protein_co ADAM_met    | 797   | 581   | 680   | 6    | 2    | 38   | 4.126694 | 3.857709 | 4.248161 | 0.04822  |
| protein_co tRNA_splici | 146   | 115   | 142   | 174  | 220  | 272  | 1.747305 | 1.764912 | 2.050465 | 3.232181 |
| protein_co schlafen_fa | 41    | 41    | 33    | 392  | 475  | 254  | 0.227003 | 0.291099 | 0.22045  | 3.368719 |
| protein_co wingless-ty | 0     | 0     | 0     | 1    | 4    | 1    | 0        | 0        | 0        | 0.01801  |
| protein_co xeroderma   | 809   | 659   | 706   | 915  | 1118 | 615  | 9.899276 | 10.34069 | 10.42336 | 17.37827 |
| protein_co chromosom   | 12    | 3     | 9     | 1    | 1    | 1    | 0.552731 | 0.1772   | 0.500176 | 0.071493 |
| protein_co coiled-coil | 331   | 252   | 323   | 312  | 354  | 318  | 5.275525 | 5.150479 | 6.211383 | 7.71832  |
| protein_co FYVE_RhoG   | 10    | 9     | 7     | 1087 | 1458 | 779  | 0.081976 | 0.09461  | 0.069236 | 13.83071 |
| protein_co folliculin  | 342   | 377   | 336   | 319  | 435  | 338  | 4.408023 | 6.231153 | 5.225225 | 6.381736 |
| protein_co DPH3_KTI1   | 728   | 600   | 572   | 250  | 278  | 372  | 10.90257 | 11.5228  | 10.33574 | 5.811227 |
| protein_co oxidoreduc  | 193   | 188   | 202   | 234  | 340  | 317  | 2.303327 | 2.87717  | 2.908692 | 4.334557 |
| protein_co phospholip  | 82    | 57    | 43    | 42   | 66   | 56   | 0.925832 | 0.825283 | 0.585781 | 0.736035 |
| protein_co CXXC_finge  | 1085  | 822   | 949   | 1080 | 1327 | 1386 | 17.32823 | 16.8347  | 18.28684 | 26.77186 |
| protein_co spindle_an  | 270   | 204   | 213   | 271  | 374  | 288  | 4.358108 | 4.22254  | 4.148221 | 6.789441 |
| protein_co protein_ph  | 2002  | 1585  | 1690  | 1148 | 1274 | 1541 | 23.9169  | 24.28171 | 24.3599  | 21.28693 |
| protein_co adenomatc   | 383   | 298   | 278   | 169  | 184  | 196  | 7.00971  | 6.99402  | 6.13895  | 4.800853 |
| protein_co piezo-type  | 52    | 45    | 55    | 345  | 374  | 270  | 0.260611 | 0.289209 | 0.332584 | 2.683736 |
| pseudogen: coiled-coil | 2     | 1     | 0     | 2    | 3    | 1    | 0.010802 | 0.006926 | 0        | 0.016766 |
| protein_co metallopho  | 172   | 144   | 149   | 142  | 216  | 172  | 1.903938 | 2.044072 | 1.990026 | 2.439738 |
| pseudogen: coiled-coil | 9     | 15    | 9     | 6    | 6    | 4    | 0.080737 | 0.172555 | 0.097413 | 0.083543 |
| protein_co ubiquitin_s | 152   | 99    | 112   | 215  | 272  | 294  | 1.966689 | 1.642619 | 1.74847  | 4.317786 |
| protein_co RAB6B_me    | 79    | 85    | 84    | 268  | 314  | 207  | 0.670342 | 0.924906 | 0.859997 | 3.529675 |
| protein_co essential_r | 125   | 82    | 92    | 199  | 201  | 178  | 2.489912 | 2.094581 | 2.211107 | 6.152583 |
| protein_co EPH_recept  | 220   | 209   | 213   | 178  | 158  | 148  | 2.208006 | 2.689882 | 2.57932  | 2.772861 |
| protein_co acyl-CoA_s  | 43    | 50    | 48    | 41   | 80   | 35   | 0.413424 | 0.616463 | 0.556823 | 0.611846 |
| protein_co ankyrin_re  | 910   | 718   | 822   | 568  | 690  | 672  | 10.19835 | 10.31864 | 11.11498 | 9.880241 |
| protein_co zinc_finger | 210   | 137   | 171   | 207  | 267  | 245  | 3.558693 | 2.977153 | 3.496354 | 5.444676 |
| protein_co carbonic_a  | 2     | 5     | 3     | 16   | 12   | 14   | 0.029407 | 0.094277 | 0.053222 | 0.365154 |
| protein_co vesicular_o | 2195  | 1629  | 1729  | 1120 | 1291 | 1578 | 34.748   | 33.06936 | 33.02466 | 27.51971 |
| protein_co apolipopro  | 123   | 102   | 86    | 70   | 69   | 53   | 4.509361 | 4.795339 | 3.804139 | 3.983257 |
| protein_co dickkopf_2  | 1212  | 1009  | 954   | 0    | 0    | 0    | 15.62141 | 16.67701 | 14.83591 | 0        |
| protein_co cytochrom   | 164   | 106   | 153   | 60   | 91   | 49   | 1.555413 | 1.289191 | 1.75082  | 0.88325  |
| protein_co radial_spok | 1     | 0     | 2     | 2    | 3    | 1    | 0.014553 | 0        | 0.035118 | 0.045177 |
| protein_co F-box_and   | 746   | 477   | 596   | 336  | 541  | 492  | 9.999987 | 8.199518 | 9.639509 | 6.990856 |
| protein_co contactin_  | 0     | 0     | 0     | 2    | 3    | 3    | 0        | 0        | 0        | 0.027547 |
| protein_co prominin_   | 26    | 14    | 23    | 149  | 233  | 133  | 0.257855 | 0.178049 | 0.275219 | 2.29361  |
| pseudogen: unc-93_ho   | 0     | 0     | 0     | 0    | 3    | 0    | 0        | 0        | 0        | 0        |
| protein_co adenylate_  | 32    | 27    | 16    | 38   | 26   | 46   | 0.237193 | 0.25664  | 0.143093 | 0.437185 |
| protein_co Kruppel-lik | 761   | 644   | 624   | 382  | 434  | 416  | 9.752201 | 10.58311 | 9.648296 | 7.598219 |
| protein_co protein_ty  | 31    | 27    | 32    | 47   | 83   | 51   | 0.307768 | 0.343744 | 0.383319 | 0.724254 |
| protein_co antizyme_i  | 2234  | 1838  | 1902  | 3219 | 4140 | 4951 | 22.18858 | 23.40999 | 22.79318 | 49.62469 |
| protein_co ATPase_H+   | 523   | 438   | 431   | 398  | 472  | 700  | 4.369829 | 4.692953 | 4.344983 | 5.161504 |
| protein_co transmembr  | 217   | 169   | 172   | 183  | 215  | 155  | 3.425971 | 3.421527 | 3.276427 | 4.484412 |
| protein_co OTU_doma    | 269   | 215   | 255   | 174  | 212  | 451  | 3.824565 | 3.919923 | 4.374395 | 3.839808 |
| protein_co cyclin-depe | 899   | 725   | 713   | 209  | 219  | 85   | 6.748979 | 6.979523 | 6.458267 | 2.435315 |
| protein_co general_tra | 969   | 774   | 823   | 526  | 606  | 801  | 47.72734 | 48.88704 | 48.90929 | 40.21237 |
| protein_co myristoylat | 18858 | 13841 | 14906 | 5057 | 7406 | 4938 | 206.9394 | 194.771  | 197.3589 | 86.13327 |
| protein_co tetratricop | 89    | 71    | 74    | 106  | 181  | 129  | 1.280126 | 1.309575 | 1.284229 | 2.36646  |
| protein_co 1-acylglyce | 681   | 595   | 585   | 957  | 1162 | 1299 | 8.672488 | 9.716792 | 8.988775 | 18.91642 |
| protein_co MMS19_nu    | 1415  | 1175  | 1308  | 2086 | 2065 | 1823 | 17.47416 | 18.60746 | 19.48927 | 39.98385 |
| protein_co phosphatic  | 671   | 532   | 519   | 497  | 596  | 511  | 7.51091  | 7.636441 | 7.009474 | 8.634892 |
| protein_co MARVEL_dc   | 5203  | 3746  | 4028  | 868  | 1124 | 1006 | 75.79023 | 69.97397 | 70.79408 | 19.625   |
| protein_co zinc_finger | 597   | 550   | 550   | 434  | 495  | 584  | 9.187181 | 10.85375 | 10.21219 | 10.3664  |
| protein_co golgin_A7_  | 2     | 2     | 2     | 3    | 1    | 0    | 0.032405 | 0.041555 | 0.039098 | 0.075446 |
| protein_co G_protein+  | 0     | 0     | 0     | 4    | 5    | 3    | 0        | 0        | 0        | 0.058883 |
| protein_co tRNA_meth   | 222   | 151   | 183   | 232  | 270  | 245  | 2.50411  | 2.184171 | 2.490574 | 4.061803 |
| protein_co Protein_LO  | 0     | 0     | 0     | 1    | 0    | 0    | 0        | 0        | 0        | 0.071563 |
| protein_co solute_carr | 422   | 351   | 357   | 179  | 235  | 211  | 13.66546 | 14.57566 | 13.94852 | 8.996951 |
| protein_co heat_shock  | 1802  | 1367  | 1455  | 457  | 367  | 551  | 21.19815 | 20.62153 | 20.65162 | 8.344297 |

|                         |       |      |       |      |       |      |          |          |          |          |
|-------------------------|-------|------|-------|------|-------|------|----------|----------|----------|----------|
| protein_co SAM_doma     | 1     | 1    | 2     | 2    | 2     | 2    | 0.02146  | 0.027519 | 0.051785 | 0.066618 |
| protein_co ubiquitin_   | 377   | 317  | 356   | 634  | 693   | 576  | 3.389098 | 3.654361 | 3.861365 | 8.846318 |
| protein_co GRAM_don     | 583   | 432  | 429   | 193  | 200   | 97   | 8.610041 | 8.18144  | 7.644375 | 4.424095 |
| protein_co zinc_finger  | 239   | 155  | 186   | 195  | 274   | 285  | 5.145415 | 4.27921  | 4.831517 | 6.516098 |
| protein_co chromosom    | 271   | 238  | 234   | 368  | 488   | 307  | 1.913734 | 2.155255 | 1.993775 | 4.033579 |
| protein_co Mov10_Mc     | 1276  | 1066 | 1167  | 1198 | 1491  | 1399 | 12.76    | 13.66994 | 14.08053 | 18.59463 |
| protein_co ras_homolo   | 3140  | 2450 | 2567  | 444  | 594   | 485  | 66.95528 | 66.99318 | 66.04335 | 14.69497 |
| protein_co protein_ph   | 114   | 82   | 80    | 277  | 335   | 162  | 2.160656 | 1.992984 | 1.829442 | 8.148749 |
| protein_co diazepam_l   | 1849  | 1419 | 1519  | 924  | 879   | 1124 | 102.9687 | 101.3351 | 102.0644 | 79.86762 |
| protein_co solute_carr  | 1784  | 1400 | 1510  | 4674 | 5658  | 6660 | 19.12478 | 19.24593 | 19.5311  | 77.77156 |
| protein_co HEAT_repe    | 333   | 260  | 305   | 277  | 299   | 329  | 4.386061 | 4.391502 | 4.847059 | 5.662923 |
| protein_co tripartite_r | 3     | 4    | 4     | 2    | 3     | 3    | 0.1042   | 0.178162 | 0.167631 | 0.107822 |
| protein_co MKI67_(FH    | 275   | 274  | 267   | 438  | 513   | 646  | 7.436421 | 9.501479 | 8.711453 | 18.38383 |
| protein_co oxidase_(cy  | 1627  | 1275 | 1300  | 1636 | 1828  | 1523 | 43.59432 | 43.80885 | 42.02752 | 68.03872 |
| protein_co solute_carr  | 39    | 41   | 43    | 51   | 96    | 76   | 0.606135 | 0.817143 | 0.806346 | 1.230285 |
| protein_co La_ribonuc   | 8767  | 6711 | 7354  | 9504 | 11495 | 9094 | 62.33279 | 61.18742 | 63.08662 | 104.8824 |
| protein_co CCR4-NOT_    | 928   | 748  | 812   | 921  | 856   | 578  | 16.06866 | 16.60897 | 16.96429 | 24.75266 |
| protein_co glutamate_   | 49    | 50   | 55    | 4    | 2     | 2    | 0.402525 | 0.526715 | 0.545139 | 0.051002 |
| protein_co leucine-ricl | 1     | 6    | 6     | 39   | 40    | 54   | 0.014825 | 0.114062 | 0.10732  | 0.89738  |
| protein_co SET_domai    | 79    | 57   | 58    | 66   | 95    | 97   | 2.288024 | 2.116985 | 2.026794 | 2.966934 |
| protein_co mesoderm_    | 555   | 474  | 422   | 302  | 344   | 456  | 4.966404 | 5.439222 | 4.556272 | 4.194561 |
| protein_co nucleopori   | 2053  | 1710 | 1831  | 4467 | 4586  | 4135 | 15.3631  | 16.4095  | 16.53204 | 51.88436 |
| protein_co zinc_finger  | 215   | 206  | 224   | 253  | 344   | 357  | 1.340071 | 1.646516 | 1.684556 | 2.447599 |
| protein_co chromosom    | 132   | 105  | 107   | 108  | 140   | 159  | 1.863741 | 1.901123 | 1.822818 | 2.366823 |
| protein_co phosphoin    | 17    | 18   | 17    | 55   | 83    | 36   | 0.165965 | 0.225346 | 0.200246 | 0.833414 |
| protein_co RNA_bindin   | 157   | 121  | 127   | 75   | 78    | 120  | 3.695649 | 3.652463 | 3.606972 | 2.740203 |
| protein_co chromosom    | 165   | 102  | 122   | 85   | 96    | 124  | 1.703402 | 1.350339 | 1.519641 | 1.362017 |
| protein_co titin        | 152   | 137  | 124   | 135  | 95    | 142  | 0.065254 | 0.075421 | 0.064229 | 0.089955 |
| protein_co V-set_and_i  | 0     | 0    | 1     | 0    | 0     | 0    | 0        | 0        | 0.025834 | 0        |
| protein_co protein_dis  | 11926 | 9364 | 10116 | 7052 | 8605  | 7562 | 192.6319 | 193.9564 | 197.147  | 176.7975 |
| protein_co lysine_(K)-s | 103   | 90   | 78    | 114  | 152   | 197  | 1.964879 | 2.201661 | 1.795317 | 3.375467 |
| protein_co PDZ_domai    | 0     | 1    | 1     | 2    | 1     | 4    | 0        | 0.045176 | 0.042506 | 0.109361 |
| protein_co otoancorin   | 0     | 0    | 0     | 4    | 2     | 2    | 0        | 0        | 0        | 0.062809 |
| protein_co potassium_   | 306   | 277  | 245   | 140  | 149   | 72   | 4.88039  | 5.66529  | 4.714625 | 3.465705 |
| protein_co family_witl  | 121   | 126  | 127   | 55   | 64    | 91   | 1.187462 | 1.585675 | 1.503786 | 0.837775 |
| protein_co amyotroph    | 13    | 7    | 3     | 2    | 1     | 0    | 0.293769 | 0.202848 | 0.081796 | 0.070149 |
| protein_co amyotroph    | 2     | 3    | 2     | 2    | 0     | 0    | 0.017014 | 0.032727 | 0.020528 | 0.026408 |
| protein_co transmembr   | 952   | 752  | 878   | 400  | 419   | 584  | 7.982707 | 8.086124 | 8.882921 | 5.205994 |
| protein_co frizzled_fan | 1909  | 1446 | 1515  | 1790 | 2128  | 2291 | 23.2441  | 22.57795 | 22.25705 | 33.82909 |
| protein_co sperm_assc   | 47    | 40   | 34    | 19   | 19    | 17   | 0.318289 | 0.34737  | 0.277812 | 0.199713 |
| protein_co DEP_domai    | 6     | 6    | 6     | 42   | 63    | 41   | 0.109513 | 0.140435 | 0.132134 | 1.189861 |
| protein_co formin_2     | 135   | 126  | 113   | 59   | 49    | 72   | 0.98386  | 1.17755  | 0.993633 | 0.667393 |
| protein_co ring_finger  | 1147  | 909  | 1025  | 975  | 961   | 1033 | 13.66434 | 13.88668 | 14.7332  | 18.02853 |
| protein_co peroxisome   | 147   | 131  | 162   | 358  | 488   | 399  | 0.652236 | 0.745364 | 0.867263 | 2.465478 |
| protein_co engulfment   | 231   | 210  | 201   | 292  | 339   | 264  | 2.693087 | 3.139547 | 2.827369 | 5.283864 |
| protein_co solute_carr  | 829   | 639  | 668   | 308  | 339   | 221  | 4.810869 | 4.755314 | 4.677282 | 2.77428  |
| protein_co LSM11_U7     | 342   | 298  | 310   | 221  | 264   | 107  | 2.43566  | 2.721549 | 2.663792 | 2.442943 |
| protein_co mediator_c   | 155   | 143  | 127   | 102  | 138   | 157  | 3.025792 | 3.579751 | 2.991294 | 3.090566 |
| protein_co family_witl  | 0     | 0    | 4     | 0    | 2     | 0    | 0        | 0        | 0.107814 | 0        |
| protein_co Ras-related  | 2004  | 1499 | 1555  | 629  | 738   | 822  | 57.01917 | 54.6933  | 53.38283 | 27.77821 |
| protein_co solute_carr  | 0     | 0    | 0     | 52   | 44    | 58   | 0        | 0        | 0        | 1.703985 |
| protein_co acid_phosp   | 372   | 334  | 322   | 423  | 443   | 363  | 4.195066 | 4.830051 | 4.381268 | 7.404006 |
| protein_co adenylate_i  | 109   | 78   | 96    | 69   | 91    | 88   | 0.86073  | 0.789849 | 0.91466  | 0.845707 |
| protein_co RAS_p21_p    | 292   | 285  | 263   | 299  | 335   | 191  | 2.438882 | 3.052546 | 2.650402 | 3.876231 |
| protein_co required_fc  | 270   | 211  | 221   | 185  | 195   | 214  | 6.828643 | 6.843251 | 6.743898 | 7.262278 |
| protein_co Src-like-ada | 47    | 26   | 39    | 6    | 11    | 41   | 0.639347 | 0.453546 | 0.640106 | 0.126684 |
| protein_co transmembr   | 76    | 71   | 73    | 39   | 66    | 57   | 1.207196 | 1.446211 | 1.399056 | 0.961522 |
| protein_co von_Hippel   | 970   | 747  | 764   | 707  | 748   | 770  | 26.97706 | 26.64114 | 25.63682 | 30.51917 |
| protein_co RAB39B_m     | 15    | 13   | 7     | 121  | 181   | 87   | 0.200671 | 0.223021 | 0.11299  | 2.512512 |
| protein_co chloride_in  | 3     | 4    | 3     | 4    | 6     | 6    | 0.052983 | 0.090591 | 0.063927 | 0.109649 |
| protein_co AF4/FMR2_    | 424   | 382  | 452   | 180  | 216   | 164  | 1.446338 | 1.671001 | 1.860332 | 0.953031 |
| protein_co mitochond    | 130   | 95   | 105   | 43   | 28    | 78   | 1.52698  | 1.430945 | 1.488083 | 0.783951 |
| protein_co glutamate_   | 77    | 38   | 60    | 176  | 211   | 125  | 0.692203 | 0.438062 | 0.650792 | 2.45576  |
| protein_co vacuolar_p   | 518   | 428  | 427   | 385  | 427   | 289  | 4.950882 | 5.24573  | 4.924122 | 5.711419 |
| protein_co kinesin_fan  | 70    | 80   | 91    | 288  | 340   | 228  | 0.563582 | 0.825959 | 0.883992 | 3.599001 |

|                         |        |        |        |        |        |        |          |          |          |          |
|-------------------------|--------|--------|--------|--------|--------|--------|----------|----------|----------|----------|
| protein_co transmembr   | 227    | 171    | 181    | 89     | 123    | 67     | 2.904238 | 2.80551  | 2.794043 | 1.767368 |
| protein_co N-acetyltra  | 4      | 5      | 0      | 3      | 3      | 1      | 0.141876 | 0.22742  | 0        | 0.165158 |
| protein_co melanoma     | 2      | 0      | 0      | 1      | 0      | 1      | 0.044403 | 0        | 0        | 0.03446  |
| protein_co pleckstrin   | 2036   | 1684   | 1727   | 590    | 671    | 479    | 8.164549 | 8.65976  | 8.355931 | 3.67229  |
| protein_co chromosom    | 345    | 285    | 312    | 464    | 651    | 472    | 3.916963 | 4.149393 | 4.273985 | 8.176714 |
| protein_co mitochond    | 431    | 319    | 380    | 732    | 791    | 680    | 6.268486 | 5.949567 | 6.668329 | 16.52445 |
| protein_co ELM2_and     | 1107   | 847    | 980    | 442    | 582    | 347    | 6.415431 | 6.294641 | 6.852552 | 3.975859 |
| protein_co tetratricop  | 2      | 2      | 6      | 3      | 8      | 4      | 0.014026 | 0.017987 | 0.050771 | 0.032656 |
| protein_co guanine_nu   | 178    | 116    | 131    | 508    | 670    | 641    | 3.362781 | 2.810256 | 2.986056 | 14.89611 |
| protein_co family_witl  | 111    | 103    | 106    | 10     | 8      | 9      | 1.27631  | 1.518727 | 1.470575 | 0.178469 |
| protein_co guanine_nu   | 2004   | 1654   | 1715   | 1242   | 1518   | 1084   | 14.37033 | 15.20946 | 14.8382  | 13.8236  |
| protein_co WNT_inhib    | 9      | 5      | 7      | 1      | 1      | 5      | 0.188566 | 0.134338 | 0.176956 | 0.03252  |
| protein_co UDP_glucu    | 0      | 0      | 0      | 0      | 0      | 1      | 0        | 0        | 0        | 0        |
| protein_co G_protein+   | 1      | 1      | 0      | 7      | 10     | 3      | 0.009529 | 0.012219 | 0        | 0.103527 |
| protein_co matrix_me    | 2702   | 2026   | 2148   | 251    | 237    | 194    | 10.96183 | 10.54014 | 10.51429 | 1.580527 |
| protein_co adenosine    | 281    | 233    | 238    | 324    | 324    | 315    | 6.325538 | 6.725993 | 6.46422  | 11.32053 |
| protein_co potassium    | 1710   | 1345   | 1490   | 53     | 46     | 38     | 7.035354 | 7.096128 | 7.396464 | 0.338451 |
| protein_co basic_leuci  | 0      | 1      | 0      | 1      | 1      | 0      | 0        | 0.061357 | 0        | 0.074265 |
| protein_co deoxycytid   | 325    | 236    | 308    | 245    | 327    | 184    | 5.610919 | 5.224828 | 6.415779 | 6.565188 |
| protein_co ADAM_met     | 662    | 558    | 593    | 66     | 99     | 99     | 5.331706 | 5.763041 | 5.7625   | 0.825054 |
| protein_co ALX_homer    | 0      | 0      | 0      | 1      | 4      | 0      | 0        | 0        | 0        | 0.03915  |
| protein_co dpy-19-like  | 787    | 593    | 729    | 189    | 290    | 242    | 5.954888 | 5.753908 | 6.655405 | 2.219684 |
| protein_co NADH_deh     | 155    | 86     | 113    | 140    | 163    | 142    | 2.851296 | 2.028702 | 2.508055 | 3.997321 |
| protein_co DNA-dama     | 180    | 181    | 186    | 352    | 331    | 208    | 3.757882 | 4.845723 | 4.685238 | 11.40627 |
| protein_co chromosom    | 59     | 56     | 45     | 46     | 42     | 41     | 0.829787 | 1.009979 | 0.763617 | 1.00416  |
| protein_co protein_ph   | 0      | 0      | 0      | 0      | 1      | 0      | 0        | 0        | 0        | 0        |
| protein_co chromosom    | 0      | 0      | 0      | 0      | 2      | 2      | 0        | 0        | 0        | 0        |
| protein_co ADAMTS-li    | 293    | 197    | 216    | 38     | 22     | 29     | 1.872788 | 1.614718 | 1.6658   | 0.376995 |
| protein_co ADP-ribosy   | 0      | 0      | 0      | 2      | 0      | 2      | 0        | 0        | 0        | 0.092302 |
| protein_co solute_carr  | 0      | 0      | 0      | 1      | 4      | 0      | 0        | 0        | 0        | 0.026465 |
| protein_co WAS_prote    | 146    | 118    | 118    | 97     | 123    | 63     | 1.777244 | 1.841982 | 1.733102 | 1.832721 |
| protein_co chemokine    | 0      | 0      | 0      | 1      | 0      | 0      | 0        | 0        | 0        | 0.060499 |
| protein_co N-6_adenin   | 153    | 115    | 118    | 104    | 110    | 196    | 1.47465  | 1.421362 | 1.372232 | 1.555827 |
| protein_co RWD_dom      | 190    | 133    | 158    | 20     | 29     | 32     | 2.879477 | 2.584765 | 2.889118 | 0.470458 |
| protein_co ubiquitin    | 598    | 526    | 546    | 340    | 311    | 625    | 7.311664 | 8.247268 | 8.054818 | 6.452447 |
| protein_co chaperonin   | 3208   | 2718   | 2727   | 4341   | 3895   | 4659   | 75.02403 | 81.51261 | 76.94833 | 157.5746 |
| protein_co MAP3K7_C     | 30     | 31     | 12     | 0      | 1      | 0      | 0.672098 | 0.890599 | 0.32437  | 0        |
| protein_co BTB_and_C    | 855    | 722    | 784    | 443    | 540    | 564    | 6.949379 | 7.525345 | 7.688542 | 5.588742 |
| protein_co tetraspanin  | 2      | 2      | 1      | 37     | 47     | 25     | 0.049125 | 0.062996 | 0.029636 | 1.410609 |
| protein_co T-cell_lymp  | 891    | 743    | 739    | 582    | 730    | 781    | 5.80264  | 6.205061 | 5.806847 | 5.883034 |
| protein_co SR-related   | 1020   | 803    | 850    | 1011   | 1138   | 1362   | 11.40659 | 11.51544 | 11.46892 | 17.54839 |
| protein_co retinitis_pi | 156    | 137    | 108    | 110    | 111    | 113    | 1.534475 | 1.728085 | 1.281761 | 1.679416 |
| protein_co cyclin-depe  | 188    | 144    | 113    | 63     | 76     | 42     | 1.601912 | 1.573449 | 1.161736 | 0.833205 |
| protein_co polycomb     | 188    | 147    | 184    | 231    | 348    | 237    | 3.95306  | 3.963713 | 4.668113 | 7.539074 |
| protein_co ankyrin_re   | 867    | 665    | 747    | 998    | 1606   | 652    | 24.71346 | 24.30779 | 25.69113 | 44.15455 |
| protein_co SWI5-depe    | 50     | 47     | 54     | 120    | 170    | 84     | 1.481049 | 1.785281 | 1.929929 | 5.517104 |
| protein_co sortilin-rel | 5      | 4      | 3      | 23     | 58     | 30     | 0.040724 | 0.041779 | 0.029482 | 0.290765 |
| protein_co sideroflexir | 206    | 140    | 184    | 172    | 203    | 273    | 3.761427 | 3.278104 | 4.053697 | 4.87466  |
| protein_co chromosom    | 947    | 823    | 775    | 733    | 784    | 744    | 26.76603 | 29.82931 | 26.42918 | 32.15648 |
| protein_co fucosyltran  | 0      | 0      | 0      | 2      | 1      | 1      | 0        | 0        | 0        | 0.046401 |
| protein_co tudor_dom    | 0      | 0      | 0      | 0      | 1      | 0      | 0        | 0        | 0        | 0        |
| protein_co fibroblast   | 316    | 226    | 262    | 58     | 59     | 30     | 7.460849 | 6.842565 | 7.463637 | 2.125493 |
| protein_co protocadhe   | 269    | 155    | 184    | 3786   | 4357   | 4338   | 2.784418 | 2.057421 | 2.29799  | 60.82656 |
| protein_co SH3_domai    | 14     | 19     | 17     | 16     | 18     | 19     | 0.117079 | 0.203757 | 0.171533 | 0.207683 |
| protein_co growth_dif   | 457    | 318    | 471    | 1      | 2      | 8      | 5.79625  | 5.172106 | 7.207753 | 0.019686 |
| protein_co ubiquinol    | 1421   | 1072   | 1084   | 1304   | 1250   | 1291   | 11.9517  | 11.56218 | 11.00051 | 17.02329 |
| protein_co MTERF_dor    | 198    | 163    | 199    | 209    | 218    | 168    | 6.072089 | 6.410174 | 7.363326 | 9.948318 |
| protein_co phosphatic   | 1291   | 999    | 1093   | 935    | 994    | 1265   | 11.69307 | 11.60318 | 11.94457 | 13.14451 |
| protein_co protein_ph   | 65     | 45     | 42     | 609    | 694    | 659    | 0.876575 | 0.778211 | 0.683397 | 12.74745 |
| protein_co ribosomal    | 535    | 378    | 441    | 872    | 1216   | 709    | 22.2198  | 20.13203 | 22.09902 | 56.21257 |
| protein_co potassium    | 5      | 5      | 0      | 1      | 0      | 1      | 0.044922 | 0.057607 | 0        | 0.013945 |
| protein_co family_witl  | 109    | 91     | 122    | 73     | 89     | 29     | 2.058402 | 2.20371  | 2.779787 | 2.13972  |
| protein_co suppressor   | 336    | 323    | 331    | 390    | 529    | 625    | 6.342611 | 7.81881  | 7.538845 | 11.42678 |
| protein_co family_witl  | 369    | 392    | 315    | 362    | 404    | 329    | 4.074992 | 5.551314 | 4.197194 | 6.204967 |
| protein_co eukaryotic   | 143990 | 118984 | 121242 | 180690 | 176415 | 151914 | 1520.309 | 1611.007 | 1544.546 | 2961.176 |

|                         |      |      |      |      |      |      |          |          |          |          |
|-------------------------|------|------|------|------|------|------|----------|----------|----------|----------|
| protein_co F-box_prot   | 42   | 36   | 44   | 4    | 2    | 3    | 0.638994 | 0.70236  | 0.807697 | 0.094458 |
| protein_co hexokinase   | 0    | 0    | 0    | 1    | 3    | 0    | 0        | 0        | 0        | 0.019729 |
| protein_co hexokinase   | 3490 | 2944 | 3075 | 8141 | 8884 | 6027 | 40.99353 | 44.34422 | 43.57958 | 148.4219 |
| protein_co trypsin_do   | 392  | 281  | 344  | 775  | 1028 | 599  | 5.044151 | 4.636793 | 5.340827 | 15.47869 |
| protein_co PHD_finger   | 782  | 670  | 710  | 835  | 841  | 796  | 7.704979 | 8.465426 | 8.440557 | 12.76973 |
| protein_co CD109_mo     | 1588 | 1296 | 1409 | 76   | 112  | 68   | 7.920577 | 8.289354 | 8.479405 | 0.58837  |
| protein_co leucine_ri   | 1    | 4    | 4    | 19   | 51   | 8    | 0.014339 | 0.073553 | 0.069206 | 0.42288  |
| protein_co nodal_grov   | 3    | 4    | 2    | 413  | 462  | 1045 | 0.084487 | 0.144456 | 0.067959 | 18.05289 |
| protein_co ubiquitin-c  | 389  | 294  | 296  | 748  | 894  | 694  | 11.59581 | 11.2385  | 10.64612 | 34.60858 |
| protein_co zinc_finger  | 2280 | 1784 | 1872 | 1459 | 1806 | 1959 | 22.9124  | 22.99005 | 22.6981  | 22.75734 |
| protein_co mediator_c   | 355  | 281  | 300  | 214  | 277  | 281  | 10.98743 | 11.15279 | 11.20307 | 10.28045 |
| protein_co zinc_finger  | 1932 | 1543 | 1554 | 852  | 1060 | 954  | 26.9137  | 27.56396 | 26.11953 | 18.42198 |
| protein_co neuroplasti  | 1378 | 1101 | 1136 | 886  | 1054 | 1185 | 22.93732 | 23.50121 | 22.81497 | 22.89063 |
| protein_co K(lysine)_a  | 1008 | 824  | 885  | 471  | 523  | 600  | 5.703528 | 5.978877 | 6.041912 | 4.136513 |
| protein_co sterile_alph | 1057 | 847  | 909  | 520  | 604  | 287  | 7.307984 | 7.509575 | 7.582886 | 5.580286 |
| protein_co RAB11_fam    | 280  | 272  | 284  | 832  | 925  | 737  | 1.680861 | 2.093881 | 2.057028 | 7.752246 |
| protein_co unc-5_hom    | 216  | 217  | 216  | 434  | 521  | 301  | 1.169273 | 1.506369 | 1.410795 | 3.646552 |
| protein_co glycine-N-a  | 41   | 17   | 30   | 5    | 5    | 6    | 1.175117 | 0.624821 | 1.037448 | 0.222432 |
| protein_co UTP14_U3     | 404  | 301  | 331  | 202  | 236  | 663  | 7.613974 | 7.274545 | 7.526725 | 5.908971 |
| protein_co apoptosis-i  | 935  | 694  | 750  | 1020 | 1222 | 910  | 19.39919 | 18.46464 | 18.77506 | 32.84752 |
| protein_co mitogen-ac   | 15   | 6    | 15   | 217  | 246  | 161  | 0.342763 | 0.175818 | 0.413564 | 7.696499 |
| protein_co BCL2-assoc   | 501  | 362  | 419  | 502  | 726  | 556  | 5.275522 | 4.888162 | 5.323408 | 8.204685 |
| IG_V_pseu immunogl      | 17   | 20   | 19   | 0    | 1    | 0    | 2.277515 | 3.435988 | 3.071242 | 0        |
| protein_co WD_repeat    | 184  | 164  | 139  | 253  | 282  | 244  | 2.463667 | 2.815901 | 2.245573 | 5.257935 |
| protein_co WDYHV_mi     | 304  | 273  | 301  | 192  | 214  | 191  | 9.560406 | 11.00968 | 11.42135 | 9.372047 |
| protein_co ATPase_fam   | 1077 | 892  | 974  | 542  | 464  | 774  | 9.074672 | 9.638055 | 9.901984 | 7.088347 |
| protein_co F-box_prot   | 556  | 438  | 404  | 26   | 26   | 13   | 3.865784 | 3.905227 | 3.389161 | 0.080586 |
| protein_co non-SMC_e    | 278  | 236  | 247  | 196  | 216  | 179  | 10.90831 | 11.87501 | 11.69385 | 11.93711 |
| protein_co zinc_finger  | 345  | 268  | 287  | 493  | 534  | 556  | 4.560771 | 4.543215 | 4.577719 | 10.11572 |
| protein_co proline_ri   | 621  | 433  | 485  | 232  | 332  | 176  | 12.57284 | 11.24188 | 11.84763 | 7.29055  |
| protein_co fibrosin     | 2653 | 1951 | 2126 | 526  | 683  | 354  | 23.92293 | 22.56024 | 23.13068 | 7.361957 |
| protein_co ferric-chela | 110  | 91   | 92   | 49   | 42   | 43   | 1.906098 | 2.022103 | 1.923484 | 1.31789  |
| protein_co phosphoryl   | 373  | 252  | 267  | 258  | 380  | 383  | 3.161601 | 2.739101 | 2.730597 | 3.394286 |
| protein_co hippocamp    | 1032 | 824  | 899  | 713  | 805  | 802  | 17.42546 | 17.8419  | 18.31522 | 18.68635 |
| protein_co spindle_ass  | 120  | 105  | 85   | 182  | 131  | 196  | 1.416617 | 1.589534 | 1.210704 | 3.334825 |
| protein_co cytochrom    | 0    | 0    | 0    | 2    | 0    | 0    | 0        | 0        | 0        | 0.203865 |
| protein_co G_protein-i  | 0    | 0    | 1    | 0    | 0    | 0    | 0        | 0        | 0.005697 | 0        |
| protein_co Zic_family_  | 34   | 57   | 32   | 1370 | 1763 | 2021 | 0.459574 | 0.988008 | 0.521884 | 28.74267 |
| protein_co mitochond    | 465  | 364  | 340  | 433  | 552  | 445  | 7.162897 | 7.190291 | 6.319209 | 10.35271 |
| protein_co vacuolar_p   | 679  | 556  | 545  | 471  | 632  | 478  | 6.308366 | 6.624166 | 6.109303 | 6.792012 |
| protein_co galactokin   | 164  | 160  | 144  | 80   | 78   | 74   | 2.386705 | 2.985961 | 2.528514 | 1.807071 |
| protein_co lipoma_HM    | 0    | 0    | 0    | 167  | 223  | 121  | 0        | 0        | 0        | 8.417055 |
| protein_co UDP-GlcNA    | 66   | 47   | 61   | 4791 | 7772 | 4422 | 0.835062 | 0.762574 | 0.931221 | 94.08743 |
| protein_co MPV17_mi     | 0    | 0    | 1    | 12   | 21   | 15   | 0        | 0        | 0.026278 | 0.405647 |
| protein_co BUB1_mitc    | 895  | 778  | 848  | 2483 | 2616 | 1876 | 11.26619 | 12.55865 | 12.87947 | 48.51335 |
| protein_co phosphodi    | 346  | 250  | 270  | 252  | 335  | 212  | 13.80761 | 12.79357 | 13.00033 | 15.60894 |
| protein_co eukaryotic   | 3735 | 3108 | 3223 | 5805 | 6160 | 4882 | 32.87671 | 35.0823  | 34.22993 | 79.31045 |
| protein_co bromodom     | 880  | 663  | 735  | 611  | 817  | 1319 | 8.712672 | 8.417664 | 8.780193 | 9.389455 |
| protein_co RNA_pseud    | 704  | 591  | 520  | 1156 | 1232 | 840  | 13.25194 | 14.26604 | 11.81022 | 33.77497 |
| protein_co somatostat   | 0    | 0    | 0    | 0    | 0    | 2    | 0        | 0        | 0        | 0        |
| protein_co TatD_DNas    | 1254 | 888  | 1127 | 583  | 835  | 1045 | 11.00713 | 9.995369 | 11.93572 | 7.942835 |
| protein_co ghrelin/ob   | 16   | 9    | 5    | 12   | 14   | 10   | 0.526484 | 0.379767 | 0.198511 | 0.612883 |
| protein_co SEC13_hon    | 5482 | 4285 | 4562 | 1821 | 2197 | 1878 | 108.2776 | 108.5325 | 108.7184 | 55.82646 |
| pseudogen: family_witl  | 1    | 0    | 1    | 3    | 2    | 1    | 0.052685 | 0        | 0.063568 | 0.245325 |
| protein_co endo/exon    | 480  | 371  | 410  | 130  | 148  | 142  | 8.061321 | 7.990027 | 8.308008 | 3.388744 |
| protein_co N-terminal   | 917  | 700  | 733  | 367  | 379  | 312  | 17.93084 | 17.55248 | 17.29351 | 11.13853 |
| protein_co SHC_SH2-d    | 0    | 1    | 0    | 0    | 0    | 0    | 0        | 0.023673 | 0        | 0        |
| protein_co nicotinami   | 15   | 14   | 13   | 301  | 371  | 268  | 0.124201 | 0.148652 | 0.129875 | 3.868395 |
| protein_co zinc_finger  | 474  | 320  | 358  | 435  | 519  | 479  | 4.522969 | 3.915656 | 4.121699 | 6.442656 |
| protein_co ATPase_Ca    | 1    | 2    | 4    | 10   | 15   | 8    | 0.005152 | 0.013214 | 0.024866 | 0.079969 |
| protein_co solute_carr  | 1    | 1    | 0    | 4    | 5    | 4    | 0.010415 | 0.013356 | 0        | 0.064664 |
| protein_co smg-1_hon    | 2728 | 2243 | 2383 | 1622 | 1944 | 1950 | 7.937696 | 8.369292 | 8.366083 | 7.325401 |
| protein_co FCH_domai    | 466  | 366  | 379  | 258  | 254  | 238  | 4.38682  | 4.418291 | 4.304781 | 3.769763 |
| protein_co RNA_bindir   | 471  | 370  | 413  | 3526 | 3905 | 2979 | 7.10135  | 7.153706 | 7.513082 | 82.51498 |
| protein_co transmembr   | 59   | 51   | 29   | 79   | 74   | 53   | 1.802287 | 1.997798 | 1.068853 | 3.745671 |

|                         |       |       |       |      |      |      |          |          |          |          |
|-------------------------|-------|-------|-------|------|------|------|----------|----------|----------|----------|
| protein_co compleme     | 0     | 2     | 0     | 0    | 0    | 0    | 0        | 0.051044 | 0        | 0        |
| protein_co TIMP_meta    | 90    | 82    | 73    | 42   | 58   | 174  | 2.557637 | 2.988269 | 2.503037 | 1.852577 |
| polymorph synapsin_II   | 20    | 16    | 26    | 133  | 174  | 122  | 0.240647 | 0.246876 | 0.37746  | 2.483889 |
| protein_co neuregulin   | 97    | 71    | 78    | 25   | 39   | 28   | 1.454535 | 1.365275 | 1.411221 | 0.581866 |
| protein_co chromosom    | 313   | 264   | 289   | 186  | 193  | 263  | 3.839021 | 4.152306 | 4.27683  | 3.540948 |
| protein_co carnitine_f  | 181   | 162   | 177   | 300  | 350  | 278  | 2.743081 | 3.14836  | 3.236543 | 7.056865 |
| protein_co NECAP_enc    | 1524  | 1250  | 1274  | 502  | 614  | 591  | 15.47096 | 16.27241 | 15.6045  | 7.90982  |
| protein_co low_densit   | 1394  | 1156  | 1220  | 829  | 1015 | 834  | 14.63279 | 15.56079 | 15.45156 | 13.50671 |
| protein_co CUB_doma     | 1     | 2     | 1     | 2    | 5    | 1    | 0.01722  | 0.044164 | 0.020777 | 0.053456 |
| protein_co PAX_intera   | 297   | 216   | 276   | 412  | 494  | 517  | 2.525174 | 2.355038 | 2.83134  | 5.43704  |
| protein_co STEAP_fami   | 455   | 357   | 407   | 276  | 401  | 235  | 3.10417  | 3.123285 | 3.350245 | 2.922628 |
| protein_co single_strai | 1725  | 1309  | 1355  | 2644 | 3616 | 3334 | 27.767   | 27.02022 | 26.31645 | 66.05898 |
| protein_co claudin_12   | 449   | 365   | 403   | 476  | 571  | 505  | 5.869422 | 6.118588 | 6.356267 | 9.657983 |
| protein_co matrix_me    | 68177 | 52048 | 54889 | 2746 | 3935 | 2832 | 856.5972 | 838.5948 | 832.0935 | 53.55127 |
| protein_co frizzled_fan | 4113  | 2890  | 2993  | 93   | 119  | 85   | 44.42724 | 40.03112 | 39.00725 | 1.559208 |
| protein_co GATA_zinc    | 629   | 516   | 564   | 627  | 719  | 687  | 8.775311 | 9.231471 | 9.493777 | 13.57719 |
| protein_co sushi_dom    | 0     | 0     | 0     | 117  | 177  | 56   | 0        | 0        | 0        | 7.125721 |
| processed_ -            | 1     | 4     | 6     | 19   | 18   | 14   | 0.018578 | 0.095293 | 0.13449  | 0.547867 |
| protein_co transmemt    | 6     | 5     | 12    | 5    | 4    | 12   | 0.299936 | 0.320521 | 0.72378  | 0.387952 |
| protein_co C-type_lect  | 17    | 8     | 16    | 2    | 1    | 2    | 0.249571 | 0.150607 | 0.283409 | 0.045573 |
| protein_co dehydroger   | 190   | 142   | 151   | 81   | 107  | 90   | 6.174015 | 5.917139 | 5.920236 | 4.085353 |
| protein_co C-type_lect  | 2     | 1     | 3     | 2    | 0    | 2    | 0.025623 | 0.016429 | 0.046373 | 0.03977  |
| protein_co armadillo_1  | 6     | 2     | 3     | 9    | 14   | 11   | 0.224354 | 0.095901 | 0.135348 | 0.522343 |
| protein_co DEAD_(Asp    | 192   | 177   | 179   | 261  | 276  | 253  | 2.658855 | 3.143229 | 2.990849 | 5.61002  |
| protein_co ST3_beta-g   | 3328  | 2398  | 2569  | 1763 | 2302 | 1320 | 29.19551 | 26.97685 | 27.19223 | 24.00576 |
| protein_co fucokinase   | 311   | 236   | 236   | 245  | 283  | 181  | 3.285153 | 3.196808 | 3.007844 | 4.016907 |
| protein_co interleukin  | 4     | 4     | 5     | 139  | 182  | 154  | 0.10543  | 0.135199 | 0.159009 | 5.686561 |
| protein_co dehydroger   | 375   | 299   | 280   | 215  | 225  | 206  | 6.610435 | 6.758951 | 5.955316 | 5.882578 |
| protein_co calcium_ch   | 52    | 52    | 60    | 19   | 14   | 14   | 0.315799 | 0.404967 | 0.439649 | 0.179098 |
| protein_co arylsulfatas | 144   | 108   | 155   | 136  | 209  | 244  | 3.128898 | 3.009276 | 4.063579 | 4.586679 |
| protein_co v-kit_Hardy  | 3     | 9     | 5     | 770  | 849  | 807  | 0.027125 | 0.104352 | 0.054546 | 10.8061  |
| protein_co HYDIN_axo    | 1     | 3     | 2     | 29   | 46   | 17   | 0.002983 | 0.011476 | 0.007198 | 0.134272 |
| protein_co aminoadip    | 173   | 163   | 180   | 272  | 289  | 186  | 2.259603 | 2.730127 | 2.836655 | 5.514236 |
| protein_co zinc_finger  | 13    | 13    | 20    | 23   | 27   | 41   | 0.18972  | 0.243289 | 0.352166 | 0.520988 |
| protein_co calcium_ch   | 13    | 12    | 12    | 130  | 142  | 122  | 0.165869 | 0.196342 | 0.184736 | 2.574524 |
| protein_co ring_finger  | 619   | 477   | 504   | 246  | 314  | 291  | 4.908662 | 4.850653 | 4.822265 | 3.027876 |
| protein_co cyclin_B2    | 785   | 653   | 738   | 1533 | 1533 | 1421 | 23.65595 | 25.23442 | 26.83337 | 71.70401 |
| protein_co family_witl  | 9     | 5     | 5     | 3    | 8    | 1    | 0.121792 | 0.086767 | 0.081639 | 0.063013 |
| protein_co myosin_1E    | 1081  | 926   | 966   | 764  | 701  | 777  | 8.184742 | 8.990827 | 8.824792 | 8.978487 |
| protein_co adaptor_pr   | 919   | 752   | 818   | 676  | 803  | 656  | 7.113226 | 7.464115 | 7.639281 | 8.121351 |
| protein_co melanoma     | 111   | 131   | 137   | 17   | 13   | 23   | 1.208169 | 1.828459 | 1.799175 | 0.2872   |
| protein_co actin_filam  | 130   | 106   | 138   | 244  | 243  | 154  | 1.459349 | 1.525918 | 1.869145 | 4.251442 |
| protein_co TSC22_don    | 682   | 480   | 507   | 288  | 356  | 303  | 14.11253 | 12.73711 | 12.65833 | 9.250037 |
| protein_co Down_sync    | 788   | 657   | 721   | 972  | 1144 | 945  | 6.542021 | 6.99456  | 7.222192 | 12.52514 |
| protein_co dual-specifi | 1069  | 832   | 874   | 808  | 995  | 997  | 7.851728 | 7.836465 | 7.745456 | 9.211479 |
| protein_co potassium_   | 37    | 31    | 26    | 1    | 3    | 7    | 0.684661 | 0.735605 | 0.580491 | 0.028721 |
| protein_co potassium_   | 46    | 47    | 46    | 0    | 0    | 0    | 0.740199 | 0.969835 | 0.893093 | 0        |
| protein_co v-ets_eryth  | 65    | 50    | 60    | 21   | 34   | 38   | 0.605453 | 0.597237 | 0.674321 | 0.303611 |
| protein_co v-ets_eryth  | 255   | 254   | 258   | 1008 | 1233 | 1683 | 3.037844 | 3.880327 | 3.708455 | 18.63873 |
| protein_co tetraspanin  | 15    | 18    | 23    | 1458 | 1788 | 1486 | 0.166316 | 0.255932 | 0.307694 | 25.09174 |
| protein_co Leber_cong   | 28    | 17    | 13    | 7    | 13   | 7    | 0.512059 | 0.398676 | 0.286849 | 0.198697 |
| protein_co solute_carr  | 2755  | 2164  | 2252  | 875  | 946  | 1017 | 63.23152 | 63.69108 | 62.36321 | 31.17099 |
| protein_co transmemt    | 557   | 488   | 567   | 451  | 531  | 419  | 4.691529 | 5.270943 | 5.762226 | 5.896118 |
| protein_co myxovirus_   | 35    | 47    | 51    | 50   | 67   | 45   | 0.472954 | 0.814438 | 0.831513 | 1.0487   |
| protein_co cAMP_resp    | 3748  | 2648  | 2799  | 275  | 338  | 142  | 65.4052  | 59.25705 | 58.9337  | 7.448621 |
| protein_co C2_calcium   | 430   | 376   | 370   | 480  | 691  | 339  | 3.177732 | 3.563247 | 3.299123 | 5.505801 |
| protein_co TGF-beta_a   | 488   | 393   | 410   | 245  | 337  | 272  | 2.864947 | 2.958684 | 2.904214 | 2.232509 |
| protein_co solute_carr  | 5038  | 3779  | 3995  | 1229 | 1907 | 1770 | 54.93765 | 52.8443  | 52.56259 | 20.80148 |
| protein_co chromosom    | 7     | 1     | 2     | 3    | 3    | 5    | 0.154099 | 0.02823  | 0.053123 | 0.102507 |
| protein_co PALM2-AK4    | 8     | 5     | 8     | 0    | 1    | 0    | 0.049969 | 0.040049 | 0.060291 | 0        |
| protein_co zinc_finger  | 3573  | 2895  | 3088  | 936  | 1162 | 1123 | 18.39258 | 19.1103  | 19.1794  | 7.478526 |
| protein_co diacylglyce  | 223   | 181   | 175   | 5    | 3    | 9    | 2.031172 | 2.114121 | 1.923215 | 0.070687 |
| protein_co chromosom    | 233   | 178   | 180   | 215  | 310  | 263  | 2.386495 | 2.337943 | 2.224463 | 3.418012 |
| protein_co SVOP-like    | 3     | 0     | 2     | 32   | 36   | 25   | 0.024418 | 0        | 0.019641 | 0.404262 |
| protein_co sorting_ne   | 36    | 27    | 36    | 154  | 164  | 113  | 0.45463  | 0.437249 | 0.548537 | 3.018607 |

|                         |      |      |      |      |      |      |          |          |          |           |
|-------------------------|------|------|------|------|------|------|----------|----------|----------|-----------|
| protein_co ubinuclein   | 490  | 375  | 477  | 821  | 994  | 738  | 1.590813 | 1.561218 | 1.868484 | 4.137106  |
| protein_co v-raf_murir  | 240  | 204  | 226  | 206  | 203  | 136  | 4.537744 | 4.946161 | 5.155671 | 6.045419  |
| protein_co solute_carr  | 0    | 5    | 0    | 15   | 11   | 40   | 0        | 0.072938 | 0        | 0.264846  |
| protein_co aggrecan     | 1898 | 1459 | 1629 | 56   | 50   | 35   | 10.06756 | 9.924137 | 10.42551 | 0.461049  |
| protein_co proteasom    | 201  | 154  | 163  | 227  | 267  | 283  | 6.775624 | 6.657073 | 6.629624 | 11.877708 |
| protein_co calcium_bi   | 2    | 2    | 0    | 230  | 359  | 192  | 0.030768 | 0.039455 | 0        | 5.491914  |
| protein_co WD_repeat    | 459  | 392  | 452  | 251  | 253  | 198  | 4.761619 | 5.214796 | 5.657551 | 4.041533  |
| protein_co solute_carr  | 1155 | 884  | 908  | 714  | 832  | 705  | 15.52694 | 15.23932 | 14.7278  | 14.89816  |
| protein_co adaptor-rel  | 270  | 221  | 223  | 339  | 360  | 248  | 2.149093 | 2.25576  | 2.141629 | 4.188143  |
| protein_co formin-like  | 2116 | 1809 | 1873 | 799  | 1132 | 694  | 17.79718 | 19.51118 | 19.00734 | 10.43068  |
| protein_co ribosomal_   | 0    | 0    | 0    | 0    | 1    | 0    | 0        | 0        | 0        | 0         |
| protein_co GRB2_asso    | 633  | 417  | 458  | 993  | 1385 | 652  | 5.776836 | 4.880133 | 5.043126 | 14.06585  |
| protein_co signal_pept  | 726  | 603  | 568  | 681  | 794  | 798  | 8.206883 | 8.741144 | 7.74708  | 11.94866  |
| protein_co dihydropyr   | 3    | 3    | 4    | 780  | 1037 | 914  | 0.027005 | 0.03463  | 0.043444 | 10.89811  |
| protein_co dynein_reg   | 6    | 7    | 5    | 5    | 2    | 1    | 0.112943 | 0.168972 | 0.11356  | 0.146086  |
| protein_co RAB28_me     | 225  | 162  | 196  | 229  | 241  | 161  | 5.82887  | 5.381783 | 6.126408 | 9.208052  |
| protein_co family_witl  | 682  | 542  | 603  | 978  | 1317 | 1136 | 11.56564 | 11.78674 | 12.33817 | 25.74273  |
| protein_co tumor_nec    | 1    | 2    | 2    | 0    | 2    | 0    | 0.01102  | 0.028263 | 0.026592 | 0         |
| protein_co pantothene   | 771  | 647  | 688  | 615  | 771  | 426  | 13.64749 | 14.68629 | 14.69383 | 16.89678  |
| protein_co multiple_Ei  | 11   | 4    | 11   | 43   | 72   | 41   | 0.083691 | 0.039026 | 0.100979 | 0.507794  |
| protein_co chromosom    | 349  | 293  | 289  | 245  | 335  | 424  | 6.460567 | 6.955401 | 6.454923 | 7.039499  |
| protein_co peroxisom    | 1042 | 835  | 755  | 535  | 710  | 898  | 23.97419 | 24.6361  | 20.95903 | 19.10559  |
| protein_co RER1_reten   | 2115 | 1546 | 1636 | 633  | 729  | 898  | 40.16703 | 37.65114 | 37.48786 | 18.65922  |
| protein_co Ras_associa  | 107  | 87   | 109  | 511  | 770  | 367  | 0.885029 | 0.922789 | 1.087799 | 6.560324  |
| protein_co v-ski_sarco  | 4358 | 3338 | 3665 | 2615 | 3509 | 2637 | 36.40597 | 35.75864 | 36.94089 | 33.90686  |
| protein_co WD_repeat    | 1670 | 1355 | 1387 | 1430 | 1771 | 1518 | 17.49471 | 18.20283 | 17.53133 | 23.25181  |
| protein_co low_densit   | 586  | 384  | 465  | 549  | 651  | 595  | 5.883844 | 4.944292 | 5.633321 | 8.555912  |
| protein_co ArfGAP_wit   | 1089 | 918  | 927  | 1070 | 1388 | 1047 | 8.319197 | 8.993019 | 8.544394 | 12.68726  |
| protein_co keratinocyt  | 13   | 19   | 16   | 332  | 461  | 371  | 0.637626 | 1.195048 | 0.94687  | 25.27499  |
| protein_co ankyrin_rej  | 45   | 39   | 41   | 21   | 27   | 28   | 1.67864  | 1.865602 | 1.845343 | 1.215892  |
| protein_co platelet-act | 173  | 120  | 167  | 260  | 244  | 203  | 2.265281 | 2.014961 | 2.6384   | 5.284208  |
| protein_co exostosin-li | 286  | 227  | 223  | 25   | 37   | 9    | 3.340111 | 3.399617 | 3.142301 | 0.453174  |
| protein_co solute_carr  | 0    | 1    | 0    | 0    | 1    | 18   | 0        | 0.019415 | 0        | 0         |
| protein_co brain_and_   | 178  | 143  | 143  | 170  | 144  | 149  | 4.506708 | 4.642851 | 4.368411 | 6.680651  |
| protein_co tripartite_r | 0    | 1    | 0    | 4    | 2    | 0    | 0        | 0.033972 | 0        | 0.164474  |
| protein_co WD_repeat    | 31   | 18   | 28   | 41   | 43   | 26   | 0.310928 | 0.231516 | 0.338848 | 0.638283  |
| protein_co mitochond    | 1491 | 1137 | 1194 | 984  | 1038 | 1113 | 35.50686 | 34.72198 | 34.30734 | 36.37142  |
| protein_co dual_specif  | 54   | 31   | 25   | 64   | 58   | 76   | 1.500036 | 1.104279 | 0.837907 | 2.759424  |
| protein_co grainyhead   | 2    | 1    | 0    | 31   | 26   | 33   | 0.032687 | 0.020958 | 0        | 0.786397  |
| protein_co UBX_doma     | 322  | 229  | 237  | 142  | 190  | 200  | 5.706193 | 5.203977 | 5.067421 | 3.905794  |
| protein_co NLR_family   | 2    | 1    | 1    | 1    | 0    | 0    | 0.025849 | 0.016574 | 0.015594 | 0.020061  |
| protein_co protein_tyri | 440  | 309  | 386  | 145  | 163  | 115  | 4.567547 | 4.113373 | 4.834657 | 2.336301  |
| protein_co UDP-N-acet   | 61   | 45   | 55   | 76   | 98   | 78   | 1.046576 | 0.990063 | 1.138548 | 2.02388   |
| protein_co NCK_adapt    | 261  | 200  | 196  | 153  | 174  | 136  | 5.092923 | 5.004561 | 4.614565 | 4.63392   |
| protein_co 4-hydroxyp   | 1    | 0    | 1    | 6    | 13   | 4    | 0.027437 | 0        | 0.033104 | 0.255517  |
| protein_co rhophilin_I  | 121  | 94   | 86   | 403  | 627  | 378  | 1.540508 | 1.534673 | 1.321068 | 7.963687  |
| protein_co tumor_pro    | 604  | 495  | 516  | 502  | 678  | 551  | 11.73222 | 12.32985 | 12.09319 | 15.13482  |
| protein_co leucine_ric  | 20   | 18   | 16   | 10   | 7    | 7    | 0.462426 | 0.533696 | 0.446355 | 0.358875  |
| protein_co AhpC/TSA_i   | 180  | 162  | 168  | 58   | 86   | 49   | 2.948028 | 3.402385 | 3.319834 | 1.474407  |
| protein_co xanthine_d   | 87   | 78   | 90   | 64   | 40   | 35   | 0.7172   | 0.824565 | 0.895182 | 0.818901  |
| protein_co XK_Kell_blo  | 352  | 279  | 255  | 398  | 396  | 294  | 6.131236 | 6.231877 | 5.359121 | 10.76016  |
| protein_co cyclin_M4    | 322  | 256  | 277  | 423  | 462  | 331  | 3.145539 | 3.206922 | 3.264878 | 6.41372   |
| protein_co eyes_absen   | 709  | 591  | 627  | 472  | 619  | 611  | 5.463438 | 5.840051 | 5.829555 | 5.645368  |
| protein_co DAZ_intera   | 440  | 362  | 377  | 71   | 85   | 59   | 5.906558 | 6.231602 | 6.106203 | 1.479349  |
| protein_co thymosin_I   | 418  | 352  | 364  | 430  | 499  | 405  | 28.61318 | 30.89881 | 30.06348 | 45.68659  |
| protein_co Fanconi_an   | 377  | 329  | 312  | 179  | 233  | 206  | 3.855515 | 4.314657 | 3.849849 | 2.841349  |
| protein_co muscle_RA    | 1360 | 907  | 1089 | 198  | 291  | 193  | 14.05254 | 12.01801 | 13.57663 | 3.175496  |
| protein_co WAS_prote    | 3947 | 3140 | 3233 | 3802 | 4284 | 2816 | 32.66412 | 33.3229  | 32.28179 | 48.83671  |
| protein_co abhydrolas   | 110  | 102  | 123  | 93   | 146  | 92   | 2.479761 | 2.948673 | 3.345571 | 3.254097  |
| protein_co extended_s   | 4    | 3    | 1    | 94   | 106  | 106  | 0.040597 | 0.039045 | 0.012246 | 1.480801  |
| protein_co Fas_apopto   | 86   | 64   | 76   | 71   | 122  | 131  | 1.275717 | 1.217433 | 1.360246 | 1.634725  |
| protein_co family_witl  | 64   | 77   | 78   | 2217 | 2860 | 3714 | 1.267298 | 1.955234 | 1.863551 | 68.13886  |
| protein_co calsyntenin  | 320  | 301  | 345  | 5    | 7    | 14   | 3.073496 | 3.707306 | 3.998064 | 0.074539  |
| protein_co collectin_si | 85   | 79   | 91   | 21   | 25   | 31   | 0.844597 | 1.006623 | 1.090988 | 0.323877  |
| protein_co ring_finger  | 70   | 61   | 77   | 84   | 91   | 67   | 0.836468 | 0.934739 | 1.110172 | 1.557977  |

|                         |      |      |      |      |      |      |          |          |          |          |
|-------------------------|------|------|------|------|------|------|----------|----------|----------|----------|
| protein_co cullin_4B    | 1186 | 981  | 1057 | 748  | 820  | 740  | 11.34467 | 12.03332 | 12.19917 | 11.10553 |
| protein_co G_protein-   | 1185 | 863  | 1014 | 876  | 1301 | 534  | 13.61212 | 12.7124  | 14.05379 | 15.6186  |
| protein_co solute_carr  | 46   | 42   | 28   | 229  | 356  | 197  | 0.536953 | 0.628691 | 0.394353 | 4.14901  |
| protein_co G_protein-   | 462  | 361  | 376  | 310  | 408  | 265  | 4.580924 | 4.590158 | 4.498285 | 4.770932 |
| protein_co rhomboid_    | 7    | 9    | 10   | 0    | 1    | 2    | 0.154171 | 0.254189 | 0.265737 | 0        |
| protein_co autism_sus   | 2576 | 1946 | 2083 | 871  | 1210 | 1758 | 19.56726 | 18.95555 | 19.09068 | 10.26911 |
| protein_co shroom_fai   | 1174 | 945  | 1013 | 94   | 125  | 109  | 5.760661 | 5.946281 | 5.997382 | 0.715917 |
| protein_co histone_clu  | 157  | 119  | 106  | 46   | 39   | 130  | 9.33046  | 9.069006 | 7.600765 | 4.243182 |
| protein_co cell_divisio | 234  | 221  | 217  | 390  | 378  | 370  | 5.156139 | 6.244683 | 5.769213 | 13.3384  |
| protein_co histone_clu  | 30   | 26   | 23   | 15   | 23   | 59   | 1.360445 | 1.511968 | 1.258449 | 1.0558   |
| protein_co MIT_micro    | 258  | 200  | 214  | 186  | 282  | 256  | 3.699579 | 3.677663 | 3.702495 | 4.139769 |
| protein_co eukaryotic_  | 2751 | 2360 | 2520 | 3492 | 2823 | 4218 | 27.35251 | 30.0904  | 30.23119 | 53.89039 |
| protein_co RIB43A_do    | 11   | 4    | 11   | 15   | 27   | 14   | 0.264644 | 0.123406 | 0.319308 | 0.560132 |
| protein_co thymosin_I   | 290  | 222  | 223  | 114  | 128  | 111  | 5.966698 | 5.857312 | 5.535909 | 3.640587 |
| protein_co chromosom    | 0    | 0    | 0    | 1    | 4    | 0    | 0        | 0        | 0        | 0.030541 |
| protein_co CCR4-NOT_    | 1161 | 846  | 876  | 1113 | 1583 | 1118 | 20.94625 | 19.57284 | 19.06893 | 31.16734 |
| protein_co potassium_   | 1    | 1    | 0    | 64   | 60   | 18   | 0.006407 | 0.008217 | 0        | 0.6365   |
| protein_co tetraspanin  | 22   | 19   | 13   | 289  | 343  | 245  | 0.547839 | 0.606727 | 0.39059  | 11.17013 |
| protein_co neuregulin   | 8    | 1    | 1    | 0    | 7    | 2    | 0.100757 | 0.016151 | 0.015196 | 0        |
| protein_co adenosylhc   | 331  | 274  | 296  | 733  | 831  | 469  | 3.069738 | 3.258616 | 3.312174 | 10.55134 |
| protein_co UDP-Gal:be   | 2289 | 1949 | 2038 | 2050 | 2628 | 2180 | 22.73004 | 24.8185  | 24.41781 | 31.59648 |
| protein_co CD1d_mole    | 2    | 6    | 1    | 93   | 126  | 50   | 0.041625 | 0.160133 | 0.025111 | 3.004226 |
| protein_co spermatog    | 358  | 221  | 267  | 379  | 455  | 454  | 4.0567   | 3.211379 | 3.650474 | 6.665912 |
| protein_co CD1c_mole    | 0    | 0    | 3    | 0    | 0    | 0    | 0        | 0        | 0.118276 | 0        |
| pseudogen: sorting_ne   | 1    | 1    | 5    | 0    | 1    | 0    | 0.038784 | 0.049735 | 0.233976 | 0        |
| protein_co family_witl  | 50   | 30   | 43   | 78   | 116  | 123  | 1.111138 | 0.854926 | 1.152961 | 2.690438 |
| protein_co CD1b_mole    | 0    | 1    | 0    | 0    | 0    | 0    | 0        | 0.043104 | 0        | 0        |
| protein_co dynein_axc   | 9    | 4    | 2    | 32   | 42   | 38   | 0.03405  | 0.019406 | 0.009129 | 0.18791  |
| protein_co CD1e_mole    | 0    | 1    | 0    | 0    | 0    | 0    | 0        | 0.033038 | 0        | 0        |
| protein_co carboxypep   | 17   | 10   | 7    | 3    | 3    | 8    | 0.583551 | 0.440189 | 0.289918 | 0.159839 |
| protein_co neutrophil   | 6    | 6    | 5    | 2    | 2    | 5    | 0.119516 | 0.153262 | 0.120169 | 0.061835 |
| protein_co carboxypep   | 8    | 11   | 8    | 0    | 0    | 0    | 0.145791 | 0.257065 | 0.175905 | 0        |
| protein_co TSR2_20S_I   | 1061 | 821  | 821  | 752  | 852  | 1064 | 32.43175 | 32.18159 | 30.27933 | 35.67823 |
| protein_co protein_ph   | 163  | 102  | 114  | 276  | 327  | 283  | 0.747928 | 0.60018  | 0.631139 | 1.965674 |
| protein_co zinc_finger  | 1848 | 1501 | 1525 | 1911 | 2715 | 2039 | 18.61898 | 19.39296 | 18.53839 | 29.88444 |
| protein_co zinc_finger  | 304  | 256  | 295  | 181  | 259  | 184  | 7.053224 | 7.616639 | 8.258176 | 6.518132 |
| protein_co POM121_t     | 2    | 0    | 0    | 0    | 0    | 0    | 0.030174 | 0        | 0        | 0        |
| protein_co glyceropho   | 582  | 373  | 432  | 126  | 178  | 156  | 6.575901 | 5.404437 | 5.889306 | 2.2097   |
| protein_co dynein_cyt   | 109  | 93   | 88   | 39   | 19   | 29   | 1.732546 | 1.895617 | 1.687676 | 0.962174 |
| protein_co 6-phosphor   | 6    | 5    | 6    | 4    | 11   | 5    | 0.145848 | 0.155857 | 0.175974 | 0.150917 |
| protein_co aminolevul   | 0    | 1    | 0    | 4    | 6    | 1    | 0        | 0.029664 | 0        | 0.143621 |
| protein_co transmembr   | 1405 | 1157 | 1109 | 968  | 1219 | 800  | 28.3723  | 29.96132 | 27.02077 | 30.34059 |
| protein_co protein_ph   | 1065 | 829  | 830  | 1014 | 1339 | 987  | 9.55383  | 9.53656  | 8.983675 | 14.11875 |
| protein_co coatomer_I   | 259  | 250  | 245  | 342  | 407  | 265  | 13.56929 | 16.79603 | 15.48715 | 27.81083 |
| protein_co chromosom    | 686  | 571  | 613  | 402  | 454  | 325  | 4.697218 | 5.013743 | 5.064367 | 4.272412 |
| protein_co 1-acylglyce  | 1218 | 993  | 998  | 701  | 809  | 769  | 9.068282 | 9.480611 | 8.965124 | 8.100769 |
| protein_co polycystic_  | 4    | 5    | 8    | 4    | 1    | 6    | 0.020629 | 0.033067 | 0.04978  | 0.032019 |
| protein_co zinc_finger  | 178  | 137  | 142  | 144  | 140  | 218  | 1.518912 | 1.499141 | 1.462006 | 1.907241 |
| protein_co transgelin_  | 7458 | 6157 | 6547 | 921  | 1121 | 1478 | 218.021  | 230.8099 | 230.9226 | 41.7894  |
| protein_co ELK4_ETS-d   | 1418 | 1230 | 1312 | 761  | 913  | 437  | 6.493803 | 7.223327 | 7.249445 | 5.409262 |
| protein_co SLAM_fami    | 3    | 4    | 6    | 0    | 0    | 0    | 0.046953 | 0.08028  | 0.113302 | 0        |
| protein_co solute_carr  | 410  | 356  | 360  | 439  | 571  | 268  | 5.754237 | 6.407126 | 6.096133 | 9.563105 |
| protein_co dual_specif  | 313  | 247  | 232  | 311  | 426  | 387  | 19.41346 | 19.64558 | 17.3618  | 29.93984 |
| protein_co ring_finger  | 591  | 393  | 431  | 329  | 586  | 396  | 11.45597 | 9.768917 | 10.08022 | 9.898534 |
| protein_co neuroblast   | 228  | 179  | 168  | 47   | 109  | 42   | 4.922157 | 4.955448 | 4.376006 | 1.574885 |
| protein_co 5-hydroxyt   | 1    | 1    | 0    | 17   | 24   | 7    | 0.023634 | 0.030307 | 0        | 0.623617 |
| protein_co intelectin_  | 0    | 0    | 0    | 49   | 60   | 45   | 0        | 0        | 0        | 3.098358 |
| protein_co F11_recept   | 1    | 0    | 0    | 3041 | 3219 | 2602 | 0.009698 | 0        | 0        | 45.77526 |
| protein_co upstream_t   | 674  | 515  | 537  | 674  | 831  | 885  | 17.48969 | 17.13716 | 16.81298 | 27.14642 |
| protein_co spermatog    | 420  | 264  | 335  | 255  | 327  | 194  | 8.434179 | 6.798401 | 8.116828 | 7.948115 |
| protein_co nitrilase_1  | 348  | 273  | 266  | 379  | 374  | 274  | 7.841291 | 7.888243 | 7.23166  | 13.25495 |
| protein_co death_effec  | 252  | 235  | 238  | 179  | 220  | 224  | 4.819039 | 5.762848 | 5.491423 | 5.313044 |
| protein_co zinc_finger  | 266  | 224  | 293  | 66   | 114  | 99   | 2.717966 | 2.935078 | 3.612252 | 1.046735 |
| protein_co nucleopho:   | 3    | 2    | 2    | 29   | 37   | 47   | 0.075064 | 0.064173 | 0.060379 | 1.126262 |
| protein_co ectodyspla:  | 16   | 12   | 5    | 142  | 164  | 134  | 0.142145 | 0.13671  | 0.053596 | 1.958077 |

|                         |      |      |      |      |       |      |          |          |          |          |
|-------------------------|------|------|------|------|-------|------|----------|----------|----------|----------|
| protein_co fibroblast_  | 2    | 2    | 2    | 19   | 13    | 18   | 0.036377 | 0.046648 | 0.043891 | 0.536391 |
| protein_co von_Willeb   | 0    | 0    | 0    | 23   | 29    | 21   | 0        | 0        | 0        | 0.380699 |
| protein_co cytidine_de  | 199  | 151  | 145  | 347  | 399   | 257  | 9.68963  | 9.428452 | 8.518638 | 26.22491 |
| protein_co PTEN_indu    | 563  | 442  | 451  | 514  | 838   | 450  | 6.908945 | 6.955606 | 6.677716 | 9.790321 |
| protein_co UDP-Gal:be   | 948  | 754  | 787  | 666  | 689   | 578  | 13.98733 | 14.26616 | 14.01036 | 15.25215 |
| protein_co erythrocyte  | 34   | 30   | 30   | 83   | 83    | 115  | 0.57513  | 0.650755 | 0.612289 | 2.179193 |
| protein_co ADAM_met     | 1471 | 1110 | 1093 | 98   | 111   | 42   | 15.91858 | 15.40366 | 14.27118 | 1.64607  |
| protein_co family_witl  | 1131 | 752  | 867  | 397  | 535   | 367  | 12.49296 | 10.65197 | 11.555   | 6.806497 |
| protein_co NADH_deh     | 1637 | 1408 | 1350 | 1862 | 1919  | 1385 | 37.18942 | 41.01878 | 37.00433 | 65.65697 |
| protein_co solute_carr  | 0    | 0    | 1    | 3    | 2     | 1    | 0        | 0        | 0.02061  | 0.079541 |
| protein_co Fc_fragmen   | 13   | 6    | 15   | 5    | 0     | 3    | 1.031422 | 0.610455 | 1.435927 | 0.615734 |
| protein_co apolipopro   | 0    | 0    | 0    | 0    | 0     | 1    | 0        | 0        | 0        | 0        |
| protein_co translocase  | 217  | 175  | 176  | 214  | 290   | 272  | 3.757435 | 3.885788 | 3.67699  | 5.751432 |
| protein_co myelin_prc   | 24   | 7    | 7    | 41   | 38    | 25   | 0.575632 | 0.215299 | 0.202572 | 1.526328 |
| protein_co WAP_four-    | 0    | 0    | 2    | 7    | 5     | 2    | 0        | 0        | 0.089236 | 0.401781 |
| protein_co KIAA1967     | 2467 | 1918 | 1984 | 2232 | 2765  | 3047 | 23.83632 | 23.76447 | 23.12916 | 33.47301 |
| protein_co wingless-ty  | 0    | 0    | 0    | 5    | 10    | 6    | 0        | 0        | 0        | 0.137113 |
| protein_co cache_dom    | 669  | 487  | 606  | 794  | 937   | 1310 | 5.655205 | 5.279108 | 6.180774 | 10.41773 |
| protein_co CDC42_sm     | 461  | 436  | 389  | 522  | 587   | 449  | 4.96698  | 6.024033 | 5.056956 | 8.729563 |
| protein_co Rap_guanir   | 57   | 44   | 48   | 71   | 77    | 67   | 0.319819 | 0.316586 | 0.324952 | 0.618328 |
| protein_co erythrocyte  | 623  | 529  | 655  | 1577 | 1800  | 1510 | 4.926219 | 5.364024 | 6.249065 | 19.35476 |
| protein_co MIS18_kin    | 408  | 309  | 306  | 891  | 1185  | 917  | 12.14675 | 11.79689 | 10.99181 | 41.17257 |
| protein_co ALG8_alph    | 492  | 406  | 464  | 428  | 477   | 617  | 13.75664 | 14.55736 | 15.65357 | 18.57469 |
| protein_co F-box_and_   | 2628 | 1946 | 2083 | 1205 | 1677  | 1393 | 51.51629 | 48.9183  | 49.26705 | 36.66374 |
| protein_co chromosom    | 65   | 53   | 49   | 138  | 209   | 197  | 1.217679 | 1.273224 | 1.107551 | 4.01263  |
| protein_co synaptojan   | 233  | 166  | 185  | 46   | 73    | 85   | 1.540087 | 1.407041 | 1.475397 | 0.47193  |
| protein_co PAX3_and_    | 670  | 578  | 570  | 675  | 859   | 770  | 7.863908 | 8.69963  | 8.0721   | 12.29696 |
| protein_co interferon_  | 213  | 123  | 148  | 93   | 122   | 55   | 2.331366 | 1.726416 | 1.954523 | 1.579954 |
| protein_co mitochond    | 689  | 497  | 507  | 1327 | 1525  | 1138 | 16.04929 | 14.84576 | 14.24927 | 47.97754 |
| protein_co DMRT-like_   | 0    | 0    | 0    | 0    | 1     | 0    | 0        | 0        | 0        | 0        |
| protein_co interferon_  | 921  | 692  | 726  | 362  | 425   | 203  | 19.44426 | 18.73472 | 18.49339 | 11.86235 |
| protein_co phosphorik   | 1486 | 1109 | 1216 | 2353 | 2804  | 2688 | 19.51234 | 18.67375 | 19.26514 | 47.956   |
| protein_co SON_DNA_     | 6929 | 5593 | 5882 | 4927 | 5826  | 5645 | 36.8661  | 38.16021 | 37.7598  | 40.68831 |
| protein_co downstre     | 283  | 241  | 246  | 237  | 352   | 283  | 5.690341 | 6.2141   | 5.968085 | 7.396575 |
| protein_co synaptic_v   | 2098 | 1527 | 1642 | 1082 | 1169  | 1168 | 22.27701 | 20.79216 | 21.03645 | 17.83237 |
| protein_co ladinin_1    | 0    | 0    | 0    | 243  | 344   | 426  | 0        | 0        | 0        | 6.085854 |
| protein_co stanniocalc  | 452  | 376  | 443  | 349  | 277   | 595  | 5.458225 | 5.822509 | 6.454532 | 6.541373 |
| protein_co troponin_I   | 71   | 39   | 38   | 32   | 31    | 18   | 0.615036 | 0.433228 | 0.397168 | 0.430252 |
| protein_co cysteine_ar  | 33   | 29   | 24   | 36   | 43    | 42   | 0.182581 | 0.205754 | 0.160214 | 0.309153 |
| protein_co prostate_c   | 42   | 51   | 41   | 271  | 289   | 240  | 5.141986 | 8.00684  | 6.056386 | 51.49694 |
| protein_co homeobox_    | 246  | 193  | 192  | 92   | 117   | 107  | 3.327068 | 3.347289 | 3.133111 | 1.931278 |
| protein_co potassium_   | 1    | 0    | 3    | 1    | 2     | 2    | 0.058394 | 0        | 0.211366 | 0.090635 |
| protein_co ATP_syntha   | 1040 | 868  | 866  | 1168 | 1162  | 1213 | 22.02602 | 23.57392 | 22.12935 | 38.39513 |
| protein_co regulator_c  | 816  | 600  | 709  | 103  | 133   | 143  | 13.58745 | 12.81175 | 14.24433 | 2.662045 |
| protein_co ubiquitin-c  | 3563 | 2913 | 2871 | 1547 | 1650  | 1918 | 39.31038 | 41.21367 | 38.21842 | 26.49185 |
| protein_co chromosom    | 42   | 31   | 25   | 83   | 97    | 50   | 1.09228  | 1.033846 | 0.784463 | 3.350374 |
| protein_co SNF8_ESCR    | 454  | 355  | 338  | 254  | 438   | 298  | 9.179848 | 9.204863 | 8.24602  | 7.971569 |
| protein_co chloride_in  | 2    | 3    | 2    | 108  | 177   | 50   | 0.024295 | 0.046733 | 0.029314 | 2.036326 |
| protein_co coiled-coil  | 93   | 55   | 77   | 168  | 149   | 94   | 1.643094 | 1.246096 | 1.641414 | 4.607011 |
| protein_co runt-relate  | 4371 | 3432 | 3821 | 33   | 36    | 25   | 28.17656 | 28.37029 | 29.71886 | 0.330181 |
| protein_co insulin-like | 2936 | 2327 | 2581 | 7862 | 10177 | 9825 | 16.63876 | 16.91105 | 17.64822 | 69.15576 |
| protein_co gastric_inh  | 1    | 1    | 0    | 2    | 4     | 5    | 0.065489 | 0.08398  | 0        | 0.203296 |
| protein_co carbonyl_r   | 212  | 151  | 165  | 1067 | 1436  | 801  | 5.166675 | 4.719126 | 4.851849 | 40.36177 |
| protein_co carbonyl_r   | 121  | 73   | 94   | 204  | 288   | 189  | 4.853458 | 3.754897 | 4.549271 | 12.70067 |
| protein_co chromosom    | 111  | 60   | 77   | 73   | 85    | 33   | 2.162356 | 1.498873 | 1.809852 | 2.207281 |
| pseudogen: tubulin_be   | 0    | 1    | 0    | 54   | 66    | 43   | 0        | 0.034657 | 0        | 2.265193 |
| protein_co gap_juncti   | 1    | 0    | 0    | 0    | 1     | 3    | 0.016231 | 0        | 0        | 0        |
| protein_co actin_alph   | 2    | 0    | 0    | 72   | 100   | 160  | 0.02284  | 0        | 0        | 1.276217 |
| protein_co MORC_fam     | 425  | 346  | 331  | 245  | 216   | 244  | 4.693419 | 4.899884 | 4.410384 | 4.199494 |
| protein_co chromatin_   | 361  | 253  | 330  | 524  | 565   | 509  | 7.385382 | 6.637364 | 8.145688 | 16.63901 |
| protein_co claudin_14   | 17   | 12   | 5    | 0    | 2     | 0    | 0.410469 | 0.371554 | 0.145663 | 0        |
| protein_co single-min   | 125  | 117  | 145  | 3    | 1     | 6    | 1.319507 | 1.583788 | 1.846792 | 0.049153 |
| protein_co holocarbox   | 494  | 369  | 406  | 190  | 211   | 201  | 3.58238  | 3.431472 | 3.552375 | 2.138596 |
| protein_co golgin_A6_   | 0    | 0    | 0    | 62   | 94    | 11   | 0        | 0        | 0        | 1.420764 |
| protein_co signal_pept  | 1    | 0    | 0    | 77   | 80    | 65   | 0.012123 | 0        | 0        | 1.448822 |

|                        |       |      |      |      |      |      |          |          |          |          |
|------------------------|-------|------|------|------|------|------|----------|----------|----------|----------|
| protein_co Rho_GTPas   | 55    | 35   | 42   | 276  | 334  | 199  | 0.54248  | 0.442689 | 0.499826 | 4.225331 |
| protein_co ADP-depen   | 1107  | 841  | 878  | 362  | 358  | 696  | 11.34337 | 11.05095 | 10.85518 | 5.757493 |
| protein_co parathymo   | 11262 | 8389 | 9011 | 3065 | 4596 | 3141 | 463.6307 | 442.8699 | 447.5872 | 195.8473 |
| protein_co phospholip  | 0     | 0    | 0    | 1    | 1    | 1    | 0        | 0        | 0        | 0.020307 |
| protein_co peptidyl_ar | 0     | 0    | 1    | 0    | 1    | 0    | 0        | 0        | 0.024956 | 0        |
| protein_co adiponectin | 1502  | 1164 | 1138 | 1205 | 1390 | 1120 | 32.35131 | 32.15024 | 29.57415 | 40.28464 |
| protein_co cytochrom   | 350   | 241  | 269  | 188  | 175  | 203  | 5.410981 | 4.77787  | 5.017742 | 4.511244 |
| protein_co proteasom   | 2573  | 2232 | 2228 | 2452 | 2587 | 2663 | 89.3689  | 99.4146  | 93.37054 | 132.1897 |
| protein_co ATPase_typ  | 5024  | 3555 | 4247 | 2575 | 3272 | 2064 | 59.17494 | 53.69541 | 60.35573 | 47.07561 |
| protein_co meiosis_1_  | 72    | 50   | 59   | 118  | 142  | 41   | 1.327598 | 1.182261 | 1.312605 | 3.37712  |
| protein_co proteasom   | 3344  | 2821 | 2892 | 3335 | 3552 | 3793 | 75.85884 | 82.06394 | 79.15644 | 117.4265 |
| protein_co iroquois_h  | 3     | 3    | 8    | 8    | 8    | 7    | 0.044971 | 0.057669 | 0.144694 | 0.186138 |
| protein_co BTG_family  | 132   | 77   | 101  | 201  | 211  | 18   | 2.282257 | 1.707225 | 2.106979 | 5.394078 |
| protein_co hexokinase  | 1344  | 1055 | 1176 | 2516 | 1938 | 2659 | 10.91826 | 10.99046 | 11.52682 | 31.72453 |
| protein_co compleme    | 99    | 89   | 73   | 84   | 93   | 67   | 2.19797  | 2.533879 | 1.955498 | 2.894651 |
| protein_co CUGBP_Ela   | 0     | 0    | 0    | 3    | 6    | 1    | 0        | 0        | 0        | 0.067264 |
| protein_co aldehyde_d  | 116   | 76   | 74   | 390  | 474  | 335  | 1.617378 | 1.358865 | 1.244897 | 8.44012  |
| protein_co STAR-relate | 879   | 737  | 812  | 201  | 219  | 101  | 2.647673 | 2.846769 | 2.95107  | 0.939728 |
| protein_co thioesteras | 103   | 80   | 92   | 150  | 171  | 160  | 2.007345 | 1.999328 | 2.163319 | 4.537394 |
| protein_co trichohyal  | 2     | 2    | 0    | 3    | 7    | 18   | 0.013591 | 0.017429 | 0        | 0.031643 |
| protein_co ubiquitin_l | 891   | 704  | 773  | 335  | 371  | 340  | 5.383199 | 5.454371 | 5.634952 | 3.141507 |
| protein_co autocrine_l | 1326  | 1044 | 1065 | 650  | 972  | 596  | 17.27116 | 17.43764 | 16.73692 | 13.1408  |
| protein_co mediator_c  | 702   | 579  | 636  | 110  | 138  | 185  | 17.10852 | 18.09519 | 18.70167 | 4.161007 |
| protein_co ral_guanine | 42    | 24   | 33   | 26   | 20   | 6    | 0.521138 | 0.381878 | 0.494044 | 0.500734 |
| protein_co ISL_LIM_hc  | 3     | 9    | 4    | 0    | 3    | 3    | 0.074785 | 0.287702 | 0.120309 | 0        |
| protein_co ring_finger | 1223  | 1007 | 1009 | 361  | 390  | 389  | 15.99177 | 16.88531 | 15.91876 | 7.326689 |
| protein_co coiled-coil | 28    | 20   | 15   | 23   | 26   | 31   | 0.439398 | 0.402475 | 0.284014 | 0.560219 |
| protein_co GC-rich_pr  | 1486  | 1189 | 1171 | 1537 | 1795 | 1127 | 18.65058 | 19.1366  | 17.73285 | 29.9418  |
| protein_co NEDD8_act   | 738   | 573  | 671  | 1103 | 1105 | 1492 | 18.1272  | 18.04839 | 19.88589 | 42.0514  |
| protein_co transmembr  | 229   | 183  | 173  | 483  | 418  | 450  | 4.402548 | 4.511584 | 4.012941 | 14.41273 |
| protein_co G_protein+  | 0     | 1    | 1    | 96   | 130  | 72   | 0        | 0.012611 | 0.011866 | 1.465365 |
| protein_co coiled-coil | 3     | 2    | 0    | 1    | 2    | 2    | 0.046258 | 0.039546 | 0        | 0.023933 |
| protein_co angiotensin | 129   | 103  | 104  | 65   | 87   | 58   | 1.245124 | 1.27488  | 1.211168 | 0.973793 |
| protein_co testis_pros | 11    | 6    | 4    | 17   | 13   | 4    | 0.218555 | 0.152872 | 0.095891 | 0.524261 |
| protein_co urocanate_  | 0     | 0    | 0    | 0    | 1    | 2    | 0        | 0        | 0        | 0        |
| protein_co EF-hand_ca  | 1290  | 998  | 1096 | 846  | 1143 | 905  | 10.48866 | 10.40568 | 10.75199 | 10.67656 |
| protein_co spondin_2_  | 866   | 595  | 639  | 93   | 129  | 41   | 21.72646 | 19.14244 | 19.34283 | 3.621467 |
| protein_co coiled-coil | 412   | 305  | 352  | 632  | 619  | 407  | 16.66841 | 15.82363 | 17.18255 | 39.68666 |
| protein_co C-terminal  | 4516  | 3509 | 3545 | 2968 | 3844 | 2923 | 49.82478 | 49.64599 | 47.19063 | 50.82599 |
| protein_co leucine_ri  | 2     | 0    | 0    | 2    | 1    | 0    | 0.039157 | 0        | 0        | 0.060776 |
| pseudogen: ankyrin_re  | 3     | 1    | 6    | 464  | 814  | 484  | 0.047205 | 0.020178 | 0.11391  | 11.33216 |
| protein_co tubulin_po  | 75    | 59   | 53   | 7    | 5    | 5    | 2.025778 | 2.043582 | 1.727248 | 0.293467 |
| protein_co zinc_finger | 430   | 310  | 374  | 94   | 120  | 66   | 9.849881 | 9.106124 | 10.33671 | 3.342111 |
| protein_co ATPase_H+   | 1570  | 1215 | 1249 | 563  | 644  | 807  | 21.71603 | 21.55094 | 20.84449 | 12.08703 |
| protein_co agouti_rela | 1     | 3    | 4    | 0    | 0    | 1    | 0.061374 | 0.236112 | 0.296207 | 0        |
| protein_co zinc_finger | 42    | 25   | 39   | 66   | 131  | 40   | 0.476732 | 0.363894 | 0.534119 | 1.162785 |
| protein_co RGD_motif   | 83    | 75   | 64   | 686  | 814  | 418  | 0.830354 | 0.962179 | 0.772527 | 10.65222 |
| protein_co chromosom   | 27    | 18   | 23   | 52   | 38   | 12   | 0.736492 | 0.629631 | 0.756973 | 2.2016   |
| protein_co family_witl | 702   | 552  | 498  | 1208 | 1585 | 923  | 5.621037 | 5.667973 | 4.811237 | 15.01332 |
| protein_co regulator_c | 1389  | 1056 | 1134 | 566  | 711  | 528  | 10.43754 | 10.17581 | 10.28151 | 6.601501 |
| protein_co protein_ser | 1162  | 795  | 911  | 612  | 834  | 939  | 15.65246 | 13.7326  | 14.80617 | 12.79553 |
| protein_co zyxin       | 7979  | 5625 | 6183 | 3100 | 4260 | 3580 | 150.0744 | 135.6719 | 140.3154 | 90.50035 |
| protein_co active_BCR  | 4007  | 3202 | 3322 | 1667 | 2323 | 1156 | 33.58147 | 34.41208 | 33.59139 | 21.68435 |
| pseudogen: family_witl | 1     | 0    | 2    | 5    | 1    | 0    | 0.018035 | 0        | 0.04352  | 0.139961 |
| protein_co LY6/PLAUR   | 1     | 1    | 2    | 5    | 7    | 5    | 0.018764 | 0.024062 | 0.045279 | 0.145618 |
| protein_co coiled-coil | 606   | 513  | 569  | 848  | 1104 | 672  | 7.130577 | 7.740674 | 8.078159 | 15.4874  |
| protein_co zinc_finger | 79    | 61   | 57   | 43   | 54   | 50   | 0.900197 | 0.891353 | 0.78367  | 0.760518 |
| protein_co coiled-coil | 22    | 11   | 15   | 16   | 19   | 9    | 0.779139 | 0.499568 | 0.640961 | 0.879514 |
| protein_co zinc_finger | 32    | 36   | 46   | 34   | 27   | 32   | 0.938974 | 1.354614 | 1.628581 | 1.548506 |
| protein_co natriuretic | 812   | 678  | 680  | 286  | 371  | 155  | 10.32954 | 11.06023 | 10.43715 | 5.647049 |
| pseudogen: zinc_finger | 1     | 3    | 1    | 1    | 6    | 5    | 0.034682 | 0.133424 | 0.041846 | 0.053831 |
| protein_co zinc_finger | 84    | 88   | 79   | 32   | 22   | 54   | 1.553752 | 2.087346 | 1.763103 | 0.918719 |
| protein_co zinc_finger | 16    | 19   | 19   | 22   | 27   | 33   | 0.255357 | 0.388858 | 0.365873 | 0.544981 |
| protein_co zinc_finger | 38    | 35   | 38   | 12   | 34   | 54   | 0.422332 | 0.498825 | 0.509568 | 0.207006 |
| protein_co glucosamin  | 1264  | 1052 | 1136 | 115  | 141  | 101  | 11.18705 | 11.9397  | 12.13095 | 1.579781 |

|                         |      |      |      |      |       |      |          |          |          |          |
|-------------------------|------|------|------|------|-------|------|----------|----------|----------|----------|
| protein_co tumor_nec    | 16   | 14   | 17   | 17   | 28    | 12   | 0.810195 | 0.90909  | 1.038643 | 1.33613  |
| protein_co Rho_GTPas    | 3450 | 2793 | 3010 | 2213 | 2539  | 2055 | 18.19896 | 18.8933  | 19.15764 | 18.11921 |
| protein_co prostaglan   | 85   | 51   | 62   | 1    | 0     | 0    | 1.891624 | 1.455444 | 1.664775 | 0.034542 |
| protein_co calmodulin   | 8412 | 6217 | 6592 | 6297 | 7529  | 5965 | 155.5358 | 147.4081 | 147.0606 | 180.7155 |
| protein_co DNA_fragm    | 1269 | 1008 | 1045 | 1714 | 2173  | 1516 | 9.864627 | 10.04822 | 9.801294 | 20.68047 |
| protein_co coiled-coil_ | 335  | 256  | 238  | 221  | 338   | 210  | 11.10117 | 10.87861 | 9.51588  | 11.36702 |
| protein_co IQ_motif_c   | 46   | 35   | 38   | 60   | 61    | 73   | 0.940663 | 0.917812 | 0.937579 | 1.9044   |
| protein_co transmemt    | 77   | 73   | 64   | 24   | 54    | 62   | 1.319639 | 1.60434  | 1.323404 | 0.638419 |
| protein_co BSD_domai    | 1462 | 1053 | 1133 | 682  | 791   | 889  | 14.90611 | 13.76749 | 13.93782 | 10.79274 |
| protein_co zinc_finger_ | 8    | 2    | 8    | 11   | 10    | 14   | 0.193062 | 0.061894 | 0.232941 | 0.412032 |
| protein_co ATPase_fan   | 1339 | 961  | 1039 | 793  | 1175  | 1822 | 14.55395 | 13.3947  | 13.62586 | 13.37839 |
| protein_co SSU72_RNA    | 2606 | 2011 | 2082 | 2239 | 2761  | 2605 | 45.61231 | 45.13663 | 43.96797 | 60.82642 |
| protein_co ubiquitin-c  | 1526 | 1200 | 1231 | 1156 | 1679  | 1563 | 29.1463  | 29.39135 | 28.36841 | 34.27024 |
| protein_co zinc_finger_ | 1117 | 874  | 914  | 404  | 444   | 322  | 16.86289 | 16.91997 | 16.64843 | 9.466529 |
| protein_co fibronectin  | 36   | 43   | 36   | 40   | 28    | 45   | 0.617877 | 0.946406 | 0.745504 | 1.06559  |
| protein_co C3_and_PZ    | 28   | 21   | 17   | 274  | 409   | 247  | 0.219112 | 0.210735 | 0.160511 | 3.328048 |
| protein_co nuclear_re   | 1620 | 1147 | 1294 | 3729 | 5016  | 3492 | 31.5981  | 28.68922 | 30.45287 | 112.8935 |
| protein_co ankyrin_re   | 28   | 34   | 33   | 302  | 381   | 189  | 0.407993 | 0.635305 | 0.580171 | 6.830174 |
| protein_co coiled-coil_ | 220  | 188  | 200  | 456  | 486   | 671  | 13.41457 | 14.70013 | 14.71405 | 43.15681 |
| protein_co VMA21_var    | 477  | 375  | 360  | 667  | 861   | 850  | 4.741687 | 4.7803   | 4.317825 | 10.29131 |
| protein_co kalirin_Rhc  | 880  | 752  | 852  | 193  | 187   | 165  | 3.818547 | 4.184491 | 4.460701 | 1.29988  |
| protein_co cartilage_ir | 151  | 74   | 94   | 399  | 431   | 182  | 1.67227  | 1.050922 | 1.256046 | 6.858559 |
| pseudogen: family_witl  | 42   | 32   | 31   | 68   | 107   | 60   | 0.789015 | 0.770895 | 0.702661 | 1.982783 |
| protein_co ATP-bindin   | 1    | 1    | 0    | 138  | 152   | 64   | 0.013494 | 0.017304 | 0        | 2.890248 |
| protein_co trefoil_fact | 0    | 0    | 0    | 6    | 10    | 19   | 0        | 0        | 0        | 0.393759 |
| protein_co trefoil_fact | 0    | 0    | 0    | 0    | 1     | 0    | 0        | 0        | 0        | 0        |
| protein_co transmemt    | 1    | 0    | 2    | 3    | 2     | 3    | 0.014685 | 0        | 0.035437 | 0.068381 |
| protein_co ubiquitin_   | 7    | 3    | 3    | 0    | 0     | 0    | 0.119183 | 0.065501 | 0.061629 | 0        |
| protein_co radial_spok  | 17   | 34   | 41   | 0    | 2     | 2    | 0.276781 | 0.709866 | 0.805415 | 0        |
| protein_co solute_carr  | 2709 | 2046 | 2090 | 750  | 946   | 765  | 34.66841 | 33.57685 | 32.27151 | 14.89761 |
| protein_co phosphodi    | 34   | 15   | 21   | 496  | 552   | 454  | 0.467251 | 0.264346 | 0.348208 | 10.57995 |
| protein_co WD_repeat    | 504  | 364  | 396  | 473  | 639   | 931  | 10.71772 | 9.926189 | 10.1605  | 15.61218 |
| protein_co NADH_deh     | 372  | 287  | 248  | 423  | 505   | 375  | 8.596888 | 8.505299 | 6.915094 | 15.17292 |
| protein_co PBX/knotte   | 418  | 332  | 393  | 428  | 500   | 518  | 3.57469  | 3.640907 | 4.055111 | 5.681152 |
| protein_co cystathioni  | 1892 | 1491 | 1518 | 7519 | 10728 | 9136 | 33.40208 | 33.75509 | 32.33495 | 206.0359 |
| protein_co U2_small_r   | 2711 | 2151 | 2376 | 3186 | 3849  | 3695 | 27.08113 | 27.55415 | 28.63728 | 49.39848 |
| protein_co crystallin_  | 0    | 0    | 0    | 2    | 1     | 0    | 0        | 0        | 0        | 0.127796 |
| protein_co heat_shock   | 29   | 8    | 11   | 16   | 19    | 20   | 0.716067 | 0.253311 | 0.327715 | 0.613205 |
| protein_co ribosomal_   | 1415 | 1122 | 1361 | 1865 | 2443  | 3055 | 13.04036 | 13.25975 | 15.1335  | 26.67734 |
| protein_co pyridoxal_   | 4397 | 3524 | 3702 | 2243 | 2742  | 2219 | 27.99014 | 28.76696 | 28.43368 | 22.16197 |
| protein_co glucose-6-p  | 3097 | 2240 | 2492 | 1010 | 1228  | 1097 | 55.19513 | 51.19375 | 53.58653 | 27.93903 |
| protein_co cystatin_B   | 1482 | 1198 | 1202 | 1118 | 1306  | 1282 | 32.12714 | 33.30351 | 31.43955 | 37.61804 |
| protein_co ribosomal_   | 895  | 720  | 748  | 1005 | 1359  | 1942 | 13.88702 | 14.32609 | 14.00347 | 24.20374 |
| protein_co 1-acylglyce  | 1482 | 1193 | 1340 | 350  | 453   | 256  | 12.04977 | 12.43885 | 13.14569 | 4.417016 |
| protein_co trafficking_ | 1515 | 1253 | 1356 | 844  | 995   | 1055 | 10.18325 | 10.80026 | 10.99719 | 8.805354 |
| protein_co GRB2-assoc   | 86   | 75   | 75   | 9    | 5     | 9    | 0.854714 | 0.955857 | 0.899356 | 0.138834 |
| protein_co chromosom    | 1233 | 981  | 1013 | 1209 | 1669  | 1743 | 34.53727 | 35.23735 | 34.23595 | 52.56319 |
| protein_co inducible_   | 93   | 72   | 84   | 370  | 461   | 356  | 0.615928 | 0.611489 | 0.671235 | 3.803464 |
| protein_co chromosom    | 70   | 46   | 42   | 37   | 64    | 38   | 0.72425  | 0.61032  | 0.52431  | 0.594186 |
| protein_co zinc_finger_ | 28   | 8    | 23   | 49   | 59    | 107  | 0.75239  | 0.275667 | 0.745694 | 2.043674 |
| protein_co leucine_ri   | 79   | 68   | 64   | 84   | 127   | 116  | 1.464734 | 1.616776 | 1.431725 | 2.41736  |
| protein_co integrin_be  | 44   | 65   | 55   | 12   | 14    | 11   | 0.431533 | 0.817494 | 0.650837 | 0.182673 |
| protein_co family_witl  | 421  | 327  | 371  | 659  | 837   | 820  | 21.29525 | 21.21083 | 22.64241 | 51.73882 |
| protein_co ral_guanine  | 1494 | 1210 | 1208 | 615  | 708   | 351  | 12.04292 | 12.50766 | 11.74888 | 7.694615 |
| protein_co formimino    | 44   | 45   | 50   | 48   | 82    | 42   | 1.055325 | 1.384062 | 1.446944 | 1.786921 |
| protein_co spermatog    | 915  | 733  | 746  | 772  | 847   | 685  | 18.62977 | 19.13814 | 18.32624 | 24.39688 |
| protein_co lanosterol   | 5695 | 4390 | 4683 | 2442 | 2791  | 4226 | 54.10021 | 53.47849 | 53.67567 | 36.00654 |
| protein_co vav_2_guar   | 1196 | 903  | 964  | 907  | 1315  | 923  | 10.99401 | 10.64442 | 10.69178 | 12.94085 |
| protein_co minichrom    | 2048 | 1601 | 1914 | 1234 | 1493  | 1289 | 15.16355 | 15.20098 | 17.09861 | 14.18132 |
| protein_co chromosom    | 458  | 324  | 335  | 421  | 597   | 368  | 7.218698 | 6.54859  | 6.370687 | 10.29926 |
| protein_co pericentrin  | 1741 | 1382 | 1450 | 1056 | 1408  | 1329 | 7.730636 | 7.869259 | 7.768417 | 7.27798  |
| protein_co DIP2_disco   | 1461 | 1182 | 1220 | 630  | 752   | 351  | 9.393434 | 9.74543  | 9.46416  | 6.287025 |
| protein_co S100_calci   | 9    | 8    | 13   | 0    | 0     | 0    | 0.434614 | 0.495405 | 0.757448 | 0        |
| protein_co protein_ar   | 2432 | 1977 | 2087 | 740  | 879   | 814  | 28.28988 | 29.4906  | 29.29126 | 13.36072 |
| protein_co claudin_do   | 3    | 5    | 3    | 17   | 17    | 4    | 0.144425 | 0.308675 | 0.174257 | 1.270284 |

|                        |       |       |       |      |      |      |          |          |          |          |
|------------------------|-------|-------|-------|------|------|------|----------|----------|----------|----------|
| protein_co ADAM_met    | 122   | 80    | 86    | 161  | 224  | 77   | 1.159421 | 0.974946 | 0.986115 | 2.374858 |
| protein_co calcium_ch  | 712   | 549   | 519   | 825  | 1151 | 661  | 11.94907 | 11.81505 | 10.50919 | 21.4901  |
| protein_co solute_carr | 657   | 501   | 562   | 130  | 233  | 384  | 9.015728 | 8.816221 | 9.305073 | 2.768913 |
| processed_ zinc_finger | 208   | 173   | 211   | 473  | 403  | 549  | 2.31886  | 2.473242 | 2.838191 | 8.184699 |
| protein_co chromosom   | 53    | 50    | 44    | 110  | 101  | 87   | 1.944578 | 2.352496 | 1.947826 | 6.264302 |
| protein_co lipocalin_1 | 2     | 1     | 1     | 0    | 1    | 0    | 0.120851 | 0.077487 | 0.072907 | 0        |
| protein_co zinc_finger | 226   | 142   | 204   | 368  | 433  | 472  | 1.556344 | 1.253992 | 1.695022 | 3.933466 |
| protein_co G-protein_  | 2767  | 2112  | 2266  | 435  | 619  | 490  | 35.71282 | 34.95572 | 35.28767 | 8.714344 |
| protein_co chromosom   | 504   | 352   | 382   | 252  | 366  | 371  | 6.513938 | 5.833982 | 5.956958 | 5.055267 |
| protein_co homeodon    | 3     | 10    | 6     | 5    | 7    | 3    | 0.05737  | 0.245228 | 0.138439 | 0.148409 |
| protein_co chromosom   | 69    | 47    | 49    | 17   | 17   | 30   | 1.19476  | 1.043612 | 1.023707 | 0.456889 |
| protein_co torsin_fami | 209   | 152   | 160   | 216  | 251  | 201  | 2.803208 | 2.614339 | 2.589268 | 4.496693 |
| protein_co ST6_(alpha  | 1125  | 823   | 845   | 720  | 874  | 442  | 21.44361 | 20.11659 | 19.43346 | 21.30141 |
| protein_co SH3KBP1_k   | 2357  | 1880  | 1913  | 1606 | 1877 | 1335 | 46.77096 | 47.83919 | 45.8015  | 49.46439 |
| protein_co retinol_def | 136   | 81    | 113   | 170  | 269  | 243  | 2.110206 | 1.611685 | 2.115497 | 4.094165 |
| protein_co zyg-11_rela | 1109  | 838   | 831   | 690  | 866  | 695  | 12.20968 | 11.83113 | 11.0388  | 11.79105 |
| protein_co zinc_finger | 230   | 166   | 218   | 391  | 552  | 365  | 4.252644 | 3.935941 | 4.863352 | 11.22118 |
| protein_co protein_kir | 419   | 304   | 350   | 1201 | 1552 | 820  | 5.821309 | 5.416136 | 5.867089 | 25.89883 |
| protein_co spectrin_bo | 24    | 26    | 22    | 49   | 91   | 21   | 0.12971  | 0.180195 | 0.14346  | 0.411043 |
| protein_co BR_serine/t | 372   | 326   | 308   | 499  | 606  | 333  | 5.665179 | 6.366455 | 5.659388 | 11.7951  |
| protein_co cytochrom   | 8     | 3     | 10    | 18   | 33   | 11   | 0.180086 | 0.086601 | 0.271606 | 0.628918 |
| protein_co transmembr  | 2     | 0     | 0     | 0    | 1    | 0    | 0.158145 | 0        | 0        | 0        |
| protein_co NLR_family  | 0     | 0     | 0     | 0    | 2    | 0    | 0        | 0        | 0        | 0        |
| protein_co phosphatic  | 24    | 12    | 14    | 140  | 138  | 38   | 0.537165 | 0.344419 | 0.37807  | 4.863567 |
| protein_co TAO_kinase  | 2717  | 2129  | 2412  | 1479 | 1697 | 1206 | 10.26841 | 10.31807 | 10.99864 | 8.675854 |
| protein_co mediator_c  | 214   | 208   | 181   | 159  | 181  | 203  | 7.012204 | 8.74004  | 7.155951 | 8.086645 |
| protein_co death_effec | 591   | 493   | 488   | 858  | 1071 | 598  | 14.63147 | 15.65153 | 14.577   | 32.96994 |
| protein_co SIK_family_ | 740   | 623   | 729   | 614  | 775  | 597  | 5.480748 | 5.917053 | 6.514538 | 7.058411 |
| protein_co myelin_prc  | 2     | 1     | 1     | 18   | 19   | 25   | 0.023658 | 0.015169 | 0.014272 | 0.330483 |
| protein_co adhesion_n  | 5     | 7     | 4     | 0    | 0    | 0    | 0.041791 | 0.075028 | 0.040339 | 0        |
| protein_co NIMA-relati | 76    | 72    | 73    | 198  | 279  | 235  | 0.995153 | 1.208977 | 1.153312 | 4.024128 |
| protein_co TLC_domai   | 95    | 78    | 80    | 183  | 210  | 325  | 4.38009  | 4.611725 | 4.450384 | 13.09607 |
| protein_co proprotein  | 1466  | 1183  | 1226  | 656  | 811  | 1212 | 7.354313 | 7.610308 | 7.420731 | 5.107901 |
| protein_co scaffold_at | 2792  | 2116  | 2366  | 3038 | 4079 | 3724 | 37.71735 | 36.65648 | 38.56458 | 63.70067 |
| protein_co S100_calci  | 20    | 6     | 10    | 12   | 18   | 34   | 0.358076 | 0.137754 | 0.216019 | 0.33347  |
| protein_co chromatin_  | 1143  | 1005  | 1036  | 1216 | 1572 | 1428 | 20.99306 | 23.67037 | 22.95818 | 34.66519 |
| protein_co zinc_finger | 534   | 420   | 421   | 499  | 715  | 375  | 6.966964 | 7.026854 | 6.627236 | 10.10493 |
| protein_co flavin_ader | 688   | 503   | 605   | 1143 | 1211 | 1129 | 12.14621 | 11.38753 | 12.88712 | 31.32052 |
| protein_co SHC_(Src_h  | 10493 | 8122  | 8352  | 3775 | 4461 | 3746 | 141.3436 | 140.2971 | 135.7422 | 78.92667 |
| processed_ vacuolar_p  | 649   | 543   | 550   | 366  | 376  | 451  | 8.984831 | 9.639941 | 9.187047 | 7.864602 |
| protein_co NLR_family  | 513   | 358   | 378   | 700  | 841  | 378  | 5.878441 | 5.260622 | 5.226183 | 12.45011 |
| protein_co adenosine_  | 6037  | 4739  | 5214  | 6798 | 7420 | 7372 | 42.76058 | 43.04458 | 44.55962 | 74.73672 |
| protein_co interleukin | 29    | 16    | 23    | 98   | 139  | 84   | 0.229931 | 0.162678 | 0.220026 | 1.206023 |
| protein_co ubiquitin-c | 1063  | 807   | 799   | 588  | 762  | 881  | 15.52775 | 15.11674 | 14.08219 | 13.33163 |
| protein_co cholinergic | 8     | 3     | 5     | 18   | 37   | 46   | 0.063937 | 0.030746 | 0.048215 | 0.223289 |
| protein_co CREB_regul  | 652   | 544   | 538   | 330  | 384  | 347  | 11.56289 | 12.37164 | 11.51196 | 9.083712 |
| protein_co anoctamin   | 607   | 500   | 507   | 627  | 726  | 514  | 8.861221 | 9.36018  | 8.930193 | 14.20702 |
| protein_co farnesyl_di | 386   | 341   | 360   | 106  | 147  | 218  | 8.973499 | 10.16572 | 10.09776 | 3.824819 |
| protein_co RUN_and_5   | 1079  | 757   | 818   | 739  | 1042 | 760  | 14.86757 | 13.37592 | 13.5994  | 15.80496 |
| pseudogen glucosidase  | 167   | 120   | 144   | 33   | 30   | 51   | 2.683562 | 2.472781 | 2.791937 | 0.823075 |
| protein_co family_witl | 1197  | 844   | 950   | 716  | 942  | 573  | 18.21134 | 16.46643 | 17.43891 | 16.90796 |
| protein_co progesteri_ | 41    | 35    | 53    | 74   | 131  | 140  | 0.90812  | 0.994116 | 1.416392 | 2.544027 |
| protein_co polyamine-  | 277   | 180   | 210   | 499  | 615  | 567  | 12.16155 | 10.13424 | 11.1244  | 34.00479 |
| protein_co solute_carr | 670   | 494   | 579   | 476  | 571  | 885  | 4.519032 | 4.272744 | 4.711913 | 4.983197 |
| protein_co lamin_A/C   | 18885 | 14643 | 15040 | 778  | 1158 | 875  | 277.5918 | 276.0127 | 266.7384 | 17.75006 |
| protein_co chemokine   | 0     | 0     | 0     | 0    | 0    | 1    | 0        | 0        | 0        | 0        |
| protein_co neurobeact  | 494   | 396   | 429   | 1391 | 1911 | 1231 | 2.624184 | 2.697564 | 2.74962  | 11.46898 |
| protein_co coiled-coil | 660   | 522   | 532   | 692  | 906  | 805  | 12.8306  | 13.01316 | 12.47851 | 20.88044 |
| protein_co parathyroid | 14    | 10    | 14    | 150  | 225  | 176  | 0.309213 | 0.28323  | 0.373084 | 5.142237 |
| protein_co ubiquilin_4 | 1496  | 1131  | 1198  | 1134 | 1438 | 1040 | 19.61618 | 19.01756 | 18.95343 | 23.0795  |
| protein_co myosin_lig  | 1     | 1     | 1     | 1    | 2    | 3    | 0.046334 | 0.059417 | 0.055905 | 0.071917 |
| protein_co protein_ph  | 159   | 121   | 134   | 246  | 386  | 170  | 7.231341 | 7.05694  | 7.353169 | 17.3655  |
| protein_co G_patch_di  | 690   | 505   | 560   | 743  | 960  | 1820 | 13.13073 | 12.32368 | 12.85807 | 21.94618 |
| pseudogen -            | 250   | 221   | 212   | 150  | 166  | 208  | 8.748138 | 9.916929 | 8.950752 | 8.146993 |
| protein_co leucine_ric | 4     | 2     | 0     | 2    | 4    | 1    | 0.095743 | 0.061388 | 0        | 0.074303 |

|                         |       |       |       |       |       |       |          |          |          |          |
|-------------------------|-------|-------|-------|-------|-------|-------|----------|----------|----------|----------|
| protein_co alpha-2-gly  | 0     | 0     | 0     | 8     | 4     | 0     | 0        | 0        | 0        | 0.287241 |
| protein_co fibroblast   | 68    | 77    | 65    | 1903  | 2459  | 1621  | 1.021307 | 1.483022 | 1.177901 | 44.36258 |
| protein_co cytochrom    | 0     | 0     | 0     | 1     | 2     | 0     | 0        | 0        | 0        | 0.031398 |
| protein_co cytochrom    | 6     | 8     | 7     | 5     | 4     | 5     | 0.121582 | 0.207882 | 0.171145 | 0.15726  |
| protein_co nucleus_ac   | 2440  | 1790  | 2021  | 4594  | 6361  | 4964  | 25.7394  | 24.21425 | 25.72308 | 75.21944 |
| protein_co hexokinase   | 5     | 6     | 4     | 0     | 1     | 0     | 0.076468 | 0.117671 | 0.07381  | 0        |
| protein_co lymphocyt    | 5     | 1     | 0     | 1     | 2     | 2     | 0.086068 | 0.022074 | 0        | 0.026718 |
| protein_co immediate    | 1009  | 745   | 710   | 1041  | 1391  | 1371  | 16.12544 | 15.26813 | 13.69073 | 25.82269 |
| protein_co zinc_finger  | 313   | 251   | 254   | 303   | 383   | 413   | 6.735464 | 6.926379 | 6.59485  | 10.12037 |
| protein_co cleavage_ar  | 693   | 530   | 606   | 959   | 1135  | 1125  | 18.69665 | 18.33647 | 19.72656 | 40.15871 |
| protein_co lymphocyt    | 1167  | 836   | 864   | 1537  | 1898  | 1212  | 38.56283 | 35.42531 | 34.44766 | 78.83196 |
| protein_co vacuolar_p   | 1823  | 1425  | 1520  | 767   | 856   | 596   | 36.57702 | 36.66451 | 36.79708 | 23.88622 |
| protein_co tonsoku-lik  | 779   | 506   | 615   | 1775  | 2241  | 1639  | 5.534443 | 4.609951 | 5.271808 | 19.57336 |
| protein_co prostaglan   | 5     | 9     | 6     | 38    | 31    | 18    | 0.16499  | 0.380836 | 0.238883 | 1.946258 |
| protein_co melanoma     | 1484  | 1200  | 1294  | 1073  | 1480  | 1017  | 16.687   | 17.30354 | 17.55604 | 18.72727 |
| processed_ RecQ_prot    | 910   | 627   | 671   | 1558  | 2232  | 1699  | 10.94943 | 9.674463 | 9.741382 | 29.09698 |
| protein_co leucine_ri   | 582   | 444   | 483   | 343   | 443   | 508   | 5.126806 | 5.015523 | 5.133565 | 4.689737 |
| protein_co zinc_finger  | 320   | 234   | 274   | 218   | 213   | 112   | 3.211645 | 3.011638 | 3.317998 | 3.395975 |
| polymorph collagen_ty   | 95    | 74    | 76    | 1998  | 2802  | 2291  | 1.469179 | 1.467548 | 1.41812  | 47.95978 |
| protein_co protein_ph   | 356   | 267   | 293   | 427   | 561   | 275   | 3.872152 | 3.724114 | 3.845192 | 7.208762 |
| protein_co forkhead_b   | 0     | 0     | 0     | 2019  | 2612  | 1983  | 0        | 0        | 0        | 58.70652 |
| protein_co ORAI_calci   | 4097  | 3083  | 3190  | 592   | 789   | 472   | 17.83902 | 17.21424 | 16.75883 | 4.000895 |
| protein_co alkB_alkyla  | 305   | 203   | 198   | 325   | 478   | 267   | 6.794041 | 5.79874  | 5.321591 | 11.23679 |
| protein_co SH2B_adap    | 95    | 48    | 71    | 340   | 477   | 134   | 2.161355 | 1.400403 | 1.948986 | 12.00637 |
| protein_co chromosom    | 333   | 244   | 250   | 305   | 314   | 295   | 3.767039 | 3.539607 | 3.412274 | 5.355329 |
| protein_co sequestoso   | 2970  | 2309  | 2379  | 829   | 1105  | 1063  | 46.63876 | 46.49689 | 45.07472 | 20.20578 |
| protein_co mannosyl_    | 2125  | 1635  | 1664  | 1832  | 2453  | 1922  | 32.9175  | 32.47843 | 31.10064 | 44.04777 |
| protein_co ribosomal    | 25518 | 19862 | 20928 | 39010 | 46922 | 35612 | 1149.414 | 1147.26  | 1137.38  | 2727.32  |
| protein_co mastermini   | 1908  | 1536  | 1663  | 1534  | 2056  | 1924  | 13.64021 | 14.08132 | 14.34442 | 17.02153 |
| protein_co leucine-ricl | 1103  | 851   | 877   | 1012  | 1256  | 923   | 9.418993 | 9.318969 | 9.036008 | 13.41343 |
| protein_co F-box_and    | 34    | 21    | 17    | 7     | 18    | 13    | 0.525812 | 0.416466 | 0.317211 | 0.168027 |
| protein_co N-acyl_pho   | 178   | 181   | 178   | 89    | 111   | 81    | 1.673301 | 2.181935 | 2.018933 | 1.298597 |
| protein_co secretoglo   | 0     | 3     | 0     | 1     | 0     | 0     | 0        | 0.252646 | 0        | 0.101932 |
| protein_co proteasom    | 1871  | 1433  | 1594  | 984   | 1033  | 1535  | 28.72666 | 28.21414 | 29.52893 | 23.44968 |
| protein_co CUGBP_Ela    | 5     | 6     | 2     | 138   | 184   | 79    | 0.054932 | 0.084531 | 0.026511 | 2.353236 |
| protein_co major_facil  | 1708  | 1265  | 1423  | 629   | 847   | 592   | 37.70629 | 35.81177 | 37.90346 | 21.55296 |
| processed_ -            | 0     | 0     | 0     | 0     | 0     | 1     | 0        | 0        | 0        | 0        |
| pseudogeni -            | 5     | 0     | 0     | 9     | 8     | 5     | 0.189073 | 0        | 0        | 0.52824  |
| protein_co ubiquitin_s  | 3     | 4     | 4     | 7     | 10    | 11    | 0.098577 | 0.168549 | 0.158586 | 0.357014 |
| pseudogeni tubulin_al   | 22    | 14    | 10    | 8     | 11    | 8     | 0.522584 | 0.426452 | 0.286603 | 0.294954 |
| protein_co YdjC_homoc   | 555   | 448   | 451   | 716   | 980   | 661   | 16.13389 | 16.70065 | 15.81869 | 32.30647 |
| protein_co coiled-coil  | 16    | 3     | 14    | 0     | 5     | 4     | 0.331965 | 0.079818 | 0.350468 | 0        |
| protein_co dishevelled  | 4394  | 3465  | 3539  | 1874  | 2402  | 1865  | 39.21483 | 39.65545 | 38.10824 | 25.95914 |
| protein_co adaptor-rel  | 9950  | 8028  | 8653  | 6542  | 7119  | 7406  | 223.1256 | 230.857  | 234.1214 | 227.7023 |
| protein_co ATP-bindin   | 963   | 780   | 773   | 548   | 797   | 785   | 15.87732 | 16.49129 | 15.37724 | 14.02367 |
| protein_co phosphate    | 1463  | 1134  | 1217  | 266   | 410   | 407   | 12.25658 | 12.18281 | 12.30166 | 3.458894 |
| protein_co F-box_prot   | 108   | 98    | 96    | 126   | 131   | 90    | 2.173443 | 2.529064 | 2.331008 | 3.935732 |
| protein_co dermokine    | 0     | 0     | 0     | 1543  | 1745  | 1647  | 0        | 0        | 0        | 39.94992 |
| protein_co U2_small_r   | 10    | 13    | 7     | 24    | 36    | 21    | 0.181603 | 0.302745 | 0.153381 | 0.676497 |
| protein_co 3-hydroxyt   | 135   | 99    | 112   | 304   | 389   | 304   | 1.785153 | 1.678751 | 1.786931 | 6.239442 |
| protein_co nephrosis    | 0     | 0     | 0     | 23    | 44    | 4     | 0        | 0        | 0        | 0.391472 |
| protein_co THAP_dom     | 138   | 112   | 96    | 190   | 222   | 109   | 3.545656 | 3.690157 | 2.976027 | 7.577075 |
| protein_co cytochrom    | 8     | 11    | 11    | 17    | 24    | 26    | 0.492284 | 0.868015 | 0.816707 | 1.623696 |
| protein_co zinc_finger  | 68    | 63    | 63    | 69    | 65    | 20    | 0.824973 | 0.980123 | 0.922188 | 1.299303 |
| protein_co dual_specif  | 403   | 313   | 324   | 322   | 454   | 287   | 8.562155 | 8.527697 | 8.305602 | 10.61853 |
| protein_co leucine_ri   | 29    | 24    | 29    | 84    | 92    | 30    | 0.491084 | 0.521168 | 0.592521 | 2.207838 |
| protein_co plexin_don   | 262   | 241   | 243   | 40    | 42    | 16    | 1.965001 | 2.317863 | 2.198952 | 0.465642 |
| protein_co post-GPI_ar  | 138   | 89    | 97    | 323   | 411   | 514   | 2.136996 | 1.767355 | 1.812359 | 7.763499 |
| protein_co IKAROS_far   | 0     | 0     | 0     | 18    | 9     | 5     | 0        | 0        | 0        | 0.537561 |
| protein_co glutamate    | 33    | 18    | 17    | 24    | 25    | 22    | 0.237472 | 0.166104 | 0.147603 | 0.268066 |
| protein_co ferredoxin   | 380   | 307   | 349   | 859   | 1118  | 358   | 7.178971 | 7.437489 | 7.955218 | 25.1885  |
| protein_co SAP30_bin    | 1258  | 910   | 1044  | 897   | 998   | 1311  | 21.17288 | 19.64039 | 21.20058 | 23.43269 |
| protein_co acyl-CoA_o   | 852   | 645   | 675   | 492   | 653   | 536   | 5.154212 | 5.003705 | 4.926908 | 4.619747 |
| protein_co phosphorit   | 793   | 673   | 616   | 661   | 902   | 544   | 10.1595  | 11.05665 | 9.521998 | 13.14411 |
| protein_co cytoglobin   | 202   | 139   | 136   | 51    | 88    | 43    | 4.389149 | 3.87305  | 3.565463 | 1.720005 |

|                          |      |      |      |      |      |      |          |          |          |          |
|--------------------------|------|------|------|------|------|------|----------|----------|----------|----------|
| protein_co serine/argini | 1263 | 1094 | 1137 | 961  | 1421 | 3567 | 20.52759 | 22.80139 | 22.29683 | 24.24312 |
| protein_co zinc_finger   | 56   | 55   | 52   | 185  | 227  | 338  | 0.83413  | 1.050552 | 0.934538 | 4.277085 |
| protein_co transmembr    | 165  | 126  | 165  | 284  | 343  | 215  | 3.022208 | 2.959513 | 3.646468 | 8.074009 |
| protein_co chemokine     | 3    | 1    | 4    | 2    | 4    | 3    | 0.103055 | 0.044051 | 0.165789 | 0.106637 |
| protein_co chemokine     | 0    | 0    | 0    | 0    | 0    | 2    | 0        | 0        | 0        | 0        |
| protein_co kelch-like_f  | 1    | 0    | 0    | 1    | 1    | 8    | 0.022795 | 0        | 0        | 0.035382 |
| protein_co coiled-coil   | 0    | 0    | 0    | 0    | 4    | 0    | 0        | 0        | 0        | 0        |
| protein_co hypocretin    | 0    | 0    | 0    | 2    | 3    | 0    | 0        | 0        | 0        | 0.25227  |
| protein_co aldehyde_d    | 665  | 447  | 542  | 799  | 957  | 901  | 7.805222 | 6.727915 | 7.675575 | 14.55596 |
| protein_co integrin_al   | 7570 | 5856 | 6317 | 653  | 690  | 507  | 71.04832 | 70.4804  | 71.53472 | 9.512652 |
| protein_co sialic_acid   | 1    | 0    | 1    | 0    | 3    | 1    | 0.014778 | 0        | 0.01783  | 0        |
| protein_co zinc_finger   | 172  | 136  | 123  | 373  | 458  | 211  | 3.233794 | 3.27893  | 2.790211 | 10.88487 |
| pseudogen: sialic_acid   | 0    | 0    | 0    | 8    | 1    | 8    | 0        | 0        | 0        | 0.231967 |
| protein_co membrane      | 157  | 153  | 149  | 106  | 159  | 129  | 2.457187 | 3.070714 | 2.813668 | 2.574986 |
| protein_co CD300_mo      | 0    | 0    | 0    | 2    | 0    | 0    | 0        | 0        | 0        | 0.052777 |
| protein_co IZUMO_farr    | 0    | 0    | 0    | 11   | 9    | 3    | 0        | 0        | 0        | 0.896504 |
| protein_co N-acetylglu   | 42   | 37   | 37   | 134  | 171  | 39   | 0.902558 | 1.019616 | 0.959346 | 4.46952  |
| protein_co LSM12_hoi     | 682  | 580  | 556  | 697  | 848  | 850  | 12.87399 | 14.03997 | 12.66344 | 20.42171 |
| protein_co ankyrin_rej   | 24   | 24   | 27   | 30   | 19   | 26   | 0.526115 | 0.674668 | 0.714137 | 1.020755 |
| protein_co ER_membr      | 941  | 583  | 704  | 725  | 1108 | 944  | 20.25873 | 16.09535 | 18.28703 | 24.22652 |
| protein_co Josephin_d    | 490  | 326  | 359  | 22   | 28   | 43   | 23.06838 | 19.68104 | 20.39218 | 1.607586 |
| protein_co SH3_and_n     | 11   | 6    | 3    | 35   | 60   | 49   | 0.077644 | 0.05431  | 0.02555  | 0.383455 |
| protein_co family_witl   | 1356 | 924  | 1030 | 1299 | 1914 | 985  | 20.12116 | 17.58226 | 18.44075 | 29.91803 |
| protein_co DBF4_hom      | 494  | 395  | 431  | 635  | 806  | 571  | 7.726374 | 7.922371 | 8.133437 | 15.41533 |
| protein_co phospholip    | 935  | 731  | 778  | 517  | 686  | 410  | 7.180178 | 7.198638 | 7.208605 | 6.162325 |
| protein_co formin-like   | 4270 | 3374 | 3750 | 359  | 415  | 423  | 17.8896  | 18.12705 | 18.95623 | 2.33452  |
| protein_co aquaporin     | 2    | 1    | 3    | 22   | 33   | 17   | 0.064676 | 0.041469 | 0.117053 | 1.104245 |
| protein_co Rac_GTPase    | 1373 | 1172 | 1088 | 1175 | 1269 | 1004 | 19.46779 | 21.30999 | 18.61329 | 25.85917 |
| protein_co La_ribonuc    | 685  | 539  | 608  | 623  | 679  | 878  | 4.997613 | 5.042782 | 5.352094 | 7.054896 |
| protein_co GRP1_(gen     | 706  | 570  | 519  | 161  | 222  | 42   | 17.12589 | 17.73098 | 15.19022 | 6.061846 |
| protein_co ribonucleo    | 1940 | 1322 | 1465 | 1341 | 1717 | 1384 | 19.38347 | 16.93833 | 17.66101 | 20.79644 |
| protein_co synaptoner    | 4    | 8    | 5    | 28   | 29   | 24   | 0.152364 | 0.39077  | 0.229795 | 1.65543  |
| protein_co SPC24_NDI     | 607  | 462  | 500  | 621  | 742  | 678  | 12.2947  | 11.99999 | 12.21933 | 19.52322 |
| protein_co inositol_he   | 0    | 0    | 0    | 0    | 1    | 0    | 0        | 0        | 0        | 0        |
| protein_co LEM_doma      | 2252 | 1849 | 1941 | 1075 | 1520 | 1151 | 21.68302 | 22.82957 | 22.54888 | 16.06536 |
| protein_co arachidona    | 1    | 0    | 0    | 10   | 18   | 10   | 0.016843 | 0        | 0        | 0.261422 |
| protein_co triggering_   | 0    | 2    | 0    | 1    | 1    | 0    | 0        | 0.10072  | 0        | 0.060955 |
| pseudogen: adenylate_    | 220  | 201  | 199  | 175  | 188  | 61   | 2.25877  | 2.646396 | 2.465191 | 2.788803 |
| protein_co zinc_finger   | 83   | 70   | 85   | 98   | 113  | 66   | 1.737443 | 1.879056 | 2.146838 | 3.184116 |
| protein_co mediator_c    | 44   | 36   | 34   | 52   | 62   | 60   | 2.476784 | 2.598647 | 2.309204 | 4.543277 |
| protein_co chemokine     | 8    | 17   | 14   | 63   | 55   | 27   | 0.168821 | 0.460039 | 0.356461 | 2.063514 |
| protein_co SLP_adapt     | 4    | 5    | 7    | 1    | 2    | 1    | 0.078708 | 0.126164 | 0.166189 | 0.030541 |
| protein_co RNASEK-C1     | 6    | 4    | 4    | 3    | 8    | 1    | 0.151584 | 0.12959  | 0.12193  | 0.11764  |
| protein_co B-cell_CLL/   | 0    | 3    | 1    | 181  | 216  | 56   | 0        | 0.050742 | 0.015914 | 3.705526 |
| protein_co asialoglyco   | 0    | 1    | 1    | 1    | 0    | 0    | 0        | 0.041355 | 0.03891  | 0.050055 |
| protein_co tumor_nec     | 14   | 16   | 13   | 42   | 38   | 48   | 0.322426 | 0.472533 | 0.361238 | 1.501351 |
| protein_co SUMO1/ser     | 523  | 396  | 392  | 486  | 825  | 570  | 9.388775 | 9.116156 | 8.490658 | 13.54172 |
| protein_co fibroblast_   | 18   | 8    | 12   | 234  | 253  | 130  | 0.151994 | 0.086627 | 0.122259 | 3.066896 |
| protein_co eukaryotic    | 70   | 88   | 59   | 103  | 146  | 183  | 1.869192 | 3.013338 | 1.900885 | 4.268975 |
| protein_co ribosomal     | 127  | 91   | 102  | 206  | 252  | 286  | 5.943146 | 5.46089  | 5.759183 | 14.96271 |
| protein_co coiled-coil   | 0    | 1    | 1    | 0    | 0    | 0    | 0        | 0.043763 | 0.041176 | 0        |
| protein_co polymerase    | 152  | 117  | 127  | 252  | 274  | 307  | 5.120174 | 5.054013 | 5.161702 | 13.17565 |
| protein_co small_nucl    | 550  | 438  | 471  | 524  | 540  | 720  | 13.5378  | 13.82512 | 13.98796 | 20.01922 |
| protein_co chromosom     | 2    | 0    | 0    | 40   | 44   | 13   | 0.04232  | 0        | 0        | 1.313715 |
| protein_co WD_repeat     | 552  | 406  | 473  | 517  | 687  | 610  | 4.631113 | 4.36799  | 4.788015 | 6.732359 |
| protein_co jumonji_dc    | 723  | 433  | 568  | 428  | 596  | 534  | 15.37482 | 11.8078  | 14.57364 | 14.12687 |
| protein_co coiled-coil   | 28   | 28   | 15   | 68   | 112  | 45   | 0.379676 | 0.486881 | 0.245411 | 1.431182 |
| protein_co mesothelin    | 0    | 0    | 0    | 0    | 1    | 0    | 0        | 0        | 0        | 0        |
| protein_co somatostat    | 0    | 0    | 0    | 23   | 33   | 9    | 0        | 0        | 0        | 0.626004 |
| protein_co splA/ryano    | 6    | 5    | 5    | 5    | 14   | 23   | 0.121477 | 0.129814 | 0.122141 | 0.157124 |
| protein_co meiosis_sp    | 2    | 1    | 0    | 45   | 42   | 4    | 0.049777 | 0.031916 | 0        | 1.738371 |
| protein_co heparan_su    | 0    | 0    | 0    | 9    | 24   | 1    | 0        | 0        | 0        | 0.514547 |
| protein_co chromosom     | 274  | 168  | 193  | 639  | 829  | 674  | 5.959121 | 4.685439 | 5.064505 | 21.57064 |
| protein_co cyclin_F      | 1001 | 725  | 814  | 1411 | 1679 | 1253 | 10.95889 | 10.1784  | 10.75238 | 23.97672 |
| protein_co TBC1_dom      | 388  | 305  | 371  | 223  | 305  | 217  | 2.765784 | 2.788019 | 3.190865 | 2.467299 |

|                         |       |      |      |       |       |       |          |          |          |          |
|-------------------------|-------|------|------|-------|-------|-------|----------|----------|----------|----------|
| protein_co amidohydr    | 96    | 62   | 66   | 104   | 228   | 166   | 1.375326 | 1.139031 | 1.140844 | 2.312588 |
| protein_co netrin_3     | 48    | 29   | 35   | 7     | 15    | 10    | 1.133293 | 0.878028 | 0.997051 | 0.256525 |
| protein_co coiled-coil  | 1     | 2    | 0    | 365   | 504   | 340   | 0.013325 | 0.034174 | 0        | 7.548914 |
| protein_co progesteron  | 208   | 144  | 121  | 260   | 359   | 225   | 3.491988 | 3.10014  | 2.450998 | 6.775062 |
| protein_co FLYWCH_fa    | 394   | 259  | 288  | 247   | 331   | 187   | 17.83269 | 15.03245 | 15.72755 | 17.35194 |
| protein_co zinc_finger  | 128   | 139  | 126  | 132   | 188   | 349   | 1.504618 | 2.095272 | 1.787043 | 2.408356 |
| protein_co adenylate_l  | 497   | 365  | 372  | 433   | 587   | 264   | 3.016743 | 2.841084 | 2.724413 | 4.079437 |
| protein_co SH3_and_n    | 3     | 0    | 1    | 1064  | 1312  | 831   | 0.015653 | 0        | 0.006295 | 8.616636 |
| protein_co ClpB_casein  | 533   | 409  | 414  | 298   | 374   | 311   | 7.713697 | 7.590459 | 7.229092 | 6.693945 |
| protein_co sialidase_3  | 145   | 127  | 163  | 132   | 183   | 109   | 1.932098 | 2.170072 | 2.620576 | 2.730018 |
| protein_co cytochrom    | 471   | 363  | 377  | 190   | 239   | 204   | 5.394528 | 5.331489 | 5.209811 | 3.377665 |
| protein_co protein_ph   | 29    | 37   | 33   | 41    | 61    | 5     | 0.88587  | 1.449383 | 1.216281 | 1.943956 |
| protein_co asparaginas  | 14    | 7    | 9    | 178   | 228   | 255   | 0.289445 | 0.185586 | 0.224506 | 5.711995 |
| protein_co guanine_nu   | 1     | 1    | 5    | 2     | 5     | 4     | 0.053163 | 0.068174 | 0.320723 | 0.165034 |
| protein_co UBX_doma     | 1976  | 1505 | 1541 | 2070  | 2610  | 1892  | 44.69594 | 43.65429 | 42.05637 | 72.67448 |
| protein_co chromosom    | 206   | 173  | 178  | 283   | 282   | 366   | 3.313668 | 3.568595 | 3.454696 | 7.065758 |
| protein_co tetratricop  | 463   | 382  | 406  | 357   | 384   | 245   | 11.84401 | 12.53114 | 12.53118 | 14.17479 |
| protein_co TAF6-like_F  | 386   | 297  | 314  | 288   | 410   | 441   | 8.553661 | 8.439768 | 8.395542 | 9.905757 |
| protein_co nuclear_RN   | 1184  | 915  | 997  | 498   | 632   | 1007  | 13.44907 | 13.32819 | 13.66419 | 8.780121 |
| protein_co syntaxin_5   | 791   | 611  | 614  | 373   | 483   | 285   | 20.67447 | 20.47899 | 19.36308 | 15.13203 |
| protein_co solute_carr  | 63    | 42   | 41   | 10    | 24    | 5     | 0.415014 | 0.354798 | 0.325877 | 0.102248 |
| protein_co ribosomal_   | 10379 | 8386 | 8712 | 12558 | 14331 | 12489 | 553.0358 | 573.0096 | 560.0975 | 1038.601 |
| protein_co inter-alpha  | 92    | 65   | 86   | 2     | 4     | 3     | 1.434613 | 1.299779 | 1.618056 | 0.048407 |
| processed_DCP1_deca     | 750   | 618  | 695  | 476   | 625   | 433   | 5.863207 | 6.195434 | 6.555515 | 5.775789 |
| protein_co synovial_a   | 1162  | 839  | 958  | 454   | 509   | 511   | 11.98289 | 11.09499 | 11.9198  | 7.266776 |
| protein_co zinc_finger  | 70    | 50   | 47   | 38    | 76    | 21    | 2.39759  | 2.196121 | 1.942329 | 2.020184 |
| protein_co ribosomal_   | 1622  | 1199 | 1333 | 360   | 453   | 222   | 24.36899 | 23.10017 | 24.16378 | 8.394979 |
| protein_co low_densit   | 4917  | 3620 | 3797 | 2203  | 2729  | 1517  | 44.69049 | 42.19226 | 41.63931 | 31.07848 |
| protein_co two_pore_    | 352   | 248  | 302  | 383   | 522   | 428   | 3.771775 | 3.407722 | 3.904434 | 6.369896 |
| protein_co fibroblast_  | 1     | 0    | 2    | 561   | 772   | 1105  | 0.019162 | 0        | 0.046241 | 16.68552 |
| protein_co cytochrom    | 0     | 0    | 0    | 2     | 1     | 0     | 0        | 0        | 0        | 0.05742  |
| protein_co T-cell_acut  | 0     | 0    | 0    | 9     | 10    | 12    | 0        | 0        | 0        | 0.130794 |
| protein_co cytidine_m   | 1715  | 1332 | 1371 | 498   | 550   | 543   | 27.44586 | 27.33546 | 26.4727  | 12.37008 |
| protein_co BEN_doma     | 16    | 11   | 12   | 89    | 101   | 77    | 0.437203 | 0.385447 | 0.395633 | 3.77471  |
| protein_co ELAV_(emb    | 0     | 3    | 1    | 23    | 47    | 16    | 0        | 0.045484 | 0.014265 | 0.422071 |
| protein_co Sel1_repar   | 337   | 301  | 292  | 380   | 447   | 480   | 9.754281 | 11.17226 | 10.19756 | 17.07181 |
| protein_co zyg-11_fam   | 991   | 799  | 809  | 460   | 623   | 344   | 5.741753 | 5.936452 | 5.655453 | 4.136749 |
| protein_co solute_carr  | 2     | 6    | 9    | 0     | 1     | 0     | 0.035563 | 0.136814 | 0.19309  | 0        |
| protein_co chromosom    | 608   | 506  | 483  | 400   | 508   | 442   | 14.91063 | 15.91301 | 14.29182 | 15.2259  |
| protein_co mago-nashi   | 532   | 355  | 423  | 495   | 549   | 738   | 32.99668 | 28.23555 | 31.65534 | 47.65344 |
| protein_co acyl-CoA_tl  | 37    | 41   | 43   | 68    | 89    | 102   | 0.272402 | 0.387081 | 0.381967 | 0.777049 |
| protein_co family_witl  | 2     | 0    | 3    | 9     | 8     | 4     | 0.046773 | 0        | 0.084652 | 0.326692 |
| protein_co prolyl-tRNA  | 112   | 98   | 93   | 264   | 250   | 177   | 2.237615 | 2.510746 | 2.241807 | 8.186565 |
| protein_co chromosom    | 2     | 1    | 2    | 3     | 3     | 2     | 0.052774 | 0.033838 | 0.063675 | 0.12287  |
| protein_co Bartter_syr  | 0     | 0    | 0    | 20    | 14    | 29    | 0        | 0        | 0        | 0.419238 |
| protein_co ubiquitin_s  | 1475  | 1285 | 1253 | 1473  | 1652  | 1377  | 6.556335 | 7.32456  | 6.719984 | 10.16254 |
| protein_co phosphatic   | 887   | 677  | 671  | 787   | 950   | 961   | 12.6341  | 12.3657  | 11.53164 | 17.39906 |
| protein_co nucleolar_   | 959   | 783  | 842  | 638   | 876   | 1247  | 6.763051 | 7.081009 | 7.164472 | 6.983533 |
| protein_co protein_kir  | 30    | 26   | 37   | 200   | 201   | 88    | 0.150498 | 0.16726  | 0.223954 | 1.557287 |
| protein_co kelch-like_f | 1200  | 861  | 944  | 797   | 933   | 1641  | 8.730492 | 8.032856 | 8.286622 | 9.000078 |
| protein_co zinc_finger  | 4     | 5    | 3    | 161   | 150   | 120   | 0.032232 | 0.051667 | 0.029168 | 2.01367  |
| protein_co glucocortic  | 655   | 573  | 586  | 604   | 746   | 683   | 4.791414 | 5.375097 | 5.172113 | 6.857878 |
| protein_co solute_carr  | 90    | 64   | 65   | 32    | 39    | 25    | 1.515841 | 1.382294 | 1.320908 | 0.836549 |
| protein_co selenoprot   | 6643  | 4846 | 5097 | 2498  | 3234  | 2083  | 71.90452 | 67.26431 | 66.56633 | 41.96767 |
| protein_co adenylate_l  | 102   | 103  | 97   | 3332  | 3809  | 5494  | 0.68345  | 0.88502  | 0.784199 | 34.65309 |
| protein_co Janus_kina   | 2262  | 1740 | 1912 | 919   | 1084  | 624   | 21.0155  | 20.7303  | 21.433   | 13.25236 |
| protein_co ribonucleo   | 461   | 366  | 357  | 547   | 680   | 543   | 4.915029 | 5.00398  | 4.592418 | 9.051967 |
| protein_co chymotryp    | 2     | 2    | 2    | 0     | 0     | 0     | 0.0298   | 0.038214 | 0.035955 | 0        |
| protein_co leucine_zip  | 486   | 385  | 387  | 223   | 268   | 204   | 9.990596 | 10.14904 | 9.598738 | 7.115255 |
| protein_co retinol_bin  | 0     | 0    | 1    | 22    | 24    | 19    | 0        | 0        | 0.065709 | 1.859646 |
| protein_co kinocilin    | 0     | 0    | 0    | 0     | 2     | 0     | 0        | 0        | 0        | 0        |
| protein_co filamin_bir  | 3321  | 2515 | 2667 | 1740  | 2260  | 1580  | 42.14391 | 40.92732 | 40.83542 | 34.27249 |
| protein_co transmembr   | 0     | 0    | 2    | 3     | 5     | 3     | 0        | 0        | 0.074441 | 0.143644 |
| protein_co solute_carr  | 13    | 6    | 12   | 1     | 7     | 5     | 0.204143 | 0.120823 | 0.227363 | 0.024374 |
| protein_co aldo-keto_   | 29    | 20   | 22   | 22    | 29    | 18    | 0.795211 | 0.703272 | 0.727872 | 0.936348 |

|                         |      |      |      |      |      |      |          |          |          |          |
|-------------------------|------|------|------|------|------|------|----------|----------|----------|----------|
| protein_co dorsal_inhi  | 3905 | 3327 | 3566 | 728  | 893  | 1477 | 24.92588 | 27.23276 | 27.46369 | 7.212591 |
| protein_co podoplanir   | 0    | 3    | 2    | 1553 | 1857 | 2447 | 0        | 0.058115 | 0.036453 | 36.41335 |
| protein_co leucine_ric  | 0    | 0    | 0    | 1    | 1    | 1    | 0        | 0        | 0        | 0.032947 |
| protein_co dehydroge    | 46   | 65   | 36   | 252  | 290  | 238  | 1.251852 | 2.26839  | 1.182077 | 10.64452 |
| protein_co matrilin_1_  | 7    | 12   | 7    | 5    | 7    | 0    | 0.085655 | 0.188298 | 0.103348 | 0.094963 |
| protein_co lysosomal_   | 157  | 119  | 153  | 8    | 9    | 4    | 3.311621 | 3.218824 | 3.893861 | 0.261916 |
| protein_co syndecan_3   | 8128 | 6553 | 6942 | 1815 | 2097 | 1436 | 59.62485 | 61.64433 | 61.44355 | 20.66573 |
| protein_co penta-EF-ha  | 832  | 680  | 708  | 447  | 469  | 540  | 23.94874 | 25.10022 | 24.58899 | 19.97088 |
| protein_co syncoilin_i  | 375  | 306  | 314  | 257  | 351  | 418  | 5.151994 | 5.391069 | 5.205013 | 5.480342 |
| protein_co retinoblast  | 1869 | 1528 | 1599 | 2100 | 2397 | 2645 | 36.74526 | 38.52341 | 37.9305  | 64.08284 |
| protein_co KIAA1522     | 1107 | 856  | 885  | 2292 | 3022 | 2030 | 9.545283 | 9.46508  | 9.207305 | 30.67512 |
| protein_co testis-speci | 7    | 9    | 6    | 5    | 10   | 5    | 0.239934 | 0.395591 | 0.248138 | 0.266008 |
| protein_co transmembr   | 100  | 80   | 111  | 230  | 358  | 177  | 1.576665 | 1.617479 | 2.111594 | 5.628566 |
| protein_co UBX_doma     | 0    | 0    | 0    | 26   | 32   | 40   | 0        | 0        | 0        | 0.339665 |
| protein_co calcium/ca   | 144  | 122  | 119  | 213  | 355  | 145  | 2.890481 | 3.14034  | 2.882057 | 6.636172 |
| protein_co alkaline_ph  | 75   | 54   | 64   | 5201 | 5959 | 5132 | 1.358343 | 1.254156 | 1.398545 | 146.2062 |
| protein_co wingless-ty  | 0    | 1    | 1    | 9    | 11   | 1    | 0        | 0.050871 | 0.047864 | 0.554161 |
| protein_co tubulin_ty   | 0    | 0    | 0    | 0    | 2    | 0    | 0        | 0        | 0        | 0        |
| protein_co sodium_ch    | 48   | 31   | 46   | 55   | 84   | 26   | 0.647689 | 0.53641  | 0.748913 | 1.151911 |
| protein_co matrix-rem   | 1538 | 1032 | 1168 | 192  | 284  | 152  | 27.47308 | 23.6396  | 25.17341 | 5.323323 |
| protein_co chromosom    | 1064 | 817  | 825  | 935  | 1355 | 943  | 13.95162 | 13.73771 | 13.05223 | 19.02939 |
| protein_co multiple_E   | 561  | 384  | 454  | 484  | 751  | 439  | 4.822236 | 4.232785 | 4.708575 | 6.457456 |
| protein_co coiled-coil  | 5    | 0    | 1    | 21   | 26   | 10   | 0.104107 | 0        | 0.025122 | 0.678675 |
| protein_co interleukin  | 2    | 0    | 0    | 0    | 1    | 0    | 0.032205 | 0        | 0        | 0        |
| protein_co DIRAS_fami   | 14   | 9    | 17   | 2    | 1    | 0    | 0.332722 | 0.274287 | 0.487473 | 0.073776 |
| protein_co chromosom    | 2    | 2    | 0    | 2    | 0    | 0    | 0.031135 | 0.039927 | 0        | 0.048327 |
| protein_co nuclear_fac  | 617  | 486  | 462  | 225  | 260  | 155  | 3.049556 | 3.080329 | 2.755126 | 1.726094 |
| protein_co OMA1_zinc    | 45   | 45   | 43   | 65   | 79   | 85   | 1.002399 | 1.285435 | 1.155699 | 2.247357 |
| protein_co Myb-like_S   | 849  | 673  | 746  | 1673 | 2012 | 2143 | 5.108382 | 5.192782 | 5.4158   | 15.62436 |
| protein_co TM2_doma     | 321  | 223  | 258  | 118  | 153  | 117  | 12.04136 | 10.72716 | 11.67718 | 6.870413 |
| protein_co ubiquitin_3  | 1742 | 1225 | 1451 | 915  | 874  | 1531 | 20.44104 | 18.43318 | 20.54331 | 16.66504 |
| protein_co far_upstrea  | 2302 | 1920 | 1961 | 2329 | 2300 | 3071 | 42.76578 | 45.74057 | 43.95585 | 67.15696 |
| protein_co nexilin_(F   | 214  | 149  | 179  | 43   | 48   | 86   | 3.140677 | 2.804175 | 3.169645 | 0.979509 |
| protein_co DnaJ_(Hsp4   | 268  | 189  | 214  | 131  | 127  | 62   | 4.205664 | 3.803391 | 4.051927 | 3.190815 |
| protein_co EGF_latrop   | 665  | 566  | 662  | 2    | 2    | 4    | 8.840902 | 9.649409 | 10.61894 | 0.04127  |
| protein_co leucine-ricl | 4    | 0    | 3    | 6    | 16   | 2    | 0.041459 | 0        | 0.037517 | 0.096525 |
| protein_co leucine_ric  | 0    | 0    | 0    | 0    | 0    | 1    | 0        | 0        | 0        | 0        |
| protein_co tRNA-yW_s    | 345  | 296  | 263  | 386  | 269  | 480  | 4.716343 | 5.189044 | 4.338005 | 8.19038  |
| protein_co LIM_homeo    | 14   | 12   | 7    | 1    | 0    | 10   | 0.276637 | 0.30407  | 0.166889 | 0.03067  |
| protein_co sorting_ne   | 588  | 541  | 521  | 187  | 246  | 224  | 15.8274  | 18.67406 | 16.92069 | 7.812757 |
| protein_co UDP-Gal:be   | 115  | 81   | 104  | 3    | 4    | 3    | 1.647023 | 1.487634 | 1.797145 | 0.066689 |
| protein_co netrin_G1    | 185  | 186  | 201  | 20   | 27   | 54   | 1.844494 | 2.378087 | 2.417962 | 0.309504 |
| protein_co family_witl  | 687  | 574  | 612  | 890  | 1182 | 496  | 3.865768 | 4.141906 | 4.155071 | 7.773194 |
| protein_co HEN1_methyl  | 73   | 50   | 54   | 66   | 88   | 110  | 1.826559 | 1.604317 | 1.630244 | 2.563216 |
| protein_co AKNA_dom     | 4    | 0    | 2    | 1    | 1    | 1    | 0.061435 | 0        | 0.037062 | 0.023839 |
| protein_co chromosom    | 394  | 324  | 314  | 324  | 428  | 502  | 5.452971 | 5.750311 | 5.24342  | 6.960052 |
| protein_co WD_repeat    | 23   | 20   | 21   | 1    | 1    | 0    | 0.310173 | 0.345872 | 0.341698 | 0.020932 |
| protein_co guanylate_   | 59   | 59   | 50   | 0    | 0    | 0    | 0.750342 | 0.962207 | 0.76723  | 0        |
| protein_co ataxin_7-lil | 225  | 157  | 168  | 197  | 216  | 443  | 2.411487 | 2.157801 | 2.172499 | 3.27717  |
| protein_co guanylate_   | 48   | 29   | 37   | 0    | 0    | 2    | 0.367345 | 0.284603 | 0.341651 | 0        |
| protein_co zinc_finger  | 470  | 342  | 349  | 335  | 346  | 565  | 8.075598 | 7.535504 | 7.235197 | 8.934127 |
| protein_co HFM1_ATP-    | 4    | 2    | 2    | 33   | 19   | 20   | 0.038037 | 0.024388 | 0.022947 | 0.487068 |
| protein_co family_witl  | 1    | 0    | 0    | 3    | 1    | 2    | 0.016231 | 0        | 0        | 0.075576 |
| protein_co growth_fac   | 20   | 13   | 28   | 12   | 2    | 7    | 0.328476 | 0.273796 | 0.554856 | 0.305905 |
| protein_co potassium_   | 82   | 76   | 66   | 101  | 98   | 78   | 0.653575 | 0.776792 | 0.634707 | 1.249492 |
| protein_co amylo-alpha  | 525  | 397  | 440  | 486  | 448  | 547  | 3.306105 | 3.205953 | 3.343167 | 4.750334 |
| protein_co vascular_cc  | 773  | 529  | 561  | 0    | 0    | 0    | 9.378003 | 8.229926 | 8.211865 | 0        |
| protein_co exostosin-li | 979  | 787  | 845  | 522  | 560  | 597  | 11.51953 | 11.87507 | 11.99656 | 9.533515 |
| protein_co solute_carr  | 1020 | 769  | 857  | 327  | 383  | 412  | 6.055687 | 5.854623 | 6.138922 | 3.013294 |
| pseudogen: DnaJ_(Hsp4   | 0    | 0    | 1    | 0    | 0    | 0    | 0        | 0        | 0.059995 | 0        |
| protein_co zinc_finger  | 691  | 557  | 601  | 965  | 1265 | 1410 | 10.34515 | 10.69358 | 10.85628 | 22.42417 |
| protein_co actin_relat  | 4300 | 3312 | 3419 | 1248 | 1534 | 1222 | 67.54676 | 66.71688 | 64.80122 | 30.42854 |
| protein_co cell_adhesi  | 0    | 1    | 1    | 37   | 49   | 24   | 0        | 0.016056 | 0.015107 | 0.719053 |
| protein_co NLR_family   | 52   | 54   | 44   | 2    | 2    | 5    | 0.564678 | 0.751971 | 0.576499 | 0.03371  |
| protein_co zinc_finger  | 1950 | 1504 | 1599 | 2203 | 2670 | 2231 | 9.892409 | 9.784184 | 9.787324 | 17.34652 |

|                          |      |      |      |      |      |      |          |          |          |          |
|--------------------------|------|------|------|------|------|------|----------|----------|----------|----------|
| protein_co tripartite_r  | 14   | 11   | 10   | 35   | 56   | 32   | 0.203554 | 0.205094 | 0.175428 | 0.789858 |
| protein_co potassium_    | 0    | 0    | 3    | 9    | 8    | 3    | 0        | 0        | 0.040702 | 0.157079 |
| protein_co immunogl      | 1087 | 807  | 811  | 2231 | 2952 | 2027 | 21.54246 | 20.50919 | 19.39253 | 68.62711 |
| protein_co discoidin_c   | 2229 | 1674 | 1870 | 2    | 2    | 1    | 32.59054 | 31.38674 | 32.98915 | 0.045388 |
| protein_co phosphopr     | 4289 | 3521 | 3836 | 834  | 926  | 1704 | 74.65155 | 78.58835 | 80.55814 | 22.53094 |
| protein_co peroxisoma    | 481  | 399  | 423  | 559  | 657  | 715  | 6.160639 | 6.553343 | 6.536858 | 11.11279 |
| protein_co nicastrin     | 1815 | 1410 | 1509 | 803  | 830  | 1154 | 28.07832 | 27.97196 | 28.16643 | 19.28148 |
| protein_co VANGL_pla     | 1775 | 1385 | 1483 | 2543 | 3038 | 2399 | 15.5861  | 15.59546 | 15.71189 | 34.659   |
| protein_co SLAM_fami     | 0    | 0    | 0    | 1    | 0    | 0    | 0        | 0        | 0        | 0.026533 |
| protein_co olfactomec    | 2927 | 2500 | 2422 | 185  | 223  | 132  | 43.43262 | 47.57104 | 43.36262 | 4.260843 |
| protein_co Fc_recepto    | 47   | 36   | 28   | 5    | 6    | 5    | 1.108009 | 1.088322 | 0.796437 | 0.182956 |
| protein_co solute_carr   | 0    | 0    | 0    | 2    | 0    | 1    | 0        | 0        | 0        | 0.032873 |
| protein_co kelch_dom     | 14   | 10   | 10   | 117  | 140  | 72   | 0.492468 | 0.451086 | 0.424422 | 6.388025 |
| protein_co chromosom     | 81   | 66   | 54   | 97   | 113  | 43   | 2.409956 | 2.518126 | 1.938501 | 4.479467 |
| protein_co feline_leuk   | 294  | 218  | 264  | 1045 | 1348 | 1245 | 2.32121  | 2.207155 | 2.51489  | 12.80601 |
| protein_co activating_   | 110  | 89   | 85   | 359  | 333  | 219  | 2.43642  | 2.527894 | 2.271572 | 12.34197 |
| protein_co RNA_bindin    | 381  | 322  | 347  | 651  | 797  | 672  | 4.209495 | 4.562157 | 4.625754 | 11.16391 |
| protein_co DENN/MAD      | 2    | 1    | 1    | 28   | 29   | 10   | 0.029242 | 0.01875  | 0.017641 | 0.635433 |
| protein_co axonemal_     | 0    | 1    | 0    | 0    | 0    | 2    | 0        | 0.01651  | 0        | 0        |
| protein_co tudor_dom     | 0    | 0    | 0    | 25   | 29   | 12   | 0        | 0        | 0        | 0.494697 |
| protein_co immediate     | 2585 | 1807 | 1995 | 687  | 789  | 270  | 51.79944 | 46.43356 | 48.23424 | 21.3674  |
| protein_co sushi_nido    | 2021 | 1558 | 1565 | 74   | 77   | 39   | 11.59343 | 11.461   | 10.83199 | 0.658882 |
| protein_co 3'(2')_5'-bis | 430  | 388  | 375  | 242  | 299  | 249  | 7.366718 | 8.524063 | 7.751485 | 6.435043 |
| protein_co spermatog     | 7    | 2    | 4    | 19   | 16   | 9    | 0.056416 | 0.02067  | 0.038897 | 0.237679 |
| protein_co chromosom     | 12   | 3    | 6    | 508  | 647  | 338  | 0.164864 | 0.052854 | 0.099459 | 10.83274 |
| protein_co BRO1_dom      | 551  | 437  | 473  | 325  | 354  | 415  | 6.264888 | 6.371659 | 6.488898 | 5.735557 |
| protein_co neuroblast    | 2    | 1    | 1    | 0    | 0    | 0    | 0.008022 | 0.005143 | 0.004839 | 0        |
| protein_co acid_phosp    | 104  | 89   | 84   | 248  | 272  | 151  | 2.727384 | 2.993038 | 2.65791  | 10.09474 |
| pseudogen: metallothi    | 0    | 0    | 0    | 0    | 0    | 2    | 0        | 0        | 0        | 0        |
| protein_co WD_repeat     | 0    | 0    | 0    | 1    | 0    | 0    | 0        | 0        | 0        | 0.016651 |
| protein_co kinesin_fan   | 4527 | 3367 | 3126 | 39   | 39   | 74   | 17.52424 | 16.71403 | 14.60043 | 0.234328 |
| protein_co transcriptic  | 277  | 199  | 249  | 282  | 345  | 469  | 7.028428 | 6.475016 | 7.622998 | 11.10601 |
| protein_co consortin_    | 515  | 344  | 426  | 239  | 278  | 253  | 4.710956 | 4.035242 | 4.701749 | 3.393362 |
| protein_co protein_ph    | 263  | 227  | 218  | 264  | 297  | 308  | 3.844163 | 4.25482  | 3.844595 | 5.98936  |
| protein_co kelch_dom     | 333  | 307  | 329  | 23   | 27   | 12   | 4.914818 | 5.810465 | 5.858779 | 0.526892 |
| protein_co peptidase_    | 13   | 15   | 14   | 2    | 6    | 16   | 0.283258 | 0.41912  | 0.368056 | 0.067639 |
| protein_co protein_kir   | 237  | 145  | 150  | 220  | 292  | 284  | 4.44162  | 3.48474  | 3.391817 | 6.399503 |
| protein_co oxoeicosan    | 111  | 74   | 61   | 37   | 66   | 32   | 2.957268 | 2.528185 | 1.960856 | 1.53003  |
| protein_co 3-hydroxya    | 472  | 326  | 380  | 65   | 97   | 61   | 14.54145 | 12.87931 | 14.12529 | 3.108204 |
| protein_co beta-13-N-i   | 449  | 327  | 359  | 397  | 466  | 399  | 6.939228 | 6.4807   | 6.694333 | 9.523263 |
| protein_co chromosom     | 16   | 6    | 5    | 0    | 4    | 2    | 0.357939 | 0.172127 | 0.134961 | 0        |
| protein_co mitogen-ac    | 2348 | 1865 | 1867 | 1052 | 1222 | 1222 | 37.18263 | 37.87304 | 35.67257 | 25.8576  |
| protein_co interleukin   | 0    | 0    | 1    | 0    | 0    | 0    | 0        | 0        | 0.03643  | 0        |
| protein_co interleukin   | 0    | 0    | 1    | 0    | 0    | 0    | 0        | 0        | 0.031103 | 0        |
| protein_co Fas_apoptc    | 0    | 0    | 0    | 2    | 1    | 2    | 0        | 0        | 0        | 0.074646 |
| protein_co polymeric_    | 1    | 0    | 0    | 0    | 2    | 0    | 0.010958 | 0        | 0        | 0        |
| protein_co calpain_2_    | 5882 | 5133 | 5181 | 629  | 839  | 638  | 66.78138 | 74.73275 | 70.97281 | 11.08438 |
| protein_co mitochond     | 482  | 383  | 379  | 249  | 348  | 354  | 15.88263 | 16.18392 | 15.06825 | 12.73519 |
| protein_co chromosom     | 12   | 15   | 14   | 5    | 9    | 8    | 0.194497 | 0.311769 | 0.273784 | 0.125786 |
| protein_co WD_repeat     | 2166 | 1841 | 1950 | 1107 | 1416 | 1039 | 14.77936 | 16.1087  | 16.05388 | 11.72399 |
| protein_co v-rel_reticu  | 54   | 41   | 47   | 33   | 19   | 19   | 0.802555 | 0.781401 | 0.842805 | 0.761247 |
| protein_co pseudouric    | 87   | 80   | 74   | 38   | 42   | 27   | 0.640816 | 0.755637 | 0.657648 | 0.434438 |
| protein_co peroxisoma    | 460  | 367  | 380  | 242  | 299  | 249  | 12.40334 | 12.68984 | 12.36268 | 10.12807 |
| protein_co KIAA1841      | 557  | 364  | 470  | 175  | 209  | 215  | 5.783379 | 4.8466   | 5.888062 | 2.820298 |
| protein_co tripartite_r  | 56   | 34   | 41   | 26   | 32   | 22   | 0.990136 | 0.770895 | 0.874659 | 0.713527 |
| protein_co raftlin_fam   | 220  | 175  | 192  | 24   | 37   | 17   | 3.173117 | 3.236762 | 3.341279 | 0.537286 |
| protein_co disrupted_j   | 186  | 123  | 133  | 24   | 28   | 41   | 1.235521 | 1.047736 | 1.06595  | 0.247445 |
| lincRNA -                | 0    | 1    | 0    | 0    | 0    | 0    | 0        | 0.032822 | 0        | 0        |
| protein_co calpain_13    | 0    | 0    | 0    | 28   | 23   | 39   | 0        | 0        | 0        | 0.759536 |
| protein_co leucine_ri    | 9    | 6    | 12   | 12   | 10   | 43   | 0.104899 | 0.089679 | 0.168756 | 0.217091 |
| protein_co mediator_c    | 152  | 98   | 109  | 127  | 257  | 95   | 4.058817 | 3.355763 | 3.511805 | 5.263687 |
| protein_co dpy-30_hoi    | 565  | 502  | 468  | 765  | 889  | 830  | 17.44099 | 19.87173 | 17.43077 | 36.65342 |
| protein_co tRNA-yW_s     | 187  | 142  | 187  | 196  | 240  | 235  | 1.343821 | 1.308572 | 1.621398 | 2.186183 |
| protein_co chromosom     | 128  | 92   | 113  | 163  | 199  | 257  | 4.014664 | 3.700295 | 4.276276 | 7.935189 |
| protein_co potassium_    | 0    | 0    | 0    | 13   | 9    | 8    | 0        | 0        | 0        | 0.413522 |

|                          |      |      |      |      |      |      |          |          |          |          |
|--------------------------|------|------|------|------|------|------|----------|----------|----------|----------|
| protein_co PQ_loop_re    | 229  | 150  | 160  | 176  | 247  | 143  | 5.867658 | 4.928672 | 4.946492 | 6.999587 |
| protein_co ADP-ribosy    | 1644 | 1301 | 1447 | 790  | 930  | 1093 | 14.47375 | 14.68811 | 15.37078 | 10.79535 |
| protein_co family_witl   | 1495 | 1100 | 1238 | 41   | 38   | 22   | 11.03078 | 10.40799 | 11.02132 | 0.469547 |
| protein_co potassium_    | 10   | 2    | 3    | 0    | 2    | 5    | 0.093388 | 0.023951 | 0.033803 | 0        |
| protein_co neuronal_c    | 0    | 0    | 0    | 2    | 1    | 3    | 0        | 0        | 0        | 0.051038 |
| protein_co clathrin_he   | 82   | 72   | 68   | 37   | 38   | 23   | 1.710401 | 1.925865 | 1.711359 | 1.197888 |
| pseudogen: prolyl-tRNA   | 27   | 35   | 29   | 33   | 32   | 33   | 0.587758 | 0.977039 | 0.761694 | 1.115011 |
| protein_co frizzled-rela | 70   | 49   | 53   | 19   | 38   | 46   | 1.038046 | 0.931803 | 0.948293 | 0.437323 |
| protein_co dual_specif   | 42   | 28   | 25   | 45   | 84   | 30   | 0.380483 | 0.325277 | 0.273259 | 0.632746 |
| protein_co coiled-coil_  | 403  | 312  | 335  | 234  | 266  | 189  | 9.226893 | 9.160399 | 9.254294 | 8.315661 |
| protein_co nucleopori    | 182  | 176  | 159  | 256  | 261  | 426  | 3.017674 | 3.742166 | 3.180872 | 6.588271 |
| protein_co coiled-coil_  | 127  | 80   | 103  | 187  | 179  | 246  | 2.498964 | 2.018625 | 2.445353 | 5.711214 |
| protein_co chromosom     | 10   | 7    | 7    | 81   | 152  | 30   | 0.24718  | 0.221881 | 0.208766 | 3.107625 |
| protein_co zinc_finger_  | 0    | 2    | 0    | 0    | 0    | 0    | 0        | 0.057513 | 0        | 0        |
| protein_co F-box_prot    | 162  | 98   | 118  | 602  | 673  | 610  | 1.035467 | 0.803261 | 0.91002  | 5.972388 |
| protein_co actin_gamr    | 454  | 314  | 355  | 2    | 3    | 20   | 10.31399 | 9.147653 | 9.730768 | 0.070523 |
| protein_co chromosom     | 187  | 135  | 175  | 310  | 421  | 340  | 2.297205 | 2.126676 | 2.593847 | 5.910856 |
| protein_co structural_   | 897  | 744  | 840  | 1010 | 902  | 1107 | 8.037521 | 8.548933 | 9.081488 | 14.04693 |
| protein_co visinin-like  | 141  | 100  | 114  | 1017 | 1072 | 871  | 2.426236 | 2.206598 | 2.366828 | 27.16222 |
| protein_co coiled-coil_  | 268  | 270  | 263  | 181  | 213  | 174  | 4.473665 | 5.779653 | 5.29703  | 4.689621 |
| protein_co H3_histone    | 3912 | 3005 | 2974 | 5922 | 6619 | 6478 | 98.46149 | 96.98875 | 90.31431 | 231.3484 |
| protein_co ankyrin_rej   | 0    | 0    | 0    | 5    | 4    | 0    | 0        | 0        | 0        | 0.111866 |
| protein_co aarF_doma     | 120  | 98   | 96   | 955  | 1023 | 741  | 1.018795 | 1.066942 | 0.983387 | 12.58459 |
| protein_co solute_carr   | 67   | 51   | 51   | 89   | 76   | 28   | 0.715634 | 0.698547 | 0.657255 | 1.47549  |
| protein_co tektin_4      | 0    | 0    | 0    | 0    | 0    | 1    | 0        | 0        | 0        | 0        |
| protein_co engrailed_t   | 129  | 85   | 102  | 2    | 3    | 8    | 2.461869 | 2.080192 | 2.348678 | 0.059243 |
| protein_co zinc_finger_  | 111  | 82   | 76   | 37   | 83   | 56   | 1.338681 | 1.26817  | 1.1059   | 0.692606 |
| protein_co sarcoglycar   | 3129 | 2396 | 2497 | 325  | 427  | 308  | 33.11191 | 32.51433 | 31.88198 | 5.338171 |
| protein_co spermatogr    | 335  | 305  | 268  | 89   | 95   | 47   | 3.573284 | 4.171881 | 3.449098 | 1.473476 |
| protein_co nitric_oxid   | 19   | 22   | 14   | 22   | 35   | 20   | 0.351167 | 0.521425 | 0.312202 | 0.631122 |
| protein_co Homo_sapi     | 2    | 0    | 0    | 1    | 12   | 5    | 0.02847  | 0        | 0        | 0.022095 |
| protein_co coiled-coil_  | 1    | 5    | 3    | 0    | 0    | 1    | 0.027599 | 0.176956 | 0.099898 | 0        |
| protein_co sphingosin    | 5    | 2    | 2    | 4    | 9    | 20   | 0.070279 | 0.036049 | 0.033918 | 0.087266 |
| protein_co inhibin_be    | 1    | 2    | 2    | 1    | 2    | 12   | 0.014635 | 0.037534 | 0.035316 | 0.022715 |
| protein_co xin_actin-b   | 3    | 0    | 0    | 4    | 5    | 3    | 0.011098 | 0        | 0        | 0.022968 |
| protein_co Bardet-Biec   | 184  | 125  | 111  | 18   | 19   | 24   | 2.48281  | 2.162942 | 1.80716  | 0.376989 |
| protein_co SWI/SNF-re    | 905  | 736  | 801  | 651  | 714  | 1224 | 8.458335 | 8.821114 | 9.032685 | 9.443821 |
| protein_co hematopoi     | 0    | 0    | 0    | 4    | 0    | 1    | 0        | 0        | 0        | 0.177946 |
| protein_co PDZ_and_L     | 3759 | 3049 | 3166 | 692  | 846  | 718  | 28.97576 | 30.13903 | 29.44568 | 8.279405 |
| protein_co OTU_doma      | 818  | 654  | 675  | 436  | 562  | 411  | 6.038418 | 6.190946 | 6.012038 | 4.995591 |
| protein_co sperm-tail_   | 1    | 1    | 0    | 1    | 1    | 2    | 0.011156 | 0.014306 | 0        | 0.017316 |
| pseudogen: neuralized_   | 0    | 0    | 0    | 0    | 2    | 0    | 0        | 0        | 0        | 0        |
| protein_co regulation_   | 1186 | 1036 | 1085 | 880  | 1119 | 925  | 7.3125   | 8.191252 | 8.071588 | 8.421594 |
| protein_co ankyrin_rej   | 5    | 9    | 11   | 7    | 9    | 7    | 0.090277 | 0.208382 | 0.239634 | 0.196172 |
| protein_co cathepsin_!   | 77   | 75   | 67   | 1    | 5    | 2    | 0.879116 | 1.098061 | 0.922951 | 0.017721 |
| protein_co msh_home      | 2418 | 1838 | 2142 | 2    | 7    | 14   | 58.47347 | 56.99771 | 62.49857 | 0.075069 |
| protein_co PARK2_co-     | 202  | 179  | 163  | 129  | 152  | 157  | 4.569119 | 5.192105 | 4.448532 | 4.528989 |
| protein_co BCL2/adeno    | 8    | 4    | 4    | 59   | 76   | 68   | 0.160582 | 0.102962 | 0.096876 | 1.838188 |
| protein_co C1q_and_ti    | 2    | 3    | 1    | 0    | 0    | 0    | 0.020766 | 0.039945 | 0.012528 | 0        |
| protein_co tumor_nec     | 0    | 2    | 2    | 2    | 6    | 2    | 0        | 0.102088 | 0.096053 | 0.123565 |
| protein_co LysM_puta     | 187  | 164  | 153  | 134  | 149  | 94   | 3.537085 | 3.977929 | 3.491752 | 3.934043 |
| protein_co sodium_ch     | 565  | 480  | 547  | 447  | 480  | 497  | 13.1413  | 14.31662 | 15.3506  | 16.13719 |
| protein_co vacuolar_p    | 1224 | 924  | 964  | 1426 | 1501 | 1330 | 13.45052 | 13.02084 | 12.78153 | 24.32247 |
| protein_co excision_re   | 1094 | 969  | 1014 | 790  | 872  | 1013 | 12.76697 | 14.50119 | 14.27764 | 14.30962 |
| protein_co ring_finger_  | 854  | 717  | 732  | 453  | 627  | 277  | 16.29132 | 17.5399  | 16.84836 | 13.41304 |
| protein_co IWS1_hom      | 1289 | 1004 | 1100 | 1462 | 1655 | 1541 | 20.43314 | 20.40917 | 21.0389  | 35.97163 |
| protein_co bolA_homc     | 203  | 168  | 162  | 294  | 332  | 412  | 3.192043 | 3.387594 | 3.073518 | 7.175473 |
| protein_co CDC42_effa    | 1619 | 1367 | 1457 | 288  | 343  | 343  | 13.31841 | 14.4206  | 14.46149 | 3.677295 |
| protein_co S100_calci    | 5703 | 4710 | 4892 | 584  | 548  | 776  | 450.1915 | 476.7868 | 465.9383 | 71.55455 |
| protein_co DEAH_(Asp     | 560  | 485  | 512  | 450  | 543  | 658  | 4.758682 | 5.285058 | 5.249485 | 5.935286 |
| protein_co small_proli   | 0    | 1    | 0    | 0    | 0    | 0    | 0        | 0.075162 | 0        | 0        |
| protein_co Rho_GTPas     | 1    | 0    | 1    | 28   | 30   | 11   | 0.01574  | 0        | 0.018991 | 0.684067 |
| protein_co S100_calci    | 57   | 55   | 61   | 1    | 0    | 1    | 4.632116 | 5.73161  | 5.981119 | 0.126135 |
| protein_co S100_calci    | 7    | 2    | 1    | 0    | 0    | 0    | 0.636105 | 0.233061 | 0.109642 | 0        |
| protein_co transformin   | 15   | 9    | 3    | 8    | 7    | 17   | 0.16319  | 0.125561 | 0.03938  | 0.13509  |

|                          |        |        |        |      |      |      |          |          |          |          |
|--------------------------|--------|--------|--------|------|------|------|----------|----------|----------|----------|
| protein_co tudor_dom     | 0      | 0      | 0      | 1    | 1    | 2    | 0        | 0        | 0        | 0.031223 |
| protein_co cyclin_Y-lik  | 926    | 736    | 775    | 588  | 891  | 750  | 11.52645 | 11.74822 | 11.63951 | 11.36037 |
| protein_co frizzled_fan  | 315    | 240    | 249    | 2819 | 3442 | 3153 | 2.201902 | 2.151334 | 2.100075 | 30.58531 |
| protein_co DDB1_and_     | 1017   | 743    | 860    | 1134 | 1400 | 891  | 10.4853  | 9.823315 | 10.69809 | 18.14694 |
| protein_co chromosom     | 0      | 0      | 1      | 3    | 1    | 0    | 0        | 0        | 0.14619  | 0.564185 |
| protein_co natriuretic   | 0      | 0      | 0      | 8    | 12   | 8    | 0        | 0        | 0        | 0.553985 |
| protein_co glucosamin    | 353    | 290    | 292    | 128  | 155  | 155  | 3.075469 | 3.239993 | 3.0695   | 1.730921 |
| protein_co alkaline_ph   | 0      | 0      | 0      | 3    | 10   | 9    | 0        | 0        | 0        | 0.07349  |
| protein_co gamma-am      | 0      | 0      | 0      | 4    | 6    | 3    | 0        | 0        | 0        | 0.042906 |
| protein_co alkaline_ph   | 0      | 0      | 0      | 68   | 94   | 43   | 0        | 0        | 0        | 1.985169 |
| protein_co gamma-am      | 0      | 0      | 1      | 2    | 2    | 0    | 0        | 0        | 0.0264   | 0.067923 |
| protein_co progesteron   | 497    | 411    | 435    | 367  | 484  | 437  | 2.375328 | 2.518943 | 2.508444 | 2.722473 |
| protein_co NIPA-like_d   | 61     | 33     | 55     | 70   | 74   | 80   | 0.539881 | 0.374534 | 0.587326 | 0.961606 |
| protein_co anthrax_to    | 3828   | 3082   | 3244   | 127  | 172  | 208  | 21.69648 | 22.40058 | 22.18433 | 1.117253 |
| protein_co helicase_PC   | 130    | 99     | 82     | 91   | 82   | 124  | 1.703186 | 1.663272 | 1.296226 | 1.850506 |
| protein_co mitochondr    | 115    | 91     | 68     | 95   | 121  | 138  | 2.172583 | 2.204598 | 1.550014 | 2.785689 |
| protein_co CGG_triple    | 1967   | 1540   | 1611   | 1104 | 1262 | 1035 | 17.40896 | 17.47827 | 17.20331 | 15.16589 |
| protein_co family_witl   | 145    | 153    | 152    | 164  | 151  | 103  | 2.369834 | 3.206643 | 2.997378 | 4.160295 |
| protein_co G_protein+    | 89     | 89     | 79     | 13   | 16   | 15   | 0.620091 | 0.795179 | 0.664111 | 0.140585 |
| protein_co phosphom      | 536    | 372    | 445    | 447  | 603  | 496  | 19.63519 | 17.47522 | 19.66883 | 25.41607 |
| protein_co pre-B-cell_I  | 2130   | 1643   | 1664   | 1048 | 1235 | 598  | 31.09456 | 30.75755 | 29.30935 | 23.74634 |
| protein_co claudin_1     | 42     | 24     | 18     | 76   | 94   | 88   | 0.565751 | 0.414569 | 0.292548 | 1.588987 |
| protein_co pygopus_h     | 1049   | 791    | 854    | 907  | 1161 | 877  | 15.63497 | 15.11846 | 15.35775 | 20.98261 |
| protein_co homeodom      | 1393   | 1107   | 1180   | 981  | 1210 | 894  | 8.007576 | 8.160314 | 8.184271 | 8.752848 |
| protein_co lens_epithe   | 0      | 1      | 0      | 0    | 0    | 3    | 0        | 0.09265  | 0        | 0        |
| protein_co DC-STAMP_     | 10     | 5      | 10     | 17   | 27   | 8    | 0.188011 | 0.120549 | 0.226846 | 0.496093 |
| protein_co DC-STAMP_     | 11     | 5      | 3      | 8    | 11   | 5    | 0.226323 | 0.131921 | 0.074474 | 0.25548  |
| protein_co collagen_ty   | 231582 | 180350 | 193521 | 29   | 45   | 77   | 1010.223 | 1008.876 | 1018.564 | 0.196354 |
| protein_co chromosom     | 287    | 210    | 206    | 950  | 1105 | 1426 | 3.131092 | 2.937938 | 2.711623 | 16.08674 |
| lincRNA -                | 69     | 60     | 55     | 1    | 1    | 6    | 2.29951  | 2.56417  | 2.211551 | 0.051727 |
| protein_co YY1_associ    | 519    | 405    | 436    | 392  | 395  | 425  | 8.314287 | 8.319975 | 8.427373 | 9.747073 |
| protein_co kelch_repe    | 37     | 26     | 31     | 169  | 156  | 314  | 0.370395 | 0.333769 | 0.374432 | 2.625915 |
| protein_co family_witl   | 0      | 0      | 0      | 64   | 84   | 75   | 0        | 0        | 0        | 2.032246 |
| protein_co EGF_domai     | 856    | 668    | 723    | 196  | 237  | 334  | 8.484011 | 8.490109 | 8.645971 | 3.015185 |
| protein_co leiomodini    | 3      | 2      | 4      | 0    | 0    | 0    | 0.034427 | 0.029432 | 0.055385 | 0        |
| protein_co apolipopro    | 1048   | 887    | 927    | 1075 | 1361 | 984  | 43.68066 | 47.409   | 46.61822 | 69.54514 |
| protein_co neuroblast    | 702    | 558    | 613    | 87   | 111  | 120  | 3.077198 | 3.13662  | 3.242104 | 0.591927 |
| protein_co protein_O-    | 351    | 288    | 307    | 205  | 220  | 258  | 4.574318 | 4.813058 | 4.827315 | 4.146709 |
| protein_co solute_carr   | 15     | 6      | 4      | 87   | 76   | 56   | 0.149015 | 0.076436 | 0.047945 | 1.341492 |
| protein_co cholecystol   | 15     | 10     | 12     | 0    | 0    | 0    | 0.408925 | 0.349592 | 0.394713 | 0        |
| protein_co immunoglc     | 7      | 10     | 14     | 1    | 2    | 7    | 0.027793 | 0.050914 | 0.067067 | 0.006163 |
| protein_co ATPase_Na     | 4080   | 3259   | 3328   | 5809 | 5555 | 6175 | 50.84009 | 52.07627 | 50.03542 | 112.3513 |
| protein_co solute_carr   | 26     | 21     | 18     | 46   | 62   | 64   | 0.214902 | 0.222585 | 0.17951  | 0.590141 |
| protein_co eukaryotic    | 29     | 25     | 38     | 206  | 313  | 230  | 0.219148 | 0.242263 | 0.346474 | 2.416219 |
| protein_co prokinetici   | 0      | 0      | 0      | 10   | 12   | 5    | 0        | 0        | 0        | 0.46985  |
| protein_co chromosom     | 0      | 0      | 0      | 0    | 0    | 2    | 0        | 0        | 0        | 0        |
| protein_co leucine_ric   | 1107   | 858    | 971    | 476  | 665  | 459  | 6.568044 | 6.528074 | 6.951134 | 4.383549 |
| protein_co follistatin-I | 32154  | 25254  | 27277  | 6020 | 6552 | 6220 | 253.6937 | 255.5137 | 259.6685 | 73.72277 |
| protein_co leiomodini    | 4      | 4      | 6      | 36   | 44   | 15   | 0.047244 | 0.060584 | 0.085505 | 0.659968 |
| protein_co E74-like_fa   | 0      | 2      | 0      | 52   | 70   | 89   | 0        | 0.024081 | 0        | 0.757819 |
| protein_co phosducin     | 0      | 0      | 0      | 2    | 2    | 1    | 0        | 0        | 0        | 0.169059 |
| protein_co transmemt     | 1329   | 980    | 1057   | 1638 | 1820 | 1653 | 20.64155 | 19.51878 | 19.80799 | 39.48768 |
| protein_co transmemt     | 47     | 38     | 30     | 63   | 57   | 23   | 0.636945 | 0.660385 | 0.490539 | 1.325181 |
| protein_co insulin-like  | 1756   | 1249   | 1262   | 3    | 0    | 8    | 57.70068 | 52.62937 | 50.03384 | 0.153006 |
| protein_co tripartite_r  | 429    | 334    | 382    | 157  | 181  | 129  | 6.062633 | 6.052849 | 6.513515 | 3.44377  |
| protein_co keratinocyt   | 1193   | 1034   | 1042   | 736  | 690  | 696  | 17.13842 | 19.04847 | 18.06118 | 16.41113 |
| protein_co actin_relat   | 6530   | 5100   | 5386   | 2350 | 2705 | 2724 | 137.5525 | 137.7637 | 136.8893 | 76.83402 |
| protein_co TSSK6_acti    | 3      | 2      | 0      | 13   | 13   | 14   | 0.18731  | 0.160133 | 0        | 1.259837 |
| protein_co chaperonin    | 4914   | 3848   | 3952   | 7804 | 7962 | 8355 | 107.171  | 107.6184 | 103.9937 | 264.1738 |
| protein_co transmemt     | 79     | 78     | 61     | 38   | 45   | 45   | 1.516917 | 1.920608 | 1.413229 | 1.132528 |
| protein_co signal_sequ   | 4784   | 3812   | 3967   | 1748 | 1785 | 1812 | 43.42273 | 44.36988 | 43.44464 | 24.62623 |
| protein_co ring_finger   | 588    | 440    | 466    | 259  | 341  | 422  | 14.40508 | 13.82294 | 13.77439 | 9.848468 |
| protein_co serine/thre   | 494    | 399    | 458    | 313  | 337  | 523  | 4.695655 | 4.863529 | 5.252702 | 4.617895 |
| protein_co adenosine_    | 5      | 5      | 13     | 54   | 95   | 35   | 0.068814 | 0.088244 | 0.215874 | 1.15354  |
| protein_co SLIT-ROBO_    | 2343   | 1807   | 2013   | 1108 | 1071 | 724  | 18.41182 | 18.20924 | 19.08606 | 13.51433 |

|                         |      |      |      |      |      |      |          |          |          |          |
|-------------------------|------|------|------|------|------|------|----------|----------|----------|----------|
| protein_co NIMA-relat   | 21   | 30   | 20   | 4    | 1    | 8    | 0.231692 | 0.424446 | 0.266238 | 0.068499 |
| protein_co coiled-coil  | 4    | 2    | 2    | 13   | 9    | 47   | 0.02055  | 0.013176 | 0.012397 | 0.103664 |
| protein_co FEV_(ETS_o   | 0    | 0    | 0    | 1    | 1    | 0    | 0        | 0        | 0        | 0.038733 |
| protein_co indian_hed   | 0    | 0    | 4    | 1    | 3    | 4    | 0        | 0        | 0.112086 | 0.036047 |
| protein_co KIAA1524     | 495  | 409  | 424  | 297  | 280  | 430  | 5.695843 | 6.035113 | 5.886629 | 5.304442 |
| protein_co eomesoder    | 0    | 0    | 0    | 27   | 41   | 119  | 0        | 0        | 0        | 0.580347 |
| protein_co CWC22_spl    | 449  | 330  | 331  | 529  | 328  | 622  | 6.418786 | 6.049644 | 5.709296 | 11.73796 |
| protein_co 5-azacytidil | 415  | 347  | 369  | 148  | 197  | 169  | 4.13501  | 4.43371  | 4.436116 | 2.288868 |
| protein_co transformin  | 1735 | 1306 | 1364 | 188  | 241  | 154  | 17.60532 | 16.99405 | 16.69963 | 2.960961 |
| protein_co resistin_lik | 0    | 0    | 0    | 1    | 1    | 0    | 0        | 0        | 0        | 0.107662 |
| protein_co ankyrin_rej  | 459  | 428  | 433  | 940  | 983  | 697  | 6.632517 | 7.930833 | 7.549212 | 21.08259 |
| protein_co histone_de   | 195  | 175  | 191  | 268  | 370  | 225  | 3.089038 | 3.554971 | 3.650649 | 6.589523 |
| protein_co fibulin_2    | 1326 | 984  | 1009 | 1119 | 1567 | 998  | 14.3993  | 13.70258 | 13.22017 | 18.86072 |
| protein_co galactosida  | 138  | 127  | 109  | 49   | 91   | 60   | 2.357312 | 2.781961 | 2.246532 | 1.299166 |
| protein_co STT3B_subi   | 4321 | 3718 | 3856 | 2070 | 2359 | 2118 | 47.71827 | 52.65252 | 51.37898 | 35.48144 |
| protein_co coiled-coil  | 156  | 143  | 143  | 296  | 387  | 352  | 4.571777 | 5.374101 | 5.056436 | 13.46426 |
| protein_co developme    | 0    | 1    | 0    | 332  | 286  | 191  | 0        | 0.043478 | 0        | 17.47136 |
| protein_co neurofascir  | 8    | 3    | 5    | 283  | 338  | 311  | 0.035209 | 0.016932 | 0.026551 | 1.933235 |
| protein_co shugoshin-l  | 452  | 380  | 433  | 517  | 338  | 462  | 5.029494 | 5.422241 | 5.813288 | 8.929083 |
| protein_co serpin_pep   | 292  | 253  | 257  | 65   | 49   | 59   | 7.179803 | 7.977367 | 7.624491 | 2.480696 |
| protein_co cytoplasmic  | 971  | 841  | 883  | 812  | 996  | 775  | 6.252432 | 6.944405 | 6.860227 | 8.115518 |
| protein_co succinate-C  | 633  | 567  | 519  | 455  | 479  | 556  | 16.81665 | 19.31648 | 16.63608 | 18.76193 |
| protein_co NUA1_fami    | 66   | 50   | 43   | 148  | 175  | 69   | 0.908881 | 0.882963 | 0.714463 | 3.16341  |
| protein_co protein_kir  | 1187 | 1021 | 999  | 1857 | 2077 | 1731 | 11.24413 | 12.40253 | 11.41797 | 27.30345 |
| protein_co myeloid_ce   | 5    | 10   | 13   | 0    | 0    | 1    | 0.133819 | 0.343207 | 0.419795 | 0        |
| protein_co interferon_  | 1211 | 1002 | 1050 | 15   | 11   | 40   | 13.72253 | 14.56019 | 14.3558  | 0.263822 |
| protein_co absent_in_   | 0    | 0    | 0    | 16   | 25   | 12   | 0        | 0        | 0        | 0.761594 |
| protein_co EF-hand_dc   | 4    | 9    | 2    | 14   | 16   | 5    | 0.06644  | 0.1917   | 0.040082 | 0.360934 |
| protein_co eukaryotic_  | 107  | 91   | 110  | 34   | 41   | 23   | 0.897056 | 0.978332 | 1.112695 | 0.44243  |
| protein_co ribosomal_   | 501  | 369  | 436  | 378  | 458  | 691  | 10.72689 | 10.13146 | 11.26343 | 12.56199 |
| protein_co protein_ph   | 52   | 38   | 56   | 424  | 556  | 313  | 0.223    | 0.208975 | 0.289759 | 2.822264 |
| protein_co islet_cell_a | 119  | 111  | 106  | 40   | 65   | 41   | 1.078661 | 1.290239 | 1.159289 | 0.562767 |
| processed_small_nucl    | 968  | 809  | 885  | 1300 | 1506 | 1345 | 12.58374 | 13.48628 | 13.88115 | 26.23059 |
| protein_co cytotoxic_   | 16   | 15   | 18   | 0    | 0    | 0    | 0.379484 | 0.45622  | 0.515103 | 0        |
| protein_co RING1_and    | 884  | 643  | 701  | 669  | 761  | 937  | 8.737516 | 8.14997  | 8.359913 | 10.26342 |
| protein_co protein_ph   | 942  | 660  | 789  | 620  | 695  | 1081 | 8.862439 | 7.962613 | 8.956275 | 9.053667 |
| protein_co CD200_rec    | 0    | 2    | 0    | 0    | 5    | 2    | 0        | 0.032688 | 0        | 0        |
| protein_co GTP-bindin   | 376  | 281  | 293  | 247  | 296  | 325  | 9.866058 | 9.455217 | 9.27623  | 10.05966 |
| protein_co chromosom    | 641  | 506  | 525  | 573  | 663  | 586  | 6.020934 | 6.094887 | 5.949948 | 8.353932 |
| protein_co spindle_an   | 423  | 370  | 351  | 180  | 235  | 186  | 3.661524 | 4.107075 | 3.665867 | 2.41838  |
| pseudogen_family_witl   | 0    | 0    | 0    | 0    | 1    | 1    | 0        | 0        | 0        | 0        |
| protein_co KIAA1407     | 41   | 34   | 37   | 27   | 33   | 8    | 0.483524 | 0.514188 | 0.526482 | 0.494229 |
| protein_co Ca++-depen   | 171  | 134  | 158  | 116  | 140  | 150  | 1.465581 | 1.472746 | 1.633875 | 1.543129 |
| protein_co NK6_home     | 38   | 41   | 36   | 4    | 3    | 13   | 0.678014 | 0.938098 | 0.775007 | 0.110776 |
| protein_co CDP-diacylg  | 78   | 45   | 84   | 427  | 435  | 423  | 0.819866 | 0.606555 | 1.065309 | 6.96637  |
| protein_co WD_repeat    | 1571 | 1292 | 1456 | 885  | 963  | 724  | 5.167606 | 5.449856 | 5.778599 | 4.518423 |
| protein_co cytochrom    | 472  | 407  | 393  | 592  | 782  | 474  | 7.075476 | 7.823794 | 7.108112 | 13.77418 |
| protein_co protein_ty   | 1778 | 1535 | 1615 | 1428 | 1478 | 1692 | 9.72477  | 10.76627 | 10.65781 | 12.12289 |
| protein_co synaptopor   | 0    | 0    | 1    | 17   | 14   | 8    | 0        | 0        | 0.020884 | 0.456721 |
| protein_co chromosom    | 6    | 6    | 4    | 2    | 2    | 5    | 0.217755 | 0.279241 | 0.175156 | 0.112662 |
| protein_co chromosom    | 24   | 24   | 30   | 53   | 96   | 81   | 0.488014 | 0.625809 | 0.736021 | 1.672736 |
| protein_co THO_comp     | 387  | 334  | 295  | 452  | 540  | 500  | 18.32973 | 20.28621 | 16.85836 | 33.22876 |
| protein_co ataxin_7     | 641  | 511  | 533  | 352  | 433  | 439  | 4.125807 | 4.217752 | 4.139292 | 3.516608 |
| protein_co proteasom    | 1316 | 1109 | 1104 | 1270 | 1368 | 1489 | 13.46438 | 14.55028 | 13.62849 | 20.16809 |
| protein_co prickly_hor  | 329  | 264  | 296  | 19   | 19   | 20   | 1.857533 | 1.911411 | 2.016418 | 0.166504 |
| protein_co ADAM_met     | 5296 | 3545 | 3780 | 132  | 159  | 102  | 33.2703  | 28.55843 | 28.65158 | 1.287103 |
| protein_co protein_ph   | 413  | 356  | 358  | 104  | 145  | 117  | 6.538007 | 7.226944 | 6.837958 | 2.555402 |
| protein_co family_witl  | 0    | 1    | 1    | 1    | 2    | 0    | 0        | 0.029303 | 0.027571 | 0.035468 |
| protein_co guanine_m    | 2086 | 1616 | 1730 | 2506 | 2742 | 2607 | 18.13695 | 18.01775 | 18.14864 | 33.81906 |
| protein_co TCDD-indu    | 654  | 561  | 652  | 71   | 109  | 74   | 7.334626 | 8.068121 | 8.822585 | 1.235916 |
| protein_co cyclin_L1    | 767  | 693  | 732  | 647  | 767  | 791  | 7.494195 | 8.683048 | 8.629562 | 9.812155 |
| protein_co pentraxin_   | 142  | 73   | 106  | 1    | 5    | 8    | 3.432156 | 2.262616 | 3.091239 | 0.037515 |
| protein_co HESX_homi    | 2    | 4    | 10   | 23   | 23   | 30   | 0.107055 | 0.274565 | 0.645839 | 1.910885 |
| protein_co doublecort   | 2    | 2    | 1    | 21   | 11   | 19   | 0.017549 | 0.022504 | 0.010587 | 0.285998 |
| protein_co sarcolemm    | 1060 | 868  | 942  | 871  | 1032 | 801  | 7.36456  | 7.733392 | 7.896596 | 9.392681 |

|                         |      |      |      |      |      |      |          |          |          |          |
|-------------------------|------|------|------|------|------|------|----------|----------|----------|----------|
| protein_co ribosomal_   | 4301 | 3399 | 3478 | 5329 | 6140 | 5436 | 93.67114 | 94.92855 | 91.39322 | 180.141  |
| protein_co small_integ  | 323  | 210  | 180  | 519  | 628  | 281  | 8.005008 | 6.674026 | 5.382448 | 19.96444 |
| protein_co ribonuclea   | 14   | 11   | 16   | 8    | 15   | 7    | 0.194276 | 0.195747 | 0.267892 | 0.172311 |
| protein_co abhydrolas   | 90   | 109  | 95   | 90   | 91   | 46   | 1.700283 | 2.640672 | 2.165461 | 2.639074 |
| protein_co chromosom    | 33   | 30   | 32   | 88   | 122  | 85   | 0.376672 | 0.439117 | 0.440705 | 1.559061 |
| protein_co RNA_bindin   | 42   | 33   | 36   | 2151 | 2835 | 2447 | 0.397774 | 0.400784 | 0.411375 | 31.61974 |
| protein_co amyloid_b    | 2090 | 1557 | 1832 | 644  | 856  | 724  | 10.92289 | 10.43492 | 11.5522  | 5.224052 |
| protein_co interleukin  | 90   | 52   | 45   | 138  | 205  | 84   | 1.502885 | 1.113515 | 0.906659 | 3.576785 |
| protein_co interleukin  | 914  | 657  | 652  | 226  | 328  | 246  | 16.35157 | 15.0726  | 14.07372 | 6.275557 |
| protein_co cysteine-ric | 699  | 525  | 656  | 271  | 398  | 232  | 12.15732 | 11.70925 | 13.76615 | 7.315774 |
| protein_co proline-ric  | 192  | 134  | 174  | 186  | 310  | 265  | 2.393747 | 2.142354 | 2.617426 | 3.59932  |
| protein_co FANCD2_o     | 2    | 2    | 1    | 3    | 4    | 12   | 0.088891 | 0.11399  | 0.053626 | 0.206957 |
| protein_co procollagen  | 994  | 818  | 811  | 121  | 192  | 154  | 23.06219 | 24.33754 | 22.70299 | 4.357425 |
| protein_co U2_snRNP-    | 1642 | 1259 | 1357 | 1312 | 1477 | 2285 | 10.37647 | 10.20262 | 10.34676 | 12.86888 |
| protein_co myotubula    | 699  | 543  | 596  | 997  | 1184 | 1086 | 13.14199 | 13.09161 | 13.52005 | 29.09441 |
| protein_co tetratricop  | 281  | 191  | 224  | 86   | 118  | 147  | 1.86842  | 1.628586 | 1.797067 | 0.887559 |
| protein_co chemokine    | 0    | 0    | 0    | 17   | 25   | 58   | 0        | 0        | 0        | 0.753965 |
| protein_co chemokine    | 2    | 1    | 0    | 49   | 88   | 166  | 0.03695  | 0.023692 | 0        | 1.405126 |
| protein_co pro-platele  | 0    | 0    | 0    | 0    | 0    | 1    | 0        | 0        | 0        | 0        |
| protein_co platelet_fac | 0    | 0    | 1    | 8    | 5    | 7    | 0        | 0        | 0.093668 | 0.963971 |
| protein_co methylenet   | 66   | 54   | 38   | 59   | 76   | 86   | 0.972883 | 1.020751 | 0.675847 | 1.349893 |
| protein_co chemokine    | 3    | 3    | 4    | 5    | 6    | 11   | 0.128232 | 0.164439 | 0.206292 | 0.331722 |
| protein_co ring_finger  | 146  | 161  | 131  | 237  | 218  | 308  | 1.460935 | 2.065919 | 1.581603 | 3.680925 |
| protein_co phospholip   | 0    | 1    | 1    | 0    | 0    | 0    | 0        | 0.041728 | 0.039261 | 0        |
| protein_co coiled-coil  | 0    | 0    | 0    | 1    | 0    | 0    | 0        | 0        | 0        | 0.019869 |
| protein_co glycogenin   | 483  | 355  | 389  | 480  | 556  | 428  | 11.03698 | 10.40257 | 10.72508 | 17.02451 |
| protein_co Hermansky    | 606  | 525  | 513  | 770  | 1000 | 583  | 6.091179 | 6.767019 | 6.221486 | 12.01296 |
| protein_co transmembr   | 7    | 15   | 8    | 5    | 2    | 17   | 0.08521  | 0.23415  | 0.117498 | 0.09447  |
| protein_co topoisome    | 1035 | 872  | 855  | 734  | 651  | 845  | 9.024018 | 9.749569 | 8.994432 | 9.93313  |
| protein_co receptor-il  | 1537 | 1228 | 1306 | 831  | 1107 | 974  | 13.67551 | 14.01127 | 14.02042 | 11.47628 |
| protein_co SNF_relate   | 379  | 297  | 287  | 201  | 304  | 179  | 3.42877  | 3.445601 | 3.132774 | 2.822446 |
| protein_co transcripti  | 0    | 0    | 0    | 0    | 2    | 0    | 0        | 0        | 0        | 0        |
| protein_co DnaJ_(Hsp4   | 0    | 0    | 0    | 1    | 2    | 1    | 0        | 0        | 0        | 0.036245 |
| protein_co urocortin    | 8    | 4    | 3    | 1    | 8    | 7    | 0.471849 | 0.30254  | 0.213492 | 0.091547 |
| protein_co zinc_finger  | 766  | 621  | 639  | 446  | 665  | 604  | 16.79184 | 17.45704 | 16.90124 | 15.17522 |
| protein_co solute_carr  | 628  | 483  | 505  | 453  | 572  | 587  | 9.951649 | 9.815036 | 9.655502 | 11.14202 |
| protein_co phospholip   | 14   | 19   | 9    | 3    | 1    | 7    | 0.12834  | 0.223356 | 0.099546 | 0.042686 |
| protein_co speedy_hoi   | 18   | 7    | 10   | 4    | 2    | 11   | 0.405584 | 0.202263 | 0.271867 | 0.139894 |
| protein_co KIAA1143     | 671  | 539  | 483  | 1101 | 1186 | 1037 | 6.145157 | 6.33007  | 5.337103 | 15.6505  |
| protein_co kinesin_fan  | 548  | 410  | 488  | 479  | 361  | 564  | 5.306842 | 5.091536 | 5.701951 | 7.199819 |
| protein_co transglutar  | 0    | 1    | 1    | 0    | 1    | 0    | 0        | 0.017748 | 0.016699 | 0        |
| protein_co WD_repeat    | 789  | 609  | 657  | 1226 | 1453 | 1928 | 10.47162 | 10.36486 | 10.52083 | 25.2556  |
| protein_co zinc_finger  | 973  | 789  | 812  | 879  | 1172 | 1214 | 14.14259 | 14.70626 | 14.24033 | 19.83058 |
| protein_co CUB_doma     | 146  | 136  | 109  | 379  | 414  | 284  | 1.139851 | 1.36158  | 1.026762 | 4.592665 |
| protein_co C-type_lect  | 0    | 0    | 0    | 0    | 0    | 1    | 0        | 0        | 0        | 0        |
| protein_co solute_carr  | 0    | 0    | 0    | 18   | 14   | 6    | 0        | 0        | 0        | 0.24157  |
| protein_co leucine_zip  | 298  | 230  | 214  | 151  | 131  | 176  | 3.430696 | 3.395495 | 2.972541 | 2.698195 |
| protein_co FYVE_and_c   | 951  | 806  | 796  | 452  | 468  | 252  | 5.243698 | 5.699038 | 5.295638 | 3.868353 |
| protein_co chemokine    | 0    | 1    | 1    | 0    | 0    | 0    | 0        | 0.022018 | 0.020716 | 0        |
| protein_co receptor_(c  | 0    | 0    | 0    | 3    | 1    | 3    | 0        | 0        | 0        | 0.165283 |
| protein_co leucine_ric  | 1    | 4    | 5    | 75   | 87   | 71   | 0.009194 | 0.047161 | 0.055466 | 1.070291 |
| protein_co elongator_   | 622  | 513  | 454  | 686  | 844  | 604  | 20.8177  | 22.01755 | 18.33353 | 35.63665 |
| protein_co F-box_prot   | 0    | 0    | 0    | 0    | 2    | 2    | 0        | 0        | 0        | 0        |
| protein_co dextex_3-il  | 162  | 163  | 154  | 136  | 154  | 92   | 1.29451  | 1.670272 | 1.48477  | 1.686785 |
| protein_co zinc_finger  | 776  | 595  | 605  | 252  | 165  | 158  | 3.770247 | 3.707101 | 3.546594 | 1.900374 |
| protein_co nicotinami   | 4    | 0    | 4    | 42   | 38   | 32   | 0.07643  | 0        | 0.092218 | 1.24562  |
| protein_co small_integ  | 742  | 587  | 579  | 449  | 630  | 621  | 10.07307 | 10.21893 | 9.48385  | 9.460953 |
| protein_co zinc_finger  | 353  | 296  | 337  | 215  | 226  | 216  | 2.652167 | 2.851854 | 3.05495  | 2.507236 |
| protein_co transmembr   | 679  | 501  | 541  | 441  | 506  | 352  | 16.47094 | 15.5846  | 15.83412 | 16.60419 |
| protein_co YEATS_dom    | 1724 | 1346 | 1327 | 1731 | 1708 | 1208 | 12.42521 | 12.44001 | 11.53946 | 19.36395 |
| protein_co glutamate_   | 0    | 0    | 0    | 232  | 316  | 189  | 0        | 0        | 0        | 1.855281 |
| protein_co zinc_finger  | 166  | 144  | 164  | 186  | 177  | 158  | 2.900053 | 3.22604  | 3.456924 | 5.043608 |
| protein_co MYST/Esal-   | 859  | 660  | 714  | 442  | 465  | 492  | 18.76037 | 18.48424 | 18.81458 | 14.98308 |
| protein_co Smad_nucl    | 411  | 316  | 358  | 272  | 359  | 328  | 7.799189 | 7.689606 | 8.196694 | 8.011374 |
| protein_co dynein_axc   | 139  | 138  | 127  | 193  | 202  | 132  | 1.841682 | 2.344705 | 2.03026  | 3.96906  |

|                         |      |      |      |       |       |       |          |          |          |          |
|-------------------------|------|------|------|-------|-------|-------|----------|----------|----------|----------|
| protein_co polymerase   | 831  | 612  | 704  | 906   | 1081  | 947   | 21.62353 | 20.42144 | 22.10275 | 36.59184 |
| protein_co Kruppel-lik  | 2    | 0    | 0    | 150   | 214   | 72    | 0.036434 | 0        | 0        | 4.241247 |
| protein_co coiled-coil  | 2    | 2    | 1    | 8     | 8     | 9     | 0.044892 | 0.057568 | 0.027083 | 0.278716 |
| protein_co calcium/ca   | 56   | 34   | 49   | 194   | 366   | 241   | 1.92793  | 1.501037 | 2.035389 | 10.36658 |
| protein_co lipase_men   | 0    | 0    | 1    | 0     | 1     | 5     | 0        | 0        | 0.014053 | 0        |
| protein_co transmemt    | 326  | 235  | 264  | 197   | 245   | 218   | 3.106309 | 2.87147  | 3.035142 | 2.913558 |
| protein_co ribophorin   | 5876 | 4784 | 5191 | 2523  | 2900  | 2970  | 119.2752 | 124.5285 | 127.1357 | 79.49067 |
| protein_co SUMO1/ser    | 900  | 665  | 732  | 549   | 666   | 1018  | 7.381671 | 6.994283 | 7.243881 | 6.989    |
| protein_co hairy/enhai  | 6    | 10   | 9    | 38    | 36    | 22    | 0.076848 | 0.164244 | 0.139082 | 0.755431 |
| protein_co intraflagell | 721  | 598  | 667  | 577   | 630   | 508   | 7.459775 | 7.934161 | 8.326536 | 9.266096 |
| protein_co chromosom    | 12   | 21   | 18   | 18    | 27    | 18    | 0.292453 | 0.656302 | 0.529293 | 0.680892 |
| protein_co replication  | 489  | 387  | 416  | 953   | 1093  | 940   | 15.8351  | 16.0706  | 16.25374 | 47.89997 |
| protein_co ribosomal    | 178  | 136  | 128  | 740   | 780   | 557   | 11.04024 | 10.817   | 9.578921 | 71.23949 |
| protein_co BRCA1_ass    | 1829 | 1387 | 1513 | 1540  | 1848  | 1754  | 21.78355 | 21.18365 | 21.74212 | 28.4686  |
| protein_co transketola  | 7920 | 6445 | 6749 | 29495 | 33282 | 22859 | 50.97021 | 53.1892  | 52.40572 | 294.6253 |
| protein_co protein_kir  | 611  | 504  | 509  | 495   | 594   | 364   | 10.19566 | 10.78485 | 10.24802 | 12.82064 |
| protein_co RFT1_homo    | 521  | 405  | 427  | 405   | 474   | 382   | 4.782635 | 4.767535 | 4.729393 | 5.770521 |
| protein_co Scm-like_w   | 148  | 114  | 107  | 269   | 365   | 254   | 1.525884 | 1.507211 | 1.331042 | 4.304698 |
| protein_co guanine_nu   | 1611 | 1275 | 1360 | 2145  | 2139  | 3292  | 35.66564 | 36.19712 | 36.32799 | 73.70759 |
| protein_co polybromo    | 1813 | 1395 | 1519 | 759   | 988   | 1228  | 11.30023 | 11.14995 | 11.42339 | 7.342798 |
| protein_co UV-stimula   | 431  | 367  | 360  | 341   | 616   | 352   | 4.193733 | 4.579298 | 4.226433 | 5.150013 |
| protein_co family_witl  | 1599 | 1364 | 1415 | 633   | 686   | 499   | 10.53198 | 11.52087 | 11.24517 | 6.47136  |
| protein_co Rho_guanin   | 786  | 728  | 673  | 91    | 113   | 56    | 9.232353 | 10.96555 | 9.537905 | 1.659059 |
| protein_co stem-loop    | 1008 | 789  | 803  | 687   | 936   | 852   | 23.90751 | 23.99717 | 22.97933 | 25.2907  |
| protein_co low_densit   | 2246 | 1772 | 1827 | 1210  | 1597  | 1493  | 13.46911 | 13.62706 | 13.21952 | 11.26276 |
| protein_co zinc_finger  | 0    | 0    | 0    | 66    | 95    | 51    | 0        | 0        | 0        | 2.649458 |
| protein_co solute_carr  | 72   | 66   | 65   | 40    | 68    | 32    | 2.307643 | 2.712622 | 2.513608 | 1.989878 |
| protein_co UBX_doma     | 1737 | 1396 | 1547 | 2091  | 2446  | 1289  | 7.707036 | 7.942959 | 8.281823 | 14.40032 |
| protein_co ring_finger  | 1128 | 865  | 930  | 1906  | 2274  | 1563  | 9.891891 | 9.727375 | 9.840138 | 25.9432  |
| protein_co phosphatic   | 327  | 265  | 278  | 127   | 248   | 157   | 5.015713 | 5.212429 | 5.14491  | 3.023564 |
| protein_co antigen_p9   | 61   | 58   | 51   | 190   | 292   | 148   | 0.721749 | 0.880022 | 0.728072 | 3.489317 |
| protein_co otopetrin    | 1    | 1    | 0    | 1     | 0     | 0     | 0.025156 | 0.032258 | 0        | 0.039045 |
| protein_co S100_calci   | 4    | 4    | 2    | 0     | 1     | 4     | 0.146646 | 0.188053 | 0.088468 | 0        |
| protein_co actin_bindi  | 5    | 3    | 4    | 35    | 64    | 29    | 0.065361 | 0.05029  | 0.063089 | 0.710146 |
| protein_co exonucleas   | 125  | 83   | 94   | 42    | 79    | 54    | 2.283308 | 1.944205 | 2.071717 | 1.190788 |
| protein_co claudin_19   | 1    | 0    | 1    | 104   | 173   | 42    | 0.013332 | 0        | 0.016086 | 2.152147 |
| protein_co chromosom    | 171  | 119  | 140  | 127   | 123   | 131   | 5.146465 | 4.592712 | 5.083807 | 5.932628 |
| protein_co erythroblat  | 74   | 68   | 73   | 26    | 27    | 28    | 0.878668 | 1.035408 | 1.045837 | 0.479178 |
| protein_co zinc_finger  | 124  | 87   | 94   | 242   | 254   | 244   | 3.004838 | 2.70351  | 2.748371 | 9.102177 |
| protein_co aminoacyl    | 588  | 452  | 510  | 554   | 460   | 507   | 10.66177 | 10.50993 | 11.15758 | 15.59165 |
| protein_co sphingomy    | 490  | 371  | 438  | 1     | 0     | 2     | 3.73656  | 3.627932 | 4.029935 | 0.011836 |
| protein_co methionyl    | 961  | 861  | 864  | 1558  | 1655  | 1398  | 16.14522 | 18.54954 | 17.51388 | 40.62735 |
| protein_co DnaJ_(Hsp4   | 953  | 818  | 843  | 374   | 273   | 358   | 6.914155 | 7.610424 | 7.379414 | 4.211612 |
| protein_co H2A_histor   | 3327 | 2724 | 3083 | 3106  | 3840  | 5774  | 82.98037 | 87.12424 | 92.77781 | 120.2415 |
| protein_co endomucir    | 0    | 0    | 1    | 0     | 0     | 0     | 0        | 0        | 0.014014 | 0        |
| protein_co solute_carr  | 7    | 8    | 9    | 7     | 9     | 0     | 0.174683 | 0.256008 | 0.270984 | 0.271133 |
| protein_co solute_carr  | 307  | 247  | 299  | 73    | 110   | 65    | 4.605002 | 4.751139 | 5.411413 | 1.699592 |
| protein_co 3-hydroxyt   | 183  | 168  | 156  | 190   | 172   | 178   | 3.085535 | 3.632436 | 3.173599 | 4.97237  |
| protein_co progesteron  | 992  | 674  | 739  | 756   | 1008  | 881   | 12.28927 | 10.70739 | 11.04605 | 14.53673 |
| protein_co cell_divisio | 497  | 368  | 415  | 1399  | 1869  | 2356  | 6.16028  | 5.849264 | 6.206406 | 26.91487 |
| protein_co cathelidici  | 1    | 1    | 1    | 0     | 0     | 0     | 0.06294  | 0.080711 | 0.07594  | 0        |
| protein_co zinc_finger  | 213  | 147  | 219  | 1636  | 1969  | 1908  | 2.12366  | 1.879456 | 2.634496 | 25.3174  |
| protein_co F-box_and    | 1    | 1    | 2    | 14    | 11    | 21    | 0.021431 | 0.027482 | 0.051714 | 0.465684 |
| protein_co plexin_B1    | 1359 | 1066 | 1144 | 2247  | 2980  | 2839  | 8.719695 | 8.770986 | 8.856374 | 22.3777  |
| protein_co coiled-coil  | 254  | 185  | 221  | 362   | 401   | 389   | 7.634657 | 7.130777 | 8.014863 | 16.88865 |
| protein_co ATR_intera   | 214  | 182  | 170  | 199   | 293   | 237   | 3.687785 | 4.021912 | 3.53467  | 5.322742 |
| protein_co shisa_homo   | 3134 | 2550 | 2663 | 1938  | 2283  | 2235  | 62.03179 | 64.72393 | 63.59669 | 59.53873 |
| protein_co sprouty_hc   | 1011 | 758  | 776  | 1310  | 1620  | 1045  | 18.93203 | 18.20223 | 17.53298 | 38.07569 |
| protein_co bassoon_pr   | 87   | 67   | 53   | 114   | 161   | 93    | 0.255684 | 0.252504 | 0.187935 | 0.520019 |
| protein_co N-acylamin   | 2239 | 1826 | 1772 | 4043  | 4497  | 3923  | 32.60458 | 34.09845 | 31.1341  | 91.3816  |
| protein_co inturned_p   | 155  | 122  | 148  | 134   | 160   | 132   | 1.266194 | 1.27802  | 1.458741 | 1.699041 |
| protein_co ring_finger  | 879  | 734  | 768  | 481   | 664   | 390   | 7.007196 | 7.503446 | 7.386941 | 5.951561 |
| protein_co heat_shock   | 60   | 62   | 58   | 140   | 131   | 80    | 0.681541 | 0.903112 | 0.794908 | 2.468307 |
| protein_co major_facil  | 221  | 165  | 192  | 159   | 133   | 167   | 2.297715 | 2.199871 | 2.408536 | 2.565851 |
| protein_co chromosom    | 161  | 183  | 153  | 270   | 365   | 263   | 1.385191 | 2.019037 | 1.588266 | 3.605605 |

|                         |       |      |       |      |      |      |          |          |          |          |
|-------------------------|-------|------|-------|------|------|------|----------|----------|----------|----------|
| protein_co CaM_kinase   | 0     | 0    | 0     | 1101 | 1407 | 1478 | 0        | 0        | 0        | 24.17941 |
| protein_co MON1_hon     | 354   | 255  | 335   | 173  | 218  | 215  | 6.568685 | 6.067708 | 7.500116 | 4.982551 |
| protein_co macrophag    | 4     | 2    | 3     | 55   | 108  | 46   | 0.040051 | 0.02568  | 0.036243 | 0.85477  |
| protein_co RAD54-like   | 727   | 590  | 627   | 443  | 509  | 449  | 6.646333 | 6.916861 | 6.916132 | 6.286109 |
| protein_co testis_expr  | 526   | 422  | 444   | 223  | 311  | 151  | 6.264706 | 6.445205 | 6.380372 | 4.122402 |
| protein_co glutamate_   | 35    | 25   | 25    | 175  | 210  | 176  | 0.250557 | 0.229503 | 0.215937 | 1.944499 |
| protein_co dual_specif  | 2143  | 1670 | 1721  | 447  | 541  | 320  | 30.08542 | 30.0649  | 29.15163 | 9.740291 |
| protein_co POC1_cent    | 336   | 255  | 273   | 473  | 545  | 393  | 7.881464 | 7.670384 | 7.72642  | 17.22103 |
| protein_co protein_ph   | 416   | 316  | 325   | 63   | 94   | 41   | 8.030567 | 7.822567 | 7.569798 | 1.887661 |
| protein_co alanine-gly  | 0     | 1    | 2     | 14   | 5    | 14   | 0        | 0.028647 | 0.053907 | 0.48543  |
| protein_co WD_repeat    | 4360  | 3482 | 3588  | 2121 | 2710 | 2707 | 47.1822  | 48.32032 | 46.84812 | 35.62565 |
| protein_co paired-like_ | 446   | 390  | 362   | 476  | 615  | 809  | 6.225945 | 6.981429 | 6.097152 | 10.31354 |
| protein_co chromosom    | 1336  | 1033 | 1103  | 1001 | 901  | 807  | 26.92096 | 26.69277 | 26.81684 | 31.30751 |
| protein_co protease_se  | 88    | 77   | 93    | 258  | 345  | 211  | 0.858041 | 0.962777 | 1.094099 | 3.904593 |
| protein_co N-deacetyl   | 223   | 194  | 207   | 6    | 3    | 11   | 1.754148 | 1.956917 | 1.964625 | 0.073256 |
| protein_co high_mobil   | 3861  | 3042 | 3116  | 4768 | 5223 | 3951 | 95.84032 | 96.83157 | 93.32413 | 183.7025 |
| protein_co Sin3A-associ | 452   | 331  | 412   | 308  | 408  | 304  | 19.12842 | 17.96296 | 21.0371  | 20.23121 |
| protein_co stimulator_  | 450   | 337  | 320   | 1    | 4    | 0    | 12.85049 | 12.34089 | 11.02568 | 0.044324 |
| protein_co heart_and_   | 1058  | 783  | 810   | 0    | 2    | 13   | 17.84519 | 16.93584 | 16.48423 | 0        |
| protein_co MAD2_mit     | 833   | 685  | 709   | 1215 | 1372 | 1595 | 23.61511 | 24.90261 | 24.25153 | 53.46279 |
| protein_co annexin_A5   | 12042 | 9993 | 10410 | 2518 | 2892 | 3126 | 320.4595 | 341.0199 | 334.2514 | 104.0065 |
| protein_co transmembr   | 16    | 29   | 20    | 3    | 2    | 19   | 0.314039 | 0.729914 | 0.473633 | 0.091394 |
| protein_co microtubul   | 331   | 263  | 256   | 171  | 170  | 161  | 2.116541 | 2.156571 | 1.975089 | 1.69717  |
| protein_co guanylate_   | 38    | 35   | 52    | 0    | 0    | 5    | 0.404959 | 0.478305 | 0.66862  | 0        |
| protein_co F-box_prot   | 237   | 173  | 151   | 88   | 89   | 95   | 4.312353 | 4.036653 | 3.315057 | 2.485302 |
| protein_co centrosom    | 244   | 183  | 219   | 212  | 224  | 175  | 2.523415 | 2.426941 | 2.732694 | 3.403026 |
| protein_co hydroxypro   | 0     | 1    | 0     | 15   | 13   | 74   | 0        | 0.019864 | 0        | 0.360653 |
| protein_co transmembr   | 30    | 30   | 39    | 43   | 43   | 30   | 0.288732 | 0.370257 | 0.452883 | 0.64235  |
| protein_co family_witl  | 2053  | 1644 | 1653  | 0    | 2    | 7    | 19.31097 | 19.83017 | 18.76014 | 0        |
| protein_co neuropepti   | 5     | 6    | 3     | 34   | 48   | 50   | 0.077402 | 0.119108 | 0.056034 | 0.816941 |
| protein_co neuropepti   | 0     | 1    | 1     | 7    | 3    | 6    | 0        | 0.018891 | 0.017774 | 0.160056 |
| protein_co N(alpha)-ac  | 1173  | 862  | 948   | 1553 | 1686 | 2200 | 8.839921 | 8.330422 | 8.61999  | 18.16571 |
| protein_co interleukin  | 7     | 5    | 4     | 20   | 30   | 28   | 0.054469 | 0.049892 | 0.037554 | 0.241553 |
| protein_co family_witl  | 4     | 4    | 3     | 367  | 384  | 216  | 0.040988 | 0.052561 | 0.037091 | 5.837016 |
| protein_co ADP-ribosy   | 540   | 501  | 471   | 471  | 562  | 491  | 7.395038 | 8.798197 | 7.782437 | 10.01147 |
| protein_co KIAA0947     | 1429  | 1120 | 1347  | 1217 | 1293 | 1474 | 8.452862 | 8.495695 | 9.613625 | 11.17359 |
| protein_co hedgehog_i   | 394   | 369  | 364   | 5    | 3    | 8    | 1.83426  | 2.202928 | 2.044627 | 0.03613  |
| protein_co anaphase_r   | 64    | 59   | 52    | 50   | 72   | 54   | 2.927767 | 3.46113  | 2.870172 | 3.550234 |
| protein_co ATP-bindin   | 1069  | 804  | 913   | 1035 | 1033 | 1496 | 12.78384 | 12.3296  | 13.17354 | 19.21119 |
| protein_co OTU_doma     | 899   | 660  | 768   | 998  | 1198 | 1006 | 5.963237 | 5.614042 | 6.146554 | 10.27504 |
| protein_co LSM6_hom     | 340   | 252  | 287   | 556  | 684  | 642  | 11.79187 | 11.20762 | 12.00974 | 29.93015 |
| protein_co transmembr   | 603   | 477  | 531   | 568  | 622  | 683  | 6.767516 | 6.864986 | 7.190424 | 9.89443  |
| protein_co protein_ar   | 153   | 136  | 129   | 153  | 172  | 107  | 2.033496 | 2.317929 | 2.068662 | 3.156267 |
| protein_co integrin_al  | 374   | 328  | 378   | 223  | 212  | 124  | 2.228602 | 2.506363 | 2.717695 | 2.062511 |
| protein_co molybdenu    | 525   | 331  | 455   | 147  | 161  | 192  | 6.899456 | 5.578185 | 7.214645 | 2.998495 |
| protein_co solute_carr  | 1     | 4    | 2     | 2    | 1    | 1    | 0.01722  | 0.088329 | 0.041554 | 0.053456 |
| protein_co EGF-like_re  | 2361  | 1887 | 2022  | 1106 | 1129 | 947  | 23.42021 | 24.00358 | 24.20048 | 17.02866 |
| protein_co transmembr   | 227   | 187  | 204   | 140  | 182  | 168  | 1.399058 | 1.477954 | 1.517009 | 1.339271 |
| protein_co ELOVL_fatt   | 3     | 4    | 2     | 131  | 152  | 115  | 0.033774 | 0.057748 | 0.027167 | 2.289113 |
| protein_co NADH_deh     | 330   | 250  | 264   | 243  | 336  | 308  | 21.85552 | 21.23227 | 21.09595 | 24.97951 |
| protein_co zinc_finger  | 2     | 4    | 6     | 0    | 0    | 1    | 0.04775  | 0.122464 | 0.172838 | 0        |
| protein_co LMBR1_doi    | 179   | 143  | 196   | 83   | 89   | 63   | 1.025451 | 1.050527 | 1.354771 | 0.738024 |
| protein_co RAN_bindin   | 243   | 183  | 169   | 1    | 0    | 0    | 3.670836 | 3.545023 | 3.080303 | 0.023447 |
| protein_co Nipped-B_    | 1629  | 1312 | 1503  | 1083 | 686  | 1018 | 7.319965 | 7.560162 | 8.148825 | 7.553476 |
| protein_co ring_finger  | 48    | 26   | 40    | 17   | 14   | 12   | 0.458769 | 0.318666 | 0.461276 | 0.252193 |
| protein_co G_protein-i  | 11    | 5    | 18    | 1003 | 926  | 883  | 0.026672 | 0.015547 | 0.052661 | 3.774855 |
| protein_co solute_carr  | 712   | 551  | 573   | 297  | 295  | 383  | 5.357139 | 5.316354 | 5.201824 | 3.468485 |
| protein_co StAR-relate  | 1922  | 1422 | 1535  | 462  | 464  | 665  | 19.56635 | 18.56374 | 18.85441 | 7.300102 |
| protein_co protein_ge   | 314   | 218  | 260   | 233  | 262  | 371  | 5.399144 | 4.806856 | 5.394071 | 6.218443 |
| protein_co coagulation  | 745   | 560  | 645   | 1    | 2    | 4    | 10.18754 | 9.819973 | 10.64194 | 0.021225 |
| protein_co coiled-coil_ | 217   | 189  | 176   | 270  | 274  | 253  | 3.965368 | 4.42889  | 3.880471 | 7.658046 |
| protein_co ankyrin_re   | 10    | 17   | 7     | 43   | 60   | 131  | 0.29472  | 0.642493 | 0.248918 | 1.967022 |
| protein_co carboxyme    | 423   | 313  | 337   | 514  | 692  | 375  | 8.494423 | 8.060225 | 8.165287 | 16.02091 |
| protein_co chromosom    | 1     | 0    | 1     | 4    | 4    | 5    | 0.008255 | 0        | 0.00996  | 0.051253 |
| protein_co proline-ric  | 2661  | 2240 | 2399  | 1201 | 1249 | 1048 | 22.66976 | 24.47143 | 24.65927 | 15.88091 |

|                         |      |      |      |      |      |      |          |          |          |          |
|-------------------------|------|------|------|------|------|------|----------|----------|----------|----------|
| protein_co coagulation  | 544  | 480  | 523  | 847  | 1003 | 1138 | 8.753661 | 9.904702 | 10.15408 | 21.1546  |
| protein_co angiogenic   | 610  | 492  | 538  | 494  | 453  | 401  | 6.343515 | 6.561069 | 6.750415 | 7.973658 |
| protein_co WD_repeat    | 1119 | 911  | 879  | 437  | 542  | 443  | 13.25668 | 13.83988 | 12.56439 | 8.035567 |
| protein_co PR_domain    | 0    | 0    | 0    | 6    | 5    | 2    | 0        | 0        | 0        | 0.118309 |
| protein_co NADH_deh     | 553  | 462  | 446  | 371  | 374  | 368  | 31.12867 | 33.3493  | 30.29133 | 32.41453 |
| protein_co secretoglob  | 0    | 0    | 0    | 620  | 714  | 1221 | 0        | 0        | 0        | 67.14803 |
| protein_co serine_pep   | 0    | 0    | 0    | 23   | 17   | 5    | 0        | 0        | 0        | 1.409037 |
| protein_co 5-hydroxyt   | 0    | 0    | 0    | 1    | 0    | 0    | 0        | 0        | 0        | 0.023614 |
| protein_co endothelial  | 27   | 27   | 23   | 0    | 0    | 1    | 0.583693 | 0.748504 | 0.599925 | 0        |
| protein_co GrpE-like_2  | 242  | 153  | 185  | 404  | 490  | 517  | 2.761593 | 2.238953 | 2.547206 | 7.155765 |
| protein_co cell_divisio | 1    | 1    | 1    | 0    | 1    | 0    | 0.015274 | 0.019586 | 0.018429 | 0        |
| protein_co arylsulfatas | 249  | 211  | 192  | 182  | 170  | 162  | 3.481101 | 3.782763 | 3.238669 | 3.949292 |
| protein_co Rho-relatec  | 3021 | 2328 | 2460 | 479  | 694  | 425  | 25.5833  | 25.28123 | 25.13559 | 6.296103 |
| protein_co glutathione  | 3602 | 2755 | 3104 | 491  | 588  | 507  | 49.35647 | 48.40958 | 51.31805 | 10.44269 |
| protein_co tigger_tran  | 86   | 60   | 63   | 41   | 56   | 25   | 1.006625 | 0.900596 | 0.88973  | 0.744876 |
| protein_co spermatogr   | 0    | 0    | 0    | 0    | 0    | 1    | 0        | 0        | 0        | 0        |
| protein_co serine_incc  | 189  | 176  | 165  | 566  | 691  | 503  | 3.202824 | 3.824664 | 3.373675 | 14.88738 |
| protein_co ectonucleo   | 0    | 0    | 0    | 1    | 4    | 2    | 0        | 0        | 0        | 0.018491 |
| protein_co cancer_ant   | 0    | 0    | 0    | 1    | 2    | 3    | 0        | 0        | 0        | 0.022162 |
| protein_co caspase_3_   | 974  | 769  | 729  | 1635 | 2076 | 3120 | 17.086   | 17.29885 | 15.42968 | 44.51739 |
| protein_co coiled-coil_ | 158  | 101  | 133  | 139  | 135  | 170  | 3.23662  | 2.653171 | 3.287262 | 4.419569 |
| protein_co endoplasm    | 912  | 653  | 708  | 304  | 341  | 294  | 7.792219 | 7.154657 | 7.298735 | 4.031534 |
| protein_co endoplasm    | 34   | 25   | 24   | 2    | 0    | 0    | 0.27945  | 0.263496 | 0.238004 | 0.025514 |
| protein_co cardiomyo    | 91   | 97   | 86   | 33   | 26   | 42   | 0.332139 | 0.454004 | 0.378726 | 0.186949 |
| protein_co EGF-like_fik | 338  | 312  | 303  | 50   | 42   | 46   | 3.593023 | 4.253116 | 3.886279 | 0.824981 |
| protein_co KIAA1430     | 752  | 583  | 611  | 769  | 704  | 549  | 7.267373 | 7.224994 | 7.124409 | 11.53497 |
| protein_co transmemt    | 0    | 0    | 0    | 0    | 1    | 0    | 0        | 0        | 0        | 0        |
| protein_co RPTOR_ind    | 555  | 432  | 459  | 343  | 240  | 297  | 2.727021 | 2.722003 | 2.721173 | 2.615894 |
| protein_co PAP_associ   | 624  | 565  | 509  | 453  | 427  | 349  | 8.305243 | 9.643297 | 8.17398  | 9.358288 |
| protein_co early_B-cell | 602  | 442  | 408  | 9    | 3    | 2    | 5.376722 | 5.062356 | 4.396725 | 0.124765 |
| protein_co ankyrin_rej  | 159  | 174  | 151  | 219  | 223  | 100  | 3.613918 | 5.071539 | 4.141009 | 7.726019 |
| protein_co ubiquitin-li | 537  | 465  | 435  | 256  | 279  | 465  | 10.54436 | 11.70869 | 10.30584 | 7.80219  |
| protein_co UTP15_U3_    | 325  | 244  | 263  | 292  | 373  | 470  | 4.13324  | 3.979298 | 4.035627 | 5.763955 |
| protein_co toll-like_re | 1    | 3    | 1    | 22   | 29   | 17   | 0.015389 | 0.059202 | 0.018568 | 0.525486 |
| protein_co kallikrein_E | 4    | 4    | 4    | 70   | 117  | 264  | 0.079374 | 0.101786 | 0.095769 | 2.155982 |
| protein_co NSA2_ribos   | 789  | 596  | 618  | 668  | 647  | 815  | 26.55867 | 25.72675 | 25.09954 | 34.90087 |
| protein_co G_elongati   | 370  | 331  | 302  | 371  | 420  | 379  | 5.339891 | 6.125873 | 5.258788 | 8.310651 |
| protein_co telomerase   | 0    | 0    | 0    | 724  | 902  | 489  | 0        | 0        | 0        | 13.11413 |
| protein_co solute_carr  | 0    | 0    | 0    | 2    | 2    | 1    | 0        | 0        | 0        | 0.068628 |
| protein_co coiled-coil_ | 238  | 202  | 238  | 266  | 314  | 243  | 7.664714 | 8.342183 | 9.247919 | 13.29631 |
| protein_co forkhead_b   | 3    | 0    | 2    | 6    | 3    | 49   | 0.060686 | 0        | 0.048814 | 0.188386 |
| protein_co chromosom    | 2    | 4    | 0    | 3    | 1    | 5    | 0.038529 | 0.098816 | 0        | 0.089704 |
| protein_co G_protein-i  | 0    | 0    | 0    | 0    | 0    | 2    | 0        | 0        | 0        | 0        |
| protein_co acyl-CoA_s   | 0    | 0    | 0    | 16   | 26   | 18   | 0        | 0        | 0        | 0.178082 |
| protein_co interleukin  | 0    | 0    | 0    | 1    | 0    | 0    | 0        | 0        | 0        | 0.069314 |
| protein_co colony_stir  | 0    | 0    | 0    | 1    | 0    | 0    | 0        | 0        | 0        | 0.09295  |
| protein_co septin_8     | 2253 | 1759 | 1856 | 745  | 954  | 767  | 24.06451 | 24.09301 | 23.91894 | 12.35101 |
| protein_co shroom_fai   | 162  | 83   | 119  | 165  | 216  | 55   | 1.890068 | 1.241795 | 1.675164 | 2.987974 |
| protein_co growth_dif   | 7    | 2    | 1    | 3    | 4    | 4    | 0.12433  | 0.045553 | 0.02143  | 0.082704 |
| protein_co ubiquinol-c  | 495  | 327  | 396  | 221  | 265  | 295  | 26.5567  | 22.49707 | 25.63375 | 18.40313 |
| protein_co liver_expre  | 16   | 8    | 12   | 13   | 16   | 20   | 0.339937 | 0.21796  | 0.307615 | 0.428698 |
| protein_co gap_junctio  | 4    | 2    | 1    | 4    | 17   | 31   | 0.082227 | 0.052722 | 0.024803 | 0.127628 |
| protein_co solute_carr  | 26   | 21   | 39   | 20   | 25   | 28   | 0.658639 | 0.682186 | 1.192028 | 0.786384 |
| protein_co glutamate_   | 7    | 9    | 4    | 1    | 4    | 2    | 0.0667   | 0.109971 | 0.045987 | 0.01479  |
| protein_co Mab-21_dc    | 48   | 35   | 54   | 117  | 160  | 194  | 0.707329 | 0.66139  | 0.960112 | 2.676064 |
| protein_co fatty_acid_  | 41   | 26   | 35   | 11   | 5    | 18   | 0.921616 | 0.749461 | 0.949253 | 0.383786 |
| protein_co T-cell_leuk  | 1    | 0    | 0    | 10   | 6    | 1    | 0.031407 | 0        | 0        | 0.487474 |
| protein_co taxilin_bet  | 9    | 7    | 5    | 0    | 2    | 0    | 0.088788 | 0.088556 | 0.059516 | 0        |
| protein_co Cbp/p300-i   | 641  | 444  | 423  | 807  | 973  | 746  | 15.77769 | 14.0145  | 12.56243 | 30.83113 |
| protein_co T_brachyur   | 20   | 9    | 11   | 3    | 8    | 14   | 0.384976 | 0.222154 | 0.255472 | 0.08963  |
| protein_co CREB3_regi   | 76   | 76   | 57   | 94   | 54   | 50   | 0.457581 | 0.586783 | 0.414073 | 0.878441 |
| protein_co discoidin_C  | 1054 | 795  | 907  | 206  | 236  | 239  | 13.62992 | 13.18345 | 14.15168 | 4.13476  |
| protein_co sideroflexir | 1712 | 1392 | 1507 | 1288 | 1545 | 1215 | 18.97322 | 19.78272 | 20.1511  | 22.15561 |
| protein_co sterile_alph | 73   | 61   | 53   | 25   | 12   | 22   | 0.927634 | 0.994016 | 0.812602 | 0.493088 |
| protein_co transmemt    | 1550 | 1247 | 1319 | 338  | 396  | 228  | 14.48665 | 14.94556 | 14.87405 | 4.903244 |

|                         |        |        |        |       |       |       |          |          |          |          |
|-------------------------|--------|--------|--------|-------|-------|-------|----------|----------|----------|----------|
| protein_co dapper_ant   | 10     | 3      | 0      | 153   | 280   | 113   | 0.159381 | 0.061315 | 0        | 3.784945 |
| protein_co prenyl_(dex  | 224    | 205    | 220    | 183   | 242   | 210   | 2.967052 | 3.482093 | 3.515992 | 3.762346 |
| protein_co syntaxin_bi  | 511    | 468    | 433    | 133   | 111   | 89    | 5.407538 | 6.350879 | 5.528593 | 2.184544 |
| protein_co interleukin  | 303    | 290    | 282    | 0     | 1     | 0     | 4.894135 | 6.006766 | 5.495795 | 0        |
| protein_co ankyrin_rej  | 0      | 0      | 0      | 1     | 0     | 0     | 0        | 0        | 0        | 0.029112 |
| protein_co retinoic_ac  | 2      | 1      | 5      | 0     | 0     | 0     | 0.044678 | 0.028647 | 0.134768 | 0        |
| protein_co peptidase_i  | 0      | 3      | 3      | 1     | 0     | 1     | 0        | 0.08237  | 0.077501 | 0.033233 |
| protein_co T-box_20     | 0      | 1      | 0      | 0     | 1     | 0     | 0        | 0.032138 | 0        | 0        |
| protein_co diacylglyce  | 286    | 205    | 201    | 390   | 477   | 688   | 4.629115 | 4.254956 | 3.925328 | 9.797764 |
| protein_co KIAA0895     | 28     | 15     | 33     | 3     | 4     | 3     | 0.309578 | 0.212673 | 0.440224 | 0.051483 |
| protein_co serine/thre  | 564    | 506    | 517    | 261   | 372   | 321   | 7.852129 | 9.033752 | 8.684542 | 5.640002 |
| protein_co transforme   | 1067   | 797    | 920    | 782   | 943   | 1549  | 27.11742 | 25.97477 | 28.21109 | 30.84759 |
| protein_co family_witl  | 0      | 0      | 0      | 0     | 2     | 0     | 0        | 0        | 0        | 0        |
| protein_co UDP-N-acet   | 11112  | 8819   | 9514   | 799   | 885   | 768   | 87.40847 | 88.95901 | 90.29682 | 9.755253 |
| protein_co SAP30-like   | 488    | 345    | 421    | 274   | 500   | 241   | 15.39861 | 13.96015 | 16.02846 | 13.41969 |
| protein_co ribosomal_   | 9911   | 7923   | 8312   | 12328 | 12395 | 11430 | 148.9987 | 152.7439 | 150.7713 | 287.6657 |
| protein_co hyperpolar   | 206    | 171    | 157    | 44    | 50    | 24    | 1.787113 | 1.902349 | 1.643359 | 0.592472 |
| protein_co myozenin_i   | 76     | 85     | 60     | 155   | 212   | 232   | 1.034439 | 1.483609 | 0.98535  | 3.274563 |
| protein_co componen     | 944    | 780    | 825    | 265   | 394   | 242   | 8.169837 | 8.65656  | 8.614764 | 3.559736 |
| protein_co chromosom    | 158    | 139    | 150    | 80    | 73    | 44    | 1.860995 | 2.099483 | 2.131707 | 1.462543 |
| protein_co G_protein-i  | 157    | 116    | 111    | 6     | 8     | 2     | 1.492344 | 1.413958 | 1.273035 | 0.088522 |
| protein_co SLU7_splici  | 795    | 634    | 631    | 514   | 458   | 663   | 9.827989 | 10.0507  | 9.411849 | 9.862594 |
| protein_co retinitis_pi | 284    | 244    | 235    | 160   | 172   | 166   | 11.87936 | 13.08802 | 11.86016 | 10.38784 |
| protein_co pituitary_ti | 993    | 797    | 805    | 1907  | 1795  | 1363  | 43.51569 | 44.78827 | 42.56381 | 129.7113 |
| protein_co calcium_m    | 598    | 500    | 508    | 939   | 1092  | 506   | 12.64212 | 13.55496 | 12.95778 | 30.81165 |
| polymorph F-box_and_    | 1      | 0      | 0      | 18    | 21    | 16    | 0.026917 | 0        | 0        | 0.75203  |
| protein_co BMP_bindi    | 4      | 5      | 3      | 24    | 21    | 12    | 0.037281 | 0.059759 | 0.033736 | 0.34719  |
| protein_co RELT-like_2  | 57     | 49     | 68     | 131   | 262   | 144   | 1.060608 | 1.16919  | 1.526641 | 3.783394 |
| antisense SMAD5_an      | 0      | 0      | 0      | 0     | 0     | 1     | 0        | 0        | 0        | 0        |
| protein_co potassium_   | 0      | 0      | 0      | 1082  | 1402  | 806   | 0        | 0        | 0        | 20.96585 |
| protein_co kinesin_fan  | 8      | 3      | 8      | 9     | 9     | 10    | 0.041304 | 0.019862 | 0.049835 | 0.072123 |
| protein_co zinc_finger  | 357    | 307    | 320    | 287   | 340   | 346   | 3.314143 | 3.654692 | 3.584273 | 4.13538  |
| protein_co solute_carr  | 704    | 499    | 576    | 622   | 730   | 467   | 11.462   | 10.41832 | 11.3151  | 15.71842 |
| protein_co six_transm   | 425    | 309    | 343    | 33    | 38    | 44    | 15.17765 | 14.15088 | 14.77944 | 1.829195 |
| protein_co cell_divisio | 920    | 737    | 795    | 1803  | 1976  | 1834  | 14.07006 | 14.4539  | 14.66977 | 42.79908 |
| protein_co Sp8_transc   | 1      | 0      | 0      | 2072  | 2930  | 1476  | 0.027357 | 0        | 0        | 87.98118 |
| protein_co missing_oo   | 246    | 222    | 209    | 488   | 544   | 513   | 3.340557 | 3.86586  | 3.42435  | 10.28571 |
| protein_co KIAA1324-l   | 366    | 312    | 327    | 790   | 811   | 504   | 2.50866  | 2.742362 | 2.704311 | 8.404625 |
| protein_co ubiquitin_s  | 182    | 105    | 151    | 474   | 616   | 483   | 0.944652 | 0.698874 | 0.945639 | 3.818644 |
| pseudogen: integrator_  | 23     | 24     | 31     | 27    | 25    | 20    | 0.42293  | 0.565927 | 0.687781 | 0.77061  |
| protein_co synaptotag   | 19     | 19     | 19     | 5     | 8     | 6     | 0.388704 | 0.498458 | 0.468994 | 0.158769 |
| protein_co IQ_motif_a   | 3      | 4      | 0      | 5     | 16    | 9     | 0.041036 | 0.070163 | 0        | 0.106155 |
| protein_co hairy/enhai  | 217    | 132    | 132    | 44    | 39    | 59    | 4.431678 | 3.45694  | 3.252599 | 1.394735 |
| protein_co zinc_finger  | 610    | 412    | 470    | 190   | 252   | 167   | 1.988246 | 1.722054 | 1.848359 | 0.961224 |
| protein_co fatty_acid_  | 950    | 627    | 736    | 484   | 651   | 1032  | 45.17801 | 38.2367  | 42.2308  | 35.72558 |
| protein_co sonic_hedg   | 0      | 0      | 0      | 3     | 9     | 14    | 0        | 0        | 0        | 0.049021 |
| protein_co T-cell_activ | 10     | 1      | 5      | 1     | 2     | 1     | 0.120633 | 0.015469 | 0.072775 | 0.018724 |
| protein_co collagen_ty  | 282020 | 211707 | 218778 | 1617  | 1877  | 1735  | 2206.561 | 2124.128 | 2065.322 | 19.63707 |
| protein_co fibronectin  | 2705   | 1889   | 2040   | 24    | 29    | 28    | 19.35859 | 17.33596 | 17.61508 | 0.266593 |
| protein_co charged_m    | 2      | 1      | 0      | 40    | 69    | 53    | 0.050257 | 0.032224 | 0        | 1.560124 |
| protein_co solute_carr  | 26     | 34     | 35     | 60    | 51    | 28    | 0.169655 | 0.284499 | 0.275556 | 0.60768  |
| protein_co brain_prot   | 863    | 670    | 691    | 582   | 761   | 481   | 49.40914 | 49.19043 | 47.73342 | 51.71898 |
| protein_co lemur_tyro   | 769    | 580    | 571    | 873   | 1222  | 1054  | 4.030676 | 3.898422 | 3.611068 | 7.102254 |
| protein_co cathepsin_i  | 6776   | 5387   | 5734   | 1568  | 1759  | 1302  | 81.994   | 83.59205 | 83.71715 | 29.44999 |
| protein_co SRY_(sex_di  | 8      | 9      | 4      | 18    | 13    | 85    | 0.160171 | 0.231071 | 0.096628 | 0.559367 |
| protein_co deleted_in_  | 2268   | 1679   | 1818   | 39    | 39    | 84    | 14.28046 | 13.55686 | 13.8115  | 0.381148 |
| protein_co adenylate_i  | 347    | 218    | 256    | 960   | 1232  | 693   | 1.301355 | 1.048412 | 1.158388 | 5.588148 |
| protein_co chromosom    | 45     | 37     | 40     | 10    | 10    | 12    | 1.460243 | 1.539656 | 1.566104 | 0.503666 |
| protein_co Sad1_and_i   | 1      | 0      | 1      | 3     | 5     | 2     | 0.032205 | 0        | 0.38857  | 0.149958 |
| protein_co chromosom    | 1      | 0      | 2      | 7     | 19    | 10    | 0.022066 | 0        | 0.053248 | 0.239745 |
| protein_co hepatocyte   | 27     | 35     | 18     | 14    | 25    | 22    | 0.300791 | 0.50001  | 0.241948 | 0.242081 |
| protein_co peroxisomi   | 388    | 390    | 369    | 382   | 438   | 315   | 4.148045 | 5.346699 | 4.759772 | 6.338779 |
| protein_co RAD21_hoi    | 2860   | 2379   | 2418   | 2787  | 2913  | 2805  | 35.77099 | 38.15652 | 36.48962 | 54.10438 |
| protein_co solute_carr  | 0      | 0      | 2      | 0     | 0     | 0     | 0        | 0        | 0.020838 | 0        |
| protein_co mediator_c   | 144    | 107    | 111    | 114   | 115   | 110   | 6.854987 | 6.531866 | 6.375514 | 8.423246 |

|                         |       |       |       |      |       |       |          |          |          |          |
|-------------------------|-------|-------|-------|------|-------|-------|----------|----------|----------|----------|
| protein_co tumor_nec    | 36    | 34    | 22    | 8    | 7     | 26    | 0.702765 | 0.85113  | 0.518177 | 0.242397 |
| protein_co somatome     | 8     | 10    | 13    | 63   | 73    | 97    | 0.09869  | 0.158195 | 0.193497 | 1.206295 |
| protein_co phosphoryl   | 35    | 19    | 16    | 11   | 27    | 7     | 0.955824 | 0.665385 | 0.527203 | 0.466265 |
| protein_co engrailed_t  | 18    | 40    | 39    | 1    | 7     | 4     | 0.248607 | 0.708451 | 0.64991  | 0.021437 |
| protein_co potassium_   | 0     | 0     | 0     | 2    | 1     | 6     | 0        | 0        | 0        | 0.020857 |
| protein_co CUB_and_S    | 15    | 11    | 15    | 0    | 1     | 0     | 0.053236 | 0.050063 | 0.064232 | 0        |
| protein_co KIAA0146     | 657   | 563   | 600   | 962  | 1162  | 904   | 7.72486  | 8.488735 | 8.511861 | 17.55621 |
| protein_co origin_recc  | 217   | 125   | 135   | 172  | 208   | 306   | 4.980486 | 3.679013 | 3.738469 | 6.127325 |
| protein_co HEAT_repe    | 977   | 672   | 769   | 1306 | 1533  | 1491  | 13.43447 | 11.84963 | 12.75852 | 27.87402 |
| protein_co oxidative_s  | 837   | 656   | 715   | 231  | 261   | 222   | 9.19994  | 9.246401 | 9.482299 | 3.94096  |
| protein_co defensin_bi  | 1     | 2     | 1     | 0    | 0     | 0     | 0.098096 | 0.251589 | 0.118359 | 0        |
| protein_co Sad1_and_I   | 4847  | 3800  | 4056  | 2050 | 2276  | 1780  | 50.34912 | 50.61879 | 50.83523 | 33.05241 |
| protein_co oxidation_I  | 598   | 492   | 496   | 196  | 212   | 161   | 6.162688 | 6.501947 | 6.167352 | 3.13513  |
| protein_co transmemt    | 4     | 2     | 6     | 55   | 80    | 49    | 0.107731 | 0.069075 | 0.194976 | 2.29919  |
| pseudogen family_witl   | 22    | 24    | 24    | 26   | 27    | 19    | 1.064582 | 1.489283 | 1.401251 | 1.952812 |
| protein_co G_protein-i  | 8     | 4     | 4     | 11   | 6     | 3     | 0.190804 | 0.122339 | 0.115108 | 0.407212 |
| protein_co G_protein-i  | 613   | 438   | 483   | 19   | 35    | 53    | 9.674716 | 8.864642 | 9.197566 | 0.465438 |
| protein_co UNC_home     | 0     | 0     | 0     | 0    | 4     | 4     | 0        | 0        | 0        | 0        |
| protein_co transmemt    | 9     | 2     | 3     | 4    | 4     | 5     | 0.148438 | 0.0423   | 0.0597   | 0.102399 |
| protein_co nitric_oxid  | 6     | 6     | 8     | 73   | 78    | 33    | 0.064116 | 0.082219 | 0.103146 | 1.210785 |
| protein_co MICAL-like   | 605   | 466   | 529   | 108  | 136   | 115   | 5.405576 | 5.339269 | 5.702828 | 1.497755 |
| protein_co carbonic_a   | 1     | 5     | 5     | 11   | 8     | 13    | 0.026748 | 0.171505 | 0.161368 | 0.45669  |
| protein_co integrator_  | 6831  | 5097  | 5579  | 5783 | 7536  | 6349  | 42.79301 | 40.9461  | 42.16897 | 56.23054 |
| protein_co cyclin-depe  | 411   | 303   | 367   | 288  | 263   | 254   | 10.96234 | 10.36367 | 11.8107  | 11.92297 |
| protein_co solute_carr  | 3359  | 2387  | 2627  | 1785 | 2310  | 1988  | 31.98042 | 29.14311 | 30.17743 | 26.37806 |
| protein_co Fas-activat  | 1786  | 1277  | 1407  | 482  | 595   | 627   | 27.81321 | 25.50174 | 26.43698 | 11.65057 |
| protein_co transmemt    | 1024  | 705   | 766   | 1139 | 1345  | 928   | 30.72001 | 27.12189 | 27.7267  | 53.03659 |
| protein_co chromosom    | 6     | 1     | 0     | 1    | 9     | 1     | 0.232512 | 0.049694 | 0        | 0.060149 |
| protein_co gastrulation | 0     | 1     | 2     | 3    | 9     | 3     | 0        | 0.055064 | 0.103618 | 0.199945 |
| protein_co phosphoryl   | 1095  | 862   | 870   | 729  | 786   | 1094  | 11.97401 | 12.08766 | 11.47871 | 12.37325 |
| protein_co aldehyde_c   | 2032  | 1724  | 1794  | 2798 | 2973  | 2553  | 19.1943  | 20.88311 | 20.44651 | 41.02294 |
| protein_co forkhead_b   | 2385  | 1763  | 1951  | 1175 | 1460  | 790   | 10.00203 | 9.481158 | 9.871998 | 7.648356 |
| protein_co cytochrom    | 1050  | 840   | 782   | 964  | 908   | 860   | 59.46198 | 61.00124 | 53.43242 | 84.73397 |
| protein_co odd-skippe   | 67    | 55    | 48    | 2    | 0     | 4     | 1.709266 | 1.799314 | 1.477489 | 0.079195 |
| protein_co tyrosine_3-  | 12521 | 10238 | 10791 | 9095 | 10638 | 10471 | 111.8731 | 117.3035 | 116.3312 | 126.1304 |
| protein_co brain_and_   | 77    | 71    | 60    | 26   | 14    | 12    | 1.275355 | 1.508024 | 1.199057 | 0.668412 |
| protein_co frizzled_fan | 473   | 424   | 409   | 228  | 257   | 254   | 5.855063 | 6.730473 | 6.108601 | 4.380622 |
| protein_co collagen_tr  | 1374  | 1083  | 1158  | 50   | 52    | 59    | 50.68992 | 51.2357  | 51.54558 | 2.863092 |
| protein_co solute_carr  | 590   | 461   | 495   | 196  | 234   | 264   | 9.569391 | 9.588321 | 9.686916 | 4.934224 |
| protein_co DDB1_and_    | 1095  | 851   | 936   | 915  | 938   | 1253  | 9.687655 | 9.654803 | 9.991448 | 12.56481 |
| protein_co dendrocyte   | 140   | 143   | 152   | 0    | 0     | 0     | 3.361292 | 4.402745 | 4.403214 | 0        |
| protein_co tumor_pro    | 711   | 524   | 558   | 375  | 368   | 189   | 5.913232 | 5.588509 | 5.599349 | 4.840799 |
| protein_co integrator_  | 757   | 622   | 666   | 838  | 752   | 769   | 7.661503 | 8.072681 | 8.132805 | 13.16414 |
| protein_co KIAA1429     | 1569  | 1341  | 1338  | 887  | 956   | 855   | 11.26998 | 12.35203 | 11.5959  | 9.889045 |
| protein_co FRAS1_rela   | 40    | 27    | 35    | 73   | 85    | 90    | 0.185906 | 0.160918 | 0.196267 | 0.526606 |
| protein_co GTP_bindir   | 1586  | 1286  | 1405  | 78   | 74    | 31    | 33.68096 | 35.02125 | 36.00026 | 2.571026 |
| protein_co pyruvate_d   | 1022  | 909   | 882   | 213  | 269   | 246   | 10.99624 | 12.54199 | 11.45011 | 3.557159 |
| protein_co transmemt    | 213   | 160   | 155   | 116  | 129   | 153   | 2.147403 | 2.068537 | 1.885445 | 1.815192 |
| protein_co KIAA0196     | 741   | 597   | 661   | 531  | 557   | 705   | 8.298424 | 8.573558 | 8.931552 | 9.230015 |
| protein_co ribonuclea   | 181   | 148   | 144   | 251  | 393   | 252   | 7.772063 | 8.14946  | 7.460506 | 16.72869 |
| protein_co family_witl  | 718   | 617   | 580   | 425  | 479   | 404   | 9.239032 | 10.18114 | 9.004883 | 8.488314 |
| protein_co chromosom    | 5     | 9     | 7     | 16   | 25    | 21    | 0.203693 | 0.470172 | 0.344073 | 1.011709 |
| protein_co small_nucl   | 826   | 743   | 771   | 691  | 894   | 450   | 6.818865 | 7.86557  | 7.679527 | 8.854022 |
| protein_co KIAA1161     | 624   | 519   | 503   | 388  | 479   | 694   | 4.573206 | 4.877675 | 4.447871 | 4.413655 |
| protein_co nudix_(nuc   | 265   | 251   | 241   | 198  | 211   | 146   | 11.58048 | 14.06578 | 12.70708 | 13.43001 |
| protein_co transmemt    | 1048  | 875   | 899   | 201  | 290   | 159   | 15.22328 | 16.29912 | 15.75631 | 4.531828 |
| protein_co PC4_and_S    | 2265  | 1791  | 1769  | 6240 | 6557  | 7886  | 31.31993 | 31.75832 | 29.51403 | 133.9269 |
| protein_co coiled-coil  | 77    | 58    | 50    | 63   | 44    | 52    | 0.554443 | 0.535554 | 0.434394 | 0.704104 |
| protein_co ubiquitin_i  | 868   | 670   | 732   | 601  | 765   | 687   | 14.04435 | 13.90164 | 14.29029 | 15.0934  |
| protein_co DIRAS_fami   | 381   | 337   | 288   | 8    | 5     | 3     | 4.074138 | 4.62115  | 3.715791 | 0.13278  |
| protein_co spleen_tyrc  | 3     | 6     | 7     | 242  | 240   | 183   | 0.028106 | 0.072084 | 0.079127 | 3.519023 |
| protein_co nipsnap_hc   | 20    | 15    | 21    | 14   | 15    | 9     | 0.535274 | 0.51481  | 0.678131 | 0.581574 |
| protein_co ATP-bindin   | 1063  | 898   | 858   | 170  | 175   | 263   | 4.74977  | 5.14547  | 4.62567  | 1.179013 |
| protein_co nuclear_fac  | 249   | 188   | 227   | 199  | 207   | 166   | 5.599815 | 5.421775 | 6.159539 | 6.94637  |
| protein_co leucine_zip  | 94    | 111   | 101   | 63   | 80    | 64    | 1.605706 | 2.431478 | 2.081649 | 1.670356 |

|                         |       |       |       |      |      |       |          |          |          |          |
|-------------------------|-------|-------|-------|------|------|-------|----------|----------|----------|----------|
| protein_co methyltran   | 822   | 619   | 685   | 648  | 830  | 681   | 6.711404 | 6.480993 | 6.74808  | 8.211964 |
| protein_co frataxin     | 172   | 141   | 115   | 244  | 264  | 325   | 3.09244  | 3.250882 | 2.494702 | 6.809153 |
| protein_co zinc_finger  | 3     | 0     | 0     | 137  | 141  | 80    | 0.057044 | 0        | 0        | 4.043322 |
| protein_co NK6_home     | 0     | 0     | 0     | 0    | 2    | 0     | 0        | 0        | 0        | 0        |
| protein_co transmembr   | 1     | 0     | 2     | 0    | 0    | 0     | 0.023527 | 0        | 0.056774 | 0        |
| protein_co MAM_dom      | 171   | 146   | 137   | 94   | 102  | 103   | 2.217421 | 2.427807 | 2.143486 | 1.891953 |
| protein_co protease_se  | 2     | 2     | 0     | 2    | 2    | 0     | 0.051134 | 0.065572 | 0        | 0.079367 |
| protein_co carboxypept  | 0     | 0     | 0     | 0    | 1    | 0     | 0        | 0        | 0        | 0        |
| protein_co chromosom    | 1     | 8     | 6     | 12   | 21   | 17    | 0.01284  | 0.131719 | 0.09295  | 0.239145 |
| protein_co transmembr   | 4     | 5     | 4     | 1    | 0    | 0     | 0.058594 | 0.093923 | 0.070697 | 0.022737 |
| protein_co aldehyde_d   | 23    | 14    | 18    | 28   | 33   | 26    | 0.511851 | 0.399534 | 0.483322 | 0.967173 |
| protein_co lysine_(K)-s | 408   | 354   | 397   | 137  | 168  | 126   | 4.182581 | 4.653683 | 4.910467 | 2.179893 |
| protein_co heparan-al   | 1835  | 1593  | 1637  | 208  | 229  | 214   | 16.3923  | 18.24857 | 17.64414 | 2.884016 |
| protein_co RAS_and_El   | 69    | 72    | 61    | 144  | 223  | 115   | 0.580239 | 0.776425 | 0.618921 | 1.879536 |
| protein_co G_kinase_a   | 7     | 6     | 6     | 94   | 82   | 31    | 0.184606 | 0.202913 | 0.190918 | 3.847751 |
| protein_co kinesin_fan  | 62    | 63    | 56    | 63   | 73   | 26    | 0.624797 | 0.814137 | 0.6809   | 0.985413 |
| protein_co chromosom    | 41    | 18    | 33    | 295  | 427  | 245   | 0.786938 | 0.443036 | 0.764221 | 8.788392 |
| protein_co heterogene   | 8677  | 6861  | 7031  | 8659 | 9643 | 11750 | 138.2953 | 140.2279 | 135.2081 | 214.2081 |
| pseudogen: -            | 18    | 10    | 8     | 25   | 34   | 20    | 0.509674 | 0.363103 | 0.273312 | 1.098729 |
| protein_co sushi_von_   | 626   | 500   | 468   | 30   | 15   | 37    | 2.378507 | 2.43618  | 2.145477 | 0.176922 |
| protein_co transient_r  | 0     | 0     | 0     | 30   | 20   | 7     | 0        | 0        | 0        | 0.209438 |
| protein_co ankyrin_re   | 830   | 627   | 667   | 1472 | 1930 | 1191  | 5.43254  | 5.262616 | 5.267429 | 14.9542  |
| protein_co fructose-16  | 1     | 0     | 2     | 135  | 143  | 160   | 0.031533 | 0        | 0.076093 | 6.607447 |
| protein_co transmembr   | 254   | 217   | 228   | 370  | 420  | 289   | 2.349125 | 2.573603 | 2.544224 | 5.311346 |
| protein_co zinc_finger  | 222   | 168   | 181   | 32   | 8    | 48    | 2.037898 | 1.977644 | 2.004731 | 0.455942 |
| protein_co chromosom    | 0     | 0     | 1     | 0    | 0    | 0     | 0        | 0        | 0.015681 | 0        |
| protein_co cytochrom    | 22    | 14    | 25    | 3    | 2    | 4     | 0.238571 | 0.194685 | 0.327102 | 0.050495 |
| protein_co dynein_ligh  | 448   | 342   | 369   | 46   | 53   | 59    | 9.475294 | 9.275774 | 9.416491 | 1.510091 |
| protein_co Williams_B   | 49    | 49    | 43    | 138  | 181  | 91    | 2.441669 | 3.131095 | 2.585278 | 10.67334 |
| protein_co MID1_inter   | 1580  | 1132  | 1226  | 2900 | 4150 | 3103  | 29.21381 | 26.84027 | 27.35078 | 83.22611 |
| pseudogen: neutrophil   | 1     | 0     | 2     | 0    | 2    | 0     | 0.032859 | 0        | 0.079293 | 0        |
| protein_co chromosom    | 20    | 12    | 13    | 8    | 7    | 2     | 0.185336 | 0.1426   | 0.145352 | 0.115067 |
| protein_co chromosom    | 0     | 1     | 1     | 0    | 0    | 0     | 0        | 0.034321 | 0.032292 | 0        |
| protein_co KIAA1958     | 191   | 173   | 151   | 821  | 985  | 586   | 0.760594 | 0.883436 | 0.725512 | 5.074498 |
| protein_co patched_d    | 7     | 3     | 6     | 173  | 233  | 144   | 0.023934 | 0.013154 | 0.024752 | 0.918106 |
| protein_co ring_finger  | 0     | 0     | 0     | 6    | 1    | 0     | 0        | 0        | 0        | 0.188875 |
| protein_co protocadhe   | 1650  | 1264  | 1395  | 72   | 96   | 91    | 7.930353 | 7.790494 | 8.089671 | 0.53712  |
| protein_co phosphatic   | 85    | 79    | 116   | 80   | 130  | 106   | 1.110209 | 1.323191 | 1.828066 | 1.621834 |
| protein_co c-fos_induc  | 3     | 1     | 5     | 0    | 2    | 0     | 0.069057 | 0.029519 | 0.13887  | 0        |
| protein_co olfactory_r  | 1     | 0     | 0     | 0    | 0    | 0     | 0.045702 | 0        | 0        | 0        |
| protein_co spermatid_   | 387   | 331   | 346   | 1407 | 1428 | 1298  | 2.884966 | 3.164223 | 3.112103 | 16.28    |
| protein_co claudin_3    | 7     | 3     | 3     | 485  | 673  | 190   | 0.25784  | 0.141704 | 0.133328 | 27.72836 |
| protein_co GTPase_act   | 1253  | 1070  | 1022  | 678  | 756  | 551   | 6.584466 | 7.210454 | 6.479902 | 5.530058 |
| protein_co chromosom    | 1161  | 914   | 881   | 361  | 450  | 193   | 20.23766 | 20.43072 | 18.529   | 9.767103 |
| protein_co WNK_lysine   | 1     | 4     | 3     | 3399 | 4969 | 2836  | 0.006018 | 0.030867 | 0.021782 | 31.74776 |
| protein_co ATPase_Cu-   | 540   | 380   | 467   | 38   | 68   | 49    | 2.984865 | 2.693543 | 3.114554 | 0.326021 |
| protein_co zinc_finger  | 196   | 133   | 169   | 233  | 277  | 279   | 2.520692 | 2.193435 | 2.622397 | 4.651041 |
| protein_co neuroligin_  | 445   | 348   | 359   | 517  | 556  | 468   | 3.153401 | 3.162335 | 3.069458 | 5.686438 |
| protein_co highly_dive  | 95    | 74    | 84    | 62   | 65   | 76    | 0.718476 | 0.717678 | 0.766507 | 0.727798 |
| protein_co NADH_deh     | 651   | 488   | 442   | 435  | 594  | 536   | 22.34656 | 21.48122 | 18.30628 | 23.17658 |
| protein_co aquaporin_   | 7     | 1     | 1     | 1    | 2    | 1     | 0.196781 | 0.036049 | 0.033918 | 0.043633 |
| protein_co nucleolar_l  | 1724  | 1273  | 1334  | 1028 | 1314 | 2016  | 17.05092 | 16.14538 | 15.91895 | 15.78098 |
| protein_co aquaporin_   | 135   | 120   | 121   | 17   | 16   | 21    | 2.174563 | 2.478727 | 2.351644 | 0.425028 |
| protein_co tRNA_meth    | 182   | 137   | 153   | 112  | 173  | 139   | 3.741334 | 3.611478 | 3.79485  | 3.573581 |
| protein_co valosin_cor  | 13512 | 10897 | 11301 | 7539 | 8751 | 9371  | 144.9835 | 149.9392 | 146.3066 | 125.5576 |
| protein_co phosphatic   | 785   | 571   | 591   | 528  | 668  | 700   | 5.530979 | 5.159146 | 5.024211 | 5.774265 |
| protein_co stomatin_(   | 2034  | 1718  | 1789  | 2798 | 3180 | 3011  | 74.62777 | 80.83176 | 79.19685 | 159.3411 |
| protein_co bromodom     | 533   | 391   | 443   | 950  | 862  | 908   | 2.195974 | 2.06579  | 2.202175 | 6.675109 |
| protein_co SLIT_and_N   | 763   | 606   | 622   | 527  | 620  | 495   | 8.050649 | 8.199518 | 7.918534 | 8.630728 |
| protein_co maternal_e   | 836   | 694   | 688   | 814  | 913  | 769   | 16.7022  | 17.78018 | 16.58455 | 25.24191 |
| protein_co armadillo_l  | 1     | 3     | 3     | 2    | 3    | 1     | 0.016681 | 0.064173 | 0.060379 | 0.051782 |
| protein_co OTU_doma     | 208   | 172   | 184   | 320  | 397  | 113   | 3.135045 | 3.324437 | 3.346157 | 7.48619  |
| protein_co Rho_GTPas    | 593   | 452   | 500   | 668  | 628  | 654   | 5.658482 | 5.530864 | 5.756563 | 9.893551 |
| protein_co FAT_tumor    | 1399  | 1075  | 1098  | 1705 | 1784 | 1065  | 3.429841 | 3.379668 | 3.24793  | 6.488004 |
| protein_co coiled-coil  | 0     | 1     | 1     | 7    | 10   | 4     | 0        | 0.021598 | 0.020322 | 0.182995 |

|                         |      |      |      |      |      |      |          |          |          |          |
|-------------------------|------|------|------|------|------|------|----------|----------|----------|----------|
| protein_co HECT_dom     | 522  | 437  | 444  | 86   | 103  | 150  | 4.559722 | 4.895067 | 4.679494 | 1.165995 |
| protein_co solute_carr  | 1    | 1    | 1    | 2039 | 2026 | 1916 | 0.02097  | 0.026892 | 0.025302 | 66.36763 |
| protein_co F-box_prot   | 260  | 192  | 190  | 219  | 299  | 242  | 3.164133 | 2.996346 | 2.789864 | 4.136719 |
| protein_co DEAD/H_(A    | 438  | 320  | 333  | 135  | 166  | 161  | 3.024271 | 2.833388 | 2.774208 | 1.446808 |
| protein_co G_protein-i  | 0    | 0    | 0    | 0    | 0    | 1    | 0        | 0        | 0        | 0        |
| protein_co claudin_2    | 8    | 5    | 9    | 5    | 3    | 1    | 0.119086 | 0.095444 | 0.161644 | 0.115523 |
| protein_co leucine_ri   | 962  | 732  | 782  | 146  | 166  | 197  | 10.60621 | 10.34917 | 10.40255 | 2.498437 |
| protein_co zinc_finger  | 50   | 22   | 39   | 217  | 287  | 381  | 0.658383 | 0.371484 | 0.619614 | 4.435051 |
| protein_co serine_pal   | 760  | 621  | 577  | 585  | 815  | 657  | 12.8327  | 13.44638 | 11.75516 | 15.33172 |
| protein_co Werner_sy    | 516  | 425  | 446  | 447  | 514  | 448  | 4.639549 | 4.900319 | 4.83848  | 6.238269 |
| protein_co membrane     | 419  | 359  | 369  | 391  | 508  | 376  | 3.912949 | 4.299262 | 4.157809 | 5.667577 |
| protein_co thyroid_sti  | 32   | 34   | 28   | 1    | 5    | 3    | 0.32862  | 0.447747 | 0.346937 | 0.01594  |
| protein_co cofilin_2_(  | 733  | 577  | 637  | 210  | 199  | 213  | 10.97745 | 11.08109 | 11.51025 | 4.88143  |
| protein_co SGT1_supp    | 764  | 634  | 717  | 643  | 702  | 795  | 21.54178 | 22.92381 | 24.39245 | 28.14036 |
| protein_co general_tra  | 945  | 752  | 785  | 840  | 1119 | 1001 | 7.02681  | 7.170569 | 7.04278  | 9.69474  |
| protein_co zinc_finger  | 2796 | 2064 | 2315 | 247  | 308  | 185  | 26.57703 | 25.15871 | 26.55023 | 3.644154 |
| protein_co phosphogl    | 583  | 502  | 501  | 784  | 819  | 541  | 3.210438 | 3.544939 | 3.328753 | 6.701041 |
| protein_co phytanoyl-i  | 63   | 71   | 46   | 1    | 6    | 14   | 0.825621 | 1.193185 | 0.727354 | 0.020341 |
| protein_co solute_carr  | 459  | 359  | 429  | 121  | 123  | 120  | 5.156329 | 5.171681 | 5.81478  | 2.109812 |
| protein_co folate_rece  | 0    | 0    | 0    | 0    | 1    | 1    | 0        | 0        | 0        | 0        |
| protein_co inositol_pc  | 6507 | 4654 | 5338 | 1895 | 2833 | 2539 | 64.46511 | 59.12615 | 63.80732 | 29.1396  |
| protein_co paired-like  | 1    | 2    | 1    | 17   | 35   | 7    | 0.027599 | 0.070783 | 0.033299 | 0.728226 |
| protein_co mannose-b    | 4    | 2    | 2    | 0    | 1    | 0    | 0.052553 | 0.033696 | 0.031704 | 0        |
| protein_co gap_juncti   | 63   | 46   | 45   | 3    | 8    | 3    | 1.279372 | 1.197908 | 1.102598 | 0.09456  |
| protein_co crystallin_I | 161  | 106  | 107  | 59   | 56   | 44   | 4.775011 | 4.031473 | 3.828956 | 2.716008 |
| protein_co receptor_ar  | 1316 | 1070 | 1127 | 320  | 426  | 314  | 11.85538 | 12.36098 | 12.24987 | 4.474455 |
| protein_co hepatic_an   | 5    | 2    | 3    | 1    | 0    | 1    | 0.065089 | 0.033387 | 0.04712  | 0.020205 |
| protein_co spindle_an   | 338  | 267  | 317  | 561  | 630  | 682  | 5.42954  | 5.500053 | 6.144034 | 13.98748 |
| protein_co mitochond    | 552  | 484  | 502  | 337  | 384  | 537  | 13.48088 | 15.15772 | 14.79214 | 12.77437 |
| protein_co chromosom    | 186  | 160  | 183  | 307  | 291  | 387  | 2.468594 | 2.723116 | 2.930461 | 6.3242   |
| protein_co PCF11_clea   | 839  | 659  | 745  | 628  | 696  | 763  | 5.124492 | 5.161591 | 5.490263 | 5.953591 |
| protein_co PBX/knotte   | 260  | 219  | 216  | 31   | 46   | 30   | 2.690665 | 2.906296 | 2.697045 | 0.497942 |
| protein_co ribosomal_   | 0    | 0    | 0    | 0    | 0    | 1    | 0        | 0        | 0        | 0        |
| protein_co leucine_ri   | 83   | 77   | 83   | 113  | 207  | 207  | 2.063559 | 2.454928 | 2.489802 | 4.360614 |
| protein_co ribosomal_   | 2535 | 2026 | 2188 | 1675 | 1788 | 2141 | 159.3381 | 163.3016 | 165.9346 | 163.4131 |
| protein_co dynein_axc   | 358  | 272  | 307  | 600  | 857  | 803  | 5.665416 | 5.519846 | 5.861856 | 14.73773 |
| protein_co chromosom    | 58   | 45   | 51   | 8    | 11   | 8    | 1.28284  | 1.27634  | 1.361015 | 0.274641 |
| protein_co chromosom    | 6    | 6    | 4    | 18   | 14   | 14   | 0.091404 | 0.117212 | 0.073522 | 0.425613 |
| protein_co zinc_finger  | 137  | 139  | 90   | 175  | 249  | 260  | 2.518202 | 3.276379 | 1.996    | 4.992734 |
| protein_co kelch_dom    | 610  | 562  | 615  | 760  | 929  | 786  | 12.32884 | 14.56592 | 14.99739 | 23.84166 |
| protein_co echinoderm   | 39   | 27   | 34   | 46   | 66   | 72   | 0.191088 | 0.169645 | 0.201    | 0.34983  |
| protein_co nuclear_ex   | 1014 | 819  | 859  | 650  | 497  | 605  | 9.43757  | 9.774971 | 9.646359 | 9.39001  |
| protein_co RNA_pseud    | 391  | 343  | 335  | 671  | 722  | 796  | 7.310206 | 8.223493 | 7.556935 | 19.47179 |
| protein_co ADP-ribosy   | 2962 | 2212 | 2390 | 1419 | 2095 | 1879 | 87.73735 | 84.02218 | 85.41722 | 65.23976 |
| protein_co tetratricop  | 291  | 238  | 228  | 128  | 170  | 165  | 6.129827 | 6.428972 | 5.794796 | 4.185002 |
| protein_co transmembr   | 24   | 15   | 15   | 74   | 101  | 64   | 0.210979 | 0.169094 | 0.159099 | 1.009694 |
| protein_co neuroglobi   | 0    | 0    | 0    | 6    | 12   | 4    | 0        | 0        | 0        | 0.231783 |
| protein_co NADP-depe    | 10   | 2    | 7    | 4    | 12   | 3    | 0.231785 | 0.059446 | 0.195763 | 0.143905 |
| protein_co caudal_typ   | 1    | 0    | 1    | 0    | 0    | 20   | 0.011569 | 0        | 0.013959 | 0        |
| protein_co APC_membr    | 0    | 0    | 0    | 9    | 14   | 31   | 0        | 0        | 0        | 0.065144 |
| protein_co aldo-keto_I  | 81   | 74   | 66   | 28   | 34   | 23   | 2.294919 | 2.688583 | 2.256183 | 1.23132  |
| protein_co kelch_repe   | 438  | 355  | 388  | 247  | 299  | 334  | 3.966363 | 4.122456 | 4.239339 | 3.471729 |
| protein_co synovial_sa  | 0    | 0    | 0    | 0    | 1    | 2    | 0        | 0        | 0        | 0        |
| protein_co orthodenti   | 0    | 0    | 0    | 99   | 109  | 392  | 0        | 0        | 0        | 3.27658  |
| protein_co fatty_acid_  | 2    | 2    | 1    | 70   | 52   | 77   | 0.047292 | 0.060645 | 0.02853  | 2.569131 |
| protein_co dorsal_roo   | 0    | 1    | 0    | 0    | 0    | 3    | 0        | 0.02205  | 0        | 0        |
| protein_co nudix_(nuc   | 622  | 510  | 520  | 733  | 838  | 874  | 8.495657 | 8.932769 | 8.569549 | 15.53964 |
| protein_co dapper_ant   | 1092 | 778  | 849  | 303  | 276  | 539  | 13.71288 | 12.52838 | 12.86358 | 5.905806 |
| protein_co oxoglutarat  | 0    | 0    | 0    | 6    | 3    | 5    | 0        | 0        | 0        | 0.191107 |
| protein_co upper_zone   | 0    | 0    | 0    | 4    | 4    | 0    | 0        | 0        | 0        | 0.352445 |
| protein_co BEN_domai    | 22   | 11   | 17   | 214  | 207  | 91   | 0.158121 | 0.101384 | 0.147422 | 2.38732  |
| protein_co ATP_syntha   | 1894 | 1550 | 1635 | 1754 | 2007 | 1971 | 76.36259 | 80.13859 | 79.5365  | 109.7642 |
| protein_co PRP18_pre    | 113  | 78   | 56   | 36   | 29   | 65   | 3.085948 | 2.731581 | 1.845212 | 1.52596  |
| protein_co TAF3_RNA_    | 302  | 232  | 210  | 219  | 329  | 368  | 2.906565 | 2.863324 | 2.438599 | 3.271506 |
| protein_co V-set_and_i  | 23   | 17   | 22   | 13   | 7    | 4    | 0.492003 | 0.466335 | 0.56782  | 0.431632 |

|                         |      |      |      |      |      |      |          |          |          |          |
|-------------------------|------|------|------|------|------|------|----------|----------|----------|----------|
| protein_co voltage-dep  | 2434 | 1994 | 2067 | 3021 | 3474 | 3233 | 72.18868 | 75.83733 | 73.96684 | 139.0688 |
| protein_co catechol-O   | 84   | 77   | 58   | 331  | 422  | 355  | 3.60033  | 4.23217  | 2.999433 | 22.02021 |
| protein_co solute_carr  | 88   | 65   | 73   | 148  | 225  | 115  | 1.00032  | 0.9475   | 1.001215 | 2.611251 |
| protein_co PDZ_domai    | 758  | 629  | 673  | 611  | 765  | 550  | 5.481591 | 5.833072 | 5.872195 | 6.858183 |
| protein_co zinc_finger  | 906  | 691  | 700  | 4    | 11   | 34   | 12.69267 | 12.41401 | 11.83234 | 0.086979 |
| protein_co dachshund    | 52   | 33   | 40   | 7    | 19   | 13   | 0.46541  | 0.378752 | 0.431957 | 0.097243 |
| protein_co family_witl  | 447  | 345  | 380  | 277  | 338  | 291  | 7.005293 | 6.933416 | 7.185392 | 6.73797  |
| protein_co quiescin_Q   | 1033 | 894  | 914  | 823  | 1158 | 951  | 10.69258 | 11.86668 | 11.41501 | 13.22247 |
| protein_co family_witl  | 502  | 423  | 430  | 208  | 259  | 312  | 3.969442 | 4.289191 | 4.10244  | 2.552816 |
| protein_co nuclear_rex  | 3192 | 2512 | 2882 | 3083 | 3701 | 4227 | 11.60975 | 11.71626 | 12.64743 | 17.4046  |
| protein_co peroxiredo   | 1626 | 1376 | 1432 | 2017 | 2089 | 2166 | 33.48404 | 36.33667 | 35.5802  | 64.46942 |
| protein_co ecto-NOX_c   | 277  | 198  | 182  | 150  | 193  | 171  | 3.104334 | 2.845531 | 2.46098  | 2.609218 |
| protein_co growth_ho    | 2436 | 1950 | 1975 | 1820 | 2162 | 2184 | 53.67673 | 55.10014 | 52.50781 | 62.24588 |
| protein_co small_nucl   | 835  | 538  | 660  | 670  | 899  | 1242 | 7.815003 | 6.457052 | 7.453061 | 9.733027 |
| protein_co peptidase_l  | 1649 | 1390 | 1339 | 1318 | 1545 | 1689 | 23.14326 | 25.01659 | 22.67423 | 28.7111  |
| protein_co serological  | 1028 | 797  | 811  | 1122 | 1621 | 1806 | 20.831   | 20.71022 | 19.82832 | 35.28908 |
| protein_co FERM_dom     | 1    | 4    | 0    | 0    | 0    | 0    | 0.014662 | 0.075209 | 0        | 0        |
| protein_co adenylate_l  | 7    | 5    | 2    | 14   | 7    | 8    | 0.133156 | 0.121967 | 0.045903 | 0.413354 |
| protein_co chromosom    | 52   | 32   | 31   | 10   | 19   | 9    | 0.961467 | 0.758736 | 0.691578 | 0.286987 |
| protein_co tuberous_s   | 1412 | 1087 | 1230 | 863  | 897  | 730  | 7.695107 | 7.596593 | 8.087851 | 7.299973 |
| protein_co growth_fac   | 2    | 0    | 0    | 0    | 1    | 1    | 0.038293 | 0        | 0        | 0        |
| protein_co hypoxanthi   | 296  | 283  | 286  | 399  | 364  | 430  | 9.864567 | 12.09434 | 11.50007 | 20.63905 |
| protein_co loss_of_het  | 147  | 87   | 85   | 124  | 122  | 68   | 3.35908  | 2.549363 | 2.343527 | 4.398    |
| protein_co family_witl  | 200  | 151  | 163  | 281  | 428  | 288  | 3.891288 | 3.767469 | 3.826476 | 8.485944 |
| protein_co zinc_finger  | 793  | 594  | 607  | 1033 | 1443 | 1161 | 27.04275 | 25.97607 | 24.97551 | 54.67748 |
| protein_co storkhead_l  | 8    | 4    | 7    | 42   | 38   | 18   | 0.111081 | 0.071223 | 0.117272 | 0.905168 |
| protein_co ret_proto-c  | 9    | 19   | 15   | 392  | 462  | 283  | 0.074573 | 0.201885 | 0.149962 | 5.041471 |
| protein_co DEAD_(Asp    | 2567 | 2037 | 2196 | 4454 | 4808 | 6791 | 25.55013 | 25.99966 | 26.37228 | 68.80943 |
| protein_co BMS1_hom     | 1839 | 1541 | 1589 | 1695 | 1793 | 2276 | 20.41447 | 21.93656 | 21.28278 | 29.20496 |
| protein_co serine/thre  | 238  | 191  | 220  | 288  | 380  | 175  | 5.349868 | 5.505652 | 5.966736 | 10.04822 |
| protein_co KIAA1462     | 9710 | 7121 | 8009 | 68   | 97   | 63   | 49.14216 | 46.21525 | 48.90591 | 0.534164 |
| protein_co FUN14_doi    | 684  | 525  | 531  | 634  | 623  | 579  | 4.968671 | 4.890495 | 4.654004 | 7.148318 |
| protein_co transmembr   | 731  | 526  | 544  | 608  | 839  | 723  | 9.926615 | 9.15965  | 8.913141 | 12.81498 |
| protein_co methyltran   | 221  | 250  | 200  | 300  | 287  | 355  | 3.589433 | 5.206945 | 3.919328 | 7.562847 |
| protein_co solute_carr  | 0    | 4    | 2    | 0    | 1    | 0    | 0        | 0.174416 | 0.082053 | 0        |
| protein_co NDRG_fami    | 228  | 162  | 147  | 427  | 530  | 349  | 3.712126 | 3.382301 | 2.887708 | 10.79062 |
| protein_co ribonuclea   | 0    | 3    | 5    | 2    | 0    | 0    | 0        | 0.12042  | 0.188837 | 0.097169 |
| protein_co Rho_guanin   | 9975 | 7515 | 8425 | 2253 | 3167 | 2204 | 79.02144 | 76.3432  | 80.52857 | 27.7028  |
| protein_co NMDA_rece    | 1663 | 1302 | 1249 | 2108 | 3003 | 1632 | 21.3873  | 21.47257 | 19.38091 | 42.07894 |
| protein_co zinc_finger  | 369  | 275  | 309  | 2658 | 3433 | 1962 | 5.634131 | 5.384466 | 5.692553 | 62.99209 |
| protein_co chromosom    | 0    | 0    | 0    | 0    | 2    | 0    | 0        | 0        | 0        | 0        |
| protein_co caspase_7_   | 446  | 376  | 358  | 46   | 74   | 42   | 7.762787 | 8.39228  | 7.5182   | 1.242714 |
| protein_co protein_ph   | 10   | 13   | 5    | 11   | 6    | 3    | 0.278114 | 0.463634 | 0.16778  | 0.474839 |
| protein_co butyrophili  | 2    | 0    | 0    | 16   | 34   | 10   | 0.026794 | 0        | 0        | 0.332708 |
| protein_co chromosom    | 445  | 337  | 379  | 329  | 206  | 270  | 2.880063 | 2.796928 | 2.959574 | 3.304976 |
| protein_co von_Willeb   | 6    | 1    | 2    | 59   | 61   | 50   | 0.095499 | 0.020411 | 0.038408 | 1.457572 |
| protein_co methyltran   | 797  | 681  | 734  | 915  | 1045 | 803  | 14.81226 | 16.23004 | 16.45914 | 26.39458 |
| protein_co sal-like_2_( | 540  | 439  | 441  | 7565 | 8598 | 5664 | 5.14124  | 5.359793 | 5.065949 | 111.7927 |
| protein_co proline-ric  | 5    | 0    | 0    | 3    | 10   | 1    | 0.241452 | 0        | 0        | 0.22486  |
| protein_co TruB_pseu    | 395  | 339  | 322  | 323  | 448  | 497  | 5.442714 | 5.990009 | 5.35331  | 6.907986 |
| protein_co family_witl  | 8    | 2    | 1    | 1    | 1    | 1    | 0.154944 | 0.049674 | 0.023369 | 0.030062 |
| protein_co zinc_finger  | 639  | 509  | 519  | 381  | 433  | 245  | 6.680651 | 6.824095 | 6.546864 | 6.182632 |
| polymorph pancreatic_   | 0    | 0    | 0    | 2    | 0    | 1    | 0        | 0        | 0        | 0.098285 |
| protein_co chromosom    | 1    | 0    | 1    | 109  | 120  | 120  | 0.026181 | 0        | 0.031589 | 4.429368 |
| protein_co heat_shock   | 342  | 281  | 292  | 110  | 127  | 48   | 2.802584 | 2.952896 | 2.887111 | 1.399122 |
| pseudogen: family_witl  | 2    | 0    | 0    | 2    | 2    | 0    | 0.028103 | 0        | 0        | 0.04362  |
| protein_co frequently   | 137  | 80   | 108  | 256  | 430  | 402  | 2.423211 | 1.814554 | 2.304849 | 7.028151 |
| protein_co ubiquitin_c  | 2197 | 1686 | 1771 | 881  | 1048 | 625  | 60.38533 | 59.42487 | 58.73108 | 37.58441 |
| protein_co ankyrin_rej  | 0    | 2    | 0    | 1    | 0    | 0    | 0        | 0.081037 | 0        | 0.049043 |
| protein_co E2F_transc   | 750  | 603  | 737  | 483  | 585  | 624  | 6.126744 | 6.316771 | 7.264137 | 6.124154 |
| protein_co Rho_GTPas    | 214  | 192  | 181  | 364  | 385  | 268  | 1.765077 | 2.030769 | 1.801261 | 4.659956 |
| protein_co iron-sulfur_ | 156  | 119  | 135  | 277  | 336  | 221  | 2.785546 | 2.724846 | 2.908489 | 7.677077 |
| protein_co otogelin-lik | 21   | 23   | 13   | 8    | 19   | 13   | 0.121822 | 0.171098 | 0.090991 | 0.072032 |
| protein_co glycosyltra  | 17   | 11   | 12   | 1605 | 1901 | 1702 | 0.315321 | 0.261641 | 0.268555 | 46.20711 |
| protein_co protein_kir  | 536  | 393  | 442  | 1076 | 1710 | 1282 | 12.51023 | 11.76257 | 12.44717 | 38.98012 |

|                         |       |       |       |      |       |      |          |          |          |          |
|-------------------------|-------|-------|-------|------|-------|------|----------|----------|----------|----------|
| protein_co tetratricop  | 882   | 714   | 724   | 353  | 435   | 278  | 11.87055 | 12.32281 | 11.75679 | 7.374073 |
| protein_co solute_carr  | 2690  | 1896  | 2035  | 544  | 729   | 503  | 35.50074 | 32.08728 | 32.40393 | 11.14332 |
| protein_co proteasom    | 3669  | 2784  | 2934  | 2355 | 2621  | 3095 | 111.4245 | 108.4206 | 107.5081 | 111.0081 |
| protein_co receptor-as  | 7     | 4     | 3     | 2    | 7     | 3    | 0.196427 | 0.143937 | 0.101572 | 0.087109 |
| protein_co ATP/GTP_b    | 1     | 0     | 2     | 30   | 39    | 15   | 0.013109 | 0        | 0.031633 | 0.610398 |
| protein_co tandem_C2    | 8     | 6     | 9     | 398  | 499   | 321  | 0.072895 | 0.070109 | 0.098947 | 5.628908 |
| protein_co cleavage_ar  | 1409  | 1074  | 1150  | 1674 | 1864  | 1810 | 12.46332 | 12.18249 | 12.2735  | 22.9831  |
| protein_co single-pass  | 10    | 5     | 7     | 1    | 2     | 2    | 0.368632 | 0.236359 | 0.311343 | 0.057217 |
| protein_co modulator    | 346   | 285   | 258   | 298  | 363   | 245  | 6.415163 | 6.776193 | 5.771641 | 8.575872 |
| protein_co interferon   | 287   | 239   | 201   | 235  | 275   | 190  | 16.25294 | 17.35631 | 13.73391 | 20.6561  |
| protein_co interferon   | 21    | 11    | 27    | 23   | 25    | 3    | 0.405222 | 0.272192 | 0.628617 | 0.688862 |
| protein_co serpin_pep   | 0     | 0     | 0     | 1    | 0     | 0    | 0        | 0        | 0        | 0.035313 |
| protein_co calmin_cal   | 110   | 93    | 117   | 148  | 157   | 119  | 0.820147 | 0.889183 | 1.052526 | 1.712738 |
| protein_co PDZ_domai    | 416   | 308   | 338   | 0    | 0     | 2    | 5.71863  | 5.429486 | 5.606133 | 0        |
| protein_co solute_carr  | 0     | 0     | 0     | 0    | 0     | 2    | 0        | 0        | 0        | 0        |
| protein_co coiled-coil  | 0     | 1     | 2     | 5    | 9     | 0    | 0        | 0.023136 | 0.043536 | 0.140015 |
| protein_co NEL-like_1   | 1     | 2     | 0     | 9    | 8     | 23   | 0.014085 | 0.036125 | 0        | 0.196761 |
| protein_co phosphotri   | 67    | 67    | 72    | 158  | 152   | 124  | 0.831779 | 1.066639 | 1.078485 | 3.044535 |
| protein_co compleme     | 4     | 4     | 4     | 45   | 45    | 34   | 0.075235 | 0.096478 | 0.090775 | 1.313715 |
| protein_co calcium_ch   | 44    | 42    | 40    | 95   | 97    | 57   | 0.462178 | 0.565737 | 0.506949 | 1.548853 |
| protein_co protein_ty   | 205   | 140   | 146   | 80   | 146   | 119  | 7.337751 | 6.426085 | 6.305362 | 4.444568 |
| protein_co ADP-ribosy   | 1957  | 1540  | 1737  | 1186 | 1143  | 1393 | 12.75205 | 12.86824 | 13.65643 | 11.99511 |
| protein_co single-pass  | 324   | 234   | 279   | 400  | 469   | 395  | 13.7612  | 12.7449  | 14.29761 | 26.36949 |
| protein_co KIAA1731     | 448   | 368   | 421   | 252  | 166   | 254  | 2.607912 | 2.747084 | 2.956957 | 2.27691  |
| protein_co potassium    | 0     | 0     | 0     | 0    | 0     | 1    | 0        | 0        | 0        | 0        |
| protein_co TATA_box_l   | 962   | 811   | 879   | 1028 | 1103  | 1495 | 10.35066 | 11.18983 | 11.41117 | 17.16788 |
| protein_co ankyrin_rej  | 520   | 353   | 394   | 522  | 654   | 343  | 4.974053 | 4.330032 | 4.547276 | 7.750113 |
| protein_co R3H_doma     | 274   | 198   | 238   | 222  | 261   | 336  | 3.758884 | 3.483236 | 3.93943  | 4.727067 |
| protein_co angiomotir   | 6165  | 4840  | 5136  | 1582 | 1888  | 1667 | 32.22709 | 32.44462 | 32.39373 | 12.83586 |
| protein_co HtrA_serine  | 15640 | 12359 | 13157 | 241  | 281   | 255  | 345.9245 | 350.5397 | 351.1151 | 8.273553 |
| protein_co lipase_hep   | 0     | 0     | 1     | 0    | 0     | 0    | 0        | 0        | 0.019062 | 0        |
| protein_co centrosom    | 930   | 722   | 707   | 906  | 782   | 687  | 13.72175 | 13.6607  | 12.58618 | 20.74843 |
| protein_co t-complex    | 57    | 70    | 66    | 63   | 60    | 31   | 0.835751 | 1.316162 | 1.1676   | 1.433748 |
| protein_co PAS_domai    | 0     | 0     | 0     | 0    | 1     | 1    | 0        | 0        | 0        | 0        |
| protein_co sprouty-rel  | 3340  | 2681  | 2821  | 1056 | 1338  | 1098 | 20.13016 | 20.72082 | 20.51407 | 9.878595 |
| protein_co G_protein-i  | 653   | 606   | 641   | 3322 | 3981  | 3007 | 7.965448 | 9.479359 | 9.434157 | 62.89659 |
| protein_co junctional   | 2811  | 2351  | 2478  | 907  | 1148  | 822  | 33.69321 | 36.13629 | 35.83694 | 16.87405 |
| protein_co interleukin  | 1     | 0     | 0     | 0    | 1     | 0    | 0.035658 | 0        | 0        | 0        |
| protein_co galactosida  | 0     | 0     | 0     | 2077 | 2592  | 3241 | 0        | 0        | 0        | 39.14129 |
| protein_co ADAM_met     | 699   | 424   | 509   | 49   | 54    | 75   | 5.781641 | 4.497272 | 5.07972  | 0.629072 |
| protein_co SV2_relate   | 0     | 0     | 0     | 2    | 0     | 4    | 0        | 0        | 0        | 0.046894 |
| protein_co glutamic_p   | 1796  | 1320  | 1488  | 1966 | 2555  | 2118 | 19.91828 | 18.77278 | 19.91115 | 33.84226 |
| protein_co amnion_as    | 24    | 19    | 7     | 65   | 78    | 27   | 0.405974 | 0.412145 | 0.142867 | 1.706597 |
| protein_co RAB8B_me     | 440   | 373   | 377   | 414  | 399   | 335  | 4.173904 | 4.537409 | 4.314984 | 6.095658 |
| protein_co IKBKB_inte   | 1092  | 785   | 824   | 110  | 129   | 97   | 16.05641 | 14.80147 | 14.61844 | 2.510435 |
| protein_co RNA_pseud    | 286   | 245   | 242   | 454  | 634   | 569  | 7.152291 | 7.85696  | 7.302012 | 17.62242 |
| protein_co hypoxia_in   | 968   | 753   | 792   | 670  | 834   | 777  | 15.03463 | 14.99759 | 14.84193 | 16.15186 |
| protein_co NADH_deh     | 23    | 16    | 16    | 14   | 26    | 16   | 0.873963 | 0.779641 | 0.733556 | 0.825703 |
| protein_co zinc_finger  | 464   | 359   | 400   | 287  | 323   | 189  | 7.468921 | 7.410435 | 7.768693 | 7.170547 |
| protein_co protein_ph   | 1     | 0     | 1     | 2    | 1     | 0    | 0.06252  | 0        | 0.075434 | 0.194079 |
| protein_co serine_pep   | 154   | 129   | 126   | 2941 | 3439  | 2667 | 2.362913 | 2.538201 | 2.332629 | 70.04103 |
| protein_co fibrillin_1  | 41465 | 32705 | 36069 | 84   | 81    | 165  | 165.3874 | 167.2801 | 173.5813 | 0.520033 |
| protein_co arginine_v   | 4     | 5     | 4     | 0    | 0     | 6    | 0.12299  | 0.197147 | 0.148395 | 0        |
| protein_co DEP_domai    | 11    | 4     | 11    | 39   | 37    | 13   | 0.220706 | 0.102918 | 0.266295 | 1.214554 |
| protein_co leucine-ricl | 0     | 1     | 0     | 4    | 2     | 1    | 0        | 0.015085 | 0        | 0.073035 |
| protein_co bromodom     | 1024  | 867   | 923   | 1639 | 1716  | 1679 | 8.941411 | 9.708107 | 9.724244 | 22.21343 |
| protein_co creatine_ki  | 164   | 114   | 128   | 8451 | 11916 | 9799 | 4.499686 | 4.010999 | 4.23737  | 359.8959 |
| protein_co tRNA_meth    | 346   | 202   | 221   | 263  | 407   | 788  | 5.024449 | 3.761604 | 3.872154 | 5.927869 |
| protein_co beta-transc  | 567   | 468   | 494   | 395  | 476   | 403  | 4.334307 | 4.587666 | 4.556293 | 4.686668 |
| protein_co polymerase   | 321   | 286   | 290   | 518  | 544   | 348  | 5.165304 | 5.901552 | 5.630369 | 12.93752 |
| protein_co BCL2-assoc   | 808   | 689   | 714   | 704  | 909   | 1026 | 7.784494 | 8.512313 | 8.299756 | 10.52743 |
| protein_co deleted_in   | 327   | 251   | 282   | 275  | 276   | 279  | 10.22884 | 10.06843 | 10.64329 | 13.35186 |
| protein_co La_ribonuc   | 604   | 501   | 467   | 288  | 324   | 141  | 13.64895 | 14.51809 | 12.7329  | 10.10149 |
| protein_co apoptosis_i  | 1510  | 1239  | 1277  | 1866 | 2315  | 2305 | 19.06406 | 20.05946 | 19.45259 | 36.56627 |
| protein_co asparaginas  | 0     | 0     | 0     | 22   | 43    | 10   | 0        | 0        | 0        | 0.742307 |

|                         |      |      |      |      |      |      |          |          |          |          |
|-------------------------|------|------|------|------|------|------|----------|----------|----------|----------|
| protein_co zinc_finger  | 319  | 231  | 250  | 275  | 284  | 192  | 3.54369  | 3.290685 | 3.350835 | 4.741636 |
| protein_co Hermansky    | 991  | 717  | 710  | 600  | 900  | 372  | 17.56161 | 16.29367 | 15.18088 | 16.50336 |
| protein_co SUMO/sent    | 21   | 9    | 16   | 49   | 33   | 40   | 0.536909 | 0.295075 | 0.49357  | 1.944499 |
| protein_co nucleolar_   | 2195 | 1796 | 1905 | 3356 | 4018 | 5147 | 25.95148 | 27.22973 | 27.17507 | 61.58573 |
| protein_co alkB_alkyla  | 255  | 179  | 206  | 90   | 133  | 174  | 7.679483 | 6.912803 | 7.485263 | 4.206925 |
| protein_co COP9_signi   | 847  | 604  | 637  | 712  | 535  | 858  | 9.779819 | 8.943215 | 8.874316 | 12.76021 |
| protein_co gamma-am     | 13   | 14   | 10   | 3032 | 3501 | 3283 | 0.102725 | 0.141863 | 0.095341 | 37.18712 |
| protein_co Spi-C_trans  | 0    | 0    | 0    | 0    | 0    | 1    | 0        | 0        | 0        | 0        |
| protein_co thymus_br    | 1    | 2    | 5    | 2    | 2    | 1    | 0.029621 | 0.075969 | 0.178697 | 0.091952 |
| protein_co sphingosin   | 1574 | 1271 | 1378 | 1129 | 1470 | 1365 | 12.8468  | 13.30287 | 13.57024 | 14.30259 |
| protein_co fibroblast_  | 555  | 477  | 466  | 269  | 290  | 325  | 3.793027 | 4.180427 | 3.842616 | 2.853486 |
| protein_co chaperonin   | 3524 | 2685 | 2903 | 4344 | 4730 | 6017 | 75.48672 | 73.75446 | 75.0291  | 144.4292 |
| protein_co pterin-4_al  | 275  | 248  | 231  | 297  | 398  | 320  | 12.81785 | 14.82325 | 12.991   | 21.48668 |
| protein_co ariadne_ho   | 1200 | 914  | 999  | 1102 | 1299 | 776  | 9.305113 | 9.088578 | 9.346607 | 13.26333 |
| protein_co chromosor    | 14   | 6    | 16   | 9    | 4    | 3    | 0.177182 | 0.097376 | 0.244321 | 0.176793 |
| protein_co CXADR-like   | 1310 | 1013 | 1168 | 133  | 204  | 208  | 23.53484 | 23.33773 | 25.31808 | 3.708703 |
| protein_co sodium_ch    | 14   | 17   | 14   | 6    | 1    | 3    | 0.108309 | 0.168653 | 0.130681 | 0.072047 |
| protein_co cytochrom    | 598  | 495  | 475  | 597  | 722  | 573  | 8.643721 | 9.175169 | 8.284021 | 13.39382 |
| protein_co zinc_finger  | 246  | 202  | 202  | 369  | 432  | 878  | 2.792965 | 2.940973 | 2.767131 | 6.502602 |
| protein_co family_witl  | 35   | 25   | 31   | 50   | 49   | 43   | 0.744624 | 0.682053 | 0.795753 | 1.651084 |
| protein_co syntaxin_bi  | 125  | 117  | 147  | 98   | 109  | 168  | 0.938852 | 1.126892 | 1.332148 | 1.142467 |
| protein_co cysteine/ty  | 243  | 159  | 193  | 643  | 714  | 664  | 3.674387 | 3.083082 | 3.521146 | 15.09107 |
| protein_co cullin_5     | 711  | 593  | 608  | 352  | 348  | 452  | 5.249378 | 5.614387 | 5.41614  | 4.033773 |
| protein_co myelin_reg   | 1    | 0    | 0    | 5    | 11   | 17   | 0.013532 | 0        | 0        | 0.105021 |
| protein_co WW_doma      | 2046 | 1645 | 1853 | 630  | 764  | 606  | 23.37646 | 24.10173 | 25.54445 | 11.17234 |
| protein_co chromosor    | 130  | 125  | 126  | 24   | 33   | 57   | 2.516805 | 3.103313 | 2.943234 | 0.721187 |
| protein_co compleme     | 0    | 1    | 0    | 1    | 2    | 3    | 0        | 0.021098 | 0        | 0.025537 |
| protein_co pleckstrin_  | 244  | 179  | 192  | 322  | 449  | 166  | 5.490002 | 5.164699 | 5.212331 | 11.24525 |
| protein_co transmembr   | 95   | 58   | 52   | 6    | 10   | 2    | 2.270414 | 1.777537 | 1.499453 | 0.222568 |
| protein_co anaphase_    | 502  | 422  | 416  | 712  | 731  | 600  | 7.367383 | 7.942026 | 7.366326 | 16.21885 |
| protein_co sphingomy    | 833  | 637  | 584  | 81   | 106  | 65   | 15.9296  | 15.621   | 13.47475 | 2.404227 |
| protein_co amyloid_br   | 912  | 749  | 768  | 767  | 935  | 621  | 16.18611 | 17.04664 | 16.44587 | 21.12873 |
| protein_co synaptopor   | 21   | 16   | 17   | 28   | 32   | 19   | 0.2001   | 0.195504 | 0.195445 | 0.41411  |
| protein_co nudix_(nuc   | 97   | 86   | 84   | 84   | 86   | 76   | 2.125389 | 2.416431 | 2.220721 | 2.856777 |
| protein_co chromosor    | 6    | 2    | 8    | 9    | 8    | 7    | 0.10486  | 0.044823 | 0.168693 | 0.244136 |
| protein_co tripartite_r | 1897 | 1413 | 1603 | 517  | 738  | 672  | 27.95423 | 26.70126 | 28.50111 | 11.825   |
| protein_co integrin-lin | 24   | 18   | 22   | 8    | 13   | 12   | 0.542604 | 0.521859 | 0.600126 | 0.280732 |
| protein_co TAF10_RNA    | 1770 | 1347 | 1368 | 1406 | 1810 | 1469 | 15.38945 | 15.01851 | 14.35106 | 18.9743  |
| protein_co tripeptidyl  | 1466 | 1264 | 1304 | 716  | 799  | 742  | 19.44026 | 21.49436 | 20.86382 | 14.73709 |
| protein_co dachous_1    | 7811 | 5751 | 6583 | 743  | 1081 | 1055 | 34.02935 | 32.12919 | 34.60341 | 5.024193 |
| protein_co neuropilin   | 1012 | 843  | 879  | 468  | 538  | 483  | 15.51756 | 16.576   | 16.26222 | 11.13831 |
| protein_co MSS51_mit    | 88   | 79   | 69   | 65   | 79   | 29   | 1.704387 | 1.962104 | 1.612437 | 1.954022 |
| protein_co cytochrom    | 283  | 198  | 184  | 976  | 1125 | 877  | 2.244187 | 2.013479 | 1.76051  | 0.013304 |
| protein_co ubiquitin_s  | 180  | 167  | 158  | 473  | 599  | 535  | 1.351081 | 1.60744  | 1.430916 | 5.51062  |
| protein_co recombinat   | 47   | 47   | 22   | 38   | 54   | 25   | 0.335745 | 0.430545 | 0.189619 | 0.421333 |
| protein_co chromosor    | 148  | 113  | 120  | 93   | 105  | 94   | 7.462067 | 7.306094 | 7.300065 | 7.27798  |
| protein_co WD_repeat    | 25   | 28   | 29   | 25   | 33   | 22   | 0.638829 | 0.917512 | 0.894109 | 0.99155  |
| protein_co olfactory_r  | 0    | 0    | 1    | 0    | 0    | 1    | 0        | 0        | 0.053677 | 0        |
| protein_co olfactory_r  | 0    | 0    | 0    | 1    | 1    | 0    | 0        | 0        | 0        | 0.065567 |
| protein_co ATPase_cla   | 372  | 298  | 332  | 307  | 318  | 394  | 2.372241 | 2.436921 | 2.554477 | 3.038678 |
| protein_co PTPRF_inte   | 315  | 234  | 250  | 208  | 238  | 125  | 4.152476 | 3.955685 | 3.97635  | 4.255889 |
| protein_co cytochrom    | 342  | 275  | 284  | 434  | 505  | 426  | 2.148785 | 2.21569  | 2.152947 | 4.232404 |
| protein_co serpin_pep   | 1681 | 1459 | 1652 | 0    | 0    | 0    | 35.77945 | 39.82268 | 42.42521 | 0        |
| protein_co KIAA0355     | 1102 | 841  | 890  | 577  | 640  | 378  | 7.710057 | 7.545383 | 7.513011 | 6.265883 |
| protein_co serpin_pep   | 238  | 196  | 185  | 9    | 7    | 31   | 3.209613 | 3.389543 | 3.010201 | 0.188386 |
| protein_co tubby_hon    | 896  | 681  | 765  | 744  | 991  | 649  | 6.544152 | 6.378254 | 6.741474 | 8.434295 |
| protein_co resistance_  | 4    | 0    | 0    | 70   | 89   | 89   | 0.035577 | 0        | 0        | 0.966348 |
| protein_co LIM_domai    | 1    | 0    | 0    | 8    | 7    | 4    | 0.036661 | 0        | 0        | 0.455229 |
| pseudogen: olfactory_r  | 0    | 0    | 0    | 0    | 0    | 1    | 0        | 0        | 0        | 0        |
| protein_co isocitrate_c | 325  | 228  | 270  | 156  | 205  | 169  | 3.69168  | 3.321122 | 3.700433 | 2.750399 |
| protein_co WD_repeat    | 4    | 2    | 0    | 237  | 238  | 182  | 0.024985 | 0.01602  | 0        | 2.297697 |
| protein_co cellular_ret | 2348 | 1774 | 1729 | 3424 | 3625 | 3467 | 142.6137 | 138.1739 | 126.7086 | 322.7954 |
| protein_co phospholip   | 4    | 4    | 0    | 3    | 5    | 4    | 0.093453 | 0.11984  | 0        | 0.108789 |
| protein_co zinc_finger  | 62   | 55   | 43   | 82   | 72   | 57   | 0.505245 | 0.574755 | 0.422792 | 1.037182 |
| protein_co X-ray_radia  | 168  | 114  | 126  | 53   | 73   | 47   | 1.386644 | 1.206618 | 1.254799 | 0.678988 |

|                         |       |       |       |       |       |       |          |          |          |          |
|-------------------------|-------|-------|-------|-------|-------|-------|----------|----------|----------|----------|
| protein_co tripartite_r | 68    | 59    | 70    | 88    | 108   | 75    | 0.316227 | 0.351845 | 0.392769 | 0.63519  |
| protein_co ring_finger  | 354   | 268   | 311   | 307   | 340   | 167   | 2.121829 | 2.059924 | 2.249135 | 2.856116 |
| protein_co ribosomal    | 11896 | 9931  | 9957  | 14209 | 14362 | 14957 | 113.467  | 121.4705 | 114.5896 | 210.3597 |
| protein_co suppressor   | 1842  | 1390  | 1574  | 342   | 462   | 332   | 19.00361 | 18.38953 | 19.59293 | 5.4765   |
| protein_co chromodom    | 350   | 275   | 252   | 39    | 42    | 16    | 6.974716 | 7.027494 | 6.059085 | 1.206295 |
| protein_co transmembr   | 363   | 266   | 243   | 38    | 66    | 8     | 4.374473 | 4.110647 | 3.533243 | 0.710777 |
| protein_co protogenin   | 13    | 18    | 8     | 117   | 152   | 149   | 0.050938 | 0.090443 | 0.037821 | 0.711156 |
| protein_co centromere   | 430   | 315   | 345   | 336   | 370   | 444   | 8.126847 | 7.634376 | 7.86721  | 9.856515 |
| protein_co A_kinase(F   | 529   | 423   | 394   | 220   | 292   | 228   | 17.45589 | 17.8993  | 15.68666 | 11.26781 |
| protein_co ATM_intera   | 1224  | 933   | 1001  | 834   | 1156  | 1237  | 10.74179 | 10.49993 | 10.5993  | 11.36035 |
| protein_co chromosom    | 30    | 26    | 29    | 9     | 21    | 24    | 0.757512 | 0.841882 | 0.883516 | 0.352729 |
| protein_co transmembr   | 705   | 571   | 627   | 308   | 433   | 610   | 8.331014 | 8.65275  | 8.939728 | 5.649239 |
| polymorph Homo_sapi     | 1     | 0     | 2     | 47    | 59    | 19    | 0.006355 | 0        | 0.015334 | 0.463566 |
| protein_co Leo1_Paf1/   | 521   | 457   | 464   | 347   | 298   | 531   | 11.13985 | 12.53047 | 11.97038 | 11.516   |
| protein_co zinc_finger  | 274   | 260   | 267   | 339   | 328   | 372   | 4.359642 | 5.30497  | 5.125775 | 8.372023 |
| protein_co thioredoxin  | 1552  | 1257  | 1359  | 283   | 345   | 378   | 14.77031 | 15.3406  | 15.60506 | 4.18037  |
| protein_co microfibrill | 18194 | 12804 | 13047 | 104   | 97    | 125   | 441.5719 | 398.5    | 382.0604 | 3.917753 |
| protein_co WEE1_hom     | 1028  | 828   | 888   | 2050  | 2612  | 2170  | 9.293028 | 9.59851  | 9.685569 | 28.76395 |
| protein_co mitogen-ac   | 887   | 631   | 717   | 562   | 688   | 737   | 9.175258 | 8.370153 | 8.94874  | 9.023218 |
| pseudogen: family_witl  | 2     | 6     | 2     | 265   | 378   | 451   | 0.096581 | 0.371554 | 0.11653  | 19.86266 |
| protein_co protein_kir  | 0     | 5     | 5     | 93    | 149   | 99    | 0        | 0.037727 | 0.035497 | 0.849356 |
| protein_co Hepatoma     | 2266  | 1813  | 1847  | 1323  | 1751  | 1603  | 43.86985 | 45.01045 | 43.14408 | 39.75544 |
| protein_co N-deacetyl   | 481   | 368   | 451   | 341   | 345   | 182   | 3.876607 | 3.803328 | 4.385623 | 4.265712 |
| protein_co minichrom    | 4931  | 3798  | 4217  | 10760 | 11958 | 13717 | 78.19231 | 77.2313  | 80.68275 | 264.8328 |
| protein_co C-type_lect  | 0     | 0     | 0     | 0     | 0     | 3     | 0        | 0        | 0        | 0        |
| protein_co coiled-coil  | 0     | 0     | 0     | 0     | 1     | 1     | 0        | 0        | 0        | 0        |
| protein_co C-type_lect  | 2     | 1     | 2     | 0     | 0     | 1     | 0.043437 | 0.027851 | 0.052409 | 0        |
| protein_co zinc_finger  | 576   | 465   | 466   | 821   | 911   | 1156  | 7.776749 | 8.050779 | 7.591185 | 17.20478 |
| protein_co C-type_lect  | 0     | 0     | 0     | 1     | 3     | 4     | 0        | 0        | 0        | 0.037593 |
| protein_co zinc_finger  | 121   | 76    | 93    | 197   | 202   | 147   | 2.829772 | 2.279234 | 2.6242   | 7.150933 |
| protein_co ribosomal    | 1325  | 1092  | 1190  | 1232  | 1691  | 1507  | 10.65682 | 11.26273 | 11.548   | 15.37988 |
| protein_co alpha-2-ma   | 9     | 0     | 3     | 124   | 127   | 134   | 0.080017 | 0        | 0.032182 | 1.711167 |
| protein_co brain_expr   | 60    | 52    | 46    | 4     | 4     | 0     | 0.960533 | 1.067514 | 0.888519 | 0.099392 |
| protein_co thymidine    | 158   | 137   | 154   | 90    | 85    | 39    | 1.448694 | 1.61083  | 1.703682 | 1.280833 |
| protein_co transmembr   | 2303  | 1804  | 1875  | 770   | 840   | 705   | 72.81707 | 73.14508 | 71.53006 | 37.78857 |
| protein_co solute_carr  | 0     | 0     | 0     | 3     | 0     | 2     | 0        | 0        | 0        | 0.166926 |
| protein_co SEC11_hon    | 245   | 244   | 248   | 274   | 367   | 302   | 9.557449 | 12.20605 | 11.67282 | 16.5904  |
| protein_co complexin    | 0     | 0     | 0     | 0     | 0     | 1     | 0        | 0        | 0        | 0        |
| protein_co galanin_rec  | 1     | 0     | 0     | 11    | 19    | 28    | 0.044657 | 0        | 0        | 0.762455 |
| protein_co transmembr   | 370   | 263   | 320   | 329   | 316   | 326   | 4.405614 | 4.015779 | 4.597299 | 6.080385 |
| protein_co IQ_motif_c   | 16    | 13    | 29    | 40    | 62    | 27    | 0.400769 | 0.417568 | 0.876437 | 1.555124 |
| protein_co nudE_nucl    | 1611  | 1191  | 1351  | 449   | 545   | 367   | 19.23601 | 18.23646 | 19.46359 | 8.321398 |
| protein_co centromere   | 492   | 374   | 401   | 1284  | 1820  | 1717  | 13.03384 | 12.70539 | 12.81739 | 52.79619 |
| protein_co Ras-related  | 1     | 4     | 2     | 2     | 2     | 0     | 0.029885 | 0.153295 | 0.072117 | 0.092772 |
| protein_co family_witl  | 1050  | 779   | 826   | 472   | 681   | 449   | 68.57175 | 65.23832 | 65.08547 | 47.8441  |
| protein_co WD_repeat    | 0     | 7     | 2     | 4     | 3     | 5     | 0        | 0.18575  | 0.049934 | 0.128473 |
| protein_co heat_shock   | 23661 | 18860 | 20047 | 11227 | 10397 | 13052 | 365.9184 | 374.0264 | 374.0663 | 269.4917 |
| protein_co melanocor    | 8     | 6     | 4     | 0     | 0     | 1     | 0.260862 | 0.250889 | 0.157373 | 0        |
| protein_co bladder_ca   | 863   | 710   | 736   | 956   | 1163  | 968   | 18.35197 | 19.36152 | 18.88416 | 31.55442 |
| protein_co CHRNA7(c     | 3     | 4     | 6     | 15    | 10    | 16    | 0.050347 | 0.086084 | 0.121494 | 0.390729 |
| pseudogen: speedy_ho    | 112   | 94    | 114   | 55    | 54    | 55    | 1.669851 | 1.797202 | 2.05075  | 1.272779 |
| protein_co activating   | 72    | 42    | 46    | 162   | 195   | 164   | 0.921168 | 0.689073 | 0.710088 | 3.217006 |
| protein_co matrix_me    | 12    | 9     | 10    | 0     | 3     | 4     | 0.320068 | 0.307832 | 0.321817 | 0        |
| protein_co trans-golgi  | 16    | 9     | 15    | 43    | 39    | 32    | 0.204036 | 0.147177 | 0.230795 | 0.85111  |
| protein_co nerve_grov   | 3898  | 3111  | 3193  | 2214  | 2422  | 2711  | 198.4553 | 203.1094 | 196.1407 | 174.956  |
| protein_co transmembr   | 11    | 11    | 18    | 7     | 9     | 8     | 0.231089 | 0.296339 | 0.456254 | 0.228252 |
| protein_co componen     | 741   | 616   | 602   | 219   | 276   | 257   | 8.577019 | 9.14341  | 8.407419 | 3.934529 |
| protein_co pleckstrin   | 12    | 8     | 13    | 417   | 486   | 303   | 0.117127 | 0.100133 | 0.153098 | 6.317481 |
| protein_co zinc_finger  | 112   | 103   | 109   | 144   | 190   | 173   | 1.236272 | 1.457949 | 1.451678 | 2.467112 |
| protein_co zinc_finger  | 59    | 47    | 39    | 40    | 48    | 28    | 2.216756 | 2.264504 | 1.767985 | 2.332686 |
| protein_co beta-2-mic   | 6128  | 5029  | 4793  | 621   | 653   | 523   | 123.3757 | 129.838  | 116.4304 | 19.40586 |
| protein_co zinc_finger  | 1203  | 922   | 1019  | 962   | 1132  | 1350  | 7.175765 | 7.052496 | 7.333728 | 8.906522 |
| protein_co cancer_sus   | 2137  | 1806  | 1802  | 366   | 555   | 369   | 25.29126 | 27.40899 | 25.73172 | 6.723222 |
| protein_co 5-hydroxyt   | 0     | 0     | 0     | 73    | 87    | 94    | 0        | 0        | 0        | 2.184591 |
| protein_co nicotinami   | 2957  | 2506  | 2536  | 0     | 0     | 3     | 74.26555 | 80.70984 | 76.84814 | 0        |

|                         |       |      |       |      |      |      |          |          |          |          |
|-------------------------|-------|------|-------|------|------|------|----------|----------|----------|----------|
| protein_co acyl-CoA_s   | 0     | 0    | 0     | 3    | 4    | 2    | 0        | 0        | 0        | 0.101695 |
| protein_co adaptor-rel  | 1816  | 1516 | 1577  | 1253 | 1351 | 1629 | 12.23628 | 13.09912 | 12.82075 | 13.10434 |
| protein_co schlafen_fa  | 2671  | 2240 | 2325  | 257  | 323  | 170  | 11.82544 | 12.71747 | 12.4198  | 1.766066 |
| protein_co cation_cha   | 45    | 33   | 54    | 32   | 48   | 30   | 0.416102 | 0.3913   | 0.602461 | 0.459269 |
| pseudogen: stereocilin_ | 0     | 0    | 0     | 13   | 22   | 9    | 0        | 0        | 0        | 0.177578 |
| lincRNA -               | 1     | 0    | 0     | 0    | 0    | 0    | 0.030828 | 0        | 0        | 0        |
| protein_co chromosom    | 451   | 363  | 390   | 109  | 124  | 126  | 8.796754 | 9.079499 | 9.178223 | 3.299916 |
| protein_co KIAA0430     | 1332  | 1131 | 1078  | 457  | 561  | 444  | 8.066318 | 8.783004 | 7.876585 | 4.29554  |
| protein_co serum_amy    | 291   | 238  | 302   | 396  | 436  | 521  | 8.625155 | 9.046076 | 10.80013 | 18.21795 |
| protein_co yippee-like  | 41    | 28   | 26    | 120  | 104  | 134  | 0.480623 | 0.420909 | 0.367741 | 2.183394 |
| protein_co peptidylpro  | 1859  | 1386 | 1442  | 670  | 948  | 737  | 72.15939 | 68.98998 | 67.53467 | 40.36628 |
| protein_co lactate_def  | 0     | 0    | 0     | 1    | 3    | 0    | 0        | 0        | 0        | 0.035659 |
| protein_co family_witl  | 414   | 386  | 381   | 666  | 849  | 703  | 12.63832 | 15.11074 | 14.03338 | 31.55687 |
| protein_co lactate_def  | 6     | 7    | 4     | 1    | 5    | 3    | 0.111378 | 0.16663  | 0.089589 | 0.028812 |
| protein_co family_witl  | 400   | 358  | 389   | 211  | 260  | 313  | 3.030539 | 3.478182 | 3.555966 | 2.481263 |
| protein_co KIAA0101     | 469   | 400  | 396   | 140  | 153  | 191  | 14.55421 | 15.91788 | 14.8272  | 6.74333  |
| protein_co kinesin_fan  | 867   | 622  | 723   | 509  | 769  | 581  | 8.932904 | 8.218135 | 8.987935 | 8.139951 |
| protein_co lactate_def  | 26    | 27   | 23    | 73   | 119  | 32   | 0.589812 | 0.78544  | 0.629529 | 2.570356 |
| protein_co perilipin_1  | 0     | 0    | 0     | 12   | 5    | 0    | 0        | 0        | 0        | 0.295753 |
| protein_co peroxisom    | 67    | 54   | 70    | 52   | 57   | 14   | 1.146581 | 1.18504  | 1.44536  | 1.381223 |
| protein_co transmembr   | 304   | 197  | 270   | 659  | 826  | 577  | 2.874484 | 2.388701 | 3.080336 | 9.671686 |
| protein_co mesoderm_    | 17    | 21   | 12    | 23   | 19   | 7    | 0.336484 | 0.533021 | 0.286579 | 0.7066   |
| protein_co alanyl_(mei  | 3940  | 3431 | 3536  | 44   | 53   | 39   | 50.2302  | 56.09172 | 54.39124 | 0.870666 |
| protein_co sodium_ch    | 0     | 0    | 0     | 9    | 6    | 30   | 0        | 0        | 0        | 0.186775 |
| protein_co RNA_bindin   | 226   | 222  | 189   | 3734 | 4421 | 4454 | 5.277462 | 6.647816 | 5.325085 | 135.3385 |
| protein_co neuron_na    | 2185  | 1659 | 1861  | 1142 | 1226 | 1170 | 9.314063 | 9.068667 | 9.571547 | 7.555867 |
| protein_co ankyrin_rej  | 105   | 71   | 123   | 102  | 98   | 67   | 1.581578 | 1.371415 | 2.235396 | 2.38469  |
| protein_co glycine-N-a  | 1     | 6    | 5     | 95   | 82   | 61   | 0.020557 | 0.158167 | 0.124015 | 3.031162 |
| protein_co chromosom    | 427   | 382  | 370   | 450  | 575  | 394  | 3.823188 | 4.386019 | 3.997124 | 6.253754 |
| protein_co dynactin_5   | 1517  | 1206 | 1229  | 871  | 1093 | 1292 | 20.73824 | 21.14185 | 20.27151 | 18.4814  |
| protein_co telomeric_   | 1745  | 1353 | 1482  | 294  | 353  | 284  | 38.63224 | 38.41153 | 39.58683 | 10.10258 |
| protein_co polo-like_k  | 2007  | 1562 | 1649  | 3479 | 3660 | 3370 | 22.75895 | 22.71409 | 22.56179 | 61.2336  |
| protein_co ClpX_casein  | 1229  | 1001 | 1017  | 1043 | 1233 | 886  | 12.2743  | 12.82001 | 12.25501 | 16.16812 |
| protein_co G_protein-i  | 1     | 1    | 2     | 13   | 23   | 3    | 0.02768  | 0.035496 | 0.066795 | 0.558523 |
| protein_co zinc_finger  | 367   | 312  | 339   | 873  | 1055 | 1014 | 2.789082 | 3.040599 | 3.108443 | 10.29769 |
| protein_co calcium_ch   | 0     | 0    | 0     | 3    | 0    | 1    | 0        | 0        | 0        | 0.091585 |
| protein_co tachykinin_  | 34    | 15   | 19    | 19   | 38   | 14   | 1.288812 | 0.729141 | 0.868985 | 1.117879 |
| protein_co myosin_IA    | 2     | 2    | 0     | 4    | 8    | 5    | 0.025637 | 0.032876 | 0        | 0.079584 |
| protein_co calcineurin  | 0     | 0    | 0     | 15   | 15   | 5    | 0        | 0        | 0        | 0.458311 |
| protein_co transmembr   | 648   | 547  | 608   | 962  | 1131 | 745  | 5.435551 | 5.8839   | 6.153472 | 12.5249  |
| protein_co olfactory_r  | 0     | 0    | 0     | 0    | 0    | 1    | 0        | 0        | 0        | 0        |
| protein_co NGFI-A_bin   | 2021  | 1532 | 1500  | 411  | 510  | 355  | 34.95563 | 33.97966 | 31.3033  | 11.03375 |
| protein_co vacuolar_p   | 1816  | 1480 | 1524  | 910  | 1146 | 1039 | 17.57892 | 18.37161 | 17.79956 | 13.67251 |
| protein_co signal_tran  | 1994  | 1606 | 1747  | 963  | 1213 | 922  | 23.17766 | 23.93863 | 24.50109 | 17.37406 |
| protein_co protein_as   | 864   | 728  | 740   | 534  | 603  | 622  | 9.949159 | 10.75012 | 10.2814  | 9.544306 |
| protein_co XRCC6_bin    | 78    | 73   | 59    | 55   | 99   | 65   | 2.937688 | 3.525683 | 2.681088 | 3.215172 |
| protein_co extracellul  | 80    | 47   | 70    | 105  | 203  | 22   | 0.448708 | 0.33805  | 0.473718 | 0.9141   |
| protein_co syntaxin_3   | 498   | 424  | 381   | 1029 | 1245 | 894  | 3.669846 | 4.006763 | 3.387595 | 11.76967 |
| protein_co mitochond    | 495   | 436  | 486   | 632  | 720  | 894  | 19.63668 | 22.17986 | 23.26201 | 38.91441 |
| protein_co phosphatic   | 618   | 539  | 532   | 379  | 440  | 490  | 9.910407 | 11.08412 | 10.29349 | 9.433497 |
| protein_co myotubula    | 358   | 266  | 316   | 240  | 317  | 295  | 2.955912 | 2.816433 | 3.148065 | 3.075744 |
| protein_co tyrosine_3-  | 5220  | 4158 | 4360  | 3680 | 4783 | 5227 | 78.72817 | 80.41804 | 79.34037 | 86.14656 |
| antisense -             | 0     | 0    | 0     | 0    | 2    | 1    | 0        | 0        | 0        | 0        |
| protein_co chromosom    | 2     | 0    | 1     | 0    | 0    | 0    | 0.107177 | 0        | 0.064658 | 0        |
| protein_co secretograr  | 99    | 102  | 101   | 200  | 202  | 191  | 3.749686 | 4.954151 | 4.615611 | 11.75764 |
| protein_co gremlin_1    | 11131 | 8937 | 10127 | 0    | 0    | 26   | 125.2238 | 128.9299 | 137.4616 | 0        |
| protein_co neuronal_t   | 68    | 54   | 51    | 214  | 246  | 47   | 0.889654 | 0.905973 | 0.805064 | 4.345669 |
| protein_co TSC22_don    | 1196  | 744  | 847   | 644  | 962  | 424  | 23.53355 | 18.77321 | 20.10888 | 19.66857 |
| protein_co membrane     | 3     | 4    | 2     | 2    | 3    | 4    | 0.048997 | 0.083775 | 0.039412 | 0.0507   |
| protein_co membrane     | 0     | 0    | 0     | 1    | 0    | 0    | 0        | 0        | 0        | 0.024284 |
| protein_co DIS3_mitot   | 446   | 353  | 340   | 639  | 736  | 731  | 5.55752  | 5.640664 | 5.111792 | 12.35883 |
| protein_co cyclin_D-ty  | 318   | 272  | 306   | 309  | 356  | 264  | 5.430089 | 5.956047 | 6.304481 | 8.189715 |
| protein_co erythrocyt   | 1     | 6    | 3     | 5    | 12   | 5    | 0.010299 | 0.07924  | 0.037278 | 0.079925 |
| protein_co SMAD_fami    | 1682  | 1385 | 1334  | 1002 | 1318 | 1221 | 12.6251  | 13.33116 | 12.08127 | 11.67366 |
| protein_co membrane     | 0     | 0    | 0     | 1    | 0    | 0    | 0        | 0        | 0        | 0.053791 |

|                         |       |       |       |      |      |      |          |          |          |          |
|-------------------------|-------|-------|-------|------|------|------|----------|----------|----------|----------|
| protein_co coiled-coil_ | 9     | 5     | 7     | 0    | 3    | 1    | 0.12445  | 0.088661 | 0.116788 | 0        |
| protein_co membrane_    | 0     | 0     | 0     | 2    | 0    | 5    | 0        | 0        | 0        | 0.068986 |
| protein_co microtubul   | 3578  | 2898  | 2990  | 13   | 18   | 67   | 15.89808 | 16.51248 | 16.02964 | 0.089656 |
| protein_co RCC1_dom     | 577   | 434   | 428   | 454  | 636  | 371  | 8.570016 | 8.26618  | 7.67004  | 10.46627 |
| protein_co AKT_intera   | 130   | 112   | 143   | 102  | 127  | 114  | 2.857807 | 3.157308 | 3.792919 | 3.480328 |
| protein_co microtubul   | 893   | 736   | 766   | 764  | 735  | 707  | 9.686048 | 10.23723 | 10.02471 | 12.86231 |
| protein_co eva-1_hom    | 39    | 36    | 23    | 56   | 68   | 55   | 0.733833 | 0.868649 | 0.522166 | 1.635501 |
| protein_co t-complex_   | 0     | 0     | 0     | 0    | 0    | 7    | 0        | 0        | 0        | 0        |
| protein_co methionyl-   | 3591  | 2684  | 2812  | 4072 | 5116 | 4729 | 46.87696 | 44.92995 | 44.29018 | 82.50539 |
| protein_co methyl-CpG   | 838   | 578   | 626   | 221  | 268  | 259  | 9.176514 | 8.11654  | 8.270964 | 3.756267 |
| protein_co canopy_4_    | 477   | 318   | 331   | 90   | 94   | 124  | 14.89117 | 12.73054 | 12.4677  | 4.360973 |
| protein_co protein_dis  | 9952  | 7829  | 8251  | 4719 | 5419 | 5870 | 125.2078 | 126.3097 | 125.2494 | 92.1513  |
| protein_co nudix_(nuc   | 2394  | 1970  | 2018  | 2696 | 3114 | 3383 | 25.30539 | 26.70327 | 25.73701 | 44.23227 |
| protein_co N-acetyltra  | 10    | 6     | 6     | 3    | 6    | 1    | 0.159762 | 0.122923 | 0.115657 | 0.074392 |
| protein_co NK3_home     | 10    | 16    | 15    | 6    | 8    | 12   | 0.143351 | 0.294123 | 0.259441 | 0.1335   |
| protein_co small_G_pr   | 0     | 0     | 0     | 198  | 208  | 57   | 0        | 0        | 0        | 2.169261 |
| protein_co HCG20182     | 0     | 0     | 0     | 3    | 5    | 1    | 0        | 0        | 0        | 0.112954 |
| protein_co dual_specif  | 110   | 92    | 121   | 11   | 19   | 18   | 1.766405 | 1.8945   | 2.344396 | 0.27417  |
| protein_co thyrotroph   | 218   | 156   | 160   | 500  | 515  | 325  | 2.32636  | 2.134786 | 2.0601   | 8.281725 |
| protein_co meiosis_inl  | 12    | 14    | 7     | 4    | 7    | 0    | 0.13997  | 0.209407 | 0.098515 | 0.072418 |
| protein_co pre-B-cell_I | 1024  | 849   | 820   | 825  | 958  | 453  | 16.54562 | 17.59138 | 15.98619 | 20.69033 |
| protein_co guanine_nu   | 1     | 2     | 0     | 0    | 1    | 4    | 0.051078 | 0.131002 | 0        | 0        |
| protein_co prohibitin   | 1434  | 1141  | 1125  | 2114 | 2139 | 2142 | 36.70321 | 37.44983 | 34.74205 | 83.98281 |
| protein_co small_nucl   | 1023  | 840   | 794   | 1410 | 1421 | 1870 | 27.1315  | 28.56846 | 25.40778 | 58.04271 |
| protein_co tetratricop  | 0     | 0     | 0     | 0    | 0    | 1    | 0        | 0        | 0        | 0        |
| protein_co sterile_alph | 731   | 495   | 503   | 139  | 190  | 136  | 7.746125 | 6.726384 | 6.431069 | 2.28619  |
| protein_co phosphatic   | 64    | 39    | 29    | 93   | 107  | 61   | 1.365314 | 1.066907 | 0.746447 | 3.0794   |
| protein_co transmemt    | 39    | 25    | 42    | 164  | 191  | 107  | 0.661378 | 0.543669 | 0.859375 | 4.316777 |
| protein_co family_witl  | 695   | 550   | 624   | 1315 | 1676 | 1202 | 7.55064  | 7.662509 | 8.179591 | 22.17457 |
| protein_co acyl-CoA_s   | 736   | 657   | 613   | 196  | 229  | 137  | 15.33143 | 17.5501  | 15.40683 | 6.337113 |
| protein_co golgin_A2    | 3999  | 3223  | 3376  | 1493 | 1701 | 917  | 44.01718 | 45.49257 | 44.83542 | 25.5071  |
| protein_co TruB_pseuc   | 670   | 484   | 591   | 447  | 548  | 788  | 17.67941 | 16.3775  | 18.81605 | 18.30758 |
| protein_co coenzyme_    | 529   | 398   | 456   | 361  | 425  | 540  | 7.932465 | 7.653233 | 8.250218 | 8.402145 |
| protein_co solute_carr  | 856   | 634   | 714   | 464  | 686  | 704  | 14.43289 | 13.70812 | 14.52532 | 12.14305 |
| protein_co ubiquitin_I  | 1298  | 933   | 962   | 887  | 996  | 1342 | 19.98793 | 18.42401 | 17.87377 | 21.20055 |
| protein_co cerebral_er  | 6968  | 4952  | 5280  | 358  | 498  | 268  | 62.86889 | 57.29512 | 57.47906 | 5.013502 |
| protein_co dolichyl_py  | 579   | 437   | 446   | 616  | 722  | 822  | 12.47098 | 12.07015 | 11.59057 | 20.59364 |
| protein_co endonuclea   | 267   | 178   | 216   | 216  | 359  | 216  | 10.68228 | 9.132341 | 10.42688 | 13.41334 |
| protein_co TBC1_dom     | 0     | 0     | 0     | 1    | 0    | 0    | 0        | 0        | 0        | 0.060298 |
| protein_co paired_rela  | 138   | 98    | 95    | 279  | 402  | 225  | 5.248031 | 4.779173 | 4.359021 | 16.46842 |
| protein_co chromosom    | 745   | 532   | 592   | 1246 | 1505 | 1235 | 7.733687 | 7.081924 | 7.41481  | 20.07608 |
| protein_co immunoglc    | 467   | 334   | 394   | 1234 | 1851 | 915  | 4.545908 | 4.169266 | 4.627517 | 18.64444 |
| protein_co Sp2_transc   | 745   | 616   | 660   | 364  | 484  | 611  | 11.22528 | 11.9023  | 11.99866 | 8.512805 |
| protein_co proline_ric  | 3     | 0     | 0     | 6    | 8    | 0    | 0.092607 | 0        | 0        | 0.287478 |
| protein_co coenzyme_    | 329   | 222   | 258   | 220  | 272  | 326  | 5.806103 | 5.024018 | 5.493594 | 6.026178 |
| protein_co G_protein+   | 404   | 266   | 330   | 3293 | 4063 | 4560 | 4.109234 | 3.469528 | 4.049873 | 51.98783 |
| protein_co v-crk_sarco  | 2075  | 1683  | 1852  | 912  | 1216 | 1276 | 25.07649 | 26.08207 | 27.0046  | 17.107   |
| protein_co chromosom    | 0     | 0     | 0     | 1    | 2    | 1    | 0        | 0        | 0        | 0.081318 |
| protein_co golgin_A6_   | 0     | 0     | 0     | 23   | 39   | 5    | 0        | 0        | 0        | 0.804004 |
| protein_co F-box_prot   | 764   | 553   | 583   | 793  | 1079 | 512  | 10.28538 | 9.546878 | 9.469859 | 16.57031 |
| protein_co TBC1_dom     | 1599  | 1197  | 1421  | 421  | 515  | 279  | 12.31961 | 11.82638 | 13.20963 | 5.034554 |
| protein_co nucleotide   | 2     | 1     | 1     | 25   | 24   | 5    | 0.020905 | 0.013404 | 0.012612 | 0.405594 |
| protein_co sorting_ne   | 3     | 2     | 2     | 0    | 1    | 0    | 0.042576 | 0.036398 | 0.034247 | 0        |
| protein_co lipoxygena   | 0     | 0     | 0     | 50   | 70   | 39   | 0        | 0        | 0        | 0.531395 |
| protein_co katanin_p6   | 47    | 30    | 25    | 142  | 191  | 77   | 1.174124 | 0.961052 | 0.753536 | 5.505984 |
| protein_co haloacid_d   | 234   | 213   | 216   | 325  | 304  | 271  | 3.398038 | 3.966444 | 3.784549 | 7.325313 |
| protein_co chromosom    | 5     | 1     | 0     | 2    | 0    | 1    | 0.125913 | 0.032293 | 0        | 0.078174 |
| protein_co zinc_finger  | 225   | 160   | 202   | 349  | 367  | 517  | 1.922072 | 1.752736 | 2.082028 | 4.627464 |
| protein_co insulin-like | 16565 | 12509 | 12710 | 59   | 89   | 122  | 139.0749 | 134.6757 | 128.7511 | 0.768847 |
| protein_co ring_finger  | 327   | 271   | 325   | 290  | 326  | 289  | 5.387574 | 5.725641 | 6.46066  | 7.416073 |
| protein_co cyclin-depe  | 1500  | 1144  | 1310  | 1269 | 1503 | 2042 | 9.094262 | 8.894296 | 9.582869 | 11.94176 |
| protein_co dipeptidase  | 1     | 0     | 1     | 1    | 0    | 0    | 0.020859 | 0        | 0.025167 | 0.032375 |
| protein_co dihydrouric  | 231   | 179   | 207   | 217  | 256  | 212  | 4.689002 | 4.659408 | 5.069753 | 6.83689  |
| protein_co processing   | 386   | 313   | 349   | 367  | 314  | 473  | 19.82426 | 20.61405 | 21.62634 | 29.25541 |
| protein_co endo-beta-l  | 359   | 287   | 293   | 733  | 1063 | 492  | 3.638892 | 3.730491 | 3.58336  | 11.53212 |

|                          |       |       |       |       |       |       |          |          |          |          |
|--------------------------|-------|-------|-------|-------|-------|-------|----------|----------|----------|----------|
| protein_co RNA_bindin    | 0     | 0     | 6     | 301   | 417   | 298   | 0        | 0        | 0.110499 | 7.131094 |
| protein_co ATP_syntha    | 609   | 433   | 417   | 499   | 459   | 559   | 18.05058 | 16.45778 | 14.91276 | 22.95646 |
| protein_co CD3d_mole     | 0     | 0     | 0     | 0     | 2     | 1     | 0        | 0        | 0        | 0        |
| protein_co TBC1_dom      | 6285  | 4905  | 5236  | 4472  | 6004  | 5684  | 26.94804 | 26.96934 | 27.08754 | 29.76145 |
| protein_co ENTH_dom      | 127   | 118   | 101   | 76    | 111   | 109   | 1.635099 | 1.948192 | 1.568953 | 1.518744 |
| protein_co myosin_VB     | 53    | 33    | 56    | 226   | 252   | 210   | 0.261459 | 0.208762 | 0.333322 | 1.730482 |
| protein_co ADP-ribosy    | 6     | 8     | 12    | 188   | 165   | 98    | 0.187061 | 0.319839 | 0.4514   | 9.097475 |
| protein_co acetyl-CoA    | 720   | 672   | 669   | 1420  | 1479  | 1230  | 16.72984 | 20.0234  | 18.75571 | 51.21274 |
| protein_co stromal_in    | 1198  | 909   | 1015  | 472   | 546   | 284   | 13.9114  | 13.53591 | 14.22094 | 8.507198 |
| protein_co ribonucleo    | 1896  | 1575  | 1714  | 1369  | 1521  | 1561  | 28.08069 | 29.91296 | 30.62868 | 31.47048 |
| protein_co tripartite_r  | 278   | 194   | 210   | 150   | 191   | 133   | 3.88885  | 3.480066 | 3.544408 | 3.256853 |
| processed_ -             | 0     | 0     | 0     | 0     | 0     | 1     | 0        | 0        | 0        | 0        |
| protein_co fructosami    | 243   | 162   | 164   | 386   | 492   | 209   | 4.530527 | 3.873172 | 3.689218 | 11.17018 |
| protein_co proline-ricl  | 264   | 217   | 233   | 183   | 235   | 117   | 4.126322 | 4.349389 | 4.394031 | 4.439568 |
| protein_co zinc_finger   | 26    | 7     | 16    | 28    | 26    | 17    | 0.376046 | 0.12983  | 0.279213 | 0.628573 |
| protein_co immunity-r    | 1272  | 962   | 1147  | 642   | 864   | 697   | 6.1584   | 5.972624 | 6.700269 | 4.824433 |
| protein_co zinc_finger   | 325   | 273   | 263   | 160   | 169   | 223   | 2.551784 | 2.748733 | 2.49152  | 1.949894 |
| protein_co zinc_finger   | 71    | 59    | 55    | 67    | 77    | 97    | 0.618005 | 0.658559 | 0.577623 | 0.905188 |
| protein_co zinc_finger   | 101   | 79    | 86    | 111   | 96    | 188   | 1.448285 | 1.452677 | 1.487918 | 2.470507 |
| protein_co protein_ph    | 797   | 582   | 654   | 1363  | 1992  | 1290  | 6.441114 | 6.031634 | 6.377177 | 17.09736 |
| protein_co zinc_finger   | 489   | 332   | 397   | 325   | 423   | 362   | 8.003218 | 6.967921 | 7.839608 | 8.255998 |
| protein_co zinc_finger   | 905   | 658   | 749   | 1075  | 1442  | 1117  | 5.22733  | 4.873787 | 5.219888 | 9.637631 |
| protein_co vitamin_K     | 46    | 24    | 33    | 23    | 39    | 27    | 2.002731 | 1.33994  | 1.733511 | 1.554258 |
| protein_co guanine_nu    | 9     | 5     | 10    | 3     | 0     | 1     | 1.953751 | 1.391893 | 2.619236 | 1.010831 |
| protein_co lactoperoxi   | 2     | 0     | 1     | 6     | 8     | 4     | 0.02782  | 0        | 0.016783 | 0.12954  |
| protein_co carbonic_a    | 0     | 1     | 0     | 18    | 24    | 16    | 0        | 0.052106 | 0        | 1.135214 |
| protein_co smg-8_horr    | 452   | 360   | 369   | 383   | 439   | 504   | 6.095567 | 6.225691 | 6.00413  | 8.016872 |
| protein_co tropomyos     | 26053 | 20706 | 22309 | 7295  | 8380  | 9326  | 457.1952 | 465.9609 | 472.3589 | 198.7008 |
| protein_co RAB8A_me      | 238   | 198   | 216   | 234   | 303   | 280   | 3.947585 | 4.211425 | 4.322713 | 6.024221 |
| protein_co glutathione   | 3695  | 2708  | 2595  | 4182  | 4315  | 3417  | 149.4897 | 140.4931 | 126.6725 | 262.6101 |
| protein_co midnolin      | 3429  | 2261  | 2478  | 6122  | 8528  | 8333  | 42.42371 | 35.87163 | 36.99053 | 117.5615 |
| protein_co junctional_   | 2     | 3     | 3     | 10    | 7     | 1     | 0.08248  | 0.158654 | 0.149276 | 0.640104 |
| protein_co family_witl   | 7     | 5     | 3     | 9     | 6     | 2     | 0.06417  | 0.058778 | 0.033182 | 0.128058 |
| protein_co kelch-like_f  | 296   | 198   | 285   | 402   | 515   | 263   | 4.348197 | 3.729856 | 5.051384 | 9.165877 |
| protein_co GATA_zinc     | 2533  | 1925  | 2100  | 3271  | 4671  | 4396  | 20.56309 | 20.0398  | 20.56935 | 41.21585 |
| protein_co mevalonat     | 5901  | 4448  | 4714  | 1771  | 1919  | 2699  | 117.6437 | 113.7149 | 113.3916 | 54.80146 |
| protein_co chromatin     | 911   | 686   | 760   | 4555  | 5613  | 3238  | 13.1842  | 12.73119 | 13.2708  | 102.3185 |
| protein_co trafficking   | 595   | 469   | 500   | 594   | 639   | 726   | 8.994056 | 9.091191 | 9.119198 | 13.93656 |
| protein_co ankyrin_rej   | 6609  | 4965  | 5579  | 3876  | 5384  | 4928  | 33.31858 | 32.0981  | 33.93557 | 30.32948 |
| protein_co chromosom     | 197   | 154   | 153   | 128   | 155   | 163   | 2.766497 | 2.773282 | 2.592409 | 2.790001 |
| protein_co uncharacte    | 13    | 12    | 7     | 17    | 15    | 12    | 0.204898 | 0.24254  | 0.133119 | 0.415885 |
| protein_co protein_int   | 93    | 70    | 99    | 369   | 450   | 285   | 1.376506 | 1.328626 | 1.767985 | 8.477193 |
| protein_co ribosomal     | 19791 | 15293 | 16114 | 24697 | 28133 | 21857 | 389.0987 | 385.5618 | 382.2464 | 753.6448 |
| protein_co zinc_finger   | 163   | 99    | 150   | 91    | 115   | 64    | 1.568775 | 1.221849 | 1.741857 | 1.359393 |
| protein_co calcium_ch    | 1087  | 865   | 918   | 63    | 123   | 78    | 12.65065 | 12.90947 | 12.89062 | 1.138031 |
| protein_co dehydrogen    | 92    | 60    | 70    | 209   | 314   | 284   | 2.117762 | 1.771128 | 1.944175 | 7.467343 |
| protein_co tumor_pro     | 1339  | 987   | 1043  | 842   | 1073  | 525   | 25.43992 | 24.04705 | 23.90934 | 24.83006 |
| protein_co myeloid/ly    | 4522  | 3323  | 3989  | 2310  | 3603  | 3106  | 10.91903 | 10.28947 | 11.62159 | 8.657569 |
| protein_co coronin_6     | 142   | 114   | 131   | 72    | 81    | 51    | 1.636368 | 1.684639 | 1.821428 | 1.287822 |
| protein_co Ras_homol     | 38    | 32    | 35    | 109   | 149   | 65    | 1.413022 | 1.525895 | 1.570296 | 6.291038 |
| protein_co tubulin_alf   | 27284 | 22317 | 23300 | 4539  | 4225  | 5155  | 668.0664 | 700.7398 | 688.3599 | 172.5052 |
| protein_co tubulin_alf   | 3319  | 2573  | 2744  | 2871  | 2861  | 2890  | 86.45998 | 85.9522  | 86.24621 | 116.0838 |
| protein_co zinc_finger   | 11    | 7     | 5     | 56    | 39    | 35    | 0.18942  | 0.154575 | 0.103885 | 1.496757 |
| protein_co zinc_finger   | 2     | 0     | 0     | 6     | 13    | 0     | 0.019501 | 0        | 0        | 0.090804 |
| protein_co zinc_finger   | 79    | 66    | 77    | 89    | 107   | 235   | 0.66889  | 0.716606 | 0.786622 | 1.169628 |
| protein_co SERTA_dorr    | 868   | 575   | 614   | 350   | 396   | 305   | 23.47205 | 19.93923 | 20.03308 | 14.69027 |
| protein_co NCK-associ    | 2453  | 1782  | 1756  | 711   | 1155  | 784   | 23.47372 | 21.86761 | 20.27481 | 10.5605  |
| protein_co RAB4B_me      | 107   | 90    | 68    | 57    | 87    | 41    | 2.531399 | 2.730415 | 1.941037 | 2.093062 |
| protein_co aquaporin     | 0     | 0     | 0     | 0     | 1     | 0     | 0        | 0        | 0        | 0        |
| protein_co glycerol-3-ph | 2     | 3     | 1     | 1     | 1     | 12    | 0.030428 | 0.05853  | 0.018357 | 0.023614 |
| protein_co chromosom     | 472   | 353   | 375   | 216   | 306   | 161   | 6.135871 | 5.884618 | 5.881845 | 4.358314 |
| protein_co cytochrom     | 1     | 2     | 1     | 3548  | 4473  | 3781  | 0.016855 | 0.043228 | 0.020336 | 92.8191  |
| protein_co AXL_recept    | 4936  | 3851  | 4311  | 437   | 556   | 366   | 48.85985 | 48.88323 | 51.48765 | 6.714117 |
| protein_co nuclear_fac   | 48    | 40    | 44    | 83    | 86    | 90    | 1.22722  | 1.311446 | 1.357319 | 3.293742 |
| protein_co transmembr    | 23    | 19    | 20    | 150   | 149   | 75    | 0.447127 | 0.473659 | 0.469117 | 4.526107 |

|                          |       |       |       |       |        |       |          |          |          |          |
|--------------------------|-------|-------|-------|-------|--------|-------|----------|----------|----------|----------|
| protein_co ankyrin_re    | 7     | 10    | 8     | 11    | 12     | 5     | 0.098894 | 0.181168 | 0.136368 | 0.241211 |
| protein_co leukocyte-2   | 0     | 3     | 1     | 5     | 4      | 4     | 0        | 0.069221 | 0.02171  | 0.139639 |
| protein_co tweety_ho     | 22    | 21    | 35    | 694   | 834    | 607   | 0.280397 | 0.343225 | 0.538229 | 13.72905 |
| protein_co leukocyte_1   | 5041  | 3931  | 4505  | 2411  | 2967   | 2090  | 40.82428 | 40.82387 | 44.01946 | 30.30606 |
| protein_co CDC42_eff     | 2423  | 1634  | 1684  | 120   | 157    | 35    | 131.4983 | 113.7177 | 110.2699 | 10.10831 |
| protein_co transmem      | 3     | 5     | 4     | 69    | 98     | 49    | 0.06995  | 0.149502 | 0.112532 | 2.497169 |
| protein_co zinc_finger   | 605   | 425   | 473   | 415   | 531    | 510   | 7.051569 | 6.352265 | 6.651806 | 7.507735 |
| protein_co trafficking_  | 612   | 498   | 530   | 296   | 379    | 226   | 0.972209 | 1.014488 | 1.015856 | 0.729845 |
| protein_co NLR_family    | 0     | 0     | 0     | 58    | 95     | 44    | 0        | 0        | 0        | 1.103301 |
| protein_co zinc_finger   | 1650  | 1283  | 1328  | 1608  | 1352   | 2129  | 20.46786 | 20.40913 | 19.87626 | 30.9603  |
| protein_co zinc_finger   | 135   | 109   | 114   | 59    | 66     | 126   | 2.220327 | 2.298894 | 2.262226 | 1.506141 |
| protein_co protein_ph    | 32    | 19    | 19    | 452   | 637    | 357   | 1.581118 | 1.203863 | 1.132702 | 34.66435 |
| protein_co serine_pep    | 25    | 34    | 17    | 2712  | 3385   | 2439  | 0.30792  | 0.537014 | 0.252636 | 51.84629 |
| protein_co chromosom     | 0     | 0     | 0     | 2     | 3      | 0     | 0        | 0        | 0        | 0.279922 |
| protein_co Yip1_inter    | 1883  | 1331  | 1428  | 1369  | 1878   | 1082  | 46.05837 | 41.74896 | 42.14388 | 51.97473 |
| protein_co dynein_axc    | 3     | 4     | 6     | 15    | 30     | 15    | 0.063137 | 0.107953 | 0.152358 | 0.48999  |
| protein_co prostate_st   | 1     | 1     | 2     | 1     | 5      | 1     | 0.045971 | 0.058951 | 0.110932 | 0.071353 |
| protein_co ataxia_cere   | 3     | 1     | 0     | 794   | 974    | 473   | 0.027746 | 0.01186  | 0        | 11.39786 |
| protein_co death-assoc   | 2301  | 1706  | 1840  | 1265  | 1805   | 1837  | 47.80413 | 45.45035 | 46.1227  | 40.79151 |
| protein_co eukaryotic    | 66984 | 50577 | 53210 | 87115 | 100617 | 66980 | 992.6931 | 961.1835 | 951.4484 | 2003.86  |
| protein_co transmem      | 7     | 5     | 4     | 20    | 28     | 7     | 0.260087 | 0.238232 | 0.17932  | 1.153404 |
| protein_co chromatin_    | 1103  | 820   | 999   | 3041  | 4031   | 4220  | 15.48957 | 14.76683 | 16.9269  | 66.28433 |
| protein_co UBX_doma      | 2542  | 1925  | 2031  | 926   | 1119   | 1190  | 25.9231  | 25.17396 | 24.99018 | 14.65726 |
| protein_co Hepatoma-     | 2927  | 2193  | 2414  | 3029  | 4070   | 2899  | 44.06006 | 42.33215 | 43.84375 | 70.77047 |
| protein_co perilipin_4   | 54    | 35    | 54    | 38    | 93     | 41    | 0.399316 | 0.331894 | 0.481797 | 0.436151 |
| protein_co sema_dom      | 363   | 235   | 258   | 3273  | 4528   | 1672  | 4.270215 | 3.545033 | 3.661937 | 59.76124 |
| protein_co zinc_finger   | 1206  | 821   | 939   | 1617  | 2039   | 1200  | 10.16161 | 8.870901 | 9.546163 | 21.14734 |
| protein_co nucleoredc    | 2123  | 1643  | 1749  | 3034  | 3812   | 2961  | 32.78903 | 32.5406  | 32.59241 | 72.73186 |
| protein_co family_witl   | 943   | 728   | 800   | 426   | 568    | 541   | 18.37792 | 18.19389 | 18.81147 | 12.8862  |
| protein_co glyoxalase_   | 1013  | 756   | 801   | 727   | 888    | 1056  | 17.35462 | 16.60874 | 16.55717 | 19.33172 |
| protein_co major_facil   | 375   | 291   | 338   | 1385  | 1920   | 1256  | 11.35902 | 11.30347 | 12.35305 | 65.1163  |
| protein_co glutamic-pr   | 14    | 6     | 10    | 2     | 6      | 12    | 0.348255 | 0.191395 | 0.300135 | 0.07722  |
| protein_co kinesin_fan   | 250   | 162   | 212   | 343   | 540    | 261   | 3.215168 | 2.671702 | 3.289634 | 6.846811 |
| protein_co solute_carr   | 180   | 114   | 132   | 327   | 409    | 304   | 2.593793 | 2.106576 | 2.295011 | 7.313766 |
| protein_co Rab_intera    | 95    | 86    | 76    | 185   | 254    | 139   | 2.515275 | 2.919911 | 2.427859 | 7.602633 |
| protein_co serpin_pep    | 6     | 5     | 3     | 25    | 33     | 10    | 0.123179 | 0.131633 | 0.074311 | 0.796627 |
| protein_co WD_repeat     | 940   | 679   | 731   | 377   | 492    | 589   | 6.546356 | 6.063884 | 6.142387 | 4.07515  |
| protein_co serine_race   | 110   | 96    | 98    | 39    | 60     | 27    | 1.890727 | 2.116005 | 2.032405 | 1.040474 |
| protein_co TSR1_20S_1    | 1069  | 831   | 828   | 1121  | 1224   | 2044  | 9.957376 | 9.926075 | 9.305625 | 16.20702 |
| protein_co transient_r   | 12    | 16    | 23    | 31    | 23     | 11    | 0.111422 | 0.19051  | 0.257671 | 0.446767 |
| protein_co hydroxyste    | 104   | 67    | 77    | 120   | 160    | 46    | 2.588409 | 2.138374 | 2.312269 | 4.635656 |
| protein_co cytochrom     | 215   | 178   | 175   | 149   | 163    | 159   | 5.278196 | 5.603719 | 5.18362  | 5.677587 |
| protein_co gamma-glu     | 0     | 0     | 0     | 5     | 4      | 2     | 0        | 0        | 0        | 0.143607 |
| protein_co chromosom     | 1114  | 807   | 848   | 1811  | 2070   | 3009  | 28.32727 | 26.31494 | 26.01737 | 71.47734 |
| protein_co kallikrein_1  | 0     | 0     | 0     | 13    | 10     | 10    | 0        | 0        | 0        | 0.510322 |
| protein_co kallikrein-r1 | 0     | 0     | 0     | 1     | 4      | 4     | 0        | 0        | 0        | 0.054031 |
| protein_co kallikrein-r1 | 0     | 0     | 0     | 1     | 1      | 0     | 0        | 0        | 0        | 0.024107 |
| protein_co kallikrein-r1 | 0     | 0     | 0     | 2     | 6      | 3     | 0        | 0        | 0        | 0.093128 |
| protein_co kallikrein-r1 | 0     | 0     | 0     | 5     | 4      | 2     | 0        | 0        | 0        | 0.213056 |
| protein_co kallikrein-r1 | 0     | 0     | 0     | 0     | 0      | 1     | 0        | 0        | 0        | 0        |
| protein_co kallikrein-r1 | 0     | 0     | 0     | 20    | 21     | 25    | 0        | 0        | 0        | 0.901856 |
| protein_co HCG20081      | 6     | 4     | 5     | 9     | 15     | 8     | 0.165397 | 0.141399 | 0.166301 | 0.385078 |
| protein_co zinc_finger   | 519   | 464   | 446   | 380   | 352    | 277   | 5.478595 | 6.281005 | 5.680476 | 6.226097 |
| protein_co keratin_80    | 44    | 36    | 52    | 3     | 8      | 4     | 0.529831 | 0.5559   | 0.755502 | 0.056071 |
| protein_co keratin_1     | 3     | 1     | 4     | 0     | 0      | 0     | 0.057393 | 0.024533 | 0.09233  | 0        |
| protein_co alkaline_ce   | 3     | 1     | 0     | 0     | 0      | 0     | 0.09735  | 0.041612 | 0        | 0        |
| protein_co OTU_doma      | 1574  | 1159  | 1309  | 1841  | 2034   | 2044  | 29.60485 | 27.95445 | 29.70611 | 53.74553 |
| protein_co REST_core     | 906   | 658   | 676   | 2361  | 3055   | 2598  | 16.31427 | 15.19409 | 14.68704 | 65.98814 |
| protein_co angiopoiet    | 109   | 66    | 69    | 55    | 89     | 38    | 2.72007  | 2.112063 | 2.077546 | 2.130329 |
| protein_co NADH_deh      | 0     | 0     | 0     | 2     | 0      | 0     | 0        | 0        | 0        | 0.250965 |
| protein_co CD320_mo      | 907   | 619   | 582   | 1203  | 1425   | 1027  | 24.5976  | 21.52709 | 19.04392 | 50.63858 |
| protein_co SPRY_dom      | 1247  | 896   | 1025  | 187   | 156    | 113   | 22.11492 | 20.37681 | 21.93264 | 5.147437 |
| protein_co insulin-like  | 267   | 244   | 232   | 29    | 35     | 25    | 10.6369  | 12.46531 | 11.15167 | 1.793215 |
| protein_co sterol_O-ac   | 2     | 1     | 1     | 0     | 0      | 1     | 0.045881 | 0.029418 | 0.027679 | 0        |
| protein_co zinc_finger   | 0     | 0     | 0     | 30    | 41     | 20    | 0        | 0        | 0        | 0.624184 |

|                        |       |       |       |       |       |       |          |          |          |          |
|------------------------|-------|-------|-------|-------|-------|-------|----------|----------|----------|----------|
| protein_co NADH_deh    | 2250  | 1773  | 1931  | 2441  | 3013  | 2272  | 60.35614 | 60.98978 | 62.49846 | 101.6336 |
| protein_co cyclin-depe | 2156  | 1527  | 1759  | 838   | 1003  | 910   | 59.74875 | 54.26607 | 58.81579 | 36.04579 |
| pseudogen: compleme    | 0     | 0     | 0     | 1     | 2     | 0     | 0        | 0        | 0        | 0.015781 |
| protein_co nudix_(nuc  | 305   | 222   | 305   | 77    | 136   | 274   | 9.762086 | 9.111819 | 11.77852 | 3.825286 |
| protein_co T-box_10    | 52    | 42    | 42    | 47    | 35    | 283   | 1.575117 | 1.631429 | 1.534994 | 2.209723 |
| protein_co peroxiredo  | 1621  | 1236  | 1269  | 2204  | 2516  | 1969  | 44.26833 | 43.28505 | 41.81381 | 93.42265 |
| protein_co zinc_finger | 120   | 118   | 117   | 296   | 335   | 452   | 2.360236 | 2.976223 | 2.776566 | 9.036418 |
| protein_co MIS12_MIM   | 301   | 269   | 261   | 356   | 403   | 538   | 5.634289 | 6.457052 | 5.894693 | 10.34316 |
| protein_co CD300c_m    | 2     | 1     | 1     | 0     | 0     | 1     | 0.061819 | 0.039637 | 0.037294 | 0        |
| protein_co CD300a_m    | 1     | 1     | 1     | 6     | 0     | 4     | 0.025264 | 0.032398 | 0.030482 | 0.23528  |
| protein_co HID1_dom    | 12    | 10    | 12    | 699   | 848   | 344   | 0.172021 | 0.183827 | 0.207553 | 15.55276 |
| protein_co immature_   | 308   | 243   | 223   | 319   | 379   | 412   | 16.22711 | 16.41746 | 14.17566 | 26.08624 |
| protein_co ATP_syntha  | 433   | 339   | 359   | 926   | 1100  | 702   | 9.266717 | 9.303515 | 9.270017 | 30.75951 |
| protein_co transmemt   | 22    | 13    | 28    | 63    | 63    | 50    | 1.178949 | 0.893357 | 1.810416 | 5.240146 |
| protein_co envoplakin  | 1     | 1     | 0     | 15    | 26    | 21    | 0.00709  | 0.009091 | 0        | 0.165059 |
| protein_co signal_reco | 2773  | 2124  | 2374  | 2022  | 2293  | 1944  | 49.08494 | 48.21279 | 50.70225 | 55.55333 |
| protein_co mannosyl_   | 318   | 206   | 226   | 455   | 629   | 344   | 3.319462 | 2.757511 | 2.846408 | 7.371952 |
| protein_co transmemt   | 4     | 10    | 5     | 29    | 30    | 9     | 0.042521 | 0.136318 | 0.06413  | 0.478489 |
| protein_co thymidine_  | 2032  | 1335  | 1726  | 1405  | 1845  | 2102  | 56.68085 | 47.75329 | 58.09002 | 60.83023 |
| protein_co transmemt   | 174   | 179   | 174   | 291   | 378   | 164   | 3.152575 | 4.1589   | 3.803763 | 8.183509 |
| processed_ -           | 72    | 61    | 57    | 30    | 28    | 41    | 3.052515 | 3.316381 | 2.915736 | 1.974136 |
| protein_co gasdermin_  | 0     | 0     | 0     | 1     | 0     | 2     | 0        | 0        | 0        | 0.033632 |
| protein_co keratin_24  | 0     | 1     | 0     | 0     | 0     | 0     | 0        | 0.031967 | 0        | 0        |
| protein_co transmemt   | 85    | 63    | 83    | 47    | 39    | 76    | 1.936663 | 1.840708 | 2.281714 | 1.662124 |
| protein_co GH3_doma    | 86    | 59    | 64    | 230   | 317   | 183   | 1.521714 | 1.338739 | 1.366352 | 6.316737 |
| protein_co integrin_al | 935   | 674   | 694   | 1249  | 1525  | 1021  | 13.64524 | 12.6136  | 12.22017 | 28.29193 |
| protein_co sclerostin  | 1     | 0     | 0     | 1     | 0     | 0     | 0.020387 | 0        | 0        | 0.031643 |
| protein_co proline_ri  | 19    | 9     | 10    | 18    | 45    | 11    | 0.736899 | 0.447616 | 0.467953 | 1.08357  |
| protein_co zinc_finger | 1287  | 887   | 992   | 947   | 1332  | 910   | 13.53993 | 11.9666  | 12.59208 | 15.46387 |
| protein_co RAB26_me    | 51    | 44    | 47    | 78    | 127   | 62    | 1.24422  | 1.376541 | 1.38348  | 2.953603 |
| protein_co MTOR_asso   | 1217  | 1008  | 933   | 1527  | 1831  | 1561  | 26.96841 | 28.64406 | 24.94563 | 52.52115 |
| protein_co E4F_transc  | 666   | 465   | 567   | 577   | 823   | 787   | 5.265343 | 4.714273 | 5.408584 | 7.080416 |
| protein_co deoxyribon  | 4     | 8     | 5     | 1     | 12    | 6     | 0.085488 | 0.219252 | 0.128932 | 0.033172 |
| protein_co enoyl-CoA_  | 755   | 530   | 566   | 1142  | 1606  | 1134  | 22.97337 | 20.68059 | 20.77984 | 53.93545 |
| protein_co CASK_inter  | 17    | 14    | 23    | 243   | 391   | 139   | 0.138487 | 0.14625  | 0.226066 | 3.072532 |
| protein_co ATP-bindin  | 66    | 49    | 51    | 561   | 782   | 282   | 0.468262 | 0.44581  | 0.436579 | 6.177859 |
| protein_co potassium_  | 1294  | 1002  | 986   | 603   | 684   | 984   | 24.44629 | 24.2748  | 22.4752  | 17.6818  |
| protein_co serine/argi | 14457 | 11293 | 12904 | 12313 | 16571 | 17142 | 72.47824 | 72.60192 | 78.0552  | 95.81286 |
| protein_co zinc_finger | 58    | 51    | 33    | 24    | 29    | 51    | 1.48532  | 1.674833 | 1.019657 | 0.953968 |
| polymorph NLR_family   | 24    | 17    | 17    | 28    | 38    | 17    | 0.170432 | 0.154809 | 0.145659 | 0.308623 |
| protein_co succinate_  | 63    | 47    | 41    | 60    | 64    | 98    | 1.45306  | 1.390113 | 1.140972 | 2.147953 |
| protein_co damage-spe  | 7621  | 6169  | 6321  | 7486  | 8358  | 7379  | 79.30511 | 82.32151 | 79.36391 | 120.912  |
| protein_co vacuolar_p  | 670   | 554   | 570   | 406   | 547   | 549   | 10.96555 | 11.62719 | 11.25586 | 10.31365 |
| protein_co von_Willeb  | 27    | 22    | 15    | 252   | 386   | 248   | 0.347811 | 0.363422 | 0.233141 | 5.038602 |
| protein_co RAB3A_inte  | 267   | 184   | 189   | 275   | 324   | 94    | 5.481451 | 4.844082 | 4.681598 | 8.762892 |
| protein_co bestrophin  | 14    | 13    | 20    | 4     | 8     | 3     | 0.113732 | 0.135427 | 0.196034 | 0.050436 |
| protein_co ferritin_he | 2631  | 1784  | 1961  | 2030  | 2728  | 1498  | 100.3805 | 87.28361 | 90.27223 | 120.214  |
| protein_co Berardinell | 31    | 15    | 23    | 20    | 10    | 15    | 0.713244 | 0.442565 | 0.638487 | 0.714228 |
| protein_co polymerase  | 1283  | 1058  | 1064  | 777   | 759   | 986   | 38.66317 | 40.88517 | 38.68659 | 36.34313 |
| protein_co solute_carr | 3737  | 2690  | 2802  | 4500  | 5987  | 6186  | 73.10304 | 67.47983 | 66.13457 | 136.6329 |
| protein_co HRAS-like_  | 0     | 0     | 0     | 117   | 197   | 91    | 0        | 0        | 0        | 2.808455 |
| protein_co chromosom   | 1668  | 1269  | 1323  | 2385  | 2893  | 2128  | 38.64256 | 37.69996 | 36.98093 | 85.76078 |
| protein_co autophagy_  | 129   | 95    | 99    | 109   | 153   | 58    | 1.321567 | 1.248051 | 1.223722 | 1.733231 |
| protein_co C2_calcium  | 1130  | 868   | 962   | 299   | 394   | 449   | 7.269271 | 7.16047  | 7.466818 | 2.98548  |
| protein_co tetratricop | 149   | 149   | 157   | 493   | 584   | 131   | 0.666598 | 0.854817 | 0.847472 | 3.42338  |
| protein_co tetratricop | 58    | 42    | 31    | 25    | 47    | 15    | 0.638709 | 0.593107 | 0.411893 | 0.427312 |
| protein_co ribosomal_  | 12925 | 10174 | 10951 | 27102 | 26284 | 24997 | 294.4866 | 297.2597 | 301.0488 | 958.4442 |
| protein_co ectonucleo  | 0     | 0     | 2     | 10    | 9     | 10    | 0        | 0        | 0.040139 | 0.258176 |
| protein_co catenin_(ca | 8653  | 6981  | 7334  | 6438  | 7834  | 7654  | 108.8065 | 112.568  | 111.2697 | 125.652  |
| protein_co unc-51-like | 133   | 130   | 134   | 147   | 152   | 163   | 1.351912 | 1.694531 | 1.643425 | 2.319235 |
| protein_co Fas_(TNFRS  | 544   | 408   | 386   | 253   | 418   | 273   | 13.85561 | 13.32589 | 11.86211 | 10.00179 |
| protein_co latent_tran | 6994  | 4730  | 5144  | 352   | 532   | 267   | 73.81246 | 64.01394 | 65.50178 | 5.766034 |
| protein_co N-acetylate | 1     | 2     | 0     | 34    | 58    | 5     | 0.017373 | 0.044557 | 0        | 0.916826 |
| protein_co SAC3_dom    | 414   | 272   | 351   | 424   | 535   | 286   | 12.39621 | 10.444   | 12.68072 | 19.70539 |
| protein_co basic_leuci | 1     | 0     | 0     | 21    | 40    | 6     | 0.018252 | 0        | 0        | 0.59493  |

|                         |       |      |       |      |      |      |          |          |          |          |
|-------------------------|-------|------|-------|------|------|------|----------|----------|----------|----------|
| protein_co solute_carr  | 0     | 3    | 1     | 1    | 1    | 2    | 0        | 0.046733 | 0.014657 | 0.018855 |
| protein_co splicing_fac | 4812  | 3699 | 3841  | 3945 | 5149 | 6892 | 65.02443 | 64.09802 | 62.62436 | 82.74245 |
| protein_co mitogen-ac   | 747   | 618  | 679   | 543  | 662  | 347  | 11.05296 | 11.72616 | 12.12205 | 12.47063 |
| protein_co coiled-coil_ | 21    | 15   | 14    | 310  | 416  | 177  | 0.188097 | 0.172292 | 0.1513   | 4.309788 |
| protein_co scavenger_   | 1913  | 1481 | 1644  | 528  | 729  | 986  | 25.55573 | 25.37101 | 26.49861 | 10.94807 |
| protein_co PDZ_bindir   | 583   | 490  | 497   | 190  | 143  | 161  | 12.90693 | 13.91105 | 13.27574 | 6.528877 |
| protein_co scavenger_   | 6     | 9    | 6     | 6    | 1    | 1    | 0.069881 | 0.134418 | 0.084315 | 0.108465 |
| protein_co prepronoci   | 13    | 7    | 12    | 2    | 0    | 1    | 0.465321 | 0.321304 | 0.518249 | 0.111114 |
| protein_co COP9_signa   | 2767  | 2213 | 2402  | 1797 | 2195 | 1838 | 90.60383 | 92.92405 | 94.8983  | 91.33052 |
| protein_co platelet-act | 2547  | 2050 | 2119  | 2021 | 2709 | 2534 | 28.46934 | 29.38405 | 28.57771 | 35.06269 |
| protein_co ankyrin_rej  | 717   | 518  | 569   | 326  | 426  | 370  | 10.85221 | 10.05398 | 10.39105 | 7.658559 |
| protein_co nudix_(nuc   | 838   | 572  | 650   | 590  | 831  | 821  | 19.26168 | 16.85992 | 18.02651 | 21.04906 |
| protein_co KIAA1586     | 198   | 210  | 185   | 153  | 141  | 217  | 3.165436 | 4.305236 | 3.56852  | 3.79656  |
| protein_co RAB4A_me     | 336   | 311  | 308   | 288  | 360  | 251  | 5.311883 | 6.304911 | 5.875002 | 7.066953 |
| protein_co olfactory_r  | 0     | 3    | 1     | 5    | 7    | 1    | 0        | 0.191496 | 0.060059 | 0.386305 |
| pseudogen_olfactory_r   | 0     | 0    | 1     | 2    | 3    | 2    | 0        | 0        | 0.060251 | 0.155016 |
| protein_co olfactory_r  | 0     | 0    | 0     | 0    | 0    | 11   | 0        | 0        | 0        | 0        |
| protein_co potassium_   | 3     | 5    | 1     | 106  | 167  | 42   | 0.068121 | 0.145593 | 0.027397 | 3.735912 |
| protein_co SET_domai    | 4377  | 3687 | 3779  | 3467 | 4231 | 3132 | 29.89187 | 32.28933 | 31.13878 | 36.7503  |
| protein_co vasorin      | 2320  | 1521 | 1629  | 165  | 196  | 201  | 38.76865 | 32.59352 | 32.84444 | 4.279639 |
| protein_co family_witl  | 15    | 22   | 12    | 47   | 31   | 50   | 0.222087 | 0.4177   | 0.214369 | 1.080092 |
| protein_co histone_clu  | 1     | 2    | 2     | 0    | 2    | 0    | 0.097484 | 0.25002  | 0.235241 | 0        |
| protein_co THAP_dom     | 69    | 49   | 51    | 241  | 165  | 236  | 0.849635 | 0.773729 | 0.757708 | 4.606075 |
| protein_co ring_finger  | 3615  | 2614 | 2802  | 2510 | 3250 | 2725 | 56.18409 | 52.09787 | 52.54377 | 60.54932 |
| protein_co hook_hom     | 3048  | 2459 | 2533  | 1045 | 1326 | 764  | 9.926432 | 10.26942 | 9.953171 | 5.282323 |
| protein_co mitogen-ac   | 1882  | 1394 | 1521  | 1250 | 1566 | 1737 | 35.28469 | 33.51497 | 34.40677 | 36.37535 |
| protein_co DNA-dama     | 82    | 69   | 60    | 395  | 401  | 127  | 2.199646 | 2.373545 | 1.941951 | 16.44624 |
| protein_co recombinat   | 2348  | 1953 | 1881  | 3145 | 3394 | 2727 | 19.84101 | 21.163   | 19.17796 | 41.24932 |
| protein_co LMBR1_do     | 235   | 229  | 223   | 196  | 209  | 175  | 4.9883   | 6.233465 | 5.711334 | 6.457601 |
| protein_co zinc_finger  | 162   | 136  | 149   | 145  | 195  | 185  | 2.727534 | 2.93632  | 3.02684  | 3.789254 |
| protein_co prostaglan   | 0     | 0    | 0     | 1    | 5    | 1    | 0        | 0        | 0        | 0.024738 |
| protein_co tetratricop  | 260   | 216  | 242   | 538  | 864  | 687  | 2.961235 | 3.154733 | 3.325546 | 9.510695 |
| protein_co glycerate_k  | 158   | 89   | 89    | 63   | 61   | 103  | 2.045451 | 1.477513 | 1.390177 | 1.26591  |
| protein_co histone_clu  | 1     | 1    | 0     | 4    | 2    | 2    | 0.097891 | 0.125532 | 0        | 0.607765 |
| protein_co guanine_nu   | 7     | 4    | 5     | 827  | 1219 | 918  | 0.064308 | 0.047124 | 0.055423 | 11.7925  |
| protein_co ubiquitin_c  | 1336  | 1079 | 1152  | 576  | 781  | 645  | 18.9776  | 19.65467 | 19.74401 | 12.69954 |
| protein_co polymerase   | 128   | 89   | 107   | 56   | 47   | 59   | 2.350929 | 2.096182 | 2.371163 | 1.596423 |
| protein_co NFkB_inhik   | 1483  | 1084 | 1187  | 736  | 959  | 898  | 16.50555 | 15.47133 | 15.93998 | 12.71444 |
| protein_co DnaJ_(Hsp    | 813   | 682  | 688   | 690  | 830  | 1111 | 14.86801 | 15.99396 | 15.18095 | 19.58583 |
| protein_co chromosom    | 0     | 0    | 2     | 0    | 1    | 1    | 0        | 0        | 0.116052 | 0        |
| protein_co potassium_   | 2     | 6    | 9     | 18   | 26   | 10   | 0.0429   | 0.165041 | 0.232928 | 0.599285 |
| protein_co interferon_  | 1732  | 1266 | 1328  | 653  | 877  | 512  | 17.41658 | 16.32518 | 16.11243 | 10.19198 |
| protein_co pancreas_si  | 1     | 0    | 0     | 1    | 1    | 2    | 0.030507 | 0        | 0        | 0.047352 |
| protein_co 5'-nucleoti  | 12382 | 9488 | 10286 | 6322 | 8302 | 6346 | 283.6308 | 278.7062 | 284.2871 | 224.7747 |
| protein_co small_integ  | 127   | 129  | 129   | 166  | 196  | 149  | 3.364425 | 4.382341 | 4.1233   | 6.825676 |
| protein_co histone_clu  | 11    | 12   | 15    | 16   | 22   | 20   | 0.942944 | 1.319118 | 1.551431 | 2.128842 |
| protein_co cytochrom    | 123   | 95   | 118   | 130  | 185  | 129  | 5.693457 | 5.639023 | 6.590237 | 9.339955 |
| protein_co kinesin_fan  | 56    | 36   | 51    | 1403 | 1819 | 1545 | 0.378855 | 0.312318 | 0.416296 | 14.73237 |
| protein_co mannosyl_    | 13    | 5    | 6     | 1    | 11   | 3    | 0.224934 | 0.110941 | 0.125259 | 0.026856 |
| protein_co BMI1_poly    | 319   | 261  | 247   | 27   | 43   | 49   | 4.363453 | 4.578144 | 4.076473 | 0.573236 |
| protein_co THAP_dom     | 670   | 483  | 531   | 791  | 1042 | 814  | 16.66648 | 15.40726 | 15.93718 | 30.54049 |
| protein_co methylmal    | 1281  | 973  | 1054  | 966  | 1116 | 1273 | 34.80076 | 33.89704 | 34.54843 | 40.73308 |
| protein_co pyruvate_d   | 1423  | 1153 | 1165  | 1846 | 1987 | 1889 | 14.964   | 15.54825 | 14.78145 | 30.13041 |
| protein_co PX_domair    | 974   | 750  | 794   | 152  | 219  | 118  | 16.17814 | 15.97497 | 15.91249 | 3.918714 |
| protein_co histone_clu  | 10    | 6    | 12    | 14   | 33   | 11   | 0.597325 | 0.459591 | 0.864848 | 1.297984 |
| protein_co protein-L-is | 388   | 282  | 334   | 275  | 280  | 148  | 4.278769 | 3.987912 | 4.444078 | 4.707066 |
| protein_co potassium_   | 120   | 96   | 85    | 140  | 144  | 127  | 2.320331 | 2.380396 | 1.983059 | 4.20172  |
| protein_co M-phase_sr   | 432   | 336  | 356   | 549  | 911  | 491  | 21.3676  | 21.31183 | 21.24565 | 42.1478  |
| protein_co acyl-CoA_o   | 39    | 40   | 28    | 8    | 14   | 12   | 0.753797 | 0.991423 | 0.652974 | 0.239999 |
| protein_co family_witl  | 1     | 1    | 2     | 46   | 43   | 6    | 0.013532 | 0.017353 | 0.032655 | 0.966196 |
| protein_co interferon_  | 287   | 263  | 260   | 151  | 183  | 59   | 5.843437 | 6.866755 | 6.387161 | 4.771928 |
| protein_co myelin-assc  | 0     | 0    | 0     | 0    | 1    | 3    | 0        | 0        | 0        | 0        |
| protein_co chemokine    | 4     | 3    | 5     | 0    | 1    | 0    | 0.057622 | 0.055419 | 0.086906 | 0        |
| protein_co xin_actin-b  | 5     | 2    | 4     | 1    | 0    | 0    | 0.036293 | 0.018616 | 0.035031 | 0.011266 |
| protein_co insulinoma   | 1     | 3    | 5     | 0    | 0    | 1    | 0.015563 | 0.05987  | 0.093886 | 0        |

|                         |        |       |       |      |      |      |          |          |          |           |
|-------------------------|--------|-------|-------|------|------|------|----------|----------|----------|-----------|
| protein_co delta(4)-de  | 2      | 0     | 1     | 11   | 4    | 2    | 0.049619 | 0        | 0.029934 | 0.423586  |
| protein_co sodium_ch    | 2      | 0     | 0     | 7    | 5    | 5    | 0.014428 | 0        | 0        | 0.078378  |
| lincRNA -               | 0      | 0     | 0     | 1    | 0    | 0    | 0        | 0        | 0        | 0.027177  |
| protein_co ADP-ribosy   | 6113   | 4771  | 4869  | 1372 | 1796 | 2146 | 172.6739 | 172.8188 | 165.9435 | 60.15294  |
| protein_co septin_2     | 10421  | 8293  | 8855  | 5041 | 5990 | 5844 | 132.0294 | 134.7356 | 135.3624 | 99.13077  |
| protein_co filamin_A_i  | 1269   | 896   | 931   | 16   | 31   | 34   | 14.10368 | 12.76992 | 12.48443 | 0.276008  |
| protein_co major_facil  | 247    | 207   | 223   | 161  | 209  | 153  | 4.762267 | 5.117956 | 5.187639 | 4.818071  |
| protein_co deoxythym    | 1309   | 1016  | 1048  | 1009 | 1367 | 1434 | 49.82064 | 49.58756 | 48.12592 | 59.60618  |
| protein_co transporter  | 283    | 244   | 252   | 248  | 364  | 131  | 4.484581 | 4.95832  | 4.818191 | 6.099828  |
| protein_co inhibitor_c  | 442    | 367   | 372   | 552  | 851  | 1094 | 3.98872  | 4.247043 | 4.05044  | 7.731803  |
| protein_co autophagy    | 1500   | 1287  | 1297  | 1177 | 1613 | 1507 | 21.35247 | 23.49334 | 22.27639 | 26.00541  |
| protein_co bradykinin   | 31     | 28    | 31    | 1    | 3    | 7    | 0.212358 | 0.245966 | 0.256222 | 0.010633  |
| protein_co mixed_line   | 3      | 9     | 2     | 15   | 15   | 23   | 0.036236 | 0.139404 | 0.029148 | 0.28122   |
| pseudogen_cytidine_m    | 23     | 25    | 26    | 3    | 2    | 2    | 0.476356 | 0.663977 | 0.649719 | 0.09644   |
| protein_co ring_finger  | 1583   | 1293  | 1336  | 2621 | 2642 | 2838 | 14.97416 | 15.68445 | 15.24811 | 38.48212  |
| protein_co melatonin    | 0      | 1     | 1     | 12   | 19   | 7    | 0        | 0.046648 | 0.043891 | 0.677547  |
| protein_co potassium    | 1      | 0     | 0     | 0    | 0    | 0    | 0.021323 | 0        | 0        | 0         |
| protein_co ras_homolo   | 1      | 1     | 0     | 38   | 30   | 27   | 0.023457 | 0.03008  | 0        | 1.383508  |
| protein_co kelch-like_f | 20     | 13    | 12    | 0    | 0    | 0    | 0.251691 | 0.209793 | 0.182208 | 0         |
| protein_co componen     | 774    | 541   | 608   | 276  | 346  | 299  | 12.40358 | 11.11764 | 11.75595 | 6.86508   |
| protein_co cell_divisio | 343    | 304   | 333   | 333  | 441  | 363  | 4.095563 | 4.654815 | 4.797465 | 6.171549  |
| protein_co stress-indu  | 5355   | 4414  | 4648  | 6530 | 7521 | 6788 | 91.54066 | 96.76009 | 95.86691 | 173.26    |
| protein_co sodium_ch    | 1      | 0     | 0     | 124  | 140  | 115  | 0.018055 | 0        | 0        | 3.475046  |
| protein_co hair_growt   | 18     | 13    | 11    | 22   | 27   | 13   | 0.13321  | 0.123372 | 0.098221 | 0.252708  |
| protein_co thioredoxin  | 5      | 4     | 4     | 0    | 5    | 2    | 0.125174 | 0.128414 | 0.120823 | 0         |
| protein_co RAB31_me     | 4078   | 3303  | 3361  | 1317 | 1620 | 1384 | 47.15598 | 48.97872 | 46.89279 | 23.63773  |
| protein_co receptor_a   | 1103   | 844   | 857   | 705  | 985  | 809  | 30.24543 | 29.6781  | 28.35392 | 30.00571  |
| protein_co tenascin_X   | 17     | 10    | 11    | 217  | 360  | 91   | 0.060701 | 0.045789 | 0.04739  | 1.202651  |
| protein_co leucine-ricl | 1      | 1     | 0     | 15   | 12   | 4    | 0.010609 | 0.013604 | 0        | 0.24699   |
| protein_co surfactant   | 1      | 0     | 0     | 0    | 0    | 0    | 0.044828 | 0        | 0        | 0         |
| protein_co bone_morp    | 3267   | 2310  | 2546  | 216  | 295  | 181  | 35.35419 | 32.05627 | 33.24284 | 3.628072  |
| protein_co ataxin_2-lil | 4521   | 3471  | 3789  | 3115 | 4368 | 3413 | 46.34669 | 45.62976 | 46.86589 | 49.56473  |
| protein_co phytanoyl-l  | 15     | 7     | 5     | 202  | 222  | 88   | 0.219797 | 0.131534 | 0.088399 | 4.594225  |
| protein_co coiled-coil  | 27     | 13    | 14    | 4    | 7    | 3    | 0.436864 | 0.269733 | 0.273312 | 0.100455  |
| protein_co polymerase   | 1445   | 1198  | 1320  | 1008 | 1213 | 770  | 23.64134 | 25.13451 | 26.05711 | 25.59736  |
| protein_co flap_struct  | 1192   | 885   | 976   | 1382 | 1583 | 2140 | 24.3436  | 23.17721 | 24.04952 | 43.80735  |
| protein_co serum_dep    | 20     | 19    | 11    | 0    | 0    | 1    | 0.290431 | 0.353814 | 0.192732 | 0         |
| protein_co SOGA_fami    | 1756   | 1343  | 1606  | 1917 | 2715 | 1456 | 13.51368 | 13.25362 | 14.91224 | 22.89822  |
| protein_co gastrulatio  | 13     | 10    | 10    | 877  | 1241 | 760  | 0.287127 | 0.28323  | 0.266488 | 30.06495  |
| protein_co hemochror    | 0      | 1     | 0     | 13   | 25   | 5    | 0        | 0.028256 | 0        | 0.444613  |
| protein_co hexamethy    | 53     | 35    | 26    | 34   | 34   | 31   | 1.626421 | 1.377319 | 0.962672 | 1.619446  |
| protein_co farnesyltra  | 438    | 393   | 398   | 358  | 393  | 545  | 2.803034 | 3.225196 | 3.073161 | 3.556049  |
| protein_co serine_incc  | 1224   | 950   | 1048  | 695  | 936  | 627  | 20.44652 | 20.35031 | 21.1226  | 18.011994 |
| protein_co trafficking  | 812    | 663   | 737   | 744  | 778  | 510  | 8.364388 | 8.757921 | 9.159962 | 11.89547  |
| protein_co cholinergic  | 0      | 0     | 0     | 11   | 7    | 9    | 0        | 0        | 0        | 0.2701    |
| protein_co collagen_ty  | 110994 | 84163 | 87647 | 1    | 5    | 199  | 938.9339 | 912.9901 | 894.5829 | 0.01313   |
| protein_co GDNF_fami    | 0      | 0     | 0     | 112  | 131  | 129  | 0        | 0        | 0        | 1.656439  |
| protein_co inhibitor_c  | 298    | 225   | 243   | 204  | 282  | 245  | 11.75208 | 11.37864 | 11.56253 | 12.48703  |
| protein_co CDKN2A_ir    | 271    | 206   | 206   | 267  | 325  | 408  | 4.670046 | 4.552274 | 4.283188 | 7.141568  |
| protein_co small_nucl   | 341    | 284   | 292   | 451  | 543  | 397  | 3.831655 | 4.092227 | 3.958794 | 7.86573   |
| protein_co transmemt    | 322    | 238   | 239   | 344  | 415  | 350  | 11.7225  | 11.11094 | 10.49809 | 19.43808  |
| protein_co solute_carr  | 1158   | 835   | 898   | 532  | 635  | 735  | 14.84786 | 13.72939 | 13.89248 | 10.5876   |
| protein_co dynein_lig   | 2      | 0     | 0     | 0    | 0    | 0    | 0.096581 | 0        | 0        | 0         |
| protein_co transmemt    | 707    | 536   | 626   | 335  | 407  | 399  | 13.71019 | 13.32902 | 14.64693 | 10.08322  |
| protein_co ADAM_met     | 0      | 0     | 0     | 0    | 0    | 2    | 0        | 0        | 0        | 0         |
| protein_co signal_tran  | 3325   | 2698  | 2687  | 1905 | 2248 | 1743 | 30.89148 | 32.14389 | 30.12054 | 27.47088  |
| protein_co zinc_finger  | 214    | 170   | 156   | 257  | 282  | 214  | 3.623858 | 3.691609 | 3.187352 | 6.754933  |
| protein_co neuroblast   | 523    | 403   | 399   | 41   | 63   | 73   | 6.663989 | 6.584866 | 6.134138 | 0.810862  |
| protein_co ADAM_met     | 3643   | 3173  | 3347  | 426  | 436  | 253  | 44.49605 | 49.69832 | 49.32488 | 8.076112  |
| protein_co ADAM_met     | 0      | 0     | 0     | 0    | 1    | 0    | 0        | 0        | 0        | 0         |
| protein_co glial_cell_d | 94     | 69    | 82    | 4    | 19   | 7    | 1.156867 | 1.088965 | 1.217636 | 0.076409  |
| protein_co diffuse_par  | 0      | 0     | 0     | 6    | 9    | 4    | 0        | 0        | 0        | 0.082175  |
| protein_co WAP_four-    | 0      | 0     | 0     | 0    | 2    | 2    | 0        | 0        | 0        | 0         |
| protein_co axin_2       | 347    | 326   | 296   | 356  | 425  | 729  | 3.820342 | 4.602562 | 3.931991 | 6.083496  |
| protein_co NADH_deh     | 2463   | 2068  | 2216  | 3161 | 2932 | 2955 | 210.7484 | 226.9132 | 228.7798 | 419.812   |

|                          |      |      |      |      |      |      |          |          |          |          |
|--------------------------|------|------|------|------|------|------|----------|----------|----------|----------|
| protein_co zinc_finger   | 48   | 51   | 37   | 68   | 79   | 66   | 0.849008 | 1.156778 | 0.789624 | 1.866853 |
| protein_co UDP_glyco     | 12   | 11   | 18   | 210  | 252  | 281  | 0.23893  | 0.280861 | 0.432424 | 6.489919 |
| protein_co family_witl   | 61   | 56   | 74   | 811  | 1016 | 924  | 0.529291 | 0.623107 | 0.77472  | 10.92236 |
| protein_co low_densit    | 1106 | 825  | 913  | 38   | 59   | 48   | 5.970569 | 5.711154 | 5.946746 | 0.318401 |
| protein_co potassium_    | 0    | 1    | 1    | 8    | 21   | 0    | 0        | 0.012239 | 0.011515 | 0.11851  |
| protein_co solute_carr   | 135  | 111  | 124  | 26   | 31   | 19   | 2.405073 | 2.535869 | 2.665411 | 0.718949 |
| protein_co interleukin   | 255  | 191  | 214  | 0    | 0    | 1    | 2.584729 | 2.482661 | 2.617198 | 0        |
| protein_co transmemt     | 537  | 352  | 385  | 343  | 360  | 469  | 16.51144 | 13.87914 | 14.283   | 16.36949 |
| protein_co low_densit    | 29   | 27   | 12   | 0    | 2    | 2    | 0.082238 | 0.098186 | 0.041059 | 0        |
| protein_co adenosylhc    | 3187 | 2549 | 2691 | 2454 | 3250 | 2359 | 37.22005 | 38.17456 | 37.91897 | 44.48359 |
| protein_co Dnal_(Hsp4    | 1135 | 921  | 1044 | 981  | 999  | 838  | 8.572837 | 8.920674 | 9.514309 | 11.5008  |
| protein_co protein_kir   | 1177 | 859  | 1007 | 351  | 473  | 427  | 37.06484 | 34.68871 | 38.26161 | 17.15629 |
| protein_co nephronec     | 2    | 0    | 1    | 23   | 17   | 11   | 0.020396 | 0        | 0.012304 | 0.364057 |
| protein_co carbonic_a    | 4    | 1    | 1    | 33   | 45   | 14   | 0.109492 | 0.035102 | 0.033027 | 1.402063 |
| protein_co family_witl   | 4    | 0    | 4    | 6    | 9    | 3    | 0.065193 | 0        | 0.078659 | 0.151783 |
| protein_co sema_dom      | 2134 | 1554 | 1648 | 2202 | 2948 | 2893 | 26.49981 | 24.74621 | 24.69185 | 42.44203 |
| protein_co cyclin_M3     | 305  | 218  | 251  | 839  | 1074 | 691  | 4.148957 | 3.802813 | 4.119655 | 17.71461 |
| protein_co glutathione   | 421  | 345  | 318  | 181  | 206  | 138  | 4.947543 | 5.199193 | 4.509025 | 3.30154  |
| protein_co tet_methyl    | 569  | 487  | 546  | 20   | 12   | 20   | 2.624476 | 2.880505 | 3.038582 | 0.143183 |
| protein_co CXXC_finge    | 122  | 86   | 86   | 14   | 12   | 17   | 1.027957 | 0.92923  | 0.874303 | 0.183094 |
| protein_co tectonic_fa   | 347  | 253  | 259  | 113  | 125  | 105  | 5.576023 | 5.213447 | 5.021609 | 2.818409 |
| protein_co short_statu   | 142  | 139  | 126  | 23   | 34   | 28   | 1.632757 | 2.049544 | 1.748042 | 0.41048  |
| protein_co diphosphoi    | 156  | 152  | 157  | 210  | 181  | 175  | 1.283982 | 1.604306 | 1.559128 | 2.682773 |
| protein_co tetraspanin   | 1722 | 1369 | 1373 | 546  | 623  | 503  | 19.87804 | 20.26531 | 19.12313 | 9.782809 |
| protein_co abhydrolas    | 180  | 130  | 161  | 62   | 91   | 23   | 2.349722 | 2.17619  | 2.535817 | 1.256222 |
| protein_co zinc_finger   | 425  | 311  | 332  | 395  | 405  | 212  | 4.30695  | 4.041575 | 4.059448 | 6.213102 |
| protein_co CTF8_chroi    | 245  | 194  | 167  | 250  | 318  | 264  | 3.957304 | 4.018319 | 3.254602 | 6.267637 |
| protein_co adenosine_    | 92   | 98   | 99   | 161  | 139  | 143  | 1.200635 | 1.640056 | 1.558858 | 3.261216 |
| protein_co leucine_car   | 238  | 170  | 202  | 161  | 224  | 484  | 3.943401 | 3.612037 | 4.038252 | 4.140476 |
| protein_co syntrophin    | 1556 | 1311 | 1352 | 563  | 757  | 344  | 7.453352 | 8.052933 | 7.813881 | 4.185824 |
| protein_co interleukin   | 5    | 5    | 5    | 5    | 1    | 6    | 0.122813 | 0.15749  | 0.148181 | 0.190623 |
| protein_co zinc_finger   | 601  | 471  | 484  | 505  | 570  | 770  | 3.690532 | 3.708897 | 3.58598  | 4.813227 |
| protein_co syntaxin_1    | 743  | 534  | 609  | 295  | 359  | 488  | 9.96262  | 9.181959 | 9.852583 | 6.13956  |
| protein_co Neuron-spe    | 27   | 15   | 24   | 873  | 1023 | 1021 | 0.303459 | 0.216191 | 0.325458 | 1.522933 |
| protein_co zinc_finger   | 59   | 71   | 73   | 61   | 75   | 121  | 0.957602 | 1.477749 | 1.429565 | 1.536714 |
| protein_co G_elongati    | 624  | 533  | 529  | 576  | 704  | 802  | 7.863308 | 8.613056 | 8.043118 | 11.2661  |
| protein_co olfactory_r   | 1    | 0    | 0    | 1    | 6    | 2    | 0.043137 | 0        | 0        | 0.066955 |
| protein_co 5-hydroxyt    | 0    | 0    | 0    | 1    | 0    | 8    | 0        | 0        | 0        | 0.035694 |
| protein_co follistatin-l | 608  | 462  | 491  | 6    | 4    | 6    | 5.90129  | 5.750355 | 5.750067 | 0.090391 |
| pseudogen: transmemt     | 7    | 3    | 3    | 2    | 3    | 2    | 0.439987 | 0.241809 | 0.227515 | 0.19512  |
| protein_co DEAD_(Asp     | 956  | 790  | 762  | 659  | 878  | 1102 | 8.952837 | 9.487226 | 8.610053 | 9.578967 |
| protein_co atonal_hon    | 49   | 47   | 40   | 17   | 37   | 31   | 0.741404 | 0.911939 | 0.730242 | 0.399244 |
| protein_co SRY_(sex_d    | 0    | 0    | 0    | 36   | 29   | 47   | 0        | 0        | 0        | 3.203023 |
| protein_co ankyrin_req   | 85   | 85   | 68   | 83   | 96   | 140  | 1.327665 | 1.702543 | 1.281524 | 2.012233 |
| protein_co surfactant_   | 1    | 2    | 1    | 6    | 9    | 7    | 0.012797 | 0.032822 | 0.015441 | 0.119181 |
| protein_co ubiquitin_s   | 1448 | 1117 | 1125 | 1748 | 2197 | 1918 | 31.18822 | 30.85208 | 29.23631 | 58.4378  |
| protein_co TNFAIP3_in    | 913  | 739  | 741  | 846  | 1062 | 936  | 21.34127 | 22.15151 | 20.89853 | 30.69377 |
| protein_co chromosom     | 601  | 557  | 596  | 884  | 1051 | 771  | 9.933345 | 11.80553 | 11.88544 | 22.67795 |
| protein_co transmemt     | 210  | 182  | 172  | 210  | 269  | 343  | 4.238874 | 4.710987 | 4.188974 | 6.579319 |
| protein_co ring_finger   | 768  | 644  | 650  | 723  | 603  | 630  | 42.66769 | 45.88103 | 43.57118 | 62.34573 |
| protein_co vesicle-assc  | 51   | 37   | 34   | 53   | 66   | 55   | 3.470814 | 3.229031 | 2.791825 | 5.598446 |
| protein_co butyrophili   | 0    | 0    | 0    | 0    | 2    | 0    | 0        | 0        | 0        | 0        |
| protein_co leucine_ric   | 445  | 301  | 375  | 108  | 138  | 130  | 3.494567 | 3.031162 | 3.553143 | 1.316399 |
| protein_co methionine    | 3101 | 2402 | 2525 | 2044 | 2666 | 6717 | 51.58068 | 51.23511 | 50.67512 | 52.77116 |
| protein_co energy_hor    | 1    | 1    | 2    | 159  | 244  | 100  | 0.043336 | 0.055573 | 0.104576 | 10.695   |
| protein_co zinc_finger   | 438  | 330  | 388  | 415  | 477  | 512  | 3.447101 | 3.330452 | 3.68434  | 5.069422 |
| protein_co solute_carr   | 117  | 90   | 106  | 15   | 17   | 16   | 1.933779 | 1.907537 | 2.113854 | 0.384807 |
| protein_co inositol_pc   | 67   | 57   | 62   | 514  | 631  | 158  | 0.664474 | 0.724915 | 0.741895 | 7.912187 |
| protein_co leucine_zip   | 1890 | 1534 | 1565 | 1277 | 1808 | 1300 | 16.22522 | 16.88742 | 16.2103  | 17.01571 |
| protein_co chymotryp     | 3    | 2    | 1    | 0    | 0    | 0    | 0.163951 | 0.140163 | 0.065939 | 0        |
| protein_co chymotryp     | 0    | 0    | 0    | 1    | 0    | 0    | 0        | 0        | 0        | 0.032375 |
| protein_co transmemt     | 1069 | 774  | 808  | 1340 | 1590 | 1087 | 17.83823 | 16.56244 | 16.26797 | 34.70638 |
| protein_co peptidylpro   | 524  | 385  | 397  | 69   | 71   | 58   | 17.80462 | 16.77534 | 16.27571 | 3.63899  |
| protein_co sprouty_hc    | 104  | 99   | 97   | 132  | 114  | 78   | 0.540699 | 0.660034 | 0.608474 | 1.065188 |
| protein_co centrosom     | 450  | 353  | 363  | 244  | 256  | 204  | 4.306226 | 4.3318   | 4.191206 | 3.624137 |

|                         |       |       |       |       |       |       |          |          |          |          |
|-------------------------|-------|-------|-------|-------|-------|-------|----------|----------|----------|----------|
| protein_co syntaxin_b   | 191   | 126   | 121   | 59    | 60    | 65    | 2.167472 | 1.83358  | 1.656737 | 1.039208 |
| protein_co transmembr   | 0     | 1     | 0     | 0     | 0     | 0     | 0        | 0.026189 | 0        | 0        |
| protein_co mitochondr   | 898   | 721   | 743   | 755   | 922   | 819   | 11.9487  | 12.30238 | 11.92838 | 15.59272 |
| protein_co glutamate_   | 7     | 4     | 8     | 3     | 5     | 5     | 0.040911 | 0.029979 | 0.056413 | 0.027214 |
| protein_co lectin_gala  | 27    | 28    | 27    | 28    | 37    | 14    | 0.406561 | 0.540666 | 0.490539 | 0.654411 |
| protein_co JMJD7-PLA    | 57    | 44    | 47    | 67    | 130   | 39    | 0.369826 | 0.366087 | 0.367933 | 0.674726 |
| protein_co complexin_   | 1     | 1     | 7     | 41    | 51    | 41    | 0.021499 | 0.02757  | 0.181581 | 1.368167 |
| protein_co PX_domain    | 1007  | 817   | 764   | 31    | 61    | 18    | 21.56084 | 22.43198 | 19.73684 | 1.030216 |
| protein_co sialic_acid  | 1     | 0     | 1     | 0     | 0     | 0     | 0.026733 | 0        | 0.032255 | 0        |
| protein_co neurotensi   | 0     | 0     | 0     | 0     | 1     | 1     | 0        | 0        | 0        | 0        |
| protein_co E2F_transc   | 299   | 255   | 299   | 228   | 285   | 196   | 4.253676 | 4.652032 | 5.132305 | 5.034525 |
| protein_co fem-1_hom    | 1104  | 935   | 971   | 1166  | 1581  | 1163  | 7.268545 | 7.894041 | 7.713397 | 11.91537 |
| protein_co COMM_doi     | 232   | 176   | 169   | 60    | 62    | 58    | 7.787032 | 7.575407 | 6.844138 | 3.125833 |
| protein_co ATP_syntha   | 19    | 16    | 13    | 21    | 32    | 45    | 1.79619  | 1.939671 | 1.482826 | 3.081403 |
| protein_co ubiquinol-4  | 1178  | 854   | 977   | 1533  | 1744  | 1734  | 36.10225 | 33.56264 | 36.12697 | 72.92251 |
| protein_co major_facil  | 11    | 8     | 15    | 39    | 90    | 69    | 0.242953 | 0.226584 | 0.399733 | 1.336982 |
| protein_co collagen_ty  | 4     | 3     | 6     | 14    | 18    | 13    | 0.023164 | 0.022279 | 0.041923 | 0.125839 |
| protein_co mitogen-ac   | 1418  | 1083  | 1119  | 1384  | 1666  | 1022  | 19.49855 | 19.09694 | 18.56539 | 29.53878 |
| protein_co kallikrein-r | 0     | 0     | 0     | 14    | 17    | 9     | 0        | 0        | 0        | 0.515907 |
| protein_co heterogene   | 6422  | 5099  | 5429  | 5946  | 7297  | 9268  | 54.12072 | 55.10457 | 55.20281 | 77.77655 |
| protein_co insulin_rec  | 1371  | 855   | 1084  | 1123  | 1498  | 751   | 10.74841 | 8.595716 | 10.25378 | 13.66523 |
| protein_co methyl_Cp    | 1468  | 1253  | 1304  | 744   | 927   | 623   | 6.552551 | 7.172074 | 7.022795 | 5.154514 |
| protein_co variable_ch  | 0     | 0     | 0     | 7     | 15    | 7     | 0        | 0        | 0        | 0.512019 |
| protein_co UPF3_regul   | 821   | 641   | 684   | 1101  | 1347  | 1238  | 16.18869 | 16.20824 | 16.27319 | 33.69662 |
| protein_co zinc_finger  | 0     | 2     | 4     | 9     | 7     | 4     | 0        | 0.037003 | 0.069631 | 0.201544 |
| protein_co actin_beta-  | 1     | 1     | 1     | 0     | 0     | 0     | 0.0168   | 0.021544 | 0.020271 | 0        |
| protein_co receptor_ty  | 831   | 587   | 575   | 544   | 674   | 655   | 8.937065 | 8.095457 | 7.461219 | 9.080783 |
| pseudogen: bromodom     | 0     | 1     | 1     | 3     | 1     | 0     | 0        | 0.040711 | 0.038304 | 0.147826 |
| protein_co androgen_r   | 455   | 381   | 374   | 609   | 788   | 517   | 2.119718 | 2.27615  | 2.102259 | 4.403666 |
| protein_co dehydrogen   | 414   | 310   | 273   | 253   | 218   | 253   | 7.550551 | 7.250189 | 6.007434 | 7.161917 |
| protein_co chromosom    | 4     | 2     | 3     | 1     | 1     | 0     | 0.05339  | 0.034233 | 0.048314 | 0.020717 |
| protein_co HSPB_(heat   | 110   | 88    | 83    | 99    | 124   | 64    | 1.727362 | 1.772077 | 1.572594 | 2.412994 |
| protein_co acetylsero   | 1246  | 988   | 1004  | 1836  | 2563  | 1062  | 28.52781 | 29.00793 | 27.73526 | 65.24595 |
| protein_co solute_carr  | 16566 | 12485 | 13203 | 18814 | 23004 | 16813 | 376.7119 | 364.074  | 362.2533 | 664.0539 |
| protein_co carbohydra   | 1077  | 888   | 873   | 460   | 650   | 425   | 23.01757 | 24.33695 | 22.51158 | 15.25921 |
| protein_co prostate_ar  | 5     | 3     | 3     | 153   | 216   | 241   | 0.046787 | 0.035999 | 0.033871 | 2.222173 |
| protein_co casein_kina  | 645   | 531   | 540   | 216   | 236   | 106   | 3.730611 | 3.938439 | 3.768444 | 1.939119 |
| protein_co family_witl  | 139   | 114   | 130   | 96    | 133   | 61    | 1.895786 | 1.993833 | 2.139272 | 2.032246 |
| protein_co armadillo_l  | 1285  | 1090  | 1112  | 133   | 165   | 127   | 16.86833 | 18.34868 | 17.61253 | 2.709886 |
| protein_co actin_filam  | 137   | 133   | 110   | 71    | 93    | 62    | 1.620568 | 2.017473 | 1.569956 | 1.303574 |
| protein_co zinc_finger  | 206   | 171   | 174   | 258   | 301   | 194   | 3.888625 | 4.13937  | 3.963018 | 7.559255 |
| protein_co activating_  | 438   | 278   | 334   | 170   | 184   | 317   | 9.926451 | 8.079306 | 9.13302  | 5.979974 |
| protein_co ubiquitin-c  | 966   | 687   | 724   | 798   | 900   | 1032  | 10.35805 | 9.446414 | 9.36672  | 13.28111 |
| protein_co zinc_finger  | 294   | 225   | 249   | 270   | 357   | 280   | 2.311092 | 2.268098 | 2.36166  | 3.294308 |
| protein_co carnitine_p  | 634   | 501   | 489   | 585   | 754   | 354   | 10.07738 | 10.21187 | 9.378109 | 14.4326  |
| protein_co proprotein   | 3263  | 2445  | 2760  | 3487  | 4015  | 4035  | 39.32206 | 37.78395 | 40.13066 | 65.22312 |
| protein_co exportin_6   | 2648  | 2185  | 2242  | 2187  | 2632  | 2461  | 28.07887 | 29.71135 | 28.68437 | 35.99489 |
| protein_co GSG1-like    | 11    | 12    | 9     | 7     | 2     | 0     | 0.103656 | 0.145008 | 0.102327 | 0.102383 |
| protein_co meningiom    | 1200  | 794   | 902   | 1545  | 1987  | 1130  | 7.4468   | 6.318562 | 6.75372  | 14.88152 |
| protein_co APEX_nucl    | 687   | 525   | 577   | 533   | 582   | 593   | 9.927101 | 9.728241 | 10.0598  | 11.95428 |
| protein_co non-SMC_e    | 293   | 244   | 252   | 354   | 416   | 353   | 7.414342 | 7.917793 | 7.694024 | 13.90397 |
| protein_co coiled-coil  | 67    | 54    | 43    | 27    | 34    | 29    | 1.270372 | 1.312984 | 0.983723 | 0.794604 |
| protein_co interleukin  | 0     | 0     | 0     | 0     | 1     | 1     | 0        | 0        | 0        | 0        |
| protein_co Uncharacte   | 23    | 19    | 13    | 10    | 18    | 26    | 0.403016 | 0.426931 | 0.274844 | 0.271972 |
| protein_co RAB3B_me     | 2057  | 1703  | 1863  | 2109  | 2517  | 1822  | 7.509558 | 7.972675 | 8.206179 | 11.95053 |
| protein_co olfactory_r  | 0     | 0     | 0     | 0     | 2     | 0     | 0        | 0        | 0        | 0        |
| protein_co CD2_(cyto    | 2044  | 1510  | 1562  | 1289  | 1664  | 1798  | 28.01613 | 26.54078 | 25.8319  | 27.42273 |
| protein_co R-spondin_   | 0     | 0     | 0     | 4     | 3     | 7     | 0        | 0        | 0        | 0.097527 |
| protein_co regulator_c  | 470   | 352   | 296   | 1801  | 2022  | 641   | 9.125593 | 8.76426  | 6.934306 | 54.27595 |
| protein_co TBC1_dom     | 2144  | 1576  | 1805  | 1068  | 1323  | 1069  | 21.78851 | 20.53848 | 22.13238 | 16.8463  |
| protein_co lectin_man   | 3076  | 2411  | 2646  | 3157  | 4116  | 3312  | 80.12983 | 80.54052 | 83.16599 | 127.6477 |
| protein_co germinal_c   | 1     | 0     | 0     | 0     | 0     | 0     | 0.011354 | 0        | 0        | 0        |
| protein_co RAB24_me     | 68    | 64    | 33    | 72    | 127   | 37    | 1.751935 | 2.114454 | 1.02582  | 2.879201 |
| protein_co PRELI_dom    | 1791  | 1245  | 1402  | 2215  | 3213  | 2205  | 66.59795 | 59.36685 | 62.90155 | 127.8408 |
| protein_co thrombosp    | 216   | 184   | 190   | 79    | 96    | 154   | 2.406902 | 2.62925  | 2.554502 | 1.366351 |

|                         |       |      |       |      |      |      |          |          |          |          |
|-------------------------|-------|------|-------|------|------|------|----------|----------|----------|----------|
| protein_co carbonic_a   | 125   | 94   | 93    | 77   | 97   | 56   | 0.968802 | 0.934248 | 0.869673 | 0.926288 |
| protein_co solute_carr  | 387   | 325  | 342   | 247  | 231  | 242  | 13.9588  | 15.03245 | 14.88371 | 13.82816 |
| protein_co ephrin-A1    | 15    | 6    | 7     | 109  | 86   | 52   | 0.365187 | 0.18732  | 0.205622 | 4.118898 |
| protein_co chemokine    | 1     | 0    | 0     | 1    | 1    | 0    | 0.039974 | 0        | 0        | 0.062046 |
| protein_co nuclear_po   | 107   | 87   | 93    | 95   | 95   | 140  | 1.433085 | 1.494228 | 1.502863 | 1.974887 |
| protein_co SH3_domai    | 57    | 48   | 60    | 1    | 0    | 2    | 0.364928 | 0.394078 | 0.46348  | 0.009937 |
| protein_co chemokine    | 0     | 1    | 0     | 0    | 2    | 2    | 0        | 0.037441 | 0        | 0        |
| protein_co zinc_finger  | 213   | 159  | 179   | 157  | 205  | 155  | 6.698574 | 6.412232 | 6.792096 | 7.663601 |
| protein_co NMD3_hon     | 776   | 603  | 627   | 555  | 448  | 566  | 11.88718 | 11.84524 | 11.58864 | 13.19595 |
| protein_co adrenocept   | 5     | 4    | 4     | 4    | 4    | 3    | 0.11487  | 0.117844 | 0.110878 | 0.142636 |
| protein_co beta-13-N-i  | 227   | 173  | 180   | 25   | 31   | 68   | 2.951756 | 2.884763 | 2.824068 | 0.504574 |
| protein_co G_protein_   | 458   | 362  | 372   | 248  | 368  | 338  | 5.099888 | 5.169078 | 4.997884 | 4.286248 |
| protein_co potassium_   | 312   | 226  | 266   | 61   | 73   | 120  | 3.580442 | 3.325828 | 3.683085 | 1.086532 |
| protein_co mitochond    | 409   | 300  | 320   | 164  | 140  | 380  | 12.87115 | 12.10667 | 12.15044 | 8.010663 |
| protein_co Src_homolo   | 0     | 0    | 0     | 5    | 13   | 4    | 0        | 0        | 0        | 0.053085 |
| protein_co nuclear_rec  | 6     | 8    | 11    | 1    | 4    | 1    | 0.139208 | 0.23802  | 0.307932 | 0.036012 |
| protein_co phosphogl    | 515   | 431  | 455   | 483  | 482  | 525  | 7.398394 | 7.939933 | 7.886598 | 10.76981 |
| protein_co serine/thre  | 1     | 1    | 0     | 22   | 30   | 6    | 0.008695 | 0.01115  | 0        | 0.296895 |
| protein_co interleukin  | 3     | 1    | 1     | 1    | 1    | 0    | 0.038361 | 0.016398 | 0.015428 | 0.019847 |
| protein_co purinergic_  | 0     | 0    | 0     | 0    | 3    | 0    | 0        | 0        | 0        | 0        |
| protein_co chromosom    | 6     | 9    | 10    | 29   | 34   | 25   | 0.139208 | 0.267772 | 0.279938 | 1.044342 |
| protein_co KIAA1024     | 179   | 173  | 172   | 20   | 22   | 13   | 1.246779 | 1.545225 | 1.445482 | 0.21622  |
| protein_co uromodulin   | 0     | 0    | 0     | 1    | 0    | 1    | 0        | 0        | 0        | 0.030224 |
| protein_co glycoprotei  | 0     | 0    | 0     | 0    | 1    | 0    | 0        | 0        | 0        | 0        |
| protein_co solute_carr  | 733   | 526  | 595   | 313  | 400  | 277  | 9.226948 | 8.490811 | 9.036893 | 6.115457 |
| protein_co snurportin   | 141   | 96   | 113   | 110  | 137  | 156  | 3.42387  | 2.989363 | 3.310736 | 4.145923 |
| protein_co CASP2_and    | 103   | 67   | 87    | 127  | 119  | 79   | 3.285491 | 2.74061  | 3.348346 | 6.287779 |
| protein_co SIN3_transl  | 1368  | 1117 | 1134  | 1727 | 1993 | 1692 | 9.521381 | 9.969568 | 9.523025 | 18.65678 |
| protein_co ADP-ribosy   | 368   | 256  | 290   | 114  | 120  | 104  | 4.417697 | 3.940919 | 4.200434 | 2.124142 |
| protein_co ribonuclea   | 1     | 2    | 0     | 1    | 1    | 2    | 0.062106 | 0.159284 | 0        | 0.096397 |
| protein_co protein_ty   | 3286  | 2826 | 3000  | 2404 | 2828 | 1934 | 31.09598 | 34.29401 | 34.25359 | 35.31032 |
| protein_co radial_spok  | 0     | 3    | 2     | 1    | 2    | 0    | 0        | 0.056022 | 0.03514  | 0.022602 |
| protein_co platelet-act | 3     | 8    | 5     | 35   | 51   | 34   | 0.031323 | 0.107112 | 0.062988 | 0.5672   |
| protein_co protein_ty   | 1390  | 1126 | 1221  | 1268 | 1417 | 909  | 16.52983 | 17.17123 | 17.51932 | 23.40471 |
| protein_co ribonuclea   | 2     | 2    | 1     | 0    | 0    | 1    | 0.088388 | 0.113346 | 0.053323 | 0        |
| protein_co natriuretic  | 1     | 2    | 3     | 263  | 380  | 261  | 0.011069 | 0.02839  | 0.040068 | 4.51867  |
| protein_co potassium_   | 10    | 4    | 3     | 2    | 5    | 3    | 0.143132 | 0.073419 | 0.051809 | 0.044432 |
| protein_co interleukin  | 4     | 4    | 4     | 0    | 0    | 0    | 0.110006 | 0.141067 | 0.132728 | 0        |
| protein_co sodium_ch    | 33    | 40   | 54    | 80   | 69   | 148  | 0.158105 | 0.245754 | 0.312157 | 0.59491  |
| protein_co Ras_assoc    | 0     | 0    | 0     | 2    | 5    | 3    | 0        | 0        | 0        | 0.024284 |
| protein_co collagen_ty  | 13843 | 9924 | 10408 | 94   | 120  | 89   | 102.2847 | 94.03216 | 92.78882 | 1.078049 |
| protein_co syndecan_2   | 1608  | 1239 | 1461  | 976  | 1220 | 1081 | 20.10108 | 19.86159 | 22.03594 | 18.93711 |
| protein_co CD52_mol     | 0     | 0    | 0     | 2    | 2    | 0    | 0        | 0        | 0        | 0.250533 |
| protein_co membrane     | 559   | 425  | 437   | 305  | 399  | 407  | 7.012178 | 6.836587 | 6.614097 | 5.938427 |
| protein_co TM2_doma     | 707   | 557  | 558   | 458  | 527  | 731  | 9.651017 | 9.750305 | 9.190431 | 9.703973 |
| protein_co HtrA_serine  | 1     | 0    | 0     | 6    | 2    | 4    | 0.022382 | 0        | 0        | 0.208439 |
| protein_co pleckstrin_  | 320   | 228  | 277   | 154  | 151  | 99   | 2.66137  | 2.431641 | 2.779605 | 1.987955 |
| protein_co chloride_in  | 10776 | 8140 | 8892  | 5352 | 6776 | 5837 | 116.2648 | 112.6223 | 115.7546 | 89.62667 |
| protein_co G_protein-i  | 4     | 2    | 4     | 3    | 2    | 1    | 0.110329 | 0.070741 | 0.133119 | 0.128435 |
| protein_co coiled-coil  | 2812  | 2181 | 2163  | 1126 | 1683 | 1478 | 41.03789 | 40.8164  | 38.08678 | 25.50578 |
| protein_co methyltran   | 233   | 212  | 217   | 255  | 279  | 170  | 2.474043 | 2.886666 | 2.780092 | 4.202638 |
| protein_co zinc_finger  | 0     | 0    | 0     | 0    | 2    | 3    | 0        | 0        | 0        | 0        |
| protein_co mucin_15_    | 0     | 0    | 0     | 0    | 2    | 2    | 0        | 0        | 0        | 0        |
| protein_co chromosom    | 0     | 0    | 2     | 0    | 0    | 0    | 0        | 0        | 0.065481 | 0        |
| protein_co zinc_finger  | 388   | 331  | 360   | 4    | 1    | 11   | 2.897027 | 3.169262 | 3.243182 | 0.046357 |
| protein_co poly(rC)_bi  | 2545  | 1796 | 1900  | 4230 | 6191 | 3788 | 68.2695  | 61.78096 | 61.49511 | 176.1205 |
| protein_co histidine_ti | 2228  | 1884 | 1745  | 2071 | 2108 | 2128 | 96.64288 | 104.7961 | 91.32679 | 139.4329 |
| protein_co DTW_doma     | 184   | 108  | 124   | 119  | 170  | 215  | 1.976578 | 1.487748 | 1.607185 | 1.984146 |
| protein_co chloride_in  | 9     | 8    | 9     | 0    | 2    | 0    | 0.414956 | 0.472997 | 0.500668 | 0        |
| protein_co iNO80_con    | 505   | 368  | 423   | 423  | 523  | 474  | 5.298603 | 4.951391 | 5.354987 | 6.888757 |
| protein_co basonuclin   | 402   | 366  | 327   | 2    | 2    | 3    | 4.088891 | 4.773862 | 4.013056 | 0.031575 |
| protein_co DNA_fragm    | 206   | 167  | 163   | 146  | 196  | 151  | 3.064513 | 3.185811 | 2.9257   | 3.371146 |
| protein_co NFU1_iron    | 367   | 273  | 315   | 326  | 362  | 279  | 11.7305  | 11.1898  | 12.14811 | 16.17329 |
| protein_co anthrax_to   | 8534  | 6351 | 6782  | 671  | 890  | 882  | 68.29824 | 65.1791  | 65.48815 | 8.335082 |
| protein_co gastrokine_  | 1     | 0    | 2     | 0    | 0    | 0    | 0.057604 | 0        | 0.139006 | 0        |

|                         |       |       |       |       |       |       |          |          |          |          |
|-------------------------|-------|-------|-------|-------|-------|-------|----------|----------|----------|----------|
| protein_co cytoskeletal | 379   | 338   | 332   | 318   | 273   | 291   | 3.751597 | 4.290452 | 3.965182 | 4.885788 |
| protein_co chromosom    | 164   | 109   | 114   | 124   | 149   | 111   | 4.088231 | 3.484395 | 3.428818 | 4.797818 |
| protein_co family_witl  | 22    | 27    | 17    | 30    | 42    | 22    | 0.657896 | 1.035398 | 0.613382 | 1.392471 |
| protein_co prokinetic   | 0     | 0     | 0     | 48    | 62    | 51    | 0        | 0        | 0        | 2.180668 |
| protein_co aprataxin_   | 43    | 34    | 38    | 43    | 50    | 44    | 0.516198 | 0.523403 | 0.550402 | 0.801211 |
| protein_co bolA_homc    | 20    | 14    | 16    | 27    | 24    | 17    | 0.92668  | 0.831835 | 0.894474 | 1.941754 |
| protein_co RANBP2-lik   | 67    | 67    | 83    | 48    | 56    | 43    | 0.56342  | 0.722507 | 0.842139 | 0.626512 |
| protein_co hypermeth    | 516   | 428   | 422   | 1966  | 2613  | 1892  | 3.486347 | 3.708293 | 3.440182 | 20.61745 |
| protein_co leucine_zip  | 2040  | 1547  | 1765  | 1643  | 1865  | 2164  | 10.75024 | 10.45412 | 11.22227 | 13.43866 |
| protein_co hexosamini   | 221   | 158   | 226   | 311   | 398   | 298   | 4.535096 | 4.157771 | 5.595652 | 9.905697 |
| pseudogen: breakpoint   | 0     | 1     | 0     | 0     | 3     | 1     | 0        | 0.032644 | 0        | 0        |
| protein_co BUB1_mitc    | 1040  | 821   | 908   | 1460  | 1384  | 1299  | 13.8068  | 13.97694 | 14.54433 | 30.08452 |
| protein_co spinster_hc  | 11    | 21    | 10    | 10    | 17    | 26    | 0.228935 | 0.560464 | 0.251112 | 0.323035 |
| protein_co leucine_ri   | 517   | 402   | 458   | 656   | 917   | 937   | 8.975246 | 8.949344 | 9.593329 | 17.67625 |
| protein_co cholinergic  | 60    | 41    | 48    | 105   | 168   | 160   | 0.776539 | 0.680464 | 0.749551 | 2.109268 |
| protein_co stimulated   | 807   | 591   | 685   | 777   | 1026  | 1062  | 42.32689 | 39.75023 | 43.34924 | 63.25493 |
| protein_co 1-acylglyce  | 967   | 700   | 756   | 673   | 984   | 679   | 29.98852 | 27.83787 | 28.28775 | 32.39471 |
| protein_co alveolar_so  | 917   | 636   | 766   | 1012  | 1574  | 1057  | 7.813583 | 6.9494   | 7.875129 | 13.38418 |
| protein_co fatty_acid_  | 58994 | 44774 | 49825 | 41893 | 50543 | 41904 | 323.1577 | 314.5154 | 329.3078 | 356.1874 |
| protein_co CCHC-type    | 3698  | 2920  | 3023  | 5659  | 6914  | 6824  | 104.2063 | 105.5162 | 102.7811 | 247.5126 |
| protein_co metallothio  | 400   | 352   | 346   | 164   | 151   | 113   | 25.7284  | 29.03387 | 26.85202 | 16.37296 |
| protein_co dihydrouri   | 1070  | 793   | 831   | 1251  | 1791  | 1632  | 11.2595  | 10.70084 | 10.55077 | 20.43257 |
| protein_co G_protein_   | 2780  | 2132  | 2193  | 2695  | 3258  | 2954  | 31.98092 | 31.4516  | 30.43918 | 48.12109 |
| protein_co RFNG_O-fu    | 652   | 476   | 489   | 410   | 567   | 377   | 9.839811 | 9.212032 | 8.904223 | 9.604029 |
| protein_co dicarbonyl   | 908   | 614   | 681   | 967   | 1137  | 751   | 34.03368 | 29.51215 | 30.7977  | 56.25745 |
| protein_co zinc_finger  | 118   | 103   | 96    | 83    | 118   | 93    | 4.607013 | 5.156843 | 4.522272 | 5.029745 |
| protein_co LIM_domai    | 387   | 334   | 302   | 579   | 645   | 344   | 6.676393 | 7.389018 | 6.286167 | 15.50386 |
| protein_co ras-related  | 534   | 431   | 429   | 1520  | 1975  | 1617  | 22.97181 | 23.77609 | 22.26687 | 101.4911 |
| protein_co neuregulin   | 61    | 34    | 54    | 67    | 55    | 59    | 0.83978  | 0.600239 | 0.896969 | 1.431664 |
| protein_co LIM_and_s    | 3238  | 2395  | 2720  | 680   | 894   | 858   | 34.56964 | 32.78936 | 35.03765 | 11.26828 |
| protein_co chromosom    | 37    | 21    | 23    | 243   | 298   | 250   | 0.688465 | 0.501082 | 0.516364 | 7.018052 |
| protein_co neuroligin   | 226   | 153   | 234   | 157   | 139   | 160   | 1.285749 | 1.116217 | 1.606245 | 1.386366 |
| protein_co transmembr   | 313   | 260   | 237   | 94    | 121   | 101   | 3.196815 | 3.405303 | 2.920583 | 1.490155 |
| protein_co UDP-glucos   | 2093  | 1705  | 1890  | 6203  | 5274  | 6240  | 22.31995 | 23.31619 | 24.31833 | 102.673  |
| protein_co taste_recep  | 0     | 0     | 0     | 0     | 1     | 0     | 0        | 0        | 0        | 0        |
| protein_co leucine_ri   | 243   | 185   | 191   | 2867  | 3826  | 3047  | 3.729713 | 3.641248 | 3.537127 | 68.30104 |
| protein_co heterogene   | 3602  | 2743  | 3000  | 5001  | 6283  | 7440  | 61.30593 | 59.86789 | 61.60672 | 132.1132 |
| protein_co biotinidase  | 238   | 178   | 197   | 192   | 152   | 150   | 5.219749 | 5.006129 | 5.212991 | 6.535885 |
| protein_co chondroitin  | 1098  | 924   | 972   | 88    | 114   | 79    | 13.80301 | 14.89542 | 14.743   | 1.717057 |
| protein_co tachykinin   | 11    | 5     | 15    | 36    | 50    | 75    | 0.099382 | 0.057929 | 0.163513 | 0.504831 |
| protein_co protocadhe   | 3215  | 2266  | 2504  | 35    | 40    | 167   | 22.29061 | 20.14699 | 20.94707 | 0.376651 |
| protein_co roundabou    | 6857  | 5173  | 5637  | 3204  | 3708  | 2466  | 42.8129  | 41.4183  | 42.46553 | 31.05013 |
| protein_co one_cut_hc   | 6     | 4     | 3     | 324   | 357   | 156   | 0.134484 | 0.114971 | 0.081131 | 11.27182 |
| protein_co apoptosis_   | 513   | 386   | 458   | 333   | 390   | 387   | 14.98728 | 14.46112 | 16.14429 | 15.10011 |
| protein_co purinergic   | 1     | 3     | 8     | 1027  | 1181  | 531   | 0.015097 | 0.058078 | 0.145719 | 24.06467 |
| protein_co catenin_(ca  | 51    | 33    | 54    | 218   | 271   | 227   | 0.436306 | 0.362029 | 0.557394 | 2.894727 |
| protein_co tripartite_r | 607   | 517   | 523   | 348   | 516   | 333   | 7.877731 | 8.604236 | 8.18959  | 7.010067 |
| protein_co mucin_17_    | 2     | 0     | 0     | 0     | 0     | 0     | 0.006585 | 0        | 0        | 0        |
| protein_co alpha_hem    | 0     | 0     | 0     | 1     | 0     | 1     | 0        | 0        | 0        | 0.138893 |
| protein_co wingless-ty  | 4     | 5     | 6     | 22    | 9     | 3     | 0.08248  | 0.132212 | 0.149276 | 0.704114 |
| protein_co calmodulin   | 4     | 6     | 1     | 12    | 17    | 16    | 0.09966  | 0.1917   | 0.030061 | 0.464058 |
| protein_co RALBP1_as    | 11    | 9     | 15    | 76    | 105   | 41    | 0.06492  | 0.068114 | 0.106813 | 0.696194 |
| protein_co mucin_3A_    | 0     | 0     | 0     | 323   | 324   | 270   | 0        | 0        | 0        | 5.546927 |
| protein_co synapse_as   | 1317  | 1060  | 1101  | 738   | 1042  | 828   | 10.07573 | 10.39934 | 10.1631  | 8.7635   |
| protein_co integrin_al  | 11    | 9     | 8     | 5     | 12    | 1     | 0.109324 | 0.114703 | 0.095931 | 0.07713  |
| protein_co PYD_(pyrin   | 0     | 0     | 0     | 18    | 29    | 3     | 0        | 0        | 0        | 1.611361 |
| protein_co tyrosylprot  | 859   | 761   | 784   | 233   | 289   | 203   | 19.03522 | 21.62513 | 20.96181 | 8.014033 |
| protein_co torsin_A_ir  | 1615  | 1346  | 1364  | 538   | 658   | 696   | 9.579681 | 10.23842 | 9.762048 | 4.953262 |
| protein_co S100_calci   | 0     | 1     | 0     | 1     | 4     | 0     | 0        | 0.132153 | 0        | 0.159956 |
| protein_co transmembr   | 1402  | 1085  | 1139  | 0     | 0     | 7     | 21.10427 | 20.94409 | 20.68684 | 0        |
| protein_co OTU_doma     | 734   | 687   | 697   | 718   | 873   | 431   | 5.380221 | 6.457585 | 6.164316 | 8.168813 |
| protein_co OTU_doma     | 3     | 3     | 8     | 94    | 117   | 53    | 0.041    | 0.052576 | 0.131916 | 1.993967 |
| protein_co glucuronid   | 787   | 628   | 596   | 894   | 1061  | 884   | 14.44323 | 14.77946 | 13.19726 | 25.46581 |
| protein_co bromodom     | 2164  | 1543  | 1648  | 2444  | 3151  | 2280  | 17.95294 | 16.41548 | 16.49618 | 31.47095 |
| protein_co Kruppel-lik  | 1828  | 1362  | 1439  | 1461  | 1697  | 665   | 12.55897 | 11.99953 | 11.92852 | 15.57968 |

|                          |       |      |       |       |       |       |          |          |          |          |
|--------------------------|-------|------|-------|-------|-------|-------|----------|----------|----------|----------|
| protein_co FERM_and_     | 1     | 1    | 2     | 56    | 54    | 55    | 0.005539 | 0.007103 | 0.013367 | 0.481473 |
| protein_co zinc_finger_  | 109   | 92   | 82    | 0     | 1     | 0     | 1.087449 | 1.177009 | 0.987062 | 0        |
| protein_co zinc_finger_  | 318   | 281  | 246   | 138   | 167   | 122   | 5.020547 | 5.689048 | 4.686052 | 3.381688 |
| protein_co zinc_finger_  | 43    | 38   | 54    | 82    | 80    | 110   | 0.512264 | 0.580521 | 0.776188 | 1.516246 |
| protein_co zinc_finger_  | 810   | 616  | 610   | 549   | 861   | 505   | 16.42773 | 16.02074 | 14.92693 | 17.28205 |
| protein_co taste_recep   | 6     | 4    | 9     | 2     | 2     | 11    | 0.081952 | 0.070061 | 0.148319 | 0.0424   |
| protein_co transmemt     | 166   | 104  | 125   | 197   | 213   | 107   | 2.534596 | 2.036307 | 2.302813 | 4.668714 |
| protein_co mitogen-ac    | 661   | 562  | 631   | 352   | 372   | 303   | 2.819714 | 3.074322 | 3.247739 | 2.330649 |
| protein_co pseudouric    | 141   | 112  | 92    | 189   | 357   | 184   | 3.708072 | 3.777082 | 2.919207 | 7.714741 |
| protein_co splicing_fa   | 1701  | 1357 | 1324  | 1395  | 1651  | 1599  | 108.2224 | 110.7139 | 101.6363 | 137.7582 |
| protein_co zinc_finger_  | 184   | 162  | 184   | 167   | 186   | 329   | 3.242301 | 3.660664 | 3.912023 | 4.567541 |
| protein_co tigger_tran   | 0     | 1    | 3     | 21    | 30    | 14    | 0        | 0.024324 | 0.06866  | 0.618275 |
| protein_co intermedia    | 640   | 529  | 582   | 186   | 280   | 153   | 4.849646 | 5.140379 | 5.321096 | 2.187628 |
| protein_co neuroligin_   | 3916  | 3102 | 3272  | 2685  | 3796  | 1950  | 39.55651 | 40.18152 | 39.8783  | 42.09689 |
| protein_co myosin_VII    | 23    | 23   | 22    | 0     | 0     | 0     | 0.160534 | 0.205863 | 0.185273 | 0        |
| protein_co chromodor     | 12468 | 9798 | 10736 | 2275  | 2706  | 2249  | 79.4759  | 80.09132 | 82.57132 | 22.50871 |
| protein_co transmemt     | 422   | 405  | 381   | 18    | 35    | 30    | 1.849653 | 2.276366 | 2.014888 | 0.122456 |
| protein_co myosin_VII    | 2     | 1    | 2     | 19    | 25    | 28    | 0.018472 | 0.011844 | 0.022287 | 0.272369 |
| protein_co activated_I   | 6268  | 4982 | 5171  | 426   | 436   | 523   | 62.52002 | 63.72403 | 62.23185 | 6.595234 |
| protein_co tyrosine_3-   | 6438  | 5119 | 5631  | 4240  | 5762  | 6050  | 80.60826 | 82.19077 | 85.0672  | 82.39956 |
| protein_co ubiquitin-c   | 1345  | 1035 | 1103  | 833   | 935   | 1063  | 40.17011 | 39.63971 | 39.74699 | 38.61502 |
| protein_co centrobini    | 1146  | 925  | 985   | 802   | 1029  | 691   | 14.25735 | 14.75725 | 14.78559 | 15.48671 |
| protein_co trafficking_  | 1030  | 742  | 767   | 452   | 498   | 361   | 59.55206 | 55.01394 | 53.50606 | 40.56285 |
| protein_co zona_pellu    | 4     | 5    | 2     | 0     | 0     | 0     | 0.051826 | 0.083075 | 0.031266 | 0        |
| protein_co potassium_    | 243   | 166  | 162   | 70    | 79    | 35    | 4.635588 | 4.060841 | 3.728735 | 2.072655 |
| protein_co serpin_pep    | 0     | 0    | 0     | 0     | 0     | 2     | 0        | 0        | 0        | 0        |
| protein_co family_witl   | 0     | 0    | 0     | 2     | 0     | 2     | 0        | 0        | 0        | 0.032354 |
| protein_co G_protein-i   | 0     | 1    | 2     | 2     | 5     | 1     | 0        | 0.023975 | 0.045116 | 0.058038 |
| protein_co SUMO-intei    | 416   | 351  | 353   | 254   | 250   | 156   | 5.460875 | 5.908611 | 5.591028 | 5.175271 |
| protein_co transmemt     | 437   | 319  | 308   | 258   | 364   | 175   | 4.511435 | 4.223119 | 3.836472 | 4.134123 |
| pseudogen- -             | 218   | 184  | 196   | 412   | 314   | 357   | 6.510843 | 7.047059 | 7.062929 | 19.0989  |
| protein_co Neuron-spe    | 14    | 13   | 10    | 4     | 6     | 3     | 0.267724 | 0.318796 | 0.230732 | 0.118727 |
| pseudogen- -             | 70    | 50   | 59    | 37    | 50    | 46    | 1.230709 | 1.127293 | 1.251577 | 1.009694 |
| protein_co zinc_finger_  | 115   | 70   | 89    | 118   | 156   | 131   | 1.849863 | 1.44394  | 1.727348 | 2.946146 |
| protein_co non_impri     | 1161  | 877  | 1082  | 714   | 964   | 328   | 7.150835 | 6.926814 | 8.040811 | 6.825795 |
| protein_co forkhead_b    | 1     | 1    | 1     | 1     | 0     | 0     | 0.021499 | 0.02757  | 0.02594  | 0.03337  |
| protein_co G_protein-i   | 0     | 0    | 0     | 0     | 0     | 1     | 0        | 0        | 0        | 0        |
| protein_co ubiquitin-c   | 827   | 723  | 741   | 1176  | 1475  | 1251  | 25.66383 | 28.77157 | 27.74484 | 56.64398 |
| protein_co heterogene    | 9488  | 7705 | 8399  | 10216 | 11317 | 11956 | 78.21598 | 81.45219 | 83.54038 | 130.717  |
| protein_co salt-inducil  | 1070  | 896  | 1011  | 580   | 737   | 494   | 5.184162 | 5.566883 | 5.910088 | 4.361674 |
| protein_co ring_finger_  | 286   | 205  | 237   | 109   | 128   | 79    | 2.957121 | 2.718105 | 2.956647 | 1.749283 |
| protein_co coiled-coil_  | 3     | 2    | 3     | 5     | 6     | 2     | 0.015784 | 0.013494 | 0.019045 | 0.040832 |
| lincRNA -                | 10    | 8    | 17    | 18    | 25    | 15    | 0.184534 | 0.189311 | 0.378506 | 0.515559 |
| protein_co vestigial_lil | 0     | 0    | 0     | 0     | 0     | 1     | 0        | 0        | 0        | 0        |
| protein_co homeobox      | 7     | 9    | 12    | 0     | 0     | 1     | 0.224201 | 0.36965  | 0.463734 | 0        |
| protein_co cholinergic   | 128   | 117  | 113   | 202   | 258   | 130   | 2.347252 | 2.751344 | 2.500208 | 5.749519 |
| protein_co homeobox      | 7     | 14   | 9     | 0     | 0     | 7     | 0.181845 | 0.466381 | 0.282094 | 0        |
| protein_co glycophori    | 0     | 0    | 1     | 0     | 0     | 0     | 0        | 0        | 0.021277 | 0        |
| protein_co ubiquitin_s   | 542   | 441  | 547   | 242   | 320   | 296   | 3.625965 | 3.783313 | 4.415295 | 2.512871 |
| protein_co solute_carr   | 253   | 172  | 203   | 651   | 889   | 282   | 5.784093 | 5.042577 | 5.599623 | 23.10076 |
| protein_co N-acetylnei   | 173   | 136  | 151   | 118   | 125   | 120   | 2.046411 | 2.06298  | 2.155121 | 2.166503 |
| protein_co ankyrin_req   | 1     | 0    | 0     | 3     | 1     | 0     | 0.018439 | 0        | 0        | 0.085859 |
| protein_co adrenocept    | 47    | 36   | 38    | 3     | 0     | 4     | 1.268027 | 1.245496 | 1.236979 | 0.125627 |
| protein_co ADP-ribose    | 88    | 57   | 70    | 60    | 72    | 69    | 3.231262 | 2.683945 | 3.101241 | 3.419568 |
| protein_co fatty_acid_   | 0     | 1    | 0     | 28    | 45    | 26    | 0        | 0.078192 | 0        | 2.64998  |
| protein_co PWWP_doi      | 392   | 360  | 389   | 950   | 1191  | 703   | 4.605584 | 5.423885 | 5.514375 | 17.32418 |
| protein_co ubiquitin_s   | 2     | 1    | 0     | 0     | 0     | 2     | 0.067662 | 0.043384 | 0        | 0        |
| protein_co ubiquitin_s   | 1865  | 1525 | 1532  | 687   | 563   | 567   | 11.24757 | 11.79395 | 11.14774 | 6.430833 |
| protein_co programm      | 2368  | 2021 | 1937  | 1327  | 1419  | 1283  | 18.02233 | 19.72445 | 17.78717 | 15.67583 |
| protein_co zinc_finger_  | 393   | 299  | 353   | 632   | 737   | 632   | 6.557928 | 6.398153 | 7.107172 | 16.36898 |
| protein_co melanocori    | 3     | 4    | 4     | 1     | 0     | 3     | 0.14067  | 0.240519 | 0.226302 | 0.07278  |
| protein_co family_witl   | 172   | 164  | 181   | 200   | 221   | 168   | 2.002752 | 2.448792 | 2.542877 | 3.614592 |
| protein_co zinc_finger_  | 1321  | 989  | 1134  | 1245  | 1605  | 1145  | 16.64652 | 15.98182 | 17.24177 | 24.35121 |
| protein_co galactosida   | 1864  | 1427 | 1574  | 919   | 1059  | 740   | 33.41093 | 32.80016 | 34.04046 | 25.56752 |
| protein_co chromosom     | 106   | 87   | 98    | 62    | 71    | 97    | 4.307055 | 4.533182 | 4.804506 | 3.91018  |

|                         |      |      |      |       |       |       |          |          |          |          |
|-------------------------|------|------|------|-------|-------|-------|----------|----------|----------|----------|
| protein_co fatty_acid_  | 146  | 89   | 118  | 153   | 163   | 93    | 1.79354  | 1.402031 | 1.748994 | 2.917294 |
| protein_co cartilage_a  | 4743 | 3757 | 3941 | 2407  | 2833  | 1877  | 88.32381 | 89.71709 | 88.54808 | 69.57148 |
| protein_co cyclic_nucl  | 11   | 24   | 0    | 0     | 4     | 1     | 0.118654 | 0.33198  | 0        | 0        |
| protein_co sarcolipin   | 73   | 60   | 83   | 0     | 0     | 0     | 3.778114 | 3.982106 | 5.182966 | 0        |
| protein_co elongator_i  | 675  | 571  | 601  | 670   | 743   | 775   | 14.32809 | 15.54283 | 15.39243 | 22.07445 |
| protein_co CKLF-like_M  | 93   | 68   | 63   | 132   | 137   | 82    | 3.714456 | 3.482816 | 3.035994 | 8.183078 |
| protein_co GABA(A)_re   | 17   | 10   | 11   | 5     | 14    | 11    | 0.48784  | 0.367991 | 0.380863 | 0.222704 |
| protein_co syntaxin_8   | 446  | 363  | 342  | 223   | 231   | 215   | 16.79755 | 17.53182 | 15.54122 | 13.03606 |
| protein_co cyclin-depe  | 949  | 792  | 752  | 1366  | 1355  | 1275  | 22.84324 | 24.44702 | 21.84024 | 51.03553 |
| protein_co ubiquitin_I  | 3091 | 2071 | 2218 | 1890  | 2715  | 1701  | 118.316  | 101.6562 | 102.4363 | 112.2888 |
| protein_co nuclear_fac  | 507  | 357  | 433  | 449   | 546   | 637   | 4.667826 | 4.214871 | 4.809973 | 6.416283 |
| protein_co fatty_acid_  | 505  | 446  | 432  | 0     | 1     | 0     | 25.16414 | 28.49935 | 25.97303 | 0        |
| protein_co FERM_and_    | 0    | 0    | 0    | 2     | 3     | 0     | 0        | 0        | 0        | 0.029129 |
| protein_co PR_domain    | 380  | 306  | 318  | 298   | 312   | 297   | 2.818445 | 2.910427 | 2.845778 | 3.43062  |
| protein_co UDP-GlcNA    | 352  | 309  | 290  | 413   | 488   | 415   | 5.973683 | 6.724613 | 5.938073 | 10.87878 |
| protein_co FBJ_murine   | 94   | 62   | 89   | 162   | 167   | 222   | 2.042475 | 1.727547 | 2.333281 | 5.463544 |
| protein_co transmembr   | 5035 | 4282 | 4284 | 2161  | 2492  | 2439  | 57.2065  | 62.38812 | 58.72776 | 38.10932 |
| pseudogen_olfactory_r   | 1    | 0    | 2    | 15    | 18    | 16    | 0.016097 | 0        | 0.038843 | 0.374767 |
| protein_co SET_domain   | 317  | 205  | 265  | 181   | 219   | 322   | 6.084378 | 5.045685 | 6.136925 | 5.3922   |
| protein_co SMAD_fami    | 435  | 314  | 318  | 173   | 231   | 221   | 6.194096 | 5.733603 | 5.46341  | 3.823536 |
| protein_co cystatin_D   | 0    | 0    | 0    | 0     | 0     | 2     | 0        | 0        | 0        | 0        |
| protein_co cystatin_SA  | 1    | 0    | 0    | 0     | 1     | 0     | 0.062687 | 0        | 0        | 0        |
| protein_co empty_spir   | 5    | 0    | 0    | 0     | 0     | 0     | 0.080957 | 0        | 0        | 0        |
| protein_co cystatin_SH  | 0    | 0    | 1    | 49    | 50    | 239   | 0        | 0        | 0.074441 | 4.692382 |
| protein_co Sp7_transc   | 143  | 104  | 87   | 3     | 5     | 0     | 2.13001  | 1.986499 | 1.563554 | 0.069358 |
| protein_co family_witl  | 33   | 20   | 29   | 2     | 1     | 1     | 0.277904 | 0.215983 | 0.294664 | 0.026142 |
| protein_co sema_dom     | 229  | 196  | 178  | 17    | 21    | 28    | 1.658094 | 1.819864 | 1.55504  | 0.191053 |
| protein_co leucine_ric  | 0    | 2    | 0    | 62    | 84    | 82    | 0        | 0.02388  | 0        | 0.896018 |
| protein_co solute_carr  | 302  | 197  | 203  | 491   | 587   | 1323  | 2.586917 | 2.16397  | 2.098069 | 6.528112 |
| protein_co doublecort   | 360  | 259  | 320  | 1     | 6     | 4     | 3.957891 | 3.651493 | 4.244821 | 0.017064 |
| protein_co zinc_finger  | 80   | 46   | 61   | 1     | 0     | 2     | 0.79983  | 0.589759 | 0.735843 | 0.015518 |
| pseudogen_              | 0    | 0    | 0    | 0     | 1     | 1     | 0        | 0        | 0        | 0        |
| protein_co G_protein-i  | 11   | 3    | 8    | 410   | 428   | 275   | 0.172621 | 0.060371 | 0.151474 | 9.986519 |
| protein_co transmembr   | 85   | 66   | 68   | 37    | 34    | 43    | 1.109282 | 1.104527 | 1.07073  | 0.749472 |
| protein_co V-set_and_   | 0    | 0    | 0    | 9     | 19    | 10    | 0        | 0        | 0        | 0.192596 |
| protein_co keratin_8    | 677  | 544  | 549  | 16680 | 19718 | 14679 | 11.09173 | 11.42928 | 10.85253 | 424.1674 |
| protein_co keratin_78   | 1    | 1    | 0    | 0     | 0     | 0     | 0.018359 | 0.023543 | 0        | 0        |
| protein_co adenosine_   | 109  | 95   | 96   | 58    | 87    | 33    | 2.725873 | 3.046576 | 2.896666 | 2.251322 |
| protein_co short_chai   | 0    | 0    | 0    | 1     | 1     | 0     | 0        | 0        | 0        | 0.041235 |
| protein_co O-6-methyl   | 93   | 69   | 71   | 228   | 208   | 155   | 2.47912  | 2.358701 | 2.283605 | 9.433652 |
| protein_co methyltran   | 19   | 16   | 17   | 17    | 12    | 19    | 0.591574 | 0.638829 | 0.638635 | 0.821552 |
| protein_co keratin_86   | 2    | 1    | 1    | 0     | 1     | 3     | 0.044849 | 0.028756 | 0.027057 | 0        |
| protein_co histidyl-tRN | 1735 | 1373 | 1488 | 606   | 849   | 1081  | 23.28397 | 23.62857 | 24.09398 | 12.62294 |
| protein_co nuclear_tra  | 223  | 183  | 183  | 370   | 413   | 315   | 2.705427 | 2.847025 | 2.678737 | 6.967277 |
| protein_co DENN/MAD     | 653  | 536  | 607  | 268   | 362   | 262   | 3.233282 | 3.403334 | 3.626329 | 2.059661 |
| protein_co CD14_mole    | 20   | 16   | 21   | 3     | 1     | 2     | 0.497243 | 0.510115 | 0.62995  | 0.115769 |
| protein_co DnaJ_(Hsp4   | 419  | 338  | 372  | 280   | 257   | 248   | 3.850072 | 3.98273  | 4.124258 | 3.993405 |
| protein_co spermatog    | 41   | 36   | 34   | 87    | 112   | 90    | 2.114951 | 2.381378 | 2.116136 | 6.965724 |
| protein_co Ral_GTPase   | 1564 | 1249 | 1432 | 845   | 1041  | 843   | 8.467381 | 8.671298 | 9.35413  | 7.100673 |
| protein_co within_bgc   | 368  | 284  | 310  | 784   | 973   | 887   | 14.07465 | 13.92893 | 14.30539 | 46.54108 |
| protein_co marginal_zi  | 0    | 0    | 0    | 4     | 4     | 0     | 0        | 0        | 0        | 0.154276 |
| protein_co keratin_4    | 1    | 0    | 0    | 0     | 0     | 0     | 0.018203 | 0        | 0        | 0        |
| protein_co solute_carr  | 12   | 1    | 10   | 8     | 9     | 6     | 0.244325 | 0.026109 | 0.24566  | 0.252817 |
| protein_co neuronal_F   | 536  | 412  | 468  | 32    | 25    | 20    | 3.148321 | 3.103279 | 3.316715 | 0.291739 |
| protein_co KiSS-1_met   | 0    | 1    | 0    | 0     | 5     | 1     | 0        | 0.084809 | 0        | 0        |
| protein_co LON_peptic   | 158  | 135  | 116  | 16    | 14    | 6     | 0.532535 | 0.583491 | 0.471734 | 0.083703 |
| protein_co nudix_(nuc   | 500  | 367  | 344  | 461   | 566   | 454   | 9.538246 | 8.977883 | 7.917809 | 13.64991 |
| protein_co hydroxyste   | 3    | 2    | 4    | 0     | 5     | 0     | 0.058686 | 0.050171 | 0.094411 | 0        |
| protein_co proliferatic | 1156 | 922  | 1003 | 1701  | 1954  | 2221  | 21.03409 | 21.51326 | 22.01988 | 48.03975 |
| protein_co ELOVL_fatt   | 2062 | 1695 | 1771 | 1652  | 1843  | 2194  | 14.98098 | 15.79176 | 15.52451 | 18.6291  |
| protein_co 6-phosphoi   | 3306 | 2652 | 2694 | 844   | 1051  | 1585  | 34.57917 | 35.57087 | 33.99831 | 13.70202 |
| protein_co transmembr   | 44   | 28   | 37   | 64    | 71    | 48    | 0.458582 | 0.374224 | 0.46528  | 1.035321 |
| protein_co ADP-ribosy   | 1489 | 1189 | 1235 | 1881  | 1944  | 2457  | 29.00675 | 29.70267 | 29.02815 | 56.87528 |
| protein_co serpin_pep   | 1045 | 823  | 783  | 206   | 415   | 407   | 11.899   | 12.0172  | 10.75731 | 3.640757 |
| protein_co small_cell_  | 345  | 282  | 286  | 109   | 129   | 87    | 6.883854 | 7.215576 | 6.885359 | 3.375744 |

|                          |      |      |      |      |      |      |          |          |          |          |
|--------------------------|------|------|------|------|------|------|----------|----------|----------|----------|
| protein_co iroquois_h    | 39   | 28   | 39   | 172  | 282  | 292  | 0.984236 | 0.906154 | 1.187538 | 6.73742  |
| protein_co cadherin_2    | 8087 | 6306 | 7063 | 819  | 931  | 1214 | 87.53453 | 87.52966 | 92.2421  | 13.75962 |
| protein_co iroquois_h    | 151  | 107  | 103  | 1948 | 2672 | 2626 | 2.692164 | 2.446345 | 2.215695 | 53.90686 |
| protein_co embigin       | 2741 | 2269 | 2221 | 541  | 656  | 706  | 30.02232 | 31.86978 | 29.3516  | 9.197354 |
| protein_co SIX_homeo     | 167  | 125  | 123  | 18   | 39   | 27   | 3.551307 | 3.408719 | 3.155913 | 0.594121 |
| protein_co discs_large   | 54   | 34   | 35   | 299  | 376  | 181  | 0.378881 | 0.305912 | 0.296295 | 3.256196 |
| protein_co signal_tran   | 2597 | 2128 | 2180 | 594  | 718  | 472  | 37.14868 | 39.03484 | 37.62495 | 13.18829 |
| protein_co NudC_dom      | 475  | 412  | 414  | 772  | 973  | 655  | 21.35451 | 23.75213 | 22.45662 | 53.86961 |
| lincRNA_long_interf      | 1    | 0    | 0    | 0    | 2    | 0    | 0.064498 | 0        | 0        | 0        |
| protein_co interferon_   | 1542 | 1111 | 1201 | 1015 | 1468 | 730  | 28.79506 | 26.60462 | 27.05981 | 29.41916 |
| protein_co heat_shock    | 3928 | 3308 | 3466 | 7197 | 8640 | 7550 | 38.17285 | 41.22474 | 40.64056 | 108.5588 |
| protein_co forkhead_b    | 0    | 1    | 1    | 341  | 425  | 330  | 0        | 0.030231 | 0.028444 | 12.47758 |
| protein_co solute_carr   | 2    | 6    | 6    | 4    | 3    | 3    | 0.034875 | 0.134168 | 0.126238 | 0.108263 |
| protein_co scratch_ho    | 0    | 0    | 1    | 4    | 12   | 3    | 0        | 0        | 0.044131 | 0.227082 |
| protein_co COMM_dor      | 312  | 227  | 259  | 155  | 219  | 257  | 9.300499 | 8.677345 | 9.315357 | 7.171563 |
| protein_co sarcoglycar   | 690  | 529  | 563  | 18   | 16   | 3    | 3.31667  | 3.260755 | 3.265198 | 0.134294 |
| protein_co gametocyte    | 1    | 0    | 0    | 9    | 5    | 5    | 0.028927 | 0        | 0        | 0.404083 |
| pseudogen:dpy-19-like    | 47   | 29   | 44   | 1    | 1    | 3    | 0.54042  | 0.427603 | 0.610427 | 0.017847 |
| protein_co zinc_finger   | 169  | 115  | 139  | 174  | 218  | 181  | 3.02921  | 2.643321 | 3.006114 | 4.840858 |
| protein_co armadillo_1   | 735  | 658  | 683  | 562  | 681  | 564  | 13.10923 | 15.0496  | 14.69801 | 15.5581  |
| protein_co ring_finger   | 596  | 441  | 461  | 601  | 754  | 673  | 13.52684 | 12.83506 | 12.62406 | 21.17167 |
| protein_co acylphosph    | 45   | 36   | 35   | 20   | 34   | 26   | 1.103006 | 1.131559 | 1.035098 | 0.760897 |
| protein_co TraB_doma     | 743  | 592  | 579  | 1700 | 2265 | 1462 | 14.49221 | 14.80734 | 13.62613 | 51.46658 |
| protein_co transmembr    | 44   | 49   | 49   | 101  | 108  | 82   | 1.113416 | 1.590049 | 1.49606  | 3.966951 |
| protein_co activating_   | 431  | 355  | 370  | 145  | 201  | 132  | 3.025389 | 3.195521 | 3.133673 | 1.579801 |
| protein_co RAS_p21_p     | 8    | 11   | 11   | 5    | 16   | 1    | 0.105105 | 0.185326 | 0.174371 | 0.101961 |
| protein_co suppressor    | 527  | 402  | 450  | 304  | 327  | 348  | 4.225554 | 4.133409 | 4.35345  | 3.783355 |
| protein_co muscle-rela   | 45   | 26   | 39   | 160  | 149  | 120  | 0.806903 | 0.597849 | 0.843765 | 4.453066 |
| protein_co zinc_finger   | 12   | 13   | 20   | 254  | 346  | 580  | 0.322638 | 0.448215 | 0.648802 | 10.59981 |
| pseudogen:olfactory_r    | 1    | 0    | 0    | 0    | 0    | 1    | 0.050583 | 0        | 0        | 0        |
| protein_co homeobox      | 22   | 24   | 19   | 0    | 0    | 46   | 0.381361 | 0.533499 | 0.397388 | 0        |
| protein_co tubulin_ty    | 0    | 1    | 1    | 101  | 158  | 58   | 0        | 0.013543 | 0.012742 | 1.655577 |
| protein_co block_of_p    | 425  | 297  | 363  | 403  | 639  | 450  | 8.530932 | 7.644927 | 8.791485 | 12.55576 |
| protein_co polymerase    | 549  | 452  | 408  | 203  | 225  | 77   | 7.271926 | 7.67759  | 6.520567 | 4.173531 |
| protein_co synaptotag    | 0    | 1    | 1    | 39   | 36   | 27   | 0        | 0.015203 | 0.014305 | 0.717677 |
| protein_co potassium_    | 26   | 32   | 22   | 679  | 726  | 473  | 0.508611 | 0.802734 | 0.519258 | 20.61639 |
| protein_co RNA_bindi     | 1    | 0    | 0    | 1    | 0    | 2    | 0.021169 | 0        | 0        | 0.032858 |
| protein_co kinesin_fan   | 5719 | 4612 | 5016 | 2065 | 1856 | 2108 | 45.6294  | 47.18711 | 48.28701 | 25.57262 |
| protein_co G_protein-i   | 75   | 39   | 52   | 198  | 260  | 233  | 1.164102 | 0.776254 | 0.973825 | 4.770076 |
| protein_co A_kinase(F    | 2846 | 2185 | 2473 | 745  | 997  | 674  | 10.0983  | 9.942006 | 10.5873  | 4.102985 |
| protein_co tumor_pro     | 1    | 0    | 0    | 0    | 0    | 0    | 0.018231 | 0        | 0        | 0        |
| protein_co cell_divisio  | 1148 | 907  | 1039 | 1297 | 1648 | 1496 | 21.42051 | 21.70224 | 23.39115 | 37.56283 |
| protein_co olfactory_r   | 0    | 0    | 0    | 0    | 0    | 1    | 0        | 0        | 0        | 0        |
| protein_co short_chain   | 0    | 0    | 0    | 0    | 3    | 4    | 0        | 0        | 0        | 0        |
| protein_co DPY30_dor     | 0    | 0    | 0    | 1    | 0    | 0    | 0        | 0        | 0        | 0.062258 |
| protein_co olfactory_r   | 0    | 0    | 1    | 0    | 0    | 1    | 0        | 0        | 0.053728 | 0        |
| protein_co coiled-coil   | 321  | 248  | 260  | 368  | 407  | 536  | 4.767721 | 4.723532 | 4.65937  | 8.483677 |
| protein_co HtrA_serine   | 260  | 192  | 218  | 99   | 116  | 72   | 4.797877 | 4.543456 | 4.853782 | 2.835577 |
| protein_co forkhead_b    | 245  | 208  | 218  | 195  | 200  | 202  | 2.12427  | 2.312684 | 2.280595 | 2.624272 |
| protein_co leiomodini    | 0    | 0    | 0    | 0    | 1    | 0    | 0        | 0        | 0        | 0        |
| protein_co follicle_stir | 0    | 0    | 0    | 0    | 1    | 2    | 0        | 0        | 0        | 0        |
| pseudogen:carboxyl_e     | 0    | 0    | 0    | 1    | 0    | 0    | 0        | 0        | 0        | 0.05827  |
| protein_co ubiquitin_s   | 1216 | 1050 | 1092 | 1427 | 1751 | 1122 | 11.02654 | 12.20969 | 11.94749 | 20.08447 |
| protein_co carboxyl_e    | 12   | 20   | 14   | 45   | 54   | 31   | 0.236024 | 0.504445 | 0.332239 | 1.37378  |
| protein_co protein_ph    | 238  | 217  | 212  | 265  | 334  | 444  | 3.724908 | 4.355196 | 4.00334  | 6.437466 |
| protein_co G_protein-i   | 2    | 4    | 0    | 233  | 300  | 145  | 0.038324 | 0.098291 | 0        | 6.929993 |
| processed_-              | 327  | 248  | 254  | 356  | 490  | 331  | 6.634806 | 6.4527   | 6.218165 | 11.21143 |
| protein_co pregnancy_    | 0    | 0    | 0    | 3    | 0    | 0    | 0        | 0        | 0        | 0.094071 |
| protein_co kelch_repe    | 739  | 635  | 708  | 506  | 654  | 720  | 9.252796 | 10.19557 | 10.69572 | 9.833533 |
| protein_co MYC_induc     | 493  | 357  | 354  | 113  | 112  | 190  | 7.90858  | 7.34394  | 6.851772 | 2.813588 |
| protein_co TP53_regul    | 372  | 324  | 335  | 742  | 831  | 728  | 14.75726 | 16.48228 | 16.03451 | 45.68749 |
| protein_co LSM3_hom      | 628  | 546  | 516  | 815  | 925  | 1067 | 7.718724 | 8.605732 | 7.652152 | 15.54798 |
| protein_co leukocyte_i   | 2    | 1    | 3    | 0    | 0    | 0    | 0.049883 | 0.031984 | 0.09028  | 0        |
| protein_co KIAA0232      | 1100 | 855  | 961  | 528  | 663  | 529  | 6.578117 | 6.556686 | 6.933945 | 4.900872 |
| protein_co metastasis_   | 84   | 44   | 56   | 135  | 167  | 132  | 0.796675 | 0.535136 | 0.640823 | 1.987313 |

|                         |       |       |       |       |       |       |          |          |          |          |
|-------------------------|-------|-------|-------|-------|-------|-------|----------|----------|----------|----------|
| protein_co transmembr   | 1587  | 1273  | 1269  | 509   | 589   | 775   | 22.27311 | 22.91087 | 21.48887 | 11.08797 |
| protein_co ring_finger  | 413   | 323   | 325   | 295   | 351   | 378   | 7.343791 | 7.365159 | 6.972711 | 8.141844 |
| protein_co ribosomal    | 14006 | 10511 | 11192 | 20067 | 24183 | 18061 | 275.4789 | 265.1109 | 265.6011 | 612.6142 |
| protein_co phospholip   | 1     | 0     | 0     | 0     | 0     | 0     | 0.082991 | 0        | 0        | 0        |
| protein_co cytokine_lil | 1672  | 1304  | 1346  | 24    | 23    | 17    | 78.16561 | 78.17473 | 75.92286 | 1.741491 |
| protein_co tRNA_splici  | 1374  | 1041  | 1054  | 595   | 749   | 538   | 27.16142 | 26.38917 | 25.13937 | 18.25632 |
| protein_co thyrotropin  | 0     | 0     | 0     | 9     | 7     | 7     | 0        | 0        | 0        | 0.331152 |
| protein_co glutathione  | 687   | 582   | 581   | 201   | 242   | 176   | 19.02743 | 20.67073 | 19.41546 | 8.640721 |
| protein_co Myb/SANT     | 424   | 335   | 372   | 272   | 281   | 273   | 4.864538 | 4.928672 | 5.14952  | 4.843677 |
| protein_co NADH_deh     | 668   | 473   | 505   | 956   | 1181  | 860   | 32.52599 | 29.53416 | 29.66836 | 72.25077 |
| protein_co osteoclast   | 7     | 10    | 6     | 73    | 112   | 24    | 0.159723 | 0.292602 | 0.165184 | 2.585365 |
| protein_co progesteron  | 256   | 188   | 226   | 413   | 436   | 161   | 2.533526 | 2.385902 | 2.698621 | 6.344039 |
| protein_co nudix_(nuc   | 32    | 39    | 52    | 44    | 57    | 32    | 0.282789 | 0.441964 | 0.554453 | 0.603526 |
| processed_TPT1_antis    | 267   | 253   | 256   | 109   | 140   | 41    | 4.363762 | 5.302488 | 5.048215 | 2.765074 |
| protein_co tetratricop  | 1728  | 1381  | 1379  | 202   | 210   | 219   | 6.912887 | 7.084656 | 6.656226 | 1.254289 |
| protein_co testis_expr  | 0     | 0     | 0     | 88    | 158   | 62    | 0        | 0        | 0        | 5.131909 |
| protein_co polycystic   | 3     | 2     | 2     | 8     | 14    | 14    | 0.00864  | 0.007386 | 0.006949 | 0.03576  |
| protein_co nuclear_caj  | 0     | 0     | 0     | 2     | 0     | 0     | 0        | 0        | 0        | 0.315064 |
| protein_co DnaJ_(Hsp4   | 257   | 207   | 219   | 111   | 162   | 121   | 4.390067 | 4.534378 | 4.513674 | 2.943008 |
| protein_co zinc_finger  | 251   | 190   | 244   | 721   | 638   | 346   | 2.510536 | 2.437001 | 2.94463  | 11.19331 |
| protein_co zinc_finger  | 12    | 3     | 4     | 107   | 88    | 96    | 0.213947 | 0.068589 | 0.086046 | 2.961003 |
| protein_co protein_kir  | 3226  | 2510  | 2548  | 439   | 680   | 948   | 128.8477 | 128.5569 | 122.7891 | 27.21493 |
| protein_co doublecort   | 2     | 2     | 1     | 1     | 0     | 2     | 0.017522 | 0.02247  | 0.010571 | 0.013599 |
| protein_co hyaluronan   | 1130  | 930   | 1026  | 210   | 312   | 1036  | 12.64576 | 13.34623 | 13.85357 | 3.647675 |
| protein_co platelet_de  | 225   | 156   | 158   | 42    | 65    | 64    | 2.603715 | 2.314967 | 2.206054 | 0.754381 |
| protein_co placenta-sp  | 1     | 0     | 2     | 3     | 5     | 6     | 0.041204 | 0        | 0.09943  | 0.191862 |
| protein_co DNA-damag    | 1     | 1     | 4     | 0     | 0     | 2     | 0.017931 | 0.022994 | 0.08654  | 0        |
| protein_co sphingosin   | 261   | 181   | 191   | 86    | 85    | 34    | 4.207045 | 3.741318 | 3.714652 | 2.15162  |
| protein_co heparan_su   | 38    | 29    | 27    | 226   | 180   | 213   | 0.401221 | 0.392651 | 0.343963 | 3.703723 |
| protein_co pygopus_h    | 361   | 294   | 325   | 23    | 36    | 20    | 1.994262 | 2.082724 | 2.166239 | 0.197212 |
| protein_co leucine_ric  | 11    | 6     | 11    | 13    | 16    | 8     | 0.143474 | 0.100356 | 0.17311  | 0.263181 |
| protein_co protein_kir  | 311   | 262   | 283   | 241   | 282   | 276   | 3.502953 | 3.784292 | 3.845993 | 4.213291 |
| protein_co XK_Kell_blc  | 117   | 58    | 77    | 210   | 294   | 148   | 1.622156 | 1.031203 | 1.288088 | 4.519148 |
| protein_co t-SNARE_dc   | 216   | 165   | 184   | 386   | 480   | 349   | 4.822973 | 4.724484 | 4.957092 | 13.37762 |
| protein_co formyl_pep   | 0     | 0     | 0     | 0     | 1     | 0     | 0        | 0        | 0        | 0        |
| protein_co formyl_pep   | 2     | 3     | 3     | 0     | 0     | 0     | 0.047725 | 0.091801 | 0.086375 | 0        |
| protein_co olfactory_r  | 1     | 0     | 0     | 1     | 1     | 2     | 0.043377 | 0        | 0        | 0.067326 |
| protein_co fasciculati  | 633   | 503   | 505   | 280   | 356   | 243   | 6.603199 | 6.728651 | 6.356091 | 4.533558 |
| protein_co SRY_(sex_d   | 1     | 2     | 0     | 5     | 8     | 6     | 0.01458  | 0.037394 | 0        | 0.113153 |
| protein_co chromosom    | 1523  | 1128  | 1233  | 503   | 577   | 602   | 34.61633 | 32.87756 | 33.81367 | 17.74515 |
| pseudogen: family_witl  | 5     | 9     | 4     | 33    | 32    | 19    | 0.116526 | 0.26897  | 0.112476 | 1.193704 |
| protein_co anaplastic   | 57    | 53    | 48    | 1     | 0     | 2     | 0.4297   | 0.51236  | 0.436596 | 0.011701 |
| protein_co cysteine_cc  | 262   | 186   | 181   | 433   | 507   | 256   | 4.933809 | 4.491623 | 4.112517 | 12.65609 |
| protein_co myotubula    | 104   | 96    | 97    | 139   | 106   | 111   | 1.35724  | 1.606585 | 1.527365 | 2.815584 |
| pseudogen: sialic_acid  | 0     | 0     | 0     | 0     | 3     | 0     | 0        | 0        | 0        | 0        |
| protein_co tRNA_meth    | 181   | 163   | 180   | 287   | 343   | 294   | 4.6226   | 5.338321 | 5.546618 | 11.3768  |
| protein_co insulin_rec  | 25    | 13    | 18    | 939   | 1094  | 495   | 0.130919 | 0.0873   | 0.113732 | 7.632369 |
| protein_co mitofusin    | 967   | 819   | 811   | 481   | 564   | 539   | 8.67968  | 9.426934 | 8.783066 | 6.701203 |
| protein_co GTPase_IM    | 1     | 4     | 1     | 1     | 1     | 0     | 0.011207 | 0.057485 | 0.013522 | 0.017395 |
| protein_co neurturin    | 8     | 13    | 4     | 108   | 147   | 64    | 0.338251 | 0.704858 | 0.20406  | 7.087663 |
| protein_co potassium    | 16    | 7     | 26    | 24    | 16    | 11    | 0.36508  | 0.204822 | 0.715797 | 0.849983 |
| protein_co fucosyltran  | 1     | 0     | 0     | 8     | 6     | 1     | 0.018146 | 0        | 0        | 0.225324 |
| protein_co potassium    | 0     | 2     | 3     | 162   | 277   | 181   | 0        | 0.031449 | 0.044385 | 3.083245 |
| protein_co heat_shock   | 3     | 1     | 2     | 0     | 0     | 0     | 0.071551 | 0.030585 | 0.057554 | 0        |
| protein_co ATPase_H+    | 276   | 194   | 172   | 208   | 283   | 285   | 4.754462 | 4.285518 | 3.57494  | 5.561425 |
| protein_co protein_kir  | 272   | 179   | 187   | 54    | 68    | 56    | 2.25736  | 1.904997 | 1.872499 | 0.695595 |
| protein_co jagunal_ho   | 438   | 379   | 375   | 468   | 554   | 434   | 12.13103 | 13.46083 | 12.53149 | 20.11869 |
| protein_co relaxin_3    | 0     | 0     | 0     | 3     | 3     | 0     | 0        | 0        | 0        | 0.376447 |
| protein_co transcriptic | 1616  | 1347  | 1336  | 1415  | 1557  | 1350  | 29.66886 | 31.71293 | 29.5947  | 40.3224  |
| protein_co suppressor   | 345   | 262   | 281   | 294   | 322   | 281   | 3.390706 | 3.302034 | 3.332156 | 4.484859 |
| protein_co C1GALT1-sp   | 218   | 147   | 154   | 122   | 156   | 126   | 6.337274 | 5.479901 | 5.401505 | 5.504734 |
| protein_co chromosom    | 1426  | 968   | 1059  | 951   | 1299  | 836   | 42.58928 | 37.07366 | 38.16144 | 44.08509 |
| protein_co MORN_rep     | 195   | 158   | 189   | 247   | 284   | 120   | 3.936097 | 4.089758 | 4.603001 | 7.738532 |
| protein_co zinc_finger  | 511   | 365   | 370   | 986   | 1239  | 609   | 8.016326 | 7.342715 | 7.003324 | 24.00833 |
| protein_co zinc_finger  | 349   | 293   | 275   | 381   | 501   | 214   | 6.052003 | 6.515544 | 5.753796 | 10.25485 |

|                         |      |      |      |       |       |       |          |          |          |          |
|-------------------------|------|------|------|-------|-------|-------|----------|----------|----------|----------|
| protein_co nuclear_ap   | 228  | 183  | 220  | 225   | 299   | 151   | 3.145314 | 3.23735  | 3.661845 | 4.817727 |
| protein_co ribokinase   | 8    | 7    | 4    | 15    | 23    | 16    | 0.174393 | 0.19568  | 0.105208 | 0.50753  |
| protein_co glutamate_   | 18   | 22   | 22   | 6     | 4     | 8     | 0.232897 | 0.365026 | 0.34345  | 0.120496 |
| protein_co mucin_7_s    | 0    | 0    | 0    | 0     | 0     | 4     | 0        | 0        | 0        | 0        |
| protein_co transmemt    | 284  | 211  | 228  | 230   | 259   | 327   | 18.01998 | 17.16832 | 17.45496 | 22.65136 |
| protein_co transmemt    | 408  | 334  | 345  | 348   | 446   | 462   | 13.78323 | 14.46927 | 14.06236 | 18.24739 |
| protein_co tripartite_r | 2563 | 1889 | 2024 | 990   | 1127  | 615   | 43.829   | 41.42421 | 41.76106 | 26.27717 |
| protein_co neuropilin_  | 1207 | 941  | 1081 | 457   | 604   | 1299  | 7.565332 | 7.563446 | 8.175126 | 4.445979 |
| protein_co claudin_20   | 58   | 43   | 37   | 6     | 13    | 17    | 2.24948  | 2.138611 | 1.731426 | 0.36119  |
| protein_co CDC42_bin    | 27   | 13   | 27   | 417   | 632   | 421   | 0.220486 | 0.136135 | 0.266029 | 5.285471 |
| protein_co SCAN_dom     | 1239 | 911  | 998  | 1013  | 1460  | 1154  | 33.64026 | 31.71873 | 32.69389 | 42.69018 |
| protein_co jun_B_prot   | 737  | 529  | 528  | 77    | 106   | 84    | 19.04019 | 17.52543 | 16.45833 | 3.087628 |
| protein_co chromosom    | 45   | 48   | 53   | 218   | 344   | 308   | 1.986865 | 2.717731 | 2.823448 | 14.93973 |
| protein_co transmemt    | 8    | 4    | 4    | 187   | 220   | 248   | 0.222228 | 0.142488 | 0.134065 | 8.062691 |
| protein_co UDP_glucu    | 0    | 0    | 0    | 1     | 0     | 0     | 0        | 0        | 0        | 0.038569 |
| protein_co leucine-ricl | 0    | 2    | 1    | 7     | 16    | 4     | 0        | 0.039611 | 0.018635 | 0.167806 |
| protein_co SHC_SH2-d    | 775  | 714  | 728  | 293   | 338   | 320   | 10.49979 | 12.4047  | 11.90031 | 6.161364 |
| protein_co sclerostin_  | 282  | 232  | 212  | 11    | 3     | 15    | 5.48444  | 5.786028 | 4.974702 | 0.332052 |
| protein_co neuronal_c   | 25   | 19   | 12   | 75    | 95    | 51    | 0.228866 | 0.223051 | 0.132547 | 0.065694 |
| protein_co family_witl  | 852  | 585  | 693  | 852   | 947   | 883   | 9.104443 | 8.016393 | 8.93501  | 14.13136 |
| protein_co BAH_and_c    | 2317 | 1683 | 1924 | 1901  | 2708  | 895   | 10.50616 | 9.786137 | 10.52618 | 13.37921 |
| protein_co zinc_finger  | 4    | 0    | 2    | 35    | 37    | 29    | 0.071533 | 0        | 0.043154 | 0.971508 |
| protein_co zinc_finger  | 147  | 158  | 120  | 125   | 126   | 77    | 1.64546  | 2.267966 | 1.620688 | 2.171753 |
| protein_co glucosidase  | 2571 | 1809 | 1838 | 2490  | 3208  | 2028  | 33.24717 | 29.99857 | 28.67782 | 49.97841 |
| protein_co calcium_ac   | 2307 | 1704 | 1777 | 634   | 790   | 684   | 30.60987 | 28.99297 | 28.44784 | 13.0567  |
| protein_co potassium_   | 49   | 33   | 43   | 1     | 1     | 1     | 0.372868 | 0.322019 | 0.394798 | 0.011811 |
| protein_co zinc_finger  | 1092 | 909  | 927  | 508   | 557   | 777   | 26.13777 | 27.90096 | 26.77156 | 18.87297 |
| protein_co carbohydra   | 1633 | 1161 | 1256 | 525   | 652   | 419   | 13.4124  | 12.22818 | 12.44681 | 6.692835 |
| protein_co exosome_c    | 508  | 388  | 434  | 420   | 494   | 594   | 11.27313 | 11.04134 | 11.62034 | 14.46641 |
| protein_co phosphogly   | 4683 | 3623 | 3846 | 11001 | 10073 | 10045 | 119.9923 | 119.0439 | 118.9013 | 437.514  |
| protein_co chromodoi    | 671  | 629  | 601  | 3106  | 3910  | 2856  | 3.011986 | 3.620682 | 3.255014 | 21.64025 |
| protein_co establishm   | 272  | 219  | 245  | 145   | 205   | 211   | 3.251934 | 3.357579 | 3.534166 | 2.690737 |
| protein_co keratin_19   | 22   | 20   | 25   | 1915  | 2262  | 1884  | 0.742144 | 0.865177 | 1.017545 | 100.2686 |
| protein_co keratin_15   | 1    | 2    | 3    | 0     | 0     | 0     | 0.008954 | 0.022963 | 0.032409 | 0        |
| protein_co leucine_ric  | 30   | 15   | 13   | 10    | 24    | 2     | 0.758738 | 0.486487 | 0.3967   | 0.392556 |
| protein_co chloride_cl  | 615  | 514  | 560  | 448   | 477   | 319   | 2.852924 | 3.057649 | 3.134377 | 3.225698 |
| protein_co tubulin_po   | 8    | 17   | 4    | 101   | 130   | 50    | 0.073323 | 0.199806 | 0.044234 | 1.436818 |
| protein_co potassium_   | 10   | 6    | 13   | 8     | 6     | 12    | 0.063399 | 0.04878  | 0.099443 | 0.078723 |
| protein_co apelin       | 15   | 16   | 12   | 118   | 107   | 48    | 0.218432 | 0.298782 | 0.21084  | 2.667086 |
| protein_co keratin_13   | 0    | 0    | 0    | 0     | 0     | 1     | 0        | 0        | 0        | 0        |
| protein_co phosphodi    | 176  | 122  | 140  | 0     | 0     | 1     | 1.531103 | 1.361008 | 1.469494 | 0        |
| protein_co mitochond    | 334  | 283  | 291  | 310   | 457   | 455   | 19.74939 | 21.45868 | 20.761   | 28.45112 |
| protein_co zinc_finger  | 368  | 259  | 308  | 1248  | 1295  | 600   | 13.03287 | 11.76255 | 13.16107 | 68.60211 |
| protein_co N-acetyltra  | 59   | 51   | 32   | 59    | 48    | 50    | 1.186325 | 1.315017 | 0.776336 | 1.841341 |
| protein_co keratin_20   | 1    | 0    | 0    | 0     | 0     | 0     | 0.026995 | 0        | 0        | 0        |
| protein_co glyoxalase_  | 0    | 0    | 0    | 0     | 1     | 0     | 0        | 0        | 0        | 0        |
| protein_co kinase_sup   | 17   | 22   | 25   | 126   | 127   | 77    | 0.046868 | 0.077778 | 0.08316  | 0.539173 |
| protein_co zinc_finger  | 159  | 100  | 124  | 51    | 61    | 51    | 5.917074 | 4.772206 | 5.567748 | 2.945849 |
| protein_co mutated_ir   | 1224 | 956  | 1088 | 737   | 846   | 685   | 1.937002 | 1.940064 | 2.077427 | 1.810284 |
| protein_co zinc_finger  | 161  | 123  | 139  | 112   | 148   | 106   | 1.699143 | 1.664633 | 1.769974 | 1.834647 |
| protein_co cyclin-depe  | 0    | 5    | 2    | 8     | 6     | 1     | 0        | 0.12026  | 0.04526  | 0.232895 |
| protein_co dermatan_    | 616  | 510  | 551  | 636   | 1124  | 1116  | 3.030558 | 3.217521 | 3.270706 | 4.856568 |
| protein_co polymerase   | 326  | 266  | 269  | 312   | 410   | 604   | 8.122288 | 8.498685 | 8.086509 | 12.06551 |
| protein_co additional_  | 2486 | 1964 | 2179 | 482   | 546   | 534   | 16.57923 | 16.79632 | 17.5335  | 4.989314 |
| protein_co delta-like_2 | 17   | 15   | 16   | 5     | 11    | 16    | 0.391134 | 0.442565 | 0.444165 | 0.178557 |
| protein_co zinc_finger  | 384  | 325  | 399  | 713   | 799   | 528   | 3.155585 | 3.424848 | 3.956121 | 9.094286 |
| protein_co zinc_finger  | 1220 | 985  | 1046 | 693   | 717   | 391   | 7.145369 | 7.397933 | 7.391704 | 6.299825 |
| protein_co zinc_finger  | 426  | 387  | 430  | 482   | 542   | 585   | 4.256371 | 4.958498 | 5.183777 | 7.474934 |
| protein_co microtubul   | 9    | 9    | 3    | 6     | 17    | 5     | 0.507224 | 0.650443 | 0.203998 | 0.524854 |
| protein_co WAS/WASL     | 1632 | 1192 | 1373 | 917   | 1175  | 890   | 10.23876 | 9.589874 | 10.39312 | 8.929499 |
| protein_co HOP_home     | 111  | 76   | 67   | 0     | 0     | 0     | 1.624974 | 1.426745 | 1.18344  | 0        |
| protein_co synovial_sa  | 0    | 0    | 0    | 0     | 1     | 1     | 0        | 0        | 0        | 0        |
| protein_co leucine_ric  | 521  | 431  | 395  | 36    | 55    | 47    | 3.384552 | 3.59046  | 3.096055 | 0.362992 |
| protein_co sperm_acro   | 1    | 1    | 0    | 0     | 0     | 0     | 0.064057 | 0.082145 | 0        | 0        |
| protein_co ribosomal_   | 1659 | 1280 | 1320 | 2197  | 2332  | 3176  | 18.81726 | 18.61784 | 18.06475 | 38.67857 |

|                         |      |      |      |      |      |      |          |          |          |          |
|-------------------------|------|------|------|------|------|------|----------|----------|----------|----------|
| protein_co leucine_ric  | 443  | 395  | 396  | 525  | 635  | 500  | 5.258804 | 6.01298  | 5.671873 | 9.673265 |
| protein_co olfactory_r  | 0    | 0    | 1    | 0    | 0    | 0    | 0        | 0        | 0.053323 | 0        |
| protein_co peptidylpro  | 445  | 311  | 348  | 350  | 481  | 524  | 11.446   | 10.25802 | 10.79993 | 13.97308 |
| protein_co collagen_ty  | 388  | 342  | 356  | 16   | 20   | 15   | 2.665689 | 3.013097 | 2.951045 | 0.170619 |
| protein_co electron-tr  | 192  | 142  | 147  | 79   | 108  | 111  | 2.743109 | 2.601594 | 2.534003 | 1.75186  |
| protein_co relaxin/insu | 0    | 0    | 0    | 8    | 3    | 6    | 0        | 0        | 0        | 0.151546 |
| protein_co lysophosph   | 65   | 63   | 55   | 693  | 728  | 512  | 0.911166 | 1.132489 | 0.93024  | 15.07815 |
| protein_co prostaglan   | 428  | 351  | 404  | 6    | 4    | 12   | 5.215418 | 5.484812 | 5.93984  | 0.113482 |
| protein_co tubulin_fol  | 1481 | 1087 | 1083 | 1794 | 2201 | 2391 | 30.17997 | 28.40551 | 26.62811 | 56.74357 |
| protein_co neuronal_c   | 0    | 0    | 2    | 0    | 1    | 0    | 0        | 0        | 0.018127 | 0        |
| protein_co microtubul   | 9    | 4    | 2    | 14   | 22   | 11   | 0.097484 | 0.05556  | 0.026138 | 0.23537  |
| protein_co orthopedia   | 0    | 0    | 0    | 22   | 15   | 14   | 0        | 0        | 0        | 0.43652  |
| protein_co endothelin   | 0    | 1    | 0    | 835  | 1111 | 520  | 0        | 0.02028  | 0        | 20.49617 |
| protein_co BCL2-like_1  | 1242 | 902  | 979  | 1058 | 1241 | 1687 | 22.31318 | 20.78049 | 21.22123 | 29.50231 |
| protein_co fibrinogen_  | 2    | 0    | 2    | 0    | 0    | 0    | 0.046174 | 0        | 0.055712 | 0        |
| protein_co fibrinogen_  | 0    | 0    | 0    | 0    | 0    | 1    | 0        | 0        | 0        | 0        |
| protein_co olfactory_r  | 0    | 0    | 0    | 0    | 0    | 1    | 0        | 0        | 0        | 0        |
| protein_co fibrinogen_  | 0    | 0    | 0    | 1    | 0    | 0    | 0        | 0        | 0        | 0.036851 |
| protein_co pleiotropic  | 793  | 618  | 721  | 643  | 817  | 928  | 11.09632 | 11.08929 | 12.17277 | 13.96521 |
| protein_co zinc_finger  | 203  | 186  | 181  | 42   | 65   | 64   | 3.513722 | 4.128513 | 3.780054 | 1.128369 |
| protein_co Down_sync    | 11   | 10   | 24   | 2    | 3    | 8    | 0.060312 | 0.070311 | 0.158771 | 0.017021 |
| protein_co dynein_axc   | 0    | 0    | 0    | 6    | 3    | 0    | 0        | 0        | 0        | 0.176436 |
| protein_co neuromedi    | 0    | 0    | 0    | 10   | 7    | 11   | 0        | 0        | 0        | 0.220679 |
| protein_co calsyntenin  | 5200 | 3883 | 4150 | 3965 | 4897 | 3582 | 46.70142 | 44.72017 | 44.97    | 55.27139 |
| protein_co CXXC_finge   | 5481 | 4005 | 4331 | 3584 | 4589 | 2702 | 96.69081 | 90.60189 | 92.18529 | 98.13499 |
| protein_co zinc_finger  | 333  | 265  | 255  | 456  | 525  | 444  | 3.218132 | 3.284088 | 2.973362 | 6.839981 |
| protein_co phosphatic   | 614  | 534  | 579  | 767  | 858  | 346  | 5.250861 | 5.856157 | 5.974324 | 10.18094 |
| protein_co pre_T-cell_  | 0    | 1    | 0    | 0    | 0    | 0    | 0        | 0.055676 | 0        | 0        |
| protein_co solute_carr  | 338  | 265  | 313  | 328  | 479  | 375  | 10.94532 | 11.00442 | 12.22937 | 16.48603 |
| protein_co ectodermal   | 1795 | 1295 | 1574 | 406  | 416  | 415  | 15.25604 | 14.11421 | 16.14099 | 5.355918 |
| protein_co splA/ryano   | 917  | 698  | 771  | 143  | 196  | 78   | 13.78146 | 13.45211 | 13.98068 | 3.335741 |
| protein_co pyrimidine   | 0    | 2    | 1    | 1    | 5    | 3    | 0        | 0.05015  | 0.023593 | 0.03035  |
| protein_co bromodom     | 2701 | 2105 | 2432 | 3178 | 3188 | 3453 | 11.2159  | 11.20911 | 12.18488 | 20.48302 |
| protein_co S100_calci   | 1    | 0    | 0    | 0    | 2    | 2    | 0.031941 | 0        | 0        | 0        |
| protein_co zinc_finger  | 130  | 106  | 134  | 438  | 525  | 676  | 1.457953 | 1.524458 | 1.813231 | 7.624385 |
| protein_co G_protein-i  | 3    | 0    | 6    | 2    | 9    | 3    | 0.042004 | 0        | 0.10136  | 0.043464 |
| pseudogen -             | 20   | 10   | 10   | 0    | 0    | 0    | 0.524204 | 0.336108 | 0.316241 | 0        |
| protein_co G_protein-i  | 4    | 1    | 8    | 1    | 3    | 1    | 0.097484 | 0.031252 | 0.235241 | 0.037827 |
| antisense SHANK2_ar     | 0    | 0    | 0    | 4    | 3    | 2    | 0        | 0        | 0        | 0.172976 |
| protein_co pleckstrin_  | 2210 | 1824 | 1971 | 940  | 1307 | 542  | 19.8481  | 21.00685 | 21.35804 | 13.10343 |
| protein_co activating_  | 1655 | 1397 | 1478 | 2048 | 2097 | 1473 | 16.01052 | 17.33058 | 17.25162 | 30.75161 |
| protein_co chromosom    | 13   | 12   | 10   | 8    | 17   | 7    | 0.70227  | 0.831288 | 0.651792 | 0.670782 |
| protein_co regulator_c  | 702  | 532  | 526  | 365  | 481  | 239  | 20.6634  | 20.08101 | 18.68093 | 16.67585 |
| protein_co transcripti  | 796  | 578  | 615  | 656  | 903  | 449  | 15.83558 | 14.74545 | 14.76196 | 20.25607 |
| protein_co anoctamin    | 10   | 13   | 13   | 168  | 190  | 155  | 0.070501 | 0.117529 | 0.110582 | 1.838371 |
| protein_co histone_de   | 980  | 746  | 725  | 906  | 982  | 1023 | 23.45698 | 22.89782 | 20.93785 | 33.65926 |
| protein_co chromosom    | 13   | 6    | 7    | 7    | 4    | 5    | 0.512675 | 0.30343  | 0.333077 | 0.428477 |
| protein_co gephyrin     | 214  | 164  | 172  | 196  | 165  | 230  | 2.335225 | 2.294924 | 2.2646   | 3.319721 |
| protein_co vesicle_ami  | 3632 | 3371 | 3459 | 193  | 239  | 521  | 44.52406 | 52.99282 | 51.16201 | 3.672288 |
| protein_co transmembr   | 265  | 186  | 207  | 191  | 293  | 152  | 6.398483 | 5.759084 | 6.030448 | 7.158055 |
| protein_co calmodulin   | 788  | 631  | 601  | 771  | 1041 | 681  | 4.375809 | 4.493356 | 4.02675  | 6.645337 |
| protein_co lectin_gala  | 1    | 0    | 0    | 0    | 0    | 2    | 0.030547 | 0        | 0        | 0        |
| protein_co leucine_ric  | 56   | 50   | 39   | 156  | 204  | 118  | 0.693383 | 0.793897 | 0.582637 | 2.998059 |
| protein_co phenylalan   | 0    | 1    | 0    | 26   | 23   | 17   | 0        | 0.014588 | 0        | 0.459067 |
| protein_co spermatog    | 230  | 172  | 187  | 238  | 314  | 367  | 4.196383 | 4.024251 | 4.116583 | 6.739919 |
| protein_co glycine_am   | 12   | 16   | 16   | 156  | 186  | 111  | 0.143871 | 0.245993 | 0.231452 | 2.903004 |
| protein_co synaptone    | 0    | 0    | 0    | 1    | 1    | 0    | 0        | 0        | 0        | 0.029359 |
| protein_co nucleoredc   | 0    | 0    | 0    | 1    | 0    | 0    | 0        | 0        | 0        | 0.076934 |
| protein_co RAS_guany    | 5    | 8    | 4    | 21   | 46   | 16   | 0.070767 | 0.145197 | 0.068307 | 0.461327 |
| protein_co nescient_h   | 6    | 5    | 7    | 11   | 12   | 18   | 0.10977  | 0.117304 | 0.154518 | 0.31236  |
| protein_co schlafen-lik | 44   | 37   | 27   | 56   | 78   | 76   | 0.478692 | 0.516195 | 0.354417 | 0.945631 |
| protein_co B-cell_CLL/  | 287  | 192  | 204  | 79   | 97   | 48   | 1.803704 | 1.547369 | 1.546898 | 0.770621 |
| protein_co RAD9-HUS1    | 493  | 403  | 445  | 595  | 677  | 619  | 12.36191 | 12.95845 | 13.46315 | 23.15721 |
| protein_co CTP_syntha   | 1153 | 880  | 1013 | 944  | 1160 | 1558 | 16.90034 | 16.54086 | 17.91528 | 21.47675 |
| protein_co undifferent  | 0    | 0    | 0    | 6262 | 7743 | 4233 | 0        | 0        | 0        | 393.9042 |

|                         |      |      |      |      |      |      |          |          |          |          |
|-------------------------|------|------|------|------|------|------|----------|----------|----------|----------|
| protein_co kinase_non   | 3    | 5    | 3    | 756  | 1232 | 483  | 0.020708 | 0.044259 | 0.024986 | 8.099739 |
| protein_co WD_repeat    | 0    | 0    | 0    | 0    | 2    | 2    | 0        | 0        | 0        | 0        |
| protein_co methyltran   | 50   | 51   | 60   | 97   | 87   | 95   | 1.541421 | 2.016186 | 2.231775 | 4.641447 |
| protein_co tetratricop  | 12   | 11   | 25   | 23   | 25   | 18   | 0.067973 | 0.079902 | 0.170861 | 0.202215 |
| protein_co collagen_ty  | 2084 | 1525 | 1672 | 89   | 139  | 41   | 20.9248  | 19.63553 | 20.25573 | 1.387024 |
| protein_co PWWP_do      | 376  | 292  | 330  | 741  | 927  | 320  | 6.650565 | 6.623124 | 7.042594 | 20.3432  |
| protein_co protocadhe   | 0    | 0    | 0    | 3    | 4    | 4    | 0        | 0        | 0        | 0.086164 |
| protein_co zinc_finger  | 7    | 4    | 2    | 6    | 3    | 1    | 0.104299 | 0.076428 | 0.035955 | 0.13876  |
| protein_co angiopoieti  | 5    | 3    | 2    | 0    | 1    | 5    | 0.104759 | 0.080603 | 0.050559 | 0        |
| protein_co F-box_and_   | 774  | 565  | 633  | 466  | 574  | 493  | 17.19227 | 16.09348 | 16.96461 | 16.06603 |
| protein_co exosome_c    | 956  | 833  | 843  | 695  | 808  | 926  | 13.44537 | 15.02343 | 14.30508 | 15.17155 |
| protein_co zinc_finger  | 78   | 67   | 64   | 56   | 55   | 43   | 1.627691 | 1.792922 | 1.611407 | 1.813827 |
| protein_co ninjurin_2   | 177  | 121  | 132  | 12   | 4    | 6    | 6.62902  | 5.811266 | 5.96483  | 0.69757  |
| protein_co myeloid/ly   | 318  | 238  | 277  | 174  | 174  | 136  | 2.201864 | 2.113244 | 2.314149 | 1.870007 |
| protein_co family_witl  | 3    | 6    | 7    | 15   | 22   | 4    | 0.055977 | 0.143565 | 0.157592 | 0.43442  |
| protein_co ribonucleo   | 3434 | 2688 | 2886 | 2123 | 2474 | 4313 | 43.83891 | 44.0046  | 44.45328 | 42.06684 |
| protein_co trafficking_ | 1961 | 1438 | 1562 | 1039 | 1334 | 1147 | 27.03656 | 25.42389 | 25.98381 | 22.23411 |
| protein_co ribosomal_   | 4032 | 2892 | 3161 | 4895 | 5556 | 4639 | 188.6832 | 173.5483 | 178.4782 | 355.546  |
| protein_co compleme     | 273  | 215  | 230  | 0    | 0    | 0    | 6.130735 | 6.191526 | 6.231976 | 0        |
| protein_co RNA_methy    | 330  | 277  | 268  | 397  | 426  | 559  | 8.553734 | 9.207271 | 8.381556 | 15.97213 |
| protein_co phosphata    | 2063 | 1576 | 1728 | 748  | 852  | 850  | 10.71609 | 10.4979  | 10.83001 | 6.030718 |
| protein_co ribosomal_   | 5860 | 4484 | 4642 | 7475 | 8221 | 7812 | 50.61254 | 49.66329 | 48.37419 | 100.208  |
| protein_co prion_prot   | 24   | 12   | 15   | 0    | 0    | 2    | 0.282754 | 0.181296 | 0.213224 | 0        |
| protein_co ribonuclea   | 608  | 470  | 463  | 438  | 719  | 751  | 13.4477  | 13.33066 | 12.35588 | 15.03658 |
| protein_co prion_prot   | 3465 | 2647 | 2772 | 236  | 306  | 330  | 61.14938 | 59.90349 | 59.0242  | 6.464446 |
| protein_co Kruppel-lik  | 7    | 5    | 2    | 0    | 0    | 2    | 0.104832 | 0.096023 | 0.036139 | 0        |
| protein_co adrenocept   | 97   | 78   | 85   | 4    | 6    | 5    | 1.699041 | 1.752008 | 1.796383 | 0.108748 |
| protein_co FERM_dom     | 440  | 356  | 423  | 290  | 367  | 201  | 4.117264 | 4.271843 | 4.775781 | 4.211962 |
| protein_co aquaporin_   | 0    | 0    | 0    | 41   | 40   | 22   | 0        | 0        | 0        | 0.565789 |
| processed_MIR31_hos     | 140  | 113  | 136  | 0    | 2    | 1    | 8.811547 | 9.120358 | 10.32788 | 0        |
| protein_co cytochrom    | 2    | 1    | 2    | 0    | 1    | 0    | 0.032653 | 0.020937 | 0.039398 | 0        |
| protein_co talin_2      | 1079 | 824  | 908  | 692  | 845  | 749  | 4.258782 | 4.170619 | 4.324121 | 4.239362 |
| protein_co lectin_gala  | 0    | 1    | 1    | 0    | 0    | 0    | 0        | 0.020404 | 0.019198 | 0        |
| protein_co trans-golgi  | 621  | 522  | 509  | 253  | 304  | 349  | 8.8292   | 9.517208 | 8.731635 | 5.583168 |
| protein_co F-box_and_   | 0    | 1    | 0    | 0    | 3    | 0    | 0        | 0.017399 | 0        | 0        |
| protein_co zinc_finger  | 1542 | 1207 | 1163 | 1675 | 2055 | 1164 | 12.47488 | 12.52185 | 11.35219 | 21.03281 |
| pseudogen: SLIT-ROBO    | 113  | 124  | 122  | 68   | 72   | 50   | 5.468083 | 7.694628 | 7.123025 | 5.107354 |
| protein_co secretograr  | 1431 | 1345 | 1359 | 7    | 14   | 25   | 26.04799 | 31.39541 | 29.84709 | 0.197771 |
| protein_co ATP_syntha   | 412  | 285  | 342  | 284  | 308  | 318  | 11.12187 | 9.865856 | 11.13922 | 11.89952 |
| protein_co cytochrom    | 0    | 0    | 0    | 50   | 58   | 16   | 0        | 0        | 0        | 1.378405 |
| protein_co forkhead_b   | 0    | 0    | 0    | 385  | 485  | 947  | 0        | 0        | 0        | 16.75851 |
| protein_co peptidylpro  | 398  | 312  | 304  | 451  | 478  | 581  | 14.23511 | 14.31007 | 13.11896 | 25.03714 |
| protein_co leucine_ric  | 55   | 60   | 68   | 19   | 34   | 40   | 0.444264 | 0.621497 | 0.662728 | 0.238211 |
| protein_co zinc_finger  | 27   | 10   | 10   | 72   | 71   | 56   | 0.632067 | 0.300199 | 0.282454 | 2.616149 |
| protein_co chromosom    | 47   | 30   | 39   | 52   | 43   | 45   | 1.909732 | 1.563166 | 1.911997 | 3.279506 |
| protein_co jumonji_dc   | 1723 | 1368 | 1470 | 2104 | 1164 | 2311 | 9.322813 | 9.491987 | 9.596814 | 17.67006 |
| protein_co lactate_def  | 3    | 3    | 6    | 1    | 2    | 3    | 0.084537 | 0.108407 | 0.203998 | 0.043738 |
| protein_co synaptopor   | 3681 | 2720 | 2968 | 92   | 144  | 77   | 24.43751 | 23.15631 | 23.77405 | 0.948003 |
| protein_co mal_T-cell_  | 0    | 0    | 0    | 0    | 1    | 1    | 0        | 0        | 0        | 0        |
| protein_co zinc_finger  | 136  | 113  | 83   | 123  | 155  | 130  | 1.582785 | 1.68644  | 1.165492 | 2.22187  |
| protein_co RAB33B_m     | 211  | 157  | 180  | 193  | 228  | 167  | 2.16874  | 2.069351 | 2.232265 | 3.079023 |
| protein_co thimet_oli   | 1798 | 1325 | 1459 | 2012 | 2670 | 2556 | 28.31987 | 26.76251 | 27.72713 | 49.1881  |
| protein_co growth_ass   | 1345 | 1065 | 1213 | 284  | 290  | 447  | 33.17574 | 33.6866  | 36.09999 | 10.87294 |
| protein_co epoxide_hy   | 83   | 63   | 80   | 14   | 35   | 14   | 2.708331 | 2.636171 | 3.149645 | 0.709059 |
| protein_co laminin_be   | 5427 | 3927 | 4060 | 1180 | 1511 | 1067 | 44.84881 | 41.61609 | 40.4823  | 15.13574 |
| protein_co ubiquitin_s  | 1490 | 1125 | 1176 | 1690 | 2215 | 1927 | 14.80528 | 14.33482 | 14.09892 | 26.06439 |
| protein_co glutaminyl-  | 3989 | 3092 | 3354 | 4838 | 5351 | 4505 | 67.69608 | 67.28966 | 68.67689 | 127.4371 |
| protein_co ORM1-like    | 1089 | 822  | 944  | 854  | 1082 | 1253 | 22.89831 | 22.16444 | 23.94945 | 27.87173 |
| protein_co small_EDR    | 0    | 0    | 1    | 0    | 0    | 0    | 0        | 0        | 0.02995  | 0        |
| protein_co Kruppel-lik  | 280  | 242  | 237  | 269  | 386  | 325  | 3.255444 | 3.608086 | 3.32467  | 4.854393 |
| protein_co leucine_ric  | 633  | 550  | 561  | 0    | 0    | 1    | 5.04528  | 5.621518 | 5.395012 | 0        |
| protein_co survival_of  | 136  | 100  | 128  | 189  | 193  | 273  | 4.114221 | 3.879342 | 4.672042 | 8.87444  |
| protein_co eukaryotic   | 346  | 290  | 330  | 260  | 304  | 256  | 3.492025 | 3.753259 | 4.018493 | 4.072912 |
| protein_co testis_expr  | 0    | 0    | 0    | 9    | 8    | 1    | 0        | 0        | 0        | 0.823922 |
| protein_co MOB_kinas    | 1240 | 963  | 1011 | 197  | 274  | 163  | 17.14645 | 17.07608 | 16.86754 | 4.228139 |

|                         |      |      |      |       |       |      |          |          |          |          |
|-------------------------|------|------|------|-------|-------|------|----------|----------|----------|----------|
| protein_co lysine-rich_ | 388  | 297  | 300  | 125   | 159   | 82   | 10.3784  | 10.18742 | 9.68206  | 5.189661 |
| protein_co NME/NM2C     | 391  | 283  | 328  | 225   | 265   | 245  | 9.148701 | 8.491383 | 9.259863 | 8.171385 |
| protein_co cytochrom    | 2634 | 1928 | 2149 | 2720  | 3208  | 3969 | 30.13868 | 28.28947 | 29.66832 | 48.30675 |
| protein_co CD8b_mole    | 0    | 0    | 0    | 7     | 4     | 5    | 0        | 0        | 0        | 0.359533 |
| protein_co schlafen_fa  | 65   | 50   | 74   | 62    | 76    | 92   | 1.200414 | 1.184124 | 1.648912 | 1.777215 |
| protein_co calbindin_   | 25   | 14   | 27   | 30    | 31    | 39   | 0.799625 | 0.574227 | 1.041977 | 1.489355 |
| protein_co solute_carr  | 28   | 11   | 20   | 7     | 6     | 5    | 0.314698 | 0.15854  | 0.271215 | 0.122114 |
| protein_co chemokine    | 8    | 9    | 6    | 0     | 0     | 0    | 0.347655 | 0.501546 | 0.3146   | 0        |
| protein_co FERM_dom     | 19   | 16   | 9    | 8     | 12    | 13   | 0.168191 | 0.181627 | 0.096126 | 0.109919 |
| protein_co syntrophin   | 830  | 613  | 651  | 243   | 342   | 253  | 7.536544 | 7.137793 | 7.132195 | 3.424766 |
| protein_co Mdm2_tra     | 181  | 157  | 124  | 145   | 165   | 152  | 2.514694 | 2.797149 | 2.078626 | 3.126836 |
| protein_co transcripti  | 151  | 92   | 102  | 133   | 122   | 178  | 3.357227 | 2.623016 | 2.736226 | 4.589717 |
| protein_co mitochond    | 403  | 313  | 394  | 401   | 381   | 475  | 7.980016 | 7.9479   | 9.413323 | 12.32462 |
| protein_co mucosa_as    | 1043 | 932  | 960  | 226   | 239   | 168  | 9.72292  | 11.14135 | 10.79771 | 3.270027 |
| protein_co interferon_  | 101  | 86   | 87   | 39    | 67    | 41   | 0.840591 | 0.917849 | 0.873637 | 0.503801 |
| protein_co membrane     | 145  | 106  | 126  | 317   | 381   | 262  | 2.112163 | 1.980043 | 2.214512 | 7.167194 |
| protein_co inhibitor_c  | 383  | 259  | 296  | 52    | 108   | 168  | 7.661637 | 6.644035 | 7.144347 | 1.614569 |
| protein_co G_protein+   | 0    | 5    | 0    | 3     | 2     | 0    | 0        | 0.102401 | 0        | 0.074366 |
| protein_co chemokine    | 2    | 4    | 6    | 3     | 5     | 5    | 0.033433 | 0.085747 | 0.121017 | 0.077839 |
| protein_co CCAAT/enh    | 302  | 232  | 220  | 395   | 628   | 296  | 7.708647 | 7.593964 | 6.77551  | 15.64944 |
| protein_co azurocidin_  | 2    | 4    | 0    | 22    | 47    | 10   | 0.054746 | 0.140408 | 0        | 0.934708 |
| protein_co tryptase_al  | 0    | 0    | 0    | 1     | 1     | 3    | 0        | 0        | 0        | 0.053633 |
| protein_co atonal_hon   | 0    | 0    | 0    | 2     | 7     | 16   | 0        | 0        | 0        | 0.123356 |
| protein_co poly(A)_bin  | 1830 | 1437 | 1474 | 1189  | 1704  | 1525 | 30.84426 | 31.05914 | 29.97566 | 31.10539 |
| protein_co C-type_lect  | 8    | 5    | 6    | 1     | 2     | 2    | 0.100703 | 0.080711 | 0.091128 | 0.019538 |
| protein_co chromosom    | 61   | 66   | 55   | 64    | 134   | 58   | 1.140922 | 1.582994 | 1.241186 | 1.857961 |
| protein_co C1q_and_t    | 17   | 2    | 9    | 186   | 255   | 101  | 0.479045 | 0.072271 | 0.305997 | 8.135242 |
| processed_serine_hyd    | 27   | 17   | 14   | 21    | 36    | 28   | 0.739504 | 0.597083 | 0.46265  | 0.892743 |
| protein_co neuronal_g   | 626  | 478  | 481  | 104   | 124   | 99   | 5.053047 | 4.947847 | 4.684596 | 1.302995 |
| protein_co zinc_finger  | 455  | 387  | 371  | 440   | 501   | 603  | 6.387712 | 6.967135 | 6.284285 | 9.587758 |
| protein_co MACRO_do     | 10   | 2    | 4    | 15    | 20    | 8    | 0.093893 | 0.024081 | 0.045315 | 0.218602 |
| protein_co dolichyl-ph  | 878  | 713  | 783  | 701   | 733   | 674  | 12.57466 | 13.09485 | 13.53043 | 15.58297 |
| protein_co basigin_(Ok  | 6140 | 4713 | 4831 | 10578 | 12654 | 8788 | 134.3466 | 132.2407 | 127.5391 | 359.2463 |
| protein_co histone_H4   | 285  | 241  | 230  | 410   | 461   | 427  | 3.833521 | 4.156994 | 3.73275  | 8.559873 |
| protein_co ceramide_s   | 611  | 446  | 480  | 201   | 292   | 228  | 3.971417 | 3.717478 | 3.764381 | 2.027826 |
| protein_co serine_paln  | 92   | 66   | 67   | 14    | 8     | 5    | 1.12634  | 1.036179 | 0.989702 | 0.266036 |
| protein_co coordinato   | 778  | 565  | 582  | 497   | 598   | 482  | 34.35069 | 31.98996 | 31.00466 | 34.05985 |
| protein_co TP53_regul   | 411  | 312  | 312  | 270   | 353   | 473  | 5.48273  | 5.337268 | 5.02178  | 5.590483 |
| protein_co UDP-Gal:be   | 18   | 20   | 12   | 45    | 66    | 88   | 0.389308 | 0.554703 | 0.313149 | 1.510651 |
| protein_co C-type_lect  | 4    | 2    | 2    | 0     | 0     | 0    | 0.111576 | 0.071541 | 0.067312 | 0        |
| protein_co 23-bisphos   | 333  | 281  | 281  | 227   | 266   | 233  | 7.613055 | 8.238163 | 7.751203 | 8.055102 |
| protein_co processing_  | 883  | 636  | 641  | 1220  | 1487  | 1503 | 44.66439 | 41.2541  | 39.12071 | 95.78356 |
| protein_co ALG14_UD     | 67   | 51   | 54   | 10    | 18    | 10   | 3.041269 | 2.968654 | 2.95748  | 0.704548 |
| protein_co succinate-C  | 857  | 812  | 713  | 816   | 986   | 689  | 17.08535 | 20.7591  | 17.15065 | 25.25014 |
| protein_co StAR-relate  | 209  | 136  | 135  | 32    | 32    | 18   | 2.01191  | 1.678845 | 1.567993 | 0.478126 |
| protein_co cold_shock   | 453  | 304  | 308  | 2     | 9     | 13   | 7.648966 | 6.582448 | 6.274849 | 0.052416 |
| protein_co regulator_c  | 73   | 73   | 52   | 84    | 96    | 69   | 1.028846 | 1.319349 | 0.884258 | 1.837542 |
| protein_co interleukin  | 51   | 33   | 33   | 2     | 1     | 2    | 0.287392 | 0.238467 | 0.224371 | 0.017493 |
| protein_co ATP-bindin   | 15   | 20   | 21   | 40    | 70    | 12   | 0.182736 | 0.312444 | 0.308674 | 0.75635  |
| protein_co guanine_nu   | 6362 | 4628 | 4893 | 3141  | 3517  | 2620 | 158.8468 | 148.1793 | 147.4036 | 121.726  |
| protein_co coiled-coil  | 9    | 9    | 12   | 7     | 4     | 1    | 0.22799  | 0.292365 | 0.366778 | 0.275234 |
| protein_co family_witl  | 176  | 149  | 138  | 378   | 616   | 381  | 4.775835 | 5.184803 | 4.518183 | 15.92058 |
| protein_co PDZ_domai    | 1    | 1    | 0    | 5     | 6     | 0    | 0.015651 | 0.02007  | 0        | 0.121462 |
| protein_co C2CD2-like   | 243  | 202  | 225  | 69    | 76    | 56   | 1.921139 | 2.047921 | 2.146263 | 0.846705 |
| protein_co aryl-hydroc  | 473  | 320  | 350  | 292   | 338   | 294  | 3.315243 | 2.876164 | 2.959855 | 3.176637 |
| protein_co guanine_nu   | 3121 | 2543 | 2625 | 634   | 906   | 717  | 33.22973 | 34.72072 | 33.72178 | 10.47738 |
| protein_co protease_sc  | 16   | 19   | 18   | 66    | 95    | 26   | 0.209623 | 0.319214 | 0.284537 | 1.342125 |
| protein_co myozenin_    | 4    | 1    | 3    | 0     | 0     | 2    | 0.072222 | 0.023154 | 0.065355 | 0        |
| protein_co synaptopor   | 978  | 790  | 838  | 4     | 5     | 23   | 6.286283 | 6.511657 | 6.499009 | 0.039907 |
| protein_co DnaJ_(Hsp4   | 2    | 0    | 3    | 3     | 2     | 5    | 0.036377 | 0        | 0.065837 | 0.084693 |
| protein_co cleavage_ar  | 284  | 261  | 267  | 391   | 461   | 561  | 5.468897 | 6.445124 | 6.203556 | 11.68661 |
| protein_co insulin-like | 0    | 2    | 0    | 0     | 0     | 0    | 0        | 0.168195 | 0        | 0        |
| protein_co tetratricop  | 0    | 0    | 3    | 1     | 0     | 0    | 0        | 0        | 0.168213 | 0.072131 |
| protein_co radial_spok  | 38   | 17   | 20   | 22    | 21    | 13   | 0.689026 | 0.395285 | 0.437552 | 0.619163 |
| protein_co myeloma_c    | 1005 | 791  | 827  | 566   | 657   | 787  | 51.11114 | 51.58641 | 50.74614 | 44.67827 |

|                         |       |      |      |      |      |      |          |          |          |          |
|-------------------------|-------|------|------|------|------|------|----------|----------|----------|----------|
| protein_co GTP_bindir   | 1598  | 1262 | 1343 | 1067 | 1093 | 781  | 25.54731 | 25.87242 | 25.90552 | 26.47666 |
| protein_co FGGY_carb    | 141   | 84   | 95   | 142  | 166  | 106  | 2.66056  | 2.032556 | 2.162846 | 4.158846 |
| protein_co interleukin  | 476   | 342  | 351  | 90   | 152  | 61   | 11.99336 | 11.05018 | 10.67061 | 3.519711 |
| pseudogen: protease_s   | 0     | 0    | 2    | 0    | 0    | 0    | 0        | 0        | 0.039275 | 0        |
| protein_co fucosyltran  | 0     | 0    | 0    | 34   | 37   | 21   | 0        | 0        | 0        | 0.911423 |
| protein_co transcriptic | 126   | 98   | 106  | 33   | 37   | 16   | 4.919352 | 4.906511 | 4.993342 | 1.999778 |
| protein_co zinc_finger  | 1613  | 1284 | 1348 | 1124 | 1346 | 1517 | 10.19458 | 10.40661 | 10.27952 | 11.02635 |
| protein_co mannosida    | 295   | 246  | 236  | 68   | 83   | 93   | 3.023509 | 3.233209 | 2.91843  | 1.081754 |
| protein_co RAB40A_m     | 18    | 20   | 20   | 13   | 27   | 25   | 0.27     | 0.384708 | 0.361967 | 0.302667 |
| protein_co chromosor    | 0     | 0    | 0    | 0    | 2    | 0    | 0        | 0        | 0        | 0        |
| protein_co AF4/FMR2_    | 1490  | 1193 | 1306 | 1570 | 1931 | 1823 | 7.440482 | 7.639494 | 7.868755 | 12.16872 |
| protein_co acyl-CoA_tl  | 0     | 0    | 0    | 1    | 1    | 0    | 0        | 0        | 0        | 0.03489  |
| protein_co fibroblast_  | 1442  | 1096 | 1100 | 845  | 910  | 966  | 49.06778 | 47.82457 | 45.16187 | 44.62912 |
| protein_co carnosine_   | 34    | 28   | 33   | 35   | 49   | 7    | 0.31476  | 0.332406 | 0.368606 | 0.502921 |
| protein_co BTG3_asso    | 504   | 324  | 394  | 517  | 583  | 331  | 9.693424 | 7.990998 | 9.143047 | 15.43362 |
| protein_co protein_ph   | 3731  | 2781 | 2938 | 2959 | 3734 | 3180 | 104.3212 | 99.71435 | 99.11678 | 128.4171 |
| protein_co host_cell_f  | 6692  | 4843 | 5379 | 5284 | 7299 | 8272 | 35.38031 | 32.83443 | 34.31273 | 43.36097 |
| protein_co cathepsin_   | 7     | 4    | 4    | 4    | 9    | 5    | 0.244765 | 0.179358 | 0.168756 | 0.217091 |
| protein_co NIPA-like_c  | 48    | 35   | 56   | 4    | 2    | 0    | 0.687453 | 0.642805 | 0.967693 | 0.088919 |
| protein_co mucin-like_  | 0     | 0    | 0    | 0    | 1    | 0    | 0        | 0        | 0        | 0        |
| protein_co syntrophin   | 7     | 8    | 6    | 156  | 160  | 133  | 0.173851 | 0.254787 | 0.179795 | 6.013585 |
| protein_co fibronectin  | 4     | 6    | 4    | 4    | 2    | 4    | 0.088264 | 0.169778 | 0.106495 | 0.136997 |
| protein_co phosphodi    | 125   | 90   | 96   | 61   | 84   | 49   | 0.773661 | 0.714319 | 0.716902 | 0.586004 |
| protein_co RAS_guany    | 11    | 14   | 14   | 70   | 81   | 42   | 0.102686 | 0.167593 | 0.157686 | 1.014252 |
| protein_co kelch-like_f | 0     | 2    | 0    | 3    | 3    | 4    | 0        | 0.019095 | 0        | 0.034668 |
| protein_co coiled-coil  | 531   | 421  | 418  | 523  | 786  | 753  | 20.71431 | 21.06044 | 19.67434 | 31.66708 |
| protein_co mitochond    | 951   | 855  | 857  | 792  | 893  | 838  | 22.07545 | 25.45098 | 24.00258 | 28.53545 |
| protein_co sphingomy    | 50    | 28   | 48   | 17   | 9    | 14   | 1.266613 | 0.909581 | 1.467112 | 0.668426 |
| protein_co Rho_family   | 8     | 3    | 14   | 40   | 59   | 55   | 0.175618 | 0.084452 | 0.370813 | 1.362918 |
| protein_co RAD9_hom     | 205   | 173  | 185  | 292  | 414  | 344  | 4.536316 | 4.909134 | 4.939343 | 10.02912 |
| protein_co EGF_contai   | 2863  | 2164 | 2276 | 143  | 156  | 82   | 58.95745 | 57.14575 | 56.55066 | 4.570712 |
| protein_co olfactory_r  | 0     | 0    | 0    | 1    | 5    | 2    | 0        | 0        | 0        | 0.06677  |
| protein_co ArfGAP_wit   | 3     | 4    | 2    | 5    | 5    | 5    | 0.057889 | 0.098979 | 0.046564 | 0.149753 |
| protein_co chromosor    | 3     | 0    | 2    | 0    | 0    | 1    | 0.053938 | 0        | 0.043386 | 0        |
| protein_co TAF15_RNA    | 4207  | 3487 | 3739 | 4076 | 5134 | 5215 | 90.03483 | 95.69722 | 96.54761 | 135.395  |
| protein_co family_witl  | 653   | 559  | 542  | 354  | 406  | 428  | 6.604655 | 7.250336 | 6.614306 | 5.557388 |
| protein_co transmemt    | 542   | 382  | 415  | 469  | 517  | 287  | 13.61972 | 12.30953 | 12.58244 | 18.29246 |
| protein_co zinc_finger  | 2090  | 1678 | 1743 | 565  | 726  | 222  | 10.4189  | 10.72696 | 10.48385 | 4.37174  |
| protein_co zinc_finger  | 112   | 89   | 87   | 146  | 174  | 111  | 1.608478 | 1.639066 | 1.507525 | 3.254472 |
| protein_co thymocyte    | 0     | 1    | 0    | 1    | 1    | 0    | 0        | 0.014662 | 0        | 0.017747 |
| protein_co v-mos_Mol    | 0     | 0    | 0    | 2    | 3    | 0    | 0        | 0        | 0        | 0.139827 |
| protein_co zinc_finger  | 249   | 189  | 216  | 875  | 1039 | 795  | 4.781169 | 4.65378  | 5.004222 | 26.07794 |
| protein_co membrane     | 0     | 0    | 1    | 0    | 0    | 0    | 0        | 0        | 0.024641 | 0        |
| protein_co schlafen_fa  | 1370  | 1164 | 1220 | 28   | 28   | 17   | 12.77124 | 13.91473 | 13.72209 | 0.405136 |
| protein_co family_witl  | 1     | 1    | 0    | 2    | 0    | 1    | 0.021952 | 0.028151 | 0        | 0.068146 |
| protein_co coronin_ac   | 3204  | 2431 | 2458 | 1885 | 2437 | 1574 | 76.88619 | 74.80836 | 71.16816 | 70.20979 |
| protein_co fucosyltran  | 155   | 141  | 133  | 395  | 413  | 208  | 1.900118 | 2.216549 | 1.967201 | 7.515823 |
| protein_co leucine_ri   | 533   | 402  | 411  | 813  | 974  | 554  | 7.320556 | 7.08031  | 6.810935 | 17.33157 |
| protein_co MUS81_en     | 615   | 519  | 511  | 296  | 425  | 310  | 8.431977 | 9.12496  | 8.453241 | 6.299071 |
| protein_co purine-rich  | 134   | 106  | 106  | 98   | 136  | 59   | 2.185483 | 2.216959 | 2.085914 | 2.480842 |
| protein_co transmemt    | 4     | 7    | 3    | 8    | 4    | 12   | 0.12132  | 0.272257 | 0.109784 | 0.37661  |
| protein_co olfactory_r  | 0     | 0    | 0    | 1    | 0    | 0    | 0        | 0        | 0        | 0.077016 |
| pseudogen: -            | 0     | 0    | 0    | 1    | 0    | 0    | 0        | 0        | 0        | 0.146438 |
| protein_co zinc_finger  | 88    | 57   | 66   | 39   | 57   | 59   | 1.438745 | 1.195048 | 1.301947 | 0.989683 |
| protein_co collagen_ty  | 1     | 1    | 1    | 2    | 1    | 4    | 0.005082 | 0.006517 | 0.006132 | 0.015777 |
| protein_co cofilin_1_(  | 12560 | 9001 | 9735 | 6593 | 7886 | 7552 | 336.1522 | 308.9203 | 314.3622 | 273.8797 |
| protein_co transmemt    | 649   | 508  | 540  | 367  | 451  | 280  | 5.078708 | 5.097786 | 5.098594 | 4.457641 |
| protein_co N(alpha)-ac  | 342   | 283  | 293  | 362  | 478  | 422  | 3.68907  | 3.914592 | 3.813348 | 6.060798 |
| protein_co EF-hand_ca   | 7     | 3    | 2    | 5    | 8    | 5    | 0.058539 | 0.032172 | 0.02018  | 0.064901 |
| protein_co family_witl  | 1248  | 971  | 1039 | 968  | 1175 | 1049 | 20.54731 | 20.50071 | 20.63973 | 24.73695 |
| protein_co RAB43_me     | 117   | 78   | 95   | 87   | 163  | 55   | 1.228147 | 1.049949 | 1.203195 | 1.417471 |
| protein_co fatty_acid_  | 0     | 0    | 0    | 10   | 12   | 1    | 0        | 0        | 0        | 0.34657  |
| protein_co COBW_dor     | 165   | 136  | 157  | 137  | 157  | 227  | 2.118525 | 2.239226 | 2.432189 | 2.730239 |
| protein_co homeobox     | 49    | 29   | 43   | 0    | 0    | 3    | 1.272915 | 0.966074 | 1.347782 | 0        |
| protein_co RAB37_me     | 1     | 1    | 1    | 130  | 172  | 53   | 0.012327 | 0.015807 | 0.014873 | 2.487217 |

|                         |      |      |      |      |      |      |          |          |          |          |
|-------------------------|------|------|------|------|------|------|----------|----------|----------|----------|
| protein_co DCP2_deca    | 900  | 724  | 819  | 2174 | 2525 | 1958 | 4.716778 | 4.865762 | 5.178869 | 17.68451 |
| protein_co sorting_ne   | 27   | 28   | 23   | 10   | 33   | 6    | 0.524019 | 0.696868 | 0.538591 | 0.301241 |
| protein_co ribosomal_   | 4532 | 3358 | 3600 | 6225 | 6034 | 5300 | 86.73696 | 82.41463 | 83.13135 | 184.9201 |
| protein_co cytochrom    | 0    | 4    | 3    | 4    | 5    | 8    | 0        | 0.109228 | 0.077078 | 0.132207 |
| protein_co ovo-like_1(  | 0    | 0    | 0    | 132  | 224  | 97   | 0        | 0        | 0        | 3.166425 |
| protein_co retinoic_ac  | 1077 | 910  | 961  | 1014 | 1226 | 643  | 17.06676 | 18.4921  | 18.37413 | 24.94043 |
| protein_co carboxylest  | 23   | 23   | 35   | 1    | 4    | 8    | 0.315434 | 0.4045   | 0.579158 | 0.021287 |
| protein_co carboxylest  | 3    | 0    | 2    | 42   | 60   | 40   | 0.03669  | 0        | 0.029513 | 0.797275 |
| protein_co slingshot_f  | 344  | 269  | 263  | 611  | 781  | 406  | 5.394704 | 5.409671 | 4.976374 | 14.87239 |
| protein_co carboxylest  | 1113 | 813  | 841  | 412  | 533  | 350  | 13.28968 | 12.44857 | 12.11612 | 7.635671 |
| protein_co pyruvate_d   | 221  | 212  | 208  | 329  | 427  | 214  | 2.589379 | 3.185287 | 2.940456 | 5.983147 |
| protein_co Sp3_transc   | 1246 | 986  | 1123 | 922  | 978  | 1180 | 9.187759 | 9.323475 | 9.99124  | 10.55244 |
| protein_co Dmx-like_1   | 632  | 539  | 579  | 503  | 519  | 509  | 2.676526 | 2.9272   | 2.958564 | 3.30638  |
| protein_co methionyl_   | 217  | 165  | 201  | 49   | 65   | 110  | 2.976055 | 2.901847 | 3.326024 | 1.043057 |
| protein_co zinc_finger  | 671  | 514  | 512  | 381  | 490  | 427  | 4.933083 | 4.845832 | 4.541652 | 4.347617 |
| protein_co EGF-like-do  | 542  | 381  | 382  | 1040 | 1244 | 759  | 11.95971 | 10.78092 | 10.17028 | 35.61929 |
| protein_co NAD_synth    | 1054 | 725  | 894  | 578  | 623  | 539  | 13.66761 | 12.05589 | 13.98742 | 11.6335  |
| protein_co 7-dehydroc   | 6741 | 5207 | 5630 | 2585 | 2853 | 4710 | 118.5617 | 117.4403 | 119.4749 | 70.56856 |
| pseudogen: -            | 0    | 0    | 0    | 1    | 3    | 0    | 0        | 0        | 0        | 0.033663 |
| protein_co Aminopept    | 3    | 1    | 3    | 3    | 0    | 0    | 0.030707 | 0.013126 | 0.03705  | 0.047662 |
| pseudogen: cytochrom    | 0    | 0    | 1    | 0    | 0    | 2    | 0        | 0        | 0.217598 | 0        |
| protein_co neurobeacl   | 419  | 340  | 359  | 418  | 419  | 432  | 1.766968 | 1.838666 | 1.826658 | 2.736034 |
| protein_co ribonuclea   | 495  | 381  | 359  | 260  | 276  | 341  | 8.307287 | 8.199518 | 7.269365 | 6.772637 |
| protein_co myeloma_c    | 23   | 36   | 40   | 17   | 14   | 7    | 0.436982 | 0.877096 | 0.916945 | 0.50132  |
| protein_co ankyrin_rej  | 1101 | 755  | 861  | 399  | 573  | 281  | 17.91944 | 15.75772 | 16.90785 | 10.07954 |
| protein_co MAS-relate   | 56   | 39   | 49   | 67   | 100  | 58   | 1.144157 | 1.021814 | 1.20793  | 2.124726 |
| protein_co myeloid_di   | 1097 | 868  | 906  | 399  | 428  | 561  | 15.52153 | 15.74914 | 15.46693 | 8.762565 |
| protein_co MAS-relate   | 0    | 0    | 0    | 1    | 0    | 0    | 0        | 0        | 0        | 0.075341 |
| protein_co oxidative-s  | 1330 | 1086 | 1245 | 1271 | 1467 | 1201 | 13.69728 | 14.3424  | 15.47035 | 20.31696 |
| protein_co solute_carr  | 5    | 3    | 5    | 6    | 2    | 3    | 0.091761 | 0.070603 | 0.110715 | 0.170911 |
| protein_co PHD_finger   | 759  | 572  | 666  | 770  | 859  | 836  | 5.870921 | 5.673745 | 6.215653 | 9.244547 |
| protein_co lysocardiol  | 190  | 138  | 145  | 146  | 185  | 177  | 1.760692 | 1.639904 | 1.621235 | 2.099971 |
| protein_co alcohol_de   | 2    | 4    | 2    | 3    | 7    | 13   | 0.028103 | 0.072076 | 0.033908 | 0.06543  |
| processed_ -            | 513  | 454  | 505  | 7    | 10   | 16   | 15.15726 | 17.20159 | 18.00292 | 0.32102  |
| protein_co FSHD_regic   | 3    | 5    | 6    | 3    | 2    | 4    | 0.067695 | 0.144682 | 0.163356 | 0.105072 |
| pseudogen: unc-93_hoi   | 5    | 11   | 4    | 0    | 3    | 0    | 0.341267 | 0.962777 | 0.329406 | 0        |
| pseudogen: -            | 19   | 20   | 39   | 39   | 53   | 44   | 0.707072 | 0.954441 | 1.751147 | 2.252708 |
| protein_co K(lysine)_ac | 332  | 262  | 259  | 286  | 343  | 406  | 6.780264 | 6.861501 | 6.381993 | 9.065777 |
| protein_co SH3_domai    | 1553 | 1149 | 1452 | 30   | 44   | 41   | 23.28011 | 22.08732 | 26.26203 | 0.698016 |
| protein_co glucoside_)  | 959  | 738  | 773  | 96   | 99   | 48   | 13.79372 | 13.61221 | 13.41499 | 2.143209 |
| protein_co heparanase   | 2    | 1    | 1    | 4    | 1    | 3    | 0.040863 | 0.0262   | 0.024652 | 0.126849 |
| protein_co dephospho    | 820  | 593  | 615  | 998  | 1312 | 718  | 18.80187 | 17.43617 | 17.01415 | 35.51797 |
| protein_co cAMP-regul   | 18   | 9    | 15   | 0    | 0    | 0    | 0.245855 | 0.157637 | 0.247199 | 0        |
| protein_co transcriptic | 596  | 466  | 498  | 420  | 461  | 415  | 7.319657 | 7.339048 | 7.379414 | 8.006159 |
| protein_co coiled-coil_ | 70   | 52   | 44   | 2    | 4    | 11   | 1.526652 | 1.454302 | 1.157824 | 0.067702 |
| protein_co adrenergic_  | 2971 | 2332 | 2344 | 2342 | 3093 | 2048 | 31.00606 | 31.20914 | 29.51546 | 37.93686 |
| protein_co v-rel_reticu | 1969 | 1407 | 1562 | 490  | 548  | 423  | 29.00611 | 26.57952 | 27.76341 | 11.20393 |
| protein_co Ellis_van_C  | 305  | 211  | 285  | 160  | 171  | 116  | 2.96219  | 2.627876 | 3.339689 | 2.411924 |
| protein_co zinc_finger  | 85   | 60   | 78   | 222  | 204  | 229  | 1.318879 | 1.193841 | 1.460255 | 5.346498 |
| protein_co HECT_domi    | 2047 | 1450 | 1622 | 917  | 1231 | 786  | 6.230696 | 5.659734 | 5.956863 | 4.3323   |
| protein_co family_witl  | 590  | 430  | 482  | 2166 | 2685 | 1906 | 6.591639 | 6.160546 | 6.497354 | 37.56041 |
| protein_co basonuclin   | 2419 | 1839 | 1938 | 586  | 656  | 462  | 8.831124 | 8.609366 | 8.536541 | 3.320536 |
| protein_co deleted_in_  | 3    | 4    | 2    | 4    | 9    | 6    | 0.052963 | 0.090557 | 0.042602 | 0.109608 |
| protein_co relaxin/insu | 7    | 7    | 3    | 2    | 1    | 1    | 0.286414 | 0.367285 | 0.148103 | 0.127015 |
| protein_co heparanase   | 23   | 16   | 15   | 40   | 41   | 18   | 0.231829 | 0.206809 | 0.182423 | 0.625794 |
| protein_co coenzyme_    | 217  | 179  | 177  | 201  | 253  | 269  | 6.200569 | 6.558948 | 6.102294 | 8.914528 |
| protein_co chromosom    | 2    | 1    | 2    | 2    | 0    | 3    | 0.075568 | 0.048453 | 0.091177 | 0.117292 |
| protein_co coiled-coil_ | 0    | 0    | 0    | 13   | 14   | 6    | 0        | 0        | 0        | 0.47473  |
| protein_co heat_shock   | 12   | 3    | 3    | 1    | 0    | 0    | 0.212653 | 0.068174 | 0.064145 | 0.027506 |
| protein_co tRNA_meth    | 2240 | 1691 | 1722 | 2502 | 3216 | 2161 | 94.96712 | 91.93444 | 88.08591 | 164.6429 |
| protein_co leucine_ric  | 301  | 197  | 209  | 4    | 1    | 11   | 3.788965 | 3.180019 | 3.174304 | 0.078153 |
| protein_co lysine_(K)-s | 2453 | 1930 | 2087 | 1343 | 1511 | 1877 | 17.66568 | 17.82376 | 18.1344  | 15.01202 |
| protein_co chromosom    | 0    | 0    | 0    | 6    | 15   | 12   | 0        | 0        | 0        | 0.189284 |
| protein_co aarF_doma    | 278  | 196  | 186  | 172  | 254  | 137  | 6.430895 | 5.814228 | 5.191438 | 6.175691 |
| protein_co mitochond    | 635  | 501  | 483  | 651  | 860  | 796  | 13.25697 | 13.41275 | 12.1665  | 21.09512 |

|                         |      |      |      |      |      |      |          |          |          |          |
|-------------------------|------|------|------|------|------|------|----------|----------|----------|----------|
| protein_co nucleolar_c  | 322  | 286  | 313  | 298  | 297  | 372  | 4.370068 | 4.977459 | 5.125364 | 6.27739  |
| protein_co estrogen-re  | 813  | 517  | 630  | 1033 | 1615 | 991  | 16.69802 | 13.61678 | 15.61216 | 32.93103 |
| protein_co ras_homolo   | 527  | 359  | 391  | 199  | 271  | 135  | 21.88755 | 19.1201  | 19.59347 | 12.82833 |
| protein_co ADAM_met     | 214  | 184  | 200  | 126  | 109  | 98   | 1.651492 | 1.820915 | 1.862262 | 1.509259 |
| protein_co copper_me    | 475  | 376  | 410  | 227  | 237  | 208  | 24.44869 | 24.81757 | 25.46208 | 18.13503 |
| protein_co Ras_associa  | 646  | 492  | 549  | 218  | 285  | 185  | 3.088392 | 3.016299 | 3.166798 | 1.617659 |
| protein_co metaxin_1    | 477  | 383  | 435  | 382  | 506  | 421  | 8.672562 | 8.929706 | 9.542592 | 10.7801  |
| protein_co adenylate_1  | 47   | 34   | 35   | 434  | 608  | 554  | 0.30144  | 0.279635 | 0.270844 | 4.320399 |
| protein_co poly_(ADP-   | 663  | 599  | 627  | 425  | 486  | 362  | 3.684732 | 4.269023 | 4.204438 | 3.666163 |
| protein_co cysteinyl_1  | 0    | 0    | 0    | 0    | 0    | 3    | 0        | 0        | 0        | 0        |
| protein_co poly_(ADP-   | 2    | 0    | 2    | 3    | 5    | 10   | 0.021126 | 0        | 0.02549  | 0.049187 |
| protein_co CDC28_prc    | 1307 | 1015 | 1140 | 2625 | 2979 | 2417 | 52.56025 | 52.34283 | 55.31396 | 163.8482 |
| protein_co ATP-bindin   | 0    | 0    | 1    | 0    | 1    | 1    | 0        | 0        | 0.009069 | 0        |
| protein_co AHA1_activ   | 570  | 502  | 502  | 385  | 537  | 293  | 9.146923 | 10.33031 | 9.71968  | 9.589399 |
| protein_co actin_bindi  | 66   | 65   | 71   | 4    | 8    | 5    | 0.677334 | 0.855425 | 0.879155 | 0.063716 |
| protein_co mab-21-lik   | 0    | 1    | 0    | 0    | 0    | 0    | 0        | 0.018622 | 0        | 0        |
| protein_co Tubulin_be   | 0    | 0    | 1    | 28   | 35   | 4    | 0        | 0        | 0.029299 | 1.055326 |
| protein_co KIAA1919     | 278  | 214  | 232  | 142  | 194  | 245  | 2.187886 | 2.159748 | 2.203007 | 1.734597 |
| protein_co VANG1_pla    | 928  | 750  | 800  | 498  | 604  | 512  | 5.006781 | 5.188971 | 5.207733 | 4.17033  |
| protein_co glutaredoxi  | 1090 | 887  | 857  | 184  | 257  | 194  | 15.0015  | 15.65457 | 14.23106 | 3.930579 |
| protein_co IQ_motif_c   | 575  | 478  | 490  | 823  | 950  | 791  | 10.39389 | 11.0802  | 10.68697 | 23.09089 |
| protein_co synaptotag   | 60   | 41   | 50   | 420  | 647  | 185  | 0.466722 | 0.408978 | 0.469273 | 5.070922 |
| protein_co golgin_B1    | 3479 | 2994 | 3332 | 1262 | 505  | 1065 | 14.56781 | 16.07685 | 16.83422 | 8.202189 |
| pseudogen: telomeric_1  | 0    | 0    | 0    | 1    | 0    | 1    | 0        | 0        | 0        | 0.061626 |
| protein_co chromosom    | 0    | 0    | 0    | 0    | 2    | 0    | 0        | 0        | 0        | 0        |
| protein_co lipase_fami  | 0    | 1    | 1    | 0    | 2    | 0    | 0        | 0.041412 | 0.038964 | 0        |
| protein_co G_protein-i  | 0    | 1    | 0    | 0    | 0    | 1    | 0        | 0.019472 | 0        | 0        |
| protein_co doublesex_   | 95   | 74   | 90   | 1    | 0    | 1    | 1.81153  | 1.809518 | 2.070677 | 0.029597 |
| protein_co zinc_finger_ | 13   | 24   | 13   | 238  | 259  | 167  | 0.166777 | 0.394833 | 0.201226 | 4.73915  |
| protein_co PLAC8-like_  | 5    | 2    | 4    | 9    | 8    | 0    | 0.367477 | 0.188495 | 0.354705 | 1.026674 |
| protein_co solute_carr  | 0    | 2    | 1    | 37   | 33   | 29   | 0        | 0.029154 | 0.013715 | 0.652813 |
| protein_co G_protein-i  | 680  | 430  | 475  | 599  | 725  | 535  | 17.30071 | 14.0292  | 14.58132 | 23.65442 |
| protein_co synuclein_1  | 7    | 9    | 2    | 47   | 54   | 40   | 0.413388 | 0.681572 | 0.142508 | 4.308124 |
| protein_co multimerin   | 8    | 6    | 6    | 26   | 49   | 34   | 0.090894 | 0.087419 | 0.082252 | 0.458511 |
| protein_co mitotic_spi  | 1355 | 1065 | 1040 | 1117 | 1572 | 1107 | 22.48265 | 22.66038 | 20.82043 | 28.76682 |
| protein_co tankyrase_1  | 2353 | 1863 | 2048 | 1305 | 1357 | 920  | 11.46904 | 11.64468 | 12.04435 | 9.872936 |
| protein_co zinc_finger_ | 154  | 148  | 176  | 54   | 80   | 73   | 1.913878 | 2.358656 | 2.639091 | 1.04164  |
| protein_co zinc_finger_ | 243  | 203  | 225  | 352  | 381  | 218  | 1.529638 | 1.638656 | 1.708886 | 3.439185 |
| protein_co protein_ph   | 540  | 438  | 404  | 393  | 575  | 554  | 4.563917 | 4.747089 | 4.119774 | 5.155455 |
| pseudogen: family_wit1  | 12   | 12   | 13   | 86   | 90   | 70   | 0.198897 | 0.255057 | 0.259979 | 2.212465 |
| protein_co storkhead_1  | 30   | 27   | 40   | 1191 | 1437 | 1683 | 0.13451  | 0.15524  | 0.216391 | 8.288463 |
| protein_co mitogen-ac   | 1561 | 1127 | 1265 | 1527 | 2228 | 1217 | 13.05893 | 12.09033 | 12.7686  | 19.82779 |
| protein_co tribbles_hc  | 1476 | 1077 | 1159 | 923  | 961  | 1096 | 19.0398  | 17.81562 | 18.03879 | 18.48026 |
| protein_co potassium_1  | 4    | 2    | 1    | 9    | 20   | 9    | 0.12     | 0.076942 | 0.036197 | 0.419078 |
| protein_co compleme1    | 0    | 1    | 0    | 0    | 0    | 0    | 0        | 0.04795  | 0        | 0        |
| protein_co compleme1    | 0    | 1    | 1    | 0    | 0    | 0    | 0        | 0.052607 | 0.049497 | 0        |
| protein_co neuron-der   | 31   | 31   | 36   | 48   | 66   | 27   | 0.503844 | 0.646109 | 0.705968 | 1.210894 |
| protein_co IQ_motif_c   | 1    | 3    | 1    | 0    | 4    | 0    | 0.06294  | 0.242133 | 0.07594  | 0        |
| protein_co GLI_pathog   | 5    | 6    | 3    | 2    | 4    | 6    | 0.207111 | 0.318709 | 0.149935 | 0.128586 |
| protein_co dystroglyca  | 3061 | 2510 | 2369 | 3711 | 4380 | 3877 | 24.63617 | 25.90556 | 23.00504 | 46.35871 |
| protein_co insulinoma   | 0    | 0    | 0    | 241  | 296  | 190  | 0        | 0        | 0        | 6.206628 |
| protein_co Dab_reelin   | 21   | 21   | 33   | 245  | 251  | 308  | 0.185861 | 0.23834  | 0.352396 | 3.365619 |
| protein_co ARV1_hom     | 154  | 124  | 146  | 102  | 129  | 186  | 5.409036 | 5.58509  | 6.187284 | 5.560704 |
| protein_co N(alpha)-ac  | 902  | 756  | 783  | 317  | 467  | 471  | 26.36833 | 28.34048 | 27.61759 | 14.38354 |
| protein_co coiled-coil_ | 2    | 1    | 0    | 2    | 2    | 0    | 0.032986 | 0.02115  | 0        | 0.051199 |
| protein_co serum_amy    | 2    | 5    | 4    | 0    | 0    | 1    | 0.138933 | 0.445406 | 0.335262 | 0        |
| protein_co mitochond    | 57   | 45   | 53   | 36   | 51   | 66   | 0.720025 | 0.728944 | 0.807786 | 0.705839 |
| protein_co EH_domain    | 1979 | 1589 | 1642 | 120  | 233  | 112  | 17.89688 | 18.42743 | 17.91649 | 1.684393 |
| protein_co THAP_dom     | 136  | 97   | 107  | 66   | 93   | 36   | 1.115062 | 1.019862 | 1.058503 | 0.839914 |
| protein_co transmemt    | 31   | 26   | 28   | 1    | 1    | 0    | 0.358557 | 0.385638 | 0.390753 | 0.017953 |
| protein_co ring_finger_ | 1228 | 993  | 1047 | 2107 | 2264 | 1861 | 20.66055 | 21.42407 | 21.25388 | 55.02226 |
| protein_co protein_ph   | 5955 | 4624 | 4871 | 5648 | 7653 | 6454 | 284.3483 | 283.1366 | 280.6306 | 418.595  |
| protein_co Sjogren_sy   | 459  | 376  | 356  | 519  | 678  | 639  | 19.98377 | 20.99239 | 18.70091 | 35.07216 |
| protein_co SWI/SNF_r    | 5289 | 4192 | 4363 | 7068 | 7903 | 7869 | 38.90216 | 39.53947 | 38.71983 | 80.69139 |
| protein_co zinc_finger_ | 164  | 140  | 158  | 154  | 192  | 217  | 2.137882 | 2.340331 | 2.485107 | 3.115955 |

|                         |      |      |      |      |      |      |          |          |          |          |
|-------------------------|------|------|------|------|------|------|----------|----------|----------|----------|
| protein_co protein_ty   | 1044 | 855  | 908  | 361  | 403  | 262  | 8.031695 | 8.434943 | 8.428311 | 4.310666 |
| protein_co FK506_bin    | 992  | 777  | 850  | 693  | 1048 | 762  | 46.42205 | 46.6276  | 47.99319 | 50.33573 |
| protein_co vascular_er  | 1557 | 1197 | 1214 | 350  | 353  | 284  | 53.13519 | 52.38382 | 49.98738 | 18.53925 |
| protein_co Homo_sapi    | 2383 | 1996 | 2199 | 1341 | 1403 | 755  | 9.538106 | 10.24491 | 10.61968 | 8.331004 |
| protein_co tumor_nec    | 4067 | 3337 | 3455 | 203  | 225  | 147  | 53.90099 | 56.71372 | 55.24827 | 4.17589  |
| protein_co macrophag    | 55   | 36   | 30   | 93   | 121  | 38   | 0.621135 | 0.521357 | 0.408783 | 1.630183 |
| protein_co tumor_nec    | 35   | 25   | 21   | 111  | 123  | 28   | 0.955268 | 0.874997 | 0.691552 | 4.702304 |
| protein_co MOB_kinas    | 1018 | 792  | 843  | 494  | 631  | 568  | 6.855384 | 6.839408 | 6.849512 | 5.163467 |
| protein_co zinc_finger  | 801  | 611  | 654  | 643  | 777  | 801  | 22.10648 | 21.62408 | 21.77774 | 27.54409 |
| protein_co chondroitin  | 7803 | 5720 | 6249 | 268  | 375  | 175  | 44.13544 | 41.48883 | 42.6466  | 2.352833 |
| protein_co sorting_ne   | 1009 | 779  | 807  | 674  | 932  | 832  | 5.908095 | 5.84929  | 5.701353 | 6.125573 |
| protein_co nucleic_aci  | 101  | 97   | 103  | 15   | 40   | 49   | 1.398256 | 1.722052 | 1.720483 | 0.32232  |
| protein_co nudix_(nuc   | 155  | 130  | 151  | 55   | 57   | 40   | 4.138925 | 4.451522 | 4.864978 | 2.27955  |
| protein_co G_protein-i  | 8    | 4    | 9    | 71   | 63   | 70   | 0.0935   | 0.05995  | 0.126914 | 1.287978 |
| protein_co chromodor    | 3243 | 2617 | 2825 | 2264 | 2712 | 2178 | 15.42704 | 15.96426 | 16.21445 | 16.71639 |
| protein_co coiled-coil  | 837  | 639  | 646  | 561  | 616  | 397  | 18.15307 | 17.77194 | 16.90461 | 18.88505 |
| protein_co chemokine    | 0    | 2    | 0    | 3    | 2    | 0    | 0        | 0.046848 | 0        | 0.085056 |
| protein_co coiled-coil  | 254  | 216  | 211  | 161  | 202  | 160  | 3.741773 | 4.080439 | 3.750371 | 3.681291 |
| protein_co sulfotransf  | 1    | 3    | 2    | 0    | 0    | 0    | 0.032813 | 0.126235 | 0.079182 | 0        |
| protein_co nudix_(nuc   | 1708 | 1231 | 1451 | 1114 | 1588 | 958  | 16.49601 | 15.24609 | 16.90856 | 16.69963 |
| protein_co pyruvate_c   | 612  | 464  | 487  | 345  | 452  | 381  | 6.845585 | 6.655588 | 6.572584 | 5.98975  |
| protein_co UDP_glucu    | 0    | 0    | 0    | 0    | 0    | 1    | 0        | 0        | 0        | 0        |
| protein_co suppressor   | 112  | 97   | 84   | 134  | 178  | 85   | 2.030813 | 2.255449 | 1.837719 | 3.771266 |
| protein_co G_protein-i  | 0    | 0    | 0    | 10   | 4    | 2    | 0        | 0        | 0        | 0.254475 |
| protein_co nicotinami   | 159  | 154  | 143  | 37   | 51   | 31   | 1.971836 | 2.449085 | 2.139724 | 0.712206 |
| protein_co leucine_ri   | 1013 | 737  | 810  | 742  | 1243 | 745  | 19.53911 | 18.2294  | 18.85074 | 22.21416 |
| protein_co BET3_like_(  | 1    | 0    | 0    | 0    | 0    | 0    | 0.019368 | 0        | 0        | 0        |
| protein_co apolipopro   | 0    | 1    | 0    | 1    | 1    | 1    | 0        | 0.022708 | 0        | 0.027485 |
| protein_co solute_carr  | 708  | 546  | 528  | 602  | 805  | 761  | 8.711134 | 8.614765 | 7.838328 | 11.49657 |
| protein_co heat_shock   | 32   | 28   | 45   | 7    | 9    | 5    | 0.518838 | 0.58217  | 0.880324 | 0.176161 |
| protein_co RCE1_homi    | 269  | 231  | 248  | 439  | 496  | 594  | 4.63899  | 5.108489 | 5.160252 | 11.75077 |
| protein_co ubiquinol-i  | 1903 | 1626 | 1651 | 3319 | 3960 | 3439 | 129.886  | 142.3159 | 135.9624 | 351.6101 |
| protein_co taste_recep  | 0    | 1    | 0    | 3    | 7    | 1    | 0        | 0.020792 | 0        | 0.075498 |
| protein_co hairy_and    | 0    | 0    | 0    | 966  | 1664 | 1669 | 0        | 0        | 0        | 100.8684 |
| protein_co eukaryotic   | 1106 | 820  | 890  | 1596 | 1827 | 2474 | 11.71456 | 11.13766 | 11.37389 | 26.23821 |
| protein_co Putative_sq  | 17   | 11   | 14   | 7    | 3    | 8    | 0.457595 | 0.379694 | 0.454683 | 0.292456 |
| protein_co chromosom    | 109  | 109  | 108  | 81   | 112  | 78   | 0.782937 | 1.004005 | 0.935992 | 0.903058 |
| protein_co proteasom    | 3024 | 2544 | 2588 | 2914 | 3289 | 3533 | 42.63241 | 45.99224 | 44.02207 | 63.76438 |
| protein_co G_protein-i  | 944  | 693  | 724  | 175  | 192  | 153  | 7.647577 | 7.199369 | 7.076825 | 2.200495 |
| protein_co mucin_13_    | 0    | 0    | 1    | 0    | 0    | 0    | 0        | 0        | 0.019672 | 0        |
| protein_co sushi_dom    | 281  | 190  | 187  | 19   | 12   | 46   | 2.632586 | 2.28265  | 2.11381  | 0.276287 |
| protein_co heart_deve   | 1155 | 861  | 993  | 253  | 346  | 486  | 5.915025 | 5.654407 | 6.13581  | 2.011063 |
| protein_co WAP_folli    | 0    | 1    | 1    | 0    | 0    | 0    | 0        | 0.016759 | 0.015768 | 0        |
| protein_co chromosom    | 213  | 186  | 164  | 146  | 196  | 145  | 4.299429 | 4.814525 | 3.994138 | 4.574193 |
| protein_co translocase  | 3192 | 2725 | 2661 | 5418 | 6218 | 4648 | 44.19041 | 48.37723 | 44.4486  | 116.4219 |
| protein_co Uncharacte   | 3    | 0    | 3    | 3    | 0    | 0    | 0.202987 | 0        | 0.244916 | 0.315064 |
| protein_co chromosom    | 0    | 1    | 1    | 0    | 1    | 1    | 0        | 0.071498 | 0.067272 | 0        |
| protein_co ArfGAP_wit   | 918  | 693  | 795  | 914  | 1294 | 1049 | 10.44275 | 10.10916 | 10.91158 | 16.13798 |
| protein_co signal_tran  | 953  | 833  | 859  | 1524 | 1760 | 1130 | 8.756846 | 9.815426 | 9.523488 | 21.73553 |
| protein_co CD7_molec    | 0    | 0    | 1    | 2    | 3    | 5    | 0        | 0        | 0.027994 | 0.072024 |
| protein_co testis_and   | 1    | 0    | 0    | 2    | 0    | 1    | 0.008791 | 0        | 0        | 0.027289 |
| protein_co 2'3'-cyclic_ | 3018 | 2246 | 2451 | 1367 | 1712 | 1453 | 53.20078 | 50.77125 | 52.13029 | 37.40225 |
| protein_co junction_p   | 3731 | 2685 | 2957 | 3906 | 4282 | 4090 | 50.02764 | 46.16772 | 47.83922 | 81.29194 |
| protein_co huntingtin   | 12   | 7    | 12   | 167  | 214  | 140  | 0.099011 | 0.074065 | 0.119463 | 2.138699 |
| protein_co tudor_dorr   | 2    | 0    | 0    | 41   | 53   | 29   | 0.023838 | 0        | 0        | 0.758508 |
| antisense CCDC13_ar     | 0    | 0    | 0    | 0    | 0    | 1    | 0        | 0        | 0        | 0        |
| protein_co eukaryotic   | 6048 | 4865 | 5078 | 3777 | 4236 | 4907 | 121.7128 | 125.55   | 123.3006 | 117.9782 |
| protein_co endonucle    | 462  | 321  | 391  | 150  | 180  | 120  | 7.695626 | 6.856719 | 7.858267 | 3.878142 |
| protein_co ring_finger  | 3765 | 3056 | 3432 | 2031 | 2793 | 1645 | 8.38475  | 8.727459 | 9.221901 | 7.02046  |
| protein_co tigger_tran  | 10   | 6    | 7    | 31   | 48   | 19   | 0.233052 | 0.179314 | 0.196833 | 1.121359 |
| protein_co potassium_   | 0    | 2    | 0    | 74   | 101  | 34   | 0        | 0.031473 | 0        | 1.409502 |
| protein_co membrane     | 2    | 0    | 1    | 5    | 5    | 6    | 0.028095 | 0        | 0.016949 | 0.109017 |
| protein_co polo-like_k  | 494  | 381  | 447  | 159  | 173  | 126  | 9.295212 | 9.193199 | 10.14817 | 4.643655 |
| protein_co neuroepith   | 4407 | 3575 | 3850 | 815  | 975  | 960  | 60.74201 | 63.18754 | 64.02578 | 17.43549 |
| protein_co dpy-19-like  | 1228 | 991  | 1054 | 281  | 344  | 310  | 11.8236  | 12.23586 | 12.24447 | 4.199409 |

|                              |      |      |      |      |       |      |          |          |          |          |
|------------------------------|------|------|------|------|-------|------|----------|----------|----------|----------|
| protein_co HCG16436          | 0    | 0    | 0    | 3    | 6     | 2    | 0        | 0        | 0        | 0.20637  |
| processed_ -                 | 7    | 0    | 2    | 1    | 4     | 3    | 0.54888  | 0        | 0.189216 | 0.121705 |
| protein_co phosphatase       | 9    | 7    | 11   | 11   | 14    | 12   | 0.194206 | 0.193699 | 0.286392 | 0.368421 |
| protein_co zinc_finger       | 433  | 316  | 372  | 333  | 428   | 356  | 4.458361 | 4.172379 | 4.621451 | 5.321843 |
| protein_co tubulin_beta      | 12   | 8    | 8    | 57   | 81    | 12   | 0.285915 | 0.24443  | 0.229982 | 2.107952 |
| protein_co polyhomeo         | 389  | 359  | 385  | 211  | 219   | 183  | 3.626286 | 4.29157  | 4.330332 | 3.05299  |
| protein_co G_protein-coupled | 2    | 4    | 2    | 583  | 727   | 477  | 0.045993 | 0.117959 | 0.055493 | 20.80953 |
| protein_co chromoblast       | 1053 | 744  | 761  | 4510 | 5708  | 5101 | 10.63204 | 9.633197 | 9.270878 | 70.67978 |
| protein_co spectrin_beta     | 2944 | 2183 | 2449 | 2138 | 3012  | 2335 | 16.98379 | 16.14953 | 17.04643 | 19.1441  |
| protein_co golgi_integ       | 4641 | 3660 | 3968 | 758  | 955   | 754  | 49.76368 | 50.32588 | 51.33583 | 12.61539 |
| protein_co RNA_binding       | 435  | 361  | 417  | 221  | 219   | 402  | 8.720461 | 9.2804   | 10.08636 | 6.876587 |
| protein_co up-regulated      | 900  | 593  | 717  | 665  | 856   | 736  | 53.48671 | 45.19261 | 51.41272 | 61.34166 |
| protein_co homeobox          | 1102 | 791  | 747  | 81   | 105   | 55   | 19.48446 | 17.93464 | 15.93586 | 2.222912 |
| protein_co C1q_and_t         | 110  | 84   | 100  | 42   | 54    | 45   | 1.663839 | 1.629324 | 1.825016 | 0.986049 |
| protein_co membrane          | 120  | 76   | 97   | 169  | 208   | 129  | 1.340992 | 1.0891   | 1.30787  | 2.931312 |
| protein_co SWIM-type         | 15   | 18   | 20   | 43   | 34    | 52   | 0.417666 | 0.642718 | 0.671918 | 1.858392 |
| protein_co solute_carr       | 65   | 42   | 62   | 88   | 95    | 257  | 0.571401 | 0.473463 | 0.657608 | 1.200717 |
| protein_co RNA_bindin        | 88   | 67   | 101  | 45   | 77    | 134  | 1.777821 | 1.735759 | 2.461924 | 1.411069 |
| protein_co primary_cil       | 1    | 2    | 1    | 59   | 63    | 46   | 0.012424 | 0.031865 | 0.014991 | 1.137787 |
| protein_co xyloside_xy       | 1174 | 918  | 967  | 418  | 509   | 531  | 20.18661 | 20.24171 | 20.06179 | 11.15583 |
| protein_co UBX_doma          | 656  | 493  | 522  | 324  | 509   | 456  | 5.070862 | 4.886909 | 4.868515 | 3.887348 |
| protein_co retina_and        | 0    | 0    | 0    | 1    | 3     | 1    | 0        | 0        | 0        | 0.029975 |
| protein_co leucine_ric       | 0    | 0    | 1    | 0    | 0     | 0    | 0        | 0        | 0.024313 | 0        |
| protein_co titin-cap         | 27   | 14   | 13   | 53   | 40    | 36   | 0.59634  | 0.396522 | 0.346435 | 1.816924 |
| protein_co copper_cha        | 685  | 573  | 613  | 466  | 554   | 370  | 22.4613  | 24.09397 | 24.2523  | 23.71705 |
| protein_co leucine_ric       | 10   | 12   | 7    | 167  | 221   | 137  | 0.182878 | 0.281419 | 0.154457 | 4.740338 |
| protein_co centrosom         | 40   | 39   | 52   | 16   | 36    | 30   | 0.852158 | 1.065453 | 1.336632 | 0.529067 |
| protein_co kelch-like_f      | 208  | 160  | 175  | 234  | 240   | 224  | 1.555026 | 1.533923 | 1.578558 | 2.715318 |
| protein_co F-box_prot        | 490  | 419  | 440  | 451  | 594   | 607  | 3.894916 | 4.270959 | 4.219905 | 5.56428  |
| protein_co spermatid         | 0    | 0    | 0    | 6    | 10    | 0    | 0        | 0        | 0        | 0.237068 |
| protein_co family_witl       | 0    | 1    | 0    | 0    | 4     | 1    | 0        | 0.019359 | 0        | 0        |
| protein_co guanine_nu        | 1725 | 1314 | 1359 | 961  | 1179  | 1070 | 87.91878 | 85.88103 | 83.57186 | 76.02325 |
| pseudogen: family_witl       | 155  | 116  | 147  | 53   | 61    | 87   | 10.67247 | 10.24237 | 12.21233 | 5.664214 |
| protein_co solute_carr       | 192  | 153  | 189  | 78   | 101   | 58   | 1.490297 | 1.522903 | 1.770033 | 0.939716 |
| protein_co chromosom         | 15   | 7    | 15   | 5    | 10    | 8    | 0.206322 | 0.12347  | 0.248939 | 0.106747 |
| protein_co CD34_mole         | 8    | 1    | 4    | 5    | 2     | 5    | 0.130522 | 0.020922 | 0.078741 | 0.126618 |
| protein_co cathepsin_l       | 0    | 0    | 1    | 83   | 122   | 69   | 0        | 0        | 0.027801 | 2.968414 |
| processed_phosphoin          | 5    | 3    | 2    | 1    | 2     | 0    | 0.069139 | 0.053197 | 0.033368 | 0.021463 |
| protein_co TBC1_doma         | 134  | 122  | 114  | 97   | 150   | 96   | 1.232496 | 1.438963 | 1.265125 | 1.384786 |
| protein_co methionine        | 1273 | 1009 | 1046 | 4    | 0     | 11   | 13.51392 | 13.73579 | 13.39778 | 0.065909 |
| protein_co mitochond         | 602  | 512  | 496  | 1069 | 986   | 1020 | 16.55589 | 18.05657 | 16.45833 | 45.63144 |
| protein_co LEM_doma          | 810  | 584  | 690  | 590  | 794   | 837  | 7.972484 | 7.371075 | 8.194185 | 9.013451 |
| protein_co chromosom         | 183  | 148  | 142  | 192  | 234   | 166  | 8.01202  | 8.309253 | 7.501141 | 13.04736 |
| protein_co suppressor        | 233  | 187  | 187  | 285  | 447   | 168  | 5.326852 | 5.482336 | 5.158274 | 10.11323 |
| protein_co toll-like_re      | 6    | 3    | 3    | 0    | 0     | 0    | 0.09882  | 0.063361 | 0.059616 | 0        |
| protein_co toll-like_re      | 31   | 38   | 36   | 0    | 3     | 1    | 0.247251 | 0.38866  | 0.34644  | 0        |
| protein_co family_witl       | 206  | 210  | 194  | 46   | 86    | 81   | 7.12341  | 9.312137 | 8.094136 | 2.468931 |
| protein_co RGM_doma          | 1391 | 1052 | 1122 | 365  | 424   | 419  | 14.24105 | 13.81147 | 13.85976 | 5.800137 |
| protein_co family_witl       | 33   | 28   | 30   | 53   | 64    | 25   | 0.552238 | 0.600869 | 0.605733 | 1.376634 |
| protein_co KIAA1239          | 2    | 0    | 0    | 1    | 2     | 6    | 0.011265 | 0        | 0        | 0.008742 |
| protein_co cytochrom         | 279  | 246  | 252  | 119  | 148   | 161  | 2.576781 | 2.913518 | 2.80816  | 1.705889 |
| protein_co zinc_finger       | 380  | 276  | 361  | 252  | 269   | 138  | 9.179911 | 8.550141 | 10.52229 | 9.449    |
| processed_ -                 | 68   | 51   | 60   | 5    | 5     | 2    | 1.09949  | 1.057455 | 1.170528 | 0.125482 |
| protein_co tRNA_meth         | 303  | 255  | 206  | 424  | 333   | 610  | 7.810707 | 8.429411 | 6.407122 | 16.96462 |
| protein_co selectin_P        | 0    | 0    | 0    | 0    | 0     | 1    | 0        | 0        | 0        | 0        |
| protein_co cytosolic_t       | 665  | 516  | 532  | 539  | 737   | 591  | 16.36843 | 16.28713 | 15.79956 | 20.59229 |
| protein_co ArfGAP_wit        | 32   | 43   | 38   | 14   | 32    | 21   | 0.535312 | 0.922434 | 0.766989 | 0.36351  |
| protein_co MGA_MAX           | 1092 | 900  | 891  | 721  | 777   | 752  | 4.252109 | 4.494006 | 4.18608  | 4.357601 |
| protein_co chromosom         | 76   | 59   | 81   | 210  | 236   | 90   | 1.320846 | 1.314921 | 1.698523 | 5.664847 |
| protein_co ADP-ribosy        | 2    | 4    | 4    | 2    | 5     | 1    | 0.061094 | 0.15669  | 0.147428 | 0.094827 |
| protein_co sorting_ne        | 1    | 0    | 0    | 2    | 0     | 0    | 0.019131 | 0        | 0        | 0.059388 |
| protein_co phosphatic        | 1023 | 770  | 836  | 514  | 623   | 816  | 13.63128 | 13.15713 | 13.4405  | 10.63053 |
| protein_co PRP8_pre-r        | 9742 | 7650 | 8573 | 8785 | 10219 | 9171 | 61.35696 | 61.78549 | 65.14732 | 85.87919 |
| protein_co adenylate_l       | 1809 | 1442 | 1529 | 141  | 217   | 95   | 13.12253 | 13.41386 | 13.38242 | 1.587554 |
| protein_co RAB15_eff         | 2    | 2    | 1    | 0    | 0     | 0    | 0.082335 | 0.105583 | 0.049671 | 0        |

|                         |       |       |       |       |       |       |          |          |          |          |
|-------------------------|-------|-------|-------|-------|-------|-------|----------|----------|----------|----------|
| protein_co phosphatic   | 1947  | 1470  | 1625  | 1277  | 1605  | 1363  | 23.33713 | 22.59479 | 23.50082 | 23.75762 |
| protein_co DEAD_(Asp    | 2492  | 1956  | 1996  | 1981  | 2248  | 2674  | 41.26057 | 41.53033 | 39.87454 | 50.90988 |
| protein_co zinc_finger  | 0     | 0     | 0     | 0     | 0     | 1     | 0        | 0        | 0        | 0        |
| protein_co zinc_finger  | 103   | 96    | 86    | 115   | 179   | 170   | 3.726599 | 4.454059 | 3.754239 | 6.458084 |
| protein_co even-skipp   | 5     | 5     | 1     | 0     | 0     | 0     | 0.055782 | 0.071532 | 0.013461 | 0        |
| protein_co zinc_finger  | 1876  | 1543  | 1545  | 665   | 1062  | 387   | 14.76925 | 15.57762 | 14.67582 | 8.126019 |
| protein_co tyrosine_ki  | 25    | 13    | 21    | 239   | 271   | 139   | 0.375481 | 0.25038  | 0.380553 | 5.571548 |
| protein_co zinc_finger  | 720   | 635   | 646   | 102   | 131   | 106   | 3.365983 | 3.806822 | 3.643846 | 0.740134 |
| protein_co pleckstrin   | 1577  | 1103  | 1256  | 1127  | 1680  | 502   | 48.29886 | 43.32016 | 46.41335 | 53.57468 |
| protein_co solute_carr  | 23    | 21    | 17    | 13    | 20    | 8     | 0.598153 | 0.700347 | 0.533435 | 0.524757 |
| protein_co solute_carr  | 272   | 205   | 217   | 60    | 106   | 80    | 7.296387 | 7.051835 | 7.023389 | 2.498163 |
| protein_co GLIS_famil   | 74    | 56    | 66    | 3     | 1     | 0     | 1.233948 | 1.197464 | 1.327875 | 0.077646 |
| protein_co cholinergic  | 78    | 73    | 57    | 15    | 19    | 34    | 1.606951 | 1.928592 | 1.416873 | 0.479656 |
| protein_co podocan      | 77    | 73    | 74    | 7     | 9     | 3     | 1.098428 | 1.335405 | 1.27368  | 0.154992 |
| protein_co stromal_an   | 59    | 61    | 51    | 18    | 47    | 47    | 1.294577 | 1.716386 | 1.350188 | 0.613026 |
| protein_co solute_carr  | 0     | 0     | 0     | 1     | 2     | 0     | 0        | 0        | 0        | 0.014066 |
| processed_small_nucl    | 115   | 66    | 68    | 103   | 122   | 140   | 2.033315 | 1.496443 | 1.450654 | 2.826666 |
| pseudogeni postmeioti   | 0     | 0     | 0     | 0     | 4     | 1     | 0        | 0        | 0        | 0        |
| protein_co chromosom    | 22    | 14    | 31    | 24    | 32    | 30    | 0.284652 | 0.232289 | 0.483952 | 0.481985 |
| protein_co exonucleas   | 255   | 203   | 211   | 515   | 560   | 640   | 3.442832 | 3.514641 | 3.43721  | 10.79228 |
| protein_co Ral_GTPase   | 385   | 307   | 326   | 260   | 320   | 227   | 2.255454 | 2.306328 | 2.3043   | 2.364161 |
| protein_co Williams-Bi  | 837   | 600   | 707   | 703   | 944   | 923   | 16.73644 | 15.38502 | 17.05709 | 21.81842 |
| antisense C20orf166     | 1     | 1     | 2     | 6     | 8     | 9     | 0.018139 | 0.023261 | 0.043772 | 0.168928 |
| protein_co ligase_IV_D  | 265   | 210   | 229   | 70    | 81    | 99    | 3.02848  | 3.077567 | 3.157638 | 1.241673 |
| protein_co chromosom    | 0     | 0     | 0     | 0     | 0     | 1     | 0        | 0        | 0        | 0        |
| protein_co thyrotropin  | 0     | 1     | 5     | 3     | 3     | 1     | 0        | 0.036223 | 0.170408 | 0.13153  |
| protein_co GTF2I_repe   | 61    | 38    | 67    | 19    | 22    | 48    | 0.806852 | 0.644551 | 1.069269 | 0.390075 |
| protein_co actin-bindi  | 2     | 1     | 1     | 0     | 0     | 0     | 0.03404  | 0.021826 | 0.020536 | 0        |
| protein_co ATPase_Ca+   | 6731  | 5315  | 5894  | 4145  | 5242  | 5338  | 38.3542  | 38.83702 | 40.52206 | 36.65965 |
| protein_co zwilch_kin   | 457   | 374   | 370   | 456   | 523   | 683   | 5.937583 | 6.23124  | 5.800204 | 9.195785 |
| protein_co ribosomal    | 25919 | 21070 | 21792 | 34567 | 34850 | 32437 | 439.2275 | 457.8731 | 445.5704 | 909.2083 |
| protein_co small_nucl   | 201   | 197   | 180   | 229   | 231   | 234   | 5.413494 | 6.803888 | 5.849277 | 9.572989 |
| protein_co StAR-relate  | 0     | 2     | 1     | 5     | 1     | 0     | 0        | 0.105956 | 0.049846 | 0.320616 |
| protein_co golgin_A6    | 1     | 0     | 0     | 0     | 0     | 0     | 0.015475 | 0        | 0        | 0        |
| protein_co von_Willeb   | 0     | 0     | 0     | 1     | 0     | 0     | 0        | 0        | 0        | 0.015787 |
| protein_co chromosom    | 75    | 71    | 64    | 216   | 221   | 70    | 1.595622 | 1.937031 | 1.642846 | 7.132685 |
| protein_co zinc_finger  | 20    | 9     | 13    | 8     | 10    | 11    | 0.42035  | 0.242568 | 0.329665 | 0.260976 |
| protein_co contactin_3  | 23    | 11    | 19    | 1723  | 2270  | 2236  | 0.109002 | 0.066851 | 0.108645 | 12.67431 |
| protein_co UDP-N-acet   | 19    | 11    | 8     | 2     | 5     | 5     | 0.227157 | 0.168646 | 0.115401 | 0.037114 |
| protein_co leucine_ric  | 39    | 21    | 29    | 52    | 44    | 25    | 0.600759 | 0.414824 | 0.538991 | 1.243282 |
| protein_co Bardet-Bie   | 9     | 9     | 8     | 11    | 13    | 7     | 0.117716 | 0.150953 | 0.126249 | 0.223313 |
| protein_co DENN/MAD     | 278   | 241   | 218   | 46    | 43    | 37    | 1.817544 | 2.020536 | 1.719668 | 0.466797 |
| protein_co immunoglob   | 46    | 32    | 40    | 2934  | 4101  | 2912  | 0.481567 | 0.429594 | 0.505251 | 47.67491 |
| protein_co germinal_c   | 24    | 17    | 15    | 33    | 54    | 41    | 0.337338 | 0.306417 | 0.254386 | 0.719944 |
| protein_co ankyrin_re   | 285   | 207   | 234   | 34    | 27    | 28    | 2.461985 | 2.293085 | 2.438959 | 0.455879 |
| protein_co solute_carr  | 3     | 1     | 2     | 2     | 2     | 0     | 0.029312 | 0.01253  | 0.023578 | 0.030331 |
| protein_co major_facil  | 21    | 24    | 27    | 19    | 25    | 13    | 0.240462 | 0.352409 | 0.373025 | 0.337684 |
| protein_co pellino_E3   | 145   | 108   | 107   | 106   | 171   | 139   | 2.443066 | 2.33346  | 2.175199 | 2.772066 |
| protein_co tetratricop  | 2     | 2     | 4     | 3     | 5     | 8     | 0.04037  | 0.051769 | 0.097418 | 0.09399  |
| protein_co myosin_IH    | 3     | 7     | 11    | 8     | 10    | 13    | 0.032234 | 0.09645  | 0.142606 | 0.133419 |
| protein_co transmembr   | 43    | 36    | 32    | 54    | 109   | 48    | 1.452645 | 1.559562 | 1.304334 | 2.831491 |
| protein_co mitochondr   | 660   | 462   | 495   | 1294  | 1407  | 1616  | 14.00969 | 12.57581 | 12.67763 | 42.63335 |
| protein_co kallikrein-r | 0     | 0     | 0     | 0     | 0     | 1     | 0        | 0        | 0        | 0        |
| protein_co interleukin  | 6     | 6     | 9     | 24    | 33    | 20    | 0.13744  | 0.176248 | 0.248744 | 0.853305 |
| protein_co golgi_trans  | 0     | 0     | 0     | 60    | 54    | 39    | 0        | 0        | 0        | 4.9454   |
| pseudogeni -            | 1     | 1     | 0     | 0     | 1     | 0     | 0.069985 | 0.089746 | 0        | 0        |
| protein_co akirin_1     | 1950  | 1443  | 1635  | 3311  | 4064  | 5191  | 33.35846 | 31.65534 | 33.74715 | 87.9146  |
| protein_co neuronal_F   | 1     | 0     | 0     | 0     | 4     | 3     | 0.014196 | 0        | 0        | 0        |
| protein_co male-specif  | 526   | 441   | 450   | 581   | 668   | 572   | 5.256639 | 5.651586 | 5.426039 | 9.012162 |
| protein_co zinc_finger  | 86    | 58    | 55    | 29    | 71    | 32    | 1.162786 | 1.005631 | 0.897247 | 0.608597 |
| protein_co Kruppel-lik  | 52    | 42    | 23    | 2     | 0     | 0     | 1.63863  | 1.697212 | 0.874487 | 0.097822 |
| protein_co translocati  | 73    | 57    | 54    | 37    | 39    | 33    | 1.69538  | 1.697572 | 1.513164 | 1.333756 |
| protein_co chemokine    | 111   | 76    | 105   | 29    | 23    | 4     | 0.985196 | 0.865013 | 1.124442 | 0.399511 |
| protein_co angel_hom    | 445   | 344   | 390   | 351   | 478   | 536   | 4.488289 | 4.449269 | 4.746063 | 5.494883 |
| protein_co UDP_glyco    | 5     | 5     | 5     | 669   | 832   | 777   | 0.057407 | 0.073616 | 0.069265 | 11.92206 |

|                         |       |       |       |       |       |       |          |          |          |          |
|-------------------------|-------|-------|-------|-------|-------|-------|----------|----------|----------|----------|
| protein_co kyphoscoli   | 0     | 0     | 0     | 1     | 2     | 1     | 0        | 0        | 0        | 0.018001 |
| protein_co IQ_motif_c   | 99    | 64    | 93    | 39    | 59    | 64    | 1.785428 | 1.480118 | 2.023662 | 1.091697 |
| protein_co solute_carr  | 19    | 11    | 9     | 67    | 58    | 74    | 0.210966 | 0.156625 | 0.120573 | 1.154688 |
| protein_co zinc_finger  | 301   | 255   | 260   | 307   | 336   | 294   | 3.206975 | 3.484003 | 3.342338 | 5.076891 |
| protein_co solute_carr  | 526   | 449   | 441   | 419   | 449   | 603   | 9.81072  | 10.73917 | 9.924343 | 12.12997 |
| protein_co BR_serine/f  | 18    | 19    | 12    | 678   | 876   | 639   | 0.206412 | 0.2794   | 0.166032 | 12.06767 |
| pseudogen: family_witl  | 1     | 0     | 0     | 0     | 0     | 0     | 0.014252 | 0        | 0        | 0        |
| antisense GRIK1_anti    | 0     | 3     | 0     | 2     | 0     | 2     | 0        | 0.220525 | 0        | 0.177946 |
| protein_co UDP-GlcNA    | 745   | 590   | 616   | 793   | 972   | 611   | 16.85959 | 17.1219  | 16.81974 | 27.85443 |
| protein_co transmembr   | 2731  | 2276  | 2313  | 1943  | 2112  | 2770  | 27.65802 | 29.55841 | 28.26331 | 30.54237 |
| protein_co leptin       | 0     | 0     | 0     | 2     | 4     | 0     | 0        | 0        | 0        | 0.042561 |
| protein_co SH3_and_P    | 5166  | 3952  | 4282  | 2469  | 3177  | 2278  | 31.14746 | 30.55586 | 31.15036 | 23.10574 |
| pseudogen: -            | 1     | 1     | 3     | 1     | 2     | 1     | 0.093036 | 0.119305 | 0.336759 | 0.144404 |
| protein_co KIAA1551     | 292   | 252   | 271   | 763   | 508   | 1867  | 2.19844  | 2.432998 | 2.461779 | 8.916344 |
| protein_co La_ribonuc   | 351   | 270   | 332   | 911   | 1169  | 1191  | 7.057631 | 6.961855 | 8.054489 | 28.43156 |
| protein_co fibroblast_  | 289   | 228   | 247   | 1282  | 1648  | 1662  | 5.324642 | 5.386874 | 5.490825 | 36.66157 |
| protein_co nuclear_re   | 388   | 292   | 347   | 383   | 414   | 479   | 3.460123 | 3.339274 | 3.733682 | 5.301381 |
| protein_co poly(A)_bir  | 35    | 28    | 31    | 35    | 29    | 15    | 0.509516 | 0.522705 | 0.544502 | 0.790839 |
| protein_co breast_canc  | 774   | 571   | 657   | 551   | 725   | 1044  | 19.97406 | 18.89604 | 20.45686 | 22.07026 |
| protein_co ribosomal_   | 13762 | 10736 | 11327 | 16022 | 17243 | 15589 | 236.3738 | 236.4665 | 234.7365 | 427.1348 |
| protein_co chromosom    | 109   | 99    | 82    | 7     | 11    | 14    | 1.874913 | 2.183731 | 1.701831 | 0.186889 |
| protein_co v-Ha-ras_Hi  | 952   | 662   | 779   | 343   | 437   | 534   | 36.20381 | 32.2838  | 35.74397 | 20.24612 |
| protein_co WD_repeat    | 0     | 0     | 1     | 1     | 2     | 4     | 0        | 0        | 0.02181  | 0.028057 |
| protein_co signal_reco  | 2836  | 2387  | 2503  | 1939  | 1789  | 2123  | 33.38692 | 36.03561 | 35.55322 | 35.43059 |
| protein_co Purkinje_c   | 0     | 2     | 0     | 4     | 9     | 4     | 0        | 0.154974 | 0        | 0.375154 |
| protein_co Ras_and_Ri   | 396   | 306   | 281   | 87    | 118   | 42    | 4.204811 | 4.166603 | 3.600026 | 1.433841 |
| protein_co chromosom    | 1     | 0     | 2     | 0     | 3     | 0     | 0.025021 | 0        | 0.060379 | 0        |
| protein_co THAP_dom     | 138   | 100   | 97    | 83    | 110   | 100   | 1.82328  | 1.694274 | 1.546301 | 1.702092 |
| protein_co centrosom    | 352   | 259   | 269   | 175   | 154   | 225   | 2.967509 | 2.800003 | 2.736212 | 2.289907 |
| protein_co frizzled_fan | 1968  | 1532  | 1653  | 328   | 423   | 348   | 12.49892 | 12.47716 | 12.66684 | 3.233343 |
| protein_co CD248_mo     | 1363  | 1064  | 1046  | 103   | 129   | 82    | 24.98479 | 25.01099 | 23.13447 | 2.930539 |
| protein_co betacelluli  | 0     | 4     | 1     | 3     | 2     | 2     | 0        | 0.085412 | 0.020091 | 0.077535 |
| protein_co PDZ_domai    | 6     | 9     | 9     | 12    | 11    | 6     | 0.135    | 0.259678 | 0.244328 | 0.419078 |
| protein_co egf-like_mc  | 0     | 3     | 3     | 1     | 0     | 0     | 0        | 0.057669 | 0.05426  | 0.032267 |
| protein_co DENN/MAC     | 486   | 397   | 366   | 286   | 324   | 324   | 4.895499 | 5.128148 | 4.448257 | 4.471541 |
| protein_co phosphodi    | 487   | 382   | 428   | 319   | 495   | 535   | 5.876335 | 5.910855 | 6.231167 | 5.974461 |
| protein_co glomulin_F   | 190   | 143   | 153   | 226   | 246   | 340   | 4.465716 | 4.310056 | 4.338873 | 8.244729 |
| protein_co dynein_axc   | 0     | 3     | 2     | 0     | 1     | 0     | 0        | 0.018905 | 0.011858 | 0        |
| protein_co Yip1_inter   | 2752  | 2057  | 2314  | 881   | 1044  | 948   | 114.8055 | 110.0418 | 116.4731 | 57.04538 |
| protein_co cornichon_   | 114   | 78    | 80    | 157   | 166   | 135   | 3.507521 | 3.077509 | 2.969843 | 7.497657 |
| protein_co NLR_family   | 0     | 3     | 0     | 3     | 17    | 8     | 0        | 0.061441 | 0        | 0.074366 |
| protein_co NADH_deh     | 94    | 71    | 70    | 66    | 123   | 149   | 1.831946 | 1.774404 | 1.646004 | 1.996453 |
| protein_co arginine/se  | 330   | 233   | 293   | 208   | 239   | 269   | 6.417962 | 5.810967 | 6.875414 | 6.278805 |
| protein_co catsper_chi  | 3     | 0     | 0     | 0     | 2     | 0     | 0.05591  | 0        | 0        | 0        |
| protein_co chromosom    | 0     | 0     | 1     | 3     | 10    | 1     | 0        | 0        | 0.038124 | 0.147129 |
| protein_co RAB1B_me     | 2072  | 1581  | 1701  | 1071  | 1290  | 1061  | 48.40863 | 47.36682 | 47.94964 | 38.83765 |
| pseudogen: methyltran   | 5     | 6     | 5     | 2     | 3     | 2     | 0.224354 | 0.345243 | 0.270696 | 0.139291 |
| protein_co phosphatic   | 803   | 644   | 717   | 1008  | 1329  | 1062  | 12.0373  | 12.37966 | 12.96823 | 23.45334 |
| protein_co chromosom    | 792   | 584   | 613   | 274   | 390   | 238   | 41.44743 | 39.19174 | 38.70623 | 22.25632 |
| protein_co chromosom    | 50    | 47    | 53    | 37    | 46    | 48    | 1.214138 | 1.463542 | 1.552823 | 1.394538 |
| protein_co seizure_reli | 1443  | 979   | 987   | 1586  | 2143  | 1174  | 17.80118 | 15.48726 | 14.69088 | 30.368   |
| protein_co aspartate_k  | 366   | 281   | 279   | 294   | 451   | 267   | 9.90863  | 9.755469 | 9.113491 | 12.35408 |
| protein_co potassium_   | 647   | 475   | 538   | 159   | 242   | 131   | 12.00073 | 11.29812 | 12.0402  | 4.577527 |
| protein_co purinergic_  | 0     | 0     | 1     | 1     | 7     | 3     | 0        | 0        | 0.022513 | 0.028961 |
| protein_co archaelysin  | 16    | 9     | 17    | 42    | 38    | 19    | 0.136012 | 0.098109 | 0.174363 | 0.554161 |
| protein_co G_protein-i  | 0     | 0     | 0     | 3     | 3     | 0     | 0        | 0        | 0        | 0.122251 |
| protein_co CD164_sial   | 0     | 0     | 0     | 34    | 36    | 15    | 0        | 0        | 0        | 1.698362 |
| protein_co fucosyltran  | 11    | 3     | 5     | 272   | 364   | 180   | 0.121477 | 0.042485 | 0.066622 | 4.662295 |
| protein_co DEAH_(Asp    | 1268  | 1000  | 1096  | 1105  | 1320  | 1672  | 8.830617 | 8.93061  | 9.20938  | 11.94441 |
| protein_co Zic_family_  | 602   | 515   | 586   | 83    | 119   | 109   | 6.517615 | 7.150045 | 7.654871 | 1.394764 |
| pseudogen: -            | 96    | 86    | 84    | 60    | 85    | 59    | 3.339348 | 3.836174 | 3.525477 | 3.239457 |
| protein_co F-box_and_   | 876   | 699   | 774   | 436   | 538   | 424   | 8.837275 | 9.042755 | 9.421136 | 6.827021 |
| protein_co zymogen_g    | 0     | 0     | 0     | 0     | 1     | 0     | 0        | 0        | 0        | 0        |
| protein_co kinesin_dgl  | 1080  | 741   | 822   | 562   | 876   | 591   | 13.48634 | 11.86583 | 12.38484 | 10.89274 |
| protein_co solute_carr  | 4     | 4     | 6     | 3     | 2     | 2     | 0.096283 | 0.12347  | 0.174257 | 0.112084 |

|                         |      |      |      |      |       |       |          |          |          |          |
|-------------------------|------|------|------|------|-------|-------|----------|----------|----------|----------|
| protein_co C-terminal_  | 1541 | 1243 | 1317 | 3534 | 4304  | 3856  | 19.69406 | 20.37104 | 20.30797 | 70.10189 |
| protein_co carbohydr    | 6353 | 5042 | 5113 | 667  | 1226  | 514   | 84.48448 | 85.98254 | 82.0393  | 13.76748 |
| protein_co zinc_finger  | 246  | 174  | 207  | 141  | 228   | 127   | 1.563001 | 1.417694 | 1.586874 | 1.390508 |
| protein_co ataxia_telai | 614  | 607  | 597  | 446  | 333   | 353   | 3.490177 | 4.424632 | 4.094506 | 3.934997 |
| processed_C17orf76_     | 2461 | 1720 | 1864 | 3169 | 3691  | 3268  | 69.43221 | 62.22819 | 63.45171 | 138.7721 |
| protein_co ubiquitin-c  | 1234 | 1032 | 1038 | 2095 | 2275  | 2174  | 40.01541 | 42.91421 | 40.61229 | 105.4451 |
| protein_co glycerol_ki  | 298  | 255  | 253  | 141  | 168   | 78    | 3.11972  | 3.423331 | 3.195714 | 2.291126 |
| protein_co valosin_cor  | 512  | 397  | 425  | 358  | 403   | 432   | 2.414775 | 2.401079 | 2.418486 | 2.620717 |
| protein_co receptor_(c  | 1    | 0    | 0    | 50   | 68    | 41    | 0.02115  | 0        | 0        | 1.641403 |
| protein_co desmin       | 2    | 0    | 1    | 28   | 39    | 18    | 0.041717 | 0        | 0.025167 | 0.90651  |
| protein_co PDLIM1_in    | 183  | 113  | 129  | 93   | 74    | 56    | 2.005345 | 1.58791  | 1.705595 | 1.5818   |
| protein_co splA/ryano   | 61   | 41   | 29   | 759  | 954   | 1040  | 0.983594 | 0.847772 | 0.564199 | 18.99583 |
| protein_co recombinat   | 0    | 1    | 2    | 0    | 1     | 0     | 0        | 0.02518  | 0.047383 | 0        |
| protein_co TNF_recept   | 263  | 240  | 254  | 133  | 137   | 152   | 2.665242 | 3.1189   | 3.105723 | 2.092006 |
| protein_co zinc_finger  | 160  | 114  | 99   | 73   | 78    | 62    | 1.510754 | 1.380346 | 1.127864 | 1.06986  |
| protein_co trans-golgi  | 124  | 114  | 125  | 49   | 71    | 66    | 1.945253 | 2.293341 | 2.365988 | 1.193111 |
| protein_co mitochond    | 386  | 339  | 355  | 320  | 311   | 422   | 8.37942  | 9.437037 | 9.298289 | 10.78219 |
| protein_co phosphofu    | 2678 | 2164 | 2317 | 929  | 1177  | 829   | 28.59095 | 29.62679 | 29.84641 | 15.39445 |
| protein_co MARCKS-lik   | 9168 | 6681 | 7351 | 9337 | 11296 | 12890 | 253.0239 | 236.4492 | 244.7831 | 399.9676 |
| protein_co SH3-bindin   | 1549 | 1201 | 1256 | 1189 | 1669  | 1240  | 17.62073 | 17.51962 | 17.23892 | 20.99349 |
| protein_co olfactory_r  | 0    | 0    | 0    | 0    | 0     | 1     | 0        | 0        | 0        | 0        |
| processed_TMEM51_a      | 3    | 2    | 2    | 6    | 5     | 2     | 0.047492 | 0.040601 | 0.038201 | 0.147427 |
| protein_co yippee-like  | 103  | 67   | 68   | 30   | 27    | 15    | 0.925757 | 0.772225 | 0.737423 | 0.418515 |
| protein_co cell_adhesi  | 14   | 12   | 19   | 104  | 96    | 77    | 0.069188 | 0.076049 | 0.113294 | 0.797755 |
| processed_ABO_blood     | 0    | 0    | 0    | 1    | 6     | 0     | 0        | 0        | 0        | 0.067639 |
| protein_co proteasom    | 7502 | 6095 | 6648 | 4998 | 5668  | 5901  | 101.9916 | 106.2601 | 109.0501 | 105.4664 |
| protein_co family_witl  | 0    | 0    | 0    | 1    | 1     | 1     | 0        | 0        | 0        | 0.043296 |
| protein_co protein_ph   | 23   | 20   | 27   | 166  | 199   | 95    | 0.360934 | 0.402475 | 0.511224 | 4.043322 |
| protein_co family_witl  | 543  | 374  | 431  | 346  | 462   | 198   | 6.924471 | 6.116003 | 6.631505 | 6.848466 |
| protein_co cysteine_ar  | 3398 | 2722 | 2759 | 1702 | 1523  | 1697  | 31.37697 | 32.23184 | 30.73884 | 24.3937  |
| protein_co inhibin_be   | 0    | 0    | 1    | 9    | 9     | 4     | 0        | 0        | 0.028401 | 0.328824 |
| protein_co presenilin_  | 658  | 487  | 543  | 662  | 847   | 884   | 21.82011 | 20.70948 | 21.72595 | 34.07371 |
| protein_co DNA-damag    | 85   | 74   | 52   | 10   | 21    | 15    | 3.462773 | 3.86586  | 2.555974 | 0.632318 |
| protein_co propionyl_   | 364  | 354  | 304  | 705  | 711   | 556   | 6.851853 | 8.545142 | 6.904437 | 20.59806 |
| protein_co HIG1_hypo    | 0    | 0    | 0    | 0    | 0     | 3     | 0        | 0        | 0        | 0        |
| protein_co dynactin_2   | 1807 | 1568 | 1573 | 1339 | 1399  | 1168  | 41.11124 | 45.74649 | 43.17966 | 47.28392 |
| protein_co natriuretic  | 5    | 4    | 6    | 0    | 0     | 1     | 0.274211 | 0.281309 | 0.397021 | 0        |
| protein_co zinc_finger  | 333  | 225  | 246  | 358  | 463   | 546   | 6.394093 | 5.540215 | 5.699252 | 10.6696  |
| protein_co CTD_(carbc   | 5435 | 4499 | 4548 | 3364 | 3712  | 2649  | 53.14854 | 56.41793 | 53.66119 | 51.0597  |
| protein_co cytoskeletc  | 4607 | 3892 | 4034 | 4543 | 4497  | 3276  | 30.33595 | 32.86409 | 32.04965 | 46.43149 |
| protein_co Rho_GTPas    | 3177 | 2430 | 2586 | 1336 | 1468  | 1550  | 44.13914 | 43.29345 | 43.34941 | 28.81002 |
| protein_co mediator_(c  | 1800 | 1364 | 1485 | 1698 | 2213  | 1863  | 27.04327 | 26.27909 | 26.91914 | 39.59632 |
| protein_co autophagy_   | 1564 | 1294 | 1345 | 1147 | 1321  | 1431  | 15.511   | 16.45684 | 16.09434 | 17.65618 |
| protein_co galactose-3  | 117  | 85   | 77   | 386  | 541   | 262   | 2.572026 | 2.396171 | 2.042341 | 13.17065 |
| protein_co chromosom    | 1    | 0    | 0    | 5    | 9     | 5     | 0.016983 | 0        | 0        | 0.1318   |
| protein_co carbohydr    | 893  | 761  | 733  | 43   | 62    | 9     | 15.40573 | 16.83546 | 15.25749 | 1.15141  |
| protein_co golgin_A8_   | 556  | 470  | 542  | 247  | 269   | 257   | 4.024521 | 4.362613 | 4.733548 | 2.775025 |
| protein_co von_Willeb   | 0    | 1    | 0    | 2    | 1     | 2     | 0        | 0.012906 | 0        | 0.031243 |
| protein_co tumor_pro    | 2229 | 1817 | 1917 | 1123 | 1296  | 1278  | 28.22518 | 29.50468 | 29.28848 | 22.07176 |
| protein_co apoptosis-i  | 83   | 44   | 58   | 40   | 57    | 45    | 2.649334 | 1.801029 | 2.23375  | 1.981751 |
| protein_co dolichol_ki  | 576  | 431  | 447  | 287  | 401   | 464   | 12.9228  | 12.39997 | 12.10012 | 9.994164 |
| protein_co phytanoyl-i  | 9    | 12   | 12   | 122  | 134   | 80    | 0.197848 | 0.338283 | 0.318287 | 4.162745 |
| protein_co cation_cha   | 1    | 5    | 5    | 0    | 3     | 0     | 0.017904 | 0.114795 | 0.10801  | 0        |
| protein_co cyclin_E2    | 82   | 75   | 103  | 34   | 37    | 46    | 1.154649 | 1.354275 | 1.749933 | 0.743097 |
| protein_co alanine-gly  | 786  | 643  | 632  | 271  | 345   | 298   | 13.25739 | 13.90772 | 12.86177 | 7.094722 |
| protein_co ankyrin_rej  | 0    | 0    | 0    | 1    | 1     | 0     | 0        | 0        | 0        | 0.024789 |
| protein_co cystatin_E/  | 0    | 0    | 0    | 4    | 3     | 6     | 0        | 0        | 0        | 0.383556 |
| protein_co GRAM_don     | 9    | 8    | 6    | 76   | 74    | 58    | 0.128622 | 0.146613 | 0.10346  | 1.685847 |
| protein_co zinc_finger  | 98   | 99   | 107  | 279  | 292   | 235   | 0.707284 | 0.916246 | 0.93175  | 3.125375 |
| protein_co LSM1_hom     | 240  | 185  | 174  | 165  | 160   | 179   | 7.177043 | 7.094396 | 6.278149 | 7.658589 |
| protein_co intestine-sf | 0    | 0    | 0    | 0    | 0     | 1     | 0        | 0        | 0        | 0        |
| protein_co barrier_to_  | 3290 | 2535 | 2602 | 2884 | 3154  | 2719  | 133.5655 | 131.9732 | 127.4541 | 181.729  |
| protein_co apolipopro   | 0    | 0    | 1    | 0    | 0     | 1     | 0        | 0        | 0.032989 | 0        |
| protein_co cholinergic  | 23   | 13   | 16   | 84   | 74    | 55    | 0.19024  | 0.137888 | 0.159677 | 1.078409 |
| protein_co TMEM9_do     | 479  | 351  | 405  | 131  | 198   | 216   | 10.78268 | 10.13229 | 11.00004 | 4.577126 |

|                         |      |      |      |      |      |      |          |          |          |          |
|-------------------------|------|------|------|------|------|------|----------|----------|----------|----------|
| protein_co nuclear_re   | 282  | 235  | 246  | 86   | 114  | 98   | 3.471511 | 3.709767 | 3.653866 | 1.64323  |
| protein_co protein_ty   | 254  | 217  | 239  | 432  | 512  | 571  | 3.513293 | 3.849016 | 3.988657 | 9.274594 |
| protein_co signal_pept  | 27   | 25   | 26   | 32   | 34   | 31   | 0.270346 | 0.321    | 0.314107 | 0.497321 |
| protein_co eukaryotic_  | 482  | 404  | 456  | 230  | 344  | 466  | 7.828538 | 8.414422 | 8.936069 | 5.798183 |
| protein_co SMAD_fam     | 1450 | 1270 | 1206 | 886  | 1051 | 1009 | 5.630685 | 6.32421  | 5.650522 | 5.340199 |
| protein_co eukaryotic_  | 4271 | 3400 | 3432 | 4000 | 4576 | 3930 | 26.56065 | 27.11423 | 25.75161 | 38.60997 |
| protein_co zinc_finger  | 224  | 172  | 162  | 17   | 21   | 11   | 2.537657 | 2.49875  | 2.214359 | 0.298926 |
| protein_co ADP-ribosy   | 1709 | 1356 | 1441 | 182  | 222  | 119  | 7.389123 | 7.518304 | 7.517317 | 1.221385 |
| protein_co clathrin_li  | 857  | 575  | 646  | 431  | 557  | 540  | 26.98774 | 23.22004 | 24.54518 | 21.06655 |
| protein_co propo        | 84   | 87   | 72   | 175  | 229  | 253  | 0.774432 | 1.028567 | 0.800912 | 2.50422  |
| protein_co lipoprotein  | 2    | 0    | 1    | 66   | 65   | 54   | 0.024384 | 0        | 0.01471  | 1.248951 |
| protein_co Rieske_(Fe-  | 2    | 2    | 2    | 8    | 17   | 8    | 0.033637 | 0.043135 | 0.040585 | 0.208837 |
| protein_co coiled-coil  | 1000 | 932  | 1015 | 624  | 711  | 798  | 5.9227   | 7.078561 | 7.25327  | 5.736339 |
| protein_co TBC1_dom     | 28   | 22   | 25   | 18   | 35   | 10   | 0.293063 | 0.29528  | 0.315712 | 0.292419 |
| protein_co squamous_    | 2636 | 1887 | 2130 | 1862 | 2558 | 2241 | 37.5348  | 34.4564  | 36.59454 | 41.15275 |
| protein_co protein_ph   | 523  | 394  | 400  | 455  | 573  | 485  | 4.777611 | 4.615457 | 4.408767 | 6.451356 |
| protein_co multiple_C   | 228  | 171  | 173  | 112  | 129  | 114  | 1.981268 | 1.905522 | 1.813855 | 1.510626 |
| protein_co polymerase   | 56   | 39   | 37   | 32   | 37   | 11   | 1.464496 | 1.307899 | 1.167481 | 1.298914 |
| protein_co olfactory_r  | 3    | 0    | 1    | 0    | 4    | 0    | 0.126275 | 0        | 0.050786 | 0        |
| protein_co leucine_ri   | 5    | 6    | 6    | 9    | 9    | 0    | 0.097081 | 0.149391 | 0.14056  | 0.271229 |
| protein_co dipeptidyl-  | 0    | 2    | 2    | 84   | 105  | 95   | 0        | 0.019156 | 0.018023 | 0.973798 |
| protein_co cardiotrop   | 133  | 84   | 107  | 22   | 32   | 18   | 3.381981 | 2.739101 | 3.282852 | 0.868306 |
| pseudogen: -            | 0    | 1    | 0    | 0    | 1    | 0    | 0        | 0.086146 | 0        | 0        |
| processed_ testis_speci | 2    | 0    | 0    | 40   | 40   | 31   | 0.048717 | 0        | 0        | 1.512308 |
| protein_co G_protein-i  | 0    | 0    | 0    | 1    | 0    | 0    | 0        | 0        | 0        | 0.050931 |
| protein_co ubiquilin-li | 4    | 7    | 2    | 2    | 0    | 3    | 0.08109  | 0.181975 | 0.04892  | 0.062931 |
| protein_co lipoyl(octa  | 7    | 12   | 11   | 24   | 37   | 51   | 0.322426 | 0.708799 | 0.611327 | 1.71583  |
| protein_co potassium_   | 12   | 14   | 15   | 40   | 44   | 35   | 0.179026 | 0.267839 | 0.270007 | 0.926246 |
| protein_co calcium_bi   | 0    | 0    | 1    | 0    | 1    | 1    | 0        | 0        | 0.039674 | 0        |
| protein_co ALG10B_al    | 94   | 60   | 102  | 88   | 86   | 48   | 1.416799 | 1.159687 | 1.854935 | 2.058702 |
| protein_co DR1-associ   | 4994 | 3671 | 3870 | 1989 | 2493 | 1725 | 236.7733 | 223.1916 | 221.3824 | 146.3691 |
| protein_co LON_peptid   | 0    | 0    | 1    | 3    | 2    | 2    | 0        | 0        | 0.01424  | 0.054956 |
| protein_co uncoupling   | 31   | 28   | 19   | 10   | 12   | 3    | 0.554171 | 0.641874 | 0.409811 | 0.277468 |
| protein_co uncoupling   | 1026 | 841  | 871  | 970  | 1028 | 1109 | 22.76818 | 23.9324  | 23.321   | 33.41051 |
| protein_co chromosom    | 1163 | 791  | 868  | 612  | 744  | 352  | 33.68319 | 29.37781 | 30.33202 | 27.51157 |
| protein_co proteasom    | 350  | 307  | 279  | 576  | 687  | 467  | 8.124508 | 9.138538 | 7.814142 | 20.75305 |
| protein_co mitochond    | 393  | 284  | 292  | 210  | 247  | 245  | 9.587813 | 8.884944 | 8.595238 | 7.952007 |
| protein_co RAB6A_me     | 2293 | 1819 | 1867 | 1228 | 1457 | 1106 | 34.30721 | 34.89984 | 33.7034  | 28.51742 |
| protein_co purinergic_  | 0    | 1    | 0    | 16   | 19   | 22   | 0        | 0.022605 | 0        | 0.437773 |
| protein_co FOS-like_ar  | 621  | 473  | 532  | 203  | 247  | 55   | 17.44679 | 17.04098 | 18.03365 | 8.852187 |
| protein_co excision_re  | 246  | 214  | 222  | 125  | 146  | 132  | 1.706858 | 1.904081 | 1.858503 | 1.346179 |
| protein_co chromosom    | 206  | 181  | 214  | 79   | 78   | 58   | 5.619164 | 6.331293 | 7.04314  | 3.344738 |
| protein_co coiled-coil  | 1804 | 1402 | 1517 | 1821 | 2820 | 1684 | 68.71616 | 68.48251 | 69.71977 | 107.6621 |
| protein_co -            | 2    | 8    | 0    | 3    | 4    | 1    | 0.047508 | 0.243687 | 0        | 0.110608 |
| protein_co transmembr   | 348  | 298  | 316  | 244  | 374  | 377  | 8.086088 | 8.879425 | 8.859197 | 8.799936 |
| processed_ long_inter   | 48   | 36   | 25   | 30   | 20   | 26   | 0.796715 | 0.766256 | 0.500668 | 0.772883 |
| protein_co ribosomal_   | 534  | 400  | 425  | 432  | 532  | 431  | 4.529535 | 4.350926 | 4.3496   | 5.687568 |
| protein_co RMI2_RecC    | 501  | 430  | 418  | 1500 | 2153 | 1260 | 12.59619 | 13.86371 | 12.68019 | 58.53603 |
| protein_co protamine_   | 0    | 0    | 0    | 0    | 0    | 1    | 0        | 0        | 0        | 0        |
| pseudogen: dopamine_    | 2    | 0    | 0    | 2    | 0    | 1    | 0.04661  | 0        | 0        | 0.072346 |
| protein_co target_of_r  | 1001 | 741  | 849  | 131  | 153  | 72   | 8.393581 | 7.967843 | 8.589521 | 1.704963 |
| protein_co testis_expr  | 0    | 1    | 0    | 0    | 1    | 0    | 0        | 0.040683 | 0        | 0        |
| protein_co zinc_finger  | 46   | 32   | 41   | 59   | 62   | 53   | 1.077393 | 0.961116 | 1.158639 | 2.144859 |
| protein_co G_protein-i  | 8    | 12   | 12   | 32   | 54   | 31   | 0.084448 | 0.16244  | 0.152838 | 0.524303 |
| processed_ long_inter   | 0    | 0    | 0    | 0    | 1    | 0    | 0        | 0        | 0        | 0        |
| lincRNA long_inter      | 147  | 121  | 128  | 155  | 231  | 121  | 3.360718 | 3.547394 | 3.530797 | 5.50018  |
| protein_co chromosom    | 1    | 0    | 0    | 423  | 452  | 324  | 0.026152 | 0        | 0        | 17.17003 |
| protein_co UDP-GlcNA    | 176  | 131  | 150  | 132  | 173  | 125  | 2.482745 | 2.369736 | 2.553046 | 2.890173 |
| protein_co RNA_bindi    | 1    | 0    | 0    | 0    | 0    | 2    | 0.013517 | 0        | 0        | 0        |
| protein_co MLX_intera   | 1382 | 1025 | 1158 | 1114 | 1426 | 1420 | 11.17469 | 10.62822 | 11.29754 | 13.98115 |
| protein_co chromosom    | 0    | 0    | 2    | 0    | 0    | 0    | 0        | 0        | 0.0319   | 0        |
| pseudogen: BCL2-antag   | 8    | 10   | 10   | 19   | 25   | 20   | 0.17914  | 0.287153 | 0.270179 | 0.660371 |
| pseudogen: RWD_dom      | 71   | 40   | 39   | 30   | 25   | 38   | 5.913306 | 4.272099 | 3.919085 | 3.878142 |
| protein_co nuclear_re   | 1417 | 1031 | 1040 | 0    | 4    | 7    | 17.80363 | 16.61142 | 15.76595 | 0        |
| protein_co chromosom    | 8    | 10   | 9    | 0    | 0    | 0    | 0.121871 | 0.195353 | 0.165425 | 0        |

|                         |      |      |      |      |      |      |          |          |          |          |
|-------------------------|------|------|------|------|------|------|----------|----------|----------|----------|
| pseudogen: eukaryotic_  | 2    | 0    | 0    | 0    | 0    | 0    | 0.142957 | 0        | 0        | 0        |
| protein_co aurora_kin   | 2011 | 1481 | 1576 | 2132 | 3134 | 2435 | 87.96252 | 83.07111 | 83.17444 | 144.7449 |
| protein_co tubulin_ty   | 103  | 67   | 79   | 3    | 15   | 22   | 1.486053 | 1.239599 | 1.37522  | 0.067181 |
| protein_co eukaryotic_  | 0    | 0    | 0    | 11   | 20   | 9    | 0        | 0        | 0        | 0.282291 |
| protein_co translocase  | 39   | 26   | 25   | 27   | 47   | 48   | 0.595477 | 0.509077 | 0.460563 | 0.639875 |
| processed_-             | 2    | 1    | 5    | 12   | 10   | 5    | 0.038387 | 0.024613 | 0.115791 | 0.357494 |
| lincRNA -               | 0    | 0    | 0    | 5    | 2    | 2    | 0        | 0        | 0        | 0.543945 |
| protein_co solute_carr  | 300  | 220  | 224  | 207  | 232  | 319  | 2.805546 | 2.638324 | 2.527506 | 3.004671 |
| protein_co proline_ri   | 0    | 0    | 0    | 157  | 199  | 189  | 0        | 0        | 0        | 3.07907  |
| protein_co zinc_finger  | 69   | 56   | 45   | 69   | 78   | 54   | 1.191241 | 1.23979  | 0.93737  | 1.848971 |
| protein_co RuvB-like_1  | 1340 | 1050 | 1131 | 2281 | 2526 | 2772 | 15.4684  | 15.54315 | 15.75256 | 40.86921 |
| protein_co stratifin    | 18   | 12   | 14   | 253  | 301  | 139  | 0.641841 | 0.548713 | 0.602325 | 14.0025  |
| pseudogen: olfactory_r  | 0    | 1    | 0    | 1    | 1    | 1    | 0        | 0.063832 | 0        | 0.077261 |
| protein_co methionine   | 165  | 156  | 132  | 32   | 41   | 53   | 4.535084 | 5.498387 | 4.377472 | 1.365155 |
| protein_co coiled-coil  | 0    | 3    | 1    | 1    | 0    | 1    | 0        | 0.024513 | 0.007688 | 0.00989  |
| protein_co CTD_nucle    | 457  | 384  | 404  | 409  | 569  | 343  | 12.42966 | 13.39318 | 13.25783 | 17.26621 |
| protein_co ets_variant  | 3388 | 2569 | 2758 | 4777 | 5787 | 4963 | 65.40279 | 63.59549 | 64.23847 | 143.1326 |
| pseudogen: family_witl  | 1    | 1    | 0    | 0    | 1    | 1    | 0.020431 | 0.0262   | 0        | 0        |
| protein_co SWI5_reco    | 509  | 388  | 413  | 193  | 219  | 194  | 22.77387 | 22.26179 | 22.2955  | 13.40315 |
| protein_co GRB2-bind    | 0    | 0    | 3    | 1    | 0    | 0    | 0        | 0        | 0.056275 | 0.024131 |
| protein_co BAI1-associ  | 1256 | 1006 | 1002 | 357  | 465  | 352  | 15.96472 | 16.39755 | 15.36694 | 7.043207 |
| protein_co calcitonin-  | 0    | 0    | 0    | 25   | 42   | 44   | 0        | 0        | 0        | 0.805799 |
| lincRNA -               | 54   | 31   | 34   | 28   | 64   | 42   | 1.224993 | 0.901801 | 0.930608 | 0.98589  |
| protein_co cellular_re  | 13   | 12   | 15   | 19   | 23   | 13   | 0.191268 | 0.226407 | 0.266279 | 0.433893 |
| protein_co Williams-B   | 0    | 0    | 0    | 2    | 0    | 0    | 0        | 0        | 0        | 0.151467 |
| protein_co homeobox     | 242  | 173  | 236  | 0    | 0    | 2    | 4.393103 | 4.027276 | 5.169113 | 0        |
| pseudogen: ribosomal_   | 2    | 1    | 4    | 5    | 5    | 4    | 0.116642 | 0.074788 | 0.28147  | 0.452611 |
| protein_co zinc_finger  | 245  | 183  | 199  | 59   | 81   | 97   | 2.444787 | 2.341722 | 2.395941 | 0.913813 |
| protein_co thrombosp    | 1    | 0    | 3    | 45   | 98   | 31   | 0.01182  | 0        | 0.042785 | 0.825584 |
| protein_co pleckstrin_  | 149  | 114  | 120  | 119  | 133  | 97   | 2.425065 | 2.379312 | 2.356494 | 3.006177 |
| lincRNA -               | 339  | 277  | 240  | 177  | 206  | 97   | 9.031657 | 9.46361  | 7.714842 | 7.319332 |
| protein_co alpha-2-ma   | 1728 | 1070 | 1078 | 7    | 9    | 2    | 16.72707 | 13.28218 | 12.5905  | 0.105173 |
| protein_co ADP-ribosy   | 129  | 91   | 114  | 235  | 260  | 87   | 3.752365 | 3.394424 | 4.000997 | 10.60996 |
| protein_co Uncharacte   | 55   | 54   | 36   | 15   | 23   | 7    | 1.434344 | 1.8059   | 1.132769 | 0.607173 |
| protein_co docking_pr   | 1    | 2    | 2    | 6    | 5    | 4    | 0.018302 | 0.04694  | 0.044165 | 0.170444 |
| protein_co leucine_ri   | 126  | 84   | 90   | 1267 | 1599 | 2656 | 1.54542  | 1.321188 | 1.331885 | 24.12033 |
| protein_co ubiquitin-c  | 1205 | 910  | 1014 | 2532 | 2798 | 2275 | 10.39413 | 10.06588 | 10.55327 | 33.89964 |
| protein_co ORAI_calci   | 103  | 84   | 67   | 42   | 55   | 20   | 2.189334 | 2.289621 | 1.718295 | 1.385654 |
| protein_co kelch-like_f | 0    | 0    | 2    | 0    | 0    | 0    | 0        | 0        | 0.057089 | 0        |
| antisense -             | 1    | 0    | 0    | 0    | 0    | 0    | 0.020794 | 0        | 0        | 0        |
| protein_co unc-119_h    | 1022 | 801  | 792  | 1269 | 1504 | 1579 | 10.88138 | 10.93641 | 10.17434 | 20.97129 |
| protein_co DENN/MAD     | 24   | 18   | 31   | 43   | 73   | 31   | 0.182599 | 0.175618 | 0.284576 | 0.507794 |
| protein_co pleckstrin_  | 5    | 0    | 3    | 3    | 12   | 11   | 0.058627 | 0        | 0.042442 | 0.054599 |
| pseudogen: family_witl  | 0    | 0    | 0    | 0    | 0    | 2    | 0        | 0        | 0        | 0        |
| protein_co achaete-sc   | 0    | 0    | 0    | 1    | 0    | 0    | 0        | 0        | 0        | 0.111969 |
| protein_co tubulin_be   | 8020 | 6010 | 6471 | 4793 | 5145 | 5808 | 173.8594 | 167.0735 | 169.2557 | 161.273  |
| protein_co LysM_puta    | 375  | 278  | 267  | 176  | 167  | 203  | 4.128612 | 3.924885 | 3.546762 | 3.007571 |
| protein_co UDP-Gal:be   | 1878 | 1287 | 1395 | 460  | 815  | 652  | 31.52863 | 27.7075  | 28.25737 | 11.98665 |
| protein_co zinc_finger  | 65   | 53   | 50   | 126  | 116  | 183  | 1.124668 | 1.17597  | 1.043829 | 3.383858 |
| protein_co chromosom    | 4    | 3    | 2    | 1    | 5    | 2    | 0.098302 | 0.094544 | 0.059303 | 0.038145 |
| protein_co calponin_h   | 0    | 0    | 1    | 0    | 0    | 0    | 0        | 0        | 0.028895 | 0        |
| pseudogen: -            | 0    | 0    | 0    | 0    | 0    | 1    | 0        | 0        | 0        | 0        |
| protein_co nuclear_pr   | 305  | 193  | 199  | 3    | 1    | 2    | 15.64711 | 12.69699 | 12.31786 | 0.238883 |
| protein_co janus_kina   | 1065 | 845  | 869  | 528  | 466  | 478  | 8.321591 | 8.466868 | 8.192654 | 6.403555 |
| pseudogen: ribosomal_   | 1    | 6    | 6    | 3    | 2    | 2    | 0.111378 | 0.856957 | 0.806302 | 0.518621 |
| protein_co metallo-be   | 119  | 84   | 89   | 107  | 114  | 90   | 1.303718 | 1.180117 | 1.176453 | 1.819495 |
| protein_co taperin      | 755  | 480  | 566  | 932  | 1497 | 859  | 10.56775 | 8.615613 | 9.558727 | 20.24799 |
| protein_co KCNE1-like   | 12   | 3    | 3    | 47   | 53   | 41   | 0.384082 | 0.123133 | 0.115854 | 2.334915 |
| protein_co zinc_finger  | 0    | 0    | 0    | 2    | 1    | 1    | 0        | 0        | 0        | 0.085023 |
| protein_co solute_carr  | 1977 | 1524 | 1652 | 1188 | 1533 | 1770 | 25.62941 | 25.33531 | 25.83985 | 23.90445 |
| protein_co absent_in_   | 0    | 0    | 0    | 423  | 466  | 301  | 0        | 0        | 0        | 12.20208 |
| protein_co inositol_he  | 1428 | 1133 | 1123 | 759  | 874  | 961  | 15.02669 | 15.28884 | 14.25814 | 12.39674 |
| protein_co Sjogren_sy   | 1434 | 1071 | 1126 | 1369 | 1912 | 1577 | 57.47033 | 55.04189 | 54.44788 | 85.15859 |
| protein_co cleavage_st  | 710  | 593  | 657  | 818  | 897  | 657  | 11.90272 | 12.74829 | 13.28928 | 21.2849  |
| protein_co v-yes-1_Yan  | 1646 | 1347 | 1381 | 1487 | 1530 | 1517 | 16.63742 | 17.45955 | 16.84216 | 23.32907 |

|                         |      |      |      |      |      |      |          |          |          |          |
|-------------------------|------|------|------|------|------|------|----------|----------|----------|----------|
| protein_co charged_m    | 386  | 239  | 262  | 153  | 225  | 187  | 10.87713 | 8.636431 | 8.907922 | 6.691893 |
| pseudogen: aquaporin_   | 1    | 0    | 1    | 0    | 0    | 0    | 0.045    | 0        | 0.054295 | 0        |
| protein_co deleted_in_  | 78   | 84   | 49   | 176  | 178  | 147  | 1.498943 | 2.070042 | 1.136147 | 5.249691 |
| protein_co UFM1-spec    | 46   | 43   | 47   | 26   | 33   | 25   | 2.169961 | 2.601188 | 2.675099 | 1.903697 |
| protein_co Protein_LO   | 1    | 0    | 0    | 0    | 0    | 0    | 0.04854  | 0        | 0        | 0        |
| protein_co melanocori   | 0    | 0    | 0    | 6    | 9    | 6    | 0        | 0        | 0        | 0.331068 |
| protein_co transmembr   | 1104 | 910  | 939  | 415  | 420  | 494  | 11.78388 | 12.45575 | 12.09297 | 6.875397 |
| protein_co t-complex_   | 415  | 372  | 349  | 207  | 266  | 135  | 5.740223 | 6.598314 | 5.82444  | 4.444076 |
| protein_co glutathione  | 5    | 2    | 4    | 9    | 17   | 13   | 0.206746 | 0.106049 | 0.199561 | 0.577617 |
| protein_co coiled-coil_ | 760  | 658  | 670  | 227  | 309  | 296  | 6.6251   | 7.355532 | 7.046958 | 3.071391 |
| protein_co heat_shock   | 0    | 0    | 1    | 2    | 3    | 1    | 0        | 0        | 0.013819 | 0.035554 |
| protein_co forkhead_b   | 15   | 10   | 28   | 10   | 34   | 19   | 0.255392 | 0.218336 | 0.575205 | 0.264269 |
| protein_co sphingosin   | 1338 | 1051 | 1127 | 73   | 109  | 40   | 25.07548 | 25.25836 | 25.48385 | 2.123471 |
| protein_co BCL2/adeno   | 422  | 329  | 324  | 2716 | 1955 | 1475 | 12.31337 | 12.31033 | 11.40664 | 123.0056 |
| protein_co ENTH_dom     | 0    | 0    | 0    | 1    | 0    | 0    | 0        | 0        | 0        | 0.026856 |
| protein_co Myb-relate   | 224  | 155  | 185  | 128  | 161  | 59   | 5.557335 | 4.93128  | 5.537814 | 4.929002 |
| protein_co cell_death_  | 126  | 98   | 115  | 2    | 0    | 2    | 3.267778 | 3.259248 | 3.598553 | 0.080509 |
| protein_co leucine_ric  | 0    | 0    | 0    | 84   | 63   | 197  | 0        | 0        | 0        | 1.690681 |
| protein_co ATPase_fam   | 269  | 224  | 257  | 460  | 472  | 469  | 1.836281 | 1.960849 | 2.116743 | 4.873884 |
| protein_co small_integ  | 188  | 111  | 116  | 309  | 316  | 199  | 6.013181 | 4.552802 | 4.476643 | 15.34035 |
| protein_co zinc_finger  | 61   | 45   | 43   | 28   | 23   | 24   | 1.545268 | 1.461826 | 1.314288 | 1.100937 |
| protein_co rotatin      | 346  | 335  | 362  | 398  | 421  | 283  | 2.214571 | 2.749588 | 2.795568 | 3.953912 |
| protein_co chromosom    | 3    | 1    | 1    | 1    | 2    | 2    | 0.082071 | 0.035082 | 0.033008 | 0.042462 |
| protein_co acyl-CoA_b   | 2    | 7    | 15   | 58   | 76   | 54   | 0.070938 | 0.318388 | 0.641931 | 3.193062 |
| protein_co anaphase_f   | 1325 | 1055 | 1109 | 652  | 975  | 1092 | 23.60535 | 24.10218 | 23.83824 | 18.02904 |
| protein_co high_mobil   | 1    | 0    | 0    | 0    | 1    | 0    | 0.018719 | 0        | 0        | 0        |
| protein_co zinc_finger  | 288  | 251  | 290  | 210  | 295  | 333  | 8.434931 | 9.42697  | 10.24791 | 9.546382 |
| pseudogen: cytochrom    | 2    | 1    | 6    | 1    | 1    | 0    | 0.308487 | 0.197795 | 1.116622 | 0.239407 |
| protein_co solute_carr  | 130  | 105  | 110  | 79   | 94   | 87   | 1.74662  | 1.809063 | 1.783182 | 1.647451 |
| protein_co solute_carr  | 149  | 111  | 118  | 51   | 69   | 82   | 1.122528 | 1.072366 | 1.072608 | 0.596364 |
| pseudogen: iduronate_   | 2    | 0    | 1    | 0    | 0    | 0    | 0.249415 | 0        | 0.150467 | 0        |
| protein_co zinc_finger  | 11   | 14   | 8    | 72   | 132  | 119  | 0.154013 | 0.251364 | 0.135146 | 1.56469  |
| protein_co forkhead_b   | 0    | 0    | 0    | 1    | 0    | 2    | 0        | 0        | 0        | 0.062795 |
| protein_co cytochrom    | 272  | 190  | 220  | 311  | 430  | 287  | 25.15599 | 22.53385 | 24.54953 | 44.64402 |
| pseudogen: ribosomal_   | 0    | 0    | 0    | 1    | 1    | 0    | 0        | 0        | 0        | 0.263695 |
| protein_co Protein_LO   | 6    | 1    | 2    | 1    | 3    | 2    | 0.062785 | 0.013419 | 0.025251 | 0.016242 |
| pseudogen: -            | 0    | 0    | 0    | 2    | 0    | 0    | 0        | 0        | 0        | 0.061083 |
| protein_co tachykinin_  | 0    | 5    | 2    | 21   | 30   | 18   | 0        | 0.445406 | 0.167631 | 2.26426  |
| protein_co zinc_finger  | 341  | 253  | 276  | 852  | 954  | 987  | 4.193416 | 3.989729 | 4.095159 | 16.26236 |
| protein_co proline_ric  | 2    | 2    | 2    | 8    | 4    | 3    | 0.034682 | 0.044475 | 0.041846 | 0.215325 |
| protein_co UDP-GlcNA    | 3    | 2    | 1    | 28   | 25   | 14   | 0.04788  | 0.040932 | 0.019256 | 0.693613 |
| protein_co cell_divisio | 90   | 89   | 81   | 79   | 67   | 105  | 4.839566 | 6.137101 | 5.255293 | 6.593583 |
| protein_co hydroxyste   | 1    | 5    | 3    | 729  | 895  | 668  | 0.024679 | 0.158236 | 0.08933  | 27.92446 |
| protein_co cytokine_r   | 388  | 322  | 325  | 341  | 406  | 319  | 6.15263  | 6.547783 | 6.21814  | 8.392936 |
| protein_co arginyl_am   | 1943 | 1508 | 1538 | 1721 | 1842 | 1395 | 37.53906 | 37.36124 | 35.85213 | 51.60859 |
| processed_ carcinoeml   | 0    | 0    | 0    | 0    | 1    | 1    | 0        | 0        | 0        | 0        |
| protein_co EP300_inte   | 506  | 334  | 402  | 349  | 497  | 330  | 11.97696 | 10.13799 | 11.48074 | 12.82188 |
| protein_co DMRT-like_   | 30   | 18   | 24   | 89   | 103  | 79   | 0.611078 | 0.470172 | 0.58984  | 2.813815 |
| protein_co EP300_inte   | 32   | 33   | 30   | 18   | 15   | 13   | 0.804547 | 1.063959 | 0.910062 | 0.702432 |
| protein_co gap_junctic  | 0    | 0    | 0    | 16   | 37   | 13   | 0        | 0        | 0        | 1.043438 |
| protein_co regulating_  | 744  | 652  | 676  | 172  | 135  | 185  | 4.359682 | 4.899354 | 4.779435 | 1.564375 |
| protein_co potassium_   | 1121 | 932  | 954  | 1604 | 1689 | 1636 | 14.87793 | 15.86215 | 15.27683 | 33.0424  |
| protein_co DnaJ_(Hsp4   | 121  | 112  | 112  | 34   | 54   | 84   | 4.79602  | 5.692762 | 5.356261 | 2.091727 |
| protein_co SPRY_dom     | 131  | 80   | 94   | 134  | 147  | 240  | 2.923652 | 2.289569 | 2.531222 | 4.641834 |
| protein_co vacuolar_p   | 166  | 129  | 136  | 300  | 332  | 60   | 4.792945 | 4.77632  | 4.73785  | 13.44454 |
| protein_co C-type_lect  | 87   | 82   | 85   | 6    | 6    | 7    | 1.799485 | 2.174964 | 2.121269 | 0.192624 |
| protein_co spectrin_re  | 349  | 214  | 272  | 4    | 5    | 4    | 2.979176 | 2.342577 | 2.801481 | 0.052998 |
| protein_co CDC-like_ki  | 739  | 544  | 559  | 612  | 803  | 869  | 12.82447 | 12.10607 | 11.70455 | 16.48454 |
| protein_co lysophosph   | 750  | 682  | 708  | 761  | 973  | 564  | 17.80634 | 20.76381 | 20.28124 | 28.04326 |
| protein_co solute_carr  | 1245 | 1019 | 1191 | 117  | 161  | 135  | 11.41311 | 11.97894 | 13.1733  | 1.664758 |
| protein_co zinc_finger  | 96   | 80   | 76   | 7    | 15   | 7    | 1.969996 | 2.105201 | 1.881724 | 0.222958 |
| protein_co WD_repeat    | 150  | 119  | 129  | 101  | 128  | 126  | 3.313002 | 3.370441 | 3.437701 | 3.46244  |
| protein_co coiled-coil_ | 194  | 168  | 146  | 247  | 292  | 215  | 7.889561 | 8.761323 | 7.163941 | 15.59116 |
| protein_co phospholip   | 3    | 1    | 3    | 1149 | 1618 | 958  | 0.054229 | 0.02318  | 0.06543  | 32.23747 |
| protein_co DIRAS_fami   | 35   | 33   | 32   | 488  | 627  | 387  | 0.479308 | 0.579522 | 0.528743 | 10.37282 |

|                         |       |      |      |      |       |       |          |          |          |          |
|-------------------------|-------|------|------|------|-------|-------|----------|----------|----------|----------|
| pseudogen: olfactory_r  | 3     | 2    | 0    | 0    | 3     | 0     | 0.210269 | 0.17976  | 0        | 0        |
| protein_co pleckstrin_  | 109   | 103  | 89   | 255  | 298   | 90    | 1.972602 | 2.390339 | 1.94335  | 7.162813 |
| protein_co proline_ri   | 143   | 91   | 89   | 321  | 474   | 363   | 3.995991 | 3.260913 | 3.000727 | 13.92272 |
| protein_co guanine_nu   | 61    | 60   | 41   | 351  | 553   | 263   | 0.679727 | 0.857364 | 0.551235 | 6.070749 |
| protein_co KIAA2018     | 641   | 559  | 579  | 356  | 492   | 372   | 2.192625 | 2.452039 | 2.389642 | 1.890109 |
| protein_co cyclin_N-te  | 13    | 9    | 7    | 5    | 10    | 10    | 0.22942  | 0.203676 | 0.149051 | 0.136959 |
| protein_co DDB1_and     | 0     | 0    | 0    | 0    | 1     | 0     | 0        | 0        | 0        | 0        |
| protein_co cyclic_nucl  | 2     | 1    | 3    | 0    | 0     | 0     | 0.058833 | 0.037723 | 0.106478 | 0        |
| protein_co HCG18115     | 73    | 68   | 81   | 139  | 193   | 98    | 0.531682 | 0.635108 | 0.711807 | 1.571356 |
| protein_co kelch_repe   | 207   | 189  | 203  | 523  | 796   | 305   | 1.446533 | 1.693671 | 1.711599 | 5.672703 |
| protein_co UDP-GlcNA    | 647   | 471  | 584  | 217  | 258   | 152   | 7.358196 | 6.86906  | 8.013605 | 3.830516 |
| protein_co mitogen-ac   | 0     | 1    | 0    | 0    | 0     | 1     | 0        | 0.013738 | 0        | 0        |
| protein_co lamin_B2     | 10285 | 7789 | 8461 | 8318 | 10921 | 10187 | 103.2464 | 100.2678 | 102.4803 | 129.6045 |
| protein_co regulator_c  | 432   | 310  | 345  | 358  | 424   | 339   | 6.613284 | 6.085614 | 6.372363 | 8.506421 |
| protein_co mex-3_hon    | 1389  | 1049 | 1168 | 1041 | 1313  | 1174  | 16.91694 | 16.38342 | 17.16369 | 19.6789  |
| protein_co HORMA_dc     | 0     | 0    | 0    | 0    | 1     | 0     | 0        | 0        | 0        | 0        |
| protein_co ring_finger  | 427   | 355  | 349  | 58   | 79    | 41    | 2.107361 | 2.246719 | 2.078187 | 0.444293 |
| pseudogen: Nanog_hon    | 0     | 0    | 0    | 24   | 41    | 39    | 0        | 0        | 0        | 1.908978 |
| protein_co myosin_ID    | 2116  | 1675 | 1739 | 689  | 955   | 779   | 17.83557 | 18.10487 | 17.68557 | 9.014072 |
| protein_co chromosom    | 30    | 18   | 18   | 0    | 0     | 0     | 0.514898 | 0.39617  | 0.372752 | 0        |
| protein_co forkhead_b   | 207   | 155  | 217  | 24   | 19    | 3     | 3.043661 | 2.922583 | 3.84976  | 0.547731 |
| protein_co TGFB-induc   | 3     | 2    | 3    | 0    | 0     | 0     | 0.155437 | 0.132884 | 0.187543 | 0        |
| protein_co leucine_ri   | 26    | 21   | 27   | 23   | 14    | 12    | 0.235492 | 0.243911 | 0.295063 | 0.323341 |
| protein_co forkhead_b   | 500   | 350  | 380  | 5    | 5     | 6     | 13.93049 | 12.50471 | 12.77403 | 0.21622  |
| protein_co brain-deriv  | 132   | 106  | 114  | 71   | 94    | 66    | 1.298674 | 1.337339 | 1.353254 | 1.084214 |
| pseudogen: SCAN_dom     | 171   | 158  | 161  | 125  | 140   | 179   | 2.024285 | 2.398512 | 2.299585 | 2.296762 |
| protein_co coiled-coil  | 30    | 16   | 24   | 29   | 26    | 25    | 0.600641 | 0.410793 | 0.579766 | 0.901202 |
| protein_co acyl-CoA_s   | 619   | 445  | 428  | 443  | 574   | 416   | 4.134604 | 3.811647 | 3.449333 | 4.592799 |
| protein_co olfactory_r  | 0     | 0    | 0    | 0    | 3     | 1     | 0        | 0        | 0        | 0        |
| protein_co BCL2-relate  | 2446  | 1654 | 1980 | 1398 | 1477  | 1529  | 43.28037 | 37.53007 | 42.27151 | 38.39478 |
| protein_co zinc_finger  | 11    | 11   | 13   | 8    | 11    | 2     | 0.238681 | 0.306075 | 0.340343 | 0.26943  |
| processed_ testis-speci | 42    | 35   | 36   | 48   | 62    | 60    | 1.317312 | 1.407721 | 1.362353 | 2.336743 |
| protein_co chromosom    | 98    | 82   | 86   | 71   | 116   | 80    | 5.38713  | 5.780356 | 5.703978 | 6.057873 |
| protein_co profilin_far | 5     | 6    | 9    | 1    | 1     | 0     | 0.240709 | 0.370409 | 0.522772 | 0.074723 |
| protein_co melanoma     | 0     | 0    | 0    | 2    | 0     | 0     | 0        | 0        | 0        | 0.074684 |
| protein_co cyclin-depe  | 243   | 207  | 217  | 337  | 449   | 269   | 2.634514 | 2.877889 | 2.838586 | 5.670935 |
| protein_co chromosom    | 1     | 0    | 0    | 4    | 4     | 2     | 0.022024 | 0        | 0        | 0.13674  |
| lincRNA long_interge    | 0     | 1    | 0    | 1    | 3     | 0     | 0        | 0.031798 | 0        | 0.038487 |
| pseudogen: zinc_finger  | 4     | 1    | 4    | 2    | 3     | 2     | 0.106146 | 0.034029 | 0.128071 | 0.082377 |
| protein_co transcriptic | 0     | 0    | 0    | 259  | 331   | 156   | 0        | 0        | 0        | 4.289934 |
| protein_co NCK-associ   | 3     | 5    | 3    | 20   | 15    | 9     | 0.018529 | 0.039601 | 0.022356 | 0.191728 |
| protein_co melanoma     | 0     | 0    | 0    | 0    | 0     | 1     | 0        | 0        | 0        | 0        |
| protein_co RUN_and_f    | 627   | 533  | 558  | 362  | 616   | 498   | 10.6099  | 11.56593 | 11.39269 | 9.507863 |
| protein_co brain_abun   | 6312  | 4484 | 4840 | 2174 | 3042  | 2745  | 157.5984 | 143.5687 | 145.8069 | 84.25095 |
| protein_co leucine_ri   | 84    | 78   | 98   | 19   | 33    | 23    | 0.69528  | 0.827912 | 0.978711 | 0.244098 |
| pseudogen: -            | 1     | 0    | 0    | 0    | 0     | 0     | 0.015809 | 0        | 0        | 0        |
| pseudogen: FK506_bin    | 13    | 14   | 18   | 0    | 4     | 0     | 0.248703 | 0.343459 | 0.415487 | 0        |
| protein_co V-set_and_i  | 390   | 236  | 288  | 1059 | 1415  | 1828  | 3.697353 | 2.869113 | 3.294328 | 15.58306 |
| lincRNA MIR7-3_ho       | 0     | 0    | 0    | 0    | 0     | 1     | 0        | 0        | 0        | 0        |
| protein_co iroquois_h   | 51    | 44   | 61   | 5    | 4     | 10    | 0.995998 | 1.10192  | 1.437362 | 0.151561 |
| protein_co meteorin_f   | 1194  | 823  | 955  | 697  | 1050  | 524   | 29.46667 | 26.0457  | 28.43664 | 26.6987  |
| protein_co family_witl  | 1217  | 1035 | 1030 | 363  | 459   | 519   | 10.35477 | 11.29275 | 10.5739  | 4.793879 |
| pseudogen: -            | 1     | 4    | 0    | 2    | 5     | 1     | 0.040916 | 0.209877 | 0        | 0.127015 |
| protein_co WD_repeat    | 1983  | 1580 | 1713 | 1050 | 1182  | 813   | 35.14093 | 35.90517 | 36.62655 | 28.88087 |
| protein_co glutamate_   | 3     | 0    | 1    | 45   | 65    | 20    | 0.027357 | 0        | 0.011003 | 0.636929 |
| protein_co SRY(sex_d    | 7280  | 5586 | 5885 | 4129 | 6116  | 4129  | 39.15569 | 38.52776 | 38.19074 | 34.46981 |
| protein_co thymidylat   | 835   | 732  | 727  | 619  | 644   | 776   | 23.55786 | 26.48316 | 24.74753 | 27.10632 |
| protein_co peroxisom    | 10    | 13   | 8    | 9    | 5     | 24    | 0.446572 | 0.744464 | 0.431051 | 0.623827 |
| protein_co transcriptic | 13    | 15   | 15   | 23   | 39    | 34    | 0.204006 | 0.301856 | 0.284014 | 0.560219 |
| protein_co paraneopla   | 2441  | 1830 | 1954 | 1333 | 1647  | 1486  | 43.43777 | 41.75997 | 41.9539  | 36.81802 |
| protein_co chromosom    | 2     | 4    | 2    | 0    | 0     | 2     | 0.051162 | 0.131216 | 0.06173  | 0        |
| protein_co MEF2_activ   | 139   | 78   | 95   | 28   | 33    | 19    | 3.54802  | 2.553143 | 2.925788 | 1.109327 |
| protein_co chromosom    | 3     | 3    | 5    | 63   | 129   | 24    | 0.166671 | 0.213732 | 0.335163 | 5.432615 |
| protein_co ankyrin_rej  | 2546  | 1964 | 2133 | 1011 | 1231  | 1263  | 10.96253 | 10.84435 | 11.08132 | 6.756692 |
| protein_co complemer    | 3     | 3    | 3    | 3    | 3     | 3     | 0.164526 | 0.210982 | 0.198511 | 0.255368 |

|                         |      |      |      |      |      |      |          |          |          |          |
|-------------------------|------|------|------|------|------|------|----------|----------|----------|----------|
| protein_co fucosyltran  | 21   | 24   | 10   | 47   | 62   | 36   | 0.316519 | 0.463875 | 0.181856 | 1.099534 |
| protein_co EF-hand_ca   | 2    | 5    | 6    | 2    | 1    | 1    | 0.018274 | 0.058583 | 0.066144 | 0.028363 |
| protein_co glucosamin   | 4    | 11   | 10   | 11   | 11   | 39   | 0.054587 | 0.192499 | 0.164655 | 0.232997 |
| pseudogen: transducer   | 3    | 8    | 4    | 11   | 9    | 9    | 0.123179 | 0.421224 | 0.198163 | 0.701031 |
| protein_co mucin_20_    | 0    | 1    | 0    | 4    | 2    | 3    | 0        | 0.009709 | 0        | 0.047008 |
| protein_co THAP_dom     | 1082 | 860  | 932  | 1553 | 2017 | 1327 | 21.4343  | 21.84691 | 22.27646 | 47.75118 |
| protein_co nuclear_fac  | 932  | 780  | 851  | 888  | 1076 | 1109 | 9.564784 | 10.2651  | 10.53748 | 14.14499 |
| protein_co lymphocyt    | 0    | 0    | 0    | 3    | 5    | 14   | 0        | 0        | 0        | 0.137234 |
| protein_co fin_bud_ini  | 1981 | 1472 | 1616 | 3    | 5    | 3    | 30.93211 | 29.47421 | 30.44489 | 0.072707 |
| protein_co family_witl  | 21   | 27   | 24   | 5    | 7    | 6    | 0.698858 | 1.152239 | 0.963671 | 0.258268 |
| protein_co serine_hyd   | 376  | 311  | 367  | 870  | 1028 | 784  | 6.397187 | 6.785329 | 7.533821 | 22.97476 |
| protein_co dipeptidyl-  | 598  | 477  | 460  | 302  | 404  | 169  | 17.63536 | 18.03894 | 16.36776 | 13.82358 |
| protein_co tripartite_r | 0    | 0    | 0    | 0    | 0    | 1    | 0        | 0        | 0        | 0        |
| protein_co Uncharacte   | 0    | 1    | 0    | 0    | 0    | 0    | 0        | 0.028895 | 0        | 0        |
| protein_co SEC24_fam    | 2540 | 2020 | 2213 | 1984 | 2239 | 1952 | 25.51428 | 26.02018 | 26.82125 | 30.93297 |
| protein_co fragile_X_r  | 1    | 0    | 1    | 0    | 0    | 0    | 0.045926 | 0        | 0.055412 | 0        |
| protein_co Smith-Magi   | 428  | 338  | 344  | 285  | 295  | 382  | 5.856121 | 5.930514 | 5.679012 | 6.052595 |
| pseudogen: HLA_compl    | 0    | 0    | 0    | 4    | 1    | 2    | 0        | 0        | 0        | 0.143197 |
| protein_co methylenet   | 655  | 491  | 565  | 294  | 334  | 396  | 4.352127 | 4.183609 | 4.529568 | 3.032062 |
| protein_co chromosom    | 5    | 2    | 1    | 4    | 6    | 3    | 0.25623  | 0.131431 | 0.061831 | 0.318163 |
| protein_co DEAF1_trar   | 1138 | 814  | 880  | 1473 | 1924 | 985  | 21.34434 | 19.57826 | 19.91458 | 42.88186 |
| protein_co metaxin_3    | 571  | 469  | 511  | 447  | 536  | 385  | 5.579121 | 5.876406 | 6.024189 | 6.779031 |
| protein_co transmembr   | 222  | 170  | 195  | 169  | 204  | 131  | 5.085288 | 4.993681 | 5.389459 | 6.008689 |
| protein_co SIX_homeo    | 228  | 124  | 135  | 177  | 235  | 160  | 3.593588 | 2.50625  | 2.567292 | 4.330092 |
| protein_co F-box_prot   | 442  | 323  | 410  | 759  | 898  | 586  | 6.90616  | 6.471817 | 7.729409 | 18.40715 |
| protein_co zinc_finger  | 661  | 591  | 620  | 314  | 376  | 292  | 4.916609 | 5.637168 | 5.564215 | 3.625136 |
| protein_co solute_carr  | 198  | 180  | 162  | 184  | 230  | 340  | 2.302635 | 2.684366 | 2.273123 | 3.3213   |
| protein_co alkaline_ce  | 11   | 17   | 14   | 82   | 95   | 70   | 0.230469 | 0.45675  | 0.353913 | 2.666642 |
| protein_co WD_repeat    | 451  | 381  | 403  | 218  | 261  | 550  | 4.170262 | 4.517739 | 4.496141 | 3.128771 |
| protein_co polymerase   | 1872 | 1404 | 1621 | 2483 | 3127 | 3501 | 10.9572  | 10.53829 | 11.44787 | 22.55801 |
| protein_co family_witl  | 509  | 405  | 356  | 166  | 257  | 128  | 10.22142 | 10.42937 | 8.625644 | 5.174067 |
| protein_co sodium_ch    | 3    | 3    | 4    | 21   | 46   | 20   | 0.031372 | 0.04023  | 0.050469 | 0.340851 |
| protein_co Down_sync    | 3    | 2    | 0    | 8    | 9    | 3    | 0.02039  | 0.017431 | 0        | 0.084395 |
| protein_co ras_homolo   | 816  | 600  | 638  | 442  | 565  | 289  | 29.00853 | 27.35245 | 27.36556 | 24.38868 |
| protein_co EPS8-like_2  | 107  | 93   | 99   | 644  | 924  | 411  | 1.305211 | 1.454753 | 1.457069 | 12.19308 |
| protein_co zinc_finger  | 6    | 6    | 3    | 2058 | 1981 | 1765 | 0.082553 | 0.105862 | 0.049802 | 43.94977 |
| antisense MRV11_ant     | 0    | 0    | 0    | 4    | 0    | 0    | 0        | 0        | 0        | 0.351169 |
| protein_co anoctamin    | 2904 | 2477 | 2550 | 1256 | 1432 | 1246 | 22.78973 | 24.92745 | 24.14519 | 15.29898 |
| protein_co zinc_finger  | 387  | 322  | 321  | 443  | 519  | 321  | 2.764539 | 2.949694 | 2.766718 | 4.91186  |
| lincRNA -               | 169  | 131  | 145  | 5    | 14   | 7    | 1.865885 | 1.854722 | 1.931587 | 0.085684 |
| protein_co family_witl  | 0    | 0    | 0    | 0    | 3    | 0    | 0        | 0        | 0        | 0        |
| pseudogen: nudix_(nuc   | 9    | 9    | 6    | 6    | 7    | 5    | 0.777183 | 0.996626 | 0.625144 | 0.804197 |
| protein_co family_witl  | 245  | 198  | 184  | 240  | 310  | 242  | 2.647017 | 2.743249 | 2.398593 | 4.024689 |
| protein_co transaldola  | 2333 | 1838 | 1952 | 3847 | 4371 | 4011 | 81.27371 | 82.10889 | 82.04709 | 208.0118 |
| protein_co unc-51-like  | 1705 | 1255 | 1414 | 2303 | 2891 | 2014 | 15.05602 | 14.21147 | 15.06549 | 31.56533 |
| pseudogen: nucleosom    | 18   | 7    | 11   | 7    | 4    | 5    | 0.72949  | 0.363793 | 0.537883 | 0.440327 |
| protein_co ribosomal_   | 0    | 0    | 0    | 166  | 72   | 40   | 0        | 0        | 0        | 8.000958 |
| protein_co clavesin_1   | 1    | 1    | 5    | 2    | 2    | 2    | 0.012946 | 0.016601 | 0.0781   | 0.040188 |
| protein_co ribosomal_   | 1454 | 1169 | 1308 | 392  | 481  | 239  | 8.610518 | 8.87746  | 9.34589  | 3.603142 |
| protein_co UDP-GlcNA    | 125  | 78   | 74   | 10   | 41   | 12   | 3.127669 | 2.502734 | 2.234038 | 0.388366 |
| protein_co pseudouric   | 436  | 375  | 378  | 871  | 1265 | 1709 | 9.504439 | 10.48288 | 9.942139 | 29.47058 |
| pseudogen: PEST_cont    | 0    | 0    | 1    | 0    | 0    | 0    | 0        | 0        | 0.117621 | 0        |
| protein_co chromodor    | 2701 | 2208 | 2367 | 463  | 312  | 467  | 9.66056  | 10.12712 | 10.21466 | 2.570332 |
| protein_co sperm_acrr   | 0    | 2    | 2    | 9    | 16   | 32   | 0        | 0.123851 | 0.11653  | 0.674581 |
| protein_co olfactory_r  | 0    | 0    | 0    | 1    | 0    | 0    | 0        | 0        | 0        | 0.068274 |
| protein_co Parkinson_   | 1260 | 913  | 1012 | 899  | 1462 | 1229 | 13.56012 | 12.60007 | 13.14079 | 15.01699 |
| protein_co chromosom    | 16   | 14   | 13   | 1    | 0    | 1    | 0.393002 | 0.440973 | 0.385271 | 0.038125 |
| pseudogen: -            | 110  | 93   | 93   | 94   | 106  | 85   | 8.109909 | 8.792565 | 8.272833 | 10.75676 |
| protein_co tripartite_r | 1    | 0    | 0    | 38   | 62   | 31   | 0.021789 | 0        | 0        | 1.285145 |
| protein_co mannosida    | 2485 | 2000 | 2105 | 1025 | 1342 | 1047 | 23.08274 | 23.82322 | 23.59181 | 14.77799 |
| protein_co potassium_   | 0    | 1    | 0    | 8    | 13   | 6    | 0        | 0.017971 | 0        | 0.17401  |
| protein_co frizzled_fan | 3483 | 2178 | 2622 | 271  | 384  | 481  | 51.26112 | 41.10568 | 46.56026 | 6.190623 |
| protein_co F-box_prot   | 2    | 0    | 0    | 0    | 1    | 0    | 0.055921 | 0        | 0        | 0        |
| protein_co potassium_   | 1    | 1    | 1    | 8    | 4    | 16   | 0.013607 | 0.017449 | 0.016418 | 0.168961 |
| protein_co topoisome    | 1094 | 798  | 874  | 848  | 1053 | 1111 | 12.64736 | 11.83027 | 12.19107 | 15.21629 |

|                         |       |       |       |       |       |       |          |          |          |          |
|-------------------------|-------|-------|-------|-------|-------|-------|----------|----------|----------|----------|
| protein_co CASK_inter   | 862   | 560   | 622   | 1010  | 1444  | 868   | 8.05966  | 6.714394 | 7.016942 | 14.65755 |
| pseudogen_olfactory_r   | 0     | 0     | 0     | 1     | 0     | 0     | 0        | 0        | 0        | 0.076289 |
| protein_co zinc_finger  | 720   | 581   | 598   | 133   | 140   | 97    | 4.394223 | 4.547106 | 4.403508 | 1.259887 |
| protein_co chromosom    | 1     | 0     | 0     | 9     | 6     | 3     | 0.025008 | 0        | 0        | 0.349343 |
| antisense_DLGA1_ar      | 83    | 79    | 66    | 31    | 49    | 35    | 1.979589 | 2.416202 | 1.899279 | 1.147596 |
| protein_co -            | 2     | 5     | 1     | 12    | 20    | 14    | 0.057534 | 0.184447 | 0.034709 | 0.535802 |
| pseudogen_ribosomal_    | 1     | 0     | 0     | 0     | 0     | 0     | 0.031833 | 0        | 0        | 0        |
| protein_co coiled-coil_ | 452   | 369   | 379   | 468   | 616   | 549   | 11.90022 | 12.45811 | 12.03937 | 19.12462 |
| protein_co chromosom    | 0     | 0     | 0     | 0     | 0     | 1     | 0        | 0        | 0        | 0        |
| pseudogen_-             | 6     | 0     | 2     | 108   | 168   | 55    | 0.063551 | 0        | 0.025559 | 1.775518 |
| protein_co LRRN4_C-ter  | 125   | 97    | 79    | 2     | 4     | 1     | 2.267409 | 2.256321 | 1.729    | 0.056309 |
| processed_-             | 0     | 0     | 0     | 0     | 1     | 2     | 0        | 0        | 0        | 0        |
| protein_co translocase  | 619   | 474   | 544   | 347   | 421   | 637   | 17.17451 | 16.86481 | 18.21129 | 14.94354 |
| protein_co hypermeth    | 1589  | 1127  | 1270  | 8     | 7     | 6     | 23.60844 | 21.47221 | 22.76644 | 0.184486 |
| protein_co protein_ty   | 349   | 219   | 271   | 647   | 870   | 352   | 3.457557 | 2.782258 | 3.239375 | 9.948982 |
| protein_co melanoma_    | 1182  | 883   | 894   | 1286  | 1742  | 1114  | 32.97085 | 31.58513 | 30.08834 | 55.67806 |
| protein_co uromodulin   | 0     | 0     | 0     | 1     | 1     | 5     | 0        | 0        | 0        | 0.013374 |
| antisense_-             | 26    | 26    | 25    | 45    | 89    | 50    | 0.521446 | 0.66868  | 0.604956 | 1.400809 |
| protein_co sterile_alph | 176   | 161   | 164   | 2     | 0     | 0     | 1.156804 | 1.357008 | 1.300586 | 0.020404 |
| antisense_ZNFX1_anti    | 761   | 579   | 617   | 1073  | 1283  | 1014  | 33.19377 | 32.38619 | 32.47171 | 72.6444  |
| pseudogen_-             | 0     | 1     | 1     | 1     | 6     | 1     | 0        | 0.116531 | 0.109642 | 0.141046 |
| protein_co PRKC_apop    | 865   | 626   | 771   | 2251  | 2694  | 1918  | 4.442969 | 4.123261 | 4.778148 | 17.94581 |
| protein_co TGFB-induc   | 1826  | 1538  | 1576  | 1857  | 2071  | 1424  | 28.25781 | 30.52133 | 29.42673 | 44.60465 |
| protein_co Smith-Magi   | 270   | 186   | 212   | 277   | 343   | 178   | 3.763467 | 3.324656 | 3.5654   | 5.992867 |
| protein_co nucleosom    | 183   | 114   | 146   | 24    | 47    | 55    | 3.697059 | 2.953381 | 3.558821 | 0.75257  |
| pseudogen_-             | 1     | 0     | 1     | 1     | 0     | 9     | 0.080291 | 0        | 0.096876 | 0.124623 |
| protein_co Serine/thre  | 4     | 3     | 1     | 0     | 0     | 0     | 0.064036 | 0.061587 | 0.019316 | 0        |
| protein_co CD19_mole    | 3     | 1     | 1     | 39    | 52    | 12    | 0.060581 | 0.025896 | 0.024365 | 1.2224   |
| protein_co chromosom    | 17    | 12    | 5     | 25    | 22    | 19    | 0.452658 | 0.409743 | 0.160635 | 1.033217 |
| protein_co olfactory_r  | 0     | 0     | 0     | 0     | 1     | 0     | 0        | 0        | 0        | 0        |
| protein_co nuclear_re   | 418   | 354   | 392   | 219   | 256   | 146   | 5.925038 | 6.434688 | 6.704232 | 4.818252 |
| protein_co G_protein-i  | 0     | 0     | 0     | 2     | 3     | 1     | 0        | 0        | 0        | 0.047756 |
| protein_co acyl-CoA_tl  | 17    | 16    | 12    | 35    | 47    | 25    | 0.337481 | 0.407314 | 0.287428 | 1.078448 |
| protein_co oligodendr   | 0     | 0     | 0     | 3     | 9     | 86    | 0        | 0        | 0        | 0.099426 |
| protein_co polymerase   | 22455 | 16916 | 17900 | 930   | 1239  | 740   | 275.0563 | 265.7146 | 264.5511 | 17.68161 |
| protein_co ariadne_ho   | 940   | 765   | 788   | 1191  | 1358  | 1425  | 8.935053 | 9.324811 | 9.037401 | 17.57161 |
| protein_co RNA_bindin   | 28    | 27    | 19    | 16    | 18    | 6     | 0.245039 | 0.303006 | 0.200622 | 0.217334 |
| protein_co zinc_finger  | 497   | 386   | 397   | 314   | 366   | 345   | 4.472143 | 4.454059 | 4.310204 | 4.385503 |
| protein_co zinc_finger  | 1     | 1     | 0     | 0     | 0     | 0     | 0.02029  | 0.026019 | 0        | 0        |
| protein_co variable_ch  | 0     | 1     | 0     | 2     | 4     | 0     | 0        | 0.074143 | 0        | 0.179482 |
| protein_co iroquois_h   | 81    | 46    | 54    | 25    | 19    | 23    | 1.460243 | 1.063426 | 1.174578 | 0.699537 |
| protein_co ST8_alpha-l  | 0     | 0     | 0     | 46    | 79    | 105   | 0        | 0        | 0        | 0.282927 |
| protein_co reprimi_Tf   | 0     | 0     | 0     | 355   | 445   | 592   | 0        | 0        | 0        | 17.56413 |
| protein_co solute_carr  | 972   | 709   | 746   | 773   | 984   | 1004  | 15.74882 | 14.73118 | 14.58373 | 19.4398  |
| protein_co rabaptin_R   | 963   | 709   | 766   | 335   | 416   | 436   | 16.00677 | 15.11238 | 15.36223 | 8.642763 |
| protein_co nescient_h   | 0     | 0     | 0     | 184   | 319   | 125   | 0        | 0        | 0        | 1.853236 |
| protein_co ATX1_antic   | 752   | 531   | 588   | 336   | 307   | 289   | 8.12285  | 7.3552   | 7.663303 | 5.633267 |
| protein_co family_witl  | 0     | 0     | 0     | 1     | 3     | 1     | 0        | 0        | 0        | 0.061469 |
| protein_co transducin   | 1849  | 1481  | 1611  | 1400  | 1470  | 1625  | 10.90836 | 11.20436 | 11.46743 | 12.81979 |
| protein_co sterile_alph | 48    | 27    | 37    | 95    | 115   | 84    | 0.25386  | 0.183116 | 0.236104 | 0.779842 |
| protein_co CD163_mo     | 2     | 4     | 7     | 0     | 0     | 2     | 0.017654 | 0.045278 | 0.074554 | 0        |
| protein_co chromosom    | 9     | 5     | 3     | 6     | 5     | 7     | 0.374122 | 0.266533 | 0.150467 | 0.387127 |
| protein_co p53-induce   | 489   | 352   | 438   | 734   | 1014  | 495   | 5.099915 | 4.707671 | 5.511582 | 11.88176 |
| protein_co zinc_finger  | 33    | 15    | 17    | 5     | 7     | 0     | 0.626212 | 0.365013 | 0.389228 | 0.147268 |
| protein_co ribosomal_   | 7951  | 6365  | 6669  | 10482 | 11021 | 10639 | 477.3656 | 490.0463 | 483.1012 | 976.7963 |
| protein_co germ_cell_   | 129   | 94    | 126   | 332   | 454   | 352   | 2.11719  | 1.978369 | 2.495105 | 8.457436 |
| protein_co jun_proto-i  | 4452  | 3451  | 3822  | 450   | 532   | 538   | 62.85888 | 62.48357 | 65.11038 | 9.861762 |
| protein_co cleavage_st  | 1061  | 827   | 886   | 728   | 913   | 1189  | 12.10764 | 12.10205 | 12.19905 | 12.89455 |
| protein_co piggyBac_ti  | 88    | 73    | 63    | 686   | 759   | 661   | 1.198467 | 1.274898 | 1.035218 | 14.501   |
| protein_co chromosom    | 1     | 0     | 0     | 0     | 0     | 0     | 0.052864 | 0        | 0        | 0        |
| protein_co glucosidase  | 771   | 571   | 596   | 132   | 152   | 232   | 15.06342 | 14.30588 | 14.04958 | 4.002889 |
| antisense_cancer_susi   | 7     | 6     | 6     | 5     | 10    | 8     | 0.100438 | 0.110397 | 0.103872 | 0.111352 |
| protein_co acyl-CoA_d   | 755   | 584   | 628   | 255   | 346   | 454   | 14.42623 | 14.30962 | 14.47817 | 7.562693 |
| protein_co interleukin  | 247   | 210   | 245   | 347   | 502   | 433   | 1.34563  | 1.467092 | 1.610433 | 2.934192 |
| protein_co patatin-like | 580   | 402   | 467   | 711   | 919   | 655   | 9.976599 | 8.86727  | 9.692135 | 18.98255 |

|                         |      |      |      |       |       |       |          |          |          |          |
|-------------------------|------|------|------|-------|-------|-------|----------|----------|----------|----------|
| protein_co membrane     | 3    | 0    | 0    | 1     | 0     | 2     | 0.093036 | 0        | 0        | 0.048135 |
| protein_co angiotensin  | 785  | 605  | 642  | 1207  | 1363  | 1122  | 32.98267 | 32.59725 | 32.54612 | 78.71435 |
| protein_co CD163_mo     | 88   | 58   | 66   | 2     | 2     | 4     | 0.894111 | 0.755694 | 0.809097 | 0.031541 |
| protein_co serine/argin | 39   | 26   | 28   | 616   | 963   | 315   | 0.506007 | 0.432588 | 0.438327 | 12.40519 |
| protein_co THAP_dom     | 265  | 215  | 243  | 110   | 122   | 150   | 3.758577 | 3.910437 | 4.158454 | 2.42159  |
| protein_co EF-hand_ca   | 16   | 20   | 22   | 519   | 753   | 413   | 0.307476 | 0.492867 | 0.510107 | 15.48062 |
| protein_co SMT3_suppr   | 4    | 0    | 3    | 1     | 0     | 5     | 0.274612 | 0        | 0.248501 | 0.106559 |
| protein_co DnaJ_(Hsp4   | 16   | 10   | 9    | 24    | 20    | 15    | 0.461686 | 0.37003  | 0.313341 | 1.074902 |
| protein_co N-acetylate  | 60   | 51   | 46   | 8     | 14    | 12    | 0.56802  | 0.619144 | 0.525434 | 0.117553 |
| protein_co CD151_mo     | 4380 | 3163 | 3440 | 1235  | 1827  | 1330  | 113.9092 | 105.4856 | 107.9422 | 49.85194 |
| antisense -             | 0    | 1    | 0    | 1     | 0     | 1     | 0        | 0.031647 | 0        | 0.038305 |
| protein_co polymerase   | 1038 | 796  | 920  | 824   | 1067  | 990   | 54.56484 | 53.65843 | 58.35142 | 67.23157 |
| protein_co family_witl  | 2806 | 1976 | 2113 | 1293  | 1973  | 1286  | 47.82748 | 43.19029 | 43.45476 | 34.2073  |
| protein_co poliovirus_  | 459  | 404  | 407  | 275   | 319   | 573   | 5.87405  | 6.630032 | 6.284452 | 5.462458 |
| protein_co solute_carr  | 1    | 6    | 4    | 1     | 0     | 2     | 0.035496 | 0.27311  | 0.171311 | 0.055094 |
| protein_co annexin_A2   | 33   | 19   | 28   | 27    | 30    | 23    | 0.692646 | 0.511399 | 0.709093 | 0.879613 |
| pseudogen-1             | 5    | 4    | 4    | 1     | 0     | 2     | 0.099008 | 0.101571 | 0.095567 | 0.030735 |
| protein_co KIAA0195     | 1596 | 1156 | 1213 | 1294  | 1520  | 1328  | 13.28773 | 12.34198 | 12.18503 | 16.72178 |
| protein_co flightless_I | 4467 | 3615 | 3819 | 3902  | 4800  | 3428  | 48.2844  | 50.10816 | 49.80679 | 65.46491 |
| protein_co SRY_(sex_d   | 4339 | 3194 | 3485 | 3054  | 4173  | 2867  | 43.97143 | 41.50736 | 42.61198 | 48.0375  |
| protein_co heterogene   | 8486 | 6197 | 6745 | 9901  | 14868 | 12529 | 134.2019 | 125.6743 | 128.7021 | 243.033  |
| pseudogen-1             | 0    | 1    | 2    | 2     | 1     | 2     | 0        | 0.109927 | 0.206857 | 0.266105 |
| processed-1             | 153  | 94   | 121  | 74    | 110   | 119   | 3.00426  | 2.366918 | 2.866682 | 2.25532  |
| lincRNA family_witl     | 2    | 1    | 6    | 0     | 1     | 0     | 0.048241 | 0.030931 | 0.174616 | 0        |
| protein_co zinc_finger  | 152  | 108  | 109  | 158   | 294   | 156   | 2.207272 | 2.011155 | 1.909796 | 3.561229 |
| pseudogen-1             | 1    | 1    | 0    | 0     | 0     | 0     | 0.155265 | 0.199105 | 0        | 0        |
| pseudogen-1             | 0    | 0    | 0    | 3     | 6     | 0     | 0        | 0        | 0        | 0.363294 |
| processed-1             | 2    | 4    | 1    | 2     | 8     | 4     | 0.108042 | 0.277096 | 0.065179 | 0.167695 |
| protein_co myozenin_1   | 6    | 7    | 4    | 75    | 107   | 34    | 0.18257  | 0.27314  | 0.146854 | 3.542171 |
| protein_co transmembr   | 0    | 0    | 0    | 0     | 1     | 0     | 0        | 0        | 0        | 0        |
| pseudogen-1             | 1    | 0    | 0    | 0     | 0     | 0     | 0.07137  | 0        | 0        | 0        |
| protein_co potassium_   | 0    | 0    | 0    | 3     | 4     | 3     | 0        | 0        | 0        | 0.041251 |
| processed-1             | 1274 | 970  | 1085 | 73    | 89    | 91    | 26.43269 | 25.80792 | 27.16125 | 2.350852 |
| protein_co chitinase_c  | 1766 | 1348 | 1401 | 1103  | 1311  | 1228  | 23.41187 | 22.9163  | 22.40947 | 22.6961  |
| pseudogen-1             | 175  | 170  | 167  | 29    | 43    | 26    | 1.945875 | 2.424014 | 2.240481 | 0.500501 |
| protein_co zinc_finger  | 15   | 12   | 13   | 165   | 232   | 276   | 0.213719 | 0.219252 | 0.223483 | 3.648942 |
| processed-1             | 307  | 210  | 255  | 580   | 486   | 730   | 1.737716 | 1.524295 | 1.74152  | 5.09564  |
| protein_co transmembr   | 120  | 121  | 100  | 136   | 194   | 63    | 2.99298  | 3.870056 | 3.009335 | 5.264922 |
| pseudogen-1             | 13   | 5    | 9    | 14    | 17    | 19    | 0.899071 | 0.443435 | 0.751002 | 1.502828 |
| protein_co coiled-coil  | 158  | 101  | 127  | 140   | 146   | 130   | 10.46416 | 8.577838 | 10.14843 | 14.39149 |
| protein_co zinc_finger  | 32   | 20   | 33   | 28    | 41    | 21    | 0.3613   | 0.289573 | 0.449553 | 0.49069  |
| protein_co chromosom    | 9    | 5    | 4    | 18    | 19    | 21    | 0.180038 | 0.128263 | 0.096545 | 0.558889 |
| protein_co adaptor-rel  | 954  | 749  | 794  | 612   | 709   | 631   | 25.85727 | 26.03307 | 25.96587 | 25.74638 |
| protein_co growth_fac   | 1899 | 1419 | 1481 | 1196  | 1519  | 1346  | 23.87883 | 22.88125 | 22.46938 | 23.34262 |
| protein_co zinc_finger  | 243  | 208  | 246  | 59    | 27    | 27    | 3.015156 | 3.309605 | 3.682872 | 1.136282 |
| protein_co ubiquitin-c  | 2175 | 1645 | 1728 | 1780  | 1999  | 2507  | 27.78147 | 26.94457 | 26.63102 | 35.28958 |
| pseudogen-1             | 1    | 0    | 0    | 0     | 1     | 0     | 0.012415 | 0        | 0        | 0        |
| protein_co ADP-ribosy   | 521  | 408  | 409  | 761   | 1108  | 837   | 8.70934  | 8.746152 | 8.249334 | 19.74525 |
| protein_co zinc_finger  | 163  | 149  | 170  | 134   | 213   | 174   | 1.412507 | 1.655764 | 1.77746  | 1.802346 |
| protein_co MAM_dom      | 162  | 90   | 111  | 67    | 124   | 90    | 1.84822  | 1.316711 | 1.527952 | 1.186435 |
| protein_co CENPB_DN     | 36   | 31   | 28   | 24    | 41    | 57    | 0.616748 | 0.681046 | 0.578778 | 0.638186 |
| protein_co outer_dens   | 0    | 3    | 2    | 1     | 2     | 0     | 0        | 0.059086 | 0.037062 | 0.023839 |
| protein_co Bet1_golgi   | 1133 | 822  | 850  | 349   | 397   | 337   | 18.21893 | 16.95017 | 16.49149 | 8.710614 |
| protein_co ribosomal_   | 7980 | 6054 | 6248 | 11362 | 10862 | 9117  | 598.6917 | 582.4413 | 565.574  | 1323.079 |
| protein_co resistance_  | 3557 | 2753 | 2924 | 1113  | 1313  | 1611  | 45.04126 | 44.70357 | 44.67372 | 21.87521 |
| protein_co IMP3_U3_s    | 473  | 311  | 382  | 890   | 1075  | 1211  | 10.93638 | 9.221088 | 10.65673 | 31.93985 |
| protein_co ankyrin_rej  | 357  | 272  | 263  | 77    | 107   | 86    | 6.401429 | 6.254419 | 5.690003 | 2.143038 |
| protein_co lipocalin_1  | 0    | 0    | 0    | 11    | 7     | 6     | 0        | 0        | 0        | 0.277497 |
| protein_co outer_dens   | 8    | 4    | 13   | 9     | 21    | 2     | 0.21784  | 0.139674 | 0.427109 | 0.380382 |
| protein_co dpy-19-like  | 111  | 83   | 97   | 28    | 34    | 26    | 1.281968 | 1.229254 | 1.351681 | 0.50193  |
| protein_co SPATA31_si   | 2    | 2    | 2    | 0     | 1     | 4     | 0.020942 | 0.026856 | 0.025268 | 0        |
| processed-1             | 4    | 1    | 2    | 3     | 5     | 2     | 0.086433 | 0.02771  | 0.052143 | 0.100617 |
| protein_co chromosom    | 0    | 1    | 0    | 0     | 0     | 0     | 0        | 0.031301 | 0        | 0        |
| protein_co G_protein-i  | 7    | 0    | 2    | 2     | 6     | 3     | 0.158949 | 0        | 0.054795 | 0.070489 |
| protein_co TSPY-like_6  | 0    | 0    | 0    | 0     | 1     | 1     | 0        | 0        | 0        | 0        |

|                         |       |       |       |      |       |      |          |          |          |          |
|-------------------------|-------|-------|-------|------|-------|------|----------|----------|----------|----------|
| protein_co family_witl  | 280   | 200   | 218   | 224  | 319   | 118  | 4.461164 | 4.086293 | 4.190778 | 5.539475 |
| protein_co DNA_meth     | 831   | 589   | 642   | 424  | 489   | 729  | 8.560106 | 7.780415 | 7.979234 | 6.779138 |
| protein_co ADAMTS-lik   | 10570 | 9051  | 9462  | 26   | 24    | 13   | 61.72198 | 67.77519 | 66.66469 | 0.235651 |
| protein_co family_witl  | 408   | 343   | 369   | 0    | 0     | 5    | 1.955348 | 2.107984 | 2.133725 | 0        |
| protein_co IMP_(inosi   | 2454  | 2084  | 2098  | 6403 | 6736  | 4982 | 70.03536 | 76.26932 | 72.2431  | 283.633  |
| protein_co ALS2_C-ter   | 18    | 15    | 18    | 116  | 177   | 105  | 0.128018 | 0.136804 | 0.154461 | 1.280518 |
| protein_co myeloid_le   | 174   | 156   | 176   | 224  | 212   | 163  | 2.676792 | 3.077509 | 3.266827 | 5.348647 |
| protein_co protease_sc  | 0     | 0     | 0     | 1    | 1     | 0    | 0        | 0        | 0        | 0.056859 |
| protein_co NADH_deh     | 653   | 488   | 508   | 219  | 284   | 226  | 15.21828 | 14.58417 | 14.28447 | 7.921857 |
| protein_co chromosor    | 301   | 266   | 244   | 398  | 501   | 327  | 3.785916 | 4.290377 | 3.702903 | 7.769947 |
| protein_co GRAM_don     | 36    | 38    | 41    | 25   | 34    | 18   | 0.404128 | 0.547027 | 0.555326 | 0.435599 |
| protein_co signal_tran  | 33    | 17    | 33    | 392  | 488   | 328  | 0.757401 | 0.500346 | 0.913848 | 13.9646  |
| pseudogen_ unc-51-like  | 4     | 2     | 1     | 13   | 13    | 3    | 0.161969 | 0.103851 | 0.048856 | 0.817044 |
| pseudogen_ twinfilin_1  | 6     | 8     | 7     | 3    | 1     | 1    | 0.267943 | 0.458132 | 0.37717  | 0.207942 |
| protein_co 5-hydroxyt   | 0     | 0     | 0     | 2    | 0     | 2    | 0        | 0        | 0        | 0.085775 |
| protein_co testis-speci | 32    | 23    | 26    | 114  | 230   | 75   | 0.597087 | 0.550332 | 0.585341 | 3.301591 |
| protein_co bolA_homc    | 103   | 86    | 104   | 199  | 223   | 94   | 4.406635 | 4.718214 | 5.368479 | 13.21458 |
| protein_co phosphodi    | 2183  | 1783  | 1801  | 531  | 635   | 600  | 11.60028 | 12.14998 | 11.5472  | 4.379655 |
| protein_co DEAD_(Asp-   | 632   | 514   | 550   | 817  | 808   | 703  | 4.418442 | 4.608128 | 4.639411 | 8.865528 |
| lincRNA -               | 0     | 1     | 0     | 0    | 0     | 1    | 0        | 0.16796  | 0        | 0        |
| protein_co golgin_A8_   | 7     | 3     | 8     | 0    | 2     | 2    | 0.172844 | 0.094992 | 0.238338 | 0        |
| protein_co protein_ph   | 1     | 0     | 1     | 2    | 2     | 0    | 0.036576 | 0        | 0.044131 | 0.113541 |
| protein_co NADH_deh     | 25    | 13    | 20    | 29   | 43    | 17   | 1.244427 | 0.829817 | 1.201178 | 2.240567 |
| pseudogen_ -            | 0     | 3     | 2     | 1    | 2     | 3    | 0        | 0.114898 | 0.072071 | 0.046357 |
| protein_co DALR_antic   | 574   | 463   | 489   | 551  | 641   | 402  | 9.01067  | 9.32042  | 9.261942 | 13.4254  |
| protein_co zinc_finger  | 16    | 16    | 22    | 163  | 204   | 224  | 0.30276  | 0.388247 | 0.502285 | 4.787372 |
| pseudogen_ -            | 0     | 1     | 0     | 48   | 62    | 56   | 0        | 0.015063 | 0        | 0.875108 |
| protein_co zinc_finger  | 531   | 478   | 479   | 450  | 502   | 248  | 3.611633 | 4.169139 | 3.930906 | 4.75064  |
| protein_co APC_membr    | 0     | 0     | 0     | 7    | 4     | 6    | 0        | 0        | 0        | 0.082544 |
| protein_co serine_pep   | 0     | 0     | 1     | 0    | 0     | 0    | 0        | 0        | 0.082472 | 0        |
| protein_co ligand_dep   | 230   | 220   | 200   | 190  | 141   | 138  | 2.153065 | 2.640957 | 2.258954 | 2.760663 |
| protein_co par-6_parti  | 525   | 393   | 465   | 550  | 837   | 489  | 6.364338 | 6.109361 | 6.801347 | 10.34873 |
| protein_co zinc_finger  | 1     | 4     | 4     | 44   | 71    | 38   | 0.020107 | 0.103139 | 0.097042 | 1.373204 |
| protein_co SH2B_adap    | 1239  | 804   | 993   | 853  | 1201  | 990  | 9.613889 | 8.000059 | 9.29662  | 10.27324 |
| protein_co zinc_finger  | 2     | 5     | 1     | 4    | 1     | 3    | 0.030788 | 0.098703 | 0.018574 | 0.095574 |
| protein_co vomeronas    | 1     | 4     | 1     | 0    | 2     | 1    | 0.035712 | 0.183183 | 0.043089 | 0        |
| protein_co KDEL_(Lys-   | 2195  | 1748  | 1876  | 290  | 377   | 357  | 23.53077 | 24.02992 | 24.26512 | 4.825364 |
| protein_co plectin      | 56204 | 42455 | 47486 | 7806 | 11576 | 6319 | 172.8249 | 167.4084 | 176.1784 | 37.25616 |
| protein_co SH2_doma     | 0     | 2     | 0     | 0    | 4     | 2    | 0        | 0.030193 | 0        | 0        |
| protein_co ring_finger  | 1     | 3     | 3     | 16   | 14    | 6    | 0.020107 | 0.077354 | 0.072782 | 0.499347 |
| protein_co protease_sc  | 7     | 1     | 11    | 22   | 33    | 14   | 0.115574 | 0.021172 | 0.21913  | 0.563787 |
| protein_co zinc_finger  | 107   | 98    | 75    | 147  | 214   | 185  | 1.371203 | 1.610473 | 1.159651 | 3.223922 |
| protein_co transmembr   | 31    | 14    | 24    | 217  | 329   | 207  | 0.296954 | 0.171975 | 0.277388 | 2.926398 |
| protein_co UDP-N-acet   | 791   | 604   | 653   | 436  | 562   | 272  | 9.601347 | 9.401604 | 9.563501 | 8.214339 |
| protein_co SLIT_and_N   | 25    | 16    | 16    | 19   | 28    | 14   | 0.226085 | 0.18555  | 0.174582 | 0.266696 |
| protein_co WD_repeat    | 4286  | 3288  | 3642  | 3122 | 3905  | 4320 | 45.66476 | 44.92315 | 46.81845 | 51.62884 |
| protein_co Gen_endon    | 344   | 266   | 303   | 278  | 281   | 524  | 2.533401 | 2.512098 | 2.692379 | 3.177758 |
| protein_co transmembr   | 24    | 22    | 22    | 31   | 64    | 20   | 0.337845 | 0.397135 | 0.37366  | 0.677326 |
| protein_co aquaporin    | 25    | 22    | 14    | 44   | 52    | 32   | 0.544726 | 0.61471  | 0.368056 | 1.488063 |
| protein_co transmembr   | 583   | 504   | 503   | 591  | 649   | 651  | 13.04863 | 14.46559 | 13.58352 | 20.5312  |
| protein_co zinc_finger  | 106   | 98    | 103   | 110  | 141   | 70   | 1.773855 | 2.103041 | 2.079685 | 2.857166 |
| protein_co potassium_   | 10    | 8     | 2     | 17   | 33    | 6    | 0.304877 | 0.312769 | 0.07357  | 0.804458 |
| protein_co shisa_homc   | 151   | 77    | 74    | 444  | 675   | 271  | 3.592284 | 2.349059 | 2.124093 | 16.39484 |
| protein_co olfactory_r  | 0     | 0     | 0     | 1    | 0     | 0    | 0        | 0        | 0        | 0.06866  |
| protein_co zinc_finger  | 172   | 130   | 142   | 66   | 63    | 85   | 7.440113 | 7.211138 | 7.411182 | 4.431243 |
| protein_co pleckstrin_  | 112   | 103   | 111   | 35   | 53    | 50   | 1.423606 | 1.678875 | 1.702326 | 0.69051  |
| protein_co zinc_finger  | 22    | 12    | 12    | 9    | 7     | 10   | 0.426625 | 0.298411 | 0.280772 | 0.270893 |
| protein_co 5-hydroxyt   | 0     | 2     | 1     | 6    | 2     | 12   | 0        | 0.075256 | 0.035404 | 0.273266 |
| protein_co chromosor    | 0     | 0     | 0     | 0    | 1     | 0    | 0        | 0        | 0        | 0        |
| protein_co family_witl  | 416   | 318   | 324   | 435  | 491   | 233  | 8.81041  | 8.636529 | 8.279342 | 14.29955 |
| protein_co DnaJ_(Hsp4   | 25    | 14    | 18    | 5    | 3     | 5    | 0.446062 | 0.320326 | 0.387503 | 0.13847  |
| protein_co neurogenin   | 0     | 0     | 0     | 0    | 0     | 2    | 0        | 0        | 0        | 0        |
| protein_co differential | 50    | 31    | 36    | 7    | 16    | 12   | 1.121771 | 0.891877 | 0.974506 | 0.24376  |
| protein_co BEN_doma     | 319   | 230   | 253   | 973  | 1267  | 2498 | 2.251342 | 2.081555 | 2.154365 | 10.65845 |
| lincRNA -               | 0     | 3     | 3     | 1    | 0     | 6    | 0        | 0.162367 | 0.152769 | 0.065508 |

|                         |      |      |      |      |      |      |          |          |          |          |
|-------------------------|------|------|------|------|------|------|----------|----------|----------|----------|
| protein_co 5'-nucleoti  | 286  | 206  | 234  | 476  | 515  | 447  | 4.301009 | 3.972655 | 4.245885 | 11.11071 |
| pseudogeni ribosomal_   | 6    | 1    | 4    | 8    | 12   | 11   | 0.357939 | 0.076501 | 0.287916 | 0.740761 |
| pseudogeni -            | 2    | 2    | 2    | 2    | 6    | 7    | 0.056871 | 0.072929 | 0.068618 | 0.088271 |
| lincRNA long_interf     | 40   | 42   | 33   | 19   | 18   | 29   | 3.337368 | 4.493686 | 3.322049 | 2.460527 |
| protein_co glycine_del  | 150  | 122  | 155  | 3910 | 4669 | 3964 | 1.867136 | 1.947395 | 2.327901 | 75.54261 |
| protein_co cytochrom    | 268  | 210  | 229  | 223  | 258  | 218  | 17.00477 | 17.08695 | 17.53152 | 21.96197 |
| pseudogeni H3_histone   | 15   | 13   | 14   | 24   | 28   | 28   | 1.711314 | 1.901916 | 1.927146 | 4.249915 |
| protein_co minichrom    | 3    | 1    | 10   | 27   | 29   | 14   | 0.027604 | 0.011799 | 0.111019 | 0.385607 |
| protein_co tubulin_alf  | 0    | 0    | 0    | 0    | 0    | 1    | 0        | 0        | 0        | 0        |
| pseudogeni -            | 20   | 22   | 21   | 22   | 23   | 18   | 1.453954 | 2.050939 | 1.841993 | 2.482412 |
| protein_co prolyl_4-hy  | 275  | 183  | 228  | 268  | 369  | 159  | 2.439878 | 2.082072 | 2.440722 | 3.690631 |
| protein_co dextex_hon   | 617  | 500  | 508  | 409  | 568  | 467  | 9.043808 | 9.398218 | 8.984169 | 9.305076 |
| protein_co kelch-like_f | 133  | 80   | 80   | 104  | 118  | 92   | 2.617026 | 2.018625 | 1.899304 | 3.17629  |
| protein_co cortixin_1   | 850  | 577  | 645  | 598  | 914  | 807  | 31.33374 | 27.27586 | 28.68805 | 34.21566 |
| protein_co solute_carr  | 232  | 201  | 184  | 74   | 90   | 83   | 5.789507 | 6.432192 | 5.540124 | 2.866261 |
| protein_co carbonic_a   | 1    | 1    | 0    | 168  | 269  | 137  | 0.012301 | 0.015774 | 0        | 3.207504 |
| protein_co EPM2A_(laf   | 776  | 605  | 653  | 286  | 359  | 339  | 4.891337 | 4.890244 | 4.966233 | 2.798094 |
| protein_co v-erb-a_ery  | 11   | 6    | 5    | 27   | 20   | 27   | 0.042515 | 0.029738 | 0.023317 | 0.161973 |
| protein_co v-maf_musi   | 710  | 520  | 530  | 110  | 171  | 74   | 5.214899 | 4.89779  | 4.696901 | 1.254038 |
| protein_co catenin_be   | 1443 | 1095 | 1133 | 625  | 801  | 557  | 22.5541  | 21.94738 | 21.36668 | 15.16246 |
| protein_co prosaposin   | 4    | 3    | 0    | 1    | 0    | 2    | 0.040086 | 0.038553 | 0        | 0.015555 |
| protein_co otospiralin  | 0    | 1    | 0    | 0    | 0    | 0    | 0        | 0.09366  | 0        | 0        |
| protein_co GTP_bindir   | 1563 | 1140 | 1235 | 831  | 1071 | 1108 | 36.35372 | 34.00197 | 34.65811 | 30.00001 |
| protein_co endoplasm    | 195  | 127  | 163  | 54   | 70   | 29   | 2.27169  | 1.897263 | 2.291132 | 0.976425 |
| protein_co G_protein-i  | 8    | 2    | 5    | 0    | 3    | 4    | 0.166794 | 0.053472 | 0.125779 | 0        |
| pseudogeni actin_gamr   | 8    | 3    | 4    | 4    | 10   | 2    | 0.332259 | 0.159778 | 0.200445 | 0.257856 |
| protein_co Uncharacte   | 1    | 0    | 1    | 3    | 8    | 3    | 0.022361 | 0        | 0.026979 | 0.10412  |
| pseudogeni -            | 5    | 2    | 2    | 3    | 7    | 5    | 0.075386 | 0.038669 | 0.036383 | 0.070206 |
| protein_co chromosom    | 0    | 0    | 0    | 0    | 2    | 0    | 0        | 0        | 0        | 0        |
| pseudogeni armadillo_   | 2    | 2    | 3    | 2    | 1    | 5    | 0.109684 | 0.140654 | 0.198511 | 0.170245 |
| protein_co cysteine-sei | 265  | 194  | 193  | 94   | 115  | 44   | 1.054111 | 0.989581 | 0.926287 | 0.580361 |
| protein_co zinc_finger  | 59   | 41   | 46   | 28   | 38   | 26   | 0.779299 | 0.694457 | 0.733091 | 0.574038 |
| protein_co poly_(ADP-   | 73   | 57   | 53   | 61   | 56   | 54   | 0.978831 | 0.980097 | 0.85745  | 1.269536 |
| protein_co dynactin_a   | 0    | 0    | 0    | 3    | 3    | 5    | 0        | 0        | 0        | 0.107716 |
| protein_co suppressor   | 756  | 673  | 702  | 474  | 573  | 693  | 7.89331  | 9.010767 | 8.843466 | 7.681502 |
| protein_co NOP2/Sun_    | 124  | 141  | 121  | 74   | 90   | 91   | 1.767821 | 2.577775 | 2.081373 | 1.63749  |
| protein_co potassium_   | 1874 | 1404 | 1314 | 266  | 322  | 347  | 14.14095 | 13.58581 | 11.96334 | 3.115453 |
| protein_co dihydrofoli  | 165  | 106  | 110  | 98   | 82   | 44   | 1.916011 | 1.578444 | 1.541185 | 1.766325 |
| protein_co ribonuclea   | 81   | 72   | 81   | 1416 | 1958 | 1435 | 1.245684 | 1.419923 | 1.50299  | 33.8     |
| protein_co glutamate_   | 1850 | 1451 | 1471 | 1065 | 1067 | 932  | 44.07852 | 44.3335  | 42.28789 | 39.38541 |
| protein_co chromosom    | 2    | 1    | 0    | 0    | 0    | 0    | 0.031576 | 0.020246 | 0        | 0        |
| pseudogeni glutamate-i  | 0    | 0    | 0    | 1    | 1    | 0    | 0        | 0        | 0        | 0.064866 |
| protein_co thrombom     | 4    | 2    | 2    | 12   | 17   | 31   | 0.045646 | 0.029267 | 0.027537 | 0.212547 |
| protein_co glycoprotei  | 0    | 0    | 0    | 1    | 0    | 0    | 0        | 0        | 0        | 0.020594 |
| protein_co cytochrom    | 909  | 809  | 772  | 1690 | 1869 | 1753 | 33.61437 | 38.36357 | 34.44502 | 97.00147 |
| protein_co syntaxin_1i  | 2    | 2    | 1    | 3    | 6    | 4    | 0.080984 | 0.103851 | 0.048856 | 0.188549 |
| protein_co family_witl  | 187  | 131  | 155  | 161  | 246  | 111  | 3.800795 | 3.414392 | 3.801128 | 5.079128 |
| protein_co family_witl  | 581  | 491  | 471  | 445  | 566  | 406  | 5.789014 | 6.273636 | 5.662359 | 6.882068 |
| protein_co zinc_finger  | 366  | 283  | 307  | 633  | 808  | 529  | 3.713056 | 3.681682 | 3.757828 | 9.967463 |
| protein_co carboxypep   | 2    | 8    | 2    | 2    | 0    | 0    | 0.030971 | 0.158863 | 0.037368 | 0.048071 |
| protein_co copine_VII   | 99   | 88   | 75   | 203  | 261  | 164  | 1.747125 | 1.991502 | 1.596975 | 5.560519 |
| protein_co chromosom    | 0    | 0    | 1    | 6    | 8    | 26   | 0        | 0        | 0.098736 | 0.762092 |
| protein_co CD300_mo     | 2    | 0    | 2    | 0    | 0    | 0    | 0.041024 | 0        | 0.049497 | 0        |
| protein_co glyceropho   | 2    | 0    | 3    | 3    | 2    | 0    | 0.037023 | 0        | 0.067006 | 0.086198 |
| protein_co mannose_f    | 513  | 397  | 420  | 657  | 677  | 535  | 7.84559  | 7.785887 | 7.750069 | 15.59567 |
| antisense ADORA2A_      | 14   | 6    | 12   | 8    | 10   | 4    | 0.255631 | 0.14049  | 0.264372 | 0.226728 |
| protein_co tripartite_r | 6    | 2    | 1    | 7    | 3    | 0    | 0.072604 | 0.031035 | 0.0146   | 0.131473 |
| processed_5-oxoprolin   | 594  | 387  | 481  | 578  | 883  | 466  | 6.906191 | 5.769956 | 6.747537 | 10.43063 |
| protein_co transmemt    | 14   | 11   | 14   | 149  | 197  | 118  | 0.587174 | 0.591617 | 0.708459 | 6.999634 |
| protein_co transmemt    | 2    | 3    | 0    | 8    | 18   | 10   | 0.039354 | 0.075698 | 0        | 0.24433  |
| protein_co EF-hand_ca   | 30   | 28   | 39   | 25   | 48   | 20   | 0.357848 | 0.428297 | 0.561293 | 0.462858 |
| protein_co muscudin     | 1322 | 884  | 1025 | 35   | 46   | 72   | 30.64192 | 26.27521 | 28.6653  | 1.259166 |
| protein_co apolipopro   | 63   | 50   | 51   | 15   | 18   | 13   | 0.635831 | 0.647114 | 0.62104  | 0.234976 |
| protein_co family_witl  | 95   | 58   | 64   | 160  | 190  | 122  | 2.073814 | 1.623616 | 1.685676 | 5.421214 |
| protein_co exosome_c    | 206  | 125  | 179  | 194  | 225  | 218  | 9.069806 | 7.057488 | 9.508935 | 13.25754 |

|                         |      |      |      |       |       |       |          |          |          |          |
|-------------------------|------|------|------|-------|-------|-------|----------|----------|----------|----------|
| protein_co dpy-19-like  | 1250 | 1018 | 1049 | 908   | 1082  | 1055  | 9.744393 | 10.17658 | 9.866618 | 10.98654 |
| protein_co TAF7_RNA_    | 944  | 867  | 858  | 796   | 876   | 842   | 19.46534 | 22.92548 | 21.34643 | 25.47613 |
| protein_co zinc_finger  | 66   | 68   | 57   | 83    | 115   | 63    | 0.875457 | 1.156669 | 0.91225  | 1.708833 |
| protein_co forkhead_b   | 0    | 0    | 0    | 0     | 0     | 1     | 0        | 0        | 0        | 0        |
| protein_co phosphorit   | 2103 | 1546 | 1690 | 3163  | 4021  | 5125  | 18.35965 | 17.30789 | 17.80164 | 42.86027 |
| protein_co hydroxyppy   | 79   | 46   | 68   | 26    | 40    | 29    | 1.704699 | 1.272881 | 1.770425 | 0.870812 |
| protein_co chromosom    | 1713 | 1385 | 1392 | 935   | 1136  | 1137  | 18.56312 | 19.24654 | 18.20039 | 15.72663 |
| protein_co tetra-pepti  | 0    | 0    | 0    | 1     | 0     | 0     | 0        | 0        | 0        | 0.035347 |
| protein_co lectin_gala  | 1    | 0    | 1    | 0     | 0     | 0     | 0.088139 | 0        | 0.106345 | 0        |
| protein_co zinc_finger  | 100  | 57   | 61   | 125   | 152   | 152   | 1.993623 | 1.457227 | 1.467307 | 3.867974 |
| lincRNA long_interf     | 7    | 11   | 8    | 127   | 178   | 79    | 0.112678 | 0.227061 | 0.155374 | 3.173029 |
| protein_co cyclin_G_a   | 2704 | 2044 | 2208 | 2049  | 2912  | 2382  | 28.54359 | 27.66891 | 28.12218 | 33.57177 |
| protein_co zinc_finger  | 1368 | 972  | 1102 | 732   | 1018  | 707   | 11.83061 | 10.77945 | 11.49875 | 9.825676 |
| protein_co Tu_translat  | 4499 | 3361 | 3524 | 5504  | 5974  | 5588  | 101.863  | 97.58389 | 96.26851 | 193.4235 |
| protein_co chromosom    | 4    | 1    | 3    | 2     | 0     | 0     | 0.026199 | 0.008399 | 0.023708 | 0.020332 |
| protein_co RMI1_RecC    | 254  | 168  | 194  | 361   | 387   | 489   | 3.486553 | 2.957203 | 3.213012 | 7.691308 |
| protein_co CTS_telom    | 196  | 160  | 175  | 231   | 372   | 278   | 1.915873 | 2.00558  | 2.063939 | 3.504718 |
| pseudogen -             | 11   | 9    | 6    | 24    | 28    | 9     | 0.202112 | 0.212056 | 0.133015 | 0.68445  |
| protein_co F-box_prot   | 603  | 498  | 524  | 289   | 314   | 178   | 8.162437 | 8.644526 | 8.558188 | 6.071987 |
| lincRNA long_interf     | 7    | 6    | 6    | 2     | 4     | 5     | 0.157651 | 0.173285 | 0.163042 | 0.069913 |
| protein_co selenoprot   | 2257 | 1649 | 1755 | 2345  | 2488  | 2576  | 42.28157 | 39.61408 | 39.6684  | 68.18563 |
| protein_co eukaryotic   | 1697 | 1307 | 1468 | 2526  | 2613  | 2605  | 59.9641  | 59.22354 | 62.58692 | 138.5394 |
| protein_co Morf4_fam    | 958  | 802  | 859  | 752   | 835   | 926   | 21.11925 | 22.67235 | 22.84831 | 25.73127 |
| protein_co sorting_ne   | 1279 | 904  | 1003 | 586   | 794   | 664   | 11.15764 | 10.11299 | 10.55725 | 7.934691 |
| protein_co exonucleas   | 1    | 0    | 0    | 6     | 8     | 3     | 0.015938 | 0        | 0        | 0.148429 |
| protein_co aurora_kin   | 1020 | 873  | 882  | 2558  | 2914  | 2329  | 38.29289 | 42.02827 | 39.95164 | 149.0558 |
| protein_co chromosom    | 10   | 10   | 8    | 9     | 14    | 9     | 0.16669  | 0.213757 | 0.160897 | 0.232854 |
| protein_co Morf4_fam    | 6858 | 5489 | 5729 | 4700  | 5804  | 6291  | 156.9408 | 161.0798 | 158.185  | 166.9424 |
| protein_co chromosom    | 285  | 238  | 226  | 177   | 232   | 311   | 5.075448 | 5.435204 | 4.856082 | 4.892527 |
| protein_co kelch_dom    | 0    | 0    | 0    | 214   | 298   | 511   | 0        | 0        | 0        | 3.081084 |
| protein_co transmemt    | 133  | 108  | 112  | 94    | 105   | 77    | 2.644772 | 2.754036 | 2.687217 | 2.901315 |
| pseudogen -             | 1    | 0    | 1    | 2     | 0     | 2     | 0.06027  | 0        | 0.072719 | 0.187095 |
| protein_co -            | 4    | 4    | 3    | 2     | 3     | 3     | 0.150289 | 0.192724 | 0.135999 | 0.116634 |
| protein_co RRS1_ribos   | 345  | 260  | 258  | 547   | 748   | 1136  | 9.493577 | 9.174734 | 8.56601  | 23.363   |
| protein_co exocyst_co   | 25   | 21   | 22   | 42    | 57    | 33    | 0.467032 | 0.503078 | 0.495881 | 1.217829 |
| protein_co tripartite_r | 3    | 1    | 4    | 884   | 1074  | 1663  | 0.085827 | 0.036687 | 0.138073 | 39.25402 |
| protein_co regulator_c  | 6348 | 5011 | 5319 | 10839 | 14671 | 15983 | 72.8304  | 73.7241  | 73.62983 | 193.0169 |
| protein_co immunogl     | 9    | 6    | 2    | 13    | 21    | 8     | 0.098508 | 0.084215 | 0.026412 | 0.220854 |
| protein_co chromosom    | 8    | 7    | 3    | 0     | 0     | 1     | 0.231556 | 0.25982  | 0.104769 | 0        |
| protein_co ZFP42_zinc   | 0    | 0    | 0    | 6     | 7     | 0     | 0        | 0        | 0        | 0.164722 |
| pseudogen -             | 1    | 0    | 0    | 1     | 3     | 3     | 0.128115 | 0        | 0        | 0.198852 |
| protein_co Uncharacte   | 0    | 0    | 0    | 5     | 10    | 1     | 0        | 0        | 0        | 0.28676  |
| protein_co coiled-coil  | 1    | 2    | 1    | 0     | 0     | 0     | 0.019312 | 0.04953  | 0.023301 | 0        |
| processed_chromosom     | 7    | 8    | 5    | 6     | 11    | 0     | 0.104366 | 0.152953 | 0.089945 | 0.138849 |
| protein_co family_witl  | 5    | 4    | 5    | 7     | 7     | 10    | 0.068633 | 0.07041  | 0.08281  | 0.149139 |
| protein_co dolichyl-ph  | 421  | 344  | 335  | 432   | 498   | 324   | 38.18317 | 40.00899 | 36.65918 | 60.81407 |
| protein_co chromosom    | 0    | 0    | 0    | 1     | 0     | 0     | 0        | 0        | 0        | 0.034823 |
| protein_co cytochrom    | 2864 | 2106 | 2328 | 3600  | 4576  | 3565  | 73.30404 | 69.12301 | 71.89289 | 143.0171 |
| protein_co period_circ  | 592  | 418  | 526  | 898   | 1018  | 647   | 5.897364 | 5.339761 | 6.322226 | 13.88491 |
| protein_co 5-hydroxyt   | 4    | 3    | 3    | 3     | 10    | 3     | 0.061015 | 0.058682 | 0.055214 | 0.071028 |
| pseudogen -             | 2    | 4    | 0    | 6     | 3     | 8     | 0.23445  | 0.601298 | 0        | 1.091697 |
| protein_co transmemt    | 436  | 306  | 295  | 110   | 135   | 61    | 3.291587 | 2.96244  | 2.687132 | 1.288968 |
| protein_co hairy_and_   | 77   | 49   | 72   | 43    | 50    | 18    | 2.156829 | 1.760072 | 2.433355 | 1.869493 |
| protein_co phenylalan   | 2074 | 1522 | 1542 | 1788  | 2317  | 2386  | 47.27754 | 44.49079 | 42.411   | 63.26217 |
| protein_co SPT2_Supp    | 816  | 713  | 719  | 366   | 373   | 345   | 6.649679 | 7.450911 | 7.06948  | 4.629372 |
| pseudogen -             | 0    | 1    | 0    | 0     | 0     | 0     | 0        | 0.165647 | 0        | 0        |
| protein_co chromosom    | 1    | 3    | 2    | 0     | 2     | 1     | 0.016752 | 0.064448 | 0.040426 | 0        |
| protein_co sterile_alph | 3199 | 2394 | 2600 | 2861  | 3870  | 2781  | 33.19344 | 31.85455 | 32.55063 | 46.07723 |
| lincRNA long_interf     | 0    | 0    | 0    | 1     | 4     | 1     | 0        | 0        | 0        | 0.024646 |
| antisense MTUS2_ant     | 0    | 0    | 0    | 1     | 0     | 0     | 0        | 0        | 0        | 0.065332 |
| protein_co GTPase_IM    | 4    | 1    | 0    | 0     | 0     | 1     | 0.149331 | 0.047874 | 0        | 0        |
| protein_co arachidona   | 1    | 2    | 0    | 1     | 12    | 0     | 0.013947 | 0.03577  | 0        | 0.021648 |
| protein_co enhancer_c   | 1065 | 866  | 912  | 944   | 1061  | 1011  | 13.27076 | 13.838   | 13.71163 | 18.25781 |
| protein_co T_cell_activ | 313  | 252  | 270  | 161   | 125   | 129   | 3.980628 | 4.109766 | 4.143039 | 3.178071 |
| pseudogen -             | 0    | 0    | 0    | 1     | 1     | 0     | 0        | 0        | 0        | 0.098218 |

|                         |       |       |       |      |       |       |          |          |          |          |
|-------------------------|-------|-------|-------|------|-------|-------|----------|----------|----------|----------|
| protein_co fucosidase_  | 43    | 54    | 64    | 119  | 141   | 81    | 0.984988 | 1.586228 | 1.768848 | 4.23097  |
| protein_co peroxisom    | 1     | 0     | 0     | 7    | 1     | 0     | 0.022244 | 0        | 0        | 0.241679 |
| protein_co gametogen    | 111   | 42    | 74    | 41   | 38    | 29    | 2.324606 | 1.127937 | 1.869847 | 1.332725 |
| protein_co transmemt    | 0     | 0     | 0     | 282  | 376   | 252   | 0        | 0        | 0        | 11.094   |
| protein_co zinc_finger  | 1508  | 1280  | 1348  | 1545 | 1880  | 1809  | 13.84302 | 15.06776 | 14.93026 | 22.01347 |
| protein_co SIGLEC_farr  | 0     | 0     | 0     | 2    | 0     | 0     | 0        | 0        | 0        | 0.085222 |
| protein_co calreticulin | 32388 | 23652 | 25771 | 9411 | 11453 | 13771 | 798.042  | 747.341  | 766.1626 | 359.9215 |
| lincRNA long_interf     | 0     | 2     | 0     | 1    | 4     | 4     | 0        | 0.076794 | 0        | 0.046475 |
| protein_co melanoma     | 16644 | 13027 | 13888 | 2909 | 3450  | 2674  | 144.0453 | 144.5756 | 145.0204 | 39.07649 |
| protein_co Protein_LO   | 66    | 58    | 51    | 86   | 116   | 47    | 0.577054 | 0.650294 | 0.538011 | 1.167082 |
| protein_co low_densit   | 694   | 505   | 496   | 287  | 348   | 447   | 8.568107 | 7.995141 | 7.388481 | 5.499685 |
| protein_co cadherin_4   | 699   | 575   | 706   | 499  | 704   | 588   | 5.033961 | 5.310188 | 6.134589 | 5.57781  |
| protein_co Uncharacte   | 1     | 0     | 0     | 0    | 0     | 0     | 0.023445 | 0        | 0        | 0        |
| protein_co single-pass  | 31    | 21    | 27    | 1    | 0     | 0     | 0.69087  | 0.600155 | 0.726016 | 0.034591 |
| protein_co RAD23_hoi    | 2180  | 1660  | 1671  | 1725 | 2157  | 1336  | 58.54538 | 57.16808 | 54.14529 | 71.90444 |
| protein_co chromosom    | 0     | 1     | 0     | 0    | 0     | 0     | 0        | 0.008536 | 0        | 0        |
| protein_co growth_arr   | 1235  | 1023  | 1039  | 1457 | 2039  | 1547  | 77.93967 | 82.78975 | 79.11433 | 142.7189 |
| pseudogen: Meis_home    | 0     | 0     | 0     | 0    | 0     | 1     | 0        | 0        | 0        | 0        |
| protein_co DAN_doma     | 2     | 2     | 0     | 4    | 2     | 0     | 0.050203 | 0.064379 | 0        | 0.155845 |
| protein_co transmemt    | 4     | 4     | 4     | 37   | 72    | 23    | 0.073208 | 0.093879 | 0.08833  | 1.051074 |
| protein_co chromosom    | 131   | 77    | 96    | 634  | 750   | 674   | 1.903499 | 1.434767 | 1.683064 | 14.29885 |
| protein_co protein_ty   | 3161  | 2507  | 2640  | 2315 | 2695  | 2549  | 24.29427 | 24.70831 | 24.48112 | 27.616   |
| pseudogen: centaurin_j  | 16    | 8     | 17    | 13   | 20    | 13    | 0.301908 | 0.193577 | 0.387036 | 0.380739 |
| protein_co NOP2/Sun_    | 37    | 42    | 35    | 530  | 675   | 353   | 0.469154 | 0.682924 | 0.535463 | 10.43085 |
| protein_co zinc_finger  | 3     | 4     | 14    | 0    | 0     | 0     | 0.053123 | 0.090831 | 0.299115 | 0        |
| protein_co family_witl  | 182   | 148   | 152   | 66   | 90    | 61    | 2.896804 | 3.020777 | 2.919035 | 1.630505 |
| protein_co WSC_doma     | 121   | 83    | 84    | 1473 | 1786  | 1041  | 0.964258 | 0.848194 | 0.807672 | 18.21969 |
| protein_co RAB39A_m     | 0     | 3     | 2     | 64   | 111   | 41    | 0        | 0.098573 | 0.061831 | 2.545305 |
| protein_co CDC-like_ki  | 920   | 667   | 756   | 573  | 613   | 337   | 11.39129 | 10.59059 | 11.29419 | 11.0121  |
| pseudogen: -            | 0     | 1     | 3     | 0    | 0     | 0     | 0        | 0.056249 | 0.158771 | 0        |
| protein_co major_histi  | 7     | 8     | 3     | 83   | 94    | 90    | 0.070678 | 0.103583 | 0.036547 | 1.300759 |
| protein_co GATA_bind    | 1     | 0     | 1     | 12   | 7     | 35    | 0.013926 | 0        | 0.016803 | 0.259387 |
| protein_co AT_rich_int  | 386   | 281   | 330   | 3759 | 4432  | 4246  | 4.237777 | 3.956093 | 4.371322 | 64.05509 |
| pseudogen: high_mobil   | 8     | 2     | 5     | 2    | 2     | 1     | 0.19507  | 0.062537 | 0.147102 | 0.075694 |
| protein_co transmemt    | 0     | 1     | 0     | 2    | 1     | 2     | 0        | 0.082596 | 0        | 0.199945 |
| protein_co phosphofu    | 2024  | 1594  | 1636  | 1546 | 2082  | 1608  | 14.98822 | 15.13691 | 14.61742 | 17.76967 |
| protein_co ELMO/CED-    | 609   | 510   | 569   | 411  | 432   | 466   | 6.476757 | 6.955363 | 7.301307 | 6.784418 |
| protein_co early_grow   | 494   | 350   | 360   | 0    | 1     | 0     | 5.342174 | 4.853651 | 4.697228 | 0        |
| protein_co chromosom    | 5     | 7     | 3     | 6    | 8     | 17    | 0.070342 | 0.126285 | 0.050923 | 0.131017 |
| protein_co glypican_5   | 20    | 12    | 9     | 2    | 6     | 4     | 0.324611 | 0.24976  | 0.176248 | 0.050384 |
| protein_co von_Willeb   | 414   | 286   | 310   | 732  | 1068  | 752   | 4.303362 | 3.812264 | 3.88792  | 11.80998 |
| lincRNA long_interf     | 112   | 94    | 119   | 75   | 122   | 66    | 1.116904 | 1.202084 | 1.431834 | 1.160886 |
| protein_co Dnal_(Hsp4   | 0     | 1     | 0     | 0    | 1     | 0     | 0        | 0.017869 | 0        | 0        |
| protein_co gem_(nucle   | 712   | 508   | 563   | 1035 | 1193  | 1315  | 7.059778 | 6.45928  | 6.735464 | 15.92876 |
| pseudogen: olfactory_r  | 0     | 0     | 0     | 1    | 0     | 0     | 0        | 0        | 0        | 0.066163 |
| antisense -             | 1     | 0     | 0     | 1    | 0     | 0     | 0.034377 | 0        | 0        | 0.053358 |
| protein_co four_jointe  | 932   | 675   | 764   | 171  | 312   | 321   | 16.27616 | 15.11643 | 16.09821 | 4.635138 |
| pseudogen: -            | 1     | 1     | 0     | 0    | 0     | 0     | 0.049358 | 0.063295 | 0        | 0        |
| antisense -             | 0     | 0     | 0     | 0    | 3     | 1     | 0        | 0        | 0        | 0        |
| lincRNA -               | 0     | 1     | 0     | 0    | 0     | 0     | 0        | 0.232161 | 0        | 0        |
| protein_co kelch-like_f | 177   | 133   | 133   | 61   | 61    | 73    | 3.465358 | 3.339149 | 3.141771 | 1.853682 |
| protein_co zinc_finger  | 437   | 323   | 363   | 297  | 382   | 283   | 5.320939 | 5.043346 | 5.332877 | 5.612984 |
| pseudogen: -            | 1     | 3     | 1     | 0    | 0     | 0     | 0.106327 | 0.409046 | 0.128289 | 0        |
| protein_co chromosom    | 69    | 41    | 69    | 63   | 71    | 25    | 0.924932 | 0.70478  | 1.115983 | 1.310785 |
| protein_co arachidona   | 0     | 0     | 0     | 8    | 14    | 1     | 0        | 0        | 0        | 0.232709 |
| protein_co solute_carr  | 0     | 0     | 0     | 2    | 0     | 0     | 0        | 0        | 0        | 0.036545 |
| lincRNA -               | 130   | 94    | 92    | 165  | 209   | 89    | 2.129131 | 1.974223 | 1.818004 | 4.194435 |
| protein_co SHANK-assc   | 1629  | 1217  | 1391  | 787  | 1046  | 745   | 43.27696 | 41.4606  | 44.58727 | 32.45196 |
| protein_co ladybird_h   | 19    | 25    | 20    | 4    | 0     | 0     | 0.613575 | 1.035293 | 0.779277 | 0.200495 |
| protein_co dynein_hez   | 305   | 287   | 338   | 257  | 306   | 99    | 0.962283 | 1.161166 | 1.286672 | 1.258539 |
| protein_co SLIT_and_N   | 11    | 11    | 9     | 119  | 114   | 92    | 0.060291 | 0.077315 | 0.059518 | 1.012367 |
| protein_co 5-hydroxyt   | 8     | 15    | 9     | 30   | 24    | 25    | 0.132318 | 0.318147 | 0.179605 | 0.770157 |
| protein_co GRIP_and_u   | 661   | 453   | 552   | 375  | 506   | 578   | 7.470306 | 6.565148 | 7.527038 | 6.578073 |
| protein_co leucine-ricl | 2     | 1     | 0     | 13   | 10    | 4     | 0.062771 | 0.040248 | 0        | 0.633291 |
| protein_co ring_finger  | 4     | 1     | 1     | 4    | 3     | 3     | 0.219883 | 0.070492 | 0.066325 | 0.341289 |

|                         |      |      |      |      |      |      |          |          |          |          |
|-------------------------|------|------|------|------|------|------|----------|----------|----------|----------|
| protein_co class_II_ma  | 12   | 10   | 18   | 17   | 12   | 11   | 0.059619 | 0.06371  | 0.1079   | 0.131093 |
| protein_co zinc_finger  | 255  | 191  | 215  | 357  | 447  | 167  | 3.389159 | 3.255326 | 3.44777  | 7.364623 |
| protein_co arachidona   | 0    | 0    | 0    | 2    | 2    | 4    | 0        | 0        | 0        | 0.049443 |
| protein_co phospholip   | 3    | 4    | 7    | 5    | 3    | 4    | 0.054949 | 0.093953 | 0.154699 | 0.142148 |
| protein_co glutamate_   | 2    | 7    | 5    | 33   | 29   | 30   | 0.023116 | 0.103749 | 0.069726 | 0.591997 |
| protein_co CDC42_eff    | 1032 | 788  | 820  | 458  | 527  | 364  | 14.78927 | 14.48114 | 14.17846 | 10.18739 |
| pseudogen: diacylglyce  | 23   | 20   | 28   | 65   | 54   | 46   | 0.388498 | 0.433212 | 0.570646 | 1.704138 |
| protein_co zinc_finger  | 179  | 136  | 150  | 219  | 413  | 152  | 2.208767 | 2.152014 | 2.233244 | 4.194415 |
| protein_co laccase_(m   | 48   | 34   | 43   | 88   | 57   | 66   | 0.52809  | 0.479684 | 0.570799 | 1.502727 |
| protein_co MAF1_hom     | 2585 | 2043 | 2123 | 2413 | 3404 | 2156 | 69.1053  | 70.03716 | 68.47765 | 100.1241 |
| protein_co tubulin_po   | 1    | 0    | 0    | 2    | 5    | 0    | 0.027647 | 0        | 0        | 0.085825 |
| protein_co reprimo-lik  | 0    | 0    | 0    | 12   | 11   | 14   | 0        | 0        | 0        | 0.799778 |
| protein_co ADP-ribosy   | 0    | 0    | 1    | 0    | 0    | 0    | 0        | 0        | 0.043993 | 0        |
| protein_co KIAA1875     | 43   | 32   | 45   | 42   | 64   | 35   | 0.283224 | 0.270284 | 0.35762  | 0.429379 |
| protein_co PC-esterase  | 52   | 41   | 51   | 98   | 128  | 109  | 1.047372 | 1.058987 | 1.239412 | 3.063755 |
| processed_ -            | 76   | 47   | 55   | 197  | 254  | 140  | 1.443939 | 1.145097 | 1.260799 | 5.809409 |
| protein_co apolipoppro  | 213  | 158  | 183  | 90   | 127  | 47   | 5.416255 | 5.152119 | 5.614597 | 3.552159 |
| protein_co syncollin    | 1    | 0    | 0    | 0    | 0    | 0    | 0.081832 | 0        | 0        | 0        |
| protein_co pipelicolic_ | 15   | 5    | 9    | 522  | 522  | 755  | 0.291847 | 0.124751 | 0.211278 | 15.76392 |
| pseudogen: ATPase_cla   | 9    | 0    | 1    | 4    | 8    | 0    | 0.106514 | 0        | 0.01428  | 0.073478 |
| protein_co forkhead_b   | 98   | 65   | 79   | 1    | 3    | 1    | 3.486511 | 2.96543  | 3.391096 | 0.05522  |
| protein_co atonal_hon   | 0    | 0    | 0    | 7    | 5    | 6    | 0        | 0        | 0        | 0.342839 |
| protein_co cadherin_5   | 48   | 37   | 45   | 2    | 3    | 7    | 0.54669  | 0.540394 | 0.618387 | 0.035356 |
| protein_co leucine_ric  | 0    | 0    | 0    | 67   | 73   | 68   | 0        | 0        | 0        | 2.875145 |
| pseudogen: olfactory_r  | 0    | 0    | 0    | 0    | 1    | 1    | 0        | 0        | 0        | 0        |
| protein_co family_witl  | 0    | 0    | 1    | 15   | 11   | 4    | 0        | 0        | 0.017144 | 0.330817 |
| protein_co MAS-relate   | 5    | 4    | 2    | 0    | 0    | 0    | 0.162362 | 0.166565 | 0.078359 | 0        |
| antisense PCBP1_ant     | 145  | 100  | 117  | 179  | 216  | 222  | 2.773991 | 2.453276 | 2.700667 | 5.315212 |
| protein_co myeloid-as   | 2109 | 1602 | 1647 | 1377 | 1195 | 1219 | 31.03925 | 30.23476 | 29.24666 | 31.45568 |
| protein_co maestro_he   | 279  | 199  | 225  | 148  | 195  | 123  | 2.243195 | 2.051754 | 2.182697 | 1.84695  |
| protein_co SERTA_dor    | 948  | 888  | 834  | 235  | 281  | 118  | 8.010765 | 9.622501 | 8.503149 | 3.082223 |
| protein_co RNA_bindir   | 3954 | 2765 | 3010 | 3118 | 4106 | 3430 | 28.09138 | 25.19074 | 25.80186 | 34.38294 |
| protein_co A_kinase_(F  | 294  | 215  | 219  | 26   | 40   | 30   | 5.30014  | 4.97036  | 4.763566 | 0.727518 |
| protein_co NTPase_KAI   | 2    | 5    | 2    | 9    | 32   | 9    | 0.020009 | 0.064145 | 0.024141 | 0.139752 |
| protein_co GIPC_PDZ_    | 91   | 77   | 77   | 29   | 35   | 14   | 0.984312 | 1.068049 | 1.004917 | 0.486878 |
| antisense -             | 53   | 43   | 37   | 17   | 23   | 13   | 0.982669 | 1.022373 | 0.827716 | 0.489228 |
| protein_co Cbp/p300-i   | 1679 | 1271 | 1368 | 585  | 834  | 281  | 61.02972 | 59.24416 | 59.99635 | 33.00479 |
| protein_co ATP-bindin   | 5    | 4    | 5    | 0    | 1    | 0    | 0.013644 | 0.013997 | 0.016462 | 0        |
| protein_co NLR_family   | 0    | 0    | 0    | 0    | 0    | 1    | 0        | 0        | 0        | 0        |
| protein_co tigger_tran  | 361  | 259  | 250  | 205  | 331  | 294  | 7.01795  | 6.456724 | 5.863962 | 6.18568  |
| protein_co pyridoxal-d  | 2522 | 2148 | 2128 | 1555 | 1952 | 1684 | 24.49392 | 26.75203 | 24.93635 | 23.44088 |
| pseudogen: polyhomec    | 93   | 61   | 101  | 974  | 1305 | 747  | 1.227349 | 1.032344 | 1.608254 | 19.95146 |
| protein_co chromosor    | 2    | 1    | 1    | 0    | 2    | 2    | 0.098096 | 0.062897 | 0.059179 | 0        |
| protein_co zinc_finger  | 172  | 125  | 146  | 293  | 406  | 381  | 1.418161 | 1.32165  | 1.45244  | 3.749689 |
| protein_co R3H_doma     | 617  | 530  | 543  | 309  | 370  | 205  | 6.61737  | 7.289294 | 7.026647 | 5.143861 |
| protein_co UDP-GlcNA    | 0    | 0    | 0    | 41   | 45   | 18   | 0        | 0        | 0        | 1.340508 |
| protein_co intelectin_  | 0    | 0    | 0    | 1    | 0    | 0    | 0        | 0        | 0        | 0.061521 |
| protein_co neurexin_1   | 0    | 0    | 0    | 151  | 124  | 102  | 0        | 0        | 0        | 1.450218 |
| protein_co selenophos   | 913  | 663  | 756  | 987  | 1303 | 1205 | 16.78188 | 15.62762 | 16.7664  | 28.15902 |
| protein_co G_protein-i  | 4    | 6    | 3    | 8    | 3    | 4    | 0.09364  | 0.180119 | 0.084736 | 0.290683 |
| protein_co zinc_finger  | 337  | 244  | 258  | 174  | 364  | 345  | 7.81887  | 7.259609 | 7.222405 | 6.266049 |
| protein_co zinc_finger  | 0    | 0    | 0    | 2    | 4    | 13   | 0        | 0        | 0        | 0.03989  |
| protein_co chromosor    | 638  | 554  | 552  | 560  | 655  | 564  | 8.187146 | 9.116559 | 8.54671  | 11.15399 |
| protein_co chemokine    | 0    | 0    | 0    | 0    | 2    | 1    | 0        | 0        | 0        | 0        |
| processed_long_interf   | 3    | 4    | 3    | 5    | 1    | 4    | 0.082119 | 0.140408 | 0.099081 | 0.212434 |
| protein_co golgin_A8_   | 0    | 0    | 0    | 0    | 2    | 1    | 0        | 0        | 0        | 0        |
| protein_co Bardet-Biec  | 255  | 195  | 216  | 161  | 175  | 121  | 3.325996 | 3.261561 | 3.399251 | 3.259401 |
| protein_co FLT3-intera  | 640  | 401  | 471  | 480  | 619  | 652  | 6.4041   | 5.14555  | 5.686526 | 7.455037 |
| protein_co poly-U_bin   | 3479 | 2525 | 2721 | 2587 | 3408 | 3891 | 67.63282 | 62.94682 | 63.82336 | 78.06026 |
| protein_co scavenger_   | 5760 | 3995 | 4411 | 35   | 48   | 31   | 55.74541 | 49.58071 | 51.50765 | 0.525757 |
| protein_co dCTP_pyro    | 506  | 391  | 440  | 533  | 600  | 735  | 19.416   | 19.23957 | 20.37089 | 31.74438 |
| protein_co zinc_finger  | 505  | 354  | 427  | 167  | 250  | 182  | 9.987119 | 8.977625 | 10.18884 | 5.126203 |
| pseudogen: protein_ph   | 64   | 30   | 38   | 73   | 89   | 63   | 6.743733 | 4.053694 | 4.831167 | 11.93916 |
| pseudogen: -            | 33   | 40   | 39   | 11   | 23   | 13   | 0.436617 | 0.678666 | 0.622586 | 0.225897 |
| protein_co cysteine-ric | 164  | 127  | 165  | 144  | 247  | 176  | 1.731584 | 1.719542 | 2.101995 | 2.359894 |

|                           |      |      |      |      |      |      |          |          |          |          |
|---------------------------|------|------|------|------|------|------|----------|----------|----------|----------|
| protein_co_teachshirt_zir | 1431 | 1028 | 1235 | 240  | 252  | 118  | 9.477347 | 8.730711 | 9.86875  | 2.467112 |
| protein_co_phosphoserine  | 72   | 71   | 55   | 58   | 63   | 71   | 0.954234 | 1.206675 | 0.879495 | 1.193111 |
| pseudogen -               | 0    | 0    | 0    | 1    | 0    | 0    | 0        | 0        | 0        | 0.068402 |
| protein_co_suppressor     | 741  | 622  | 680  | 336  | 484  | 563  | 5.125461 | 5.517146 | 5.675076 | 3.607319 |
| protein_co_zinc_bindir    | 722  | 606  | 640  | 439  | 490  | 251  | 4.378504 | 4.712708 | 4.682918 | 4.132221 |
| pseudogen -               | 17   | 14   | 16   | 6    | 11   | 13   | 0.697402 | 0.736498 | 0.791958 | 0.382046 |
| pseudogen -               | 0    | 1    | 2    | 0    | 0    | 2    | 0        | 0.283631 | 0.533731 | 0        |
| protein_co_zinc_finger    | 794  | 606  | 683  | 769  | 1087 | 1534 | 11.51227 | 11.26736 | 11.94838 | 17.30602 |
| pseudogen - olfactory_r   | 0    | 0    | 0    | 0    | 1    | 0    | 0        | 0        | 0        | 0        |
| protein_co_chromosom      | 255  | 186  | 197  | 6    | 11   | 6    | 4.639874 | 4.339985 | 4.324942 | 0.169452 |
| protein_co_NK2_home       | 0    | 0    | 0    | 0    | 0    | 6    | 0        | 0        | 0        | 0        |
| protein_co_transmembr     | 1    | 2    | 3    | 5    | 7    | 2    | 0.039173 | 0.100467 | 0.141793 | 0.304009 |
| protein_co_chromosom      | 12   | 8    | 4    | 1    | 2    | 2    | 0.304811 | 0.260584 | 0.12259  | 0.039426 |
| protein_co_ankyrin_rej    | 16   | 8    | 10   | 82   | 161  | 93   | 0.185657 | 0.119039 | 0.140004 | 1.476848 |
| protein_co_WAP_four-      | 0    | 0    | 0    | 1    | 0    | 0    | 0        | 0        | 0        | 0.113364 |
| protein_co_transmembr     | 16   | 11   | 11   | 20   | 15   | 16   | 0.245096 | 0.216082 | 0.20331  | 0.47553  |
| protein_co_septin_1       | 21   | 18   | 5    | 4    | 8    | 5    | 0.359639 | 0.395302 | 0.103315 | 0.106325 |
| protein_co_tRNA_selen     | 315  | 245  | 256  | 266  | 278  | 371  | 7.24037  | 7.221471 | 7.099671 | 9.489915 |
| protein_co_exocyst_co     | 1297 | 924  | 996  | 535  | 552  | 693  | 10.58044 | 9.665959 | 9.803271 | 6.774042 |
| protein_co_tudor_dom      | 35   | 31   | 22   | 3    | 9    | 3    | 0.184669 | 0.209747 | 0.140054 | 0.024568 |
| protein_co_chromosom      | 1    | 0    | 2    | 0    | 1    | 1    | 0.015319 | 0        | 0.036965 | 0        |
| protein_co_casein_kina    | 0    | 2    | 0    | 0    | 0    | 0    | 0        | 0.049983 | 0        | 0        |
| antisense ACTA2_anti      | 3    | 0    | 2    | 0    | 0    | 1    | 0.05808  | 0        | 0.046718 | 0        |
| pseudogen -               | 2    | 0    | 0    | 0    | 2    | 1    | 0.117962 | 0        | 0        | 0        |
| protein_co_Ly6/neurot     | 138  | 88   | 100  | 461  | 721  | 253  | 1.375015 | 1.124399 | 1.202199 | 7.129513 |
| protein_co_tyrosine_hy    | 8    | 8    | 4    | 2    | 0    | 0    | 0.196398 | 0.251853 | 0.118483 | 0.076209 |
| pseudogen -               | 0    | 2    | 1    | 12   | 17   | 7    | 0        | 0.031706 | 0.014916 | 0.230255 |
| protein_co_mediator_c     | 1736 | 1445 | 1561 | 1189 | 1475 | 1046 | 10.19552 | 10.88271 | 11.06142 | 10.83858 |
| protein_co_fumarylace     | 558  | 355  | 398  | 212  | 304  | 309  | 13.32211 | 10.86867 | 11.46489 | 7.856068 |
| pseudogen - high_mobil    | 7    | 8    | 1    | 1    | 1    | 4    | 0.555381 | 0.81394  | 0.095728 | 0.123147 |
| protein_co_chromosom      | 40   | 40   | 62   | 937  | 1165 | 1110 | 0.55246  | 0.708451 | 1.03319  | 20.0868  |
| protein_co_regulator_c    | 1206 | 992  | 1086 | 2312 | 2799 | 2905 | 19.88374 | 20.97354 | 21.60373 | 59.16558 |
| protein_co_myosin_lig     | 10   | 8    | 2    | 3    | 3    | 5    | 0.687537 | 0.705335 | 0.165911 | 0.320146 |
| protein_co_coagulation    | 3    | 3    | 0    | 2    | 5    | 6    | 0.069535 | 0.089169 | 0        | 0.071952 |
| protein_co_family_witl    | 0    | 0    | 0    | 2    | 0    | 1    | 0        | 0        | 0        | 0.081047 |
| pseudogen -               | 0    | 0    | 0    | 3    | 0    | 2    | 0        | 0        | 0        | 0.4402   |
| protein_co_protein_kir    | 736  | 594  | 711  | 533  | 642  | 553  | 18.64454 | 19.29611 | 21.7316  | 20.95712 |
| pseudogen - hect_doma     | 487  | 431  | 392  | 200  | 232  | 233  | 5.210002 | 5.912832 | 5.059913 | 3.321004 |
| protein_co_zinc_and_r     | 96   | 69   | 85   | 375  | 586  | 226  | 1.300995 | 1.19912  | 1.389861 | 7.887984 |
| protein_co_retinal_pig    | 3    | 0    | 0    | 1    | 0    | 2    | 0.09668  | 0        | 0        | 0.05002  |
| protein_co_solute_carr    | 1    | 1    | 1    | 0    | 0    | 0    | 0.011332 | 0.014531 | 0.013672 | 0        |
| protein_co_zinc_finger    | 74   | 62   | 62   | 112  | 95   | 98   | 1.286563 | 1.382294 | 1.300586 | 3.022372 |
| protein_co_FYVE_RhoG      | 432  | 432  | 408  | 555  | 693  | 624  | 2.180931 | 2.796735 | 2.485229 | 4.348922 |
| protein_co_G_protein-     | 0    | 0    | 0    | 10   | 22   | 2    | 0        | 0        | 0        | 0.251659 |
| protein_co_G_protein-     | 0    | 0    | 0    | 6    | 3    | 0    | 0        | 0        | 0        | 0.270725 |
| lincRNA -                 | 3    | 1    | 2    | 2    | 8    | 3    | 0.150289 | 0.064241 | 0.120888 | 0.155512 |
| protein_co_phospholip     | 0    | 0    | 0    | 28   | 41   | 48   | 0        | 0        | 0        | 0.720083 |
| protein_co_ornithine_c    | 1474 | 1139 | 1096 | 2637 | 3209 | 2814 | 9.73189  | 9.643458 | 8.730886 | 27.02342 |
| protein_co_patatin-like   | 0    | 1    | 1    | 0    | 0    | 2    | 0        | 0.024265 | 0.022831 | 0        |
| protein_co_ALX_homer      | 64   | 35   | 31   | 0    | 3    | 9    | 2.07679  | 1.456431 | 1.213731 | 0        |
| protein_co_coiled-coil    | 246  | 186  | 184  | 249  | 290  | 246  | 5.540319 | 5.371826 | 4.999949 | 8.704213 |
| protein_co_potassium_     | 32   | 32   | 35   | 2    | 0    | 1    | 0.709447 | 0.909765 | 0.936238 | 0.068823 |
| protein_co_chromosom      | 14   | 12   | 8    | 31   | 15   | 15   | 0.151678 | 0.166718 | 0.104576 | 0.521297 |
| protein_co_frizzled_fan   | 2279 | 1673 | 1812 | 598  | 590  | 459  | 53.88923 | 50.72978 | 51.69683 | 21.94772 |
| pseudogen -               | 0    | 1    | 0    | 0    | 1    | 0    | 0        | 0.145241 | 0        | 0        |
| protein_co_tigger_tran    | 54   | 36   | 44   | 65   | 78   | 61   | 1.215584 | 1.039209 | 1.195066 | 2.271093 |
| protein_co_coiled-coil    | 1    | 0    | 0    | 1    | 2    | 1    | 0.010319 | 0        | 0        | 0.016017 |
| protein_co_hematopoi      | 639  | 479  | 525  | 29   | 21   | 15   | 11.05635 | 10.62811 | 10.9602  | 0.778824 |
| protein_co_chromosom      | 165  | 142  | 111  | 222  | 215  | 68   | 1.303159 | 1.438173 | 1.057753 | 2.721428 |
| protein_co_zinc_finger    | 1918 | 1434 | 1502 | 1553 | 1767 | 1201 | 10.28652 | 9.862304 | 9.719365 | 12.92772 |
| protein_co_p21_protei     | 2723 | 2298 | 2487 | 1484 | 1797 | 1335 | 20.79842 | 22.50827 | 22.91958 | 17.59329 |
| protein_co_coiled-coil    | 160  | 120  | 154  | 159  | 172  | 221  | 2.404616 | 2.312684 | 2.792509 | 3.708971 |
| protein_co_defensin_bi    | 0    | 0    | 0    | 1    | 0    | 0    | 0        | 0        | 0        | 0.12746  |
| pseudogen -               | 108  | 70   | 81   | 248  | 282  | 227  | 1.757155 | 1.460474 | 1.590082 | 6.2628   |
| protein_co_ATP_syntha     | 2    | 0    | 0    | 0    | 0    | 0    | 0.243585 | 0        | 0        | 0        |

|                         |      |      |      |      |      |      |          |          |          |          |
|-------------------------|------|------|------|------|------|------|----------|----------|----------|----------|
| protein_co multiple_c   | 1904 | 1525 | 1580 | 1064 | 1242 | 1198 | 21.20632 | 21.78098 | 21.23261 | 18.39375 |
| lincRNA_long_interge    | 5    | 6    | 3    | 3    | 13   | 8    | 0.104525 | 0.160847 | 0.075669 | 0.097343 |
| protein_co harbinger_1  | 61   | 42   | 75   | 77   | 64   | 83   | 1.454139 | 1.28391  | 2.157175 | 2.849031 |
| protein_co chromosom    | 13   | 11   | 14   | 17   | 16   | 16   | 0.423019 | 0.459006 | 0.549658 | 0.85861  |
| protein_co cytochrom    | 0    | 0    | 0    | 0    | 2    | 0    | 0        | 0        | 0        | 0        |
| protein_co tetra-pepti  | 0    | 0    | 0    | 1    | 0    | 0    | 0        | 0        | 0        | 0.03097  |
| protein_co serine-rich  | 981  | 821  | 920  | 17   | 29   | 28   | 14.34334 | 15.39338 | 16.22995 | 0.385799 |
| protein_co growth_arr   | 1086 | 707  | 858  | 296  | 465  | 268  | 18.01931 | 15.04309 | 17.17685 | 7.623079 |
| protein_co histocomp    | 59   | 47   | 50   | 1421 | 1916 | 1193 | 0.648807 | 0.662782 | 0.663409 | 24.25424 |
| antisense_-             | 0    | 0    | 0    | 4    | 2    | 5    | 0        | 0        | 0        | 0.089109 |
| protein_co zinc_finger  | 35   | 37   | 19   | 74   | 78   | 51   | 0.426938 | 0.578773 | 0.27964  | 1.401068 |
| protein_co GLI_pathog   | 4    | 7    | 2    | 4    | 1    | 1    | 0.07189  | 0.161329 | 0.043369 | 0.111583 |
| protein_co family_witl  | 272  | 222  | 230  | 121  | 148  | 100  | 2.411892 | 2.52436  | 2.460735 | 1.665347 |
| protein_co potassium_   | 5    | 4    | 4    | 1    | 5    | 10   | 0.070617 | 0.072446 | 0.068163 | 0.021922 |
| protein_co proline_ric  | 14   | 7    | 10   | 11   | 17   | 7    | 0.29189  | 0.187154 | 0.251558 | 0.355971 |
| protein_co nuclear_rex  | 509  | 418  | 422  | 190  | 188  | 172  | 3.111331 | 3.276529 | 3.112353 | 1.802654 |
| protein_co zinc_finger  | 0    | 0    | 0    | 1    | 2    | 0    | 0        | 0        | 0        | 0.032404 |
| protein_co basic_helix  | 6    | 2    | 6    | 27   | 48   | 12   | 0.398499 | 0.170339 | 0.480812 | 2.783364 |
| protein_co ring_finger  | 151  | 103  | 153  | 142  | 153  | 166  | 1.910521 | 1.671174 | 2.335686 | 2.788649 |
| protein_co chromosom    | 2    | 1    | 2    | 2    | 0    | 0    | 0.024582 | 0.015761 | 0.02966  | 0.038155 |
| protein_co TSPY-like_5  | 150  | 110  | 116  | 141  | 193  | 117  | 1.577019 | 1.483022 | 1.471471 | 2.300886 |
| protein_co fucosyltran  | 2    | 0    | 0    | 1    | 3    | 1    | 0.036293 | 0        | 0        | 0.028166 |
| protein_co histone_cll  | 177  | 148  | 134  | 242  | 250  | 546  | 4.975739 | 5.335258 | 4.545035 | 10.55918 |
| protein_co Putative_ei  | 16   | 15   | 22   | 35   | 46   | 32   | 0.350252 | 0.421077 | 0.581074 | 1.189212 |
| pseudogen: signal_reco  | 34   | 23   | 35   | 35   | 51   | 44   | 1.66242  | 1.442112 | 2.064799 | 2.656197 |
| protein_co SKI/DACH_1   | 159  | 130  | 145  | 360  | 489  | 287  | 1.129966 | 1.184734 | 1.243323 | 3.971011 |
| protein_co histone_cll  | 38   | 29   | 36   | 8    | 13   | 17   | 2.703825 | 2.646076 | 3.090619 | 0.883518 |
| pseudogen: zinc_finger  | 19   | 12   | 15   | 9    | 16   | 7    | 0.707072 | 0.572665 | 0.673518 | 0.519856 |
| protein_co Mab-21_dc    | 209  | 176  | 168  | 344  | 481  | 590  | 2.909743 | 3.142175 | 2.822056 | 7.433566 |
| protein_co GS_homeol    | 0    | 0    | 0    | 3    | 3    | 7    | 0        | 0        | 0        | 0.120496 |
| protein_co somatostat   | 25   | 25   | 23   | 26   | 27   | 42   | 0.55928  | 0.717197 | 0.620819 | 0.902803 |
| protein_co zinc_finger  | 84   | 73   | 71   | 48   | 73   | 89   | 0.810111 | 0.902813 | 0.826175 | 0.718517 |
| protein_co polycomb_    | 195  | 155  | 154  | 77   | 85   | 66   | 1.302872 | 1.328031 | 1.241469 | 0.798524 |
| protein_co solute_carr  | 8    | 2    | 2    | 3    | 10   | 9    | 0.120462 | 0.038619 | 0.036336 | 0.070115 |
| protein_co perforin_1_  | 7    | 1    | 4    | 0    | 1    | 3    | 0.129582 | 0.023739 | 0.089342 | 0        |
| protein_co mab-21-like  | 163  | 140  | 137  | 5    | 7    | 5    | 2.629196 | 2.895828 | 2.666269 | 0.12518  |
| pseudogen: ribosomal_   | 0    | 0    | 0    | 0    | 0    | 1    | 0        | 0        | 0        | 0        |
| protein_co YOD1_OTU     | 175  | 141  | 130  | 257  | 335  | 230  | 1.304364 | 1.347687 | 1.169101 | 2.973201 |
| pseudogen: -            | 735  | 648  | 654  | 19   | 16   | 44   | 18.27368 | 20.65965 | 19.61844 | 0.733201 |
| pseudogen: exocyst_co   | 7    | 3    | 3    | 0    | 0    | 1    | 0.166699 | 0.091615 | 0.086199 | 0        |
| protein_co transmembr   | 658  | 483  | 492  | 861  | 1818 | 1738 | 6.174431 | 5.812026 | 5.570372 | 12.54021 |
| protein_co chromosom    | 0    | 0    | 0    | 0    | 0    | 2    | 0        | 0        | 0        | 0        |
| processed_-             | 5    | 3    | 4    | 1    | 7    | 2    | 0.108895 | 0.083785 | 0.10511  | 0.033804 |
| protein_co cholinergic  | 4    | 3    | 6    | 7    | 20   | 6    | 0.127766 | 0.122881 | 0.231235 | 0.347043 |
| protein_co shisa_homo   | 1380 | 1009 | 1095 | 221  | 263  | 74   | 22.62525 | 21.21362 | 21.6609  | 5.623894 |
| protein_co sphingosin   | 31   | 29   | 27   | 59   | 85   | 32   | 0.663437 | 0.795876 | 0.697188 | 1.959839 |
| pseudogen: -            | 93   | 69   | 90   | 59   | 121  | 87   | 1.023175 | 0.973476 | 1.194696 | 1.00751  |
| protein_co G_protein-i  | 68   | 60   | 72   | 154  | 171  | 41   | 0.605607 | 0.68524  | 0.773682 | 2.128792 |
| pseudogen: PIP5K1A_al   | 10   | 3    | 6    | 2    | 1    | 3    | 0.13997  | 0.053848 | 0.101329 | 0.043451 |
| protein_co carbohydr    | 0    | 1    | 1    | 50   | 95   | 60   | 0        | 0.033611 | 0.031624 | 2.034092 |
| processed_WDFY3_an      | 51   | 37   | 32   | 38   | 66   | 23   | 0.37168  | 0.345788 | 0.281383 | 0.429847 |
| pseudogen: serine/argi  | 822  | 609  | 717  | 380  | 531  | 529  | 8.899468 | 8.455102 | 9.366113 | 6.385667 |
| protein_co solute_carr  | 540  | 412  | 441  | 266  | 278  | 154  | 4.214482 | 4.123415 | 4.152763 | 3.222275 |
| protein_co zinc_finger  | 658  | 524  | 575  | 401  | 459  | 504  | 16.5081  | 16.85822 | 17.40552 | 15.61514 |
| protein_co ankyrin_rej  | 0    | 0    | 0    | 0    | 1    | 0    | 0        | 0        | 0        | 0        |
| protein_co olfactory_r  | 0    | 1    | 1    | 0    | 0    | 1    | 0        | 0.016647 | 0.015663 | 0        |
| protein_co ZFP3_zinc_   | 1    | 0    | 1    | 17   | 20   | 15   | 0.009007 | 0        | 0.010867 | 0.23766  |
| protein_co arylsulfatas | 1223 | 880  | 990  | 84   | 119  | 130  | 12.31404 | 11.3623  | 12.027   | 1.312756 |
| pseudogen: -            | 0    | 0    | 0    | 0    | 0    | 1    | 0        | 0        | 0        | 0        |
| protein_co homeobox     | 231  | 166  | 143  | 1    | 0    | 8    | 7.144851 | 6.584133 | 5.336608 | 0.048008 |
| protein_co mitogen-ac   | 6    | 2    | 6    | 43   | 55   | 37   | 0.059898 | 0.025603 | 0.07227  | 0.666283 |
| protein_co pyrophosph   | 616  | 512  | 565  | 1557 | 1875 | 1845 | 22.32168 | 23.7917  | 24.7026  | 87.57199 |
| protein_co homeobox     | 29   | 21   | 29   | 0    | 0    | 13   | 0.702381 | 0.652234 | 0.847464 | 0        |
| protein_co proteasom    | 240  | 232  | 219  | 338  | 463  | 424  | 2.444841 | 3.030657 | 2.691731 | 5.344248 |
| protein_co basic_helix  | 0    | 0    | 0    | 2    | 1    | 7    | 0        | 0        | 0        | 0.043218 |

|                         |       |      |      |       |       |       |          |          |          |          |
|-------------------------|-------|------|------|-------|-------|-------|----------|----------|----------|----------|
| protein_co MAP6_dom     | 114   | 73   | 74   | 117   | 178   | 134   | 2.532194 | 2.079334 | 1.983225 | 4.033745 |
| antisense CSNK1G2_      | 7     | 14   | 15   | 6     | 6     | 24    | 0.254837 | 0.653585 | 0.658876 | 0.339036 |
| protein_co zinc_finger  | 40    | 42   | 38   | 74    | 70    | 121   | 0.704319 | 0.948348 | 0.807311 | 2.02242  |
| protein_co chromosom    | 3     | 2    | 1    | 1     | 0     | 0     | 0.051153 | 0.043731 | 0.020573 | 0.026465 |
| pseudogen: protein_dis  | 79    | 75   | 88   | 65    | 63    | 53    | 2.453186 | 2.986579 | 3.297116 | 3.132905 |
| protein_co chemokine    | 0     | 0    | 0    | 6     | 3     | 1     | 0        | 0        | 0        | 0.151677 |
| protein_co gremlin_2_   | 176   | 160  | 157  | 7     | 4     | 3     | 1.979051 | 2.307138 | 2.130061 | 0.122172 |
| protein_co chromosom    | 8     | 3    | 6    | 1     | 5     | 14    | 0.328476 | 0.157959 | 0.297244 | 0.06373  |
| protein_co signal_sequ  | 2665  | 1954 | 2106 | 1164  | 1466  | 1216  | 50.34726 | 47.33828 | 48.00484 | 34.13203 |
| protein_co calcyphosin  | 29    | 19   | 25   | 14    | 10    | 6     | 0.354949 | 0.298216 | 0.369195 | 0.265966 |
| protein_co zinc_finger  | 58    | 55   | 44   | 156   | 182   | 131   | 0.699491 | 0.850602 | 0.640258 | 2.920177 |
| protein_co CUE_domai    | 890   | 691  | 677  | 282   | 376   | 381   | 11.52502 | 11.47464 | 10.57764 | 5.668021 |
| protein_co scribbled_f  | 3325  | 2450 | 2658 | 3822  | 5659  | 3841  | 29.87913 | 28.23266 | 28.81903 | 53.30862 |
| protein_co potassium_   | 832   | 708  | 672  | 977   | 1189  | 1253  | 10.73246 | 11.71166 | 10.45908 | 19.56145 |
| protein_co D-2-hydrox   | 438   | 343  | 404  | 228   | 330   | 288   | 4.514801 | 4.533858 | 5.024512 | 3.64779  |
| protein_co HCG20441     | 0     | 0    | 0    | 0     | 1     | 0     | 0        | 0        | 0        | 0        |
| protein_co oxytocin_r   | 139   | 108  | 128  | 24    | 44    | 42    | 1.493518 | 1.488088 | 1.65941  | 0.400256 |
| protein_co FtsJ_methy   | 410   | 297  | 352  | 166   | 207   | 210   | 3.94843  | 3.667806 | 4.090076 | 2.481299 |
| protein_co olfactory_r  | 0     | 0    | 0    | 2     | 5     | 2     | 0        | 0        | 0        | 0.126354 |
| protein_co family_witl  | 7     | 4    | 4    | 1931  | 3168  | 2758  | 0.058053 | 0.04254  | 0.040025 | 24.85635 |
| protein_co G_protein-i  | 9     | 2    | 9    | 22    | 30    | 5     | 0.193583 | 0.055165 | 0.233569 | 0.734475 |
| protein_co olfactory_r  | 0     | 0    | 0    | 1     | 0     | 1     | 0        | 0        | 0        | 0.067955 |
| protein_co zinc_finger  | 3     | 5    | 1    | 3     | 9     | 5     | 0.042953 | 0.091801 | 0.017275 | 0.066669 |
| protein_co suppressor   | 24    | 22   | 26   | 23    | 21    | 23    | 1.120877 | 1.317585 | 1.465103 | 1.667266 |
| protein_co phosphatic   | 1371  | 1111 | 1127 | 910   | 1191  | 1112  | 21.97068 | 22.83124 | 21.79104 | 22.63487 |
| protein_co transcriptic | 1409  | 1124 | 1170 | 687   | 728   | 893   | 54.06549 | 55.3076  | 54.16804 | 40.9163  |
| protein_co leucine_ri   | 233   | 189  | 196  | 90    | 131   | 153   | 4.124339 | 4.290121 | 4.186032 | 2.4727   |
| protein_co olfactory_r  | 0     | 0    | 0    | 5     | 2     | 2     | 0        | 0        | 0        | 0.351593 |
| protein_co mitochond    | 1209  | 918  | 968  | 1078  | 1422  | 1260  | 59.2992  | 57.7397  | 57.28566 | 82.0676  |
| protein_co G_protein-i  | 91    | 87   | 95   | 58    | 66    | 36    | 0.788723 | 0.966967 | 0.99347  | 0.780264 |
| protein_co chromosom    | 1     | 0    | 0    | 0     | 0     | 0     | 0.047604 | 0        | 0        | 0        |
| protein_co Bardet-Biec  | 142   | 120  | 123  | 41    | 44    | 29    | 1.940654 | 2.103053 | 2.02821  | 0.869709 |
| protein_co ZFP82_zinc   | 110   | 112  | 90   | 158   | 179   | 124   | 0.902047 | 1.177778 | 0.890485 | 2.011054 |
| protein_co chromosom    | 0     | 0    | 0    | 0     | 0     | 1     | 0        | 0        | 0        | 0        |
| protein_co leucine-ricl | 10    | 7    | 6    | 3     | 2     | 8     | 0.250749 | 0.225085 | 0.181526 | 0.116759 |
| pseudogen: olfactory_r  | 0     | 0    | 0    | 0     | 1     | 0     | 0        | 0        | 0        | 0        |
| protein_co NAD(P)H_d    | 2202  | 1764 | 1882 | 421   | 450   | 603   | 35.45736 | 36.42478 | 36.56425 | 10.52208 |
| protein_co apoptosis_i  | 784   | 648  | 734  | 3672  | 4144  | 2536  | 7.29545  | 7.732508 | 8.241004 | 53.03581 |
| protein_co fukutin_rel  | 1130  | 756  | 859  | 448   | 611   | 901   | 15.90208 | 13.64289 | 14.58534 | 9.785519 |
| protein_co rabphilin_5  | 50    | 44   | 56   | 63    | 70    | 44    | 0.834639 | 0.941869 | 1.127885 | 1.632299 |
| protein_co solute_carr  | 232   | 166  | 180  | 178   | 206   | 98    | 3.486694 | 3.199214 | 3.263971 | 4.152181 |
| protein_co Fc_recepto   | 1     | 3    | 0    | 0     | 0     | 0     | 0.02348  | 0.09033  | 0        | 0        |
| protein_co methyltran   | 124   | 105  | 117  | 172   | 242   | 136   | 4.910779 | 5.332457 | 5.590654 | 10.57274 |
| protein_co ankyrin_rej  | 161   | 125  | 145  | 10    | 12    | 1     | 2.090638 | 2.08148  | 2.271794 | 0.20155  |
| protein_co solute_carr  | 326   | 265  | 309  | 413   | 457   | 355   | 5.298491 | 5.523188 | 6.05956  | 10.41874 |
| protein_co HIG1_hypo    | 1281  | 1001 | 1080 | 801   | 909   | 1219  | 43.74808 | 43.83826 | 44.50222 | 42.4593  |
| protein_co cholinergic  | 1     | 0    | 0    | 7     | 3     | 3     | 0.007923 | 0        | 0        | 0.086086 |
| protein_co olfactory_r  | 0     | 0    | 0    | 2     | 1     | 0     | 0        | 0        | 0        | 0.140366 |
| protein_co mitogen-ac   | 32    | 24   | 27   | 98    | 161   | 76    | 0.669857 | 0.644248 | 0.681937 | 3.184116 |
| protein_co euchromat    | 2507  | 1870 | 2113 | 3071  | 4190  | 3585  | 14.99022 | 14.33853 | 15.24408 | 28.50125 |
| antisense -             | 9     | 11   | 11   | 20    | 18    | 10    | 0.214982 | 0.336947 | 0.31703  | 0.741516 |
| pseudogen: serological  | 0     | 0    | 0    | 0     | 0     | 1     | 0        | 0        | 0        | 0        |
| protein_co coagulation  | 4290  | 3240 | 3500 | 558   | 658   | 458   | 52.64543 | 50.98679 | 51.82263 | 10.6284  |
| pseudogen: major_histi  | 0     | 0    | 0    | 3     | 3     | 0     | 0        | 0        | 0        | 0.045355 |
| protein_co zinc_finger  | 379   | 247  | 312  | 212   | 297   | 383   | 5.863186 | 4.900053 | 5.823675 | 5.090504 |
| protein_co mucin_16_    | 0     | 0    | 0    | 6     | 1     | 1     | 0        | 0        | 0        | 0.009966 |
| protein_co nucleopho:   | 11604 | 9330 | 9959 | 27468 | 27154 | 29058 | 309.5061 | 319.1189 | 320.498  | 1137.153 |
| protein_co praja_ring   | 982   | 731  | 732  | 1065  | 1232  | 1094  | 16.71361 | 15.95458 | 15.03204 | 28.13448 |
| protein_co dehydroge    | 828   | 649  | 697  | 1912  | 2358  | 1415  | 7.525671 | 7.564303 | 7.64356  | 26.97325 |
| protein_co proenkeph:   | 2     | 2    | 5    | 0     | 1     | 6     | 0.078215 | 0.1003   | 0.235928 | 0        |
| pseudogen: histone_clu  | 0     | 0    | 0    | 0     | 2     | 0     | 0        | 0        | 0        | 0        |
| sense_intrc HECW1_int   | 12    | 9    | 12   | 3     | 0     | 3     | 0.305971 | 0.294273 | 0.369171 | 0.118727 |
| protein_co chromosom    | 0     | 0    | 0    | 0     | 2     | 2     | 0        | 0        | 0        | 0        |
| protein_co histone_clu  | 45    | 45   | 31   | 141   | 191   | 163   | 4.254135 | 5.455324 | 3.535969 | 20.68942 |
| protein_co zinc_finger  | 1048  | 703  | 783  | 721   | 934   | 560   | 9.728913 | 8.368887 | 8.770267 | 10.38888 |

|                        |      |      |      |      |      |      |          |          |          |          |
|------------------------|------|------|------|------|------|------|----------|----------|----------|----------|
| protein_co polymerase  | 7021 | 5375 | 5832 | 5541 | 6971 | 5828 | 48.77979 | 47.88823 | 48.88848 | 59.75298 |
| pseudogen-             | 10   | 8    | 15   | 3    | 2    | 9    | 0.346307 | 0.355272 | 0.62676  | 0.161255 |
| protein_co transmemt   | 0    | 0    | 0    | 30   | 46   | 21   | 0        | 0        | 0        | 0.441357 |
| protein_co solute_carr | 3    | 6    | 3    | 13   | 9    | 5    | 0.086301 | 0.221337 | 0.104127 | 0.580452 |
| pseudogen-             | 0    | 0    | 0    | 1    | 0    | 0    | 0        | 0        | 0        | 0.074038 |
| protein_co transmemt   | 185  | 167  | 178  | 111  | 131  | 89   | 2.09381  | 2.423769 | 2.430712 | 1.94993  |
| protein_co frequently_ | 251  | 170  | 178  | 1213 | 1616 | 2479 | 5.340016 | 4.637961 | 4.569165 | 40.05531 |
| protein_co transmemt   | 94   | 85   | 98   | 269  | 331  | 108  | 2.23399  | 2.590488 | 2.810137 | 9.922842 |
| protein_co transmemt   | 4    | 0    | 1    | 149  | 243  | 83   | 0.04293  | 0        | 0.012949 | 2.482076 |
| protein_co zinc_finger | 196  | 165  | 191  | 113  | 135  | 107  | 3.158228 | 3.409421 | 3.713375 | 2.826157 |
| protein_co NME/NM2     | 19   | 8    | 24   | 22   | 24   | 21   | 0.417679 | 0.225522 | 0.636574 | 0.750659 |
| protein_co spermatid_  | 0    | 0    | 0    | 0    | 0    | 1    | 0        | 0        | 0        | 0        |
| protein_co hephaestin  | 7    | 7    | 5    | 13   | 9    | 13   | 0.061409 | 0.078748 | 0.052924 | 0.177014 |
| protein_co family_witl | 189  | 132  | 118  | 283  | 456  | 125  | 2.807163 | 2.514138 | 2.114637 | 6.524132 |
| protein_co orofacial_c | 1    | 2    | 0    | 5    | 12   | 8    | 0.016298 | 0.0418   | 0        | 0.126486 |
| pseudogen: CTAGE_fam   | 0    | 0    | 0    | 3    | 0    | 0    | 0        | 0        | 0        | 0.090673 |
| protein_co coiled-coil | 0    | 0    | 0    | 8    | 8    | 7    | 0        | 0        | 0        | 0.097806 |
| protein_co DEAD_(Asp   | 773  | 631  | 693  | 19   | 21   | 22   | 5.345227 | 5.595325 | 5.781865 | 0.203925 |
| protein_co spectrin_re | 3    | 2    | 5    | 156  | 230  | 119  | 0.060141 | 0.051415 | 0.12094  | 4.854061 |
| protein_co 2-oxogluta  | 1139 | 776  | 880  | 483  | 613  | 699  | 12.45807 | 10.88424 | 11.61335 | 8.199824 |
| pseudogen-             | 131  | 104  | 83   | 104  | 100  | 101  | 3.343817 | 3.404191 | 2.556215 | 4.120359 |
| protein_co urotensin_  | 2    | 0    | 0    | 16   | 22   | 7    | 0.071588 | 0        | 0        | 0.888914 |
| protein_co apoptosis-a | 9    | 8    | 11   | 102  | 136  | 61   | 0.080276 | 0.091504 | 0.118381 | 1.412125 |
| protein_co dendrin     | 7    | 8    | 2    | 16   | 19   | 3    | 0.087551 | 0.128311 | 0.030182 | 0.31061  |
| protein_co sarcoma_ar  | 0    | 0    | 0    | 0    | 0    | 1    | 0        | 0        | 0        | 0        |
| protein_co zinc_finger | 122  | 96   | 95   | 17   | 20   | 31   | 2.240729 | 2.26105  | 2.105238 | 0.484629 |
| protein_co SRY_(sex_d  | 644  | 501  | 542  | 4572 | 6142 | 8382 | 12.07887 | 12.05001 | 12.26557 | 133.0997 |
| protein_co zinc_finger | 130  | 106  | 91   | 252  | 214  | 278  | 1.997281 | 2.088387 | 1.686884 | 6.009341 |
| protein_co transmemt   | 765  | 594  | 624  | 138  | 125  | 127  | 7.772668 | 7.73935  | 7.649646 | 2.176297 |
| protein_co RAP2B_me    | 1511 | 1151 | 1302 | 989  | 1501 | 1023 | 11.35976 | 11.09658 | 11.81037 | 11.54068 |
| protein_co zinc_finger | 402  | 326  | 368  | 302  | 392  | 894  | 6.100255 | 6.343791 | 6.737795 | 7.113107 |
| protein_co ring_finger | 233  | 199  | 228  | 221  | 293  | 195  | 3.777792 | 4.137562 | 4.46031  | 5.561665 |
| protein_co olfactory_r | 0    | 0    | 0    | 0    | 0    | 1    | 0        | 0        | 0        | 0        |
| protein_co acyl-CoA_b  | 41   | 39   | 57   | 188  | 256  | 99   | 0.857872 | 1.046436 | 1.439002 | 6.105579 |
| protein_co olfactory_r | 0    | 0    | 0    | 0    | 0    | 1    | 0        | 0        | 0        | 0        |
| protein_co N-sulfogluc | 410  | 290  | 291  | 214  | 277  | 304  | 3.456474 | 3.135139 | 2.959991 | 2.80023  |
| pseudogen: ribosomal_  | 7    | 6    | 4    | 23   | 17   | 13   | 0.779644 | 0.856957 | 0.537534 | 3.976094 |
| protein_co mab-21-lik  | 95   | 125  | 113  | 4    | 4    | 3    | 1.609885 | 2.71638  | 2.310456 | 0.105211 |
| protein_co Fanconi_ar  | 81   | 51   | 73   | 50   | 64   | 73   | 1.262663 | 1.019488 | 1.373009 | 1.209771 |
| protein_co SET_domai   | 1700 | 1480 | 1523 | 1078 | 1200 | 1479 | 9.754409 | 10.88988 | 10.54387 | 9.600664 |
| protein_co chromosom   | 240  | 189  | 217  | 19   | 26   | 22   | 3.142587 | 3.173564 | 3.42834  | 0.386154 |
| protein_co transmemt   | 1    | 0    | 0    | 4    | 17   | 13   | 0.025707 | 0        | 0        | 0.159605 |
| protein_co mex-3_hon   | 4513 | 3057 | 3268 | 3367 | 4484 | 2928 | 74.25075 | 64.49712 | 64.87325 | 85.98231 |
| protein_co mitochond   | 602  | 465  | 520  | 688  | 749  | 954  | 30.64907 | 30.35869 | 31.94274 | 54.36754 |
| protein_co G_protein-i | 118  | 109  | 109  | 17   | 19   | 14   | 1.208611 | 1.431662 | 1.347036 | 0.270261 |
| protein_co SLX1_struc  | 1    | 0    | 0    | 0    | 0    | 0    | 0.030096 | 0        | 0        | 0        |
| protein_co ankyrin_rej | 0    | 1    | 0    | 0    | 0    | 1    | 0        | 0.013303 | 0        | 0        |
| protein_co purinergic_ | 0    | 0    | 0    | 1    | 0    | 0    | 0        | 0        | 0        | 0.026331 |
| protein_co tumor_nec   | 6    | 6    | 1    | 0    | 0    | 1    | 0.100875 | 0.129358 | 0.020285 | 0        |
| protein_co ZFP41_zinc  | 265  | 202  | 174  | 210  | 292  | 319  | 2.590339 | 2.532045 | 2.052145 | 3.186108 |
| protein_co plectstrin_ | 2024 | 1421 | 1667 | 110  | 176  | 171  | 99.37738 | 89.47062 | 98.75536 | 8.383014 |
| protein_co autophagy_  | 27   | 29   | 20   | 25   | 24   | 26   | 0.27697  | 0.381484 | 0.247541 | 0.398052 |
| protein_co G_protein-i | 195  | 104  | 126  | 0    | 0    | 0    | 2.619179 | 1.79132  | 2.041969 | 0        |
| protein_co HKR1_GLI-I  | 424  | 374  | 420  | 656  | 857  | 522  | 5.7262   | 6.477115 | 6.843811 | 13.75102 |
| protein_co pleiomorpl  | 324  | 231  | 273  | 346  | 394  | 165  | 2.074893 | 1.89702  | 2.109412 | 3.439198 |
| protein_co Yip1_doma   | 901  | 706  | 770  | 705  | 772  | 750  | 6.267305 | 6.297528 | 6.462415 | 7.611595 |
| protein_co olfactory_r | 0    | 0    | 0    | 1    | 0    | 0    | 0        | 0        | 0        | 0.058317 |
| protein_co zinc_finger | 56   | 37   | 50   | 8    | 5    | 5    | 0.702097 | 0.594867 | 0.756357 | 0.155679 |
| protein_co olfactory_r | 0    | 1    | 0    | 0    | 0    | 0    | 0        | 0.056941 | 0        | 0        |
| pseudogen: ferredoxin_ | 3    | 4    | 3    | 2    | 1    | 2    | 0.2553   | 0.436514 | 0.308034 | 0.264174 |
| protein_co chromosom   | 516  | 434  | 443  | 499  | 650  | 698  | 5.567245 | 6.004678 | 5.7669   | 8.356447 |
| protein_co chromosom   | 277  | 225  | 255  | 222  | 328  | 195  | 4.259933 | 4.437259 | 4.731635 | 5.299152 |
| protein_co adhesion_n  | 42   | 34   | 38   | 104  | 136  | 70   | 0.387064 | 0.401811 | 0.422537 | 1.487637 |
| protein_co G_protein-i | 135  | 102  | 93   | 123  | 131  | 103  | 2.99298  | 2.899877 | 2.487717 | 4.232584 |
| protein_co outer_dens  | 0    | 3    | 1    | 20   | 18   | 11   | 0        | 0.112462 | 0.035272 | 0.907479 |

|                         |       |      |      |      |      |      |          |          |          |          |
|-------------------------|-------|------|------|------|------|------|----------|----------|----------|----------|
| protein_co siah_E3_ub   | 711   | 489  | 498  | 316  | 415  | 282  | 13.24545 | 11.68195 | 11.19372 | 9.137234 |
| protein_co coatomer_    | 7854  | 6218 | 6627 | 2240 | 2410 | 1878 | 113.9815 | 115.7187 | 116.0402 | 50.45706 |
| protein_co brain-speci  | 358   | 259  | 242  | 304  | 434  | 248  | 2.689733 | 2.495372 | 2.193763 | 3.545114 |
| processed_ long_interf  | 16    | 13   | 7    | 38   | 37   | 20   | 0.585211 | 0.609741 | 0.308915 | 2.15728  |
| antisense CELF2_anti    | 10    | 4    | 2    | 5    | 7    | 1    | 0.189992 | 0.097455 | 0.045847 | 0.147447 |
| protein_co solute_carr  | 41    | 25   | 32   | 10   | 8    | 19   | 0.53005  | 0.41446  | 0.49915  | 0.200661 |
| protein_co LSM10_U7     | 824   | 551  | 565  | 479  | 695  | 532  | 38.40693 | 32.93391 | 31.77451 | 34.6536  |
| pseudogen: potassium_   | 0     | 1    | 0    | 2    | 0    | 0    | 0        | 0.059358 | 0        | 0.143692 |
| protein_co RELT-like_1  | 151   | 120  | 118  | 59   | 83   | 78   | 5.244735 | 5.344871 | 4.945118 | 3.180747 |
| protein_co regulatory_  | 791   | 708  | 737  | 502  | 531  | 597  | 5.155686 | 5.917695 | 5.795962 | 5.078602 |
| protein_co solute_carr  | 1238  | 901  | 1051 | 381  | 571  | 361  | 13.91749 | 12.98896 | 14.25578 | 6.648071 |
| protein_co T_cell_imm   | 0     | 0    | 0    | 3    | 0    | 0    | 0        | 0        | 0        | 0.058852 |
| protein_co ring_finger  | 995   | 753  | 813  | 917  | 949  | 774  | 14.26776 | 13.8464  | 14.06602 | 20.4095  |
| protein_co solute_carr  | 1     | 1    | 3    | 88   | 110  | 49   | 0.013687 | 0.017551 | 0.049541 | 1.869417 |
| protein_co IBA57_iron   | 340   | 272  | 312  | 433  | 542  | 840  | 1.62431  | 1.666358 | 1.798427 | 3.210765 |
| protein_co claudin_7    | 1     | 1    | 0    | 927  | 1235 | 1075 | 0.024384 | 0.031269 | 0        | 35.08418 |
| protein_co zinc_finger  | 216   | 175  | 191  | 291  | 388  | 276  | 2.970159 | 3.08584  | 3.168892 | 6.210828 |
| protein_co zinc_finger  | 136   | 106  | 130  | 658  | 858  | 788  | 1.378224 | 1.377514 | 1.589543 | 10.34993 |
| protein_co chromosom    | 1274  | 1050 | 1132 | 225  | 294  | 196  | 11.79425 | 12.46521 | 12.64432 | 3.233061 |
| protein_co HCG16520     | 0     | 0    | 0    | 1    | 1    | 1    | 0        | 0        | 0        | 0.031142 |
| protein_co 2-aminoeth   | 1414  | 995  | 1123 | 775  | 1136 | 714  | 17.80889 | 16.07014 | 17.06535 | 15.15024 |
| protein_co cytochrom    | 634   | 513  | 532  | 726  | 836  | 990  | 28.63995 | 29.71733 | 28.99631 | 50.90379 |
| protein_co protein_kir  | 796   | 666  | 666  | 472  | 506  | 433  | 18.02243 | 19.33677 | 18.19376 | 16.58719 |
| protein_co GINS_com     | 209   | 149  | 163  | 196  | 259  | 388  | 3.060591 | 2.798045 | 2.880015 | 4.454978 |
| protein_co neurogenin   | 0     | 0    | 0    | 0    | 1    | 3    | 0        | 0        | 0        | 0        |
| protein_co coiled-coil  | 438   | 384  | 380  | 112  | 120  | 92   | 3.664851 | 4.120243 | 3.836312 | 1.454557 |
| protein_co mitochond    | 717   | 598  | 573  | 387  | 461  | 561  | 16.79328 | 17.96085 | 16.19269 | 14.06882 |
| pseudogen: -            | 0     | 1    | 1    | 1    | 0    | 0    | 0        | 0.149205 | 0.140386 | 0.180595 |
| protein_co small_nucl   | 1086  | 847  | 897  | 1408 | 1309 | 1557 | 52.66035 | 52.66798 | 52.48007 | 105.971  |
| protein_co rhotekin_2   | 604   | 499  | 562  | 427  | 399  | 435  | 4.264654 | 4.51811  | 4.787748 | 4.679563 |
| protein_co paraneopla   | 726   | 625  | 641  | 526  | 684  | 363  | 9.228016 | 10.18735 | 9.83055  | 10.37739 |
| protein_co carbohydra   | 130   | 97   | 98   | 184  | 205  | 323  | 1.267298 | 1.212597 | 1.152682 | 2.784092 |
| protein_co Usher_sync   | 1     | 0    | 0    | 52   | 71   | 3    | 0.013168 | 0        | 0        | 1.062777 |
| pseudogen: transient_r  | 0     | 1    | 1    | 3    | 15   | 0    | 0        | 0.01895  | 0.01783  | 0.068812 |
| protein_co mannosyl_    | 0     | 0    | 0    | 17   | 14   | 50   | 0        | 0        | 0        | 0.38749  |
| protein_co tripartite_r | 0     | 0    | 0    | 0    | 0    | 1    | 0        | 0        | 0        | 0        |
| protein_co isocitrate_  | 4487  | 3527 | 3475 | 1533 | 1748 | 1052 | 78.09781 | 78.72227 | 72.97694 | 41.41479 |
| lincRNA -               | 11    | 8    | 9    | 19   | 8    | 15   | 0.41529  | 0.387309 | 0.409967 | 1.113379 |
| protein_co olfactory_r  | 0     | 0    | 0    | 1    | 0    | 3    | 0        | 0        | 0        | 0.040911 |
| protein_co patched_d    | 0     | 1    | 2    | 0    | 0    | 0    | 0        | 0.023776 | 0.044741 | 0        |
| protein_co transmem     | 3318  | 2557 | 2578 | 2355 | 3567 | 2954 | 30.51806 | 30.15926 | 28.60958 | 33.62033 |
| protein_co tryptophan   | 481   | 364  | 411  | 324  | 338  | 278  | 13.95674 | 13.54409 | 14.38894 | 14.59199 |
| protein_co trinucleoti  | 10396 | 7339 | 8040 | 3911 | 5381 | 3930 | 46.1094  | 41.74164 | 43.02564 | 26.92412 |
| protein_co family_witl  | 137   | 85   | 105  | 79   | 114  | 49   | 3.464904 | 2.75676  | 3.204114 | 3.101189 |
| protein_co transmem     | 52    | 24   | 41   | 412  | 511  | 342  | 0.545355 | 0.322772 | 0.518809 | 6.706616 |
| protein_co Dexi_homc    | 1     | 1    | 2    | 3    | 2    | 1    | 0.030038 | 0.03852  | 0.072486 | 0.139871 |
| antisense -             | 2     | 2    | 4    | 2    | 1    | 7    | 0.041847 | 0.053663 | 0.100983 | 0.064953 |
| protein_co NOP10_rib    | 1037  | 742  | 823  | 781  | 955  | 989  | 88.24854 | 80.97334 | 84.50389 | 103.1598 |
| protein_co family_witl  | 285   | 219  | 213  | 61   | 98   | 60   | 8.479476 | 8.3556   | 7.646309 | 2.816985 |
| protein_co Kv_channel   | 741   | 646  | 638  | 12   | 13   | 7    | 17.25199 | 19.28692 | 17.92213 | 0.433643 |
| protein_co tudor_and    | 183   | 132  | 146  | 415  | 425  | 326  | 2.774288 | 2.56616  | 2.670554 | 9.765153 |
| protein_co zinc_finger  | 124   | 104  | 121  | 240  | 252  | 485  | 1.452138 | 1.561813 | 1.709699 | 4.362426 |
| protein_co increased_s  | 1770  | 1327 | 1422 | 2067 | 2205 | 1847 | 31.27179 | 30.0649  | 30.31287 | 56.68269 |
| protein_co excision_re  | 407   | 311  | 343  | 204  | 208  | 304  | 4.181472 | 4.097363 | 4.25184  | 3.253085 |
| protein_co mitochond    | 1848  | 1275 | 1346 | 1191 | 1833 | 1184 | 68.66304 | 60.7492  | 60.34123 | 68.68522 |
| protein_co cAMP_resp    | 5351  | 4276 | 4891 | 588  | 775  | 856  | 33.85166 | 34.68902 | 37.33281 | 5.773681 |
| protein_co purinergic_  | 0     | 0    | 4    | 7    | 7    | 4    | 0        | 0        | 0.053907 | 0.121357 |
| processed_TP53_targe    | 123   | 84   | 112  | 96   | 102  | 31   | 6.745581 | 5.907489 | 7.41106  | 8.171767 |
| protein_co unc-5_hom    | 313   | 214  | 224  | 7    | 4    | 21   | 1.486235 | 1.303066 | 1.283333 | 0.051591 |
| protein_co MAS-relate   | 0     | 0    | 0    | 0    | 0    | 1    | 0        | 0        | 0        | 0        |
| protein_co tRNA_splici  | 281   | 186  | 217  | 812  | 1082 | 742  | 6.777827 | 5.75316  | 6.31527  | 30.39979 |
| protein_co RGM_dom      | 570   | 396  | 415  | 1000 | 1211 | 1006 | 8.310731 | 7.404042 | 7.300633 | 22.63054 |
| protein_co ankyrin_re   | 0     | 0    | 0    | 9    | 14   | 7    | 0        | 0        | 0        | 0.180595 |
| protein_co ubiquitin-li | 353   | 247  | 267  | 4    | 10   | 1    | 5.017331 | 4.501988 | 4.57886  | 0.088245 |
| protein_co mitochond    | 1423  | 1114 | 1117 | 1637 | 2017 | 1966 | 25.332   | 25.43075 | 23.99197 | 45.23179 |

|                         |       |       |       |      |       |      |          |          |          |          |
|-------------------------|-------|-------|-------|------|-------|------|----------|----------|----------|----------|
| protein_co family_witl  | 10    | 1     | 4     | 11   | 8     | 11   | 0.235392 | 0.030186 | 0.113605 | 0.401896 |
| protein_co RAD51_hoi    | 48    | 34    | 40    | 66   | 58    | 39   | 0.866996 | 0.787524 | 0.871734 | 1.850334 |
| protein_co crystallin_  | 0     | 0     | 0     | 4    | 1     | 2    | 0        | 0        | 0        | 0.454164 |
| protein_co leucine_zip  | 1430  | 1108  | 1126  | 639  | 741   | 573  | 48.94359 | 48.63052 | 46.49928 | 33.9462  |
| protein_co ADP-ribosy   | 13    | 5     | 10    | 8    | 4     | 6    | 0.342071 | 0.168714 | 0.317483 | 0.326733 |
| protein_co exostosin_   | 2273  | 1633  | 1857  | 594  | 756   | 809  | 12.88767 | 11.87327 | 12.70383 | 5.227473 |
| protein_co serine_hyd   | 4765  | 3425  | 3618  | 4500 | 5622  | 5143 | 65.40718 | 60.28822 | 59.92101 | 95.87503 |
| protein_co MOB_kinas    | 388   | 311   | 290   | 299  | 408   | 264  | 5.731987 | 5.891735 | 5.169155 | 6.856068 |
| protein_co histone_cl   | 2     | 0     | 0     | 0    | 4     | 3    | 0.055295 | 0        | 0        | 0        |
| protein_co HHIP-like_1  | 108   | 95    | 89    | 45   | 80    | 132  | 0.685267 | 0.772981 | 0.681356 | 0.443179 |
| protein_co ATPase_H+    | 1790  | 1463  | 1564  | 863  | 985   | 939  | 40.10183 | 42.03053 | 42.2762  | 30.00906 |
| protein_co zygote_arre  | 3     | 6     | 3     | 17   | 44    | 18   | 0.096349 | 0.247109 | 0.116251 | 0.847436 |
| protein_co cytochrom    | 210   | 168   | 179   | 166  | 192   | 252  | 2.806185 | 2.878828 | 2.886012 | 3.442989 |
| protein_co family_witl  | 0     | 0     | 0     | 1    | 0     | 0    | 0        | 0        | 0        | 0.016808 |
| protein_co beta-site_A  | 413   | 315   | 323   | 313  | 397   | 253  | 6.47029  | 6.328395 | 6.105542 | 7.611119 |
| protein_co ubiquitin-c  | 419   | 342   | 307   | 566  | 686   | 517  | 7.149533 | 7.483403 | 6.32048  | 14.99031 |
| protein_co synemin_ir   | 391   | 375   | 373   | 38   | 64    | 35   | 2.479913 | 3.050003 | 2.854411 | 0.374088 |
| protein_co potassium_   | 11    | 7     | 11    | 0    | 1     | 0    | 0.123631 | 0.100889 | 0.149168 | 0        |
| protein_co gamma-am     | 217   | 180   | 172   | 8    | 13    | 8    | 5.077412 | 5.40088  | 4.855782 | 0.290538 |
| protein_co chromosom    | 3     | 4     | 2     | 2    | 0     | 1    | 0.049936 | 0.085381 | 0.040167 | 0.051672 |
| protein_co NLR_family   | 4     | 4     | 3     | 2    | 2     | 2    | 0.079813 | 0.102349 | 0.072224 | 0.06194  |
| protein_co fidgetin     | 150   | 127   | 150   | 364  | 359   | 343  | 0.737574 | 0.800806 | 0.889925 | 2.778088 |
| protein_co izumo_spe    | 0     | 0     | 3     | 5    | 4     | 6    | 0        | 0        | 0.076522 | 0.164066 |
| protein_co beta-14-N-i  | 1687  | 1324  | 1308  | 1087 | 1639  | 1100 | 22.96848 | 23.1161  | 21.48686 | 22.97086 |
| protein_co adaptor-rel  | 1094  | 882   | 936   | 1706 | 2087  | 2141 | 14.69006 | 15.18742 | 15.16457 | 35.55623 |
| protein_co chromosom    | 801   | 558   | 614   | 898  | 1006  | 1115 | 14.03022 | 12.53359 | 12.97623 | 24.41399 |
| protein_co DDB1_and     | 7     | 2     | 1     | 4    | 2     | 5    | 0.068898 | 0.025243 | 0.011876 | 0.061108 |
| pseudogen: long_inter   | 220   | 160   | 192   | 67   | 83    | 78   | 5.263165 | 4.908555 | 5.54209  | 2.487881 |
| protein_co zinc_finger  | 188   | 142   | 156   | 85   | 83    | 122  | 1.904369 | 1.844552 | 1.906628 | 1.336419 |
| protein_co Tyrosine-pr  | 873   | 656   | 718   | 1517 | 1938  | 1707 | 8.369451 | 8.064843 | 8.305298 | 22.57349 |
| protein_co potassium_   | 34    | 34    | 24    | 21   | 26    | 30   | 0.510981 | 0.655261 | 0.435196 | 0.489864 |
| protein_co F-box_and    | 193   | 156   | 191   | 254  | 419   | 376  | 2.911767 | 3.018098 | 3.476809 | 5.947899 |
| protein_co complemer    | 38    | 26    | 32    | 59   | 64    | 69   | 0.579265 | 0.508249 | 0.588562 | 1.395971 |
| protein_co glycolipid_  | 44    | 36    | 22    | 33   | 27    | 8    | 2.016775 | 2.116005 | 1.216678 | 2.347736 |
| protein_co uncharacte   | 5     | 5     | 1     | 2    | 2     | 1    | 0.045657 | 0.058549 | 0.011018 | 0.028347 |
| protein_co lipase_gast  | 0     | 1     | 0     | 0    | 0     | 0    | 0        | 0.040905 | 0        | 0        |
| pseudogen: -            | 0     | 1     | 0     | 1    | 0     | 0    | 0        | 0.053976 | 0        | 0.065332 |
| protein_co kelch_repe   | 21    | 24    | 32    | 36   | 41    | 21   | 0.262514 | 0.384728 | 0.482649 | 0.6985   |
| protein_co ybeY_metal   | 229   | 191   | 199   | 182  | 221   | 197  | 7.658926 | 8.19172  | 8.030332 | 9.447877 |
| lincRNA family_witl     | 1     | 1     | 0     | 0    | 1     | 1    | 0.011685 | 0.014984 | 0        | 0        |
| protein_co family_witl  | 2     | 10    | 1     | 3    | 10    | 4    | 0.15224  | 0.976133 | 0.091843 | 0.354447 |
| protein_co ceroid-lipo  | 1232  | 938   | 1093  | 1506 | 2065  | 1699 | 8.121538 | 7.92939  | 8.693523 | 15.4093  |
| antisense -             | 2     | 2     | 5     | 1    | 2     | 1    | 0.043884 | 0.056275 | 0.132371 | 0.034057 |
| protein_co phosphatic   | 1770  | 1366  | 1559  | 3355 | 4283  | 3411 | 15.07088 | 14.91507 | 16.0162  | 44.33925 |
| protein_co neurexophi   | 720   | 467   | 540   | 113  | 162   | 67   | 16.82153 | 13.99134 | 15.22211 | 4.097717 |
| pseudogen: -            | 0     | 0     | 1     | 0    | 0     | 0    | 0        | 0        | 0.126003 | 0        |
| protein_co calcium_ch   | 4     | 19    | 9     | 68   | 113   | 59   | 0.023285 | 0.141833 | 0.063213 | 0.614404 |
| protein_co interferon_  | 0     | 0     | 0     | 0    | 2     | 0    | 0        | 0        | 0        | 0        |
| pseudogen: DNM1_pse     | 11    | 6     | 5     | 3    | 5     | 1    | 0.134636 | 0.094174 | 0.073839 | 0.056993 |
| protein_co trafficking_ | 440   | 324   | 327   | 263  | 366   | 291  | 4.551425 | 4.297828 | 4.081224 | 4.222609 |
| sense_intrc -           | 1     | 1     | 2     | 4    | 1     | 2    | 0.024627 | 0.031581 | 0.059428 | 0.152899 |
| protein_co piggyBac_t   | 30    | 27    | 26    | 12   | 16    | 20   | 0.60686  | 0.70039  | 0.634583 | 0.376772 |
| protein_co nuclear_pr   | 4779  | 3639  | 4031  | 1875 | 2622  | 2587 | 40.4636  | 39.51107 | 41.18018 | 24.64105 |
| protein_co potassium_   | 0     | 0     | 0     | 0    | 0     | 1    | 0        | 0        | 0        | 0        |
| protein_co testis_expr  | 3     | 2     | 3     | 25   | 18    | 11   | 0.07266  | 0.062118 | 0.087669 | 0.939822 |
| protein_co teashirt_zir | 1019  | 778   | 828   | 20   | 21    | 11   | 3.920647 | 3.838597 | 3.84381  | 0.119438 |
| protein_co calpain_12   | 14    | 7     | 10    | 13   | 42    | 16   | 0.237676 | 0.152393 | 0.204835 | 0.342555 |
| protein_co exocyst_co   | 1835  | 1448  | 1606  | 800  | 967   | 1248 | 18.11054 | 18.32624 | 19.12445 | 12.25507 |
| pseudogen: olfactory_r  | 0     | 1     | 0     | 0    | 0     | 0    | 0        | 0.064104 | 0        | 0        |
| protein_co karyopheri   | 4184  | 3513  | 3610  | 9522 | 10350 | 9827 | 79.88104 | 86.00813 | 83.15862 | 282.1699 |
| pseudogen: WAS_prote    | 12    | 11    | 9     | 8    | 17    | 9    | 0.132583 | 0.15585  | 0.119976 | 0.137191 |
| pseudogen: neutrophil   | 2     | 1     | 0     | 1    | 3     | 6    | 0.06186  | 0.039663 | 0        | 0.048008 |
| protein_co XK_Kell_blc  | 6     | 9     | 4     | 22   | 25    | 16   | 0.098681 | 0.189817 | 0.079376 | 0.561612 |
| protein_co biglycan     | 20101 | 15980 | 16779 | 45   | 58    | 66   | 392.3964 | 400.0309 | 395.2042 | 1.363485 |
| protein_co ORAI_calci   | 501   | 386   | 388   | 675  | 914   | 637  | 10.98265 | 10.85091 | 10.26241 | 22.96698 |

|                         |       |       |       |      |      |      |          |          |          |          |
|-------------------------|-------|-------|-------|------|------|------|----------|----------|----------|----------|
| pseudogen: abhydrolas   | 2     | 0     | 0     | 0    | 1    | 0    | 0.1042   | 0        | 0        | 0        |
| protein_co centrosom    | 707   | 540   | 531   | 262  | 286  | 176  | 3.964985 | 3.883518 | 3.593062 | 2.280625 |
| protein_co lipoma_HM    | 55    | 27    | 30    | 32   | 31   | 19   | 1.539672 | 0.969256 | 1.013293 | 1.39042  |
| protein_co feline_sarc  | 302   | 246   | 224   | 123  | 147  | 119  | 5.00558  | 5.228678 | 4.479644 | 3.164339 |
| protein_co glutaredoxi  | 1613  | 1225  | 1276  | 1863 | 2557 | 2003 | 40.59774 | 39.53784 | 38.74951 | 72.7798  |
| protein_co family_witl  | 115   | 80    | 106   | 115  | 98   | 133  | 4.387593 | 3.914063 | 4.87958  | 6.810152 |
| protein_co TATA_box_I   | 0     | 0     | 2     | 1    | 1    | 1    | 0        | 0        | 0.055548 | 0.035729 |
| protein_co caveolin_3   | 4     | 0     | 0     | 1    | 2    | 0    | 0.131069 | 0        | 0        | 0.050859 |
| protein_co matrix-rem   | 2769  | 2306  | 2387  | 676  | 993  | 625  | 22.9356  | 24.49378 | 23.85545 | 8.690893 |
| protein_co LIM_domai    | 937   | 678   | 724   | 692  | 732  | 920  | 11.97165 | 11.10845 | 11.16094 | 13.72306 |
| protein_co major_facil  | 643   | 487   | 537   | 270  | 338  | 324  | 14.79405 | 14.3686  | 14.90728 | 9.642074 |
| protein_co ribonuclea   | 1     | 0     | 1     | 0    | 4    | 4    | 0.040009 | 0        | 0.048273 | 0        |
| protein_co acireducto   | 605   | 495   | 572   | 211  | 253  | 372  | 7.330352 | 7.69102  | 8.362064 | 3.968098 |
| protein_co RWD_dom      | 399   | 280   | 353   | 221  | 246  | 234  | 7.084103 | 6.374988 | 7.561966 | 6.090245 |
| protein_co spinster_hc  | 0     | 4     | 5     | 1    | 1    | 0    | 0        | 0.112761 | 0.13262  | 0.034121 |
| pseudogen: olfactory_r  | 0     | 2     | 0     | 0    | 0    | 0    | 0        | 0.113026 | 0        | 0        |
| protein_co C-type_lect  | 0     | 0     | 0     | 7    | 11   | 4    | 0        | 0        | 0        | 0.374602 |
| protein_co SATB_home    | 267   | 244   | 219   | 892  | 1025 | 624  | 1.599953 | 1.874974 | 1.583391 | 8.296432 |
| pseudogen: -            | 0     | 0     | 0     | 1    | 0    | 0    | 0        | 0        | 0        | 0.076934 |
| protein_co neurexophi   | 21    | 10    | 16    | 111  | 122  | 79   | 0.189582 | 0.115768 | 0.17428  | 1.555363 |
| protein_co colony_stir  | 13    | 16    | 23    | 2    | 5    | 7    | 0.152813 | 0.241182 | 0.326206 | 0.03649  |
| protein_co EPH_recept   | 1794  | 1271  | 1440  | 557  | 532  | 175  | 19.85852 | 18.04178 | 19.23247 | 9.56996  |
| protein_co variable_ch  | 0     | 0     | 0     | 3    | 2    | 3    | 0        | 0        | 0        | 0.22579  |
| protein_co actin-like_1 | 83    | 83    | 69    | 26   | 24   | 11   | 1.919069 | 2.460933 | 1.924906 | 0.933074 |
| protein_co epithelial_I | 6     | 4     | 5     | 0    | 0    | 0    | 0.235234 | 0.201103 | 0.23652  | 0        |
| lincRNA long_interg     | 1     | 4     | 1     | 2    | 1    | 0    | 0.07961  | 0.408352 | 0.096053 | 0.24713  |
| protein_co chromosom    | 26    | 28    | 31    | 40   | 52   | 14   | 0.438224 | 0.605188 | 0.630424 | 1.046439 |
| protein_co heparan_su   | 0     | 0     | 0     | 155  | 215  | 86   | 0        | 0        | 0        | 3.52197  |
| protein_co trafficking_ | 1686  | 1306  | 1419  | 1346 | 1543 | 1114 | 14.28045 | 14.18524 | 14.50156 | 17.69538 |
| protein_co histone_cli  | 1     | 2     | 2     | 5    | 2    | 3    | 0.094536 | 0.242459 | 0.228127 | 0.733667 |
| polymorph tetraspanin   | 18    | 16    | 17    | 13   | 21   | 24   | 0.445158 | 0.507424 | 0.50727  | 0.499018 |
| protein_co phospholip   | 216   | 163   | 190   | 208  | 236  | 180  | 1.388382 | 1.343544 | 1.473522 | 2.075147 |
| pseudogen: -            | 0     | 0     | 0     | 0    | 1    | 0    | 0        | 0        | 0        | 0        |
| protein_co spindle_an   | 844   | 668   | 661   | 575  | 667  | 715  | 14.14409 | 14.35551 | 13.36541 | 14.95654 |
| protein_co relaxin/insu | 3     | 2     | 1     | 2    | 5    | 14   | 0.055535 | 0.047477 | 0.022335 | 0.057465 |
| protein_co necdin_me    | 399   | 296   | 338   | 661  | 798  | 702  | 9.919998 | 9.437126 | 10.13919 | 25.50766 |
| protein_co coiled-coil_ | 0     | 0     | 0     | 18   | 29   | 40   | 0        | 0        | 0        | 0.771063 |
| protein_co family_witl  | 30    | 23    | 23    | 13   | 13   | 18   | 0.477657 | 0.469605 | 0.441846 | 0.321269 |
| processed_ -            | 0     | 0     | 0     | 2    | 6    | 2    | 0        | 0        | 0        | 0.190026 |
| protein_co neurotrimi   | 3399  | 2739  | 2974  | 170  | 160  | 124  | 49.96212 | 51.62869 | 52.74469 | 3.878547 |
| protein_co tetratricop  | 10582 | 8638  | 9295  | 389  | 355  | 338  | 47.88094 | 50.12074 | 50.74489 | 2.731964 |
| protein_co potassium_   | 7     | 8     | 5     | 26   | 33   | 28   | 0.091633 | 0.134293 | 0.078972 | 0.528273 |
| protein_co protein_ph   | 0     | 1     | 2     | 5    | 15   | 8    | 0        | 0.04167  | 0.078414 | 0.252182 |
| protein_co BRICHOS_d    | 126   | 81    | 92    | 45   | 64   | 71   | 3.088417 | 2.546008 | 2.720829 | 1.712018 |
| protein_co galanin_rec  | 3     | 2     | 0     | 37   | 53   | 39   | 0.103131 | 0.088167 | 0        | 1.974232 |
| protein_co regulated_   | 0     | 0     | 0     | 2    | 1    | 0    | 0        | 0        | 0        | 0.168083 |
| protein_co IgA-inducir  | 40    | 50    | 34    | 28   | 22   | 13   | 0.653292 | 1.047193 | 0.669999 | 0.7098   |
| protein_co tsukushi_sr  | 4720  | 3390  | 3596  | 688  | 892  | 965  | 62.27374 | 57.3551  | 57.2441  | 14.08906 |
| protein_co annexin_A2   | 22366 | 18276 | 18928 | 2186 | 2115 | 2219 | 297.2625 | 311.4887 | 303.5321 | 45.09542 |
| pseudogen: selenophos   | 0     | 0     | 0     | 1    | 0    | 0    | 0        | 0        | 0        | 0.075971 |
| protein_co regulator_c  | 23    | 12    | 18    | 4    | 11   | 3    | 0.347333 | 0.232386 | 0.327974 | 0.093758 |
| protein_co homeobox     | 369   | 287   | 311   | 0    | 0    | 2    | 4.605381 | 4.593359 | 4.683253 | 0        |
| protein_co solute_carr  | 6     | 2     | 3     | 13   | 11   | 6    | 0.119262 | 0.050979 | 0.071949 | 0.401076 |
| protein_co progesterin_ | 448   | 368   | 383   | 125  | 166  | 111  | 6.371467 | 6.711485 | 6.572162 | 2.759319 |
| protein_co pregnancy-   | 1227  | 1018  | 1095  | 27   | 23   | 10   | 5.249936 | 5.585558 | 5.652904 | 0.17931  |
| protein_co v-maf_mus    | 0     | 1     | 2     | 164  | 279  | 70   | 0        | 0.02562  | 0.048211 | 5.085593 |
| protein_co neugrin_ne   | 766   | 556   | 683   | 479  | 648  | 613  | 12.90149 | 12.00868 | 13.87969 | 12.5221  |
| protein_co glutamate_   | 7     | 7     | 7     | 10   | 10   | 4    | 0.056262 | 0.072148 | 0.067883 | 0.124751 |
| protein_co hydroxycar   | 0     | 0     | 1     | 0    | 0    | 2    | 0        | 0        | 0.027584 | 0        |
| protein_co coiled-coil_ | 7     | 5     | 4     | 4    | 13   | 11   | 0.1126   | 0.103139 | 0.077634 | 0.099869 |
| protein_co chromosom    | 0     | 1     | 1     | 62   | 63   | 47   | 0        | 0.010947 | 0.0103   | 0.821472 |
| pseudogen: transmembr   | 140   | 113   | 107   | 129  | 168  | 108  | 2.355437 | 2.437986 | 2.172077 | 3.36871  |
| protein_co melanoma_    | 0     | 0     | 2     | 3    | 7    | 15   | 0        | 0        | 0.078906 | 0.152259 |
| protein_co cysteine-ric | 3448  | 2621  | 2727  | 261  | 299  | 152  | 81.82023 | 79.75718 | 78.07763 | 9.613122 |
| protein_co DEAD_(Asp    | 180   | 131   | 151   | 270  | 375  | 453  | 3.256251 | 3.038967 | 3.295872 | 7.581229 |

|                         |       |       |       |      |      |      |          |          |          |          |
|-------------------------|-------|-------|-------|------|------|------|----------|----------|----------|----------|
| protein_co acyl-CoA_b   | 1825  | 1450  | 1616  | 642  | 847  | 599  | 23.95026 | 24.40196 | 25.58803 | 13.07714 |
| protein_co chromosom    | 1410  | 1037  | 1231  | 731  | 991  | 939  | 11.10615 | 10.47448 | 11.69905 | 8.937012 |
| protein_co phosphatic   | 42    | 29    | 28    | 1    | 0    | 0    | 0.255631 | 0.226345 | 0.205622 | 0.009447 |
| pseudogen: ribosomal_   | 147   | 151   | 193   | 201  | 365  | 260  | 2.902245 | 3.822989 | 4.597504 | 6.159469 |
| protein_co glycosylpho  | 0     | 0     | 0     | 0    | 1    | 0    | 0        | 0        | 0        | 0        |
| protein_co vitelline_m  | 10    | 5     | 7     | 4    | 1    | 1    | 0.612141 | 0.392492 | 0.517009 | 0.380051 |
| protein_co ALG12_alpl   | 589   | 509   | 566   | 516  | 653  | 584  | 11.70264 | 12.96867 | 13.56853 | 15.91287 |
| protein_co lymphocyt    | 0     | 2     | 0     | 874  | 1008 | 619  | 0        | 0.055522 | 0        | 29.36729 |
| protein_co UDP-N-acet   | 14    | 6     | 4     | 4    | 6    | 1    | 0.27239  | 0.149701 | 0.093901 | 0.120796 |
| protein_co collagen_ty  | 21848 | 14700 | 16294 | 5172 | 7936 | 6010 | 155.0557 | 133.7836 | 139.5249 | 56.97247 |
| protein_co RNA_bindin   | 2056  | 1633  | 1782  | 1799 | 2261 | 1782 | 25.72882 | 26.20549 | 26.9062  | 34.94285 |
| antisense -             | 47    | 29    | 36    | 107  | 137  | 58   | 0.975146 | 0.771577 | 0.901203 | 3.445769 |
| protein_co G_protein-i  | 0     | 0     | 0     | 7    | 8    | 0    | 0        | 0        | 0        | 0.186752 |
| pseudogen: -            | 0     | 0     | 0     | 0    | 2    | 0    | 0        | 0        | 0        | 0        |
| protein_co glutamate_   | 16    | 7     | 14    | 10   | 17   | 11   | 0.321577 | 0.180415 | 0.339502 | 0.311958 |
| protein_co transmembr   | 0     | 0     | 0     | 0    | 1    | 0    | 0        | 0        | 0        | 0        |
| protein_co ribosomal_   | 7644  | 5822  | 5637  | 8607 | 8719 | 8555 | 249.4275 | 243.6156 | 221.9319 | 435.9191 |
| protein_co regulator_c  | 289   | 247   | 227   | 27   | 28   | 16   | 5.433526 | 5.955116 | 5.149414 | 0.787913 |
| protein_co solute_carr  | 10    | 5     | 8     | 10   | 13   | 17   | 0.191076 | 0.122514 | 0.184435 | 0.296576 |
| protein_co zinc_finger  | 187   | 168   | 166   | 427  | 361  | 614  | 1.952011 | 2.248844 | 2.090724 | 6.918294 |
| protein_co leukocyte_   | 201   | 135   | 141   | 92   | 119  | 41   | 4.924187 | 4.24113  | 4.167788 | 3.498298 |
| protein_co chromosom    | 9     | 3     | 8     | 38   | 45   | 18   | 0.17424  | 0.07448  | 0.186872 | 1.14188  |
| protein_co transcriptic | 672   | 604   | 597   | 70   | 70   | 49   | 26.77153 | 30.85675 | 28.69633 | 4.32845  |
| protein_co chromosom    | 333   | 257   | 257   | 351  | 385  | 248  | 3.813966 | 3.774635 | 3.551516 | 6.239792 |
| protein_co centrosom    | 324   | 270   | 298   | 289  | 286  | 311  | 2.629347 | 2.809804 | 2.917878 | 3.64025  |
| protein_co WAP_four-i   | 0     | 0     | 0     | 6    | 0    | 3    | 0        | 0        | 0        | 0.693141 |
| protein_co signal_reco  | 4533  | 3794  | 3899  | 1255 | 1463 | 1362 | 69.25788 | 74.33446 | 71.87615 | 29.7617  |
| protein_co otopetrin_   | 0     | 0     | 0     | 0    | 1    | 0    | 0        | 0        | 0        | 0        |
| protein_co Ewing_sarc   | 5697  | 4513  | 4909  | 4072 | 5215 | 6467 | 36.66883 | 37.24993 | 38.12343 | 40.68076 |
| protein_co outer_dens   | 9     | 12    | 13    | 0    | 1    | 0    | 0.352851 | 0.603309 | 0.614951 | 0        |
| protein_co high_mobil   | 749   | 584   | 569   | 677  | 729  | 467  | 28.6699  | 28.66596 | 26.27874 | 40.22198 |
| protein_co spermatog    | 337   | 278   | 290   | 443  | 570  | 488  | 1.836794 | 1.943053 | 1.907113 | 3.747699 |
| protein_co gap_junctio  | 2628  | 2167  | 2356  | 1787 | 2378 | 2405 | 16.12918 | 17.05514 | 17.44658 | 17.02323 |
| protein_co SRY(sex_d    | 0     | 0     | 1     | 1    | 3    | 13   | 0        | 0        | 0.013772 | 0.017717 |
| protein_co CCR4-NOT_    | 446   | 355   | 393   | 399  | 517  | 551  | 7.429111 | 7.582976 | 7.898463 | 10.31586 |
| protein_co metastasis_  | 1858  | 1442  | 1586  | 2785 | 3404 | 2231 | 30.29265 | 30.14853 | 31.19915 | 70.47696 |
| protein_co zinc_finger  | 0     | 0     | 0     | 0    | 2    | 0    | 0        | 0        | 0        | 0        |
| protein_co cell_adhesi  | 1493  | 1162  | 1246  | 617  | 668  | 468  | 16.5775  | 16.54531 | 16.69265 | 10.63347 |
| protein_co zinc_finger  | 350   | 280   | 293   | 668  | 793  | 830  | 2.545209 | 2.611095 | 2.570816 | 7.539843 |
| protein_co chromosom    | 12    | 10    | 7     | 16   | 25   | 24   | 0.196056 | 0.209511 | 0.137989 | 0.405741 |
| protein_co pyrroline-5  | 3754  | 2556  | 2897  | 1708 | 2404 | 1365 | 93.13499 | 81.31839 | 86.71917 | 65.77138 |
| protein_co LSM_doma     | 895   | 557   | 696   | 335  | 390  | 363  | 42.00857 | 33.52582 | 39.41597 | 24.40564 |
| pseudogen: IQ_motif_c   | 0     | 0     | 0     | 2    | 3    | 0    | 0        | 0        | 0        | 0.059267 |
| protein_co spinster_hc  | 3     | 7     | 4     | 44   | 63   | 36   | 0.040809 | 0.122109 | 0.065652 | 0.929014 |
| protein_co chromosom    | 1     | 0     | 0     | 0    | 1    | 3    | 0.027104 | 0        | 0        | 0        |
| protein_co adaptor-rel  | 1969  | 1650  | 1693  | 968  | 1221 | 1224 | 20.18064 | 21.68616 | 20.93603 | 15.39909 |
| protein_co solute_carr  | 440   | 326   | 373   | 27   | 24   | 29   | 3.376143 | 3.20771  | 3.453226 | 0.32156  |
| protein_co olfactory_r  | 0     | 0     | 0     | 1    | 0    | 0    | 0        | 0        | 0        | 0.072926 |
| protein_co solute_carr  | 15    | 11    | 8     | 51   | 65   | 58   | 0.252549 | 0.237497 | 0.162515 | 1.332772 |
| protein_co otopetrin_   | 0     | 0     | 0     | 1    | 0    | 0    | 0        | 0        | 0        | 0.033898 |
| protein_co Purkinje_c   | 1     | 3     | 0     | 5    | 4    | 3    | 0.066416 | 0.255509 | 0        | 0.515438 |
| protein_co 4-aminobu    | 134   | 106   | 124   | 154  | 182  | 135  | 1.124823 | 1.141024 | 1.255883 | 2.006461 |
| protein_co solute_carr  | 74    | 37    | 50    | 84   | 160  | 107  | 1.783074 | 1.14327  | 1.453636 | 3.141574 |
| protein_co calcium/ca   | 615   | 468   | 540   | 429  | 585  | 355  | 3.536591 | 3.451158 | 3.746722 | 3.829107 |
| protein_co RANBP2-lik   | 3     | 6     | 4     | 0    | 5    | 0    | 0.019633 | 0.050353 | 0.031584 | 0        |
| pseudogen: family_witl  | 4     | 3     | 10    | 1    | 0    | 1    | 0.266421 | 0.256235 | 0.803629 | 0.10338  |
| protein_co LysM_putat   | 230   | 205   | 207   | 226  | 273  | 280  | 3.545268 | 4.052139 | 3.849812 | 5.407046 |
| protein_co WBP2_N-te    | 0     | 0     | 0     | 0    | 1    | 0    | 0        | 0        | 0        | 0        |
| protein_co immunoglc    | 5     | 3     | 6     | 14   | 24   | 19   | 0.11348  | 0.087313 | 0.164304 | 0.493184 |
| protein_co NK2_home     | 0     | 0     | 0     | 0    | 3    | 0    | 0        | 0        | 0        | 0        |
| protein_co arylformam   | 329   | 217   | 230   | 415  | 453  | 355  | 8.917234 | 7.542292 | 7.521599 | 17.45874 |
| protein_co GATS_prot    | 0     | 0     | 0     | 2    | 0    | 2    | 0        | 0        | 0        | 0.14703  |
| protein_co growth_arr   | 3162  | 2147  | 2392  | 434  | 717  | 440  | 56.33216 | 49.04965 | 51.41664 | 12.00092 |
| protein_co FRAS1_rela   | 1     | 0     | 3     | 4    | 3    | 1    | 0.006968 | 0        | 0.025223 | 0.043263 |
| protein_co nebulin      | 49    | 34    | 46    | 77   | 56   | 35   | 0.087688 | 0.078025 | 0.099323 | 0.213879 |

|                         |      |      |      |      |      |      |          |          |          |          |
|-------------------------|------|------|------|------|------|------|----------|----------|----------|----------|
| protein_co brain-enric  | 151  | 115  | 102  | 46   | 62   | 16   | 1.218446 | 1.189972 | 0.993065 | 0.576126 |
| protein_co glypican_6   | 1195 | 931  | 926  | 793  | 833  | 610  | 8.664539 | 8.656385 | 8.100961 | 8.924444 |
| protein_co Rho_guanin   | 26   | 20   | 19   | 8    | 14   | 8    | 0.245399 | 0.242068 | 0.216372 | 0.117198 |
| protein_co family_witl  | 805  | 491  | 590  | 31   | 52   | 11   | 14.62474 | 11.43887 | 12.9328  | 0.874147 |
| protein_co CUB_and_S    | 40   | 17   | 26   | 3    | 2    | 5    | 0.154574 | 0.084243 | 0.121227 | 0.017994 |
| pseudogen: olfactory_r  | 0    | 0    | 0    | 2    | 0    | 1    | 0        | 0        | 0        | 0.152738 |
| protein_co calcium_hc   | 0    | 0    | 0    | 6    | 0    | 0    | 0        | 0        | 0        | 0.264333 |
| protein_co prostaglan   | 2    | 3    | 0    | 2    | 7    | 2    | 0.032394 | 0.062311 | 0        | 0.05028  |
| protein_co centrosom    | 298  | 256  | 299  | 107  | 135  | 74   | 3.646458 | 4.017022 | 4.414425 | 2.032213 |
| protein_co Down_sync    | 2    | 4    | 3    | 18   | 39   | 17   | 0.04196  | 0.107615 | 0.07594  | 0.586146 |
| protein_co ankyrin_rej  | 2    | 1    | 0    | 1    | 1    | 0    | 0.02671  | 0.017126 | 0        | 0.020729 |
| protein_co G_protein-i  | 2    | 2    | 3    | 108  | 89   | 52   | 0.053558 | 0.068681 | 0.096931 | 4.488988 |
| protein_co gap_junctio  | 2    | 0    | 1    | 1    | 4    | 3    | 0.105253 | 0        | 0.063497 | 0.081683 |
| protein_co Uncharacte   | 2    | 0    | 3    | 0    | 1    | 0    | 0.044957 | 0        | 0.081365 | 0        |
| protein_co RAB_intera   | 293  | 224  | 215  | 106  | 142  | 112  | 5.653817 | 5.542829 | 5.005652 | 3.174757 |
| protein_co transmemt    | 826  | 589  | 648  | 2    | 2    | 1    | 14.30778 | 13.08328 | 13.54301 | 0.053772 |
| protein_co Fanconi_ar   | 244  | 230  | 231  | 343  | 441  | 270  | 3.45759  | 4.179466 | 3.949514 | 7.544114 |
| protein_co calneuron_   | 99   | 50   | 65   | 235  | 235  | 235  | 0.490761 | 0.317844 | 0.388773 | 1.808146 |
| pseudogen: -            | 1    | 1    | 0    | 0    | 0    | 0    | 0.021881 | 0.028059 | 0        | 0        |
| protein_co single-pass  | 378  | 261  | 246  | 199  | 300  | 213  | 11.31106 | 10.01524 | 8.881668 | 9.242617 |
| protein_co C2_calcium   | 240  | 158  | 204  | 190  | 338  | 375  | 3.640765 | 3.073603 | 3.733874 | 4.473686 |
| protein_co carbohydra   | 2287 | 1802 | 1940 | 360  | 517  | 334  | 36.25337 | 36.6308  | 37.10496 | 8.857582 |
| pseudogen: heat_shock   | 7    | 7    | 8    | 29   | 30   | 24   | 0.151049 | 0.193699 | 0.208285 | 0.97129  |
| protein_co POTE_anky    | 0    | 0    | 0    | 2    | 5    | 6    | 0        | 0        | 0        | 0.022203 |
| protein_co RuvB-like_2  | 2546 | 2015 | 2214 | 3113 | 3740 | 2963 | 47.98311 | 48.69837 | 50.34492 | 91.06251 |
| protein_co GDP-D-gluc   | 33   | 28   | 21   | 26   | 37   | 36   | 0.970138 | 1.05557  | 0.744881 | 1.186379 |
| protein_co catenin_(ca  | 5    | 2    | 1    | 5    | 10   | 10   | 0.07254  | 0.037209 | 0.017505 | 0.112593 |
| pseudogen: -            | 0    | 2    | 1    | 2    | 1    | 0    | 0        | 0.264307 | 0.124342 | 0.319911 |
| antisense WT1_antise    | 0    | 0    | 0    | 1    | 1    | 0    | 0        | 0        | 0        | 0.019012 |
| protein_co RIMS_bindi   | 0    | 1    | 1    | 0    | 1    | 0    | 0        | 0.010396 | 0.009781 | 0        |
| protein_co Protein_FL   | 46   | 51   | 31   | 1411 | 2107 | 1056 | 0.477411 | 0.678756 | 0.38819  | 22.72959 |
| protein_co chromosom    | 50   | 28   | 44   | 8    | 10   | 39   | 1.01802  | 0.731061 | 1.080904 | 0.252817 |
| protein_co pituitary_ti | 6209 | 5060 | 5280 | 2491 | 3049 | 2753 | 105.4855 | 110.238  | 108.2314 | 65.68641 |
| protein_co DEAD_(Asp    | 1589 | 1201 | 1368 | 1849 | 2031 | 2005 | 25.26559 | 24.48826 | 26.24459 | 45.63237 |
| protein_co abhydrolas   | 63   | 51   | 47   | 28   | 66   | 32   | 1.663328 | 1.7267   | 1.497212 | 1.147429 |
| protein_co coiled-coil  | 0    | 0    | 0    | 7    | 3    | 2    | 0        | 0        | 0        | 0.207942 |
| protein_co plasminoge   | 2    | 5    | 6    | 3    | 2    | 2    | 0.045065 | 0.144473 | 0.16312  | 0.10492  |
| protein_co DAZ_associ   | 1984 | 1666 | 1708 | 500  | 538  | 395  | 37.97134 | 40.88826 | 39.44121 | 14.85302 |
| protein_co collagen_ar  | 6    | 5    | 9    | 49   | 70   | 57   | 0.086566 | 0.092507 | 0.156671 | 1.097295 |
| protein_co Homo_sapi    | 2402 | 1793 | 1843 | 1093 | 1207 | 1375 | 63.382   | 60.6712  | 58.67679 | 44.76552 |
| pseudogen: -            | 7    | 7    | 7    | 20   | 34   | 16   | 0.372989 | 0.478305 | 0.450032 | 1.654086 |
| protein_co cat_eye_syn  | 23   | 25   | 26   | 226  | 345  | 190  | 0.217697 | 0.303441 | 0.296924 | 3.320193 |
| protein_co zinc_finger  | 492  | 446  | 507  | 366  | 478  | 436  | 5.844917 | 6.794499 | 7.267236 | 6.748773 |
| protein_co EPH_recept   | 0    | 0    | 0    | 16   | 29   | 10   | 0        | 0        | 0        | 0.21465  |
| protein_co coiled-coil  | 89   | 73   | 68   | 66   | 86   | 81   | 0.994095 | 1.045611 | 0.916421 | 1.144227 |
| protein_co chromosom    | 0    | 0    | 1    | 0    | 0    | 2    | 0        | 0        | 0.061031 | 0        |
| protein_co BCL6_corej   | 1134 | 846  | 902  | 1226 | 1525 | 1793 | 8.321327 | 7.960846 | 7.986089 | 13.9637  |
| protein_co jerky_homo   | 391  | 295  | 369  | 116  | 129  | 95   | 5.135573 | 4.968709 | 5.84772  | 2.364834 |
| protein_co chromosom    | 5    | 4    | 1    | 0    | 2    | 0    | 0.13914  | 0.142741 | 0.033576 | 0        |
| protein_co guanylate_l  | 0    | 0    | 0    | 0    | 0    | 7    | 0        | 0        | 0        | 0        |
| protein_co KIAA2026     | 599  | 505  | 497  | 321  | 318  | 292  | 4.019336 | 4.345385 | 4.023759 | 3.343205 |
| polymorph ovochymas     | 3    | 1    | 4    | 3    | 4    | 2    | 0.079745 | 0.034087 | 0.128289 | 0.123775 |
| protein_co synapse_di   | 0    | 0    | 0    | 78   | 70   | 15   | 0        | 0        | 0        | 2.177531 |
| protein_co four_and_a   | 1257 | 968  | 1012 | 586  | 688  | 681  | 35.78673 | 35.3404  | 34.76285 | 25.89494 |
| protein_co pro-melani   | 0    | 4    | 1    | 3    | 2    | 2    | 0        | 0.313994 | 0.073858 | 0.285038 |
| protein_co transmemt    | 3    | 0    | 2    | 8    | 7    | 4    | 0.212493 | 0        | 0.170923 | 0.879514 |
| protein_co chromosom    | 171  | 125  | 151  | 50   | 70   | 50   | 11.89643 | 11.15167 | 12.67493 | 5.399095 |
| protein_co coiled-coil  | 48   | 47   | 39   | 26   | 37   | 14   | 1.598523 | 2.007174 | 1.567077 | 1.343945 |
| pseudogen: ribosomal_   | 50   | 43   | 44   | 71   | 71   | 75   | 3.623649 | 3.996262 | 3.847484 | 7.986655 |
| protein_co receptor-in  | 172  | 134  | 134  | 560  | 716  | 560  | 2.007738 | 2.005823 | 1.887259 | 10.14605 |
| protein_co leucine-ricl | 0    | 1    | 0    | 0    | 2    | 2    | 0        | 0.015903 | 0        | 0        |
| protein_co nuclear_po   | 96   | 84   | 72   | 62   | 80   | 69   | 0.842493 | 0.945331 | 0.762387 | 0.844534 |
| protein_co splicing_fac | 1947 | 1657 | 1777 | 2525 | 2748 | 3177 | 24.85567 | 27.12635 | 27.37127 | 50.0324  |
| pseudogen: zinc_finger  | 0    | 0    | 0    | 1    | 0    | 0    | 0        | 0        | 0        | 0.146144 |
| pseudogen: -            | 45   | 27   | 52   | 27   | 33   | 29   | 2.259155 | 1.738228 | 3.149814 | 2.103913 |

|                                   |      |      |      |      |      |      |          |          |          |          |
|-----------------------------------|------|------|------|------|------|------|----------|----------|----------|----------|
| protein_co glutamate_pseudogeni - | 50   | 43   | 50   | 50   | 58   | 36   | 0.251152 | 0.276977 | 0.303029 | 0.389822 |
| protein_co parahox_cl             | 411  | 283  | 385  | 179  | 234  | 189  | 2.821639 | 2.491469 | 3.189102 | 1.907406 |
| protein_co somatostat             | 0    | 0    | 0    | 0    | 0    | 7    | 0        | 0        | 0        | 0        |
| protein_co general_tra            | 0    | 0    | 0    | 0    | 2    | 1    | 0        | 0        | 0        | 0        |
| protein_co ankyrin_rej            | 297  | 234  | 271  | 176  | 223  | 270  | 4.717593 | 4.766386 | 5.193754 | 4.339175 |
| protein_co SH2_domai              | 211  | 201  | 181  | 121  | 204  | 119  | 1.984713 | 2.424491 | 2.054196 | 1.766571 |
| protein_co three_prim             | 5    | 3    | 2    | 16   | 29   | 6    | 0.085255 | 0.065596 | 0.041146 | 0.423446 |
| protein_co G_protein-i            | 5    | 9    | 7    | 6    | 7    | 6    | 0.103647 | 0.239243 | 0.175079 | 0.19305  |
| protein_co myxovirus_             | 172  | 162  | 159  | 3    | 0    | 3    | 2.204779 | 2.662938 | 2.459132 | 0.059688 |
| protein_co E1A_bindin             | 4    | 2    | 3    | 20   | 33   | 16   | 0.046152 | 0.029591 | 0.041763 | 0.358168 |
| protein_co mex-3_hon              | 3493 | 2675 | 2822 | 2224 | 3246 | 2333 | 13.23423 | 12.9967  | 12.90046 | 13.07872 |
| pseudogeni -                      | 1023 | 700  | 770  | 201  | 264  | 196  | 11.0705  | 9.714022 | 10.05381 | 3.376123 |
| pseudogeni phosphatic             | 2    | 2    | 1    | 2    | 2    | 1    | 0.274211 | 0.351636 | 0.165425 | 0.425613 |
| protein_co family_witl            | 493  | 380  | 396  | 468  | 582  | 367  | 5.970242 | 5.901168 | 5.786131 | 8.796732 |
| protein_co cytochrom              | 11   | 6    | 11   | 39   | 51   | 58   | 0.089687 | 0.062733 | 0.108213 | 0.493551 |
| protein_co UTP11-like             | 306  | 306  | 299  | 369  | 394  | 257  | 8.180356 | 10.49015 | 9.644285 | 15.31114 |
| protein_co proteasomi             | 882  | 696  | 752  | 561  | 661  | 757  | 20.4839  | 20.72825 | 21.0722  | 20.22262 |
| protein_co proline_ri             | 590  | 434  | 491  | 440  | 495  | 666  | 12.8436  | 12.11529 | 12.89627 | 14.86681 |
| processed_ COL18A1_e              | 1108 | 918  | 1003 | 1358 | 1503 | 1001 | 4.799015 | 5.098758 | 5.24157  | 9.129408 |
| protein_co histone_clu            | 41   | 32   | 14   | 15   | 21   | 16   | 0.561311 | 0.561797 | 0.231258 | 0.318744 |
| protein_co folate_rece            | 0    | 5    | 2    | 3    | 5    | 2    | 0        | 0.308675 | 0.116171 | 0.224168 |
| protein_co HCG17829               | 0    | 0    | 0    | 1    | 5    | 0    | 0        | 0        | 0        | 0.09041  |
| protein_co serine_hyd             | 13   | 5    | 9    | 12   | 9    | 19   | 0.414392 | 0.204384 | 0.346145 | 0.593717 |
| protein_co poly(rC)_bi            | 70   | 87   | 76   | 103  | 105  | 121  | 1.565983 | 2.495846 | 2.051402 | 3.576488 |
| protein_co pyroglutar             | 41   | 33   | 30   | 162  | 184  | 83   | 0.873066 | 0.901128 | 0.770783 | 5.354372 |
| protein_co SET_domai              | 3    | 1    | 1    | 1    | 2    | 0    | 0.094855 | 0.040546 | 0.038149 | 0.049076 |
| protein_co tumor_nec              | 1087 | 830  | 908  | 986  | 1270 | 1031 | 17.71002 | 17.34112 | 17.84939 | 24.93429 |
| protein_co zinc_and_ri            | 117  | 90   | 91   | 18   | 33   | 5    | 2.425346 | 2.392432 | 2.276026 | 0.57915  |
| protein_co F-box_and_             | 374  | 282  | 348  | 734  | 967  | 568  | 2.559753 | 2.475055 | 2.873781 | 7.797456 |
| protein_co transport_i            | 1239 | 985  | 1097 | 450  | 559  | 311  | 12.73493 | 12.98287 | 13.60441 | 7.179069 |
| protein_co histone_clu            | 232  | 165  | 187  | 72   | 127  | 102  | 3.49903  | 3.191192 | 3.402901 | 1.685476 |
| pseudogeni -                      | 5    | 2    | 0    | 0    | 3    | 6    | 0.570438 | 0.292602 | 0        | 0        |
| protein_co sideroflexir           | 37   | 14   | 19   | 21   | 57   | 19   | 0.315213 | 0.152946 | 0.195301 | 0.277685 |
| protein_co family_witl            | 134  | 96   | 129  | 200  | 234  | 294  | 4.609877 | 4.235114 | 5.354542 | 10.67935 |
| protein_co mitochond              | 21   | 28   | 27   | 87   | 143  | 15   | 1.05202  | 1.798755 | 1.631986 | 6.764789 |
| protein_co zinc_finger            | 401  | 292  | 350  | 361  | 428  | 483  | 30.03658 | 28.04776 | 31.63167 | 41.97046 |
| protein_co chromosom              | 54   | 40   | 48   | 32   | 46   | 21   | 0.740802 | 0.703684 | 0.794507 | 0.681379 |
| protein_co DiGeorge_s             | 743  | 644  | 644  | 1128 | 1444 | 1034 | 13.8526  | 15.39705 | 14.48693 | 32.64239 |
| protein_co golgin_A8_             | 112  | 63   | 70   | 94   | 122  | 104  | 1.618392 | 1.167389 | 1.220427 | 2.108259 |
| protein_co retinitis_pi           | 0    | 0    | 1    | 0    | 0    | 0    | 0        | 0        | 0.009285 | 0        |
| protein_co chromosom              | 1    | 0    | 0    | 2    | 4    | 2    | 0.005881 | 0        | 0.042575 | 0.018257 |
| protein_co chromosom              | 1    | 0    | 0    | 0    | 0    | 0    | 0.02681  | 0        | 0        | 0        |
| protein_co zinc_finger            | 17   | 5    | 6    | 0    | 0    | 0    | 0.257222 | 0.097015 | 0.109536 | 0        |
| protein_co NADH_deh               | 77   | 67   | 77   | 128  | 149  | 229  | 0.826776 | 0.922532 | 0.997553 | 2.13323  |
| protein_co membrane               | 444  | 330  | 391  | 446  | 532  | 553  | 15.61828 | 14.88585 | 16.59492 | 24.35093 |
| protein_co kelch-like_f           | 0    | 0    | 0    | 16   | 10   | 7    | 0        | 0        | 0        | 0.668855 |
| protein_co -                      | 420  | 274  | 279  | 363  | 569  | 492  | 5.240502 | 4.384131 | 4.200257 | 7.030087 |
| protein_co family_witl            | 5    | 5    | 1    | 1    | 1    | 2    | 0.080678 | 0.103458 | 0.019469 | 0.025045 |
| pseudogeni -                      | 0    | 1    | 0    | 0    | 0    | 0    | 0        | 0.029856 | 0        | 0        |
| protein_co tRNA_meth              | 0    | 0    | 0    | 2    | 0    | 0    | 0        | 0        | 0        | 0.152738 |
| pseudogeni glucuronid             | 172  | 169  | 158  | 187  | 278  | 267  | 3.641121 | 4.587781 | 4.035634 | 6.14439  |
| protein_co pregnancy_             | 117  | 108  | 95   | 71   | 85   | 88   | 4.203933 | 4.976259 | 4.118523 | 3.959667 |
| protein_co G_protein-i            | 0    | 0    | 0    | 0    | 0    | 1    | 0        | 0        | 0        | 0        |
| protein_co bone_morf              | 3    | 8    | 7    | 4    | 4    | 11   | 0.061294 | 0.209603 | 0.172561 | 0.126849 |
| protein_co Aly/REF_ex             | 11   | 8    | 10   | 2    | 5    | 4    | 0.304841 | 0.284302 | 0.334371 | 0.086028 |
| protein_co family_witl            | 1884 | 1397 | 1478 | 1655 | 2164 | 2516 | 80.67652 | 76.71354 | 76.36402 | 110.0005 |
| protein_co EF-hand_dc             | 3738 | 2525 | 3055 | 710  | 877  | 542  | 48.4051  | 41.92978 | 47.73216 | 14.27055 |
| protein_co noggin                 | 5    | 8    | 6    | 45   | 63   | 32   | 0.072116 | 0.147966 | 0.104415 | 1.00741  |
| protein_co uridine_ph             | 5    | 8    | 25   | 18   | 29   | 21   | 0.123917 | 0.254249 | 0.747562 | 0.692408 |
| protein_co opioid_bin             | 660  | 453  | 531  | 555  | 657  | 799  | 11.12416 | 9.791085 | 10.79856 | 14.51933 |
| protein_co tripartite_r           | 114  | 98   | 84   | 17   | 31   | 18   | 0.782301 | 0.862391 | 0.695499 | 0.181071 |
| protein_co lipoma_HN              | 143  | 109  | 103  | 89   | 93   | 70   | 1.934027 | 1.890438 | 1.680784 | 1.868302 |
| protein_co CKLF-like_N            | 1268 | 976  | 1086 | 9    | 20   | 27   | 28.17846 | 27.81359 | 29.11896 | 0.310435 |
| protein_co transmembr             | 1206 | 920  | 958  | 1483 | 1822 | 957  | 8.048585 | 7.873529 | 7.71411  | 15.36186 |
|                                   | 1499 | 1305 | 1316 | 928  | 1156 | 936  | 26.19759 | 29.24688 | 27.75004 | 25.17319 |

|                         |        |       |       |       |       |       |          |          |          |          |
|-------------------------|--------|-------|-------|-------|-------|-------|----------|----------|----------|----------|
| protein_co neuropepti   | 3      | 0     | 0     | 5     | 5     | 8     | 0.052352 | 0        | 0        | 0.135429 |
| protein_co achaete-sc   | 0      | 0     | 0     | 4     | 3     | 4     | 0        | 0        | 0        | 0.157192 |
| protein_co TANK-bind    | 388    | 352   | 352   | 187   | 214   | 257   | 5.587631 | 6.500519 | 6.116271 | 4.179921 |
| protein_co chromobo     | 3074   | 2292  | 2365  | 521   | 750   | 340   | 23.54458 | 22.51184 | 21.85578 | 6.193773 |
| protein_co metastasis   | 1      | 1     | 5     | 533   | 616   | 431   | 0.00512  | 0.006565 | 0.030885 | 4.235357 |
| protein_co cDNA_FLJ5    | 3      | 1     | 6     | 0     | 0     | 0     | 0.027204 | 0.011628 | 0.065646 | 0        |
| protein_co transducin   | 1414   | 1035  | 1117  | 1671  | 2055  | 1814  | 9.746066 | 9.148073 | 9.28926  | 17.87668 |
| protein_co Iron/zinc_c  | 1      | 3     | 4     | 3     | 3     | 1     | 0.015809 | 0.060819 | 0.076299 | 0.073614 |
| protein_co kringle_cor  | 136    | 118   | 108   | 244   | 288   | 95    | 1.03155  | 1.147738 | 0.988378 | 2.872577 |
| protein_co TRAF_inter   | 234    | 217   | 197   | 367   | 384   | 448   | 5.415728 | 6.440358 | 5.501172 | 13.18371 |
| protein_co checkpoint   | 251    | 227   | 262   | 1188  | 1400  | 956   | 4.59742  | 5.331822 | 5.790149 | 33.77438 |
| protein_co forkhead_b   | 4      | 5     | 5     | 63    | 94    | 144   | 0.064299 | 0.103068 | 0.096975 | 1.571864 |
| protein_co apoptosis-i  | 3      | 1     | 1     | 22    | 25    | 15    | 0.049358 | 0.021098 | 0.019851 | 0.561809 |
| protein_co potassium_   | 8      | 5     | 5     | 3     | 7     | 0     | 0.06644  | 0.05325  | 0.050102 | 0.038672 |
| protein_co UDP-Gal:be   | 42     | 19    | 24    | 130   | 158   | 184   | 0.673984 | 0.390988 | 0.464686 | 3.237979 |
| protein_co zinc_finger  | 1805   | 1327  | 1508  | 24    | 27    | 58    | 25.28727 | 23.83993 | 25.49025 | 0.521875 |
| protein_co solute_carr  | 15     | 11    | 12    | 51    | 48    | 34    | 0.24329  | 0.228789 | 0.234834 | 1.283905 |
| protein_co potassium_   | 0      | 0     | 1     | 61    | 62    | 60    | 0        | 0        | 0.021869 | 1.716107 |
| protein_co chromosom    | 0      | 0     | 0     | 3     | 4     | 4     | 0        | 0        | 0        | 0.07837  |
| protein_co tubulin_alp  | 6      | 3     | 4     | 2     | 3     | 4     | 0.139415 | 0.08939  | 0.112142 | 0.072131 |
| protein_co transcriptic | 1      | 0     | 1     | 8     | 1     | 0     | 0.024981 | 0        | 0.030141 | 0.310196 |
| protein_co Homo_sapi    | 26     | 30    | 37    | 21    | 19    | 24    | 1.157778 | 1.7131   | 1.987933 | 1.451449 |
| protein_co elastin_mic  | 50     | 17    | 23    | 220   | 291   | 126   | 0.617624 | 0.269285 | 0.342792 | 4.218007 |
| protein_co olfactomed   | 10     | 10    | 6     | 4     | 2     | 3     | 0.167944 | 0.215365 | 0.121581 | 0.104269 |
| protein_co family_witl  | 0      | 0     | 1     | 12    | 16    | 14    | 0        | 0        | 0.054768 | 0.845458 |
| protein_co RNA_bindin   | 618    | 475   | 551   | 653   | 762   | 430   | 3.986522 | 3.929241 | 4.2885   | 6.538067 |
| protein_co chemokine    | 0      | 0     | 0     | 7     | 4     | 1     | 0        | 0        | 0        | 0.164607 |
| protein_co lin-9_homo   | 178    | 111   | 137   | 200   | 242   | 257   | 2.3399   | 1.871154 | 2.172931 | 4.080729 |
| protein_co BTB_(POZ)_   | 621    | 494   | 520   | 111   | 146   | 110   | 3.415683 | 3.484354 | 3.45094  | 0.947631 |
| protein_co nudix_(nuc   | 128    | 76    | 62    | 149   | 248   | 150   | 5.760002 | 4.385667 | 3.366297 | 10.40709 |
| protein_co ankyrin_rej  | 11     | 17    | 20    | 9     | 18    | 15    | 0.28278  | 0.56042  | 0.620345 | 0.359111 |
| protein_co MYCBP-ass    | 9      | 2     | 7     | 21    | 19    | 7     | 0.095197 | 0.027128 | 0.089336 | 0.344772 |
| protein_co paraneopla   | 6      | 3     | 5     | 45    | 71    | 51    | 0.075004 | 0.048091 | 0.075414 | 0.873125 |
| protein_co G_protein-i  | 17     | 9     | 5     | 4     | 2     | 1     | 0.286326 | 0.194385 | 0.101608 | 0.104569 |
| protein_co family_witl  | 0      | 0     | 1     | 7     | 9     | 10    | 0        | 0        | 0.020633 | 0.185798 |
| protein_co zinc_finger  | 52     | 46    | 53    | 219   | 256   | 282   | 1.027077 | 1.16511  | 1.263059 | 6.713891 |
| protein_co kin_of_IRRI  | 4781   | 3759  | 4019  | 1010  | 1269  | 1310  | 32.6319  | 32.90071 | 33.09708 | 10.6998  |
| protein_co IQ_motif_c   | 1283   | 1120  | 1167  | 886   | 1162  | 839   | 10.04674 | 11.24672 | 11.02599 | 10.76869 |
| protein_co cyclic_nucl  | 0      | 0     | 0     | 1     | 1     | 0     | 0        | 0        | 0        | 0.025681 |
| protein_co transducer   | 1337   | 973   | 1030  | 1109  | 1397  | 1527  | 13.74522 | 12.82751 | 12.77631 | 17.69629 |
| protein_co sodium_ch    | 0      | 0     | 0     | 425   | 482   | 322   | 0        | 0        | 0        | 3.637278 |
| protein_co arylsulfatas | 284    | 155   | 174   | 369   | 485   | 200   | 4.212833 | 2.948471 | 3.114248 | 8.495965 |
| protein_co ubiquitous   | 263    | 208   | 232   | 326   | 328   | 293   | 1.888815 | 1.915607 | 2.010341 | 3.633974 |
| protein_co NPIP-like_c  | 3      | 1     | 2     | 3     | 1     | 5     | 0.031163 | 0.013321 | 0.025067 | 0.048369 |
| protein_co tetratricop  | 71     | 49    | 44    | 88    | 141   | 60    | 4.050111 | 3.58438  | 3.028373 | 7.791512 |
| protein_co leucine_ric  | 0      | 0     | 0     | 13    | 7     | 17    | 0        | 0        | 0        | 0.174887 |
| pseudogen: ribosomal_   | 0      | 0     | 2     | 0     | 0     | 0     | 0        | 0        | 0.244916 | 0        |
| protein_co dynein_axc   | 6      | 4     | 2     | 9     | 11    | 3     | 0.018812 | 0.016083 | 0.007566 | 0.043799 |
| protein_co SH2_domai    | 0      | 0     | 0     | 0     | 0     | 1     | 0        | 0        | 0        | 0        |
| protein_co short_chai   | 2      | 1     | 2     | 4     | 7     | 1     | 0.037097 | 0.023786 | 0.044759 | 0.115158 |
| pseudogen: dual_specif  | 25     | 17    | 21    | 0     | 0     | 0     | 0.475944 | 0.415025 | 0.482373 | 0        |
| pseudogen: 5-hydroxyt   | 164    | 109   | 119   | 24    | 27    | 40    | 1.74336  | 1.485864 | 1.526295 | 0.395991 |
| TR_V_gene T_cell_rece   | 0      | 0     | 0     | 1     | 0     | 0     | 0        | 0        | 0        | 0.19831  |
| protein_co histone_clu  | 0      | 1     | 0     | 0     | 0     | 3     | 0        | 0.035454 | 0        | 0        |
| protein_co protein_kir  | 425    | 366   | 403   | 1225  | 1592  | 1146  | 3.304304 | 3.649064 | 3.780456 | 14.78283 |
| protein_co SET_domai    | 1208   | 1011  | 1043  | 348   | 492   | 300   | 18.03922 | 19.36026 | 18.79244 | 8.066042 |
| protein_co potassium_   | 0      | 0     | 0     | 61    | 61    | 26    | 0        | 0        | 0        | 0.864234 |
| protein_co smoothelir   | 2158   | 1674  | 1884  | 311   | 480   | 260   | 19.91903 | 19.81442 | 20.98194 | 4.455614 |
| protein_co neuropepti   | 127    | 58    | 78    | 167   | 179   | 80    | 5.867027 | 3.435988 | 4.347674 | 11.97461 |
| protein_co protein_ph   | 10     | 18    | 9     | 20    | 17    | 14    | 0.217992 | 0.503178 | 0.236718 | 0.676707 |
| protein_co cytochrom    | 661    | 557   | 541   | 419   | 472   | 626   | 22.55772 | 24.37576 | 22.27609 | 22.19413 |
| pseudogen: melanoma_    | 0      | 0     | 0     | 0     | 1     | 0     | 0        | 0        | 0        | 0        |
| protein_co ST6_(alpha   | 165    | 117   | 139   | 177   | 163   | 135   | 1.127657 | 1.025388 | 1.146188 | 1.877572 |
| protein_co protein_ty   | 3919   | 2954  | 3278  | 2204  | 3300  | 2450  | 46.77067 | 45.2083  | 47.20145 | 40.82634 |
| protein_co actin_gamr   | 106587 | 82457 | 87681 | 70830 | 74358 | 74250 | 2215.366 | 2197.749 | 2198.846 | 2285.015 |

|                         |      |      |      |      |      |      |          |          |          |          |
|-------------------------|------|------|------|------|------|------|----------|----------|----------|----------|
| protein_co transmembr   | 0    | 0    | 2    | 97   | 136  | 150  | 0        | 0        | 0.034923 | 2.178901 |
| protein_co DENN/MAC     | 2943 | 2314 | 2385 | 1261 | 1392 | 1029 | 27.4294  | 27.6566  | 26.82023 | 18.24197 |
| protein_co -            | 0    | 0    | 0    | 0    | 0    | 1    | 0        | 0        | 0        | 0        |
| protein_co diablo_IAP   | 40   | 30   | 40   | 36   | 36   | 43   | 0.73009  | 0.702177 | 0.880895 | 1.01988  |
| pseudogen: olfactory_r  | 0    | 0    | 0    | 0    | 0    | 2    | 0        | 0        | 0        | 0        |
| protein_co vacuolar_p   | 423  | 362  | 371  | 522  | 576  | 389  | 7.168225 | 7.866638 | 7.585657 | 13.73005 |
| protein_co T-box_1      | 1617 | 1278 | 1412 | 375  | 562  | 348  | 36.41746 | 36.90964 | 38.36917 | 13.10875 |
| protein_co ArfGAP_wit   | 1    | 1    | 1    | 21   | 32   | 12   | 0.015982 | 0.020494 | 0.019283 | 0.520919 |
| processed_ -            | 123  | 80   | 80   | 88   | 135  | 132  | 1.929566 | 1.609362 | 1.514232 | 2.142731 |
| protein_co ubiquinol-c  | 830  | 643  | 681  | 698  | 901  | 840  | 42.48768 | 42.20902 | 42.06105 | 55.45884 |
| protein_co family_witl  | 265  | 237  | 220  | 126  | 147  | 109  | 1.542243 | 1.768743 | 1.54482  | 1.138172 |
| pseudogen: -            | 1    | 0    | 0    | 0    | 0    | 1    | 0.154243 | 0        | 0        | 0        |
| pseudogen: -            | 1    | 4    | 5    | 7    | 7    | 5    | 0.023814 | 0.122153 | 0.143666 | 0.25874  |
| pseudogen: triggering_  | 3    | 8    | 4    | 0    | 0    | 0    | 0.114927 | 0.393005 | 0.184887 | 0        |
| protein_co tripartite_r | 0    | 1    | 0    | 0    | 0    | 0    | 0        | 0.033461 | 0        | 0        |
| protein_co eukaryotic_  | 573  | 482  | 537  | 648  | 713  | 741  | 6.789987 | 7.324377 | 7.677798 | 11.91845 |
| pseudogen: -            | 4    | 0    | 1    | 0    | 2    | 4    | 0.430184 | 0        | 0.12976  | 0        |
| protein_co claudin_5    | 2    | 1    | 0    | 28   | 40   | 16   | 0.036805 | 0.023599 | 0        | 0.799778 |
| protein_co nipsnap_hc   | 2482 | 1993 | 2122 | 4249 | 4430 | 2830 | 52.02549 | 53.57116 | 53.66706 | 138.2393 |
| protein_co contactin_   | 5    | 4    | 1    | 10   | 13   | 10   | 0.028799 | 0.029544 | 0.006949 | 0.089399 |
| protein_co leucine_ric  | 108  | 95   | 86   | 79   | 71   | 60   | 1.324993 | 1.494592 | 1.273023 | 1.504344 |
| protein_co potassium_   | 35   | 19   | 16   | 93   | 96   | 78   | 0.143445 | 0.099857 | 0.07912  | 0.591602 |
| protein_co adrenocept   | 7    | 8    | 7    | 494  | 748  | 335  | 0.154316 | 0.226158 | 0.186191 | 16.90325 |
| protein_co nuclear_rex  | 112  | 118  | 111  | 200  | 225  | 175  | 3.355707 | 4.533748 | 4.012704 | 9.300933 |
| protein_co family_witl  | 25   | 8    | 21   | 57   | 84   | 33   | 1.131516 | 0.464323 | 1.146801 | 4.004294 |
| protein_co cysteine-ric | 1272 | 989  | 942  | 331  | 475  | 552  | 22.74756 | 22.68054 | 20.32575 | 9.187687 |
| protein_co sec1_famil   | 439  | 296  | 308  | 193  | 202  | 245  | 6.481334 | 5.604036 | 5.486541 | 4.422702 |
| protein_co ubiquitin-c  | 134  | 96   | 115  | 92   | 101  | 148  | 3.127557 | 2.8733   | 3.238518 | 3.332873 |
| protein_co potassium_   | 54   | 21   | 34   | 104  | 123  | 46   | 0.46717  | 0.232975 | 0.354902 | 1.396513 |
| protein_co G_protein-i  | 475  | 463  | 495  | 165  | 263  | 136  | 4.966055 | 6.207379 | 6.244119 | 2.677518 |
| protein_co protein_ph   | 573  | 471  | 482  | 384  | 407  | 314  | 7.783308 | 8.204268 | 7.899593 | 8.096015 |
| protein_co TSPY-like_2  | 771  | 576  | 671  | 307  | 352  | 268  | 8.652993 | 8.289795 | 9.086205 | 5.34787  |
| protein_co golgin_A6_   | 22   | 21   | 22   | 9    | 10   | 6    | 0.226075 | 0.276731 | 0.272773 | 0.14355  |
| protein_co phosphogl    | 1442 | 1060 | 1088 | 1104 | 1911 | 1592 | 24.79479 | 23.37278 | 22.57211 | 29.46421 |
| protein_co chromosom    | 212  | 174  | 157  | 117  | 151  | 156  | 1.998127 | 2.103032 | 1.785398 | 1.711605 |
| protein_co small_nucl   | 345  | 288  | 302  | 249  | 302  | 206  | 7.485912 | 8.013596 | 7.906433 | 8.386011 |
| protein_co interleukin  | 1394 | 997  | 1148 | 1136 | 1336 | 1379 | 17.82997 | 16.35281 | 17.7165  | 22.55261 |
| protein_co cms1_ribos   | 442  | 305  | 285  | 543  | 572  | 649  | 9.662185 | 8.549924 | 7.517025 | 18.42398 |
| protein_co oligodendr   | 1    | 0    | 1    | 13   | 19   | 5    | 0.020593 | 0        | 0.024847 | 0.415519 |
| protein_co chromosom    | 0    | 0    | 0    | 2    | 2    | 5    | 0        | 0        | 0        | 0.059876 |
| protein_co protocadhe   | 151  | 151  | 152  | 2    | 0    | 11   | 1.13723  | 1.458336 | 1.38122  | 0.023379 |
| protein_co acyl-CoA_tl  | 54   | 54   | 49   | 23   | 33   | 35   | 1.478144 | 1.89551  | 1.61833  | 0.977195 |
| protein_co OAF_homo     | 8924 | 6641 | 7077 | 99   | 164  | 97   | 165.7214 | 158.1473 | 158.5683 | 2.853545 |
| protein_co aldehyde_d   | 177  | 97   | 81   | 127  | 174  | 64   | 2.11507  | 1.486389 | 1.167843 | 2.355513 |
| protein_co cerebellar_  | 57   | 61   | 53   | 4    | 8    | 7    | 2.05753  | 2.823647 | 2.308315 | 0.22411  |
| protein_co histone_clu  | 17   | 15   | 17   | 15   | 6    | 21   | 1.824097 | 2.063952 | 2.200878 | 2.498163 |
| protein_co potassium_   | 13   | 4    | 5    | 413  | 639  | 180  | 0.299249 | 0.118075 | 0.13887  | 14.75604 |
| protein_co histone_clu  | 0    | 0    | 1    | 0    | 0    | 0    | 0        | 0        | 0.126285 | 0        |
| protein_co POU_class_   | 474  | 353  | 347  | 197  | 271  | 208  | 4.309845 | 4.115924 | 3.806806 | 2.780225 |
| lincRNA long_interg     | 6    | 2    | 0    | 6    | 3    | 3    | 0.121111 | 0.051769 | 0        | 0.187981 |
| protein_co TM2_doma     | 442  | 370  | 391  | 210  | 281  | 275  | 6.681298 | 7.172155 | 7.131213 | 4.927066 |
| protein_co tumor_sup    | 1127 | 786  | 846  | 540  | 803  | 723  | 31.34345 | 28.03204 | 28.38842 | 23.31026 |
| protein_co tumor-asso   | 0    | 0    | 1    | 20   | 27   | 36   | 0        | 0        | 0.027358 | 0.703867 |
| protein_co C-type_lect  | 0    | 0    | 0    | 1    | 0    | 0    | 0        | 0        | 0        | 0.068082 |
| protein_co SIX_homeo    | 2    | 1    | 1    | 15   | 12   | 43   | 0.033649 | 0.021575 | 0.0203   | 0.39171  |
| pseudogen: dopamine_    | 0    | 0    | 0    | 0    | 1    | 1    | 0        | 0        | 0        | 0        |
| protein_co protein_kir  | 128  | 118  | 125  | 31   | 38   | 53   | 1.610822 | 1.904272 | 1.897997 | 0.605522 |
| protein_co coiled-coil_ | 15   | 5    | 12   | 8    | 16   | 13   | 0.120293 | 0.051419 | 0.116112 | 0.099579 |
| protein_co zinc_finger  | 28   | 18   | 19   | 183  | 273  | 208  | 0.248659 | 0.204988 | 0.203586 | 2.522482 |
| protein_co maestro_hc   | 2    | 2    | 1    | 17   | 21   | 1    | 0.015759 | 0.020208 | 0.009507 | 0.207907 |
| pseudogen: -            | 383  | 292  | 284  | 139  | 170  | 142  | 6.012346 | 5.878105 | 5.379124 | 3.386807 |
| protein_co olfactory_r  | 0    | 0    | 0    | 1    | 0    | 0    | 0        | 0        | 0        | 0.07653  |
| protein_co SRSF_prote   | 19   | 3    | 4    | 13   | 24   | 22   | 0.198908 | 0.040274 | 0.050525 | 0.211239 |
| protein_co growth_dif   | 0    | 0    | 0    | 405  | 481  | 728  | 0        | 0        | 0        | 23.79001 |
| protein_co slit_homol   | 386  | 322  | 357  | 65   | 97   | 43   | 1.864779 | 1.994827 | 2.080925 | 0.487398 |

|                         |       |      |      |      |       |      |          |          |          |          |
|-------------------------|-------|------|------|------|-------|------|----------|----------|----------|----------|
| protein_co histone_clu  | 10    | 10   | 13   | 8    | 7     | 17   | 1.019348 | 1.307169 | 1.598873 | 1.265736 |
| protein_co ephrin-A5    | 293   | 222  | 268  | 176  | 213   | 167  | 2.575216 | 2.502121 | 2.842031 | 2.400983 |
| protein_co histone_clu  | 0     | 0    | 1    | 1    | 0     | 0    | 0        | 0        | 0.071615 | 0.092126 |
| protein_co spermatog    | 7     | 5    | 5    | 11   | 14    | 3    | 0.172119 | 0.157655 | 0.148336 | 0.41981  |
| protein_co plakophilin  | 2     | 3    | 0    | 112  | 141   | 47   | 0.033386 | 0.064218 | 0        | 2.901865 |
| protein_co MAP7_dom     | 4     | 4    | 4    | 24   | 24    | 29   | 0.047725 | 0.061201 | 0.057583 | 0.444457 |
| protein_co colony_stir  | 231   | 187  | 167  | 142  | 170   | 136  | 2.572825 | 2.670848 | 2.244206 | 2.454806 |
| protein_co collectin_si | 3     | 5    | 2    | 0    | 1     | 0    | 0.111114 | 0.237479 | 0.089377 | 0        |
| protein_co actin-relate | 107   | 104  | 71   | 58   | 94    | 179  | 2.50236  | 3.118952 | 2.003422 | 2.105351 |
| protein_co phospholip   | 316   | 266  | 290  | 533  | 647   | 210  | 4.529882 | 4.889797 | 5.015866 | 11.85926 |
| protein_co mastermini   | 860   | 732  | 756  | 189  | 252   | 182  | 5.67484  | 6.194063 | 6.01901  | 1.935742 |
| protein_co poly(A)_bin  | 0     | 0    | 0    | 3    | 10    | 1    | 0        | 0        | 0        | 0.099245 |
| pseudogen: alpha_13-g   | 1     | 0    | 3    | 0    | 0     | 0    | 0.04689  | 0        | 0.169727 | 0        |
| protein_co synovial_sa  | 648   | 500  | 583  | 473  | 625   | 439  | 6.762682 | 6.691497 | 7.34109  | 7.661884 |
| protein_co potassium_   | 1     | 0    | 0    | 117  | 121   | 139  | 0.008796 | 0        | 0        | 1.597306 |
| pseudogen: -            | 0     | 0    | 3    | 11   | 8     | 5    | 0        | 0        | 0.168714 | 0.795803 |
| protein_co topoisome    | 449   | 401  | 411  | 1026 | 1221  | 897  | 10.37635 | 11.88371 | 11.46009 | 36.8024  |
| protein_co coatomer_    | 6628  | 5487 | 5800 | 2270 | 2606  | 2052 | 88.19155 | 93.62434 | 93.11519 | 46.88143 |
| protein_co leucine_ri   | 2     | 2    | 2    | 1    | 0     | 0    | 0.025985 | 0.033322 | 0.031352 | 0.020166 |
| protein_co THAP_dom     | 538   | 392  | 423  | 270  | 395   | 377  | 12.89056 | 12.04439 | 12.22863 | 10.04116 |
| processed_ -            | 14    | 8    | 20   | 8    | 16    | 8    | 0.150772 | 0.110482 | 0.259878 | 0.133725 |
| protein_co kinetochor   | 938   | 795  | 904  | 1174 | 1159  | 1190 | 6.305783 | 6.853504 | 7.33251  | 12.24996 |
| protein_co chemokine    | 27    | 30   | 11   | 32   | 36    | 10   | 0.651921 | 0.928885 | 0.320459 | 1.199255 |
| protein_co noncompa     | 0     | 2    | 0    | 9    | 20    | 9    | 0        | 0.029599 | 0        | 0.161215 |
| protein_co BPI_fold_co  | 0     | 0    | 0    | 1    | 0     | 0    | 0        | 0        | 0        | 0.034806 |
| protein_co WD_repeat    | 553   | 472  | 452  | 634  | 813   | 608  | 7.385411 | 8.083527 | 7.283432 | 13.14224 |
| protein_co thioredoxi   | 145   | 89   | 138  | 47   | 40    | 74   | 2.172221 | 1.709761 | 2.494383 | 1.09286  |
| protein_co C1q_and_t    | 0     | 0    | 0    | 1    | 0     | 1    | 0        | 0        | 0        | 0.044733 |
| protein_co olfactory_r  | 0     | 0    | 0    | 0    | 1     | 0    | 0        | 0        | 0        | 0        |
| protein_co forkhead_b   | 195   | 125  | 123  | 922  | 1116  | 1341 | 2.769934 | 2.276954 | 2.108085 | 20.32808 |
| protein_co POU_class_   | 6     | 10   | 11   | 1    | 2     | 9    | 0.068939 | 0.147341 | 0.152495 | 0.017834 |
| protein_co protein_ty   | 197   | 191  | 171  | 712  | 973   | 537  | 4.950339 | 6.154765 | 5.184572 | 27.77021 |
| protein_co forkhead_b   | 4     | 1    | 2    | 0    | 1     | 1    | 0.090696 | 0.029076 | 0.054715 | 0        |
| protein_co transmemt    | 110   | 78   | 97   | 57   | 59    | 31   | 5.002815 | 4.549102 | 5.322817 | 4.023714 |
| protein_co protein_S_   | 219   | 179  | 186  | 270  | 301   | 226  | 2.887771 | 3.026781 | 2.959236 | 5.526025 |
| protein_co gastrin      | 0     | 0    | 1    | 0    | 0     | 0    | 0        | 0        | 0.120373 | 0        |
| protein_co NUT_midlin   | 0     | 1    | 1    | 23   | 29    | 30   | 0        | 0.014659 | 0.013792 | 0.408078 |
| protein_co HD_domain    | 42    | 35   | 39   | 77   | 101   | 62   | 1.614246 | 1.725035 | 1.808561 | 4.593479 |
| protein_co brain_expr   | 0     | 0    | 0    | 85   | 90    | 62   | 0        | 0        | 0        | 7.193352 |
| protein_co ZFP1_zinc_   | 201   | 161  | 165  | 106  | 98    | 99   | 2.899967 | 2.978738 | 2.872295 | 2.373741 |
| protein_co cell_cycle_  | 46    | 50   | 38   | 38   | 39    | 48   | 1.30803  | 1.82322  | 1.303741 | 1.677157 |
| protein_co chromosom    | 0     | 0    | 0    | 0    | 1     | 0    | 0        | 0        | 0        | 0        |
| protein_co dual_specif  | 82    | 85   | 86   | 129  | 137   | 90   | 0.858255 | 1.140856 | 1.086048 | 2.095668 |
| pseudogen: -            | 20    | 6    | 13   | 15   | 13    | 11   | 0.339906 | 0.130764 | 0.266575 | 0.395686 |
| protein_co suppressor   | 671   | 567  | 572  | 381  | 435   | 392  | 11.52921 | 12.49307 | 11.85826 | 10.1609  |
| protein_co chromosom    | 0     | 0    | 0    | 0    | 0     | 2    | 0        | 0        | 0        | 0        |
| protein_co SLIT_and_N   | 512   | 425  | 479  | 3    | 2     | 12   | 5.559909 | 5.918287 | 6.275977 | 0.050565 |
| protein_co HCG17851     | 0     | 0    | 0    | 1    | 0     | 0    | 0        | 0        | 0        | 0.063287 |
| protein_co piwi-like_R  | 0     | 0    | 0    | 7    | 17    | 7    | 0        | 0        | 0        | 0.145393 |
| protein_co lysophosph   | 80    | 59   | 61   | 5    | 6     | 4    | 1.182971 | 1.118782 | 1.088334 | 0.114758 |
| protein_co exportin_tf  | 2649  | 2098 | 2270 | 2663 | 3455  | 3330 | 19.36571 | 19.66827 | 20.02282 | 30.21712 |
| protein_co transmemt    | 851   | 644  | 683  | 14   | 3     | 6    | 12.46981 | 12.10112 | 12.07533 | 0.318412 |
| protein_co phosphodi    | 1169  | 976  | 936  | 30   | 22    | 81   | 12.05773 | 12.90952 | 11.64863 | 0.480289 |
| pseudogen: -            | 8     | 12   | 10   | 5    | 7     | 17   | 0.461402 | 0.887525 | 0.695886 | 0.4476   |
| protein_co family_witl  | 10    | 10   | 13   | 5    | 2     | 0    | 0.365757 | 0.469031 | 0.573699 | 0.283853 |
| protein_co stannin      | 733   | 626  | 636  | 2077 | 2837  | 2187 | 10.37753 | 11.36511 | 10.86414 | 45.6412  |
| protein_co potassium_   | 0     | 0    | 0    | 30   | 27    | 14   | 0        | 0        | 0        | 0.530852 |
| pseudogen: ribosomal_   | 3     | 2    | 7    | 3    | 4     | 2    | 0.186565 | 0.159495 | 0.525237 | 0.289575 |
| protein_co NEL-like_2_  | 4     | 3    | 2    | 1269 | 1378  | 1183 | 0.051927 | 0.049942 | 0.031326 | 25.56965 |
| pseudogen: -            | 26    | 23   | 24   | 25   | 35    | 22   | 0.432473 | 0.490594 | 0.481664 | 0.64544  |
| pseudogen: zinc_finger  | 0     | 0    | 0    | 7    | 9     | 4    | 0        | 0        | 0        | 0.25524  |
| protein_co KRAB-A_do    | 35    | 22   | 28   | 17   | 12    | 6    | 0.640574 | 0.516337 | 0.618312 | 0.482926 |
| protein_co mediator_c   | 1441  | 1109 | 1228 | 1004 | 1095  | 739  | 9.684465 | 9.557682 | 9.957678 | 10.47311 |
| protein_co zinc_finger  | 100   | 74   | 72   | 386  | 389   | 551  | 1.770771 | 1.680364 | 1.538307 | 10.60914 |
| protein_co septin_9     | 11829 | 9053 | 9326 | 9954 | 11975 | 9190 | 124.5592 | 122.2446 | 118.4871 | 162.6881 |

|                         |      |      |      |       |       |       |          |          |          |          |
|-------------------------|------|------|------|-------|-------|-------|----------|----------|----------|----------|
| protein_co protease_s   | 0    | 0    | 0    | 0     | 1     | 0     | 0        | 0        | 0        | 0        |
| protein_co cell_divisio | 479  | 386  | 334  | 761   | 803   | 863   | 6.019919 | 6.220879 | 5.064653 | 14.84466 |
| pseudogen: olfactory_r  | 0    | 0    | 0    | 19    | 12    | 11    | 0        | 0        | 0        | 1.366419 |
| protein_co RALY_RNA_    | 2    | 0    | 0    | 22    | 28    | 19    | 0.03472  | 0        | 0        | 0.592801 |
| protein_co APC_membr    | 247  | 221  | 262  | 506   | 566   | 474   | 1.371768 | 1.573929 | 1.75563  | 4.361788 |
| protein_co zinc_finger  | 946  | 753  | 787  | 440   | 477   | 552   | 4.933047 | 5.035335 | 4.951615 | 3.561289 |
| protein_co histone_cl   | 53   | 65   | 60   | 63    | 84    | 133   | 1.117936 | 1.758181 | 1.527004 | 2.062585 |
| protein_co chromosom    | 21   | 13   | 18   | 0     | 0     | 0     | 0.575842 | 0.457127 | 0.595532 | 0        |
| protein_co claudin_6    | 2    | 3    | 5    | 10469 | 12118 | 13665 | 0.053928 | 0.103732 | 0.162667 | 438.1436 |
| protein_co septin_5     | 1629 | 1225 | 1244 | 471   | 653   | 337   | 18.57132 | 17.90883 | 17.11158 | 8.334375 |
| protein_co eukaryotic   | 311  | 220  | 224  | 275   | 287   | 231   | 3.946629 | 3.580123 | 3.429746 | 5.416629 |
| protein_co leucine_ri   | 0    | 0    | 0    | 2     | 3     | 5     | 0        | 0        | 0        | 0.120397 |
| protein_co renalase_F   | 73   | 56   | 58   | 55    | 50    | 68    | 1.011218 | 0.994762 | 0.969388 | 1.182537 |
| protein_co apolipopro   | 2    | 2    | 2    | 1     | 0     | 5     | 0.024731 | 0.031714 | 0.029839 | 0.019193 |
| protein_co family_witl  | 0    | 0    | 0    | 142   | 170   | 91    | 0        | 0        | 0        | 2.748599 |
| protein_co DEAD_(Asp    | 0    | 0    | 0    | 1     | 1     | 1     | 0        | 0        | 0        | 0.034363 |
| protein_co atlastin_GT  | 1202 | 1082 | 1024 | 549   | 699   | 436   | 7.899341 | 9.118492 | 8.119596 | 5.600016 |
| protein_co NADH_deh     | 694  | 594  | 599  | 474   | 557   | 514   | 40.02666 | 43.93247 | 41.68355 | 42.4325  |
| protein_co Putative_in  | 0    | 0    | 0    | 5     | 7     | 0     | 0        | 0        | 0        | 0.129501 |
| protein_co ribosomal_   | 0    | 0    | 0    | 1     | 1     | 2     | 0        | 0        | 0        | 0.037867 |
| protein_co small_integ  | 41   | 26   | 33   | 29    | 29    | 28    | 1.253253 | 1.019149 | 1.217074 | 1.375889 |
| protein_co t-complex-   | 21   | 5    | 6    | 21    | 22    | 17    | 1.280482 | 0.390961 | 0.441421 | 1.987485 |
| protein_co ubiquitin-c  | 1568 | 1366 | 1410 | 1369  | 1888  | 2078  | 16.94091 | 18.92565 | 18.38052 | 22.9575  |
| protein_co spermidine   | 54   | 30   | 53   | 45    | 71    | 35    | 1.138517 | 0.811103 | 1.348247 | 1.472613 |
| protein_co oxysterol_k  | 135  | 127  | 109  | 202   | 293   | 241   | 1.45856  | 1.759559 | 1.420906 | 3.387447 |
| pseudogen: unc-93_ho    | 0    | 0    | 0    | 1     | 0     | 1     | 0        | 0        | 0        | 0.10412  |
| protein_co chromosom    | 28   | 18   | 28   | 96    | 151   | 134   | 0.967517 | 0.797595 | 1.167365 | 5.148755 |
| protein_co tumor_sup    | 1    | 0    | 0    | 2     | 0     | 0     | 0.013039 | 0        | 0        | 0.040478 |
| protein_co histone_cl   | 3    | 2    | 2    | 1     | 1     | 3     | 0.307812 | 0.26315  | 0.247595 | 0.159256 |
| protein_co zinc_finger  | 12   | 6    | 9    | 4     | 1     | 2     | 0.113696 | 0.072899 | 0.102885 | 0.058824 |
| protein_co apolipopro   | 169  | 145  | 142  | 226   | 288   | 242   | 7.088026 | 7.798587 | 7.185798 | 14.7122  |
| protein_co proline_ri   | 78   | 93   | 60   | 5     | 1     | 3     | 2.002969 | 3.06247  | 1.858998 | 0.199288 |
| protein_co transmembr   | 5159 | 4012 | 4273 | 1882  | 2544  | 2294  | 164.2265 | 163.7751 | 164.1189 | 92.98818 |
| pseudogen: -            | 0    | 0    | 0    | 14    | 25    | 12    | 0        | 0        | 0        | 3.234658 |
| protein_co dopamine_    | 5    | 7    | 3    | 7     | 3     | 5     | 0.057832 | 0.103825 | 0.041866 | 0.125668 |
| lincRNA long_interg     | 2    | 0    | 0    | 0     | 0     | 0     | 0.128996 | 0        | 0        | 0        |
| protein_co transmembr   | 152  | 105  | 122  | 181   | 240   | 119   | 4.922157 | 4.360241 | 4.766721 | 9.097475 |
| protein_co short_chai   | 0    | 0    | 0    | 5     | 2     | 0     | 0        | 0        | 0        | 0.129732 |
| protein_co RNA_bindin   | 1501 | 1276 | 1319 | 1456  | 1721  | 1201  | 6.934862 | 7.559919 | 7.352753 | 10.44117 |
| protein_co armadillo_   | 2987 | 2416 | 2519 | 1239  | 1655  | 1314  | 50.70981 | 52.59724 | 51.59801 | 32.64814 |
| protein_co phosphatic   | 138  | 81   | 101  | 165   | 167   | 402   | 2.773606 | 2.087661 | 2.449261 | 5.147307 |
| protein_co BTB_(POZ)_   | 864  | 672  | 674  | 110   | 158   | 234   | 18.45694 | 18.40876 | 17.37216 | 3.647279 |
| protein_co sex_determ   | 0    | 1    | 1    | 40    | 45    | 46    | 0        | 0.07116  | 0.066953 | 3.445198 |
| protein_co H1_histone   | 1962 | 1492 | 1551 | 3780  | 5378  | 3061  | 61.08779 | 59.57082 | 58.26601 | 182.6744 |
| protein_co RNA_bindin   | 105  | 120  | 118  | 55    | 79    | 64    | 1.174488 | 1.721273 | 1.592536 | 0.954888 |
| protein_co SMT3_suppr   | 2054 | 1633 | 1705 | 1385  | 1535  | 1613  | 53.29944 | 54.33977 | 53.38198 | 55.78308 |
| protein_co IMP2_inne    | 64   | 44   | 60   | 103   | 129   | 72    | 1.975616 | 1.741745 | 2.234714 | 4.935036 |
| protein_co transcripti  | 1    | 2    | 2    | 240   | 287   | 181   | 0.042627 | 0.109327 | 0.102865 | 15.87923 |
| pseudogen: -            | 3    | 0    | 0    | 0     | 0     | 0     | 0.146531 | 0        | 0        | 0        |
| protein_co chloride_cl  | 3    | 10   | 7    | 62    | 82    | 29    | 0.054799 | 0.234242 | 0.154277 | 1.757829 |
| protein_co jagged_2     | 61   | 32   | 47   | 272   | 470   | 153   | 0.490196 | 0.329761 | 0.455707 | 3.392649 |
| protein_co formin-like  | 39   | 31   | 18   | 94    | 129   | 93    | 0.371765 | 0.378944 | 0.207026 | 1.390791 |
| protein_co NUT_family   | 62   | 41   | 42   | 23    | 30    | 13    | 0.73155  | 0.620363 | 0.597929 | 0.421222 |
| protein_co peptidyl-tR  | 55   | 54   | 59   | 79    | 96    | 81    | 2.543344 | 3.202178 | 3.291869 | 5.670221 |
| protein_co lipocalin_1  | 3    | 0    | 1    | 8     | 16    | 6     | 0.077977 | 0        | 0.031361 | 0.322749 |
| protein_co olfactory_r  | 0    | 2    | 0    | 1     | 2     | 1     | 0        | 0.087589 | 0        | 0.053008 |
| protein_co Wilms_tur    | 1    | 0    | 1    | 0     | 0     | 0     | 0.015019 | 0        | 0.018122 | 0        |
| protein_co ZFP90_zinc   | 63   | 45   | 50   | 54    | 99    | 41    | 0.633377 | 0.580155 | 0.606513 | 0.842648 |
| protein_co family_witl  | 98   | 124  | 127  | 55    | 72    | 37    | 0.445187 | 0.72235  | 0.696095 | 0.387802 |
| protein_co mucin_6_o    | 8    | 5    | 3    | 7     | 18    | 13    | 0.046855 | 0.037553 | 0.0212   | 0.063635 |
| pseudogen: -            | 1    | 4    | 1    | 0     | 0     | 0     | 0.080706 | 0.413975 | 0.097376 | 0        |
| protein_co nucleolar_c  | 653  | 477  | 487  | 706   | 978   | 931   | 18.76175 | 17.5747  | 16.88252 | 31.4844  |
| protein_co ubiquitin_s  | 96   | 78   | 80   | 132   | 111   | 150   | 2.114346 | 2.20297  | 2.1259   | 4.512416 |
| protein_co NADH_deh     | 1192 | 898  | 976  | 989   | 1340  | 1198  | 44.50072 | 42.99089 | 43.96313 | 57.3083  |
| protein_co cholinergic  | 5    | 4    | 8    | 0     | 0     | 0     | 0.077046 | 0.07904  | 0.148736 | 0        |

|                         |      |      |      |      |      |      |          |          |          |          |
|-------------------------|------|------|------|------|------|------|----------|----------|----------|----------|
| protein_co sortilin-rel | 1441 | 990  | 1089 | 91   | 115  | 115  | 10.98318 | 9.676284 | 10.01475 | 1.076554 |
| protein_co transmemt    | 347  | 208  | 211  | 73   | 98   | 43   | 10.62065 | 8.163837 | 7.792057 | 3.467967 |
| protein_co transmemt    | 240  | 205  | 148  | 13   | 18   | 12   | 3.444629 | 3.773066 | 2.562955 | 0.289604 |
| protein_co SIVA1_apo    | 866  | 598  | 714  | 876  | 1083 | 1417 | 9.803659 | 8.681221 | 9.752513 | 15.39235 |
| lincRNA testis-speci    | 4    | 1    | 0    | 0    | 0    | 0    | 0.284613 | 0.091244 | 0        | 0        |
| protein_co BRI3_bindi   | 489  | 385  | 411  | 644  | 835  | 604  | 3.44904  | 3.482246 | 3.497673 | 7.05027  |
| protein_co interferon_  | 68   | 82   | 75   | 0    | 0    | 3    | 2.166115 | 3.349622 | 2.882583 | 0        |
| protein_co solute_carr  | 0    | 0    | 0    | 1    | 0    | 0    | 0        | 0        | 0        | 0.032578 |
| protein_co diacylglyce  | 1637 | 1243 | 1499 | 580  | 750  | 428  | 38.30287 | 37.29608 | 42.3187  | 21.06401 |
| protein_co regulatory_  | 0    | 0    | 0    | 1    | 3    | 1    | 0        | 0        | 0        | 0.021035 |
| protein_co roundabou    | 55   | 32   | 34   | 201  | 206  | 162  | 0.269483 | 0.201061 | 0.201    | 1.528604 |
| protein_co adaptor-rel  | 1160 | 920  | 971  | 603  | 660  | 724  | 15.05464 | 15.31121 | 15.20476 | 12.14675 |
| protein_co coagulation  | 23   | 17   | 15   | 22   | 15   | 10   | 0.11905  | 0.112839 | 0.093678 | 0.176748 |
| protein_co carbonic_a   | 48   | 30   | 34   | 29   | 51   | 45   | 0.589966 | 0.472842 | 0.504212 | 0.553241 |
| protein_co U-box_dor    | 236  | 159  | 179  | 193  | 179  | 141  | 2.389558 | 2.064487 | 2.186788 | 3.033147 |
| pseudogeni -            | 4    | 2    | 2    | 3    | 2    | 3    | 0.052086 | 0.033396 | 0.031422 | 0.060633 |
| protein_co v-maf_mus    | 772  | 557  | 633  | 109  | 118  | 72   | 14.53779 | 13.45072 | 14.38245 | 3.185943 |
| protein_co BRF1_hom     | 969  | 668  | 778  | 555  | 668  | 550  | 2.48844  | 2.19983  | 2.410633 | 2.212213 |
| protein_co leucine_ri   | 3    | 0    | 0    | 1    | 5    | 1    | 0.089428 | 0        | 0        | 0.046268 |
| pseudogeni -            | 0    | 0    | 0    | 2    | 0    | 0    | 0        | 0        | 0        | 0.098351 |
| protein_co sema_dom     | 464  | 359  | 368  | 1496 | 1670 | 1058 | 5.71499  | 5.670238 | 5.468817 | 28.59958 |
| protein_co maestro_he   | 0    | 0    | 1    | 2    | 0    | 1    | 0        | 0        | 0.010553 | 0.027152 |
| pseudogeni -            | 2    | 2    | 7    | 5    | 10   | 3    | 0.106327 | 0.136349 | 0.449012 | 0.412584 |
| protein_co calcium_ar   | 517  | 428  | 425  | 151  | 155  | 172  | 19.44037 | 20.63797 | 19.28195 | 8.812951 |
| lincRNA -               | 2    | 0    | 1    | 3    | 7    | 5    | 0.05242  | 0        | 0.031624 | 0.122046 |
| protein_co ankyrin_re   | 5    | 7    | 5    | 17   | 25   | 19   | 0.060348 | 0.108342 | 0.072813 | 0.31847  |
| protein_co negative_el  | 923  | 728  | 811  | 2226 | 2553 | 1634 | 12.9463  | 13.09437 | 13.72502 | 48.46181 |
| protein_co solute_carr  | 6    | 0    | 0    | 59   | 70   | 92   | 0.071606 | 0        | 0        | 1.092901 |
| protein_co sarcoglycar  | 15   | 1    | 6    | 0    | 0    | 0    | 0.314839 | 0.026916 | 0.151949 | 0        |
| protein_co EF-hand_ca   | 6    | 9    | 12   | 16   | 28   | 10   | 0.18151  | 0.349141 | 0.438004 | 0.751275 |
| protein_co chromosom    | 2    | 4    | 8    | 3    | 22   | 3    | 0.037185 | 0.095368 | 0.179462 | 0.086574 |
| processed_ -            | 5    | 6    | 5    | 18   | 14   | 14   | 0.111803 | 0.172045 | 0.134896 | 0.624719 |
| protein_co general_tra  | 590  | 424  | 456  | 378  | 403  | 298  | 13.01888 | 11.99766 | 12.14044 | 12.94624 |
| protein_co fibronectin  | 3771 | 2855 | 3297 | 205  | 206  | 286  | 22.26139 | 21.61281 | 23.4835  | 1.878366 |
| protein_co integrator_  | 613  | 457  | 550  | 507  | 775  | 791  | 8.749948 | 8.365089 | 9.472307 | 11.23268 |
| protein_co ribosomal_   | 1440 | 1147 | 1086 | 696  | 764  | 597  | 22.93533 | 23.42693 | 20.8699  | 17.20609 |
| protein_co mannosida    | 6    | 6    | 7    | 149  | 212  | 115  | 0.104782 | 0.134368 | 0.147497 | 4.038805 |
| protein_co adenylosuc   | 103  | 60   | 67   | 167  | 196  | 73   | 1.857566 | 1.387611 | 1.457907 | 4.674703 |
| protein_co anoctamin    | 6    | 5    | 3    | 30   | 61   | 25   | 0.051274 | 0.054793 | 0.030932 | 0.397921 |
| protein_co Fas_(TNFRS   | 655  | 497  | 540  | 666  | 850  | 744  | 7.032966 | 6.843258 | 6.995826 | 11.09946 |
| protein_co myeloid-as   | 2    | 4    | 2    | 0    | 10   | 1    | 0.038246 | 0.098091 | 0.046146 | 0        |
| protein_co family_witl  | 1987 | 1404 | 1501 | 65   | 102  | 55   | 29.66268 | 26.8775  | 27.03592 | 1.506109 |
| protein_co necdin-like  | 523  | 398  | 391  | 363  | 579  | 370  | 14.58863 | 14.23656 | 13.15944 | 15.71628 |
| protein_co heat_shock   | 2670 | 2083 | 2325 | 1578 | 2117 | 1639 | 36.27828 | 36.29393 | 38.11592 | 33.2792  |
| protein_co chromosom    | 896  | 615  | 729  | 571  | 691  | 581  | 10.13594 | 8.92155  | 9.950191 | 10.02588 |
| protein_co TBC1_dom     | 58   | 47   | 34   | 35   | 44   | 26   | 0.802485 | 0.833904 | 0.567591 | 0.751636 |
| protein_co purine-rich  | 249  | 169  | 180  | 142  | 206  | 215  | 4.46657  | 3.887504 | 3.895788 | 3.953608 |
| protein_co histone_cli  | 0    | 2    | 0    | 3    | 3    | 6    | 0        | 0.265474 | 0        | 0.481985 |
| protein_co inositol_pc  | 103  | 81   | 80   | 114  | 145  | 96   | 1.442985 | 1.455188 | 1.352268 | 2.478906 |
| protein_co neuropepti   | 0    | 1    | 0    | 1    | 4    | 3    | 0        | 0.016583 | 0        | 0.020072 |
| protein_co Mix_paired   | 13   | 15   | 11   | 94   | 126  | 212  | 0.304025 | 0.449849 | 0.310389 | 3.41212  |
| protein_co major_facil  | 0    | 0    | 0    | 28   | 48   | 17   | 0        | 0        | 0        | 0.913008 |
| protein_co leucine_ri   | 227  | 166  | 174  | 153  | 201  | 112  | 3.366235 | 3.156719 | 3.113263 | 3.521603 |
| pseudogeni -            | 0    | 0    | 0    | 0    | 1    | 0    | 0        | 0        | 0        | 0        |
| protein_co DEAD_(Asp    | 536  | 451  | 487  | 522  | 674  | 812  | 5.327056 | 5.747889 | 5.83982  | 8.052365 |
| protein_co NODAL_mc     | 1381 | 1069 | 1173 | 643  | 667  | 587  | 14.87939 | 14.76993 | 15.24887 | 10.75308 |
| lincRNA long_inter      | 3    | 0    | 0    | 5    | 6    | 0    | 0.069535 | 0        | 0        | 0.179881 |
| lincRNA long_inter      | 4    | 3    | 2    | 2    | 7    | 1    | 0.193961 | 0.186545 | 0.117012 | 0.150527 |
| protein_co single_imr   | 278  | 260  | 237  | 701  | 1016 | 598  | 6.982016 | 8.373726 | 7.181786 | 27.32653 |
| protein_co nuclear_re   | 524  | 397  | 473  | 246  | 384  | 181  | 6.337469 | 6.157217 | 6.902299 | 4.61796  |
| protein_co protease_s   | 0    | 0    | 0    | 5    | 2    | 0    | 0        | 0        | 0        | 0.337882 |
| protein_co interferon_  | 345  | 293  | 269  | 424  | 407  | 338  | 24.54788 | 26.73449 | 23.09379 | 46.82646 |
| antisense WASH_and      | 0    | 0    | 0    | 2    | 0    | 0    | 0        | 0        | 0        | 0.138102 |
| protein_co tumor_nec    | 966  | 736  | 855  | 228  | 353  | 244  | 9.67238  | 9.450252 | 10.32929 | 3.543411 |
| protein_co zinc_finger  | 1152 | 927  | 974  | 817  | 941  | 752  | 5.273582 | 5.441796 | 5.379727 | 5.805047 |

|                         |      |      |      |      |      |      |          |          |          |          |
|-------------------------|------|------|------|------|------|------|----------|----------|----------|----------|
| protein_co piggyBac_t   | 97   | 65   | 62   | 75   | 97   | 156  | 1.57983  | 1.357567 | 1.218368 | 1.895966 |
| protein_co WW_doma      | 2324 | 1854 | 1993 | 397  | 351  | 474  | 99.42737 | 101.7159 | 102.8786 | 26.36276 |
| protein_co RAB11B_m     | 2595 | 1761 | 1992 | 1806 | 2036 | 2044 | 69.49149 | 60.4732  | 64.36231 | 75.06586 |
| protein_co protein_ar   | 336  | 244  | 241  | 436  | 560  | 555  | 3.788181 | 3.527692 | 3.278359 | 7.629717 |
| protein_co glycoprotei  | 16   | 11   | 22   | 64   | 84   | 61   | 0.299976 | 0.264465 | 0.497665 | 1.862418 |
| protein_co PRP39_pre    | 383  | 307  | 329  | 288  | 287  | 420  | 5.120866 | 5.263715 | 5.307483 | 5.976784 |
| protein_co melanoma     | 0    | 0    | 0    | 0    | 0    | 1    | 0        | 0        | 0        | 0        |
| protein_co peptidylpro  | 15   | 21   | 16   | 10   | 17   | 5    | 0.174485 | 0.313254 | 0.224562 | 0.18055  |
| protein_co zinc_finger  | 661  | 497  | 497  | 1477 | 1894 | 884  | 7.990281 | 7.704179 | 7.248782 | 27.71224 |
| protein_co KIAA0825     | 33   | 23   | 23   | 13   | 7    | 43   | 0.269061 | 0.240477 | 0.226263 | 0.164517 |
| protein_co UBA-like_d   | 1351 | 1030 | 1014 | 811  | 884  | 605  | 39.89195 | 39.00106 | 36.12567 | 37.16903 |
| protein_co cerebral_d   | 6    | 5    | 11   | 11   | 12   | 14   | 0.188566 | 0.201507 | 0.417112 | 0.53658  |
| protein_co notum_pec    | 6    | 7    | 6    | 52   | 94   | 17   | 0.121059 | 0.181114 | 0.146064 | 1.628464 |
| protein_co kelch-like_f | 8    | 3    | 2    | 0    | 0    | 1    | 0.201353 | 0.096827 | 0.060736 | 0        |
| protein_co RNA_bindi    | 0    | 0    | 0    | 25   | 30   | 18   | 0        | 0        | 0        | 0.913401 |
| protein_co Williams-B   | 167  | 164  | 164  | 2967 | 3783 | 2093 | 2.016126 | 2.538951 | 2.388873 | 55.59672 |
| pseudogen: CD24_mol     | 1310 | 976  | 1001 | 5636 | 7180 | 6142 | 252.7816 | 241.509  | 233.0538 | 1688.012 |
| protein_co zinc_finger  | 116  | 59   | 67   | 76   | 90   | 54   | 1.850082 | 1.206686 | 1.289306 | 1.881383 |
| protein_co interleukin  | 36   | 29   | 35   | 127  | 205  | 122  | 0.989473 | 1.022136 | 1.160693 | 5.417957 |
| protein_co coiled-coil  | 929  | 624  | 745  | 1087 | 1606 | 1993 | 17.65025 | 15.203   | 17.0781  | 32.05496 |
| protein_co RANBP2-lik   | 0    | 1    | 0    | 2    | 4    | 0    | 0        | 0.008675 | 0        | 0.021001 |
| protein_co ADP-ribosy   | 327  | 298  | 282  | 178  | 180  | 169  | 4.720762 | 5.516835 | 4.912036 | 3.988548 |
| protein_co chromosom    | 0    | 0    | 1    | 36   | 40   | 27   | 0        | 0        | 0.017451 | 0.808166 |
| protein_co cyclin-depe  | 964  | 726  | 891  | 782  | 1023 | 991  | 13.51734 | 13.0545  | 15.07439 | 17.01968 |
| protein_co transmembr   | 4    | 2    | 1    | 0    | 0    | 3    | 0.056545 | 0.036256 | 0.017056 | 0        |
| protein_co suppressor   | 391  | 280  | 295  | 933  | 1017 | 437  | 14.96653 | 13.74395 | 13.62431 | 55.43147 |
| protein_co transcobal   | 246  | 154  | 190  | 916  | 1066 | 1247 | 4.550274 | 3.652855 | 4.240373 | 26.29834 |
| protein_co growth_arr   | 2728 | 1952 | 2004 | 574  | 709  | 762  | 37.83377 | 34.71558 | 33.53366 | 12.35599 |
| protein_co ATPase_H+    | 953  | 765  | 839  | 580  | 786  | 932  | 7.719155 | 7.945983 | 8.19949  | 7.291809 |
| protein_co parkinson_   | 33   | 36   | 28   | 18   | 9    | 0    | 0.370184 | 0.517864 | 0.378975 | 0.313406 |
| protein_co chromosom    | 283  | 199  | 256  | 269  | 426  | 375  | 2.990731 | 2.696829 | 3.264217 | 4.412388 |
| protein_co heparan_su   | 0    | 0    | 0    | 6    | 3    | 11   | 0        | 0        | 0        | 0.263218 |
| protein_co hepatocyte   | 2738 | 1896 | 2133 | 1777 | 2209 | 1809 | 43.22723 | 38.38589 | 40.6315  | 43.54536 |
| protein_co tumor_nec    | 621  | 483  | 543  | 294  | 409  | 91   | 7.573134 | 7.553366 | 7.989727 | 5.564957 |
| protein_co RAD51_hoi    | 116  | 105  | 115  | 68   | 76   | 80   | 2.26258  | 2.626301 | 2.706399 | 2.058663 |
| protein_co mitogen-ac   | 681  | 489  | 526  | 77   | 113  | 59   | 13.13538 | 12.09522 | 12.24135 | 2.305243 |
| protein_co SP140_nuc    | 60   | 53   | 61   | 33   | 35   | 26   | 0.783459 | 0.887463 | 0.961043 | 0.66882  |
| protein_co mitochond    | 0    | 1    | 1    | 2    | 0    | 0    | 0        | 0.023082 | 0.021718 | 0.055877 |
| protein_co threonyl-tF  | 208  | 197  | 199  | 173  | 191  | 224  | 2.701696 | 3.281321 | 3.118705 | 3.487785 |
| protein_co SET_and_M    | 350  | 297  | 289  | 230  | 230  | 195  | 8.809182 | 9.58591  | 8.77634  | 8.985161 |
| protein_co methyltran   | 95   | 58   | 79   | 417  | 466  | 906  | 1.092873 | 0.855625 | 1.096532 | 7.445824 |
| lincRNA long_interg     | 0    | 0    | 0    | 0    | 0    | 1    | 0        | 0        | 0        | 0        |
| protein_co interferon_  | 4    | 7    | 3    | 170  | 205  | 138  | 0.041231 | 0.092528 | 0.037311 | 2.719843 |
| protein_co SH3_domai    | 19   | 22   | 16   | 65   | 73   | 70   | 0.712159 | 1.057438 | 0.723588 | 3.781524 |
| protein_co family_witl  | 66   | 45   | 61   | 226  | 292  | 435  | 1.108432 | 0.969141 | 1.236069 | 5.891202 |
| protein_co family_witl  | 0    | 0    | 0    | 1    | 3    | 0    | 0        | 0        | 0        | 0.02822  |
| protein_co chromosom    | 256  | 175  | 203  | 222  | 405  | 174  | 5.271781 | 4.621306 | 5.043842 | 7.095791 |
| protein_co karyopheri   | 0    | 0    | 2    | 0    | 1    | 0    | 0        | 0        | 0.065595 | 0        |
| protein_co transmembr   | 84   | 62   | 56   | 44   | 53   | 61   | 3.850207 | 3.64423  | 3.096997 | 3.130314 |
| protein_co GPRIN_fam    | 376  | 252  | 291  | 54   | 33   | 21   | 2.775606 | 2.385502 | 2.591856 | 0.61872  |
| protein_co PARP1_bin    | 160  | 132  | 158  | 200  | 196  | 288  | 2.352588 | 2.48891  | 2.803051 | 4.564428 |
| protein_co SH3_and_c    | 26   | 35   | 41   | 43   | 69   | 31   | 0.736196 | 1.270859 | 1.400722 | 1.889814 |
| protein_co receptor_ty  | 170  | 151  | 165  | 1405 | 1719 | 1732 | 1.366821 | 1.556859 | 1.600644 | 17.53354 |
| pseudogen: succinate_c  | 401  | 359  | 309  | 145  | 189  | 208  | 7.548333 | 8.665836 | 7.017997 | 4.23648  |
| processed_ -            | 1    | 0    | 3    | 0    | 0    | 2    | 0.024928 | 0        | 0.090232 | 0        |
| protein_co mucin_1_c    | 17   | 22   | 20   | 25   | 23   | 16   | 0.44016  | 0.730456 | 0.624799 | 1.004691 |
| protein_co chromosom    | 2263 | 1607 | 1750 | 1065 | 1343 | 1440 | 27.7635  | 25.2822  | 25.90454 | 20.28009 |
| protein_co interferon_  | 300  | 228  | 257  | 321  | 362  | 253  | 6.858608 | 6.684346 | 7.089178 | 11.3907  |
| protein_co I(3)mbt-lik  | 145  | 136  | 155  | 254  | 319  | 128  | 1.573126 | 1.892099 | 2.028969 | 4.277203 |
| protein_co BRCA1/BRC    | 290  | 230  | 267  | 221  | 231  | 330  | 4.777971 | 4.8594   | 5.307681 | 5.651559 |
| protein_co synaptic_v   | 1    | 2    | 1    | 15   | 22   | 7    | 0.004157 | 0.010662 | 0.005016 | 0.09679  |
| protein_co family_witl  | 11   | 6    | 6    | 27   | 35   | 11   | 0.304301 | 0.212849 | 0.200267 | 1.159324 |
| protein_co chromosom    | 20   | 8    | 8    | 74   | 143  | 36   | 0.45     | 0.230825 | 0.21718  | 2.584312 |
| protein_co chromosom    | 2    | 1    | 1    | 1    | 0    | 0    | 0.185336 | 0.118834 | 0.111809 | 0.143834 |
| protein_co phosphodi    | 0    | 4    | 0    | 98   | 123  | 83   | 0        | 0.159813 | 0        | 4.73915  |

|                         |       |       |       |      |      |      |          |          |          |          |
|-------------------------|-------|-------|-------|------|------|------|----------|----------|----------|----------|
| protein_co protein_kir  | 765   | 554   | 578   | 284  | 241  | 300  | 5.177665 | 4.808301 | 4.72007  | 2.983468 |
| protein_co nuclear_rex  | 8108  | 6063  | 6459  | 1    | 1    | 12   | 72.07285 | 69.11222 | 69.27416 | 0.013797 |
| protein_co nuclear_RN   | 0     | 0     | 0     | 3    | 0    | 0    | 0        | 0        | 0        | 0.05515  |
| protein_co delta-like_1 | 54    | 29    | 39    | 51   | 50   | 64   | 1.489448 | 1.025744 | 1.297909 | 2.183394 |
| protein_co TLC_domai    | 70    | 63    | 67    | 13   | 13   | 5    | 3.31211  | 3.82258  | 3.824984 | 0.95473  |
| protein_co limbic_syst  | 134   | 142   | 138   | 21   | 20   | 27   | 3.61107  | 4.907144 | 4.487023 | 0.878377 |
| protein_co AHNAK_nu     | 4674  | 4208  | 4500  | 289  | 392  | 107  | 11.95331 | 13.80017 | 13.88545 | 1.14717  |
| protein_co olfactomed   | 2667  | 2011  | 2043  | 268  | 328  | 207  | 19.46392 | 18.82039 | 17.98969 | 3.035796 |
| protein_co Sp1_transc   | 2035  | 1608  | 1750  | 1977 | 2137 | 1803 | 12.55046 | 12.71718 | 13.02211 | 18.92485 |
| protein_co spermatog    | 0     | 0     | 0     | 1    | 0    | 1    | 0        | 0        | 0        | 0.052511 |
| pseudogen: WAS_prote    | 557   | 410   | 470   | 380  | 505  | 346  | 15.17591 | 14.32494 | 15.4506  | 16.06992 |
| pseudogen: actin_beta_  | 6     | 3     | 1     | 4    | 3    | 1    | 0.250303 | 0.160489 | 0.050334 | 0.259003 |
| protein_co mitochond    | 299   | 248   | 224   | 238  | 298  | 245  | 10.10823 | 10.7514  | 9.136924 | 12.48853 |
| protein_co developing   | 0     | 0     | 0     | 3    | 6    | 3    | 0        | 0        | 0        | 0.077812 |
| protein_co family_witl  | 629   | 464   | 481   | 16   | 39   | 27   | 28.35944 | 26.82714 | 26.16617 | 1.119689 |
| protein_co protein_dis  | 1     | 2     | 0     | 13   | 11   | 6    | 0.023972 | 0.061482 | 0        | 0.48371  |
| protein_co polycomb     | 1850  | 1438  | 1475  | 843  | 1221 | 896  | 15.25884 | 15.20961 | 14.67878 | 10.79215 |
| protein_co leishmanol   | 207   | 168   | 162   | 79   | 80   | 69   | 1.378139 | 1.434304 | 1.301325 | 0.816357 |
| protein_co prolyl_4-hy  | 18074 | 13491 | 14167 | 4829 | 5474 | 4999 | 325.5821 | 311.6447 | 307.9159 | 135.0187 |
| protein_co proteasom    | 2020  | 1592  | 1513  | 1499 | 1692 | 1710 | 43.05356 | 43.51211 | 38.90852 | 49.58951 |
| protein_co pre-B-cell_I | 701   | 516   | 569   | 2305 | 3014 | 2350 | 2.903445 | 2.740657 | 2.843518 | 14.81825 |
| pseudogen: -            | 0     | 0     | 2     | 1    | 1    | 0    | 0        | 0        | 0.272653 | 0.175373 |
| protein_co NADH_deh     | 73    | 51    | 45    | 21   | 19   | 7    | 2.852476 | 2.555516 | 2.121581 | 1.273647 |
| protein_co SHC_(Src_h   | 119   | 99    | 110   | 6    | 6    | 5    | 1.224202 | 1.306022 | 1.365359 | 0.095805 |
| pseudogen: ferritin_he  | 0     | 0     | 0     | 1    | 0    | 0    | 0        | 0        | 0        | 0.132087 |
| protein_co keratin_79   | 13    | 16    | 12    | 0    | 0    | 0    | 0.294763 | 0.465221 | 0.328291 | 0        |
| pseudogen: -            | 31    | 22    | 28    | 50   | 61   | 63   | 3.876241 | 3.527615 | 4.224304 | 9.703973 |
| protein_co ZFP36_ring   | 5104  | 3754  | 4063  | 2366 | 3030 | 2059 | 75.02403 | 70.76089 | 72.05839 | 53.98025 |
| protein_co ubiquitin-c  | 2837  | 2177  | 2295  | 1978 | 2168 | 2489 | 38.54737 | 37.93178 | 37.6241  | 41.71499 |
| protein_co neurotropl   | 32    | 20    | 29    | 16   | 16   | 9    | 1.285759 | 1.030502 | 1.405904 | 0.997838 |
| protein_co bromodom     | 905   | 818   | 855   | 945  | 708  | 723  | 3.282192 | 3.804329 | 3.741361 | 5.319585 |
| protein_co premelano    | 9     | 7     | 7     | 1266 | 1414 | 722  | 0.153069 | 0.152669 | 0.143645 | 33.4201  |
| protein_co synapsin_II  | 2     | 2     | 3     | 49   | 75   | 41   | 0.03     | 0.038471 | 0.054295 | 1.140822 |
| protein_co POU_class_   | 8     | 5     | 8     | 432  | 551  | 170  | 0.128115 | 0.102681 | 0.154578 | 10.738   |
| protein_co snail_homo   | 81    | 60    | 67    | 165  | 172  | 43   | 2.192893 | 2.083018 | 2.188544 | 6.933411 |
| protein_co zinc_finger  | 127   | 131   | 107   | 944  | 1016 | 1053 | 1.999675 | 2.645065 | 2.032767 | 23.07056 |
| protein_co lysozyme_C   | 5     | 1     | 2     | 6    | 5    | 3    | 0.267027 | 0.068485 | 0.128874 | 0.497356 |
| protein_co EP400_N-ter  | 400   | 327   | 351   | 188  | 253  | 189  | 4.766457 | 4.996809 | 5.046506 | 3.477154 |
| protein_co preferentia  | 0     | 0     | 0     | 6    | 9    | 3    | 0        | 0        | 0        | 0.154249 |
| protein_co chromosom    | 6     | 4     | 7     | 4    | 6    | 5    | 0.112716 | 0.096362 | 0.158665 | 0.116634 |
| protein_co v-myb_myb    | 336   | 269   | 236   | 50   | 68   | 40   | 3.034485 | 3.115353 | 2.571614 | 0.700884 |
| pseudogen: -            | 1     | 1     | 0     | 7    | 3    | 0    | 0.011351 | 0.014556 | 0        | 0.123326 |
| protein_co chromosom    | 188   | 157   | 148   | 108  | 147  | 104  | 2.021863 | 2.165224 | 1.920453 | 1.802802 |
| protein_co developme    | 1116  | 867   | 944   | 1058 | 1149 | 1157 | 29.97094 | 29.85827 | 30.58836 | 44.10139 |
| protein_co ankyrin_re   | 1898  | 1524  | 1577  | 884  | 1099 | 1196 | 11.99747 | 12.35344 | 12.02744 | 8.673139 |
| protein_co YTH_domai    | 1813  | 1541  | 1482  | 1179 | 1443 | 1612 | 16.46873 | 17.95041 | 16.24272 | 16.6229  |
| protein_co zinc_finger  | 250   | 215   | 189   | 273  | 408  | 370  | 4.194098 | 4.625369 | 3.825678 | 7.108725 |
| protein_co adenosine_   | 33    | 18    | 24    | 48   | 69   | 27   | 0.42911  | 0.300149 | 0.376542 | 0.968783 |
| protein_co neuregulin   | 0     | 0     | 0     | 121  | 131  | 115  | 0        | 0        | 0        | 2.494718 |
| protein_co sarcalumer   | 1     | 0     | 1     | 2    | 2    | 2    | 0.008393 | 0        | 0.010126 | 0.026053 |
| protein_co chromosom    | 248   | 198   | 220   | 8    | 9    | 10   | 1.97633  | 2.023402 | 2.115332 | 0.098953 |
| protein_co interferon-i | 29    | 27    | 49    | 24   | 22   | 16   | 0.491084 | 0.586314 | 1.001156 | 0.630811 |
| protein_co chromosom    | 219   | 157   | 165   | 118  | 198  | 139  | 3.689872 | 3.392159 | 3.354279 | 3.085884 |
| protein_co claudin_24   | 1     | 2     | 0     | 2    | 1    | 1    | 0.070724 | 0.181387 | 0        | 0.219547 |
| protein_co potassium_   | 116   | 116   | 118   | 26   | 38   | 21   | 0.813284 | 1.042921 | 0.998192 | 0.282936 |
| protein_co ADAMTS-li    | 17    | 14    | 16    | 11   | 13   | 5    | 0.279597 | 0.295271 | 0.317505 | 0.280806 |
| protein_co Kv_channel   | 20    | 23    | 24    | 11   | 17   | 22   | 0.377993 | 0.557431 | 0.547284 | 0.322684 |
| protein_co SPATA31_s    | 0     | 0     | 0     | 0    | 0    | 1    | 0        | 0        | 0        | 0        |
| protein_co mortality_f  | 7436  | 5987  | 6235  | 5892 | 6394 | 7357 | 147.8059 | 152.6058 | 149.533  | 181.7798 |
| protein_co NLR_family   | 1     | 2     | 0     | 0    | 0    | 0    | 0.013459 | 0.034518 | 0        | 0        |
| protein_co WD_repeat    | 143   | 110   | 117   | 171  | 233  | 163  | 4.01273  | 3.958275 | 3.961301 | 7.447843 |
| protein_co dystrophin   | 1746  | 1233  | 1411  | 451  | 707  | 574  | 24.77155 | 22.43269 | 24.15372 | 9.931525 |
| protein_co solute_carr  | 1603  | 1151  | 1203  | 928  | 1168 | 933  | 35.00917 | 32.2354  | 31.7002  | 31.45769 |
| protein_co phosphatic   | 126   | 82    | 117   | 61   | 84   | 53   | 1.718982 | 1.434578 | 1.925905 | 1.291699 |
| protein_co IKAROS_far   | 2     | 4     | 4     | 31   | 33   | 16   | 0.015153 | 0.038862 | 0.036565 | 0.364546 |

|                         |      |      |      |      |      |      |          |          |          |          |
|-------------------------|------|------|------|------|------|------|----------|----------|----------|----------|
| protein_co phosphate    | 2218 | 1620 | 1809 | 399  | 557  | 703  | 20.20635 | 18.92564 | 19.88442 | 5.641955 |
| protein_co N-acetyltra  | 13   | 7    | 4    | 1495 | 2290 | 1151 | 0.103845 | 0.071705 | 0.038552 | 18.53591 |
| protein_co nuclear_po   | 0    | 0    | 0    | 4    | 11   | 21   | 0        | 0        | 0        | 0.03615  |
| protein_co B-cell_rece  | 2538 | 1959 | 2009 | 2033 | 2208 | 2305 | 65.74965 | 65.07971 | 62.79568 | 81.74659 |
| protein_co ADP-ribosy   | 50   | 43   | 46   | 33   | 44   | 37   | 0.594297 | 0.655407 | 0.659689 | 0.608804 |
| pseudogeni_ribosomal_   | 62   | 38   | 49   | 77   | 72   | 60   | 5.495616 | 4.319343 | 5.240453 | 10.59366 |
| antisense CECR5_anti    | 8    | 3    | 7    | 5    | 8    | 3    | 0.608961 | 0.29284  | 0.642903 | 0.590745 |
| protein_co guanine_nu   | 317  | 204  | 240  | 334  | 488  | 190  | 2.216543 | 1.82918  | 2.024772 | 3.624881 |
| pseudogeni -            | 4    | 8    | 6    | 11   | 14   | 11   | 0.271826 | 0.697157 | 0.491961 | 1.160258 |
| protein_co dynein_axc   | 129  | 87   | 113  | 165  | 229  | 157  | 0.438701 | 0.379409 | 0.463666 | 0.870951 |
| lincRNA -               | 0    | 0    | 0    | 118  | 126  | 94   | 0        | 0        | 0        | 12.18158 |
| protein_co ecotropic_   | 8    | 3    | 7    | 3    | 4    | 1    | 0.187654 | 0.09024  | 0.198113 | 0.109224 |
| protein_co transmembr   | 0    | 0    | 0    | 0    | 0    | 2    | 0        | 0        | 0        | 0        |
| protein_co Nuclear_pc   | 92   | 119  | 104  | 70   | 104  | 112  | 1.133145 | 1.87955  | 1.545535 | 1.338215 |
| protein_co zinc_finger  | 13   | 14   | 18   | 86   | 95   | 89   | 0.122477 | 0.169141 | 0.204613 | 1.257598 |
| protein_co threonine_   | 129  | 87   | 107  | 181  | 170  | 106  | 1.596835 | 1.381017 | 1.598094 | 3.477599 |
| protein_co tripartite_r | 326  | 264  | 240  | 167  | 201  | 78   | 2.686021 | 2.789363 | 2.385894 | 2.135693 |
| protein_co ATPase_H+    | 24   | 8    | 17   | 11   | 23   | 10   | 0.957754 | 0.409394 | 0.818539 | 0.681343 |
| protein_co interferon_  | 46   | 30   | 34   | 2203 | 3218 | 1539 | 2.522738 | 2.109817 | 2.249786 | 187.525  |
| protein_co protease_sc  | 1    | 0    | 0    | 0    | 0    | 0    | 0.037009 | 0        | 0        | 0        |
| protein_co lysosomal-i  | 6126 | 4799 | 5030 | 2599 | 3226 | 3353 | 54.79745 | 55.04824 | 54.28745 | 36.08445 |
| protein_co taste_recep  | 0    | 0    | 0    | 0    | 0    | 3    | 0        | 0        | 0        | 0        |
| protein_co Probable_i   | 250  | 192  | 187  | 256  | 276  | 228  | 6.285525 | 6.190306 | 5.672718 | 9.99015  |
| pseudogeni_olfactory_r  | 0    | 0    | 2    | 2    | 0    | 2    | 0        | 0        | 0.132651 | 0.170644 |
| protein_co chromosom    | 3    | 0    | 0    | 74   | 139  | 61   | 0.054418 | 0        | 0        | 2.083445 |
| protein_co kelch_dom    | 347  | 230  | 251  | 258  | 357  | 232  | 8.314173 | 7.066864 | 7.256235 | 9.594884 |
| protein_co kelch-like_f | 1    | 2    | 2    | 51   | 105  | 20   | 0.016511 | 0.042345 | 0.039842 | 1.306961 |
| protein_co SET_domain   | 234  | 191  | 201  | 586  | 835  | 854  | 2.568414 | 2.688387 | 2.661909 | 9.983372 |
| protein_co patched_1    | 970  | 757  | 839  | 839  | 947  | 1296 | 4.278367 | 4.281653 | 4.464947 | 5.743792 |
| protein_co reticulon_4  | 37   | 33   | 29   | 14   | 28   | 8    | 0.944951 | 1.080764 | 0.893622 | 0.554966 |
| protein_co olfactory_r  | 1    | 0    | 0    | 0    | 0    | 0    | 0.050419 | 0        | 0        | 0        |
| protein_co PAXIP1_ass   | 479  | 376  | 395  | 422  | 774  | 610  | 11.16873 | 11.24257 | 11.11254 | 15.27254 |
| protein_co calcium_hc   | 1    | 0    | 0    | 5    | 0    | 0    | 0.015359 | 0        | 0        | 0.119194 |
| protein_co keratin_ass  | 0    | 0    | 0    | 1    | 1    | 0    | 0        | 0        | 0        | 0.064521 |
| protein_co Na+/K+_tra   | 3    | 5    | 5    | 5    | 9    | 13   | 0.07076  | 0.151232 | 0.142293 | 0.183048 |
| protein_co nuclear_RN   | 0    | 0    | 0    | 0    | 1    | 0    | 0        | 0        | 0        | 0        |
| protein_co RNA-bindin   | 147  | 112  | 156  | 158  | 191  | 132  | 1.884317 | 1.841044 | 2.412733 | 3.143578 |
| protein_co zinc_finger  | 34   | 12   | 16   | 25   | 26   | 41   | 0.482087 | 0.218191 | 0.273725 | 0.550195 |
| protein_co insulin_rec  | 2105 | 1414 | 1644 | 1667 | 2079 | 854  | 14.10251 | 12.14795 | 13.28906 | 17.33447 |
| protein_co chromosom    | 4    | 2    | 2    | 0    | 1    | 0    | 0.186813 | 0.11978  | 0.1127   | 0        |
| protein_co family_witl  | 1    | 0    | 0    | 0    | 0    | 0    | 0.005718 | 0        | 0        | 0        |
| protein_co short_statu  | 99   | 77   | 105  | 0    | 0    | 0    | 1.23559  | 1.232365 | 1.581163 | 0        |
| protein_co late_cornif  | 0    | 0    | 0    | 0    | 0    | 1    | 0        | 0        | 0        | 0        |
| protein_co bicaudal_D   | 1770 | 1401 | 1592 | 1114 | 1430 | 958  | 12.91354 | 13.10749 | 14.01404 | 12.61501 |
| protein_co calicin      | 32   | 14   | 26   | 4    | 3    | 9    | 0.773045 | 0.433703 | 0.757838 | 0.149984 |
| protein_co trimethylly  | 169  | 157  | 163  | 120  | 129  | 87   | 2.798168 | 3.333467 | 3.256288 | 3.08389  |
| protein_co G_protein-i  | 0    | 0    | 0    | 1    | 0    | 0    | 0        | 0        | 0        | 0.034641 |
| protein_co SLIT_and_N   | 0    | 0    | 0    | 2    | 5    | 7    | 0        | 0        | 0        | 0.018973 |
| pseudogeni_succinate_4  | 26   | 23   | 29   | 91   | 109  | 182  | 1.188246 | 1.347939 | 1.599113 | 6.455129 |
| protein_co polo-like_k  | 9    | 0    | 3    | 5    | 13   | 9    | 0.200385 | 0        | 0.080592 | 0.172792 |
| protein_co RAS_p21_p    | 3074 | 2405 | 2677 | 507  | 685  | 540  | 34.39273 | 34.50541 | 36.13759 | 8.804428 |
| protein_co coagulation  | 8    | 3    | 5    | 9    | 15   | 8    | 0.220529 | 0.106049 | 0.166301 | 0.385078 |
| protein_co leucine-ricl | 948  | 765  | 733  | 632  | 831  | 701  | 6.011866 | 6.221165 | 5.608581 | 6.220832 |
| protein_co LEM_doma     | 6    | 1    | 1    | 31   | 39   | 12   | 0.302842 | 0.064725 | 0.060899 | 2.428605 |
| pseudogeni_ribosomal_   | 0    | 0    | 0    | 0    | 0    | 2    | 0        | 0        | 0        | 0        |
| protein_co ATPase_H+    | 19   | 13   | 15   | 0    | 2    | 1    | 0.59873  | 0.525328 | 0.570318 | 0        |
| protein_co NADH_deh     | 3    | 2    | 8    | 15   | 20   | 24   | 0.120643 | 0.103139 | 0.388168 | 0.936275 |
| protein_co zinc_finger  | 103  | 89   | 107  | 108  | 136  | 206  | 0.919412 | 1.018761 | 1.152404 | 1.496329 |
| antisense -             | 1    | 5    | 2    | 0    | 8    | 12   | 0.014658 | 0.093982 | 0.035371 | 0        |
| protein_co zinc_finger  | 175  | 158  | 149  | 149  | 196  | 203  | 1.566581 | 1.813766 | 1.609345 | 2.070292 |
| protein_co zinc_finger  | 36   | 22   | 24   | 16   | 17   | 15   | 0.387966 | 0.304035 | 0.312069 | 0.267634 |
| protein_co 5-hydroxyt   | 0    | 0    | 0    | 1    | 0    | 0    | 0        | 0        | 0        | 0.034025 |
| protein_co deleted_in   | 5    | 4    | 0    | 49   | 68   | 68   | 0.102335 | 0.104984 | 0        | 1.556617 |
| protein_co T-cell_acut  | 0    | 0    | 2    | 3    | 1    | 1    | 0        | 0        | 0.179605 | 0.34657  |
| antisense MATN1_ani     | 27   | 12   | 12   | 3    | 3    | 1    | 0.322556 | 0.183836 | 0.17297  | 0.055628 |

|                          |       |      |      |      |      |      |          |          |          |          |
|--------------------------|-------|------|------|------|------|------|----------|----------|----------|----------|
| protein_co axin_intera   | 1334  | 1210 | 1203 | 894  | 1104 | 1044 | 15.44476 | 17.9647  | 16.80502 | 16.06547 |
| protein_co chromosor     | 84    | 50   | 60   | 132  | 171  | 124  | 0.674099 | 0.514546 | 0.580957 | 1.644178 |
| protein_co CD300_mo      | 0     | 3    | 0    | 0    | 0    | 0    | 0        | 0.098844 | 0        | 0        |
| pseudogeni -             | 43    | 37   | 47   | 105  | 109  | 121  | 2.635648 | 2.908239 | 3.475881 | 9.989384 |
| pseudogeni -             | 0     | 0    | 1    | 0    | 0    | 0    | 0        | 0        | 0.04526  | 0        |
| protein_co gamma-sec     | 11    | 13   | 16   | 20   | 23   | 17   | 0.149159 | 0.226052 | 0.261772 | 0.420936 |
| protein_co ATP/GTP_b     | 4     | 1    | 0    | 9    | 1    | 7    | 0.047628 | 0.015269 | 0        | 0.166333 |
| protein_co arginine-fif  | 0     | 0    | 0    | 1    | 2    | 2    | 0        | 0        | 0        | 0.073367 |
| protein_co cytochrom     | 196   | 141  | 169  | 210  | 226  | 107  | 3.952879 | 3.646581 | 4.11237  | 6.573659 |
| protein_co leucine_ri    | 0     | 1    | 1    | 2    | 5    | 0    | 0        | 0.026736 | 0.025156 | 0.064722 |
| protein_co ankyrin_rej   | 116   | 89   | 100  | 332  | 330  | 289  | 1.663377 | 1.63656  | 1.730138 | 7.389264 |
| protein_co phosphatic    | 4786  | 3503 | 3678 | 1174 | 1728 | 1091 | 44.1763  | 41.46352 | 40.96156 | 16.81958 |
| protein_co cytochrom     | 1     | 0    | 0    | 2    | 3    | 4    | 0.019489 | 0        | 0        | 0.060499 |
| protein_co testis_expr   | 3     | 4    | 4    | 1    | 0    | 0    | 0.140249 | 0.2398   | 0.225625 | 0.072562 |
| protein_co zinc_finger   | 243   | 198  | 196  | 197  | 187  | 243  | 2.77503  | 2.899586 | 2.700633 | 3.491871 |
| protein_co chromosor     | 108   | 84   | 77   | 30   | 40   | 33   | 4.403584 | 4.392089 | 3.788099 | 1.898604 |
| protein_co taste_recep   | 2     | 5    | 1    | 0    | 1    | 1    | 0.099238 | 0.318147 | 0.059868 | 0        |
| protein_co polymerase    | 507   | 411  | 460  | 303  | 377  | 546  | 12.84346 | 13.35135 | 14.05982 | 11.91371 |
| protein_co chromosor     | 1     | 0    | 0    | 2    | 0    | 0    | 0.023433 | 0        | 0        | 0.072743 |
| protein_co WW_doma       | 99    | 103  | 89   | 69   | 130  | 92   | 1.870311 | 2.495314 | 2.028695 | 2.02329  |
| protein_co cytochrom     | 0     | 0    | 0    | 1    | 1    | 0    | 0        | 0        | 0        | 0.038185 |
| pseudogeni cell_death    | 116   | 103  | 114  | 69   | 67   | 77   | 3.048902 | 3.471619 | 3.615251 | 2.814914 |
| protein_co coiled-coil   | 168   | 166  | 185  | 220  | 312  | 311  | 4.42309  | 5.604462 | 5.876737 | 8.990206 |
| protein_co B-cell_CLL/   | 2606  | 1950 | 2082 | 1797 | 2588 | 2248 | 12.21343 | 11.71945 | 11.77313 | 13.07199 |
| protein_co polymerase    | 847   | 722  | 725  | 1620 | 1760 | 1348 | 20.41946 | 22.32067 | 21.08856 | 60.61865 |
| protein_co kinesin_fan   | 1031  | 805  | 961  | 1195 | 1517 | 1468 | 11.46398 | 11.47842 | 12.89283 | 20.62411 |
| protein_co zinc_and_ri   | 719   | 551  | 563  | 766  | 1081 | 665  | 6.324127 | 6.214879 | 5.974866 | 10.45757 |
| protein_co free_fatty_a  | 0     | 0    | 0    | 0    | 0    | 2    | 0        | 0        | 0        | 0        |
| protein_co suppressor    | 680   | 513  | 535  | 1730 | 2469 | 1591 | 8.296959 | 8.026694 | 7.876111 | 32.76322 |
| protein_co EDAR-assoc    | 125   | 91   | 97   | 44   | 64   | 31   | 1.892558 | 1.76681  | 1.771981 | 1.034004 |
| protein_co solute_carr   | 7     | 2    | 2    | 1    | 9    | 2    | 0.349181 | 0.127936 | 0.120373 | 0.077425 |
| protein_co mitochond     | 57    | 19   | 43   | 457  | 530  | 570  | 0.987341 | 0.422041 | 0.898687 | 12.2868  |
| protein_co sosondowa     | 12    | 14   | 18   | 49   | 46   | 18   | 0.192633 | 0.288195 | 0.348634 | 1.220887 |
| protein_co biogenesis    | 639   | 439  | 469  | 378  | 649  | 404  | 19.3808  | 17.07437 | 17.16294 | 17.7948  |
| protein_co zinc_finger   | 45    | 50   | 36   | 122  | 187  | 150  | 0.815636 | 1.162153 | 0.78729  | 3.432213 |
| protein_co kelch-like_f  | 0     | 1    | 0    | 2    | 3    | 3    | 0        | 0.01626  | 0        | 0.039362 |
| pseudogeni family_witl   | 0     | 0    | 0    | 0    | 4    | 0    | 0        | 0        | 0        | 0        |
| protein_co Protein_LO    | 26    | 16   | 23   | 38   | 49   | 12   | 0.645731 | 0.509575 | 0.689214 | 1.464848 |
| protein_co MKL/myoc      | 706   | 507  | 582  | 320  | 363  | 229  | 3.762286 | 3.46469  | 3.742123 | 2.646839 |
| protein_co B_and_T_ly    | 0     | 0    | 0    | 2    | 6    | 2    | 0        | 0        | 0        | 0.045303 |
| protein_co zinc_finger   | 34    | 28   | 34   | 26   | 46   | 84   | 0.579731 | 0.612231 | 0.699479 | 0.6881   |
| protein_co neuroblast    | 175   | 112  | 127  | 68   | 95   | 100  | 0.658832 | 0.54071  | 0.576884 | 0.397353 |
| protein_co lysine_(K)-s  | 55    | 56   | 41   | 79   | 83   | 31   | 0.866001 | 1.130715 | 0.778911 | 1.930693 |
| protein_co glycerol-3-ph | 2     | 3    | 2    | 18   | 11   | 3    | 0.02128  | 0.040932 | 0.025675 | 0.297263 |
| protein_co torsin_fami   | 681   | 518  | 558  | 432  | 638  | 571  | 11.7225  | 11.43437 | 11.58926 | 11.54217 |
| protein_co poly(A)_bir   | 0     | 0    | 0    | 2    | 3    | 1    | 0        | 0        | 0        | 0.065069 |
| protein_co gamma-am      | 31    | 9    | 28   | 425  | 558  | 445  | 0.447121 | 0.166462 | 0.48727  | 9.514431 |
| protein_co protein_ph    | 2223  | 1862 | 1924 | 5517 | 6115 | 4795 | 37.26725 | 40.0292  | 38.91715 | 143.556  |
| protein_co zinc_finger   | 103   | 81   | 74   | 97   | 114  | 54   | 0.564412 | 0.569185 | 0.489259 | 0.825014 |
| pseudogeni macrophag     | 21    | 12   | 16   | 85   | 144  | 39   | 0.415832 | 0.304712 | 0.382267 | 2.612451 |
| protein_co nucleosom     | 215   | 170  | 172  | 259  | 392  | 488  | 3.820142 | 3.873462 | 3.687377 | 7.142845 |
| pseudogeni carbonic_a    | 286   | 176  | 214  | 190  | 209  | 246  | 10.60961 | 8.372503 | 9.578448 | 10.94    |
| protein_co PRELI_dom     | 118   | 89   | 83   | 58   | 82   | 61   | 2.585524 | 2.500725 | 2.194284 | 1.972537 |
| protein_co beta-site_A   | 987   | 792  | 798  | 200  | 275  | 123  | 4.663487 | 4.79875  | 4.5493   | 1.466743 |
| pseudogeni -             | 2     | 0    | 3    | 1    | 3    | 0    | 0.052804 | 0        | 0.095567 | 0.04098  |
| protein_co regulator_c   | 1     | 2    | 1    | 3    | 2    | 0    | 0.016202 | 0.041555 | 0.019549 | 0.075446 |
| pseudogeni -             | 0     | 0    | 0    | 4    | 0    | 2    | 0        | 0        | 0        | 0.887559 |
| protein_co solute_carr   | 1     | 0    | 0    | 0    | 1    | 1    | 0.013179 | 0        | 0        | 0        |
| protein_co solute_carr   | 1     | 0    | 0    | 2    | 2    | 2    | 0.013707 | 0        | 0        | 0.042549 |
| protein_co thrombosp     | 11443 | 9096 | 9964 | 731  | 870  | 1373 | 92.33565 | 94.1216  | 97.00883 | 9.155401 |
| protein_co retinoid_X    | 1721  | 1181 | 1323 | 1332 | 1954 | 1442 | 13.98574 | 12.30733 | 12.97217 | 16.80116 |
| protein_co ankyrin_rej   | 11    | 12   | 22   | 19   | 18   | 11   | 0.357195 | 0.499694 | 0.861954 | 0.957629 |
| protein_co chromosor     | 65    | 36   | 58   | 12   | 10   | 5    | 0.630112 | 0.447524 | 0.678391 | 0.180558 |
| protein_co nudix_(nuc    | 44    | 40   | 33   | 48   | 59   | 42   | 0.88094  | 1.026982 | 0.797178 | 1.491644 |
| protein_co KIAA1024-I    | 0     | 0    | 0    | 0    | 0    | 7    | 0        | 0        | 0        | 0        |

|                       |              |      |      |      |      |      |      |          |          |          |          |
|-----------------------|--------------|------|------|------|------|------|------|----------|----------|----------|----------|
| lincRNA               | long_interf  | 0    | 0    | 0    | 0    | 0    | 1    | 0        | 0        | 0        | 0        |
| protein_co            | zinc_finger  | 282  | 207  | 251  | 116  | 107  | 138  | 2.364625 | 2.225835 | 2.539423 | 1.509738 |
| protein_co            | cytochrom    | 0    | 0    | 0    | 10   | 21   | 27   | 0        | 0        | 0        | 0.308782 |
| protein_co            | keratin_10   | 1012 | 708  | 823  | 226  | 416  | 441  | 22.34119 | 20.04327 | 21.92168 | 7.74399  |
| protein_co            | golgin_A8_   | 11   | 11   | 13   | 3    | 7    | 0    | 0.168449 | 0.216012 | 0.240196 | 0.071306 |
| protein_co            | CD300e_m     | 5    | 6    | 10   | 0    | 0    | 0    | 0.066967 | 0.10305  | 0.161598 | 0        |
| protein_co            | coiled-coil  | 11   | 12   | 10   | 9    | 27   | 12   | 0.075552 | 0.105692 | 0.08287  | 0.095945 |
| protein_co            | NFKB_repr    | 241  | 181  | 206  | 277  | 349  | 319  | 3.020715 | 2.909247 | 3.115358 | 5.388935 |
| protein_co            | gliomedin    | 3    | 2    | 0    | 10   | 12   | 6    | 0.028298 | 0.024192 | 0        | 0.146409 |
| protein_co            | karyopheri   | 2309 | 1886 | 1933 | 973  | 1211 | 1519 | 12.05534 | 12.62719 | 12.17687 | 7.884951 |
| protein_co            | triadin      | 0    | 0    | 0    | 154  | 147  | 109  | 0        | 0        | 0        | 2.361586 |
| protein_co            | keratin_3    | 0    | 0    | 2    | 0    | 0    | 1    | 0        | 0        | 0.048793 | 0        |
| protein_co            | zinc_finger  | 65   | 57   | 51   | 138  | 167  | 139  | 0.983495 | 1.105969 | 0.931059 | 3.24092  |
| protein_co            | zinc_finger  | 404  | 317  | 353  | 256  | 301  | 306  | 4.406505 | 4.433856 | 4.645535 | 4.333945 |
| protein_co            | spermatog    | 9    | 8    | 17   | 8    | 6    | 18   | 0.17489  | 0.199353 | 0.398584 | 0.241292 |
| protein_co            | transmemt    | 0    | 0    | 0    | 1    | 2    | 1    | 0        | 0        | 0        | 0.021816 |
| protein_co            | family_witl  | 1    | 1    | 3    | 0    | 0    | 0    | 0.026432 | 0.033895 | 0.095674 | 0        |
| protein_co            | nucleosom    | 2    | 0    | 0    | 240  | 337  | 249  | 0.036776 | 0        | 0        | 6.849864 |
| pseudogen             | aquaporin_   | 16   | 17   | 13   | 1    | 1    | 0    | 0.545629 | 0.743423 | 0.534896 | 0.052931 |
| protein_co            | ribosomal_   | 1168 | 953  | 983  | 606  | 694  | 812  | 15.93469 | 16.67259 | 16.18089 | 12.83228 |
| protein_co            | guanine_nu   | 635  | 494  | 480  | 62   | 56   | 104  | 7.984758 | 7.965706 | 7.282446 | 1.210069 |
| protein_co            | butyrophili  | 658  | 596  | 573  | 55   | 63   | 33   | 10.22659 | 11.87847 | 10.74503 | 1.326778 |
| protein_co            | A_kinase_(F  | 1    | 1    | 3    | 4    | 0    | 2    | 0.047994 | 0.061545 | 0.173722 | 0.297973 |
| protein_co            | piccolo_pr   | 71   | 58   | 60   | 42   | 46   | 77   | 0.19419  | 0.203426 | 0.198001 | 0.178299 |
| protein_co            | kallikrein-r | 0    | 0    | 0    | 1    | 1    | 0    | 0        | 0        | 0        | 0.062205 |
| protein_co            | regulator_c  | 0    | 3    | 0    | 68   | 68   | 82   | 0        | 0.043363 | 0        | 1.18967  |
| protein_co            | insulin_ind  | 6269 | 5237 | 5252 | 845  | 820  | 2025 | 97.65898 | 104.6179 | 98.7158  | 20.43154 |
| pseudogen             | ankyrin_rej  | 0    | 0    | 3    | 6    | 17   | 12   | 0        | 0        | 0.049773 | 0.128058 |
| protein_co            | myelin_tra   | 1    | 0    | 0    | 1    | 2    | 6    | 0.006639 | 0        | 0        | 0.010304 |
| protein_co            | chromosom    | 15   | 11   | 10   | 155  | 233  | 211  | 0.488099 | 0.459006 | 0.392613 | 7.8285   |
| protein_co            | zinc_finger  | 6    | 8    | 6    | 11   | 12   | 4    | 0.100911 | 0.172539 | 0.121755 | 0.287151 |
| protein_co            | transmemt    | 706  | 500  | 592  | 440  | 462  | 657  | 11.5709  | 10.50853 | 11.70664 | 11.19298 |
| protein_co            | chloride_cl  | 2    | 3    | 0    | 11   | 34   | 13   | 0.030647 | 0.058951 | 0        | 0.261627 |
| protein_co            | Rho_GTPas    | 23   | 11   | 11   | 21   | 21   | 21   | 0.222045 | 0.13618  | 0.128131 | 0.314675 |
| protein_co            | septin_10    | 1682 | 1384 | 1414 | 1155 | 1171 | 1174 | 25.51569 | 26.92321 | 25.88087 | 27.1953  |
| protein_co            | family_witl  | 2    | 4    | 4    | 24   | 30   | 21   | 0.039173 | 0.100467 | 0.094529 | 0.729622 |
| protein_co            | cytochrom    | 0    | 0    | 0    | 0    | 3    | 0    | 0        | 0        | 0        | 0        |
| processed_XK_Kell_blc |              | 192  | 206  | 182  | 184  | 238  | 79   | 1.839576 | 2.531005 | 2.103952 | 2.736306 |
| protein_co            | SET_and_M    | 352  | 265  | 282  | 374  | 495  | 430  | 3.764892 | 3.634671 | 3.639209 | 6.208861 |
| pseudogen             | ciliary_roo  | 0    | 0    | 0    | 5    | 5    | 0    | 0        | 0        | 0        | 0.438433 |
| protein_co            | forkhead_b   | 59   | 44   | 58   | 3    | 3    | 4    | 0.591767 | 0.565927 | 0.701899 | 0.046704 |
| protein_co            | G_patch_di   | 1818 | 1475 | 1566 | 1553 | 1662 | 1553 | 10.51252 | 10.93741 | 10.92579 | 13.93847 |
| protein_co            | carcinoeml   | 101  | 83   | 104  | 73   | 102  | 39   | 1.444475 | 1.522506 | 1.794952 | 1.620783 |
| protein_co            | neurofibroi  | 3170 | 2505 | 2744 | 1155 | 1420 | 1037 | 24.67076 | 25.00002 | 25.7665  | 13.95198 |
| protein_co            | chromosom    | 507  | 353  | 345  | 155  | 189  | 68   | 15.98738 | 14.27426 | 13.12613 | 7.586328 |
| protein_co            | spermatog    | 1    | 1    | 0    | 16   | 32   | 4    | 0.023997 | 0.030773 | 0        | 0.595945 |
| protein_co            | ubiquitin-c  | 3451 | 2776 | 2922 | 2375 | 3204 | 2128 | 31.41476 | 32.40542 | 32.0935  | 33.55698 |
| lincRNA               | MIR22_hos    | 512  | 351  | 410  | 6    | 7    | 80   | 9.142303 | 8.037151 | 8.83319  | 0.16629  |
| protein_co            | 4-hydroxyp   | 71   | 45   | 53   | 415  | 557  | 521  | 1.846473 | 1.500744 | 1.663063 | 16.75187 |
| antisense             | KTN1_antis   | 46   | 34   | 27   | 64   | 106  | 49   | 0.987158 | 0.935658 | 0.699102 | 2.131765 |
| protein_co            | katanin_p6   | 258  | 203  | 215  | 307  | 316  | 249  | 6.387341 | 6.444746 | 6.422246 | 11.79694 |
| protein_co            | fibronectin  | 22   | 16   | 13   | 10   | 14   | 29   | 0.160732 | 0.149903 | 0.114597 | 0.1134   |
| protein_co            | ArfGAP_wit   | 1919 | 1416 | 1481 | 1629 | 2101 | 1306 | 15.6029  | 14.76397 | 14.52893 | 20.55805 |
| protein_co            | kinesin_fan  | 254  | 209  | 226  | 120  | 145  | 165  | 1.912956 | 2.018491 | 2.053656 | 1.402759 |
| protein_co            | phosphodi    | 8    | 8    | 7    | 81   | 126  | 88   | 0.086934 | 0.111481 | 0.091779 | 1.366203 |
| pseudogen             | speedy_hoi   | 2    | 6    | 3    | 5    | 6    | 2    | 0.032517 | 0.125097 | 0.058851 | 0.126179 |
| protein_co            | leucine_ric  | 0    | 5    | 3    | 173  | 219  | 128  | 0        | 0.065401 | 0.036921 | 2.73894  |
| protein_co            | proteoglyc   | 0    | 0    | 1    | 0    | 1    | 0    | 0        | 0        | 0        | 0.03973  |
| protein_co            | proline_ric  | 627  | 381  | 442  | 232  | 286  | 166  | 12.90041 | 10.05241 | 10.97252 | 7.408914 |
| protein_co            | ZFP91_zinc   | 1212 | 937  | 939  | 424  | 570  | 585  | 10.88711 | 10.79341 | 10.17709 | 5.911616 |
| protein_co            | chromosom    | 211  | 192  | 148  | 460  | 657  | 347  | 5.981737 | 6.980001 | 5.062379 | 20.24106 |
| protein_co            | BCDIN3_dc    | 18   | 9    | 13   | 17   | 15   | 11   | 0.561931 | 0.360298 | 0.489668 | 0.823739 |
| protein_co            | melanoma_    | 0    | 0    | 0    | 2    | 4    | 4    | 0        | 0        | 0        | 0.064493 |
| protein_co            | cytochrom    | 519  | 463  | 492  | 107  | 179  | 135  | 5.529634 | 6.325857 | 6.324733 | 1.76947  |
| protein_co            | LYR_motif_   | 316  | 228  | 265  | 231  | 292  | 229  | 2.333057 | 2.158651 | 2.360653 | 2.647163 |

|                         |      |      |      |      |      |      |          |          |          |          |
|-------------------------|------|------|------|------|------|------|----------|----------|----------|----------|
| pseudogen: deltex_hon   | 17   | 6    | 12   | 8    | 33   | 17   | 0.482524 | 0.218389 | 0.41096  | 0.352445 |
| protein_co coiled-coil_ | 3    | 1    | 1    | 8    | 7    | 13   | 0.092913 | 0.039716 | 0.037368 | 0.38457  |
| protein_co coiled-coil_ | 0    | 0    | 1    | 0    | 0    | 0    | 0        | 0        | 0.012914 | 0        |
| pseudogen: macrophag    | 4    | 4    | 2    | 70   | 101  | 10   | 0.042851 | 0.054951 | 0.025851 | 1.163945 |
| protein_co breakpoint   | 2946 | 2186 | 2409 | 4373 | 5735 | 4448 | 19.50551 | 18.56026 | 19.24462 | 44.94014 |
| protein_co metallophc   | 0    | 0    | 0    | 10   | 14   | 5    | 0        | 0        | 0        | 0.26669  |
| pseudogen: triosephos   | 0    | 0    | 1    | 2    | 0    | 0    | 0        | 0        | 0.076453 | 0.196702 |
| protein_co fascin_hon   | 19   | 13   | 25   | 8    | 12   | 9    | 0.535081 | 0.469482 | 0.849482 | 0.349693 |
| protein_co forkhead_b   | 0    | 0    | 0    | 34   | 65   | 43   | 0        | 0        | 0        | 0.769199 |
| protein_co spindlin_fa  | 335  | 290  | 279  | 210  | 312  | 396  | 3.815437 | 4.235521 | 3.833997 | 3.712353 |
| protein_co zinc_finger_ | 72   | 84   | 56   | 310  | 352  | 319  | 1.539481 | 2.303193 | 1.444701 | 10.28807 |
| protein_co spindlin_fa  | 85   | 60   | 58   | 45   | 94   | 56   | 3.168244 | 2.867876 | 2.60841  | 2.603411 |
| protein_co forkhead_b   | 1    | 0    | 0    | 0    | 0    | 1    | 0.023682 | 0        | 0        | 0        |
| protein_co hyaluronog   | 90   | 48   | 78   | 18   | 30   | 22   | 2.17307  | 1.486215 | 2.272343 | 0.674581 |
| protein_co V-set_and_i  | 3    | 4    | 1    | 229  | 291  | 123  | 0.04141  | 0.070803 | 0.016655 | 4.906263 |
| protein_co zinc_finger_ | 312  | 280  | 244  | 634  | 781  | 464  | 5.547852 | 6.384658 | 5.234897 | 17.49806 |
| protein_co zinc_finger_ | 278  | 275  | 219  | 169  | 196  | 92   | 3.015365 | 3.825051 | 2.866073 | 2.845197 |
| protein_co two_pore_    | 753  | 543  | 606  | 551  | 708  | 526  | 6.605834 | 6.108602 | 6.41436  | 7.502651 |
| protein_co leukocyte_i  | 0    | 0    | 1    | 0    | 3    | 1    | 0        | 0        | 0.014137 | 0        |
| protein_co chromosom    | 0    | 0    | 2    | 0    | 0    | 0    | 0        | 0        | 0.085397 | 0        |
| protein_co tumor_nec    | 2    | 3    | 1    | 3    | 2    | 1    | 0.054939 | 0.105676 | 0.033143 | 0.127908 |
| pseudogen: keratin_17   | 0    | 0    | 0    | 0    | 1    | 0    | 0        | 0        | 0        | 0        |
| protein_co hexamethy    | 832  | 575  | 663  | 545  | 829  | 753  | 8.153081 | 7.225629 | 7.838988 | 8.289444 |
| protein_co Selenoprot   | 1    | 1    | 0    | 139  | 180  | 69   | 0.027518 | 0.035287 | 0        | 5.93685  |
| lincRNA long_inter      | 5    | 1    | 3    | 12   | 12   | 3    | 0.131862 | 0.033819 | 0.095459 | 0.491202 |
| protein_co keratin_14   | 0    | 0    | 0    | 0    | 1    | 0    | 0        | 0        | 0        | 0        |
| protein_co TraB_doma    | 38   | 32   | 19   | 276  | 289  | 278  | 0.457464 | 0.494006 | 0.275978 | 5.157182 |
| protein_co PDZ_doma     | 27   | 23   | 27   | 47   | 72   | 26   | 0.294015 | 0.321176 | 0.354747 | 0.794392 |
| protein_co protein_O-   | 2276 | 1825 | 1853 | 623  | 855  | 640  | 22.11848 | 22.74339 | 21.72734 | 9.397268 |
| protein_co pyroglutar   | 29   | 18   | 14   | 0    | 6    | 4    | 0.796142 | 0.633686 | 0.463734 | 0        |
| protein_co microtubul   | 75   | 43   | 52   | 123  | 140  | 66   | 0.515955 | 0.37934  | 0.431621 | 1.313368 |
| protein_co excision_re  | 233  | 211  | 185  | 398  | 365  | 442  | 2.516787 | 2.922688 | 2.411073 | 6.672739 |
| protein_co olfactory_r  | 0    | 0    | 0    | 1    | 0    | 0    | 0        | 0        | 0        | 0.066587 |
| protein_co transmemt    | 29   | 34   | 40   | 15   | 24   | 24   | 0.552768 | 0.831062 | 0.919927 | 0.443779 |
| protein_co tumor_nec    | 0    | 1    | 2    | 9    | 8    | 4    | 0        | 0.051001 | 0.095972 | 0.555571 |
| protein_co fibroblast_  | 0    | 0    | 1    | 1    | 3    | 0    | 0        | 0        | 0.063425 | 0.081592 |
| protein_co compleme     | 37   | 13   | 22   | 6    | 14   | 6    | 0.84016  | 0.378541 | 0.602741 | 0.211467 |
| protein_co reticulon_4  | 104  | 102  | 113  | 142  | 214  | 91   | 2.2136   | 2.78404  | 2.901966 | 4.691208 |
| protein_co zinc_finger_ | 855  | 641  | 737  | 349  | 352  | 420  | 7.623306 | 7.328998 | 7.928532 | 4.829844 |
| protein_co serpin_pep   | 0    | 0    | 0    | 4    | 2    | 9    | 0        | 0        | 0        | 0.197235 |
| protein_co pyrimidine   | 7    | 4    | 2    | 2    | 3    | 2    | 0.200262 | 0.146748 | 0.069037 | 0.08881  |
| protein_co zinc_finger_ | 257  | 202  | 222  | 502  | 557  | 368  | 2.506392 | 2.526252 | 2.612263 | 7.598889 |
| protein_co zinc_activa  | 4    | 5    | 2    | 3    | 3    | 4    | 0.070751 | 0.11341  | 0.042682 | 0.082361 |
| pseudogen: coiled-coil- | 0    | 0    | 0    | 1    | 2    | 1    | 0        | 0        | 0        | 0.159605 |
| protein_co peroxisome   | 386  | 299  | 315  | 169  | 208  | 62   | 1.801308 | 1.789292 | 1.773615 | 1.224103 |
| protein_co transmemt    | 3    | 1    | 4    | 3    | 6    | 8    | 0.033358 | 0.014259 | 0.053664 | 0.051776 |
| protein_co chromosom    | 0    | 1    | 1    | 1    | 0    | 1    | 0        | 0.038178 | 0.035921 | 0.046209 |
| protein_co keratin_ass  | 0    | 0    | 0    | 1    | 2    | 4    | 0        | 0        | 0        | 0.112837 |
| protein_co family_witl  | 0    | 2    | 0    | 8    | 13   | 5    | 0        | 0.226905 | 0        | 1.098563 |
| protein_co EF-hand_ca   | 7    | 11   | 10   | 4    | 7    | 6    | 0.064107 | 0.129185 | 0.110499 | 0.056859 |
| protein_co KN_motif_i   | 29   | 27   | 26   | 223  | 304  | 54   | 0.487912 | 0.582528 | 0.527794 | 5.823429 |
| protein_co EMI_doma     | 27   | 24   | 21   | 146  | 195  | 81   | 0.582619 | 0.664112 | 0.546749 | 4.889945 |
| protein_co actin-like_  | 0    | 0    | 1    | 0    | 0    | 1    | 0        | 0        | 0.03948  | 0        |
| processed_polycystic_   | 14   | 4    | 10   | 10   | 21   | 4    | 0.126364 | 0.046298 | 0.108904 | 0.140096 |
| protein_co Rh_blood_    | 12   | 8    | 18   | 22   | 14   | 5    | 0.192041 | 0.164177 | 0.347563 | 0.546469 |
| protein_co chromosom    | 34   | 23   | 30   | 0    | 0    | 0    | 1.042    | 0.903912 | 1.109324 | 0        |
| protein_co espin        | 2    | 1    | 4    | 474  | 641  | 251  | 0.026559 | 0.017029 | 0.06409  | 9.769931 |
| protein_co pancreatic   | 0    | 0    | 0    | 6    | 10   | 0    | 0        | 0        | 0        | 0.127871 |
| protein_co G_protein-   | 0    | 0    | 1    | 1    | 2    | 2    | 0        | 0        | 0.044548 | 0.057307 |
| protein_co transmemt    | 7    | 13   | 10   | 11   | 13   | 1    | 0.100684 | 0.239781 | 0.173544 | 0.245576 |
| protein_co cytochrom    | 0    | 0    | 0    | 0    | 1    | 0    | 0        | 0        | 0        | 0        |
| protein_co transmemt    | 183  | 159  | 134  | 182  | 197  | 226  | 4.389193 | 4.890352 | 3.87781  | 6.775409 |
| protein_co ribosomal_   | 933  | 771  | 771  | 702  | 994  | 1019 | 15.61885 | 16.55126 | 15.57291 | 18.24042 |
| protein_co transmemt    | 0    | 0    | 1    | 0    | 0    | 0    | 0        | 0        | 0.017424 | 0        |
| pseudogen: -            | 20   | 4    | 13   | 1    | 1    | 1    | 1.568228 | 0.402206 | 1.229902 | 0.121705 |

|                         |       |       |       |       |       |       |          |          |          |          |
|-------------------------|-------|-------|-------|-------|-------|-------|----------|----------|----------|----------|
| protein_co uncharacte   | 3     | 7     | 9     | 3     | 1     | 6     | 0.034069 | 0.10194  | 0.123318 | 0.052879 |
| protein_co chromosom    | 219   | 164   | 162   | 30    | 50    | 43    | 1.740199 | 1.671121 | 1.553166 | 0.370004 |
| protein_co TEA_domai    | 6093  | 5051  | 5251  | 1535  | 1614  | 1432  | 30.29702 | 32.20738 | 31.5035  | 11.84698 |
| protein_co phospholip   | 458   | 373   | 391   | 431   | 518   | 243   | 6.565463 | 6.856745 | 6.762771 | 9.589757 |
| protein_co cholecystol  | 1     | 0     | 0     | 3     | 6     | 3     | 0.030707 | 0        | 0        | 0.142986 |
| protein_co ectonucleo   | 508   | 393   | 456   | 179   | 197   | 90    | 4.077393 | 4.045021 | 4.416027 | 2.229987 |
| protein_co microphthi   | 44    | 34    | 25    | 4     | 8     | 7     | 0.428575 | 0.424681 | 0.293807 | 0.060473 |
| protein_co HEAT_repe    | 13    | 22    | 12    | 47    | 65    | 4     | 0.173026 | 0.375491 | 0.192707 | 0.970948 |
| protein_co nucleosom    | 7170  | 5871  | 5995  | 10496 | 11669 | 11530 | 64.62926 | 67.86275 | 65.19995 | 146.8468 |
| protein_co leukocyte_i  | 2     | 5     | 1     | 0     | 0     | 0     | 0.068703 | 0.220256 | 0.041447 | 0        |
| protein_co COX_assem    | 200   | 190   | 189   | 291   | 350   | 172   | 1.554451 | 1.893695 | 1.77238  | 3.510513 |
| protein_co slit_homol   | 0     | 0     | 0     | 5     | 7     | 7     | 0        | 0        | 0        | 0.045918 |
| protein_co LY6/PLAUR    | 118   | 90    | 69    | 92    | 111   | 80    | 1.359131 | 1.329325 | 0.958907 | 1.644741 |
| protein_co aldo-keto_r  | 38    | 28    | 48    | 31    | 28    | 20    | 0.265745 | 0.251101 | 0.405015 | 0.336491 |
| protein_co V-set_and_i  | 7     | 0     | 0     | 70    | 108   | 99    | 0.220585 | 0        | 0        | 3.423781 |
| protein_co forkhead_b   | 0     | 0     | 0     | 364   | 602   | 652   | 0        | 0        | 0        | 12.81037 |
| protein_co spermatog    | 0     | 0     | 1     | 2     | 9     | 4     | 0        | 0        | 0.015633 | 0.040221 |
| protein_co mitochond    | 901   | 742   | 764   | 979   | 1186  | 1416  | 28.87758 | 30.49645 | 29.54456 | 48.70227 |
| protein_co ring_finger  | 626   | 500   | 540   | 1217  | 1358  | 1101  | 7.654016 | 7.839608 | 7.966303 | 23.09596 |
| protein_co angiopoieti  | 0     | 0     | 1     | 0     | 0     | 0     | 0        | 0        | 0.023892 | 0        |
| protein_co KIAA1598     | 611   | 523   | 519   | 147   | 167   | 204   | 7.269678 | 7.979671 | 7.450568 | 2.7147   |
| protein_co H1_histone   | 2     | 0     | 4     | 0     | 0     | 0     | 0.072138 | 0        | 0.174078 | 0        |
| protein_co keratin_ass  | 0     | 0     | 0     | 1     | 6     | 3     | 0        | 0        | 0        | 0.123775 |
| protein_co Uncharacte   | 1     | 0     | 1     | 3     | 2     | 1     | 0.035821 | 0        | 0.04322  | 0.166799 |
| protein_co HCG20402     | 0     | 0     | 2     | 1     | 1     | 1     | 0        | 0        | 0.074197 | 0.047724 |
| protein_co zinc_finger  | 63    | 47    | 40    | 29    | 34    | 7     | 0.648819 | 0.620712 | 0.497039 | 0.463566 |
| protein_co TSPY-like_4  | 923   | 710   | 706   | 269   | 412   | 572   | 10.52773 | 10.38486 | 9.715959 | 4.762288 |
| protein_co metallothio  | 5     | 7     | 9     | 25    | 28    | 32    | 0.135756 | 0.243722 | 0.294835 | 1.053558 |
| protein_co glucosamin   | 245   | 185   | 210   | 205   | 227   | 142   | 1.923653 | 1.862695 | 1.989427 | 2.498302 |
| processed_-             | 3     | 3     | 1     | 2     | 2     | 2     | 0.068486 | 0.087823 | 0.027544 | 0.070866 |
| protein_co SEC14_and    | 1480  | 1260  | 1346  | 407   | 479   | 548   | 6.537657 | 7.137404 | 7.17387  | 2.790521 |
| protein_co formin_bin   | 1462  | 1155  | 1206  | 880   | 1073  | 723   | 12.69974 | 12.86586 | 12.63988 | 11.86481 |
| protein_co dynein_cyt   | 737   | 676   | 672   | 529   | 189   | 507   | 2.526535 | 2.971761 | 2.779554 | 2.814777 |
| protein_co keratin_12   | 0     | 0     | 1     | 0     | 0     | 0     | 0        | 0        | 0.030303 | 0        |
| protein_co melanoma     | 64    | 59    | 58    | 19    | 40    | 27    | 0.92909  | 1.098346 | 1.015907 | 0.428116 |
| protein_co basal_cell_i | 96    | 92    | 100   | 1208  | 1564  | 935   | 1.67589  | 2.059546 | 2.106311 | 32.73194 |
| protein_co round_sper   | 503   | 358   | 418   | 438   | 565   | 502   | 7.630436 | 6.96424  | 7.65078  | 10.31302 |
| protein_co WD_repeat    | 31    | 18    | 18    | 751   | 1115  | 406   | 0.718532 | 0.535015 | 0.503391 | 27.01811 |
| protein_co erythropoi   | 69    | 59    | 65    | 300   | 383   | 165   | 1.516836 | 1.663225 | 1.724054 | 10.23626 |
| protein_co family_witl  | 0     | 0     | 0     | 2     | 3     | 3     | 0        | 0        | 0        | 0.024848 |
| protein_co cell_death   | 0     | 1     | 1     | 0     | 0     | 0     | 0        | 0.047087 | 0.044303 | 0        |
| protein_co deleted_in   | 374   | 291   | 362   | 5     | 7     | 7     | 3.06535  | 3.058516 | 3.579852 | 0.063608 |
| protein_co TAF9B_RNA    | 304   | 255   | 283   | 276   | 286   | 384   | 5.254171 | 5.651713 | 5.901536 | 7.404064 |
| protein_co protocadhe   | 82    | 78    | 73    | 45    | 64    | 31    | 1.103295 | 1.345803 | 1.185082 | 0.939768 |
| protein_co membrane     | 189   | 125   | 141   | 442   | 536   | 414   | 1.29168  | 1.0955   | 1.16268  | 4.688627 |
| protein_co leucine_zip  | 61    | 48    | 57    | 17    | 26    | 16    | 0.570233 | 0.575405 | 0.642903 | 0.246662 |
| protein_co lipoma_HM    | 0     | 0     | 1     | 3     | 2     | 3     | 0        | 0        | 0.017825 | 0.06879  |
| protein_co calcineurin  | 1766  | 1563  | 1509  | 1328  | 1514  | 1230  | 25.21552 | 28.61841 | 25.99648 | 29.43105 |
| protein_co RAD52_mo     | 4     | 4     | 4     | 156   | 133   | 62    | 0.122189 | 0.15669  | 0.147428 | 7.396514 |
| protein_co formyl_pep   | 0     | 0     | 0     | 7     | 10    | 0     | 0        | 0        | 0        | 0.19445  |
| protein_co histone_cli  | 0     | 1     | 0     | 0     | 0     | 1     | 0        | 0.082938 | 0        | 0        |
| protein_co chromosom    | 197   | 148   | 194   | 10    | 13    | 9     | 5.036714 | 4.85235  | 5.984541 | 0.396836 |
| protein_co potassium_   | 0     | 2     | 1     | 182   | 237   | 53    | 0        | 0.042935 | 0.020198 | 4.728998 |
| protein_co cadherin-re  | 2     | 2     | 1     | 9     | 12    | 4     | 0.037876 | 0.04857  | 0.02285  | 0.264547 |
| protein_co collagen_ty  | 86495 | 65381 | 71246 | 3273  | 4463  | 3434  | 621.6665 | 602.5975 | 617.8385 | 36.51261 |
| protein_co pleckstrin_  | 0     | 0     | 0     | 0     | 0     | 1     | 0        | 0        | 0        | 0        |
| protein_co gap_junctio  | 2     | 0     | 0     | 16    | 24    | 27    | 0.057818 | 0        | 0        | 0.717927 |
| protein_co prothymos    | 23552 | 18027 | 18803 | 42283 | 52636 | 38219 | 675.4457 | 662.9724 | 650.6356 | 1882.17  |
| protein_co chromosom    | 0     | 0     | 1     | 0     | 0     | 0     | 0        | 0        | 0.113151 | 0        |
| protein_co heat_shock   | 341   | 289   | 289   | 481   | 503   | 682   | 8.397844 | 9.126844 | 8.587353 | 18.38607 |
| protein_co sirtuin_7    | 360   | 271   | 273   | 318   | 415   | 405   | 4.899973 | 4.730094 | 4.483342 | 6.718135 |
| protein_co chromosom    | 0     | 0     | 0     | 0     | 1     | 0     | 0        | 0        | 0        | 0        |
| pseudogeni_-            | 37    | 19    | 32    | 36    | 58    | 37    | 1.777593 | 1.17056  | 1.854935 | 2.684501 |
| protein_co intraflagell | 916   | 725   | 766   | 836   | 1041  | 444   | 8.150143 | 8.272126 | 8.223309 | 11.54533 |
| pseudogeni tropomyos    | 1     | 0     | 1     | 1     | 0     | 1     | 0.064057 | 0        | 0.077289 | 0.099426 |

|                          |      |      |      |      |      |      |          |          |          |          |
|--------------------------|------|------|------|------|------|------|----------|----------|----------|----------|
| protein_co alkylglycerol | 437  | 339  | 335  | 24   | 18   | 15   | 8.279167 | 8.23596  | 7.657695 | 0.705744 |
| protein_co SH3-bindin    | 3    | 1    | 1    | 65   | 121  | 24   | 0.12965  | 0.055419 | 0.052143 | 4.36008  |
| protein_co cytochrom     | 1    | 0    | 0    | 0    | 9    | 6    | 0.029885 | 0        | 0        | 0        |
| protein_co toll-like_re  | 10   | 14   | 7    | 77   | 74   | 22   | 0.114702 | 0.205924 | 0.096876 | 1.370852 |
| protein_co ubiquitin_s   | 2466 | 2030 | 2129 | 3992 | 4851 | 4553 | 21.36563 | 22.55423 | 22.25596 | 53.68384 |
| protein_co nanos_hon     | 23   | 34   | 27   | 5    | 6    | 3    | 1.389781 | 2.634553 | 1.968478 | 0.468942 |
| protein_co NHL_repea     | 11   | 16   | 14   | 21   | 29   | 37   | 0.241701 | 0.450833 | 0.371161 | 0.716202 |
| protein_co developme     | 0    | 0    | 0    | 17   | 14   | 16   | 0        | 0        | 0        | 1.14667  |
| protein_co pleckstrin_   | 16   | 11   | 19   | 50   | 48   | 25   | 0.305597 | 0.269421 | 0.437855 | 1.482277 |
| pseudogen: telomeric_    | 0    | 0    | 0    | 1    | 2    | 0    | 0        | 0        | 0        | 0.060049 |
| protein_co zinc_finger   | 2    | 0    | 1    | 112  | 128  | 98   | 0.044978 | 0        | 0.027135 | 3.909515 |
| protein_co melanoma_     | 436  | 353  | 341  | 183  | 249  | 171  | 13.99319 | 14.52828 | 13.20482 | 9.116156 |
| protein_co tet_methyl    | 1418 | 1044 | 1263 | 657  | 960  | 1103 | 6.053906 | 5.715698 | 6.505951 | 4.353667 |
| protein_co Zinc_finger   | 333  | 283  | 253  | 402  | 427  | 575  | 2.780338 | 3.030045 | 2.548718 | 5.209665 |
| protein_co ISG15_ubic    | 516  | 416  | 431  | 277  | 363  | 243  | 34.02989 | 35.18143 | 34.29542 | 28.35444 |
| protein_co exonucleas    | 401  | 290  | 298  | 231  | 360  | 104  | 6.412993 | 5.947354 | 5.750171 | 5.734016 |
| protein_co transmembr    | 23   | 14   | 24   | 0    | 0    | 0    | 1.318423 | 1.029116 | 1.659917 | 0        |
| processed_ T-cell_leuk   | 0    | 0    | 0    | 2    | 1    | 1    | 0        | 0        | 0        | 0.034395 |
| protein_co chromosom     | 51   | 32   | 34   | 21   | 34   | 25   | 1.300376 | 1.046304 | 1.045985 | 0.831091 |
| protein_co zinc_finger   | 109  | 93   | 100  | 140  | 136  | 163  | 2.152005 | 2.354556 | 2.382127 | 4.290178 |
| protein_co RANBP2-lik    | 2    | 1    | 1    | 1    | 1    | 2    | 0.014003 | 0.008979 | 0.008448 | 0.010868 |
| protein_co dehydrogen    | 173  | 131  | 111  | 91   | 93   | 78   | 5.921148 | 5.749637 | 4.583855 | 4.834279 |
| protein_co sterile_alph  | 632  | 444  | 507  | 50   | 63   | 31   | 11.61681 | 10.46555 | 11.24413 | 1.426496 |
| protein_co chromosom     | 1    | 5    | 1    | 5    | 9    | 5    | 0.015304 | 0.098123 | 0.018465 | 0.118766 |
| protein_co vimentin-ty   | 108  | 84   | 100  | 24   | 41   | 23   | 2.246727 | 2.240862 | 2.510005 | 0.77494  |
| pseudogen: thymosin_     | 106  | 93   | 76   | 116  | 188  | 126  | 8.797065 | 9.897471 | 7.610156 | 14.9424  |
| protein_co chromosom     | 1    | 0    | 0    | 0    | 0    | 0    | 0.068353 | 0        | 0        | 0        |
| pseudogen: WAS_prote     | 34   | 36   | 27   | 1    | 4    | 0    | 0.436903 | 0.593224 | 0.418618 | 0.019945 |
| protein_co ELKS/RAB6-    | 30   | 17   | 18   | 123  | 131  | 141  | 0.229179 | 0.166537 | 0.165911 | 1.458442 |
| protein_co beta_13-ga    | 313  | 247  | 250  | 71   | 99   | 101  | 3.450065 | 3.491316 | 3.324842 | 1.214708 |
| protein_co sprouty_hc    | 7590 | 5895 | 6129 | 3751 | 4174 | 4124 | 72.07275 | 71.78314 | 70.22099 | 55.28494 |
| protein_co ES_cell_exp   | 1    | 0    | 0    | 2    | 0    | 0    | 0.037038 | 0        | 0        | 0.114976 |
| pseudogen: -             | 7    | 2    | 2    | 2    | 2    | 1    | 0.098331 | 0.036027 | 0.033898 | 0.043607 |
| protein_co transient_r   | 174  | 137  | 135  | 11   | 27   | 5    | 2.905578 | 2.933683 | 2.719976 | 0.285106 |
| protein_co amelotin      | 0    | 0    | 1    | 0    | 0    | 0    | 0        | 0        | 0.054557 | 0        |
| protein_co chromosom     | 0    | 0    | 0    | 6    | 7    | 5    | 0        | 0        | 0        | 0.227318 |
| protein_co Uncharacte    | 1    | 4    | 0    | 7    | 12   | 3    | 0.020467 | 0.104984 | 0        | 0.222374 |
| protein_co chromosom     | 43   | 26   | 20   | 23   | 26   | 18   | 0.499695 | 0.387453 | 0.280424 | 0.414854 |
| protein_co transmembr    | 884  | 706  | 693  | 880  | 1192 | 975  | 26.62221 | 27.26502 | 25.18101 | 41.13438 |
| protein_co solute_carr   | 45   | 36   | 29   | 2    | 0    | 1    | 0.872282 | 0.894863 | 0.678251 | 0.060173 |
| protein_co kelch_repe    | 0    | 0    | 2    | 0    | 0    | 1    | 0        | 0        | 0.019757 | 0        |
| protein_co thrombosp     | 436  | 337  | 384  | 271  | 326  | 206  | 2.222179 | 2.202581 | 2.361412 | 2.14384  |
| protein_co DnaJ_(Hsp4    | 7    | 0    | 0    | 3    | 5    | 5    | 0.175056 | 0        | 0        | 0.116448 |
| protein_co gamma-am      | 0    | 0    | 0    | 29   | 40   | 15   | 0        | 0        | 0        | 1.103301 |
| protein_co transcriptio  | 1727 | 1378 | 1379 | 2678 | 3241 | 3107 | 27.30245 | 27.93623 | 26.30399 | 65.71285 |
| protein_co nonhomolo     | 0    | 1    | 3    | 1    | 2    | 1    | 0        | 0.028457 | 0.080325 | 0.034444 |
| protein_co Fanconi_ar    | 738  | 583  | 661  | 652  | 797  | 613  | 6.348346 | 6.431053 | 6.860468 | 8.705271 |
| protein_co SECIS_bind    | 806  | 693  | 762  | 1520 | 1654 | 1619 | 6.992295 | 7.709519 | 7.976047 | 20.46722 |
| protein_co olfactory_r   | 0    | 0    | 0    | 0    | 2    | 0    | 0        | 0        | 0        | 0        |
| protein_co chromosom     | 3    | 1    | 0    | 0    | 2    | 0    | 0.076244 | 0.032591 | 0        | 0        |
| protein_co alcohol_de    | 2    | 1    | 0    | 0    | 0    | 0    | 0.062562 | 0.040113 | 0        | 0        |
| pseudogen: -             | 1    | 2    | 1    | 1    | 0    | 0    | 0.151258 | 0.387934 | 0.182502 | 0.234774 |
| pseudogen: olfactory_r   | 0    | 0    | 0    | 0    | 1    | 0    | 0        | 0        | 0        | 0        |
| protein_co sema_dom      | 392  | 280  | 287  | 1259 | 1525 | 1132 | 3.233794 | 2.962059 | 2.856645 | 16.12065 |
| protein_co lin-28_hon    | 101  | 77   | 92   | 1765 | 2093 | 2420 | 0.860289 | 0.841053 | 0.945494 | 23.33449 |
| protein_co family_witl   | 3    | 0    | 0    | 2    | 5    | 5    | 0.069881 | 0        | 0        | 0.07231  |
| protein_co dynein_axc    | 52   | 55   | 66   | 62   | 52   | 44   | 0.17679  | 0.239787 | 0.270735 | 0.327171 |
| protein_co microspher    | 1381 | 1075 | 1162 | 1464 | 1637 | 1840 | 26.43066 | 26.38348 | 26.83295 | 43.48964 |
| protein_co transmembr    | 1    | 0    | 1    | 2    | 0    | 0    | 0.015583 | 0        | 0.018802 | 0.048375 |
| protein_co scleraxis_h   | 20   | 8    | 14   | 0    | 1    | 1    | 1.547525 | 0.793793 | 1.307025 | 0        |
| protein_co Fanconi_ar    | 169  | 152  | 174  | 157  | 125  | 151  | 1.114388 | 1.285294 | 1.384354 | 1.606867 |
| protein_co zinc_finger   | 360  | 297  | 302  | 60   | 78   | 89   | 4.199106 | 4.442425 | 4.2502   | 1.086266 |
| protein_co caspase_re    | 248  | 161  | 194  | 84   | 109  | 127  | 2.542353 | 2.116506 | 2.399573 | 1.336577 |
| protein_co platelet_en   | 322  | 260  | 262  | 24   | 41   | 13   | 3.037945 | 3.145623 | 2.982451 | 0.351452 |
| protein_co ZFP69_zinc    | 146  | 114  | 117  | 94   | 126  | 93   | 2.874031 | 2.877748 | 2.778898 | 2.872083 |

|                         |      |      |      |      |      |      |          |          |          |          |
|-------------------------|------|------|------|------|------|------|----------|----------|----------|----------|
| protein_co sosondowa    | 3    | 3    | 1    | 162  | 169  | 109  | 0.088527 | 0.113524 | 0.035604 | 7.419967 |
| protein_co -            | 0    | 0    | 0    | 1    | 0    | 0    | 0        | 0        | 0        | 0.0207   |
| pseudogen -             | 0    | 0    | 0    | 5    | 1    | 0    | 0        | 0        | 0        | 0.175712 |
| protein_co ZFP69_zinc   | 164  | 134  | 141  | 80   | 91   | 55   | 2.678496 | 2.806476 | 2.778525 | 2.027999 |
| protein_co helt_bHLH_   | 0    | 0    | 0    | 0    | 11   | 5    | 0        | 0        | 0        | 0        |
| protein_co zinc_finger  | 0    | 0    | 0    | 6    | 4    | 5    | 0        | 0        | 0        | 0.158966 |
| protein_co transmembr   | 32   | 31   | 30   | 35   | 37   | 51   | 0.483091 | 0.600136 | 0.546447 | 0.82012  |
| protein_co chromosom    | 0    | 0    | 1    | 12   | 11   | 1    | 0        | 0        | 0.01858  | 0.286817 |
| protein_co histone_clu  | 259  | 241  | 222  | 408  | 466  | 442  | 16.59087 | 19.79683 | 17.15814 | 40.56579 |
| protein_co phospholip   | 0    | 0    | 0    | 1    | 0    | 0    | 0        | 0        | 0        | 0.028463 |
| protein_co eukaryotic   | 2156 | 1525 | 1609 | 1786 | 2504 | 2077 | 99.11262 | 89.89994 | 89.24509 | 127.436  |
| protein_co purinergic   | 0    | 3    | 2    | 30   | 24   | 17   | 0        | 0.09662  | 0.060606 | 1.169467 |
| protein_co coiled-coil  | 60   | 54   | 40   | 90   | 116  | 117  | 0.587472 | 0.678014 | 0.472545 | 1.367756 |
| protein_co tetratricop  | 6    | 4    | 2    | 0    | 0    | 1    | 0.140319 | 0.11996  | 0.056434 | 0        |
| protein_co family_witl  | 300  | 208  | 212  | 237  | 293  | 333  | 3.858202 | 3.430334 | 3.289634 | 4.730887 |
| protein_co paralemmii   | 702  | 574  | 618  | 898  | 1404 | 922  | 14.55207 | 15.2584  | 15.45697 | 28.89313 |
| protein_co chromosom    | 1    | 0    | 0    | 0    | 0    | 0    | 0.014957 | 0        | 0        | 0        |
| pseudogen CXXC_finge    | 1    | 0    | 0    | 0    | 0    | 0    | 0.024718 | 0        | 0        | 0        |
| protein_co shisa_home   | 11   | 5    | 4    | 26   | 31   | 21   | 0.085495 | 0.049834 | 0.037511 | 0.313654 |
| processed -             | 0    | 4    | 1    | 2    | 0    | 4    | 0        | 0.40697  | 0.095728 | 0.246294 |
| protein_co deleted_in   | 2    | 4    | 5    | 1    | 2    | 4    | 0.012201 | 0.031293 | 0.036804 | 0.009469 |
| protein_co C-type_lect  | 1    | 0    | 1    | 0    | 2    | 4    | 0.022707 | 0        | 0.027397 | 0        |
| protein_co lipocalin_1  | 0    | 0    | 0    | 2    | 0    | 0    | 0        | 0        | 0        | 0.044623 |
| protein_co low_densit   | 4    | 5    | 4    | 6    | 3    | 3    | 0.04675  | 0.074937 | 0.056406 | 0.108843 |
| protein_co chromosom    | 4    | 8    | 7    | 0    | 0    | 0    | 0.112379 | 0.28822  | 0.237285 | 0        |
| protein_co ovochymas    | 0    | 0    | 1    | 1    | 0    | 3    | 0        | 0        | 0.016615 | 0.021374 |
| protein_co Rho_GTPas    | 201  | 191  | 173  | 146  | 154  | 132  | 4.613262 | 5.621533 | 4.790779 | 5.201102 |
| pseudogen heparan_su    | 0    | 2    | 2    | 4    | 6    | 6    | 0        | 0.097455 | 0.091694 | 0.235915 |
| pseudogen PMS2_C-ter    | 139  | 122  | 118  | 138  | 178  | 132  | 1.959036 | 2.20494  | 2.006585 | 3.01882  |
| protein_co cysteine/hi  | 1360 | 964  | 1166 | 1005 | 1303 | 923  | 10.3557  | 9.412979 | 10.71241 | 11.87783 |
| protein_co collagen_ty  | 1284 | 970  | 1002 | 381  | 384  | 389  | 9.311287 | 9.020399 | 8.767191 | 4.288448 |
| protein_co delta/notcl  | 53   | 56   | 50   | 27   | 28   | 18   | 0.762322 | 1.032904 | 0.867722 | 0.602777 |
| protein_co cleavage_ar  | 1    | 0    | 0    | 0    | 3    | 0    | 0.036776 | 0        | 0        | 0        |
| protein_co kelch-like_f | 422  | 311  | 359  | 577  | 639  | 348  | 7.729526 | 7.304831 | 7.933831 | 16.40388 |
| antisense -             | 0    | 0    | 1    | 1    | 0    | 2    | 0        | 0        | 0.030433 | 0.03915  |
| protein_co phospholip   | 0    | 0    | 0    | 4    | 1    | 0    | 0        | 0        | 0        | 0.089603 |
| pseudogen ankyrin_rej   | 7    | 8    | 5    | 79   | 105  | 43   | 0.138494 | 0.20297  | 0.119358 | 2.425993 |
| protein_co zinc_finger  | 43   | 41   | 32   | 38   | 57   | 40   | 0.645    | 0.788651 | 0.579148 | 0.884719 |
| protein_co histone_clu  | 8    | 4    | 8    | 5    | 9    | 14   | 0.842967 | 0.540493 | 1.017088 | 0.817751 |
| protein_co Ras_and_Ra   | 34   | 26   | 19   | 204  | 259  | 128  | 0.527726 | 0.517502 | 0.355821 | 4.914624 |
| protein_co chromosom    | 0    | 1    | 0    | 0    | 0    | 0    | 0        | 0.025012 | 0        | 0        |
| pseudogen -             | 0    | 0    | 0    | 2    | 6    | 3    | 0        | 0        | 0        | 0.157532 |
| protein_co olfactory_r  | 0    | 1    | 1    | 1    | 1    | 0    | 0        | 0.018703 | 0.017597 | 0.022638 |
| protein_co tumor_pro    | 6    | 3    | 3    | 12   | 10   | 5    | 0.051349 | 0.032924 | 0.030978 | 0.159401 |
| pseudogen -             | 0    | 1    | 1    | 32   | 33   | 32   | 0        | 0.025718 | 0.024198 | 0.996131 |
| protein_co chromosom    | 8    | 16   | 6    | 0    | 0    | 0    | 0.149988 | 0.384677 | 0.135727 | 0        |
| protein_co MORN_repi    | 144  | 111  | 113  | 36   | 45   | 65   | 7.347293 | 7.262685 | 6.956509 | 2.851004 |
| protein_co CXXC_finge   | 0    | 0    | 0    | 1    | 3    | 0    | 0        | 0        | 0        | 0.027971 |
| pseudogen Meis_home     | 0    | 0    | 0    | 10   | 12   | 9    | 0        | 0        | 0        | 0.442969 |
| protein_co S100_calci   | 53   | 38   | 42   | 0    | 0    | 2    | 2.903237 | 2.669313 | 2.775901 | 0        |
| protein_co ubiquilin_2  | 1876 | 1377 | 1466 | 740  | 974  | 737  | 25.73601 | 24.22432 | 24.26556 | 15.75689 |
| protein_co Rab_intera   | 418  | 314  | 315  | 192  | 255  | 65   | 7.515348 | 7.239554 | 6.833314 | 5.358022 |
| pseudogen cathepsin_1   | 0    | 0    | 0    | 1    | 0    | 1    | 0        | 0        | 0        | 0.09236  |
| protein_co chromosom    | 1    | 2    | 3    | 2    | 1    | 3    | 0.032859 | 0.084274 | 0.118939 | 0.102004 |
| protein_co zinc_finger  | 22   | 14   | 24   | 37   | 25   | 19   | 0.24347  | 0.198682 | 0.320465 | 0.635556 |
| protein_co chloride_cl  | 2    | 3    | 9    | 15   | 22   | 12   | 0.029565 | 0.056869 | 0.160523 | 0.344167 |
| protein_co NACHT_anc    | 0    | 1    | 0    | 0    | 1    | 1    | 0        | 0.007164 | 0        | 0        |
| protein_co ADP-ribosy   | 4985 | 4381 | 4520 | 390  | 649  | 777  | 58.24738 | 65.64382 | 63.72322 | 7.073043 |
| protein_co ring_finger  | 0    | 0    | 0    | 0    | 1    | 1    | 0        | 0        | 0        | 0        |
| protein_co transmembr   | 2    | 4    | 5    | 40   | 40   | 16   | 0.048591 | 0.124621 | 0.146569 | 1.50839  |
| protein_co triggering_1 | 3    | 1    | 0    | 0    | 0    | 0    | 0.061055 | 0.026098 | 0        | 0        |
| protein_co RAB42_me     | 135  | 117  | 119  | 98   | 124  | 72   | 3.246232 | 3.607788 | 3.452556 | 3.657652 |
| protein_co wingless-ty  | 969  | 801  | 953  | 5    | 5    | 5    | 11.59388 | 12.28986 | 13.75771 | 0.092855 |
| processed chromosom     | 1488 | 1117 | 1214 | 1158 | 1616 | 1799 | 12.49952 | 12.03242 | 12.30431 | 15.09835 |
| protein_co secretoglot  | 0    | 0    | 0    | 0    | 2    | 0    | 0        | 0        | 0        | 0        |

|                         |       |       |       |      |      |      |          |          |          |          |
|-------------------------|-------|-------|-------|------|------|------|----------|----------|----------|----------|
| protein_co protease_s   | 0     | 0     | 0     | 8    | 13   | 2    | 0        | 0        | 0        | 0.186138 |
| protein_co phospholip   | 0     | 0     | 0     | 0    | 1    | 1    | 0        | 0        | 0        | 0        |
| protein_co G_protein-i  | 22    | 15    | 32    | 21   | 31   | 32   | 0.381925 | 0.333931 | 0.670276 | 0.565856 |
| protein_co mesoderm_    | 13    | 12    | 9     | 21   | 22   | 9    | 0.392764 | 0.464921 | 0.32808  | 0.984778 |
| protein_co family_witl  | 0     | 0     | 0     | 0    | 1    | 0    | 0        | 0        | 0        | 0        |
| pseudogeni arachidona   | 0     | 0     | 0     | 0    | 0    | 1    | 0        | 0        | 0        | 0        |
| protein_co eyes_shut_l  | 17    | 17    | 19    | 32   | 11   | 3    | 0.075279 | 0.096535 | 0.101514 | 0.219941 |
| protein_co chromosom    | 2     | 8     | 8     | 1320 | 1935 | 1848 | 0.015101 | 0.077462 | 0.072883 | 15.4701  |
| protein_co deleted_in_  | 0     | 0     | 1     | 0    | 0    | 0    | 0        | 0        | 0.012797 | 0        |
| protein_co olfactory_r  | 0     | 0     | 1     | 0    | 1    | 1    | 0        | 0        | 0.052924 | 0        |
| protein_co mitogen-ac   | 1066  | 739   | 803   | 409  | 547  | 417  | 8.000121 | 7.112023 | 7.271148 | 4.764235 |
| protein_co transmembr   | 3     | 0     | 0     | 5    | 4    | 4    | 0.039282 | 0        | 0        | 0.101619 |
| protein_co NUT_family   | 48    | 54    | 44    | 47   | 70   | 53   | 0.78945  | 1.138902 | 0.87314  | 1.199807 |
| protein_co collagen_ty  | 577   | 455   | 445   | 494  | 590  | 494  | 4.173306 | 4.220123 | 3.883403 | 5.545769 |
| protein_co keratin_ass  | 0     | 0     | 0     | 1    | 4    | 1    | 0        | 0        | 0        | 0.058788 |
| protein_co agrin        | 28929 | 20311 | 22210 | 6960 | 9590 | 6556 | 185.2357 | 166.7754 | 171.5884 | 69.17212 |
| protein_co Nance-Hor    | 124   | 129   | 148   | 124  | 206  | 110  | 0.663664 | 0.885372 | 0.955733 | 1.030099 |
| protein_co otogelin     | 0     | 0     | 0     | 30   | 45   | 16   | 0        | 0        | 0        | 0.21937  |
| protein_co family_witl  | 2     | 1     | 1     | 0    | 0    | 0    | 0.054523 | 0.034959 | 0.032893 | 0        |
| protein_co transmembr   | 65    | 59    | 73    | 52   | 57   | 76   | 0.769271 | 0.895421 | 1.042406 | 0.955212 |
| protein_co zinc_finger  | 47    | 35    | 30    | 152  | 201  | 209  | 0.369584 | 0.352934 | 0.284633 | 1.855195 |
| protein_co smoothelir   | 2     | 0     | 0     | 87   | 113  | 26   | 0.041132 | 0        | 0        | 2.777124 |
| protein_co zinc_finger  | 190   | 192   | 150   | 341  | 338  | 74   | 0.772019 | 1.000426 | 0.735384 | 2.150599 |
| processed_ long_inter   | 71    | 73    | 90    | 123  | 187  | 130  | 1.091896 | 1.439644 | 1.669989 | 2.936017 |
| protein_co late_endos   | 819   | 612   | 673   | 1126 | 1366 | 1030 | 52.60675 | 50.41019 | 52.15797 | 112.2604 |
| protein_co protein_kir  | 250   | 138   | 215   | 665  | 969  | 971  | 4.591659 | 3.250259 | 4.764486 | 18.95753 |
| protein_co NUT_family   | 29    | 21    | 12    | 3    | 11   | 5    | 0.342522 | 0.318067 | 0.171009 | 0.054997 |
| processed_ HNRNPU_a     | 54    | 71    | 47    | 117  | 140  | 83   | 0.505704 | 0.852649 | 0.531066 | 1.700666 |
| protein_co natural_kill | 702   | 535   | 586   | 36   | 39   | 26   | 5.112891 | 4.996807 | 5.149619 | 0.40697  |
| protein_co DCN1_defe    | 164   | 171   | 174   | 111  | 137  | 114  | 2.552261 | 3.41261  | 3.267221 | 2.681234 |
| protein_co zinc_finger  | 52    | 41    | 52    | 201  | 219  | 262  | 0.363272 | 0.367301 | 0.438308 | 2.17949  |
| protein_co tubulin_be   | 8086  | 6235  | 6788  | 5259 | 6106 | 6616 | 186.3158 | 184.2306 | 188.7148 | 188.083  |
| protein_co ArfGAP_wit   | 58    | 49    | 51    | 43   | 42   | 53   | 1.115056 | 1.20802  | 1.183006 | 1.283121 |
| protein_co Uncharacte   | 131   | 92    | 84    | 130  | 170  | 82   | 3.274303 | 2.948796 | 2.533232 | 5.043376 |
| protein_co COMM_doi     | 552   | 398   | 422   | 409  | 472  | 352  | 14.43574 | 13.34727 | 13.3156  | 16.60175 |
| protein_co phospholip   | 0     | 0     | 0     | 36   | 74   | 22   | 0        | 0        | 0        | 2.006181 |
| protein_co interleukin  | 2     | 0     | 0     | 8    | 9    | 1    | 0.025567 | 0        | 0        | 0.158735 |
| protein_co aminoglycc   | 7     | 6     | 7     | 16   | 20   | 5    | 0.150564 | 0.165495 | 0.181664 | 0.534164 |
| protein_co chromosom    | 61    | 53    | 64    | 28   | 24   | 19   | 1.151023 | 1.282446 | 1.457075 | 0.820054 |
| protein_co family_witl  | 0     | 0     | 1     | 0    | 0    | 0    | 0        | 0        | 0.187958 | 0        |
| protein_co family_witl  | 1     | 2     | 0     | 0    | 0    | 13   | 0.005296 | 0.013583 | 0        | 0        |
| protein_co RUN_and_f    | 0     | 0     | 0     | 2    | 4    | 1    | 0        | 0        | 0        | 0.040796 |
| protein_co zinc_finger  | 67    | 68    | 63    | 31   | 59   | 52   | 1.385199 | 1.802833 | 1.571542 | 0.994786 |
| protein_co hairy_and_   | 57    | 37    | 41    | 94   | 181  | 26   | 2.569934 | 2.139233 | 2.23038  | 6.578174 |
| protein_co zinc_finger  | 101   | 101   | 110   | 154  | 176  | 204  | 2.427418 | 3.112819 | 3.189803 | 5.744792 |
| protein_co chromosom    | 17    | 12    | 12    | 6    | 2    | 4    | 0.310893 | 0.281419 | 0.264784 | 0.170312 |
| protein_co leucine-ricl | 2     | 0     | 1     | 1    | 2    | 4    | 0.05133  | 0        | 0.030966 | 0.039836 |
| protein_co centromere   | 243   | 197   | 253   | 124  | 145  | 104  | 1.299826 | 1.351308 | 1.632855 | 1.029511 |
| protein_co phospholip   | 554   | 441   | 482   | 481  | 594  | 541  | 11.63326 | 11.87516 | 12.212   | 15.67715 |
| protein_co chromosom    | 150   | 134   | 126   | 50   | 53   | 64   | 1.660803 | 1.902572 | 1.683238 | 0.859266 |
| protein_co enolase_far  | 17    | 5     | 12    | 8    | 3    | 4    | 0.286841 | 0.108186 | 0.244299 | 0.209514 |
| protein_co zinc_finger  | 112   | 92    | 75    | 156  | 117  | 137  | 1.726391 | 1.818521 | 1.39486  | 3.732297 |
| protein_co SH3-bindin   | 590   | 413   | 444   | 5701 | 8744 | 5343 | 5.541889 | 4.974681 | 5.031956 | 83.11652 |
| processed_olute_carr    | 7     | 0     | 3     | 25   | 28   | 19   | 0.132887 | 0        | 0.068715 | 0.736638 |
| protein_co general_tra  | 498   | 395   | 443   | 469  | 604  | 623  | 16.30672 | 16.58608 | 17.50206 | 23.8364  |
| protein_co family_witl  | 515   | 386   | 449   | 305  | 347  | 313  | 5.694025 | 5.47279  | 5.98972  | 5.234105 |
| protein_co focadhesin   | 1088  | 936   | 941   | 751  | 855  | 659  | 8.368822 | 9.232528 | 8.733194 | 8.966147 |
| antisense -             | 6     | 5     | 2     | 8    | 11   | 4    | 0.373626 | 0.399268 | 0.150267 | 0.773225 |
| protein_co proline_ric  | 24    | 19    | 28    | 51   | 69   | 55   | 0.575338 | 0.584083 | 0.809874 | 1.897633 |
| protein_co zona_pellu   | 18    | 19    | 17    | 35   | 35   | 12   | 0.457216 | 0.618887 | 0.52101  | 1.379899 |
| protein_co H3_histone   | 2     | 0     | 2     | 0    | 1    | 2    | 0.08906  | 0        | 0.107456 | 0        |
| pseudogeni -            | 3     | 1     | 3     | 24   | 40   | 19   | 0.13321  | 0.056941 | 0.160726 | 1.654086 |
| pseudogeni -            | 1     | 0     | 1     | 1    | 1    | 2    | 0.00975  | 0        | 0.011765 | 0.015134 |
| protein_co Janus_kina   | 9     | 11    | 12    | 39   | 39   | 35   | 0.06369  | 0.099823 | 0.102461 | 0.428375 |
| protein_co protein_ph   | 0     | 0     | 0     | 0    | 0    | 1    | 0        | 0        | 0        | 0        |

|                           |      |      |      |      |      |      |          |          |          |          |
|---------------------------|------|------|------|------|------|------|----------|----------|----------|----------|
| pseudogen: golgin_A6_     | 1    | 0    | 0    | 1    | 1    | 0    | 0.027927 | 0        | 0        | 0.043347 |
| protein_co programme      | 0    | 0    | 0    | 0    | 1    | 3    | 0        | 0        | 0        | 0        |
| protein_co G_protein-     | 1    | 1    | 2    | 1    | 0    | 1    | 0.040077 | 0.051393 | 0.09671  | 0.062205 |
| protein_co Tctex1_dor     | 15   | 16   | 13   | 2    | 2    | 5    | 0.55733  | 0.762343 | 0.58279  | 0.11534  |
| pseudogen: ankyrin_rej    | 0    | 0    | 0    | 0    | 2    | 0    | 0        | 0        | 0        | 0        |
| protein_co selectin_L     | 4    | 5    | 12   | 0    | 1    | 0    | 0.076995 | 0.123419 | 0.278697 | 0        |
| protein_co choroidere     | 456  | 330  | 386  | 199  | 154  | 229  | 3.929042 | 3.646239 | 4.01289  | 2.661371 |
| protein_co nanos_hon      | 0    | 0    | 0    | 1    | 2    | 0    | 0        | 0        | 0        | 0.046594 |
| protein_co biogenesis_    | 147  | 114  | 114  | 157  | 211  | 149  | 2.568119 | 2.553948 | 2.402983 | 4.257239 |
| pseudogen: signal_reco    | 2    | 5    | 4    | 2    | 7    | 4    | 0.047388 | 0.15192  | 0.114352 | 0.073552 |
| protein_co ceramide_k     | 283  | 187  | 216  | 4    | 6    | 9    | 4.136495 | 3.505072 | 3.809323 | 0.090748 |
| pseudogen: WAS_prote      | 0    | 0    | 1    | 15   | 6    | 9    | 0        | 0        | 0.030125 | 0.581308 |
| protein_co solute_carr    | 7    | 8    | 10   | 40   | 31   | 48   | 0.109997 | 0.161206 | 0.189596 | 0.975601 |
| sense_intrc -             | 0    | 0    | 0    | 0    | 0    | 2    | 0        | 0        | 0        | 0        |
| protein_co immediate      | 2267 | 1622 | 1745 | 225  | 288  | 109  | 39.28295 | 36.04232 | 36.48347 | 6.051536 |
| protein_co H2A_histor     | 3633 | 2642 | 2796 | 4114 | 5496 | 5536 | 105.5461 | 98.42808 | 98.00812 | 185.5118 |
| protein_co inscuteable    | 0    | 0    | 2    | 11   | 11   | 0    | 0        | 0        | 0.038304 | 0.271015 |
| protein_co serpin_pep     | 4    | 1    | 1    | 17   | 16   | 13   | 0.081125 | 0.026008 | 0.02447  | 0.535146 |
| protein_co chromosom      | 161  | 138  | 141  | 860  | 1056 | 757  | 2.742206 | 3.014134 | 2.897619 | 22.73543 |
| protein_co lactase-like   | 93   | 42   | 66   | 52   | 47   | 50   | 1.385692 | 0.802495 | 1.186522 | 1.20259  |
| protein_co non-specifi    | 0    | 0    | 0    | 23   | 29   | 12   | 0        | 0        | 0        | 0.846277 |
| protein_co keratinocyt    | 0    | 0    | 0    | 3    | 2    | 4    | 0        | 0        | 0        | 0.444683 |
| protein_co chromosom      | 0    | 0    | 0    | 1    | 3    | 0    | 0        | 0        | 0        | 0.025845 |
| pseudogen: -              | 0    | 0    | 0    | 1    | 2    | 0    | 0        | 0        | 0        | 0.228867 |
| protein_co collagen_ty    | 3372 | 2572 | 2536 | 78   | 101  | 86   | 34.14971 | 33.40256 | 30.98822 | 1.226096 |
| protein_co family_witl    | 426  | 365  | 362  | 874  | 1210 | 688  | 3.79323  | 4.167751 | 3.889163 | 12.07929 |
| protein_co chromosom      | 3    | 8    | 5    | 26   | 31   | 9    | 0.077376 | 0.264598 | 0.155598 | 1.040855 |
| protein_co serine/argir   | 2338 | 1831 | 2007 | 1871 | 2280 | 3136 | 27.70504 | 27.82352 | 28.69523 | 34.41269 |
| protein_co hemoglobi      | 0    | 0    | 0    | 4    | 4    | 2    | 0        | 0        | 0        | 0.454874 |
| protein_co dual_specif    | 47   | 35   | 28   | 26   | 47   | 38   | 0.636761 | 0.608074 | 0.457704 | 0.546742 |
| protein_co chromosom      | 115  | 94   | 113  | 20   | 28   | 4    | 1.07396  | 1.125712 | 1.273259 | 0.289902 |
| protein_co neighbor_c     | 2019 | 1619 | 1770 | 1418 | 1323 | 926  | 19.03699 | 19.57574 | 20.13647 | 20.75241 |
| protein_co Ral_GTPase     | 299  | 216  | 235  | 474  | 603  | 607  | 1.598827 | 1.481131 | 1.516164 | 3.934043 |
| protein_co NADPH_dej      | 510  | 364  | 413  | 452  | 651  | 698  | 9.577056 | 8.765417 | 9.357502 | 13.1744  |
| protein_co fibrillarin-li | 5    | 3    | 4    | 56   | 83   | 41   | 0.154345 | 0.118755 | 0.148981 | 2.683126 |
| protein_co Na+/K+_tra     | 0    | 4    | 0    | 0    | 3    | 2    | 0        | 0.077213 | 0        | 0        |
| protein_co keratin_ass    | 0    | 1    | 0    | 0    | 0    | 0    | 0        | 0.066589 | 0        | 0        |
| protein_co progesterin_   | 5    | 2    | 12   | 42   | 33   | 22   | 0.111484 | 0.057185 | 0.322827 | 1.45352  |
| protein_co chromosom      | 8    | 5    | 7    | 0    | 0    | 0    | 0.13611  | 0.109089 | 0.143697 | 0        |
| pseudogen: nuclear_po     | 15   | 15   | 16   | 16   | 24   | 19   | 0.242367 | 0.310802 | 0.311926 | 0.401267 |
| protein_co ceroid-lipo    | 2    | 5    | 2    | 1    | 11   | 3    | 0.030438 | 0.097582 | 0.036725 | 0.023622 |
| protein_co family_witl    | 100  | 64   | 78   | 337  | 368  | 179  | 1.975148 | 1.621022 | 1.858841 | 10.33142 |
| protein_co N-acylsphir    | 14   | 11   | 15   | 14   | 11   | 14   | 0.136848 | 0.137884 | 0.176909 | 0.212407 |
| protein_co SMT3_supp      | 2276 | 1755 | 1836 | 2993 | 3513 | 2777 | 72.94715 | 72.1311  | 70.99975 | 148.8926 |
| protein_co nanos_hon      | 127  | 131  | 128  | 208  | 232  | 239  | 1.287018 | 1.7024   | 1.565089 | 3.271709 |
| protein_co H6_family_     | 0    | 0    | 0    | 0    | 0    | 2    | 0        | 0        | 0        | 0        |
| protein_co IGF-like_far   | 74   | 61   | 68   | 3    | 1    | 4    | 5.241482 | 5.540661 | 5.811381 | 0.329818 |
| protein_co golgin_A8_     | 3    | 3    | 1    | 5    | 3    | 0    | 0.074076 | 0.094992 | 0.029792 | 0.191627 |
| protein_co zinc_finger    | 2    | 0    | 1    | 3    | 5    | 1    | 0.038608 | 0        | 0.023292 | 0.089889 |
| protein_co leucine_zip    | 1578 | 1161 | 1293 | 747  | 879  | 951  | 13.46541 | 12.7044  | 13.31249 | 9.893815 |
| protein_co dihydropyr     | 292  | 300  | 217  | 1    | 2    | 4    | 3.103328 | 4.088608 | 2.782612 | 0.016496 |
| protein_co S100_calci     | 3788 | 3021 | 3224 | 137  | 151  | 83   | 154.9907 | 158.5097 | 159.1618 | 8.700552 |
| protein_co protein_pri    | 1030 | 751  | 845  | 1218 | 1514 | 1209 | 4.890312 | 4.572446 | 4.840654 | 8.975881 |
| protein_co coiled-coil_   | 0    | 0    | 0    | 0    | 0    | 2    | 0        | 0        | 0        | 0        |
| protein_co ribonuclea     | 0    | 0    | 0    | 1    | 0    | 2    | 0        | 0        | 0        | 0.026926 |
| protein_co family_witl    | 28   | 29   | 26   | 36   | 28   | 30   | 0.418928 | 0.556402 | 0.469356 | 0.836016 |
| lincRNA long_inter        | 3    | 5    | 11   | 6    | 2    | 1    | 0.040111 | 0.085728 | 0.177454 | 0.124516 |
| pseudogen: histone_lin    | 12   | 6    | 9    | 2    | 0    | 0    | 0.461592 | 0.295963 | 0.417703 | 0.119409 |
| protein_co Rh_blood_      | 20   | 15   | 13   | 6    | 8    | 2    | 0.518122 | 0.498313 | 0.406343 | 0.241259 |
| protein_co chromosom      | 0    | 0    | 0    | 0    | 0    | 6    | 0        | 0        | 0        | 0        |
| protein_co indoleamir     | 0    | 0    | 0    | 2    | 2    | 2    | 0        | 0        | 0        | 0.034137 |
| protein_co parvin_bet     | 378  | 335  | 373  | 239  | 272  | 164  | 10.38946 | 11.80743 | 12.36967 | 10.196   |
| pseudogen: tektin_4_p     | 88   | 81   | 70   | 115  | 110  | 75   | 1.892808 | 2.234181 | 1.816645 | 3.839301 |
| protein_co scleraxis_h    | 41   | 22   | 43   | 0    | 0    | 0    | 1.924415 | 1.32418  | 2.435182 | 0        |
| protein_co solute_carr    | 4    | 1    | 4    | 9    | 12   | 9    | 0.028522 | 0.009144 | 0.034413 | 0.099607 |

|                         |      |      |      |       |       |       |          |          |          |          |
|-------------------------|------|------|------|-------|-------|-------|----------|----------|----------|----------|
| protein_co uroporphyrin | 856  | 595  | 697  | 293   | 306   | 372   | 25.79554 | 22.99308 | 25.34263 | 13.70468 |
| pseudogen: -            | 0    | 0    | 0    | 0     | 0     | 1     | 0        | 0        | 0        | 0        |
| processed_ -            | 1    | 1    | 1    | 1     | 7     | 6     | 0.015857 | 0.020335 | 0.019133 | 0.024613 |
| protein_co zinc_finger  | 1149 | 933  | 960  | 578   | 654   | 781   | 11.79178 | 12.27864 | 11.88717 | 9.206987 |
| protein_co chromosom    | 0    | 0    | 0    | 2     | 1     | 10    | 0        | 0        | 0        | 0.0507   |
| protein_co pyroglutar   | 4    | 6    | 6    | 0     | 1     | 7     | 0.456351 | 0.877807 | 0.82592  | 0        |
| protein_co dual_specif  | 6    | 2    | 3    | 1     | 3     | 0     | 0.424344 | 0.181387 | 0.255998 | 0.109773 |
| pseudogen: -            | 0    | 0    | 0    | 10    | 11    | 6     | 0        | 0        | 0        | 1.128369 |
| protein_co small_integ  | 645  | 509  | 545  | 293   | 347   | 409   | 10.4687  | 10.594   | 10.67278 | 7.381267 |
| protein_co osteocrin    | 0    | 0    | 0    | 3     | 0     | 0     | 0        | 0        | 0        | 0.069668 |
| protein_co von_Willek   | 47   | 57   | 34   | 185   | 226   | 109   | 1.165431 | 1.812479 | 1.017222 | 7.120182 |
| protein_co family_witl  | 23   | 17   | 14   | 173   | 227   | 120   | 0.259622 | 0.246078 | 0.190673 | 3.031032 |
| protein_co transmemt    | 757  | 619  | 632  | 577   | 913   | 541   | 4.757505 | 4.988654 | 4.792349 | 5.628461 |
| protein_co fibrous_she  | 28   | 29   | 32   | 27    | 14    | 25    | 0.06236  | 0.082823 | 0.085989 | 0.093334 |
| protein_co RNA_bindin   | 5    | 14   | 7    | 7     | 10    | 6     | 0.114143 | 0.409843 | 0.192808 | 0.248032 |
| protein_co NADPH_oxi    | 8    | 2    | 7    | 66    | 84    | 22    | 0.223552 | 0.071668 | 0.236012 | 2.862614 |
| protein_co transmemt    | 53   | 19   | 22   | 89    | 122   | 110   | 1.038517 | 0.47742  | 0.520126 | 2.706812 |
| protein_co BCL2-like_1  | 2    | 3    | 5    | 1     | 1     | 1     | 0.023207 | 0.04464  | 0.070002 | 0.01801  |
| protein_co frizzled_fan | 149  | 76   | 88   | 91    | 119   | 48    | 2.983182 | 1.951266 | 2.125809 | 2.827909 |
| protein_co sprouty-rel  | 290  | 197  | 232  | 43    | 47    | 30    | 8.835676 | 7.696926 | 8.528601 | 2.033484 |
| protein_co opticin      | 0    | 0    | 0    | 2     | 3     | 8     | 0        | 0        | 0        | 0.107108 |
| protein_co chromosom    | 0    | 3    | 1    | 4     | 2     | 1     | 0        | 0.11706  | 0.036714 | 0.188916 |
| protein_co adrenocept   | 0    | 0    | 0    | 2     | 1     | 0     | 0        | 0        | 0        | 0.04946  |
| protein_co SKI_family_  | 27   | 12   | 22   | 8     | 14    | 20    | 0.344498 | 0.196342 | 0.338683 | 0.158432 |
| protein_co cation_cha   | 0    | 0    | 0    | 6     | 18    | 6     | 0        | 0        | 0        | 0.228388 |
| protein_co proline/arg  | 0    | 0    | 2    | 8     | 9     | 3     | 0        | 0        | 0.019689 | 0.101312 |
| protein_co phospholip   | 1    | 0    | 0    | 0     | 0     | 1     | 0.059733 | 0        | 0        | 0        |
| protein_co zinc_finger  | 99   | 89   | 86   | 94    | 111   | 110   | 1.373    | 1.582831 | 1.439069 | 2.023455 |
| protein_co metal-regul  | 396  | 287  | 308  | 271   | 311   | 311   | 2.329208 | 2.164733 | 2.185807 | 2.474075 |
| protein_co transmemt    | 0    | 2    | 0    | 0     | 0     | 0     | 0        | 0.162733 | 0        | 0        |
| pseudogen: zinc_finger  | 11   | 2    | 9    | 40    | 73    | 46    | 0.217266 | 0.050657 | 0.214482 | 1.226281 |
| protein_co shisa_homo   | 1054 | 786  | 858  | 57    | 83    | 29    | 6.524367 | 6.239211 | 6.408156 | 0.54765  |
| protein_co transmemt    | 770  | 510  | 583  | 647   | 873   | 873   | 9.375568 | 7.963177 | 8.564923 | 12.22761 |
| protein_co NHL_repea    | 308  | 274  | 297  | 273   | 335   | 211   | 4.069351 | 4.642312 | 4.734552 | 5.598446 |
| protein_co H6_family_   | 0    | 0    | 0    | 28    | 14    | 10    | 0        | 0        | 0        | 1.251741 |
| protein_co sentan_cili  | 0    | 0    | 0    | 0     | 2     | 1     | 0        | 0        | 0        | 0        |
| protein_co zinc_finger  | 20   | 5    | 14   | 101   | 127   | 93    | 0.239052 | 0.076638 | 0.201901 | 1.87376  |
| protein_co family_witl  | 5    | 2    | 1    | 2     | 3     | 10    | 0.211407 | 0.10844  | 0.051015 | 0.131253 |
| protein_co cannabinoi   | 0    | 0    | 0    | 0     | 0     | 1     | 0        | 0        | 0        | 0        |
| lincRNA -               | 2    | 9    | 8    | 24    | 38    | 3     | 0.03245  | 0.187255 | 0.15661  | 0.6044   |
| protein_co SLX4_struc   | 748  | 583  | 612  | 631   | 876   | 525   | 4.800018 | 4.797546 | 4.738499 | 6.28494  |
| protein_co glycine_rec  | 0    | 1    | 1    | 4     | 9     | 5     | 0        | 0.032733 | 0.030798 | 0.158475 |
| pseudogen: developme    | 0    | 0    | 0    | 1     | 2     | 1     | 0        | 0        | 0        | 0.059705 |
| protein_co ectonucleo   | 4    | 4    | 5    | 27    | 27    | 12    | 0.066135 | 0.084809 | 0.099745 | 0.692897 |
| protein_co ribosomal_   | 9397 | 7240 | 7754 | 12085 | 11985 | 12588 | 456.134  | 450.6622 | 454.1268 | 910.5009 |
| protein_co BEN_domai    | 0    | 0    | 0    | 1698  | 2160  | 1247  | 0        | 0        | 0        | 14.09927 |
| pseudogen: ribosomal_   | 62   | 47   | 44   | 143   | 266   | 106   | 3.273853 | 3.182546 | 2.803291 | 11.72017 |
| protein_co family_witl  | 4    | 0    | 0    | 45    | 42    | 28    | 0.042637 | 0        | 0        | 0.744508 |
| protein_co zinc_finger  | 0    | 1    | 1    | 59    | 45    | 33    | 0        | 0.021834 | 0.020543 | 1.55919  |
| protein_co transmemt    | 14   | 7    | 6    | 1     | 2     | 2     | 0.141357 | 0.090635 | 0.073095 | 0.015672 |
| pseudogen: ribosomal_   | 1    | 1    | 1    | 3     | 1     | 1     | 0.071697 | 0.091942 | 0.086507 | 0.333852 |
| protein_co Fas_(TNFRS   | 54   | 38   | 56   | 91    | 127   | 41    | 0.524779 | 0.473561 | 0.656628 | 1.372635 |
| protein_co killer_cell_ | 0    | 1    | 0    | 305   | 467   | 219   | 0        | 0.027369 | 0        | 10.1037  |
| protein_co astacin-like | 0    | 0    | 0    | 12    | 25    | 9     | 0        | 0        | 0        | 0.673887 |
| protein_co G_protein-   | 0    | 1    | 0    | 3     | 3     | 2     | 0        | 0.007535 | 0        | 0.027361 |
| protein_co male-specif  | 2338 | 1803 | 1913 | 1139  | 1638  | 1388  | 32.01777 | 31.66297 | 31.60892 | 24.21034 |
| protein_co Protein_LO   | 11   | 16   | 14   | 216   | 316   | 129   | 0.067627 | 0.126141 | 0.103849 | 2.061156 |
| protein_co leucine-ricl | 8    | 4    | 6    | 5     | 7     | 6     | 0.040961 | 0.026263 | 0.037066 | 0.039736 |
| protein_co brain-speci  | 3    | 0    | 0    | 0     | 0     | 1     | 0.169482 | 0        | 0        | 0        |
| protein_co gap_junctio  | 2    | 0    | 1    | 5     | 14    | 7     | 0.0423   | 0        | 0.025519 | 0.16414  |
| protein_co family_witl  | 43   | 47   | 43   | 28    | 20    | 11    | 0.457931 | 0.641858 | 0.55252  | 0.462829 |
| protein_co tRNA_meth    | 416  | 308  | 316  | 354   | 443   | 317   | 5.701914 | 5.413615 | 5.225916 | 7.531146 |
| protein_co protein_ty   | 102  | 113  | 116  | 33    | 46    | 46    | 1.149431 | 1.632941 | 1.577207 | 0.577201 |
| protein_co chromosom    | 232  | 180  | 196  | 125   | 146   | 120   | 14.05489 | 13.98367 | 14.32661 | 11.75384 |
| pseudogen: ubiquitin_s  | 0    | 1    | 0    | 2     | 11    | 5     | 0        | 0.015634 | 0        | 0.037847 |

|                         |      |      |      |      |      |      |          |          |          |          |
|-------------------------|------|------|------|------|------|------|----------|----------|----------|----------|
| protein_co nyctalopin   | 0    | 0    | 0    | 14   | 20   | 8    | 0        | 0        | 0        | 0.375568 |
| protein_co family_witl  | 566  | 441  | 468  | 493  | 592  | 727  | 9.577679 | 9.569556 | 9.555156 | 12.94855 |
| protein_co urotensin_   | 3    | 3    | 5    | 1    | 0    | 1    | 0.058735 | 0.075319 | 0.118112 | 0.030388 |
| protein_co chromosom    | 7    | 4    | 3    | 1    | 3    | 2    | 0.120806 | 0.088524 | 0.062468 | 0.026787 |
| protein_co Uncharacte   | 518  | 401  | 445  | 115  | 164  | 129  | 6.641791 | 6.593396 | 6.884359 | 2.288673 |
| protein_co nucleolar_c  | 2617 | 1950 | 2131 | 3673 | 4228 | 4097 | 29.20999 | 27.91076 | 28.6985  | 63.63252 |
| protein_co Myb/SANT-    | 15   | 9    | 7    | 10   | 11   | 8    | 0.222298 | 0.171039 | 0.125167 | 0.230025 |
| protein_co arylacetam   | 0    | 0    | 0    | 13   | 7    | 6    | 0        | 0        | 0        | 0.246904 |
| pseudogen: dihydrofol   | 15   | 7    | 12   | 48   | 44   | 43   | 0.477171 | 0.285555 | 0.460588 | 2.370034 |
| protein_co negative_el  | 2416 | 1824 | 1894 | 2663 | 3492 | 2388 | 41.98899 | 40.65113 | 39.71609 | 71.83566 |
| protein_co histone_cl   | 1    | 1    | 4    | 4    | 1    | 5    | 0.127766 | 0.163841 | 0.616627 | 0.79324  |
| protein_co solute_carr  | 0    | 0    | 0    | 1    | 2    | 0    | 0        | 0        | 0        | 0.024899 |
| protein_co lipase_men   | 5    | 10   | 3    | 3    | 9    | 3    | 0.141919 | 0.363982 | 0.10274  | 0.132167 |
| protein_co leucine_ric  | 36   | 35   | 27   | 7    | 6    | 1    | 0.507376 | 0.632565 | 0.459134 | 0.153129 |
| protein_co zinc_finger  | 934  | 756  | 746  | 496  | 317  | 649  | 4.127736 | 4.284461 | 3.977882 | 3.402336 |
| protein_co HUS1_chec    | 3    | 3    | 0    | 12   | 9    | 9    | 0.137239 | 0.17599  | 0        | 0.852056 |
| protein_co potassium_   | 140  | 122  | 123  | 28   | 34   | 30   | 1.83113  | 2.046258 | 1.941084 | 0.568434 |
| protein_co suprabasin   | 0    | 2    | 0    | 2    | 3    | 3    | 0        | 0.06183  | 0        | 0.074838 |
| protein_co adenosine_   | 132  | 93   | 92   | 133  | 145  | 131  | 2.997328 | 2.708025 | 2.520555 | 4.687513 |
| pseudogen: -            | 0    | 1    | 4    | 0    | 2    | 2    | 0        | 0.066442 | 0.250057 | 0        |
| pseudogen: family_witl  | 2    | 5    | 2    | 6    | 3    | 8    | 0.03458  | 0.110859 | 0.041722 | 0.161017 |
| protein_co melanoma_    | 0    | 0    | 0    | 0    | 0    | 1    | 0        | 0        | 0        | 0        |
| protein_co von_Hippel   | 0    | 1    | 0    | 0    | 0    | 0    | 0        | 0.0593   | 0        | 0        |
| protein_co zinc_finger  | 92   | 68   | 65   | 152  | 88   | 155  | 1.155298 | 1.095026 | 0.984844 | 2.962649 |
| protein_co NADH_deh     | 1556 | 1314 | 1286 | 2557 | 2472 | 2296 | 34.25393 | 37.09416 | 34.15779 | 87.36993 |
| protein_co ankyrin_re   | 4    | 0    | 4    | 11   | 9    | 10   | 0.073009 | 0        | 0.08809  | 0.31163  |
| protein_co alkB_alkyla  | 169  | 133  | 163  | 163  | 227  | 130  | 6.837285 | 6.900141 | 7.956693 | 10.23564 |
| protein_co ring_finger  | 164  | 102  | 119  | 19   | 33   | 32   | 3.660144 | 2.9192   | 3.204419 | 0.658171 |
| protein_co ring_finger  | 1    | 0    | 0    | 4    | 5    | 0    | 0.015314 | 0        | 0        | 0.095075 |
| protein_co chorionic_   | 0    | 1    | 0    | 0    | 0    | 0    | 0        | 0.071498 | 0        | 0        |
| protein_co reelin       | 0    | 2    | 1    | 14   | 23   | 10   | 0        | 0.010393 | 0.004889 | 0.088058 |
| protein_co family_witl  | 196  | 175  | 183  | 176  | 80   | 414  | 2.634875 | 3.016833 | 2.968268 | 3.672375 |
| protein_co apolipopro   | 7    | 5    | 4    | 0    | 0    | 0    | 0.271265 | 0.24847  | 0.187026 | 0        |
| protein_co H1_histone   | 7364 | 5755 | 5999 | 7619 | 9809 | 5634 | 148.2602 | 148.5818 | 145.7263 | 238.089  |
| protein_co lipopolysac  | 1370 | 1133 | 1124 | 870  | 1138 | 842  | 27.2547  | 28.90414 | 26.97958 | 26.86399 |
| protein_co V-set_and_   | 1    | 0    | 0    | 2    | 0    | 0    | 0.045043 | 0        | 0        | 0.139827 |
| polymorph transmembr    | 340  | 257  | 253  | 176  | 217  | 130  | 10.94959 | 10.61357 | 9.830771 | 8.797558 |
| protein_co AT_rich_int  | 898  | 709  | 749  | 823  | 875  | 783  | 4.872395 | 4.93312  | 4.903385 | 6.931009 |
| pseudogen: ribosomal_   | 1    | 2    | 6    | 10   | 9    | 10   | 0.040284 | 0.103316 | 0.291626 | 0.625256 |
| protein_co splicing_fac | 4360 | 3577 | 3833 | 5035 | 4994 | 4676 | 29.3357  | 30.863   | 31.11693 | 52.58234 |
| protein_co protease_sc  | 0    | 1    | 1    | 0    | 8    | 5    | 0        | 0.060799 | 0.057205 | 0        |
| protein_co interleukin  | 0    | 0    | 0    | 6    | 6    | 5    | 0        | 0        | 0        | 0.146291 |
| protein_co biogenesis_  | 298  | 182  | 176  | 89   | 138  | 124  | 5.372251 | 4.207467 | 3.828254 | 2.490351 |
| protein_co Sp6_transc   | 5    | 9    | 7    | 52   | 76   | 21   | 0.060928 | 0.140636 | 0.102918 | 0.983511 |
| protein_co ankyrin_re   | 0    | 0    | 3    | 4    | 8    | 3    | 0        | 0        | 0.0431   | 0.073926 |
| protein_co placenta-sp  | 79   | 72   | 64   | 28   | 36   | 32   | 4.718868 | 5.51509  | 4.612525 | 2.595967 |
| protein_co NFKB_activ   | 0    | 1    | 0    | 0    | 2    | 0    | 0        | 0.036687 | 0        | 0        |
| pseudogen: ubiquitin-c  | 57   | 44   | 43   | 11   | 19   | 17   | 1.243131 | 1.230563 | 1.13151  | 0.372362 |
| protein_co claudin_4    | 37   | 25   | 17   | 666  | 862  | 411  | 0.41675  | 0.361097 | 0.231031 | 11.64337 |
| protein_co zinc_finger  | 56   | 27   | 49   | 49   | 90   | 64   | 1.043657 | 0.645272 | 1.101828 | 1.417413 |
| pseudogen: -            | 0    | 0    | 0    | 0    | 1    | 0    | 0        | 0        | 0        | 0        |
| lincRNA CRYM_anti       | 9    | 11   | 6    | 2    | 4    | 0    | 0.208092 | 0.326148 | 0.167383 | 0.071775 |
| protein_co GRB2-relat   | 0    | 0    | 0    | 0    | 1    | 0    | 0        | 0        | 0        | 0        |
| protein_co family_witl  | 0    | 1    | 0    | 6    | 8    | 6    | 0        | 0.009622 | 0        | 0.06988  |
| protein_co hematologi   | 3755 | 2958 | 2965 | 3464 | 3883 | 4219 | 76.92093 | 77.70377 | 73.28369 | 110.1395 |
| protein_co zinc_finger  | 103  | 74   | 68   | 43   | 55   | 79   | 0.90562  | 0.834353 | 0.721383 | 0.586824 |
| pseudogen: trinucleoti  | 1    | 0    | 0    | 1    | 0    | 1    | 0.017425 | 0        | 0        | 0.027046 |
| protein_co zygote_arre  | 1    | 1    | 0    | 6    | 5    | 3    | 0.029981 | 0.038446 | 0        | 0.279206 |
| protein_co keratin_ass  | 0    | 0    | 1    | 4    | 9    | 2    | 0        | 0        | 0.064806 | 0.33347  |
| protein_co S100_calci   | 1798 | 1506 | 1498 | 373  | 398  | 376  | 38.60268 | 41.46313 | 38.80499 | 12.42988 |
| protein_co zinc_finger  | 325  | 279  | 301  | 641  | 516  | 712  | 2.491296 | 2.742556 | 2.783918 | 7.62659  |
| protein_co protocadhe   | 1754 | 1391 | 1484 | 377  | 442  | 311  | 13.92568 | 14.16196 | 14.21572 | 4.645781 |
| protein_co zinc_finger  | 26   | 25   | 22   | 80   | 73   | 58   | 0.318397 | 0.392595 | 0.325062 | 1.520602 |
| protein_co BTB_(POZ)_   | 9    | 7    | 14   | 13   | 8    | 3    | 0.261145 | 0.260463 | 0.490134 | 0.585481 |
| lincRNA -               | 0    | 0    | 3    | 0    | 0    | 0    | 0        | 0        | 0.079721 | 0        |

|                         |      |      |      |       |       |       |          |          |          |          |
|-------------------------|------|------|------|-------|-------|-------|----------|----------|----------|----------|
| pseudogen: dpy-19-like  | 28   | 23   | 32   | 8     | 3     | 2     | 0.335442 | 0.353343 | 0.462549 | 0.148758 |
| protein_co monoamin     | 26   | 13   | 12   | 92    | 131   | 84    | 0.303646 | 0.194692 | 0.169092 | 1.667682 |
| processed_ -            | 1014 | 762  | 829  | 219   | 282   | 213   | 17.695   | 17.05207 | 17.45482 | 5.931811 |
| protein_co chromosom    | 51   | 37   | 49   | 18    | 25    | 11    | 1.708136 | 1.589145 | 1.980143 | 0.93574  |
| lincRNA -               | 42   | 58   | 48   | 50    | 60    | 54    | 1.818449 | 3.220248 | 2.507502 | 3.360102 |
| protein_co nuclear_GT   | 1    | 0    | 0    | 0     | 0     | 1     | 0.012063 | 0        | 0        | 0        |
| protein_co TSPY-like_1  | 2111 | 1575 | 1800 | 1199  | 1569  | 1765  | 29.76092 | 28.47397 | 30.61813 | 26.23662 |
| protein_co proline-ricl | 1411 | 988  | 1107 | 1576  | 1755  | 1822  | 27.38486 | 24.5895  | 25.92263 | 47.47557 |
| protein_co chromosom    | 3    | 0    | 3    | 0     | 2     | 1     | 0.108208 | 0        | 0.130559 | 0        |
| protein_co Uncharacte   | 0    | 0    | 0    | 0     | 0     | 1     | 0        | 0        | 0        | 0        |
| protein_co gap_junctio  | 1    | 0    | 0    | 0     | 0     | 1     | 0.034605 | 0        | 0        | 0        |
| protein_co fragile_hist | 21   | 16   | 21   | 30    | 25    | 25    | 0.321479 | 0.314096 | 0.387883 | 0.712829 |
| protein_co family_witl  | 5    | 3    | 4    | 42    | 71    | 71    | 0.168791 | 0.12987  | 0.162924 | 2.200685 |
| protein_co zinc_finger  | 112  | 71   | 104  | 94    | 112   | 111   | 2.244309 | 1.824451 | 2.514467 | 2.923633 |
| protein_co ribosomal_   | 1038 | 764  | 935  | 741   | 986   | 1237  | 12.80501 | 12.08607 | 13.91689 | 14.18833 |
| protein_co lin-54_horn  | 346  | 264  | 288  | 169   | 304   | 194   | 2.647943 | 2.590871 | 2.659335 | 2.007473 |
| antisense -             | 0    | 0    | 0    | 1     | 0     | 1     | 0        | 0        | 0        | 0.068531 |
| protein_co family_witl  | 530  | 416  | 454  | 839   | 1032  | 552   | 4.575899 | 4.605781 | 4.729383 | 11.24328 |
| protein_co family_witl  | 4    | 3    | 2    | 0     | 0     | 0     | 0.1042   | 0.100216 | 0.062862 | 0        |
| protein_co chromosom    | 0    | 0    | 0    | 0     | 2     | 0     | 0        | 0        | 0        | 0        |
| protein_co S100_calci   | 0    | 4    | 3    | 7     | 10    | 11    | 0        | 0.197471 | 0.139349 | 0.418275 |
| protein_co kazrin_peri  | 384  | 284  | 273  | 341   | 504   | 269   | 2.986031 | 2.831984 | 2.561379 | 4.11574  |
| protein_co solute_carr  | 2314 | 1726 | 1891 | 1399  | 1696  | 1445  | 17.33006 | 16.57627 | 17.08741 | 16.26241 |
| pseudogen: ribosomal_   | 7449 | 5668 | 5900 | 10763 | 14774 | 9146  | 378.4223 | 369.2478 | 361.6419 | 848.6771 |
| pseudogen: family_witl  | 0    | 0    | 0    | 3     | 2     | 2     | 0        | 0        | 0        | 0.157874 |
| protein_co family_witl  | 4    | 1    | 4    | 26    | 24    | 30    | 0.014779 | 0.004738 | 0.017832 | 0.149104 |
| protein_co transmembr   | 107  | 95   | 72   | 72    | 76    | 72    | 0.813429 | 0.926124 | 0.660414 | 0.84957  |
| protein_co ALG1_chitc   | 1    | 1    | 0    | 18    | 14    | 12    | 0.058248 | 0.074695 | 0        | 1.627374 |
| protein_co KIAA0408     | 15   | 8    | 9    | 2     | 0     | 1     | 0.106892 | 0.073106 | 0.077383 | 0.022122 |
| protein_co G1_to_S_pl   | 307  | 223  | 233  | 485   | 574   | 673   | 5.061616 | 4.714819 | 4.635054 | 12.41146 |
| protein_co TBC1_dom     | 1    | 0    | 0    | 1     | 3     | 1     | 0.016812 | 0        | 0        | 0.026095 |
| protein_co chromosom    | 19   | 13   | 22   | 9     | 29    | 17    | 0.663868 | 0.582479 | 0.927467 | 0.488091 |
| protein_co chemokine    | 1    | 1    | 2    | 4     | 1     | 1     | 0.040009 | 0.051305 | 0.096545 | 0.248395 |
| pseudogen: olfactory_r  | 2    | 5    | 3    | 132   | 156   | 197   | 0.096382 | 0.308992 | 0.174436 | 9.873519 |
| protein_co OTU_doma     | 0    | 0    | 0    | 2     | 3     | 0     | 0        | 0        | 0        | 0.086181 |
| protein_co high_mobil   | 9887 | 7630 | 8148 | 9071  | 9977  | 11854 | 110.4076 | 109.2618 | 109.7826 | 157.2245 |
| protein_co matrix_me    | 90   | 64   | 62   | 53    | 85    | 39    | 2.756435 | 2.51359  | 2.291105 | 2.519484 |
| protein_co SH2_domai    | 54   | 68   | 67   | 287   | 441   | 281   | 0.683417 | 1.103597 | 1.023093 | 5.637734 |
| lincRNA -               | 0    | 3    | 2    | 1     | 5     | 3     | 0        | 0.087061 | 0.05461  | 0.035125 |
| protein_co ZFP92_zinc   | 0    | 0    | 0    | 1     | 5     | 4     | 0        | 0        | 0        | 0.058084 |
| pseudogen: ubiquitin_s  | 22   | 19   | 13   | 9     | 13    | 10    | 0.878689 | 0.97314  | 0.626475 | 0.557937 |
| protein_co natural_cyl  | 0    | 0    | 0    | 10    | 4     | 16    | 0        | 0        | 0        | 0.451488 |
| pseudogen: Ras_assoc    | 283  | 161  | 228  | 52    | 84    | 71    | 7.180668 | 5.238581 | 6.980095 | 2.047916 |
| protein_co gap_junctio  | 0    | 0    | 0    | 0     | 1     | 0     | 0        | 0        | 0        | 0        |
| protein_co olfactory_r  | 0    | 0    | 0    | 1     | 0     | 0     | 0        | 0        | 0        | 0.038651 |
| protein_co biogenesis_  | 635  | 489  | 580  | 508   | 543   | 560   | 14.71105 | 14.52741 | 16.21235 | 18.26687 |
| protein_co synaptoner   | 23   | 46   | 24   | 4     | 3     | 3     | 0.193726 | 0.496851 | 0.243904 | 0.052294 |
| protein_co zinc_finger  | 100  | 87   | 71   | 357   | 462   | 554   | 1.696455 | 1.892653 | 1.453278 | 9.400285 |
| protein_co interleukin  | 903  | 681  | 764  | 109   | 119   | 77    | 8.861801 | 8.570195 | 9.046397 | 1.660318 |
| protein_co protein_ty   | 5    | 1    | 3    | 13    | 15    | 30    | 0.018381 | 0.004714 | 0.013307 | 0.074178 |
| protein_co paired_box   | 0    | 0    | 0    | 471   | 637   | 324   | 0        | 0        | 0        | 4.015849 |
| processed_ -            | 0    | 1    | 0    | 0     | 0     | 0     | 0        | 0.034817 | 0        | 0        |
| protein_co sparc/ostec  | 12   | 3    | 11   | 76    | 97    | 71    | 0.188439 | 0.060412 | 0.208416 | 1.852399 |
| protein_co zinc_finger  | 48   | 62   | 61   | 38    | 54    | 17    | 0.670256 | 1.110199 | 1.027727 | 0.823595 |
| pseudogen: -            | 2    | 1    | 3    | 0     | 3     | 1     | 0.235038 | 0.150701 | 0.42538  | 0        |
| protein_co tudor_dom    | 122  | 94   | 84   | 40    | 51    | 43    | 1.492066 | 1.474231 | 1.239526 | 0.759309 |
| protein_co chromosom    | 16   | 15   | 11   | 5     | 12    | 10    | 0.354891 | 0.426654 | 0.294385 | 0.172138 |
| protein_co KIAA0895-l   | 826  | 751  | 807  | 248   | 373   | 279   | 10.91018 | 12.72042 | 12.86097 | 5.084335 |
| protein_co major_hist   | 12   | 7    | 19   | 23    | 21    | 12    | 0.457836 | 0.342481 | 0.874642 | 1.36203  |
| protein_co vomeronas    | 0    | 0    | 0    | 1     | 0     | 0     | 0        | 0        | 0        | 0.055515 |
| protein_co myelin_tra   | 16   | 10   | 8    | 64    | 84    | 21    | 0.133637 | 0.107107 | 0.080621 | 0.829695 |
| protein_co serpin_pep   | 5    | 2    | 9    | 0     | 0     | 0     | 0.076443 | 0.039211 | 0.166019 | 0        |
| pseudogen: -            | 0    | 2    | 0    | 0     | 1     | 1     | 0        | 0.06779  | 0        | 0        |
| protein_co aldo-keto_r  | 9    | 14   | 8    | 27    | 28    | 25    | 0.233542 | 0.465864 | 0.250473 | 1.087468 |
| protein_co spermatogr   | 3382 | 2494 | 2584 | 1655  | 2287  | 2162  | 58.77763 | 55.58329 | 54.18499 | 44.64439 |

|                         |       |       |       |       |       |       |          |          |          |          |
|-------------------------|-------|-------|-------|-------|-------|-------|----------|----------|----------|----------|
| protein_co zinc_finger  | 219   | 196   | 220   | 150   | 172   | 127   | 1.613594 | 1.851892 | 1.955784 | 1.715426 |
| protein_co WD_repeat    | 88    | 54    | 48    | 105   | 117   | 66    | 2.149126 | 1.691151 | 1.414388 | 3.980145 |
| protein_co zinc_finger  | 83    | 64    | 74    | 61    | 73    | 73    | 1.872893 | 1.851928 | 2.01472  | 2.136462 |
| protein_co S100_calci   | 1303  | 918   | 959   | 57    | 51    | 40    | 80.9241  | 73.11146 | 71.86213 | 5.494634 |
| protein_co plectstrin_  | 173   | 107   | 141   | 123   | 156   | 80    | 1.167358 | 0.925873 | 1.147956 | 1.288231 |
| protein_co FAT_tumor    | 2148  | 1632  | 1701  | 244   | 229   | 400   | 6.246961 | 6.08645  | 5.968798 | 1.101425 |
| protein_co chromosom    | 0     | 0     | 0     | 16    | 12    | 10    | 0        | 0        | 0        | 0.211877 |
| protein_co kinesin_fan  | 0     | 0     | 0     | 16    | 30    | 7     | 0        | 0        | 0        | 0.319648 |
| protein_co zinc_finger  | 12    | 10    | 11    | 235   | 251   | 265   | 0.086606 | 0.09255  | 0.095787 | 2.632485 |
| protein_co histone_clu  | 1     | 1     | 0     | 0     | 4     | 0     | 0.126048 | 0.161639 | 0        | 0        |
| protein_co acyl-CoA_d   | 176   | 140   | 132   | 135   | 161   | 202   | 1.408541 | 1.436793 | 1.274615 | 1.676954 |
| protein_co serine/thre  | 830   | 584   | 651   | 529   | 657   | 670   | 8.046044 | 7.259831 | 7.614359 | 7.959585 |
| pseudogen: ribosomal_   | 1     | 0     | 0     | 0     | 2     | 0     | 0.052626 | 0        | 0        | 0        |
| protein_co transmembr   | 481   | 450   | 421   | 1010  | 1156  | 1603  | 4.171278 | 5.004329 | 4.405084 | 13.5949  |
| protein_co sema_dom     | 22    | 18    | 12    | 227   | 261   | 211   | 0.3126   | 0.327981 | 0.205729 | 5.006368 |
| pseudogen: -            | 0     | 0     | 1     | 1     | 1     | 2     | 0        | 0        | 0.16788  | 0.215964 |
| protein_co histidine_ri | 16    | 13    | 12    | 2     | 3     | 1     | 0.789727 | 0.822829 | 0.714638 | 0.153221 |
| protein_co M-phase_pl   | 1139  | 970   | 969   | 885   | 1141  | 1004  | 12.61103 | 13.77235 | 12.9449  | 15.209   |
| pseudogen: ring_finger  | 338   | 256   | 292   | 175   | 214   | 271   | 4.363664 | 4.238224 | 4.548471 | 3.506736 |
| pseudogen: eukaryotic_  | 1671  | 1449  | 1330  | 2395  | 2819  | 2219  | 46.75013 | 51.98572 | 44.89584 | 104.0022 |
| protein_co growth_reg   | 8     | 7     | 7     | 1059  | 1345  | 784   | 0.044215 | 0.049612 | 0.046679 | 9.084607 |
| protein_co signal-regul | 0     | 1     | 2     | 2     | 0     | 0     | 0        | 0.022759 | 0.042828 | 0.055094 |
| protein_co zinc_finger  | 291   | 249   | 232   | 492   | 518   | 573   | 4.586553 | 5.032712 | 4.411939 | 12.03619 |
| protein_co ryanodine_   | 1     | 2     | 0     | 412   | 655   | 373   | 0.003049 | 0.007821 | 0        | 1.950008 |
| protein_co SLIT-ROBO    | 129   | 129   | 113   | 107   | 142   | 101   | 0.6988   | 0.896112 | 0.738567 | 0.899658 |
| protein_co histone_clu  | 2     | 0     | 0     | 0     | 0     | 0     | 0.217587 | 0        | 0        | 0        |
| protein_co family_witl  | 672   | 504   | 507   | 308   | 353   | 297   | 6.116089 | 5.882263 | 5.567504 | 4.350966 |
| protein_co sulfotransfr | 0     | 0     | 1     | 0     | 1     | 0     | 0        | 0        | 0.061831 | 0        |
| protein_co tubulin_be   | 52156 | 41986 | 43753 | 51163 | 52673 | 57843 | 842.4374 | 869.6554 | 852.6862 | 1282.684 |
| protein_co ligand_dep   | 317   | 263   | 289   | 279   | 295   | 253   | 1.911294 | 2.033449 | 2.102394 | 2.610977 |
| protein_co suppressor   | 4304  | 3184  | 3558  | 2738  | 3571  | 3694  | 51.72082 | 49.06542 | 51.58781 | 51.06896 |
| protein_co X-prolyl_an  | 581   | 501   | 435   | 428   | 542   | 334   | 3.410503 | 3.771285 | 3.080914 | 3.899569 |
| protein_co zinc_finger  | 141   | 115   | 139   | 266   | 155   | 417   | 1.084918 | 1.134711 | 1.290449 | 3.176801 |
| protein_co peptidylpro  | 14571 | 11898 | 12513 | 16017 | 16982 | 19179 | 305.288  | 319.6713 | 316.3223 | 520.8731 |
| protein_co zinc_finger  | 2     | 1     | 4     | 3     | 2     | 1     | 0.014916 | 0.009564 | 0.035995 | 0.034729 |
| protein_co olfactory_r  | 0     | 1     | 0     | 0     | 0     | 0     | 0        | 0.060737 | 0        | 0        |
| protein_co zinc_finger  | 38    | 48    | 41    | 60    | 79    | 76    | 0.5346   | 0.865956 | 0.695948 | 1.310167 |
| protein_co zinc_finger  | 56    | 36    | 42    | 204   | 188   | 223   | 0.522763 | 0.430952 | 0.473058 | 2.955819 |
| pseudogen: -            | 0     | 0     | 1     | 0     | 0     | 0     | 0        | 0        | 0.319636 | 0        |
| protein_co GTF2I_repe   | 53    | 35    | 28    | 6     | 9     | 19    | 0.698474 | 0.591496 | 0.445226 | 0.122732 |
| protein_co glutamate_   | 4     | 1     | 0     | 8     | 7     | 9     | 0.044278 | 0.014195 | 0        | 0.13745  |
| protein_co suppressor   | 131   | 92    | 85    | 217   | 184   | 211   | 2.571198 | 2.315589 | 2.012942 | 6.610807 |
| pseudogen: beclin_1_al  | 0     | 0     | 0     | 2     | 3     | 0     | 0        | 0        | 0        | 0.110022 |
| protein_co NIF3_NGG1    | 368   | 257   | 271   | 539   | 561   | 610   | 10.27115 | 9.198427 | 9.126168 | 23.35019 |
| processed_ -            | 142   | 108   | 126   | 103   | 126   | 58    | 1.650566 | 1.609821 | 1.767108 | 1.858284 |
| protein_co ATPase_Ca+   | 36    | 30    | 31    | 114   | 141   | 74    | 0.477387 | 0.510151 | 0.495996 | 2.346408 |
| protein_co isoleucyl-tf | 4416  | 3557  | 3964  | 4143  | 4676  | 5180  | 44.47301 | 45.93679 | 48.16695 | 64.76089 |
| protein_co hippocamp    | 181   | 144   | 127   | 123   | 231   | 111   | 10.79783 | 11.01615 | 9.141335 | 11.38921 |
| protein_co POM121_t     | 1699  | 1417  | 1526  | 1362  | 1909  | 1871  | 11.36302 | 12.15289 | 12.31411 | 14.13865 |
| protein_co zinc_finger  | 361   | 307   | 329   | 1441  | 1753  | 1265  | 1.817208 | 1.981733 | 1.998212 | 11.2588  |
| protein_co histone_clu  | 1     | 7     | 7     | 4     | 8     | 30    | 0.100407 | 0.901303 | 0.848027 | 0.623382 |
| protein_co serine/thre  | 0     | 0     | 0     | 2     | 1     | 7     | 0        | 0        | 0        | 0.039003 |
| protein_co chorionic_   | 9     | 11    | 11    | 8     | 18    | 1     | 0.124634 | 0.195342 | 0.183795 | 0.171955 |
| protein_co neuroligin_  | 98    | 78    | 83    | 327   | 393   | 265   | 1.174347 | 1.198601 | 1.200043 | 6.082033 |
| protein_co alcohol_de   | 1     | 0     | 0     | 0     | 0     | 0     | 0.018637 | 0        | 0        | 0        |
| protein_co zinc_finger  | 114   | 97    | 95    | 103   | 106   | 134   | 1.537378 | 1.677478 | 1.545779 | 2.155973 |
| protein_co CD55_mole    | 113   | 97    | 83    | 210   | 230   | 203   | 1.919772 | 2.113257 | 1.701365 | 5.537594 |
| protein_co copine_IV    | 4     | 1     | 1     | 47    | 46    | 33    | 0.034535 | 0.011072 | 0.010417 | 0.629838 |
| protein_co Uncharacter  | 11    | 10    | 14    | 11    | 8     | 2     | 0.272041 | 0.31714  | 0.417752 | 0.422246 |
| protein_co zinc_finger  | 62    | 57    | 64    | 24    | 20    | 35    | 1.154101 | 1.360619 | 1.437409 | 0.693416 |
| protein_co netrin_G2    | 24    | 27    | 22    | 42    | 75    | 14    | 0.234841 | 0.338795 | 0.259737 | 0.637886 |
| protein_co ELAV_(emb    | 0     | 0     | 0     | 34    | 45    | 9     | 0        | 0        | 0        | 0.523264 |
| protein_co WD_repeat    | 1306  | 1037  | 997   | 1391  | 1777  | 1888  | 19.43458 | 19.78883 | 17.90091 | 32.12844 |
| protein_co lon_peptid   | 3668  | 2641  | 2970  | 4171  | 5260  | 4548  | 53.14975 | 49.07379 | 51.92498 | 93.80858 |
| protein_co chromosom    | 19    | 8     | 8     | 15    | 31    | 19    | 0.346388 | 0.187029 | 0.175974 | 0.424455 |

|                         |       |       |       |      |       |      |          |          |          |          |
|-------------------------|-------|-------|-------|------|-------|------|----------|----------|----------|----------|
| protein_co transforma   | 4359  | 3306  | 3721  | 2257 | 2728  | 2210 | 16.12318 | 15.68108 | 16.60625 | 12.95764 |
| protein_co nudix_(nuc   | 249   | 188   | 239   | 700  | 945   | 781  | 4.895436 | 4.739791 | 5.669411 | 21.36095 |
| pseudogen: SLIT-ROBO_   | 343   | 249   | 274   | 153  | 163   | 104  | 12.05643 | 11.22363 | 11.62046 | 8.347309 |
| protein_co fucosyltran  | 255   | 170   | 200   | 185  | 236   | 126  | 1.977337 | 1.690436 | 1.871192 | 2.226602 |
| protein_co ankyrin_rej  | 323   | 254   | 260   | 694  | 771   | 310  | 5.448013 | 5.493873 | 5.291234 | 18.16877 |
| protein_co histone_cli  | 2     | 1     | 0     | 8    | 9     | 18   | 0.210269 | 0.13482  | 0        | 1.305467 |
| protein_co solute_carr  | 3     | 6     | 3     | 337  | 386   | 329  | 0.028992 | 0.074357 | 0.034981 | 5.054986 |
| protein_co zinc_finger  | 48    | 26    | 63    | 65   | 87    | 62   | 1.094709 | 0.760396 | 1.733588 | 2.300918 |
| protein_co zinc_finger  | 13    | 6     | 1     | 1    | 1     | 3    | 0.193699 | 0.114642 | 0.017978 | 0.023127 |
| protein_co zinc_finger  | 201   | 172   | 206   | 185  | 224   | 299  | 2.6549   | 2.913331 | 3.282973 | 3.79275  |
| protein_co inhibitor_c  | 41    | 35    | 33    | 29   | 38    | 11   | 1.238718 | 1.35602  | 1.202959 | 1.359932 |
| protein_co zinc_finger  | 32    | 17    | 17    | 26   | 34    | 12   | 0.468607 | 0.31924  | 0.30037  | 0.590967 |
| protein_co protein_ty   | 1315  | 1040  | 1132  | 734  | 877   | 877  | 17.47248 | 17.72031 | 18.14777 | 15.13754 |
| protein_co HDCMB45F     | 1     | 0     | 0     | 1    | 0     | 0    | 0.03947  | 0        | 0        | 0.061262 |
| protein_co Enah/Vasp    | 1574  | 1203  | 1239  | 1308 | 1651  | 1178 | 19.92573 | 19.5292  | 18.92469 | 25.70086 |
| protein_co SPANX_fam    | 0     | 0     | 0     | 0    | 0     | 1    | 0        | 0        | 0        | 0        |
| protein_co thioesteras  | 45    | 37    | 46    | 60   | 67    | 35   | 0.843009 | 0.888854 | 1.039742 | 1.744622 |
| protein_co NADPH_oxi    | 0     | 0     | 0     | 1    | 0     | 0    | 0        | 0        | 0        | 0.044981 |
| protein_co zinc_finger  | 39    | 30    | 28    | 52   | 52    | 50   | 0.440123 | 0.43415  | 0.381255 | 0.910842 |
| protein_co EPH_recept   | 4269  | 3198  | 3466  | 3514 | 4609  | 4487 | 39.57562 | 38.01801 | 38.76843 | 50.56311 |
| protein_co proteinase_  | 1     | 0     | 0     | 25   | 64    | 39   | 0.045043 | 0        | 0        | 1.747834 |
| protein_co zinc_finger  | 140   | 124   | 109   | 209  | 207   | 351  | 1.43677  | 1.631888 | 1.349689 | 3.32917  |
| protein_co zinc_finger  | 106   | 89    | 108   | 102  | 146   | 232  | 2.215935 | 2.38589  | 2.724099 | 3.309648 |
| protein_co X-ray_repai  | 6259  | 5173  | 5427  | 9002 | 9264  | 9927 | 108.3369 | 114.8215 | 113.339  | 241.8471 |
| protein_co S100_calci   | 26    | 17    | 30    | 1    | 4     | 0    | 1.717099 | 1.439728 | 2.390514 | 0.102507 |
| lincRNA long_interge    | 5     | 1     | 10    | 27   | 36    | 18   | 0.054485 | 0.013974 | 0.131479 | 0.456671 |
| protein_co protein_ph   | 445   | 369   | 416   | 1263 | 1701  | 720  | 4.23075  | 4.498762 | 4.771981 | 18.63765 |
| protein_co TSC22_don    | 1893  | 1327  | 1331  | 850  | 1059  | 804  | 18.34321 | 16.48941 | 15.56148 | 12.78422 |
| protein_co crystallin_k | 2     | 3     | 6     | 7    | 11    | 3    | 0.115635 | 0.222428 | 0.418561 | 0.628186 |
| protein_co acetylserot  | 0     | 0     | 5     | 1    | 7     | 0    | 0        | 0        | 0.203802 | 0.052435 |
| protein_co nuclear_po   | 26    | 26    | 40    | 17   | 34    | 26   | 0.85374  | 1.0948   | 1.584748 | 0.866426 |
| protein_co zinc_finger  | 90    | 95    | 104   | 126  | 96    | 106  | 1.039178 | 1.406632 | 1.448868 | 2.258127 |
| protein_co armadillo_l  | 391   | 326   | 377   | 310  | 421   | 362  | 2.470889 | 2.641821 | 2.874524 | 3.040666 |
| protein_co yrdC_doma    | 243   | 201   | 204   | 239  | 290   | 371  | 6.240019 | 6.618888 | 6.320593 | 9.525943 |
| protein_co zinc_finger  | 660   | 490   | 478   | 545  | 695   | 627  | 9.572351 | 9.113393 | 8.364705 | 12.26879 |
| protein_co phosphoin    | 567   | 494   | 480   | 595  | 773   | 623  | 5.301424 | 5.923055 | 5.415003 | 8.634892 |
| protein_co zinc_finger  | 639   | 460   | 472   | 1624 | 2026  | 1333 | 11.60446 | 10.71251 | 10.34223 | 45.7763  |
| protein_co zinc_finger  | 307   | 246   | 285   | 251  | 325   | 223  | 2.316208 | 2.380037 | 2.594372 | 2.939297 |
| protein_co trafficking_ | 159   | 140   | 124   | 100  | 114   | 142  | 2.398814 | 2.708549 | 2.257195 | 2.341692 |
| protein_co RFX_family   | 385   | 338   | 326   | 0    | 3     | 1    | 9.267278 | 10.4332  | 9.467975 | 0        |
| protein_co myosin_lig   | 691   | 525   | 604   | 518  | 602   | 454  | 24.82835 | 24.19015 | 26.18514 | 28.88884 |
| protein_co zinc_finger  | 44    | 42    | 32    | 35   | 44    | 29   | 0.506173 | 0.619591 | 0.444165 | 0.624949 |
| protein_co fibroblast_j | 10    | 6     | 9     | 9    | 18    | 14   | 0.42396  | 0.326201 | 0.460379 | 0.592241 |
| protein_co siah_E3_ub   | 193   | 125   | 115   | 123  | 248   | 239  | 2.699813 | 2.24231  | 1.940985 | 2.670619 |
| protein_co chromosom    | 204   | 194   | 188   | 259  | 288   | 218  | 6.073374 | 7.406464 | 6.75314  | 11.96823 |
| protein_co estrogen-re  | 0     | 0     | 0     | 24   | 16    | 18   | 0        | 0        | 0        | 0.315748 |
| protein_co importin_4   | 0     | 1     | 2     | 1    | 2     | 4    | 0        | 0.016492 | 0.031034 | 0.019962 |
| protein_co nuclear_rex  | 17355 | 12219 | 14218 | 7169 | 10799 | 6674 | 93.45157 | 84.37368 | 92.37374 | 59.91713 |
| protein_co sulfotransf  | 18    | 11    | 16    | 26   | 35    | 36   | 0.106193 | 0.083219 | 0.113891 | 0.238082 |
| protein_co ADP-ribosy   | 64    | 57    | 59    | 11   | 20    | 21   | 2.385502 | 2.724482 | 2.653382 | 0.636389 |
| protein_co PRP40_pre    | 2199  | 1766  | 1879  | 2642 | 2260  | 2938 | 12.81202 | 13.19449 | 13.20892 | 23.89218 |
| protein_co ganglioside  | 149   | 162   | 149   | 120  | 135   | 146  | 2.410839 | 3.361293 | 2.908817 | 3.013656 |
| protein_co transcriptio | 658   | 472   | 533   | 132  | 161   | 117  | 25.26915 | 23.24428 | 24.69676 | 7.868087 |
| protein_co anaphase_f   | 657   | 596   | 636   | 818  | 940   | 1006 | 10.11716 | 11.76925 | 11.81676 | 19.55136 |
| protein_co thiamin_py   | 53    | 33    | 25    | 32   | 24    | 26   | 0.561113 | 0.448021 | 0.319347 | 0.525842 |
| protein_co solute_carr  | 635   | 402   | 516   | 256  | 381   | 394  | 9.512831 | 7.722741 | 9.326824 | 5.952597 |
| protein_co actin_filam  | 2624  | 1961  | 2189  | 815  | 958   | 766  | 15.83926 | 15.17952 | 15.94281 | 7.635883 |
| protein_co nascent_pc   | 6575  | 5450  | 5602  | 8820 | 7458  | 8906 | 46.50805 | 49.43542 | 47.81053 | 96.83479 |
| protein_co histone_cli  | 0     | 2     | 0     | 0    | 1     | 0    | 0        | 0.262003 | 0        | 0        |
| protein_co chromosom    | 2     | 0     | 0     | 2    | 0     | 0    | 0.056324 | 0        | 0        | 0.087423 |
| protein_co myosin_XV    | 1028  | 795   | 934   | 1046 | 1377  | 868  | 6.344996 | 6.292377 | 6.955577 | 10.02075 |
| protein_co serine_palr  | 0     | 0     | 0     | 127  | 191   | 120  | 0        | 0        | 0        | 2.978741 |
| protein_co chromosom    | 270   | 190   | 216   | 170  | 275   | 174  | 6.618037 | 5.972118 | 6.388034 | 6.467625 |
| protein_co mannosida    | 632   | 443   | 456   | 451  | 649   | 279  | 4.727902 | 4.249761 | 4.115895 | 5.236709 |
| protein_co membrane     | 1165  | 937   | 998   | 191  | 164   | 191  | 9.716626 | 10.02163 | 10.04311 | 2.472597 |

|                         |       |      |      |      |      |      |          |          |          |          |
|-------------------------|-------|------|------|------|------|------|----------|----------|----------|----------|
| protein_co family_witl  | 50    | 50   | 31   | 192  | 159  | 96   | 0.97769  | 1.253749 | 0.731376 | 5.82724  |
| processed_long_interf   | 0     | 0    | 0    | 4    | 1    | 1    | 0        | 0        | 0        | 0.25492  |
| protein_co calcium_ch   | 454   | 354  | 385  | 1526 | 2284 | 1552 | 2.633358 | 2.633096 | 2.694405 | 13.73849 |
| processed_long_interf   | 13    | 11   | 11   | 7    | 11   | 10   | 0.222633 | 0.241573 | 0.227294 | 0.18607  |
| protein_co sulfatase_2  | 6938  | 5015 | 5519 | 501  | 746  | 633  | 66.18981 | 61.35319 | 63.52802 | 7.418653 |
| protein_co hemoglobi    | 1     | 2    | 0    | 0    | 2    | 3    | 0.026462 | 0.067867 | 0        | 0        |
| protein_co laminin_al   | 608   | 473  | 470  | 267  | 259  | 227  | 2.957379 | 2.950352 | 2.758349 | 2.015789 |
| protein_co plexin_B2    | 8146  | 5870 | 6371 | 3514 | 4277 | 2835 | 59.84115 | 55.29718 | 56.46914 | 40.06709 |
| protein_co adherens_ji  | 0     | 0    | 0    | 532  | 824  | 417  | 0        | 0        | 0        | 13.25081 |
| protein_co X-ray_repai  | 239   | 199  | 231  | 346  | 507  | 532  | 2.370286 | 2.530844 | 2.764159 | 5.326102 |
| protein_co myosin_VI    | 925   | 834  | 792  | 1157 | 1496 | 972  | 5.00557  | 5.78745  | 5.171125 | 9.717972 |
| protein_co megakaryol   | 1602  | 1148 | 1288 | 763  | 1022 | 647  | 16.67432 | 15.32275 | 16.17519 | 12.32652 |
| protein_co histone_de   | 3665  | 3085 | 3237 | 4900 | 5404 | 5484 | 17.40449 | 18.78676 | 18.54719 | 36.11718 |
| pseudogen_ankyrin_rej   | 1     | 2    | 7    | 3    | 4    | 4    | 0.01677  | 0.043011 | 0.141641 | 0.07809  |
| protein_co zinc_finger  | 62    | 37   | 42   | 55   | 82   | 54   | 0.69005  | 0.52808  | 0.564009 | 0.950128 |
| protein_co POTE_anky    | 0     | 0    | 1    | 3    | 4    | 5    | 0        | 0        | 0.014035 | 0.054165 |
| protein_co zinc_finger  | 171   | 167  | 142  | 63   | 90   | 52   | 3.977278 | 4.98099  | 3.984981 | 2.274369 |
| protein_co matrix_me    | 2912  | 2627 | 2600 | 1    | 0    | 0    | 69.31154 | 80.18324 | 74.66818 | 0.036944 |
| protein_co UDP_glucu    | 0     | 0    | 0    | 1    | 0    | 0    | 0        | 0        | 0        | 0.035041 |
| protein_co RIMS_bindi   | 41    | 34   | 22   | 14   | 19   | 15   | 0.332381 | 0.35346  | 0.21519  | 0.176161 |
| protein_co transcriptio | 10042 | 7780 | 8173 | 1764 | 2028 | 1831 | 56.51339 | 56.14616 | 55.49587 | 15.40849 |
| protein_co WNK_lysin    | 179   | 154  | 143  | 401  | 416  | 369  | 0.740086 | 0.816505 | 0.713367 | 2.57338  |
| protein_co ACN9_hom     | 165   | 105  | 91   | 247  | 345  | 226  | 3.755754 | 3.064868 | 2.499209 | 8.72651  |
| protein_co histamine_   | 793   | 717  | 687  | 3    | 1    | 0    | 7.89297  | 9.151574 | 8.250344 | 0.046347 |
| protein_co RAB_memt     | 4596  | 3279 | 3730 | 4173 | 5865 | 4678 | 54.57243 | 49.92798 | 53.43799 | 76.90811 |
| protein_co zinc_finger  | 93    | 76   | 87   | 99   | 79   | 107  | 1.218433 | 1.276855 | 1.375264 | 2.013188 |
| protein_co Golgin_sub   | 15    | 8    | 7    | 16   | 26   | 12   | 0.107464 | 0.073497 | 0.060509 | 0.177919 |
| protein_co zinc_finger  | 456   | 365  | 384  | 499  | 578  | 495  | 3.800542 | 3.901062 | 3.861535 | 6.455229 |
| protein_co zinc_finger  | 0     | 0    | 0    | 0    | 1    | 1    | 0        | 0        | 0        | 0        |
| protein_co trafficking_ | 825   | 685  | 625  | 583  | 604  | 651  | 20.10617 | 21.40796 | 18.37822 | 22.05334 |
| pseudogen_              | 85    | 69   | 73   | 89   | 71   | 125  | 9.017311 | 9.386778 | 9.343918 | 14.65476 |
| protein_co tetratricop  | 101   | 58   | 63   | 65   | 61   | 54   | 1.709708 | 1.259035 | 1.286735 | 1.707829 |
| protein_co solute_carr  | 3     | 3    | 3    | 7    | 9    | 3    | 0.03854  | 0.049422 | 0.0465   | 0.139578 |
| protein_co tectonin_b   | 1239  | 917  | 958  | 676  | 857  | 644  | 6.688548 | 6.348034 | 6.23985  | 5.664189 |
| protein_co toll-like_re | 1     | 0    | 1    | 2    | 1    | 0    | 0.009357 | 0        | 0.01129  | 0.029048 |
| protein_co family_witl  | 0     | 1    | 0    | 3    | 2    | 0    | 0        | 0.041902 | 0        | 0.152153 |
| processed_long_interf   | 18    | 23   | 13   | 92   | 119  | 33   | 0.528504 | 0.86599  | 0.460539 | 4.1927   |
| protein_co ZFP62_zinc   | 314   | 248  | 240  | 427  | 461  | 300  | 3.662554 | 3.7095   | 3.377642 | 7.730591 |
| pseudogen_              | 9     | 7    | 3    | 2    | 2    | 3    | 1.212673 | 1.209507 | 0.48772  | 0.418275 |
| protein_co ERI1_exoril  | 118   | 102  | 89   | 108  | 123  | 169  | 1.438643 | 1.594706 | 1.30921  | 2.043739 |
| protein_co translocase  | 856   | 676  | 647  | 2450 | 2449 | 2283 | 51.59107 | 52.24646 | 47.0493  | 229.1909 |
| protein_co hematopoi    | 0     | 4    | 0    | 24   | 29   | 23   | 0        | 0.097219 | 0        | 0.706029 |
| protein_co transient_r  | 12    | 8    | 5    | 3    | 4    | 4    | 0.134935 | 0.115357 | 0.067836 | 0.05236  |
| protein_co zinc_finger  | 118   | 80   | 80   | 212  | 215  | 307  | 0.930702 | 0.809148 | 0.761319 | 2.595344 |
| processed_pyridoxal-d   | 53    | 50   | 60   | 26   | 35   | 23   | 0.59397  | 0.718568 | 0.811312 | 0.452265 |
| protein_co zinc_finger  | 1112  | 810  | 889  | 625  | 938  | 1208 | 8.798802 | 8.218889 | 8.48728  | 7.675899 |
| protein_co archaelysin  | 720   | 630  | 636  | 806  | 904  | 585  | 14.05529 | 15.77093 | 14.98003 | 24.42153 |
| protein_co zinc_finger  | 147   | 114  | 116  | 393  | 488  | 530  | 1.793607 | 1.78371  | 1.707718 | 7.442743 |
| protein_co family_witl  | 0     | 0    | 0    | 11   | 12   | 7    | 0        | 0        | 0        | 0.657829 |
| protein_co neurofibroi  | 2478  | 2197 | 2170 | 752  | 824  | 527  | 9.351587 | 10.63221 | 9.880792 | 4.404862 |
| protein_co vitamin_K_   | 977   | 922  | 928  | 700  | 967  | 833  | 7.765985 | 9.398147 | 8.900164 | 8.636355 |
| protein_co zinc_finger  | 107   | 99   | 94   | 192  | 239  | 209  | 1.358211 | 1.611492 | 1.439658 | 3.782816 |
| protein_co death-assoc  | 430   | 317  | 321  | 2307 | 2603 | 2130 | 3.353744 | 3.170517 | 3.020748 | 27.92798 |
| protein_co major_histi  | 1     | 1    | 2    | 5    | 4    | 1    | 0.008604 | 0.011033 | 0.020762 | 0.06677  |
| protein_co collagen_ty  | 6138  | 5048 | 5363 | 822  | 1203 | 950  | 36.9462  | 38.96473 | 38.94922 | 7.679717 |
| protein_co chromosom    | 38    | 23   | 38   | 18   | 26   | 20   | 1.439274 | 1.117113 | 1.736566 | 1.058188 |
| protein_co GM2_gangl    | 836   | 666  | 665  | 996  | 970  | 696  | 10.06162 | 10.27886 | 9.656753 | 18.60592 |
| protein_co histone_cli  | 11    | 11   | 11   | 6    | 12   | 17   | 0.971356 | 1.245627 | 1.171997 | 0.822371 |
| protein_co colipase-lik | 0     | 0    | 0    | 33   | 33   | 28   | 0        | 0        | 0        | 4.514537 |
| protein_co S100_calci   | 72    | 62   | 56   | 4    | 8    | 6    | 3.382847 | 3.735518 | 3.174577 | 0.291703 |
| processed_              | 274   | 156  | 249  | 287  | 332  | 555  | 6.009291 | 4.387394 | 6.589009 | 9.769786 |
| protein_co zinc_finger  | 155   | 132  | 133  | 90   | 115  | 113  | 2.33471  | 2.549673 | 2.417135 | 2.104138 |
| protein_co POU_class_   | 0     | 0    | 0    | 121  | 116  | 91   | 0        | 0        | 0        | 5.843634 |
| protein_co olfactory_r  | 0     | 0    | 0    | 1    | 5    | 3    | 0        | 0        | 0        | 0.078258 |
| protein_co ankyrin_rej  | 1     | 0    | 0    | 1    | 2    | 0    | 0.013355 | 0        | 0        | 0.020729 |

|                         |       |       |       |       |       |       |          |          |          |          |
|-------------------------|-------|-------|-------|-------|-------|-------|----------|----------|----------|----------|
| protein_co CD47_mole    | 1808  | 1524  | 1551  | 268   | 330   | 233   | 12.47457 | 13.48408 | 12.9118  | 2.870069 |
| protein_co transducin   | 1123  | 890   | 893   | 2941  | 3986  | 2846  | 13.5262  | 13.7466  | 12.97763 | 54.98212 |
| protein_co mastermin    | 523   | 419   | 479   | 252   | 280   | 212   | 3.583209 | 3.681237 | 3.959624 | 2.679794 |
| protein_co histone_clu  | 99    | 65    | 82    | 68    | 80    | 86    | 2.073297 | 1.745617 | 2.071993 | 2.210374 |
| protein_co striatin_cal | 679   | 620   | 609   | 427   | 506   | 443   | 8.019728 | 9.390548 | 8.678711 | 7.827953 |
| protein_co zinc_finger  | 36    | 38    | 31    | 60    | 67    | 187   | 0.706589 | 0.956439 | 0.734132 | 1.827873 |
| protein_co Uncharacte   | 2     | 2     | 1     | 2     | 5     | 2     | 0.069467 | 0.089081 | 0.041908 | 0.107822 |
| antisense CTBP1_anti    | 258   | 217   | 216   | 170   | 182   | 209   | 2.140415 | 2.308593 | 2.162121 | 2.18906  |
| protein_co cholinergic  | 7     | 8     | 8     | 13    | 24    | 13    | 0.145106 | 0.212661 | 0.20009  | 0.418275 |
| protein_co zinc_finger  | 25    | 24    | 32    | 64    | 79    | 88    | 0.882719 | 1.086683 | 1.363265 | 3.50746  |
| protein_co multivesicu  | 2052  | 1541  | 1610  | 284   | 302   | 212   | 19.96645 | 19.22806 | 18.90155 | 4.28916  |
| protein_co chromosom    | 2704  | 2140  | 2309  | 2103  | 2738  | 1947  | 28.69864 | 29.1258  | 29.56832 | 34.64371 |
| protein_co adenosine_   | 327   | 281   | 343   | 322   | 409   | 174   | 8.662732 | 9.54603  | 10.9635  | 13.24017 |
| protein_co AT_rich_int  | 693   | 540   | 610   | 500   | 575   | 556   | 10.55368 | 10.54566 | 11.20853 | 11.81874 |
| protein_co prostate_ar  | 0     | 0     | 0     | 1     | 0     | 5     | 0        | 0        | 0        | 0.043923 |
| protein_co PTC7_prot    | 454   | 416   | 430   | 404   | 565   | 418   | 3.073645 | 3.611608 | 3.512484 | 4.245313 |
| protein_co translocase  | 1     | 4     | 2     | 0     | 5     | 4     | 0.075629 | 0.387934 | 0.182502 | 0        |
| protein_co RANBP2-lik   | 4     | 1     | 4     | 0     | 1     | 1     | 0.034327 | 0.011005 | 0.041417 | 0        |
| protein_co NHL_repea    | 560   | 462   | 510   | 440   | 536   | 437   | 2.376112 | 2.513797 | 2.610941 | 2.897757 |
| protein_co ZFP28_zinc   | 132   | 123   | 116   | 84    | 74    | 45    | 1.514802 | 1.810075 | 1.606157 | 1.496207 |
| protein_co KIAA1211-I   | 490   | 343   | 369   | 12    | 28    | 3     | 5.880755 | 5.278864 | 5.343323 | 0.223537 |
| protein_co COBW_dor     | 16    | 16    | 14    | 23    | 30    | 25    | 0.341795 | 0.438304 | 0.360846 | 0.762613 |
| protein_co sodium_ch    | 559   | 467   | 561   | 311   | 343   | 209   | 3.096093 | 3.316869 | 3.748979 | 2.673579 |
| protein_co laminin_be   | 98    | 70    | 85    | 3     | 9     | 5     | 1.067415 | 0.97772  | 1.117054 | 0.050718 |
| protein_co histone_clu  | 0     | 2     | 0     | 0     | 1     | 7     | 0        | 0.266061 | 0        | 0        |
| protein_co karyopherin  | 154   | 109   | 94    | 264   | 202   | 160   | 1.418955 | 1.287905 | 1.045018 | 3.775568 |
| pseudogen: ankyrin_rej  | 112   | 90    | 99    | 21    | 23    | 22    | 0.877327 | 0.904056 | 0.935679 | 0.255325 |
| protein_co Rho_guanin   | 3649  | 2940  | 3102  | 1055  | 1328  | 940   | 17.71239 | 18.30037 | 18.16741 | 7.948519 |
| protein_co hydroxycar   | 4     | 4     | 1     | 1     | 0     | 2     | 0.051927 | 0.066589 | 0.015663 | 0.020149 |
| pseudogen: zinc_finger  | 224   | 168   | 150   | 140   | 171   | 272   | 2.016001 | 1.938926 | 1.628853 | 1.955695 |
| protein_co PDZ_and_L    | 6695  | 5003  | 5351  | 738   | 982   | 1142  | 164.8785 | 157.9986 | 158.9998 | 28.20982 |
| protein_co filamin_A_3  | 74202 | 55274 | 62453 | 31802 | 37852 | 32108 | 410.0086 | 391.6585 | 416.3693 | 272.7484 |
| protein_co transmembr   | 56    | 37    | 34    | 23    | 25    | 29    | 0.509773 | 0.431917 | 0.373436 | 0.324973 |
| pseudogen: ribosomal_   | 1     | 0     | 0     | 3     | 1     | 2     | 0.134741 | 0        | 0        | 0.627412 |
| protein_co RIMS_bindi   | 11    | 11    | 3     | 6     | 5     | 5     | 0.089175 | 0.114355 | 0.029344 | 0.075498 |
| protein_co SLIT-ROBO_   | 620   | 449   | 523   | 297   | 378   | 227   | 3.25079  | 3.018929 | 3.30862  | 2.417041 |
| protein_co family_witl  | 1629  | 1291  | 1333  | 654   | 738   | 831   | 30.45608 | 30.95198 | 30.06984 | 18.97846 |
| protein_co NOP9_nucl    | 562   | 367   | 476   | 463   | 584   | 582   | 4.368008 | 3.657821 | 4.463773 | 5.585455 |
| protein_co olfactory_r  | 0     | 0     | 0     | 1     | 0     | 1     | 0        | 0        | 0        | 0.069513 |
| protein_co solute_carr  | 759   | 680   | 708   | 1699  | 1545  | 1804  | 6.551827 | 7.527294 | 7.37398  | 22.76379 |
| processed_ -            | 5     | 3     | 1     | 2     | 0     | 4     | 0.118111 | 0.090876 | 0.028502 | 0.07333  |
| protein_co caspase_4_   | 201   | 175   | 193   | 2     | 1     | 4     | 1.986279 | 2.217643 | 2.301174 | 0.030676 |
| protein_co Putative_U   | 29    | 35    | 35    | 0     | 0     | 0     | 0.52665  | 0.815082 | 0.766903 | 0        |
| protein_co adaptor-rel  | 4287  | 3322  | 3648  | 3478  | 4530  | 3151  | 59.3322  | 58.95844 | 60.91719 | 74.71315 |
| protein_co protocadhe   | 539   | 423   | 471   | 107   | 118   | 129   | 5.250046 | 5.283528 | 5.535327 | 1.617665 |
| protein_co histone_clu  | 32    | 25    | 31    | 4     | 8     | 40    | 3.247793 | 3.253777 | 3.796192 | 0.630128 |
| protein_co zinc_finger  | 79    | 58    | 60    | 106   | 111   | 107   | 0.565803 | 0.532691 | 0.518486 | 1.17835  |
| protein_co fucosyltran  | 722   | 556   | 589   | 166   | 215   | 140   | 14.05922 | 13.88379 | 13.83844 | 5.017212 |
| processed_ nuclear_RN   | 2     | 0     | 0     | 0     | 0     | 1     | 0.025928 | 0        | 0        | 0        |
| lincRNA long_interge    | 155   | 112   | 111   | 115   | 196   | 175   | 2.695828 | 2.497974 | 2.329333 | 3.10448  |
| protein_co annexin_A4   | 409   | 359   | 367   | 69    | 83    | 62    | 4.340882 | 4.886056 | 4.699685 | 1.13667  |
| protein_co L_antigen_1  | 406   | 310   | 313   | 827   | 1144  | 789   | 20.06043 | 19.64198 | 18.65978 | 63.42349 |
| protein_co Uncharacte   | 12    | 10    | 15    | 0     | 1     | 0     | 0.172707 | 0.18456  | 0.260477 | 0        |
| protein_co WD_repeat    | 163   | 126   | 124   | 43    | 54    | 94    | 1.833751 | 1.817743 | 1.683148 | 0.750847 |
| protein_co Putative_lu  | 0     | 0     | 0     | 7     | 10    | 2     | 0        | 0        | 0        | 0.366253 |
| protein_co family_witl  | 42    | 30    | 41    | 52    | 69    | 9     | 2.428336 | 2.224283 | 2.860167 | 4.666522 |
| protein_co Uncharacte   | 3     | 4     | 3     | 2     | 3     | 1     | 0.06626  | 0.113292 | 0.079947 | 0.068563 |
| protein_co WD_repeat    | 127   | 92    | 106   | 63    | 85    | 87    | 1.93408  | 1.796668 | 1.947711 | 1.489161 |
| protein_co methyltran   | 3376  | 2770  | 2940  | 1691  | 2086  | 1747  | 28.25285 | 29.72685 | 29.68624 | 21.96513 |
| protein_co zinc_finger  | 74    | 41    | 46    | 240   | 232   | 198   | 1.343866 | 0.954811 | 1.007929 | 6.76497  |
| protein_co zinc_finger  | 14    | 13    | 7     | 148   | 141   | 153   | 0.293981 | 0.350062 | 0.177353 | 4.82374  |
| protein_co zinc_finger  | 176   | 154   | 134   | 137   | 199   | 189   | 1.154054 | 1.294922 | 1.060148 | 1.394327 |
| protein_co SERTA_dor    | 325   | 280   | 265   | 115   | 132   | 95    | 7.20873  | 7.964211 | 7.09201  | 3.959166 |
| protein_co zinc_finger  | 70    | 90    | 76    | 204   | 177   | 385   | 0.571332 | 0.941981 | 0.748431 | 2.584348 |
| protein_co chromosom    | 569   | 425   | 462   | 332   | 394   | 325   | 16.1406  | 15.45987 | 15.81239 | 14.6176  |

|                         |       |       |       |      |      |      |          |          |          |          |
|-------------------------|-------|-------|-------|------|------|------|----------|----------|----------|----------|
| protein_co zinc_finger  | 419   | 390   | 375   | 2154 | 2887 | 2544 | 3.620217 | 4.321102 | 3.909308 | 28.88662 |
| protein_co zinc_finger  | 372   | 243   | 256   | 359  | 458  | 763  | 3.048425 | 2.553572 | 2.531166 | 4.566227 |
| protein_co annexin_Af   | 8774  | 7084  | 7480  | 1553 | 1755 | 1572 | 158.6629 | 164.2728 | 163.2028 | 43.58929 |
| protein_co zinc_finger  | 71    | 57    | 51    | 21   | 14   | 5    | 0.764277 | 0.786822 | 0.662385 | 0.350867 |
| protein_co glia_matur   | 1186  | 904   | 944   | 795  | 721  | 1095 | 8.274299 | 8.087686 | 7.946329 | 8.608829 |
| protein_co sialic_acid  | 54    | 57    | 53    | 10   | 16   | 5    | 0.981419 | 1.328449 | 1.16221  | 0.282092 |
| pseudogeni -            | 14    | 8     | 13    | 0    | 2    | 0    | 1.971352 | 1.44456  | 2.208653 | 0        |
| protein_co zinc_finger  | 37    | 28    | 39    | 57   | 30   | 89   | 0.490787 | 0.476276 | 0.624171 | 1.173536 |
| protein_co zinc_finger  | 1     | 2     | 1     | 16   | 21   | 9    | 0.01789  | 0.045883 | 0.021585 | 0.444287 |
| protein_co zinc_finger  | 246   | 214   | 254   | 356  | 411  | 253  | 2.744455 | 3.061569 | 3.419029 | 6.164551 |
| protein_co death_dom    | 0     | 0     | 0     | 0    | 1    | 1    | 0        | 0        | 0        | 0        |
| protein_co histone_clu  | 18    | 12    | 4     | 12   | 26   | 18   | 2.033784 | 1.738693 | 0.545306 | 2.104476 |
| pseudogeni -            | 258   | 209   | 252   | 101  | 110  | 115  | 4.308271 | 4.475473 | 5.077289 | 2.617792 |
| protein_co v-maf_mus    | 1657  | 1296  | 1373  | 810  | 1049 | 1004 | 15.41602 | 15.46195 | 15.41234 | 11.69675 |
| pseudogeni -            | 0     | 0     | 0     | 1    | 1    | 0    | 0        | 0        | 0        | 0.075576 |
| protein_co arrestin_dc  | 507   | 340   | 366   | 571  | 809  | 489  | 7.464125 | 6.418879 | 6.501298 | 13.04781 |
| pseudogeni -            | 1     | 1     | 1     | 0    | 0    | 2    | 0.127073 | 0.162953 | 0.153321 | 0        |
| protein_co KIAA1671     | 1012  | 910   | 951   | 681  | 851  | 488  | 4.523613 | 5.216217 | 5.129009 | 4.72479  |
| protein_co insulin-like | 7071  | 5632  | 6144  | 2450 | 3002 | 2937 | 36.47116 | 37.25124 | 38.23561 | 19.61396 |
| protein_co late_cornif  | 0     | 0     | 0     | 0    | 1    | 0    | 0        | 0        | 0        | 0        |
| processed_NPSR1_ant     | 0     | 0     | 0     | 4    | 2    | 0    | 0        | 0        | 0        | 0.061418 |
| protein_co galactose-3  | 174   | 142   | 141   | 162  | 265  | 86   | 2.580286 | 2.700326 | 2.522817 | 3.728756 |
| antisense -             | 0     | 0     | 0     | 0    | 1    | 2    | 0        | 0        | 0        | 0        |
| protein_co dynein_cyt   | 16987 | 13242 | 14682 | 8673 | 9594 | 6942 | 55.57251 | 55.55283 | 57.95308 | 44.03957 |
| protein_co solute_carr  | 38    | 30    | 44    | 8    | 5    | 0    | 0.27724  | 0.280674 | 0.387323 | 0.090593 |
| protein_co poly(rC)_bi  | 2204  | 1718  | 1746  | 2162 | 2552 | 2652 | 32.63202 | 32.61856 | 31.19066 | 49.68422 |
| protein_co zinc_finger  | 693   | 539   | 625   | 470  | 691  | 581  | 7.678351 | 7.658308 | 8.355314 | 8.082823 |
| protein_co solute_carr  | 1485  | 1147  | 1312  | 2184 | 3191 | 2158 | 13.47101 | 13.34279 | 14.36004 | 30.75084 |
| protein_co post-GPI_ai  | 1068  | 777   | 876   | 459  | 521  | 442  | 5.600373 | 5.224877 | 5.5424   | 3.735845 |
| protein_co v-src_sarco  | 1230  | 951   | 983   | 965  | 1380 | 1031 | 12.45405 | 12.34797 | 12.00901 | 15.16573 |
| protein_co zinc_finger  | 52    | 28    | 40    | 164  | 169  | 213  | 0.64693  | 0.446706 | 0.60043  | 3.166858 |
| protein_co zinc_finger  | 133   | 115   | 151   | 153  | 175  | 201  | 1.150835 | 1.276052 | 1.576472 | 2.054864 |
| protein_co pecanex-lik  | 3066  | 2200  | 2449  | 1272 | 1811 | 2149 | 20.23431 | 18.61866 | 19.50083 | 13.02968 |
| protein_co ADAM_met     | 11    | 5     | 4     | 0    | 0    | 3    | 0.075068 | 0.043756 | 0.032936 | 0        |
| protein_co acyl-CoA_s   | 10    | 3     | 5     | 3    | 0    | 8    | 0.138728 | 0.05337  | 0.083692 | 0.064597 |
| pseudogeni -            | 6     | 19    | 16    | 45   | 40   | 6    | 0.122428 | 0.497157 | 0.393911 | 1.425192 |
| protein_co leucine_ric  | 245   | 194   | 190   | 439  | 486  | 480  | 1.51298  | 1.536307 | 1.415692 | 4.207867 |
| pseudogeni -            | 1     | 3     | 6     | 11   | 12   | 5    | 0.053163 | 0.204523 | 0.384867 | 0.907685 |
| protein_co ATP-bindin   | 1090  | 914   | 983   | 320  | 424  | 420  | 10.91397 | 11.73577 | 11.87566 | 4.973209 |
| protein_co histone_clu  | 10    | 7     | 10    | 16   | 20   | 38   | 0.898276 | 0.806338 | 1.083822 | 2.230799 |
| protein_co staphyloco   | 8726  | 6753  | 7295  | 5811 | 6585 | 4876 | 117.7107 | 116.8172 | 118.7337 | 121.6696 |
| protein_co zinc_finger  | 206   | 143   | 155   | 67   | 107  | 83   | 2.943127 | 2.619915 | 2.671908 | 1.485755 |
| protein_co sulfotransf  | 0     | 0     | 0     | 1    | 3    | 8    | 0        | 0        | 0        | 0.036554 |
| protein_co NIMA-relat   | 21    | 12    | 18    | 9    | 18   | 4    | 0.337454 | 0.247278 | 0.348992 | 0.224475 |
| protein_co proteasom    | 1229  | 963   | 961   | 877  | 1160 | 1489 | 13.0794  | 13.1423  | 12.33978 | 14.48658 |
| pseudogeni olfactory_r  | 0     | 0     | 0     | 1    | 0    | 0    | 0        | 0        | 0        | 0.077179 |
| protein_co G_protein-i  | 0     | 0     | 0     | 15   | 20   | 9    | 0        | 0        | 0        | 0.254891 |
| pseudogeni -            | 18    | 21    | 16    | 8    | 16   | 5    | 3.309884 | 4.951866 | 3.549836 | 2.283288 |
| protein_co piwi-like_R  | 0     | 3     | 1     | 142  | 185  | 52   | 0        | 0.035177 | 0.011033 | 2.015353 |
| protein_co hsa-mir-471  | 113   | 89    | 73    | 10   | 7    | 3    | 1.161968 | 1.173586 | 0.905704 | 0.159605 |
| protein_co chromosor    | 2811  | 2294  | 2477  | 595  | 781  | 403  | 22.00097 | 23.02416 | 23.39134 | 7.228173 |
| protein_co chromosor    | 11    | 9     | 14    | 34   | 47   | 31   | 0.397679 | 0.417246 | 0.610684 | 1.907875 |
| protein_co solute_carr  | 49    | 26    | 38    | 4    | 11   | 5    | 1.043894 | 0.710302 | 0.976769 | 0.132267 |
| processed_ -            | 0     | 0     | 0     | 0    | 1    | 0    | 0        | 0        | 0        | 0        |
| protein_co zinc_finger  | 1     | 1     | 1     | 0    | 1    | 0    | 0.022773 | 0.029203 | 0.027477 | 0        |
| protein_co ectonucleo   | 2382  | 1883  | 2137  | 614  | 724  | 533  | 19.05682 | 19.31827 | 20.6282  | 7.624432 |
| protein_co C1D_nucle    | 262   | 187   | 209   | 204  | 249  | 272  | 5.50165  | 5.0355   | 5.295244 | 6.648938 |
| protein_co TBC1_dom     | 4116  | 2969  | 3294  | 2119 | 2341 | 2158 | 37.30897 | 34.51099 | 36.02546 | 29.81257 |
| protein_co histone_clu  | 1     | 4     | 4     | 13   | 16   | 33   | 0.125374 | 0.643099 | 0.605086 | 2.529779 |
| protein_co solute_carr  | 1     | 0     | 0     | 0    | 0    | 0    | 0.030468 | 0        | 0        | 0        |
| protein_co family_witl  | 70    | 58    | 58    | 40   | 55   | 34   | 2.153741 | 2.288404 | 2.153136 | 1.910231 |
| protein_co serpin_pep   | 21    | 18    | 16    | 0    | 0    | 3    | 0.278791 | 0.306437 | 0.256288 | 0        |
| antisense long_interf   | 0     | 0     | 0     | 1    | 0    | 0    | 0        | 0        | 0        | 0.034542 |
| polymorph tryptase_br   | 1     | 0     | 0     | 3    | 4    | 6    | 0.03872  | 0        | 0        | 0.180297 |
| protein_co KN_motif_2   | 6048  | 4492  | 4678  | 906  | 1194 | 862  | 54.2135  | 51.63507 | 50.59457 | 12.60533 |

|                         |      |      |      |      |       |       |          |          |          |          |
|-------------------------|------|------|------|------|-------|-------|----------|----------|----------|----------|
| pseudogen: eukaryotic_  | 22   | 28   | 24   | 47   | 69    | 44    | 0.564322 | 0.921025 | 0.742786 | 1.871253 |
| protein_co chromosom    | 30   | 18   | 16   | 92   | 147   | 387   | 0.772912 | 0.59469  | 0.497367 | 3.678979 |
| protein_co general_tra  | 878  | 678  | 719  | 590  | 740   | 398   | 23.36517 | 23.13734 | 23.08615 | 24.37008 |
| protein_co RAD54_hoi    | 66   | 64   | 72   | 98   | 111   | 97    | 1.008716 | 1.254337 | 1.327717 | 2.324779 |
| protein_co zinc_finger  | 7    | 6    | 5    | 102  | 83    | 75    | 0.155781 | 0.171229 | 0.134256 | 3.523275 |
| protein_co synaptic_R   | 787  | 579  | 733  | 945  | 1340  | 1211  | 6.237736 | 5.884914 | 7.009778 | 11.62558 |
| pseudogen: -            | 3    | 6    | 9    | 13   | 7     | 10    | 0.038455 | 0.098627 | 0.139196 | 0.258649 |
| lincRNA RAMP2_an        | 19   | 7    | 3    | 9    | 14    | 16    | 0.285731 | 0.134993 | 0.054434 | 0.210076 |
| protein_co fat_storage  | 367  | 287  | 316  | 70   | 86    | 57    | 3.743449 | 3.754025 | 3.889028 | 1.108241 |
| protein_co Bloom_syn    | 387  | 332  | 367  | 659  | 733   | 768   | 3.98385  | 4.382677 | 4.558334 | 10.5295  |
| protein_co Uncharacte   | 372  | 390  | 341  | 52   | 42    | 44    | 3.778013 | 5.07919  | 4.178524 | 0.819699 |
| protein_co zinc_finger  | 247  | 198  | 209  | 236  | 209   | 255   | 1.932238 | 1.98627  | 1.972686 | 2.865538 |
| lincRNA GATA3_ant       | 0    | 0    | 0    | 1    | 0     | 2     | 0        | 0        | 0        | 0.032873 |
| protein_co DNA-damag    | 680  | 477  | 578  | 861  | 998   | 1114  | 3.000961 | 2.699474 | 3.077707 | 5.897733 |
| pseudogen: -            | 0    | 0    | 0    | 10   | 6     | 5     | 0        | 0        | 0        | 0.358168 |
| protein_co supervillin  | 1501 | 1205 | 1189 | 492  | 677   | 528   | 8.804343 | 9.063848 | 8.414846 | 4.479317 |
| protein_co chromosom    | 0    | 0    | 0    | 8    | 11    | 4     | 0        | 0        | 0        | 0.145669 |
| protein_co tripartite_r | 1078 | 841  | 925  | 1305 | 1587  | 1387  | 6.061571 | 6.064175 | 6.275614 | 11.38957 |
| protein_co low_densit   | 4741 | 3445 | 3674 | 686  | 817   | 631   | 32.2837  | 30.08236 | 30.18565 | 7.2505   |
| protein_co pellino_E3   | 774  | 607  | 705  | 645  | 743   | 800   | 9.6781   | 9.73301  | 10.63619 | 12.51813 |
| lincRNA zinc_finger     | 3    | 3    | 5    | 12   | 14    | 9     | 0.041606 | 0.053354 | 0.083667 | 0.258313 |
| pseudogen: -            | 1    | 1    | 1    | 0    | 0     | 0     | 0.205658 | 0.263727 | 0.248138 | 0        |
| protein_co zinc_finger  | 815  | 657  | 758  | 471  | 626   | 657   | 7.821401 | 8.085402 | 8.776961 | 7.015818 |
| protein_co mitochond    | 515  | 421  | 412  | 597  | 574   | 816   | 10.57747 | 11.08832 | 10.20986 | 19.03177 |
| protein_co UDP-N-act    | 761  | 559  | 610  | 555  | 813   | 342   | 8.087784 | 7.61844  | 7.822089 | 9.155211 |
| pseudogen: BCL2/aden    | 2    | 2    | 0    | 12   | 11    | 5     | 0.059167 | 0.075874 | 0        | 0.551014 |
| protein_co zinc_finger  | 0    | 1    | 0    | 0    | 0     | 0     | 0        | 0.025718 | 0        | 0        |
| protein_co F-box_and    | 4    | 2    | 1    | 7    | 6     | 9     | 0.12291  | 0.078807 | 0.037074 | 0.333852 |
| protein_co zinc_finger  | 210  | 146  | 156  | 269  | 323   | 334   | 3.131967 | 2.792287 | 2.807182 | 6.227025 |
| protein_co zinc_finger  | 179  | 111  | 130  | 233  | 264   | 219   | 2.630308 | 2.091635 | 2.304862 | 5.314226 |
| protein_co zinc_finger  | 91   | 61   | 78   | 289  | 331   | 463   | 1.009461 | 0.867735 | 1.043977 | 4.975955 |
| protein_co solute_carr  | 106  | 70   | 62   | 94   | 121   | 31    | 0.476315 | 0.403362 | 0.336146 | 0.655611 |
| protein_co olfactory_r  | 0    | 0    | 1    | 0    | 0     | 0     | 0        | 0        | 0.025611 | 0        |
| protein_co dapper_ant   | 1657 | 1113 | 1178 | 67   | 60    | 36    | 25.18534 | 21.69351 | 21.60322 | 1.580631 |
| protein_co adenosine_   | 900  | 671  | 797  | 354  | 474   | 322   | 6.005552 | 5.741724 | 6.416775 | 3.666437 |
| protein_co zinc_finger  | 9    | 11   | 18   | 37   | 45    | 67    | 0.13622  | 0.213502 | 0.328715 | 0.869223 |
| protein_co huntingtin   | 2997 | 2402 | 2644 | 3063 | 3760  | 3484  | 9.7333   | 10.00359 | 10.36055 | 15.44013 |
| protein_co compleme     | 22   | 13   | 17   | 1    | 0     | 3     | 0.446378 | 0.338246 | 0.416176 | 0.031493 |
| protein_co deiodinase   | 2    | 1    | 0    | 4    | 3     | 16    | 0.044615 | 0.028606 | 0        | 0.138496 |
| protein_co cytochrom    | 0    | 0    | 0    | 104  | 177   | 129   | 0        | 0        | 0        | 2.478422 |
| protein_co histone_cl   | 3    | 2    | 6    | 0    | 1     | 31    | 0.162624 | 0.139028 | 0.392431 | 0        |
| protein_co dachsous_2   | 40   | 23   | 29   | 14   | 23    | 20    | 0.210458 | 0.155182 | 0.184099 | 0.114331 |
| protein_co golgin_A6    | 0    | 0    | 0    | 0    | 0     | 1     | 0        | 0        | 0        | 0        |
| protein_co ventricular  | 643  | 545  | 620  | 55   | 65    | 50    | 7.175222 | 7.798843 | 8.347647 | 0.952615 |
| protein_co fatty_acid   | 0    | 0    | 0    | 1    | 0     | 0     | 0        | 0        | 0        | 0.132087 |
| protein_co sedoheptul   | 81   | 49   | 64   | 117  | 121   | 141   | 0.989602 | 0.767681 | 0.943416 | 2.218665 |
| pseudogen: gamma-glu    | 1    | 0    | 1    | 0    | 0     | 2     | 0.020038 | 0        | 0.024178 | 0        |
| protein_co intracistern | 475  | 372  | 347  | 146  | 225   | 76    | 7.154757 | 7.185443 | 6.306361 | 3.41338  |
| protein_co oligodendr   | 0    | 0    | 0    | 1    | 0     | 0     | 0        | 0        | 0        | 0.020055 |
| protein_co olfactory_r  | 0    | 0    | 0    | 1    | 1     | 0     | 0        | 0        | 0        | 0.069579 |
| protein_co mitogen-ac   | 399  | 292  | 302  | 17   | 27    | 16    | 3.599984 | 3.378468 | 3.287628 | 0.238071 |
| protein_co oxoglutarat  | 223  | 176  | 219  | 799  | 986   | 733   | 2.823022 | 2.857139 | 3.345042 | 15.69953 |
| protein_co chromosom    | 1    | 2    | 4    | 0    | 0     | 0     | 0.035849 | 0.091942 | 0.173014 | 0        |
| protein_co cytochrom    | 0    | 0    | 0    | 13   | 12    | 13    | 0        | 0        | 0        | 0.454874 |
| protein_co glutathione  | 1081 | 800  | 900  | 280  | 318   | 221   | 18.82916 | 17.86918 | 18.91454 | 7.569964 |
| protein_co heterogene   | 6563 | 5076 | 5288 | 8206 | 12569 | 12470 | 171.347  | 169.9437 | 166.5764 | 332.534  |
| protein_co olfactory_r  | 0    | 0    | 0    | 0    | 0     | 2     | 0        | 0        | 0        | 0        |
| protein_co stathmin-li  | 926  | 724  | 733  | 887  | 1064  | 1042  | 19.25506 | 19.30553 | 18.39018 | 28.6278  |
| protein_co histone_cl   | 16   | 12   | 12   | 18   | 18    | 34    | 1.765271 | 1.697782 | 1.597426 | 3.082439 |
| protein_co platelet-de  | 632  | 442  | 416  | 3897 | 5153  | 3316  | 12.85661 | 11.53031 | 10.21059 | 123.0468 |
| lincRNA -               | 1    | 0    | 0    | 37   | 32    | 45    | 0.056022 | 0        | 0        | 3.217267 |
| protein_co glycophori   | 5    | 1    | 0    | 0    | 1     | 1     | 0.139222 | 0.035707 | 0        | 0        |
| protein_co collagen_ty  | 2437 | 1888 | 1984 | 132  | 223   | 114   | 36.43845 | 36.20059 | 35.79267 | 3.063436 |
| protein_co sialophorin  | 3    | 3    | 2    | 21   | 31    | 11    | 0.020524 | 0.026319 | 0.016509 | 0.22299  |
| protein_co zinc_finger  | 13   | 12   | 11   | 78   | 79    | 70    | 0.182506 | 0.216035 | 0.186327 | 1.699648 |

|                         |       |      |       |      |      |      |          |          |          |          |
|-------------------------|-------|------|-------|------|------|------|----------|----------|----------|----------|
| pseudogen: ADAM_met     | 0     | 0    | 0     | 0    | 0    | 1    | 0        | 0        | 0        | 0        |
| protein_co protocadhe   | 35    | 21   | 40    | 17   | 13   | 13   | 0.501727 | 0.386037 | 0.691844 | 0.37825  |
| protein_co zinc_finger  | 471   | 350  | 382   | 428  | 558  | 557  | 5.740889 | 5.470608 | 5.617843 | 8.097155 |
| protein_co solute_carr  | 955   | 687  | 785   | 281  | 327  | 158  | 10.25182 | 9.457228 | 10.16753 | 4.682034 |
| protein_co zinc_finger  | 4     | 0    | 1     | 59   | 68   | 29   | 0.079745 | 0        | 0.024054 | 1.825684 |
| protein_co ribosome_l   | 233   | 193  | 247   | 382  | 402  | 547  | 7.136103 | 7.580046 | 9.127466 | 18.1593  |
| protein_co Uncharacte   | 0     | 1    | 3     | 4    | 0    | 0    | 0        | 1.002163 | 2.828775 | 4.851987 |
| protein_co solute_carr  | 1     | 0    | 0     | 0    | 0    | 4    | 0.009595 | 0        | 0        | 0        |
| protein_co family_witl  | 0     | 0    | 0     | 0    | 1    | 1    | 0        | 0        | 0        | 0        |
| protein_co mindbomb     | 1284  | 965  | 1067  | 902  | 1304 | 720  | 14.17631 | 13.66264 | 14.21381 | 15.45735 |
| protein_co myosin_VA    | 1839  | 1548 | 1798  | 1026 | 1135 | 787  | 7.053639 | 7.613982 | 8.32088  | 6.108145 |
| protein_co chromosom    | 18    | 3    | 23    | 3    | 10   | 4    | 0.4168   | 0.089081 | 0.642586 | 0.107822 |
| protein_co granzyme_I   | 1     | 1    | 1     | 2    | 7    | 1    | 0.051414 | 0.065932 | 0.062035 | 0.159605 |
| protein_co autophagy    | 490   | 421  | 416   | 242  | 262  | 206  | 4.633214 | 5.104788 | 4.745999 | 3.551666 |
| pseudogen: PRAME_fan    | 0     | 0    | 0     | 0    | 0    | 1    | 0        | 0        | 0        | 0        |
| pseudogen: -            | 10    | 12   | 5     | 0    | 0    | 0    | 0.143176 | 0.220323 | 0.086375 | 0        |
| protein_co signal-indu  | 1656  | 1284 | 1520  | 1649 | 2001 | 1584 | 9.915703 | 9.859106 | 10.98133 | 15.32549 |
| protein_co tetratricop  | 95    | 66   | 91    | 54   | 44   | 64   | 0.95407  | 0.849982 | 1.102671 | 0.841745 |
| processed_SCO-spondi    | 84    | 66   | 82    | 22   | 43   | 15   | 0.25276  | 0.254673 | 0.297708 | 0.10275  |
| protein_co elastase_ne  | 0     | 0    | 0     | 1    | 21   | 7    | 0        | 0        | 0        | 0.071144 |
| protein_co RAB40C_m     | 1003  | 812  | 875   | 626  | 771  | 484  | 17.30979 | 17.97033 | 18.21994 | 16.76855 |
| protein_co phosphatic   | 365   | 371  | 343   | 280  | 277  | 283  | 3.111226 | 4.055291 | 3.527613 | 3.70448  |
| protein_co collagen_ty  | 15    | 13   | 20    | 359  | 439  | 344  | 0.104978 | 0.11667  | 0.168882 | 3.899694 |
| protein_co zinc_finger  | 56    | 62   | 61    | 19   | 26   | 26   | 0.619156 | 0.879049 | 0.813748 | 0.326059 |
| protein_co HERV-H_LTI   | 73    | 36   | 52    | 85   | 82   | 38   | 3.811772 | 2.410549 | 3.276087 | 6.888957 |
| protein_co homeobox     | 17    | 8    | 6     | 0    | 0    | 0    | 0.456285 | 0.275351 | 0.194306 | 0        |
| protein_co topoisome    | 515   | 422  | 421   | 585  | 649  | 754  | 5.892718 | 6.19199  | 5.812174 | 10.3895  |
| protein_co beta-carote  | 4     | 9    | 11    | 1    | 1    | 2    | 0.064014 | 0.184699 | 0.2124   | 0.02484  |
| pseudogen: glutathione  | 11    | 11   | 14    | 10   | 10   | 20   | 0.851139 | 1.091465 | 1.307025 | 1.200987 |
| protein_co potassium_   | 9     | 3    | 5     | 11   | 8    | 9    | 0.165364 | 0.070685 | 0.110845 | 0.313706 |
| processed_ -            | 2     | 0    | 0     | 1    | 1    | 0    | 0.172707 | 0        | 0        | 0.134033 |
| protein_co ectonucleo   | 1306  | 1067 | 1023  | 830  | 1054 | 927  | 22.13968 | 23.19541 | 20.92435 | 21.8392  |
| protein_co diencephal   | 2     | 0    | 1     | 84   | 86   | 49   | 0.03254  | 0        | 0.019631 | 2.121271 |
| pseudogen: kallikrein_g | 0     | 0    | 0     | 0    | 0    | 1    | 0        | 0        | 0        | 0        |
| protein_co ectonucleo   | 4096  | 3528 | 3781  | 703  | 805  | 680  | 25.80778 | 28.5055  | 28.74388 | 6.875061 |
| protein_co chromosom    | 0     | 0    | 0     | 0    | 3    | 0    | 0        | 0        | 0        | 0        |
| protein_co coiled-coil  | 12    | 16   | 16    | 2    | 1    | 8    | 0.219454 | 0.375225 | 0.353045 | 0.056771 |
| protein_co fatty_acyl_l | 1798  | 1438 | 1539  | 759  | 745  | 1055 | 14.48595 | 14.85681 | 14.96043 | 9.491386 |
| protein_co chromosom    | 619   | 531  | 499   | 131  | 113  | 113  | 2.579993 | 2.838126 | 2.509438 | 0.84748  |
| protein_co Uncharacte   | 4     | 1    | 3     | 12   | 25   | 31   | 0.108416 | 0.034757 | 0.098108 | 0.504831 |
| protein_co zinc_finger  | 355   | 249  | 242   | 141  | 170  | 186  | 4.294622 | 3.862827 | 3.53232  | 2.647562 |
| protein_co microfibrill | 369   | 317  | 323   | 0    | 3    | 5    | 6.081693 | 6.699875 | 6.423159 | 0        |
| protein_co myosin_he    | 0     | 0    | 0     | 5    | 0    | 2    | 0        | 0        | 0        | 0.061252 |
| pseudogen: vomeronas    | 0     | 2    | 1     | 0    | 0    | 0    | 0        | 0.112182 | 0.052776 | 0        |
| protein_co zinc_finger  | 104   | 76   | 78    | 94   | 82   | 82   | 1.183057 | 1.108652 | 1.07057  | 1.659704 |
| protein_co chromosom    | 145   | 135  | 86    | 50   | 51   | 35   | 2.820013 | 3.36687  | 2.01804  | 1.509328 |
| protein_co CDC42_sm     | 1251  | 1006 | 966   | 989  | 1235 | 1025 | 18.44056 | 19.01621 | 17.18074 | 22.62786 |
| protein_co macrophag    | 32    | 29   | 29    | 0    | 2    | 0    | 0.337794 | 0.392563 | 0.369358 | 0        |
| protein_co serpin_pep   | 658   | 507  | 531   | 0    | 0    | 0    | 14.31723 | 14.14655 | 13.94041 | 0        |
| protein_co dipeptidyl-  | 79    | 90   | 112   | 58   | 69   | 70   | 0.94885  | 1.386189 | 1.623068 | 1.081257 |
| protein_co programmi    | 43    | 39   | 36    | 0    | 0    | 0    | 0.853267 | 0.992409 | 0.861921 | 0        |
| protein_co zinc_finger  | 13    | 14   | 15    | 24   | 27   | 34   | 0.262519 | 0.36254  | 0.365475 | 0.752246 |
| protein_co dynein_axc   | 70    | 63   | 59    | 11   | 8    | 6    | 0.231703 | 0.267413 | 0.235631 | 0.056514 |
| antisense -             | 39    | 33   | 40    | 22   | 16   | 17   | 0.939245 | 1.019149 | 1.162311 | 0.822371 |
| protein_co TBC1_dom     | 16    | 15   | 20    | 11   | 13   | 4    | 0.221375 | 0.26614  | 0.333877 | 0.236228 |
| pseudogen: chromobo     | 0     | 1    | 0     | 0    | 0    | 0    | 0        | 0.11978  | 0        | 0        |
| protein_co spectrin_al  | 12626 | 9950 | 10593 | 6123 | 6945 | 6428 | 75.20749 | 76.00247 | 76.13114 | 56.60959 |
| protein_co neuromedi    | 123   | 115  | 101   | 173  | 326  | 214  | 5.671064 | 6.799338 | 5.61861  | 12.38044 |
| protein_co histone_cl   | 0     | 5    | 2     | 6    | 5    | 6    | 0        | 0.604928 | 0.227668 | 0.878629 |
| protein_co zinc_finger  | 17    | 9    | 19    | 28   | 37   | 53   | 0.274116 | 0.186096 | 0.369647 | 0.700768 |
| protein_co parvin_alpl  | 4037  | 3189 | 3413  | 185  | 204  | 246  | 42.46187 | 43.01344 | 43.31364 | 3.020247 |
| protein_co kelch-like_f | 396   | 353  | 377   | 186  | 241  | 137  | 4.306226 | 4.9225   | 4.946421 | 3.139388 |
| protein_co family_witl  | 3593  | 3073 | 3173  | 189  | 255  | 112  | 41.59897 | 45.62441 | 44.32446 | 3.396391 |
| protein_co ribulose-5-  | 797   | 640  | 657   | 499  | 554  | 635  | 14.54704 | 14.97979 | 14.46871 | 14.13668 |
| protein_co zinc_finger  | 76    | 94   | 88    | 118  | 133  | 109  | 1.063774 | 1.687224 | 1.486163 | 2.563587 |

|                         |       |       |       |       |       |       |          |          |          |          |
|-------------------------|-------|-------|-------|-------|-------|-------|----------|----------|----------|----------|
| protein_co compleme     | 0     | 0     | 0     | 83    | 115   | 98    | 0        | 0        | 0        | 3.378481 |
| protein_co heat_shock   | 5     | 2     | 1     | 4     | 4     | 6     | 0.380601 | 0.195227 | 0.091843 | 0.472596 |
| protein_co PHD_finger   | 1378  | 1085  | 1159  | 482   | 540   | 381   | 11.61086 | 11.72342 | 11.78275 | 6.303659 |
| pseudogen: -            | 1     | 1     | 0     | 1     | 4     | 0     | 0.072361 | 0.092793 | 0        | 0.112315 |
| protein_co ribosomal_   | 2874  | 2305  | 2321  | 3099  | 3110  | 4096  | 111.9285 | 115.1156 | 109.0629 | 187.3294 |
| protein_co chromosor    | 0     | 2     | 0     | 0     | 0     | 0     | 0        | 0.18732  | 0        | 0        |
| pseudogen: prothymos    | 65    | 42    | 60    | 119   | 126   | 100   | 9.320646 | 7.723093 | 10.38083 | 26.48562 |
| protein_co prosaposin   | 13843 | 11077 | 11550 | 9696  | 10310 | 8132  | 226.4824 | 232.3998 | 227.9997 | 246.2222 |
| protein_co S100_calci   | 3126  | 2560  | 2644  | 793   | 837   | 902   | 121.9453 | 128.0635 | 124.4473 | 48.01529 |
| protein_co WD_repeat    | 1     | 5     | 4     | 9     | 19    | 3     | 0.00874  | 0.056039 | 0.042181 | 0.122091 |
| protein_co ribosomal_   | 14784 | 11264 | 11377 | 16061 | 16277 | 13782 | 222.7577 | 217.642  | 206.8315 | 375.6158 |
| protein_co homeobox     | 228   | 190   | 203   | 0     | 1     | 17    | 3.632662 | 3.881978 | 3.902422 | 0        |
| protein_co thioredoxi   | 148   | 127   | 92    | 97    | 109   | 38    | 2.352448 | 2.588639 | 1.764389 | 2.393099 |
| protein_co compleme     | 7     | 8     | 12    | 33    | 44    | 8     | 0.24679  | 0.361683 | 0.510456 | 1.805815 |
| protein_co chromosor    | 6     | 9     | 8     | 17    | 30    | 3     | 0.233284 | 0.44873  | 0.375294 | 1.025918 |
| protein_co microtubul   | 77    | 69    | 55    | 7     | 2     | 3     | 3.054595 | 3.510115 | 2.632532 | 0.431014 |
| protein_co minichrom    | 1469  | 1236  | 1250  | 1348  | 1643  | 1813  | 16.74725 | 18.06964 | 17.19411 | 23.85295 |
| protein_co essential_r  | 133   | 94    | 117   | 76    | 121   | 253   | 1.111059 | 1.006984 | 1.179286 | 0.985438 |
| protein_co kelch_dom    | 36    | 32    | 24    | 0     | 1     | 1     | 0.627291 | 0.715033 | 0.504575 | 0        |
| protein_co zinc_finger  | 190   | 165   | 143   | 108   | 105   | 75    | 1.123043 | 1.250651 | 1.019828 | 0.990825 |
| protein_co TAF13_RNA    | 759   | 599   | 650   | 231   | 310   | 356   | 33.07576 | 33.47374 | 34.17665 | 15.62466 |
| protein_co zinc_finger  | 142   | 120   | 130   | 80    | 101   | 131   | 0.887784 | 0.962077 | 0.980642 | 0.776318 |
| protein_co ATPase_fam   | 2236  | 1510  | 1744  | 1545  | 2194  | 2098  | 40.14015 | 34.7611  | 37.77476 | 43.04931 |
| protein_co family_witl  | 410   | 355   | 404   | 315   | 386   | 486   | 8.003708 | 8.886793 | 9.515614 | 9.544395 |
| protein_co zinc_finger  | 65    | 82    | 78    | 54    | 79    | 58    | 0.916371 | 1.482454 | 1.326786 | 1.181632 |
| lincRNA -               | 26    | 32    | 37    | 11    | 14    | 8     | 2.127645 | 3.358034 | 3.653218 | 1.397169 |
| pseudogen: -            | 24    | 13    | 30    | 3     | 1     | 3     | 1.585015 | 1.100968 | 2.390514 | 0.30752  |
| protein_co coiled-coil  | 28    | 22    | 29    | 23    | 24    | 9     | 0.16653  | 0.16779  | 0.208104 | 0.212321 |
| protein_co solute_carr  | 257   | 223   | 200   | 278   | 357   | 320   | 1.911905 | 2.127391 | 1.795193 | 3.210025 |
| protein_co occludin     | 93    | 81    | 67    | 318   | 447   | 437   | 0.677349 | 0.756526 | 0.588779 | 3.594902 |
| pseudogen: -            | 0     | 1     | 1     | 1     | 0     | 0     | 0        | 0.400865 | 0.37717  | 0.485199 |
| protein_co chromosor    | 11    | 3     | 5     | 0     | 0     | 0     | 0.154013 | 0.053864 | 0.084466 | 0        |
| pseudogen: -            | 10    | 7     | 7     | 7     | 4     | 5     | 0.344021 | 0.30881  | 0.290557 | 0.373777 |
| protein_co histone_clu  | 32    | 20    | 21    | 19    | 40    | 81    | 0.782315 | 0.627005 | 0.61944  | 0.720968 |
| protein_co cytochrom    | 0     | 0     | 0     | 7     | 10    | 11    | 0        | 0        | 0        | 0.292961 |
| protein_co zinc_finger  | 81    | 66    | 65    | 112   | 148   | 153   | 1.058259 | 1.105758 | 1.024633 | 2.2712   |
| pseudogen: -            | 3     | 1     | 0     | 4     | 1     | 2     | 0.289445 | 0.123724 | 0        | 0.599011 |
| protein_co histone_clu  | 2     | 3     | 1     | 1     | 1     | 5     | 0.078477 | 0.150953 | 0.047344 | 0.060904 |
| pseudogen: solute_carr  | 5     | 4     | 5     | 124   | 161   | 121   | 0.073357 | 0.075256 | 0.08851  | 2.823747 |
| pseudogen: POM121_t     | 10    | 9     | 6     | 21    | 18    | 7     | 0.290521 | 0.335296 | 0.210318 | 0.946949 |
| protein_co family_witl  | 64    | 46    | 63    | 539   | 661   | 465   | 0.501833 | 0.462537 | 0.59603  | 6.559919 |
| protein_co zinc_finger  | 61    | 46    | 48    | 75    | 75    | 85    | 0.883897 | 0.85475  | 0.839192 | 1.6868   |
| protein_co glycosylph   | 1853  | 1411  | 1419  | 1360  | 1605  | 1404  | 41.8129  | 40.82923 | 38.63361 | 47.63259 |
| protein_co ADAMTS-lik   | 1270  | 831   | 913   | 6     | 27    | 10    | 13.94621 | 11.70208 | 12.09682 | 0.102267 |
| protein_co small_gluta  | 340   | 315   | 336   | 195   | 217   | 195   | 2.915086 | 3.463318 | 3.47584  | 2.595001 |
| protein_co zinc_finger  | 64    | 45    | 43    | 47    | 44    | 61    | 0.988133 | 0.890958 | 0.801036 | 1.126326 |
| polymorph: proline-ricl | 12    | 2     | 3     | 19    | 35    | 28    | 0.488014 | 0.104301 | 0.147204 | 1.19932  |
| protein_co family_witl  | 476   | 410   | 406   | 126   | 133   | 93    | 4.779368 | 5.279061 | 4.918556 | 1.963652 |
| protein_co myosin_IC    | 7586  | 5974  | 6511  | 2582  | 3335  | 2076  | 69.13657 | 69.81835 | 71.59633 | 36.52429 |
| protein_co myelodyspl   | 0     | 0     | 0     | 0     | 0     | 2     | 0        | 0        | 0        | 0        |
| pseudogen: olfactory_r  | 1     | 2     | 1     | 0     | 0     | 0     | 0.051527 | 0.132153 | 0.062171 | 0        |
| protein_co NFkB_inhib   | 134   | 116   | 123   | 58    | 82    | 57    | 2.627881 | 2.917213 | 2.910409 | 1.765466 |
| protein_co UDP_glucu    | 0     | 0     | 0     | 0     | 0     | 1     | 0        | 0        | 0        | 0        |
| protein_co meiosis_ex   | 2     | 1     | 1     | 0     | 0     | 0     | 0.150048 | 0.096208 | 0.090521 | 0        |
| protein_co kinesin_fan  | 621   | 523   | 508   | 352   | 466   | 197   | 3.329754 | 3.596099 | 3.28649  | 2.929501 |
| protein_co nebulin-rel  | 3     | 0     | 2     | 0     | 2     | 2     | 0.02512  | 0        | 0.020206 | 0        |
| protein_co alcohol_de   | 2581  | 2085  | 2105  | 3503  | 3929  | 3844  | 46.33351 | 47.99794 | 45.59397 | 97.6063  |
| protein_co solute_carr  | 0     | 0     | 0     | 0     | 1     | 0     | 0        | 0        | 0        | 0        |
| protein_co histone_clu  | 715   | 585   | 608   | 843   | 892   | 1963  | 40.88581 | 42.89748 | 41.94867 | 74.82119 |
| protein_co TEA_domai    | 306   | 252   | 236   | 1127  | 1408  | 1349  | 8.490145 | 8.9661   | 7.900485 | 48.53422 |
| protein_co spastic_par  | 1957  | 1643  | 1643  | 1616  | 2159  | 1675  | 29.83217 | 32.11744 | 30.21897 | 38.23542 |
| protein_co histone_clu  | 7     | 5     | 14    | 4     | 8     | 12    | 0.927204 | 0.849291 | 2.237449 | 0.822371 |
| protein_co hornerin     | 0     | 1     | 0     | 0     | 0     | 1     | 0        | 0.006249 | 0        | 0        |
| protein_co interferon_  | 9     | 5     | 4     | 0     | 0     | 0     | 0.481747 | 0.343207 | 0.258336 | 0        |
| protein_co hairy_and_   | 0     | 0     | 0     | 5     | 4     | 10    | 0        | 0        | 0        | 0.278636 |

|                         |       |      |      |       |       |       |          |          |          |          |
|-------------------------|-------|------|------|-------|-------|-------|----------|----------|----------|----------|
| protein_co chromosom    | 43    | 35   | 53   | 13    | 22    | 10    | 1.514854 | 1.581174 | 2.252819 | 0.710847 |
| protein_co zinc_finger  | 38    | 23   | 35   | 320   | 405   | 343   | 0.20408  | 0.158399 | 0.226794 | 2.667453 |
| protein_co ERO1-like_(  | 1306  | 965  | 1032 | 747   | 961   | 531   | 11.5872  | 10.97923 | 11.04748 | 10.28695 |
| protein_co coagulation  | 158   | 132  | 154  | 168   | 135   | 128   | 4.355451 | 4.666157 | 5.122062 | 7.188129 |
| protein_co zinc_finger  | 27    | 26   | 18   | 38    | 36    | 29    | 0.522505 | 0.645223 | 0.420289 | 1.141408 |
| antisense -             | 8     | 3    | 5    | 7     | 8     | 11    | 0.109941 | 0.052869 | 0.082907 | 0.149314 |
| protein_co zinc_finger  | 5     | 0    | 5    | 129   | 131   | 101   | 0.077453 | 0        | 0.093451 | 3.101617 |
| protein_co zinc_finger  | 48    | 38   | 37   | 122   | 152   | 186   | 0.494338 | 0.501852 | 0.459761 | 1.950173 |
| protein_co olfactory_r  | 0     | 0    | 0    | 0     | 2     | 0     | 0        | 0        | 0        | 0        |
| protein_co phospholip   | 69    | 56   | 80   | 219   | 229   | 127   | 0.751024 | 0.781632 | 1.050613 | 3.699809 |
| protein_co FCH_and_d    | 742   | 524  | 580  | 309   | 472   | 286   | 8.053795 | 7.293522 | 7.595785 | 5.205777 |
| protein_co zinc_finger  | 422   | 347  | 306  | 384   | 445   | 244   | 3.645466 | 3.843964 | 3.189408 | 5.148755 |
| protein_co arylacetam   | 0     | 1    | 0    | 0     | 0     | 0     | 0        | 0.012403 | 0        | 0        |
| protein_co S100_calci   | 6780  | 5250 | 5302 | 97    | 125   | 91    | 472.3838 | 469.066  | 445.7107 | 10.48981 |
| protein_co ribosomal_   | 10008 | 8029 | 8232 | 15550 | 15082 | 12772 | 206.2749 | 212.2119 | 204.7163 | 497.4619 |
| protein_co dynamin_3    | 839   | 647  | 722  | 14    | 15    | 13    | 5.147288 | 5.090145 | 5.344435 | 0.133314 |
| protein_co zinc_finger  | 259   | 202  | 234  | 1916  | 2428  | 1794  | 5.045498 | 5.046206 | 5.50007  | 57.93357 |
| protein_co myelin_prc   | 2713  | 2191 | 2316 | 1333  | 1545  | 1000  | 25.39174 | 26.29628 | 26.15347 | 19.36437 |
| protein_co vacuolar_p   | 1011  | 817  | 896  | 701   | 417   | 612   | 3.094374 | 3.206661 | 3.308855 | 3.330198 |
| protein_co myelin_bas   | 183   | 138  | 133  | 490   | 615   | 248   | 0.875867 | 0.846985 | 0.768046 | 3.640104 |
| protein_co A_kinase(F   | 1994  | 1508 | 1659 | 1355  | 1837  | 1661  | 28.92905 | 28.05561 | 29.04046 | 30.51257 |
| protein_co ELOVL_fatt   | 46    | 33   | 37   | 15    | 32    | 24    | 0.53964  | 0.496443 | 0.523716 | 0.273129 |
| protein_co leucine_glu  | 2     | 4    | 5    | 0     | 1     | 2     | 0.032551 | 0.083485 | 0.098187 | 0        |
| protein_co chromosom    | 1657  | 1215 | 1155 | 624   | 1015  | 885   | 34.85723 | 32.776   | 29.31571 | 20.37443 |
| processed_small_nucl    | 151   | 144  | 169  | 252   | 270   | 394   | 3.720648 | 4.550021 | 5.024309 | 9.637683 |
| protein_co protocadhe   | 4     | 3    | 4    | 22    | 28    | 25    | 0.029551 | 0.028421 | 0.035655 | 0.25227  |
| protein_co Kell_blood   | 8     | 7    | 5    | 11    | 17    | 22    | 0.1334   | 0.149683 | 0.100597 | 0.284701 |
| protein_co nucleolar_l  | 704   | 587  | 639  | 365   | 320   | 675   | 7.179333 | 7.676422 | 7.862494 | 5.777431 |
| protein_co interleukin  | 138   | 129  | 150  | 113   | 103   | 61    | 1.560362 | 1.870447 | 2.046377 | 1.983149 |
| protein_co coiled-coil  | 7     | 4    | 4    | 141   | 143   | 75    | 0.134081 | 0.098251 | 0.092444 | 4.191974 |
| protein_co discs_large  | 0     | 2    | 0    | 21    | 25    | 16    | 0        | 0.011869 | 0        | 0.150846 |
| protein_co mitochond    | 659   | 489  | 545  | 937   | 1046  | 1008  | 9.847202 | 9.370131 | 9.825892 | 21.73189 |
| protein_co ectonucleo   | 691   | 501  | 549  | 136   | 163   | 162   | 9.127043 | 8.485923 | 8.749282 | 2.788184 |
| protein_co Fc_fragmen   | 0     | 1    | 1    | 1     | 0     | 1     | 0        | 0.057596 | 0.054191 | 0.069712 |
| protein_co zinc_finger  | 838   | 675  | 750  | 464   | 602   | 752   | 8.86994  | 9.161989 | 9.578246 | 7.622986 |
| protein_co tubulin_alp  | 0     | 0    | 0    | 1     | 0     | 0     | 0        | 0        | 0        | 0.046924 |
| protein_co ribosomal_   | 9401  | 7732 | 7964 | 9404  | 8620  | 8868  | 242.205  | 255.4525 | 247.5645 | 376.0556 |
| protein_co ArfGAP_wit   | 19    | 26   | 33   | 13    | 19    | 15    | 0.369672 | 0.648703 | 0.774685 | 0.392588 |
| protein_co zinc_finger  | 76    | 65   | 79   | 263   | 203   | 269   | 0.948534 | 1.040308 | 1.189637 | 5.09478  |
| protein_co zinc_finger  | 642   | 518  | 590  | 497   | 531   | 856   | 4.20321  | 4.348958 | 4.660646 | 5.050483 |
| protein_co MAK16_ho     | 404   | 308  | 336  | 305   | 354   | 570   | 4.746572 | 4.640435 | 4.763059 | 5.561974 |
| protein_co zinc_finger  | 1     | 0    | 0    | 0     | 0     | 0     | 0.008931 | 0        | 0        | 0        |
| protein_co arginine_va  | 0     | 0    | 0    | 3     | 2     | 2     | 0        | 0        | 0        | 0.097604 |
| protein_co signal-regul | 1236  | 924  | 1067 | 298   | 351   | 268   | 14.50352 | 13.90389 | 15.10662 | 5.427523 |
| protein_co G_protein-i  | 1060  | 830  | 908  | 1834  | 2406  | 1618  | 16.91168 | 16.98119 | 17.47892 | 45.41618 |
| protein_co primase_DI   | 104   | 102  | 93   | 429   | 363   | 487   | 3.500762 | 4.4029   | 3.777116 | 22.41388 |
| protein_co membrane     | 876   | 758  | 765  | 547   | 689   | 406   | 10.46247 | 11.60937 | 11.02401 | 10.14023 |
| protein_co Putative_N   | 0     | 1    | 0    | 0     | 0     | 0     | 0        | 0.016777 | 0        | 0        |
| protein_co aldo-keto_l  | 6     | 21   | 10   | 0     | 0     | 0     | 0.176943 | 0.794167 | 0.355821 | 0        |
| protein_co sulfotransf  | 17    | 15   | 10   | 38    | 55    | 55    | 0.428565 | 0.484918 | 0.304169 | 1.486899 |
| protein_co cytochrom    | 3     | 0    | 1    | 0     | 0     | 0     | 0.06167  | 0        | 0.024803 | 0        |
| protein_co zinc_finger  | 286   | 241  | 226  | 256   | 328   | 304   | 3.801175 | 4.107506 | 3.624168 | 5.281074 |
| protein_co CD2-associ   | 319   | 255  | 270  | 845   | 848   | 875   | 2.763842 | 2.833167 | 2.822503 | 11.36344 |
| protein_co nucleopori   | 0     | 0    | 2    | 31    | 43    | 39    | 0        | 0        | 0.064474 | 1.285569 |
| protein_co Sfi1_homol   | 405   | 308  | 325  | 518   | 669   | 342   | 3.61723  | 3.527615 | 3.502293 | 7.18094  |
| protein_co transmemt    | 0     | 0    | 0    | 1     | 0     | 2     | 0        | 0        | 0        | 0.034856 |
| protein_co zinc_finger  | 102   | 57   | 71   | 372   | 493   | 575   | 1.496022 | 1.072067 | 1.256447 | 8.468591 |
| protein_co alcohol_de   | 1     | 3    | 0    | 1     | 2     | 2     | 0.021799 | 0.083863 | 0        | 0.033835 |
| pseudogen -             | 1     | 0    | 0    | 0     | 2     | 1     | 0.223286 | 0        | 0        | 0        |
| protein_co zinc_finger  | 245   | 144  | 174  | 142   | 160   | 85    | 2.234595 | 1.684242 | 1.914829 | 2.010257 |
| lincRNA_sorting_ne      | 23    | 20   | 13   | 17    | 21    | 15    | 0.178378 | 0.198908 | 0.121648 | 0.204641 |
| protein_co chondroitin  | 1600  | 997  | 1351 | 10    | 19    | 8     | 19.48676 | 15.57127 | 19.85286 | 0.189038 |
| protein_co torsin_fam   | 356   | 278  | 297  | 161   | 261   | 70    | 4.024312 | 4.029914 | 4.05085  | 2.824867 |
| protein_co lysophosph   | 3290  | 2504 | 2660 | 78    | 97    | 75    | 42.41632 | 41.39813 | 41.37774 | 1.560854 |
| protein_co myoglobin    | 5     | 2    | 2    | 3     | 0     | 3     | 0.195865 | 0.100467 | 0.094529 | 0.182406 |

|                         |      |      |      |      |      |      |          |          |          |          |
|-------------------------|------|------|------|------|------|------|----------|----------|----------|----------|
| protein_co olfactory_r  | 0    | 0    | 0    | 0    | 1    | 0    | 0        | 0        | 0        | 0        |
| protein_co 3-hydroxyli  | 425  | 381  | 433  | 282  | 314  | 369  | 5.890706 | 6.771934 | 7.241263 | 6.066776 |
| protein_co zinc_finger  | 237  | 168  | 192  | 418  | 459  | 935  | 2.704535 | 2.458458 | 2.643587 | 7.403737 |
| protein_co transmembr   | 3    | 4    | 2    | 7    | 25   | 11   | 0.03458  | 0.059125 | 0.027815 | 0.125236 |
| pseudogen_ -            | 1    | 0    | 0    | 0    | 0    | 1    | 0.143395 | 0        | 0        | 0        |
| protein_co sosondowa    | 708  | 597  | 635  | 503  | 735  | 538  | 7.13478  | 7.714913 | 7.720921 | 7.867664 |
| protein_co zinc_finger  | 487  | 431  | 413  | 1902 | 2107 | 1577 | 4.198463 | 4.764836 | 4.295952 | 25.45085 |
| protein_co HCG19853     | 34   | 20   | 28   | 34   | 35   | 11   | 0.881781 | 0.665153 | 0.876169 | 1.368647 |
| pseudogen_ zinc_finger  | 25   | 44   | 31   | 123  | 118  | 101  | 0.451213 | 1.018365 | 0.675073 | 3.445695 |
| protein_co Protein_LO   | 2    | 2    | 1    | 5    | 3    | 1    | 0.046518 | 0.059653 | 0.028063 | 0.180505 |
| protein_co high_mobil   | 139  | 112  | 108  | 435  | 424  | 691  | 3.065716 | 3.167703 | 2.874014 | 14.89145 |
| protein_co mesoderm_    | 695  | 525  | 550  | 391  | 392  | 490  | 6.546517 | 6.341531 | 6.250809 | 5.716533 |
| protein_co mannosida    | 1548 | 1210 | 1345 | 391  | 448  | 430  | 8.463823 | 8.483798 | 8.872907 | 3.318202 |
| protein_co small_VCP/   | 425  | 265  | 296  | 122  | 187  | 182  | 4.388517 | 3.509006 | 3.687811 | 1.955326 |
| protein_co zinc_finger  | 270  | 231  | 224  | 203  | 269  | 136  | 4.510262 | 4.948337 | 4.514754 | 5.263377 |
| protein_co DDRGK_do     | 687  | 523  | 593  | 665  | 920  | 785  | 24.66573 | 24.07954 | 25.68857 | 37.05863 |
| protein_co transcriptic | 1872 | 1414 | 1454 | 915  | 1275 | 1698 | 33.14883 | 32.10858 | 31.06525 | 25.14861 |
| protein_co C-type_lect  | 0    | 0    | 0    | 0    | 2    | 0    | 0        | 0        | 0        | 0        |
| protein_co zinc_finger  | 77   | 51   | 63   | 222  | 258  | 277  | 0.827344 | 0.702708 | 0.816741 | 3.702364 |
| protein_co zinc_finger  | 39   | 40   | 36   | 181  | 172  | 194  | 0.524437 | 0.68976  | 0.584089 | 3.777787 |
| protein_co hydroxyste   | 188  | 159  | 169  | 141  | 124  | 108  | 4.676564 | 5.071956 | 5.072287 | 5.444006 |
| protein_co seizure_thr  | 1323 | 976  | 1008 | 254  | 344  | 339  | 5.051339 | 4.778657 | 4.643605 | 1.505258 |
| protein_co sulfotransf  | 16   | 8    | 7    | 12   | 20   | 25   | 0.117851 | 0.075564 | 0.06221  | 0.137191 |
| protein_co zinc_finger  | 95   | 85   | 96   | 87   | 127  | 68   | 0.855986 | 0.982135 | 1.043668 | 1.216726 |
| protein_co ribosomal_   | 22   | 33   | 22   | 135  | 197  | 121  | 0.189073 | 0.363688 | 0.228127 | 1.80082  |
| protein_co calcium_ch   | 0    | 1    | 1    | 18   | 10   | 27   | 0        | 0.003719 | 0.003499 | 0.081016 |
| protein_co glutamine-i  | 2043 | 1615 | 1748 | 1728 | 2100 | 2159 | 26.99248 | 27.36253 | 27.86531 | 35.43632 |
| processed_ MLLT4_ant    | 21   | 30   | 31   | 104  | 139  | 54   | 0.439987 | 0.806029 | 0.783664 | 3.382082 |
| protein_co colony_stir  | 1    | 2    | 1    | 15   | 21   | 6    | 0.020467 | 0.052492 | 0.024695 | 0.476516 |
| protein_co FK506_bin    | 5    | 10   | 6    | 15   | 12   | 11   | 0.14848  | 0.380809 | 0.21498  | 0.691385 |
| protein_co DEAD_(Asp    | 3131 | 2565 | 2605 | 2199 | 2858 | 3619 | 33.8512  | 35.56212 | 33.98183 | 36.90173 |
| pseudogen_ -            | 8    | 12   | 10   | 10   | 8    | 3    | 0.592607 | 1.139901 | 0.893768 | 1.14976  |
| protein_co ribosomal_   | 395  | 318  | 308  | 517  | 786  | 639  | 11.85759 | 12.24153 | 11.15573 | 24.08909 |
| protein_co solute_carr  | 111  | 94   | 106  | 266  | 279  | 214  | 2.306066 | 2.504298 | 2.657068 | 8.577504 |
| pseudogen_ -            | 1    | 0    | 0    | 4    | 1    | 1    | 0.071045 | 0        | 0        | 0.44109  |
| protein_co serine/thre  | 567  | 475  | 436  | 552  | 677  | 804  | 5.473881 | 5.880513 | 5.078633 | 8.271454 |
| protein_co ubiquitin-li | 2173 | 1637 | 1694 | 1913 | 1871 | 1993 | 70.27035 | 67.88447 | 66.0958  | 96.01914 |
| protein_co helicase_wi  | 851  | 724  | 765  | 820  | 847  | 662  | 2.889457 | 3.152351 | 3.13398  | 4.321465 |
| protein_co transmembr   | 33   | 28   | 25   | 88   | 65   | 59   | 0.425102 | 0.462537 | 0.388568 | 1.759512 |
| protein_co uridine-cyt  | 712  | 550  | 573  | 618  | 723  | 745  | 17.08582 | 16.92497 | 16.59046 | 23.01838 |
| protein_co caspase_rex  | 7    | 2    | 4    | 1081 | 1410 | 1071 | 0.075179 | 0.027545 | 0.051833 | 18.01992 |
| protein_co zinc_finger  | 26   | 17   | 19   | 58   | 59   | 103  | 0.593545 | 0.497666 | 0.523337 | 2.055126 |
| protein_co SDA1_dom     | 438  | 337  | 357  | 414  | 458  | 688  | 6.668126 | 6.579137 | 6.557615 | 9.78274  |
| pseudogen_ speedy_hoi   | 0    | 2    | 0    | 0    | 0    | 0    | 0        | 0.042676 | 0        | 0        |
| pseudogen_ -            | 8    | 14   | 12   | 1    | 1    | 4    | 0.423865 | 0.951206 | 0.767125 | 0.082237 |
| protein_co zinc_finger  | 504  | 395  | 438  | 242  | 285  | 222  | 5.606778 | 5.634939 | 5.87902  | 4.178579 |
| protein_co family_witl  | 693  | 524  | 478  | 345  | 526  | 262  | 9.97997  | 9.676908 | 8.305618 | 7.711619 |
| protein_co transmembr   | 1    | 0    | 0    | 0    | 0    | 0    | 0.012048 | 0        | 0        | 0        |
| protein_co hydroletha   | 117  | 82   | 102  | 110  | 126  | 123  | 2.661879 | 2.392355 | 2.799952 | 3.884414 |
| protein_co myosin_ligl  | 28   | 19   | 17   | 0    | 1    | 1    | 1.427087 | 1.241811 | 1.045417 | 0        |
| protein_co histone_cl   | 23   | 14   | 15   | 46   | 66   | 80   | 0.803031 | 0.626818 | 0.631893 | 2.49283  |
| protein_co zinc_finger  | 3    | 2    | 2    | 26   | 21   | 21   | 0.050293 | 0.042996 | 0.040454 | 0.676537 |
| protein_co zinc_finger  | 79   | 83   | 85   | 509  | 463  | 436  | 0.602229 | 0.811376 | 0.781811 | 6.022585 |
| protein_co homeobox     | 107  | 99   | 95   | 0    | 1    | 8    | 3.011544 | 3.573139 | 3.226094 | 0        |
| protein_co DDB1_and     | 135  | 86   | 91   | 28   | 23   | 21   | 3.831811 | 3.130244 | 3.116447 | 1.233556 |
| protein_co pim-3_onc    | 832  | 597  | 607  | 1295 | 1566 | 971  | 16.46792 | 15.15301 | 14.49613 | 39.78465 |
| protein_co arsA_arseni  | 1618 | 1279 | 1324 | 1805 | 1952 | 1871 | 55.4591  | 56.21784 | 54.75583 | 96.0289  |
| processed_ -            | 0    | 0    | 0    | 1    | 1    | 2    | 0        | 0        | 0        | 0.034073 |
| protein_co aspartate_k  | 3521 | 2918 | 3156 | 1109 | 1242 | 1029 | 32.03954 | 34.04982 | 34.65016 | 15.66326 |
| protein_co histone_cl   | 3    | 2    | 2    | 3    | 2    | 1    | 0.299936 | 0.256417 | 0.24126  | 0.465542 |
| protein_co sprouty-rel  | 2849 | 2158 | 2319 | 770  | 916  | 572  | 32.6067  | 31.67198 | 32.02309 | 13.67841 |
| protein_co WW_doma      | 897  | 720  | 730  | 922  | 1276 | 1116 | 9.315691 | 9.588805 | 9.147313 | 14.86223 |
| protein_co histone_cl   | 0    | 0    | 0    | 0    | 0    | 1    | 0        | 0        | 0        | 0        |
| protein_co glutamine-   | 3290 | 2506 | 2591 | 1954 | 2323 | 1559 | 17.74217 | 17.33011 | 16.85878 | 16.35558 |
| protein_co UV_radiati   | 436  | 358  | 387  | 290  | 381  | 176  | 4.958537 | 5.221069 | 5.310386 | 5.119123 |

|                         |       |      |      |      |      |      |          |          |          |          |
|-------------------------|-------|------|------|------|------|------|----------|----------|----------|----------|
| pseudogen: transmembr   | 2     | 1    | 0    | 3    | 2    | 4    | 0.035931 | 0.023038 | 0        | 0.083655 |
| pseudogen: -            | 0     | 0    | 0    | 0    | 2    | 0    | 0        | 0        | 0        | 0        |
| protein_co zinc_finger  | 157   | 110  | 117  | 133  | 116  | 238  | 1.516945 | 1.362926 | 1.363967 | 1.994583 |
| protein_co transmembr   | 0     | 1    | 0    | 0    | 0    | 1    | 0        | 0.041526 | 0        | 0        |
| protein_co intersectin  | 521   | 442  | 493  | 242  | 271  | 173  | 3.87773  | 4.21863  | 4.427258 | 2.795669 |
| protein_co neurotroph   | 7     | 6    | 4    | 1    | 6    | 4    | 0.107546 | 0.118211 | 0.074149 | 0.023847 |
| pseudogen: basic_leuci  | 37    | 45   | 33   | 24   | 23   | 38   | 2.1004   | 3.275836 | 2.26028  | 2.114667 |
| protein_co meningiom    | 3890  | 3278 | 3496 | 3737 | 4503 | 3964 | 35.44543 | 38.30266 | 38.43528 | 52.85234 |
| pseudogen: TatD_DNase   | 1     | 0    | 0    | 0    | 0    | 1    | 0.020116 | 0        | 0        | 0        |
| pseudogen: -            | 1     | 4    | 4    | 2    | 3    | 2    | 0.011615 | 0.059579 | 0.056057 | 0.036056 |
| protein_co metallothio  | 41    | 28   | 19   | 232  | 227  | 235  | 1.222181 | 1.070333 | 0.683366 | 10.73421 |
| protein_co family_witl  | 1582  | 1243 | 1303 | 389  | 485  | 281  | 12.93913 | 13.03704 | 12.85852 | 4.938312 |
| protein_co zinc_finger  | 37    | 35   | 59   | 71   | 72   | 115  | 0.86315  | 1.047036 | 1.660674 | 2.570829 |
| protein_co thioredoxin  | 2373  | 2002 | 2093 | 1996 | 2481 | 2728 | 27.9995  | 30.29186 | 29.79681 | 36.55473 |
| protein_co NOTCH-regi   | 146   | 95   | 114  | 1373 | 1911 | 1024 | 2.611958 | 2.179447 | 2.460743 | 38.1254  |
| protein_co zinc_finger  | 85    | 63   | 78   | 10   | 12   | 24   | 0.810751 | 0.770581 | 0.897659 | 0.148047 |
| protein_co coagulation  | 0     | 0    | 0    | 1    | 0    | 0    | 0        | 0        | 0        | 0.042786 |
| protein_co zinc_finger  | 35    | 32   | 45   | 56   | 68   | 44   | 0.434857 | 0.509845 | 0.674589 | 1.079933 |
| protein_co chromosom    | 0     | 1    | 0    | 0    | 0    | 0    | 0        | 0.061482 | 0        | 0        |
| protein_co zinc_finger  | 252   | 163  | 157  | 285  | 388  | 340  | 2.095829 | 1.73841  | 1.575444 | 3.679007 |
| protein_co zinc_finger  | 148   | 126  | 152  | 238  | 186  | 521  | 1.464695 | 1.599062 | 1.815001 | 3.655887 |
| protein_co zinc_finger  | 716   | 578  | 599  | 562  | 648  | 564  | 4.878415 | 5.050134 | 4.924256 | 5.943367 |
| protein_co tropomyos    | 10671 | 8490 | 8692 | 980  | 1338 | 1240 | 233.0523 | 237.7746 | 229.0425 | 33.2204  |
| lincRNA FLVCR1_an       | 109   | 93   | 116  | 328  | 353  | 237  | 2.024163 | 2.214682 | 2.599112 | 9.454168 |
| protein_co receptor_(c  | 0     | 0    | 0    | 1    | 0    | 1    | 0        | 0        | 0        | 0.054071 |
| protein_co zinc_finger  | 140   | 104  | 87   | 136  | 165  | 101  | 1.146455 | 1.092123 | 0.8596   | 1.728616 |
| protein_co SH3_domai    | 277   | 179  | 195  | 435  | 559  | 452  | 2.793834 | 2.315172 | 2.373032 | 6.809898 |
| protein_co zinc_finger  | 114   | 114  | 86   | 272  | 383  | 316  | 1.262807 | 1.619371 | 1.14942  | 4.676614 |
| protein_co ankyrin_rej  | 40    | 41   | 52   | 246  | 255  | 202  | 0.561221 | 0.737679 | 0.880289 | 5.357221 |
| protein_co UDP-GlcNA    | 0     | 0    | 0    | 1    | 0    | 2    | 0        | 0        | 0        | 0.027579 |
| antisense -             | 0     | 0    | 0    | 1    | 3    | 0    | 0        | 0        | 0        | 0.027218 |
| protein_co YTH_domai    | 1837  | 1383 | 1549 | 2489 | 2957 | 3720 | 29.44853 | 28.4306  | 29.96084 | 61.93126 |
| pseudogen: neighbor_c   | 63    | 45   | 34   | 62   | 56   | 47   | 2.19797  | 2.013274 | 1.431226 | 3.357402 |
| protein_co translation  | 493   | 397  | 442  | 376  | 508  | 587  | 11.68695 | 12.06852 | 12.64225 | 13.83479 |
| protein_co major_histi  | 11    | 8    | 13   | 0    | 0    | 0    | 0.409357 | 0.381776 | 0.583716 | 0        |
| protein_co atlastin_GT  | 238   | 165  | 166  | 65   | 65   | 61   | 3.91161  | 3.477538 | 3.29181  | 1.658145 |
| protein_co cyclic_nucl  | 7     | 0    | 0    | 11   | 14   | 11   | 0.114486 | 0        | 0        | 0.279239 |
| protein_co v-maf_musi   | 236   | 155  | 180  | 186  | 356  | 289  | 3.285643 | 2.767256 | 3.023632 | 4.019312 |
| protein_co histone_cli  | 5     | 3    | 5    | 12   | 11   | 14   | 0.166395 | 0.128027 | 0.200765 | 0.619842 |
| protein_co chromosom    | 20    | 10   | 20   | 13   | 11   | 2    | 0.443824 | 0.284571 | 0.535499 | 0.44777  |
| protein_co zinc_finger  | 297   | 230  | 293  | 584  | 628  | 720  | 2.493971 | 2.476693 | 2.968593 | 7.611641 |
| protein_co GPN-loop_1   | 478   | 406  | 417  | 450  | 379  | 476  | 8.979739 | 9.780728 | 9.451917 | 13.12136 |
| protein_co phospholip   | 3     | 4    | 8    | 0    | 0    | 1    | 0.0703   | 0.120199 | 0.226189 | 0        |
| protein_co C2_calcium   | 17    | 10   | 11   | 5    | 9    | 12   | 0.231388 | 0.174542 | 0.180647 | 0.105631 |
| protein_co zinc_finger  | 153   | 97   | 127  | 242  | 215  | 223  | 1.387386 | 1.127942 | 1.389497 | 3.406055 |
| protein_co integrin_be  | 1592  | 1238 | 1318 | 0    | 0    | 0    | 29.9314  | 29.84791 | 29.89836 | 0        |
| protein_co zinc_finger  | 176   | 104  | 123  | 165  | 190  | 201  | 4.118085 | 3.120508 | 3.472449 | 5.992349 |
| processed_ chromosom    | 0     | 0    | 1    | 23   | 31   | 0    | 0        | 0        | 0.01637  | 0.484356 |
| protein_co zinc_finger  | 279   | 225  | 238  | 207  | 233  | 199  | 4.606449 | 4.763804 | 4.741187 | 5.304725 |
| protein_co potassium_   | 12    | 4    | 12   | 3    | 4    | 2    | 0.346691 | 0.148194 | 0.418303 | 0.134528 |
| protein_co WD_repeat    | 682   | 557  | 542  | 1351 | 1272 | 1323 | 5.333388 | 5.585773 | 5.114063 | 16.39852 |
| protein_co zinc_finger  | 233   | 187  | 224  | 154  | 199  | 208  | 2.568863 | 2.643845 | 2.979759 | 2.635337 |
| protein_co catenin_(ca  | 4837  | 4012 | 4234 | 4901 | 5044 | 4630 | 34.61117 | 36.81379 | 36.55436 | 54.43214 |
| protein_co DEAD_(Asp    | 1325  | 1182 | 1241 | 1117 | 1299 | 1421 | 12.04523 | 13.77926 | 13.6119  | 15.76096 |
| protein_co solute_carr  | 17    | 12   | 20   | 4    | 16   | 8    | 0.3687   | 0.333745 | 0.523363 | 0.134653 |
| protein_co retinal_deg  | 0     | 0    | 0    | 1    | 1    | 2    | 0        | 0        | 0        | 0.01706  |
| protein_co SPANX_fam    | 0     | 0    | 1    | 0    | 0    | 1    | 0        | 0        | 0.14619  | 0        |
| protein_co activity-reg | 13    | 14   | 17   | 136  | 142  | 103  | 0.1544   | 0.213226 | 0.243613 | 2.507106 |
| protein_co Uncharacte   | 13    | 12   | 5    | 28   | 23   | 14   | 0.521    | 0.616716 | 0.241776 | 1.741739 |
| protein_co nudix_(nuc   | 1286  | 1139 | 1128 | 614  | 698  | 549  | 9.857865 | 11.19631 | 10.43276 | 7.305345 |
| protein_co tousled-like | 862   | 637  | 714  | 912  | 1013 | 1010 | 7.053961 | 6.684586 | 7.049723 | 11.5838  |
| protein_co LPS-respon   | 1047  | 866  | 855  | 1847 | 1919 | 1792 | 4.760385 | 5.0492   | 4.690396 | 13.03445 |
| protein_co chromosom    | 5     | 11   | 10   | 21   | 22   | 5    | 0.126116 | 0.355798 | 0.304333 | 0.822149 |
| protein_co zinc_finger  | 0     | 0    | 0    | 7    | 3    | 3    | 0        | 0        | 0        | 0.103025 |
| protein_co matrix_mei   | 1152  | 883  | 859  | 1523 | 2177 | 1195 | 22.40452 | 22.02182 | 20.15693 | 45.97413 |

|                         |       |       |       |       |       |       |          |          |          |          |
|-------------------------|-------|-------|-------|-------|-------|-------|----------|----------|----------|----------|
| protein_co bromodom     | 1064  | 925   | 1001  | 792   | 810   | 872   | 8.301328 | 9.254586 | 9.422975 | 9.590949 |
| protein_co aldo-keto_r  | 0     | 0     | 0     | 0     | 0     | 1     | 0        | 0        | 0        | 0        |
| protein_co COP9_sign    | 1367  | 1073  | 1242  | 727   | 758   | 841   | 15.99667 | 16.10164 | 17.53601 | 13.20462 |
| pseudogen: peptidylpro  | 757   | 647   | 660   | 839   | 775   | 917   | 71.27659 | 78.12044 | 74.97959 | 122.615  |
| protein_co coiled-coil_ | 50    | 37    | 33    | 399   | 470   | 366   | 0.679369 | 0.644683 | 0.541    | 8.414703 |
| protein_co Mdm4_p53     | 928   | 749   | 809   | 903   | 1246  | 839   | 4.319859 | 4.471083 | 4.543789 | 6.524388 |
| protein_co ryanodine_   | 118   | 106   | 122   | 189   | 209   | 258   | 0.334079 | 0.384842 | 0.41675  | 0.830539 |
| protein_co zinc_finger  | 0     | 0     | 0     | 1     | 2     | 0     | 0        | 0        | 0        | 0.03489  |
| protein_co kelch-like_f | 1349  | 1049  | 1080  | 467   | 550   | 419   | 11.07787 | 11.04661 | 10.7008  | 5.952394 |
| protein_co family_witl  | 0     | 1     | 0     | 0     | 4     | 0     | 0        | 0.045587 | 0        | 0        |
| protein_co nuclear_re   | 1357  | 1056  | 1136  | 162   | 263   | 190   | 6.833826 | 6.819575 | 6.902564 | 1.266279 |
| protein_co serine_thre  | 816   | 666   | 642   | 545   | 695   | 467   | 10.0163  | 10.48336 | 9.508239 | 10.38351 |
| protein_co tyrosine_ar  | 0     | 0     | 0     | 1     | 2     | 3     | 0        | 0        | 0        | 0.018273 |
| protein_co chromosom    | 867   | 663   | 733   | 188   | 193   | 203   | 15.84937 | 15.54232 | 16.16758 | 5.334348 |
| protein_co calmodulin   | 7220  | 5675  | 5808  | 3399  | 4090  | 4256  | 79.80809 | 80.44238 | 77.46123 | 58.31649 |
| protein_co lipoprotein  | 0     | 1     | 0     | 1     | 1     | 0     | 0        | 0.009265 | 0        | 0.011214 |
| protein_co family_witl  | 2     | 4     | 3     | 9     | 10    | 18    | 0.022718 | 0.058265 | 0.041116 | 0.158677 |
| protein_co tetratricop  | 2242  | 1927  | 1930  | 985   | 715   | 1073  | 18.42401 | 20.30672 | 19.13612 | 12.56364 |
| protein_co tumor_sup    | 929   | 641   | 662   | 190   | 335   | 181   | 17.70046 | 15.6616  | 15.2186  | 5.61892  |
| protein_co melanoma_    | 0     | 0     | 1     | 0     | 0     | 0     | 0        | 0        | 0.033124 | 0        |
| protein_co 3'-phospho   | 1701  | 1371  | 1460  | 648   | 722   | 585   | 20.1975  | 20.87565 | 20.91675 | 11.9426  |
| protein_co chromosom    | 0     | 1     | 0     | 2     | 2     | 1     | 0        | 0.022295 | 0        | 0.053971 |
| protein_co solute_carr  | 412   | 298   | 328   | 187   | 234   | 224   | 4.127043 | 3.82796  | 3.964274 | 2.907461 |
| protein_co FANCD2/FA    | 411   | 313   | 315   | 359   | 437   | 381   | 3.85513  | 3.764878 | 3.56497  | 5.226635 |
| protein_co ATP-bindin   | 12    | 8     | 4     | 2     | 2     | 2     | 0.076985 | 0.065815 | 0.030962 | 0.019915 |
| protein_co eukaryotic_  | 338   | 275   | 250   | 318   | 293   | 394   | 5.03457  | 5.252762 | 4.492972 | 7.351962 |
| protein_co mitochond    | 6858  | 5614  | 6125  | 7306  | 9527  | 8015  | 612.5176 | 642.988  | 660.0476 | 1012.818 |
| protein_co importin_5   | 2991  | 2441  | 2649  | 2078  | 2320  | 2803  | 12.2648  | 12.83575 | 13.10612 | 13.22575 |
| protein_co centrosom    | 572   | 429   | 480   | 165   | 91    | 173   | 3.374571 | 3.245556 | 3.416739 | 1.510904 |
| protein_co chromosom    | 19    | 6     | 12    | 14    | 30    | 15    | 0.867488 | 0.351294 | 0.661058 | 0.99213  |
| protein_co mitochond    | 38341 | 31845 | 33723 | 57480 | 60408 | 62693 | 2628.377 | 2799.464 | 2789.321 | 6116.057 |
| protein_co chromosom    | 627   | 495   | 497   | 537   | 517   | 506   | 18.3292  | 18.55627 | 17.52994 | 24.36581 |
| protein_co family_witl  | 336   | 207   | 234   | 103   | 91    | 142   | 2.47138  | 1.95245  | 2.076654 | 1.175893 |
| protein_co delta-like_1 | 18    | 16    | 5     | 583   | 792   | 715   | 0.265917 | 0.303112 | 0.089123 | 13.36819 |
| protein_co ankyrin_re   | 531   | 375   | 385   | 581   | 863   | 473   | 7.746919 | 7.015767 | 6.777091 | 13.15652 |
| protein_co enoyl-CoA_   | 183   | 177   | 164   | 253   | 235   | 224   | 2.21728  | 2.750122 | 2.397515 | 4.757956 |
| protein_co unc-13_ho    | 935   | 818   | 847   | 1719  | 1883  | 1697  | 6.955762 | 7.803613 | 7.602642 | 19.84904 |
| protein_co chromosom    | 0     | 0     | 0     | 14    | 20    | 4     | 0        | 0        | 0        | 0.60686  |
| protein_co mitochond    | 31090 | 27160 | 28246 | 23213 | 26844 | 34635 | 1277.661 | 1431.31  | 1400.554 | 1480.664 |
| protein_co LIM_domai    | 2113  | 1604  | 1620  | 2140  | 2499  | 1846  | 43.36044 | 42.20927 | 40.11042 | 68.16139 |
| protein_co protein_ph   | 21    | 26    | 18    | 8     | 16    | 14    | 0.45757  | 0.726475 | 0.473215 | 0.270557 |
| protein_co Ctr9_Paf1/   | 1215  | 951   | 1013  | 1075  | 1143  | 1076  | 12.42289 | 12.46913 | 12.49694 | 17.06025 |
| protein_co SPARC_rela   | 55    | 63    | 42    | 9     | 4     | 11    | 0.703478 | 1.033327 | 0.648165 | 0.178674 |
| protein_co coagulation  | 0     | 1     | 1     | 1     | 3     | 0     | 0        | 0.008542 | 0.008037 | 0.01034  |
| protein_co methionine   | 559   | 460   | 485   | 361   | 508   | 447   | 18.4199  | 19.4376  | 19.28259 | 18.46346 |
| protein_co small_integ  | 0     | 0     | 0     | 1     | 0     | 0     | 0        | 0        | 0        | 0.084431 |
| protein_co leucine_ri   | 91    | 59    | 95    | 14    | 8     | 144   | 0.979117 | 0.814056 | 1.233289 | 0.233804 |
| protein_co zinc_finger  | 425   | 383   | 371   | 819   | 1007  | 530   | 3.328032 | 3.845977 | 3.505263 | 9.954352 |
| protein_co SMAD_spec    | 1103  | 890   | 1046  | 553   | 740   | 728   | 9.015111 | 9.328136 | 10.31514 | 7.015379 |
| protein_co solute_carr  | 6070  | 5041  | 5579  | 614   | 744   | 425   | 24.59153 | 26.18924 | 27.27102 | 3.860964 |
| pseudogen: -            | 9     | 10    | 17    | 18    | 35    | 31    | 0.771499 | 1.099265 | 1.758288 | 2.394948 |
| protein_co G_patch_d    | 232   | 169   | 185   | 238   | 282   | 359   | 5.124109 | 4.786592 | 4.930037 | 8.159017 |
| protein_co GATS_prot    | 43    | 56    | 50    | 82    | 80    | 70    | 1.595151 | 2.663978 | 2.237955 | 4.721474 |
| protein_co CDC42_bin    | 4953  | 3988  | 4426  | 1962  | 2682  | 2021  | 34.36612 | 35.48352 | 37.05285 | 21.12962 |
| protein_co plexin_B3    | 184   | 173   | 174   | 26    | 25    | 8     | 1.35295  | 1.631246 | 1.543694 | 0.296734 |
| protein_co 3-oxoacid_   | 10    | 5     | 6     | 7     | 8     | 10    | 0.256791 | 0.164649 | 0.1859   | 0.279003 |
| protein_co ribosomal_   | 8486  | 6722  | 7014  | 11774 | 14579 | 11834 | 372.2252 | 378.1034 | 371.2073 | 801.599  |
| protein_co collagen_bi  | 101   | 84    | 63    | 32    | 23    | 28    | 0.914795 | 0.975643 | 0.688479 | 0.449865 |
| protein_co EGF-like-do  | 0     | 0     | 0     | 11    | 9     | 12    | 0        | 0        | 0        | 0.333852 |
| protein_co mitochond    | 17393 | 14874 | 16203 | 29151 | 31855 | 30000 | 782.6853 | 858.3211 | 879.7437 | 2036.088 |
| protein_co synaptoner   | 0     | 0     | 0     | 0     | 2     | 1     | 0        | 0        | 0        | 0        |
| protein_co adenomatc    | 330   | 276   | 331   | 60    | 94    | 58    | 4.516552 | 4.844082 | 5.465993 | 1.274602 |
| protein_co RCSD_dom     | 85    | 60    | 55    | 3     | 13    | 6     | 1.27134  | 1.150809 | 0.992553 | 0.069646 |
| protein_co Ras_assoc    | 122   | 60    | 80    | 1     | 4     | 1     | 3.132849 | 1.975787 | 2.478664 | 0.039858 |
| protein_co family_witl  | 53    | 50    | 36    | 852   | 963   | 993   | 0.414887 | 0.501918 | 0.34002  | 10.35199 |

|                         |        |        |        |        |        |        |          |          |          |          |
|-------------------------|--------|--------|--------|--------|--------|--------|----------|----------|----------|----------|
| protein_co zinc_finger  | 258    | 208    | 206    | 260    | 328    | 347    | 7.30092  | 7.547977 | 7.033527 | 11.41988 |
| protein_co glutamate    | 17     | 17     | 19     | 22     | 10     | 26     | 0.102591 | 0.131558 | 0.138344 | 0.206069 |
| protein_co mitochond    | 19954  | 16527  | 18628  | 21066  | 29394  | 25635  | 516.3595 | 548.4355 | 581.6162 | 846.1254 |
| protein_co mucin_2_o    | 1      | 0      | 0      | 0      | 1      | 0      | 0.005429 | 0        | 0        | 0        |
| protein_co CCR4-NOT     | 1046   | 871    | 1011   | 1187   | 1256   | 1668   | 18.51527 | 19.77088 | 21.59224 | 32.61216 |
| protein_co transmemt    | 1876   | 1415   | 1515   | 1221   | 1646   | 1565   | 23.98846 | 23.20253 | 23.37385 | 24.23347 |
| protein_co mechanisti   | 2267   | 1902   | 2022   | 2118   | 2575   | 2287   | 12.25074 | 13.18046 | 13.18378 | 17.76508 |
| protein_co secretory_c  | 139    | 123    | 98     | 1247   | 1574   | 1145   | 1.901871 | 2.158146 | 1.617858 | 26.48276 |
| protein_co zinc_finger  | 1186   | 892    | 978    | 283    | 303    | 177    | 11.41687 | 11.01125 | 11.35924 | 4.22843  |
| protein_co alpha-kinas  | 502    | 437    | 439    | 0      | 0      | 8      | 3.223167 | 3.598072 | 3.400883 | 0        |
| protein_co family_witl  | 20     | 17     | 20     | 1      | 1      | 3      | 0.263575 | 0.287298 | 0.318019 | 0.020455 |
| protein_co melanoma     | 0      | 0      | 0      | 1      | 0      | 4      | 0        | 0        | 0        | 0.031602 |
| protein_co leucine-ricl | 278    | 256    | 242    | 371    | 381    | 398    | 2.568051 | 3.032551 | 2.697256 | 5.319406 |
| protein_co mitochond    | 140597 | 113461 | 120955 | 169914 | 166095 | 185677 | 4275.354 | 4424.375 | 4437.802 | 8019.654 |
| protein_co purine_nuc   | 604    | 506    | 482    | 645    | 766    | 1001   | 11.00722 | 11.82498 | 10.59829 | 18.24445 |
| protein_co paired_box   | 0      | 0      | 1      | 7      | 8      | 14     | 0        | 0        | 0.012533 | 0.112862 |
| protein_co leucine_ri   | 0      | 0      | 0      | 0      | 0      | 1      | 0        | 0        | 0        | 0        |
| protein_co glycerol_kii | 120    | 96     | 95     | 50     | 71     | 74     | 1.517886 | 1.557178 | 1.449871 | 0.981654 |
| protein_co forkhead_b   | 920    | 744    | 791    | 666    | 768    | 642    | 8.060317 | 8.358851 | 8.361589 | 9.056679 |
| protein_co zinc_finger  | 374    | 280    | 329    | 282    | 279    | 256    | 8.974855 | 8.616347 | 9.525763 | 10.50353 |
| protein_co SFT2_dom     | 660    | 514    | 512    | 632    | 799    | 588    | 12.01375 | 11.99795 | 11.24482 | 17.85591 |
| protein_co CD247_mo     | 0      | 0      | 0      | 9      | 10     | 12     | 0        | 0        | 0        | 0.224168 |
| protein_co glutamate    | 3      | 2      | 3      | 20     | 28     | 14     | 0.032959 | 0.028177 | 0.039767 | 0.341049 |
| protein_co chromosom    | 535    | 446    | 437    | 443    | 564    | 875    | 6.622534 | 7.079696 | 6.526794 | 8.511471 |
| protein_co inositol_pc  | 791    | 625    | 710    | 382    | 457    | 357    | 7.530965 | 7.630685 | 8.156063 | 5.645053 |
| protein_co Rho_GTPas    | 1575   | 1234   | 1332   | 1539   | 1643   | 1746   | 12.52149 | 12.58056 | 12.77697 | 18.99086 |
| protein_co succinate_I  | 6      | 4      | 3      | 0      | 0      | 0      | 0.195511 | 0.167143 | 0.117948 | 0        |
| protein_co high_mobil   | 6546   | 4973   | 5367   | 3703   | 4483   | 6317   | 205.1752 | 199.8833 | 202.9684 | 180.1495 |
| protein_co Selenoprot   | 1809   | 1380   | 1393   | 195    | 236    | 88     | 40.9778  | 40.08653 | 38.07231 | 6.856068 |
| protein_co ubiquitin-c  | 2126   | 1699   | 1708   | 303    | 388    | 325    | 23.23734 | 23.81364 | 22.5247  | 5.140392 |
| protein_co gap_junctic  | 54     | 33     | 24     | 11     | 17     | 9      | 1.128872 | 0.884656 | 0.605355 | 0.356923 |
| protein_co optic_atro   | 1382   | 1109   | 1209   | 1347   | 1200   | 1320   | 9.981824 | 10.27171 | 10.53601 | 15.1008  |
| protein_co DENN/MAD     | 1516   | 1116   | 1217   | 1912   | 2293   | 1363   | 12.45799 | 11.7604  | 12.06666 | 24.38748 |
| protein_co ryanodine    | 60     | 40     | 45     | 39     | 48     | 99     | 0.180821 | 0.154585 | 0.163629 | 0.182429 |
| protein_co zinc_finger  | 156    | 150    | 178    | 282    | 220    | 168    | 3.297945 | 4.066488 | 4.540325 | 9.253338 |
| protein_co mitochond    | 6724   | 5630   | 5684   | 8773   | 8828   | 6894   | 911.2384 | 978.4126 | 929.408  | 1845.368 |
| protein_co KTI12_hom    | 188    | 145    | 184    | 165    | 234    | 213    | 5.143129 | 5.086826 | 6.07345  | 7.006224 |
| protein_co dual_specif  | 9      | 11     | 9      | 0      | 0      | 5      | 0.101347 | 0.158844 | 0.122281 | 0        |
| protein_co Selenoprot   | 852    | 683    | 730    | 508    | 600    | 776    | 11.51637 | 11.83876 | 11.90548 | 10.65787 |
| protein_co Rho_guanir   | 1      | 0      | 0      | 48     | 38     | 10     | 0.011288 | 0        | 0        | 0.84098  |
| protein_co thymocyte    | 311    | 255    | 284    | 103    | 99     | 48     | 3.530088 | 3.711716 | 3.88948  | 1.81465  |
| protein_co carboxylest  | 1      | 1      | 3      | 0      | 0      | 0      | 0.021529 | 0.027608 | 0.077928 | 0        |
| protein_co CD3e_mole    | 54     | 34     | 36     | 5      | 2      | 1      | 0.958025 | 0.77352  | 0.770608 | 0.137684 |
| protein_co RUN_and_S    | 1962   | 1511   | 1630   | 299    | 423    | 274    | 16.32332 | 16.12067 | 16.36233 | 3.8611   |
| protein_co FIC_domain   | 169    | 175    | 144    | 71     | 95     | 97     | 2.367617 | 3.143924 | 2.434082 | 1.54388  |
| protein_co oligosaccha  | 3202   | 2535   | 2666   | 1001   | 1137   | 1154   | 139.4075 | 141.5311 | 140.0467 | 67.64399 |
| pseudogen: hydroxy-de   | 22     | 18     | 21     | 36     | 34     | 7      | 0.91129  | 0.956128 | 1.049546 | 2.314552 |
| protein_co R3H_doma     | 1739   | 1348   | 1441   | 1581   | 2286   | 1419   | 44.92658 | 44.65838 | 44.91752 | 63.39662 |
| protein_co tRNA_splici  | 600    | 421    | 481    | 240    | 290    | 265    | 14.35409 | 12.91563 | 13.88409 | 8.911812 |
| protein_co listerin_E3  | 911    | 728    | 797    | 509    | 313    | 629    | 5.507582 | 5.643952 | 5.813651 | 4.776292 |
| protein_co RUN_doma     | 465    | 411    | 393    | 334    | 496    | 484    | 5.695888 | 6.455942 | 5.8083   | 6.350171 |
| protein_co coiled-coil  | 0      | 0      | 0      | 5      | 0      | 0      | 0        | 0        | 0        | 0.106062 |
| protein_co chromosom    | 32     | 19     | 17     | 18     | 29     | 11     | 0.531144 | 0.404413 | 0.340454 | 0.46373  |
| protein_co G_protein-i  | 366    | 330    | 344    | 42     | 64     | 30     | 6.46637  | 7.476576 | 7.333072 | 1.151753 |
| protein_co tRNA-yW_s    | 360    | 282    | 277    | 335    | 336    | 383    | 5.041937 | 5.064696 | 4.680829 | 7.282328 |
| protein_co DDB1_and     | 830    | 701    | 703    | 803    | 821    | 621    | 10.61323 | 11.49468 | 10.84608 | 15.93733 |
| protein_co Scm-like_w   | 208    | 200    | 173    | 364    | 446    | 237    | 1.231144 | 1.518046 | 1.235491 | 3.344086 |
| protein_co paraneopla   | 0      | 0      | 1      | 2      | 5      | 3      | 0        | 0        | 0.017608 | 0.045303 |
| protein_co inositol_14  | 68     | 50     | 64     | 95     | 121    | 103    | 1.478906 | 1.394476 | 1.679421 | 3.206902 |
| protein_co mitochond    | 53167  | 45696  | 49420  | 72661  | 86769  | 72601  | 1809.145 | 1993.97  | 2029     | 3837.629 |
| protein_co structural   | 1345   | 1106   | 1310   | 477    | 416    | 535    | 10.65142 | 11.23181 | 12.51713 | 5.863193 |
| protein_co mitochond    | 22633  | 18070  | 19970  | 36456  | 35484  | 46753  | 1110.106 | 1136.554 | 1181.813 | 2775.377 |
| protein_co DDB1_and     | 17     | 10     | 18     | 61     | 90     | 108    | 0.235907 | 0.177951 | 0.301379 | 1.31387  |
| protein_co protein_ar   | 888    | 697    | 740    | 668    | 1048   | 1290   | 15.77807 | 15.88119 | 15.86429 | 18.42247 |
| protein_co shisa_hom    | 546    | 403    | 445    | 83     | 97     | 32     | 19.09168 | 18.07033 | 18.77412 | 4.504641 |

|                         |       |       |       |       |       |       |          |          |          |          |
|-------------------------|-------|-------|-------|-------|-------|-------|----------|----------|----------|----------|
| protein_co KIAA1737     | 218   | 166   | 189   | 364   | 412   | 277   | 2.27865  | 2.225044 | 2.383587 | 5.90545  |
| protein_co capping_pr   | 1082  | 836   | 916   | 796   | 724   | 901   | 21.19256 | 20.99771 | 21.6471  | 24.19913 |
| protein_co mitochond    | 31689 | 26454 | 27669 | 45227 | 51013 | 49883 | 2181.935 | 2335.791 | 2298.66  | 4833.498 |
| protein_co topoisome    | 3034  | 2287  | 2373  | 2442  | 2999  | 2881  | 38.05894 | 36.78888 | 35.91591 | 47.54635 |
| protein_co protein_re   | 1621  | 1395  | 1450  | 984   | 1114  | 757   | 18.59768 | 20.52387 | 20.07205 | 17.52271 |
| protein_co basic_helix  | 200   | 148   | 165   | 300   | 285   | 313   | 1.828071 | 1.734739 | 1.81968  | 4.256129 |
| protein_co mitogen-ac   | 1515  | 1149  | 1209  | 493   | 594   | 401   | 14.74437 | 14.3398  | 14.19672 | 7.447165 |
| protein_co L1_cell_ad   | 17    | 15    | 27    | 1594  | 1914  | 1079  | 0.155903 | 0.176403 | 0.298756 | 22.68942 |
| protein_co sterol_regu  | 8528  | 6651  | 6940  | 6473  | 7094  | 6937  | 70.16636 | 70.17429 | 68.89525 | 82.66427 |
| protein_co chromosom    | 423   | 393   | 370   | 394   | 393   | 315   | 5.668613 | 6.753647 | 5.982548 | 8.195268 |
| protein_co POU_class    | 1620  | 1015  | 1204  | 1     | 5     | 3     | 15.3118  | 12.30231 | 13.73048 | 0.01467  |
| protein_co RasGEF_doi   | 29    | 21    | 27    | 445   | 454   | 314   | 0.331338 | 0.307682 | 0.372207 | 7.891572 |
| protein_co chromosom    | 620   | 509   | 541   | 935   | 1242  | 1094  | 6.78297  | 7.140939 | 7.141239 | 15.87707 |
| protein_co ribosomal    | 5012  | 4342  | 4324  | 4102  | 3741  | 3815  | 122.7221 | 136.3361 | 127.7454 | 155.897  |
| protein_co DAZ_intera   | 407   | 365   | 343   | 537   | 458   | 537   | 3.567147 | 4.102313 | 3.627177 | 7.305188 |
| protein_co KIAA0753     | 501   | 446   | 470   | 349   | 364   | 353   | 4.834719 | 5.51922  | 5.47242  | 5.227444 |
| protein_co DNA_cross    | 151   | 135   | 112   | 332   | 281   | 255   | 1.586109 | 1.818441 | 1.419457 | 5.412835 |
| protein_co autophagy    | 1960  | 1565  | 1517  | 1297  | 1605  | 1357  | 17.52229 | 17.94149 | 16.36321 | 17.99722 |
| protein_co nitric_oxid  | 64    | 50    | 68    | 145   | 205   | 127   | 0.539838 | 0.540833 | 0.692055 | 1.898376 |
| protein_co adenine_ph   | 833   | 688   | 667   | 1861  | 2307  | 2116  | 41.24539 | 43.68458 | 39.8478  | 143.0235 |
| protein_co G_protein-i  | 273   | 213   | 222   | 104   | 93    | 89    | 2.140631 | 2.141747 | 2.100295 | 1.265736 |
| protein_co TBK1_bindi   | 1045  | 736   | 794   | 316   | 395   | 443   | 11.89033 | 10.73903 | 10.9005  | 5.580786 |
| protein_co melanoma     | 21    | 35    | 34    | 304   | 321   | 167   | 0.266204 | 0.568949 | 0.520024 | 5.981362 |
| protein_co coiled-coil  | 531   | 358   | 384   | 192   | 207   | 174   | 40.22391 | 34.7762  | 35.09692 | 22.57467 |
| protein_co mitochond    | 39326 | 32213 | 34846 | 63653 | 72627 | 75671 | 2352.037 | 2470.614 | 2514.579 | 5908.996 |
| protein_co ZFP2_zinc    | 3     | 5     | 10    | 46    | 39    | 10    | 0.057913 | 0.123775 | 0.232917 | 1.378292 |
| protein_co sosondowa    | 4     | 1     | 2     | 1     | 3     | 3     | 0.054271 | 0.017399 | 0.03274  | 0.021059 |
| protein_co l(3)mbt-like | 817   | 691   | 748   | 288   | 373   | 172   | 8.479226 | 9.196478 | 9.36664  | 4.63935  |
| protein_co dystrophin   | 1161  | 894   | 973   | 216   | 172   | 163   | 3.900782 | 3.851823 | 3.944394 | 1.126429 |
| protein_co microfibril  | 644   | 530   | 601   | 272   | 378   | 270   | 4.779546 | 5.044127 | 5.381747 | 3.133287 |
| protein_co N-acetylgl   | 954   | 806   | 845   | 660   | 831   | 547   | 12.10966 | 13.11982 | 12.94161 | 13.00343 |
| protein_co smg-5_horr   | 2239  | 1680  | 1988  | 2357  | 3098  | 4203  | 23.02846 | 22.15794 | 24.67035 | 37.62711 |
| protein_co KIAA1279     | 1113  | 813   | 871   | 468   | 708   | 760   | 20.59534 | 19.29184 | 19.44643 | 13.44157 |
| protein_co transglutar  | 147   | 126   | 124   | 14    | 30    | 29    | 1.724933 | 1.895985 | 1.755596 | 0.254984 |
| protein_co armadillo_i  | 69    | 53    | 61    | 146   | 154   | 210   | 1.678118 | 1.652946 | 1.789993 | 5.511333 |
| protein_co praja_ring   | 3722  | 3095  | 3199  | 1304  | 960   | 908   | 35.69741 | 38.0654  | 37.01883 | 19.41192 |
| protein_co RAR-relate   | 8     | 3     | 5     | 129   | 164   | 146   | 0.105164 | 0.050572 | 0.079304 | 2.63207  |
| protein_co sphingomy    | 383   | 308   | 340   | 283   | 346   | 179   | 4.796708 | 4.946575 | 5.137733 | 5.501251 |
| pseudogeni -            | 0     | 0     | 0     | 0     | 1     | 0     | 0        | 0        | 0        | 0        |
| antisense -             | 2     | 1     | 2     | 3     | 0     | 2     | 0.165689 | 0.106236 | 0.199913 | 0.385759 |
| pseudogeni -            | 0     | 2     | 2     | 0     | 0     | 0     | 0        | 0.152227 | 0.143229 | 0        |
| lincRNA -               | 0     | 1     | 0     | 7     | 9     | 5     | 0        | 0.078091 | 0        | 0.661635 |
| pseudogeni -            | 7     | 6     | 11    | 2     | 9     | 4     | 0.188964 | 0.207702 | 0.358279 | 0.083799 |
| lincRNA -               | 3     | 2     | 3     | 40    | 47    | 14    | 0.243374 | 0.208062 | 0.293644 | 5.036664 |
| antisense -             | 6     | 2     | 2     | 2     | 6     | 1     | 0.296147 | 0.126589 | 0.119106 | 0.153221 |
| pseudogeni -            | 0     | 2     | 0     | 3     | 0     | 0     | 0        | 0.471606 | 0        | 0.856233 |
| pseudogeni -            | 1     | 0     | 0     | 1     | 0     | 0     | 0.200385 | 0        | 0        | 0.311025 |
| protein_co Uncharacte   | 1     | 0     | 2     | 1     | 1     | 0     | 0.150289 | 0        | 0.362663 | 0.233269 |
| antisense -             | 0     | 0     | 0     | 1     | 0     | 2     | 0        | 0        | 0        | 0.073367 |
| protein_co Uncharacte   | 6     | 7     | 5     | 0     | 6     | 1     | 0.124432 | 0.18616  | 0.125112 | 0        |
| pseudogeni -            | 15    | 2     | 10    | 15    | 20    | 7     | 0.345967 | 0.059154 | 0.278286 | 0.536988 |
| antisense -             | 2     | 0     | 0     | 1     | 3     | 4     | 0.157879 | 0        | 0        | 0.122525 |
| pseudogeni -            | 0     | 0     | 0     | 0     | 0     | 2     | 0        | 0        | 0        | 0        |
| pseudogeni -            | 1     | 2     | 4     | 7     | 2     | 9     | 0.38122  | 0.97772  | 1.839854 | 4.14194  |
| pseudogeni -            | 0     | 0     | 0     | 0     | 1     | 0     | 0        | 0        | 0        | 0        |
| processed -             | 3     | 8     | 4     | 6     | 8     | 3     | 0.195647 | 0.669038 | 0.314746 | 0.607342 |
| antisense -             | 14    | 8     | 7     | 1     | 10    | 7     | 1.05202  | 0.770895 | 0.634661 | 0.116634 |
| protein_co zinc_finger  | 5     | 11    | 18    | 400   | 306   | 348   | 0.03839  | 0.108306 | 0.166753 | 4.766976 |
| antisense -             | 1     | 6     | 5     | 1     | 2     | 0     | 0.05119  | 0.393863 | 0.308818 | 0.079454 |
| pseudogeni -            | 1     | 0     | 0     | 0     | 0     | 0     | 0.022587 | 0        | 0        | 0        |
| antisense -             | 1     | 0     | 0     | 2     | 0     | 0     | 0.018984 | 0        | 0        | 0.058931 |
| pseudogeni -            | 0     | 0     | 0     | 0     | 1     | 0     | 0        | 0        | 0        | 0        |
| antisense -             | 17    | 12    | 14    | 55    | 71    | 33    | 0.805182 | 0.728846 | 0.800058 | 4.043322 |
| pseudogeni -            | 0     | 0     | 1     | 2     | 0     | 2     | 0        | 0        | 0.229982 | 0.591706 |
| protein_co Uncharacte   | 50    | 41    | 33    | 19    | 28    | 12    | 0.968002 | 1.017887 | 0.770847 | 0.57094  |

|                        |      |      |      |      |      |      |          |          |          |          |
|------------------------|------|------|------|------|------|------|----------|----------|----------|----------|
| pseudogeni -           | 4    | 4    | 3    | 0    | 0    | 0    | 0.367765 | 0.471606 | 0.332797 | 0        |
| pseudogeni -           | 1    | 0    | 1    | 57   | 64   | 71   | 0.02009  | 0        | 0.02424  | 1.777399 |
| pseudogeni -           | 0    | 1    | 0    | 27   | 35   | 15   | 0        | 0.031091 | 0        | 1.016057 |
| pseudogeni -           | 2    | 0    | 1    | 0    | 2    | 1    | 0.057853 | 0        | 0.034902 | 0        |
| pseudogeni -           | 0    | 0    | 0    | 1    | 0    | 0    | 0        | 0        | 0        | 0.782579 |
| pseudogeni -           | 0    | 0    | 0    | 0    | 1    | 0    | 0        | 0        | 0        | 0        |
| pseudogeni -           | 0    | 0    | 0    | 0    | 1    | 0    | 0        | 0        | 0        | 0        |
| pseudogeni -           | 0    | 0    | 0    | 1    | 1    | 1    | 0        | 0        | 0        | 0.782579 |
| lincRNA -              | 4    | 2    | 1    | 0    | 0    | 0    | 0.326191 | 0.209147 | 0.098392 | 0        |
| pseudogeni -           | 2    | 1    | 0    | 0    | 0    | 0    | 0.065949 | 0.042285 | 0        | 0        |
| pseudogeni -           | 1    | 0    | 1    | 3    | 0    | 0    | 0.060038 | 0        | 0.07244  | 0.279564 |
| antisense long_interf  | 1    | 3    | 5    | 27   | 35   | 24   | 0.053773 | 0.206869 | 0.324401 | 2.253503 |
| protein_co Uncharacte  | 0    | 0    | 1    | 0    | 0    | 0    | 0        | 0        | 0.285735 | 0        |
| antisense -            | 10   | 7    | 4    | 2    | 0    | 0    | 0.264766 | 0.237667 | 0.127782 | 0.082191 |
| pseudogeni -           | 1    | 2    | 0    | 0    | 0    | 1    | 0.21411  | 0.549131 | 0        | 0        |
| pseudogeni -           | 1    | 0    | 0    | 0    | 0    | 0    | 0.284182 | 0        | 0        | 0        |
| processed_ -           | 294  | 257  | 239  | 38   | 32   | 41   | 24.05875 | 26.96921 | 23.59781 | 4.826584 |
| pseudogeni -           | 0    | 0    | 0    | 0    | 0    | 1    | 0        | 0        | 0        | 0        |
| pseudogeni -           | 0    | 0    | 0    | 2    | 0    | 2    | 0        | 0        | 0        | 0.95137  |
| protein_co inverted_fc | 3323 | 2425 | 2716 | 1366 | 2062 | 1151 | 33.35093 | 31.21035 | 32.88936 | 21.27937 |
| pseudogeni high_mobil  | 0    | 0    | 0    | 2    | 0    | 0    | 0        | 0        | 0        | 0.165409 |
| antisense PDCD4_ant    | 35   | 38   | 37   | 21   | 22   | 10   | 2.109448 | 2.936931 | 2.690609 | 1.964493 |
| processed_ -           | 0    | 1    | 0    | 99   | 124  | 136  | 0        | 0.011477 | 0        | 1.375301 |
| pseudogeni -           | 0    | 0    | 0    | 1    | 0    | 0    | 0        | 0        | 0        | 0.039533 |
| antisense RBMS3_ant    | 3    | 5    | 6    | 2    | 0    | 1    | 0.162624 | 0.347571 | 0.392431 | 0.168277 |
| pseudogeni -           | 5    | 2    | 3    | 1    | 0    | 0    | 0.102469 | 0.052561 | 0.074181 | 0.031809 |
| pseudogeni -           | 0    | 1    | 0    | 0    | 1    | 0    | 0        | 0.253712 | 0        | 0        |
| pseudogeni -           | 0    | 0    | 1    | 3    | 3    | 1    | 0        | 0        | 0.229982 | 0.887559 |
| pseudogeni -           | 0    | 1    | 0    | 0    | 0    | 1    | 0        | 0.267244 | 0        | 0        |
| pseudogeni taste_recep | 22   | 17   | 21   | 2    | 1    | 5    | 1.133605 | 1.123304 | 1.305589 | 0.159956 |
| antisense -            | 0    | 0    | 0    | 1    | 0    | 1    | 0        | 0        | 0        | 0.037304 |
| pseudogeni -           | 0    | 0    | 0    | 0    | 0    | 1    | 0        | 0        | 0        | 0        |
| pseudogeni -           | 7    | 10   | 5    | 0    | 0    | 1    | 1.243296 | 2.277644 | 1.071506 | 0        |
| pseudogeni -           | 4    | 1    | 2    | 0    | 4    | 1    | 0.702472 | 0.225205 | 0.423787 | 0        |
| protein_co Uncharacte  | 2    | 1    | 0    | 0    | 2    | 3    | 0.024295 | 0.015578 | 0        | 0        |
| pseudogeni -           | 0    | 0    | 0    | 1    | 0    | 2    | 0        | 0        | 0        | 0.341689 |
| pseudogeni -           | 1    | 3    | 0    | 3    | 4    | 4    | 0.127073 | 0.48886  | 0        | 0.591706 |
| pseudogeni -           | 1    | 0    | 0    | 0    | 0    | 0    | 0.269483 | 0        | 0        | 0        |
| pseudogeni -           | 1    | 0    | 1    | 0    | 0    | 0    | 0.269483 | 0        | 0.325147 | 0        |
| pseudogeni -           | 0    | 0    | 1    | 0    | 0    | 0    | 0        | 0        | 0.319636 | 0        |
| pseudogeni olfactory_r | 1    | 0    | 0    | 0    | 3    | 0    | 0.047701 | 0        | 0        | 0        |
| lincRNA -              | 1    | 1    | 1    | 0    | 0    | 0    | 0.026552 | 0.034049 | 0.032036 | 0        |
| antisense IGBP1_anti   | 13   | 8    | 6    | 7    | 5    | 6    | 1.124668 | 0.887525 | 0.626297 | 0.939961 |
| pseudogeni -           | 14   | 9    | 15   | 3    | 2    | 5    | 0.578889 | 0.477221 | 0.748353 | 0.192539 |
| antisense -            | 0    | 0    | 1    | 4    | 0    | 0    | 0        | 0        | 0.089945 | 0.462829 |
| antisense -            | 0    | 3    | 0    | 1    | 0    | 0    | 0        | 0.159778 | 0        | 0.064464 |
| pseudogeni -           | 2    | 3    | 1    | 4    | 0    | 0    | 0.201677 | 0.387934 | 0.121668 | 0.626063 |
| pseudogeni -           | 0    | 0    | 0    | 0    | 0    | 4    | 0        | 0        | 0        | 0        |
| pseudogeni -           | 4    | 6    | 3    | 1    | 1    | 0    | 0.109428 | 0.210489 | 0.099024 | 0.042462 |
| pseudogeni -           | 9    | 15   | 8    | 7    | 11   | 7    | 3.430977 | 7.332902 | 3.679708 | 4.14194  |
| protein_co HCG20436    | 21   | 5    | 7    | 9    | 8    | 4    | 0.741484 | 0.226392 | 0.298214 | 0.493237 |
| pseudogeni -           | 10   | 2    | 11   | 26   | 25   | 13   | 0.254146 | 0.065181 | 0.337307 | 1.025623 |
| lincRNA -              | 4    | 7    | 6    | 47   | 35   | 31   | 0.114296 | 0.256495 | 0.206857 | 2.084492 |
| pseudogeni -           | 36   | 17   | 20   | 35   | 40   | 28   | 1.863179 | 1.128263 | 1.248907 | 2.811582 |
| lincRNA long_interf    | 1    | 0    | 0    | 0    | 0    | 0    | 0.022918 | 0        | 0        | 0        |
| pseudogeni -           | 1    | 0    | 1    | 0    | 3    | 0    | 0.109301 | 0        | 0.131878 | 0        |
| pseudogeni -           | 2    | 0    | 1    | 0    | 0    | 0    | 0.128115 | 0        | 0.077289 | 0        |
| processed_ -           | 5    | 1    | 1    | 3    | 2    | 0    | 0.10238  | 0.026258 | 0.024705 | 0.095345 |
| pseudogeni -           | 2    | 1    | 0    | 2    | 0    | 0    | 0.058759 | 0.037675 | 0        | 0.091203 |
| protein_co EF-hand_ca  | 129  | 80   | 106  | 94   | 121  | 114  | 0.980835 | 0.78002  | 0.972434 | 1.10934  |
| protein_co COX20_Co    | 40   | 23   | 23   | 32   | 53   | 58   | 0.712885 | 0.52565  | 0.494579 | 0.885197 |
| protein_co choroidere  | 406  | 340  | 369  | 822  | 622  | 945  | 2.689651 | 2.888405 | 2.949472 | 8.452246 |
| protein_co chromosor   | 8    | 3    | 3    | 3    | 0    | 3    | 0.631515 | 0.303686 | 0.285735 | 0.367575 |
| protein_co chromosor   | 1    | 3    | 0    | 43   | 53   | 33   | 0.006086 | 0.023412 | 0        | 0.406169 |
| lincRNA -              | 4    | 1    | 4    | 0    | 1    | 2    | 0.073352 | 0.023516 | 0.088503 | 0        |

|                         |      |      |      |      |      |      |          |          |          |          |
|-------------------------|------|------|------|------|------|------|----------|----------|----------|----------|
| protein_co -            | 10   | 5    | 10   | 5    | 3    | 4    | 0.286439 | 0.183659 | 0.345605 | 0.222296 |
| protein_co calpain_8    | 0    | 1    | 0    | 0    | 0    | 0    | 0        | 0.023162 | 0        | 0        |
| protein_co TatD_DNase   | 168  | 135  | 130  | 307  | 289  | 176  | 3.297414 | 3.397875 | 3.078617 | 9.352616 |
| antisense SERTAD4_a     | 271  | 201  | 198  | 27   | 14   | 16   | 17.50302 | 16.64751 | 15.42968 | 2.706687 |
| protein_co chromosom    | 5    | 2    | 0    | 0    | 5    | 1    | 0.073334 | 0.037616 | 0        | 0        |
| protein_co compleme     | 0    | 1    | 1    | 17   | 5    | 15   | 0        | 0.00805  | 0.007574 | 0.16563  |
| protein_co chromosom    | 1    | 3    | 0    | 11   | 21   | 9    | 0.046061 | 0.1772   | 0        | 0.786422 |
| protein_co long_inter   | 2    | 5    | 2    | 16   | 3    | 8    | 0.066182 | 0.212173 | 0.079853 | 0.82179  |
| protein_co retinoic_ac  | 6    | 1    | 2    | 1    | 0    | 0    | 0.254146 | 0.054318 | 0.102214 | 0.065745 |
| protein_co chromosom    | 73   | 36   | 44   | 1    | 3    | 4    | 5.82138  | 3.681416 | 4.233541 | 0.123775 |
| protein_co sterile_alph | 3099 | 2481 | 2671 | 1    | 3    | 2    | 23.8647  | 24.50025 | 24.8174  | 0.011953 |
| protein_co transmembr   | 0    | 0    | 0    | 0    | 1    | 4    | 0        | 0        | 0        | 0        |
| protein_co epithelial_c | 3    | 3    | 2    | 3    | 7    | 4    | 0.03257  | 0.041766 | 0.026198 | 0.050553 |
| protein_co G_protein-i  | 1    | 1    | 3    | 1    | 0    | 0    | 0.031855 | 0.040849 | 0.115303 | 0.049443 |
| antisense -             | 29   | 27   | 31   | 20   | 41   | 27   | 0.749207 | 0.894493 | 0.966303 | 0.801981 |
| protein_co methyltran   | 8    | 4    | 12   | 2    | 4    | 6    | 0.378145 | 0.242459 | 0.684381 | 0.146733 |
| protein_co Fc_fragmen   | 7    | 6    | 10   | 0    | 0    | 0    | 0.142091 | 0.156181 | 0.244916 | 0        |
| protein_co transmembr   | 2    | 3    | 1    | 0    | 0    | 0    | 0.165106 | 0.317587 | 0.099605 | 0        |
| protein_co centromere   | 436  | 324  | 397  | 503  | 561  | 619  | 27.25873 | 25.97607 | 29.9473  | 48.81099 |
| pseudogen: misato_ho    | 25   | 26   | 26   | 18   | 38   | 29   | 0.573228 | 0.764486 | 0.719297 | 0.640605 |
| protein_co shadow_of    | 120  | 58   | 87   | 49   | 62   | 100  | 1.773897 | 1.099473 | 1.551724 | 1.124278 |
| protein_co family_witl  | 193  | 144  | 121  | 113  | 95   | 107  | 3.5587   | 3.404912 | 2.691953 | 3.234022 |
| protein_co fibronectin  | 63   | 51   | 58   | 27   | 27   | 16   | 1.866122 | 1.93722  | 2.072886 | 1.241348 |
| protein_co lorocrin     | 0    | 0    | 0    | 5    | 2    | 0    | 0        | 0        | 0        | 0.295853 |
| protein_co keratinocyt  | 0    | 0    | 0    | 0    | 0    | 1    | 0        | 0        | 0        | 0        |
| protein_co methyltran   | 107  | 65   | 86   | 88   | 99   | 71   | 1.398726 | 1.089612 | 1.356424 | 1.785509 |
| protein_co family_witl  | 0    | 0    | 0    | 0    | 0    | 1    | 0        | 0        | 0        | 0        |
| pseudogen: coiled-coil_ | 3    | 2    | 1    | 23   | 20   | 7    | 0.047798 | 0.040863 | 0.019224 | 0.568785 |
| lincRNA long_inter      | 1    | 0    | 1    | 1    | 2    | 1    | 0.026269 | 0        | 0.031695 | 0.040773 |
| protein_co chromosom    | 16   | 3    | 5    | 3    | 1    | 4    | 1.531103 | 0.368142 | 0.577301 | 0.445591 |
| protein_co phosphatic   | 190  | 153  | 159  | 3    | 2    | 4    | 5.857399 | 6.048559 | 5.914205 | 0.14355  |
| antisense BVES_antis    | 5    | 7    | 4    | 0    | 3    | 0    | 0.136626 | 0.245285 | 0.131878 | 0        |
| lincRNA long_inter      | 0    | 0    | 0    | 9    | 22   | 7    | 0        | 0        | 0        | 1.139162 |
| protein_co histone_clu  | 1    | 0    | 0    | 0    | 0    | 0    | 0.028315 | 0        | 0        | 0        |
| protein_co histone_clu  | 3    | 0    | 1    | 0    | 3    | 2    | 0.25623  | 0        | 0.103052 | 0        |
| protein_co histone_clu  | 30   | 19   | 12   | 23   | 16   | 43   | 2.973997 | 2.415362 | 1.435319 | 3.538976 |
| protein_co histone_clu  | 3    | 3    | 3    | 1    | 3    | 3    | 0.134355 | 0.172292 | 0.162107 | 0.069513 |
| protein_co Protein_LO   | 12   | 6    | 8    | 3    | 2    | 6    | 0.890317 | 0.570852 | 0.716146 | 0.345474 |
| protein_co family_witl  | 0    | 0    | 0    | 2    | 7    | 7    | 0        | 0        | 0        | 0.117103 |
| pseudogen: histone_clu  | 6    | 8    | 9    | 9    | 9    | 14   | 0.485069 | 0.829376 | 0.877896 | 1.129342 |
| protein_co neuroblast   | 32   | 30   | 22   | 2    | 4    | 9    | 0.39177  | 0.470991 | 0.324977 | 0.038005 |
| protein_co neuroblast   | 170  | 184  | 165  | 12   | 14   | 16   | 0.50805  | 0.705155 | 0.594962 | 0.055663 |
| protein_co neuroblast   | 23   | 17   | 18   | 18   | 25   | 7    | 0.20933  | 0.19841  | 0.197663 | 0.254277 |
| protein_co pancreatic_  | 2    | 1    | 2    | 0    | 0    | 1    | 0.039839 | 0.025544 | 0.048068 | 0        |
| pseudogen: profilin_1_  | 4    | 2    | 2    | 0    | 0    | 0    | 0.448708 | 0.287702 | 0.270696 | 0        |
| processed_ -            | 0    | 0    | 1    | 0    | 0    | 0    | 0        | 0        | 0.009778 | 0        |
| protein_co histone_clu  | 0    | 0    | 0    | 0    | 1    | 0    | 0        | 0        | 0        | 0        |
| pseudogen: hydroxy-de   | 0    | 1    | 1    | 2    | 4    | 1    | 0        | 0.053687 | 0.050514 | 0.129964 |
| protein_co hydroxy-de   | 0    | 0    | 0    | 0    | 1    | 0    | 0        | 0        | 0        | 0        |
| pseudogen: hydroxy-de   | 0    | 0    | 0    | 1    | 1    | 0    | 0        | 0        | 0        | 0.065098 |
| protein_co Uncharacte   | 3    | 0    | 0    | 0    | 0    | 1    | 0.057652 | 0        | 0        | 0        |
| processed_ ATP1A1_op    | 4    | 6    | 5    | 10   | 16   | 4    | 0.185519 | 0.356853 | 0.2798   | 0.719879 |
| protein_co RNA_bindin   | 79   | 41   | 63   | 17   | 19   | 22   | 0.51214  | 0.340844 | 0.492777 | 0.171057 |
| protein_co chromosom    | 5    | 4    | 5    | 12   | 10   | 6    | 0.150289 | 0.154179 | 0.181332 | 0.559845 |
| protein_co chromosom    | 13   | 3    | 3    | 14   | 17   | 6    | 0.470347 | 0.139189 | 0.130962 | 0.786202 |
| processed_ small_nucl   | 3309 | 2639 | 2617 | 4199 | 4761 | 4425 | 150.7863 | 154.2104 | 143.8854 | 296.9897 |
| protein_co Uncharacte   | 7    | 8    | 8    | 3    | 5    | 1    | 0.308777 | 0.452529 | 0.42578  | 0.205399 |
| protein_co ripply2_ho   | 0    | 0    | 0    | 4    | 6    | 11   | 0        | 0        | 0        | 0.438433 |
| protein_co GDP_dissoc   | 4850 | 3667 | 4020 | 1670 | 2020 | 1442 | 55.89004 | 54.18923 | 55.89421 | 29.8703  |
| protein_co protein-Lis  | 999  | 782  | 834  | 806  | 1025 | 714  | 12.18921 | 12.23562 | 12.2779  | 15.26425 |
| protein_co SRY_(sex_d   | 10   | 8    | 3    | 31   | 44   | 5    | 0.272142 | 0.279187 | 0.098506 | 1.309445 |
| processed_ -            | 0    | 0    | 0    | 4    | 2    | 0    | 0        | 0        | 0        | 0.089191 |
| protein_co oocyte_exp   | 0    | 0    | 0    | 5    | 6    | 3    | 0        | 0        | 0        | 0.361369 |
| protein_co KH_domain    | 0    | 0    | 0    | 2    | 1    | 0    | 0        | 0        | 0        | 0.142986 |
| protein_co developme    | 0    | 0    | 0    | 15   | 24   | 7    | 0        | 0        | 0        | 1.607801 |

|                         |      |      |      |      |      |      |          |          |          |          |
|-------------------------|------|------|------|------|------|------|----------|----------|----------|----------|
| protein_co chromosom    | 0    | 2    | 0    | 2    | 2    | 0    | 0        | 0.138071 | 0        | 0.167118 |
| protein_co SPANX_fam    | 0    | 0    | 0    | 0    | 0    | 2    | 0        | 0        | 0        | 0        |
| protein_co Uncharacter  | 31   | 46   | 40   | 3    | 3    | 11   | 1.052564 | 2.002875 | 1.638682 | 0.158102 |
| protein_co chromosom    | 1    | 0    | 2    | 0    | 0    | 0    | 0.037784 | 0        | 0.091177 | 0        |
| protein_co sterile_alph | 8    | 7    | 7    | 10   | 27   | 15   | 0.239693 | 0.268951 | 0.253053 | 0.465047 |
| protein_co family_witl  | 1058 | 817  | 802  | 780  | 858  | 627  | 39.87913 | 39.49039 | 36.47392 | 45.63364 |
| protein_co coiled-coil  | 8    | 14   | 9    | 25   | 20   | 20   | 0.209564 | 0.470289 | 0.284458 | 1.016478 |
| protein_co chromosom    | 0    | 0    | 0    | 1    | 0    | 0    | 0        | 0        | 0        | 0.01691  |
| protein_co EF-hand_ca   | 88   | 75   | 69   | 35   | 28   | 30   | 1.087305 | 1.188336 | 1.028646 | 0.671223 |
| lincRNA -               | 0    | 1    | 0    | 0    | 0    | 0    | 0        | 0.032432 | 0        | 0        |
| protein_co low_densit   | 1    | 0    | 0    | 0    | 0    | 0    | 0.059733 | 0        | 0        | 0        |
| antisense -             | 0    | 0    | 1    | 2    | 6    | 9    | 0        | 0        | 0.017559 | 0.045177 |
| protein_co chromosom    | 325  | 232  | 247  | 472  | 637  | 366  | 10.70172 | 9.796427 | 9.813307 | 24.12364 |
| protein_co zyg-11_fam   | 32   | 32   | 34   | 147  | 226  | 130  | 0.335753 | 0.430556 | 0.430425 | 2.393965 |
| processed -             | 6    | 13   | 5    | 1    | 0    | 0    | 0.123341 | 0.342695 | 0.124015 | 0.031907 |
| protein_co lipocalin_8  | 0    | 0    | 0    | 0    | 1    | 0    | 0        | 0        | 0        | 0        |
| protein_co interferon-i | 0    | 0    | 0    | 0    | 1    | 0    | 0        | 0        | 0        | 0        |
| antisense COL5A1_ar     | 17   | 8    | 14   | 0    | 1    | 0    | 2.372412 | 1.431662 | 2.357313 | 0        |
| protein_co TraB_doma    | 6    | 10   | 11   | 272  | 279  | 141  | 0.146075 | 0.3122   | 0.323121 | 10.27835 |
| protein_co lipase_fami  | 0    | 1    | 0    | 0    | 0    | 1    | 0        | 0.050234 | 0        | 0        |
| protein_co lipase_fami  | 9    | 6    | 5    | 2    | 0    | 0    | 0.343098 | 0.293316 | 0.229982 | 0.118341 |
| protein_co lipase_fami  | 1    | 1    | 3    | 0    | 2    | 0    | 0.013116 | 0.01682  | 0.047476 | 0        |
| antisense TRPC5_opf     | 2    | 1    | 0    | 1    | 0    | 0    | 0.033421 | 0.021429 | 0        | 0.025937 |
| protein_co leucine-ricl | 0    | 0    | 1    | 1    | 0    | 0    | 0        | 0        | 0.018363 | 0.023622 |
| protein_co Uncharacter  | 0    | 0    | 0    | 0    | 0    | 1    | 0        | 0        | 0        | 0        |
| antisense -             | 0    | 0    | 0    | 3    | 14   | 4    | 0        | 0        | 0        | 0.111683 |
| protein_co Uncharacter  | 9    | 2    | 7    | 1    | 2    | 3    | 0.219568 | 0.06257  | 0.20605  | 0.037867 |
| protein_co leucine_ric  | 35   | 19   | 27   | 25   | 20   | 17   | 0.773763 | 0.538645 | 0.720197 | 0.857848 |
| pseudogen: v-myc_mye    | 0    | 0    | 0    | 1    | 4    | 0    | 0        | 0        | 0        | 0.067702 |
| lincRNA -               | 443  | 357  | 357  | 49   | 66   | 40   | 10.37058 | 10.71709 | 10.0836  | 1.780434 |
| antisense -             | 4    | 9    | 5    | 117  | 136  | 77   | 0.091627 | 0.264371 | 0.138191 | 4.159862 |
| protein_co forkhead_b   | 18   | 38   | 27   | 136  | 148  | 28   | 0.351968 | 0.952849 | 0.637005 | 4.127628 |
| protein_co transcriptic | 0    | 1    | 3    | 47   | 62   | 58   | 0        | 0.051481 | 0.145314 | 2.928639 |
| protein_co SYS1_Golgi   | 252  | 204  | 207  | 167  | 195  | 216  | 4.053614 | 4.208054 | 4.01754  | 4.169546 |
| protein_co transcriptic | 0    | 0    | 0    | 3    | 3    | 1    | 0        | 0        | 0        | 0.197414 |
| pseudogen: -            | 0    | 0    | 0    | 1    | 2    | 2    | 0        | 0        | 0        | 0.111114 |
| protein_co inositol_pc  | 406  | 319  | 314  | 389  | 526  | 466  | 4.055677 | 4.086367 | 3.784557 | 6.03139  |
| protein_co replication  | 2    | 0    | 3    | 0    | 1    | 0    | 0.060896 | 0        | 0.110212 | 0        |
| antisense testis_deve   | 0    | 0    | 1    | 6    | 5    | 8    | 0        | 0        | 0.048563 | 0.374832 |
| lincRNA -               | 0    | 0    | 3    | 0    | 1    | 1    | 0        | 0        | 0.306366 | 0        |
| protein_co sialidase_4  | 0    | 1    | 1    | 12   | 15   | 1    | 0        | 0.019137 | 0.018006 | 0.277962 |
| protein_co v-maf_mus    | 36   | 33   | 31   | 443  | 552  | 397  | 0.497507 | 0.584817 | 0.5169   | 9.502344 |
| protein_co TNF_recept   | 388  | 298  | 362  | 255  | 359  | 210  | 4.251771 | 4.187586 | 4.786243 | 4.337193 |
| lincRNA -               | 0    | 0    | 0    | 1    | 4    | 2    | 0        | 0        | 0        | 0.13553  |
| pseudogen: BMP2_indu    | 2    | 0    | 0    | 1    | 1    | 0    | 0.076555 | 0        | 0        | 0.059412 |
| protein_co cysteine-ric | 182  | 119  | 117  | 125  | 123  | 146  | 1.255551 | 1.052736 | 0.973861 | 1.338454 |
| protein_co nucleosom    | 0    | 0    | 0    | 125  | 137  | 62   | 0        | 0        | 0        | 4.45082  |
| protein_co GRB10_inte   | 1573 | 1334 | 1375 | 1223 | 1447 | 1050 | 9.362528 | 10.18192 | 9.874501 | 11.29851 |
| pseudogen: -            | 0    | 0    | 0    | 90   | 154  | 140  | 0        | 0        | 0        | 3.76015  |
| protein_co chromosom    | 0    | 0    | 0    | 53   | 78   | 15   | 0        | 0        | 0        | 1.05478  |
| protein_co RUN_and_f    | 360  | 299  | 304  | 98   | 115  | 108  | 3.741225 | 3.984665 | 3.811825 | 1.580767 |
| protein_co NHS-like_2   | 228  | 159  | 166  | 123  | 150  | 68   | 2.687512 | 2.403378 | 2.360868 | 2.250356 |
| pseudogen: glycoprotei  | 0    | 0    | 1    | 0    | 1    | 0    | 0        | 0        | 0.016267 | 0        |
| protein_co phosphatas   | 1197 | 939  | 1031 | 1167 | 1616 | 1123 | 9.067423 | 9.121467 | 9.423158 | 13.72117 |
| protein_co colipase-lik | 0    | 0    | 0    | 0    | 4    | 0    | 0        | 0        | 0        | 0        |
| protein_co N-acylsphir  | 71   | 64   | 90   | 35   | 56   | 72   | 0.896148 | 1.035883 | 1.370604 | 0.685678 |
| protein_co ArfGAP_wit   | 310  | 281  | 331  | 199  | 208  | 242  | 5.377693 | 6.251007 | 6.92804  | 5.358187 |
| pseudogen: centaurin_j  | 0    | 2    | 2    | 1    | 5    | 4    | 0        | 0.049715 | 0.046776 | 0.030087 |
| protein_co translocase  | 15   | 12   | 9    | 10   | 9    | 20   | 0.89713  | 0.920354 | 0.649464 | 0.928314 |
| protein_co zinc_finger  | 903  | 809  | 795  | 728  | 928  | 775  | 13.50612 | 15.51675 | 14.3469  | 16.9007  |
| pseudogen: BMS1_pseu    | 72   | 76   | 55   | 73   | 68   | 97   | 0.82869  | 1.121714 | 0.763783 | 1.304105 |
| protein_co chromosom    | 0    | 0    | 0    | 7    | 3    | 4    | 0        | 0        | 0        | 0.66509  |
| protein_co ArfGAP_wit   | 56   | 53   | 51   | 78   | 80   | 71   | 1.085058 | 1.316892 | 1.192294 | 2.345795 |
| protein_co ArfGAP_wit   | 9    | 9    | 14   | 4    | 9    | 11   | 0.084318 | 0.108126 | 0.158253 | 0.058166 |
| pseudogen: leucine_ric  | 5    | 3    | 4    | 2    | 1    | 0    | 0.212557 | 0.163544 | 0.20517  | 0.131967 |

|                         |       |       |       |      |      |      |          |          |          |          |
|-------------------------|-------|-------|-------|------|------|------|----------|----------|----------|----------|
| protein_co neuropepti   | 0     | 0     | 0     | 1    | 1    | 2    | 0        | 0        | 0        | 0.037208 |
| protein_co G_protein_   | 0     | 0     | 0     | 497  | 656  | 200  | 0        | 0        | 0        | 4.68665  |
| protein_co synaptotag   | 64    | 37    | 24    | 26   | 37   | 9    | 0.848448 | 0.629008 | 0.383888 | 0.534994 |
| pseudogen: BMS1_pseu    | 15    | 8     | 9     | 9    | 6    | 10   | 0.172686 | 0.118104 | 0.125013 | 0.16082  |
| protein_co transmembr   | 843   | 626   | 637   | 263  | 371  | 467  | 10.09147 | 9.609715 | 9.200561 | 4.88667  |
| protein_co zinc_finger  | 388   | 285   | 330   | 273  | 260  | 230  | 1.769435 | 1.666698 | 1.815786 | 1.932395 |
| lincRNA long_interf     | 0     | 1     | 1     | 0    | 0    | 0    | 0        | 0.053639 | 0.050469 | 0        |
| protein_co gametogen    | 0     | 0     | 0     | 1    | 2    | 2    | 0        | 0        | 0        | 0.075812 |
| pseudogen: ribosomal_   | 0     | 0     | 0     | 0    | 1    | 0    | 0        | 0        | 0        | 0        |
| protein_co acyl-CoA_w   | 0     | 0     | 0     | 0    | 1    | 0    | 0        | 0        | 0        | 0        |
| protein_co death-dom    | 1344  | 1023  | 1080  | 1617 | 1722 | 1809 | 24.11794 | 23.54106 | 23.38368 | 45.03825 |
| protein_co bone_morp    | 6689  | 4916  | 5676  | 712  | 792  | 399  | 27.36649 | 25.79165 | 28.01872 | 4.521352 |
| protein_co transcriptic | 77    | 60    | 56    | 1    | 4    | 1    | 2.315928 | 2.314168 | 2.032218 | 0.046684 |
| protein_co prefoldin_s  | 534   | 445   | 479   | 616  | 856  | 795  | 13.07534 | 13.97272 | 14.15126 | 23.41115 |
| protein_co ring_finger  | 1126  | 832   | 882   | 511  | 619  | 545  | 30.13594 | 28.55479 | 28.4815  | 21.22744 |
| protein_co hydroxyste   | 63    | 56    | 46    | 165  | 159  | 71   | 2.98391  | 3.401281 | 2.628761 | 12.12997 |
| protein_co retinoid_X   | 1192  | 854   | 964   | 466  | 519  | 356  | 19.22039 | 17.65848 | 18.75474 | 11.66279 |
| protein_co oxidoreduc   | 214   | 204   | 170   | 290  | 413  | 285  | 6.27154  | 7.666549 | 6.011147 | 13.19134 |
| processed_ -            | 0     | 2     | 1     | 6    | 4    | 2    | 0        | 0.054515 | 0.025646 | 0.197951 |
| protein_co collagen_ty  | 41    | 29    | 39    | 72   | 101  | 48   | 0.29922  | 0.271403 | 0.343416 | 0.815587 |
| protein_co major_histi  | 3     | 2     | 0     | 382  | 426  | 242  | 0.040318 | 0.034468 | 0        | 7.968439 |
| pseudogen: -            | 40    | 33    | 37    | 94   | 107  | 111  | 2.128945 | 2.252308 | 2.376043 | 7.765382 |
| protein_co bromodom     | 3176  | 2599  | 2598  | 2521 | 3069 | 3611 | 30.4048  | 31.90636 | 30.00881 | 37.45975 |
| protein_co major_histi  | 16    | 23    | 13    | 37   | 34   | 20   | 0.432415 | 0.79711  | 0.423909 | 1.552076 |
| processed_ -            | 3     | 5     | 4     | 2    | 2    | 1    | 0.111026 | 0.237292 | 0.178612 | 0.114885 |
| protein_co collagen_ty  | 28699 | 22481 | 23425 | 565  | 635  | 855  | 193.6533 | 194.5284 | 190.7154 | 5.917483 |
| protein_co proteasom    | 314   | 269   | 259   | 131  | 156  | 95   | 10.8982  | 11.97255 | 10.84608 | 7.057109 |
| protein_co transporter  | 55    | 37    | 39    | 22   | 50   | 41   | 0.453721 | 0.391415 | 0.388185 | 0.281695 |
| protein_co spindlin_fa  | 77    | 65    | 67    | 79   | 101  | 89   | 2.161995 | 2.340381 | 2.269796 | 3.442877 |
| processed_ -            | 619   | 491   | 492   | 394  | 376  | 326  | 18.98294 | 19.30918 | 18.20481 | 18.75425 |
| lincRNA -               | 4     | 3     | 0     | 1    | 2    | 0    | 0.063926 | 0.061482 | 0        | 0.024806 |
| protein_co transmembr   | 0     | 0     | 0     | 10   | 7    | 0    | 0        | 0        | 0        | 0.302116 |
| processed_ -            | 5     | 5     | 6     | 18   | 26   | 11   | 0.073449 | 0.094188 | 0.106345 | 0.410412 |
| protein_co major_histi  | 28    | 19    | 22    | 14   | 11   | 21   | 1.025719 | 0.892552 | 0.972391 | 0.796029 |
| protein_co butyrophili  | 0     | 0     | 0     | 0    | 0    | 1    | 0        | 0        | 0        | 0        |
| protein_co collagen_ty  | 749   | 560   | 625   | 5    | 4    | 4    | 6.396034 | 6.132341 | 6.439572 | 0.066272 |
| protein_co chromosom    | 0     | 0     | 0     | 2    | 3    | 2    | 0        | 0        | 0        | 0.066986 |
| protein_co notch_4      | 7     | 8     | 13    | 29   | 29   | 28   | 0.048663 | 0.071318 | 0.109041 | 0.312915 |
| protein_co pre-B-cell_I | 2110  | 1565  | 1624  | 2612 | 3294 | 2129 | 26.33429 | 25.04741 | 24.45532 | 50.59911 |
| protein_co advanced_f   | 51    | 30    | 35    | 67   | 88   | 49   | 1.497427 | 1.129552 | 1.239914 | 3.053379 |
| protein_co ring_finger  | 1326  | 920   | 939   | 1604 | 1837 | 1545 | 46.92541 | 41.7505  | 40.09389 | 88.10476 |
| protein_co 1-acylglyce  | 533   | 420   | 405   | 447  | 568  | 450  | 10.01297 | 10.11799 | 9.17992  | 13.03388 |
| protein_co deafness_a   | 15    | 17    | 12    | 20   | 26   | 16   | 0.362178 | 0.526368 | 0.349591 | 0.749535 |
| protein_co proline-ricl | 13    | 17    | 12    | 43   | 58   | 17   | 0.219112 | 0.367436 | 0.244035 | 1.124921 |
| protein_co FK506_bin    | 119   | 91    | 121   | 105  | 154  | 139  | 4.148633 | 4.068261 | 5.089692 | 5.681695 |
| protein_co mitochond    | 22    | 11    | 13    | 20   | 29   | 22   | 0.546388 | 0.350332 | 0.389556 | 0.770972 |
| protein_co small_integ  | 8     | 3     | 10    | 8    | 9    | 23   | 0.086354 | 0.041526 | 0.130238 | 0.134033 |
| protein_co glutamate-i  | 0     | 1     | 0     | 3    | 2    | 3    | 0        | 0.10005  | 0        | 0.363294 |
| protein_co Sp5_transc   | 0     | 0     | 0     | 18   | 13   | 84   | 0        | 0        | 0        | 0.644386 |
| pseudogen: cytochrom    | 0     | 1     | 0     | 2    | 2    | 0    | 0        | 0.030507 | 0        | 0.073851 |
| protein_co serine/thre  | 314   | 268   | 264   | 136  | 197  | 145  | 7.773741 | 8.508334 | 7.88592  | 5.226005 |
| protein_co BTB_(POZ)_   | 0     | 0     | 0     | 39   | 41   | 66   | 0        | 0        | 0        | 1.572528 |
| protein_co dom-3_hor    | 193   | 144   | 163   | 126  | 144  | 131  | 4.323829 | 4.136976 | 4.406024 | 4.381393 |
| protein_co superkiller  | 1499  | 1262  | 1368  | 1131 | 1526 | 1298 | 15.59533 | 16.83688 | 17.17224 | 18.26358 |
| protein_co chromosom    | 3     | 0     | 0     | 128  | 137  | 247  | 0.121898 | 0        | 0        | 8.07263  |
| protein_co negative_el  | 1452  | 1046  | 1115  | 1148 | 1341 | 1148 | 36.70313 | 33.90607 | 34.0063  | 45.04108 |
| protein_co neurexophi   | 8     | 2     | 4     | 0    | 0    | 1    | 0.165033 | 0.052908 | 0.099561 | 0        |
| lincRNA -               | 0     | 4     | 0     | 0    | 0    | 0    | 0        | 0.051437 | 0        | 0        |
| protein_co zinc_finger  | 187   | 121   | 172   | 283  | 431  | 352  | 4.676498 | 3.880376 | 5.18986  | 10.9849  |
| protein_co succinate_c  | 272   | 249   | 247   | 371  | 494  | 501  | 8.863158 | 10.40467 | 9.711014 | 18.76394 |
| protein_co euchromat    | 2035  | 1568  | 1737  | 3869 | 4707 | 3589 | 23.11    | 22.83447 | 23.80035 | 68.19691 |
| protein_co chromosom    | 32    | 36    | 38    | 12   | 19   | 10   | 5.954288 | 8.589971 | 8.531227 | 3.465705 |
| antisense -             | 13    | 15    | 12    | 6    | 6    | 9    | 0.149882 | 0.221772 | 0.16693  | 0.107371 |
| protein_co layilin      | 650   | 546   | 524   | 32   | 50   | 43   | 14.03246 | 15.1155  | 13.64897 | 1.072262 |
| protein_co solute_carr  | 7     | 2     | 6     | 42   | 61   | 40   | 0.124613 | 0.045657 | 0.128874 | 1.160498 |

|                          |       |       |       |       |       |       |          |          |          |          |
|--------------------------|-------|-------|-------|-------|-------|-------|----------|----------|----------|----------|
| protein_co sialidase_1   | 1124  | 770   | 832   | 756   | 932   | 725   | 11.41776 | 10.03032 | 10.19732 | 11.91974 |
| protein_co chromosor     | 2492  | 1889  | 1967  | 1523  | 1672  | 1577  | 110.9686 | 107.8682 | 105.6828 | 105.2646 |
| protein_co heat_shock    | 587   | 461   | 501   | 632   | 1054  | 430   | 10.9224  | 10.99993 | 11.24775 | 18.25271 |
| protein_co heat_shock    | 384   | 335   | 301   | 285   | 494   | 203   | 7.41894  | 8.299745 | 7.016575 | 8.546454 |
| protein_co heat_shock    | 17    | 30    | 16    | 34    | 53    | 22    | 0.313337 | 0.709078 | 0.355821 | 0.972686 |
| protein_co LSM2_hom      | 520   | 444   | 458   | 842   | 838   | 832   | 27.83426 | 30.47675 | 29.57943 | 69.95501 |
| protein_co valyl-tRNA_   | 5129  | 4169  | 4361  | 6234  | 8030  | 6244  | 55.77433 | 58.1357  | 57.21841 | 105.2201 |
| protein_co von_Willeb    | 5     | 2     | 5     | 21    | 28    | 8     | 0.079691 | 0.040877 | 0.096151 | 0.519502 |
| protein_co caspase_rex   | 4     | 7     | 2     | 0     | 0     | 2     | 0.178459 | 0.400484 | 0.10766  | 0        |
| protein_co caspase_12    | 1     | 2     | 0     | 0     | 0     | 0     | 0.032316 | 0.08288  | 0        | 0        |
| protein_co methyl-CpG    | 317   | 332   | 322   | 113   | 144   | 116   | 1.750988 | 2.351642 | 2.14599  | 0.968797 |
| protein_co mutS_hom      | 32    | 31    | 37    | 41    | 50    | 39    | 0.376438 | 0.467643 | 0.525161 | 0.748613 |
| protein_co chromosor     | 7     | 7     | 13    | 15    | 18    | 6     | 0.136991 | 0.175671 | 0.306962 | 0.455633 |
| protein_co lymphocyt     | 2     | 0     | 3     | 0     | 0     | 1     | 0.094536 | 0        | 0.171095 | 0        |
| protein_co abhydrolas    | 9     | 10    | 6     | 3     | 7     | 5     | 0.18673  | 0.266061 | 0.1502   | 0.09661  |
| protein_co lymphocyt     | 21    | 17    | 28    | 12    | 19    | 13    | 0.689559 | 0.715831 | 1.109324 | 0.611595 |
| pseudogen_ -             | 0     | 0     | 0     | 2     | 0     | 0     | 0        | 0        | 0        | 0.187819 |
| protein_co casein_kina   | 46    | 45    | 39    | 43    | 56    | 52    | 1.20365  | 1.509956 | 1.231275 | 1.74639  |
| protein_co G_patch_di    | 473   | 353   | 397   | 727   | 899   | 787   | 7.940916 | 7.599648 | 8.041703 | 18.94412 |
| protein_co chromosor     | 333   | 217   | 246   | 178   | 261   | 229   | 6.308839 | 5.271986 | 5.623262 | 5.234264 |
| protein_co family_witl   | 326   | 246   | 319   | 164   | 181   | 146   | 7.482205 | 7.240299 | 8.833865 | 5.842334 |
| protein_co apolipoppro   | 12    | 22    | 11    | 24    | 30    | 24    | 0.475237 | 1.117277 | 0.525617 | 1.475266 |
| protein_co chromosor     | 2     | 2     | 2     | 2     | 4     | 0     | 0.028953 | 0.037129 | 0.034934 | 0.04494  |
| protein_co tripartite_r  | 0     | 0     | 0     | 0     | 1     | 0     | 0        | 0        | 0        | 0        |
| lincRNA -                | 0     | 1     | 0     | 0     | 0     | 1     | 0        | 0.027171 | 0        | 0        |
| protein_co BCL2-assoc    | 7458  | 5852  | 6185  | 7065  | 7739  | 5859  | 90.10712 | 90.66724 | 90.1622  | 132.4889 |
| protein_co chromosor     | 0     | 0     | 0     | 1     | 1     | 2     | 0        | 0        | 0        | 0.165034 |
| processed_ diacylglyce   | 0     | 1     | 1     | 13    | 16    | 38    | 0        | 0.008119 | 0.007639 | 0.127753 |
| protein_co proline-ric   | 14660 | 11105 | 12354 | 13985 | 19284 | 11996 | 99.72547 | 96.87239 | 101.3976 | 147.6607 |
| protein_co allograft_in  | 3     | 2     | 7     | 16    | 17    | 11    | 0.119212 | 0.101915 | 0.335617 | 0.986845 |
| protein_co natural_cyt   | 0     | 0     | 0     | 0     | 2     | 0     | 0        | 0        | 0        | 0        |
| protein_co leukocyte_    | 4     | 8     | 2     | 2     | 4     | 0     | 0.10238  | 0.262576 | 0.061764 | 0.079454 |
| protein_co nuclear_fac   | 165   | 131   | 151   | 198   | 261   | 118   | 5.234677 | 5.329502 | 5.780041 | 9.749933 |
| protein_co mitochond     | 1     | 2     | 1     | 4     | 6     | 6     | 0.049099 | 0.125926 | 0.059241 | 0.304837 |
| protein_co zinc_finger   | 308   | 205   | 208   | 271   | 366   | 534   | 4.590631 | 3.918184 | 3.740529 | 6.269334 |
| protein_co MHC_class     | 516   | 394   | 384   | 495   | 529   | 245   | 9.891762 | 9.685666 | 8.881845 | 14.72854 |
| protein_co zinc_finger   | 121   | 110   | 102   | 440   | 477   | 569   | 1.24314  | 1.449228 | 1.264396 | 7.016458 |
| protein_co MHC_class     | 698   | 580   | 537   | 99    | 133   | 103   | 23.61416 | 25.16254 | 21.91995 | 5.198557 |
| protein_co zinc_finger   | 93    | 98    | 104   | 77    | 90    | 66    | 1.807199 | 2.442072 | 2.438397 | 2.322439 |
| protein_co major_histi   | 749   | 577   | 628   | 541   | 609   | 418   | 18.68118 | 18.45473 | 18.89863 | 20.94355 |
| sense_intrc psoriasis_si | 0     | 0     | 0     | 1     | 5     | 8     | 0        | 0        | 0        | 0.122732 |
| pseudogen_ guanylate_    | 0     | 0     | 0     | 3     | 0     | 1     | 0        | 0        | 0        | 0.260238 |
| protein_co POU_class_    | 6     | 4     | 3     | 46384 | 56725 | 45930 | 0.086248 | 0.073734 | 0.052031 | 1034.892 |
| protein_co zinc_finger   | 3     | 0     | 0     | 1     | 0     | 0     | 0.07435  | 0        | 0        | 0.038467 |
| protein_co Uncharacte    | 30    | 36    | 31    | 24    | 27    | 22    | 1.961925 | 3.019069 | 2.446082 | 2.436144 |
| protein_co coiled-coil_  | 472   | 375   | 420   | 903   | 1246  | 583   | 7.482112 | 7.622946 | 8.033033 | 22.21777 |
| protein_co psoriasis_si  | 3     | 7     | 3     | 2     | 3     | 3     | 0.122322 | 0.366007 | 0.147588 | 0.126574 |
| protein_co corneodesr    | 0     | 0     | 3     | 0     | 0     | 0     | 0        | 0        | 0.066507 | 0        |
| protein_co psoriasis_si  | 37    | 32    | 37    | 1     | 5     | 4     | 0.45334  | 0.502784 | 0.54698  | 0.019017 |
| protein_co mucin_21_     | 0     | 0     | 0     | 0     | 1     | 0     | 0        | 0        | 0        | 0        |
| pseudogen_ -             | 6     | 5     | 4     | 14    | 20    | 20    | 0.796997 | 0.851697 | 0.641082 | 2.886451 |
| protein_co DEAH_(Asp     | 1228  | 936   | 1071  | 801   | 1030  | 1157  | 16.71435 | 16.33715 | 17.5885  | 16.9221  |
| protein_co chromosor     | 176   | 145   | 127   | 263   | 295   | 236   | 4.172216 | 4.407897 | 3.632502 | 9.676991 |
| protein_co mitochond     | 677   | 555   | 590   | 757   | 767   | 898   | 19.71711 | 20.72797 | 20.73264 | 34.22007 |
| protein_co protein_ph    | 1859  | 1559  | 1577  | 1974  | 2517  | 3121  | 19.26377 | 20.71654 | 19.71703 | 31.74969 |
| protein_co keratin_ass   | 0     | 0     | 0     | 1     | 0     | 0     | 0        | 0        | 0        | 0.071283 |
| protein_co keratin_ass   | 0     | 2     | 0     | 1     | 2     | 2     | 0        | 0.113667 | 0        | 0.06879  |
| protein_co ATP-bindin    | 2448  | 1960  | 2139  | 2869  | 3539  | 4287  | 32.97523 | 33.85648 | 34.76444 | 59.98427 |
| protein_co proline_ric   | 415   | 343   | 356   | 103   | 140   | 214   | 5.674936 | 6.014733 | 5.873689 | 2.186153 |
| protein_co leukocyte_    | 5     | 7     | 4     | 1     | 2     | 3     | 0.082321 | 0.147791 | 0.07946  | 0.025555 |
| protein_co discoidin_c   | 843   | 614   | 638   | 6547  | 7750  | 5451  | 9.52948  | 8.900601 | 8.701826 | 114.8721 |
| antisense -              | 2     | 0     | 3     | 3     | 2     | 2     | 0.030991 | 0        | 0.056089 | 0.072154 |
| lincRNA leucine_ric      | 1     | 2     | 0     | 0     | 0     | 0     | 0.050912 | 0.130575 | 0        | 0        |
| antisense -              | 2     | 1     | 2     | 26    | 26    | 28    | 0.044657 | 0.028633 | 0.053881 | 0.901083 |
| processed_ -             | 6     | 2     | 3     | 6     | 3     | 2     | 0.115493 | 0.049368 | 0.069674 | 0.179261 |

|                         |       |       |       |       |       |       |          |          |          |          |
|-------------------------|-------|-------|-------|-------|-------|-------|----------|----------|----------|----------|
| protein_co guanine_nu   | 2634  | 1918  | 2092  | 1082  | 1337  | 1201  | 16.48976 | 15.39772 | 15.80186 | 10.51372 |
| protein_co major_histi  | 2811  | 2255  | 2189  | 1504  | 1609  | 753   | 50.67583 | 52.13098 | 47.61391 | 42.08413 |
| protein_co divergent-p  | 0     | 0     | 0     | 1     | 1     | 0     | 0        | 0        | 0        | 0.112315 |
| protein_co tripartite_r | 190   | 156   | 167   | 167   | 189   | 352   | 2.520256 | 2.653536 | 2.672732 | 3.438254 |
| protein_co zinc_finger  | 157   | 117   | 98    | 192   | 237   | 288   | 1.670464 | 1.596366 | 1.258089 | 3.170801 |
| protein_co tripartite_r | 0     | 0     | 0     | 2     | 6     | 3     | 0        | 0        | 0        | 0.065745 |
| protein_co zinc_finger  | 144   | 127   | 132   | 318   | 339   | 348   | 1.557592 | 1.761588 | 1.722714 | 5.338864 |
| protein_co forkhead_b   | 0     | 0     | 0     | 0     | 0     | 19    | 0        | 0        | 0        | 0        |
| protein_co tripartite_r | 0     | 0     | 0     | 0     | 1     | 0     | 0        | 0        | 0        | 0        |
| protein_co tripartite_r | 0     | 0     | 0     | 0     | 1     | 0     | 0        | 0        | 0        | 0        |
| protein_co tripartite_r | 0     | 0     | 0     | 2     | 4     | 0     | 0        | 0        | 0        | 0.071248 |
| protein_co ring_finger  | 50    | 33    | 38    | 32    | 39    | 17    | 1.062784 | 0.899494 | 0.974555 | 1.055736 |
| protein_co protein_ph   | 825   | 588   | 752   | 278   | 353   | 326   | 22.34793 | 20.42537 | 24.57815 | 11.68849 |
| protein_co Uncharacte   | 6     | 6     | 6     | 4     | 7     | 4     | 0.156823 | 0.201103 | 0.189216 | 0.162274 |
| pseudogen: major_histi  | 3     | 1     | 0     | 2     | 1     | 0     | 0.107711 | 0.046041 | 0        | 0.111455 |
| antisense ZNRD1_ant     | 75    | 73    | 80    | 110   | 134   | 90    | 0.359917 | 0.449235 | 0.463212 | 0.819341 |
| protein_co patched_dc   | 12    | 11    | 3     | 170   | 202   | 152   | 0.107896 | 0.126832 | 0.032546 | 2.372496 |
| lincRNA HLA_compl       | 1     | 0     | 0     | 1     | 0     | 2     | 0.071153 | 0        | 0        | 0.11044  |
| protein_co guanine_nu   | 16027 | 13125 | 13068 | 18121 | 18357 | 17521 | 455.1825 | 478.0155 | 447.8066 | 798.8145 |
| protein_co major_histi  | 0     | 0     | 0     | 6     | 3     | 3     | 0        | 0        | 0        | 0.276729 |
| protein_co TBC1_dom     | 81    | 52    | 54    | 1309  | 1471  | 1063  | 0.998709 | 0.82218  | 0.803333 | 25.05095 |
| protein_co major_histi  | 19    | 15    | 19    | 23    | 37    | 20    | 0.549267 | 0.556071 | 0.662722 | 1.032019 |
| protein_co ZFP57_zinc   | 0     | 1     | 0     | 10    | 10    | 8     | 0        | 0.030369 | 0        | 0.367575 |
| protein_co synovial_sa  | 0     | 0     | 0     | 1     | 0     | 0     | 0        | 0        | 0        | 0.059171 |
| pseudogen: CRHR1_int    | 206   | 167   | 157   | 531   | 651   | 268   | 3.702316 | 3.84886  | 3.404505 | 14.8126  |
| pseudogen: ribosomal_   | 1     | 0     | 0     | 2     | 0     | 1     | 0.106327 | 0        | 0        | 0.330067 |
| protein_co aspartate_c  | 3     | 4     | 7     | 8     | 10    | 5     | 0.13526  | 0.231268 | 0.380797 | 0.559845 |
| protein_co myelin_oli   | 0     | 0     | 1     | 5     | 4     | 11    | 0        | 0        | 0.022639 | 0.145618 |
| protein_co olfactory_r  | 0     | 2     | 0     | 5     | 3     | 5     | 0        | 0.113132 | 0        | 0.342332 |
| protein_co chibby_hoi   | 1     | 3     | 1     | 5     | 2     | 3     | 0.059733 | 0.229795 | 0.072071 | 0.463566 |
| protein_co chromosom    | 0     | 2     | 0     | 8     | 6     | 5     | 0        | 0.03706  | 0        | 0.179426 |
| pseudogen: cystatin_1   | 0     | 0     | 0     | 0     | 1     | 0     | 0        | 0        | 0        | 0        |
| sense_overl -           | 0     | 1     | 0     | 1     | 5     | 0     | 0        | 0.039429 | 0        | 0.047724 |
| protein_co AKT1_subst   | 2141  | 1514  | 1754  | 841   | 1143  | 1369  | 27.58009 | 25.01003 | 27.26193 | 16.81533 |
| protein_co family_witl  | 0     | 0     | 0     | 1     | 0     | 3     | 0        | 0        | 0        | 0.048199 |
| protein_co gamma-am     | 1108  | 961   | 1056  | 791   | 846   | 1565  | 11.47651 | 12.76447 | 13.1972  | 12.71677 |
| protein_co chromosom    | 509   | 376   | 411   | 323   | 542   | 614   | 6.279142 | 5.94812  | 6.117478 | 6.184656 |
| processed_ -            | 65    | 60    | 55    | 34    | 31    | 33    | 1.770977 | 2.096332 | 1.808049 | 1.437835 |
| protein_co olfactory_r  | 0     | 0     | 0     | 0     | 2     | 0     | 0        | 0        | 0        | 0        |
| protein_co olfactory_r  | 1     | 0     | 0     | 0     | 0     | 0     | 0.045613 | 0        | 0        | 0        |
| antisense -             | 44    | 29    | 35    | 4     | 13    | 6     | 0.983863 | 0.831552 | 0.944274 | 0.138827 |
| protein_co chromosom    | 0     | 0     | 0     | 0     | 2     | 0     | 0        | 0        | 0        | 0        |
| protein_co speedy_hoi   | 2     | 2     | 3     | 18    | 17    | 11    | 0.094632 | 0.121352 | 0.171268 | 1.321934 |
| protein_co chromosom    | 0     | 0     | 0     | 103   | 84    | 117   | 0        | 0        | 0        | 8.586849 |
| protein_co tripartite_r | 2157  | 1666  | 1649  | 1853  | 2138  | 2299  | 14.43645 | 14.29864 | 13.31616 | 19.24935 |
| protein_co chromosom    | 1     | 0     | 1     | 5     | 2     | 6     | 0.01006  | 0        | 0.012138 | 0.078073 |
| pseudogen: -            | 49    | 46    | 45    | 75    | 81    | 86    | 0.601626 | 0.724266 | 0.66664  | 1.429297 |
| processed_ -            | 3     | 1     | 1     | 4     | 7     | 2     | 0.068055 | 0.02909  | 0.027371 | 0.140841 |
| protein_co RAN_bindin   | 93    | 71    | 84    | 134   | 145   | 139   | 0.920188 | 0.900868 | 1.002815 | 2.057922 |
| protein_co family_witl  | 72    | 55    | 68    | 0     | 0     | 0     | 1.125736 | 1.102747 | 1.282806 | 0        |
| pseudogen: -            | 1     | 3     | 0     | 0     | 0     | 0     | 0.012411 | 0.047747 | 0        | 0        |
| protein_co KM-PA-2_p    | 23    | 22    | 12    | 0     | 2     | 6     | 0.547725 | 0.671841 | 0.344797 | 0        |
| pseudogen: -            | 5     | 3     | 3     | 7     | 7     | 5     | 0.357939 | 0.275404 | 0.259124 | 0.777799 |
| protein_co forkhead_b   | 0     | 0     | 1     | 0     | 0     | 0     | 0        | 0        | 0.018197 | 0        |
| protein_co LOC44142     | 0     | 0     | 0     | 0     | 1     | 0     | 0        | 0        | 0        | 0        |
| pseudogen: zinc_finger  | 1     | 2     | 3     | 161   | 139   | 104   | 0.011705 | 0.03002  | 0.042368 | 2.924999 |
| protein_co COBW_dor     | 53    | 48    | 45    | 51    | 70    | 61    | 0.745402 | 0.865696 | 0.763617 | 1.113308 |
| antisense -             | 0     | 6     | 2     | 164   | 254   | 85    | 0        | 0.259553 | 0.081404 | 8.586969 |
| pseudogen: phosphogl    | 8     | 3     | 2     | 7     | 10    | 3     | 0.166056 | 0.079854 | 0.050089 | 0.225524 |
| processed_ -            | 4     | 3     | 4     | 3     | 2     | 5     | 0.073813 | 0.070991 | 0.08906  | 0.085927 |
| protein_co Uncharacte   | 0     | 0     | 2     | 0     | 2     | 1     | 0        | 0        | 0.296984 | 0        |
| pseudogen: family_witl  | 2     | 0     | 1     | 1     | 3     | 5     | 0.066938 | 0        | 0.040382 | 0.051948 |
| protein_co family_witl  | 0     | 2     | 0     | 2     | 0     | 0     | 0        | 0.08988  | 0        | 0.108789 |
| processed_ tetratricop  | 21    | 31    | 24    | 16    | 23    | 15    | 0.562038 | 1.06394  | 0.775007 | 0.664656 |
| pseudogen: -            | 1     | 0     | 0     | 0     | 0     | 3     | 0.028264 | 0        | 0        | 0        |

|                         |      |      |      |      |      |      |          |          |          |          |
|-------------------------|------|------|------|------|------|------|----------|----------|----------|----------|
| protein_co mitochond    | 35   | 36   | 30   | 5    | 16   | 12   | 1.41235  | 1.862885 | 1.460641 | 0.313166 |
| antisense ST8SIA6_ar    | 3    | 0    | 1    | 8    | 11   | 6    | 0.077675 | 0        | 0.03124  | 0.321501 |
| lincRNA -               | 29   | 16   | 24   | 28   | 31   | 33   | 0.719476 | 0.509035 | 0.718419 | 1.078219 |
| protein_co maestro_hc   | 37   | 30   | 36   | 86   | 106  | 62   | 0.500124 | 0.520004 | 0.58712  | 1.804284 |
| protein_co ataxin_2     | 1219 | 1037 | 1002 | 806  | 913  | 551  | 12.1563  | 13.26129 | 12.05629 | 12.47565 |
| protein_co dynactin_1   | 3631 | 2755 | 3017 | 2724 | 3030 | 3062 | 31.44766 | 30.598   | 31.52721 | 36.61843 |
| lincRNA family_witl     | 0    | 0    | 0    | 0    | 0    | 1    | 0        | 0        | 0        | 0        |
| protein_co paraneopla   | 92   | 62   | 83   | 190  | 271  | 66   | 0.812713 | 0.702345 | 0.884658 | 2.605155 |
| protein_co tectonic_fa  | 214  | 195  | 195  | 80   | 94   | 50   | 2.384049 | 2.785771 | 2.621103 | 1.383318 |
| protein_co family_witl  | 82   | 54   | 74   | 111  | 134  | 106  | 2.290043 | 1.933895 | 2.493501 | 4.811529 |
| protein_co zinc_finger  | 325  | 268  | 301  | 304  | 415  | 357  | 6.134966 | 6.487434 | 6.855566 | 8.907029 |
| antisense family_witl   | 6    | 3    | 5    | 136  | 170  | 64   | 0.081856 | 0.052485 | 0.082304 | 2.879852 |
| protein_co IGF-like_far | 15   | 17   | 13   | 1    | 0    | 1    | 0.366328 | 0.532399 | 0.383063 | 0.037906 |
| protein_co IGF-like_far | 12   | 8    | 8    | 8    | 5    | 3    | 0.206944 | 0.176917 | 0.16646  | 0.214137 |
| protein_co G_protein-i  | 7    | 4    | 5    | 0    | 1    | 2    | 0.216654 | 0.158759 | 0.186718 | 0        |
| protein_co mitotic_spi  | 596  | 459  | 508  | 500  | 715  | 534  | 12.15592 | 12.00504 | 12.50124 | 15.82858 |
| protein_co chromosom    | 1    | 1    | 2    | 7    | 8    | 1    | 0.09     | 0.115412 | 0.21718  | 0.977848 |
| protein_co serine_pep   | 1    | 0    | 0    | 4    | 1    | 0    | 0.077632 | 0        | 0        | 0.481985 |
| protein_co leucine_ri   | 0    | 0    | 0    | 1    | 0    | 0    | 0        | 0        | 0        | 0.081683 |
| protein_co zinc_finger  | 51   | 49   | 55   | 57   | 51   | 46   | 0.921183 | 1.134961 | 1.198634 | 1.598016 |
| protein_co chromosom    | 36   | 25   | 29   | 48   | 65   | 51   | 0.73778  | 0.657013 | 0.717085 | 1.526849 |
| protein_co F-box_prot   | 13   | 19   | 31   | 20   | 24   | 11   | 0.223204 | 0.418333 | 0.642197 | 0.53299  |
| processed_-             | 3    | 1    | 3    | 0    | 0    | 0    | 0.111114 | 0.047496 | 0.134065 | 0        |
| protein_co family_witl  | 1    | 0    | 0    | 1    | 4    | 2    | 0.012461 | 0        | 0        | 0.019341 |
| processed_ ATP6VOE2_    | 16   | 14   | 15   | 12   | 9    | 11   | 0.252266 | 0.283059 | 0.285351 | 0.293664 |
| protein_co CD177_mo     | 0    | 0    | 0    | 15   | 12   | 12   | 0        | 0        | 0        | 0.439669 |
| protein_co pregnancy_   | 0    | 1    | 0    | 1    | 1    | 0    | 0        | 0.028033 | 0        | 0.03393  |
| protein_co zinc_finger  | 464  | 415  | 382  | 204  | 237  | 213  | 4.88701  | 5.605091 | 4.854412 | 3.334924 |
| protein_co zinc_finger  | 60   | 53   | 45   | 175  | 200  | 191  | 0.873727 | 0.989714 | 0.790651 | 3.955424 |
| antisense -             | 0    | 1    | 0    | 0    | 0    | 0    | 0        | 0.04464  | 0        | 0        |
| protein_co leucine_ri   | 4    | 0    | 5    | 70   | 99   | 67   | 0.08483  | 0        | 0.127941 | 2.3042   |
| protein_co F-box_prot   | 0    | 0    | 0    | 0    | 0    | 2    | 0        | 0        | 0        | 0        |
| protein_co chromosom    | 137  | 108  | 106  | 132  | 172  | 169  | 3.696164 | 3.736489 | 3.45052  | 5.52758  |
| protein_co protocadhe   | 4    | 6    | 4    | 10   | 5    | 13   | 0.040756 | 0.078396 | 0.049175 | 0.158148 |
| protein_co -            | 6    | 12   | 14   | 3    | 4    | 4    | 0.12794  | 0.32813  | 0.36019  | 0.09929  |
| pseudogeni -            | 23   | 20   | 31   | 197  | 286  | 269  | 0.21377  | 0.238374 | 0.347639 | 2.841947 |
| protein_co B-cell_acut  | 0    | 0    | 2    | 0    | 0    | 0    | 0        | 0        | 0.046071 | 0        |
| protein_co protocadhe   | 15   | 21   | 16   | 29   | 38   | 10   | 0.110105 | 0.197672 | 0.141704 | 0.330403 |
| protein_co protocadhe   | 22   | 10   | 8    | 27   | 27   | 11   | 0.196118 | 0.114315 | 0.086046 | 0.373585 |
| protein_co protocadhe   | 8    | 7    | 6    | 10   | 21   | 10   | 0.071848 | 0.080618 | 0.065017 | 0.139398 |
| protein_co protocadhe   | 10   | 10   | 15   | 16   | 19   | 9    | 0.089862 | 0.115235 | 0.162636 | 0.223165 |
| protein_co protocadhe   | 241  | 148  | 174  | 92   | 92   | 96   | 2.152065 | 1.694765 | 1.874717 | 1.275136 |
| protein_co protocadhe   | 124  | 88   | 78   | 29   | 27   | 13   | 1.106654 | 1.007123 | 0.83991  | 0.401716 |
| protein_co protocadhe   | 10   | 8    | 6    | 20   | 23   | 19   | 0.089145 | 0.091452 | 0.064535 | 0.276729 |
| protein_co tripartite_r | 622  | 575  | 624  | 380  | 369  | 449  | 4.023395 | 4.769573 | 4.870067 | 3.815192 |
| protein_co membrane     | 0    | 0    | 0    | 0    | 1    | 0    | 0        | 0        | 0        | 0        |
| pseudogeni: protease_sc | 0    | 1    | 0    | 2    | 6    | 3    | 0        | 0.371172 | 0        | 0.898516 |
| lincRNA -               | 0    | 0    | 0    | 0    | 1    | 0    | 0        | 0        | 0        | 0        |
| protein_co spire_homo   | 100  | 88   | 74   | 236  | 354  | 157  | 1.44946  | 1.635679 | 1.294154 | 5.309438 |
| pseudogeni -            | 0    | 0    | 0    | 3    | 0    | 0    | 0        | 0        | 0        | 0.116448 |
| protein_co alanine_an   | 16   | 8    | 11   | 10   | 19   | 17   | 0.326333 | 0.209238 | 0.270696 | 0.316572 |
| protein_co Uncharacte   | 0    | 0    | 0    | 1    | 0    | 0    | 0        | 0        | 0        | 0.040165 |
| protein_co poly(A)_bir  | 0    | 0    | 0    | 1    | 0    | 0    | 0        | 0        | 0        | 0.057217 |
| pseudogeni -            | 0    | 0    | 0    | 7    | 1    | 2    | 0        | 0        | 0        | 0.231994 |
| processed_-             | 0    | 0    | 0    | 0    | 1    | 5    | 0        | 0        | 0        | 0        |
| protein_co polycystic_  | 0    | 0    | 0    | 3    | 3    | 6    | 0        | 0        | 0        | 0.016698 |
| sense_intrc -           | 44   | 41   | 25   | 51   | 54   | 30   | 1.411191 | 1.686267 | 0.967433 | 2.53883  |
| pseudogeni -            | 0    | 0    | 0    | 1    | 0    | 0    | 0        | 0        | 0        | 0.088864 |
| protein_co HCG19806     | 55   | 44   | 47   | 53   | 89   | 88   | 0.371714 | 0.381336 | 0.383259 | 0.555971 |
| processed_-             | 16   | 2    | 6    | 1    | 1    | 0    | 0.337035 | 0.054025 | 0.152495 | 0.032695 |
| lincRNA -               | 1    | 0    | 3    | 0    | 0    | 1    | 0.004413 | 0        | 0.015973 | 0        |
| protein_co solute_carr  | 778  | 710  | 647  | 545  | 822  | 754  | 5.367137 | 6.281029 | 5.385369 | 5.835662 |
| protein_co lectin_gala  | 0    | 0    | 0    | 4    | 2    | 2    | 0        | 0        | 0        | 0.515255 |
| protein_co synaptoner   | 113  | 70   | 85   | 47   | 92   | 41   | 6.175492 | 4.905694 | 5.604799 | 3.986772 |
| protein_co transmembr   | 581  | 500  | 566  | 159  | 162  | 139  | 9.108358 | 10.05179 | 10.70603 | 3.868936 |

|                         |      |      |      |      |      |      |          |          |          |          |
|-------------------------|------|------|------|------|------|------|----------|----------|----------|----------|
| protein_co family_witl  | 12   | 3    | 5    | 1    | 1    | 1    | 0.262077 | 0.084019 | 0.131755 | 0.033898 |
| protein_co chromosor    | 1    | 0    | 1    | 2    | 1    | 0    | 0.012601 | 0        | 0.015204 | 0.039118 |
| protein_co cyclin_l_fa  | 2    | 3    | 3    | 13   | 13   | 9    | 0.039822 | 0.076598 | 0.072071 | 0.401757 |
| protein_co transmemt    | 64   | 30   | 51   | 40   | 101  | 29   | 4.179612 | 2.512387 | 4.018594 | 4.054585 |
| protein_co FSHD_regic   | 0    | 1    | 3    | 0    | 0    | 0    | 0        | 0.028633 | 0.080822 | 0        |
| pseudogeni cytochrom    | 1    | 0    | 0    | 0    | 0    | 0    | 0.116933 | 0        | 0        | 0        |
| protein_co family_witl  | 0    | 1    | 1    | 2    | 2    | 0    | 0        | 0.014232 | 0.013391 | 0.034452 |
| protein_co cyclin-depe  | 1    | 2    | 0    | 1    | 3    | 4    | 0.029923 | 0.076745 | 0        | 0.046445 |
| protein_co transmemt    | 3    | 3    | 1    | 42   | 65   | 26   | 0.285915 | 0.366645 | 0.114991 | 6.21291  |
| protein_co chromosor    | 9    | 6    | 17   | 34   | 35   | 22   | 0.372143 | 0.318147 | 0.848134 | 2.18211  |
| protein_co triple_Qxxl  | 192  | 157  | 158  | 143  | 98   | 72   | 2.451766 | 2.570909 | 2.434349 | 2.83429  |
| protein_co succinate_c  | 235  | 161  | 185  | 222  | 356  | 283  | 9.742842 | 8.559591 | 9.254172 | 14.28569 |
| protein_co AT_rich_int  | 2    | 2    | 1    | 3    | 8    | 1    | 0.066464 | 0.08523  | 0.040096 | 0.154741 |
| protein_co -            | 6    | 11   | 10   | 10   | 18   | 7    | 0.138728 | 0.326148 | 0.278972 | 0.358875 |
| protein_co -            | 1    | 0    | 2    | 0    | 0    | 0    | 0.123071 | 0        | 0.296984 | 0        |
| protein_co presenilin_  | 39   | 48   | 27   | 27   | 44   | 33   | 1.587422 | 2.505408 | 1.325988 | 1.705777 |
| protein_co chromosor    | 2    | 5    | 3    | 1    | 0    | 0    | 0.115635 | 0.370714 | 0.209281 | 0.089741 |
| pseudogeni -            | 0    | 1    | 0    | 0    | 0    | 0    | 0        | 0.046041 | 0        | 0        |
| protein_co zinc_finger  | 616  | 472  | 529  | 406  | 531  | 416  | 2.850795 | 2.801151 | 2.953853 | 2.916364 |
| protein_co chromosor    | 507  | 397  | 399  | 433  | 615  | 409  | 6.751843 | 6.779758 | 6.411141 | 8.9502   |
| protein_co secretoglok  | 0    | 2    | 2    | 10   | 6    | 5    | 0        | 0.048008 | 0.04517  | 0.290538 |
| protein_co coiled-coil_ | 0    | 0    | 0    | 14   | 11   | 17   | 0        | 0        | 0        | 0.363121 |
| protein_co leucine-ricl | 1017 | 772  | 882  | 1112 | 1351 | 2078 | 9.160036 | 8.916674 | 9.585016 | 15.54574 |
| pseudogeni -            | 0    | 0    | 1    | 0    | 0    | 0    | 0        | 0        | 0.02424  | 0        |
| pseudogeni family_witl  | 0    | 0    | 2    | 2    | 0    | 0    | 0        | 0        | 0.069717 | 0.089686 |
| protein_co proteasom    | 61   | 47   | 36   | 9    | 12   | 18   | 2.348351 | 2.320279 | 1.672182 | 0.537782 |
| protein_co vitrin       | 15   | 11   | 6    | 13   | 15   | 24   | 0.250303 | 0.235384 | 0.120802 | 0.336704 |
| antisense TTL10_ant     | 0    | 0    | 0    | 0    | 2    | 0    | 0        | 0        | 0        | 0        |
| protein_co Uncharacte   | 1    | 0    | 1    | 2    | 2    | 0    | 0.051246 | 0        | 0.061831 | 0.159082 |
| protein_co speedy_hoi   | 96   | 82   | 74   | 44   | 53   | 43   | 2.584065 | 2.83045  | 2.403322 | 1.838296 |
| protein_co ribosomal_   | 145  | 131  | 134  | 333  | 329  | 361  | 4.866895 | 5.638513 | 5.426713 | 17.34837 |
| protein_co E2F_transc   | 1400 | 1061 | 1190 | 1312 | 1587 | 1855 | 25.10364 | 24.39683 | 25.74564 | 36.51514 |
| pseudogeni diacylglyce  | 0    | 0    | 0    | 7    | 14   | 5    | 0        | 0        | 0        | 0.684756 |
| protein_co phosphodi    | 547  | 449  | 478  | 966  | 1257 | 1059 | 6.983076 | 7.350471 | 7.362671 | 19.14111 |
| protein_co transmemt    | 237  | 197  | 163  | 216  | 301  | 169  | 1.32898  | 1.416595 | 1.102823 | 1.879985 |
| pseudogeni -            | 2    | 0    | 2    | 1    | 1    | 5    | 0.019166 | 0        | 0.023125 | 0.014874 |
| TR_V_gene T_cell_rece   | 0    | 0    | 0    | 3    | 5    | 1    | 0        | 0        | 0        | 0.524854 |
| pseudogeni -            | 3    | 6    | 1    | 6    | 8    | 4    | 0.028557 | 0.07324  | 0.011485 | 0.088648 |
| protein_co mucin_12_    | 5    | 5    | 3    | 15   | 31   | 10   | 0.014008 | 0.017963 | 0.010141 | 0.065227 |
| protein_co golgin_A6_   | 0    | 0    | 0    | 0    | 1    | 0    | 0        | 0        | 0        | 0        |
| lincRNA -               | 0    | 0    | 0    | 1    | 1    | 0    | 0        | 0        | 0        | 0.034509 |
| protein_co sorting_ne   | 835  | 714  | 712  | 908  | 790  | 831  | 18.39904 | 20.17513 | 18.9294  | 31.05454 |
| protein_co 5'3'-nucleo  | 44   | 20   | 48   | 314  | 476  | 147  | 1.275919 | 0.74372  | 1.679421 | 14.13287 |
| pseudogeni -            | 0    | 0    | 0    | 1    | 0    | 1    | 0        | 0        | 0        | 0.028485 |
| protein_co glucosamin   | 0    | 1    | 0    | 2    | 0    | 0    | 0        | 0.051131 | 0        | 0.123775 |
| protein_co SAP_domai    | 88   | 74   | 77   | 31   | 28   | 48   | 1.840465 | 1.984659 | 1.943048 | 1.006322 |
| lincRNA -               | 6    | 3    | 5    | 1    | 0    | 2    | 0.093843 | 0.06017  | 0.094355 | 0.024276 |
| protein_co Uncharacte   | 0    | 0    | 0    | 12   | 7    | 2    | 0        | 0        | 0        | 0.30537  |
| protein_co G_protein-i  | 371  | 310  | 360  | 19   | 16   | 6    | 4.303859 | 4.611637 | 5.038887 | 0.342112 |
| protein_co importin_7   | 3306 | 2823 | 2904 | 5387 | 5597 | 4612 | 25.03931 | 27.41825 | 26.53776 | 63.32818 |
| protein_co proline_ric  | 464  | 384  | 378  | 483  | 600  | 565  | 15.82325 | 16.79261 | 15.55312 | 25.56556 |
| protein_co tectonin_b   | 893  | 664  | 710  | 329  | 518  | 322  | 6.379157 | 6.0826   | 6.119532 | 3.64786  |
| protein_co metallothi   | 0    | 0    | 0    | 83   | 52   | 49   | 0        | 0        | 0        | 8.666748 |
| protein_co solute_carr  | 1    | 9    | 6    | 9    | 2    | 2    | 0.017438 | 0.201253 | 0.126238 | 0.243592 |
| protein_co metallothi   | 3    | 2    | 0    | 1    | 0    | 3    | 0.355227 | 0.303686 | 0        | 0.183787 |
| protein_co chromosor    | 23   | 14   | 18   | 124  | 178  | 106  | 0.489324 | 0.38195  | 0.46205  | 4.094689 |
| protein_co metallothi   | 8    | 0    | 6    | 4    | 3    | 15   | 0.452497 | 0        | 0.409473 | 0.351169 |
| protein_co compleme     | 22   | 24   | 14   | 0    | 1    | 0    | 0.436002 | 0.609939 | 0.334766 | 0        |
| protein_co sterile_alph | 100  | 80   | 83   | 2    | 0    | 0    | 0.684326 | 0.702041 | 0.685313 | 0.021243 |
| antisense -             | 3    | 4    | 4    | 0    | 0    | 2    | 0.056975 | 0.097416 | 0.091657 | 0        |
| protein_co CTD_nucle    | 318  | 256  | 267  | 120  | 165  | 121  | 5.029014 | 5.191645 | 5.094658 | 2.945557 |
| antisense -             | 0    | 1    | 0    | 9    | 3    | 0    | 0        | 0.017348 | 0        | 0.188984 |
| protein_co keratin_81   | 20   | 6    | 14   | 0    | 1    | 3    | 0.486159 | 0.187029 | 0.410605 | 0        |
| protein_co exocyst_co   | 0    | 0    | 0    | 0    | 2    | 1    | 0        | 0        | 0        | 0        |
| protein_co keratin_ass  | 0    | 0    | 0    | 0    | 2    | 0    | 0        | 0        | 0        | 0        |

|                         |       |       |       |       |       |       |          |          |          |          |
|-------------------------|-------|-------|-------|-------|-------|-------|----------|----------|----------|----------|
| protein_co IZUMO_fan    | 0     | 1     | 1     | 0     | 0     | 0     | 0        | 0.048926 | 0.046034 | 0        |
| protein_co keratin_ass  | 0     | 0     | 0     | 1     | 0     | 1     | 0        | 0        | 0        | 0.063342 |
| protein_co ATPase_H+    | 33    | 24    | 22    | 54    | 53    | 23    | 0.439095 | 0.409511 | 0.353196 | 1.115241 |
| protein_co coiled-coil_ | 404   | 335   | 347   | 830   | 951   | 827   | 3.569543 | 3.795644 | 3.699209 | 11.38256 |
| pseudogeni -            | 9     | 12    | 15    | 21    | 17    | 12    | 0.449425 | 0.768432 | 0.903762 | 1.627663 |
| pseudogeni -            | 47    | 47    | 42    | 47    | 41    | 51    | 0.826333 | 1.059655 | 0.890953 | 1.282584 |
| antisense CALML3_ar     | 2     | 1     | 2     | 0     | 1     | 0     | 0.020697 | 0.013271 | 0.024973 | 0        |
| pseudogeni olfactory_r  | 0     | 0     | 0     | 1     | 0     | 0     | 0        | 0        | 0        | 0.071775 |
| processed_ -            | 1     | 1     | 0     | 2     | 2     | 0     | 0.02385  | 0.030585 | 0        | 0.074038 |
| protein_co C2_calcium   | 20    | 11    | 15    | 5     | 6     | 7     | 0.59392  | 0.41889  | 0.537449 | 0.230462 |
| pseudogeni -            | 3     | 1     | 0     | 1     | 0     | 0     | 0.102754 | 0.043922 | 0        | 0.053163 |
| pseudogeni -            | 0     | 1     | 3     | 0     | 1     | 0     | 0        | 0.032503 | 0.091744 | 0        |
| pseudogeni -            | 1     | 6     | 3     | 0     | 1     | 0     | 0.025346 | 0.195016 | 0.091744 | 0        |
| protein_co ral_guanine  | 0     | 0     | 0     | 677   | 842   | 386   | 0        | 0        | 0        | 19.38313 |
| protein_co nucleosom    | 3126  | 2523  | 2528  | 2929  | 3312  | 3678  | 58.37443 | 60.41715 | 56.95853 | 84.89528 |
| pseudogeni -            | 42    | 38    | 29    | 26    | 28    | 52    | 0.466567 | 0.541325 | 0.388697 | 0.4483   |
| protein_co thymosin_I   | 29671 | 23170 | 25084 | 25030 | 31534 | 26507 | 817.4346 | 818.5707 | 833.8073 | 1070.316 |
| protein_co transmembr   | 20    | 19    | 11    | 41    | 49    | 22    | 1.835226 | 2.235746 | 1.217868 | 5.839475 |
| protein_co chromosom    | 0     | 3     | 0     | 0     | 0     | 0     | 0        | 0.475961 | 0        | 0        |
| antisense -             | 14    | 7     | 12    | 5     | 13    | 12    | 1.135744 | 0.728216 | 1.174578 | 0.629583 |
| protein_co carnitine_p  | 5     | 1     | 0     | 2     | 15    | 10    | 0.079935 | 0.020501 | 0        | 0.049628 |
| lincRNA -               | 33    | 28    | 23    | 0     | 1     | 0     | 0.88573  | 0.963729 | 0.744841 | 0        |
| pseudogeni -            | 2     | 3     | 4     | 6     | 8     | 0     | 0.021633 | 0.041612 | 0.052203 | 0.100733 |
| protein_co survival_of  | 37    | 54    | 56    | 57    | 67    | 79    | 1.102944 | 2.064214 | 2.014131 | 2.637285 |
| protein_co small_EDRf   | 20    | 16    | 15    | 14    | 20    | 16    | 0.496453 | 0.509305 | 0.44925  | 0.539395 |
| pseudogeni POM121_t     | 44    | 31    | 30    | 37    | 53    | 41    | 0.672697 | 0.607768 | 0.553396 | 0.878009 |
| pseudogeni dynein_lig   | 0     | 1     | 1     | 1     | 2     | 1     | 0        | 0.222703 | 0.209539 | 0.269555 |
| pseudogeni -            | 2     | 2     | 0     | 0     | 0     | 0     | 0.046334 | 0.059417 | 0        | 0        |
| protein_co high_mobil   | 5356  | 4318  | 4571  | 5488  | 7628  | 6746  | 58.41892 | 60.39555 | 60.15507 | 92.90894 |
| pseudogeni stromal_an   | 122   | 105   | 115   | 51    | 66    | 86    | 3.146635 | 3.472843 | 3.578759 | 2.041678 |
| pseudogeni -            | 0     | 3     | 1     | 2     | 0     | 0     | 0        | 0.385447 | 0.120888 | 0.311025 |
| protein_co mucin_19_    | 5     | 4     | 0     | 4     | 3     | 7     | 0.011981 | 0.012291 | 0        | 0.014877 |
| protein_co DENN/MAD     | 82    | 56    | 50    | 19    | 28    | 13    | 1.56938  | 1.374395 | 1.154602 | 0.564415 |
| protein_co eukaryotic   | 100   | 95    | 85    | 145   | 191   | 201   | 1.514535 | 1.845068 | 1.553268 | 3.408615 |
| lincRNA -               | 4     | 2     | 1     | 10    | 17    | 11    | 0.056358 | 0.036136 | 0.017    | 0.218689 |
| lincRNA -               | 0     | 1     | 0     | 0     | 0     | 2     | 0        | 0.015728 | 0        | 0        |
| protein_co leucine_car  | 451   | 388   | 394   | 754   | 816   | 684   | 13.83087 | 15.25857 | 14.57865 | 35.8901  |
| lincRNA -               | 0     | 0     | 0     | 3     | 8     | 0     | 0        | 0        | 0        | 0.06373  |
| protein_co major_facil  | 1     | 3     | 6     | 10    | 10    | 9     | 0.016546 | 0.063652 | 0.119779 | 0.256809 |
| protein_co variable_ch  | 0     | 0     | 0     | 6     | 5     | 3     | 0        | 0        | 0        | 0.372911 |
| protein_co cysteine-ric | 204   | 151   | 159   | 166   | 265   | 133   | 5.101634 | 4.842453 | 4.797603 | 6.443438 |
| pseudogeni -            | 9     | 6     | 3     | 4     | 3     | 0     | 0.485069 | 0.414688 | 0.195088 | 0.33462  |
| protein_co lin-52_hon   | 302   | 264   | 261   | 163   | 177   | 188   | 5.104825 | 5.722518 | 5.323074 | 4.276535 |
| processed_ -            | 0     | 1     | 1     | 0     | 0     | 0     | 0        | 0.027406 | 0.025786 | 0        |
| protein_co HCG19813     | 154   | 108   | 139   | 203   | 258   | 251   | 7.831955 | 7.043403 | 8.529279 | 16.02419 |
| protein_co arylsulfatas | 1     | 0     | 3     | 1     | 0     | 0     | 0.025008 | 0        | 0.090521 | 0.038816 |
| protein_co acyl-CoA_tl  | 0     | 0     | 0     | 3     | 4     | 2     | 0        | 0        | 0        | 0.21747  |
| protein_co small_integ  | 166   | 125   | 158   | 157   | 191   | 119   | 4.191569 | 4.047509 | 4.81364  | 6.153166 |
| lincRNA -               | 8     | 4     | 3     | 4     | 2     | 2     | 0.180433 | 0.11569  | 0.081639 | 0.140028 |
| protein_co D4_zinc_ar   | 203   | 165   | 185   | 8     | 13    | 4     | 2.534933 | 2.642188 | 2.787342 | 0.155057 |
| protein_co MANSC_do     | 3     | 1     | 3     | 0     | 0     | 0     | 0.137507 | 0.058778 | 0.165911 | 0        |
| antisense ADARB2_ar     | 0     | 0     | 0     | 1     | 0     | 0     | 0        | 0        | 0        | 0.114254 |
| polymorph cytochrom     | 15    | 19    | 14    | 25    | 39    | 14    | 0.404689 | 0.657345 | 0.455729 | 1.04689  |
| pseudogeni long_integ   | 4     | 6     | 1     | 10    | 14    | 5     | 0.124212 | 0.238926 | 0.037467 | 0.481985 |
| protein_co LYR_motif_   | 79    | 66    | 65    | 33    | 41    | 48    | 3.255107 | 3.487317 | 3.231466 | 2.110486 |
| protein_co chromosom    | 43    | 26    | 33    | 45    | 73    | 17    | 0.630282 | 0.488707 | 0.583617 | 1.023786 |
| protein_co intersectin  | 1534  | 1271  | 1376  | 1954  | 2185  | 1817  | 4.227404 | 4.491623 | 4.575251 | 8.358021 |
| protein_co inositol_14  | 3580  | 2684  | 2946  | 131   | 192   | 117   | 21.82065 | 20.9786  | 1.66534  | 1.239328 |
| protein_co Uncharacter  | 1     | 0     | 1     | 1     | 3     | 1     | 0.025008 | 0        | 0.030174 | 0.038816 |
| protein_co DENN/MAD     | 3     | 1     | 1     | 581   | 735   | 312   | 0.047961 | 0.020501 | 0.019289 | 14.417   |
| protein_co -            | 0     | 1     | 0     | 0     | 0     | 0     | 0        | 0.040167 | 0        | 0        |
| pseudogeni -            | 217   | 173   | 153   | 64    | 90    | 81    | 1.588624 | 1.624115 | 1.351452 | 0.72723  |
| protein_co cytokine_r   | 0     | 0     | 0     | 3     | 1     | 2     | 0        | 0        | 0        | 0.210956 |
| protein_co crystallin_z | 359   | 296   | 292   | 148   | 219   | 135   | 6.580733 | 6.957944 | 6.458189 | 4.210872 |
| pseudogeni retinitis_pi | 214   | 172   | 163   | 3     | 1     | 1     | 7.701047 | 7.937318 | 7.077366 | 0.167567 |

|                        |      |      |      |      |      |      |          |          |          |          |
|------------------------|------|------|------|------|------|------|----------|----------|----------|----------|
| protein_co chromosom   | 663  | 558  | 581  | 370  | 451  | 611  | 5.931708 | 6.401913 | 6.271774 | 5.138051 |
| pseudogen: cation_cha  | 22   | 11   | 21   | 25   | 42   | 17   | 0.624066 | 0.400138 | 0.718745 | 1.100723 |
| protein_co arrestin_dc | 0    | 1    | 0    | 0    | 0    | 0    | 0        | 0.036709 | 0        | 0        |
| processed_ -           | 5    | 8    | 7    | 7    | 13   | 12   | 0.076343 | 0.156639 | 0.128958 | 0.165893 |
| protein_co loss_of_het | 19   | 5    | 8    | 7    | 6    | 3    | 0.579265 | 0.19548  | 0.294281 | 0.331247 |
| pseudogen: -           | 5    | 2    | 0    | 2    | 1    | 0    | 0.14535  | 0.074556 | 0        | 0.090242 |
| protein_co cystin_1    | 1316 | 839  | 979  | 32   | 44   | 11   | 22.53735 | 18.42546 | 20.22915 | 0.850604 |
| protein_co phosphatic  | 145  | 103  | 97   | 179  | 294  | 159  | 2.297753 | 2.093062 | 1.854621 | 4.402698 |
| processed_ -           | 21   | 26   | 17   | 19   | 32   | 41   | 0.372424 | 0.591291 | 0.363761 | 0.523002 |
| processed_ transmemt   | 0    | 0    | 0    | 1    | 2    | 1    | 0        | 0        | 0        | 0.042561 |
| lincRNA -              | 1    | 0    | 1    | 0    | 0    | 0    | 0.018689 | 0        | 0.022549 | 0        |
| protein_co chromosom   | 0    | 3    | 1    | 35   | 69   | 37   | 0        | 0.047185 | 0.014799 | 0.666307 |
| protein_co geminin_cc  | 1    | 0    | 0    | 0    | 0    | 0    | 0.013703 | 0        | 0        | 0        |
| lincRNA long_interf    | 0    | 0    | 0    | 1    | 2    | 0    | 0        | 0        | 0        | 0.034153 |
| protein_co tetratricop | 2    | 0    | 7    | 27   | 29   | 16   | 0.027501 | 0        | 0.116137 | 0.576262 |
| protein_co C-type_lect | 1    | 0    | 0    | 3    | 2    | 0    | 0.027878 | 0        | 0        | 0.129809 |
| protein_co RFPL3_anti  | 3    | 7    | 0    | 8    | 5    | 1    | 0.108626 | 0.325026 | 0        | 0.449605 |
| protein_co chromosom   | 0    | 0    | 0    | 6    | 22   | 9    | 0        | 0        | 0        | 0.228747 |
| protein_co leucine_ric | 1    | 0    | 0    | 0    | 0    | 0    | 0.04689  | 0        | 0        | 0        |
| antisense C1QTNF9B_    | 1    | 0    | 0    | 1    | 1    | 0    | 0.058248 | 0        | 0        | 0.09041  |
| protein_co C1q_and_ti  | 0    | 1    | 0    | 0    | 1    | 1    | 0        | 0.054122 | 0        | 0        |
| protein_co keratin_ass | 0    | 0    | 0    | 0    | 2    | 0    | 0        | 0        | 0        | 0        |
| protein_co keratin_ass | 0    | 0    | 0    | 1    | 0    | 1    | 0        | 0        | 0        | 0.077261 |
| pseudogen: ribosomal_  | 1    | 1    | 3    | 3    | 2    | 1    | 0.059205 | 0.075921 | 0.214301 | 0.275681 |
| protein_co Uncharacte  | 61   | 43   | 58   | 97   | 146  | 119  | 1.143659 | 1.033819 | 1.312027 | 2.822727 |
| pseudogen: family_witl | 1    | 2    | 0    | 5    | 5    | 0    | 0.019352 | 0.049633 | 0        | 0.150185 |
| protein_co defensin_bi | 0    | 0    | 0    | 1    | 2    | 1    | 0        | 0        | 0        | 0.068725 |
| antisense C1RL_antis   | 121  | 92   | 89   | 46   | 59   | 48   | 1.076193 | 1.049306 | 0.955087 | 0.635029 |
| antisense -            | 1    | 0    | 2    | 114  | 204  | 110  | 0.015319 | 0        | 0.036965 | 2.710519 |
| pseudogen: olfactory_r | 0    | 0    | 0    | 0    | 3    | 0    | 0        | 0        | 0        | 0        |
| pseudogen: -           | 1    | 1    | 0    | 0    | 2    | 0    | 0.08169  | 0.104756 | 0        | 0        |
| protein_co basic_helix | 0    | 1    | 0    | 24   | 56   | 4    | 0        | 0.066663 | 0        | 1.936491 |
| pseudogen: zinc_finger | 1293 | 888  | 974  | 395  | 705  | 504  | 20.10905 | 17.70987 | 18.2768  | 9.534999 |
| antisense SRRM2_anti   | 12   | 12   | 15   | 7    | 17   | 30   | 0.159716 | 0.204813 | 0.240884 | 0.144609 |
| pseudogen: -           | 62   | 55   | 35   | 31   | 22   | 35   | 1.217923 | 1.385479 | 0.829553 | 0.945192 |
| protein_co one_cut_hc  | 0    | 0    | 1    | 2    | 3    | 0    | 0        | 0        | 0.006802 | 0.017499 |
| protein_co oligodendr  | 1    | 1    | 1    | 4    | 11   | 2    | 0.014375 | 0.018433 | 0.017344 | 0.089246 |
| protein_co chromosom   | 0    | 0    | 0    | 1    | 2    | 0    | 0        | 0        | 0        | 0.018714 |
| protein_co chromosom   | 5    | 1    | 1    | 2    | 4    | 0    | 0.095577 | 0.024513 | 0.023064 | 0.059339 |
| protein_co RNA_bindin  | 2005 | 1599 | 1686 | 2855 | 3670 | 3291 | 28.17335 | 28.81257 | 28.58445 | 62.26741 |
| pseudogen: heat_shock  | 3    | 2    | 3    | 5    | 6    | 6    | 0.064646 | 0.055266 | 0.077999 | 0.167233 |
| pseudogen: heat_shock  | 0    | 1    | 0    | 0    | 0    | 1    | 0        | 0.027431 | 0        | 0        |
| processed_ -           | 8    | 3    | 5    | 43   | 51   | 16   | 0.117079 | 0.056301 | 0.088289 | 0.976758 |
| protein_co LOC401290   | 0    | 1    | 0    | 3    | 0    | 0    | 0        | 0.042256 | 0        | 0.153436 |
| pseudogen: -           | 13   | 14   | 10   | 10   | 20   | 14   | 0.24729  | 0.341508 | 0.229515 | 0.295253 |
| protein_co NYN_doma    | 3612 | 2875 | 2997 | 813  | 1133 | 761  | 21.55616 | 22.00244 | 21.58035 | 7.530861 |
| protein_co DnaJ_(Hsp4  | 284  | 224  | 241  | 381  | 448  | 429  | 8.169794 | 8.263236 | 8.364845 | 17.01172 |
| protein_co interferon_ | 1    | 4    | 1    | 0    | 5    | 3    | 0.063709 | 0.326792 | 0.076869 | 0        |
| protein_co small_integ | 4    | 5    | 0    | 0    | 0    | 0    | 0.073438 | 0.117717 | 0        | 0        |
| processed_ -           | 4    | 9    | 4    | 3    | 0    | 0    | 0.07178  | 0.207106 | 0.086606 | 0.083559 |
| protein_co Uncharacte  | 1    | 3    | 3    | 2    | 3    | 1    | 0.049936 | 0.192108 | 0.180752 | 0.155016 |
| protein_co docking_pr  | 195  | 128  | 131  | 79   | 75   | 65   | 1.028521 | 0.865761 | 0.833677 | 0.64675  |
| protein_co hematologi  | 2459 | 1953 | 2082 | 2168 | 2548 | 3578 | 31.01198 | 31.58512 | 31.68107 | 42.43857 |
| pseudogen: immunogl    | 2    | 3    | 5    | 2    | 4    | 0    | 0.216083 | 0.415644 | 0.651792 | 0.335391 |
| protein_co transmemt   | 0    | 0    | 0    | 2    | 3    | 0    | 0        | 0        | 0        | 0.168083 |
| protein_co serpin_pep  | 0    | 0    | 0    | 0    | 0    | 1    | 0        | 0        | 0        | 0        |
| protein_co serpin_pep  | 2    | 0    | 0    | 0    | 0    | 0    | 0.033697 | 0        | 0        | 0        |
| protein_co zinc_finger | 1    | 0    | 0    | 11   | 13   | 8    | 0.017157 | 0        | 0        | 0.29293  |
| pseudogen: -           | 3    | 1    | 0    | 7    | 9    | 10   | 0.095176 | 0.040683 | 0        | 0.344695 |
| pseudogen: EGF-like_ar | 14   | 13   | 17   | 22   | 22   | 13   | 0.282106 | 0.335921 | 0.413315 | 0.688077 |
| protein_co golgin_A8_  | 21   | 20   | 10   | 2    | 5    | 2    | 0.493085 | 0.602201 | 0.283302 | 0.072889 |
| lincRNA -              | 25   | 28   | 43   | 25   | 36   | 12   | 0.458268 | 0.658184 | 0.951035 | 0.711296 |
| processed_ transmemt   | 8    | 5    | 6    | 35   | 23   | 17   | 0.144666 | 0.115946 | 0.130911 | 0.982373 |
| pseudogen: -           | 0    | 0    | 0    | 5    | 2    | 1    | 0        | 0        | 0        | 0.168784 |
| pseudogen: -           | 1    | 0    | 0    | 3    | 2    | 3    | 0.100622 | 0        | 0        | 0.468539 |

|                          |      |      |      |      |       |      |          |          |          |          |
|--------------------------|------|------|------|------|-------|------|----------|----------|----------|----------|
| pseudogen: hect_doma     | 309  | 299  | 305  | 184  | 221   | 277  | 2.793332 | 3.466129 | 3.326688 | 2.58174  |
| pseudogen: glycogenin    | 18   | 9    | 8    | 21   | 18    | 10   | 0.894089 | 0.573271 | 0.479453 | 1.619042 |
| pseudogen: -             | 1    | 2    | 0    | 2    | 2     | 3    | 0.138319 | 0.354748 | 0        | 0.429379 |
| protein_co hemoglobin    | 0    | 2    | 0    | 0    | 1     | 0    | 0        | 0.178427 | 0        | 0        |
| lincRNA -                | 2    | 1    | 1    | 7    | 19    | 4    | 0.11901  | 0.076307 | 0.071796 | 0.646521 |
| pseudogen: hemoglobin    | 0    | 0    | 0    | 0    | 1     | 0    | 0        | 0        | 0        | 0        |
| protein_co transcriptic  | 1    | 1    | 1    | 3    | 2     | 0    | 0.015394 | 0.019741 | 0.018574 | 0.071681 |
| protein_co ATPase_cla    | 499  | 350  | 412  | 111  | 154   | 106  | 3.458191 | 3.110468 | 3.445035 | 1.193993 |
| processed_ -             | 18   | 17   | 7    | 1    | 2     | 7    | 0.204067 | 0.247149 | 0.095752 | 0.017597 |
| protein_co ankyrin_rej   | 0    | 0    | 2    | 0    | 0     | 0    | 0        | 0        | 0.045792 | 0        |
| pseudogen: heterogene    | 4    | 3    | 4    | 8    | 14    | 14   | 0.248095 | 0.23861  | 0.299341 | 0.770157 |
| antisense -              | 0    | 0    | 0    | 1    | 0     | 0    | 0        | 0        | 0        | 0.090298 |
| protein_co Protein_LO    | 2    | 0    | 3    | 0    | 1     | 2    | 0.148152 | 0        | 0.26813  | 0        |
| protein_co proline_ri    | 0    | 1    | 0    | 0    | 0     | 0    | 0        | 0.026064 | 0        | 0        |
| protein_co chromosom     | 3    | 0    | 0    | 80   | 88    | 106  | 0.03976  | 0        | 0        | 1.645671 |
| processed_ HLA_compl     | 25   | 13   | 10   | 41   | 45    | 13   | 0.441027 | 0.294089 | 0.21285  | 1.122638 |
| pseudogen: major_hist    | 4    | 5    | 0    | 13   | 8     | 12   | 0.137306 | 0.220094 | 0        | 0.692634 |
| protein_co HLA_compl     | 2    | 4    | 4    | 3    | 14    | 3    | 0.054523 | 0.139837 | 0.131571 | 0.126942 |
| pseudogen: -             | 1    | 0    | 0    | 0    | 0     | 0    | 0.014876 | 0        | 0        | 0        |
| protein_co collagen_ty   | 3    | 2    | 2    | 0    | 4     | 5    | 0.014682 | 0.012552 | 0.01181  | 0        |
| antisense H1FX_antis     | 26   | 19   | 32   | 56   | 51    | 49   | 0.4689   | 0.43941  | 0.696314 | 1.567565 |
| protein_co RAB12_me      | 419  | 308  | 369  | 734  | 1415  | 762  | 9.193691 | 8.666344 | 9.769004 | 24.99784 |
| protein_co transmembr    | 448  | 342  | 332  | 233  | 403   | 295  | 6.385024 | 6.250575 | 5.709139 | 5.154314 |
| pseudogen: peptidylpro   | 2    | 1    | 0    | 1    | 0     | 2    | 0.180694 | 0.115857 | 0        | 0.140231 |
| protein_co major_hist    | 1532 | 1181 | 1106 | 1267 | 1405  | 1125 | 38.45584 | 38.01568 | 33.49706 | 49.36403 |
| protein_co protein_ty    | 571  | 441  | 487  | 522  | 676   | 653  | 6.289453 | 6.229091 | 6.472227 | 8.924373 |
| protein_co WD_repeat     | 137  | 109  | 129  | 6    | 9     | 11   | 0.626175 | 0.638868 | 0.711399 | 0.042565 |
| protein_co CD200_rec     | 0    | 1    | 1    | 4    | 4     | 1    | 0        | 0.037652 | 0.035426 | 0.182291 |
| protein_co Uncharacte    | 87   | 56   | 72   | 5    | 8     | 12   | 4.765691 | 3.933725 | 4.758687 | 0.425116 |
| protein_co leukemia_M    | 36   | 26   | 36   | 86   | 115   | 73   | 0.763819 | 0.707409 | 0.921592 | 2.832155 |
| protein_co vestigial_lil | 1000 | 721  | 804  | 94   | 112   | 268  | 4.508656 | 4.168614 | 4.373722 | 0.657817 |
| protein_co protease_sc   | 0    | 0    | 0    | 9    | 18    | 5    | 0        | 0        | 0        | 0.22144  |
| protein_co tripartite_r  | 0    | 0    | 0    | 9871 | 12076 | 9982 | 0        | 0        | 0        | 93.42125 |
| protein_co zinc_finger   | 11   | 18   | 10   | 2    | 4     | 7    | 0.300577 | 0.630732 | 0.329694 | 0.084825 |
| protein_co ankyrin_rej   | 1633 | 1369 | 1501 | 709  | 837   | 879  | 11.66536 | 12.54078 | 12.93721 | 7.861194 |
| protein_co collagen-lik  | 99   | 73   | 89   | 16   | 27    | 25   | 1.475091 | 1.394813 | 1.600006 | 0.370028 |
| protein_co methyltran    | 156  | 138  | 145  | 125  | 118   | 138  | 1.819613 | 2.064157 | 2.040659 | 2.263054 |
| lincRNA -                | 33   | 35   | 23   | 28   | 48    | 41   | 0.815694 | 1.109406 | 0.685944 | 1.074241 |
| antisense SETD5_anti     | 264  | 230  | 283  | 204  | 277   | 325  | 3.805399 | 4.251415 | 4.921878 | 4.564119 |
| protein_co XK_Kell_blo   | 3    | 0    | 0    | 27   | 35    | 21   | 0.035335 | 0        | 0        | 0.493608 |
| protein_co glutathione   | 36   | 27   | 28   | 227  | 204   | 227  | 1.03181  | 0.992362 | 0.968285 | 10.09842 |
| protein_co deiodinase    | 30   | 17   | 26   | 3    | 0     | 2    | 0.220936 | 0.160548 | 0.231029 | 0.034292 |
| protein_co chromosom     | 524  | 331  | 369  | 730  | 1130  | 621  | 16.89847 | 13.68842 | 14.35788 | 36.54007 |
| pseudogen: gonadotrop    | 32   | 21   | 15   | 26   | 33    | 8    | 0.938387 | 0.789697 | 0.530727 | 1.183411 |
| protein_co deiodinase    | 8    | 5    | 1    | 1    | 0     | 0    | 0.201569 | 0.161552 | 0.030401 | 0.039108 |
| polymorph aldo-keto_r    | 19   | 16   | 21   | 7    | 20    | 6    | 0.421234 | 0.454883 | 0.561743 | 0.240879 |
| protein_co serine/thre   | 964  | 769  | 832  | 488  | 559   | 610  | 8.919096 | 9.123878 | 9.287849 | 7.008    |
| protein_co SAC1_supp     | 807  | 681  | 665  | 1314 | 1449  | 1203 | 8.118482 | 8.785323 | 8.071811 | 20.51763 |
| protein_co translin      | 1681 | 1293 | 1423 | 1305 | 1594  | 1883 | 23.0474  | 22.73328 | 23.54004 | 27.77124 |
| protein_co solute_carr   | 351  | 222  | 279  | 229  | 258   | 119  | 5.467906 | 4.434822 | 5.244042 | 5.537068 |
| IG_V_gene immunoglob     | 1    | 0    | 2    | 0    | 1     | 0    | 0.12372  | 0        | 0.298551 | 0        |
| IG_V_gene immunoglob     | 0    | 0    | 0    | 0    | 1     | 0    | 0        | 0        | 0        | 0        |
| TR_V_gene T_cell_rece    | 0    | 0    | 0    | 0    | 0     | 3    | 0        | 0        | 0        | 0        |
| TR_V_gene T_cell_rece    | 0    | 0    | 0    | 1    | 0     | 1    | 0        | 0        | 0        | 0.131847 |
| TR_V_gene T_cell_rece    | 0    | 0    | 0    | 1    | 3     | 0    | 0        | 0        | 0        | 0.105785 |
| TR_V_gene T_cell_rece    | 0    | 0    | 0    | 0    | 2     | 2    | 0        | 0        | 0        | 0        |
| TR_V_gene T_cell_rece    | 0    | 0    | 0    | 0    | 1     | 1    | 0        | 0        | 0        | 0        |
| TR_V_gene T_cell_rece    | 0    | 1    | 1    | 0    | 0     | 0    | 0        | 0.15146  | 0.142508 | 0        |
| TR_V_gene T_cell_rece    | 0    | 3    | 0    | 0    | 0     | 0    | 0        | 0.462537 | 0        | 0        |
| TR_V_gene T_cell_rece    | 1    | 0    | 0    | 0    | 0     | 0    | 0.113811 | 0        | 0        | 0        |
| TR_V_gene T_cell_rece    | 0    | 0    | 0    | 0    | 1     | 0    | 0        | 0        | 0        | 0        |
| TR_V_gene T_cell_rece    | 0    | 0    | 0    | 0    | 1     | 0    | 0        | 0        | 0        | 0        |
| TR_J_gene T_cell_rece    | 0    | 0    | 0    | 0    | 0     | 1    | 0        | 0        | 0        | 0        |
| TR_C_gene T_cell_rece    | 9    | 3    | 2    | 75   | 83    | 48   | 0.556742 | 0.237981 | 0.149276 | 7.201168 |
| TR_V_gene T_cell_rece    | 0    | 0    | 0    | 1    | 0     | 0    | 0        | 0        | 0        | 0.184253 |

|            |             |      |     |     |     |     |     |          |          |          |          |
|------------|-------------|------|-----|-----|-----|-----|-----|----------|----------|----------|----------|
| TR_V_gene  | T_cell_rece | 0    | 0   | 0   | 1   | 0   | 0   | 0        | 0        | 0        | 0.206761 |
| TR_V_gene  | T_cell_rece | 0    | 0   | 0   | 1   | 0   | 0   | 0        | 0        | 0        | 0.180148 |
| TR_V_gene  | T_cell_rece | 0    | 0   | 0   | 1   | 0   | 0   | 0        | 0        | 0        | 0.128586 |
| TR_V_gene  | T_cell_rece | 3    | 1   | 3   | 1   | 4   | 1   | 0.412522 | 0.176334 | 0.497732 | 0.213431 |
| TR_V_gene  | T_cell_rece | 203  | 186 | 181 | 8   | 11  | 10  | 26.44076 | 31.06706 | 28.44491 | 1.617329 |
| TR_V_gene  | T_cell_rece | 0    | 1   | 0   | 0   | 0   | 0   | 0        | 0.135123 | 0        | 0        |
| TR_V_gene  | T_cell_rece | 8    | 6   | 10  | 0   | 0   | 0   | 0.79983  | 0.769251 | 1.206301 | 0        |
| TR_J_gene  | T_cell_rece | 1    | 0   | 0   | 0   | 0   | 0   | 0.744286 | 0        | 0        | 0        |
| TR_J_gene  | T_cell_rece | 1    | 1   | 0   | 0   | 0   | 0   | 0.868334 | 1.113515 | 0        | 0        |
| TR_J_gene  | T_cell_rece | 1    | 1   | 1   | 0   | 0   | 0   | 0.756291 | 0.969835 | 0.912508 | 0        |
| TR_J_gene  | T_cell_rece | 1    | 0   | 0   | 0   | 0   | 0   | 0.768689 | 0        | 0        | 0        |
| TR_J_gene  | T_cell_rece | 0    | 0   | 0   | 0   | 1   | 0   | 0        | 0        | 0        | 0        |
| TR_J_gene  | T_cell_rece | 3    | 4   | 0   | 0   | 0   | 0   | 2.268872 | 3.879342 | 0        | 0        |
| TR_J_gene  | T_cell_rece | 0    | 1   | 1   | 0   | 0   | 0   | 0        | 0.954441 | 0.898024 | 0        |
| TR_J_gene  | T_cell_rece | 0    | 2   | 0   | 0   | 0   | 1   | 0        | 2.004327 | 0        | 0        |
| TR_J_gene  | T_cell_rece | 4    | 0   | 2   | 0   | 0   | 0   | 3.178984 | 0        | 1.917814 | 0        |
| TR_J_gene  | T_cell_rece | 1    | 1   | 0   | 0   | 0   | 0   | 0.808449 | 1.036721 | 0        | 0        |
| TR_J_gene  | T_cell_rece | 0    | 3   | 0   | 0   | 0   | 0   | 0        | 2.733173 | 0        | 0        |
| TR_J_gene  | T_cell_rece | 1    | 0   | 2   | 0   | 0   | 0   | 0.822632 | 0        | 1.985105 | 0        |
| TR_J_gene  | T_cell_rece | 0    | 1   | 0   | 0   | 0   | 0   | 0        | 1.002163 | 0        | 0        |
| TR_J_gene  | T_cell_rece | 0    | 1   | 0   | 0   | 0   | 0   | 0        | 0.911058 | 0        | 0        |
| TR_J_gene  | T_cell_rece | 1    | 1   | 0   | 0   | 0   | 0   | 0.794746 | 1.019149 | 0        | 0        |
| TR_J_gene  | T_cell_rece | 2    | 0   | 0   | 0   | 0   | 0   | 1.563001 | 0        | 0        | 0        |
| TR_J_gene  | T_cell_rece | 1    | 0   | 0   | 1   | 0   | 0   | 0.7815   | 0        | 0        | 1.212997 |
| TR_J_gene  | T_cell_rece | 1    | 0   | 0   | 0   | 0   | 0   | 0.744286 | 0        | 0        | 0        |
| TR_J_gene  | T_cell_rece | 1    | 0   | 0   | 0   | 0   | 0   | 0.852546 | 0        | 0        | 0        |
| TR_J_gene  | T_cell_rece | 0    | 0   | 1   | 0   | 0   | 0   | 0        | 0        | 0.992553 | 0        |
| TR_J_gene  | T_cell_rece | 1    | 0   | 1   | 0   | 0   | 0   | 0.7815   | 0        | 0.942925 | 0        |
| TR_J_gene  | T_cell_rece | 1    | 0   | 2   | 0   | 0   | 0   | 0.710455 | 0        | 1.714409 | 0        |
| TR_J_gene  | T_cell_rece | 0    | 1   | 0   | 0   | 0   | 0   | 0        | 0.954441 | 0        | 0        |
| TR_J_gene  | T_cell_rece | 0    | 0   | 2   | 0   | 0   | 0   | 0        | 0        | 1.88585  | 0        |
| TR_J_pseud | T_cell_rece | 0    | 0   | 2   | 0   | 0   | 0   | 0        | 0        | 1.825016 | 0        |
| TR_J_gene  | T_cell_rece | 0    | 2   | 0   | 0   | 0   | 0   | 0        | 1.908882 | 0        | 0        |
| TR_J_gene  | T_cell_rece | 1    | 0   | 1   | 0   | 0   | 0   | 0.7815   | 0        | 0.942925 | 0        |
| TR_J_gene  | T_cell_rece | 3    | 0   | 0   | 0   | 0   | 0   | 2.344501 | 0        | 0        | 0        |
| TR_J_gene  | T_cell_rece | 1    | 0   | 0   | 0   | 0   | 0   | 0.732657 | 0        | 0        | 0        |
| TR_J_gene  | T_cell_rece | 0    | 1   | 0   | 0   | 0   | 0   | 0        | 0.985734 | 0        | 0        |
| TR_J_gene  | T_cell_rece | 4    | 0   | 1   | 0   | 0   | 0   | 3.126001 | 0        | 0.942925 | 0        |
| TR_J_gene  | T_cell_rece | 1    | 3   | 2   | 0   | 0   | 0   | 0.794746 | 3.057447 | 1.917814 | 0        |
| TR_J_gene  | T_cell_rece | 0    | 1   | 0   | 1   | 0   | 0   | 0        | 0.969835 | 0        | 1.173868 |
| TR_J_gene  | T_cell_rece | 0    | 0   | 0   | 2   | 0   | 0   | 0        | 0        | 0        | 2.425993 |
| TR_J_gene  | T_cell_rece | 0    | 1   | 2   | 0   | 0   | 0   | 0        | 0.954441 | 1.796048 | 0        |
| TR_J_gene  | T_cell_rece | 0    | 1   | 0   | 0   | 0   | 0   | 0        | 0.969835 | 0        | 0        |
| protein_co | proline_ri  | 7    | 6   | 3   | 6   | 12  | 43  | 0.20014  | 0.219987 | 0.103492 | 0.266268 |
| protein_co | taste_recep | 12   | 2   | 7   | 6   | 6   | 5   | 0.561557 | 0.12002  | 0.395238 | 0.435807 |
| pseudogen  | taste_recep | 7    | 3   | 3   | 2   | 1   | 4   | 0.353696 | 0.194385 | 0.182895 | 0.156853 |
| protein_co | taste_recep | 0    | 1   | 0   | 0   | 1   | 2   | 0        | 0.06013  | 0        | 0        |
| protein_co | taste_recep | 17   | 20  | 12  | 7   | 4   | 18  | 0.429026 | 0.647253 | 0.365396 | 0.274197 |
| protein_co | taste_recep | 3    | 0   | 2   | 0   | 2   | 0   | 0.085932 | 0        | 0.069121 | 0        |
| pseudogen  | -           | 11   | 13  | 16  | 29  | 32  | 18  | 0.889293 | 1.347737 | 1.560704 | 3.63899  |
| protein_co | Uncharacter | 23   | 26  | 10  | 20  | 8   | 6   | 0.604863 | 0.876823 | 0.317305 | 0.816375 |
| protein_co | HCG20323    | 10   | 11  | 8   | 5   | 4   | 10  | 0.298283 | 0.420756 | 0.287916 | 0.231488 |
| lincRNA    | -           | 202  | 194 | 203 | 282 | 377 | 351 | 5.908786 | 7.277093 | 7.164584 | 12.80343 |
| pseudogen  | -           | 0    | 0   | 0   | 0   | 1   | 0   | 0        | 0        | 0        | 0        |
| protein_co | cutaneous_  | 0    | 0   | 0   | 0   | 0   | 1   | 0        | 0        | 0        | 0        |
| pseudogen  | -           | 0    | 2   | 0   | 0   | 0   | 0   | 0        | 0.104847 | 0        | 0        |
| protein_co | chromosome  | 1207 | 907 | 981 | 470 | 628 | 508 | 7.151409 | 6.891297 | 7.012961 | 4.322278 |
| protein_co | keratin_ass | 1    | 0   | 0   | 0   | 0   | 0   | 0.040527 | 0        | 0        | 0        |
| protein_co | keratin_ass | 2    | 1   | 0   | 0   | 0   | 0   | 0.110329 | 0.070741 | 0        | 0        |
| protein_co | -           | 6    | 4   | 3   | 16  | 15  | 3   | 0.11502  | 0.098332 | 0.069389 | 0.476074 |
| protein_co | family_witl | 908  | 688 | 687 | 119 | 168 | 154 | 21.10864 | 20.51031 | 19.26989 | 4.2939   |
| processed  | long_interf | 7    | 13  | 6   | 9   | 9   | 9   | 0.131397 | 0.312925 | 0.13589  | 0.262217 |
| pseudogen  | suppression | 4    | 0   | 3   | 1   | 1   | 6   | 0.168973 | 0        | 0.152907 | 0.065567 |
| pseudogen  | ribosomal   | 68   | 60  | 62  | 88  | 109 | 90  | 5.184587 | 5.866322 | 5.703547 | 10.41402 |
| protein_co | olfactory_r | 1    | 1   | 1   | 13  | 10  | 4   | 0.050257 | 0.064448 | 0.060638 | 1.014081 |

|                         |      |      |      |      |      |      |          |          |          |          |
|-------------------------|------|------|------|------|------|------|----------|----------|----------|----------|
| pseudogen: ribosomal_   | 0    | 1    | 0    | 5    | 5    | 5    | 0        | 0.137912 | 0        | 0.834631 |
| protein_co ring_finger_ | 64   | 48   | 50   | 278  | 350  | 187  | 2.662787 | 2.560985 | 2.510005 | 17.95278 |
| protein_co mitochond    | 2430 | 2079 | 2207 | 3495 | 5061 | 2797 | 383.6456 | 420.9086 | 420.4112 | 856.4492 |
| protein_co microtubul   | 98   | 72   | 66   | 52   | 53   | 81   | 0.84316  | 0.794375 | 0.685135 | 0.694413 |
| pseudogen: ribosomal_   | 1    | 0    | 0    | 0    | 0    | 0    | 0.101274 | 0        | 0        | 0        |
| protein_co keratin_ass  | 0    | 0    | 0    | 1    | 1    | 0    | 0        | 0        | 0        | 0.162818 |
| pseudogen: -            | 0    | 0    | 2    | 0    | 0    | 0    | 0        | 0        | 0.066132 | 0        |
| pseudogen: -            | 1    | 0    | 0    | 1    | 0    | 0    | 0.03669  | 0        | 0        | 0.056948 |
| processed_ -            | 96   | 59   | 71   | 81   | 87   | 74   | 1.918773 | 1.512216 | 1.712217 | 2.512858 |
| protein_co POU_class_   | 2    | 1    | 2    | 125  | 177  | 124  | 0.017506 | 0.011225 | 0.021122 | 1.698241 |
| pseudogen: ribosomal_   | 2    | 2    | 3    | 2    | 6    | 5    | 0.226522 | 0.290482 | 0.409967 | 0.351593 |
| protein_co HCG20091     | 2    | 1    | 2    | 1    | 5    | 0    | 0.050419 | 0.032328 | 0.060834 | 0.039129 |
| protein_co RBM12B_a     | 17   | 20   | 30   | 16   | 11   | 15   | 1.22072  | 1.841648 | 2.599181 | 1.783272 |
| pseudogen: basic_trans  | 2    | 2    | 0    | 2    | 0    | 0    | 0.199957 | 0.256417 | 0        | 0.310362 |
| pseudogen: -            | 0    | 1    | 0    | 0    | 0    | 0    | 0        | 0.157408 | 0        | 0        |
| protein_co zinc_finger_ | 620  | 472  | 456  | 339  | 385  | 289  | 20.50198 | 20.015   | 18.19353 | 17.3994  |
| pseudogen: -            | 7    | 3    | 9    | 16   | 13   | 1    | 0.759792 | 0.417568 | 1.178656 | 2.695548 |
| protein_co zinc_finger_ | 221  | 188  | 219  | 218  | 254  | 292  | 2.160695 | 2.357048 | 2.58341  | 3.308173 |
| protein_co synaptotag   | 0    | 0    | 0    | 192  | 227  | 115  | 0        | 0        | 0        | 4.79373  |
| protein_co nucleopori   | 1695 | 1292 | 1334 | 1783 | 2143 | 2020 | 22.13888 | 21.64003 | 21.02276 | 36.14663 |
| pseudogen: COX20_Co     | 3    | 1    | 1    | 4    | 6    | 4    | 0.394034 | 0.168431 | 0.158475 | 0.81546  |
| pseudogen: cofilin_1_(  | 1    | 0    | 0    | 0    | 0    | 0    | 0.094157 | 0        | 0        | 0        |
| pseudogen: -            | 2    | 0    | 2    | 1    | 2    | 6    | 0.10351  | 0        | 0.124891 | 0.080331 |
| pseudogen: aurora_kin   | 1    | 0    | 0    | 1    | 0    | 0    | 0.038688 | 0        | 0        | 0.060049 |
| pseudogen: -            | 4    | 0    | 3    | 0    | 0    | 0    | 0.326191 | 0        | 0.295177 | 0        |
| pseudogen: -            | 1    | 1    | 0    | 2    | 1    | 4    | 0.084946 | 0.108931 | 0        | 0.263695 |
| pseudogen: -            | 0    | 0    | 0    | 1    | 2    | 4    | 0        | 0        | 0        | 0.140773 |
| pseudogen: eukaryotic_  | 1    | 0    | 0    | 0    | 1    | 0    | 0.034811 | 0        | 0        | 0        |
| protein_co DENN/MAD     | 325  | 232  | 283  | 36   | 28   | 29   | 2.189548 | 2.004327 | 2.300412 | 0.376447 |
| pseudogen: olfactory_r  | 0    | 0    | 0    | 0    | 1    | 0    | 0        | 0        | 0        | 0        |
| pseudogen: -            | 0    | 1    | 0    | 0    | 0    | 0    | 0        | 0.063295 | 0        | 0        |
| pseudogen: tropomyos    | 0    | 0    | 0    | 0    | 2    | 2    | 0        | 0        | 0        | 0        |
| pseudogen: -            | 3    | 0    | 0    | 2    | 2    | 1    | 0.208092 | 0        | 0        | 0.215325 |
| protein_co chromosom    | 6    | 2    | 1    | 0    | 2    | 3    | 0.108416 | 0.046343 | 0.021802 | 0        |
| pseudogen: -            | 0    | 0    | 3    | 2    | 0    | 3    | 0        | 0        | 0.475424 | 0.40773  |
| pseudogen: -            | 0    | 0    | 0    | 2    | 2    | 1    | 0        | 0        | 0        | 0.344113 |
| pseudogen: profilin_1_  | 2    | 1    | 0    | 0    | 0    | 1    | 0.24108  | 0.154575 | 0        | 0        |
| pseudogen: -            | 15   | 20   | 13   | 11   | 14   | 11   | 0.480759 | 0.822007 | 0.502722 | 0.547217 |
| pseudogen: -            | 0    | 0    | 1    | 0    | 0    | 0    | 0        | 0        | 0.123798 | 0        |
| protein_co SFT2_dom     | 283  | 246  | 230  | 71   | 80   | 70   | 11.48907 | 12.80687 | 11.26612 | 4.47391  |
| protein_co FGFR1_onc    | 361  | 296  | 305  | 371  | 473  | 588  | 4.372848 | 4.597887 | 4.457641 | 6.975279 |
| pseudogen: -            | 0    | 0    | 0    | 1    | 1    | 0    | 0        | 0        | 0        | 0.175373 |
| pseudogen: keratin_8_   | 0    | 1    | 0    | 0    | 1    | 0    | 0        | 0.106802 | 0        | 0        |
| pseudogen: high_mobil   | 0    | 0    | 2    | 0    | 5    | 2    | 0        | 0        | 0.189216 | 0        |
| pseudogen: lipoprotein  | 15   | 7    | 16   | 4    | 10   | 20   | 0.297023 | 0.177749 | 0.382267 | 0.122939 |
| pseudogen: -            | 49   | 41   | 40   | 28   | 25   | 28   | 0.733827 | 0.787391 | 0.722779 | 0.650857 |
| pseudogen: -            | 0    | 2    | 2    | 0    | 1    | 0    | 0        | 0.207344 | 0.195088 | 0        |
| protein_co family_witl  | 1    | 0    | 3    | 0    | 0    | 1    | 0.020557 | 0        | 0.074409 | 0        |
| pseudogen: -            | 0    | 0    | 0    | 1    | 0    | 0    | 0        | 0        | 0        | 0.077923 |
| protein_co SR-related_  | 785  | 614  | 723  | 655  | 830  | 1109 | 7.281635 | 7.303599 | 8.091808 | 9.430419 |
| pseudogen: -            | 6    | 5    | 4    | 4    | 11   | 10   | 0.256463 | 0.274065 | 0.206292 | 0.265378 |
| pseudogen: -            | 0    | 0    | 0    | 1    | 3    | 0    | 0        | 0        | 0        | 0.098484 |
| pseudogen: protein_ph   | 0    | 0    | 0    | 4    | 5    | 5    | 0        | 0        | 0        | 0.655674 |
| protein_co coiled-coil_ | 17   | 19   | 17   | 1    | 0    | 2    | 0.403406 | 0.578171 | 0.486733 | 0.036832 |
| protein_co Duffy_bloo   | 0    | 0    | 0    | 4    | 4    | 1    | 0        | 0        | 0        | 0.15306  |
| pseudogen: phosducin-   | 4    | 5    | 5    | 2    | 1    | 1    | 0.259778 | 0.416411 | 0.391797 | 0.201606 |
| pseudogen: -            | 1    | 2    | 2    | 1    | 3    | 0    | 0.016958 | 0.043494 | 0.040923 | 0.026322 |
| protein_co zinc_finger_ | 221  | 162  | 144  | 390  | 342  | 345  | 2.612224 | 2.455515 | 2.053661 | 7.15506  |
| pseudogen: nucleopho:   | 0    | 0    | 1    | 5    | 4    | 5    | 0        | 0        | 0.065405 | 0.420692 |
| pseudogen: -            | 3    | 1    | 0    | 5    | 4    | 2    | 0.108458 | 0.046361 | 0        | 0.28057  |
| pseudogen: cytochrom    | 2    | 1    | 0    | 0    | 0    | 0    | 0.08336  | 0.053449 | 0        | 0        |
| pseudogen: tubulin_be   | 0    | 0    | 0    | 7    | 9    | 1    | 0        | 0        | 0        | 0.48153  |
| pseudogen: coiled-coil- | 0    | 0    | 0    | 0    | 1    | 0    | 0        | 0        | 0        | 0        |
| pseudogen: lin-28_horr  | 1    | 0    | 0    | 0    | 0    | 0    | 0.115778 | 0        | 0        | 0        |
| protein_co Tctex1_dor   | 48   | 25   | 35   | 16   | 36   | 10   | 2.813401 | 1.879056 | 2.475178 | 1.455596 |

|                         |      |      |      |      |      |      |          |          |          |          |
|-------------------------|------|------|------|------|------|------|----------|----------|----------|----------|
| pseudogen: tyrosine_3-  | 9    | 5    | 8    | 1    | 2    | 3    | 0.59606  | 0.424645 | 0.639271 | 0.102796 |
| protein_co Uncharacter  | 11   | 4    | 6    | 4    | 3    | 0    | 0.227421 | 0.106049 | 0.149671 | 0.128359 |
| pseudogen: protein_ph   | 1    | 0    | 0    | 0    | 1    | 0    | 0.107793 | 0        | 0        | 0        |
| pseudogen: -            | 7    | 3    | 7    | 12   | 13   | 18   | 2.668538 | 1.46658  | 3.219744 | 7.100468 |
| pseudogen: ADP-ribosy   | 1    | 0    | 0    | 1    | 0    | 1    | 0.087156 | 0        | 0        | 0.135278 |
| protein_co crystallin_ε | 21   | 17   | 32   | 19   | 14   | 10   | 0.641074 | 0.665499 | 1.178656 | 0.900271 |
| pseudogen: -            | 3    | 4    | 0    | 1    | 5    | 7    | 0.25811  | 0.44132  | 0        | 0.133541 |
| protein_co cysteine-ric | 4    | 2    | 1    | 0    | 0    | 1    | 0.083695 | 0.053663 | 0.025246 | 0        |
| pseudogen: calponin_2   | 7    | 2    | 9    | 6    | 5    | 1    | 0.361089 | 0.132299 | 0.560154 | 0.480395 |
| pseudogen: -            | 0    | 0    | 0    | 0    | 0    | 1    | 0        | 0        | 0        | 0        |
| pseudogen: ribosomal_   | 0    | 1    | 2    | 1    | 2    | 1    | 0        | 0.07573  | 0.142508 | 0.091662 |
| protein_co kelch-like_1 | 228  | 176  | 184  | 781  | 1116 | 870  | 2.622253 | 2.595743 | 2.553322 | 13.94188 |
| pseudogen: -            | 0    | 0    | 1    | 1    | 1    | 0    | 0        | 0        | 0.204984 | 0.263695 |
| pseudogen: -            | 3    | 0    | 3    | 0    | 0    | 0    | 0.236818 | 0        | 0.285735 | 0        |
| pseudogen: peroxiredo   | 0    | 0    | 0    | 3    | 3    | 2    | 0        | 0        | 0        | 0.363899 |
| pseudogen: -            | 27   | 24   | 22   | 71   | 65   | 61   | 3.087879 | 3.519793 | 3.035759 | 12.60333 |
| protein_co tripartite_r | 439  | 333  | 350  | 331  | 338  | 444  | 4.460394 | 4.338726 | 4.290667 | 5.21996  |
| pseudogen: Y_box_binc   | 9    | 3    | 3    | 4    | 7    | 2    | 0.52229  | 0.223254 | 0.210058 | 0.360296 |
| pseudogen: basic_trans  | 23   | 19   | 15   | 29   | 32   | 26   | 1.514706 | 1.604587 | 1.1919   | 2.964346 |
| protein_co myeloid/ly   | 1654 | 1255 | 1355 | 324  | 322  | 371  | 19.04619 | 18.53214 | 18.82608 | 5.790927 |
| pseudogen: -            | 0    | 0    | 0    | 0    | 1    | 0    | 0        | 0        | 0        | 0        |
| pseudogen: -            | 4    | 2    | 4    | 2    | 2    | 5    | 0.270259 | 0.173285 | 0.326084 | 0.20974  |
| protein_co acid-sensin  | 30   | 17   | 30   | 38   | 31   | 11   | 0.630242 | 0.457978 | 0.760423 | 1.239083 |
| protein_co GTPase_1M    | 1    | 0    | 1    | 0    | 0    | 0    | 0.010609 | 0        | 0.0128   | 0        |
| protein_co chromosom    | 14   | 11   | 12   | 2    | 5    | 2    | 0.254442 | 0.256367 | 0.263142 | 0.056418 |
| pseudogen: STE20-relat  | 0    | 0    | 0    | 0    | 0    | 1    | 0        | 0        | 0        | 0        |
| pseudogen: -            | 0    | 0    | 2    | 0    | 0    | 0    | 0        | 0        | 0.092823 | 0        |
| pseudogen: nucleolin_1  | 9    | 4    | 10   | 7    | 16   | 14   | 0.214982 | 0.122526 | 0.288209 | 0.259531 |
| protein_co KIAA1984     | 32   | 27   | 17   | 28   | 48   | 46   | 0.353553 | 0.382541 | 0.226622 | 0.480168 |
| protein_co Rho_guanin   | 2    | 3    | 6    | 278  | 409  | 419  | 0.038577 | 0.074204 | 0.139635 | 8.322824 |
| pseudogen: -            | 0    | 0    | 0    | 0    | 1    | 0    | 0        | 0        | 0        | 0        |
| protein_co DNL-type_2   | 1    | 5    | 3    | 2    | 12   | 2    | 0.015982 | 0.102471 | 0.057848 | 0.049611 |
| pseudogen: -            | 95   | 64   | 65   | 9    | 22   | 18   | 4.337441 | 3.747134 | 3.580728 | 0.637798 |
| pseudogen: -            | 0    | 0    | 0    | 1    | 6    | 5    | 0        | 0        | 0        | 0.032564 |
| pseudogen: -            | 0    | 0    | 1    | 0    | 0    | 0    | 0        | 0        | 0.058933 | 0        |
| pseudogen: ribosomal_   | 3    | 0    | 1    | 2    | 3    | 2    | 0.06066  | 0        | 0.024397 | 0.062768 |
| protein_co T-cell_leuk  | 0    | 0    | 0    | 3    | 4    | 1    | 0        | 0        | 0        | 0.126647 |
| pseudogen: suppressor   | 1    | 1    | 0    | 0    | 1    | 0    | 0.043336 | 0.055573 | 0        | 0        |
| pseudogen: eukaryotic   | 3    | 2    | 0    | 0    | 7    | 0    | 0.099484 | 0.085049 | 0        | 0        |
| pseudogen: tyrosine_3-  | 5    | 4    | 4    | 5    | 1    | 1    | 0.322047 | 0.330383 | 0.310854 | 0.499861 |
| protein_co notch_2_N    | 360  | 276  | 297  | 36   | 73   | 48   | 3.351947 | 3.295438 | 3.336562 | 0.520269 |
| protein_co suppressor   | 204  | 186  | 167  | 218  | 231  | 314  | 5.822011 | 6.807147 | 5.750523 | 9.656723 |
| pseudogen: RNA_bindin   | 8    | 7    | 4    | 2    | 0    | 1    | 0.305971 | 0.343319 | 0.184586 | 0.118727 |
| pseudogen: -            | 0    | 0    | 0    | 1    | 0    | 0    | 0        | 0        | 0        | 0.048552 |
| pseudogen: -            | 1    | 2    | 0    | 6    | 4    | 6    | 0.093968 | 0.241001 | 0        | 0.875108 |
| pseudogen: tyrosine_3-  | 1    | 0    | 1    | 0    | 0    | 1    | 0.064233 | 0        | 0.077501 | 0        |
| pseudogen: -            | 5    | 6    | 6    | 11   | 14   | 13   | 0.348366 | 0.536075 | 0.504388 | 1.189566 |
| pseudogen: NIP7_nucle   | 0    | 0    | 0    | 3    | 1    | 2    | 0        | 0        | 0        | 0.401359 |
| pseudogen: -            | 0    | 0    | 0    | 1    | 1    | 0    | 0        | 0        | 0        | 0.090975 |
| pseudogen: interferon_  | 0    | 0    | 1    | 0    | 1    | 0    | 0        | 0        | 0.142867 | 0        |
| pseudogen: MARCKS-lik   | 5    | 5    | 2    | 12   | 3    | 0    | 0.433364 | 0.555728 | 0.209152 | 1.614339 |
| sense_intrc -           | 0    | 0    | 0    | 0    | 0    | 1    | 0        | 0        | 0        | 0        |
| pseudogen: -            | 4    | 4    | 6    | 3    | 3    | 2    | 0.418661 | 0.536873 | 0.757708 | 0.487365 |
| protein_co neuroblast   | 2280 | 1774 | 1788 | 1479 | 1789 | 1881 | 24.02995 | 23.97623 | 22.73702 | 24.1945  |
| pseudogen: -            | 0    | 0    | 0    | 0    | 1    | 0    | 0        | 0        | 0        | 0        |
| pseudogen: -            | 1    | 0    | 0    | 1    | 1    | 1    | 0.114646 | 0        | 0        | 0.177946 |
| pseudogen: phosphogl    | 0    | 0    | 0    | 0    | 0    | 1    | 0        | 0        | 0        | 0        |
| pseudogen: -            | 1    | 1    | 0    | 0    | 0    | 0    | 0.113811 | 0.145946 | 0        | 0        |
| pseudogen: -            | 67   | 49   | 53   | 63   | 57   | 83   | 3.122894 | 2.928787 | 2.980618 | 4.557781 |
| pseudogen: -            | 3    | 0    | 1    | 1    | 2    | 1    | 0.355227 | 0        | 0.142867 | 0.183787 |
| pseudogen: -            | 2    | 6    | 7    | 7    | 10   | 12   | 0.17661  | 0.679433 | 0.745816 | 0.959432 |
| pseudogen: -            | 0    | 1    | 0    | 2    | 0    | 0    | 0        | 0.069035 | 0        | 0.167118 |
| pseudogen: -            | 0    | 2    | 0    | 0    | 0    | 0    | 0        | 0.380568 | 0        | 0        |
| pseudogen: -            | 2    | 1    | 2    | 1    | 1    | 0    | 0.204314 | 0.131002 | 0.246516 | 0.158562 |
| protein_co leukotrien   | 0    | 0    | 1    | 0    | 1    | 0    | 0        | 0        | 0.062239 | 0        |

|                        |      |      |      |      |      |     |          |          |          |          |
|------------------------|------|------|------|------|------|-----|----------|----------|----------|----------|
| pseudogen: ribosomal_  | 18   | 8    | 11   | 15   | 21   | 23  | 1.440308 | 0.820885 | 1.061998 | 1.862964 |
| pseudogen: -           | 0    | 0    | 0    | 6    | 2    | 0   | 0        | 0        | 0        | 0.485199 |
| pseudogen: solute_carr | 0    | 0    | 0    | 1    | 0    | 0   | 0        | 0        | 0        | 0.082144 |
| pseudogen: nucleopho:  | 1    | 0    | 0    | 0    | 0    | 2   | 0.054083 | 0        | 0        | 0        |
| pseudogen: chloride_cl | 0    | 0    | 1    | 0    | 0    | 0   | 0        | 0        | 0.082955 | 0        |
| protein_co ankyrin_rej | 30   | 23   | 23   | 26   | 38   | 31  | 0.283323 | 0.278547 | 0.262082 | 0.381123 |
| pseudogen: activating_ | 0    | 0    | 0    | 0    | 1    | 0   | 0        | 0        | 0        | 0        |
| protein_co queueine_tF | 770  | 570  | 574  | 678  | 729  | 935 | 17.75089 | 16.85053 | 15.96575 | 24.25993 |
| protein_co conserved_  | 546  | 465  | 449  | 236  | 274  | 372 | 5.2842   | 5.770971 | 5.243014 | 3.545105 |
| pseudogen: PEST_conta  | 0    | 1    | 0    | 0    | 0    | 0   | 0        | 0.127664 | 0        | 0        |
| protein_co MAX_dime    | 500  | 368  | 391  | 390  | 566  | 232 | 10.28741 | 9.709419 | 9.70646  | 12.45464 |
| pseudogen: glyceraldeh | 0    | 1    | 0    | 0    | 4    | 3   | 0        | 0.059712 | 0        | 0        |
| pseudogen: -           | 0    | 0    | 0    | 2    | 0    | 0   | 0        | 0        | 0        | 0.4563   |
| pseudogen: ferritin_he | 0    | 0    | 0    | 0    | 1    | 0   | 0        | 0        | 0        | 0        |
| pseudogen: -           | 0    | 0    | 0    | 0    | 1    | 0   | 0        | 0        | 0        | 0        |
| protein_co glutathione | 275  | 218  | 241  | 86   | 107  | 41  | 2.984206 | 3.033625 | 3.155449 | 1.448522 |
| pseudogen: suppressor  | 2    | 1    | 1    | 2    | 0    | 0   | 0.13025  | 0.083514 | 0.078577 | 0.202166 |
| pseudogen: RAN_memt    | 0    | 0    | 0    | 1    | 0    | 0   | 0        | 0        | 0        | 0.113012 |
| pseudogen: nucleosom   | 0    | 0    | 3    | 0    | 0    | 0   | 0        | 0        | 0.192871 | 0        |
| protein_co componen    | 549  | 412  | 427  | 555  | 652  | 608 | 6.061366 | 5.833171 | 5.688189 | 9.510899 |
| pseudogen: -           | 0    | 0    | 0    | 2    | 3    | 1   | 0        | 0        | 0        | 0.16731  |
| pseudogen: -           | 2    | 1    | 3    | 2    | 2    | 2   | 0.118111 | 0.07573  | 0.213761 | 0.183324 |
| protein_co Rho_GTPas   | 448  | 365  | 394  | 1052 | 1055 | 675 | 3.802123 | 3.972376 | 4.034525 | 13.8578  |
| pseudogen: -           | 0    | 0    | 1    | 0    | 1    | 0   | 0        | 0        | 0.152085 | 0        |
| pseudogen: -           | 0    | 0    | 0    | 0    | 0    | 2   | 0        | 0        | 0        | 0        |
| protein_co HAUS_augn   | 15   | 6    | 8    | 4    | 7    | 9   | 0.331144 | 0.169858 | 0.21309  | 0.137062 |
| protein_co lecithin-ch | 169  | 102  | 144  | 121  | 150  | 79  | 5.258403 | 4.069834 | 5.40602  | 5.843634 |
| pseudogen: -           | 1    | 0    | 1    | 1    | 0    | 2   | 0.053527 | 0        | 0.064584 | 0.083082 |
| pseudogen: ribosomal_  | 0    | 0    | 0    | 0    | 1    | 0   | 0        | 0        | 0        | 0        |
| protein_co protein_ty  | 11   | 14   | 10   | 36   | 41   | 34  | 0.399218 | 0.651561 | 0.437891 | 2.02792  |
| pseudogen: annexin_A2  | 3    | 2    | 0    | 0    | 2    | 8   | 0.151912 | 0.12987  | 0        | 0        |
| pseudogen: -           | 2    | 0    | 6    | 4    | 1    | 0   | 0.113673 | 0        | 0.411458 | 0.352872 |
| pseudogen: RNA_bindir  | 3    | 1    | 0    | 0    | 2    | 1   | 0.077547 | 0.033148 | 0        | 0        |
| protein_co poliovirus_ | 5    | 2    | 5    | 2    | 5    | 4   | 0.148105 | 0.075969 | 0.178697 | 0.091952 |
| protein_co glypican_2  | 557  | 451  | 464  | 1787 | 2328 | 963 | 10.31506 | 10.71032 | 10.36771 | 51.36552 |
| pseudogen: RNA_bindir  | 0    | 2    | 0    | 0    | 0    | 0   | 0        | 0.127124 | 0        | 0        |
| protein_co keratin_22: | 0    | 0    | 0    | 1    | 0    | 0   | 0        | 0        | 0        | 0.026331 |
| pseudogen: heat_shock  | 7    | 2    | 4    | 9    | 25   | 19  | 0.190168 | 0.069675 | 0.131114 | 0.379501 |
| pseudogen: -           | 4    | 0    | 2    | 1    | 7    | 6   | 0.360692 | 0        | 0.217598 | 0.139961 |
| pseudogen: vesicle_tra | 2    | 3    | 0    | 1    | 0    | 0   | 0.134741 | 0.25918  | 0        | 0.104569 |
| pseudogen: -           | 1    | 0    | 0    | 2    | 0    | 0   | 0.061697 | 0        | 0        | 0.191526 |
| pseudogen: H2A_histor  | 2    | 1    | 0    | 1    | 1    | 1   | 0.237418 | 0.152227 | 0        | 0.184253 |
| pseudogen: ribosomal_  | 287  | 224  | 243  | 486  | 452  | 431 | 23.90308 | 23.92376 | 24.41891 | 62.8259  |
| pseudogen: -           | 18   | 13   | 14   | 16   | 26   | 12  | 1.000024 | 0.92617  | 0.938456 | 1.379712 |
| protein_co signal-indu | 1878 | 1537 | 1471 | 1208 | 1667 | 885 | 24.27218 | 25.47395 | 22.93897 | 24.23319 |
| pseudogen: -           | 0    | 0    | 0    | 0    | 0    | 2   | 0        | 0        | 0        | 0        |
| pseudogen: ferritin_he | 3    | 3    | 0    | 4    | 5    | 6   | 0.240873 | 0.308886 | 0        | 0.498492 |
| pseudogen: -           | 10   | 7    | 2    | 0    | 0    | 0   | 1.17225  | 1.052271 | 0.282878 | 0        |
| protein_co endogenou   | 155  | 127  | 153  | 70   | 101  | 75  | 2.673024 | 2.808563 | 3.183543 | 1.873698 |
| protein_co synaptojan  | 349  | 255  | 254  | 202  | 269  | 219 | 7.867604 | 7.371682 | 6.90874  | 7.068038 |
| protein_co ADP-ribosy  | 289  | 212  | 215  | 604  | 757  | 451 | 11.03519 | 10.38071 | 9.905321 | 35.79723 |
| pseudogen: high_mobil  | 0    | 0    | 0    | 1    | 0    | 0   | 0        | 0        | 0        | 0.119507 |
| processed_ -           | 8    | 12   | 13   | 179  | 212  | 185 | 0.128115 | 0.246434 | 0.251189 | 4.449312 |
| protein_co tubulin_ty  | 2    | 3    | 0    | 1    | 2    | 3   | 0.034251 | 0.065884 | 0        | 0.026581 |
| pseudogen: -           | 0    | 0    | 0    | 0    | 1    | 0   | 0        | 0        | 0        | 0        |
| pseudogen: eukaryotic_ | 0    | 0    | 0    | 1    | 0    | 0   | 0        | 0        | 0        | 0.061159 |
| pseudogen: actinin_alp | 2    | 2    | 1    | 0    | 0    | 0   | 0.064631 | 0.08288  | 0.038991 | 0        |
| pseudogen: peptidylpro | 0    | 0    | 0    | 0    | 1    | 2   | 0        | 0        | 0        | 0        |
| protein_co guanylate_l | 2    | 2    | 1    | 0    | 0    | 0   | 0.038215 | 0.049006 | 0.023054 | 0        |
| pseudogen: -           | 15   | 23   | 14   | 14   | 19   | 14  | 0.456721 | 0.898042 | 0.514323 | 0.661635 |
| pseudogen: -           | 3    | 2    | 4    | 1    | 1    | 1   | 0.037906 | 0.032406 | 0.060981 | 0.019612 |
| protein_co RNA_bindir  | 251  | 215  | 241  | 341  | 361  | 430 | 2.314987 | 2.542861 | 2.681884 | 4.881572 |
| pseudogen: -           | 0    | 0    | 0    | 1    | 0    | 0   | 0        | 0        | 0        | 0.254475 |
| protein_co steroid_rec | 1311 | 1142 | 1116 | 540  | 644  | 600 | 28.39391 | 31.71743 | 29.16317 | 18.15293 |
| pseudogen: SET_pseudc  | 0    | 0    | 0    | 0    | 1    | 0   | 0        | 0        | 0        | 0        |

|                        |      |      |      |      |      |      |          |          |          |          |
|------------------------|------|------|------|------|------|------|----------|----------|----------|----------|
| pseudogen: -           | 4    | 0    | 0    | 3    | 0    | 0    | 0.46541  | 0        | 0        | 0.541785 |
| protein_co transmembr  | 8    | 3    | 3    | 5    | 4    | 17   | 0.078658 | 0.037825 | 0.03559  | 0.076305 |
| pseudogen: keratin_8_  | 1    | 1    | 0    | 0    | 0    | 0    | 0.025651 | 0.032894 | 0        | 0        |
| pseudogen: -           | 2    | 2    | 3    | 3    | 1    | 3    | 0.190223 | 0.243934 | 0.344273 | 0.442879 |
| pseudogen: -           | 3    | 1    | 1    | 4    | 1    | 3    | 0.177166 | 0.07573  | 0.071254 | 0.366649 |
| pseudogen: -           | 0    | 0    | 2    | 0    | 0    | 0    | 0        | 0        | 0.233301 | 0        |
| pseudogen: -           | 4    | 0    | 2    | 2    | 3    | 0    | 0.50016  | 0        | 0.301736 | 0.388159 |
| protein_co DnaJ_(Hsp4  | 95   | 66   | 88   | 68   | 92   | 118  | 1.469179 | 1.308894 | 1.642033 | 1.632265 |
| pseudogen: ribosomal_  | 161  | 124  | 141  | 325  | 279  | 264  | 7.913305 | 7.815613 | 8.361788 | 24.79396 |
| pseudogen: -           | 0    | 0    | 0    | 0    | 1    | 0    | 0        | 0        | 0        | 0        |
| pseudogen: -           | 0    | 0    | 0    | 0    | 1    | 1    | 0        | 0        | 0        | 0        |
| protein_co chromosom   | 900  | 686  | 693  | 462  | 746  | 559  | 17.04403 | 16.65955 | 15.83474 | 13.58008 |
| pseudogen: -           | 0    | 0    | 0    | 1    | 2    | 0    | 0        | 0        | 0        | 0.119116 |
| pseudogen: -           | 0    | 0    | 0    | 0    | 0    | 1    | 0        | 0        | 0        | 0        |
| protein_co voltage-dep | 4382 | 3577 | 3538 | 4352 | 4843 | 4331 | 105.2084 | 110.1302 | 102.4906 | 162.1801 |
| protein_co zinc_finger | 353  | 305  | 246  | 547  | 727  | 788  | 6.094321 | 6.752426 | 5.124291 | 14.65779 |
| pseudogen: -           | 3    | 1    | 0    | 3    | 3    | 4    | 0.106407 | 0.045484 | 0        | 0.165158 |
| pseudogen: -           | 2    | 0    | 5    | 1    | 4    | 4    | 0.192567 | 0        | 0.580857 | 0.149445 |
| protein_co thioredoxin | 757  | 583  | 613  | 628  | 660  | 1164 | 20.91676 | 20.65744 | 20.43653 | 26.93324 |
| pseudogen: -           | 0    | 0    | 1    | 0    | 0    | 0    | 0        | 0        | 0.150467 | 0        |
| pseudogen: -           | 15   | 8    | 12   | 2    | 5    | 4    | 1.959193 | 1.33994  | 1.891103 | 0.405459 |
| pseudogen: solute_carr | 1    | 2    | 3    | 0    | 1    | 3    | 0.052042 | 0.133473 | 0.188376 | 0        |
| pseudogen: -           | 0    | 0    | 1    | 2    | 1    | 1    | 0        | 0        | 0.071164 | 0.183094 |
| pseudogen: family_witl | 0    | 2    | 4    | 227  | 277  | 232  | 0        | 0.144717 | 0.272325 | 19.88088 |
| pseudogen: -           | 10   | 10   | 11   | 12   | 11   | 9    | 0.896559 | 1.149709 | 1.189925 | 1.6699   |
| protein_co hexosamini  | 84   | 87   | 78   | 34   | 59   | 48   | 0.570091 | 0.757171 | 0.638716 | 0.358158 |
| protein_co NADH_deh    | 864  | 669  | 702  | 787  | 1005 | 949  | 22.90163 | 22.73987 | 22.4511  | 32.37858 |
| pseudogen: -           | 1    | 3    | 0    | 6    | 5    | 2    | 0.088305 | 0.339716 | 0        | 0.822371 |
| pseudogen: ribosomal_  | 5    | 5    | 4    | 9    | 9    | 8    | 0.264616 | 0.339333 | 0.25542  | 0.739298 |
| protein_co leptin_rece | 956  | 722  | 799  | 274  | 315  | 247  | 9.698584 | 9.392841 | 9.780145 | 4.31451  |
| protein_co limb_bud_i  | 781  | 624  | 554  | 549  | 658  | 647  | 12.48589 | 12.7927  | 10.68627 | 13.62295 |
| protein_co adenosine_  | 114  | 82   | 91   | 212  | 275  | 276  | 3.303747 | 3.047369 | 3.181935 | 9.536043 |
| protein_co protein_ph  | 2051 | 1658 | 1756 | 1185 | 1299 | 1728 | 19.6549  | 20.37507 | 20.30382 | 17.62601 |
| pseudogen: -           | 0    | 0    | 0    | 0    | 0    | 1    | 0        | 0        | 0        | 0        |
| pseudogen: -           | 0    | 0    | 0    | 0    | 1    | 0    | 0        | 0        | 0        | 0        |
| pseudogen: -           | 0    | 0    | 0    | 3    | 4    | 0    | 0        | 0        | 0        | 0.216178 |
| pseudogen: -           | 0    | 1    | 0    | 0    | 0    | 0    | 0        | 0.050785 | 0        | 0        |
| pseudogen: high_mobil  | 0    | 0    | 0    | 0    | 0    | 1    | 0        | 0        | 0        | 0        |
| protein_co G-protein_i | 92   | 73   | 85   | 109  | 168  | 78   | 2.922684 | 2.973899 | 3.258074 | 5.37466  |
| pseudogen: -           | 2    | 0    | 0    | 0    | 0    | 0    | 0.248753 | 0        | 0        | 0        |
| pseudogen: Ras_suppre  | 0    | 2    | 3    | 2    | 1    | 2    | 0        | 0.144023 | 0.203265 | 0.174323 |
| pseudogen: ribosomal_  | 0    | 0    | 0    | 1    | 0    | 0    | 0        | 0        | 0        | 0.168863 |
| pseudogen: protein_gei | 1    | 0    | 1    | 0    | 1    | 0    | 0.045836 | 0        | 0.055304 | 0        |
| pseudogen: -           | 1    | 0    | 0    | 0    | 0    | 0    | 0.100839 | 0        | 0        | 0        |
| protein_co NCK_intera  | 364  | 262  | 306  | 765  | 822  | 680  | 5.71026  | 5.270661 | 5.791939 | 18.62715 |
| protein_co activating_ | 2114 | 1551 | 1737 | 647  | 712  | 751  | 37.77648 | 35.54166 | 37.45109 | 17.94532 |
| pseudogen: -           | 0    | 1    | 1    | 1    | 8    | 4    | 0        | 0.07891  | 0.074246 | 0.095512 |
| protein_co three_prim  | 228  | 179  | 183  | 62   | 67   | 98   | 4.866147 | 4.899059 | 4.712479 | 2.053868 |
| pseudogen: SEC14-like_ | 26   | 38   | 32   | 8    | 7    | 32   | 0.558982 | 1.047653 | 0.830085 | 0.266959 |
| protein_co sphingosin  | 3217 | 2314 | 2616 | 117  | 194  | 105  | 17.73606 | 16.35983 | 17.40171 | 1.001204 |
| pseudogen: ribosomal_  | 0    | 0    | 0    | 0    | 1    | 1    | 0        | 0        | 0        | 0        |
| protein_co solute_carr | 953  | 691  | 753  | 192  | 273  | 280  | 11.46388 | 10.65923 | 10.92903 | 3.584844 |
| pseudogen: ribosomal_  | 28   | 22   | 21   | 15   | 8    | 8    | 2.404616 | 2.422812 | 2.175981 | 1.999445 |
| pseudogen: -           | 0    | 0    | 0    | 2    | 0    | 2    | 0        | 0        | 0        | 0.266593 |
| pseudogen: -           | 2    | 4    | 0    | 0    | 0    | 0    | 0.164238 | 0.421224 | 0        | 0        |
| pseudogen: high_mobil  | 28   | 17   | 23   | 34   | 39   | 44   | 2.332008 | 1.815642 | 2.311255 | 4.395228 |
| pseudogen: phosphatic  | 143  | 92   | 111  | 102  | 105  | 39   | 7.491925 | 6.18094  | 7.016627 | 8.294458 |
| protein_co family_witl | 0    | 2    | 1    | 2    | 8    | 3    | 0        | 0.173285 | 0.081521 | 0.20974  |
| pseudogen: -           | 2    | 2    | 1    | 1    | 0    | 0    | 0.221179 | 0.283631 | 0.133433 | 0.17165  |
| protein_co chloride_in | 6841 | 5462 | 5709 | 2669 | 2835 | 2762 | 205.6247 | 210.5314 | 207.0446 | 124.5188 |
| pseudogen: high_mobil  | 2    | 0    | 0    | 0    | 0    | 1    | 0.366328 | 0        | 0        | 0        |
| protein_co dimethylar  | 3124 | 2337 | 2393 | 1774 | 2216 | 1387 | 86.77987 | 83.24842 | 80.20449 | 76.48778 |
| pseudogen: ribosomal_  | 0    | 0    | 0    | 1    | 0    | 0    | 0        | 0        | 0        | 0.091547 |
| pseudogen: polymerase  | 0    | 0    | 0    | 1    | 0    | 0    | 0        | 0        | 0        | 0.072999 |
| pseudogen: RAB5C_me    | 0    | 1    | 0    | 5    | 6    | 1    | 0        | 0.103672 | 0        | 0.627412 |

|                         |      |      |      |      |      |      |          |          |          |          |
|-------------------------|------|------|------|------|------|------|----------|----------|----------|----------|
| pseudogen: anaphase_    | 0    | 0    | 0    | 0    | 0    | 2    | 0        | 0        | 0        | 0        |
| pseudogen: SERPINE1_    | 8    | 10   | 4    | 6    | 18   | 13   | 0.323379 | 0.51836  | 0.195088 | 0.376447 |
| protein_co ribosomal_   | 2592 | 1855 | 1985 | 4460 | 4795 | 3430 | 88.45628 | 81.1796  | 81.7339  | 236.243  |
| antisense -             | 16   | 6    | 11   | 15   | 23   | 15   | 0.160789 | 0.077321 | 0.133376 | 0.233968 |
| pseudogen: ribosomal_   | 0    | 0    | 0    | 0    | 2    | 0    | 0        | 0        | 0        | 0        |
| pseudogen: ribosomal_   | 740  | 600  | 642  | 480  | 602  | 441  | 10.5724  | 10.99265 | 11.06687 | 10.64421 |
| pseudogen: -            | 0    | 0    | 0    | 2    | 2    | 3    | 0        | 0        | 0        | 0.101365 |
| pseudogen: -            | 1    | 0    | 0    | 2    | 1    | 2    | 0.096482 | 0        | 0        | 0.299505 |
| pseudogen: -            | 4    | 2    | 1    | 1    | 7    | 4    | 0.238323 | 0.152808 | 0.071888 | 0.092478 |
| protein_co ATPase_H+    | 14   | 14   | 9    | 15   | 19   | 17   | 0.413388 | 0.530112 | 0.320642 | 0.687467 |
| pseudogen: metallothe   | 0    | 1    | 0    | 4    | 0    | 2    | 0        | 0.328578 | 0        | 1.590815 |
| protein_co zinc_finger  | 331  | 231  | 285  | 747  | 794  | 923  | 4.375697 | 3.915981 | 4.545819 | 15.32746 |
| pseudogen: actin_beta   | 4    | 1    | 0    | 2    | 1    | 8    | 0.167017 | 0.053544 | 0        | 0.129617 |
| pseudogen: -            | 2    | 0    | 0    | 0    | 0    | 0    | 0.278279 | 0        | 0        | 0        |
| pseudogen: -            | 2    | 0    | 0    | 11   | 11   | 9    | 0.105727 | 0        | 0        | 0.902568 |
| pseudogen: -            | 0    | 1    | 0    | 1    | 0    | 0    | 0        | 0.132444 | 0        | 0.160308 |
| protein_co DEAD_(Asp    | 7    | 11   | 12   | 8    | 6    | 11   | 0.122064 | 0.245975 | 0.252475 | 0.216526 |
| pseudogen: -            | 1    | 0    | 1    | 0    | 0    | 1    | 0.079745 | 0        | 0.096217 | 0        |
| pseudogen: Obg-like_A   | 0    | 0    | 3    | 4    | 2    | 1    | 0        | 0        | 0.142747 | 0.244844 |
| lincRNA zinc_finger     | 11   | 6    | 5    | 19   | 19   | 26   | 0.936098 | 0.654771 | 0.513389 | 2.509648 |
| protein_co zinc_finger  | 136  | 102  | 138  | 221  | 167  | 290  | 1.479249 | 1.422695 | 1.811046 | 3.730999 |
| protein_co killer_cell_ | 0    | 1    | 1    | 0    | 0    | 2    | 0        | 0.029133 | 0.027411 | 0        |
| protein_co Uncharacter  | 0    | 0    | 0    | 0    | 4    | 0    | 0        | 0        | 0        | 0        |
| pseudogen: cofilin_1_(  | 0    | 1    | 0    | 0    | 0    | 0    | 0        | 0.11978  | 0        | 0        |
| pseudogen: -            | 97   | 65   | 74   | 35   | 50   | 32   | 6.424197 | 5.520391 | 5.913259 | 3.597872 |
| pseudogen: suppressor   | 2    | 5    | 1    | 1    | 2    | 3    | 0.094536 | 0.303074 | 0.057032 | 0.073367 |
| pseudogen: -            | 35   | 28   | 34   | 3    | 5    | 7    | 2.202887 | 2.259912 | 2.581969 | 0.293073 |
| protein_co epithelial_  | 656  | 505  | 569  | 280  | 368  | 239  | 5.918771 | 5.842899 | 6.194239 | 3.921175 |
| pseudogen: voltage-dep  | 2    | 0    | 1    | 1    | 2    | 0    | 0.110329 | 0        | 0.066559 | 0.085623 |
| pseudogen: -            | 0    | 2    | 1    | 1    | 0    | 4    | 0        | 0.113452 | 0.053373 | 0.06866  |
| protein_co potassium_   | 332  | 239  | 266  | 136  | 129  | 58   | 5.102421 | 4.710266 | 4.932509 | 3.2442   |
| pseudogen: ribosomal_   | 1    | 3    | 5    | 3    | 5    | 4    | 0.083138 | 0.319839 | 0.501556 | 0.387127 |
| pseudogen: -            | 7    | 4    | 1    | 4    | 6    | 2    | 0.414432 | 0.303686 | 0.071434 | 0.367575 |
| lincRNA -               | 0    | 0    | 0    | 1    | 0    | 0    | 0        | 0        | 0        | 0.096016 |
| pseudogen: eukaryotic   | 1    | 0    | 0    | 0    | 0    | 0    | 0.069364 | 0        | 0        | 0        |
| protein_co chromosom    | 50   | 53   | 41   | 49   | 72   | 40   | 1.277657 | 1.736719 | 1.264085 | 1.943439 |
| pseudogen: Y_box_binc   | 23   | 19   | 20   | 18   | 46   | 31   | 1.106123 | 1.17176  | 1.160523 | 1.343627 |
| pseudogen: TAF9B_RNA    | 1    | 0    | 1    | 1    | 5    | 5    | 0.062855 | 0        | 0.075838 | 0.09756  |
| pseudogen: -            | 2    | 6    | 4    | 1    | 1    | 3    | 0.229291 | 0.8821   | 0.553306 | 0.177946 |
| pseudogen: ribosomal_   | 0    | 2    | 0    | 0    | 0    | 0    | 0        | 0.181387 | 0        | 0        |
| pseudogen: nucleopho    | 5    | 3    | 0    | 13   | 16   | 20   | 0.269173 | 0.207106 | 0        | 1.086266 |
| pseudogen: ribosomal_   | 12   | 1    | 3    | 3    | 5    | 6    | 0.920917 | 0.098412 | 0.277785 | 0.357348 |
| protein_co CDNA_FLJ2    | 107  | 82   | 101  | 106  | 155  | 169  | 2.793559 | 2.745347 | 3.181585 | 4.295467 |
| protein_co protein_ph   | 7    | 4    | 7    | 174  | 234  | 127  | 0.168065 | 0.123154 | 0.20278  | 6.484222 |
| pseudogen: ribosomal_   | 7    | 5    | 5    | 1    | 6    | 3    | 0.272616 | 0.249708 | 0.234948 | 0.060448 |
| protein_co carcinoeml   | 0    | 0    | 0    | 1    | 0    | 0    | 0        | 0        | 0        | 0.042786 |
| protein_co solute_carr  | 14   | 9    | 8    | 3    | 6    | 6    | 0.155486 | 0.128178 | 0.107201 | 0.051715 |
| protein_co leukotriene  | 62   | 52   | 47   | 74   | 110  | 121  | 0.707343 | 0.760766 | 0.64697  | 1.310391 |
| antisense -             | 2    | 3    | 4    | 12   | 11   | 7    | 0.039354 | 0.075698 | 0.094965 | 0.366495 |
| protein_co leukotriene  | 10   | 9    | 10   | 7    | 14   | 15   | 0.151649 | 0.175022 | 0.182974 | 0.164767 |
| protein_co deoxyribon   | 334  | 213  | 245  | 255  | 253  | 183  | 3.31035  | 2.707175 | 2.929824 | 3.922817 |
| protein_co magnesium    | 2    | 0    | 0    | 1    | 0    | 0    | 0.105489 | 0        | 0        | 0.081867 |
| protein_co Interleukin  | 1    | 0    | 1    | 0    | 0    | 0    | 0.100192 | 0        | 0.120888 | 0        |
| protein_co casein_kina  | 4889 | 3845 | 4101 | 4377 | 5612 | 3254 | 82.13733 | 82.83736 | 83.13011 | 114.1373 |
| pseudogen: methionine   | 0    | 0    | 0    | 1    | 0    | 0    | 0        | 0        | 0        | 0.205593 |
| protein_co interferon_  | 18   | 19   | 11   | 6    | 1    | 4    | 0.459206 | 0.621581 | 0.338591 | 0.237584 |
| protein_co galactose-1  | 87   | 114  | 83   | 82   | 92   | 70   | 1.589802 | 2.671394 | 1.829995 | 2.325777 |
| protein_co hemoglobi    | 0    | 0    | 0    | 6    | 6    | 0    | 0        | 0        | 0        | 0.481985 |
| protein_co claudin_9    | 0    | 0    | 0    | 55   | 97   | 76   | 0        | 0        | 0        | 1.952629 |
| pseudogen: selenophos   | 0    | 0    | 0    | 0    | 2    | 2    | 0        | 0        | 0        | 0        |
| pseudogen: -            | 0    | 0    | 2    | 2    | 1    | 4    | 0        | 0        | 0.28147  | 0.362089 |
| pseudogen: -            | 0    | 0    | 0    | 1    | 0    | 0    | 0        | 0        | 0        | 0.19305  |
| pseudogen: keratin_18   | 0    | 0    | 0    | 0    | 2    | 1    | 0        | 0        | 0        | 0        |
| protein_co integrin_al  | 998  | 785  | 813  | 80   | 80   | 126  | 5.817533 | 5.867962 | 5.718036 | 0.723817 |
| pseudogen: ribosomal_   | 0    | 0    | 0    | 1    | 0    | 1    | 0        | 0        | 0        | 0.147328 |

|                            |      |      |      |      |      |      |          |          |           |
|----------------------------|------|------|------|------|------|------|----------|----------|-----------|
| protein_co Uncharacterized | 0    | 0    | 0    | 2    | 0    | 0    | 0        | 0        | 2.553677  |
| pseudogen: keratin_18      | 0    | 0    | 2    | 1    | 0    | 0    | 0        | 0.089306 | 0.057443  |
| processed_ -               | 27   | 21   | 17   | 10   | 17   | 0    | 0.243374 | 0.242739 | 0.184887  |
| pseudogen: coiled-coil-    | 1    | 3    | 0    | 0    | 0    | 0    | 0.143395 | 0.55165  | 0         |
| protein_co nudix_(nuc      | 170  | 119  | 164  | 46   | 105  | 51   | 2.686654 | 2.411677 | 3.127193  |
| protein_co zinc_finger     | 4    | 2    | 8    | 85   | 126  | 103  | 0.075843 | 0.048629 | 0.183018  |
| pseudogen: -               | 1    | 0    | 2    | 2    | 0    | 1    | 0.106568 | 0        | 0.257161  |
| processed_ -               | 16   | 20   | 24   | 66   | 69   | 115  | 0.283003 | 0.453639 | 0.512189  |
| pseudogen: -               | 15   | 9    | 10   | 90   | 87   | 109  | 0.398725 | 0.306785 | 0.320723  |
| protein_co Tax1_(hum       | 11   | 8    | 4    | 3    | 8    | 5    | 0.374575 | 0.349338 | 0.164344  |
| pseudogen: ribosomal_      | 1    | 1    | 0    | 1    | 1    | 0    | 0.058466 | 0.074975 | 0         |
| processed_ -               | 0    | 0    | 0    | 0    | 1    | 0    | 0        | 0        | 0         |
| protein_co adaptor-rel     | 99   | 102  | 98   | 193  | 244  | 187  | 1.407554 | 1.859684 | 1.68114   |
| pseudogen: -               | 2    | 1    | 1    | 1    | 6    | 1    | 0.079139 | 0.050742 | 0.047743  |
| protein_co zinc_finger     | 15   | 10   | 17   | 541  | 569  | 676  | 0.304481 | 0.260302 | 0.416357  |
| antisense_ -               | 2    | 1    | 1    | 2    | 1    | 2    | 0.21411  | 0.137283 | 0.129168  |
| protein_co carbohydrase    | 624  | 519  | 503  | 370  | 448  | 443  | 11.0039  | 11.7365  | 10.70232  |
| protein_co transmembr      | 0    | 0    | 1    | 11   | 12   | 4    | 0        | 0        | 0.030932  |
| pseudogen: phosphogl       | 2    | 0    | 2    | 6    | 3    | 1    | 0.127246 | 0        | 0.153529  |
| protein_co myocyte_ei      | 1    | 0    | 1    | 0    | 0    | 1    | 0.027861 | 0        | 0.033616  |
| pseudogen: -               | 5    | 8    | 13   | 6    | 9    | 8    | 0.87809  | 1.801642 | 2.754613  |
| protein_co glucosidase     | 194  | 160  | 139  | 185  | 195  | 138  | 2.016104 | 2.132262 | 1.742907  |
| pseudogen: -               | 0    | 1    | 0    | 0    | 2    | 0    | 0        | 0.068485 | 0         |
| pseudogen: ribonucleo      | 1    | 6    | 0    | 9    | 9    | 2    | 0.040318 | 0.310214 | 0         |
| pseudogen: -               | 0    | 0    | 0    | 0    | 2    | 1    | 0        | 0        | 0         |
| protein_co tubulin_ty      | 413  | 363  | 342  | 118  | 178  | 48   | 3.666334 | 4.132358 | 3.663162  |
| protein_co replication     | 2034 | 1523 | 1583 | 2334 | 3233 | 2450 | 28.97154 | 27.81825 | 27.20505  |
| pseudogen: ATP_syntha      | 0    | 0    | 0    | 0    | 0    | 1    | 0        | 0        | 0         |
| protein_co mitochond       | 965  | 728  | 722  | 861  | 1068 | 1026 | 49.23707 | 47.63274 | 44.44779  |
| pseudogen: actin_relat     | 0    | 0    | 0    | 0    | 1    | 0    | 0        | 0        | 0         |
| protein_co zinc_finger     | 43   | 37   | 44   | 46   | 65   | 51   | 0.489624 | 0.540263 | 0.604498  |
| pseudogen: phosphogl       | 3    | 2    | 0    | 6    | 3    | 0    | 0.15949  | 0.136349 | 0         |
| processed_ -               | 5    | 2    | 1    | 0    | 0    | 0    | 0.095382 | 0.048926 | 0.023017  |
| protein_co small_integ     | 536  | 431  | 514  | 346  | 445  | 522  | 9.053692 | 9.335714 | 10.47544  |
| pseudogen: ribosomal_      | 0    | 1    | 0    | 0    | 0    | 0    | 0        | 0.129311 | 0         |
| lincRNA_ urothelial_       | 0    | 0    | 0    | 7    | 6    | 1    | 0        | 0        | 0.220259  |
| protein_co F-box_prot      | 35   | 31   | 44   | 49   | 57   | 32   | 0.550168 | 0.624882 | 0.834503  |
| pseudogen: -               | 0    | 5    | 1    | 0    | 2    | 1    | 0        | 0.415261 | 0.078143  |
| protein_co tetraspanin     | 664  | 567  | 510  | 917  | 1382 | 910  | 11.21173 | 12.27713 | 10.39017  |
| pseudogen: -               | 0    | 0    | 0    | 3    | 0    | 0    | 0        | 0        | 0.466537  |
| pseudogen: -               | 0    | 0    | 0    | 0    | 1    | 0    | 0        | 0        | 0         |
| pseudogen: cleavage_ar     | 18   | 15   | 13   | 135  | 177  | 30   | 0.226279 | 0.241809 | 0.19718   |
| pseudogen: guanine_nu      | 0    | 0    | 0    | 24   | 20   | 27   | 0        | 0        | 0.1637034 |
| protein_co copine_I        | 2215 | 1693 | 1775 | 1830 | 1850 | 1237 | 47.12404 | 46.18863 | 45.5633   |
| protein_co ADP-ribosy      | 531  | 493  | 484  | 240  | 319  | 423  | 10.6268  | 12.65215 | 11.68696  |
| pseudogen: -               | 1    | 0    | 1    | 2    | 2    | 0    | 0.102604 | 0        | 0.123798  |
| protein_co single-pass     | 2    | 2    | 0    | 0    | 0    | 0    | 0.050802 | 0.065146 | 0         |
| pseudogen: -               | 0    | 0    | 0    | 1    | 0    | 0    | 0        | 0        | 0.18195   |
| protein_co WEE1_hom        | 1    | 1    | 0    | 1    | 1    | 1    | 0.015319 | 0.019644 | 0         |
| lincRNA_ -                 | 0    | 1    | 0    | 0    | 0    | 0    | 0        | 0.014344 | 0         |
| protein_co HCG19991        | 25   | 23   | 37   | 14   | 30   | 12   | 0.552688 | 0.652044 | 0.986937  |
| protein_co melanoma_       | 0    | 0    | 0    | 0    | 0    | 5    | 0        | 0        | 0         |
| pseudogen: -               | 2    | 2    | 0    | 3    | 2    | 0    | 0.18     | 0.230825 | 0         |
| protein_co Uncharacter     | 2    | 1    | 0    | 0    | 2    | 1    | 0.244219 | 0.156588 | 0         |
| pseudogen: lactate_def     | 26   | 17   | 18   | 46   | 43   | 34   | 1.221584 | 1.024255 | 1.0204    |
| protein_co LYR_motif_      | 504  | 399  | 402  | 594  | 637  | 672  | 15.87144 | 16.11269 | 15.27425  |
| protein_co c-myc_binc      | 161  | 99   | 130  | 195  | 201  | 239  | 2.336519 | 1.842417 | 2.276328  |
| protein_co -               | 4    | 2    | 1    | 2    | 8    | 3    | 0.097637 | 0.062603 | 0.029451  |
| pseudogen: thioredoxin     | 3    | 1    | 1    | 8    | 8    | 0    | 0.236024 | 0.100889 | 0.094925  |
| pseudogen: small_nucl      | 1    | 0    | 0    | 0    | 0    | 0    | 0.197017 | 0        | 0         |
| protein_co transmembr      | 0    | 0    | 0    | 8    | 5    | 4    | 0        | 0        | 0.139726  |
| pseudogen: -               | 0    | 0    | 1    | 1    | 0    | 0    | 0        | 0        | 0.040296  |
| pseudogen: -               | 329  | 301  | 232  | 220  | 280  | 184  | 9.939959 | 11.66177 | 8.457163  |
| protein_co progressive     | 40   | 52   | 48   | 32   | 67   | 16   | 0.556228 | 0.927269 | 0.805345  |
| pseudogen: -               | 0    | 1    | 0    | 0    | 0    | 0    | 0        | 0.081809 | 0         |

|                         |      |     |     |     |      |     |          |          |          |          |
|-------------------------|------|-----|-----|-----|------|-----|----------|----------|----------|----------|
| lincRNA -               | 14   | 6   | 5   | 3   | 1    | 5   | 0.227938 | 0.12527  | 0.098221 | 0.075812 |
| processed_ -            | 2    | 2   | 0   | 0   | 2    | 1   | 0.058068 | 0.074464 | 0        | 0        |
| protein_co ALG3_alpha   | 635  | 505 | 511 | 974 | 877  | 953 | 17.54576 | 17.89366 | 17.03599 | 41.77226 |
| pseudogen: archaelysin  | 171  | 120 | 133 | 84  | 140  | 48  | 2.341078 | 2.106737 | 2.196947 | 1.784964 |
| pseudogen: pleckstrin_  | 262  | 192 | 198 | 63  | 76   | 74  | 2.450176 | 2.302537 | 2.234134 | 0.914465 |
| pseudogen: DEAD_(Asp    | 1    | 2   | 2   | 0   | 0    | 0   | 0.032249 | 0.082709 | 0.077821 | 0        |
| pseudogen: prothymos    | 45   | 40  | 37  | 105 | 147  | 108 | 6.336489 | 7.222798 | 6.286167 | 22.94859 |
| antisense -             | 38   | 33  | 29  | 24  | 25   | 18  | 3.104217 | 3.45694  | 2.858344 | 3.043058 |
| pseudogen: exportin_tf  | 0    | 0   | 3   | 0   | 2    | 1   | 0        | 0        | 0.070778 | 0        |
| protein_co ST7_overla   | 2    | 6   | 3   | 0   | 1    | 5   | 0.059505 | 0.228921 | 0.107694 | 0        |
| protein_co zinc_finger  | 3    | 1   | 0   | 11  | 7    | 13  | 0.037273 | 0.015933 | 0        | 0.21213  |
| pseudogen: -            | 2    | 2   | 0   | 0   | 0    | 0   | 0.155265 | 0.199105 | 0        | 0        |
| pseudogen: ubiquitin-c  | 3    | 5   | 1   | 3   | 3    | 2   | 0.319705 | 0.683293 | 0.128581 | 0.496226 |
| protein_co SH3_domai    | 117  | 104 | 110 | 203 | 232  | 168 | 1.725741 | 1.967128 | 1.95763  | 4.647468 |
| protein_co Putative_tr  | 562  | 457 | 463 | 339 | 386  | 277 | 24.62821 | 25.6816  | 24.4808  | 23.05827 |
| pseudogen: -            | 7    | 6   | 8   | 1   | 4    | 4   | 0.082824 | 0.091037 | 0.114207 | 0.018365 |
| pseudogen: eukaryotic_  | 10   | 21  | 13  | 21  | 41   | 26  | 0.348366 | 0.938132 | 0.54642  | 1.135495 |
| pseudogen: -            | 1    | 0   | 0   | 0   | 0    | 0   | 0.059581 | 0        | 0        | 0        |
| pseudogen: CTAGE_fam    | 0    | 3   | 0   | 2   | 1    | 2   | 0        | 0.075068 | 0        | 0.060574 |
| protein_co chromosom    | 3    | 5   | 1   | 1   | 5    | 3   | 0.11502  | 0.245829 | 0.04626  | 0.059509 |
| protein_co IQ_motif_c   | 0    | 0   | 0   | 1   | 0    | 1   | 0        | 0        | 0        | 0.049849 |
| pseudogen: tubulin_be   | 1    | 0   | 1   | 1   | 4    | 0   | 0.114088 | 0        | 0.137653 | 0.17708  |
| pseudogen: heterogene   | 78   | 59  | 71  | 125 | 138  | 157 | 3.801893 | 3.687794 | 4.175531 | 9.456835 |
| protein_co chromosom    | 115  | 74  | 88  | 49  | 93   | 83  | 2.678764 | 2.210435 | 2.473246 | 1.77159  |
| protein_co family_witl  | 0    | 0   | 0   | 0   | 1    | 2   | 0        | 0        | 0        | 0        |
| protein_co Uncharacte   | 25   | 9   | 12  | 11  | 15   | 11  | 17.76137 | 8.199518 | 10.28646 | 12.12997 |
| pseudogen: -            | 3    | 3   | 4   | 5   | 4    | 1   | 0.283038 | 0.362957 | 0.455336 | 0.732191 |
| protein_co Uncharacte   | 6    | 8   | 0   | 9   | 14   | 8   | 0.059367 | 0.101506 | 0        | 0.138219 |
| pseudogen: alpha-2-gly  | 0    | 0   | 0   | 2   | 4    | 3   | 0        | 0        | 0        | 0.421912 |
| protein_co fission_1_(i | 1272 | 920 | 974 | 921 | 1067 | 897 | 59.34737 | 55.04419 | 54.83039 | 66.69671 |
| pseudogen: ankyrin_rej  | 180  | 132 | 178 | 33  | 55   | 59  | 4.744353 | 4.46157  | 5.660731 | 1.350047 |
| pseudogen: -            | 0    | 0   | 0   | 0   | 0    | 1   | 0        | 0        | 0        | 0        |
| protein_co SNRPN_ups    | 84   | 75  | 73  | 544 | 597  | 619 | 1.227028 | 1.404902 | 1.286608 | 12.33402 |
| pseudogen: legumain_f   | 0    | 1   | 0   | 0   | 0    | 0   | 0        | 0.046254 | 0        | 0        |
| pseudogen: angiogenic   | 1    | 0   | 2   | 0   | 0    | 0   | 0.022619 | 0        | 0.054583 | 0        |
| protein_co angiogenin   | 16   | 22  | 14  | 11  | 14   | 3   | 0.613945 | 1.082533 | 0.648165 | 0.655137 |
| pseudogen: -            | 72   | 68  | 50  | 11  | 28   | 7   | 0.688434 | 0.833774 | 0.57683  | 0.16325  |
| pseudogen: -            | 1    | 4   | 0   | 1   | 4    | 0   | 0.070405 | 0.36114  | 0        | 0.109279 |
| pseudogen: keratin_8_f  | 5    | 2   | 4   | 0   | 0    | 0   | 0.162587 | 0.083398 | 0.156936 | 0        |
| pseudogen: -            | 1    | 0   | 0   | 0   | 1    | 0   | 0.046843 | 0        | 0        | 0        |
| pseudogen: phosducin-   | 1    | 0   | 1   | 0   | 3    | 3   | 0.06558  | 0        | 0.079127 | 0        |
| pseudogen: ribosomal_   | 1    | 0   | 0   | 1   | 2    | 0   | 0.104432 | 0        | 0        | 0.162093 |
| protein_co chromosom    | 0    | 0   | 0   | 31  | 37   | 11  | 0        | 0        | 0        | 1.595597 |
| processed_ RSBN1L_an    | 93   | 79  | 89  | 110 | 147  | 83  | 2.149222 | 2.34118  | 2.481626 | 3.945677 |
| pseudogen: forkhead_b   | 0    | 0   | 0   | 0   | 6    | 2   | 0        | 0        | 0        | 0        |
| pseudogen: mitochond    | 0    | 0   | 0   | 0   | 3    | 0   | 0        | 0        | 0        | 0        |
| protein_co speedy_hoi   | 90   | 65  | 65  | 55  | 61   | 55  | 1.324993 | 1.227139 | 1.154602 | 1.256794 |
| protein_co Uncharacte   | 2    | 0   | 0   | 0   | 0    | 0   | 0.315758 | 0        | 0        | 0        |
| protein_co metallo-be   | 48   | 26  | 34  | 22  | 40   | 43  | 1.501482 | 1.042945 | 1.283234 | 1.068149 |
| pseudogen: alpha-2-gly  | 0    | 0   | 0   | 1   | 1    | 0   | 0        | 0        | 0        | 0.061626 |
| protein_co Uncharacte   | 2    | 3   | 3   | 2   | 1    | 0   | 0.205658 | 0.395591 | 0.372207 | 0.31921  |
| pseudogen: -            | 116  | 93  | 113 | 87  | 97   | 103 | 2.309657 | 2.374552 | 2.714663 | 2.688681 |
| processed_ forkhead_b   | 0    | 0   | 0   | 207 | 260  | 96  | 0        | 0        | 0        | 11.24285 |
| protein_co SOGA_fami    | 6    | 8   | 6   | 1   | 2    | 2   | 0.023806 | 0.040704 | 0.028723 | 0.006158 |
| pseudogen: ATP_syntha   | 1    | 0   | 0   | 0   | 0    | 0   | 0.061697 | 0        | 0        | 0        |
| lincRNA -               | 4    | 3   | 3   | 3   | 3    | 0   | 0.291242 | 0.280108 | 0.26355  | 0.339036 |
| antisense -             | 15   | 15  | 8   | 14  | 18   | 15  | 0.144931 | 0.185853 | 0.093263 | 0.209956 |
| pseudogen: -            | 0    | 3   | 1   | 0   | 0    | 0   | 0        | 0.192518 | 0.060379 | 0        |
| protein_co neuralized_  | 280  | 206 | 243 | 306 | 387  | 166 | 2.043774 | 1.928197 | 2.140076 | 3.466784 |
| pseudogen: ribosomal_   | 3    | 2   | 1   | 3   | 0    | 2   | 0.261468 | 0.223531 | 0.105159 | 0.405835 |
| protein_co EF-hand_ca   | 2    | 1   | 2   | 1   | 0    | 0   | 0.13359  | 0.085655 | 0.161184 | 0.103675 |
| protein_co HAUS_augn    | 150  | 137 | 124 | 128 | 119  | 171 | 1.251513 | 1.465798 | 1.248285 | 1.657618 |
| pseudogen: -            | 1    | 1   | 4   | 0   | 2    | 1   | 0.05913  | 0.075826 | 0.285375 | 0        |
| protein_co V-set_and_f  | 3    | 1   | 6   | 9   | 9    | 1   | 0.04738  | 0.020253 | 0.114332 | 0.220619 |
| pseudogen: ribosomal_   | 51   | 36  | 35  | 77  | 68   | 78  | 3.050243 | 2.761062 | 2.525692 | 7.148016 |

|                         |      |      |      |      |      |      |          |          |          |          |
|-------------------------|------|------|------|------|------|------|----------|----------|----------|----------|
| pseudogen: -            | 2    | 2    | 3    | 5    | 4    | 3    | 0.05814  | 0.074556 | 0.105224 | 0.225604 |
| antisense KANSL1_an     | 8    | 7    | 5    | 5    | 7    | 15   | 0.563243 | 0.631995 | 0.424741 | 0.546395 |
| protein_co lipocalin-li | 0    | 2    | 1    | 1    | 3    | 0    | 0        | 0.03245  | 0.015266 | 0.019638 |
| lincRNA -               | 0    | 0    | 1    | 0    | 0    | 0    | 0        | 0        | 0.027584 | 0        |
| protein_co BBSome_in    | 252  | 203  | 226  | 105  | 141  | 117  | 2.5077   | 2.590481 | 2.713511 | 1.621791 |
| protein_co tripartite_r | 0    | 0    | 0    | 1    | 2    | 0    | 0        | 0        | 0        | 0.053791 |
| pseudogen: family_witl  | 0    | 0    | 1    | 0    | 0    | 0    | 0        | 0        | 0.03514  | 0        |
| pseudogen: leucine_ri   | 213  | 187  | 213  | 164  | 176  | 290  | 2.022185 | 2.276629 | 2.439883 | 2.416661 |
| pseudogen: -            | 0    | 0    | 0    | 1    | 4    | 5    | 0        | 0        | 0        | 0.240993 |
| antisense -             | 3    | 2    | 0    | 7    | 6    | 2    | 0.065155 | 0.055702 | 0        | 0.23597  |
| pseudogen: -            | 13   | 7    | 11   | 15   | 19   | 6    | 0.782503 | 0.540319 | 0.798884 | 1.401408 |
| protein_co arsenic_(+3  | 2    | 1    | 1    | 1    | 0    | 1    | 0.03901  | 0.025012 | 0.023534 | 0.030274 |
| pseudogen: family_witl  | 8    | 3    | 5    | 3    | 6    | 9    | 0.523911 | 0.25194  | 0.39508  | 0.304943 |
| pseudogen: reticulocal  | 225  | 154  | 172  | 51   | 89   | 63   | 11.53033 | 10.12021 | 10.63496 | 4.056579 |
| protein_co perilipin_5  | 0    | 0    | 0    | 13   | 13   | 14   | 0        | 0        | 0        | 0.383052 |
| pseudogen: SWI/SNF_r    | 2    | 0    | 2    | 1    | 0    | 0    | 0.077122 | 0        | 0.093052 | 0.059852 |
| protein_co -            | 0    | 0    | 0    | 1    | 0    | 2    | 0        | 0        | 0        | 1.347774 |
| pseudogen: -            | 64   | 52   | 68   | 120  | 126  | 132  | 3.948633 | 4.114144 | 5.062019 | 11.49155 |
| protein_co SEC14-like_  | 0    | 0    | 0    | 25   | 31   | 21   | 0        | 0        | 0        | 1.062169 |
| protein_co serine_pep   | 0    | 0    | 0    | 0    | 4    | 0    | 0        | 0        | 0        | 0        |
| protein_co HIG1_hypo    | 0    | 0    | 0    | 0    | 0    | 1    | 0        | 0        | 0        | 0        |
| protein_co notochord    | 0    | 2    | 0    | 2    | 1    | 4    | 0        | 0.043747 | 0        | 0.05295  |
| pseudogen: keratin_42   | 1    | 1    | 0    | 1    | 0    | 0    | 0.016197 | 0.02077  | 0        | 0.02514  |
| protein_co protein_ph   | 1953 | 1530 | 1661 | 547  | 543  | 457  | 22.58353 | 22.68769 | 23.17433 | 9.817645 |
| pseudogen: -            | 0    | 0    | 0    | 0    | 0    | 2    | 0        | 0        | 0        | 0        |
| protein_co StAR-relate  | 195  | 159  | 157  | 420  | 561  | 244  | 4.657949 | 4.870422 | 4.524888 | 15.57184 |
| pseudogen: -            | 0    | 0    | 1    | 0    | 0    | 0    | 0        | 0        | 0.054243 | 0        |
| pseudogen: zinc_finger  | 2    | 1    | 1    | 4    | 5    | 0    | 0.027246 | 0.017469 | 0.016437 | 0.084579 |
| pseudogen: ribosomal_   | 3    | 3    | 1    | 0    | 3    | 8    | 0.35977  | 0.461354 | 0.144694 | 0        |
| pseudogen: GTF2I_repe   | 1    | 0    | 3    | 0    | 0    | 0    | 0.015578 | 0        | 0.056388 | 0        |
| lincRNA -               | 0    | 1    | 3    | 0    | 4    | 1    | 0        | 0.097613 | 0.27553  | 0        |
| lincRNA maternally      | 0    | 0    | 0    | 1    | 0    | 1    | 0        | 0        | 0        | 0.014954 |
| pseudogen: COP9_signa   | 1    | 0    | 0    | 2    | 0    | 0    | 0.074785 | 0        | 0        | 0.232152 |
| pseudogen: leucine_ri   | 0    | 0    | 0    | 8    | 9    | 4    | 0        | 0        | 0        | 0.156642 |
| pseudogen: -            | 1    | 1    | 1    | 0    | 1    | 0    | 0.014486 | 0.018576 | 0.017478 | 0        |
| antisense -             | 0    | 1    | 0    | 0    | 0    | 1    | 0        | 0.15146  | 0        | 0        |
| pseudogen: retinoblast  | 0    | 0    | 1    | 0    | 0    | 0    | 0        | 0        | 0.043891 | 0        |
| protein_co NUT_family   | 30   | 26   | 19   | 12   | 24   | 14   | 0.25378  | 0.282045 | 0.193927 | 0.15756  |
| protein_co cytoplasmic  | 8    | 3    | 4    | 4    | 4    | 5    | 0.076837 | 0.03695  | 0.046354 | 0.059631 |
| pseudogen: high_mobil   | 0    | 3    | 3    | 1    | 5    | 3    | 0        | 0.668109 | 0.628617 | 0.269555 |
| pseudogen: -            | 1    | 0    | 0    | 0    | 0    | 0    | 0.19061  | 0        | 0        | 0        |
| protein_co echinoderm   | 83   | 103  | 86   | 16   | 21   | 26   | 0.467773 | 0.744395 | 0.584795 | 0.139961 |
| protein_co transmembr   | 5    | 2    | 3    | 11   | 9    | 2    | 0.132984 | 0.068213 | 0.096271 | 0.4541   |
| pseudogen: polymerase   | 0    | 0    | 2    | 1    | 3    | 0    | 0        | 0        | 0.096217 | 0.061888 |
| pseudogen: -            | 0    | 0    | 0    | 1    | 0    | 0    | 0        | 0        | 0        | 0.128586 |
| pseudogen: -            | 0    | 1    | 0    | 1    | 3    | 0    | 0        | 0.068174 | 0        | 0.082517 |
| protein_co defensin_b   | 0    | 0    | 0    | 3    | 0    | 1    | 0        | 0        | 0        | 1.173868 |
| pseudogen: -            | 0    | 1    | 1    | 2    | 0    | 0    | 0        | 0.099883 | 0.093979 | 0.241793 |
| lincRNA -               | 5    | 2    | 5    | 2    | 4    | 6    | 0.182878 | 0.093806 | 0.220653 | 0.113541 |
| pseudogen: heterogene   | 6    | 1    | 11   | 8    | 4    | 13   | 0.247441 | 0.052885 | 0.547344 | 0.512083 |
| pseudogen: -            | 21   | 25   | 16   | 35   | 44   | 57   | 0.96823  | 1.478117 | 0.890077 | 2.504713 |
| protein_co zinc_finger  | 1457 | 1070 | 1167 | 350  | 499  | 361  | 11.24589 | 10.59076 | 10.86808 | 4.193075 |
| pseudogen: keratin_8_j  | 6    | 12   | 6    | 1    | 0    | 0    | 0.220486 | 0.565484 | 0.266029 | 0.057037 |
| pseudogen: ribosomal_   | 13   | 9    | 16   | 0    | 0    | 0    | 1.07508  | 0.954441 | 1.596487 | 0        |
| protein_co chromosom    | 0    | 0    | 0    | 1    | 0    | 0    | 0        | 0        | 0        | 0.015046 |
| protein_co Rho_guanin   | 9    | 2    | 8    | 5    | 9    | 12   | 0.094115 | 0.02682  | 0.100938 | 0.081155 |
| protein_co chromosom    | 4    | 0    | 1    | 0    | 3    | 1    | 0.195988 | 0        | 0.059118 | 0        |
| pseudogen: -            | 0    | 0    | 0    | 5    | 11   | 1    | 0        | 0        | 0        | 0.792808 |
| protein_co interferon-i | 991  | 690  | 763  | 741  | 961  | 1220 | 20.4255  | 18.23717 | 18.97455 | 23.70542 |
| protein_co Uncharacter  | 1    | 0    | 1    | 8    | 6    | 2    | 0.029325 | 0        | 0.035382 | 0.364127 |
| protein_co calpain_14   | 10   | 5    | 2    | 3    | 9    | 1    | 0.122749 | 0.078704 | 0.029621 | 0.057157 |
| protein_co zinc_finger  | 960  | 726  | 813  | 1260 | 1574 | 1173 | 9.981024 | 9.679431 | 10.19864 | 20.33316 |
| processed_ -            | 269  | 247  | 198  | 209  | 259  | 192  | 2.661058 | 3.133346 | 2.363281 | 3.209067 |
| antisense -             | 1    | 0    | 0    | 5    | 3    | 8    | 0.062024 | 0        | 0        | 0.481348 |
| antisense -             | 0    | 0    | 1    | 15   | 25   | 4    | 0        | 0        | 0.080938 | 1.561798 |

|                          |      |      |     |     |     |     |          |          |          |          |
|--------------------------|------|------|-----|-----|-----|-----|----------|----------|----------|----------|
| pseudogen: -             | 0    | 0    | 1   | 3   | 1   | 3   | 0        | 0        | 0.044373 | 0.171247 |
| protein_co heterogeneous | 1226 | 1043 | 997 | 771 | 993 | 856 | 11.25875 | 12.28268 | 11.04696 | 10.98966 |
| pseudogen: -             | 0    | 0    | 0   | 1   | 1   | 0   | 0        | 0        | 0        | 0.082517 |
| protein_co methyltran    | 63   | 64   | 49  | 96  | 114 | 149 | 1.029293 | 1.340874 | 0.965923 | 2.434446 |
| pseudogen: ribosomal_    | 0    | 1    | 0   | 0   | 1   | 0   | 0        | 0.118599 | 0        | 0        |
| pseudogen: septin_7_p    | 186  | 153  | 176 | 162 | 160 | 185 | 2.901378 | 3.060499 | 3.312471 | 3.922265 |
| antisense -              | 2    | 4    | 8   | 11  | 30  | 11  | 0.053558 | 0.137361 | 0.258483 | 0.457212 |
| antisense -              | 0    | 1    | 3   | 5   | 13  | 9   | 0        | 0.091522 | 0.258336 | 0.55388  |
| sense_intrc -            | 1    | 2    | 4   | 2   | 8   | 2   | 0.032836 | 0.084215 | 0.158475 | 0.101932 |
| pseudogen: -             | 18   | 15   | 14  | 21  | 33  | 16  | 0.107341 | 0.114708 | 0.100732 | 0.194376 |
| protein_co membrane      | 0    | 0    | 0   | 0   | 0   | 1   | 0        | 0        | 0        | 0        |
| pseudogen: polymerase    | 160  | 119  | 108 | 44  | 76  | 130 | 1.160285 | 1.106626 | 0.944967 | 0.495254 |
| pseudogen: -             | 2    | 0    | 1   | 2   | 1   | 4   | 0.114786 | 0        | 0.069248 | 0.178164 |
| protein_co membrane      | 0    | 0    | 0   | 2   | 1   | 0   | 0        | 0        | 0        | 0.129386 |
| pseudogen: -             | 44   | 34   | 29  | 230 | 357 | 307 | 1.124338 | 1.114122 | 0.894109 | 9.122264 |
| lincRNA -                | 4    | 1    | 4   | 0   | 0   | 1   | 0.156954 | 0.050318 | 0.189374 | 0        |
| pseudogen: cytochrom     | 0    | 0    | 0   | 0   | 0   | 2   | 0        | 0        | 0        | 0        |
| protein_co fer-1-like_6  | 12   | 2    | 7   | 0   | 0   | 0   | 0.09299  | 0.019874 | 0.065448 | 0        |
| pseudogen: -             | 0    | 2    | 1   | 0   | 0   | 0   | 0        | 0.077637 | 0.036524 | 0        |
| pseudogen: myosin_ph     | 15   | 14   | 15  | 18  | 48  | 31  | 0.645868 | 0.773018 | 0.779277 | 1.202972 |
| pseudogen: keratin_16    | 0    | 0    | 0   | 2   | 1   | 0   | 0        | 0        | 0        | 0.075069 |
| pseudogen: DEAD/H_(A     | 311  | 237  | 271 | 336 | 403 | 403 | 3.711579 | 3.627071 | 3.902256 | 6.223979 |
| protein_co mature_T-c    | 8    | 9    | 9   | 2   | 8   | 8   | 0.16496  | 0.237981 | 0.223914 | 0.06401  |
| pseudogen: UPF3_regul    | 7    | 6    | 5   | 11  | 14  | 14  | 0.289956 | 0.318709 | 0.249892 | 0.707224 |
| pseudogen: ribosomal_    | 0    | 0    | 0   | 0   | 0   | 1   | 0        | 0        | 0        | 0        |
| processed_ -             | 5    | 3    | 0   | 8   | 5   | 11  | 0.302907 | 0.233061 | 0        | 0.752246 |
| protein_co RAD51_ass     | 0    | 2    | 3   | 2   | 5   | 1   | 0        | 0.032293 | 0.045576 | 0.039087 |
| pseudogen: zinc_finger   | 0    | 0    | 1   | 0   | 0   | 0   | 0        | 0        | 0.093668 | 0        |
| pseudogen: -             | 1    | 0    | 0   | 2   | 1   | 0   | 0.070405 | 0        | 0        | 0.218558 |
| processed_ long_inter    | 2    | 1    | 0   | 4   | 5   | 5   | 0.042377 | 0.027171 | 0        | 0.13155  |
| pseudogen: apolipopro    | 0    | 0    | 0   | 5   | 1   | 5   | 0        | 0        | 0        | 0.49781  |
| pseudogen: keratin_16    | 0    | 0    | 0   | 1   | 1   | 2   | 0        | 0        | 0        | 0.03717  |
| pseudogen: serine/argi   | 6    | 1    | 4   | 1   | 0   | 1   | 0.53083  | 0.113452 | 0.426985 | 0.13732  |
| processed_ -             | 2    | 4    | 0   | 19  | 20  | 17  | 0.029288 | 0.075115 | 0        | 0.43186  |
| protein_co Uncharacte    | 1    | 1    | 1   | 3   | 6   | 5   | 0.181744 | 0.233061 | 0.219285 | 0.846277 |
| protein_co smoothelir    | 1    | 3    | 0   | 20  | 19  | 2   | 0.02274  | 0.087483 | 0        | 0.705915 |
| pseudogen: mediator_c    | 2    | 1    | 1   | 2   | 7   | 2   | 0.164238 | 0.105306 | 0.099081 | 0.25492  |
| pseudogen: ribosomal_    | 0    | 0    | 0   | 4   | 7   | 2   | 0        | 0        | 0        | 0.458455 |
| pseudogen: olfactory_r   | 0    | 0    | 0   | 2   | 3   | 4   | 0        | 0        | 0        | 0.079411 |
| pseudogen: transmemt     | 0    | 0    | 0   | 1   | 0   | 0   | 0        | 0        | 0        | 0.210956 |
| pseudogen: family_witl   | 0    | 1    | 0   | 0   | 0   | 0   | 0        | 0.127124 | 0        | 0        |
| pseudogen: ubiquitin_s   | 0    | 0    | 2   | 0   | 0   | 0   | 0        | 0        | 0.035549 | 0        |
| processed_ long_inter    | 2    | 1    | 0   | 2   | 0   | 0   | 0.045702 | 0.029303 | 0        | 0.070935 |
| protein_co chromosom     | 9    | 8    | 2   | 0   | 0   | 2   | 0.098624 | 0.112418 | 0.026443 | 0        |
| protein_co CDNA_FLJ2     | 0    | 0    | 0   | 2   | 4   | 1   | 0        | 0        | 0        | 0.091952 |
| processed_ HLA-F_anti    | 6    | 7    | 8   | 12  | 20  | 5   | 0.099238 | 0.148469 | 0.159649 | 0.308063 |
| protein_co zinc_finger   | 187  | 140  | 166 | 158 | 187 | 171 | 4.36675  | 4.192316 | 4.677059 | 5.726698 |
| protein_co Rho_guanin    | 313  | 285  | 310 | 59  | 67  | 27  | 1.771464 | 2.068436 | 2.116887 | 0.518287 |
| protein_co TBC1_dom      | 0    | 1    | 0   | 12  | 4   | 0   | 0        | 0.015941 | 0        | 0.231537 |
| protein_co leucine_ric   | 11   | 8    | 7   | 10  | 11  | 11  | 0.277158 | 0.258484 | 0.212804 | 0.391079 |
| processed_ -             | 1    | 4    | 3   | 0   | 1   | 3   | 0.058248 | 0.298782 | 0.21084  | 0        |
| protein_co isoprenoid    | 85   | 55   | 67  | 4   | 6   | 12  | 2.143976 | 1.778988 | 2.039031 | 0.1566   |
| protein_co Uncharacte    | 1    | 0    | 0   | 0   | 0   | 0   | 0.035229 | 0        | 0        | 0        |
| antisense -              | 0    | 0    | 1   | 0   | 0   | 0   | 0        | 0        | 0.024901 | 0        |
| pseudogen: coiled-coil   | 0    | 0    | 2   | 1   | 0   | 0   | 0        | 0        | 0.176798 | 0.113718 |
| pseudogen: peptidylpro   | 20   | 6    | 21  | 16  | 21  | 13  | 1.879359 | 0.723004 | 2.380933 | 2.333621 |
| protein_co Putative_g    | 4    | 1    | 1   | 0   | 0   | 0   | 0.212653 | 0.068174 | 0.064145 | 0        |
| pseudogen: poly_(ADP-    | 186  | 117  | 141 | 144 | 191 | 142 | 3.552563 | 2.865656 | 3.249347 | 4.268958 |
| pseudogen: -             | 0    | 0    | 0   | 0   | 2   | 0   | 0        | 0        | 0        | 0        |
| pseudogen: ribosomal_    | 1    | 2    | 2   | 0   | 4   | 0   | 0.057675 | 0.147921 | 0.139177 | 0        |
| pseudogen: A_kinase_(F   | 1    | 0    | 0   | 4   | 1   | 1   | 0.017245 | 0        | 0        | 0.107068 |
| pseudogen: -             | 0    | 0    | 1   | 0   | 0   | 0   | 0        | 0        | 0.049196 | 0        |
| protein_co -             | 0    | 0    | 0   | 9   | 12  | 0   | 0        | 0        | 0        | 0.363092 |
| pseudogen: heat_shock    | 0    | 0    | 0   | 1   | 0   | 0   | 0        | 0        | 0        | 0.043167 |
| pseudogen: DnaJ_(Hsp4    | 0    | 0    | 0   | 2   | 3   | 4   | 0        | 0        | 0        | 0.121909 |

|                        |      |      |      |      |      |      |          |          |          |          |
|------------------------|------|------|------|------|------|------|----------|----------|----------|----------|
| protein_co acyl-CoA_s  | 2    | 0    | 3    | 0    | 0    | 0    | 0.043782 | 0        | 0.079237 | 0        |
| protein_co chromosom   | 944  | 779  | 791  | 490  | 602  | 489  | 6.523828 | 6.903627 | 6.595612 | 5.256021 |
| protein_co Uncharacte  | 8    | 1    | 4    | 7    | 9    | 10   | 0.368126 | 0.059009 | 0.222082 | 0.499959 |
| protein_co collagen_ty | 2    | 1    | 0    | 23   | 22   | 17   | 0.021927 | 0.014059 | 0        | 0.391381 |
| protein_co prohibitin  | 3811 | 2833 | 3009 | 5194 | 5810 | 6241 | 117.7193 | 112.2185 | 112.1447 | 249.0239 |
| antisense -            | 0    | 1    | 0    | 0    | 4    | 0    | 0        | 0.081366 | 0        | 0        |
| pseudogen: dual_specif | 0    | 0    | 0    | 1    | 0    | 0    | 0        | 0        | 0        | 0.041352 |
| pseudogen: ribosomal_  | 68   | 68   | 59   | 108  | 103  | 112  | 5.013398 | 6.428972 | 5.248357 | 12.35883 |
| pseudogen: guanine_nu  | 3    | 2    | 1    | 3    | 1    | 0    | 0.085618 | 0.073195 | 0.034434 | 0.132891 |
| processed_ CD27_anti   | 53   | 24   | 40   | 19   | 24   | 18   | 1.051257 | 0.610455 | 0.957284 | 0.584948 |
| protein_co neuralized_ | 236  | 203  | 176  | 210  | 323  | 218  | 2.128085 | 2.347375 | 1.914863 | 2.939184 |
| protein_co glutamate_  | 4    | 3    | 4    | 115  | 179  | 26   | 0.051584 | 0.049612 | 0.062239 | 2.301891 |
| pseudogen: peroxiredo  | 2    | 3    | 2    | 0    | 2    | 0    | 0.159219 | 0.306264 | 0.192107 | 0        |
| pseudogen: pyruvate_k  | 2    | 0    | 0    | 1    | 4    | 0    | 0.058576 | 0        | 0        | 0.045459 |
| pseudogen: dual_specif | 2    | 0    | 5    | 1    | 4    | 1    | 0.053254 | 0        | 0.160635 | 0.041329 |
| protein_co chromosom   | 8    | 5    | 6    | 3    | 5    | 3    | 0.136012 | 0.10901  | 0.123079 | 0.079166 |
| protein_co Uncharacte  | 15   | 16   | 16   | 13   | 21   | 23   | 0.406561 | 0.556114 | 0.523242 | 0.5469   |
| processed_ -           | 77   | 74   | 59   | 2    | 6    | 11   | 1.490108 | 1.836403 | 1.377612 | 0.060074 |
| pseudogen: -           | 0    | 0    | 0    | 1    | 0    | 0    | 0        | 0        | 0        | 0.113718 |
| pseudogen: nucleopho:  | 1    | 1    | 1    | 1    | 3    | 1    | 0.05245  | 0.067259 | 0.063284 | 0.081409 |
| pseudogen: ribosomal_  | 0    | 1    | 0    | 1    | 0    | 0    | 0        | 0.097613 | 0        | 0.118149 |
| pseudogen: -           | 0    | 0    | 0    | 1    | 1    | 0    | 0        | 0        | 0        | 0.056726 |
| pseudogen: eukaryotic_ | 0    | 0    | 0    | 0    | 0    | 1    | 0        | 0        | 0        | 0        |
| pseudogen: telomeric_  | 0    | 0    | 0    | 6    | 5    | 4    | 0        | 0        | 0        | 0.39164  |
| pseudogen: -           | 7    | 7    | 2    | 5    | 11   | 5    | 0.65646  | 0.841817 | 0.226302 | 0.727798 |
| pseudogen: tetratricop | 16   | 16   | 17   | 17   | 39   | 50   | 0.123374 | 0.15821  | 0.158162 | 0.203463 |
| protein_co UBX_doma    | 366  | 275  | 288  | 411  | 520  | 598  | 3.386296 | 3.262765 | 3.215025 | 5.902229 |
| pseudogen: -           | 0    | 0    | 0    | 0    | 0    | 1    | 0        | 0        | 0        | 0        |
| protein_co COBW_dor    | 2    | 6    | 2    | 4    | 4    | 4    | 0.028196 | 0.108472 | 0.03402  | 0.087528 |
| protein_co chromosom   | 1    | 1    | 0    | 2    | 8    | 2    | 0.050474 | 0.064725 | 0        | 0.156684 |
| pseudogen: -           | 1    | 2    | 3    | 7    | 8    | 10   | 0.031747 | 0.081422 | 0.114913 | 0.344928 |
| pseudogen: keratin_18  | 0    | 0    | 0    | 1    | 0    | 0    | 0        | 0        | 0        | 0.05655  |
| pseudogen: -           | 159  | 119  | 135  | 75   | 118  | 121  | 2.713069 | 2.603874 | 2.779364 | 1.986348 |
| pseudogen: -           | 120  | 90   | 94   | 338  | 435  | 193  | 1.563869 | 1.504081 | 1.47807  | 6.837013 |
| pseudogen: -           | 112  | 88   | 89   | 177  | 228  | 159  | 1.050126 | 1.058073 | 1.006843 | 2.57589  |
| antisense -            | 7    | 1    | 1    | 1    | 2    | 2    | 0.557267 | 0.102088 | 0.096053 | 0.123565 |
| pseudogen: olfactory_r | 0    | 0    | 0    | 0    | 0    | 1    | 0        | 0        | 0        | 0        |
| lincRNA long_interf    | 0    | 0    | 0    | 1    | 0    | 0    | 0        | 0        | 0        | 0.033493 |
| pseudogen: mitogen-ac  | 0    | 0    | 0    | 1    | 0    | 0    | 0        | 0        | 0        | 0.033977 |
| protein_co mucin_5AC   | 0    | 0    | 0    | 2    | 0    | 0    | 0        | 0        | 0        | 0.036281 |
| pseudogen: -           | 0    | 2    | 1    | 0    | 2    | 2    | 0        | 0.295478 | 0.139006 | 0        |
| protein_co golgin_A6_  | 0    | 0    | 0    | 14   | 26   | 11   | 0        | 0        | 0        | 0.477468 |
| protein_co family_witl | 2    | 4    | 4    | 5    | 7    | 1    | 0.096581 | 0.247703 | 0.233061 | 0.374767 |
| processed_ long_interf | 87   | 61   | 62   | 23   | 21   | 64   | 1.555847 | 1.398901 | 1.337788 | 0.638419 |
| protein_co peroxisom:  | 1160 | 940  | 1064 | 1119 | 1337 | 1610 | 12.03638 | 12.50764 | 13.32072 | 18.02182 |
| processed_ -           | 5    | 5    | 8    | 6    | 6    | 7    | 0.079718 | 0.102227 | 0.153895 | 0.14848  |
| pseudogen: -           | 0    | 0    | 0    | 0    | 0    | 1    | 0        | 0        | 0        | 0        |
| pseudogen: tyrosine_3- | 0    | 0    | 1    | 0    | 0    | 0    | 0        | 0        | 0.076661 | 0        |
| pseudogen: -           | 0    | 1    | 1    | 0    | 0    | 0    | 0        | 0.046361 | 0.04362  | 0        |
| pseudogen: RNA_bindin  | 2    | 1    | 2    | 1    | 0    | 0    | 0.080291 | 0.051481 | 0.096876 | 0.062311 |
| protein_co chromosom   | 28   | 24   | 22   | 2    | 5    | 1    | 0.550491 | 0.60508  | 0.52187  | 0.061031 |
| protein_co ubiquitin-c | 19   | 14   | 14   | 40   | 44   | 16   | 0.206373 | 0.195    | 0.183474 | 0.674355 |
| pseudogen: ubiquitin_  | 5    | 1    | 0    | 0    | 0    | 0    | 0.613744 | 0.157408 | 0        | 0        |
| pseudogen: cytochrom   | 12   | 6    | 4    | 1    | 4    | 1    | 0.394034 | 0.252646 | 0.158475 | 0.050966 |
| pseudogen: -           | 3    | 1    | 0    | 0    | 0    | 0    | 0.371161 | 0.158654 | 0        | 0        |
| pseudogen: -           | 1    | 0    | 0    | 4    | 11   | 3    | 0.03947  | 0        | 0        | 0.24505  |
| lincRNA -              | 6    | 13   | 10   | 10   | 12   | 8    | 0.353887 | 0.983255 | 0.711642 | 0.915469 |
| protein_co HCG20454    | 4    | 4    | 3    | 19   | 13   | 11   | 0.060896 | 0.078091 | 0.055106 | 0.448966 |
| antisense -            | 2    | 2    | 0    | 2    | 2    | 5    | 0.026933 | 0.034538 | 0        | 0.041803 |
| protein_co FAST_kinase | 196  | 160  | 169  | 318  | 408  | 423  | 3.197788 | 3.347518 | 3.326813 | 8.05288  |
| protein_co golgin_A8_  | 159  | 171  | 149  | 122  | 157  | 114  | 1.149123 | 1.584802 | 1.299283 | 1.368547 |
| processed_ DHRS4_ant   | 87   | 76   | 69   | 47   | 54   | 35   | 1.430376 | 1.602337 | 1.368762 | 1.199387 |
| protein_co potassium_  | 1    | 0    | 1    | 0    | 0    | 0    | 0.012521 | 0        | 0.015107 | 0        |
| pseudogen: -           | 0    | 0    | 0    | 0    | 1    | 1    | 0        | 0        | 0        | 0        |
| pseudogen: aldo-keto_  | 1    | 0    | 0    | 1    | 0    | 0    | 0.052391 | 0        | 0        | 0.081318 |

|                         |      |      |      |      |      |      |          |          |          |          |
|-------------------------|------|------|------|------|------|------|----------|----------|----------|----------|
| pseudogen: -            | 2    | 2    | 0    | 2    | 0    | 2    | 0.089399 | 0.114642 | 0        | 0.13876  |
| protein_co homeobox     | 34   | 32   | 29   | 57   | 67   | 19   | 0.475615 | 0.574031 | 0.489466 | 1.237604 |
| protein_co chromoso     | 4    | 4    | 6    | 16   | 6    | 6    | 0.112311 | 0.144023 | 0.203265 | 0.697292 |
| pseudogen: ribosomal_   | 0    | 0    | 0    | 0    | 1    | 0    | 0        | 0        | 0        | 0        |
| pseudogen: high_mobil   | 5    | 5    | 3    | 2    | 4    | 4    | 0.376929 | 0.483358 | 0.272872 | 0.234019 |
| pseudogen: -            | 2    | 0    | 0    | 1    | 0    | 0    | 0.143176 | 0        | 0        | 0.111114 |
| pseudogen: -            | 0    | 0    | 0    | 0    | 0    | 1    | 0        | 0        | 0        | 0        |
| pseudogen: -            | 0    | 0    | 1    | 0    | 0    | 0    | 0        | 0        | 0.12193  | 0        |
| protein_co DEAD_(Asp    | 5677 | 4403 | 4798 | 4313 | 5136 | 6941 | 49.90525 | 49.6347  | 50.89038 | 58.84876 |
| pseudogen: -            | 27   | 44   | 37   | 4    | 2    | 0    | 0.842896 | 1.761459 | 1.393671 | 0.193821 |
| processed_ -            | 5    | 0    | 0    | 2    | 1    | 5    | 0.213719 | 0        | 0        | 0.132689 |
| protein_co vacuolar_p   | 646  | 483  | 557  | 294  | 356  | 301  | 11.01489 | 10.56098 | 11.45911 | 7.780822 |
| protein_co Uncharacte   | 1    | 4    | 0    | 1    | 5    | 3    | 0.710455 | 3.64423  | 0        | 1.102724 |
| pseudogen: nucleopho    | 0    | 0    | 0    | 0    | 2    | 0    | 0        | 0        | 0        | 0        |
| pseudogen: ribosomal_   | 0    | 0    | 0    | 0    | 0    | 1    | 0        | 0        | 0        | 0        |
| pseudogen: -            | 0    | 0    | 0    | 0    | 0    | 1    | 0        | 0        | 0        | 0        |
| pseudogen: argininosuc  | 4    | 1    | 2    | 0    | 1    | 1    | 0.150772 | 0.048336 | 0.090957 | 0        |
| protein_co -            | 10   | 9    | 4    | 8    | 20   | 14   | 0.215191 | 0.248356 | 0.103856 | 0.267204 |
| pseudogen: mitochond    | 0    | 1    | 1    | 0    | 0    | 0    | 0        | 0.058209 | 0.054768 | 0        |
| pseudogen: family_witl  | 0    | 0    | 0    | 0    | 1    | 0    | 0        | 0        | 0        | 0        |
| pseudogen: heat_shock   | 0    | 0    | 0    | 0    | 0    | 1    | 0        | 0        | 0        | 0        |
| pseudogen: transmemt    | 0    | 0    | 0    | 0    | 1    | 0    | 0        | 0        | 0        | 0        |
| processed_ family_witl  | 0    | 2    | 0    | 8    | 3    | 5    | 0        | 0.08398  | 0        | 0.406591 |
| protein_co myosin_ligi  | 60   | 36   | 43   | 44   | 98   | 78   | 0.951759 | 0.732298 | 0.822986 | 1.083326 |
| lincRNA long_interf     | 22   | 15   | 10   | 1    | 0    | 0    | 0.296858 | 0.259553 | 0.162807 | 0.020944 |
| pseudogen: actin_gamr   | 4    | 9    | 14   | 8    | 2    | 9    | 0.168366 | 0.485788 | 0.711003 | 0.522656 |
| lincRNA long_interf     | 1    | 4    | 2    | 1    | 0    | 0    | 0.059885 | 0.307176 | 0.14451  | 0.09295  |
| protein_co scratch_ho   | 0    | 0    | 1    | 18   | 33   | 7    | 0        | 0        | 0.015816 | 0.366239 |
| pseudogen: high_mobil   | 3    | 4    | 2    | 0    | 0    | 0    | 0.230229 | 0.393648 | 0.18519  | 0        |
| pseudogen: proteasom    | 0    | 4    | 3    | 2    | 2    | 1    | 0        | 0.324587 | 0.229051 | 0.196437 |
| processed_ miR-17-92_   | 32   | 23   | 28   | 133  | 199  | 371  | 0.52741  | 0.486111 | 0.556806 | 3.40236  |
| protein_co zinc_finger  | 436  | 313  | 320  | 127  | 175  | 189  | 2.572225 | 2.36797  | 2.277826 | 1.162938 |
| antisense MCM3AP_c      | 77   | 55   | 68   | 48   | 73   | 75   | 1.422029 | 1.302536 | 1.515216 | 1.375908 |
| protein_co aminopept    | 97   | 82   | 96   | 159  | 218  | 144  | 0.971036 | 1.052657 | 1.159532 | 2.470536 |
| pseudogen: CTAGE_fam    | 0    | 0    | 0    | 1    | 2    | 2    | 0        | 0        | 0        | 0.030787 |
| pseudogen: -            | 0    | 0    | 0    | 0    | 1    | 0    | 0        | 0        | 0        | 0        |
| processed_ -            | 175  | 141  | 153  | 91   | 110  | 68   | 5.620379 | 5.807056 | 5.928803 | 4.536275 |
| pseudogen: -            | 0    | 0    | 0    | 0    | 0    | 1    | 0        | 0        | 0        | 0        |
| pseudogen: -            | 0    | 0    | 0    | 32   | 23   | 48   | 0        | 0        | 0        | 0.855604 |
| protein_co keratin_ass  | 0    | 0    | 0    | 0    | 0    | 1    | 0        | 0        | 0        | 0        |
| antisense -             | 16   | 17   | 20   | 47   | 88   | 36   | 0.163167 | 0.222315 | 0.246087 | 0.743943 |
| pseudogen: -            | 0    | 0    | 1    | 0    | 0    | 1    | 0        | 0        | 0.124069 | 0        |
| protein_co SKI_family_  | 2    | 0    | 0    | 23   | 44   | 65   | 0.031198 | 0        | 0        | 0.556865 |
| protein_co siah_E3_ub   | 0    | 0    | 0    | 6    | 16   | 10   | 0        | 0        | 0        | 0.108357 |
| pseudogen: carboxylest  | 0    | 0    | 0    | 1    | 2    | 0    | 0        | 0        | 0        | 0.071634 |
| pseudogen: breakpoint   | 0    | 1    | 0    | 2    | 20   | 5    | 0        | 0.04127  | 0        | 0.099904 |
| pseudogen: calmodulin   | 0    | 1    | 0    | 2    | 2    | 1    | 0        | 0.133919 | 0        | 0.324186 |
| lincRNA long_interf     | 1    | 0    | 2    | 0    | 0    | 4    | 0.066795 | 0        | 0.161184 | 0        |
| pseudogen: heterogene   | 1    | 0    | 2    | 1    | 2    | 1    | 0.030488 | 0        | 0.07357  | 0.047321 |
| pseudogen: -            | 37   | 29   | 25   | 5    | 5    | 1    | 1.01875  | 1.023937 | 0.830527 | 0.213681 |
| protein_co CDNA_FLJ2    | 5    | 2    | 13   | 4    | 0    | 1    | 0.09822  | 0.050381 | 0.30812  | 0.12196  |
| pseudogen: transmemt    | 0    | 0    | 0    | 2    | 3    | 1    | 0        | 0        | 0        | 0.090691 |
| pseudogen: phosphatic   | 116  | 106  | 102  | 171  | 191  | 104  | 2.062663 | 2.417049 | 2.188359 | 4.719509 |
| pseudogen: interferon-i | 5    | 0    | 1    | 1    | 1    | 1    | 0.161801 | 0        | 0.039045 | 0.050228 |
| protein_co Uncharacte   | 4    | 1    | 0    | 8    | 1    | 1    | 0.398217 | 0.127664 | 0        | 1.236175 |
| protein_co EF-hand_ca   | 0    | 3    | 0    | 6    | 5    | 1    | 0        | 0.140819 | 0        | 0.340889 |
| processed_ long_interf  | 1    | 0    | 2    | 0    | 0    | 0    | 0.047412 | 0        | 0.11441  | 0        |
| pseudogen: -            | 97   | 86   | 72   | 71   | 78   | 47   | 4.885426 | 5.554417 | 4.375334 | 5.550339 |
| protein_co Uncharacte   | 0    | 0    | 1    | 0    | 0    | 0    | 0        | 0        | 0.538814 | 0        |
| pseudogen: ankyrin_rej  | 0    | 0    | 0    | 1    | 0    | 1    | 0        | 0        | 0        | 0.01958  |
| pseudogen: -            | 0    | 0    | 0    | 0    | 0    | 1    | 0        | 0        | 0        | 0        |
| protein_co GRB2-assoc   | 0    | 0    | 0    | 2    | 3    | 7    | 0        | 0        | 0        | 0.053951 |
| pseudogen: G_protein-i  | 2    | 1    | 0    | 0    | 0    | 0    | 0.05481  | 0.035143 | 0        | 0        |
| pseudogen: estrogen-re  | 2    | 0    | 0    | 0    | 0    | 4    | 0.074606 | 0        | 0        | 0        |
| pseudogen: BCL6_corej   | 0    | 0    | 1    | 0    | 0    | 1    | 0        | 0        | 0.011108 | 0        |

|                        |     |     |     |     |     |     |          |          |          |          |
|------------------------|-----|-----|-----|-----|-----|-----|----------|----------|----------|----------|
| protein_co chromosom   | 0   | 1   | 0   | 4   | 2   | 2   | 0        | 0.037487 | 0        | 0.181496 |
| pseudogen: -           | 0   | 0   | 0   | 1   | 0   | 0   | 0        | 0        | 0        | 0.057352 |
| protein_co H6_family_  | 8   | 6   | 4   | 5   | 8   | 14  | 0.198162 | 0.190586 | 0.119547 | 0.192234 |
| pseudogen: glucuronid  | 23  | 8   | 19  | 9   | 10  | 5   | 0.890562 | 0.397224 | 0.887642 | 0.54089  |
| protein_co glucagon_r  | 0   | 0   | 0   | 16  | 31  | 5   | 0        | 0        | 0        | 0.567761 |
| antisense -            | 0   | 0   | 0   | 4   | 5   | 0   | 0        | 0        | 0        | 0.616778 |
| protein_co chymotryp   | 1   | 1   | 1   | 4   | 3   | 0   | 0.050802 | 0.065146 | 0.061295 | 0.315405 |
| protein_co transmemt   | 261 | 182 | 177 | 121 | 175 | 165 | 6.802832 | 6.08317  | 5.56635  | 4.895139 |
| protein_co transmemt   | 744 | 559 | 628 | 315 | 355 | 253 | 12.46825 | 12.01307 | 12.69815 | 8.19358  |
| pseudogen: mitochond   | 0   | 0   | 0   | 0   | 1   | 0   | 0        | 0        | 0        | 0        |
| protein_co Uncharacte  | 1   | 0   | 0   | 0   | 0   | 1   | 0.010772 | 0        | 0        | 0        |
| processed_ hsa-mir-60i | 10  | 14  | 6   | 1   | 5   | 0   | 0.163894 | 0.294239 | 0.118648 | 0.025439 |
| pseudogen: leucine_ri  | 1   | 0   | 0   | 0   | 0   | 0   | 0.101494 | 0        | 0        | 0        |
| protein_co family_witl | 32  | 18  | 18  | 120 | 144 | 60  | 0.627029 | 0.452293 | 0.425557 | 3.649635 |
| pseudogen: cofilin_1_( | 0   | 0   | 0   | 2   | 1   | 0   | 0        | 0        | 0        | 0.294655 |
| protein_co tumor_nec   | 274 | 243 | 274 | 111 | 150 | 99  | 3.688735 | 4.195102 | 4.450671 | 2.319425 |
| protein_co solute_carr | 153 | 132 | 157 | 124 | 137 | 77  | 3.452441 | 3.819602 | 4.274473 | 4.342972 |
| pseudogen: -           | 11  | 5   | 8   | 2   | 4   | 1   | 0.308856 | 0.180029 | 0.27102  | 0.087161 |
| pseudogen: -           | 0   | 4   | 3   | 2   | 6   | 0   | 0        | 0.195385 | 0.137877 | 0.118245 |
| pseudogen: riboflavin_ | 0   | 1   | 1   | 0   | 0   | 0   | 0        | 0.14049  | 0.132186 | 0        |
| pseudogen: -           | 0   | 1   | 0   | 0   | 0   | 0   | 0        | 0.046757 | 0        | 0        |
| processed_ -           | 269 | 175 | 213 | 176 | 215 | 124 | 8.206516 | 6.846268 | 7.840327 | 8.333926 |
| pseudogen: butyrophili | 1   | 1   | 1   | 0   | 0   | 1   | 0.053959 | 0.069194 | 0.065104 | 0        |
| pseudogen: zinc_finger | 3   | 3   | 1   | 5   | 1   | 0   | 0.130613 | 0.167492 | 0.052531 | 0.337882 |
| pseudogen: zinc_finger | 1   | 2   | 2   | 1   | 3   | 1   | 0.014486 | 0.037152 | 0.034956 | 0.022484 |
| pseudogen: keratin_18  | 0   | 0   | 0   | 1   | 0   | 0   | 0        | 0        | 0        | 0.057172 |
| pseudogen: glutaminyl  | 0   | 0   | 0   | 0   | 2   | 0   | 0        | 0        | 0        | 0        |
| pseudogen: -           | 6   | 5   | 2   | 3   | 12  | 7   | 0.142885 | 0.152691 | 0.057466 | 0.110888 |
| pseudogen: -           | 0   | 1   | 0   | 2   | 1   | 0   | 0        | 0.049449 | 0        | 0.119704 |
| pseudogen: -           | 0   | 0   | 1   | 1   | 0   | 1   | 0        | 0        | 0.063999 | 0.08233  |
| antisense -            | 0   | 0   | 0   | 1   | 0   | 0   | 0        | 0        | 0        | 0.277786 |
| protein_co thiosulfate | 4   | 1   | 0   | 183 | 184 | 125 | 0.230701 | 0.07396  | 0        | 16.38217 |
| pseudogen: -           | 0   | 1   | 0   | 0   | 0   | 0   | 0        | 0.098735 | 0        | 0        |
| pseudogen: PDZ_domai   | 1   | 1   | 1   | 1   | 0   | 0   | 0.013405 | 0.01719  | 0.016174 | 0.020806 |
| pseudogen: -           | 6   | 4   | 6   | 2   | 0   | 2   | 0.74626  | 0.637982 | 0.900406 | 0.3861   |
| processed_ -           | 40  | 31  | 45  | 22  | 20  | 16  | 0.848688 | 0.84345  | 1.15199  | 0.724505 |
| lincRNA -              | 1   | 3   | 1   | 80  | 106 | 147 | 0.025778 | 0.09917  | 0.031103 | 3.200871 |
| pseudogen: -           | 1   | 2   | 2   | 3   | 1   | 4   | 0.037392 | 0.095901 | 0.090232 | 0.174114 |
| pseudogen: -           | 0   | 0   | 0   | 1   | 0   | 0   | 0        | 0        | 0        | 0.08941  |
| pseudogen: suppressio  | 0   | 0   | 0   | 1   | 0   | 0   | 0        | 0        | 0        | 0.068338 |
| pseudogen: MARCKS-li   | 0   | 2   | 0   | 1   | 2   | 4   | 0        | 0.123217 | 0        | 0.074569 |
| protein_co cytochrom   | 85  | 59  | 56  | 106 | 152 | 85  | 0.7063   | 0.628683 | 0.561444 | 1.36712  |
| pseudogen: -           | 1   | 1   | 0   | 1   | 0   | 0   | 0.093968 | 0.120501 | 0        | 0.145851 |
| pseudogen: -           | 0   | 1   | 0   | 1   | 0   | 0   | 0        | 0.030678 | 0        | 0.037133 |
| protein_co zinc_finger | 5   | 11  | 12  | 50  | 98  | 34  | 0.058496 | 0.165027 | 0.169388 | 0.907932 |
| protein_co Uncharacte  | 0   | 0   | 0   | 1   | 0   | 0   | 0        | 0        | 0        | 1.102724 |
| pseudogen: -           | 0   | 0   | 0   | 2   | 4   | 0   | 0        | 0        | 0        | 0.443779 |
| protein_co lactamase_  | 0   | 0   | 0   | 0   | 0   | 2   | 0        | 0        | 0        | 0        |
| processed_ ciliary_roo | 663 | 541 | 573 | 541 | 728 | 429 | 11.25157 | 11.77351 | 11.73281 | 14.25041 |
| protein_co chromosom   | 0   | 1   | 0   | 4   | 19  | 1   | 0        | 0.013186 | 0        | 0.063842 |
| protein_co tetratricop | 8   | 6   | 3   | 5   | 4   | 3   | 0.10038  | 0.096542 | 0.045418 | 0.097377 |
| pseudogen: matrix_me   | 8   | 4   | 6   | 0   | 5   | 2   | 0.333737 | 0.213985 | 0.302004 | 0        |
| protein_co ATPase_fan  | 6   | 2   | 2   | 7   | 24  | 7   | 0.072905 | 0.031163 | 0.029321 | 0.132018 |
| pseudogen: -           | 12  | 14  | 17  | 60  | 45  | 50  | 0.73553  | 1.100415 | 1.257233 | 5.70822  |
| pseudogen: keratin_19  | 0   | 0   | 0   | 1   | 3   | 0   | 0        | 0        | 0        | 0.071917 |
| pseudogen: -           | 2   | 1   | 0   | 1   | 0   | 0   | 0.161134 | 0.103316 | 0        | 0.125051 |
| pseudogen: histone_cl  | 2   | 3   | 1   | 1   | 0   | 19  | 0.455243 | 0.875677 | 0.274638 | 0.3533   |
| pseudogen: -           | 2   | 0   | 0   | 0   | 0   | 0   | 0.069518 | 0        | 0        | 0        |
| pseudogen: -           | 0   | 0   | 0   | 0   | 1   | 0   | 0        | 0        | 0        | 0        |
| pseudogen: -           | 0   | 0   | 2   | 0   | 0   | 0   | 0        | 0        | 0.11961  | 0        |
| pseudogen: ribosomal_  | 0   | 1   | 0   | 0   | 0   | 0   | 0        | 0.209511 | 0        | 0        |
| pseudogen: -           | 0   | 0   | 0   | 1   | 0   | 0   | 0        | 0        | 0        | 0.073963 |
| pseudogen: ribosomal_  | 0   | 0   | 0   | 4   | 4   | 0   | 0        | 0        | 0        | 0.58812  |
| pseudogen: retinoic_ac | 0   | 0   | 0   | 0   | 1   | 0   | 0        | 0        | 0        | 0        |
| pseudogen: ribosomal_  | 0   | 0   | 0   | 0   | 0   | 1   | 0        | 0        | 0        | 0        |

|                         |     |     |     |     |     |     |          |          |          |          |
|-------------------------|-----|-----|-----|-----|-----|-----|----------|----------|----------|----------|
| pseudogeni -            | 0   | 0   | 1   | 5   | 0   | 0   | 0        | 0        | 0.095728 | 0.615734 |
| protein_co interferon_  | 0   | 0   | 0   | 0   | 2   | 0   | 0        | 0        | 0        | 0        |
| protein_co immunogl     | 1   | 0   | 2   | 3   | 10  | 0   | 0.047412 | 0        | 0.11441  | 0.220768 |
| pseudogeni -            | 0   | 0   | 2   | 0   | 0   | 0   | 0        | 0        | 0.156936 | 0        |
| pseudogeni -            | 0   | 0   | 4   | 3   | 0   | 1   | 0        | 0        | 0.302948 | 0.292288 |
| pseudogeni -            | 0   | 0   | 1   | 0   | 0   | 0   | 0        | 0        | 0.148492 | 0        |
| pseudogeni nudix_(nuc   | 0   | 0   | 0   | 2   | 3   | 4   | 0        | 0        | 0        | 0.26227  |
| pseudogeni -            | 0   | 0   | 0   | 0   | 0   | 1   | 0        | 0        | 0        | 0        |
| pseudogeni -            | 355 | 260 | 285 | 126 | 163 | 74  | 5.477445 | 5.144372 | 5.305699 | 3.017524 |
| pseudogeni -            | 1   | 1   | 1   | 0   | 1   | 1   | 0.062687 | 0.080387 | 0.075636 | 0        |
| pseudogeni -            | 10  | 9   | 8   | 0   | 0   | 1   | 0.185777 | 0.214409 | 0.17932  | 0        |
| pseudogeni -            | 2   | 0   | 0   | 2   | 1   | 2   | 0.236222 | 0        | 0        | 0.366649 |
| pseudogeni tubulin_be   | 0   | 0   | 3   | 2   | 4   | 2   | 0        | 0        | 0.194864 | 0.167118 |
| pseudogeni ribosomal_   | 3   | 0   | 0   | 2   | 0   | 0   | 0.254376 | 0        | 0        | 0.263218 |
| pseudogeni ribosomal_   | 14  | 16  | 10  | 32  | 51  | 22  | 0.743443 | 1.089555 | 0.640719 | 2.637547 |
| pseudogeni -            | 2   | 1   | 3   | 1   | 2   | 6   | 0.242326 | 0.155374 | 0.43857  | 0.188062 |
| protein_co Protein_LO   | 30  | 22  | 27  | 55  | 57  | 33  | 1.395536 | 1.312357 | 1.515415 | 3.97112  |
| pseudogeni -            | 2   | 1   | 4   | 0   | 1   | 0   | 0.043097 | 0.027633 | 0.103999 | 0        |
| protein_co Protein_LO   | 1   | 1   | 1   | 9   | 1   | 6   | 0.078807 | 0.101058 | 0.095085 | 1.100871 |
| protein_co coiled-coil_ | 7   | 6   | 5   | 8   | 5   | 2   | 0.082099 | 0.09024  | 0.070755 | 0.145632 |
| pseudogeni ribosomal_   | 1   | 0   | 2   | 0   | 0   | 2   | 0.100622 | 0        | 0.242813 | 0        |
| pseudogeni heat_shock   | 0   | 0   | 0   | 0   | 1   | 1   | 0        | 0        | 0        | 0        |
| pseudogeni -            | 3   | 1   | 3   | 0   | 3   | 0   | 0.428872 | 0.183323 | 0.517459 | 0        |
| pseudogeni -            | 4   | 0   | 2   | 1   | 0   | 0   | 0.361387 | 0        | 0.218017 | 0.140231 |
| pseudogeni -            | 0   | 0   | 0   | 0   | 1   | 0   | 0        | 0        | 0        | 0        |
| protein_co Uncharacte   | 5   | 2   | 4   | 2   | 2   | 3   | 0.545233 | 0.279673 | 0.526284 | 0.338511 |
| pseudogeni -            | 0   | 0   | 0   | 0   | 0   | 1   | 0        | 0        | 0        | 0        |
| pseudogeni peptidylpro  | 4   | 7   | 3   | 3   | 14  | 9   | 0.378909 | 0.85032  | 0.342882 | 0.44109  |
| protein_co folliculin_i | 739 | 547 | 603 | 282 | 330 | 199 | 5.42026  | 5.144846 | 5.33631  | 3.210371 |
| pseudogeni -            | 0   | 0   | 0   | 4   | 3   | 1   | 0        | 0        | 0        | 0.584577 |
| pseudogeni La_ribonuc   | 0   | 0   | 1   | 0   | 0   | 0   | 0        | 0        | 0.193752 | 0        |
| pseudogeni ankyrin_rej  | 50  | 44  | 48  | 17  | 33  | 13  | 0.890768 | 1.005209 | 1.031772 | 0.470082 |
| pseudogeni -            | 0   | 0   | 0   | 3   | 2   | 5   | 0        | 0        | 0        | 0.455823 |
| pseudogeni -            | 0   | 0   | 0   | 1   | 2   | 0   | 0        | 0        | 0        | 0.231047 |
| pseudogeni -            | 0   | 0   | 0   | 1   | 0   | 0   | 0        | 0        | 0        | 0.060298 |
| pseudogeni -            | 0   | 0   | 0   | 0   | 0   | 3   | 0        | 0        | 0        | 0        |
| protein_co Sp9_transc   | 0   | 0   | 2   | 0   | 0   | 7   | 0        | 0        | 0.044303 | 0        |
| pseudogeni chromobo     | 1   | 0   | 2   | 0   | 2   | 2   | 0.084946 | 0        | 0.204984 | 0        |
| processed_ -            | 0   | 0   | 1   | 2   | 7   | 2   | 0        | 0        | 0.114525 | 0.294655 |
| pseudogeni -            | 0   | 0   | 3   | 0   | 1   | 3   | 0        | 0        | 0.340133 | 0        |
| pseudogeni -            | 0   | 0   | 0   | 0   | 1   | 0   | 0        | 0        | 0        | 0        |
| pseudogeni ubiquinol-c  | 0   | 0   | 0   | 1   | 3   | 0   | 0        | 0        | 0        | 0.189038 |
| pseudogeni PRELI_dom    | 0   | 1   | 0   | 5   | 5   | 3   | 0        | 0.066589 | 0        | 0.402989 |
| pseudogeni -            | 0   | 0   | 3   | 0   | 0   | 0   | 0        | 0        | 0.264784 | 0        |
| pseudogeni iron-sulfur_ | 2   | 2   | 0   | 3   | 1   | 2   | 0.242326 | 0.310748 | 0        | 0.564185 |
| protein_co synaptone    | 1   | 1   | 0   | 3   | 5   | 2   | 0.104665 | 0.134218 | 0        | 0.487365 |
| pseudogeni -            | 0   | 0   | 0   | 2   | 1   | 2   | 0        | 0        | 0        | 0.250102 |
| protein_co LOC39262:    | 4   | 4   | 4   | 0   | 0   | 1   | 0.189838 | 0.24344  | 0.229051 | 0        |
| pseudogeni -            | 2   | 0   | 0   | 2   | 2   | 1   | 0.112852 | 0        | 0        | 0.175162 |
| pseudogeni -            | 0   | 0   | 1   | 1   | 0   | 0   | 0        | 0        | 0.072071 | 0.092713 |
| pseudogeni -            | 3   | 2   | 0   | 3   | 2   | 0   | 0.314698 | 0.269037 | 0        | 0.488455 |
| pseudogeni ribosomal_   | 2   | 1   | 3   | 3   | 1   | 0   | 0.232129 | 0.148836 | 0.420115 | 0.540444 |
| protein_co chemokine    | 50  | 37  | 37  | 20  | 25  | 20  | 3.504486 | 3.325564 | 3.128989 | 2.175779 |
| processed_ -            | 64  | 69  | 70  | 55  | 64  | 66  | 0.790559 | 1.092981 | 1.043279 | 1.054502 |
| pseudogeni -            | 2   | 0   | 7   | 3   | 3   | 4   | 0.127592 | 0        | 0.538814 | 0.29706  |
| pseudogeni prostaglan   | 2   | 0   | 0   | 2   | 4   | 2   | 0.194564 | 0        | 0        | 0.301991 |
| pseudogeni -            | 1   | 0   | 1   | 0   | 0   | 0   | 0.088305 | 0        | 0.106545 | 0        |
| pseudogeni -            | 20  | 19  | 6   | 2   | 1   | 7   | 0.824078 | 1.003925 | 0.298289 | 0.127908 |
| pseudogeni -            | 1   | 2   | 2   | 18  | 22  | 11  | 0.062106 | 0.159284 | 0.149869 | 1.735148 |
| protein_co -            | 1   | 0   | 1   | 0   | 0   | 1   | 0.050802 | 0        | 0.061295 | 0        |
| pseudogeni ribosomal_   | 2   | 3   | 2   | 8   | 9   | 4   | 0.189838 | 0.365161 | 0.229051 | 1.17862  |
| pseudogeni chaperonir   | 2   | 2   | 1   | 0   | 0   | 1   | 0.058212 | 0.074649 | 0.035118 | 0        |
| pseudogeni -            | 0   | 2   | 0   | 1   | 0   | 1   | 0        | 0.261434 | 0        | 0.158217 |
| pseudogeni -            | 0   | 0   | 0   | 1   | 0   | 0   | 0        | 0        | 0        | 0.239407 |
| pseudogeni lactate_def  | 2   | 2   | 5   | 1   | 0   | 0   | 0.086673 | 0.111146 | 0.261439 | 0.067264 |

|                        |       |       |       |      |      |      |          |          |          |          |
|------------------------|-------|-------|-------|------|------|------|----------|----------|----------|----------|
| pseudogen:-            | 46    | 31    | 40    | 41   | 55   | 16   | 1.767984 | 1.527888 | 1.854935 | 2.445879 |
| pseudogen:-            | 0     | 0     | 0     | 1    | 0    | 0    | 0        | 0        | 0        | 0.188062 |
| pseudogen:-            | 0     | 1     | 0     | 1    | 1    | 3    | 0        | 0.066222 | 0        | 0.080154 |
| pseudogen: histone_clu | 1     | 1     | 0     | 0    | 0    | 1    | 0.176943 | 0.226905 | 0        | 0        |
| pseudogen:-            | 1     | 1     | 0     | 0    | 1    | 0    | 0.055035 | 0.070575 | 0        | 0        |
| pseudogen: zinc_finger | 3     | 2     | 1     | 4    | 1    | 5    | 0.16338  | 0.139674 | 0.065709 | 0.338118 |
| pseudogen:-            | 2     | 0     | 1     | 1    | 1    | 0    | 0.325625 | 0        | 0.196443 | 0.252708 |
| pseudogen:-            | 0     | 2     | 2     | 0    | 0    | 0    | 0        | 0.042767 | 0.040239 | 0        |
| protein_co presequenc  | 81    | 66    | 96    | 61   | 101  | 136  | 4.712272 | 4.92378  | 6.738522 | 5.508149 |
| pseudogen:-            | 0     | 0     | 0     | 2    | 2    | 0    | 0        | 0        | 0        | 0.063259 |
| antisense -            | 2     | 1     | 2     | 1    | 6    | 4    | 0.060896 | 0.039045 | 0.073475 | 0.04726  |
| pseudogen:-            | 0     | 0     | 0     | 2    | 0    | 0    | 0        | 0        | 0        | 0.150371 |
| pseudogen:-            | 17    | 8     | 10    | 0    | 0    | 0    | 0.220751 | 0.133215 | 0.156675 | 0        |
| pseudogen: ribosomal_  | 0     | 0     | 0     | 1    | 0    | 0    | 0        | 0        | 0        | 0.147626 |
| pseudogen:-            | 0     | 1     | 0     | 0    | 1    | 4    | 0        | 0.123724 | 0        | 0        |
| pseudogen: DnaJ_(Hsp4  | 0     | 0     | 0     | 0    | 1    | 0    | 0        | 0        | 0        | 0        |
| antisense KIRREL3_ar   | 1     | 0     | 1     | 0    | 1    | 0    | 0.026522 | 0        | 0.032    | 0        |
| pseudogen: keratin_18  | 1     | 2     | 0     | 0    | 0    | 0    | 0.034811 | 0.08928  | 0        | 0        |
| pseudogen:-            | 12    | 9     | 18    | 21   | 13   | 9    | 1.630957 | 1.568603 | 2.951765 | 4.430075 |
| pseudogen: keratin_8_1 | 0     | 0     | 0     | 3    | 0    | 1    | 0        | 0        | 0        | 0.149753 |
| pseudogen: POM121_t    | 2     | 5     | 2     | 1    | 5    | 0    | 0.060193 | 0.192971 | 0.072626 | 0.046714 |
| pseudogen:-            | 0     | 1     | 1     | 1    | 2    | 0    | 0        | 0.134519 | 0.126567 | 0.162818 |
| pseudogen: TatD_DNas   | 75    | 59    | 73    | 72   | 82   | 112  | 1.579852 | 1.593737 | 1.855351 | 2.354064 |
| pseudogen:-            | 1     | 3     | 3     | 5    | 7    | 9    | 0.07934  | 0.305227 | 0.287185 | 0.615734 |
| pseudogen: nephrocan   | 0     | 0     | 1     | 4    | 2    | 3    | 0        | 0        | 0.041266 | 0.212341 |
| pseudogen: histone_clu | 0     | 0     | 1     | 1    | 1    | 1    | 0        | 0        | 0.422205 | 0.543133 |
| pseudogen: mortality_f | 369   | 247   | 290   | 260  | 332  | 384  | 17.89288 | 15.3589  | 16.9668  | 19.56851 |
| pseudogen:-            | 0     | 0     | 0     | 0    | 0    | 2    | 0        | 0        | 0        | 0        |
| pseudogen:-            | 0     | 1     | 0     | 4    | 2    | 3    | 0        | 0.064241 | 0        | 0.311025 |
| protein_co teneurin_t  | 13609 | 10788 | 11784 | 1764 | 1989 | 1653 | 58.56518 | 59.5338  | 61.18628 | 11.78263 |
| pseudogen: vomeronas   | 1     | 0     | 1     | 0    | 0    | 1    | 0.050474 | 0        | 0.060899 | 0        |
| pseudogen: lysophosph  | 0     | 0     | 0     | 2    | 2    | 2    | 0        | 0        | 0        | 0.209438 |
| pseudogen: retinoic_ac | 1     | 2     | 2     | 7    | 5    | 3    | 0.024902 | 0.063866 | 0.060091 | 0.270557 |
| pseudogen:-            | 0     | 2     | 0     | 0    | 0    | 0    | 0        | 0.073062 | 0        | 0        |
| protein_co Uncharacte  | 11    | 9     | 10    | 1    | 5    | 10   | 0.255721 | 0.268304 | 0.280493 | 0.036083 |
| pseudogen:-            | 8     | 3     | 4     | 4    | 3    | 5    | 0.063429 | 0.030502 | 0.038265 | 0.049225 |
| pseudogen:-            | 38    | 18    | 44    | 47   | 56   | 36   | 0.647699 | 0.393434 | 0.904879 | 1.243421 |
| pseudogen: NADH_deh    | 0     | 0     | 0     | 0    | 1    | 0    | 0        | 0        | 0        | 0        |
| pseudogen:-            | 74    | 69    | 52    | 104  | 131  | 105  | 7.762553 | 9.281781 | 6.581491 | 16.93311 |
| pseudogen: NIP7_nucle  | 0     | 1     | 0     | 5    | 0    | 6    | 0        | 0.116757 | 0        | 0.7066   |
| pseudogen: ribosomal_  | 0     | 0     | 1     | 2    | 1    | 0    | 0        | 0        | 0.224506 | 0.577617 |
| pseudogen:-            | 1     | 0     | 0     | 0    | 0    | 0    | 0.126388 | 0        | 0        | 0        |
| pseudogen:-            | 0     | 0     | 0     | 0    | 0    | 1    | 0        | 0        | 0        | 0        |
| pseudogen: H2A_histor  | 0     | 2     | 0     | 1    | 1    | 1    | 0        | 0.310748 | 0        | 0.188062 |
| lincRNA long_interf    | 175   | 157   | 134   | 296  | 311  | 154  | 7.785344 | 8.956715 | 7.192711 | 20.43911 |
| pseudogen:-            | 0     | 1     | 0     | 0    | 0    | 0    | 0        | 0.124751 | 0        | 0        |
| pseudogen:-            | 0     | 0     | 0     | 0    | 0    | 1    | 0        | 0        | 0        | 0        |
| protein_co Uncharacte  | 2     | 0     | 1     | 1    | 4    | 2    | 0.063537 | 0        | 0.03833  | 0.049309 |
| pseudogen:-            | 0     | 0     | 0     | 0    | 0    | 1    | 0        | 0        | 0        | 0        |
| pseudogen: glyceraldeh | 0     | 0     | 0     | 0    | 1    | 0    | 0        | 0        | 0        | 0        |
| pseudogen:-            | 0     | 0     | 1     | 0    | 0    | 0    | 0        | 0        | 0.012612 | 0        |
| pseudogen:-            | 1     | 1     | 0     | 4    | 6    | 7    | 0.124048 | 0.159074 | 0        | 0.770157 |
| pseudogen:-            | 4     | 0     | 2     | 1    | 0    | 0    | 0.304481 | 0        | 0.183687 | 0.118149 |
| pseudogen:-            | 0     | 0     | 0     | 1    | 1    | 0    | 0        | 0        | 0        | 0.098351 |
| protein_co HCG20007    | 0     | 2     | 0     | 0    | 0    | 0    | 0        | 0.077537 | 0        | 0        |
| pseudogen: bromodom    | 0     | 1     | 0     | 0    | 1    | 1    | 0        | 0.039507 | 0        | 0        |
| pseudogen:-            | 0     | 0     | 2     | 1    | 0    | 1    | 0        | 0        | 0.223619 | 0.143834 |
| pseudogen: histone_clu | 2     | 1     | 0     | 5    | 8    | 13   | 0.269483 | 0.172787 | 0        | 1.045687 |
| pseudogen:-            | 0     | 1     | 0     | 0    | 0    | 0    | 0        | 0.046432 | 0        | 0        |
| pseudogen:-            | 2     | 0     | 0     | 0    | 0    | 0    | 0.072981 | 0        | 0        | 0        |
| pseudogen:-            | 0     | 0     | 0     | 1    | 0    | 0    | 0        | 0        | 0        | 0.179261 |
| protein_co HCG19881    | 10    | 7     | 4     | 53   | 86   | 52   | 0.14848  | 0.133283 | 0.07166  | 1.221447 |
| pseudogen:-            | 0     | 0     | 0     | 1    | 0    | 1    | 0        | 0        | 0        | 0.237068 |
| pseudogen:-            | 1     | 1     | 1     | 1    | 1    | 0    | 0.085722 | 0.109927 | 0.103429 | 0.133053 |
| pseudogen:-            | 0     | 0     | 0     | 0    | 0    | 1    | 0        | 0        | 0        | 0        |

|                         |      |     |      |      |      |     |          |          |          |          |
|-------------------------|------|-----|------|------|------|-----|----------|----------|----------|----------|
| pseudogen: family_witl  | 0    | 0   | 1    | 0    | 0    | 0   | 0        | 0        | 0.049846 | 0        |
| pseudogen: glutathione  | 0    | 0   | 0    | 0    | 1    | 0   | 0        | 0        | 0        | 0        |
| pseudogen: -            | 0    | 0   | 2    | 0    | 0    | 0   | 0        | 0        | 0.310003 | 0        |
| protein_co poly(A)_pol  | 0    | 1   | 0    | 2    | 3    | 0   | 0        | 0.014108 | 0        | 0.034153 |
| pseudogen: -            | 0    | 0   | 1    | 1    | 0    | 1   | 0        | 0        | 0.048688 | 0.062633 |
| pseudogen: nuclear_fra  | 0    | 0   | 1    | 0    | 2    | 0   | 0        | 0        | 0.038253 | 0        |
| protein_co zinc_finger  | 1525 | 994 | 1147 | 971  | 1430 | 485 | 33.47719 | 27.98175 | 30.3802  | 33.08483 |
| pseudogen: tubulin_be   | 1    | 2   | 2    | 4    | 3    | 1   | 0.094727 | 0.242949 | 0.228588 | 0.58812  |
| pseudogen: prothymos    | 1    | 0   | 0    | 3    | 1    | 1   | 0.142091 | 0        | 0        | 0.661635 |
| pseudogen: ferritin_hei | 0    | 1   | 0    | 0    | 0    | 0   | 0        | 0.214749 | 0        | 0        |
| pseudogen: -            | 1    | 0   | 0    | 0    | 0    | 0   | 0.11007  | 0        | 0        | 0        |
| pseudogen: -            | 4    | 3   | 2    | 7    | 3    | 3   | 0.313122 | 0.301151 | 0.1889   | 0.850515 |
| protein_co Uncharacte   | 1    | 0   | 3    | 5    | 2    | 11  | 0.015568 | 0        | 0.05635  | 0.120816 |
| pseudogen: -            | 2    | 0   | 0    | 1    | 3    | 0   | 0.239235 | 0        | 0        | 0.185663 |
| pseudogen: ribosomal_   | 0    | 0   | 0    | 0    | 0    | 2   | 0        | 0        | 0        | 0        |
| pseudogen: tripartite_r | 0    | 0   | 0    | 0    | 0    | 1   | 0        | 0        | 0        | 0        |
| pseudogen: superoxide   | 0    | 0   | 0    | 0    | 1    | 0   | 0        | 0        | 0        | 0        |
| pseudogen: nucleopho:   | 1    | 2   | 0    | 7    | 1    | 0   | 0.05365  | 0.137597 | 0        | 0.582905 |
| pseudogen: -            | 0    | 0   | 1    | 0    | 3    | 3   | 0        | 0        | 0.053222 | 0        |
| pseudogen: -            | 0    | 0   | 0    | 0    | 1    | 0   | 0        | 0        | 0        | 0        |
| pseudogen: -            | 0    | 0   | 0    | 2    | 0    | 0   | 0        | 0        | 0        | 0.713527 |
| pseudogen: ferritin_hei | 0    | 2   | 0    | 0    | 0    | 0   | 0        | 0.227764 | 0        | 0        |
| pseudogen: calcyclin_b  | 0    | 1   | 2    | 0    | 0    | 0   | 0        | 0.096208 | 0.181042 | 0        |
| protein_co ribonuclea:  | 2    | 3   | 2    | 2    | 2    | 4   | 0.098508 | 0.189485 | 0.118856 | 0.152899 |
| pseudogen: -            | 41   | 51  | 35   | 51   | 44   | 48  | 1.724207 | 2.750331 | 1.775913 | 3.328942 |
| pseudogen: -            | 0    | 0   | 1    | 0    | 0    | 0   | 0        | 0        | 0        | 0.445476 |
| pseudogen: archaelysin  | 0    | 0   | 0    | 0    | 1    | 0   | 0        | 0        | 0        | 0        |
| pseudogen: nucleopho:   | 0    | 0   | 0    | 0    | 1    | 0   | 0        | 0        | 0        | 0        |
| pseudogen: phosphatic   | 0    | 0   | 0    | 0    | 0    | 2   | 0        | 0        | 0        | 0        |
| pseudogen: -            | 0    | 1   | 0    | 1    | 0    | 0   | 0        | 0.110941 | 0        | 0.13428  |
| pseudogen: ribosomal_   | 0    | 1   | 2    | 0    | 5    | 2   | 0        | 0.163841 | 0.308313 | 0        |
| pseudogen: -            | 3    | 1   | 3    | 2    | 0    | 1   | 0.392933 | 0.16796  | 0.474096 | 0.406591 |
| pseudogen: activating_  | 0    | 1   | 0    | 0    | 0    | 0   | 0        | 0.064865 | 0        | 0        |
| pseudogen: -            | 5    | 3   | 1    | 0    | 1    | 0   | 0.253734 | 0.195227 | 0.061229 | 0        |
| pseudogen: heat_shock   | 10   | 12  | 12   | 7    | 6    | 15  | 0.596565 | 0.918012 | 0.863748 | 0.648166 |
| pseudogen: -            | 2    | 0   | 3    | 5    | 2    | 8   | 0.155265 | 0        | 0.281004 | 0.602482 |
| pseudogen: -            | 0    | 0   | 0    | 0    | 2    | 0   | 0        | 0        | 0        | 0        |
| antisense -             | 4    | 2   | 3    | 1    | 3    | 2   | 0.259419 | 0.166334 | 0.234753 | 0.100664 |
| pseudogen: mannose-b    | 0    | 0   | 1    | 0    | 0    | 0   | 0        | 0        | 0.08785  | 0        |
| pseudogen: -            | 4    | 5   | 3    | 0    | 1    | 1   | 0.277456 | 0.444747 | 0.251075 | 0        |
| protein_co testis_expr: | 0    | 0   | 0    | 0    | 0    | 1   | 0        | 0        | 0        | 0        |
| protein_co family_witl  | 301  | 246 | 249  | 1035 | 1230 | 742 | 5.350226 | 5.607252 | 5.340144 | 28.55462 |
| processed_ -            | 0    | 0   | 0    | 338  | 444  | 340 | 0        | 0        | 0        | 12.82564 |
| pseudogen: ribosomal_   | 0    | 0   | 0    | 0    | 0    | 5   | 0        | 0        | 0        | 0        |
| pseudogen: -            | 12   | 10  | 7    | 6    | 14   | 17  | 0.637959 | 0.681744 | 0.449012 | 0.495101 |
| protein_co neuroblast:  | 1021 | 835 | 898  | 369  | 401  | 280 | 8.070585 | 8.463989 | 8.564532 | 4.527267 |
| pseudogen: ferritin_hei | 3    | 3   | 5    | 3    | 7    | 4   | 0.273677 | 0.350952 | 0.550345 | 0.424785 |
| pseudogen: -            | 0    | 3   | 0    | 0    | 0    | 2   | 0        | 0.503881 | 0        | 0        |
| pseudogen: -            | 0    | 2   | 0    | 0    | 1    | 0   | 0        | 0.416123 | 0        | 0        |
| protein_co Uncharacte   | 117  | 72  | 80   | 78   | 77   | 93  | 2.598831 | 2.05085  | 2.144027 | 2.689164 |
| pseudogen: ribosomal_   | 1    | 1   | 0    | 0    | 1    | 0   | 0.084487 | 0.108342 | 0        | 0        |
| pseudogen: zinc_finger  | 0    | 2   | 1    | 1    | 1    | 1   | 0        | 0.024483 | 0.011518 | 0.014817 |
| pseudogen: -            | 0    | 0   | 2    | 0    | 0    | 0   | 0        | 0        | 0.819935 | 0        |
| protein_co protein_ph   | 13   | 3   | 6    | 8    | 8    | 6   | 0.351135 | 0.103911 | 0.195537 | 0.335391 |
| pseudogen: HIG1_hypo    | 1    | 0   | 1    | 1    | 2    | 0   | 0.181744 | 0        | 0.219285 | 0.282092 |
| protein_co family_witl  | 37   | 34  | 53   | 10   | 9    | 13  | 0.6632   | 0.781503 | 1.146216 | 0.27821  |
| pseudogen: bone_morp    | 5    | 0   | 2    | 2    | 4    | 3   | 0.146715 | 0        | 0.070808 | 0.091089 |
| processed_ -            | 73   | 48  | 51   | 123  | 149  | 117 | 0.855743 | 0.721558 | 0.721338 | 2.237979 |
| pseudogen: -            | 1    | 0   | 1    | 2    | 3    | 0   | 0.032608 | 0        | 0.039343 | 0.101224 |
| pseudogen: -            | 2    | 0   | 3    | 2    | 3    | 4   | 0.321165 | 0        | 0.581255 | 0.498492 |
| pseudogen: -            | 0    | 0   | 0    | 2    | 0    | 0   | 0        | 0        | 0        | 0.344928 |
| pseudogen: patched_dc   | 0    | 0   | 0    | 0    | 4    | 0   | 0        | 0        | 0        | 0        |
| pseudogen: -            | 1    | 1   | 0    | 4    | 5    | 1   | 0.038215 | 0.049006 | 0        | 0.237261 |
| pseudogen: -            | 1    | 0   | 2    | 0    | 0    | 0   | 0.033303 | 0        | 0.080363 | 0        |
| pseudogen: -            | 3    | 2   | 3    | 4    | 2    | 2   | 0.347333 | 0.296937 | 0.419078 | 0.718813 |

|                         |     |     |     |     |     |     |          |          |          |          |
|-------------------------|-----|-----|-----|-----|-----|-----|----------|----------|----------|----------|
| pseudogen: -            | 3   | 5   | 7   | 1   | 2   | 1   | 0.188819 | 0.403556 | 0.531582 | 0.097691 |
| pseudogen: -            | 0   | 0   | 1   | 1   | 0   | 0   | 0        | 0        | 0.064732 | 0.083272 |
| pseudogen: oligosaccha  | 0   | 1   | 0   | 0   | 1   | 0   | 0        | 0.131575 | 0        | 0        |
| pseudogen: -            | 2   | 4   | 1   | 2   | 0   | 0   | 0.20387  | 0.522868 | 0.12299  | 0.316434 |
| pseudogen: glyceraldeh  | 3   | 6   | 1   | 1   | 1   | 0   | 0.143395 | 0.367766 | 0.057671 | 0.074189 |
| pseudogen: zinc_finger  | 12  | 9   | 6   | 13  | 26  | 14  | 0.339578 | 0.326595 | 0.20486  | 0.570994 |
| pseudogen: ribosomal_   | 3   | 0   | 2   | 1   | 1   | 0   | 0.379165 | 0        | 0.304989 | 0.196172 |
| pseudogen: -            | 0   | 0   | 0   | 1   | 0   | 1   | 0        | 0        | 0        | 0.418275 |
| pseudogen: ribosomal_   | 0   | 0   | 0   | 0   | 1   | 0   | 0        | 0        | 0        | 0        |
| pseudogen: -            | 2   | 1   | 1   | 1   | 0   | 0   | 0.094346 | 0.060493 | 0.056917 | 0.073219 |
| pseudogen: -            | 26  | 17  | 10  | 1   | 1   | 0   | 2.796194 | 2.34451  | 1.297603 | 0.166926 |
| protein_co leucine_ric  | 5   | 3   | 0   | 99  | 162 | 15  | 0.104619 | 0.080495 | 0        | 3.215172 |
| protein_co Homo_sapi    | 10  | 6   | 4   | 25  | 24  | 10  | 0.225758 | 0.173702 | 0.108956 | 0.876021 |
| pseudogen: MT-CYB_ps    | 0   | 0   | 0   | 0   | 1   | 0   | 0        | 0        | 0        | 0        |
| pseudogen: -            | 0   | 0   | 0   | 0   | 1   | 0   | 0        | 0        | 0        | 0        |
| pseudogen: heterogene   | 0   | 1   | 0   | 1   | 2   | 1   | 0        | 0.06257  | 0        | 0.075733 |
| lincRNA -               | 5   | 7   | 11  | 12  | 18  | 13  | 0.125307 | 0.224964 | 0.332619 | 0.466787 |
| protein_co zinc_finger  | 1   | 4   | 1   | 4   | 3   | 10  | 0.02036  | 0.104437 | 0.024566 | 0.126409 |
| protein_co vesicle-assc | 338 | 249 | 278 | 203 | 258 | 268 | 7.361275 | 6.954166 | 7.305151 | 6.862192 |
| pseudogen: ribosomal_   | 4   | 1   | 0   | 0   | 0   | 1   | 0.476041 | 0.152614 | 0        | 0        |
| pseudogen: -            | 7   | 3   | 6   | 3   | 3   | 4   | 0.276987 | 0.152227 | 0.286458 | 0.184253 |
| pseudogen: histone_clu  | 5   | 3   | 10  | 4   | 2   | 8   | 0.475558 | 0.365901 | 1.147576 | 0.590505 |
| pseudogen: -            | 0   | 0   | 0   | 0   | 1   | 1   | 0        | 0        | 0        | 0        |
| pseudogen: -            | 1   | 0   | 2   | 0   | 0   | 0   | 0.073611 | 0        | 0.177631 | 0        |
| pseudogen: keratin_8_   | 0   | 0   | 1   | 0   | 0   | 0   | 0        | 0        | 0.04044  | 0        |
| pseudogen: FCF1_small   | 1   | 2   | 0   | 2   | 0   | 0   | 0.097282 | 0.249501 | 0        | 0.301991 |
| pseudogen: tubulin_be   | 0   | 1   | 0   | 0   | 0   | 0   | 0        | 0.045142 | 0        | 0        |
| pseudogen: -            | 0   | 0   | 1   | 0   | 0   | 0   | 0        | 0        | 0.157592 | 0        |
| pseudogen: -            | 0   | 1   | 0   | 6   | 4   | 4   | 0        | 0.08237  | 0        | 0.59819  |
| pseudogen: Yes-associat | 2   | 2   | 3   | 0   | 0   | 0   | 0.067322 | 0.086331 | 0.121842 | 0        |
| pseudogen: -            | 0   | 0   | 0   | 1   | 0   | 1   | 0        | 0        | 0        | 0.217904 |
| pseudogen: -            | 2   | 1   | 0   | 2   | 5   | 1   | 0.143395 | 0.091942 | 0        | 0.222568 |
| pseudogen: phosphogly   | 1   | 0   | 1   | 0   | 0   | 0   | 0.061616 | 0        | 0.074344 | 0        |
| pseudogen: argininosuc  | 0   | 0   | 0   | 0   | 1   | 0   | 0        | 0        | 0        | 0        |
| pseudogen: -            | 1   | 0   | 0   | 0   | 0   | 0   | 0.112177 | 0        | 0        | 0        |
| pseudogen: -            | 0   | 0   | 0   | 0   | 0   | 2   | 0        | 0        | 0        | 0        |
| pseudogen: pyruvate_k   | 5   | 2   | 5   | 4   | 0   | 0   | 0.327902 | 0.168195 | 0.395633 | 0.40716  |
| pseudogen: ribosomal_   | 3   | 0   | 1   | 3   | 2   | 3   | 0.387521 | 0        | 0.155855 | 0.601486 |
| pseudogen: -            | 1   | 0   | 0   | 0   | 2   | 0   | 0.136706 | 0        | 0        | 0        |
| pseudogen: -            | 0   | 0   | 0   | 0   | 0   | 5   | 0        | 0        | 0        | 0        |
| pseudogen: -            | 0   | 0   | 0   | 1   | 0   | 0   | 0        | 0        | 0        | 0.134033 |
| pseudogen: regulator_c  | 0   | 1   | 0   | 0   | 0   | 0   | 0        | 0.047571 | 0        | 0        |
| pseudogen: -            | 3   | 1   | 2   | 0   | 0   | 2   | 0.118409 | 0.050614 | 0.095245 | 0        |
| pseudogen: -            | 3   | 4   | 6   | 0   | 5   | 12  | 0.076203 | 0.130292 | 0.183886 | 0        |
| pseudogen: -            | 1   | 0   | 2   | 0   | 0   | 0   | 0.084639 | 0        | 0.204244 | 0        |
| pseudogen: -            | 1   | 4   | 0   | 3   | 2   | 1   | 0.060348 | 0.309549 | 0        | 0.281003 |
| pseudogen: olfactory_r  | 0   | 0   | 0   | 0   | 1   | 1   | 0        | 0        | 0        | 0        |
| pseudogen: -            | 1   | 0   | 0   | 1   | 0   | 0   | 0.119617 | 0        | 0        | 0.185663 |
| pseudogen: -            | 1   | 1   | 2   | 0   | 0   | 2   | 0.052626 | 0.067486 | 0.126993 | 0        |
| pseudogen: ribosomal_   | 23  | 12  | 28  | 26  | 49  | 32  | 1.986133 | 1.328835 | 2.917337 | 3.484852 |
| pseudogen: -            | 1   | 1   | 1   | 8   | 8   | 7   | 0.183164 | 0.234882 | 0.220998 | 2.274369 |
| pseudogen: -            | 9   | 5   | 11  | 0   | 0   | 0   | 0.477387 | 0.340101 | 0.703994 | 0        |
| pseudogen: myotubula    | 205 | 161 | 144 | 229 | 337 | 160 | 3.663283 | 3.689366 | 3.104753 | 6.351591 |
| pseudogen: ribosomal_   | 5   | 3   | 4   | 3   | 3   | 7   | 0.431768 | 0.332209 | 0.416762 | 0.402098 |
| pseudogen: -            | 13  | 12  | 15  | 7   | 10  | 7   | 0.493579 | 0.584257 | 0.687152 | 0.412517 |
| pseudogen: -            | 103 | 62  | 70  | 111 | 145 | 142 | 8.910834 | 6.878316 | 7.3068   | 14.90509 |
| pseudogen: ribosomal_   | 23  | 22  | 17  | 6   | 19  | 12  | 2.344501 | 2.875773 | 2.090834 | 0.949302 |
| pseudogen: -            | 8   | 7   | 8   | 3   | 3   | 5   | 1.364073 | 1.530577 | 1.645833 | 0.793961 |
| pseudogen: mitochond    | 0   | 0   | 0   | 1   | 0   | 0   | 0        | 0        | 0        | 0.127237 |
| pseudogen: DnaJ_(Hsp4   | 0   | 1   | 0   | 0   | 3   | 0   | 0        | 0.214749 | 0        | 0        |
| pseudogen: histone_clu  | 0   | 0   | 0   | 1   | 0   | 0   | 0        | 0        | 0        | 0.174532 |
| pseudogen: mesoderm_    | 0   | 0   | 0   | 0   | 0   | 1   | 0        | 0        | 0        | 0        |
| pseudogen: -            | 1   | 1   | 0   | 4   | 0   | 3   | 0.130613 | 0.167492 | 0        | 0.810917 |
| pseudogen: oligosaccha  | 0   | 0   | 1   | 0   | 1   | 1   | 0        | 0        | 0.126003 | 0        |
| antisense IGBP1_anti    | 2   | 1   | 1   | 2   | 1   | 0   | 0.182807 | 0.117212 | 0.110284 | 0.283742 |

|                         |      |      |      |      |      |      |          |          |          |          |
|-------------------------|------|------|------|------|------|------|----------|----------|----------|----------|
| pseudogeni -            | 0    | 2    | 0    | 3    | 1    | 0    | 0        | 0.12959  | 0        | 0.23528  |
| processed_ -            | 19   | 18   | 17   | 10   | 14   | 14   | 0.780815 | 0.948586 | 0.84293  | 0.63786  |
| protein_co early_B-cell | 405  | 387  | 354  | 208  | 236  | 418  | 3.691051 | 4.522883 | 3.892659 | 2.942313 |
| protein_co chromosom    | 3    | 6    | 10   | 4    | 4    | 10   | 0.141519 | 0.362957 | 0.56917  | 0.292876 |
| protein_co chromosom    | 81   | 62   | 68   | 50   | 80   | 27   | 6.905621 | 6.778268 | 6.99479  | 6.616346 |
| protein_co protein_ph   | 1379 | 1028 | 1084 | 589  | 765  | 1006 | 21.38979 | 20.44771 | 20.28708 | 14.18038 |
| protein_co pregnancy_   | 0    | 0    | 0    | 0    | 1    | 0    | 0        | 0        | 0        | 0        |
| protein_co Fanconi_ar   | 782  | 655  | 658  | 844  | 1038 | 902  | 13.9369  | 14.9696  | 14.14925 | 23.34707 |
| protein_co keratin_ass  | 0    | 0    | 0    | 2    | 1    | 0    | 0        | 0        | 0        | 0.115984 |
| protein_co adaptor-rel  | 445  | 330  | 380  | 211  | 226  | 260  | 6.12267  | 5.822427 | 6.308302 | 4.506026 |
| protein_co chromosom    | 28   | 24   | 21   | 10   | 17   | 23   | 0.211761 | 0.232761 | 0.191627 | 0.117387 |
| pseudogeni -            | 0    | 0    | 0    | 3    | 2    | 1    | 0        | 0        | 0        | 0.128738 |
| protein_co taste_recep  | 0    | 0    | 0    | 1    | 1    | 1    | 0        | 0        | 0        | 0.078766 |
| protein_co olfactory_r  | 0    | 0    | 0    | 1    | 0    | 0    | 0        | 0        | 0        | 0.069579 |
| protein_co keratin_ass  | 0    | 0    | 0    | 3    | 5    | 0    | 0        | 0        | 0        | 0.198852 |
| protein_co keratin_ass  | 0    | 0    | 0    | 0    | 1    | 0    | 0        | 0        | 0        | 0        |
| protein_co plexin_A4    | 1238 | 1046 | 1233 | 19   | 19   | 44   | 4.210782 | 4.562293 | 5.060032 | 0.100306 |
| protein_co CCAAT/enh    | 126  | 78   | 111  | 109  | 153  | 71   | 2.712646 | 2.153409 | 2.883325 | 3.642332 |
| polymorph pregnancy_    | 0    | 0    | 0    | 0    | 0    | 1    | 0        | 0        | 0        | 0        |
| protein_co olfactory_r  | 0    | 0    | 0    | 0    | 3    | 0    | 0        | 0        | 0        | 0        |
| protein_co ariadne_ho   | 24   | 10   | 14   | 13   | 11   | 8    | 0.704231 | 0.376282 | 0.495655 | 0.592076 |
| protein_co chromosom    | 80   | 66   | 69   | 66   | 72   | 37   | 1.315749 | 1.391991 | 1.369242 | 1.684836 |
| protein_co histocomp    | 15   | 24   | 17   | 21   | 20   | 25   | 1.031305 | 2.116005 | 1.41024  | 2.24102  |
| protein_co neuronal_p   | 1593 | 1249 | 1323 | 478  | 603  | 335  | 12.91421 | 12.98446 | 12.94077 | 6.014652 |
| protein_co family_witl  | 82   | 70   | 68   | 71   | 78   | 117  | 1.550396 | 1.697212 | 1.551264 | 2.083615 |
| protein_co protein_ph   | 1028 | 751  | 831  | 1071 | 1116 | 980  | 12.23425 | 11.46129 | 11.93255 | 19.78354 |
| protein_co chromosom    | 18   | 8    | 8    | 26   | 35   | 4    | 1.135963 | 0.647427 | 0.609158 | 2.546803 |
| protein_co zinc_finger  | 6    | 2    | 6    | 16   | 27   | 9    | 0.126161 | 0.053928 | 0.152221 | 0.522187 |
| protein_co tripartite_r | 307  | 187  | 256  | 170  | 207  | 119  | 4.490092 | 3.507259 | 4.51757  | 3.859191 |
| pseudogeni family_witl  | 6    | 4    | 4    | 10   | 3    | 8    | 0.173239 | 0.148103 | 0.139349 | 0.448151 |
| protein_co olfactory_r  | 0    | 0    | 0    | 0    | 0    | 2    | 0        | 0        | 0        | 0        |
| protein_co taste_recep  | 0    | 1    | 1    | 0    | 0    | 0    | 0        | 0.058209 | 0.054768 | 0        |
| protein_co olfactory_r  | 0    | 0    | 0    | 0    | 2    | 0    | 0        | 0        | 0        | 0        |
| protein_co tigger_tran  | 69   | 53   | 70   | 44   | 74   | 59   | 1.321655 | 1.30183  | 1.617764 | 1.308134 |
| protein_co FXVD_dom     | 1    | 1    | 3    | 41   | 57   | 28   | 0.042205 | 0.054122 | 0.152769 | 2.685843 |
| protein_co XK_Kell_bla  | 8    | 2    | 2    | 16   | 27   | 6    | 0.118185 | 0.037889 | 0.035649 | 0.36688  |
| protein_co chromosom    | 13   | 15   | 12   | 23   | 23   | 35   | 0.361978 | 0.535598 | 0.403151 | 0.994023 |
| protein_co chromosom    | 18   | 13   | 18   | 18   | 20   | 2    | 0.373791 | 0.346186 | 0.451    | 0.580176 |
| protein_co solute_carr  | 72   | 71   | 67   | 108  | 173  | 209  | 0.969024 | 1.225378 | 1.08799  | 2.25609  |
| protein_co transmemt    | 1    | 3    | 1    | 1    | 0    | 0    | 0.036181 | 0.139189 | 0.043654 | 0.056157 |
| protein_co apolipoppro  | 6    | 5    | 6    | 1    | 0    | 1    | 0.091672 | 0.097963 | 0.110607 | 0.023715 |
| protein_co fatty_acid_  | 654  | 469  | 478  | 401  | 582  | 342  | 5.770808 | 5.306901 | 5.089027 | 5.49204  |
| protein_co olfactory_r  | 1    | 1    | 0    | 14   | 16   | 3    | 0.050257 | 0.064448 | 0        | 1.092087 |
| pseudogeni tetratricop  | 3    | 0    | 0    | 0    | 0    | 0    | 0.121477 | 0        | 0        | 0        |
| protein_co chromosom    | 0    | 1    | 0    | 1    | 0    | 1    | 0        | 0.036114 | 0        | 0.043712 |
| protein_co cyclin_L2    | 2696 | 2297 | 2464 | 1340 | 1805 | 2421 | 28.39521 | 31.02384 | 31.31223 | 21.90587 |
| protein_co ubiquitin_   | 7159 | 5493 | 5614 | 7399 | 7557 | 7615 | 117.9914 | 116.0959 | 111.6397 | 189.2786 |
| protein_co myosin_bir   | 0    | 0    | 1    | 0    | 2    | 1    | 0        | 0        | 0.041236 | 0        |
| protein_co palmitoyl-p  | 114  | 100  | 115  | 117  | 97   | 114  | 2.427549 | 2.73069  | 2.95467  | 3.867047 |
| protein_co chromosom    | 63   | 48   | 56   | 33   | 33   | 42   | 1.830279 | 1.788247 | 1.962967 | 1.488063 |
| protein_co zinc_finger  | 33   | 34   | 21   | 29   | 20   | 18   | 0.554414 | 0.732502 | 0.425685 | 0.756222 |
| protein_co TGFB1-indu   | 40   | 19   | 15   | 34   | 25   | 31   | 0.351434 | 0.214065 | 0.159009 | 0.463652 |
| protein_co Uncharacte   | 1    | 0    | 0    | 0    | 0    | 0    | 0.079745 | 0        | 0        | 0        |
| protein_co chromosom    | 0    | 1    | 0    | 0    | 0    | 0    | 0        | 0.030741 | 0        | 0        |
| protein_co Uncharacte   | 3    | 1    | 0    | 1    | 0    | 1    | 0.088583 | 0.037865 | 0        | 0.045831 |
| protein_co Uncharacte   | 7    | 2    | 3    | 0    | 1    | 1    | 0.744286 | 0.272697 | 0.384867 | 0        |
| protein_co BTB_(POZ)_   | 826  | 733  | 761  | 12   | 9    | 14   | 14.56606 | 16.57583 | 16.19179 | 0.328453 |
| protein_co family_witl  | 73   | 57   | 48   | 45   | 61   | 51   | 1.543965 | 1.545962 | 1.224909 | 1.477263 |
| protein_co Uncharacte   | 1    | 2    | 1    | 0    | 0    | 2    | 0.013568 | 0.034797 | 0.01637  | 0        |
| protein_co RAB6C_me     | 1    | 0    | 0    | 0    | 0    | 1    | 0.015239 | 0        | 0        | 0        |
| protein_co Uncharacte   | 0    | 0    | 0    | 2    | 2    | 2    | 0        | 0        | 0        | 0.141046 |
| protein_co Uncharacte   | 4    | 6    | 3    | 1    | 0    | 0    | 0.248095 | 0.477221 | 0.224506 | 0.09627  |
| protein_co Protein_LO   | 5    | 3    | 4    | 7    | 15   | 3    | 0.169768 | 0.130622 | 0.163868 | 0.368906 |
| protein_co Uncharacte   | 4    | 5    | 4    | 15   | 12   | 8    | 0.41222  | 0.660767 | 0.497367 | 2.399334 |
| protein_co Uncharacte   | 202  | 149  | 179  | 0    | 0    | 0    | 16.10848 | 15.23697 | 17.22282 | 0        |

|                         |      |      |      |     |      |      |          |          |          |          |
|-------------------------|------|------|------|-----|------|------|----------|----------|----------|----------|
| pseudogeni -            | 1    | 0    | 0    | 0   | 0    | 0    | 0.047701 | 0        | 0        | 0        |
| lincRNA -               | 328  | 212  | 274  | 0   | 0    | 0    | 28.4287  | 23.56288 | 28.65377 | 0        |
| protein_co Uncharacte   | 0    | 0    | 0    | 0   | 0    | 3    | 0        | 0        | 0        | 0        |
| antisense -             | 0    | 0    | 0    | 0   | 1    | 0    | 0        | 0        | 0        | 0        |
| protein_co adrenocept   | 4    | 0    | 2    | 121 | 160  | 42   | 0.057218 | 0        | 0.034518 | 2.686503 |
| lincRNA long_interge    | 435  | 343  | 378  | 7   | 5    | 15   | 18.61055 | 18.81799 | 19.51235 | 0.464834 |
| lincRNA -               | 0    | 0    | 2    | 0   | 0    | 0    | 0        | 0        | 0.148298 | 0        |
| antisense -             | 5    | 2    | 4    | 1   | 4    | 3    | 0.46984  | 0.241001 | 0.453511 | 0.145851 |
| antisense -             | 1    | 0    | 1    | 2   | 0    | 0    | 0.044446 | 0        | 0.053626 | 0.137971 |
| protein_co doublecort   | 12   | 12   | 9    | 5   | 5    | 9    | 0.302029 | 0.387309 | 0.273312 | 0.19533  |
| protein_co chromosom    | 3    | 2    | 3    | 2   | 6    | 0    | 0.055977 | 0.047855 | 0.067539 | 0.057923 |
| antisense -             | 0    | 1    | 2    | 8   | 7    | 4    | 0        | 0.076892 | 0.144694 | 0.74455  |
| pseudogeni histone_clu  | 0    | 0    | 0    | 1   | 3    | 0    | 0        | 0        | 0        | 0.096782 |
| antisense -             | 5    | 10   | 14   | 9   | 9    | 9    | 0.541455 | 1.388679 | 1.829231 | 1.512744 |
| pseudogeni ferritin_he  | 1    | 0    | 2    | 0   | 1    | 1    | 0.050419 | 0        | 0.121668 | 0        |
| sense_intrc PROX1_inti  | 0    | 0    | 1    | 0   | 0    | 0    | 0        | 0        | 0.247055 | 0        |
| pseudogeni -            | 0    | 0    | 0    | 2   | 1    | 0    | 0        | 0        | 0        | 0.237068 |
| antisense -             | 21   | 17   | 11   | 17  | 11   | 11   | 2.227806 | 2.312684 | 1.407988 | 2.799223 |
| pseudogeni -            | 0    | 1    | 0    | 0   | 0    | 0    | 0        | 0.278379 | 0        | 0        |
| processed_ SEC22_vesi   | 2212 | 1702 | 1858 | 370 | 462  | 596  | 51.65374 | 50.96659 | 52.34925 | 13.41062 |
| lincRNA -               | 8    | 9    | 5    | 0   | 0    | 0    | 0.338556 | 0.488419 | 0.255305 | 0        |
| lincRNA -               | 0    | 1    | 0    | 0   | 0    | 0    | 0        | 0.01872  | 0        | 0        |
| antisense -             | 0    | 1    | 0    | 0   | 0    | 2    | 0        | 0.07891  | 0        | 0        |
| antisense -             | 9    | 2    | 5    | 7   | 5    | 12   | 0.531499 | 0.15146  | 0.356269 | 0.641636 |
| pseudogeni -            | 0    | 0    | 0    | 1   | 0    | 1    | 0        | 0        | 0        | 0.15618  |
| lincRNA -               | 20   | 19   | 20   | 6   | 10   | 3    | 1.749628 | 2.131467 | 2.111026 | 0.814699 |
| pseudogeni -            | 0    | 0    | 0    | 3   | 1    | 0    | 0        | 0        | 0        | 0.627412 |
| lincRNA maternally      | 17   | 16   | 11   | 0   | 4    | 9    | 0.302172 | 0.364699 | 0.23591  | 0        |
| pseudogeni ribosomal_   | 1    | 0    | 1    | 1   | 3    | 0    | 0.084183 | 0        | 0.101572 | 0.130664 |
| lincRNA -               | 0    | 0    | 0    | 0   | 0    | 1    | 0        | 0        | 0        | 0        |
| processed_ long_interge | 2    | 3    | 3    | 0   | 0    | 0    | 0.042396 | 0.08155  | 0.07673  | 0        |
| pseudogeni -            | 0    | 0    | 2    | 1   | 3    | 0    | 0        | 0        | 0.325147 | 0.209137 |
| pseudogeni -            | 0    | 0    | 0    | 5   | 1    | 0    | 0        | 0        | 0        | 0.937884 |
| pseudogeni -            | 0    | 2    | 1    | 0   | 0    | 2    | 0        | 0.169858 | 0.079909 | 0        |
| pseudogeni -            | 1    | 0    | 0    | 0   | 0    | 2    | 0.055755 | 0        | 0        | 0        |
| pseudogeni MT-ND6_ps    | 1    | 0    | 1    | 1   | 3    | 0    | 0.097282 | 0        | 0.117377 | 0.150995 |
| antisense -             | 0    | 0    | 1    | 0   | 0    | 0    | 0        | 0        | 0.107558 | 0        |
| antisense -             | 1    | 3    | 1    | 1   | 0    | 2    | 0.099343 | 0.382181 | 0.119863 | 0.154194 |
| pseudogeni -            | 1    | 0    | 1    | 0   | 2    | 0    | 0.126388 | 0        | 0.152495 | 0        |
| pseudogeni -            | 0    | 0    | 0    | 1   | 0    | 0    | 0        | 0        | 0        | 0.073963 |
| sense_intrc             | 2    | 0    | 0    | 0   | 0    | 1    | 0.385926 | 0        | 0        | 0        |
| pseudogeni family_witl  | 276  | 241  | 228  | 69  | 48   | 39   | 5.798228 | 6.492509 | 5.779218 | 2.249913 |
| antisense -             | 5    | 1    | 5    | 12  | 10   | 4    | 0.402835 | 0.103316 | 0.486044 | 1.500614 |
| lincRNA -               | 1    | 1    | 0    | 0   | 0    | 0    | 0.110329 | 0.141482 | 0        | 0        |
| lincRNA -               | 0    | 0    | 1    | 0   | 0    | 0    | 0        | 0        | 0.090957 | 0        |
| lincRNA -               | 14   | 6    | 12   | 17  | 23   | 19   | 0.939142 | 0.516136 | 0.971253 | 1.770038 |
| protein_co Uncharacte   | 1    | 0    | 0    | 0   | 0    | 0    | 0.022576 | 0        | 0        | 0        |
| pseudogeni vomeronas    | 1    | 1    | 3    | 8   | 15   | 5    | 0.136308 | 0.174796 | 0.493391 | 1.692554 |
| antisense -             | 14   | 13   | 12   | 19  | 20   | 8    | 1.206728 | 1.436925 | 1.247989 | 2.541942 |
| antisense NUTM2A_a      | 321  | 235  | 283  | 201 | 285  | 243  | 6.287258 | 5.902465 | 6.687915 | 6.110585 |
| lincRNA -               | 12   | 5    | 10   | 0   | 0    | 0    | 0.869676 | 0.464682 | 0.874428 | 0        |
| processed_ -            | 5    | 6    | 7    | 81  | 103  | 130  | 0.087124 | 0.134069 | 0.147168 | 2.190696 |
| pseudogeni -            | 0    | 1    | 1    | 1   | 4    | 0    | 0        | 0.213226 | 0.200622 | 0.258084 |
| antisense -             | 1    | 1    | 2    | 0   | 0    | 0    | 0.028944 | 0.037117 | 0.069846 | 0        |
| protein_co exosome_c    | 985  | 692  | 779  | 717 | 1149 | 1161 | 27.16863 | 24.47636 | 25.92489 | 30.69595 |
| protein_co vacuolar_p   | 587  | 433  | 517  | 516 | 508  | 586  | 8.245788 | 7.799941 | 8.762593 | 11.25056 |
| antisense -             | 0    | 1    | 0    | 0   | 0    | 2    | 0        | 0.142826 | 0        | 0        |
| pseudogeni -            | 2    | 1    | 0    | 1   | 0    | 4    | 0.141662 | 0.090831 | 0        | 0.109939 |
| pseudogeni -            | 4    | 4    | 3    | 2   | 2    | 2    | 0.571829 | 0.73329  | 0.517459 | 0.443779 |
| pseudogeni ribosomal_   | 25   | 15   | 19   | 9   | 11   | 8    | 2.565099 | 1.973626 | 2.352154 | 1.4333   |
| pseudogeni -            | 55   | 65   | 77   | 3   | 8    | 3    | 1.541513 | 2.336185 | 2.603894 | 0.130508 |
| protein_co CMT1A_du     | 9    | 11   | 9    | 14  | 3    | 7    | 0.550927 | 0.863483 | 0.664725 | 1.330179 |
| lincRNA -               | 0    | 0    | 0    | 5   | 2    | 0    | 0        | 0        | 0        | 0.817751 |
| pseudogeni ATPase_H+    | 1    | 1    | 2    | 0   | 2    | 1    | 0.191388 | 0.245428 | 0.461841 | 0        |
| sense_intrc AFF2_intro  | 1    | 0    | 0    | 1   | 0    | 0    | 0.105847 | 0        | 0        | 0.164288 |

|                          |    |    |    |     |     |     |          |          |          |          |
|--------------------------|----|----|----|-----|-----|-----|----------|----------|----------|----------|
| pseudogen: casein_kinase | 3  | 0  | 0  | 2   | 2   | 0   | 0.065519 | 0        | 0        | 0.067797 |
| pseudogen: -             | 5  | 10 | 11 | 3   | 3   | 5   | 0.076869 | 0.197147 | 0.204043 | 0.071587 |
| antisense -              | 1  | 1  | 4  | 3   | 4   | 1   | 0.022223 | 0.028498 | 0.107252 | 0.103478 |
| processed_ -             | 0  | 1  | 1  | 0   | 0   | 0   | 0        | 0.075445 | 0.070986 | 0        |
| sense_intrc RABGAP1L     | 0  | 3  | 0  | 10  | 14  | 12  | 0        | 0.244762 | 0        | 0.987514 |
| antisense -              | 6  | 5  | 1  | 0   | 5   | 4   | 0.336129 | 0.359198 | 0.067593 | 0        |
| pseudogen: eukaryotic    | 1  | 0  | 0  | 1   | 1   | 0   | 0.033782 | 0        | 0        | 0.052435 |
| antisense HLA-DQB1       | 0  | 0  | 0  | 0   | 0   | 1   | 0        | 0        | 0        | 0        |
| processed_ -             | 0  | 0  | 1  | 0   | 1   | 0   | 0        | 0        | 0.08966  | 0        |
| pseudogen: transcriptic  | 0  | 2  | 0  | 0   | 0   | 0   | 0        | 0.204523 | 0        | 0        |
| processed_ long_interf   | 50 | 41 | 48 | 39  | 41  | 55  | 1.115898 | 1.173404 | 1.292539 | 1.350982 |
| protein_co zinc_finger   | 9  | 15 | 8  | 230 | 259 | 282 | 0.063748 | 0.136246 | 0.068369 | 2.528603 |
| pseudogen: MT-ND5_p      | 4  | 4  | 1  | 7   | 2   | 2   | 0.117666 | 0.15089  | 0.035493 | 0.31961  |
| pseudogen: thymosin_I    | 4  | 5  | 5  | 2   | 4   | 4   | 0.303495 | 0.486487 | 0.457731 | 0.235533 |
| antisense -              | 0  | 0  | 0  | 0   | 2   | 0   | 0        | 0        | 0        | 0        |
| pseudogen: sphingomy     | 0  | 0  | 1  | 5   | 6   | 3   | 0        | 0        | 0.026156 | 0.168238 |
| lincRNA -                | 1  | 0  | 0  | 0   | 0   | 0   | 0.157349 | 0        | 0        | 0        |
| pseudogen: -             | 2  | 0  | 0  | 3   | 1   | 1   | 0.032517 | 0        | 0        | 0.075707 |
| processed_ -             | 0  | 0  | 1  | 0   | 1   | 0   | 0        | 0        | 0.030254 | 0        |
| antisense -              | 0  | 0  | 3  | 0   | 0   | 0   | 0        | 0        | 0.470157 | 0        |
| pseudogen: cytochrom     | 0  | 0  | 0  | 0   | 2   | 1   | 0        | 0        | 0        | 0        |
| sense_intrc DHRSX_int    | 1  | 4  | 1  | 3   | 5   | 6   | 0.072028 | 0.369461 | 0.086906 | 0.335391 |
| protein_co creatine_ki   | 0  | 0  | 0  | 159 | 148 | 102 | 0        | 0        | 0        | 6.055462 |
| lincRNA tissue_diffe     | 9  | 5  | 2  | 16  | 14  | 9   | 0.113049 | 0.080538 | 0.030311 | 0.311941 |
| pseudogen: RNA_bindin    | 0  | 0  | 0  | 0   | 2   | 0   | 0        | 0        | 0        | 0        |
| antisense -              | 7  | 2  | 6  | 4   | 4   | 7   | 0.739257 | 0.270855 | 0.764534 | 0.655674 |
| pseudogen: -             | 2  | 3  | 3  | 1   | 6   | 3   | 0.17529  | 0.337176 | 0.317246 | 0.136037 |
| pseudogen: trans-golgi   | 5  | 0  | 1  | 5   | 0   | 1   | 0.366902 | 0        | 0.088538 | 0.569482 |
| processed_ -             | 1  | 0  | 0  | 0   | 0   | 0   | 0.057675 | 0        | 0        | 0        |
| pseudogen: -             | 0  | 0  | 0  | 0   | 2   | 0   | 0        | 0        | 0        | 0        |
| pseudogen: centromer     | 0  | 0  | 0  | 12  | 30  | 24  | 0        | 0        | 0        | 0.670267 |
| pseudogen: fibronectin   | 0  | 0  | 2  | 0   | 0   | 0   | 0        | 0        | 0.097966 | 0        |
| pseudogen: -             | 1  | 0  | 0  | 0   | 0   | 0   | 0.05119  | 0        | 0        | 0        |
| processed_ -             | 0  | 1  | 1  | 3   | 3   | 1   | 0        | 0.070492 | 0.066325 | 0.255966 |
| pseudogen: -             | 1  | 5  | 5  | 3   | 12  | 14  | 0.035821 | 0.229678 | 0.216102 | 0.166799 |
| pseudogen: -             | 1  | 1  | 1  | 0   | 0   | 0   | 0.033421 | 0.042858 | 0.040325 | 0        |
| pseudogen: suppressor    | 1  | 3  | 4  | 4   | 2   | 14  | 0.019108 | 0.073508 | 0.092218 | 0.11863  |
| pseudogen: -             | 12 | 12 | 17 | 6   | 12  | 16  | 0.799262 | 1.02494  | 1.36617  | 0.620282 |
| lincRNA -                | 0  | 0  | 0  | 0   | 0   | 1   | 0        | 0        | 0        | 0        |
| pseudogen: adenylate_I   | 1  | 0  | 0  | 0   | 0   | 0   | 0.072585 | 0        | 0        | 0        |
| pseudogen: -             | 0  | 3  | 3  | 0   | 0   | 2   | 0        | 1.288496 | 1.212332 | 0        |
| lincRNA -                | 0  | 0  | 0  | 0   | 0   | 1   | 0        | 0        | 0        | 0        |
| lincRNA -                | 0  | 0  | 0  | 1   | 0   | 0   | 0        | 0        | 0        | 0.136547 |
| antisense -              | 0  | 0  | 0  | 0   | 2   | 2   | 0        | 0        | 0        | 0        |
| antisense -              | 2  | 2  | 0  | 0   | 0   | 1   | 0.081619 | 0.104665 | 0        | 0        |
| lincRNA -                | 0  | 0  | 1  | 0   | 0   | 0   | 0        | 0        | 0.135348 | 0        |
| pseudogen: ubiquitin-li  | 1  | 2  | 2  | 2   | 2   | 0   | 0.019644 | 0.050381 | 0.047403 | 0.06098  |
| antisense -              | 42 | 38 | 32 | 0   | 0   | 0   | 2.486592 | 2.885015 | 2.285879 | 0        |
| processed_ -             | 8  | 8  | 10 | 3   | 4   | 2   | 0.192369 | 0.246686 | 0.290131 | 0.111969 |
| pseudogen: -             | 0  | 0  | 0  | 0   | 2   | 0   | 0        | 0        | 0        | 0        |
| antisense -              | 0  | 0  | 0  | 1   | 1   | 0   | 0        | 0        | 0        | 0.177512 |
| antisense SAMSN1_ar      | 0  | 0  | 0  | 1   | 0   | 1   | 0        | 0        | 0        | 0.086643 |
| pseudogen: -             | 0  | 0  | 1  | 3   | 0   | 0   | 0        | 0        | 0.154157 | 0.59493  |
| lincRNA -                | 1  | 0  | 1  | 0   | 0   | 0   | 0.087481 | 0        | 0.105551 | 0        |
| pseudogen: eukaryotic    | 0  | 0  | 0  | 1   | 0   | 0   | 0        | 0        | 0        | 0.052816 |
| antisense -              | 22 | 16 | 17 | 6   | 10  | 0   | 1.395914 | 1.301863 | 1.301466 | 0.590905 |
| lincRNA -                | 2  | 0  | 1  | 0   | 0   | 0   | 0.043197 | 0        | 0.02606  | 0        |
| antisense -              | 1  | 0  | 0  | 0   | 0   | 0   | 0.132833 | 0        | 0        | 0        |
| pseudogen: -             | 0  | 0  | 0  | 1   | 0   | 0   | 0        | 0        | 0        | 0.122319 |
| lincRNA long_interf      | 3  | 2  | 2  | 1   | 0   | 0   | 0.267943 | 0.229066 | 0.215526 | 0.138628 |
| pseudogen: ribosomal     | 0  | 0  | 0  | 1   | 0   | 0   | 0        | 0        | 0        | 0.198852 |
| sense_intrc DIP2A_intr   | 5  | 3  | 4  | 4   | 7   | 6   | 0.547781 | 0.421471 | 0.528743 | 0.680185 |
| lincRNA -                | 2  | 1  | 4  | 2   | 1   | 0   | 0.183882 | 0.117902 | 0.443729 | 0.285411 |
| antisense -              | 1  | 2  | 6  | 1   | 1   | 4   | 0.06066  | 0.155575 | 0.439137 | 0.094152 |
| pseudogen: golgin_A6     | 0  | 0  | 0  | 0   | 0   | 1   | 0        | 0        | 0        | 0        |

|                         |     |     |     |      |      |      |          |          |          |          |
|-------------------------|-----|-----|-----|------|------|------|----------|----------|----------|----------|
| pseudogeni -            | 0   | 0   | 1   | 0    | 1    | 12   | 0        | 0        | 0.023622 | 0        |
| lincRNA -               | 0   | 0   | 1   | 0    | 4    | 0    | 0        | 0        | 0.009362 | 0        |
| pseudogeni NOP2/Sun_    | 217 | 214 | 209 | 405  | 492  | 342  | 2.123358 | 2.685262 | 2.467504 | 6.151047 |
| antisense -             | 0   | 0   | 1   | 0    | 0    | 1    | 0        | 0        | 0.069846 | 0        |
| lincRNA -               | 0   | 0   | 1   | 4    | 2    | 1    | 0        | 0        | 0.067755 | 0.348646 |
| pseudogeni -            | 0   | 0   | 1   | 0    | 0    | 1    | 0        | 0        | 0.091993 | 0        |
| pseudogeni -            | 7   | 8   | 9   | 2    | 3    | 3    | 0.759792 | 1.113515 | 1.178656 | 0.336944 |
| lincRNA -               | 0   | 1   | 0   | 0    | 0    | 0    | 0        | 0.222703 | 0        | 0        |
| pseudogeni -            | 0   | 0   | 0   | 1    | 1    | 0    | 0        | 0        | 0        | 0.179703 |
| pseudogeni -            | 1   | 2   | 1   | 1    | 2    | 2    | 0.038122 | 0.097772 | 0.045996 | 0.059171 |
| pseudogeni RAD17_hoi    | 1   | 0   | 0   | 1    | 2    | 2    | 0.023718 | 0        | 0        | 0.036813 |
| antisense -             | 1   | 2   | 1   | 2    | 2    | 1    | 0.063279 | 0.162294 | 0.07635  | 0.196437 |
| pseudogeni -            | 0   | 0   | 0   | 5    | 14   | 5    | 0        | 0        | 0        | 0.393404 |
| pseudogeni suppressor   | 1   | 0   | 4   | 4    | 4    | 2    | 0.017911 | 0        | 0.086441 | 0.111199 |
| lincRNA -               | 0   | 0   | 0   | 1    | 0    | 1    | 0        | 0        | 0        | 0.231047 |
| antisense -             | 0   | 1   | 1   | 4    | 1    | 3    | 0        | 0.104939 | 0.098736 | 0.508061 |
| pseudogeni olfactory_r  | 0   | 0   | 0   | 1    | 0    | 0    | 0        | 0        | 0        | 0.079715 |
| lincRNA -               | 0   | 0   | 0   | 0    | 1    | 0    | 0        | 0        | 0        | 0        |
| processed_ -            | 96  | 84  | 100 | 170  | 191  | 42   | 1.514108 | 1.698925 | 1.902977 | 4.161644 |
| processed_ -            | 110 | 99  | 97  | 24   | 38   | 73   | 6.786713 | 7.832697 | 7.220821 | 2.29831  |
| pseudogeni -            | 0   | 0   | 0   | 0    | 1    | 0    | 0        | 0        | 0        | 0        |
| lincRNA -               | 8   | 3   | 3   | 10   | 5    | 2    | 0.701159 | 0.337176 | 0.317246 | 1.36037  |
| pseudogeni -            | 0   | 0   | 0   | 0    | 0    | 2    | 0        | 0        | 0        | 0        |
| antisense -             | 1   | 0   | 0   | 0    | 0    | 0    | 0.086354 | 0        | 0        | 0        |
| pseudogeni tumor_sup    | 19  | 16  | 17  | 1720 | 2169 | 1587 | 0.38122  | 0.411672 | 0.411546 | 53.56494 |
| processed_ -            | 9   | 6   | 10  | 6    | 7    | 1    | 0.212279 | 0.181478 | 0.284585 | 0.219657 |
| processed_ CCDC74B_i    | 0   | 0   | 0   | 2    | 1    | 2    | 0        | 0        | 0        | 0.079066 |
| processed_ -            | 194 | 162 | 156 | 27   | 36   | 13   | 6.549074 | 7.012978 | 6.354052 | 1.414726 |
| lincRNA long_interf     | 156 | 137 | 166 | 67   | 89   | 72   | 5.258694 | 5.922201 | 6.751642 | 3.505569 |
| antisense microRNA_     | 2   | 4   | 1   | 0    | 0    | 1    | 0.035375 | 0.090728 | 0.021341 | 0        |
| pseudogeni gem_(nucl    | 0   | 0   | 0   | 0    | 0    | 2    | 0        | 0        | 0        | 0        |
| pseudogeni CD99_mol     | 130 | 128 | 138 | 151  | 172  | 125  | 1.984924 | 2.506224 | 2.542305 | 3.578557 |
| antisense -             | 1   | 0   | 1   | 0    | 0    | 0    | 0.07815  | 0        | 0.094293 | 0        |
| antisense LGALS8_an     | 0   | 0   | 0   | 0    | 1    | 0    | 0        | 0        | 0        | 0        |
| pseudogeni -            | 1   | 0   | 1   | 0    | 0    | 0    | 0.108042 | 0        | 0.130358 | 0        |
| processed_ -            | 2   | 1   | 3   | 2    | 3    | 3    | 0.018545 | 0.01189  | 0.033563 | 0.028784 |
| lincRNA -               | 0   | 0   | 0   | 0    | 3    | 0    | 0        | 0        | 0        | 0        |
| lincRNA -               | 1   | 0   | 4   | 1    | 0    | 8    | 0.051134 | 0        | 0.246785 | 0.079367 |
| pseudogeni -            | 0   | 1   | 0   | 0    | 0    | 0    | 0        | 0.173786 | 0        | 0        |
| antisense UBE2E1_an     | 2   | 1   | 1   | 11   | 6    | 3    | 0.12054  | 0.077288 | 0.072719 | 1.02902  |
| antisense ENTPD3_ar     | 14  | 8   | 11  | 20   | 20   | 14   | 0.322426 | 0.236266 | 0.305663 | 0.714929 |
| processed_ -            | 1   | 0   | 1   | 0    | 0    | 0    | 0.021046 | 0        | 0.025393 | 0        |
| protein_co ceramide_s   | 26  | 24  | 28  | 47   | 77   | 38   | 0.476599 | 0.564158 | 0.619278 | 1.337236 |
| pseudogeni ribosomal_   | 1   | 2   | 1   | 0    | 0    | 0    | 0.13025  | 0.334054 | 0.157154 | 0        |
| processed_ -            | 51  | 50  | 42  | 44   | 65   | 34   | 1.082077 | 1.360403 | 1.075191 | 1.44901  |
| lincRNA long_interf     | 0   | 0   | 0   | 0    | 1    | 1    | 0        | 0        | 0        | 0        |
| pseudogeni -            | 0   | 0   | 0   | 0    | 0    | 1    | 0        | 0        | 0        | 0        |
| lincRNA -               | 0   | 1   | 2   | 0    | 0    | 0    | 0        | 0.118599 | 0.223178 | 0        |
| lincRNA -               | 0   | 0   | 1   | 0    | 0    | 0    | 0        | 0        | 0.062792 | 0        |
| processed_ -            | 12  | 8   | 6   | 30   | 39   | 23   | 0.632936 | 0.541101 | 0.381837 | 2.456011 |
| lincRNA -               | 0   | 1   | 1   | 14   | 13   | 6    | 0        | 0.147739 | 0.139006 | 2.503482 |
| antisense DIAPH3_an     | 0   | 0   | 0   | 1    | 1    | 2    | 0        | 0        | 0        | 0.19831  |
| pseudogeni cofilin_1_(i | 6   | 1   | 1   | 12   | 19   | 4    | 0.132708 | 0.028363 | 0.026687 | 0.411961 |
| antisense -             | 0   | 1   | 0   | 0    | 0    | 1    | 0        | 0.162513 | 0        | 0        |
| lincRNA -               | 0   | 0   | 0   | 0    | 1    | 0    | 0        | 0        | 0        | 0        |
| pseudogeni DAZ_associ   | 1   | 3   | 0   | 1    | 2    | 1    | 0.093221 | 0.358627 | 0        | 0.144691 |
| pseudogeni barrier_to_  | 1   | 2   | 1   | 0    | 1    | 0    | 0.173667 | 0.445406 | 0.209539 | 0        |
| sense_intrc -           | 6   | 3   | 2   | 0    | 0    | 1    | 1.12988  | 0.724455 | 0.454422 | 0        |
| lincRNA -               | 1   | 0   | 0   | 0    | 2    | 0    | 0.111378 | 0        | 0        | 0        |
| sense_intrc BRD2_intrc  | 0   | 0   | 0   | 0    | 1    | 0    | 0        | 0        | 0        | 0        |
| lincRNA -               | 0   | 2   | 1   | 0    | 0    | 0    | 0        | 0.212473 | 0.099957 | 0        |
| lincRNA family_witl     | 1   | 0   | 1   | 6    | 13   | 7    | 0.009994 | 0        | 0.012058 | 0.093069 |
| lincRNA -               | 1   | 0   | 2   | 1    | 1    | 0    | 0.041643 | 0        | 0.100489 | 0.064636 |
| pseudogeni -            | 5   | 4   | 11  | 2    | 0    | 2    | 0.673707 | 0.691147 | 1.788306 | 0.418275 |
| lincRNA -               | 0   | 0   | 0   | 1    | 1    | 0    | 0        | 0        | 0        | 0.070048 |

|                         |     |     |     |     |     |     |          |          |          |          |
|-------------------------|-----|-----|-----|-----|-----|-----|----------|----------|----------|----------|
| processed_ -            | 29  | 26  | 16  | 72  | 126 | 80  | 0.387852 | 0.445914 | 0.258188 | 1.494622 |
| pseudogen_ -            | 4   | 1   | 1   | 0   | 0   | 0   | 0.378909 | 0.121474 | 0.114294 | 0        |
| pseudogen_ nucleopho:   | 1   | 0   | 0   | 1   | 2   | 0   | 0.065857 | 0        | 0        | 0.102219 |
| protein_co major_histi  | 49  | 40  | 40  | 301 | 367 | 307 | 1.472827 | 1.54179  | 1.450654 | 14.04277 |
| pseudogen_ -            | 1   | 0   | 0   | 0   | 0   | 0   | 0.119923 | 0        | 0        | 0        |
| pseudogen_ -            | 0   | 0   | 0   | 0   | 0   | 1   | 0        | 0        | 0        | 0        |
| pseudogen_ -            | 14  | 31  | 23  | 2   | 11  | 4   | 1.342454 | 3.811909 | 2.661016 | 0.297668 |
| antisense ABCC5_ant     | 0   | 0   | 1   | 1   | 2   | 1   | 0        | 0        | 0.12063  | 0.155181 |
| antisense -             | 2   | 5   | 1   | 1   | 2   | 1   | 0.168973 | 0.54171  | 0.101938 | 0.131135 |
| pseudogen_ -            | 4   | 6   | 1   | 6   | 9   | 2   | 0.405097 | 0.77922  | 0.122193 | 0.943151 |
| lincRNA -               | 49  | 28  | 35  | 95  | 96  | 52  | 1.470001 | 1.077181 | 1.266886 | 4.423596 |
| pseudogen_ -            | 0   | 0   | 0   | 1   | 0   | 0   | 0        | 0        | 0        | 0.033233 |
| pseudogen_ cyclin_J_ps  | 1   | 1   | 0   | 2   | 0   | 1   | 0.040318 | 0.051702 | 0        | 0.125159 |
| pseudogen_ SEC13_hon    | 3   | 1   | 0   | 0   | 1   | 1   | 0.148386 | 0.063428 | 0        | 0        |
| antisense -             | 2   | 0   | 4   | 1   | 1   | 2   | 0.178629 | 0        | 0.431051 | 0.138628 |
| pseudogen_ -            | 0   | 0   | 0   | 0   | 1   | 0   | 0        | 0        | 0        | 0        |
| lincRNA -               | 0   | 0   | 0   | 0   | 0   | 1   | 0        | 0        | 0        | 0        |
| pseudogen_ -            | 2   | 0   | 1   | 0   | 0   | 2   | 0.306471 | 0        | 0.184887 | 0        |
| processed_ ZNF32_anti   | 0   | 0   | 0   | 2   | 1   | 0   | 0        | 0        | 0        | 0.075341 |
| antisense -             | 0   | 1   | 0   | 0   | 1   | 1   | 0        | 0.145946 | 0        | 0        |
| pseudogen_ developme    | 3   | 1   | 1   | 0   | 1   | 2   | 0.253004 | 0.108147 | 0.101755 | 0        |
| pseudogen_ -            | 2   | 2   | 1   | 5   | 4   | 0   | 0.182097 | 0.233514 | 0.109855 | 0.7066   |
| pseudogen_ -            | 2   | 0   | 0   | 0   | 0   | 0   | 0.131161 | 0        | 0        | 0        |
| pseudogen_ argininosuc  | 12  | 4   | 6   | 5   | 3   | 8   | 0.460082 | 0.196663 | 0.277558 | 0.297546 |
| antisense -             | 5   | 7   | 2   | 3   | 1   | 1   | 0.412764 | 0.741036 | 0.19921  | 0.3844   |
| lincRNA -               | 1   | 2   | 1   | 1   | 1   | 0   | 0.022329 | 0.057266 | 0.026941 | 0.034657 |
| antisense -             | 2   | 0   | 1   | 1   | 1   | 1   | 0.12971  | 0        | 0.078251 | 0.100664 |
| pseudogen_ -            | 3   | 0   | 5   | 0   | 1   | 0   | 0.16169  | 0        | 0.325147 | 0        |
| lincRNA -               | 0   | 1   | 0   | 0   | 0   | 0   | 0        | 0.373477 | 0        | 0        |
| antisense -             | 10  | 8   | 11  | 0   | 0   | 0   | 0.134548 | 0.138031 | 0.178574 | 0        |
| antisense -             | 4   | 3   | 2   | 8   | 15  | 25  | 0.085683 | 0.082407 | 0.051691 | 0.265984 |
| pseudogen_ -            | 0   | 1   | 0   | 0   | 1   | 0   | 0        | 0.233061 | 0        | 0        |
| lincRNA -               | 0   | 1   | 2   | 1   | 2   | 1   | 0        | 0.11033  | 0.207617 | 0.133541 |
| pseudogen_ AFG3_ATPa    | 371 | 303 | 385 | 235 | 263 | 431 | 5.228794 | 5.476203 | 6.54691  | 5.140743 |
| antisense -             | 230 | 192 | 219 | 101 | 106 | 129 | 5.373545 | 5.752327 | 6.173411 | 3.662561 |
| pseudogen_ protein-kin  | 3   | 4   | 1   | 0   | 2   | 2   | 0.066511 | 0.113721 | 0.02675  | 0        |
| pseudogen_ zinc_finger_ | 2   | 2   | 1   | 2   | 1   | 2   | 0.067662 | 0.086767 | 0.040819 | 0.105021 |
| antisense -             | 7   | 3   | 2   | 12  | 11  | 8   | 0.7294   | 0.400865 | 0.251447 | 1.940795 |
| pseudogen_ DEAD/H_(A    | 0   | 0   | 0   | 0   | 1   | 0   | 0        | 0        | 0        | 0        |
| pseudogen_ -            | 1   | 1   | 0   | 0   | 0   | 0   | 0.037784 | 0.048453 | 0        | 0        |
| pseudogen_ -            | 0   | 0   | 0   | 0   | 3   | 0   | 0        | 0        | 0        | 0        |
| lincRNA Smith-Magi      | 4   | 0   | 3   | 2   | 2   | 1   | 0.332553 | 0        | 0.300934 | 0.258084 |
| pseudogen_ prohibitin_  | 0   | 1   | 0   | 0   | 0   | 0   | 0        | 0.076501 | 0        | 0        |
| pseudogen_ -            | 0   | 0   | 0   | 0   | 0   | 1   | 0        | 0        | 0        | 0        |
| pseudogen_ heterogene   | 1   | 0   | 0   | 4   | 2   | 1   | 0.027664 | 0        | 0        | 0.171752 |
| antisense -             | 0   | 0   | 0   | 1   | 0   | 0   | 0        | 0        | 0        | 0.031036 |
| sense_intrc -           | 1   | 2   | 0   | 0   | 2   | 0   | 0.078675 | 0.201778 | 0        | 0        |
| lincRNA -               | 1   | 0   | 0   | 0   | 0   | 0   | 0.071261 | 0        | 0        | 0        |
| pseudogen_ -            | 0   | 1   | 0   | 0   | 0   | 0   | 0        | 0.108342 | 0        | 0        |
| pseudogen_ -            | 1   | 0   | 1   | 4   | 2   | 1   | 0.028802 | 0        | 0.034752 | 0.17882  |
| pseudogen_ ATP_syntha   | 1   | 0   | 0   | 0   | 0   | 0   | 0.052391 | 0        | 0        | 0        |
| pseudogen_ -            | 7   | 5   | 5   | 3   | 6   | 1   | 1.3025   | 1.193052 | 1.12253  | 0.866426 |
| pseudogen_ -            | 0   | 2   | 1   | 0   | 0   | 0   | 0        | 0.117441 | 0.05525  | 0        |
| pseudogen_ -            | 0   | 0   | 0   | 0   | 1   | 0   | 0        | 0        | 0        | 0        |
| pseudogen_ -            | 4   | 1   | 6   | 0   | 0   | 0   | 0.694667 | 0.222703 | 1.257233 | 0        |
| lincRNA -               | 0   | 0   | 0   | 1   | 1   | 2   | 0        | 0        | 0        | 0.191023 |
| pseudogen_ -            | 0   | 0   | 0   | 5   | 3   | 7   | 0        | 0        | 0        | 1.250512 |
| lincRNA -               | 6   | 0   | 3   | 0   | 1   | 1   | 0.230607 | 0        | 0.13912  | 0        |
| pseudogen_ -            | 4   | 1   | 0   | 0   | 0   | 0   | 0.393208 | 0.126058 | 0        | 0        |
| antisense MIR181A2_     | 24  | 31  | 27  | 10  | 16  | 12  | 1.69994  | 2.815746 | 2.30746  | 1.099393 |
| lincRNA -               | 0   | 0   | 0   | 0   | 0   | 1   | 0        | 0        | 0        | 0        |
| lincRNA -               | 0   | 1   | 1   | 1   | 0   | 0   | 0        | 0.104211 | 0.098051 | 0.126135 |
| sense_intrc -           | 0   | 0   | 2   | 1   | 0   | 0   | 0        | 0        | 0.177075 | 0.113896 |
| antisense TCEAL3_an     | 0   | 0   | 0   | 0   | 0   | 1   | 0        | 0        | 0        | 0        |
| lincRNA EPB41L4A_       | 186 | 143 | 162 | 545 | 612 | 502 | 2.937536 | 2.896113 | 3.086976 | 13.35971 |

|                         |      |      |      |      |      |       |          |          |          |          |
|-------------------------|------|------|------|------|------|-------|----------|----------|----------|----------|
| lincRNA -               | 0    | 0    | 0    | 0    | 0    | 2     | 0        | 0        | 0        | 0        |
| pseudogen: splicing_fac | 0    | 0    | 0    | 0    | 0    | 1     | 0        | 0        | 0        | 0        |
| pseudogen: cathepsin_l  | 1    | 0    | 0    | 0    | 0    | 0     | 0.119923 | 0        | 0        | 0        |
| processed_ -            | 1    | 0    | 0    | 0    | 0    | 0     | 0.046518 | 0        | 0        | 0        |
| pseudogen: -            | 0    | 0    | 0    | 2    | 0    | 1     | 0        | 0        | 0        | 0.099835 |
| pseudogen: high_mobil   | 0    | 1    | 0    | 1    | 1    | 3     | 0        | 0.207344 | 0        | 0.250965 |
| antisense -             | 5    | 7    | 5    | 11   | 6    | 15    | 0.240215 | 0.431259 | 0.289834 | 0.820264 |
| processed_ -            | 4    | 4    | 1    | 15   | 14   | 19    | 0.243901 | 0.312769 | 0.07357  | 1.419632 |
| lincRNA -               | 0    | 0    | 0    | 4    | 3    | 1     | 0        | 0        | 0        | 0.478814 |
| lincRNA -               | 1    | 0    | 0    | 7    | 11   | 1     | 0.079475 | 0        | 0        | 0.863489 |
| protein_co glycolipid_  | 723  | 519  | 533  | 244  | 347  | 259   | 15.48013 | 14.24994 | 13.76929 | 8.1088   |
| pseudogen: glyceraldeh  | 2    | 3    | 1    | 1    | 0    | 0     | 0.116787 | 0.224644 | 0.070455 | 0.090635 |
| antisense EGFR_antis    | 22   | 17   | 11   | 0    | 0    | 0     | 0.367634 | 0.364293 | 0.221786 | 0        |
| pseudogen: heat_shock   | 0    | 0    | 2    | 0    | 0    | 0     | 0        | 0        | 0.060671 | 0        |
| pseudogen: arylsulfatas | 3    | 0    | 0    | 0    | 1    | 0     | 0.221528 | 0        | 0        | 0        |
| processed_ -            | 0    | 1    | 1    | 2    | 7    | 11    | 0        | 0.072533 | 0.068245 | 0.175585 |
| pseudogen: -            | 0    | 0    | 0    | 0    | 1    | 0     | 0        | 0        | 0        | 0        |
| antisense -             | 0    | 0    | 0    | 3    | 0    | 0     | 0        | 0        | 0        | 0.277786 |
| pseudogen: -            | 3    | 0    | 3    | 1    | 0    | 0     | 0.340605 | 0        | 0.41096  | 0.176222 |
| pseudogen: -            | 3    | 4    | 5    | 3    | 1    | 3     | 0.061187 | 0.104619 | 0.123044 | 0.094971 |
| lincRNA -               | 0    | 0    | 0    | 2    | 0    | 0     | 0        | 0        | 0        | 0.196437 |
| lincRNA long_interf     | 0    | 0    | 0    | 0    | 1    | 0     | 0        | 0        | 0        | 0        |
| processed_small_nucl    | 1908 | 1623 | 1641 | 8768 | 8892 | 10702 | 10.11832 | 11.03717 | 10.49993 | 72.1707  |
| antisense -             | 3    | 4    | 3    | 2    | 9    | 10    | 0.161876 | 0.276777 | 0.195312 | 0.167502 |
| pseudogen: ubiquitin-c  | 3    | 5    | 3    | 2    | 1    | 2     | 0.314698 | 0.672593 | 0.379701 | 0.325637 |
| lincRNA -               | 23   | 10   | 14   | 19   | 27   | 11    | 0.810271 | 0.451764 | 0.595084 | 1.03893  |
| pseudogen: -            | 2    | 1    | 0    | 3    | 0    | 0     | 0.061374 | 0.039352 | 0        | 0.142892 |
| antisense -             | 36   | 23   | 34   | 4    | 8    | 2     | 0.462857 | 0.379212 | 0.527438 | 0.079824 |
| pseudogen: -            | 0    | 1    | 0    | 0    | 0    | 0     | 0        | 0.078704 | 0        | 0        |
| antisense -             | 12   | 13   | 7    | 4    | 5    | 1     | 0.779335 | 1.082669 | 0.548516 | 0.403212 |
| pseudogen: -            | 1    | 0    | 0    | 0    | 0    | 2     | 0.116642 | 0        | 0        | 0        |
| lincRNA -               | 1    | 0    | 0    | 0    | 0    | 0     | 0.1073   | 0        | 0        | 0        |
| pseudogen: -            | 2    | 0    | 2    | 0    | 3    | 0     | 0.061214 | 0        | 0.073858 | 0        |
| lincRNA -               | 6    | 3    | 3    | 0    | 0    | 0     | 0.284469 | 0.182396 | 0.171614 | 0        |
| antisense -             | 0    | 0    | 1    | 1    | 1    | 0     | 0        | 0        | 0.129463 | 0.166544 |
| antisense ELMO1_ant     | 0    | 0    | 0    | 2    | 0    | 1     | 0        | 0        | 0        | 0.275681 |
| pseudogen: cytochrom    | 0    | 0    | 0    | 3    | 4    | 1     | 0        | 0        | 0        | 0.419883 |
| pseudogen: centromere   | 0    | 0    | 2    | 47   | 62   | 54    | 0        | 0        | 0.232821 | 7.038376 |
| sense_overl -           | 28   | 28   | 33   | 44   | 70   | 41    | 0.281985 | 0.361605 | 0.400986 | 0.687782 |
| pseudogen: -            | 4    | 1    | 3    | 0    | 3    | 0     | 0.433164 | 0.138868 | 0.391978 | 0        |
| antisense INHBA_anti    | 7    | 7    | 7    | 0    | 0    | 0     | 0.109228 | 0.140069 | 0.13179  | 0        |
| pseudogen: protein_ty   | 0    | 1    | 1    | 0    | 0    | 0     | 0        | 0.058721 | 0.05525  | 0        |
| sense_intrc -           | 0    | 0    | 0    | 0    | 7    | 5     | 0        | 0        | 0        | 0        |
| pseudogen: autophagy_   | 2    | 1    | 0    | 0    | 1    | 1     | 0.225433 | 0.144543 | 0        | 0        |
| pseudogen: POM121_t     | 5    | 7    | 9    | 6    | 23   | 12    | 0.024557 | 0.044088 | 0.053334 | 0.04574  |
| pseudogen: ubiquitin-c  | 17   | 3    | 9    | 17   | 17   | 17    | 1.603884 | 0.362957 | 1.024506 | 2.48945  |
| antisense -             | 2    | 1    | 3    | 0    | 0    | 0     | 0.13997  | 0.089746 | 0.253323 | 0        |
| antisense -             | 1    | 1    | 0    | 1    | 2    | 4     | 0.100192 | 0.128482 | 0        | 0.155512 |
| protein_co Uncharacte   | 17   | 8    | 7    | 0    | 0    | 0     | 2.277515 | 1.374395 | 1.13151  | 0        |
| antisense -             | 19   | 13   | 23   | 2    | 0    | 3     | 1.72657  | 1.514898 | 2.521776 | 0.282092 |
| sense_intrc AMMECR1_    | 0    | 1    | 0    | 1    | 0    | 0     | 0        | 0.107183 | 0        | 0.129732 |
| antisense -             | 11   | 6    | 9    | 0    | 0    | 0     | 0.234131 | 0.163767 | 0.23113  | 0        |
| antisense -             | 27   | 27   | 24   | 19   | 33   | 16    | 0.84741  | 1.086683 | 0.908843 | 0.92558  |
| pseudogen: -            | 1    | 0    | 0    | 0    | 0    | 0     | 0.05523  | 0        | 0        | 0        |
| antisense HLA_compl     | 0    | 1    | 0    | 3    | 2    | 0     | 0        | 0.145593 | 0        | 0.528667 |
| pseudogen: ubiquinol-c  | 0    | 1    | 1    | 0    | 0    | 0     | 0        | 0.239561 | 0.2254   | 0        |
| pseudogen: -            | 0    | 1    | 2    | 0    | 0    | 0     | 0        | 0.107375 | 0.202055 | 0        |
| antisense DNAJC27_ε     | 10   | 4    | 3    | 3    | 2    | 1     | 0.100622 | 0.051614 | 0.036422 | 0.046854 |
| pseudogen: -            | 1    | 2    | 2    | 0    | 1    | 0     | 0.057818 | 0.148286 | 0.13952  | 0        |
| lincRNA -               | 0    | 1    | 0    | 1    | 0    | 0     | 0        | 0.183883 | 0        | 0.222568 |
| lincRNA long_interf     | 0    | 2    | 1    | 3    | 2    | 0     | 0        | 0.090421 | 0.042538 | 0.164165 |
| pseudogen: succinate_c  | 0    | 4    | 3    | 1    | 3    | 4     | 0        | 0.501082 | 0.353597 | 0.151625 |
| lincRNA -               | 35   | 18   | 17   | 0    | 0    | 0     | 0.751787 | 0.495802 | 0.440579 | 0        |
| protein_co Homo_sapi    | 37   | 32   | 29   | 3    | 8    | 5     | 0.699851 | 0.776181 | 0.661835 | 0.088076 |
| pseudogen: ubiquitin-c  | 0    | 1    | 0    | 0    | 0    | 0     | 0        | 0.137912 | 0        | 0        |

|             |             |     |     |     |    |     |    |          |          |          |          |
|-------------|-------------|-----|-----|-----|----|-----|----|----------|----------|----------|----------|
| antisense   | HOXD_clus   | 197 | 135 | 141 | 0  | 1   | 3  | 2.181189 | 1.91677  | 1.883624 | 0        |
| antisense   | -           | 7   | 5   | 5   | 8  | 16  | 17 | 0.737596 | 0.675616 | 0.63568  | 1.308401 |
| antisense   | -           | 1   | 1   | 1   | 4  | 2   | 3  | 0.201245 | 0.258068 | 0.242813 | 1.249439 |
| antisense   | PHEX_antis  | 1   | 0   | 0   | 1  | 0   | 2  | 0.024601 | 0        | 0        | 0.038185 |
| pseudogen   | -           | 1   | 0   | 0   | 1  | 0   | 1  | 0.181744 | 0        | 0        | 0.282092 |
| pseudogen   | -           | 0   | 1   | 0   | 1  | 0   | 0  | 0        | 0.093953 | 0        | 0.113718 |
| lincRNA     | long_interf | 0   | 0   | 0   | 2  | 1   | 1  | 0        | 0        | 0        | 0.132568 |
| antisense   | -           | 2   | 0   | 0   | 0  | 1   | 0  | 0.105135 | 0        | 0        | 0        |
| antisense   | -           | 6   | 10  | 4   | 2  | 6   | 7  | 0.211693 | 0.452444 | 0.17028  | 0.109526 |
| antisense   | -           | 0   | 0   | 1   | 0  | 0   | 0  | 0        | 0        | 0.514323 | 0        |
| pseudogen   | -           | 0   | 2   | 0   | 0  | 0   | 0  | 0        | 0.890812 | 0        | 0        |
| antisense   | -           | 1   | 1   | 0   | 2  | 4   | 0  | 0.113261 | 0.145241 | 0        | 0.351593 |
| pseudogen   | ribosomal_  | 0   | 0   | 0   | 0  | 2   | 0  | 0        | 0        | 0        | 0        |
| lincRNA     | -           | 0   | 1   | 0   | 2  | 3   | 0  | 0        | 0.114752 | 0        | 0.277786 |
| processed   | -           | 0   | 0   | 0   | 1  | 2   | 0  | 0        | 0        | 0        | 0.024012 |
| pseudogen   | olfactory_r | 0   | 0   | 1   | 0  | 1   | 2  | 0        | 0        | 0.060315 | 0        |
| lincRNA     | -           | 1   | 0   | 0   | 0  | 0   | 0  | 0.084792 | 0        | 0        | 0        |
| pseudogen   | -           | 0   | 0   | 2   | 2  | 1   | 2  | 0        | 0        | 0.166889 | 0.21469  |
| pseudogen   | mitochond   | 0   | 1   | 0   | 0  | 0   | 0  | 0        | 0.296206 | 0        | 0        |
| antisense   | WARS2_int   | 3   | 0   | 3   | 1  | 0   | 3  | 0.068286 | 0        | 0.082392 | 0.03533  |
| lincRNA     | long_interf | 0   | 0   | 0   | 0  | 0   | 1  | 0        | 0        | 0        | 0        |
| pseudogen   | -           | 0   | 0   | 1   | 2  | 5   | 5  | 0        | 0        | 0.112925 | 0.290538 |
| antisense   | -           | 0   | 0   | 0   | 1  | 0   | 0  | 0        | 0        | 0        | 0.243411 |
| antisense   | -           | 0   | 0   | 0   | 1  | 0   | 0  | 0        | 0        | 0        | 0.171247 |
| pseudogen   | -           | 3   | 4   | 2   | 1  | 1   | 1  | 0.574163 | 0.981711 | 0.461841 | 0.29706  |
| pseudogen   | -           | 0   | 2   | 3   | 4  | 0   | 4  | 0        | 0.135733 | 0.191565 | 0.328577 |
| antisense   | -           | 7   | 1   | 2   | 0  | 0   | 0  | 0.96823  | 0.177374 | 0.333779 | 0        |
| antisense   | -           | 3   | 1   | 2   | 0  | 7   | 0  | 0.114552 | 0.048966 | 0.092143 | 0        |
| pseudogen   | -           | 6   | 3   | 2   | 6  | 7   | 2  | 0.445864 | 0.285879 | 0.17932  | 0.692042 |
| pseudogen   | -           | 0   | 0   | 0   | 0  | 0   | 1  | 0        | 0        | 0        | 0        |
| pseudogen   | -           | 1   | 1   | 1   | 0  | 0   | 0  | 0.015756 | 0.020205 | 0.019011 | 0        |
| processed   | SLC25A5_a   | 23  | 23  | 34  | 39 | 49  | 48 | 0.352211 | 0.451661 | 0.628206 | 0.92698  |
| lincRNA     | -           | 0   | 3   | 0   | 0  | 0   | 0  | 0        | 0.123809 | 0        | 0        |
| pseudogen   | male-specif | 38  | 25  | 47  | 74 | 109 | 68 | 0.87688  | 0.739786 | 1.308587 | 2.650446 |
| antisense   | -           | 1   | 0   | 1   | 1  | 0   | 2  | 0.071807 | 0        | 0.086639 | 0.111455 |
| lincRNA     | -           | 1   | 0   | 0   | 1  | 0   | 0  | 0.021046 | 0        | 0        | 0.032666 |
| pseudogen   | -           | 1   | 3   | 4   | 1  | 0   | 1  | 0.031725 | 0.12205  | 0.153114 | 0.049242 |
| pseudogen   | -           | 2   | 2   | 1   | 1  | 1   | 0  | 0.367765 | 0.471606 | 0.221865 | 0.285411 |
| lincRNA     | -           | 1   | 0   | 1   | 5  | 12  | 3  | 0.080429 | 0        | 0.097042 | 0.624184 |
| pseudogen   | ankyrin_rej | 0   | 2   | 0   | 0  | 0   | 0  | 0        | 0.036889 | 0        | 0        |
| lincRNA     | -           | 0   | 1   | 1   | 7  | 2   | 0  | 0        | 0.020684 | 0.019462 | 0.175252 |
| pseudogen   | mitochond   | 2   | 0   | 1   | 2  | 0   | 0  | 0.27994  | 0        | 0.168882 | 0.434506 |
| pseudogen   | -           | 5   | 3   | 2   | 5  | 11  | 4  | 0.333499 | 0.256599 | 0.160954 | 0.517637 |
| pseudogen   | -           | 3   | 0   | 2   | 3  | 4   | 1  | 0.192435 | 0        | 0.154789 | 0.298686 |
| pseudogen   | -           | 0   | 0   | 1   | 0  | 0   | 0  | 0        | 0        | 0.11546  | 0        |
| pseudogen   | THAP_dom    | 5   | 0   | 1   | 4  | 3   | 2  | 0.894848 | 0        | 0.215937 | 1.111142 |
| lincRNA     | -           | 0   | 0   | 1   | 0  | 0   | 0  | 0        | 0        | 0.157592 | 0        |
| pseudogen   | -           | 0   | 1   | 2   | 0  | 0   | 0  | 0        | 0.193967 | 0.365003 | 0        |
| pseudogen   | glyceraldeh | 1   | 0   | 0   | 1  | 1   | 1  | 0.046564 | 0        | 0        | 0.072274 |
| pseudogen   | -           | 0   | 1   | 0   | 0  | 0   | 2  | 0        | 0.051614 | 0        | 0        |
| pseudogen   | -           | 0   | 0   | 0   | 0  | 0   | 1  | 0        | 0        | 0        | 0        |
| pseudogen   | -           | 0   | 0   | 0   | 1  | 1   | 0  | 0        | 0        | 0        | 0.075891 |
| lincRNA     | -           | 0   | 2   | 0   | 0  | 0   | 0  | 0        | 0.217075 | 0        | 0        |
| antisense   | -           | 22  | 15  | 18  | 38 | 51  | 27 | 2.497773 | 2.183891 | 2.465761 | 6.696447 |
| pseudogen   | -           | 1   | 0   | 2   | 0  | 0   | 0  | 0.154753 | 0        | 0.373436 | 0        |
| antisense   | -           | 0   | 0   | 0   | 1  | 1   | 0  | 0        | 0        | 0        | 0.208538 |
| pseudogen   | MT-ND2_ps   | 0   | 0   | 0   | 0  | 2   | 0  | 0        | 0        | 0        | 0        |
| sense_intrc | -           | 4   | 4   | 3   | 3  | 3   | 3  | 0.079073 | 0.101399 | 0.071554 | 0.092049 |
| antisense   | -           | 2   | 2   | 0   | 0  | 2   | 6  | 0.043619 | 0.055935 | 0        | 0        |
| lincRNA     | -           | 0   | 0   | 1   | 0  | 0   | 0  | 0        | 0        | 0.159818 | 0        |
| protein_co  | Uncharacte  | 1   | 2   | 0   | 0  | 0   | 0  | 0.080291 | 0.205924 | 0        | 0        |
| lincRNA     | -           | 1   | 1   | 0   | 1  | 4   | 0  | 0.021559 | 0.027646 | 0        | 0.033462 |
| pseudogen   | O-acyltrans | 13  | 9   | 14  | 0  | 1   | 1  | 0.276073 | 0.245094 | 0.358721 | 0        |
| antisense   | -           | 0   | 0   | 1   | 0  | 0   | 0  | 0        | 0        | 0.261924 | 0        |
| processed   | -           | 22  | 27  | 21  | 13 | 21  | 4  | 0.785667 | 1.236485 | 0.904863 | 0.720592 |

|             |              |      |     |     |     |     |      |          |          |          |          |
|-------------|--------------|------|-----|-----|-----|-----|------|----------|----------|----------|----------|
| lincRNA     | long_interge | 2    | 0   | 2   | 0   | 0   | 0    | 0.039239 | 0        | 0.047344 | 0        |
| protein_co  | chromosom    | 3    | 1   | 2   | 2   | 3   | 1    | 0.044986 | 0.019229 | 0.036185 | 0.046549 |
| antisense   | -            | 10   | 4   | 1   | 22  | 24  | 13   | 0.974844 | 0.50004  | 0.117621 | 3.328806 |
| antisense   | -            | 1    | 1   | 3   | 0   | 0   | 0    | 0.103055 | 0.132153 | 0.373025 | 0        |
| antisense   | BACE2_intr   | 1    | 1   | 2   | 2   | 3   | 1    | 0.122749 | 0.157408 | 0.296207 | 0.381046 |
| protein_co  | compleme     | 0    | 3   | 0   | 0   | 3   | 0    | 0        | 0.033038 | 0        | 0        |
| antisense   | -            | 0    | 0   | 0   | 1   | 2   | 0    | 0        | 0        | 0        | 0.061469 |
| antisense   | GPC6_antis   | 2    | 0   | 2   | 1   | 0   | 0    | 0.159762 | 0        | 0.192762 | 0.123986 |
| lincRNA     | -            | 0    | 1   | 0   | 0   | 0   | 0    | 0        | 0.029915 | 0        | 0        |
| pseudogen   | ribosomal_   | 1    | 2   | 2   | 2   | 2   | 3    | 0.063365 | 0.162513 | 0.152907 | 0.196702 |
| antisense   | -            | 0    | 0   | 2   | 0   | 0   | 0    | 0        | 0        | 0.286458 | 0        |
| pseudogen   | -            | 9    | 5   | 7   | 11  | 13  | 15   | 0.192172 | 0.136908 | 0.180341 | 0.364562 |
| pseudogen   | -            | 1    | 0   | 0   | 1   | 0   | 0    | 0.263427 | 0        | 0        | 0.408875 |
| lincRNA     | -            | 10   | 3   | 17  | 0   | 1   | 3    | 0.21333  | 0.08207  | 0.437572 | 0        |
| pseudogen   | -            | 1    | 0   | 0   | 0   | 0   | 1    | 0.016344 | 0        | 0        | 0        |
| pseudogen   | ribosomal_   | 1    | 5   | 0   | 1   | 2   | 1    | 0.07934  | 0.508712 | 0        | 0.123147 |
| sense_intrc | -            | 4    | 0   | 0   | 0   | 0   | 0    | 0.421483 | 0        | 0        | 0        |
| antisense   | STK24_anti   | 5    | 3   | 1   | 0   | 7   | 7    | 0.183451 | 0.14115  | 0.044269 | 0        |
| protein_co  | adrenomec    | 16   | 7   | 10  | 26  | 56  | 75   | 0.436694 | 0.244999 | 0.32931  | 1.101441 |
| pseudogen   | ATP_syntha   | 0    | 1   | 1   | 1   | 2   | 2    | 0        | 0.255871 | 0.240747 | 0.309701 |
| antisense   | PRKAR2A_c    | 6    | 5   | 1   | 15  | 20  | 5    | 0.081619 | 0.08722  | 0.016413 | 0.316709 |
| lincRNA     | long_interge | 3    | 5   | 3   | 8   | 3   | 6    | 0.119414 | 0.25522  | 0.14408  | 0.49426  |
| pseudogen   | makorin_ri   | 4    | 1   | 2   | 1   | 2   | 0    | 0.127853 | 0.040988 | 0.077131 | 0.049611 |
| pseudogen   | -            | 7    | 3   | 15  | 2   | 0   | 0    | 0.092303 | 0.050728 | 0.238648 | 0.040934 |
| pseudogen   | -            | 0    | 0   | 0   | 3   | 4   | 3    | 0        | 0        | 0        | 0.921263 |
| pseudogen   | phosphatic   | 1    | 0   | 0   | 0   | 0   | 2    | 0.092852 | 0        | 0        | 0        |
| antisense   | -            | 0    | 0   | 0   | 3   | 2   | 0    | 0        | 0        | 0        | 0.59493  |
| pseudogen   | -            | 2    | 0   | 2   | 0   | 0   | 0    | 0.084108 | 0        | 0.101481 | 0        |
| pseudogen   | -            | 0    | 0   | 0   | 0   | 0   | 1    | 0        | 0        | 0        | 0        |
| pseudogen   | -            | 3    | 0   | 3   | 3   | 1   | 3    | 0.267434 | 0        | 0.322674 | 0.415094 |
| pseudogen   | ATP_syntha   | 0    | 3   | 6   | 0   | 3   | 1    | 0        | 0.317029 | 0.596578 | 0        |
| pseudogen   | ribosomal_   | 3    | 6   | 1   | 0   | 2   | 0    | 0.350798 | 0.899698 | 0.141086 | 0        |
| antisense   | -            | 0    | 0   | 0   | 0   | 2   | 0    | 0        | 0        | 0        | 0        |
| lincRNA     | -            | 11   | 7   | 6   | 3   | 12  | 2    | 1.28306  | 1.047036 | 0.844411 | 0.543133 |
| pseudogen   | phosphogh    | 1    | 1   | 1   | 4   | 0   | 0    | 0.062771 | 0.080495 | 0.075737 | 0.389718 |
| antisense   | -            | 3    | 0   | 0   | 0   | 0   | 0    | 0.279662 | 0        | 0        | 0        |
| processed_  | -            | 15   | 16  | 10  | 4   | 8   | 2    | 1.342271 | 1.836024 | 1.079685 | 0.555571 |
| pseudogen   | -            | 0    | 0   | 0   | 0   | 1   | 0    | 0        | 0        | 0        | 0        |
| protein_co  | ataxin_1-lil | 1115 | 865 | 871 | 746 | 891 | 1008 | 6.633977 | 6.599705 | 6.252667 | 6.889193 |
| pseudogen   | -            | 1    | 0   | 0   | 0   | 0   | 0    | 0.146075 | 0        | 0        | 0        |
| protein_co  | LOC64421!    | 25   | 22  | 16  | 7   | 14  | 4    | 4.967163 | 5.60532  | 3.835627 | 2.158723 |
| pseudogen   | ribosomal_   | 0    | 0   | 0   | 1   | 1   | 0    | 0        | 0        | 0        | 0.237842 |
| lincRNA     | -            | 0    | 0   | 0   | 1   | 0   | 0    | 0        | 0        | 0        | 0.08613  |
| pseudogen   | -            | 1    | 3   | 0   | 2   | 0   | 0    | 0.025442 | 0.097878 | 0        | 0.07898  |
| lincRNA     | -            | 3    | 0   | 1   | 2   | 9   | 1    | 0.105687 | 0        | 0.042506 | 0.109361 |
| pseudogen   | -            | 2    | 1   | 0   | 1   | 0   | 1    | 0.067034 | 0.042981 | 0        | 0.052023 |
| processed_  | -            | 5    | 2   | 3   | 3   | 2   | 3    | 0.103739 | 0.053212 | 0.0751   | 0.09661  |
| pseudogen   | -            | 0    | 0   | 0   | 0   | 2   | 0    | 0        | 0        | 0        | 0        |
| antisense   | -            | 0    | 0   | 2   | 0   | 0   | 0    | 0        | 0        | 0.270696 | 0        |
| pseudogen   | -            | 0    | 0   | 0   | 1   | 2   | 1    | 0        | 0        | 0        | 0.133541 |
| antisense   | -            | 5    | 3   | 4   | 1   | 1   | 1    | 0.411316 | 0.316473 | 0.397021 | 0.127684 |
| lincRNA     | -            | 0    | 0   | 0   | 15  | 12  | 16   | 0        | 0        | 0        | 1.295014 |
| antisense   | -            | 0    | 1   | 0   | 3   | 7   | 3    | 0        | 0.127394 | 0        | 0.462583 |
| lincRNA     | long_interge | 1    | 0   | 0   | 1   | 0   | 1    | 0.017911 | 0        | 0        | 0.0278   |
| antisense   | -            | 0    | 0   | 0   | 0   | 1   | 0    | 0        | 0        | 0        | 0        |
| antisense   | long_interge | 0    | 0   | 0   | 2   | 0   | 0    | 0        | 0        | 0        | 0.146438 |
| pseudogen   | keratin_8_   | 0    | 1   | 0   | 1   | 0   | 3    | 0        | 0.041555 | 0        | 0.050297 |
| pseudogen   | -            | 0    | 0   | 0   | 0   | 2   | 0    | 0        | 0        | 0        | 0        |
| pseudogen   | peptidylpro  | 0    | 1   | 2   | 0   | 0   | 0    | 0        | 0.131288 | 0.247055 | 0        |
| protein_co  | small_integ  | 663  | 468 | 553 | 240 | 307 | 199  | 6.634247 | 6.005281 | 6.676537 | 3.727519 |
| antisense   | TMLHE_ant    | 1    | 0   | 0   | 0   | 1   | 0    | 0.02755  | 0        | 0        | 0        |
| pseudogen   | -            | 0    | 0   | 0   | 0   | 0   | 1    | 0        | 0        | 0        | 0        |
| antisense   | -            | 1    | 0   | 3   | 1   | 3   | 1    | 0.119617 | 0        | 0.432976 | 0.185663 |
| pseudogen   | -            | 51   | 38  | 52  | 23  | 45  | 58   | 2.560376 | 2.446394 | 3.149814 | 1.792222 |
| pseudogen   | -            | 0    | 0   | 0   | 3   | 3   | 3    | 0        | 0        | 0        | 0.59493  |

|                        |     |     |     |     |     |     |          |          |          |          |
|------------------------|-----|-----|-----|-----|-----|-----|----------|----------|----------|----------|
| pseudogen: eukaryotic_ | 33  | 16  | 25  | 65  | 103 | 40  | 0.836417 | 0.520041 | 0.764534 | 2.557128 |
| pseudogen: -           | 1   | 0   | 0   | 0   | 0   | 0   | 0.062354 | 0        | 0        | 0        |
| pseudogen: high_mobil  | 0   | 0   | 1   | 0   | 2   | 1   | 0        | 0        | 0.103429 | 0        |
| pseudogen: -           | 0   | 0   | 0   | 1   | 0   | 0   | 0        | 0        | 0        | 0.209137 |
| pseudogen: major_hist  | 0   | 0   | 0   | 709 | 798 | 661 | 0        | 0        | 0        | 31.91149 |
| lincRNA -              | 0   | 0   | 0   | 2   | 0   | 0   | 0        | 0        | 0        | 0.194079 |
| pseudogen: family_witl | 0   | 0   | 3   | 1   | 3   | 0   | 0        | 0        | 0.355821 | 0.152578 |
| lincRNA -              | 0   | 1   | 0   | 0   | 0   | 0   | 0        | 0.039071 | 0        | 0        |
| pseudogen: -           | 0   | 0   | 0   | 0   | 1   | 1   | 0        | 0        | 0        | 0        |
| antisense COL18A1_ε    | 7   | 9   | 6   | 3   | 6   | 7   | 0.59462  | 0.980377 | 0.614951 | 0.395542 |
| lincRNA -              | 2   | 1   | 7   | 0   | 0   | 0   | 0.134163 | 0.086023 | 0.566564 | 0        |
| pseudogen: -           | 165 | 144 | 164 | 279 | 384 | 316 | 5.61863  | 6.288083 | 6.738114 | 14.74623 |
| pseudogen: -           | 3   | 0   | 1   | 1   | 0   | 2   | 0.430184 | 0        | 0.173014 | 0.222568 |
| pseudogen: -           | 1   | 0   | 1   | 0   | 2   | 0   | 0.106811 | 0        | 0.128874 | 0        |
| antisense -            | 3   | 1   | 1   | 34  | 43  | 8   | 0.237218 | 0.101399 | 0.095406 | 4.172872 |
| pseudogen: -           | 0   | 0   | 0   | 8   | 7   | 4   | 0        | 0        | 0        | 0.968783 |
| pseudogen: ribosomal_  | 5   | 10  | 5   | 0   | 1   | 0   | 0.509674 | 1.307169 | 0.614951 | 0        |
| antisense ZMIZ1_anti   | 15  | 10  | 17  | 2   | 10  | 1   | 0.244389 | 0.208929 | 0.334185 | 0.050577 |
| antisense patched_d    | 80  | 64  | 72  | 33  | 40  | 50  | 1.852445 | 1.900398 | 2.011574 | 1.186041 |
| pseudogen: ribosomal_  | 6   | 1   | 4   | 2   | 2   | 3   | 0.439594 | 0.093953 | 0.353597 | 0.227437 |
| processed_ -           | 0   | 0   | 0   | 1   | 0   | 2   | 0        | 0        | 0        | 0.065508 |
| antisense -            | 0   | 1   | 0   | 1   | 0   | 0   | 0        | 0.114098 | 0        | 0.138102 |
| processed_ -           | 8   | 6   | 8   | 6   | 15  | 7   | 0.17897  | 0.172127 | 0.215937 | 0.208339 |
| antisense -            | 5   | 6   | 15  | 2   | 9   | 1   | 0.554256 | 0.852905 | 2.006224 | 0.344113 |
| pseudogen: -           | 0   | 1   | 1   | 1   | 0   | 1   | 0        | 0.160346 | 0.150868 | 0.194079 |
| antisense -            | 1   | 2   | 5   | 0   | 3   | 1   | 0.086195 | 0.221065 | 0.519995 | 0        |
| pseudogen: tubulin_be  | 1   | 0   | 0   | 0   | 0   | 0   | 0.036405 | 0        | 0        | 0        |
| pseudogen: -           | 0   | 0   | 0   | 0   | 1   | 0   | 0        | 0        | 0        | 0        |
| pseudogen: -           | 1   | 2   | 1   | 1   | 2   | 11  | 0.225433 | 0.578171 | 0.271998 | 0.349903 |
| pseudogen: -           | 26  | 24  | 29  | 53  | 65  | 46  | 2.153958 | 2.549673 | 2.898745 | 6.81507  |
| lincRNA -              | 3   | 4   | 5   | 6   | 10  | 15  | 0.070195 | 0.12002  | 0.141156 | 0.217904 |
| pseudogen: -           | 0   | 0   | 0   | 1   | 1   | 0   | 0        | 0        | 0        | 0.107345 |
| lincRNA -              | 0   | 1   | 1   | 3   | 1   | 2   | 0        | 0.131864 | 0.124069 | 0.478814 |
| antisense -            | 0   | 0   | 1   | 1   | 1   | 0   | 0        | 0        | 0.187336 | 0.240993 |
| pseudogen: -           | 0   | 0   | 0   | 0   | 1   | 0   | 0        | 0        | 0        | 0        |
| pseudogen: -           | 0   | 1   | 0   | 10  | 5   | 1   | 0        | 0.046504 | 0        | 0.562875 |
| lincRNA -              | 0   | 2   | 0   | 0   | 1   | 0   | 0        | 0.494895 | 0        | 0        |
| antisense -            | 4   | 3   | 8   | 0   | 0   | 0   | 0.603087 | 0.58003  | 1.455318 | 0        |
| processed_ SH3BP5_ar   | 105 | 90  | 99  | 22  | 22  | 34  | 0.883923 | 0.971577 | 1.005561 | 0.287461 |
| pseudogen: ATPase_H+   | 0   | 0   | 0   | 0   | 0   | 1   | 0        | 0        | 0        | 0        |
| pseudogen: ribosomal_  | 0   | 0   | 0   | 13  | 4   | 13  | 0        | 0        | 0        | 2.994106 |
| pseudogen: -           | 2   | 0   | 4   | 0   | 0   | 2   | 0.202987 | 0        | 0.489831 | 0        |
| pseudogen: importin_8  | 1   | 0   | 1   | 0   | 0   | 1   | 0.015082 | 0        | 0.018197 | 0        |
| pseudogen: -           | 0   | 0   | 1   | 0   | 0   | 0   | 0        | 0        | 0.229982 | 0        |
| antisense -            | 0   | 0   | 0   | 1   | 0   | 0   | 0        | 0        | 0        | 0.098218 |
| antisense -            | 0   | 0   | 0   | 1   | 2   | 4   | 0        | 0        | 0        | 0.030813 |
| pseudogen: -           | 5   | 6   | 3   | 2   | 3   | 1   | 1.483861 | 2.28341  | 1.074218 | 0.921263 |
| pseudogen: glyceraldeh | 0   | 0   | 0   | 1   | 0   | 0   | 0        | 0        | 0        | 0.073219 |
| pseudogen: phospholip  | 7   | 4   | 6   | 2   | 2   | 6   | 0.57787  | 0.423449 | 0.597629 | 0.256267 |
| pseudogen: suppressor  | 0   | 1   | 0   | 3   | 8   | 1   | 0        | 0.044246 | 0        | 0.160662 |
| pseudogen: -           | 1   | 0   | 0   | 0   | 0   | 0   | 0.146075 | 0        | 0        | 0        |
| processed_ RASAL2_an   | 6   | 2   | 4   | 7   | 12  | 9   | 0.120799 | 0.051636 | 0.097167 | 0.218746 |
| pseudogen: -           | 0   | 0   | 2   | 0   | 0   | 0   | 0        | 0        | 0.151271 | 0        |
| protein_co zinc_finger | 0   | 0   | 0   | 1   | 1   | 4   | 0        | 0        | 0        | 0.03469  |
| pseudogen: ubiquitin-c | 1   | 0   | 0   | 0   | 0   | 0   | 0.110329 | 0        | 0        | 0        |
| antisense -            | 12  | 7   | 0   | 0   | 1   | 2   | 1.593995 | 1.192376 | 0        | 0        |
| antisense LAMTOR5_     | 2   | 2   | 6   | 12  | 12  | 2   | 0.106447 | 0.136504 | 0.385304 | 0.991325 |
| antisense -            | 8   | 6   | 2   | 0   | 0   | 1   | 0.650122 | 0.625267 | 0.196102 | 0        |
| pseudogen: ribosomal_  | 0   | 0   | 0   | 0   | 1   | 0   | 0        | 0        | 0        | 0        |
| sense_intrc E2F3_intro | 2   | 3   | 4   | 2   | 5   | 5   | 0.23445  | 0.450973 | 0.565755 | 0.363899 |
| pseudogen: olfactory_r | 0   | 0   | 1   | 0   | 1   | 0   | 0        | 0        | 0.063213 | 0        |
| protein_co Protein_LO  | 5   | 6   | 3   | 3   | 6   | 3   | 0.202987 | 0.312363 | 0.146949 | 0.189038 |
| antisense -            | 10  | 8   | 10  | 0   | 1   | 0   | 0.199108 | 0.204263 | 0.240236 | 0        |
| processed_ -           | 0   | 0   | 0   | 1   | 7   | 0   | 0        | 0        | 0        | 0.125266 |
| lincRNA -              | 0   | 1   | 0   | 5   | 4   | 0   | 0        | 0.013779 | 0        | 0.083387 |

|                        |     |     |     |     |     |     |          |          |          |          |
|------------------------|-----|-----|-----|-----|-----|-----|----------|----------|----------|----------|
| processed_-            | 0   | 1   | 0   | 55  | 74  | 37  | 0        | 0.020842 | 0        | 1.387483 |
| processed_-            | 0   | 0   | 0   | 0   | 1   | 1   | 0        | 0        | 0        | 0        |
| pseudogen_-            | 1   | 0   | 0   | 2   | 1   | 3   | 0.037572 | 0        | 0        | 0.116634 |
| pseudogen: centrosom   | 0   | 1   | 0   | 0   | 0   | 0   | 0        | 0.050066 | 0        | 0        |
| pseudogen: FCF1_small  | 4   | 9   | 8   | 0   | 2   | 0   | 0.336129 | 0.969835 | 0.811118 | 0        |
| pseudogen_-            | 13  | 6   | 3   | 9   | 3   | 7   | 0.399718 | 0.236576 | 0.111296 | 0.42952  |
| antisense PCOLCE_an    | 12  | 18  | 13  | 48  | 60  | 5   | 0.22179  | 0.426621 | 0.289902 | 1.376993 |
| antisense -            | 0   | 0   | 0   | 0   | 0   | 2   | 0        | 0        | 0        | 0        |
| antisense -            | 0   | 0   | 0   | 2   | 1   | 2   | 0        | 0        | 0        | 0.265136 |
| antisense -            | 13  | 4   | 10  | 15  | 17  | 10  | 0.455583 | 0.17976  | 0.422836 | 0.815917 |
| lincRNA -              | 0   | 0   | 0   | 1   | 2   | 0   | 0        | 0        | 0        | 0.307088 |
| antisense TEX26_anti   | 1   | 0   | 0   | 3   | 3   | 1   | 0.02284  | 0        | 0        | 0.106351 |
| sense_intrc -          | 7   | 4   | 6   | 7   | 4   | 2   | 0.657776 | 0.482002 | 0.680267 | 1.020959 |
| processed_-            | 1   | 1   | 1   | 1   | 1   | 0   | 0.058321 | 0.074788 | 0.070368 | 0.090522 |
| pseudogen_-            | 0   | 5   | 3   | 8   | 4   | 1   | 0        | 0.270125 | 0.152495 | 0.523125 |
| lincRNA -              | 2   | 0   | 1   | 0   | 0   | 0   | 0.039603 | 0        | 0.023892 | 0        |
| pseudogen: serine_hyd  | 3   | 1   | 5   | 1   | 2   | 0   | 0.107218 | 0.045831 | 0.215608 | 0.055472 |
| pseudogen: vomeronas   | 0   | 0   | 0   | 0   | 1   | 0   | 0        | 0        | 0        | 0        |
| pseudogen: farnesyl_di | 2   | 0   | 3   | 4   | 2   | 1   | 0.086116 | 0        | 0.155855 | 0.267327 |
| antisense -            | 3   | 2   | 0   | 0   | 1   | 1   | 0.28885  | 0.24694  | 0        | 0        |
| antisense -            | 0   | 1   | 0   | 11  | 14  | 18  | 0        | 0.102611 | 0        | 1.366174 |
| pseudogen_-            | 0   | 0   | 0   | 1   | 0   | 0   | 0        | 0        | 0        | 0.043321 |
| pseudogen: heat_shock  | 0   | 0   | 0   | 1   | 0   | 1   | 0        | 0        | 0        | 0.037361 |
| pseudogen: v-raf_murir | 0   | 0   | 0   | 1   | 0   | 0   | 0        | 0        | 0        | 0.026926 |
| pseudogen: centrin_EF  | 4   | 4   | 2   | 4   | 3   | 0   | 0.399915 | 0.512834 | 0.24126  | 0.620723 |
| antisense -            | 0   | 0   | 0   | 1   | 0   | 0   | 0        | 0        | 0        | 0.126574 |
| lincRNA -              | 2   | 0   | 1   | 1   | 6   | 4   | 0.21411  | 0        | 0.129168 | 0.166164 |
| antisense -            | 3   | 0   | 5   | 0   | 1   | 0   | 0.079117 | 0        | 0.159099 | 0        |
| pseudogen_-            | 0   | 1   | 0   | 0   | 1   | 0   | 0        | 0.226905 | 0        | 0        |
| antisense -            | 2   | 0   | 0   | 0   | 4   | 6   | 0.145621 | 0        | 0        | 0        |
| pseudogen_-            | 1   | 0   | 0   | 0   | 0   | 0   | 0.104665 | 0        | 0        | 0        |
| pseudogen: tubulin_be  | 0   | 0   | 1   | 1   | 1   | 0   | 0        | 0        | 0.070897 | 0.091203 |
| antisense long_inter   | 0   | 1   | 0   | 1   | 2   | 0   | 0        | 0.090968 | 0        | 0.110106 |
| pseudogen: ADP-ribosy  | 0   | 0   | 0   | 0   | 1   | 1   | 0        | 0        | 0        | 0        |
| pseudogen: double_hoi  | 1   | 1   | 1   | 0   | 0   | 0   | 0.037244 | 0.04776  | 0.044937 | 0        |
| antisense SRGAP3_ar    | 0   | 0   | 0   | 0   | 0   | 1   | 0        | 0        | 0        | 0        |
| lincRNA -              | 0   | 0   | 0   | 0   | 0   | 2   | 0        | 0        | 0        | 0        |
| antisense TMEM72_a     | 0   | 0   | 1   | 0   | 1   | 0   | 0        | 0        | 0.017144 | 0        |
| lincRNA -              | 57  | 37  | 43  | 19  | 28  | 12  | 4.46945  | 3.720405 | 4.068138 | 2.312402 |
| antisense COL4A2_ar    | 19  | 30  | 23  | 8   | 4   | 0   | 0.585355 | 1.185213 | 0.854952 | 0.382548 |
| sense_intrc THRB_intrc | 0   | 0   | 0   | 0   | 1   | 1   | 0        | 0        | 0        | 0        |
| antisense -            | 0   | 0   | 0   | 42  | 62  | 35  | 0        | 0        | 0        | 2.594866 |
| pseudogen_-            | 10  | 12  | 17  | 13  | 15  | 15  | 0.414589 | 0.637982 | 0.850383 | 0.836549 |
| pseudogen: glycine_cle | 4   | 4   | 5   | 24  | 25  | 18  | 0.35931  | 0.460765 | 0.541911 | 3.346198 |
| pseudogen_-            | 1   | 0   | 1   | 0   | 1   | 0   | 0.094157 | 0        | 0.113605 | 0        |
| antisense -            | 0   | 4   | 0   | 8   | 7   | 12  | 0        | 0.475334 | 0        | 1.150669 |
| processed_ long_inter  | 0   | 4   | 1   | 2   | 10  | 5   | 0        | 0.474397 | 0.111589 | 0.2871   |
| lincRNA -              | 2   | 0   | 0   | 0   | 0   | 1   | 0.140179 | 0        | 0        | 0        |
| antisense -            | 0   | 1   | 1   | 1   | 3   | 0   | 0        | 0.145593 | 0.136987 | 0.176222 |
| lincRNA -              | 3   | 3   | 2   | 11  | 27  | 8   | 0.330988 | 0.424446 | 0.266238 | 1.883713 |
| lincRNA -              | 0   | 0   | 1   | 0   | 0   | 0   | 0        | 0        | 0.118359 | 0        |
| protein_co chromosom   | 0   | 0   | 1   | 0   | 0   | 0   | 0        | 0        | 0.093979 | 0        |
| antisense OPA1_antis   | 2   | 1   | 3   | 0   | 3   | 0   | 0.19061  | 0.122215 | 0.344973 | 0        |
| pseudogen_-            | 1   | 1   | 0   | 1   | 2   | 0   | 0.145621 | 0.186738 | 0        | 0.226024 |
| lincRNA -              | 1   | 0   | 0   | 1   | 1   | 0   | 0.11007  | 0        | 0        | 0.170845 |
| pseudogen: ribosomal_  | 20  | 26  | 14  | 22  | 14  | 32  | 1.906098 | 3.177591 | 1.609872 | 3.254381 |
| pseudogen: Y_box_binc  | 82  | 54  | 71  | 83  | 133 | 93  | 4.005189 | 3.382301 | 4.18423  | 6.29242  |
| lincRNA -              | 0   | 0   | 0   | 1   | 0   | 2   | 0        | 0        | 0        | 0.064464 |
| pseudogen_-            | 0   | 1   | 2   | 7   | 5   | 8   | 0        | 0.124492 | 0.234267 | 1.05478  |
| processed_-            | 1   | 0   | 3   | 0   | 0   | 0   | 0.038153 | 0        | 0.138101 | 0        |
| protein_co HCG20425    | 339 | 244 | 260 | 349 | 408 | 449 | 7.134522 | 6.58513  | 6.602168 | 11.40043 |
| antisense -            | 0   | 0   | 0   | 0   | 1   | 0   | 0        | 0        | 0        | 0        |
| antisense -            | 1   | 0   | 0   | 0   | 1   | 1   | 0.07137  | 0        | 0        | 0        |
| protein_co chromosom   | 767 | 625 | 583 | 421 | 696 | 637 | 48.53528 | 50.71676 | 44.51217 | 41.34993 |
| pseudogen: inhibitor_c | 4   | 5   | 8   | 0   | 6   | 5   | 0.174474 | 0.279673 | 0.421027 | 0        |

|                         |     |     |     |    |     |     |          |          |          |          |
|-------------------------|-----|-----|-----|----|-----|-----|----------|----------|----------|----------|
| antisense -             | 0   | 0   | 0   | 0  | 1   | 1   | 0        | 0        | 0        | 0        |
| sense_intrc TSSC1_intri | 11  | 2   | 2   | 3  | 3   | 8   | 0.718371 | 0.167492 | 0.157592 | 0.304094 |
| pseudogen: BEN_domai    | 47  | 36  | 50  | 25 | 34  | 7   | 4.479331 | 4.399741 | 5.749543 | 3.698161 |
| antisense -             | 7   | 7   | 10  | 1  | 1   | 3   | 0.072601 | 0.093101 | 0.125139 | 0.016098 |
| pseudogen: -            | 0   | 0   | 1   | 1  | 1   | 0   | 0        | 0        | 0.073001 | 0.093909 |
| pseudogen: ribosomal_   | 1   | 2   | 0   | 1  | 5   | 1   | 0.058104 | 0.149021 | 0        | 0.090186 |
| pseudogen: vacuolar_p   | 3   | 4   | 1   | 1  | 2   | 1   | 0.186318 | 0.318568 | 0.074934 | 0.096397 |
| pseudogen: sialic_acid_ | 0   | 0   | 1   | 1  | 0   | 0   | 0        | 0        | 0.060123 | 0.077343 |
| processed_ -            | 5   | 10  | 7   | 15 | 19  | 18  | 0.072094 | 0.184901 | 0.12178  | 0.3357   |
| lincRNA -               | 1   | 0   | 0   | 4  | 4   | 0   | 0.07815  | 0        | 0        | 0.485199 |
| antisense -             | 0   | 0   | 0   | 1  | 0   | 0   | 0        | 0        | 0        | 0.294655 |
| antisense -             | 1   | 0   | 0   | 0  | 2   | 0   | 0.063194 | 0        | 0        | 0        |
| pseudogen: -            | 0   | 0   | 1   | 0  | 0   | 0   | 0        | 0        | 0.021454 | 0        |
| processed_ -            | 54  | 43  | 42  | 42 | 53  | 38  | 1.900947 | 1.941127 | 1.783912 | 2.294859 |
| lincRNA -               | 0   | 0   | 0   | 0  | 0   | 1   | 0        | 0        | 0        | 0        |
| lincRNA long_interf     | 151 | 135 | 125 | 75 | 122 | 130 | 2.154059 | 2.469584 | 2.151487 | 1.660628 |
| lincRNA long_interf     | 0   | 0   | 0   | 0  | 2   | 0   | 0        | 0        | 0        | 0        |
| pseudogen: keratin_8_   | 0   | 0   | 0   | 5  | 6   | 4   | 0        | 0        | 0        | 0.559845 |
| lincRNA long_interf     | 0   | 0   | 1   | 0  | 0   | 0   | 0        | 0        | 0.077078 | 0        |
| lincRNA -               | 0   | 1   | 0   | 1  | 1   | 0   | 0        | 0.081809 | 0        | 0.09902  |
| lincRNA -               | 9   | 12  | 18  | 25 | 25  | 19  | 0.633649 | 1.08342  | 1.529068 | 2.731975 |
| lincRNA -               | 0   | 0   | 0   | 0  | 0   | 1   | 0        | 0        | 0        | 0        |
| lincRNA long_interf     | 1   | 1   | 0   | 0  | 0   | 0   | 0.020656 | 0.026489 | 0        | 0        |
| protein_co proline-ricl | 2   | 4   | 3   | 22 | 34  | 19  | 0.026462 | 0.067867 | 0.047891 | 0.451793 |
| lincRNA -               | 0   | 0   | 2   | 0  | 0   | 0   | 0        | 0        | 0.132651 | 0        |
| sense_intrc -           | 45  | 33  | 30  | 64 | 62  | 56  | 3.606924 | 3.391937 | 2.901308 | 7.962235 |
| processed_ -            | 4   | 9   | 4   | 0  | 1   | 0   | 0.081726 | 0.235803 | 0.098607 | 0        |
| pseudogen: -            | 1   | 0   | 1   | 0  | 0   | 0   | 0.075024 | 0        | 0.090521 | 0        |
| pseudogen: -            | 44  | 29  | 28  | 37 | 53  | 49  | 1.669224 | 1.410812 | 1.281646 | 2.178683 |
| lincRNA -               | 0   | 0   | 0   | 0  | 2   | 1   | 0        | 0        | 0        | 0        |
| lincRNA -               | 10  | 8   | 10  | 0  | 0   | 0   | 0.532236 | 0.546014 | 0.642174 | 0        |
| protein_co Protein_LO   | 2   | 1   | 0   | 0  | 1   | 0   | 0.133971 | 0.0859   | 0        | 0        |
| antisense KCNC4_ant     | 0   | 1   | 1   | 0  | 0   | 0   | 0        | 0.080387 | 0.075636 | 0        |
| pseudogen: -            | 1   | 0   | 0   | 1  | 0   | 1   | 0.13321  | 0        | 0        | 0.206761 |
| antisense -             | 4   | 2   | 0   | 0  | 1   | 0   | 0.398217 | 0.255328 | 0        | 0        |
| pseudogen: SMT3_suppr   | 1   | 0   | 1   | 0  | 0   | 0   | 0.162813 | 0        | 0.196443 | 0        |
| processed_ -            | 0   | 2   | 0   | 6  | 12  | 12  | 0        | 0.045936 | 0        | 0.166799 |
| protein_co inactivatio  | 51  | 38  | 50  | 32 | 30  | 24  | 2.530572 | 2.417918 | 2.993413 | 2.464501 |
| lincRNA -               | 1   | 1   | 1   | 0  | 0   | 5   | 0.13997  | 0.179492 | 0.168882 | 0        |
| pseudogen: -            | 0   | 0   | 0   | 1  | 0   | 0   | 0        | 0        | 0        | 0.168083 |
| protein_co transmembr   | 0   | 0   | 0   | 2  | 1   | 1   | 0        | 0        | 0        | 0.092536 |
| antisense -             | 0   | 0   | 0   | 0  | 3   | 1   | 0        | 0        | 0        | 0        |
| antisense -             | 1   | 0   | 1   | 2  | 1   | 1   | 0.12372  | 0        | 0.149276 | 0.384062 |
| pseudogen: protein_ph   | 0   | 0   | 1   | 0  | 0   | 0   | 0        | 0        | 0.054191 | 0        |
| pseudogen: -            | 0   | 1   | 0   | 0  | 0   | 0   | 0        | 0.219452 | 0        | 0        |
| pseudogen: -            | 2   | 0   | 0   | 2  | 0   | 0   | 0.275015 | 0        | 0        | 0.426861 |
| sense_intrc -           | 5   | 1   | 0   | 3  | 2   | 0   | 0.441526 | 0.113239 | 0        | 0.411185 |
| pseudogen: -            | 0   | 1   | 0   | 2  | 0   | 0   | 0        | 0.128482 | 0        | 0.311025 |
| protein_co Uncharacte   | 20  | 13  | 24  | 11 | 29  | 24  | 0.607777 | 0.506602 | 0.879982 | 0.518845 |
| lincRNA -               | 3   | 0   | 0   | 0  | 0   | 0   | 0.49014  | 0        | 0        | 0        |
| processed_ -            | 0   | 0   | 0   | 15 | 20  | 21  | 0        | 0        | 0        | 1.505789 |
| pseudogen: -            | 0   | 0   | 0   | 0  | 0   | 1   | 0        | 0        | 0        | 0        |
| pseudogen: potassium_   | 0   | 0   | 0   | 0  | 0   | 1   | 0        | 0        | 0        | 0        |
| pseudogen: -            | 2   | 0   | 0   | 2  | 1   | 0   | 0.042531 | 0        | 0        | 0.066013 |
| pseudogen: ubiquitin-c  | 3   | 2   | 5   | 5  | 6   | 2   | 0.316824 | 0.270855 | 0.637112 | 0.819592 |
| pseudogen: -            | 0   | 1   | 0   | 0  | 0   | 0   | 0        | 0.221065 | 0        | 0        |
| lincRNA -               | 9   | 2   | 0   | 2  | 0   | 2   | 0.233542 | 0.066552 | 0        | 0.080553 |
| sense_intrc -           | 2   | 2   | 2   | 2  | 0   | 4   | 0.395696 | 0.507424 | 0.47743  | 0.614176 |
| pseudogen: eukaryotic_  | 17  | 12  | 16  | 25 | 31  | 24  | 0.439675 | 0.397991 | 0.499287 | 1.003582 |
| antisense -             | 26  | 33  | 22  | 16 | 33  | 9   | 0.593256 | 0.965588 | 0.605675 | 0.566655 |
| antisense EIF1AX_ant    | 0   | 4   | 4   | 1  | 6   | 6   | 0        | 0.636294 | 0.598683 | 0.192539 |
| lincRNA -               | 2   | 1   | 1   | 4  | 1   | 1   | 0.20933  | 0.134218 | 0.126285 | 0.64982  |
| pseudogen: ribosomal_   | 1   | 1   | 0   | 0  | 0   | 0   | 0.097282 | 0.124751 | 0        | 0        |
| pseudogen: -            | 0   | 1   | 0   | 0  | 0   | 0   | 0        | 0.318147 | 0        | 0        |
| pseudogen: high_mobil   | 3   | 2   | 3   | 0  | 4   | 3   | 0.235628 | 0.20144  | 0.284299 | 0        |

|                         |     |     |     |     |     |     |          |          |          |          |
|-------------------------|-----|-----|-----|-----|-----|-----|----------|----------|----------|----------|
| processed_-             | 1   | 1   | 2   | 0   | 2   | 0   | 0.018689 | 0.023966 | 0.045098 | 0        |
| processed_-             | 0   | 0   | 0   | 1   | 0   | 0   | 0        | 0        | 0        | 0.13758  |
| antisense -             | 0   | 0   | 0   | 0   | 1   | 1   | 0        | 0        | 0        | 0        |
| pseudogeni -            | 1   | 0   | 0   | 2   | 0   | 0   | 0.134741 | 0        | 0        | 0.418275 |
| antisense -             | 2   | 3   | 0   | 3   | 0   | 3   | 0.208864 | 0.401758 | 0        | 0.486279 |
| antisense WWC3_ant      | 2   | 0   | 2   | 0   | 4   | 2   | 0.162249 | 0        | 0.195763 | 0        |
| antisense long_interf   | 1   | 1   | 2   | 148 | 248 | 176 | 0.036014 | 0.046183 | 0.086906 | 8.272973 |
| pseudogeni profilin_1_  | 6   | 2   | 0   | 3   | 5   | 1   | 0.699851 | 0.299153 | 0        | 0.543133 |
| pseudogeni death_asso   | 0   | 0   | 0   | 0   | 0   | 1   | 0        | 0        | 0        | 0        |
| antisense GRTP1_ant     | 0   | 0   | 0   | 6   | 11  | 11  | 0        | 0        | 0        | 0.503666 |
| antisense -             | 0   | 0   | 0   | 0   | 2   | 0   | 0        | 0        | 0        | 0        |
| lincRNA -               | 0   | 0   | 0   | 17  | 20  | 13  | 0        | 0        | 0        | 2.479472 |
| processed_-             | 2   | 2   | 1   | 4   | 4   | 4   | 0.679565 | 0.871446 | 0.409967 | 2.109559 |
| sense_intrc -           | 0   | 3   | 1   | 1   | 1   | 1   | 0        | 0.107631 | 0.033756 | 0.043425 |
| pseudogeni ribosomal_   | 1   | 1   | 0   | 0   | 0   | 0   | 0.038688 | 0.049612 | 0        | 0        |
| pseudogeni SET_pseudc   | 2   | 5   | 3   | 2   | 1   | 2   | 0.11007  | 0.352874 | 0.19921  | 0.170845 |
| lincRNA -               | 0   | 0   | 1   | 0   | 1   | 0   | 0        | 0        | 0.187958 | 0        |
| pseudogeni breakpoint   | 1   | 0   | 0   | 0   | 1   | 0   | 0.067858 | 0        | 0        | 0        |
| pseudogeni olfactory_r  | 0   | 2   | 0   | 2   | 0   | 0   | 0        | 0.127529 | 0        | 0.154358 |
| antisense -             | 1   | 6   | 2   | 0   | 0   | 0   | 0.050043 | 0.385036 | 0.120759 | 0        |
| pseudogeni -            | 0   | 0   | 0   | 0   | 0   | 2   | 0        | 0        | 0        | 0        |
| sense_intrc -           | 2   | 2   | 0   | 0   | 0   | 3   | 0.199957 | 0.256417 | 0        | 0        |
| antisense -             | 5   | 11  | 7   | 0   | 1   | 0   | 0.628553 | 1.773265 | 1.061739 | 0        |
| antisense -             | 6   | 7   | 8   | 7   | 6   | 12  | 0.472047 | 0.706222 | 0.759403 | 0.854796 |
| pseudogeni arylsulfatas | 1   | 0   | 0   | 3   | 3   | 3   | 0.038593 | 0        | 0        | 0.179703 |
| pseudogeni -            | 0   | 0   | 0   | 1   | 0   | 0   | 0        | 0        | 0        | 0.367575 |
| protein_co -            | 2   | 2   | 2   | 3   | 4   | 6   | 0.094536 | 0.121229 | 0.114064 | 0.2201   |
| pseudogeni -            | 1   | 1   | 0   | 3   | 1   | 2   | 0.205658 | 0.263727 | 0        | 0.957629 |
| pseudogeni RAN_memt     | 2   | 4   | 3   | 3   | 5   | 0   | 0.143176 | 0.367205 | 0.259124 | 0.333343 |
| antisense -             | 0   | 0   | 0   | 0   | 1   | 0   | 0        | 0        | 0        | 0        |
| lincRNA long_interf     | 0   | 0   | 0   | 30  | 41  | 40  | 0        | 0        | 0        | 1.789667 |
| pseudogeni proteasom    | 0   | 1   | 0   | 0   | 0   | 0   | 0        | 0.0859   | 0        | 0        |
| pseudogeni mortality_f  | 0   | 0   | 1   | 0   | 0   | 1   | 0        | 0        | 0.057967 | 0        |
| lincRNA -               | 40  | 43  | 37  | 13  | 14  | 10  | 1.269872 | 1.750563 | 1.41726  | 0.640581 |
| pseudogeni dynein_cyt   | 6   | 10  | 12  | 6   | 11  | 5   | 0.153069 | 0.327148 | 0.369372 | 0.237584 |
| antisense -             | 142 | 109 | 104 | 140 | 264 | 133 | 2.410711 | 2.372972 | 2.130287 | 3.689056 |
| antisense -             | 2   | 3   | 4   | 6   | 0   | 0   | 0.056596 | 0.108865 | 0.136573 | 0.263536 |
| antisense -             | 0   | 0   | 1   | 0   | 0   | 0   | 0        | 0        | 0.105749 | 0        |
| pseudogeni -            | 288 | 195 | 232 | 545 | 745 | 402 | 3.175247 | 2.75695  | 3.086179 | 9.326356 |
| lincRNA -               | 0   | 0   | 0   | 5   | 2   | 0   | 0        | 0        | 0        | 0.874757 |
| antisense -             | 0   | 0   | 0   | 7   | 9   | 2   | 0        | 0        | 0        | 0.189742 |
| pseudogeni -            | 0   | 0   | 2   | 0   | 0   | 0   | 0        | 0        | 0.373436 | 0        |
| pseudogeni nucleopho:   | 1   | 4   | 0   | 12  | 12  | 7   | 0.054083 | 0.277415 | 0        | 1.007333 |
| lincRNA long_interf     | 0   | 5   | 4   | 3   | 1   | 0   | 0        | 0.671091 | 0.505138 | 0.487365 |
| pseudogeni -            | 1   | 0   | 0   | 0   | 0   | 0   | 0.072811 | 0        | 0        | 0        |
| pseudogeni brain_prot   | 2   | 2   | 3   | 5   | 5   | 3   | 0.248095 | 0.318147 | 0.449012 | 0.962696 |
| pseudogeni deoxyuridi   | 1   | 1   | 6   | 2   | 4   | 1   | 0.101494 | 0.130151 | 0.734747 | 0.315064 |
| lincRNA -               | 0   | 0   | 1   | 24  | 33  | 12  | 0        | 0        | 0.079796 | 2.463632 |
| antisense -             | 131 | 123 | 119 | 63  | 62  | 52  | 6.698574 | 8.065393 | 7.341859 | 5.000139 |
| processed_ long_interf  | 0   | 0   | 0   | 1   | 0   | 0   | 0        | 0        | 0        | 0.176222 |
| antisense AATK_antis    | 2   | 1   | 1   | 2   | 6   | 3   | 0.059467 | 0.038129 | 0.035875 | 0.092302 |
| antisense -             | 1   | 5   | 1   | 0   | 1   | 1   | 0.054523 | 0.349592 | 0.065785 | 0        |
| protein_co pleckstrin_  | 537 | 429 | 454 | 273 | 320 | 223 | 4.784332 | 4.901327 | 4.880349 | 3.775202 |
| pseudogeni ribosomal_   | 0   | 1   | 2   | 4   | 2   | 2   | 0        | 0.151843 | 0.285735 | 0.73515  |
| lincRNA long_interf     | 0   | 0   | 1   | 1   | 0   | 2   | 0        | 0        | 0.032778 | 0.042167 |
| processed_-             | 1   | 1   | 0   | 2   | 6   | 4   | 0.166868 | 0.213985 | 0        | 0.518006 |
| pseudogeni -            | 1   | 3   | 2   | 4   | 7   | 8   | 0.074785 | 0.287702 | 0.180464 | 0.464305 |
| antisense TBC1D4_ar     | 0   | 0   | 0   | 2   | 0   | 0   | 0        | 0        | 0        | 0.342493 |
| antisense -             | 6   | 6   | 11  | 34  | 30  | 21  | 0.201389 | 0.258253 | 0.445476 | 1.771305 |
| lincRNA MIR137_hc       | 29  | 38  | 21  | 0   | 0   | 0   | 0.515275 | 0.865833 | 0.450203 | 0        |
| lincRNA -               | 16  | 11  | 4   | 0   | 1   | 2   | 0.160445 | 0.141452 | 0.048396 | 0        |
| sense_intrc -           | 10  | 5   | 4   | 10  | 4   | 3   | 0.672741 | 0.431347 | 0.32468  | 1.044187 |
| antisense -             | 0   | 1   | 0   | 0   | 0   | 0   | 0        | 0.118599 | 0        | 0        |
| antisense -             | 14  | 15  | 18  | 1   | 0   | 0   | 1.182811 | 1.62513  | 1.834881 | 0.131135 |
| pseudogeni heat_shock   | 27  | 14  | 9   | 0   | 5   | 0   | 0.656996 | 0.436854 | 0.264234 | 0        |

|                         |      |      |      |      |      |      |          |          |          |          |
|-------------------------|------|------|------|------|------|------|----------|----------|----------|----------|
| lincRNA -               | 3    | 5    | 3    | 15   | 19   | 41   | 0.493579 | 1.054909 | 0.595532 | 3.830516 |
| pseudogen: coiled-coil- | 0    | 0    | 0    | 3    | 1    | 0    | 0        | 0        | 0        | 0.511333 |
| pseudogen: -            | 0    | 2    | 1    | 2    | 5    | 5    | 0        | 0.258623 | 0.121668 | 0.313031 |
| pseudogen: ADP-ribosy   | 5    | 5    | 4    | 0    | 3    | 5    | 0.441526 | 0.566194 | 0.426181 | 0        |
| antisense -             | 0    | 1    | 2    | 2    | 2    | 1    | 0        | 0.065788 | 0.123798 | 0.159256 |
| antisense TRAPPC12_     | 69   | 52   | 46   | 40   | 49   | 25   | 3.563228 | 3.443557 | 2.86616  | 3.206159 |
| antisense DDX26B_ar     | 0    | 1    | 0    | 0    | 1    | 0    | 0        | 0.15108  | 0        | 0        |
| pseudogen: -            | 0    | 0    | 0    | 0    | 0    | 1    | 0        | 0        | 0        | 0        |
| pseudogen: -            | 0    | 0    | 0    | 1    | 4    | 2    | 0        | 0        | 0        | 0.186615 |
| pseudogen: -            | 1    | 0    | 1    | 0    | 0    | 0    | 0.7815   | 0        | 0.942925 | 0        |
| pseudogen: -            | 851  | 715  | 814  | 18   | 25   | 26   | 13.0574  | 14.06833 | 15.06952 | 0.428677 |
| pseudogen: ribosomal_   | 2    | 0    | 1    | 1    | 0    | 0    | 0.114227 | 0        | 0.06891  | 0.088648 |
| lincRNA -               | 0    | 0    | 0    | 0    | 0    | 1    | 0        | 0        | 0        | 0        |
| pseudogen: suppressio   | 7    | 3    | 4    | 8    | 4    | 1    | 0.297849 | 0.163693 | 0.205356 | 0.528347 |
| processed_ -            | 3    | 4    | 0    | 1    | 2    | 1    | 0.212172 | 0.362774 | 0        | 0.109773 |
| antisense -             | 11   | 2    | 4    | 8    | 14   | 12   | 0.392833 | 0.091591 | 0.172355 | 0.443441 |
| lincRNA long_interf     | 0    | 2    | 4    | 0    | 0    | 0    | 0        | 0.068917 | 0.129686 | 0        |
| pseudogen: -            | 0    | 1    | 0    | 0    | 0    | 0    | 0        | 0.127394 | 0        | 0        |
| pseudogen: ubiquitin-c  | 0    | 1    | 0    | 1    | 4    | 1    | 0        | 0.079327 | 0        | 0.096016 |
| processed_ -            | 0    | 0    | 0    | 0    | 3    | 0    | 0        | 0        | 0        | 0        |
| antisense -             | 0    | 0    | 0    | 1    | 0    | 0    | 0        | 0        | 0        | 0.112837 |
| antisense -             | 0    | 2    | 0    | 0    | 4    | 0    | 0        | 0.218654 | 0        | 0        |
| lincRNA -               | 2    | 7    | 2    | 11   | 36   | 7    | 0.147918 | 0.663894 | 0.178472 | 1.262741 |
| sense_intrc -           | 0    | 0    | 5    | 2    | 4    | 0    | 0        | 0        | 0.898024 | 0.462094 |
| pseudogen: -            | 0    | 0    | 0    | 0    | 2    | 2    | 0        | 0        | 0        | 0        |
| lincRNA long_interf     | 0    | 0    | 0    | 0    | 0    | 1    | 0        | 0        | 0        | 0        |
| antisense -             | 0    | 1    | 1    | 0    | 0    | 0    | 0        | 0.119069 | 0.112031 | 0        |
| sense_intrc -           | 1    | 4    | 2    | 2    | 0    | 1    | 0.023923 | 0.122714 | 0.05773  | 0.074265 |
| antisense -             | 11   | 1    | 4    | 4    | 0    | 4    | 0.785069 | 0.091522 | 0.344448 | 0.443104 |
| antisense -             | 0    | 0    | 0    | 0    | 0    | 2    | 0        | 0        | 0        | 0        |
| antisense -             | 1    | 0    | 0    | 4    | 2    | 1    | 0.093593 | 0        | 0        | 0.581076 |
| antisense -             | 41   | 22   | 23   | 1    | 1    | 0    | 2.400113 | 1.651505 | 1.624515 | 0.090861 |
| antisense -             | 0    | 0    | 2    | 0    | 0    | 0    | 0        | 0        | 0.18519  | 0        |
| lincRNA -               | 0    | 1    | 0    | 0    | 1    | 0    | 0        | 0.093953 | 0        | 0        |
| processed_ -            | 0    | 0    | 3    | 0    | 5    | 3    | 0        | 0        | 0.311997 | 0        |
| lincRNA -               | 24   | 22   | 12   | 15   | 29   | 5    | 1.30401  | 1.532857 | 0.786681 | 1.265002 |
| antisense -             | 8    | 10   | 11   | 0    | 1    | 0    | 0.886809 | 1.421508 | 1.471231 | 0        |
| antisense -             | 3    | 2    | 2    | 2    | 2    | 8    | 0.174745 | 0.149391 | 0.14056  | 0.180819 |
| pseudogen: -            | 0    | 1    | 0    | 0    | 0    | 0    | 0        | 0.128482 | 0        | 0        |
| lincRNA -               | 1759 | 1558 | 1531 | 1106 | 1264 | 1153 | 11.63322 | 13.21329 | 12.2168  | 11.35324 |
| pseudogen: sorting_ne   | 3    | 2    | 3    | 6    | 5    | 11   | 0.080383 | 0.06872  | 0.096987 | 0.249531 |
| pseudogen: -            | 2    | 0    | 0    | 2    | 1    | 0    | 0.175948 | 0        | 0        | 0.273095 |
| lincRNA -               | 1    | 1    | 0    | 1    | 2    | 2    | 0.053527 | 0.068641 | 0        | 0.083082 |
| pseudogen: -            | 0    | 0    | 0    | 0    | 2    | 2    | 0        | 0        | 0        | 0        |
| pseudogen: ribosome_l   | 0    | 0    | 0    | 0    | 0    | 1    | 0        | 0        | 0        | 0        |
| antisense -             | 41   | 31   | 28   | 65   | 70   | 46   | 0.658613 | 0.638583 | 0.542691 | 1.620653 |
| protein_co cancer/test  | 2    | 1    | 1    | 1    | 0    | 3    | 0.033232 | 0.021308 | 0.020048 | 0.02579  |
| pseudogen: ATPase_H+    | 1    | 1    | 0    | 2    | 1    | 0    | 0.207478 | 0.266061 | 0        | 0.644069 |
| pseudogen: teratocarci  | 0    | 0    | 0    | 30   | 31   | 28   | 0        | 0        | 0        | 0.80568  |
| pseudogen: capicua_tra  | 0    | 1    | 0    | 0    | 0    | 0    | 0        | 0.021376 | 0        | 0        |
| pseudogen: -            | 20   | 18   | 15   | 14   | 17   | 20   | 1.507718 | 1.740091 | 1.364361 | 1.638131 |
| antisense -             | 0    | 0    | 1    | 0    | 2    | 0    | 0        | 0        | 0.105159 | 0        |
| antisense -             | 38   | 30   | 43   | 50   | 57   | 26   | 2.338347 | 2.367315 | 3.192581 | 4.775578 |
| antisense -             | 0    | 0    | 1    | 0    | 0    | 0    | 0        | 0        | 0.09978  | 0        |
| IG_V_pseuc -            | 1    | 1    | 0    | 0    | 0    | 0    | 0.146075 | 0.18732  | 0        | 0        |
| lincRNA surfactant_     | 10   | 4    | 8    | 0    | 2    | 5    | 0.676624 | 0.34707  | 0.653108 | 0        |
| pseudogen: -            | 0    | 1    | 0    | 0    | 1    | 1    | 0        | 0.144196 | 0        | 0        |
| lincRNA -               | 0    | 0    | 0    | 3    | 0    | 1    | 0        | 0        | 0        | 0.480924 |
| protein_co Uncharacte   | 0    | 1    | 1    | 0    | 0    | 0    | 0        | 0.049006 | 0.046109 | 0        |
| pseudogen: -            | 0    | 0    | 0    | 2    | 0    | 1    | 0        | 0        | 0        | 0.223594 |
| pseudogen: TGFB-induc   | 2    | 2    | 3    | 2    | 1    | 3    | 0.136905 | 0.175561 | 0.247776 | 0.212496 |
| pseudogen: -            | 0    | 1    | 0    | 0    | 0    | 0    | 0        | 0.057431 | 0        | 0        |
| pseudogen: -            | 0    | 0    | 0    | 2    | 0    | 5    | 0        | 0        | 0        | 0.212806 |
| processed_ -            | 3    | 4    | 0    | 4    | 13   | 0    | 0.23445  | 0.400865 | 0        | 0.485199 |
| antisense -             | 0    | 1    | 1    | 0    | 0    | 0    | 0        | 0.110736 | 0.104191 | 0        |

|                        |      |      |      |     |      |      |          |          |          |          |
|------------------------|------|------|------|-----|------|------|----------|----------|----------|----------|
| processed_-            | 1    | 2    | 0    | 0   | 3    | 4    | 0.016293 | 0.041786 | 0        | 0        |
| lincRNA -              | 0    | 0    | 0    | 1   | 0    | 0    | 0        | 0        | 0        | 0.152578 |
| pseudogen-             | 0    | 0    | 0    | 0   | 0    | 1    | 0        | 0        | 0        | 0        |
| pseudogen: ribosomal_  | 0    | 0    | 2    | 2   | 1    | 0    | 0        | 0        | 0.236718 | 0.304518 |
| antisense -            | 0    | 0    | 0    | 2   | 9    | 1    | 0        | 0        | 0        | 0.08332  |
| pseudogen: RNA_bindin  | 1    | 2    | 2    | 2   | 2    | 1    | 0.040562 | 0.104031 | 0.097881 | 0.125917 |
| pseudogen: transportir | 1    | 1    | 0    | 4   | 0    | 0    | 0.041204 | 0.052838 | 0        | 0.255817 |
| processed_-            | 0    | 0    | 0    | 0   | 1    | 1    | 0        | 0        | 0        | 0        |
| lincRNA -              | 0    | 0    | 1    | 0   | 0    | 0    | 0        | 0        | 0.027226 | 0        |
| antisense BOLA3_ant    | 150  | 111  | 108  | 124 | 173  | 40   | 3.898837 | 3.699782 | 3.387004 | 5.002603 |
| antisense MPRIP_ant    | 1    | 1    | 0    | 0   | 1    | 2    | 0.044319 | 0.056833 | 0        | 0        |
| pseudogen: ribosomal_  | 11   | 10   | 8    | 10  | 4    | 3    | 1.350236 | 1.574078 | 1.184827 | 1.90523  |
| pseudogen-             | 3    | 1    | 0    | 0   | 0    | 0    | 0.057323 | 0.024503 | 0        | 0        |
| antisense -            | 0    | 1    | 0    | 0   | 1    | 0    | 0        | 0.12026  | 0        | 0        |
| antisense -            | 0    | 0    | 0    | 0   | 0    | 1    | 0        | 0        | 0        | 0        |
| pseudogen-             | 0    | 1    | 0    | 4   | 5    | 3    | 0        | 0.131864 | 0        | 0.638419 |
| pseudogen: zinc_finger | 0    | 0    | 0    | 0   | 1    | 0    | 0        | 0        | 0        | 0        |
| antisense RFPL1_anti   | 1    | 2    | 0    | 6   | 13   | 3    | 0.008435 | 0.021633 | 0        | 0.078553 |
| lincRNA JPX_transc     | 221  | 178  | 217  | 256 | 228  | 240  | 4.723197 | 4.878352 | 5.595663 | 8.492083 |
| pseudogen-             | 20   | 11   | 19   | 15  | 14   | 10   | 0.41331  | 0.291506 | 0.473748 | 0.481136 |
| antisense -            | 0    | 0    | 0    | 1   | 2    | 2    | 0        | 0        | 0        | 0.075498 |
| pseudogen-             | 0    | 0    | 0    | 0   | 0    | 1    | 0        | 0        | 0        | 0        |
| lincRNA -              | 94   | 60   | 68   | 28  | 57   | 50   | 5.316842 | 4.351976 | 4.640693 | 2.458184 |
| protein_co Rho_GTPas   | 3360 | 2435 | 2593 | 812 | 1123 | 1039 | 25.10364 | 23.32952 | 23.37481 | 9.41638  |
| processed_-            | 1    | 0    | 0    | 5   | 7    | 2    | 0.031239 | 0        | 0        | 0.242438 |
| lincRNA -              | 3    | 0    | 1    | 6   | 3    | 0    | 0.254376 | 0        | 0.102307 | 0.789654 |
| pseudogen: guanylate_l | 0    | 0    | 0    | 10  | 18   | 4    | 0        | 0        | 0        | 0.418275 |
| lincRNA -              | 4    | 3    | 1    | 0   | 0    | 1    | 0.094967 | 0.091336 | 0.028646 | 0        |
| pseudogen-             | 0    | 0    | 0    | 0   | 3    | 0    | 0        | 0        | 0        | 0        |
| pseudogen: ribosomal_  | 0    | 0    | 0    | 0   | 0    | 1    | 0        | 0        | 0        | 0        |
| pseudogen: glyceraldeh | 0    | 1    | 0    | 0   | 0    | 0    | 0        | 0.062505 | 0        | 0        |
| lincRNA -              | 1    | 0    | 0    | 1   | 0    | 1    | 0.017836 | 0        | 0        | 0.027683 |
| pseudogen-             | 1    | 0    | 2    | 0   | 2    | 0    | 0.058833 | 0        | 0.141971 | 0        |
| lincRNA CYP4A22_a      | 0    | 0    | 1    | 7   | 2    | 6    | 0        | 0        | 0.061428 | 0.553158 |
| pseudogen-             | 15   | 11   | 20   | 21  | 38   | 33   | 1.337168 | 1.257467 | 2.15116  | 2.905657 |
| processed_ long_interf | 11   | 4    | 7    | 4   | 3    | 0    | 0.205822 | 0.095977 | 0.158032 | 0.116169 |
| pseudogen-             | 3    | 1    | 0    | 6   | 2    | 3    | 0.3126   | 0.133622 | 0        | 0.970397 |
| pseudogen: MT-ND1_ps   | 0    | 0    | 0    | 2   | 0    | 0    | 0        | 0        | 0        | 0.216929 |
| processed_-            | 9    | 15   | 6    | 13  | 9    | 6    | 0.709261 | 1.515877 | 0.570509 | 1.590147 |
| antisense -            | 6    | 3    | 6    | 3   | 0    | 1    | 0.503292 | 0.3227   | 0.607251 | 0.390589 |
| protein_co chromosom   | 4    | 1    | 4    | 9   | 11   | 1    | 0.208169 | 0.066737 | 0.251168 | 0.72699  |
| antisense -            | 3    | 2    | 0    | 7   | 4    | 2    | 0.340605 | 0.291185 | 0        | 1.233556 |
| sense_intrc -          | 0    | 1    | 0    | 0   | 0    | 0    | 0        | 0.046721 | 0        | 0        |
| pseudogen: Sp3_transc  | 0    | 0    | 0    | 0   | 0    | 2    | 0        | 0        | 0        | 0        |
| lincRNA -              | 0    | 0    | 0    | 2   | 0    | 0    | 0        | 0        | 0        | 0.331571 |
| pseudogen: PRKC_apo    | 0    | 1    | 0    | 0   | 6    | 3    | 0        | 0.106424 | 0        | 0        |
| lincRNA -              | 0    | 0    | 0    | 2   | 4    | 0    | 0        | 0        | 0        | 0.122628 |
| pseudogen-             | 1    | 0    | 0    | 0   | 0    | 0    | 0.028873 | 0        | 0        | 0        |
| pseudogen: olfactory_r | 0    | 0    | 0    | 0   | 0    | 1    | 0        | 0        | 0        | 0        |
| lincRNA -              | 0    | 0    | 0    | 0   | 1    | 0    | 0        | 0        | 0        | 0        |
| antisense ZNF385D_e    | 0    | 0    | 0    | 11  | 11   | 1    | 0        | 0        | 0        | 1.135571 |
| pseudogen-             | 1    | 1    | 1    | 0   | 0    | 0    | 0.119617 | 0.153392 | 0.144325 | 0        |
| lincRNA -              | 2    | 1    | 5    | 0   | 0    | 0    | 0.059467 | 0.038129 | 0.179377 | 0        |
| lincRNA -              | 0    | 0    | 0    | 61  | 59   | 54   | 0        | 0        | 0        | 8.176    |
| pseudogen-             | 1    | 1    | 0    | 0   | 1    | 0    | 0.039771 | 0.051001 | 0        | 0        |
| pseudogen-             | 0    | 0    | 0    | 0   | 0    | 3    | 0        | 0        | 0        | 0        |
| lincRNA -              | 10   | 12   | 11   | 17  | 24   | 4    | 0.930357 | 1.431662 | 1.234783 | 2.454874 |
| antisense -            | 0    | 2    | 0    | 0   | 0    | 1    | 0        | 0.255328 | 0        | 0        |
| protein_co C2_calcium  | 41   | 41   | 38   | 44  | 67   | 23   | 1.094189 | 1.403143 | 1.223602 | 1.822602 |
| pseudogen: ubiquitin-c | 2    | 0    | 0    | 0   | 0    | 0    | 0.210742 | 0        | 0        | 0        |
| lincRNA -              | 1    | 2    | 0    | 0   | 3    | 0    | 0.102604 | 0.26315  | 0        | 0        |
| pseudogen-             | 0    | 0    | 0    | 0   | 1    | 0    | 0        | 0        | 0        | 0        |
| pseudogen: chaperonin  | 0    | 1    | 0    | 2   | 4    | 5    | 0        | 0.038844 | 0        | 0.094031 |
| antisense -            | 4    | 4    | 4    | 1   | 7    | 0    | 0.075205 | 0.096439 | 0.090739 | 0.029182 |
| pseudogen: ribosomal_  | 0    | 2    | 1    | 2   | 2    | 1    | 0        | 0.325026 | 0.152907 | 0.393404 |

|                        |      |      |      |      |      |      |          |          |          |          |
|------------------------|------|------|------|------|------|------|----------|----------|----------|----------|
| pseudogen: dorsal_inhi | 1    | 0    | 0    | 0    | 0    | 0    | 0.049462 | 0        | 0        | 0        |
| antisense NCBP2_ant    | 10   | 8    | 8    | 3    | 6    | 7    | 0.834342 | 0.85594  | 0.805345 | 0.388504 |
| lincRNA -              | 0    | 0    | 0    | 2    | 0    | 3    | 0        | 0        | 0        | 0.242196 |
| pseudogen: -           | 0    | 0    | 0    | 0    | 1    | 0    | 0        | 0        | 0        | 0        |
| pseudogen: -           | 0    | 1    | 0    | 0    | 0    | 0    | 0        | 0.235803 | 0        | 0        |
| processed_ -           | 0    | 0    | 0    | 2    | 2    | 0    | 0        | 0        | 0        | 0.059219 |
| antisense MTOR_anti    | 0    | 0    | 2    | 0    | 1    | 0    | 0        | 0        | 0.160498 | 0        |
| pseudogen: -           | 0    | 1    | 0    | 5    | 9    | 2    | 0        | 0.036114 | 0        | 0.218558 |
| antisense -            | 0    | 0    | 0    | 1    | 0    | 0    | 0        | 0        | 0        | 0.093188 |
| antisense -            | 1    | 0    | 0    | 0    | 0    | 3    | 0.052274 | 0        | 0        | 0        |
| protein_co zinc_finger | 1126 | 808  | 926  | 117  | 237  | 86   | 3.976064 | 3.658775 | 3.945246 | 0.641256 |
| pseudogen: -           | 0    | 0    | 0    | 0    | 1    | 0    | 0        | 0        | 0        | 0        |
| lincRNA -              | 0    | 0    | 0    | 3    | 1    | 1    | 0        | 0        | 0        | 0.59819  |
| processed_ -           | 0    | 0    | 0    | 0    | 0    | 4    | 0        | 0        | 0        | 0        |
| pseudogen: MT-ND2_ps   | 157  | 117  | 139  | 287  | 344  | 300  | 7.051468 | 6.738684 | 7.532562 | 20.00747 |
| antisense -            | 0    | 0    | 0    | 3    | 0    | 3    | 0        | 0        | 0        | 0.196525 |
| pseudogen: -           | 0    | 2    | 3    | 0    | 0    | 0    | 0        | 0.117212 | 0.165425 | 0        |
| pseudogen: phosphogl   | 2    | 2    | 0    | 0    | 0    | 0    | 0.129352 | 0.165875 | 0        | 0        |
| pseudogen: small_nucl  | 0    | 2    | 0    | 0    | 0    | 0    | 0        | 0.432588 | 0        | 0        |
| lincRNA -              | 1    | 1    | 3    | 6    | 8    | 1    | 0.097081 | 0.124492 | 0.351401 | 0.904097 |
| pseudogen: ribosomal_  | 2    | 0    | 0    | 0    | 1    | 1    | 0.919412 | 0        | 0        | 0        |
| pseudogen: -           | 0    | 1    | 0    | 0    | 0    | 0    | 0        | 0.668109 | 0        | 0        |
| pseudogen: Shwachma    | 270  | 177  | 213  | 59   | 78   | 204  | 7.386409 | 6.209436 | 7.030678 | 2.505256 |
| processed_ -           | 46   | 44   | 37   | 1    | 0    | 0    | 1.11068  | 1.362364 | 1.077906 | 0.037477 |
| pseudogen: eukaryotic_ | 1    | 0    | 0    | 0    | 1    | 2    | 0.04844  | 0        | 0        | 0        |
| antisense -            | 4    | 2    | 1    | 0    | 2    | 0    | 0.267561 | 0.171554 | 0.080707 | 0        |
| pseudogen: ring_finger | 0    | 0    | 0    | 0    | 2    | 0    | 0        | 0        | 0        | 0        |
| lincRNA -              | 0    | 0    | 0    | 0    | 1    | 1    | 0        | 0        | 0        | 0        |
| pseudogen: TAF13_RNA   | 0    | 0    | 1    | 0    | 0    | 0    | 0        | 0        | 0.197816 | 0        |
| pseudogen: ribosomal_  | 0    | 1    | 0    | 0    | 0    | 0    | 0        | 0.08237  | 0        | 0        |
| protein_co family_witl | 40   | 25   | 32   | 21   | 39   | 25   | 0.629607 | 0.504614 | 0.607726 | 0.51305  |
| antisense -            | 3    | 0    | 1    | 7    | 9    | 2    | 0.273677 | 0        | 0.110069 | 0.991165 |
| lincRNA long_interf    | 0    | 0    | 0    | 3    | 4    | 0    | 0        | 0        | 0        | 0.616778 |
| antisense -            | 0    | 0    | 0    | 0    | 3    | 0    | 0        | 0        | 0        | 0        |
| pseudogen: -           | 0    | 0    | 0    | 1    | 0    | 1    | 0        | 0        | 0        | 0.123356 |
| pseudogen: importin_7  | 0    | 0    | 1    | 0    | 2    | 0    | 0        | 0        | 0.032329 | 0        |
| lincRNA -              | 4    | 0    | 3    | 3    | 6    | 3    | 0.330794 | 0        | 0.299341 | 0.385078 |
| pseudogen: -           | 0    | 0    | 0    | 1    | 4    | 6    | 0        | 0        | 0        | 0.07278  |
| lincRNA -              | 0    | 0    | 1    | 0    | 0    | 0    | 0        | 0        | 0.077928 | 0        |
| lincRNA family_witl    | 5    | 0    | 0    | 1    | 0    | 1    | 0.031768 | 0        | 0        | 0.009862 |
| pseudogen: -           | 1    | 1    | 3    | 5    | 2    | 1    | 0.09688  | 0.124235 | 0.350675 | 0.751857 |
| pseudogen: -           | 3    | 4    | 3    | 7    | 4    | 6    | 0.146075 | 0.24976  | 0.176248 | 0.529033 |
| protein_co solute_carr | 538  | 437  | 541  | 596  | 620  | 589  | 4.43978  | 4.624555 | 5.386721 | 7.634066 |
| lincRNA -              | 0    | 1    | 2    | 3    | 4    | 7    | 0        | 0.132737 | 0.249781 | 0.481985 |
| processed_ -           | 11   | 7    | 5    | 8    | 12   | 10   | 0.263293 | 0.214859 | 0.144399 | 0.297212 |
| lincRNA -              | 0    | 1    | 0    | 0    | 0    | 0    | 0        | 0.0593   | 0        | 0        |
| pseudogen: -           | 2    | 2    | 2    | 2    | 2    | 1    | 0.130069 | 0.166796 | 0.156936 | 0.201886 |
| pseudogen: -           | 0    | 0    | 2    | 1    | 1    | 0    | 0        | 0        | 0.145438 | 0.093547 |
| antisense -            | 4    | 4    | 10   | 6    | 4    | 5    | 0.323379 | 0.414688 | 0.97544  | 0.752894 |
| pseudogen: -           | 0    | 2    | 1    | 0    | 0    | 0    | 0        | 0.24694  | 0.116171 | 0        |
| pseudogen: -           | 5    | 2    | 1    | 0    | 0    | 0    | 0.644094 | 0.330383 | 0.155427 | 0        |
| pseudogen: -           | 0    | 0    | 1    | 1    | 3    | 1    | 0        | 0        | 0.148883 | 0.191526 |
| antisense -            | 3    | 0    | 2    | 0    | 0    | 0    | 0.180115 | 0        | 0.14488  | 0        |
| antisense -            | 0    | 0    | 0    | 3    | 2    | 0    | 0        | 0        | 0        | 0.124481 |
| antisense FGDS_antis   | 2880 | 2306 | 2272 | 1298 | 1688 | 1245 | 35.61267 | 36.56627 | 33.89756 | 24.9125  |
| processed_ NRG3_anti   | 0    | 0    | 0    | 0    | 1    | 0    | 0        | 0        | 0        | 0        |
| pseudogen: nucleopho   | 0    | 0    | 0    | 1    | 1    | 0    | 0        | 0        | 0        | 0.099426 |
| lincRNA -              | 0    | 0    | 0    | 8    | 6    | 11   | 0        | 0        | 0        | 0.639822 |
| lincRNA -              | 0    | 1    | 0    | 0    | 1    | 0    | 0        | 0.075921 | 0        | 0        |
| processed_ -           | 5    | 4    | 5    | 7    | 7    | 1    | 0.231899 | 0.237902 | 0.2798   | 0.503916 |
| lincRNA -              | 1    | 2    | 0    | 0    | 2    | 3    | 0.168065 | 0.431038 | 0        | 0        |
| antisense -            | 5    | 4    | 1    | 2    | 1    | 2    | 0.327902 | 0.33639  | 0.079127 | 0.20358  |
| antisense -            | 0    | 0    | 0    | 1    | 4    | 0    | 0        | 0        | 0        | 0.159956 |
| pseudogen: -           | 0    | 0    | 0    | 1    | 0    | 0    | 0        | 0        | 0        | 0.064236 |
| antisense DBH_antis    | 9    | 15   | 14   | 32   | 33   | 7    | 0.197293 | 0.421668 | 0.370293 | 1.088805 |

|                         |      |      |      |      |      |     |          |          |          |          |
|-------------------------|------|------|------|------|------|-----|----------|----------|----------|----------|
| lincRNA -               | 2    | 1    | 0    | 0    | 0    | 0   | 0.137105 | 0.087909 | 0        | 0        |
| sense_intrc -           | 8    | 0    | 3    | 4    | 3    | 5   | 0.848688 | 0        | 0.383997 | 0.658641 |
| antisense -             | 1    | 2    | 1    | 0    | 0    | 2   | 0.097081 | 0.248985 | 0.117134 | 0        |
| antisense LEPREL1_ar    | 0    | 0    | 0    | 1    | 2    | 0   | 0        | 0        | 0        | 0.099698 |
| lincRNA -               | 0    | 0    | 0    | 0    | 0    | 1   | 0        | 0        | 0        | 0        |
| pseudogeni -            | 4    | 0    | 0    | 2    | 5    | 0   | 0.208632 | 0        | 0        | 0.161913 |
| antisense -             | 4    | 2    | 2    | 1    | 2    | 1   | 0.372883 | 0.239085 | 0.224952 | 0.144691 |
| pseudogeni ciliary_roo  | 0    | 0    | 0    | 0    | 1    | 0   | 0        | 0        | 0        | 0        |
| pseudogeni signal-regul | 2    | 0    | 1    | 2    | 4    | 3   | 0.052983 | 0        | 0.031964 | 0.082237 |
| antisense PROSER2_a     | 0    | 2    | 1    | 5    | 7    | 4   | 0        | 0.038287 | 0.018012 | 0.115855 |
| pseudogeni -            | 4    | 1    | 0    | 1    | 1    | 4   | 0.506919 | 0.162513 | 0        | 0.196702 |
| processed_ myocardial   | 2245 | 2012 | 2061 | 1000 | 1172 | 384 | 10.30424 | 11.84232 | 11.41368 | 7.1241   |
| pseudogeni -            | 21   | 22   | 16   | 22   | 32   | 39  | 0.418483 | 0.5622   | 0.384704 | 0.680474 |
| lincRNA -               | 0    | 3    | 0    | 0    | 0    | 0   | 0        | 0.322124 | 0        | 0        |
| processed_ -            | 43   | 31   | 51   | 28   | 45   | 24  | 3.036552 | 2.807265 | 4.345408 | 3.069028 |
| antisense -             | 0    | 2    | 0    | 3    | 1    | 1   | 0        | 0.196824 | 0        | 0.357348 |
| processed_ -            | 2    | 1    | 0    | 2    | 5    | 2   | 0.210742 | 0.135123 | 0        | 0.3271   |
| lincRNA -               | 0    | 0    | 0    | 1    | 0    | 0   | 0        | 0        | 0        | 0.111284 |
| pseudogeni MT-ND4_ps    | 0    | 0    | 0    | 0    | 2    | 0   | 0        | 0        | 0        | 0        |
| antisense -             | 1    | 1    | 1    | 0    | 0    | 0   | 0.122428 | 0.156997 | 0.147717 | 0        |
| pseudogeni -            | 8    | 1    | 2    | 3    | 3    | 4   | 1.736667 | 0.278379 | 0.523847 | 1.010831 |
| processed_ -            | 2    | 1    | 2    | 14   | 20   | 23  | 0.105017 | 0.067335 | 0.126709 | 1.141005 |
| pseudogeni Dnal_(Hsp4   | 4    | 11   | 5    | 17   | 13   | 0   | 0.593545 | 2.093126 | 0.895182 | 3.915369 |
| processed_ -            | 0    | 0    | 0    | 2    | 3    | 1   | 0        | 0        | 0        | 0.179482 |
| lincRNA -               | 0    | 0    | 1    | 0    | 6    | 2   | 0        | 0        | 0.05525  | 0        |
| antisense UBXN7_ant     | 3    | 2    | 7    | 7    | 6    | 5   | 0.070055 | 0.05989  | 0.197225 | 0.253714 |
| pseudogeni ribosomal_   | 0    | 1    | 0    | 0    | 0    | 0   | 0        | 0.080928 | 0        | 0        |
| lincRNA long_interf     | 86   | 59   | 62   | 0    | 0    | 1   | 4.222557 | 3.714825 | 3.672965 | 0        |
| protein_co family_witl  | 46   | 30   | 38   | 40   | 58   | 36  | 0.781784 | 0.653822 | 0.77922  | 1.055162 |
| protein_co excision_re  | 108  | 107  | 110  | 60   | 79   | 75  | 0.632383 | 0.803433 | 0.777136 | 0.545303 |
| pseudogeni -            | 0    | 0    | 0    | 0    | 1    | 0   | 0        | 0        | 0        | 0        |
| lincRNA -               | 0    | 0    | 0    | 1    | 0    | 0   | 0        | 0        | 0        | 0.197771 |
| antisense TRMT2B_ar     | 5    | 3    | 0    | 1    | 0    | 0   | 0.584664 | 0.449849 | 0        | 0.181496 |
| pseudogeni makorin_ri   | 1    | 0    | 0    | 13   | 3    | 6   | 0.03834  | 0        | 0        | 0.77362  |
| antisense -             | 2    | 1    | 2    | 28   | 40   | 29  | 0.152488 | 0.097772 | 0.183985 | 3.313552 |
| pseudogeni major_histi  | 1    | 0    | 0    | 0    | 0    | 0   | 0.884717 | 0        | 0        | 0        |
| pseudogeni -            | 0    | 0    | 0    | 4    | 2    | 2   | 0        | 0        | 0        | 0.841385 |
| antisense RUSC1_ant     | 175  | 182  | 211  | 44   | 49   | 94  | 4.469364 | 5.960579 | 6.501869 | 1.744178 |
| lincRNA -               | 4    | 3    | 1    | 0    | 0    | 0   | 0.345414 | 0.332209 | 0.104191 | 0        |
| antisense -             | 0    | 0    | 1    | 0    | 0    | 0   | 0        | 0        | 0.113605 | 0        |
| lincRNA -               | 0    | 0    | 0    | 20   | 21   | 7   | 0        | 0        | 0        | 0.848249 |
| pseudogeni -            | 0    | 0    | 0    | 0    | 2    | 0   | 0        | 0        | 0        | 0        |
| lincRNA -               | 0    | 0    | 0    | 1    | 0    | 0   | 0        | 0        | 0        | 0.111969 |
| lincRNA -               | 0    | 0    | 0    | 2    | 2    | 0   | 0        | 0        | 0        | 0.067171 |
| lincRNA long_interf     | 0    | 0    | 0    | 0    | 0    | 1   | 0        | 0        | 0        | 0        |
| lincRNA -               | 0    | 0    | 0    | 1    | 1    | 0   | 0        | 0        | 0        | 0.038857 |
| lincRNA long_interf     | 16   | 17   | 13   | 14   | 19   | 12  | 0.569659 | 0.776163 | 0.558452 | 0.773665 |
| lincRNA -               | 0    | 0    | 0    | 6    | 8    | 7   | 0        | 0        | 0        | 0.616778 |
| pseudogeni -            | 4    | 2    | 4    | 1    | 0    | 1   | 0.211932 | 0.135887 | 0.255708 | 0.082237 |
| protein_co Uncharacte   | 0    | 0    | 0    | 2    | 1    | 3   | 0        | 0        | 0        | 0.186376 |
| antisense -             | 0    | 0    | 3    | 0    | 0    | 0   | 0        | 0        | 0.347089 | 0        |
| antisense -             | 7    | 7    | 5    | 131  | 124  | 116 | 0.218238 | 0.279859 | 0.188083 | 6.339198 |
| antisense -             | 3    | 2    | 5    | 1    | 0    | 5   | 0.265917 | 0.227334 | 0.53474  | 0.13758  |
| pseudogeni -            | 49   | 48   | 49   | 67   | 79   | 90  | 0.92422  | 1.160994 | 1.115125 | 1.961483 |
| protein_co FSHD_regic   | 1    | 0    | 0    | 0    | 0    | 0   | 0.022393 | 0        | 0        | 0        |
| pseudogeni -            | 0    | 0    | 0    | 0    | 0    | 1   | 0        | 0        | 0        | 0        |
| antisense -             | 0    | 2    | 0    | 0    | 3    | 1   | 0        | 0.221473 | 0        | 0        |
| pseudogeni ribosomal_   | 0    | 0    | 0    | 0    | 1    | 0   | 0        | 0        | 0        | 0        |
| pseudogeni -            | 0    | 3    | 0    | 0    | 4    | 1   | 0        | 0.413737 | 0        | 0        |
| lincRNA -               | 6    | 10   | 6    | 33   | 26   | 15  | 0.568364 | 1.214743 | 0.685764 | 4.851987 |
| antisense -             | 0    | 0    | 0    | 3    | 6    | 8   | 0        | 0        | 0        | 0.06314  |
| pseudogeni ribosomal_   | 8    | 11   | 14   | 13   | 2    | 4   | 0.573578 | 1.011357 | 1.211096 | 1.446693 |
| protein_co nucleolar_l  | 26   | 19   | 22   | 6    | 13   | 44  | 1.029679 | 0.964921 | 1.051234 | 0.368817 |
| pseudogeni calcyclin_b  | 5    | 1    | 1    | 0    | 2    | 0   | 0.342763 | 0.087909 | 0.082713 | 0        |
| antisense -             | 0    | 0    | 0    | 1    | 0    | 0   | 0        | 0        | 0        | 0.035852 |

|                         |     |     |     |     |     |     |          |          |          |          |
|-------------------------|-----|-----|-----|-----|-----|-----|----------|----------|----------|----------|
| lincRNA -               | 3   | 3   | 2   | 6   | 12  | 9   | 0.033021 | 0.042345 | 0.026561 | 0.102507 |
| antisense -             | 0   | 0   | 0   | 0   | 1   | 0   | 0        | 0        | 0        | 0        |
| pseudogen: -            | 2   | 2   | 0   | 0   | 0   | 0   | 0.264915 | 0.339716 | 0        | 0        |
| pseudogen: -            | 1   | 0   | 0   | 1   | 1   | 0   | 0.069881 | 0        | 0        | 0.108465 |
| antisense -             | 0   | 0   | 0   | 2   | 0   | 2   | 0        | 0        | 0        | 0.195645 |
| antisense prostate_c    | 0   | 0   | 1   | 0   | 3   | 2   | 0        | 0        | 0.014425 | 0        |
| antisense -             | 2   | 1   | 3   | 1   | 2   | 2   | 0.232705 | 0.149205 | 0.421158 | 0.180595 |
| antisense -             | 0   | 2   | 1   | 1   | 1   | 1   | 0        | 0.287016 | 0.135025 | 0.173699 |
| processed_ -            | 0   | 0   | 0   | 61  | 82  | 32  | 0        | 0        | 0        | 2.131334 |
| protein_co neurotropl   | 10  | 5   | 7   | 48  | 60  | 24  | 0.26825  | 0.171996 | 0.226561 | 1.99853  |
| antisense -             | 1   | 9   | 6   | 3   | 1   | 4   | 0.115209 | 1.329652 | 0.834037 | 0.53646  |
| antisense -             | 0   | 0   | 0   | 0   | 1   | 0   | 0        | 0        | 0        | 0        |
| processed_ SATB2_anti   | 31  | 20  | 19  | 39  | 42  | 26  | 0.438621 | 0.362884 | 0.324362 | 0.856491 |
| antisense -             | 1   | 1   | 1   | 0   | 0   | 2   | 0.105135 | 0.13482  | 0.126851 | 0        |
| antisense -             | 0   | 1   | 4   | 0   | 0   | 0   | 0        | 0.077788 | 0.292758 | 0        |
| pseudogen: -            | 1   | 0   | 0   | 1   | 0   | 0   | 0.2605   | 0        | 0        | 0.404332 |
| protein_co extracellu   | 188 | 140 | 154 | 404 | 517 | 226 | 2.292672 | 2.189381 | 2.265963 | 7.647084 |
| antisense long_inter    | 2   | 1   | 5   | 6   | 9   | 0   | 0.168065 | 0.107759 | 0.506949 | 0.782579 |
| processed_ -            | 0   | 0   | 0   | 0   | 0   | 1   | 0        | 0        | 0        | 0        |
| pseudogen: MT-ND1_ps    | 5   | 9   | 5   | 13  | 21  | 18  | 0.630242 | 1.454753 | 0.760423 | 2.54338  |
| antisense -             | 97  | 65  | 98  | 48  | 72  | 37  | 5.252115 | 4.513206 | 6.402309 | 4.033984 |
| lincRNA -               | 9   | 7   | 13  | 0   | 0   | 0   | 1.352597 | 1.349066 | 2.357313 | 0        |
| lincRNA -               | 21  | 17  | 15  | 6   | 16  | 6   | 1.208209 | 1.254241 | 1.041267 | 0.535802 |
| pseudogen: -            | 0   | 1   | 1   | 3   | 3   | 2   | 0        | 0.184447 | 0.173544 | 0.669753 |
| processed_ highly_acc   | 2   | 0   | 0   | 0   | 0   | 2   | 0.04983  | 0        | 0        | 0        |
| antisense -             | 3   | 0   | 2   | 0   | 4   | 0   | 0.28247  | 0        | 0.227211 | 0        |
| lincRNA -               | 0   | 0   | 0   | 2   | 0   | 0   | 0        | 0        | 0        | 0.127126 |
| pseudogen: high_mobil   | 0   | 2   | 0   | 0   | 0   | 2   | 0        | 0.191496 | 0        | 0        |
| antisense -             | 0   | 0   | 0   | 1   | 8   | 2   | 0        | 0        | 0        | 0.142705 |
| lincRNA -               | 0   | 0   | 0   | 10  | 11  | 5   | 0        | 0        | 0        | 3.220345 |
| pseudogen: -            | 3   | 1   | 3   | 6   | 9   | 2   | 0.240051 | 0.102611 | 0.289636 | 0.745186 |
| lincRNA -               | 0   | 1   | 1   | 6   | 3   | 8   | 0        | 0.026784 | 0.025201 | 0.194512 |
| antisense -             | 0   | 3   | 1   | 3   | 8   | 2   | 0        | 0.212223 | 0.066559 | 0.25687  |
| pseudogen: -            | 0   | 0   | 1   | 0   | 1   | 0   | 0        | 0        | 0.031946 | 0        |
| lincRNA -               | 10  | 7   | 3   | 0   | 0   | 0   | 1.633799 | 1.46658  | 0.591382 | 0        |
| pseudogen: -            | 1   | 0   | 0   | 0   | 0   | 0   | 0.229853 | 0        | 0        | 0        |
| pseudogen: chaperonin   | 4   | 5   | 8   | 3   | 9   | 10  | 0.113193 | 0.181442 | 0.273147 | 0.131768 |
| pseudogen: ribosomal_   | 0   | 2   | 0   | 0   | 0   | 0   | 0        | 0.394294 | 0        | 0        |
| antisense PRICKLE2_     | 2   | 1   | 1   | 0   | 0   | 0   | 0.037572 | 0.02409  | 0.022666 | 0        |
| pseudogen: cyclin-depe  | 0   | 0   | 0   | 1   | 0   | 0   | 0        | 0        | 0        | 0.195645 |
| antisense -             | 9   | 3   | 5   | 1   | 2   | 2   | 0.17246  | 0.073719 | 0.115602 | 0.029742 |
| lincRNA -               | 58  | 42  | 46  | 27  | 40  | 6   | 0.838096 | 0.778259 | 0.801995 | 0.605564 |
| processed_ FGF13_anti   | 5   | 3   | 4   | 12  | 14  | 37  | 0.276149 | 0.212473 | 0.266551 | 1.02869  |
| pseudogen: -            | 0   | 0   | 2   | 0   | 0   | 0   | 0        | 0        | 0.24598  | 0        |
| pseudogen: -            | 0   | 0   | 0   | 2   | 6   | 2   | 0        | 0        | 0        | 0.27885  |
| pseudogen: -            | 3   | 4   | 2   | 1   | 4   | 2   | 0.380189 | 0.650052 | 0.305814 | 0.196702 |
| pseudogen: Y_box_binc   | 0   | 0   | 0   | 1   | 0   | 1   | 0        | 0        | 0        | 0.077179 |
| pseudogen: tousled-like | 10  | 3   | 2   | 8   | 9   | 14  | 0.146899 | 0.056513 | 0.035448 | 0.182406 |
| lincRNA ZNF503_an       | 1   | 1   | 0   | 3   | 0   | 0   | 0.02521  | 0.032328 | 0        | 0.117387 |
| processed_ -            | 2   | 0   | 2   | 0   | 0   | 0   | 0.042073 | 0        | 0.050763 | 0        |
| pseudogen: mediator_c   | 13  | 4   | 9   | 12  | 18  | 13  | 0.395825 | 0.156181 | 0.330636 | 0.567115 |
| pseudogen: phosphorik   | 5   | 4   | 1   | 1   | 2   | 3   | 0.192646 | 0.197633 | 0.046488 | 0.059803 |
| pseudogen: MT-ND4_ps    | 0   | 0   | 0   | 0   | 3   | 1   | 0        | 0        | 0        | 0        |
| processed_ long_inter   | 37  | 35  | 39  | 25  | 26  | 25  | 2.496303 | 3.028119 | 3.174741 | 2.617978 |
| lincRNA -               | 0   | 1   | 0   | 1   | 3   | 3   | 0        | 0.072973 | 0        | 0.088325 |
| pseudogen: -            | 0   | 0   | 0   | 0   | 0   | 1   | 0        | 0        | 0        | 0        |
| pseudogen: protease_s   | 0   | 0   | 0   | 7   | 7   | 8   | 0        | 0        | 0        | 0.444554 |
| pseudogen: ubiquitin_   | 0   | 0   | 0   | 0   | 0   | 1   | 0        | 0        | 0        | 0        |
| pseudogen: -            | 49  | 33  | 38  | 75  | 63  | 63  | 3.723843 | 3.216018 | 3.484391 | 8.846815 |
| pseudogen: ubiquinol-   | 74  | 70  | 52  | 134 | 198 | 106 | 4.205892 | 5.101922 | 3.565971 | 11.8212  |
| pseudogen: eukaryotic_  | 0   | 0   | 0   | 3   | 1   | 0   | 0        | 0        | 0        | 0.26562  |
| lincRNA -               | 0   | 0   | 1   | 0   | 0   | 0   | 0        | 0        | 0.095728 | 0        |
| antisense -             | 2   | 3   | 2   | 3   | 0   | 1   | 0.163096 | 0.313721 | 0.196784 | 0.379721 |
| processed_ -            | 17  | 17  | 17  | 111 | 173 | 192 | 0.262819 | 0.337028 | 0.317106 | 2.663554 |
| lincRNA -               | 4   | 6   | 1   | 0   | 0   | 2   | 0.090916 | 0.174881 | 0.027424 | 0        |

|                        |     |     |     |     |     |     |          |          |          |          |
|------------------------|-----|-----|-----|-----|-----|-----|----------|----------|----------|----------|
| protein_co Uncharacte  | 1   | 2   | 2   | 2   | 2   | 7   | 0.578889 | 1.484686 | 1.396926 | 1.797032 |
| pseudogeni -           | 3   | 5   | 1   | 1   | 0   | 1   | 0.486748 | 1.040308 | 0.195763 | 0.251833 |
| pseudogeni FCF1_small  | 0   | 1   | 0   | 0   | 0   | 0   | 0        | 0.328578 | 0        | 0        |
| lincRNA -              | 0   | 0   | 1   | 0   | 0   | 0   | 0        | 0        | 0.159368 | 0        |
| pseudogeni AT_hook_c   | 5   | 10  | 5   | 6   | 2   | 3   | 0.034372 | 0.088154 | 0.041472 | 0.06402  |
| protein_co HCG16537    | 0   | 0   | 0   | 9   | 17  | 5   | 0        | 0        | 0        | 0.641546 |
| lincRNA -              | 0   | 0   | 0   | 2   | 0   | 1   | 0        | 0        | 0        | 0.055791 |
| pseudogeni ribosomal_  | 0   | 1   | 0   | 0   | 0   | 0   | 0        | 0.138868 | 0        | 0        |
| pseudogeni -           | 0   | 0   | 1   | 0   | 0   | 0   | 0        | 0        | 0.166399 | 0        |
| lincRNA -              | 0   | 0   | 0   | 0   | 1   | 0   | 0        | 0        | 0        | 0        |
| lincRNA BAIAP2_an      | 971 | 827 | 836 | 234 | 308 | 157 | 10.20399 | 11.14463 | 10.59998 | 3.81678  |
| pseudogeni -           | 2   | 0   | 1   | 0   | 4   | 0   | 0.252097 | 0        | 0.152085 | 0        |
| lincRNA -              | 0   | 0   | 0   | 0   | 1   | 1   | 0        | 0        | 0        | 0        |
| pseudogeni ribosomal_  | 0   | 0   | 1   | 0   | 0   | 0   | 0        | 0        | 0.124616 | 0        |
| pseudogeni solute_carr | 4   | 6   | 5   | 10  | 13  | 4   | 0.176113 | 0.338759 | 0.265613 | 0.683378 |
| lincRNA -              | 5   | 3   | 1   | 0   | 0   | 0   | 0.322047 | 0.247788 | 0.077714 | 0        |
| processed_ -           | 1   | 0   | 0   | 0   | 0   | 4   | 0.07789  | 0        | 0        | 0        |
| pseudogeni -           | 0   | 0   | 0   | 0   | 0   | 2   | 0        | 0        | 0        | 0        |
| pseudogeni Charcot-Le  | 0   | 0   | 1   | 0   | 1   | 0   | 0        | 0        | 0.134384 | 0        |
| pseudogeni eukaryotic_ | 0   | 0   | 0   | 0   | 1   | 0   | 0        | 0        | 0        | 0        |
| antisense -            | 0   | 0   | 0   | 2   | 0   | 1   | 0        | 0        | 0        | 0.898516 |
| processed_ AP4B1_ant   | 7   | 2   | 6   | 1   | 2   | 3   | 0.189291 | 0.069354 | 0.195763 | 0.041972 |
| antisense -            | 0   | 0   | 0   | 15  | 11  | 19  | 0        | 0        | 0        | 2.420614 |
| protein_co testis_expr | 13  | 16  | 12  | 9   | 8   | 7   | 0.237095 | 0.374203 | 0.264063 | 0.254772 |
| antisense long_inter   | 27  | 21  | 20  | 8   | 14  | 13  | 2.958015 | 2.950294 | 2.643715 | 1.36037  |
| protein_co Uncharacte  | 11  | 15  | 19  | 27  | 39  | 69  | 0.197621 | 0.345574 | 0.411852 | 0.752894 |
| pseudogeni heterogene  | 0   | 0   | 0   | 1   | 1   | 0   | 0        | 0        | 0        | 0.132087 |
| pseudogeni -           | 0   | 0   | 0   | 3   | 4   | 3   | 0        | 0        | 0        | 0.150268 |
| lincRNA -              | 1   | 1   | 1   | 3   | 1   | 0   | 0.020548 | 0.02635  | 0.024792 | 0.095679 |
| antisense -            | 1   | 3   | 4   | 2   | 3   | 5   | 0.022446 | 0.086352 | 0.10833  | 0.069679 |
| pseudogeni -           | 2   | 3   | 1   | 4   | 6   | 2   | 0.119923 | 0.230677 | 0.072347 | 0.372275 |
| lincRNA -              | 1   | 0   | 0   | 0   | 0   | 0   | 0.093968 | 0        | 0        | 0        |
| pseudogeni -           | 534 | 441 | 491 | 430 | 492 | 402 | 13.78056 | 14.59397 | 15.28815 | 17.22362 |
| TR_V_pseu T_cell_rece  | 0   | 0   | 0   | 1   | 0   | 0   | 0        | 0        | 0        | 0.243411 |
| pseudogeni ribosomal_  | 0   | 0   | 0   | 2   | 1   | 2   | 0        | 0        | 0        | 0.392344 |
| pseudogeni -           | 1   | 1   | 3   | 2   | 2   | 3   | 0.03555  | 0.045587 | 0.128678 | 0.110356 |
| pseudogeni -           | 9   | 13  | 15  | 27  | 27  | 37  | 0.963494 | 1.784674 | 1.937517 | 4.486426 |
| pseudogeni ribosomal_  | 0   | 0   | 0   | 0   | 1   | 0   | 0        | 0        | 0        | 0        |
| pseudogeni -           | 0   | 0   | 0   | 0   | 1   | 0   | 0        | 0        | 0        | 0        |
| pseudogeni -           | 0   | 0   | 0   | 3   | 0   | 0   | 0        | 0        | 0        | 0.188875 |
| antisense LEMD1_ant    | 0   | 1   | 4   | 4   | 3   | 1   | 0        | 0.021622 | 0.081374 | 0.104681 |
| processed_ -           | 4   | 5   | 5   | 2   | 0   | 0   | 0.042754 | 0.068532 | 0.064481 | 0.03318  |
| lincRNA -              | 0   | 0   | 1   | 0   | 0   | 0   | 0        | 0        | 0.123527 | 0        |
| antisense -            | 0   | 0   | 0   | 11  | 26  | 6   | 0        | 0        | 0        | 0.397704 |
| antisense long_inter   | 0   | 0   | 0   | 0   | 1   | 0   | 0        | 0        | 0        | 0        |
| pseudogeni ribosomal_  | 0   | 0   | 0   | 0   | 0   | 1   | 0        | 0        | 0        | 0        |
| antisense ZNF32_anti   | 3   | 2   | 1   | 1   | 4   | 2   | 0.324125 | 0.277096 | 0.130358 | 0.167695 |
| pseudogeni -           | 1   | 0   | 0   | 0   | 0   | 0   | 0.137912 | 0        | 0        | 0        |
| lincRNA -              | 4   | 2   | 0   | 0   | 0   | 0   | 0.311045 | 0.199435 | 0        | 0        |
| lincRNA -              | 1   | 0   | 1   | 1   | 1   | 0   | 0.12953  | 0        | 0.156286 | 0.201049 |
| antisense -            | 0   | 0   | 0   | 1   | 0   | 0   | 0        | 0        | 0        | 0.018033 |
| pseudogeni mitochond   | 1   | 0   | 1   | 0   | 0   | 0   | 0.128819 | 0        | 0.155427 | 0        |
| pseudogeni protein_ty  | 3   | 0   | 3   | 4   | 0   | 0   | 0.334929 | 0        | 0.404111 | 0.693141 |
| processed_ GRM7_anti   | 9   | 3   | 9   | 14  | 1   | 11  | 0.445628 | 0.190485 | 0.537676 | 1.075942 |
| pseudogeni general_tra | 64  | 49  | 66  | 49  | 67  | 66  | 1.424958 | 1.399031 | 1.773022 | 1.693357 |
| pseudogeni -           | 1   | 0   | 1   | 0   | 0   | 0   | 0.066605 | 0        | 0.080363 | 0        |
| antisense ISM1_antis   | 0   | 1   | 3   | 0   | 1   | 2   | 0        | 0.092224 | 0.260317 | 0        |
| processed_ -           | 18  | 18  | 9   | 11  | 18  | 7   | 2.104789 | 2.699093 | 1.269774 | 1.996453 |
| pseudogeni -           | 3   | 2   | 3   | 3   | 4   | 0   | 0.145621 | 0.124492 | 0.1757   | 0.226024 |
| lincRNA -              | 0   | 1   | 0   | 1   | 4   | 2   | 0        | 0.158654 | 0        | 0.192031 |
| pseudogeni -           | 0   | 0   | 0   | 0   | 2   | 0   | 0        | 0        | 0        | 0        |
| lincRNA -              | 0   | 0   | 0   | 1   | 0   | 0   | 0        | 0        | 0        | 0.128133 |
| pseudogeni actin_relat | 4   | 1   | 0   | 1   | 3   | 0   | 0.351895 | 0.112814 | 0        | 0.136547 |
| antisense -            | 1   | 0   | 0   | 0   | 0   | 0   | 0.099979 | 0        | 0        | 0        |
| processed_ transmemt   | 9   | 7   | 4   | 85  | 82  | 72  | 0.215202 | 0.21464  | 0.115401 | 3.154657 |

|                        |     |    |    |     |     |    |          |          |          |          |
|------------------------|-----|----|----|-----|-----|----|----------|----------|----------|----------|
| pseudogen: -           | 0   | 0  | 0  | 1   | 1   | 1  | 0        | 0        | 0        | 0.105631 |
| antisense -            | 0   | 1  | 2  | 2   | 0   | 2  | 0        | 0.199105 | 0.374672 | 0.481985 |
| pseudogen: phosducin-  | 1   | 0  | 0  | 0   | 0   | 0  | 0.063883 | 0        | 0        | 0        |
| lincRNA -              | 0   | 0  | 0  | 1   | 1   | 0  | 0        | 0        | 0        | 0.101506 |
| pseudogen: neuropepti  | 0   | 0  | 0  | 0   | 2   | 0  | 0        | 0        | 0        | 0        |
| processed_ -           | 1   | 0  | 1  | 3   | 4   | 0  | 0.040214 | 0        | 0.048521 | 0.187255 |
| pseudogen: SWI/SNF_r   | 0   | 0  | 0  | 0   | 1   | 0  | 0        | 0        | 0        | 0        |
| antisense -            | 1   | 0  | 0  | 0   | 4   | 0  | 0.070511 | 0        | 0        | 0        |
| antisense CFLAR_anti   | 4   | 8  | 5  | 2   | 12  | 3  | 0.174963 | 0.44873  | 0.263878 | 0.135783 |
| pseudogen: zinc_finger | 12  | 7  | 10 | 12  | 21  | 12 | 0.345627 | 0.258543 | 0.347515 | 0.53646  |
| pseudogen: -           | 3   | 9  | 9  | 9   | 3   | 4  | 0.184364 | 0.709264 | 0.667339 | 0.858477 |
| protein_co Protein_LO  | 0   | 2  | 0  | 0   | 0   | 0  | 0        | 0.038202 | 0        | 0        |
| processed_ -           | 111 | 60 | 66 | 101 | 160 | 50 | 4.107965 | 2.847504 | 2.947106 | 5.801705 |
| pseudogen: -           | 1   | 2  | 3  | 31  | 26  | 14 | 0.031963 | 0.081977 | 0.115696 | 1.537951 |
| processed_ -           | 1   | 1  | 0  | 5   | 18  | 4  | 0.096482 | 0.123724 | 0        | 0.748763 |
| pseudogen: -           | 0   | 0  | 0  | 1   | 0   | 0  | 0        | 0        | 0        | 0.154851 |
| antisense -            | 13  | 7  | 4  | 10  | 14  | 13 | 0.89511  | 0.618074 | 0.332308 | 1.06872  |
| pseudogen: -           | 0   | 0  | 0  | 0   | 1   | 1  | 0        | 0        | 0        | 0        |
| pseudogen: -           | 0   | 0  | 1  | 3   | 2   | 1  | 0        | 0        | 0.28147  | 1.086266 |
| pseudogen: vomeronas   | 1   | 1  | 2  | 0   | 2   | 0  | 0.054971 | 0.070492 | 0.132651 | 0        |
| sense_intrc -          | 1   | 2  | 0  | 0   | 0   | 0  | 0.087809 | 0.225205 | 0        | 0        |
| antisense -            | 3   | 5  | 4  | 3   | 0   | 4  | 0.374122 | 0.799598 | 0.601867 | 0.58069  |
| lincRNA -              | 0   | 0  | 0  | 1   | 1   | 0  | 0        | 0        | 0        | 0.090975 |
| pseudogen: keratin_8_  | 0   | 5  | 0  | 0   | 0   | 0  | 0        | 0.210244 | 0        | 0        |
| pseudogen: -           | 2   | 0  | 0  | 5   | 6   | 5  | 0.106933 | 0        | 0        | 0.414936 |
| pseudogen: ribosomal_  | 6   | 9  | 13 | 15  | 21  | 17 | 0.431503 | 0.830013 | 1.128039 | 1.674382 |
| pseudogen: telomeric_  | 0   | 0  | 0  | 1   | 2   | 4  | 0        | 0        | 0        | 0.060049 |
| lincRNA -              | 7   | 5  | 10 | 0   | 1   | 1  | 0.292801 | 0.268197 | 0.504688 | 0        |
| antisense ST7_antiser  | 0   | 2  | 2  | 2   | 2   | 2  | 0        | 0.089015 | 0.083754 | 0.107742 |
| lincRNA -              | 0   | 0  | 0  | 1   | 0   | 0  | 0        | 0        | 0        | 0.105478 |
| antisense -            | 0   | 0  | 0  | 1   | 2   | 3  | 0        | 0        | 0        | 0.123147 |
| processed_ -           | 20  | 14 | 20 | 2   | 1   | 1  | 0.420916 | 0.377835 | 0.507859 | 0.065332 |
| processed_ -           | 38  | 35 | 29 | 20  | 32  | 10 | 2.892566 | 3.416466 | 2.663457 | 2.362981 |
| lincRNA -              | 4   | 5  | 6  | 27  | 26  | 20 | 0.117006 | 0.187554 | 0.211761 | 1.225861 |
| antisense PARD3_ant    | 1   | 0  | 5  | 2   | 11  | 5  | 0.155265 | 0        | 0.936681 | 0.481985 |
| antisense SORCS3_an    | 0   | 0  | 0  | 0   | 1   | 0  | 0        | 0        | 0        | 0        |
| antisense -            | 2   | 0  | 0  | 14  | 18  | 12 | 0.118859 | 0        | 0        | 1.291403 |
| pseudogen: interferon_ | 1   | 2  | 3  | 0   | 0   | 4  | 0.088807 | 0.227764 | 0.321452 | 0        |
| pseudogen: -           | 6   | 3  | 2  | 0   | 0   | 0  | 1.217923 | 0.780906 | 0.489831 | 0        |
| pseudogen: ribosomal_  | 3   | 1  | 2  | 13  | 10  | 4  | 0.309165 | 0.132153 | 0.248684 | 2.079423 |
| protein_co chromosom   | 0   | 0  | 1  | 0   | 0   | 0  | 0        | 0        | 0.037319 | 0        |
| antisense -            | 2   | 0  | 1  | 0   | 0   | 0  | 0.271041 | 0        | 0.163513 | 0        |
| sense_intrc -          | 0   | 0  | 0  | 5   | 6   | 2  | 0        | 0        | 0        | 0.810465 |
| pseudogen: RNA_bindin  | 0   | 3  | 1  | 0   | 0   | 0  | 0        | 0.215777 | 0.067674 | 0        |
| antisense -            | 1   | 0  | 0  | 0   | 0   | 0  | 0.057113 | 0        | 0        | 0        |
| pseudogen: -           | 0   | 0  | 0  | 0   | 1   | 0  | 0        | 0        | 0        | 0        |
| pseudogen: olfactory_r | 0   | 1  | 3  | 0   | 0   | 0  | 0        | 0.065501 | 0.184887 | 0        |
| pseudogen: triosephos  | 33  | 15 | 38 | 55  | 51  | 63 | 2.063161 | 1.202596 | 2.866492 | 5.337185 |
| antisense MRPL23_ar    | 19  | 14 | 4  | 42  | 80  | 4  | 0.474899 | 0.44873  | 0.12063  | 1.629399 |
| processed_ -           | 45  | 32 | 41 | 52  | 86  | 37 | 0.911863 | 0.831527 | 1.002418 | 1.635501 |
| pseudogen: solute_carr | 0   | 0  | 0  | 4   | 2   | 6  | 0        | 0        | 0        | 0.324548 |
| lincRNA -              | 2   | 1  | 0  | 0   | 1   | 0  | 0.165982 | 0.106424 | 0        | 0        |
| pseudogen: -           | 1   | 1  | 1  | 0   | 0   | 3  | 0.053466 | 0.068563 | 0.06451  | 0        |
| lincRNA -              | 1   | 0  | 0  | 0   | 0   | 0  | 0.10351  | 0        | 0        | 0        |
| pseudogen: ankyrin_re  | 0   | 0  | 0  | 5   | 9   | 5  | 0        | 0        | 0        | 0.125612 |
| antisense -            | 0   | 0  | 2  | 1   | 0   | 4  | 0        | 0        | 0.20278  | 0.13043  |
| pseudogen: -           | 0   | 0  | 0  | 2   | 0   | 2  | 0        | 0        | 0        | 0.362089 |
| antisense -            | 0   | 0  | 1  | 0   | 0   | 0  | 0        | 0        | 0.063284 | 0        |
| antisense PLCL2_anti   | 0   | 1  | 0  | 0   | 0   | 0  | 0        | 0.193343 | 0        | 0        |
| pseudogen: glyceraldeh | 0   | 0  | 0  | 0   | 1   | 0  | 0        | 0        | 0        | 0        |
| antisense -            | 35  | 17 | 25 | 0   | 2   | 3  | 1.674643 | 1.043068 | 1.443253 | 0        |
| pseudogen: cytochrom   | 5   | 11 | 7  | 19  | 24  | 8  | 0.157349 | 0.443911 | 0.265791 | 0.928065 |
| lincRNA -              | 3   | 1  | 0  | 5   | 1   | 4  | 0.171131 | 0.073151 | 0        | 0.4427   |
| sense_intrc -          | 0   | 1  | 0  | 0   | 1   | 3  | 0        | 0.142826 | 0        | 0        |
| antisense -            | 0   | 3  | 1  | 1   | 0   | 1  | 0        | 0.205924 | 0.064584 | 0.083082 |

|                         |     |     |     |     |     |     |          |          |          |          |
|-------------------------|-----|-----|-----|-----|-----|-----|----------|----------|----------|----------|
| pseudogen: -            | 0   | 0   | 1   | 2   | 6   | 1   | 0        | 0        | 0.148492 | 0.382046 |
| antisense -             | 0   | 0   | 0   | 8   | 1   | 1   | 0        | 0        | 0        | 1.819495 |
| pseudogen: -            | 0   | 0   | 0   | 4   | 7   | 4   | 0        | 0        | 0        | 0.365728 |
| pseudogen: ADAM_met     | 0   | 1   | 2   | 4   | 3   | 1   | 0        | 0.030065 | 0.056576 | 0.145556 |
| antisense -             | 18  | 21  | 30  | 18  | 27  | 11  | 1.635698 | 2.447143 | 3.289274 | 2.53883  |
| lincRNA -               | 4   | 2   | 0   | 5   | 10  | 3   | 0.304481 | 0.195227 | 0        | 0.590745 |
| lincRNA -               | 86  | 64  | 89  | 16  | 17  | 12  | 2.242793 | 2.140326 | 2.800456 | 0.647651 |
| pseudogen: UPF3_regul   | 2   | 8   | 4   | 6   | 9   | 7   | 0.083286 | 0.42721  | 0.200979 | 0.387814 |
| protein_co transmembr   | 521 | 351 | 418 | 174 | 225 | 240 | 11.46396 | 9.904063 | 11.0974  | 5.942602 |
| pseudogen: fat_mass_a   | 11  | 12  | 8   | 5   | 5   | 3   | 0.599059 | 0.838046 | 0.525673 | 0.422647 |
| pseudogen: -            | 3   | 2   | 5   | 0   | 0   | 3   | 0.321899 | 0.275194 | 0.647317 | 0        |
| antisense long_interf   | 0   | 0   | 0   | 0   | 1   | 0   | 0        | 0        | 0        | 0        |
| pseudogen: -            | 3   | 0   | 0   | 0   | 1   | 0   | 0.158949 | 0        | 0        | 0        |
| pseudogen: -            | 1   | 1   | 1   | 1   | 0   | 1   | 0.289445 | 0.371172 | 0.349232 | 0.449258 |
| pseudogen: upstream_t   | 0   | 1   | 0   | 2   | 0   | 0   | 0        | 0.114315 | 0        | 0.276729 |
| processed_ -            | 0   | 1   | 2   | 0   | 4   | 1   | 0        | 0.075826 | 0.142687 | 0        |
| lincRNA -               | 0   | 0   | 0   | 21  | 20  | 21  | 0        | 0        | 0        | 2.082256 |
| lincRNA -               | 5   | 6   | 11  | 42  | 35  | 33  | 0.294166 | 0.452671 | 0.780841 | 3.835322 |
| antisense UPK1A_ant     | 0   | 0   | 0   | 12  | 7   | 6   | 0        | 0        | 0        | 1.098563 |
| lincRNA family_witl     | 0   | 0   | 0   | 1   | 2   | 0   | 0        | 0        | 0        | 0.059075 |
| sense_intrc KIRREL_int  | 10  | 8   | 3   | 6   | 8   | 3   | 0.798808 | 0.819486 | 0.289142 | 0.743916 |
| pseudogen: -            | 0   | 0   | 1   | 0   | 2   | 0   | 0        | 0        | 0.294664 | 0        |
| lincRNA -               | 9   | 2   | 10  | 5   | 1   | 5   | 0.778617 | 0.221881 | 1.043829 | 0.6714   |
| pseudogen: ribosomal_   | 4   | 2   | 3   | 4   | 4   | 4   | 0.311045 | 0.199435 | 0.28147  | 0.482785 |
| antisense -             | 12  | 13  | 4   | 3   | 4   | 5   | 0.884717 | 1.229068 | 0.355821 | 0.343301 |
| lincRNA -               | 0   | 0   | 0   | 0   | 1   | 0   | 0        | 0        | 0        | 0        |
| processed_ -            | 0   | 0   | 0   | 2   | 0   | 1   | 0        | 0        | 0        | 0.248395 |
| antisense BTBD9_ant     | 0   | 1   | 0   | 0   | 0   | 3   | 0        | 0.107375 | 0        | 0        |
| pseudogen: -            | 2   | 2   | 1   | 2   | 10  | 27  | 0.130613 | 0.167492 | 0.078796 | 0.202729 |
| pseudogen: myosin_lig   | 0   | 0   | 0   | 1   | 2   | 0   | 0        | 0        | 0        | 0.160662 |
| pseudogen: -            | 4   | 1   | 3   | 8   | 12  | 5   | 0.451952 | 0.144891 | 0.40898  | 1.402984 |
| pseudogen: -            | 0   | 0   | 2   | 0   | 0   | 2   | 0        | 0        | 0.329886 | 0        |
| pseudogen: SSU72_RN#    | 0   | 0   | 0   | 1   | 1   | 1   | 0        | 0        | 0        | 0.124837 |
| pseudogen: stearoyl-Co  | 2   | 0   | 0   | 1   | 0   | 0   | 0.086753 | 0        | 0        | 0.067326 |
| pseudogen: acylglycero  | 0   | 0   | 0   | 2   | 3   | 7   | 0        | 0        | 0        | 0.115249 |
| pseudogen: nucleopho:   | 0   | 1   | 0   | 0   | 0   | 0   | 0        | 0.084215 | 0        | 0        |
| lincRNA -               | 4   | 7   | 8   | 63  | 78  | 41  | 0.220141 | 0.494024 | 0.531225 | 5.381605 |
| pseudogen: ferritin_he  | 5   | 2   | 2   | 0   | 7   | 3   | 0.427829 | 0.219452 | 0.20648  | 0        |
| antisense -             | 1   | 0   | 0   | 0   | 0   | 0   | 0.051302 | 0        | 0        | 0        |
| processed_ SPANXA2_c    | 1   | 0   | 0   | 0   | 0   | 0   | 0.027566 | 0        | 0        | 0        |
| lincRNA -               | 0   | 0   | 1   | 1   | 3   | 2   | 0        | 0        | 0.07946  | 0.102219 |
| pseudogen: ribosomal_   | 0   | 0   | 0   | 0   | 1   | 1   | 0        | 0        | 0        | 0        |
| antisense -             | 2   | 0   | 6   | 4   | 4   | 4   | 0.019722 | 0        | 0.071389 | 0.061224 |
| lincRNA -               | 1   | 0   | 0   | 0   | 0   | 0   | 0.076368 | 0        | 0        | 0        |
| antisense -             | 3   | 3   | 7   | 2   | 3   | 0   | 0.075874 | 0.097297 | 0.213608 | 0.078511 |
| pseudogen: ferritin_lig | 16  | 8   | 15  | 9   | 14  | 2   | 1.42091  | 0.911058 | 1.607259 | 1.240565 |
| antisense -             | 1   | 2   | 1   | 1   | 1   | 1   | 0.111643 | 0.286332 | 0.134704 | 0.173285 |
| pseudogen: -            | 0   | 1   | 1   | 0   | 0   | 0   | 0        | 0.274565 | 0.258336 | 0        |
| pseudogen: olfactory_r  | 0   | 0   | 0   | 0   | 1   | 0   | 0        | 0        | 0        | 0        |
| pseudogen: ribosomal_   | 2   | 0   | 1   | 0   | 0   | 0   | 0.210269 | 0        | 0.126851 | 0        |
| pseudogen: -            | 0   | 0   | 0   | 0   | 2   | 0   | 0        | 0        | 0        | 0        |
| pseudogen: -            | 1   | 1   | 0   | 0   | 2   | 3   | 0.039403 | 0.050529 | 0        | 0        |
| pseudogen: -            | 4   | 4   | 1   | 11  | 8   | 2   | 0.243901 | 0.312769 | 0.07357  | 1.041063 |
| antisense SHANK2_ar     | 0   | 0   | 0   | 5   | 13  | 9   | 0        | 0        | 0        | 0.161589 |
| pseudogen: ubiquitin-c  | 2   | 0   | 7   | 6   | 1   | 2   | 0.210742 | 0        | 0.889952 | 0.981301 |
| pseudogen: -            | 0   | 0   | 0   | 2   | 2   | 2   | 0        | 0        | 0        | 0.078511 |
| pseudogen: actin_gamr   | 0   | 0   | 0   | 1   | 1   | 1   | 0        | 0        | 0        | 0.062418 |
| lincRNA -               | 0   | 0   | 1   | 0   | 0   | 0   | 0        | 0        | 0.179036 | 0        |
| lincRNA -               | 0   | 0   | 3   | 2   | 8   | 2   | 0        | 0        | 0.316654 | 0.271566 |
| antisense -             | 3   | 3   | 2   | 4   | 6   | 5   | 0.335728 | 0.430524 | 0.27005  | 0.694795 |
| antisense -             | 3   | 4   | 0   | 0   | 1   | 1   | 0.148857 | 0.254518 | 0        | 0        |
| antisense -             | 5   | 5   | 2   | 6   | 8   | 5   | 0.160363 | 0.205642 | 0.077395 | 0.298686 |
| lincRNA -               | 0   | 0   | 1   | 1   | 1   | 1   | 0        | 0        | 0.130059 | 0.16731  |
| protein_co kinesin_fan  | 0   | 0   | 1   | 1   | 2   | 2   | 0        | 0        | 0.012783 | 0.016444 |
| pseudogen: -            | 1   | 0   | 2   | 0   | 0   | 3   | 0.093593 | 0        | 0.22585  | 0        |

|                         |     |     |     |      |      |      |          |          |          |          |
|-------------------------|-----|-----|-----|------|------|------|----------|----------|----------|----------|
| antisense -             | 9   | 11  | 13  | 1    | 4    | 2    | 0.705703 | 1.106066 | 1.229902 | 0.121705 |
| pseudogen: heat_shock   | 0   | 0   | 0   | 7    | 2    | 2    | 0        | 0        | 0        | 0.251089 |
| pseudogen: -            | 0   | 0   | 0   | 3    | 4    | 3    | 0        | 0        | 0        | 0.0568   |
| lincRNA -               | 0   | 0   | 2   | 0    | 1    | 0    | 0        | 0        | 0.166644 | 0        |
| lincRNA -               | 68  | 45  | 42  | 1669 | 2369 | 1687 | 1.011587 | 0.858452 | 0.753861 | 38.53727 |
| lincRNA -               | 0   | 2   | 2   | 19   | 12   | 7    | 0        | 0.025946 | 0.024412 | 0.298342 |
| pseudogen: -            | 1   | 0   | 4   | 2    | 5    | 3    | 0.091404 | 0        | 0.441135 | 0.283742 |
| lincRNA -               | 1   | 0   | 0   | 0    | 0    | 0    | 0.077376 | 0        | 0        | 0        |
| pseudogen: immunogl     | 0   | 0   | 2   | 1    | 1    | 0    | 0        | 0        | 0.112142 | 0.072131 |
| antisense -             | 2   | 1   | 4   | 0    | 0    | 1    | 0.143176 | 0.091801 | 0.345499 | 0        |
| pseudogen: PWWP_do      | 1   | 2   | 2   | 0    | 0    | 0    | 0.020629 | 0.052908 | 0.04978  | 0        |
| lincRNA -               | 0   | 0   | 0   | 1    | 0    | 0    | 0        | 0        | 0        | 0.125917 |
| lincRNA -               | 1   | 1   | 0   | 15   | 26   | 20   | 0.027599 | 0.035391 | 0        | 0.642553 |
| processed_ ENTPD1_ar    | 6   | 3   | 3   | 10   | 20   | 4    | 0.066338 | 0.042535 | 0.04002  | 0.17161  |
| processed_ -            | 29  | 17  | 13  | 2    | 2    | 5    | 1.242971 | 0.934375 | 0.672287 | 0.133053 |
| antisense LENG8_ant     | 32  | 43  | 38  | 30   | 58   | 34   | 1.72271  | 2.96852  | 2.468277 | 2.506767 |
| antisense -             | 30  | 31  | 31  | 21   | 34   | 30   | 4.597061 | 6.091581 | 5.731505 | 4.994692 |
| antisense -             | 2   | 3   | 2   | 11   | 11   | 2    | 0.509674 | 0.980377 | 0.614951 | 4.350966 |
| pseudogen: -            | 1   | 0   | 0   | 0    | 1    | 0    | 0.073726 | 0        | 0        | 0        |
| pseudogen: syndecan_t   | 0   | 0   | 1   | 2    | 0    | 0    | 0        | 0        | 0.063568 | 0.16355  |
| antisense -             | 2   | 1   | 0   | 1    | 1    | 0    | 0.083957 | 0.053832 | 0        | 0.065156 |
| antisense FGF12_anti    | 0   | 0   | 0   | 3    | 4    | 2    | 0        | 0        | 0        | 0.750307 |
| antisense family_witl   | 53  | 30  | 33  | 20   | 23   | 9    | 0.947454 | 0.687722 | 0.711777 | 0.554936 |
| lincRNA -               | 0   | 0   | 1   | 0    | 0    | 0    | 0        | 0        | 0.118359 | 0        |
| processed_ -            | 1   | 0   | 0   | 0    | 0    | 0    | 0.073726 | 0        | 0        | 0        |
| processed_ long_interf  | 0   | 0   | 0   | 0    | 0    | 1    | 0        | 0        | 0        | 0        |
| pseudogen: -            | 0   | 2   | 1   | 1    | 0    | 0    | 0        | 0.154179 | 0.072533 | 0.093307 |
| antisense -             | 0   | 0   | 0   | 1    | 0    | 0    | 0        | 0        | 0        | 0.089191 |
| lincRNA -               | 0   | 0   | 0   | 0    | 0    | 2    | 0        | 0        | 0        | 0        |
| protein_co heat_shock   | 31  | 25  | 25  | 17   | 39   | 23   | 1.375204 | 1.422181 | 1.338115 | 1.170536 |
| pseudogen: -            | 0   | 0   | 1   | 2    | 4    | 3    | 0        | 0        | 0.459963 | 1.183411 |
| pseudogen: -            | 0   | 0   | 0   | 0    | 2    | 0    | 0        | 0        | 0        | 0        |
| antisense Smith-Magi    | 5   | 2   | 4   | 1    | 7    | 3    | 0.082437 | 0.042285 | 0.079572 | 0.025591 |
| processed_ -            | 2   | 1   | 1   | 2    | 5    | 5    | 0.079542 | 0.051001 | 0.047986 | 0.12346  |
| pseudogen: -            | 0   | 0   | 0   | 0    | 1    | 0    | 0        | 0        | 0        | 0        |
| processed_ -            | 441 | 362 | 369 | 207  | 276  | 249  | 5.876243 | 6.18556  | 5.93247  | 4.281165 |
| antisense -             | 15  | 3   | 8   | 3    | 2    | 1    | 0.595555 | 0.152743 | 0.383238 | 0.184877 |
| pseudogen: vacuolar_p   | 0   | 0   | 0   | 0    | 1    | 0    | 0        | 0        | 0        | 0        |
| lincRNA -               | 3   | 0   | 1   | 2    | 4    | 0    | 0.224354 | 0        | 0.090232 | 0.232152 |
| protein_co Uncharacte   | 3   | 0   | 0   | 0    | 1    | 0    | 0.063279 | 0        | 0        | 0        |
| sense_intrc DISC1_intr  | 3   | 0   | 1   | 0    | 0    | 0    | 0.184606 | 0        | 0.074246 | 0        |
| antisense -             | 0   | 0   | 0   | 0    | 0    | 1    | 0        | 0        | 0        | 0        |
| protein_co taste_recep  | 2   | 1   | 3   | 3    | 0    | 0    | 0.100839 | 0.064656 | 0.182502 | 0.234774 |
| protein_co serine/argir | 8   | 15  | 12  | 5    | 13   | 13   | 0.139036 | 0.334302 | 0.251633 | 0.134877 |
| pseudogen: fatty_acid_  | 0   | 0   | 1   | 1    | 3    | 0    | 0        | 0        | 0.144694 | 0.186138 |
| antisense -             | 0   | 0   | 0   | 0    | 1    | 0    | 0        | 0        | 0        | 0        |
| pseudogen: -            | 0   | 0   | 2   | 6    | 0    | 3    | 0        | 0        | 0.258336 | 0.996984 |
| antisense -             | 0   | 0   | 0   | 2    | 0    | 0    | 0        | 0        | 0        | 0.231047 |
| pseudogen: tubulin_fol  | 0   | 0   | 0   | 1    | 0    | 0    | 0        | 0        | 0        | 0.222568 |
| protein_co phosphogl    | 3   | 1   | 4   | 13   | 10   | 3    | 0.083832 | 0.035834 | 0.134864 | 0.563848 |
| lincRNA -               | 2   | 0   | 4   | 3    | 0    | 0    | 0.118111 | 0        | 0.285015 | 0.274987 |
| pseudogen: -            | 0   | 0   | 1   | 0    | 0    | 0    | 0        | 0        | 0.020027 | 0        |
| pseudogen: heterogene   | 1   | 1   | 0   | 0    | 0    | 0    | 0.015599 | 0.020003 | 0        | 0        |
| lincRNA -               | 1   | 0   | 1   | 0    | 0    | 0    | 0.032928 | 0        | 0.03973  | 0        |
| processed_ long_interf  | 0   | 0   | 0   | 595  | 774  | 761  | 0        | 0        | 0        | 21.50148 |
| antisense -             | 4   | 2   | 2   | 0    | 0    | 0    | 0.357939 | 0.229503 | 0.215937 | 0        |
| lincRNA -               | 0   | 0   | 0   | 0    | 0    | 1    | 0        | 0        | 0        | 0        |
| antisense CACTIN_anti   | 4   | 12  | 9   | 6    | 7    | 11   | 0.098045 | 0.377186 | 0.266168 | 0.228269 |
| pseudogen: oligosaccha  | 4   | 0   | 5   | 3    | 3    | 4    | 0.418661 | 0        | 0.631423 | 0.487365 |
| antisense -             | 33  | 23  | 14  | 7    | 10   | 10   | 1.721213 | 1.53836  | 0.881042 | 0.566695 |
| antisense -             | 60  | 55  | 61  | 0    | 0    | 0    | 1.510957 | 1.776122 | 1.85344  | 0        |
| polymorph maestro_he    | 0   | 0   | 0   | 1    | 1    | 0    | 0        | 0        | 0        | 0.017478 |
| lincRNA -               | 0   | 0   | 0   | 0    | 2    | 0    | 0        | 0        | 0        | 0        |
| antisense MEIS1_anti    | 0   | 1   | 0   | 0    | 0    | 0    | 0        | 0.085049 | 0        | 0        |
| lincRNA -               | 0   | 2   | 1   | 0    | 0    | 0    | 0        | 0.278379 | 0.130962 | 0        |

|                         |      |      |      |      |      |      |          |          |          |          |
|-------------------------|------|------|------|------|------|------|----------|----------|----------|----------|
| pseudogen: -            | 11   | 6    | 3    | 4    | 3    | 0    | 1.083593 | 0.757939 | 0.356568 | 0.611595 |
| sense_intrc -           | 58   | 54   | 56   | 50   | 77   | 65   | 5.353585 | 6.39175  | 6.23667  | 7.163366 |
| lincRNA -               | 1    | 0    | 0    | 0    | 0    | 0    | 0.114927 | 0        | 0        | 0        |
| pseudogen: nucleopho:   | 0    | 0    | 0    | 0    | 0    | 1    | 0        | 0        | 0        | 0        |
| processed_ -            | 0    | 1    | 0    | 0    | 1    | 0    | 0        | 0.033424 | 0        | 0        |
| antisense -             | 4    | 3    | 1    | 12   | 9    | 3    | 0.258347 | 0.24847  | 0.077928 | 1.202972 |
| lincRNA -               | 1    | 0    | 2    | 0    | 0    | 0    | 0.097688 | 0        | 0.235731 | 0        |
| pseudogen: phosphorit   | 0    | 1    | 0    | 0    | 0    | 0    | 0        | 0.051481 | 0        | 0        |
| antisense -             | 3    | 0    | 2    | 1    | 0    | 2    | 0.301867 | 0        | 0.242813 | 0.15618  |
| pseudogen: eukaryotic_  | 0    | 0    | 1    | 2    | 0    | 0    | 0        | 0        | 0.043925 | 0.113012 |
| lincRNA long_interf     | 0    | 0    | 0    | 0    | 1    | 0    | 0        | 0        | 0        | 0        |
| antisense -             | 5    | 1    | 3    | 0    | 2    | 1    | 0.087416 | 0.02242  | 0.063284 | 0        |
| processed_ -            | 0    | 0    | 3    | 0    | 7    | 0    | 0        | 0        | 0.302543 | 0        |
| lincRNA -               | 3    | 5    | 3    | 3    | 3    | 3    | 0.080521 | 0.172094 | 0.097153 | 0.12498  |
| lincRNA -               | 8    | 3    | 4    | 2    | 4    | 7    | 0.668663 | 0.32155  | 0.40339  | 0.259465 |
| lincRNA -               | 0    | 2    | 0    | 9    | 12   | 9    | 0        | 0.154575 | 0        | 0.841926 |
| lincRNA -               | 0    | 0    | 0    | 0    | 1    | 0    | 0        | 0        | 0        | 0        |
| antisense -             | 0    | 0    | 0    | 2    | 0    | 3    | 0        | 0        | 0        | 0.463566 |
| antisense -             | 6    | 2    | 1    | 0    | 1    | 0    | 0.295836 | 0.126456 | 0.059491 | 0        |
| lincRNA -               | 0    | 1    | 0    | 0    | 0    | 1    | 0        | 0.345574 | 0        | 0        |
| pseudogen: -            | 2    | 2    | 1    | 0    | 2    | 1    | 0.247441 | 0.317308 | 0.149276 | 0        |
| antisense -             | 3    | 3    | 0    | 2    | 4    | 4    | 0.242117 | 0.310481 | 0        | 0.250533 |
| antisense -             | 1    | 2    | 2    | 0    | 0    | 0    | 0.094727 | 0.242949 | 0.228588 | 0        |
| pseudogen: glutathione  | 1    | 0    | 1    | 0    | 0    | 0    | 0.106327 | 0        | 0.128289 | 0        |
| antisense -             | 1    | 0    | 3    | 0    | 0    | 0    | 0.061134 | 0        | 0.221286 | 0        |
| pseudogen: -            | 0    | 0    | 0    | 0    | 1    | 0    | 0        | 0        | 0        | 0        |
| protein_co endogenou    | 46   | 41   | 59   | 232  | 268  | 204  | 0.56317  | 0.643687 | 0.871529 | 4.408594 |
| antisense -             | 1    | 0    | 2    | 1    | 2    | 1    | 0.142523 | 0        | 0.343924 | 0.221215 |
| lincRNA -               | 0    | 1    | 1    | 6    | 3    | 2    | 0        | 0.021444 | 0.020177 | 0.155734 |
| antisense -             | 0    | 0    | 0    | 1    | 1    | 0    | 0        | 0        | 0        | 0.087687 |
| processed_ -            | 0    | 0    | 0    | 3    | 2    | 0    | 0        | 0        | 0        | 0.344384 |
| lincRNA long_interf     | 0    | 0    | 0    | 0    | 2    | 0    | 0        | 0        | 0        | 0        |
| antisense -             | 1    | 0    | 0    | 0    | 0    | 0    | 0.137912 | 0        | 0        | 0        |
| pseudogen: iron-sulfur_ | 0    | 0    | 2    | 0    | 2    | 1    | 0        | 0        | 0.252569 | 0        |
| processed_BSN_antise    | 1    | 0    | 0    | 5    | 11   | 4    | 0.018014 | 0        | 0        | 0.1398   |
| lincRNA -               | 2    | 0    | 0    | 6    | 3    | 0    | 0.114927 | 0        | 0        | 0.535146 |
| antisense -             | 0    | 1    | 1    | 1    | 0    | 1    | 0        | 0.105122 | 0.098908 | 0.127237 |
| lincRNA -               | 5    | 6    | 5    | 14   | 15   | 14   | 0.490481 | 0.754767 | 0.591794 | 2.131626 |
| pseudogen: -            | 0    | 3    | 0    | 1    | 0    | 0    | 0        | 0.101172 | 0        | 0.040819 |
| pseudogen: -            | 5    | 0    | 0    | 0    | 0    | 0    | 0.560885 | 0        | 0        | 0        |
| pseudogen: general_tra  | 0    | 0    | 0    | 0    | 0    | 2    | 0        | 0        | 0        | 0        |
| pseudogen: nuclear_rex  | 0    | 0    | 0    | 0    | 0    | 1    | 0        | 0        | 0        | 0        |
| lincRNA long_interf     | 0    | 0    | 0    | 0    | 1    | 0    | 0        | 0        | 0        | 0        |
| pseudogen: centrosom:   | 4    | 1    | 2    | 0    | 1    | 1    | 0.075874 | 0.024324 | 0.045773 | 0        |
| lincRNA -               | 0    | 0    | 0    | 0    | 0    | 2    | 0        | 0        | 0        | 0        |
| lincRNA -               | 3    | 0    | 1    | 0    | 0    | 0    | 0.252549 | 0        | 0.101572 | 0        |
| protein_co RNA_bindir   | 1    | 0    | 0    | 0    | 0    | 0    | 0.024409 | 0        | 0        | 0        |
| pseudogen: interleukin  | 4    | 2    | 1    | 25   | 41   | 33   | 0.112043 | 0.07184  | 0.033797 | 1.086915 |
| pseudogen: asparagine-  | 0    | 0    | 0    | 0    | 1    | 0    | 0        | 0        | 0        | 0        |
| antisense -             | 7    | 4    | 5    | 3    | 3    | 2    | 0.868334 | 0.636294 | 0.748353 | 0.577617 |
| pseudogen: -            | 0    | 0    | 1    | 0    | 0    | 0    | 0        | 0        | 0.071344 | 0        |
| processed_ differentiat | 695  | 512  | 646  | 2166 | 2359 | 2919 | 37.11681 | 35.0643  | 41.62617 | 179.5456 |
| pseudogen: -            | 0    | 0    | 0    | 1    | 0    | 0    | 0        | 0        | 0        | 0.288809 |
| processed_ -            | 0    | 0    | 0    | 7    | 7    | 2    | 0        | 0        | 0        | 0.952259 |
| processed_ -            | 0    | 0    | 0    | 0    | 0    | 1    | 0        | 0        | 0        | 0        |
| antisense -             | 2    | 1    | 0    | 0    | 0    | 1    | 0.144499 | 0.09265  | 0        | 0        |
| pseudogen: RNA_28S_r    | 1726 | 1194 | 1465 | 730  | 1224 | 1164 | 187.343  | 166.1921 | 191.8591 | 122.9844 |
| antisense -             | 0    | 1    | 0    | 0    | 1    | 1    | 0        | 0.107759 | 0        | 0        |
| pseudogen: Ras-homolo   | 8    | 5    | 8    | 5    | 0    | 4    | 0.6252   | 0.501082 | 0.75434  | 0.606498 |
| lincRNA -               | 0    | 0    | 1    | 0    | 0    | 0    | 0        | 0        | 0.114294 | 0        |
| lincRNA long_interf     | 0    | 1    | 0    | 0    | 0    | 0    | 0        | 0.066589 | 0        | 0        |
| antisense -             | 0    | 0    | 0    | 0    | 2    | 2    | 0        | 0        | 0        | 0        |
| pseudogen: -            | 0    | 0    | 1    | 1    | 0    | 0    | 0        | 0        | 0.231867 | 0.298278 |
| pseudogen: -            | 0    | 0    | 0    | 0    | 1    | 0    | 0        | 0        | 0        | 0        |
| pseudogen: -            | 0    | 0    | 1    | 0    | 0    | 0    | 0        | 0        | 0.071254 | 0        |

|                        |      |      |      |      |      |      |          |          |          |          |
|------------------------|------|------|------|------|------|------|----------|----------|----------|----------|
| protein_co cytochrom   | 11   | 9    | 7    | 15   | 8    | 12   | 0.90331  | 0.947755 | 0.69357  | 1.911904 |
| pseudogen: high_mobil  | 8    | 1    | 3    | 0    | 2    | 2    | 1.258792 | 0.201778 | 0.569552 | 0        |
| protein_co lymphotox   | 0    | 0    | 1    | 2    | 6    | 0    | 0        | 0        | 0.037542 | 0.096589 |
| pseudogen: abhydrolas  | 0    | 0    | 0    | 1    | 1    | 1    | 0        | 0        | 0        | 0.069712 |
| pseudogen: centromer   | 0    | 3    | 0    | 0    | 0    | 0    | 0        | 0.069973 | 0        | 0        |
| pseudogen: -           | 0    | 0    | 0    | 0    | 2    | 1    | 0        | 0        | 0        | 0        |
| lincRNA -              | 0    | 0    | 0    | 0    | 0    | 1    | 0        | 0        | 0        | 0        |
| pseudogen: -           | 0    | 1    | 0    | 0    | 0    | 1    | 0        | 0.107567 | 0        | 0        |
| pseudogen: -           | 0    | 0    | 1    | 0    | 0    | 0    | 0        | 0        | 0.142508 | 0        |
| lincRNA long_interf    | 0    | 0    | 0    | 0    | 2    | 0    | 0        | 0        | 0        | 0        |
| pseudogen: neuroblast  | 5    | 4    | 7    | 9    | 9    | 5    | 0.35469  | 0.363872 | 0.599135 | 0.99095  |
| antisense -            | 12   | 18   | 13   | 0    | 3    | 1    | 0.653519 | 1.257069 | 0.854218 | 0        |
| pseudogen: -           | 10   | 8    | 5    | 17   | 18   | 14   | 1.127164 | 1.156342 | 0.679994 | 2.974175 |
| lincRNA -              | 2    | 0    | 0    | 8    | 12   | 21   | 0.123071 | 0        | 0        | 0.764092 |
| antisense -            | 27   | 29   | 18   | 26   | 23   | 23   | 1.417727 | 1.952703 | 1.14038  | 2.119009 |
| lincRNA -              | 0    | 1    | 0    | 2    | 0    | 0    | 0        | 0.089213 | 0        | 0.215964 |
| antisense SLC8A1_an    | 1    | 2    | 6    | 0    | 2    | 2    | 0.05015  | 0.12862  | 0.363051 | 0        |
| pseudogen: -           | 0    | 0    | 0    | 2    | 0    | 0    | 0        | 0        | 0        | 0.175162 |
| antisense -            | 0    | 0    | 0    | 0    | 1    | 0    | 0        | 0        | 0        | 0        |
| processed_ long_interf | 47   | 38   | 27   | 9    | 12   | 12   | 0.972994 | 1.0088   | 0.67441  | 0.289191 |
| pseudogen: -           | 5    | 9    | 2    | 10   | 17   | 13   | 0.097728 | 0.225581 | 0.047166 | 0.303376 |
| antisense ITGB2_anti   | 1    | 0    | 3    | 0    | 0    | 0    | 0.020548 | 0        | 0.074376 | 0        |
| antisense -            | 1    | 0    | 0    | 0    | 0    | 0    | 0.121477 | 0        | 0        | 0        |
| lincRNA -              | 1    | 0    | 0    | 0    | 0    | 0    | 0.068353 | 0        | 0        | 0        |
| antisense -            | 0    | 0    | 0    | 7    | 5    | 11   | 0        | 0        | 0        | 1.037594 |
| protein_co chromosom   | 1343 | 965  | 1031 | 673  | 767  | 639  | 8.100501 | 7.464015 | 7.503132 | 6.300593 |
| antisense -            | 0    | 0    | 0    | 1    | 2    | 1    | 0        | 0        | 0        | 0.17882  |
| pseudogen: -           | 0    | 0    | 0    | 0    | 2    | 1    | 0        | 0        | 0        | 0        |
| pseudogen: -           | 0    | 2    | 0    | 0    | 3    | 0    | 0        | 0.153588 | 0        | 0        |
| protein_co WD_repeat   | 1251 | 1097 | 1102 | 968  | 1130 | 1531 | 24.87676 | 27.97387 | 26.44029 | 29.87737 |
| processed_ long_interf | 3    | 8    | 3    | 4    | 12   | 1    | 0.166671 | 0.569951 | 0.201098 | 0.344928 |
| pseudogen: ribosomal_  | 1180 | 830  | 900  | 1413 | 990  | 1351 | 180.8177 | 163.0972 | 166.3985 | 336.0714 |
| lincRNA -              | 0    | 0    | 0    | 1    | 0    | 0    | 0        | 0        | 0        | 0.029194 |
| antisense -            | 0    | 2    | 0    | 0    | 2    | 2    | 0        | 0.189984 | 0        | 0        |
| antisense -            | 1    | 0    | 0    | 2    | 1    | 0    | 0.12953  | 0        | 0        | 0.402098 |
| lincRNA -              | 8    | 10   | 5    | 6    | 4    | 2    | 1.044903 | 1.674925 | 0.78796  | 1.216376 |
| pseudogen: succinate_  | 0    | 1    | 0    | 0    | 2    | 0    | 0        | 0.129311 | 0        | 0        |
| sense_intrc -          | 3    | 1    | 0    | 0    | 0    | 0    | 0.379165 | 0.162075 | 0        | 0        |
| pseudogen: -           | 0    | 0    | 1    | 0    | 1    | 0    | 0        | 0        | 0.152495 | 0        |
| pseudogen: -           | 95   | 76   | 78   | 144  | 169  | 130  | 13.83401 | 14.19213 | 13.70463 | 32.54749 |
| processed_ -           | 5    | 4    | 6    | 1    | 0    | 0    | 0.064022 | 0.06568  | 0.092696 | 0.019874 |
| antisense -            | 0    | 0    | 0    | 5    | 5    | 0    | 0        | 0        | 0        | 0.681459 |
| lincRNA -              | 0    | 0    | 0    | 0    | 1    | 0    | 0        | 0        | 0        | 0        |
| antisense -            | 0    | 0    | 1    | 2    | 1    | 0    | 0        | 0        | 0.10943  | 0.281547 |
| pseudogen: -           | 297  | 252  | 259  | 601  | 604  | 564  | 37.23619 | 40.51526 | 39.17929 | 116.9536 |
| lincRNA -              | 9    | 1    | 3    | 7    | 6    | 3    | 0.205158 | 0.029232 | 0.082512 | 0.247671 |
| antisense LMCD1_an     | 21   | 16   | 11   | 11   | 10   | 10   | 0.367011 | 0.358582 | 0.231953 | 0.298389 |
| antisense -            | 0    | 0    | 0    | 1    | 3    | 2    | 0        | 0        | 0        | 0.21469  |
| pseudogen: -           | 6    | 4    | 5    | 3    | 8    | 10   | 1.212673 | 1.036721 | 1.2193   | 0.941118 |
| lincRNA -              | 0    | 0    | 0    | 1    | 3    | 2    | 0        | 0        | 0        | 0.022829 |
| lincRNA -              | 0    | 0    | 0    | 1    | 0    | 0    | 0        | 0        | 0        | 0.154851 |
| processed_ -           | 1    | 0    | 1    | 5    | 7    | 4    | 0.051984 | 0        | 0.062722 | 0.403436 |
| lincRNA -              | 0    | 0    | 0    | 0    | 0    | 1    | 0        | 0        | 0        | 0        |
| pseudogen: ribosomal_  | 0    | 1    | 3    | 0    | 1    | 1    | 0        | 0.11978  | 0.338101 | 0        |
| protein_co zinc_finger | 19   | 20   | 24   | 95   | 109  | 72   | 0.229912 | 0.310347 | 0.350403 | 1.784279 |
| antisense -            | 1    | 0    | 0    | 0    | 0    | 0    | 0.018367 | 0        | 0        | 0        |
| pseudogen: -           | 0    | 0    | 0    | 0    | 1    | 0    | 0        | 0        | 0        | 0        |
| pseudogen: -           | 0    | 0    | 2    | 1    | 0    | 3    | 0        | 0        | 0.045792 | 0.029454 |
| antisense IL21_antise  | 0    | 3    | 1    | 0    | 0    | 0    | 0        | 0.04813  | 0.015095 | 0        |
| lincRNA -              | 1    | 0    | 4    | 0    | 0    | 0    | 0.167464 | 0        | 0.808222 | 0        |
| pseudogen: -           | 0    | 1    | 0    | 2    | 0    | 0    | 0        | 0.075921 | 0        | 0.183787 |
| antisense -            | 1    | 0    | 0    | 4    | 1    | 2    | 0.036209 | 0        | 0        | 0.224802 |
| pseudogen: -           | 0    | 0    | 0    | 0    | 0    | 1    | 0        | 0        | 0        | 0        |
| processed_ -           | 1    | 0    | 1    | 3    | 0    | 1    | 0.483402 | 0        | 0.583253 | 2.250922 |
| pseudogen: -           | 1    | 0    | 1    | 0    | 0    | 0    | 0.090173 | 0        | 0.108799 | 0        |

|                         |     |     |     |      |      |     |          |          |          |          |
|-------------------------|-----|-----|-----|------|------|-----|----------|----------|----------|----------|
| antisense WDR11_an      | 0   | 0   | 0   | 2    | 1    | 4   | 0        | 0        | 0        | 0.064924 |
| antisense -             | 1   | 3   | 6   | 1    | 0    | 0   | 0.116642 | 0.44873  | 0.844411 | 0.181044 |
| antisense -             | 0   | 1   | 0   | 0    | 1    | 1   | 0        | 0.145241 | 0        | 0        |
| antisense -             | 0   | 0   | 1   | 0    | 0    | 0   | 0        | 0        | 0.148883 | 0        |
| pseudogen: -            | 5   | 1   | 1   | 0    | 0    | 1   | 0.303692 | 0.077888 | 0.073284 | 0        |
| lincRNA -               | 0   | 0   | 1   | 0    | 0    | 0   | 0        | 0        | 0.218438 | 0        |
| protein_co epiplakin_1  | 6   | 3   | 6   | 1029 | 1791 | 624 | 0.035181 | 0.022557 | 0.042448 | 9.364814 |
| antisense -             | 1   | 1   | 1   | 0    | 1    | 1   | 0.123395 | 0.158236 | 0.148883 | 0        |
| antisense -             | 3   | 1   | 2   | 2    | 1    | 3   | 0.28247  | 0.120743 | 0.227211 | 0.292288 |
| antisense -             | 0   | 0   | 1   | 0    | 0    | 0   | 0        | 0        | 0.026132 | 0        |
| antisense -             | 1   | 0   | 0   | 1    | 0    | 1   | 0.084946 | 0        | 0        | 0.131847 |
| lincRNA -               | 0   | 0   | 1   | 0    | 1    | 0   | 0        | 0        | 0.114525 | 0        |
| processed_ -            | 7   | 5   | 5   | 5    | 7    | 6   | 0.270594 | 0.247856 | 0.233205 | 0.299999 |
| antisense -             | 1   | 2   | 1   | 5    | 1    | 2   | 0.058686 | 0.150513 | 0.070808 | 0.455443 |
| antisense ST7_antise    | 11  | 7   | 4   | 20   | 26   | 17  | 0.273049 | 0.222821 | 0.1198   | 0.770564 |
| sense_intrc -           | 10  | 2   | 6   | 0    | 2    | 0   | 1.257105 | 0.322412 | 0.910062 | 0        |
| pseudogen: calponin_2   | 0   | 1   | 0   | 3    | 4    | 4   | 0        | 0.065501 | 0        | 0.237842 |
| pseudogen: SUB1_hom     | 1   | 1   | 0   | 0    | 1    | 0   | 0.122109 | 0.156588 | 0        | 0        |
| pseudogen: RNA_bindi    | 0   | 1   | 0   | 0    | 0    | 1   | 0        | 0.05678  | 0        | 0        |
| pseudogen: long_inter   | 0   | 0   | 0   | 0    | 1    | 0   | 0        | 0        | 0        | 0        |
| antisense -             | 4   | 1   | 7   | 8    | 10   | 6   | 0.346691 | 0.111146 | 0.732031 | 1.076226 |
| pseudogen: -            | 2   | 0   | 2   | 0    | 0    | 0   | 0.269483 | 0        | 0.325147 | 0        |
| pseudogen: profilin_1_  | 5   | 2   | 4   | 0    | 0    | 0   | 0.587594 | 0.301402 | 0.567173 | 0        |
| antisense SPATA13_a     | 1   | 1   | 0   | 1    | 0    | 1   | 0.108291 | 0.138868 | 0        | 0.168083 |
| antisense HLA_compl     | 1   | 2   | 5   | 9    | 13   | 9   | 0.045436 | 0.116531 | 0.274106 | 0.634708 |
| antisense -             | 4   | 0   | 0   | 1    | 1    | 2   | 0.39075  | 0        | 0        | 0.151625 |
| antisense -             | 5   | 2   | 2   | 0    | 1    | 10  | 0.212172 | 0.108832 | 0.102399 | 0        |
| antisense -             | 3   | 4   | 2   | 4    | 2    | 10  | 0.284182 | 0.485897 | 0.228588 | 0.58812  |
| pseudogen: MT-ND1_p     | 0   | 0   | 0   | 0    | 0    | 1   | 0        | 0        | 0        | 0        |
| antisense -             | 5   | 0   | 0   | 4    | 1    | 3   | 0.410596 | 0        | 0        | 0.509841 |
| antisense -             | 4   | 12  | 10  | 0    | 1    | 0   | 0.270259 | 1.039708 | 0.815209 | 0        |
| pseudogen: WAS_prote    | 372 | 307 | 295 | 292  | 350  | 282 | 9.782999 | 10.35325 | 9.360501 | 11.91907 |
| pseudogen: -            | 0   | 0   | 0   | 0    | 1    | 0   | 0        | 0        | 0        | 0        |
| pseudogen: -            | 0   | 0   | 0   | 3    | 2    | 7   | 0        | 0        | 0        | 0.126647 |
| antisense -             | 0   | 2   | 0   | 1    | 0    | 0   | 0        | 0.260302 | 0        | 0.157532 |
| processed_ -            | 0   | 1   | 0   | 0    | 0    | 0   | 0        | 0.072271 | 0        | 0        |
| pseudogen: neuroblast   | 3   | 1   | 3   | 2    | 1    | 2   | 0.036941 | 0.01579  | 0.044571 | 0.038225 |
| lincRNA -               | 1   | 2   | 0   | 1    | 2    | 1   | 0.092122 | 0.236266 | 0        | 0.142986 |
| sense_intrc FAM155A_i   | 2   | 3   | 0   | 1    | 0    | 2   | 0.114506 | 0.220256 | 0        | 0.088864 |
| processed_ -            | 5   | 7   | 9   | 8    | 7    | 6   | 0.10015  | 0.179799 | 0.217505 | 0.248714 |
| antisense -             | 3   | 1   | 0   | 0    | 0    | 0   | 0.202112 | 0.086393 | 0        | 0        |
| pseudogen: voltage-dep  | 1   | 0   | 0   | 0    | 2    | 0   | 0.053163 | 0        | 0        | 0        |
| antisense MIS18A_an     | 9   | 3   | 1   | 3    | 4    | 1   | 0.548778 | 0.234577 | 0.07357  | 0.283926 |
| pseudogen: -            | 3   | 0   | 2   | 0    | 1    | 0   | 0.35977  | 0        | 0.289389 | 0        |
| antisense SMIM2_ant     | 0   | 0   | 0   | 0    | 3    | 0   | 0        | 0        | 0        | 0        |
| pseudogen: tyrosine_3-  | 0   | 0   | 0   | 0    | 0    | 1   | 0        | 0        | 0        | 0        |
| pseudogen: HLA_compl    | 0   | 0   | 0   | 0    | 0    | 1   | 0        | 0        | 0        | 0        |
| pseudogen: -            | 1   | 0   | 0   | 1    | 0    | 3   | 0.080706 | 0        | 0        | 0.125266 |
| protein_co killin_p53-i | 14  | 10  | 8   | 0    | 15   | 12  | 0.153486 | 0.140589 | 0.105823 | 0        |
| lincRNA -               | 0   | 1   | 1   | 0    | 0    | 1   | 0        | 0.13697  | 0.128874 | 0        |
| antisense -             | 0   | 0   | 0   | 0    | 1    | 0   | 0        | 0        | 0        | 0        |
| antisense -             | 0   | 1   | 0   | 0    | 0    | 0   | 0        | 0.139189 | 0        | 0        |
| antisense -             | 7   | 7   | 8   | 0    | 3    | 1   | 0.745978 | 0.95661  | 1.028646 | 0        |
| antisense -             | 5   | 0   | 3   | 8    | 9    | 4   | 0.299043 | 0        | 0.216488 | 0.742651 |
| lincRNA -               | 0   | 0   | 0   | 0    | 2    | 0   | 0        | 0        | 0        | 0        |
| antisense -             | 26  | 19  | 12  | 19   | 19   | 5   | 1.505112 | 1.410452 | 0.838156 | 1.707181 |
| pseudogen: -            | 2   | 2   | 0   | 16   | 12   | 7   | 0.055988 | 0.071797 | 0        | 0.69521  |
| pseudogen: heat_shock   | 5   | 4   | 0   | 0    | 1    | 3   | 0.196851 | 0.201947 | 0        | 0        |
| lincRNA -               | 1   | 0   | 0   | 0    | 0    | 0   | 0.052745 | 0        | 0        | 0        |
| lincRNA -               | 1   | 2   | 0   | 0    | 0    | 0   | 0.075386 | 0.193343 | 0        | 0        |
| lincRNA -               | 0   | 0   | 0   | 1    | 3    | 2   | 0        | 0        | 0        | 0.198852 |
| antisense -             | 3   | 6   | 10  | 1    | 1    | 1   | 0.254837 | 0.653585 | 1.024919 | 0.131847 |
| pseudogen: elongation_  | 0   | 0   | 0   | 1    | 0    | 4   | 0        | 0        | 0        | 0.038185 |
| lincRNA -               | 0   | 0   | 1   | 0    | 0    | 0   | 0        | 0        | 0.068743 | 0        |
| pseudogen: -            | 2   | 1   | 2   | 1    | 2    | 0   | 0.062813 | 0.040274 | 0.075788 | 0.048747 |

|                        |      |     |     |      |      |      |          |          |          |          |
|------------------------|------|-----|-----|------|------|------|----------|----------|----------|----------|
| pseudogeni -           | 0    | 0   | 1   | 0    | 1    | 0    | 0        | 0        | 0.156719 | 0        |
| pseudogeni -           | 6    | 7   | 0   | 0    | 0    | 0    | 0.173026 | 0.258861 | 0        | 0        |
| pseudogeni MT-ND4_p    | 1    | 0   | 2   | 3    | 3    | 1    | 0.045392 | 0        | 0.109536 | 0.211364 |
| pseudogeni -           | 5    | 3   | 8   | 9    | 8    | 5    | 1.403893 | 1.080176 | 2.710204 | 3.922265 |
| lincRNA -              | 0    | 0   | 0   | 1    | 0    | 1    | 0        | 0        | 0        | 0.152259 |
| pseudogeni -           | 0    | 0   | 0   | 1    | 0    | 3    | 0        | 0        | 0        | 0.090975 |
| pseudogeni -           | 0    | 1   | 0   | 2    | 2    | 10   | 0        | 0.127664 | 0        | 0.309044 |
| pseudogeni HAUS_augn   | 1    | 0   | 0   | 0    | 3    | 2    | 0.030232 | 0        | 0        | 0        |
| protein_co poly_(ADP-  | 332  | 229 | 230 | 413  | 468  | 404  | 6.136179 | 5.427561 | 5.129037 | 11.84787 |
| antisense ARHGEF7_ε    | 0    | 1   | 0   | 0    | 0    | 0    | 0        | 0.18732  | 0        | 0        |
| processed_RBM26_an     | 5    | 5   | 4   | 14   | 9    | 11   | 0.133514 | 0.171212 | 0.128874 | 0.580249 |
| antisense -            | 0    | 0   | 0   | 4    | 2    | 4    | 0        | 0        | 0        | 0.661635 |
| lincRNA long_interf    | 0    | 0   | 0   | 1    | 1    | 0    | 0        | 0        | 0        | 0.174114 |
| lincRNA -              | 2    | 1   | 2   | 2    | 0    | 0    | 0.167166 | 0.107183 | 0.201695 | 0.259465 |
| lincRNA -              | 1    | 1   | 0   | 0    | 3    | 0    | 0.065398 | 0.083863 | 0        | 0        |
| pseudogeni -           | 0    | 0   | 0   | 1    | 0    | 0    | 0        | 0        | 0        | 0.133053 |
| pseudogeni -           | 4    | 3   | 4   | 1    | 2    | 2    | 0.411316 | 0.395591 | 0.496276 | 0.159605 |
| pseudogeni -           | 1    | 0   | 0   | 0    | 0    | 0    | 0.112177 | 0        | 0        | 0        |
| antisense TP73_antis   | 784  | 689 | 647 | 1420 | 1752 | 1231 | 5.781971 | 6.51611  | 5.757212 | 16.25469 |
| lincRNA -              | 3    | 2   | 0   | 2    | 2    | 4    | 0.204462 | 0.174796 | 0        | 0.211569 |
| lincRNA -              | 2    | 0   | 1   | 0    | 0    | 1    | 0.189455 | 0        | 0.114294 | 0        |
| processed_DLG1_antis   | 0    | 1   | 0   | 0    | 0    | 1    | 0        | 0.035496 | 0        | 0        |
| pseudogeni ferritin_he | 2    | 2   | 2   | 6    | 9    | 10   | 0.169891 | 0.217862 | 0.204984 | 0.791085 |
| pseudogeni peptidylpro | 3    | 2   | 3   | 0    | 2    | 2    | 0.285915 | 0.24443  | 0.344973 | 0        |
| pseudogeni eukaryotic_ | 5    | 0   | 0   | 0    | 1    | 0    | 0.219112 | 0        | 0        | 0        |
| pseudogeni -           | 2    | 1   | 0   | 1    | 4    | 4    | 0.286789 | 0.183883 | 0        | 0.222568 |
| processed -            | 2    | 3   | 3   | 17   | 7    | 4    | 0.171758 | 0.330383 | 0.310854 | 2.266038 |
| antisense HPN_antis    | 0    | 0   | 0   | 9    | 5    | 2    | 0        | 0        | 0        | 0.582756 |
| pseudogeni -           | 0    | 1   | 0   | 3    | 5    | 0    | 0        | 0.103316 | 0        | 0.375154 |
| pseudogeni eukaryotic_ | 0    | 2   | 0   | 0    | 0    | 0    | 0        | 0.067524 | 0        | 0        |
| processed_KIF9_antis   | 32   | 13  | 20  | 12   | 21   | 15   | 0.637688 | 0.332209 | 0.48088  | 0.371168 |
| processed -            | 0    | 0   | 0   | 1    | 0    | 0    | 0        | 0        | 0        | 0.124198 |
| pseudogeni ribosomal_  | 0    | 0   | 0   | 0    | 4    | 0    | 0        | 0        | 0        | 0        |
| processed -            | 0    | 0   | 0   | 11   | 6    | 18   | 0        | 0        | 0        | 0.343154 |
| antisense ZMYM4_an     | 0    | 2   | 2   | 2    | 0    | 0    | 0        | 0.262003 | 0.246516 | 0.317123 |
| processed -            | 0    | 1   | 3   | 57   | 71   | 29   | 0        | 0.073151 | 0.20648  | 5.046775 |
| pseudogeni -           | 3    | 5   | 4   | 0    | 4    | 3    | 0.396254 | 0.846899 | 0.63747  | 0        |
| pseudogeni -           | 3    | 5   | 0   | 2    | 0    | 0    | 0.218771 | 0.467572 | 0        | 0.226376 |
| processed_PCGEM1_p     | 1    | 0   | 0   | 0    | 0    | 0    | 0.029491 | 0        | 0        | 0        |
| pseudogeni -           | 0    | 0   | 0   | 0    | 2    | 0    | 0        | 0        | 0        | 0        |
| antisense -            | 2    | 1   | 3   | 2    | 1    | 3    | 0.168669 | 0.108147 | 0.305264 | 0.261798 |
| antisense -            | 1    | 2   | 2   | 0    | 1    | 0    | 0.090347 | 0.231714 | 0.218017 | 0        |
| pseudogeni -           | 0    | 0   | 0   | 1    | 0    | 0    | 0        | 0        | 0        | 0.19831  |
| pseudogeni FCF1_small  | 2    | 2   | 2   | 2    | 2    | 1    | 0.164238 | 0.210612 | 0.198163 | 0.25492  |
| antisense -            | 7    | 4   | 7   | 0    | 0    | 0    | 0.488438 | 0.357915 | 0.589328 | 0        |
| pseudogeni ATP_syntha  | 1    | 9   | 2   | 9    | 7    | 5    | 0.106327 | 1.227139 | 0.256578 | 1.485302 |
| protein_co Uncharacte  | 11   | 4   | 4   | 13   | 6    | 7    | 0.380096 | 0.177243 | 0.166766 | 0.697227 |
| lincRNA long_interf    | 6    | 1   | 6   | 1    | 0    | 1    | 0.234841 | 0.050192 | 0.28335  | 0.060751 |
| pseudogeni -           | 0    | 0   | 0   | 1    | 0    | 0    | 0        | 0        | 0        | 0.222568 |
| processed -            | 0    | 0   | 0   | 0    | 0    | 2    | 0        | 0        | 0        | 0        |
| pseudogeni -           | 8    | 3   | 4   | 8    | 6    | 10   | 2.451766 | 1.179016 | 1.479098 | 3.80548  |
| protein_co aldo-keto_r | 0    | 0   | 0   | 1    | 0    | 1    | 0        | 0        | 0        | 0.036591 |
| pseudogeni -           | 0    | 0   | 1   | 0    | 0    | 0    | 0        | 0        | 0.065481 | 0        |
| lincRNA -              | 2    | 0   | 0   | 0    | 0    | 0    | 0.501498 | 0        | 0        | 0        |
| processed_STK4_antis   | 4    | 4   | 1   | 1    | 5    | 0    | 0.090828 | 0.116474 | 0.027397 | 0.035244 |
| antisense -            | 1    | 2   | 0   | 2    | 1    | 0    | 0.081265 | 0.208422 | 0        | 0.25227  |
| lincRNA -              | 1    | 1   | 0   | 1    | 2    | 0    | 0.03834  | 0.049166 | 0        | 0.059509 |
| processed -            | 2    | 2   | 0   | 6    | 24   | 16   | 0.093128 | 0.119424 | 0        | 0.433643 |
| antisense -            | 9    | 6   | 7   | 0    | 0    | 0    | 0.390389 | 0.333745 | 0.366354 | 0        |
| lincRNA -              | 2    | 0   | 2   | 0    | 1    | 0    | 0.143614 | 0        | 0.173279 | 0        |
| antisense -            | 3    | 1   | 7   | 2    | 5    | 2    | 0.166277 | 0.071075 | 0.468119 | 0.172056 |
| pseudogeni ubiquitin_ε | 1    | 0   | 0   | 0    | 0    | 0    | 0.083286 | 0        | 0        | 0        |
| antisense -            | 0    | 4   | 0   | 2    | 3    | 0    | 0        | 0.412554 | 0        | 0.249673 |
| antisense -            | 3    | 9   | 3   | 0    | 2    | 0    | 0.091941 | 0.353705 | 0.110932 | 0        |
| protein_co secretory_c | 1214 | 909 | 949 | 723  | 937  | 793  | 19.2703  | 18.50304 | 18.17541 | 17.81307 |

|                          |     |     |     |     |     |     |          |          |          |          |
|--------------------------|-----|-----|-----|-----|-----|-----|----------|----------|----------|----------|
| processed_ -             | 0   | 2   | 0   | 0   | 0   | 1   | 0        | 0.291185 | 0        | 0        |
| protein_coding lymphotox | 7   | 6   | 2   | 3   | 10  | 2   | 0.236477 | 0.259927 | 0.081521 | 0.157305 |
| antisense -              | 11  | 7   | 8   | 5   | 13  | 8   | 0.596979 | 0.487163 | 0.523847 | 0.421179 |
| lincRNA -                | 0   | 1   | 1   | 4   | 3   | 9   | 0        | 0.149205 | 0.140386 | 0.72238  |
| antisense microRNA_      | 5   | 1   | 4   | 3   | 6   | 7   | 0.080209 | 0.020571 | 0.077421 | 0.074697 |
| pseudogenes -            | 0   | 0   | 0   | 2   | 0   | 0   | 0        | 0        | 0        | 0.147328 |
| pseudogenes ribosomal_   | 2   | 2   | 0   | 1   | 1   | 2   | 0.301544 | 0.386687 | 0        | 0.234019 |
| sense_intronic -         | 1   | 2   | 0   | 1   | 3   | 2   | 0.070938 | 0.181936 | 0        | 0.110106 |
| antisense DIAPH3_an      | 1   | 0   | 0   | 1   | 0   | 1   | 0.100407 | 0        | 0        | 0.155845 |
| pseudogenes -            | 1   | 0   | 0   | 0   | 0   | 0   | 0.242953 | 0        | 0        | 0        |
| processed_ SLC2A1_an     | 27  | 26  | 19  | 82  | 88  | 31  | 0.411717 | 0.508415 | 0.349572 | 1.940795 |
| pseudogenes -            | 0   | 0   | 0   | 1   | 2   | 0   | 0        | 0        | 0        | 0.075186 |
| antisense -              | 0   | 0   | 0   | 1   | 0   | 0   | 0        | 0        | 0        | 0.261798 |
| pseudogenes suppressor_  | 5   | 5   | 3   | 5   | 8   | 2   | 0.149713 | 0.191985 | 0.108382 | 0.232375 |
| processed_ -             | 4   | 2   | 0   | 14  | 23  | 9   | 0.246142 | 0.157821 | 0        | 1.337162 |
| pseudogenes -            | 0   | 0   | 0   | 1   | 1   | 0   | 0        | 0        | 0        | 0.105785 |
| lincRNA -                | 15  | 5   | 29  | 7   | 17  | 29  | 0.773763 | 0.330747 | 1.804939 | 0.560461 |
| processed_ SPAG5_ant     | 13  | 17  | 12  | 21  | 12  | 21  | 0.284713 | 0.477444 | 0.317098 | 0.713861 |
| lincRNA -                | 0   | 0   | 0   | 0   | 0   | 1   | 0        | 0        | 0        | 0        |
| lincRNA -                | 0   | 0   | 0   | 0   | 0   | 1   | 0        | 0        | 0        | 0        |
| pseudogenes phosphogl    | 22  | 19  | 20  | 10  | 11  | 7   | 0.524177 | 0.580521 | 0.574954 | 0.369816 |
| pseudogenes -            | 2   | 6   | 0   | 1   | 3   | 1   | 0.240462 | 0.925074 | 0        | 0.186615 |
| pseudogenes -            | 1   | 0   | 0   | 0   | 0   | 1   | 0.077249 | 0        | 0        | 0        |
| pseudogenes ribosomal_   | 4   | 3   | 6   | 0   | 1   | 0   | 0.24108  | 0.231863 | 0.436315 | 0        |
| lincRNA -                | 2   | 1   | 1   | 0   | 0   | 0   | 0.117519 | 0.075351 | 0.070897 | 0        |
| pseudogenes -            | 1   | 5   | 6   | 0   | 0   | 1   | 0.041313 | 0.264889 | 0.299078 | 0        |
| pseudogenes -            | 0   | 1   | 0   | 1   | 1   | 4   | 0        | 0.080711 | 0        | 0.097691 |
| pseudogenes -            | 0   | 1   | 0   | 0   | 0   | 1   | 0        | 0.172787 | 0        | 0        |
| antisense -              | 0   | 0   | 0   | 0   | 3   | 0   | 0        | 0        | 0        | 0        |
| pseudogenes ATP_syntha   | 0   | 0   | 0   | 0   | 1   | 0   | 0        | 0        | 0        | 0        |
| antisense -              | 1   | 0   | 0   | 0   | 3   | 0   | 0.104432 | 0        | 0        | 0        |
| antisense -              | 10  | 7   | 10  | 6   | 19  | 6   | 1.217923 | 1.093269 | 1.469494 | 1.134231 |
| antisense -              | 2   | 4   | 6   | 6   | 6   | 8   | 0.135716 | 0.348074 | 0.491249 | 0.631952 |
| pseudogenes SMT3_suppr   | 0   | 0   | 0   | 1   | 0   | 0   | 0        | 0        | 0        | 0.285411 |
| pseudogenes -            | 9   | 8   | 10  | 23  | 8   | 15  | 1.05767  | 1.20561  | 1.417932 | 4.195327 |
| pseudogenes -            | 0   | 0   | 0   | 0   | 1   | 0   | 0        | 0        | 0        | 0        |
| antisense CERS6_anti     | 0   | 0   | 0   | 1   | 0   | 0   | 0        | 0        | 0        | 0.025183 |
| antisense -              | 0   | 0   | 0   | 0   | 0   | 1   | 0        | 0        | 0        | 0        |
| pseudogenes asparagine-  | 2   | 0   | 1   | 4   | 7   | 6   | 0.123395 | 0        | 0.074441 | 0.383052 |
| antisense -              | 1   | 3   | 2   | 5   | 5   | 3   | 0.070724 | 0.272081 | 0.170665 | 0.548867 |
| processed_ -             | 1   | 0   | 0   | 0   | 1   | 0   | 0.01312  | 0        | 0        | 0        |
| pseudogenes -            | 0   | 2   | 0   | 0   | 0   | 0   | 0        | 0.194595 | 0        | 0        |
| lincRNA -                | 1   | 0   | 1   | 0   | 1   | 0   | 0.094346 | 0        | 0.113834 | 0        |
| antisense -              | 8   | 5   | 2   | 2   | 6   | 7   | 1.17225  | 0.939528 | 0.353597 | 0.454874 |
| pseudogenes heterogene   | 4   | 1   | 5   | 8   | 4   | 6   | 0.200599 | 0.06431  | 0.302543 | 0.622715 |
| processed_ SOX21_ant     | 0   | 0   | 0   | 146 | 168 | 271 | 0        | 0        | 0        | 6.917872 |
| processed_ STEAP2_an     | 0   | 1   | 0   | 1   | 0   | 0   | 0        | 0.059831 | 0        | 0.072418 |
| sense_intronic -         | 2   | 0   | 1   | 0   | 0   | 0   | 0.246142 | 0        | 0.148492 | 0        |
| antisense CLYBL_anti     | 0   | 0   | 0   | 2   | 0   | 0   | 0        | 0        | 0        | 0.209438 |
| antisense -              | 2   | 2   | 0   | 3   | 3   | 1   | 0.131345 | 0.168431 | 0        | 0.305797 |
| pseudogenes -            | 4   | 3   | 0   | 1   | 1   | 0   | 0.593545 | 0.570852 | 0        | 0.230316 |
| pseudogenes -            | 209 | 206 | 217 | 191 | 202 | 196 | 6.689429 | 8.455111 | 8.380126 | 9.488698 |
| antisense -              | 0   | 0   | 0   | 0   | 0   | 4   | 0        | 0        | 0        | 0        |
| antisense -              | 1   | 5   | 2   | 0   | 2   | 0   | 0.060975 | 0.390961 | 0.14714  | 0        |
| lincRNA -                | 0   | 0   | 1   | 0   | 0   | 0   | 0        | 0        | 0.103052 | 0        |
| lincRNA -                | 4   | 2   | 1   | 0   | 1   | 0   | 0.242639 | 0.155575 | 0.07319  | 0        |
| lincRNA -                | 1   | 1   | 0   | 0   | 0   | 1   | 0.087645 | 0.112392 | 0        | 0        |
| pseudogenes ciliary_roo  | 0   | 0   | 0   | 4   | 8   | 1   | 0        | 0        | 0        | 0.584577 |
| pseudogenes heterogene   | 0   | 0   | 0   | 0   | 0   | 1   | 0        | 0        | 0        | 0        |
| pseudogenes signal_reco  | 1   | 0   | 0   | 0   | 0   | 0   | 0.184606 | 0        | 0        | 0        |
| pseudogenes mediator_c   | 7   | 2   | 1   | 0   | 7   | 1   | 0.618136 | 0.226478 | 0.106545 | 0        |
| pseudogenes glutathione  | 0   | 0   | 0   | 10  | 16  | 4   | 0        | 0        | 0        | 1.267941 |
| antisense DNMBP_an       | 0   | 3   | 0   | 0   | 0   | 1   | 0        | 0.088687 | 0        | 0        |
| sense_intronic -         | 4   | 2   | 6   | 6   | 3   | 7   | 0.419597 | 0.269037 | 0.759403 | 0.97691  |
| pseudogenes -            | 0   | 0   | 0   | 3   | 4   | 1   | 0        | 0        | 0        | 0.42232  |

|                        |     |     |     |     |     |     |          |          |          |          |
|------------------------|-----|-----|-----|-----|-----|-----|----------|----------|----------|----------|
| antisense -            | 0   | 2   | 1   | 0   | 0   | 0   | 0        | 0.247958 | 0.116651 | 0        |
| lincRNA -              | 0   | 0   | 0   | 18  | 5   | 12  | 0        | 0        | 0        | 0.816222 |
| lincRNA -              | 1   | 0   | 0   | 0   | 0   | 0   | 0.075751 | 0        | 0        | 0        |
| lincRNA -              | 0   | 0   | 0   | 7   | 6   | 8   | 0        | 0        | 0        | 0.567326 |
| pseudogen: MT-ND6_p    | 0   | 0   | 0   | 0   | 1   | 0   | 0        | 0        | 0        | 0        |
| antisense -            | 7   | 3   | 5   | 19  | 20  | 5   | 0.626393 | 0.344255 | 0.539843 | 2.638962 |
| pseudogen -            | 0   | 0   | 0   | 2   | 1   | 0   | 0        | 0        | 0        | 0.26562  |
| lincRNA -              | 0   | 0   | 1   | 0   | 0   | 0   | 0        | 0        | 0.152907 | 0        |
| pseudogen: GRINL1B_c   | 1   | 3   | 5   | 2   | 3   | 1   | 0.042358 | 0.162953 | 0.255535 | 0.13149  |
| sense_intrc -          | 0   | 0   | 0   | 12  | 14  | 4   | 0        | 0        | 0        | 4.2396   |
| pseudogen: MT-ND6_p    | 1   | 1   | 0   | 0   | 0   | 0   | 0.091582 | 0.117441 | 0        | 0        |
| sense_intrc -          | 0   | 0   | 0   | 5   | 1   | 1   | 0        | 0        | 0        | 0.144807 |
| pseudogen -            | 0   | 0   | 0   | 0   | 0   | 1   | 0        | 0        | 0        | 0        |
| lincRNA -              | 2   | 0   | 2   | 0   | 0   | 0   | 0.14274  | 0        | 0.172224 | 0        |
| processed_ -           | 28  | 20  | 28  | 3   | 12  | 31  | 0.832016 | 0.762101 | 1.003875 | 0.138365 |
| lincRNA -              | 7   | 9   | 2   | 0   | 1   | 0   | 0.094076 | 0.155107 | 0.032431 | 0        |
| pseudogen -            | 0   | 0   | 0   | 0   | 1   | 2   | 0        | 0        | 0        | 0        |
| lincRNA -              | 2   | 0   | 3   | 1   | 0   | 0   | 0.20611  | 0        | 0.373025 | 0.159956 |
| pseudogen -            | 0   | 0   | 0   | 0   | 2   | 1   | 0        | 0        | 0        | 0        |
| pseudogen: HLA_compl   | 0   | 2   | 4   | 1   | 0   | 1   | 0        | 0.534487 | 1.005787 | 0.323466 |
| pseudogen: vesicle_tra | 1   | 0   | 0   | 0   | 0   | 0   | 0.088975 | 0        | 0        | 0        |
| pseudogen: glucuronid  | 0   | 0   | 1   | 0   | 0   | 0   | 0        | 0        | 0.083322 | 0        |
| antisense -            | 0   | 0   | 1   | 0   | 0   | 0   | 0        | 0        | 0.049978 | 0        |
| sense_intrc ASH1L_intr | 2   | 3   | 1   | 1   | 3   | 0   | 0.20933  | 0.402655 | 0.126285 | 0.162455 |
| pseudogen -            | 332 | 269 | 282 | 222 | 272 | 193 | 8.610335 | 8.946303 | 8.824277 | 8.936458 |
| pseudogen -            | 0   | 0   | 0   | 2   | 1   | 3   | 0        | 0        | 0        | 0.235533 |
| pseudogen -            | 4   | 0   | 1   | 2   | 0   | 0   | 0.12203  | 0        | 0.036809 | 0.094704 |
| pseudogen: glutamate_  | 8   | 9   | 6   | 5   | 5   | 5   | 0.402489 | 0.580653 | 0.36422  | 0.39045  |
| protein_co Uncharacte  | 0   | 0   | 0   | 0   | 0   | 1   | 0        | 0        | 0        | 0        |
| processed_ -           | 0   | 0   | 0   | 1   | 1   | 2   | 0        | 0        | 0        | 0.202166 |
| pseudogen -            | 1   | 0   | 0   | 1   | 3   | 1   | 0.060817 | 0        | 0        | 0.094397 |
| pseudogen -            | 0   | 0   | 0   | 0   | 0   | 1   | 0        | 0        | 0        | 0        |
| pseudogen -            | 0   | 1   | 0   | 0   | 0   | 0   | 0        | 0.108147 | 0        | 0        |
| pseudogen -            | 31  | 21  | 31  | 17  | 11  | 18  | 1.013661 | 0.880562 | 1.223041 | 0.862801 |
| processed_ -           | 1   | 0   | 0   | 2   | 0   | 0   | 0.245497 | 0        | 0        | 0.762092 |
| pseudogen -            | 0   | 0   | 0   | 0   | 1   | 0   | 0        | 0        | 0        | 0        |
| processed_ -           | 2   | 1   | 0   | 5   | 10  | 2   | 0.044008 | 0.028217 | 0        | 0.170764 |
| pseudogen -            | 1   | 2   | 1   | 0   | 1   | 1   | 0.095694 | 0.245428 | 0.11546  | 0        |
| pseudogen -            | 0   | 0   | 1   | 0   | 0   | 0   | 0        | 0        | 0.071164 | 0        |
| pseudogen -            | 0   | 0   | 2   | 0   | 0   | 0   | 0        | 0        | 0.314308 | 0        |
| processed_ -           | 0   | 0   | 0   | 0   | 1   | 3   | 0        | 0        | 0        | 0        |
| pseudogen: solute_carr | 61  | 55  | 54  | 6   | 10  | 16  | 0.863875 | 0.998834 | 0.922705 | 0.131887 |
| pseudogen -            | 127 | 74  | 104 | 68  | 73  | 63  | 0.59958  | 0.448007 | 0.592414 | 0.498291 |
| pseudogen -            | 1   | 3   | 2   | 0   | 0   | 1   | 0.12953  | 0.498313 | 0.312572 | 0        |
| lincRNA -              | 1   | 0   | 0   | 73  | 59  | 80  | 0.057253 | 0        | 0        | 6.487089 |
| antisense -            | 3   | 2   | 3   | 0   | 0   | 0   | 0.089599 | 0.076598 | 0.108106 | 0        |
| pseudogen -            | 0   | 0   | 1   | 0   | 0   | 0   | 0        | 0        | 0.127999 | 0        |
| antisense SUCLA2_an    | 0   | 1   | 3   | 2   | 4   | 0   | 0        | 0.108931 | 0.307476 | 0.263695 |
| pseudogen -            | 0   | 1   | 0   | 1   | 0   | 1   | 0        | 0.362228 | 0        | 0.438433 |
| pseudogen -            | 29  | 16  | 38  | 26  | 35  | 20  | 0.584613 | 0.413619 | 0.924277 | 0.813532 |
| antisense -            | 1   | 1   | 1   | 0   | 5   | 1   | 0.138319 | 0.177374 | 0.166889 | 0        |
| protein_co uncharacte  | 0   | 0   | 0   | 0   | 1   | 2   | 0        | 0        | 0        | 0        |
| lincRNA -              | 1   | 0   | 1   | 0   | 0   | 1   | 0.088305 | 0        | 0.106545 | 0        |
| pseudogen -            | 0   | 0   | 0   | 0   | 2   | 0   | 0        | 0        | 0        | 0        |
| lincRNA -              | 1   | 1   | 2   | 0   | 0   | 2   | 0.053897 | 0.069115 | 0.130059 | 0        |
| pseudogen: paraspeckl  | 0   | 1   | 1   | 3   | 2   | 5   | 0        | 0.090421 | 0.085076 | 0.32833  |
| pseudogen: ATPase_H+   | 0   | 0   | 0   | 0   | 3   | 0   | 0        | 0        | 0        | 0        |
| lincRNA -              | 7   | 9   | 13  | 2   | 14  | 3   | 0.386153 | 0.636668 | 0.865272 | 0.171247 |
| pseudogen -            | 0   | 1   | 0   | 0   | 0   | 0   | 0        | 0.182212 | 0        | 0        |
| processed_ family_witl | 6   | 4   | 2   | 5   | 5   | 5   | 0.305472 | 0.26115  | 0.122857 | 0.395113 |
| lincRNA long_interf    | 1   | 1   | 4   | 0   | 0   | 0   | 0.084946 | 0.108931 | 0.409967 | 0        |
| antisense -            | 11  | 11  | 9   | 32  | 32  | 16  | 0.802162 | 1.028659 | 0.791881 | 3.622012 |
| antisense SNAP25_ar    | 2   | 0   | 2   | 0   | 0   | 0   | 0.029242 | 0        | 0.035283 | 0        |
| antisense -            | 0   | 0   | 0   | 1   | 9   | 2   | 0        | 0        | 0        | 0.031795 |
| lincRNA -              | 2   | 0   | 1   | 0   | 0   | 0   | 0.201245 | 0        | 0.121407 | 0        |

|                         |    |    |    |    |     |    |          |          |          |          |
|-------------------------|----|----|----|----|-----|----|----------|----------|----------|----------|
| pseudogen: keratin_8_1  | 0  | 0  | 0  | 0  | 1   | 0  | 0        | 0        | 0        | 0        |
| antisense -             | 1  | 0  | 2  | 2  | 1   | 2  | 0.041866 | 0        | 0.101028 | 0.129964 |
| lincRNA -               | 0  | 0  | 0  | 0  | 2   | 0  | 0        | 0        | 0        | 0        |
| protein_co -            | 1  | 5  | 0  | 0  | 0   | 3  | 0.012346 | 0.07916  | 0        | 0        |
| lincRNA -               | 0  | 0  | 2  | 0  | 0   | 1  | 0        | 0        | 0.267496 | 0        |
| sense_intrc MACROD2_    | 0  | 0  | 0  | 3  | 0   | 0  | 0        | 0        | 0        | 0.32833  |
| antisense SRGAP3_ar     | 0  | 1  | 0  | 1  | 0   | 2  | 0        | 0.106049 | 0        | 0.128359 |
| antisense -             | 0  | 0  | 0  | 1  | 1   | 0  | 0        | 0        | 0        | 0.126794 |
| pseudogen: -            | 2  | 1  | 0  | 1  | 0   | 1  | 0.163665 | 0.104939 | 0        | 0.127015 |
| lincRNA -               | 0  | 0  | 0  | 1  | 3   | 1  | 0        | 0        | 0        | 0.102796 |
| pseudogen: ribosomal_   | 0  | 0  | 1  | 3  | 2   | 0  | 0        | 0        | 0.047029 | 0.181496 |
| antisense -             | 0  | 0  | 0  | 1  | 0   | 0  | 0        | 0        | 0        | 0.096782 |
| lincRNA -               | 33 | 19 | 14 | 83 | 130 | 76 | 2.057674 | 1.519237 | 1.053267 | 8.032877 |
| lincRNA -               | 0  | 0  | 0  | 1  | 0   | 0  | 0        | 0        | 0        | 0.0893   |
| pseudogen: -            | 0  | 0  | 0  | 0  | 2   | 1  | 0        | 0        | 0        | 0        |
| pseudogen: -            | 3  | 0  | 0  | 1  | 3   | 1  | 0.491853 | 0        | 0        | 0.254475 |
| processed_ -            | 8  | 4  | 4  | 4  | 6   | 0  | 0.144277 | 0.092507 | 0.087039 | 0.111969 |
| processed_ -            | 0  | 0  | 0  | 0  | 0   | 1  | 0        | 0        | 0        | 0        |
| antisense -             | 5  | 3  | 8  | 3  | 1   | 3  | 0.259347 | 0.199546 | 0.500668 | 0.241526 |
| sense_intrc -           | 0  | 0  | 0  | 1  | 3   | 1  | 0        | 0        | 0        | 0.212186 |
| pseudogen: -            | 0  | 0  | 1  | 0  | 1   | 1  | 0        | 0        | 0.200622 | 0        |
| processed_ -            | 3  | 7  | 1  | 3  | 5   | 10 | 0.053876 | 0.161206 | 0.021668 | 0.083623 |
| lincRNA -               | 5  | 3  | 0  | 1  | 4   | 1  | 0.100795 | 0.077553 | 0        | 0.03129  |
| pseudogen: protein-kin  | 2  | 3  | 0  | 0  | 0   | 0  | 0.041386 | 0.079607 | 0        | 0        |
| pseudogen: protein_(pr  | 1  | 3  | 10 | 3  | 2   | 1  | 0.118409 | 0.455529 | 1.428674 | 0.551362 |
| pseudogen: tripartite_r | 0  | 0  | 0  | 3  | 3   | 2  | 0        | 0        | 0        | 0.263695 |
| pseudogen: -            | 10 | 23 | 23 | 0  | 0   | 0  | 1.351297 | 3.985548 | 3.749961 | 0        |
| pseudogen: MT-ND5_ps    | 3  | 2  | 1  | 10 | 12  | 5  | 0.102305 | 0.087462 | 0.041146 | 0.529308 |
| pseudogen: ribosomal_   | 1  | 2  | 1  | 2  | 4   | 2  | 0.062687 | 0.160775 | 0.075636 | 0.194598 |
| pseudogen: DEAH_(Asp-   | 0  | 0  | 2  | 0  | 0   | 0  | 0        | 0        | 0.036785 | 0        |
| antisense -             | 0  | 0  | 0  | 0  | 0   | 1  | 0        | 0        | 0        | 0        |
| pseudogen: -            | 0  | 1  | 0  | 3  | 1   | 2  | 0        | 0.18732  | 0        | 0.680185 |
| protein_co Uncharacte   | 2  | 4  | 1  | 0  | 1   | 2  | 0.1563   | 0.400865 | 0.094293 | 0        |
| processed_ -            | 6  | 3  | 3  | 5  | 14  | 4  | 0.49883  | 0.319839 | 0.300934 | 0.645211 |
| pseudogen: -            | 0  | 0  | 0  | 0  | 2   | 0  | 0        | 0        | 0        | 0        |
| pseudogen: -            | 0  | 0  | 0  | 0  | 0   | 1  | 0        | 0        | 0        | 0        |
| processed_ RAPGEF4_a    | 4  | 0  | 1  | 0  | 0   | 0  | 0.040554 | 0        | 0.012233 | 0        |
| pseudogen: -            | 2  | 5  | 3  | 1  | 3   | 2  | 0.248095 | 0.795368 | 0.449012 | 0.192539 |
| lincRNA -               | 0  | 0  | 4  | 1  | 1   | 0  | 0        | 0        | 0.064108 | 0.020618 |
| lincRNA HLA_compl       | 1  | 1  | 1  | 1  | 4   | 1  | 0.03901  | 0.050025 | 0.047068 | 0.060549 |
| antisense -             | 4  | 8  | 9  | 1  | 1   | 2  | 0.444455 | 1.139901 | 1.206587 | 0.172464 |
| lincRNA -               | 2  | 2  | 1  | 0  | 0   | 0  | 0.169584 | 0.217468 | 0.102307 | 0        |
| lincRNA -               | 0  | 0  | 3  | 0  | 2   | 1  | 0        | 0        | 0.347089 | 0        |
| antisense -             | 0  | 0  | 4  | 0  | 0   | 0  | 0        | 0        | 0.086706 | 0        |
| antisense -             | 0  | 2  | 0  | 2  | 0   | 4  | 0        | 0.192108 | 0        | 0.232523 |
| pseudogen: vomeronas    | 0  | 0  | 0  | 30 | 34  | 22 | 0        | 0        | 0        | 2.31047  |
| processed_ -            | 3  | 2  | 1  | 7  | 7   | 5  | 0.151584 | 0.12959  | 0.060965 | 0.548986 |
| pseudogen: DnaJ_(Hsp4   | 0  | 0  | 0  | 0  | 2   | 3  | 0        | 0        | 0        | 0        |
| protein_co Homo_sapi    | 1  | 2  | 5  | 0  | 0   | 0  | 0.027357 | 0.070163 | 0.165039 | 0        |
| pseudogen: topoisome    | 0  | 0  | 2  | 1  | 2   | 2  | 0        | 0        | 0.081993 | 0.052739 |
| pseudogen: -            | 2  | 1  | 0  | 0  | 1   | 0  | 0.196193 | 0.125795 | 0        | 0        |
| pseudogen: RAN_memt     | 2  | 0  | 2  | 0  | 0   | 0  | 0.143176 | 0        | 0.17275  | 0        |
| pseudogen: cofilin_1_(r | 0  | 0  | 0  | 3  | 6   | 6  | 0        | 0        | 0        | 0.445591 |
| pseudogen: SEC63_hon    | 6  | 1  | 3  | 1  | 0   | 1  | 0.223641 | 0.047798 | 0.134918 | 0.057854 |
| antisense -             | 7  | 7  | 4  | 1  | 8   | 11 | 0.595699 | 0.763899 | 0.410711 | 0.132087 |
| processed_ -            | 1  | 3  | 3  | 2  | 1   | 0  | 0.078411 | 0.301654 | 0.283824 | 0.243411 |
| processed_ -            | 0  | 0  | 1  | 0  | 0   | 0  | 0        | 0        | 0.078143 | 0        |
| antisense -             | 0  | 0  | 0  | 0  | 0   | 1  | 0        | 0        | 0        | 0        |
| lincRNA -               | 46 | 33 | 22 | 39 | 36  | 37 | 1.757898 | 1.617183 | 1.014394 | 2.313294 |
| pseudogen: -            | 0  | 0  | 3  | 2  | 3   | 7  | 0        | 0        | 0.217877 | 0.186854 |
| pseudogen: ribosomal_   | 0  | 0  | 0  | 0  | 0   | 2  | 0        | 0        | 0        | 0        |
| antisense -             | 1  | 0  | 3  | 0  | 0   | 2  | 0.118111 | 0        | 0.427523 | 0        |
| pseudogen: ubiquitin_f  | 0  | 0  | 0  | 0  | 0   | 1  | 0        | 0        | 0        | 0        |
| protein_co biorientati  | 0  | 0  | 0  | 1  | 0   | 2  | 0        | 0        | 0        | 0.02247  |
| pseudogen: -            | 0  | 2  | 0  | 1  | 4   | 0  | 0        | 0.161639 | 0        | 0.097822 |

|                        |     |     |     |     |     |     |          |          |          |          |
|------------------------|-----|-----|-----|-----|-----|-----|----------|----------|----------|----------|
| pseudogen: major_hist  | 0   | 0   | 0   | 0   | 1   | 0   | 0        | 0        | 0        | 0        |
| lincRNA -              | 2   | 1   | 1   | 1   | 0   | 6   | 0.166572 | 0.106802 | 0.100489 | 0.129271 |
| pseudogen: -           | 0   | 0   | 0   | 0   | 0   | 1   | 0        | 0        | 0        | 0        |
| antisense -            | 2   | 6   | 4   | 6   | 8   | 0   | 0.143176 | 0.550807 | 0.345499 | 0.666685 |
| antisense -            | 0   | 1   | 2   | 0   | 0   | 0   | 0        | 0.101571 | 0.191133 | 0        |
| pseudogen: -           | 3   | 0   | 0   | 6   | 5   | 7   | 0.32714  | 0        | 0        | 1.015532 |
| lincRNA -              | 22  | 19  | 19  | 18  | 29  | 20  | 1.344955 | 1.489526 | 1.401479 | 1.708001 |
| processed_ -           | 6   | 6   | 12  | 6   | 11  | 5   | 0.472047 | 0.605334 | 1.139104 | 0.732683 |
| antisense -            | 1   | 0   | 2   | 0   | 0   | 0   | 0.087481 | 0        | 0.211103 | 0        |
| antisense MFI2_antis   | 6   | 5   | 7   | 17  | 29  | 14  | 0.295836 | 0.31614  | 0.416434 | 1.301006 |
| pseudogen: suppressio  | 0   | 0   | 2   | 3   | 3   | 1   | 0        | 0        | 0.100668 | 0.194252 |
| antisense -            | 1   | 1   | 0   | 1   | 0   | 0   | 0.057113 | 0.07324  | 0        | 0.088648 |
| sense_intrc -          | 1   | 0   | 0   | 5   | 5   | 0   | 0.116352 | 0        | 0        | 0.902975 |
| protein_co -           | 0   | 0   | 0   | 0   | 0   | 1   | 0        | 0        | 0        | 0        |
| antisense -            | 0   | 0   | 2   | 1   | 1   | 0   | 0        | 0        | 0.239727 | 0.154194 |
| pseudogen: -           | 0   | 1   | 0   | 0   | 1   | 0   | 0        | 0.105491 | 0        | 0        |
| lincRNA long_interf    | 10  | 5   | 7   | 8   | 10  | 2   | 0.828446 | 0.531182 | 0.699697 | 1.02869  |
| lincRNA -              | 0   | 0   | 0   | 2   | 1   | 3   | 0        | 0        | 0        | 0.104269 |
| lincRNA -              | 0   | 1   | 1   | 0   | 0   | 0   | 0        | 0.034419 | 0.032384 | 0        |
| antisense -            | 0   | 0   | 0   | 2   | 1   | 1   | 0        | 0        | 0        | 0.143976 |
| antisense -            | 1   | 8   | 7   | 0   | 7   | 2   | 0.120231 | 1.233432 | 1.015458 | 0        |
| lincRNA -              | 0   | 1   | 0   | 0   | 0   | 0   | 0        | 0.215519 | 0        | 0        |
| processed_ -           | 1   | 1   | 1   | 2   | 3   | 0   | 0.009056 | 0.011613 | 0.010926 | 0.028111 |
| lincRNA -              | 0   | 0   | 0   | 4   | 6   | 0   | 0        | 0        | 0        | 0.11332  |
| protein_co caspase_16  | 11  | 11  | 9   | 9   | 17  | 4   | 0.238681 | 0.306075 | 0.235622 | 0.303109 |
| pseudogen: ribosomal_  | 0   | 0   | 0   | 1   | 2   | 2   | 0        | 0        | 0        | 0.060099 |
| processed_ -           | 4   | 5   | 5   | 9   | 7   | 10  | 0.426273 | 0.683293 | 0.642903 | 1.488678 |
| antisense -            | 0   | 0   | 1   | 0   | 0   | 1   | 0        | 0        | 0.018133 | 0        |
| lincRNA -              | 0   | 0   | 0   | 1   | 2   | 4   | 0        | 0        | 0        | 0.16355  |
| pseudogen: -           | 0   | 0   | 1   | 0   | 1   | 3   | 0        | 0        | 0.319636 | 0        |
| processed_ -           | 0   | 1   | 0   | 0   | 0   | 0   | 0        | 0.162513 | 0        | 0        |
| protein_co Uncharacte  | 0   | 0   | 0   | 10  | 8   | 6   | 0        | 0        | 0        | 0.378864 |
| pseudogen: transducin  | 0   | 0   | 4   | 4   | 8   | 18  | 0        | 0        | 0.384214 | 0.49426  |
| pseudogen: MT-ND1_ps   | 0   | 0   | 1   | 0   | 0   | 0   | 0        | 0        | 0.064584 | 0        |
| pseudogen: peptidylpro | 0   | 0   | 0   | 1   | 1   | 0   | 0        | 0        | 0        | 0.147926 |
| pseudogen: -           | 0   | 1   | 0   | 0   | 2   | 0   | 0        | 0.241485 | 0        | 0        |
| processed_ -           | 0   | 1   | 4   | 1   | 0   | 0   | 0        | 0.116305 | 0.437722 | 0.140773 |
| pseudogen: gem_(nucle  | 7   | 3   | 3   | 34  | 39  | 22  | 0.450247 | 0.247448 | 0.232821 | 3.394394 |
| lincRNA -              | 0   | 1   | 0   | 0   | 0   | 0   | 0        | 0.120743 | 0        | 0        |
| pseudogen: -           | 1   | 0   | 0   | 0   | 0   | 0   | 0.192963 | 0        | 0        | 0        |
| pseudogen: -           | 0   | 0   | 0   | 2   | 1   | 0   | 0        | 0        | 0        | 0.25492  |
| antisense -            | 3   | 0   | 0   | 0   | 1   | 0   | 0.230607 | 0        | 0        | 0        |
| pseudogen: -           | 0   | 0   | 0   | 1   | 0   | 0   | 0        | 0        | 0        | 0.08261  |
| pseudogen: protein_ty  | 0   | 0   | 0   | 2   | 0   | 2   | 0        | 0        | 0        | 0.135783 |
| antisense -            | 2   | 5   | 7   | 2   | 0   | 2   | 0.24108  | 0.772877 | 1.018068 | 0.374189 |
| processed_ RNF144A_2   | 78  | 71  | 76  | 21  | 25  | 17  | 1.238125 | 1.445232 | 1.455565 | 0.517392 |
| antisense -            | 0   | 0   | 0   | 8   | 10  | 8   | 0        | 0        | 0        | 0.764092 |
| pseudogen: -           | 3   | 5   | 6   | 3   | 1   | 1   | 0.192172 | 0.410723 | 0.463734 | 0.298278 |
| pseudogen: OFD1_pseu   | 3   | 0   | 0   | 2   | 5   | 1   | 0.04661  | 0        | 0        | 0.04823  |
| antisense NLGN1_ant    | 1   | 2   | 1   | 2   | 1   | 1   | 0.057534 | 0.147558 | 0.069418 | 0.178601 |
| antisense long_interf  | 5   | 9   | 17  | 15  | 25  | 21  | 0.145712 | 0.336338 | 0.597752 | 0.678494 |
| pseudogen: -           | 1   | 4   | 0   | 1   | 1   | 5   | 0.111643 | 0.572665 | 0        | 0.173285 |
| pseudogen: activating_ | 0   | 3   | 0   | 3   | 3   | 3   | 0        | 0.170823 | 0        | 0.206761 |
| pseudogen: nucleopho:  | 0   | 0   | 0   | 0   | 0   | 2   | 0        | 0        | 0        | 0        |
| lincRNA -              | 6   | 6   | 7   | 21  | 27  | 27  | 0.608961 | 0.780906 | 0.857205 | 3.308173 |
| lincRNA HLA_compl      | 531 | 436 | 437 | 305 | 344 | 161 | 5.26175  | 5.540277 | 5.224745 | 4.691006 |
| pseudogen: glyceraldeh | 13  | 8   | 10  | 24  | 23  | 24  | 0.606538 | 0.478645 | 0.56294  | 1.738025 |
| antisense EFCAB14_a    | 5   | 5   | 1   | 2   | 3   | 4   | 0.4689   | 0.601298 | 0.113151 | 0.291119 |
| pseudogen: MOB_kinas   | 0   | 0   | 1   | 0   | 0   | 0   | 0        | 0        | 0.105749 | 0        |
| processed_ -           | 3   | 5   | 0   | 1   | 1   | 4   | 0.244644 | 0.522868 | 0        | 0.126574 |
| pseudogen: -           | 19  | 14  | 4   | 0   | 0   | 1   | 1.504916 | 1.421988 | 0.382267 | 0        |
| pseudogen: ubiquitin_I | 0   | 2   | 0   | 0   | 0   | 0   | 0        | 0.520604 | 0        | 0        |
| lincRNA -              | 2   | 2   | 7   | 2   | 5   | 4   | 0.177278 | 0.227334 | 0.748636 | 0.27516  |
| pseudogen: collagen_ty | 20  | 18  | 27  | 12  | 18  | 10  | 0.359035 | 0.414371 | 0.584816 | 0.334364 |
| protein_co mitochond   | 60  | 50  | 47  | 99  | 203 | 95  | 13.59131 | 14.52411 | 12.84565 | 34.80773 |

|                        |     |     |     |     |     |     |          |          |          |          |
|------------------------|-----|-----|-----|-----|-----|-----|----------|----------|----------|----------|
| protein_co Uncharacte  | 0   | 0   | 0   | 1   | 3   | 3   | 0        | 0        | 0        | 0.093668 |
| lincRNA -              | 5   | 5   | 5   | 7   | 5   | 4   | 0.245755 | 0.315146 | 0.296517 | 0.534024 |
| lincRNA -              | 0   | 0   | 0   | 0   | 1   | 2   | 0        | 0        | 0        | 0        |
| lincRNA -              | 17  | 11  | 5   | 11  | 18  | 16  | 1.207773 | 1.002163 | 0.428602 | 1.212997 |
| lincRNA -              | 1   | 1   | 1   | 0   | 0   | 4   | 0.026477 | 0.033952 | 0.031946 | 0        |
| antisense -            | 69  | 44  | 51  | 23  | 43  | 20  | 2.44182  | 1.996763 | 2.177623 | 1.263347 |
| protein_co orosomucc   | 0   | 1   | 0   | 1   | 2   | 4   | 0        | 0.061357 | 0        | 0.074265 |
| sense_intrc -          | 0   | 0   | 0   | 0   | 1   | 0   | 0        | 0        | 0        | 0        |
| pseudogeni -           | 1   | 0   | 1   | 0   | 0   | 0   | 0.031985 | 0        | 0.038592 | 0        |
| pseudogeni lysophosph  | 1   | 0   | 0   | 1   | 2   | 1   | 0.067371 | 0        | 0        | 0.104569 |
| antisense KDM5B_an     | 84  | 71  | 48  | 144 | 165 | 86  | 5.265724 | 5.707507 | 3.630514 | 14.01108 |
| pseudogeni -           | 0   | 0   | 0   | 2   | 0   | 0   | 0        | 0        | 0        | 0.41235  |
| antisense -            | 5   | 9   | 7   | 0   | 0   | 0   | 0.307677 | 0.710194 | 0.519722 | 0        |
| pseudogeni -           | 0   | 0   | 1   | 0   | 2   | 1   | 0        | 0        | 0.220138 | 0        |
| antisense -            | 1   | 0   | 0   | 1   | 0   | 0   | 0.053773 | 0        | 0        | 0.083463 |
| lincRNA -              | 0   | 0   | 0   | 1   | 0   | 0   | 0        | 0        | 0        | 0.093668 |
| protein_co chromosom   | 770 | 537 | 580 | 833 | 957 | 817 | 21.84229 | 19.534   | 19.85105 | 36.67609 |
| antisense -            | 28  | 22  | 29  | 10  | 19  | 22  | 0.685956 | 0.691147 | 0.857205 | 0.38025  |
| pseudogeni -           | 4   | 4   | 3   | 4   | 11  | 9   | 0.28548  | 0.366087 | 0.258336 | 0.443104 |
| lincRNA -              | 0   | 0   | 0   | 0   | 1   | 0   | 0        | 0        | 0        | 0        |
| pseudogeni glyceraldeh | 0   | 0   | 0   | 0   | 0   | 1   | 0        | 0        | 0        | 0        |
| antisense -            | 6   | 6   | 5   | 2   | 3   | 2   | 0.105253 | 0.134971 | 0.105828 | 0.054456 |
| pseudogeni glucuronid  | 233 | 206 | 225 | 185 | 227 | 133 | 2.183328 | 2.475367 | 2.543863 | 2.6907   |
| pseudogeni -           | 1   | 0   | 0   | 1   | 0   | 0   | 0.071153 | 0        | 0        | 0.11044  |
| processed_ -           | 1   | 0   | 0   | 0   | 0   | 0   | 0.053711 | 0        | 0        | 0        |
| antisense -            | 1   | 2   | 2   | 3   | 4   | 1   | 0.106811 | 0.27394  | 0.257747 | 0.497356 |
| lincRNA -              | 36  | 46  | 34  | 37  | 55  | 42  | 1.281732 | 2.100205 | 1.460567 | 2.044687 |
| pseudogeni -           | 1   | 0   | 0   | 0   | 1   | 0   | 0.037572 | 0        | 0        | 0        |
| pseudogeni -           | 0   | 1   | 0   | 0   | 0   | 0   | 0        | 0.075826 | 0        | 0        |
| pseudogeni -           | 0   | 1   | 1   | 0   | 0   | 0   | 0        | 0.099061 | 0.093205 | 0        |
| pseudogeni adenosylm   | 0   | 1   | 0   | 1   | 2   | 0   | 0        | 0.065217 | 0        | 0.078937 |
| processed_ -           | 4   | 3   | 1   | 0   | 0   | 0   | 0.091806 | 0.088296 | 0.027692 | 0        |
| antisense -            | 146 | 92  | 125 | 79  | 79  | 123 | 15.21321 | 12.2932  | 15.71542 | 12.7769  |
| pseudogeni EF-hand_ca  | 0   | 0   | 0   | 2   | 0   | 0   | 0        | 0        | 0        | 0.314384 |
| antisense -            | 2   | 1   | 1   | 4   | 10  | 6   | 0.47847  | 0.306785 | 0.288651 | 1.485302 |
| antisense -            | 6   | 5   | 7   | 5   | 1   | 7   | 0.443055 | 0.473463 | 0.623667 | 0.573069 |
| antisense -            | 1   | 0   | 0   | 0   | 0   | 0   | 0.149808 | 0        | 0        | 0        |
| lincRNA -              | 2   | 4   | 0   | 0   | 1   | 0   | 0.15604  | 0.400198 | 0        | 0        |
| pseudogeni -           | 0   | 0   | 0   | 1   | 1   | 0   | 0        | 0        | 0        | 0.264654 |
| antisense -            | 8   | 6   | 7   | 1   | 1   | 2   | 0.192567 | 0.185205 | 0.2033   | 0.037361 |
| pseudogeni -           | 0   | 0   | 0   | 1   | 0   | 0   | 0        | 0        | 0        | 0.147926 |
| antisense -            | 1   | 0   | 0   | 3   | 3   | 5   | 0.119923 | 0        | 0        | 0.558413 |
| pseudogeni -           | 0   | 0   | 0   | 18  | 19  | 23  | 0        | 0        | 0        | 5.038602 |
| pseudogeni -           | 0   | 0   | 1   | 0   | 0   | 0   | 0        | 0        | 0.098392 | 0        |
| pseudogeni -           | 1   | 0   | 0   | 11  | 19  | 13  | 0.020729 | 0        | 0        | 0.353925 |
| pseudogeni -           | 1   | 0   | 1   | 0   | 0   | 1   | 0.076244 | 0        | 0.091993 | 0        |
| sense_intrc ITPKB_intr | 1   | 0   | 0   | 0   | 0   | 0   | 0.062855 | 0        | 0        | 0        |
| antisense -            | 3   | 3   | 0   | 0   | 0   | 3   | 0.11616  | 0.148959 | 0        | 0        |
| lincRNA -              | 0   | 0   | 1   | 1   | 1   | 3   | 0        | 0        | 0.093823 | 0.120696 |
| antisense -            | 13  | 14  | 18  | 1   | 3   | 6   | 0.289995 | 0.400484 | 0.484471 | 0.034624 |
| antisense -            | 20  | 33  | 27  | 13  | 30  | 26  | 1.367056 | 2.892541 | 2.226733 | 1.379209 |
| antisense -            | 27  | 23  | 16  | 6   | 7   | 5   | 1.305186 | 1.425758 | 0.933204 | 0.450184 |
| lincRNA -              | 0   | 2   | 0   | 0   | 0   | 0   | 0        | 0.195544 | 0        | 0        |
| pseudogeni -           | 0   | 0   | 3   | 3   | 0   | 4   | 0        | 0        | 0.499196 | 0.642175 |
| pseudogeni chaperonin  | 98  | 79  | 79  | 112 | 133 | 191 | 3.494465 | 3.61236  | 3.398833 | 6.198736 |
| pseudogeni chromodoi   | 1   | 3   | 5   | 2   | 5   | 3   | 0.030991 | 0.119226 | 0.186965 | 0.096206 |
| processed_ -           | 3   | 1   | 2   | 1   | 0   | 1   | 0.138455 | 0.059183 | 0.111369 | 0.071634 |
| pseudogeni -           | 0   | 0   | 0   | 2   | 1   | 2   | 0        | 0        | 0        | 0.423138 |
| processed_ -           | 0   | 0   | 1   | 0   | 0   | 0   | 0        | 0        | 0.033182 | 0        |
| pseudogeni prothymos   | 16  | 15  | 9   | 6   | 7   | 7   | 2.809889 | 3.378078 | 1.907039 | 1.635501 |
| pseudogeni cathepsin_  | 0   | 0   | 2   | 1   | 2   | 0   | 0        | 0        | 0.287916 | 0.18519  |
| lincRNA -              | 0   | 0   | 0   | 5   | 8   | 7   | 0        | 0        | 0        | 0.764494 |
| lincRNA -              | 3   | 2   | 9   | 2   | 0   | 0   | 0.239235 | 0.204523 | 0.865952 | 0.24755  |
| lincRNA -              | 2   | 4   | 0   | 7   | 8   | 9   | 0.265666 | 0.681357 | 0        | 1.443226 |
| pseudogeni ADP-ribosy  | 3   | 0   | 1   | 0   | 0   | 0   | 0.36443  | 0        | 0.146569 | 0        |

|                        |     |     |     |     |      |     |          |          |          |          |
|------------------------|-----|-----|-----|-----|------|-----|----------|----------|----------|----------|
| processed_-            | 21  | 22  | 29  | 14  | 18   | 8   | 0.527701 | 0.708926 | 0.879255 | 0.546044 |
| antisense_-            | 16  | 6   | 5   | 3   | 5    | 0   | 1.190858 | 0.572665 | 0.449012 | 0.34657  |
| lincRNA_-              | 0   | 0   | 0   | 0   | 0    | 1   | 0        | 0        | 0        | 0        |
| antisense thiosulfate  | 17  | 15  | 15  | 23  | 11   | 15  | 0.828618 | 0.937575 | 0.882154 | 1.740058 |
| antisense_-            | 9   | 12  | 5   | 3   | 15   | 10  | 0.206463 | 0.353013 | 0.138394 | 0.10682  |
| pseudogen_-            | 1   | 0   | 5   | 0   | 4    | 1   | 0.065672 | 0        | 0.396187 | 0        |
| pseudogen_-            | 0   | 0   | 0   | 0   | 1    | 1   | 0        | 0        | 0        | 0        |
| pseudogen: SDA1_dom    | 7   | 13  | 14  | 19  | 17   | 8   | 0.103412 | 0.246278 | 0.249545 | 0.43567  |
| antisense_-            | 11  | 19  | 9   | 15  | 17   | 9   | 1.065682 | 2.360467 | 1.052024 | 2.255572 |
| protein_co chromosom   | 1   | 0   | 3   | 0   | 0    | 0   | 0.06957  | 0        | 0.25182  | 0        |
| pseudogen_-            | 0   | 0   | 2   | 0   | 0    | 0   | 0        | 0        | 0.285735 | 0        |
| lincRNA_-              | 3   | 8   | 9   | 1   | 5    | 4   | 0.062326 | 0.213132 | 0.2256   | 0.032246 |
| lincRNA_-              | 3   | 0   | 0   | 0   | 0    | 0   | 0.157879 | 0        | 0        | 0        |
| processed_-            | 10  | 7   | 8   | 2   | 2    | 2   | 0.905213 | 0.812565 | 0.873753 | 0.281003 |
| protein_co oligosaccha | 841 | 553 | 566 | 297 | 335  | 225 | 70.29323 | 59.27233 | 57.07974 | 38.53048 |
| pseudogen_-            | 14  | 5   | 13  | 5   | 15   | 5   | 0.905462 | 0.414688 | 1.014457 | 0.50193  |
| pseudogen_-            | 0   | 1   | 0   | 0   | 0    | 1   | 0        | 0.040087 | 0        | 0        |
| antisense_-            | 0   | 0   | 1   | 0   | 0    | 0   | 0        | 0        | 0.151271 | 0        |
| lincRNA_-              | 0   | 0   | 0   | 0   | 0    | 3   | 0        | 0        | 0        | 0        |
| sense_intrc_-          | 3   | 1   | 1   | 0   | 0    | 1   | 0.351675 | 0.150324 | 0.141439 | 0        |
| antisense_-            | 11  | 13  | 13  | 15  | 28   | 10  | 0.380376 | 0.576466 | 0.542391 | 0.805086 |
| antisense_-            | 0   | 4   | 1   | 10  | 5    | 4   | 0        | 0.605842 | 0.142508 | 1.833244 |
| pseudogen: RAB11_fam   | 42  | 26  | 36  | 8   | 8    | 9   | 1.117696 | 0.887273 | 1.155913 | 0.330442 |
| processed_-            | 39  | 31  | 39  | 0   | 0    | 0   | 0.99875  | 1.018036 | 1.205049 | 0        |
| sense_intrc_-          | 0   | 0   | 0   | 16  | 13   | 17  | 0        | 0        | 0        | 0.995279 |
| pseudogen: thymosin_I  | 0   | 1   | 0   | 3   | 0    | 1   | 0        | 0.455529 | 0        | 1.654086 |
| pseudogen: ribosomal_  | 0   | 1   | 1   | 1   | 0    | 0   | 0        | 0.098251 | 0.092444 | 0.118921 |
| pseudogen: eukaryotic_ | 25  | 13  | 11  | 20  | 30   | 22  | 0.843953 | 0.56277  | 0.448042 | 1.047945 |
| antisense_-            | 27  | 15  | 18  | 38  | 42   | 19  | 0.772912 | 0.550639 | 0.621709 | 1.68842  |
| pseudogen: death_asso  | 0   | 0   | 1   | 0   | 1    | 1   | 0        | 0        | 0.110932 | 0        |
| antisense_-            | 3   | 4   | 3   | 0   | 0    | 0   | 0.174097 | 0.297672 | 0.210058 | 0        |
| pseudogen_-            | 8   | 3   | 2   | 1   | 1    | 0   | 0.216332 | 0.104031 | 0.065254 | 0.041972 |
| lincRNA_-              | 5   | 2   | 1   | 0   | 0    | 0   | 0.45     | 0.230825 | 0.10859  | 0        |
| pseudogen_-            | 3   | 2   | 2   | 0   | 0    | 0   | 0.129055 | 0.11033  | 0.103808 | 0        |
| pseudogen_-            | 8   | 5   | 4   | 13  | 12   | 12  | 0.61901  | 0.49612  | 0.373436 | 1.561283 |
| pseudogen_-            | 8   | 15  | 9   | 0   | 0    | 0   | 0.477252 | 1.147515 | 0.647811 | 0        |
| pseudogen_-            | 0   | 0   | 0   | 0   | 2    | 4   | 0        | 0        | 0        | 0        |
| lincRNA_-              | 2   | 3   | 5   | 4   | 7    | 1   | 0.171131 | 0.329178 | 0.5162   | 0.531239 |
| lincRNA_-              | 0   | 0   | 1   | 2   | 1    | 0   | 0        | 0        | 0.172486 | 0.443779 |
| lincRNA_-              | 5   | 1   | 1   | 6   | 5    | 2   | 0.330677 | 0.084809 | 0.079796 | 0.615908 |
| lincRNA_-              | 1   | 4   | 5   | 1   | 0    | 0   | 0.057818 | 0.296571 | 0.348801 | 0.089741 |
| protein_co HDCMB45F    | 0   | 1   | 0   | 0   | 0    | 0   | 0        | 0.137283 | 0        | 0        |
| lincRNA_-              | 2   | 0   | 0   | 3   | 3    | 5   | 0.113949 | 0        | 0        | 0.265297 |
| lincRNA_-              | 0   | 0   | 1   | 1   | 0    | 0   | 0        | 0        | 0.133433 | 0.17165  |
| antisense KIAA1984_    | 9   | 8   | 7   | 1   | 4    | 11  | 0.176869 | 0.201609 | 0.16598  | 0.030503 |
| antisense ITPKB_anti:  | 0   | 1   | 0   | 0   | 2    | 0   | 0        | 0.111765 | 0        | 0        |
| lincRNA_-              | 4   | 3   | 1   | 78  | 85   | 27  | 0.074429 | 0.071583 | 0.022451 | 2.252708 |
| pseudogen_-            | 1   | 0   | 0   | 0   | 0    | 0   | 0.117225 | 0        | 0        | 0        |
| antisense_-            | 7   | 4   | 1   | 5   | 5    | 3   | 0.449015 | 0.329028 | 0.077395 | 0.49781  |
| lincRNA_-              | 1   | 0   | 0   | 6   | 4    | 3   | 0.078807 | 0        | 0        | 0.733914 |
| processed_-            | 0   | 1   | 1   | 0   | 0    | 0   | 0        | 0.056566 | 0.053222 | 0        |
| lincRNA_-              | 0   | 0   | 0   | 0   | 0    | 1   | 0        | 0        | 0        | 0        |
| lincRNA_-              | 1   | 1   | 0   | 0   | 0    | 0   | 0.059055 | 0.07573  | 0        | 0        |
| antisense_-            | 2   | 5   | 6   | 8   | 19   | 6   | 0.213136 | 0.683293 | 0.771484 | 1.323269 |
| pseudogen: signal_pept | 18  | 14  | 22  | 17  | 18   | 29  | 0.674138 | 0.672378 | 0.994138 | 0.988224 |
| processed_-            | 0   | 0   | 0   | 195 | 158  | 236 | 0        | 0        | 0        | 8.227282 |
| protein_co chromosom   | 316 | 245 | 257 | 994 | 1547 | 671 | 7.106593 | 7.065612 | 6.973575 | 34.69694 |
| antisense MACC1_anti   | 0   | 0   | 0   | 26  | 37   | 5   | 0        | 0        | 0        | 2.961306 |
| pseudogen_-            | 0   | 0   | 0   | 1   | 1    | 0   | 0        | 0        | 0        | 0.098086 |
| pseudogen: ribosomal_  | 1   | 2   | 0   | 0   | 0    | 0   | 0.300577 | 0.770895 | 0        | 0        |
| antisense_-            | 2   | 2   | 1   | 1   | 6    | 3   | 0.117962 | 0.15127  | 0.071164 | 0.091547 |
| antisense_-            | 0   | 0   | 0   | 4   | 1    | 4   | 0        | 0        | 0        | 0.522656 |
| lincRNA_-              | 39  | 31  | 34  | 32  | 31   | 20  | 0.568629 | 0.579609 | 0.598124 | 0.724177 |
| pseudogen: hexokinase  | 0   | 0   | 0   | 0   | 1    | 2   | 0        | 0        | 0        | 0        |
| antisense_-            | 3   | 4   | 2   | 27  | 29   | 31  | 0.17897  | 0.306004 | 0.143958 | 2.50007  |

|                         |      |     |     |      |      |      |          |          |          |          |
|-------------------------|------|-----|-----|------|------|------|----------|----------|----------|----------|
| antisense -             | 2    | 4   | 1   | 3    | 5    | 1    | 0.194162 | 0.497969 | 0.117134 | 0.452048 |
| pseudogen-              | 1    | 1   | 0   | 0    | 1    | 0    | 0.046106 | 0.059125 | 0        | 0        |
| antisense -             | 0    | 0   | 0   | 1    | 0    | 0    | 0        | 0        | 0        | 0.130899 |
| lincRNA -               | 0    | 1   | 0   | 0    | 0    | 0    | 0        | 0.137597 | 0        | 0        |
| lincRNA zinc_finger     | 23   | 14  | 26  | 153  | 144  | 139  | 0.465058 | 0.363009 | 0.634309 | 4.801772 |
| processed_-             | 14   | 21  | 15  | 750  | 1296 | 1266 | 0.325625 | 0.626352 | 0.420949 | 27.07582 |
| antisense -             | 2    | 1   | 1   | 0    | 0    | 0    | 0.115209 | 0.07387  | 0.069503 | 0        |
| pseudogen-              | 14   | 7   | 9   | 0    | 2    | 3    | 2.303369 | 1.476872 | 1.786595 | 0        |
| antisense -             | 1    | 1   | 0   | 2    | 2    | 0    | 0.108042 | 0.138548 | 0        | 0.335391 |
| antisense HOX_transc    | 124  | 101 | 106 | 0    | 0    | 3    | 2.401637 | 2.508513 | 2.477077 | 0        |
| lincRNA -               | 4    | 1   | 3   | 5    | 4    | 4    | 0.362785 | 0.116305 | 0.328291 | 0.703867 |
| pseudogen:FCF1_small    | 57   | 59  | 61  | 15   | 35   | 25   | 4.584444 | 6.085177 | 5.919564 | 1.872551 |
| processed_-             | 0    | 1   | 0   | 0    | 0    | 0    | 0        | 0.086642 | 0        | 0        |
| lincRNA -               | 0    | 0   | 0   | 58   | 73   | 39   | 0        | 0        | 0        | 20.59136 |
| processed_-             | 10   | 12  | 16  | 92   | 110  | 184  | 0.459256 | 0.706717 | 0.88659  | 6.558023 |
| antisense -             | 11   | 3   | 5   | 0    | 0    | 0    | 0.955167 | 0.334054 | 0.523847 | 0        |
| pseudogen-              | 4    | 3   | 10  | 1    | 3    | 5    | 0.207249 | 0.199325 | 0.625144 | 0.08042  |
| pseudogen-              | 3    | 1   | 1   | 0    | 0    | 0    | 0.299936 | 0.128209 | 0.12063  | 0        |
| antisense -             | 7    | 4   | 5   | 2    | 6    | 2    | 0.664433 | 0.486881 | 0.572627 | 0.294655 |
| pseudogen:proteasom     | 23   | 10  | 15  | 16   | 11   | 3    | 1.583657 | 0.882963 | 1.246156 | 1.709951 |
| pseudogen-              | 1    | 0   | 0   | 2    | 0    | 0    | 0.174963 | 0        | 0        | 0.543133 |
| TR_V_pseuT_cell_rece    | 0    | 1   | 1   | 2    | 0    | 0    | 0        | 0.169858 | 0.159818 | 0.411185 |
| protein_co proline-ricl | 89   | 61  | 71  | 174  | 269  | 105  | 1.28367  | 1.128243 | 1.235577 | 3.89532  |
| antisense TTC3_antis    | 0    | 2   | 5   | 0    | 0    | 0    | 0        | 0.109626 | 0.257865 | 0        |
| lincRNA -               | 1    | 0   | 1   | 0    | 1    | 1    | 0.056156 | 0        | 0.067755 | 0        |
| antisense -             | 0    | 3   | 2   | 0    | 2    | 0    | 0        | 0.362957 | 0.227668 | 0        |
| lincRNA -               | 3    | 1   | 3   | 0    | 0    | 0    | 0.242953 | 0.103851 | 0.293137 | 0        |
| pseudogen-              | 1    | 0   | 0   | 0    | 0    | 0    | 0.239235 | 0        | 0        | 0        |
| antisense -             | 0    | 0   | 2   | 7    | 16   | 2    | 0        | 0        | 0.17989  | 0.80995  |
| lincRNA -               | 2    | 1   | 1   | 1    | 1    | 0    | 0.1563   | 0.100216 | 0.094293 | 0.1213   |
| protein_co ADP-ribosy   | 3    | 4   | 7   | 1    | 6    | 3    | 0.064028 | 0.109476 | 0.180259 | 0.033127 |
| lincRNA -               | 0    | 0   | 0   | 5    | 3    | 1    | 0        | 0        | 0        | 0.202054 |
| antisense TNKS2_anti    | 9    | 2   | 2   | 4    | 2    | 6    | 0.692956 | 0.197471 | 0.185798 | 0.478028 |
| pseudogen-              | 0    | 0   | 1   | 4    | 1    | 0    | 0        | 0        | 0.163987 | 0.843824 |
| antisense long_interf   | 1    | 0   | 1   | 4    | 13   | 6    | 0.086833 | 0        | 0.104769 | 0.53911  |
| processed_-             | 10   | 14  | 5   | 58   | 70   | 63   | 0.514145 | 0.923045 | 0.310173 | 4.62854  |
| lincRNA -               | 3    | 0   | 0   | 0    | 1    | 0    | 0.355227 | 0        | 0        | 0        |
| protein_co dihydrofol   | 1063 | 833 | 883 | 1178 | 1479 | 2107 | 12.72507 | 12.78737 | 12.75368 | 21.88782 |
| lincRNA -               | 0    | 0   | 0   | 0    | 0    | 2    | 0        | 0        | 0        | 0        |
| lincRNA -               | 0    | 0   | 0   | 0    | 2    | 0    | 0        | 0        | 0        | 0        |
| antisense SRGAP3_ar     | 0    | 0   | 0   | 1    | 0    | 0    | 0        | 0        | 0        | 0.061211 |
| protein_co suppressor   | 1    | 2   | 1   | 9    | 7    | 6    | 0.05119  | 0.131288 | 0.061764 | 0.715085 |
| pseudogen-              | 0    | 0   | 1   | 1    | 1    | 2    | 0        | 0        | 0.114525 | 0.147328 |
| pseudogen-              | 0    | 0   | 2   | 0    | 1    | 2    | 0        | 0        | 0.137821 | 0        |
| pseudogen-              | 2    | 0   | 0   | 0    | 1    | 1    | 1.077931 | 0        | 0        | 0        |
| lincRNA -               | 0    | 0   | 0   | 0    | 1    | 1    | 0        | 0        | 0        | 0        |
| antisense -             | 0    | 0   | 0   | 2    | 1    | 1    | 0        | 0        | 0        | 0.234019 |
| antisense -             | 2    | 1   | 2   | 0    | 0    | 0    | 0.09668  | 0.061989 | 0.116651 | 0        |
| processed_-             | 0    | 2   | 4   | 0    | 0    | 1    | 0        | 0.069878 | 0.131494 | 0        |
| pseudogen:ribosomal_    | 0    | 0   | 0   | 0    | 1    | 0    | 0        | 0        | 0        | 0        |
| pseudogen:cathepsin_l   | 0    | 0   | 0   | 0    | 1    | 0    | 0        | 0        | 0        | 0        |
| antisense -             | 9    | 15  | 18  | 7    | 10   | 7    | 0.208092 | 0.444747 | 0.502149 | 0.251212 |
| pseudogen:eukaryotic_   | 0    | 0   | 0   | 2    | 0    | 0    | 0        | 0        | 0        | 0.081137 |
| antisense -             | 12   | 8   | 10  | 0    | 1    | 0    | 1.179623 | 1.008466 | 1.186069 | 0        |
| pseudogen:ribosomal_    | 1    | 0   | 0   | 0    | 1    | 0    | 0.063279 | 0        | 0        | 0        |
| protein_co Uncharacte   | 4    | 2   | 1   | 1    | 0    | 0    | 0.408628 | 0.262003 | 0.123258 | 0.158562 |
| pseudogen-              | 0    | 0   | 0   | 1    | 0    | 0    | 0        | 0        | 0        | 0.245878 |
| lincRNA -               | 0    | 0   | 0   | 0    | 2    | 0    | 0        | 0        | 0        | 0        |
| processed_-             | 8    | 3   | 7   | 10   | 12   | 4    | 0.165836 | 0.079748 | 0.175079 | 0.32175  |
| antisense -             | 2    | 2   | 2   | 3    | 4    | 3    | 0.117079 | 0.150137 | 0.141262 | 0.272584 |
| pseudogen:mitochond     | 39   | 30  | 46  | 44   | 52   | 62   | 1.037272 | 1.023196 | 1.476162 | 1.816399 |
| lincRNA -               | 3    | 1   | 1   | 5    | 4    | 4    | 0.046968 | 0.020077 | 0.01889  | 0.121502 |
| antisense NLGN4Y_ar     | 3    | 3   | 0   | 4    | 3    | 2    | 0.264417 | 0.339078 | 0        | 0.547217 |
| processed_HLA_compl     | 1    | 1   | 1   | 1    | 0    | 0    | 0.023682 | 0.030369 | 0.028573 | 0.036757 |
| lincRNA THRB_antis      | 1    | 0   | 1   | 2    | 6    | 5    | 0.038561 | 0        | 0.046526 | 0.119704 |

|                        |     |     |     |    |     |     |          |          |          |          |
|------------------------|-----|-----|-----|----|-----|-----|----------|----------|----------|----------|
| lincRNA -              | 1   | 2   | 3   | 0  | 1   | 2   | 0.05943  | 0.15242  | 0.215116 | 0        |
| processed_ -           | 187 | 164 | 151 | 95 | 110 | 110 | 1.327344 | 1.492777 | 1.293203 | 1.046637 |
| pseudogen: family_witl | 1   | 1   | 0   | 7  | 5   | 7   | 0.092852 | 0.119069 | 0        | 1.008829 |
| antisense -            | 51  | 29  | 32  | 56 | 51  | 17  | 2.554905 | 1.862996 | 1.934205 | 4.354347 |
| antisense -            | 0   | 0   | 0   | 0  | 0   | 1   | 0        | 0        | 0        | 0        |
| protein_co Uncharacte  | 0   | 1   | 2   | 0  | 0   | 1   | 0        | 0.089479 | 0.168379 | 0        |
| pseudogen: mitochond   | 0   | 1   | 0   | 1  | 0   | 0   | 0        | 0.26964  | 0        | 0.326367 |
| pseudogen: high_mobil  | 7   | 1   | 5   | 5  | 2   | 2   | 0.63858  | 0.116984 | 0.550345 | 0.707975 |
| antisense -            | 1   | 0   | 0   | 1  | 2   | 4   | 0.042589 | 0        | 0        | 0.066103 |
| antisense -            | 0   | 1   | 0   | 0  | 3   | 0   | 0        | 0.087145 | 0        | 0        |
| pseudogen: adenylate_l | 7   | 5   | 4   | 1  | 10  | 6   | 0.632428 | 0.579285 | 0.436035 | 0.140231 |
| sense_intrc BACH1_int  | 2   | 3   | 1   | 2  | 4   | 2   | 0.116352 | 0.223808 | 0.070193 | 0.180595 |
| pseudogen: -           | 3   | 6   | 2   | 1  | 1   | 3   | 0.051717 | 0.132639 | 0.0416   | 0.026757 |
| processed_ MIR4500_t   | 3   | 6   | 3   | 1  | 3   | 0   | 0.084234 | 0.216035 | 0.101633 | 0.043581 |
| lincRNA -              | 0   | 0   | 1   | 1  | 0   | 2   | 0        | 0        | 0.153321 | 0.197235 |
| pseudogen: -           | 3   | 1   | 0   | 0  | 0   | 1   | 0.913442 | 0.390453 | 0        | 0        |
| pseudogen: -           | 4   | 6   | 6   | 11 | 5   | 2   | 0.083732 | 0.161062 | 0.151542 | 0.357401 |
| pseudogen: -           | 0   | 0   | 0   | 2  | 0   | 0   | 0        | 0        | 0        | 0.485199 |
| pseudogen: -           | 1   | 0   | 0   | 0  | 1   | 0   | 0.181043 | 0        | 0        | 0        |
| protein_co Uncharacte  | 60  | 36  | 54  | 16 | 16  | 6   | 1.6938   | 1.303235 | 1.8393   | 0.70107  |
| antisense -            | 7   | 2   | 3   | 2  | 2   | 3   | 0.486267 | 0.178162 | 0.251447 | 0.215644 |
| antisense -            | 4   | 5   | 3   | 6  | 12  | 3   | 0.338556 | 0.542688 | 0.306366 | 0.788229 |
| antisense -            | 23  | 25  | 20  | 5  | 4   | 2   | 2.906928 | 4.051873 | 3.049892 | 0.98086  |
| lincRNA -              | 3   | 3   | 1   | 0  | 0   | 1   | 0.243374 | 0.312092 | 0.097881 | 0        |
| lincRNA -              | 2   | 0   | 0   | 0  | 0   | 0   | 0.026313 | 0        | 0        | 0        |
| antisense -            | 0   | 0   | 0   | 1  | 3   | 0   | 0        | 0        | 0        | 0.064693 |
| antisense -            | 1   | 0   | 0   | 0  | 1   | 1   | 0.206564 | 0        | 0        | 0        |
| pseudogen: myosin_lig  | 0   | 0   | 0   | 0  | 1   | 0   | 0        | 0        | 0        | 0        |
| pseudogen: -           | 0   | 0   | 0   | 0  | 0   | 1   | 0        | 0        | 0        | 0        |
| lincRNA -              | 0   | 0   | 1   | 0  | 0   | 0   | 0        | 0        | 0.287185 | 0        |
| pseudogen: -           | 3   | 0   | 1   | 0  | 0   | 0   | 0.389668 | 0        | 0.156719 | 0        |
| lincRNA -              | 2   | 1   | 2   | 0  | 0   | 0   | 0.219112 | 0.14049  | 0.264372 | 0        |
| processed_ -           | 5   | 7   | 5   | 2  | 6   | 7   | 0.333974 | 0.599585 | 0.402959 | 0.20735  |
| pseudogen: -           | 1   | 0   | 0   | 1  | 3   | 0   | 0.145621 | 0        | 0        | 0.226024 |
| antisense -            | 6   | 2   | 1   | 3  | 1   | 1   | 0.673062 | 0.287702 | 0.135348 | 0.522343 |
| lincRNA -              | 9   | 1   | 2   | 7  | 3   | 2   | 1.361323 | 0.193967 | 0.365003 | 1.643415 |
| pseudogen: eukaryotic_ | 2   | 1   | 0   | 0  | 1   | 1   | 0.104665 | 0.067109 | 0        | 0        |
| lincRNA -              | 1   | 0   | 0   | 0  | 0   | 0   | 0.05365  | 0        | 0        | 0        |
| processed_ UBAC2_ant   | 18  | 14  | 19  | 27 | 19  | 34  | 0.494736 | 0.493445 | 0.630091 | 1.151849 |
| pseudogen: -           | 0   | 1   | 0   | 0  | 0   | 0   | 0        | 0.081366 | 0        | 0        |
| pseudogen: -           | 0   | 0   | 0   | 0  | 0   | 1   | 0        | 0        | 0        | 0        |
| pseudogen: RAS_p21_p   | 15  | 13  | 13  | 30 | 42  | 8   | 0.220279 | 0.244813 | 0.230342 | 0.683806 |
| lincRNA -              | 7   | 5   | 0   | 6  | 9   | 8   | 0.727783 | 0.666627 | 0        | 0.968246 |
| pseudogen: -           | 5   | 5   | 7   | 13 | 8   | 4   | 0.228955 | 0.293603 | 0.386747 | 0.923962 |
| antisense -            | 0   | 0   | 0   | 1  | 0   | 0   | 0        | 0        | 0        | 0.065627 |
| processed_ -           | 0   | 0   | 0   | 0  | 1   | 0   | 0        | 0        | 0        | 0        |
| protein_co -           | 7   | 3   | 2   | 5  | 9   | 2   | 0.25346  | 0.139297 | 0.087375 | 0.281003 |
| processed_ -           | 16  | 11  | 11  | 7  | 5   | 6   | 0.40885  | 0.360451 | 0.339145 | 0.277634 |
| pseudogen: -           | 0   | 2   | 1   | 1  | 3   | 1   | 0        | 0.264307 | 0.124342 | 0.159956 |
| pseudogen: MT-CO1_ps   | 1   | 0   | 0   | 0  | 0   | 0   | 0.244219 | 0        | 0        | 0        |
| processed_ -           | 2   | 2   | 4   | 2  | 3   | 0   | 0.144722 | 0.185586 | 0.349232 | 0.224629 |
| processed_ -           | 0   | 1   | 1   | 0  | 0   | 0   | 0        | 0.032001 | 0.030109 | 0        |
| sense_intrc AKT3_intro | 5   | 5   | 6   | 2  | 3   | 2   | 0.453482 | 0.581526 | 0.656582 | 0.281547 |
| pseudogen: ubiquitin_l | 0   | 0   | 0   | 0  | 1   | 0   | 0        | 0        | 0        | 0        |
| antisense -            | 1   | 0   | 0   | 4  | 1   | 10  | 0.088975 | 0        | 0        | 0.552408 |
| pseudogen: solute_carr | 0   | 0   | 0   | 0  | 2   | 0   | 0        | 0        | 0        | 0        |
| pseudogen: UDP_glucu   | 0   | 0   | 0   | 1  | 0   | 0   | 0        | 0        | 0        | 0.085322 |
| lincRNA -              | 1   | 0   | 1   | 0  | 0   | 0   | 0.15224  | 0        | 0.183687 | 0        |
| lincRNA -              | 4   | 0   | 2   | 0  | 0   | 0   | 0.28548  | 0        | 0.172224 | 0        |
| lincRNA -              | 1   | 2   | 0   | 1  | 5   | 4   | 0.19061  | 0.48886  | 0        | 0.295853 |
| pseudogen: -           | 0   | 0   | 1   | 1  | 1   | 1   | 0        | 0        | 0.254845 | 0.327837 |
| processed_ -           | 1   | 2   | 0   | 70 | 61  | 48  | 0.041904 | 0.107471 | 0        | 4.552803 |
| pseudogen: olfactory_r | 4   | 6   | 7   | 25 | 33  | 16  | 0.064387 | 0.123851 | 0.135952 | 0.624612 |
| lincRNA -              | 0   | 0   | 0   | 0  | 1   | 0   | 0        | 0        | 0        | 0        |
| antisense HLA_compl    | 0   | 0   | 0   | 1  | 1   | 1   | 0        | 0        | 0        | 0.119311 |

|                         |      |      |      |      |      |      |          |          |          |          |
|-------------------------|------|------|------|------|------|------|----------|----------|----------|----------|
| lincRNA -               | 2    | 2    | 1    | 0    | 0    | 0    | 0.065125 | 0.083514 | 0.039289 | 0        |
| sense_intrc -           | 3    | 0    | 0    | 2    | 2    | 1    | 0.076953 | 0        | 0        | 0.079628 |
| antisense -             | 0    | 0    | 1    | 1    | 2    | 2    | 0        | 0        | 0.208766 | 0.26856  |
| pseudogeni -            | 1    | 1    | 2    | 0    | 0    | 2    | 0.149808 | 0.192108 | 0.361505 | 0        |
| pseudogeni: SMT3_sup    | 1    | 1    | 1    | 0    | 0    | 0    | 0.163951 | 0.210244 | 0.197816 | 0        |
| pseudogeni -            | 0    | 0    | 0    | 1    | 0    | 1    | 0        | 0        | 0        | 0.147926 |
| lincRNA -               | 0    | 0    | 0    | 1    | 3    | 0    | 0        | 0        | 0        | 0.048747 |
| pseudogeni -            | 2    | 2    | 0    | 6    | 11   | 2    | 0.111246 | 0.142657 | 0        | 0.518006 |
| pseudogeni -            | 0    | 1    | 0    | 0    | 0    | 0    | 0        | 0.18732  | 0        | 0        |
| pseudogeni -            | 0    | 0    | 0    | 3    | 1    | 4    | 0        | 0        | 0        | 0.365116 |
| pseudogeni -            | 0    | 1    | 0    | 0    | 0    | 0    | 0        | 0.061798 | 0        | 0        |
| antisense -             | 1    | 4    | 0    | 0    | 1    | 0    | 0.102604 | 0.5263   | 0        | 0        |
| antisense -             | 47   | 33   | 43   | 54   | 69   | 45   | 5.310436 | 4.781405 | 5.86204  | 9.470143 |
| pseudogeni -            | 0    | 1    | 0    | 0    | 0    | 0    | 0        | 0.041412 | 0        | 0        |
| pseudogeni: MT-ND1_p    | 1    | 0    | 0    | 4    | 0    | 3    | 0.049672 | 0        | 0        | 0.308389 |
| pseudogeni -            | 286  | 225  | 214  | 83   | 128  | 115  | 5.205957 | 5.25202  | 4.699984 | 2.345001 |
| pseudogeni: septin_7_p  | 0    | 0    | 0    | 1    | 1    | 1    | 0        | 0        | 0        | 0.093909 |
| pseudogeni: actin_beta_ | 1    | 0    | 1    | 0    | 0    | 0    | 0.043058 | 0        | 0.051952 | 0        |
| pseudogeni: exosome_c   | 3    | 0    | 1    | 0    | 1    | 2    | 0.28134  | 0        | 0.113151 | 0        |
| pseudogeni: transmemt   | 0    | 0    | 1    | 0    | 0    | 0    | 0        | 0        | 0.04699  | 0        |
| pseudogeni -            | 8    | 4    | 4    | 1    | 10   | 7    | 0.458582 | 0.294033 | 0.276653 | 0.088973 |
| pseudogeni: ribosomal_  | 0    | 2    | 0    | 1    | 0    | 0    | 0        | 0.345574 | 0        | 0.209137 |
| lincRNA -               | 0    | 0    | 0    | 0    | 0    | 1    | 0        | 0        | 0        | 0        |
| pseudogeni -            | 0    | 0    | 0    | 0    | 0    | 1    | 0        | 0        | 0        | 0        |
| antisense -             | 0    | 0    | 0    | 0    | 2    | 2    | 0        | 0        | 0        | 0        |
| pseudogeni -            | 2    | 1    | 4    | 1    | 4    | 1    | 0.070353 | 0.045109 | 0.169769 | 0.054599 |
| pseudogeni: aldo-keto_r | 7    | 8    | 6    | 30   | 33   | 19   | 0.358721 | 0.525725 | 0.370987 | 2.386223 |
| processed_ -            | 2    | 1    | 2    | 2    | 1    | 0    | 0.022823 | 0.014634 | 0.027537 | 0.035425 |
| pseudogeni -            | 0    | 2    | 0    | 0    | 0    | 2    | 0        | 0.194595 | 0        | 0        |
| pseudogeni -            | 1    | 6    | 4    | 2    | 0    | 0    | 0.075144 | 0.578171 | 0.362663 | 0.233269 |
| pseudogeni -            | 1    | 0    | 0    | 1    | 2    | 0    | 0.137105 | 0        | 0        | 0.212806 |
| processed_ -            | 3    | 3    | 2    | 7    | 5    | 6    | 0.164912 | 0.211476 | 0.132651 | 0.597255 |
| pseudogeni: small_proli | 0    | 0    | 0    | 1    | 0    | 0    | 0        | 0        | 0        | 0.332328 |
| antisense -             | 26   | 19   | 26   | 27   | 30   | 28   | 0.586407 | 0.549527 | 0.707534 | 0.945192 |
| antisense -             | 21   | 15   | 16   | 33   | 43   | 29   | 0.702848 | 0.643788 | 0.646116 | 1.714299 |
| antisense -             | 0    | 2    | 0    | 0    | 1    | 0    | 0        | 0.27394  | 0        | 0        |
| pseudogeni: high_mobil  | 1    | 0    | 0    | 2    | 0    | 0    | 0.151258 | 0        | 0        | 0.469547 |
| pseudogeni: deoxyuridi  | 2    | 0    | 0    | 0    | 0    | 0    | 0.199532 | 0        | 0        | 0        |
| pseudogeni -            | 0    | 0    | 0    | 2    | 4    | 0    | 0        | 0        | 0        | 0.042774 |
| pseudogeni -            | 1    | 0    | 3    | 1    | 1    | 1    | 0.274211 | 0        | 0.992553 | 0.425613 |
| processed_ -            | 11   | 6    | 8    | 0    | 0    | 1    | 0.365032 | 0.255328 | 0.320314 | 0        |
| pseudogeni -            | 3    | 2    | 3    | 32   | 45   | 40   | 0.191649 | 0.163841 | 0.231235 | 3.172961 |
| pseudogeni -            | 1    | 2    | 2    | 0    | 3    | 3    | 0.31053  | 0.796421 | 0.749344 | 0        |
| antisense -             | 3    | 0    | 2    | 1    | 2    | 3    | 0.265917 | 0        | 0.213896 | 0.13758  |
| pseudogeni: thymopoie   | 0    | 0    | 0    | 0    | 0    | 1    | 0        | 0        | 0        | 0        |
| antisense -             | 3    | 2    | 6    | 1    | 0    | 0    | 0.086673 | 0.074097 | 0.209152 | 0.044843 |
| pseudogeni: olfactory_r | 0    | 2    | 2    | 0    | 0    | 0    | 0        | 0.119542 | 0.112476 | 0        |
| pseudogeni -            | 0    | 1    | 0    | 0    | 0    | 0    | 0        | 0.172787 | 0        | 0        |
| pseudogeni: calmodulin  | 21   | 26   | 20   | 7    | 7    | 9    | 2.237933 | 3.553124 | 2.571614 | 1.15786  |
| antisense -             | 1    | 0    | 0    | 0    | 4    | 1    | 0.026703 | 0        | 0        | 0        |
| pseudogeni: abhydrolas  | 1    | 0    | 0    | 1    | 2    | 0    | 0.051584 | 0        | 0        | 0.080066 |
| lincRNA -               | 359  | 263  | 220  | 2    | 1    | 2    | 24.15139 | 22.68886 | 17.8574  | 0.208837 |
| antisense -             | 0    | 4    | 0    | 1    | 0    | 0    | 0        | 0.54171  | 0        | 0.163918 |
| antisense MED4_anti     | 2    | 0    | 0    | 2    | 2    | 1    | 0.173026 | 0        | 0        | 0.26856  |
| pseudogeni -            | 0    | 0    | 1    | 0    | 1    | 0    | 0        | 0        | 0.229982 | 0        |
| antisense -             | 0    | 0    | 1    | 21   | 22   | 7    | 0        | 0        | 0.061831 | 1.670356 |
| protein_co ribosomal_   | 6639 | 5162 | 5484 | 8857 | 8638 | 8166 | 445.3545 | 444.0487 | 443.8628 | 922.1898 |
| lincRNA -               | 2    | 1    | 0    | 0    | 0    | 1    | 0.151994 | 0.097455 | 0        | 0        |
| pseudogeni -            | 18   | 17   | 10   | 41   | 28   | 25   | 2.861086 | 3.465107 | 1.917814 | 10.11516 |
| pseudogeni -            | 0    | 0    | 0    | 0    | 1    | 0    | 0        | 0        | 0        | 0        |
| sense_intrc AGBL5_intr  | 10   | 22   | 25   | 5    | 5    | 6    | 1.383186 | 3.902229 | 4.172235 | 1.073448 |
| antisense VIM_antise    | 35   | 19   | 24   | 6    | 9    | 5    | 1.214767 | 0.845645 | 1.005042 | 0.323226 |
| antisense -             | 4    | 12   | 7    | 8    | 9    | 9    | 0.085293 | 0.32813  | 0.180095 | 0.264774 |
| lincRNA -               | 0    | 1    | 0    | 2    | 0    | 0    | 0        | 0.129034 | 0        | 0.31236  |
| pseudogeni: eukaryotic_ | 21   | 18   | 15   | 34   | 51   | 55   | 0.809778 | 0.890079 | 0.697889 | 2.034962 |

|                         |     |     |     |     |     |     |          |          |          |          |
|-------------------------|-----|-----|-----|-----|-----|-----|----------|----------|----------|----------|
| lincRNA -               | 0   | 0   | 0   | 1   | 0   | 1   | 0        | 0        | 0        | 0.107345 |
| pseudogen: crystallin_ε | 0   | 0   | 0   | 56  | 84  | 42  | 0        | 0        | 0        | 7.71907  |
| antisense -             | 0   | 0   | 0   | 0   | 1   | 0   | 0        | 0        | 0        | 0        |
| sense_intrc ANKRD10_i   | 106 | 119 | 140 | 138 | 156 | 112 | 13.07985 | 18.83012 | 20.84361 | 26.43056 |
| processed_ EPHA1_ant    | 6   | 1   | 1   | 108 | 100 | 79  | 0.056066 | 0.011983 | 0.011275 | 1.566405 |
| antisense KCNQ5_ant     | 1   | 1   | 0   | 0   | 1   | 1   | 0.042589 | 0.054614 | 0        | 0        |
| pseudogen: -            | 0   | 0   | 0   | 1   | 1   | 0   | 0        | 0        | 0        | 0.192539 |
| lincRNA -               | 5   | 1   | 5   | 0   | 0   | 0   | 0.667949 | 0.17131  | 0.805919 | 0        |
| antisense -             | 9   | 3   | 8   | 1   | 2   | 0   | 0.514647 | 0.219987 | 0.551956 | 0.088756 |
| pseudogen: nucleosom    | 0   | 2   | 0   | 1   | 0   | 0   | 0        | 0.110431 | 0        | 0.066832 |
| TR_C_gene T_cell_rece   | 501 | 421 | 407 | 25  | 41  | 50  | 24.11899 | 25.99039 | 23.64089 | 1.868065 |
| pseudogen: -            | 1   | 0   | 0   | 0   | 1   | 0   | 0.197017 | 0        | 0        | 0        |
| pseudogen: -            | 0   | 3   | 2   | 0   | 1   | 0   | 0        | 0.248813 | 0.15607  | 0        |
| processed_ -            | 0   | 0   | 1   | 0   | 2   | 0   | 0        | 0        | 0.033596 | 0        |
| lincRNA -               | 99  | 86  | 99  | 36  | 56  | 41  | 0.88438  | 0.985171 | 1.067056 | 0.499157 |
| pseudogen: ADAM_met     | 68  | 58  | 65  | 77  | 109 | 162 | 1.222592 | 1.337242 | 1.410049 | 2.14879  |
| antisense -             | 1   | 3   | 0   | 0   | 1   | 0   | 0.084183 | 0.323859 | 0        | 0        |
| processed_ -            | 10  | 2   | 3   | 95  | 116 | 77  | 0.134125 | 0.034399 | 0.048549 | 1.977712 |
| antisense -             | 1   | 3   | 1   | 1   | 2   | 0   | 0.109813 | 0.422458 | 0.132495 | 0.170444 |
| TR_V_gene T_cell_rece   | 1   | 0   | 0   | 0   | 0   | 0   | 0.121477 | 0        | 0        | 0        |
| sense_intrc -           | 0   | 1   | 0   | 0   | 3   | 0   | 0        | 0.138868 | 0        | 0        |
| pseudogen: serpin_pep   | 1   | 3   | 2   | 4   | 5   | 2   | 0.037542 | 0.144427 | 0.090593 | 0.233082 |
| lincRNA -               | 0   | 0   | 0   | 2   | 0   | 0   | 0        | 0        | 0        | 0.22815  |
| pseudogen: -            | 85  | 53  | 63  | 159 | 233 | 103 | 1.578476 | 1.26213  | 1.411587 | 4.582966 |
| lincRNA long_interf     | 6   | 8   | 11  | 0   | 8   | 8   | 0.116352 | 0.198941 | 0.257374 | 0        |
| pseudogen: -            | 0   | 0   | 0   | 14  | 10  | 1   | 0        | 0        | 0        | 1.36037  |
| pseudogen: -            | 1   | 0   | 0   | 0   | 1   | 0   | 0.050203 | 0        | 0        | 0        |
| pseudogen: keratin_18   | 2   | 2   | 1   | 2   | 3   | 3   | 0.072811 | 0.093369 | 0.043925 | 0.113012 |
| antisense long_interf   | 1   | 1   | 0   | 0   | 0   | 0   | 0.078543 | 0.10072  | 0        | 0        |
| pseudogen: metallothi   | 0   | 0   | 0   | 0   | 1   | 0   | 0        | 0        | 0        | 0        |
| lincRNA -               | 3   | 1   | 4   | 0   | 0   | 0   | 0.325625 | 0.139189 | 0.523847 | 0        |
| pseudogen: -            | 1   | 0   | 1   | 1   | 0   | 3   | 0.192963 | 0        | 0.232821 | 0.299505 |
| lincRNA testis-speci    | 2   | 5   | 1   | 2   | 2   | 0   | 0.057604 | 0.184674 | 0.034752 | 0.08941  |
| pseudogen: high_mobil   | 0   | 0   | 0   | 3   | 3   | 0   | 0        | 0        | 0        | 0.720592 |
| pseudogen: protein_ph   | 0   | 0   | 0   | 0   | 0   | 1   | 0        | 0        | 0        | 0        |
| protein_co long_interf  | 0   | 0   | 1   | 0   | 0   | 0   | 0        | 0        | 0.03875  | 0        |
| pseudogen: polyribonu   | 0   | 0   | 1   | 0   | 0   | 0   | 0        | 0        | 0.024439 | 0        |
| lincRNA -               | 0   | 0   | 0   | 12  | 8   | 4   | 0        | 0        | 0        | 0.30828  |
| lincRNA -               | 45  | 45  | 31  | 0   | 0   | 0   | 3.211645 | 4.118479 | 2.669468 | 0        |
| pseudogen: WW_doma      | 0   | 1   | 0   | 0   | 0   | 0   | 0        | 0.077989 | 0        | 0        |
| pseudogen: heterogene   | 0   | 1   | 0   | 2   | 1   | 1   | 0        | 0.06244  | 0        | 0.151152 |
| pseudogen: suppressio   | 0   | 0   | 0   | 1   | 8   | 2   | 0        | 0        | 0        | 0.066648 |
| pseudogen: leucine_ri   | 0   | 0   | 0   | 4   | 9   | 17  | 0        | 0        | 0        | 0.161643 |
| antisense -             | 1   | 2   | 1   | 2   | 1   | 0   | 0.085722 | 0.219853 | 0.103429 | 0.266105 |
| processed_ -            | 2   | 0   | 1   | 3   | 1   | 0   | 0.207478 | 0        | 0.125167 | 0.483052 |
| processed_ -            | 0   | 0   | 0   | 1   | 3   | 2   | 0        | 0        | 0        | 0.17708  |
| pseudogen: -            | 57  | 29  | 51  | 85  | 93  | 95  | 5.835657 | 3.807345 | 6.299892 | 13.50717 |
| sense_intrc REV3L_intr  | 0   | 1   | 0   | 0   | 0   | 0   | 0        | 0.157408 | 0        | 0        |
| antisense -             | 5   | 2   | 1   | 1   | 0   | 1   | 0.773763 | 0.396896 | 0.186718 | 0.240197 |
| lincRNA -               | 0   | 2   | 1   | 4   | 0   | 1   | 0        | 0.30216  | 0.14215  | 0.731455 |
| lincRNA -               | 0   | 3   | 2   | 0   | 0   | 0   | 0        | 0.949418 | 0.595532 | 0        |
| processed_ -            | 0   | 0   | 0   | 0   | 1   | 0   | 0        | 0        | 0        | 0        |
| pseudogen: tubulin_be   | 3   | 13  | 8   | 18  | 11  | 16  | 0.193494 | 1.075223 | 0.622564 | 1.801976 |
| pseudogen: -            | 0   | 0   | 0   | 0   | 2   | 0   | 0        | 0        | 0        | 0        |
| lincRNA -               | 2   | 2   | 1   | 0   | 0   | 0   | 0.167764 | 0.215133 | 0.101208 | 0        |
| pseudogen: keratin_8_i  | 108 | 98  | 68  | 70  | 68  | 68  | 3.624998 | 4.218125 | 2.753854 | 3.646805 |
| lincRNA -               | 0   | 0   | 0   | 2   | 2   | 4   | 0        | 0        | 0        | 0.225324 |
| lincRNA -               | 1   | 0   | 0   | 0   | 0   | 2   | 0.064145 | 0        | 0        | 0        |
| pseudogen: -            | 1   | 0   | 0   | 0   | 0   | 0   | 0.12504  | 0        | 0        | 0        |
| sense_intrc ACAP2_intr  | 13  | 9   | 7   | 9   | 7   | 5   | 0.883435 | 0.784302 | 0.573954 | 0.949302 |
| pseudogen: -            | 0   | 0   | 1   | 4   | 6   | 5   | 0        | 0        | 0.104383 | 0.53712  |
| antisense -             | 1   | 0   | 0   | 2   | 1   | 2   | 0.176943 | 0        | 0        | 0.549282 |
| sense_intrc -           | 3   | 2   | 1   | 1   | 1   | 0   | 0.290641 | 0.24847  | 0.116892 | 0.150371 |
| pseudogen: piggyBac_ti  | 3   | 1   | 3   | 0   | 0   | 0   | 0.250303 | 0.106993 | 0.302004 | 0        |
| antisense -             | 17  | 27  | 27  | 3   | 1   | 7   | 0.820093 | 1.670272 | 1.571542 | 0.224629 |

|                        |    |    |    |    |    |    |          |          |          |          |
|------------------------|----|----|----|----|----|----|----------|----------|----------|----------|
| antisense -            | 0  | 0  | 0  | 36 | 36 | 40 | 0        | 0        | 0        | 5.901065 |
| pseudogen-             | 13 | 15 | 13 | 31 | 50 | 45 | 0.893798 | 1.322503 | 1.078419 | 3.308173 |
| antisense HYI_antiser  | 5  | 0  | 6  | 0  | 0  | 1  | 0.430184 | 0        | 0.62285  | 0        |
| pseudogen: actin_gamr  | 0  | 1  | 0  | 0  | 0  | 0  | 0        | 0.022622 | 0        | 0        |
| antisense LRRC3_anti   | 1  | 0  | 0  | 3  | 5  | 1  | 0.059809 | 0        | 0        | 0.278494 |
| pseudogen-             | 35 | 34 | 46 | 31 | 35 | 22 | 0.951944 | 1.185854 | 1.509555 | 1.308686 |
| pseudogen: protein_ph  | 1  | 0  | 0  | 0  | 0  | 0  | 0.077761 | 0        | 0        | 0        |
| processed_-            | 2  | 1  | 2  | 2  | 1  | 0  | 0.177951 | 0.114098 | 0.214708 | 0.276204 |
| pseudogen-             | 0  | 0  | 1  | 0  | 0  | 0  | 0        | 0        | 0.096053 | 0        |
| lincRNA long_interf    | 4  | 1  | 6  | 0  | 0  | 0  | 0.116714 | 0.037417 | 0.211234 | 0        |
| pseudogen: capicua_tr  | 3  | 5  | 2  | 2  | 2  | 10 | 0.057299 | 0.122464 | 0.04609  | 0.059291 |
| antisense -            | 0  | 0  | 2  | 1  | 1  | 2  | 0        | 0        | 0.197816 | 0.127237 |
| lincRNA -              | 1  | 0  | 0  | 0  | 1  | 0  | 0.12372  | 0        | 0        | 0        |
| pseudogen: olfactory_r | 0  | 0  | 0  | 0  | 1  | 0  | 0        | 0        | 0        | 0        |
| lincRNA -              | 4  | 1  | 1  | 0  | 2  | 2  | 0.272616 | 0.087398 | 0.082232 | 0        |
| pseudogen: MHC_class_  | 2  | 0  | 0  | 0  | 1  | 0  | 0.115351 | 0        | 0        | 0        |
| antisense -            | 2  | 3  | 2  | 0  | 0  | 1  | 0.182451 | 0.350952 | 0.220138 | 0        |
| pseudogen-             | 3  | 0  | 3  | 3  | 0  | 0  | 0.316112 | 0        | 0.381408 | 0.49065  |
| antisense -            | 12 | 7  | 10 | 0  | 3  | 1  | 0.672258 | 0.502878 | 0.675932 | 0        |
| antisense -            | 0  | 0  | 0  | 0  | 0  | 1  | 0        | 0        | 0        | 0        |
| lincRNA -              | 2  | 1  | 0  | 0  | 0  | 0  | 0.15949  | 0.102262 | 0        | 0        |
| lincRNA long_interf    | 8  | 2  | 0  | 6  | 6  | 9  | 0.13971  | 0.044789 | 0        | 0.162636 |
| antisense -            | 0  | 1  | 0  | 0  | 0  | 0  | 0        | 0.110533 | 0        | 0        |
| pseudogen-             | 1  | 1  | 0  | 2  | 1  | 0  | 0.289445 | 0.371172 | 0        | 0.898516 |
| pseudogen-             | 8  | 8  | 6  | 11 | 15 | 4  | 1.524879 | 1.955441 | 1.37989  | 3.254381 |
| antisense KCNQ1_ant    | 0  | 0  | 0  | 0  | 3  | 2  | 0        | 0        | 0        | 0        |
| pseudogen: nucleopho:  | 0  | 0  | 1  | 0  | 3  | 0  | 0        | 0        | 0.066248 | 0        |
| pseudogen: Ral_GTPase  | 17 | 8  | 6  | 13 | 9  | 10 | 0.127909 | 0.077188 | 0.054469 | 0.151819 |
| pseudogen-             | 3  | 5  | 2  | 1  | 1  | 0  | 0.225072 | 0.481038 | 0.181042 | 0.116448 |
| pseudogen: ankyrin_rej | 3  | 1  | 1  | 1  | 0  | 0  | 0.148074 | 0.063295 | 0.059553 | 0.07661  |
| antisense -            | 23 | 24 | 25 | 2  | 4  | 11 | 1.475336 | 1.974166 | 1.934867 | 0.199124 |
| lincRNA -              | 0  | 0  | 0  | 2  | 2  | 2  | 0        | 0        | 0        | 0.056179 |
| lincRNA -              | 0  | 1  | 0  | 0  | 0  | 0  | 0        | 0.121474 | 0        | 0        |
| pseudogen-             | 1  | 0  | 0  | 0  | 0  | 0  | 0.183882 | 0        | 0        | 0        |
| lincRNA -              | 0  | 0  | 0  | 0  | 2  | 0  | 0        | 0        | 0        | 0        |
| antisense -            | 2  | 3  | 2  | 2  | 3  | 1  | 0.199957 | 0.384626 | 0.24126  | 0.310362 |
| pseudogen-             | 8  | 3  | 8  | 9  | 10 | 9  | 0.858398 | 0.41279  | 1.035707 | 1.498898 |
| antisense -            | 0  | 0  | 0  | 0  | 1  | 0  | 0        | 0        | 0        | 0        |
| protein_co serine_pep  | 3  | 3  | 0  | 5  | 2  | 2  | 0.319705 | 0.409976 | 0        | 0.827043 |
| pseudogen: ribosomal_  | 1  | 2  | 3  | 3  | 5  | 0  | 0.094727 | 0.242949 | 0.342882 | 0.44109  |
| pseudogen: ring_finger | 1  | 0  | 1  | 2  | 9  | 7  | 0.027911 | 0        | 0.033676 | 0.086643 |
| lincRNA -              | 1  | 0  | 0  | 0  | 0  | 0  | 0.089485 | 0        | 0        | 0        |
| lincRNA -              | 0  | 0  | 0  | 0  | 1  | 0  | 0        | 0        | 0        | 0        |
| antisense -            | 9  | 6  | 6  | 6  | 6  | 8  | 1.834827 | 1.568603 | 1.475883 | 1.898604 |
| pseudogen: regulator_c | 3  | 0  | 0  | 0  | 1  | 0  | 0.254376 | 0        | 0        | 0        |
| protein_co protein_as  | 2  | 2  | 1  | 5  | 3  | 0  | 0.044657 | 0.057266 | 0.026941 | 0.173285 |
| lincRNA -              | 0  | 0  | 0  | 26 | 23 | 23 | 0        | 0        | 0        | 0.725844 |
| lincRNA -              | 0  | 0  | 1  | 0  | 0  | 0  | 0        | 0        | 0.129168 | 0        |
| antisense ALG13_ant    | 9  | 10 | 4  | 3  | 6  | 2  | 2.164155 | 3.083579 | 1.160523 | 1.119689 |
| pseudogen: ATP_syntha  | 2  | 0  | 0  | 0  | 0  | 0  | 0.070564 | 0        | 0        | 0        |
| antisense -            | 2  | 0  | 1  | 1  | 0  | 0  | 0.127419 | 0        | 0.076869 | 0.098886 |
| pseudogen-             | 0  | 0  | 0  | 5  | 7  | 14 | 0        | 0        | 0        | 0.321466 |
| pseudogen-             | 0  | 0  | 1  | 0  | 2  | 0  | 0        | 0        | 0.182502 | 0        |
| antisense -            | 0  | 0  | 1  | 0  | 0  | 0  | 0        | 0        | 0.033066 | 0        |
| antisense -            | 1  | 1  | 0  | 3  | 2  | 3  | 0.063109 | 0.080928 | 0        | 0.293862 |
| pseudogen-             | 1  | 0  | 0  | 2  | 0  | 0  | 0.098302 | 0        | 0        | 0.305156 |
| pseudogen-             | 0  | 2  | 0  | 0  | 0  | 0  | 0        | 0.163396 | 0        | 0        |
| pseudogen-             | 0  | 0  | 1  | 0  | 1  | 0  | 0        | 0        | 0.505138 | 0        |
| pseudogen-             | 0  | 0  | 0  | 0  | 1  | 0  | 0        | 0        | 0        | 0        |
| sense_intrc-           | 1  | 0  | 8  | 1  | 2  | 4  | 0.186071 | 0        | 1.796048 | 0.288809 |
| pseudogen-             | 18 | 9  | 11 | 6  | 6  | 18 | 2.104789 | 1.349547 | 1.551947 | 1.088975 |
| lincRNA long_interf    | 0  | 0  | 0  | 0  | 0  | 1  | 0        | 0        | 0        | 0        |
| sense_intrc MYCBP2_ar  | 2  | 1  | 0  | 0  | 0  | 1  | 0.219112 | 0.14049  | 0        | 0        |
| pseudogen-             | 0  | 0  | 0  | 0  | 1  | 0  | 0        | 0        | 0        | 0        |
| processed_-            | 0  | 0  | 0  | 11 | 7  | 0  | 0        | 0        | 0        | 0.500987 |

|                        |     |    |    |     |     |     |          |          |          |          |
|------------------------|-----|----|----|-----|-----|-----|----------|----------|----------|----------|
| antisense -            | 0   | 0  | 0  | 0   | 0   | 2   | 0        | 0        | 0        | 0        |
| pseudogeni -           | 2   | 0  | 0  | 0   | 0   | 1   | 0.102716 | 0        | 0        | 0        |
| antisense -            | 1   | 1  | 0  | 7   | 19  | 3   | 0.069985 | 0.089746 | 0        | 0.760386 |
| lincRNA -              | 0   | 1  | 0  | 2   | 5   | 7   | 0        | 0.106802 | 0        | 0.258543 |
| antisense -            | 11  | 12 | 10 | 3   | 11  | 13  | 1.169592 | 1.636185 | 1.282891 | 0.495101 |
| protein_co NK1_home    | 0   | 0  | 0  | 80  | 116 | 199 | 0        | 0        | 0        | 3.685053 |
| lincRNA -              | 0   | 0  | 0  | 39  | 43  | 47  | 0        | 0        | 0        | 12.50402 |
| lincRNA -              | 0   | 0  | 0  | 1   | 0   | 0   | 0        | 0        | 0        | 0.035641 |
| lincRNA long_interf    | 0   | 0  | 0  | 1   | 0   | 0   | 0        | 0        | 0        | 0.156853 |
| lincRNA SACS_antis     | 5   | 0  | 3  | 3   | 2   | 8   | 0.114702 | 0        | 0.083036 | 0.10682  |
| processed_ -           | 1   | 3  | 2  | 0   | 0   | 0   | 0.021179 | 0.081477 | 0.051107 | 0        |
| lincRNA -              | 0   | 0  | 0  | 0   | 0   | 2   | 0        | 0        | 0        | 0        |
| pseudogeni -           | 0   | 0  | 0  | 0   | 1   | 0   | 0        | 0        | 0        | 0        |
| lincRNA -              | 0   | 0  | 1  | 0   | 0   | 0   | 0        | 0        | 0.028035 | 0        |
| antisense -            | 0   | 2  | 0  | 0   | 0   | 1   | 0        | 0.236266 | 0        | 0        |
| pseudogeni ribosomal_  | 1   | 0  | 0  | 3   | 0   | 0   | 0.099343 | 0        | 0        | 0.462583 |
| sense_intrc -          | 1   | 1  | 0  | 5   | 0   | 2   | 0.069985 | 0.089746 | 0        | 0.543133 |
| lincRNA -              | 0   | 0  | 0  | 2   | 0   | 0   | 0        | 0        | 0        | 0.344113 |
| processed_ ACVR2B_ar   | 8   | 11 | 11 | 69  | 78  | 44  | 0.149035 | 0.262784 | 0.247251 | 1.995155 |
| pseudogeni msh_home    | 0   | 0  | 0  | 15  | 21  | 5   | 0        | 0        | 0        | 1.412286 |
| antisense -            | 1   | 4  | 2  | 2   | 2   | 0   | 0.069673 | 0.357384 | 0.168129 | 0.216285 |
| pseudogeni succinate-C | 1   | 0  | 0  | 3   | 0   | 0   | 0.034554 | 0        | 0        | 0.160899 |
| pseudogeni peroxiredo  | 8   | 6  | 4  | 5   | 5   | 7   | 0.491638 | 0.472842 | 0.296595 | 0.476932 |
| pseudogeni -           | 3   | 4  | 1  | 2   | 6   | 0   | 0.556008 | 0.950669 | 0.223619 | 0.575334 |
| pseudogeni -           | 0   | 0  | 0  | 0   | 1   | 2   | 0        | 0        | 0        | 0        |
| pseudogeni golgin_A2_  | 0   | 1  | 0  | 0   | 0   | 0   | 0        | 0.077387 | 0        | 0        |
| lincRNA -              | 0   | 0  | 0  | 0   | 2   | 1   | 0        | 0        | 0        | 0        |
| lincRNA -              | 0   | 0  | 0  | 3   | 6   | 1   | 0        | 0        | 0        | 0.517392 |
| lincRNA -              | 0   | 0  | 0  | 0   | 1   | 1   | 0        | 0        | 0        | 0        |
| lincRNA -              | 0   | 0  | 0  | 0   | 0   | 1   | 0        | 0        | 0        | 0        |
| lincRNA -              | 2   | 0  | 0  | 0   | 0   | 0   | 0.0447   | 0        | 0        | 0        |
| pseudogeni methyltran  | 1   | 0  | 0  | 0   | 2   | 0   | 0.073843 | 0        | 0        | 0        |
| lincRNA -              | 0   | 1  | 1  | 0   | 0   | 0   | 0        | 0.12959  | 0.12193  | 0        |
| lincRNA -              | 6   | 4  | 1  | 0   | 0   | 0   | 0.528835 | 0.452104 | 0.106345 | 0        |
| pseudogeni -           | 0   | 2  | 0  | 0   | 0   | 1   | 0        | 1.26589  | 0        | 0        |
| lincRNA -              | 0   | 0  | 0  | 0   | 1   | 0   | 0        | 0        | 0        | 0        |
| pseudogeni -           | 5   | 4  | 1  | 0   | 0   | 0   | 0.45791  | 0.469764 | 0.110499 | 0        |
| pseudogeni keratin_8_  | 0   | 0  | 0  | 4   | 3   | 1   | 0        | 0        | 0        | 0.195251 |
| antisense HOXB_clusi   | 60  | 43 | 58 | 134 | 140 | 186 | 2.20486  | 2.026318 | 2.571614 | 7.64302  |
| pseudogeni ribosomal_  | 86  | 65 | 60 | 91  | 101 | 108 | 3.140609 | 3.043954 | 2.643715 | 5.15807  |
| protein_co nicotinami  | 9   | 10 | 4  | 11  | 18  | 4   | 0.167864 | 0.23918  | 0.090017 | 0.318448 |
| lincRNA long_interf    | 121 | 71 | 89 | 2   | 3   | 2   | 2.010522 | 1.512833 | 1.784274 | 0.05158  |
| lincRNA -              | 0   | 1  | 0  | 2   | 5   | 0   | 0        | 0.411848 | 0        | 0.996984 |
| lincRNA -              | 6   | 4  | 5  | 1   | 4   | 1   | 0.268454 | 0.229503 | 0.269921 | 0.069446 |
| pseudogeni -           | 0   | 0  | 0  | 0   | 0   | 1   | 0        | 0        | 0        | 0        |
| pseudogeni -           | 3   | 7  | 6  | 4   | 5   | 2   | 0.321165 | 0.960978 | 0.775007 | 0.664656 |
| lincRNA -              | 1   | 0  | 0  | 0   | 1   | 0   | 0.082991 | 0        | 0        | 0        |
| antisense MAST4_ant    | 6   | 0  | 0  | 8   | 6   | 4   | 0.362085 | 0        | 0        | 0.749342 |
| pseudogeni plakophilin | 0   | 0  | 0  | 1   | 0   | 3   | 0        | 0        | 0        | 0.033726 |
| lincRNA -              | 0   | 0  | 1  | 0   | 0   | 1   | 0        | 0        | 0.179605 | 0        |
| pseudogeni -           | 0   | 1  | 0  | 0   | 0   | 0   | 0        | 0.134519 | 0        | 0        |
| pseudogeni -           | 1   | 2  | 2  | 4   | 4   | 4   | 0.0851   | 0.218257 | 0.205356 | 0.528347 |
| pseudogeni -           | 0   | 0  | 1  | 0   | 0   | 0   | 0        | 0        | 0.156719 | 0        |
| pseudogeni asparagine_ | 0   | 0  | 0  | 0   | 3   | 0   | 0        | 0        | 0        | 0        |
| antisense -            | 4   | 2  | 1  | 2   | 2   | 0   | 0.083286 | 0.053401 | 0.025122 | 0.064636 |
| antisense -            | 1   | 5  | 1  | 0   | 1   | 5   | 0.155781 | 0.998834 | 0.187958 | 0        |
| sense_intrc SOS1_intro | 20  | 34 | 13 | 36  | 34  | 19  | 0.787406 | 1.716552 | 0.617533 | 2.199893 |
| lincRNA -              | 0   | 0  | 0  | 3   | 0   | 1   | 0        | 0        | 0        | 0.389197 |
| pseudogeni -           | 0   | 0  | 1  | 1   | 0   | 0   | 0        | 0        | 0.048856 | 0.06285  |
| pseudogeni lysyl-tRNA_ | 0   | 0  | 0  | 0   | 1   | 1   | 0        | 0        | 0        | 0        |
| lincRNA -              | 0   | 0  | 0  | 0   | 1   | 0   | 0        | 0        | 0        | 0        |
| pseudogeni -           | 2   | 0  | 0  | 1   | 0   | 0   | 0.192963 | 0        | 0        | 0.149753 |
| processed_ -           | 0   | 0  | 0  | 1   | 6   | 0   | 0        | 0        | 0        | 0.044216 |
| lincRNA -              | 0   | 0  | 1  | 0   | 0   | 0   | 0        | 0        | 0.097544 | 0        |
| sense_intrc -          | 0   | 0  | 0  | 0   | 0   | 1   | 0        | 0        | 0        | 0        |

|                        |     |     |     |    |    |    |          |          |          |          |
|------------------------|-----|-----|-----|----|----|----|----------|----------|----------|----------|
| pseudogen: eukaryotic_ | 19  | 6   | 16  | 2  | 2  | 2  | 0.271371 | 0.109893 | 0.275726 | 0.044337 |
| antisense -            | 0   | 0   | 0   | 2  | 4  | 1  | 0        | 0        | 0        | 0.074455 |
| lincRNA -              | 0   | 0   | 0   | 0  | 1  | 3  | 0        | 0        | 0        | 0        |
| lincRNA -              | 1   | 3   | 1   | 0  | 0  | 0  | 0.050203 | 0.193136 | 0.060573 | 0        |
| pseudogen: -           | 1   | 0   | 0   | 3  | 3  | 0  | 0.075265 | 0        | 0        | 0.350465 |
| antisense -            | 0   | 1   | 0   | 1  | 4  | 3  | 0        | 0.116984 | 0        | 0.141595 |
| processed_ -           | 3   | 3   | 0   | 2  | 0  | 3  | 0.062437 | 0.080066 | 0        | 0.064607 |
| antisense -            | 15  | 12  | 10  | 7  | 8  | 2  | 1.465313 | 1.503245 | 1.178656 | 1.061372 |
| protein_co Uncharacte  | 62  | 66  | 60  | 54 | 38 | 26 | 2.111243 | 2.882038 | 2.465164 | 2.85411  |
| antisense -            | 1   | 0   | 0   | 1  | 0  | 1  | 0.149331 | 0        | 0        | 0.231783 |
| pseudogen: -           | 2   | 0   | 0   | 0  | 1  | 3  | 0.197848 | 0        | 0        | 0        |
| antisense -            | 7   | 4   | 5   | 0  | 0  | 0  | 0.105778 | 0.077512 | 0.091163 | 0        |
| pseudogen: -           | 2   | 0   | 0   | 0  | 0  | 0  | 0.198266 | 0        | 0        | 0        |
| antisense -            | 0   | 0   | 2   | 1  | 0  | 2  | 0        | 0        | 0.227668 | 0.146438 |
| antisense -            | 1   | 3   | 3   | 0  | 0  | 0  | 0.082263 | 0.316473 | 0.297766 | 0        |
| pseudogen: chemokine   | 1   | 0   | 1   | 0  | 0  | 0  | 0.018734 | 0        | 0.022603 | 0        |
| pseudogen: -           | 0   | 0   | 0   | 3  | 1  | 0  | 0        | 0        | 0        | 0.277433 |
| pseudogen: dynein_lig  | 0   | 0   | 1   | 0  | 2  | 3  | 0        | 0        | 0.191781 | 0        |
| pseudogen: mitochond   | 0   | 1   | 0   | 4  | 9  | 4  | 0        | 0.102088 | 0        | 0.49426  |
| processed_ -           | 2   | 0   | 0   | 0  | 0  | 0  | 0.048616 | 0        | 0        | 0        |
| TR_V_gene T_cell_rece  | 0   | 0   | 0   | 1  | 0  | 0  | 0        | 0        | 0        | 0.184253 |
| antisense -            | 0   | 0   | 0   | 0  | 1  | 0  | 0        | 0        | 0        | 0        |
| lincRNA -              | 1   | 0   | 0   | 0  | 0  | 2  | 0.171758 | 0        | 0        | 0        |
| antisense UBE2Q1_ar    | 1   | 0   | 0   | 2  | 2  | 1  | 0.108542 | 0        | 0        | 0.336944 |
| antisense -            | 0   | 0   | 0   | 1  | 0  | 0  | 0        | 0        | 0        | 0.196702 |
| pseudogen: small_nucl  | 1   | 1   | 1   | 0  | 1  | 0  | 0.186813 | 0.239561 | 0.2254   | 0        |
| pseudogen: -           | 23  | 26  | 23  | 24 | 29 | 17 | 2.537577 | 3.678529 | 3.061733 | 4.109918 |
| lincRNA -              | 0   | 1   | 0   | 0  | 0  | 0  | 0        | 0.145241 | 0        | 0        |
| pseudogen: -           | 0   | 1   | 0   | 0  | 0  | 0  | 0        | 0.05547  | 0        | 0        |
| pseudogen: -           | 2   | 1   | 0   | 0  | 1  | 0  | 0.379676 | 0.24344  | 0        | 0        |
| antisense -            | 0   | 0   | 0   | 1  | 0  | 0  | 0        | 0        | 0        | 0.103088 |
| pseudogen: -           | 0   | 0   | 0   | 1  | 0  | 0  | 0        | 0        | 0        | 0.056815 |
| pseudogen: ATPase_am   | 0   | 1   | 0   | 0  | 0  | 0  | 0        | 0.038348 | 0        | 0        |
| pseudogen: ribosomal_  | 0   | 0   | 0   | 4  | 2  | 1  | 0        | 0        | 0        | 0.673887 |
| lincRNA X_inactive_    | 0   | 0   | 0   | 2  | 0  | 0  | 0        | 0        | 0        | 0.007552 |
| pseudogen: -           | 1   | 3   | 4   | 4  | 2  | 2  | 0.034377 | 0.13225  | 0.165911 | 0.213431 |
| protein_co zinc_finger | 142 | 129 | 147 | 71 | 78 | 64 | 2.656976 | 3.095269 | 3.318675 | 2.061998 |
| pseudogen: cyclin_B1_i | 2   | 0   | 0   | 1  | 0  | 0  | 0.111776 | 0        | 0        | 0.086746 |
| pseudogen: DEAD/H_(A   | 13  | 6   | 12  | 12 | 11 | 10 | 0.253988 | 0.150324 | 0.282878 | 0.363899 |
| antisense -            | 3   | 2   | 2   | 2  | 1  | 1  | 0.290641 | 0.24847  | 0.233783 | 0.300743 |
| pseudogen: -           | 0   | 2   | 4   | 0  | 6  | 0  | 0        | 0.305227 | 0.574371 | 0        |
| antisense -            | 0   | 1   | 0   | 0  | 0  | 0  | 0        | 0.077989 | 0        | 0        |
| pseudogen: -           | 0   | 1   | 0   | 2  | 0  | 0  | 0        | 0.155374 | 0        | 0.376123 |
| antisense -            | 0   | 0   | 0   | 4  | 1  | 1  | 0        | 0        | 0        | 0.586934 |
| protein_co PET100_ho   | 11  | 14  | 8   | 8  | 10 | 21 | 0.284182 | 0.463811 | 0.249369 | 0.320793 |
| pseudogen: KH-type_sp  | 7   | 4   | 2   | 2  | 2  | 3  | 0.185651 | 0.13604  | 0.063999 | 0.08233  |
| pseudogen: -           | 0   | 0   | 0   | 0  | 2  | 0  | 0        | 0        | 0        | 0        |
| antisense -            | 5   | 2   | 4   | 1  | 3  | 2  | 0.139222 | 0.071413 | 0.134384 | 0.043218 |
| antisense -            | 13  | 9   | 15  | 4  | 4  | 2  | 0.31053  | 0.275684 | 0.432314 | 0.148303 |
| antisense -            | 0   | 0   | 0   | 0  | 0  | 1  | 0        | 0        | 0        | 0        |
| antisense EMX2_opp     | 0   | 0   | 0   | 0  | 0  | 2  | 0        | 0        | 0        | 0        |
| antisense -            | 19  | 10  | 7   | 5  | 8  | 7  | 1.137817 | 0.767941 | 0.505784 | 0.46475  |
| processed_ -           | 60  | 75  | 59  | 46 | 83 | 60 | 0.836824 | 1.341385 | 0.992848 | 0.995797 |
| pseudogen: -           | 1   | 2   | 0   | 1  | 0  | 1  | 0.054523 | 0.139837 | 0        | 0.084628 |
| antisense -            | 7   | 1   | 8   | 0  | 0  | 0  | 0.495816 | 0.090831 | 0.683692 | 0        |
| lincRNA -              | 0   | 1   | 0   | 0  | 0  | 0  | 0        | 0.07324  | 0        | 0        |
| antisense -            | 0   | 0   | 3   | 0  | 1  | 1  | 0        | 0        | 0.289636 | 0        |
| pseudogen: -           | 8   | 5   | 7   | 2  | 6  | 3  | 0.644536 | 0.516579 | 0.680461 | 0.250102 |
| antisense STEAP3_an    | 8   | 3   | 12  | 3  | 3  | 2  | 0.116569 | 0.056056 | 0.210971 | 0.067849 |
| antisense -            | 2   | 0   | 0   | 0  | 1  | 1  | 0.230418 | 0        | 0        | 0        |
| pseudogen: -           | 2   | 2   | 0   | 2  | 5  | 0  | 0.200814 | 0.257515 | 0        | 0.311691 |
| pseudogen: -           | 0   | 0   | 0   | 1  | 0  | 0  | 0        | 0        | 0        | 0.081775 |
| antisense OGFR_anti    | 8   | 9   | 14  | 25 | 24 | 5  | 0.561557 | 0.810132 | 1.185714 | 2.723795 |
| antisense -            | 112 | 85  | 116 | 36 | 55 | 21 | 6.92834  | 6.742787 | 8.657993 | 3.45656  |
| pseudogen: -           | 0   | 1   | 0   | 0  | 1  | 0  | 0        | 0.176334 | 0        | 0        |

|                         |    |    |    |     |     |     |          |          |          |          |
|-------------------------|----|----|----|-----|-----|-----|----------|----------|----------|----------|
| lincRNA -               | 0  | 0  | 0  | 0   | 0   | 1   | 0        | 0        | 0        | 0        |
| pseudogen: inner_mern   | 0  | 0  | 0  | 1   | 5   | 0   | 0        | 0        | 0        | 0.032798 |
| pseudogen: -            | 0  | 0  | 0  | 3   | 2   | 0   | 0        | 0        | 0        | 0.713527 |
| pseudogen: heterogene   | 0  | 0  | 0  | 4   | 0   | 1   | 0        | 0        | 0        | 0.302304 |
| lincRNA -               | 20 | 19 | 18 | 336 | 500 | 321 | 0.821191 | 1.000408 | 0.891733 | 21.41332 |
| pseudogen: -            | 0  | 0  | 0  | 0   | 1   | 0   | 0        | 0        | 0        | 0        |
| antisense -             | 0  | 0  | 2  | 0   | 1   | 2   | 0        | 0        | 0.131724 | 0        |
| pseudogen: glycerol_kii | 0  | 0  | 0  | 0   | 0   | 2   | 0        | 0        | 0        | 0        |
| processed_ -            | 1  | 1  | 0  | 3   | 0   | 1   | 0.059809 | 0.076696 | 0        | 0.278494 |
| pseudogen: septin_7_p   | 1  | 1  | 0  | 0   | 0   | 0   | 0.036042 | 0.046218 | 0        | 0        |
| pseudogen: heat_shock   | 0  | 0  | 0  | 0   | 1   | 2   | 0        | 0        | 0        | 0        |
| antisense -             | 0  | 0  | 2  | 3   | 0   | 0   | 0        | 0        | 0.287185 | 0.554161 |
| antisense -             | 2  | 1  | 1  | 0   | 3   | 1   | 0.205658 | 0.131864 | 0.124069 | 0        |
| lincRNA -               | 0  | 0  | 0  | 0   | 1   | 0   | 0        | 0        | 0        | 0        |
| pseudogen: -            | 0  | 0  | 0  | 0   | 0   | 2   | 0        | 0        | 0        | 0        |
| antisense -             | 6  | 5  | 3  | 0   | 0   | 1   | 0.622434 | 0.665153 | 0.375501 | 0        |
| pseudogen: -            | 1  | 0  | 0  | 3   | 0   | 3   | 0.063365 | 0        | 0        | 0.295053 |
| antisense DOCK9_ant     | 0  | 2  | 4  | 0   | 0   | 0   | 0        | 0.306785 | 0.577301 | 0        |
| pseudogen: -            | 0  | 0  | 0  | 1   | 1   | 4   | 0        | 0        | 0        | 0.054558 |
| lincRNA KIF25_anti:     | 4  | 5  | 0  | 67  | 117 | 122 | 0.067106 | 0.107567 | 0        | 1.744632 |
| protein_co family_witl  | 1  | 0  | 1  | 0   | 2   | 0   | 0.018839 | 0        | 0.02273  | 0        |
| pseudogen: Ras-homol    | 1  | 1  | 1  | 0   | 2   | 2   | 0.066229 | 0.084929 | 0.079909 | 0        |
| pseudogen: -            | 1  | 1  | 4  | 0   | 0   | 0   | 0.19061  | 0.24443  | 0.919927 | 0        |
| antisense -             | 19 | 8  | 17 | 5   | 9   | 4   | 1.403008 | 0.757541 | 1.51462  | 0.573069 |
| pseudogen: tyrosine_3-  | 4  | 5  | 5  | 3   | 6   | 4   | 0.254146 | 0.407383 | 0.383303 | 0.295853 |
| pseudogen: -            | 1  | 2  | 2  | 3   | 4   | 4   | 0.16338  | 0.419023 | 0.394254 | 0.760764 |
| antisense -             | 0  | 0  | 1  | 0   | 0   | 0   | 0        | 0        | 0.07635  | 0        |
| pseudogen: -            | 14 | 12 | 12 | 13  | 20  | 18  | 0.493951 | 0.542933 | 0.51084  | 0.711917 |
| pseudogen: -            | 0  | 0  | 0  | 0   | 2   | 1   | 0        | 0        | 0        | 0        |
| pseudogen: -            | 1  | 0  | 1  | 3   | 0   | 0   | 0.048092 | 0        | 0.058026 | 0.223938 |
| antisense -             | 2  | 1  | 2  | 0   | 0   | 0   | 0.059543 | 0.038178 | 0.071842 | 0        |
| antisense -             | 0  | 3  | 1  | 1   | 0   | 1   | 0        | 0.06011  | 0.018852 | 0.024252 |
| antisense -             | 0  | 0  | 0  | 1   | 1   | 1   | 0        | 0        | 0        | 0.096016 |
| pseudogen: MT-ND2_ps    | 0  | 1  | 1  | 3   | 1   | 0   | 0        | 0.063629 | 0.059868 | 0.231047 |
| processed_ -            | 1  | 2  | 4  | 10  | 10  | 8   | 0.086673 | 0.222291 | 0.418303 | 1.345283 |
| processed_ ZRANB2_ar    | 1  | 7  | 6  | 0   | 0   | 2   | 0.052804 | 0.473996 | 0.382267 | 0        |
| lincRNA -               | 0  | 0  | 0  | 0   | 1   | 0   | 0        | 0        | 0        | 0        |
| antisense -             | 0  | 0  | 0  | 1   | 2   | 0   | 0        | 0        | 0        | 0.085623 |
| pseudogen: -            | 0  | 0  | 0  | 1   | 0   | 0   | 0        | 0        | 0        | 0.050788 |
| processed_ -            | 7  | 1  | 5  | 38  | 31  | 46  | 0.177134 | 0.03245  | 0.152659 | 1.492516 |
| protein_co IQ_motif_c   | 0  | 0  | 0  | 1   | 0   | 0   | 0        | 0        | 0        | 0.043193 |
| pseudogen: lipoyltrans  | 0  | 0  | 2  | 0   | 0   | 0   | 0        | 0        | 0.095406 | 0        |
| lincRNA -               | 0  | 0  | 0  | 7   | 5   | 4   | 0        | 0        | 0        | 1.061372 |
| processed_ TOB1_antis   | 6  | 3  | 2  | 23  | 25  | 3   | 0.208246 | 0.133523 | 0.083754 | 1.239034 |
| lincRNA -               | 5  | 5  | 8  | 0   | 0   | 0   | 0.293063 | 0.375811 | 0.565755 | 0        |
| lincRNA -               | 0  | 0  | 0  | 1   | 1   | 0   | 0        | 0        | 0        | 0.142705 |
| lincRNA -               | 9  | 8  | 5  | 0   | 0   | 0   | 0.182847 | 0.208422 | 0.122564 | 0        |
| antisense -             | 5  | 1  | 3  | 3   | 2   | 8   | 0.73959  | 0.189684 | 0.535415 | 0.688768 |
| pseudogen: high_mobil   | 2  | 0  | 2  | 3   | 1   | 1   | 0.160858 | 0        | 0.194084 | 0.37451  |
| pseudogen: -            | 8  | 5  | 5  | 9   | 15  | 8   | 0.423386 | 0.339333 | 0.319275 | 0.739298 |
| antisense -             | 4  | 2  | 5  | 0   | 5   | 0   | 0.438224 | 0.28098  | 0.660929 | 0        |
| antisense -             | 2  | 1  | 0  | 0   | 5   | 1   | 0.217083 | 0.139189 | 0        | 0        |
| sense_intrc ALMS1_inti  | 12 | 2  | 9  | 53  | 73  | 30  | 0.267053 | 0.057076 | 0.241661 | 1.830721 |
| pseudogen: -            | 0  | 0  | 1  | 0   | 0   | 0   | 0        | 0        | 0.261924 | 0        |
| antisense SNAP47_ar     | 3  | 0  | 3  | 1   | 5   | 1   | 0.08236  | 0        | 0.099371 | 0.042611 |
| pseudogen: ankyrin_rej  | 1  | 0  | 0  | 2   | 1   | 0   | 0.008691 | 0        | 0        | 0.02698  |
| lincRNA -               | 4  | 3  | 5  | 1   | 1   | 0   | 0.075325 | 0.072446 | 0.113605 | 0.029229 |
| pseudogen: cathepsin_l  | 0  | 0  | 0  | 1   | 2   | 0   | 0        | 0        | 0        | 0.072635 |
| lincRNA -               | 2  | 0  | 0  | 0   | 0   | 1   | 0.205658 | 0        | 0        | 0        |
| antisense NHS_antise    | 0  | 0  | 0  | 1   | 0   | 0   | 0        | 0        | 0        | 0.198852 |
| lincRNA -               | 0  | 2  | 0  | 0   | 0   | 0   | 0        | 0.160346 | 0        | 0        |
| pseudogen: farnesyltra  | 1  | 6  | 1  | 3   | 0   | 0   | 0.073959 | 0.569052 | 0.089236 | 0.344384 |
| lincRNA -               | 9  | 3  | 6  | 0   | 3   | 0   | 0.935721 | 0.399976 | 0.752667 | 0        |
| pseudogen: -            | 0  | 1  | 1  | 0   | 0   | 1   | 0        | 0.043321 | 0.04076  | 0        |
| lincRNA -               | 0  | 0  | 0  | 0   | 1   | 0   | 0        | 0        | 0        | 0        |

|                        |     |     |     |     |     |     |          |          |          |          |
|------------------------|-----|-----|-----|-----|-----|-----|----------|----------|----------|----------|
| antisense -            | 0   | 0   | 0   | 3   | 0   | 1   | 0        | 0        | 0        | 0.507766 |
| pseudogen-             | 1   | 0   | 0   | 0   | 2   | 0   | 0.240462 | 0        | 0        | 0        |
| pseudogen:adenylate_   | 12  | 2   | 8   | 25  | 32  | 36  | 0.84741  | 0.181114 | 0.681633 | 2.740203 |
| antisense BIRC6_anti   | 0   | 1   | 0   | 0   | 1   | 0   | 0        | 0.086269 | 0        | 0        |
| protein_co CDGSH_iro   | 299 | 241 | 224 | 317 | 425 | 345 | 6.027565 | 6.230129 | 5.448372 | 9.918829 |
| lincRNA -              | 0   | 0   | 0   | 1   | 3   | 0   | 0        | 0        | 0        | 0.163918 |
| sense_intrc -          | 0   | 0   | 0   | 0   | 1   | 0   | 0        | 0        | 0        | 0        |
| antisense -            | 4   | 1   | 1   | 0   | 0   | 0   | 0.501498 | 0.160775 | 0.151271 | 0        |
| pseudogen:heat_shock   | 0   | 0   | 0   | 0   | 1   | 1   | 0        | 0        | 0        | 0        |
| sense_intrc CDC42_inti | 2   | 3   | 4   | 4   | 3   | 1   | 0.13552  | 0.260678 | 0.327026 | 0.420692 |
| pseudogen:leucine_ri   | 12  | 6   | 4   | 7   | 4   | 3   | 0.415262 | 0.266257 | 0.167013 | 0.375984 |
| pseudogen:ribosomal_   | 3   | 4   | 2   | 1   | 5   | 3   | 0.107876 | 0.184447 | 0.086772 | 0.055813 |
| antisense -            | 15  | 9   | 2   | 27  | 19  | 9   | 1.05767  | 0.813787 | 0.170152 | 2.954969 |
| pseudogen-             | 3   | 4   | 2   | 1   | 2   | 5   | 0.442359 | 0.75635  | 0.355821 | 0.228867 |
| pseudogen:methylthio   | 0   | 1   | 0   | 0   | 0   | 0   | 0        | 0.072271 | 0        | 0        |
| pseudogen-             | 0   | 1   | 0   | 0   | 1   | 3   | 0        | 0.284975 | 0        | 0        |
| antisense PRRT3_anti   | 2   | 6   | 6   | 5   | 3   | 2   | 0.152736 | 0.587588 | 0.552855 | 0.592669 |
| antisense -            | 18  | 19  | 13  | 9   | 5   | 5   | 1.169003 | 1.582363 | 1.018673 | 0.907227 |
| antisense -            | 1   | 3   | 2   | 2   | 3   | 3   | 0.044319 | 0.1705   | 0.106948 | 0.13758  |
| processed_ TMEM254_    | 9   | 3   | 5   | 22  | 37  | 17  | 0.135216 | 0.057799 | 0.090637 | 0.513026 |
| pseudogen-             | 0   | 1   | 1   | 1   | 2   | 0   | 0        | 0.114971 | 0.108175 | 0.139158 |
| antisense -            | 0   | 0   | 0   | 4   | 9   | 0   | 0        | 0        | 0        | 0.616778 |
| pseudogen:tubulin_be   | 1   | 0   | 0   | 0   | 0   | 0   | 0.157879 | 0        | 0        | 0        |
| processed_ -           | 1   | 0   | 0   | 1   | 1   | 1   | 0.017588 | 0        | 0        | 0.027299 |
| pseudogen-             | 0   | 0   | 1   | 1   | 0   | 0   | 0        | 0        | 0.082352 | 0.105939 |
| lincRNA -              | 1   | 0   | 0   | 1   | 0   | 7   | 0.065764 | 0        | 0        | 0.102075 |
| pseudogen-             | 0   | 0   | 0   | 1   | 1   | 1   | 0        | 0        | 0        | 0.379061 |
| lincRNA -              | 1   | 1   | 1   | 4   | 4   | 2   | 0.081976 | 0.105122 | 0.098908 | 0.50895  |
| lincRNA -              | 2   | 1   | 0   | 1   | 0   | 0   | 0.213622 | 0.13697  | 0        | 0.165785 |
| pseudogen-             | 0   | 0   | 0   | 4   | 0   | 6   | 0        | 0        | 0        | 1.366757 |
| pseudogen-             | 0   | 0   | 1   | 0   | 0   | 0   | 0        | 0        | 0.074934 | 0        |
| pseudogen-             | 0   | 0   | 0   | 0   | 0   | 1   | 0        | 0        | 0        | 0        |
| pseudogen-             | 0   | 0   | 1   | 0   | 0   | 0   | 0        | 0        | 0.589328 | 0        |
| pseudogen:endothelin   | 0   | 0   | 0   | 1   | 1   | 0   | 0        | 0        | 0        | 0.098751 |
| antisense -            | 30  | 17  | 12  | 11  | 20  | 36  | 0.527447 | 0.38328  | 0.254558 | 0.300179 |
| antisense FGF12_anti   | 1   | 1   | 1   | 10  | 5   | 8   | 0.080845 | 0.103672 | 0.097544 | 1.254824 |
| lincRNA -              | 0   | 0   | 0   | 5   | 10  | 3   | 0        | 0        | 0        | 0.437905 |
| lincRNA -              | 0   | 0   | 1   | 0   | 0   | 0   | 0        | 0        | 0.023811 | 0        |
| antisense -            | 3   | 4   | 4   | 0   | 0   | 0   | 0.285335 | 0.487869 | 0.45903  | 0        |
| pseudogen:selenophos   | 0   | 0   | 0   | 2   | 0   | 0   | 0        | 0        | 0        | 0.123775 |
| pseudogen-             | 0   | 0   | 0   | 1   | 0   | 0   | 0        | 0        | 0        | 0.157874 |
| antisense HOXB_clusi   | 42  | 41  | 58  | 5   | 10  | 7   | 2.449479 | 3.06632  | 4.081318 | 0.452611 |
| processed_ -           | 0   | 0   | 1   | 0   | 2   | 2   | 0        | 0        | 0.107354 | 0        |
| pseudogen-             | 2   | 0   | 3   | 3   | 2   | 0   | 0.102268 | 0        | 0.185089 | 0.238102 |
| antisense -            | 2   | 0   | 2   | 1   | 2   | 0   | 0.1563   | 0        | 0.188585 | 0.1213   |
| processed_long_interf  | 0   | 0   | 0   | 1   | 1   | 1   | 0        | 0        | 0        | 0.062205 |
| pseudogen:MT-ND1_ps    | 0   | 1   | 0   | 1   | 0   | 0   | 0        | 0.063295 | 0        | 0.07661  |
| lincRNA -              | 0   | 0   | 0   | 1   | 0   | 0   | 0        | 0        | 0        | 0.142148 |
| pseudogen-             | 0   | 2   | 0   | 0   | 0   | 0   | 0        | 0.344583 | 0        | 0        |
| pseudogen-             | 0   | 2   | 0   | 1   | 1   | 0   | 0        | 0.106049 | 0        | 0.06418  |
| antisense SMIM12_ai    | 20  | 18  | 10  | 4   | 13  | 8   | 1.3025   | 1.503245 | 0.785771 | 0.404332 |
| pseudogen-             | 0   | 0   | 0   | 0   | 0   | 1   | 0        | 0        | 0        | 0        |
| pseudogen:heterogene   | 0   | 0   | 0   | 1   | 0   | 0   | 0        | 0        | 0        | 0.075733 |
| pseudogen-             | 0   | 3   | 0   | 0   | 0   | 0   | 0        | 0.478486 | 0        | 0        |
| lincRNA -              | 0   | 1   | 2   | 0   | 0   | 0   | 0        | 0.028085 | 0.05285  | 0        |
| pseudogen-             | 0   | 1   | 0   | 1   | 0   | 0   | 0        | 0.127936 | 0        | 0.154851 |
| antisense -            | 0   | 0   | 1   | 0   | 0   | 0   | 0        | 0        | 0.08117  | 0        |
| antisense -            | 23  | 23  | 18  | 19  | 16  | 20  | 1.936213 | 2.482918 | 1.828293 | 2.482614 |
| pseudogen-             | 0   | 0   | 2   | 4   | 0   | 0   | 0        | 0        | 0.935132 | 2.405944 |
| pseudogen:CCR4-NOT_    | 0   | 1   | 1   | 0   | 0   | 0   | 0        | 0.041128 | 0.038697 | 0        |
| sense_intrc SMYD3_int  | 11  | 9   | 4   | 8   | 3   | 2   | 1.428782 | 1.499081 | 0.626875 | 1.612849 |
| protein_co chromosor   | 2   | 5   | 1   | 4   | 5   | 6   | 0.108667 | 0.348377 | 0.065557 | 0.337334 |
| pseudogen-             | 2   | 0   | 2   | 0   | 1   | 1   | 0.198266 | 0        | 0.23922  | 0        |
| pseudogen-             | 19  | 26  | 8   | 13  | 8   | 16  | 0.87688  | 1.538755 | 0.445476 | 0.931238 |
| pseudogen-             | 0   | 0   | 1   | 0   | 0   | 0   | 0        | 0        | 0.079796 | 0        |

|                        |    |    |    |     |     |     |          |          |          |          |
|------------------------|----|----|----|-----|-----|-----|----------|----------|----------|----------|
| pseudogen: -           | 0  | 1  | 0  | 0   | 0   | 0   | 0        | 0.202457 | 0        | 0        |
| pseudogen: -           | 11 | 3  | 8  | 5   | 11  | 16  | 0.542937 | 0.189884 | 0.476425 | 0.383052 |
| pseudogen: ATPase_H+   | 5  | 5  | 0  | 5   | 4   | 1   | 0.379369 | 0.486487 | 0        | 0.588833 |
| pseudogen: -           | 94 | 78 | 72 | 140 | 165 | 118 | 9.298864 | 9.894777 | 8.593748 | 21.49614 |
| lincRNA -              | 5  | 1  | 2  | 0   | 0   | 0   | 0.550352 | 0.14115  | 0.265613 | 0        |
| pseudogen: ribosomal_  | 2  | 5  | 0  | 2   | 8   | 5   | 0.073495 | 0.235618 | 0        | 0.114075 |
| pseudogen: interferon_ | 0  | 0  | 0  | 0   | 1   | 0   | 0        | 0        | 0        | 0        |
| sense_intrc -          | 0  | 2  | 1  | 7   | 12  | 3   | 0        | 0.098493 | 0.046335 | 0.417247 |
| pseudogen: heat_shock  | 1  | 0  | 0  | 6   | 9   | 2   | 0.085879 | 0        | 0        | 0.799778 |
| pseudogen: family_witl | 0  | 0  | 0  | 1   | 0   | 0   | 0        | 0        | 0        | 0.029646 |
| pseudogen: -           | 1  | 0  | 0  | 2   | 0   | 2   | 0.018961 | 0        | 0        | 0.05886  |
| pseudogen: prohibitin_ | 23 | 18 | 23 | 15  | 27  | 21  | 1.307237 | 1.311923 | 1.577257 | 1.323269 |
| pseudogen: MT-ND5_ps   | 0  | 0  | 1  | 0   | 0   | 0   | 0        | 0        | 0.044653 | 0        |
| pseudogen: siah_E3_ub  | 0  | 0  | 0  | 0   | 0   | 1   | 0        | 0        | 0        | 0        |
| pseudogen: -           | 0  | 2  | 0  | 0   | 0   | 0   | 0        | 0.351636 | 0        | 0        |
| pseudogen: SPATA31_si  | 0  | 0  | 0  | 0   | 0   | 2   | 0        | 0        | 0        | 0        |
| pseudogen: prohibitin_ | 0  | 0  | 0  | 1   | 1   | 1   | 0        | 0        | 0        | 0.086953 |
| pseudogen: -           | 0  | 0  | 2  | 1   | 5   | 1   | 0        | 0        | 0.105848 | 0.068082 |
| processed_ -           | 1  | 4  | 6  | 1   | 1   | 1   | 0.043741 | 0.224365 | 0.316654 | 0.067892 |
| lincRNA MIRLET7D_      | 1  | 0  | 0  | 0   | 0   | 1   | 0.036236 | 0        | 0        | 0        |
| antisense XXYLT1_anti  | 0  | 2  | 1  | 0   | 1   | 1   | 0        | 0.153392 | 0.072163 | 0        |
| lincRNA -              | 0  | 0  | 0  | 26  | 24  | 6   | 0        | 0        | 0        | 1.256491 |
| pseudogen: -           | 0  | 1  | 0  | 0   | 0   | 0   | 0        | 0.157821 | 0        | 0        |
| pseudogen: -           | 14 | 6  | 9  | 4   | 5   | 3   | 0.715098 | 0.393005 | 0.554662 | 0.317123 |
| lincRNA -              | 0  | 2  | 0  | 0   | 0   | 0   | 0        | 0.471606 | 0        | 0        |
| pseudogen: -           | 1  | 0  | 0  | 0   | 1   | 0   | 0.205658 | 0        | 0        | 0        |
| antisense -            | 4  | 1  | 3  | 9   | 7   | 9   | 0.396533 | 0.127124 | 0.35883  | 1.384817 |
| antisense ARMC2_anti   | 1  | 1  | 0  | 0   | 0   | 0   | 0.418661 | 0.536873 | 0        | 0        |
| pseudogen: -           | 5  | 5  | 9  | 3   | 10  | 3   | 0.535274 | 0.686413 | 1.16251  | 0.498492 |
| lincRNA -              | 0  | 0  | 0  | 0   | 0   | 1   | 0        | 0        | 0        | 0        |
| pseudogen: -           | 10 | 8  | 18 | 10  | 11  | 8   | 1.335898 | 1.37048  | 2.901308 | 2.073499 |
| pseudogen: -           | 0  | 1  | 0  | 0   | 1   | 3   | 0        | 0.484918 | 0        | 0        |
| sense_intrc STARD13_i  | 4  | 3  | 1  | 0   | 0   | 0   | 0.414956 | 0.399092 | 0.125167 | 0        |
| protein_cofactory_r    | 0  | 0  | 0  | 1   | 1   | 0   | 0        | 0        | 0        | 0.065391 |
| lincRNA -              | 0  | 0  | 1  | 0   | 1   | 1   | 0        | 0        | 0.114991 | 0        |
| pseudogen: capicua_tr  | 0  | 0  | 0  | 1   | 0   | 3   | 0        | 0        | 0        | 0.026669 |
| pseudogen: barrier_to_ | 5  | 1  | 2  | 5   | 3   | 3   | 0.888069 | 0.227764 | 0.428602 | 1.378405 |
| lincRNA -              | 0  | 0  | 1  | 0   | 3   | 0   | 0        | 0        | 0.104191 | 0        |
| pseudogen: -           | 0  | 1  | 0  | 3   | 2   | 1   | 0        | 0.138229 | 0        | 0.50193  |
| pseudogen: -           | 6  | 4  | 3  | 0   | 1   | 0   | 0.306137 | 0.261718 | 0.184686 | 0        |
| antisense HLA_compl    | 0  | 0  | 0  | 7   | 3   | 5   | 0        | 0        | 0        | 0.710542 |
| processed_ELOVL2_an    | 0  | 0  | 0  | 1   | 0   | 0   | 0        | 0        | 0        | 0.080598 |
| antisense FEZF1_anti   | 0  | 1  | 0  | 169 | 262 | 366 | 0        | 0.022665 | 0        | 4.63618  |
| antisense -            | 7  | 9  | 8  | 5   | 7   | 1   | 0.157576 | 0.259802 | 0.217285 | 0.174699 |
| pseudogen: -           | 1  | 2  | 0  | 0   | 1   | 0   | 0.102604 | 0.26315  | 0        | 0        |
| pseudogen: -           | 1  | 0  | 1  | 0   | 2   | 1   | 0.109556 | 0        | 0.132186 | 0        |
| antisense -            | 1  | 0  | 0  | 1   | 1   | 0   | 0.109047 | 0        | 0        | 0.169255 |
| lincRNA long_interf    | 0  | 2  | 0  | 5   | 2   | 0   | 0        | 0.274565 | 0        | 0.83082  |
| processed_ -           | 1  | 1  | 2  | 0   | 0   | 0   | 0.094919 | 0.12172  | 0.229051 | 0        |
| pseudogen: high_mobil  | 0  | 1  | 0  | 2   | 0   | 0   | 0        | 0.133325 | 0        | 0.322749 |
| pseudogen: high_mobil  | 15 | 18 | 19 | 6   | 16  | 28  | 2.576375 | 3.964602 | 3.937489 | 1.599556 |
| processed_ -           | 0  | 1  | 4  | 1   | 0   | 0   | 0        | 0.028936 | 0.108904 | 0.035024 |
| antisense -            | 0  | 0  | 2  | 2   | 3   | 6   | 0        | 0        | 0.232343 | 0.29889  |
| pseudogen: Fanconi_ar  | 0  | 0  | 1  | 2   | 2   | 2   | 0        | 0        | 0.040411 | 0.103971 |
| pseudogen: non-SMC_c   | 0  | 0  | 0  | 0   | 1   | 2   | 0        | 0        | 0        | 0        |
| pseudogen: -           | 14 | 10 | 7  | 11  | 11  | 10  | 0.645487 | 0.591247 | 0.389409 | 0.787195 |
| pseudogen: triosephos  | 11 | 3  | 10 | 2   | 1   | 8   | 0.685891 | 0.23988  | 0.752334 | 0.193563 |
| pseudogen: ribosomal_  | 0  | 0  | 1  | 0   | 1   | 2   | 0        | 0        | 0.043154 | 0        |
| lincRNA Down_sync      | 3  | 2  | 4  | 1   | 2   | 0   | 0.085566 | 0.073151 | 0.137653 | 0.04427  |
| pseudogen: -           | 1  | 1  | 0  | 1   | 1   | 2   | 0.098096 | 0.125795 | 0        | 0.152259 |
| pseudogen: lysyl-tRNA_ | 2  | 1  | 0  | 0   | 2   | 0   | 0.057218 | 0.036687 | 0        | 0        |
| pseudogen: golgin_A6_  | 80 | 57 | 63 | 14  | 21  | 24  | 1.605135 | 1.46658  | 1.525142 | 0.435994 |
| pseudogen: mediator_c  | 0  | 0  | 0  | 0   | 0   | 1   | 0        | 0        | 0        | 0        |
| pseudogen: -           | 12 | 13 | 15 | 17  | 19  | 17  | 0.652761 | 0.90683  | 0.984493 | 1.435333 |
| lincRNA -              | 2  | 3  | 8  | 0   | 0   | 0   | 0.183523 | 0.353013 | 0.885722 | 0        |

|                         |     |     |     |     |     |     |          |          |          |          |
|-------------------------|-----|-----|-----|-----|-----|-----|----------|----------|----------|----------|
| pseudogen: -            | 0   | 0   | 0   | 0   | 2   | 1   | 0        | 0        | 0        | 0        |
| lincRNA -               | 0   | 0   | 1   | 1   | 0   | 0   | 0        | 0        | 0.019462 | 0.025036 |
| antisense -             | 17  | 16  | 9   | 0   | 0   | 0   | 0.308248 | 0.372033 | 0.196899 | 0        |
| lincRNA -               | 0   | 0   | 0   | 0   | 2   | 1   | 0        | 0        | 0        | 0        |
| pseudogen: serine_palr  | 1   | 2   | 0   | 1   | 0   | 0   | 0.179655 | 0.460765 | 0        | 0.27885  |
| pseudogen: retinoblast  | 3   | 2   | 1   | 0   | 0   | 0   | 0.076285 | 0.065217 | 0.030681 | 0        |
| lincRNA -               | 1   | 0   | 0   | 1   | 0   | 0   | 0.020211 | 0        | 0        | 0.031371 |
| pseudogen: transcriptic | 18  | 23  | 34  | 63  | 69  | 45  | 0.897894 | 1.471261 | 2.046348 | 4.877795 |
| pseudogen: olfactory_r  | 0   | 0   | 0   | 0   | 2   | 0   | 0        | 0        | 0        | 0        |
| processed_ -            | 9   | 1   | 5   | 7   | 6   | 4   | 1.084859 | 0.154575 | 0.727192 | 1.309662 |
| processed_ long_interf  | 0   | 0   | 0   | 0   | 1   | 2   | 0        | 0        | 0        | 0        |
| lincRNA -               | 0   | 0   | 0   | 0   | 0   | 2   | 0        | 0        | 0        | 0        |
| antisense -             | 13  | 7   | 7   | 7   | 15  | 4   | 1.202308 | 0.830194 | 0.781121 | 1.004849 |
| antisense -             | 0   | 0   | 0   | 0   | 2   | 0   | 0        | 0        | 0        | 0        |
| pseudogen: -            | 1   | 4   | 0   | 0   | 0   | 0   | 0.168669 | 0.865177 | 0        | 0        |
| antisense -             | 2   | 0   | 0   | 1   | 0   | 0   | 0.301544 | 0        | 0        | 0.234019 |
| antisense -             | 1   | 2   | 1   | 2   | 5   | 4   | 0.0551   | 0.141316 | 0.066481 | 0.171045 |
| lincRNA -               | 0   | 0   | 0   | 0   | 1   | 0   | 0        | 0        | 0        | 0        |
| lincRNA -               | 12  | 5   | 10  | 0   | 2   | 1   | 0.448708 | 0.239752 | 0.45116  | 0        |
| processed_ -            | 3   | 2   | 3   | 2   | 6   | 2   | 0.084183 | 0.071969 | 0.101572 | 0.087109 |
| pseudogen: transcriptic | 0   | 0   | 0   | 1   | 0   | 0   | 0        | 0        | 0        | 0.098886 |
| pseudogen: leucine_ric  | 10  | 6   | 2   | 18  | 33  | 12  | 0.086132 | 0.066271 | 0.020785 | 0.240639 |
| pseudogen: ribosomal_   | 1   | 0   | 3   | 0   | 1   | 1   | 0.064233 | 0        | 0.232502 | 0        |
| antisense -             | 0   | 0   | 0   | 0   | 0   | 2   | 0        | 0        | 0        | 0        |
| protein_co ankyrin_rej  | 57  | 41  | 42  | 189 | 227 | 143 | 0.708384 | 0.653412 | 0.629783 | 3.645741 |
| processed_ -            | 20  | 27  | 7   | 37  | 46  | 15  | 0.357257 | 0.618478 | 0.150868 | 1.025849 |
| pseudogen: -            | 3   | 4   | 0   | 0   | 0   | 0   | 0.184606 | 0.315642 | 0        | 0        |
| pseudogen: proliferatic | 3   | 1   | 5   | 3   | 3   | 1   | 0.11901  | 0.050871 | 0.239321 | 0.18472  |
| pseudogen: -            | 1   | 1   | 2   | 0   | 4   | 0   | 0.151258 | 0.193967 | 0.365003 | 0        |
| antisense PROX1_ant     | 6   | 8   | 6   | 0   | 2   | 0   | 0.05426  | 0.092775 | 0.065468 | 0        |
| antisense -             | 11  | 12  | 16  | 0   | 1   | 0   | 0.577593 | 0.808015 | 1.013671 | 0        |
| pseudogen: ATP_syntha   | 1   | 2   | 4   | 0   | 0   | 0   | 0.110329 | 0.282964 | 0.532475 | 0        |
| pseudogen: olfactory_r  | 1   | 0   | 0   | 0   | 0   | 0   | 0.050043 | 0        | 0        | 0        |
| lincRNA PSMG3_an        | 34  | 20  | 27  | 19  | 33  | 29  | 0.279646 | 0.210945 | 0.267942 | 0.242557 |
| lincRNA -               | 0   | 1   | 0   | 1   | 0   | 0   | 0        | 0.06741  | 0        | 0.081592 |
| pseudogen: -            | 5   | 1   | 0   | 0   | 0   | 1   | 0.42396  | 0.108734 | 0        | 0        |
| antisense -             | 8   | 5   | 4   | 1   | 4   | 0   | 0.754769 | 0.604928 | 0.455336 | 0.146438 |
| lincRNA -               | 6   | 7   | 4   | 0   | 0   | 0   | 0.682864 | 1.021623 | 0.549277 | 0        |
| antisense -             | 13  | 10  | 10  | 0   | 0   | 0   | 0.818215 | 0.807111 | 0.759403 | 0        |
| pseudogen: ankyrin_rej  | 1   | 0   | 0   | 0   | 0   | 0   | 0.043822 | 0        | 0        | 0        |
| pseudogen: ribosomal_   | 0   | 0   | 1   | 0   | 0   | 0   | 0        | 0        | 0.095728 | 0        |
| protein_co PPP5_tetra   | 4   | 3   | 9   | 10  | 20  | 12  | 0.067541 | 0.064958 | 0.183356 | 0.262081 |
| antisense THAP7_ant     | 16  | 13  | 14  | 20  | 33  | 13  | 0.326475 | 0.34016  | 0.344672 | 0.633419 |
| lincRNA -               | 0   | 0   | 0   | 1   | 0   | 2   | 0        | 0        | 0        | 0.155181 |
| pseudogen: -            | 0   | 1   | 3   | 0   | 0   | 0   | 0        | 0.105676 | 0.298289 | 0        |
| pseudogen: HLA_compl    | 1   | 0   | 2   | 0   | 1   | 0   | 0.048092 | 0        | 0.116052 | 0        |
| lincRNA -               | 1   | 0   | 0   | 1   | 0   | 0   | 0.02183  | 0        | 0        | 0.033883 |
| pseudogen: collagen_ty  | 2   | 3   | 3   | 0   | 1   | 1   | 0.021723 | 0.041786 | 0.039316 | 0        |
| pseudogen: nitric_oxid  | 2   | 0   | 0   | 0   | 0   | 0   | 0.028221 | 0        | 0        | 0        |
| pseudogen: carcinoeml   | 0   | 0   | 0   | 0   | 0   | 1   | 0        | 0        | 0        | 0        |
| processed_ LIMD1_ant    | 0   | 0   | 0   | 5   | 8   | 4   | 0        | 0        | 0        | 0.236913 |
| antisense -             | 0   | 0   | 0   | 1   | 1   | 1   | 0        | 0        | 0        | 0.111797 |
| pseudogen: brain_abun   | 0   | 0   | 0   | 2   | 4   | 16  | 0        | 0        | 0        | 0.218887 |
| antisense -             | 1   | 0   | 0   | 0   | 0   | 0   | 0.061294 | 0        | 0        | 0        |
| lincRNA -               | 3   | 0   | 0   | 2   | 1   | 0   | 0.172601 | 0        | 0        | 0.178601 |
| lincRNA long_interf     | 2   | 5   | 2   | 9   | 6   | 3   | 0.069985 | 0.224365 | 0.084441 | 0.48882  |
| antisense -             | 0   | 0   | 0   | 1   | 2   | 1   | 0        | 0        | 0        | 0.064636 |
| processed_ -            | 330 | 301 | 335 | 269 | 305 | 362 | 1.791768 | 2.09577  | 2.194626 | 2.266995 |
| processed_ -            | 6   | 0   | 0   | 2   | 9   | 6   | 0.060205 | 0        | 0        | 0.031149 |
| lincRNA -               | 27  | 37  | 24  | 26  | 22  | 27  | 1.66583  | 2.927372 | 1.786595 | 2.489835 |
| lincRNA -               | 3   | 1   | 2   | 5   | 2   | 2   | 0.134741 | 0.057596 | 0.108382 | 0.348562 |
| pseudogen: family_witl  | 11  | 10  | 4   | 6   | 4   | 20  | 0.74644  | 0.870185 | 0.327499 | 0.631952 |
| antisense ZNF32_anti    | 20  | 25  | 16  | 3   | 28  | 13  | 1.036243 | 1.661044 | 1.00023  | 0.241259 |
| pseudogen: splicing_fac | 1   | 1   | 1   | 2   | 3   | 0   | 0.031747 | 0.040711 | 0.038304 | 0.098551 |
| pseudogen: -            | 0   | 0   | 0   | 1   | 0   | 1   | 0        | 0        | 0        | 0.060499 |

|                         |      |      |      |     |     |     |          |          |          |          |
|-------------------------|------|------|------|-----|-----|-----|----------|----------|----------|----------|
| pseudogen:-             | 5    | 1    | 3    | 3   | 1   | 0   | 0.550352 | 0.14115  | 0.398419 | 0.512534 |
| pseudogen:-             | 0    | 1    | 2    | 3   | 6   | 5   | 0        | 0.053592 | 0.100848 | 0.194598 |
| pseudogen: GTF2I_repe   | 1    | 0    | 0    | 5   | 5   | 3   | 0.019328 | 0        | 0        | 0.15     |
| pseudogen: prohibitin_  | 0    | 0    | 3    | 2   | 5   | 1   | 0        | 0        | 0.209281 | 0.179482 |
| lincRNA -               | 0    | 2    | 1    | 0   | 0   | 1   | 0        | 0.126323 | 0.059428 | 0        |
| lincRNA FTX_transc      | 145  | 121  | 120  | 39  | 66  | 101 | 2.618041 | 2.801581 | 2.614194 | 1.092958 |
| pseudogen: ribosomal_   | 0    | 0    | 0    | 1   | 0   | 0   | 0        | 0        | 0        | 0.081867 |
| lincRNA -               | 1    | 0    | 0    | 0   | 0   | 0   | 0.13321  | 0        | 0        | 0        |
| lincRNA -               | 0    | 0    | 0    | 0   | 1   | 0   | 0        | 0        | 0        | 0        |
| pseudogen: tRNA_splici  | 2    | 0    | 1    | 0   | 1   | 2   | 0.261955 | 0        | 0.158032 | 0        |
| lincRNA -               | 6    | 9    | 11   | 0   | 1   | 3   | 0.078962 | 0.151886 | 0.174665 | 0        |
| pseudogen:-             | 1    | 1    | 2    | 0   | 0   | 0   | 0.242953 | 0.311553 | 0.586275 | 0        |
| pseudogen: high_mobil   | 2    | 2    | 1    | 1   | 0   | 0   | 0.155522 | 0.199435 | 0.093823 | 0.120696 |
| antisense -             | 1    | 0    | 3    | 0   | 1   | 1   | 0.093406 | 0        | 0.338101 | 0        |
| antisense HM13_anti     | 3    | 7    | 6    | 10  | 16  | 11  | 0.287669 | 0.860754 | 0.694178 | 1.488339 |
| lincRNA -               | 8    | 7    | 11   | 0   | 0   | 0   | 0.141876 | 0.159194 | 0.235375 | 0        |
| pseudogen:-             | 0    | 0    | 0    | 0   | 0   | 1   | 0        | 0        | 0        | 0        |
| pseudogen: ubiquinol-4  | 0    | 0    | 0    | 2   | 2   | 1   | 0        | 0        | 0        | 0.531239 |
| lincRNA -               | 0    | 0    | 2    | 174 | 205 | 117 | 0        | 0        | 0.223178 | 24.97768 |
| pseudogen:-             | 4    | 4    | 2    | 2   | 8   | 3   | 0.1563   | 0.200433 | 0.094293 | 0.1213   |
| pseudogen: ribosomal_   | 16   | 20   | 13   | 35  | 38  | 28  | 2.273455 | 3.64423  | 2.228732 | 7.71907  |
| antisense DNMT3_opp     | 1360 | 1095 | 1141 | 0   | 0   | 5   | 112.2719 | 115.9192 | 113.649  | 0        |
| lincRNA -               | 0    | 0    | 0    | 0   | 2   | 0   | 0        | 0        | 0        | 0        |
| antisense -             | 5    | 0    | 3    | 0   | 2   | 0   | 0.536499 | 0        | 0.38839  | 0        |
| pseudogen:-             | 0    | 0    | 0    | 0   | 0   | 1   | 0        | 0        | 0        | 0        |
| pseudogen:-             | 6    | 2    | 2    | 3   | 3   | 0   | 0.424344 | 0.181387 | 0.170665 | 0.32932  |
| pseudogen:-             | 19   | 13   | 18   | 0   | 0   | 0   | 0.397373 | 0.348656 | 0.454219 | 0        |
| antisense USP12_ant     | 1    | 0    | 0    | 0   | 0   | 0   | 0.168065 | 0        | 0        | 0        |
| pseudogen:-             | 0    | 0    | 1    | 4   | 14  | 3   | 0        | 0        | 0.054452 | 0.280192 |
| lincRNA -               | 0    | 1    | 0    | 0   | 0   | 0   | 0        | 0.074788 | 0        | 0        |
| antisense -             | 2    | 1    | 1    | 3   | 3   | 3   | 0.448708 | 0.287702 | 0.270696 | 1.044686 |
| lincRNA -               | 1    | 1    | 0    | 0   | 0   | 0   | 0.103055 | 0.132153 | 0        | 0        |
| pseudogen:-             | 0    | 2    | 1    | 2   | 1   | 1   | 0        | 0.038422 | 0.018075 | 0.046505 |
| protein_co proline-ricl | 1    | 4    | 3    | 0   | 0   | 1   | 0.051358 | 0.263438 | 0.1859   | 0        |
| processed_ KLHL7_anti   | 0    | 7    | 3    | 7   | 11  | 5   | 0        | 0.164161 | 0.066196 | 0.198697 |
| pseudogen: YY1_transc   | 0    | 0    | 0    | 0   | 0   | 2   | 0        | 0        | 0        | 0        |
| lincRNA family_witl     | 6    | 0    | 1    | 3   | 1   | 0   | 0.138455 | 0        | 0.027842 | 0.10745  |
| pseudogen: protein-kin  | 0    | 0    | 0    | 1   | 3   | 1   | 0        | 0        | 0        | 0.033037 |
| pseudogen: carcinoeml   | 0    | 0    | 1    | 1   | 6   | 4   | 0        | 0        | 0.018758 | 0.024131 |
| pseudogen: SET_pseudc   | 2    | 0    | 0    | 1   | 3   | 2   | 0.106689 | 0        | 0        | 0.082798 |
| pseudogen: poly(A)_bir  | 3    | 1    | 4    | 16  | 8   | 2   | 0.306471 | 0.131002 | 0.493033 | 2.536987 |
| lincRNA -               | 0    | 0    | 1    | 0   | 2   | 0   | 0        | 0        | 0.030648 | 0        |
| antisense ENO1_antis    | 0    | 1    | 2    | 1   | 1   | 1   | 0        | 0.131864 | 0.248138 | 0.159605 |
| pseudogen: D-dopachro   | 10   | 9    | 19   | 9   | 1   | 1   | 1.224282 | 1.412972 | 2.806618 | 1.71023  |
| antisense -             | 2    | 1    | 0    | 2   | 4   | 2   | 0.352557 | 0.226052 | 0        | 0.547217 |
| pseudogen: mitochond    | 0    | 0    | 0    | 0   | 0   | 1   | 0        | 0        | 0        | 0        |
| antisense -             | 1    | 2    | 0    | 0   | 0   | 0   | 0.103055 | 0.264307 | 0        | 0        |
| antisense -             | 1    | 1    | 5    | 3   | 3   | 0   | 0.357939 | 0.459006 | 2.15937  | 1.666713 |
| processed_ -            | 0    | 1    | 0    | 0   | 1   | 0   | 0        | 0.098573 | 0        | 0        |
| pseudogen:-             | 2    | 3    | 2    | 2   | 0   | 0   | 0.236818 | 0.455529 | 0.285735 | 0.367575 |
| antisense -             | 0    | 0    | 0    | 0   | 1   | 1   | 0        | 0        | 0        | 0        |
| antisense -             | 39   | 38   | 42   | 24  | 47  | 10  | 0.600957 | 0.750881 | 0.780865 | 0.574011 |
| pseudogen: F-box_and_   | 17   | 13   | 8    | 19  | 24  | 43  | 0.653921 | 0.641253 | 0.371291 | 1.134386 |
| pseudogen:-             | 1    | 0    | 0    | 1   | 0   | 1   | 0.129889 | 0        | 0        | 0.201606 |
| pseudogen:-             | 0    | 0    | 0    | 19  | 8   | 18  | 0        | 0        | 0        | 1.68842  |
| pseudogen:-             | 0    | 0    | 0    | 1   | 0   | 0   | 0        | 0        | 0        | 0.109608 |
| pseudogen:-             | 183  | 140  | 163  | 81  | 132 | 79  | 16.9248  | 16.60389 | 18.18897 | 11.62754 |
| lincRNA -               | 0    | 0    | 0    | 1   | 0   | 0   | 0        | 0        | 0        | 0.178382 |
| processed_ -            | 77   | 85   | 94   | 174 | 195 | 190 | 1.356833 | 1.920719 | 1.998533 | 4.758995 |
| antisense -             | 0    | 0    | 0    | 3   | 3   | 0   | 0        | 0        | 0        | 0.346021 |
| sense_intrc -           | 8    | 15   | 9    | 5   | 13  | 8   | 0.391566 | 0.94149  | 0.531503 | 0.379853 |
| lincRNA -               | 639  | 455  | 536  | 273 | 416 | 438 | 9.216463 | 8.415582 | 9.327736 | 6.111623 |
| pseudogen: ribosomal_   | 1    | 0    | 0    | 0   | 1   | 0   | 0.100192 | 0        | 0        | 0        |
| processed_ -            | 0    | 3    | 1    | 0   | 0   | 1   | 0        | 0.41279  | 0.129463 | 0        |
| processed_ -            | 5    | 3    | 7    | 1   | 4   | 3   | 0.150481 | 0.115783 | 0.25419  | 0.046714 |

|                        |    |    |    |      |      |      |          |          |          |          |
|------------------------|----|----|----|------|------|------|----------|----------|----------|----------|
| antisense -            | 0  | 0  | 0  | 1    | 0    | 1    | 0        | 0        | 0        | 0.150371 |
| antisense -            | 4  | 1  | 0  | 11   | 12   | 1    | 0.25346  | 0.081256 | 0        | 1.081862 |
| sense_intrc -          | 0  | 0  | 0  | 0    | 2    | 1    | 0        | 0        | 0        | 0        |
| antisense -            | 0  | 0  | 0  | 3    | 0    | 2    | 0        | 0        | 0        | 0.340093 |
| pseudogen: ras_homolo  | 0  | 0  | 0  | 0    | 1    | 1    | 0        | 0        | 0        | 0        |
| pseudogen: synaptosor  | 0  | 0  | 1  | 0    | 1    | 1    | 0        | 0        | 0.229982 | 0        |
| pseudogen: -           | 2  | 3  | 1  | 2    | 3    | 4    | 0.190998 | 0.367392 | 0.115225 | 0.296455 |
| pseudogen: vomeronas   | 2  | 2  | 1  | 0    | 1    | 0    | 0.112988 | 0.144891 | 0.068163 | 0        |
| lincRNA -              | 0  | 0  | 0  | 0    | 0    | 1    | 0        | 0        | 0        | 0        |
| pseudogen: -           | 1  | 0  | 1  | 1    | 0    | 0    | 0.274211 | 0        | 0.330851 | 0.425613 |
| protein_co ankyrin_rej | 3  | 2  | 2  | 22   | 38   | 2    | 0.123071 | 0.105214 | 0.098995 | 1.400836 |
| pseudogen: -           | 1  | 0  | 0  | 0    | 0    | 0    | 0.031281 | 0        | 0        | 0        |
| processed_ -           | 0  | 1  | 4  | 2    | 2    | 2    | 0        | 0.026407 | 0.099386 | 0.063926 |
| pseudogen: -           | 1  | 2  | 1  | 1    | 0    | 1    | 0.061294 | 0.157202 | 0.073955 | 0.095137 |
| pseudogen: phosphosei  | 0  | 1  | 0  | 0    | 0    | 0    | 0        | 0.054122 | 0        | 0        |
| sense_intrc ARHGAP26   | 1  | 1  | 0  | 1    | 0    | 0    | 0.120851 | 0.154974 | 0        | 0.187577 |
| antisense -            | 2  | 1  | 0  | 1    | 0    | 0    | 0.167166 | 0.107183 | 0        | 0.129732 |
| pseudogen: SWI/SNF_re  | 3  | 2  | 0  | 0    | 1    | 1    | 0.114833 | 0.098171 | 0        | 0        |
| pseudogen: major_histi | 3  | 1  | 1  | 8    | 10   | 8    | 0.135651 | 0.057984 | 0.054557 | 0.561464 |
| protein_co YY2_transci | 51 | 25 | 29 | 9    | 7    | 9    | 0.872452 | 0.548429 | 0.598573 | 0.238971 |
| antisense -            | 0  | 0  | 0  | 2035 | 2525 | 2150 | 0        | 0        | 0        | 157.3931 |
| pseudogen: -           | 7  | 5  | 6  | 4    | 6    | 3    | 0.392151 | 0.359198 | 0.405559 | 0.347813 |
| pseudogen: -           | 0  | 1  | 1  | 0    | 0    | 1    | 0        | 0.24344  | 0.229051 | 0        |
| lincRNA -              | 22 | 7  | 12 | 4    | 6    | 3    | 1.754388 | 0.715831 | 1.154602 | 0.495101 |
| lincRNA -              | 5  | 4  | 8  | 2    | 0    | 2    | 0.09363  | 0.096054 | 0.180752 | 0.058131 |
| lincRNA -              | 1  | 2  | 2  | 0    | 0    | 2    | 0.088472 | 0.226905 | 0.213492 | 0        |
| sense_intrc -          | 1  | 0  | 1  | 0    | 3    | 2    | 0.11059  | 0        | 0.133433 | 0        |
| lincRNA -              | 0  | 0  | 0  | 0    | 0    | 1    | 0        | 0        | 0        | 0        |
| pseudogen: -           | 0  | 0  | 1  | 0    | 0    | 0    | 0        | 0        | 0.034267 | 0        |
| pseudogen: chromobo:   | 0  | 1  | 0  | 0    | 0    | 0    | 0        | 0.140819 | 0        | 0        |
| processed_ -           | 1  | 1  | 0  | 3    | 2    | 1    | 0.069467 | 0.089081 | 0        | 0.323466 |
| antisense -            | 1  | 1  | 0  | 0    | 2    | 0    | 0.059505 | 0.076307 | 0        | 0        |
| antisense -            | 0  | 0  | 1  | 0    | 1    | 0    | 0        | 0        | 0.102307 | 0        |
| pseudogen: -           | 0  | 0  | 0  | 4    | 1    | 1    | 0        | 0        | 0        | 0.234584 |
| pseudogen: ribulose-5- | 0  | 0  | 1  | 2    | 2    | 0    | 0        | 0        | 0.083692 | 0.215325 |
| pseudogen: -           | 0  | 0  | 0  | 0    | 0    | 1    | 0        | 0        | 0        | 0        |
| pseudogen: ribosomal_  | 0  | 0  | 1  | 1    | 1    | 1    | 0        | 0        | 0.150068 | 0.19305  |
| lincRNA -              | 86 | 49 | 75 | 0    | 0    | 0    | 6.223058 | 4.546852 | 6.548091 | 0        |
| lincRNA -              | 4  | 0  | 3  | 1    | 0    | 2    | 0.542081 | 0        | 0.490539 | 0.210346 |
| processed_ ZNF674_an   | 66 | 73 | 68 | 66   | 78   | 55   | 1.623684 | 2.302978 | 2.018434 | 2.520182 |
| pseudogen: -           | 0  | 0  | 0  | 0    | 1    | 0    | 0        | 0        | 0        | 0        |
| pseudogen: -           | 0  | 0  | 0  | 0    | 3    | 1    | 0        | 0        | 0        | 0        |
| processed_ -           | 0  | 0  | 0  | 5    | 5    | 1    | 0        | 0        | 0        | 0.203751 |
| pseudogen: -           | 0  | 0  | 0  | 1    | 0    | 0    | 0        | 0        | 0        | 0.21469  |
| pseudogen: -           | 0  | 0  | 0  | 1    | 4    | 1    | 0        | 0        | 0        | 0.253588 |
| lincRNA -              | 0  | 0  | 1  | 0    | 0    | 1    | 0        | 0        | 0.111589 | 0        |
| pseudogen: cyclin_B1_i | 1  | 0  | 0  | 0    | 3    | 0    | 0.057323 | 0        | 0        | 0        |
| pseudogen: -           | 0  | 0  | 0  | 1    | 1    | 3    | 0        | 0        | 0        | 0.098086 |
| lincRNA -              | 0  | 0  | 0  | 1    | 0    | 0    | 0        | 0        | 0        | 0.244228 |
| pseudogen: -           | 0  | 0  | 1  | 0    | 0    | 0    | 0        | 0        | 0.124616 | 0        |
| pseudogen: centaurin_j | 2  | 5  | 2  | 1    | 4    | 2    | 0.038784 | 0.124338 | 0.046795 | 0.030099 |
| pseudogen: F-box_and_  | 2  | 0  | 3  | 2    | 1    | 0    | 0.063623 | 0        | 0.115147 | 0.098751 |
| pseudogen: -           | 2  | 7  | 5  | 5    | 1    | 3    | 0.072698 | 0.326286 | 0.219285 | 0.282092 |
| protein_co stathmin_c  | 0  | 0  | 0  | 4    | 5    | 2    | 0        | 0        | 0        | 0.139626 |
| lincRNA long_interf    | 3  | 1  | 0  | 0    | 0    | 1    | 0.078411 | 0.033517 | 0        | 0        |
| lincRNA -              | 1  | 0  | 0  | 0    | 0    | 0    | 0.063537 | 0        | 0        | 0        |
| antisense -            | 4  | 2  | 3  | 0    | 0    | 0    | 0.707774 | 0.45381  | 0.640477 | 0        |
| pseudogen: -           | 23 | 15 | 17 | 46   | 63   | 56   | 0.308575 | 0.258068 | 0.275188 | 0.957903 |
| pseudogen: SHC_(Src_h  | 0  | 0  | 0  | 0    | 0    | 6    | 0        | 0        | 0        | 0        |
| antisense -            | 2  | 0  | 2  | 2    | 4    | 4    | 0.018771 | 0        | 0.022648 | 0.029135 |
| sense_intrc -          | 41 | 37 | 34 | 8    | 13   | 8    | 3.214867 | 3.720405 | 3.216668 | 0.973643 |
| pseudogen: ribosomal_  | 2  | 0  | 1  | 0    | 4    | 0    | 0.204314 | 0        | 0.123258 | 0        |
| antisense MAGEA8_ai    | 0  | 0  | 0  | 0    | 0    | 1    | 0        | 0        | 0        | 0        |
| pseudogen: ribosomal_  | 0  | 0  | 1  | 0    | 2    | 2    | 0        | 0        | 0.084065 | 0        |
| lincRNA -              | 0  | 0  | 0  | 0    | 1    | 0    | 0        | 0        | 0        | 0        |

|                         |      |      |      |      |      |      |          |          |          |          |
|-------------------------|------|------|------|------|------|------|----------|----------|----------|----------|
| antisense -             | 2    | 0    | 1    | 7    | 17   | 4    | 0.039653 | 0        | 0.023922 | 0.215416 |
| pseudogen: peptidylpro  | 2    | 3    | 1    | 2    | 2    | 5    | 0.183882 | 0.353705 | 0.110932 | 0.285411 |
| antisense -             | 3    | 5    | 6    | 3    | 6    | 0    | 0.343098 | 0.73329  | 0.827934 | 0.532535 |
| lincRNA -               | 2    | 1    | 1    | 1    | 0    | 2    | 0.154243 | 0.098898 | 0.093052 | 0.119704 |
| antisense -             | 3    | 0    | 1    | 0    | 0    | 0    | 0.219797 | 0        | 0.088399 | 0        |
| sense_intrc -           | 0    | 0    | 0    | 68   | 78   | 42   | 0        | 0        | 0        | 3.030635 |
| lincRNA long_interf     | 0    | 0    | 0    | 3    | 1    | 9    | 0        | 0        | 0        | 0.066023 |
| antisense -             | 2    | 4    | 2    | 4    | 3    | 3    | 0.118559 | 0.30407  | 0.143048 | 0.368039 |
| pseudogen: -            | 0    | 0    | 0    | 0    | 0    | 1    | 0        | 0        | 0        | 0        |
| antisense -             | 16   | 11   | 16   | 0    | 0    | 0    | 0.642329 | 0.566291 | 0.775007 | 0        |
| pseudogen: -            | 5    | 1    | 3    | 4    | 4    | 2    | 0.773763 | 0.198448 | 0.560154 | 0.960789 |
| pseudogen: -            | 0    | 0    | 0    | 1    | 1    | 0    | 0        | 0        | 0        | 0.027537 |
| processed_ MIR205_hc    | 0    | 0    | 0    | 373  | 509  | 69   | 0        | 0        | 0        | 8.108383 |
| lincRNA -               | 3    | 3    | 3    | 2    | 2    | 1    | 0.287669 | 0.368894 | 0.347089 | 0.297668 |
| lincRNA -               | 1    | 0    | 0    | 0    | 0    | 0    | 0.100839 | 0        | 0        | 0        |
| pseudogen: -            | 1    | 3    | 1    | 3    | 3    | 3    | 0.047896 | 0.184259 | 0.057789 | 0.223023 |
| sense_intrc -           | 1    | 1    | 0    | 2    | 2    | 0    | 0.128819 | 0.165192 | 0        | 0.399889 |
| pseudogen: -            | 3    | 1    | 4    | 9    | 7    | 3    | 0.803829 | 0.343599 | 1.293154 | 3.742961 |
| pseudogen: -            | 0    | 0    | 0    | 0    | 1    | 0    | 0        | 0        | 0        | 0        |
| pseudogen: -            | 1    | 1    | 0    | 2    | 2    | 1    | 0.154753 | 0.198448 | 0        | 0.480395 |
| pseudogen: -            | 2    | 0    | 0    | 0    | 1    | 0    | 0.976875 | 0        | 0        | 0        |
| lincRNA -               | 0    | 0    | 0    | 0    | 1    | 1    | 0        | 0        | 0        | 0        |
| antisense HHATL_ant     | 0    | 0    | 0    | 0    | 1    | 1    | 0        | 0        | 0        | 0        |
| lincRNA -               | 0    | 1    | 0    | 0    | 0    | 0    | 0        | 0.033914 | 0        | 0        |
| processed_ -            | 1    | 0    | 0    | 0    | 0    | 0    | 0.061535 | 0        | 0        | 0        |
| pseudogen: -            | 6    | 7    | 3    | 14   | 15   | 6    | 0.529831 | 0.792672 | 0.319636 | 1.918865 |
| pseudogen: -            | 3    | 2    | 5    | 0    | 0    | 1    | 0.250749 | 0.214366 | 0.504238 | 0        |
| pseudogen: destrin_(ac  | 31   | 37   | 23   | 6    | 5    | 5    | 3.126001 | 4.784521 | 2.798358 | 0.939094 |
| pseudogen: DEAD_(Asp    | 3    | 1    | 0    | 0    | 0    | 0    | 1.267298 | 0.54171  | 0        | 0        |
| pseudogen: -            | 0    | 0    | 0    | 0    | 1    | 0    | 0        | 0        | 0        | 0        |
| protein_co heat_shock   | 2315 | 1880 | 1849 | 2120 | 2485 | 2238 | 20.21046 | 21.04711 | 19.47647 | 28.72709 |
| pseudogen: family_witl  | 1    | 2    | 3    | 23   | 21   | 18   | 0.021578 | 0.055343 | 0.078107 | 0.770334 |
| pseudogen: -            | 1    | 2    | 0    | 1    | 1    | 1    | 0.093968 | 0.241001 | 0        | 0.145851 |
| pseudogen: RAB42_me     | 0    | 0    | 0    | 1    | 0    | 2    | 0        | 0        | 0        | 0.110776 |
| lincRNA -               | 2    | 0    | 0    | 0    | 0    | 0    | 0.192963 | 0        | 0        | 0        |
| pseudogen: cyclin_B1_i  | 0    | 0    | 0    | 1    | 1    | 0    | 0        | 0        | 0        | 0.087792 |
| pseudogen: -            | 0    | 0    | 0    | 0    | 1    | 0    | 0        | 0        | 0        | 0        |
| pseudogen: -            | 2    | 2    | 0    | 0    | 1    | 7    | 0.126048 | 0.161639 | 0        | 0        |
| pseudogen: cell_divisio | 2    | 1    | 3    | 13   | 20   | 12   | 0.06252  | 0.040087 | 0.113151 | 0.630758 |
| lincRNA -               | 0    | 1    | 1    | 1    | 0    | 0    | 0        | 0.050914 | 0.047905 | 0.061626 |
| lincRNA -               | 0    | 0    | 0    | 0    | 1    | 0    | 0        | 0        | 0        | 0        |
| lincRNA long_interf     | 2    | 1    | 0    | 0    | 0    | 0    | 0.037288 | 0.023908 | 0        | 0        |
| lincRNA -               | 0    | 0    | 0    | 0    | 1    | 0    | 0        | 0        | 0        | 0        |
| antisense -             | 70   | 48   | 49   | 107  | 117  | 150  | 0.935129 | 0.822288 | 0.7898   | 2.218644 |
| pseudogen: -            | 0    | 0    | 1    | 0    | 0    | 0    | 0        | 0        | 0.112925 | 0        |
| lincRNA long_interf     | 2    | 5    | 5    | 0    | 4    | 3    | 0.059354 | 0.190284 | 0.179036 | 0        |
| pseudogen: ribosomal_   | 2    | 0    | 0    | 1    | 0    | 0    | 0.125879 | 0        | 0        | 0.097691 |
| pseudogen: -            | 2    | 2    | 1    | 2    | 1    | 1    | 0.053866 | 0.069075 | 0.032496 | 0.083607 |
| antisense -             | 0    | 0    | 0    | 3    | 11   | 11   | 0        | 0        | 0        | 0.504248 |
| pseudogen: glucosamin   | 0    | 0    | 2    | 1    | 0    | 0    | 0        | 0        | 0.196784 | 0.126574 |
| pseudogen: olfactory_r  | 0    | 0    | 0    | 1    | 0    | 0    | 0        | 0        | 0        | 0.07653  |
| antisense -             | 7    | 0    | 4    | 2    | 1    | 2    | 0.362285 | 0        | 0.249781 | 0.160662 |
| lincRNA -               | 0    | 1    | 0    | 0    | 0    | 0    | 0        | 0.108734 | 0        | 0        |
| antisense -             | 0    | 0    | 0    | 3    | 0    | 1    | 0        | 0        | 0        | 0.118277 |
| pseudogen: -            | 2    | 0    | 2    | 2    | 2    | 1    | 0.111776 | 0        | 0.134864 | 0.173492 |
| antisense -             | 2    | 2    | 2    | 0    | 6    | 2    | 0.102829 | 0.131864 | 0.124069 | 0        |
| pseudogen: nucleopho:   | 7    | 5    | 1    | 3    | 3    | 5    | 0.388898 | 0.356219 | 0.067033 | 0.258696 |
| pseudogen: -            | 2    | 0    | 5    | 0    | 0    | 0    | 0.164238 | 0        | 0.495407 | 0        |
| antisense -             | 2    | 4    | 5    | 6    | 18   | 6    | 0.254837 | 0.653585 | 0.768689 | 1.186627 |
| antisense HLA_compl     | 552  | 506  | 560  | 324  | 362  | 514  | 5.323589 | 6.257852 | 6.516307 | 4.849991 |
| antisense -             | 0    | 0    | 0    | 4    | 8    | 4    | 0        | 0        | 0        | 0.142357 |
| lincRNA -               | 8    | 5    | 2    | 8    | 13   | 5    | 0.692104 | 0.554703 | 0.208766 | 1.074241 |
| lincRNA -               | 2    | 1    | 2    | 0    | 0    | 0    | 0.165982 | 0.106424 | 0.200267 | 0        |
| pseudogen: -            | 4    | 4    | 10   | 0    | 1    | 4    | 0.49883  | 0.639679 | 1.504668 | 0        |
| pseudogen: testis-speci | 0    | 0    | 1    | 9    | 10   | 2    | 0        | 0        | 0.073666 | 0.852888 |

|                         |    |    |    |     |     |     |          |          |          |          |
|-------------------------|----|----|----|-----|-----|-----|----------|----------|----------|----------|
| pseudogen: farnesyl_dil | 0  | 0  | 0  | 1   | 2   | 1   | 0        | 0        | 0        | 0.069051 |
| pseudogen: -            | 1  | 0  | 0  | 0   | 0   | 0   | 0.120231 | 0        | 0        | 0        |
| antisense -             | 0  | 0  | 0  | 1   | 1   | 0   | 0        | 0        | 0        | 0.175797 |
| antisense -             | 4  | 3  | 2  | 0   | 0   | 0   | 0.459706 | 0.442131 | 0.277331 | 0        |
| antisense -             | 15 | 2  | 2  | 3   | 1   | 1   | 0.785866 | 0.134368 | 0.126426 | 0.243955 |
| antisense -             | 2  | 3  | 0  | 6   | 10  | 2   | 0.03783  | 0.072767 | 0        | 0.176151 |
| lincRNA -               | 0  | 0  | 0  | 3   | 1   | 0   | 0        | 0        | 0        | 0.269222 |
| lincRNA -               | 6  | 4  | 2  | 13  | 13  | 15  | 0.27773  | 0.237433 | 0.111699 | 0.933995 |
| antisense -             | 79 | 79 | 70 | 42  | 60  | 54  | 5.45554  | 6.995956 | 5.832526 | 4.501843 |
| lincRNA -               | 1  | 1  | 0  | 0   | 0   | 2   | 0.025553 | 0.032768 | 0        | 0        |
| processed_ -            | 4  | 10 | 0  | 6   | 8   | 3   | 0.103682 | 0.332392 | 0        | 0.241392 |
| processed_ -            | 3  | 4  | 2  | 0   | 2   | 0   | 0.141948 | 0.242704 | 0.114179 | 0        |
| pseudogen: spermatog    | 10 | 4  | 6  | 0   | 0   | 0   | 1.070548 | 0.549131 | 0.775007 | 0        |
| sense_intrc -           | 8  | 4  | 2  | 4   | 2   | 2   | 0.472443 | 0.302921 | 0.142508 | 0.366649 |
| pseudogen: major_hist   | 0  | 1  | 0  | 2   | 2   | 0   | 0        | 0.133622 | 0        | 0.323466 |
| processed_ -            | 4  | 2  | 1  | 0   | 0   | 1   | 0.192369 | 0.123343 | 0.058026 | 0        |
| antisense -             | 2  | 2  | 1  | 0   | 0   | 1   | 0.210269 | 0.26964  | 0.126851 | 0        |
| processed_ highly_acc   | 0  | 0  | 0  | 0   | 1   | 0   | 0        | 0        | 0        | 0        |
| sense_intrc TCF7L1_int  | 1  | 2  | 0  | 3   | 3   | 7   | 0.10238  | 0.262576 | 0        | 0.476724 |
| antisense -             | 0  | 0  | 0  | 3   | 2   | 0   | 0        | 0        | 0        | 0.270893 |
| pseudogen: -            | 0  | 0  | 0  | 1   | 0   | 0   | 0        | 0        | 0        | 0.24505  |
| protein_co -            | 0  | 2  | 1  | 1   | 1   | 1   | 0        | 2.505408 | 1.178656 | 1.516246 |
| pseudogen: high_mobil   | 0  | 0  | 0  | 0   | 1   | 0   | 0        | 0        | 0        | 0        |
| lincRNA -               | 0  | 0  | 0  | 2   | 0   | 0   | 0        | 0        | 0        | 0.547217 |
| pseudogen: MT-ND2_ps    | 0  | 0  | 0  | 0   | 1   | 0   | 0        | 0        | 0        | 0        |
| pseudogen: -            | 0  | 0  | 0  | 0   | 0   | 1   | 0        | 0        | 0        | 0        |
| processed_ MORF4L2_i    | 8  | 10 | 11 | 23  | 33  | 9   | 0.179827 | 0.288254 | 0.298337 | 0.802462 |
| lincRNA -               | 5  | 3  | 4  | 1   | 1   | 3   | 0.638829 | 0.491524 | 0.616627 | 0.19831  |
| processed_ -            | 19 | 8  | 11 | 9   | 10  | 6   | 0.376229 | 0.203141 | 0.262809 | 0.276612 |
| antisense -             | 1  | 1  | 4  | 2   | 0   | 1   | 0.034301 | 0.043987 | 0.165546 | 0.106481 |
| pseudogen: ribosomal_   | 0  | 0  | 0  | 0   | 1   | 0   | 0        | 0        | 0        | 0        |
| IG_V_pseuT_cell_rece    | 1  | 1  | 1  | 1   | 8   | 1   | 0.160034 | 0.205221 | 0.19309  | 0.248395 |
| pseudogen: Y_box_binc   | 5  | 4  | 8  | 13  | 18  | 7   | 0.234685 | 0.24076  | 0.453057 | 0.947085 |
| pseudogen: eukaryotic   | 0  | 0  | 0  | 0   | 0   | 2   | 0        | 0        | 0        | 0        |
| protein_co HCG20258     | 0  | 0  | 0  | 3   | 1   | 3   | 0        | 0        | 0        | 0.21116  |
| processed_ -            | 4  | 5  | 3  | 0   | 0   | 1   | 0.170354 | 0.273069 | 0.154157 | 0        |
| lincRNA -               | 0  | 0  | 0  | 6   | 4   | 2   | 0        | 0        | 0        | 1.705777 |
| lincRNA long_interf     | 6  | 11 | 13 | 17  | 26  | 28  | 0.211852 | 0.498063 | 0.553826 | 0.931669 |
| pseudogen: -            | 8  | 14 | 2  | 7   | 4   | 9   | 0.671056 | 1.505934 | 0.202417 | 0.911375 |
| processed_ -            | 41 | 34 | 32 | 18  | 20  | 6   | 3.252945 | 3.459244 | 3.06331  | 2.216644 |
| antisense -             | 5  | 11 | 11 | 8   | 6   | 2   | 0.350449 | 0.988681 | 0.93024  | 0.870312 |
| antisense -             | 0  | 0  | 1  | 1   | 1   | 2   | 0        | 0        | 0.120118 | 0.154522 |
| lincRNA -               | 0  | 0  | 1  | 0   | 0   | 0   | 0        | 0        | 0.070019 | 0        |
| processed_ -            | 0  | 1  | 0  | 0   | 0   | 1   | 0        | 0.109128 | 0        | 0        |
| antisense FARP1_anti    | 0  | 0  | 0  | 0   | 1   | 0   | 0        | 0        | 0        | 0        |
| lincRNA -               | 9  | 5  | 3  | 1   | 2   | 3   | 0.622434 | 0.443435 | 0.250334 | 0.107345 |
| antisense -             | 0  | 0  | 3  | 0   | 0   | 0   | 0        | 0        | 0.205979 | 0        |
| pseudogen: keratin_8_i  | 0  | 0  | 0  | 2   | 4   | 1   | 0        | 0        | 0        | 0.100594 |
| pseudogen: zinc_finger  | 41 | 40 | 47 | 147 | 163 | 220 | 0.577325 | 0.72228  | 0.798513 | 3.212802 |
| pseudogen: heterogene   | 0  | 1  | 0  | 0   | 0   | 0   | 0        | 0.064173 | 0        | 0        |
| pseudogen: -            | 1  | 0  | 0  | 0   | 1   | 0   | 0.132085 | 0        | 0        | 0        |
| antisense -             | 1  | 0  | 0  | 2   | 0   | 0   | 0.087974 | 0        | 0        | 0.273095 |
| lincRNA -               | 1  | 0  | 1  | 0   | 0   | 0   | 0.074904 | 0        | 0.090376 | 0        |
| lincRNA -               | 0  | 0  | 0  | 0   | 1   | 0   | 0        | 0        | 0        | 0        |
| lincRNA -               | 1  | 0  | 0  | 3   | 1   | 2   | 0.090696 | 0        | 0        | 0.42232  |
| pseudogen: ADP-ribosy   | 5  | 3  | 6  | 0   | 0   | 0   | 0.450866 | 0.346903 | 0.652794 | 0        |
| lincRNA -               | 6  | 16 | 17 | 0   | 0   | 0   | 0.46273  | 1.582363 | 1.581881 | 0        |
| antisense CCDC147_i     | 5  | 6  | 10 | 9   | 12  | 7   | 0.294906 | 0.45381  | 0.711642 | 0.823922 |
| pseudogen: S-phase_kir  | 1  | 3  | 3  | 3   | 3   | 10  | 0.09589  | 0.368894 | 0.347089 | 0.446502 |
| pseudogen: -            | 0  | 0  | 2  | 6   | 14  | 5   | 0        | 0        | 0.10859  | 0.419078 |
| pseudogen: ribosomal_   | 0  | 0  | 2  | 0   | 5   | 0   | 0        | 0        | 0.467566 | 0        |
| lincRNA -               | 2  | 4  | 4  | 0   | 3   | 1   | 0.046129 | 0.118308 | 0.111314 | 0        |
| lincRNA -               | 0  | 0  | 0  | 0   | 1   | 0   | 0        | 0        | 0        | 0        |
| antisense ITPR1_anti    | 2  | 1  | 1  | 9   | 2   | 1   | 0.109301 | 0.070081 | 0.065939 | 0.763424 |
| lincRNA -               | 4  | 0  | 2  | 0   | 0   | 0   | 0.080017 | 0        | 0.048273 | 0        |

|                        |    |    |    |     |     |     |          |          |          |          |
|------------------------|----|----|----|-----|-----|-----|----------|----------|----------|----------|
| lincRNA -              | 0  | 0  | 0  | 2   | 2   | 0   | 0        | 0        | 0        | 0.264654 |
| protein_co chromosom   | 0  | 1  | 3  | 4   | 3   | 7   | 0        | 0.016022 | 0.045224 | 0.07757  |
| pseudogen: zinc_finger | 0  | 0  | 0  | 3   | 0   | 0   | 0        | 0        | 0        | 0.107134 |
| pseudogen:-            | 68 | 61 | 67 | 345 | 496 | 229 | 1.449987 | 1.667993 | 1.723765 | 11.41839 |
| lincRNA long_interf    | 0  | 0  | 1  | 1   | 0   | 0   | 0        | 0        | 0.122458 | 0.157532 |
| pseudogen:-            | 0  | 0  | 0  | 0   | 0   | 1   | 0        | 0        | 0        | 0        |
| protein_co putative_u  | 1  | 4  | 3  | 34  | 38  | 15  | 0.03695  | 0.189534 | 0.133748 | 1.949971 |
| processed_ APCDD1L_    | 10 | 11 | 13 | 1   | 1   | 0   | 0.178289 | 0.251493 | 0.279651 | 0.027673 |
| lincRNA -              | 0  | 0  | 0  | 1   | 3   | 0   | 0        | 0        | 0        | 0.043425 |
| antisense -            | 0  | 0  | 0  | 0   | 2   | 0   | 0        | 0        | 0        | 0        |
| antisense -            | 0  | 0  | 0  | 0   | 1   | 0   | 0        | 0        | 0        | 0        |
| pseudogen:-            | 0  | 2  | 0  | 2   | 1   | 0   | 0        | 0.384216 | 0        | 0.465047 |
| processed_ long_interf | 11 | 8  | 6  | 0   | 0   | 0   | 0.609681 | 0.568603 | 0.401245 | 0        |
| pseudogen: ribosomal_  | 0  | 0  | 0  | 1   | 1   | 0   | 0        | 0        | 0        | 0.140502 |
| pseudogen: ribosomal_  | 1  | 0  | 0  | 0   | 0   | 0   | 0.148857 | 0        | 0        | 0        |
| antisense -            | 6  | 0  | 1  | 4   | 12  | 7   | 0.216749 | 0        | 0.043587 | 0.224283 |
| pseudogen: ribosomal_  | 3  | 0  | 2  | 1   | 1   | 2   | 0.200671 | 0        | 0.161414 | 0.103823 |
| antisense TBL1XR1_a    | 3  | 0  | 1  | 0   | 3   | 0   | 0.339783 | 0        | 0.136656 | 0        |
| antisense -            | 49 | 39 | 35 | 101 | 146 | 55  | 0.912837 | 0.931689 | 0.786707 | 2.920445 |
| pseudogen: ribosomal_  | 1  | 0  | 0  | 4   | 0   | 3   | 0.024744 | 0        | 0        | 0.153625 |
| lincRNA -              | 0  | 1  | 1  | 0   | 0   | 0   | 0        | 0.053071 | 0.049934 | 0        |
| lincRNA -              | 0  | 0  | 0  | 0   | 0   | 2   | 0        | 0        | 0        | 0        |
| lincRNA -              | 10 | 8  | 12 | 21  | 14  | 26  | 0.708308 | 0.726644 | 1.025538 | 2.308725 |
| antisense -            | 3  | 3  | 5  | 4   | 3   | 1   | 0.169686 | 0.217599 | 0.341227 | 0.351169 |
| pseudogen:-            | 0  | 0  | 0  | 0   | 0   | 1   | 0        | 0        | 0        | 0        |
| antisense OOEP_anti    | 0  | 0  | 0  | 0   | 1   | 0   | 0        | 0        | 0        | 0        |
| pseudogen: ribosomal_  | 1  | 0  | 2  | 3   | 2   | 0   | 0.135913 | 0        | 0.327974 | 0.632868 |
| sense_intrc -          | 0  | 1  | 0  | 0   | 0   | 0   | 0        | 0.251589 | 0        | 0        |
| antisense -            | 0  | 0  | 1  | 0   | 0   | 0   | 0        | 0        | 0.155427 | 0        |
| pseudogen: actin_gamr  | 21 | 5  | 13 | 11  | 11  | 8   | 0.910065 | 0.277864 | 0.679743 | 0.739906 |
| pseudogen: voltage-dep | 3  | 2  | 0  | 0   | 2   | 1   | 0.164526 | 0.140654 | 0        | 0        |
| pseudogen:-            | 1  | 2  | 2  | 0   | 0   | 5   | 0.134355 | 0.344583 | 0.324215 | 0        |
| pseudogen:-            | 6  | 0  | 3  | 3   | 3   | 11  | 0.101861 | 0        | 0.061451 | 0.079051 |
| lincRNA -              | 3  | 2  | 2  | 1   | 0   | 0   | 0.157349 | 0.134519 | 0.126567 | 0.081409 |
| pseudogen:-            | 1  | 1  | 2  | 1   | 1   | 1   | 0.092852 | 0.119069 | 0.224061 | 0.144118 |
| antisense -            | 0  | 1  | 0  | 0   | 0   | 0   | 0        | 0.090285 | 0        | 0        |
| pseudogen:-            | 1  | 0  | 1  | 1   | 2   | 2   | 0.116642 | 0        | 0.140735 | 0.181044 |
| pseudogen:-            | 1  | 0  | 1  | 11  | 10  | 1   | 0.153235 | 0        | 0.184887 | 2.616267 |
| protein_co Protein_LO  | 1  | 0  | 0  | 2   | 1   | 1   | 0.0437   | 0        | 0        | 0.135657 |
| antisense -            | 78 | 70 | 44 | 47  | 45  | 57  | 1.481337 | 1.704773 | 1.008231 | 1.38544  |
| lincRNA -              | 0  | 0  | 0  | 2   | 0   | 0   | 0        | 0        | 0        | 0.125917 |
| pseudogen:-            | 0  | 0  | 0  | 3   | 0   | 0   | 0        | 0        | 0        | 0.37775  |
| antisense -            | 0  | 0  | 1  | 2   | 10  | 5   | 0        | 0        | 0.093513 | 0.240594 |
| pseudogen: high_mobil  | 1  | 0  | 0  | 0   | 0   | 0   | 0.179655 | 0        | 0        | 0        |
| pseudogen: NADH_deh    | 1  | 0  | 1  | 1   | 0   | 0   | 0.093406 | 0        | 0.1127   | 0.14498  |
| pseudogen: ring_finger | 0  | 2  | 4  | 8   | 28  | 11  | 0        | 0.119069 | 0.224061 | 0.576474 |
| pseudogen: neuroblast  | 0  | 0  | 1  | 0   | 0   | 0   | 0        | 0        | 0.038991 | 0        |
| antisense FGF12_anti   | 1  | 0  | 0  | 1   | 1   | 1   | 0.080845 | 0        | 0        | 0.125482 |
| pseudogen:-            | 0  | 1  | 0  | 1   | 2   | 0   | 0        | 0.117671 | 0        | 0.142426 |
| protein_co major_histi | 32 | 25 | 20 | 64  | 51  | 51  | 0.298603 | 0.299153 | 0.225176 | 0.926947 |
| antisense -            | 8  | 1  | 1  | 4   | 1   | 0   | 0.55246  | 0.088556 | 0.083322 | 0.428747 |
| pseudogen:-            | 2  | 1  | 5  | 3   | 0   | 3   | 0.181043 | 0.116081 | 0.546096 | 0.421505 |
| pseudogen:-            | 0  | 0  | 1  | 0   | 0   | 0   | 0        | 0        | 0.155001 | 0        |
| lincRNA -              | 0  | 0  | 0  | 1   | 2   | 0   | 0        | 0        | 0        | 0.07759  |
| lincRNA -              | 0  | 0  | 0  | 1   | 1   | 0   | 0        | 0        | 0        | 0.116262 |
| antisense -            | 23 | 14 | 14 | 4   | 2   | 2   | 0.518495 | 0.40472  | 0.380797 | 0.139961 |
| pseudogen:-            | 1  | 1  | 1  | 1   | 0   | 3   | 0.148857 | 0.190888 | 0.179605 | 0.231047 |
| lincRNA -              | 0  | 0  | 0  | 1   | 3   | 0   | 0        | 0        | 0        | 0.241793 |
| pseudogen:-            | 1  | 1  | 1  | 1   | 4   | 1   | 0.300577 | 0.385447 | 0.362663 | 0.466537 |
| pseudogen:-            | 0  | 0  | 0  | 1   | 1   | 2   | 0        | 0        | 0        | 0.221215 |
| pseudogen: iroquois_h  | 0  | 0  | 0  | 0   | 0   | 1   | 0        | 0        | 0        | 0        |
| processed_ long_interf | 0  | 0  | 0  | 2   | 2   | 0   | 0        | 0        | 0        | 0.031076 |
| processed_-            | 0  | 0  | 0  | 2   | 2   | 0   | 0        | 0        | 0        | 0.107742 |
| antisense -            | 0  | 0  | 0  | 2   | 1   | 1   | 0        | 0        | 0        | 0.291119 |
| lincRNA -              | 1  | 0  | 0  | 0   | 0   | 0   | 0.106811 | 0        | 0        | 0        |

|                        |       |       |       |       |       |       |          |          |          |          |
|------------------------|-------|-------|-------|-------|-------|-------|----------|----------|----------|----------|
| lincRNA -              | 3     | 1     | 0     | 0     | 0     | 0     | 0.265917 | 0.113667 | 0        | 0        |
| pseudogen -            | 0     | 0     | 0     | 1     | 3     | 0     | 0        | 0        | 0        | 0.044297 |
| lincRNA -              | 0     | 0     | 0     | 3     | 0     | 0     | 0        | 0        | 0        | 0.210752 |
| processed_ -           | 0     | 0     | 0     | 0     | 1     | 0     | 0        | 0        | 0        | 0        |
| antisense WASH_and     | 3     | 3     | 0     | 20    | 22    | 11    | 0.13025  | 0.167027 | 0        | 1.347774 |
| sense_intrc -          | 0     | 1     | 0     | 0     | 0     | 0     | 0        | 0.089081 | 0        | 0        |
| antisense -            | 2     | 3     | 1     | 4     | 3     | 0     | 0.1702   | 0.327385 | 0.102678 | 0.528347 |
| pseudogen -            | 1     | 1     | 0     | 8     | 12    | 2     | 0.037754 | 0.048414 | 0        | 0.468791 |
| pseudogen: translocase | 3     | 2     | 1     | 0     | 1     | 0     | 0.476848 | 0.40766  | 0.191781 | 0        |
| pseudogen -            | 0     | 0     | 1     | 0     | 0     | 0     | 0        | 0        | 0        | 0.122193 |
| processed_ -           | 0     | 0     | 0     | 2     | 0     | 1     | 0        | 0        | 0        | 0.046609 |
| pseudogen: ribonuclea  | 0     | 0     | 1     | 0     | 0     | 0     | 0        | 0        | 0.071615 | 0        |
| lincRNA long_interf    | 0     | 0     | 0     | 9     | 8     | 2     | 0        | 0        | 0        | 0.22486  |
| lincRNA -              | 4     | 6     | 4     | 3     | 1     | 2     | 0.131161 | 0.252293 | 0.158253 | 0.152685 |
| pseudogen -            | 0     | 0     | 0     | 0     | 2     | 0     | 0        | 0        | 0        | 0        |
| pseudogen -            | 14    | 19    | 9     | 6     | 7     | 15    | 0.841616 | 1.4647   | 0.652794 | 0.559845 |
| pseudogen: peroxiredo  | 5     | 1     | 2     | 7     | 6     | 11    | 0.383715 | 0.098412 | 0.18519  | 0.833811 |
| pseudogen: high_mobil  | 0     | 0     | 0     | 0     | 0     | 1     | 0        | 0        | 0        | 0        |
| pseudogen: high_mobil  | 0     | 0     | 0     | 1     | 1     | 0     | 0        | 0        | 0        | 0.270557 |
| processed_ long_interf | 2     | 1     | 7     | 3     | 7     | 1     | 0.082047 | 0.052607 | 0.346482 | 0.191023 |
| lincRNA -              | 3     | 5     | 4     | 2     | 4     | 0     | 0.25346  | 0.54171  | 0.407751 | 0.26227  |
| lincRNA -              | 0     | 0     | 0     | 9     | 6     | 4     | 0        | 0        | 0        | 2.112962 |
| pseudogen: ribosomal_  | 0     | 0     | 0     | 0     | 1     | 0     | 0        | 0        | 0        | 0        |
| lincRNA -              | 0     | 0     | 0     | 8     | 8     | 8     | 0        | 0        | 0        | 5.062943 |
| protein_co ribosomal_  | 15193 | 12672 | 12664 | 19498 | 18410 | 17117 | 642.3806 | 687.0737 | 646.0525 | 1279.586 |
| pseudogen -            | 1     | 1     | 0     | 1     | 4     | 2     | 0.13552  | 0.173786 | 0        | 0.210346 |
| lincRNA -              | 0     | 0     | 0     | 1     | 0     | 0     | 0        | 0        | 0        | 0.093909 |
| pseudogen -            | 0     | 0     | 0     | 0     | 0     | 1     | 0        | 0        | 0        | 0        |
| lincRNA -              | 1     | 1     | 0     | 0     | 2     | 0     | 0.06186  | 0.079327 | 0        | 0        |
| lincRNA -              | 0     | 0     | 0     | 1     | 3     | 10    | 0        | 0        | 0        | 0.162093 |
| pseudogen -            | 0     | 0     | 0     | 2     | 0     | 1     | 0        | 0        | 0        | 0.28319  |
| antisense -            | 4     | 2     | 2     | 2     | 2     | 2     | 0.362085 | 0.232161 | 0.218438 | 0.281003 |
| antisense -            | 0     | 1     | 0     | 1     | 1     | 0     | 0        | 0.210982 | 0        | 0.255368 |
| lincRNA -              | 1     | 0     | 0     | 2     | 0     | 0     | 0.050365 | 0        | 0        | 0.156348 |
| lincRNA family_witl    | 1     | 0     | 1     | 1     | 1     | 0     | 0.007687 | 0        | 0.009275 | 0.011931 |
| antisense -            | 4     | 6     | 7     | 0     | 4     | 8     | 0.516694 | 0.993881 | 1.090988 | 0        |
| lincRNA -              | 0     | 0     | 0     | 1     | 13    | 0     | 0        | 0        | 0        | 0.02733  |
| lincRNA -              | 0     | 0     | 0     | 2     | 0     | 0     | 0        | 0        | 0        | 0.307088 |
| sense_intrc FBXO36_in  | 0     | 1     | 0     | 0     | 1     | 0     | 0        | 0.103316 | 0        | 0        |
| antisense -            | 1     | 0     | 1     | 0     | 1     | 1     | 0.062771 | 0        | 0.075737 | 0        |
| lincRNA -              | 0     | 0     | 0     | 3     | 0     | 0     | 0        | 0        | 0        | 0.389197 |
| pseudogen: ribosomal_  | 0     | 1     | 0     | 0     | 0     | 0     | 0        | 0.122464 | 0        | 0        |
| pseudogen: ribosomal_  | 0     | 0     | 0     | 0     | 3     | 0     | 0        | 0        | 0        | 0        |
| pseudogen: up-regulate | 0     | 1     | 0     | 1     | 0     | 0     | 0        | 0.339716 | 0        | 0.411185 |
| pseudogen: patched_d   | 0     | 1     | 3     | 4     | 10    | 4     | 0        | 0.0499   | 0.140852 | 0.241593 |
| processed_ -           | 7     | 4     | 0     | 3     | 2     | 2     | 0.21108  | 0.154675 | 0        | 0.140411 |
| pseudogen: ribosomal_  | 0     | 0     | 0     | 0     | 1     | 2     | 0        | 0        | 0        | 0        |
| pseudogen -            | 1     | 1     | 2     | 0     | 0     | 0     | 0.189838 | 0.24344  | 0.458101 | 0        |
| lincRNA -              | 5     | 1     | 1     | 0     | 0     | 0     | 0.059264 | 0.0152   | 0.014301 | 0        |
| pseudogen: carcinoeml  | 2     | 0     | 0     | 1     | 1     | 0     | 0.097586 | 0        | 0        | 0.075733 |
| pseudogen -            | 1     | 1     | 2     | 1     | 1     | 1     | 0.060193 | 0.077188 | 0.145252 | 0.093427 |
| antisense -            | 11    | 7     | 8     | 2     | 1     | 0     | 1.82258  | 1.487309 | 1.599308 | 0.514345 |
| pseudogen: eukaryotic_ | 1     | 0     | 0     | 0     | 0     | 0     | 0.211216 | 0        | 0        | 0        |
| processed_ -           | 10    | 3     | 10    | 14    | 25    | 34    | 0.239235 | 0.092035 | 0.288651 | 0.519856 |
| pseudogen -            | 0     | 0     | 0     | 0     | 1     | 0     | 0        | 0        | 0        | 0        |
| lincRNA -              | 1     | 2     | 1     | 0     | 0     | 0     | 0.015857 | 0.040669 | 0.019133 | 0        |
| pseudogen -            | 4     | 3     | 1     | 0     | 1     | 2     | 0.29537  | 0.284078 | 0.089095 | 0        |
| pseudogen: fumarylase  | 48    | 46    | 48    | 70    | 66    | 27    | 2.332353 | 2.866291 | 2.814118 | 5.279364 |
| sense_intrc -          | 12    | 6     | 7     | 6     | 15    | 10    | 6.542793 | 4.195102 | 4.604983 | 5.077661 |
| antisense -            | 13    | 13    | 12    | 8     | 5     | 23    | 0.396597 | 0.50858  | 0.441709 | 0.378815 |
| antisense -            | 0     | 0     | 0     | 1     | 4     | 0     | 0        | 0        | 0        | 0.074953 |
| processed_ deleted_in  | 91    | 62    | 81    | 18    | 14    | 47    | 3.297521 | 2.881026 | 3.541434 | 1.012393 |
| antisense -            | 9     | 9     | 9     | 3     | 1     | 3     | 0.203968 | 0.26156  | 0.246099 | 0.105529 |
| lincRNA -              | 28    | 19    | 20    | 17    | 18    | 25    | 2.195519 | 1.910478 | 1.892157 | 2.068991 |
| antisense -            | 1     | 3     | 0     | 0     | 0     | 0     | 0.104899 | 0.403556 | 0        | 0        |

|                        |    |    |    |     |     |     |          |          |          |          |
|------------------------|----|----|----|-----|-----|-----|----------|----------|----------|----------|
| sense_intrc -          | 0  | 1  | 0  | 0   | 0   | 0   | 0        | 0.118133 | 0        | 0        |
| pseudogen -            | 1  | 0  | 0  | 1   | 0   | 0   | 0.035071 | 0        | 0        | 0.054435 |
| antisense -            | 1  | 5  | 10 | 4   | 2   | 0   | 0.032699 | 0.209658 | 0.394529 | 0.203012 |
| antisense -            | 1  | 1  | 1  | 0   | 0   | 0   | 0.103055 | 0.132153 | 0.124342 | 0        |
| pseudogen -            | 0  | 1  | 0  | 0   | 0   | 1   | 0        | 0.351636 | 0        | 0        |
| pseudogen -            | 1  | 0  | 0  | 1   | 0   | 2   | 0.040774 | 0        | 0        | 0.063287 |
| antisense -            | 10 | 8  | 10 | 7   | 14  | 7   | 0.391402 | 0.401535 | 0.47225  | 0.425258 |
| lincRNA -              | 80 | 54 | 74 | 15  | 25  | 20  | 8.429666 | 7.296649 | 9.408062 | 2.453252 |
| antisense long_interf  | 0  | 0  | 1  | 0   | 0   | 0   | 0        | 0        | 0.029058 | 0        |
| antisense AGBL5_ant    | 3  | 0  | 1  | 1   | 10  | 1   | 0.345627 | 0        | 0.139006 | 0.17882  |
| antisense -            | 6  | 6  | 10 | 4   | 4   | 4   | 0.096482 | 0.123724 | 0.194018 | 0.099835 |
| pseudogen -            | 0  | 0  | 0  | 0   | 0   | 1   | 0        | 0        | 0        | 0        |
| antisense -            | 3  | 3  | 0  | 1   | 0   | 0   | 0.204166 | 0.261813 | 0        | 0.105631 |
| antisense DLG3_antis   | 2  | 2  | 2  | 0   | 1   | 0   | 0.217083 | 0.278379 | 0.261924 | 0        |
| processed -            | 0  | 2  | 1  | 0   | 0   | 0   | 0        | 0.352667 | 0.165911 | 0        |
| antisense RPS6KA2_a    | 0  | 0  | 0  | 3   | 2   | 0   | 0        | 0        | 0        | 0.348229 |
| pseudogen -            | 1  | 1  | 1  | 1   | 2   | 1   | 0.13321  | 0.170823 | 0.160726 | 0.206761 |
| antisense -            | 3  | 5  | 8  | 10  | 5   | 12  | 0.244644 | 0.522868 | 0.787137 | 1.265736 |
| pseudogen 2-oxogluta   | 2  | 1  | 3  | 2   | 0   | 0   | 0.058907 | 0.03777  | 0.106612 | 0.091432 |
| lincRNA -              | 0  | 0  | 0  | 0   | 1   | 0   | 0        | 0        | 0        | 0        |
| processed -            | 0  | 2  | 0  | 3   | 0   | 0   | 0        | 0.223116 | 0        | 0.405082 |
| lincRNA -              | 0  | 0  | 0  | 1   | 0   | 0   | 0        | 0        | 0        | 0.094397 |
| protein_co disrupted_i | 11 | 7  | 11 | 4   | 1   | 4   | 0.167573 | 0.136747 | 0.202187 | 0.094581 |
| lincRNA long_interf    | 0  | 1  | 0  | 0   | 0   | 0   | 0        | 0.029797 | 0        | 0        |
| lincRNA -              | 5  | 1  | 0  | 1   | 5   | 0   | 0.23802  | 0.061045 | 0        | 0.073888 |
| pseudogen -            | 4  | 1  | 8  | 1   | 2   | 5   | 0.189838 | 0.06086  | 0.458101 | 0.073664 |
| pseudogen ribosomal_   | 1  | 2  | 0  | 7   | 1   | 1   | 0.099343 | 0.254787 | 0        | 1.079361 |
| lincRNA -              | 0  | 0  | 0  | 138 | 185 | 152 | 0        | 0        | 0        | 11.40024 |
| processed long_interf  | 6  | 0  | 8  | 5   | 4   | 2   | 0.121372 | 0        | 0.195256 | 0.156988 |
| antisense -            | 0  | 0  | 0  | 0   | 2   | 0   | 0        | 0        | 0        | 0        |
| pseudogen Nanog_hon    | 1  | 0  | 2  | 1   | 1   | 0   | 0.053345 | 0        | 0.128727 | 0.082798 |
| processed -            | 0  | 0  | 0  | 110 | 83  | 180 | 0        | 0        | 0        | 13.70852 |
| pseudogen -            | 1  | 0  | 0  | 0   | 0   | 0   | 0.287669 | 0        | 0        | 0        |
| pseudogen -            | 0  | 0  | 1  | 1   | 3   | 0   | 0        | 0        | 0.367373 | 0.472596 |
| antisense -            | 4  | 11 | 4  | 0   | 4   | 0   | 0.057183 | 0.201655 | 0.068995 | 0        |
| lincRNA -              | 0  | 0  | 0  | 1   | 1   | 0   | 0        | 0        | 0        | 0.133053 |
| lincRNA -              | 0  | 1  | 1  | 0   | 0   | 0   | 0        | 0.202457 | 0.19049  | 0        |
| pseudogen poly(A)_bir  | 1  | 1  | 2  | 5   | 4   | 3   | 0.07934  | 0.101742 | 0.191457 | 0.615734 |
| lincRNA -              | 1  | 2  | 0  | 0   | 3   | 0   | 0.055689 | 0.142826 | 0        | 0        |
| processed -            | 32 | 24 | 29 | 20  | 34  | 12  | 0.580681 | 0.558481 | 0.634942 | 0.563311 |
| lincRNA -              | 2  | 0  | 0  | 5   | 4   | 13  | 0.060817 | 0        | 0        | 0.235992 |
| processed -            | 0  | 0  | 1  | 0   | 0   | 0   | 0        | 0        | 0.024641 | 0        |
| lincRNA -              | 0  | 0  | 0  | 7   | 12  | 24  | 0        | 0        | 0        | 0.879894 |
| processed -            | 37 | 20 | 40 | 18  | 28  | 20  | 0.494987 | 0.343109 | 0.645655 | 0.373762 |
| antisense -            | 0  | 0  | 0  | 1   | 2   | 0   | 0        | 0        | 0        | 0.134777 |
| pseudogen vomeronas    | 0  | 0  | 0  | 1   | 0   | 0   | 0        | 0        | 0        | 0.074953 |
| processed -            | 7  | 9  | 6  | 5   | 6   | 3   | 0.267071 | 0.440332 | 0.276203 | 0.296094 |
| sense_intrc ARHGEF9_i  | 0  | 0  | 0  | 0   | 5   | 0   | 0        | 0        | 0        | 0        |
| antisense -            | 8  | 15 | 18 | 10  | 17  | 15  | 0.372513 | 0.895677 | 1.01128  | 0.722739 |
| lincRNA -              | 2  | 3  | 1  | 1   | 0   | 2   | 0.061576 | 0.118443 | 0.037147 | 0.047787 |
| pseudogen -            | 0  | 0  | 0  | 0   | 2   | 0   | 0        | 0        | 0        | 0        |
| protein_co tetraspanir | 0  | 1  | 1  | 2   | 5   | 1   | 0        | 0.015704 | 0.014776 | 0.038015 |
| pseudogen glyceraldeh  | 0  | 0  | 0  | 1   | 1   | 2   | 0        | 0        | 0        | 0.272584 |
| lincRNA -              | 4  | 1  | 4  | 10  | 17  | 13  | 0.32733  | 0.104939 | 0.394942 | 1.270154 |
| pseudogen -            | 0  | 0  | 0  | 0   | 1   | 2   | 0        | 0        | 0        | 0        |
| pseudogen -            | 2  | 0  | 1  | 0   | 0   | 1   | 0.261226 | 0        | 0.157592 | 0        |
| pseudogen embigin_ps   | 14 | 17 | 15 | 17  | 28  | 22  | 0.726977 | 1.132012 | 0.939792 | 1.370162 |
| lincRNA CHODL_ant      | 0  | 0  | 0  | 0   | 0   | 1   | 0        | 0        | 0        | 0        |
| antisense -            | 3  | 5  | 4  | 0   | 1   | 1   | 0.339783 | 0.726205 | 0.546623 | 0        |
| antisense -            | 4  | 9  | 1  | 3   | 2   | 5   | 0.167914 | 0.484484 | 0.05065  | 0.195469 |
| pseudogen -            | 0  | 2  | 2  | 2   | 1   | 7   | 0        | 0.05263  | 0.049519 | 0.063702 |
| antisense DLX6_antis   | 1  | 1  | 0  | 0   | 1   | 1   | 0.009419 | 0.012079 | 0        | 0        |
| pseudogen microRNA_    | 9  | 5  | 7  | 10  | 9   | 9   | 0.895988 | 0.638321 | 0.840825 | 1.545219 |
| lincRNA -              | 0  | 1  | 1  | 1   | 0   | 0   | 0        | 0.021024 | 0.019782 | 0.025447 |
| antisense -            | 1  | 0  | 0  | 1   | 0   | 1   | 0.101494 | 0        | 0        | 0.157532 |

|                         |      |      |      |      |      |     |          |          |          |          |
|-------------------------|------|------|------|------|------|-----|----------|----------|----------|----------|
| antisense TMEM44_a      | 21   | 21   | 14   | 12   | 25   | 30  | 0.879974 | 1.128441 | 0.707826 | 0.78048  |
| lincRNA -               | 2    | 2    | 1    | 5    | 1    | 0   | 0.012309 | 0.015784 | 0.007426 | 0.047762 |
| processed_ -            | 0    | 0    | 0    | 1    | 0    | 0   | 0        | 0        | 0        | 0.081318 |
| processed_ -            | 2    | 2    | 6    | 3    | 1    | 0   | 0.186071 | 0.23861  | 0.673518 | 0.433213 |
| lincRNA -               | 0    | 0    | 0    | 0    | 0    | 5   | 0        | 0        | 0        | 0        |
| pseudogen: diazepam_l   | 6    | 3    | 5    | 7    | 5    | 10  | 0.105095 | 0.067385 | 0.10567  | 0.19031  |
| pseudogen: -            | 7    | 6    | 1    | 0    | 0    | 0   | 0.758037 | 0.833207 | 0.130659 | 0        |
| antisense -             | 29   | 36   | 21   | 56   | 69   | 43  | 1.448147 | 2.305296 | 1.265267 | 4.340435 |
| pseudogen: double_C2    | 9    | 6    | 7    | 33   | 46   | 21  | 0.362863 | 0.310214 | 0.340523 | 2.065119 |
| antisense -             | 2    | 6    | 2    | 1    | 0    | 1   | 0.051812 | 0.199325 | 0.062514 | 0.04021  |
| sense_intrc ITCH_introi | 3    | 1    | 0    | 2    | 5    | 1   | 0.676298 | 0.289086 | 0        | 0.699806 |
| pseudogen: -            | 3    | 0    | 0    | 4    | 8    | 2   | 0.117519 | 0        | 0        | 0.243207 |
| processed_ -            | 2    | 3    | 6    | 18   | 31   | 26  | 0.086833 | 0.167027 | 0.314308 | 1.212997 |
| pseudogen: -            | 0    | 0    | 1    | 0    | 0    | 0   | 0        | 0        | 0.183687 | 0        |
| lincRNA -               | 0    | 1    | 0    | 0    | 0    | 0   | 0        | 0.182765 | 0        | 0        |
| pseudogen: -            | 5    | 2    | 1    | 7    | 7    | 11  | 0.31898  | 0.163618 | 0.076973 | 0.693141 |
| lincRNA -               | 1    | 3    | 1    | 0    | 0    | 0   | 0.021749 | 0.083669 | 0.026241 | 0        |
| pseudogen: -            | 4    | 0    | 0    | 0    | 1    | 0   | 0.091941 | 0        | 0        | 0        |
| lincRNA -               | 0    | 0    | 0    | 1    | 1    | 1   | 0        | 0        | 0        | 0.173285 |
| antisense -             | 2    | 0    | 0    | 0    | 1    | 2   | 0.275015 | 0        | 0        | 0        |
| pseudogen: methylenet   | 0    | 1    | 1    | 3    | 1    | 0   | 0        | 0.021755 | 0.020469 | 0.078994 |
| lincRNA -               | 0    | 0    | 0    | 1    | 0    | 0   | 0        | 0        | 0        | 0.081683 |
| antisense -             | 0    | 1    | 1    | 0    | 0    | 0   | 0        | 0.101571 | 0.095567 | 0        |
| pseudogen: -            | 2    | 1    | 0    | 4    | 1    | 1   | 0.123071 | 0.07891  | 0        | 0.382046 |
| lincRNA -               | 0    | 0    | 1    | 2    | 0    | 2   | 0        | 0        | 0.097042 | 0.249673 |
| pseudogen: high_mobil   | 3    | 6    | 3    | 2    | 2    | 1   | 0.234841 | 0.602302 | 0.28335  | 0.243004 |
| pseudogen: -            | 0    | 0    | 0    | 1    | 0    | 2   | 0        | 0        | 0        | 0.157874 |
| pseudogen: ubiquitin-c  | 0    | 0    | 0    | 2    | 2    | 0   | 0        | 0        | 0        | 0.562006 |
| antisense -             | 7    | 3    | 4    | 13   | 12   | 9   | 0.580938 | 0.319273 | 0.400535 | 1.674579 |
| antisense -             | 3    | 1    | 7    | 2    | 6    | 8   | 0.247223 | 0.105676 | 0.696008 | 0.255817 |
| processed_ -            | 0    | 1    | 1    | 0    | 2    | 0   | 0        | 0.122714 | 0.11546  | 0        |
| pseudogen: -            | 1    | 0    | 1    | 0    | 1    | 0   | 0.11901  | 0        | 0.143593 | 0        |
| antisense -             | 1    | 0    | 0    | 0    | 1    | 0   | 0.081832 | 0        | 0        | 0        |
| sense_intrc SIK3_introi | 5    | 5    | 7    | 4    | 11   | 5   | 0.094842 | 0.121622 | 0.160206 | 0.117767 |
| antisense -             | 0    | 0    | 0    | 5    | 8    | 0   | 0        | 0        | 0        | 1.036749 |
| antisense IPO9_antis    | 2    | 1    | 1    | 1    | 1    | 5   | 0.111776 | 0.071668 | 0.067432 | 0.086746 |
| pseudogen: -            | 0    | 1    | 0    | 0    | 0    | 1   | 0        | 0.066589 | 0        | 0        |
| processed_ -            | 7    | 7    | 10   | 8    | 3    | 6   | 0.113183 | 0.145141 | 0.195088 | 0.200772 |
| pseudogen: small_nucl   | 0    | 0    | 1    | 1    | 0    | 2   | 0        | 0        | 0.224506 | 0.288809 |
| lincRNA -               | 0    | 0    | 0    | 1    | 2    | 0   | 0        | 0        | 0        | 0.045261 |
| antisense F10_antis     | 0    | 0    | 0    | 0    | 0    | 1   | 0        | 0        | 0        | 0        |
| pseudogen: NADH_deh     | 0    | 0    | 0    | 1    | 1    | 0   | 0        | 0        | 0        | 0.404332 |
| pseudogen: MT-ND5_ps    | 1    | 0    | 0    | 0    | 0    | 1   | 0.134355 | 0        | 0        | 0        |
| processed_ TRAF3IP2_i   | 40   | 26   | 41   | 94   | 111  | 43  | 0.856048 | 0.713544 | 1.058693 | 3.122456 |
| antisense -             | 0    | 0    | 0    | 2    | 2    | 7   | 0        | 0        | 0        | 0.104419 |
| lincRNA -               | 0    | 0    | 0    | 1    | 0    | 0   | 0        | 0        | 0        | 0.174114 |
| antisense -             | 1    | 0    | 0    | 0    | 0    | 1   | 0.053527 | 0        | 0        | 0        |
| lincRNA -               | 4    | 4    | 3    | 0    | 0    | 0   | 0.300096 | 0.384831 | 0.271562 | 0        |
| antisense -             | 0    | 0    | 0    | 0    | 1    | 0   | 0        | 0        | 0        | 0        |
| pseudogen: SET_pseud    | 0    | 2    | 1    | 0    | 4    | 1   | 0        | 0.147739 | 0.069503 | 0        |
| pseudogen: glyceraldeh  | 0    | 0    | 0    | 1    | 1    | 5   | 0        | 0        | 0        | 0.075186 |
| antisense IDH1_antis    | 6    | 7    | 6    | 11   | 23   | 8   | 0.575338 | 0.860754 | 0.694178 | 1.637173 |
| pseudogen: -            | 0    | 0    | 0    | 1    | 0    | 0   | 0        | 0        | 0        | 0.141046 |
| pseudogen: sal-like_4_( | 1    | 0    | 0    | 0    | 0    | 0   | 0.026642 | 0        | 0        | 0        |
| pseudogen: -            | 0    | 0    | 0    | 2    | 1    | 0   | 0        | 0        | 0        | 0.341689 |
| processed_ -            | 0    | 0    | 0    | 3    | 2    | 2   | 0        | 0        | 0        | 0.05543  |
| protein_co pregnancy_   | 0    | 0    | 2    | 0    | 0    | 0   | 0        | 0        | 0.039983 | 0        |
| protein_co TAP_bindir   | 2512 | 1918 | 2126 | 1221 | 1542 | 896 | 31.33486 | 30.68075 | 31.99775 | 23.64037 |
| antisense -             | 0    | 0    | 2    | 2    | 1    | 2   | 0        | 0        | 0.467566 | 0.601486 |
| pseudogen: high_mobil   | 1    | 0    | 0    | 0    | 0    | 0   | 0.078807 | 0        | 0        | 0        |
| pseudogen: -            | 0    | 0    | 0    | 3    | 4    | 4   | 0        | 0        | 0        | 2.140582 |
| antisense -             | 0    | 0    | 0    | 0    | 0    | 1   | 0        | 0        | 0        | 0        |
| pseudogen: ribosomal_   | 1    | 0    | 2    | 10   | 12   | 16  | 0.080845 | 0        | 0.195088 | 1.254824 |
| pseudogen: -            | 1    | 3    | 2    | 1    | 2    | 1   | 0.049099 | 0.188889 | 0.118483 | 0.076209 |
| antisense PHKA1_ant     | 0    | 2    | 1    | 1    | 0    | 1   | 0        | 0.201103 | 0.094608 | 0.121705 |

|                        |     |     |     |    |    |    |          |          |          |          |
|------------------------|-----|-----|-----|----|----|----|----------|----------|----------|----------|
| sense_intrc HS1BP3_in  | 3   | 1   | 1   | 0  | 0  | 0  | 0.23445  | 0.100216 | 0.094293 | 0        |
| pseudogeni -           | 3   | 7   | 5   | 2  | 0  | 2  | 0.153738 | 0.460009 | 0.309156 | 0.159082 |
| antisense -            | 0   | 0   | 1   | 0  | 0  | 0  | 0        | 0        | 0.134704 | 0        |
| pseudogeni MT-ND2_ps   | 0   | 0   | 0   | 0  | 1  | 0  | 0        | 0        | 0        | 0        |
| antisense -            | 38  | 34  | 34  | 13 | 35 | 29 | 1.262807 | 1.448911 | 1.363265 | 0.670544 |
| pseudogeni guanine_nu  | 1   | 1   | 0   | 0  | 0  | 0  | 0.050528 | 0.064795 | 0        | 0        |
| pseudogeni -           | 0   | 0   | 0   | 0  | 0  | 2  | 0        | 0        | 0        | 0        |
| pseudogeni -           | 1   | 2   | 1   | 4  | 7  | 8  | 0.090173 | 0.231268 | 0.108799 | 0.559845 |
| lincRNA -              | 0   | 1   | 2   | 0  | 2  | 1  | 0        | 0.170339 | 0.320541 | 0        |
| pseudogeni -           | 0   | 0   | 1   | 0  | 0  | 1  | 0        | 0        | 0.264372 | 0        |
| antisense -            | 0   | 4   | 0   | 0  | 0  | 1  | 0        | 0.235342 | 0        | 0        |
| antisense -            | 17  | 11  | 14  | 7  | 6  | 4  | 1.454617 | 1.206985 | 1.44536  | 0.929669 |
| lincRNA -              | 1   | 1   | 1   | 0  | 1  | 0  | 0.034478 | 0.044213 | 0.0416   | 0        |
| lincRNA long_interf    | 0   | 0   | 0   | 0  | 1  | 0  | 0        | 0        | 0        | 0        |
| lincRNA -              | 0   | 0   | 0   | 3  | 3  | 5  | 0        | 0        | 0        | 0.40284  |
| pseudogeni -           | 0   | 1   | 0   | 0  | 2  | 1  | 0        | 0.195863 | 0        | 0        |
| pseudogeni ribosomal_  | 0   | 1   | 0   | 0  | 1  | 0  | 0        | 0.082483 | 0        | 0        |
| pseudogeni -           | 8   | 8   | 10  | 17 | 37 | 14 | 1.136728 | 1.457692 | 1.714409 | 3.749262 |
| lincRNA long_interf    | 1   | 0   | 0   | 0  | 0  | 0  | 0.107793 | 0        | 0        | 0        |
| pseudogeni protein_ph  | 1   | 0   | 2   | 0  | 1  | 0  | 0.023551 | 0        | 0.056831 | 0        |
| lincRNA -              | 0   | 0   | 0   | 3  | 6  | 1  | 0        | 0        | 0        | 0.558413 |
| pseudogeni annexin_A2  | 143 | 135 | 154 | 13 | 13 | 13 | 5.118529 | 6.196582 | 6.650861 | 0.722242 |
| processed_ -           | 1   | 1   | 0   | 0  | 0  | 0  | 0.111643 | 0.143166 | 0        | 0        |
| processed_ -           | 9   | 8   | 7   | 15 | 15 | 11 | 0.923436 | 1.0526   | 0.866583 | 2.388834 |
| pseudogeni -           | 28  | 31  | 29  | 3  | 0  | 3  | 2.18456  | 3.101537 | 2.729933 | 0.363294 |
| protein_co family_witl | 0   | 0   | 0   | 0  | 1  | 0  | 0        | 0        | 0        | 0        |
| antisense -            | 6   | 14  | 12  | 0  | 5  | 4  | 0.330599 | 0.989209 | 0.797774 | 0        |
| pseudogeni -           | 0   | 0   | 0   | 0  | 0  | 1  | 0        | 0        | 0        | 0        |
| processed_ -           | 0   | 1   | 0   | 0  | 1  | 5  | 0        | 0.04857  | 0        | 0        |
| antisense -            | 0   | 0   | 0   | 0  | 1  | 1  | 0        | 0        | 0        | 0        |
| protein_co HCG17865    | 3   | 2   | 1   | 0  | 0  | 1  | 0.078193 | 0.066848 | 0.031448 | 0        |
| pseudogeni -           | 3   | 1   | 0   | 0  | 0  | 0  | 0.560438 | 0.239561 | 0        | 0        |
| lincRNA -              | 1   | 0   | 0   | 0  | 0  | 0  | 0.056975 | 0        | 0        | 0        |
| lincRNA -              | 0   | 0   | 0   | 0  | 0  | 1  | 0        | 0        | 0        | 0        |
| processed_ LEF1_antise | 29  | 17  | 14  | 0  | 1  | 1  | 0.404706 | 0.304228 | 0.235731 | 0        |
| pseudogeni -           | 2   | 1   | 1   | 9  | 22 | 14 | 0.074017 | 0.047458 | 0.044653 | 0.516984 |
| lincRNA -              | 0   | 0   | 0   | 1  | 0  | 0  | 0        | 0        | 0        | 0.107662 |
| pseudogeni LSM12_hoi   | 16  | 12  | 11  | 12 | 21 | 22 | 1.275919 | 1.227139 | 1.058385 | 1.485302 |
| pseudogeni -           | 2   | 2   | 1   | 5  | 0  | 1  | 0.098199 | 0.125926 | 0.059241 | 0.381046 |
| lincRNA -              | 2   | 0   | 0   | 2  | 2  | 1  | 0.186071 | 0        | 0        | 0.288809 |
| pseudogeni -           | 0   | 0   | 0   | 0  | 0  | 1  | 0        | 0        | 0        | 0        |
| sense_intrc -          | 0   | 3   | 1   | 0  | 0  | 0  | 0        | 0.251589 | 0.078906 | 0        |
| pseudogeni -           | 0   | 0   | 0   | 0  | 2  | 1  | 0        | 0        | 0        | 0        |
| protein_co SCAN_dom    | 65  | 36  | 31  | 63 | 78 | 89 | 0.624944 | 0.443853 | 0.359615 | 0.940153 |
| pseudogeni proteasom   | 0   | 3   | 0   | 0  | 0  | 0  | 0        | 0.402655 | 0        | 0        |
| antisense -            | 14  | 10  | 14  | 7  | 6  | 4  | 0.143113 | 0.131087 | 0.172674 | 0.111066 |
| processed_ -           | 7   | 22  | 10  | 2  | 0  | 0  | 0.098597 | 0.397373 | 0.169947 | 0.043725 |
| processed_ -           | 6   | 2   | 1   | 2  | 0  | 0  | 0.412522 | 0.176334 | 0.082955 | 0.213431 |
| lincRNA -              | 2   | 0   | 1   | 0  | 0  | 0  | 0.105489 | 0        | 0.063639 | 0        |
| antisense -            | 0   | 0   | 0   | 1  | 0  | 5  | 0        | 0        | 0        | 0.021387 |
| lincRNA -              | 0   | 1   | 0   | 0  | 0  | 0  | 0        | 0.061608 | 0        | 0        |
| pseudogeni -           | 7   | 1   | 5   | 6  | 3  | 0  | 1.127939 | 0.206632 | 0.972088 | 1.500614 |
| pseudogeni -           | 0   | 0   | 1   | 0  | 3  | 1  | 0        | 0        | 0.093979 | 0        |
| processed_ -           | 3   | 3   | 2   | 1  | 2  | 2  | 0.065065 | 0.083436 | 0.052336 | 0.033663 |
| antisense -            | 1   | 1   | 2   | 3  | 5  | 5  | 0.134741 | 0.172787 | 0.325147 | 0.627412 |
| protein_co transmemt   | 0   | 1   | 3   | 4  | 2  | 2  | 0        | 0.039404 | 0.111223 | 0.190773 |
| antisense -            | 4   | 0   | 1   | 0  | 2  | 3  | 0.330794 | 0        | 0.09978  | 0        |
| pseudogeni mitochond   | 8   | 5   | 2   | 2  | 5  | 3  | 0.73409  | 0.588354 | 0.221431 | 0.284852 |
| lincRNA -              | 5   | 0   | 0   | 0  | 0  | 0  | 0.300963 | 0        | 0        | 0        |
| lincRNA -              | 0   | 0   | 0   | 0  | 0  | 1  | 0        | 0        | 0        | 0        |
| sense_intrc LARGE_intr | 0   | 0   | 0   | 2  | 1  | 2  | 0        | 0        | 0        | 0.26086  |
| sense_intrc RPS6KA2_i  | 4   | 2   | 0   | 3  | 3  | 4  | 0.323938 | 0.207702 | 0        | 0.377097 |
| lincRNA -              | 5   | 3   | 5   | 0  | 0  | 0  | 0.075265 | 0.05791  | 0.090811 | 0        |
| antisense -            | 0   | 1   | 2   | 0  | 0  | 1  | 0        | 0.161206 | 0.303354 | 0        |
| antisense -            | 6   | 6   | 4   | 15 | 14 | 13 | 0.342263 | 0.438904 | 0.275307 | 1.328099 |

|                          |     |     |     |     |     |     |          |          |          |          |
|--------------------------|-----|-----|-----|-----|-----|-----|----------|----------|----------|----------|
| pseudogen:               | 1   | 3   | 0   | 2   | 2   | 1   | 0.131714 | 0.506712 | 0        | 0.408875 |
| lincRNA -                | 166 | 141 | 144 | 89  | 154 | 61  | 2.544538 | 2.771592 | 2.663247 | 2.11749  |
| pseudogen:               | 0   | 0   | 0   | 0   | 2   | 2   | 0        | 0        | 0        | 0        |
| lincRNA -                | 2   | 8   | 8   | 15  | 23  | 11  | 0.169891 | 0.871446 | 0.819935 | 1.977712 |
| antisense -              | 5   | 3   | 4   | 0   | 1   | 0   | 0.388806 | 0.299153 | 0.375294 | 0        |
| pseudogen:               | 0   | 1   | 0   | 0   | 1   | 0   | 0        | 0.005091 | 0        | 0        |
| protein_co translation   | 232 | 180 | 208 | 169 | 175 | 254 | 15.81175 | 15.73163 | 17.10422 | 17.8776  |
| pseudogen:               | 0   | 1   | 0   | 0   | 0   | 0   | 0        | 0.131575 | 0        | 0        |
| lincRNA -                | 3   | 1   | 0   | 2   | 1   | 1   | 0.150449 | 0.06431  | 0        | 0.155679 |
| lincRNA -                | 2   | 1   | 1   | 0   | 0   | 0   | 0.013687 | 0.008776 | 0.008257 | 0        |
| lincRNA BACH1_ant        | 1   | 2   | 2   | 2   | 0   | 0   | 0.194564 | 0.499002 | 0.469506 | 0.603982 |
| protein_co malignant_    | 407 | 337 | 294 | 198 | 195 | 241 | 16.88871 | 17.93251 | 14.71964 | 12.75257 |
| antisense -              | 6   | 3   | 5   | 7   | 9   | 0   | 0.352115 | 0.225769 | 0.354039 | 0.63762  |
| pseudogen:               | 2   | 2   | 2   | 2   | 5   | 2   | 0.480923 | 0.616716 | 0.580262 | 0.746459 |
| antisense -              | 0   | 1   | 0   | 0   | 1   | 0   | 0        | 0.12002  | 0        | 0        |
| pseudogen:               | 0   | 2   | 1   | 0   | 1   | 0   | 0        | 0.309947 | 0.145813 | 0        |
| pseudogen: double_ho     | 2   | 0   | 0   | 1   | 3   | 2   | 0.13611  | 0        | 0        | 0.105631 |
| lincRNA long_interf      | 0   | 0   | 0   | 0   | 0   | 1   | 0        | 0        | 0        | 0        |
| pseudogen: flavin_cont   | 0   | 0   | 0   | 1   | 0   | 0   | 0        | 0        | 0        | 0.053124 |
| pseudogen: fer_(fps/fes  | 8   | 6   | 1   | 1   | 3   | 0   | 0.473039 | 0.454954 | 0.071344 | 0.091778 |
| pseudogen: suppressio    | 7   | 7   | 11  | 6   | 4   | 6   | 0.300302 | 0.385095 | 0.569378 | 0.399523 |
| processed_ -             | 1   | 0   | 1   | 2   | 1   | 0   | 0.008183 | 0        | 0.009874 | 0.025403 |
| pseudogen:               | 0   | 0   | 0   | 0   | 0   | 1   | 0        | 0        | 0        | 0        |
| antisense -              | 18  | 11  | 17  | 5   | 8   | 7   | 0.242953 | 0.190394 | 0.276852 | 0.104749 |
| antisense USP12_ant      | 0   | 0   | 2   | 1   | 0   | 1   | 0        | 0        | 0.422205 | 0.271566 |
| pseudogen: ribosomal_    | 8   | 7   | 7   | 2   | 1   | 3   | 1.254582 | 1.407721 | 1.32451  | 0.486821 |
| lincRNA -                | 0   | 0   | 0   | 5   | 2   | 1   | 0        | 0        | 0        | 0.216736 |
| pseudogen: olfactory_r   | 0   | 0   | 1   | 0   | 1   | 0   | 0        | 0        | 0.060965 | 0        |
| pseudogen:               | 0   | 0   | 0   | 0   | 1   | 2   | 0        | 0        | 0        | 0        |
| antisense -              | 1   | 2   | 1   | 2   | 2   | 1   | 0.330211 | 0.846899 | 0.398419 | 1.025068 |
| processed_ -             | 2   | 0   | 0   | 0   | 0   | 0   | 0.24108  | 0        | 0        | 0        |
| pseudogen:               | 2   | 6   | 3   | 4   | 13  | 15  | 0.076368 | 0.293794 | 0.138214 | 0.237068 |
| pseudogen: ferritin_he   | 9   | 9   | 8   | 18  | 13  | 5   | 0.764511 | 0.980377 | 0.819935 | 2.373254 |
| lincRNA -                | 0   | 0   | 0   | 0   | 0   | 2   | 0        | 0        | 0        | 0        |
| processed_ -             | 0   | 1   | 0   | 1   | 0   | 0   | 0        | 0.014727 | 0        | 0.017825 |
| antisense -              | 5   | 10  | 7   | 0   | 0   | 0   | 0.289445 | 0.742343 | 0.488924 | 0        |
| antisense -              | 0   | 0   | 0   | 1   | 1   | 0   | 0        | 0        | 0        | 0.101365 |
| pseudogen: translocase   | 0   | 0   | 0   | 3   | 1   | 8   | 0        | 0        | 0        | 0.921263 |
| protein_co MT-RNR2-li    | 0   | 0   | 0   | 0   | 1   | 0   | 0        | 0        | 0        | 0        |
| antisense -              | 0   | 0   | 0   | 1   | 1   | 0   | 0        | 0        | 0        | 0.16965  |
| pseudogen:               | 0   | 0   | 3   | 1   | 3   | 0   | 0        | 0        | 0.17319  | 0.074265 |
| pseudogen: prohibitin_   | 9   | 2   | 3   | 4   | 5   | 9   | 0.634602 | 0.180841 | 0.255228 | 0.437773 |
| pseudogen: ferritin_ligl | 0   | 0   | 0   | 0   | 3   | 0   | 0        | 0        | 0        | 0        |
| pseudogen:               | 1   | 5   | 1   | 0   | 2   | 5   | 0.233284 | 1.495766 | 0.28147  | 0        |
| lincRNA long_interf      | 11  | 11  | 7   | 10  | 13  | 4   | 0.142483 | 0.182715 | 0.1094   | 0.201049 |
| pseudogen:               | 3   | 2   | 3   | 0   | 0   | 0   | 0.442359 | 0.378175 | 0.533731 | 0        |
| processed_ long_interf   | 0   | 0   | 0   | 0   | 0   | 1   | 0        | 0        | 0        | 0        |
| processed_ -             | 1   | 1   | 0   | 35  | 32  | 17  | 0.025595 | 0.032822 | 0        | 1.390444 |
| protein_co achaete-sc    | 2   | 2   | 3   | 7   | 5   | 0   | 0.046288 | 0.059358 | 0.083774 | 0.25146  |
| pseudogen: RBPJ_pseu     | 0   | 0   | 0   | 0   | 1   | 1   | 0        | 0        | 0        | 0        |
| lincRNA -                | 2   | 2   | 2   | 1   | 0   | 1   | 0.483402 | 0.619895 | 0.583253 | 0.375154 |
| protein_co transmemt     | 0   | 1   | 0   | 2   | 3   | 4   | 0        | 0.093369 | 0        | 0.226024 |
| pseudogen: basic_trans   | 0   | 0   | 0   | 0   | 5   | 1   | 0        | 0        | 0        | 0        |
| protein_co olfactory_r   | 1   | 0   | 0   | 1   | 0   | 0   | 0.044785 | 0        | 0        | 0.069513 |
| pseudogen: integrator_   | 3   | 2   | 1   | 5   | 2   | 0   | 0.100264 | 0.085716 | 0.040325 | 0.259372 |
| pseudogen: ferritin_he   | 4   | 2   | 3   | 2   | 1   | 1   | 0.352557 | 0.226052 | 0.319035 | 0.273608 |
| lincRNA -                | 0   | 0   | 0   | 5   | 13  | 3   | 0        | 0        | 0        | 0.062926 |
| pseudogen:               | 0   | 1   | 1   | 0   | 0   | 0   | 0        | 0.113882 | 0.107151 | 0        |
| lincRNA -                | 1   | 0   | 0   | 0   | 0   | 0   | 0.073037 | 0        | 0        | 0        |
| pseudogen: MT-ND1_ps     | 1   | 0   | 0   | 1   | 0   | 0   | 0.049989 | 0        | 0        | 0.07759  |
| antisense GNG12_an       | 54  | 59  | 60  | 4   | 3   | 3   | 1.134436 | 1.589452 | 1.520847 | 0.13043  |
| antisense SLC6A1_an      | 1   | 0   | 0   | 0   | 0   | 0   | 0.080291 | 0        | 0        | 0        |
| antisense -              | 0   | 4   | 2   | 4   | 1   | 1   | 0        | 0.607372 | 0.285735 | 0.73515  |
| pseudogen: phosphorit    | 0   | 0   | 0   | 10  | 9   | 4   | 0        | 0        | 0        | 0.756547 |
| antisense -              | 74  | 52  | 59  | 13  | 11  | 15  | 3.667929 | 3.305232 | 3.528493 | 1.000145 |

|                         |     |     |     |     |     |     |          |          |          |          |
|-------------------------|-----|-----|-----|-----|-----|-----|----------|----------|----------|----------|
| antisense -             | 0   | 0   | 0   | 1   | 1   | 0   | 0        | 0        | 0        | 0.085023 |
| sense_intrc family_witl | 11  | 4   | 7   | 4   | 5   | 12  | 0.236276 | 0.110178 | 0.181415 | 0.133357 |
| antisense -             | 0   | 0   | 0   | 612 | 779 | 488 | 0        | 0        | 0        | 58.91698 |
| pseudogeni -            | 7   | 1   | 0   | 2   | 1   | 2   | 0.335271 | 0.06142  | 0        | 0.148682 |
| pseudogeni: Charcot-Le  | 0   | 0   | 0   | 0   | 7   | 7   | 0        | 0        | 0        | 0        |
| antisense -             | 0   | 0   | 0   | 0   | 0   | 1   | 0        | 0        | 0        | 0        |
| processed_ -            | 3   | 2   | 0   | 0   | 0   | 0   | 0.157702 | 0.13482  | 0        | 0        |
| lincRNA -               | 1   | 0   | 1   | 1   | 0   | 3   | 0.100839 | 0        | 0.121668 | 0.156516 |
| pseudogeni -            | 16  | 12  | 9   | 5   | 10  | 4   | 1.462457 | 1.406545 | 0.992553 | 0.709355 |
| lincRNA -               | 3   | 1   | 1   | 1   | 0   | 1   | 0.25346  | 0.108342 | 0.101938 | 0.131135 |
| lincRNA -               | 1   | 1   | 0   | 17  | 19  | 51  | 0.061779 | 0.079222 | 0        | 1.630114 |
| pseudogeni -            | 1   | 0   | 0   | 0   | 0   | 0   | 0.018468 | 0        | 0        | 0        |
| pseudogeni: ribosomal_  | 3   | 2   | 2   | 3   | 0   | 1   | 0.302516 | 0.258623 | 0.243336 | 0.469547 |
| pseudogeni -            | 1   | 0   | 0   | 4   | 1   | 1   | 0.089314 | 0        | 0        | 0.554513 |
| antisense -             | 0   | 0   | 1   | 0   | 0   | 0   | 0        | 0        | 0.104964 | 0        |
| lincRNA -               | 0   | 0   | 0   | 0   | 1   | 1   | 0        | 0        | 0        | 0        |
| antisense -             | 0   | 1   | 0   | 2   | 0   | 1   | 0        | 0.067034 | 0        | 0.162274 |
| pseudogeni -            | 10  | 14  | 13  | 7   | 5   | 4   | 0.549707 | 0.98689  | 0.862229 | 0.597255 |
| pseudogeni -            | 3   | 0   | 2   | 4   | 7   | 1   | 0.345627 | 0        | 0.278012 | 0.715281 |
| processed_ -            | 18  | 35  | 18  | 8   | 26  | 11  | 1.195496 | 2.980939 | 1.442435 | 0.8247   |
| antisense -             | 7   | 5   | 4   | 6   | 12  | 6   | 0.971095 | 0.889494 | 0.669533 | 1.291949 |
| antisense VIPR1_anti    | 1   | 0   | 1   | 11  | 3   | 1   | 0.057889 | 0        | 0.069846 | 0.988368 |
| antisense -             | 1   | 1   | 0   | 0   | 0   | 1   | 0.058466 | 0.074975 | 0        | 0        |
| antisense -             | 0   | 0   | 1   | 0   | 0   | 0   | 0        | 0        | 0.147332 | 0        |
| antisense -             | 0   | 0   | 0   | 1   | 1   | 0   | 0        | 0        | 0        | 0.133541 |
| pseudogeni -            | 1   | 0   | 0   | 2   | 3   | 2   | 0.095305 | 0        | 0        | 0.295853 |
| pseudogeni -            | 15  | 5   | 16  | 10  | 21  | 17  | 1.953751 | 0.835136 | 2.514467 | 2.021661 |
| pseudogeni: G_protein-i | 0   | 0   | 2   | 0   | 0   | 0   | 0        | 0        | 0.104191 | 0        |
| antisense -             | 4   | 4   | 3   | 1   | 0   | 2   | 0.179312 | 0.229942 | 0.162262 | 0.069579 |
| pseudogeni -            | 0   | 0   | 0   | 0   | 1   | 0   | 0        | 0        | 0        | 0        |
| pseudogeni: olfactory_r | 0   | 0   | 0   | 1   | 0   | 0   | 0        | 0        | 0        | 0.078851 |
| pseudogeni: ribosomal_  | 3   | 0   | 0   | 4   | 6   | 2   | 0.17739  | 0        | 0        | 0.367111 |
| lincRNA -               | 0   | 1   | 0   | 10  | 9   | 1   | 0        | 0.01539  | 0        | 0.186281 |
| pseudogeni: spindle_an  | 1   | 0   | 0   | 1   | 2   | 0   | 0.120231 | 0        | 0        | 0.186615 |
| lincRNA long_interf     | 326 | 306 | 269 | 376 | 485 | 408 | 30.2696  | 36.43508 | 30.13626 | 54.18853 |
| pseudogeni -            | 0   | 0   | 0   | 0   | 2   | 0   | 0        | 0        | 0        | 0        |
| antisense -             | 0   | 0   | 1   | 0   | 0   | 0   | 0        | 0        | 0.135348 | 0        |
| lincRNA -               | 0   | 0   | 0   | 2   | 0   | 2   | 0        | 0        | 0        | 0.18519  |
| antisense -             | 0   | 1   | 0   | 0   | 2   | 0   | 0        | 0.101915 | 0        | 0        |
| pseudogeni: transmemt   | 0   | 0   | 0   | 0   | 1   | 0   | 0        | 0        | 0        | 0        |
| processed_ -            | 1   | 0   | 1   | 1   | 0   | 0   | 0.01736  | 0        | 0.020946 | 0.026946 |
| pseudogeni -            | 2   | 0   | 0   | 0   | 1   | 0   | 0.189455 | 0        | 0        | 0        |
| lincRNA -               | 0   | 2   | 0   | 0   | 2   | 0   | 0        | 0.237667 | 0        | 0        |
| lincRNA -               | 1   | 2   | 1   | 0   | 1   | 6   | 0.143834 | 0.368894 | 0.173544 | 0        |
| antisense -             | 3   | 0   | 0   | 0   | 0   | 0   | 0.264417 | 0        | 0        | 0        |
| lincRNA blepharop       | 0   | 0   | 0   | 0   | 4   | 0   | 0        | 0        | 0        | 0        |
| pseudogeni -            | 1   | 0   | 0   | 0   | 0   | 0   | 0.032608 | 0        | 0        | 0        |
| pseudogeni -            | 5   | 1   | 1   | 1   | 2   | 0   | 0.693639 | 0.177899 | 0.167383 | 0.215325 |
| pseudogeni -            | 1   | 0   | 0   | 8   | 7   | 8   | 0.039304 | 0        | 0        | 0.488046 |
| protein_co chromosor    | 205 | 123 | 167 | 18  | 29  | 40  | 3.279582 | 2.523359 | 3.223511 | 0.446959 |
| lincRNA -               | 0   | 1   | 0   | 0   | 0   | 0   | 0        | 0.07451  | 0        | 0        |
| pseudogeni: ribosomal_  | 18  | 28  | 20  | 7   | 13  | 1   | 1.610726 | 3.213043 | 2.15937  | 0.972249 |
| antisense -             | 49  | 30  | 44  | 66  | 96  | 53  | 2.868428 | 2.252052 | 3.107768 | 5.996838 |
| antisense -             | 4   | 1   | 3   | 842 | 974 | 518 | 0.266043 | 0.08529  | 0.240747 | 86.92283 |
| pseudogeni -            | 6   | 7   | 9   | 6   | 3   | 7   | 0.376123 | 0.562712 | 0.680721 | 0.583795 |
| lincRNA -               | 0   | 0   | 0   | 0   | 1   | 1   | 0        | 0        | 0        | 0        |
| lincRNA -               | 14  | 4   | 4   | 3   | 0   | 2   | 0.542081 | 0.198612 | 0.186872 | 0.180297 |
| pseudogeni -            | 4   | 5   | 6   | 2   | 1   | 3   | 0.534359 | 0.85655  | 0.967103 | 0.4147   |
| antisense LARS2_anti    | 2   | 1   | 6   | 0   | 3   | 2   | 0.163096 | 0.104574 | 0.590353 | 0        |
| pseudogeni -            | 4   | 0   | 0   | 0   | 3   | 0   | 0.266421 | 0        | 0        | 0        |
| pseudogeni -            | 2   | 6   | 5   | 3   | 11  | 13  | 0.088555 | 0.340679 | 0.267118 | 0.206175 |
| lincRNA -               | 1   | 0   | 0   | 0   | 0   | 0   | 0.01437  | 0        | 0        | 0        |
| pseudogeni: bone_morp   | 2   | 0   | 0   | 3   | 8   | 3   | 0.092485 | 0        | 0        | 0.215325 |
| pseudogeni -            | 4   | 0   | 1   | 5   | 3   | 2   | 0.504194 | 0        | 0.152085 | 0.978223 |
| pseudogeni: translation | 0   | 0   | 0   | 0   | 1   | 2   | 0        | 0        | 0        | 0        |

|                         |     |     |     |     |     |     |          |          |          |          |
|-------------------------|-----|-----|-----|-----|-----|-----|----------|----------|----------|----------|
| lincRNA -               | 4   | 6   | 6   | 4   | 9   | 3   | 0.467731 | 0.899698 | 0.846516 | 0.725983 |
| pseudogen: eukaryotic_  | 22  | 28  | 26  | 36  | 37  | 49  | 1.521505 | 2.483236 | 2.169562 | 3.864414 |
| pseudogen: -            | 0   | 0   | 0   | 0   | 2   | 2   | 0        | 0        | 0        | 0        |
| antisense -             | 59  | 48  | 52  | 3   | 1   | 3   | 4.966806 | 5.181742 | 5.281735 | 0.391992 |
| pseudogen: -            | 0   | 1   | 0   | 0   | 0   | 0   | 0        | 0.14115  | 0        | 0        |
| processed_ -            | 6   | 4   | 6   | 2   | 5   | 0   | 0.37512  | 0.320692 | 0.452604 | 0.194079 |
| pseudogen: -            | 1   | 1   | 0   | 0   | 3   | 0   | 0.019265 | 0.024704 | 0        | 0        |
| sense_intrc RASA3_intr  | 14  | 5   | 1   | 0   | 1   | 2   | 1.727527 | 0.791182 | 0.148883 | 0        |
| pseudogen: microfibrill | 0   | 3   | 8   | 0   | 0   | 0   | 0        | 0.143737 | 0.360641 | 0        |
| antisense OSBPL10_a     | 5   | 1   | 0   | 6   | 3   | 4   | 0.407739 | 0.104574 | 0        | 0.759441 |
| pseudogen: -            | 3   | 0   | 5   | 0   | 9   | 2   | 0.165494 | 0        | 0.332797 | 0        |
| pseudogen: ribosomal_   | 2   | 1   | 0   | 0   | 3   | 0   | 0.187186 | 0.12002  | 0        | 0        |
| antisense -             | 1   | 0   | 0   | 0   | 0   | 0   | 0.118409 | 0        | 0        | 0        |
| pseudogen: -            | 6   | 3   | 5   | 9   | 6   | 8   | 0.273411 | 0.175306 | 0.274905 | 0.636558 |
| pseudogen: -            | 0   | 0   | 0   | 1   | 0   | 0   | 0        | 0        | 0        | 0.212186 |
| processed_ -            | 9   | 2   | 0   | 0   | 1   | 0   | 0.538966 | 0.153588 | 0        | 0        |
| processed_ -            | 0   | 0   | 0   | 1   | 0   | 0   | 0        | 0        | 0        | 0.156853 |
| pseudogen: -            | 0   | 1   | 1   | 3   | 3   | 2   | 0        | 0.008595 | 0.008087 | 0.031209 |
| antisense -             | 0   | 1   | 0   | 2   | 6   | 0   | 0        | 0.108931 | 0        | 0.263695 |
| antisense -             | 4   | 1   | 0   | 2   | 1   | 1   | 0.418661 | 0.134218 | 0        | 0.32491  |
| antisense -             | 0   | 0   | 1   | 0   | 0   | 1   | 0        | 0        | 0.032054 | 0        |
| antisense -             | 0   | 0   | 0   | 1   | 1   | 0   | 0        | 0        | 0        | 0.161374 |
| pseudogen: -            | 0   | 0   | 0   | 2   | 5   | 3   | 0        | 0        | 0        | 0.169452 |
| lincRNA -               | 263 | 266 | 241 | 3   | 13  | 8   | 20.38359 | 26.43723 | 22.53669 | 0.360892 |
| pseudogen: -            | 3   | 1   | 3   | 2   | 1   | 0   | 0.102904 | 0.043987 | 0.12416  | 0.106481 |
| antisense -             | 2   | 1   | 1   | 1   | 0   | 0   | 0.116064 | 0.074418 | 0.070019 | 0.090074 |
| pseudogen: -            | 3   | 2   | 2   | 1   | 0   | 3   | 0.13321  | 0.113882 | 0.107151 | 0.06892  |
| antisense -             | 0   | 0   | 0   | 1   | 0   | 0   | 0        | 0        | 0        | 0.09627  |
| antisense -             | 146 | 118 | 132 | 100 | 141 | 112 | 10.56473 | 10.94956 | 11.52464 | 11.23145 |
| pseudogen: olfactory_r  | 0   | 0   | 0   | 2   | 2   | 2   | 0        | 0        | 0        | 0.156348 |
| processed_ -            | 2   | 0   | 2   | 0   | 2   | 3   | 0.178289 | 0        | 0.215116 | 0        |
| pseudogen: ribosomal_   | 0   | 0   | 1   | 0   | 0   | 0   | 0        | 0        | 0.187958 | 0        |
| sense_intrc DPYD_intrc  | 0   | 1   | 2   | 0   | 0   | 0   | 0        | 0.14995  | 0.282172 | 0        |
| sense_intrc -           | 16  | 11  | 21  | 12  | 13  | 11  | 1.344517 | 1.185354 | 2.129186 | 1.565157 |
| pseudogen: -            | 8   | 10  | 8   | 6   | 5   | 11  | 1.258792 | 2.017778 | 1.518806 | 1.465365 |
| lincRNA -               | 0   | 1   | 0   | 0   | 1   | 0   | 0        | 0.117902 | 0        | 0        |
| pseudogen: -            | 1   | 0   | 0   | 0   | 0   | 0   | 0.041024 | 0        | 0        | 0        |
| pseudogen: -            | 205 | 159 | 163 | 111 | 163 | 178 | 10.03388 | 9.979789 | 9.626104 | 8.432733 |
| protein_co chromosom    | 1   | 0   | 0   | 0   | 0   | 0   | 0.065672 | 0        | 0        | 0        |
| pseudogen: general_tra  | 54  | 49  | 39  | 75  | 108 | 101 | 0.963127 | 1.120715 | 0.839271 | 2.076259 |
| antisense -             | 16  | 7   | 8   | 9   | 14  | 6   | 0.388323 | 0.217862 | 0.234267 | 0.339036 |
| pseudogen: -            | 0   | 0   | 0   | 0   | 1   | 0   | 0        | 0        | 0        | 0        |
| pseudogen: ribosomal_   | 114 | 96  | 108 | 203 | 197 | 201 | 12.63703 | 13.64648 | 14.44481 | 34.92742 |
| pseudogen: -            | 0   | 0   | 0   | 0   | 1   | 0   | 0        | 0        | 0        | 0        |
| pseudogen: -            | 0   | 0   | 0   | 1   | 1   | 0   | 0        | 0        | 0        | 0.322035 |
| pseudogen: G_protein-i  | 0   | 0   | 0   | 4   | 6   | 0   | 0        | 0        | 0        | 1.420094 |
| processed_ -            | 3   | 2   | 2   | 0   | 0   | 0   | 0.327902 | 0.280325 | 0.263755 | 0        |
| processed_ -            | 9   | 5   | 4   | 3   | 3   | 5   | 0.293063 | 0.208784 | 0.157154 | 0.151625 |
| pseudogen: eukaryotic_  | 4   | 4   | 3   | 3   | 3   | 4   | 0.135422 | 0.17366  | 0.122546 | 0.157646 |
| lincRNA -               | 0   | 1   | 0   | 0   | 0   | 0   | 0        | 0.107953 | 0        | 0        |
| lincRNA -               | 38  | 25  | 32  | 31  | 22  | 9   | 1.489817 | 1.256894 | 1.513726 | 1.886433 |
| pseudogen: -            | 3   | 3   | 0   | 5   | 8   | 1   | 0.263427 | 0.337808 | 0        | 0.681459 |
| antisense -             | 5   | 3   | 5   | 11  | 22  | 11  | 0.422433 | 0.325026 | 0.509689 | 1.442483 |
| lincRNA -               | 0   | 0   | 0   | 0   | 6   | 0   | 0        | 0        | 0        | 0        |
| pseudogen: translocase  | 2   | 1   | 5   | 4   | 1   | 5   | 0.352557 | 0.226052 | 1.063449 | 1.094433 |
| lincRNA -               | 18  | 21  | 18  | 19  | 31  | 9   | 0.279662 | 0.418398 | 0.337428 | 0.45819  |
| antisense -             | 1   | 2   | 1   | 9   | 1   | 1   | 0.046061 | 0.118133 | 0.055575 | 0.643436 |
| pseudogen: -            | 0   | 0   | 0   | 1   | 0   | 1   | 0        | 0        | 0        | 0.067702 |
| lincRNA -               | 1   | 0   | 0   | 1   | 5   | 0   | 0.084639 | 0        | 0        | 0.131371 |
| antisense -             | 4   | 2   | 2   | 2   | 1   | 3   | 0.322268 | 0.206632 | 0.194418 | 0.250102 |
| pseudogen: -            | 1   | 0   | 0   | 0   | 4   | 0   | 0.040043 | 0        | 0        | 0        |
| pseudogen: -            | 3   | 3   | 0   | 5   | 4   | 0   | 0.391839 | 0.502477 | 0        | 1.013646 |
| sense_intrc -           | 5   | 5   | 3   | 1   | 1   | 1   | 0.296772 | 0.380568 | 0.214844 | 0.092126 |
| protein_co major_hist   | 0   | 1   | 0   | 0   | 2   | 0   | 0        | 0.029679 | 0        | 0        |
| pseudogen: phosphorik   | 10  | 21  | 20  | 13  | 12  | 32  | 0.500427 | 1.347626 | 1.207588 | 1.009752 |

|                        |     |    |     |      |      |      |          |          |          |          |
|------------------------|-----|----|-----|------|------|------|----------|----------|----------|----------|
| antisense -            | 1   | 3  | 2   | 1    | 3    | 1    | 0.013951 | 0.053671 | 0.033666 | 0.021654 |
| pseudogen -            | 121 | 90 | 106 | 23   | 33   | 40   | 1.032331 | 0.984658 | 1.091158 | 0.304573 |
| antisense -            | 15  | 25 | 21  | 44   | 74   | 72   | 1.745286 | 3.730136 | 2.948103 | 7.946182 |
| antisense -            | 2   | 0  | 2   | 0    | 0    | 1    | 0.118409 | 0        | 0.142867 | 0        |
| antisense -            | 5   | 3  | 5   | 1    | 2    | 2    | 0.456129 | 0.350952 | 0.550345 | 0.141595 |
| pseudogen -            | 0   | 2  | 0   | 0    | 0    | 0    | 0        | 0.561961 | 0        | 0        |
| antisense -            | 15  | 10 | 12  | 12   | 17   | 14   | 1.258229 | 1.075667 | 1.214501 | 1.562357 |
| lincRNA -              | 0   | 0  | 0   | 15   | 40   | 19   | 0        | 0        | 0        | 2.469903 |
| protein_co golgin_A8_  | 6   | 10 | 6   | 2    | 3    | 2    | 0.140881 | 0.301101 | 0.169981 | 0.072889 |
| antisense IDI2_antise  | 0   | 1  | 0   | 0    | 0    | 1    | 0        | 0.057049 | 0        | 0        |
| pseudogen lactate_def  | 0   | 0  | 0   | 0    | 0    | 1    | 0        | 0        | 0        | 0        |
| protein_co Uncharacte  | 1   | 2  | 2   | 0    | 1    | 4    | 0.075386 | 0.193343 | 0.181915 | 0        |
| pseudogen alcohol_de   | 0   | 0  | 1   | 0    | 0    | 0    | 0        | 0        | 0.050334 | 0        |
| lincRNA long_interge   | 75  | 39 | 61  | 1175 | 1399 | 1815 | 1.287244 | 0.858368 | 1.263216 | 31.30171 |
| lincRNA -              | 4   | 4  | 2   | 0    | 0    | 1    | 0.333737 | 0.42797  | 0.201336 | 0        |
| antisense -            | 0   | 2  | 5   | 2    | 6    | 2    | 0        | 0.077788 | 0.182974 | 0.094152 |
| antisense ATP11A_an    | 0   | 1  | 1   | 14   | 10   | 5    | 0        | 0.027431 | 0.02581  | 0.464834 |
| sense_intrc ARID4B_int | 2   | 5  | 3   | 6    | 3    | 2    | 0.202549 | 0.64935  | 0.36658  | 0.943151 |
| sense_intrc -          | 0   | 0  | 0   | 0    | 3    | 1    | 0        | 0        | 0        | 0        |
| pseudogen -            | 0   | 0  | 1   | 0    | 0    | 0    | 0        | 0        | 0.181915 | 0        |
| antisense -            | 3   | 2  | 11  | 9    | 2    | 7    | 0.130492 | 0.111558 | 0.577301 | 0.607624 |
| processed_ -           | 2   | 3  | 0   | 0    | 3    | 1    | 0.176943 | 0.340357 | 0        | 0        |
| antisense -            | 0   | 1  | 0   | 0    | 0    | 0    | 0        | 0.12959  | 0        | 0        |
| lincRNA -              | 1   | 5  | 1   | 1    | 5    | 0    | 0.101274 | 0.64935  | 0.122193 | 0.157192 |
| pseudogen 3-hydroxyl   | 0   | 1  | 0   | 0    | 0    | 0    | 0        | 0.081477 | 0        | 0        |
| pseudogen -            | 0   | 1  | 0   | 3    | 0    | 0    | 0        | 0.131575 | 0        | 0.477767 |
| pseudogen NUT_family   | 0   | 1  | 0   | 0    | 2    | 0    | 0        | 0.035412 | 0        | 0        |
| pseudogen MAP/micrc    | 5   | 3  | 2   | 0    | 0    | 3    | 0.135756 | 0.104452 | 0.065519 | 0        |
| sense_intrc -          | 6   | 7  | 5   | 11   | 7    | 7    | 0.421799 | 0.631047 | 0.424104 | 1.200267 |
| antisense -            | 4   | 9  | 3   | 11   | 11   | 8    | 0.034934 | 0.100795 | 0.031612 | 0.149111 |
| pseudogen -            | 3   | 6  | 6   | 1    | 1    | 0    | 0.350798 | 0.899698 | 0.846516 | 0.181496 |
| pseudogen -            | 0   | 0  | 0   | 0    | 1    | 0    | 0        | 0        | 0        | 0        |
| pseudogen tripartite_r | 8   | 4  | 1   | 0    | 0    | 0    | 0.284182 | 0.182212 | 0.04286  | 0        |
| lincRNA -              | 0   | 0  | 1   | 1    | 5    | 0    | 0        | 0        | 0.044583 | 0.057352 |
| processed_ -           | 0   | 0  | 0   | 0    | 1    | 1    | 0        | 0        | 0        | 0        |
| pseudogen -            | 0   | 0  | 1   | 0    | 0    | 1    | 0        | 0        | 0.019865 | 0        |
| antisense -            | 2   | 1  | 5   | 2    | 3    | 1    | 0.102604 | 0.065788 | 0.309494 | 0.159256 |
| processed_ -           | 8   | 10 | 19  | 3    | 14   | 13   | 0.295836 | 0.47421  | 0.84774  | 0.172192 |
| processed_ -           | 2   | 0  | 1   | 0    | 0    | 1    | 0.095499 | 0        | 0.057613 | 0        |
| antisense -            | 7   | 3  | 7   | 4    | 6    | 3    | 0.413388 | 0.227191 | 0.498776 | 0.366649 |
| pseudogen ras_homolo   | 7   | 2  | 2   | 1    | 4    | 1    | 0.54705  | 0.200433 | 0.188585 | 0.1213   |
| pseudogen ankyrin_rej  | 0   | 1  | 0   | 2    | 1    | 2    | 0        | 0.034439 | 0        | 0.083367 |
| pseudogen -            | 3   | 0  | 2   | 0    | 1    | 0    | 0.408925 | 0        | 0.328927 | 0        |
| pseudogen -            | 0   | 0  | 1   | 0    | 0    | 0    | 0        | 0        | 0.179036 | 0        |
| pseudogen -            | 0   | 0  | 0   | 0    | 1    | 0    | 0        | 0        | 0        | 0        |
| antisense -            | 2   | 1  | 2   | 0    | 0    | 1    | 0.262689 | 0.168431 | 0.31695  | 0        |
| antisense -            | 0   | 5  | 1   | 1    | 4    | 4    | 0        | 0.153002 | 0.028792 | 0.037038 |
| pseudogen eukaryotic_  | 0   | 1  | 0   | 2    | 1    | 1    | 0        | 0.061108 | 0        | 0.147926 |
| processed_ -           | 3   | 0  | 1   | 0    | 0    | 2    | 0.057841 | 0        | 0.023263 | 0        |
| antisense -            | 14  | 0  | 3   | 1    | 4    | 12   | 0.872952 | 0        | 0.2257   | 0.096782 |
| antisense -            | 0   | 0  | 0   | 0    | 0    | 1    | 0        | 0        | 0        | 0        |
| pseudogen -            | 1   | 0  | 0   | 4    | 2    | 1    | 0.287669 | 0        | 0        | 1.786007 |
| protein_co Uncharacte  | 0   | 0  | 0   | 3    | 1    | 2    | 0        | 0        | 0        | 0.131927 |
| pseudogen -            | 0   | 0  | 0   | 0    | 0    | 1    | 0        | 0        | 0        | 0        |
| pseudogen mitochond    | 0   | 0  | 0   | 0    | 1    | 1    | 0        | 0        | 0        | 0        |
| pseudogen ribosomal_   | 0   | 0  | 1   | 3    | 0    | 2    | 0        | 0        | 0.124342 | 0.479867 |
| pseudogen -            | 0   | 0  | 0   | 1    | 1    | 0    | 0        | 0        | 0        | 0.116448 |
| pseudogen -            | 0   | 0  | 0   | 1    | 0    | 0    | 0        | 0        | 0        | 0.085422 |
| pseudogen olfactory_r  | 0   | 0  | 1   | 0    | 0    | 0    | 0        | 0        | 0.148883 | 0        |
| antisense -            | 2   | 1  | 1   | 4    | 6    | 2    | 0.124377 | 0.079748 | 0.075034 | 0.3861   |
| processed_ -           | 0   | 0  | 0   | 14   | 20   | 17   | 0        | 0        | 0        | 2.279457 |
| pseudogen ferritin_hei | 3   | 0  | 0   | 2    | 0    | 0    | 0.299936 | 0        | 0        | 0.310362 |
| pseudogen DnaJ_(Hsp4   | 0   | 1  | 1   | 0    | 0    | 0    | 0        | 0.232161 | 0.218438 | 0        |
| pseudogen crystallin_ε | 0   | 1  | 0   | 0    | 0    | 0    | 0        | 0.094992 | 0        | 0        |
| pseudogen solute_carr  | 0   | 0  | 0   | 1    | 0    | 0    | 0        | 0        | 0        | 0.053397 |

|                        |     |     |     |     |     |     |          |          |          |          |
|------------------------|-----|-----|-----|-----|-----|-----|----------|----------|----------|----------|
| antisense -            | 4   | 2   | 1   | 6   | 1   | 0   | 0.132085 | 0.08469  | 0.039842 | 0.30752  |
| antisense -            | 0   | 1   | 0   | 0   | 0   | 0   | 0        | 0.093953 | 0        | 0        |
| protein_co tumor_nec   | 0   | 1   | 0   | 0   | 0   | 0   | 0        | 0.035877 | 0        | 0        |
| antisense -            | 7   | 9   | 7   | 10  | 12  | 5   | 0.13914  | 0.229406 | 0.16788  | 0.30852  |
| antisense COL4A2_ar    | 25  | 21  | 22  | 5   | 3   | 1   | 2.170834 | 2.338381 | 2.304928 | 0.673887 |
| pseudogeni -           | 27  | 22  | 32  | 0   | 8   | 3   | 1.770672 | 1.850148 | 2.532051 | 0        |
| pseudogeni ribosomal_  | 16  | 13  | 18  | 19  | 32  | 19  | 0.841077 | 0.876331 | 1.141658 | 1.550242 |
| antisense -            | 5   | 5   | 8   | 0   | 0   | 0   | 0.137025 | 0.175715 | 0.264526 | 0        |
| pseudogeni -           | 1   | 1   | 0   | 1   | 0   | 0   | 0.114927 | 0.147377 | 0        | 0.178382 |
| antisense -            | 1   | 0   | 0   | 0   | 0   | 0   | 0.050692 | 0        | 0        | 0        |
| pseudogeni -           | 1   | 0   | 0   | 0   | 1   | 0   | 0.115493 | 0        | 0        | 0        |
| protein_co family_witl | 7   | 2   | 5   | 7   | 9   | 7   | 0.217948 | 0.079854 | 0.187834 | 0.338286 |
| lincRNA -              | 0   | 0   | 0   | 1   | 1   | 0   | 0        | 0        | 0        | 0.045544 |
| pseudogeni sorting_nei | 0   | 0   | 0   | 1   | 3   | 0   | 0        | 0        | 0        | 0.090074 |
| pseudogeni solute_carr | 0   | 0   | 0   | 1   | 0   | 0   | 0        | 0        | 0        | 0.082798 |
| pseudogeni -           | 11  | 4   | 11  | 0   | 0   | 0   | 0.644738 | 0.300649 | 0.777913 | 0        |
| protein_co -           | 2   | 5   | 8   | 3   | 5   | 1   | 0.134741 | 0.431967 | 0.650293 | 0.313706 |
| pseudogeni capicua_tr  | 2   | 2   | 4   | 3   | 4   | 1   | 0.03335  | 0.042767 | 0.080477 | 0.077646 |
| lincRNA -              | 0   | 0   | 2   | 2   | 0   | 0   | 0        | 0        | 0.125723 | 0.161733 |
| protein_co LYR_motif_  | 17  | 24  | 21  | 17  | 27  | 7   | 0.28227  | 0.511018 | 0.42071  | 0.438122 |
| processed_ SMG7_anti   | 6   | 7   | 10  | 4   | 1   | 4   | 0.125263 | 0.187404 | 0.251895 | 0.129617 |
| pseudogeni -           | 2   | 0   | 1   | 0   | 0   | 0   | 0.104432 | 0        | 0.063002 | 0        |
| pseudogeni -           | 0   | 1   | 0   | 1   | 2   | 0   | 0        | 0.200433 | 0        | 0.242599 |
| pseudogeni secretory_t | 2   | 2   | 2   | 3   | 5   | 3   | 0.062065 | 0.079589 | 0.074885 | 0.1445   |
| pseudogeni CTAGE_fam   | 1   | 1   | 0   | 9   | 9   | 6   | 0.019505 | 0.025012 | 0        | 0.27247  |
| antisense -            | 0   | 0   | 0   | 3   | 2   | 1   | 0        | 0        | 0        | 0.507766 |
| pseudogeni high_mobil  | 0   | 1   | 0   | 1   | 0   | 0   | 0        | 0.222703 | 0        | 0.269555 |
| antisense -            | 1   | 0   | 1   | 2   | 2   | 0   | 0.059354 | 0        | 0.071615 | 0.184253 |
| antisense DPYD_anti    | 1   | 1   | 0   | 0   | 0   | 0   | 0.087974 | 0.112814 | 0        | 0        |
| pseudogeni -           | 0   | 0   | 0   | 5   | 2   | 4   | 0        | 0        | 0        | 2.103462 |
| pseudogeni -           | 0   | 0   | 0   | 0   | 1   | 0   | 0        | 0        | 0        | 0        |
| pseudogeni phosphoryl  | 0   | 0   | 4   | 1   | 3   | 2   | 0        | 0        | 0.364415 | 0.117198 |
| lincRNA -              | 0   | 0   | 1   | 0   | 0   | 0   | 0        | 0        | 0.069333 | 0        |
| pseudogeni -           | 0   | 0   | 0   | 0   | 1   | 0   | 0        | 0        | 0        | 0        |
| pseudogeni ribosomal_  | 40  | 59  | 58  | 6   | 14  | 13  | 3.859261 | 7.299708 | 6.751809 | 0.898516 |
| sense_intrc -          | 1   | 1   | 0   | 0   | 2   | 0   | 0.124048 | 0.159074 | 0        | 0        |
| antisense -            | 0   | 0   | 0   | 2   | 3   | 3   | 0        | 0        | 0        | 0.297668 |
| pseudogeni mitochond   | 1   | 1   | 2   | 0   | 0   | 0   | 0.090521 | 0.116081 | 0.218438 | 0        |
| pseudogeni cytochrom   | 11  | 6   | 9   | 6   | 5   | 11  | 1.754388 | 1.227139 | 1.731903 | 1.485302 |
| pseudogeni -           | 0   | 0   | 0   | 5   | 12  | 6   | 0        | 0        | 0        | 0.292759 |
| processed_ -           | 3   | 1   | 1   | 10  | 20  | 11  | 0.18781  | 0.08028  | 0.075535 | 0.971693 |
| antisense -            | 2   | 1   | 3   | 7   | 6   | 8   | 0.140179 | 0.08988  | 0.253702 | 0.761523 |
| antisense -            | 0   | 0   | 2   | 7   | 3   | 1   | 0        | 0        | 0.219285 | 0.987323 |
| antisense -            | 4   | 1   | 1   | 0   | 0   | 0   | 0.116352 | 0.037301 | 0.035096 | 0        |
| pseudogeni -           | 0   | 2   | 2   | 1   | 1   | 0   | 0        | 0.095977 | 0.090304 | 0.058084 |
| pseudogeni high_mobil  | 1   | 0   | 0   | 0   | 0   | 0   | 0.173667 | 0        | 0        | 0        |
| pseudogeni -           | 1   | 0   | 0   | 0   | 0   | 0   | 0.157879 | 0        | 0        | 0        |
| pseudogeni -           | 2   | 2   | 3   | 0   | 0   | 0   | 0.137507 | 0.176334 | 0.248866 | 0        |
| pseudogeni DEAD_(Asp   | 6   | 3   | 0   | 0   | 1   | 2   | 0.144277 | 0.092507 | 0        | 0        |
| lincRNA long_inter     | 293 | 298 | 277 | 12  | 12  | 22  | 5.843801 | 7.621727 | 6.665851 | 0.371483 |
| antisense -            | 1   | 0   | 0   | 7   | 4   | 0   | 0.083286 | 0        | 0        | 0.9049   |
| pseudogeni -           | 0   | 1   | 3   | 4   | 5   | 8   | 0        | 0.026653 | 0.075233 | 0.129042 |
| antisense -            | 1   | 0   | 1   | 2   | 0   | 0   | 0.098096 | 0        | 0.118359 | 0.304518 |
| antisense HLA_compl    | 5   | 3   | 6   | 1   | 3   | 2   | 0.308893 | 0.237667 | 0.447237 | 0.095889 |
| pseudogeni -           | 2   | 0   | 2   | 20  | 23  | 10  | 0.283323 | 0        | 0.341846 | 4.397571 |
| lincRNA -              | 0   | 0   | 0   | 1   | 0   | 0   | 0        | 0        | 0        | 0.130664 |
| pseudogeni -           | 0   | 0   | 0   | 1   | 0   | 0   | 0        | 0        | 0        | 0.04476  |
| pseudogeni -           | 2   | 0   | 0   | 0   | 0   | 1   | 0.052715 | 0        | 0        | 0        |
| pseudogeni heat_shock  | 2   | 0   | 0   | 1   | 0   | 0   | 0.048641 | 0        | 0        | 0.037749 |
| lincRNA small_nucl     | 238 | 161 | 189 | 337 | 360 | 528 | 3.581458 | 3.106835 | 3.431569 | 7.871243 |
| pseudogeni high_mobil  | 0   | 1   | 0   | 0   | 0   | 0   | 0        | 0.220256 | 0        | 0        |
| antisense -            | 0   | 2   | 1   | 1   | 0   | 0   | 0        | 0.946926 | 0.445476 | 0.573069 |
| pseudogeni polymerase  | 1   | 0   | 1   | 4   | 3   | 0   | 0.099766 | 0        | 0.120373 | 0.619403 |
| antisense CYP1B1_an    | 20  | 9   | 12  | 1   | 2   | 1   | 0.533751 | 0.308007 | 0.386401 | 0.041423 |
| lincRNA long_inter     | 41  | 49  | 36  | 0   | 3   | 1   | 0.921174 | 1.411768 | 0.975907 | 0        |

|                         |      |     |      |     |     |     |          |          |          |          |
|-------------------------|------|-----|------|-----|-----|-----|----------|----------|----------|----------|
| antisense -             | 0    | 1   | 0    | 0   | 1   | 0   | 0        | 0.147017 | 0        | 0        |
| pseudogen-              | 0    | 0   | 0    | 1   | 0   | 0   | 0        | 0        | 0        | 0.153869 |
| lincRNA -               | 2    | 1   | 1    | 13  | 16  | 0   | 0.129889 | 0.083282 | 0.078359 | 1.31044  |
| pseudogen: ribosomal_   | 1    | 1   | 1    | 0   | 0   | 0   | 0.063279 | 0.081147 | 0.07635  | 0        |
| processed_ -            | 20   | 19  | 17   | 19  | 18  | 28  | 0.650798 | 0.792829 | 0.667442 | 0.959623 |
| antisense -             | 1    | 0   | 0    | 0   | 0   | 0   | 0.062855 | 0        | 0        | 0        |
| pseudogen-              | 0    | 0   | 1    | 0   | 0   | 0   | 0        | 0        | 0.023111 | 0        |
| lincRNA -               | 1    | 0   | 0    | 0   | 0   | 0   | 0.093036 | 0        | 0        | 0        |
| processed_ -            | 10   | 2   | 3    | 13  | 8   | 4   | 0.261663 | 0.067109 | 0.094713 | 0.527978 |
| processed_ -            | 0    | 1   | 1    | 0   | 0   | 0   | 0        | 0.018927 | 0.017808 | 0        |
| antisense NALCN_ant     | 18   | 13  | 5    | 1   | 0   | 0   | 0.296564 | 0.274662 | 0.099395 | 0.025573 |
| pseudogen: ribulose-5-  | 6    | 6   | 5    | 1   | 1   | 3   | 0.467342 | 0.5993   | 0.469896 | 0.120897 |
| pseudogen: histone_de   | 0    | 0   | 0    | 6   | 10  | 11  | 0        | 0        | 0        | 0.31236  |
| lincRNA family_witl     | 2    | 2   | 6    | 9   | 4   | 9   | 0.052245 | 0.066997 | 0.18911  | 0.364913 |
| antisense small_nucl    | 585  | 435 | 420  | 611 | 666 | 764 | 11.63796 | 11.09735 | 10.08134 | 18.86655 |
| lincRNA -               | 0    | 0   | 0    | 1   | 1   | 0   | 0        | 0        | 0        | 0.152578 |
| antisense -             | 1    | 1   | 0    | 0   | 1   | 0   | 0.084032 | 0.107759 | 0        | 0        |
| lincRNA -               | 0    | 0   | 0    | 1   | 0   | 0   | 0        | 0        | 0        | 0.091778 |
| protein_co NPIP-like_p  | 2    | 1   | 0    | 0   | 0   | 0   | 0.060621 | 0.038869 | 0        | 0        |
| pseudogen: crystallin_z | 11   | 16  | 14   | 11  | 10  | 10  | 0.544657 | 1.015921 | 0.836386 | 0.845383 |
| processed_ -            | 1    | 0   | 1    | 2   | 2   | 3   | 0.013235 | 0        | 0.015968 | 0.041084 |
| antisense -             | 2    | 0   | 2    | 2   | 2   | 0   | 0.026469 | 0        | 0.031936 | 0.041084 |
| antisense CASK_antis    | 2    | 0   | 1    | 0   | 1   | 0   | 0.182097 | 0        | 0.109855 | 0        |
| antisense -             | 1    | 1   | 0    | 0   | 3   | 2   | 0.0109   | 0.013977 | 0        | 0        |
| protein_co proline/his  | 0    | 0   | 1    | 0   | 0   | 0   | 0        | 0        | 0.099081 | 0        |
| antisense -             | 2    | 0   | 0    | 1   | 0   | 2   | 0.221702 | 0        | 0        | 0.172056 |
| pseudogen-              | 1    | 0   | 0    | 3   | 0   | 0   | 0.073611 | 0        | 0        | 0.342762 |
| lincRNA -               | 0    | 0   | 1    | 1   | 0   | 0   | 0        | 0        | 0.018653 | 0.023996 |
| sense_intrc -           | 1    | 0   | 0    | 0   | 0   | 0   | 0.130613 | 0        | 0        | 0        |
| antisense endogenou     | 3    | 5   | 3    | 438 | 650 | 305 | 0.050419 | 0.107759 | 0.060834 | 11.42565 |
| pseudogen: eukaryotic_  | 0    | 1   | 0    | 0   | 0   | 0   | 0        | 0.043699 | 0        | 0        |
| processed_ -            | 2    | 0   | 2    | 23  | 65  | 16  | 0.034993 | 0        | 0.042221 | 0.624603 |
| lincRNA -               | 0    | 1   | 0    | 0   | 0   | 1   | 0        | 0.134218 | 0        | 0        |
| sense_intrc TTLL7_intrc | 1    | 2   | 0    | 0   | 1   | 0   | 0.016053 | 0.041171 | 0        | 0        |
| lincRNA -               | 0    | 0   | 0    | 0   | 2   | 0   | 0        | 0        | 0        | 0        |
| processed_ -            | 2    | 2   | 0    | 1   | 0   | 0   | 0.130613 | 0.167492 | 0        | 0.101365 |
| lincRNA -               | 4    | 4   | 5    | 0   | 0   | 0   | 0.415876 | 0.533302 | 0.627223 | 0        |
| antisense -             | 0    | 1   | 0    | 0   | 0   | 0   | 0        | 0.201103 | 0        | 0        |
| processed_ ZFY_antiser  | 0    | 1   | 0    | 0   | 0   | 1   | 0        | 0.12026  | 0        | 0        |
| pseudogen-              | 0    | 0   | 3    | 0   | 1   | 0   | 0        | 0        | 0.440848 | 0        |
| antisense -             | 1    | 0   | 0    | 0   | 1   | 0   | 0.068253 | 0        | 0        | 0        |
| processed_ -            | 3    | 0   | 0    | 0   | 1   | 1   | 0.06252  | 0        | 0        | 0        |
| processed_ -            | 0    | 0   | 0    | 1   | 0   | 0   | 0        | 0        | 0        | 0.112315 |
| lincRNA -               | 0    | 0   | 0    | 1   | 2   | 0   | 0        | 0        | 0        | 0.153544 |
| pseudogen: ferritin_he  | 0    | 0   | 0    | 1   | 0   | 0   | 0        | 0        | 0        | 0.227437 |
| pseudogen-              | 2    | 0   | 2    | 4   | 2   | 1   | 0.202549 | 0        | 0.244387 | 0.628767 |
| lincRNA -               | 1    | 1   | 0    | 0   | 0   | 0   | 0.071697 | 0.091942 | 0        | 0        |
| lincRNA -               | 0    | 0   | 1    | 0   | 0   | 0   | 0        | 0        | 0.031642 | 0        |
| pseudogen-              | 0    | 1   | 0    | 5   | 2   | 1   | 0        | 0.016402 | 0        | 0.099263 |
| processed_ -            | 16   | 15  | 16   | 0   | 0   | 0   | 0.435933 | 0.524083 | 0.525978 | 0        |
| lincRNA -               | 0    | 0   | 0    | 1   | 0   | 0   | 0        | 0        | 0        | 0.108627 |
| antisense -             | 2    | 4   | 1    | 182 | 224 | 185 | 0.025162 | 0.064534 | 0.01518  | 3.554044 |
| antisense -             | 0    | 0   | 1    | 0   | 0   | 0   | 0        | 0        | 0.150068 | 0        |
| antisense HOXB_clusi    | 7    | 10  | 3    | 0   | 0   | 18  | 0.441763 | 0.809284 | 0.228434 | 0        |
| antisense -             | 0    | 1   | 2    | 0   | 0   | 0   | 0        | 0.105862 | 0.19921  | 0        |
| antisense -             | 3    | 0   | 7    | 0   | 0   | 0   | 0.078631 | 0        | 0.221369 | 0        |
| pseudogen-              | 5    | 0   | 1    | 2   | 0   | 0   | 1.03739  | 0        | 0.250334 | 0.644069 |
| pseudogen: family_witl  | 0    | 1   | 0    | 0   | 0   | 0   | 0        | 0.02711  | 0        | 0        |
| lincRNA long_interf     | 6    | 5   | 9    | 0   | 0   | 0   | 0.630807 | 0.674101 | 1.141658 | 0        |
| pseudogen: CTAGE_fam    | 10   | 6   | 8    | 18  | 12  | 13  | 0.1661   | 0.1278   | 0.160327 | 0.464058 |
| pseudogen-              | 0    | 1   | 0    | 4   | 1   | 0   | 0        | 0.341647 | 0        | 1.654086 |
| lincRNA -               | 1134 | 953 | 1052 | 748 | 925 | 578 | 12.15389 | 13.09799 | 13.60398 | 12.44327 |
| lincRNA -               | 3    | 2   | 1    | 0   | 0   | 0   | 0.252549 | 0.215906 | 0.101572 | 0        |
| antisense -             | 2    | 2   | 3    | 2   | 0   | 0   | 0.233865 | 0.299899 | 0.423258 | 0.362992 |
| lincRNA -               | 1    | 0   | 1    | 0   | 0   | 0   | 0.072698 | 0        | 0.087714 | 0        |

|                         |      |      |      |      |      |      |          |          |          |          |
|-------------------------|------|------|------|------|------|------|----------|----------|----------|----------|
| pseudogen: SYF2_homc    | 0    | 0    | 2    | 2    | 0    | 0    | 0        | 0        | 0.194084 | 0.249673 |
| antisense UBE2E2_an     | 1    | 0    | 0    | 0    | 1    | 2    | 0.093968 | 0        | 0        | 0        |
| lincRNA -               | 0    | 2    | 0    | 5    | 5    | 0    | 0        | 0.193655 | 0        | 0.585989 |
| pseudogen: high_mobil   | 0    | 0    | 1    | 0    | 0    | 1    | 0        | 0        | 0.176248 | 0        |
| pseudogen: -            | 0    | 0    | 0    | 2    | 1    | 0    | 0        | 0        | 0        | 0.408875 |
| pseudogen: -            | 0    | 2    | 0    | 0    | 0    | 0    | 0        | 0.318991 | 0        | 0        |
| antisense ADIRF_anti    | 4    | 9    | 12   | 9    | 12   | 2    | 0.261226 | 0.753716 | 0.945552 | 0.912282 |
| pseudogen: -            | 14   | 4    | 3    | 1    | 9    | 6    | 0.981256 | 0.35952  | 0.253702 | 0.108789 |
| antisense -             | 1    | 1    | 1    | 2    | 2    | 0    | 0.02341  | 0.03002  | 0.028245 | 0.072671 |
| lincRNA -               | 0    | 0    | 1    | 2    | 1    | 0    | 0        | 0        | 0.021245 | 0.05466  |
| processed_ -            | 48   | 43   | 55   | 22   | 24   | 16   | 1.470099 | 1.688819 | 2.032432 | 1.045823 |
| pseudogen: -            | 0    | 0    | 0    | 3    | 3    | 1    | 0        | 0        | 0        | 0.184253 |
| pseudogen: -            | 0    | 1    | 0    | 3    | 0    | 0    | 0        | 0.131575 | 0        | 0.477767 |
| antisense -             | 0    | 0    | 0    | 0    | 3    | 0    | 0        | 0        | 0        | 0        |
| pseudogen: -            | 0    | 0    | 1    | 0    | 0    | 0    | 0        | 0        | 0.083568 | 0        |
| protein_co ring_finger  | 8    | 1    | 2    | 2    | 10   | 0    | 0.249581 | 0.040007 | 0.075283 | 0.096846 |
| processed_ -            | 3    | 3    | 1    | 3    | 5    | 3    | 0.258585 | 0.331598 | 0.103999 | 0.401359 |
| antisense -             | 1    | 3    | 1    | 0    | 0    | 2    | 0.091049 | 0.350271 | 0.109855 | 0        |
| pseudogen: -            | 6    | 2    | 6    | 2    | 3    | 3    | 0.658876 | 0.281638 | 0.794972 | 0.340889 |
| antisense -             | 0    | 0    | 0    | 1    | 0    | 0    | 0        | 0        | 0        | 0.022744 |
| sense_intrc KCNJ6_intr  | 0    | 0    | 0    | 0    | 1    | 0    | 0        | 0        | 0        | 0        |
| lincRNA -               | 0    | 2    | 0    | 0    | 0    | 0    | 0        | 0.134069 | 0        | 0        |
| pseudogen: -            | 0    | 0    | 1    | 0    | 1    | 1    | 0        | 0        | 0.1757   | 0        |
| pseudogen: maestro_hc   | 0    | 0    | 0    | 2    | 3    | 1    | 0        | 0        | 0        | 0.055451 |
| lincRNA -               | 0    | 0    | 0    | 2    | 4    | 0    | 0        | 0        | 0        | 0.383052 |
| lincRNA long_interf     | 0    | 1    | 0    | 1    | 1    | 2    | 0        | 0.042375 | 0        | 0.05129  |
| processed_ -            | 0    | 0    | 0    | 15   | 15   | 6    | 0        | 0        | 0        | 0.386578 |
| antisense -             | 37   | 26   | 32   | 169  | 258  | 118  | 2.555126 | 2.302466 | 2.666298 | 18.11456 |
| protein_co histone_clu  | 0    | 0    | 0    | 1    | 0    | 2    | 0        | 0        | 0        | 0.149445 |
| pseudogen: -            | 15   | 17   | 7    | 26   | 24   | 19   | 0.406326 | 0.590529 | 0.228786 | 1.093169 |
| pseudogen: lysophosph   | 0    | 1    | 0    | 0    | 0    | 0    | 0        | 0.039198 | 0        | 0        |
| antisense -             | 71   | 49   | 77   | 43   | 46   | 41   | 5.074987 | 4.491402 | 6.640722 | 4.770627 |
| pseudogen: -            | 13   | 13   | 12   | 9    | 22   | 13   | 0.674303 | 0.864698 | 0.751002 | 0.724578 |
| protein_co nuclear_po   | 0    | 0    | 1    | 0    | 0    | 1    | 0        | 0        | 0.040239 | 0        |
| lincRNA long_interf     | 12   | 21   | 30   | 6    | 18   | 8    | 0.190223 | 0.426885 | 0.573788 | 0.147626 |
| antisense -             | 0    | 0    | 2    | 1    | 0    | 0    | 0        | 0        | 0.086112 | 0.055388 |
| processed_ -            | 0    | 0    | 0    | 2    | 2    | 0    | 0        | 0        | 0        | 0.1859   |
| antisense -             | 7    | 5    | 2    | 0    | 0    | 0    | 0.669857 | 0.613569 | 0.23092  | 0        |
| pseudogen: -            | 9    | 2    | 0    | 1    | 1    | 6    | 0.34591  | 0.098573 | 0        | 0.059656 |
| antisense -             | 1    | 4    | 3    | 0    | 2    | 5    | 0.215092 | 1.103299 | 0.778562 | 0        |
| processed_ -            | 5    | 0    | 1    | 15   | 6    | 6    | 0.076244 | 0        | 0.018399 | 0.355023 |
| pseudogen: cysteine-ric | 0    | 1    | 0    | 0    | 0    | 0    | 0        | 0.325026 | 0        | 0        |
| pseudogen: ribosomal_   | 1    | 0    | 0    | 0    | 0    | 0    | 0.097081 | 0        | 0        | 0        |
| antisense -             | 0    | 0    | 0    | 3    | 2    | 0    | 0        | 0        | 0        | 0.480924 |
| lincRNA long_interf     | 0    | 0    | 0    | 1    | 0    | 0    | 0        | 0        | 0        | 0.067078 |
| pseudogen: -            | 5    | 2    | 2    | 12   | 15   | 8    | 0.159598 | 0.081865 | 0.077026 | 0.594525 |
| pseudogen: MHC_class    | 0    | 0    | 0    | 2    | 0    | 0    | 0        | 0        | 0        | 1.128369 |
| pseudogen: high_mobil   | 2    | 3    | 4    | 0    | 1    | 2    | 0.219625 | 0.422458 | 0.529981 | 0        |
| pseudogen: small_nucl   | 12   | 2    | 13   | 4    | 23   | 12   | 2.016775 | 0.431038 | 2.636135 | 1.043438 |
| pseudogen: -            | 0    | 1    | 0    | 0    | 0    | 0    | 0        | 0.16938  | 0        | 0        |
| protein_co glutathione  | 4226 | 3043 | 3333 | 4391 | 5293 | 4306 | 172.9121 | 159.664  | 164.5429 | 278.8622 |
| pseudogen: ribosomal_   | 0    | 0    | 0    | 2    | 0    | 0    | 0        | 0        | 0        | 0.418275 |
| protein_co Beta/gamm    | 265  | 221  | 245  | 61   | 51   | 62   | 2.916183 | 3.118678 | 3.252992 | 1.041908 |
| antisense -             | 0    | 0    | 0    | 1    | 3    | 3    | 0        | 0        | 0        | 0.155181 |
| pseudogen: family_witl  | 0    | 0    | 0    | 2    | 0    | 0    | 0        | 0        | 0        | 0.104344 |
| antisense -             | 0    | 0    | 1    | 5    | 4    | 5    | 0        | 0        | 0.029118 | 0.187287 |
| pseudogen: RAS_p21_p    | 3    | 5    | 2    | 0    | 1    | 1    | 0.117323 | 0.25075  | 0.094371 | 0        |
| antisense XXYL1_an      | 1    | 0    | 4    | 0    | 0    | 5    | 0.108794 | 0        | 0.525063 | 0        |
| TR_V_gene T_cell_rece   | 0    | 0    | 0    | 1    | 1    | 1    | 0        | 0        | 0        | 0.133786 |
| antisense OSTN_antis    | 0    | 0    | 0    | 0    | 0    | 1    | 0        | 0        | 0        | 0        |
| pseudogen: -            | 0    | 0    | 0    | 4    | 8    | 6    | 0        | 0        | 0        | 0.400991 |
| pseudogen: high_mobil   | 0    | 1    | 0    | 0    | 0    | 0    | 0        | 0.221881 | 0        | 0        |
| pseudogen: H2B_histor   | 1    | 0    | 0    | 0    | 0    | 0    | 0.128819 | 0        | 0        | 0        |
| lincRNA -               | 0    | 1    | 0    | 0    | 0    | 0    | 0        | 0.072271 | 0        | 0        |
| pseudogen: mitochond    | 0    | 1    | 2    | 1    | 1    | 0    | 0        | 0.135427 | 0.254845 | 0.163918 |

|                         |     |     |     |     |     |     |          |          |          |          |
|-------------------------|-----|-----|-----|-----|-----|-----|----------|----------|----------|----------|
| pseudogen: ubiquitin_5  | 1   | 0   | 0   | 3   | 1   | 7   | 0.009903 | 0        | 0        | 0.046112 |
| pseudogen: profilin_1_  | 27  | 20  | 17  | 33  | 37  | 15  | 2.99298  | 2.843016 | 2.27372  | 5.677857 |
| antisense -             | 3   | 0   | 2   | 2   | 2   | 1   | 0.413735 | 0        | 0.332797 | 0.428116 |
| processed_ -            | 0   | 0   | 1   | 12  | 5   | 6   | 0        | 0        | 0.032835 | 0.506882 |
| pseudogen: ring_finger_ | 0   | 0   | 0   | 1   | 0   | 0   | 0        | 0        | 0        | 0.096142 |
| antisense -             | 3   | 1   | 0   | 3   | 1   | 3   | 0.094346 | 0.040329 | 0        | 0.146438 |
| pseudogen: ubiquitin-c  | 5   | 9   | 2   | 5   | 3   | 7   | 0.447424 | 1.032764 | 0.215937 | 0.694464 |
| antisense TLR8_antis    | 0   | 0   | 0   | 9   | 6   | 6   | 0        | 0        | 0        | 0.485558 |
| antisense -             | 0   | 2   | 1   | 0   | 3   | 1   | 0        | 0.277736 | 0.130659 | 0        |
| antisense -             | 0   | 1   | 1   | 2   | 0   | 2   | 0        | 0.16796  | 0.158032 | 0.406591 |
| pseudogen: ATPase_H+    | 0   | 0   | 0   | 2   | 1   | 0   | 0        | 0        | 0        | 0.434506 |
| pseudogen: endoplasm    | 1   | 0   | 2   | 3   | 3   | 1   | 0.066416 | 0        | 0.160271 | 0.309263 |
| lincRNA long_interf     | 1   | 0   | 0   | 0   | 0   | 0   | 0.076493 | 0        | 0        | 0        |
| processed_ CHRM3_an     | 0   | 0   | 0   | 2   | 1   | 0   | 0        | 0        | 0        | 0.059876 |
| antisense -             | 0   | 1   | 4   | 2   | 2   | 0   | 0        | 0.030915 | 0.116351 | 0.074838 |
| antisense -             | 0   | 1   | 2   | 0   | 0   | 0   | 0        | 0.019754 | 0.037172 | 0        |
| antisense -             | 1   | 3   | 1   | 0   | 0   | 0   | 0.073495 | 0.282742 | 0.088676 | 0        |
| pseudogen: -            | 167 | 156 | 158 | 265 | 325 | 244 | 2.978559 | 3.567991 | 3.400125 | 7.336115 |
| pseudogen: -            | 0   | 3   | 0   | 0   | 0   | 0   | 0        | 0.160204 | 0        | 0        |
| pseudogen: adenylate_   | 0   | 0   | 0   | 3   | 4   | 2   | 0        | 0        | 0        | 0.32491  |
| pseudogen: NFkB_activ   | 13  | 11  | 10  | 22  | 41  | 24  | 0.123395 | 0.133892 | 0.114525 | 0.324121 |
| antisense -             | 30  | 22  | 25  | 9   | 7   | 12  | 3.490572 | 3.28252  | 3.509647 | 1.625355 |
| lincRNA -               | 0   | 0   | 0   | 0   | 2   | 0   | 0        | 0        | 0        | 0        |
| pseudogen: -            | 0   | 0   | 0   | 0   | 1   | 0   | 0        | 0        | 0        | 0        |
| lincRNA -               | 0   | 0   | 0   | 324 | 400 | 186 | 0        | 0        | 0        | 10.09446 |
| lincRNA -               | 8   | 6   | 8   | 16  | 22  | 13  | 0.430184 | 0.413737 | 0.519041 | 1.335409 |
| lincRNA -               | 0   | 0   | 2   | 0   | 0   | 0   | 0        | 0        | 0.182796 | 0        |
| pseudogen: protein_kir  | 0   | 0   | 0   | 0   | 2   | 0   | 0        | 0        | 0        | 0        |
| pseudogen: -            | 2   | 1   | 2   | 2   | 4   | 7   | 0.107793 | 0.069115 | 0.130059 | 0.16731  |
| antisense -             | 0   | 0   | 0   | 0   | 0   | 1   | 0        | 0        | 0        | 0        |
| pseudogen: calponin_2   | 0   | 0   | 0   | 0   | 1   | 0   | 0        | 0        | 0        | 0        |
| lincRNA -               | 0   | 0   | 0   | 0   | 0   | 1   | 0        | 0        | 0        | 0        |
| pseudogen: -            | 0   | 0   | 1   | 0   | 0   | 0   | 0        | 0        | 0.150868 | 0        |
| processed_ -            | 0   | 1   | 0   | 9   | 27  | 6   | 0        | 0.038844 | 0        | 0.423138 |
| pseudogen: -            | 0   | 1   | 0   | 0   | 0   | 0   | 0        | 0.047571 | 0        | 0        |
| pseudogen: eukaryotic_  | 32  | 31  | 9   | 38  | 43  | 30  | 1.381658 | 1.716412 | 0.468858 | 2.546623 |
| antisense -             | 3   | 0   | 0   | 0   | 1   | 0   | 0.12965  | 0        | 0        | 0        |
| antisense HOXA_tran     | 127 | 133 | 113 | 0   | 0   | 1   | 6.698574 | 8.995796 | 7.191262 | 0        |
| lincRNA -               | 4   | 4   | 2   | 3   | 3   | 2   | 0.349274 | 0.447894 | 0.21071  | 0.406591 |
| antisense -             | 0   | 0   | 0   | 1   | 1   | 1   | 0        | 0        | 0        | 0.088648 |
| pseudogen: -            | 0   | 1   | 0   | 0   | 0   | 0   | 0        | 0.037581 | 0        | 0        |
| pseudogen: angiogenic_  | 1   | 2   | 2   | 0   | 0   | 0   | 0.05796  | 0.148652 | 0.139865 | 0        |
| protein_co BTB_(POZ)_   | 9   | 9   | 7   | 10  | 10  | 12  | 0.138637 | 0.177782 | 0.130101 | 0.239093 |
| protein_co Uncharacte   | 6   | 4   | 3   | 0   | 3   | 2   | 0.341018 | 0.291538 | 0.205729 | 0        |
| processed_ STXBP5_an    | 32  | 19  | 18  | 5   | 11  | 7   | 0.512634 | 0.39032  | 0.347919 | 0.124325 |
| pseudogen: -            | 2   | 0   | 0   | 0   | 0   | 0   | 0.109428 | 0        | 0        | 0        |
| lincRNA -               | 1   | 0   | 0   | 0   | 0   | 0   | 0.113535 | 0        | 0        | 0        |
| pseudogen: -            | 0   | 1   | 0   | 0   | 0   | 0   | 0        | 0.090831 | 0        | 0        |
| pseudogen: ribosomal_   | 1   | 0   | 0   | 0   | 0   | 0   | 0.13914  | 0        | 0        | 0        |
| antisense -             | 32  | 17  | 23  | 21  | 10  | 35  | 3.22684  | 2.198294 | 2.798358 | 3.28683  |
| pseudogen: ST6_(alpha   | 6   | 8   | 8   | 1   | 4   | 1   | 0.563808 | 0.964005 | 0.907022 | 0.145851 |
| pseudogen: -            | 2   | 1   | 1   | 1   | 2   | 0   | 0.072867 | 0.046721 | 0.043959 | 0.05655  |
| processed_ -            | 4   | 5   | 3   | 0   | 0   | 0   | 0.399915 | 0.641043 | 0.36189  | 0        |
| pseudogen: -            | 0   | 0   | 1   | 1   | 6   | 1   | 0        | 0        | 0.085333 | 0.109773 |
| pseudogen: eukaryotic_  | 219 | 201 | 178 | 343 | 445 | 301 | 7.409029 | 8.720122 | 7.26583  | 18.01116 |
| antisense -             | 0   | 0   | 0   | 11  | 6   | 4   | 0        | 0        | 0        | 0.359972 |
| antisense -             | 10  | 7   | 2   | 9   | 17  | 7   | 0.809845 | 0.726958 | 0.195425 | 1.131292 |
| antisense -             | 1   | 0   | 0   | 0   | 0   | 0   | 0.015101 | 0        | 0        | 0        |
| pseudogen: -            | 0   | 3   | 1   | 3   | 4   | 0   | 0        | 0.204291 | 0.064072 | 0.24727  |
| lincRNA -               | 33  | 33  | 29  | 1   | 1   | 0   | 0.757031 | 0.970784 | 0.802686 | 0.035607 |
| processed_ -            | 2   | 0   | 1   | 0   | 0   | 0   | 0.020516 | 0        | 0.012377 | 0        |
| lincRNA -               | 0   | 0   | 0   | 2   | 1   | 0   | 0        | 0        | 0        | 0.324186 |
| protein_co transmembr   | 16  | 8   | 9   | 88  | 134 | 84  | 0.75024  | 0.481038 | 0.50918  | 6.404623 |
| sense_intrc SYNJ2_intr  | 0   | 1   | 1   | 0   | 0   | 0   | 0        | 0.100384 | 0.09445  | 0        |
| antisense SRGAP2_ar     | 2   | 0   | 1   | 0   | 0   | 0   | 0.043058 | 0        | 0.025976 | 0        |

|                         |     |     |     |     |     |    |          |          |          |          |
|-------------------------|-----|-----|-----|-----|-----|----|----------|----------|----------|----------|
| protein_co -            | 3   | 1   | 1   | 0   | 0   | 0  | 0.450866 | 0.192724 | 0.181332 | 0        |
| antisense ZNF197_an     | 4   | 1   | 4   | 5   | 5   | 5  | 0.30106  | 0.096517 | 0.363246 | 0.584108 |
| pseudogen -             | 0   | 0   | 0   | 0   | 2   | 0  | 0        | 0        | 0        | 0        |
| processed_ -            | 8   | 2   | 5   | 0   | 0   | 0  | 0.757818 | 0.242949 | 0.57147  | 0        |
| pseudogen -             | 3   | 1   | 2   | 1   | 2   | 1  | 0.39075  | 0.167027 | 0.314308 | 0.202166 |
| lincRNA -               | 0   | 0   | 0   | 0   | 1   | 0  | 0        | 0        | 0        | 0        |
| antisense -             | 1   | 0   | 2   | 1   | 0   | 0  | 0.081125 | 0        | 0.195763 | 0.125917 |
| lincRNA -               | 12  | 5   | 9   | 0   | 0   | 0  | 0.883328 | 0.471976 | 0.79934  | 0        |
| pseudogen: prohibitin_  | 0   | 0   | 0   | 0   | 1   | 0  | 0        | 0        | 0        | 0        |
| pseudogen: RAN_memt     | 3   | 2   | 1   | 1   | 1   | 0  | 0.197293 | 0.168667 | 0.079349 | 0.102075 |
| antisense -             | 40  | 29  | 35  | 27  | 30  | 23 | 1.815683 | 1.688058 | 1.916885 | 1.902279 |
| lincRNA long_interf     | 12  | 10  | 11  | 0   | 0   | 0  | 0.761408 | 0.813664 | 0.842125 | 0        |
| lincRNA -               | 0   | 1   | 0   | 2   | 1   | 1  | 0        | 0.084452 | 0        | 0.204438 |
| protein_co Uncharacte   | 3   | 1   | 2   | 8   | 12  | 25 | 0.247659 | 0.105862 | 0.19921  | 1.025068 |
| antisense -             | 0   | 0   | 0   | 7   | 8   | 5  | 0        | 0        | 0        | 0.260726 |
| antisense -             | 3   | 0   | 0   | 0   | 0   | 3  | 0.305804 | 0        | 0        | 0        |
| pseudogen -             | 1   | 0   | 0   | 1   | 0   | 1  | 0.171758 | 0        | 0        | 0.266593 |
| antisense -             | 5   | 1   | 1   | 1   | 0   | 1  | 0.278114 | 0.071328 | 0.067112 | 0.086334 |
| pseudogen -             | 0   | 0   | 0   | 1   | 0   | 0  | 0        | 0        | 0        | 0.116822 |
| processed_ -            | 5   | 4   | 8   | 1   | 6   | 1  | 0.14508  | 0.148836 | 0.280077 | 0.045037 |
| pseudogen: keratin_8_   | 5   | 6   | 8   | 8   | 12  | 24 | 0.163608 | 0.251765 | 0.315844 | 0.406307 |
| pseudogen -             | 0   | 0   | 0   | 1   | 0   | 1  | 0        | 0        | 0        | 0.106403 |
| lincRNA -               | 0   | 0   | 0   | 2   | 0   | 2  | 0        | 0        | 0        | 0.276729 |
| lincRNA -               | 1   | 0   | 0   | 0   | 0   | 0  | 0.171131 | 0        | 0        | 0        |
| pseudogen -             | 0   | 1   | 0   | 0   | 0   | 0  | 0        | 0.056887 | 0        | 0        |
| processed_ -            | 0   | 0   | 0   | 3   | 6   | 3  | 0        | 0        | 0        | 0.3844   |
| pseudogen -             | 1   | 0   | 1   | 2   | 0   | 0  | 0.073037 | 0        | 0.088124 | 0.226728 |
| pseudogen: keratin_8_   | 1   | 0   | 1   | 2   | 1   | 1  | 0.032316 | 0        | 0.038991 | 0.100317 |
| antisense -             | 0   | 0   | 3   | 0   | 0   | 1  | 0        | 0        | 0.295177 | 0        |
| pseudogen -             | 1   | 0   | 0   | 0   | 4   | 0  | 0.047945 | 0        | 0        | 0        |
| pseudogen: cytochrom    | 3   | 0   | 2   | 1   | 1   | 3  | 0.093843 | 0        | 0.075484 | 0.048552 |
| antisense -             | 2   | 2   | 3   | 11  | 3   | 6  | 0.097688 | 0.12527  | 0.176798 | 0.833935 |
| processed_ -            | 12  | 19  | 15  | 27  | 36  | 24 | 0.188439 | 0.382608 | 0.284204 | 0.658089 |
| pseudogen: basic_trans  | 1   | 0   | 0   | 0   | 0   | 0  | 0.100407 | 0        | 0        | 0        |
| pseudogen -             | 0   | 1   | 2   | 0   | 0   | 1  | 0        | 0.104392 | 0.196443 | 0        |
| sense_intrc ERI3_intron | 10  | 6   | 5   | 1   | 1   | 3  | 0.757512 | 0.582841 | 0.456991 | 0.117576 |
| pseudogen: jumping_tr   | 2   | 4   | 3   | 2   | 0   | 1  | 0.379676 | 0.973762 | 0.687152 | 0.58931  |
| protein_co twist_basic  | 292 | 227 | 264 | 113 | 183 | 98 | 11.64276 | 11.60669 | 12.70062 | 6.993297 |
| pseudogen -             | 1   | 0   | 0   | 2   | 1   | 1  | 0.064945 | 0        | 0        | 0.201606 |
| lincRNA long_interf     | 0   | 1   | 0   | 0   | 0   | 0  | 0        | 0.062505 | 0        | 0        |
| protein_co -            | 2   | 0   | 0   | 2   | 1   | 1  | 0.122109 | 0        | 0        | 0.189531 |
| antisense DCUN1D2_      | 11  | 17  | 18  | 28  | 34  | 10 | 1.563001 | 3.097596 | 3.085937 | 6.175256 |
| antisense -             | 134 | 102 | 135 | 10  | 15  | 13 | 4.504131 | 4.396587 | 5.475049 | 0.521719 |
| pseudogen: cytochrom    | 21  | 27  | 14  | 46  | 24  | 13 | 0.766296 | 1.263428 | 0.616387 | 2.605347 |
| pseudogen: phosphogl    | 0   | 6   | 4   | 4   | 4   | 0  | 0        | 0.530557 | 0.332797 | 0.428116 |
| pseudogen -             | 0   | 0   | 1   | 0   | 0   | 0  | 0        | 0        | 0.146569 | 0        |
| processed_ -            | 4   | 0   | 5   | 3   | 6   | 5  | 0.353887 | 0        | 0.533731 | 0.411961 |
| antisense -             | 1   | 2   | 2   | 0   | 1   | 0  | 0.095499 | 0.244928 | 0.23045  | 0        |
| antisense -             | 57  | 74  | 53  | 0   | 0   | 0  | 3.577953 | 5.956633 | 4.014059 | 0        |
| pseudogen: keratin_ass  | 0   | 0   | 1   | 0   | 0   | 0  | 0        | 0        | 0        | 0.113378 |
| lincRNA -               | 0   | 1   | 1   | 0   | 0   | 0  | 0        | 0.117902 | 0.110932 | 0        |
| sense_intrc ARHGEF7_i   | 0   | 0   | 0   | 1   | 0   | 0  | 0        | 0        | 0        | 0.090522 |
| pseudogen: olfactory_r  | 1   | 0   | 0   | 0   | 0   | 0  | 0.049936 | 0        | 0        | 0        |
| pseudogen -             | 0   | 0   | 0   | 0   | 2   | 0  | 0        | 0        | 0        | 0        |
| pseudogen -             | 0   | 1   | 1   | 0   | 0   | 0  | 0        | 0.417568 | 0.392885 | 0        |
| antisense -             | 9   | 11  | 6   | 1   | 6   | 3  | 1.04458  | 1.637197 | 0.84023  | 0.180148 |
| pseudogen -             | 0   | 3   | 3   | 0   | 0   | 3  | 0        | 0.279673 | 0.263142 | 0        |
| protein_co phosphoin    | 0   | 1   | 0   | 0   | 0   | 0  | 0        | 0.033517 | 0        | 0        |
| pseudogen -             | 0   | 0   | 0   | 1   | 0   | 0  | 0        | 0        | 0        | 0.052892 |
| antisense RNASEH2B_     | 2   | 6   | 2   | 7   | 5   | 7  | 0.118111 | 0.454381 | 0.142508 | 0.641636 |
| pseudogen: anaphase_f   | 1   | 2   | 0   | 2   | 2   | 1  | 0.021819 | 0.055961 | 0        | 0.067734 |
| pseudogen -             | 4   | 2   | 4   | 2   | 2   | 1  | 0.692104 | 0.443762 | 0.835063 | 0.53712  |
| pseudogen: DEAD_(Asp    | 0   | 0   | 1   | 1   | 0   | 0  | 0        | 0        | 0.294664 | 0.379061 |
| pseudogen: heterogene   | 0   | 0   | 0   | 6   | 17  | 2  | 0        | 0        | 0        | 0.457255 |
| pseudogen: carcinoeml   | 0   | 0   | 0   | 1   | 1   | 0  | 0        | 0        | 0        | 0.070319 |

|             |              |     |     |     |     |     |     |          |          |          |          |
|-------------|--------------|-----|-----|-----|-----|-----|-----|----------|----------|----------|----------|
| lincRNA     | -            | 16  | 13  | 0   | 0   | 1   | 1   | 1.948676 | 2.030357 | 0        | 0        |
| pseudogen   | -            | 0   | 0   | 0   | 1   | 2   | 1   | 0        | 0        | 0        | 0.341689 |
| lincRNA     | -            | 1   | 1   | 1   | 1   | 0   | 0   | 0.054971 | 0.070492 | 0.066325 | 0.085322 |
| pseudogen   | estrogen_r   | 7   | 11  | 8   | 1   | 4   | 2   | 0.604475 | 1.218099 | 0.833525 | 0.134033 |
| pseudogen   | -            | 0   | 0   | 0   | 0   | 2   | 0   | 0        | 0        | 0        | 0        |
| antisense   | -            | 0   | 0   | 1   | 0   | 0   | 1   | 0        | 0        | 0.028821 | 0        |
| lincRNA     | -            | 1   | 0   | 0   | 0   | 1   | 0   | 0.02723  | 0        | 0        | 0        |
| antisense   | GAS6_antis   | 14  | 8   | 9   | 2   | 4   | 2   | 0.849237 | 0.622301 | 0.658706 | 0.188305 |
| antisense   | SLC26A4_a    | 1   | 1   | 0   | 0   | 0   | 0   | 0.012718 | 0.016309 | 0        | 0        |
| pseudogen   | -            | 0   | 0   | 0   | 2   | 1   | 0   | 0        | 0        | 0        | 0.074189 |
| pseudogen   | -            | 0   | 0   | 0   | 0   | 0   | 1   | 0        | 0        | 0        | 0        |
| lincRNA     | -            | 0   | 0   | 0   | 1   | 2   | 0   | 0        | 0        | 0        | 0.081592 |
| processed   | -            | 5   | 1   | 1   | 0   | 0   | 0   | 0.289088 | 0.074143 | 0.06976  | 0        |
| pseudogen   | -            | 0   | 1   | 0   | 1   | 0   | 1   | 0        | 0.053449 | 0        | 0.064693 |
| pseudogen   | -            | 1   | 0   | 0   | 0   | 0   | 1   | 0.274211 | 0        | 0        | 0        |
| antisense   | MYCN_opp     | 0   | 0   | 0   | 55  | 55  | 58  | 0        | 0        | 0        | 3.048659 |
| lincRNA     | -            | 1   | 0   | 0   | 0   | 0   | 0   | 0.065216 | 0        | 0        | 0        |
| lincRNA     | -            | 2   | 1   | 3   | 12  | 11  | 12  | 0.023002 | 0.014749 | 0.04163  | 0.214216 |
| lincRNA     | long_interf  | 2   | 1   | 1   | 1   | 0   | 0   | 0.029233 | 0.018744 | 0.017636 | 0.022687 |
| antisense   | -            | 1   | 0   | 0   | 0   | 0   | 0   | 0.027405 | 0        | 0        | 0        |
| pseudogen   | H2A_histor   | 0   | 2   | 0   | 1   | 0   | 0   | 0        | 0.305227 | 0        | 0.18472  |
| pseudogen   | -            | 0   | 0   | 0   | 1   | 0   | 0   | 0        | 0        | 0        | 0.50193  |
| pseudogen   | -            | 0   | 0   | 1   | 0   | 3   | 1   | 0        | 0        | 0.178472 | 0        |
| pseudogen   | -            | 1   | 1   | 4   | 2   | 4   | 20  | 0.012301 | 0.015774 | 0.059366 | 0.038185 |
| lincRNA     | -            | 0   | 0   | 0   | 4   | 1   | 3   | 0        | 0        | 0        | 0.369441 |
| lincRNA     | -            | 27  | 24  | 37  | 42  | 69  | 35  | 1.155137 | 1.316711 | 1.909939 | 2.789007 |
| pseudogen   | -            | 38  | 26  | 31  | 34  | 79  | 48  | 3.681448 | 3.230113 | 3.623638 | 5.112631 |
| pseudogen   | -            | 0   | 0   | 3   | 0   | 1   | 0   | 0        | 0        | 0.267286 | 0        |
| antisense   | -            | 1   | 1   | 1   | 0   | 0   | 5   | 0.038848 | 0.049818 | 0.046873 | 0        |
| pseudogen   | capicua_tr   | 2   | 0   | 0   | 3   | 2   | 1   | 0.042339 | 0        | 0        | 0.098573 |
| lincRNA     | -            | 1   | 0   | 0   | 1   | 1   | 0   | 0.068253 | 0        | 0        | 0.105939 |
| antisense   | -            | 0   | 0   | 0   | 0   | 1   | 0   | 0        | 0        | 0        | 0        |
| pseudogen   | -            | 0   | 0   | 0   | 0   | 1   | 0   | 0        | 0        | 0        | 0        |
| processed   | -            | 6   | 2   | 5   | 3   | 14  | 6   | 0.178856 | 0.076452 | 0.179833 | 0.138804 |
| antisense   | -            | 0   | 0   | 0   | 2   | 3   | 1   | 0        | 0        | 0        | 0.216607 |
| antisense   | -            | 13  | 9   | 8   | 3   | 3   | 0   | 2.131364 | 1.892196 | 1.582532 | 0.763424 |
| sense_intrc | -            | 0   | 0   | 0   | 0   | 1   | 5   | 0        | 0        | 0        | 0        |
| processed   | -            | 9   | 7   | 1   | 3   | 3   | 2   | 0.500605 | 0.499298 | 0.067112 | 0.259003 |
| protein_co  | Uncharacte   | 0   | 0   | 1   | 1   | 0   | 0   | 0        | 0        | 0.040819 | 0.052511 |
| processed   | -            | 5   | 4   | 6   | 0   | 0   | 0   | 0.077046 | 0.07904  | 0.111552 | 0        |
| antisense   | -            | 6   | 9   | 6   | 0   | 0   | 0   | 0.393483 | 0.756879 | 0.474759 | 0        |
| pseudogen   | -            | 1   | 2   | 1   | 7   | 5   | 4   | 0.037155 | 0.095293 | 0.04483  | 0.403691 |
| lincRNA     | ENOX1_ant    | 9   | 3   | 3   | 0   | 0   | 0   | 0.108014 | 0.046171 | 0.043442 | 0        |
| protein_co  | histone_cli  | 25  | 15  | 8   | 9   | 13  | 14  | 1.658063 | 1.275738 | 0.640175 | 0.926476 |
| antisense   | -            | 4   | 0   | 1   | 0   | 1   | 3   | 0.489713 | 0        | 0.147717 | 0        |
| protein_co  | Uncharacte   | 0   | 0   | 0   | 0   | 0   | 1   | 0        | 0        | 0        | 0        |
| pseudogen   | -            | 25  | 17  | 23  | 27  | 25  | 18  | 1.706333 | 1.487928 | 1.894085 | 2.860342 |
| processed   | -            | 0   | 0   | 0   | 60  | 73  | 62  | 0        | 0        | 0        | 5.901065 |
| pseudogen   | -            | 0   | 0   | 0   | 98  | 94  | 40  | 0        | 0        | 0        | 3.693641 |
| pseudogen   | eukaryotic   | 0   | 0   | 1   | 1   | 1   | 0   | 0        | 0        | 0.070106 | 0.090186 |
| pseudogen   | DPH3_KTI1    | 0   | 0   | 0   | 0   | 0   | 1   | 0        | 0        | 0        | 0        |
| pseudogen   | cytochrom    | 0   | 0   | 0   | 0   | 1   | 0   | 0        | 0        | 0        | 0        |
| sense_intrc | KCNQ5_int    | 1   | 1   | 0   | 1   | 0   | 1   | 0.083286 | 0.106802 | 0        | 0.129271 |
| antisense   | -            | 7   | 4   | 0   | 2   | 2   | 2   | 0.65125  | 0.477221 | 0        | 0.288809 |
| pseudogen   | -            | 1   | 0   | 1   | 2   | 1   | 0   | 0.096283 | 0        | 0.116171 | 0.29889  |
| antisense   | -            | 4   | 0   | 0   | 0   | 0   | 1   | 0.459706 | 0        | 0        | 0        |
| antisense   | -            | 2   | 0   | 0   | 0   | 2   | 0   | 0.152736 | 0        | 0        | 0        |
| antisense   | LATS2_anti   | 0   | 2   | 0   | 0   | 1   | 0   | 0        | 0.190284 | 0        | 0        |
| lincRNA     | -            | 0   | 0   | 0   | 0   | 1   | 1   | 0        | 0        | 0        | 0        |
| antisense   | POU6F2_ar    | 0   | 0   | 2   | 0   | 0   | 2   | 0        | 0        | 0.220138 | 0        |
| lincRNA     | -            | 18  | 16  | 19  | 1   | 0   | 0   | 0.237819 | 0.271084 | 0.302884 | 0.020507 |
| pseudogen   | alcohol_de   | 2   | 0   | 2   | 2   | 9   | 0   | 0.084487 | 0        | 0.101938 | 0.131135 |
| antisense   | -            | 0   | 1   | 1   | 0   | 1   | 1   | 0        | 0.108342 | 0.101938 | 0        |
| antisense   | -            | 0   | 0   | 1   | 0   | 2   | 0   | 0        | 0        | 0.015879 | 0        |
| lincRNA     | testis-speci | 413 | 358 | 372 | 353 | 448 | 496 | 3.664946 | 4.073896 | 3.982984 | 4.862087 |

|                          |      |      |      |      |      |      |          |          |          |          |
|--------------------------|------|------|------|------|------|------|----------|----------|----------|----------|
| pseudogen: -             | 0    | 0    | 0    | 3    | 1    | 0    | 0        | 0        | 0        | 0.559845 |
| antisense DLG5_anti      | 6    | 9    | 10   | 12   | 20   | 22   | 0.5777   | 1.111228 | 1.161715 | 1.793342 |
| pseudogen: -             | 0    | 1    | 0    | 1    | 0    | 0    | 0        | 0.155374 | 0        | 0.188062 |
| lincRNA -                | 0    | 0    | 0    | 1    | 1    | 0    | 0        | 0        | 0        | 0.026975 |
| antisense YEATS2_ant     | 11   | 12   | 3    | 5    | 2    | 1    | 0.276119 | 0.386273 | 0.09086  | 0.194807 |
| pseudogen: -             | 2    | 0    | 0    | 0    | 0    | 0    | 0.138523 | 0        | 0        | 0        |
| processed_ -             | 0    | 0    | 0    | 0    | 0    | 1    | 0        | 0        | 0        | 0        |
| pseudogen: poly(A)_bir   | 5    | 6    | 5    | 9    | 9    | 3    | 0.194888 | 0.299899 | 0.235143 | 0.544487 |
| antisense EZR_antiser    | 2    | 1    | 0    | 0    | 2    | 0    | 0.432166 | 0.277096 | 0        | 0        |
| lincRNA -                | 33   | 20   | 19   | 1    | 4    | 3    | 2.285629 | 1.77636  | 1.587791 | 0.107503 |
| processed_ -             | 0    | 0    | 0    | 5    | 0    | 2    | 0        | 0        | 0        | 0.201942 |
| processed_ -             | 9    | 8    | 6    | 12   | 8    | 1    | 0.178515 | 0.203485 | 0.143593 | 0.369441 |
| lincRNA -                | 98   | 86   | 87   | 67   | 90   | 75   | 5.100135 | 5.739359 | 5.462896 | 5.412038 |
| pseudogen: -             | 0    | 0    | 0    | 1    | 0    | 0    | 0        | 0        | 0        | 0.119507 |
| lincRNA -                | 11   | 3    | 4    | 5    | 8    | 17   | 0.948144 | 0.331598 | 0.415996 | 0.668932 |
| processed_ -             | 3    | 1    | 1    | 4    | 1    | 1    | 0.593545 | 0.253712 | 0.238715 | 1.228351 |
| antisense -              | 4    | 2    | 2    | 2    | 0    | 3    | 0.279107 | 0.178958 | 0.168379 | 0.216607 |
| pseudogen: -             | 48   | 37   | 31   | 43   | 28   | 38   | 3.029234 | 2.994351 | 2.360485 | 4.212021 |
| pseudogen: -             | 1    | 0    | 0    | 0    | 0    | 0    | 0.0521   | 0        | 0        | 0        |
| pseudogen: zinc_finger   | 0    | 0    | 0    | 1    | 0    | 1    | 0        | 0        | 0        | 0.172056 |
| processed_ -             | 0    | 0    | 0    | 8    | 6    | 2    | 0        | 0        | 0        | 0.709182 |
| pseudogen: -             | 1    | 1    | 0    | 2    | 3    | 4    | 0.053589 | 0.06872  | 0        | 0.166354 |
| processed_ -             | 0    | 0    | 1    | 1    | 1    | 5    | 0        | 0        | 0.039045 | 0.050228 |
| protein_co ribosomal_    | 4379 | 3317 | 3236 | 7092 | 8416 | 6334 | 134.8203 | 130.959  | 120.209  | 338.9063 |
| lincRNA -                | 0    | 1    | 0    | 9    | 9    | 7    | 0        | 0.121474 | 0        | 1.323269 |
| pseudogen: metallothic   | 1    | 1    | 2    | 2    | 7    | 0    | 0.252097 | 0.323278 | 0.608339 | 0.782579 |
| processed_ -             | 0    | 0    | 0    | 1    | 5    | 2    | 0        | 0        | 0        | 0.032132 |
| lincRNA -                | 0    | 0    | 0    | 1    | 0    | 0    | 0        | 0        | 0        | 0.082144 |
| antisense -              | 37   | 24   | 30   | 65   | 86   | 35   | 1.734931 | 1.443115 | 1.697265 | 4.730687 |
| pseudogen: -             | 1    | 0    | 0    | 0    | 0    | 0    | 0.037512 | 0        | 0        | 0        |
| pseudogen: ferritin_ligl | 1    | 3    | 3    | 0    | 0    | 0    | 0.088139 | 0.339078 | 0.319035 | 0        |
| antisense -              | 6    | 0    | 2    | 5    | 7    | 6    | 0.65125  | 0        | 0.261924 | 0.842359 |
| pseudogen: -             | 18   | 13   | 5    | 36   | 39   | 18   | 1.635698 | 1.514898 | 0.548212 | 5.077661 |
| pseudogen: adenosylhc    | 1    | 0    | 0    | 0    | 0    | 0    | 0.036661 | 0        | 0        | 0        |
| pseudogen: basic_trans   | 1    | 1    | 0    | 5    | 3    | 5    | 0.093968 | 0.120501 | 0        | 0.729257 |
| lincRNA -                | 0    | 0    | 0    | 1    | 0    | 0    | 0        | 0        | 0        | 0.098618 |
| pseudogen: -             | 34   | 35   | 33   | 38   | 45   | 24   | 3.488535 | 4.605127 | 4.085321 | 6.051712 |
| pseudogen: ubiquitin-c   | 26   | 20   | 22   | 38   | 40   | 32   | 1.822333 | 1.797602 | 1.86048  | 4.13398  |
| lincRNA -                | 14   | 19   | 17   | 17   | 9    | 5    | 0.962552 | 1.67517  | 1.41024  | 1.814159 |
| antisense -              | 0    | 1    | 2    | 0    | 0    | 0    | 0        | 0.042827 | 0.080592 | 0        |
| pseudogen: -             | 62   | 57   | 50   | 97   | 163  | 29   | 1.082749 | 1.276498 | 1.053548 | 2.629289 |
| lincRNA -                | 0    | 0    | 1    | 0    | 0    | 0    | 0        | 0        | 0.128289 | 0        |
| lincRNA -                | 1    | 0    | 3    | 0    | 0    | 0    | 0.082408 | 0        | 0.298289 | 0        |
| pseudogen: -             | 0    | 0    | 1    | 0    | 0    | 0    | 0        | 0        | 0.166399 | 0        |
| pseudogen: farnesyl_dil  | 0    | 0    | 0    | 1    | 2    | 2    | 0        | 0        | 0        | 0.081137 |
| lincRNA -                | 0    | 0    | 0    | 0    | 1    | 1    | 0        | 0        | 0        | 0        |
| pseudogen: ribosomal_    | 0    | 0    | 1    | 0    | 0    | 0    | 0        | 0        | 0.157592 | 0        |
| lincRNA -                | 1    | 1    | 1    | 0    | 0    | 0    | 0.061697 | 0.079118 | 0.074441 | 0        |
| lincRNA -                | 0    | 0    | 0    | 0    | 1    | 0    | 0        | 0        | 0        | 0        |
| pseudogen: -             | 2    | 1    | 0    | 2    | 1    | 2    | 0.275824 | 0.176852 | 0        | 0.428116 |
| pseudogen: -             | 61   | 56   | 56   | 6    | 2    | 0    | 1.585527 | 1.866557 | 1.756224 | 0.242061 |
| antisense -              | 4    | 0    | 1    | 1    | 2    | 1    | 0.110655 | 0        | 0.033378 | 0.042938 |
| pseudogen: GDP_dissoc    | 3    | 2    | 1    | 1    | 1    | 1    | 0.231365 | 0.197795 | 0.093052 | 0.119704 |
| pseudogen: SET_pseudc    | 0    | 1    | 0    | 1    | 1    | 0    | 0        | 0.106993 | 0        | 0.129501 |
| pseudogen: -             | 0    | 0    | 0    | 4    | 5    | 3    | 0        | 0        | 0        | 0.468791 |
| pseudogen: -             | 0    | 0    | 0    | 0    | 0    | 1    | 0        | 0        | 0        | 0        |
| pseudogen: glyceraldeh   | 0    | 1    | 0    | 2    | 4    | 0    | 0        | 0.145593 | 0        | 0.352445 |
| antisense DDX39B_ar      | 4    | 1    | 0    | 1    | 0    | 4    | 0.363489 | 0.116531 | 0        | 0.141046 |
| pseudogen: protein_ph    | 0    | 0    | 0    | 0    | 0    | 1    | 0        | 0        | 0        | 0        |
| pseudogen: -             | 12   | 5    | 7    | 33   | 40   | 42   | 0.631515 | 0.337429 | 0.444476 | 2.695548 |
| pseudogen: -             | 0    | 0    | 0    | 0    | 0    | 2    | 0        | 0        | 0        | 0        |
| lincRNA -                | 0    | 0    | 1    | 4    | 0    | 0    | 0        | 0        | 0.091993 | 0.473365 |
| pseudogen: -             | 1    | 0    | 2    | 0    | 0    | 0    | 0.075265 | 0        | 0.181623 | 0        |
| processed_ -             | 0    | 0    | 0    | 5    | 9    | 10   | 0        | 0        | 0        | 0.548867 |
| processed_ -             | 13   | 9    | 13   | 23   | 32   | 20   | 0.377677 | 0.335296 | 0.455689 | 1.037135 |

|                         |      |     |     |     |      |      |          |          |          |          |
|-------------------------|------|-----|-----|-----|------|------|----------|----------|----------|----------|
| pseudogen: transmembr   | 0    | 0   | 0   | 0   | 1    | 0    | 0        | 0        | 0        | 0        |
| pseudogen: ribosomal_   | 0    | 0   | 0   | 1   | 0    | 0    | 0        | 0        | 0        | 0.092126 |
| pseudogen: -            | 3    | 2   | 3   | 0   | 0    | 1    | 0.453774 | 0.387934 | 0.547505 | 0        |
| pseudogen: -            | 3    | 1   | 1   | 0   | 1    | 0    | 0.267943 | 0.114533 | 0.107763 | 0        |
| pseudogen: -            | 10   | 2   | 2   | 3   | 3    | 0    | 1.474529 | 0.378175 | 0.355821 | 0.686602 |
| pseudogen: -            | 0    | 1   | 0   | 0   | 2    | 0    | 0        | 0.351636 | 0        | 0        |
| pseudogen: -            | 0    | 0   | 0   | 1   | 4    | 2    | 0        | 0        | 0        | 0.105325 |
| pseudogen: -            | 1    | 1   | 0   | 1   | 1    | 0    | 0.06294  | 0.080711 | 0        | 0.097691 |
| antisense -             | 0    | 0   | 0   | 0   | 0    | 1    | 0        | 0        | 0        | 0        |
| antisense -             | 1    | 2   | 0   | 0   | 1    | 0    | 0.194564 | 0.499002 | 0        | 0        |
| processed_ -            | 20   | 16  | 20  | 18  | 23   | 23   | 0.422052 | 0.432978 | 0.50923  | 0.589575 |
| pseudogen: MT-ND4_p     | 1    | 0   | 0   | 0   | 3    | 0    | 0.034503 | 0        | 0        | 0        |
| pseudogen: taste_recep  | 0    | 0   | 0   | 3   | 0    | 0    | 0        | 0        | 0        | 0.232276 |
| protein_co P_antigen_   | 0    | 0   | 0   | 2   | 0    | 0    | 0        | 0        | 0        | 0.264174 |
| antisense -             | 188  | 133 | 150 | 239 | 320  | 279  | 2.880825 | 2.613485 | 2.773309 | 5.684435 |
| pseudogen: -            | 0    | 0   | 0   | 0   | 1    | 0    | 0        | 0        | 0        | 0        |
| lincRNA TPRG1_ant       | 1    | 0   | 1   | 0   | 0    | 0    | 0.067274 | 0        | 0.08117  | 0        |
| pseudogen: -            | 0    | 0   | 0   | 0   | 1    | 0    | 0        | 0        | 0        | 0        |
| antisense -             | 9    | 20  | 13  | 4   | 6    | 4    | 0.731387 | 2.084222 | 1.274665 | 0.504539 |
| pseudogen: -            | 6    | 1   | 3   | 1   | 6    | 1    | 0.75024  | 0.160346 | 0.452604 | 0.194079 |
| antisense -             | 3    | 5   | 4   | 0   | 2    | 0    | 0.296772 | 0.634281 | 0.47743  | 0        |
| pseudogen: -            | 1    | 0   | 1   | 0   | 0    | 0    | 0.120231 | 0        | 0.145065 | 0        |
| pseudogen: -            | 1    | 1   | 0   | 4   | 0    | 2    | 0.134355 | 0.172292 | 0        | 0.834152 |
| pseudogen: -            | 0    | 0   | 1   | 1   | 1    | 0    | 0        | 0        | 0.187958 | 0.241793 |
| pseudogen: ribosomal_   | 0    | 0   | 2   | 0   | 0    | 0    | 0        | 0        | 0        | 0.184887 |
| pseudogen: -            | 0    | 0   | 0   | 0   | 2    | 0    | 0        | 0        | 0        | 0        |
| pseudogen: rhomboid_    | 0    | 0   | 0   | 0   | 5    | 3    | 0        | 0        | 0        | 0        |
| protein_co tripartite_r | 1011 | 839 | 884 | 989 | 1137 | 2036 | 13.63019 | 14.50515 | 14.37974 | 20.69558 |
| lincRNA -               | 5    | 7   | 1   | 6   | 7    | 7    | 0.218908 | 0.393005 | 0.052825 | 0.40773  |
| pseudogen: -            | 0    | 0   | 0   | 0   | 2    | 0    | 0        | 0        | 0        | 0        |
| antisense -             | 0    | 0   | 0   | 1   | 1    | 1    | 0        | 0        | 0        | 0.143267 |
| lincRNA -               | 1    | 6   | 0   | 0   | 2    | 0    | 0.132833 | 1.022036 | 0        | 0        |
| sense_intrc -           | 3    | 2   | 2   | 2   | 5    | 6    | 0.4689   | 0.400865 | 0.37717  | 0.485199 |
| antisense -             | 1    | 0   | 2   | 4   | 2    | 0    | 0.099133 | 0        | 0.23922  | 0.615474 |
| antisense -             | 0    | 0   | 1   | 0   | 1    | 1    | 0        | 0        | 0.081757 | 0        |
| pseudogen: -            | 0    | 0   | 0   | 0   | 0    | 1    | 0        | 0        | 0        | 0        |
| lincRNA -               | 0    | 0   | 0   | 1   | 0    | 0    | 0        | 0        | 0        | 0.160662 |
| antisense -             | 0    | 0   | 2   | 0   | 0    | 1    | 0        | 0        | 0.598683 | 0        |
| lincRNA -               | 16   | 6   | 11  | 0   | 0    | 0    | 0.298544 | 0.143565 | 0.247644 | 0        |
| pseudogen: RNA_bindir   | 0    | 0   | 0   | 2   | 1    | 3    | 0        | 0        | 0        | 0.289959 |
| antisense -             | 32   | 19  | 45  | 103 | 101  | 77   | 5.191974 | 3.95317  | 8.809335 | 25.93882 |
| antisense PABPC5_ar     | 0    | 0   | 1   | 0   | 0    | 2    | 0        | 0        | 0.132806 | 0        |
| lincRNA -               | 0    | 0   | 0   | 1   | 0    | 1    | 0        | 0        | 0        | 0.17165  |
| lincRNA -               | 0    | 0   | 0   | 8   | 13   | 9    | 0        | 0        | 0        | 1.00041  |
| pseudogen: transcripti  | 0    | 1   | 0   | 0   | 2    | 2    | 0        | 0.203141 | 0        | 0        |
| lincRNA -               | 0    | 0   | 0   | 1   | 0    | 0    | 0        | 0        | 0        | 0.095262 |
| antisense -             | 63   | 67  | 83  | 218 | 235  | 246  | 2.447449 | 3.337777 | 3.890445 | 13.14498 |
| antisense -             | 0    | 2   | 2   | 1   | 0    | 0    | 0        | 0.206277 | 0.194084 | 0.124837 |
| pseudogen: -            | 1    | 0   | 2   | 1   | 1    | 0    | 0.138728 | 0        | 0.334766 | 0.215325 |
| pseudogen: heat_shock   | 1    | 0   | 0   | 0   | 0    | 2    | 0.025581 | 0        | 0        | 0        |
| lincRNA -               | 0    | 6   | 8   | 0   | 0    | 1    | 0        | 0.148225 | 0.185951 | 0        |
| antisense -             | 0    | 0   | 0   | 2   | 0    | 0    | 0        | 0        | 0        | 0.342493 |
| antisense -             | 0    | 0   | 0   | 1   | 2    | 0    | 0        | 0        | 0        | 0.259003 |
| lincRNA -               | 1    | 0   | 0   | 0   | 0    | 0    | 0.07934  | 0        | 0        | 0        |
| antisense -             | 1    | 3   | 4   | 2   | 4    | 3    | 0.116064 | 0.446508 | 0.560154 | 0.360296 |
| antisense -             | 2    | 2   | 5   | 0   | 0    | 4    | 0.174637 | 0.223947 | 0.526774 | 0        |
| antisense ETV5_antis    | 3    | 7   | 4   | 1   | 5    | 3    | 0.251197 | 0.751622 | 0.404111 | 0.129964 |
| processed_ -            | 9    | 4   | 7   | 1   | 3    | 2    | 0.46631  | 0.265767 | 0.437601 | 0.08042  |
| antisense -             | 3    | 2   | 0   | 0   | 0    | 0    | 0.320433 | 0.27394  | 0        | 0        |
| antisense -             | 6    | 11  | 10  | 6   | 6    | 6    | 0.832367 | 1.956887 | 1.673832 | 1.291949 |
| processed_ -            | 0    | 0   | 1   | 0   | 2    | 0    | 0        | 0        | 0.195763 | 0        |
| lincRNA -               | 1    | 0   | 0   | 0   | 0    | 2    | 0.011581 | 0        | 0        | 0        |
| lincRNA -               | 1    | 0   | 0   | 0   | 0    | 0    | 0.067858 | 0        | 0        | 0        |
| pseudogen: -            | 4    | 1   | 1   | 2   | 2    | 5    | 0.275824 | 0.088426 | 0.083199 | 0.214058 |
| antisense -             | 17   | 22  | 15  | 5   | 13   | 10   | 0.867389 | 1.439451 | 0.92343  | 0.395973 |

|                        |    |    |    |    |    |    |          |          |          |          |
|------------------------|----|----|----|----|----|----|----------|----------|----------|----------|
| lincRNA -              | 2  | 3  | 0  | 0  | 0  | 0  | 0.162249 | 0.312092 | 0        | 0        |
| protein_co transmembr  | 0  | 0  | 0  | 5  | 4  | 7  | 0        | 0        | 0        | 0.14265  |
| lincRNA -              | 0  | 1  | 1  | 4  | 3  | 2  | 0        | 0.082709 | 0.077821 | 0.400439 |
| pseudogen: nucleolin_l | 0  | 2  | 0  | 0  | 0  | 0  | 0        | 0.082257 | 0        | 0        |
| lincRNA -              | 0  | 1  | 0  | 0  | 0  | 0  | 0        | 0.029274 | 0        | 0        |
| antisense ZFX_antise   | 1  | 0  | 1  | 0  | 0  | 0  | 0.112446 | 0        | 0.135673 | 0        |
| pseudogen:-            | 74 | 52 | 55 | 17 | 13 | 19 | 1.656258 | 1.492482 | 1.485276 | 0.590576 |
| lincRNA -              | 0  | 0  | 0  | 8  | 10 | 8  | 0        | 0        | 0        | 1.084243 |
| sense_intrc KCNH1_int  | 2  | 0  | 1  | 0  | 0  | 2  | 0.149808 | 0        | 0.090376 | 0        |
| antisense BOK_antise   | 2  | 0  | 0  | 1  | 0  | 0  | 0.145848 | 0        | 0        | 0.113188 |
| protein_co Uncharacte  | 0  | 2  | 2  | 1  | 1  | 1  | 0        | 0.715831 | 0.673518 | 0.433213 |
| pseudogen:-            | 0  | 3  | 0  | 2  | 0  | 3  | 0        | 0.107183 | 0        | 0.086488 |
| pseudogen:-            | 1  | 6  | 0  | 0  | 0  | 0  | 0.065672 | 0.505292 | 0        | 0        |
| antisense -            | 7  | 5  | 6  | 2  | 0  | 4  | 0.136763 | 0.12527  | 0.141439 | 0.06065  |
| lincRNA -              | 0  | 0  | 0  | 0  | 1  | 0  | 0        | 0        | 0        | 0        |
| pseudogen: superoxide  | 2  | 1  | 0  | 0  | 0  | 0  | 0.166868 | 0.106993 | 0        | 0        |
| lincRNA -              | 0  | 0  | 0  | 50 | 52 | 53 | 0        | 0        | 0        | 3.578161 |
| antisense -            | 3  | 1  | 9  | 0  | 0  | 0  | 0.278555 | 0.119069 | 1.008276 | 0        |
| processed_-            | 3  | 5  | 7  | 0  | 0  | 3  | 0.112807 | 0.241098 | 0.317585 | 0        |
| pseudogen:-            | 3  | 1  | 2  | 0  | 2  | 2  | 0.551647 | 0.235803 | 0.443729 | 0        |
| pseudogen: ribosomal_  | 0  | 0  | 0  | 0  | 1  | 0  | 0        | 0        | 0        | 0        |
| pseudogen:-            | 2  | 1  | 2  | 2  | 0  | 0  | 0.300577 | 0.192724 | 0.362663 | 0.466537 |
| pseudogen:-            | 1  | 1  | 1  | 0  | 1  | 1  | 0.161134 | 0.206632 | 0.194418 | 0        |
| lincRNA -              | 1  | 0  | 0  | 8  | 8  | 11 | 0.120851 | 0        | 0        | 1.500614 |
| pseudogen: cytochrom   | 1  | 2  | 0  | 0  | 1  | 1  | 0.19376  | 0.49694  | 0        | 0        |
| antisense -            | 6  | 11 | 6  | 5  | 8  | 7  | 0.325625 | 0.765541 | 0.392885 | 0.421179 |
| processed_-            | 1  | 0  | 1  | 0  | 3  | 0  | 0.111643 | 0        | 0.134704 | 0        |
| protein_co zinc_finger | 38 | 25 | 34 | 41 | 62 | 78 | 0.539292 | 0.454977 | 0.582193 | 0.903139 |
| antisense -            | 0  | 0  | 0  | 3  | 1  | 1  | 0        | 0        | 0        | 1.526849 |
| pseudogen:-            | 16 | 11 | 12 | 39 | 24 | 26 | 2.942119 | 2.593834 | 2.662377 | 11.13103 |
| pseudogen: olfactory_r | 0  | 0  | 0  | 0  | 0  | 1  | 0        | 0        | 0        | 0        |
| pseudogen: H2B_histor  | 0  | 0  | 1  | 0  | 2  | 1  | 0        | 0        | 0.12299  | 0        |
| antisense -            | 3  | 4  | 4  | 6  | 1  | 0  | 0.037713 | 0.064482 | 0.060671 | 0.117072 |
| lincRNA -              | 3  | 0  | 0  | 2  | 0  | 0  | 0.134484 | 0        | 0        | 0.139158 |
| sense_intrc BACH1_int  | 0  | 1  | 0  | 0  | 0  | 0  | 0        | 0.148103 | 0        | 0        |
| pseudogen:-            | 0  | 3  | 1  | 1  | 5  | 6  | 0        | 0.181114 | 0.056803 | 0.073072 |
| protein_co transcripti | 0  | 0  | 0  | 0  | 0  | 1  | 0        | 0        | 0        | 0        |
| pseudogen: cyclin-depe | 0  | 0  | 1  | 1  | 0  | 0  | 0        | 0        | 0.152085 | 0.195645 |
| lincRNA -              | 1  | 0  | 0  | 0  | 0  | 0  | 0.13997  | 0        | 0        | 0        |
| antisense -            | 4  | 2  | 2  | 0  | 0  | 1  | 0.185153 | 0.118716 | 0.111699 | 0        |
| pseudogen: ribosomal_  | 0  | 0  | 0  | 0  | 0  | 1  | 0        | 0        | 0        | 0        |
| pseudogen:-            | 7  | 2  | 6  | 0  | 0  | 0  | 0.510467 | 0.187029 | 0.527921 | 0        |
| pseudogen: suppressio  | 5  | 4  | 0  | 2  | 3  | 1  | 0.228286 | 0.234196 | 0        | 0.141733 |
| lincRNA -              | 7  | 9  | 4  | 5  | 1  | 1  | 0.19468  | 0.320978 | 0.134224 | 0.215836 |
| pseudogen: ribosomal_  | 3  | 8  | 4  | 3  | 3  | 1  | 0.254376 | 0.86987  | 0.409226 | 0.394827 |
| processed_-            | 24 | 22 | 17 | 27 | 23 | 30 | 0.683694 | 0.803679 | 0.584316 | 1.193836 |
| pseudogen:-            | 10 | 23 | 14 | 4  | 5  | 10 | 0.595051 | 1.755058 | 1.005149 | 0.369441 |
| pseudogen: breast_carc | 1  | 0  | 1  | 1  | 1  | 0  | 0.06957  | 0        | 0.08394  | 0.107982 |
| pseudogen:-            | 0  | 0  | 0  | 1  | 0  | 1  | 0        | 0        | 0        | 0.094274 |
| antisense JAZF1_anti   | 4  | 3  | 1  | 1  | 5  | 1  | 0.050912 | 0.048966 | 0.015357 | 0.019756 |
| pseudogen:-            | 0  | 1  | 2  | 0  | 1  | 0  | 0        | 0.080495 | 0.151474 | 0        |
| pseudogen:-            | 18 | 19 | 32 | 49 | 34 | 14 | 0.526525 | 0.712705 | 1.129392 | 2.22471  |
| pseudogen:-            | 6  | 10 | 9  | 1  | 3  | 4  | 0.268454 | 0.573758 | 0.485858 | 0.069446 |
| lincRNA -              | 0  | 0  | 0  | 3  | 4  | 0  | 0        | 0        | 0        | 0.107769 |
| antisense -            | 0  | 0  | 0  | 15 | 19 | 9  | 0        | 0        | 0        | 0.505415 |
| pseudogen:-            | 4  | 9  | 6  | 6  | 16 | 3  | 0.20702  | 0.597316 | 0.374672 | 0.481985 |
| pseudogen: ribosomal_  | 4  | 1  | 0  | 3  | 1  | 1  | 0.426273 | 0.136659 | 0        | 0.496226 |
| pseudogen:-            | 2  | 2  | 3  | 1  | 1  | 2  | 0.122269 | 0.156792 | 0.221286 | 0.094889 |
| antisense -            | 1  | 3  | 2  | 3  | 2  | 4  | 0.068855 | 0.264889 | 0.166154 | 0.320616 |
| lincRNA -              | 3  | 0  | 1  | 0  | 0  | 1  | 0.182926 | 0        | 0.07357  | 0        |
| pseudogen: profilin_1_ | 22 | 15 | 14 | 1  | 1  | 1  | 2.56612  | 2.243649 | 1.970291 | 0.181044 |
| pseudogen: TatD_DNas   | 0  | 0  | 0  | 1  | 1  | 1  | 0        | 0        | 0        | 0.081683 |
| pseudogen: sorting_ne  | 7  | 3  | 9  | 13 | 13 | 22 | 0.516898 | 0.284078 | 0.801858 | 1.48998  |
| antisense RNF219_ar    | 7  | 5  | 6  | 1  | 4  | 4  | 0.082037 | 0.075143 | 0.084842 | 0.01819  |
| lincRNA -              | 0  | 1  | 0  | 0  | 1  | 0  | 0        | 0.080603 | 0        | 0        |

|                         |     |     |     |     |     |     |          |          |          |          |
|-------------------------|-----|-----|-----|-----|-----|-----|----------|----------|----------|----------|
| antisense -             | 9   | 1   | 4   | 5   | 1   | 3   | 0.160338 | 0.022846 | 0.085981 | 0.13826  |
| pseudogen-              | 0   | 0   | 0   | 0   | 0   | 1   | 0        | 0        | 0        | 0        |
| pseudogen: C-terminal_  | 19  | 22  | 30  | 1   | 1   | 3   | 0.669857 | 0.994628 | 1.276139 | 0.054722 |
| lincRNA -               | 3   | 0   | 1   | 0   | 0   | 0   | 0.189582 | 0        | 0.076247 | 0        |
| lincRNA -               | 11  | 9   | 12  | 6   | 9   | 9   | 0.320367 | 0.336129 | 0.421681 | 0.271229 |
| antisense -             | 1   | 0   | 0   | 0   | 1   | 1   | 0.06776  | 0        | 0        | 0        |
| lincRNA -               | 0   | 0   | 0   | 0   | 0   | 1   | 0        | 0        | 0        | 0        |
| antisense -             | 0   | 0   | 1   | 1   | 1   | 5   | 0        | 0        | 0.089518 | 0.115158 |
| protein_co uncharacte   | 11  | 11  | 7   | 2   | 6   | 2   | 0.407417 | 0.522455 | 0.312819 | 0.114976 |
| protein_co RNA_bindin   | 0   | 0   | 0   | 0   | 0   | 1   | 0        | 0        | 0        | 0        |
| lincRNA -               | 0   | 0   | 0   | 1   | 0   | 0   | 0        | 0        | 0        | 0.154194 |
| pseudogen: capicua_tr   | 2   | 1   | 0   | 0   | 0   | 0   | 0.033625 | 0.02156  | 0        | 0        |
| pseudogen: zinc_finger_ | 142 | 86  | 129 | 50  | 67  | 83  | 2.273261 | 1.765504 | 2.491717 | 1.2424   |
| pseudogen: solute_carr  | 0   | 0   | 0   | 0   | 1   | 2   | 0        | 0        | 0        | 0        |
| antisense -             | 1   | 0   | 0   | 2   | 2   | 2   | 0.053527 | 0        | 0        | 0.166164 |
| lincRNA -               | 37  | 37  | 44  | 15  | 24  | 14  | 3.898721 | 4.999556 | 5.593983 | 2.453252 |
| protein_co Uncharacte   | 34  | 21  | 27  | 13  | 42  | 28  | 0.603201 | 0.477762 | 0.577956 | 0.357979 |
| lincRNA -               | 0   | 0   | 0   | 2   | 1   | 0   | 0        | 0        | 0        | 0.279922 |
| protein_co kelch_repe   | 12  | 11  | 10  | 0   | 0   | 6   | 0.180173 | 0.211792 | 0.181158 | 0        |
| protein_co zinc_finger_ | 0   | 0   | 0   | 30  | 23  | 20  | 0        | 0        | 0        | 1.040703 |
| antisense FGF14_anti    | 3   | 2   | 2   | 0   | 0   | 0   | 0.438224 | 0.37464  | 0.352495 | 0        |
| processed_-             | 0   | 0   | 0   | 0   | 4   | 2   | 0        | 0        | 0        | 0        |
| pseudogen-              | 0   | 0   | 2   | 1   | 2   | 4   | 0        | 0        | 0.261319 | 0.168083 |
| antisense -             | 0   | 0   | 0   | 0   | 1   | 0   | 0        | 0        | 0        | 0        |
| pseudogen-              | 0   | 0   | 0   | 0   | 2   | 0   | 0        | 0        | 0        | 0        |
| processed_ MAGI2_ant    | 570 | 416 | 490 | 6   | 6   | 15  | 5.93281  | 5.552496 | 6.153607 | 0.096932 |
| pseudogen-              | 1   | 0   | 0   | 0   | 2   | 0   | 0.306471 | 0        | 0        | 0        |
| antisense -             | 3   | 2   | 1   | 0   | 5   | 0   | 0.486748 | 0.416123 | 0.195763 | 0        |
| lincRNA -               | 1   | 0   | 0   | 0   | 0   | 0   | 0.23802  | 0        | 0        | 0        |
| protein_co phospholip   | 9   | 7   | 10  | 96  | 111 | 86  | 0.163127 | 0.162701 | 0.218692 | 2.700758 |
| protein_co Homo_sapi    | 4   | 0   | 2   | 0   | 2   | 0   | 0.29215  | 0        | 0.176248 | 0        |
| lincRNA -               | 0   | 1   | 0   | 0   | 3   | 5   | 0        | 0.143166 | 0        | 0        |
| pseudogen: zinc_finger_ | 1   | 1   | 2   | 4   | 4   | 0   | 0.038153 | 0.048926 | 0.092068 | 0.236875 |
| sense_intrc             | 0   | 0   | 2   | 2   | 1   | 2   | 0        | 0        | 0.172486 | 0.22189  |
| antisense -             | 5   | 2   | 3   | 1   | 2   | 2   | 0.438224 | 0.224784 | 0.317246 | 0.136037 |
| pseudogen: adaptor-rel  | 0   | 0   | 0   | 0   | 0   | 1   | 0        | 0        | 0        | 0        |
| pseudogen-              | 1   | 0   | 0   | 0   | 0   | 0   | 0.115493 | 0        | 0        | 0        |
| pseudogen: aldehyde_c   | 1   | 0   | 0   | 0   | 0   | 0   | 0.263427 | 0        | 0        | 0        |
| processed_ RPL34_anti   | 5   | 5   | 4   | 4   | 1   | 4   | 0.063143 | 0.080972 | 0.060949 | 0.078405 |
| antisense -             | 17  | 18  | 18  | 6   | 14  | 6   | 0.458648 | 0.622748 | 0.585937 | 0.251254 |
| antisense -             | 1   | 0   | 0   | 0   | 0   | 0   | 0.079745 | 0        | 0        | 0        |
| pseudogen: ribosomal_   | 2   | 3   | 3   | 3   | 16  | 6   | 0.153235 | 0.294754 | 0.277331 | 0.356764 |
| pseudogen-              | 14  | 19  | 20  | 5   | 16  | 6   | 0.921995 | 1.604587 | 1.5892   | 0.511094 |
| pseudogen: forty-two-t  | 0   | 0   | 1   | 0   | 1   | 0   | 0        | 0        | 0.061428 | 0        |
| lincRNA -               | 0   | 0   | 0   | 3   | 2   | 1   | 0        | 0        | 0        | 0.282092 |
| antisense -             | 1   | 0   | 0   | 0   | 0   | 0   | 0.032472 | 0        | 0        | 0        |
| processed_-             | 4   | 0   | 3   | 11  | 7   | 2   | 0.083995 | 0        | 0.076008 | 0.358521 |
| protein_co chromosom    | 0   | 0   | 0   | 8   | 18  | 5   | 0        | 0        | 0        | 0.275551 |
| pseudogen: prostaglan   | 2   | 2   | 0   | 0   | 2   | 1   | 0.194162 | 0.248985 | 0        | 0        |
| pseudogen: NADH_deh     | 0   | 0   | 1   | 0   | 2   | 0   | 0        | 0        | 0.321452 | 0        |
| lincRNA -               | 2   | 0   | 0   | 0   | 0   | 0   | 0.197432 | 0        | 0        | 0        |
| pseudogen-              | 0   | 1   | 0   | 0   | 0   | 0   | 0        | 0.062963 | 0        | 0        |
| lincRNA -               | 1   | 1   | 0   | 1   | 0   | 0   | 0.121792 | 0.156181 | 0        | 0.189038 |
| pseudogen-              | 3   | 2   | 2   | 2   | 8   | 9   | 0.36443  | 0.311553 | 0.293137 | 0.377097 |
| pseudogen-              | 3   | 5   | 8   | 12  | 19  | 3   | 0.075507 | 0.161379 | 0.242944 | 0.468791 |
| lincRNA -               | 0   | 0   | 0   | 1   | 2   | 2   | 0        | 0        | 0        | 0.179703 |
| protein_co family_witl  | 318 | 243 | 263 | 392 | 376 | 609 | 6.12614  | 6.003098 | 6.11313  | 11.72132 |
| lincRNA -               | 3   | 4   | 1   | 5   | 9   | 6   | 0.522937 | 0.894123 | 0.210318 | 1.352784 |
| pseudogen-              | 0   | 0   | 0   | 1   | 0   | 2   | 0        | 0        | 0        | 0.183324 |
| pseudogen: API5_pseu    | 0   | 1   | 1   | 1   | 2   | 1   | 0        | 0.039821 | 0.037467 | 0.048199 |
| pseudogen: thiopurine   | 0   | 1   | 0   | 0   | 2   | 0   | 0        | 0.082823 | 0        | 0        |
| pseudogen: cytochrom    | 0   | 0   | 0   | 1   | 0   | 0   | 0        | 0        | 0        | 0.341689 |
| pseudogen: ribosomal_   | 0   | 0   | 0   | 3   | 0   | 1   | 0        | 0        | 0        | 0.295453 |
| antisense -             | 2   | 0   | 1   | 0   | 0   | 0   | 0.295836 | 0        | 0.178472 | 0        |
| pseudogen: bridging_in  | 1   | 0   | 0   | 0   | 0   | 0   | 0.030647 | 0        | 0        | 0        |

|                        |      |      |      |      |      |      |          |          |          |
|------------------------|------|------|------|------|------|------|----------|----------|----------|
| lincRNA -              | 0    | 0    | 0    | 1    | 0    | 0    | 0        | 0        | 0.020559 |
| lincRNA -              | 0    | 0    | 0    | 0    | 0    | 1    | 0        | 0        | 0        |
| pseudogen: cathepsin_1 | 0    | 0    | 1    | 0    | 0    | 0    | 0        | 0.058506 | 0        |
| antisense SYNE1_anti   | 0    | 1    | 0    | 0    | 0    | 0    | 0        | 0.108734 | 0        |
| lincRNA -              | 1    | 0    | 1    | 0    | 0    | 0    | 0.086037 | 0        | 0.103808 |
| pseudogen: chaperonin  | 46   | 42   | 28   | 20   | 27   | 41   | 0.582642 | 0.682186 | 0.427908 |
| pseudogen: -           | 0    | 0    | 0    | 2    | 0    | 0    | 0        | 0        | 0.121401 |
| pseudogen: -           | 0    | 0    | 0    | 2    | 0    | 1    | 0        | 0        | 0.088325 |
| antisense CHRM3_an     | 0    | 0    | 0    | 1    | 0    | 0    | 0        | 0        | 0.149753 |
| protein_co multiciliat | 2    | 0    | 1    | 0    | 0    | 0    | 0.044849 | 0        | 0.027057 |
| pseudogen: -           | 4    | 4    | 2    | 1    | 4    | 3    | 1.875601 | 2.405192 | 1.13151  |
| pseudogen: -           | 1    | 0    | 2    | 0    | 0    | 1    | 0.083286 | 0        | 0.200979 |
| lincRNA MAPKAPK5       | 40   | 40   | 48   | 132  | 177  | 66   | 0.820832 | 1.0526   | 1.188457 |
| lincRNA long_interf    | 0    | 0    | 0    | 3    | 1    | 5    | 0        | 0        | 0.311468 |
| pseudogen: olfactory_r | 0    | 0    | 1    | 0    | 0    | 0    | 0        | 0        | 0.062514 |
| pseudogen: H2A_histor  | 3    | 0    | 0    | 1    | 1    | 1    | 0.368246 | 0        | 0.190523 |
| antisense -            | 34   | 25   | 20   | 44   | 33   | 24   | 3.150713 | 2.97084  | 2.236186 |
| processed_ jerky_hom   | 849  | 604  | 727  | 721  | 1103 | 883  | 4.454473 | 4.063824 | 4.602259 |
| antisense SNRK_antis   | 2    | 0    | 1    | 0    | 1    | 2    | 0.12504  | 0        | 0.075434 |
| pseudogen: ribosomal_  | 5    | 7    | 0    | 6    | 8    | 10   | 0.26402  | 0.473996 | 0        |
| pseudogen: -           | 1    | 0    | 0    | 4    | 6    | 1    | 0.071261 | 0        | 0.44243  |
| lincRNA -              | 0    | 0    | 1    | 0    | 2    | 0    | 0        | 0        | 0.10324  |
| pseudogen: -           | 1    | 0    | 0    | 0    | 0    | 0    | 0.150772 | 0        | 0        |
| antisense -            | 0    | 0    | 1    | 0    | 3    | 2    | 0        | 0        | 0.156719 |
| lincRNA -              | 56   | 38   | 37   | 6    | 7    | 10   | 5.011147 | 4.360558 | 3.994835 |
| pseudogen: NECAP_end   | 0    | 0    | 0    | 2    | 0    | 0    | 0        | 0        | 0.20022  |
| lincRNA long_interf    | 41   | 40   | 27   | 7    | 13   | 12   | 1.080658 | 1.351991 | 0.85865  |
| antisense MED14_an     | 3    | 2    | 2    | 3    | 1    | 6    | 0.156823 | 0.134069 | 0.126144 |
| pseudogen: -           | 0    | 0    | 0    | 0    | 0    | 2    | 0        | 0        | 0        |
| pseudogen: -           | 0    | 0    | 0    | 1    | 2    | 0    | 0        | 0        | 0.095137 |
| pseudogen: -           | 10   | 12   | 7    | 10   | 32   | 15   | 2.967723 | 4.56682  | 2.50651  |
| antisense PCCA_antis   | 13   | 11   | 5    | 5    | 7    | 8    | 1.286013 | 1.395417 | 0.596788 |
| antisense -            | 0    | 0    | 0    | 0    | 0    | 1    | 0        | 0        | 0        |
| lincRNA -              | 1    | 0    | 2    | 0    | 0    | 0    | 0.026477 | 0        | 0.063891 |
| pseudogen: high_mobil  | 56   | 30   | 32   | 33   | 60   | 60   | 9.618465 | 6.60767  | 6.631561 |
| processed_ -           | 1    | 4    | 0    | 1    | 2    | 3    | 0.02927  | 0.150137 | 0        |
| pseudogen: actin_beta_ | 0    | 0    | 0    | 1    | 2    | 1    | 0        | 0        | 0.015706 |
| lincRNA -              | 4    | 7    | 1    | 0    | 0    | 0    | 0.420538 | 0.943741 | 0.126851 |
| antisense -            | 2    | 0    | 0    | 2    | 1    | 1    | 0.231556 | 0        | 0.359406 |
| antisense -            | 5    | 4    | 14   | 7    | 9    | 2    | 0.297525 | 0.305227 | 1.005149 |
| pseudogen: vomeronas   | 0    | 0    | 2    | 0    | 0    | 0    | 0        | 0        | 0.080135 |
| pseudogen: -           | 0    | 0    | 0    | 1    | 0    | 0    | 0        | 0        | 0.102363 |
| processed_ SDCBP2_ar   | 14   | 29   | 17   | 17   | 20   | 15   | 0.362485 | 0.962874 | 0.531079 |
| pseudogen: nuclear_un  | 0    | 0    | 0    | 3    | 0    | 1    | 0        | 0        | 0.250102 |
| lincRNA long_interf    | 0    | 0    | 0    | 1    | 0    | 1    | 0        | 0        | 0.338511 |
| lincRNA -              | 1    | 1    | 0    | 5    | 5    | 2    | 0.024783 | 0.031781 | 0        |
| lincRNA -              | 0    | 0    | 0    | 7    | 5    | 9    | 0        | 0        | 0.119311 |
| antisense -            | 4    | 0    | 1    | 0    | 2    | 2    | 0.293981 | 0        | 0.088676 |
| antisense -            | 3    | 3    | 1    | 18   | 11   | 11   | 0.212814 | 0.272904 | 0.085591 |
| antisense GPR50_ant    | 0    | 0    | 0    | 7    | 12   | 22   | 0        | 0        | 0.314481 |
| lincRNA -              | 0    | 0    | 0    | 0    | 3    | 0    | 0        | 0        | 0        |
| antisense -            | 0    | 1    | 0    | 0    | 1    | 0    | 0        | 0.091522 | 0        |
| pseudogen: -           | 0    | 0    | 1    | 3    | 2    | 0    | 0        | 0        | 0.066481 |
| lincRNA -              | 8    | 3    | 3    | 0    | 0    | 1    | 0.537421 | 0.258438 | 0.243161 |
| antisense high_mobil   | 4    | 2    | 0    | 0    | 0    | 1    | 0.561557 | 0.360059 | 0        |
| antisense -            | 0    | 0    | 0    | 1    | 1    | 2    | 0        | 0        | 0.151309 |
| pseudogen: UPF3_regul  | 4    | 8    | 6    | 0    | 4    | 4    | 0.243901 | 0.625538 | 0.441421 |
| lincRNA -              | 0    | 0    | 0    | 1    | 2    | 0    | 0        | 0        | 0.117767 |
| lincRNA -              | 0    | 0    | 0    | 0    | 0    | 1    | 0        | 0        | 0        |
| protein_co NPIP-like_p | 0    | 0    | 1    | 1    | 3    | 4    | 0        | 0        | 0.047383 |
| lincRNA -              | 0    | 0    | 1    | 0    | 0    | 1    | 0        | 0        | 0.021561 |
| pseudogen: histone_de  | 2    | 0    | 1    | 0    | 0    | 0    | 0.0649   | 0        | 0.039153 |
| pseudogen: keratin_18  | 1    | 0    | 0    | 2    | 2    | 4    | 0.036321 | 0        | 0.112749 |
| sense_intrc -          | 5    | 1    | 0    | 5    | 3    | 2    | 0.51302  | 0.131575 | 0        |
| processed_ growth_arr  | 1265 | 1022 | 1031 | 2399 | 2638 | 2329 | 34.93279 | 36.1912  | 34.35179 |

|                         |     |     |     |     |     |     |          |          |          |          |
|-------------------------|-----|-----|-----|-----|-----|-----|----------|----------|----------|----------|
| pseudogen: -            | 3   | 5   | 2   | 10  | 5   | 2   | 0.25346  | 0.54171  | 0.203876 | 1.311348 |
| pseudogen: eukaryotic_  | 2   | 1   | 3   | 1   | 7   | 6   | 0.201677 | 0.129311 | 0.365003 | 0.156516 |
| protein_co major_hist   | 613 | 526 | 442 | 172 | 173 | 152 | 18.58021 | 20.44491 | 16.16443 | 8.091872 |
| pseudogen: -            | 4   | 3   | 2   | 3   | 3   | 4   | 0.220919 | 0.212473 | 0.133276 | 0.257172 |
| pseudogen: -            | 0   | 0   | 0   | 0   | 2   | 0   | 0        | 0        | 0        | 0        |
| antisense -             | 4   | 0   | 3   | 29  | 36  | 26  | 0.326191 | 0        | 0.295177 | 3.670633 |
| lincRNA -               | 9   | 10  | 4   | 0   | 0   | 1   | 0.097237 | 0.138548 | 0.052143 | 0        |
| pseudogen: -            | 0   | 0   | 0   | 0   | 1   | 0   | 0        | 0        | 0        | 0        |
| pseudogen: -            | 0   | 1   | 1   | 1   | 3   | 0   | 0        | 0.080711 | 0.07594  | 0.097691 |
| protein_co WAS_prote    | 57  | 44  | 46  | 41  | 46  | 45  | 0.629915 | 0.623547 | 0.613357 | 0.703269 |
| pseudogen: gulonolact   | 0   | 0   | 0   | 1   | 4   | 1   | 0        | 0        | 0        | 0.097299 |
| antisense -             | 49  | 44  | 66  | 34  | 68  | 84  | 0.604475 | 0.696057 | 0.982369 | 0.651016 |
| antisense -             | 0   | 0   | 0   | 1   | 1   | 1   | 0        | 0        | 0        | 0.173285 |
| lincRNA -               | 2   | 0   | 1   | 0   | 2   | 1   | 0.102268 | 0        | 0.061696 | 0        |
| protein_co chromosom    | 1   | 1   | 1   | 4   | 1   | 5   | 0.127073 | 0.162953 | 0.153321 | 0.788941 |
| antisense -             | 43  | 15  | 17  | 44  | 49  | 44  | 4.710913 | 2.107353 | 2.247158 | 7.482036 |
| lincRNA -               | 2   | 0   | 0   | 0   | 0   | 0   | 0.064365 | 0        | 0        | 0        |
| pseudogen: eukaryotic_  | 0   | 0   | 0   | 0   | 0   | 3   | 0        | 0        | 0        | 0        |
| lincRNA long_interf     | 0   | 0   | 0   | 123 | 107 | 273 | 0        | 0        | 0        | 8.493279 |
| pseudogen: heat_shock   | 7   | 4   | 0   | 0   | 1   | 1   | 0.420808 | 0.308358 | 0        | 0        |
| antisense -             | 5   | 8   | 2   | 2   | 7   | 2   | 0.49883  | 1.023486 | 0.240747 | 0.309701 |
| antisense -             | 0   | 0   | 0   | 0   | 3   | 8   | 0        | 0        | 0        | 0        |
| pseudogen: ribosomal_   | 77  | 74  | 89  | 109 | 93  | 140 | 4.485132 | 5.52746  | 6.254932 | 9.854656 |
| pseudogen: -            | 0   | 0   | 1   | 2   | 4   | 3   | 0        | 0        | 0.129168 | 0.332328 |
| lincRNA -               | 1   | 0   | 0   | 0   | 0   | 0   | 0.047078 | 0        | 0        | 0        |
| lincRNA -               | 0   | 2   | 0   | 0   | 0   | 0   | 0        | 0.029599 | 0        | 0        |
| pseudogen: supervillin_ | 28  | 24  | 13  | 3   | 7   | 4   | 0.506528 | 0.556757 | 0.283751 | 0.084236 |
| pseudogen: -            | 0   | 0   | 0   | 2   | 2   | 0   | 0        | 0        | 0        | 0.39447  |
| processed_ -            | 2   | 0   | 1   | 0   | 2   | 3   | 0.041186 | 0        | 0.024847 | 0        |
| antisense -             | 0   | 0   | 1   | 0   | 0   | 2   | 0        | 0        | 0.100134 | 0        |
| pseudogen: X-ray_repai  | 0   | 4   | 1   | 0   | 6   | 4   | 0        | 0.132008 | 0.031051 | 0        |
| lincRNA -               | 0   | 1   | 0   | 0   | 0   | 0   | 0        | 0.138229 | 0        | 0        |
| lincRNA -               | 0   | 0   | 0   | 1   | 1   | 1   | 0        | 0        | 0        | 0.034041 |
| antisense -             | 5   | 4   | 4   | 2   | 1   | 4   | 0.288022 | 0.295478 | 0.278012 | 0.17882  |
| pseudogen: prohibitin_  | 2   | 0   | 1   | 0   | 2   | 1   | 0.123395 | 0        | 0.074441 | 0        |
| pseudogen: -            | 0   | 0   | 0   | 1   | 1   | 0   | 0        | 0        | 0        | 0.217253 |
| processed_ -            | 9   | 5   | 5   | 2   | 1   | 1   | 0.179808 | 0.128099 | 0.120527 | 0.062019 |
| pseudogen: -            | 2   | 6   | 6   | 7   | 20  | 12  | 0.072083 | 0.277309 | 0.260917 | 0.39159  |
| pseudogen: -            | 0   | 1   | 0   | 0   | 0   | 0   | 0        | 0.088818 | 0        | 0        |
| pseudogen: cell_divisio | 1   | 0   | 0   | 0   | 0   | 0   | 0.082408 | 0        | 0        | 0        |
| antisense -             | 0   | 0   | 2   | 0   | 0   | 0   | 0        | 0        | 0.162807 | 0        |
| pseudogen: -            | 0   | 0   | 0   | 0   | 0   | 2   | 0        | 0        | 0        | 0        |
| protein_co HCG20447     | 0   | 2   | 2   | 5   | 4   | 4   | 0        | 0.030057 | 0.028281 | 0.090952 |
| antisense -             | 0   | 2   | 1   | 6   | 6   | 2   | 0        | 0.04078  | 0.019185 | 0.148077 |
| lincRNA -               | 1   | 2   | 1   | 0   | 1   | 0   | 0.169891 | 0.435723 | 0.204984 | 0        |
| lincRNA long_interf     | 0   | 2   | 1   | 2   | 0   | 0   | 0        | 0.055805 | 0.026253 | 0.067545 |
| pseudogen: eukaryotic_  | 8   | 9   | 7   | 6   | 4   | 3   | 0.285046 | 0.411222 | 0.300934 | 0.331823 |
| lincRNA MIR155_hc       | 65  | 45  | 48  | 3   | 1   | 2   | 1.904907 | 1.691151 | 1.697265 | 0.136462 |
| antisense -             | 0   | 0   | 1   | 0   | 0   | 2   | 0        | 0        | 0.115933 | 0        |
| pseudogen: MT-ND5_ps    | 0   | 1   | 0   | 1   | 1   | 0   | 0        | 0.034321 | 0        | 0.041541 |
| lincRNA -               | 0   | 0   | 0   | 0   | 0   | 2   | 0        | 0        | 0        | 0        |
| processed_ -            | 16  | 19  | 18  | 8   | 7   | 3   | 0.247441 | 0.376803 | 0.33587  | 0.192031 |
| lincRNA -               | 0   | 1   | 0   | 0   | 0   | 0   | 0        | 0.082483 | 0        | 0        |
| lincRNA -               | 2   | 0   | 1   | 0   | 2   | 0   | 0.113949 | 0        | 0.068743 | 0        |
| protein_co apolipopro   | 1   | 0   | 0   | 1   | 0   | 0   | 0.053284 | 0        | 0        | 0.082704 |
| pseudogen: testis_expr  | 5   | 1   | 1   | 2   | 11  | 1   | 0.158842 | 0.040738 | 0.03833  | 0.098618 |
| processed_ long_interf  | 60  | 55  | 49  | 54  | 83  | 122 | 1.315288 | 1.546114 | 1.296026 | 1.837358 |
| sense_intrc -           | 0   | 2   | 3   | 0   | 1   | 1   | 0        | 0.048239 | 0.068081 | 0        |
| processed_ -            | 0   | 0   | 0   | 0   | 0   | 1   | 0        | 0        | 0        | 0        |
| lincRNA -               | 0   | 2   | 3   | 3   | 3   | 2   | 0        | 0.201778 | 0.284776 | 0.366341 |
| lincRNA -               | 0   | 0   | 1   | 0   | 0   | 0   | 0        | 0        | 0.101938 | 0        |
| pseudogen: -            | 7   | 7   | 5   | 2   | 1   | 3   | 0.691011 | 0.886123 | 0.595532 | 0.306441 |
| lincRNA -               | 0   | 0   | 0   | 6   | 3   | 2   | 0        | 0        | 0        | 0.476204 |
| pseudogen: cell_divisio | 0   | 0   | 0   | 0   | 0   | 2   | 0        | 0        | 0        | 0        |
| antisense -             | 3   | 3   | 1   | 5   | 10  | 6   | 0.353442 | 0.45324  | 0.14215  | 0.914319 |

|                         |    |    |    |     |     |    |          |          |          |          |
|-------------------------|----|----|----|-----|-----|----|----------|----------|----------|----------|
| pseudogen: -            | 1  | 0  | 0  | 3   | 2   | 2  | 0.04983  | 0        | 0        | 0.232029 |
| lincRNA -               | 0  | 1  | 0  | 0   | 0   | 0  | 0        | 0.119542 | 0        | 0        |
| antisense -             | 0  | 1  | 1  | 0   | 0   | 1  | 0        | 0.159495 | 0.150068 | 0        |
| lincRNA -               | 0  | 0  | 0  | 0   | 0   | 1  | 0        | 0        | 0        | 0        |
| antisense -             | 9  | 5  | 6  | 14  | 11  | 7  | 0.489004 | 0.348377 | 0.393341 | 1.180669 |
| pseudogen: succinate_c  | 0  | 0  | 0  | 1   | 2   | 0  | 0        | 0        | 0        | 0.143834 |
| processed_ -            | 0  | 1  | 2  | 0   | 0   | 0  | 0        | 0.013697 | 0.025775 | 0        |
| protein_co -            | 0  | 0  | 1  | 4   | 5   | 3  | 0        | 0        | 0.043486 | 0.223766 |
| lincRNA long_interf     | 0  | 0  | 1  | 0   | 0   | 0  | 0        | 0        | 0.026979 | 0        |
| pseudogen: fatty_acid_  | 36 | 36 | 41 | 25  | 28  | 56 | 4.137354 | 5.30557  | 5.685284 | 4.459547 |
| protein_co shisa_hom    | 0  | 1  | 1  | 35  | 65  | 18 | 0        | 0.123724 | 0.116411 | 5.241344 |
| pseudogen: -            | 4  | 3  | 6  | 0   | 2   | 4  | 0.15868  | 0.152614 | 0.287185 | 0        |
| protein_co TBC1_dom     | 11 | 12 | 13 | 3   | 9   | 2  | 0.194418 | 0.271978 | 0.277226 | 0.082299 |
| pseudogen: ferritin_he  | 7  | 4  | 5  | 4   | 7   | 3  | 0.796675 | 0.583784 | 0.686596 | 0.7066   |
| lincRNA -               | 0  | 1  | 0  | 0   | 0   | 0  | 0        | 0.132444 | 0        | 0        |
| processed_ -            | 2  | 1  | 0  | 12  | 7   | 8  | 0.053835 | 0.034518 | 0        | 0.501353 |
| pseudogen: -            | 0  | 0  | 0  | 2   | 1   | 0  | 0        | 0        | 0        | 0.183787 |
| pseudogen: -            | 0  | 0  | 0  | 0   | 0   | 2  | 0        | 0        | 0        | 0        |
| pseudogen: cubilin(in   | 0  | 0  | 1  | 0   | 0   | 2  | 0        | 0        | 0.049671 | 0        |
| pseudogen: -            | 1  | 0  | 0  | 0   | 2   | 3  | 0.060038 | 0        | 0        | 0        |
| processed_ -            | 3  | 0  | 0  | 8   | 13  | 9  | 0.060608 | 0        | 0        | 0.250857 |
| antisense -             | 1  | 0  | 0  | 1   | 0   | 0  | 0.092303 | 0        | 0        | 0.143267 |
| pseudogen: -            | 0  | 1  | 0  | 0   | 3   | 0  | 0        | 0.130717 | 0        | 0        |
| pseudogen: eukaryotic_  | 0  | 2  | 2  | 9   | 17  | 8  | 0        | 0.098573 | 0.092747 | 0.5369   |
| antisense -             | 0  | 0  | 0  | 2   | 6   | 5  | 0        | 0        | 0        | 0.323466 |
| lincRNA -               | 0  | 0  | 0  | 4   | 11  | 0  | 0        | 0        | 0        | 0.301366 |
| pseudogen: -            | 0  | 0  | 0  | 2   | 4   | 1  | 0        | 0        | 0        | 0.083367 |
| antisense -             | 2  | 0  | 0  | 0   | 0   | 1  | 0.194969 | 0        | 0        | 0        |
| pseudogen: -            | 1  | 0  | 0  | 0   | 1   | 1  | 0.011781 | 0        | 0        | 0        |
| antisense -             | 8  | 11 | 7  | 8   | 11  | 20 | 0.13616  | 0.240083 | 0.143749 | 0.211339 |
| pseudogen: -            | 0  | 1  | 0  | 0   | 0   | 1  | 0        | 0.113882 | 0        | 0        |
| processed_ -            | 2  | 1  | 0  | 4   | 2   | 1  | 0.11826  | 0.075826 | 0        | 0.367111 |
| antisense -             | 0  | 0  | 0  | 3   | 20  | 17 | 0        | 0        | 0        | 0.076503 |
| processed_ -            | 0  | 0  | 0  | 1   | 0   | 0  | 0        | 0        | 0        | 0.131609 |
| antisense -             | 0  | 0  | 0  | 24  | 27  | 30 | 0        | 0        | 0        | 2.392761 |
| antisense -             | 5  | 4  | 8  | 1   | 9   | 2  | 0.116352 | 0.119364 | 0.224617 | 0.036119 |
| antisense -             | 0  | 0  | 0  | 0   | 1   | 0  | 0        | 0        | 0        | 0        |
| antisense -             | 0  | 0  | 0  | 0   | 2   | 0  | 0        | 0        | 0        | 0        |
| antisense -             | 6  | 6  | 5  | 0   | 0   | 0  | 0.440972 | 0.565484 | 0.443382 | 0        |
| protein_co chromosom    | 0  | 0  | 0  | 106 | 138 | 65 | 0        | 0        | 0        | 10.15087 |
| antisense -             | 0  | 0  | 0  | 2   | 1   | 1  | 0        | 0        | 0        | 0.335391 |
| pseudogen: -            | 11 | 3  | 5  | 7   | 3   | 3  | 0.376764 | 0.131767 | 0.206631 | 0.372139 |
| pseudogen: trans-23-er  | 23 | 20 | 30 | 32  | 28  | 38 | 2.349609 | 2.620035 | 3.697745 | 5.073973 |
| pseudogen: peptidylpro  | 0  | 0  | 0  | 0   | 0   | 1  | 0        | 0        | 0        | 0        |
| lincRNA -               | 0  | 1  | 0  | 0   | 0   | 0  | 0        | 0.025587 | 0        | 0        |
| antisense -             | 1  | 0  | 3  | 1   | 2   | 1  | 0.088305 | 0        | 0.319636 | 0.137062 |
| lincRNA -               | 1  | 0  | 0  | 2   | 4   | 9  | 0.102829 | 0        | 0        | 0.31921  |
| lincRNA -               | 0  | 0  | 0  | 0   | 1   | 0  | 0        | 0        | 0        | 0        |
| pseudogen: -            | 0  | 1  | 0  | 0   | 1   | 0  | 0        | 0.066515 | 0        | 0        |
| pseudogen: voltage-dep  | 0  | 2  | 0  | 0   | 0   | 1  | 0        | 0.144023 | 0        | 0        |
| pseudogen: breakpoint   | 0  | 0  | 0  | 1   | 1   | 0  | 0        | 0        | 0        | 0.287667 |
| pseudogen: ribosomal_   | 1  | 0  | 0  | 2   | 1   | 1  | 0.098716 | 0        | 0        | 0.306441 |
| antisense -             | 7  | 1  | 2  | 1   | 2   | 0  | 0.384795 | 0.070492 | 0.132651 | 0.085322 |
| processed_ -            | 1  | 1  | 1  | 5   | 6   | 3  | 0.111909 | 0.143508 | 0.135025 | 0.868494 |
| pseudogen: glyceraldeh  | 0  | 2  | 0  | 0   | 2   | 3  | 0        | 0.127664 | 0        | 0        |
| antisense -             | 2  | 3  | 0  | 0   | 1   | 0  | 0.096283 | 0.185205 | 0        | 0        |
| antisense ZRANB2_ar     | 2  | 5  | 0  | 6   | 1   | 3  | 0.154498 | 0.495303 | 0        | 0.719405 |
| pseudogen: -            | 1  | 0  | 3  | 0   | 0   | 0  | 0.052042 | 0        | 0.188376 | 0        |
| pseudogen: -            | 5  | 6  | 3  | 8   | 3   | 2  | 0.771217 | 1.186772 | 0.558311 | 1.915258 |
| pseudogen: coiled-coil- | 5  | 0  | 1  | 2   | 1   | 2  | 0.507468 | 0        | 0.122458 | 0.315064 |
| antisense -             | 1  | 0  | 1  | 3   | 0   | 1  | 0.122109 | 0        | 0.147332 | 0.568592 |
| sense_intrc FNDC1_int   | 2  | 4  | 0  | 0   | 0   | 1  | 0.181744 | 0.466122 | 0        | 0        |
| pseudogen: -            | 2  | 4  | 2  | 1   | 1   | 0  | 0.290341 | 0.744641 | 0.350313 | 0.225324 |
| pseudogen: ribosomal_   | 0  | 1  | 0  | 3   | 7   | 2  | 0        | 0.087271 | 0        | 0.316893 |
| lincRNA -               | 2  | 0  | 1  | 3   | 1   | 0  | 0.116497 | 0        | 0.07028  | 0.271229 |

|                         |      |      |      |     |     |     |          |          |          |          |
|-------------------------|------|------|------|-----|-----|-----|----------|----------|----------|----------|
| antisense -             | 15   | 11   | 13   | 14  | 22  | 9   | 0.738038 | 0.694048 | 0.771754 | 1.069168 |
| antisense -             | 2    | 2    | 1    | 2   | 2   | 2   | 0.1334   | 0.171066 | 0.080477 | 0.207055 |
| lincRNA long_interf     | 0    | 0    | 0    | 0   | 0   | 1   | 0        | 0        | 0        | 0        |
| protein_co ankyrin_re   | 3    | 1    | 4    | 33  | 49  | 5   | 0.069846 | 0.029856 | 0.112364 | 1.192519 |
| lincRNA -               | 3    | 2    | 0    | 6   | 5   | 4   | 0.108374 | 0.09265  | 0        | 0.336424 |
| pseudogen SET_pseud     | 0    | 0    | 0    | 0   | 1   | 0   | 0        | 0        | 0        | 0        |
| pseudogen -             | 0    | 1    | 0    | 6   | 0   | 1   | 0        | 0.047836 | 0        | 0.347398 |
| antisense long_interf   | 556  | 385  | 425  | 260 | 326 | 305 | 5.033954 | 4.469969 | 4.642709 | 3.653746 |
| protein_co zinc_finger  | 43   | 26   | 22   | 78  | 96  | 111 | 0.567804 | 0.440263 | 0.35051  | 1.598655 |
| pseudogen -             | 8    | 1    | 3    | 4   | 8   | 3   | 1.267298 | 0.203141 | 0.5734   | 0.983511 |
| pseudogen -             | 0    | 0    | 0    | 1   | 0   | 0   | 0        | 0        | 0        | 0.107187 |
| lincRNA -               | 3    | 5    | 4    | 7   | 4   | 1   | 0.201822 | 0.431347 | 0.32468  | 0.730931 |
| antisense -             | 0    | 0    | 0    | 0   | 0   | 2   | 0        | 0        | 0        | 0        |
| antisense -             | 14   | 11   | 9    | 6   | 8   | 7   | 0.362886 | 0.365632 | 0.28147  | 0.241392 |
| antisense DSCAM_an      | 0    | 0    | 0    | 0   | 1   | 3   | 0        | 0        | 0        | 0        |
| pseudogen -             | 4    | 1    | 0    | 1   | 0   | 0   | 0.234744 | 0.075256 | 0        | 0.091089 |
| pseudogen fatty_acid_   | 0    | 2    | 0    | 0   | 0   | 0   | 0        | 0.317308 | 0        | 0        |
| antisense -             | 0    | 0    | 0    | 0   | 1   | 1   | 0        | 0        | 0        | 0        |
| antisense -             | 32   | 16   | 28   | 19  | 46  | 49  | 0.710455 | 0.455529 | 0.750054 | 0.654743 |
| pseudogen -             | 0    | 0    | 0    | 0   | 1   | 0   | 0        | 0        | 0        | 0        |
| antisense -             | 0    | 0    | 0    | 0   | 2   | 0   | 0        | 0        | 0        | 0        |
| pseudogen -             | 0    | 0    | 1    | 1   | 2   | 1   | 0        | 0        | 0.06891  | 0.088648 |
| antisense -             | 0    | 0    | 0    | 1   | 0   | 0   | 0        | 0        | 0        | 0.12746  |
| lincRNA -               | 0    | 0    | 0    | 106 | 107 | 81  | 0        | 0        | 0        | 9.431123 |
| protein_co transmemt    | 1    | 0    | 1    | 0   | 0   | 0   | 0.103282 | 0        | 0.124616 | 0        |
| antisense -             | 3    | 3    | 3    | 1   | 0   | 0   | 0.162249 | 0.208062 | 0.195763 | 0.083944 |
| protein_co chromosom    | 1230 | 1061 | 1044 | 160 | 210 | 194 | 42.22161 | 46.70404 | 43.23926 | 8.52472  |
| processed_ -            | 9    | 3    | 5    | 11  | 13  | 15  | 0.591051 | 0.252646 | 0.396187 | 1.121257 |
| protein_co small_inte   | 30   | 17   | 21   | 24  | 40  | 18  | 2.576375 | 1.872173 | 2.175981 | 3.199112 |
| processed_ -            | 2    | 2    | 2    | 0   | 0   | 3   | 0.095402 | 0.122339 | 0.115108 | 0        |
| protein_co family_witl  | 85   | 69   | 58   | 75  | 62  | 79  | 1.574734 | 1.639256 | 1.296475 | 2.156652 |
| pseudogen ribosomal_    | 124  | 97   | 125  | 113 | 99  | 114 | 37.27155 | 37.3884  | 45.33294 | 52.7187  |
| lincRNA long_interf     | 16   | 8    | 6    | 0   | 0   | 0   | 0.642329 | 0.411848 | 0.290628 | 0        |
| pseudogen -             | 0    | 0    | 1    | 1   | 0   | 0   | 0        | 0        | 0.173014 | 0.222568 |
| antisense -             | 1    | 0    | 1    | 0   | 0   | 0   | 0.089145 | 0        | 0.107558 | 0        |
| antisense NUCB1_ant     | 4    | 1    | 1    | 0   | 0   | 0   | 0.433164 | 0.138868 | 0.130659 | 0        |
| lincRNA -               | 0    | 0    | 1    | 2   | 3   | 3   | 0        | 0        | 0.072626 | 0.186854 |
| protein_co protein_ph   | 145  | 83   | 102  | 35  | 65  | 41  | 1.506548 | 1.105866 | 1.278684 | 0.564435 |
| pseudogen -             | 0    | 1    | 0    | 0   | 0   | 0   | 0        | 0.110533 | 0        | 0        |
| antisense -             | 11   | 4    | 9    | 2   | 2   | 2   | 1.674643 | 0.780906 | 1.65318  | 0.472596 |
| pseudogen TatD_DNas     | 0    | 0    | 0    | 0   | 0   | 1   | 0        | 0        | 0        | 0        |
| lincRNA -               | 2    | 0    | 1    | 0   | 0   | 0   | 0.138319 | 0        | 0.083445 | 0        |
| antisense FAM83C_ai     | 0    | 0    | 1    | 5   | 1   | 2   | 0        | 0        | 0.160726 | 1.033804 |
| lincRNA -               | 0    | 0    | 0    | 3   | 0   | 3   | 0        | 0        | 0        | 0.688768 |
| pseudogen testis_speci  | 340  | 267  | 247  | 221 | 311 | 231 | 4.104687 | 4.133536 | 3.597876 | 4.141178 |
| lincRNA -               | 0    | 0    | 0    | 0   | 1   | 0   | 0        | 0        | 0        | 0        |
| pseudogen -             | 0    | 0    | 0    | 0   | 1   | 2   | 0        | 0        | 0        | 0        |
| IG_V_pseu immunogl      | 1    | 0    | 0    | 0   | 0   | 0   | 0.132458 | 0        | 0        | 0        |
| antisense -             | 0    | 2    | 0    | 5   | 7   | 3   | 0        | 0.216684 | 0        | 0.655674 |
| pseudogen SMT3_sup      | 12   | 10   | 9    | 22  | 22  | 18  | 1.981268 | 2.117246 | 1.792886 | 5.637872 |
| pseudogen -             | 1    | 0    | 0    | 1   | 2   | 2   | 0.269483 | 0        | 0        | 0.418275 |
| pseudogen -             | 1    | 4    | 0    | 10  | 8   | 2   | 0.092303 | 0.473463 | 0        | 1.432673 |
| processed_ -            | 6    | 5    | 6    | 8   | 9   | 8   | 0.115068 | 0.122965 | 0.138836 | 0.238134 |
| antisense -             | 36   | 28   | 37   | 28  | 45  | 24  | 2.696551 | 2.689512 | 3.34392  | 3.255327 |
| processed_ -            | 3    | 0    | 3    | 0   | 1   | 0   | 0.473637 | 0        | 0.57147  | 0        |
| pseudogen -             | 10   | 2    | 0    | 4   | 3   | 4   | 0.389129 | 0.0998   | 0        | 0.241593 |
| pseudogen transmemt     | 3    | 1    | 2    | 0   | 7   | 4   | 0.257637 | 0.110128 | 0.207236 | 0        |
| processed_ -            | 37   | 30   | 35   | 13  | 15  | 8   | 0.552702 | 0.574672 | 0.63082  | 0.301414 |
| pseudogen -             | 1    | 4    | 0    | 2   | 1   | 0   | 0.128115 | 0.657156 | 0        | 0.397704 |
| sense_intrc KDM5C_int   | 1    | 0    | 0    | 1   | 2   | 2   | 0.062106 | 0        | 0        | 0.096397 |
| lincRNA -               | 0    | 1    | 0    | 0   | 0   | 0   | 0        | 0.084929 | 0        | 0        |
| pseudogen -             | 0    | 1    | 0    | 3   | 2   | 0   | 0        | 0.15146  | 0        | 0.549973 |
| protein_co lysine_(K)-s | 0    | 1    | 0    | 0   | 1   | 1   | 0        | 0.025707 | 0        | 0        |
| lincRNA -               | 1    | 0    | 0    | 0   | 0   | 0   | 0.07789  | 0        | 0        | 0        |
| lincRNA -               | 0    | 0    | 0    | 2   | 1   | 1   | 0        | 0        | 0        | 0.281547 |

|                        |     |    |     |    |     |    |          |          |          |          |
|------------------------|-----|----|-----|----|-----|----|----------|----------|----------|----------|
| pseudogen: family_witl | 1   | 2  | 1   | 0  | 1   | 3  | 0.132458 | 0.339716 | 0.159818 | 0        |
| pseudogen: keratin_18  | 0   | 0  | 1   | 0  | 0   | 0  | 0        | 0        | 0.043721 | 0        |
| sense_intrc -          | 0   | 1  | 1   | 0  | 1   | 1  | 0        | 0.150324 | 0.141439 | 0        |
| antisense MCF2L_ant    | 1   | 1  | 0   | 7  | 4   | 12 | 0.065857 | 0.084452 | 0        | 0.715532 |
| sense_intrc -          | 1   | 5  | 6   | 1  | 1   | 3  | 0.545233 | 3.495918 | 3.947128 | 0.846277 |
| sense_intrc SMIM2_int  | 0   | 1  | 0   | 0  | 1   | 0  | 0        | 0.125795 | 0        | 0        |
| pseudogen: -           | 1   | 4  | 0   | 1  | 4   | 2  | 0.03236  | 0.16599  | 0        | 0.050228 |
| pseudogen: major_hist  | 1   | 1  | 0   | 0  | 2   | 1  | 0.060817 | 0.077989 | 0        | 0        |
| lincRNA -              | 0   | 0  | 1   | 1  | 0   | 0  | 0        | 0        | 0.202055 | 0.259928 |
| antisense -            | 0   | 0  | 0   | 0  | 1   | 0  | 0        | 0        | 0        | 0        |
| pseudogen: FBR-MuSV-   | 1   | 1  | 1   | 4  | 5   | 0  | 0.113261 | 0.145241 | 0.136656 | 0.703186 |
| antisense -            | 5   | 2  | 3   | 5  | 6   | 3  | 0.601154 | 0.308358 | 0.435196 | 0.933074 |
| pseudogen: mitochond   | 3   | 1  | 1   | 0  | 3   | 6  | 0.440972 | 0.188495 | 0.177353 | 0        |
| lincRNA -              | 1   | 0  | 0   | 0  | 0   | 0  | 0.024384 | 0        | 0        | 0        |
| pseudogen: -           | 3   | 3  | 4   | 2  | 0   | 3  | 0.296147 | 0.379767 | 0.476425 | 0.306441 |
| pseudogen: -           | 0   | 0  | 0   | 0  | 0   | 2  | 0        | 0        | 0        | 0        |
| sense_intrc HM13_intr  | 31  | 27 | 24  | 17 | 8   | 22 | 4.083119 | 4.560406 | 3.814079 | 3.47544  |
| processed_ -           | 3   | 4  | 4   | 1  | 5   | 2  | 0.054313 | 0.092865 | 0.087375 | 0.0281   |
| pseudogen: dual_specif | 93  | 69 | 96  | 51 | 71  | 20 | 2.402629 | 2.285926 | 2.992423 | 2.045052 |
| lincRNA -              | 0   | 2  | 1   | 2  | 5   | 0  | 0        | 0.178427 | 0.08394  | 0.215964 |
| lincRNA -              | 1   | 0  | 5   | 1  | 0   | 0  | 0.087318 | 0        | 0.526774 | 0.13553  |
| pseudogen: -           | 3   | 0  | 1   | 0  | 4   | 0  | 0.428872 | 0        | 0.172486 | 0        |
| pseudogen: -           | 0   | 0  | 1   | 5  | 9   | 1  | 0        | 0        | 0.08394  | 0.53991  |
| pseudogen: -           | 0   | 0  | 1   | 0  | 0   | 0  | 0        | 0        | 0.066325 | 0        |
| antisense -            | 1   | 1  | 0   | 1  | 1   | 2  | 0.072924 | 0.093514 | 0        | 0.113188 |
| pseudogen: dual_specif | 0   | 0  | 0   | 0  | 0   | 1  | 0        | 0        | 0        | 0        |
| processed_ hsa-mir-10  | 0   | 0  | 1   | 0  | 0   | 0  | 0        | 0        | 0.698463 | 0        |
| pseudogen: -           | 2   | 0  | 1   | 5  | 0   | 1  | 0.076932 | 0        | 0.046411 | 0.298523 |
| pseudogen: -           | 0   | 0  | 0   | 1  | 0   | 0  | 0        | 0        | 0        | 0.231047 |
| antisense -            | 3   | 11 | 2   | 16 | 12  | 9  | 0.240873 | 1.132582 | 0.193752 | 1.993967 |
| pseudogen: -           | 0   | 2  | 1   | 0  | 1   | 0  | 0        | 0.703272 | 0.330851 | 0        |
| pseudogen: -           | 0   | 1  | 0   | 0  | 0   | 0  | 0        | 0.085412 | 0        | 0        |
| lincRNA -              | 2   | 0  | 1   | 1  | 0   | 1  | 0.132271 | 0        | 0.079796 | 0.102651 |
| antisense -            | 0   | 0  | 1   | 2  | 2   | 1  | 0        | 0        | 0.240747 | 0.619403 |
| pseudogen: small_nucl  | 66  | 37 | 56  | 86 | 110 | 67 | 13.75441 | 9.888011 | 14.08101 | 27.81806 |
| antisense -            | 0   | 0  | 0   | 1  | 0   | 0  | 0        | 0        | 0        | 0.139961 |
| pseudogen: ribosomal_  | 1   | 5  | 9   | 1  | 6   | 0  | 0.176278 | 1.130259 | 1.914209 | 0.273608 |
| processed_ chondroitin | 0   | 1  | 1   | 1  | 0   | 0  | 0        | 0.00687  | 0.006464 | 0.008316 |
| pseudogen: -           | 0   | 1  | 0   | 0  | 0   | 0  | 0        | 0.02603  | 0        | 0        |
| lincRNA -              | 8   | 12 | 8   | 20 | 13  | 23 | 0.077185 | 0.148469 | 0.093128 | 0.299505 |
| pseudogen: signal_sequ | 11  | 11 | 7   | 6  | 14  | 9  | 0.533392 | 0.684    | 0.409543 | 0.451581 |
| pseudogen: -           | 1   | 0  | 0   | 1  | 2   | 0  | 0.022014 | 0        | 0        | 0.034169 |
| antisense -            | 107 | 99 | 113 | 24 | 25  | 35 | 1.624751 | 1.927736 | 2.070282 | 0.565646 |
| lincRNA -              | 0   | 0  | 0   | 1  | 2   | 0  | 0        | 0        | 0        | 0.048617 |
| pseudogen: -           | 11  | 13 | 18  | 4  | 6   | 5  | 4.912288 | 7.444641 | 9.698658 | 2.772564 |
| processed_ -           | 2   | 3  | 7   | 3  | 4   | 2  | 0.058176 | 0.111904 | 0.245675 | 0.135446 |
| sense_intrc -          | 0   | 1  | 0   | 0  | 1   | 1  | 0        | 0.123724 | 0        | 0        |
| antisense EPN2_antis   | 6   | 4  | 2   | 7  | 6   | 5  | 0.23642  | 0.202117 | 0.095085 | 0.428116 |
| lincRNA long_interf    | 10  | 12 | 9   | 14 | 9   | 18 | 0.225    | 0.346237 | 0.244328 | 0.488924 |
| antisense -            | 0   | 1  | 0   | 1  | 1   | 1  | 0        | 0.139189 | 0        | 0.168472 |
| lincRNA -              | 3   | 5  | 14  | 11 | 10  | 8  | 1.034339 | 2.210654 | 5.823949 | 5.886602 |
| antisense -            | 0   | 0  | 0   | 1  | 0   | 0  | 0        | 0        | 0        | 0.092126 |
| pseudogen: -           | 4   | 0  | 1   | 1  | 1   | 1  | 0.16239  | 0        | 0.048983 | 0.063013 |
| pseudogen: -           | 4   | 3  | 3   | 1  | 0   | 6  | 0.191583 | 0.184259 | 0.173367 | 0.074341 |
| pseudogen: -           | 0   | 0  | 0   | 0  | 1   | 0  | 0        | 0        | 0        | 0        |
| lincRNA -              | 0   | 0  | 0   | 0  | 0   | 1  | 0        | 0        | 0        | 0        |
| processed_ -           | 3   | 1  | 2   | 0  | 0   | 0  | 0.246357 | 0.105306 | 0.198163 | 0        |
| pseudogen: ribosomal_  | 0   | 1  | 1   | 0  | 0   | 0  | 0        | 0.072185 | 0.067918 | 0        |
| 3prime_ov-             | 63  | 88 | 76  | 27 | 21  | 42 | 2.661325 | 4.767047 | 3.873638 | 1.770319 |
| pseudogen: -           | 0   | 0  | 0   | 0  | 1   | 0  | 0        | 0        | 0        | 0        |
| antisense -            | 3   | 8  | 6   | 0  | 1   | 5  | 0.275284 | 0.941367 | 0.664292 | 0        |
| antisense -            | 1   | 1  | 1   | 0  | 0   | 2  | 0.121477 | 0.155777 | 0.146569 | 0        |
| pseudogen: -           | 1   | 0  | 0   | 0  | 0   | 0  | 0.052923 | 0        | 0        | 0        |
| pseudogen: -           | 0   | 0  | 0   | 0  | 0   | 1  | 0        | 0        | 0        | 0        |
| pseudogen: dpy-19-like | 1   | 2  | 2   | 7  | 1   | 1  | 0.020081 | 0.051503 | 0.048459 | 0.218184 |

|                         |     |     |     |     |     |     |          |          |          |          |
|-------------------------|-----|-----|-----|-----|-----|-----|----------|----------|----------|----------|
| processed_-             | 106 | 86  | 73  | 85  | 82  | 70  | 9.395731 | 9.775354 | 7.807206 | 11.6943  |
| pseudogen_-             | 0   | 0   | 0   | 4   | 2   | 1   | 0        | 0        | 0        | 0.355023 |
| sense_intrc_-           | 1   | 3   | 1   | 0   | 4   | 0   | 0.129889 | 0.499694 | 0.156719 | 0        |
| pseudogen_-             | 0   | 0   | 0   | 0   | 3   | 2   | 0        | 0        | 0        | 0        |
| processed_-             | 0   | 3   | 0   | 0   | 1   | 0   | 0        | 0.225769 | 0        | 0        |
| pseudogen_-             | 6   | 3   | 7   | 5   | 8   | 2   | 1.480737 | 0.949418 | 2.084361 | 1.915258 |
| lincRNA_-               | 0   | 0   | 0   | 1   | 0   | 0   | 0        | 0        | 0        | 0.360296 |
| processed_ TOPORS_ar    | 17  | 5   | 12  | 14  | 9   | 16  | 0.79713  | 0.300649 | 0.678906 | 1.018917 |
| pseudogen_-             | 4   | 3   | 4   | 6   | 5   | 7   | 0.169431 | 0.162953 | 0.204428 | 0.39447  |
| lincRNA_-               | 0   | 0   | 0   | 1   | 0   | 1   | 0        | 0        | 0        | 0.064123 |
| pseudogen: TGF-beta_a   | 0   | 0   | 0   | 0   | 1   | 0   | 0        | 0        | 0        | 0        |
| pseudogen_-             | 0   | 0   | 0   | 0   | 0   | 2   | 0        | 0        | 0        | 0        |
| pseudogen: mitochond    | 0   | 0   | 0   | 0   | 1   | 0   | 0        | 0        | 0        | 0        |
| antisense_-             | 0   | 0   | 0   | 1   | 1   | 0   | 0        | 0        | 0        | 0.113718 |
| lincRNA_-               | 5   | 2   | 3   | 1   | 2   | 1   | 0.479448 | 0.24593  | 0.347089 | 0.148834 |
| antisense_-             | 105 | 78  | 98  | 87  | 116 | 85  | 2.726164 | 2.596968 | 3.069989 | 3.506004 |
| protein_co Uncharacte   | 1   | 0   | 0   | 1   | 7   | 1   | 0.039906 | 0        | 0        | 0.06194  |
| antisense_-             | 2   | 0   | 0   | 3   | 9   | 2   | 0.213136 | 0        | 0        | 0.496226 |
| antisense_-             | 2   | 2   | 4   | 8   | 5   | 2   | 0.144946 | 0.185873 | 0.349771 | 0.899905 |
| pseudogen: ribosomal_   | 1   | 0   | 0   | 0   | 0   | 0   | 0.059279 | 0        | 0        | 0        |
| antisense GYG2_anti     | 3   | 0   | 0   | 0   | 1   | 0   | 0.273146 | 0        | 0        | 0        |
| pseudogen_-             | 1   | 0   | 0   | 2   | 2   | 0   | 0.056426 | 0        | 0        | 0.175162 |
| antisense JARID2_ant    | 3   | 1   | 3   | 5   | 18  | 19  | 0.309165 | 0.132153 | 0.373025 | 0.799778 |
| pseudogen: DBF4_hom     | 0   | 0   | 0   | 2   | 1   | 2   | 0        | 0        | 0        | 0.076934 |
| lincRNA_-               | 0   | 0   | 0   | 9   | 10  | 14  | 0        | 0        | 0        | 0.867574 |
| lincRNA_-               | 0   | 1   | 1   | 8   | 7   | 12  | 0        | 0.213985 | 0.201336 | 2.072023 |
| lincRNA_-               | 0   | 0   | 0   | 0   | 0   | 1   | 0        | 0        | 0        | 0        |
| lincRNA_-               | 36  | 39  | 36  | 18  | 23  | 34  | 4.328309 | 6.01298  | 5.222354 | 3.359068 |
| antisense_-             | 105 | 79  | 88  | 95  | 99  | 71  | 5.171693 | 4.989762 | 5.229669 | 7.26269  |
| pseudogen_-             | 2   | 1   | 0   | 0   | 0   | 0   | 0.026567 | 0.017034 | 0        | 0        |
| pseudogen: ribosomal_   | 4   | 4   | 1   | 4   | 8   | 3   | 0.211932 | 0.271773 | 0.063927 | 0.328948 |
| pseudogen_-             | 2   | 0   | 0   | 4   | 5   | 4   | 0.413128 | 0        | 0        | 1.282463 |
| antisense_-             | 7   | 8   | 14  | 7   | 4   | 6   | 0.131292 | 0.192415 | 0.316823 | 0.203783 |
| lincRNA_-               | 0   | 0   | 0   | 3   | 7   | 6   | 0        | 0        | 0        | 0.366957 |
| antisense_-             | 5   | 1   | 4   | 1   | 1   | 3   | 0.263427 | 0.067562 | 0.254272 | 0.081775 |
| pseudogen: ferritin_lig | 0   | 0   | 0   | 0   | 0   | 1   | 0        | 0        | 0        | 0        |
| antisense_-             | 3   | 1   | 1   | 1   | 0   | 0   | 0.27691  | 0.118366 | 0.111369 | 0.143267 |
| processed_-             | 1   | 0   | 2   | 0   | 2   | 0   | 0.022149 | 0        | 0.053449 | 0        |
| sense_intrc AGAP1_int   | 7   | 1   | 5   | 8   | 20  | 8   | 0.494322 | 0.090557 | 0.42602  | 0.876865 |
| antisense_-             | 7   | 13  | 9   | 1   | 1   | 3   | 0.284922 | 0.678548 | 0.441996 | 0.063177 |
| protein_co Protein_LO   | 227 | 216 | 190 | 3   | 6   | 3   | 2.522283 | 3.077734 | 2.547238 | 0.051739 |
| processed_long_inter    | 0   | 0   | 0   | 7   | 2   | 7   | 0        | 0        | 0        | 0.152533 |
| antisense_-             | 13  | 6   | 6   | 12  | 12  | 10  | 0.496393 | 0.293794 | 0.276428 | 0.711203 |
| pseudogen_-             | 0   | 0   | 0   | 1   | 0   | 0   | 0        | 0        | 0        | 0.054232 |
| pseudogen: NADH_deh     | 2   | 0   | 0   | 2   | 2   | 4   | 0.201677 | 0        | 0        | 0.313031 |
| pseudogen_-             | 0   | 0   | 0   | 1   | 0   | 2   | 0        | 0        | 0        | 0.087266 |
| pseudogen_-             | 1   | 0   | 0   | 0   | 0   | 0   | 0.133971 | 0        | 0        | 0        |
| pseudogen: ribosomal_   | 175 | 123 | 126 | 169 | 177 | 194 | 9.464536 | 8.530525 | 8.222046 | 14.1866  |
| pseudogen_-             | 1   | 5   | 2   | 1   | 2   | 3   | 0.045348 | 0.290763 | 0.10943  | 0.070387 |
| pseudogen: SUMO1_ps     | 0   | 0   | 0   | 0   | 1   | 0   | 0        | 0        | 0        | 0        |
| pseudogen_-             | 0   | 1   | 1   | 0   | 3   | 4   | 0        | 0.161639 | 0.152085 | 0        |
| antisense_-             | 5   | 5   | 2   | 33  | 51  | 9   | 0.162249 | 0.208062 | 0.078305 | 1.662099 |
| antisense_-             | 0   | 0   | 0   | 0   | 1   | 0   | 0        | 0        | 0        | 0        |
| lincRNA_-               | 12  | 15  | 15  | 10  | 16  | 6   | 0.247659 | 0.396984 | 0.373518 | 0.320334 |
| protein_co NFAT_activ   | 9   | 2   | 2   | 49  | 61  | 33  | 0.075332 | 0.021467 | 0.020198 | 0.636596 |
| lincRNA long_inter      | 0   | 0   | 0   | 2   | 4   | 1   | 0        | 0        | 0        | 0.271061 |
| pseudogen_-             | 0   | 2   | 3   | 3   | 5   | 0   | 0        | 0.110941 | 0.156574 | 0.20142  |
| lincRNA_-               | 0   | 0   | 0   | 1   | 0   | 0   | 0        | 0        | 0        | 0.299505 |
| lincRNA_-               | 0   | 0   | 0   | 1   | 0   | 1   | 0        | 0        | 0        | 0.163183 |
| pseudogen_-             | 0   | 0   | 1   | 0   | 1   | 0   | 0        | 0        | 0.287185 | 0        |
| antisense_-             | 10  | 5   | 3   | 3   | 4   | 4   | 2.012447 | 1.290339 | 0.72844  | 0.937079 |
| pseudogen: glyceraldeh  | 5   | 2   | 1   | 11  | 9   | 4   | 0.233052 | 0.119542 | 0.056238 | 0.795803 |
| antisense GNAS_anti     | 28  | 28  | 11  | 67  | 51  | 54  | 1.135744 | 1.456431 | 0.538348 | 4.218206 |
| antisense RBMS3_ant     | 1   | 0   | 1   | 0   | 0   | 0   | 0.084639 | 0        | 0.102122 | 0        |
| pseudogen: glyceraldeh  | 0   | 0   | 0   | 0   | 0   | 1   | 0        | 0        | 0        | 0        |

|                         |     |     |     |     |     |     |          |          |          |          |
|-------------------------|-----|-----|-----|-----|-----|-----|----------|----------|----------|----------|
| lincRNA -               | 8   | 2   | 7   | 0   | 1   | 0   | 0.099291 | 0.031832 | 0.104825 | 0        |
| lincRNA -               | 0   | 0   | 0   | 0   | 1   | 1   | 0        | 0        | 0        | 0        |
| pseudogen: POU_class_   | 11  | 8   | 6   | 76  | 85  | 66  | 0.769836 | 0.717968 | 0.506646 | 8.255619 |
| pseudogen: -            | 0   | 0   | 0   | 0   | 1   | 0   | 0        | 0        | 0        | 0        |
| protein_co NK1_home     | 0   | 0   | 0   | 0   | 1   | 2   | 0        | 0        | 0        | 0        |
| lincRNA -               | 17  | 15  | 33  | 2   | 1   | 3   | 0.399164 | 0.451651 | 0.934898 | 0.072889 |
| pseudogen: nuclear_sp   | 0   | 1   | 1   | 1   | 5   | 4   | 0        | 0.035517 | 0.033417 | 0.042989 |
| pseudogen: olfactory_r  | 0   | 0   | 0   | 1   | 0   | 3   | 0        | 0        | 0        | 0.078258 |
| pseudogen: suppressio   | 0   | 0   | 0   | 1   | 2   | 10  | 0        | 0        | 0        | 0.065627 |
| pseudogen: -            | 1   | 7   | 2   | 1   | 0   | 4   | 0.169278 | 1.519526 | 0.408487 | 0.262743 |
| processed_ -            | 6   | 3   | 5   | 1   | 4   | 1   | 0.129233 | 0.082861 | 0.129939 | 0.033431 |
| pseudogen: -            | 0   | 0   | 1   | 0   | 1   | 0   | 0        | 0        | 0.182502 | 0        |
| processed_ long_inter   | 0   | 0   | 0   | 2   | 0   | 0   | 0        | 0        | 0        | 0.041072 |
| pseudogen: -            | 2   | 0   | 0   | 0   | 0   | 1   | 0.146531 | 0        | 0        | 0        |
| pseudogen: -            | 0   | 0   | 0   | 0   | 0   | 1   | 0        | 0        | 0        | 0        |
| pseudogen: small_nucl   | 1   | 1   | 4   | 2   | 4   | 3   | 0.19376  | 0.24847  | 0.935132 | 0.601486 |
| protein_co ring_finger  | 0   | 3   | 0   | 0   | 2   | 2   | 0        | 0.138335 | 0        | 0        |
| antisense -             | 4   | 0   | 3   | 2   | 0   | 1   | 0.432166 | 0        | 0.391075 | 0.335391 |
| pseudogen: nuclear_un   | 14  | 11  | 6   | 10  | 11  | 8   | 0.744286 | 0.749918 | 0.384867 | 0.825168 |
| pseudogen: -            | 0   | 0   | 0   | 0   | 0   | 2   | 0        | 0        | 0        | 0        |
| lincRNA long_inter      | 0   | 3   | 0   | 5   | 3   | 1   | 0        | 0.065716 | 0        | 0.132568 |
| lincRNA -               | 0   | 0   | 0   | 0   | 1   | 0   | 0        | 0        | 0        | 0        |
| pseudogen: matrix-rem   | 4   | 2   | 3   | 0   | 0   | 0   | 0.023445 | 0.015032 | 0.021216 | 0        |
| pseudogen: -            | 3   | 0   | 2   | 3   | 8   | 5   | 0.100622 | 0        | 0.080938 | 0.15618  |
| antisense -             | 9   | 7   | 12  | 4   | 8   | 3   | 0.590224 | 0.588683 | 0.949519 | 0.40716  |
| pseudogen: H3_histone   | 400 | 368 | 327 | 603 | 729 | 822 | 18.35226 | 21.65143 | 18.10195 | 42.94151 |
| lincRNA long_inter      | 0   | 1   | 0   | 1   | 1   | 1   | 0        | 0.210982 | 0        | 0.255368 |
| lincRNA -               | 0   | 1   | 0   | 1   | 3   | 5   | 0        | 0.089081 | 0        | 0.107822 |
| pseudogen: ribosomal_   | 0   | 0   | 0   | 3   | 3   | 0   | 0        | 0        | 0        | 0.452048 |
| pseudogen: -            | 0   | 0   | 0   | 2   | 1   | 3   | 0        | 0        | 0        | 0.247972 |
| pseudogen: -            | 7   | 0   | 1   | 0   | 0   | 1   | 0.475007 | 0        | 0.081875 | 0        |
| pseudogen: nucleopho:   | 6   | 8   | 15  | 3   | 1   | 6   | 0.38122  | 0.651814 | 1.149909 | 0.295853 |
| pseudogen: -            | 2   | 6   | 8   | 3   | 6   | 2   | 0.430184 | 1.654949 | 2.076165 | 1.001557 |
| pseudogen: -            | 1   | 0   | 0   | 1   | 2   | 0   | 0.022751 | 0        | 0        | 0.035313 |
| pseudogen: peptidylpro  | 0   | 0   | 1   | 2   | 2   | 0   | 0        | 0        | 0.419078 | 1.078219 |
| antisense -             | 0   | 0   | 1   | 162 | 251 | 82  | 0        | 0        | 0.106345 | 22.16227 |
| pseudogen: -            | 2   | 0   | 1   | 1   | 3   | 1   | 0.303495 | 0        | 0.183092 | 0.235533 |
| pseudogen: proliferatic | 0   | 0   | 1   | 0   | 2   | 0   | 0        | 0        | 0.047146 | 0        |
| pseudogen: cytochrom    | 2   | 2   | 2   | 0   | 0   | 2   | 0.302516 | 0.387934 | 0.365003 | 0        |
| pseudogen: poly(rC)_bi  | 1   | 1   | 0   | 2   | 0   | 2   | 0.047994 | 0.061545 | 0        | 0.148986 |
| processed_ -            | 36  | 17  | 31  | 36  | 46  | 23  | 0.494447 | 0.299416 | 0.51372  | 0.76745  |
| lincRNA -               | 0   | 0   | 0   | 3   | 1   | 1   | 0        | 0        | 0        | 0.255966 |
| pseudogen: -            | 0   | 0   | 0   | 0   | 1   | 0   | 0        | 0        | 0        | 0        |
| processed_ DICER1_an    | 20  | 17  | 10  | 94  | 112 | 25  | 0.403702 | 0.440037 | 0.243545 | 2.945029 |
| protein_co ankyrin_re   | 0   | 0   | 0   | 0   | 0   | 1   | 0        | 0        | 0        | 0        |
| pseudogen: -            | 0   | 0   | 0   | 1   | 0   | 0   | 0        | 0        | 0        | 0.111284 |
| pseudogen: -            | 1   | 3   | 1   | 0   | 0   | 2   | 0.03458  | 0.133031 | 0.041722 | 0        |
| pseudogen: -            | 0   | 0   | 1   | 0   | 0   | 0   | 0        | 0        | 0.024344 | 0        |
| antisense -             | 2   | 2   | 4   | 2   | 1   | 0   | 0.087481 | 0.112182 | 0.211103 | 0.135783 |
| processed_ -            | 1   | 1   | 2   | 9   | 21  | 7   | 0.028384 | 0.036398 | 0.068493 | 0.3965   |
| lincRNA -               | 0   | 0   | 0   | 1   | 0   | 0   | 0        | 0        | 0        | 0.083463 |
| pseudogen: -            | 0   | 0   | 0   | 2   | 0   | 0   | 0        | 0        | 0        | 0.424372 |
| pseudogen: olfactory_r  | 2   | 0   | 0   | 0   | 0   | 0   | 0.105489 | 0        | 0        | 0        |
| lincRNA -               | 0   | 0   | 0   | 0   | 0   | 1   | 0        | 0        | 0        | 0        |
| antisense -             | 0   | 0   | 1   | 1   | 0   | 0   | 0        | 0        | 0.07594  | 0.097691 |
| pseudogen: high_mobil   | 8   | 7   | 6   | 14  | 14  | 14  | 1.23802  | 1.389137 | 1.120307 | 3.362763 |
| antisense -             | 1   | 3   | 2   | 0   | 6   | 4   | 0.027599 | 0.106174 | 0.066599 | 0        |
| pseudogen: C-terminal_  | 0   | 0   | 0   | 2   | 1   | 1   | 0        | 0        | 0        | 0.109115 |
| pseudogen: -            | 1   | 3   | 1   | 7   | 2   | 2   | 0.083732 | 0.322124 | 0.101028 | 0.909748 |
| antisense -             | 0   | 0   | 0   | 2   | 0   | 0   | 0        | 0        | 0        | 0.094458 |
| protein_co KIAA0040     | 0   | 0   | 0   | 2   | 5   | 0   | 0        | 0        | 0        | 0.031893 |
| antisense -             | 4   | 1   | 1   | 18  | 20  | 10  | 0.432166 | 0.138548 | 0.130358 | 3.018517 |
| pseudogen: small_nucl   | 1   | 1   | 0   | 0   | 0   | 0   | 0.213136 | 0.273317 | 0        | 0        |
| pseudogen: bromodom     | 0   | 0   | 0   | 1   | 0   | 0   | 0        | 0        | 0        | 0.039945 |
| processed_ long_inter   | 152 | 141 | 166 | 1   | 2   | 0   | 1.931513 | 2.297643 | 2.545131 | 0.019724 |

|                        |     |     |     |     |     |     |          |          |          |          |
|------------------------|-----|-----|-----|-----|-----|-----|----------|----------|----------|----------|
| antisense -            | 38  | 63  | 44  | 11  | 10  | 18  | 3.098819 | 6.588134 | 4.329256 | 1.392309 |
| pseudogen: -           | 1   | 1   | 0   | 1   | 2   | 1   | 0.058539 | 0.075068 | 0        | 0.090861 |
| antisense -            | 1   | 0   | 1   | 2   | 2   | 2   | 0.0551   | 0        | 0.066481 | 0.171045 |
| pseudogen: heterogene  | 0   | 1   | 1   | 3   | 0   | 0   | 0        | 0.068407 | 0.064363 | 0.248395 |
| antisense -            | 0   | 0   | 0   | 3   | 1   | 3   | 0        | 0        | 0        | 0.387127 |
| sense_intrc ZNRF3_intr | 0   | 3   | 1   | 1   | 4   | 7   | 0        | 0.26764  | 0.08394  | 0.107982 |
| antisense -            | 12  | 12  | 9   | 0   | 1   | 2   | 0.645275 | 0.827474 | 0.583921 | 0        |
| antisense -            | 2   | 1   | 5   | 5   | 1   | 3   | 0.139762 | 0.089612 | 0.421576 | 0.542323 |
| antisense HCFC1_ant    | 2   | 1   | 0   | 0   | 0   | 1   | 0.267943 | 0.171799 | 0        | 0        |
| lincRNA -              | 3   | 1   | 0   | 1   | 3   | 0   | 0.119212 | 0.050957 | 0        | 0.061678 |
| pseudogen: PRELI_dom   | 3   | 5   | 1   | 2   | 3   | 1   | 0.21411  | 0.457609 | 0.086112 | 0.221552 |
| antisense -            | 0   | 0   | 1   | 1   | 0   | 1   | 0        | 0        | 0.11961  | 0.153869 |
| pseudogen: interferon_ | 4   | 0   | 1   | 4   | 8   | 2   | 0.446572 | 0        | 0.134704 | 0.693141 |
| processed_ long_interf | 646 | 507 | 513 | 461 | 460 | 348 | 11.87415 | 11.95053 | 11.3772  | 13.15229 |
| pseudogen: ribosomal_  | 0   | 1   | 0   | 0   | 0   | 0   | 0        | 0.18732  | 0        | 0        |
| pseudogen: tubulin_fol | 0   | 0   | 0   | 4   | 1   | 4   | 0        | 0        | 0        | 0.893004 |
| antisense BHLHE40_ε    | 10  | 7   | 15  | 20  | 9   | 8   | 0.199024 | 0.178654 | 0.360201 | 0.617825 |
| pseudogen: calponin_2  | 0   | 0   | 0   | 0   | 0   | 1   | 0        | 0        | 0        | 0        |
| sense_intrc -          | 0   | 0   | 0   | 0   | 1   | 0   | 0        | 0        | 0        | 0        |
| antisense -            | 2   | 2   | 5   | 3   | 0   | 1   | 0.144722 | 0.185586 | 0.436539 | 0.336944 |
| processed_ -           | 0   | 4   | 0   | 0   | 0   | 0   | 0        | 0.234653 | 0        | 0        |
| antisense -            | 3   | 0   | 0   | 1   | 0   | 3   | 0.290041 | 0        | 0        | 0.150061 |
| antisense RMDN2_an     | 0   | 0   | 1   | 0   | 1   | 2   | 0        | 0        | 0.065862 | 0        |
| antisense -            | 12  | 4   | 7   | 14  | 20  | 4   | 0.612274 | 0.261718 | 0.430934 | 1.108724 |
| pseudogen: -           | 8   | 7   | 12  | 119 | 88  | 74  | 0.303987 | 0.341093 | 0.550167 | 7.018474 |
| pseudogen: -           | 1   | 0   | 0   | 1   | 0   | 1   | 0.21411  | 0        | 0        | 0.332328 |
| protein_co UDP-Gal:be  | 85  | 62  | 68  | 90  | 108 | 54  | 2.363969 | 2.211179 | 2.281812 | 3.885043 |
| pseudogen: heat_shock  | 0   | 0   | 0   | 5   | 0   | 0   | 0        | 0        | 0        | 0.234471 |
| antisense GSN_antise   | 417 | 290 | 315 | 6   | 14  | 9   | 4.105215 | 3.661063 | 3.741609 | 0.091681 |
| pseudogen: -           | 1   | 0   | 0   | 4   | 6   | 4   | 0.140389 | 0        | 0        | 0.871614 |
| antisense -            | 3   | 5   | 8   | 4   | 4   | 2   | 0.181043 | 0.386936 | 0.582502 | 0.374671 |
| processed_ ARHGEF7_ε   | 0   | 0   | 0   | 0   | 0   | 1   | 0        | 0        | 0        | 0        |
| pseudogen: fem-1_hom   | 0   | 2   | 0   | 0   | 0   | 0   | 0        | 0.060523 | 0        | 0        |
| protein_co Protein_LO  | 9   | 6   | 8   | 5   | 2   | 11  | 0.524888 | 0.44873  | 0.56294  | 0.452611 |
| antisense -            | 0   | 0   | 0   | 1   | 0   | 0   | 0        | 0        | 0        | 0.179261 |
| processed_ -           | 37  | 24  | 29  | 16  | 15  | 46  | 1.054669 | 0.877274 | 0.99738  | 0.707889 |
| lincRNA -              | 0   | 0   | 0   | 0   | 0   | 1   | 0        | 0        | 0        | 0        |
| lincRNA -              | 1   | 0   | 0   | 1   | 0   | 1   | 0.033208 | 0        | 0        | 0.051544 |
| antisense TSPEAR_anti  | 5   | 9   | 5   | 24  | 48  | 14  | 0.168912 | 0.389891 | 0.203802 | 1.25844  |
| pseudogen: -           | 0   | 0   | 4   | 0   | 0   | 0   | 0        | 0        | 0.418303 | 0        |
| antisense TM4SF19_ε    | 0   | 1   | 2   | 5   | 7   | 2   | 0        | 0.032876 | 0.061865 | 0.198961 |
| antisense -            | 0   | 3   | 0   | 0   | 0   | 0   | 0        | 0.318709 | 0        | 0        |
| antisense -            | 0   | 2   | 1   | 0   | 1   | 0   | 0        | 0.194595 | 0.091546 | 0        |
| processed_ CPB2_antis  | 1   | 0   | 1   | 1   | 4   | 1   | 0.062771 | 0        | 0.075737 | 0.097429 |
| antisense RBMS3_anti   | 4   | 4   | 2   | 1   | 3   | 5   | 0.305971 | 0.392364 | 0.184586 | 0.118727 |
| pseudogen: -           | 1   | 4   | 0   | 1   | 2   | 1   | 0.063709 | 0.326792 | 0        | 0.098886 |
| sense_intrc RHOA_intrc | 15  | 13  | 7   | 2   | 7   | 5   | 1.360445 | 1.511968 | 0.766013 | 0.281547 |
| antisense -            | 2   | 4   | 1   | 1   | 0   | 4   | 0.166572 | 0.42721  | 0.100489 | 0.129271 |
| pseudogen: -           | 0   | 1   | 0   | 1   | 2   | 3   | 0        | 0.313176 | 0        | 0.379061 |
| processed_ ASH1L_anti  | 21  | 28  | 20  | 57  | 66  | 39  | 0.503678 | 0.861194 | 0.578778 | 2.121969 |
| pseudogen: -           | 0   | 0   | 1   | 0   | 0   | 0   | 0        | 0        | 0.057848 | 0        |
| pseudogen: zinc_and_ri | 0   | 0   | 0   | 0   | 1   | 0   | 0        | 0        | 0        | 0        |
| pseudogen: -           | 0   | 0   | 0   | 0   | 0   | 1   | 0        | 0        | 0        | 0        |
| antisense NEXN_antis   | 17  | 20  | 19  | 3   | 6   | 3   | 0.347788 | 0.524693 | 0.468994 | 0.095262 |
| protein_co chromosom   | 0   | 0   | 0   | 0   | 2   | 0   | 0        | 0        | 0        | 0        |
| antisense -            | 0   | 2   | 1   | 0   | 0   | 0   | 0        | 0.219853 | 0.103429 | 0        |
| pseudogen: -           | 1   | 1   | 0   | 0   | 1   | 0   | 0.113811 | 0.145946 | 0        | 0        |
| pseudogen: zinc_finger | 31  | 28  | 35  | 47  | 59  | 47  | 0.528578 | 0.612231 | 0.720052 | 1.243873 |
| pseudogen: -           | 5   | 3   | 2   | 2   | 2   | 3   | 0.119985 | 0.092318 | 0.057907 | 0.074493 |
| pseudogen: -           | 17  | 14  | 6   | 3   | 6   | 0   | 1.607118 | 1.697212 | 0.684381 | 0.4402   |
| lincRNA eosinophil_    | 2   | 5   | 4   | 1   | 0   | 1   | 0.064057 | 0.205361 | 0.154578 | 0.049713 |
| antisense -            | 1   | 3   | 0   | 0   | 0   | 0   | 0.108542 | 0.417568 | 0        | 0        |
| processed_ TTC28_anti  | 47  | 44  | 63  | 149 | 197 | 123 | 0.376145 | 0.451564 | 0.608339 | 1.85086  |
| pseudogen: -           | 0   | 0   | 0   | 1   | 0   | 0   | 0        | 0        | 0        | 0.025984 |
| pseudogen: cytochrom   | 1   | 2   | 1   | 3   | 8   | 2   | 0.244219 | 0.626352 | 0.294664 | 1.137184 |

|                         |     |     |     |     |     |     |          |          |          |          |
|-------------------------|-----|-----|-----|-----|-----|-----|----------|----------|----------|----------|
| processed_ UBOX5_ant    | 12  | 4   | 10  | 4   | 6   | 7   | 0.313996 | 0.134218 | 0.315712 | 0.162455 |
| protein_co paraneopla   | 23  | 16  | 18  | 16  | 12  | 20  | 0.478257 | 0.426642 | 0.4516   | 0.516398 |
| pseudogeni -            | 3   | 0   | 0   | 0   | 0   | 0   | 0.17739  | 0        | 0        | 0        |
| pseudogeni: FXYD_dom    | 1   | 0   | 0   | 1   | 0   | 0   | 0.162813 | 0        | 0        | 0.252708 |
| pseudogeni: cytochrom   | 3   | 1   | 2   | 0   | 0   | 0   | 0.383297 | 0.163841 | 0.308313 | 0        |
| pseudogeni: vomeronas   | 1   | 0   | 0   | 4   | 1   | 0   | 0.044572 | 0        | 0        | 0.276729 |
| protein_co Uncharacte   | 4   | 5   | 5   | 1   | 4   | 0   | 0.368487 | 0.590666 | 0.555752 | 0.142986 |
| lincRNA -               | 0   | 0   | 0   | 0   | 2   | 2   | 0        | 0        | 0        | 0        |
| pseudogeni -            | 1   | 0   | 0   | 3   | 3   | 0   | 0.091226 | 0        | 0        | 0.424785 |
| antisense MORC2_an      | 106 | 59  | 66  | 93  | 113 | 169 | 2.29048  | 1.634865 | 1.72073  | 3.119134 |
| pseudogeni -            | 1   | 1   | 2   | 2   | 1   | 0   | 0.111378 | 0.142826 | 0.268767 | 0.345747 |
| pseudogeni -            | 0   | 0   | 0   | 0   | 1   | 0   | 0        | 0        | 0        | 0        |
| antisense -             | 0   | 0   | 0   | 8   | 16  | 9   | 0        | 0        | 0        | 0.573069 |
| lincRNA -               | 2   | 3   | 0   | 5   | 3   | 3   | 0.031768 | 0.061108 | 0        | 0.123272 |
| processed_ -            | 82  | 79  | 97  | 64  | 74  | 47  | 1.936043 | 2.39187  | 2.763255 | 2.345371 |
| pseudogeni -            | 15  | 17  | 13  | 5   | 8   | 3   | 0.814063 | 1.183109 | 0.851252 | 0.421179 |
| antisense -             | 3   | 0   | 2   | 0   | 0   | 3   | 0.215752 | 0        | 0.173544 | 0        |
| pseudogeni -            | 0   | 0   | 0   | 0   | 0   | 1   | 0        | 0        | 0        | 0        |
| lincRNA -               | 1   | 1   | 1   | 13  | 10  | 2   | 0.005305 | 0.006803 | 0.006401 | 0.107041 |
| pseudogeni -            | 7   | 5   | 7   | 3   | 4   | 6   | 0.398822 | 0.365309 | 0.481201 | 0.265297 |
| antisense -             | 1   | 1   | 2   | 6   | 8   | 6   | 0.05119  | 0.065644 | 0.123527 | 0.476724 |
| antisense ASMTL_ant     | 40  | 43  | 44  | 27  | 52  | 30  | 2.232858 | 3.078073 | 2.963479 | 2.339351 |
| pseudogeni -            | 1   | 1   | 2   | 5   | 4   | 4   | 0.061214 | 0.078498 | 0.147717 | 0.475064 |
| antisense -             | 0   | 1   | 2   | 0   | 3   | 1   | 0        | 0.103851 | 0.195425 | 0        |
| protein_co -            | 1   | 0   | 0   | 1   | 0   | 0   | 0.010367 | 0        | 0        | 0.016091 |
| antisense -             | 0   | 4   | 3   | 2   | 5   | 0   | 0        | 0.320265 | 0.226001 | 0.193821 |
| pseudogeni -            | 3   | 1   | 1   | 0   | 0   | 1   | 0.177614 | 0.075921 | 0.071434 | 0        |
| lincRNA -               | 4   | 1   | 3   | 1   | 0   | 3   | 0.318438 | 0.102088 | 0.28816  | 0.123565 |
| pseudogeni: fatty_acid_ | 2   | 1   | 0   | 1   | 7   | 1   | 0.229853 | 0.147377 | 0        | 0.178382 |
| antisense -             | 6   | 1   | 3   | 0   | 1   | 0   | 0.386988 | 0.082709 | 0.233462 | 0        |
| pseudogeni -            | 12  | 9   | 7   | 5   | 5   | 1   | 0.955314 | 0.918791 | 0.672374 | 0.617825 |
| pseudogeni -            | 2   | 0   | 2   | 0   | 0   | 0   | 0.078543 | 0        | 0.094766 | 0        |
| lincRNA -               | 0   | 0   | 0   | 1   | 2   | 0   | 0        | 0        | 0        | 0.028789 |
| antisense MYCBP2_ar     | 1   | 1   | 0   | 0   | 1   | 3   | 0.056223 | 0.072098 | 0        | 0        |
| lincRNA -               | 0   | 0   | 0   | 0   | 1   | 0   | 0        | 0        | 0        | 0        |
| antisense -             | 0   | 0   | 0   | 3   | 0   | 0   | 0        | 0        | 0        | 0.477767 |
| pseudogeni -            | 0   | 0   | 0   | 0   | 1   | 0   | 0        | 0        | 0        | 0        |
| pseudogeni: glyceraldeh | 1   | 0   | 0   | 0   | 0   | 0   | 0.050043 | 0        | 0        | 0        |
| pseudogeni -            | 1   | 2   | 1   | 2   | 5   | 0   | 0.08541  | 0.219052 | 0.103052 | 0.265136 |
| pseudogeni: heat_shock  | 4   | 3   | 4   | 2   | 1   | 0   | 0.732657 | 0.704646 | 0.883992 | 0.568592 |
| pseudogeni: glutathione | 0   | 0   | 0   | 1   | 3   | 0   | 0        | 0        | 0        | 0.110272 |
| processed_ -            | 0   | 0   | 0   | 4   | 4   | 2   | 0        | 0        | 0        | 0.139291 |
| antisense -             | 1   | 1   | 1   | 1   | 2   | 6   | 0.027911 | 0.035792 | 0.033676 | 0.043321 |
| lincRNA -               | 1   | 4   | 3   | 5   | 2   | 0   | 0.107546 | 0.55165  | 0.389281 | 0.834631 |
| lincRNA -               | 55  | 50  | 50  | 0   | 0   | 0   | 3.770396 | 4.395453 | 4.135636 | 0        |
| pseudogeni -            | 0   | 0   | 0   | 1   | 0   | 2   | 0        | 0        | 0        | 0.097954 |
| pseudogeni -            | 0   | 0   | 0   | 2   | 0   | 1   | 0        | 0        | 0        | 1.265736 |
| sense_intrc -           | 0   | 0   | 0   | 0   | 0   | 1   | 0        | 0        | 0        | 0        |
| pseudogeni -            | 0   | 0   | 0   | 2   | 0   | 0   | 0        | 0        | 0        | 0.1521   |
| lincRNA -               | 0   | 0   | 0   | 0   | 1   | 0   | 0        | 0        | 0        | 0        |
| lincRNA -               | 1   | 1   | 0   | 0   | 0   | 0   | 0.073611 | 0.094395 | 0        | 0        |
| antisense -             | 6   | 3   | 10  | 0   | 0   | 0   | 1.888189 | 1.210667 | 3.797014 | 0        |
| pseudogeni: olfactory_r | 6   | 4   | 5   | 36  | 43  | 1   | 0.305141 | 0.260867 | 0.306809 | 2.841728 |
| pseudogeni: high_mobil  | 0   | 0   | 3   | 1   | 0   | 0   | 0        | 0        | 0.63568  | 0.272584 |
| processed_ COX10_ant    | 118 | 139 | 121 | 44  | 52  | 37  | 1.845571 | 2.787872 | 2.283401 | 1.068149 |
| lincRNA -               | 5   | 2   | 5   | 0   | 0   | 0   | 0.243965 | 0.12514  | 0.294357 | 0        |
| lincRNA long_interge    | 0   | 0   | 1   | 3   | 6   | 0   | 0        | 0        | 0.137653 | 0.531239 |
| sense_intrc -           | 1   | 3   | 1   | 2   | 1   | 0   | 0.060193 | 0.231565 | 0.072626 | 0.186854 |
| lincRNA -               | 2   | 3   | 3   | 0   | 0   | 0   | 0.158412 | 0.304712 | 0.2867   | 0        |
| protein_co zinc_finger  | 897 | 816 | 814 | 261 | 370 | 197 | 15.86584 | 18.50845 | 17.37173 | 7.16542  |
| lincRNA -               | 0   | 0   | 1   | 13  | 7   | 22  | 0        | 0        | 0.032403 | 0.541889 |
| antisense -             | 0   | 0   | 1   | 3   | 2   | 1   | 0        | 0        | 0.024545 | 0.094724 |
| pseudogeni -            | 1   | 0   | 1   | 0   | 0   | 0   | 0.153738 | 0        | 0.185493 | 0        |
| antisense -             | 0   | 0   | 0   | 0   | 0   | 2   | 0        | 0        | 0        | 0        |
| lincRNA -               | 0   | 0   | 0   | 1   | 0   | 1   | 0        | 0        | 0        | 0.07653  |

|                         |     |     |     |     |     |     |          |          |          |          |
|-------------------------|-----|-----|-----|-----|-----|-----|----------|----------|----------|----------|
| lincRNA -               | 0   | 0   | 0   | 1   | 0   | 2   | 0        | 0        | 0        | 0.209137 |
| lincRNA -               | 0   | 3   | 1   | 0   | 1   | 1   | 0        | 0.209755 | 0.065785 | 0        |
| pseudogen: carcinoeml   | 0   | 0   | 0   | 3   | 0   | 1   | 0        | 0        | 0        | 0.37451  |
| lincRNA -               | 0   | 0   | 0   | 1   | 1   | 0   | 0        | 0        | 0        | 0.114614 |
| lincRNA -               | 0   | 0   | 0   | 0   | 1   | 1   | 0        | 0        | 0        | 0        |
| pseudogen: -            | 2   | 1   | 2   | 1   | 1   | 1   | 0.196604 | 0.126058 | 0.237214 | 0.152578 |
| antisense -             | 5   | 5   | 4   | 8   | 4   | 4   | 0.129245 | 0.165738 | 0.124753 | 0.320969 |
| pseudogen: -            | 7   | 6   | 7   | 2   | 3   | 5   | 0.261538 | 0.287473 | 0.315561 | 0.115984 |
| lincRNA -               | 1   | 2   | 2   | 1   | 1   | 2   | 0.123071 | 0.315642 | 0.296984 | 0.191023 |
| antisense -             | 46  | 49  | 55  | 235 | 244 | 154 | 0.551506 | 0.753352 | 0.795616 | 4.373115 |
| pseudogen: mitochond    | 0   | 1   | 0   | 0   | 0   | 0   | 0        | 0.195863 | 0        | 0        |
| antisense -             | 0   | 1   | 2   | 0   | 4   | 2   | 0        | 0.226905 | 0.426985 | 0        |
| antisense -             | 0   | 0   | 0   | 39  | 75  | 34  | 0        | 0        | 0        | 5.642967 |
| pseudogen: -            | 3   | 2   | 5   | 19  | 38  | 20  | 0.066732 | 0.057049 | 0.134192 | 0.655985 |
| pseudogen: coiled-coil- | 2   | 5   | 12  | 8   | 5   | 6   | 0.228732 | 0.73329  | 1.655868 | 1.420094 |
| pseudogen: -            | 0   | 0   | 1   | 0   | 0   | 0   | 0        | 0        | 0.09671  | 0        |
| pseudogen: -            | 1   | 0   | 0   | 0   | 1   | 0   | 0.086994 | 0        | 0        | 0        |
| lincRNA -               | 0   | 0   | 0   | 1   | 0   | 0   | 0        | 0        | 0        | 0.128133 |
| pseudogen: protease-as  | 4   | 5   | 1   | 8   | 7   | 2   | 0.357257 | 0.572665 | 0.107763 | 1.109026 |
| lincRNA -               | 7   | 6   | 7   | 7   | 11  | 9   | 0.59462  | 0.653585 | 0.717443 | 0.922932 |
| lincRNA -               | 1   | 0   | 0   | 0   | 0   | 1   | 0.037815 | 0        | 0        | 0        |
| lincRNA -               | 0   | 0   | 3   | 1   | 0   | 0   | 0        | 0        | 0.244563 | 0.10487  |
| pseudogen: transcripti  | 7   | 5   | 8   | 9   | 20  | 7   | 0.388898 | 0.356219 | 0.536261 | 0.776088 |
| pseudogen: gap_juncti   | 0   | 0   | 2   | 0   | 0   | 0   | 0        | 0        | 0.10859  | 0        |
| antisense PRKX_antis    | 4   | 0   | 0   | 1   | 1   | 0   | 0.363489 | 0        | 0        | 0.141046 |
| pseudogen: -            | 0   | 0   | 0   | 1   | 0   | 0   | 0        | 0        | 0        | 0.315064 |
| sense_intrc -           | 1   | 0   | 0   | 5   | 5   | 5   | 0.054842 | 0        | 0        | 0.425613 |
| antisense -             | 0   | 0   | 0   | 6   | 4   | 3   | 0        | 0        | 0        | 0.16998  |
| antisense -             | 28  | 23  | 11  | 1   | 0   | 4   | 3.126001 | 3.292822 | 1.481739 | 0.173285 |
| antisense KDM4A_an      | 14  | 13  | 18  | 10  | 13  | 8   | 0.788068 | 0.9384   | 1.22252  | 0.873707 |
| antisense GRM7_anti     | 0   | 0   | 0   | 1   | 0   | 0   | 0        | 0        | 0        | 0.169255 |
| lincRNA -               | 4   | 3   | 2   | 13  | 11  | 9   | 0.096234 | 0.092555 | 0.058056 | 0.485448 |
| lincRNA -               | 2   | 1   | 0   | 1   | 0   | 0   | 0.19061  | 0.122215 | 0        | 0.147926 |
| pseudogen: -            | 0   | 0   | 0   | 0   | 2   | 0   | 0        | 0        | 0        | 0        |
| lincRNA -               | 0   | 0   | 0   | 4   | 2   | 4   | 0        | 0        | 0        | 0.570822 |
| antisense -             | 1   | 0   | 0   | 0   | 0   | 1   | 0.140811 | 0        | 0        | 0        |
| pseudogen: vascular_er  | 0   | 0   | 0   | 0   | 1   | 0   | 0        | 0        | 0        | 0        |
| processed_ -            | 1   | 0   | 0   | 0   | 0   | 0   | 0.069467 | 0        | 0        | 0        |
| lincRNA -               | 3   | 2   | 0   | 0   | 0   | 0   | 0.171131 | 0.146301 | 0        | 0        |
| pseudogen: -            | 1   | 0   | 0   | 0   | 0   | 0   | 0.042396 | 0        | 0        | 0        |
| pseudogen: -            | 3   | 0   | 2   | 2   | 6   | 1   | 0.056653 | 0        | 0.04557  | 0.058622 |
| antisense -             | 3   | 3   | 1   | 1   | 0   | 2   | 0.182926 | 0.234577 | 0.07357  | 0.094642 |
| pseudogen: -            | 0   | 0   | 1   | 0   | 0   | 0   | 0        | 0        | 0.032989 | 0        |
| pseudogen: -            | 0   | 0   | 0   | 0   | 1   | 1   | 0        | 0        | 0        | 0        |
| pseudogen: -            | 1   | 0   | 0   | 0   | 0   | 0   | 0.037126 | 0        | 0        | 0        |
| pseudogen: solute_carr  | 0   | 0   | 0   | 2   | 4   | 5   | 0        | 0        | 0        | 0.057511 |
| pseudogen: MT-ND4_ps    | 1   | 0   | 0   | 2   | 0   | 0   | 0.034631 | 0        | 0        | 0.107503 |
| lincRNA -               | 19  | 14  | 14  | 90  | 75  | 55  | 0.28832  | 0.272433 | 0.256329 | 2.1198   |
| antisense DIAPH2_an     | 0   | 4   | 4   | 3   | 3   | 6   | 0        | 0.213226 | 0.200622 | 0.193563 |
| pseudogen: -            | 0   | 0   | 0   | 1   | 0   | 0   | 0        | 0        | 0        | 0.150683 |
| antisense SHANK2_ar     | 0   | 0   | 0   | 2   | 5   | 1   | 0        | 0        | 0        | 0.408875 |
| pseudogen: ribosomal_   | 3   | 3   | 2   | 2   | 8   | 9   | 0.218093 | 0.279673 | 0.175428 | 0.225674 |
| antisense -             | 1   | 2   | 1   | 4   | 0   | 1   | 0.056494 | 0.144891 | 0.068163 | 0.350746 |
| lincRNA -               | 0   | 1   | 0   | 0   | 1   | 1   | 0        | 0.039404 | 0        | 0        |
| sense_intrc ENO1_intrc  | 3   | 5   | 4   | 6   | 4   | 10  | 0.189073 | 0.404098 | 0.304169 | 0.586934 |
| pseudogen: -            | 0   | 0   | 0   | 1   | 1   | 0   | 0        | 0        | 0        | 0.072562 |
| pseudogen: phosphatic   | 0   | 1   | 1   | 0   | 0   | 0   | 0        | 0.109726 | 0.10324  | 0        |
| protein_co C-type_lect  | 0   | 0   | 0   | 10  | 8   | 2   | 0        | 0        | 0        | 0.332328 |
| pseudogen: -            | 0   | 0   | 0   | 0   | 0   | 2   | 0        | 0        | 0        | 0        |
| protein_co zinc_finger  | 652 | 562 | 526 | 564 | 650 | 837 | 8.314466 | 9.190358 | 8.093205 | 11.1634  |
| pseudogen: eukaryotic_  | 1   | 0   | 0   | 3   | 1   | 0   | 0.0667   | 0        | 0        | 0.310582 |
| pseudogen: glucuronid   | 12  | 7   | 7   | 16  | 26  | 30  | 0.282896 | 0.211618 | 0.199109 | 0.585458 |
| antisense MRGPRG_a      | 1   | 0   | 0   | 0   | 1   | 3   | 0.025792 | 0        | 0        | 0        |
| antisense -             | 3   | 0   | 0   | 0   | 0   | 0   | 0.098647 | 0        | 0        | 0        |
| antisense -             | 2   | 6   | 1   | 10  | 19  | 5   | 0.254146 | 0.97772  | 0.153321 | 1.972352 |

|                         |     |    |    |     |     |     |          |          |          |          |
|-------------------------|-----|----|----|-----|-----|-----|----------|----------|----------|----------|
| pseudogen: -            | 0   | 0  | 1  | 0   | 0   | 1   | 0        | 0        | 0.131571 | 0        |
| antisense -             | 6   | 3  | 9  | 5   | 6   | 10  | 0.486748 | 0.312092 | 0.880933 | 0.629583 |
| processed_ -            | 2   | 2  | 0  | 0   | 0   | 0   | 0.242953 | 0.311553 | 0        | 0        |
| pseudogen: -            | 1   | 2  | 2  | 1   | 4   | 6   | 0.244219 | 0.626352 | 0.589328 | 0.379061 |
| lincRNA -               | 4   | 2  | 2  | 0   | 0   | 0   | 0.224086 | 0.143679 | 0.135186 | 0        |
| antisense -             | 0   | 3  | 1  | 0   | 2   | 2   | 0        | 0.484918 | 0.152085 | 0        |
| pseudogen: -            | 0   | 0  | 0  | 2   | 1   | 3   | 0        | 0        | 0        | 0.39024  |
| pseudogen: -            | 1   | 1  | 1  | 1   | 1   | 0   | 0.173026 | 0.221881 | 0.208766 | 0.26856  |
| pseudogen: -            | 0   | 0  | 0  | 1   | 1   | 0   | 0        | 0        | 0        | 0.082144 |
| processed_ TRHDE_ant    | 36  | 53 | 43 | 60  | 67  | 61  | 0.356653 | 0.673332 | 0.513997 | 0.922626 |
| protein_co peptidylpro  | 0   | 0  | 1  | 0   | 0   | 0   | 0        | 0        | 0.076661 | 0        |
| antisense -             | 0   | 0  | 0  | 7   | 10  | 2   | 0        | 0        | 0        | 1.380647 |
| sense_intrc FMR1_intrc  | 2   | 6  | 4  | 5   | 9   | 7   | 0.273411 | 1.051833 | 0.659773 | 1.06093  |
| antisense -             | 8   | 4  | 5  | 0   | 0   | 1   | 0.257992 | 0.165419 | 0.194551 | 0        |
| lincRNA -               | 2   | 1  | 1  | 0   | 0   | 2   | 0.157085 | 0.10072  | 0.094766 | 0        |
| pseudogen: succinate-C  | 5   | 3  | 2  | 3   | 3   | 1   | 0.180903 | 0.139189 | 0.087308 | 0.168472 |
| antisense -             | 0   | 0  | 0  | 2   | 0   | 0   | 0        | 0        | 0        | 0.16466  |
| antisense -             | 7   | 6  | 9  | 7   | 10  | 6   | 0.945908 | 1.039708 | 1.467376 | 1.46818  |
| lincRNA -               | 0   | 0  | 0  | 1   | 0   | 0   | 0        | 0        | 0        | 0.03174  |
| lincRNA -               | 0   | 0  | 0  | 36  | 55  | 31  | 0        | 0        | 0        | 1.169153 |
| pseudogen: POU_class_   | 3   | 2  | 1  | 1   | 0   | 2   | 0.336531 | 0.287702 | 0.135348 | 0.174114 |
| lincRNA -               | 3   | 0  | 0  | 0   | 0   | 1   | 0.274746 | 0        | 0        | 0        |
| pseudogen: keratin_ass  | 0   | 1  | 0  | 6   | 8   | 6   | 0        | 0.105306 | 0        | 0.764761 |
| processed_ long_interf  | 108 | 67 | 97 | 3   | 17  | 7   | 5.167471 | 4.110915 | 5.59982  | 0.222795 |
| lincRNA long_interf     | 0   | 0  | 0  | 2   | 0   | 3   | 0        | 0        | 0        | 0.071598 |
| lincRNA -               | 0   | 1  | 0  | 0   | 0   | 0   | 0        | 0.083167 | 0        | 0        |
| antisense ITCH_antis    | 0   | 1  | 1  | 0   | 1   | 1   | 0        | 0.201103 | 0.189216 | 0        |
| lincRNA -               | 1   | 2  | 0  | 0   | 0   | 0   | 0.050474 | 0.129451 | 0        | 0        |
| antisense -             | 9   | 3  | 4  | 1   | 6   | 8   | 0.72886  | 0.311553 | 0.39085  | 0.125699 |
| processed_ -            | 1   | 1  | 0  | 1   | 2   | 1   | 0.139554 | 0.178958 | 0        | 0.216607 |
| lincRNA -               | 0   | 0  | 1  | 0   | 0   | 0   | 0        | 0        | 0.088816 | 0        |
| lincRNA -               | 3   | 0  | 3  | 1   | 0   | 3   | 0.04689  | 0        | 0.056576 | 0.02426  |
| pseudogen: DEAD/H_(A    | 41  | 23 | 33 | 11  | 8   | 22  | 1.16444  | 0.837665 | 1.130825 | 0.484905 |
| processed_ -            | 7   | 12 | 15 | 77  | 90  | 37  | 0.103641 | 0.227836 | 0.267961 | 1.769512 |
| pseudogen: neurotrop    | 0   | 2  | 2  | 2   | 3   | 3   | 0        | 0.174037 | 0.16375  | 0.210651 |
| pseudogen: NADH_deh     | 1   | 1  | 4  | 0   | 2   | 0   | 0.089314 | 0.114533 | 0.431051 | 0        |
| pseudogen: cathepsin_   | 0   | 0  | 0  | 1   | 0   | 2   | 0        | 0        | 0        | 0.072635 |
| lincRNA -               | 8   | 6  | 1  | 13  | 16  | 17  | 0.122628 | 0.11794  | 0.018495 | 0.309296 |
| antisense -             | 0   | 0  | 1  | 0   | 0   | 0   | 0        | 0        | 0.080135 | 0        |
| pseudogen: keratin_8_   | 0   | 1  | 1  | 6   | 1   | 0   | 0        | 0.043858 | 0.041266 | 0.318511 |
| antisense -             | 3   | 5  | 1  | 13  | 11  | 14  | 0.054778 | 0.117075 | 0.022031 | 0.368434 |
| antisense -             | 1   | 1  | 0  | 1   | 0   | 1   | 0.107793 | 0.138229 | 0        | 0.16731  |
| lincRNA -               | 0   | 0  | 0  | 0   | 2   | 0   | 0        | 0        | 0        | 0        |
| lincRNA family_witl     | 35  | 27 | 47 | 156 | 203 | 262 | 0.756988 | 0.748849 | 1.226498 | 5.236923 |
| pseudogen: -            | 4   | 4  | 1  | 11  | 14  | 9   | 0.582485 | 0.746954 | 0.1757   | 2.486267 |
| pseudogen: ubiquitin-c  | 0   | 0  | 1  | 0   | 0   | 0   | 0        | 0        | 0.098736 | 0        |
| sense_intrc ATG10_int   | 0   | 0  | 0  | 1   | 3   | 1   | 0        | 0        | 0        | 0.149445 |
| lincRNA -               | 13  | 8  | 5  | 1   | 0   | 1   | 0.253988 | 0.200433 | 0.117866 | 0.030325 |
| lincRNA -               | 0   | 0  | 0  | 1   | 0   | 0   | 0        | 0        | 0        | 0.035296 |
| lincRNA -               | 4   | 6  | 5  | 0   | 0   | 0   | 0.252436 | 0.48557  | 0.380723 | 0        |
| antisense -             | 7   | 3  | 3  | 2   | 2   | 0   | 0.233616 | 0.128391 | 0.120802 | 0.103601 |
| pseudogen: -            | 0   | 1  | 0  | 0   | 2   | 1   | 0        | 0.102786 | 0        | 0        |
| sense_intrc -           | 0   | 0  | 0  | 0   | 1   | 0   | 0        | 0        | 0        | 0        |
| pseudogen: heterogene   | 0   | 0  | 0  | 1   | 0   | 0   | 0        | 0        | 0        | 0.076934 |
| lincRNA -               | 1   | 0  | 0  | 0   | 0   | 0   | 0.030748 | 0        | 0        | 0        |
| lincRNA long_interf     | 0   | 0  | 1  | 1   | 1   | 0   | 0        | 0        | 0.131571 | 0.169255 |
| lincRNA -               | 0   | 0  | 0  | 0   | 0   | 1   | 0        | 0        | 0        | 0        |
| antisense -             | 21  | 6  | 10 | 0   | 0   | 0   | 0.276133 | 0.101172 | 0.158653 | 0        |
| processed_ -            | 0   | 0  | 0  | 0   | 1   | 0   | 0        | 0        | 0        | 0        |
| antisense -             | 3   | 0  | 1  | 1   | 0   | 0   | 0.300577 | 0        | 0.120888 | 0.155512 |
| pseudogen: glucosamin   | 1   | 0  | 2  | 1   | 3   | 1   | 0.036209 | 0        | 0.087375 | 0.056201 |
| pseudogen: tripartite_r | 2   | 1  | 0  | 0   | 0   | 2   | 0.124542 | 0.079854 | 0        | 0        |
| pseudogen: -            | 7   | 5  | 3  | 4   | 13  | 12  | 0.288681 | 0.264423 | 0.149276 | 0.256042 |
| pseudogen: pyruvate_k   | 0   | 0  | 0  | 0   | 2   | 0   | 0        | 0        | 0        | 0        |
| lincRNA -               | 0   | 0  | 0  | 1   | 0   | 2   | 0        | 0        | 0        | 0.24755  |

|                        |     |     |     |     |     |     |          |          |          |          |
|------------------------|-----|-----|-----|-----|-----|-----|----------|----------|----------|----------|
| pseudogen: -           | 2   | 1   | 0   | 1   | 7   | 0   | 0.11151  | 0.071498 | 0        | 0.08654  |
| pseudogen: ribonucleo  | 0   | 1   | 0   | 0   | 0   | 0   | 0        | 0.092224 | 0        | 0        |
| pseudogen: -           | 1   | 1   | 1   | 0   | 0   | 0   | 0.156823 | 0.201103 | 0.189216 | 0        |
| pseudogen: -           | 0   | 0   | 2   | 0   | 0   | 0   | 0        | 0        | 0.155001 | 0        |
| pseudogen: eukaryotic_ | 2   | 0   | 1   | 0   | 2   | 3   | 0.093874 | 0        | 0.056632 | 0        |
| lincRNA -              | 1   | 1   | 0   | 1   | 5   | 2   | 0.029509 | 0.037841 | 0        | 0.045802 |
| antisense -            | 3   | 3   | 4   | 7   | 5   | 5   | 0.175399 | 0.224924 | 0.282172 | 0.635235 |
| protein_co Em:AC0065   | 1   | 3   | 0   | 0   | 0   | 0   | 0.077249 | 0.297182 | 0        | 0        |
| pseudogen: -           | 0   | 0   | 0   | 1   | 0   | 0   | 0        | 0        | 0        | 0.323466 |
| lincRNA -              | 1   | 0   | 0   | 0   | 0   | 0   | 0.082698 | 0        | 0        | 0        |
| antisense SIX3_antise  | 0   | 0   | 0   | 2   | 1   | 7   | 0        | 0        | 0        | 0.172464 |
| antisense -            | 0   | 0   | 0   | 1   | 0   | 0   | 0        | 0        | 0        | 0.085023 |
| processed_ -           | 0   | 1   | 0   | 0   | 0   | 0   | 0        | 0.067867 | 0        | 0        |
| antisense -            | 0   | 1   | 0   | 0   | 0   | 0   | 0        | 0.072796 | 0        | 0        |
| pseudogen: -           | 0   | 0   | 0   | 1   | 0   | 0   | 0        | 0        | 0        | 0.059412 |
| antisense -            | 4   | 0   | 2   | 8   | 12  | 13  | 0.181921 | 0        | 0.109749 | 0.564732 |
| antisense GPC6_anti    | 1   | 2   | 1   | 4   | 0   | 1   | 0.067178 | 0.172292 | 0.081054 | 0.417076 |
| antisense -            | 0   | 0   | 0   | 1   | 0   | 0   | 0        | 0        | 0        | 0.136292 |
| antisense -            | 35  | 21  | 27  | 15  | 7   | 5   | 0.896314 | 0.689637 | 0.834265 | 0.59623  |
| pseudogen: ADP-ribosy  | 1   | 2   | 1   | 0   | 0   | 0   | 0.089145 | 0.22863  | 0.107558 | 0        |
| antisense -            | 2   | 1   | 0   | 1   | 3   | 0   | 0.110459 | 0.070824 | 0        | 0.085724 |
| pseudogen: -           | 1   | 0   | 0   | 1   | 0   | 2   | 0.121792 | 0        | 0        | 0.189038 |
| lincRNA -              | 0   | 0   | 0   | 0   | 0   | 3   | 0        | 0        | 0        | 0        |
| pseudogen: H3_histone  | 0   | 1   | 0   | 0   | 1   | 1   | 0        | 0.149205 | 0        | 0        |
| sense_intrc RC3H1_int  | 0   | 1   | 1   | 7   | 2   | 1   | 0        | 0.134218 | 0.126285 | 1.137184 |
| antisense -            | 3   | 5   | 2   | 0   | 0   | 0   | 0.20328  | 0.434464 | 0.163513 | 0        |
| lincRNA -              | 69  | 49  | 55  | 8   | 22  | 25  | 7.630687 | 6.948962 | 7.338804 | 1.373204 |
| pseudogen: -           | 0   | 0   | 0   | 0   | 3   | 0   | 0        | 0        | 0        | 0        |
| antisense -            | 56  | 38  | 54  | 16  | 28  | 25  | 2.823485 | 2.456916 | 3.285029 | 1.252126 |
| pseudogen: mediator_c  | 0   | 1   | 0   | 1   | 3   | 0   | 0        | 0.113452 | 0        | 0.13732  |
| lincRNA -              | 0   | 2   | 0   | 0   | 0   | 0   | 0        | 0.225205 | 0        | 0        |
| antisense -            | 2   | 2   | 6   | 0   | 4   | 1   | 0.159762 | 0.204872 | 0.578285 | 0        |
| antisense -            | 0   | 0   | 0   | 0   | 2   | 1   | 0        | 0        | 0        | 0        |
| processed_ -           | 1   | 6   | 7   | 1   | 5   | 1   | 0.010404 | 0.080049 | 0.08787  | 0.016148 |
| pseudogen: -           | 4   | 6   | 4   | 4   | 5   | 5   | 0.41222  | 0.79292  | 0.497367 | 0.639822 |
| pseudogen: ribosomal_  | 518 | 427 | 454 | 740 | 721 | 676 | 39.68796 | 41.95331 | 41.96941 | 88.00172 |
| pseudogen: asparagine_ | 0   | 2   | 2   | 4   | 0   | 0   | 0        | 0.092082 | 0.086639 | 0.222909 |
| antisense -            | 0   | 1   | 0   | 3   | 0   | 11  | 0        | 0.02996  | 0        | 0.108789 |
| antisense -            | 0   | 2   | 0   | 2   | 0   | 4   | 0        | 0.32155  | 0        | 0.389197 |
| pseudogen: YWHAQ_ps    | 3   | 0   | 0   | 0   | 0   | 0   | 0.101787 | 0        | 0        | 0        |
| pseudogen: heterogene  | 24  | 12  | 16  | 21  | 30  | 28  | 1.350973 | 0.866216 | 1.086684 | 1.834785 |
| pseudogen: -           | 4   | 3   | 0   | 0   | 1   | 2   | 0.09683  | 0.093128 | 0        | 0        |
| pseudogen: RAD23_hoi   | 0   | 0   | 0   | 1   | 0   | 1   | 0        | 0        | 0        | 0.059315 |
| pseudogen: -           | 0   | 0   | 0   | 2   | 3   | 2   | 0        | 0        | 0        | 0.132447 |
| pseudogen: small_nucl  | 0   | 0   | 0   | 1   | 2   | 1   | 0        | 0        | 0        | 0.332328 |
| antisense STARD13_a    | 17  | 9   | 10  | 1   | 0   | 1   | 0.8857   | 0.601298 | 0.628617 | 0.080866 |
| pseudogen: -           | 0   | 1   | 0   | 1   | 0   | 1   | 0        | 0.042585 | 0        | 0.051544 |
| antisense -            | 5   | 3   | 5   | 5   | 4   | 1   | 1.803462 | 1.387611 | 2.175981 | 2.799223 |
| pseudogen: S100_calci  | 1   | 1   | 0   | 0   | 0   | 0   | 0.148857 | 0.190888 | 0        | 0        |
| pseudogen: RAN_memt    | 5   | 4   | 3   | 4   | 7   | 9   | 0.360138 | 0.369461 | 0.260717 | 0.447188 |
| lincRNA -              | 0   | 0   | 1   | 4   | 0   | 0   | 0        | 0        | 0.098564 | 0.507176 |
| protein_co zinc_finger | 474 | 304 | 327 | 384 | 467 | 317 | 5.762476 | 4.739294 | 4.796523 | 7.245902 |
| pseudogen: BCL2-antag  | 0   | 1   | 0   | 0   | 0   | 0   | 0        | 0.095293 | 0        | 0        |
| antisense -            | 0   | 4   | 0   | 0   | 3   | 8   | 0        | 0.433368 | 0        | 0        |
| antisense PITPNA_an    | 0   | 1   | 0   | 2   | 1   | 6   | 0        | 0.110941 | 0        | 0.26856  |
| protein_co coiled-coil | 42  | 39  | 36  | 56  | 60  | 49  | 0.883527 | 1.052069 | 0.913736 | 1.828474 |
| lincRNA -              | 1   | 0   | 0   | 2   | 1   | 1   | 0.082263 | 0        | 0        | 0.255368 |
| pseudogen: -           | 0   | 0   | 0   | 1   | 0   | 0   | 0        | 0        | 0        | 0.168472 |
| lincRNA -              | 0   | 0   | 1   | 0   | 0   | 0   | 0        | 0        | 0.117377 | 0        |
| antisense -            | 1   | 1   | 0   | 5   | 4   | 8   | 0.075997 | 0.097455 | 0        | 0.589788 |
| pseudogen: late_endos  | 0   | 0   | 0   | 0   | 0   | 1   | 0        | 0        | 0        | 0        |
| lincRNA -              | 6   | 1   | 3   | 0   | 0   | 0   | 0.296147 | 0.063295 | 0.178659 | 0        |
| pseudogen: -           | 3   | 0   | 2   | 4   | 1   | 2   | 0.679565 | 0        | 0.546623 | 1.406373 |
| antisense -            | 1   | 1   | 5   | 0   | 2   | 0   | 0.101494 | 0.130151 | 0.612289 | 0        |
| antisense -            | 1   | 0   | 1   | 1   | 3   | 1   | 0.111114 | 0        | 0.134065 | 0.172464 |

|                         |    |    |    |      |      |      |          |          |          |          |
|-------------------------|----|----|----|------|------|------|----------|----------|----------|----------|
| antisense -             | 0  | 0  | 0  | 5    | 6    | 3    | 0        | 0        | 0        | 0.678916 |
| antisense -             | 0  | 0  | 0  | 0    | 0    | 1    | 0        | 0        | 0        | 0        |
| protein_co -            | 0  | 0  | 0  | 0    | 3    | 2    | 0        | 0        | 0        | 0        |
| pseudogen: keratin_18   | 3  | 5  | 4  | 0    | 2    | 4    | 0.108962 | 0.232881 | 0.175292 | 0        |
| processed_ PRKG1_ant    | 7  | 8  | 14 | 2    | 2    | 1    | 0.295437 | 0.432978 | 0.712923 | 0.131017 |
| processed_ -            | 0  | 0  | 0  | 2017 | 2207 | 2068 | 0        | 0        | 0        | 63.68627 |
| pseudogen: -            | 1  | 0  | 0  | 0    | 0    | 0    | 0.034554 | 0        | 0        | 0        |
| pseudogen: metaxin_1    | 61 | 40 | 75 | 7    | 18   | 20   | 3.413235 | 2.870157 | 5.06344  | 0.607946 |
| antisense -             | 0  | 0  | 0  | 1    | 4    | 2    | 0        | 0        | 0        | 0.163183 |
| pseudogen: -            | 0  | 0  | 0  | 2    | 2    | 0    | 0        | 0        | 0        | 0.117576 |
| processed_ -            | 4  | 3  | 6  | 2    | 7    | 6    | 0.069725 | 0.067059 | 0.126191 | 0.054111 |
| pseudogen: -            | 0  | 0  | 0  | 0    | 0    | 1    | 0        | 0        | 0        | 0        |
| pseudogen: eukaryotic   | 18 | 3  | 8  | 25   | 26   | 28   | 1.940277 | 0.414688 | 1.040469 | 4.182747 |
| protein_co Rho_guanin   | 1  | 0  | 0  | 0    | 1    | 2    | 0.008597 | 0        | 0        | 0        |
| antisense MYB_antise    | 0  | 0  | 0  | 0    | 0    | 1    | 0        | 0        | 0        | 0        |
| antisense -             | 0  | 0  | 0  | 0    | 2    | 2    | 0        | 0        | 0        | 0        |
| sense_intrc DAPK1_int   | 0  | 0  | 0  | 1    | 1    | 3    | 0        | 0        | 0        | 0.103675 |
| pseudogen: -            | 2  | 1  | 0  | 0    | 0    | 0    | 0.128466 | 0.08237  | 0        | 0        |
| antisense SMAD9_an      | 10 | 5  | 5  | 1    | 2    | 2    | 0.930357 | 0.596526 | 0.561265 | 0.144404 |
| pseudogen: -            | 0  | 1  | 0  | 0    | 0    | 0    | 0        | 0.161206 | 0        | 0        |
| lincRNA -               | 5  | 5  | 7  | 26   | 27   | 17   | 0.104806 | 0.134398 | 0.177036 | 0.845898 |
| lincRNA -               | 0  | 0  | 0  | 0    | 0    | 1    | 0        | 0        | 0        | 0        |
| lincRNA -               | 0  | 0  | 0  | 1    | 0    | 0    | 0        | 0        | 0        | 0.048878 |
| antisense -             | 2  | 0  | 0  | 0    | 0    | 0    | 0.385926 | 0        | 0        | 0        |
| pseudogen: -            | 1  | 1  | 3  | 0    | 0    | 0    | 0.099343 | 0.127394 | 0.35959  | 0        |
| processed_ galectin-rel | 2  | 0  | 1  | 2    | 1    | 0    | 0.144722 | 0        | 0.087308 | 0.224629 |
| pseudogen: -            | 1  | 2  | 1  | 0    | 0    | 0    | 0.087645 | 0.224784 | 0.105749 | 0        |
| lincRNA -               | 0  | 0  | 0  | 0    | 0    | 2    | 0        | 0        | 0        | 0        |
| lincRNA -               | 0  | 1  | 0  | 0    | 2    | 0    | 0        | 0.13697  | 0        | 0        |
| pseudogen: yrdC_dom     | 0  | 1  | 1  | 4    | 2    | 5    | 0        | 0.09366  | 0.088124 | 0.453457 |
| processed_ -            | 17 | 22 | 14 | 25   | 18   | 25   | 0.390176 | 0.647506 | 0.387693 | 0.8906   |
| antisense -             | 0  | 0  | 0  | 1    | 3    | 0    | 0        | 0        | 0        | 0.039597 |
| protein_co DNAJC9_ar    | 5  | 0  | 0  | 0    | 0    | 0    | 0.077198 | 0        | 0        | 0        |
| lincRNA -               | 1  | 0  | 0  | 0    | 0    | 0    | 0.066229 | 0        | 0        | 0        |
| lincRNA -               | 1  | 2  | 1  | 2    | 1    | 0    | 0.065306 | 0.167492 | 0.078796 | 0.202729 |
| protein_co CTAGE_fam    | 0  | 0  | 0  | 0    | 0    | 2    | 0        | 0        | 0        | 0        |
| antisense -             | 40 | 38 | 24 | 12   | 13   | 5    | 1.902232 | 2.317376 | 1.377091 | 0.885758 |
| pseudogen: -            | 0  | 0  | 0  | 0    | 1    | 0    | 0        | 0        | 0        | 0        |
| pseudogen: -            | 0  | 0  | 0  | 0    | 1    | 0    | 0        | 0        | 0        | 0        |
| pseudogen: -            | 1  | 0  | 1  | 3    | 0    | 3    | 0.101935 | 0        | 0.12299  | 0.474651 |
| processed_ INTS6_anti   | 1  | 11 | 4  | 7    | 7    | 4    | 0.051755 | 0.730053 | 0.249781 | 0.562316 |
| pseudogen: -            | 0  | 1  | 0  | 1    | 0    | 0    | 0        | 0.070908 | 0        | 0.085825 |
| lincRNA -               | 0  | 0  | 0  | 3    | 2    | 1    | 0        | 0        | 0        | 0.103971 |
| antisense -             | 0  | 0  | 0  | 0    | 0    | 1    | 0        | 0        | 0        | 0        |
| lincRNA long_interf     | 0  | 0  | 0  | 2    | 2    | 0    | 0        | 0        | 0        | 0.062152 |
| pseudogen: -            | 0  | 1  | 0  | 0    | 0    | 0    | 0        | 0.135733 | 0        | 0        |
| pseudogen: -            | 1  | 0  | 0  | 2    | 0    | 1    | 0.039603 | 0        | 0        | 0.122939 |
| pseudogen: sperm_aut    | 1  | 0  | 0  | 0    | 0    | 0    | 0.103739 | 0        | 0        | 0        |
| lincRNA -               | 0  | 0  | 1  | 1    | 0    | 0    | 0        | 0        | 0.164464 | 0.211569 |
| pseudogen: -            | 7  | 10 | 7  | 17   | 20   | 16   | 0.692469 | 1.268561 | 0.835503 | 2.610246 |
| pseudogen: ribosomal_   | 1  | 1  | 0  | 0    | 0    | 1    | 0.062271 | 0.079854 | 0        | 0        |
| pseudogen: -            | 1  | 0  | 1  | 1    | 0    | 0    | 0.058981 | 0        | 0.071164 | 0.091547 |
| pseudogen: sorting_ne   | 0  | 2  | 0  | 9    | 5    | 13   | 0        | 0.144196 | 0        | 0.785394 |
| antisense -             | 5  | 8  | 9  | 16   | 9    | 10   | 0.218296 | 0.447894 | 0.474096 | 1.084243 |
| pseudogen: glyceraldeh  | 2  | 2  | 2  | 2    | 4    | 1    | 0.093968 | 0.120501 | 0.113378 | 0.145851 |
| pseudogen: -            | 2  | 3  | 2  | 1    | 8    | 3    | 0.080154 | 0.154179 | 0.09671  | 0.062205 |
| lincRNA -               | 0  | 0  | 0  | 2    | 2    | 0    | 0        | 0        | 0        | 0.194079 |
| lincRNA brain_cyto      | 66 | 55 | 53 | 57   | 74   | 31   | 0.229956 | 0.245738 | 0.222804 | 0.308251 |
| processed_ -            | 17 | 8  | 16 | 31   | 64   | 51   | 0.464799 | 0.280489 | 0.527818 | 1.315553 |
| processed_ CBR3_antis   | 7  | 4  | 16 | 0    | 8    | 4    | 0.070572 | 0.051713 | 0.194627 | 0        |
| processed_ -            | 0  | 0  | 0  | 2    | 2    | 0    | 0        | 0        | 0        | 0.098953 |
| antisense -             | 0  | 0  | 1  | 0    | 1    | 0    | 0        | 0        | 0.140038 | 0        |
| antisense -             | 14 | 12 | 15 | 0    | 0    | 0    | 0.17771  | 0.195332 | 0.229733 | 0        |
| pseudogen: -            | 0  | 0  | 0  | 1    | 0    | 0    | 0        | 0        | 0        | 0.153544 |
| lincRNA -               | 0  | 0  | 0  | 0    | 1    | 0    | 0        | 0        | 0        | 0        |

|                         |     |     |     |     |     |     |          |          |          |          |
|-------------------------|-----|-----|-----|-----|-----|-----|----------|----------|----------|----------|
| pseudogeni -            | 1   | 0   | 1   | 1   | 3   | 6   | 0.176943 | 0        | 0.213492 | 0.274641 |
| pseudogeni -            | 484 | 370 | 406 | 161 | 214 | 177 | 12.77859 | 12.52704 | 12.93336 | 6.597718 |
| pseudogeni: olfactory_r | 0   | 0   | 0   | 1   | 3   | 0   | 0        | 0        | 0        | 0.079628 |
| lincRNA -               | 0   | 0   | 0   | 0   | 2   | 0   | 0        | 0        | 0        | 0        |
| lincRNA -               | 0   | 0   | 1   | 0   | 0   | 0   | 0        | 0        | 0.103052 | 0        |
| pseudogeni -            | 19  | 25  | 23  | 0   | 0   | 0   | 1.611049 | 2.718345 | 2.35305  | 0        |
| processed_ -            | 50  | 47  | 39  | 44  | 54  | 41  | 1.841713 | 2.220032 | 1.733264 | 2.515563 |
| pseudogeni: ribosomal_  | 5   | 4   | 3   | 0   | 0   | 0   | 1.493313 | 1.531969 | 1.081061 | 0        |
| antisense -             | 17  | 9   | 11  | 8   | 10  | 10  | 1.415862 | 0.961222 | 1.105383 | 1.034171 |
| pseudogeni: ribosomal_  | 0   | 0   | 1   | 2   | 0   | 1   | 0        | 0        | 0.120118 | 0.309044 |
| pseudogeni -            | 5   | 7   | 6   | 1   | 2   | 10  | 0.504194 | 0.90518  | 0.730007 | 0.156516 |
| antisense -             | 9   | 13  | 9   | 7   | 15  | 8   | 0.925461 | 1.714227 | 1.116622 | 1.117234 |
| lincRNA long_interf     | 21  | 16  | 28  | 25  | 21  | 32  | 2.661325 | 2.600207 | 4.28139  | 4.917554 |
| pseudogeni -            | 0   | 0   | 0   | 0   | 2   | 1   | 0        | 0        | 0        | 0        |
| lincRNA -               | 0   | 0   | 0   | 0   | 1   | 0   | 0        | 0        | 0        | 0        |
| pseudogeni: thymosin_I  | 0   | 0   | 2   | 0   | 1   | 1   | 0        | 0        | 0.589328 | 0        |
| pseudogeni -            | 0   | 0   | 1   | 1   | 0   | 0   | 0        | 0        | 0.085461 | 0.109939 |
| protein_co chromosom    | 5   | 0   | 5   | 0   | 0   | 0   | 0.114254 | 0        | 0.137855 | 0        |
| pseudogeni -            | 0   | 0   | 0   | 1   | 0   | 0   | 0        | 0        | 0        | 0.202166 |
| pseudogeni -            | 1   | 2   | 0   | 1   | 1   | 1   | 0.223286 | 0.572665 | 0        | 0.34657  |
| antisense -             | 3   | 3   | 3   | 0   | 0   | 8   | 0.349926 | 0.44873  | 0.422205 | 0        |
| sense_intrc MIR600_hc   | 185 | 154 | 180 | 682 | 878 | 603 | 1.449641 | 1.547458 | 1.701803 | 8.294757 |
| pseudogeni -            | 0   | 4   | 0   | 0   | 1   | 1   | 0        | 0.502128 | 0        | 0        |
| lincRNA -               | 0   | 2   | 3   | 2   | 7   | 1   | 0        | 0.040033 | 0.0565   | 0.048455 |
| pseudogeni -            | 0   | 0   | 0   | 3   | 2   | 2   | 0        | 0        | 0        | 0.485199 |
| processed_ -            | 15  | 26  | 22  | 0   | 4   | 5   | 0.727353 | 1.616727 | 1.287137 | 0        |
| lincRNA -               | 0   | 0   | 0   | 1   | 0   | 0   | 0        | 0        | 0        | 0.094397 |
| lincRNA -               | 1   | 1   | 0   | 0   | 0   | 0   | 0.105847 | 0.135733 | 0        | 0        |
| lincRNA -               | 0   | 0   | 0   | 0   | 2   | 0   | 0        | 0        | 0        | 0        |
| processed_ -            | 0   | 1   | 1   | 17  | 35  | 18  | 0        | 0.114315 | 0.107558 | 2.352199 |
| pseudogeni -            | 1   | 0   | 4   | 3   | 1   | 1   | 0.09     | 0        | 0.434361 | 0.419078 |
| antisense -             | 5   | 1   | 3   | 3   | 0   | 0   | 0.310942 | 0.079748 | 0.225101 | 0.289575 |
| antisense -             | 0   | 0   | 0   | 0   | 0   | 2   | 0        | 0        | 0        | 0        |
| antisense -             | 1   | 2   | 0   | 0   | 0   | 0   | 0.064855 | 0.166334 | 0        | 0        |
| pseudogeni: prostaglan  | 0   | 0   | 1   | 0   | 0   | 1   | 0        | 0        | 0.15892  | 0        |
| lincRNA -               | 1   | 3   | 0   | 0   | 0   | 0   | 0.105135 | 0.404461 | 0        | 0        |
| protein_co chromosom    | 0   | 0   | 3   | 0   | 0   | 0   | 0        | 0        | 0.342191 | 0        |
| pseudogeni -            | 1   | 0   | 0   | 0   | 4   | 0   | 0.101494 | 0        | 0        | 0        |
| pseudogeni -            | 3   | 5   | 1   | 0   | 2   | 0   | 0.103434 | 0.221065 | 0.0416   | 0        |
| pseudogeni -            | 2   | 1   | 5   | 4   | 1   | 1   | 0.265666 | 0.170339 | 0.801353 | 0.8247   |
| antisense -             | 62  | 53  | 35  | 45  | 50  | 50  | 1.402403 | 1.537327 | 0.955206 | 1.57988  |
| lincRNA -               | 0   | 0   | 0   | 4   | 4   | 3   | 0        | 0        | 0        | 0.431288 |
| sense_intrc ZDHHC20_i   | 7   | 5   | 6   | 5   | 8   | 9   | 0.745978 | 0.683293 | 0.771484 | 0.827043 |
| pseudogeni -            | 0   | 0   | 0   | 0   | 0   | 1   | 0        | 0        | 0        | 0        |
| lincRNA -               | 0   | 1   | 0   | 0   | 0   | 0   | 0        | 0.10072  | 0        | 0        |
| pseudogeni: gamma-glu   | 1   | 0   | 1   | 2   | 2   | 5   | 0.088139 | 0        | 0.106345 | 0.273608 |
| pseudogeni: fatty_acid_ | 1   | 3   | 0   | 1   | 0   | 0   | 0.114088 | 0.438904 | 0        | 0.17708  |
| pseudogeni: glyceraldeh | 3   | 0   | 0   | 0   | 0   | 0   | 0.14067  | 0        | 0        | 0        |
| lincRNA -               | 0   | 0   | 0   | 1   | 1   | 1   | 0        | 0        | 0        | 0.121502 |
| sense_intrc ANKRD44_i   | 7   | 9   | 3   | 1   | 0   | 0   | 0.307044 | 0.506238 | 0.158771 | 0.068082 |
| protein_co uncharacte   | 0   | 0   | 0   | 1   | 0   | 0   | 0        | 0        | 0        | 0.103088 |
| lincRNA long_interf     | 2   | 0   | 2   | 0   | 4   | 0   | 0.145395 | 0        | 0.175428 | 0        |
| antisense -             | 0   | 1   | 2   | 7   | 4   | 4   | 0        | 0.064586 | 0.121537 | 0.547217 |
| lincRNA -               | 0   | 0   | 0   | 11  | 10  | 14  | 0        | 0        | 0        | 0.938544 |
| antisense -             | 8   | 11  | 10  | 8   | 6   | 17  | 0.526854 | 0.928972 | 0.7946   | 0.817751 |
| pseudogeni -            | 2   | 1   | 1   | 0   | 1   | 0   | 0.187186 | 0.12002  | 0.112925 | 0        |
| pseudogeni: glyceraldeh | 0   | 0   | 0   | 7   | 4   | 5   | 0        | 0        | 0        | 0.504414 |
| pseudogeni: Y_box_binc  | 0   | 0   | 0   | 1   | 0   | 0   | 0        | 0        | 0        | 0.107187 |
| pseudogeni -            | 0   | 0   | 0   | 5   | 6   | 2   | 0        | 0        | 0        | 0.291586 |
| pseudogeni -            | 1   | 0   | 0   | 0   | 2   | 3   | 0.146075 | 0        | 0        | 0        |
| pseudogeni: zinc_and_ri | 83  | 57  | 66  | 113 | 99  | 59  | 8.785263 | 7.736791 | 8.428856 | 18.5646  |
| pseudogeni: keratin_18  | 1   | 0   | 0   | 0   | 0   | 0   | 0.055426 | 0        | 0        | 0        |
| antisense GLIS3_anti    | 3   | 4   | 2   | 0   | 0   | 1   | 0.191649 | 0.327683 | 0.154157 | 0        |
| lincRNA -               | 1   | 0   | 0   | 0   | 0   | 0   | 0.064676 | 0        | 0        | 0        |
| antisense -             | 11  | 5   | 10  | 10  | 18  | 17  | 1.339715 | 0.780906 | 1.469494 | 1.890384 |

|                        |     |     |     |     |     |     |          |          |          |          |
|------------------------|-----|-----|-----|-----|-----|-----|----------|----------|----------|----------|
| pseudogeni -           | 0   | 0   | 0   | 0   | 1   | 0   | 0        | 0        | 0        | 0        |
| antisense -            | 8   | 7   | 6   | 14  | 13  | 9   | 0.090216 | 0.101229 | 0.081639 | 0.24505  |
| lincRNA -              | 2   | 2   | 1   | 1   | 2   | 0   | 0.045065 | 0.057789 | 0.027187 | 0.034973 |
| pseudogeni -           | 1   | 5   | 3   | 0   | 5   | 0   | 0.066323 | 0.425246 | 0.240066 | 0        |
| pseudogeni -           | 3   | 0   | 1   | 0   | 1   | 1   | 0.450866 | 0        | 0.181332 | 0        |
| antisense -            | 2   | 0   | 3   | 0   | 2   | 0   | 0.115635 | 0        | 0.209281 | 0        |
| processed_ -           | 1   | 4   | 0   | 3   | 8   | 7   | 0.107793 | 0.552918 | 0        | 0.50193  |
| antisense ZEB1_antis   | 40  | 26  | 39  | 15  | 14  | 11  | 3.206155 | 2.672435 | 3.7717   | 1.866149 |
| antisense NDUFA6_ar    | 30  | 10  | 17  | 21  | 27  | 9   | 0.500427 | 0.213909 | 0.34215  | 0.543712 |
| pseudogeni -           | 5   | 3   | 3   | 3   | 8   | 5   | 1.116429 | 0.858997 | 0.808222 | 1.039711 |
| pseudogeni -           | 0   | 0   | 0   | 1   | 0   | 0   | 0        | 0        | 0        | 0.175797 |
| pseudogeni ribosomal_  | 1   | 0   | 0   | 0   | 0   | 0   | 0.132458 | 0        | 0        | 0        |
| antisense PRMT5_ant    | 0   | 2   | 0   | 3   | 2   | 0   | 0        | 0.057158 | 0        | 0.103773 |
| lincRNA -              | 0   | 1   | 0   | 0   | 0   | 0   | 0        | 0.10072  | 0        | 0        |
| pseudogeni Nanog_hon   | 0   | 1   | 1   | 0   | 4   | 0   | 0        | 0.066737 | 0.062792 | 0        |
| pseudogeni ribosomal_  | 0   | 0   | 0   | 4   | 1   | 0   | 0        | 0        | 0        | 0.340889 |
| antisense -            | 14  | 25  | 7   | 0   | 0   | 1   | 0.175383 | 0.401615 | 0.105805 | 0        |
| antisense -            | 6   | 3   | 1   | 0   | 0   | 1   | 0.712253 | 0.456682 | 0.143229 | 0        |
| pseudogeni -           | 2   | 2   | 2   | 1   | 4   | 3   | 0.026559 | 0.034058 | 0.032045 | 0.020612 |
| lincRNA -              | 0   | 0   | 0   | 0   | 0   | 1   | 0        | 0        | 0        | 0        |
| antisense EHMT2_ant    | 0   | 1   | 0   | 0   | 2   | 0   | 0        | 0.26964  | 0        | 0        |
| pseudogeni cytochrom   | 31  | 26  | 37  | 32  | 34  | 17  | 6.889055 | 7.409359 | 9.920823 | 11.03769 |
| pseudogeni -           | 0   | 0   | 0   | 0   | 0   | 1   | 0        | 0        | 0        | 0        |
| lincRNA -              | 0   | 0   | 0   | 55  | 109 | 74  | 0        | 0        | 0        | 6.94946  |
| pseudogeni -           | 1   | 0   | 0   | 0   | 0   | 0   | 0.059505 | 0        | 0        | 0        |
| lincRNA -              | 37  | 25  | 38  | 43  | 56  | 52  | 0.651984 | 0.564917 | 0.807918 | 1.176073 |
| lincRNA -              | 5   | 0   | 0   | 0   | 0   | 0   | 0.417171 | 0        | 0        | 0        |
| antisense -            | 2   | 2   | 2   | 0   | 0   | 0   | 0.070884 | 0.090899 | 0.085526 | 0        |
| pseudogeni -           | 7   | 3   | 3   | 4   | 7   | 2   | 0.134908 | 0.074143 | 0.06976  | 0.119654 |
| pseudogeni cytochrom   | 4   | 11  | 2   | 18  | 19  | 11  | 0.177614 | 0.626352 | 0.107151 | 1.240565 |
| lincRNA -              | 0   | 0   | 0   | 4   | 7   | 0   | 0        | 0        | 0        | 0.235915 |
| pseudogeni piezo-type_ | 0   | 0   | 0   | 0   | 2   | 0   | 0        | 0        | 0        | 0        |
| pseudogeni MT-ND2_ps   | 0   | 0   | 0   | 1   | 3   | 3   | 0        | 0        | 0        | 0.112315 |
| antisense -            | 186 | 159 | 157 | 0   | 0   | 2   | 1.652433 | 1.811413 | 1.682902 | 0        |
| antisense -            | 8   | 6   | 14  | 11  | 14  | 21  | 0.301544 | 0.290015 | 0.636702 | 0.643551 |
| lincRNA -              | 0   | 0   | 2   | 0   | 0   | 0   | 0        | 0        | 0.414473 | 0        |
| pseudogeni mitochond   | 0   | 1   | 0   | 0   | 0   | 1   | 0        | 0.162513 | 0        | 0        |
| antisense -            | 4   | 3   | 2   | 1   | 3   | 0   | 0.554911 | 0.533696 | 0.334766 | 0.215325 |
| pseudogeni DEAD_(Asp   | 0   | 1   | 3   | 0   | 1   | 0   | 0        | 0.031107 | 0.087805 | 0        |
| protein_co chromosom   | 0   | 0   | 2   | 123 | 174 | 172 | 0        | 0        | 0.133748 | 10.58146 |
| antisense -            | 0   | 0   | 0   | 0   | 1   | 0   | 0        | 0        | 0        | 0        |
| pseudogeni -           | 0   | 0   | 0   | 3   | 1   | 2   | 0        | 0        | 0        | 0.768801 |
| pseudogeni -           | 0   | 0   | 0   | 0   | 1   | 2   | 0        | 0        | 0        | 0        |
| processed_ ZNF503_an   | 25  | 22  | 22  | 0   | 2   | 5   | 0.579175 | 0.653585 | 0.614951 | 0        |
| antisense DLEU7_ant    | 0   | 0   | 0   | 1   | 1   | 1   | 0        | 0        | 0        | 0.076209 |
| processed_ -           | 0   | 0   | 0   | 0   | 2   | 0   | 0        | 0        | 0        | 0        |
| pseudogeni multiple_c  | 0   | 0   | 0   | 1   | 0   | 1   | 0        | 0        | 0        | 0.242599 |
| pseudogeni -           | 0   | 0   | 0   | 7   | 10  | 5   | 0        | 0        | 0        | 0.985413 |
| antisense -            | 0   | 0   | 0   | 8   | 9   | 4   | 0        | 0        | 0        | 0.652734 |
| pseudogeni -           | 10  | 6   | 2   | 2   | 6   | 0   | 0.302712 | 0.232911 | 0.073048 | 0.09397  |
| pseudogeni -           | 1   | 0   | 1   | 0   | 0   | 0   | 0.127766 | 0        | 0.154157 | 0        |
| lincRNA -              | 0   | 0   | 0   | 1   | 0   | 0   | 0        | 0        | 0        | 0.116262 |
| pseudogeni -           | 0   | 0   | 0   | 0   | 1   | 0   | 0        | 0        | 0        | 0        |
| pseudogeni -           | 0   | 0   | 0   | 0   | 1   | 0   | 0        | 0        | 0        | 0        |
| pseudogeni -           | 2   | 0   | 0   | 0   | 1   | 0   | 0.160582 | 0        | 0        | 0        |
| protein_co UDP-GlcNA   | 988 | 750 | 777 | 136 | 180 | 64  | 15.88184 | 15.46018 | 15.06999 | 3.39323  |
| antisense -            | 3   | 6   | 13  | 0   | 0   | 1   | 0.192435 | 0.493541 | 1.006131 | 0        |
| processed_ -           | 315 | 235 | 219 | 9   | 13  | 21  | 5.150054 | 4.926953 | 4.320096 | 0.228388 |
| processed_ -           | 35  | 21  | 28  | 23  | 29  | 23  | 1.55265  | 1.194632 | 1.498689 | 1.583666 |
| protein_co CDKN2A_ir   | 482 | 344 | 345 | 527 | 790 | 622 | 18.47996 | 16.91304 | 15.95957 | 31.36137 |
| protein_co family_witl | 0   | 1   | 0   | 0   | 1   | 0   | 0        | 0.04484  | 0        | 0        |
| sense_intrc ZBTB40_int | 1   | 4   | 2   | 1   | 1   | 2   | 0.171758 | 0.881023 | 0.414473 | 0.266593 |
| lincRNA -              | 0   | 0   | 0   | 1   | 1   | 0   | 0        | 0        | 0        | 0.113896 |
| pseudogeni -           | 1   | 6   | 0   | 3   | 4   | 3   | 0.080154 | 0.616716 | 0        | 0.37323  |
| pseudogeni -           | 0   | 0   | 0   | 1   | 0   | 0   | 0        | 0        | 0        | 0.16965  |

|                         |     |    |     |     |     |     |          |          |          |          |
|-------------------------|-----|----|-----|-----|-----|-----|----------|----------|----------|----------|
| antisense PPEF1_anti    | 0   | 0  | 0   | 0   | 1   | 0   | 0        | 0        | 0        | 0        |
| processed_-             | 1   | 0  | 0   | 0   | 0   | 0   | 0.012857 | 0        | 0        | 0        |
| pseudogen: sulfotransf  | 1   | 0  | 0   | 0   | 0   | 0   | 0.025008 | 0        | 0        | 0        |
| antisense -             | 0   | 0  | 1   | 0   | 0   | 0   | 0        | 0        | 0.071254 | 0        |
| pseudogen: olfactory_r  | 1   | 0  | 1   | 0   | 0   | 0   | 0.048092 | 0        | 0.058026 | 0        |
| pseudogen: ribosomal_   | 0   | 0  | 1   | 3   | 0   | 0   | 0        | 0        | 0.073001 | 0.281728 |
| pseudogen:-             | 1   | 0  | 3   | 17  | 36  | 36  | 0.152736 | 0        | 0.552855 | 4.030152 |
| lincRNA ZNF295_an       | 1   | 0  | 1   | 1   | 1   | 1   | 0.016344 | 0        | 0.01972  | 0.025368 |
| antisense -             | 3   | 0  | 1   | 0   | 0   | 0   | 0.163001 | 0        | 0.065557 | 0        |
| antisense -             | 4   | 7  | 0   | 0   | 2   | 0   | 0.24139  | 0.54171  | 0        | 0        |
| pseudogen:-             | 111 | 92 | 108 | 11  | 9   | 10  | 4.647136 | 4.939233 | 5.455495 | 0.714802 |
| antisense -             | 7   | 6  | 3   | 0   | 1   | 2   | 0.568856 | 0.625267 | 0.294153 | 0        |
| lincRNA -               | 0   | 0  | 0   | 1   | 0   | 0   | 0        | 0        | 0        | 0.029597 |
| pseudogen:-             | 1   | 0  | 0   | 6   | 5   | 6   | 0.118709 | 0        | 0        | 1.105516 |
| processed_-             | 0   | 0  | 0   | 0   | 0   | 1   | 0        | 0        | 0        | 0        |
| pseudogen:-             | 0   | 0  | 0   | 2   | 0   | 0   | 0        | 0        | 0        | 0.188793 |
| pseudogen:-             | 0   | 0  | 0   | 1   | 0   | 0   | 0        | 0        | 0        | 0.157874 |
| lincRNA -               | 0   | 1  | 0   | 0   | 0   | 0   | 0        | 0.164739 | 0        | 0        |
| TR_V_gene T_cell_rece   | 0   | 0  | 0   | 0   | 0   | 1   | 0        | 0        | 0        | 0        |
| pseudogen: MT-ND2_ps    | 0   | 0  | 0   | 0   | 2   | 0   | 0        | 0        | 0        | 0        |
| antisense -             | 0   | 1  | 1   | 1   | 0   | 0   | 0        | 0.233061 | 0.219285 | 0.282092 |
| pseudogen: mitogen-ac   | 2   | 0  | 0   | 2   | 4   | 2   | 0.043377 | 0        | 0        | 0.067326 |
| pseudogen: ferritin_he  | 2   | 4  | 2   | 3   | 1   | 3   | 0.1702   | 0.436514 | 0.205356 | 0.39626  |
| processed_-             | 0   | 0  | 0   | 0   | 0   | 1   | 0        | 0        | 0        | 0        |
| pseudogen: ribosomal_   | 0   | 0  | 0   | 6   | 2   | 0   | 0        | 0        | 0        | 0.887559 |
| pseudogen:-             | 0   | 0  | 0   | 1   | 0   | 0   | 0        | 0        | 0        | 0.07249  |
| pseudogen: anoctamin    | 17  | 13 | 9   | 17  | 15  | 1   | 0.463448 | 0.454469 | 0.296035 | 0.719335 |
| sense_intrc-            | 8   | 5  | 10  | 0   | 10  | 6   | 0.545233 | 0.43699  | 0.822318 | 0        |
| antisense -             | 1   | 1  | 0   | 0   | 0   | 4   | 0.087645 | 0.112392 | 0        | 0        |
| lincRNA -               | 2   | 1  | 10  | 0   | 0   | 0   | 0.12794  | 0.082032 | 0.771835 | 0        |
| pseudogen: heterogene   | 0   | 0  | 0   | 1   | 0   | 0   | 0        | 0        | 0        | 0.075812 |
| antisense -             | 0   | 0  | 0   | 0   | 1   | 0   | 0        | 0        | 0        | 0        |
| protein_co creatine_ki  | 0   | 0  | 0   | 165 | 201 | 101 | 0        | 0        | 0        | 5.011965 |
| lincRNA -               | 1   | 0  | 0   | 0   | 2   | 0   | 0.020539 | 0        | 0        | 0        |
| lincRNA -               | 0   | 0  | 0   | 2   | 2   | 0   | 0        | 0        | 0        | 0.240594 |
| lincRNA -               | 1   | 0  | 0   | 2   | 1   | 0   | 0.086513 | 0        | 0        | 0.26856  |
| pseudogen: smg-1_horr   | 18  | 21 | 17  | 24  | 21  | 20  | 0.199863 | 0.299012 | 0.227749 | 0.41362  |
| antisense TTN_antise    | 23  | 10 | 9   | 11  | 14  | 17  | 0.234859 | 0.130945 | 0.110884 | 0.174342 |
| pseudogen:-             | 0   | 0  | 0   | 0   | 0   | 1   | 0        | 0        | 0        | 0        |
| processed_-             | 2   | 3  | 9   | 6   | 4   | 2   | 0.032963 | 0.063406 | 0.178973 | 0.15349  |
| pseudogen: HIG1_hypo    | 1   | 0  | 0   | 0   | 0   | 0   | 0.171131 | 0        | 0        | 0        |
| pseudogen:-             | 1   | 0  | 0   | 0   | 0   | 0   | 0.143395 | 0        | 0        | 0        |
| pseudogen: serine/argi  | 0   | 2  | 1   | 0   | 2   | 0   | 0        | 0.044906 | 0.021126 | 0        |
| lincRNA -               | 5   | 5  | 5   | 5   | 21  | 7   | 0.434167 | 0.556757 | 0.523847 | 0.673887 |
| lincRNA -               | 0   | 0  | 0   | 0   | 0   | 1   | 0        | 0        | 0        | 0        |
| pseudogen:-             | 1   | 1  | 0   | 0   | 1   | 5   | 0.06186  | 0.079327 | 0        | 0        |
| antisense RAI1_antise   | 5   | 1  | 2   | 3   | 1   | 2   | 0.323826 | 0.083052 | 0.156286 | 0.301574 |
| pseudogen:-             | 0   | 0  | 1   | 5   | 1   | 1   | 0        | 0        | 0.111589 | 0.71775  |
| protein_co ring_finger  | 0   | 0  | 0   | 0   | 1   | 0   | 0        | 0        | 0        | 0        |
| antisense XIAP_antise   | 6   | 4  | 0   | 4   | 0   | 1   | 0.583693 | 0.499002 | 0        | 0.603982 |
| antisense -             | 1   | 1  | 0   | 0   | 0   | 0   | 0.064945 | 0.083282 | 0        | 0        |
| antisense FTCD_antis    | 1   | 2  | 0   | 1   | 8   | 1   | 0.09378  | 0.240519 | 0        | 0.14556  |
| lincRNA -               | 0   | 0  | 0   | 4   | 8   | 2   | 0        | 0        | 0        | 0.595336 |
| pseudogen:-             | 3   | 0  | 0   | 1   | 1   | 5   | 0.349057 | 0        | 0        | 0.180595 |
| pseudogen:-             | 0   | 0  | 0   | 0   | 0   | 1   | 0        | 0        | 0        | 0        |
| pseudogen: cell_divisio | 15  | 10 | 17  | 9   | 15  | 13  | 1.221094 | 1.04392  | 1.669763 | 1.137184 |
| pseudogen:-             | 5   | 3  | 3   | 4   | 1   | 12  | 0.187861 | 0.144543 | 0.135999 | 0.233269 |
| protein_co prostate_ar  | 0   | 0  | 0   | 0   | 1   | 5   | 0        | 0        | 0        | 0        |
| lincRNA -               | 10  | 14 | 21  | 6   | 8   | 11  | 0.828446 | 1.487309 | 2.099091 | 0.771517 |
| lincRNA -               | 0   | 3  | 2   | 6   | 5   | 7   | 0        | 0.069945 | 0.043874 | 0.169321 |
| lincRNA -               | 0   | 0  | 2   | 0   | 0   | 1   | 0        | 0        | 0.155427 | 0        |
| processed_-             | 0   | 0  | 0   | 2   | 1   | 5   | 0        | 0        | 0        | 0.16965  |
| pseudogen:-             | 0   | 0  | 0   | 0   | 1   | 0   | 0        | 0        | 0        | 0        |
| antisense -             | 0   | 0  | 0   | 0   | 1   | 0   | 0        | 0        | 0        | 0        |
| processed_-             | 0   | 0  | 0   | 2   | 1   | 3   | 0        | 0        | 0        | 0.17708  |

|                        |      |     |     |      |      |     |          |          |          |          |
|------------------------|------|-----|-----|------|------|-----|----------|----------|----------|----------|
| processed_ BRWD1_in    | 0    | 0   | 1   | 0    | 0    | 0   | 0        | 0        | 0.115696 | 0        |
| antisense HOXD_clus    | 124  | 101 | 104 | 0    | 0    | 6   | 5.820182 | 6.079189 | 5.889742 | 0        |
| pseudogen: ribosomal_  | 1    | 0   | 1   | 1    | 1    | 3   | 0.100839 | 0        | 0.121668 | 0.156516 |
| antisense -            | 0    | 0   | 0   | 2    | 3    | 1   | 0        | 0        | 0        | 0.220545 |
| processed_ -           | 0    | 0   | 0   | 4    | 1    | 3   | 0        | 0        | 0        | 0.052116 |
| pseudogen: major_hist  | 0    | 0   | 0   | 23   | 17   | 36  | 0        | 0        | 0        | 7.309762 |
| processed_ PITRM1_an   | 22   | 16  | 11  | 4    | 16   | 4   | 0.269835 | 0.251655 | 0.162786 | 0.076149 |
| sense_intrc CAMTA1_ir  | 0    | 0   | 1   | 1    | 0    | 0   | 0        | 0        | 0.155001 | 0.199397 |
| lincRNA -              | 0    | 0   | 0   | 0    | 0    | 1   | 0        | 0        | 0        | 0        |
| pseudogen: NADH_deh    | 5    | 0   | 0   | 1    | 1    | 2   | 0.206564 | 0        | 0        | 0.064123 |
| antisense -            | 0    | 2   | 0   | 0    | 0    | 1   | 0        | 0.256417 | 0        | 0        |
| protein_co protease_s  | 1    | 0   | 0   | 3    | 1    | 2   | 0.021739 | 0        | 0        | 0.101224 |
| pseudogen: nuclear_rec | 0    | 0   | 0   | 0    | 1    | 1   | 0        | 0        | 0        | 0        |
| processed_ -           | 2    | 2   | 0   | 3    | 3    | 0   | 0.134548 | 0.172539 | 0        | 0.313256 |
| pseudogen: -           | 6    | 1   | 5   | 1    | 0    | 0   | 1.815097 | 0.387934 | 1.825016 | 0.469547 |
| lincRNA -              | 0    | 0   | 0   | 0    | 0    | 2   | 0        | 0        | 0        | 0        |
| lincRNA -              | 0    | 0   | 0   | 0    | 1    | 1   | 0        | 0        | 0        | 0        |
| lincRNA -              | 0    | 2   | 0   | 0    | 0    | 0   | 0        | 0.280325 | 0        | 0        |
| antisense FOXD2_ant    | 61   | 42  | 31  | 2    | 5    | 9   | 1.140012 | 1.006557 | 0.69902  | 0.058015 |
| pseudogen: ribosomal_  | 0    | 0   | 0   | 1    | 0    | 0   | 0        | 0        | 0        | 0.081959 |
| antisense -            | 0    | 0   | 1   | 2    | 1    | 0   | 0        | 0        | 0.199913 | 0.514345 |
| antisense -            | 4    | 3   | 3   | 25   | 27   | 28  | 0.451952 | 0.434673 | 0.40898  | 4.384325 |
| pseudogen: argininosuc | 13   | 15  | 19  | 9    | 10   | 21  | 0.496797 | 0.735083 | 0.876067 | 0.533837 |
| lincRNA cat_eye_sy     | 0    | 0   | 0   | 1    | 5    | 13  | 0        | 0        | 0        | 0.026698 |
| protein_co zinc_finger | 87   | 55  | 67  | 168  | 168  | 124 | 1.422892 | 1.153519 | 1.322134 | 4.264739 |
| protein_co ral_guanine | 1040 | 809 | 791 | 1023 | 1167 | 909 | 14.87664 | 14.83984 | 13.65199 | 22.71316 |
| lincRNA -              | 0    | 0   | 0   | 2    | 0    | 0   | 0        | 0        | 0        | 0.384062 |
| pseudogen: Ras-homol   | 0    | 0   | 0   | 0    | 1    | 0   | 0        | 0        | 0        | 0        |
| pseudogen: cyclin-depe | 0    | 1   | 0   | 0    | 0    | 0   | 0        | 0.163841 | 0        | 0        |
| protein_co Uncharacte  | 0    | 1   | 0   | 1    | 2    | 2   | 0        | 0.021873 | 0        | 0.026475 |
| pseudogen: -           | 1    | 1   | 0   | 6    | 2    | 0   | 0.115778 | 0.148469 | 0        | 1.078219 |
| processed_ -           | 0    | 1   | 0   | 4    | 3    | 4   | 0        | 0.114315 | 0        | 0.553459 |
| processed_ -           | 1    | 2   | 3   | 3    | 1    | 1   | 0.030369 | 0.077888 | 0.109926 | 0.141412 |
| antisense -            | 0    | 0   | 0   | 0    | 1    | 1   | 0        | 0        | 0        | 0        |
| antisense -            | 0    | 0   | 0   | 0    | 6    | 2   | 0        | 0        | 0        | 0        |
| lincRNA -              | 10   | 2   | 4   | 0    | 0    | 0   | 0.844865 | 0.216684 | 0.407751 | 0        |
| lincRNA -              | 3    | 3   | 1   | 11   | 15   | 3   | 0.205658 | 0.263727 | 0.082713 | 1.170435 |
| pseudogen: -           | 0    | 0   | 0   | 0    | 0    | 1   | 0        | 0        | 0        | 0        |
| antisense -            | 2    | 1   | 0   | 0    | 1    | 0   | 0.146531 | 0.093953 | 0        | 0        |
| pseudogen: -           | 0    | 0   | 0   | 0    | 1    | 0   | 0        | 0        | 0        | 0        |
| antisense SGOL1_ant    | 0    | 0   | 0   | 2    | 1    | 1   | 0        | 0        | 0        | 0.177728 |
| lincRNA -              | 9    | 12  | 8   | 17   | 25   | 14  | 0.148438 | 0.253801 | 0.159199 | 0.435194 |
| lincRNA -              | 49   | 33  | 35  | 30   | 40   | 19  | 1.226701 | 1.059414 | 1.057204 | 1.16572  |
| pseudogen: -           | 0    | 0   | 0   | 0    | 0    | 1   | 0        | 0        | 0        | 0        |
| pseudogen: -           | 6    | 12  | 14  | 6    | 4    | 8   | 0.465795 | 1.194632 | 1.311353 | 0.722978 |
| processed_ -           | 11   | 5   | 4   | 2    | 2    | 2   | 0.535608 | 0.3122   | 0.234997 | 0.151152 |
| pseudogen: -           | 0    | 0   | 1   | 0    | 0    | 0   | 0        | 0        | 0.227211 | 0        |
| antisense -            | 2    | 1   | 5   | 5    | 2    | 4   | 0.142091 | 0.091106 | 0.428602 | 0.551362 |
| processed_ -           | 0    | 1   | 0   | 2    | 7    | 0   | 0        | 0.016976 | 0        | 0.041095 |
| pseudogen: ribosomal_  | 36   | 32  | 28  | 66   | 83   | 96  | 1.637285 | 1.866298 | 1.536483 | 4.659037 |
| pseudogen: -           | 0    | 0   | 0   | 3    | 4    | 2   | 0        | 0        | 0        | 0.130586 |
| antisense UNC5B_ant    | 26   | 26  | 11  | 45   | 74   | 48  | 1.884297 | 2.416344 | 0.961871 | 5.061965 |
| processed_ -           | 0    | 4   | 3   | 0    | 0    | 0   | 0        | 0.269943 | 0.19049  | 0        |
| protein_co shisa_hom   | 87   | 46  | 75  | 661  | 750  | 727 | 0.606517 | 0.411236 | 0.63086  | 7.15246  |
| antisense DiGeorge_s   | 13   | 9   | 14  | 109  | 110  | 76  | 0.110992 | 0.098538 | 0.14422  | 1.444464 |
| pseudogen: non-POU_c   | 6    | 6   | 9   | 1    | 3    | 0   | 0.228546 | 0.293078 | 0.413631 | 0.059123 |
| processed_ long_inter  | 3    | 3   | 0   | 10   | 10   | 9   | 0.065095 | 0.083475 | 0        | 0.336788 |
| lincRNA -              | 8    | 2   | 3   | 1    | 0    | 4   | 0.228453 | 0.07324  | 0.103366 | 0.044324 |
| antisense -            | 2    | 0   | 0   | 1    | 0    | 0   | 0.177951 | 0        | 0        | 0.138102 |
| lincRNA -              | 0    | 1   | 1   | 0    | 4    | 1   | 0        | 0.127124 | 0.11961  | 0        |
| lincRNA -              | 0    | 0   | 0   | 2    | 1    | 2   | 0        | 0        | 0        | 0.24755  |
| pseudogen: -           | 1    | 0   | 0   | 0    | 0    | 0   | 0.155781 | 0        | 0        | 0        |
| protein_co major_hist  | 0    | 0   | 1   | 0    | 0    | 0   | 0        | 0        | 0.037123 | 0        |
| processed_ -           | 1    | 0   | 0   | 0    | 0    | 0   | 0.068855 | 0        | 0        | 0        |
| processed_ TTLL11_int  | 3    | 1   | 3   | 0    | 0    | 0   | 0.133717 | 0.057158 | 0.161337 | 0        |

|                         |      |      |      |      |      |      |          |          |          |          |
|-------------------------|------|------|------|------|------|------|----------|----------|----------|----------|
| pseudogen: ribosomal_   | 3    | 2    | 0    | 1    | 1    | 1    | 0.209019 | 0.178692 | 0        | 0.108142 |
| pseudogen: -            | 0    | 1    | 0    | 0    | 0    | 0    | 0        | 0.134218 | 0        | 0        |
| pseudogen: -            | 0    | 0    | 1    | 0    | 3    | 5    | 0        | 0        | 0.077821 | 0        |
| lincRNA -               | 1    | 0    | 0    | 0    | 0    | 0    | 0.070511 | 0        | 0        | 0        |
| lincRNA -               | 0    | 0    | 1    | 0    | 0    | 0    | 0        | 0        | 0.096053 | 0        |
| pseudogen: peptide_YY   | 2    | 1    | 2    | 4    | 12   | 2    | 0.087156 | 0.055883 | 0.105159 | 0.270557 |
| pseudogen: -            | 0    | 0    | 0    | 0    | 3    | 4    | 0        | 0        | 0        | 0        |
| pseudogen: ras-related_ | 0    | 0    | 0    | 0    | 0    | 1    | 0        | 0        | 0        | 0        |
| lincRNA -               | 1    | 0    | 0    | 0    | 0    | 0    | 0.158949 | 0        | 0        | 0        |
| pseudogen: -            | 3    | 3    | 4    | 0    | 0    | 0    | 0.287082 | 0.368142 | 0.461841 | 0        |
| lincRNA -               | 3    | 4    | 3    | 15   | 17   | 2    | 0.034143 | 0.058378 | 0.041196 | 0.264975 |
| pseudogen: high_mobil   | 0    | 0    | 0    | 0    | 1    | 0    | 0        | 0        | 0        | 0        |
| lincRNA -               | 12   | 13   | 12   | 36   | 66   | 56   | 0.667474 | 0.927269 | 0.805345 | 3.108034 |
| lincRNA -               | 5    | 6    | 5    | 10   | 8    | 2    | 0.31985  | 0.492195 | 0.385917 | 0.992903 |
| antisense -             | 4    | 2    | 2    | 0    | 0    | 0    | 0.227621 | 0.145946 | 0.137319 | 0        |
| lincRNA -               | 0    | 0    | 1    | 3    | 6    | 0    | 0        | 0        | 0.06891  | 0.265943 |
| antisense -             | 3    | 0    | 5    | 2    | 0    | 0    | 0.392933 | 0        | 0.790161 | 0.406591 |
| lincRNA -               | 0    | 0    | 2    | 0    | 1    | 3    | 0        | 0        | 0.387503 | 0        |
| pseudogen: -            | 7    | 11   | 16   | 14   | 13   | 9    | 1.287177 | 2.593834 | 3.549836 | 3.995754 |
| pseudogen: 3-oxoacid_   | 0    | 3    | 4    | 9    | 5    | 2    | 0        | 0.117518 | 0.147428 | 0.426722 |
| pseudogen: -            | 1    | 1    | 0    | 1    | 1    | 0    | 0.078411 | 0.100551 | 0        | 0.121705 |
| pseudogen: -            | 0    | 2    | 0    | 1    | 0    | 1    | 0        | 0.211353 | 0        | 0.127908 |
| processed_ FRY_antise   | 0    | 1    | 2    | 1    | 1    | 0    | 0        | 0.053928 | 0.101481 | 0.065273 |
| lincRNA -               | 0    | 0    | 0    | 1    | 0    | 0    | 0        | 0        | 0        | 0.024856 |
| antisense -             | 0    | 0    | 0    | 7    | 3    | 4    | 0        | 0        | 0        | 0.749204 |
| pseudogen: -            | 3    | 2    | 3    | 2    | 0    | 4    | 0.345627 | 0.295478 | 0.417018 | 0.35764  |
| pseudogen: -            | 0    | 0    | 1    | 2    | 0    | 0    | 0        | 0        | 0.117621 | 0.302619 |
| sense_intrc HLCS_intro  | 3    | 1    | 2    | 0    | 0    | 1    | 0.264915 | 0.113239 | 0.21309  | 0        |
| antisense ERICH1_an     | 0    | 0    | 0    | 0    | 0    | 2    | 0        | 0        | 0        | 0        |
| protein_co kinesin_fan  | 1594 | 1315 | 1369 | 1998 | 2369 | 1709 | 27.6211  | 29.2205  | 28.62227 | 53.73764 |
| pseudogen: olfactory_r  | 0    | 3    | 1    | 0    | 0    | 0    | 0        | 0.205689 | 0.06451  | 0        |
| antisense -             | 0    | 3    | 6    | 1    | 3    | 1    | 0        | 0.041612 | 0.078305 | 0.016789 |
| lincRNA -               | 0    | 0    | 0    | 0    | 1    | 1    | 0        | 0        | 0        | 0        |
| lincRNA long_interf     | 1    | 0    | 2    | 1    | 2    | 0    | 0.103055 | 0        | 0.248684 | 0.159956 |
| pseudogen: -            | 2    | 0    | 0    | 0    | 0    | 2    | 0.252097 | 0        | 0        | 0        |
| pseudogen: HLA_compl    | 3    | 2    | 1    | 0    | 6    | 3    | 0.141235 | 0.120743 | 0.056803 | 0        |
| pseudogen: KRR1_smal    | 12   | 11   | 10   | 14   | 9    | 13   | 0.700723 | 0.823696 | 0.704552 | 1.268888 |
| pseudogen: -            | 0    | 1    | 0    | 0    | 1    | 0    | 0        | 0.070575 | 0        | 0        |
| pseudogen: -            | 1    | 2    | 0    | 1    | 3    | 2    | 0.026166 | 0.067109 | 0        | 0.040614 |
| protein_co cDNA_FLJ5    | 91   | 109  | 111  | 358  | 380  | 553  | 1.603529 | 2.463039 | 2.35997  | 9.791495 |
| processed_ -            | 0    | 1    | 0    | 0    | 0    | 0    | 0        | 0.040766 | 0        | 0        |
| processed_ -            | 10   | 15   | 2    | 10   | 9    | 14   | 0.210081 | 0.404098 | 0.050695 | 0.326074 |
| lincRNA long_interf     | 3    | 0    | 0    | 0    | 0    | 0    | 0.423705 | 0        | 0        | 0        |
| lincRNA -               | 2    | 0    | 0    | 0    | 0    | 0    | 0.18756  | 0        | 0        | 0        |
| pseudogen: interferon_  | 1    | 5    | 1    | 0    | 0    | 0    | 0.080845 | 0.51836  | 0.097544 | 0        |
| protein_co immunity-i   | 0    | 3    | 1    | 0    | 3    | 1    | 0        | 0.108734 | 0.034102 | 0        |
| lincRNA long_interf     | 24   | 20   | 23   | 1    | 4    | 3    | 0.537421 | 0.574306 | 0.621412 | 0.034756 |
| lincRNA -               | 0    | 1    | 0    | 0    | 0    | 0    | 0        | 0.174796 | 0        | 0        |
| pseudogen: -            | 0    | 0    | 0    | 0    | 1    | 0    | 0        | 0        | 0        | 0        |
| antisense -             | 2    | 1    | 2    | 0    | 1    | 0    | 0.151502 | 0.09714  | 0.182796 | 0        |
| pseudogen: -            | 1    | 4    | 1    | 0    | 0    | 0    | 0.060581 | 0.310748 | 0.073095 | 0        |
| lincRNA -               | 0    | 0    | 0    | 6    | 4    | 0    | 0        | 0        | 0        | 0.518621 |
| antisense P4HA2_ant     | 2    | 0    | 3    | 2    | 0    | 0    | 0.111776 | 0        | 0.202296 | 0.173492 |
| antisense -             | 6    | 9    | 9    | 3    | 13   | 13   | 0.538966 | 1.036721 | 0.97544  | 0.418275 |
| pseudogen: -            | 12   | 2    | 8    | 4    | 2    | 4    | 0.857744 | 0.183323 | 0.689945 | 0.443779 |
| lincRNA -               | 0    | 0    | 0    | 3    | 2    | 1    | 0        | 0        | 0        | 0.428958 |
| antisense -             | 1    | 0    | 0    | 0    | 0    | 0    | 0.108542 | 0        | 0        | 0        |
| pseudogen: RNA_guany    | 0    | 1    | 0    | 0    | 1    | 0    | 0        | 0.082596 | 0        | 0        |
| pseudogen: -            | 4    | 6    | 8    | 0    | 1    | 2    | 0.13945  | 0.268237 | 0.336509 | 0        |
| antisense -             | 0    | 0    | 0    | 0    | 2    | 0    | 0        | 0        | 0        | 0        |
| lincRNA -               | 0    | 0    | 1    | 0    | 0    | 0    | 0        | 0        | 0.061428 | 0        |
| processed_ DCTN1_ant    | 1    | 1    | 3    | 4    | 0    | 1    | 0.02186  | 0.028033 | 0.079127 | 0.13572  |
| sense_intrc RNF216_in   | 4    | 0    | 3    | 4    | 2    | 2    | 0.556558 | 0        | 0.50364  | 0.863855 |
| pseudogen: -            | 0    | 0    | 0    | 0    | 1    | 0    | 0        | 0        | 0        | 0        |
| processed_ -            | 0    | 0    | 0    | 20   | 18   | 23   | 0        | 0        | 0        | 2.055927 |

|                                        |     |     |     |     |     |     |          |          |          |          |
|----------------------------------------|-----|-----|-----|-----|-----|-----|----------|----------|----------|----------|
| pseudogeni -                           | 1   | 0   | 0   | 0   | 0   | 0   | 0.138319 | 0        | 0        | 0        |
| pseudogeni: ubiquinol-<br>pseudogeni - | 1   | 2   | 1   | 1   | 1   | 2   | 0.139554 | 0.357915 | 0.168379 | 0.216607 |
| antisense -                            | 1   | 0   | 0   | 1   | 0   | 0   | 0.176278 | 0        | 0        | 0.273608 |
| processed_ -                           | 0   | 0   | 0   | 0   | 0   | 1   | 0        | 0        | 0        | 0        |
| lincRNA -                              | 53  | 60  | 53  | 24  | 47  | 16  | 1.229066 | 1.784267 | 1.482939 | 0.863855 |
| pseudogeni: eukaryotic_                | 0   | 0   | 0   | 1   | 3   | 0   | 0        | 0        | 0        | 0.155181 |
| pseudogeni: barrier_to_                | 2   | 0   | 0   | 2   | 9   | 2   | 0.070247 | 0        | 0        | 0.109033 |
| lincRNA -                              | 10  | 9   | 7   | 9   | 5   | 7   | 1.796552 | 2.073441 | 1.517351 | 2.509648 |
| processed_ -                           | 0   | 0   | 1   | 0   | 0   | 0   | 0        | 0        | 0.153321 | 0        |
| protein_co family_witl                 | 0   | 0   | 0   | 4   | 4   | 3   | 0        | 0        | 0        | 0.200357 |
| pseudogeni -                           | 311 | 252 | 238 | 159 | 199 | 210 | 4.923294 | 5.115702 | 4.545905 | 3.906816 |
| lincRNA -                              | 2   | 2   | 2   | 0   | 1   | 2   | 0.08336  | 0.106897 | 0.100579 | 0        |
| antisense -                            | 0   | 0   | 0   | 3   | 1   | 1   | 0        | 0        | 0        | 0.298686 |
| lincRNA -                              | 1   | 0   | 4   | 0   | 0   | 0   | 0.161134 | 0        | 0.77767  | 0        |
| pseudogeni -                           | 0   | 0   | 2   | 1   | 0   | 0   | 0        | 0        | 0.166399 | 0.107029 |
| antisense -                            | 0   | 0   | 0   | 0   | 0   | 2   | 0        | 0        | 0        | 0        |
| pseudogeni -                           | 3   | 2   | 2   | 2   | 6   | 3   | 0.212172 | 0.181387 | 0.170665 | 0.219547 |
| pseudogeni -                           | 5   | 3   | 3   | 2   | 0   | 0   | 0.141833 | 0.109128 | 0.102678 | 0.088058 |
| pseudogeni -                           | 0   | 0   | 3   | 0   | 2   | 0   | 0        | 0        | 0.071015 | 0        |
| lincRNA -                              | 1   | 0   | 0   | 0   | 0   | 1   | 0.13513  | 0        | 0        | 0        |
| antisense -                            | 2   | 2   | 4   | 0   | 0   | 0   | 0.205208 | 0.26315  | 0.49519  | 0        |
| pseudogeni: adenosylm                  | 1   | 0   | 0   | 0   | 0   | 0   | 0.047268 | 0        | 0        | 0        |
| lincRNA long_interf                    | 0   | 1   | 4   | 0   | 0   | 0   | 0        | 0.031269 | 0.117682 | 0        |
| pseudogeni -                           | 0   | 0   | 0   | 0   | 1   | 0   | 0        | 0        | 0        | 0        |
| antisense -                            | 0   | 1   | 2   | 0   | 1   | 1   | 0        | 0.090831 | 0.170923 | 0        |
| lincRNA -                              | 3   | 1   | 0   | 2   | 5   | 6   | 0.058932 | 0.025191 | 0        | 0.06098  |
| antisense -                            | 0   | 0   | 0   | 1   | 0   | 0   | 0        | 0        | 0        | 0.10412  |
| pseudogeni -                           | 4   | 2   | 1   | 8   | 8   | 6   | 1.389334 | 0.890812 | 0.419078 | 4.312877 |
| pseudogeni: ribosomal_                 | 0   | 0   | 0   | 1   | 1   | 0   | 0        | 0        | 0        | 0.094642 |
| antisense -                            | 6   | 5   | 1   | 2   | 1   | 2   | 0.533852 | 0.570491 | 0.107354 | 0.276204 |
| pseudogeni -                           | 2   | 2   | 2   | 2   | 2   | 3   | 0.085332 | 0.109426 | 0.102958 | 0.132447 |
| pseudogeni -                           | 0   | 0   | 1   | 3   | 3   | 1   | 0        | 0        | 0.141439 | 0.545849 |
| pseudogeni: proliferatic               | 0   | 0   | 0   | 1   | 0   | 0   | 0        | 0        | 0        | 0.060802 |
| pseudogeni -                           | 2   | 0   | 0   | 0   | 0   | 0   | 0.065489 | 0        | 0        | 0        |
| antisense PHKA2_ant                    | 1   | 5   | 7   | 0   | 2   | 1   | 0.071479 | 0.458306 | 0.603702 | 0        |
| lincRNA -                              | 0   | 1   | 0   | 0   | 0   | 0   | 0        | 0.102962 | 0        | 0        |
| pseudogeni: family_witl                | 2   | 1   | 2   | 4   | 0   | 0   | 0.082918 | 0.053165 | 0.100045 | 0.2574   |
| pseudogeni -                           | 0   | 0   | 0   | 1   | 0   | 0   | 0        | 0        | 0        | 0.047537 |
| lincRNA -                              | 0   | 0   | 1   | 0   | 0   | 0   | 0        | 0        | 0.076453 | 0        |
| pseudogeni -                           | 160 | 125 | 150 | 102 | 142 | 57  | 10.62663 | 10.64621 | 12.02029 | 10.51493 |
| pseudogeni -                           | 0   | 0   | 0   | 1   | 0   | 0   | 0        | 0        | 0        | 0.311025 |
| lincRNA -                              | 0   | 0   | 0   | 0   | 1   | 0   | 0        | 0        | 0        | 0        |
| sense_intrc -                          | 1   | 0   | 0   | 0   | 0   | 0   | 0.110851 | 0        | 0        | 0        |
| lincRNA -                              | 1   | 0   | 1   | 0   | 2   | 1   | 0.097688 | 0        | 0.117866 | 0        |
| pseudogeni: long_interf                | 104 | 83  | 95  | 30  | 30  | 23  | 7.192569 | 7.361022 | 7.927246 | 3.220345 |
| lincRNA -                              | 10  | 3   | 5   | 22  | 31  | 28  | 0.333974 | 0.128482 | 0.20148  | 1.140424 |
| processed_ -                           | 0   | 0   | 0   | 7   | 10  | 16  | 0        | 0        | 0        | 0.446111 |
| pseudogeni -                           | 1   | 0   | 1   | 1   | 1   | 0   | 0.097891 | 0        | 0.118112 | 0.151941 |
| processed_ -                           | 5   | 3   | 5   | 0   | 0   | 0   | 0.11974  | 0.092129 | 0.144473 | 0        |
| pseudogeni: POU_class_                 | 5   | 7   | 2   | 27  | 26  | 37  | 0.216083 | 0.387934 | 0.104287 | 1.81111  |
| lincRNA -                              | 7   | 5   | 4   | 3   | 7   | 7   | 0.304198 | 0.278637 | 0.209733 | 0.202353 |
| lincRNA long_interf                    | 0   | 1   | 0   | 0   | 0   | 0   | 0        | 0.066368 | 0        | 0        |
| antisense DGUOK_an                     | 19  | 7   | 7   | 3   | 10  | 3   | 1.48238  | 0.700347 | 0.658949 | 0.363294 |
| antisense -                            | 19  | 19  | 14  | 69  | 149 | 24  | 1.207196 | 1.548057 | 1.073248 | 6.804616 |
| pseudogeni -                           | 4   | 0   | 7   | 0   | 2   | 0   | 0.408628 | 0        | 0.862807 | 0        |
| sense_intrc KLF7_intro                 | 12  | 7   | 4   | 3   | 0   | 5   | 0.859054 | 0.642609 | 0.345499 | 0.333343 |
| protein_co Uncharacte                  | 4   | 1   | 2   | 0   | 0   | 0   | 0.262322 | 0.084098 | 0.158253 | 0        |
| lincRNA -                              | 5   | 6   | 8   | 5   | 6   | 8   | 0.497771 | 0.765985 | 0.960943 | 0.772609 |
| sense_intrc -                          | 5   | 3   | 6   | 0   | 0   | 2   | 0.541455 | 0.416604 | 0.783956 | 0        |
| pseudogeni -                           | 2   | 0   | 1   | 4   | 5   | 0   | 0.165689 | 0        | 0.099957 | 0.514345 |
| pseudogeni: signal_reco                | 1   | 1   | 0   | 1   | 3   | 0   | 0.136308 | 0.174796 | 0        | 0.211569 |
| pseudogeni -                           | 5   | 10  | 10  | 2   | 1   | 3   | 0.753859 | 1.933434 | 1.819148 | 0.468037 |
| pseudogeni: poly_(ADP-                 | 0   | 2   | 0   | 0   | 0   | 0   | 0        | 0.051459 | 0        | 0        |
| lincRNA -                              | 0   | 0   | 0   | 1   | 2   | 3   | 0        | 0        | 0        | 0.197235 |
| pseudogeni -                           | 1   | 0   | 0   | 0   | 0   | 0   | 0.071479 | 0        | 0        | 0        |

|                        |     |     |     |     |     |     |          |          |          |          |
|------------------------|-----|-----|-----|-----|-----|-----|----------|----------|----------|----------|
| lincRNA -              | 0   | 0   | 0   | 41  | 49  | 90  | 0        | 0        | 0        | 3.734633 |
| pseudogen -            | 0   | 0   | 0   | 1   | 0   | 0   | 0        | 0        | 0        | 0.08941  |
| lincRNA -              | 0   | 0   | 0   | 1   | 0   | 0   | 0        | 0        | 0        | 0.036354 |
| antisense -            | 11  | 11  | 14  | 0   | 0   | 0   | 0.404541 | 0.518767 | 0.621221 | 0        |
| pseudogen -            | 0   | 1   | 0   | 0   | 0   | 0   | 0        | 0.07996  | 0        | 0        |
| antisense -            | 3   | 1   | 3   | 2   | 7   | 5   | 0.245497 | 0.104939 | 0.296207 | 0.254031 |
| lincRNA -              | 0   | 0   | 0   | 1   | 0   | 1   | 0        | 0        | 0        | 0.124837 |
| antisense -            | 14  | 8   | 10  | 2   | 7   | 4   | 1.017768 | 0.745796 | 0.87714  | 0.225674 |
| processed_ -           | 33  | 18  | 25  | 19  | 16  | 5   | 0.713074 | 0.498773 | 0.651792 | 0.637242 |
| antisense KCNQ1_do     | 0   | 0   | 0   | 0   | 0   | 1   | 0        | 0        | 0        | 0        |
| lincRNA PRKCQ_ant      | 6   | 6   | 8   | 184 | 261 | 278 | 0.248314 | 0.318428 | 0.399474 | 11.81949 |
| antisense long_interf  | 9   | 9   | 17  | 162 | 179 | 108 | 0.046253 | 0.059313 | 0.105412 | 1.292232 |
| antisense -            | 1   | 5   | 1   | 4   | 2   | 1   | 0.094919 | 0.608601 | 0.114525 | 0.58931  |
| pseudogen -            | 0   | 0   | 0   | 0   | 3   | 0   | 0        | 0        | 0        | 0        |
| pseudogen: tubulin_ga  | 3   | 0   | 2   | 3   | 3   | 6   | 0.103586 | 0        | 0.083322 | 0.16078  |
| pseudogen: hsa-mir-67  | 253 | 208 | 200 | 374 | 528 | 362 | 7.688383 | 8.105637 | 7.333183 | 17.64073 |
| processed_ FLG_antise  | 0   | 0   | 0   | 0   | 1   | 0   | 0        | 0        | 0        | 0        |
| antisense -            | 3   | 1   | 1   | 3   | 2   | 5   | 0.227621 | 0.097297 | 0.091546 | 0.3533   |
| pseudogen -            | 4   | 1   | 3   | 10  | 17  | 23  | 0.333144 | 0.106802 | 0.301468 | 1.292714 |
| processed_ -           | 0   | 1   | 0   | 51  | 49  | 52  | 0        | 0.062375 | 0        | 3.850384 |
| pseudogen -            | 0   | 1   | 0   | 0   | 0   | 0   | 0        | 0.075826 | 0        | 0        |
| lincRNA -              | 6   | 1   | 1   | 1   | 2   | 0   | 0.594799 | 0.127124 | 0.11961  | 0.153869 |
| pseudogen -            | 0   | 1   | 0   | 0   | 0   | 0   | 0        | 0.123979 | 0        | 0        |
| pseudogen: phosphata   | 7   | 16  | 12  | 24  | 20  | 6   | 0.08214  | 0.24076  | 0.169896 | 0.437116 |
| antisense CELF2_anti   | 1   | 0   | 1   | 1   | 1   | 0   | 0.054971 | 0        | 0.066325 | 0.085322 |
| pseudogen: olfactory_r | 0   | 0   | 0   | 0   | 0   | 3   | 0        | 0        | 0        | 0        |
| processed_ -           | 12  | 14  | 13  | 0   | 0   | 0   | 0.201101 | 0.300864 | 0.26286  | 0        |
| antisense -            | 0   | 0   | 0   | 1   | 0   | 0   | 0        | 0        | 0        | 0.103234 |
| antisense -            | 7   | 6   | 5   | 2   | 7   | 1   | 0.371301 | 0.408121 | 0.319997 | 0.16466  |
| pseudogen -            | 0   | 1   | 0   | 0   | 0   | 0   | 0        | 0.05388  | 0        | 0        |
| pseudogen -            | 1   | 0   | 0   | 0   | 1   | 0   | 0.15224  | 0        | 0        | 0        |
| lincRNA -              | 0   | 0   | 1   | 0   | 0   | 0   | 0        | 0        | 0.063639 | 0        |
| pseudogen -            | 2   | 2   | 0   | 1   | 0   | 0   | 0.418661 | 0.536873 | 0        | 0.32491  |
| lincRNA -              | 0   | 1   | 2   | 0   | 0   | 3   | 0        | 0.021881 | 0.041176 | 0        |
| sense_intrac           | 0   | 0   | 0   | 0   | 0   | 1   | 0        | 0        | 0        | 0        |
| lincRNA -              | 0   | 0   | 0   | 1   | 0   | 0   | 0        | 0        | 0        | 0.251833 |
| pseudogen -            | 0   | 0   | 0   | 1   | 0   | 0   | 0        | 0        | 0        | 0.271566 |
| pseudogen -            | 4   | 0   | 0   | 0   | 0   | 0   | 0.442359 | 0        | 0        | 0        |
| antisense -            | 17  | 17  | 15  | 9   | 8   | 11  | 1.324137 | 1.698018 | 1.409689 | 1.08807  |
| antisense HTR3E_anti   | 0   | 0   | 0   | 0   | 1   | 0   | 0        | 0        | 0        | 0        |
| pseudogen: armadillo_  | 3   | 2   | 1   | 0   | 2   | 1   | 0.198968 | 0.170098 | 0.080022 | 0        |
| pseudogen: DEAD_(Asp   | 0   | 0   | 0   | 3   | 0   | 0   | 0        | 0        | 0        | 0.846277 |
| pseudogen: zinc_finger | 0   | 0   | 0   | 1   | 1   | 0   | 0        | 0        | 0        | 0.070319 |
| lincRNA -              | 0   | 0   | 0   | 0   | 1   | 0   | 0        | 0        | 0        | 0        |
| lincRNA -              | 0   | 0   | 0   | 1   | 6   | 5   | 0        | 0        | 0        | 0.127908 |
| lincRNA -              | 79  | 81  | 104 | 49  | 79  | 90  | 1.392075 | 1.830332 | 2.211143 | 1.340177 |
| pseudogen: ATPase_H+   | 0   | 1   | 0   | 4   | 8   | 1   | 0        | 0.24443  | 0        | 1.183411 |
| processed_ -           | 0   | 1   | 1   | 0   | 0   | 0   | 0        | 0.091801 | 0.086375 | 0        |
| pseudogen -            | 3   | 0   | 0   | 0   | 1   | 0   | 0.543128 | 0        | 0        | 0        |
| lincRNA -              | 3   | 1   | 1   | 2   | 0   | 1   | 0.195375 | 0.083514 | 0.078577 | 0.202166 |
| lincRNA -              | 0   | 2   | 0   | 0   | 0   | 0   | 0        | 0.212473 | 0        | 0        |
| antisense -            | 5   | 3   | 3   | 8   | 11  | 3   | 0.096086 | 0.07393  | 0.06956  | 0.238622 |
| pseudogen -            | 0   | 0   | 0   | 1   | 0   | 1   | 0        | 0        | 0        | 0.08854  |
| pseudogen -            | 1   | 0   | 0   | 0   | 0   | 0   | 0.174963 | 0        | 0        | 0        |
| pseudogen -            | 0   | 0   | 0   | 0   | 0   | 1   | 0        | 0        | 0        | 0        |
| antisense ZEB2_antis   | 1   | 0   | 0   | 0   | 0   | 0   | 0.024575 | 0        | 0        | 0        |
| antisense -            | 24  | 8   | 15  | 6   | 9   | 9   | 3.618522 | 1.546747 | 2.728722 | 1.404112 |
| pseudogen -            | 2   | 4   | 3   | 0   | 2   | 2   | 0.096382 | 0.247193 | 0.174436 | 0        |
| processed_ -           | 0   | 0   | 0   | 10  | 12  | 7   | 0        | 0        | 0        | 0.207468 |
| lincRNA -              | 0   | 0   | 0   | 0   | 0   | 1   | 0        | 0        | 0        | 0        |
| antisense ZNF630_an    | 1   | 0   | 1   | 0   | 0   | 0   | 0.118409 | 0        | 0.142867 | 0        |
| pseudogen -            | 3   | 0   | 3   | 1   | 2   | 6   | 0.545233 | 0        | 0.657855 | 0.282092 |
| pseudogen -            | 2   | 0   | 0   | 0   | 0   | 0   | 0.105608 | 0        | 0        | 0        |
| lincRNA -              | 2   | 1   | 1   | 0   | 0   | 3   | 0.097484 | 0.062505 | 0.05881  | 0        |
| pseudogen -            | 5   | 4   | 1   | 3   | 2   | 5   | 0.328822 | 0.337334 | 0.079349 | 0.306226 |

|                         |      |      |      |      |      |      |          |          |          |          |
|-------------------------|------|------|------|------|------|------|----------|----------|----------|----------|
| protein_co leucine_ric  | 99   | 78   | 78   | 68   | 79   | 70   | 0.818859 | 0.827328 | 0.778425 | 0.872998 |
| pseudogeni -            | 1    | 0    | 0    | 2    | 1    | 0    | 0.082408 | 0        | 0        | 0.255817 |
| pseudogeni -            | 0    | 0    | 1    | 0    | 0    | 0    | 0        | 0        | 0.164464 | 0        |
| pseudogeni protein_ph   | 8    | 5    | 2    | 1    | 3    | 4    | 0.103825 | 0.083213 | 0.031318 | 0.020144 |
| pseudogeni -            | 2    | 0    | 1    | 11   | 11   | 3    | 0.101604 | 0        | 0.061295 | 0.867365 |
| protein_co HDCMB45F     | 0    | 1    | 0    | 0    | 0    | 0    | 0        | 0.137283 | 0        | 0        |
| lincRNA -               | 12   | 8    | 14   | 0    | 0    | 0    | 0.470862 | 0.402543 | 0.662809 | 0        |
| pseudogeni ATP-bindin   | 7    | 4    | 4    | 17   | 19   | 4    | 0.078374 | 0.057431 | 0.054036 | 0.295429 |
| lincRNA -               | 0    | 0    | 0    | 0    | 2    | 0    | 0        | 0        | 0        | 0        |
| pseudogeni ribosomal_   | 7    | 4    | 2    | 7    | 7    | 5    | 0.51286  | 0.375811 | 0.176798 | 0.796029 |
| pseudogeni -            | 9    | 3    | 7    | 211  | 240  | 152  | 0.080139 | 0.034255 | 0.075205 | 2.916168 |
| lincRNA -               | 0    | 0    | 1    | 0    | 0    | 0    | 0        | 0        | 0.029497 | 0        |
| pseudogeni -            | 4    | 5    | 5    | 4    | 6    | 2    | 0.134645 | 0.215828 | 0.203071 | 0.208987 |
| pseudogeni -            | 0    | 1    | 0    | 0    | 2    | 0    | 0        | 0.131575 | 0        | 0        |
| processed_ -            | 84   | 65   | 77   | 1    | 1    | 6    | 1.369052 | 1.358511 | 1.514186 | 0.025297 |
| antisense -             | 17   | 10   | 14   | 1    | 2    | 0    | 1.566071 | 1.181332 | 1.556104 | 0.142986 |
| antisense -             | 4    | 2    | 0    | 0    | 1    | 0    | 0.342263 | 0.219452 | 0        | 0        |
| lincRNA long_interf     | 1    | 0    | 4    | 1    | 2    | 0    | 0.029509 | 0        | 0.142418 | 0.045802 |
| antisense MID1IP1_a     | 35   | 14   | 32   | 21   | 35   | 40   | 4.364762 | 2.238875 | 4.814937 | 4.064829 |
| pseudogeni solute_carr  | 0    | 0    | 0    | 1    | 0    | 0    | 0        | 0        | 0        | 0.036012 |
| pseudogeni cancer_sus   | 2    | 0    | 1    | 0    | 0    | 4    | 0.071479 | 0        | 0.043122 | 0        |
| antisense MLK7_anti     | 1    | 7    | 5    | 4    | 5    | 1    | 0.018475 | 0.165843 | 0.111457 | 0.114704 |
| pseudogeni actin_relai  | 0    | 0    | 0    | 0    | 1    | 4    | 0        | 0        | 0        | 0        |
| antisense -             | 0    | 2    | 0    | 1    | 0    | 1    | 0        | 0.177374 | 0        | 0.107345 |
| antisense BRWD1_an      | 0    | 1    | 1    | 1    | 2    | 3    | 0        | 0.087019 | 0.081875 | 0.105325 |
| lincRNA -               | 12   | 6    | 3    | 27   | 32   | 13   | 1.385912 | 0.888618 | 0.418046 | 4.840036 |
| pseudogeni -            | 0    | 0    | 1    | 1    | 1    | 0    | 0        | 0        | 0.144694 | 0.186138 |
| pseudogeni -            | 0    | 0    | 0    | 0    | 0    | 1    | 0        | 0        | 0        | 0        |
| pseudogeni myeloid/ly   | 3    | 1    | 4    | 4    | 3    | 6    | 0.536909 | 0.229503 | 0.863748 | 1.111142 |
| antisense -             | 0    | 0    | 0    | 1    | 0    | 0    | 0        | 0        | 0        | 0.094889 |
| pseudogeni olfactory_r  | 0    | 0    | 0    | 0    | 3    | 0    | 0        | 0        | 0        | 0        |
| processed_ -            | 0    | 0    | 0    | 0    | 0    | 1    | 0        | 0        | 0        | 0        |
| pseudogeni -            | 0    | 1    | 0    | 0    | 0    | 0    | 0        | 0.153392 | 0        | 0        |
| pseudogeni -            | 1    | 0    | 0    | 5    | 1    | 6    | 0.109301 | 0        | 0        | 0.848249 |
| lincRNA -               | 0    | 1    | 1    | 0    | 0    | 0    | 0        | 0.072185 | 0.067918 | 0        |
| pseudogeni ribosomal_   | 0    | 0    | 0    | 0    | 2    | 0    | 0        | 0        | 0        | 0        |
| pseudogeni ribosomal_   | 5    | 0    | 0    | 2    | 0    | 0    | 1.563001 | 0        | 0        | 0.970397 |
| antisense -             | 8    | 7    | 11   | 25   | 36   | 50   | 0.361736 | 0.405891 | 0.600126 | 1.754576 |
| processed_ -            | 1    | 0    | 0    | 0    | 0    | 1    | 0.043822 | 0        | 0        | 0        |
| pseudogeni -            | 0    | 0    | 1    | 0    | 0    | 0    | 0        | 0        | 0.116651 | 0        |
| processed_ -            | 9    | 2    | 8    | 9    | 18   | 5    | 0.289048 | 0.08237  | 0.310003 | 0.448643 |
| antisense -             | 8    | 3    | 10   | 5    | 9    | 6    | 0.687033 | 0.330383 | 1.036181 | 0.666482 |
| pseudogeni -            | 4    | 2    | 5    | 0    | 1    | 0    | 0.311045 | 0.199435 | 0.469117 | 0        |
| lincRNA ENOX1_ant       | 1    | 0    | 0    | 0    | 0    | 0    | 0.189073 | 0        | 0        | 0        |
| antisense -             | 0    | 0    | 2    | 0    | 0    | 0    | 0        | 0        | 0.169388 | 0        |
| lincRNA -               | 0    | 0    | 1    | 0    | 0    | 0    | 0        | 0        | 0.183687 | 0        |
| processed_ PAXBP1_ar    | 7    | 10   | 12   | 15   | 12   | 9    | 0.093168 | 0.170678 | 0.192707 | 0.309877 |
| processed_ -            | 4    | 11   | 6    | 3    | 3    | 10   | 0.076275 | 0.268982 | 0.138045 | 0.088792 |
| pseudogeni ubiquitin-c  | 0    | 0    | 1    | 0    | 1    | 5    | 0        | 0        | 0.129463 | 0        |
| lincRNA -               | 0    | 0    | 0    | 0    | 1    | 0    | 0        | 0        | 0        | 0        |
| pseudogeni mitochond    | 0    | 0    | 0    | 0    | 0    | 1    | 0        | 0        | 0        | 0        |
| lincRNA -               | 140  | 115  | 131  | 181  | 220  | 88   | 10.79704 | 11.37323 | 12.18979 | 21.66636 |
| antisense -             | 0    | 0    | 0    | 4    | 2    | 6    | 0        | 0        | 0        | 0.491755 |
| pseudogeni -            | 0    | 0    | 0    | 0    | 1    | 1    | 0        | 0        | 0        | 0        |
| lincRNA -               | 3    | 0    | 0    | 0    | 0    | 0    | 0.251197 | 0        | 0        | 0        |
| lincRNA -               | 1    | 0    | 3    | 0    | 0    | 0    | 0.049203 | 0        | 0.178097 | 0        |
| pseudogeni TAR_DNA_t    | 0    | 1    | 1    | 3    | 5    | 1    | 0        | 0.048846 | 0.045959 | 0.177368 |
| antisense -             | 0    | 4    | 0    | 3    | 0    | 1    | 0        | 0.481038 | 0        | 0.436679 |
| pseudogeni makorin_ri   | 0    | 0    | 0    | 1    | 5    | 1    | 0        | 0        | 0        | 0.04785  |
| antisense -             | 0    | 0    | 1    | 0    | 0    | 0    | 0        | 0        | 0.208766 | 0        |
| pseudogeni cysteine-ric | 0    | 0    | 1    | 0    | 0    | 0    | 0        | 0        | 0.248138 | 0        |
| protein_co chromosor    | 1629 | 1197 | 1322 | 1334 | 1850 | 1486 | 26.85789 | 25.30779 | 26.29846 | 34.13792 |
| pseudogeni -            | 3    | 3    | 3    | 5    | 3    | 3    | 0.139002 | 0.17825  | 0.167714 | 0.359584 |
| lincRNA long_interf     | 0    | 0    | 0    | 2    | 4    | 2    | 0        | 0        | 0        | 0.078937 |
| pseudogeni -            | 1    | 1    | 3    | 4    | 0    | 0    | 0.127766 | 0.163841 | 0.46247  | 0.79324  |

|                        |      |     |     |      |      |      |          |          |          |          |
|------------------------|------|-----|-----|------|------|------|----------|----------|----------|----------|
| pseudogen: chemokine   | 0    | 0   | 0   | 0    | 1    | 0    | 0        | 0        | 0        | 0        |
| lincRNA -              | 1    | 2   | 1   | 0    | 0    | 0    | 0.068653 | 0.176076 | 0.082834 | 0        |
| protein_co olfactory_r | 3    | 2   | 2   | 7    | 6    | 0    | 0.077376 | 0.066149 | 0.062239 | 0.28023  |
| protein_co GABA(A)_re  | 0    | 0   | 0   | 1    | 0    | 0    | 0        | 0        | 0        | 0.039319 |
| pseudogen: myosin_VB   | 1    | 0   | 3   | 0    | 0    | 2    | 0.036719 | 0        | 0.13291  | 0        |
| antisense -            | 0    | 0   | 1   | 3    | 0    | 0    | 0        | 0        | 0.113378 | 0.437554 |
| sense_intrc ST6GAL2_i  | 35   | 16  | 26  | 9    | 3    | 6    | 4.22977  | 2.479579 | 3.791142 | 1.688191 |
| pseudogen: -           | 1    | 4   | 1   | 7    | 1    | 7    | 0.091226 | 0.467936 | 0.110069 | 0.991165 |
| antisense -            | 5    | 3   | 4   | 0    | 0    | 0    | 0.300192 | 0.230972 | 0.289759 | 0        |
| pseudogen: -           | 0    | 0   | 1   | 2    | 0    | 0    | 0        | 0        | 0.188585 | 0.485199 |
| antisense -            | 10   | 3   | 12  | 3    | 9    | 6    | 0.753859 | 0.290015 | 1.091489 | 0.351028 |
| lincRNA -              | 1    | 0   | 0   | 2    | 3    | 0    | 0.018794 | 0        | 0        | 0.058341 |
| sense_intrc NTM_introi | 0    | 0   | 1   | 0    | 0    | 0    | 0        | 0        | 0.151677 | 0        |
| processed_ long_inter  | 0    | 0   | 0   | 5    | 11   | 30   | 0        | 0        | 0        | 0.118534 |
| pseudogen: -           | 0    | 0   | 0   | 0    | 0    | 1    | 0        | 0        | 0        | 0        |
| protein_co P_antigen_  | 0    | 0   | 0   | 0    | 1    | 0    | 0        | 0        | 0        | 0        |
| pseudogen: interferon_ | 32   | 30  | 29  | 1    | 0    | 0    | 2.651026 | 3.187092 | 2.898745 | 0.128586 |
| antisense -            | 3    | 5   | 5   | 0    | 2    | 2    | 0.070055 | 0.149726 | 0.140875 | 0        |
| lincRNA long_inter     | 26   | 16  | 13  | 22   | 18   | 13   | 3.728258 | 2.942131 | 2.249179 | 4.8965   |
| pseudogen: asparagine- | 123  | 80  | 116 | 72   | 105  | 57   | 7.608802 | 6.346153 | 8.657993 | 6.913121 |
| antisense -            | 7    | 3   | 3   | 0    | 1    | 0    | 0.618136 | 0.339716 | 0.319636 | 0        |
| antisense -            | 2    | 0   | 1   | 0    | 0    | 0    | 0.136308 | 0        | 0.082232 | 0        |
| pseudogen: mitochond   | 0    | 1   | 1   | 0    | 0    | 0    | 0        | 0.124751 | 0.117377 | 0        |
| pseudogen: solute_carr | 6    | 6   | 9   | 0    | 1    | 1    | 0.325625 | 0.417568 | 0.589328 | 0        |
| antisense -            | 6    | 0   | 4   | 6    | 9    | 1    | 0.465025 | 0        | 0.374053 | 0.721783 |
| pseudogen: -           | 0    | 0   | 0   | 0    | 1    | 1    | 0        | 0        | 0        | 0        |
| lincRNA -              | 9    | 2   | 4   | 5    | 3    | 0    | 0.206463 | 0.058835 | 0.110715 | 0.178033 |
| lincRNA -              | 0    | 0   | 1   | 0    | 0    | 0    | 0        | 0        | 0.068081 | 0        |
| lincRNA -              | 0    | 0   | 1   | 0    | 0    | 0    | 0        | 0        | 0.097881 | 0        |
| lincRNA -              | 0    | 0   | 0   | 0    | 2    | 0    | 0        | 0        | 0        | 0        |
| processed_ -           | 1    | 0   | 0   | 0    | 0    | 0    | 0.093968 | 0        | 0        | 0        |
| pseudogen: glyceraldeh | 0    | 3   | 0   | 1    | 2    | 3    | 0        | 0.184259 | 0        | 0.074341 |
| pseudogen: ribosomal_  | 0    | 0   | 0   | 0    | 0    | 2    | 0        | 0        | 0        | 0        |
| pseudogen: ribosomal_  | 0    | 0   | 0   | 1    | 0    | 2    | 0        | 0        | 0        | 0.087371 |
| antisense -            | 21   | 14  | 19  | 49   | 90   | 25   | 0.824699 | 0.705039 | 0.90028  | 2.986776 |
| pseudogen: ribosomal_  | 0    | 0   | 0   | 0    | 4    | 2    | 0        | 0        | 0        | 0        |
| pseudogen: ribosomal_  | 73   | 24  | 37  | 71   | 69   | 79   | 2.597095 | 1.094928 | 1.588235 | 3.920611 |
| processed_ -           | 0    | 1   | 2   | 3    | 2    | 0    | 0        | 0.009619 | 0.018101 | 0.034929 |
| antisense -            | 17   | 26  | 26  | 15   | 41   | 10   | 0.599346 | 1.17547  | 1.105987 | 0.820825 |
| pseudogen: -           | 2    | 0   | 2   | 1    | 3    | 1    | 0.209799 | 0        | 0.253134 | 0.162818 |
| pseudogen: -           | 1    | 7   | 3   | 4    | 0    | 2    | 0.026779 | 0.240382 | 0.096931 | 0.166259 |
| pseudogen: RNA_bindi   | 0    | 0   | 0   | 0    | 2    | 0    | 0        | 0        | 0        | 0        |
| protein_co thioredoxi  | 266  | 173 | 209 | 80   | 226  | 77   | 4.208078 | 3.5096   | 3.989298 | 1.964367 |
| antisense CLRN1_ant    | 0    | 3   | 0   | 1    | 2    | 1    | 0        | 0.081147 | 0        | 0.032739 |
| processed_ -           | 0    | 0   | 0   | 0    | 1    | 1    | 0        | 0        | 0        | 0        |
| pseudogen: ribosomal_  | 6    | 7   | 6   | 5    | 6    | 3    | 0.574163 | 0.858997 | 0.692761 | 0.742651 |
| pseudogen: -           | 0    | 0   | 0   | 0    | 1    | 0    | 0        | 0        | 0        | 0        |
| pseudogen: -           | 7    | 3   | 4   | 3    | 4    | 3    | 0.759792 | 0.417568 | 0.523847 | 0.505415 |
| protein_co GATS_prot   | 0    | 3   | 1   | 1    | 4    | 0    | 0        | 0.111146 | 0.034859 | 0.044843 |
| pseudogen: -           | 3    | 2   | 7   | 0    | 5    | 0    | 0.175181 | 0.149763 | 0.493186 | 0        |
| antisense -            | 5    | 5   | 8   | 5    | 2    | 5    | 0.477495 | 0.61232  | 0.9218   | 0.741139 |
| protein_co ring_finger | 214  | 155 | 149 | 106  | 148  | 67   | 2.20054  | 2.043886 | 1.848629 | 1.691811 |
| protein_co RNA_bindi   | 1067 | 766 | 910 | 1130 | 1321 | 1923 | 17.69153 | 16.28692 | 18.20499 | 29.08104 |
| pseudogen: -           | 0    | 1   | 0   | 1    | 0    | 1    | 0        | 0.252646 | 0        | 0.305797 |
| antisense -            | 1    | 0   | 0   | 0    | 4    | 0    | 0.041532 | 0        | 0        | 0        |
| protein_co Protein_LO  | 4    | 3   | 7   | 1    | 0    | 1    | 0.086954 | 0.08363  | 0.183602 | 0.033741 |
| antisense -            | 8    | 9   | 4   | 7    | 9    | 7    | 0.602119 | 0.868649 | 0.363246 | 0.817751 |
| pseudogen: -           | 0    | 0   | 0   | 0    | 1    | 0    | 0        | 0        | 0        | 0        |
| pseudogen: nucleopho:  | 5    | 4   | 12  | 3    | 1    | 2    | 0.291968 | 0.299526 | 0.845462 | 0.271905 |
| lincRNA -              | 5    | 7   | 8   | 1    | 2    | 1    | 0.613744 | 1.101855 | 1.184827 | 0.190523 |
| pseudogen: ribosomal_  | 0    | 0   | 0   | 1    | 1    | 0    | 0        | 0        | 0        | 0.217904 |
| pseudogen: transmemt   | 0    | 0   | 0   | 0    | 0    | 1    | 0        | 0        | 0        | 0        |
| pseudogen: -           | 0    | 0   | 0   | 1    | 0    | 0    | 0        | 0        | 0        | 0.151625 |
| antisense -            | 12   | 7   | 8   | 20   | 20   | 35   | 1.339715 | 1.002163 | 1.077629 | 3.465705 |
| protein_co alkB_alkyla | 22   | 18  | 12  | 15   | 22   | 19   | 0.310156 | 0.325417 | 0.204121 | 0.328231 |

|                         |     |     |     |     |     |     |          |          |          |          |
|-------------------------|-----|-----|-----|-----|-----|-----|----------|----------|----------|----------|
| protein_co ankyrin_rej  | 9   | 11  | 14  | 9   | 9   | 11  | 0.132749 | 0.208062 | 0.249153 | 0.206045 |
| protein_co protocadhe   | 7   | 2   | 3   | 25  | 21  | 2   | 0.062401 | 0.022863 | 0.032267 | 0.345912 |
| pseudogeni -            | 0   | 0   | 0   | 3   | 0   | 1   | 0        | 0        | 0        | 0.141779 |
| pseudogeni -            | 0   | 0   | 0   | 0   | 4   | 1   | 0        | 0        | 0        | 0        |
| pseudogeni cytochrom    | 0   | 0   | 0   | 0   | 1   | 0   | 0        | 0        | 0        | 0        |
| processed_ -            | 23  | 15  | 20  | 6   | 7   | 17  | 0.951871 | 0.79607  | 0.998685 | 0.385418 |
| processed_ -            | 29  | 20  | 20  | 21  | 22  | 19  | 0.675179 | 0.597118 | 0.561822 | 0.758876 |
| processed_ -            | 0   | 0   | 0   | 0   | 0   | 1   | 0        | 0        | 0        | 0        |
| antisense ST3GAL6_a     | 5   | 3   | 1   | 5   | 4   | 5   | 0.304877 | 0.234577 | 0.07357  | 0.473211 |
| antisense -             | 0   | 0   | 2   | 1   | 1   | 2   | 0        | 0        | 0.286458 | 0.184253 |
| pseudogeni -            | 1   | 2   | 0   | 2   | 0   | 0   | 0.09668  | 0.247958 | 0        | 0.300123 |
| lincRNA -               | 0   | 1   | 2   | 36  | 41  | 13  | 0        | 0.091106 | 0.171441 | 3.969807 |
| pseudogeni -            | 2   | 2   | 3   | 2   | 2   | 1   | 0.168065 | 0.215519 | 0.304169 | 0.26086  |
| protein_co kelch-like_f | 2   | 3   | 6   | 0   | 0   | 2   | 0.03806  | 0.07321  | 0.137765 | 0        |
| antisense -             | 8   | 6   | 6   | 5   | 4   | 5   | 0.693383 | 0.666874 | 0.627455 | 0.672641 |
| processed_ -            | 4   | 2   | 8   | 4   | 10  | 7   | 0.170975 | 0.109626 | 0.412583 | 0.265378 |
| pseudogeni ribosomal_   | 4   | 2   | 1   | 5   | 5   | 6   | 0.519557 | 0.333129 | 0.156719 | 1.00803  |
| pseudogeni -            | 18  | 21  | 12  | 12  | 11  | 7   | 2.497102 | 3.735875 | 2.008598 | 2.583898 |
| processed_ -            | 0   | 0   | 0   | 0   | 1   | 0   | 0        | 0        | 0        | 0        |
| pseudogeni MAP/micrc    | 10  | 3   | 2   | 4   | 4   | 8   | 0.492542 | 0.189485 | 0.118856 | 0.305797 |
| antisense PLCH1_ant     | 1   | 0   | 2   | 0   | 4   | 0   | 0.035849 | 0        | 0.086507 | 0        |
| lincRNA -               | 0   | 0   | 0   | 1   | 0   | 5   | 0        | 0        | 0        | 0.056506 |
| antisense CADM2_an      | 0   | 1   | 0   | 2   | 0   | 1   | 0        | 0.022639 | 0        | 0.054804 |
| pseudogeni GATS_stron   | 86  | 72  | 94  | 37  | 65  | 40  | 1.144958 | 1.229229 | 1.509965 | 0.764581 |
| antisense MYLK_anti     | 2   | 2   | 4   | 6   | 13  | 6   | 0.123395 | 0.158236 | 0.297766 | 0.574577 |
| pseudogeni ribosomal_   | 2   | 3   | 2   | 1   | 2   | 2   | 0.23445  | 0.450973 | 0.282878 | 0.18195  |
| pseudogeni -            | 1   | 0   | 0   | 6   | 9   | 5   | 0.127073 | 0        | 0        | 1.183411 |
| pseudogeni -            | 3   | 0   | 0   | 0   | 0   | 0   | 0.386456 | 0        | 0        | 0        |
| antisense HOXB_clus     | 67  | 81  | 70  | 0   | 1   | 2   | 3.717907 | 5.763921 | 4.686728 | 0        |
| pseudogeni -            | 10  | 10  | 11  | 10  | 6   | 2   | 0.596565 | 0.76501  | 0.791769 | 0.925952 |
| pseudogeni -            | 2   | 6   | 3   | 0   | 1   | 0   | 0.076182 | 0.293078 | 0.137877 | 0        |
| pseudogeni ribosomal_   | 0   | 1   | 0   | 0   | 0   | 0   | 0        | 0.209511 | 0        | 0        |
| antisense -             | 16  | 16  | 16  | 44  | 58  | 29  | 1.019348 | 1.307169 | 1.229902 | 4.350966 |
| pseudogeni SET_pseud    | 0   | 1   | 1   | 2   | 1   | 4   | 0        | 0.087145 | 0.081993 | 0.210956 |
| pseudogeni -            | 5   | 0   | 0   | 1   | 0   | 2   | 1.347414 | 0        | 0        | 0.418275 |
| pseudogeni -            | 0   | 1   | 4   | 3   | 10  | 5   | 0        | 0.07387  | 0.278012 | 0.26823  |
| pseudogeni MT-ND1_ps    | 0   | 0   | 0   | 0   | 2   | 0   | 0        | 0        | 0        | 0        |
| processed_ -            | 12  | 7   | 5   | 0   | 1   | 0   | 0.671456 | 0.502278 | 0.337563 | 0        |
| pseudogeni -            | 2   | 0   | 1   | 1   | 1   | 4   | 0.29215  | 0        | 0.176248 | 0.226728 |
| protein_co chromosom    | 0   | 1   | 0   | 0   | 0   | 3   | 0        | 0.037094 | 0        | 0        |
| antisense RUVBL1_ar     | 3   | 1   | 2   | 4   | 2   | 0   | 0.239235 | 0.102262 | 0.192434 | 0.495101 |
| pseudogeni high_mobil   | 0   | 0   | 1   | 1   | 2   | 1   | 0        | 0        | 0.180752 | 0.232523 |
| pseudogeni -            | 0   | 0   | 0   | 7   | 3   | 5   | 0        | 0        | 0        | 0.847685 |
| pseudogeni ribosomal_   | 0   | 2   | 0   | 0   | 1   | 1   | 0        | 0.139837 | 0        | 0        |
| pseudogeni -            | 1   | 0   | 0   | 0   | 0   | 0   | 0.097891 | 0        | 0        | 0        |
| antisense -             | 4   | 3   | 0   | 12  | 11  | 2   | 0.220141 | 0.211725 | 0        | 1.025068 |
| antisense PLS1_anti     | 0   | 0   | 0   | 0   | 1   | 0   | 0        | 0        | 0        | 0        |
| pseudogeni MT-ND1_ps    | 0   | 0   | 0   | 1   | 0   | 0   | 0        | 0        | 0        | 0.076449 |
| pseudogeni myeloid-as   | 0   | 1   | 0   | 0   | 0   | 0   | 0        | 0.028006 | 0        | 0        |
| pseudogeni glucuronid   | 9   | 11  | 7   | 6   | 12  | 2   | 0.627991 | 0.984267 | 0.589328 | 0.64982  |
| antisense PSMD6_an      | 32  | 29  | 37  | 29  | 20  | 8   | 0.610945 | 0.710002 | 0.852318 | 0.859371 |
| protein_co Uncharacte   | 336 | 366 | 347 | 91  | 87  | 77  | 10.89561 | 15.21957 | 13.57656 | 4.580195 |
| protein_co NME/NM2      | 280 | 214 | 252 | 260 | 261 | 330 | 7.98128  | 7.822356 | 8.666886 | 11.50319 |
| processed_ -            | 0   | 0   | 0   | 0   | 0   | 1   | 0        | 0        | 0        | 0        |
| antisense PDZRN3_ar     | 3   | 1   | 0   | 0   | 0   | 0   | 0.284757 | 0.12172  | 0        | 0        |
| pseudogeni -            | 2   | 1   | 0   | 0   | 1   | 0   | 0.269483 | 0.172787 | 0        | 0        |
| protein_co tumor_nec    | 80  | 57  | 75  | 64  | 67  | 19  | 2.12172  | 1.938574 | 2.399979 | 2.634563 |
| pseudogeni -            | 3   | 0   | 0   | 1   | 1   | 0   | 0.483402 | 0        | 0        | 0.250102 |
| protein_co CMT1A_du     | 16  | 13  | 19  | 14  | 14  | 1   | 0.300698 | 0.313302 | 0.430836 | 0.408384 |
| antisense -             | 0   | 1   | 0   | 0   | 1   | 0   | 0        | 0.109327 | 0        | 0        |
| protein_co apolipoppro  | 34  | 25  | 26  | 14  | 18  | 14  | 0.574508 | 0.54171  | 0.530077 | 0.367177 |
| protein_co toll-like_re | 0   | 2   | 0   | 0   | 0   | 0   | 0        | 0.029126 | 0        | 0        |
| pseudogeni -            | 11  | 15  | 5   | 1   | 7   | 2   | 1.090466 | 1.906865 | 0.59805  | 0.153869 |
| protein_co WW_doma      | 144 | 96  | 141 | 69  | 118 | 58  | 3.298565 | 2.819961 | 3.896994 | 2.453252 |
| protein_co mitochond    | 42  | 28  | 41  | 61  | 104 | 89  | 1.068573 | 0.913529 | 1.258598 | 2.408881 |

|                        |     |     |     |      |      |      |          |          |          |          |
|------------------------|-----|-----|-----|------|------|------|----------|----------|----------|----------|
| antisense -            | 1   | 1   | 0   | 0    | 0    | 0    | 0.031512 | 0.04041  | 0        | 0        |
| pseudogen-             | 0   | 0   | 0   | 0    | 1    | 0    | 0        | 0        | 0        | 0        |
| pseudogen-             | 0   | 0   | 0   | 0    | 0    | 1    | 0        | 0        | 0        | 0        |
| pseudogen: ribosomal_  | 1   | 0   | 0   | 0    | 0    | 1    | 0.097081 | 0        | 0        | 0        |
| antisense ITIH4_antis  | 0   | 0   | 0   | 0    | 0    | 1    | 0        | 0        | 0        | 0        |
| antisense -            | 2   | 0   | 0   | 1    | 2    | 0    | 0.257637 | 0        | 0        | 0.199945 |
| pseudogen-             | 0   | 0   | 0   | 0    | 0    | 2    | 0        | 0        | 0        | 0        |
| lincRNA -              | 6   | 1   | 3   | 3    | 2    | 3    | 0.652761 | 0.139512 | 0.393797 | 0.506588 |
| pseudogen: suppressor  | 1   | 2   | 1   | 1    | 3    | 3    | 0.044615 | 0.114424 | 0.05383  | 0.069248 |
| lincRNA -              | 5   | 11  | 2   | 0    | 0    | 2    | 0.270728 | 0.763773 | 0.130659 | 0        |
| pseudogen: ribosomal_  | 1   | 3   | 0   | 0    | 2    | 0    | 0.060115 | 0.231268 | 0        | 0        |
| pseudogen-             | 3   | 0   | 0   | 0    | 0    | 0    | 0.124597 | 0        | 0        | 0        |
| pseudogen: ribosomal_  | 1   | 2   | 1   | 0    | 0    | 0    | 0.107793 | 0.276459 | 0.130059 | 0        |
| protein_co golgi_to_EF | 102 | 85  | 87  | 286  | 366  | 168  | 1.097976 | 1.173332 | 1.129952 | 4.778472 |
| pseudogen-             | 1   | 0   | 0   | 0    | 0    | 0    | 0.098508 | 0        | 0        | 0        |
| pseudogen-             | 0   | 0   | 0   | 3    | 0    | 0    | 0        | 0        | 0        | 0.111797 |
| pseudogen: ribosomal_  | 0   | 1   | 0   | 17   | 36   | 6    | 0        | 0.124235 | 0        | 2.556315 |
| lincRNA -              | 10  | 15  | 8   | 12   | 8    | 4    | 0.587594 | 1.130259 | 0.567173 | 1.094433 |
| protein_co chromosom   | 129 | 91  | 106 | 332  | 437  | 338  | 1.468871 | 1.328755 | 1.45629  | 5.867628 |
| pseudogen: zinc_finger | 15  | 11  | 11  | 0    | 0    | 0    | 0.522937 | 0.491768 | 0.462699 | 0        |
| protein_co adenylosuc  | 986 | 807 | 885 | 1676 | 1516 | 1932 | 18.31032 | 19.21772 | 19.82943 | 48.30849 |
| pseudogen-             | 0   | 0   | 1   | 1    | 1    | 0    | 0        | 0        | 0.022468 | 0.028904 |
| antisense -            | 12  | 13  | 9   | 46   | 57   | 48   | 1.742044 | 2.420085 | 1.576407 | 10.36493 |
| antisense PRKAG2_ar    | 0   | 0   | 0   | 9    | 15   | 8    | 0        | 0        | 0        | 0.62087  |
| pseudogen: ribosomal_  | 5   | 4   | 7   | 4    | 3    | 5    | 1.502885 | 1.54179  | 2.538644 | 1.866149 |
| pseudogen: ribosomal_  | 0   | 0   | 0   | 0    | 2    | 0    | 0        | 0        | 0        | 0        |
| pseudogen: small_nucl  | 0   | 0   | 0   | 0    | 0    | 1    | 0        | 0        | 0        | 0        |
| lincRNA -              | 0   | 0   | 0   | 0    | 0    | 4    | 0        | 0        | 0        | 0        |
| pseudogen: peroxiredo  | 3   | 0   | 1   | 0    | 0    | 0    | 0.188313 | 0        | 0.075737 | 0        |
| processed_ -           | 3   | 2   | 2   | 0    | 0    | 0    | 0.087754 | 0.075022 | 0.070587 | 0        |
| TR_V_pseu T_cell_rece  | 0   | 0   | 3   | 0    | 0    | 0    | 0        | 0        | 0.628617 | 0        |
| lincRNA ZBTB20_an      | 0   | 0   | 1   | 1    | 0    | 0    | 0        | 0        | 0.12193  | 0.156853 |
| pseudogen-             | 0   | 0   | 5   | 2    | 2    | 5    | 0        | 0        | 0.299976 | 0.154358 |
| protein_co leukocyte_i | 0   | 0   | 0   | 1    | 5    | 1    | 0        | 0        | 0        | 0.037438 |
| pseudogen-             | 0   | 3   | 0   | 2    | 1    | 0    | 0        | 0.29965  | 0        | 0.241793 |
| pseudogen: ribosomal_  | 0   | 0   | 0   | 1    | 1    | 0    | 0        | 0        | 0        | 0.19831  |
| pseudogen: FCF1_small  | 0   | 1   | 0   | 0    | 2    | 1    | 0        | 0.101915 | 0        | 0        |
| protein_co leukocyte_i | 3   | 1   | 0   | 2    | 0    | 0    | 0.078193 | 0.033424 | 0        | 0.080911 |
| pseudogen-             | 0   | 0   | 0   | 0    | 0    | 1    | 0        | 0        | 0        | 0        |
| antisense -            | 4   | 4   | 0   | 4    | 4    | 1    | 0.389129 | 0.499002 | 0        | 0.603982 |
| lincRNA -              | 0   | 0   | 0   | 0    | 1    | 0    | 0        | 0        | 0        | 0        |
| pseudogen-             | 0   | 2   | 2   | 0    | 0    | 1    | 0        | 0.071371 | 0.067152 | 0        |
| antisense -            | 0   | 0   | 0   | 6    | 2    | 3    | 0        | 0        | 0        | 0.703186 |
| protein_co testis_expr | 0   | 0   | 0   | 0    | 0    | 2    | 0        | 0        | 0        | 0        |
| pseudogen-             | 0   | 0   | 0   | 0    | 2    | 1    | 0        | 0        | 0        | 0        |
| pseudogen-             | 174 | 129 | 148 | 90   | 116  | 118  | 5.475747 | 5.205868 | 5.61958  | 4.396095 |
| antisense -            | 7   | 3   | 4   | 0    | 0    | 1    | 0.462948 | 0.254428 | 0.319185 | 0        |
| lincRNA -              | 1   | 0   | 0   | 0    | 0    | 0    | 0.05943  | 0        | 0        | 0        |
| pseudogen-             | 2   | 2   | 1   | 2    | 1    | 3    | 0.249415 | 0.319839 | 0.150467 | 0.387127 |
| protein_co amylase_al  | 17  | 12  | 14  | 10   | 25   | 12   | 0.169027 | 0.153002 | 0.167951 | 0.154325 |
| processed_ -           | 10  | 2   | 2   | 9    | 9    | 4    | 0.293797 | 0.075351 | 0.070897 | 0.410412 |
| pseudogen: ribosomal_  | 1   | 0   | 0   | 1    | 2    | 2    | 0.100622 | 0        | 0        | 0.15618  |
| protein_co lymphocyt   | 19  | 26  | 26  | 20   | 37   | 42   | 0.335686 | 0.589064 | 0.554244 | 0.548454 |
| antisense -            | 3   | 2   | 7   | 0    | 0    | 1    | 0.184123 | 0.157408 | 0.518362 | 0        |
| antisense -            | 0   | 0   | 2   | 2    | 1    | 0    | 0        | 0        | 0.060283 | 0.077549 |
| protein_co proteasom   | 14  | 16  | 15  | 15   | 23   | 8    | 0.245314 | 0.35952  | 0.317127 | 0.407959 |
| pseudogen: ribosomal_  | 0   | 0   | 0   | 0    | 1    | 0    | 0        | 0        | 0        | 0        |
| pseudogen: ribosomal_  | 0   | 0   | 0   | 1    | 0    | 0    | 0        | 0        | 0        | 0.094642 |
| processed_ -           | 5   | 3   | 3   | 38   | 30   | 25   | 0.283495 | 0.218125 | 0.205232 | 3.344175 |
| pseudogen-             | 6   | 1   | 4   | 7    | 11   | 11   | 0.316824 | 0.067714 | 0.254845 | 0.573715 |
| antisense -            | 1   | 2   | 0   | 2    | 3    | 1    | 0.08169  | 0.209511 | 0        | 0.253588 |
| pseudogen-             | 7   | 3   | 0   | 2    | 1    | 1    | 0.605591 | 0.332822 | 0        | 0.26856  |
| pseudogen-             | 0   | 0   | 0   | 1    | 1    | 0    | 0        | 0        | 0        | 0.057854 |
| pseudogen: fatty_acid_ | 0   | 0   | 0   | 1    | 1    | 1    | 0        | 0        | 0        | 0.183324 |
| pseudogen-             | 0   | 0   | 0   | 0    | 2    | 0    | 0        | 0        | 0        | 0        |

|                         |      |      |      |      |      |      |          |          |          |          |
|-------------------------|------|------|------|------|------|------|----------|----------|----------|----------|
| processed_-             | 0    | 0    | 0    | 0    | 2    | 0    | 0        | 0        | 0        | 0        |
| pseudogen: eukaryotic_  | 6    | 1    | 1    | 5    | 6    | 4    | 0.17739  | 0.037913 | 0.035672 | 0.229445 |
| antisense_-             | 10   | 3    | 8    | 3    | 3    | 1    | 0.755073 | 0.290482 | 0.728831 | 0.351593 |
| processed_-             | 0    | 3    | 1    | 0    | 4    | 1    | 0        | 0.553342 | 0.173544 | 0        |
| pseudogen:-             | 2    | 1    | 1    | 1    | 0    | 0    | 0.300577 | 0.192724 | 0.181332 | 0.233269 |
| pseudogen: ribosomal_   | 0    | 0    | 0    | 0    | 1    | 0    | 0        | 0        | 0        | 0        |
| antisense MAGI1_ant     | 1    | 1    | 1    | 1    | 2    | 0    | 0.07934  | 0.101742 | 0.095728 | 0.123147 |
| protein_co protocadhe   | 2528 | 2123 | 2120 | 401  | 539  | 393  | 25.16195 | 27.09734 | 25.45958 | 6.195012 |
| protein_co small_lysin  | 3    | 2    | 2    | 5    | 9    | 6    | 0.135913 | 0.116193 | 0.109325 | 0.351593 |
| processed_-             | 4    | 0    | 5    | 2    | 7    | 2    | 0.172548 | 0        | 0.260237 | 0.133909 |
| pseudogen:-             | 0    | 0    | 0    | 3    | 1    | 0    | 0        | 0        | 0        | 0.272584 |
| antisense_-             | 0    | 0    | 0    | 1    | 1    | 2    | 0        | 0        | 0        | 0.240197 |
| pseudogen: ceruloplas   | 0    | 0    | 0    | 0    | 1    | 0    | 0        | 0        | 0        | 0        |
| lincRNA_-               | 0    | 0    | 0    | 5    | 1    | 6    | 0        | 0        | 0        | 0.163992 |
| pseudogen: zinc_finger  | 83   | 61   | 59   | 127  | 156  | 188  | 1.131358 | 1.066255 | 0.970336 | 2.686929 |
| protein_co cytochrom    | 332  | 251  | 268  | 217  | 263  | 283  | 4.24645  | 4.116906 | 4.135907 | 4.308024 |
| pseudogen: ribosomal_   | 0    | 0    | 1    | 0    | 0    | 1    | 0        | 0        | 0.224506 | 0        |
| protein_co_-            | 0    | 0    | 0    | 0    | 1    | 0    | 0        | 0        | 0        | 0        |
| pseudogen: glyceraldeh  | 4    | 2    | 0    | 0    | 3    | 2    | 0.185153 | 0.118716 | 0        | 0        |
| pseudogen:-             | 0    | 0    | 0    | 3    | 3    | 3    | 0        | 0        | 0        | 0.361489 |
| antisense B4GALT4_a     | 0    | 1    | 2    | 1    | 0    | 1    | 0        | 0.110533 | 0.207998 | 0.133786 |
| processed_ MAGI1_inti   | 0    | 0    | 0    | 4    | 5    | 4    | 0        | 0        | 0        | 0.113408 |
| pseudogen:-             | 0    | 0    | 0    | 2    | 3    | 0    | 0        | 0        | 0        | 0.14132  |
| pseudogen: testicular_c | 0    | 0    | 0    | 12   | 5    | 3    | 0        | 0        | 0        | 0.263297 |
| processed_-             | 1    | 0    | 1    | 5    | 9    | 7    | 0.080017 | 0        | 0.096545 | 0.620988 |
| pseudogen: MYST/Esa1-   | 0    | 0    | 0    | 0    | 1    | 1    | 0        | 0        | 0        | 0        |
| antisense ghrelin_opi   | 1    | 9    | 7    | 9    | 11   | 12   | 0.039872 | 0.460177 | 0.336759 | 0.556988 |
| processed_-             | 10   | 14   | 11   | 33   | 33   | 25   | 0.456129 | 0.818888 | 0.60538  | 2.336317 |
| lincRNA_-               | 1    | 0    | 0    | 0    | 0    | 0    | 0.070938 | 0        | 0        | 0        |
| processed_-             | 4    | 5    | 6    | 5    | 14   | 14   | 0.336733 | 0.539765 | 0.609431 | 0.65332  |
| protein_co acyl-CoA_d   | 0    | 1    | 0    | 1    | 1    | 2    | 0        | 0.014517 | 0        | 0.017571 |
| pseudogen:-             | 0    | 2    | 0    | 5    | 4    | 0    | 0        | 0.143508 | 0        | 0.434247 |
| pseudogen:-             | 0    | 1    | 0    | 0    | 3    | 0    | 0        | 0.105862 | 0        | 0        |
| pseudogen:-             | 0    | 0    | 0    | 0    | 2    | 0    | 0        | 0        | 0        | 0        |
| pseudogen:-             | 12   | 8    | 14   | 2    | 1    | 7    | 0.449425 | 0.384216 | 0.632633 | 0.116262 |
| pseudogen: ribosomal_   | 2447 | 1858 | 1956 | 3528 | 4110 | 2828 | 123.2437 | 120.0012 | 118.8633 | 275.7971 |
| protein_co peptidylpro  | 288  | 233  | 253  | 248  | 201  | 251  | 9.857172 | 10.22645 | 10.44789 | 13.17474 |
| lincRNA_-               | 6    | 7    | 2    | 0    | 0    | 1    | 0.371651 | 0.556022 | 0.149473 | 0        |
| pseudogen: ribosomal_   | 172  | 175  | 197  | 49   | 59   | 35   | 3.881176 | 5.063866 | 5.36351  | 1.716174 |
| pseudogen: ribosomal_   | 3    | 0    | 0    | 0    | 2    | 0    | 0.442359 | 0        | 0        | 0        |
| processed_-             | 6    | 4    | 5    | 5    | 1    | 5    | 0.532841 | 0.455529 | 0.535753 | 0.689203 |
| pseudogen: ribosomal_   | 23   | 20   | 19   | 20   | 21   | 20   | 0.749979 | 0.836298 | 0.747521 | 1.012236 |
| antisense SEC62_anti    | 8    | 5    | 2    | 2    | 3    | 5    | 1.084162 | 0.868928 | 0.327026 | 0.420692 |
| pseudogen:-             | 4    | 1    | 8    | 2    | 5    | 6    | 0.298188 | 0.095596 | 0.719561 | 0.231414 |
| pseudogen: ribosomal_   | 1    | 0    | 0    | 0    | 0    | 0    | 0.274211 | 0        | 0        | 0        |
| pseudogen: ribosomal_   | 0    | 1    | 0    | 1    | 0    | 0    | 0        | 0.104574 | 0        | 0.126574 |
| pseudogen:-             | 0    | 1    | 0    | 0    | 0    | 0    | 0        | 0.074881 | 0        | 0        |
| pseudogen:-             | 2    | 4    | 0    | 2    | 2    | 3    | 0.108042 | 0.277096 | 0        | 0.167695 |
| pseudogen:-             | 3    | 8    | 2    | 2    | 1    | 10   | 0.180578 | 0.617508 | 0.145252 | 0.186854 |
| antisense_-             | 15   | 7    | 10   | 17   | 14   | 9    | 0.633649 | 0.379197 | 0.509689 | 1.114646 |
| lincRNA_-               | 0    | 1    | 0    | 0    | 1    | 0    | 0        | 0.029418 | 0        | 0        |
| pseudogen:-             | 0    | 0    | 0    | 0    | 0    | 1    | 0        | 0        | 0        | 0        |
| pseudogen:-             | 1    | 2    | 1    | 0    | 0    | 1    | 0.052508 | 0.134669 | 0.063354 | 0        |
| lincRNA long_interf     | 6    | 4    | 3    | 1    | 1    | 0    | 0.222579 | 0.190284 | 0.134277 | 0.057579 |
| protein_co LIM_and_s    | 0    | 0    | 1    | 0    | 0    | 0    | 0        | 0        | 0.022942 | 0        |
| pseudogen: leucine_ric  | 21   | 25   | 20   | 23   | 17   | 17   | 0.43842  | 0.669299 | 0.503789 | 0.745296 |
| pseudogen: ribosomal_   | 1    | 2    | 2    | 2    | 6    | 3    | 0.13914  | 0.356853 | 0.33576  | 0.431928 |
| pseudogen:-             | 0    | 0    | 0    | 0    | 3    | 1    | 0        | 0        | 0        | 0        |
| pseudogen:-             | 0    | 1    | 4    | 0    | 0    | 1    | 0        | 0.112392 | 0.422994 | 0        |
| pseudogen: forkhead_b   | 147  | 118  | 124  | 87   | 105  | 148  | 3.575121 | 3.680143 | 3.638674 | 3.284151 |
| antisense_-             | 2    | 4    | 1    | 5    | 4    | 3    | 0.16253  | 0.416844 | 0.098051 | 0.630674 |
| pseudogen:-             | 0    | 0    | 0    | 0    | 1    | 0    | 0        | 0        | 0        | 0        |
| pseudogen: ribosomal_   | 1    | 0    | 0    | 1    | 1    | 2    | 0.296772 | 0        | 0        | 0.460632 |
| processed_-             | 1    | 0    | 0    | 0    | 0    | 0    | 0.057746 | 0        | 0        | 0        |
| pseudogen: ribosomal_   | 10   | 11   | 14   | 4    | 8    | 5    | 1.063266 | 1.499836 | 1.796048 | 0.660134 |

|                         |      |      |      |      |      |       |          |          |          |          |
|-------------------------|------|------|------|------|------|-------|----------|----------|----------|----------|
| lincRNA -               | 3    | 4    | 5    | 0    | 0    | 0     | 0.146227 | 0.25002  | 0.294051 | 0        |
| pseudogeni -            | 0    | 0    | 0    | 0    | 1    | 0     | 0        | 0        | 0        | 0        |
| pseudogeni SET_pseudc   | 10   | 9    | 6    | 31   | 22   | 29    | 0.537114 | 0.619895 | 0.388835 | 2.584392 |
| lincRNA -               | 0    | 0    | 0    | 0    | 1    | 2     | 0        | 0        | 0        | 0        |
| antisense CDKN2B_ar     | 15   | 14   | 15   | 0    | 0    | 0     | 0.183403 | 0.219509 | 0.221286 | 0        |
| antisense -             | 1    | 1    | 1    | 1    | 0    | 4     | 0.063109 | 0.080928 | 0.076145 | 0.097954 |
| protein_co tumor_nec    | 0    | 0    | 0    | 0    | 1    | 6     | 0        | 0        | 0        | 0        |
| pseudogeni -            | 0    | 0    | 0    | 0    | 0    | 1     | 0        | 0        | 0        | 0        |
| pseudogeni -            | 2    | 0    | 0    | 0    | 0    | 0     | 0.296772 | 0        | 0        | 0        |
| pseudogeni ribosomal_   | 11   | 6    | 5    | 7    | 6    | 3     | 0.652074 | 0.456105 | 0.35762  | 0.644069 |
| processed_ -            | 0    | 0    | 0    | 0    | 1    | 0     | 0        | 0        | 0        | 0        |
| processed_ -            | 22   | 13   | 21   | 19   | 11   | 24    | 1.72794  | 1.309359 | 1.990093 | 2.316275 |
| pseudogeni ribosomal_   | 3    | 3    | 0    | 1    | 5    | 1     | 0.345627 | 0.443217 | 0        | 0.17882  |
| antisense TM4SF1_ar     | 2    | 0    | 1    | 0    | 0    | 0     | 0.124377 | 0        | 0.075034 | 0        |
| protein_co keratin_ass  | 2    | 0    | 0    | 0    | 0    | 0     | 0.124542 | 0        | 0        | 0        |
| antisense THOC7_ant     | 3    | 2    | 1    | 0    | 4    | 2     | 0.209019 | 0.178692 | 0.084065 | 0        |
| processed_ -            | 0    | 3    | 1    | 5    | 6    | 1     | 0        | 0.270855 | 0.084948 | 0.546395 |
| protein_co LINE-1_typ   | 216  | 165  | 166  | 7945 | 6656 | 13940 | 2.631396 | 2.577661 | 2.439993 | 150.2301 |
| lincRNA -               | 0    | 0    | 0    | 0    | 3    | 0     | 0        | 0        | 0        | 0        |
| antisense -             | 2    | 2    | 0    | 0    | 1    | 5     | 0.163096 | 0.209147 | 0        | 0        |
| pseudogeni -            | 3    | 0    | 0    | 2    | 2    | 1     | 0.220832 | 0        | 0        | 0.228508 |
| protein_co aquaporin_   | 2451 | 1768 | 1983 | 0    | 3    | 2     | 41.76142 | 38.6299  | 40.76643 | 0        |
| antisense KCNAB1_ar     | 0    | 0    | 0    | 0    | 2    | 0     | 0        | 0        | 0        | 0        |
| pseudogeni -            | 3    | 0    | 2    | 1    | 6    | 11    | 0.188062 | 0        | 0.151271 | 0.097299 |
| lincRNA -               | 0    | 1    | 2    | 2    | 1    | 0     | 0        | 0.20383  | 0.383563 | 0.493422 |
| pseudogeni olfactory_r  | 0    | 0    | 0    | 1    | 0    | 1     | 0        | 0        | 0        | 0.180595 |
| pseudogeni -            | 0    | 1    | 0    | 0    | 0    | 0     | 0        | 0.084452 | 0        | 0        |
| pseudogeni -            | 0    | 3    | 2    | 0    | 1    | 0     | 0        | 0.259927 | 0.163042 | 0        |
| protein_co C1q_and_t    | 11   | 2    | 5    | 0    | 0    | 0     | 0.278204 | 0.064865 | 0.152577 | 0        |
| antisense -             | 0    | 0    | 0    | 2    | 0    | 0     | 0        | 0        | 0        | 0.17904  |
| pseudogeni lymphocyt    | 0    | 0    | 0    | 1    | 0    | 0     | 0        | 0        | 0        | 0.547217 |
| antisense MME_antis     | 1    | 0    | 3    | 0    | 0    | 1     | 0.102604 | 0        | 0.371393 | 0        |
| pseudogeni keratin_8_   | 3    | 4    | 5    | 3    | 2    | 3     | 0.097688 | 0.167027 | 0.196443 | 0.151625 |
| pseudogeni -            | 0    | 1    | 1    | 0    | 0    | 0     | 0        | 0.131002 | 0.123258 | 0        |
| IG_V_gene immunogl      | 0    | 0    | 0    | 2    | 0    | 0     | 0        | 0        | 0        | 0.365728 |
| pseudogeni -            | 0    | 0    | 0    | 4    | 4    | 2     | 0        | 0        | 0        | 0.581076 |
| pseudogeni -            | 0    | 0    | 0    | 2    | 1    | 0     | 0        | 0        | 0        | 0.303249 |
| protein_co ISY1_splici  | 273  | 199  | 198  | 117  | 150  | 150   | 3.331852 | 3.114479 | 2.915656 | 2.216355 |
| processed_ -            | 0    | 0    | 0    | 6    | 7    | 5     | 0        | 0        | 0        | 0.925167 |
| protein_co paraneopla   | 9    | 7    | 8    | 131  | 164  | 114   | 0.084997 | 0.084775 | 0.091159 | 1.920273 |
| pseudogeni -            | 2    | 1    | 1    | 1    | 1    | 1     | 0.128466 | 0.08237  | 0.077501 | 0.099698 |
| pseudogeni ribosomal_   | 1    | 1    | 1    | 0    | 2    | 0     | 0.070195 | 0.090015 | 0.084694 | 0        |
| lincRNA -               | 0    | 1    | 0    | 0    | 0    | 1     | 0        | 0.011445 | 0        | 0        |
| protein_co leucine-ricl | 1    | 1    | 3    | 0    | 0    | 0     | 0.013355 | 0.017126 | 0.048341 | 0        |
| pseudogeni ribosomal_   | 0    | 0    | 0    | 1    | 0    | 0     | 0        | 0        | 0        | 0.189038 |
| pseudogeni -            | 2    | 2    | 1    | 1    | 5    | 7     | 0.197017 | 0.252646 | 0.118856 | 0.152899 |
| sense_intrc -           | 29   | 31   | 27   | 18   | 24   | 24    | 3.522825 | 4.829077 | 3.957354 | 3.393877 |
| pseudogeni -            | 0    | 0    | 0    | 2    | 1    | 0     | 0        | 0        | 0        | 0.462094 |
| processed_ -            | 18   | 6    | 7    | 8    | 12   | 6     | 2.110051 | 0.901947 | 0.990071 | 1.455596 |
| protein_co KRAB_box_    | 0    | 0    | 0    | 1    | 9    | 4     | 0        | 0        | 0        | 0.028363 |
| pseudogeni -            | 2    | 1    | 2    | 0    | 0    | 0     | 0.08906  | 0.057103 | 0.107456 | 0        |
| pseudogeni -            | 1    | 0    | 1    | 0    | 1    | 0     | 0.116933 | 0        | 0.141086 | 0        |
| pseudogeni -            | 19   | 13   | 9    | 12   | 13   | 10    | 1.345786 | 1.180797 | 0.769153 | 1.319271 |
| pseudogeni -            | 0    | 3    | 2    | 4    | 0    | 1     | 0        | 0.536873 | 0.336759 | 0.866426 |
| protein_co protocadhe   | 207  | 187  | 211  | 15   | 10   | 17    | 2.09141  | 2.422812 | 2.572168 | 0.235229 |
| processed_ C21orf91_c   | 0    | 0    | 0    | 0    | 2    | 0     | 0        | 0        | 0        | 0        |
| protein_co Rho_guanin   | 225  | 131  | 147  | 35   | 58   | 27    | 4.134112 | 3.0866   | 3.258856 | 0.998156 |
| pseudogeni -            | 0    | 1    | 0    | 1    | 7    | 2     | 0        | 0.172787 | 0        | 0.209137 |
| pseudogeni -            | 0    | 1    | 0    | 2    | 0    | 0     | 0        | 0.121474 | 0        | 0.29406  |
| antisense -             | 0    | 3    | 0    | 0    | 0    | 0     | 0        | 0.364423 | 0        | 0        |
| pseudogeni ubiquitin_   | 5    | 3    | 2    | 5    | 10   | 2     | 0.610547 | 0.469764 | 0.294664 | 0.947654 |
| pseudogeni MT-ND2_ps    | 0    | 0    | 0    | 0    | 1    | 0     | 0        | 0        | 0        | 0        |
| pseudogeni -            | 9    | 7    | 8    | 3    | 5    | 4     | 1.455207 | 1.451409 | 1.560704 | 0.752894 |
| pseudogeni -            | 1    | 0    | 2    | 3    | 5    | 0     | 0.098508 | 0        | 0.237712 | 0.458696 |
| pseudogeni ribosomal_   | 0    | 0    | 0    | 0    | 4    | 2     | 0        | 0        | 0        | 0        |

|                        |     |     |     |     |     |     |          |          |          |          |
|------------------------|-----|-----|-----|-----|-----|-----|----------|----------|----------|----------|
| protein_co transmembr  | 420 | 336 | 357 | 401 | 501 | 352 | 6.753706 | 6.928536 | 6.926425 | 10.00847 |
| protein_co retinol_def | 141 | 144 | 113 | 135 | 176 | 129 | 4.166032 | 5.456012 | 4.028376 | 6.191098 |
| processed_ -           | 1   | 0   | 2   | 16  | 34  | 13  | 0.009363 | 0        | 0.022594 | 0.232523 |
| pseudogen_ -           | 0   | 0   | 2   | 1   | 2   | 0   | 0        | 0        | 0.228127 | 0.146733 |
| protein_co keratin_ass | 0   | 0   | 1   | 0   | 0   | 0   | 0        | 0        | 0.060315 | 0        |
| pseudogen_ ribosomal_  | 1   | 0   | 2   | 1   | 0   | 2   | 0.279107 | 0        | 0.673518 | 0.433213 |
| pseudogen_ -           | 0   | 0   | 0   | 1   | 1   | 0   | 0        | 0        | 0        | 0.16965  |
| processed_ -           | 16  | 13  | 14  | 1   | 2   | 12  | 0.226933 | 0.236445 | 0.239582 | 0.022014 |
| pseudogen_ -           | 1   | 1   | 3   | 0   | 1   | 1   | 0.038215 | 0.049006 | 0.138326 | 0        |
| antisense NDUFB2_ar    | 3   | 6   | 3   | 1   | 3   | 0   | 0.085358 | 0.218919 | 0.102989 | 0.044163 |
| pseudogen_ -           | 0   | 0   | 0   | 4   | 6   | 1   | 0        | 0        | 0        | 0.129559 |
| protein_co phosphatic  | 12  | 8   | 4   | 12  | 7   | 7   | 0.272749 | 0.233174 | 0.109696 | 0.423343 |
| lincRNA -              | 1   | 2   | 1   | 1   | 1   | 0   | 0.02319  | 0.059476 | 0.02798  | 0.035994 |
| lincRNA -              | 0   | 0   | 1   | 0   | 1   | 0   | 0        | 0        | 0.070631 | 0        |
| pseudogen_ -           | 5   | 4   | 8   | 0   | 7   | 2   | 0.485404 | 0.497969 | 0.937068 | 0        |
| pseudogen_ -           | 3   | 4   | 2   | 5   | 5   | 12  | 0.2553   | 0.436514 | 0.205356 | 0.660434 |
| pseudogen_ ribosomal_  | 1   | 3   | 4   | 3   | 4   | 1   | 0.076244 | 0.293316 | 0.367971 | 0.355023 |
| antisense -            | 1   | 0   | 0   | 0   | 1   | 0   | 0.085255 | 0        | 0        | 0        |
| pseudogen_ -           | 0   | 0   | 0   | 1   | 0   | 2   | 0        | 0        | 0        | 0.152259 |
| antisense LSAMP_ant    | 7   | 3   | 6   | 2   | 1   | 2   | 0.593545 | 0.326201 | 0.613839 | 0.263218 |
| pseudogen_ ribosomal_  | 3   | 2   | 1   | 1   | 3   | 1   | 0.423705 | 0.362228 | 0.170408 | 0.219216 |
| pseudogen_ histone_clu | 0   | 0   | 1   | 0   | 0   | 0   | 0        | 0        | 0.148492 | 0        |
| pseudogen_ plasminoge  | 0   | 2   | 2   | 1   | 0   | 0   | 0        | 0.039755 | 0.037405 | 0.024059 |
| pseudogen_ -           | 5   | 3   | 3   | 0   | 2   | 0   | 0.370379 | 0.284975 | 0.26813  | 0        |
| pseudogen_ -           | 1   | 0   | 1   | 0   | 0   | 0   | 0.068453 | 0        | 0.082592 | 0        |
| pseudogen_ suppressio  | 0   | 0   | 0   | 0   | 2   | 1   | 0        | 0        | 0        | 0        |
| pseudogen_ ribosomal_  | 13  | 16  | 17  | 18  | 14  | 24  | 1.401311 | 2.211671 | 2.210997 | 3.011578 |
| protein_co macrophag   | 6   | 2   | 4   | 4   | 10  | 6   | 0.299617 | 0.128072 | 0.241003 | 0.310031 |
| pseudogen_ -           | 0   | 0   | 0   | 1   | 1   | 0   | 0        | 0        | 0        | 0.349903 |
| pseudogen_ -           | 0   | 0   | 0   | 0   | 0   | 1   | 0        | 0        | 0        | 0        |
| antisense HOXA11_ar    | 330 | 269 | 288 | 0   | 0   | 9   | 8.980677 | 9.387647 | 9.456614 | 0        |
| pseudogen_ ribosomal_  | 0   | 0   | 3   | 0   | 0   | 1   | 0        | 0        | 0.358073 | 0        |
| lincRNA -              | 0   | 2   | 1   | 7   | 3   | 2   | 0        | 0.180299 | 0.084821 | 0.763806 |
| pseudogen_ -           | 0   | 0   | 0   | 5   | 8   | 17  | 0        | 0        | 0        | 0.836549 |
| pseudogen_ -           | 0   | 0   | 0   | 3   | 1   | 6   | 0        | 0        | 0        | 0.570077 |
| pseudogen_ septin_7_p  | 0   | 0   | 1   | 2   | 0   | 0   | 0        | 0        | 0.049497 | 0.127349 |
| pseudogen_ -           | 0   | 0   | 0   | 2   | 10  | 6   | 0        | 0        | 0        | 0.40773  |
| processed_ -           | 51  | 65  | 47  | 29  | 30  | 7   | 0.756051 | 1.235674 | 0.840673 | 0.667282 |
| pseudogen_ tropomyos   | 113 | 104 | 103 | 128 | 133 | 210 | 1.814579 | 2.141609 | 1.995643 | 3.190347 |
| pseudogen_ -           | 5   | 0   | 1   | 0   | 0   | 2   | 0.485404 | 0        | 0.117134 | 0        |
| pseudogen_ ribosomal_  | 2   | 4   | 3   | 5   | 2   | 4   | 0.20702  | 0.530947 | 0.374672 | 0.803309 |
| pseudogen_ -           | 2   | 0   | 0   | 0   | 0   | 2   | 0.261955 | 0        | 0        | 0        |
| lincRNA -              | 0   | 0   | 1   | 2   | 2   | 1   | 0        | 0        | 0.330851 | 0.851226 |
| protein_co GVQW_mo     | 20  | 11  | 13  | 6   | 9   | 17  | 0.51162  | 0.360844 | 0.401245 | 0.238232 |
| pseudogen_ -           | 2   | 4   | 6   | 2   | 3   | 0   | 0.080154 | 0.205572 | 0.290131 | 0.12441  |
| protein_co NOP2/Sun_   | 69  | 59  | 51  | 84  | 96  | 80  | 1.469973 | 1.611839 | 1.310927 | 2.777603 |
| pseudogen_ -           | 0   | 1   | 0   | 1   | 1   | 1   | 0        | 0.067259 | 0        | 0.081409 |
| pseudogen_ ribosomal_  | 1   | 0   | 0   | 1   | 2   | 0   | 0.113535 | 0        | 0        | 0.176222 |
| processed_ -           | 2   | 0   | 0   | 0   | 0   | 0   | 0.244219 | 0        | 0        | 0        |
| pseudogen_ -           | 0   | 0   | 0   | 0   | 0   | 1   | 0        | 0        | 0        | 0        |
| lincRNA -              | 0   | 0   | 0   | 6   | 0   | 0   | 0        | 0        | 0        | 1.105516 |
| pseudogen_ -           | 1   | 2   | 0   | 0   | 2   | 1   | 0.031115 | 0.079801 | 0        | 0        |
| antisense PRICKLE2_    | 1   | 2   | 0   | 0   | 0   | 0   | 0.094536 | 0.242459 | 0        | 0        |
| pseudogen_ carcinoeml  | 0   | 0   | 0   | 0   | 2   | 0   | 0        | 0        | 0        | 0        |
| antisense -            | 0   | 3   | 5   | 0   | 0   | 2   | 0        | 0.027731 | 0.043486 | 0        |
| pseudogen_ ribosomal_  | 2   | 2   | 4   | 3   | 6   | 5   | 0.219112 | 0.28098  | 0.528743 | 0.510139 |
| protein_co UDP_glucu   | 0   | 0   | 0   | 1   | 0   | 0   | 0        | 0        | 0        | 0.030124 |
| pseudogen_ high_mobil  | 5   | 0   | 2   | 5   | 3   | 1   | 0.814063 | 0        | 0.392885 | 1.263538 |
| lincRNA -              | 0   | 0   | 0   | 1   | 0   | 0   | 0        | 0        | 0        | 0.170046 |
| protein_co Yae1_dome   | 110 | 112 | 103 | 96  | 140 | 169 | 5.328411 | 6.957166 | 6.019914 | 7.217832 |
| pseudogen_ ribosomal_  | 2   | 0   | 0   | 0   | 3   | 0   | 0.212653 | 0        | 0        | 0        |
| lincRNA -              | 0   | 1   | 0   | 0   | 0   | 0   | 0        | 0.076017 | 0        | 0        |
| antisense ARHGAP31     | 8   | 9   | 8   | 23  | 23  | 10  | 0.601154 | 0.867257 | 0.725327 | 2.682589 |
| pseudogen_ -           | 1   | 2   | 4   | 0   | 7   | 3   | 0.13025  | 0.334054 | 0.628617 | 0        |
| antisense ADAMTS9_     | 9   | 8   | 4   | 1   | 1   | 0   | 0.24436  | 0.27854  | 0.131038 | 0.042142 |

|                        |     |     |     |      |      |      |          |          |          |            |
|------------------------|-----|-----|-----|------|------|------|----------|----------|----------|------------|
| lincRNA -              | 3   | 3   | 1   | 10   | 11   | 7    | 0.056133 | 0.071983 | 0.022576 | 0.290422   |
| processed_ -           | 0   | 0   | 0   | 0    | 0    | 1    | 0        | 0        | 0        | 0          |
| lincRNA -              | 4   | 0   | 0   | 0    | 1    | 0    | 0.438224 | 0        | 0        | 0          |
| pseudogeni -           | 12  | 6   | 4   | 2    | 5    | 6    | 0.778258 | 0.499002 | 0.313004 | 0.201327   |
| processed_ -           | 1   | 1   | 0   | 0    | 0    | 0    | 0.085879 | 0.110128 | 0        | 0          |
| pseudogeni -           | 0   | 0   | 0   | 1    | 0    | 0    | 0        | 0        | 0        | 0.205014   |
| antisense -            | 0   | 0   | 0   | 0    | 1    | 0    | 0        | 0        | 0        | 0          |
| processed_ -           | 3   | 3   | 1   | 1    | 4    | 4    | 0.063251 | 0.08111  | 0.025439 | 0.032725   |
| pseudogeni ribosomal_  | 0   | 0   | 0   | 5    | 1    | 2    | 0        | 0        | 0        | 0.685309   |
| protein_co teratocarci | 0   | 0   | 0   | 4787 | 5731 | 6513 | 0        | 0        | 0        | 0.138.6378 |
| pseudogeni -           | 0   | 0   | 0   | 4    | 0    | 0    | 0        | 0        | 0        | 0.627412   |
| pseudogeni -           | 0   | 0   | 0   | 1    | 0    | 0    | 0        | 0        | 0        | 0.256267   |
| antisense IQCJ-SCHIP   | 1   | 4   | 3   | 0    | 0    | 1    | 0.092303 | 0.473463 | 0.334107 | 0          |
| processed_ -           | 1   | 0   | 0   | 0    | 0    | 2    | 0.09589  | 0        | 0        | 0          |
| pseudogeni -           | 11  | 4   | 2   | 0    | 1    | 0    | 0.37704  | 0.175818 | 0.082713 | 0          |
| lincRNA -              | 0   | 0   | 1   | 2    | 1    | 6    | 0        | 0        | 0.045152 | 0.116169   |
| pseudogeni -           | 1   | 0   | 0   | 1    | 1    | 3    | 0.1042   | 0        | 0        | 0.161733   |
| lincRNA -              | 0   | 2   | 0   | 0    | 0    | 0    | 0        | 0.139028 | 0        | 0          |
| protein_co keratin_ass | 0   | 0   | 0   | 0    | 1    | 0    | 0        | 0        | 0        | 0          |
| processed_ -           | 7   | 12  | 3   | 0    | 1    | 3    | 0.959737 | 2.109817 | 0.496276 | 0          |
| processed_ -           | 2   | 0   | 2   | 0    | 0    | 0    | 0.298663 | 0        | 0.360354 | 0          |
| pseudogeni -           | 0   | 1   | 0   | 3    | 5    | 2    | 0        | 0.149577 | 0        | 0.543133   |
| pseudogeni -           | 0   | 0   | 0   | 7    | 10   | 1    | 0        | 0        | 0        | 2.709886   |
| protein_co CGRP_rece   | 624 | 470 | 497 | 455  | 489  | 655  | 9.321239 | 9.003187 | 8.957638 | 10.54948   |
| pseudogeni -           | 0   | 1   | 0   | 3    | 0    | 4    | 0        | 0.108931 | 0        | 0.395542   |
| antisense -            | 16  | 6   | 10  | 11   | 22   | 22   | 1.286862 | 0.618832 | 0.97042  | 1.373204   |
| pseudogeni -           | 5   | 14  | 5   | 3    | 7    | 5    | 0.215884 | 0.775154 | 0.260477 | 0.201049   |
| lincRNA -              | 20  | 29  | 22  | 7    | 18   | 5    | 0.46984  | 0.873629 | 0.623578 | 0.25524    |
| pseudogeni phosphorit  | 0   | 0   | 1   | 0    | 0    | 0    | 0        | 0        | 0.036571 | 0          |
| pseudogeni -           | 1   | 0   | 2   | 0    | 1    | 0    | 0.07802  | 0        | 0.188271 | 0          |
| antisense WWTR1_ar     | 5   | 7   | 6   | 7    | 5    | 4    | 0.137912 | 0.247593 | 0.199678 | 0.299682   |
| processed_ -           | 20  | 10  | 32  | 10   | 9    | 17   | 0.421294 | 0.270125 | 0.813305 | 0.326953   |
| pseudogeni -           | 0   | 0   | 0   | 0    | 2    | 1    | 0        | 0        | 0        | 0          |
| protein_co CMT1A_du    | 1   | 2   | 0   | 0    | 0    | 0    | 0.018238 | 0.046775 | 0        | 0          |
| lincRNA -              | 4   | 1   | 2   | 4    | 7    | 11   | 0.207249 | 0.066442 | 0.125029 | 0.321679   |
| protein_co ribosomal_  | 61  | 48  | 88  | 124  | 188  | 119  | 1.276916 | 1.288496 | 2.222609 | 4.028882   |
| pseudogeni postmeioti  | 0   | 0   | 2   | 0    | 1    | 3    | 0        | 0        | 0.197127 | 0          |
| pseudogeni -           | 0   | 0   | 0   | 2    | 2    | 0    | 0        | 0        | 0        | 0.191778   |
| pseudogeni -           | 4   | 3   | 3   | 0    | 0    | 0    | 0.362785 | 0.348916 | 0.328291 | 0          |
| antisense -            | 0   | 0   | 0   | 0    | 1    | 0    | 0        | 0        | 0        | 0          |
| pseudogeni -           | 0   | 0   | 0   | 0    | 1    | 0    | 0        | 0        | 0        | 0          |
| antisense SYNPR_anti   | 0   | 0   | 0   | 10   | 15   | 11   | 0        | 0        | 0        | 1.304298   |
| protein_co pyridoxal_  | 227 | 186 | 202 | 241  | 484  | 247  | 5.295539 | 5.56425  | 5.685698 | 8.726334   |
| pseudogeni ribosomal_  | 5   | 1   | 4   | 2    | 2    | 0    | 0.763681 | 0.195863 | 0.73714  | 0.474136   |
| protein_co ribonuclea  | 2   | 10  | 11  | 9    | 15   | 8    | 0.062855 | 0.403015 | 0.417112 | 0.43902    |
| pseudogeni -           | 3   | 0   | 0   | 3    | 8    | 0    | 0.208092 | 0        | 0        | 0.322987   |
| processed_ HNF1A_ant   | 0   | 0   | 0   | 0    | 0    | 2    | 0        | 0        | 0        | 0          |
| protein_co CD302_mo    | 64  | 66  | 70  | 49   | 62   | 39   | 0.781704 | 1.03375  | 1.031593 | 0.928943   |
| pseudogeni -           | 0   | 0   | 1   | 0    | 2    | 0    | 0        | 0        | 0.156286 | 0          |
| protein_co EGF-like-do | 21  | 12  | 20  | 9    | 20   | 11   | 0.403396 | 0.295599 | 0.463544 | 0.26834    |
| processed_ -           | 0   | 0   | 0   | 0    | 1    | 0    | 0        | 0        | 0        | 0          |
| pseudogeni -           | 0   | 2   | 0   | 17   | 38   | 17   | 0        | 0.235342 | 0        | 2.421246   |
| pseudogeni eukaryotic_ | 0   | 1   | 2   | 4    | 3    | 2    | 0        | 0.047458 | 0.089306 | 0.22977    |
| pseudogeni teratocarci | 2   | 0   | 1   | 1    | 0    | 1    | 0.20933  | 0        | 0.126285 | 0.162455   |
| pseudogeni -           | 0   | 0   | 0   | 0    | 1    | 1    | 0        | 0        | 0        | 0          |
| antisense -            | 0   | 0   | 0   | 2    | 0    | 1    | 0        | 0        | 0        | 0.258084   |
| pseudogeni -           | 0   | 0   | 0   | 0    | 2    | 1    | 0        | 0        | 0        | 0          |
| pseudogeni ribosomal_  | 0   | 2   | 1   | 0    | 3    | 2    | 0        | 0.796421 | 0.374672 | 0          |
| protein_co ATP_syntha  | 197 | 153 | 187 | 233  | 250  | 239  | 11.93454 | 11.88612 | 13.66876 | 21.90916   |
| processed_ -           | 0   | 2   | 0   | 0    | 0    | 1    | 0        | 0.286332 | 0        | 0          |
| processed_ PTPRG_ant   | 18  | 7   | 18  | 18   | 16   | 12   | 0.317182 | 0.158177 | 0.382698 | 0.49231    |
| pseudogeni heat_shock  | 1   | 0   | 0   | 0    | 0    | 0    | 0.024133 | 0        | 0        | 0          |
| antisense -            | 0   | 0   | 2   | 0    | 0    | 1    | 0        | 0        | 0.211497 | 0          |
| lincRNA -              | 3   | 2   | 2   | 1    | 1    | 1    | 0.16376  | 0.14     | 0.131724 | 0.084726   |
| protein_co Rho_GTPas   | 0   | 8   | 0   | 109  | 149  | 62   | 0        | 0.16559  | 0        | 2.730808   |

|                        |      |      |      |      |      |      |          |          |          |          |
|------------------------|------|------|------|------|------|------|----------|----------|----------|----------|
| processed_-            | 13   | 8    | 5    | 1    | 1    | 1    | 0.58388  | 0.460765 | 0.270955 | 0.069712 |
| pseudogen_-            | 0    | 0    | 4    | 0    | 0    | 2    | 0        | 0        | 1.714409 | 0        |
| pseudogen_-            | 1    | 0    | 1    | 0    | 0    | 0    | 0.149331 | 0        | 0.180177 | 0        |
| pseudogen; proteasom   | 59   | 33   | 33   | 30   | 26   | 26   | 2.095842 | 1.503245 | 1.414388 | 1.654086 |
| pseudogen; ribosomal_  | 0    | 1    | 0    | 3    | 0    | 0    | 0        | 0.151843 | 0        | 0.551362 |
| antisense_-            | 0    | 0    | 0    | 0    | 1    | 2    | 0        | 0        | 0        | 0        |
| antisense_-            | 1    | 1    | 0    | 0    | 0    | 0    | 0.052864 | 0.06779  | 0        | 0        |
| pseudogen; carbonic_a  | 2    | 0    | 1    | 1    | 3    | 5    | 0.103624 | 0        | 0.062514 | 0.08042  |
| processed_-            | 8    | 5    | 7    | 2    | 5    | 7    | 0.259959 | 0.20835  | 0.274448 | 0.100873 |
| pseudogen; angiogenic  | 3    | 3    | 2    | 0    | 0    | 2    | 0.115969 | 0.148713 | 0.093282 | 0        |
| pseudogen; chromobo    | 1    | 2    | 0    | 2    | 1    | 2    | 0.083583 | 0.214366 | 0        | 0.259465 |
| pseudogen_-            | 3    | 0    | 0    | 3    | 0    | 1    | 0.150772 | 0        | 0        | 0.234019 |
| processed_-            | 0    | 1    | 0    | 0    | 0    | 0    | 0        | 0.040167 | 0        | 0        |
| pseudogen_-            | 1    | 0    | 0    | 1    | 0    | 0    | 0.134741 | 0        | 0        | 0.209137 |
| pseudogen_-            | 15   | 8    | 17   | 3    | 8    | 6    | 1.502885 | 1.02786  | 2.055093 | 0.466537 |
| pseudogen; glucuronid  | 33   | 30   | 31   | 45   | 34   | 11   | 1.062025 | 1.238088 | 1.203734 | 2.247832 |
| protein_co actin_relat | 1902 | 1446 | 1404 | 1004 | 1201 | 1669 | 34.54098 | 33.67455 | 30.76375 | 28.30012 |
| pseudogen_-            | 9    | 4    | 9    | 8    | 18   | 10   | 0.907549 | 0.517246 | 1.09501  | 1.252126 |
| antisense_ZBTB20_an    | 4    | 2    | 0    | 0    | 0    | 0    | 0.111118 | 0.071286 | 0        | 0        |
| protein_co cortistatin | 7    | 1    | 2    | 4    | 3    | 3    | 0.290469 | 0.053212 | 0.100134 | 0.257628 |
| antisense_-            | 0    | 1    | 0    | 3    | 2    | 3    | 0        | 0.065932 | 0        | 0.239407 |
| pseudogen_-            | 0    | 0    | 0    | 0    | 0    | 2    | 0        | 0        | 0        | 0        |
| pseudogen_-            | 0    | 0    | 0    | 1    | 1    | 0    | 0        | 0        | 0        | 0.423138 |
| lincRNA_-              | 0    | 1    | 4    | 1    | 0    | 0    | 0        | 0.0593   | 0.223178 | 0.071775 |
| sense_intrc            | 1    | 0    | 0    | 0    | 0    | 1    | 0.083434 | 0        | 0        | 0        |
| pseudogen_-            | 3    | 1    | 0    | 0    | 0    | 1    | 0.242953 | 0.103851 | 0        | 0        |
| lincRNA_-              | 5    | 0    | 6    | 4    | 5    | 3    | 0.51302  | 0        | 0.742786 | 0.637022 |
| pseudogen_-            | 0    | 0    | 0    | 0    | 0    | 1    | 0        | 0        | 0        | 0        |
| pseudogen; golgin_A2_  | 0    | 0    | 0    | 0    | 1    | 0    | 0        | 0        | 0        | 0        |
| pseudogen_-            | 2    | 3    | 1    | 0    | 0    | 0    | 0.194969 | 0.37503  | 0.117621 | 0        |
| pseudogen; ubiquilin_4 | 12   | 8    | 7    | 4    | 12   | 4    | 0.312427 | 0.267095 | 0.219894 | 0.161643 |
| pseudogen_-            | 18   | 26   | 17   | 13   | 19   | 25   | 1.658193 | 3.071463 | 1.889555 | 1.858816 |
| pseudogen; ribosomal_  | 0    | 0    | 2    | 0    | 1    | 1    | 0        | 0        | 0.262531 | 0        |
| protein_co indolethyl  | 8    | 2    | 6    | 38   | 42   | 8    | 0.146589 | 0.046995 | 0.132651 | 1.080747 |
| pseudogen_-            | 0    | 0    | 0    | 2    | 3    | 1    | 0        | 0        | 0        | 0.243004 |
| pseudogen; protein_ph  | 2    | 0    | 1    | 0    | 0    | 0    | 0.15949  | 0        | 0.096217 | 0        |
| processed_-            | 3    | 1    | 0    | 0    | 0    | 0    | 0.055755 | 0.023833 | 0        | 0        |
| pseudogen_-            | 0    | 0    | 1    | 0    | 0    | 0    | 0        | 0        | 0.118112 | 0        |
| lincRNA_-              | 20   | 33   | 25   | 3    | 5    | 2    | 1.772779 | 3.751008 | 2.673701 | 0.41274  |
| pseudogen; ribosomal_  | 1    | 1    | 3    | 0    | 0    | 2    | 0.12504  | 0.160346 | 0.452604 | 0        |
| processed_ADAMTS9_     | 4    | 5    | 5    | 4    | 0    | 1    | 0.050816 | 0.081455 | 0.07664  | 0.078873 |
| protein_co actin_relat | 2857 | 2192 | 2336 | 1896 | 2071 | 2090 | 78.71021 | 77.44096 | 77.65005 | 81.0755  |
| lincRNA_-              | 0    | 0    | 2    | 0    | 0    | 0    | 0        | 0        | 0.120373 | 0        |
| protein_co transmemt   | 44   | 23   | 30   | 340  | 590  | 228  | 0.79018  | 0.529676 | 0.650044 | 9.477263 |
| processed_-            | 1    | 0    | 1    | 0    | 1    | 0    | 0.058032 | 0        | 0.070019 | 0        |
| lincRNA_-              | 2    | 1    | 3    | 425  | 603  | 275  | 0.045746 | 0.029332 | 0.082793 | 15.0885  |
| pseudogen; fatty_acid_ | 0    | 0    | 0    | 1    | 0    | 1    | 0        | 0        | 0        | 0.070866 |
| pseudogen; zinc_finger | 1    | 1    | 2    | 0    | 3    | 0    | 0.024034 | 0.03082  | 0.057996 | 0        |
| pseudogen; ribosomal_  | 3    | 4    | 1    | 13   | 8    | 14   | 0.176721 | 0.30216  | 0.071075 | 1.188615 |
| lincRNA_-              | 0    | 0    | 0    | 4    | 2    | 6    | 0        | 0        | 0        | 0.585753 |
| pseudogen; ribosomal_  | 138  | 132  | 114  | 20   | 20   | 14   | 5.656313 | 6.938053 | 5.637769 | 1.272374 |
| processed_-            | 18   | 12   | 11   | 13   | 18   | 22   | 1.284658 | 1.098261 | 0.947231 | 1.440087 |
| processed_-            | 10   | 3    | 9    | 1    | 0    | 2    | 0.418661 | 0.161062 | 0.454625 | 0.064982 |
| antisense_-            | 3    | 0    | 0    | 1    | 1    | 0    | 0.439594 | 0        | 0        | 0.227437 |
| processed_-            | 0    | 0    | 0    | 0    | 2    | 4    | 0        | 0        | 0        | 0        |
| pseudogen_-            | 0    | 2    | 2    | 4    | 5    | 1    | 0        | 0.253712 | 0.238715 | 0.614176 |
| antisense_-            | 1    | 0    | 2    | 0    | 0    | 0    | 0.074785 | 0        | 0.180464 | 0        |
| pseudogen; cytochrom   | 0    | 0    | 0    | 1    | 1    | 0    | 0        | 0        | 0        | 0.316434 |
| antisense_-            | 0    | 11   | 2    | 3    | 2    | 0    | 0        | 1.434767 | 0.245447 | 0.473621 |
| pseudogen_-            | 0    | 1    | 0    | 1    | 1    | 1    | 0        | 0.088556 | 0        | 0.107187 |
| pseudogen_-            | 0    | 0    | 0    | 0    | 0    | 1    | 0        | 0        | 0        | 0        |
| pseudogen; ribosomal_  | 0    | 0    | 1    | 1    | 3    | 1    | 0        | 0        | 0.12193  | 0.156853 |
| processed_cat_eye_sy   | 0    | 0    | 0    | 2    | 2    | 5    | 0        | 0        | 0        | 0.07601  |
| protein_co ATP_syntha  | 100  | 89   | 72   | 154  | 205  | 126  | 1.651639 | 1.885013 | 1.434814 | 3.9479   |
| protein_co plectstrin_ | 389  | 283  | 304  | 564  | 627  | 580  | 4.903284 | 4.57439  | 4.623375 | 11.03436 |

|                         |      |      |      |      |      |      |          |          |          |          |
|-------------------------|------|------|------|------|------|------|----------|----------|----------|----------|
| pseudogen:-             | 0    | 1    | 1    | 0    | 0    | 1    | 0        | 0.070492 | 0.066325 | 0        |
| protein_co chromosom    | 293  | 241  | 266  | 163  | 194  | 159  | 6.798008 | 7.170352 | 7.446355 | 5.86992  |
| pseudogen: Kallmann_    | 1    | 2    | 3    | 98   | 95   | 120  | 0.02582  | 0.066222 | 0.093462 | 3.927544 |
| processed_-             | 40   | 25   | 36   | 58   | 80   | 104  | 0.385926 | 0.30931  | 0.419078 | 0.868566 |
| pseudogen:-             | 0    | 0    | 0    | 0    | 0    | 1    | 0        | 0        | 0        | 0        |
| protein_co phosphatic   | 850  | 642  | 691  | 795  | 993  | 991  | 14.93313 | 14.46359 | 14.64731 | 21.67851 |
| lincRNA -               | 1    | 1    | 0    | 0    | 0    | 0    | 0.0225   | 0.028853 | 0        | 0        |
| processed_-             | 2    | 2    | 3    | 0    | 0    | 2    | 0.166868 | 0.213985 | 0.302004 | 0        |
| pseudogen:-             | 4    | 4    | 3    | 3    | 5    | 0    | 0.255531 | 0.327683 | 0.231235 | 0.297465 |
| pseudogen: ribosomal_   | 1    | 1    | 1    | 0    | 0    | 3    | 0.083434 | 0.106993 | 0.100668 | 0        |
| pseudogen:-             | 2    | 0    | 0    | 1    | 0    | 0    | 0.264169 | 0        | 0        | 0.205014 |
| TR_V_pseuT_cell_rece    | 0    | 0    | 0    | 0    | 1    | 0    | 0        | 0        | 0        | 0        |
| lincRNA -               | 1    | 0    | 0    | 0    | 0    | 0    | 0.122749 | 0        | 0        | 0        |
| pseudogen:-             | 1    | 0    | 0    | 1    | 0    | 0    | 0.275824 | 0        | 0        | 0.428116 |
| pseudogen:-             | 0    | 0    | 0    | 1    | 0    | 0    | 0        | 0        | 0        | 0.117009 |
| pseudogen:-             | 0    | 0    | 0    | 2    | 0    | 0    | 0        | 0        | 0        | 0.195382 |
| processed_-             | 0    | 0    | 1    | 0    | 0    | 0    | 0        | 0        | 0.019382 | 0        |
| protein_co 4-hydroxy-   | 0    | 2    | 8    | 1    | 2    | 0    | 0        | 0.046594 | 0.17536  | 0.028198 |
| pseudogen: ribosomal_   | 0    | 0    | 0    | 1    | 0    | 0    | 0        | 0        | 0        | 0.180595 |
| pseudogen: ribosomal_   | 2    | 1    | 0    | 0    | 0    | 0    | 0.275824 | 0.176852 | 0        | 0        |
| protein_co PWP2_peri    | 929  | 736  | 837  | 1187 | 1601 | 1717 | 9.54444  | 9.696654 | 10.37548 | 18.92849 |
| pseudogen: heterogene   | 1    | 0    | 0    | 0    | 0    | 2    | 0.044828 | 0        | 0        | 0        |
| antisense -             | 6    | 1    | 2    | 1    | 4    | 1    | 0.633649 | 0.135427 | 0.254845 | 0.163918 |
| antisense -             | 16   | 5    | 8    | 0    | 0    | 0    | 0.463684 | 0.185815 | 0.279731 | 0        |
| protein_co chromosom    | 9    | 4    | 6    | 61   | 82   | 73   | 0.16427  | 0.093624 | 0.132134 | 1.728131 |
| protein_co phosphatic   | 2182 | 1665 | 1746 | 876  | 992  | 962  | 15.15314 | 14.82762 | 14.62986 | 9.442403 |
| pseudogen: transcriptic | 1    | 0    | 4    | 3    | 0    | 2    | 0.147453 | 0        | 0.711642 | 0.686602 |
| protein_co A_kinase(F   | 2    | 4    | 6    | 2    | 4    | 2    | 0.013659 | 0.03503  | 0.04944  | 0.0212   |
| pseudogen:-             | 5    | 3    | 1    | 1    | 3    | 0    | 0.506372 | 0.38961  | 0.122193 | 0.157192 |
| pseudogen:-             | 4    | 2    | 3    | 2    | 6    | 2    | 0.25346  | 0.162513 | 0.22936  | 0.196702 |
| sense_intrc WWTR1_in    | 60   | 36   | 30   | 2    | 4    | 5    | 6.23814  | 4.799718 | 3.763337 | 0.322749 |
| processed_-             | 4    | 0    | 2    | 0    | 0    | 2    | 0.213866 | 0        | 0.129021 | 0        |
| pseudogen:-             | 0    | 0    | 0    | 0    | 1    | 2    | 0        | 0        | 0        | 0        |
| processed_-             | 0    | 0    | 0    | 1    | 0    | 0    | 0        | 0        | 0        | 0.126354 |
| lincRNA -               | 0    | 0    | 0    | 0    | 0    | 1    | 0        | 0        | 0        | 0        |
| protein_co ubiquitin_   | 166  | 97   | 112  | 129  | 153  | 74   | 2.886074 | 2.162622 | 2.349446 | 3.481125 |
| pseudogen: asparagine-  | 1    | 1    | 0    | 0    | 1    | 0    | 0.059055 | 0.07573  | 0        | 0        |
| lincRNA -               | 1    | 0    | 0    | 0    | 0    | 0    | 0.078939 | 0        | 0        | 0        |
| pseudogen:-             | 4    | 5    | 0    | 2    | 2    | 3    | 0.211454 | 0.33895  | 0        | 0.164103 |
| protein_co huntingtin   | 19   | 14   | 23   | 14   | 14   | 12   | 0.1865   | 0.176223 | 0.272396 | 0.213296 |
| pseudogen:-             | 0    | 0    | 0    | 0    | 4    | 0    | 0        | 0        | 0        | 0        |
| pseudogen: ribosomal_   | 0    | 0    | 0    | 1    | 2    | 1    | 0        | 0        | 0        | 0.092126 |
| pseudogen: ribosomal_   | 0    | 0    | 1    | 0    | 0    | 0    | 0        | 0        | 0.097712 | 0        |
| pseudogen: ribosomal_   | 111  | 94   | 81   | 166  | 201  | 153  | 6.401958 | 6.952277 | 5.636674 | 14.86033 |
| lincRNA -               | 0    | 0    | 0    | 12   | 17   | 11   | 0        | 0        | 0        | 2.863468 |
| processed_-             | 0    | 1    | 0    | 8    | 11   | 0    | 0        | 0.068641 | 0        | 0.664656 |
| pseudogen: ribosomal_   | 2    | 2    | 0    | 1    | 4    | 3    | 0.117519 | 0.150701 | 0        | 0.091203 |
| pseudogen: ribosomal_   | 11   | 10   | 7    | 12   | 19   | 16   | 1.457034 | 1.698582 | 1.118725 | 2.467112 |
| lincRNA -               | 239  | 214  | 214  | 102  | 140  | 90   | 2.663193 | 3.057932 | 2.877176 | 1.764149 |
| pseudogen: ribosomal_   | 1    | 0    | 0    | 0    | 2    | 0    | 0.153235 | 0        | 0        | 0        |
| pseudogen:-             | 0    | 0    | 1    | 1    | 1    | 1    | 0        | 0        | 0.224506 | 0.288809 |
| sense_intrc FOXP1_intr  | 10   | 15   | 10   | 2    | 6    | 3    | 0.132495 | 0.254859 | 0.159863 | 0.04113  |
| pseudogen: ribosomal_   | 0    | 0    | 0    | 1    | 2    | 1    | 0        | 0        | 0        | 0.117387 |
| lincRNA -               | 0    | 0    | 0    | 2    | 0    | 0    | 0        | 0        | 0        | 0.149139 |
| protein_co Uncharacte   | 0    | 1    | 0    | 0    | 0    | 0    | 0        | 0.127664 | 0        | 0        |
| protein_co alpha-meth   | 46   | 29   | 45   | 12   | 17   | 5    | 0.519369 | 0.419881 | 0.613026 | 0.210296 |
| protein_co mitochond    | 1    | 4    | 3    | 6    | 12   | 9    | 0.034102 | 0.174923 | 0.123437 | 0.317585 |
| processed_small_nucl    | 605  | 445  | 481  | 1154 | 1309 | 1468 | 10.85251 | 10.23633 | 10.41041 | 32.13003 |
| pseudogen: ribosomal_   | 0    | 1    | 1    | 0    | 0    | 0    | 0        | 0.084809 | 0.079796 | 0        |
| processed_-             | 0    | 1    | 0    | 3    | 3    | 0    | 0        | 0.109927 | 0        | 0.399158 |
| pseudogen: SERPINE1_I   | 1    | 0    | 0    | 2    | 3    | 0    | 0.05796  | 0        | 0        | 0.179925 |
| lincRNA -               | 28   | 19   | 29   | 0    | 0    | 0    | 1.883674 | 1.639119 | 2.353931 | 0        |
| pseudogen:-             | 0    | 0    | 0    | 1    | 0    | 2    | 0        | 0        | 0        | 0.076853 |
| pseudogen: OFD1_pseu    | 0    | 0    | 0    | 0    | 1    | 0    | 0        | 0        | 0        | 0        |
| antisense -             | 1    | 1    | 3    | 0    | 2    | 0    | 0.085879 | 0.110128 | 0.310854 | 0        |

|                         |      |      |      |      |      |      |          |          |          |          |
|-------------------------|------|------|------|------|------|------|----------|----------|----------|----------|
| pseudogeni -            | 0    | 0    | 0    | 1    | 0    | 0    | 0        | 0        | 0        | 0.181496 |
| protein_co Rho_GDP_c    | 4    | 2    | 3    | 39   | 59   | 36   | 0.147453 | 0.094544 | 0.133433 | 2.231456 |
| lincRNA -               | 0    | 0    | 0    | 2    | 1    | 1    | 0        | 0        | 0        | 0.387127 |
| pseudogeni -            | 38   | 24   | 35   | 19   | 36   | 16   | 0.610004 | 0.494048 | 0.677899 | 0.473405 |
| pseudogeni -            | 0    | 0    | 1    | 4    | 4    | 4    | 0        | 0        | 0.193752 | 0.996984 |
| pseudogeni -            | 5    | 5    | 5    | 4    | 1    | 3    | 0.675649 | 0.866424 | 0.815209 | 0.83896  |
| pseudogeni -            | 0    | 1    | 1    | 1    | 3    | 5    | 0        | 0.178427 | 0.16788  | 0.215964 |
| antisense HOXB_clusi    | 1    | 0    | 0    | 0    | 0    | 0    | 0.082845 | 0        | 0        | 0        |
| antisense PVRL3_anti    | 20   | 16   | 18   | 8    | 9    | 9    | 1.184091 | 1.214743 | 1.285807 | 0.73515  |
| protein_co ADP-ribosy   | 1219 | 1008 | 1082 | 285  | 363  | 128  | 20.00663 | 21.21485 | 21.42622 | 7.260148 |
| protein_co bone_gamr    | 8    | 5    | 7    | 8    | 9    | 2    | 0.402922 | 0.322931 | 0.42538  | 0.62539  |
| processed_ -            | 0    | 0    | 0    | 0    | 0    | 2    | 0        | 0        | 0        | 0        |
| protein_co chromosom    | 159  | 120  | 119  | 148  | 181  | 109  | 2.50269  | 2.422147 | 2.259982 | 3.615781 |
| pseudogeni -            | 74   | 82   | 84   | 88   | 106  | 91   | 3.368797 | 4.787032 | 4.613925 | 6.21808  |
| pseudogeni -            | 0    | 0    | 1    | 2    | 2    | 1    | 0        | 0        | 0.091843 | 0.236298 |
| protein_co paternally_  | 6103 | 4657 | 4635 | 2969 | 3398 | 4107 | 43.24113 | 42.31255 | 39.62337 | 32.65084 |
| pseudogeni Skint-like_f | 0    | 0    | 0    | 3    | 6    | 1    | 0        | 0        | 0        | 0.267245 |
| lincRNA -               | 2    | 1    | 3    | 1    | 1    | 0    | 0.132085 | 0.08469  | 0.239051 | 0.102507 |
| pseudogeni -            | 0    | 0    | 0    | 1    | 0    | 1    | 0        | 0        | 0        | 0.093188 |
| pseudogeni -            | 0    | 0    | 0    | 1    | 0    | 0    | 0        | 0        | 0        | 0.048199 |
| processed_ -            | 22   | 19   | 12   | 2    | 1    | 16   | 1.128644 | 1.249963 | 0.742786 | 0.159256 |
| pseudogeni ribosomal_   | 0    | 1    | 0    | 0    | 0    | 0    | 0        | 0.071328 | 0        | 0        |
| antisense DMD_antis     | 0    | 1    | 0    | 0    | 0    | 1    | 0        | 0.091801 | 0        | 0        |
| processed_ -            | 28   | 31   | 29   | 22   | 31   | 32   | 0.344599 | 0.489245 | 0.430627 | 0.420251 |
| pseudogeni -            | 6    | 12   | 6    | 8    | 19   | 14   | 0.411918 | 1.056453 | 0.497003 | 0.852472 |
| pseudogeni -            | 53   | 43   | 54   | 69   | 66   | 56   | 5.414316 | 5.633075 | 6.655942 | 10.94075 |
| pseudogeni ribosomal_   | 4    | 1    | 1    | 4    | 3    | 0    | 0.538966 | 0.172787 | 0.162573 | 0.836549 |
| pseudogeni -            | 0    | 0    | 0    | 0    | 0    | 1    | 0        | 0        | 0        | 0        |
| pseudogeni -            | 0    | 1    | 0    | 0    | 0    | 0    | 0        | 0.12172  | 0        | 0        |
| pseudogeni -            | 1    | 0    | 0    | 0    | 0    | 0    | 0.098924 | 0        | 0        | 0        |
| pseudogeni -            | 0    | 0    | 0    | 0    | 1    | 2    | 0        | 0        | 0        | 0        |
| pseudogeni ribosomal_   | 3    | 1    | 1    | 1    | 1    | 3    | 0.353442 | 0.15108  | 0.14215  | 0.182864 |
| pseudogeni -            | 0    | 0    | 0    | 0    | 2    | 0    | 0        | 0        | 0        | 0        |
| pseudogeni transferrin_ | 1    | 4    | 7    | 0    | 0    | 0    | 0.029809 | 0.152905 | 0.251766 | 0        |
| pseudogeni BMS1_pseu    | 12   | 23   | 17   | 16   | 36   | 18   | 0.327902 | 0.805935 | 0.56048  | 0.6786   |
| antisense NPPA_antis    | 5    | 4    | 3    | 0    | 0    | 3    | 0.22718  | 0.233061 | 0.164464 | 0        |
| pseudogeni -            | 0    | 0    | 0    | 1    | 0    | 0    | 0        | 0        | 0        | 0.028608 |
| processed_ -            | 1    | 4    | 2    | 1    | 6    | 2    | 0.085255 | 0.437308 | 0.205729 | 0.132327 |
| antisense KCNAB1_ar     | 0    | 0    | 0    | 2    | 1    | 2    | 0        | 0        | 0        | 0.31921  |
| protein_co eukaryotic_  | 940  | 626  | 714  | 827  | 906  | 823  | 34.19443 | 29.2019  | 31.33818 | 46.69426 |
| processed_ -            | 2    | 4    | 1    | 4    | 15   | 1    | 0.197848 | 0.507424 | 0.119358 | 0.614176 |
| protein_co TBC1_dom     | 0    | 0    | 0    | 0    | 0    | 1    | 0        | 0        | 0        | 0        |
| antisense -             | 0    | 0    | 0    | 1    | 1    | 0    | 0        | 0        | 0        | 0.191526 |
| antisense -             | 2    | 1    | 0    | 0    | 0    | 1    | 0.163096 | 0.104574 | 0        | 0        |
| pseudogeni -            | 1    | 0    | 0    | 2    | 0    | 3    | 0.091761 | 0        | 0        | 0.284852 |
| lincRNA -               | 16   | 19   | 14   | 2    | 5    | 5    | 1.410226 | 2.147493 | 1.488829 | 0.273608 |
| pseudogeni -            | 0    | 1    | 0    | 1    | 1    | 2    | 0        | 0.098573 | 0        | 0.119311 |
| pseudogeni diazepam_I   | 1    | 3    | 5    | 3    | 1    | 1    | 0.027713 | 0.106613 | 0.167185 | 0.129042 |
| protein_co protocadhe   | 133  | 115  | 114  | 85   | 128  | 130  | 1.348988 | 1.495766 | 1.395113 | 1.338153 |
| antisense -             | 1    | 0    | 0    | 0    | 0    | 0    | 0.021285 | 0        | 0        | 0        |
| pseudogeni -            | 1    | 0    | 4    | 1    | 3    | 2    | 0.089485 | 0        | 0.431874 | 0.138893 |
| pseudogeni -            | 1    | 0    | 0    | 0    | 0    | 0    | 0.092852 | 0        | 0        | 0        |
| pseudogeni uroplakin_   | 1    | 2    | 1    | 0    | 4    | 0    | 0.092122 | 0.236266 | 0.11115  | 0        |
| pseudogeni -            | 0    | 0    | 0    | 4    | 1    | 1    | 0        | 0        | 0        | 0.696457 |
| pseudogeni -            | 0    | 0    | 0    | 2    | 1    | 0    | 0        | 0        | 0        | 0.26227  |
| pseudogeni ribosomal_   | 2    | 3    | 3    | 6    | 5    | 5    | 0.117372 | 0.225769 | 0.212424 | 0.546532 |
| pseudogeni retinoblast  | 1    | 2    | 0    | 1    | 4    | 1    | 0.037097 | 0.095142 | 0        | 0.057579 |
| lincRNA -               | 8    | 9    | 5    | 20   | 32   | 39   | 0.566647 | 0.817475 | 0.427307 | 2.198786 |
| pseudogeni -            | 8    | 2    | 3    | 2    | 6    | 0    | 0.576221 | 0.184731 | 0.260717 | 0.223594 |
| protein_co mitochond    | 884  | 664  | 718  | 808  | 883  | 1149 | 24.48362 | 23.5831  | 23.99363 | 34.73484 |
| pseudogeni -            | 10   | 11   | 4    | 11   | 7    | 5    | 0.489457 | 0.690426 | 0.236223 | 0.835676 |
| protein_co chromosom    | 304  | 255  | 279  | 91   | 111  | 61   | 5.338788 | 5.742733 | 5.911822 | 2.48051  |
| pseudogeni -            | 0    | 0    | 1    | 0    | 0    | 2    | 0        | 0        | 0.027109 | 0        |
| pseudogeni NADH_deh     | 0    | 1    | 1    | 0    | 0    | 0    | 0        | 0.157821 | 0.148492 | 0        |
| lincRNA -               | 25   | 19   | 25   | 23   | 27   | 20   | 0.551388 | 0.537378 | 0.665281 | 0.787364 |

|                        |      |     |     |     |     |     |          |          |          |          |
|------------------------|------|-----|-----|-----|-----|-----|----------|----------|----------|----------|
| processed_-            | 0    | 0   | 2   | 0   | 2   | 0   | 0        | 0        | 0.207617 | 0        |
| pseudogen: olfactory_r | 0    | 0   | 0   | 0   | 0   | 1   | 0        | 0        | 0        | 0        |
| pseudogen_-            | 0    | 0   | 0   | 1   | 0   | 0   | 0        | 0        | 0        | 0.26086  |
| pseudogen_-            | 3    | 0   | 2   | 1   | 1   | 2   | 1.073817 | 0        | 0.863748 | 0.555571 |
| lincRNA_-              | 0    | 0   | 0   | 1   | 0   | 1   | 0        | 0        | 0        | 0.101648 |
| antisense_-            | 200  | 172 | 214 | 72  | 101 | 71  | 5.526225 | 6.094476 | 7.134448 | 3.087888 |
| processed_-            | 11   | 13  | 7   | 15  | 4   | 13  | 0.676003 | 1.024492 | 0.519041 | 1.430796 |
| protein_co serpin_pep  | 19   | 18  | 6   | 0   | 0   | 0   | 0.419845 | 0.510055 | 0.159968 | 0        |
| pseudogen: POU_class_  | 0    | 0   | 4   | 0   | 0   | 1   | 0        | 0        | 0.228588 | 0        |
| lincRNA_-              | 6    | 3   | 10  | 5   | 11  | 7   | 0.541039 | 0.346903 | 1.08799  | 0.699806 |
| processed_-            | 6    | 4   | 5   | 0   | 1   | 3   | 0.483402 | 0.413263 | 0.486044 | 0        |
| pseudogen: DDB1_and_   | 0    | 0   | 0   | 0   | 2   | 1   | 0        | 0        | 0        | 0        |
| pseudogen: ribosomal_  | 0    | 0   | 0   | 0   | 2   | 0   | 0        | 0        | 0        | 0        |
| protein_co major_hist  | 1    | 1   | 0   | 6   | 2   | 2   | 0.010263 | 0.01316  | 0        | 0.095574 |
| pseudogen_-            | 0    | 0   | 0   | 1   | 2   | 0   | 0        | 0        | 0        | 0.056815 |
| lincRNA_-              | 4    | 3   | 6   | 0   | 0   | 3   | 0.28247  | 0.271671 | 0.511224 | 0        |
| IG_V_gene immunogl     | 0    | 0   | 0   | 0   | 1   | 0   | 0        | 0        | 0        | 0        |
| pseudogen_-            | 0    | 0   | 0   | 0   | 0   | 1   | 0        | 0        | 0        | 0        |
| pseudogen_-            | 399  | 312 | 357 | 146 | 244 | 145 | 9.878098 | 9.905225 | 10.66392 | 5.61027  |
| pseudogen: mannose-b   | 19   | 9   | 21  | 8   | 7   | 15  | 0.625639 | 0.380034 | 0.83433  | 0.408875 |
| pseudogen_-            | 5    | 0   | 4   | 2   | 1   | 2   | 0.737264 | 0        | 0.711642 | 0.457735 |
| pseudogen: ribosomal_  | 0    | 0   | 0   | 10  | 5   | 9   | 0        | 0        | 0        | 0.93188  |
| pseudogen: olfactory_r | 0    | 0   | 0   | 4   | 1   | 1   | 0        | 0        | 0        | 0.316778 |
| lincRNA_-              | 0    | 0   | 0   | 2   | 1   | 1   | 0        | 0        | 0        | 0.240594 |
| protein_co 24-dienoyl  | 198  | 166 | 185 | 244 | 302 | 230 | 4.502533 | 4.840711 | 5.075882 | 8.612159 |
| pseudogen_-            | 9    | 2   | 6   | 18  | 33  | 23  | 0.278187 | 0.079275 | 0.223766 | 0.86357  |
| protein_co guanine_n   | 4    | 3   | 1   | 3   | 6   | 2   | 0.125795 | 0.120986 | 0.037945 | 0.146438 |
| processed_-            | 25   | 28  | 21  | 46  | 53  | 47  | 1.193738 | 1.714495 | 1.209863 | 3.409237 |
| antisense_-            | 0    | 0   | 2   | 1   | 1   | 0   | 0        | 0        | 0.261924 | 0.168472 |
| sense_intrc USP6NL_in  | 56   | 56  | 52  | 17  | 34  | 33  | 1.054131 | 1.351774 | 1.181022 | 0.496691 |
| pseudogen_-            | 0    | 0   | 0   | 0   | 0   | 1   | 0        | 0        | 0        | 0        |
| lincRNA_-              | 0    | 0   | 0   | 1   | 1   | 0   | 0        | 0        | 0        | 0.130196 |
| lincRNA_-              | 3    | 1   | 3   | 8   | 1   | 1   | 0.464258 | 0.198448 | 0.560154 | 1.921579 |
| pseudogen_-            | 0    | 0   | 0   | 5   | 10  | 9   | 0        | 0        | 0        | 0.46594  |
| lincRNA_-              | 0    | 0   | 1   | 0   | 0   | 0   | 0        | 0        | 0.030932 | 0        |
| pseudogen_-            | 0    | 0   | 0   | 1   | 0   | 0   | 0        | 0        | 0        | 0.140502 |
| antisense_-            | 0    | 0   | 0   | 2   | 1   | 3   | 0        | 0        | 0        | 0.10487  |
| antisense_-            | 63   | 53  | 40  | 33  | 56  | 54  | 0.869356 | 0.937869 | 0.665986 | 0.706808 |
| protein_co ciliary_neu | 4    | 5   | 8   | 3   | 3   | 24  | 0.099449 | 0.159411 | 0.239981 | 0.115769 |
| pseudogen_-            | 0    | 5   | 4   | 0   | 0   | 0   | 0        | 0.686413 | 0.516671 | 0        |
| protein_co coiled-coil | 5    | 6   | 7   | 65  | 86  | 81  | 0.143658 | 0.221065 | 0.242665 | 2.898705 |
| pseudogen: family_witl | 0    | 0   | 0   | 0   | 2   | 0   | 0        | 0        | 0        | 0        |
| protein_co retrotransp | 760  | 565 | 658 | 19  | 28  | 39  | 8.175364 | 7.793837 | 8.540189 | 0.317232 |
| pseudogen_-            | 3    | 1   | 4   | 2   | 3   | 3   | 0.391839 | 0.167492 | 0.630368 | 0.405459 |
| pseudogen_-            | 0    | 0   | 0   | 1   | 2   | 0   | 0        | 0        | 0        | 0.152899 |
| pseudogen_-            | 0    | 1   | 0   | 0   | 0   | 0   | 0        | 0.128758 | 0        | 0        |
| lincRNA_-              | 22   | 10  | 10  | 16  | 7   | 6   | 0.379537 | 0.221228 | 0.208151 | 0.428432 |
| processed_-            | 0    | 0   | 0   | 1   | 0   | 1   | 0        | 0        | 0        | 0.122939 |
| processed_-            | 2    | 2   | 0   | 0   | 0   | 0   | 0.164238 | 0.210612 | 0        | 0        |
| pseudogen: zinc_finger | 5    | 2   | 4   | 34  | 30  | 28  | 0.078411 | 0.040221 | 0.075686 | 0.827596 |
| lincRNA_-              | 5    | 0   | 5   | 6   | 2   | 1   | 0.34478  | 0        | 0.415996 | 0.642175 |
| sense_intrc            | 1    | 0   | 1   | 1   | 2   | 5   | 0.091404 | 0        | 0.110284 | 0.141871 |
| processed_ GLYCTK_an   | 7    | 5   | 7   | 3   | 3   | 9   | 0.470918 | 0.431347 | 0.56819  | 0.313256 |
| processed_-            | 19   | 21  | 22  | 15  | 2   | 22  | 1.557536 | 2.207562 | 2.175981 | 1.908561 |
| protein_co adaptor-rel | 1011 | 670 | 806 | 307 | 391 | 706 | 8.375584 | 7.117838 | 8.056512 | 3.947597 |
| processed_ SOX2_overl  | 6    | 9   | 5   | 38  | 43  | 75  | 0.078675 | 0.151333 | 0.079104 | 0.773387 |
| pseudogen: ribosomal_  | 1    | 0   | 3   | 1   | 3   | 2   | 0.134741 | 0        | 0.48772  | 0.209137 |
| pseudogen: keratin_8_  | 0    | 0   | 0   | 2   | 7   | 1   | 0        | 0        | 0        | 0.108789 |
| protein_co zinc_finger | 2    | 0   | 4   | 13  | 6   | 6   | 0.0191   | 0        | 0.04609  | 0.192696 |
| processed_-            | 6    | 11  | 9   | 14  | 18  | 24  | 0.808449 | 1.900654 | 1.46316  | 2.927923 |
| protein_co stereocilin | 1    | 0   | 0   | 5   | 4   | 3   | 0.008255 | 0        | 0        | 0.064067 |
| processed_-            | 2    | 3   | 0   | 0   | 1   | 2   | 0.24679  | 0.474709 | 0        | 0        |
| pseudogen_-            | 1    | 0   | 0   | 0   | 0   | 3   | 0.087974 | 0        | 0        | 0        |
| processed_-            | 1    | 0   | 1   | 0   | 0   | 1   | 0.087974 | 0        | 0.106145 | 0        |
| pseudogen_-            | 0    | 0   | 0   | 3   | 0   | 1   | 0        | 0        | 0        | 0.244501 |

|                         |     |     |     |     |     |     |          |          |          |          |
|-------------------------|-----|-----|-----|-----|-----|-----|----------|----------|----------|----------|
| pseudogeni -            | 1   | 0   | 0   | 1   | 3   | 1   | 0.057604 | 0        | 0        | 0.08941  |
| pseudogeni -            | 0   | 0   | 0   | 0   | 0   | 1   | 0        | 0        | 0        | 0        |
| processed_ -            | 0   | 0   | 1   | 0   | 0   | 0   | 0        | 0        | 0.090088 | 0        |
| antisense PLCH1_ant     | 1   | 1   | 0   | 0   | 0   | 0   | 0.114927 | 0.147377 | 0        | 0        |
| pseudogeni -            | 2   | 1   | 0   | 5   | 6   | 6   | 0.132458 | 0.084929 | 0        | 0.513982 |
| pseudogeni -            | 1   | 0   | 1   | 2   | 3   | 0   | 0.094919 | 0        | 0.114525 | 0.294655 |
| pseudogeni epidermal_   | 0   | 0   | 1   | 0   | 0   | 0   | 0        | 0        | 0.027318 | 0        |
| protein_co endogenou    | 18  | 9   | 20  | 23  | 24  | 9   | 0.251796 | 0.161446 | 0.337563 | 0.499384 |
| pseudogeni -            | 0   | 0   | 0   | 0   | 3   | 1   | 0        | 0        | 0        | 0        |
| pseudogeni -            | 0   | 0   | 0   | 0   | 1   | 0   | 0        | 0        | 0        | 0        |
| pseudogeni -            | 1   | 1   | 0   | 0   | 1   | 0   | 0.148386 | 0.190284 | 0        | 0        |
| pseudogeni ferritin_hei | 5   | 2   | 2   | 1   | 0   | 2   | 0.426273 | 0.218654 | 0.205729 | 0.132327 |
| pseudogeni -            | 0   | 0   | 2   | 0   | 0   | 0   | 0        | 0        | 0.327974 | 0        |
| processed_ -            | 4   | 0   | 0   | 0   | 0   | 0   | 0.501498 | 0        | 0        | 0        |
| pseudogeni ferritin_hei | 2   | 1   | 0   | 0   | 0   | 1   | 0.169584 | 0.108734 | 0        | 0        |
| pseudogeni -            | 1   | 0   | 0   | 0   | 1   | 0   | 0.115493 | 0        | 0        | 0        |
| pseudogeni -            | 0   | 1   | 0   | 1   | 1   | 0   | 0        | 0.175306 | 0        | 0.212186 |
| processed_ -            | 1   | 0   | 1   | 269 | 261 | 333 | 0.058321 | 0        | 0.070368 | 24.35046 |
| antisense -             | 0   | 1   | 1   | 0   | 1   | 0   | 0        | 0.278379 | 0.261924 | 0        |
| pseudogeni -            | 1   | 0   | 0   | 0   | 0   | 0   | 0.064498 | 0        | 0        | 0        |
| pseudogeni ubiquitin_ / | 0   | 1   | 0   | 2   | 0   | 0   | 0        | 0.157408 | 0        | 0.381046 |
| pseudogeni ribosomal_   | 5   | 3   | 0   | 5   | 5   | 2   | 0.171633 | 0.132057 | 0        | 0.266398 |
| pseudogeni methylthio   | 0   | 0   | 0   | 0   | 1   | 0   | 0        | 0        | 0        | 0        |
| pseudogeni -            | 0   | 0   | 0   | 0   | 1   | 0   | 0        | 0        | 0        | 0        |
| pseudogeni ribosomal_   | 1   | 0   | 2   | 2   | 1   | 3   | 0.12372  | 0        | 0.298551 | 0.384062 |
| antisense GK_antisen    | 3   | 1   | 1   | 1   | 1   | 1   | 0.216083 | 0.092365 | 0.086906 | 0.111797 |
| protein_co eukaryotic   | 12  | 8   | 7   | 2   | 4   | 7   | 0.814298 | 0.696148 | 0.573124 | 0.210651 |
| pseudogeni ATP-bindin   | 0   | 0   | 0   | 3   | 6   | 12  | 0        | 0        | 0        | 0.053515 |
| antisense ARHGEF26_     | 0   | 1   | 0   | 3   | 6   | 0   | 0        | 0.023145 | 0        | 0.084041 |
| pseudogeni -            | 0   | 1   | 0   | 0   | 1   | 1   | 0        | 0.12527  | 0        | 0        |
| processed_ -            | 2   | 0   | 2   | 2   | 2   | 2   | 0.266421 | 0        | 0.321452 | 0.413522 |
| lincRNA -               | 0   | 0   | 0   | 0   | 7   | 4   | 0        | 0        | 0        | 0        |
| lincRNA long_interf     | 0   | 4   | 3   | 0   | 0   | 0   | 0        | 0.089313 | 0.063025 | 0        |
| lincRNA -               | 3   | 0   | 2   | 0   | 0   | 0   | 0.302516 | 0        | 0.243336 | 0        |
| pseudogeni -            | 5   | 3   | 1   | 2   | 2   | 2   | 0.580322 | 0.446508 | 0.140038 | 0.360296 |
| pseudogeni ribosomal_   | 0   | 0   | 0   | 0   | 0   | 1   | 0        | 0        | 0        | 0        |
| processed_ -            | 12  | 8   | 10  | 7   | 5   | 10  | 0.35411  | 0.30273  | 0.356045 | 0.320616 |
| pseudogeni -            | 0   | 0   | 0   | 1   | 0   | 0   | 0        | 0        | 0        | 0.20974  |
| protein_co pregnancy_   | 0   | 0   | 0   | 0   | 3   | 1   | 0        | 0        | 0        | 0        |
| protein_co pregnancy_   | 1   | 0   | 0   | 0   | 1   | 0   | 0.02044  | 0        | 0        | 0        |
| pseudogeni -            | 0   | 0   | 0   | 0   | 0   | 1   | 0        | 0        | 0        | 0        |
| lincRNA -               | 0   | 0   | 0   | 1   | 0   | 1   | 0        | 0        | 0        | 0.106872 |
| protein_co mitochond    | 362 | 241 | 285 | 219 | 293 | 282 | 23.28421 | 19.8783  | 22.118   | 21.86389 |
| antisense -             | 1   | 7   | 2   | 0   | 5   | 1   | 0.091226 | 0.818888 | 0.220138 | 0        |
| processed_ -            | 4   | 6   | 6   | 6   | 4   | 2   | 0.077376 | 0.148836 | 0.140038 | 0.180148 |
| protein_co microtubul   | 933 | 773 | 869 | 457 | 590 | 447 | 4.63191  | 4.921157 | 5.205306 | 3.521479 |
| pseudogeni ribosomal_   | 0   | 0   | 0   | 2   | 0   | 0   | 0        | 0        | 0        | 0.292288 |
| pseudogeni -            | 3   | 2   | 4   | 2   | 2   | 4   | 0.111554 | 0.095368 | 0.179462 | 0.115432 |
| processed_ -            | 6   | 10  | 13  | 8   | 4   | 10  | 0.496191 | 1.06049  | 1.297146 | 1.026876 |
| pseudogeni -            | 1   | 0   | 0   | 0   | 0   | 0   | 0.098716 | 0        | 0        | 0        |
| antisense CCDC39_ar     | 0   | 0   | 0   | 1   | 0   | 0   | 0        | 0        | 0        | 0.257172 |
| antisense -             | 1   | 1   | 0   | 0   | 1   | 0   | 0.086673 | 0.111146 | 0        | 0        |
| pseudogeni -            | 45  | 40  | 38  | 70  | 61  | 76  | 2.425346 | 2.764588 | 2.471114 | 5.855846 |
| antisense -             | 2   | 0   | 0   | 0   | 0   | 0   | 0.13552  | 0        | 0        | 0        |
| processed_ -            | 7   | 11  | 8   | 12  | 15  | 5   | 0.29812  | 0.600752 | 0.411085 | 0.79324  |
| pseudogeni -            | 2   | 1   | 7   | 1   | 0   | 2   | 0.202549 | 0.12987  | 0.855353 | 0.157192 |
| antisense -             | 5   | 2   | 3   | 6   | 5   | 5   | 0.438224 | 0.224784 | 0.317246 | 0.816222 |
| protein_co protocadhe   | 332 | 247 | 235 | 162 | 239 | 191 | 2.607619 | 2.487782 | 2.227009 | 1.974929 |
| antisense -             | 8   | 4   | 3   | 0   | 0   | 0   | 0.445511 | 0.285652 | 0.201575 | 0        |
| protein_co stonin_1     | 125 | 124 | 126 | 217 | 283 | 82  | 1.010212 | 1.28509  | 1.22863  | 2.72203  |
| pseudogeni ribosomal_   | 1   | 0   | 1   | 1   | 1   | 0   | 0.071588 | 0        | 0.086375 | 0.111114 |
| pseudogeni -            | 0   | 0   | 0   | 0   | 2   | 0   | 0        | 0        | 0        | 0        |
| pseudogeni -            | 0   | 2   | 1   | 0   | 1   | 0   | 0        | 0.266061 | 0.125167 | 0        |
| lincRNA -               | 3   | 0   | 0   | 0   | 0   | 0   | 0.178742 | 0        | 0        | 0        |
| protein_co PRA1_dom     | 267 | 209 | 224 | 50  | 63  | 40  | 9.370984 | 9.406532 | 9.485713 | 2.723795 |

|                         |      |      |      |     |     |     |          |          |          |          |
|-------------------------|------|------|------|-----|-----|-----|----------|----------|----------|----------|
| pseudogeni -            | 0    | 1    | 0    | 0   | 0   | 0   | 0        | 0.192108 | 0        | 0        |
| protein_co V-set_and_i  | 4    | 3    | 3    | 1   | 0   | 0   | 0.103168 | 0.099224 | 0.093359 | 0.040033 |
| lincRNA -               | 1    | 0    | 0    | 0   | 0   | 0   | 0.10238  | 0        | 0        | 0        |
| pseudogeni ribosomal_   | 0    | 1    | 0    | 0   | 0   | 0   | 0        | 0.15992  | 0        | 0        |
| pseudogeni -            | 283  | 255  | 253  | 112 | 181 | 142 | 11.53902 | 13.33313 | 12.44661 | 7.08812  |
| pseudogeni -            | 1    | 2    | 0    | 1   | 0   | 0   | 0.134741 | 0.345574 | 0        | 0.209137 |
| pseudogeni -            | 3    | 2    | 1    | 3   | 3   | 1   | 0.176721 | 0.15108  | 0.071075 | 0.274296 |
| pseudogeni -            | 0    | 0    | 0    | 0   | 0   | 1   | 0        | 0        | 0        | 0        |
| pseudogeni -            | 0    | 1    | 0    | 0   | 0   | 0   | 0        | 0.069837 | 0        | 0        |
| pseudogeni -            | 1    | 1    | 1    | 1   | 0   | 0   | 0.125374 | 0.160775 | 0.151271 | 0.194598 |
| protein_co chromosom    | 659  | 540  | 588  | 539 | 663 | 723 | 15.41942 | 16.20264 | 16.6     | 19.57501 |
| processed_ FGF14_intr   | 2    | 3    | 3    | 0   | 0   | 1   | 0.108042 | 0.207822 | 0.195537 | 0        |
| lincRNA -               | 3    | 0    | 3    | 0   | 0   | 0   | 0.071515 | 0        | 0.086287 | 0        |
| pseudogeni protein_tyri | 0    | 0    | 3    | 6   | 9   | 2   | 0        | 0        | 0.033496 | 0.086181 |
| protein_co potassium_   | 500  | 381  | 437  | 119 | 155 | 115 | 4.811206 | 4.701304 | 5.073568 | 1.777303 |
| pseudogeni -            | 1    | 0    | 0    | 2   | 0   | 0   | 0.274211 | 0        | 0        | 0.851226 |
| pseudogeni -            | 2    | 4    | 7    | 0   | 1   | 0   | 0.378145 | 0.969835 | 1.596889 | 0        |
| protein_co ephrin-A4    | 223  | 144  | 192  | 213 | 266 | 162 | 8.279077 | 6.855654 | 8.600552 | 12.27403 |
| antisense MCCC1_an      | 2    | 2    | 2    | 2   | 1   | 0   | 0.122588 | 0.157202 | 0.14791  | 0.190274 |
| antisense -             | 0    | 3    | 0    | 0   | 1   | 0   | 0        | 0.515398 | 0        | 0        |
| pseudogeni -            | 2    | 2    | 1    | 0   | 0   | 0   | 0.160582 | 0.205924 | 0.096876 | 0        |
| processed_ -            | 1    | 0    | 1    | 1   | 2   | 1   | 0.110329 | 0        | 0.133119 | 0.171247 |
| pseudogeni -            | 1    | 0    | 0    | 0   | 0   | 0   | 0.116642 | 0        | 0        | 0        |
| pseudogeni -            | 0    | 0    | 0    | 0   | 2   | 0   | 0        | 0        | 0        | 0        |
| pseudogeni -            | 4    | 2    | 0    | 5   | 1   | 0   | 0.538966 | 0.345574 | 0        | 1.045687 |
| pseudogeni ribosomal_   | 3    | 5    | 5    | 1   | 6   | 4   | 0.435511 | 0.930802 | 0.875782 | 0.225324 |
| pseudogeni mitochond    | 1    | 0    | 0    | 0   | 0   | 0   | 0.050967 | 0        | 0        | 0        |
| protein_co toll-like_re | 1    | 0    | 1    | 0   | 0   | 0   | 0.013363 | 0        | 0.016123 | 0        |
| antisense -             | 6    | 1    | 2    | 0   | 0   | 0   | 0.506919 | 0.108342 | 0.203876 | 0        |
| processed_ -            | 4    | 3    | 2    | 0   | 0   | 1   | 0.335528 | 0.3227   | 0.202417 | 0        |
| pseudogeni -            | 3    | 1    | 0    | 0   | 1   | 0   | 0.181043 | 0.077387 | 0        | 0        |
| pseudogeni -            | 10   | 8    | 8    | 4   | 4   | 2   | 1.001923 | 1.02786  | 0.967103 | 0.62205  |
| pseudogeni -            | 0    | 0    | 0    | 0   | 1   | 0   | 0        | 0        | 0        | 0        |
| pseudogeni ribosomal_   | 7    | 12   | 6    | 2   | 5   | 5   | 0.368384 | 0.809829 | 0.38098  | 0.163367 |
| antisense -             | 2    | 5    | 7    | 0   | 5   | 3   | 0.183523 | 0.588354 | 0.775007 | 0        |
| protein_co Protein_LO   | 0    | 0    | 0    | 1   | 5   | 6   | 0        | 0        | 0        | 0.063232 |
| protein_co paralemmi    | 111  | 88   | 105  | 4   | 12  | 13  | 0.560137 | 0.56946  | 0.639306 | 0.03133  |
| pseudogeni -            | 0    | 0    | 0    | 2   | 0   | 0   | 0        | 0        | 0        | 0.34657  |
| protein_co chromosom    | 558  | 395  | 468  | 285 | 386 | 281 | 54.85247 | 49.79302 | 55.50804 | 43.48479 |
| protein_co neuroblast   | 1340 | 1108 | 1153 | 157 | 202 | 80  | 13.34876 | 14.1542  | 13.85841 | 2.42754  |
| pseudogeni inhibitor_c  | 0    | 0    | 0    | 0   | 0   | 1   | 0        | 0        | 0        | 0        |
| processed_ -            | 1    | 3    | 3    | 4   | 2   | 2   | 0.143834 | 0.553342 | 0.520633 | 0.893004 |
| protein_co N-acetyltra  | 157  | 115  | 127  | 182 | 207 | 79  | 4.044908 | 3.79941  | 3.947851 | 7.27798  |
| antisense -             | 0    | 0    | 0    | 1   | 1   | 0   | 0        | 0        | 0        | 0.069913 |
| pseudogeni -            | 0    | 0    | 1    | 0   | 0   | 2   | 0        | 0        | 0.133119 | 0        |
| protein_co keratin_ass  | 0    | 0    | 0    | 3   | 2   | 1   | 0        | 0        | 0        | 0.176936 |
| pseudogeni ubiquitin_   | 1    | 0    | 2    | 1   | 4   | 2   | 0.222228 | 0        | 0.536261 | 0.344928 |
| pseudogeni -            | 1    | 0    | 0    | 0   | 0   | 1   | 0.108542 | 0        | 0        | 0        |
| pseudogeni -            | 2    | 0    | 0    | 0   | 0   | 0   | 0.131529 | 0        | 0        | 0        |
| pseudogeni ribosomal_   | 1    | 1    | 1    | 1   | 0   | 0   | 0.11901  | 0.152614 | 0.143593 | 0.18472  |
| pseudogeni -            | 1    | 0    | 1    | 2   | 8   | 1   | 0.077376 | 0        | 0.093359 | 0.240197 |
| pseudogeni -            | 0    | 0    | 0    | 1   | 1   | 0   | 0        | 0        | 0        | 0.086643 |
| IG_V_pseu immunogl      | 0    | 1    | 0    | 1   | 0   | 0   | 0        | 0.182212 | 0        | 0.220545 |
| processed_ -            | 1    | 1    | 0    | 2   | 0   | 1   | 0.13914  | 0.178427 | 0        | 0.431928 |
| pseudogeni -            | 0    | 0    | 0    | 1   | 0   | 1   | 0        | 0        | 0        | 0.209137 |
| protein_co WAP_four-i   | 1    | 1    | 0    | 0   | 0   | 1   | 0.059205 | 0.075921 | 0        | 0        |
| pseudogeni heterogene   | 1    | 1    | 1    | 6   | 3   | 0   | 0.033831 | 0.043384 | 0.040819 | 0.315064 |
| pseudogeni -            | 77   | 49   | 55   | 42  | 62  | 34  | 8.077251 | 6.591409 | 6.961192 | 6.838371 |
| processed_ -            | 1    | 1    | 0    | 0   | 0   | 0   | 0.080845 | 0.103672 | 0        | 0        |
| protein_co uroplakin_   | 4    | 5    | 2    | 34  | 39  | 28  | 0.116642 | 0.186971 | 0.070368 | 1.538876 |
| lincRNA -               | 0    | 0    | 1    | 0   | 0   | 0   | 0        | 0        | 0.119358 | 0        |
| pseudogeni -            | 0    | 0    | 0    | 1   | 0   | 0   | 0        | 0        | 0        | 0.03     |
| polymorph chromosom     | 10   | 18   | 22   | 21  | 32  | 22  | 0.189915 | 0.43837  | 0.504115 | 0.619026 |
| pseudogeni ribosomal_   | 0    | 0    | 0    | 0   | 0   | 1   | 0        | 0        | 0        | 0        |
| pseudogeni ribosomal_   | 0    | 3    | 0    | 2   | 2   | 0   | 0        | 0.213226 | 0        | 0.172056 |

|                         |      |      |      |     |     |     |          |          |          |          |
|-------------------------|------|------|------|-----|-----|-----|----------|----------|----------|----------|
| antisense -             | 0    | 0    | 0    | 0   | 0   | 1   | 0        | 0        | 0        | 0        |
| antisense -             | 0    | 2    | 2    | 0   | 0   | 0   | 0        | 0.210982 | 0.198511 | 0        |
| pseudogeni -            | 0    | 0    | 0    | 1   | 1   | 2   | 0        | 0        | 0        | 0.43065  |
| lincRNA -               | 0    | 1    | 2    | 6   | 12  | 7   | 0        | 0.083167 | 0.156502 | 0.603982 |
| lincRNA -               | 0    | 3    | 2    | 0   | 0   | 0   | 0        | 0.08939  | 0.056071 | 0        |
| protein_co interleukin  | 159  | 131  | 136  | 28  | 65  | 34  | 3.744607 | 3.956305 | 3.864525 | 1.023523 |
| pseudogeni -            | 0    | 0    | 1    | 0   | 0   | 0   | 0        | 0        | 0.113605 | 0        |
| protein_co compleme     | 1    | 1    | 1    | 0   | 1   | 0   | 0.012104 | 0.015521 | 0.014604 | 0        |
| pseudogeni MT-ND5_p     | 0    | 0    | 0    | 0   | 2   | 0   | 0        | 0        | 0        | 0        |
| pseudogeni -            | 2    | 0    | 3    | 0   | 2   | 0   | 0.332553 | 0        | 0.601867 | 0        |
| protein_co zinc_finger  | 29   | 27   | 22   | 12  | 16  | 7   | 0.495377 | 0.591441 | 0.453428 | 0.318163 |
| pseudogeni WW_doma      | 0    | 0    | 0    | 1   | 1   | 0   | 0        | 0        | 0        | 0.081227 |
| pseudogeni -            | 0    | 0    | 0    | 0   | 2   | 5   | 0        | 0        | 0        | 0        |
| protein_co WD_repeat    | 125  | 95   | 101  | 110 | 119 | 96  | 2.232008 | 2.175297 | 2.175981 | 3.048659 |
| pseudogeni ribosomal_   | 0    | 0    | 0    | 2   | 2   | 0   | 0        | 0        | 0        | 0.186376 |
| pseudogeni -            | 0    | 0    | 0    | 1   | 0   | 0   | 0        | 0        | 0        | 0.225324 |
| protein_co NME1-NME     | 12   | 14   | 17   | 16  | 17  | 41  | 0.649746 | 0.972075 | 1.110605 | 1.344661 |
| pseudogeni -            | 345  | 253  | 278  | 184 | 275 | 144 | 21.45498 | 20.17618 | 20.8594  | 17.76059 |
| protein_co musculoske   | 4    | 0    | 2    | 3   | 9   | 4   | 0.033255 | 0        | 0.020062 | 0.038713 |
| pseudogeni -            | 0    | 1    | 3    | 0   | 0   | 0   | 0        | 0.07554  | 0.213224 | 0        |
| processed_ -            | 0    | 0    | 1    | 0   | 0   | 0   | 0        | 0        | 0.103808 | 0        |
| processed_ -            | 195  | 153  | 156  | 5   | 12  | 11  | 3.340721 | 3.361293 | 3.224618 | 0.132955 |
| protein_co phospholip   | 9    | 9    | 5    | 6   | 13  | 3   | 0.139048 | 0.178309 | 0.093205 | 0.143881 |
| protein_co left-right_d | 0    | 0    | 3    | 76  | 115 | 415 | 0        | 0        | 0.104383 | 3.401762 |
| protein_co WD_repeat    | 1    | 0    | 9    | 8   | 10  | 3   | 0.011049 | 0        | 0.119976 | 0.137191 |
| pseudogeni ribosomal_   | 0    | 1    | 0    | 0   | 1   | 0   | 0        | 0.124492 | 0        | 0        |
| antisense CACNA2D3      | 0    | 0    | 0    | 3   | 3   | 3   | 0        | 0        | 0        | 0.105072 |
| protein_co Putative_N   | 158  | 126  | 164  | 145 | 210 | 210 | 1.297937 | 1.327322 | 1.625505 | 1.848821 |
| pseudogeni -            | 1    | 1    | 0    | 1   | 2   | 2   | 0.099554 | 0.127664 | 0        | 0.154522 |
| protein_co tetratricop  | 6    | 4    | 2    | 3   | 5   | 5   | 0.11747  | 0.100426 | 0.047245 | 0.091165 |
| pseudogeni ribosomal_   | 331  | 330  | 311  | 3   | 3   | 1   | 4.403006 | 5.629172 | 4.991484 | 0.06194  |
| pseudogeni eukaryotic_  | 2    | 1    | 2    | 1   | 0   | 0   | 0.067468 | 0.043259 | 0.081404 | 0.05236  |
| protein_co ZMYM6_ne     | 0    | 0    | 1    | 0   | 0   | 0   | 0        | 0        | 0.061362 | 0        |
| pseudogeni major_hist   | 32   | 37   | 24   | 29  | 31  | 19  | 0.327116 | 0.485023 | 0.296013 | 0.46013  |
| processed_ -            | 0    | 0    | 6    | 13  | 18  | 3   | 0        | 0        | 0.180752 | 0.503801 |
| pseudogeni -            | 0    | 0    | 0    | 0   | 0   | 1   | 0        | 0        | 0        | 0        |
| pseudogeni suppressor   | 0    | 4    | 1    | 0   | 5   | 1   | 0        | 0.217271 | 0.051107 | 0        |
| antisense HOXA_dist     | 39   | 37   | 40   | 0   | 0   | 1   | 0.405389 | 0.493195 | 0.501667 | 0        |
| processed_ -            | 0    | 0    | 0    | 0   | 1   | 0   | 0        | 0        | 0        | 0        |
| pseudogeni oligosaccha  | 0    | 0    | 0    | 1   | 0   | 0   | 0        | 0        | 0        | 0.060904 |
| processed_ -            | 1    | 0    | 0    | 6   | 11  | 13  | 0.127766 | 0        | 0        | 1.189861 |
| protein_co jumonji_dc   | 15   | 6    | 15   | 4   | 8   | 6   | 0.496716 | 0.254787 | 0.599317 | 0.205593 |
| lincRNA -               | 2    | 2    | 3    | 2   | 0   | 0   | 0.037482 | 0.048065 | 0.067836 | 0.058177 |
| antisense PEX5L_anti    | 0    | 0    | 0    | 1   | 0   | 0   | 0        | 0        | 0        | 0.088005 |
| pseudogeni -            | 0    | 0    | 0    | 0   | 2   | 0   | 0        | 0        | 0        | 0        |
| pseudogeni -            | 0    | 0    | 1    | 0   | 0   | 0   | 0        | 0        | 0.077078 | 0        |
| antisense -             | 0    | 0    | 0    | 0   | 3   | 1   | 0        | 0        | 0        | 0        |
| protein_co apolipoppro  | 21   | 15   | 19   | 163 | 205 | 73  | 0.393404 | 0.360346 | 0.429458 | 4.739556 |
| pseudogeni -            | 1    | 1    | 1    | 0   | 6   | 0   | 0.094157 | 0.120743 | 0.113605 | 0        |
| pseudogeni -            | 0    | 1    | 0    | 1   | 11  | 3   | 0        | 0.102962 | 0        | 0.124623 |
| processed_ WDR86_an     | 0    | 0    | 1    | 23  | 42  | 38  | 0        | 0        | 0.075334 | 2.228942 |
| processed_ -            | 4    | 4    | 3    | 1   | 4   | 0   | 0.240154 | 0.307963 | 0.217319 | 0.093188 |
| antisense WDR52_an      | 3    | 0    | 0    | 0   | 0   | 0   | 0.205058 | 0        | 0        | 0        |
| protein_co olfactory_r  | 1    | 0    | 3    | 10  | 23  | 8   | 0.042016 | 0        | 0.152085 | 0.652149 |
| processed_ -            | 4    | 0    | 0    | 1   | 5   | 1   | 0.095208 | 0        | 0        | 0.036944 |
| pseudogeni tubulin_alp  | 0    | 0    | 0    | 0   | 2   | 2   | 0        | 0        | 0        | 0        |
| pseudogeni -            | 0    | 0    | 0    | 0   | 3   | 1   | 0        | 0        | 0        | 0        |
| pseudogeni protein-kin  | 0    | 0    | 0    | 3   | 0   | 0   | 0        | 0        | 0        | 0.096312 |
| antisense TIPARP_ant    | 4    | 0    | 3    | 4   | 0   | 1   | 0.255184 | 0        | 0.23092  | 0.396081 |
| protein_co mitochond    | 1494 | 1210 | 1264 | 512 | 644 | 439 | 17.80724 | 18.49442 | 18.17779 | 9.472104 |
| protein_co zinc_finger  | 360  | 324  | 306  | 316 | 365 | 344 | 4.932907 | 5.693178 | 5.05906  | 6.720753 |
| processed_ -            | 0    | 0    | 0    | 1   | 3   | 0   | 0        | 0        | 0        | 0.130664 |
| protein_co glutathione  | 0    | 1    | 0    | 1   | 5   | 2   | 0        | 0.059009 | 0        | 0.071423 |
| processed_ -            | 2    | 4    | 0    | 7   | 6   | 1   | 0.12971  | 0.332668 | 0        | 0.704645 |
| processed_ -            | 0    | 0    | 1    | 0   | 0   | 0   | 0        | 0        | 0.05461  | 0        |

|                         |      |      |      |      |      |      |          |          |          |          |
|-------------------------|------|------|------|------|------|------|----------|----------|----------|----------|
| pseudogen: -            | 1    | 1    | 1    | 0    | 0    | 2    | 0.100192 | 0.128482 | 0.120888 | 0        |
| lincRNA -               | 2    | 1    | 0    | 0    | 0    | 0    | 0.26718  | 0.17131  | 0        | 0        |
| pseudogen: peptidylpro  | 3    | 1    | 0    | 0    | 1    | 1    | 0.173026 | 0.07396  | 0        | 0        |
| protein_co retrotransp  | 36   | 24   | 32   | 3    | 0    | 7    | 0.311102 | 0.265963 | 0.333656 | 0.040239 |
| pseudogen: -            | 1    | 2    | 0    | 0    | 0    | 0    | 0.084032 | 0.215519 | 0        | 0        |
| pseudogen: enolase_1_   | 0    | 0    | 2    | 3    | 7    | 9    | 0        | 0        | 0.092444 | 0.178382 |
| protein_co aminoacyl    | 5    | 14   | 7    | 12   | 13   | 16   | 0.127696 | 0.458506 | 0.215702 | 0.475685 |
| pseudogen: -            | 0    | 0    | 0    | 3    | 0    | 6    | 0        | 0        | 0        | 0.279922 |
| protein_co NFS1_nitro   | 320  | 232  | 239  | 230  | 268  | 243  | 4.981675 | 4.631512 | 4.489225 | 5.557555 |
| pseudogen: -            | 3    | 4    | 6    | 10   | 19   | 3    | 0.174529 | 0.298411 | 0.421158 | 0.902975 |
| pseudogen: -            | 0    | 0    | 0    | 1    | 0    | 2    | 0        | 0        | 0        | 0.150683 |
| pseudogen: family_witl  | 290  | 235  | 273  | 127  | 155  | 165  | 5.607466 | 5.827011 | 6.369119 | 3.811561 |
| processed_ -            | 0    | 0    | 0    | 1    | 0    | 0    | 0        | 0        | 0        | 0.160662 |
| antisense -             | 0    | 1    | 0    | 1    | 0    | 0    | 0        | 0.072271 | 0        | 0.087476 |
| protein_co dolichyl-di  | 6570 | 4897 | 5392 | 3997 | 4084 | 3945 | 148.1806 | 141.6333 | 146.7317 | 139.9235 |
| processed_ -            | 25   | 16   | 13   | 0    | 0    | 0    | 0.483402 | 0.396733 | 0.303291 | 0        |
| processed_ -            | 24   | 10   | 18   | 41   | 47   | 20   | 0.401341 | 0.214443 | 0.363181 | 1.064184 |
| protein_co transmemt    | 71   | 62   | 43   | 48   | 77   | 104  | 1.057558 | 1.184259 | 0.772791 | 1.10973  |
| pseudogen: -            | 4    | 1    | 1    | 0    | 0    | 0    | 0.368487 | 0.118133 | 0.11115  | 0        |
| pseudogen: ribosomal_   | 0    | 0    | 0    | 0    | 2    | 0    | 0        | 0        | 0        | 0        |
| processed_ long_inter   | 1    | 2    | 5    | 3    | 5    | 2    | 0.13513  | 0.346569 | 0.815209 | 0.62922  |
| processed_ -            | 2    | 2    | 4    | 2    | 7    | 3    | 0.145848 | 0.187029 | 0.351947 | 0.226376 |
| pseudogen: ribosomal_   | 0    | 2    | 1    | 0    | 2    | 1    | 0        | 0.199435 | 0.093823 | 0        |
| pseudogen: -            | 0    | 0    | 0    | 3    | 0    | 0    | 0        | 0        | 0        | 0.363899 |
| pseudogen: -            | 0    | 0    | 0    | 1    | 3    | 2    | 0        | 0        | 0        | 0.08654  |
| protein_co glutathione  | 0    | 0    | 0    | 1    | 1    | 2    | 0        | 0        | 0        | 0.055856 |
| pseudogen: -            | 7    | 2    | 3    | 0    | 0    | 0    | 0.411832 | 0.15089  | 0.212957 | 0        |
| pseudogen: ribosomal_   | 3    | 0    | 1    | 2    | 4    | 1    | 0.394034 | 0        | 0.158475 | 0.40773  |
| protein_co small_proli  | 0    | 0    | 0    | 0    | 1    | 2    | 0        | 0        | 0        | 0        |
| pseudogen: ribosomal_   | 0    | 1    | 1    | 0    | 0    | 0    | 0        | 0.079748 | 0.075034 | 0        |
| pseudogen: -            | 0    | 1    | 0    | 0    | 0    | 0    | 0        | 0.139837 | 0        | 0        |
| pseudogen: -            | 0    | 2    | 0    | 0    | 0    | 0    | 0        | 0.204523 | 0        | 0        |
| pseudogen: phosducin-   | 2    | 3    | 5    | 4    | 6    | 12   | 0.13025  | 0.250541 | 0.392885 | 0.404332 |
| antisense ATP1B3_an     | 13   | 10   | 13   | 10   | 5    | 8    | 1.621197 | 1.599197 | 1.956068 | 1.935633 |
| pseudogen: -            | 0    | 0    | 0    | 7    | 2    | 0    | 0        | 0        | 0        | 2.522072 |
| pseudogen: ribosomal_   | 4    | 0    | 0    | 4    | 2    | 0    | 0.290791 | 0        | 0        | 0.451348 |
| pseudogen: ribosomal_   | 2    | 1    | 2    | 2    | 1    | 1    | 0.24679  | 0.158236 | 0.297766 | 0.383052 |
| processed_ -            | 0    | 0    | 0    | 0    | 1    | 0    | 0        | 0        | 0        | 0        |
| pseudogen: -            | 9    | 6    | 5    | 0    | 1    | 6    | 0.813122 | 0.695142 | 0.545043 | 0        |
| pseudogen: -            | 0    | 0    | 0    | 0    | 1    | 0    | 0        | 0        | 0        | 0        |
| processed_ -            | 0    | 1    | 1    | 0    | 0    | 1    | 0        | 0.138868 | 0.130659 | 0        |
| antisense -             | 2    | 2    | 2    | 3    | 3    | 3    | 0.076244 | 0.097772 | 0.091993 | 0.177512 |
| pseudogen: -            | 0    | 1    | 2    | 0    | 2    | 0    | 0        | 0.253712 | 0.47743  | 0        |
| antisense FLNB_antis    | 11   | 5    | 6    | 29   | 24   | 26   | 0.139064 | 0.081059 | 0.091521 | 0.569052 |
| processed_ -            | 0    | 0    | 0    | 0    | 0    | 1    | 0        | 0        | 0        | 0        |
| protein_co purinergic_  | 39   | 32   | 41   | 40   | 58   | 191  | 0.941179 | 0.9903   | 1.193822 | 1.498298 |
| pseudogen: pre-B-cell_l | 6    | 4    | 6    | 13   | 17   | 6    | 0.128996 | 0.110279 | 0.155641 | 0.433809 |
| processed_ -            | 0    | 0    | 2    | 2    | 0    | 0    | 0        | 0        | 0.35921  | 0.462094 |
| antisense -             | 1    | 1    | 0    | 2    | 4    | 2    | 0.099343 | 0.127394 | 0        | 0.308389 |
| protein_co transmemt    | 445  | 302  | 353  | 410  | 544  | 386  | 24.87015 | 21.64386 | 23.80352 | 35.56581 |
| antisense -             | 4    | 3    | 3    | 113  | 161  | 106  | 0.219112 | 0.210735 | 0.198279 | 9.607614 |
| pseudogen: -            | 0    | 0    | 1    | 0    | 0    | 0    | 0        | 0        | 0.086243 | 0        |
| processed_ FOXP1_ant    | 8    | 15   | 11   | 1    | 5    | 10   | 0.535886 | 1.288496 | 0.889044 | 0.103971 |
| pseudogen: -            | 1    | 0    | 0    | 1    | 1    | 0    | 0.064145 | 0        | 0        | 0.099562 |
| processed_ -            | 5    | 1    | 4    | 1    | 2    | 1    | 0.178425 | 0.045761 | 0.172224 | 0.055388 |
| pseudogen: interleukin  | 0    | 1    | 0    | 1    | 1    | 2    | 0        | 0.051481 | 0        | 0.062311 |
| lincRNA -               | 0    | 1    | 0    | 0    | 0    | 0    | 0        | 0.025587 | 0        | 0        |
| pseudogen: ribosomal_   | 1    | 0    | 2    | 1    | 1    | 1    | 0.101935 | 0        | 0.24598  | 0.158217 |
| pseudogen: germ_cell-l  | 0    | 0    | 0    | 2    | 0    | 1    | 0        | 0        | 0        | 0.092068 |
| protein_co interferon_  | 124  | 91   | 117  | 45   | 48   | 6    | 1.527282 | 1.437303 | 1.738727 | 0.860281 |
| pseudogen: ribosomal_   | 0    | 0    | 0    | 1    | 1    | 1    | 0        | 0        | 0        | 0.092831 |
| pseudogen: -            | 0    | 0    | 0    | 1    | 0    | 0    | 0        | 0        | 0        | 0.202729 |
| pseudogen: polycystic_  | 2    | 2    | 0    | 0    | 3    | 1    | 0.013781 | 0.017672 | 0        | 0        |
| antisense SLAH2_anti    | 3    | 2    | 0    | 1    | 0    | 1    | 0.31898  | 0.272697 | 0        | 0.165034 |
| antisense -             | 1    | 2    | 2    | 3    | 0    | 3    | 0.14517  | 0.372321 | 0.350313 | 0.675973 |

|                        |      |      |      |      |      |      |          |          |          |          |
|------------------------|------|------|------|------|------|------|----------|----------|----------|----------|
| pseudogen: piggyBac_t  | 0    | 0    | 0    | 1    | 0    | 0    | 0        | 0        | 0        | 0.17882  |
| protein_co dysbindin_  | 4    | 2    | 4    | 24   | 28   | 36   | 0.12203  | 0.078243 | 0.147236 | 1.136445 |
| pseudogen: endothelin  | 0    | 0    | 0    | 56   | 62   | 80   | 0        | 0        | 0        | 3.147235 |
| pseudogen: -           | 0    | 3    | 3    | 0    | 0    | 0    | 0        | 0.174796 | 0.164464 | 0        |
| antisense ITGB5_anti   | 5    | 7    | 6    | 9    | 15   | 8    | 0.509674 | 0.915019 | 0.737941 | 1.423953 |
| pseudogen: ribosomal_  | 0    | 0    | 0    | 8    | 5    | 1    | 0        | 0        | 0        | 0.745504 |
| protein_co chromosom   | 16   | 9    | 10   | 14   | 27   | 17   | 0.32733  | 0.236112 | 0.246839 | 0.444554 |
| processed_ -           | 1    | 0    | 0    | 1    | 11   | 0    | 0.029715 | 0        | 0        | 0.046122 |
| lincRNA -              | 9    | 13   | 6    | 2    | 0    | 1    | 0.09897  | 0.183323 | 0.079609 | 0.034137 |
| pseudogen: -           | 105  | 70   | 79   | 120  | 130  | 132  | 9.886449 | 8.451979 | 8.974829 | 17.5373  |
| processed_ -           | 4    | 2    | 8    | 2    | 0    | 0    | 0.245177 | 0.157202 | 0.591639 | 0.190274 |
| processed_ -           | 4    | 2    | 0    | 9    | 10   | 9    | 0.290791 | 0.186449 | 0        | 1.015532 |
| lincRNA long_interf    | 0    | 0    | 0    | 48   | 37   | 111  | 0        | 0        | 0        | 1.785095 |
| pseudogen: -           | 2    | 2    | 1    | 0    | 4    | 0    | 0.172707 | 0.221473 | 0.104191 | 0        |
| antisense HLA_compl    | 0    | 0    | 1    | 5    | 9    | 6    | 0        | 0        | 0.178472 | 1.147946 |
| protein_co lymphocyt   | 0    | 0    | 1    | 0    | 0    | 0    | 0        | 0        | 0.108175 | 0        |
| pseudogen: -           | 7    | 2    | 1    | 8    | 13   | 8    | 0.403727 | 0.147921 | 0.069589 | 0.71616  |
| pseudogen: profilin_1_ | 10   | 5    | 6    | 3    | 5    | 5    | 0.863536 | 0.553681 | 0.625144 | 0.402098 |
| pseudogen: ribosomal_  | 0    | 3    | 6    | 5    | 1    | 3    | 0        | 0.087695 | 0.165023 | 0.176908 |
| processed_ -           | 0    | 0    | 0    | 2    | 0    | 1    | 0        | 0        | 0        | 0.164474 |
| antisense -            | 1    | 0    | 0    | 0    | 1    | 0    | 0.057113 | 0        | 0        | 0        |
| pseudogen: ribosomal_  | 0    | 0    | 1    | 0    | 0    | 0    | 0        | 0        | 0.077928 | 0        |
| processed_ -           | 1    | 1    | 0    | 1    | 1    | 0    | 0.047847 | 0.061357 | 0        | 0.074265 |
| pseudogen: -           | 140  | 113  | 129  | 169  | 167  | 158  | 20.45047 | 21.16719 | 22.73595 | 38.31709 |
| protein_co ets_variant | 2096 | 1724 | 1632 | 1465 | 1793 | 1197 | 23.90695 | 25.21619 | 22.45955 | 25.93588 |
| protein_co compleme    | 0    | 0    | 1    | 2    | 1    | 1    | 0        | 0        | 0.044513 | 0.114524 |
| pseudogen: -           | 0    | 0    | 0    | 1    | 1    | 1    | 0        | 0        | 0        | 0.093188 |
| processed_ -           | 20   | 10   | 9    | 7    | 9    | 14   | 1.483861 | 0.951421 | 0.805664 | 0.806105 |
| lincRNA -              | 5    | 6    | 2    | 10   | 15   | 7    | 0.404922 | 0.623107 | 0.195425 | 1.256991 |
| protein_co RNA_bindi   | 2060 | 1608 | 1747 | 1825 | 2342 | 2827 | 14.49916 | 14.51347 | 14.836   | 19.93743 |
| antisense -            | 0    | 0    | 0    | 2    | 0    | 4    | 0        | 0        | 0        | 0.264174 |
| processed_ -           | 0    | 0    | 0    | 1    | 0    | 0    | 0        | 0        | 0        | 0.122114 |
| protein_co endogenou   | 8    | 13   | 3    | 2    | 8    | 6    | 0.117298 | 0.24443  | 0.053073 | 0.045516 |
| antisense -            | 4    | 14   | 10   | 172  | 240  | 168  | 0.147918 | 0.663894 | 0.446179 | 9.872339 |
| pseudogen: -           | 7    | 5    | 5    | 0    | 4    | 2    | 0.235628 | 0.215828 | 0.203071 | 0        |
| protein_co leukocyte_  | 3    | 5    | 5    | 1    | 1    | 2    | 0.062855 | 0.134338 | 0.126397 | 0.03252  |
| protein_co scavenger_  | 2367 | 1680 | 1688 | 790  | 1103 | 701  | 32.07765 | 29.19597 | 27.601   | 16.61735 |
| pseudogen: RWD_dom     | 1    | 2    | 3    | 3    | 0    | 0    | 0.082991 | 0.212849 | 0.300401 | 0.386441 |
| protein_co apolipopro  | 612  | 493  | 506  | 348  | 324  | 217  | 21.92261 | 22.64629 | 21.86952 | 19.34864 |
| pseudogen: -           | 0    | 1    | 0    | 0    | 0    | 0    | 0        | 0.398211 | 0        | 0        |
| antisense -            | 18   | 14   | 12   | 1    | 6    | 8    | 0.87736  | 0.87507  | 0.705724 | 0.075655 |
| pseudogen: keratin_18  | 3    | 6    | 6    | 3    | 3    | 0    | 0.110764 | 0.284078 | 0.267286 | 0.171921 |
| pseudogen: -           | 0    | 0    | 0    | 0    | 0    | 1    | 0        | 0        | 0        | 0        |
| pseudogen: -           | 0    | 0    | 0    | 0    | 1    | 0    | 0        | 0        | 0        | 0        |
| pseudogen: -           | 0    | 0    | 0    | 0    | 2    | 0    | 0        | 0        | 0        | 0        |
| pseudogen: -           | 6    | 3    | 6    | 22   | 17   | 18   | 0.171654 | 0.110061 | 0.20711  | 0.97691  |
| antisense -            | 1    | 1    | 2    | 0    | 3    | 0    | 0.054397 | 0.069756 | 0.131266 | 0        |
| pseudogen: -           | 23   | 19   | 29   | 12   | 21   | 3    | 0.384619 | 0.407442 | 0.585125 | 0.311468 |
| lincRNA -              | 1    | 2    | 3    | 0    | 0    | 0    | 0.082991 | 0.212849 | 0.300401 | 0        |
| lincRNA -              | 56   | 44   | 35   | 22   | 39   | 26   | 2.080698 | 2.096443 | 1.569051 | 1.268745 |
| pseudogen: -           | 1    | 1    | 0    | 0    | 2    | 0    | 0.130978 | 0.16796  | 0        | 0        |
| lincRNA -              | 0    | 0    | 0    | 1    | 0    | 1    | 0        | 0        | 0        | 0.168472 |
| processed_ -           | 0    | 0    | 0    | 4    | 12   | 19   | 0        | 0        | 0        | 0.082284 |
| pseudogen: ribosomal_  | 1    | 0    | 0    | 0    | 1    | 1    | 0.093406 | 0        | 0        | 0        |
| antisense WNT5A_an     | 454  | 350  | 406  | 29   | 42   | 21   | 42.57614 | 42.09086 | 45.93931 | 4.221228 |
| protein_co RAD21-like  | 6    | 3    | 7    | 2    | 8    | 1    | 0.155608 | 0.099773 | 0.219042 | 0.080509 |
| pseudogen: -           | 0    | 0    | 0    | 0    | 0    | 1    | 0        | 0        | 0        | 0        |
| pseudogen: -           | 1    | 0    | 0    | 0    | 7    | 4    | 0.13513  | 0        | 0        | 0        |
| protein_co coiled-coil | 3    | 0    | 1    | 2    | 3    | 6    | 0.047798 | 0        | 0.019224 | 0.04946  |
| protein_co aspartic_pe | 7    | 7    | 13   | 25   | 20   | 9    | 0.151119 | 0.193788 | 0.33862  | 0.837705 |
| processed_ -           | 7    | 5    | 4    | 26   | 15   | 17   | 0.326272 | 0.298856 | 0.224952 | 1.880989 |
| pseudogen: -           | 104  | 77   | 107  | 166  | 171  | 131  | 5.006737 | 4.753588 | 6.215174 | 12.40395 |
| pseudogen: -           | 1    | 0    | 1    | 2    | 3    | 2    | 0.13914  | 0        | 0.16788  | 0.431928 |
| lincRNA -              | 25   | 14   | 25   | 2    | 3    | 5    | 0.81633  | 0.586224 | 0.98495  | 0.101365 |
| pseudogen: -           | 1    | 2    | 2    | 1    | 2    | 0    | 0.098508 | 0.252646 | 0.237712 | 0.152899 |

|                         |     |     |     |     |     |     |          |          |          |          |
|-------------------------|-----|-----|-----|-----|-----|-----|----------|----------|----------|----------|
| pseudogeni -            | 0   | 0   | 0   | 0   | 1   | 0   | 0        | 0        | 0        | 0        |
| pseudogeni ribosomal_   | 0   | 0   | 1   | 1   | 0   | 0   | 0        | 0        | 0.07244  | 0.093188 |
| processed_ -            | 1   | 1   | 2   | 9   | 10  | 3   | 0.015831 | 0.0203   | 0.038201 | 0.221141 |
| processed_ -            | 4   | 0   | 0   | 3   | 1   | 2   | 0.444455 | 0        | 0        | 0.517392 |
| polymorph Fc_fragmen    | 9   | 8   | 11  | 1   | 3   | 0   | 0.258585 | 0.294754 | 0.38133  | 0.044595 |
| protein_co ubiquitin-c  | 62  | 63  | 52  | 43  | 73  | 29  | 1.146365 | 1.493761 | 1.160066 | 1.234042 |
| pseudogeni -            | 0   | 2   | 0   | 1   | 0   | 3   | 0        | 0.187029 | 0        | 0.113188 |
| protein_co CTAGE_fam    | 0   | 0   | 0   | 5   | 9   | 16  | 0        | 0        | 0        | 0.14061  |
| protein_co patched_d    | 163 | 133 | 139 | 15  | 18  | 11  | 2.364812 | 2.474401 | 2.433167 | 0.337778 |
| processed_ -            | 2   | 4   | 1   | 1   | 1   | 0   | 0.072028 | 0.184731 | 0.043453 | 0.055898 |
| pseudogeni -            | 0   | 0   | 0   | 1   | 0   | 0   | 0        | 0        | 0        | 0.197235 |
| processed_ -            | 5   | 3   | 3   | 8   | 7   | 14  | 0.304481 | 0.234272 | 0.220424 | 0.756154 |
| pseudogeni CD46_mol     | 0   | 0   | 0   | 0   | 1   | 3   | 0        | 0        | 0        | 0        |
| pseudogeni -            | 1   | 0   | 0   | 1   | 0   | 1   | 0.101056 | 0        | 0        | 0.156853 |
| pseudogeni -            | 47  | 30  | 36  | 75  | 73  | 70  | 3.601031 | 2.947539 | 3.327971 | 8.919093 |
| pseudogeni -            | 1   | 0   | 0   | 0   | 0   | 0   | 0.053959 | 0        | 0        | 0        |
| pseudogeni argininosuc  | 4   | 6   | 11  | 17  | 16  | 3   | 0.294443 | 0.566372 | 0.976971 | 1.942318 |
| pseudogeni -            | 2   | 0   | 3   | 1   | 3   | 0   | 0.284182 | 0        | 0.514323 | 0.220545 |
| protein_co compleme     | 19  | 4   | 12  | 4   | 7   | 3   | 0.16317  | 0.044051 | 0.124342 | 0.053319 |
| lincRNA -               | 3   | 1   | 1   | 3   | 0   | 0   | 0.14949  | 0.0639   | 0.060123 | 0.232029 |
| protein_co crystallin_k | 0   | 0   | 3   | 0   | 0   | 0   | 0        | 0        | 0.191565 | 0        |
| pseudogeni ribosomal_   | 0   | 0   | 0   | 1   | 1   | 0   | 0        | 0        | 0        | 0.128359 |
| protein_co NEDD4_bir    | 942 | 769 | 838 | 519 | 543 | 457 | 8.307391 | 8.696598 | 8.916734 | 7.104141 |
| pseudogeni -            | 0   | 2   | 1   | 0   | 0   | 0   | 0        | 0.417568 | 0.196443 | 0        |
| antisense -             | 1   | 0   | 0   | 0   | 4   | 0   | 0.064409 | 0        | 0        | 0        |
| lincRNA -               | 0   | 0   | 0   | 1   | 0   | 0   | 0        | 0        | 0        | 0.051181 |
| processed_ GABPB1_ar    | 73  | 61  | 62  | 298 | 340 | 128 | 1.481806 | 1.587843 | 1.518477 | 9.388909 |
| pseudogeni -            | 2   | 0   | 1   | 4   | 11  | 5   | 0.125542 | 0        | 0.075737 | 0.389718 |
| antisense -             | 11  | 1   | 9   | 3   | 2   | 3   | 0.270614 | 0.031548 | 0.267146 | 0.114554 |
| pseudogeni -            | 47  | 50  | 51  | 40  | 51  | 29  | 4.262729 | 5.815261 | 5.580949 | 5.630932 |
| antisense -             | 14  | 14  | 14  | 9   | 11  | 24  | 0.333907 | 0.428188 | 0.402877 | 0.333173 |
| lincRNA -               | 1   | 1   | 3   | 1   | 4   | 2   | 0.064057 | 0.082145 | 0.231867 | 0.099426 |
| lincRNA -               | 4   | 2   | 0   | 0   | 0   | 0   | 0.091716 | 0.058807 | 0        | 0        |
| processed_ LIFR_antise  | 7   | 9   | 7   | 24  | 14  | 8   | 0.086308 | 0.1423   | 0.104136 | 0.459299 |
| processed_ -            | 0   | 0   | 0   | 2   | 3   | 0   | 0        | 0        | 0        | 0.105478 |
| protein_co Uncharacte   | 1   | 0   | 2   | 0   | 0   | 0   | 0.024473 | 0        | 0.059056 | 0        |
| protein_co Uncharacte   | 1   | 1   | 3   | 9   | 17  | 7   | 0.025693 | 0.032948 | 0.093001 | 0.358914 |
| processed_ -            | 4   | 2   | 3   | 0   | 1   | 0   | 0.096432 | 0.06183  | 0.087263 | 0        |
| lincRNA -               | 2   | 0   | 0   | 1   | 0   | 2   | 0.086195 | 0        | 0        | 0.066893 |
| processed_ long_inter   | 205 | 147 | 185 | 148 | 176 | 84  | 5.137602 | 4.724254 | 5.59405  | 5.757034 |
| antisense -             | 26  | 18  | 12  | 0   | 0   | 0   | 0.877711 | 0.77922  | 0.488773 | 0        |
| processed_ -            | 1   | 0   | 0   | 0   | 0   | 0   | 0.017815 | 0        | 0        | 0        |
| processed_ A2M_antise   | 7   | 15  | 7   | 7   | 5   | 4   | 0.150082 | 0.412413 | 0.181083 | 0.232949 |
| antisense SMARCA5_      | 1   | 0   | 1   | 0   | 1   | 5   | 0.049619 | 0        | 0.059868 | 0        |
| processed_ -            | 8   | 2   | 2   | 4   | 6   | 5   | 0.135471 | 0.043431 | 0.040863 | 0.105135 |
| antisense ARAP1_ant     | 3   | 8   | 4   | 3   | 2   | 3   | 0.077122 | 0.263727 | 0.124069 | 0.119704 |
| processed_ -            | 36  | 16  | 24  | 26  | 23  | 17  | 0.298557 | 0.170159 | 0.240151 | 0.334679 |
| lincRNA -               | 12  | 6   | 16  | 7   | 7   | 8   | 0.201533 | 0.129219 | 0.324215 | 0.182471 |
| pseudogeni eukaryotic_  | 7   | 3   | 6   | 7   | 11  | 13  | 0.233616 | 0.128391 | 0.241604 | 0.362604 |
| processed_ -            | 28  | 22  | 21  | 46  | 56  | 29  | 0.644853 | 0.649733 | 0.583539 | 1.644337 |
| antisense -             | 0   | 1   | 4   | 20  | 26  | 25  | 0        | 0.024187 | 0.091031 | 0.585517 |
| processed_ -            | 59  | 32  | 50  | 13  | 16  | 5   | 2.662667 | 1.851928 | 2.722594 | 0.910623 |
| processed_ -            | 2   | 2   | 3   | 1   | 5   | 4   | 0.089145 | 0.114315 | 0.161337 | 0.069182 |
| antisense -             | 1   | 0   | 2   | 0   | 0   | 1   | 0.016687 | 0        | 0.040267 | 0        |
| antisense -             | 1   | 0   | 1   | 0   | 0   | 3   | 0.058321 | 0        | 0.070368 | 0        |
| protein_co Uncharacte   | 16  | 12  | 13  | 8   | 15  | 5   | 0.515984 | 0.496257 | 0.505833 | 0.400439 |
| antisense -             | 1   | 3   | 2   | 1   | 4   | 2   | 0.060975 | 0.234577 | 0.14714  | 0.094642 |
| antisense -             | 1   | 0   | 0   | 1   | 0   | 0   | 0.015799 | 0        | 0        | 0.024521 |
| lincRNA -               | 0   | 0   | 0   | 5   | 2   | 3   | 0        | 0        | 0        | 0.123733 |
| processed_ -            | 0   | 0   | 1   | 0   | 0   | 1   | 0        | 0        | 0.026363 | 0        |
| sense_overl -           | 0   | 0   | 0   | 2   | 1   | 0   | 0        | 0        | 0        | 0.112401 |
| antisense -             | 0   | 0   | 0   | 1   | 0   | 0   | 0        | 0        | 0        | 0.033401 |
| antisense -             | 19  | 5   | 10  | 22  | 16  | 20  | 0.308701 | 0.104175 | 0.196034 | 0.554801 |
| processed_ -            | 13  | 8   | 7   | 4   | 4   | 0   | 0.263769 | 0.208152 | 0.171367 | 0.125971 |
| lincRNA long_inter      | 6   | 9   | 5   | 2   | 3   | 16  | 0.079073 | 0.152099 | 0.079505 | 0.040911 |

|                |                   |      |      |      |     |     |     |          |          |          |          |
|----------------|-------------------|------|------|------|-----|-----|-----|----------|----------|----------|----------|
| lincRNA        | nuclear_pa        | 2140 | 1845 | 1586 | 265 | 374 | 152 | 4.412111 | 4.877961 | 3.945335 | 0.848026 |
| antisense      | -                 | 3    | 1    | 1    | 3   | 6   | 5   | 0.161876 | 0.069194 | 0.065104 | 0.251254 |
| antisense      | -                 | 7    | 8    | 4    | 12  | 11  | 7   | 0.170421 | 0.24976  | 0.117498 | 0.453457 |
| lincRNA        | -                 | 64   | 46   | 55   | 42  | 49  | 53  | 2.029047 | 1.870163 | 2.10389  | 2.066769 |
| processed_     | -                 | 0    | 0    | 2    | 1   | 1   | 1   | 0        | 0        | 0.075434 | 0.04852  |
| lincRNA        | -                 | 21   | 20   | 21   | 20  | 32  | 20  | 0.466678 | 0.569951 | 0.563074 | 0.689856 |
| antisense      | BDNF_antisense    | 19   | 9    | 4    | 19  | 12  | 16  | 0.383352 | 0.232861 | 0.097376 | 0.595016 |
| antisense      | DACT3_antisense   | 8    | 6    | 6    | 3   | 1   | 3   | 0.287669 | 0.276671 | 0.260317 | 0.167438 |
| processed_     | DDX11_antisense   | 11   | 12   | 9    | 38  | 31  | 31  | 0.253959 | 0.355272 | 0.250704 | 1.36171  |
| antisense      | -                 | 1    | 0    | 0    | 7   | 3   | 0   | 0.016569 | 0        | 0        | 0.180021 |
| lincRNA        | -                 | 5    | 10   | 6    | 8   | 10  | 2   | 0.066852 | 0.171457 | 0.096793 | 0.166022 |
| lincRNA        | -                 | 0    | 0    | 0    | 2   | 0   | 0   | 0        | 0        | 0        | 0.155346 |
| antisense      | -                 | 1    | 2    | 3    | 0   | 0   | 2   | 0.083732 | 0.214749 | 0.303083 | 0        |
| protein_coding | zinc_finger       | 54   | 32   | 43   | 58  | 58  | 76  | 0.407739 | 0.309848 | 0.391747 | 0.679747 |
| lincRNA        | -                 | 13   | 5    | 14   | 1   | 5   | 5   | 0.622646 | 0.307098 | 0.809047 | 0.074341 |
| sense_intronic | -                 | 1    | 0    | 1    | 2   | 2   | 2   | 0.032161 | 0        | 0.038804 | 0.099835 |
| antisense      | colorectal_       | 135  | 102  | 97   | 27  | 31  | 24  | 8.612452 | 8.344543 | 7.466427 | 2.673544 |
| antisense      | NADKD1_antisense  | 35   | 43   | 43   | 1   | 5   | 2   | 2.279376 | 3.591085 | 3.378815 | 0.101083 |
| lincRNA        | -                 | 1    | 1    | 1    | 0   | 5   | 0   | 0.02361  | 0.030277 | 0.028487 | 0        |
| antisense      | -                 | 10   | 8    | 6    | 4   | 2   | 6   | 0.109047 | 0.111869 | 0.078943 | 0.067702 |
| lincRNA        | -                 | 0    | 0    | 2    | 5   | 4   | 2   | 0        | 0        | 0.083322 | 0.267967 |
| lincRNA        | -                 | 1    | 1    | 1    | 1   | 1   | 1   | 0.020422 | 0.026189 | 0.024641 | 0.031699 |
| processed_     | -                 | 92   | 78   | 69   | 0   | 0   | 0   | 1.619325 | 1.760557 | 1.465357 | 0        |
| lincRNA        | -                 | 2    | 0    | 2    | 0   | 0   | 0   | 0.06713  | 0        | 0.080996 | 0        |
| protein_coding | CCAAT/enh         | 0    | 0    | 0    | 2   | 3   | 1   | 0        | 0        | 0        | 0.055325 |
| processed_     | -                 | 100  | 78   | 86   | 111 | 180 | 52  | 4.07385  | 4.074825 | 4.227188 | 7.01873  |
| processed_     | -                 | 9    | 6    | 5    | 5   | 10  | 5   | 0.380189 | 0.325026 | 0.254845 | 0.327837 |
| antisense      | -                 | 0    | 0    | 1    | 0   | 0   | 0   | 0        | 0        | 0.122193 | 0        |
| antisense      | -                 | 0    | 1    | 0    | 1   | 0   | 0   | 0        | 0.036531 | 0        | 0.044216 |
| protein_coding | HCG18159          | 0    | 0    | 2    | 6   | 0   | 5   | 0        | 0        | 0.04362  | 0.168342 |
| antisense      | -                 | 11   | 10   | 3    | 16  | 12  | 18  | 0.090505 | 0.105509 | 0.029782 | 0.20433  |
| processed_     | small_nucleolar   | 407  | 289  | 335  | 643 | 845 | 583 | 29.45098 | 26.81715 | 29.24814 | 72.21823 |
| antisense      | -                 | 3    | 2    | 2    | 0   | 1   | 0   | 0.083484 | 0.071371 | 0.067152 | 0        |
| processed_     | -                 | 135  | 83   | 113  | 39  | 62  | 25  | 2.126353 | 1.676444 | 2.147475 | 0.953447 |
| processed_     | -                 | 0    | 1    | 0    | 0   | 0   | 0   | 0        | 0.03777  | 0        | 0        |
| pseudogen      | -                 | 188  | 162  | 148  | 116 | 125 | 79  | 3.710153 | 4.099759 | 3.524063 | 3.553223 |
| antisense      | -                 | 5    | 2    | 0    | 5   | 18  | 9   | 0.117873 | 0.060462 | 0        | 0.182956 |
| processed_     | -                 | 4    | 5    | 0    | 7   | 2   | 12  | 0.134355 | 0.215365 | 0        | 0.364942 |
| processed_     | ALDH1L1_antisense | 0    | 0    | 1    | 1   | 2   | 0   | 0        | 0        | 0.024344 | 0.031317 |
| lincRNA        | -                 | 33   | 29   | 23   | 42  | 52  | 40  | 1.799268 | 2.027633 | 1.513066 | 3.554362 |
| pseudogen      | -                 | 2    | 1    | 2    | 14  | 17  | 0   | 0.042473 | 0.027233 | 0.051246 | 0.461466 |
| lincRNA        | -                 | 0    | 0    | 0    | 1   | 9   | 2   | 0        | 0        | 0        | 0.065273 |
| processed_     | -                 | 89   | 76   | 82   | 169 | 214 | 102 | 1.72947  | 1.893852 | 1.922582 | 5.097301 |
| processed_     | -                 | 51   | 27   | 47   | 32  | 25  | 24  | 0.495625 | 0.336478 | 0.551098 | 0.482685 |
| lincRNA        | -                 | 0    | 0    | 1    | 0   | 0   | 0   | 0        | 0        | 0.044795 | 0        |
| lincRNA        | -                 | 10   | 7    | 10   | 7   | 9   | 3   | 0.14115  | 0.126703 | 0.170306 | 0.153359 |
| processed_     | -                 | 1    | 4    | 6    | 18  | 27  | 6   | 0.017788 | 0.091244 | 0.128776 | 0.496979 |
| processed_     | -                 | 2    | 0    | 0    | 1   | 4   | 7   | 0.02148  | 0        | 0        | 0.01667  |
| processed_     | -                 | 37   | 17   | 20   | 51  | 39  | 18  | 0.969777 | 0.571384 | 0.632482 | 2.074774 |
| pseudogen      | -                 | 9    | 15   | 9    | 16  | 12  | 16  | 0.168467 | 0.360059 | 0.203265 | 0.464861 |
| processed_     | -                 | 0    | 2    | 0    | 2   | 0   | 0   | 0        | 0.07184  | 0        | 0.086953 |
| antisense      | -                 | 3    | 1    | 5    | 0   | 0   | 0   | 0.06933  | 0.029635 | 0.139417 | 0        |
| antisense      | -                 | 2    | 0    | 4    | 1   | 2   | 0   | 0.066042 | 0        | 0.159368 | 0.051253 |
| antisense      | -                 | 15   | 15   | 26   | 22  | 19  | 11  | 0.321165 | 0.411848 | 0.671673 | 0.731121 |
| antisense      | -                 | 21   | 22   | 17   | 120 | 138 | 71  | 0.480806 | 0.645926 | 0.469621 | 4.264441 |
| processed_     | SBF2_antisense    | 5    | 8    | 7    | 13  | 25  | 12  | 0.086545 | 0.17757  | 0.14619  | 0.349257 |
| processed_     | -                 | 7    | 7    | 12   | 11  | 14  | 19  | 0.14057  | 0.180261 | 0.290752 | 0.34286  |
| antisense      | -                 | 0    | 0    | 0    | 3   | 0   | 1   | 0        | 0        | 0        | 0.368817 |
| processed_     | -                 | 2    | 0    | 0    | 3   | 3   | 7   | 0.074844 | 0        | 0        | 0.174253 |
| processed_     | -                 | 0    | 2    | 0    | 2   | 2   | 0   | 0        | 0.077487 | 0        | 0.093788 |
| processed_     | PRR7_antisense    | 13   | 8    | 8    | 16  | 26  | 9   | 0.822632 | 0.649175 | 0.610802 | 1.571494 |
| processed_     | EXTL3_antisense   | 2    | 7    | 10   | 12  | 18  | 10  | 0.025428 | 0.114129 | 0.153404 | 0.236811 |
| processed_     | -                 | 0    | 1    | 0    | 7   | 1   | 0   | 0        | 0.020922 | 0        | 0.177265 |
| lincRNA        | -                 | 205  | 187  | 168  | 1   | 0   | 1   | 3.26843  | 3.823282 | 3.231787 | 0.024747 |
| protein_coding | Uncharacterized   | 7    | 7    | 7    | 3   | 4   | 6   | 0.088329 | 0.113269 | 0.106574 | 0.058757 |

|                       |     |     |     |     |      |      |          |          |          |          |
|-----------------------|-----|-----|-----|-----|------|------|----------|----------|----------|----------|
| processed_-           | 1   | 0   | 0   | 0   | 0    | 0    | 0.028349 | 0        | 0        | 0        |
| processed_-           | 0   | 0   | 0   | 3   | 2    | 4    | 0        | 0        | 0        | 0.081531 |
| lincRNA_-             | 0   | 1   | 0   | 0   | 0    | 0    | 0        | 0.052241 | 0        | 0        |
| antisense_-           | 6   | 5   | 2   | 3   | 0    | 1    | 0.113444 | 0.121229 | 0.045625 | 0.08804  |
| lincRNA_-             | 1   | 0   | 0   | 0   | 0    | 0    | 0.019818 | 0        | 0        | 0        |
| antisense_-           | 0   | 1   | 1   | 0   | 1    | 0    | 0        | 0.106236 | 0.099957 | 0        |
| antisense_-           | 172 | 144 | 179 | 81  | 111  | 67   | 5.744361 | 6.167159 | 7.212974 | 4.198835 |
| lincRNA_-             | 5   | 3   | 4   | 91  | 94   | 92   | 0.094498 | 0.072708 | 0.091214 | 2.669473 |
| antisense_-           | 19  | 20  | 25  | 12  | 19   | 19   | 0.152292 | 0.205572 | 0.241776 | 0.149292 |
| processed_-           | 6   | 4   | 4   | 5   | 9    | 5    | 0.230041 | 0.196663 | 0.185038 | 0.297546 |
| processed_-           | 0   | 0   | 1   | 0   | 2    | 0    | 0        | 0        | 0.031068 | 0        |
| processed_-           | 1   | 2   | 1   | 5   | 9    | 3    | 0.05663  | 0.145241 | 0.068328 | 0.439492 |
| processed_-           | 0   | 0   | 0   | 0   | 0    | 1    | 0        | 0        | 0        | 0        |
| lincRNA_-             | 0   | 0   | 1   | 2   | 2    | 1    | 0        | 0        | 0.019349 | 0.049781 |
| antisense_-           | 11  | 10  | 7   | 8   | 16   | 9    | 0.584134 | 0.680972 | 0.448503 | 0.659387 |
| pseudogen_-           | 28  | 24  | 23  | 7   | 11   | 4    | 1.864944 | 2.049879 | 1.848347 | 0.723663 |
| processed_-           | 24  | 18  | 24  | 23  | 16   | 13   | 0.571249 | 0.549409 | 0.689245 | 0.849713 |
| pseudogen_-           | 56  | 39  | 34  | 23  | 19   | 7    | 3.07836  | 2.749193 | 2.255061 | 1.96241  |
| antisense_CACNA1C_    | 4   | 5   | 2   | 3   | 8    | 8    | 0.085605 | 0.13722  | 0.051644 | 0.099653 |
| processed_-           | 2   | 1   | 0   | 2   | 1    | 0    | 0.037023 | 0.023739 | 0        | 0.057465 |
| processed_long_interf | 7   | 3   | 5   | 2   | 3    | 1    | 0.171489 | 0.094247 | 0.147794 | 0.07605  |
| antisense_-           | 162 | 131 | 114 | 50  | 82   | 74   | 2.910415 | 3.018009 | 2.471114 | 1.394249 |
| protein_co_H2A_histor | 865 | 719 | 730 | 812 | 1206 | 819  | 11.06681 | 11.79627 | 11.26879 | 16.12475 |
| antisense_-           | 7   | 10  | 1   | 11  | 11   | 4    | 0.13124  | 0.240423 | 0.022621 | 0.320103 |
| antisense_-           | 1   | 1   | 0   | 0   | 2    | 0    | 0.018764 | 0.024062 | 0        | 0        |
| antisense_-           | 48  | 35  | 42  | 6   | 9    | 16   | 1.106549 | 1.034682 | 1.168226 | 0.21469  |
| lincRNA_-             | 10  | 7   | 7   | 1   | 2    | 0    | 0.240338 | 0.21574  | 0.202987 | 0.037304 |
| lincRNA_-             | 7   | 5   | 1   | 2   | 3    | 11   | 0.113417 | 0.103887 | 0.019549 | 0.050297 |
| processed_-           | 0   | 0   | 0   | 1   | 3    | 8    | 0        | 0        | 0        | 0.025027 |
| processed_-           | 2   | 1   | 2   | 50  | 142  | 67   | 0.027003 | 0.017314 | 0.03258  | 1.047794 |
| antisense_-           | 3   | 2   | 3   | 2   | 4    | 2    | 0.045613 | 0.038995 | 0.055035 | 0.047198 |
| processed_STARD4_an   | 486 | 436 | 493 | 129 | 184  | 170  | 4.124624 | 4.745084 | 5.048276 | 1.699293 |
| processed_-           | 2   | 2   | 0   | 3   | 4    | 3    | 0.019493 | 0.024997 | 0        | 0.045383 |
| lincRNA_-             | 0   | 0   | 0   | 0   | 4    | 4    | 0        | 0        | 0        | 0        |
| antisense_DNM1_pse    | 2   | 0   | 1   | 4   | 8    | 6    | 0.029417 | 0        | 0.017746 | 0.091317 |
| antisense_-           | 15  | 13  | 16  | 22  | 18   | 28   | 0.270311 | 0.300418 | 0.347889 | 0.615356 |
| lincRNA_-             | 16  | 8   | 14  | 0   | 0    | 1    | 0.349437 | 0.224051 | 0.368913 | 0        |
| protein_co_ubiquitin_ | 72  | 55  | 59  | 85  | 107  | 60   | 0.45765  | 0.448304 | 0.452481 | 0.838591 |
| processed_-           | 5   | 3   | 5   | 9   | 15   | 3    | 0.19061  | 0.146658 | 0.229982 | 0.532535 |
| processed_SOCS2_anti  | 44  | 36  | 41  | 61  | 65   | 44   | 0.620499 | 0.651029 | 0.697623 | 1.335208 |
| lincRNA_-             | 0   | 0   | 0   | 0   | 2    | 1    | 0        | 0        | 0        | 0        |
| protein_co_phosphogl  | 571 | 501 | 498 | 943 | 1290 | 1211 | 9.764478 | 10.98652 | 10.2752  | 25.02967 |
| processed_-           | 47  | 46  | 39  | 5   | 8    | 14   | 1.628848 | 2.044324 | 1.63078  | 0.268957 |
| antisense_small_nucl  | 62  | 58  | 50  | 50  | 89   | 92   | 1.898877 | 2.277941 | 1.847665 | 2.376871 |
| processed_MIR210_hc   | 53  | 50  | 38  | 157 | 136  | 42   | 1.264718 | 1.53002  | 1.094081 | 5.814976 |
| protein_co_Uncharacte | 14  | 14  | 12  | 17  | 14   | 8    | 0.29241  | 0.374974 | 0.302408 | 0.551117 |
| processed_-           | 73  | 59  | 58  | 93  | 113  | 92   | 4.644466 | 4.813647 | 4.452346 | 9.183883 |
| processed_-           | 43  | 24  | 25  | 34  | 32   | 41   | 0.878549 | 0.628808 | 0.616291 | 1.078219 |
| antisense_CSTF3_anti  | 3   | 1   | 1   | 4   | 1    | 0    | 0.069261 | 0.029606 | 0.027856 | 0.143338 |
| processed_-           | 23  | 16  | 20  | 3   | 1    | 0    | 0.293621 | 0.261932 | 0.308062 | 0.059444 |
| processed_-           | 0   | 0   | 0   | 3   | 0    | 0    | 0        | 0        | 0        | 0.150787 |
| processed_-           | 1   | 2   | 2   | 6   | 2    | 0    | 0.023064 | 0.059154 | 0.055657 | 0.214795 |
| processed_-           | 1   | 0   | 0   | 1   | 0    | 3    | 0.015714 | 0        | 0        | 0.02439  |
| antisense_-           | 99  | 103 | 119 | 148 | 164  | 205  | 2.070523 | 2.76243  | 3.002893 | 4.804376 |
| antisense_-           | 50  | 24  | 39  | 53  | 74   | 54   | 1.454405 | 0.895233 | 1.368762 | 2.392884 |
| processed_-           | 26  | 21  | 27  | 18  | 13   | 15   | 1.13832  | 1.179016 | 1.426273 | 1.22319  |
| processed_-           | 0   | 0   | 0   | 3   | 2    | 1    | 0        | 0        | 0        | 0.048531 |
| antisense_-           | 0   | 0   | 1   | 0   | 0    | 0    | 0        | 0        | 0.077395 | 0        |
| processed_-           | 2   | 0   | 0   | 6   | 8    | 0    | 0.052656 | 0        | 0        | 0.245187 |
| antisense_-           | 0   | 1   | 0   | 1   | 1    | 0    | 0        | 0.021529 | 0        | 0.026058 |
| antisense_-           | 3   | 2   | 5   | 1   | 0    | 0    | 0.192963 | 0.164965 | 0.388035 | 0.099835 |
| lincRNA_-             | 0   | 1   | 2   | 6   | 9    | 5    | 0        | 0.034697 | 0.065292 | 0.251979 |
| antisense_-           | 1   | 1   | 1   | 0   | 0    | 0    | 0.088975 | 0.114098 | 0.107354 | 0        |
| lincRNA_-             | 25  | 17  | 21  | 12  | 16   | 8    | 0.601154 | 0.524208 | 0.609275 | 0.447876 |
| processed_DNAJC3_ar   | 34  | 31  | 25  | 30  | 35   | 27   | 0.548233 | 0.640999 | 0.486378 | 0.750823 |

|            |              |      |      |      |      |      |      |          |          |          |          |
|------------|--------------|------|------|------|------|------|------|----------|----------|----------|----------|
| lincRNA    | -            | 3    | 1    | 1    | 3    | 0    | 2    | 0.35977  | 0.153785 | 0.144694 | 0.558413 |
| antisense  | -            | 9    | 9    | 10   | 0    | 1    | 1    | 0.218206 | 0.279818 | 0.292531 | 0        |
| antisense  | CARS_antis   | 3    | 2    | 2    | 6    | 9    | 3    | 0.052804 | 0.045142 | 0.042474 | 0.163918 |
| antisense  | -            | 10   | 4    | 6    | 3    | 1    | 0    | 0.268557 | 0.137754 | 0.194418 | 0.125051 |
| processed_ | -            | 0    | 0    | 1    | 0    | 0    | 0    | 0        | 0        | 0.056294 | 0        |
| processed_ | OIP5_antis   | 3707 | 2990 | 3147 | 3303 | 4345 | 2753 | 19.68754 | 20.36336 | 20.16572 | 27.22751 |
| processed_ | -            | 63   | 60   | 48   | 59   | 72   | 35   | 1.199379 | 1.464794 | 1.102568 | 1.743406 |
| processed_ | SPTY2D1_a    | 7    | 24   | 21   | 5    | 16   | 6    | 0.225743 | 0.992514 | 0.817115 | 0.250274 |
| protein_co | twinfilin_a  | 829  | 589  | 600  | 260  | 441  | 264  | 24.00977 | 21.87551 | 20.96683 | 11.68792 |
| processed_ | -            | 1    | 0    | 0    | 0    | 0    | 2    | 0.025963 | 0        | 0        | 0        |
| protein_co | methionyl-   | 103  | 91   | 78   | 655  | 837  | 562  | 1.595531 | 1.807668 | 1.457843 | 15.74852 |
| pseudogen  | MT-ND4_ps    | 7    | 3    | 4    | 3    | 5    | 7    | 0.238366 | 0.131002 | 0.164344 | 0.158562 |
| processed_ | LRP4_antis   | 5    | 3    | 7    | 13   | 12   | 4    | 0.155884 | 0.11994  | 0.263317 | 0.629081 |
| antisense  | -            | 48   | 44   | 58   | 25   | 36   | 13   | 1.285392 | 1.510971 | 1.874003 | 1.039118 |
| antisense  | -            | 0    | 0    | 0    | 0    | 3    | 0    | 0        | 0        | 0        | 0        |
| processed_ | -            | 20   | 14   | 18   | 35   | 52   | 41   | 1.295304 | 1.162731 | 1.406573 | 3.518361 |
| antisense  | -            | 4    | 1    | 3    | 1    | 2    | 2    | 0.193361 | 0.061989 | 0.174976 | 0.075031 |
| pseudogen  | -            | 1    | 0    | 0    | 10   | 11   | 0    | 0.230985 | 0        | 0        | 3.585212 |
| antisense  | -            | 19   | 12   | 18   | 45   | 61   | 25   | 0.505624 | 0.409511 | 0.577956 | 1.858735 |
| protein_co | ubiquitin_s  | 64   | 44   | 53   | 120  | 189  | 128  | 0.680953 | 0.600343 | 0.680395 | 1.981751 |
| lincRNA    | -            | 1    | 2    | 1    | 3    | 2    | 1    | 0.021698 | 0.05565  | 0.02618  | 0.101036 |
| processed_ | PCED1B_ar    | 3    | 6    | 0    | 10   | 2    | 2    | 0.056403 | 0.144659 | 0        | 0.29182  |
| processed_ | -            | 1    | 0    | 0    | 0    | 0    | 0    | 0.017721 | 0        | 0        | 0        |
| processed_ | -            | 19   | 10   | 12   | 18   | 17   | 21   | 0.284001 | 0.191679 | 0.216419 | 0.417608 |
| antisense  | NR2F2_ant    | 95   | 100  | 98   | 0    | 0    | 0    | 2.308058 | 3.115533 | 2.872746 | 0        |
| processed_ | TMEM161E     | 81   | 67   | 87   | 86   | 114  | 60   | 3.449674 | 3.659125 | 4.470544 | 5.684889 |
| antisense  | -            | 6    | 7    | 6    | 7    | 6    | 5    | 0.128115 | 0.191671 | 0.154578 | 0.231994 |
| pseudogen  | signal_pept  | 0    | 0    | 0    | 0    | 0    | 1    | 0        | 0        | 0        | 0        |
| processed_ | -            | 3    | 0    | 1    | 3    | 3    | 0    | 0.089656 | 0        | 0.036058 | 0.139158 |
| antisense  | -            | 140  | 119  | 137  | 143  | 161  | 86   | 2.575364 | 2.807158 | 3.040739 | 4.082978 |
| pseudogen  | high_mobil   | 2    | 7    | 0    | 0    | 1    | 1    | 0.480923 | 2.158506 | 0        | 0        |
| antisense  | -            | 5    | 4    | 3    | 0    | 0    | 0    | 0.333026 | 0.341647 | 0.241089 | 0        |
| antisense  | -            | 3    | 5    | 5    | 2    | 3    | 2    | 0.190352 | 0.406832 | 0.382784 | 0.196968 |
| processed_ | SEC24B_an    | 21   | 7    | 21   | 19   | 13   | 16   | 0.687153 | 0.293725 | 0.82909  | 0.96498  |
| lincRNA    | -            | 0    | 1    | 0    | 1    | 3    | 0    | 0        | 0.057873 | 0        | 0.070048 |
| lincRNA    | -            | 38   | 24   | 37   | 18   | 27   | 41   | 0.704277 | 0.570401 | 0.827389 | 0.517801 |
| antisense  | -            | 120  | 69   | 76   | 75   | 95   | 104  | 2.959917 | 2.182512 | 2.26183  | 2.871376 |
| antisense  | -            | 3    | 3    | 7    | 7    | 7    | 5    | 0.039392 | 0.050515 | 0.110901 | 0.142666 |
| antisense  | FAM13A_ar    | 17   | 9    | 12   | 7    | 4    | 0    | 0.248327 | 0.168588 | 0.211497 | 0.15871  |
| processed_ | -            | 4    | 2    | 9    | 4    | 14   | 12   | 0.100568 | 0.064482 | 0.273019 | 0.156096 |
| processed_ | -            | 151  | 87   | 136  | 30   | 52   | 51   | 2.734798 | 2.020584 | 2.971908 | 0.843335 |
| processed_ | -            | 52   | 54   | 72   | 57   | 44   | 83   | 0.727411 | 0.968678 | 1.215226 | 1.237604 |
| protein_co | Uncharacter  | 0    | 1    | 0    | 0    | 0    | 0    | 0        | 0.019554 | 0        | 0        |
| lincRNA    | ATPBD4_ar    | 0    | 1    | 0    | 0    | 3    | 1    | 0        | 0.040711 | 0        | 0        |
| processed_ | -            | 76   | 44   | 51   | 30   | 37   | 27   | 3.426578 | 2.543953 | 2.774376 | 2.099417 |
| protein_co | branched_c   | 2    | 6    | 3    | 4    | 2    | 2    | 0.044593 | 0.171554 | 0.080707 | 0.13843  |
| protein_co | insulin-like | 0    | 1    | 0    | 6    | 7    | 4    | 0        | 0.066885 | 0        | 0.485738 |
| lincRNA    | -            | 14   | 5    | 13   | 0    | 1    | 3    | 0.248753 | 0.113925 | 0.278697 | 0        |
| lincRNA    | -            | 78   | 64   | 91   | 33   | 71   | 66   | 6.66197  | 7.009667 | 9.377725 | 4.374742 |
| pseudogen  | -            | 0    | 0    | 1    | 0    | 0    | 0    | 0        | 0        | 0.187958 | 0        |
| lincRNA    | -            | 0    | 0    | 0    | 0    | 1    | 0    | 0        | 0        | 0        | 0        |
| pseudogen  | -            | 1    | 0    | 0    | 3    | 0    | 0    | 0.03698  | 0        | 0        | 0.172192 |
| antisense  | -            | 1    | 1    | 0    | 2    | 1    | 0    | 0.018629 | 0.023889 | 0        | 0.057831 |
| pseudogen  | SMAD_spec    | 58   | 32   | 34   | 38   | 43   | 11   | 4.771265 | 3.375708 | 3.374679 | 4.851987 |
| pseudogen  | RNA_polyr    | 101  | 72   | 90   | 47   | 75   | 100  | 1.815909 | 1.660025 | 1.952376 | 1.311599 |
| lincRNA    | -            | 0    | 1    | 0    | 1    | 0    | 0    | 0        | 0.091942 | 0        | 0.111284 |
| pseudogen  | -            | 0    | 0    | 0    | 0    | 0    | 1    | 0        | 0        | 0        | 0        |
| processed_ | cancer/test  | 0    | 0    | 0    | 154  | 188  | 170  | 0        | 0        | 0        | 8.497414 |
| antisense  | -            | 2    | 1    | 2    | 0    | 0    | 0    | 0.215586 | 0.138229 | 0.260117 | 0        |
| lincRNA    | -            | 1    | 1    | 0    | 0    | 0    | 0    | 0.080567 | 0.103316 | 0        | 0        |
| antisense  | -            | 0    | 0    | 1    | 1    | 7    | 3    | 0        | 0        | 0.048108 | 0.061888 |
| pseudogen  | heat_shock   | 0    | 2    | 0    | 0    | 0    | 0    | 0        | 0.063361 | 0        | 0        |
| processed_ | -            | 6    | 8    | 8    | 8    | 2    | 1    | 0.418039 | 0.714767 | 0.672517 | 0.865139 |
| processed_ | -            | 0    | 1    | 1    | 0    | 0    | 0    | 0        | 0.045278 | 0.042602 | 0        |
| lincRNA    | -            | 63   | 43   | 39   | 51   | 40   | 51   | 1.324102 | 1.158934 | 0.988994 | 1.663725 |

|                        |     |     |     |     |      |     |          |          |          |          |
|------------------------|-----|-----|-----|-----|------|-----|----------|----------|----------|----------|
| pseudogen: glyceraldeh | 0   | 2   | 2   | 3   | 2    | 0   | 0        | 0.120864 | 0.11372  | 0.219437 |
| pseudogen: -           | 1   | 0   | 0   | 0   | 0    | 0   | 0.1563   | 0        | 0        | 0        |
| lincRNA -              | 11  | 11  | 13  | 0   | 0    | 0   | 0.3178   | 0.407534 | 0.453162 | 0        |
| pseudogen: -           | 0   | 0   | 0   | 0   | 4    | 0   | 0        | 0        | 0        | 0        |
| antisense ATG10_ant    | 2   | 0   | 0   | 0   | 1    | 0   | 0.144722 | 0        | 0        | 0        |
| pseudogen: -           | 2   | 1   | 4   | 3   | 3    | 4   | 0.105253 | 0.067486 | 0.253987 | 0.24505  |
| pseudogen: -           | 0   | 0   | 0   | 0   | 0    | 2   | 0        | 0        | 0        | 0        |
| processed_ -           | 2   | 7   | 8   | 2   | 5    | 1   | 0.064277 | 0.288491 | 0.310215 | 0.099767 |
| lincRNA -              | 12  | 6   | 7   | 0   | 1    | 0   | 0.798128 | 0.511743 | 0.561743 | 0        |
| sense_intrc -          | 1   | 1   | 0   | 1   | 1    | 8   | 0.075386 | 0.096672 | 0        | 0.117009 |
| pseudogen: -           | 0   | 0   | 0   | 0   | 0    | 1   | 0        | 0        | 0        | 0        |
| pseudogen: capicua_tr  | 28  | 21  | 15  | 14  | 18   | 20  | 0.466733 | 0.448889 | 0.301682 | 0.362217 |
| lincRNA -              | 3   | 1   | 1   | 21  | 24   | 13  | 0.178515 | 0.076307 | 0.071796 | 1.939563 |
| pseudogen: -           | 0   | 2   | 0   | 0   | 0    | 0   | 0        | 0.102786 | 0        | 0        |
| sense_intrc STX18_intr | 1   | 0   | 2   | 0   | 1    | 0   | 0.086513 | 0        | 0.208766 | 0        |
| antisense -            | 2   | 2   | 2   | 0   | 2    | 1   | 0.062982 | 0.080765 | 0.075991 | 0        |
| lincRNA -              | 0   | 0   | 1   | 0   | 0    | 0   | 0        | 0        | 0.113151 | 0        |
| pseudogen: -           | 1   | 1   | 0   | 0   | 0    | 0   | 0.089656 | 0.114971 | 0        | 0        |
| pseudogen: keratin_8_I | 0   | 2   | 0   | 0   | 1    | 1   | 0        | 0.082709 | 0        | 0        |
| pseudogen: -           | 1   | 0   | 0   | 0   | 0    | 0   | 0.174312 | 0        | 0        | 0        |
| antisense -            | 5   | 2   | 1   | 0   | 0    | 1   | 0.45791  | 0.234882 | 0.110499 | 0        |
| processed_ -           | 0   | 2   | 0   | 0   | 0    | 0   | 0        | 0.209147 | 0        | 0        |
| lincRNA -              | 0   | 0   | 0   | 6   | 5    | 0   | 0        | 0        | 0        | 0.612453 |
| antisense -            | 0   | 0   | 0   | 1   | 0    | 1   | 0        | 0        | 0        | 0.127684 |
| pseudogen: -           | 0   | 0   | 0   | 1   | 1    | 0   | 0        | 0        | 0        | 0.171247 |
| antisense -            | 5   | 5   | 8   | 0   | 0    | 0   | 0.3901   | 0.500248 | 0.753085 | 0        |
| antisense OCIAD1_an    | 1   | 2   | 5   | 3   | 3    | 6   | 0.176943 | 0.45381  | 1.067462 | 0.823922 |
| lincRNA -              | 3   | 0   | 1   | 3   | 4    | 0   | 0.035685 | 0        | 0.014352 | 0.055388 |
| sense_intrc -          | 3   | 0   | 1   | 0   | 0    | 0   | 0.491853 | 0        | 0.197816 | 0        |
| antisense -            | 1   | 0   | 0   | 22  | 10   | 4   | 0.082991 | 0        | 0        | 2.833904 |
| antisense -            | 165 | 106 | 116 | 103 | 119  | 80  | 9.587178 | 7.89809  | 8.132291 | 9.28912  |
| pseudogen: -           | 5   | 5   | 3   | 4   | 1    | 4   | 0.317683 | 0.407383 | 0.229982 | 0.39447  |
| lincRNA -              | 0   | 0   | 1   | 0   | 0    | 0   | 0        | 0        | 0.028175 | 0        |
| pseudogen: -           | 3   | 1   | 1   | 6   | 8    | 9   | 0.395141 | 0.168904 | 0.15892  | 1.226626 |
| pseudogen: -           | 0   | 0   | 0   | 0   | 0    | 1   | 0        | 0        | 0        | 0        |
| pseudogen: -           | 0   | 0   | 0   | 3   | 8    | 1   | 0        | 0        | 0        | 0.225324 |
| processed_ -           | 0   | 0   | 0   | 0   | 0    | 2   | 0        | 0        | 0        | 0        |
| pseudogen: -           | 10  | 4   | 10  | 2   | 2    | 3   | 0.636228 | 0.326349 | 0.767646 | 0.197503 |
| pseudogen: tenascin_X  | 0   | 0   | 0   | 2   | 2    | 2   | 0        | 0        | 0        | 0.071423 |
| processed_ -           | 22  | 10  | 10  | 22  | 17   | 5   | 0.58813  | 0.342815 | 0.322551 | 0.91286  |
| antisense -            | 9   | 0   | 5   | 4   | 2    | 4   | 0.213893 | 0        | 0.143374 | 0.147552 |
| lincRNA -              | 0   | 0   | 0   | 0   | 0    | 1   | 0        | 0        | 0        | 0        |
| processed_ -           | 1   | 2   | 1   | 1   | 0    | 0   | 0.017549 | 0.045007 | 0.021173 | 0.027238 |
| processed_ -           | 76  | 49  | 64  | 164 | 154  | 472 | 1.369578 | 1.132344 | 1.391557 | 4.587197 |
| protein_co cyclin-depe | 849 | 622 | 641 | 946 | 1207 | 937 | 16.69867 | 15.68823 | 15.21179 | 28.8799  |
| pseudogen: WAS_prote   | 31  | 27  | 32  | 8   | 15   | 1   | 0.490746 | 0.548111 | 0.611214 | 0.196569 |
| pseudogen: -           | 1   | 2   | 0   | 0   | 4    | 4   | 0.063109 | 0.161857 | 0        | 0        |
| pseudogen: -           | 0   | 0   | 0   | 0   | 0    | 2   | 0        | 0        | 0        | 0        |
| antisense -            | 1   | 0   | 4   | 6   | 8    | 9   | 0.06294  | 0        | 0.303761 | 0.586146 |
| processed_ long_inter  | 0   | 0   | 0   | 0   | 1    | 2   | 0        | 0        | 0        | 0        |
| antisense -            | 13  | 11  | 11  | 40  | 40   | 24  | 1.551069 | 1.683022 | 1.583538 | 7.407613 |
| lincRNA -              | 0   | 1   | 0   | 0   | 0    | 0   | 0        | 0.101229 | 0        | 0        |
| pseudogen: -           | 1   | 2   | 0   | 8   | 12   | 12  | 0.062437 | 0.160133 | 0        | 0.775284 |
| protein_co protocadhe  | 116 | 112 | 80  | 96  | 152  | 115 | 1.026466 | 1.270907 | 0.854131 | 1.318524 |
| antisense -            | 3   | 3   | 4   | 0   | 0    | 0   | 0.423705 | 0.543342 | 0.681633 | 0        |
| lincRNA -              | 0   | 0   | 0   | 1   | 1    | 0   | 0        | 0        | 0        | 0.162093 |
| pseudogen: FOS-like_ar | 1   | 6   | 7   | 4   | 9    | 6   | 0.057463 | 0.442131 | 0.485329 | 0.356764 |
| sense_intrc -          | 0   | 0   | 0   | 2   | 2    | 0   | 0        | 0        | 0        | 0.661635 |
| pseudogen: -           | 1   | 0   | 1   | 1   | 0    | 0   | 0.045613 | 0        | 0.055035 | 0.070797 |
| pseudogen: -           | 0   | 0   | 0   | 0   | 1    | 0   | 0        | 0        | 0        | 0        |
| protein_co PRR5-ARHC   | 0   | 0   | 0   | 4   | 3    | 1   | 0        | 0        | 0        | 0.142496 |
| lincRNA -              | 0   | 0   | 0   | 0   | 1    | 1   | 0        | 0        | 0        | 0        |
| pseudogen: -           | 0   | 0   | 0   | 1   | 1    | 0   | 0        | 0        | 0        | 0.115707 |
| pseudogen: glyceraldeh | 4   | 1   | 6   | 1   | 8    | 6   | 0.186627 | 0.059831 | 0.337764 | 0.072418 |
| antisense -            | 5   | 2   | 0   | 0   | 2    | 6   | 0.412039 | 0.211353 | 0        | 0        |

|                         |      |     |      |      |      |      |          |          |          |          |
|-------------------------|------|-----|------|------|------|------|----------|----------|----------|----------|
| pseudogeni -            | 1    | 1   | 3    | 2    | 1    | 1    | 0.07225  | 0.09265  | 0.26152  | 0.224283 |
| processed_ -            | 6    | 11  | 12   | 0    | 0    | 1    | 0.096448 | 0.226749 | 0.232741 | 0        |
| lincRNA -               | 0    | 0   | 0    | 1    | 0    | 0    | 0        | 0        | 0        | 0.242599 |
| lincRNA -               | 0    | 0   | 2    | 0    | 0    | 0    | 0        | 0        | 0.081757 | 0        |
| antisense -             | 84   | 53  | 70   | 104  | 167  | 188  | 4.569329 | 3.697076 | 4.594299 | 8.780858 |
| pseudogeni: protocadhe  | 9    | 9   | 6    | 9    | 7    | 4    | 0.178289 | 0.22863  | 0.143411 | 0.276729 |
| pseudogeni -            | 0    | 0   | 0    | 3    | 2    | 3    | 0        | 0        | 0        | 0.377097 |
| lincRNA -               | 0    | 0   | 2    | 0    | 0    | 0    | 0        | 0        | 0.164703 | 0        |
| lincRNA -               | 1    | 0   | 1    | 0    | 0    | 0    | 0.060896 | 0        | 0.073475 | 0        |
| lincRNA -               | 2    | 0   | 0    | 0    | 0    | 0    | 0.347333 | 0        | 0        | 0        |
| protein_co Uncharacte   | 10   | 7   | 12   | 0    | 1    | 0    | 0.405623 | 0.364108 | 0.587289 | 0        |
| pseudogeni -            | 0    | 0   | 1    | 0    | 0    | 0    | 0        | 0        | 0.084821 | 0        |
| antisense -             | 0    | 0   | 0    | 1    | 1    | 1    | 0        | 0        | 0        | 0.126574 |
| pseudogeni: DEAD/H_(A   | 0    | 0   | 0    | 0    | 1    | 0    | 0        | 0        | 0        | 0        |
| antisense -             | 0    | 0   | 1    | 3    | 3    | 0    | 0        | 0        | 0.088261 | 0.340623 |
| sense_intrc BACH1_inti  | 25   | 12  | 14   | 8    | 7    | 8    | 1.427832 | 0.878876 | 0.964747 | 0.709182 |
| pseudogeni -            | 4    | 2   | 3    | 3    | 2    | 3    | 0.1748   | 0.112078 | 0.158179 | 0.203485 |
| lincRNA -               | 0    | 0   | 0    | 0    | 1    | 0    | 0        | 0        | 0        | 0        |
| lincRNA -               | 2    | 3   | 1    | 0    | 0    | 0    | 0.243585 | 0.468544 | 0.146949 | 0        |
| protein_co POU_doma     | 1    | 2   | 1    | 0    | 1    | 3    | 0.03515  | 0.09015  | 0.04241  | 0        |
| protein_co Purkinje_cr  | 0    | 0   | 0    | 11   | 24   | 11   | 0        | 0        | 0        | 0.562204 |
| protein_co abhydrolas   | 102  | 73  | 97   | 37   | 44   | 21   | 4.495096 | 4.125447 | 5.157729 | 2.530877 |
| processed_ -            | 6    | 8   | 8    | 0    | 3    | 0    | 0.588578 | 1.006356 | 0.94687  | 0        |
| lincRNA -               | 0    | 1   | 1    | 0    | 0    | 0    | 0        | 0.122464 | 0.115225 | 0        |
| lincRNA -               | 0    | 5   | 0    | 0    | 0    | 0    | 0        | 0.466122 | 0        | 0        |
| sense_intrc LNX1_antis  | 2    | 0   | 0    | 2    | 1    | 4    | 0.149331 | 0        | 0        | 0.231783 |
| pseudogeni -            | 4    | 4   | 5    | 3    | 2    | 6    | 0.079374 | 0.101786 | 0.119711 | 0.092399 |
| processed_ -            | 22   | 18  | 23   | 65   | 80   | 27   | 0.445222 | 0.467128 | 0.561604 | 2.041729 |
| protein_co HCG20457     | 0    | 0   | 0    | 15   | 23   | 10   | 0        | 0        | 0        | 1.844083 |
| antisense -             | 2    | 2   | 2    | 1    | 3    | 0    | 0.205658 | 0.263727 | 0.248138 | 0.159605 |
| lincRNA -               | 0    | 1   | 1    | 0    | 0    | 0    | 0        | 0.042465 | 0.039954 | 0        |
| pseudogeni -            | 0    | 0   | 0    | 2    | 3    | 0    | 0        | 0        | 0        | 0.145851 |
| pseudogeni: SET_bindin  | 0    | 0   | 0    | 1    | 0    | 1    | 0        | 0        | 0        | 0.012925 |
| pseudogeni: mitochond   | 1376 | 942 | 1000 | 2440 | 3212 | 2145 | 94.744   | 83.17514 | 83.0771  | 260.7676 |
| pseudogeni -            | 0    | 0   | 0    | 1    | 6    | 1    | 0        | 0        | 0        | 0.09929  |
| lincRNA -               | 0    | 0   | 2    | 0    | 0    | 0    | 0        | 0        | 0.232343 | 0        |
| antisense -             | 0    | 1   | 1    | 0    | 0    | 0    | 0        | 0.153785 | 0.144694 | 0        |
| lincRNA -               | 8    | 15  | 17   | 5    | 3    | 4    | 0.536653 | 1.290339 | 1.375942 | 0.520599 |
| lincRNA -               | 1    | 0   | 0    | 0    | 0    | 0    | 0.086833 | 0        | 0        | 0        |
| protein_co HCG20047     | 16   | 6   | 9    | 179  | 299  | 180  | 0.25658  | 0.123385 | 0.174138 | 4.455398 |
| pseudogeni: nucleopho:  | 0    | 0   | 0    | 0    | 2    | 2    | 0        | 0        | 0        | 0        |
| antisense -             | 16   | 11  | 7    | 4    | 7    | 0    | 0.388323 | 0.342354 | 0.204984 | 0.150683 |
| pseudogeni: acidic_(leu | 0    | 0   | 0    | 0    | 0    | 2    | 0        | 0        | 0        | 0        |
| pseudogeni -            | 0    | 0   | 0    | 0    | 1    | 0    | 0        | 0        | 0        | 0        |
| antisense OTX2_antis    | 0    | 0   | 0    | 1    | 0    | 0    | 0        | 0        | 0        | 0.029975 |
| antisense -             | 7    | 3   | 1    | 1    | 3    | 4    | 0.573829 | 0.315366 | 0.098908 | 0.127237 |
| processed_ -            | 0    | 0   | 0    | 0    | 2    | 1    | 0        | 0        | 0        | 0        |
| pseudogeni -            | 5    | 1   | 5    | 0    | 0    | 0    | 0.444034 | 0.113882 | 0.535753 | 0        |
| antisense -             | 12   | 2   | 7    | 11   | 10   | 9    | 1.082077 | 0.231268 | 0.761593 | 1.539573 |
| pseudogeni -            | 0    | 0   | 0    | 1    | 0    | 1    | 0        | 0        | 0        | 0.046386 |
| pseudogeni -            | 2    | 1   | 2    | 2    | 8    | 5    | 0.192567 | 0.12347  | 0.232343 | 0.29889  |
| pseudogeni -            | 0    | 0   | 1    | 0    | 0    | 0    | 0        | 0        | 0.046373 | 0        |
| pseudogeni -            | 6    | 1   | 2    | 0    | 4    | 4    | 0.300577 | 0.064241 | 0.120888 | 0        |
| antisense -             | 1    | 0   | 0    | 0    | 1    | 0    | 0.019776 | 0        | 0        | 0        |
| antisense EGFLAM_ar     | 3    | 0   | 2    | 0    | 0    | 0    | 0.260983 | 0        | 0.209928 | 0        |
| antisense -             | 0    | 0   | 0    | 2    | 2    | 0    | 0        | 0        | 0        | 0.36119  |
| pseudogeni -            | 1    | 1   | 0    | 0    | 0    | 0    | 0.069985 | 0.089746 | 0        | 0        |
| pseudogeni -            | 0    | 1   | 1    | 1    | 5    | 2    | 0        | 0.076017 | 0.071524 | 0.09201  |
| pseudogeni -            | 0    | 2   | 0    | 0    | 0    | 0    | 0        | 0.059183 | 0        | 0        |
| lincRNA GDNF_anti:      | 30   | 30  | 24   | 19   | 10   | 6    | 0.482904 | 0.619256 | 0.466122 | 0.474705 |
| pseudogeni: glycine_del | 1    | 0   | 0    | 5    | 12   | 9    | 0.017509 | 0        | 0        | 0.135885 |
| protein_co TMEM110-     | 7    | 2   | 4    | 8    | 15   | 4    | 0.062165 | 0.022776 | 0.04286  | 0.110272 |
| pseudogeni: destrin_(ac | 68   | 61  | 49   | 36   | 42   | 35   | 2.88554  | 3.319382 | 2.508778 | 2.371107 |
| processed_ -            | 4    | 6   | 6    | 3    | 5    | 4    | 0.051641 | 0.099333 | 0.093462 | 0.060115 |
| lincRNA -               | 0    | 0   | 0    | 3    | 0    | 0    | 0        | 0        | 0        | 0.445591 |

|                         |    |    |    |     |     |     |          |          |          |          |
|-------------------------|----|----|----|-----|-----|-----|----------|----------|----------|----------|
| lincRNA -               | 0  | 1  | 0  | 0   | 1   | 1   | 0        | 0.030867 | 0        | 0        |
| processed_-             | 48 | 48 | 40 | 9   | 16  | 3   | 0.863006 | 1.106683 | 0.867722 | 0.251157 |
| lincRNA -               | 0  | 0  | 0  | 126 | 123 | 79  | 0        | 0        | 0        | 14.37344 |
| antisense -             | 1  | 0  | 1  | 1   | 0   | 0   | 0.12372  | 0        | 0.149276 | 0.192031 |
| pseudogen_-             | 0  | 0  | 2  | 0   | 0   | 0   | 0        | 0        | 0.067392 | 0        |
| pseudogen: heat_shock   | 9  | 5  | 6  | 0   | 0   | 0   | 0.219797 | 0.156588 | 0.176798 | 0        |
| pseudogen_-             | 0  | 0  | 0  | 1   | 0   | 0   | 0        | 0        | 0        | 0.279922 |
| pseudogen_-             | 0  | 0  | 1  | 0   | 0   | 0   | 0        | 0        | 0.079127 | 0        |
| pseudogen_-             | 0  | 0  | 0  | 0   | 0   | 2   | 0        | 0        | 0        | 0        |
| sense_intrc -           | 0  | 0  | 0  | 0   | 4   | 2   | 0        | 0        | 0        | 0        |
| pseudogen: glyceraldeh  | 2  | 1  | 0  | 0   | 0   | 0   | 0.093221 | 0.059771 | 0        | 0        |
| antisense -             | 0  | 0  | 0  | 1   | 0   | 3   | 0        | 0        | 0        | 0.208538 |
| antisense -             | 5  | 3  | 2  | 0   | 0   | 1   | 0.87809  | 0.675616 | 0.423787 | 0        |
| lincRNA -               | 0  | 0  | 0  | 0   | 0   | 1   | 0        | 0        | 0        | 0        |
| pseudogen_-             | 0  | 2  | 2  | 1   | 2   | 1   | 0        | 0.084929 | 0.079909 | 0.051398 |
| lincRNA -               | 0  | 0  | 0  | 3   | 3   | 2   | 0        | 0        | 0        | 0.314157 |
| pseudogen: high_mobil   | 4  | 14 | 9  | 6   | 6   | 6   | 0.578889 | 2.598201 | 1.571542 | 1.347774 |
| pseudogen_-             | 2  | 2  | 3  | 2   | 0   | 3   | 0.379676 | 0.486881 | 0.687152 | 0.58931  |
| lincRNA -               | 0  | 0  | 0  | 24  | 13  | 11  | 0        | 0        | 0        | 2.830981 |
| antisense -             | 0  | 3  | 5  | 1   | 1   | 0   | 0        | 0.190686 | 0.299025 | 0.076934 |
| processed_-             | 8  | 2  | 3  | 7   | 5   | 2   | 0.494229 | 0.158445 | 0.223619 | 0.671223 |
| processed_ OXCT1_ant    | 2  | 2  | 0  | 8   | 10  | 3   | 0.187936 | 0.241001 | 0        | 1.16681  |
| processed_-             | 9  | 6  | 5  | 16  | 16  | 13  | 0.194924 | 0.166641 | 0.130659 | 0.537865 |
| processed_-             | 4  | 0  | 5  | 0   | 0   | 0   | 0.055755 | 0        | 0.08409  | 0        |
| sense_intrc ARHGAP22    | 1  | 1  | 0  | 0   | 0   | 0   | 0.099766 | 0.127936 | 0        | 0        |
| antisense HAS2_antis    | 8  | 14 | 19 | 0   | 1   | 17  | 0.226522 | 0.508344 | 0.649115 | 0        |
| processed_-             | 5  | 7  | 15 | 1   | 2   | 1   | 0.386881 | 0.694569 | 1.400384 | 0.120099 |
| antisense -             | 0  | 2  | 0  | 1   | 0   | 0   | 0        | 0.270855 | 0        | 0.163918 |
| pseudogen_-             | 0  | 0  | 1  | 0   | 0   | 1   | 0        | 0        | 0.152907 | 0        |
| pseudogen: TOX_high_1   | 0  | 0  | 0  | 0   | 0   | 1   | 0        | 0        | 0        | 0        |
| processed_-             | 0  | 0  | 0  | 1   | 0   | 0   | 0        | 0        | 0        | 0.036683 |
| pseudogen_-             | 2  | 1  | 0  | 0   | 0   | 0   | 0.063365 | 0.040628 | 0        | 0        |
| protein_co coiled-coil_ | 21 | 21 | 13 | 38  | 39  | 26  | 0.578889 | 0.742343 | 0.432382 | 1.625886 |
| protein_co Protein_LO   | 0  | 0  | 2  | 0   | 0   | 0   | 0        | 0        | 0.011219 | 0        |
| lincRNA -               | 0  | 1  | 4  | 6   | 2   | 2   | 0        | 0.10005  | 0.376542 | 0.726587 |
| antisense -             | 8  | 6  | 4  | 0   | 0   | 0   | 0.662756 | 0.637418 | 0.399827 | 0        |
| processed_-             | 0  | 0  | 3  | 0   | 0   | 0   | 0        | 0        | 0.36658  | 0        |
| processed_ NPHP3_ant    | 0  | 0  | 0  | 1   | 1   | 1   | 0        | 0        | 0        | 0.024488 |
| protein_co Uncharacter  | 1  | 0  | 0  | 0   | 0   | 0   | 0.071479 | 0        | 0        | 0        |
| pseudogen_-             | 0  | 0  | 2  | 0   | 0   | 0   | 0        | 0        | 0.195088 | 0        |
| antisense EGFLAM_ar     | 1  | 0  | 0  | 2   | 1   | 1   | 0.029696 | 0        | 0        | 0.092185 |
| pseudogen_-             | 0  | 0  | 0  | 0   | 0   | 6   | 0        | 0        | 0        | 0        |
| antisense -             | 2  | 3  | 6  | 6   | 3   | 0   | 0.094441 | 0.181661 | 0.341846 | 0.439757 |
| pseudogen: R3H_doma     | 2  | 1  | 1  | 0   | 1   | 1   | 0.047847 | 0.030678 | 0.028865 | 0        |
| antisense -             | 0  | 0  | 0  | 0   | 0   | 1   | 0        | 0        | 0        | 0        |
| lincRNA -               | 2  | 1  | 4  | 10  | 12  | 11  | 0.177951 | 0.114098 | 0.429416 | 1.381021 |
| polymorph actinin_alp   | 2  | 12 | 3  | 660 | 792 | 269 | 0.030409 | 0.233968 | 0.055035 | 15.57544 |
| pseudogen_-             | 0  | 0  | 0  | 2   | 2   | 3   | 0        | 0        | 0        | 0.3271   |
| lincRNA -               | 0  | 0  | 0  | 1   | 0   | 0   | 0        | 0        | 0        | 0.168472 |
| antisense -             | 0  | 1  | 0  | 0   | 1   | 1   | 0        | 0.311553 | 0        | 0        |
| antisense -             | 0  | 0  | 0  | 1   | 0   | 0   | 0        | 0        | 0        | 0.138893 |
| sense_intrc -           | 1  | 2  | 1  | 2   | 2   | 3   | 0.119313 | 0.306004 | 0.143958 | 0.370381 |
| antisense -             | 8  | 13 | 6  | 24  | 21  | 7   | 0.72     | 1.50036  | 0.651541 | 3.35262  |
| lincRNA -               | 4  | 4  | 3  | 0   | 0   | 0   | 0.317361 | 0.40697  | 0.287185 | 0        |
| pseudogen_-             | 0  | 0  | 0  | 7   | 13  | 7   | 0        | 0        | 0        | 0.847685 |
| pseudogen: HIG1_hypo    | 1  | 1  | 1  | 1   | 0   | 0   | 0.166277 | 0.213226 | 0.200622 | 0.258084 |
| lincRNA -               | 12 | 8  | 4  | 4   | 4   | 0   | 1.317752 | 1.126554 | 0.529981 | 0.681778 |
| pseudogen_-             | 0  | 0  | 0  | 0   | 1   | 0   | 0        | 0        | 0        | 0        |
| pseudogen_-             | 1  | 2  | 1  | 0   | 1   | 1   | 0.173667 | 0.445406 | 0.209539 | 0        |
| pseudogen_-             | 0  | 1  | 2  | 2   | 0   | 0   | 0        | 0.04857  | 0.091398 | 0.117576 |
| protein_co HCG17875     | 0  | 0  | 0  | 16  | 17  | 12  | 0        | 0        | 0        | 0.727798 |
| pseudogen_-             | 0  | 0  | 0  | 1   | 0   | 2   | 0        | 0        | 0        | 0.234774 |
| lincRNA -               | 84 | 72 | 61 | 3   | 4   | 12  | 1.387376 | 1.524954 | 1.215606 | 0.076907 |
| antisense -             | 3  | 0  | 0  | 0   | 0   | 0   | 0.271564 | 0        | 0        | 0        |
| pseudogen_-             | 0  | 0  | 0  | 1   | 2   | 2   | 0        | 0        | 0        | 0.04618  |

|                        |     |     |     |     |     |     |          |          |          |          |
|------------------------|-----|-----|-----|-----|-----|-----|----------|----------|----------|----------|
| processed_-            | 1   | 0   | 0   | 0   | 0   | 0   | 0.056358 | 0        | 0        | 0        |
| processed_-            | 56  | 29  | 38  | 54  | 53  | 29  | 0.705492 | 0.468502 | 0.577611 | 1.055913 |
| protein_co CDNA:_FLJ;  | 72  | 80  | 57  | 165 | 173 | 110 | 1.266822 | 1.805022 | 1.210058 | 4.506066 |
| pseudogen_-            | 4   | 2   | 4   | 2   | 4   | 1   | 0.578889 | 0.371172 | 0.698463 | 0.449258 |
| pseudogen_-            | 0   | 0   | 1   | 0   | 1   | 3   | 0        | 0        | 0.071979 | 0        |
| lincRNA_-              | 2   | 5   | 3   | 0   | 0   | 0   | 0.053436 | 0.17131  | 0.09671  | 0        |
| lincRNA_-              | 0   | 0   | 0   | 0   | 0   | 1   | 0        | 0        | 0        | 0        |
| pseudogen; pro-platele | 0   | 0   | 0   | 0   | 0   | 1   | 0        | 0        | 0        | 0        |
| pseudogen_-            | 2   | 0   | 0   | 0   | 2   | 0   | 0.131714 | 0        | 0        | 0        |
| processed_-            | 3   | 4   | 7   | 2   | 0   | 0   | 0.032851 | 0.05617  | 0.092487 | 0.033993 |
| lincRNA_-              | 0   | 0   | 0   | 6   | 15  | 11  | 0        | 0        | 0        | 0.779784 |
| pseudogen_-            | 7   | 8   | 3   | 7   | 4   | 3   | 0.329218 | 0.482486 | 0.170237 | 0.510992 |
| processed_-            | 0   | 1   | 0   | 1   | 2   | 0   | 0        | 0.137912 | 0        | 0.166926 |
| antisense USP46_ant    | 33  | 26  | 29  | 5   | 13  | 15  | 1.476499 | 1.49177  | 1.565544 | 0.347232 |
| lincRNA_-              | 0   | 0   | 0   | 1   | 0   | 2   | 0        | 0        | 0        | 0.114434 |
| lincRNA_-              | 0   | 0   | 0   | 1   | 0   | 0   | 0        | 0        | 0        | 0.020211 |
| pseudogen; SERPINE1_1  | 3   | 1   | 0   | 2   | 5   | 0   | 0.150934 | 0.064517 | 0        | 0.15618  |
| protein_co chromosom   | 0   | 2   | 0   | 0   | 0   | 0   | 0        | 0.060615 | 0        | 0        |
| pseudogen_-            | 3   | 0   | 0   | 3   | 2   | 1   | 0.110677 | 0        | 0        | 0.171786 |
| processed_ HHIP_antis  | 63  | 61  | 53  | 1   | 3   | 10  | 2.700248 | 3.352758 | 2.740861 | 0.066526 |
| processed_-            | 1   | 0   | 5   | 0   | 5   | 9   | 0.057113 | 0        | 0.344552 | 0        |
| antisense_-            | 0   | 0   | 1   | 0   | 0   | 3   | 0        | 0        | 0.095406 | 0        |
| pseudogen_-            | 0   | 0   | 1   | 0   | 0   | 0   | 0        | 0        | 0.221865 | 0        |
| protein_co formin_1    | 427 | 316 | 333 | 83  | 115 | 101 | 1.620562 | 1.537921 | 1.52486  | 0.488929 |
| pseudogen; high_mobil  | 6   | 2   | 5   | 3   | 2   | 6   | 0.484234 | 0.206987 | 0.48688  | 0.375799 |
| lincRNA_-              | 0   | 0   | 1   | 0   | 0   | 0   | 0        | 0        | 0.059742 | 0        |
| pseudogen; nucleopori  | 0   | 3   | 0   | 1   | 0   | 3   | 0        | 0.464921 | 0        | 0.187577 |
| protein_co ATP5J2-PTC  | 0   | 1   | 2   | 0   | 2   | 1   | 0        | 0.024139 | 0.045424 | 0        |
| pseudogen; MT-ND5_p:   | 7   | 1   | 4   | 17  | 15  | 13  | 0.181142 | 0.033184 | 0.124891 | 0.682813 |
| antisense_-            | 7   | 2   | 2   | 1   | 0   | 1   | 0.628793 | 0.230382 | 0.216764 | 0.139425 |
| pseudogen_-            | 0   | 0   | 0   | 0   | 0   | 1   | 0        | 0        | 0        | 0        |
| lincRNA_-              | 4   | 3   | 0   | 11  | 3   | 2   | 0.168366 | 0.161929 | 0        | 0.718652 |
| processed_-            | 32  | 32  | 17  | 31  | 28  | 25  | 2.492493 | 3.196268 | 1.597647 | 3.747797 |
| antisense_-            | 0   | 1   | 0   | 0   | 1   | 3   | 0        | 0.112603 | 0        | 0        |
| lincRNA_-              | 1   | 2   | 0   | 0   | 0   | 0   | 0.083882 | 0.215133 | 0        | 0        |
| processed_-            | 1   | 0   | 0   | 4   | 4   | 0   | 0.02582  | 0        | 0        | 0.160308 |
| pseudogen; high_mobil  | 1   | 0   | 0   | 0   | 0   | 0   | 0.081976 | 0        | 0        | 0        |
| pseudogen; zinc_finger | 2   | 2   | 2   | 0   | 1   | 0   | 0.034189 | 0.043842 | 0.041251 | 0        |
| lincRNA_-              | 2   | 5   | 1   | 1   | 2   | 0   | 0.05023  | 0.161033 | 0.030303 | 0.038982 |
| pseudogen_-            | 0   | 1   | 0   | 0   | 0   | 0   | 0        | 0.021849 | 0        | 0        |
| antisense_-            | 3   | 1   | 6   | 4   | 0   | 2   | 0.204462 | 0.087398 | 0.493391 | 0.423138 |
| antisense_-            | 0   | 0   | 0   | 0   | 0   | 1   | 0        | 0        | 0        | 0        |
| pseudogen; keratin_8_1 | 15  | 12  | 16  | 9   | 8   | 11  | 0.493233 | 0.506001 | 0.634788 | 0.45934  |
| lincRNA_-              | 0   | 0   | 0   | 1   | 6   | 2   | 0        | 0        | 0        | 0.100943 |
| lincRNA_-              | 0   | 1   | 0   | 0   | 0   | 0   | 0        | 0.065217 | 0        | 0        |
| pseudogen; late_endos  | 0   | 1   | 0   | 2   | 7   | 3   | 0        | 0.25918  | 0        | 0.627412 |
| antisense_-            | 0   | 0   | 0   | 0   | 0   | 1   | 0        | 0        | 0        | 0        |
| pseudogen_-            | 1   | 0   | 0   | 0   | 0   | 0   | 0.065398 | 0        | 0        | 0        |
| lincRNA_-              | 0   | 0   | 0   | 5   | 5   | 3   | 0        | 0        | 0        | 0.506823 |
| antisense_-            | 3   | 4   | 5   | 1   | 3   | 2   | 0.324125 | 0.554192 | 0.651792 | 0.167695 |
| pseudogen_-            | 0   | 0   | 0   | 0   | 2   | 0   | 0        | 0        | 0        | 0        |
| antisense_-            | 1   | 0   | 1   | 1   | 3   | 0   | 0.057113 | 0        | 0.06891  | 0.088648 |
| pseudogen_-            | 0   | 0   | 2   | 0   | 0   | 0   | 0        | 0        | 0.189216 | 0        |
| pseudogen_-            | 0   | 0   | 0   | 1   | 0   | 0   | 0        | 0        | 0        | 0.038305 |
| pseudogen_-            | 3   | 4   | 5   | 11  | 7   | 5   | 0.289445 | 0.494895 | 0.582053 | 1.647279 |
| pseudogen; ferritin_he | 0   | 0   | 0   | 0   | 0   | 2   | 0        | 0        | 0        | 0        |
| pseudogen; high_mobil  | 3   | 0   | 0   | 1   | 1   | 2   | 0.369213 | 0        | 0        | 0.191023 |
| antisense_-            | 0   | 0   | 0   | 0   | 0   | 1   | 0        | 0        | 0        | 0        |
| pseudogen_-            | 2   | 3   | 0   | 2   | 1   | 3   | 0.32676  | 0.628534 | 0        | 0.507176 |
| sense_intrc-           | 5   | 5   | 1   | 1   | 2   | 2   | 1.711314 | 2.194518 | 0.41296  | 0.531239 |
| lincRNA_-              | 0   | 0   | 0   | 1   | 0   | 0   | 0        | 0        | 0        | 0.129501 |
| pseudogen_-            | 0   | 0   | 1   | 0   | 0   | 0   | 0        | 0        | 0.452604 | 0        |
| antisense_-            | 4   | 5   | 0   | 3   | 0   | 0   | 0.089828 | 0.143989 | 0        | 0.104569 |
| pseudogen; SMT3_suppr  | 0   | 0   | 0   | 0   | 0   | 2   | 0        | 0        | 0        | 0        |
| protein_co Uncharacte  | 7   | 3   | 3   | 15  | 10  | 8   | 0.113811 | 0.062548 | 0.058851 | 0.378536 |

|                         |     |     |     |     |     |     |          |          |          |          |
|-------------------------|-----|-----|-----|-----|-----|-----|----------|----------|----------|----------|
| processed_-             | 17  | 19  | 21  | 1   | 0   | 0   | 0.404019 | 0.57905  | 0.602172 | 0.036888 |
| antisense_-             | 0   | 0   | 0   | 0   | 0   | 1   | 0        | 0        | 0        | 0        |
| antisense_-             | 118 | 72  | 71  | 30  | 29  | 11  | 4.807143 | 3.761377 | 3.489888 | 1.896954 |
| processed_-             | 78  | 70  | 82  | 50  | 45  | 38  | 6.674127 | 7.680813 | 8.465678 | 6.640493 |
| pseudogen: cytochrom    | 0   | 0   | 1   | 2   | 0   | 0   | 0        | 0        | 0.227211 | 0.584577 |
| pseudogen:-             | 0   | 0   | 0   | 9   | 1   | 0   | 0        | 0        | 0        | 0.827043 |
| sense_intrc MAST4_intl  | 0   | 0   | 0   | 0   | 0   | 1   | 0        | 0        | 0        | 0        |
| lincRNA_-               | 0   | 2   | 5   | 0   | 0   | 0   | 0        | 0.199767 | 0.469896 | 0        |
| pseudogen: proliferatin | 2   | 0   | 0   | 0   | 0   | 0   | 0.124707 | 0        | 0        | 0        |
| pseudogen:-             | 1   | 0   | 0   | 0   | 1   | 1   | 0.082991 | 0        | 0        | 0        |
| antisense_-             | 6   | 1   | 5   | 3   | 6   | 3   | 0.373626 | 0.079854 | 0.375667 | 0.289959 |
| protein_co chromosom    | 52  | 52  | 36  | 10  | 23  | 2   | 0.957315 | 1.22762  | 0.799654 | 0.285747 |
| pseudogen:-             | 0   | 0   | 0   | 0   | 1   | 0   | 0        | 0        | 0        | 0        |
| lincRNA_-               | 0   | 0   | 0   | 0   | 2   | 1   | 0        | 0        | 0        | 0        |
| lincRNA_-               | 1   | 1   | 0   | 1   | 0   | 0   | 0.022985 | 0.029475 | 0        | 0.035676 |
| pseudogen:-             | 0   | 0   | 0   | 1   | 2   | 2   | 0        | 0        | 0        | 0.127237 |
| lincRNA_-               | 0   | 0   | 0   | 0   | 1   | 0   | 0        | 0        | 0        | 0        |
| lincRNA_-               | 0   | 1   | 1   | 0   | 3   | 1   | 0        | 0.072271 | 0.067999 | 0        |
| sense_intrc-            | 0   | 0   | 0   | 2   | 0   | 0   | 0        | 0        | 0        | 0.371326 |
| protein_co HAUS_augn    | 484 | 384 | 395 | 495 | 663 | 678 | 5.086232 | 5.174774 | 5.008365 | 8.073958 |
| antisense_-             | 0   | 0   | 0   | 21  | 21  | 33  | 0        | 0        | 0        | 3.596178 |
| pseudogen: MT-ND6_ps    | 0   | 0   | 1   | 2   | 5   | 3   | 0        | 0        | 0.108382 | 0.27885  |
| pseudogen: suppressor   | 7   | 2   | 2   | 8   | 16  | 18  | 0.339783 | 0.124492 | 0.117134 | 0.602731 |
| lincRNA_-               | 5   | 1   | 6   | 0   | 1   | 0   | 0.569054 | 0.145946 | 0.823915 | 0        |
| pseudogen:-             | 1   | 0   | 0   | 0   | 0   | 0   | 0.062437 | 0        | 0        | 0        |
| pseudogen: peroxiredo   | 1   | 4   | 2   | 2   | 1   | 1   | 0.080017 | 0.410442 | 0.19309  | 0.248395 |
| protein_co-             | 0   | 0   | 0   | 0   | 0   | 1   | 0        | 0        | 0        | 0        |
| pseudogen:-             | 1   | 2   | 0   | 0   | 0   | 0   | 0.04232  | 0.108538 | 0        | 0        |
| pseudogen:-             | 0   | 0   | 0   | 3   | 2   | 0   | 0        | 0        | 0        | 0.462583 |
| lincRNA_-               | 0   | 0   | 0   | 2   | 4   | 2   | 0        | 0        | 0        | 0.263218 |
| processed_-             | 0   | 0   | 0   | 221 | 254 | 197 | 0        | 0        | 0        | 26.11094 |
| pseudogen:-             | 0   | 0   | 0   | 1   | 0   | 0   | 0        | 0        | 0        | 0.122525 |
| protein_co protocadhe   | 311 | 250 | 298 | 174 | 240 | 286 | 2.773977 | 2.859511 | 3.207057 | 2.408919 |
| lincRNA_-               | 0   | 1   | 2   | 5   | 3   | 2   | 0        | 0.124751 | 0.234753 | 0.754977 |
| lincRNA_-               | 0   | 0   | 0   | 1   | 0   | 0   | 0        | 0        | 0        | 0.110272 |
| antisense_-             | 0   | 1   | 0   | 0   | 0   | 0   | 0        | 0.030995 | 0        | 0        |
| antisense_-             | 0   | 2   | 0   | 0   | 0   | 0   | 0        | 0.212849 | 0        | 0        |
| antisense_-             | 0   | 0   | 0   | 0   | 1   | 0   | 0        | 0        | 0        | 0        |
| pseudogen:-             | 1   | 1   | 0   | 3   | 6   | 0   | 0.046937 | 0.06019  | 0        | 0.218558 |
| pseudogen:-             | 1   | 0   | 0   | 4   | 3   | 2   | 0.347333 | 0        | 0        | 2.156439 |
| pseudogen: heat_shock   | 3   | 0   | 0   | 0   | 0   | 1   | 0.081785 | 0        | 0        | 0        |
| processed_-             | 0   | 0   | 0   | 0   | 0   | 4   | 0        | 0        | 0        | 0        |
| processed_-             | 0   | 0   | 0   | 3   | 1   | 0   | 0        | 0        | 0        | 0.096142 |
| pseudogen: olfactory_r  | 2   | 0   | 0   | 0   | 0   | 0   | 0.095015 | 0        | 0        | 0        |
| lincRNA_-               | 2   | 0   | 0   | 0   | 0   | 0   | 0.160582 | 0        | 0        | 0        |
| antisense_-             | 3   | 10  | 0   | 3   | 6   | 0   | 0.1487   | 0.635622 | 0        | 0.230803 |
| pseudogen: ATPase_Na-   | 0   | 1   | 3   | 2   | 6   | 4   | 0        | 0.065716 | 0.185493 | 0.159082 |
| pseudogen:-             | 4   | 2   | 0   | 1   | 3   | 0   | 1.42091  | 0.911058 | 0        | 0.551362 |
| antisense_-             | 0   | 0   | 1   | 0   | 0   | 0   | 0        | 0        | 0.130059 | 0        |
| protein_co ATP_syntha   | 0   | 0   | 3   | 1   | 1   | 0   | 0        | 0        | 0.212424 | 0.091089 |
| lincRNA_-               | 1   | 0   | 0   | 0   | 0   | 0   | 0.029233 | 0        | 0        | 0        |
| antisense_-             | 0   | 0   | 2   | 1   | 0   | 0   | 0        | 0        | 0.273312 | 0.175797 |
| pseudogen:-             | 1   | 0   | 0   | 0   | 0   | 0   | 0.051812 | 0        | 0        | 0        |
| pseudogen:-             | 0   | 0   | 0   | 6   | 3   | 2   | 0        | 0        | 0        | 0.468037 |
| protein_co Uncharacte   | 1   | 0   | 0   | 0   | 0   | 0   | 0.039805 | 0        | 0        | 0        |
| lincRNA_-               | 0   | 2   | 1   | 1   | 0   | 0   | 0        | 0.125663 | 0.059118 | 0.07605  |
| protein_co transmemt    | 50  | 26  | 27  | 45  | 48  | 28  | 1.178141 | 0.785615 | 0.767607 | 1.645774 |
| pseudogen:-             | 2   | 1   | 0   | 3   | 0   | 3   | 0.026756 | 0.017155 | 0        | 0.062294 |
| pseudogen:-             | 1   | 0   | 0   | 2   | 0   | 1   | 0.024981 | 0        | 0        | 0.077549 |
| antisense_-             | 9   | 2   | 5   | 1   | 1   | 4   | 0.551647 | 0.157202 | 0.369775 | 0.095137 |
| antisense_-             | 0   | 0   | 1   | 1   | 3   | 10  | 0        | 0        | 0.089802 | 0.115523 |
| pseudogen: phosphogl    | 0   | 0   | 0   | 4   | 3   | 4   | 0        | 0        | 0        | 0.385588 |
| lincRNA_-               | 6   | 8   | 7   | 1   | 3   | 0   | 0.122749 | 0.209877 | 0.172787 | 0.031754 |
| pseudogen: eukaryotic_  | 3   | 3   | 1   | 10  | 8   | 4   | 0.101714 | 0.130433 | 0.040908 | 0.526246 |
| lincRNA_-               | 0   | 0   | 0   | 2   | 1   | 0   | 0        | 0        | 0        | 0.029276 |

|                        |     |     |     |     |     |     |          |          |          |          |
|------------------------|-----|-----|-----|-----|-----|-----|----------|----------|----------|----------|
| pseudogen: -           | 0   | 0   | 2   | 0   | 2   | 0   | 0        | 0        | 0.112476 | 0        |
| lincRNA -              | 2   | 0   | 0   | 0   | 0   | 0   | 0.276637 | 0        | 0        | 0        |
| pseudogen: -           | 3   | 6   | 5   | 3   | 1   | 0   | 0.141519 | 0.362957 | 0.284585 | 0.219657 |
| antisense -            | 0   | 1   | 1   | 0   | 0   | 0   | 0        | 0.108147 | 0.101755 | 0        |
| processed_ -           | 0   | 0   | 0   | 1   | 0   | 1   | 0        | 0        | 0        | 0.223251 |
| pseudogen: ferritin_he | 0   | 0   | 0   | 1   | 1   | 0   | 0        | 0        | 0        | 0.157532 |
| antisense -            | 7   | 5   | 7   | 1   | 1   | 1   | 0.744286 | 0.681744 | 0.898024 | 0.165034 |
| processed_ -           | 2   | 0   | 0   | 0   | 0   | 0   | 0.111114 | 0        | 0        | 0        |
| antisense -            | 1   | 1   | 2   | 2   | 0   | 0   | 0.048191 | 0.061798 | 0.116291 | 0.149599 |
| antisense -            | 1   | 0   | 0   | 1   | 1   | 1   | 0.09     | 0        | 0        | 0.139693 |
| antisense APOBEC3B_    | 0   | 0   | 2   | 3   | 6   | 1   | 0        | 0        | 0.16375  | 0.315976 |
| pseudogen: ADP-ribosy  | 2   | 0   | 0   | 0   | 0   | 0   | 0.199108 | 0        | 0        | 0        |
| antisense -            | 0   | 1   | 2   | 0   | 1   | 0   | 0        | 0.137283 | 0.258336 | 0        |
| pseudogen: olfactory_r | 0   | 0   | 0   | 0   | 0   | 1   | 0        | 0        | 0        | 0        |
| antisense -            | 0   | 0   | 0   | 4   | 9   | 2   | 0        | 0        | 0        | 0.178055 |
| lincRNA -              | 1   | 0   | 3   | 0   | 1   | 0   | 0.022056 | 0        | 0.079834 | 0        |
| processed_ -           | 0   | 0   | 0   | 0   | 1   | 0   | 0        | 0        | 0        | 0        |
| lincRNA -              | 0   | 0   | 0   | 0   | 1   | 0   | 0        | 0        | 0        | 0        |
| lincRNA -              | 0   | 0   | 2   | 0   | 0   | 0   | 0        | 0        | 0.03591  | 0        |
| antisense UGDH_anti    | 54  | 25  | 38  | 17  | 23  | 14  | 0.908526 | 0.539377 | 0.771392 | 0.443939 |
| pseudogen: nucleopho:  | 105 | 84  | 70  | 307 | 317 | 325 | 5.93187  | 6.085425 | 4.771428 | 26.91976 |
| lincRNA -              | 0   | 0   | 0   | 1   | 0   | 1   | 0        | 0        | 0        | 0.074723 |
| lincRNA -              | 0   | 0   | 0   | 0   | 2   | 0   | 0        | 0        | 0        | 0        |
| pseudogen: -           | 7   | 0   | 2   | 3   | 2   | 3   | 0.374692 | 0        | 0.129168 | 0.249246 |
| processed_ -           | 0   | 0   | 0   | 3   | 5   | 1   | 0        | 0        | 0        | 0.140321 |
| pseudogen: fatty_acid_ | 0   | 0   | 0   | 0   | 1   | 0   | 0        | 0        | 0        | 0        |
| pseudogen: ATPase_H+   | 0   | 1   | 0   | 0   | 0   | 0   | 0        | 0.180029 | 0        | 0        |
| antisense -            | 0   | 0   | 0   | 1   | 2   | 0   | 0        | 0        | 0        | 0.170444 |
| processed_ -           | 1   | 2   | 2   | 1   | 5   | 4   | 0.014205 | 0.036431 | 0.034278 | 0.022048 |
| processed_ -           | 10  | 12  | 6   | 3   | 0   | 5   | 0.192567 | 0.296328 | 0.139406 | 0.089667 |
| antisense -            | 5   | 0   | 2   | 5   | 4   | 7   | 0.428611 | 0        | 0.206857 | 0.665263 |
| lincRNA -              | 0   | 0   | 0   | 3   | 2   | 0   | 0        | 0        | 0        | 0.413522 |
| lincRNA -              | 0   | 0   | 0   | 0   | 1   | 0   | 0        | 0        | 0        | 0        |
| lincRNA -              | 86  | 53  | 75  | 120 | 119 | 68  | 3.464383 | 2.737869 | 3.645329 | 7.503072 |
| lincRNA -              | 11  | 15  | 5   | 2   | 1   | 4   | 0.614768 | 1.075026 | 0.33716  | 0.173492 |
| antisense IL20RB_ant   | 0   | 0   | 0   | 0   | 1   | 0   | 0        | 0        | 0        | 0        |
| lincRNA -              | 0   | 0   | 0   | 0   | 0   | 1   | 0        | 0        | 0        | 0        |
| pseudogen: -           | 0   | 2   | 0   | 0   | 0   | 0   | 0        | 0.054688 | 0        | 0        |
| antisense -            | 0   | 0   | 0   | 4   | 3   | 1   | 0        | 0        | 0        | 0.511633 |
| processed_ -           | 1   | 1   | 1   | 1   | 2   | 0   | 0.062188 | 0.079748 | 0.075034 | 0.096525 |
| processed_ -           | 3   | 0   | 6   | 2   | 2   | 1   | 0.333341 | 0        | 0.804391 | 0.344928 |
| pseudogen: -           | 0   | 0   | 0   | 1   | 0   | 0   | 0        | 0        | 0        | 0.168472 |
| antisense -            | 3   | 1   | 2   | 0   | 0   | 0   | 0.127303 | 0.054416 | 0.102399 | 0        |
| antisense -            | 1   | 0   | 0   | 48  | 82  | 46  | 0.059657 | 0        | 0        | 4.444568 |
| lincRNA -              | 0   | 0   | 0   | 1   | 0   | 1   | 0        | 0        | 0        | 0.051362 |
| lincRNA -              | 0   | 0   | 0   | 0   | 1   | 2   | 0        | 0        | 0        | 0        |
| protein_co Uncharacte  | 1   | 1   | 5   | 3   | 3   | 0   | 0.033541 | 0.043011 | 0.202344 | 0.15618  |
| lincRNA -              | 183 | 104 | 125 | 283 | 380 | 269 | 12.17145 | 8.870211 | 10.03112 | 29.21515 |
| protein_co NLR_family  | 12  | 12  | 14  | 16  | 14  | 15  | 0.091881 | 0.117825 | 0.129337 | 0.19015  |
| pseudogen: -           | 0   | 0   | 1   | 0   | 0   | 0   | 0        | 0        | 0.042442 | 0        |
| lincRNA -              | 0   | 0   | 0   | 0   | 1   | 0   | 0        | 0        | 0        | 0        |
| antisense -            | 1   | 0   | 0   | 0   | 1   | 0   | 0.106086 | 0        | 0        | 0        |
| processed_ -           | 71  | 41  | 32  | 36  | 55  | 27  | 5.998543 | 4.442021 | 3.262011 | 4.720852 |
| protein_co zinc_finger | 189 | 106 | 152 | 177 | 220 | 221 | 1.663328 | 1.196276 | 1.614016 | 2.417797 |
| processed_ -           | 6   | 2   | 1   | 9   | 13  | 7   | 0.053466 | 0.022854 | 0.010752 | 0.124481 |
| pseudogen: RNA_bindir  | 2   | 3   | 0   | 1   | 2   | 2   | 0.082698 | 0.159074 | 0        | 0.06418  |
| protein_co zinc_finger | 102 | 75  | 87  | 38  | 54  | 63  | 1.268642 | 1.196216 | 1.305589 | 0.73359  |
| lincRNA -              | 8   | 6   | 7   | 3   | 4   | 1   | 0.068565 | 0.065944 | 0.072387 | 0.039909 |
| antisense -            | 0   | 0   | 0   | 1   | 0   | 0   | 0        | 0        | 0        | 0.023164 |
| lincRNA -              | 1   | 3   | 1   | 0   | 0   | 0   | 0.021382 | 0.082257 | 0.025798 | 0        |
| pseudogen: retinoblast | 4   | 1   | 0   | 0   | 2   | 2   | 0.146991 | 0.047124 | 0        | 0        |
| lincRNA -              | 1   | 0   | 0   | 0   | 0   | 0   | 0.025553 | 0        | 0        | 0        |
| pseudogen: glyceraldeh | 0   | 0   | 3   | 1   | 0   | 0   | 0        | 0        | 0.162418 | 0.069646 |
| antisense EGFLAM_ar    | 0   | 1   | 0   | 0   | 0   | 0   | 0        | 0.181661 | 0        | 0        |
| processed_ -           | 2   | 1   | 4   | 10  | 3   | 3   | 0.194564 | 0.124751 | 0.469506 | 1.509954 |

|                         |     |     |     |     |     |     |          |          |          |          |
|-------------------------|-----|-----|-----|-----|-----|-----|----------|----------|----------|----------|
| pseudogen: ankyrin_rej  | 7   | 2   | 3   | 4   | 2   | 4   | 0.667134 | 0.24443  | 0.344973 | 0.591706 |
| antisense -             | 0   | 2   | 0   | 1   | 0   | 1   | 0        | 0.148103 | 0        | 0.08963  |
| lincRNA -               | 0   | 0   | 2   | 0   | 0   | 0   | 0        | 0        | 0.06451  | 0        |
| lincRNA -               | 1   | 0   | 1   | 0   | 0   | 0   | 0.021678 | 0        | 0.026156 | 0        |
| antisense -             | 5   | 4   | 2   | 4   | 4   | 3   | 0.3126   | 0.320692 | 0.150868 | 0.388159 |
| pseudogen: -            | 0   | 0   | 0   | 1   | 1   | 0   | 0        | 0        | 0        | 0.062795 |
| pseudogen: zinc_finger  | 4   | 4   | 4   | 0   | 0   | 0   | 0.189263 | 0.242704 | 0.228357 | 0        |
| antisense -             | 0   | 0   | 0   | 0   | 2   | 0   | 0        | 0        | 0        | 0        |
| lincRNA -               | 0   | 1   | 0   | 1   | 0   | 0   | 0        | 0.130151 | 0        | 0.157532 |
| pseudogen: -            | 0   | 0   | 0   | 1   | 3   | 0   | 0        | 0        | 0        | 0.12746  |
| pseudogen: -            | 0   | 0   | 0   | 2   | 4   | 0   | 0        | 0        | 0        | 0.143267 |
| pseudogen: -            | 0   | 0   | 0   | 0   | 1   | 0   | 0        | 0        | 0        | 0        |
| lincRNA -               | 6   | 6   | 9   | 3   | 3   | 7   | 0.495317 | 0.635174 | 0.896443 | 0.3844   |
| pseudogen: -            | 0   | 0   | 2   | 0   | 0   | 0   | 0        | 0        | 0.130358 | 0        |
| antisense -             | 3   | 0   | 1   | 43  | 59  | 52  | 0.219797 | 0        | 0.088399 | 4.889893 |
| lincRNA -               | 0   | 2   | 0   | 0   | 0   | 0   | 0        | 0.058407 | 0        | 0        |
| pseudogen: -            | 1   | 0   | 2   | 1   | 0   | 0   | 0.145621 | 0        | 0.351401 | 0.226024 |
| lincRNA -               | 5   | 2   | 1   | 44  | 48  | 40  | 0.112285 | 0.057596 | 0.027096 | 1.533674 |
| pseudogen: regulator_c  | 0   | 1   | 0   | 2   | 1   | 1   | 0        | 0.057706 | 0        | 0.139693 |
| pseudogen: SERPINE1_r   | 5   | 8   | 12  | 21  | 18  | 24  | 0.198518 | 0.407314 | 0.574857 | 1.294137 |
| antisense -             | 4   | 0   | 1   | 0   | 0   | 0   | 0.066042 | 0        | 0.019921 | 0        |
| antisense -             | 14  | 16  | 18  | 5   | 8   | 7   | 1.222459 | 1.791577 | 1.896386 | 0.677652 |
| processed_ -            | 0   | 0   | 0   | 0   | 3   | 1   | 0        | 0        | 0        | 0        |
| pseudogen: -            | 9   | 8   | 20  | 5   | 0   | 5   | 1.42091  | 1.619658 | 3.809798 | 1.225249 |
| pseudogen: -            | 0   | 0   | 0   | 1   | 0   | 0   | 0        | 0        | 0        | 0.121705 |
| processed_ -            | 101 | 95  | 127 | 65  | 57  | 58  | 7.663255 | 9.243253 | 11.62636 | 7.654833 |
| antisense -             | 2   | 1   | 2   | 8   | 8   | 3   | 0.087891 | 0.056354 | 0.106046 | 0.545678 |
| sense_intrc -           | 0   | 0   | 0   | 1   | 1   | 0   | 0        | 0        | 0        | 0.237068 |
| lincRNA -               | 15  | 9   | 9   | 0   | 0   | 0   | 1.376419 | 1.059038 | 0.996437 | 0        |
| processed_ -            | 4   | 10  | 3   | 28  | 16  | 13  | 0.490995 | 1.574078 | 0.44431  | 5.334645 |
| antisense -             | 0   | 2   | 3   | 2   | 0   | 1   | 0        | 0.038214 | 0.053933 | 0.046253 |
| pseudogen: trafficking_ | 0   | 0   | 0   | 0   | 1   | 0   | 0        | 0        | 0        | 0        |
| antisense -             | 10  | 12  | 11  | 2   | 3   | 2   | 0.849457 | 1.307169 | 1.12741  | 0.263695 |
| processed_ -            | 0   | 0   | 0   | 1   | 2   | 0   | 0        | 0        | 0        | 0.040957 |
| pseudogen: high_mobil   | 1   | 7   | 0   | 0   | 0   | 0   | 0.339783 | 3.050062 | 0        | 0        |
| lincRNA -               | 0   | 2   | 2   | 0   | 0   | 1   | 0        | 0.206277 | 0.194084 | 0        |
| antisense -             | 3   | 5   | 6   | 0   | 0   | 0   | 0.313996 | 0.671091 | 0.757708 | 0        |
| protein_co Uncharacte   | 5   | 3   | 5   | 0   | 2   | 0   | 0.17201  | 0.132347 | 0.20754  | 0        |
| pseudogen: -            | 1   | 1   | 3   | 20  | 14  | 11  | 0.031323 | 0.040167 | 0.113378 | 0.972342 |
| lincRNA -               | 9   | 10  | 16  | 0   | 0   | 1   | 0.174601 | 0.248779 | 0.374517 | 0        |
| lincRNA -               | 2   | 0   | 0   | 0   | 4   | 0   | 0.125542 | 0        | 0        | 0        |
| pseudogen: olfactory_r  | 0   | 1   | 0   | 1   | 0   | 0   | 0        | 0.06696  | 0        | 0.081047 |
| antisense -             | 1   | 1   | 3   | 1   | 0   | 0   | 0.013298 | 0.017053 | 0.048136 | 0.020641 |
| antisense -             | 3   | 7   | 4   | 23  | 14  | 30  | 0.25623  | 0.766682 | 0.412208 | 3.049063 |
| antisense -             | 0   | 0   | 1   | 0   | 0   | 0   | 0        | 0        | 0.112253 | 0        |
| antisense HOXC_clusi    | 1   | 0   | 0   | 0   | 0   | 0   | 0.033303 | 0        | 0        | 0        |
| antisense -             | 0   | 0   | 0   | 2   | 1   | 0   | 0        | 0        | 0        | 0.239802 |
| pseudogen: mitochond    | 0   | 0   | 0   | 0   | 0   | 1   | 0        | 0        | 0        | 0        |
| antisense -             | 2   | 0   | 1   | 0   | 1   | 3   | 0.15868  | 0        | 0.095728 | 0        |
| antisense -             | 2   | 15  | 12  | 13  | 19  | 25  | 0.17082  | 1.642891 | 1.236623 | 1.723383 |
| pseudogen: TNRC18P1     | 22  | 8   | 13  | 0   | 0   | 1   | 0.282625 | 0.131791 | 0.201502 | 0        |
| lincRNA -               | 2   | 4   | 2   | 2   | 0   | 0   | 0.113673 | 0.291538 | 0.137153 | 0.176436 |
| processed_ MIR143_hc    | 84  | 65  | 59  | 0   | 0   | 0   | 0.469012 | 0.465401 | 0.39747  | 0        |
| processed_ NOP14_ant    | 199 | 169 | 189 | 181 | 207 | 246 | 2.417387 | 2.632626 | 2.770148 | 3.412732 |
| lincRNA -               | 0   | 0   | 0   | 2   | 0   | 2   | 0        | 0        | 0        | 0.155845 |
| antisense -             | 0   | 0   | 1   | 0   | 0   | 0   | 0        | 0        | 0.314308 | 0        |
| protein_co Uncharacte   | 4   | 2   | 1   | 0   | 3   | 0   | 0.476041 | 0.305227 | 0.143593 | 0        |
| antisense -             | 0   | 2   | 2   | 14  | 10  | 15  | 0        | 0.196182 | 0.184586 | 1.662181 |
| lincRNA -               | 4   | 2   | 7   | 1   | 5   | 1   | 0.41222  | 0.264307 | 0.870392 | 0.159956 |
| processed_ -            | 6   | 0   | 0   | 3   | 3   | 3   | 0.127361 | 0        | 0        | 0.098841 |
| pseudogen: -            | 0   | 0   | 0   | 3   | 0   | 0   | 0        | 0        | 0        | 0.24727  |
| protein_co theg_sperr   | 4   | 5   | 0   | 0   | 2   | 2   | 0.113673 | 0.182212 | 0        | 0        |
| processed_ -            | 0   | 0   | 0   | 0   | 0   | 1   | 0        | 0        | 0        | 0        |
| antisense -             | 0   | 0   | 0   | 6   | 3   | 3   | 0        | 0        | 0        | 0.088882 |
| lincRNA -               | 6   | 2   | 2   | 0   | 0   | 0   | 0.100407 | 0.042919 | 0.040382 | 0        |

|                         |      |      |      |      |       |      |          |          |          |          |
|-------------------------|------|------|------|------|-------|------|----------|----------|----------|----------|
| antisense SRD5A3_ar     | 17   | 20   | 23   | 12   | 15    | 18   | 0.492969 | 0.74372  | 0.804723 | 0.54011  |
| protein_co zinc_finger  | 5    | 1    | 4    | 4    | 7     | 7    | 0.079881 | 0.020487 | 0.077105 | 0.099189 |
| antisense -             | 1    | 4    | 5    | 1    | 0     | 0    | 0.029528 | 0.15146  | 0.178134 | 0.045831 |
| pseudogen: fer-1-like_5 | 3    | 5    | 6    | 28   | 42    | 19   | 0.021718 | 0.046418 | 0.052409 | 0.314626 |
| processed_-             | 2    | 0    | 1    | 2    | 4     | 0    | 0.166868 | 0        | 0.100668 | 0.259003 |
| pseudogen:-             | 0    | 0    | 0    | 5    | 2     | 3    | 0        | 0        | 0        | 0.935473 |
| lincRNA -               | 0    | 0    | 1    | 0    | 0     | 0    | 0        | 0        | 0.10139  | 0        |
| lincRNA -               | 0    | 0    | 0    | 0    | 1     | 1    | 0        | 0        | 0        | 0        |
| lincRNA -               | 0    | 0    | 1    | 0    | 0     | 0    | 0        | 0        | 0.102492 | 0        |
| lincRNA -               | 0    | 0    | 0    | 2    | 2     | 0    | 0        | 0        | 0        | 0.227082 |
| antisense -             | 0    | 0    | 0    | 0    | 1     | 0    | 0        | 0        | 0        | 0        |
| processed_-             | 2    | 0    | 2    | 0    | 0     | 2    | 0.059354 | 0        | 0.071615 | 0        |
| processed_-             | 5    | 6    | 7    | 1    | 0     | 0    | 0.280108 | 0.431038 | 0.473152 | 0.086953 |
| pseudogen:-             | 3    | 2    | 1    | 2    | 1     | 0    | 0.2605   | 0.222703 | 0.104769 | 0.269555 |
| lincRNA -               | 0    | 1    | 0    | 0    | 0     | 0    | 0        | 0.126856 | 0        | 0        |
| lincRNA -               | 27   | 34   | 31   | 0    | 0     | 0    | 1.34541  | 2.172596 | 1.863805 | 0        |
| lincRNA -               | 0    | 0    | 1    | 0    | 0     | 0    | 0        | 0        | 0.086772 | 0        |
| protein_co endothelial  | 7    | 10   | 8    | 5    | 8     | 14   | 0.7294   | 1.336218 | 1.005787 | 0.808664 |
| processed_-             | 2    | 1    | 3    | 2    | 5     | 3    | 0.341018 | 0.218654 | 0.617187 | 0.529308 |
| pseudogen:-             | 9    | 5    | 2    | 2    | 2     | 1    | 0.642329 | 0.457609 | 0.172224 | 0.221552 |
| pseudogen:-             | 0    | 1    | 0    | 0    | 0     | 0    | 0        | 0.328578 | 0        | 0        |
| processed_-             | 1    | 0    | 4    | 0    | 0     | 0    | 0.091226 | 0        | 0.440276 | 0        |
| pseudogen:-             | 0    | 3    | 0    | 2    | 11    | 3    | 0        | 0.193343 | 0        | 0.156012 |
| protein_co 28S_riboso   | 1    | 0    | 0    | 0    | 1     | 0    | 0.027073 | 0        | 0        | 0        |
| pseudogen:-             | 1    | 0    | 0    | 0    | 0     | 0    | 0.28247  | 0        | 0        | 0        |
| sense_intrc small_Cajal | 1    | 1    | 1    | 0    | 0     | 0    | 0.37512  | 0.481038 | 0.452604 | 0        |
| antisense EAF1_antisi   | 2    | 0    | 1    | 3    | 2     | 5    | 0.098716 | 0        | 0.059553 | 0.229831 |
| lincRNA -               | 1    | 1    | 0    | 0    | 0     | 0    | 0.083286 | 0.106802 | 0        | 0        |
| processed_-             | 1917 | 1440 | 1578 | 8679 | 10760 | 8430 | 45.58223 | 43.90817 | 45.27188 | 320.3123 |
| antisense -             | 0    | 1    | 0    | 1    | 4     | 2    | 0        | 0.162513 | 0        | 0.196702 |
| lincRNA -               | 1    | 0    | 0    | 0    | 0     | 0    | 0.058104 | 0        | 0        | 0        |
| pseudogen: hydroxy-de   | 0    | 0    | 1    | 0    | 0     | 0    | 0        | 0        | 0.056917 | 0        |
| pseudogen:-             | 0    | 0    | 0    | 1    | 2     | 1    | 0        | 0        | 0        | 0.383052 |
| lincRNA -               | 2    | 0    | 0    | 0    | 0     | 0    | 0.099449 | 0        | 0        | 0        |
| lincRNA -               | 0    | 0    | 0    | 0    | 1     | 0    | 0        | 0        | 0        | 0        |
| lincRNA -               | 1    | 0    | 0    | 0    | 2     | 0    | 0.080429 | 0        | 0        | 0        |
| processed_-             | 6    | 6    | 3    | 1    | 5     | 2    | 0.378145 | 0.484918 | 0.228127 | 0.097822 |
| antisense -             | 8    | 3    | 9    | 6    | 1     | 1    | 0.138677 | 0.066687 | 0.188236 | 0.161434 |
| pseudogen: piggyBac_ti  | 0    | 0    | 1    | 0    | 0     | 1    | 0        | 0        | 0.097376 | 0        |
| antisense VCAN_antis    | 12   | 12   | 8    | 7    | 4     | 5    | 1.24212  | 1.592842 | 0.999126 | 1.124633 |
| lincRNA -               | 2    | 0    | 1    | 0    | 0     | 0    | 0.218093 | 0        | 0.131571 | 0        |
| pseudogen:-             | 2    | 4    | 2    | 2    | 5     | 5    | 0.028989 | 0.074349 | 0.034977 | 0.044995 |
| pseudogen:-             | 0    | 0    | 0    | 1    | 2     | 0    | 0        | 0        | 0        | 0.074569 |
| processed_-             | 8    | 6    | 11   | 22   | 31    | 29   | 0.233284 | 0.224365 | 0.387021 | 0.995744 |
| pseudogen:-             | 2    | 0    | 0    | 0    | 0     | 0    | 0.163096 | 0        | 0        | 0        |
| antisense -             | 0    | 2    | 0    | 0    | 0     | 1    | 0        | 0.279025 | 0        | 0        |
| pseudogen:-             | 2    | 1    | 0    | 0    | 0     | 1    | 0.072585 | 0.04654  | 0        | 0        |
| protein_co Uncharacte   | 12   | 3    | 8    | 7    | 2     | 10   | 0.280779 | 0.090015 | 0.22585  | 0.254221 |
| protein_co heparan_su   | 61   | 45   | 44   | 65   | 80    | 64   | 0.73322  | 0.693627 | 0.638124 | 1.212686 |
| pseudogen: eukaryotic_  | 17   | 25   | 20   | 32   | 40    | 19   | 0.576795 | 1.087731 | 0.818748 | 1.685205 |
| processed_-             | 0    | 0    | 0    | 0    | 2     | 0    | 0        | 0        | 0        | 0        |
| pseudogen: sorting_ne   | 0    | 0    | 0    | 1    | 0     | 0    | 0        | 0        | 0        | 0.069913 |
| processed_ Pvt1_onco    | 115  | 88   | 108  | 220  | 292   | 199  | 3.173839 | 3.114433 | 3.596324 | 9.424106 |
| protein_co MT-RNR2-li   | 0    | 0    | 0    | 1    | 0     | 0    | 0        | 0        | 0        | 0.041852 |
| pseudogen:-             | 18   | 15   | 8    | 36   | 30    | 15   | 0.797751 | 0.852502 | 0.427792 | 2.476439 |
| processed_-             | 0    | 1    | 2    | 0    | 0     | 0    | 0        | 0.135733 | 0.25542  | 0        |
| lincRNA -               | 0    | 0    | 1    | 0    | 0     | 0    | 0        | 0        | 0.070193 | 0        |
| processed_-             | 6    | 8    | 6    | 4    | 5     | 7    | 0.319705 | 0.546635 | 0.385742 | 0.330817 |
| antisense -             | 0    | 0    | 0    | 2    | 0     | 0    | 0        | 0        | 0        | 0.438433 |
| lincRNA -               | 0    | 0    | 0    | 1    | 1     | 1    | 0        | 0        | 0        | 0.198852 |
| pseudogen:-             | 0    | 0    | 0    | 1    | 0     | 0    | 0        | 0        | 0        | 0.107662 |
| lincRNA -               | 0    | 1    | 0    | 0    | 0     | 0    | 0        | 0.113667 | 0        | 0        |
| pseudogen: asparagine-  | 0    | 1    | 0    | 0    | 1     | 0    | 0        | 0.133622 | 0        | 0        |
| lincRNA -               | 0    | 0    | 0    | 3    | 2     | 0    | 0        | 0        | 0        | 0.385759 |
| lincRNA -               | 0    | 0    | 0    | 13   | 16    | 8    | 0        | 0        | 0        | 0.371471 |

|                         |     |     |     |     |     |     |          |          |          |          |
|-------------------------|-----|-----|-----|-----|-----|-----|----------|----------|----------|----------|
| antisense -             | 47  | 31  | 30  | 23  | 43  | 17  | 1.02647  | 0.868199 | 0.790529 | 0.779663 |
| antisense -             | 0   | 1   | 0   | 4   | 1   | 1   | 0        | 0.049246 | 0        | 0.238427 |
| pseudogen-              | 0   | 0   | 0   | 0   | 2   | 0   | 0        | 0        | 0        | 0        |
| antisense -             | 1   | 1   | 1   | 1   | 1   | 1   | 0.072585 | 0.09308  | 0.087578 | 0.112662 |
| protein_co programm     | 868 | 699 | 792 | 594 | 704 | 763 | 10.81598 | 11.16947 | 11.90747 | 11.48849 |
| antisense -             | 1   | 0   | 2   | 0   | 4   | 1   | 0.083286 | 0        | 0.200979 | 0        |
| lincRNA long_interf     | 10  | 4   | 5   | 0   | 0   | 0   | 0.174183 | 0.089346 | 0.105081 | 0        |
| pseudogen fatty_acid_   | 0   | 0   | 0   | 1   | 0   | 0   | 0        | 0        | 0        | 0.177946 |
| pseudogen-              | 0   | 1   | 0   | 0   | 0   | 0   | 0        | 0.063428 | 0        | 0        |
| antisense -             | 0   | 0   | 0   | 1   | 0   | 0   | 0        | 0        | 0        | 0.032666 |
| lincRNA -               | 0   | 0   | 0   | 0   | 1   | 0   | 0        | 0        | 0        | 0        |
| pseudogen ubiquinol-    | 1   | 0   | 0   | 0   | 0   | 0   | 0.150289 | 0        | 0        | 0        |
| protein_co golgin_A8_   | 2   | 3   | 4   | 11  | 2   | 2   | 0.049514 | 0.095243 | 0.119484 | 0.422692 |
| pseudogen ras-related_  | 37  | 35  | 26  | 35  | 36  | 34  | 2.08275  | 2.526462 | 1.765862 | 3.057975 |
| lincRNA -               | 0   | 0   | 2   | 0   | 0   | 0   | 0        | 0        | 0.14488  | 0        |
| antisense -             | 1   | 0   | 3   | 0   | 0   | 0   | 0.064057 | 0        | 0.231867 | 0        |
| pseudogen X-box_binc    | 14  | 5   | 2   | 0   | 4   | 4   | 1.006841 | 0.461118 | 0.173544 | 0        |
| antisense -             | 1   | 5   | 0   | 0   | 0   | 0   | 0.084639 | 0.542688 | 0        | 0        |
| protein_co coiled-coil_ | 1   | 0   | 1   | 0   | 0   | 2   | 0.018453 | 0        | 0.022265 | 0        |
| pseudogen cell_divisio  | 2   | 0   | 0   | 2   | 0   | 0   | 0.166572 | 0        | 0        | 0.258543 |
| pseudogen coiled-coil-  | 1   | 0   | 0   | 0   | 1   | 2   | 0.103739 | 0        | 0        | 0        |
| pseudogen-              | 1   | 0   | 1   | 0   | 0   | 0   | 0.122109 | 0        | 0.147332 | 0        |
| TR_V_pseuT_cell_rece    | 1   | 0   | 0   | 2   | 2   | 2   | 0.132833 | 0        | 0        | 0.41235  |
| pseudogen YWHAQ_ps      | 2   | 1   | 2   | 0   | 0   | 0   | 0.308487 | 0.197795 | 0.372207 | 0        |
| lincRNA -               | 0   | 0   | 0   | 0   | 0   | 1   | 0        | 0        | 0        | 0        |
| protein_co transmemt    | 315 | 227 | 229 | 48  | 112 | 45  | 8.146914 | 7.528662 | 7.146051 | 1.926878 |
| pseudogen-              | 0   | 0   | 0   | 2   | 0   | 5   | 0        | 0        | 0        | 0.092302 |
| antisense -             | 9   | 8   | 7   | 2   | 0   | 0   | 0.752246 | 0.857466 | 0.705933 | 0.259465 |
| lincRNA -               | 4   | 0   | 0   | 0   | 0   | 0   | 0.415876 | 0        | 0        | 0        |
| sense_intrc -           | 12  | 7   | 4   | 3   | 5   | 0   | 1.036243 | 0.775154 | 0.416762 | 0.402098 |
| antisense -             | 0   | 1   | 0   | 1   | 3   | 1   | 0        | 0.135427 | 0        | 0.163918 |
| lincRNA -               | 8   | 4   | 5   | 3   | 0   | 5   | 1.820972 | 1.167569 | 1.373192 | 1.0599   |
| pseudogen sorting_ne    | 0   | 0   | 0   | 0   | 1   | 0   | 0        | 0        | 0        | 0        |
| pseudogen-              | 4   | 0   | 1   | 0   | 0   | 0   | 0.092714 | 0        | 0.027966 | 0        |
| pseudogen-              | 0   | 0   | 0   | 1   | 1   | 3   | 0        | 0        | 0        | 0.101365 |
| antisense -             | 3   | 2   | 7   | 2   | 7   | 4   | 0.181043 | 0.154774 | 0.509689 | 0.187335 |
| pseudogen-              | 1   | 1   | 1   | 3   | 1   | 0   | 0.15224  | 0.195227 | 0.183687 | 0.708894 |
| pseudogen-              | 4   | 2   | 0   | 2   | 6   | 4   | 0.10543  | 0.0676   | 0        | 0.081821 |
| processed_SLC7A11_a     | 5   | 2   | 0   | 1   | 0   | 3   | 0.050376 | 0.02584  | 0        | 0.015638 |
| protein_co Uncharacte   | 0   | 0   | 0   | 1   | 0   | 0   | 0        | 0        | 0        | 0.082704 |
| antisense -             | 0   | 3   | 2   | 2   | 1   | 2   | 0        | 0.096259 | 0.060379 | 0.077673 |
| processed_ -            | 5   | 0   | 1   | 0   | 0   | 0   | 0.420916 | 0        | 0.101572 | 0        |
| lincRNA -               | 0   | 0   | 0   | 0   | 0   | 1   | 0        | 0        | 0        | 0        |
| pseudogen chromobo      | 1   | 0   | 1   | 0   | 2   | 3   | 0.088139 | 0        | 0.106345 | 0        |
| processed_ -            | 0   | 0   | 0   | 20  | 23  | 35  | 0        | 0        | 0        | 1.967022 |
| lincRNA -               | 0   | 0   | 0   | 8   | 6   | 0   | 0        | 0        | 0        | 0.196902 |
| pseudogen MT-ND4_ps     | 3   | 1   | 0   | 0   | 1   | 0   | 0.10451  | 0.044673 | 0        | 0        |
| processed_ -            | 0   | 0   | 0   | 13  | 12  | 3   | 0        | 0        | 0        | 0.311639 |
| lincRNA -               | 0   | 0   | 1   | 0   | 0   | 0   | 0        | 0        | 0.143593 | 0        |
| lincRNA -               | 0   | 1   | 0   | 0   | 0   | 0   | 0        | 0.108734 | 0        | 0        |
| antisense -             | 0   | 0   | 0   | 1   | 3   | 2   | 0        | 0        | 0        | 0.115523 |
| lincRNA -               | 3   | 1   | 0   | 0   | 0   | 0   | 0.19757  | 0.084452 | 0        | 0        |
| protein_co YjeF_N-tern  | 25  | 26  | 23  | 45  | 91  | 58  | 0.423348 | 0.564599 | 0.46993  | 1.18277  |
| pseudogen-              | 6   | 0   | 0   | 6   | 7   | 5   | 1.082077 | 0        | 0        | 1.679534 |
| sense_intrc -           | 1   | 0   | 0   | 0   | 1   | 4   | 0.015501 | 0        | 0        | 0        |
| pseudogen-              | 0   | 0   | 0   | 0   | 6   | 2   | 0        | 0        | 0        | 0        |
| processed_ -            | 3   | 3   | 3   | 0   | 0   | 0   | 0.04551  | 0.05836  | 0.05491  | 0        |
| processed_ -            | 3   | 4   | 3   | 0   | 1   | 4   | 0.09422  | 0.161098 | 0.113682 | 0        |
| lincRNA -               | 0   | 2   | 1   | 5   | 5   | 1   | 0        | 0.060402 | 0.028416 | 0.182772 |
| pseudogen-              | 0   | 0   | 1   | 0   | 0   | 0   | 0        | 0        | 0.032665 | 0        |
| lincRNA -               | 4   | 12  | 7   | 5   | 3   | 1   | 0.513863 | 1.97687  | 1.08501  | 0.996984 |
| pseudogen-              | 0   | 0   | 0   | 0   | 1   | 0   | 0        | 0        | 0        | 0        |
| protein_co dynein_axc   | 95  | 89  | 78  | 5   | 10  | 4   | 0.88384  | 1.061816 | 0.875573 | 0.072202 |
| processed_ -            | 2   | 2   | 0   | 0   | 0   | 0   | 0.589812 | 0.75635  | 0        | 0        |
| lincRNA -               | 0   | 2   | 0   | 2   | 0   | 0   | 0        | 0.380568 | 0        | 0.460632 |

|                        |     |     |     |     |     |     |          |          |          |          |
|------------------------|-----|-----|-----|-----|-----|-----|----------|----------|----------|----------|
| antisense -            | 0   | 0   | 1   | 0   | 3   | 2   | 0        | 0        | 0.103429 | 0        |
| lincRNA -              | 15  | 5   | 8   | 79  | 67  | 90  | 1.426674 | 0.609836 | 0.918061 | 11.66248 |
| lincRNA -              | 0   | 0   | 0   | 0   | 1   | 0   | 0        | 0        | 0        | 0        |
| antisense ANKRD33B     | 4   | 0   | 0   | 0   | 1   | 0   | 0.35931  | 0        | 0        | 0        |
| antisense CACNA1G_     | 5   | 11  | 4   | 6   | 2   | 0   | 0.163608 | 0.461569 | 0.157922 | 0.304731 |
| pseudogen-             | 0   | 1   | 0   | 1   | 0   | 0   | 0        | 0.046254 | 0        | 0.055984 |
| pseudogen-             | 0   | 0   | 0   | 1   | 0   | 0   | 0        | 0        | 0        | 0.351593 |
| antisense -            | 8   | 16  | 7   | 12  | 11  | 8   | 0.246952 | 0.633362 | 0.260717 | 0.574956 |
| protein_co protocadhe  | 17  | 12  | 10  | 73  | 120 | 83  | 0.151719 | 0.137335 | 0.107681 | 1.011215 |
| lincRNA -              | 0   | 0   | 0   | 1   | 0   | 1   | 0        | 0        | 0        | 0.017843 |
| antisense -            | 0   | 0   | 1   | 0   | 3   | 0   | 0        | 0        | 0.084315 | 0        |
| pseudogen-             | 17  | 8   | 3   | 6   | 2   | 6   | 0.795539 | 0.480078 | 0.169388 | 0.435807 |
| antisense -            | 24  | 18  | 24  | 67  | 88  | 66  | 0.520759 | 0.50085  | 0.628326 | 2.256477 |
| processed_ -           | 8   | 12  | 11  | 7   | 9   | 5   | 0.183702 | 0.353358 | 0.304765 | 0.24949  |
| antisense HOXC_clusi   | 3   | 8   | 2   | 0   | 0   | 1   | 0.067306 | 0.230162 | 0.054139 | 0        |
| pseudogen-             | 47  | 34  | 28  | 35  | 49  | 32  | 0.496694 | 0.460765 | 0.357024 | 0.574103 |
| pseudogen-             | 0   | 0   | 0   | 1   | 1   | 0   | 0        | 0        | 0        | 0.171247 |
| pseudogen keratin_8_   | 0   | 0   | 0   | 0   | 1   | 0   | 0        | 0        | 0        | 0        |
| lincRNA -              | 0   | 0   | 0   | 1   | 0   | 0   | 0        | 0        | 0        | 0.18519  |
| antisense -            | 121 | 131 | 138 | 29  | 40  | 21  | 8.331413 | 11.56682 | 11.46464 | 3.099287 |
| lincRNA -              | 0   | 0   | 0   | 0   | 2   | 0   | 0        | 0        | 0        | 0        |
| antisense -            | 0   | 0   | 0   | 4   | 2   | 0   | 0        | 0        | 0        | 0.253588 |
| pseudogen casein_kina  | 0   | 0   | 1   | 0   | 0   | 0   | 0        | 0        | 0.171441 | 0        |
| processed_ -           | 2   | 0   | 1   | 0   | 5   | 3   | 0.048742 | 0        | 0.029405 | 0        |
| antisense -            | 0   | 0   | 3   | 0   | 0   | 1   | 0        | 0        | 0        | 0.267707 |
| sense_intrc RASA2_intr | 0   | 2   | 0   | 2   | 2   | 0   | 0        | 0.196503 | 0        | 0.237842 |
| antisense MYLK_anti    | 0   | 0   | 0   | 0   | 1   | 0   | 0        | 0        | 0        | 0        |
| lincRNA -              | 1   | 0   | 0   | 0   | 0   | 0   | 0.082991 | 0        | 0        | 0        |
| pseudogen eukaryotic_  | 26  | 29  | 12  | 49  | 60  | 39  | 0.877711 | 1.25541  | 0.488773 | 2.567466 |
| pseudogen regulator_c  | 0   | 0   | 1   | 0   | 0   | 0   | 0        | 0        | 0.054662 | 0        |
| lincRNA -              | 0   | 1   | 0   | 0   | 0   | 0   | 0        | 0.087525 | 0        | 0        |
| lincRNA -              | 2   | 1   | 1   | 0   | 0   | 0   | 0.167464 | 0.107375 | 0.101028 | 0        |
| pseudogen high_mobil   | 0   | 2   | 1   | 1   | 4   | 5   | 0        | 0.40766  | 0.191781 | 0.246711 |
| lincRNA -              | 1   | 2   | 0   | 0   | 0   | 0   | 0.017354 | 0.044508 | 0        | 0        |
| antisense -            | 0   | 0   | 1   | 1   | 1   | 2   | 0        | 0        | 0.100489 | 0.129271 |
| processed_ -           | 60  | 40  | 54  | 19  | 18  | 45  | 0.676461 | 0.57831  | 0.73457  | 0.332488 |
| protein_co Protein_LO  | 1   | 0   | 0   | 0   | 0   | 0   | 0.123395 | 0        | 0        | 0        |
| pseudogen-             | 0   | 0   | 0   | 0   | 1   | 1   | 0        | 0        | 0        | 0        |
| pseudogen corepresso   | 0   | 0   | 0   | 0   | 2   | 0   | 0        | 0        | 0        | 0        |
| antisense -            | 20  | 7   | 10  | 2   | 8   | 18  | 1.369052 | 0.614465 | 0.82592  | 0.212496 |
| pseudogen keratin_8_   | 0   | 0   | 0   | 0   | 1   | 2   | 0        | 0        | 0        | 0        |
| antisense -            | 3   | 1   | 2   | 2   | 5   | 1   | 0.358852 | 0.153392 | 0.288651 | 0.371326 |
| lincRNA -              | 0   | 1   | 2   | 2   | 4   | 1   | 0        | 0.025598 | 0.04817  | 0.061967 |
| antisense -            | 2   | 1   | 0   | 2   | 6   | 1   | 0.230418 | 0.147739 | 0        | 0.35764  |
| antisense -            | 1   | 4   | 3   | 1   | 0   | 0   | 0.05796  | 0.297304 | 0.209798 | 0.089963 |
| processed_ -           | 32  | 28  | 31  | 5   | 16  | 6   | 0.532085 | 0.597033 | 0.621929 | 0.129042 |
| pseudogen-             | 0   | 0   | 0   | 1   | 1   | 0   | 0        | 0        | 0        | 0.206175 |
| antisense -            | 0   | 0   | 0   | 0   | 0   | 1   | 0        | 0        | 0        | 0        |
| pseudogen polycystic_  | 648 | 498 | 574 | 435 | 741 | 316 | 6.3713   | 6.279018 | 6.809465 | 6.638543 |
| antisense -            | 1   | 0   | 1   | 0   | 3   | 2   | 0.101935 | 0        | 0.12299  | 0        |
| lincRNA -              | 1   | 1   | 0   | 0   | 0   | 0   | 0.17239  | 0.221065 | 0        | 0        |
| lincRNA -              | 0   | 0   | 3   | 0   | 0   | 0   | 0        | 0        | 0.262735 | 0        |
| pseudogen-             | 1   | 0   | 0   | 0   | 0   | 1   | 0.041754 | 0        | 0        | 0        |
| lincRNA -              | 0   | 0   | 0   | 2   | 1   | 8   | 0        | 0        | 0        | 0.310362 |
| antisense -            | 2   | 1   | 1   | 6   | 3   | 5   | 0.057079 | 0.036598 | 0.034434 | 0.265781 |
| pseudogen proteasom    | 2   | 2   | 0   | 0   | 0   | 2   | 0.529831 | 0.679433 | 0        | 0        |
| lincRNA -              | 1   | 0   | 0   | 0   | 0   | 0   | 0.021489 | 0        | 0        | 0        |
| sense_intrc -          | 4   | 7   | 9   | 0   | 0   | 0   | 0.054255 | 0.121755 | 0.147289 | 0        |
| antisense -            | 0   | 0   | 1   | 2   | 0   | 0   | 0        | 0        | 0.131571 | 0.338511 |
| lincRNA -              | 0   | 0   | 0   | 0   | 0   | 1   | 0        | 0        | 0        | 0        |
| processed_ -           | 0   | 0   | 0   | 2   | 2   | 0   | 0        | 0        | 0        | 0.203012 |
| pseudogen-             | 0   | 4   | 8   | 0   | 1   | 3   | 0        | 0.132591 | 0.249506 | 0        |
| antisense -            | 7   | 11  | 12  | 1   | 2   | 6   | 0.100653 | 0.20283  | 0.20819  | 0.022318 |
| processed_ -           | 72  | 62  | 28  | 5   | 3   | 8   | 1.228112 | 1.356147 | 0.576251 | 0.132375 |
| protein_co KIAA1456    | 8   | 5   | 7   | 17  | 36  | 8   | 0.039128 | 0.03136  | 0.041309 | 0.129056 |

|                          |     |     |     |     |     |     |          |          |          |          |
|--------------------------|-----|-----|-----|-----|-----|-----|----------|----------|----------|----------|
| antisense -              | 0   | 0   | 0   | 1   | 0   | 0   | 0        | 0        | 0        | 0.126135 |
| lincRNA zinc_finger      | 75  | 79  | 81  | 143 | 170 | 211 | 1.094198 | 1.477988 | 1.425829 | 3.23818  |
| protein_co small_integ   | 358 | 271 | 273 | 382 | 495 | 408 | 17.95361 | 17.42799 | 16.51884 | 29.73464 |
| pseudogeni -             | 24  | 22  | 16  | 5   | 5   | 1   | 1.838824 | 2.161529 | 1.479098 | 0.594606 |
| antisense -              | 22  | 31  | 35  | 33  | 42  | 42  | 1.3025   | 2.353565 | 2.50018  | 3.032492 |
| pseudogeni -             | 2   | 0   | 0   | 0   | 2   | 1   | 0.660423 | 0        | 0        | 0        |
| pseudogeni -             | 0   | 0   | 1   | 0   | 0   | 0   | 0        | 0        | 0.332797 | 0        |
| pseudogeni: mitochond    | 0   | 0   | 1   | 0   | 0   | 1   | 0        | 0        | 0.091843 | 0        |
| pseudogeni: immunogl     | 0   | 0   | 0   | 2   | 0   | 0   | 0        | 0        | 0        | 0.165597 |
| antisense -              | 12  | 5   | 8   | 4   | 6   | 6   | 0.741344 | 0.396112 | 0.596316 | 0.383556 |
| pseudogeni -             | 7   | 6   | 6   | 5   | 5   | 4   | 0.379896 | 0.417568 | 0.392885 | 0.421179 |
| antisense -              | 7   | 7   | 7   | 15  | 32  | 15  | 0.230499 | 0.295582 | 0.27811  | 0.766641 |
| pseudogeni -             | 0   | 0   | 0   | 0   | 0   | 2   | 0        | 0        | 0        | 0        |
| lincRNA -                | 1   | 5   | 4   | 0   | 0   | 0   | 0.064765 | 0.415261 | 0.312572 | 0        |
| pseudogeni -             | 0   | 0   | 0   | 0   | 0   | 1   | 0        | 0        | 0        | 0        |
| lincRNA -                | 0   | 0   | 0   | 2   | 0   | 0   | 0        | 0        | 0        | 0.069981 |
| processed_ -             | 25  | 22  | 20  | 385 | 367 | 184 | 0.728106 | 0.821649 | 0.702801 | 17.40387 |
| pseudogeni -             | 0   | 0   | 0   | 0   | 0   | 1   | 0        | 0        | 0        | 0        |
| antisense -              | 0   | 0   | 0   | 0   | 1   | 0   | 0        | 0        | 0        | 0        |
| lincRNA -                | 0   | 0   | 0   | 1   | 4   | 1   | 0        | 0        | 0        | 0.117198 |
| pseudogeni -             | 0   | 0   | 0   | 1   | 0   | 1   | 0        | 0        | 0        | 0.173699 |
| antisense -              | 0   | 0   | 0   | 2   | 1   | 1   | 0        | 0        | 0        | 0.192539 |
| pseudogeni -             | 0   | 0   | 0   | 0   | 2   | 0   | 0        | 0        | 0        | 0        |
| processed_ -             | 0   | 0   | 3   | 0   | 0   | 0   | 0        | 0        | 0.23155  | 0        |
| antisense -              | 7   | 7   | 8   | 4   | 10  | 5   | 0.270594 | 0.346998 | 0.373128 | 0.239999 |
| lincRNA long_integ       | 4   | 0   | 0   | 868 | 929 | 587 | 0.058668 | 0        | 0        | 19.76005 |
| lincRNA -                | 0   | 1   | 0   | 0   | 1   | 0   | 0        | 0.02232  | 0        | 0        |
| lincRNA -                | 0   | 0   | 3   | 0   | 0   | 0   | 0        | 0        | 0.450203 | 0        |
| pseudogeni: unc-93_ho    | 0   | 0   | 0   | 2   | 1   | 1   | 0        | 0        | 0        | 0.194859 |
| antisense -              | 1   | 0   | 1   | 0   | 1   | 0   | 0.117814 | 0        | 0.14215  | 0        |
| pseudogeni: ubiquitin-c  | 9   | 4   | 4   | 0   | 0   | 0   | 0.9378   | 0.534487 | 0.502893 | 0        |
| antisense -              | 0   | 0   | 0   | 0   | 1   | 2   | 0        | 0        | 0        | 0        |
| lincRNA -                | 0   | 0   | 0   | 0   | 0   | 1   | 0        | 0        | 0        | 0        |
| processed_ -             | 0   | 0   | 0   | 2   | 2   | 1   | 0        | 0        | 0        | 0.255368 |
| antisense -              | 25  | 24  | 30  | 21  | 21  | 31  | 0.568778 | 0.700201 | 0.823515 | 0.74157  |
| lincRNA -                | 0   | 1   | 1   | 0   | 0   | 0   | 0        | 0.051702 | 0.048646 | 0        |
| pseudogeni -             | 0   | 0   | 0   | 0   | 0   | 1   | 0        | 0        | 0        | 0        |
| processed_ -             | 21  | 20  | 38  | 17  | 25  | 26  | 0.346356 | 0.423002 | 0.756197 | 0.435194 |
| pseudogeni -             | 0   | 0   | 1   | 0   | 0   | 0   | 0        | 0        | 0.02959  | 0        |
| lincRNA -                | 2   | 1   | 1   | 0   | 0   | 0   | 0.033409 | 0.021421 | 0.020155 | 0        |
| antisense -              | 0   | 0   | 0   | 0   | 0   | 4   | 0        | 0        | 0        | 0        |
| antisense -              | 0   | 0   | 0   | 0   | 1   | 0   | 0        | 0        | 0        | 0        |
| antisense -              | 10  | 0   | 3   | 1   | 7   | 0   | 0.798808 | 0        | 0.289142 | 0.123986 |
| pseudogeni: kelch-like_1 | 3   | 0   | 0   | 2   | 1   | 2   | 0.27     | 0        | 0        | 0.279385 |
| antisense -              | 1   | 0   | 0   | 2   | 1   | 0   | 0.066605 | 0        | 0        | 0.206761 |
| lincRNA -                | 0   | 0   | 0   | 1   | 0   | 1   | 0        | 0        | 0        | 0.147626 |
| pseudogeni: acetoacetyl  | 0   | 0   | 0   | 81  | 82  | 81  | 0        | 0        | 0        | 2.089002 |
| lincRNA -                | 0   | 0   | 0   | 6   | 6   | 8   | 0        | 0        | 0        | 0.74139  |
| pseudogeni -             | 0   | 1   | 0   | 0   | 0   | 1   | 0        | 0.029076 | 0        | 0        |
| protein_co KIAA1210      | 1   | 1   | 0   | 0   | 0   | 0   | 0.005993 | 0.007685 | 0        | 0        |
| processed_ -             | 1   | 0   | 1   | 3   | 1   | 1   | 0.065216 | 0        | 0.078686 | 0.303671 |
| antisense -              | 0   | 0   | 0   | 4   | 0   | 0   | 0        | 0        | 0        | 0.108102 |
| lincRNA -                | 0   | 0   | 0   | 0   | 0   | 1   | 0        | 0        | 0        | 0        |
| pseudogeni: FYVE_RhoG    | 1   | 0   | 0   | 0   | 0   | 0   | 0.013885 | 0        | 0        | 0        |
| pseudogeni -             | 1   | 0   | 1   | 5   | 6   | 7   | 0.027341 | 0        | 0.032989 | 0.212186 |
| pseudogeni: chaperonin   | 0   | 0   | 2   | 0   | 0   | 0   | 0        | 0        | 0.069933 | 0        |
| lincRNA -                | 0   | 0   | 0   | 0   | 0   | 1   | 0        | 0        | 0        | 0        |
| processed_ -             | 0   | 0   | 0   | 10  | 14  | 2   | 0        | 0        | 0        | 0.352274 |
| antisense HOXC_clusi     | 9   | 15  | 6   | 0   | 0   | 2   | 0.770092 | 1.645889 | 0.61944  | 0        |
| pseudogeni -             | 0   | 2   | 0   | 0   | 0   | 0   | 0        | 0.372321 | 0        | 0        |
| pseudogeni -             | 11  | 17  | 11  | 7   | 12  | 12  | 0.693266 | 1.373934 | 0.836466 | 0.684756 |
| pseudogeni: guanine_m    | 2   | 0   | 4   | 6   | 0   | 6   | 0.161969 | 0        | 0.39085  | 0.754195 |
| sense_intrc TRIM36_in    | 0   | 0   | 0   | 1   | 2   | 0   | 0        | 0        | 0        | 0.08261  |
| pseudogeni: deoxyuridil  | 1   | 1   | 1   | 1   | 2   | 0   | 0.096482 | 0.123724 | 0.116411 | 0.149753 |
| pseudogeni: WW_doma      | 4   | 5   | 3   | 0   | 0   | 0   | 0.198266 | 0.317811 | 0.179415 | 0        |

|                          |     |     |     |     |     |     |          |          |          |          |
|--------------------------|-----|-----|-----|-----|-----|-----|----------|----------|----------|----------|
| pseudogeni -             | 0   | 0   | 0   | 2   | 0   | 0   | 0        | 0        | 0        | 0.232152 |
| protein_co coiled-coil-  | 37  | 22  | 37  | 117 | 209 | 120 | 1.48158  | 1.12968  | 1.787612 | 7.271765 |
| pseudogeni: protein_ph   | 2   | 3   | 3   | 0   | 0   | 2   | 0.082626 | 0.158933 | 0.149539 | 0        |
| pseudogeni -             | 0   | 1   | 0   | 0   | 0   | 0   | 0        | 0.113667 | 0        | 0        |
| protein_co family_witl   | 9   | 12  | 18  | 8   | 23  | 8   | 0.194117 | 0.331903 | 0.468426 | 0.267819 |
| lincRNA -                | 0   | 0   | 0   | 0   | 0   | 1   | 0        | 0        | 0        | 0        |
| antisense -              | 1   | 0   | 1   | 4   | 6   | 0   | 0.007426 | 0        | 0.00896  | 0.046107 |
| lincRNA -                | 0   | 0   | 0   | 0   | 0   | 1   | 0        | 0        | 0        | 0        |
| pseudogeni -             | 0   | 0   | 0   | 9   | 7   | 12  | 0        | 0        | 0        | 0.484481 |
| protein_co cyclin-depe   | 0   | 1   | 0   | 3   | 4   | 2   | 0        | 0.038009 | 0        | 0.138015 |
| lincRNA -                | 3   | 0   | 0   | 12  | 17  | 22  | 0.043256 | 0        | 0        | 0.26856  |
| lincRNA -                | 0   | 0   | 0   | 0   | 1   | 0   | 0        | 0        | 0        | 0        |
| protein_co G_protein-i   | 165 | 156 | 114 | 7   | 17  | 5   | 2.795106 | 3.388818 | 2.330061 | 0.184053 |
| antisense -              | 0   | 1   | 5   | 6   | 10  | 3   | 0        | 0.041555 | 0.195492 | 0.301782 |
| antisense -              | 0   | 1   | 0   | 0   | 0   | 0   | 0        | 0.107183 | 0        | 0        |
| lincRNA -                | 0   | 0   | 2   | 22  | 29  | 20  | 0        | 0        | 0.198511 | 2.809045 |
| pseudogeni -             | 0   | 0   | 2   | 0   | 0   | 0   | 0        | 0        | 0.336759 | 0        |
| pseudogeni: chaperonin   | 0   | 0   | 0   | 0   | 0   | 1   | 0        | 0        | 0        | 0        |
| antisense -              | 0   | 0   | 0   | 2   | 0   | 1   | 0        | 0        | 0        | 0.326367 |
| processed_ -             | 0   | 0   | 0   | 1   | 2   | 1   | 0        | 0        | 0        | 0.108303 |
| pseudogeni: abhydrolas   | 1   | 0   | 7   | 11  | 5   | 1   | 0.04124  | 0        | 0.34831  | 0.704114 |
| pseudogeni: keratin_8_   | 20  | 12  | 24  | 21  | 23  | 16  | 0.65903  | 0.507068 | 0.95419  | 1.074052 |
| pseudogeni -             | 0   | 0   | 0   | 2   | 0   | 0   | 0        | 0        | 0        | 0.392344 |
| antisense -              | 3   | 6   | 1   | 1   | 2   | 0   | 0.291242 | 0.746954 | 0.117134 | 0.150683 |
| processed_ -             | 0   | 0   | 0   | 10  | 6   | 4   | 0        | 0        | 0        | 0.260393 |
| lincRNA -                | 0   | 0   | 0   | 0   | 1   | 1   | 0        | 0        | 0        | 0        |
| lincRNA -                | 1   | 0   | 0   | 0   | 0   | 1   | 0.066605 | 0        | 0        | 0        |
| pseudogeni: coiled-coil_ | 0   | 1   | 0   | 1   | 0   | 0   | 0        | 0.116305 | 0        | 0.140773 |
| processed_ -             | 1   | 3   | 2   | 3   | 6   | 3   | 0.12673  | 0.487539 | 0.305814 | 0.590106 |
| lincRNA -                | 0   | 0   | 0   | 3   | 6   | 7   | 0        | 0        | 0        | 0.326367 |
| protein_co ATPase_H+     | 65  | 68  | 74  | 77  | 98  | 99  | 1.305849 | 1.751854 | 1.793739 | 2.401047 |
| pseudogeni -             | 2   | 1   | 2   | 3   | 5   | 2   | 0.297714 | 0.190888 | 0.35921  | 0.693141 |
| pseudogeni: N-terminal_  | 7   | 4   | 5   | 7   | 8   | 15  | 0.349181 | 0.255871 | 0.300934 | 0.541977 |
| protein_co GLI_family_   | 198 | 141 | 150 | 89  | 131 | 64  | 3.979521 | 3.634077 | 3.637516 | 2.776426 |
| pseudogeni -             | 0   | 0   | 0   | 0   | 1   | 1   | 0        | 0        | 0        | 0        |
| pseudogeni -             | 2   | 4   | 5   | 14  | 21  | 13  | 0.07569  | 0.194124 | 0.228311 | 0.822371 |
| lincRNA -                | 0   | 0   | 0   | 0   | 2   | 1   | 0        | 0        | 0        | 0        |
| antisense -              | 0   | 4   | 3   | 261 | 407 | 231 | 0        | 0.27055  | 0.190918 | 21.3673  |
| antisense -              | 0   | 0   | 0   | 1   | 0   | 1   | 0        | 0        | 0        | 0.06677  |
| lincRNA -                | 1   | 0   | 0   | 0   | 0   | 0   | 0.051134 | 0        | 0        | 0        |
| lincRNA -                | 0   | 0   | 0   | 0   | 2   | 1   | 0        | 0        | 0        | 0        |
| protein_co IQCJ-SCHIP    | 413 | 304 | 299 | 70  | 98  | 40  | 7.354948 | 6.942445 | 6.42464  | 1.934898 |
| antisense -              | 10  | 6   | 6   | 5   | 7   | 3   | 0.627711 | 0.48297  | 0.454422 | 0.487147 |
| lincRNA -                | 0   | 0   | 0   | 1   | 0   | 0   | 0        | 0        | 0        | 0.187577 |
| pseudogeni: protease_sc  | 0   | 0   | 0   | 0   | 0   | 1   | 0        | 0        | 0        | 0        |
| processed_ -             | 4   | 7   | 9   | 6   | 3   | 2   | 0.085683 | 0.192283 | 0.232608 | 0.199488 |
| processed_ -             | 8   | 4   | 2   | 0   | 0   | 0   | 0.363137 | 0.232836 | 0.109536 | 0        |
| pseudogeni -             | 0   | 0   | 1   | 0   | 0   | 0   | 0        | 0        | 0.171962 | 0        |
| antisense -              | 1   | 1   | 0   | 0   | 1   | 3   | 0.10351  | 0.132737 | 0        | 0        |
| antisense -              | 0   | 2   | 8   | 8   | 6   | 6   | 0        | 0.072885 | 0.274305 | 0.352872 |
| antisense -              | 0   | 0   | 0   | 0   | 0   | 1   | 0        | 0        | 0        | 0        |
| antisense -              | 0   | 0   | 0   | 1   | 0   | 0   | 0        | 0        | 0        | 0.125266 |
| pseudogeni -             | 3   | 0   | 0   | 0   | 0   | 1   | 0.190095 | 0        | 0        | 0        |
| lincRNA -                | 18  | 12  | 9   | 0   | 10  | 16  | 1.462774 | 1.250533 | 0.88246  | 0        |
| pseudogeni -             | 0   | 0   | 0   | 0   | 1   | 0   | 0        | 0        | 0        | 0        |
| pseudogeni -             | 0   | 0   | 0   | 0   | 0   | 2   | 0        | 0        | 0        | 0        |
| pseudogeni -             | 4   | 1   | 0   | 0   | 0   | 0   | 0.460836 | 0.147739 | 0        | 0        |
| processed_ -             | 2   | 2   | 0   | 3   | 3   | 1   | 0.20611  | 0.264307 | 0        | 0.479867 |
| pseudogeni: poly(A)_bin  | 2   | 0   | 0   | 0   | 1   | 0   | 0.061983 | 0        | 0        | 0        |
| pseudogeni -             | 1   | 0   | 2   | 14  | 24  | 19  | 0.083138 | 0        | 0.200622 | 1.806591 |
| pseudogeni: ST3_beta-g   | 3   | 1   | 0   | 1   | 3   | 4   | 0.138728 | 0.0593   | 0        | 0.071775 |
| processed_ -             | 3   | 2   | 0   | 0   | 0   | 0   | 0.215421 | 0.184165 | 0        | 0        |
| lincRNA -                | 2   | 0   | 2   | 5   | 1   | 0   | 0.044361 | 0        | 0.053525 | 0.172138 |
| antisense -              | 4   | 7   | 9   | 0   | 2   | 0   | 0.710455 | 1.594351 | 1.92871  | 0        |
| processed_ -             | 3   | 3   | 4   | 8   | 8   | 3   | 0.290641 | 0.372705 | 0.467566 | 1.202972 |

|                        |     |     |     |     |     |    |          |          |          |          |
|------------------------|-----|-----|-----|-----|-----|----|----------|----------|----------|----------|
| pseudogen: heterogene  | 0   | 0   | 0   | 0   | 1   | 0  | 0        | 0        | 0        | 0        |
| lincRNA -              | 0   | 0   | 0   | 0   | 2   | 0  | 0        | 0        | 0        | 0        |
| pseudogen: -           | 0   | 0   | 0   | 1   | 2   | 2  | 0        | 0        | 0        | 0.179703 |
| pseudogen: -           | 0   | 0   | 0   | 1   | 0   | 0  | 0        | 0        | 0        | 0.512534 |
| pseudogen: -           | 1   | 0   | 0   | 1   | 0   | 0  | 0.097081 | 0        | 0        | 0.150683 |
| lincRNA long_interf    | 14  | 11  | 19  | 52  | 52  | 28 | 0.695403 | 0.700665 | 1.138702 | 4.009057 |
| processed_ -           | 0   | 0   | 0   | 1   | 1   | 1  | 0        | 0        | 0        | 0.108142 |
| pseudogen: -           | 1   | 0   | 0   | 0   | 0   | 1  | 0.0437   | 0        | 0        | 0        |
| processed_ -           | 0   | 1   | 0   | 0   | 0   | 0  | 0        | 0.09714  | 0        | 0        |
| antisense -            | 0   | 0   | 2   | 2   | 1   | 0  | 0        | 0        | 0.172224 | 0.221552 |
| antisense -            | 1   | 0   | 2   | 0   | 0   | 0  | 0.096086 | 0        | 0.231867 | 0        |
| lincRNA -              | 0   | 0   | 0   | 1   | 0   | 0  | 0        | 0        | 0        | 0.142426 |
| pseudogen: -           | 1   | 0   | 0   | 0   | 0   | 0  | 0.099979 | 0        | 0        | 0        |
| pseudogen: -           | 0   | 0   | 1   | 0   | 0   | 0  | 0        | 0        | 0.040614 | 0        |
| protein_co selenoprot  | 0   | 0   | 0   | 126 | 105 | 91 | 0        | 0        | 0        | 2.196468 |
| processed_ -           | 0   | 1   | 0   | 0   | 0   | 0  | 0        | 0.104031 | 0        | 0        |
| pseudogen: -           | 0   | 0   | 0   | 1   | 1   | 1  | 0        | 0        | 0        | 0.114254 |
| pseudogen: tropomyos   | 11  | 5   | 9   | 14  | 17  | 19 | 0.695135 | 0.405187 | 0.686226 | 1.373204 |
| pseudogen: ribulose-5- | 5   | 1   | 2   | 0   | 0   | 0  | 0.356307 | 0.091383 | 0.171962 | 0        |
| protein_co chromosom   | 0   | 2   | 0   | 1   | 0   | 1  | 0        | 0.043337 | 0        | 0.026227 |
| processed_ -           | 5   | 2   | 2   | 1   | 1   | 1  | 0.438224 | 0.224784 | 0.211497 | 0.136037 |
| lincRNA -              | 0   | 0   | 0   | 0   | 0   | 1  | 0        | 0        | 0        | 0        |
| antisense -            | 0   | 0   | 0   | 0   | 1   | 0  | 0        | 0        | 0        | 0        |
| lincRNA -              | 3   | 3   | 3   | 4   | 9   | 7  | 0.102754 | 0.131767 | 0.123978 | 0.212651 |
| pseudogen: -           | 1   | 5   | 1   | 1   | 0   | 0  | 0.022795 | 0.146159 | 0.027504 | 0.035382 |
| lincRNA -              | 56  | 42  | 62  | 0   | 0   | 0  | 2.449479 | 2.355832 | 3.272091 | 0        |
| pseudogen: -           | 1   | 1   | 3   | 1   | 3   | 0  | 0.102157 | 0.131002 | 0.369775 | 0.158562 |
| antisense -            | 0   | 1   | 0   | 0   | 1   | 0  | 0        | 0.104574 | 0        | 0        |
| pseudogen: -           | 0   | 0   | 0   | 1   | 0   | 0  | 0        | 0        | 0        | 0.203865 |
| processed_ -           | 0   | 0   | 0   | 1   | 0   | 1  | 0        | 0        | 0        | 0.033294 |
| antisense -            | 0   | 2   | 0   | 2   | 0   | 0  | 0        | 0.230382 | 0        | 0.27885  |
| pseudogen: -           | 2   | 1   | 0   | 1   | 0   | 1  | 0.352557 | 0.226052 | 0        | 0.273608 |
| processed_ -           | 6   | 17  | 9   | 3   | 4   | 3  | 0.074765 | 0.271647 | 0.135312 | 0.058023 |
| antisense -            | 13  | 12  | 7   | 4   | 13  | 11 | 0.7309   | 0.865177 | 0.474854 | 0.349064 |
| pseudogen: -           | 0   | 0   | 1   | 0   | 0   | 0  | 0        | 0        | 0.083077 | 0        |
| pseudogen: -           | 1   | 0   | 0   | 1   | 0   | 0  | 0.022729 | 0        | 0        | 0.035279 |
| lincRNA -              | 4   | 4   | 7   | 2   | 1   | 1  | 0.081442 | 0.104437 | 0.171962 | 0.063204 |
| pseudogen: -           | 0   | 0   | 1   | 2   | 3   | 3  | 0        | 0        | 0.018647 | 0.047976 |
| lincRNA -              | 0   | 0   | 0   | 1   | 0   | 0  | 0        | 0        | 0        | 0.114254 |
| lincRNA -              | 10  | 9   | 15  | 0   | 0   | 0  | 1.046652 | 1.207965 | 1.894269 | 0        |
| antisense -            | 0   | 0   | 0   | 1   | 0   | 3  | 0        | 0        | 0        | 0.121705 |
| processed_ -           | 15  | 7   | 9   | 4   | 1   | 1  | 0.757921 | 0.453565 | 0.548685 | 0.313706 |
| lincRNA -              | 532 | 440 | 430 | 268 | 261 | 98 | 13.86631 | 14.70656 | 13.52277 | 10.84213 |
| lincRNA -              | 2   | 0   | 0   | 2   | 3   | 1  | 0.083882 | 0        | 0        | 0.130196 |
| pseudogen: asparagine- | 0   | 0   | 0   | 1   | 13  | 3  | 0        | 0        | 0        | 0.167695 |
| processed_ZBED3_anti   | 12  | 13  | 13  | 30  | 57  | 55 | 0.283181 | 0.393401 | 0.370147 | 1.098839 |
| pseudogen: -           | 1   | 0   | 0   | 0   | 0   | 0  | 0.045304 | 0        | 0        | 0        |
| pseudogen: -           | 0   | 0   | 0   | 0   | 1   | 0  | 0        | 0        | 0        | 0        |
| pseudogen: DDB1_and_   | 0   | 0   | 0   | 0   | 0   | 1  | 0        | 0        | 0        | 0        |
| processed_ -           | 0   | 0   | 0   | 0   | 3   | 2  | 0        | 0        | 0        | 0        |
| lincRNA -              | 0   | 0   | 0   | 1   | 1   | 1  | 0        | 0        | 0        | 0.131371 |
| pseudogen: phosphogl   | 0   | 0   | 2   | 0   | 0   | 0  | 0        | 0        | 0.151271 | 0        |
| lincRNA -              | 3   | 0   | 0   | 2   | 3   | 0  | 0.748245 | 0        | 0        | 0.774253 |
| pseudogen: DNM1_pse    | 0   | 0   | 0   | 1   | 1   | 0  | 0        | 0        | 0        | 0.170845 |
| pseudogen: keratin_18  | 0   | 0   | 0   | 1   | 0   | 0  | 0        | 0        | 0        | 0.097299 |
| pseudogen: LSM3_hom    | 0   | 0   | 4   | 0   | 0   | 0  | 0        | 0        | 0.732369 | 0        |
| antisense -            | 1   | 3   | 2   | 30  | 28  | 16 | 0.109556 | 0.421471 | 0.264372 | 5.101388 |
| lincRNA -              | 0   | 1   | 1   | 0   | 0   | 0  | 0        | 0.113452 | 0.106746 | 0        |
| processed_ -           | 8   | 5   | 5   | 0   | 1   | 0  | 0.318709 | 0.255437 | 0.240338 | 0        |
| pseudogen: -           | 10  | 9   | 9   | 8   | 7   | 7  | 0.389776 | 0.449849 | 0.423258 | 0.483989 |
| antisense -            | 0   | 0   | 0   | 0   | 1   | 0  | 0        | 0        | 0        | 0        |
| pseudogen: ring_finger | 0   | 0   | 0   | 2   | 4   | 1  | 0        | 0        | 0        | 0.266593 |
| pseudogen: heterogene  | 0   | 1   | 0   | 0   | 0   | 0  | 0        | 0.043604 | 0        | 0        |
| pseudogen: -           | 2   | 0   | 0   | 0   | 0   | 1  | 0.039771 | 0        | 0        | 0        |
| lincRNA -              | 0   | 0   | 0   | 1   | 3   | 0  | 0        | 0        | 0        | 0.050089 |

|                        |     |     |     |     |     |     |          |          |          |          |
|------------------------|-----|-----|-----|-----|-----|-----|----------|----------|----------|----------|
| antisense -            | 0   | 2   | 0   | 0   | 0   | 0   | 0        | 0.282964 | 0        | 0        |
| pseudogen: methyltran  | 5   | 5   | 3   | 2   | 3   | 1   | 0.101406 | 0.130038 | 0.073411 | 0.062958 |
| pseudogen: -           | 1   | 2   | 0   | 0   | 0   | 0   | 0.102829 | 0.263727 | 0        | 0        |
| lincRNA -              | 2   | 3   | 4   | 1   | 0   | 8   | 0.175618 | 0.337808 | 0.423787 | 0.136292 |
| lincRNA -              | 19  | 15  | 11  | 0   | 0   | 0   | 0.317842 | 0.321779 | 0.222023 | 0        |
| pseudogen: -           | 1   | 6   | 8   | 9   | 11  | 2   | 0.049358 | 0.379767 | 0.476425 | 0.689493 |
| antisense -            | 0   | 0   | 0   | 6   | 3   | 7   | 0        | 0        | 0        | 0.506588 |
| pseudogen: RNA_bindir  | 11  | 6   | 4   | 15  | 18  | 23  | 0.561863 | 0.393005 | 0.246516 | 1.189212 |
| processed_ -           | 131 | 77  | 96  | 539 | 691 | 829 | 1.748034 | 1.317585 | 1.545603 | 11.16344 |
| antisense -            | 0   | 0   | 0   | 1   | 0   | 1   | 0        | 0        | 0        | 0.098618 |
| antisense -            | 0   | 0   | 1   | 0   | 0   | 0   | 0        | 0        | 0.117621 | 0        |
| processed_ -           | 37  | 36  | 27  | 17  | 22  | 14  | 0.211139 | 0.263438 | 0.1859   | 0.150573 |
| antisense -            | 3   | 3   | 3   | 3   | 1   | 3   | 0.294906 | 0.378175 | 0.355821 | 0.457735 |
| antisense -            | 0   | 0   | 0   | 2   | 0   | 0   | 0        | 0        | 0        | 0.330067 |
| antisense -            | 6   | 3   | 5   | 2   | 3   | 4   | 0.558214 | 0.357915 | 0.561265 | 0.288809 |
| antisense -            | 5   | 0   | 3   | 1   | 2   | 1   | 0.279107 | 0        | 0.202055 | 0.086643 |
| pseudogen: -           | 0   | 1   | 0   | 0   | 0   | 0   | 0        | 0.052515 | 0        | 0        |
| processed_ -           | 0   | 3   | 1   | 2   | 3   | 1   | 0        | 0.377384 | 0.118359 | 0.304518 |
| pseudogen: -           | 2   | 0   | 2   | 3   | 6   | 2   | 0.079475 | 0        | 0.095891 | 0.185033 |
| pseudogen: -           | 0   | 0   | 1   | 0   | 0   | 0   | 0        | 0        | 0.035075 | 0        |
| pseudogen: mesoderm_   | 1   | 1   | 0   | 0   | 0   | 0   | 0.04844  | 0.062118 | 0        | 0        |
| pseudogen: -           | 0   | 0   | 1   | 0   | 0   | 0   | 0        | 0        | 0.096545 | 0        |
| antisense LNX1_antis   | 1   | 0   | 0   | 2   | 0   | 0   | 0.085255 | 0        | 0        | 0.264654 |
| pseudogen: glyceraldeh | 1   | 0   | 0   | 3   | 6   | 2   | 0.04849  | 0        | 0        | 0.22579  |
| lincRNA -              | 0   | 0   | 0   | 4   | 5   | 0   | 0        | 0        | 0        | 0.581076 |
| processed_ -           | 3   | 3   | 3   | 1   | 4   | 1   | 0.060141 | 0.077122 | 0.072564 | 0.031116 |
| pseudogen: -           | 0   | 0   | 0   | 0   | 0   | 2   | 0        | 0        | 0        | 0        |
| pseudogen: -           | 0   | 0   | 0   | 0   | 1   | 3   | 0        | 0        | 0        | 0        |
| antisense -            | 0   | 8   | 1   | 1   | 0   | 0   | 0        | 1.963422 | 0.23092  | 0.29706  |
| lincRNA -              | 0   | 0   | 0   | 0   | 0   | 1   | 0        | 0        | 0        | 0        |
| processed_ -           | 4   | 2   | 4   | 1   | 4   | 4   | 0.32733  | 0.209877 | 0.394942 | 0.127015 |
| lincRNA -              | 3   | 0   | 0   | 0   | 0   | 0   | 0.122963 | 0        | 0        | 0        |
| lincRNA long_interf    | 1   | 1   | 0   | 1   | 1   | 0   | 0.079073 | 0.101399 | 0        | 0.122732 |
| pseudogen: glutamate_  | 52  | 48  | 48  | 16  | 44  | 18  | 2.721296 | 3.221239 | 3.030831 | 1.299639 |
| processed_ -           | 4   | 0   | 0   | 0   | 0   | 0   | 0.209097 | 0        | 0        | 0        |
| pseudogen: -           | 0   | 0   | 1   | 0   | 0   | 1   | 0        | 0        | 0.066093 | 0        |
| processed_ -           | 0   | 0   | 1   | 2   | 3   | 1   | 0        | 0        | 0.099605 | 0.256267 |
| pseudogen: -           | 0   | 0   | 0   | 2   | 3   | 0   | 0        | 0        | 0        | 0.35416  |
| lincRNA -              | 1   | 0   | 1   | 0   | 0   | 0   | 0.076368 | 0        | 0.092143 | 0        |
| processed_ -           | 3   | 3   | 3   | 0   | 1   | 1   | 0.264417 | 0.339078 | 0.319035 | 0        |
| lincRNA -              | 10  | 4   | 5   | 0   | 0   | 0   | 1.113777 | 0.571304 | 0.671918 | 0        |
| lincRNA -              | 16  | 14  | 15  | 0   | 0   | 0   | 1.320846 | 1.482072 | 1.494071 | 0        |
| antisense -            | 0   | 1   | 0   | 0   | 2   | 0   | 0        | 0.385447 | 0        | 0        |
| pseudogen: -           | 2   | 1   | 1   | 4   | 3   | 2   | 0.030768 | 0.019728 | 0.018562 | 0.095512 |
| pseudogen: -           | 0   | 3   | 0   | 1   | 0   | 1   | 0        | 0.234577 | 0        | 0.094642 |
| processed_ -           | 2   | 0   | 0   | 55  | 64  | 30  | 0.020725 | 0        | 0        | 0.884616 |
| antisense -            | 27  | 26  | 32  | 20  | 31  | 14  | 1.60257  | 1.978955 | 2.291666 | 1.842527 |
| antisense -            | 4   | 3   | 7   | 2   | 3   | 2   | 0.329053 | 0.316473 | 0.694787 | 0.255368 |
| pseudogen: MHC_class_  | 15  | 14  | 11  | 20  | 10  | 4   | 0.607909 | 0.727586 | 0.537883 | 1.258078 |
| lincRNA -              | 13  | 7   | 8   | 2   | 0   | 1   | 1.130928 | 0.780906 | 0.839711 | 0.270055 |
| lincRNA -              | 0   | 0   | 0   | 15  | 17  | 45  | 0        | 0        | 0        | 1.528987 |
| pseudogen: -           | 3   | 1   | 0   | 0   | 0   | 0   | 0.132458 | 0.056619 | 0        | 0        |
| pseudogen: -           | 0   | 1   | 0   | 0   | 0   | 0   | 0        | 0.124492 | 0        | 0        |
| antisense -            | 6   | 3   | 10  | 12  | 12  | 10  | 0.580083 | 0.371937 | 1.166505 | 1.800737 |
| pseudogen: -           | 2   | 4   | 5   | 0   | 6   | 5   | 0.224354 | 0.575405 | 0.67674  | 0        |
| pseudogen: -           | 0   | 0   | 0   | 0   | 0   | 1   | 0        | 0        | 0        | 0        |
| processed_ -           | 82  | 72  | 94  | 0   | 0   | 0   | 4.800226 | 5.404925 | 6.639323 | 0        |
| pseudogen: oral_cancer | 0   | 0   | 0   | 0   | 4   | 5   | 0        | 0        | 0        | 0        |
| lincRNA -              | 2   | 1   | 2   | 1   | 2   | 0   | 0.123071 | 0.07891  | 0.148492 | 0.095512 |
| antisense -            | 22  | 17  | 20  | 3   | 0   | 2   | 0.425043 | 0.421181 | 0.466218 | 0.089963 |
| pseudogen: glyceraldeh | 1   | 0   | 0   | 0   | 0   | 0   | 0.047364 | 0        | 0        | 0        |
| lincRNA SLC25A30_      | 0   | 0   | 3   | 0   | 5   | 0   | 0        | 0        | 0.242121 | 0        |
| antisense -            | 2   | 3   | 1   | 1   | 0   | 1   | 0.117225 | 0.225487 | 0.070719 | 0.090975 |
| processed_ THAP9_ant   | 159 | 175 | 208 | 288 | 319 | 269 | 2.884144 | 4.070683 | 4.552304 | 8.108543 |
| sense_intrc -          | 2   | 2   | 3   | 4   | 0   | 2   | 0.029705 | 0.038093 | 0.053762 | 0.092214 |

|                        |    |    |     |     |     |     |          |          |          |          |
|------------------------|----|----|-----|-----|-----|-----|----------|----------|----------|----------|
| pseudogeni -           | 0  | 0  | 1   | 0   | 0   | 0   | 0        | 0        | 0.100311 | 0        |
| lincRNA -              | 0  | 0  | 0   | 0   | 3   | 0   | 0        | 0        | 0        | 0        |
| lincRNA -              | 0  | 0  | 0   | 69  | 69  | 97  | 0        | 0        | 0        | 8.341871 |
| antisense -            | 12 | 11 | 10  | 4   | 2   | 1   | 0.138047 | 0.162274 | 0.138802 | 0.071423 |
| processed_ -           | 0  | 0  | 3   | 0   | 0   | 2   | 0        | 0        | 0.373847 | 0        |
| pseudogeni zinc_finger | 0  | 0  | 0   | 0   | 1   | 0   | 0        | 0        | 0        | 0        |
| pseudogeni -           | 0  | 1  | 0   | 7   | 3   | 1   | 0        | 0.192724 | 0        | 1.63288  |
| pseudogeni ankyrin_rej | 1  | 0  | 0   | 0   | 0   | 0   | 0.035256 | 0        | 0        | 0        |
| processed_ -           | 0  | 0  | 0   | 0   | 2   | 5   | 0        | 0        | 0        | 0        |
| pseudogeni BMS1_pseu   | 0  | 0  | 0   | 0   | 0   | 1   | 0        | 0        | 0        | 0        |
| lincRNA -              | 0  | 0  | 0   | 2   | 1   | 2   | 0        | 0        | 0        | 0.159256 |
| pseudogeni nudix_(nuc  | 6  | 1  | 2   | 0   | 0   | 0   | 0.494447 | 0.105676 | 0.198859 | 0        |
| antisense HTT_antisei  | 0  | 0  | 0   | 0   | 0   | 1   | 0        | 0        | 0        | 0        |
| antisense -            | 0  | 0  | 0   | 3   | 0   | 1   | 0        | 0        | 0        | 0.307088 |
| pseudogeni BMS1_pseu   | 3  | 3  | 4   | 2   | 1   | 0   | 0.07571  | 0.097088 | 0.121799 | 0.078342 |
| antisense -            | 76 | 40 | 39  | 111 | 140 | 21  | 1.962358 | 1.324445 | 1.215003 | 4.448545 |
| pseudogeni -           | 0  | 2  | 1   | 0   | 0   | 0   | 0        | 0.737789 | 0.347089 | 0        |
| pseudogeni C-terminal_ | 0  | 0  | 0   | 2   | 3   | 0   | 0        | 0        | 0        | 0.158217 |
| pseudogeni FCF1_small  | 0  | 1  | 1   | 0   | 1   | 1   | 0        | 0.10072  | 0.094766 | 0        |
| pseudogeni -           | 0  | 0  | 0   | 1   | 1   | 3   | 0        | 0        | 0        | 0.115158 |
| processed_ -           | 1  | 0  | 0   | 0   | 0   | 0   | 0.112177 | 0        | 0        | 0        |
| processed_ -           | 1  | 0  | 0   | 0   | 1   | 1   | 0.05365  | 0        | 0        | 0        |
| lincRNA -              | 2  | 1  | 0   | 0   | 0   | 0   | 0.034102 | 0.021865 | 0        | 0        |
| antisense WWC2_ant     | 0  | 0  | 0   | 1   | 2   | 0   | 0        | 0        | 0        | 0.180148 |
| lincRNA -              | 2  | 1  | 1   | 2   | 4   | 5   | 0.127766 | 0.081921 | 0.077078 | 0.19831  |
| antisense -            | 0  | 1  | 1   | 2   | 1   | 2   | 0        | 0.127394 | 0.119863 | 0.308389 |
| pseudogeni -           | 0  | 0  | 0   | 0   | 1   | 0   | 0        | 0        | 0        | 0        |
| processed_ -           | 83 | 58 | 67  | 36  | 44  | 41  | 1.023638 | 0.917288 | 0.996991 | 0.68913  |
| lincRNA -              | 0  | 1  | 0   | 0   | 2   | 2   | 0        | 0.062246 | 0        | 0        |
| antisense -            | 67 | 66 | 75  | 24  | 10  | 13  | 4.053718 | 5.120731 | 5.475049 | 2.253826 |
| antisense -            | 17 | 4  | 3   | 4   | 9   | 3   | 0.188313 | 0.05682  | 0.040096 | 0.068774 |
| lincRNA -              | 5  | 3  | 10  | 0   | 0   | 0   | 0.816899 | 0.628534 | 1.971272 | 0        |
| antisense -            | 0  | 0  | 0   | 0   | 2   | 0   | 0        | 0        | 0        | 0        |
| antisense HOXC_clusi   | 2  | 2  | 1   | 0   | 0   | 0   | 0.033303 | 0.042706 | 0.020091 | 0        |
| lincRNA -              | 0  | 0  | 0   | 2   | 4   | 0   | 0        | 0        | 0        | 0.036218 |
| pseudogeni -           | 2  | 3  | 1   | 1   | 2   | 4   | 0.504194 | 0.969835 | 0.304169 | 0.391289 |
| pseudogeni -           | 0  | 1  | 2   | 0   | 0   | 1   | 0        | 0.01388  | 0.02612  | 0        |
| processed_ -           | 2  | 1  | 2   | 0   | 0   | 0   | 0.047628 | 0.030538 | 0.057466 | 0        |
| lincRNA -              | 11 | 5  | 3   | 6   | 5   | 3   | 0.875705 | 0.51044  | 0.28816  | 0.74139  |
| lincRNA highly_up-r    | 0  | 0  | 0   | 2   | 0   | 0   | 0        | 0        | 0        | 0.261798 |
| processed_ -           | 0  | 0  | 0   | 5   | 3   | 1   | 0        | 0        | 0        | 0.240674 |
| processed_ -           | 2  | 0  | 0   | 1   | 1   | 0   | 0.155781 | 0        | 0        | 0.120897 |
| antisense -            | 2  | 1  | 0   | 3   | 2   | 0   | 0.147221 | 0.094395 | 0        | 0.342762 |
| pseudogeni -           | 0  | 0  | 0   | 0   | 1   | 0   | 0        | 0        | 0        | 0        |
| antisense -            | 0  | 2  | 1   | 2   | 4   | 2   | 0        | 0.25002  | 0.117621 | 0.302619 |
| antisense -            | 12 | 8  | 6   | 0   | 3   | 1   | 0.75024  | 0.641384 | 0.452604 | 0        |
| lincRNA -              | 0  | 0  | 0   | 0   | 0   | 1   | 0        | 0        | 0        | 0        |
| antisense -            | 0  | 0  | 4   | 1   | 0   | 0   | 0        | 0        | 0.340816 | 0.109608 |
| pseudogeni -           | 13 | 8  | 20  | 73  | 102 | 92  | 1.108309 | 0.874615 | 2.057291 | 9.659865 |
| lincRNA -              | 0  | 0  | 0   | 0   | 1   | 0   | 0        | 0        | 0        | 0        |
| lincRNA long_interf    | 8  | 5  | 8   | 0   | 0   | 0   | 0.26718  | 0.214137 | 0.322368 | 0        |
| protein_co zinc_finger | 96 | 79 | 104 | 74  | 108 | 131 | 1.105191 | 1.166279 | 1.444599 | 1.322294 |
| sense_intrc -          | 25 | 20 | 28  | 0   | 0   | 0   | 1.665128 | 1.708233 | 2.250162 | 0        |
| pseudogeni -           | 7  | 5  | 10  | 23  | 34  | 148 | 0.410288 | 0.375811 | 0.707194 | 2.092419 |
| protein_co TMED7-TIC   | 0  | 0  | 0   | 0   | 0   | 1   | 0        | 0        | 0        | 0        |
| pseudogeni -           | 0  | 0  | 1   | 0   | 0   | 0   | 0        | 0        | 0.084567 | 0        |
| lincRNA -              | 0  | 0  | 0   | 0   | 2   | 0   | 0        | 0        | 0        | 0        |
| pseudogeni -           | 0  | 0  | 1   | 2   | 1   | 2   | 0        | 0        | 0.065709 | 0.169059 |
| lincRNA -              | 0  | 0  | 0   | 0   | 1   | 2   | 0        | 0        | 0        | 0        |
| lincRNA -              | 4  | 5  | 1   | 3   | 3   | 4   | 0.426273 | 0.683293 | 0.128581 | 0.496226 |
| antisense CNOT10_ar    | 0  | 0  | 1   | 1   | 0   | 2   | 0        | 0        | 0.121407 | 0.15618  |
| lincRNA -              | 0  | 0  | 0   | 1   | 2   | 3   | 0        | 0        | 0        | 0.019756 |
| pseudogeni -           | 17 | 15 | 22  | 17  | 16  | 27  | 0.8857   | 1.002163 | 1.382957 | 1.37473  |
| processed_ -           | 1  | 0  | 1   | 0   | 0   | 0   | 0.064321 | 0        | 0.077607 | 0        |
| pseudogeni proteasom   | 0  | 0  | 0   | 0   | 2   | 0   | 0        | 0        | 0        | 0        |

|                        |     |     |     |     |      |     |          |          |          |          |
|------------------------|-----|-----|-----|-----|------|-----|----------|----------|----------|----------|
| pseudogen: -           | 0   | 0   | 0   | 1   | 1    | 0   | 0        | 0        | 0        | 0.153221 |
| protein_co zinc_finger | 46  | 35  | 36  | 54  | 55   | 72  | 0.611551 | 0.596695 | 0.577465 | 1.114292 |
| processed_ -           | 0   | 0   | 0   | 1   | 0    | 0   | 0        | 0        | 0        | 0.027443 |
| lincRNA -              | 1   | 0   | 0   | 0   | 0    | 0   | 0.141235 | 0        | 0        | 0        |
| pseudogen: general_tra | 8   | 9   | 8   | 0   | 0    | 0   | 0.555734 | 0.801731 | 0.670525 | 0        |
| antisense -            | 5   | 5   | 5   | 0   | 0    | 0   | 0.514145 | 0.659318 | 0.620345 | 0        |
| protein_co ret_finger_ | 0   | 1   | 0   | 0   | 0    | 0   | 0        | 0.031647 | 0        | 0        |
| lincRNA -              | 2   | 0   | 1   | 1   | 5    | 6   | 0.17082  | 0        | 0.103052 | 0.132568 |
| antisense WDFY3_an     | 0   | 0   | 0   | 0   | 1    | 0   | 0        | 0        | 0        | 0        |
| processed_ -           | 40  | 31  | 46  | 35  | 24   | 46  | 1.764441 | 1.75355  | 2.448234 | 2.396325 |
| antisense -            | 0   | 0   | 0   | 3   | 1    | 6   | 0        | 0        | 0        | 0.556988 |
| pseudogen: asparagine- | 3   | 2   | 1   | 24  | 35   | 15  | 0.183164 | 0.156588 | 0.073666 | 2.274369 |
| antisense -            | 0   | 0   | 2   | 0   | 1    | 1   | 0        | 0        | 0.215116 | 0        |
| antisense -            | 1   | 4   | 7   | 1   | 0    | 1   | 0.058907 | 0.30216  | 0.497523 | 0.091432 |
| lincRNA -              | 1   | 2   | 0   | 0   | 0    | 0   | 0.110329 | 0.282964 | 0        | 0        |
| pseudogen: ALG1_chitc  | 4   | 5   | 2   | 21  | 15   | 7   | 0.19356  | 0.310267 | 0.116771 | 1.577271 |
| pseudogen: -           | 1   | 2   | 0   | 3   | 0    | 1   | 0.037784 | 0.096905 | 0        | 0.175938 |
| lincRNA -              | 0   | 0   | 0   | 2   | 6    | 6   | 0        | 0        | 0        | 0.227793 |
| pseudogen: tubulin_be  | 0   | 0   | 1   | 3   | 1    | 0   | 0        | 0        | 0.043353 | 0.16731  |
| antisense -            | 0   | 0   | 0   | 1   | 1    | 1   | 0        | 0        | 0        | 0.128133 |
| lincRNA -              | 0   | 0   | 2   | 0   | 1    | 2   | 0        | 0        | 0.125167 | 0        |
| pseudogen: -           | 1   | 0   | 2   | 5   | 2    | 2   | 0.101935 | 0        | 0.24598  | 0.791085 |
| antisense -            | 1   | 0   | 2   | 0   | 0    | 0   | 0.060896 | 0        | 0.146949 | 0        |
| pseudogen: -           | 0   | 0   | 0   | 0   | 2    | 0   | 0        | 0        | 0        | 0        |
| processed_ -           | 1   | 0   | 0   | 0   | 0    | 0   | 0.080706 | 0        | 0        | 0        |
| lincRNA -              | 3   | 1   | 2   | 0   | 0    | 0   | 0.067274 | 0.028756 | 0.054113 | 0        |
| protein_co SH3_and_n   | 732 | 584 | 562 | 695 | 1015 | 494 | 4.642074 | 4.749229 | 4.300167 | 6.840947 |
| lincRNA -              | 3   | 5   | 1   | 9   | 14   | 4   | 0.08567  | 0.183099 | 0.034455 | 0.398915 |
| antisense -            | 0   | 0   | 0   | 1   | 0    | 0   | 0        | 0        | 0        | 0.165409 |
| lincRNA -              | 1   | 1   | 0   | 0   | 0    | 0   | 0.07225  | 0.09265  | 0        | 0        |
| antisense -            | 0   | 4   | 1   | 1   | 1    | 3   | 0        | 0.467936 | 0.110069 | 0.141595 |
| processed_ -           | 0   | 0   | 0   | 17  | 18   | 31  | 0        | 0        | 0        | 2.295467 |
| pseudogen: -           | 2   | 0   | 0   | 4   | 8    | 1   | 0.132085 | 0        | 0        | 0.410027 |
| pseudogen: reticulon_3 | 2   | 0   | 1   | 2   | 0    | 2   | 0.131899 | 0        | 0.079572 | 0.204725 |
| pseudogen: -           | 0   | 0   | 0   | 0   | 0    | 3   | 0        | 0        | 0        | 0        |
| pseudogen: heat_shock  | 17  | 18  | 18  | 4   | 5    | 0   | 0.468349 | 0.63592  | 0.598331 | 0.171045 |
| processed_ -           | 0   | 0   | 0   | 0   | 1    | 0   | 0        | 0        | 0        | 0        |
| pseudogen: MT-ND3_ps   | 0   | 0   | 1   | 0   | 1    | 0   | 0        | 0        | 0.169896 | 0        |
| pseudogen: -           | 0   | 0   | 1   | 1   | 2    | 1   | 0        | 0        | 0.072626 | 0.093427 |
| pseudogen: RAB5C_me    | 0   | 1   | 1   | 0   | 0    | 0   | 0        | 0.094395 | 0.088816 | 0        |
| lincRNA WWC2_ant       | 14  | 12  | 11  | 23  | 63   | 17  | 0.300715 | 0.330535 | 0.28508  | 0.766805 |
| lincRNA -              | 2   | 2   | 3   | 2   | 1    | 0   | 0.150048 | 0.192415 | 0.271562 | 0.232895 |
| lincRNA -              | 30  | 42  | 33  | 73  | 88   | 46  | 2.021121 | 3.628522 | 2.682459 | 7.633514 |
| antisense -            | 1   | 2   | 4   | 15  | 21   | 5   | 0.010577 | 0.027128 | 0.051049 | 0.246266 |
| protein_co zinc_finger | 106 | 72  | 83  | 126 | 120  | 148 | 1.154551 | 1.005655 | 1.09077  | 2.130141 |
| lincRNA -              | 6   | 5   | 7   | 3   | 1    | 1   | 0.167564 | 0.179064 | 0.235872 | 0.130041 |
| pseudogen: -           | 0   | 0   | 1   | 2   | 1    | 1   | 0        | 0        | 0.549277 | 1.4132   |
| antisense -            | 0   | 0   | 2   | 0   | 0    | 0   | 0        | 0        | 0.129909 | 0        |
| processed_ -           | 13  | 10  | 8   | 4   | 6    | 4   | 0.391252 | 0.385942 | 0.290503 | 0.186854 |
| lincRNA -              | 2   | 2   | 3   | 2   | 1    | 0   | 0.169584 | 0.217468 | 0.30692  | 0.263218 |
| lincRNA -              | 3   | 0   | 3   | 0   | 0    | 0   | 0.227254 | 0        | 0.274195 | 0        |
| processed_ -           | 8   | 0   | 3   | 0   | 0    | 0   | 0.28247  | 0        | 0.127806 | 0        |
| processed_ -           | 3   | 12  | 9   | 9   | 12   | 3   | 0.057557 | 0.295236 | 0.208339 | 0.268011 |
| lincRNA -              | 0   | 0   | 0   | 1   | 0    | 0   | 0        | 0        | 0        | 0.205014 |
| pseudogen: aldehyde_d  | 3   | 0   | 0   | 5   | 1    | 1   | 0.091761 | 0        | 0        | 0.237377 |
| pseudogen: family_witl | 0   | 0   | 1   | 1   | 3    | 1   | 0        | 0        | 0.040673 | 0.052322 |
| processed_ -           | 15  | 23  | 21  | 13  | 7    | 2   | 0.353087 | 0.69427  | 0.596429 | 0.474969 |
| lincRNA -              | 0   | 0   | 0   | 5   | 7    | 0   | 0        | 0        | 0        | 0.088304 |
| lincRNA -              | 0   | 0   | 1   | 0   | 0    | 1   | 0        | 0        | 0.094293 | 0        |
| pseudogen: -           | 2   | 3   | 3   | 6   | 7    | 5   | 0.084487 | 0.162513 | 0.152907 | 0.393404 |
| antisense -            | 14  | 12  | 20  | 3   | 15   | 9   | 1.243296 | 1.366586 | 2.143012 | 0.413522 |
| lincRNA -              | 0   | 0   | 0   | 0   | 2    | 1   | 0        | 0        | 0        | 0        |
| lincRNA -              | 9   | 4   | 2   | 2   | 2    | 1   | 0.218658 | 0.124621 | 0.058627 | 0.075419 |
| lincRNA -              | 0   | 0   | 0   | 0   | 0    | 1   | 0        | 0        | 0        | 0        |
| pseudogen: -           | 3   | 3   | 1   | 2   | 1    | 0   | 0.045159 | 0.05791  | 0.018162 | 0.046729 |

|                        |      |      |      |      |      |      |          |          |          |          |
|------------------------|------|------|------|------|------|------|----------|----------|----------|----------|
| processed_-            | 48   | 38   | 25   | 14   | 21   | 10   | 1.118649 | 1.135652 | 0.702976 | 0.50642  |
| pseudogen: regulator_c | 4    | 3    | 0    | 0    | 1    | 0    | 0.050898 | 0.048952 | 0        | 0        |
| processed_-            | 6    | 3    | 2    | 0    | 0    | 0    | 0.128701 | 0.08252  | 0.051762 | 0        |
| lincRNA_-              | 2    | 0    | 0    | 0    | 0    | 0    | 0.181393 | 0        | 0        | 0        |
| pseudogen_-            | 0    | 0    | 0    | 1    | 0    | 2    | 0        | 0        | 0        | 0.632868 |
| lincRNA_-              | 0    | 0    | 0    | 1    | 0    | 0    | 0        | 0        | 0        | 0.286535 |
| pseudogen: MT-ND1_ps   | 0    | 0    | 0    | 3    | 1    | 4    | 0        | 0        | 0        | 0.693141 |
| antisense_-            | 0    | 0    | 0    | 3    | 2    | 6    | 0        | 0        | 0        | 0.32833  |
| pseudogen_-            | 2    | 1    | 1    | 4    | 3    | 0    | 0.311562 | 0.199767 | 0.187958 | 0.967173 |
| antisense_-            | 0    | 2    | 0    | 9    | 7    | 3    | 0        | 0.046885 | 0        | 0.255368 |
| sense_intrc_-          | 0    | 0    | 0    | 0    | 1    | 0    | 0        | 0        | 0        | 0        |
| antisense_-            | 1    | 0    | 1    | 0    | 4    | 1    | 0.173026 | 0        | 0.208766 | 0        |
| pseudogen: FK506_bin   | 0    | 0    | 0    | 0    | 1    | 0    | 0        | 0        | 0        | 0        |
| pseudogen_-            | 2    | 1    | 1    | 4    | 2    | 1    | 0.12971  | 0.083167 | 0.078251 | 0.402655 |
| pseudogen_-            | 0    | 1    | 0    | 12   | 9    | 19   | 0        | 0.042405 | 0        | 0.615908 |
| pseudogen: ribosomal_  | 273  | 247  | 261  | 220  | 244  | 135  | 4.545801 | 5.274169 | 5.243681 | 5.685922 |
| pseudogen_-            | 0    | 1    | 0    | 0    | 1    | 0    | 0        | 0.122215 | 0        | 0        |
| pseudogen_-            | 0    | 0    | 1    | 0    | 0    | 0    | 0        | 0        | 0.03622  | 0        |
| pseudogen_-            | 0    | 0    | 3    | 7    | 2    | 9    | 0        | 0        | 0.278697 | 0.836549 |
| pseudogen_-            | 6    | 1    | 4    | 0    | 1    | 1    | 0.357031 | 0.076307 | 0.287185 | 0        |
| lincRNA_-              | 1    | 0    | 0    | 0    | 0    | 0    | 0.079881 | 0        | 0        | 0        |
| protein_co forkhead_b  | 23   | 15   | 9    | 0    | 0    | 0    | 0.475097 | 0.397333 | 0.224308 | 0        |
| pseudogen: peptidylpr  | 3    | 4    | 3    | 7    | 3    | 7    | 0.285335 | 0.487869 | 0.344273 | 1.033385 |
| lincRNA_-              | 3    | 1    | 6    | 3    | 7    | 2    | 0.064204 | 0.027444 | 0.154931 | 0.099653 |
| lincRNA_-              | 0    | 0    | 0    | 0    | 1    | 5    | 0        | 0        | 0        | 0        |
| pseudogen_-            | 0    | 0    | 0    | 0    | 2    | 0    | 0        | 0        | 0        | 0        |
| processed_-            | 0    | 1    | 1    | 0    | 0    | 0    | 0        | 0.067335 | 0.063354 | 0        |
| lincRNA_-              | 0    | 1    | 2    | 0    | 0    | 0    | 0        | 0.110128 | 0.207236 | 0        |
| pseudogen_-            | 7    | 7    | 6    | 1    | 2    | 6    | 0.611229 | 0.783815 | 0.632129 | 0.13553  |
| pseudogen: inositol(my | 1    | 0    | 1    | 0    | 0    | 0    | 0.055689 | 0        | 0.067192 | 0        |
| antisense_-            | 6    | 5    | 9    | 1    | 2    | 1    | 0.575338 | 0.614824 | 1.041267 | 0.148834 |
| lincRNA_-              | 1    | 0    | 0    | 0    | 0    | 0    | 0.080291 | 0        | 0        | 0        |
| lincRNA long_interf    | 0    | 0    | 0    | 20   | 39   | 4    | 0        | 0        | 0        | 0.934272 |
| pseudogen_-            | 1    | 3    | 5    | 1    | 6    | 0    | 0.088639 | 0.341001 | 0.53474  | 0.13758  |
| lincRNA_-              | 0    | 0    | 2    | 12   | 9    | 14   | 0        | 0        | 0.056974 | 0.439757 |
| protein_co Uncharact   | 1    | 0    | 1    | 0    | 0    | 1    | 0.008504 | 0        | 0.01026  | 0        |
| lincRNA_-              | 0    | 1    | 0    | 0    | 0    | 0    | 0        | 0.03642  | 0        | 0        |
| processed_-            | 2    | 1    | 3    | 0    | 2    | 0    | 0.160582 | 0.102962 | 0.290628 | 0        |
| pseudogen: MT-ND5_ps   | 0    | 0    | 0    | 0    | 0    | 1    | 0        | 0        | 0        | 0        |
| pseudogen_-            | 3    | 0    | 0    | 1    | 1    | 1    | 0.227254 | 0        | 0        | 0.117576 |
| pseudogen_-            | 14   | 4    | 0    | 3    | 8    | 11   | 2.131364 | 0.780906 | 0        | 0.708894 |
| pseudogen: coenzyme_   | 2    | 0    | 0    | 2    | 0    | 2    | 0.12953  | 0        | 0        | 0.201049 |
| antisense_-            | 0    | 3    | 1    | 4    | 3    | 7    | 0        | 0.41091  | 0.128874 | 0.663142 |
| lincRNA metastasis_    | 8079 | 6761 | 6502 | 3281 | 5092 | 3794 | 43.50304 | 46.68553 | 42.24322 | 27.42197 |
| lincRNA_-              | 0    | 0    | 0    | 1    | 3    | 3    | 0        | 0        | 0        | 0.083177 |
| pseudogen: ALG3_alph   | 0    | 0    | 0    | 1    | 1    | 0    | 0        | 0        | 0        | 0.065332 |
| lincRNA_-              | 0    | 0    | 0    | 1    | 0    | 0    | 0        | 0        | 0        | 0.093668 |
| lincRNA_-              | 1    | 0    | 0    | 0    | 0    | 0    | 0.037067 | 0        | 0        | 0        |
| processed_-            | 1    | 0    | 0    | 0    | 0    | 0    | 0.056836 | 0        | 0        | 0        |
| pseudogen_-            | 2    | 1    | 0    | 1    | 0    | 0    | 0.179312 | 0.114971 | 0        | 0.139158 |
| antisense_-            | 0    | 4    | 0    | 0    | 4    | 0    | 0        | 0.569951 | 0        | 0        |
| processed_-            | 2    | 5    | 8    | 0    | 4    | 3    | 0.184606 | 0.591829 | 0.890953 | 0        |
| antisense TET2_antis   | 0    | 1    | 1    | 0    | 0    | 1    | 0        | 0.111974 | 0.105355 | 0        |
| pseudogen_-            | 0    | 0    | 0    | 0    | 1    | 0    | 0        | 0        | 0        | 0        |
| pseudogen: moesin_ps   | 0    | 2    | 7    | 0    | 3    | 0    | 0        | 0.069434 | 0.228654 | 0        |
| processed_-            | 4    | 6    | 4    | 2    | 1    | 0    | 0.065306 | 0.125619 | 0.078796 | 0.050682 |
| pseudogen: ATP-bindin  | 14   | 10   | 12   | 15   | 13   | 17   | 0.311119 | 0.284975 | 0.321756 | 0.517392 |
| pseudogen: hydroxyacy  | 3    | 1    | 1    | 0    | 2    | 3    | 0.061589 | 0.026327 | 0.02477  | 0        |
| lincRNA_-              | 0    | 0    | 0    | 0    | 2    | 0    | 0        | 0        | 0        | 0        |
| processed_-            | 1    | 1    | 0    | 0    | 1    | 0    | 0.035986 | 0.046147 | 0        | 0        |
| antisense_-            | 56   | 40   | 31   | 29   | 39   | 64   | 1.15219  | 1.055372 | 0.769566 | 0.926114 |
| antisense_-            | 3    | 0    | 0    | 90   | 88   | 65   | 0.46273  | 0        | 0        | 21.54665 |
| lincRNA_-              | 4    | 1    | 2    | 3    | 13   | 11   | 0.240462 | 0.077089 | 0.145065 | 0.279922 |
| pseudogen: SET_pseud   | 2    | 1    | 8    | 18   | 15   | 7    | 0.116497 | 0.074695 | 0.562241 | 1.627374 |
| lincRNA_-              | 3    | 0    | 1    | 26   | 24   | 3    | 0.392933 | 0        | 0.158032 | 5.285684 |

|                         |    |    |    |    |    |    |          |          |          |          |
|-------------------------|----|----|----|----|----|----|----------|----------|----------|----------|
| pseudogen: heat_shock   | 1  | 0  | 0  | 0  | 2  | 1  | 0.03091  | 0        | 0        | 0        |
| lincRNA -               | 15 | 4  | 10 | 2  | 13 | 9  | 0.307543 | 0.105168 | 0.247379 | 0.063647 |
| antisense STPG2_anti    | 0  | 0  | 0  | 1  | 2  | 0  | 0        | 0        | 0        | 0.13553  |
| lincRNA -               | 0  | 0  | 0  | 0  | 1  | 0  | 0        | 0        | 0        | 0        |
| pseudogen: unc-93_ho    | 0  | 0  | 0  | 0  | 0  | 1  | 0        | 0        | 0        | 0        |
| lincRNA -               | 0  | 0  | 0  | 0  | 0  | 1  | 0        | 0        | 0        | 0        |
| lincRNA -               | 1  | 0  | 0  | 0  | 0  | 0  | 0.027795 | 0        | 0        | 0        |
| lincRNA -               | 0  | 2  | 0  | 0  | 0  | 0  | 0        | 0.053118 | 0        | 0        |
| pseudogen: -            | 16 | 13 | 20 | 6  | 8  | 19 | 0.26315  | 0.27418  | 0.396882 | 0.153167 |
| sense_intrc EMCN_intr   | 0  | 1  | 0  | 0  | 0  | 0  | 0        | 0.12501  | 0        | 0        |
| lincRNA -               | 1  | 0  | 0  | 1  | 3  | 5  | 0.013844 | 0        | 0        | 0.021488 |
| antisense -             | 0  | 0  | 0  | 0  | 2  | 0  | 0        | 0        | 0        | 0        |
| lincRNA -               | 0  | 0  | 0  | 0  | 0  | 3  | 0        | 0        | 0        | 0        |
| protein_co proline-ricl | 0  | 1  | 0  | 0  | 0  | 0  | 0        | 0.051262 | 0        | 0        |
| processed_ -            | 3  | 1  | 0  | 0  | 1  | 0  | 0.194028 | 0.082938 | 0        | 0        |
| processed_ -            | 8  | 3  | 16 | 8  | 12 | 5  | 0.325908 | 0.156724 | 0.786454 | 0.505854 |
| protein_co protocadhe   | 54 | 62 | 55 | 54 | 84 | 62 | 0.483864 | 0.712411 | 0.594621 | 0.751024 |
| lincRNA -               | 0  | 1  | 0  | 0  | 0  | 0  | 0        | 0.07621  | 0        | 0        |
| sense_intrc ZNF346_in   | 11 | 9  | 8  | 6  | 9  | 5  | 0.692336 | 0.7264   | 0.607522 | 0.586146 |
| pseudogen: -            | 6  | 2  | 0  | 6  | 5  | 2  | 0.295836 | 0.126456 | 0        | 0.459179 |
| pseudogen: family_witl  | 6  | 13 | 11 | 35 | 41 | 34 | 0.098889 | 0.274758 | 0.218745 | 0.895358 |
| lincRNA -               | 1  | 0  | 0  | 0  | 0  | 0  | 0.102604 | 0        | 0        | 0        |
| antisense -             | 10 | 11 | 12 | 25 | 41 | 28 | 0.706175 | 0.996126 | 1.022449 | 2.740203 |
| lincRNA -               | 0  | 0  | 0  | 0  | 0  | 1  | 0        | 0        | 0        | 0        |
| antisense -             | 3  | 0  | 2  | 0  | 0  | 0  | 0.222932 | 0        | 0.17932  | 0        |
| pseudogen: -            | 5  | 4  | 5  | 2  | 4  | 1  | 0.396701 | 0.40697  | 0.478642 | 0.246294 |
| antisense -             | 1  | 3  | 1  | 23 | 26 | 20 | 0.059055 | 0.227191 | 0.071254 | 2.108231 |
| lincRNA -               | 0  | 1  | 1  | 0  | 0  | 0  | 0        | 0.058492 | 0.055035 | 0        |
| pseudogen: -            | 7  | 4  | 5  | 33 | 55 | 46 | 1.058807 | 0.775868 | 0.912508 | 7.747527 |
| protein_co pentraxin_   | 1  | 1  | 4  | 5  | 4  | 3  | 0.03093  | 0.039663 | 0.149276 | 0.240039 |
| protein_co HCG17745     | 1  | 0  | 0  | 0  | 0  | 0  | 0.028962 | 0        | 0        | 0        |
| antisense -             | 1  | 0  | 0  | 0  | 0  | 1  | 0.06558  | 0        | 0        | 0        |
| antisense -             | 37 | 23 | 21 | 19 | 38 | 14 | 0.736701 | 0.587255 | 0.504495 | 0.587183 |
| lincRNA -               | 4  | 0  | 2  | 0  | 0  | 0  | 0.23893  | 0        | 0.144141 | 0        |
| antisense -             | 2  | 1  | 3  | 3  | 0  | 5  | 0.230418 | 0.147739 | 0.417018 | 0.53646  |
| lincRNA -               | 1  | 0  | 1  | 1  | 0  | 0  | 0.075024 | 0        | 0.090521 | 0.116448 |
| pseudogen: -            | 2  | 1  | 2  | 0  | 1  | 1  | 0.095499 | 0.061232 | 0.115225 | 0        |
| antisense -             | 0  | 1  | 3  | 1  | 1  | 1  | 0        | 0.09015  | 0.254463 | 0.109115 |
| processed_ -            | 1  | 0  | 0  | 0  | 0  | 1  | 0.028767 | 0        | 0        | 0        |
| antisense -             | 1  | 1  | 0  | 0  | 8  | 4  | 0.083882 | 0.107567 | 0        | 0        |
| lincRNA -               | 1  | 2  | 3  | 0  | 0  | 0  | 0.13552  | 0.347571 | 0.490539 | 0        |
| pseudogen: -            | 0  | 0  | 0  | 1  | 0  | 0  | 0        | 0        | 0        | 0.152899 |
| lincRNA -               | 1  | 0  | 0  | 1  | 0  | 0  | 0.062271 | 0        | 0        | 0.096653 |
| lincRNA -               | 0  | 0  | 0  | 2  | 1  | 0  | 0        | 0        | 0        | 0.168277 |
| pseudogen: -            | 0  | 0  | 0  | 2  | 0  | 1  | 0        | 0        | 0        | 0.302619 |
| lincRNA -               | 18 | 15 | 15 | 0  | 0  | 0  | 1.632534 | 1.744578 | 1.641456 | 0        |
| protein_co protocadhe   | 9  | 13 | 6  | 12 | 17 | 5  | 0.0889   | 0.16467  | 0.071509 | 0.183981 |
| lincRNA -               | 75 | 70 | 78 | 1  | 1  | 0  | 3.217522 | 3.850948 | 4.03741  | 0.066587 |
| lincRNA -               | 0  | 1  | 0  | 0  | 0  | 0  | 0        | 0.079222 | 0        | 0        |
| pseudogen: -            | 1  | 2  | 0  | 0  | 0  | 0  | 0.285915 | 0.73329  | 0        | 0        |
| antisense KIAA0196_     | 3  | 1  | 2  | 0  | 0  | 1  | 0.239642 | 0.102436 | 0.192762 | 0        |
| antisense -             | 0  | 0  | 0  | 0  | 1  | 0  | 0        | 0        | 0        | 0        |
| lincRNA -               | 0  | 0  | 0  | 29 | 22 | 48 | 0        | 0        | 0        | 4.020218 |
| antisense -             | 3  | 5  | 1  | 0  | 0  | 0  | 0.217419 | 0.464682 | 0.087443 | 0        |
| pseudogen: -            | 0  | 0  | 0  | 0  | 1  | 1  | 0        | 0        | 0        | 0        |
| antisense -             | 2  | 7  | 2  | 6  | 7  | 5  | 0.106086 | 0.476141 | 0.127999 | 0.493981 |
| pseudogen: -            | 1  | 0  | 0  | 1  | 1  | 0  | 0.12504  | 0        | 0        | 0.194079 |
| pseudogen: -            | 0  | 0  | 0  | 0  | 1  | 0  | 0        | 0        | 0        | 0        |
| pseudogen: -            | 3  | 4  | 7  | 1  | 0  | 1  | 0.322638 | 0.55165  | 0.908322 | 0.166926 |
| lincRNA -               | 1  | 0  | 1  | 0  | 0  | 0  | 0.10238  | 0        | 0.123527 | 0        |
| antisense HOXA_clus     | 59 | 43 | 69 | 0  | 0  | 2  | 2.382869 | 2.227029 | 3.362369 | 0        |
| lincRNA -               | 0  | 0  | 1  | 0  | 0  | 0  | 0        | 0        | 0.170923 | 0        |
| lincRNA -               | 0  | 0  | 2  | 3  | 1  | 0  | 0        | 0        | 0.118607 | 0.228867 |
| pseudogen: Fc_fragmen   | 1  | 1  | 0  | 0  | 0  | 0  | 0.041791 | 0.053592 | 0        | 0        |
| antisense -             | 0  | 1  | 0  | 0  | 0  | 1  | 0        | 0.127664 | 0        | 0        |

|                         |      |      |      |      |      |      |          |          |          |
|-------------------------|------|------|------|------|------|------|----------|----------|----------|
| antisense -             | 0    | 0    | 0    | 3    | 0    | 0    | 0        | 0        | 0.32588  |
| processed_ -            | 0    | 1    | 0    | 1    | 0    | 0    | 0        | 0.099883 | 0.120897 |
| antisense -             | 47   | 32   | 28   | 7    | 8    | 10   | 0.801393 | 0.699692 | 0.576042 |
| pseudogen: glucuronid   | 93   | 70   | 57   | 52   | 41   | 59   | 3.268944 | 3.155237 | 2.417394 |
| pseudogen: -            | 0    | 1    | 2    | 0    | 1    | 0    | 0        | 0.217862 | 0.409967 |
| lincRNA -               | 1    | 1    | 0    | 0    | 0    | 0    | 0.026612 | 0.034126 | 0        |
| pseudogen: -            | 0    | 0    | 0    | 1    | 0    | 1    | 0        | 0        | 0.091547 |
| antisense -             | 3    | 11   | 11   | 10   | 28   | 9    | 0.278555 | 1.309758 | 1.232338 |
| pseudogen: -            | 2    | 1    | 3    | 2    | 4    | 7    | 0.083957 | 0.053832 | 0.151949 |
| pseudogen: Kruppel-lik  | 5    | 3    | 0    | 4    | 2    | 3    | 0.229403 | 0.176506 | 0        |
| pseudogen: HIG1_hypo    | 0    | 0    | 1    | 0    | 0    | 0    | 0        | 0        | 0.20278  |
| processed_ long_interf  | 0    | 0    | 0    | 539  | 720  | 264  | 0        | 0        | 11.76614 |
| pseudogen: -            | 0    | 0    | 0    | 0    | 0    | 1    | 0        | 0        | 0        |
| pseudogen: -            | 0    | 0    | 0    | 0    | 1    | 0    | 0        | 0        | 0        |
| lincRNA -               | 0    | 3    | 1    | 0    | 0    | 0    | 0        | 0.346903 | 0.108799 |
| pseudogen: MT-ND1_ps    | 0    | 1    | 0    | 0    | 0    | 0    | 0        | 0.064241 | 0        |
| protein_co uncharacte   | 22   | 24   | 28   | 41   | 29   | 39   | 1.153893 | 1.614223 | 1.77194  |
| protein_co CDNA_FLJ2    | 22   | 17   | 14   | 13   | 17   | 20   | 0.584134 | 0.578826 | 0.448503 |
| lincRNA -               | 0    | 0    | 0    | 1    | 6    | 23   | 0        | 0        | 0.22189  |
| pseudogen: MT-ND4_ps    | 0    | 0    | 1    | 0    | 0    | 0    | 0        | 0        | 0.435196 |
| sense_intrc -           | 4    | 6    | 1    | 1    | 1    | 0    | 0.351895 | 0.676883 | 0.106145 |
| lincRNA prostate_c      | 0    | 0    | 2    | 2    | 0    | 0    | 0        | 0        | 0.196784 |
| lincRNA -               | 2    | 0    | 1    | 0    | 0    | 3    | 0.088139 | 0        | 0.053172 |
| pseudogen: -            | 0    | 0    | 0    | 0    | 0    | 3    | 0        | 0        | 0        |
| protein_co coiled-coil_ | 385  | 292  | 295  | 84   | 131  | 60   | 4.265751 | 4.148842 | 3.943708 |
| lincRNA -               | 0    | 1    | 0    | 0    | 0    | 0    | 0        | 0.082257 | 0        |
| sense_intrc -           | 9    | 2    | 2    | 8    | 17   | 21   | 0.07828  | 0.022307 | 0.020989 |
| pseudogen: -            | 0    | 0    | 1    | 1    | 0    | 0    | 0        | 0        | 0.067755 |
| protein_co homeobox     | 339  | 250  | 281  | 0    | 0    | 13   | 6.255693 | 5.915958 | 6.25648  |
| antisense -             | 0    | 3    | 0    | 0    | 1    | 0    | 0        | 0.382181 | 0        |
| processed_ -            | 0    | 0    | 0    | 0    | 2    | 0    | 0        | 0        | 0        |
| lincRNA STAU2_anti      | 0    | 2    | 0    | 1    | 0    | 0    | 0        | 0.057929 | 0        |
| protein_co transmembr   | 299  | 224  | 250  | 754  | 1344 | 956  | 5.491624 | 5.275783 | 5.5401   |
| protein_co protocadhe   | 2016 | 1533 | 1594 | 104  | 155  | 134  | 20.55453 | 20.04327 | 19.60891 |
| antisense -             | 0    | 3    | 3    | 2    | 1    | 8    | 0        | 0.454381 | 0.427523 |
| lincRNA -               | 4    | 1    | 0    | 0    | 3    | 4    | 0.247768 | 0.079432 | 0        |
| protein_co serpin_pep   | 32   | 30   | 36   | 24   | 29   | 34   | 0.654374 | 0.786696 | 0.888233 |
| protein_co chromosom    | 0    | 0    | 0    | 202  | 185  | 131  | 0        | 0        | 0.946901 |
| lincRNA -               | 1    | 1    | 3    | 1    | 0    | 1    | 0.058759 | 0.075351 | 0.21269  |
| protein_co HCG15011     | 43   | 18   | 13   | 28   | 40   | 20   | 2.667025 | 1.431662 | 0.972859 |
| pseudogen: -            | 0    | 2    | 0    | 0    | 1    | 2    | 0        | 0.096749 | 0        |
| antisense RAD21_ant     | 1    | 0    | 0    | 4    | 2    | 0    | 0.023328 | 0        | 0.144835 |
| pseudogen: -            | 1    | 0    | 0    | 8    | 2    | 2    | 0.158949 | 0        | 0.197369 |
| pseudogen: -            | 8    | 2    | 3    | 6    | 9    | 4    | 0.338556 | 0.108538 | 0.153183 |
| pseudogen: -            | 0    | 1    | 0    | 0    | 1    | 0    | 0        | 0.162075 | 0        |
| antisense -             | 0    | 1    | 0    | 1    | 0    | 0    | 0        | 0.125795 | 0.152259 |
| antisense -             | 1    | 3    | 1    | 1    | 2    | 1    | 0.086037 | 0.33099  | 0.103808 |
| pseudogen: -            | 6    | 4    | 1    | 10   | 7    | 4    | 0.281059 | 0.240279 | 0.056519 |
| antisense -             | 16   | 6    | 8    | 4    | 5    | 4    | 1.462457 | 0.703272 | 0.882269 |
| antisense microRNA_     | 0    | 0    | 0    | 12   | 12   | 3    | 0        | 0        | 0.145076 |
| protein_co Uncharacte   | 0    | 0    | 0    | 1    | 1    | 1    | 0        | 0        | 0.101083 |
| antisense taurine_up    | 2073 | 1742 | 1679 | 1051 | 1187 | 1400 | 17.13432 | 18.46397 | 16.74428 |
| processed_ -            | 0    | 0    | 4    | 0    | 1    | 0    | 0        | 0        | 0.454422 |
| sense_intrc -           | 0    | 1    | 0    | 0    | 0    | 4    | 0        | 0.126856 | 0        |
| antisense -             | 1    | 1    | 0    | 0    | 1    | 2    | 0.117814 | 0.15108  | 0        |
| lincRNA -               | 4    | 2    | 3    | 4    | 4    | 0    | 0.494881 | 0.317308 | 0.447827 |
| pseudogen: -            | 8    | 7    | 12   | 11   | 8    | 5    | 0.586125 | 0.65767  | 1.060791 |
| protein_co TMF1-regul   | 107  | 87   | 84   | 726  | 1249 | 926  | 2.562427 | 2.671753 | 2.427141 |
| lincRNA -               | 0    | 0    | 0    | 3    | 1    | 4    | 0        | 0        | 0.367575 |
| pseudogen: -            | 4    | 0    | 0    | 0    | 0    | 0    | 1.705092 | 0        | 0        |
| lincRNA -               | 0    | 0    | 2    | 0    | 0    | 0    | 0        | 0        | 0.184285 |
| sense_intrc -           | 4    | 2    | 0    | 5    | 5    | 6    | 0.247441 | 0.158654 | 0.480078 |
| protein_co Uncharacte   | 0    | 2    | 1    | 8    | 13   | 6    | 0        | 0.066922 | 0.031483 |
| pseudogen: -            | 0    | 0    | 0    | 0    | 0    | 2    | 0        | 0        | 0        |
| pseudogen: -            | 0    | 0    | 1    | 0    | 0    | 0    | 0        | 0        | 0.050559 |

|                        |    |    |    |     |     |     |          |          |          |          |
|------------------------|----|----|----|-----|-----|-----|----------|----------|----------|----------|
| lincRNA -              | 2  | 0  | 5  | 2   | 3   | 1   | 0.121792 | 0        | 0.367373 | 0.189038 |
| antisense -            | 1  | 0  | 0  | 1   | 0   | 0   | 0.043097 | 0        | 0        | 0.066893 |
| lincRNA -              | 2  | 3  | 2  | 1   | 2   | 0   | 0.148857 | 0.286332 | 0.179605 | 0.115523 |
| antisense -            | 5  | 3  | 0  | 2   | 3   | 1   | 0.302126 | 0.232461 | 0        | 0.187577 |
| pseudogen: RAN_memt    | 0  | 1  | 0  | 0   | 0   | 0   | 0        | 0.221881 | 0        | 0        |
| lincRNA -              | 0  | 3  | 0  | 0   | 0   | 1   | 0        | 0.41951  | 0        | 0        |
| antisense -            | 0  | 0  | 1  | 0   | 0   | 0   | 0        | 0        | 0.174078 | 0        |
| sense_intrc -          | 1  | 1  | 0  | 3   | 1   | 4   | 0.106327 | 0.136349 | 0        | 0.495101 |
| lincRNA -              | 0  | 0  | 0  | 3   | 1   | 1   | 0        | 0        | 0        | 0.588516 |
| antisense -            | 1  | 0  | 0  | 0   | 0   | 0   | 0.079881 | 0        | 0        | 0        |
| antisense EVX1_antis   | 0  | 0  | 4  | 0   | 0   | 2   | 0        | 0        | 0.392885 | 0        |
| antisense -            | 0  | 1  | 0  | 0   | 1   | 0   | 0        | 0.073779 | 0        | 0        |
| sense_intrc -          | 6  | 1  | 5  | 0   | 0   | 1   | 0.551647 | 0.117902 | 0.554662 | 0        |
| lincRNA -              | 0  | 1  | 1  | 0   | 0   | 0   | 0        | 0.025885 | 0.024355 | 0        |
| antisense -            | 0  | 0  | 0  | 0   | 2   | 0   | 0        | 0        | 0        | 0        |
| lincRNA -              | 1  | 0  | 1  | 0   | 0   | 0   | 0.085566 | 0        | 0.10324  | 0        |
| protein_co Uncharacte  | 11 | 2  | 6  | 29  | 54  | 55  | 0.624443 | 0.145593 | 0.41096  | 2.555223 |
| lincRNA -              | 0  | 0  | 0  | 2   | 2   | 4   | 0        | 0        | 0        | 0.283742 |
| sense_intrc -          | 0  | 1  | 0  | 2   | 0   | 0   | 0        | 0.118366 | 0        | 0.286535 |
| pseudogen:-            | 0  | 0  | 0  | 0   | 0   | 1   | 0        | 0        | 0        | 0        |
| lincRNA -              | 0  | 0  | 0  | 0   | 0   | 1   | 0        | 0        | 0        | 0        |
| sense_intrc -          | 0  | 0  | 0  | 0   | 1   | 1   | 0        | 0        | 0        | 0        |
| lincRNA prostate_c     | 1  | 0  | 0  | 1   | 1   | 1   | 0.023539 | 0        | 0        | 0.036536 |
| antisense -            | 0  | 0  | 1  | 0   | 0   | 0   | 0        | 0        | 0.103808 | 0        |
| lincRNA -              | 9  | 10 | 3  | 0   | 0   | 0   | 0.730121 | 1.040308 | 0.293644 | 0        |
| pseudogen:-            | 0  | 0  | 1  | 1   | 0   | 1   | 0        | 0        | 0.164464 | 0.211569 |
| lincRNA -              | 2  | 1  | 5  | 0   | 0   | 0   | 0.324498 | 0.208062 | 0.978815 | 0        |
| antisense -            | 1  | 3  | 1  | 0   | 0   | 0   | 0.086513 | 0.332822 | 0.104383 | 0        |
| protein_co small_integ | 1  | 0  | 1  | 1   | 2   | 1   | 0.051812 | 0        | 0.062514 | 0.08042  |
| protein_co Full-length | 5  | 1  | 5  | 3   | 3   | 3   | 0.138728 | 0.03558  | 0.167383 | 0.129195 |
| pseudogen: high_mobil  | 3  | 0  | 2  | 1   | 0   | 1   | 0.243796 | 0        | 0.196102 | 0.126135 |
| pseudogen:-            | 1  | 0  | 3  | 0   | 0   | 0   | 0.079881 | 0        | 0.289142 | 0        |
| antisense -            | 0  | 0  | 0  | 0   | 1   | 1   | 0        | 0        | 0        | 0        |
| sense_intrc -          | 2  | 1  | 0  | 0   | 2   | 2   | 0.331378 | 0.212473 | 0        | 0        |
| lincRNA -              | 5  | 8  | 7  | 4   | 3   | 0   | 0.444034 | 0.911058 | 0.750054 | 0.551362 |
| antisense -            | 6  | 6  | 4  | 16  | 32  | 10  | 0.389668 | 0.499694 | 0.313438 | 1.612849 |
| lincRNA -              | 1  | 0  | 0  | 0   | 0   | 0   | 0.041349 | 0        | 0        | 0        |
| pseudogen:-            | 0  | 0  | 0  | 0   | 0   | 2   | 0        | 0        | 0        | 0        |
| pseudogen:-            | 4  | 3  | 5  | 2   | 0   | 1   | 0.361387 | 0.347571 | 0.545043 | 0.280462 |
| lincRNA -              | 0  | 0  | 0  | 0   | 1   | 1   | 0        | 0        | 0        | 0        |
| protein_co protocadhe  | 7  | 5  | 6  | 12  | 10  | 5   | 0.071323 | 0.06533  | 0.073762 | 0.189778 |
| lincRNA -              | 2  | 1  | 0  | 0   | 0   | 0   | 0.03147  | 0.020178 | 0        | 0        |
| pseudogen: cadherin_1  | 0  | 1  | 0  | 0   | 1   | 0   | 0        | 0.20383  | 0        | 0        |
| lincRNA -              | 29 | 31 | 32 | 2   | 0   | 0   | 2.504255 | 3.432824 | 3.3341   | 0.268066 |
| pseudogen:-            | 0  | 0  | 0  | 2   | 2   | 2   | 0        | 0        | 0        | 0.284296 |
| antisense -            | 10 | 13 | 16 | 0   | 0   | 0   | 0.449138 | 0.748743 | 0.867058 | 0        |
| pseudogen: ATPase_H+   | 1  | 0  | 0  | 1   | 1   | 0   | 0.13552  | 0        | 0        | 0.210346 |
| lincRNA -              | 0  | 1  | 1  | 0   | 0   | 0   | 0        | 0.110533 | 0.103999 | 0        |
| lincRNA -              | 0  | 0  | 0  | 590 | 660 | 404 | 0        | 0        | 0        | 48.57475 |
| lincRNA -              | 39 | 30 | 33 | 0   | 0   | 0   | 3.289048 | 3.244413 | 3.357899 | 0        |
| antisense -            | 0  | 0  | 0  | 1   | 0   | 0   | 0        | 0        | 0        | 0.17665  |
| antisense -            | 0  | 0  | 0  | 0   | 1   | 0   | 0        | 0        | 0        | 0        |
| pseudogen: high_mobil  | 1  | 1  | 1  | 0   | 1   | 0   | 0.106568 | 0.136659 | 0.128581 | 0        |
| antisense -            | 4  | 13 | 9  | 2   | 6   | 2   | 0.101659 | 0.423679 | 0.275978 | 0.078894 |
| pseudogen:-            | 0  | 0  | 2  | 2   | 6   | 3   | 0        | 0        | 0.390176 | 0.50193  |
| lincRNA hsa-mir-141    | 0  | 0  | 2  | 0   | 1   | 0   | 0        | 0        | 0.049175 | 0        |
| lincRNA -              | 0  | 1  | 0  | 0   | 0   | 0   | 0        | 0.135123 | 0        | 0        |
| pseudogen:-            | 3  | 1  | 0  | 2   | 1   | 1   | 0.500605 | 0.213985 | 0        | 0.518006 |
| sense_intrc -          | 1  | 0  | 0  | 1   | 1   | 0   | 0.078807 | 0        | 0        | 0.122319 |
| antisense -            | 0  | 1  | 0  | 3   | 2   | 0   | 0        | 0.081147 | 0        | 0.294655 |
| pseudogen:-            | 0  | 0  | 0  | 0   | 2   | 0   | 0        | 0        | 0        | 0        |
| protein_co protocadhe  | 2  | 3  | 1  | 2   | 6   | 3   | 0.020365 | 0.039173 | 0.012286 | 0.031609 |
| antisense -            | 3  | 1  | 2  | 1   | 0   | 0   | 0.217083 | 0.092793 | 0.174616 | 0.112315 |
| pseudogen: family_witl | 39 | 27 | 32 | 20  | 30  | 35  | 1.906893 | 1.692914 | 1.887817 | 1.517827 |
| protein_co pyrin_dom   | 0  | 1  | 0  | 0   | 0   | 0   | 0        | 0.204523 | 0        | 0        |

|                        |     |     |     |     |     |     |          |          |          |          |
|------------------------|-----|-----|-----|-----|-----|-----|----------|----------|----------|----------|
| antisense -            | 2   | 2   | 5   | 3   | 7   | 7   | 0.15868  | 0.203485 | 0.478642 | 0.369441 |
| pseudogen-             | 0   | 2   | 0   | 0   | 0   | 0   | 0        | 0.270855 | 0        | 0        |
| antisense HOXA_clus    | 79  | 65  | 86  | 0   | 0   | 0   | 1.508884 | 1.592031 | 1.981871 | 0        |
| processed_-            | 5   | 6   | 8   | 3   | 8   | 1   | 0.159598 | 0.245595 | 0.308103 | 0.148631 |
| antisense -            | 0   | 0   | 0   | 21  | 18  | 5   | 0        | 0        | 0        | 2.630595 |
| pseudogen-             | 2   | 0   | 0   | 0   | 0   | 0   | 0.066558 | 0        | 0        | 0        |
| pseudogen-             | 0   | 0   | 2   | 3   | 0   | 0   | 0        | 0        | 0.050067 | 0.09661  |
| antisense OSGEPL1_a    | 5   | 1   | 2   | 0   | 4   | 2   | 0.413492 | 0.106049 | 0.199561 | 0        |
| antisense -            | 1   | 0   | 0   | 0   | 1   | 0   | 0.105847 | 0        | 0        | 0        |
| pseudogen ring_finger  | 2   | 2   | 6   | 2   | 5   | 5   | 0.173667 | 0.222703 | 0.628617 | 0.269555 |
| antisense -            | 0   | 0   | 0   | 1   | 0   | 0   | 0        | 0        | 0        | 0.160662 |
| antisense -            | 1   | 3   | 2   | 0   | 0   | 1   | 0.114366 | 0.439974 | 0.275978 | 0        |
| pseudogen-             | 0   | 3   | 1   | 0   | 0   | 1   | 0        | 0.683293 | 0.214301 | 0        |
| antisense -            | 1   | 2   | 3   | 4   | 5   | 0   | 0.093036 | 0.23861  | 0.336759 | 0.577617 |
| lincRNA -              | 0   | 0   | 0   | 4   | 2   | 0   | 0        | 0        | 0        | 0.398793 |
| lincRNA -              | 1   | 2   | 2   | 0   | 0   | 0   | 0.070195 | 0.180029 | 0.169388 | 0        |
| sense_intrc-           | 1   | 3   | 0   | 0   | 0   | 0   | 0.131714 | 0.506712 | 0        | 0        |
| antisense -            | 29  | 17  | 22  | 1   | 3   | 2   | 0.86557  | 0.650673 | 0.792273 | 0.046327 |
| antisense -            | 1   | 1   | 0   | 0   | 2   | 0   | 0.058907 | 0.07554  | 0        | 0        |
| antisense -            | 0   | 0   | 0   | 5   | 4   | 0   | 0        | 0        | 0        | 0.616778 |
| protein_co solute_carr | 2   | 0   | 5   | 0   | 6   | 7   | 0.036519 | 0        | 0.110155 | 0        |
| antisense -            | 0   | 1   | 0   | 0   | 0   | 1   | 0        | 0.107953 | 0        | 0        |
| lincRNA -              | 0   | 1   | 0   | 0   | 0   | 0   | 0        | 0.109327 | 0        | 0        |
| antisense -            | 0   | 1   | 0   | 0   | 0   | 0   | 0        | 0.096208 | 0        | 0        |
| antisense -            | 2   | 1   | 2   | 0   | 0   | 0   | 0.039536 | 0.02535  | 0.047703 | 0        |
| antisense -            | 1   | 2   | 0   | 2   | 2   | 1   | 0.09688  | 0.24847  | 0        | 0.300743 |
| antisense -            | 0   | 0   | 0   | 1   | 3   | 1   | 0        | 0        | 0        | 0.181496 |
| pseudogen-             | 0   | 0   | 0   | 1   | 0   | 0   | 0        | 0        | 0        | 0.531239 |
| pseudogen-             | 0   | 0   | 1   | 1   | 0   | 1   | 0        | 0        | 0.143958 | 0.18519  |
| protein_co eukaryotic  | 21  | 18  | 22  | 45  | 30  | 53  | 0.256965 | 0.282447 | 0.324807 | 0.854669 |
| pseudogen-             | 1   | 0   | 1   | 0   | 0   | 0   | 0.229853 | 0        | 0.277331 | 0        |
| lincRNA -              | 1   | 2   | 0   | 0   | 0   | 0   | 0.073037 | 0.18732  | 0        | 0        |
| protein_co Uncharacte  | 3   | 0   | 1   | 7   | 8   | 3   | 0.190095 | 0        | 0.076453 | 0.688458 |
| lincRNA -              | 1   | 0   | 0   | 0   | 0   | 0   | 0.079881 | 0        | 0        | 0        |
| antisense -            | 15  | 7   | 11  | 161 | 160 | 229 | 0.198183 | 0.118599 | 0.175354 | 3.301648 |
| pseudogen-             | 0   | 0   | 0   | 0   | 1   | 1   | 0        | 0        | 0        | 0        |
| lincRNA -              | 0   | 0   | 0   | 1   | 3   | 1   | 0        | 0        | 0        | 0.024147 |
| lincRNA -              | 3   | 1   | 4   | 0   | 1   | 5   | 0.250303 | 0.106993 | 0.402673 | 0        |
| lincRNA -              | 0   | 2   | 0   | 0   | 1   | 0   | 0        | 0.153392 | 0        | 0        |
| antisense -            | 1   | 0   | 1   | 0   | 0   | 1   | 0.038593 | 0        | 0.046564 | 0        |
| antisense protease_sr  | 1   | 0   | 1   | 2   | 2   | 2   | 0.041754 | 0        | 0.050379 | 0.129617 |
| lincRNA -              | 0   | 0   | 0   | 0   | 0   | 1   | 0        | 0        | 0        | 0        |
| antisense -            | 0   | 0   | 0   | 0   | 3   | 1   | 0        | 0        | 0        | 0        |
| pseudogen immunogl     | 0   | 0   | 1   | 0   | 0   | 0   | 0        | 0        | 0.119106 | 0        |
| pseudogen-             | 0   | 1   | 0   | 0   | 0   | 0   | 0        | 0.113026 | 0        | 0        |
| processed_-            | 5   | 5   | 1   | 0   | 0   | 0   | 0.099049 | 0.127017 | 0.023902 | 0        |
| antisense -            | 1   | 0   | 0   | 0   | 0   | 0   | 0.070724 | 0        | 0        | 0        |
| antisense ZFX4_anti    | 99  | 65  | 61  | 0   | 0   | 1   | 2.713099 | 2.2843   | 2.017011 | 0        |
| pseudogen-             | 15  | 6   | 7   | 23  | 19  | 18  | 0.283723 | 0.145534 | 0.159753 | 0.675246 |
| lincRNA -              | 51  | 26  | 35  | 1   | 2   | 1   | 0.863318 | 0.564395 | 0.714853 | 0.026274 |
| pseudogen transgelin_  | 0   | 0   | 4   | 0   | 1   | 1   | 0        | 0        | 0.385523 | 0        |
| lincRNA -              | 3   | 0   | 0   | 0   | 0   | 0   | 0.287669 | 0        | 0        | 0        |
| pseudogen-             | 10  | 13  | 11  | 18  | 20  | 21  | 2.442188 | 4.071288 | 3.241305 | 6.823106 |
| lincRNA -              | 0   | 0   | 0   | 18  | 22  | 25  | 0        | 0        | 0        | 0.554865 |
| lincRNA -              | 1   | 2   | 2   | 0   | 0   | 0   | 0.061374 | 0.157408 | 0.148103 | 0        |
| processed_-            | 0   | 0   | 1   | 0   | 0   | 0   | 0        | 0        | 0.077078 | 0        |
| lincRNA -              | 0   | 0   | 0   | 7   | 3   | 10  | 0        | 0        | 0        | 0.625103 |
| pseudogen-             | 1   | 3   | 2   | 5   | 0   | 0   | 0.325625 | 1.252704 | 0.785771 | 2.527076 |
| antisense -            | 0   | 0   | 0   | 0   | 0   | 2   | 0        | 0        | 0        | 0        |
| lincRNA -              | 7   | 5   | 9   | 0   | 0   | 0   | 0.587174 | 0.537834 | 0.910876 | 0        |
| processed_-            | 7   | 3   | 4   | 3   | 4   | 0   | 0.183471 | 0.100833 | 0.126496 | 0.122046 |
| processed_-            | 1   | 0   | 0   | 36  | 14  | 18  | 0.016687 | 0        | 0        | 0.93241  |
| antisense -            | 0   | 1   | 1   | 0   | 2   | 3   | 0        | 0.103139 | 0.097042 | 0        |
| protein_co ALG11_alpl  | 207 | 176 | 161 | 86  | 113 | 96  | 2.122045 | 2.313696 | 1.991398 | 1.3684   |
| lincRNA -              | 0   | 3   | 1   | 0   | 1   | 2   | 0        | 0.368142 | 0.11546  | 0        |

|                         |      |      |      |       |       |      |          |          |          |          |
|-------------------------|------|------|------|-------|-------|------|----------|----------|----------|----------|
| antisense -             | 35   | 29   | 19   | 39    | 41    | 27   | 2.381931 | 2.530862 | 1.560137 | 4.119611 |
| processed_ -            | 0    | 0    | 0    | 2     | 1     | 1    | 0        | 0        | 0        | 0.406591 |
| protein_co ataxin_7-lil | 1834 | 1490 | 1471 | 1397  | 1712  | 1462 | 23.41309 | 24.39243 | 22.65793 | 27.68129 |
| lincRNA -               | 7    | 0    | 7    | 4     | 13    | 8    | 0.597869 | 0        | 0.721363 | 0.530272 |
| pseudogeni -            | 0    | 0    | 0    | 1     | 0     | 0    | 0        | 0        | 0        | 0.257172 |
| sense_intrc -           | 0    | 0    | 0    | 1     | 0     | 0    | 0        | 0        | 0        | 0.042265 |
| protein_co protein_kir  | 9251 | 7438 | 8144 | 10030 | 10994 | 9818 | 32.11279 | 33.10967 | 34.10948 | 54.04067 |
| antisense -             | 4    | 1    | 3    | 8     | 3     | 5    | 0.342889 | 0.109927 | 0.310286 | 1.064421 |
| protein_co protocadhe   | 8    | 7    | 5    | 11    | 18    | 8    | 0.081459 | 0.091403 | 0.061428 | 0.17385  |
| lincRNA LZTS1_anti:     | 6    | 12   | 5    | 1     | 1     | 2    | 0.315404 | 0.808921 | 0.317127 | 0.081592 |
| lincRNA -               | 0    | 0    | 0    | 1     | 1     | 0    | 0        | 0        | 0        | 0.019607 |
| antisense -             | 2    | 0    | 0    | 0     | 1     | 0    | 0.266421 | 0        | 0        | 0        |
| antisense -             | 301  | 267  | 244  | 169   | 155   | 214  | 3.301496 | 3.755475 | 3.229105 | 2.877143 |
| sense_intrc -           | 1    | 2    | 0    | 2     | 2     | 5    | 0.438224 | 1.123921 | 0        | 1.36037  |
| antisense -             | 0    | 0    | 0    | 0     | 0     | 1    | 0        | 0        | 0        | 0        |
| antisense -             | 2    | 0    | 0    | 1     | 2     | 0    | 0.016499 | 0        | 0        | 0.012804 |
| antisense -             | 1    | 0    | 0    | 0     | 0     | 0    | 0.097484 | 0        | 0        | 0        |
| lincRNA -               | 10   | 17   | 18   | 0     | 0     | 0    | 0.811246 | 1.768523 | 1.761867 | 0        |
| antisense -             | 4    | 3    | 3    | 3     | 8     | 4    | 0.419597 | 0.403556 | 0.379701 | 0.488455 |
| lincRNA -               | 0    | 0    | 0    | 0     | 1     | 0    | 0        | 0        | 0        | 0        |
| lincRNA -               | 2    | 0    | 0    | 5     | 11    | 4    | 0.168366 | 0        | 0        | 0.65332  |
| protein_co protocadhe   | 11   | 9    | 9    | 14    | 7     | 6    | 0.112007 | 0.117518 | 0.110571 | 0.221263 |
| pseudogeni: high_mobil  | 2    | 0    | 0    | 1     | 1     | 0    | 0.165106 | 0        | 0        | 0.128133 |
| pseudogeni: transmemt   | 2    | 2    | 4    | 9     | 4     | 8    | 0.121792 | 0.156181 | 0.293899 | 0.850673 |
| pseudogeni -            | 0    | 0    | 0    | 2     | 0     | 0    | 0        | 0        | 0        | 0.207646 |
| processed_ -            | 0    | 1    | 2    | 1     | 2     | 1    | 0        | 0.097455 | 0.183389 | 0.117958 |
| lincRNA -               | 0    | 0    | 0    | 1     | 1     | 2    | 0        | 0        | 0        | 0.149139 |
| pseudogeni -            | 2    | 0    | 0    | 0     | 1     | 0    | 0.108542 | 0        | 0        | 0        |
| lincRNA -               | 0    | 3    | 3    | 0     | 0     | 0    | 0        | 0.574488 | 0.54053  | 0        |
| pseudogeni -            | 0    | 1    | 2    | 1     | 0     | 0    | 0        | 0.069675 | 0.131114 | 0.084333 |
| pseudogeni: MT-ND1_ps   | 0    | 0    | 2    | 0     | 0     | 0    | 0        | 0        | 0.120373 | 0        |
| protein_co UTP14_U3_    | 743  | 594  | 647  | 406   | 477   | 490  | 6.301191 | 6.459956 | 6.620429 | 5.344294 |
| processed_ -            | 1    | 0    | 0    | 3     | 1     | 2    | 0.063537 | 0        | 0        | 0.295853 |
| lincRNA -               | 0    | 0    | 0    | 1     | 0     | 0    | 0        | 0        | 0        | 0.255368 |
| antisense -             | 3    | 0    | 2    | 0     | 0     | 0    | 0.249858 | 0        | 0.200979 | 0        |
| pseudogeni -            | 22   | 17   | 45   | 39    | 31    | 28   | 1.739596 | 1.723788 | 4.293251 | 4.78653  |
| lincRNA -               | 0    | 0    | 0    | 1     | 0     | 0    | 0        | 0        | 0        | 0.128359 |
| lincRNA -               | 0    | 0    | 0    | 1     | 0     | 2    | 0        | 0        | 0        | 0.153544 |
| antisense -             | 0    | 4    | 2    | 2     | 2     | 3    | 0        | 0.621497 | 0.29238  | 0.376123 |
| processed_ -            | 12   | 6    | 10   | 0     | 0     | 0    | 0.55003  | 0.352667 | 0.553035 | 0        |
| pseudogeni -            | 0    | 1    | 0    | 0     | 1     | 1    | 0        | 0.153785 | 0        | 0        |
| lincRNA -               | 0    | 0    | 0    | 0     | 1     | 0    | 0        | 0        | 0        | 0        |
| lincRNA -               | 0    | 2    | 0    | 0     | 0     | 0    | 0        | 0.147739 | 0        | 0        |
| processed_ -            | 50   | 40   | 39   | 2     | 2     | 4    | 0.536008 | 0.549884 | 0.504446 | 0.033278 |
| sense_intrc -           | 0    | 0    | 0    | 7     | 8     | 4    | 0        | 0        | 0        | 4.994692 |
| protein_co protocadhe   | 71   | 38   | 53   | 48    | 56    | 88   | 0.721072 | 0.494895 | 0.649448 | 0.756645 |
| antisense -             | 1    | 0    | 0    | 0     | 2     | 4    | 0.088472 | 0        | 0        | 0        |
| antisense -             | 2    | 1    | 0    | 0     | 0     | 1    | 0.151994 | 0.097455 | 0        | 0        |
| antisense -             | 34   | 30   | 26   | 35    | 38    | 16   | 1.697828 | 1.92108  | 1.566521 | 2.712772 |
| protein_co Uncharacte   | 0    | 0    | 0    | 0     | 1     | 1    | 0        | 0        | 0        | 0        |
| antisense -             | 0    | 0    | 1    | 0     | 0     | 0    | 0        | 0        | 0.09978  | 0        |
| antisense -             | 0    | 0    | 0    | 0     | 0     | 1    | 0        | 0        | 0        | 0        |
| processed_ -            | 43   | 36   | 31   | 0     | 0     | 0    | 0.392959 | 0.421881 | 0.341813 | 0        |
| antisense -             | 0    | 0    | 0    | 1     | 1     | 3    | 0        | 0        | 0        | 0.123775 |
| pseudogeni: phosphatic  | 1    | 0    | 0    | 0     | 2     | 0    | 0.071807 | 0        | 0        | 0        |
| protein_co protocadhe   | 26   | 18   | 17   | 55    | 63    | 36   | 0.309741 | 0.274984 | 0.244356 | 1.016994 |
| antisense -             | 2    | 0    | 2    | 0     | 0     | 0    | 0.160582 | 0        | 0.193752 | 0        |
| sense_intrc -           | 16   | 6    | 6    | 27    | 49    | 12   | 1.058167 | 0.508856 | 0.478777 | 2.771586 |
| pseudogeni -            | 3    | 1    | 6    | 1     | 0     | 0    | 0.047316 | 0.020225 | 0.114179 | 0.02448  |
| pseudogeni: ADP-ribosy  | 1    | 0    | 0    | 0     | 0     | 0    | 0.091761 | 0        | 0        | 0        |
| lincRNA -               | 0    | 0    | 0    | 0     | 2     | 0    | 0        | 0        | 0        | 0        |
| antisense family_witl   | 0    | 0    | 0    | 4     | 2     | 0    | 0        | 0        | 0        | 0.367575 |
| lincRNA -               | 0    | 0    | 1    | 0     | 0     | 0    | 0        | 0        | 0.017559 | 0        |
| lincRNA -               | 1    | 0    | 0    | 0     | 0     | 0    | 0.030828 | 0        | 0        | 0        |
| pseudogeni -            | 0    | 0    | 0    | 0     | 2     | 0    | 0        | 0        | 0        | 0        |

|                        |     |     |     |     |     |     |          |          |          |          |
|------------------------|-----|-----|-----|-----|-----|-----|----------|----------|----------|----------|
| lincRNA -              | 0   | 0   | 0   | 2   | 2   | 3   | 0        | 0        | 0        | 0.25227  |
| pseudogeni -           | 6   | 4   | 2   | 3   | 1   | 4   | 0.40952  | 0.350101 | 0.164703 | 0.317816 |
| protein_co protocadhe  | 27  | 15  | 16  | 16  | 31  | 21  | 0.275104 | 0.19599  | 0.196699 | 0.253037 |
| antisense -            | 1   | 1   | 0   | 1   | 0   | 2   | 0.155781 | 0.199767 | 0        | 0.241793 |
| pseudogeni MAPRE1_p:   | 1   | 3   | 1   | 2   | 0   | 0   | 0.058833 | 0.226335 | 0.070986 | 0.182634 |
| pseudogeni -           | 0   | 0   | 0   | 9   | 7   | 7   | 0        | 0        | 0        | 0.728608 |
| pseudogeni protein-kin | 1   | 0   | 0   | 0   | 1   | 1   | 0.020476 | 0        | 0        | 0        |
| antisense -            | 2   | 1   | 0   | 1   | 2   | 0   | 0.164526 | 0.105491 | 0        | 0.127684 |
| pseudogeni -           | 0   | 1   | 2   | 0   | 0   | 0   | 0        | 0.061672 | 0.116052 | 0        |
| lincRNA -              | 1   | 0   | 0   | 3   | 0   | 0   | 0.16169  | 0        | 0        | 0.752894 |
| antisense -            | 12  | 12  | 8   | 5   | 8   | 2   | 0.883328 | 1.132743 | 0.710524 | 0.57127  |
| antisense -            | 0   | 0   | 2   | 8   | 5   | 12  | 0        | 0        | 0.207998 | 1.070291 |
| antisense -            | 9   | 7   | 4   | 0   | 0   | 0   | 0.120989 | 0.120673 | 0.06488  | 0        |
| pseudogeni mitochond   | 2   | 3   | 0   | 0   | 0   | 0   | 0.201677 | 0.387934 | 0        | 0        |
| antisense -            | 0   | 0   | 0   | 2   | 2   | 6   | 0        | 0        | 0        | 0.289959 |
| antisense -            | 0   | 1   | 1   | 5   | 0   | 1   | 0        | 0.117902 | 0.110932 | 0.713527 |
| processed_ -           | 14  | 15  | 22  | 15  | 21  | 13  | 1.727527 | 2.373545 | 3.275424 | 2.872887 |
| protein_co protocadhe  | 460 | 382 | 404 | 91  | 120 | 88  | 4.711535 | 5.017384 | 4.992683 | 1.446693 |
| pseudogeni high_mobil  | 0   | 3   | 3   | 5   | 11  | 3   | 0        | 0.159778 | 0.150333 | 0.32232  |
| antisense -            | 7   | 2   | 3   | 0   | 5   | 3   | 0.18471  | 0.067676 | 0.095513 | 0        |
| lincRNA -              | 0   | 0   | 2   | 0   | 0   | 0   | 0        | 0        | 0.146379 | 0        |
| protein_co claudin_23  | 2   | 0   | 0   | 20  | 37  | 11  | 0.043237 | 0        | 0        | 0.671091 |
| lincRNA -              | 0   | 0   | 0   | 0   | 1   | 0   | 0        | 0        | 0        | 0        |
| antisense -            | 2   | 0   | 0   | 1   | 9   | 4   | 0.145848 | 0        | 0        | 0.113188 |
| antisense -            | 0   | 0   | 0   | 0   | 1   | 0   | 0        | 0        | 0        | 0        |
| pseudogeni -           | 1   | 1   | 2   | 3   | 11  | 7   | 0.035071 | 0.044974 | 0.084631 | 0.163305 |
| lincRNA -              | 0   | 0   | 0   | 13  | 25  | 2   | 0        | 0        | 0        | 0.39972  |
| lincRNA -              | 0   | 0   | 0   | 0   | 0   | 1   | 0        | 0        | 0        | 0        |
| lincRNA -              | 0   | 0   | 0   | 2   | 7   | 8   | 0        | 0        | 0        | 0.241392 |
| antisense -            | 3   | 0   | 0   | 2   | 2   | 0   | 0.146531 | 0        | 0        | 0.151625 |
| protein_co Uncharacte  | 0   | 0   | 0   | 1   | 0   | 0   | 0        | 0        | 0        | 0.08952  |
| antisense -            | 14  | 8   | 7   | 9   | 2   | 8   | 1.30509  | 0.956339 | 0.787333 | 1.302223 |
| pseudogeni asparagine- | 3   | 9   | 0   | 34  | 41  | 30  | 0.183882 | 0.707409 | 0        | 3.234658 |
| antisense -            | 248 | 189 | 209 | 94  | 165 | 110 | 11.89031 | 11.62018 | 12.09027 | 6.995196 |
| antisense -            | 0   | 0   | 1   | 0   | 0   | 7   | 0        | 0        | 0.056974 | 0        |
| lincRNA -              | 8   | 3   | 3   | 1   | 2   | 0   | 0.524644 | 0.252293 | 0.23738  | 0.10179  |
| pseudogeni -           | 0   | 0   | 0   | 0   | 1   | 4   | 0        | 0        | 0        | 0        |
| antisense -            | 0   | 2   | 0   | 0   | 0   | 2   | 0        | 0.292602 | 0        | 0        |
| lincRNA -              | 0   | 0   | 0   | 0   | 0   | 1   | 0        | 0        | 0        | 0        |
| lincRNA -              | 2   | 0   | 0   | 0   | 0   | 0   | 0.211693 | 0        | 0        | 0        |
| antisense -            | 0   | 0   | 1   | 0   | 1   | 1   | 0        | 0        | 0.098221 | 0        |
| protein_co zinc_finger | 361 | 284 | 350 | 357 | 312 | 381 | 2.987521 | 3.013918 | 3.494781 | 4.585667 |
| lincRNA -              | 0   | 0   | 0   | 0   | 0   | 1   | 0        | 0        | 0        | 0        |
| antisense long_interf  | 0   | 0   | 1   | 1   | 0   | 0   | 0        | 0        | 0.054087 | 0.069579 |
| pseudogeni mitogen-ac  | 0   | 0   | 0   | 8   | 3   | 7   | 0        | 0        | 0        | 0.4901   |
| pseudogeni asparagine- | 2   | 2   | 4   | 25  | 26  | 7   | 0.221179 | 0.283631 | 0.533731 | 4.291262 |
| IG_C_pseu immunogl     | 1   | 0   | 3   | 1   | 0   | 0   | 0.037333 | 0        | 0.135133 | 0.057946 |
| protein_co Uncharacte  | 0   | 0   | 0   | 0   | 2   | 0   | 0        | 0        | 0        | 0        |
| pseudogeni pyruvate_k  | 0   | 2   | 0   | 0   | 0   | 0   | 0        | 0.393005 | 0        | 0        |
| antisense -            | 4   | 2   | 3   | 3   | 1   | 4   | 0.302516 | 0.193967 | 0.273752 | 0.35216  |
| lincRNA -              | 0   | 0   | 0   | 1   | 0   | 0   | 0        | 0        | 0        | 0.085724 |
| antisense -            | 1   | 0   | 1   | 0   | 1   | 0   | 0.068453 | 0        | 0.082592 | 0        |
| antisense -            | 0   | 0   | 3   | 1   | 2   | 3   | 0        | 0        | 0.30972  | 0.13281  |
| antisense -            | 0   | 1   | 1   | 12  | 12  | 2   | 0        | 0.089213 | 0.08394  | 1.295783 |
| lincRNA -              | 3   | 6   | 3   | 0   | 0   | 0   | 0.220141 | 0.564599 | 0.265613 | 0        |
| lincRNA -              | 0   | 0   | 0   | 1   | 1   | 0   | 0        | 0        | 0        | 0.184253 |
| antisense -            | 5   | 4   | 1   | 1   | 0   | 0   | 0.067409 | 0.069154 | 0.016267 | 0.020926 |
| sense_intrc -          | 1   | 0   | 0   | 1   | 0   | 0   | 0.0851   | 0        | 0        | 0.132087 |
| pseudogeni -           | 0   | 0   | 0   | 0   | 0   | 1   | 0        | 0        | 0        | 0        |
| lincRNA -              | 0   | 0   | 2   | 0   | 1   | 4   | 0        | 0        | 0.178472 | 0        |
| lincRNA -              | 0   | 0   | 1   | 0   | 1   | 0   | 0        | 0        | 0.107151 | 0        |
| pseudogeni -           | 3   | 1   | 1   | 1   | 3   | 4   | 0.324873 | 0.138868 | 0.130659 | 0.168083 |
| antisense -            | 51  | 45  | 57  | 30  | 26  | 25  | 4.643477 | 5.25406  | 6.261755 | 4.2396   |
| pseudogeni -           | 1   | 1   | 2   | 2   | 3   | 1   | 0.101274 | 0.12987  | 0.244387 | 0.314384 |
| lincRNA -              | 2   | 0   | 0   | 1   | 2   | 3   | 0.050311 | 0        | 0        | 0.039045 |

|                        |      |     |     |     |     |     |          |          |          |          |
|------------------------|------|-----|-----|-----|-----|-----|----------|----------|----------|----------|
| antisense -            | 0    | 0   | 0   | 4   | 6   | 0   | 0        | 0        | 0        | 0.430014 |
| protein_co v-yes-1_Yan | 152  | 124 | 109 | 588 | 743 | 756 | 2.360027 | 2.468906 | 2.041964 | 14.17037 |
| pseudogeni -           | 2    | 1   | 2   | 1   | 0   | 2   | 0.063753 | 0.040877 | 0.076921 | 0.049476 |
| pseudogeni MT-ND2_ps   | 0    | 0   | 0   | 2   | 0   | 0   | 0        | 0        | 0        | 0.140231 |
| protein_co PIN2/TERF1  | 88   | 76  | 71  | 203 | 264 | 342 | 2.670758 | 2.957841 | 2.59991  | 9.562653 |
| sense_intrc -          | 3    | 0   | 2   | 9   | 12  | 7   | 0.266926 | 0        | 0.214708 | 1.242919 |
| antisense -            | 3    | 4   | 2   | 2   | 3   | 0   | 0.408925 | 0.699184 | 0.328927 | 0.423138 |
| lincRNA -              | 1    | 2   | 1   | 1   | 2   | 1   | 0.087318 | 0.223947 | 0.105355 | 0.13553  |
| pseudogeni VENT_homi   | 0    | 1   | 0   | 0   | 0   | 0   | 0        | 0.191496 | 0        | 0        |
| antisense -            | 0    | 1   | 0   | 8   | 6   | 3   | 0        | 0.058322 | 0        | 0.564732 |
| pseudogeni -           | 1    | 0   | 0   | 0   | 0   | 2   | 0.146991 | 0        | 0        | 0        |
| pseudogeni high_mobil  | 0    | 0   | 0   | 0   | 0   | 1   | 0        | 0        | 0        | 0        |
| antisense -            | 1    | 2   | 5   | 0   | 0   | 0   | 0.058321 | 0.149577 | 0.351838 | 0        |
| lincRNA -              | 0    | 0   | 0   | 1   | 0   | 0   | 0        | 0        | 0        | 0.062046 |
| protein_co protocadhe  | 1097 | 813 | 849 | 186 | 242 | 188 | 11.19198 | 10.63654 | 10.45096 | 2.945397 |
| lincRNA -              | 4    | 0   | 0   | 0   | 0   | 0   | 0.227898 | 0        | 0        | 0        |
| IG_C_pseuc immunogl    | 0    | 0   | 0   | 0   | 1   | 0   | 0        | 0        | 0        | 0        |
| antisense -            | 0    | 0   | 0   | 0   | 1   | 1   | 0        | 0        | 0        | 0        |
| pseudogeni -           | 4    | 8   | 5   | 2   | 3   | 9   | 0.446572 | 1.145329 | 0.673518 | 0.34657  |
| pseudogeni MT-ND6_ps   | 0    | 0   | 0   | 0   | 0   | 1   | 0        | 0        | 0        | 0        |
| lincRNA -              | 0    | 1   | 0   | 0   | 0   | 0   | 0        | 0.087019 | 0        | 0        |
| sense_intrc -          | 0    | 1   | 0   | 0   | 0   | 0   | 0        | 0.08398  | 0        | 0        |
| processed_ -           | 1    | 1   | 1   | 0   | 0   | 0   | 0.059581 | 0.076404 | 0.071888 | 0        |
| processed_ -           | 18   | 14  | 13  | 0   | 1   | 0   | 0.135869 | 0.135515 | 0.118397 | 0        |
| lincRNA -              | 17   | 9   | 7   | 0   | 1   | 1   | 0.211665 | 0.143698 | 0.105159 | 0        |
| antisense -            | 0    | 0   | 0   | 0   | 0   | 1   | 0        | 0        | 0        | 0        |
| lincRNA -              | 0    | 1   | 0   | 0   | 0   | 1   | 0        | 0.131575 | 0        | 0        |
| antisense -            | 10   | 6   | 2   | 3   | 10  | 5   | 0.662288 | 0.509575 | 0.159818 | 0.308389 |
| lincRNA -              | 0    | 0   | 0   | 0   | 1   | 0   | 0        | 0        | 0        | 0        |
| lincRNA -              | 0    | 0   | 2   | 0   | 0   | 0   | 0        | 0        | 0.212291 | 0        |
| lincRNA -              | 0    | 0   | 0   | 0   | 1   | 0   | 0        | 0        | 0        | 0        |
| processed_ -           | 1    | 0   | 1   | 2   | 1   | 4   | 0.081125 | 0        | 0.097881 | 0.251833 |
| pseudogeni tRNA-yW_s   | 21   | 17  | 10  | 14  | 6   | 19  | 0.490384 | 0.509067 | 0.281751 | 0.507429 |
| lincRNA -              | 0    | 0   | 0   | 1   | 1   | 0   | 0        | 0        | 0        | 0.098886 |
| lincRNA -              | 1    | 1   | 0   | 0   | 4   | 1   | 0.15949  | 0.204523 | 0        | 0        |
| pseudogeni -           | 81   | 54  | 48  | 77  | 94  | 96  | 9.424544 | 8.057094 | 6.738522 | 13.90582 |
| antisense -            | 0    | 0   | 0   | 2   | 4   | 0   | 0        | 0        | 0        | 0.399889 |
| protein_co Protein_LO  | 34   | 29  | 27  | 37  | 50  | 30  | 0.436425 | 0.477351 | 0.41816  | 0.737162 |
| sense_intrc -          | 12   | 4   | 2   | 5   | 4   | 6   | 1.780634 | 0.761137 | 0.358073 | 1.151579 |
| antisense -            | 2    | 3   | 1   | 3   | 5   | 3   | 0.200385 | 0.385447 | 0.120888 | 0.466537 |
| pseudogeni -           | 0    | 0   | 0   | 0   | 0   | 1   | 0        | 0        | 0        | 0        |
| protein_co protocadhe  | 27   | 22  | 26  | 15  | 19  | 23  | 0.275824 | 0.288204 | 0.320471 | 0.237842 |
| antisense -            | 0    | 0   | 0   | 0   | 1   | 1   | 0        | 0        | 0        | 0        |
| lincRNA -              | 0    | 0   | 0   | 0   | 4   | 0   | 0        | 0        | 0        | 0        |
| antisense -            | 0    | 1   | 0   | 0   | 0   | 0   | 0        | 0.157408 | 0        | 0        |
| lincRNA -              | 0    | 0   | 1   | 0   | 0   | 0   | 0        | 0        | 0.015755 | 0        |
| processed_ -           | 3    | 1   | 0   | 1   | 0   | 2   | 0.094664 | 0.040464 | 0        | 0.048977 |
| lincRNA -              | 0    | 0   | 0   | 0   | 2   | 11  | 0        | 0        | 0        | 0        |
| lincRNA -              | 4    | 0   | 0   | 0   | 0   | 1   | 0.054492 | 0        | 0        | 0        |
| antisense -            | 1    | 0   | 0   | 4   | 0   | 1   | 0.113261 | 0        | 0        | 0.703186 |
| antisense -            | 5    | 6   | 1   | 1   | 1   | 4   | 0.397373 | 0.611489 | 0.095891 | 0.123356 |
| pseudogeni phosphorit  | 1    | 0   | 1   | 0   | 1   | 0   | 0.037422 | 0        | 0.045152 | 0        |
| protein_co protocadhe  | 6    | 7   | 6   | 6   | 6   | 9   | 0.061094 | 0.091403 | 0.073714 | 0.094827 |
| antisense -            | 0    | 0   | 0   | 0   | 1   | 0   | 0        | 0        | 0        | 0        |
| pseudogeni -           | 0    | 0   | 0   | 2   | 0   | 13  | 0        | 0        | 0        | 0.195382 |
| pseudogeni -           | 0    | 0   | 0   | 0   | 1   | 0   | 0        | 0        | 0        | 0        |
| lincRNA -              | 0    | 0   | 0   | 4   | 3   | 6   | 0        | 0        | 0        | 0.657154 |
| lincRNA -              | 4    | 5   | 2   | 3   | 5   | 7   | 0.401628 | 0.643788 | 0.242293 | 0.467536 |
| lincRNA -              | 2    | 2   | 0   | 9   | 6   | 15  | 0.046634 | 0.059801 | 0        | 0.325718 |
| lincRNA -              | 1    | 2   | 1   | 0   | 0   | 0   | 0.107793 | 0.276459 | 0.130059 | 0        |
| pseudogeni enhancer_c  | 0    | 0   | 0   | 0   | 1   | 0   | 0        | 0        | 0        | 0        |
| lincRNA -              | 0    | 0   | 0   | 0   | 3   | 1   | 0        | 0        | 0        | 0        |
| pseudogeni -           | 0    | 2   | 0   | 0   | 0   | 0   | 0        | 0.290482 | 0        | 0        |
| pseudogeni -           | 0    | 0   | 0   | 1   | 4   | 1   | 0        | 0        | 0        | 0.192031 |
| pseudogeni teratocarci | 3    | 1   | 1   | 2   | 2   | 1   | 0.31053  | 0.132737 | 0.124891 | 0.321324 |

|                         |    |    |    |      |      |      |          |          |          |          |
|-------------------------|----|----|----|------|------|------|----------|----------|----------|----------|
| processed_-             | 2  | 1  | 3  | 27   | 25   | 11   | 0.045635 | 0.02926  | 0.082592 | 0.956231 |
| lincRNA -               | 0  | 0  | 0  | 850  | 828  | 743  | 0        | 0        | 0        | 76.56291 |
| lincRNA -               | 0  | 1  | 0  | 2    | 6    | 1    | 0        | 0.106802 | 0        | 0.258543 |
| pseudogen-              | 0  | 0  | 0  | 0    | 1    | 0    | 0        | 0        | 0        | 0        |
| pseudogen: keratin_8_l  | 0  | 1  | 1  | 8    | 13   | 14   | 0        | 0.041497 | 0.039045 | 0.401821 |
| antisense -             | 0  | 0  | 0  | 2    | 5    | 6    | 0        | 0        | 0        | 0.253588 |
| antisense -             | 0  | 0  | 0  | 1    | 0    | 0    | 0        | 0        | 0        | 0.120297 |
| lincRNA -               | 0  | 2  | 2  | 0    | 0    | 0    | 0        | 0.05055  | 0.047562 | 0        |
| pseudogen: IMP_(inosi   | 0  | 1  | 0  | 0    | 1    | 1    | 0        | 0.039716 | 0        | 0        |
| lincRNA -               | 0  | 1  | 0  | 0    | 0    | 0    | 0        | 0.122965 | 0        | 0        |
| antisense -             | 0  | 0  | 0  | 5    | 0    | 5    | 0        | 0        | 0        | 0.561573 |
| lincRNA -               | 0  | 1  | 1  | 0    | 0    | 0    | 0        | 0.111974 | 0.105355 | 0        |
| lincRNA -               | 1  | 2  | 1  | 0    | 0    | 0    | 0.059354 | 0.152227 | 0.071615 | 0        |
| pseudogen: mitochond    | 2  | 1  | 0  | 0    | 0    | 0    | 0.152985 | 0.098091 | 0        | 0        |
| lincRNA -               | 1  | 0  | 0  | 0    | 0    | 0    | 0.0851   | 0        | 0        | 0        |
| pseudogen-              | 0  | 0  | 0  | 0    | 1    | 0    | 0        | 0        | 0        | 0        |
| antisense -             | 1  | 0  | 1  | 1    | 1    | 0    | 0.095499 | 0        | 0.115225 | 0.148228 |
| antisense -             | 3  | 0  | 2  | 0    | 1    | 0    | 0.153402 | 0        | 0.123393 | 0        |
| lincRNA -               | 0  | 0  | 0  | 1    | 0    | 0    | 0        | 0        | 0        | 0.125051 |
| lincRNA -               | 3  | 0  | 0  | 0    | 0    | 0    | 0.191388 | 0        | 0        | 0        |
| sense_intrc-            | 0  | 0  | 0  | 3    | 2    | 3    | 0        | 0        | 0        | 0.324427 |
| pseudogen-              | 0  | 0  | 0  | 0    | 0    | 1    | 0        | 0        | 0        | 0        |
| pseudogen: CDC28_prc    | 0  | 1  | 1  | 0    | 3    | 1    | 0        | 0.255871 | 0.240747 | 0        |
| pseudogen-              | 16 | 7  | 9  | 2    | 4    | 8    | 1.002995 | 0.562712 | 0.680721 | 0.194598 |
| lincRNA -               | 3  | 1  | 1  | 3    | 2    | 6    | 0.382256 | 0.163396 | 0.153738 | 0.593314 |
| pseudogen: cadherin_1   | 2  | 0  | 0  | 0    | 0    | 0    | 0.317898 | 0        | 0        | 0        |
| lincRNA -               | 12 | 5  | 6  | 0    | 0    | 0    | 1.092583 | 0.583784 | 0.659132 | 0        |
| antisense -             | 0  | 1  | 1  | 13   | 17   | 7    | 0        | 0.144196 | 0.135673 | 2.268915 |
| lincRNA -               | 0  | 0  | 0  | 1624 | 1415 | 1317 | 0        | 0        | 0        | 134.7713 |
| antisense -             | 0  | 0  | 1  | 0    | 2    | 1    | 0        | 0        | 0.086906 | 0        |
| lincRNA -               | 0  | 1  | 2  | 4    | 6    | 4    | 0        | 0.115191 | 0.216764 | 0.5577   |
| pseudogen: MT-ND1_ps    | 0  | 0  | 0  | 1    | 0    | 0    | 0        | 0        | 0        | 0.076934 |
| lincRNA -               | 0  | 0  | 0  | 1    | 5    | 0    | 0        | 0        | 0        | 0.288809 |
| pseudogen-              | 0  | 0  | 0  | 1    | 1    | 1    | 0        | 0        | 0        | 0.284296 |
| protein_co Uncharacte   | 0  | 0  | 0  | 6    | 6    | 7    | 0        | 0        | 0        | 0.205496 |
| lincRNA -               | 71 | 76 | 78 | 0    | 0    | 0    | 4.715568 | 6.472896 | 6.250552 | 0        |
| pseudogen-              | 5  | 4  | 12 | 7    | 5    | 4    | 0.687537 | 0.705335 | 1.990927 | 1.494014 |
| lincRNA -               | 2  | 5  | 4  | 2    | 4    | 3    | 0.132645 | 0.425246 | 0.320088 | 0.205883 |
| sense_intrc-            | 0  | 0  | 0  | 0    | 3    | 0    | 0        | 0        | 0        | 0        |
| lincRNA -               | 5  | 2  | 3  | 0    | 1    | 0    | 0.402144 | 0.206277 | 0.291126 | 0        |
| antisense -             | 0  | 0  | 0  | 1    | 2    | 8    | 0        | 0        | 0        | 0.139158 |
| antisense HOXA_clusi    | 11 | 15 | 9  | 0    | 0    | 0    | 0.129368 | 0.226222 | 0.12771  | 0        |
| sense_intrc-            | 4  | 0  | 1  | 3    | 7    | 1    | 0.367045 | 0        | 0.110715 | 0.427279 |
| antisense -             | 0  | 1  | 0  | 0    | 0    | 0    | 0        | 0.189087 | 0        | 0        |
| pseudogen-              | 0  | 0  | 1  | 0    | 2    | 0    | 0        | 0        | 0.169896 | 0        |
| processed_-             | 0  | 0  | 0  | 69   | 89   | 127  | 0        | 0        | 0        | 1.768242 |
| pseudogen: deoxyuridi   | 0  | 1  | 0  | 2    | 2    | 5    | 0        | 0.12987  | 0        | 0.314384 |
| antisense RHPN1_ant     | 24 | 19 | 13 | 39   | 37   | 12   | 0.586736 | 0.595655 | 0.383463 | 1.479881 |
| lincRNA -               | 0  | 1  | 2  | 0    | 0    | 0    | 0        | 0.097613 | 0.183687 | 0        |
| antisense -             | 8  | 6  | 2  | 5    | 8    | 4    | 0.628342 | 0.60432  | 0.189533 | 0.609546 |
| pseudogen-              | 2  | 1  | 1  | 0    | 1    | 1    | 0.171758 | 0.110128 | 0.103618 | 0        |
| pseudogen: glycine-N-a  | 0  | 0  | 0  | 0    | 0    | 1    | 0        | 0        | 0        | 0        |
| pseudogen-              | 0  | 0  | 0  | 0    | 1    | 0    | 0        | 0        | 0        | 0        |
| pseudogen-              | 0  | 1  | 1  | 0    | 0    | 0    | 0        | 0.111146 | 0.104576 | 0        |
| processed_-             | 2  | 0  | 0  | 1    | 0    | 0    | 0.126218 | 0        | 0        | 0.097954 |
| antisense -             | 0  | 1  | 1  | 3    | 4    | 0    | 0        | 0.07116  | 0.066953 | 0.25839  |
| protein_co sialic_acid_ | 0  | 0  | 2  | 0    | 1    | 0    | 0        | 0        | 0.055602 | 0        |
| processed_-             | 0  | 0  | 0  | 1    | 0    | 0    | 0        | 0        | 0        | 0.101083 |
| antisense ANO1_anti:    | 22 | 20 | 19 | 0    | 0    | 0    | 1.02747  | 1.197805 | 1.070652 | 0        |
| antisense -             | 0  | 0  | 0  | 4    | 2    | 3    | 0        | 0        | 0        | 1.212997 |
| sense_intrc-            | 5  | 6  | 5  | 8    | 15   | 13   | 0.406326 | 0.625267 | 0.490256 | 1.009079 |
| antisense -             | 0  | 1  | 0  | 0    | 0    | 1    | 0        | 0.137597 | 0        | 0        |
| pseudogen-              | 1  | 0  | 0  | 0    | 0    | 0    | 0.039704 | 0        | 0        | 0        |
| pseudogen-              | 0  | 0  | 0  | 0    | 0    | 1    | 0        | 0        | 0        | 0        |
| lincRNA -               | 0  | 0  | 2  | 6    | 1    | 6    | 0        | 0        | 0.12976  | 0.500778 |

|                        |     |     |     |     |     |     |          |          |          |          |
|------------------------|-----|-----|-----|-----|-----|-----|----------|----------|----------|----------|
| antisense -            | 18  | 13  | 18  | 27  | 27  | 39  | 1.613806 | 1.494622 | 1.947149 | 3.757275 |
| antisense -            | 33  | 41  | 33  | 286 | 447 | 215 | 3.058045 | 4.872177 | 3.689707 | 41.13641 |
| antisense -            | 1   | 1   | 0   | 2   | 2   | 2   | 0.064945 | 0.083282 | 0        | 0.201606 |
| antisense -            | 1   | 2   | 2   | 3   | 6   | 2   | 0.155781 | 0.399534 | 0.375917 | 0.72538  |
| antisense -            | 3   | 2   | 5   | 7   | 5   | 8   | 0.170303 | 0.145593 | 0.342467 | 0.616778 |
| protein_co prostate_ar | 0   | 0   | 1   | 1   | 5   | 0   | 0        | 0        | 0.022639 | 0.029124 |
| pseudogeni -           | 0   | 1   | 1   | 0   | 1   | 1   | 0        | 0.065716 | 0.061831 | 0        |
| pseudogeni -           | 0   | 0   | 0   | 1   | 6   | 1   | 0        | 0        | 0        | 0.237068 |
| processed_ -           | 0   | 0   | 0   | 0   | 4   | 0   | 0        | 0        | 0        | 0        |
| pseudogeni splicing_fa | 0   | 1   | 0   | 0   | 0   | 1   | 0        | 0.0399   | 0        | 0        |
| sense_intrc ALG9_intrc | 1   | 0   | 0   | 0   | 0   | 0   | 0.068553 | 0        | 0        | 0        |
| antisense -            | 1   | 0   | 0   | 0   | 0   | 0   | 0.026779 | 0        | 0        | 0        |
| antisense NAV2_antis   | 0   | 2   | 0   | 1   | 0   | 2   | 0        | 0.153785 | 0        | 0.093069 |
| pseudogeni regulator_c | 0   | 0   | 0   | 4   | 6   | 17  | 0        | 0        | 0        | 0.186974 |
| antisense -            | 1   | 2   | 4   | 0   | 4   | 0   | 0.086195 | 0.221065 | 0.415996 | 0        |
| processed_ -           | 3   | 2   | 2   | 0   | 1   | 3   | 0.240462 | 0.205572 | 0.193421 | 0        |
| antisense -            | 13  | 15  | 13  | 8   | 7   | 13  | 1.130928 | 1.673371 | 1.36453  | 1.08022  |
| pseudogeni -           | 10  | 10  | 7   | 8   | 2   | 5   | 0.976875 | 1.252704 | 0.825059 | 1.212997 |
| protein_co Putative_sl | 39  | 30  | 28  | 37  | 44  | 34  | 1.026789 | 1.012855 | 0.889452 | 1.511989 |
| protein_co adaptor-rel | 390 | 292 | 349 | 293 | 390 | 108 | 3.801103 | 3.649532 | 4.104105 | 4.432443 |
| pseudogeni -           | 1   | 1   | 0   | 0   | 0   | 0   | 0.022139 | 0.02839  | 0        | 0        |
| antisense -            | 4   | 8   | 7   | 9   | 3   | 5   | 0.184425 | 0.472997 | 0.389409 | 0.644069 |
| processed_hsa-mir-21l  | 2   | 0   | 0   | 3   | 0   | 0   | 0.852546 | 0        | 0        | 1.984904 |
| antisense -            | 2   | 3   | 2   | 3   | 1   | 0   | 0.106689 | 0.205221 | 0.128727 | 0.248395 |
| pseudogeni solute_carr | 1   | 0   | 1   | 0   | 0   | 0   | 0.050583 | 0        | 0.061031 | 0        |
| processed_ -           | 0   | 1   | 0   | 8   | 5   | 2   | 0        | 0.130151 | 0        | 1.260256 |
| pseudogeni protein_ty  | 2   | 0   | 0   | 0   | 0   | 0   | 0.186813 | 0        | 0        | 0        |
| sense_intrc -          | 0   | 0   | 0   | 0   | 3   | 0   | 0        | 0        | 0        | 0        |
| processed_ -           | 0   | 0   | 3   | 3   | 5   | 2   | 0        | 0        | 0.204736 | 0.263377 |
| lincRNA -              | 2   | 0   | 0   | 0   | 0   | 0   | 0.028349 | 0        | 0        | 0        |
| antisense -            | 0   | 0   | 0   | 0   | 0   | 1   | 0        | 0        | 0        | 0        |
| antisense -            | 0   | 0   | 0   | 0   | 1   | 1   | 0        | 0        | 0        | 0        |
| antisense -            | 0   | 0   | 0   | 1   | 1   | 0   | 0        | 0        | 0        | 0.256267 |
| pseudogeni RAN_memt    | 0   | 0   | 1   | 0   | 0   | 2   | 0        | 0        | 0.204984 | 0        |
| pseudogeni -           | 0   | 3   | 0   | 2   | 3   | 0   | 0        | 0.143394 | 0        | 0.115707 |
| protein_co charged_m   | 35  | 26  | 27  | 19  | 42  | 26  | 1.178141 | 1.122308 | 1.096582 | 0.992689 |
| pseudogeni -           | 0   | 0   | 0   | 0   | 0   | 2   | 0        | 0        | 0        | 0        |
| pseudogeni -           | 0   | 0   | 0   | 3   | 4   | 5   | 0        | 0        | 0        | 0.319677 |
| antisense -            | 0   | 0   | 0   | 0   | 0   | 1   | 0        | 0        | 0        | 0        |
| pseudogeni -           | 24  | 17  | 26  | 11  | 11  | 13  | 2.598985 | 2.360754 | 3.397143 | 1.848909 |
| processed_ -           | 5   | 2   | 1   | 19  | 2   | 18  | 0.24731  | 0.126856 | 0.059679 | 1.458667 |
| pseudogeni -           | 2   | 0   | 2   | 3   | 4   | 2   | 0.116352 | 0        | 0.140386 | 0.270893 |
| pseudogeni -           | 0   | 0   | 0   | 1   | 0   | 0   | 0        | 0        | 0        | 0.254475 |
| lincRNA -              | 0   | 0   | 1   | 0   | 0   | 0   | 0        | 0        | 0.114991 | 0        |
| pseudogeni -           | 1   | 1   | 3   | 4   | 6   | 4   | 0.074311 | 0.095293 | 0.26898  | 0.461362 |
| antisense -            | 25  | 14  | 16  | 11  | 5   | 1   | 1.222367 | 0.877807 | 0.943908 | 0.834805 |
| lincRNA -              | 0   | 1   | 0   | 0   | 0   | 0   | 0        | 0.134218 | 0        | 0        |
| protein_co Uncharacte  | 54  | 58  | 42  | 46  | 71  | 41  | 3.20514  | 4.414593 | 3.007812 | 4.237811 |
| lincRNA -              | 0   | 0   | 0   | 1   | 0   | 0   | 0        | 0        | 0        | 0.127237 |
| protein_co poly(A)_bir | 293 | 253 | 230 | 74  | 79  | 68  | 2.778878 | 3.07703  | 2.631951 | 1.089342 |
| pseudogeni -           | 2   | 2   | 1   | 0   | 0   | 0   | 0.240462 | 0.308358 | 0.145065 | 0        |
| lincRNA -              | 3   | 2   | 3   | 2   | 6   | 6   | 0.355227 | 0.303686 | 0.428602 | 0.367575 |
| antisense -            | 11  | 8   | 8   | 1   | 3   | 2   | 0.593545 | 0.553554 | 0.520833 | 0.083751 |
| antisense NAV2_antis   | 0   | 1   | 0   | 1   | 2   | 0   | 0        | 0.100551 | 0        | 0.121705 |
| antisense -            | 9   | 2   | 2   | 0   | 0   | 0   | 0.785866 | 0.223947 | 0.21071  | 0        |
| pseudogeni -           | 1   | 0   | 0   | 0   | 0   | 0   | 0.02964  | 0        | 0        | 0        |
| antisense -            | 0   | 0   | 0   | 0   | 1   | 0   | 0        | 0        | 0        | 0        |
| protein_co olfactory_n | 0   | 1   | 0   | 0   | 1   | 2   | 0        | 0.122215 | 0        | 0        |
| protein_co -           | 0   | 0   | 0   | 2   | 0   | 0   | 0        | 0        | 0        | 0.042228 |
| antisense -            | 14  | 5   | 9   | 10  | 8   | 8   | 0.81751  | 0.374407 | 0.634097 | 0.906349 |
| sense_intrc -          | 8   | 8   | 5   | 11  | 13  | 14  | 0.219369 | 0.281309 | 0.165425 | 0.468174 |
| antisense -            | 0   | 0   | 2   | 0   | 1   | 4   | 0        | 0        | 0.204984 | 0        |
| antisense -            | 15  | 8   | 5   | 26  | 36  | 41  | 0.800171 | 0.547256 | 0.321817 | 2.152759 |
| antisense -            | 0   | 0   | 0   | 4   | 5   | 0   | 0        | 0        | 0        | 0.06504  |
| antisense -            | 2   | 2   | 0   | 3   | 2   | 0   | 0.293063 | 0.375811 | 0        | 0.682311 |

|                        |     |     |     |     |     |     |          |          |          |          |
|------------------------|-----|-----|-----|-----|-----|-----|----------|----------|----------|----------|
| pseudogen  MT-ND2_ps   | 0   | 0   | 1   | 2   | 1   | 0   | 0        | 0        | 0.054981 | 0.141457 |
| antisense -            | 0   | 0   | 0   | 0   | 1   | 1   | 0        | 0        | 0        | 0        |
| pseudogen  glutamate-i | 1   | 0   | 0   | 0   | 0   | 0   | 0.044957 | 0        | 0        | 0        |
| antisense -            | 1   | 0   | 0   | 0   | 0   | 0   | 0.125374 | 0        | 0        | 0        |
| antisense -            | 1   | 0   | 0   | 0   | 0   | 0   | 0.096086 | 0        | 0        | 0        |
| processed_-            | 6   | 7   | 9   | 8   | 7   | 9   | 1.537378 | 2.300047 | 2.782402 | 3.181631 |
| pseudogen -            | 0   | 2   | 0   | 0   | 0   | 0   | 0        | 0.06543  | 0        | 0        |
| pseudogen  proteasom   | 0   | 1   | 2   | 0   | 0   | 0   | 0        | 0.09308  | 0.175156 | 0        |
| protein_co MAGE-like_  | 2   | 3   | 3   | 13  | 5   | 5   | 0.037738 | 0.072591 | 0.0683   | 0.380739 |
| lincRNA -              | 0   | 0   | 0   | 2   | 0   | 2   | 0        | 0        | 0        | 0.088379 |
| antisense -            | 1   | 0   | 0   | 2   | 1   | 1   | 0.033807 | 0        | 0        | 0.104946 |
| pseudogen -            | 0   | 0   | 0   | 0   | 1   | 0   | 0        | 0        | 0        | 0        |
| antisense -            | 0   | 0   | 0   | 0   | 0   | 1   | 0        | 0        | 0        | 0        |
| pseudogen -            | 5   | 2   | 3   | 8   | 8   | 10  | 0.26402  | 0.135427 | 0.191133 | 0.655674 |
| pseudogen -            | 35  | 37  | 38  | 21  | 22  | 12  | 2.392348 | 3.243152 | 3.13392  | 2.227953 |
| pseudogen -            | 2   | 0   | 0   | 2   | 3   | 0   | 0.269483 | 0        | 0        | 0.418275 |
| protein_co casein_kin  | 9   | 1   | 3   | 6   | 2   | 2   | 0.29803  | 0.042465 | 0.119863 | 0.308389 |
| lincRNA -              | 0   | 0   | 0   | 0   | 0   | 1   | 0        | 0        | 0        | 0        |
| processed_-            | 45  | 30  | 22  | 75  | 109 | 76  | 0.756291 | 0.646557 | 0.446115 | 1.956446 |
| antisense -            | 8   | 4   | 1   | 0   | 1   | 0   | 0.695956 | 0.446232 | 0.104964 | 0        |
| lincRNA -              | 13  | 19  | 20  | 2   | 1   | 0   | 0.930642 | 1.744223 | 1.727496 | 0.222228 |
| lincRNA -              | 3   | 3   | 3   | 0   | 0   | 0   | 0.188313 | 0.241485 | 0.227211 | 0        |
| protein_co Uncharacte  | 1   | 0   | 1   | 0   | 1   | 0   | 0.114927 | 0        | 0.138665 | 0        |
| pseudogen -            | 0   | 0   | 0   | 1   | 1   | 0   | 0        | 0        | 0        | 0.205014 |
| lincRNA -              | 0   | 0   | 0   | 4   | 3   | 6   | 0        | 0        | 0        | 0.639822 |
| pseudogen -            | 22  | 26  | 17  | 51  | 88  | 44  | 1.424835 | 2.159357 | 1.32843  | 5.126754 |
| protein_co Uncharacte  | 4   | 6   | 2   | 5   | 10  | 7   | 0.128996 | 0.248128 | 0.077821 | 0.250274 |
| lincRNA -              | 125 | 95  | 78  | 42  | 61  | 44  | 4.447081 | 4.33409  | 3.348171 | 2.319235 |
| pseudogen -            | 2   | 0   | 1   | 2   | 0   | 1   | 0.160034 | 0        | 0.096545 | 0.248395 |
| antisense NAV2_anti    | 0   | 2   | 0   | 0   | 0   | 0   | 0        | 0.101829 | 0        | 0        |
| antisense -            | 0   | 0   | 0   | 3   | 0   | 1   | 0        | 0        | 0        | 0.444683 |
| antisense -            | 0   | 0   | 2   | 2   | 1   | 0   | 0        | 0        | 0.210318 | 0.270557 |
| pseudogen -            | 8   | 14  | 7   | 14  | 15  | 12  | 0.128027 | 0.28731  | 0.135163 | 0.347753 |
| antisense WAC_anti     | 252 | 208 | 209 | 215 | 223 | 254 | 4.530784 | 4.795628 | 4.53385  | 5.999869 |
| protein_co age-related | 1   | 0   | 0   | 0   | 0   | 0   | 0.057323 | 0        | 0        | 0        |
| antisense -            | 0   | 0   | 1   | 0   | 0   | 0   | 0        | 0        | 0.095245 | 0        |
| lincRNA -              | 11  | 5   | 8   | 0   | 2   | 3   | 0.789878 | 0.460412 | 0.693115 | 0        |
| pseudogen -            | 0   | 0   | 0   | 0   | 1   | 1   | 0        | 0        | 0        | 0        |
| lincRNA -              | 0   | 0   | 1   | 4   | 5   | 2   | 0        | 0        | 0.050067 | 0.257628 |
| antisense -            | 1   | 0   | 0   | 1   | 1   | 0   | 0.128466 | 0        | 0        | 0.199397 |
| lincRNA -              | 0   | 1   | 0   | 0   | 0   | 0   | 0        | 0.099388 | 0        | 0        |
| protein_co retrotransp | 27  | 32  | 42  | 0   | 1   | 1   | 0.301939 | 0.458897 | 0.5667   | 0        |
| antisense -            | 0   | 0   | 0   | 1   | 0   | 3   | 0        | 0        | 0        | 0.234019 |
| antisense -            | 0   | 0   | 0   | 1   | 0   | 3   | 0        | 0        | 0        | 0.128359 |
| protein_co Uncharacte  | 58  | 48  | 58  | 100 | 75  | 40  | 2.465658 | 2.616709 | 2.974959 | 6.59835  |
| lincRNA -              | 0   | 0   | 0   | 1   | 0   | 0   | 0        | 0        | 0        | 0.13553  |
| lincRNA -              | 3   | 4   | 1   | 5   | 6   | 6   | 0.209955 | 0.358984 | 0.084441 | 0.543133 |
| antisense STT3A_anti   | 3   | 2   | 1   | 1   | 1   | 0   | 0.327902 | 0.280325 | 0.131878 | 0.16965  |
| pseudogen -            | 1   | 2   | 0   | 4   | 6   | 4   | 0.028128 | 0.072141 | 0        | 0.174637 |
| antisense -            | 0   | 0   | 0   | 2   | 0   | 0   | 0        | 0        | 0        | 0.525486 |
| processed_-            | 2   | 3   | 3   | 6   | 2   | 6   | 0.103624 | 0.199325 | 0.187543 | 0.482518 |
| pseudogen  polycystic_ | 659 | 446 | 519 | 238 | 366 | 295 | 3.002674 | 2.605956 | 2.853239 | 1.683179 |
| antisense -            | 82  | 79  | 62  | 229 | 204 | 186 | 5.654384 | 6.985667 | 5.158355 | 24.50967 |
| pseudogen -            | 0   | 0   | 0   | 4   | 7   | 4   | 0        | 0        | 0        | 1.386282 |
| pseudogen -            | 0   | 0   | 0   | 1   | 0   | 0   | 0        | 0        | 0        | 0.146144 |
| protein_co fucose-1-pt | 58  | 69  | 63  | 31  | 32  | 34  | 0.843555 | 1.286897 | 1.105539 | 0.699806 |
| antisense -            | 0   | 0   | 0   | 1   | 1   | 0   | 0        | 0        | 0        | 0.088111 |
| antisense -            | 4   | 2   | 0   | 3   | 2   | 3   | 0.383558 | 0.24593  | 0        | 0.446502 |
| lincRNA -              | 0   | 1   | 0   | 0   | 0   | 0   | 0        | 0.129034 | 0        | 0        |
| antisense -            | 89  | 47  | 35  | 5   | 2   | 7   | 9.399125 | 6.365091 | 4.459781 | 0.819592 |
| antisense -            | 5   | 4   | 8   | 0   | 5   | 5   | 0.425499 | 0.436514 | 0.821423 | 0        |
| antisense -            | 0   | 0   | 2   | 0   | 0   | 0   | 0        | 0        | 0.208381 | 0        |
| antisense -            | 4   | 3   | 3   | 0   | 1   | 4   | 0.518122 | 0.498313 | 0.468858 | 0        |
| lincRNA -              | 1   | 0   | 2   | 1   | 0   | 0   | 0.099554 | 0        | 0.240236 | 0.154522 |
| pseudogen -            | 2   | 3   | 3   | 2   | 4   | 1   | 0.160582 | 0.308886 | 0.290628 | 0.249246 |

|             |              |      |      |      |      |      |      |          |          |          |          |
|-------------|--------------|------|------|------|------|------|------|----------|----------|----------|----------|
| antisense   | FLI1_antise  | 122  | 65   | 74   | 0    | 0    | 1    | 4.43456  | 3.029796 | 3.245417 | 0        |
| antisense   | -            | 1    | 3    | 0    | 10   | 3    | 2    | 0.060503 | 0.232761 | 0        | 0.939094 |
| antisense   | -            | 0    | 0    | 0    | 0    | 3    | 0    | 0        | 0        | 0        | 0        |
| pseudogen   | -            | 0    | 0    | 1    | 1    | 0    | 4    | 0        | 0        | 0.063855 | 0.082144 |
| antisense   | -            | 7    | 3    | 3    | 0    | 1    | 2    | 0.468231 | 0.257332 | 0.242121 | 0        |
| pseudogen   | -            | 0    | 1    | 1    | 0    | 0    | 2    | 0        | 0.05995  | 0.056406 | 0        |
| pseudogen   | -            | 1    | 0    | 0    | 0    | 0    | 0    | 0.04849  | 0        | 0        | 0        |
| pseudogen   | glycine-N-a  | 7    | 11   | 7    | 2    | 3    | 4    | 0.363891 | 0.73329  | 0.439056 | 0.161374 |
| antisense   | -            | 3    | 0    | 1    | 1    | 3    | 6    | 0.049203 | 0        | 0.019789 | 0.025456 |
| pseudogen   | -            | 5    | 3    | 1    | 3    | 1    | 1    | 1.127164 | 0.867257 | 0.271998 | 1.049709 |
| protein_co  | mex-3_hon    | 3166 | 2349 | 2512 | 3094 | 3893 | 2640 | 24.24131 | 23.06416 | 23.20667 | 36.7702  |
| pseudogen   | -            | 0    | 0    | 0    | 0    | 0    | 3    | 0        | 0        | 0        | 0        |
| lincRNA     | -            | 0    | 0    | 0    | 0    | 0    | 1    | 0        | 0        | 0        | 0        |
| protein_co  | -            | 7    | 5    | 1    | 1    | 3    | 0    | 0.565914 | 0.51836  | 0.097544 | 0.125482 |
| pseudogen   | -            | 0    | 0    | 0    | 0    | 1    | 0    | 0        | 0        | 0        | 0        |
| protein_co  | olfactory_r  | 0    | 0    | 0    | 0    | 0    | 1    | 0        | 0        | 0        | 0        |
| antisense   | -            | 2    | 4    | 0    | 2    | 7    | 1    | 0.171444 | 0.439706 | 0        | 0.266105 |
| antisense   | -            | 0    | 0    | 0    | 0    | 1    | 0    | 0        | 0        | 0        | 0        |
| pseudogen   | olfactory_r  | 0    | 0    | 0    | 4    | 2    | 0    | 0        | 0        | 0        | 0.401544 |
| antisense   | -            | 0    | 1    | 0    | 0    | 0    | 0    | 0        | 0.105122 | 0        | 0        |
| pseudogen   | -            | 0    | 0    | 0    | 1    | 0    | 0    | 0        | 0        | 0        | 0.081959 |
| antisense   | -            | 2    | 2    | 0    | 2    | 1    | 2    | 0.181744 | 0.233061 | 0        | 0.282092 |
| lincRNA     | -            | 0    | 0    | 0    | 2    | 0    | 0    | 0        | 0        | 0        | 0.323466 |
| pseudogen   | nucleosom    | 1    | 1    | 0    | 0    | 2    | 0    | 0.044111 | 0.056566 | 0        | 0        |
| antisense   | -            | 0    | 0    | 0    | 3    | 3    | 4    | 0        | 0        | 0        | 0.443779 |
| lincRNA     | -            | 1    | 0    | 0    | 0    | 0    | 0    | 0.056358 | 0        | 0        | 0        |
| pseudogen   | -            | 0    | 0    | 0    | 1    | 2    | 1    | 0        | 0        | 0        | 0.360296 |
| lincRNA     | -            | 0    | 0    | 0    | 2    | 1    | 2    | 0        | 0        | 0        | 0.157192 |
| pseudogen   | GTPase_ver   | 0    | 0    | 1    | 0    | 1    | 2    | 0        | 0        | 0.025786 | 0        |
| pseudogen   | -            | 2    | 5    | 4    | 1    | 2    | 7    | 0.126388 | 0.405187 | 0.304989 | 0.098086 |
| pseudogen   | -            | 0    | 0    | 0    | 0    | 0    | 1    | 0        | 0        | 0        | 0        |
| antisense   | -            | 0    | 1    | 0    | 0    | 0    | 1    | 0        | 0.17131  | 0        | 0        |
| sense_intrc | FAR1_intro   | 1    | 3    | 4    | 5    | 9    | 10   | 0.127419 | 0.490189 | 0.614951 | 0.988856 |
| pseudogen   | -            | 0    | 0    | 0    | 1    | 0    | 1    | 0        | 0        | 0        | 0.673887 |
| pseudogen   | farnesyl_dil | 1    | 1    | 1    | 0    | 1    | 1    | 0.0447   | 0.057321 | 0.053933 | 0        |
| pseudogen   | -            | 0    | 1    | 0    | 0    | 0    | 0    | 0        | 1.156342 | 0        | 0        |
| protein_co  | SYS1-DBND    | 0    | 0    | 1    | 1    | 0    | 0    | 0        | 0        | 0.043089 | 0.05543  |
| antisense   | -            | 0    | 2    | 1    | 5    | 7    | 3    | 0        | 0.171554 | 0.080707 | 0.519114 |
| lincRNA     | -            | 0    | 0    | 0    | 0    | 0    | 1    | 0        | 0        | 0        | 0        |
| antisense   | -            | 0    | 0    | 1    | 0    | 0    | 0    | 0        | 0        | 0.074638 | 0        |
| antisense   | -            | 2    | 4    | 0    | 8    | 20   | 1    | 0.042434 | 0.108832 | 0        | 0.263456 |
| antisense   | -            | 0    | 0    | 0    | 0    | 0    | 1    | 0        | 0        | 0        | 0        |
| lincRNA     | -            | 0    | 0    | 1    | 0    | 0    | 0    | 0        | 0        | 0.209539 | 0        |
| sense_intrc | -            | 0    | 0    | 1    | 1    | 0    | 0    | 0        | 0        | 0.067192 | 0.086437 |
| protein_co  | solute_carr  | 3    | 5    | 9    | 1    | 8    | 1    | 0.084792 | 0.181223 | 0.30692  | 0.04387  |
| pseudogen   | -            | 0    | 0    | 0    | 0    | 1    | 0    | 0        | 0        | 0        | 0        |
| lincRNA     | -            | 0    | 1    | 1    | 2    | 4    | 1    | 0        | 0.105676 | 0.09943  | 0.255817 |
| processed_  | -            | 15   | 15   | 7    | 35   | 61   | 17   | 0.28213  | 0.361792 | 0.158856 | 1.021778 |
| pseudogen   | GTPase_ver   | 3    | 7    | 8    | 1    | 3    | 2    | 0.019933 | 0.059644 | 0.064135 | 0.010313 |
| lincRNA     | -            | 1    | 0    | 0    | 1    | 0    | 0    | 0.07338  | 0        | 0        | 0.113896 |
| processed_  | -            | 0    | 2    | 0    | 3    | 3    | 0    | 0        | 0.054589 | 0        | 0.09911  |
| pseudogen   | -            | 2    | 2    | 1    | 1    | 0    | 1    | 0.050637 | 0.064935 | 0.030548 | 0.039298 |
| antisense   | -            | 0    | 2    | 3    | 0    | 0    | 3    | 0        | 0.256965 | 0.362663 | 0        |
| lincRNA     | -            | 2    | 4    | 4    | 0    | 0    | 0    | 0.180694 | 0.463428 | 0.436035 | 0        |
| pseudogen   | -            | 0    | 0    | 0    | 0    | 1    | 0    | 0        | 0        | 0        | 0        |
| pseudogen   | -            | 37   | 32   | 22   | 9    | 15   | 42   | 2.110621 | 2.340819 | 1.514186 | 0.796859 |
| protein_co  | Protein_LO   | 0    | 0    | 0    | 1    | 2    | 2    | 0        | 0        | 0        | 0.065567 |
| antisense   | -            | 5    | 1    | 1    | 10   | 17   | 7    | 0.448279 | 0.114971 | 0.108175 | 1.391583 |
| antisense   | -            | 0    | 1    | 1    | 1    | 2    | 0    | 0        | 0.125532 | 0.118112 | 0.151941 |
| pseudogen   | NADH_deh     | 1    | 1    | 1    | 1    | 2    | 1    | 0.202112 | 0.25918  | 0.24386  | 0.313706 |
| protein_co  | MPV17_mi     | 605  | 393  | 436  | 513  | 669  | 608  | 14.48109 | 12.06279 | 12.59159 | 19.05872 |
| antisense   | -            | 3    | 0    | 0    | 1    | 2    | 0    | 0.28247  | 0        | 0        | 0.146144 |
| antisense   | TMEM9B_a     | 21   | 15   | 12   | 42   | 34   | 24   | 0.935129 | 0.85655  | 0.644735 | 2.902898 |
| lincRNA     | -            | 0    | 0    | 1    | 0    | 0    | 0    | 0        | 0        | 0.111809 | 0        |
| antisense   | -            | 2    | 0    | 2    | 4    | 10   | 1    | 0.069467 | 0        | 0.083816 | 0.215644 |

|                           |      |      |      |      |      |      |          |          |           |
|---------------------------|------|------|------|------|------|------|----------|----------|-----------|
| lincRNA -                 | 0    | 0    | 0    | 1    | 0    | 0    | 0        | 0        | 0.140502  |
| antisense -               | 0    | 0    | 0    | 1    | 0    | 4    | 0        | 0        | 0.139425  |
| processed_-               | 0    | 0    | 0    | 0    | 3    | 8    | 0        | 0        | 0         |
| protein_co Uncharacte     | 1    | 6    | 0    | 4    | 3    | 6    | 0.022608 | 0.173953 | 0.140366  |
| processed_-               | 4    | 4    | 7    | 3    | 6    | 28   | 0.059336 | 0.07609  | 0.125286  |
| pseudogeni-               | 0    | 0    | 0    | 0    | 1    | 2    | 0        | 0        | 0         |
| antisense -               | 1    | 0    | 0    | 0    | 0    | 0    | 0.23802  | 0        | 0         |
| antisense -               | 1    | 0    | 0    | 2    | 3    | 1    | 0.155781 | 0        | 0.483587  |
| antisense -               | 0    | 0    | 0    | 0    | 1    | 3    | 0        | 0        | 0         |
| pseudogeni-               | 4    | 9    | 5    | 6    | 3    | 6    | 0.461971 | 1.332927 | 0.696743  |
| lincRNA -                 | 2    | 1    | 0    | 0    | 0    | 0    | 0.250749 | 0.160775 | 0         |
| antisense -               | 4    | 1    | 4    | 0    | 1    | 1    | 0.247115 | 0.079222 | 0.298158  |
| pseudogeni-               | 17   | 16   | 22   | 4    | 7    | 12   | 0.411316 | 0.496428 | 0.64224   |
| pseudogeni-               | 0    | 0    | 0    | 1    | 0    | 0    | 0        | 0        | 0.124198  |
| sense_intrc OPCML_int     | 0    | 0    | 0    | 7    | 3    | 6    | 0        | 0        | 0.173521  |
| pseudogeni-               | 0    | 0    | 0    | 0    | 1    | 0    | 0        | 0        | 0         |
| antisense -               | 1    | 0    | 0    | 0    | 1    | 0    | 0.108042 | 0        | 0         |
| antisense -               | 1    | 3    | 3    | 1    | 1    | 3    | 0.087318 | 0.335921 | 0.316064  |
| protein_co MEF2B_nei      | 98   | 82   | 89   | 34   | 43   | 67   | 1.242623 | 1.333327 | 1.361606  |
| antisense -               | 0    | 0    | 0    | 0    | 0    | 2    | 0        | 0        | 0         |
| processed_-               | 0    | 0    | 0    | 0    | 0    | 1    | 0        | 0        | 0         |
| antisense -               | 4    | 1    | 3    | 0    | 0    | 2    | 0.238323 | 0.076404 | 0.215663  |
| pseudogeni-               | 6    | 8    | 10   | 3    | 11   | 8    | 1.352597 | 2.312684 | 2.719976  |
| antisense -               | 13   | 14   | 10   | 19   | 20   | 5    | 1.555026 | 2.147493 | 1.443253  |
| antisense small_Cajal     | 10   | 9    | 10   | 17   | 21   | 19   | 1.328329 | 1.533054 | 1.602706  |
| pseudogeni-               | 3    | 0    | 0    | 0    | 0    | 0    | 0.114739 | 0        | 0         |
| pseudogeni-               | 1    | 0    | 2    | 0    | 0    | 0    | 0.152736 | 0        | 0.36857   |
| pseudogeni-               | 0    | 0    | 0    | 2    | 1    | 0    | 0        | 0        | 0.099767  |
| protein_co Protein_LO     | 2    | 1    | 0    | 75   | 108  | 55   | 0.103739 | 0.066515 | 0         |
| pseudogeni-               | 0    | 0    | 0    | 0    | 1    | 0    | 0        | 0        | 0         |
| lincRNA -                 | 1    | 0    | 3    | 0    | 1    | 1    | 0.072698 | 0        | 0.263142  |
| antisense -               | 5    | 2    | 0    | 0    | 0    | 0    | 0.382463 | 0.196182 | 0         |
| lincRNA long_interf       | 1    | 0    | 0    | 2424 | 2626 | 2337 | 0.058759 | 0        | 0.2210755 |
| sense_intrc-              | 12   | 7    | 8    | 9    | 17   | 16   | 0.322638 | 0.241347 | 0.259521  |
| pseudogeni-               | 2    | 1    | 0    | 8    | 13   | 8    | 0.20933  | 0.134218 | 0         |
| pseudogeni: ATP_syntha    | 1    | 3    | 0    | 3    | 5    | 2    | 0.061697 | 0.237354 | 0.287289  |
| lincRNA -                 | 6    | 3    | 5    | 0    | 0    | 1    | 0.492715 | 0.315918 | 0.495407  |
| pseudogeni: olfactory_r   | 0    | 1    | 0    | 0    | 0    | 0    | 0        | 0.066077 | 0         |
| pseudogeni: guanine_nu    | 0    | 0    | 2    | 0    | 0    | 0    | 0        | 0        | 0.546623  |
| processed_-               | 5    | 3    | 2    | 6    | 5    | 11   | 0.093668 | 0.072069 | 0.045206  |
| lincRNA -                 | 1    | 1    | 0    | 0    | 0    | 0    | 0.121792 | 0.156181 | 0         |
| lincRNA KIRREL3_ar        | 1    | 0    | 0    | 0    | 0    | 0    | 0.095305 | 0        | 0         |
| antisense -               | 0    | 2    | 1    | 1    | 0    | 2    | 0        | 1.307169 | 0.614951  |
| antisense -               | 1    | 1    | 0    | 5    | 1    | 2    | 0.05365  | 0.068798 | 0         |
| processed_-               | 1    | 1    | 2    | 0    | 1    | 0    | 0.055955 | 0.071754 | 0.135025  |
| lincRNA -                 | 0    | 1    | 0    | 0    | 0    | 0    | 0        | 0.070327 | 0         |
| lincRNA -                 | 0    | 0    | 0    | 1    | 0    | 0    | 0        | 0        | 0.20974   |
| lincRNA -                 | 0    | 0    | 0    | 3    | 14   | 4    | 0        | 0        | 0.120696  |
| pseudogeni-               | 1    | 0    | 0    | 0    | 0    | 0    | 0.099343 | 0        | 0         |
| lincRNA -                 | 0    | 0    | 0    | 1    | 0    | 0    | 0        | 0        | 0.161017  |
| antisense -               | 0    | 0    | 0    | 1    | 0    | 0    | 0        | 0        | 0.259928  |
| pseudogeni: asparagine-   | 14   | 5    | 6    | 22   | 31   | 15   | 1.195738 | 0.54763  | 0.618312  |
| protein_co Uncharacte     | 0    | 0    | 1    | 0    | 0    | 0    | 0        | 0        | 0.034518  |
| antisense -               | 2    | 1    | 5    | 1    | 1    | 1    | 0.248753 | 0.159495 | 0.750338  |
| pseudogeni: high_mobil    | 4    | 3    | 3    | 2    | 3    | 14   | 0.27381  | 0.263342 | 0.247776  |
| pseudogeni: ferritin_ligl | 0    | 4    | 1    | 0    | 0    | 0    | 0        | 0.569951 | 0.134065  |
| sense_intrc RSF1_intro    | 3    | 1    | 2    | 2    | 3    | 3    | 0.248534 | 0.106236 | 0.199913  |
| protein_co dipeptidyl-    | 1427 | 1066 | 1060 | 1652 | 1857 | 1666 | 21.73881 | 20.82468 | 19.48344  |
| lincRNA -                 | 0    | 0    | 1    | 0    | 0    | 0    | 0        | 0        | 0.100668  |
| antisense -               | 0    | 1    | 1    | 2    | 3    | 1    | 0        | 0.105862 | 0.099605  |
| lincRNA -                 | 0    | 0    | 1    | 0    | 1    | 0    | 0        | 0        | 0.072255  |
| processed_-               | 1    | 1    | 0    | 0    | 0    | 0    | 0.148857 | 0.190888 | 0         |
| protein_co STX16-NPEI     | 2    | 4    | 7    | 16   | 19   | 13   | 0.027317 | 0.070061 | 0.115359  |
| protein_co ANKHD1-EI      | 19   | 10   | 5    | 8    | 9    | 13   | 0.108042 | 0.07292  | 0.034305  |
| protein_co keratin_ass    | 1    | 0    | 1    | 1    | 0    | 0    | 0.03947  | 0        | 0.047622  |

|                        |      |      |      |      |      |      |          |          |          |          |
|------------------------|------|------|------|------|------|------|----------|----------|----------|----------|
| processed_-            | 0    | 0    | 0    | 1    | 0    | 0    | 0        | 0        | 0        | 0.16355  |
| protein_co BRICK1_SC.  | 2646 | 2156 | 2266 | 1709 | 1849 | 1855 | 100.6253 | 105.1418 | 103.9741 | 100.8765 |
| pseudogeni-            | 0    | 1    | 1    | 0    | 2    | 1    | 0        | 0.058378 | 0.054928 | 0        |
| pseudogeni-            | 0    | 0    | 0    | 0    | 2    | 2    | 0        | 0        | 0        | 0        |
| antisense -            | 1    | 0    | 0    | 0    | 1    | 0    | 0.060425 | 0        | 0        | 0        |
| lincRNA -              | 0    | 2    | 1    | 0    | 1    | 0    | 0        | 0.156384 | 0.07357  | 0        |
| pseudogeni ADP-ribosy  | 1    | 2    | 1    | 0    | 0    | 0    | 0.083732 | 0.214749 | 0.101028 | 0        |
| lincRNA -              | 1    | 0    | 0    | 0    | 0    | 0    | 0.092485 | 0        | 0        | 0        |
| antisense -            | 1    | 2    | 0    | 4    | 6    | 8    | 0.042666 | 0.109426 | 0        | 0.264895 |
| lincRNA -              | 0    | 0    | 0    | 0    | 1    | 0    | 0        | 0        | 0        | 0        |
| antisense -            | 6    | 7    | 6    | 59   | 102  | 25   | 0.346478 | 0.51836  | 0.418046 | 5.288188 |
| antisense -            | 0    | 0    | 0    | 3    | 0    | 1    | 0        | 0        | 0        | 0.383725 |
| processed_-            | 0    | 0    | 2    | 0    | 0    | 0    | 0        | 0        | 0.14091  | 0        |
| processed_-            | 24   | 11   | 14   | 12   | 10   | 4    | 1.422706 | 0.836192 | 1.001336 | 1.104118 |
| lincRNA -              | 0    | 0    | 0    | 0    | 1    | 2    | 0        | 0        | 0        | 0        |
| processed_-            | 0    | 0    | 1    | 0    | 0    | 0    | 0        | 0        | 0.008754 | 0        |
| protein_co Uncharacte  | 0    | 0    | 2    | 0    | 1    | 1    | 0        | 0        | 0.2254   | 0        |
| pseudogeni-            | 0    | 0    | 2    | 0    | 0    | 2    | 0        | 0        | 0.119106 | 0        |
| antisense NAV2_anti    | 0    | 0    | 5    | 0    | 0    | 0    | 0        | 0        | 0.085539 | 0        |
| antisense -            | 0    | 1    | 2    | 0    | 0    | 0    | 0        | 0.135123 | 0.254272 | 0        |
| protein_co Uncharacte  | 7    | 3    | 11   | 0    | 4    | 4    | 0.404723 | 0.222428 | 0.767362 | 0        |
| antisense -            | 2    | 2    | 1    | 2    | 5    | 5    | 0.079949 | 0.102523 | 0.048231 | 0.124092 |
| pseudogeni-            | 0    | 0    | 0    | 0    | 0    | 1    | 0        | 0        | 0        | 0        |
| antisense -            | 4    | 0    | 1    | 0    | 0    | 0    | 0.392385 | 0        | 0.118359 | 0        |
| protein_co Uncharacte  | 21   | 15   | 11   | 7    | 14   | 15   | 1.934559 | 1.771998 | 1.222653 | 1.000901 |
| sense_intrc -          | 1    | 0    | 0    | 0    | 2    | 1    | 0.111909 | 0        | 0        | 0        |
| pseudogeni-            | 0    | 0    | 0    | 0    | 1    | 0    | 0        | 0        | 0        | 0        |
| lincRNA -              | 0    | 0    | 0    | 2    | 0    | 1    | 0        | 0        | 0        | 0.184486 |
| sense_intrc -          | 0    | 0    | 0    | 1    | 0    | 1    | 0        | 0        | 0        | 0.154522 |
| antisense GRM5_anti    | 1    | 2    | 2    | 1    | 2    | 3    | 0.009726 | 0.024945 | 0.02347  | 0.015096 |
| antisense -            | 0    | 1    | 0    | 0    | 2    | 1    | 0        | 0.083863 | 0        | 0        |
| pseudogeni-            | 0    | 0    | 0    | 2    | 2    | 0    | 0        | 0        | 0        | 0.210043 |
| processed_-            | 29   | 8    | 19   | 0    | 0    | 0    | 1.417946 | 0.501604 | 1.120891 | 0        |
| antisense -            | 6    | 4    | 2    | 0    | 0    | 0    | 1.12988  | 0.965941 | 0.454422 | 0        |
| antisense -            | 5    | 1    | 0    | 0    | 0    | 0    | 0.413492 | 0.106049 | 0        | 0        |
| lincRNA -              | 1    | 2    | 0    | 0    | 0    | 0    | 0.058176 | 0.149205 | 0        | 0        |
| pseudogeni olfactory_r | 0    | 0    | 1    | 0    | 0    | 0    | 0        | 0        | 0.062171 | 0        |
| sense_intrc -          | 3    | 1    | 0    | 1    | 2    | 0    | 0.250749 | 0.107183 | 0        | 0.129732 |
| protein_co Protein_LO  | 0    | 0    | 3    | 33   | 45   | 23   | 0        | 0        | 0.399357 | 5.651138 |
| antisense -            | 4    | 10   | 3    | 6    | 5    | 8    | 0.558214 | 1.789577 | 0.505138 | 1.299639 |
| antisense -            | 0    | 0    | 0    | 0    | 0    | 2    | 0        | 0        | 0        | 0        |
| protein_co KIAA0754    | 855  | 707  | 776  | 292  | 328  | 296  | 6.677376 | 7.080574 | 7.312224 | 3.539591 |
| pseudogeni-            | 0    | 0    | 0    | 1    | 1    | 0    | 0        | 0        | 0        | 0.250102 |
| antisense -            | 0    | 0    | 1    | 1    | 0    | 0    | 0        | 0        | 0.105551 | 0.135783 |
| lincRNA -              | 1    | 0    | 0    | 0    | 0    | 0    | 0.085879 | 0        | 0        | 0        |
| protein_co charged_m   | 625  | 539  | 565  | 511  | 701  | 683  | 9.596025 | 10.6123  | 10.46665 | 12.17763 |
| pseudogeni-            | 0    | 1    | 0    | 0    | 0    | 1    | 0        | 0.210244 | 0        | 0        |
| antisense -            | 0    | 0    | 0    | 0    | 0    | 5    | 0        | 0        | 0        | 0        |
| lincRNA -              | 16   | 12   | 16   | 17   | 24   | 55   | 0.552053 | 0.530947 | 0.666084 | 0.910417 |
| pseudogeni-            | 1    | 0    | 1    | 13   | 18   | 16   | 0.252097 | 0        | 0.304169 | 5.08676  |
| lincRNA -              | 0    | 0    | 1    | 0    | 1    | 0    | 0        | 0        | 0.114064 | 0        |
| antisense -            | 6    | 3    | 2    | 8    | 2    | 1    | 0.378654 | 0.242785 | 0.152289 | 0.783632 |
| antisense -            | 0    | 0    | 0    | 4    | 2    | 3    | 0        | 0        | 0        | 0.529308 |
| lincRNA -              | 0    | 0    | 1    | 0    | 0    | 1    | 0        | 0        | 0.097881 | 0        |
| lincRNA -              | 0    | 0    | 0    | 1    | 0    | 0    | 0        | 0        | 0        | 0.236298 |
| processed_-            | 79   | 50   | 58   | 169  | 174  | 148  | 1.420365 | 1.152795 | 1.258198 | 4.716176 |
| lincRNA -              | 0    | 0    | 0    | 2    | 0    | 0    | 0        | 0        | 0        | 0.270557 |
| processed_-            | 2    | 0    | 0    | 0    | 0    | 1    | 0.721385 | 0        | 0        | 0        |
| antisense -            | 2    | 4    | 6    | 6    | 7    | 11   | 0.15604  | 0.400198 | 0.564814 | 0.726587 |
| pseudogeni-            | 0    | 4    | 0    | 2    | 1    | 0    | 0        | 0.283631 | 0        | 0.17165  |
| antisense -            | 23   | 27   | 26   | 21   | 41   | 14   | 3.797431 | 5.716565 | 5.179448 | 5.381605 |
| processed_-            | 7    | 1    | 6    | 0    | 0    | 0    | 0.660423 | 0.120986 | 0.683004 | 0        |
| antisense -            | 0    | 1    | 0    | 7    | 2    | 5    | 0        | 0.110533 | 0        | 0.936505 |
| lincRNA -              | 2    | 0    | 0    | 0    | 0    | 1    | 0.049619 | 0        | 0        | 0        |
| antisense -            | 2    | 1    | 1    | 0    | 0    | 0    | 0.163665 | 0.104939 | 0.098736 | 0        |

|                        |      |      |      |     |     |     |          |          |          |          |
|------------------------|------|------|------|-----|-----|-----|----------|----------|----------|----------|
| protein_co EP300_inte  | 5    | 8    | 14   | 33  | 30  | 28  | 0.160144 | 0.328578 | 0.541023 | 1.640528 |
| pseudogen: glycine-N-a | 0    | 0    | 0    | 7   | 2   | 3   | 0        | 0        | 0        | 0.560461 |
| antisense -            | 6    | 6    | 7    | 24  | 35  | 16  | 0.299617 | 0.384216 | 0.421756 | 1.860187 |
| protein_co Hydroxyac   | 1    | 0    | 0    | 0   | 1   | 1   | 0.014366 | 0        | 0        | 0        |
| sense_intrc KLHL22_in  | 2    | 2    | 0    | 2   | 0   | 1   | 0.860367 | 1.103299 | 0        | 1.335409 |
| antisense -            | 11   | 8    | 6    | 2   | 9   | 1   | 0.565559 | 0.527454 | 0.372207 | 0.159605 |
| antisense -            | 5    | 3    | 2    | 1   | 0   | 1   | 0.275824 | 0.212223 | 0.133119 | 0.085623 |
| pseudogen:-            | 0    | 0    | 0    | 0   | 1   | 0   | 0        | 0        | 0        | 0        |
| pseudogen:-            | 0    | 0    | 1    | 0   | 0   | 0   | 0        | 0        | 0.202055 | 0        |
| antisense -            | 2    | 0    | 0    | 0   | 1   | 1   | 0.213622 | 0        | 0        | 0        |
| sense_intrc -          | 0    | 1    | 0    | 1   | 2   | 0   | 0        | 0.12959  | 0        | 0.156853 |
| pseudogen:-            | 0    | 0    | 0    | 0   | 0   | 1   | 0        | 0        | 0        | 0        |
| antisense -            | 27   | 40   | 25   | 5   | 11  | 11  | 0.912126 | 1.732847 | 1.019011 | 0.262175 |
| lincRNA -              | 1    | 0    | 0    | 0   | 0   | 0   | 0.029847 | 0        | 0        | 0        |
| processed_-            | 1    | 0    | 0    | 0   | 0   | 0   | 0.017863 | 0        | 0        | 0        |
| pseudogen:-            | 0    | 1    | 2    | 1   | 0   | 3   | 0        | 0.045726 | 0.086046 | 0.055346 |
| sense_intrc -          | 1    | 0    | 1    | 0   | 0   | 0   | 0.31053  | 0        | 0.374672 | 0        |
| pseudogen: glycine-N-a | 0    | 0    | 0    | 0   | 1   | 0   | 0        | 0        | 0        | 0        |
| lincRNA -              | 10   | 5    | 13   | 1   | 2   | 1   | 1.085417 | 0.695947 | 1.702504 | 0.168472 |
| pseudogen: Nanog_hon   | 2    | 0    | 0    | 60  | 78  | 74  | 0.10238  | 0        | 0        | 4.767236 |
| lincRNA -              | 0    | 0    | 2    | 0   | 0   | 0   | 0        | 0        | 0.165668 | 0        |
| antisense -            | 5    | 4    | 8    | 1   | 3   | 0   | 0.2755   | 0.282631 | 0.53185  | 0.085523 |
| lincRNA small_nucl     | 26   | 27   | 25   | 15  | 33  | 33  | 2.588409 | 3.446931 | 3.002946 | 2.317828 |
| pseudogen:-            | 7    | 1    | 5    | 3   | 0   | 7   | 0.139435 | 0.025544 | 0.120169 | 0.092753 |
| antisense -            | 34   | 28   | 18   | 51  | 40  | 15  | 2.985507 | 3.152873 | 1.907039 | 6.95088  |
| antisense -            | 12   | 11   | 8    | 3   | 1   | 0   | 0.868334 | 1.020722 | 0.698463 | 0.336944 |
| pseudogen: olfactory_r | 5    | 2    | 3    | 0   | 0   | 1   | 0.263723 | 0.135275 | 0.190918 | 0        |
| antisense -            | 0    | 0    | 0    | 3   | 0   | 1   | 0        | 0        | 0        | 0.282092 |
| pseudogen:-            | 0    | 1    | 0    | 0   | 0   | 0   | 0        | 0.201778 | 0        | 0        |
| lincRNA -              | 0    | 0    | 0    | 1   | 2   | 1   | 0        | 0        | 0        | 0.129501 |
| pseudogen: DEAD_(Asp   | 2    | 0    | 0    | 2   | 6   | 4   | 0.071807 | 0        | 0        | 0.111455 |
| pseudogen: SET_pseudc  | 0    | 1    | 0    | 0   | 0   | 0   | 0        | 0.073598 | 0        | 0        |
| antisense -            | 8    | 8    | 11   | 38  | 32  | 26  | 0.296772 | 0.380568 | 0.49235  | 2.188    |
| pseudogen:-            | 0    | 0    | 0    | 1   | 0   | 0   | 0        | 0        | 0        | 0.205014 |
| processed_-            | 2    | 0    | 0    | 0   | 2   | 1   | 0.035482 | 0        | 0        | 0        |
| antisense -            | 4    | 0    | 1    | 4   | 12  | 0   | 0.340399 | 0        | 0.102678 | 0.528347 |
| antisense -            | 0    | 2    | 0    | 2   | 3   | 0   | 0        | 0.181114 | 0        | 0.219216 |
| pseudogen:-            | 0    | 0    | 0    | 4   | 5   | 6   | 0        | 0        | 0        | 0.626063 |
| processed_-            | 0    | 0    | 3    | 15  | 18  | 17  | 0        | 0        | 0.060401 | 0.388504 |
| antisense -            | 0    | 0    | 1    | 2   | 4   | 1   | 0        | 0        | 0.224506 | 0.577617 |
| lincRNA -              | 2    | 1    | 0    | 5   | 3   | 2   | 0.167764 | 0.107567 | 0        | 0.650982 |
| sense_overl-           | 2252 | 1860 | 1932 | 5   | 11  | 4   | 31.33422 | 33.18737 | 32.43438 | 0.107982 |
| lincRNA -              | 1    | 0    | 0    | 0   | 0   | 0   | 0.093221 | 0        | 0        | 0        |
| pseudogen:-            | 0    | 0    | 0    | 4   | 2   | 0   | 0        | 0        | 0        | 1.663538 |
| sense_intrc -          | 1    | 1    | 1    | 0   | 0   | 1   | 0.094919 | 0.12172  | 0.114525 | 0        |
| lincRNA -              | 0    | 0    | 0    | 0   | 1   | 0   | 0        | 0        | 0        | 0        |
| processed_-            | 0    | 0    | 0    | 0   | 1   | 2   | 0        | 0        | 0        | 0        |
| lincRNA -              | 0    | 0    | 0    | 0   | 0   | 2   | 0        | 0        | 0        | 0        |
| sense_intrc NAV2_intrc | 0    | 0    | 1    | 0   | 0   | 0   | 0        | 0        | 0.111809 | 0        |
| protein_co -           | 0    | 0    | 0    | 0   | 1   | 0   | 0        | 0        | 0        | 0        |
| antisense RRM1_anti    | 0    | 1    | 2    | 0   | 1   | 0   | 0        | 0.173786 | 0.327026 | 0        |
| pseudogen: ATP-bindin  | 2    | 4    | 7    | 3   | 6   | 0   | 0.130795 | 0.335452 | 0.552341 | 0.304518 |
| pseudogen: Wilms_turr  | 6    | 10   | 4    | 10  | 16  | 2   | 0.106488 | 0.227592 | 0.085656 | 0.275472 |
| protein_co Protein_LO  | 89   | 110  | 95   | 75  | 123 | 61  | 5.455178 | 8.646114 | 7.025716 | 7.135275 |
| pseudogen:-            | 0    | 0    | 1    | 0   | 0   | 0   | 0        | 0        | 0.160271 | 0        |
| pseudogen:-            | 0    | 3    | 1    | 1   | 8   | 0   | 0        | 0.322124 | 0.101028 | 0.129964 |
| lincRNA -              | 1    | 1    | 0    | 0   | 1   | 0   | 0.080154 | 0.102786 | 0        | 0        |
| protein_co EP300_inte  | 1191 | 961  | 1038 | 381 | 481 | 578 | 24.30201 | 25.14566 | 25.55499 | 12.06663 |
| pseudogen:-            | 0    | 0    | 0    | 0   | 0   | 1   | 0        | 0        | 0        | 0        |
| antisense -            | 10   | 9    | 3    | 10  | 15  | 15  | 0.634506 | 0.732298 | 0.229671 | 0.984842 |
| protein_co olfactory_r | 0    | 0    | 0    | 0   | 1   | 0   | 0        | 0        | 0        | 0        |
| antisense -            | 3    | 3    | 3    | 0   | 0   | 0   | 0.272616 | 0.349592 | 0.328927 | 0        |
| sense_intrc -          | 73   | 65   | 75   | 148 | 156 | 128 | 1.765328 | 2.015697 | 2.188325 | 5.555137 |
| antisense -            | 0    | 0    | 1    | 3   | 0   | 0   | 0        | 0        | 0.062308 | 0.240462 |
| lincRNA -              | 0    | 1    | 1    | 0   | 0   | 0   | 0        | 0.130151 | 0.122458 | 0        |

|                        |     |    |    |     |     |     |          |          |          |          |
|------------------------|-----|----|----|-----|-----|-----|----------|----------|----------|----------|
| lincRNA -              | 76  | 81 | 76 | 141 | 133 | 526 | 4.288377 | 5.861027 | 5.174174 | 12.34892 |
| pseudogen -            | 0   | 1  | 0  | 1   | 9   | 0   | 0        | 0.044706 | 0        | 0.054111 |
| antisense -            | 40  | 47 | 30 | 2   | 8   | 9   | 4.724435 | 7.118641 | 4.275227 | 0.366649 |
| antisense -            | 2   | 1  | 0  | 0   | 1   | 0   | 0.13611  | 0.087271 | 0        | 0        |
| lincRNA -              | 2   | 8  | 4  | 1   | 1   | 2   | 0.136507 | 0.700201 | 0.329406 | 0.105939 |
| lincRNA -              | 8   | 3  | 1  | 0   | 0   | 0   | 0.594485 | 0.285879 | 0.08966  | 0        |
| antisense -            | 10  | 3  | 5  | 3   | 6   | 2   | 0.720277 | 0.277096 | 0.434528 | 0.335391 |
| lincRNA -              | 0   | 0  | 1  | 0   | 0   | 0   | 0        | 0        | 0.074246 | 0        |
| lincRNA -              | 0   | 0  | 0  | 2   | 0   | 2   | 0        | 0        | 0        | 0.176009 |
| pseudogen: H2A_hist    | 0   | 0  | 0  | 2   | 3   | 3   | 0        | 0        | 0        | 0.3861   |
| lincRNA -              | 0   | 0  | 2  | 0   | 0   | 0   | 0        | 0        | 0.109536 | 0        |
| sense_intrc -          | 1   | 1  | 1  | 0   | 2   | 0   | 0.145621 | 0.186738 | 0.1757   | 0        |
| antisense -            | 0   | 0  | 1  | 3   | 1   | 1   | 0        | 0        | 0.081757 | 0.315519 |
| antisense -            | 1   | 1  | 0  | 0   | 1   | 0   | 0.105608 | 0.135427 | 0        | 0        |
| pseudogen -            | 6   | 4  | 3  | 0   | 0   | 2   | 0.619692 | 0.529778 | 0.373847 | 0        |
| processed_ -           | 0   | 0  | 0  | 0   | 0   | 1   | 0        | 0        | 0        | 0        |
| lincRNA -              | 2   | 1  | 0  | 0   | 1   | 0   | 0.049436 | 0.031697 | 0        | 0        |
| protein_co NADPH_oxi   | 12  | 5  | 4  | 0   | 3   | 0   | 0.065489 | 0.034992 | 0.026339 | 0        |
| antisense -            | 0   | 2  | 4  | 0   | 1   | 5   | 0        | 0.360059 | 0.677551 | 0        |
| pseudogen -            | 1   | 0  | 2  | 1   | 0   | 0   | 0.030727 | 0        | 0.074149 | 0.047693 |
| pseudogen -            | 0   | 0  | 0  | 0   | 0   | 1   | 0        | 0        | 0        | 0        |
| antisense -            | 0   | 0  | 0  | 1   | 0   | 2   | 0        | 0        | 0        | 0.106559 |
| pseudogen -            | 0   | 0  | 0  | 2   | 4   | 0   | 0        | 0        | 0        | 0.421912 |
| pseudogen -            | 0   | 2  | 0  | 1   | 3   | 2   | 0        | 0.235803 | 0        | 0.142705 |
| lincRNA -              | 4   | 5  | 2  | 3   | 4   | 3   | 0.483402 | 0.774869 | 0.291626 | 0.56273  |
| lincRNA -              | 3   | 4  | 1  | 0   | 0   | 0   | 0.254376 | 0.434935 | 0.102307 | 0        |
| lincRNA -              | 0   | 0  | 0  | 2   | 3   | 0   | 0        | 0        | 0        | 0.058434 |
| processed_ -           | 16  | 11 | 14 | 22  | 34  | 20  | 0.763215 | 0.672866 | 0.805755 | 1.628846 |
| sense_intrc OPCML_int  | 0   | 1  | 0  | 0   | 0   | 0   | 0        | 0.15108  | 0        | 0        |
| antisense -            | 0   | 0  | 0  | 0   | 2   | 0   | 0        | 0        | 0        | 0        |
| pseudogen: cytochrom   | 0   | 0  | 0  | 2   | 0   | 0   | 0        | 0        | 0        | 0.457735 |
| pseudogen -            | 2   | 0  | 0  | 0   | 0   | 1   | 0.191388 | 0        | 0        | 0        |
| protein_co -           | 1   | 0  | 0  | 1   | 2   | 0   | 0.022478 | 0        | 0        | 0.03489  |
| pseudogen -            | 0   | 0  | 0  | 0   | 0   | 1   | 0        | 0        | 0        | 0        |
| lincRNA -              | 3   | 2  | 4  | 0   | 0   | 0   | 0.16376  | 0.14     | 0.263448 | 0        |
| antisense -            | 9   | 10 | 6  | 15  | 23  | 11  | 0.174312 | 0.248368 | 0.140212 | 0.450928 |
| protein_co chromosom   | 0   | 1  | 0  | 0   | 0   | 0   | 0        | 0.042525 | 0        | 0        |
| pseudogen -            | 1   | 0  | 2  | 4   | 7   | 2   | 0.021638 | 0        | 0.052216 | 0.134342 |
| protein_co hydroxycar  | 1   | 2  | 0  | 0   | 0   | 0   | 0.021942 | 0.056275 | 0        | 0        |
| antisense TBX5_antis   | 0   | 0  | 0  | 25  | 35  | 45  | 0        | 0        | 0        | 0.502623 |
| lincRNA -              | 2   | 1  | 2  | 0   | 0   | 0   | 0.170509 | 0.109327 | 0.205729 | 0        |
| pseudogen -            | 0   | 0  | 0  | 3   | 1   | 1   | 0        | 0        | 0        | 0.133215 |
| protein_co protocadhe  | 39  | 24 | 33 | 23  | 26  | 12  | 0.347664 | 0.274356 | 0.354941 | 0.318239 |
| sense_intrc RSF1_intro | 0   | 1  | 0  | 0   | 4   | 2   | 0        | 0.095142 | 0        | 0        |
| antisense -            | 0   | 2  | 1  | 0   | 0   | 2   | 0        | 0.24694  | 0.116171 | 0        |
| processed_ -           | 0   | 3  | 1  | 3   | 2   | 1   | 0        | 0.073003 | 0.022896 | 0.088361 |
| pseudogen -            | 0   | 0  | 0  | 0   | 1   | 0   | 0        | 0        | 0        | 0        |
| lincRNA -              | 1   | 0  | 2  | 0   | 0   | 0   | 0.068453 | 0        | 0.165184 | 0        |
| antisense -            | 4   | 4  | 3  | 4   | 5   | 0   | 0.658106 | 0.843927 | 0.595532 | 1.021471 |
| antisense -            | 0   | 0  | 0  | 7   | 5   | 4   | 0        | 0        | 0        | 1.198726 |
| protein_co endogenou   | 39  | 34 | 44 | 20  | 27  | 29  | 1.089167 | 1.217637 | 1.482622 | 0.866942 |
| pseudogen -            | 2   | 0  | 0  | 0   | 0   | 0   | 0.101056 | 0        | 0        | 0        |
| sense_intrc -          | 2   | 5  | 1  | 0   | 3   | 1   | 0.171758 | 0.550639 | 0.103618 | 0        |
| antisense -            | 2   | 0  | 1  | 0   | 2   | 1   | 0.161969 | 0        | 0.097712 | 0        |
| pseudogen -            | 0   | 0  | 0  | 0   | 0   | 1   | 0        | 0        | 0        | 0        |
| antisense -            | 9   | 7  | 10 | 3   | 8   | 2   | 0.173168 | 0.172716 | 0.232152 | 0.089594 |
| antisense -            | 0   | 0  | 0  | 2   | 1   | 0   | 0        | 0        | 0        | 0.19967  |
| antisense -            | 15  | 14 | 7  | 0   | 1   | 0   | 1.198212 | 1.434101 | 0.674665 | 0        |
| pseudogen -            | 3   | 1  | 8  | 2   | 3   | 1   | 0.208092 | 0.088949 | 0.669533 | 0.215325 |
| processed_ -           | 3   | 2  | 1  | 0   | 2   | 2   | 0.19757  | 0.168904 | 0.07946  | 0        |
| lincRNA -              | 104 | 80 | 77 | 38  | 59  | 39  | 1.220972 | 1.204403 | 1.090715 | 0.692447 |
| antisense -            | 0   | 0  | 2  | 0   | 1   | 0   | 0        | 0        | 0.284299 | 0        |
| lincRNA -              | 4   | 0  | 6  | 16  | 15  | 4   | 0.176777 | 0        | 0.319937 | 1.097528 |
| pseudogen -            | 0   | 0  | 0  | 1   | 1   | 0   | 0        | 0        | 0        | 0.097822 |
| antisense -            | 0   | 0  | 1  | 0   | 1   | 0   | 0        | 0        | 0.058688 | 0        |

|                                |     |     |     |     |     |     |          |          |          |          |
|--------------------------------|-----|-----|-----|-----|-----|-----|----------|----------|----------|----------|
| protein_co Uncharacterized     | 37  | 27  | 28  | 18  | 25  | 31  | 2.276812 | 2.130583 | 2.07889  | 1.719208 |
| pseudogenes                    | 0   | 0   | 0   | 0   | 1   | 0   | 0        | 0        | 0        | 0        |
| antisense                      | 64  | 37  | 48  | 10  | 20  | 8   | 2.595987 | 1.92457  | 2.349156 | 0.629583 |
| lincRNA                        | 4   | 1   | 4   | 16  | 26  | 26  | 0.150168 | 0.048142 | 0.181187 | 0.932327 |
| antisense                      | 0   | 0   | 1   | 1   | 0   | 0   | 0        | 0        | 0.096545 | 0.124198 |
| antisense                      | 0   | 1   | 0   | 0   | 0   | 0   | 0        | 0.164739 | 0        | 0        |
| pseudogenes                    | 0   | 0   | 0   | 0   | 1   | 0   | 0        | 0        | 0        | 0        |
| antisense                      | 0   | 1   | 3   | 0   | 0   | 0   | 0        | 0.234882 | 0.662994 | 0        |
| pseudogenes                    | 0   | 0   | 0   | 0   | 0   | 1   | 0        | 0        | 0        | 0        |
| antisense                      | 16  | 10  | 10  | 3   | 11  | 9   | 0.551242 | 0.441806 | 0.415691 | 0.160426 |
| protein_co caspase_receptor    | 0   | 0   | 2   | 0   | 0   | 0   | 0        | 0        | 0.173544 | 0        |
| lincRNA                        | 0   | 0   | 2   | 5   | 0   | 0   | 0        | 0        | 0.259521 | 0.834631 |
| antisense                      | 3   | 1   | 0   | 2   | 1   | 1   | 0.241287 | 0.103139 | 0        | 0.249673 |
| antisense                      | 1   | 2   | 2   | 3   | 2   | 1   | 0.068653 | 0.176076 | 0.165668 | 0.319677 |
| protein_co microRNA            | 22  | 17  | 21  | 6   | 16  | 11  | 0.203709 | 0.201858 | 0.234614 | 0.086232 |
| antisense                      | 1   | 0   | 4   | 3   | 17  | 36  | 0.032073 | 0        | 0.154789 | 0.149343 |
| lincRNA                        | 0   | 0   | 0   | 0   | 1   | 0   | 0        | 0        | 0        | 0        |
| antisense                      | 7   | 4   | 15  | 5   | 5   | 9   | 0.347701 | 0.254787 | 0.898975 | 0.385486 |
| antisense                      | 0   | 0   | 0   | 0   | 1   | 0   | 0        | 0        | 0        | 0        |
| antisense                      | 2   | 0   | 1   | 0   | 0   | 0   | 0.28247  | 0        | 0.170408 | 0        |
| antisense                      | 1   | 0   | 3   | 0   | 0   | 1   | 0.04255  | 0        | 0.154017 | 0        |
| pseudogenes                    | 0   | 0   | 0   | 2   | 1   | 0   | 0        | 0        | 0        | 0.770157 |
| antisense                      | 0   | 0   | 0   | 1   | 0   | 0   | 0        | 0        | 0        | 0.113188 |
| protein_co Protein_LO          | 2   | 1   | 5   | 2   | 2   | 0   | 0.045569 | 0.029218 | 0.137453 | 0.070729 |
| protein_co polymerase          | 386 | 257 | 310 | 254 | 338 | 337 | 4.310442 | 3.680247 | 4.176806 | 4.402493 |
| pseudogenes                    | 1   | 0   | 0   | 1   | 5   | 1   | 0.162249 | 0        | 0        | 0.251833 |
| protein_co                     | 2   | 0   | 0   | 0   | 0   | 0   | 0.027397 | 0        | 0        | 0        |
| pseudogenes olfactory_receptor | 0   | 1   | 0   | 3   | 2   | 0   | 0        | 0.078704 | 0        | 0.285785 |
| antisense                      | 0   | 0   | 0   | 0   | 0   | 1   | 0        | 0        | 0        | 0        |
| pseudogenes                    | 0   | 0   | 0   | 2   | 0   | 0   | 0        | 0        | 0        | 0.038651 |
| processed                      | 0   | 0   | 0   | 37  | 51  | 6   | 0        | 0        | 0        | 0.607182 |
| antisense                      | 1   | 0   | 1   | 0   | 0   | 1   | 0.085722 | 0        | 0.103429 | 0        |
| pseudogenes                    | 1   | 1   | 0   | 3   | 1   | 3   | 0.050474 | 0.064725 | 0        | 0.235026 |
| pseudogenes olfactory_receptor | 0   | 0   | 0   | 0   | 1   | 0   | 0        | 0        | 0        | 0        |
| antisense                      | 0   | 0   | 0   | 2   | 0   | 0   | 0        | 0        | 0        | 0.347398 |
| lincRNA                        | 6   | 4   | 15  | 0   | 7   | 0   | 0.606336 | 0.51836  | 1.82895  | 0        |
| antisense ZNF252P_a            | 9   | 1   | 5   | 8   | 5   | 9   | 0.130411 | 0.018582 | 0.087416 | 0.179925 |
| protein_co ferredoxin          | 17  | 14  | 12  | 9   | 20  | 26  | 0.285812 | 0.301835 | 0.243423 | 0.234858 |
| pseudogenes unc-93_homolog     | 0   | 0   | 0   | 0   | 0   | 1   | 0        | 0        | 0        | 0        |
| lincRNA                        | 0   | 3   | 2   | 0   | 0   | 0   | 0        | 0.387934 | 0.243336 | 0        |
| pseudogenes                    | 5   | 7   | 7   | 6   | 4   | 8   | 0.465179 | 0.835136 | 0.785771 | 0.866426 |
| sense_intronic BRWD1_intron    | 15  | 4   | 10  | 7   | 5   | 13  | 0.70335  | 0.240519 | 0.565755 | 0.509459 |
| lincRNA                        | 0   | 0   | 0   | 2   | 4   | 10  | 0        | 0        | 0        | 0.053554 |
| lincRNA                        | 2   | 0   | 0   | 0   | 0   | 0   | 0.114646 | 0        | 0        | 0        |
| pseudogenes                    | 0   | 0   | 0   | 5   | 6   | 4   | 0        | 0        | 0        | 0.551362 |
| pseudogenes                    | 4   | 2   | 8   | 5   | 16  | 5   | 0.183343 | 0.117556 | 0.442428 | 0.355718 |
| protein_co RAB44_mechanism     | 3   | 7   | 1   | 1   | 2   | 1   | 0.062855 | 0.188074 | 0.025279 | 0.03252  |
| lincRNA                        | 0   | 0   | 0   | 0   | 3   | 1   | 0        | 0        | 0        | 0        |
| sense_intronic                 | 1   | 2   | 1   | 0   | 1   | 1   | 0.083732 | 0.214749 | 0.101028 | 0        |
| lincRNA                        | 0   | 0   | 0   | 2   | 2   | 4   | 0        | 0        | 0        | 0.214058 |
| processed                      | 4   | 0   | 3   | 3   | 5   | 4   | 0.078052 | 0        | 0.070631 | 0.090861 |
| protein_co Protocadherin       | 12  | 6   | 2   | 6   | 3   | 1   | 0.183702 | 0.117786 | 0.036941 | 0.142566 |
| pseudogenes                    | 0   | 1   | 0   | 2   | 0   | 0   | 0        | 0.039301 | 0        | 0.095137 |
| antisense                      | 0   | 0   | 0   | 0   | 1   | 1   | 0        | 0        | 0        | 0        |
| protein_co MT-RNR2-like        | 0   | 0   | 0   | 0   | 0   | 2   | 0        | 0        | 0        | 0        |
| pseudogenes                    | 0   | 0   | 0   | 1   | 0   | 0   | 0        | 0        | 0        | 0.970397 |
| pseudogenes                    | 4   | 3   | 2   | 0   | 3   | 2   | 0.283323 | 0.272492 | 0.170923 | 0        |
| antisense                      | 0   | 0   | 0   | 1   | 3   | 1   | 0        | 0        | 0        | 0.170444 |
| antisense FAM222A_intron       | 2   | 1   | 0   | 0   | 1   | 2   | 0.107669 | 0.069035 | 0        | 0        |
| processed                      | 4   | 3   | 6   | 1   | 7   | 12  | 0.81904  | 0.787727 | 1.482328 | 0.317816 |
| lincRNA                        | 0   | 0   | 0   | 0   | 1   | 0   | 0        | 0        | 0        | 0        |
| lincRNA RERG_antisense         | 4   | 1   | 1   | 0   | 0   | 0   | 0.556558 | 0.178427 | 0.16788  | 0        |
| protein_co Uncharacterized     | 4   | 3   | 3   | 1   | 2   | 0   | 0.078973 | 0.075953 | 0.071464 | 0.030644 |
| protein_co                     | 0   | 0   | 2   | 0   | 0   | 0   | 0        | 0        | 0.155214 | 0        |
| lincRNA                        | 0   | 0   | 1   | 43  | 40  | 40  | 0        | 0        | 0.08785  | 4.859521 |

|                        |     |     |     |      |      |      |          |          |          |          |
|------------------------|-----|-----|-----|------|------|------|----------|----------|----------|----------|
| lincRNA -              | 0   | 2   | 5   | 0    | 2    | 1    | 0        | 0.218654 | 0.514323 | 0        |
| lincRNA -              | 4   | 1   | 0   | 0    | 8    | 1    | 0.455243 | 0.145946 | 0        | 0        |
| pseudogeni -           | 2   | 0   | 0   | 0    | 0    | 1    | 0.568364 | 0        | 0        | 0        |
| pseudogeni -           | 69  | 38  | 41  | 1    | 3    | 1    | 0.640675 | 0.452462 | 0.459326 | 0.014412 |
| protein_co Uncharacte  | 0   | 3   | 2   | 0    | 5    | 3    | 0        | 0.399976 | 0.250889 | 0        |
| lincRNA -              | 0   | 0   | 0   | 0    | 0    | 2    | 0        | 0        | 0        | 0        |
| pseudogeni -           | 0   | 0   | 1   | 1    | 0    | 0    | 0        | 0        | 0.146949 | 0.189038 |
| pseudogeni -           | 11  | 10  | 7   | 28   | 30   | 38   | 0.500767 | 0.583784 | 0.384494 | 1.97848  |
| processed_small_nucl   | 430 | 356 | 355 | 1624 | 1868 | 2351 | 7.284215 | 7.733456 | 7.25589  | 42.70029 |
| processed_ -           | 1   | 0   | 0   | 0    | 0    | 0    | 0.134355 | 0        | 0        | 0        |
| pseudogeni -           | 1   | 1   | 0   | 1    | 4    | 6    | 0.038153 | 0.048926 | 0        | 0.059219 |
| lincRNA -              | 2   | 0   | 0   | 0    | 0    | 0    | 0.155008 | 0        | 0        | 0        |
| processed_IFNG_antis   | 1   | 1   | 2   | 0    | 0    | 0    | 0.026181 | 0.033573 | 0.063178 | 0        |
| pseudogeni -           | 3   | 2   | 2   | 1    | 0    | 0    | 0.084385 | 0.072141 | 0.067877 | 0.043659 |
| protein_co HCG20144    | 2   | 2   | 1   | 0    | 0    | 0    | 0.06252  | 0.080173 | 0.037717 | 0        |
| antisense -            | 4   | 1   | 3   | 2    | 4    | 3    | 0.329631 | 0.105676 | 0.298289 | 0.255817 |
| lincRNA -              | 0   | 0   | 1   | 1    | 0    | 0    | 0        | 0        | 0.084441 | 0.108627 |
| sense_intrc -          | 0   | 0   | 0   | 1    | 0    | 0    | 0        | 0        | 0        | 0.144691 |
| protein_co Uncharacte  | 16  | 10  | 9   | 6    | 8    | 6    | 1.423606 | 1.140983 | 0.966185 | 0.828613 |
| antisense -            | 0   | 1   | 0   | 0    | 0    | 0    | 0        | 0.084929 | 0        | 0        |
| pseudogeni -           | 3   | 5   | 2   | 13   | 16   | 13   | 0.240051 | 0.513053 | 0.19309  | 1.614569 |
| pseudogeni -           | 2   | 0   | 1   | 2    | 0    | 0    | 0.069518 | 0        | 0.041939 | 0.107902 |
| lincRNA -              | 0   | 0   | 0   | 3    | 0    | 2    | 0        | 0        | 0        | 0.779784 |
| pseudogeni -           | 0   | 0   | 1   | 1    | 0    | 1    | 0        | 0        | 0.222738 | 0.286535 |
| pseudogeni -           | 0   | 3   | 1   | 0    | 2    | 0    | 0        | 0.555044 | 0.174078 | 0        |
| sense_intrc -          | 2   | 0   | 1   | 0    | 1    | 0    | 0.166868 | 0        | 0.100668 | 0        |
| processed_rhabdomyo    | 0   | 0   | 0   | 280  | 242  | 516  | 0        | 0        | 0        | 7.843858 |
| protein_co Uncharacte  | 0   | 1   | 0   | 0    | 0    | 0    | 0        | 0.083398 | 0        | 0        |
| antisense -            | 0   | 1   | 0   | 1    | 1    | 0    | 0        | 0.106993 | 0        | 0.129501 |
| antisense -            | 1   | 2   | 0   | 0    | 0    | 0    | 0.120231 | 0.308358 | 0        | 0        |
| protein_co MT-RNR2-li  | 1   | 1   | 1   | 0    | 1    | 2    | 0.036349 | 0.046612 | 0.043857 | 0        |
| pseudogeni -           | 18  | 9   | 6   | 19   | 29   | 25   | 0.696961 | 0.446877 | 0.280308 | 1.14188  |
| protein_co taste_recep | 20  | 11  | 14  | 3    | 3    | 10   | 0.679073 | 0.478948 | 0.573539 | 0.158102 |
| pseudogeni -           | 0   | 0   | 0   | 1    | 0    | 0    | 0        | 0        | 0        | 0.108303 |
| antisense -            | 0   | 2   | 3   | 1    | 2    | 0    | 0        | 0.208062 | 0.293644 | 0.125917 |
| antisense -            | 0   | 0   | 0   | 0    | 0    | 1    | 0        | 0        | 0        | 0        |
| antisense -            | 0   | 0   | 0   | 0    | 0    | 2    | 0        | 0        | 0        | 0        |
| pseudogeni -           | 0   | 0   | 2   | 0    | 2    | 0    | 0        | 0        | 0.75434  | 0        |
| pseudogeni -           | 3   | 1   | 0   | 0    | 0    | 0    | 0.175399 | 0.074975 | 0        | 0        |
| pseudogeni -           | 0   | 0   | 0   | 0    | 0    | 1    | 0        | 0        | 0        | 0        |
| lincRNA -              | 0   | 1   | 0   | 0    | 1    | 0    | 0        | 0.073688 | 0        | 0        |
| antisense PXN_antise   | 28  | 18  | 16  | 42   | 43   | 36   | 1.122154 | 0.925074 | 0.773682 | 2.612608 |
| lincRNA -              | 2   | 1   | 2   | 0    | 0    | 0    | 0.197432 | 0.126589 | 0.238213 | 0        |
| pseudogeni -           | 1   | 0   | 0   | 0    | 0    | 0    | 0.056836 | 0        | 0        | 0        |
| lincRNA -              | 3   | 2   | 3   | 3    | 2    | 7    | 0.169075 | 0.144543 | 0.203998 | 0.262427 |
| lincRNA -              | 5   | 3   | 8   | 0    | 0    | 0    | 0.529233 | 0.4072   | 1.02168  | 0        |
| antisense DENND5B_     | 5   | 3   | 2   | 6    | 5    | 3    | 0.21198  | 0.163101 | 0.102307 | 0.394827 |
| protein_co -           | 3   | 6   | 7   | 4    | 0    | 1    | 0.054292 | 0.139243 | 0.152848 | 0.112358 |
| protein_co long_inter  | 5   | 4   | 5   | 2    | 0    | 0    | 0.400769 | 0.411144 | 0.483551 | 0.24882  |
| pseudogeni -           | 1   | 0   | 0   | 1    | 0    | 1    | 0.082263 | 0        | 0        | 0.127684 |
| antisense -            | 0   | 0   | 1   | 0    | 0    | 0    | 0        | 0        | 0.084315 | 0        |
| antisense -            | 1   | 7   | 6   | 5    | 4    | 7    | 0.080706 | 0.724455 | 0.584257 | 0.626332 |
| processed_ -           | 1   | 4   | 2   | 2    | 9    | 2    | 0.043177 | 0.221473 | 0.104191 | 0.134033 |
| pseudogeni -           | 0   | 0   | 0   | 1    | 0    | 0    | 0        | 0        | 0        | 0.256267 |
| processed_ -           | 0   | 2   | 0   | 4    | 1    | 7    | 0        | 0.215906 | 0        | 0.522656 |
| processed_ -           | 2   | 1   | 0   | 0    | 1    | 0    | 0.130613 | 0.083746 | 0        | 0        |
| antisense -            | 1   | 1   | 2   | 0    | 0    | 0    | 0.094727 | 0.121474 | 0.228588 | 0        |
| antisense -            | 1   | 0   | 0   | 1    | 3    | 0    | 0.223286 | 0        | 0        | 0.34657  |
| antisense -            | 0   | 0   | 0   | 1    | 2    | 2    | 0        | 0        | 0        | 0.076289 |
| lincRNA -              | 0   | 0   | 0   | 3    | 1    | 0    | 0        | 0        | 0        | 0.394114 |
| lincRNA -              | 14  | 5   | 9   | 4    | 14   | 1    | 0.985676 | 0.451425 | 0.764534 | 0.437116 |
| antisense -            | 0   | 0   | 0   | 2    | 1    | 2    | 0        | 0        | 0        | 0.249673 |
| pseudogeni -           | 0   | 1   | 1   | 0    | 0    | 0    | 0        | 0.108538 | 0.102122 | 0        |
| antisense -            | 0   | 1   | 0   | 0    | 0    | 2    | 0        | 0.12002  | 0        | 0        |
| pseudogeni -           | 0   | 0   | 0   | 0    | 0    | 1    | 0        | 0        | 0        | 0        |

|                         |     |     |     |     |     |     |          |          |          |          |
|-------------------------|-----|-----|-----|-----|-----|-----|----------|----------|----------|----------|
| pseudogeni -            | 0   | 0   | 0   | 6   | 2   | 2   | 0        | 0        | 0        | 0.408493 |
| pseudogeni -            | 2   | 0   | 1   | 0   | 0   | 0   | 0.721385 | 0        | 0.435196 | 0        |
| antisense -             | 2   | 3   | 3   | 7   | 4   | 7   | 0.196604 | 0.378175 | 0.355821 | 1.068047 |
| pseudogeni -            | 0   | 0   | 1   | 0   | 1   | 3   | 0        | 0        | 0.02476  | 0        |
| antisense -             | 1   | 4   | 3   | 3   | 7   | 10  | 0.060503 | 0.310347 | 0.219002 | 0.281728 |
| lincRNA -               | 12  | 2   | 3   | 2   | 0   | 1   | 0.179483 | 0.03836  | 0.054139 | 0.04643  |
| pseudogeni -            | 0   | 0   | 0   | 0   | 1   | 1   | 0        | 0        | 0        | 0        |
| protein_co cytochrom    | 4   | 5   | 0   | 3   | 9   | 3   | 0.106327 | 0.170436 | 0        | 0.123775 |
| pseudogeni -            | 0   | 0   | 0   | 0   | 0   | 1   | 0        | 0        | 0        | 0        |
| pseudogeni neurexophi   | 0   | 1   | 2   | 0   | 0   | 0   | 0        | 0.082823 | 0.155855 | 0        |
| lincRNA -               | 0   | 0   | 0   | 5   | 7   | 5   | 0        | 0        | 0        | 0.259003 |
| pseudogeni metallothi   | 0   | 0   | 0   | 0   | 3   | 2   | 0        | 0        | 0        | 0        |
| lincRNA -               | 4   | 2   | 1   | 8   | 7   | 16  | 0.264169 | 0.16938  | 0.079684 | 0.820054 |
| lincRNA -               | 10  | 2   | 5   | 7   | 14  | 9   | 1.100705 | 0.2823   | 0.664032 | 1.195912 |
| pseudogeni proteasom    | 1   | 0   | 0   | 0   | 0   | 1   | 0.035124 | 0        | 0        | 0        |
| protein_co coiled-coil  | 0   | 0   | 0   | 2   | 1   | 5   | 0        | 0        | 0        | 0.264654 |
| lincRNA -               | 0   | 0   | 0   | 2   | 4   | 0   | 0        | 0        | 0        | 0.288237 |
| sense_intrc -           | 7   | 6   | 4   | 1   | 0   | 7   | 1.215667 | 1.336218 | 0.838156 | 0.269555 |
| antisense -             | 1   | 0   | 0   | 26  | 16  | 24  | 0.094536 | 0        | 0        | 3.81507  |
| protein_co histone_cl   | 5   | 4   | 11  | 14  | 35  | 83  | 0.502034 | 0.51503  | 1.332614 | 2.181836 |
| pseudogeni taste_recep  | 2   | 0   | 0   | 0   | 0   | 2   | 0.101384 | 0        | 0        | 0        |
| sense_intrc -           | 0   | 4   | 3   | 0   | 0   | 0   | 0        | 0.644824 | 0.455031 | 0        |
| pseudogeni -            | 1   | 0   | 1   | 0   | 1   | 1   | 0.100407 | 0        | 0.121147 | 0        |
| lincRNA -               | 0   | 0   | 0   | 0   | 1   | 0   | 0        | 0        | 0        | 0        |
| antisense CACNA1C_      | 1   | 2   | 0   | 0   | 0   | 0   | 0.063796 | 0.163618 | 0        | 0        |
| pseudogeni chromobo     | 1   | 0   | 2   | 4   | 2   | 0   | 0.110851 | 0        | 0.267496 | 0.688225 |
| sense_intrc -           | 0   | 0   | 0   | 0   | 2   | 3   | 0        | 0        | 0        | 0        |
| antisense -             | 0   | 1   | 0   | 0   | 0   | 0   | 0        | 0.14049  | 0        | 0        |
| pseudogeni -            | 0   | 0   | 0   | 2   | 0   | 0   | 0        | 0        | 0        | 0.150216 |
| pseudogeni mitochond    | 2   | 5   | 4   | 1   | 4   | 2   | 0.155265 | 0.497763 | 0.374672 | 0.120496 |
| protein_co cathepsin_   | 140 | 125 | 124 | 42  | 48  | 31  | 2.222276 | 2.544423 | 2.374869 | 1.034784 |
| processed_ peptidyl_ar  | 0   | 0   | 0   | 0   | 4   | 3   | 0        | 0        | 0        | 0        |
| lincRNA -               | 3   | 2   | 2   | 0   | 0   | 0   | 0.107628 | 0.092012 | 0.086573 | 0        |
| protein_co apoptogeni   | 224 | 188 | 201 | 130 | 149 | 123 | 4.163046 | 4.48054  | 4.507204 | 3.750049 |
| pseudogeni -            | 2   | 4   | 1   | 0   | 0   | 0   | 0.101056 | 0.25918  | 0.060965 | 0        |
| protein_co trafficking_ | 27  | 17  | 24  | 36  | 46  | 27  | 0.726351 | 0.586464 | 0.779009 | 1.503197 |
| protein_co dyslexia_su  | 4   | 8   | 4   | 2   | 4   | 3   | 0.094109 | 0.241364 | 0.113548 | 0.073035 |
| pseudogeni alpha-2-ma   | 0   | 0   | 0   | 0   | 5   | 3   | 0        | 0        | 0        | 0        |
| pseudogeni -            | 0   | 0   | 0   | 0   | 0   | 2   | 0        | 0        | 0        | 0        |
| protein_co chromosom    | 6   | 2   | 1   | 15  | 21  | 3   | 0.34478  | 0.147377 | 0.069333 | 1.337864 |
| antisense -             | 35  | 40  | 38  | 2   | 2   | 6   | 3.614869 | 5.297779 | 4.735395 | 0.320616 |
| lincRNA -               | 0   | 0   | 0   | 4   | 5   | 5   | 0        | 0        | 0        | 0.393937 |
| protein_co zinc_finger  | 286 | 272 | 298 | 120 | 122 | 126 | 2.971537 | 3.624043 | 3.735763 | 1.935204 |
| pseudogeni -            | 0   | 0   | 0   | 0   | 1   | 0   | 0        | 0        | 0        | 0        |
| lincRNA -               | 24  | 17  | 18  | 35  | 36  | 29  | 0.586125 | 0.532399 | 0.530395 | 1.326715 |
| protein_co long_inter   | 2   | 0   | 0   | 0   | 2   | 0   | 0.19061  | 0        | 0        | 0        |
| lincRNA -               | 1   | 1   | 0   | 5   | 7   | 5   | 0.077761 | 0.099718 | 0        | 0.603481 |
| pseudogeni -            | 0   | 0   | 1   | 0   | 4   | 0   | 0        | 0        | 0.098564 | 0        |
| lincRNA -               | 0   | 0   | 0   | 1   | 2   | 1   | 0        | 0        | 0        | 0.096525 |
| antisense -             | 1   | 2   | 1   | 0   | 1   | 0   | 0.050802 | 0.130292 | 0.061295 | 0        |
| lincRNA -               | 7   | 6   | 5   | 4   | 9   | 3   | 0.513662 | 0.564599 | 0.442688 | 0.455586 |
| lincRNA -               | 0   | 0   | 0   | 0   | 0   | 1   | 0        | 0        | 0        | 0        |
| pseudogeni -            | 2   | 0   | 1   | 0   | 4   | 1   | 0.13025  | 0        | 0.078577 | 0        |
| lincRNA -               | 0   | 0   | 0   | 1   | 1   | 7   | 0        | 0        | 0        | 0.185663 |
| processed_ -            | 4   | 3   | 7   | 9   | 13  | 2   | 0.347978 | 0.334674 | 0.734747 | 1.215247 |
| pseudogeni -            | 1   | 2   | 4   | 5   | 6   | 4   | 0.032293 | 0.082823 | 0.155855 | 0.250619 |
| lincRNA -               | 0   | 0   | 0   | 4   | 3   | 3   | 0        | 0        | 0        | 0.085952 |
| pseudogeni -            | 1   | 0   | 0   | 0   | 0   | 0   | 0.287669 | 0        | 0        | 0        |
| lincRNA -               | 0   | 0   | 1   | 0   | 0   | 0   | 0        | 0        | 0.044303 | 0        |
| lincRNA -               | 0   | 0   | 0   | 1   | 0   | 2   | 0        | 0        | 0        | 0.129501 |
| pseudogeni -            | 0   | 0   | 0   | 1   | 0   | 0   | 0        | 0        | 0        | 0.150995 |
| protein_co small_leuci  | 0   | 0   | 0   | 0   | 1   | 0   | 0        | 0        | 0        | 0        |
| antisense -             | 1   | 3   | 1   | 2   | 7   | 6   | 0.084487 | 0.325026 | 0.101938 | 0.26227  |
| pseudogeni activating_  | 1   | 1   | 0   | 0   | 2   | 1   | 0.024295 | 0.031155 | 0        | 0        |
| pseudogeni glycine_cle  | 0   | 0   | 0   | 0   | 1   | 0   | 0        | 0        | 0        | 0        |

|                        |     |     |     |     |      |     |          |          |          |          |
|------------------------|-----|-----|-----|-----|------|-----|----------|----------|----------|----------|
| lincRNA -              | 0   | 0   | 1   | 0   | 0    | 0   | 0        | 0        | 0.07635  | 0        |
| pseudogeni -           | 3   | 2   | 0   | 4   | 7    | 7   | 0.445158 | 0.380568 | 0        | 0.921263 |
| lincRNA -              | 15  | 14  | 17  | 16  | 21   | 29  | 4.089246 | 4.894286 | 5.591765 | 6.770214 |
| protein_co taste_recep | 0   | 4   | 4   | 3   | 0    | 2   | 0        | 0.142572 | 0.134145 | 0.129425 |
| pseudogeni -           | 0   | 0   | 0   | 1   | 0    | 0   | 0        | 0        | 0        | 0.081047 |
| lincRNA long_interf    | 1   | 0   | 1   | 0   | 0    | 0   | 0.024233 | 0        | 0.029238 | 0        |
| antisense -            | 3   | 0   | 4   | 0   | 2    | 0   | 0.036661 | 0        | 0.058979 | 0        |
| antisense -            | 3   | 5   | 1   | 3   | 1    | 4   | 0.162813 | 0.347973 | 0.065481 | 0.252708 |
| sense_intrc TSPAN9_in  | 0   | 1   | 0   | 0   | 1    | 0   | 0        | 0.106993 | 0        | 0        |
| lincRNA -              | 0   | 0   | 0   | 0   | 1    | 0   | 0        | 0        | 0        | 0        |
| pseudogeni -           | 0   | 1   | 0   | 0   | 0    | 2   | 0        | 0.128209 | 0        | 0        |
| lincRNA -              | 0   | 0   | 0   | 0   | 0    | 1   | 0        | 0        | 0        | 0        |
| protein_co MT-RNR2-li  | 1   | 1   | 0   | 1   | 1    | 1   | 0.033905 | 0.043478 | 0        | 0.052625 |
| protein_co zinc_finger | 65  | 58  | 51  | 81  | 77   | 123 | 0.686298 | 0.785302 | 0.649707 | 1.327441 |
| protein_co zinc_finger | 191 | 148 | 132 | 364 | 487  | 370 | 2.334113 | 2.319315 | 1.946304 | 6.904313 |
| lincRNA -              | 0   | 0   | 0   | 16  | 14   | 24  | 0        | 0        | 0        | 1.341563 |
| antisense -            | 2   | 2   | 2   | 0   | 3    | 1   | 0.134163 | 0.172045 | 0.161876 | 0        |
| protein_co small_integ | 0   | 0   | 0   | 0   | 1    | 1   | 0        | 0        | 0        | 0        |
| lincRNA -              | 1   | 1   | 0   | 0   | 0    | 0   | 0.249415 | 0.319839 | 0        | 0        |
| pseudogeni -           | 0   | 1   | 0   | 3   | 1    | 4   | 0        | 0.019192 | 0        | 0.06969  |
| pseudogeni ribosomal_  | 0   | 0   | 2   | 1   | 1    | 0   | 0        | 0        | 0.239727 | 0.154194 |
| lincRNA -              | 3   | 1   | 5   | 10  | 7    | 2   | 0.732657 | 0.313176 | 1.47332  | 3.790615 |
| lincRNA -              | 2   | 2   | 0   | 1   | 1    | 1   | 0.159762 | 0.204872 | 0        | 0.123986 |
| pseudogeni -           | 0   | 1   | 1   | 4   | 1    | 0   | 0        | 0.053354 | 0.0502   | 0.258313 |
| sense_intrc CACNA1C_i  | 0   | 0   | 1   | 0   | 0    | 0   | 0        | 0        | 0.096053 | 0        |
| lincRNA -              | 0   | 0   | 0   | 0   | 1    | 0   | 0        | 0        | 0        | 0        |
| lincRNA -              | 0   | 1   | 0   | 0   | 0    | 0   | 0        | 0.15992  | 0        | 0        |
| antisense USP30_ant    | 1   | 0   | 0   | 0   | 0    | 0   | 0.071479 | 0        | 0        | 0        |
| pseudogeni DEAD/H_(A   | 2   | 0   | 0   | 3   | 2    | 1   | 0.25623  | 0        | 0        | 0.596556 |
| lincRNA -              | 48  | 54  | 34  | 0   | 0    | 0   | 3.677648 | 5.30557  | 3.143084 | 0        |
| protein_co hydroxyme   | 649 | 494 | 538 | 850 | 1054 | 895 | 14.40891 | 14.06445 | 14.41175 | 29.29111 |
| antisense CACNA1C_i    | 2   | 2   | 4   | 9   | 6    | 5   | 0.15399  | 0.197471 | 0.371596 | 1.075564 |
| lincRNA -              | 0   | 0   | 0   | 2   | 1    | 0   | 0        | 0        | 0        | 0.255368 |
| antisense -            | 4   | 3   | 4   | 13  | 16   | 10  | 0.184244 | 0.1772   | 0.222301 | 0.929408 |
| pseudogeni -           | 0   | 0   | 0   | 0   | 0    | 1   | 0        | 0        | 0        | 0        |
| pseudogeni -           | 7   | 15  | 9   | 9   | 16   | 13  | 0.34807  | 0.956465 | 0.539957 | 0.694611 |
| pseudogeni -           | 0   | 0   | 0   | 0   | 0    | 1   | 0        | 0        | 0        | 0        |
| lincRNA -              | 0   | 0   | 0   | 38  | 38   | 46  | 0        | 0        | 0        | 4.261375 |
| pseudogeni -           | 0   | 0   | 0   | 0   | 0    | 1   | 0        | 0        | 0        | 0        |
| protein_co zinc_finger | 102 | 60  | 61  | 58  | 65   | 57  | 1.884469 | 1.421508 | 1.359774 | 1.663211 |
| pseudogeni -           | 0   | 0   | 0   | 1   | 1    | 1   | 0        | 0        | 0        | 0.332328 |
| lincRNA -              | 0   | 0   | 0   | 1   | 0    | 0   | 0        | 0        | 0        | 0.229589 |
| pseudogeni -           | 3   | 11  | 12  | 59  | 53   | 74  | 0.063508 | 0.298613 | 0.306504 | 1.938604 |
| processed_ -           | 0   | 1   | 0   | 0   | 0    | 0   | 0        | 0.157408 | 0        | 0        |
| pseudogeni -           | 1   | 0   | 0   | 0   | 0    | 0   | 0.12372  | 0        | 0        | 0        |
| lincRNA -              | 0   | 0   | 0   | 2   | 0    | 0   | 0        | 0        | 0        | 0.372275 |
| antisense -            | 1   | 1   | 2   | 5   | 0    | 1   | 0.097282 | 0.124751 | 0.234753 | 0.754977 |
| processed_ -           | 0   | 1   | 2   | 0   | 0    | 0   | 0        | 0.084098 | 0.158253 | 0        |
| protein_co histone_clu | 1   | 0   | 1   | 1   | 0    | 5   | 0.100622 | 0        | 0.121407 | 0.15618  |
| lincRNA -              | 0   | 0   | 0   | 3   | 0    | 2   | 0        | 0        | 0        | 0.134033 |
| pseudogeni -           | 13  | 11  | 17  | 11  | 12   | 6   | 3.078637 | 3.340544 | 4.857493 | 4.043322 |
| antisense -            | 1   | 3   | 1   | 0   | 2    | 4   | 0.125374 | 0.482325 | 0.151271 | 0        |
| sense_intrc -          | 2   | 3   | 1   | 0   | 5    | 1   | 0.378145 | 0.727377 | 0.228127 | 0        |
| pseudogeni ribosomal_  | 6   | 4   | 6   | 7   | 7    | 8   | 0.922427 | 0.788587 | 1.112961 | 1.670356 |
| pseudogeni ATP-bindin  | 1   | 0   | 2   | 8   | 20   | 9   | 0.015933 | 0        | 0.038448 | 0.197838 |
| antisense -            | 0   | 0   | 0   | 1   | 0    | 0   | 0        | 0        | 0        | 0.126574 |
| pseudogeni -           | 5   | 2   | 2   | 1   | 1    | 0   | 0.683528 | 0.350611 | 0.329886 | 0.212186 |
| pseudogeni heat_shock  | 0   | 1   | 0   | 0   | 0    | 2   | 0        | 0.029062 | 0        | 0        |
| lincRNA -              | 12  | 2   | 5   | 8   | 6    | 5   | 1.469139 | 0.313994 | 0.738584 | 1.520205 |
| pseudogeni -           | 6   | 1   | 6   | 4   | 2    | 2   | 0.649746 | 0.138868 | 0.783956 | 0.672331 |
| lincRNA -              | 0   | 1   | 1   | 1   | 0    | 0   | 0        | 0.118834 | 0.111809 | 0.143834 |
| antisense -            | 1   | 7   | 0   | 0   | 0    | 1   | 0.042243 | 0.379197 | 0        | 0        |
| lincRNA -              | 0   | 1   | 1   | 0   | 1    | 0   | 0        | 0.105122 | 0.098908 | 0        |
| pseudogeni -           | 8   | 5   | 5   | 11  | 20   | 11  | 0.252266 | 0.202185 | 0.190234 | 0.538385 |
| processed_ -           | 43  | 31  | 31  | 65  | 100  | 58  | 1.240019 | 1.146386 | 1.078623 | 2.909402 |

|                         |     |     |     |      |      |      |          |          |          |          |
|-------------------------|-----|-----|-----|------|------|------|----------|----------|----------|----------|
| pseudogeni -            | 54  | 34  | 38  | 51   | 44   | 54   | 32.46232 | 26.21042 | 27.56243 | 47.58679 |
| protein_co acid-sensin  | 0   | 0   | 0   | 0    | 0    | 1    | 0        | 0        | 0        | 0        |
| pseudogeni -            | 1   | 0   | 0   | 2    | 0    | 0    | 0.038434 | 0        | 0        | 0.119311 |
| pseudogeni -            | 1   | 0   | 0   | 0    | 1    | 0    | 0.6252   | 0        | 0        | 0        |
| protein_co NADH-cyto    | 0   | 2   | 0   | 0    | 1    | 0    | 0        | 0.050487 | 0        | 0        |
| lincRNA -               | 0   | 0   | 0   | 11   | 26   | 11   | 0        | 0        | 0        | 0.807034 |
| processed_ -            | 1   | 0   | 0   | 1    | 0    | 0    | 0.157879 | 0        | 0        | 0.24505  |
| pseudogeni -            | 1   | 0   | 0   | 0    | 1    | 1    | 0.02605  | 0        | 0        | 0        |
| lincRNA -               | 0   | 0   | 0   | 3    | 3    | 4    | 0        | 0        | 0        | 0.334876 |
| lincRNA -               | 0   | 0   | 0   | 2    | 0    | 0    | 0        | 0        | 0        | 0.294655 |
| lincRNA -               | 0   | 0   | 0   | 1    | 0    | 0    | 0        | 0        | 0        | 0.32491  |
| processed_ -            | 1   | 4   | 1   | 0    | 0    | 0    | 0.050912 | 0.26115  | 0.061428 | 0        |
| lincRNA -               | 0   | 0   | 1   | 0    | 1    | 2    | 0        | 0        | 0.078143 | 0        |
| protein_co taste_recep  | 9   | 7   | 9   | 6    | 6    | 3    | 0.41333  | 0.412251 | 0.498707 | 0.427697 |
| lincRNA -               | 2   | 4   | 0   | 4    | 0    | 4    | 0.051218 | 0.131359 | 0        | 0.158995 |
| antisense -             | 1   | 1   | 3   | 0    | 0    | 0    | 0.140389 | 0.180029 | 0.508163 | 0        |
| antisense -             | 1   | 10  | 6   | 8    | 18   | 13   | 0.296772 | 3.805683 | 2.148437 | 3.685053 |
| antisense -             | 1   | 3   | 0   | 0    | 1    | 0    | 0.109813 | 0.422458 | 0        | 0        |
| protein_co sal-like_3_( | 1   | 1   | 0   | 2753 | 3775 | 3565 | 0.011731 | 0.015044 | 0        | 50.12829 |
| pseudogeni -            | 5   | 2   | 0   | 2    | 2    | 0    | 0.328822 | 0.168667 | 0        | 0.204151 |
| antisense -             | 0   | 2   | 0   | 0    | 0    | 0    | 0        | 0.202799 | 0        | 0        |
| antisense -             | 1   | 0   | 0   | 4    | 1    | 1    | 0.064057 | 0        | 0        | 0.397704 |
| lincRNA -               | 1   | 0   | 0   | 0    | 0    | 0    | 0.109813 | 0        | 0        | 0        |
| antisense -             | 1   | 1   | 4   | 0    | 5    | 0    | 0.03147  | 0.040356 | 0.151881 | 0        |
| protein_co polymerase   | 221 | 201 | 191 | 329  | 373  | 276  | 5.986536 | 6.982143 | 6.242589 | 13.83279 |
| protein_co -            | 0   | 2   | 0   | 3    | 4    | 5    | 0        | 0.095596 | 0        | 0.173561 |
| pseudogeni -            | 4   | 3   | 3   | 0    | 2    | 1    | 0.176943 | 0.170179 | 0.160119 | 0        |
| lincRNA -               | 1   | 4   | 4   | 5    | 3    | 5    | 0.059055 | 0.302921 | 0.285015 | 0.458311 |
| lincRNA -               | 0   | 0   | 0   | 1    | 5    | 0    | 0        | 0        | 0        | 0.068466 |
| antisense -             | 0   | 0   | 0   | 0    | 0    | 2    | 0        | 0        | 0        | 0        |
| processed_ -            | 6   | 12  | 10  | 63   | 91   | 67   | 0.315051 | 0.808015 | 0.633544 | 5.134521 |
| pseudogeni -            | 10  | 2   | 3   | 2    | 5    | 9    | 0.756291 | 0.193967 | 0.273752 | 0.234774 |
| pseudogeni -            | 0   | 2   | 0   | 0    | 0    | 0    | 0        | 0.382992 | 0        | 0        |
| antisense -             | 0   | 1   | 0   | 5    | 1    | 6    | 0        | 0.099718 | 0        | 0.603481 |
| sense_intrc -           | 0   | 2   | 0   | 0    | 4    | 0    | 0        | 0.233514 | 0        | 0        |
| protein_co olfactory_r  | 0   | 1   | 0   | 4    | 0    | 3    | 0        | 0.028936 | 0        | 0.140096 |
| lincRNA -               | 6   | 8   | 12  | 18   | 13   | 8    | 0.190481 | 0.325686 | 0.459652 | 0.886958 |
| antisense -             | 0   | 0   | 0   | 4    | 3    | 1    | 0        | 0        | 0        | 0.41948  |
| pseudogeni -            | 0   | 0   | 0   | 0    | 0    | 2    | 0        | 0        | 0        | 0        |
| sense_intrc -           | 1   | 2   | 1   | 2    | 2    | 2    | 0.074429 | 0.190888 | 0.089802 | 0.231047 |
| pseudogeni -            | 1   | 0   | 1   | 1    | 6    | 0    | 0.046288 | 0        | 0.055849 | 0.071846 |
| protein_co Uncharacte   | 2   | 9   | 5   | 3    | 2    | 1    | 0.106206 | 0.612874 | 0.32036  | 0.24727  |
| pseudogeni -            | 81  | 78  | 64  | 29   | 49   | 40   | 1.454093 | 1.795606 | 1.38623  | 0.808045 |
| lincRNA -               | 1   | 2   | 1   | 1    | 5    | 3    | 0.020785 | 0.053307 | 0.025078 | 0.032261 |
| lincRNA -               | 2   | 0   | 0   | 0    | 0    | 0    | 0.230985 | 0        | 0        | 0        |
| antisense -             | 1   | 3   | 1   | 0    | 2    | 3    | 0.080017 | 0.307832 | 0.096545 | 0        |
| pseudogeni -            | 2   | 0   | 6   | 2    | 4    | 2    | 0.10238  | 0        | 0.370582 | 0.158908 |
| antisense -             | 0   | 0   | 0   | 0    | 1    | 0    | 0        | 0        | 0        | 0        |
| pseudogeni cytochrom    | 0   | 1   | 0   | 4    | 6    | 0    | 0        | 0.020342 | 0        | 0.098484 |
| antisense -             | 0   | 0   | 0   | 0    | 0    | 1    | 0        | 0        | 0        | 0        |
| pseudogeni -            | 10  | 7   | 10  | 1    | 2    | 2    | 0.139346 | 0.125084 | 0.168129 | 0.021628 |
| pseudogeni -            | 0   | 1   | 0   | 1    | 0    | 0    | 0        | 0.06117  | 0        | 0.074038 |
| protein_co -            | 1   | 0   | 1   | 1    | 1    | 0    | 0.040492 | 0        | 0.048856 | 0.06285  |
| pseudogeni taste_recep  | 0   | 2   | 4   | 1    | 1    | 1    | 0        | 0.152227 | 0.286458 | 0.092126 |
| antisense -             | 0   | 0   | 0   | 1    | 3    | 4    | 0        | 0        | 0        | 0.109608 |
| protein_co Proteasom    | 0   | 0   | 0   | 0    | 0    | 1    | 0        | 0        | 0        | 0        |
| sense_intrc RERG_intrc  | 7   | 3   | 4   | 0    | 0    | 0    | 1.090466 | 0.5993   | 0.751834 | 0        |
| pseudogeni -            | 3   | 4   | 4   | 0    | 0    | 0    | 0.149173 | 0.255057 | 0.239981 | 0        |
| lincRNA -               | 11  | 8   | 12  | 1    | 0    | 0    | 0.713403 | 0.665337 | 0.939013 | 0.100664 |
| protein_co transmembr   | 1   | 1   | 6   | 7    | 9    | 9    | 0.031985 | 0.041016 | 0.23155  | 0.347516 |
| pseudogeni -            | 0   | 3   | 2   | 0    | 0    | 1    | 0        | 0.19565  | 0.122723 | 0        |
| antisense -             | 0   | 0   | 0   | 1    | 0    | 0    | 0        | 0        | 0        | 0.485199 |
| antisense A2ML1_ant     | 0   | 0   | 1   | 3    | 3    | 3    | 0        | 0        | 0.125167 | 0.483052 |
| pseudogeni -            | 581 | 407 | 467 | 136  | 195  | 348  | 19.14483 | 17.19805 | 18.56694 | 6.955765 |
| pseudogeni killer_cell_ | 49  | 36  | 38  | 64   | 61   | 58   | 1.084802 | 1.022036 | 1.015047 | 2.199201 |

|                         |    |    |    |     |     |     |          |          |          |          |
|-------------------------|----|----|----|-----|-----|-----|----------|----------|----------|----------|
| antisense -             | 0  | 0  | 0  | 1   | 0   | 0   | 0        | 0        | 0        | 0.286535 |
| pseudogen -             | 9  | 8  | 4  | 11  | 20  | 18  | 1.055025 | 1.202596 | 0.565755 | 2.001445 |
| pseudogen: coiled-coil_ | 0  | 0  | 1  | 0   | 0   | 1   | 0        | 0        | 0.130962 | 0        |
| pseudogen -             | 0  | 2  | 0  | 1   | 0   | 0   | 0        | 0.127936 | 0        | 0.077425 |
| protein_co zinc_finger_ | 92 | 68 | 67 | 68  | 78  | 139 | 1.845116 | 1.748856 | 1.621283 | 2.116778 |
| antisense -             | 1  | 0  | 1  | 1   | 3   | 6   | 0.082991 | 0        | 0.100134 | 0.128814 |
| antisense -             | 0  | 0  | 0  | 1   | 1   | 0   | 0        | 0        | 0        | 0.13732  |
| antisense -             | 0  | 0  | 0  | 1   | 1   | 0   | 0        | 0        | 0        | 0.066103 |
| lincRNA -               | 0  | 0  | 0  | 0   | 1   | 0   | 0        | 0        | 0        | 0        |
| lincRNA -               | 0  | 0  | 0  | 1   | 1   | 3   | 0        | 0        | 0        | 0.046416 |
| antisense -             | 4  | 5  | 2  | 0   | 2   | 0   | 0.313122 | 0.501918 | 0.1889   | 0        |
| sense_intrc -           | 4  | 4  | 5  | 4   | 7   | 3   | 0.487169 | 0.624725 | 0.734747 | 0.756154 |
| protein_co pepsinogen   | 1  | 0  | 0  | 0   | 0   | 0   | 0.030869 | 0        | 0        | 0        |
| pseudogen -             | 0  | 0  | 1  | 0   | 0   | 0   | 0        | 0        | 0.111369 | 0        |
| sense_intrc CACNA1C_i   | 2  | 0  | 0  | 0   | 3   | 0   | 0.150772 | 0        | 0        | 0        |
| pseudogen -             | 0  | 1  | 0  | 0   | 0   | 0   | 0        | 0.050957 | 0        | 0        |
| pseudogen -             | 0  | 0  | 0  | 1   | 0   | 3   | 0        | 0        | 0        | 0.059075 |
| lincRNA -               | 0  | 1  | 0  | 0   | 0   | 0   | 0        | 0.133031 | 0        | 0        |
| antisense -             | 0  | 0  | 0  | 1   | 0   | 0   | 0        | 0        | 0        | 0.129964 |
| lincRNA -               | 7  | 1  | 5  | 13  | 17  | 17  | 0.603364 | 0.110533 | 0.519995 | 1.739223 |
| pseudogen -             | 4  | 6  | 10 | 2   | 0   | 4   | 0.341639 | 0.657156 | 1.030519 | 0.265136 |
| antisense -             | 3  | 3  | 2  | 0   | 4   | 2   | 0.285915 | 0.366645 | 0.229982 | 0        |
| antisense -             | 2  | 0  | 2  | 2   | 0   | 0   | 0.138115 | 0        | 0.166644 | 0.214373 |
| antisense -             | 0  | 0  | 0  | 0   | 1   | 1   | 0        | 0        | 0        | 0        |
| antisense -             | 0  | 0  | 1  | 0   | 0   | 3   | 0        | 0        | 0.107969 | 0        |
| protein_co saitohein    | 0  | 2  | 0  | 0   | 0   | 0   | 0        | 0.270246 | 0        | 0        |
| protein_co zinc_finger_ | 54 | 71 | 67 | 290 | 271 | 518 | 0.71954  | 1.21319  | 1.077169 | 5.997767 |
| antisense -             | 1  | 1  | 0  | 0   | 1   | 1   | 0.110851 | 0.142151 | 0        | 0        |
| lincRNA -               | 13 | 10 | 10 | 0   | 0   | 1   | 1.009222 | 0.995526 | 0.936681 | 0        |
| antisense -             | 89 | 70 | 84 | 24  | 25  | 27  | 1.649491 | 1.66367  | 1.878396 | 0.690401 |
| protein_co calpain_sm   | 1  | 1  | 0  | 2   | 0   | 2   | 0.046152 | 0.059183 | 0        | 0.143267 |
| processed_ -            | 0  | 0  | 0  | 1   | 0   | 1   | 0        | 0        | 0        | 0.148228 |
| processed_ -            | 0  | 0  | 0  | 3   | 4   | 0   | 0        | 0        | 0        | 0.335907 |
| pseudogen -             | 1  | 0  | 0  | 0   | 0   | 1   | 0.175618 | 0        | 0        | 0        |
| pseudogen -             | 2  | 1  | 2  | 1   | 0   | 0   | 0.264169 | 0.16938  | 0.318735 | 0.205014 |
| pseudogen -             | 1  | 1  | 2  | 0   | 4   | 0   | 0.024537 | 0.031465 | 0.05921  | 0        |
| processed_ -            | 0  | 0  | 0  | 2   | 1   | 0   | 0        | 0        | 0        | 0.294655 |
| antisense -             | 2  | 0  | 0  | 0   | 0   | 0   | 0.138319 | 0        | 0        | 0        |
| protein_co solute_carr  | 0  | 0  | 0  | 0   | 0   | 1   | 0        | 0        | 0        | 0        |
| protein_co nucleolar_l  | 56 | 45 | 44 | 45  | 70  | 56  | 0.920702 | 0.948752 | 0.872834 | 1.148349 |
| pseudogen -             | 28 | 14 | 22 | 10  | 9   | 16  | 2.007524 | 1.287182 | 1.903152 | 1.112841 |
| pseudogen -             | 0  | 0  | 0  | 0   | 1   | 1   | 0        | 0        | 0        | 0        |
| antisense -             | 20 | 13 | 9  | 2   | 3   | 0   | 1.656891 | 1.381073 | 0.899611 | 0.257172 |
| antisense -             | 11 | 19 | 16 | 19  | 36  | 7   | 0.845558 | 1.872895 | 1.483948 | 2.266912 |
| pseudogen -             | 3  | 2  | 0  | 1   | 1   | 3   | 0.264417 | 0.226052 | 0        | 0.136804 |
| pseudogen -             | 5  | 4  | 1  | 1   | 2   | 0   | 0.437407 | 0.44873  | 0.105551 | 0.135783 |
| antisense A2ML1_ant     | 1  | 0  | 0  | 1   | 7   | 1   | 0.121477 | 0        | 0        | 0.188549 |
| pseudogen -             | 1  | 6  | 2  | 1   | 1   | 0   | 0.339783 | 2.614339 | 0.819935 | 0.52739  |
| pseudogen -             | 0  | 0  | 1  | 0   | 0   | 0   | 0        | 0        | 0.022685 | 0        |
| processed_ -            | 5  | 2  | 1  | 1   | 1   | 2   | 0.40845  | 0.209511 | 0.098564 | 0.126794 |
| lincRNA -               | 1  | 1  | 2  | 0   | 0   | 0   | 0.085722 | 0.109927 | 0.206857 | 0        |
| pseudogen -             | 0  | 0  | 0  | 0   | 3   | 0   | 0        | 0        | 0        | 0        |
| pseudogen -             | 0  | 0  | 0  | 0   | 3   | 0   | 0        | 0        | 0        | 0        |
| antisense -             | 1  | 0  | 0  | 0   | 0   | 1   | 0.108794 | 0        | 0        | 0        |
| antisense -             | 2  | 1  | 0  | 5   | 4   | 2   | 0.053103 | 0.034049 | 0        | 0.206058 |
| antisense -             | 0  | 0  | 0  | 0   | 0   | 1   | 0        | 0        | 0        | 0        |
| antisense -             | 0  | 0  | 0  | 0   | 1   | 0   | 0        | 0        | 0        | 0        |
| protein_co Homo_sapi    | 1  | 0  | 0  | 0   | 0   | 0   | 0.034453 | 0        | 0        | 0        |
| lincRNA -               | 2  | 8  | 5  | 1   | 3   | 4   | 0.331378 | 1.699782 | 0.999567 | 0.257172 |
| antisense -             | 20 | 13 | 21 | 9   | 19  | 4   | 1.25207  | 1.043641 | 1.586229 | 0.874524 |
| pseudogen: small_nucl   | 0  | 0  | 1  | 0   | 5   | 2   | 0        | 0        | 0.20278  | 0        |
| lincRNA -               | 0  | 0  | 0  | 11  | 12  | 19  | 0        | 0        | 0        | 1.477081 |
| lincRNA long_interf     | 0  | 1  | 0  | 0   | 0   | 0   | 0        | 0.309947 | 0        | 0        |
| lincRNA -               | 2  | 3  | 0  | 1   | 0   | 1   | 0.284182 | 0.546635 | 0        | 0.220545 |
| lincRNA -               | 18 | 13 | 23 | 16  | 19  | 9   | 1.143659 | 1.059197 | 1.763193 | 1.577882 |

|                        |      |      |      |      |      |      |          |          |          |          |
|------------------------|------|------|------|------|------|------|----------|----------|----------|----------|
| pseudogeni -           | 0    | 0    | 1    | 3    | 2    | 0    | 0        | 0        | 0.027706 | 0.106924 |
| pseudogeni taste_recep | 4    | 5    | 3    | 6    | 4    | 4    | 0.20611  | 0.330383 | 0.186513 | 0.479867 |
| lincRNA -              | 0    | 0    | 0    | 1    | 0    | 0    | 0        | 0        | 0        | 0.209137 |
| pseudogeni -           | 1    | 0    | 0    | 0    | 1    | 0    | 0.033978 | 0        | 0        | 0        |
| lincRNA -              | 0    | 0    | 0    | 0    | 1    | 3    | 0        | 0        | 0        | 0        |
| lincRNA -              | 0    | 0    | 0    | 4    | 2    | 1    | 0        | 0        | 0        | 0.151625 |
| antisense -            | 0    | 0    | 0    | 8    | 8    | 3    | 0        | 0        | 0        | 0.777354 |
| lincRNA -              | 0    | 0    | 0    | 1    | 3    | 0    | 0        | 0        | 0        | 0.301991 |
| protein_co G_protein-i | 0    | 0    | 0    | 0    | 2    | 0    | 0        | 0        | 0        | 0        |
| protein_co haptoglobi  | 0    | 0    | 0    | 2    | 4    | 6    | 0        | 0        | 0        | 0.048135 |
| antisense -            | 0    | 0    | 0    | 0    | 1    | 5    | 0        | 0        | 0        | 0        |
| sense_intrc -          | 74   | 61   | 57   | 24   | 40   | 28   | 1.383517 | 1.462487 | 1.285807 | 0.696457 |
| pseudogeni -           | 0    | 2    | 1    | 0    | 0    | 2    | 0        | 0.084809 | 0.039898 | 0        |
| antisense -            | 6    | 7    | 7    | 0    | 1    | 1    | 0.165982 | 0.248324 | 0.233645 | 0        |
| protein_co -           | 1    | 0    | 0    | 0    | 0    | 0    | 0.021952 | 0        | 0        | 0        |
| antisense -            | 6    | 8    | 11   | 0    | 0    | 0    | 0.355227 | 0.607372 | 0.785771 | 0        |
| pseudogeni -           | 0    | 0    | 0    | 1    | 0    | 1    | 0        | 0        | 0        | 0.145851 |
| antisense -            | 0    | 1    | 0    | 0    | 1    | 0    | 0        | 0.072358 | 0        | 0        |
| lincRNA -              | 0    | 0    | 0    | 1    | 2    | 0    | 0        | 0        | 0        | 0.14132  |
| antisense -            | 1    | 2    | 1    | 1    | 0    | 0    | 0.057889 | 0.148469 | 0.069846 | 0.089852 |
| pseudogeni -           | 0    | 0    | 0    | 0    | 1    | 0    | 0        | 0        | 0        | 0        |
| antisense -            | 0    | 0    | 0    | 0    | 0    | 1    | 0        | 0        | 0        | 0        |
| antisense -            | 2    | 7    | 2    | 0    | 3    | 1    | 0.239847 | 1.076493 | 0.289389 | 0        |
| lincRNA -              | 0    | 0    | 0    | 0    | 0    | 1    | 0        | 0        | 0        | 0        |
| lincRNA -              | 0    | 0    | 0    | 0    | 0    | 1    | 0        | 0        | 0        | 0        |
| lincRNA -              | 0    | 0    | 0    | 1    | 0    | 0    | 0        | 0        | 0        | 0.13281  |
| processed_ -           | 0    | 0    | 0    | 0    | 1    | 0    | 0        | 0        | 0        | 0        |
| pseudogeni -           | 3    | 0    | 0    | 0    | 1    | 2    | 0.419911 | 0        | 0        | 0        |
| pseudogeni ribosomal_  | 5    | 0    | 0    | 2    | 2    | 0    | 0.504194 | 0        | 0        | 0.313031 |
| pseudogeni -           | 0    | 0    | 0    | 2    | 0    | 0    | 0        | 0        | 0        | 0.299505 |
| lincRNA -              | 0    | 0    | 0    | 2    | 0    | 0    | 0        | 0        | 0        | 0.187819 |
| antisense -            | 0    | 0    | 0    | 0    | 2    | 0    | 0        | 0        | 0        | 0        |
| processed_ -           | 6    | 7    | 2    | 15   | 32   | 14   | 0.329824 | 0.493445 | 0.132651 | 1.279832 |
| protein_co paraneopla  | 3    | 5    | 3    | 6    | 4    | 8    | 0.095112 | 0.203279 | 0.114758 | 0.295253 |
| protein_co KIAA1147    | 358  | 274  | 325  | 867  | 1056 | 861  | 2.300799 | 2.258164 | 2.520153 | 8.648587 |
| pseudogeni -           | 0    | 0    | 0    | 1    | 1    | 1    | 0        | 0        | 0        | 0.235533 |
| antisense -            | 0    | 0    | 0    | 0    | 2    | 0    | 0        | 0        | 0        | 0        |
| lincRNA -              | 0    | 0    | 0    | 0    | 0    | 2    | 0        | 0        | 0        | 0        |
| pseudogeni leucine_ri  | 0    | 0    | 0    | 0    | 0    | 1    | 0        | 0        | 0        | 0        |
| protein_co LSM14A_SC   | 2520 | 2098 | 2251 | 3287 | 3850 | 3101 | 32.36451 | 34.55281 | 34.88125 | 65.52375 |
| protein_co NHL_repea   | 10   | 12   | 6    | 8    | 17   | 2    | 0.223605 | 0.34409  | 0.161876 | 0.277653 |
| pseudogeni -           | 3    | 1    | 3    | 4    | 6    | 2    | 0.273146 | 0.116757 | 0.329566 | 0.56528  |
| pseudogeni RNA_polyr   | 31   | 30   | 34   | 23   | 36   | 72   | 0.444659 | 0.551818 | 0.588427 | 0.512063 |
| pseudogeni -           | 0    | 1    | 0    | 0    | 0    | 0    | 0        | 0.138868 | 0        | 0        |
| protein_co chronic_ly  | 6    | 4    | 8    | 0    | 0    | 0    | 0.072194 | 0.061719 | 0.116142 | 0        |
| pseudogeni -           | 2    | 0    | 1    | 0    | 0    | 0    | 0.201677 | 0        | 0.121668 | 0        |
| processed_ -           | 5    | 5    | 12   | 26   | 18   | 7    | 0.134974 | 0.173085 | 0.39085  | 1.089393 |
| protein_co taste_recep | 0    | 0    | 0    | 3    | 0    | 0    | 0        | 0        | 0        | 0.191023 |
| processed_ -           | 3    | 0    | 0    | 1    | 2    | 1    | 0.243374 | 0        | 0        | 0.125917 |
| processed_ -           | 0    | 0    | 0    | 0    | 1    | 0    | 0        | 0        | 0        | 0        |
| pseudogeni phosphogl   | 0    | 0    | 0    | 10   | 14   | 16   | 0        | 0        | 0        | 0.338826 |
| lincRNA -              | 183  | 172  | 148  | 1666 | 1502 | 2169 | 1.858136 | 2.239568 | 1.81316  | 26.2562  |
| lincRNA -              | 14   | 26   | 15   | 1    | 0    | 0    | 1.095927 | 2.609974 | 1.416749 | 0.121502 |
| pseudogeni -           | 0    | 0    | 0    | 2    | 0    | 1    | 0        | 0        | 0        | 0.229952 |
| processed_ TMPO_anti   | 44   | 39   | 36   | 85   | 90   | 123  | 0.614585 | 0.698559 | 0.606708 | 1.842801 |
| pseudogeni -           | 0    | 0    | 1    | 0    | 1    | 0    | 0        | 0        | 0.150068 | 0        |
| antisense -            | 4    | 3    | 4    | 4    | 1    | 5    | 0.078807 | 0.075794 | 0.095085 | 0.122319 |
| sense_intrc hsa-mir-10 | 7    | 0    | 3    | 0    | 0    | 0    | 0.124802 | 0        | 0.064535 | 0        |
| protein_co Uncharact   | 33   | 23   | 21   | 0    | 0    | 0    | 2.022707 | 1.807824 | 1.553053 | 0        |
| lincRNA -              | 0    | 0    | 0    | 3    | 2    | 1    | 0        | 0        | 0        | 0.380382 |
| antisense -            | 2    | 0    | 0    | 4    | 1    | 3    | 0.130978 | 0        | 0        | 0.406591 |
| lincRNA -              | 1    | 5    | 0    | 0    | 0    | 0    | 0.050637 | 0.324675 | 0        | 0        |
| pseudogeni -           | 0    | 0    | 1    | 0    | 1    | 2    | 0        | 0        | 0.060965 | 0        |
| processed_ -           | 0    | 0    | 1    | 0    | 0    | 0    | 0        | 0        | 0.130358 | 0        |
| antisense -            | 0    | 1    | 0    | 1    | 0    | 0    | 0        | 0.106613 | 0        | 0.129042 |

|                        |     |     |     |     |     |     |          |          |          |          |
|------------------------|-----|-----|-----|-----|-----|-----|----------|----------|----------|----------|
| protein_co LIM_and_sr  | 1   | 1   | 0   | 0   | 0   | 0   | 0.014644 | 0.018779 | 0        | 0        |
| protein_co glutamyl-tf | 307 | 216 | 229 | 211 | 238 | 301 | 6.91746  | 6.241247 | 6.225752 | 7.379403 |
| processed_-            | 10  | 12  | 15  | 0   | 0   | 0   | 0.432964 | 0.666258 | 0.783594 | 0        |
| pseudogeni-            | 0   | 1   | 2   | 0   | 0   | 0   | 0        | 0.090015 | 0.169388 | 0        |
| antisense -            | 5   | 2   | 0   | 2   | 0   | 1   | 0.39075  | 0.200433 | 0        | 0.242599 |
| antisense -            | 1   | 0   | 0   | 3   | 2   | 1   | 0.125374 | 0        | 0        | 0.583795 |
| antisense -            | 0   | 2   | 1   | 0   | 0   | 2   | 0        | 0.043088 | 0.020271 | 0        |
| pseudogeni-            | 0   | 1   | 0   | 1   | 0   | 1   | 0        | 0.226052 | 0        | 0.273608 |
| processed_-            | 0   | 1   | 0   | 1   | 0   | 0   | 0        | 0.120501 | 0        | 0.145851 |
| protein_co uncharacte  | 10  | 4   | 8   | 1   | 1   | 5   | 0.21304  | 0.109277 | 0.205636 | 0.033067 |
| pseudogeni-            | 5   | 3   | 4   | 9   | 8   | 1   | 0.433364 | 0.333437 | 0.418303 | 1.210755 |
| pseudogeni-            | 0   | 3   | 8   | 7   | 4   | 4   | 0        | 0.239243 | 0.600271 | 0.675675 |
| antisense -            | 1   | 0   | 1   | 3   | 3   | 1   | 0.057604 | 0        | 0.069503 | 0.26823  |
| antisense -            | 0   | 0   | 1   | 0   | 0   | 1   | 0        | 0        | 0.174078 | 0        |
| lincRNA -              | 0   | 0   | 0   | 1   | 1   | 2   | 0        | 0        | 0        | 0.122732 |
| lincRNA -              | 1   | 1   | 1   | 0   | 0   | 0   | 0.023742 | 0.030445 | 0.028646 | 0        |
| processed_-            | 16  | 10  | 22  | 27  | 26  | 28  | 0.904994 | 0.725329 | 1.501401 | 2.370392 |
| lincRNA microRNA_      | 0   | 1   | 0   | 1   | 0   | 0   | 0        | 0.088949 | 0        | 0.107662 |
| processed_-            | 0   | 0   | 0   | 0   | 1   | 0   | 0        | 0        | 0        | 0        |
| pseudogeni zinc_finger | 451 | 384 | 366 | 183 | 200 | 262 | 4.127127 | 4.506214 | 4.041108 | 2.599279 |
| antisense -            | 24  | 8   | 21  | 26  | 47  | 58  | 2.5289   | 1.080985 | 2.669855 | 4.252303 |
| antisense KIRREL3_ar   | 0   | 4   | 2   | 1   | 1   | 1   | 0        | 0.410442 | 0.19309  | 0.124198 |
| lincRNA -              | 1   | 1   | 0   | 0   | 0   | 1   | 0.07802  | 0.10005  | 0        | 0        |
| antisense -            | 0   | 0   | 0   | 2   | 2   | 0   | 0        | 0        | 0        | 0.053163 |
| antisense -            | 6   | 11  | 5   | 5   | 7   | 6   | 0.06705  | 0.157633 | 0.067416 | 0.086725 |
| antisense -            | 1   | 3   | 1   | 0   | 0   | 0   | 0.086833 | 0.334054 | 0.104769 | 0        |
| antisense -            | 5   | 5   | 4   | 2   | 6   | 6   | 0.396701 | 0.508712 | 0.382914 | 0.246294 |
| lincRNA -              | 0   | 0   | 0   | 0   | 0   | 1   | 0        | 0        | 0        | 0        |
| pseudogeni-            | 0   | 0   | 0   | 6   | 4   | 5   | 0        | 0        | 0        | 1.017899 |
| sense_intrc-           | 7   | 11  | 17  | 10  | 3   | 4   | 0.069644 | 0.140341 | 0.20407  | 0.154424 |
| pseudogeni fumarylase  | 0   | 0   | 0   | 1   | 0   | 1   | 0        | 0        | 0        | 0.077508 |
| antisense -            | 17  | 22  | 23  | 5   | 14  | 22  | 1.824097 | 3.027129 | 2.977658 | 0.832721 |
| pseudogeni-            | 0   | 2   | 0   | 1   | 0   | 0   | 0        | 0.169619 | 0        | 0.102651 |
| protein_co zinc_finger | 432 | 326 | 367 | 23  | 23  | 31  | 4.766232 | 4.612309 | 4.885461 | 0.393867 |
| antisense -            | 0   | 0   | 0   | 1   | 0   | 0   | 0        | 0        | 0        | 0.145851 |
| antisense -            | 0   | 2   | 0   | 0   | 0   | 0   | 0        | 0.166796 | 0        | 0        |
| protein_co Uncharacte  | 0   | 0   | 0   | 0   | 1   | 0   | 0        | 0        | 0        | 0        |
| pseudogeni-            | 0   | 0   | 0   | 1   | 1   | 0   | 0        | 0        | 0        | 0.038733 |
| protein_co maltase-glu | 0   | 0   | 0   | 4   | 6   | 3   | 0        | 0        | 0        | 0.031174 |
| antisense -            | 72  | 68  | 61  | 29  | 42  | 34  | 1.179211 | 1.428161 | 1.205416 | 0.737204 |
| protein_co -           | 0   | 0   | 0   | 0   | 0   | 3   | 0        | 0        | 0        | 0        |
| lincRNA -              | 0   | 0   | 0   | 1   | 3   | 3   | 0        | 0        | 0        | 0.081047 |
| antisense -            | 1   | 0   | 0   | 0   | 0   | 0   | 0.065398 | 0        | 0        | 0        |
| pseudogeni-            | 0   | 0   | 0   | 0   | 1   | 0   | 0        | 0        | 0        | 0        |
| antisense -            | 17  | 19  | 18  | 9   | 4   | 10  | 1.436271 | 2.058498 | 1.834881 | 1.180213 |
| antisense -            | 1   | 0   | 0   | 1   | 2   | 0   | 0.082263 | 0        | 0        | 0.127684 |
| protein_co farnesyltra | 19  | 27  | 14  | 10  | 18  | 12  | 0.314365 | 0.572867 | 0.279484 | 0.256809 |
| pseudogeni-            | 1   | 0   | 0   | 1   | 0   | 1   | 0.069673 | 0        | 0        | 0.108142 |
| pseudogeni-            | 2   | 1   | 3   | 3   | 5   | 2   | 0.121006 | 0.077587 | 0.219002 | 0.281728 |
| pseudogeni-            | 2   | 0   | 2   | 1   | 1   | 0   | 0.331378 | 0        | 0.399827 | 0.257172 |
| pseudogeni-            | 3   | 2   | 2   | 0   | 0   | 0   | 0.417419 | 0.356853 | 0.33576  | 0        |
| protein_co Uncharacte  | 0   | 1   | 1   | 2   | 1   | 0   | 0        | 0.033276 | 0.031309 | 0.080553 |
| lincRNA microRNA_      | 0   | 0   | 0   | 2   | 6   | 2   | 0        | 0        | 0        | 0.068725 |
| processed_-            | 0   | 0   | 0   | 2   | 2   | 0   | 0        | 0        | 0        | 0.199124 |
| pseudogeni-            | 0   | 0   | 1   | 0   | 0   | 0   | 0        | 0        | 0.221865 | 0        |
| processed_-            | 15  | 8   | 18  | 11  | 15  | 10  | 0.49151  | 0.336155 | 0.711642 | 0.559453 |
| processed_-            | 0   | 0   | 1   | 0   | 0   | 0   | 0        | 0        | 0.108382 | 0        |
| pseudogeni-            | 0   | 0   | 0   | 2   | 2   | 1   | 0        | 0        | 0        | 0.817751 |
| lincRNA -              | 0   | 1   | 1   | 0   | 0   | 0   | 0        | 0.019144 | 0.018012 | 0        |
| lincRNA -              | 6   | 8   | 2   | 8   | 4   | 2   | 0.08528  | 0.145813 | 0.034299 | 0.176489 |
| antisense -            | 8   | 7   | 2   | 5   | 2   | 5   | 0.498168 | 0.558976 | 0.150267 | 0.483266 |
| antisense -            | 1   | 0   | 1   | 1   | 2   | 0   | 0.084487 | 0        | 0.101938 | 0.131135 |
| protein_co zinc_finger | 5   | 3   | 3   | 73  | 83  | 77  | 0.134974 | 0.103851 | 0.097712 | 3.058679 |
| antisense -            | 0   | 0   | 0   | 0   | 1   | 0   | 0        | 0        | 0        | 0        |
| processed_-            | 0   | 0   | 0   | 0   | 2   | 0   | 0        | 0        | 0        | 0        |

|                        |     |     |     |     |     |     |          |          |          |          |
|------------------------|-----|-----|-----|-----|-----|-----|----------|----------|----------|----------|
| antisense -            | 0   | 0   | 1   | 0   | 1   | 4   | 0        | 0        | 0.162107 | 0        |
| processed_ -           | 0   | 0   | 0   | 0   | 1   | 1   | 0        | 0        | 0        | 0        |
| pseudogen_ -           | 0   | 0   | 0   | 0   | 3   | 0   | 0        | 0        | 0        | 0        |
| pseudogen_ -           | 0   | 1   | 0   | 0   | 1   | 1   | 0        | 0.185586 | 0        | 0        |
| lincRNA -              | 0   | 3   | 1   | 1   | 0   | 0   | 0        | 0.167027 | 0.052385 | 0.067389 |
| lincRNA -              | 6   | 0   | 0   | 247 | 407 | 258 | 0.34478  | 0        | 0        | 22.03016 |
| sense_intrc -          | 11  | 3   | 5   | 8   | 11  | 22  | 0.962295 | 0.336547 | 0.527757 | 1.086266 |
| lincRNA -              | 0   | 0   | 0   | 1   | 0   | 0   | 0        | 0        | 0        | 0.153544 |
| processed_ -           | 0   | 1   | 0   | 0   | 0   | 0   | 0        | 0.132444 | 0        | 0        |
| pseudogen_ -           | 2   | 0   | 1   | 19  | 33  | 18  | 0.101056 | 0        | 0.060965 | 1.490104 |
| processed_ -           | 1   | 1   | 2   | 3   | 6   | 1   | 0.083434 | 0.106993 | 0.201336 | 0.388504 |
| antisense -            | 7   | 14  | 20  | 21  | 12  | 6   | 0.404224 | 1.036721 | 1.393485 | 1.882236 |
| 3prime_ov_ -           | 16  | 2   | 6   | 1   | 1   | 1   | 0.417961 | 0.066997 | 0.18911  | 0.040546 |
| pseudogen_ -           | 0   | 0   | 0   | 1   | 0   | 0   | 0        | 0        | 0        | 0.281003 |
| processed_ -           | 1   | 0   | 0   | 1   | 1   | 0   | 0.110851 | 0        | 0        | 0.172056 |
| sense_intrc -          | 23  | 18  | 25  | 9   | 29  | 12  | 2.038696 | 2.046004 | 2.673701 | 1.23822  |
| lincRNA -              | 0   | 0   | 1   | 0   | 0   | 0   | 0        | 0        | 0.046679 | 0        |
| pseudogen_ -           | 8   | 9   | 10  | 14  | 9   | 7   | 0.373254 | 0.538476 | 0.56294  | 1.013848 |
| pseudogen_ -           | 2   | 0   | 0   | 2   | 0   | 2   | 0.082771 | 0        | 0        | 0.128473 |
| pseudogen_ -           | 1   | 1   | 0   | 0   | 1   | 0   | 0.041532 | 0.053259 | 0        | 0        |
| processed_ -           | 3   | 2   | 1   | 0   | 0   | 0   | 0.243796 | 0.208422 | 0.098051 | 0        |
| processed_ -           | 0   | 1   | 0   | 0   | 0   | 0   | 0        | 0.056144 | 0        | 0        |
| processed_ -           | 0   | 1   | 0   | 0   | 0   | 0   | 0        | 0.240519 | 0        | 0        |
| pseudogen_ -           | 5   | 0   | 1   | 3   | 4   | 2   | 0.662288 | 0        | 0.159818 | 0.616778 |
| lincRNA -              | 3   | 2   | 1   | 0   | 4   | 1   | 0.186565 | 0.159495 | 0.075034 | 0        |
| pseudogen_ heat_shock  | 0   | 0   | 0   | 2   | 3   | 0   | 0        | 0        | 0        | 0.080642 |
| pseudogen_ olfactory_r | 2   | 0   | 1   | 0   | 0   | 1   | 0.065949 | 0        | 0.039786 | 0        |
| lincRNA -              | 4   | 2   | 2   | 4   | 10  | 5   | 0.494881 | 0.317308 | 0.298551 | 0.768125 |
| protein_co Uncharacte  | 0   | 0   | 2   | 1   | 0   | 0   | 0        | 0        | 0.198511 | 0.127684 |
| processed_ -           | 0   | 0   | 0   | 0   | 1   | 0   | 0        | 0        | 0        | 0        |
| antisense -            | 4   | 0   | 1   | 0   | 0   | 1   | 0.081654 | 0        | 0.02463  | 0        |
| lincRNA -              | 16  | 16  | 19  | 5   | 6   | 3   | 0.777451 | 0.996971 | 1.113922 | 0.377097 |
| antisense -            | 3   | 6   | 4   | 6   | 3   | 6   | 0.11821  | 0.303175 | 0.19017  | 0.366957 |
| antisense -            | 2   | 0   | 0   | 2   | 1   | 0   | 0.11059  | 0        | 0        | 0.17165  |
| pseudogen_ glutathione | 0   | 1   | 0   | 1   | 0   | 0   | 0        | 0.188495 | 0        | 0.22815  |
| pseudogen_ -           | 0   | 1   | 0   | 0   | 0   | 0   | 0        | 0.601298 | 0        | 0        |
| pseudogen_ -           | 8   | 2   | 2   | 1   | 3   | 0   | 0.358967 | 0.115081 | 0.108278 | 0.069646 |
| pseudogen_ -           | 0   | 2   | 0   | 1   | 2   | 2   | 0        | 0.070658 | 0        | 0.042761 |
| processed_ -           | 1   | 1   | 2   | 0   | 1   | 0   | 0.092485 | 0.118599 | 0.223178 | 0        |
| antisense -            | 0   | 0   | 0   | 0   | 2   | 0   | 0        | 0        | 0        | 0        |
| lincRNA long_interf    | 0   | 0   | 0   | 0   | 1   | 0   | 0        | 0        | 0        | 0        |
| protein_co zinc_finger | 2   | 3   | 1   | 7   | 8   | 9   | 0.055888 | 0.107503 | 0.033716 | 0.303611 |
| protein_co UDP-N-acet  | 37  | 31  | 28  | 1   | 4   | 8   | 0.321343 | 0.345254 | 0.293409 | 0.01348  |
| lincRNA -              | 0   | 0   | 1   | 1   | 3   | 0   | 0        | 0        | 0.180177 | 0.231783 |
| antisense -            | 3   | 2   | 8   | 9   | 17  | 16  | 0.191388 | 0.163618 | 0.615788 | 0.891181 |
| protein_co Uncharacte  | 0   | 0   | 0   | 1   | 0   | 0   | 0        | 0        | 0        | 0.075576 |
| pseudogen_ -           | 1   | 0   | 1   | 0   | 0   | 1   | 0.192963 | 0        | 0.232821 | 0        |
| processed_ -           | 12  | 2   | 4   | 4   | 5   | 1   | 0.883328 | 0.188791 | 0.355262 | 0.457016 |
| pseudogen_ -           | 0   | 1   | 0   | 0   | 0   | 0   | 0        | 0.024704 | 0        | 0        |
| processed_ -           | 4   | 0   | 3   | 3   | 3   | 0   | 0.298188 | 0        | 0.269835 | 0.347121 |
| processed_ -           | 399 | 349 | 376 | 184 | 257 | 296 | 7.559239 | 8.478909 | 8.594905 | 5.4107   |
| pseudogen_ -           | 0   | 0   | 0   | 1   | 0   | 0   | 0        | 0        | 0        | 0.294655 |
| pseudogen_ -           | 6   | 10  | 8   | 0   | 0   | 0   | 1.284658 | 2.745653 | 2.066685 | 0        |
| antisense -            | 0   | 0   | 0   | 13  | 5   | 5   | 0        | 0        | 0        | 1.553592 |
| pseudogen_ -           | 0   | 0   | 0   | 1   | 1   | 1   | 0        | 0        | 0        | 0.126354 |
| antisense -            | 0   | 1   | 0   | 0   | 0   | 0   | 0        | 0.109526 | 0        | 0        |
| lincRNA -              | 34  | 32  | 33  | 225 | 211 | 229 | 3.733631 | 4.506214 | 4.372346 | 38.35001 |
| lincRNA -              | 0   | 0   | 0   | 2   | 3   | 0   | 0        | 0        | 0        | 0.397704 |
| lincRNA -              | 0   | 1   | 1   | 2   | 1   | 0   | 0        | 0.127124 | 0.11961  | 0.307737 |
| pseudogen_ eukaryotic_ | 5   | 6   | 6   | 0   | 0   | 0   | 1.662767 | 2.558715 | 2.407468 | 0        |
| pseudogen_ ribosomal_  | 0   | 1   | 0   | 0   | 0   | 0   | 0        | 0.122464 | 0        | 0        |
| pseudogen_ chromobo    | 1   | 0   | 3   | 0   | 0   | 0   | 0.09     | 0        | 0.325771 | 0        |
| processed_ -           | 0   | 0   | 0   | 1   | 2   | 0   | 0        | 0        | 0        | 0.042989 |
| pseudogen_ -           | 0   | 1   | 9   | 0   | 0   | 1   | 0        | 0.036442 | 0.308594 | 0        |
| pseudogen_ -           | 0   | 0   | 0   | 0   | 0   | 2   | 0        | 0        | 0        | 0        |

|                         |      |      |      |      |      |      |          |          |          |          |
|-------------------------|------|------|------|------|------|------|----------|----------|----------|----------|
| antisense -             | 0    | 1    | 2    | 3    | 14   | 2    | 0        | 0.081477 | 0.153321 | 0.295853 |
| antisense -             | 0    | 2    | 1    | 1    | 1    | 2    | 0        | 0.287702 | 0.135348 | 0.174114 |
| processed_-             | 94   | 86   | 90   | 7    | 13   | 13   | 5.807196 | 6.813126 | 6.708558 | 0.671223 |
| antisense LBX2_antis    | 30   | 22   | 33   | 2    | 3    | 2    | 0.675324 | 0.635072 | 0.896299 | 0.06988  |
| protein_co proline_ric  | 790  | 594  | 690  | 173  | 261  | 141  | 44.20419 | 42.62184 | 46.58365 | 15.02495 |
| processed_-             | 0    | 1    | 1    | 1    | 0    | 0    | 0        | 0.069675 | 0.065557 | 0.084333 |
| processed_-             | 1    | 1    | 0    | 0    | 1    | 0    | 0.071479 | 0.091661 | 0        | 0        |
| antisense -             | 8    | 15   | 5    | 6    | 1    | 6    | 0.713156 | 1.714728 | 0.53779  | 0.830188 |
| pseudogen: coiled-coil- | 0    | 1    | 0    | 1    | 0    | 0    | 0        | 0.0941   | 0        | 0.113896 |
| protein_co canopy_2_]   | 76   | 63   | 60   | 48   | 82   | 112  | 2.947594 | 3.133314 | 2.807717 | 2.889521 |
| antisense -             | 0    | 1    | 1    | 0    | 0    | 0    | 0        | 0.085777 | 0.080707 | 0        |
| antisense -             | 0    | 0    | 0    | 1    | 1    | 0    | 0        | 0        | 0        | 0.129501 |
| pseudogen:-             | 2    | 3    | 0    | 6    | 4    | 0    | 0.127592 | 0.245428 | 0        | 0.594121 |
| antisense -             | 39   | 24   | 17   | 19   | 17   | 28   | 4.184693 | 3.302323 | 2.200878 | 3.164339 |
| lincRNA -               | 87   | 69   | 82   | 75   | 80   | 132  | 0.814583 | 0.828466 | 0.926356 | 1.089953 |
| pseudogen:-             | 8    | 2    | 5    | 0    | 1    | 2    | 0.533599 | 0.171066 | 0.402386 | 0        |
| antisense -             | 0    | 1    | 0    | 2    | 1    | 0    | 0        | 0.145593 | 0        | 0.352445 |
| lincRNA -               | 0    | 0    | 0    | 0    | 2    | 3    | 0        | 0        | 0        | 0        |
| processed_-             | 1    | 0    | 0    | 0    | 0    | 0    | 0.073495 | 0        | 0        | 0        |
| processed_-             | 2    | 0    | 0    | 0    | 0    | 0    | 0.177951 | 0        | 0        | 0        |
| pseudogen:-             | 0    | 0    | 2    | 0    | 1    | 2    | 0        | 0        | 0.137486 | 0        |
| antisense -             | 0    | 0    | 2    | 0    | 0    | 1    | 0        | 0        | 0.213492 | 0        |
| lincRNA -               | 1    | 0    | 0    | 0    | 0    | 0    | 0.014853 | 0        | 0        | 0        |
| pseudogen: suppressio   | 0    | 0    | 0    | 0    | 1    | 1    | 0        | 0        | 0        | 0        |
| pseudogen: formin_bin   | 8    | 6    | 6    | 10   | 14   | 13   | 0.188124 | 0.180932 | 0.170237 | 0.364994 |
| pseudogen: MRS2_mag     | 1    | 2    | 1    | 0    | 1    | 4    | 0.039042 | 0.100133 | 0.047107 | 0        |
| pseudogen:-             | 4    | 6    | 10   | 5    | 2    | 2    | 0.128996 | 0.248128 | 0.389103 | 0.250274 |
| pseudogen:-             | 0    | 0    | 0    | 1    | 0    | 0    | 0        | 0        | 0        | 0.070387 |
| antisense -             | 1    | 0    | 0    | 4    | 3    | 2    | 0.086833 | 0        | 0        | 0.53911  |
| processed_-             | 17   | 23   | 13   | 19   | 31   | 32   | 0.902752 | 1.566235 | 0.832935 | 1.566043 |
| lincRNA -               | 0    | 0    | 1    | 0    | 2    | 0    | 0        | 0        | 0.042538 | 0        |
| pseudogen:-             | 0    | 4    | 0    | 0    | 0    | 8    | 0        | 0.220862 | 0        | 0        |
| antisense -             | 0    | 2    | 5    | 1    | 5    | 1    | 0        | 0.123343 | 0.290131 | 0.074646 |
| processed_-             | 0    | 0    | 0    | 1    | 0    | 0    | 0        | 0        | 0        | 0.121909 |
| pseudogen:-             | 0    | 0    | 0    | 1    | 1    | 0    | 0        | 0        | 0        | 0.027351 |
| antisense NOVA1_ant     | 0    | 0    | 0    | 3    | 3    | 1    | 0        | 0        | 0        | 0.266919 |
| lincRNA -               | 0    | 0    | 0    | 0    | 3    | 0    | 0        | 0        | 0        | 0        |
| lincRNA -               | 1    | 1    | 0    | 0    | 0    | 0    | 0.183164 | 0.234882 | 0        | 0        |
| pseudogen:-             | 1    | 0    | 1    | 5    | 7    | 4    | 0.041204 | 0        | 0.049715 | 0.319771 |
| pseudogen:-             | 0    | 0    | 0    | 1    | 0    | 0    | 0        | 0        | 0        | 0.201049 |
| lincRNA -               | 1    | 2    | 1    | 0    | 0    | 0    | 0.018734 | 0.048046 | 0.022603 | 0        |
| lincRNA -               | 0    | 0    | 0    | 3    | 4    | 0    | 0        | 0        | 0        | 0.429802 |
| pseudogen:-             | 0    | 1    | 0    | 0    | 0    | 0    | 0        | 0.121967 | 0        | 0        |
| 3prime_ov-              | 19   | 5    | 13   | 5    | 2    | 1    | 1.565748 | 0.528381 | 1.292586 | 0.639541 |
| lincRNA -               | 1    | 0    | 0    | 2    | 7    | 2    | 0.053527 | 0        | 0        | 0.166164 |
| pseudogen:-             | 0    | 0    | 1    | 0    | 0    | 0    | 0        | 0        | 0.024945 | 0        |
| lincRNA -               | 1    | 1    | 2    | 0    | 0    | 0    | 0.074193 | 0.095142 | 0.179036 | 0        |
| lincRNA -               | 3    | 2    | 1    | 2    | 1    | 3    | 0.121792 | 0.104121 | 0.048983 | 0.126026 |
| pseudogen:-             | 3    | 0    | 9    | 0    | 0    | 9    | 0.241701 | 0        | 0.874879 | 0        |
| pseudogen:-             | 0    | 0    | 0    | 0    | 1    | 0    | 0        | 0        | 0        | 0        |
| pseudogen:-             | 1    | 0    | 1    | 1    | 1    | 0    | 0.201245 | 0        | 0.242813 | 0.31236  |
| processed_-             | 7    | 6    | 4    | 3    | 5    | 1    | 0.574834 | 0.631837 | 0.396326 | 0.382381 |
| antisense -             | 12   | 10   | 8    | 1    | 3    | 5    | 0.266168 | 0.284436 | 0.214098 | 0.034428 |
| processed_-             | 0    | 0    | 0    | 0    | 0    | 1    | 0        | 0        | 0        | 0        |
| protein_co cut-like_ho  | 3312 | 2375 | 2703 | 2015 | 2356 | 1525 | 11.28468 | 10.377   | 11.11202 | 10.65625 |
| antisense -             | 0    | 2    | 0    | 0    | 0    | 0    | 0        | 0.181387 | 0        | 0        |
| pseudogen: mitochond    | 0    | 1    | 1    | 0    | 0    | 0    | 0        | 0.201778 | 0.189851 | 0        |
| antisense -             | 0    | 0    | 0    | 8    | 9    | 24   | 0        | 0        | 0        | 1.536249 |
| lincRNA -               | 1    | 0    | 0    | 0    | 0    | 0    | 0.084639 | 0        | 0        | 0        |
| protein_co TEN1_telon   | 2    | 2    | 1    | 4    | 4    | 5    | 0.094346 | 0.120986 | 0.056917 | 0.292876 |
| protein_co -            | 6    | 11   | 13   | 15   | 16   | 25   | 0.047644 | 0.112011 | 0.124552 | 0.184877 |
| pseudogen:-             | 0    | 0    | 2    | 19   | 20   | 3    | 0        | 0        | 0.119232 | 1.45713  |
| antisense -             | 5    | 8    | 6    | 3    | 6    | 6    | 0.384344 | 0.788587 | 0.55648  | 0.357933 |
| pseudogen:-             | 1    | 0    | 6    | 1    | 2    | 4    | 0.072473 | 0        | 0.524657 | 0.112488 |
| pseudogen:-             | 2    | 0    | 0    | 0    | 2    | 0    | 0.243585 | 0        | 0        | 0        |

|                        |    |    |    |    |    |    |          |          |          |          |
|------------------------|----|----|----|----|----|----|----------|----------|----------|----------|
| pseudogen: glutaminyl- | 2  | 2  | 0  | 0  | 2  | 2  | 0.071261 | 0.091383 | 0        | 0        |
| antisense -            | 12 | 6  | 11 | 4  | 8  | 10 | 0.987158 | 0.632945 | 1.091808 | 0.510735 |
| protein_co Uncharacte  | 0  | 0  | 0  | 0  | 0  | 1  | 0        | 0        | 0        | 0        |
| antisense -            | 0  | 0  | 0  | 1  | 3  | 1  | 0        | 0        | 0        | 0.113541 |
| lincRNA -              | 0  | 0  | 0  | 0  | 1  | 1  | 0        | 0        | 0        | 0        |
| antisense -            | 1  | 0  | 0  | 0  | 0  | 0  | 0.084183 | 0        | 0        | 0        |
| antisense -            | 0  | 1  | 1  | 0  | 0  | 2  | 0        | 0.031798 | 0.029918 | 0        |
| pseudogen: high_mobil  | 4  | 2  | 1  | 0  | 0  | 0  | 0.578889 | 0.371172 | 0.174616 | 0        |
| pseudogen: -           | 0  | 0  | 0  | 1  | 1  | 1  | 0        | 0        | 0        | 0.060904 |
| pseudogen: HIG1_hypo   | 0  | 0  | 0  | 0  | 1  | 0  | 0        | 0        | 0        | 0        |
| antisense -            | 5  | 2  | 3  | 2  | 2  | 1  | 0.261371 | 0.134069 | 0.189216 | 0.162274 |
| lincRNA -              | 1  | 0  | 0  | 0  | 0  | 0  | 0.078675 | 0        | 0        | 0        |
| pseudogen: -           | 1  | 0  | 3  | 0  | 0  | 0  | 0.060738 | 0        | 0.219853 | 0        |
| antisense -            | 0  | 0  | 0  | 0  | 1  | 0  | 0        | 0        | 0        | 0        |
| lincRNA -              | 0  | 0  | 0  | 0  | 1  | 0  | 0        | 0        | 0        | 0        |
| pseudogen: -           | 0  | 1  | 0  | 0  | 2  | 0  | 0        | 0.047874 | 0        | 0        |
| antisense -            | 0  | 1  | 0  | 2  | 0  | 0  | 0        | 0.12002  | 0        | 0.290538 |
| antisense -            | 2  | 1  | 0  | 1  | 0  | 1  | 0.210269 | 0.13482  | 0        | 0.163183 |
| pseudogen: -           | 3  | 0  | 1  | 1  | 7  | 1  | 0.578889 | 0        | 0.232821 | 0.299505 |
| antisense -            | 2  | 2  | 3  | 3  | 3  | 3  | 0.1406   | 0.180299 | 0.254463 | 0.327345 |
| lincRNA -              | 0  | 0  | 0  | 2  | 1  | 1  | 0        | 0        | 0        | 0.411185 |
| protein_co Uncharacte  | 0  | 0  | 1  | 29 | 41 | 27 | 0        | 0        | 0.100134 | 3.7356   |
| antisense -            | 73 | 60 | 54 | 40 | 49 | 44 | 2.686791 | 2.831859 | 2.39802  | 2.28508  |
| antisense BCDIN3D_ε    | 11 | 5  | 4  | 5  | 7  | 5  | 0.167573 | 0.097677 | 0.073522 | 0.118226 |
| sense_intrc -          | 2  | 3  | 0  | 0  | 0  | 0  | 0.209799 | 0.403556 | 0        | 0        |
| pseudogen: -           | 0  | 0  | 0  | 11 | 5  | 4  | 0        | 0        | 0        | 1.179054 |
| pseudogen: -           | 0  | 0  | 0  | 2  | 0  | 0  | 0        | 0        | 0        | 1.003859 |
| processed_ -           | 1  | 0  | 1  | 0  | 0  | 0  | 0.062687 | 0        | 0.075636 | 0        |
| lincRNA -              | 0  | 0  | 1  | 0  | 0  | 0  | 0        | 0        | 0.066874 | 0        |
| protein_co olfactory_r | 0  | 0  | 0  | 0  | 1  | 0  | 0        | 0        | 0        | 0        |
| processed_ -           | 0  | 0  | 0  | 0  | 0  | 2  | 0        | 0        | 0        | 0        |
| processed_ -           | 4  | 2  | 0  | 0  | 0  | 0  | 0.343517 | 0.220256 | 0        | 0        |
| processed_ -           | 0  | 0  | 0  | 0  | 0  | 1  | 0        | 0        | 0        | 0        |
| pseudogen: -           | 0  | 2  | 0  | 0  | 0  | 0  | 0        | 0.166104 | 0        | 0        |
| pseudogen: -           | 0  | 0  | 0  | 1  | 0  | 0  | 0        | 0        | 0        | 0.285411 |
| pseudogen: -           | 2  | 0  | 0  | 0  | 2  | 1  | 0.411316 | 0        | 0        | 0        |
| processed_ -           | 7  | 5  | 1  | 2  | 0  | 2  | 0.523493 | 0.479504 | 0.090232 | 0.232152 |
| antisense -            | 4  | 1  | 1  | 3  | 3  | 7  | 0.386722 | 0.123979 | 0.116651 | 0.450184 |
| antisense -            | 11 | 8  | 4  | 4  | 9  | 13 | 0.765267 | 0.713707 | 0.33576  | 0.431928 |
| processed_ -           | 0  | 0  | 3  | 12 | 11 | 0  | 0        | 0        | 0.231867 | 1.193111 |
| pseudogen: HIG1_hypo   | 1  | 0  | 0  | 1  | 1  | 0  | 0.168065 | 0        | 0        | 0.26086  |
| pseudogen: -           | 0  | 0  | 0  | 0  | 0  | 2  | 0        | 0        | 0        | 0        |
| processed_ -           | 2  | 0  | 0  | 0  | 4  | 0  | 0.216083 | 0        | 0        | 0        |
| lincRNA -              | 0  | 0  | 0  | 0  | 0  | 1  | 0        | 0        | 0        | 0        |
| pseudogen: makorin_ri  | 1  | 1  | 0  | 0  | 0  | 0  | 0.032316 | 0.04144  | 0        | 0        |
| protein_co Uncharacte  | 16 | 10 | 9  | 3  | 3  | 0  | 0.443143 | 0.355167 | 0.300756 | 0.128966 |
| processed_ -           | 0  | 0  | 0  | 1  | 1  | 0  | 0        | 0        | 0        | 0.127015 |
| pseudogen: -           | 6  | 1  | 1  | 4  | 5  | 3  | 0.377638 | 0.080711 | 0.07594  | 0.390764 |
| lincRNA -              | 0  | 0  | 0  | 0  | 0  | 2  | 0        | 0        | 0        | 0        |
| processed_ -           | 8  | 10 | 13 | 4  | 8  | 7  | 0.223286 | 0.357915 | 0.437787 | 0.173285 |
| processed_ -           | 0  | 1  | 0  | 0  | 0  | 1  | 0        | 0.106613 | 0        | 0        |
| pseudogen: -           | 3  | 0  | 0  | 0  | 0  | 1  | 0.277456 | 0        | 0        | 0        |
| pseudogen: -           | 1  | 1  | 0  | 0  | 1  | 1  | 0.15224  | 0.195227 | 0        | 0        |
| antisense -            | 0  | 0  | 1  | 2  | 0  | 1  | 0        | 0        | 0.029133 | 0.074953 |
| lincRNA long_interf    | 0  | 0  | 0  | 0  | 1  | 2  | 0        | 0        | 0        | 0        |
| lincRNA -              | 0  | 0  | 0  | 0  | 1  | 0  | 0        | 0        | 0        | 0        |
| lincRNA -              | 2  | 2  | 0  | 0  | 0  | 0  | 0.073901 | 0.094767 | 0        | 0        |
| antisense -            | 1  | 1  | 4  | 2  | 3  | 1  | 0.095112 | 0.121967 | 0.45903  | 0.295253 |
| lincRNA -              | 10 | 6  | 7  | 0  | 0  | 0  | 0.705113 | 0.542524 | 0.595532 | 0        |
| processed_ -           | 3  | 1  | 3  | 0  | 0  | 0  | 0.267943 | 0.114533 | 0.323289 | 0        |
| lincRNA -              | 0  | 0  | 0  | 0  | 0  | 1  | 0        | 0        | 0        | 0        |
| lincRNA -              | 0  | 0  | 0  | 0  | 0  | 6  | 0        | 0        | 0        | 0        |
| lincRNA -              | 1  | 3  | 8  | 1  | 0  | 0  | 0.08169  | 0.314267 | 0.788509 | 0.126794 |
| sense_overl -          | 3  | 3  | 5  | 5  | 20 | 4  | 0.349057 | 0.447616 | 0.701929 | 0.902975 |
| lincRNA -              | 0  | 0  | 0  | 0  | 2  | 0  | 0        | 0        | 0        | 0        |

|                        |     |     |     |     |     |     |          |          |          |          |
|------------------------|-----|-----|-----|-----|-----|-----|----------|----------|----------|----------|
| pseudogeni -           | 0   | 0   | 0   | 1   | 0   | 0   | 0        | 0        | 0        | 0.131609 |
| processed_ -           | 0   | 2   | 3   | 1   | 2   | 5   | 0        | 0.127124 | 0.179415 | 0.076934 |
| pseudogeni -           | 0   | 2   | 0   | 0   | 0   | 0   | 0        | 0.07891  | 0        | 0        |
| processed_ -           | 1   | 0   | 0   | 0   | 0   | 0   | 0.098716 | 0        | 0        | 0        |
| protein_co C-type_lect | 0   | 0   | 0   | 1   | 0   | 0   | 0        | 0        | 0        | 0.020729 |
| pseudogeni -           | 1   | 5   | 2   | 3   | 1   | 1   | 0.082553 | 0.529312 | 0.19921  | 0.3844   |
| protein_co Protein_LO  | 1   | 0   | 0   | 0   | 0   | 0   | 0.032405 | 0        | 0        | 0        |
| lincRNA -              | 0   | 0   | 0   | 2   | 2   | 2   | 0        | 0        | 0        | 0.246711 |
| pseudogeni -           | 2   | 0   | 0   | 0   | 0   | 0   | 0.309505 | 0        | 0        | 0        |
| lincRNA -              | 0   | 0   | 0   | 1   | 0   | 0   | 0        | 0        | 0        | 0.149753 |
| protein_co Uncharacte  | 0   | 0   | 0   | 0   | 1   | 0   | 0        | 0        | 0        | 0        |
| antisense -            | 0   | 0   | 1   | 0   | 0   | 1   | 0        | 0        | 0.104383 | 0        |
| pseudogeni -           | 0   | 0   | 0   | 0   | 1   | 0   | 0        | 0        | 0        | 0        |
| lincRNA -              | 1   | 0   | 0   | 0   | 0   | 0   | 0.12372  | 0        | 0        | 0        |
| pseudogeni -           | 1   | 1   | 0   | 1   | 0   | 0   | 0.31898  | 0.409046 | 0        | 0.495101 |
| antisense -            | 2   | 1   | 0   | 2   | 3   | 3   | 0.059093 | 0.037889 | 0        | 0.09172  |
| pseudogeni polymerase  | 2   | 1   | 0   | 4   | 0   | 3   | 0.558214 | 0.357915 | 0        | 1.732852 |
| lincRNA -              | 2   | 0   | 4   | 6   | 5   | 5   | 0.08906  | 0        | 0.214912 | 0.4147   |
| protein_co churchill_d | 479 | 410 | 408 | 178 | 210 | 208 | 6.643099 | 7.291694 | 6.827213 | 3.831649 |
| processed_ -           | 0   | 0   | 0   | 0   | 0   | 1   | 0        | 0        | 0        | 0        |
| antisense -            | 89  | 78  | 79  | 92  | 126 | 83  | 1.784186 | 2.005183 | 1.910844 | 2.862651 |
| pseudogeni -           | 0   | 0   | 1   | 0   | 0   | 0   | 0        | 0        | 0.147332 | 0        |
| lincRNA -              | 27  | 21  | 21  | 63  | 71  | 48  | 0.754938 | 0.752967 | 0.708459 | 2.734125 |
| 3prime_ov -            | 7   | 6   | 8   | 1   | 5   | 1   | 0.384344 | 0.422458 | 0.529981 | 0.085222 |
| processed_ -           | 0   | 2   | 0   | 0   | 2   | 3   | 0        | 0.154377 | 0        | 0        |
| lincRNA -              | 0   | 0   | 0   | 1   | 3   | 0   | 0        | 0        | 0        | 0.070387 |
| protein_co Uncharacte  | 7   | 5   | 7   | 1   | 4   | 1   | 0.097052 | 0.088897 | 0.117099 | 0.02152  |
| protein_co chromosom   | 7   | 7   | 4   | 2   | 6   | 7   | 0.14009  | 0.179645 | 0.096586 | 0.062125 |
| pseudogeni -           | 0   | 0   | 0   | 1   | 1   | 2   | 0        | 0        | 0        | 0.064636 |
| antisense -            | 2   | 8   | 10  | 3   | 6   | 6   | 0.106327 | 0.545395 | 0.641446 | 0.24755  |
| processed_ -           | 1   | 2   | 0   | 3   | 2   | 1   | 0.078675 | 0.201778 | 0        | 0.366341 |
| antisense -            | 1   | 0   | 3   | 1   | 2   | 2   | 0.106811 | 0        | 0.386621 | 0.165785 |
| lincRNA -              | 1   | 1   | 2   | 0   | 0   | 1   | 0.056089 | 0.071926 | 0.135348 | 0        |
| antisense -            | 1   | 1   | 4   | 3   | 5   | 5   | 0.011255 | 0.014433 | 0.054321 | 0.05241  |
| sense_intrc -          | 1   | 1   | 0   | 0   | 2   | 0   | 0.095112 | 0.121967 | 0        | 0        |
| processed_ -           | 0   | 0   | 0   | 1   | 2   | 1   | 0        | 0        | 0        | 0.155845 |
| sense_overl -          | 5   | 3   | 5   | 8   | 14  | 8   | 0.413492 | 0.318147 | 0.498902 | 1.026876 |
| antisense -            | 1   | 1   | 0   | 0   | 0   | 0   | 0.099766 | 0.127936 | 0        | 0        |
| processed_ -           | 2   | 1   | 2   | 0   | 0   | 1   | 0.1563   | 0.100216 | 0.188585 | 0        |
| pseudogeni -           | 0   | 2   | 0   | 0   | 3   | 1   | 0        | 0.297672 | 0        | 0        |
| lincRNA microRNA_      | 2   | 0   | 0   | 0   | 2   | 0   | 0.064277 | 0        | 0        | 0        |
| processed_ -           | 6   | 3   | 6   | 1   | 7   | 1   | 0.901731 | 0.578171 | 1.08799  | 0.233269 |
| pseudogeni -           | 0   | 0   | 0   | 0   | 1   | 0   | 0        | 0        | 0        | 0        |
| pseudogeni PEST_conta  | 2   | 0   | 2   | 1   | 5   | 7   | 0.183523 | 0        | 0.221431 | 0.142426 |
| protein_co Uncharacte  | 3   | 11  | 7   | 1   | 1   | 3   | 0.176721 | 0.830939 | 0.497523 | 0.091432 |
| protein_co regulator_c | 8   | 8   | 8   | 9   | 6   | 5   | 0.074577 | 0.095634 | 0.089981 | 0.130222 |
| antisense -            | 0   | 0   | 0   | 10  | 15  | 3   | 0        | 0        | 0        | 0.432441 |
| antisense -            | 0   | 1   | 1   | 1   | 0   | 4   | 0        | 0.137912 | 0.12976  | 0.166926 |
| processed_ -           | 0   | 0   | 0   | 3   | 2   | 1   | 0        | 0        | 0        | 0.640292 |
| processed_ -           | 3   | 0   | 2   | 2   | 0   | 4   | 0.313296 | 0        | 0.252007 | 0.324186 |
| antisense -            | 0   | 2   | 2   | 6   | 6   | 7   | 0        | 0.064725 | 0.060899 | 0.235026 |
| pseudogeni -           | 1   | 0   | 0   | 0   | 1   | 0   | 0.019147 | 0        | 0        | 0        |
| protein_co Epidermal_  | 8   | 8   | 6   | 10  | 4   | 5   | 0.08972  | 0.115053 | 0.081189 | 0.174073 |
| lincRNA -              | 1   | 0   | 0   | 0   | 0   | 0   | 0.087809 | 0        | 0        | 0        |
| lincRNA -              | 0   | 1   | 2   | 0   | 1   | 0   | 0        | 0.115634 | 0.217598 | 0        |
| protein_co zinc_finger | 0   | 0   | 0   | 29  | 68  | 24  | 0        | 0        | 0        | 0.401639 |
| lincRNA -              | 1   | 0   | 0   | 0   | 0   | 0   | 0.081976 | 0        | 0        | 0        |
| sense_intrc -          | 0   | 0   | 0   | 0   | 0   | 1   | 0        | 0        | 0        | 0        |
| lincRNA -              | 0   | 0   | 0   | 2   | 3   | 0   | 0        | 0        | 0        | 0.262743 |
| processed_ -           | 0   | 0   | 2   | 0   | 0   | 0   | 0        | 0        | 0.153321 | 0        |
| pseudogeni -           | 1   | 0   | 0   | 0   | 0   | 0   | 0.087156 | 0        | 0        | 0        |
| protein_co Otoconin-9  | 0   | 0   | 0   | 45  | 71  | 76  | 0        | 0        | 0        | 1.357269 |
| processed_ -           | 0   | 0   | 0   | 1   | 3   | 0   | 0        | 0        | 0        | 0.126354 |
| processed_ -           | 19  | 16  | 33  | 3   | 10  | 5   | 2.969701 | 3.206922 | 6.223306 | 0.727798 |
| lincRNA -              | 5   | 1   | 0   | 0   | 0   | 0   | 0.452606 | 0.116081 | 0        | 0        |

|                        |      |      |      |       |       |       |          |          |          |          |
|------------------------|------|------|------|-------|-------|-------|----------|----------|----------|----------|
| pseudogeni -           | 4    | 3    | 5    | 7     | 3     | 6     | 0.357257 | 0.343599 | 0.538814 | 0.970397 |
| antisense -            | 0    | 3    | 1    | 1     | 4     | 1     | 0        | 0.428478 | 0.134384 | 0.172874 |
| protein_co peptide_de  | 174  | 113  | 115  | 151   | 295   | 439   | 7.04565  | 5.867588 | 5.618466 | 9.490285 |
| lincRNA -              | 3    | 2    | 1    | 12    | 6     | 14    | 0.196741 | 0.168195 | 0.079127 | 1.221479 |
| processed_ -           | 4    | 0    | 0    | 1     | 1     | 0     | 0.347978 | 0        | 0        | 0.135027 |
| pseudogeni -           | 5    | 0    | 2    | 3     | 1     | 3     | 0.432565 | 0        | 0.208766 | 0.40284  |
| processed_long_interf  | 1013 | 890  | 940  | 191   | 257   | 396   | 8.755684 | 9.864612 | 9.802945 | 2.562386 |
| 3prime_ov -            | 0    | 1    | 0    | 4     | 1     | 0     | 0        | 0.131002 | 0        | 0.634247 |
| processed_ -           | 0    | 0    | 3    | 0     | 6     | 0     | 0        | 0        | 0.181138 | 0        |
| pseudogeni -           | 3    | 1    | 4    | 0     | 1     | 0     | 0.227621 | 0.097297 | 0.366184 | 0        |
| pseudogeni -           | 0    | 0    | 0    | 1     | 0     | 1     | 0        | 0        | 0        | 0.240197 |
| pseudogeni -           | 6    | 0    | 0    | 1     | 1     | 4     | 0.550568 | 0        | 0        | 0.142426 |
| sense_intrc -          | 2    | 2    | 4    | 16    | 10    | 11    | 0.233865 | 0.299899 | 0.564344 | 2.903932 |
| lincRNA -              | 2    | 0    | 0    | 0     | 2     | 0     | 0.102492 | 0        | 0        | 0        |
| processed_ -           | 1    | 1    | 1    | 4     | 5     | 3     | 0.090173 | 0.115634 | 0.108799 | 0.559845 |
| antisense -            | 1    | 0    | 0    | 0     | 0     | 1     | 0.129174 | 0        | 0        | 0        |
| antisense -            | 10   | 12   | 11   | 2     | 12    | 8     | 0.459256 | 0.706717 | 0.60953  | 0.142566 |
| processed_ -           | 1    | 1    | 4    | 3     | 13    | 3     | 0.070831 | 0.090831 | 0.341846 | 0.329818 |
| processed_ -           | 0    | 0    | 0    | 0     | 3     | 0     | 0        | 0        | 0        | 0        |
| pseudogeni -           | 0    | 0    | 0    | 1     | 0     | 0     | 0        | 0        | 0        | 0.420692 |
| protein_co DDB1-_and   | 0    | 0    | 0    | 0     | 1     | 3     | 0        | 0        | 0        | 0        |
| protein_co -           | 2    | 5    | 3    | 4     | 0     | 6     | 0.13997  | 0.44873  | 0.253323 | 0.434506 |
| pseudogeni charged_m   | 1    | 1    | 1    | 4     | 1     | 3     | 0.079745 | 0.102262 | 0.096217 | 0.495101 |
| antisense -            | 1    | 0    | 0    | 2     | 0     | 2     | 0.033541 | 0        | 0        | 0.10412  |
| protein_co Uncharacte  | 94   | 74   | 94   | 192   | 271   | 170   | 1.222992 | 1.23463  | 1.47561  | 3.877281 |
| protein_co Uncharacte  | 2    | 0    | 0    | 0     | 0     | 0     | 0.170509 | 0        | 0        | 0        |
| pseudogeni peptidylpr  | 2    | 3    | 1    | 1     | 2     | 2     | 0.187936 | 0.361502 | 0.113378 | 0.145851 |
| lincRNA long_interf    | 1    | 0    | 1    | 5     | 4     | 0     | 0.066229 | 0        | 0.079909 | 0.513982 |
| lincRNA -              | 0    | 0    | 0    | 0     | 0     | 1     | 0        | 0        | 0        | 0        |
| protein_co sperm_equ   | 0    | 3    | 4    | 0     | 0     | 1     | 0        | 0.126058 | 0.158143 | 0        |
| pseudogeni -           | 3    | 2    | 1    | 2     | 3     | 3     | 0.15357  | 0.131288 | 0.061764 | 0.158908 |
| antisense RNA_7SL_c    | 2764 | 1541 | 1609 | 29574 | 71703 | 21719 | 432.0134 | 308.8667 | 303.4333 | 7174.633 |
| pseudogeni -           | 0    | 1    | 2    | 0     | 4     | 0     | 0        | 0.081809 | 0.153947 | 0        |
| pseudogeni ZFP64_zinc  | 0    | 0    | 0    | 2     | 0     | 0     | 0        | 0        | 0        | 0.124516 |
| lincRNA DIO3_oppc      | 5    | 1    | 2    | 1     | 0     | 2     | 0.075434 | 0.019347 | 0.036406 | 0.023417 |
| pseudogeni -           | 2    | 0    | 1    | 0     | 0     | 0     | 0.290341 | 0        | 0.175156 | 0        |
| pseudogeni -           | 0    | 0    | 1    | 0     | 0     | 0     | 0        | 0        | 0.19049  | 0        |
| pseudogeni -           | 0    | 0    | 0    | 0     | 1     | 0     | 0        | 0        | 0        | 0        |
| pseudogeni -           | 3    | 1    | 1    | 0     | 2     | 0     | 0.284757 | 0.12172  | 0.114525 | 0        |
| protein_co Uncharacte  | 0    | 0    | 2    | 0     | 0     | 0     | 0        | 0        | 0.177075 | 0        |
| pseudogeni -           | 3    | 0    | 0    | 0     | 0     | 0     | 0.598596 | 0        | 0        | 0        |
| antisense -            | 7    | 9    | 10   | 4     | 7     | 5     | 0.686674 | 1.132151 | 1.183588 | 0.609036 |
| lincRNA -              | 2    | 2    | 1    | 0     | 3     | 1     | 0.162249 | 0.208062 | 0.097881 | 0        |
| antisense -            | 1    | 8    | 3    | 8     | 4     | 5     | 0.084946 | 0.871446 | 0.307476 | 1.05478  |
| pseudogeni 5'3'-nucleo | 1    | 3    | 3    | 0     | 0     | 3     | 0.092122 | 0.3544   | 0.333451 | 0        |
| antisense -            | 15   | 1    | 4    | 3     | 1     | 1     | 0.353265 | 0.030201 | 0.113662 | 0.109663 |
| lincRNA -              | 1    | 0    | 0    | 3     | 4     | 2     | 0.054714 | 0        | 0        | 0.254772 |
| pseudogeni ankyrin_rej | 4    | 1    | 8    | 3     | 1     | 7     | 0.23652  | 0.075826 | 0.570749 | 0.275333 |
| pseudogeni barrier_to_ | 8    | 0    | 0    | 0     | 0     | 0     | 1.426312 | 0        | 0        | 0        |
| lincRNA -              | 0    | 0    | 0    | 11    | 16    | 6     | 0        | 0        | 0        | 1.375563 |
| pseudogeni -           | 3    | 2    | 5    | 0     | 0     | 3     | 0.432831 | 0.37003  | 0.870392 | 0        |
| lincRNA FRMD6_an       | 0    | 1    | 0    | 0     | 0     | 0     | 0        | 0.103494 | 0        | 0        |
| protein_co -           | 1    | 2    | 1    | 0     | 10    | 2     | 0.013703 | 0.035143 | 0.016533 | 0        |
| processed_ -           | 2    | 0    | 0    | 23    | 20    | 17    | 0.044615 | 0        | 0        | 0.796354 |
| lincRNA -              | 0    | 0    | 1    | 0     | 0     | 0     | 0        | 0        | 0.026437 | 0        |
| pseudogeni -           | 0    | 0    | 0    | 2     | 0     | 0     | 0        | 0        | 0        | 0.251833 |
| antisense -            | 1    | 0    | 0    | 0     | 0     | 0     | 0.093406 | 0        | 0        | 0        |
| protein_co Uncharacte  | 0    | 0    | 1    | 0     | 0     | 0     | 0        | 0        | 0.009119 | 0        |
| processed_ -           | 3    | 5    | 1    | 8     | 8     | 10    | 0.102904 | 0.219933 | 0.041387 | 0.425924 |
| antisense -            | 2    | 0    | 1    | 2     | 1     | 0     | 0.171131 | 0        | 0.10324  | 0.26562  |
| lincRNA -              | 1    | 0    | 1    | 1     | 5     | 3     | 0.038881 | 0        | 0.046912 | 0.060348 |
| pseudogeni -           | 12   | 12   | 3    | 1     | 3     | 3     | 0.497947 | 0.638547 | 0.1502   | 0.064407 |
| pseudogeni -           | 0    | 0    | 1    | 0     | 1     | 0     | 0        | 0        | 0.093668 | 0        |
| pseudogeni ras_homolo  | 11   | 8    | 8    | 17    | 22    | 14    | 0.890829 | 0.830809 | 0.7817   | 2.136885 |
| lincRNA -              | 10   | 10   | 9    | 0     | 0     | 1     | 0.868334 | 1.113515 | 0.942925 | 0        |

|                         |     |     |     |     |     |     |          |          |          |          |
|-------------------------|-----|-----|-----|-----|-----|-----|----------|----------|----------|----------|
| pseudogen: pituitary_t  | 2   | 1   | 1   | 1   | 0   | 2   | 0.266421 | 0.170823 | 0.160726 | 0.206761 |
| protein_co Uncharacte   | 1   | 3   | 1   | 0   | 0   | 0   | 0.047221 | 0.181661 | 0.056974 | 0        |
| pseudogen: small_nucl   | 0   | 0   | 1   | 0   | 0   | 0   | 0        | 0        | 0.254845 | 0        |
| pseudogen: -            | 0   | 1   | 1   | 2   | 1   | 0   | 0        | 0.205221 | 0.19309  | 0.49679  |
| lincRNA -               | 1   | 0   | 0   | 0   | 0   | 0   | 0.059657 | 0        | 0        | 0        |
| lincRNA -               | 1   | 0   | 0   | 0   | 0   | 0   | 0.03994  | 0        | 0        | 0        |
| pseudogen: neurobeacl   | 2   | 3   | 1   | 0   | 0   | 0   | 0.030889 | 0.059417 | 0.018635 | 0        |
| pseudogen: -            | 4   | 0   | 0   | 0   | 0   | 0   | 0.512459 | 0        | 0        | 0        |
| lincRNA -               | 0   | 0   | 0   | 12  | 13  | 7   | 0        | 0        | 0        | 0.7861   |
| lincRNA -               | 0   | 0   | 0   | 5   | 3   | 6   | 0        | 0        | 0        | 0.348229 |
| pseudogen: -            | 0   | 1   | 1   | 0   | 0   | 1   | 0        | 0.104031 | 0.097881 | 0        |
| processed_ -            | 0   | 0   | 0   | 0   | 0   | 1   | 0        | 0        | 0        | 0        |
| lincRNA -               | 5   | 3   | 5   | 0   | 2   | 0   | 0.403529 | 0.310481 | 0.48688  | 0        |
| antisense -             | 1   | 0   | 1   | 3   | 5   | 2   | 0.075507 | 0        | 0.091104 | 0.351593 |
| lincRNA -               | 1   | 0   | 0   | 4   | 1   | 2   | 0.098096 | 0        | 0        | 0.609036 |
| pseudogen: -            | 0   | 0   | 0   | 1   | 0   | 1   | 0        | 0        | 0        | 0.269555 |
| pseudogen: DnaJ_(Hsp4   | 0   | 0   | 0   | 0   | 1   | 1   | 0        | 0        | 0        | 0        |
| lincRNA long_interge    | 0   | 0   | 0   | 21  | 45  | 72  | 0        | 0        | 0        | 0.592394 |
| pseudogen: -            | 3   | 1   | 5   | 6   | 6   | 8   | 0.137777 | 0.058893 | 0.277059 | 0.427697 |
| processed_ -            | 0   | 0   | 0   | 0   | 1   | 0   | 0        | 0        | 0        | 0        |
| pseudogen: -            | 0   | 0   | 0   | 1   | 2   | 0   | 0        | 0        | 0        | 0.402098 |
| lincRNA -               | 1   | 0   | 0   | 0   | 0   | 0   | 0.052745 | 0        | 0        | 0        |
| sense_intrc -           | 1   | 0   | 1   | 0   | 3   | 1   | 0.106327 | 0        | 0.128289 | 0        |
| antisense -             | 5   | 5   | 3   | 19  | 10  | 3   | 0.508569 | 0.652167 | 0.36817  | 2.999601 |
| pseudogen: -            | 2   | 2   | 0   | 0   | 0   | 0   | 0.333737 | 0.42797  | 0        | 0        |
| pseudogen: cytochrom    | 0   | 0   | 1   | 1   | 2   | 3   | 0        | 0        | 0.179605 | 0.231047 |
| pseudogen: -            | 2   | 0   | 0   | 0   | 0   | 0   | 0.037333 | 0        | 0        | 0        |
| lincRNA -               | 0   | 0   | 0   | 1   | 0   | 0   | 0        | 0        | 0        | 0.042786 |
| lincRNA -               | 0   | 2   | 0   | 0   | 0   | 0   | 0        | 0.26315  | 0        | 0        |
| antisense -             | 0   | 0   | 0   | 0   | 2   | 0   | 0        | 0        | 0        | 0        |
| antisense -             | 168 | 126 | 147 | 279 | 380 | 168 | 1.868483 | 1.797048 | 1.972628 | 4.81631  |
| lincRNA -               | 60  | 28  | 49  | 20  | 26  | 32  | 5.308304 | 3.176668 | 5.230566 | 2.746408 |
| antisense -             | 0   | 0   | 0   | 0   | 0   | 2   | 0        | 0        | 0        | 0        |
| pseudogen: ribosomal_   | 2   | 1   | 0   | 0   | 0   | 1   | 0.198687 | 0.127394 | 0        | 0        |
| protein_co BCL2L2-PAI   | 9   | 3   | 4   | 0   | 1   | 0   | 0.308939 | 0.132057 | 0.165668 | 0        |
| pseudogen: -            | 1   | 0   | 1   | 0   | 3   | 0   | 0.153235 | 0        | 0.184887 | 0        |
| antisense -             | 1   | 1   | 2   | 1   | 7   | 4   | 0.09589  | 0.122965 | 0.231393 | 0.148834 |
| pseudogen: ubiquitin-c  | 4   | 4   | 9   | 3   | 2   | 1   | 0.338556 | 0.43415  | 0.919097 | 0.394114 |
| lincRNA -               | 1   | 1   | 1   | 326 | 340 | 340 | 0.088305 | 0.113239 | 0.106545 | 44.68214 |
| pseudogen: -            | 0   | 0   | 0   | 0   | 0   | 2   | 0        | 0        | 0        | 0        |
| pseudogen: -            | 0   | 0   | 0   | 1   | 1   | 0   | 0        | 0        | 0        | 0.135783 |
| protein_co Uncharacte   | 1   | 0   | 0   | 0   | 2   | 0   | 0.01269  | 0        | 0        | 0        |
| lincRNA -               | 13  | 16  | 14  | 7   | 11  | 0   | 0.672815 | 1.061895 | 0.874235 | 0.562316 |
| antisense ARHGAP5_      | 11  | 11  | 3   | 3   | 15  | 8   | 0.37512  | 0.481038 | 0.123437 | 0.158792 |
| antisense -             | 0   | 2   | 1   | 2   | 1   | 1   | 0        | 0.301402 | 0.141793 | 0.364811 |
| protein_co tripartite_r | 0   | 0   | 1   | 1   | 0   | 1   | 0        | 0        | 0.022694 | 0.029194 |
| antisense -             | 76  | 58  | 45  | 17  | 41  | 30  | 5.14234  | 5.032508 | 3.673734 | 1.785363 |
| pseudogen: -            | 0   | 0   | 0   | 1   | 2   | 0   | 0        | 0        | 0        | 0.22189  |
| lincRNA HIF1A_anti      | 8   | 4   | 8   | 1   | 4   | 11  | 0.70379  | 0.451256 | 0.849163 | 0.136547 |
| pseudogen: -            | 1   | 0   | 0   | 0   | 0   | 0   | 0.20476  | 0        | 0        | 0        |
| antisense -             | 0   | 0   | 2   | 24  | 9   | 22  | 0        | 0        | 0.130358 | 2.012345 |
| lincRNA -               | 0   | 0   | 0   | 1   | 0   | 0   | 0        | 0        | 0        | 0.147626 |
| antisense -             | 0   | 0   | 1   | 0   | 1   | 0   | 0        | 0        | 0.097712 | 0        |
| lincRNA -               | 0   | 0   | 0   | 1   | 1   | 0   | 0        | 0        | 0        | 0.114254 |
| processed_ -            | 0   | 0   | 0   | 1   | 2   | 2   | 0        | 0        | 0        | 0.036757 |
| pseudogen: -            | 0   | 0   | 0   | 0   | 0   | 1   | 0        | 0        | 0        | 0        |
| processed_ -            | 34  | 19  | 34  | 28  | 19  | 30  | 2.767814 | 1.983448 | 3.339526 | 3.537907 |
| pseudogen: -            | 1   | 1   | 0   | 0   | 0   | 1   | 0.040881 | 0.052424 | 0        | 0        |
| processed_ -            | 11  | 18  | 10  | 10  | 24  | 7   | 0.105912 | 0.222246 | 0.116171 | 0.149445 |
| antisense -             | 0   | 3   | 0   | 0   | 0   | 0   | 0        | 0.342946 | 0        | 0        |
| pseudogen: sal-like_4_( | 4   | 0   | 2   | 0   | 2   | 1   | 0.060115 | 0        | 0.036266 | 0        |
| lincRNA -               | 0   | 0   | 0   | 0   | 3   | 0   | 0        | 0        | 0        | 0        |
| lincRNA -               | 2   | 0   | 0   | 0   | 0   | 0   | 0.268711 | 0        | 0        | 0        |
| antisense -             | 0   | 0   | 0   | 0   | 2   | 0   | 0        | 0        | 0        | 0        |
| antisense -             | 8   | 8   | 3   | 0   | 10  | 4   | 1.03055  | 1.321534 | 0.466282 | 0        |

|                        |    |    |    |    |    |    |          |          |          |          |
|------------------------|----|----|----|----|----|----|----------|----------|----------|----------|
| processed_-            | 0  | 0  | 1  | 0  | 0  | 1  | 0        | 0        | 0.288651 | 0        |
| processed_-            | 0  | 0  | 0  | 0  | 2  | 4  | 0        | 0        | 0        | 0        |
| lincRNA long_interf    | 3  | 1  | 0  | 0  | 0  | 0  | 0.162437 | 0.069434 | 0        | 0        |
| lincRNA long_interf    | 6  | 4  | 8  | 14 | 20 | 10 | 0.111732 | 0.09552  | 0.179747 | 0.404653 |
| lincRNA -              | 0  | 0  | 0  | 17 | 13 | 1  | 0        | 0        | 0        | 0.408336 |
| processed_-            | 13 | 14 | 11 | 17 | 23 | 12 | 1.010896 | 1.396048 | 1.032057 | 2.051835 |
| protein_co HCG18042    | 6  | 2  | 1  | 5  | 19 | 11 | 0.146227 | 0.062505 | 0.029405 | 0.189137 |
| processed_cancer/test  | 0  | 0  | 0  | 0  | 0  | 2  | 0        | 0        | 0        | 0        |
| lincRNA -              | 0  | 0  | 1  | 0  | 0  | 0  | 0        | 0        | 0.012002 | 0        |
| lincRNA -              | 1  | 3  | 0  | 0  | 0  | 0  | 0.064945 | 0.249847 | 0        | 0        |
| antisense -            | 0  | 0  | 0  | 1  | 0  | 0  | 0        | 0        | 0        | 0.138628 |
| antisense -            | 3  | 14 | 9  | 7  | 9  | 8  | 0.092243 | 0.552011 | 0.333888 | 0.334071 |
| antisense -            | 2  | 3  | 0  | 2  | 3  | 1  | 0.028918 | 0.055624 | 0        | 0.044884 |
| antisense ITPK1_anti:  | 1  | 1  | 0  | 15 | 11 | 9  | 0.009974 | 0.012791 | 0        | 0.232227 |
| antisense -            | 0  | 0  | 0  | 0  | 0  | 2  | 0        | 0        | 0        | 0        |
| pseudogeni-            | 15 | 23 | 22 | 20 | 15 | 3  | 1.860715 | 3.658691 | 3.292754 | 3.850783 |
| lincRNA -              | 2  | 1  | 0  | 4  | 5  | 7  | 0.127419 | 0.081698 | 0        | 0.395542 |
| pseudogeni-            | 0  | 0  | 0  | 0  | 0  | 1  | 0        | 0        | 0        | 0        |
| protein_co long_interf | 0  | 0  | 0  | 2  | 1  | 0  | 0        | 0        | 0        | 0.070797 |
| lincRNA -              | 0  | 0  | 1  | 0  | 0  | 0  | 0        | 0        | 0.112476 | 0        |
| antisense -            | 13 | 9  | 4  | 25 | 25 | 14 | 0.287941 | 0.25563  | 0.106898 | 0.859469 |
| pseudogeni enolase_1_  | 3  | 4  | 1  | 2  | 3  | 0  | 0.144425 | 0.24694  | 0.058086 | 0.149445 |
| pseudogeni-            | 1  | 1  | 0  | 1  | 0  | 1  | 0.125711 | 0.161206 | 0        | 0.19512  |
| lincRNA -              | 3  | 6  | 1  | 11 | 14 | 5  | 0.178289 | 0.457261 | 0.071705 | 1.014674 |
| protein_co Uncharacte  | 2  | 1  | 3  | 2  | 1  | 1  | 0.134355 | 0.086146 | 0.243161 | 0.208538 |
| antisense -            | 0  | 1  | 0  | 1  | 3  | 1  | 0        | 0.112392 | 0        | 0.136037 |
| antisense -            | 0  | 0  | 0  | 7  | 7  | 6  | 0        | 0        | 0        | 1.102724 |
| processed_-            | 0  | 1  | 2  | 9  | 12 | 13 | 0        | 0.10005  | 0.188271 | 1.089881 |
| lincRNA -              | 0  | 0  | 0  | 0  | 1  | 0  | 0        | 0        | 0        | 0        |
| lincRNA -              | 3  | 4  | 3  | 0  | 1  | 0  | 0.040422 | 0.069115 | 0.048772 | 0        |
| pseudogeni-            | 3  | 2  | 0  | 0  | 1  | 2  | 0.232129 | 0.198448 | 0        | 0        |
| pseudogeni-            | 1  | 0  | 0  | 0  | 1  | 0  | 0.183882 | 0        | 0        | 0        |
| antisense DIO2_antis   | 0  | 1  | 1  | 0  | 0  | 2  | 0        | 0.037652 | 0.035426 | 0        |
| lincRNA -              | 23 | 12 | 9  | 13 | 41 | 14 | 0.281659 | 0.188445 | 0.13298  | 0.247098 |
| pseudogeni RAP1A_me    | 1  | 5  | 0  | 3  | 2  | 0  | 0.103969 | 0.666627 | 0        | 0.484123 |
| lincRNA -              | 0  | 0  | 1  | 0  | 0  | 0  | 0        | 0        | 0.126003 | 0        |
| lincRNA -              | 4  | 4  | 8  | 0  | 0  | 0  | 0.32733  | 0.419754 | 0.789885 | 0        |
| pseudogeni Nanog_hon   | 0  | 0  | 0  | 1  | 0  | 0  | 0        | 0        | 0        | 0.079281 |
| lincRNA HIF1A_anti     | 1  | 0  | 0  | 3  | 0  | 1  | 0.071917 | 0        | 0        | 0.334876 |
| lincRNA -              | 0  | 0  | 1  | 0  | 0  | 0  | 0        | 0        | 0.022239 | 0        |
| pseudogeni-            | 10 | 7  | 1  | 0  | 0  | 0  | 0.410955 | 0.368894 | 0.049584 | 0        |
| pseudogeni-            | 0  | 0  | 0  | 0  | 0  | 1  | 0        | 0        | 0        | 0        |
| processed_-            | 2  | 5  | 7  | 8  | 10 | 9  | 0.130613 | 0.418731 | 0.551572 | 0.810917 |
| protein_co KIAA0391    | 7  | 6  | 0  | 5  | 6  | 4  | 0.0851   | 0.093539 | 0        | 0.094348 |
| processed_long_interf  | 0  | 1  | 0  | 0  | 0  | 0  | 0        | 0.068097 | 0        | 0        |
| protein_co Protein_LO  | 15 | 13 | 11 | 0  | 5  | 1  | 1.007665 | 1.119896 | 0.891591 | 0        |
| antisense -            | 1  | 0  | 0  | 0  | 0  | 0  | 0.063537 | 0        | 0        | 0        |
| pseudogeni-            | 0  | 0  | 0  | 1  | 0  | 0  | 0        | 0        | 0        | 0.057716 |
| pseudogeni-            | 0  | 0  | 0  | 1  | 1  | 0  | 0        | 0        | 0        | 0.149445 |
| processed_-            | 1  | 0  | 0  | 8  | 8  | 7  | 0.154753 | 0        | 0        | 1.921579 |
| pseudogeni-            | 0  | 0  | 1  | 0  | 0  | 0  | 0        | 0        | 0.358073 | 0        |
| polymorph olfactory_r  | 0  | 1  | 0  | 3  | 0  | 2  | 0        | 0.063968 | 0        | 0.232276 |
| lincRNA -              | 1  | 0  | 0  | 0  | 0  | 0  | 0.056768 | 0        | 0        | 0        |
| processed_-            | 0  | 1  | 0  | 0  | 0  | 0  | 0        | 0.105122 | 0        | 0        |
| lincRNA -              | 3  | 1  | 2  | 2  | 2  | 3  | 0.245927 | 0.105122 | 0.197816 | 0.254475 |
| antisense -            | 0  | 1  | 0  | 0  | 0  | 0  | 0        | 0.204523 | 0        | 0        |
| lincRNA -              | 1  | 0  | 1  | 7  | 12 | 1  | 0.01441  | 0        | 0.017386 | 0.156564 |
| lincRNA -              | 3  | 0  | 0  | 1  | 1  | 6  | 0.284757 | 0        | 0        | 0.147328 |
| lincRNA -              | 5  | 1  | 3  | 12 | 8  | 7  | 0.451734 | 0.115857 | 0.327026 | 1.68277  |
| lincRNA -              | 0  | 0  | 0  | 8  | 10 | 3  | 0        | 0        | 0        | 0.320439 |
| antisense -            | 0  | 0  | 0  | 0  | 1  | 0  | 0        | 0        | 0        | 0        |
| antisense -            | 4  | 3  | 2  | 0  | 1  | 1  | 0.455243 | 0.437838 | 0.274638 | 0        |
| pseudogeni-            | 0  | 0  | 0  | 1  | 0  | 0  | 0        | 0        | 0        | 0.094889 |
| antisense -            | 7  | 3  | 7  | 1  | 3  | 6  | 0.596782 | 0.327981 | 0.720052 | 0.132327 |
| sense_intrc-           | 0  | 0  | 0  | 0  | 1  | 1  | 0        | 0        | 0        | 0        |

|                        |     |     |     |     |     |     |          |          |          |          |
|------------------------|-----|-----|-----|-----|-----|-----|----------|----------|----------|----------|
| antisense -            | 0   | 0   | 0   | 0   | 1   | 0   | 0        | 0        | 0        | 0        |
| protein_co melanocori  | 65  | 60  | 66  | 8   | 24  | 20  | 0.838012 | 0.991968 | 1.026666 | 0.160088 |
| antisense -            | 0   | 0   | 2   | 0   | 0   | 0   | 0        | 0        | 0.288651 | 0        |
| pseudogen: eukaryotic_ | 2   | 1   | 0   | 0   | 0   | 0   | 0.068855 | 0.044148 | 0        | 0        |
| protein_co Uncharacte  | 0   | 0   | 1   | 0   | 2   | 1   | 0        | 0        | 0.07319  | 0        |
| antisense -            | 0   | 1   | 1   | 1   | 0   | 2   | 0        | 0.108734 | 0.102307 | 0.131609 |
| lincRNA -              | 1   | 0   | 0   | 0   | 0   | 0   | 0.224354 | 0        | 0        | 0        |
| antisense -            | 0   | 0   | 0   | 1   | 0   | 0   | 0        | 0        | 0        | 0.155845 |
| pseudogen: -           | 0   | 1   | 0   | 0   | 0   | 0   | 0        | 0.045484 | 0        | 0        |
| lincRNA -              | 4   | 2   | 0   | 8   | 3   | 1   | 0.374371 | 0.240039 | 0        | 1.162153 |
| antisense -            | 4   | 4   | 1   | 1   | 2   | 3   | 0.261955 | 0.335921 | 0.079016 | 0.101648 |
| lincRNA -              | 0   | 0   | 1   | 0   | 0   | 0   | 0        | 0        | 0.103999 | 0        |
| lincRNA -              | 0   | 0   | 2   | 0   | 0   | 0   | 0        | 0        | 0.135836 | 0        |
| pseudogen: eukaryotic_ | 6   | 3   | 3   | 3   | 1   | 0   | 0.825044 | 0.529001 | 0.497732 | 0.640292 |
| lincRNA -              | 0   | 0   | 3   | 0   | 0   | 0   | 0        | 0        | 0.259521 | 0        |
| pseudogen: -           | 1   | 0   | 0   | 0   | 1   | 0   | 0.046288 | 0        | 0        | 0        |
| protein_co HCG18161    | 10  | 10  | 4   | 0   | 0   | 1   | 0.767431 | 0.984121 | 0.37038  | 0        |
| lincRNA -              | 0   | 0   | 0   | 1   | 3   | 0   | 0        | 0        | 0        | 0.109608 |
| lincRNA -              | 1   | 1   | 1   | 0   | 0   | 0   | 0.122109 | 0.156588 | 0.147332 | 0        |
| antisense -            | 0   | 0   | 0   | 1   | 0   | 0   | 0        | 0        | 0        | 0.139961 |
| protein_co centrosom:  | 392 | 290 | 336 | 441 | 551 | 561 | 5.048307 | 4.789245 | 5.22092  | 8.815131 |
| antisense -            | 8   | 2   | 4   | 4   | 3   | 4   | 0.105727 | 0.033895 | 0.063783 | 0.082052 |
| pseudogen: -           | 0   | 1   | 0   | 0   | 0   | 0   | 0        | 0.115634 | 0        | 0        |
| pseudogen: -           | 6   | 3   | 0   | 2   | 3   | 1   | 0.806132 | 0.516875 | 0        | 0.417076 |
| pseudogen: heterogene  | 12  | 5   | 9   | 8   | 1   | 13  | 0.734569 | 0.392492 | 0.664725 | 0.760102 |
| lincRNA -              | 3   | 1   | 3   | 0   | 0   | 0   | 0.252097 | 0.107759 | 0.304169 | 0        |
| lincRNA -              | 2   | 0   | 0   | 7   | 0   | 8   | 0.127246 | 0        | 0        | 0.69126  |
| sense_intrc -          | 11  | 17  | 10  | 13  | 15  | 19  | 0.967711 | 1.917836 | 1.061454 | 1.775117 |
| lincRNA -              | 4   | 2   | 1   | 1   | 1   | 0   | 0.269871 | 0.173035 | 0.081404 | 0.104719 |
| lincRNA -              | 0   | 0   | 0   | 1   | 5   | 2   | 0        | 0        | 0        | 0.573069 |
| pseudogen: zinc_finger | 4   | 5   | 1   | 3   | 1   | 6   | 0.238323 | 0.382019 | 0.071888 | 0.277433 |
| lincRNA -              | 0   | 0   | 0   | 1   | 0   | 0   | 0        | 0        | 0        | 0.20735  |
| lincRNA -              | 1   | 0   | 0   | 0   | 0   | 0   | 0.086994 | 0        | 0        | 0        |
| antisense FOXN3_ant    | 19  | 13  | 9   | 13  | 45  | 31  | 0.827215 | 0.725801 | 0.472776 | 0.878493 |
| processed_ -           | 2   | 1   | 2   | 1   | 2   | 5   | 0.202112 | 0.12959  | 0.24386  | 0.156853 |
| antisense -            | 0   | 0   | 0   | 1   | 2   | 0   | 0        | 0        | 0        | 0.122732 |
| lincRNA -              | 0   | 0   | 0   | 0   | 0   | 1   | 0        | 0        | 0        | 0        |
| lincRNA -              | 7   | 5   | 9   | 2   | 1   | 1   | 0.142647 | 0.13066  | 0.221286 | 0.063259 |
| pseudogen: -           | 0   | 0   | 0   | 5   | 0   | 2   | 0        | 0        | 0        | 0.53991  |
| lincRNA -              | 2   | 5   | 3   | 1   | 0   | 0   | 0.167764 | 0.537834 | 0.303625 | 0.130196 |
| antisense -            | 5   | 4   | 3   | 1   | 1   | 0   | 0.081775 | 0.083892 | 0.0592   | 0.025385 |
| antisense -            | 3   | 2   | 2   | 1   | 1   | 0   | 0.10351  | 0.088491 | 0.08326  | 0.053554 |
| processed_ -           | 1   | 0   | 0   | 2   | 3   | 1   | 0.057675 | 0        | 0        | 0.17904  |
| lincRNA -              | 16  | 13  | 15  | 0   | 0   | 0   | 0.852546 | 0.888281 | 0.964355 | 0        |
| antisense -            | 1   | 0   | 0   | 4   | 2   | 3   | 0.060348 | 0        | 0        | 0.374671 |
| lincRNA -              | 0   | 0   | 2   | 0   | 0   | 0   | 0        | 0        | 0.045996 | 0        |
| protein_co Tubulin_be  | 119 | 83  | 84  | 17  | 31  | 58  | 1.501995 | 1.343411 | 1.279231 | 0.333044 |
| antisense -            | 0   | 3   | 3   | 7   | 3   | 2   | 0        | 0.501082 | 0.471463 | 1.415163 |
| pseudogen: -           | 4   | 4   | 5   | 6   | 2   | 4   | 0.153864 | 0.197309 | 0.232057 | 0.358227 |
| antisense -            | 44  | 36  | 18  | 1   | 2   | 0   | 3.606924 | 3.784393 | 1.780348 | 0.127237 |
| pseudogen: -           | 0   | 1   | 0   | 0   | 1   | 0   | 0        | 0.020198 | 0        | 0        |
| lincRNA long_interf    | 0   | 0   | 0   | 1   | 0   | 0   | 0        | 0        | 0        | 0.106715 |
| lincRNA -              | 0   | 0   | 5   | 3   | 1   | 3   | 0        | 0        | 0.154916 | 0.119573 |
| antisense -            | 8   | 16  | 12  | 4   | 1   | 2   | 0.662756 | 1.699782 | 1.199481 | 0.514345 |
| pseudogen: -           | 0   | 1   | 4   | 1   | 0   | 1   | 0        | 0.226052 | 0.850759 | 0.273608 |
| pseudogen: -           | 1   | 0   | 1   | 1   | 2   | 0   | 0.13359  | 0        | 0.161184 | 0.20735  |
| lincRNA -              | 1   | 0   | 0   | 0   | 0   | 0   | 0.182451 | 0        | 0        | 0        |
| antisense -            | 0   | 1   | 0   | 0   | 0   | 0   | 0        | 0.158236 | 0        | 0        |
| pseudogen: NADH_deh    | 0   | 0   | 0   | 0   | 1   | 0   | 0        | 0        | 0        | 0        |
| lincRNA -              | 7   | 10  | 8   | 0   | 0   | 0   | 0.492099 | 0.901496 | 0.678567 | 0        |
| pseudogen: hypoxia_in  | 0   | 0   | 1   | 2   | 0   | 0   | 0        | 0        | 0.323289 | 0.831769 |
| lincRNA -              | 0   | 0   | 0   | 0   | 0   | 2   | 0        | 0        | 0        | 0        |
| pseudogen: eukaryotic_ | 0   | 0   | 0   | 1   | 0   | 0   | 0        | 0        | 0        | 0.176222 |
| antisense -            | 3   | 1   | 6   | 1   | 6   | 5   | 0.424985 | 0.181661 | 1.025538 | 0.219879 |
| processed_ -           | 4   | 2   | 4   | 1   | 1   | 1   | 0.38122  | 0.24443  | 0.459963 | 0.147926 |

|                        |    |    |    |    |    |     |          |          |          |          |
|------------------------|----|----|----|----|----|-----|----------|----------|----------|----------|
| protein_co Ubiquitin-c | 4  | 1  | 0  | 0  | 0  | 1   | 0.064631 | 0.02072  | 0        | 0        |
| antisense -            | 17 | 23 | 23 | 28 | 38 | 12  | 2.177952 | 3.778648 | 3.555291 | 5.567854 |
| protein_co transmembr  | 1  | 0  | 0  | 23 | 32 | 16  | 0.018681 | 0        | 0        | 0.666907 |
| pseudogeni -           | 1  | 0  | 0  | 1  | 0  | 0   | 0.189838 | 0        | 0        | 0.294655 |
| pseudogeni neurofibro  | 0  | 0  | 0  | 2  | 1  | 0   | 0        | 0        | 0        | 0.058108 |
| lincRNA -              | 7  | 7  | 14 | 2  | 3  | 1   | 0.113027 | 0.144941 | 0.272747 | 0.050124 |
| antisense -            | 1  | 0  | 3  | 3  | 1  | 0   | 0.07802  | 0        | 0.282407 | 0.363294 |
| pseudogeni -           | 0  | 1  | 0  | 0  | 0  | 0   | 0        | 0.010137 | 0        | 0        |
| antisense -            | 17 | 12 | 14 | 13 | 9  | 27  | 1.249421 | 1.130968 | 1.241469 | 1.482974 |
| lincRNA -              | 19 | 8  | 18 | 0  | 0  | 0   | 0.944762 | 0.510115 | 1.079914 | 0        |
| lincRNA -              | 1  | 1  | 5  | 5  | 4  | 1   | 0.07961  | 0.102088 | 0.480267 | 0.617825 |
| processed_ -           | 3  | 1  | 1  | 0  | 0  | 0   | 0.142812 | 0.061045 | 0.057437 | 0        |
| pseudogeni -           | 1  | 0  | 0  | 0  | 1  | 0   | 0.033445 | 0        | 0        | 0        |
| pseudogeni -           | 1  | 2  | 2  | 1  | 0  | 2   | 0.197017 | 0.505292 | 0.475424 | 0.305797 |
| pseudogeni -           | 3  | 2  | 6  | 4  | 6  | 2   | 0.486748 | 0.416123 | 1.174578 | 1.007333 |
| processed_ -           | 3  | 2  | 3  | 0  | 0  | 0   | 0.279107 | 0.23861  | 0.336759 | 0        |
| pseudogeni -           | 0  | 1  | 0  | 0  | 0  | 0   | 0        | 0.186738 | 0        | 0        |
| lincRNA long_interf    | 0  | 0  | 0  | 0  | 1  | 0   | 0        | 0        | 0        | 0        |
| lincRNA -              | 0  | 0  | 1  | 0  | 0  | 0   | 0        | 0        | 0.075434 | 0        |
| protein_co FPGT-TNNI   | 4  | 8  | 9  | 3  | 5  | 1   | 0.02479  | 0.063579 | 0.067298 | 0.028858 |
| lincRNA -              | 3  | 0  | 1  | 0  | 1  | 0   | 0.254376 | 0        | 0.102307 | 0        |
| pseudogeni endosulfini | 4  | 1  | 1  | 7  | 2  | 3   | 0.532841 | 0.170823 | 0.160726 | 1.447326 |
| lincRNA -              | 0  | 0  | 0  | 0  | 0  | 3   | 0        | 0        | 0        | 0        |
| antisense -            | 0  | 0  | 2  | 0  | 2  | 0   | 0        | 0        | 0.197816 | 0        |
| antisense -            | 0  | 0  | 1  | 0  | 1  | 0   | 0        | 0        | 0.20278  | 0        |
| antisense -            | 0  | 1  | 3  | 0  | 2  | 0   | 0        | 0.084929 | 0.239727 | 0        |
| antisense -            | 22 | 8  | 8  | 76 | 61 | 107 | 1.314115 | 0.612788 | 0.576566 | 7.046197 |
| pseudogeni cysteine_ar | 4  | 4  | 2  | 0  | 0  | 0   | 0.172073 | 0.22066  | 0.103808 | 0        |
| pseudogeni -           | 0  | 0  | 0  | 0  | 1  | 1   | 0        | 0        | 0        | 0        |
| lincRNA -              | 0  | 0  | 0  | 1  | 0  | 1   | 0        | 0        | 0        | 0.09627  |
| pseudogeni phosphatic  | 0  | 0  | 0  | 1  | 0  | 0   | 0        | 0        | 0        | 0.142705 |
| lincRNA -              | 0  | 0  | 1  | 0  | 0  | 0   | 0        | 0        | 0.137319 | 0        |
| antisense ACTN1_ant    | 0  | 1  | 2  | 1  | 2  | 2   | 0        | 0.100384 | 0.1889   | 0.121502 |
| pseudogeni -           | 0  | 0  | 0  | 2  | 1  | 1   | 0        | 0        | 0        | 0.425613 |
| antisense -            | 11 | 11 | 7  | 7  | 13 | 2   | 0.900157 | 1.154324 | 0.691149 | 0.889108 |
| protein_co Uncharacte  | 0  | 0  | 3  | 3  | 2  | 0   | 0        | 0        | 0.297766 | 0.383052 |
| lincRNA long_interf    | 0  | 1  | 1  | 2  | 2  | 4   | 0        | 0.01338  | 0.012589 | 0.03239  |
| lincRNA -              | 7  | 10 | 9  | 8  | 11 | 19  | 0.735942 | 1.348202 | 1.141658 | 1.305467 |
| lincRNA -              | 3  | 1  | 3  | 0  | 0  | 0   | 0.134741 | 0.057596 | 0.162573 | 0        |
| processed_ FOXN3_ant   | 0  | 0  | 0  | 2  | 2  | 4   | 0        | 0        | 0        | 0.11534  |
| protein_co POC1B-GAL   | 2  | 1  | 3  | 6  | 1  | 0   | 0.017252 | 0.011061 | 0.031223 | 0.080331 |
| pseudogeni polypyrimi  | 0  | 2  | 1  | 0  | 1  | 0   | 0        | 0.075115 | 0.035338 | 0        |
| pseudogeni -           | 0  | 2  | 0  | 1  | 1  | 0   | 0        | 0.302921 | 0        | 0.183324 |
| antisense -            | 40 | 28 | 31 | 1  | 2  | 0   | 2.50414  | 2.247843 | 2.341576 | 0.097169 |
| lincRNA -              | 2  | 1  | 1  | 1  | 10 | 7   | 0.176943 | 0.113452 | 0.106746 | 0.13732  |
| pseudogeni -           | 1  | 1  | 2  | 1  | 3  | 2   | 0.1042   | 0.133622 | 0.251447 | 0.161733 |
| processed_ -           | 0  | 0  | 0  | 2  | 0  | 0   | 0        | 0        | 0        | 0.384062 |
| antisense -            | 3  | 2  | 3  | 9  | 8  | 2   | 0.313996 | 0.268437 | 0.378854 | 1.462094 |
| pseudogeni -           | 0  | 1  | 0  | 1  | 0  | 0   | 0        | 0.050276 | 0        | 0.060853 |
| processed_ long_interf | 3  | 7  | 5  | 0  | 0  | 0   | 0.040656 | 0.12165  | 0.081757 | 0        |
| pseudogeni -           | 36 | 23 | 26 | 22 | 30 | 4   | 2.374178 | 1.945127 | 2.068865 | 2.251977 |
| pseudogeni -           | 0  | 1  | 1  | 0  | 0  | 0   | 0        | 0.035391 | 0.033299 | 0        |
| antisense -            | 3  | 2  | 8  | 2  | 2  | 4   | 0.313996 | 0.268437 | 1.010277 | 0.32491  |
| lincRNA -              | 0  | 2  | 0  | 0  | 0  | 0   | 0        | 0.239561 | 0        | 0        |
| antisense -            | 4  | 7  | 4  | 4  | 6  | 3   | 0.336129 | 0.754316 | 0.405559 | 0.521719 |
| antisense -            | 5  | 8  | 12 | 6  | 4  | 10  | 0.294535 | 0.60432  | 0.852897 | 0.548591 |
| protein_co small_inte  | 4  | 1  | 1  | 5  | 14 | 10  | 0.195988 | 0.062832 | 0.059118 | 0.38025  |
| pseudogeni -           | 6  | 3  | 5  | 0  | 0  | 0   | 1.399702 | 0.89746  | 1.407351 | 0        |
| pseudogeni trans-golgi | 1  | 0  | 0  | 0  | 0  | 0   | 0.075997 | 0        | 0        | 0        |
| lincRNA -              | 1  | 0  | 2  | 2  | 1  | 0   | 0.074193 | 0        | 0.179036 | 0.230316 |
| antisense -            | 0  | 1  | 1  | 3  | 1  | 4   | 0        | 0.093224 | 0.087714 | 0.338511 |
| lincRNA -              | 1  | 1  | 0  | 0  | 0  | 0   | 0.178289 | 0.22863  | 0        | 0        |
| lincRNA long_interf    | 17 | 6  | 6  | 27 | 42 | 33  | 0.276302 | 0.125053 | 0.117661 | 0.681128 |
| lincRNA -              | 0  | 0  | 1  | 2  | 0  | 1   | 0        | 0        | 0.103052 | 0.265136 |
| protein_co Uncharacte  | 0  | 0  | 0  | 1  | 0  | 0   | 0        | 0        | 0        | 0.127684 |

|                        |    |    |    |     |     |     |          |          |          |          |
|------------------------|----|----|----|-----|-----|-----|----------|----------|----------|----------|
| lincRNA -              | 0  | 0  | 1  | 0   | 0   | 0   | 0        | 0        | 0.021095 | 0        |
| antisense -            | 6  | 0  | 0  | 2   | 1   | 0   | 0.766594 | 0        | 0        | 0.39662  |
| processed_-            | 2  | 3  | 5  | 7   | 10  | 3   | 0.157879 | 0.303686 | 0.476225 | 0.857674 |
| antisense -            | 5  | 9  | 4  | 1   | 2   | 5   | 0.457018 | 1.054909 | 0.441135 | 0.141871 |
| pseudogeni CAP_adeny   | 1  | 1  | 0  | 9   | 6   | 25  | 0.033734 | 0.043259 | 0        | 0.471236 |
| lincRNA -              | 6  | 2  | 8  | 113 | 144 | 55  | 0.447282 | 0.191192 | 0.719561 | 13.07491 |
| pseudogeni -           | 6  | 5  | 6  | 7   | 3   | 5   | 0.535886 | 0.572665 | 0.646577 | 0.970397 |
| lincRNA ADAM_met       | 0  | 1  | 0  | 0   | 2   | 0   | 0        | 0.019819 | 0        | 0        |
| pseudogeni -           | 0  | 1  | 0  | 0   | 1   | 0   | 0        | 0.337808 | 0        | 0        |
| pseudogeni -           | 0  | 1  | 1  | 0   | 0   | 0   | 0        | 0.082483 | 0.077607 | 0        |
| pseudogeni -           | 6  | 10 | 17 | 1   | 1   | 0   | 0.316112 | 0.675616 | 1.080656 | 0.081775 |
| processed_-            | 0  | 2  | 3  | 0   | 6   | 0   | 0        | 0.097219 | 0.137208 | 0        |
| pseudogeni DEAD_(Asp   | 6  | 1  | 2  | 1   | 1   | 1   | 0.141235 | 0.030186 | 0.056803 | 0.036536 |
| antisense -            | 19 | 18 | 20 | 0   | 0   | 0   | 0.809918 | 0.983942 | 1.028646 | 0        |
| pseudogeni -           | 0  | 0  | 0  | 0   | 1   | 1   | 0        | 0        | 0        | 0        |
| lincRNA -              | 0  | 0  | 0  | 1   | 0   | 0   | 0        | 0        | 0        | 0.151625 |
| antisense -            | 8  | 4  | 3  | 5   | 9   | 5   | 0.144834 | 0.092865 | 0.065531 | 0.140502 |
| antisense -            | 0  | 2  | 1  | 1   | 1   | 1   | 0        | 0.047722 | 0.022451 | 0.028881 |
| processed_-            | 0  | 0  | 0  | 1   | 0   | 0   | 0        | 0        | 0        | 0.031411 |
| antisense -            | 0  | 1  | 0  | 1   | 4   | 0   | 0        | 0.131288 | 0        | 0.158908 |
| processed_-            | 0  | 0  | 0  | 1   | 0   | 0   | 0        | 0        | 0        | 0.153869 |
| lincRNA -              | 4  | 2  | 2  | 10  | 2   | 3   | 0.290791 | 0.186449 | 0.175428 | 1.128369 |
| antisense -            | 0  | 1  | 0  | 0   | 0   | 0   | 0        | 0.04683  | 0        | 0        |
| pseudogeni -           | 2  | 1  | 5  | 3   | 1   | 7   | 0.143176 | 0.091801 | 0.431874 | 0.333343 |
| pseudogeni -           | 0  | 1  | 0  | 0   | 3   | 3   | 0        | 0.076991 | 0        | 0        |
| sense_intrc -          | 0  | 0  | 0  | 1   | 0   | 0   | 0        | 0        | 0        | 0.418275 |
| pseudogeni -           | 2  | 2  | 3  | 4   | 1   | 2   | 0.538966 | 0.691147 | 0.97544  | 1.673099 |
| sense_intrc HMBOX1_i   | 0  | 0  | 1  | 2   | 0   | 0   | 0        | 0        | 0.163042 | 0.41948  |
| lincRNA -              | 0  | 0  | 0  | 0   | 0   | 1   | 0        | 0        | 0        | 0        |
| lincRNA -              | 1  | 2  | 2  | 6   | 1   | 1   | 0.05446  | 0.139674 | 0.131418 | 0.507176 |
| antisense -            | 0  | 3  | 1  | 0   | 1   | 1   | 0        | 0.353705 | 0.110932 | 0        |
| protein_co Uncharacte  | 1  | 1  | 0  | 0   | 1   | 4   | 0.099343 | 0.127394 | 0        | 0        |
| lincRNA -              | 0  | 0  | 0  | 199 | 216 | 241 | 0        | 0        | 0        | 25.32025 |
| sense_intrc -          | 0  | 0  | 0  | 0   | 3   | 0   | 0        | 0        | 0        | 0        |
| pseudogeni protein_kir | 1  | 2  | 1  | 1   | 3   | 3   | 0.041791 | 0.107183 | 0.050424 | 0.064866 |
| protein_co integrin_be | 74 | 56 | 65 | 1   | 2   | 0   | 0.868551 | 0.842871 | 0.920503 | 0.018218 |
| antisense -            | 2  | 5  | 6  | 4   | 5   | 1   | 0.188313 | 0.603713 | 0.681633 | 0.584577 |
| antisense -            | 0  | 0  | 0  | 3   | 0   | 3   | 0        | 0        | 0        | 0.299505 |
| antisense -            | 6  | 5  | 10 | 1   | 2   | 0   | 0.593545 | 0.634281 | 1.193576 | 0.153544 |
| lincRNA -              | 2  | 0  | 2  | 0   | 0   | 2   | 0.239847 | 0        | 0.289389 | 0        |
| pseudogeni -           | 0  | 0  | 0  | 1   | 2   | 0   | 0        | 0        | 0        | 0.14853  |
| antisense -            | 3  | 3  | 1  | 2   | 0   | 4   | 0.058784 | 0.075382 | 0.023642 | 0.060827 |
| lincRNA -              | 0  | 0  | 0  | 1   | 0   | 0   | 0        | 0        | 0        | 0.113188 |
| protein_co solute_carr | 7  | 8  | 3  | 3   | 1   | 2   | 0.27467  | 0.402543 | 0.142031 | 0.182711 |
| lincRNA -              | 5  | 1  | 1  | 0   | 0   | 0   | 0.204403 | 0.052424 | 0.049325 | 0        |
| pseudogeni -           | 0  | 0  | 0  | 1   | 0   | 0   | 0        | 0        | 0        | 0.18519  |
| pseudogeni -           | 1  | 0  | 1  | 1   | 0   | 0   | 0.049254 | 0        | 0.059428 | 0.076449 |
| lincRNA -              | 4  | 0  | 0  | 14  | 33  | 15  | 0.117006 | 0        | 0        | 0.635631 |
| pseudogeni -           | 4  | 2  | 3  | 0   | 1   | 3   | 0.631515 | 0.404914 | 0.57147  | 0        |
| pseudogeni -           | 1  | 4  | 0  | 3   | 1   | 0   | 0.026079 | 0.13377  | 0        | 0.121435 |
| antisense -            | 4  | 0  | 1  | 0   | 1   | 0   | 0.466567 | 0        | 0.140735 | 0        |
| lincRNA -              | 0  | 0  | 0  | 2   | 4   | 3   | 0        | 0        | 0        | 0.259465 |
| lincRNA -              | 0  | 0  | 0  | 0   | 1   | 0   | 0        | 0        | 0        | 0        |
| antisense -            | 0  | 0  | 0  | 2   | 1   | 0   | 0        | 0        | 0        | 0.075498 |
| processed_-            | 0  | 0  | 1  | 0   | 0   | 0   | 0        | 0        | 0.114991 | 0        |
| antisense -            | 8  | 4  | 9  | 7   | 9   | 12  | 0.207593 | 0.133104 | 0.281782 | 0.281936 |
| antisense -            | 25 | 16 | 26 | 12  | 20  | 18  | 2.162824 | 1.775049 | 2.713954 | 1.611361 |
| antisense -            | 0  | 0  | 0  | 5   | 0   | 0   | 0        | 0        | 0        | 0.189432 |
| sense_intrc -          | 0  | 1  | 1  | 1   | 0   | 0   | 0        | 0.116531 | 0.109642 | 0.141046 |
| lincRNA -              | 0  | 1  | 0  | 0   | 0   | 0   | 0        | 0.148836 | 0        | 0        |
| pseudogeni -           | 0  | 0  | 1  | 0   | 0   | 0   | 0        | 0        | 0.090521 | 0        |
| pseudogeni -           | 1  | 0  | 3  | 1   | 1   | 1   | 0.175618 | 0        | 0.63568  | 0.272584 |
| antisense -            | 2  | 1  | 7  | 36  | 24  | 46  | 0.069777 | 0.044739 | 0.294664 | 1.949459 |
| lincRNA -              | 2  | 0  | 0  | 2   | 0   | 0   | 0.175618 | 0        | 0        | 0.272584 |
| antisense -            | 0  | 0  | 0  | 0   | 2   | 1   | 0        | 0        | 0        | 0        |

|                       |     |     |    |     |     |     |          |          |          |          |
|-----------------------|-----|-----|----|-----|-----|-----|----------|----------|----------|----------|
| lincRNA -             | 14  | 5   | 2  | 0   | 0   | 0   | 1.166004 | 0.534012 | 0.200979 | 0        |
| antisense -           | 0   | 1   | 1  | 0   | 2   | 0   | 0        | 0.105862 | 0.099605 | 0        |
| antisense -           | 2   | 0   | 0  | 1   | 1   | 0   | 0.124874 | 0        | 0        | 0.096911 |
| lincRNA -             | 1   | 1   | 2  | 0   | 0   | 0   | 0.06252  | 0.080173 | 0.150868 | 0        |
| antisense -           | 0   | 0   | 0  | 0   | 0   | 1   | 0        | 0        | 0        | 0        |
| pseudogeni-           | 5   | 1   | 0  | 3   | 0   | 0   | 0.254837 | 0.065358 | 0        | 0.237325 |
| antisense -           | 23  | 15  | 20 | 5   | 12  | 17  | 2.412685 | 2.017778 | 2.531343 | 0.814092 |
| protein_co Uncharacte | 0   | 0   | 0  | 1   | 0   | 0   | 0        | 0        | 0        | 0.026303 |
| antisense -           | 30  | 27  | 31 | 12  | 23  | 7   | 1.204367 | 1.389987 | 1.501576 | 0.747738 |
| antisense -           | 0   | 0   | 0  | 5   | 5   | 7   | 0        | 0        | 0        | 0.585047 |
| pseudogeni-           | 7   | 7   | 4  | 4   | 5   | 8   | 0.042135 | 0.054032 | 0.02905  | 0.037371 |
| antisense -           | 0   | 0   | 0  | 1   | 0   | 2   | 0        | 0        | 0        | 0.188062 |
| antisense -           | 2   | 4   | 2  | 0   | 3   | 2   | 0.1406   | 0.360598 | 0.169642 | 0        |
| pseudogeni-           | 0   | 1   | 0  | 1   | 2   | 0   | 0        | 0.041044 | 0        | 0.049679 |
| protein_co ZHX1-C8OF  | 1   | 2   | 0  | 0   | 3   | 0   | 0.037363 | 0.095824 | 0        | 0        |
| pseudogeni-           | 3   | 2   | 0  | 0   | 1   | 0   | 0.348193 | 0.297672 | 0        | 0        |
| antisense -           | 2   | 1   | 7  | 2   | 2   | 0   | 0.116208 | 0.07451  | 0.490742 | 0.180371 |
| pseudogeni-           | 5   | 4   | 4  | 11  | 14  | 4   | 0.141065 | 0.144717 | 0.136162 | 0.481695 |
| processed_-           | 7   | 2   | 16 | 0   | 1   | 3   | 0.195027 | 0.071455 | 0.537854 | 0        |
| pseudogeni-           | 1   | 0   | 0  | 0   | 0   | 0   | 0.127419 | 0        | 0        | 0        |
| pseudogeni-           | 17  | 13  | 9  | 3   | 11  | 9   | 2.711328 | 2.658801 | 1.731903 | 0.742651 |
| antisense -           | 13  | 5   | 4  | 7   | 6   | 8   | 0.150177 | 0.07407  | 0.055753 | 0.125513 |
| lincRNA -             | 0   | 0   | 0  | 2   | 4   | 1   | 0        | 0        | 0        | 0.194859 |
| antisense -           | 0   | 0   | 6  | 0   | 1   | 4   | 0        | 0        | 0.75602  | 0        |
| antisense -           | 1   | 0   | 1  | 3   | 3   | 4   | 0.022024 | 0        | 0.026574 | 0.102555 |
| lincRNA -             | 0   | 2   | 1  | 0   | 2   | 1   | 0        | 0.137597 | 0.064732 | 0        |
| pseudogeni-           | 16  | 13  | 7  | 19  | 48  | 17  | 0.646759 | 0.673868 | 0.341404 | 1.192083 |
| antisense -           | 120 | 109 | 99 | 155 | 228 | 185 | 9.472731 | 11.03392 | 9.429251 | 18.99136 |
| pseudogeni-           | 2   | 0   | 0  | 2   | 7   | 1   | 0.053043 | 0        | 0        | 0.08233  |
| processed_-           | 0   | 0   | 0  | 1   | 0   | 0   | 0        | 0        | 0        | 0.054232 |
| pseudogeni-           | 0   | 0   | 1  | 0   | 0   | 0   | 0        | 0        | 0.142508 | 0        |
| lincRNA -             | 3   | 8   | 6  | 0   | 0   | 0   | 0.356127 | 1.217819 | 0.859375 | 0        |
| antisense -           | 0   | 0   | 1  | 0   | 0   | 0   | 0        | 0        | 0.077607 | 0        |
| antisense -           | 3   | 5   | 6  | 3   | 1   | 4   | 0.182926 | 0.390961 | 0.441421 | 0.283926 |
| pseudogeni-           | 2   | 0   | 6  | 7   | 6   | 2   | 0.154243 | 0        | 0.558311 | 0.837925 |
| processed_-           | 8   | 8   | 19 | 7   | 28  | 12  | 0.272221 | 0.349084 | 0.780069 | 0.369709 |
| lincRNA -             | 1   | 0   | 0  | 0   | 0   | 1   | 0.063279 | 0        | 0        | 0        |
| lincRNA -             | 2   | 0   | 1  | 0   | 0   | 0   | 0.167166 | 0        | 0.100848 | 0        |
| antisense -           | 4   | 4   | 3  | 8   | 7   | 4   | 0.336733 | 0.431812 | 0.304715 | 1.045311 |
| antisense -           | 0   | 0   | 2  | 0   | 0   | 1   | 0        | 0        | 0.105551 | 0        |
| antisense -           | 0   | 0   | 0  | 3   | 3   | 1   | 0        | 0        | 0        | 0.485199 |
| antisense -           | 1   | 0   | 1  | 0   | 0   | 0   | 0.019546 | 0        | 0.023583 | 0        |
| antisense -           | 0   | 0   | 0  | 1   | 0   | 1   | 0        | 0        | 0        | 0.040865 |
| pseudogeni-           | 0   | 0   | 0  | 2   | 1   | 0   | 0        | 0        | 0        | 0.059195 |
| lincRNA -             | 6   | 2   | 3  | 0   | 0   | 0   | 0.440282 | 0.1882   | 0.265613 | 0        |
| antisense -           | 0   | 0   | 0  | 1   | 0   | 0   | 0        | 0        | 0        | 0.125266 |
| lincRNA -             | 1   | 0   | 2  | 4   | 2   | 1   | 0.012294 | 0        | 0.029667 | 0.076329 |
| protein_co Uncharacte | 15  | 14  | 21 | 3   | 6   | 9   | 1.05767  | 1.26589  | 1.786595 | 0.32833  |
| antisense -           | 1   | 0   | 3  | 9   | 10  | 19  | 0.080291 | 0        | 0.290628 | 1.121607 |
| lincRNA -             | 0   | 0   | 0  | 1   | 4   | 0   | 0        | 0        | 0        | 0.130899 |
| 3prime_ov-            | 57  | 41  | 39 | 23  | 22  | 22  | 4.841904 | 4.466162 | 3.997182 | 3.032492 |
| antisense -           | 3   | 3   | 2  | 1   | 0   | 1   | 0.213136 | 0.273317 | 0.171441 | 0.110272 |
| antisense -           | 86  | 46  | 52 | 1   | 0   | 2   | 1.354111 | 0.928801 | 0.987887 | 0.024439 |
| lincRNA -             | 3   | 2   | 1  | 0   | 0   | 0   | 0.213784 | 0.182765 | 0.085981 | 0        |
| pseudogeni-           | 0   | 0   | 0  | 6   | 12  | 3   | 0        | 0        | 0        | 0.210043 |
| antisense -           | 2   | 1   | 2  | 6   | 15  | 0   | 0.190998 | 0.122464 | 0.23045  | 0.889366 |
| sense_intrc-          | 0   | 0   | 0  | 0   | 0   | 1   | 0        | 0        | 0        | 0        |
| pseudogeni DDB1_and_  | 10  | 6   | 4  | 1   | 0   | 0   | 0.351499 | 0.270449 | 0.169642 | 0.054558 |
| lincRNA -             | 1   | 1   | 0  | 0   | 0   | 0   | 0.018976 | 0.024334 | 0        | 0        |
| pseudogeni-           | 4   | 7   | 5  | 0   | 2   | 4   | 0.153486 | 0.344442 | 0.231487 | 0        |
| protein_co growth_ho  | 0   | 0   | 0  | 1   | 0   | 0   | 0        | 0        | 0        | 0.087687 |
| pseudogeni H3_histone | 2   | 0   | 0  | 1   | 1   | 1   | 0.280779 | 0        | 0        | 0.217904 |
| pseudogeni-           | 2   | 4   | 2  | 0   | 1   | 0   | 0.272616 | 0.699184 | 0.328927 | 0        |
| pseudogeni-           | 0   | 0   | 0  | 0   | 0   | 1   | 0        | 0        | 0        | 0        |
| sense_intrc-          | 0   | 1   | 0  | 0   | 3   | 1   | 0        | 0.126323 | 0        | 0        |

|                         |     |     |     |     |     |     |          |          |          |          |
|-------------------------|-----|-----|-----|-----|-----|-----|----------|----------|----------|----------|
| pseudogen: -            | 1   | 0   | 1   | 1   | 2   | 2   | 0.064057 | 0        | 0.077289 | 0.099426 |
| sense_intrc -           | 7   | 0   | 1   | 1   | 3   | 3   | 0.861496 | 0        | 0.148492 | 0.191023 |
| sense_intrc -           | 2   | 0   | 2   | 2   | 3   | 1   | 0.178289 | 0        | 0.215116 | 0.276729 |
| lincRNA -               | 0   | 0   | 0   | 1   | 1   | 0   | 0        | 0        | 0        | 0.160308 |
| pseudogen: elongation_  | 0   | 0   | 0   | 2   | 1   | 1   | 0        | 0        | 0        | 0.080956 |
| pseudogen: iron-sulfur_ | 0   | 0   | 0   | 1   | 1   | 0   | 0        | 0        | 0        | 0.543133 |
| antisense -             | 7   | 3   | 3   | 2   | 0   | 5   | 0.340488 | 0.187126 | 0.176065 | 0.150995 |
| antisense -             | 7   | 9   | 6   | 11  | 6   | 10  | 0.604475 | 0.996626 | 0.625144 | 1.474361 |
| processed_ -            | 0   | 0   | 1   | 0   | 0   | 0   | 0        | 0        | 0        | 0.163513 |
| pseudogen: -            | 0   | 0   | 1   | 2   | 0   | 0   | 0        | 0        | 0        | 0.052482 |
| pseudogen: hect_doma    | 5   | 2   | 2   | 4   | 0   | 1   | 0.322934 | 0.165647 | 0.155855 | 0.400991 |
| sense_intrc -           | 0   | 0   | 0   | 1   | 1   | 1   | 0        | 0        | 0        | 0.16965  |
| antisense -             | 4   | 4   | 4   | 9   | 4   | 9   | 0.219369 | 0.281309 | 0.264681 | 0.766103 |
| antisense -             | 3   | 0   | 0   | 4   | 5   | 2   | 0.020417 | 0        | 0        | 0.042252 |
| antisense -             | 1   | 1   | 2   | 0   | 3   | 0   | 0.086513 | 0.110941 | 0.208766 | 0        |
| lincRNA -               | 0   | 1   | 0   | 0   | 4   | 0   | 0        | 0.08363  | 0        | 0        |
| antisense -             | 5   | 4   | 2   | 3   | 7   | 3   | 0.099596 | 0.102175 | 0.048068 | 0.092753 |
| antisense -             | 4   | 0   | 4   | 12  | 28  | 9   | 0.561557 | 0        | 0.677551 | 2.614843 |
| pseudogen: -            | 0   | 2   | 2   | 5   | 5   | 2   | 0        | 0.030523 | 0.028719 | 0.09236  |
| processed_ -            | 11  | 5   | 12  | 4   | 4   | 8   | 0.290096 | 0.169094 | 0.381837 | 0.163734 |
| pseudogen: ubiquitin-c  | 6   | 8   | 2   | 6   | 7   | 1   | 0.347763 | 0.594609 | 0.139865 | 0.539776 |
| antisense -             | 0   | 0   | 0   | 0   | 4   | 1   | 0        | 0        | 0        | 0        |
| protein_co thiamine_t   | 70  | 46  | 70  | 130 | 120 | 69  | 1.147658 | 0.967123 | 1.384715 | 3.308173 |
| sense_intrc -           | 0   | 0   | 1   | 3   | 1   | 2   | 0        | 0        | 0.09978  | 0.385078 |
| processed_ -            | 0   | 2   | 4   | 0   | 0   | 0   | 0        | 0.25974  | 0.488773 | 0        |
| pseudogen: olfactory_r  | 0   | 0   | 0   | 0   | 1   | 0   | 0        | 0        | 0        | 0        |
| antisense -             | 14  | 4   | 2   | 2   | 3   | 2   | 0.335785 | 0.123028 | 0.057878 | 0.074455 |
| lincRNA -               | 1   | 2   | 1   | 2   | 3   | 9   | 0.054208 | 0.139028 | 0.065405 | 0.168277 |
| antisense -             | 0   | 0   | 0   | 79  | 120 | 125 | 0        | 0        | 0        | 1.99639  |
| pseudogen: nucleopho:   | 0   | 0   | 0   | 3   | 2   | 1   | 0        | 0        | 0        | 0.277786 |
| pseudogen: mitochond    | 0   | 0   | 0   | 0   | 1   | 0   | 0        | 0        | 0        | 0        |
| antisense -             | 1   | 0   | 3   | 6   | 11  | 4   | 0.042979 | 0        | 0.15557  | 0.400256 |
| lincRNA -               | 6   | 7   | 1   | 10  | 14  | 10  | 0.534867 | 0.800206 | 0.107558 | 1.383646 |
| antisense -             | 0   | 0   | 1   | 0   | 0   | 0   | 0        | 0        | 0.118112 | 0        |
| processed_ -            | 0   | 0   | 0   | 0   | 0   | 2   | 0        | 0        | 0        | 0        |
| processed_ -            | 0   | 0   | 0   | 15  | 30  | 9   | 0        | 0        | 0        | 2.332686 |
| lincRNA -               | 4   | 0   | 2   | 0   | 2   | 0   | 0.095645 | 0        | 0.057701 | 0        |
| lincRNA -               | 3   | 2   | 3   | 0   | 0   | 0   | 0.299298 | 0.255871 | 0.36112  | 0        |
| sense_intrc -           | 2   | 2   | 3   | 3   | 1   | 1   | 0.125711 | 0.161206 | 0.227515 | 0.29268  |
| antisense -             | 9   | 11  | 10  | 6   | 12  | 13  | 0.73778  | 1.156342 | 0.989082 | 0.763424 |
| lincRNA -               | 1   | 0   | 0   | 0   | 0   | 0   | 0.052685 | 0        | 0        | 0        |
| protein_co Uncharacte   | 0   | 1   | 0   | 0   | 0   | 0   | 0        | 0.024796 | 0        | 0        |
| lincRNA -               | 2   | 3   | 0   | 0   | 0   | 0   | 0.114927 | 0.221065 | 0        | 0        |
| antisense -             | 0   | 0   | 0   | 1   | 1   | 3   | 0        | 0        | 0        | 0.034041 |
| antisense -             | 3   | 1   | 0   | 0   | 0   | 2   | 0.339783 | 0.145241 | 0        | 0        |
| pseudogen: NADH_deh     | 0   | 2   | 2   | 1   | 0   | 0   | 0        | 0.231714 | 0.218017 | 0.140231 |
| lincRNA -               | 1   | 4   | 0   | 2   | 2   | 0   | 0.086833 | 0.445406 | 0        | 0.269555 |
| pseudogen: keratin_8_   | 0   | 1   | 0   | 0   | 0   | 0   | 0        | 0.041497 | 0        | 0        |
| protein_co HCG20035     | 0   | 1   | 0   | 0   | 0   | 0   | 0        | 0.072185 | 0        | 0        |
| pseudogen: -            | 1   | 4   | 0   | 0   | 1   | 0   | 0.034759 | 0.178294 | 0        | 0        |
| antisense -             | 1   | 2   | 0   | 2   | 5   | 2   | 0.144277 | 0.37003  | 0        | 0.447876 |
| antisense -             | 4   | 8   | 9   | 4   | 9   | 6   | 0.31898  | 0.818092 | 0.865952 | 0.495101 |
| pseudogen: -            | 7   | 5   | 9   | 13  | 14  | 14  | 0.2897   | 0.265357 | 0.449408 | 0.835073 |
| pseudogen: -            | 2   | 0   | 1   | 9   | 4   | 0   | 0.088139 | 0        | 0.053172 | 0.615619 |
| antisense -             | 2   | 2   | 0   | 3   | 2   | 1   | 0.197017 | 0.252646 | 0        | 0.458696 |
| processed_ -            | 0   | 0   | 1   | 1   | 0   | 0   | 0        | 0        | 0.10943  | 0.140773 |
| processed_ -            | 18  | 15  | 15  | 14  | 23  | 24  | 0.279755 | 0.298955 | 0.281284 | 0.337725 |
| lincRNA -               | 0   | 1   | 1   | 35  | 40  | 29  | 0        | 0.106424 | 0.100134 | 4.508483 |
| antisense -             | 1   | 1   | 2   | 2   | 3   | 9   | 0.062354 | 0.07996  | 0.150467 | 0.193563 |
| protein_co mitochond    | 24  | 16  | 21  | 23  | 31  | 54  | 0.202367 | 0.173004 | 0.213646 | 0.301013 |
| protein_co Uncharacte   | 6   | 0   | 5   | 25  | 28  | 17  | 0.645275 | 0        | 0.648802 | 4.173154 |
| antisense -             | 244 | 189 | 183 | 46  | 49  | 26  | 3.4112   | 3.388352 | 3.086857 | 0.998173 |
| lincRNA -               | 3   | 4   | 1   | 2   | 1   | 3   | 0.214763 | 0.367205 | 0.086375 | 0.222228 |
| pseudogen: -            | 0   | 0   | 0   | 0   | 1   | 0   | 0        | 0        | 0        | 0        |
| pseudogen: -            | 0   | 0   | 1   | 0   | 0   | 2   | 0        | 0        | 0.091398 | 0        |

|                        |     |    |    |    |     |     |          |          |          |          |
|------------------------|-----|----|----|----|-----|-----|----------|----------|----------|----------|
| lincRNA -              | 0   | 0  | 0  | 1  | 0   | 0   | 0        | 0        | 0        | 0.129732 |
| protein_co uncharacte  | 0   | 5  | 4  | 0  | 0   | 2   | 0        | 0.602503 | 0.453511 | 0        |
| pseudogen: heterogene  | 2   | 3  | 2  | 3  | 0   | 0   | 0.097081 | 0.186738 | 0.117134 | 0.226024 |
| antisense -            | 2   | 1  | 2  | 0  | 1   | 0   | 0.12372  | 0.079327 | 0.149276 | 0        |
| antisense -            | 6   | 6  | 3  | 1  | 4   | 1   | 0.339783 | 0.435723 | 0.204984 | 0.087898 |
| pseudogen: acidic_(leu | 2   | 2  | 0  | 2  | 0   | 4   | 0.087318 | 0.111974 | 0        | 0.13553  |
| protein_co HCG20454    | 0   | 0  | 0  | 0  | 0   | 1   | 0        | 0        | 0        | 0        |
| protein_co Uncharacte  | 5   | 8  | 11 | 0  | 0   | 0   | 0.091297 | 0.18732  | 0.242341 | 0        |
| antisense -            | 1   | 0  | 2  | 0  | 2   | 0   | 0.160582 | 0        | 0.387503 | 0        |
| antisense -            | 10  | 2  | 2  | 8  | 1   | 1   | 0.744286 | 0.190888 | 0.179605 | 0.924188 |
| antisense -            | 2   | 1  | 1  | 4  | 2   | 0   | 0.211216 | 0.135427 | 0.127422 | 0.655674 |
| antisense -            | 21  | 21 | 23 | 1  | 2   | 4   | 0.678629 | 0.870245 | 0.896786 | 0.050158 |
| processed_-            | 19  | 5  | 10 | 11 | 15  | 48  | 1.260128 | 0.425246 | 0.800219 | 1.132359 |
| lincRNA long_interf    | 2   | 0  | 1  | 0  | 0   | 1   | 0.052508 | 0        | 0.031677 | 0        |
| antisense -            | 1   | 0  | 2  | 1  | 3   | 3   | 0.088305 | 0        | 0.21309  | 0.137062 |
| protein_co E3_ubiquit  | 11  | 3  | 5  | 0  | 4   | 2   | 0.107501 | 0.037597 | 0.058957 | 0        |
| pseudogen:-            | 2   | 1  | 1  | 3  | 3   | 5   | 0.060038 | 0.038495 | 0.03622  | 0.139782 |
| lincRNA -              | 0   | 0  | 0  | 1  | 1   | 2   | 0        | 0        | 0        | 0.154194 |
| pseudogen:-            | 0   | 0  | 0  | 1  | 0   | 0   | 0        | 0        | 0        | 0.14132  |
| antisense -            | 0   | 2  | 0  | 3  | 0   | 3   | 0        | 0.053639 | 0        | 0.097386 |
| pseudogen:-            | 1   | 0  | 2  | 0  | 0   | 0   | 0.228732 | 0        | 0.551956 | 0        |
| antisense -            | 0   | 1  | 0  | 0  | 0   | 0   | 0        | 0.095142 | 0        | 0        |
| antisense -            | 1   | 0  | 0  | 0  | 0   | 0   | 0.022035 | 0        | 0        | 0        |
| lincRNA -              | 3   | 2  | 6  | 0  | 0   | 0   | 0.250303 | 0.213985 | 0.604009 | 0        |
| lincRNA -              | 1   | 1  | 0  | 4  | 2   | 1   | 0.083138 | 0.106613 | 0        | 0.516169 |
| antisense -            | 1   | 0  | 0  | 0  | 0   | 0   | 0.082408 | 0        | 0        | 0        |
| pseudogen:-            | 1   | 1  | 0  | 0  | 1   | 0   | 0.078411 | 0.100551 | 0        | 0        |
| pseudogen: cytochrom   | 0   | 1  | 0  | 0  | 0   | 1   | 0        | 0.199767 | 0        | 0        |
| lincRNA -              | 1   | 0  | 0  | 0  | 1   | 1   | 0.086994 | 0        | 0        | 0        |
| lincRNA -              | 0   | 2  | 1  | 0  | 0   | 0   | 0        | 0.220256 | 0.103618 | 0        |
| lincRNA -              | 0   | 0  | 1  | 4  | 5   | 3   | 0        | 0        | 0.07946  | 0.408875 |
| antisense -            | 0   | 0  | 0  | 3  | 2   | 4   | 0        | 0        | 0        | 0.110272 |
| pseudogen:-            | 26  | 15 | 26 | 39 | 25  | 36  | 1.171124 | 0.866424 | 1.413029 | 2.726621 |
| pseudogen:-            | 24  | 13 | 12 | 9  | 8   | 20  | 1.619224 | 1.12473  | 0.976843 | 0.942472 |
| antisense -            | 3   | 5  | 3  | 5  | 6   | 4   | 0.28247  | 0.603713 | 0.340816 | 0.730721 |
| antisense -            | 1   | 0  | 1  | 0  | 0   | 0   | 0.117519 | 0        | 0.141793 | 0        |
| pseudogen: DNMT1_pse   | 0   | 1  | 0  | 2  | 0   | 0   | 0        | 0.144891 | 0        | 0.350746 |
| pseudogen:-            | 0   | 0  | 2  | 0  | 1   | 0   | 0        | 0        | 0.290877 | 0        |
| protein_co BH3-like_m  | 4   | 0  | 0  | 0  | 0   | 0   | 0.217587 | 0        | 0        | 0        |
| antisense -            | 8   | 3  | 3  | 0  | 1   | 0   | 0.779876 | 0.37503  | 0.352862 | 0        |
| lincRNA -              | 5   | 3  | 1  | 8  | 16  | 8   | 0.118889 | 0.091475 | 0.028689 | 0.295253 |
| pseudogen: TYRO3P_pr   | 3   | 3  | 1  | 7  | 1   | 5   | 0.052004 | 0.066687 | 0.020915 | 0.18834  |
| antisense -            | 56  | 39 | 28 | 2  | 6   | 2   | 0.817255 | 0.729867 | 0.493033 | 0.045303 |
| processed_-            | 3   | 0  | 0  | 2  | 2   | 1   | 0.162813 | 0        | 0        | 0.168472 |
| pseudogen:-            | 0   | 0  | 0  | 0  | 1   | 0   | 0        | 0        | 0        | 0        |
| processed_-            | 0   | 0  | 0  | 3  | 1   | 1   | 0        | 0        | 0        | 0.466537 |
| lincRNA -              | 2   | 0  | 1  | 0  | 0   | 0   | 0.290341 | 0        | 0.175156 | 0        |
| antisense -            | 3   | 0  | 0  | 0  | 0   | 2   | 0.174529 | 0        | 0        | 0        |
| pseudogen: PRELI_dom   | 1   | 0  | 3  | 10 | 7   | 4   | 0.091582 | 0        | 0.331497 | 1.42148  |
| lincRNA -              | 2   | 0  | 1  | 2  | 10  | 5   | 0.137105 | 0        | 0.082713 | 0.212806 |
| antisense -            | 2   | 1  | 2  | 2  | 3   | 0   | 0.150048 | 0.096208 | 0.181042 | 0.232895 |
| antisense -            | 0   | 0  | 0  | 1  | 0   | 0   | 0        | 0        | 0        | 0.131609 |
| 3prime_ov:-            | 14  | 11 | 12 | 5  | 7   | 3   | 2.138307 | 2.154488 | 2.21142  | 1.185339 |
| processed_-            | 47  | 51 | 44 | 62 | 82  | 48  | 1.551994 | 2.159591 | 1.753044 | 3.17771  |
| antisense YLP_motif_   | 11  | 4  | 13 | 1  | 3   | 0   | 0.741078 | 0.345574 | 1.056726 | 0.104569 |
| lincRNA -              | 1   | 4  | 1  | 0  | 2   | 1   | 0.098508 | 0.505292 | 0.118856 | 0        |
| pseudogen:-            | 2   | 4  | 2  | 0  | 0   | 0   | 0.111246 | 0.285313 | 0.134224 | 0        |
| antisense -            | 1   | 0  | 0  | 0  | 0   | 6   | 0.102157 | 0        | 0        | 0        |
| antisense -            | 0   | 0  | 1  | 1  | 2   | 2   | 0        | 0        | 0.113151 | 0.14556  |
| lincRNA -              | 1   | 0  | 0  | 2  | 1   | 4   | 0.157879 | 0        | 0        | 0.4901   |
| antisense -            | 0   | 0  | 0  | 0  | 1   | 0   | 0        | 0        | 0        | 0        |
| sense_overl:-          | 102 | 69 | 79 | 95 | 125 | 119 | 1.632349 | 1.416026 | 1.525415 | 2.359755 |
| pseudogen:-            | 1   | 0  | 0  | 3  | 1   | 1   | 0.115493 | 0        | 0        | 0.537782 |
| antisense -            | 0   | 1  | 2  | 0  | 0   | 0   | 0        | 0.184447 | 0.347089 | 0        |
| pseudogen:-            | 1   | 0  | 0  | 1  | 1   | 0   | 0.02605  | 0        | 0        | 0.040433 |

|                       |    |    |    |    |    |    |          |          |          |          |
|-----------------------|----|----|----|----|----|----|----------|----------|----------|----------|
| antisense -           | 8  | 5  | 2  | 38 | 31 | 42 | 0.233139 | 0.186855 | 0.070324 | 1.718852 |
| lincRNA -             | 0  | 2  | 0  | 0  | 0  | 0  | 0        | 0.171554 | 0        | 0        |
| sense_overl           | 2  | 0  | 1  | 0  | 1  | 0  | 0.197432 | 0        | 0.119106 | 0        |
| protein_co chromosom  | 10 | 15 | 18 | 14 | 11 | 3  | 0.225216 | 0.433212 | 0.489125 | 0.489393 |
| sense_intrc -         | 5  | 5  | 9  | 4  | 3  | 6  | 0.174183 | 0.223365 | 0.378291 | 0.216285 |
| sense_intrc -         | 0  | 0  | 0  | 2  | 0  | 1  | 0        | 0        | 0        | 0.20974  |
| protein_co Uncharacte | 2  | 1  | 0  | 0  | 2  | 0  | 0.146991 | 0.094247 | 0        | 0        |
| antisense -           | 0  | 0  | 0  | 1  | 1  | 0  | 0        | 0        | 0        | 0.213431 |
| lincRNA -             | 0  | 0  | 1  | 1  | 1  | 3  | 0        | 0        | 0.214301 | 0.275681 |
| antisense -           | 0  | 1  | 3  | 0  | 0  | 1  | 0        | 0.12347  | 0.348514 | 0        |
| lincRNA -             | 1  | 3  | 1  | 0  | 3  | 0  | 0.063109 | 0.242785 | 0.076145 | 0        |
| pseudogen: phosphatic | 8  | 15 | 8  | 4  | 11 | 2  | 0.663929 | 1.596366 | 0.801069 | 0.515255 |
| protein_co Uncharacte | 29 | 13 | 22 | 15 | 27 | 4  | 2.175697 | 1.2507   | 1.991458 | 1.746715 |
| sense_intrc -         | 12 | 16 | 8  | 7  | 9  | 15 | 0.861685 | 1.473318 | 0.693115 | 0.780182 |
| pseudogen: DNM1_pse   | 6  | 2  | 1  | 0  | 2  | 2  | 0.018702 | 0.007994 | 0.003761 | 0        |
| antisense -           | 1  | 2  | 1  | 1  | 0  | 2  | 0.006934 | 0.017785 | 0.008367 | 0.010763 |
| lincRNA -             | 0  | 0  | 0  | 8  | 4  | 3  | 0        | 0        | 0        | 0.429063 |
| pseudogen: -          | 0  | 0  | 0  | 2  | 8  | 2  | 0        | 0        | 0        | 0.393404 |
| antisense -           | 0  | 0  | 0  | 0  | 6  | 0  | 0        | 0        | 0        | 0        |
| antisense -           | 4  | 7  | 12 | 3  | 4  | 2  | 0.17812  | 0.399723 | 0.644735 | 0.20735  |
| lincRNA IQCH_antis    | 28 | 25 | 19 | 20 | 26 | 3  | 0.228215 | 0.261298 | 0.186848 | 0.253015 |
| pseudogen: -          | 1  | 0  | 1  | 0  | 0  | 0  | 0.058466 | 0        | 0.070543 | 0        |
| lincRNA -             | 17 | 13 | 22 | 1  | 0  | 0  | 1.396025 | 1.36898  | 2.179792 | 0.12746  |
| pseudogen: -          | 4  | 1  | 2  | 2  | 1  | 1  | 0.251421 | 0.080603 | 0.151677 | 0.19512  |
| antisense -           | 0  | 0  | 1  | 0  | 0  | 0  | 0        | 0        | 0.101028 | 0        |
| sense_intrc -         | 3  | 1  | 3  | 1  | 2  | 1  | 0.35977  | 0.153785 | 0.434083 | 0.186138 |
| pseudogen: -          | 4  | 5  | 1  | 0  | 1  | 0  | 0.193361 | 0.309947 | 0.058325 | 0        |
| antisense -           | 11 | 6  | 15 | 6  | 7  | 8  | 0.851139 | 0.595345 | 1.400384 | 0.720592 |
| lincRNA -             | 0  | 0  | 0  | 0  | 2  | 0  | 0        | 0        | 0        | 0        |
| pseudogen: -          | 0  | 0  | 2  | 0  | 0  | 0  | 0        | 0        | 0.119106 | 0        |
| lincRNA -             | 0  | 4  | 0  | 3  | 5  | 2  | 0        | 0.33639  | 0        | 0.30537  |
| pseudogen: -          | 0  | 0  | 0  | 1  | 1  | 0  | 0        | 0        | 0        | 0.32491  |
| pseudogen: ATP-bindin | 1  | 4  | 1  | 11 | 9  | 7  | 0.02146  | 0.110077 | 0.025893 | 0.366397 |
| sense_intrc -         | 0  | 0  | 0  | 4  | 5  | 1  | 0        | 0        | 0        | 0.086772 |
| pseudogen: FK506_bin  | 0  | 0  | 0  | 3  | 1  | 0  | 0        | 0        | 0        | 0.771517 |
| lincRNA -             | 2  | 1  | 2  | 12 | 12 | 10 | 0.164816 | 0.105676 | 0.198859 | 1.534899 |
| pseudogen: -          | 0  | 0  | 0  | 0  | 1  | 0  | 0        | 0        | 0        | 0        |
| pseudogen: high_mobil | 1  | 1  | 2  | 0  | 0  | 1  | 0.04941  | 0.063361 | 0.119232 | 0        |
| processed_ -          | 0  | 0  | 1  | 0  | 0  | 0  | 0        | 0        | 0.047225 | 0        |
| sense_intrc -         | 0  | 0  | 0  | 1  | 1  | 0  | 0        | 0        | 0        | 0.200495 |
| sense_overl -         | 0  | 0  | 0  | 5  | 2  | 2  | 0        | 0        | 0        | 0.905221 |
| lincRNA -             | 12 | 18 | 14 | 0  | 4  | 2  | 0.289594 | 0.557044 | 0.407646 | 0        |
| pseudogen: heat_shock | 3  | 2  | 0  | 1  | 0  | 5  | 0.059006 | 0.050444 | 0        | 0.030528 |
| pseudogen: -          | 0  | 0  | 0  | 0  | 0  | 3  | 0        | 0        | 0        | 0        |
| antisense -           | 5  | 5  | 4  | 2  | 3  | 2  | 0.261955 | 0.335921 | 0.252851 | 0.162636 |
| pseudogen: -          | 1  | 0  | 1  | 1  | 0  | 0  | 0.121792 | 0        | 0.146949 | 0.189038 |
| antisense -           | 2  | 5  | 4  | 3  | 4  | 5  | 0.147685 | 0.473463 | 0.356381 | 0.343842 |
| sense_overl -         | 0  | 1  | 0  | 1  | 0  | 3  | 0        | 0.12002  | 0        | 0.145269 |
| lincRNA long_interf   | 0  | 0  | 0  | 2  | 1  | 0  | 0        | 0        | 0        | 0.362992 |
| lincRNA -             | 17 | 6  | 14 | 61 | 48 | 12 | 1.3025   | 0.589508 | 1.294211 | 7.254196 |
| antisense -           | 0  | 0  | 2  | 0  | 0  | 0  | 0        | 0        | 0.158475 | 0        |
| lincRNA long_interf   | 3  | 0  | 0  | 0  | 3  | 2  | 0.289445 | 0        | 0        | 0        |
| processed_ -          | 0  | 0  | 0  | 1  | 0  | 0  | 0        | 0        | 0        | 0.127015 |
| lincRNA -             | 60 | 44 | 48 | 0  | 0  | 0  | 1.618758 | 1.522273 | 1.5625   | 0        |
| pseudogen: -          | 0  | 0  | 1  | 1  | 1  | 1  | 0        | 0        | 0.23092  | 0.29706  |
| antisense -           | 1  | 1  | 4  | 9  | 5  | 4  | 0.086513 | 0.110941 | 0.417531 | 1.208521 |
| lincRNA -             | 0  | 1  | 0  | 0  | 0  | 0  | 0        | 0.01895  | 0        | 0        |
| antisense -           | 1  | 0  | 0  | 0  | 0  | 0  | 0.084183 | 0        | 0        | 0        |
| pseudogen: -          | 55 | 32 | 43 | 21 | 34 | 11 | 0.525245 | 0.391885 | 0.495468 | 0.311278 |
| lincRNA -             | 17 | 6  | 3  | 0  | 0  | 1  | 0.650719 | 0.294513 | 0.138552 | 0        |
| pseudogen: -          | 2  | 0  | 1  | 0  | 1  | 2  | 0.035986 | 0        | 0.02171  | 0        |
| processed_ -          | 1  | 2  | 2  | 1  | 0  | 1  | 0.079073 | 0.202799 | 0.190811 | 0.122732 |
| sense_overl -         | 9  | 9  | 11 | 3  | 3  | 3  | 0.666683 | 0.854926 | 0.983145 | 0.344928 |
| sense_intrc -         | 3  | 0  | 1  | 0  | 0  | 2  | 0.283038 | 0        | 0.113834 | 0        |
| antisense -           | 9  | 1  | 12 | 11 | 10 | 6  | 0.642329 | 0.091522 | 1.033343 | 1.218535 |

|                        |      |      |      |      |      |      |          |          |          |          |
|------------------------|------|------|------|------|------|------|----------|----------|----------|----------|
| pseudogeni -           | 1    | 0    | 0    | 0    | 1    | 3    | 0.058613 | 0        | 0        | 0        |
| sense_intrc -          | 1    | 1    | 1    | 4    | 2    | 3    | 0.062106 | 0.079642 | 0.074934 | 0.385588 |
| pseudogeni -           | 0    | 1    | 0    | 0    | 0    | 0    | 0        | 0.030867 | 0        | 0        |
| pseudogeni -           | 3    | 1    | 0    | 1    | 2    | 1    | 0.455243 | 0.194595 | 0        | 0.235533 |
| pseudogeni -           | 0    | 0    | 1    | 0    | 0    | 0    | 0        | 0        | 0.072163 | 0        |
| pseudogeni -           | 0    | 2    | 1    | 3    | 1    | 1    | 0        | 0.09552  | 0.044937 | 0.173423 |
| protein_co -           | 2    | 0    | 2    | 2    | 6    | 1    | 0.149331 | 0        | 0.180177 | 0.231783 |
| antisense -            | 2    | 1    | 0    | 2    | 1    | 1    | 0.13025  | 0.083514 | 0        | 0.202166 |
| antisense -            | 0    | 0    | 1    | 0    | 0    | 0    | 0        | 0        | 0.098051 | 0        |
| lincRNA -              | 0    | 0    | 0    | 2    | 0    | 0    | 0        | 0        | 0        | 0.211569 |
| lincRNA -              | 1489 | 1265 | 1287 | 2054 | 2781 | 2107 | 7.470494 | 8.13869  | 7.790785 | 15.99505 |
| antisense -            | 1    | 4    | 0    | 0    | 0    | 0    | 0.236818 | 1.214743 | 0        | 0        |
| lincRNA -              | 0    | 1    | 0    | 0    | 0    | 0    | 0        | 0.118133 | 0        | 0        |
| antisense -            | 1    | 3    | 3    | 3    | 7    | 3    | 0.094919 | 0.365161 | 0.343576 | 0.441983 |
| lincRNA -              | 2    | 2    | 8    | 0    | 0    | 0    | 0.209799 | 0.269037 | 1.012537 | 0        |
| antisense -            | 0    | 0    | 0    | 0    | 2    | 0    | 0        | 0        | 0        | 0        |
| sense_intrc -          | 3    | 3    | 8    | 3    | 6    | 4    | 0.309846 | 0.397333 | 0.996925 | 0.480924 |
| processed_ -           | 5    | 4    | 13   | 15   | 24   | 8    | 0.507468 | 0.520604 | 1.591951 | 2.362981 |
| sense_intrc -          | 3    | 0    | 2    | 3    | 1    | 1    | 0.313996 | 0        | 0.252569 | 0.487365 |
| processed_ -           | 0    | 0    | 0    | 10   | 6    | 0    | 0        | 0        | 0        | 0.762891 |
| lincRNA -              | 0    | 1    | 0    | 1    | 0    | 1    | 0        | 0.049612 | 0        | 0.060049 |
| antisense -            | 5    | 6    | 4    | 0    | 3    | 3    | 0.337824 | 0.519854 | 0.326084 | 0        |
| pseudogeni -           | 417  | 317  | 389  | 396  | 356  | 529  | 30.26801 | 29.50642 | 34.06791 | 44.61424 |
| sense_intrc -          | 1    | 1    | 5    | 0    | 1    | 0    | 0.057675 | 0.07396  | 0.347943 | 0        |
| lincRNA -              | 0    | 0    | 1    | 0    | 0    | 0    | 0        | 0        | 0.128874 | 0        |
| pseudogeni -           | 0    | 0    | 0    | 1    | 0    | 0    | 0        | 0        | 0        | 0.01455  |
| sense_overl -          | 0    | 2    | 1    | 0    | 0    | 0    | 0        | 0.03559  | 0.016743 | 0        |
| antisense -            | 0    | 1    | 0    | 0    | 0    | 0    | 0        | 0.055573 | 0        | 0        |
| pseudogeni acidc_(leu  | 1    | 0    | 0    | 1    | 0    | 0    | 0.036153 | 0        | 0        | 0.056114 |
| antisense -            | 7    | 3    | 3    | 1    | 5    | 2    | 0.679565 | 0.373477 | 0.351401 | 0.150683 |
| antisense -            | 2    | 0    | 0    | 2    | 1    | 3    | 0.041042 | 0        | 0        | 0.063702 |
| sense_overl -          | 0    | 1    | 0    | 6    | 6    | 11   | 0        | 0.035877 | 0        | 0.260548 |
| sense_intrc -          | 3    | 7    | 14   | 5    | 5    | 4    | 0.328668 | 0.983431 | 1.850601 | 0.850231 |
| antisense -            | 0    | 0    | 0    | 1    | 1    | 3    | 0        | 0        | 0        | 0.150683 |
| antisense -            | 4    | 4    | 13   | 16   | 21   | 1    | 0.32733  | 0.419754 | 1.283563 | 2.032246 |
| antisense -            | 23   | 14   | 19   | 36   | 57   | 33   | 1.19697  | 0.934314 | 1.193046 | 2.907961 |
| protein_co solute_carr | 0    | 1    | 1    | 72   | 120  | 60   | 0        | 0.035963 | 0.033837 | 3.134058 |
| antisense -            | 5    | 3    | 9    | 6    | 7    | 9    | 0.26079  | 0.200656 | 0.566384 | 0.485738 |
| lincRNA -              | 100  | 72   | 79   | 40   | 33   | 51   | 12.60484 | 11.63803 | 12.01469 | 7.825785 |
| lincRNA -              | 70   | 61   | 77   | 0    | 0    | 0    | 1.563745 | 1.74746  | 2.075423 | 0        |
| 3prime_ov -            | 0    | 2    | 0    | 1    | 0    | 0    | 0        | 0.049307 | 0        | 0.02984  |
| processed_ -           | 1    | 3    | 2    | 0    | 0    | 0    | 0.062024 | 0.23861  | 0.149671 | 0        |
| lincRNA -              | 0    | 0    | 0    | 7    | 4    | 5    | 0        | 0        | 0        | 0.730931 |
| lincRNA -              | 2    | 0    | 0    | 0    | 0    | 2    | 0.061015 | 0        | 0        | 0        |
| lincRNA -              | 1    | 2    | 0    | 0    | 0    | 0    | 0.164526 | 0.421963 | 0        | 0        |
| antisense -            | 2    | 1    | 2    | 1    | 0    | 2    | 0.026115 | 0.016745 | 0.03151  | 0.020267 |
| lincRNA -              | 12   | 15   | 27   | 68   | 76   | 43   | 0.089986 | 0.144242 | 0.244289 | 0.791464 |
| lincRNA -              | 0    | 0    | 0    | 0    | 0    | 1    | 0        | 0        | 0        | 0        |
| pseudogeni -           | 1    | 0    | 0    | 0    | 0    | 0    | 0.18756  | 0        | 0        | 0        |
| antisense -            | 7    | 8    | 4    | 5    | 16   | 10   | 0.146925 | 0.215326 | 0.101299 | 0.162891 |
| lincRNA -              | 0    | 0    | 0    | 0    | 1    | 0    | 0        | 0        | 0        | 0        |
| lincRNA long_interf    | 0    | 0    | 0    | 0    | 3    | 5    | 0        | 0        | 0        | 0        |
| antisense -            | 0    | 0    | 0    | 0    | 0    | 2    | 0        | 0        | 0        | 0        |
| lincRNA -              | 0    | 0    | 0    | 7    | 10   | 2    | 0        | 0        | 0        | 0.146354 |
| pseudogeni transcripti | 0    | 0    | 0    | 0    | 1    | 0    | 0        | 0        | 0        | 0        |
| lincRNA -              | 4    | 0    | 2    | 0    | 2    | 0    | 0.420538 | 0        | 0.253702 | 0        |
| pseudogeni hect_doma   | 6    | 6    | 7    | 9    | 30   | 10   | 0.117568 | 0.150764 | 0.165495 | 0.273723 |
| lincRNA -              | 1    | 0    | 3    | 0    | 0    | 0    | 0.085566 | 0        | 0.30972  | 0        |
| lincRNA -              | 2    | 0    | 2    | 1    | 1    | 0    | 0.12504  | 0        | 0.150868 | 0.09704  |
| pseudogeni -           | 0    | 0    | 0    | 2    | 1    | 0    | 0        | 0        | 0        | 0.021975 |
| pseudogeni RAB43_pse   | 6    | 5    | 6    | 4    | 6    | 2    | 0.477657 | 0.51044  | 0.576321 | 0.49426  |
| lincRNA -              | 2    | 1    | 2    | 0    | 0    | 0    | 0.205658 | 0.131864 | 0.248138 | 0        |
| lincRNA SH3RF3_an      | 317  | 210  | 262  | 7    | 4    | 7    | 9.266917 | 7.872355 | 9.241136 | 0.317618 |
| lincRNA -              | 64   | 56   | 66   | 46   | 81   | 65   | 2.408476 | 2.702463 | 2.996776 | 2.686895 |
| pseudogeni -           | 0    | 0    | 1    | 0    | 0    | 0    | 0        | 0        | 0.04819  | 0        |

|                         |     |    |    |     |     |     |          |          |          |          |
|-------------------------|-----|----|----|-----|-----|-----|----------|----------|----------|----------|
| antisense -             | 0   | 0  | 3  | 0   | 0   | 0   | 0        | 0        | 0.114991 | 0        |
| lincRNA -               | 0   | 0  | 0  | 2   | 0   | 0   | 0        | 0        | 0        | 0.150371 |
| antisense -             | 2   | 1  | 0  | 0   | 0   | 1   | 0.166572 | 0.106802 | 0        | 0        |
| antisense -             | 28  | 33 | 29 | 20  | 33  | 32  | 0.541634 | 0.818599 | 0.676852 | 0.600493 |
| antisense -             | 1   | 0  | 0  | 2   | 3   | 1   | 0.018274 | 0        | 0        | 0.056726 |
| antisense -             | 10  | 10 | 7  | 0   | 0   | 3   | 0.608171 | 0.779894 | 0.513656 | 0        |
| lincRNA -               | 0   | 0  | 0  | 0   | 1   | 0   | 0        | 0        | 0        | 0        |
| lincRNA -               | 0   | 0  | 0  | 1   | 2   | 0   | 0        | 0        | 0        | 0.026708 |
| lincRNA -               | 12  | 12 | 8  | 5   | 6   | 6   | 1.317752 | 1.68983  | 1.059963 | 0.852222 |
| lincRNA -               | 0   | 0  | 0  | 10  | 6   | 1   | 0        | 0        | 0        | 2.483952 |
| pseudogeni -            | 1   | 0  | 0  | 0   | 0   | 0   | 0.092303 | 0        | 0        | 0        |
| antisense -             | 62  | 55 | 51 | 28  | 53  | 38  | 1.303084 | 1.482357 | 1.293299 | 0.913417 |
| pseudogeni -            | 2   | 0  | 0  | 0   | 1   | 0   | 0.098612 | 0        | 0        | 0        |
| lincRNA -               | 3   | 4  | 1  | 2   | 0   | 4   | 0.352557 | 0.602805 | 0.141793 | 0.364811 |
| antisense -             | 7   | 6  | 5  | 2   | 11  | 10  | 0.100561 | 0.110533 | 0.086666 | 0.044595 |
| antisense -             | 0   | 1  | 1  | 0   | 0   | 0   | 0        | 0.086146 | 0.081054 | 0        |
| antisense -             | 77  | 49 | 74 | 30  | 41  | 32  | 1.516393 | 1.237446 | 1.758332 | 0.917007 |
| pseudogeni -            | 5   | 2  | 1  | 2   | 0   | 3   | 0.220555 | 0.113132 | 0.053222 | 0.136933 |
| lincRNA Prader-Will     | 0   | 0  | 0  | 6   | 4   | 12  | 0        | 0        | 0        | 0.302619 |
| pseudogeni -            | 0   | 0  | 0  | 4   | 2   | 1   | 0        | 0        | 0        | 0.762092 |
| antisense -             | 0   | 0  | 0  | 1   | 2   | 6   | 0        | 0        | 0        | 0.152899 |
| lincRNA -               | 2   | 0  | 2  | 2   | 3   | 4   | 0.042589 | 0        | 0.051386 | 0.066103 |
| pseudogeni -            | 14  | 13 | 12 | 16  | 28  | 24  | 0.418128 | 0.49789  | 0.432424 | 0.741705 |
| pseudogeni -            | 0   | 1  | 1  | 0   | 0   | 1   | 0        | 0.175306 | 0.164943 | 0        |
| lincRNA -               | 1   | 2  | 1  | 1   | 0   | 3   | 0.016158 | 0.04144  | 0.019495 | 0.025079 |
| sense_intrc -           | 3   | 4  | 1  | 0   | 2   | 1   | 0.035977 | 0.061514 | 0.014469 | 0        |
| pseudogeni -            | 1   | 0  | 0  | 0   | 0   | 0   | 0.045524 | 0        | 0        | 0        |
| pseudogeni -            | 1   | 0  | 2  | 1   | 0   | 0   | 0.048641 | 0        | 0.117377 | 0.075498 |
| sense_intrc -           | 0   | 5  | 3  | 3   | 2   | 1   | 0        | 0.425848 | 0.240406 | 0.309263 |
| lincRNA -               | 0   | 1  | 0  | 0   | 0   | 0   | 0        | 0.039559 | 0        | 0        |
| pseudogeni -            | 1   | 0  | 1  | 1   | 0   | 3   | 0.173026 | 0        | 0.208766 | 0.26856  |
| sense_overl -           | 4   | 5  | 3  | 1   | 1   | 0   | 0.3126   | 0.501082 | 0.282878 | 0.1213   |
| lincRNA -               | 0   | 0  | 0  | 1   | 1   | 7   | 0        | 0        | 0        | 0.071213 |
| antisense -             | 1   | 2  | 1  | 0   | 0   | 0   | 0.027844 | 0.071413 | 0.033596 | 0        |
| lincRNA -               | 0   | 0  | 0  | 0   | 4   | 1   | 0        | 0        | 0        | 0        |
| antisense -             | 64  | 60 | 57 | 63  | 97  | 38  | 1.947411 | 2.341199 | 2.09267  | 2.975423 |
| lincRNA -               | 9   | 14 | 12 | 0   | 0   | 0   | 0.233155 | 0.465092 | 0.375086 | 0        |
| pseudogeni -            | 0   | 0  | 1  | 0   | 0   | 0   | 0        | 0        | 0.127999 | 0        |
| sense_overl -           | 64  | 46 | 40 | 23  | 34  | 14  | 0.668663 | 0.616304 | 0.504238 | 0.37298  |
| antisense IL21R_anti    | 0   | 0  | 1  | 0   | 2   | 0   | 0        | 0        | 0.021635 | 0        |
| lincRNA -               | 86  | 71 | 65 | 159 | 176 | 158 | 0.956032 | 1.012142 | 0.871837 | 2.743478 |
| processed_ -            | 0   | 0  | 0  | 0   | 2   | 1   | 0        | 0        | 0        | 0        |
| lincRNA -               | 1   | 0  | 0  | 3   | 0   | 0   | 0.084335 | 0        | 0        | 0.392697 |
| sense_overl -           | 131 | 85 | 82 | 9   | 6   | 15  | 6.261562 | 5.210023 | 4.729043 | 0.667705 |
| antisense -             | 31  | 15 | 17 | 7   | 11  | 15  | 2.140781 | 1.328346 | 1.416471 | 0.750307 |
| lincRNA long_interf     | 0   | 0  | 0  | 3   | 1   | 16  | 0        | 0        | 0        | 0.04445  |
| lincRNA -               | 29  | 29 | 23 | 5   | 1   | 1   | 0.809893 | 1.038573 | 0.775007 | 0.216736 |
| lincRNA -               | 10  | 13 | 4  | 0   | 0   | 1   | 0.660423 | 1.100968 | 0.318735 | 0        |
| pseudogeni mitochond    | 1   | 1  | 1  | 2   | 0   | 3   | 0.199532 | 0.255871 | 0.240747 | 0.619403 |
| pseudogeni cell_divisio | 4   | 6  | 5  | 0   | 2   | 0   | 0.195579 | 0.376203 | 0.294971 | 0        |
| pseudogeni -            | 0   | 0  | 0  | 2   | 0   | 3   | 0        | 0        | 0        | 0.317123 |
| antisense -             | 31  | 16 | 12 | 29  | 39  | 32  | 1.243448 | 0.822991 | 0.580758 | 1.805487 |
| antisense -             | 4   | 1  | 3  | 3   | 5   | 4   | 0.448708 | 0.143851 | 0.406044 | 0.522343 |
| pseudogeni -            | 0   | 0  | 0  | 0   | 2   | 0   | 0        | 0        | 0        | 0        |
| pseudogeni -            | 3   | 0  | 2  | 2   | 1   | 1   | 0.055208 | 0        | 0.044408 | 0.057127 |
| sense_overl -           | 44  | 29 | 34 | 39  | 38  | 21  | 0.636582 | 0.538033 | 0.59351  | 0.875783 |
| processed_ -            | 2   | 0  | 3  | 1   | 1   | 1   | 0.219625 | 0        | 0.397486 | 0.170444 |
| antisense -             | 23  | 29 | 18 | 21  | 48  | 14  | 0.710923 | 1.149482 | 0.671298 | 1.007499 |
| protein_co transformi   | 13  | 6  | 2  | 42  | 39  | 13  | 0.483786 | 0.286332 | 0.089802 | 2.425993 |
| antisense -             | 4   | 4  | 6  | 7   | 12  | 14  | 0.041625 | 0.053378 | 0.075334 | 0.113062 |
| lincRNA -               | 57  | 51 | 39 | 29  | 34  | 57  | 1.002525 | 1.15027  | 0.827624 | 0.791678 |
| sense_overl -           | 5   | 3  | 4  | 3   | 1   | 5   | 0.119801 | 0.092176 | 0.115637 | 0.111568 |
| lincRNA -               | 2   | 2  | 0  | 0   | 6   | 1   | 0.2605   | 0.334054 | 0        | 0        |
| pseudogeni -            | 2   | 0  | 1  | 1   | 0   | 0   | 0.123395 | 0        | 0.074441 | 0.095763 |
| sense_intrc -           | 0   | 0  | 0  | 18  | 20  | 12  | 0        | 0        | 0        | 3.203023 |

|                        |      |      |      |      |      |      |          |          |          |          |
|------------------------|------|------|------|------|------|------|----------|----------|----------|----------|
| antisense -            | 1    | 0    | 0    | 0    | 0    | 1    | 0.129889 | 0        | 0        | 0        |
| antisense -            | 11   | 6    | 13   | 14   | 19   | 10   | 0.99     | 0.692474 | 1.411673 | 1.955695 |
| lincRNA -              | 0    | 0    | 0    | 2    | 0    | 0    | 0        | 0        | 0        | 0.108627 |
| antisense -            | 0    | 0    | 0    | 1    | 0    | 0    | 0        | 0        | 0        | 0.122939 |
| antisense -            | 2    | 3    | 5    | 0    | 0    | 0    | 0.176943 | 0.340357 | 0.533731 | 0        |
| lincRNA -              | 17   | 15   | 15   | 34   | 48   | 29   | 1.99782  | 2.260519 | 2.126899 | 6.201788 |
| pseudogen: mitochond   | 0    | 1    | 0    | 0    | 3    | 3    | 0        | 0.252646 | 0        | 0        |
| lincRNA -              | 36   | 21   | 27   | 57   | 36   | 39   | 4.612133 | 3.45007  | 4.173603 | 11.33456 |
| lincRNA -              | 0    | 0    | 0    | 0    | 0    | 1    | 0        | 0        | 0        | 0        |
| protein_co homeobox    | 111  | 75   | 89   | 0    | 0    | 12   | 1.324712 | 1.147807 | 1.281553 | 0        |
| antisense -            | 4    | 5    | 0    | 3    | 0    | 1    | 0.163665 | 0.262346 | 0        | 0.190523 |
| lincRNA -              | 0    | 0    | 0    | 0    | 2    | 1    | 0        | 0        | 0        | 0        |
| lincRNA long_interf    | 9572 | 8155 | 8250 | 3300 | 4770 | 3594 | 84.06654 | 91.84463 | 87.42235 | 44.98471 |
| pseudogen:-            | 1    | 2    | 1    | 0    | 1    | 5    | 0.099979 | 0.256417 | 0.12063  | 0        |
| antisense -            | 15   | 23   | 15   | 28   | 25   | 18   | 0.124135 | 0.244085 | 0.149776 | 0.35966  |
| pseudogen:-            | 0    | 0    | 5    | 0    | 0    | 4    | 0        | 0        | 0.391255 | 0        |
| lincRNA -              | 1    | 2    | 3    | 0    | 0    | 0    | 0.074429 | 0.190888 | 0.269407 | 0        |
| sense_intrc -          | 10   | 4    | 3    | 0    | 3    | 3    | 1.309777 | 0.671841 | 0.474096 | 0        |
| lincRNA -              | 0    | 0    | 0    | 1    | 0    | 0    | 0        | 0        | 0        | 0.044788 |
| antisense -            | 1    | 0    | 0    | 0    | 0    | 0    | 0.137507 | 0        | 0        | 0        |
| antisense -            | 3    | 5    | 7    | 12   | 13   | 12   | 0.24679  | 0.527454 | 0.694787 | 1.532206 |
| lincRNA -              | 2    | 1    | 1    | 3    | 2    | 1    | 0.173989 | 0.111558 | 0.104964 | 0.405082 |
| pseudogen: ATP-bindin  | 0    | 1    | 2    | 2    | 1    | 1    | 0        | 0.027532 | 0.051809 | 0.066648 |
| lincRNA -              | 462  | 342  | 395  | 206  | 266  | 224  | 13.807   | 13.10669 | 14.24304 | 9.555538 |
| lincRNA -              | 1    | 0    | 0    | 0    | 0    | 0    | 0.057746 | 0        | 0        | 0        |
| antisense -            | 9    | 11   | 4    | 11   | 18   | 16   | 0.506615 | 0.794031 | 0.271671 | 0.961078 |
| antisense -            | 17   | 9    | 6    | 2    | 3    | 11   | 0.398565 | 0.270584 | 0.169727 | 0.07278  |
| sense_intrc -          | 0    | 0    | 2    | 0    | 0    | 0    | 0        | 0        | 0.136491 | 0        |
| lincRNA -              | 160  | 135  | 134  | 78   | 87   | 78   | 2.456582 | 2.657997 | 2.482357 | 1.858816 |
| lincRNA -              | 0    | 0    | 0    | 4    | 6    | 2    | 0        | 0        | 0        | 0.09627  |
| pseudogen:-            | 1    | 1    | 0    | 0    | 0    | 0    | 0.19376  | 0.24847  | 0        | 0        |
| antisense -            | 0    | 2    | 0    | 0    | 1    | 1    | 0        | 0.170581 | 0        | 0        |
| lincRNA -              | 0    | 0    | 0    | 2    | 0    | 0    | 0        | 0        | 0        | 0.182864 |
| pseudogen: N-ethylmal  | 0    | 0    | 1    | 0    | 0    | 0    | 0        | 0        | 0.038461 | 0        |
| lincRNA -              | 35   | 23   | 32   | 86   | 109  | 53   | 1.043989 | 0.879762 | 1.151664 | 3.981592 |
| pseudogen:-            | 2    | 0    | 0    | 1    | 0    | 0    | 0.024731 | 0        | 0        | 0.019193 |
| antisense -            | 12   | 4    | 17   | 18   | 15   | 8    | 0.745272 | 0.318568 | 1.273886 | 1.735148 |
| pseudogen:-            | 3    | 0    | 0    | 0    | 2    | 0    | 0.23445  | 0        | 0        | 0        |
| antisense microRNA_    | 9    | 3    | 5    | 10   | 17   | 10   | 0.295319 | 0.126235 | 0.197955 | 0.509306 |
| antisense -            | 0    | 3    | 0    | 4    | 3    | 0    | 0        | 0.32978  | 0        | 0.532211 |
| lincRNA -              | 11   | 15   | 4    | 12   | 21   | 8    | 0.60397  | 1.056144 | 0.264991 | 1.022667 |
| lincRNA -              | 1    | 0    | 1    | 5    | 4    | 3    | 0.063709 | 0        | 0.076869 | 0.494428 |
| pseudogen: ADAM_met    | 0    | 1    | 0    | 1    | 3    | 1    | 0        | 0.071583 | 0        | 0.086643 |
| lincRNA -              | 0    | 0    | 0    | 2    | 0    | 0    | 0        | 0        | 0        | 0.039836 |
| lincRNA -              | 7    | 3    | 4    | 16   | 10   | 4    | 0.364295 | 0.20021  | 0.251168 | 1.292427 |
| antisense -            | 4    | 0    | 0    | 0    | 2    | 2    | 0.049751 | 0        | 0        | 0        |
| antisense -            | 3    | 1    | 1    | 7    | 10   | 6    | 0.354333 | 0.15146  | 0.142508 | 1.283271 |
| pseudogen: DNM1_pse    | 0    | 0    | 0    | 0    | 1    | 0    | 0        | 0        | 0        | 0        |
| lincRNA -              | 2    | 1    | 1    | 2    | 2    | 1    | 0.097282 | 0.062375 | 0.058688 | 0.150995 |
| lincRNA -              | 7    | 4    | 3    | 1    | 2    | 0    | 0.172119 | 0.126124 | 0.089002 | 0.038165 |
| pseudogen:-            | 15   | 6    | 6    | 12   | 18   | 13   | 0.207784 | 0.106582 | 0.100282 | 0.258008 |
| pseudogen:-            | 0    | 0    | 0    | 4    | 6    | 1    | 0        | 0        | 0        | 0.127182 |
| pseudogen:-            | 0    | 0    | 1    | 0    | 0    | 0    | 0        | 0        | 0.047463 | 0        |
| sense_intrc -          | 43   | 27   | 39   | 14   | 18   | 16   | 0.888225 | 0.7152   | 0.972002 | 0.448862 |
| lincRNA -              | 4    | 2    | 2    | 1    | 3    | 2    | 0.130978 | 0.08398  | 0.079016 | 0.050824 |
| antisense -            | 14   | 9    | 13   | 6    | 4    | 8    | 0.355805 | 0.293316 | 0.398635 | 0.236682 |
| lincRNA -              | 1    | 0    | 0    | 0    | 0    | 0    | 0.052333 | 0        | 0        | 0        |
| lincRNA -              | 2    | 0    | 0    | 5    | 4    | 1    | 0.157085 | 0        | 0        | 0.609546 |
| lincRNA -              | 1    | 0    | 0    | 28   | 17   | 5    | 0.012076 | 0        | 0        | 0.524809 |
| lincRNA -              | 0    | 0    | 0    | 0    | 1    | 0    | 0        | 0        | 0        | 0        |
| pseudogen: unc-51-like | 2    | 0    | 0    | 0    | 0    | 0    | 0.117519 | 0        | 0        | 0        |
| antisense -            | 5    | 1    | 4    | 0    | 1    | 1    | 0.618602 | 0.158654 | 0.597103 | 0        |
| pseudogen: carbonic_a  | 1    | 0    | 0    | 0    | 0    | 0    | 0.081406 | 0        | 0        | 0        |
| lincRNA -              | 2    | 3    | 5    | 3    | 4    | 7    | 0.128466 | 0.247109 | 0.387503 | 0.299095 |
| lincRNA -              | 0    | 0    | 0    | 0    | 2    | 0    | 0        | 0        | 0        | 0        |

|                       |     |     |     |     |     |     |          |          |          |          |
|-----------------------|-----|-----|-----|-----|-----|-----|----------|----------|----------|----------|
| pseudogeni-           | 6   | 11  | 10  | 0   | 0   | 0   | 0.0586   | 0.137769 | 0.117841 | 0        |
| lincRNA -             | 2   | 2   | 0   | 0   | 1   | 0   | 0.091226 | 0.116984 | 0        | 0        |
| pseudogeni-           | 2   | 4   | 2   | 6   | 6   | 1   | 0.078543 | 0.20144  | 0.094766 | 0.365728 |
| antisense -           | 2   | 3   | 4   | 0   | 0   | 0   | 0.139554 | 0.268437 | 0.336759 | 0        |
| antisense -           | 0   | 0   | 3   | 0   | 2   | 0   | 0        | 0        | 0.35959  | 0        |
| pseudogeni-           | 0   | 0   | 0   | 1   | 1   | 0   | 0        | 0        | 0        | 0.119704 |
| antisense -           | 1   | 0   | 0   | 0   | 3   | 1   | 0.0851   | 0        | 0        | 0        |
| pseudogeni-           | 2   | 1   | 1   | 0   | 0   | 0   | 0.123395 | 0.079118 | 0.074441 | 0        |
| sense_overl-          | 27  | 21  | 16  | 9   | 8   | 12  | 1.875601 | 1.870705 | 1.341049 | 0.970397 |
| pseudogeni-           | 0   | 0   | 0   | 0   | 2   | 0   | 0        | 0        | 0        | 0        |
| lincRNA -             | 1   | 0   | 0   | 2   | 1   | 1   | 0.010476 | 0        | 0        | 0.03252  |
| pseudogeni-           | 2   | 2   | 3   | 7   | 8   | 9   | 0.532841 | 0.683293 | 0.964355 | 2.894651 |
| processed_-           | 1   | 0   | 0   | 0   | 0   | 0   | 0.220141 | 0        | 0        | 0        |
| antisense -           | 1   | 4   | 5   | 12  | 23  | 11  | 0.097282 | 0.499002 | 0.586883 | 1.811945 |
| lincRNA -             | 0   | 0   | 0   | 2   | 1   | 0   | 0        | 0        | 0        | 0.131728 |
| lincRNA -             | 0   | 0   | 0   | 1   | 0   | 0   | 0        | 0        | 0        | 0.094274 |
| protein_co Uncharacte | 0   | 0   | 1   | 0   | 0   | 0   | 0        | 0        | 0.029683 | 0        |
| lincRNA -             | 13  | 6   | 13  | 4   | 3   | 2   | 1.065682 | 0.630732 | 1.285807 | 0.50895  |
| lincRNA -             | 6   | 10  | 1   | 8   | 17  | 9   | 0.180578 | 0.385942 | 0.036313 | 0.373709 |
| sense_intrc-          | 0   | 0   | 0   | 0   | 1   | 0   | 0        | 0        | 0        | 0        |
| antisense -           | 1   | 0   | 1   | 3   | 3   | 1   | 0.115493 | 0        | 0.139349 | 0.537782 |
| lincRNA -             | 0   | 0   | 1   | 1   | 0   | 0   | 0        | 0        | 0.060834 | 0.078258 |
| pseudogeni-           | 1   | 3   | 0   | 0   | 0   | 0   | 0.095112 | 0.365901 | 0        | 0        |
| antisense -           | 0   | 0   | 0   | 0   | 0   | 1   | 0        | 0        | 0        | 0        |
| sense_overl-          | 11  | 6   | 7   | 2   | 2   | 3   | 0.629012 | 0.439974 | 0.482962 | 0.177512 |
| lincRNA -             | 5   | 3   | 2   | 10  | 11  | 6   | 0.184027 | 0.141593 | 0.088816 | 0.57127  |
| antisense -           | 0   | 2   | 1   | 1   | 3   | 0   | 0        | 0.162733 | 0.076557 | 0.098484 |
| antisense -           | 112 | 109 | 101 | 8   | 9   | 6   | 1.821603 | 2.273378 | 1.982007 | 0.201956 |
| lincRNA -             | 19  | 6   | 13  | 13  | 25  | 18  | 0.334175 | 0.135326 | 0.275875 | 0.35489  |
| sense_intrc-          | 1   | 0   | 0   | 1   | 1   | 1   | 0.026387 | 0        | 0        | 0.040957 |
| antisense -           | 2   | 0   | 0   | 2   | 0   | 1   | 0.163951 | 0        | 0        | 0.254475 |
| lincRNA -             | 0   | 1   | 0   | 4   | 3   | 4   | 0        | 0.055676 | 0        | 0.269555 |
| pseudogeni-           | 8   | 2   | 7   | 4   | 2   | 12  | 0.148327 | 0.047552 | 0.156595 | 0.115112 |
| antisense -           | 6   | 5   | 3   | 7   | 4   | 13  | 0.356578 | 0.381051 | 0.215116 | 0.645702 |
| sense_overl-          | 44  | 36  | 34  | 6   | 4   | 1   | 0.451063 | 0.473256 | 0.420544 | 0.09547  |
| processed_-           | 19  | 8   | 16  | 14  | 23  | 39  | 2.146772 | 1.159129 | 2.181224 | 2.455222 |
| antisense -           | 0   | 2   | 3   | 0   | 0   | 0   | 0        | 0.208422 | 0.294153 | 0        |
| pseudogeni-           | 0   | 1   | 0   | 2   | 2   | 2   | 0        | 0.120986 | 0        | 0.292876 |
| sense_overl-          | 18  | 15  | 16  | 7   | 12  | 5   | 0.14949  | 0.15975  | 0.160327 | 0.090234 |
| antisense -           | 39  | 15  | 27  | 70  | 107 | 46  | 0.768366 | 0.378969 | 0.641823 | 2.140582 |
| processed_-           | 36  | 16  | 32  | 24  | 22  | 12  | 0.869228 | 0.495405 | 0.932243 | 0.899441 |
| antisense -           | 25  | 27  | 17  | 8   | 7   | 9   | 0.613423 | 0.849558 | 0.503288 | 0.304677 |
| sense_overl-          | 14  | 3   | 2   | 0   | 0   | 0   | 0.251036 | 0.068983 | 0.04327  | 0        |
| pseudogeni: SUB1_hom  | 2   | 2   | 5   | 1   | 5   | 7   | 0.276637 | 0.354748 | 0.834447 | 0.21469  |
| lincRNA -             | 6   | 9   | 12  | 12  | 12  | 11  | 0.244431 | 0.470172 | 0.58984  | 0.758782 |
| antisense -           | 3   | 5   | 6   | 2   | 4   | 3   | 0.026979 | 0.057662 | 0.065104 | 0.027917 |
| pseudogeni-           | 0   | 0   | 1   | 0   | 0   | 0   | 0        | 0        | 0.077183 | 0        |
| antisense -           | 1   | 0   | 0   | 1   | 0   | 1   | 0.127073 | 0        | 0        | 0.197235 |
| sense_overl-          | 8   | 2   | 7   | 4   | 0   | 2   | 0.499494 | 0.160133 | 0.527335 | 0.387642 |
| pseudogeni-           | 0   | 0   | 0   | 5   | 3   | 5   | 0        | 0        | 0        | 0.332632 |
| lincRNA -             | 60  | 42  | 34  | 81  | 100 | 100 | 1.645264 | 1.476872 | 1.124893 | 3.447464 |
| pseudogeni-           | 0   | 0   | 1   | 0   | 0   | 0   | 0        | 0        | 0.065254 | 0        |
| protein_co Uncharacte | 4   | 7   | 2   | 2   | 7   | 6   | 0.260139 | 0.583784 | 0.156936 | 0.201886 |
| lincRNA -             | 186 | 193 | 176 | 362 | 427 | 433 | 25.50159 | 33.9329  | 29.11488 | 77.03593 |
| lincRNA -             | 11  | 10  | 10  | 46  | 59  | 28  | 0.147033 | 0.171408 | 0.161276 | 0.954353 |
| lincRNA -             | 1   | 1   | 1   | 0   | 2   | 0   | 0.065764 | 0.084334 | 0.079349 | 0        |
| sense_overl-          | 11  | 9   | 3   | 8   | 6   | 8   | 0.330211 | 0.346458 | 0.10866  | 0.372752 |
| lincRNA -             | 0   | 0   | 0   | 48  | 41  | 42  | 0        | 0        | 0        | 4.45023  |
| pseudogeni-           | 0   | 1   | 0   | 29  | 38  | 84  | 0        | 0.018019 | 0        | 0.632489 |
| antisense -           | 98  | 77  | 81  | 55  | 80  | 25  | 1.51858  | 1.530071 | 1.514414 | 1.322832 |
| processed_-           | 7   | 8   | 6   | 2   | 6   | 8   | 0.416008 | 0.609681 | 0.430232 | 0.184486 |
| lincRNA -             | 0   | 0   | 0   | 0   | 0   | 1   | 0        | 0        | 0        | 0        |
| antisense -           | 2   | 4   | 0   | 3   | 3   | 4   | 0.107546 | 0.275825 | 0        | 0.250389 |
| lincRNA -             | 7   | 2   | 6   | 0   | 3   | 4   | 0.229532 | 0.084098 | 0.23738  | 0        |
| antisense -           | 25  | 39  | 38  | 35  | 54  | 61  | 0.512347 | 1.02494  | 0.939628 | 1.113327 |

|                       |     |     |     |     |     |     |          |          |          |          |
|-----------------------|-----|-----|-----|-----|-----|-----|----------|----------|----------|----------|
| antisense -           | 0   | 4   | 1   | 0   | 2   | 1   | 0        | 0.467028 | 0.109855 | 0        |
| antisense -           | 1   | 5   | 1   | 3   | 4   | 11  | 0.020211 | 0.12959  | 0.024386 | 0.094112 |
| antisense -           | 55  | 54  | 51  | 25  | 29  | 28  | 6.415301 | 8.077137 | 7.177489 | 4.526107 |
| antisense -           | 3   | 4   | 1   | 2   | 4   | 2   | 0.284757 | 0.486881 | 0.114525 | 0.294655 |
| pseudogen-            | 1   | 2   | 0   | 0   | 2   | 0   | 0.140811 | 0.36114  | 0        | 0        |
| pseudogen: tryptase_p | 0   | 0   | 0   | 0   | 1   | 1   | 0        | 0        | 0        | 0        |
| antisense -           | 30  | 14  | 13  | 51  | 57  | 33  | 0.346222 | 0.207191 | 0.181019 | 0.913554 |
| protein_co Uncharacte | 0   | 0   | 0   | 0   | 0   | 1   | 0        | 0        | 0        | 0        |
| processed_-           | 0   | 1   | 1   | 1   | 2   | 0   | 0        | 0.037652 | 0.035426 | 0.045573 |
| pseudogen-            | 8   | 1   | 3   | 10  | 10  | 4   | 0.267561 | 0.042889 | 0.12106  | 0.519114 |
| sense_intrc-          | 10  | 10  | 8   | 2   | 3   | 5   | 0.930357 | 1.193052 | 0.898024 | 0.288809 |
| sense_overl-          | 37  | 28  | 22  | 22  | 18  | 29  | 1.499508 | 1.455172 | 1.075766 | 1.383886 |
| pseudogen-            | 0   | 0   | 1   | 0   | 0   | 0   | 0        | 0        | 0.052288 | 0        |
| processed_-           | 4   | 1   | 4   | 4   | 2   | 9   | 0.256932 | 0.08237  | 0.310003 | 0.398793 |
| lincRNA NTRK3_ant     | 0   | 0   | 0   | 1   | 0   | 3   | 0        | 0        | 0        | 0.02733  |
| lincRNA -             | 10  | 1   | 7   | 1   | 1   | 4   | 0.281622 | 0.036114 | 0.237855 | 0.043712 |
| sense_intrc-          | 3   | 1   | 1   | 1   | 1   | 0   | 0.323379 | 0.138229 | 0.130059 | 0.16731  |
| sense_intrc-          | 4   | 0   | 2   | 1   | 2   | 1   | 0.059074 | 0        | 0.035638 | 0.022923 |
| lincRNA -             | 10  | 8   | 8   | 0   | 1   | 1   | 0.259778 | 0.266503 | 0.25075  | 0        |
| pseudogen: cytochrom  | 9   | 9   | 5   | 2   | 5   | 1   | 1.962838 | 2.517061 | 1.315709 | 0.677021 |
| pseudogen-            | 0   | 1   | 3   | 0   | 0   | 0   | 0        | 0.073062 | 0.206229 | 0        |
| antisense -           | 7   | 6   | 15  | 3   | 5   | 5   | 0.223438 | 0.245595 | 0.577694 | 0.148631 |
| lincRNA -             | 2   | 0   | 0   | 1   | 1   | 4   | 0.114506 | 0        | 0        | 0.088864 |
| pseudogen-            | 0   | 0   | 0   | 0   | 2   | 1   | 0        | 0        | 0        | 0        |
| sense_overl-          | 326 | 267 | 294 | 173 | 272 | 126 | 3.898532 | 4.094531 | 4.242081 | 3.211147 |
| processed_-           | 0   | 0   | 0   | 1   | 4   | 9   | 0        | 0        | 0        | 0.019102 |
| processed_-           | 0   | 0   | 0   | 0   | 2   | 1   | 0        | 0        | 0        | 0        |
| antisense HEXA_antis  | 0   | 0   | 1   | 3   | 1   | 0   | 0        | 0        | 0.021142 | 0.081592 |
| antisense -           | 40  | 26  | 27  | 6   | 26  | 40  | 2.565801 | 2.138679 | 2.089656 | 0.597372 |
| antisense -           | 0   | 1   | 2   | 0   | 2   | 0   | 0        | 0.139837 | 0.263142 | 0        |
| antisense -           | 0   | 1   | 0   | 2   | 1   | 0   | 0        | 0.120501 | 0        | 0.291703 |
| antisense -           | 1   | 0   | 0   | 2   | 3   | 5   | 0.101274 | 0        | 0        | 0.314384 |
| antisense -           | 16  | 20  | 15  | 19  | 17  | 17  | 0.324498 | 0.520154 | 0.367056 | 0.598104 |
| pseudogen: DNM1_pse   | 0   | 0   | 0   | 0   | 2   | 0   | 0        | 0        | 0        | 0        |
| lincRNA -             | 110 | 101 | 108 | 20  | 22  | 8   | 1.641598 | 1.93288  | 1.94467  | 0.463271 |
| lincRNA -             | 4   | 0   | 0   | 0   | 0   | 4   | 0.149212 | 0        | 0        | 0        |
| lincRNA -             | 1   | 5   | 2   | 10  | 6   | 19  | 0.02701  | 0.173185 | 0.065179 | 0.419238 |
| protein_co Uncharacte | 0   | 0   | 0   | 488 | 576 | 257 | 0        | 0        | 0        | 53.81294 |
| lincRNA -             | 0   | 0   | 0   | 3   | 1   | 6   | 0        | 0        | 0        | 0.279564 |
| sense_overl-          | 2   | 1   | 4   | 1   | 0   | 2   | 0.342263 | 0.219452 | 0.82592  | 0.26562  |
| antisense -           | 4   | 5   | 6   | 3   | 3   | 3   | 0.401628 | 0.643788 | 0.72688  | 0.467536 |
| sense_overl-          | 5   | 1   | 3   | 0   | 0   | 2   | 0.205298 | 0.052653 | 0.148622 | 0        |
| lincRNA -             | 2   | 1   | 1   | 8   | 3   | 8   | 0.094251 | 0.060432 | 0.05686  | 0.585164 |
| antisense AQP4_antis  | 0   | 0   | 0   | 7   | 8   | 8   | 0        | 0        | 0        | 0.212984 |
| antisense -           | 0   | 2   | 1   | 0   | 5   | 0   | 0        | 0.153002 | 0.071979 | 0        |
| antisense -           | 0   | 0   | 1   | 0   | 0   | 0   | 0        | 0        | 0.084948 | 0        |
| pseudogen-            | 1   | 3   | 4   | 1   | 1   | 0   | 0.048591 | 0.186932 | 0.23451  | 0.075419 |
| lincRNA long_interf   | 4   | 1   | 10  | 11  | 14  | 13  | 0.075997 | 0.024364 | 0.229236 | 0.324383 |
| pseudogen: WW_doma    | 1   | 0   | 0   | 0   | 0   | 0   | 0.015777 | 0        | 0        | 0        |
| lincRNA -             | 0   | 0   | 0   | 0   | 0   | 1   | 0        | 0        | 0        | 0        |
| sense_overl-          | 9   | 4   | 7   | 0   | 0   | 1   | 0.166277 | 0.094767 | 0.15604  | 0        |
| sense_overl-          | 0   | 3   | 0   | 0   | 0   | 1   | 0        | 0.120662 | 0        | 0        |
| antisense -           | 1   | 2   | 1   | 0   | 2   | 1   | 0.038434 | 0.098573 | 0.046373 | 0        |
| pseudogen-            | 0   | 0   | 0   | 0   | 0   | 1   | 0        | 0        | 0        | 0        |
| lincRNA -             | 16  | 6   | 10  | 7   | 13  | 1   | 0.522088 | 0.251064 | 0.393706 | 0.354529 |
| sense_overl-          | 3   | 4   | 3   | 2   | 3   | 5   | 0.037472 | 0.06407  | 0.045212 | 0.038775 |
| sense_overl-          | 18  | 16  | 8   | 111 | 150 | 119 | 0.367765 | 0.419206 | 0.197213 | 3.520069 |
| sense_overl-          | 0   | 0   | 0   | 11  | 15  | 12  | 0        | 0        | 0        | 0.238196 |
| antisense -           | 0   | 0   | 1   | 2   | 6   | 5   | 0        | 0        | 0.104383 | 0.26856  |
| processed_-           | 163 | 113 | 143 | 141 | 159 | 177 | 1.739038 | 1.545999 | 1.840796 | 2.334915 |
| lincRNA -             | 2   | 3   | 1   | 1   | 4   | 1   | 0.058539 | 0.112603 | 0.035316 | 0.045431 |
| pseudogen-            | 4   | 1   | 2   | 5   | 4   | 1   | 0.184788 | 0.059241 | 0.111479 | 0.358521 |
| processed_-           | 0   | 0   | 0   | 7   | 5   | 4   | 0        | 0        | 0        | 0.322442 |
| sense_overl-          | 19  | 19  | 13  | 14  | 16  | 9   | 0.129474 | 0.166032 | 0.106886 | 0.148077 |
| lincRNA -             | 107 | 91  | 106 | 63  | 56  | 31  | 1.754277 | 1.913221 | 2.096854 | 1.603191 |

|                          |   |     |     |     |     |     |     |          |          |          |          |
|--------------------------|---|-----|-----|-----|-----|-----|-----|----------|----------|----------|----------|
| lincRNA                  | - | 3   | 1   | 2   | 3   | 10  | 6   | 0.040715 | 0.017404 | 0.03275  | 0.063195 |
| lincRNA                  | - | 0   | 0   | 0   | 11  | 8   | 12  | 0        | 0        | 0        | 2.140582 |
| lincRNA                  | - | 7   | 2   | 7   | 0   | 0   | 0   | 0.200262 | 0.073374 | 0.241628 | 0        |
| lincRNA                  | - | 0   | 0   | 2   | 6   | 7   | 3   | 0        | 0        | 0.025786 | 0.099517 |
| antisense                | - | 8   | 6   | 6   | 3   | 4   | 5   | 0.862345 | 0.829376 | 0.780352 | 0.50193  |
| sense_overl              | - | 1   | 0   | 0   | 0   | 0   | 0   | 0.025196 | 0        | 0        | 0        |
| lincRNA                  | - | 7   | 2   | 1   | 0   | 0   | 0   | 0.390286 | 0.142996 | 0.067272 | 0        |
| pseudogen                | - | 0   | 0   | 0   | 0   | 1   | 0   | 0        | 0        | 0        | 0        |
| lincRNA                  | - | 8   | 7   | 11  | 12  | 24  | 26  | 0.081125 | 0.091027 | 0.134587 | 0.188875 |
| antisense                | - | 0   | 0   | 0   | 1   | 0   | 1   | 0        | 0        | 0        | 0.253588 |
| pseudogen                | - | 0   | 0   | 0   | 1   | 0   | 0   | 0        | 0        | 0        | 0.089741 |
| antisense                | - | 9   | 5   | 12  | 2   | 1   | 2   | 0.299723 | 0.213529 | 0.482178 | 0.10338  |
| lincRNA                  | - | 0   | 1   | 0   | 0   | 0   | 1   | 0        | 0.018691 | 0        | 0        |
| antisense                | - | 2   | 0   | 0   | 2   | 2   | 1   | 0.205208 | 0        | 0        | 0.318511 |
| antisense                | - | 8   | 5   | 5   | 26  | 31  | 16  | 0.672258 | 0.538797 | 0.506949 | 3.391174 |
| pseudogen                | - | 0   | 0   | 0   | 0   | 1   | 1   | 0        | 0        | 0        | 0        |
| antisense                | - | 3   | 0   | 1   | 0   | 0   | 1   | 0.224354 | 0        | 0.090232 | 0        |
| lincRNA                  | - | 11  | 6   | 6   | 6   | 8   | 6   | 0.673355 | 0.470991 | 0.44315  | 0.570077 |
| pseudogen: TP53RK_bi     |   | 0   | 0   | 0   | 0   | 0   | 1   | 0        | 0        | 0        | 0        |
| lincRNA                  | - | 0   | 0   | 0   | 0   | 0   | 1   | 0        | 0        | 0        | 0        |
| lincRNA                  | - | 3   | 10  | 5   | 21  | 27  | 5   | 0.07251  | 0.309947 | 0.145813 | 0.787823 |
| protein_co chromosom     |   | 14  | 17  | 12  | 11  | 19  | 12  | 0.397855 | 0.619519 | 0.411458 | 0.485199 |
| pseudogen: ferritin_ligl |   | 0   | 0   | 0   | 40  | 41  | 52  | 0        | 0        | 0        | 6.01486  |
| lincRNA                  | - | 0   | 0   | 0   | 1   | 0   | 0   | 0        | 0        | 0        | 0.039814 |
| sense_overl              | - | 40  | 38  | 31  | 35  | 30  | 15  | 0.785427 | 0.956839 | 0.734439 | 1.066706 |
| lincRNA                  | - | 8   | 9   | 8   | 1   | 1   | 4   | 0.212412 | 0.306437 | 0.256288 | 0.041212 |
| processed_               | - | 2   | 1   | 1   | 2   | 1   | 1   | 0.179655 | 0.115191 | 0.108382 | 0.27885  |
| lincRNA                  | - | 0   | 2   | 2   | 0   | 0   | 0   | 0        | 0.239561 | 0.2254   | 0        |
| lincRNA                  | - | 0   | 0   | 0   | 17  | 22  | 12  | 0        | 0        | 0        | 2.383924 |
| lincRNA                  | - | 0   | 4   | 1   | 5   | 7   | 0   | 0        | 0.111506 | 0.026229 | 0.168706 |
| lincRNA                  | - | 6   | 7   | 7   | 2   | 1   | 7   | 0.273944 | 0.409843 | 0.385617 | 0.141733 |
| antisense                | - | 4   | 4   | 0   | 0   | 2   | 1   | 0.217083 | 0.278379 | 0        | 0        |
| lincRNA                  | - | 271 | 222 | 235 | 78  | 121 | 105 | 5.159235 | 5.419738 | 5.397988 | 2.304841 |
| pseudogen                | - | 0   | 0   | 1   | 0   | 0   | 0   | 0        | 0        | 0.204244 | 0        |
| lincRNA                  | - | 0   | 0   | 0   | 1   | 4   | 0   | 0        | 0        | 0        | 0.033508 |
| antisense                | - | 0   | 1   | 1   | 0   | 4   | 1   | 0        | 0.10005  | 0.094136 | 0        |
| pseudogen                | - | 3   | 1   | 1   | 0   | 1   | 2   | 0.277456 | 0.118599 | 0.111589 | 0        |
| lincRNA                  | - | 0   | 0   | 0   | 1   | 6   | 2   | 0        | 0        | 0        | 0.125266 |
| antisense                | - | 2   | 0   | 1   | 3   | 4   | 3   | 0.074193 | 0        | 0.044759 | 0.172737 |
| pseudogen                | - | 0   | 0   | 0   | 1   | 2   | 2   | 0        | 0        | 0        | 0.100664 |
| antisense                | - | 3   | 1   | 2   | 8   | 13  | 12  | 0.052235 | 0.022328 | 0.042017 | 0.216204 |
| lincRNA                  | - | 1   | 0   | 2   | 0   | 0   | 0   | 0.047652 | 0        | 0.114991 | 0        |
| processed_               | - | 1   | 0   | 0   | 0   | 1   | 1   | 0.081548 | 0        | 0        | 0        |
| processed_               | - | 0   | 0   | 0   | 0   | 3   | 0   | 0        | 0        | 0        | 0        |
| 3prime_ov                | - | 0   | 0   | 0   | 1   | 0   | 0   | 0        | 0        | 0        | 0.186138 |
| lincRNA                  | - | 0   | 0   | 0   | 0   | 0   | 1   | 0        | 0        | 0        | 0        |
| lincRNA                  | - | 0   | 0   | 0   | 0   | 2   | 0   | 0        | 0        | 0        | 0        |
| processed_               | - | 0   | 0   | 0   | 1   | 1   | 0   | 0        | 0        | 0        | 0.20735  |
| sense_overl              | - | 61  | 38  | 45  | 1   | 8   | 5   | 0.536741 | 0.428773 | 0.477744 | 0.013657 |
| lincRNA                  | - | 1   | 1   | 3   | 2   | 3   | 1   | 0.018696 | 0.023975 | 0.067674 | 0.058038 |
| lincRNA                  | - | 27  | 12  | 19  | 0   | 0   | 0   | 2.182811 | 1.244065 | 1.853336 | 0        |
| pseudogen                | - | 1   | 2   | 0   | 0   | 0   | 0   | 0.039805 | 0.102088 | 0        | 0        |
| antisense                | - | 1   | 0   | 0   | 0   | 0   | 0   | 0.108291 | 0        | 0        | 0        |
| pseudogen                | - | 0   | 0   | 0   | 0   | 0   | 1   | 0        | 0        | 0        | 0        |
| lincRNA                  | - | 4   | 0   | 0   | 0   | 0   | 0   | 0.06294  | 0        | 0        | 0        |
| antisense                | - | 5   | 8   | 4   | 18  | 25  | 17  | 0.115152 | 0.236266 | 0.11115  | 0.643436 |
| processed_ family_witl   |   | 44  | 50  | 54  | 102 | 137 | 116 | 0.944671 | 1.376598 | 1.398845 | 3.399057 |
| lincRNA                  | - | 0   | 0   | 0   | 1   | 1   | 0   | 0        | 0        | 0        | 0.041049 |
| sense_overl              | - | 67  | 49  | 41  | 7   | 17  | 7   | 1.457833 | 1.36722  | 1.076379 | 0.236408 |
| antisense                | - | 5   | 4   | 4   | 9   | 9   | 14  | 0.510785 | 0.524007 | 0.493033 | 1.427055 |
| lincRNA                  | - | 969 | 871 | 825 | 640 | 799 | 696 | 18.42515 | 21.23806 | 18.92733 | 18.88851 |
| sense_overl              | - | 3   | 0   | 0   | 0   | 2   | 0   | 0.639409 | 0        | 0        | 0        |
| antisense                | - | 0   | 3   | 1   | 2   | 3   | 3   | 0        | 0.434673 | 0.136327 | 0.350746 |
| pseudogen: metallothi    |   | 7   | 12  | 11  | 4   | 3   | 2   | 0.798613 | 1.755614 | 1.514186 | 0.708319 |
| lincRNA                  | - | 0   | 0   | 0   | 1   | 0   | 0   | 0        | 0        | 0        | 0.117198 |

|             |             |      |     |     |    |    |    |          |          |          |          |
|-------------|-------------|------|-----|-----|----|----|----|----------|----------|----------|----------|
| lincRNA     | Prader-Will | 0    | 0   | 0   | 0  | 1  | 0  | 0        | 0        | 0        | 0        |
| antisense   | -           | 23   | 20  | 31  | 25 | 50 | 30 | 1.770887 | 1.974706 | 2.87987  | 2.987677 |
| lincRNA     | -           | 0    | 1   | 1   | 0  | 1  | 0  | 0        | 0.019754 | 0.018586 | 0        |
| processed_  | -           | 168  | 143 | 141 | 5  | 6  | 16 | 17.86286 | 19.49787 | 18.08877 | 0.825168 |
| lincRNA     | -           | 3    | 2   | 3   | 3  | 3  | 2  | 0.262444 | 0.224365 | 0.316654 | 0.40735  |
| lincRNA     | -           | 20   | 27  | 30  | 29 | 32 | 9  | 0.78477  | 1.358581 | 1.420306 | 1.766204 |
| processed_  | endogenou   | 194  | 117 | 152 | 16 | 31 | 26 | 1.630811 | 1.261238 | 1.541677 | 0.208762 |
| lincRNA     | -           | 0    | 0   | 0   | 0  | 0  | 2  | 0        | 0        | 0        | 0        |
| pseudogeni  | -           | 0    | 3   | 0   | 0  | 0  | 1  | 0        | 0.362228 | 0        | 0        |
| antisense   | -           | 2    | 2   | 1   | 0  | 0  | 3  | 0.054682 | 0.070122 | 0.032989 | 0        |
| antisense   | -           | 1    | 0   | 1   | 3  | 8  | 5  | 0.085255 | 0        | 0.102865 | 0.396981 |
| lincRNA     | -           | 50   | 52  | 42  | 42 | 31 | 19 | 0.738193 | 0.984493 | 0.748165 | 0.962453 |
| antisense   | -           | 21   | 9   | 20  | 3  | 6  | 13 | 2.486592 | 1.366586 | 2.857349 | 0.551362 |
| antisense   | -           | 0    | 2   | 2   | 2  | 0  | 0  | 0        | 0.076745 | 0.072209 | 0.092891 |
| pseudogeni  | tyrosylprot | 0    | 0   | 2   | 1  | 1  | 2  | 0        | 0        | 0.102678 | 0.066043 |
| antisense   | long_interf | 13   | 12  | 6   | 4  | 6  | 6  | 1.094381 | 1.295435 | 0.609431 | 0.522656 |
| sense_intrc | -           | 0    | 0   | 0   | 0  | 2  | 0  | 0        | 0        | 0        | 0        |
| lincRNA     | -           | 8    | 3   | 9   | 23 | 30 | 23 | 0.211932 | 0.101915 | 0.287672 | 0.945726 |
| antisense   | -           | 8    | 13  | 7   | 9  | 20 | 5  | 0.144555 | 0.301228 | 0.152612 | 0.252415 |
| lincRNA     | -           | 1    | 0   | 2   | 1  | 10 | 3  | 0.136706 | 0        | 0.329886 | 0.212186 |
| antisense   | -           | 0    | 0   | 0   | 0  | 1  | 0  | 0        | 0        | 0        | 0        |
| antisense   | -           | 0    | 0   | 0   | 2  | 8  | 3  | 0        | 0        | 0        | 0.313031 |
| antisense   | -           | 1    | 0   | 0   | 0  | 0  | 0  | 0.103739 | 0        | 0        | 0        |
| lincRNA     | -           | 63   | 61  | 79  | 0  | 0  | 1  | 1.102265 | 1.368626 | 1.667711 | 0        |
| sense_intrc | -           | 0    | 0   | 0   | 0  | 0  | 1  | 0        | 0        | 0        | 0        |
| sense_intrc | -           | 2    | 0   | 0   | 1  | 0  | 0  | 0.180346 | 0        | 0        | 0.139961 |
| pseudogeni  | high_mobil  | 0    | 0   | 0   | 2  | 1  | 0  | 0        | 0        | 0        | 0.372275 |
| lincRNA     | -           | 1003 | 840 | 932 | 1  | 0  | 1  | 6.652148 | 7.144134 | 7.458044 | 0.010294 |
| antisense   | -           | 3    | 4   | 0   | 3  | 9  | 7  | 0.334133 | 0.571304 | 0        | 0.518621 |
| lincRNA     | -           | 0    | 0   | 0   | 0  | 2  | 0  | 0        | 0        | 0        | 0        |
| lincRNA     | -           | 0    | 0   | 1   | 1  | 2  | 0  | 0        | 0        | 0.036104 | 0.046445 |
| antisense   | -           | 1    | 0   | 2   | 7  | 27 | 13 | 0.071697 | 0        | 0.173014 | 0.778989 |
| antisense   | -           | 0    | 1   | 0   | 0  | 0  | 0  | 0        | 0.076404 | 0        | 0        |
| antisense   | -           | 8    | 5   | 8   | 2  | 4  | 4  | 0.59074  | 0.473463 | 0.712762 | 0.229228 |
| lincRNA     | -           | 0    | 0   | 1   | 1  | 0  | 0  | 0        | 0        | 0.023045 | 0.029646 |
| antisense   | -           | 1    | 1   | 2   | 4  | 1  | 1  | 0.072473 | 0.092936 | 0.174886 | 0.449952 |
| lincRNA     | -           | 0    | 1   | 0   | 0  | 0  | 0  | 0        | 0.107375 | 0        | 0        |
| pseudogeni  | -           | 27   | 17  | 23  | 17 | 4  | 5  | 0.758102 | 0.6121   | 0.779184 | 0.740872 |
| antisense   | SNAI3_anti  | 281  | 159 | 222 | 39 | 44 | 29 | 6.286305 | 4.561373 | 5.992253 | 1.354204 |
| lincRNA     | -           | 3    | 0   | 2   | 35 | 35 | 14 | 0.072287 | 0        | 0.058145 | 1.308989 |
| lincRNA     | -           | 2    | 0   | 1   | 2  | 1  | 0  | 0.063709 | 0        | 0.038434 | 0.098886 |
| antisense   | -           | 9    | 10  | 4   | 3  | 4  | 1  | 0.99766  | 1.421508 | 0.534993 | 0.516169 |
| lincRNA     | -           | 4    | 2   | 0   | 3  | 8  | 1  | 0.337946 | 0.216684 | 0        | 0.393404 |
| antisense   | -           | 21   | 15  | 19  | 1  | 7  | 4  | 0.174374 | 0.159721 | 0.190355 | 0.012888 |
| processed_  | -           | 1    | 0   | 2   | 2  | 1  | 2  | 0.06066  | 0        | 0.146379 | 0.188305 |
| pseudogeni  | hect_doma   | 0    | 0   | 0   | 1  | 0  | 0  | 0        | 0        | 0        | 0.019027 |
| lincRNA     | -           | 18   | 15  | 14  | 16 | 20 | 7  | 0.39756  | 0.424845 | 0.373084 | 0.548505 |
| lincRNA     | -           | 0    | 1   | 1   | 2  | 2  | 2  | 0        | 0.088167 | 0.082955 | 0.213431 |
| antisense   | -           | 3    | 1   | 2   | 1  | 1  | 1  | 0.18781  | 0.08028  | 0.151069 | 0.097169 |
| sense_intrc | -           | 2    | 3   | 1   | 7  | 5  | 5  | 0.023294 | 0.044806 | 0.014053 | 0.126542 |
| antisense   | -           | 0    | 2   | 0   | 0  | 0  | 0  | 0        | 0.216684 | 0        | 0        |
| antisense   | -           | 2    | 5   | 2   | 0  | 3  | 1  | 0.195783 | 0.62766  | 0.236223 | 0        |
| lincRNA     | -           | 10   | 7   | 9   | 11 | 12 | 5  | 0.434972 | 0.390453 | 0.472337 | 0.742651 |
| lincRNA     | -           | 3    | 0   | 1   | 0  | 0  | 0  | 0.246357 | 0        | 0.099081 | 0        |
| antisense   | -           | 0    | 3   | 0   | 1  | 3  | 0  | 0        | 0.250541 | 0        | 0.101083 |
| antisense   | -           | 5    | 7   | 6   | 0  | 0  | 0  | 0.179793 | 0.322783 | 0.260317 | 0        |
| lincRNA     | -           | 1    | 4   | 1   | 2  | 1  | 0  | 0.014535 | 0.074556 | 0.017537 | 0.045121 |
| pseudogeni  | -           | 0    | 0   | 0   | 0  | 1  | 0  | 0        | 0        | 0        | 0        |
| processed_  | -           | 2    | 0   | 4   | 3  | 11 | 2  | 0.044488 | 0        | 0.107354 | 0.103577 |
| sense_intrc | -           | 2    | 0   | 2   | 8  | 2  | 4  | 0.271041 | 0        | 0.327026 | 1.68277  |
| lincRNA     | -           | 6    | 0   | 1   | 1  | 0  | 1  | 0.115256 | 0        | 0.023177 | 0.029816 |
| pseudogeni  | -           | 0    | 1   | 0   | 0  | 0  | 0  | 0        | 0.141816 | 0        | 0        |
| antisense   | -           | 0    | 0   | 0   | 1  | 0  | 0  | 0        | 0        | 0        | 0.109443 |
| lincRNA     | -           | 5    | 4   | 3   | 26 | 30 | 6  | 0.084487 | 0.086674 | 0.061163 | 0.681901 |
| pseudogeni  | -           | 0    | 0   | 1   | 1  | 1  | 0  | 0        | 0        | 0.083077 | 0.106872 |

|                        |     |     |     |     |     |     |          |          |          |          |
|------------------------|-----|-----|-----|-----|-----|-----|----------|----------|----------|----------|
| sense_overl            | 14  | 10  | 8   | 4   | 10  | 19  | 0.301405 | 0.276078 | 0.207807 | 0.133664 |
| pseudogen              | 2   | 3   | 2   | 4   | 0   | 4   | 0.100407 | 0.193136 | 0.121147 | 0.311691 |
| lincRNA                | 3   | 2   | 8   | 0   | 0   | 0   | 0.200671 | 0.171554 | 0.645655 | 0        |
| lincRNA                | 0   | 0   | 1   | 0   | 0   | 0   | 0        | 0        | 0.021166 | 0        |
| lincRNA                | 9   | 7   | 5   | 0   | 2   | 2   | 0.142187 | 0.141816 | 0.095309 | 0        |
| pseudogen              | 0   | 0   | 1   | 0   | 1   | 2   | 0        | 0        | 0.085591 | 0        |
| antisense              | 45  | 36  | 28  | 113 | 153 | 73  | 3.14933  | 3.230855 | 2.364349 | 12.2748  |
| lincRNA                | 0   | 0   | 0   | 1   | 0   | 0   | 0        | 0        | 0        | 0.227437 |
| sense_intrc            | 0   | 1   | 0   | 22  | 33  | 24  | 0        | 0.01978  | 0        | 0.526696 |
| pseudogen              | 0   | 1   | 2   | 2   | 0   | 0   | 0        | 0.015006 | 0.028238 | 0.036326 |
| lincRNA                | 0   | 0   | 1   | 0   | 0   | 0   | 0        | 0        | 0.040239 | 0        |
| antisense              | 0   | 0   | 0   | 71  | 125 | 67  | 0        | 0        | 0        | 3.12039  |
| sense_intrc            | 0   | 1   | 1   | 0   | 0   | 0   | 0        | 0.138229 | 0.130059 | 0        |
| lincRNA                | 0   | 2   | 1   | 35  | 28  | 10  | 0        | 0.076598 | 0.036035 | 1.62248  |
| pseudogen: solute_carr | 23  | 17  | 17  | 13  | 36  | 56  | 2.008325 | 1.90355  | 1.791031 | 1.761895 |
| processed              | 6   | 1   | 1   | 0   | 3   | 0   | 0.064321 | 0.013747 | 0.012935 | 0        |
| antisense              | 1   | 0   | 0   | 0   | 2   | 0   | 0.065216 | 0        | 0        | 0        |
| pseudogen              | 0   | 0   | 0   | 2   | 0   | 0   | 0        | 0        | 0        | 0.224283 |
| antisense              | 0   | 1   | 3   | 1   | 2   | 6   | 0        | 0.023145 | 0.06533  | 0.028014 |
| lincRNA                | 0   | 2   | 0   | 0   | 0   | 0   | 0        | 0.08988  | 0        | 0        |
| antisense: long_interf | 0   | 0   | 0   | 0   | 1   | 2   | 0        | 0        | 0        | 0        |
| antisense              | 1   | 1   | 1   | 0   | 0   | 0   | 0.012297 | 0.01577  | 0.014838 | 0        |
| sense_overl            | 6   | 3   | 10  | 9   | 6   | 5   | 0.179655 | 0.115191 | 0.361274 | 0.418275 |
| antisense              | 2   | 1   | 3   | 4   | 4   | 0   | 0.122749 | 0.078704 | 0.222155 | 0.381046 |
| pseudogen              | 3   | 0   | 0   | 1   | 1   | 4   | 0.318258 | 0        | 0        | 0.16466  |
| lincRNA                | 45  | 37  | 50  | 35  | 54  | 20  | 3.801893 | 4.008653 | 5.096892 | 4.589717 |
| sense_intrc            | 19  | 19  | 24  | 9   | 11  | 20  | 0.87003  | 1.11569  | 1.325988 | 0.639666 |
| lincRNA                | 0   | 0   | 0   | 1   | 3   | 2   | 0        | 0        | 0        | 0.085724 |
| lincRNA                | 0   | 0   | 0   | 2   | 5   | 1   | 0        | 0        | 0        | 0.044109 |
| pseudogen              | 0   | 0   | 0   | 0   | 1   | 0   | 0        | 0        | 0        | 0        |
| sense_overl            | 34  | 27  | 27  | 21  | 22  | 14  | 0.865505 | 0.881381 | 0.829283 | 0.829737 |
| antisense              | 2   | 2   | 3   | 4   | 6   | 6   | 0.18756  | 0.240519 | 0.339453 | 0.582238 |
| processed              | 10  | 12  | 17  | 13  | 14  | 23  | 0.162756 | 0.250454 | 0.333837 | 0.328406 |
| pseudogen              | 0   | 1   | 1   | 33  | 44  | 20  | 0        | 0.028323 | 0.026649 | 1.131292 |
| lincRNA                | 2   | 1   | 1   | 0   | 2   | 1   | 0.034276 | 0.021977 | 0.020678 | 0        |
| lincRNA: hsa-mir-941   | 9   | 13  | 8   | 12  | 10  | 25  | 0.777183 | 1.439572 | 0.833525 | 1.608393 |
| pseudogen: Rho_GTPas   | 7   | 6   | 1   | 2   | 9   | 2   | 0.169453 | 0.186256 | 0.029208 | 0.075147 |
| pseudogen              | 1   | 1   | 2   | 3   | 0   | 2   | 0.025539 | 0.03275  | 0.061629 | 0.118921 |
| pseudogen              | 1   | 0   | 0   | 0   | 0   | 0   | 0.040562 | 0        | 0        | 0        |
| lincRNA                | 0   | 0   | 0   | 0   | 0   | 2   | 0        | 0        | 0        | 0        |
| lincRNA                | 10  | 4   | 7   | 0   | 2   | 3   | 0.345797 | 0.177374 | 0.292056 | 0        |
| antisense              | 3   | 1   | 0   | 1   | 3   | 1   | 0.099413 | 0.042495 | 0        | 0.051434 |
| lincRNA                | 1   | 3   | 4   | 0   | 1   | 0   | 0.012288 | 0.047272 | 0.059303 | 0        |
| antisense              | 107 | 68  | 70  | 17  | 38  | 18  | 2.793559 | 2.276629 | 2.205059 | 0.688896 |
| pseudogen              | 0   | 0   | 2   | 0   | 0   | 0   | 0        | 0        | 0.379701 | 0        |
| antisense              | 2   | 2   | 4   | 6   | 4   | 12  | 0.173667 | 0.222703 | 0.419078 | 0.808664 |
| antisense              | 0   | 0   | 0   | 3   | 4   | 5   | 0        | 0        | 0        | 0.388504 |
| pseudogen              | 0   | 0   | 2   | 2   | 0   | 2   | 0        | 0        | 0.078686 | 0.101224 |
| antisense              | 1   | 0   | 6   | 1   | 2   | 0   | 0.033613 | 0        | 0.243336 | 0.052172 |
| lincRNA                | 0   | 0   | 0   | 15  | 11  | 7   | 0        | 0        | 0        | 0.237584 |
| processed              | 1   | 2   | 0   | 2   | 1   | 1   | 0.06066  | 0.155575 | 0        | 0.188305 |
| lincRNA                | 368 | 214 | 262 | 73  | 105 | 270 | 5.481425 | 4.087604 | 4.708635 | 1.687715 |
| lincRNA                | 17  | 10  | 5   | 17  | 42  | 15  | 0.419763 | 0.316639 | 0.148961 | 0.651531 |
| antisense              | 16  | 7   | 9   | 20  | 32  | 20  | 0.496191 | 0.278379 | 0.336759 | 0.962696 |
| lincRNA                | 467 | 333 | 349 | 139 | 221 | 100 | 5.876983 | 5.373919 | 5.299209 | 2.715081 |
| lincRNA                | 1   | 4   | 7   | 7   | 4   | 5   | 0.083286 | 0.42721  | 0.703425 | 0.9049   |
| lincRNA                | 4   | 0   | 4   | 0   | 1   | 0   | 0.266043 | 0        | 0.320996 | 0        |
| processed              | 3   | 4   | 7   | 4   | 2   | 6   | 0.421168 | 0.720117 | 1.185714 | 0.871614 |
| sense_intrc            | 0   | 0   | 0   | 1   | 0   | 0   | 0        | 0        | 0        | 0.029347 |
| pseudogen              | 0   | 0   | 0   | 0   | 0   | 1   | 0        | 0        | 0        | 0        |
| pseudogen: uracil-DNA  | 0   | 2   | 0   | 0   | 0   | 0   | 0        | 0.095368 | 0        | 0        |
| sense_overl            | 285 | 248 | 217 | 564 | 677 | 425 | 2.699183 | 3.011955 | 2.479678 | 8.290812 |
| pseudogen: high_mobil  | 0   | 0   | 0   | 0   | 1   | 0   | 0        | 0        | 0        | 0        |
| antisense              | 0   | 0   | 1   | 2   | 1   | 10  | 0        | 0        | 0.089945 | 0.231414 |
| sense_intrc            | 8   | 5   | 4   | 5   | 6   | 2   | 0.083657 | 0.067049 | 0.050469 | 0.081155 |

|                         |     |     |     |      |      |      |          |          |          |          |
|-------------------------|-----|-----|-----|------|------|------|----------|----------|----------|----------|
| antisense -             | 1   | 0   | 0   | 0    | 0    | 0    | 0.031407 | 0        | 0        | 0        |
| processed_-             | 64  | 53  | 49  | 65   | 71   | 62   | 4.274873 | 4.539714 | 3.949002 | 6.73887  |
| lincRNA -               | 0   | 0   | 0   | 2029 | 2909 | 2368 | 0        | 0        | 0        | 110.4489 |
| lincRNA -               | 18  | 14  | 9   | 7    | 11   | 4    | 0.543477 | 0.542059 | 0.327868 | 0.328048 |
| lincRNA -               | 0   | 0   | 0   | 0    | 3    | 0    | 0        | 0        | 0        | 0        |
| sense_overl             | 47  | 31  | 38  | 7    | 12   | 13   | 0.713676 | 0.603635 | 0.696201 | 0.16498  |
| antisense FBXL19_an     | 107 | 79  | 82  | 17   | 33   | 45   | 1.269864 | 1.202292 | 1.174182 | 0.31315  |
| antisense -             | 32  | 36  | 33  | 41   | 42   | 34   | 2.61864  | 3.777788 | 3.258275 | 5.20763  |
| antisense -             | 21  | 6   | 11  | 5    | 6    | 7    | 0.283609 | 0.103911 | 0.179243 | 0.10481  |
| pseudogeni-             | 0   | 0   | 0   | 4    | 7    | 12   | 0        | 0        | 0        | 0.326001 |
| sense_intrc-            | 0   | 2   | 0   | 0    | 0    | 0    | 0        | 0.029789 | 0        | 0        |
| pseudogeni-             | 0   | 1   | 0   | 3    | 0    | 1    | 0        | 0.168431 | 0        | 0.611595 |
| antisense -             | 1   | 0   | 0   | 0    | 2    | 0    | 0.142091 | 0        | 0        | 0        |
| lincRNA -               | 5   | 1   | 4   | 0    | 0    | 2    | 0.124443 | 0.031916 | 0.120118 | 0        |
| sense_overl             | 0   | 0   | 0   | 0    | 5    | 1    | 0        | 0        | 0        | 0        |
| antisense -             | 27  | 24  | 17  | 12   | 14   | 6    | 0.531276 | 0.605588 | 0.403602 | 0.366495 |
| lincRNA -               | 1   | 2   | 6   | 5    | 4    | 1    | 0.05943  | 0.15242  | 0.430232 | 0.461215 |
| lincRNA -               | 3   | 2   | 0   | 2    | 0    | 0    | 0.094157 | 0.080495 | 0        | 0.097429 |
| lincRNA -               | 2   | 6   | 3   | 1    | 3    | 0    | 0.252776 | 0.97245  | 0.457484 | 0.196172 |
| antisense -             | 2   | 1   | 5   | 0    | 2    | 2    | 0.059885 | 0.038397 | 0.180637 | 0        |
| lincRNA -               | 1   | 0   | 2   | 0    | 0    | 0    | 0.043457 | 0        | 0.104867 | 0        |
| pseudogeni-             | 1   | 0   | 1   | 0    | 6    | 0    | 0.107055 | 0        | 0.129168 | 0        |
| processed_-             | 24  | 29  | 28  | 17   | 19   | 6    | 2.193685 | 3.39915  | 3.087942 | 2.411806 |
| antisense -             | 2   | 1   | 4   | 2    | 0    | 5    | 0.20387  | 0.130717 | 0.491961 | 0.316434 |
| lincRNA -               | 4   | 2   | 4   | 6    | 5    | 0    | 0.301544 | 0.193343 | 0.36383  | 0.702056 |
| lincRNA -               | 0   | 2   | 6   | 0    | 0    | 2    | 0        | 0.05422  | 0.153045 | 0        |
| processed_ ADPGK_ant    | 3   | 3   | 6   | 2    | 6    | 5    | 0.051527 | 0.066077 | 0.124342 | 0.053319 |
| lincRNA -               | 0   | 0   | 0   | 1    | 0    | 0    | 0        | 0        | 0        | 0.082423 |
| lincRNA -               | 0   | 0   | 0   | 0    | 1    | 0    | 0        | 0        | 0        | 0        |
| sense_overl             | 0   | 0   | 0   | 149  | 162  | 79   | 0        | 0        | 0        | 2.498086 |
| lincRNA -               | 0   | 1   | 0   | 0    | 0    | 0    | 0        | 0.160346 | 0        | 0        |
| lincRNA -               | 1   | 4   | 3   | 4    | 3    | 1    | 0.055821 | 0.286332 | 0.202055 | 0.34657  |
| pseudogeni-             | 0   | 0   | 0   | 6    | 2    | 3    | 0        | 0        | 0        | 0.237325 |
| pseudogeni-             | 0   | 0   | 1   | 0    | 0    | 0    | 0        | 0        | 0.14215  | 0        |
| lincRNA long_interf     | 45  | 31  | 43  | 0    | 1    | 1    | 0.905213 | 0.799667 | 1.043649 | 0        |
| lincRNA -               | 2   | 1   | 2   | 0    | 4    | 0    | 0.203427 | 0.130433 | 0.245447 | 0        |
| sense_overl             | 5   | 8   | 4   | 74   | 76   | 69   | 0.119313 | 0.244803 | 0.115166 | 2.740817 |
| protein_co cell_cycle_  | 211 | 167 | 171 | 40   | 41   | 35   | 1.450278 | 1.471955 | 1.41812  | 0.426736 |
| sense_overl             | 186 | 147 | 180 | 59   | 76   | 58   | 2.058424 | 2.086165 | 2.403491 | 1.013455 |
| sense_overl             | 0   | 0   | 0   | 0    | 1    | 0    | 0        | 0        | 0        | 0        |
| antisense -             | 0   | 0   | 0   | 1    | 1    | 2    | 0        | 0        | 0        | 0.146144 |
| sense_overl             | 87  | 72  | 66  | 54   | 73   | 45   | 1.667797 | 1.769969 | 1.526567 | 1.606749 |
| antisense -             | 2   | 0   | 0   | 0    | 0    | 0    | 0.143834 | 0        | 0        | 0        |
| processed_-             | 3   | 1   | 0   | 0    | 2    | 3    | 0.068419 | 0.029246 | 0        | 0        |
| antisense -             | 26  | 12  | 31  | 60   | 61   | 70   | 0.847803 | 0.501779 | 1.219639 | 3.036709 |
| antisense -             | 4   | 3   | 5   | 4    | 6    | 3    | 0.325061 | 0.312633 | 0.490256 | 0.504539 |
| lincRNA -               | 4   | 0   | 3   | 2    | 1    | 1    | 0.081195 | 0        | 0.073475 | 0.063013 |
| lincRNA -               | 6   | 5   | 7   | 0    | 0    | 2    | 0.136706 | 0.146088 | 0.192434 | 0        |
| antisense -             | 2   | 3   | 6   | 6    | 1    | 3    | 0.241701 | 0.464921 | 0.874879 | 1.125461 |
| sense_intrc FTO_intron  | 2   | 3   | 10  | 0    | 6    | 4    | 0.07668  | 0.147497 | 0.462596 | 0        |
| lincRNA -               | 0   | 0   | 0   | 1    | 0    | 0    | 0        | 0        | 0        | 0.150683 |
| sense_overl             | 3   | 4   | 3   | 4    | 6    | 3    | 0.23445  | 0.400865 | 0.282878 | 0.485199 |
| pseudogeni-             | 0   | 0   | 1   | 0    | 0    | 0    | 0        | 0        | 0.063425 | 0        |
| sense_overl             | 0   | 1   | 0   | 0    | 0    | 0    | 0        | 0.101571 | 0        | 0        |
| sense_overl long_interf | 15  | 21  | 9   | 26   | 44   | 4    | 0.447994 | 0.804284 | 0.324318 | 1.205271 |
| antisense -             | 86  | 65  | 74  | 53   | 85   | 56   | 1.008135 | 0.977109 | 1.046647 | 0.964332 |
| antisense -             | 1   | 1   | 0   | 0    | 0    | 0    | 0.146991 | 0.188495 | 0        | 0        |
| lincRNA -               | 18  | 9   | 11  | 17   | 16   | 14   | 0.239235 | 0.153392 | 0.176398 | 0.350696 |
| sense_overl             | 13  | 2   | 9   | 20   | 35   | 14   | 0.30132  | 0.059446 | 0.251695 | 0.719523 |
| sense_overl             | 4   | 4   | 4   | 5    | 8    | 7    | 0.205884 | 0.264017 | 0.248411 | 0.39945  |
| processed_-             | 1   | 0   | 1   | 0    | 2    | 0    | 0.083583 | 0        | 0.100848 | 0        |
| sense_intrc-            | 2   | 1   | 0   | 0    | 2    | 0    | 0.232129 | 0.148836 | 0        | 0        |
| lincRNA -               | 1   | 2   | 0   | 3    | 1    | 0    | 0.106568 | 0.273317 | 0        | 0.496226 |
| lincRNA long_interf     | 0   | 0   | 0   | 0    | 0    | 2    | 0        | 0        | 0        | 0        |
| sense_overl             | 20  | 22  | 27  | 63   | 57   | 104  | 0.183415 | 0.258724 | 0.298756 | 0.896759 |

|                        |   |     |    |     |     |     |     |          |          |          |          |
|------------------------|---|-----|----|-----|-----|-----|-----|----------|----------|----------|----------|
| lincRNA                | - | 2   | 2  | 3   | 1   | 0   | 0   | 0.069364 | 0.088949 | 0.125537 | 0.053831 |
| lincRNA                | - | 3   | 1  | 3   | 5   | 2   | 3   | 0.057113 | 0.024413 | 0.06891  | 0.147746 |
| lincRNA                | - | 2   | 2  | 0   | 1   | 2   | 7   | 0.219625 | 0.281638 | 0        | 0.170444 |
| lincRNA                | - | 0   | 0  | 2   | 5   | 6   | 2   | 0        | 0        | 0.058597 | 0.188451 |
| antisense              | - | 1   | 0  | 2   | 4   | 4   | 1   | 0.09668  | 0        | 0.233301 | 0.600246 |
| pseudogeni             | - | 0   | 0  | 0   | 0   | 1   | 0   | 0        | 0        | 0        | 0        |
| antisense DOCK9_ant    |   | 8   | 9  | 3   | 9   | 7   | 3   | 0.464833 | 0.670593 | 0.210318 | 0.811671 |
| lincRNA                | - | 0   | 0  | 0   | 1   | 0   | 0   | 0        | 0        | 0        | 0.029926 |
| sense_overl            | - | 1   | 0  | 0   | 2   | 1   | 2   | 0.025291 | 0        | 0        | 0.078511 |
| sense_overl            | - | 0   | 0  | 0   | 1   | 0   | 0   | 0        | 0        | 0        | 0.038085 |
| antisense              | - | 0   | 0  | 1   | 0   | 0   | 0   | 0        | 0        | 0.11115  | 0        |
| antisense              | - | 6   | 4  | 4   | 1   | 4   | 2   | 0.341847 | 0.292247 | 0.274972 | 0.088432 |
| sense_overl            | - | 0   | 1  | 0   | 0   | 0   | 0   | 0        | 0.011592 | 0        | 0        |
| lincRNA                | - | 20  | 13 | 18  | 32  | 42  | 37  | 0.40845  | 0.340456 | 0.443536 | 1.014353 |
| processed_             | - | 9   | 5  | 5   | 13  | 19  | 22  | 0.192347 | 0.137032 | 0.128932 | 0.431239 |
| lincRNA                | - | 0   | 0  | 0   | 1   | 0   | 3   | 0        | 0        | 0        | 0.091547 |
| lincRNA                | - | 1   | 0  | 0   | 0   | 0   | 0   | 0.105847 | 0        | 0        | 0        |
| sense_overl            | - | 12  | 11 | 13  | 15  | 36  | 18  | 0.213541 | 0.251016 | 0.27912  | 0.414306 |
| antisense              | - | 0   | 2  | 0   | 0   | 0   | 0   | 0        | 0.060432 | 0        | 0        |
| lincRNA                | - | 4   | 0  | 3   | 1   | 0   | 1   | 0.137105 | 0        | 0.124069 | 0.053202 |
| lincRNA                | - | 5   | 6  | 2   | 2   | 3   | 1   | 0.369213 | 0.568156 | 0.178191 | 0.229228 |
| sense_overl            | - | 44  | 44 | 37  | 0   | 0   | 0   | 0.41288  | 0.52946  | 0.41891  | 0        |
| lincRNA                | - | 0   | 0  | 0   | 0   | 1   | 0   | 0        | 0        | 0        | 0        |
| antisense              | - | 4   | 5  | 2   | 8   | 2   | 0   | 0.158412 | 0.253927 | 0.095567 | 0.491755 |
| lincRNA                | - | 0   | 1  | 1   | 0   | 0   | 0   | 0        | 0.116305 | 0.10943  | 0        |
| lincRNA                | - | 3   | 1  | 6   | 0   | 0   | 0   | 0.259539 | 0.110941 | 0.626297 | 0        |
| processed_             | - | 21  | 10 | 17  | 2   | 2   | 4   | 1.563001 | 0.954441 | 1.526641 | 0.231047 |
| pseudogeni             | - | 0   | 0  | 0   | 0   | 4   | 1   | 0        | 0        | 0        | 0        |
| antisense              | - | 2   | 1  | 2   | 1   | 0   | 1   | 0.333737 | 0.213985 | 0.402673 | 0.259003 |
| sense_overl            | - | 72  | 72 | 71  | 14  | 20  | 15  | 1.135199 | 1.455731 | 1.350659 | 0.342608 |
| sense_overl            | - | 7   | 14 | 5   | 7   | 0   | 2   | 0.156673 | 0.401822 | 0.135025 | 0.243178 |
| protein_co sulfotransf |   | 0   | 2  | 0   | 1   | 0   | 2   | 0        | 0.050764 | 0        | 0.030722 |
| antisense              | - | 1   | 2  | 3   | 0   | 0   | 1   | 0.018302 | 0.04694  | 0.066248 | 0        |
| lincRNA                | - | 0   | 0  | 0   | 6   | 6   | 1   | 0        | 0        | 0        | 0.231169 |
| pseudogeni             | - | 24  | 14 | 17  | 1   | 2   | 4   | 0.717247 | 0.536531 | 0.612991 | 0.046386 |
| processed_             | - | 0   | 1  | 0   | 0   | 0   | 0   | 0        | 0.117902 | 0        | 0        |
| sense_intrc            | - | 144 | 90 | 102 | 81  | 100 | 151 | 9.430395 | 7.558215 | 8.059639 | 8.233469 |
| sense_overl            | - | 5   | 3  | 4   | 2   | 0   | 0   | 0.092962 | 0.071526 | 0.089731 | 0.057716 |
| lincRNA                | - | 13  | 7  | 10  | 1   | 1   | 1   | 1.122597 | 0.775154 | 1.041906 | 0.134033 |
| processed_             | - | 4   | 6  | 7   | 3   | 9   | 7   | 0.035415 | 0.068123 | 0.074779 | 0.041227 |
| lincRNA                | - | 0   | 0  | 2   | 54  | 73  | 14  | 0        | 0        | 0.05596  | 1.943674 |
| lincRNA                | - | 64  | 72 | 84  | 199 | 168 | 230 | 2.427962 | 3.502707 | 3.844937 | 11.71778 |
| lincRNA                | - | 3   | 2  | 0   | 1   | 0   | 0   | 0.142091 | 0.121474 | 0        | 0.073515 |
| antisense              | - | 25  | 23 | 15  | 13  | 10  | 13  | 1.121771 | 1.323431 | 0.812089 | 0.905395 |
| pseudogeni             | - | 3   | 3  | 6   | 5   | 6   | 5   | 0.154582 | 0.19823  | 0.373025 | 0.399889 |
| lincRNA                | - | 2   | 3  | 3   | 8   | 3   | 7   | 0.039653 | 0.076275 | 0.071766 | 0.24619  |
| lincRNA                | - | 0   | 1  | 1   | 0   | 0   | 0   | 0        | 0.039742 | 0.037393 | 0        |
| pseudogeni             | - | 0   | 0  | 0   | 1   | 0   | 0   | 0        | 0        | 0        | 0.075031 |
| lincRNA                | - | 1   | 2  | 2   | 0   | 0   | 0   | 0.026477 | 0.067905 | 0.063891 | 0        |
| lincRNA                | - | 13  | 21 | 13  | 52  | 37  | 12  | 0.215777 | 0.446983 | 0.260347 | 1.339664 |
| lincRNA                | - | 106 | 90 | 91  | 144 | 185 | 99  | 2.611845 | 2.843763 | 2.705397 | 5.507247 |
| pseudogeni             | - | 1   | 0  | 1   | 5   | 1   | 0   | 0.045569 | 0        | 0.054981 | 0.353643 |
| sense_overl            | - | 32  | 40 | 28  | 30  | 35  | 38  | 0.752875 | 1.20682  | 0.794839 | 1.095531 |
| sense_overl            | - | 9   | 11 | 1   | 13  | 9   | 2   | 0.168333 | 0.263832 | 0.022567 | 0.377398 |
| lincRNA                | - | 16  | 28 | 29  | 27  | 22  | 46  | 0.181217 | 0.406675 | 0.396302 | 0.474651 |
| sense_overl            | - | 23  | 16 | 19  | 5   | 2   | 4   | 1.656637 | 1.477844 | 1.651205 | 0.558985 |
| pseudogeni ATP_syntha  |   | 0   | 0  | 0   | 2   | 2   | 0   | 0        | 0        | 0        | 0.547217 |
| antisense              | - | 3   | 3  | 3   | 0   | 0   | 0   | 0.248534 | 0.318709 | 0.29987  | 0        |
| lincRNA                | - | 0   | 0  | 0   | 8   | 10  | 1   | 0        | 0        | 0        | 0.177891 |
| processed_             | - | 7   | 5  | 3   | 2   | 3   | 0   | 0.597869 | 0.54763  | 0.309156 | 0.265136 |
| antisense              | - | 27  | 15 | 28  | 21  | 18  | 16  | 1.892422 | 1.348202 | 2.367884 | 2.284568 |
| sense_intrc            | - | 2   | 0  | 3   | 1   | 1   | 0   | 0.134163 | 0        | 0.242813 | 0.10412  |
| protein_co transmemt   |   | 10  | 5  | 11  | 729 | 952 | 640 | 0.044412 | 0.028476 | 0.058944 | 5.025239 |
| sense_overl            | - | 8   | 5  | 5   | 30  | 28  | 23  | 0.194061 | 0.155535 | 0.146341 | 1.129536 |
| lincRNA                | - | 21  | 10 | 17  | 0   | 1   | 2   | 1.211181 | 0.739604 | 1.183006 | 0        |

|                        |     |     |     |     |     |     |          |          |          |          |
|------------------------|-----|-----|-----|-----|-----|-----|----------|----------|----------|----------|
| processed_ -           | 9   | 5   | 13  | 6   | 8   | 7   | 0.484512 | 0.345177 | 0.844411 | 0.501353 |
| antisense -            | 2   | 0   | 0   | 3   | 7   | 2   | 0.18497  | 0        | 0        | 0.43065  |
| lincRNA -              | 0   | 0   | 0   | 5   | 10  | 1   | 0        | 0        | 0        | 0.165785 |
| sense_intrc -          | 1   | 3   | 0   | 1   | 1   | 0   | 0.078675 | 0.302667 | 0        | 0.122114 |
| antisense -            | 7   | 4   | 3   | 4   | 2   | 10  | 0.65125  | 0.477221 | 0.336759 | 0.577617 |
| processed_ -           | 4   | 5   | 21  | 2   | 3   | 2   | 0.03616  | 0.057962 | 0.229051 | 0.028062 |
| lincRNA -              | 386 | 301 | 419 | 62  | 96  | 40  | 3.922745 | 3.922642 | 5.137654 | 0.977969 |
| sense_intrc -          | 2   | 1   | 6   | 3   | 1   | 0   | 0.29215  | 0.18732  | 1.057486 | 0.680185 |
| lincRNA -              | 1   | 1   | 2   | 5   | 4   | 3   | 0.042243 | 0.054171 | 0.101938 | 0.327837 |
| antisense -            | 12  | 14  | 23  | 21  | 9   | 24  | 0.184667 | 0.276277 | 0.427055 | 0.5016   |
| processed_ -           | 3   | 0   | 2   | 2   | 6   | 1   | 0.041767 | 0        | 0.033596 | 0.043218 |
| antisense -            | 13  | 7   | 20  | 10  | 12  | 14  | 1.32804  | 0.917012 | 2.465164 | 1.585617 |
| antisense -            | 6   | 3   | 4   | 2   | 0   | 1   | 0.474435 | 0.304198 | 0.381622 | 0.245463 |
| pseudogen-             | 4   | 4   | 2   | 10  | 10  | 4   | 0.050474 | 0.064725 | 0.03045  | 0.195855 |
| pseudogen-             | 0   | 0   | 2   | 0   | 0   | 1   | 0        | 0        | 1.067462 | 0        |
| protein_co Uncharacte  | 0   | 1   | 0   | 1   | 0   | 1   | 0        | 0.015667 | 0        | 0.018963 |
| lincRNA -              | 2   | 0   | 3   | 1   | 2   | 4   | 0.086753 | 0        | 0.157009 | 0.067326 |
| antisense -            | 1   | 1   | 1   | 0   | 0   | 2   | 0.050583 | 0.064865 | 0.061031 | 0        |
| lincRNA -              | 1   | 0   | 0   | 2   | 3   | 3   | 0.057818 | 0        | 0        | 0.179482 |
| lincRNA -              | 0   | 0   | 1   | 0   | 0   | 0   | 0        | 0        | 0.111369 | 0        |
| lincRNA -              | 0   | 0   | 0   | 3   | 1   | 2   | 0        | 0        | 0        | 0.151205 |
| sense_overl-           | 45  | 39  | 30  | 51  | 55  | 61  | 0.607559 | 0.675227 | 0.488703 | 1.06875  |
| sense_overl-           | 3   | 4   | 3   | 2   | 3   | 3   | 0.091582 | 0.156588 | 0.110499 | 0.094765 |
| processed_ -           | 1   | 0   | 1   | 0   | 0   | 0   | 0.08169  | 0        | 0.098564 | 0        |
| processed_ -           | 27  | 23  | 26  | 19  | 36  | 38  | 2.149457 | 2.348023 | 2.497391 | 2.347736 |
| antisense -            | 2   | 3   | 0   | 2   | 13  | 7   | 0.181744 | 0.349592 | 0        | 0.282092 |
| processed_ -           | 3   | 0   | 0   | 18  | 15  | 5   | 0.255764 | 0        | 0        | 2.381884 |
| sense_overl-           | 342 | 259 | 260 | 2   | 7   | 3   | 2.817355 | 2.736054 | 2.584264 | 0.025573 |
| antisense -            | 1   | 0   | 0   | 22  | 40  | 27  | 0.072924 | 0        | 0        | 2.490133 |
| lincRNA -              | 0   | 2   | 2   | 0   | 3   | 6   | 0        | 0.080603 | 0.075838 | 0        |
| antisense -            | 3   | 4   | 2   | 9   | 13  | 11  | 0.127419 | 0.217862 | 0.102492 | 0.593314 |
| lincRNA -              | 1   | 1   | 0   | 0   | 1   | 1   | 0.041313 | 0.052978 | 0        | 0        |
| antisense -            | 54  | 30  | 31  | 73  | 105 | 35  | 1.246093 | 0.887743 | 0.863111 | 2.614629 |
| antisense -            | 34  | 31  | 22  | 44  | 49  | 58  | 1.795338 | 2.099126 | 1.401645 | 3.606206 |
| antisense -            | 1   | 1   | 2   | 0   | 4   | 1   | 0.068353 | 0.087653 | 0.164943 | 0        |
| pseudogen ubiquitin-c  | 0   | 1   | 0   | 0   | 0   | 0   | 0        | 0.130151 | 0        | 0        |
| lincRNA -              | 0   | 2   | 0   | 0   | 0   | 0   | 0        | 0.030284 | 0        | 0        |
| lincRNA -              | 3   | 1   | 1   | 8   | 13  | 4   | 0.096152 | 0.0411   | 0.038671 | 0.397976 |
| lincRNA -              | 0   | 0   | 0   | 1   | 0   | 0   | 0        | 0        | 0        | 0.168083 |
| antisense -            | 12  | 15  | 13  | 8   | 11  | 6   | 0.995894 | 1.596366 | 1.301737 | 1.03051  |
| protein_co C-type_lect | 0   | 0   | 0   | 0   | 0   | 1   | 0        | 0        | 0        | 0        |
| lincRNA -              | 7   | 7   | 6   | 11  | 7   | 4   | 0.098716 | 0.126589 | 0.102091 | 0.240775 |
| sense_overl-           | 2   | 2   | 0   | 2   | 2   | 1   | 0.264915 | 0.339716 | 0        | 0.411185 |
| lincRNA -              | 1   | 3   | 3   | 0   | 0   | 0   | 0.033255 | 0.127936 | 0.120373 | 0        |
| processed_ -           | 1   | 0   | 0   | 0   | 2   | 0   | 0.014366 | 0        | 0        | 0        |
| antisense -            | 1   | 0   | 4   | 4   | 8   | 10  | 0.122109 | 0        | 0.589328 | 0.758123 |
| lincRNA -              | 0   | 1   | 0   | 0   | 1   | 1   | 0        | 0.079537 | 0        | 0        |
| lincRNA -              | 26  | 14  | 12  | 12  | 7   | 8   | 1.795494 | 1.23979  | 0.999862 | 1.286241 |
| protein_co zinc_finger | 932 | 643 | 730 | 584 | 835 | 466 | 10.91173 | 9.653797 | 10.31214 | 10.61259 |
| lincRNA -              | 0   | 0   | 1   | 0   | 0   | 0   | 0        | 0        | 0.016197 | 0        |
| sense_intrc -          | 1   | 0   | 0   | 8   | 14  | 7   | 0.016321 | 0        | 0        | 0.202659 |
| lincRNA -              | 2   | 0   | 0   | 0   | 0   | 3   | 0.12372  | 0        | 0        | 0        |
| lincRNA -              | 0   | 0   | 0   | 0   | 0   | 1   | 0        | 0        | 0        | 0        |
| antisense -            | 1   | 0   | 1   | 9   | 13  | 6   | 0.056562 | 0        | 0.068245 | 0.790131 |
| antisense -            | 0   | 8   | 7   | 5   | 6   | 9   | 0        | 0.987758 | 0.8132   | 0.747226 |
| antisense -            | 1   | 1   | 2   | 0   | 1   | 0   | 0.102829 | 0.131864 | 0.248138 | 0        |
| lincRNA -              | 0   | 0   | 0   | 2   | 2   | 1   | 0        | 0        | 0        | 0.124304 |
| antisense -            | 0   | 1   | 3   | 0   | 0   | 4   | 0        | 0.054863 | 0.15486  | 0        |
| antisense -            | 0   | 1   | 0   | 2   | 2   | 0   | 0        | 0.100889 | 0        | 0.244228 |
| lincRNA -              | 0   | 0   | 0   | 0   | 0   | 1   | 0        | 0        | 0        | 0        |
| protein_co golgin_A8_  | 0   | 0   | 0   | 2   | 4   | 0   | 0        | 0        | 0        | 0.076772 |
| processed_ -           | 0   | 0   | 0   | 1   | 2   | 1   | 0        | 0        | 0        | 0.153221 |
| antisense -            | 0   | 0   | 0   | 0   | 1   | 0   | 0        | 0        | 0        | 0        |
| antisense -            | 4   | 5   | 4   | 14  | 4   | 11  | 0.128202 | 0.205502 | 0.154684 | 0.696457 |
| lincRNA -              | 0   | 1   | 3   | 2   | 6   | 9   | 0        | 0.229503 | 0.647811 | 0.555571 |

|                        |     |     |     |     |     |     |          |          |          |          |
|------------------------|-----|-----|-----|-----|-----|-----|----------|----------|----------|----------|
| antisense -            | 32  | 9   | 16  | 2   | 2   | 3   | 1.245212 | 0.449102 | 0.75121  | 0.120796 |
| sense_overl -          | 41  | 27  | 30  | 19  | 11  | 11  | 0.379414 | 0.320407 | 0.334965 | 0.272906 |
| lincRNA -              | 0   | 0   | 0   | 0   | 1   | 0   | 0        | 0        | 0        | 0        |
| lincRNA -              | 0   | 1   | 1   | 5   | 4   | 2   | 0        | 0.075162 | 0.070719 | 0.454874 |
| antisense -            | 0   | 1   | 3   | 6   | 4   | 2   | 0        | 0.127124 | 0.35883  | 0.923211 |
| antisense -            | 3   | 1   | 1   | 2   | 1   | 3   | 0.321165 | 0.137283 | 0.129168 | 0.332328 |
| sense_intrc -          | 4   | 6   | 4   | 5   | 3   | 6   | 0.31208  | 0.600297 | 0.376542 | 0.605489 |
| protein_co mucin_22    | 1   | 0   | 0   | 0   | 0   | 0   | 0.00779  | 0        | 0        | 0        |
| processed_ -           | 0   | 0   | 0   | 0   | 0   | 1   | 0        | 0        | 0        | 0        |
| pseudogen: unc-51-like | 0   | 3   | 0   | 6   | 3   | 2   | 0        | 0.206159 | 0        | 0.499061 |
| lincRNA -              | 0   | 0   | 0   | 6   | 11  | 9   | 0        | 0        | 0        | 0.219437 |
| antisense -            | 3   | 7   | 7   | 2   | 5   | 2   | 0.046921 | 0.140396 | 0.132098 | 0.048552 |
| sense_intrc -          | 4   | 2   | 1   | 0   | 0   | 0   | 0.367765 | 0.235803 | 0.110932 | 0        |
| sense_overl -          | 0   | 0   | 0   | 0   | 0   | 1   | 0        | 0        | 0        | 0        |
| antisense -            | 3   | 0   | 0   | 0   | 1   | 0   | 0.280219 | 0        | 0        | 0        |
| antisense -            | 409 | 324 | 363 | 0   | 0   | 1   | 29.41414 | 29.88045 | 31.49833 | 0        |
| lincRNA -              | 1   | 0   | 0   | 0   | 0   | 0   | 0.039042 | 0        | 0        | 0        |
| antisense -            | 3   | 3   | 2   | 2   | 1   | 1   | 0.138183 | 0.1772   | 0.11115  | 0.142986 |
| sense_overl -          | 0   | 0   | 0   | 3   | 1   | 2   | 0        | 0        | 0        | 0.26086  |
| pseudogen: -           | 90  | 67  | 57  | 244 | 419 | 145 | 2.156414 | 2.058608 | 1.64783  | 9.074232 |
| lincRNA -              | 0   | 0   | 0   | 0   | 1   | 1   | 0        | 0        | 0        | 0        |
| lincRNA -              | 41  | 20  | 37  | 8   | 10  | 7   | 0.623578 | 0.390073 | 0.678979 | 0.188854 |
| antisense -            | 0   | 0   | 0   | 3   | 2   | 5   | 0        | 0        | 0        | 0.158332 |
| sense_overl -          | 0   | 0   | 0   | 0   | 1   | 0   | 0        | 0        | 0        | 0        |
| pseudogen: La_ribonuc  | 0   | 0   | 0   | 2   | 1   | 0   | 0        | 0        | 0        | 0.066862 |
| sense_overl -          | 26  | 26  | 17  | 28  | 54  | 80  | 0.224602 | 0.28802  | 0.177189 | 0.37543  |
| lincRNA -              | 0   | 0   | 0   | 0   | 0   | 1   | 0        | 0        | 0        | 0        |
| lincRNA -              | 88  | 126 | 101 | 60  | 54  | 13  | 0.757958 | 1.391689 | 1.049619 | 0.802129 |
| antisense -            | 26  | 15  | 18  | 0   | 0   | 0   | 0.928515 | 0.686936 | 0.775597 | 0        |
| antisense -            | 1   | 8   | 1   | 0   | 0   | 1   | 0.069057 | 0.708451 | 0.083322 | 0        |
| pseudogen: -           | 6   | 8   | 3   | 0   | 0   | 0   | 0.569514 | 0.973762 | 0.343576 | 0        |
| pseudogen: CD24_mol    | 0   | 0   | 0   | 0   | 0   | 1   | 0        | 0        | 0        | 0        |
| lincRNA -              | 0   | 2   | 1   | 1   | 0   | 0   | 0        | 0.062182 | 0.029253 | 0.037632 |
| antisense -            | 5   | 0   | 2   | 2   | 5   | 7   | 0.136546 | 0        | 0.0659   | 0.084776 |
| pseudogen: eukaryotic_ | 0   | 0   | 0   | 2   | 0   | 0   | 0        | 0        | 0        | 0.081092 |
| antisense -            | 15  | 10  | 18  | 10  | 16  | 5   | 0.923032 | 0.789105 | 1.336429 | 0.955116 |
| sense_overl -          | 32  | 39  | 40  | 9   | 16  | 23  | 0.733373 | 1.146169 | 1.10607  | 0.320146 |
| lincRNA -              | 1   | 0   | 0   | 0   | 0   | 0   | 0.020566 | 0        | 0        | 0        |
| lincRNA -              | 0   | 1   | 0   | 1   | 3   | 3   | 0        | 0.121474 | 0        | 0.14703  |
| sense_intrc -          | 3   | 7   | 7   | 17  | 44  | 19  | 0.088751 | 0.265557 | 0.24986  | 0.780604 |
| lincRNA -              | 0   | 0   | 0   | 2   | 0   | 1   | 0        | 0        | 0        | 0.274641 |
| pseudogen: -           | 12  | 11  | 10  | 8   | 14  | 7   | 1.225883 | 1.441019 | 1.232582 | 1.268493 |
| antisense -            | 6   | 5   | 6   | 12  | 5   | 7   | 0.260983 | 0.278895 | 0.314891 | 0.810165 |
| lincRNA -              | 27  | 13  | 13  | 10  | 14  | 5   | 3.701843 | 2.285636 | 2.150531 | 2.128064 |
| sense_overl -          | 25  | 35  | 35  | 21  | 21  | 13  | 0.318893 | 0.572509 | 0.538668 | 0.415771 |
| lincRNA -              | 1   | 0   | 0   | 0   | 0   | 1   | 0.066605 | 0        | 0        | 0        |
| protein_co chromosom   | 0   | 0   | 0   | 1   | 1   | 1   | 0        | 0        | 0        | 0.066466 |
| antisense -            | 7   | 7   | 10  | 4   | 3   | 5   | 0.117351 | 0.150486 | 0.202272 | 0.104083 |
| antisense MANEA_an     | 8   | 4   | 5   | 3   | 2   | 2   | 0.165397 | 0.106049 | 0.124726 | 0.09627  |
| antisense -            | 8   | 2   | 9   | 1   | 1   | 2   | 0.431173 | 0.138229 | 0.585264 | 0.083655 |
| sense_overl -          | 15  | 12  | 12  | 12  | 19  | 4   | 1.048212 | 1.075347 | 1.011783 | 1.301576 |
| antisense -            | 56  | 42  | 55  | 37  | 47  | 102 | 1.497913 | 1.440645 | 1.775044 | 1.53614  |
| sense_overl -          | 1   | 0   | 1   | 1   | 0   | 1   | 0.029417 | 0        | 0.035493 | 0.045659 |
| pseudogen: -           | 0   | 1   | 0   | 0   | 0   | 0   | 0        | 0.047646 | 0        | 0        |
| pseudogen: -           | 9   | 7   | 6   | 7   | 6   | 12  | 0.394771 | 0.39374  | 0.317543 | 0.476575 |
| lincRNA -              | 5   | 0   | 1   | 0   | 0   | 0   | 0.228509 | 0        | 0.055142 | 0        |
| sense_intrc -          | 0   | 0   | 0   | 0   | 3   | 0   | 0        | 0        | 0        | 0        |
| lincRNA -              | 16  | 9   | 5   | 7   | 15  | 27  | 0.940151 | 0.678156 | 0.354483 | 0.638419 |
| lincRNA -              | 0   | 3   | 1   | 2   | 3   | 3   | 0        | 0.233665 | 0.073284 | 0.188549 |
| lincRNA -              | 0   | 2   | 0   | 0   | 0   | 0   | 0        | 0.159707 | 0        | 0        |
| antisense -            | 0   | 0   | 0   | 0   | 0   | 2   | 0        | 0        | 0        | 0        |
| antisense -            | 2   | 1   | 2   | 0   | 1   | 0   | 0.173989 | 0.111558 | 0.209928 | 0        |
| pseudogen: -           | 0   | 0   | 0   | 3   | 3   | 3   | 0        | 0        | 0        | 0.802718 |
| antisense -            | 0   | 0   | 0   | 0   | 1   | 3   | 0        | 0        | 0        | 0        |
| antisense -            | 5   | 0   | 0   | 1   | 4   | 2   | 0.500962 | 0        | 0        | 0.155512 |

|                        |     |     |     |     |     |     |          |          |          |          |
|------------------------|-----|-----|-----|-----|-----|-----|----------|----------|----------|----------|
| pseudogeni -           | 2   | 4   | 1   | 1   | 1   | 0   | 0.130978 | 0.335921 | 0.079016 | 0.101648 |
| lincRNA -              | 1   | 3   | 0   | 0   | 0   | 4   | 0.012198 | 0.046928 | 0        | 0        |
| lincRNA -              | 0   | 0   | 0   | 1   | 0   | 0   | 0        | 0        | 0        | 0.12746  |
| processed_ -           | 0   | 1   | 0   | 1   | 2   | 3   | 0        | 0.062246 | 0        | 0.075341 |
| processed_ -           | 0   | 0   | 1   | 0   | 0   | 0   | 0        | 0        | 0.12299  | 0        |
| processed_TEN1-CDK3    | 3   | 8   | 6   | 7   | 12  | 14  | 0.036097 | 0.123438 | 0.087106 | 0.130731 |
| sense_overl -          | 4   | 0   | 4   | 72  | 117 | 150 | 0.037542 | 0        | 0.045297 | 1.048868 |
| pseudogeni -           | 0   | 0   | 0   | 0   | 0   | 1   | 0        | 0        | 0        | 0        |
| pseudogeni -           | 4   | 2   | 1   | 2   | 3   | 1   | 0.519557 | 0.333129 | 0.156719 | 0.403212 |
| antisense -            | 3   | 3   | 2   | 10  | 20  | 12  | 0.085984 | 0.110262 | 0.069163 | 0.444864 |
| 3prime_ovl -           | 0   | 0   | 0   | 0   | 2   | 0   | 0        | 0        | 0        | 0        |
| lincRNA -              | 7   | 6   | 4   | 3   | 3   | 13  | 0.141174 | 0.155174 | 0.097334 | 0.093909 |
| pseudogeni ATP_syntha  | 0   | 0   | 0   | 1   | 0   | 0   | 0        | 0        | 0        | 0.095763 |
| lincRNA -              | 50  | 30  | 27  | 2   | 0   | 1   | 1.057988 | 0.814032 | 0.689322 | 0.065686 |
| sense_intrc -          | 20  | 22  | 18  | 0   | 0   | 0   | 0.229347 | 0.323516 | 0.249048 | 0        |
| protein_co -           | 2   | 0   | 0   | 0   | 0   | 0   | 0.115921 | 0        | 0        | 0        |
| antisense -            | 10  | 14  | 14  | 12  | 13  | 19  | 0.166572 | 0.299047 | 0.28137  | 0.310251 |
| sense_intrc -          | 0   | 0   | 2   | 2   | 0   | 0   | 0        | 0        | 0.36857  | 0.474136 |
| antisense -            | 0   | 0   | 0   | 1   | 2   | 1   | 0        | 0        | 0        | 0.389197 |
| lincRNA -              | 1   | 1   | 1   | 2   | 0   | 2   | 0.086673 | 0.111146 | 0.104576 | 0.269057 |
| sense_overl -          | 0   | 1   | 1   | 1   | 1   | 1   | 0        | 0.106613 | 0.100311 | 0.129042 |
| lincRNA microRNA_      | 0   | 0   | 0   | 1   | 1   | 0   | 0        | 0        | 0        | 0.036832 |
| processed_ -           | 0   | 0   | 0   | 1   | 0   | 0   | 0        | 0        | 0        | 0.090975 |
| antisense -            | 0   | 0   | 0   | 44  | 45  | 30  | 0        | 0        | 0        | 1.466931 |
| sense_overl -          | 10  | 1   | 6   | 1   | 0   | 0   | 0.383088 | 0.049126 | 0.277331 | 0.059461 |
| antisense -            | 0   | 0   | 0   | 2   | 0   | 0   | 0        | 0        | 0        | 0.076409 |
| antisense -            | 2   | 0   | 1   | 6   | 4   | 4   | 0.084563 | 0        | 0.051015 | 0.393759 |
| antisense -            | 2   | 1   | 5   | 7   | 4   | 1   | 0.060778 | 0.038969 | 0.18333  | 0.330174 |
| lincRNA -              | 1   | 1   | 4   | 0   | 1   | 0   | 0.048591 | 0.062311 | 0.23451  | 0        |
| antisense -            | 0   | 2   | 0   | 0   | 0   | 0   | 0        | 0.187612 | 0        | 0        |
| antisense -            | 1   | 0   | 0   | 0   | 0   | 0   | 0.047268 | 0        | 0        | 0        |
| sense_overl -          | 3   | 0   | 2   | 1   | 0   | 1   | 0.03031  | 0        | 0.024381 | 0.015682 |
| lincRNA -              | 253 | 212 | 257 | 152 | 207 | 142 | 6.102456 | 6.557365 | 7.479375 | 5.690602 |
| lincRNA -              | 0   | 0   | 1   | 0   | 0   | 0   | 0        | 0        | 0.20278  | 0        |
| lincRNA -              | 54  | 41  | 26  | 23  | 34  | 28  | 1.435409 | 1.397575 | 0.833879 | 0.948943 |
| pseudogeni -           | 0   | 0   | 0   | 0   | 0   | 1   | 0        | 0        | 0        | 0        |
| antisense -            | 3   | 0   | 5   | 7   | 2   | 10  | 0.044686 | 0        | 0.089859 | 0.161836 |
| pseudogeni ubiquitin-c | 1   | 2   | 2   | 3   | 4   | 4   | 0.085255 | 0.218654 | 0.205729 | 0.396981 |
| lincRNA -              | 0   | 0   | 0   | 0   | 1   | 2   | 0        | 0        | 0        | 0        |
| lincRNA -              | 1   | 0   | 0   | 0   | 0   | 0   | 0.071045 | 0        | 0        | 0        |
| sense_overl -          | 6   | 8   | 6   | 3   | 1   | 3   | 0.146837 | 0.251064 | 0.177168 | 0.113956 |
| sense_intrc -          | 2   | 1   | 1   | 8   | 16  | 8   | 0.175948 | 0.112814 | 0.106145 | 1.09238  |
| antisense -            | 3   | 2   | 1   | 0   | 1   | 1   | 0.057794 | 0.049408 | 0.023244 | 0        |
| lincRNA -              | 0   | 0   | 1   | 0   | 0   | 0   | 0        | 0        | 0.135025 | 0        |
| lincRNA -              | 31  | 29  | 31  | 27  | 31  | 5   | 3.237395 | 3.883662 | 3.906104 | 4.376514 |
| sense_intrc -          | 8   | 5   | 4   | 11  | 5   | 2   | 0.440282 | 0.352874 | 0.265613 | 0.939645 |
| lincRNA -              | 1   | 0   | 0   | 0   | 0   | 0   | 0.084183 | 0        | 0        | 0        |
| antisense -            | 0   | 0   | 0   | 0   | 1   | 3   | 0        | 0        | 0        | 0        |
| antisense PAN3_antis   | 22  | 22  | 17  | 4   | 13  | 12  | 0.763568 | 0.979168 | 0.711905 | 0.215484 |
| processed_ -           | 0   | 2   | 0   | 0   | 0   | 0   | 0        | 0.091244 | 0        | 0        |
| antisense -            | 5   | 4   | 4   | 10  | 11  | 8   | 0.121038 | 0.124171 | 0.116831 | 0.375735 |
| lincRNA -              | 0   | 0   | 0   | 3   | 1   | 2   | 0        | 0        | 0        | 0.856233 |
| sense_overl -          | 30  | 20  | 29  | 45  | 34  | 55  | 0.400769 | 0.34262  | 0.467433 | 0.933074 |
| sense_overl -          | 1   | 0   | 0   | 1   | 0   | 0   | 0.029696 | 0        | 0        | 0.046092 |
| lincRNA -              | 47  | 15  | 28  | 8   | 6   | 2   | 1.601621 | 0.655485 | 1.151246 | 0.423138 |
| antisense -            | 168 | 110 | 127 | 130 | 135 | 163 | 2.535411 | 2.128831 | 2.312549 | 3.04518  |
| lincRNA -              | 94  | 60  | 58  | 55  | 74  | 48  | 2.770372 | 2.267623 | 2.062463 | 2.515958 |
| antisense -            | 3   | 3   | 7   | 6   | 16  | 3   | 0.181043 | 0.232161 | 0.509689 | 0.562006 |
| protein_co Uncharacter | 0   | 0   | 0   | 2   | 1   | 1   | 0        | 0        | 0        | 0.335391 |
| lincRNA -              | 2   | 1   | 1   | 2   | 0   | 6   | 0.049099 | 0.031482 | 0.029621 | 0.076209 |
| antisense DLGAP1_ar    | 0   | 0   | 1   | 2   | 3   | 5   | 0        | 0        | 0.02181  | 0.056114 |
| lincRNA -              | 3   | 0   | 2   | 4   | 6   | 0   | 0.253917 | 0        | 0.204244 | 0.525486 |
| pseudogeni ATP-bindin  | 0   | 1   | 1   | 0   | 0   | 0   | 0        | 0.027761 | 0.02612  | 0        |
| lincRNA -              | 6   | 3   | 4   | 8   | 12  | 5   | 0.218432 | 0.140054 | 0.1757   | 0.452048 |
| pseudogeni -           | 1   | 0   | 0   | 0   | 0   | 4   | 0.064945 | 0        | 0        | 0        |

|                       |     |     |     |     |     |     |          |          |          |          |
|-----------------------|-----|-----|-----|-----|-----|-----|----------|----------|----------|----------|
| pseudogeni -          | 3   | 1   | 1   | 0   | 5   | 3   | 0.19376  | 0.082823 | 0.077928 | 0        |
| sense_intrc -         | 4   | 4   | 0   | 2   | 1   | 2   | 0.117006 | 0.150043 | 0        | 0.090804 |
| sense_overl -         | 6   | 6   | 6   | 5   | 5   | 8   | 0.130009 | 0.166718 | 0.156864 | 0.16816  |
| sense_overl -         | 52  | 45  | 72  | 2   | 4   | 1   | 0.645219 | 0.71602  | 1.077914 | 0.038518 |
| sense_intrc -         | 2   | 0   | 0   | 0   | 0   | 0   | 0.11826  | 0        | 0        | 0        |
| lincRNA -             | 9   | 1   | 3   | 8   | 13  | 13  | 0.205458 | 0.029274 | 0.082632 | 0.283466 |
| antisense -           | 3   | 0   | 0   | 0   | 0   | 0   | 0.253917 | 0        | 0        | 0        |
| sense_intrc -         | 1   | 2   | 0   | 0   | 0   | 0   | 0.109556 | 0.28098  | 0        | 0        |
| antisense -           | 2   | 3   | 1   | 1   | 8   | 5   | 0.044551 | 0.085696 | 0.026877 | 0.034575 |
| pseudogeni -          | 0   | 0   | 0   | 2   | 2   | 0   | 0        | 0        | 0        | 0.20022  |
| antisense -           | 5   | 5   | 8   | 0   | 0   | 0   | 0.50528  | 0.64795  | 0.97544  | 0        |
| processed_ -          | 11  | 12  | 14  | 3   | 0   | 6   | 0.124949 | 0.174796 | 0.191874 | 0.052892 |
| pseudogeni -          | 0   | 0   | 0   | 1   | 0   | 0   | 0        | 0        | 0        | 0.121705 |
| lincRNA -             | 0   | 0   | 1   | 0   | 0   | 0   | 0        | 0        | 0.034185 | 0        |
| pseudogeni -          | 116 | 107 | 108 | 127 | 140 | 80  | 2.067367 | 2.445416 | 2.32237  | 3.513126 |
| pseudogeni -          | 1   | 5   | 0   | 1   | 3   | 5   | 0.031661 | 0.203004 | 0        | 0.049142 |
| sense_intrc -         | 10  | 9   | 18  | 6   | 21  | 15  | 0.313646 | 0.361985 | 0.681177 | 0.292093 |
| pseudogeni -          | 0   | 0   | 0   | 0   | 0   | 1   | 0        | 0        | 0        | 0        |
| protein_co Uncharacte | 0   | 1   | 3   | 0   | 3   | 2   | 0        | 0.208062 | 0.587289 | 0        |
| lincRNA -             | 10  | 0   | 2   | 7   | 15  | 15  | 0.290341 | 0        | 0.070063 | 0.315454 |
| antisense -           | 1   | 0   | 0   | 1   | 5   | 1   | 0.098924 | 0        | 0        | 0.153544 |
| sense_intrc -         | 2   | 3   | 3   | 6   | 9   | 1   | 0.049593 | 0.095394 | 0.089755 | 0.230925 |
| sense_intrc -         | 1   | 5   | 5   | 2   | 6   | 4   | 0.111643 | 0.715831 | 0.673518 | 0.34657  |
| pseudogeni -          | 2   | 1   | 0   | 2   | 2   | 4   | 0.190998 | 0.122464 | 0        | 0.296455 |
| sense_overl -         | 302 | 256 | 278 | 38  | 49  | 51  | 3.37805  | 3.672049 | 3.751906 | 0.659741 |
| pseudogeni -          | 2   | 1   | 0   | 0   | 0   | 0   | 0.129352 | 0.082938 | 0        | 0        |
| antisense -           | 3   | 2   | 7   | 0   | 1   | 5   | 0.265917 | 0.227334 | 0.748636 | 0        |
| lincRNA -             | 15  | 14  | 19  | 9   | 12  | 7   | 0.407976 | 0.488293 | 0.623512 | 0.379941 |
| processed_ -          | 76  | 52  | 58  | 169 | 254 | 136 | 1.701834 | 1.493195 | 1.567039 | 5.873823 |
| pseudogeni -          | 3   | 3   | 0   | 5   | 5   | 6   | 0.543128 | 0.696484 | 0        | 1.405015 |
| lincRNA -             | 26  | 29  | 19  | 36  | 15  | 41  | 0.25346  | 0.362529 | 0.223479 | 0.544714 |
| processed_ -          | 1   | 2   | 3   | 0   | 2   | 0   | 0.091404 | 0.234424 | 0.330851 | 0        |
| protein_co trophoblas | 24  | 12  | 16  | 11  | 31  | 13  | 0.402922 | 0.258345 | 0.324099 | 0.286637 |
| antisense -           | 0   | 0   | 3   | 0   | 0   | 0   | 0        | 0        | 0.079871 | 0        |
| sense_intrc -         | 13  | 5   | 12  | 6   | 5   | 4   | 0.922194 | 0.45484  | 1.027089 | 0.660634 |
| sense_overl -         | 22  | 27  | 26  | 14  | 18  | 23  | 0.251974 | 0.396557 | 0.359297 | 0.248881 |
| protein_co protease_s | 0   | 0   | 0   | 3   | 5   | 0   | 0        | 0        | 0        | 0.222342 |
| antisense -           | 22  | 25  | 20  | 12  | 14  | 16  | 0.48545  | 0.707409 | 0.532475 | 0.410992 |
| processed_ -          | 0   | 0   | 0   | 0   | 0   | 2   | 0        | 0        | 0        | 0        |
| lincRNA microRNA_     | 235 | 217 | 215 | 643 | 791 | 559 | 1.446843 | 1.713257 | 1.597129 | 6.144618 |
| lincRNA -             | 0   | 1   | 1   | 1   | 5   | 4   | 0        | 0.033743 | 0.031748 | 0.040842 |
| antisense -           | 0   | 1   | 2   | 0   | 0   | 1   | 0        | 0.03005  | 0.056547 | 0        |
| pseudogeni Y_box_binc | 1   | 1   | 0   | 0   | 1   | 0   | 0.043018 | 0.055165 | 0        | 0        |
| antisense -           | 20  | 7   | 17  | 4   | 5   | 3   | 0.350318 | 0.157231 | 0.359277 | 0.108748 |
| lincRNA -             | 0   | 0   | 0   | 0   | 3   | 0   | 0        | 0        | 0        | 0        |
| pseudogeni high_mobil | 1   | 1   | 3   | 2   | 1   | 4   | 0.113811 | 0.145946 | 0.411958 | 0.3533   |
| lincRNA -             | 0   | 0   | 0   | 1   | 0   | 0   | 0        | 0        | 0        | 0.019815 |
| pseudogeni -          | 0   | 0   | 0   | 3   | 3   | 0   | 0        | 0        | 0        | 0.456777 |
| sense_overl -         | 3   | 1   | 2   | 4   | 8   | 2   | 0.109556 | 0.04683  | 0.088124 | 0.226728 |
| pseudogeni -          | 1   | 0   | 0   | 3   | 0   | 0   | 0.142091 | 0        | 0        | 0.661635 |
| antisense -           | 0   | 0   | 0   | 3   | 2   | 1   | 0        | 0        | 0        | 0.366341 |
| antisense -           | 1   | 3   | 4   | 2   | 1   | 4   | 0.085722 | 0.32978  | 0.413715 | 0.266105 |
| antisense -           | 0   | 1   | 1   | 0   | 0   | 0   | 0        | 0.076991 | 0.07244  | 0        |
| antisense -           | 0   | 1   | 0   | 0   | 0   | 0   | 0        | 0.108147 | 0        | 0        |
| processed_ -          | 0   | 0   | 0   | 3   | 3   | 2   | 0        | 0        | 0        | 0.09026  |
| pseudogeni -          | 0   | 0   | 0   | 1   | 0   | 0   | 0        | 0        | 0        | 0.100386 |
| lincRNA -             | 0   | 0   | 0   | 3   | 0   | 4   | 0        | 0        | 0        | 0.432355 |
| lincRNA -             | 0   | 2   | 0   | 0   | 0   | 0   | 0        | 0.038483 | 0        | 0        |
| sense_overl -         | 22  | 10  | 19  | 14  | 19  | 20  | 1.198119 | 0.698372 | 1.248472 | 1.183411 |
| antisense -           | 1   | 0   | 1   | 0   | 0   | 4   | 0.040774 | 0        | 0.049196 | 0        |
| lincRNA -             | 0   | 1   | 0   | 0   | 0   | 0   | 0        | 0.02722  | 0        | 0        |
| pseudogeni golgin_A6_ | 1   | 6   | 0   | 0   | 3   | 0   | 0.023634 | 0.181844 | 0        | 0        |
| protein_co uncharacte | 10  | 7   | 8   | 5   | 8   | 2   | 0.64321  | 0.577378 | 0.620856 | 0.499176 |
| lincRNA -             | 1   | 0   | 0   | 0   | 0   | 0   | 0.041532 | 0        | 0        | 0        |
| sense_overl -         | 5   | 10  | 4   | 11  | 3   | 4   | 0.039173 | 0.100467 | 0.037812 | 0.133764 |

|                         |     |     |     |    |     |     |          |          |          |          |
|-------------------------|-----|-----|-----|----|-----|-----|----------|----------|----------|----------|
| sense_overl             | 9   | 13  | 3   | 4  | 5   | 2   | 0.214982 | 0.398211 | 0.086463 | 0.148303 |
| processed_              | 0   | 1   | 3   | 2  | 0   | 0   | 0        | 0.112814 | 0.318436 | 0.273095 |
| sense_overl             | 19  | 6   | 12  | 71 | 97  | 93  | 0.272783 | 0.110465 | 0.207871 | 1.58217  |
| processed_              | 28  | 10  | 18  | 2  | 2   | 12  | 0.384682 | 0.176179 | 0.298377 | 0.042649 |
| sense_overl             | 15  | 9   | 18  | 0  | 2   | 5   | 0.51755  | 0.398211 | 0.749344 | 0        |
| antisense -             | 17  | 12  | 16  | 19 | 38  | 32  | 1.011587 | 0.915682 | 1.148741 | 1.754843 |
| pseudogen: tubulin_al   | 1   | 0   | 0   | 0  | 0   | 0   | 0.112716 | 0        | 0        | 0        |
| protein_co Uncharacte   | 0   | 0   | 0   | 5  | 10  | 4   | 0        | 0        | 0        | 0.368319 |
| antisense -             | 4   | 2   | 3   | 4  | 6   | 1   | 0.048806 | 0.031293 | 0.044165 | 0.075753 |
| antisense -             | 5   | 3   | 6   | 8  | 9   | 16  | 0.404922 | 0.311553 | 0.586275 | 1.005593 |
| lincRNA -               | 0   | 0   | 0   | 1  | 2   | 0   | 0        | 0        | 0        | 0.015832 |
| lincRNA -               | 0   | 0   | 2   | 0  | 0   | 0   | 0        | 0        | 0.127854 | 0        |
| lincRNA -               | 1   | 2   | 0   | 1  | 3   | 0   | 0.119923 | 0.307569 | 0        | 0.186138 |
| sense_overl             | 0   | 0   | 0   | 0  | 1   | 0   | 0        | 0        | 0        | 0        |
| pseudogen:              | 0   | 0   | 0   | 1  | 0   | 0   | 0        | 0        | 0        | 0.169255 |
| lincRNA -               | 198 | 180 | 205 | 83 | 91  | 51  | 2.698118 | 3.145412 | 3.370526 | 1.755514 |
| antisense -             | 0   | 1   | 0   | 0  | 0   | 0   | 0        | 0.113026 | 0        | 0        |
| antisense -             | 47  | 45  | 34  | 57 | 72  | 52  | 2.271991 | 2.789527 | 1.983059 | 4.276751 |
| sense_intrc             | 0   | 1   | 1   | 3  | 1   | 3   | 0        | 0.144891 | 0.136327 | 0.526119 |
| antisense -             | 0   | 0   | 0   | 3  | 4   | 3   | 0        | 0        | 0        | 0.064655 |
| lincRNA -               | 0   | 0   | 0   | 1  | 0   | 0   | 0        | 0        | 0        | 0.049883 |
| processed_              | 0   | 0   | 1   | 0  | 0   | 0   | 0        | 0        | 0.032931 | 0        |
| protein_co haptoglobi   | 2   | 2   | 0   | 0  | 1   | 0   | 0.075386 | 0.096672 | 0        | 0        |
| lincRNA -               | 48  | 50  | 49  | 77 | 100 | 53  | 2.953702 | 3.945525 | 3.638057 | 7.354389 |
| antisense -             | 0   | 0   | 0   | 3  | 3   | 1   | 0        | 0        | 0        | 0.272924 |
| lincRNA -               | 14  | 13  | 17  | 1  | 0   | 1   | 1.240946 | 1.47767  | 1.818116 | 0.13758  |
| pseudogen:              | 1   | 1   | 0   | 1  | 2   | 1   | 0.100622 | 0.129034 | 0        | 0.15618  |
| sense_overl             | 107 | 68  | 94  | 86 | 111 | 102 | 1.108291 | 0.903209 | 1.174751 | 1.382607 |
| processed_              | 3   | 2   | 2   | 9  | 2   | 8   | 0.224354 | 0.191802 | 0.180464 | 1.044686 |
| lincRNA -               | 0   | 0   | 0   | 1  | 0   | 0   | 0        | 0        | 0        | 0.032448 |
| lincRNA -               | 0   | 0   | 1   | 0  | 0   | 0   | 0        | 0        | 0.062792 | 0        |
| antisense -             | 4   | 1   | 2   | 7  | 14  | 15  | 0.425306 | 0.136349 | 0.256578 | 1.155235 |
| protein_co              | 16  | 13  | 16  | 16 | 16  | 24  | 0.140864 | 0.146768 | 0.16996  | 0.21864  |
| sense_intrc             | 2   | 0   | 0   | 2  | 0   | 1   | 0.158412 | 0        | 0        | 0.245878 |
| antisense -             | 8   | 3   | 12  | 1  | 7   | 3   | 0.390344 | 0.18771  | 0.706458 | 0.075733 |
| protein_co golgin_A8_   | 1   | 0   | 0   | 0  | 1   | 0   | 0.010782 | 0        | 0        | 0        |
| protein_co BolA-like_p  | 5   | 1   | 3   | 1  | 3   | 5   | 0.075556 | 0.019378 | 0.054698 | 0.023455 |
| lincRNA -               | 5   | 3   | 2   | 1  | 5   | 5   | 0.13321  | 0.102494 | 0.06429  | 0.041352 |
| antisense -             | 11  | 6   | 4   | 6  | 13  | 3   | 0.70367  | 0.492195 | 0.308734 | 0.595742 |
| protein_co Uncharacte   | 0   | 0   | 1   | 0  | 0   | 1   | 0        | 0        | 0.112476 | 0        |
| lincRNA -               | 0   | 0   | 0   | 15 | 12  | 22  | 0        | 0        | 0        | 0.395973 |
| lincRNA -               | 4   | 2   | 6   | 3  | 2   | 4   | 0.114366 | 0.073329 | 0.206984 | 0.133134 |
| antisense -             | 3   | 3   | 2   | 2  | 2   | 0   | 0.044643 | 0.057248 | 0.03591  | 0.046195 |
| antisense -             | 0   | 0   | 2   | 0  | 0   | 0   | 0        | 0        | 0.099517 | 0        |
| lincRNA -               | 3   | 2   | 0   | 8  | 8   | 9   | 0.164142 | 0.140326 | 0        | 0.679391 |
| antisense -             | 11  | 3   | 3   | 16 | 19  | 37  | 0.239457 | 0.083746 | 0.078796 | 0.540611 |
| pseudogen: keratin_18_  | 0   | 0   | 0   | 0  | 1   | 1   | 0        | 0        | 0        | 0        |
| sense_intrc             | 0   | 0   | 1   | 0  | 0   | 0   | 0        | 0        | 0.132806 | 0        |
| antisense -             | 8   | 6   | 11  | 7  | 7   | 7   | 0.689559 | 0.663196 | 1.14399  | 0.936505 |
| lincRNA -               | 5   | 11  | 5   | 2  | 5   | 5   | 0.063953 | 0.180422 | 0.077162 | 0.039705 |
| sense_overl             | 0   | 2   | 0   | 2  | 1   | 2   | 0        | 0.151843 | 0        | 0.183787 |
| pseudogen:              | 0   | 2   | 0   | 0  | 0   | 0   | 0        | 0.399534 | 0        | 0        |
| lincRNA -               | 1   | 1   | 2   | 3  | 7   | 7   | 0.129889 | 0.166565 | 0.313438 | 0.604818 |
| processed_              | 2   | 3   | 5   | 5  | 3   | 8   | 0.063753 | 0.12263  | 0.192303 | 0.247382 |
| pseudogen:              | 0   | 0   | 0   | 0  | 0   | 1   | 0        | 0        | 0        | 0        |
| processed_              | 0   | 2   | 0   | 7  | 12  | 3   | 0        | 0.103227 | 0        | 0.437304 |
| processed_              | 2   | 4   | 1   | 3  | 2   | 2   | 0.250749 | 0.643099 | 0.151271 | 0.583795 |
| lincRNA -               | 3   | 3   | 2   | 23 | 22  | 12  | 0.027762 | 0.035601 | 0.022331 | 0.33036  |
| protein_co transcriptic | 0   | 0   | 0   | 27 | 52  | 17  | 0        | 0        | 0        | 0.802063 |
| lincRNA -               | 0   | 0   | 1   | 1  | 5   | 0   | 0        | 0        | 0.086112 | 0.110776 |
| pseudogen: DNM1_pse     | 0   | 0   | 1   | 0  | 0   | 0   | 0        | 0        | 0.119358 | 0        |
| protein_co golgin_A8_   | 5   | 11  | 8   | 9  | 10  | 13  | 0.12346  | 0.348303 | 0.238338 | 0.344928 |
| lincRNA -               | 0   | 0   | 0   | 0  | 1   | 0   | 0        | 0        | 0        | 0        |
| lincRNA -               | 0   | 0   | 0   | 1  | 0   | 5   | 0        | 0        | 0        | 0.189038 |
| antisense -             | 0   | 0   | 0   | 1  | 1   | 1   | 0        | 0        | 0        | 0.060853 |

|                        |     |     |     |     |     |     |          |          |          |          |
|------------------------|-----|-----|-----|-----|-----|-----|----------|----------|----------|----------|
| sense_overl -          | 95  | 89  | 111 | 75  | 111 | 89  | 1.405221 | 1.688187 | 1.981035 | 1.72192  |
| antisense LOXL1_anti   | 155 | 138 | 132 | 111 | 102 | 78  | 3.082253 | 3.519047 | 3.167077 | 3.426021 |
| lincRNA -              | 0   | 0   | 0   | 5   | 3   | 1   | 0        | 0        | 0        | 0.504714 |
| processed_ -           | 0   | 0   | 0   | 0   | 0   | 1   | 0        | 0        | 0        | 0        |
| polymorph tubulin_be   | 0   | 0   | 0   | 54  | 54  | 57  | 0        | 0        | 0        | 1.858208 |
| pseudogeni -           | 0   | 0   | 0   | 2   | 0   | 0   | 0        | 0        | 0        | 0.435807 |
| lincRNA -              | 0   | 0   | 1   | 1   | 0   | 0   | 0        | 0        | 0.111809 | 0.143834 |
| lincRNA -              | 2   | 1   | 0   | 0   | 0   | 0   | 0.219112 | 0.14049  | 0        | 0        |
| pseudogeni -           | 13  | 9   | 9   | 9   | 16  | 4   | 0.320489 | 0.284526 | 0.267707 | 0.344384 |
| pseudogeni -           | 0   | 0   | 0   | 0   | 2   | 0   | 0        | 0        | 0        | 0        |
| antisense -            | 0   | 1   | 1   | 10  | 4   | 1   | 0        | 0.076598 | 0.072071 | 0.927131 |
| lincRNA -              | 0   | 3   | 0   | 2   | 1   | 0   | 0        | 0.215005 | 0        | 0.173492 |
| lincRNA long_interf    | 117 | 84  | 138 | 162 | 189 | 118 | 2.21215  | 2.036654 | 3.148153 | 4.754164 |
| sense_overl -          | 1   | 0   | 0   | 0   | 0   | 2   | 0.098302 | 0        | 0        | 0        |
| sense_overl -          | 0   | 1   | 0   | 1   | 2   | 0   | 0        | 0.100551 | 0        | 0.121705 |
| lincRNA -              | 0   | 1   | 0   | 0   | 0   | 0   | 0        | 0.134519 | 0        | 0        |
| sense_intrc -          | 2   | 1   | 0   | 2   | 1   | 0   | 0.132645 | 0.085049 | 0        | 0.205883 |
| antisense -            | 2   | 5   | 1   | 0   | 4   | 1   | 0.229853 | 0.736885 | 0.138665 | 0        |
| antisense -            | 7   | 6   | 6   | 11  | 21  | 13  | 0.287417 | 0.315918 | 0.297244 | 0.701031 |
| lincRNA -              | 2   | 0   | 0   | 0   | 1   | 0   | 0.04232  | 0        | 0        | 0        |
| lincRNA -              | 0   | 0   | 0   | 6   | 5   | 2   | 0        | 0        | 0        | 0.817751 |
| protein_co melanoma_   | 2   | 4   | 2   | 0   | 0   | 0   | 0.148386 | 0.380568 | 0.179036 | 0        |
| processed_ -           | 0   | 2   | 0   | 1   | 0   | 2   | 0        | 0.219052 | 0        | 0.132568 |
| pseudogeni -           | 2   | 3   | 4   | 6   | 11  | 9   | 0.070671 | 0.135938 | 0.170537 | 0.329072 |
| antisense -            | 0   | 1   | 1   | 0   | 0   | 0   | 0        | 0.089346 | 0.084065 | 0        |
| lincRNA -              | 0   | 0   | 0   | 0   | 2   | 1   | 0        | 0        | 0        | 0        |
| antisense -            | 9   | 3   | 3   | 2   | 6   | 1   | 0.24607  | 0.105183 | 0.098966 | 0.084874 |
| protein_co -           | 18  | 13  | 13  | 13  | 16  | 15  | 0.148464 | 0.1375   | 0.129372 | 0.166427 |
| processed_ -           | 4   | 0   | 3   | 2   | 3   | 0   | 0.474836 | 0        | 0.429687 | 0.368505 |
| lincRNA -              | 25  | 12  | 23  | 3   | 6   | 11  | 0.441359 | 0.271671 | 0.489923 | 0.082206 |
| lincRNA -              | 8   | 4   | 10  | 4   | 4   | 13  | 0.501498 | 0.32155  | 0.756357 | 0.389197 |
| processed_ -           | 41  | 57  | 62  | 18  | 21  | 43  | 0.683431 | 1.218414 | 1.246954 | 0.465708 |
| pseudogeni -           | 0   | 0   | 0   | 1   | 0   | 0   | 0        | 0        | 0        | 0.050193 |
| sense_intrc -          | 10  | 11  | 1   | 4   | 4   | 3   | 0.915821 | 1.291851 | 0.110499 | 0.568592 |
| antisense -            | 7   | 1   | 1   | 0   | 3   | 6   | 0.104765 | 0.019192 | 0.018058 | 0        |
| lincRNA -              | 0   | 0   | 0   | 10  | 12  | 5   | 0        | 0        | 0        | 0.605993 |
| protein_co protocadhe  | 26  | 20  | 17  | 6   | 5   | 5   | 0.264743 | 0.26115  | 0.208856 | 0.094827 |
| pseudogeni -           | 1   | 0   | 2   | 0   | 3   | 0   | 0.37512  | 0        | 0.905208 | 0        |
| protein_co Homo_sapi   | 6   | 3   | 6   | 35  | 42  | 14  | 0.149968 | 0.096156 | 0.180945 | 1.357832 |
| antisense -            | 4   | 5   | 2   | 0   | 0   | 0   | 0.104549 | 0.167586 | 0.063072 | 0        |
| pseudogeni -           | 0   | 0   | 0   | 237 | 322 | 103 | 0        | 0        | 0        | 21.7788  |
| pseudogeni -           | 4   | 1   | 1   | 0   | 0   | 0   | 0.511063 | 0.163841 | 0.154157 | 0        |
| antisense -            | 45  | 44  | 50  | 47  | 99  | 94  | 0.97552  | 1.223167 | 1.307802 | 1.581438 |
| antisense -            | 3   | 3   | 3   | 5   | 2   | 6   | 0.338964 | 0.434673 | 0.40898  | 0.876865 |
| antisense -            | 2   | 2   | 3   | 8   | 3   | 6   | 0.106689 | 0.136814 | 0.19309  | 0.662387 |
| lincRNA -              | 5   | 8   | 7   | 2   | 0   | 2   | 0.061246 | 0.125663 | 0.103456 | 0.038025 |
| antisense DLGAP1_ar    | 147 | 118 | 127 | 283 | 301 | 318 | 3.048577 | 3.138132 | 3.177837 | 9.109546 |
| protein_co Uncharacte  | 3   | 3   | 4   | 0   | 2   | 6   | 0.171549 | 0.219987 | 0.275978 | 0        |
| antisense -            | 0   | 0   | 0   | 4   | 7   | 0   | 0        | 0        | 0        | 0.424372 |
| antisense -            | 0   | 0   | 0   | 0   | 0   | 1   | 0        | 0        | 0        | 0        |
| lincRNA -              | 2   | 0   | 0   | 0   | 0   | 0   | 0.189838 | 0        | 0        | 0        |
| sense_intrc -          | 1   | 0   | 0   | 0   | 0   | 0   | 0.095112 | 0        | 0        | 0        |
| protein_co Uncharacte  | 6   | 1   | 0   | 0   | 4   | 0   | 0.736492 | 0.157408 | 0        | 0        |
| antisense -            | 10  | 8   | 15  | 30  | 46  | 37  | 0.237178 | 0.243317 | 0.429253 | 1.104398 |
| antisense -            | 0   | 1   | 0   | 3   | 2   | 0   | 0        | 0.135733 | 0        | 0.492865 |
| processed_ -           | 1   | 0   | 0   | 0   | 0   | 0   | 0.020821 | 0        | 0        | 0        |
| lincRNA -              | 1   | 3   | 0   | 1   | 8   | 17  | 0.068154 | 0.262194 | 0        | 0.105785 |
| pseudogeni interleukin | 0   | 0   | 0   | 1   | 0   | 0   | 0        | 0        | 0        | 0.058317 |
| pseudogeni olfactory_r | 0   | 0   | 0   | 1   | 5   | 2   | 0        | 0        | 0        | 0.073219 |
| sense_overl -          | 4   | 9   | 11  | 3   | 9   | 5   | 0.037119 | 0.107098 | 0.123161 | 0.04321  |
| lincRNA -              | 4   | 6   | 1   | 2   | 4   | 1   | 0.546822 | 1.051833 | 0.164943 | 0.424372 |
| pseudogeni protocadhe  | 16  | 7   | 12  | 1   | 8   | 3   | 0.319659 | 0.179339 | 0.289265 | 0.03101  |
| processed_ -           | 1   | 2   | 2   | 1   | 3   | 0   | 0.127419 | 0.326792 | 0.307476 | 0.197771 |
| lincRNA -              | 0   | 0   | 0   | 1   | 0   | 0   | 0        | 0        | 0        | 0.182864 |
| antisense -            | 2   | 0   | 3   | 0   | 0   | 0   | 0.116497 | 0        | 0.21084  | 0        |

|                                   |    |    |    |    |     |    |          |          |          |          |
|-----------------------------------|----|----|----|----|-----|----|----------|----------|----------|----------|
| lincRNA breast_cancer             | 0  | 1  | 1  | 0  | 0   | 0  | 0        | 0.047235 | 0.044443 | 0        |
| sense_intronic                    | 0  | 1  | 0  | 2  | 3   | 2  | 0        | 0.033952 | 0        | 0.082191 |
| pseudogenomic                     | 0  | 0  | 0  | 1  | 0   | 0  | 0        | 0        | 0        | 0.218558 |
| antisense                         | 2  | 1  | 0  | 0  | 1   | 1  | 0.160308 | 0.102786 | 0        | 0        |
| antisense                         | 5  | 0  | 3  | 0  | 0   | 1  | 0.396031 | 0        | 0.2867   | 0        |
| pseudogenomic                     | 2  | 0  | 3  | 0  | 0   | 1  | 0.106447 | 0        | 0.192652 | 0        |
| pseudogenomic                     | 1  | 0  | 2  | 1  | 2   | 0  | 0.298663 | 0        | 0.720707 | 0.463566 |
| antisense                         | 14 | 9  | 23 | 6  | 11  | 12 | 2.06434  | 1.701787 | 4.091939 | 1.373204 |
| antisense                         | 0  | 0  | 0  | 0  | 2   | 0  | 0        | 0        | 0        | 0        |
| lincRNA long_intergenic           | 0  | 0  | 0  | 4  | 9   | 3  | 0        | 0        | 0        | 0.086003 |
| lincRNA                           | 4  | 0  | 2  | 10 | 8   | 2  | 0.100032 | 0        | 0.060347 | 0.388159 |
| processed                         | 8  | 4  | 2  | 4  | 8   | 1  | 0.667474 | 0.42797  | 0.201336 | 0.518006 |
| antisense                         | 5  | 5  | 4  | 6  | 0   | 5  | 0.437407 | 0.560912 | 0.422205 | 0.814699 |
| sense_intronic                    | 13 | 15 | 6  | 7  | 13  | 11 | 1.376005 | 2.035998 | 0.76626  | 1.150019 |
| lincRNA                           | 3  | 1  | 2  | 43 | 61  | 45 | 0.172179 | 0.073598 | 0.138496 | 3.830516 |
| protein_coding oculomedial        | 21 | 17 | 11 | 16 | 9   | 9  | 1.113903 | 1.156342 | 0.703994 | 1.317281 |
| sense_overlapping                 | 5  | 0  | 1  | 1  | 3   | 1  | 0.168185 | 0        | 0.040585 | 0.052209 |
| lincRNA                           | 1  | 0  | 0  | 0  | 1   | 1  | 0.030448 | 0        | 0        | 0        |
| lincRNA                           | 20 | 33 | 24 | 23 | 32  | 16 | 1.810425 | 3.830663 | 2.621259 | 3.231536 |
| lincRNA                           | 0  | 0  | 0  | 3  | 11  | 6  | 0        | 0        | 0        | 0.37323  |
| lincRNA                           | 0  | 0  | 0  | 6  | 9   | 22 | 0        | 0        | 0        | 0.685524 |
| protein_coding protocadherin      | 4  | 6  | 1  | 5  | 23  | 8  | 0.039678 | 0.076323 | 0.011969 | 0.076983 |
| lincRNA                           | 0  | 0  | 0  | 1  | 0   | 0  | 0        | 0        | 0        | 0.214058 |
| antisense                         | 17 | 10 | 6  | 8  | 6   | 7  | 0.371276 | 0.280064 | 0.158106 | 0.271187 |
| lincRNA                           | 12 | 4  | 6  | 0  | 2   | 1  | 0.801539 | 0.34262  | 0.483551 | 0        |
| antisense                         | 4  | 8  | 10 | 2  | 7   | 3  | 0.340399 | 0.873028 | 1.026779 | 0.264174 |
| processed                         | 0  | 0  | 0  | 0  | 1   | 0  | 0        | 0        | 0        | 0        |
| pseudogenomic                     | 0  | 0  | 0  | 1  | 1   | 0  | 0        | 0        | 0        | 0.19512  |
| protein_coding coronin_7          | 45 | 34 | 36 | 94 | 142 | 63 | 0.589729 | 0.571384 | 0.569234 | 1.912046 |
| pseudogenomic                     | 2  | 9  | 5  | 2  | 7   | 12 | 0.272616 | 1.573163 | 0.822318 | 0.423138 |
| sense_intronic                    | 7  | 10 | 13 | 16 | 24  | 28 | 0.295171 | 0.540736 | 0.661404 | 1.047191 |
| sense_intronic                    | 3  | 2  | 4  | 2  | 3   | 1  | 0.350798 | 0.299899 | 0.564344 | 0.362992 |
| lincRNA                           | 0  | 0  | 0  | 2  | 1   | 0  | 0        | 0        | 0        | 0.145414 |
| antisense                         | 0  | 0  | 0  | 0  | 1   | 0  | 0        | 0        | 0        | 0        |
| antisense                         | 2  | 0  | 1  | 0  | 0   | 0  | 0.480923 | 0        | 0.290131 | 0        |
| antisense                         | 0  | 0  | 2  | 4  | 4   | 5  | 0        | 0        | 0.206104 | 0.530272 |
| protein_coding transient_receptor | 1  | 1  | 1  | 1  | 0   | 0  | 0.009865 | 0.012651 | 0.011903 | 0.015312 |
| sense_overlapping                 | 2  | 1  | 0  | 1  | 0   | 0  | 0.195375 | 0.12527  | 0        | 0.151625 |
| antisense                         | 2  | 0  | 1  | 0  | 3   | 0  | 0.189838 | 0        | 0.114525 | 0        |
| antisense                         | 2  | 3  | 1  | 7  | 2   | 1  | 0.035084 | 0.067486 | 0.021166 | 0.190594 |
| antisense                         | 0  | 0  | 0  | 0  | 2   | 0  | 0        | 0        | 0        | 0        |
| pseudogenomic heterogeneous       | 12 | 13 | 17 | 10 | 19  | 8  | 0.589194 | 0.818521 | 1.007103 | 0.762092 |
| antisense                         | 0  | 1  | 0  | 1  | 2   | 0  | 0        | 0.14995  | 0        | 0.181496 |
| lincRNA                           | 0  | 3  | 0  | 1  | 0   | 1  | 0        | 0.196075 | 0        | 0.079108 |
| antisense                         | 2  | 1  | 1  | 0  | 0   | 1  | 0.235628 | 0.15108  | 0.14215  | 0        |
| protein_coding double_C2orf       | 17 | 13 | 18 | 25 | 31  | 5  | 0.622272 | 0.610217 | 0.794972 | 1.420371 |
| sense_overlapping                 | 0  | 0  | 0  | 6  | 3   | 7  | 0        | 0        | 0        | 0.718222 |
| lincRNA                           | 0  | 0  | 0  | 3  | 5   | 47 | 0        | 0        | 0        | 0.180894 |
| antisense                         | 9  | 5  | 5  | 6  | 7   | 3  | 1.388191 | 0.988977 | 0.930518 | 1.436443 |
| sense_intronic                    | 2  | 0  | 1  | 2  | 1   | 0  | 0.186441 | 0        | 0.112476 | 0.289383 |
| pseudogenomic                     | 2  | 1  | 2  | 0  | 2   | 1  | 0.197432 | 0.126589 | 0.238213 | 0        |
| pseudogenomic                     | 0  | 2  | 0  | 1  | 0   | 0  | 0        | 0.664418 | 0        | 0.402098 |
| sense_intronic                    | 4  | 3  | 4  | 8  | 6   | 3  | 0.29215  | 0.28098  | 0.352495 | 0.906913 |
| lincRNA                           | 1  | 0  | 0  | 0  | 0   | 0  | 0.046796 | 0        | 0        | 0        |
| antisense                         | 2  | 0  | 2  | 0  | 4   | 8  | 0.036111 | 0        | 0.04357  | 0        |
| antisense                         | 6  | 9  | 8  | 8  | 9   | 7  | 0.578889 | 1.113515 | 0.931284 | 1.198021 |
| lincRNA                           | 0  | 2  | 0  | 3  | 0   | 0  | 0        | 0.163174 | 0        | 0.296254 |
| lincRNA                           | 18 | 12 | 14 | 2  | 10  | 7  | 1.296498 | 1.108383 | 1.216678 | 0.223594 |
| lincRNA                           | 16 | 8  | 13 | 31 | 31  | 7  | 0.358452 | 0.229832 | 0.351401 | 1.077962 |
| pseudogenomic trans-golgi         | 0  | 0  | 0  | 3  | 0   | 0  | 0        | 0        | 0        | 0.350465 |
| pseudogenomic sterile_alpha       | 0  | 1  | 0  | 0  | 2   | 0  | 0        | 0.090968 | 0        | 0        |
| antisense                         | 1  | 4  | 0  | 6  | 5   | 1  | 0.091941 | 0.471606 | 0        | 0.856233 |
| protein_coding uncharacterized    | 1  | 0  | 0  | 3  | 4   | 9  | 0.044361 | 0        | 0        | 0.206565 |
| pseudogenomic                     | 0  | 1  | 0  | 0  | 0   | 0  | 0        | 0.051791 | 0        | 0        |
| pseudogenomic                     | 0  | 0  | 0  | 0  | 0   | 2  | 0        | 0        | 0        | 0        |

|                       |     |     |     |     |     |     |          |          |          |          |
|-----------------------|-----|-----|-----|-----|-----|-----|----------|----------|----------|----------|
| pseudogeni -          | 0   | 0   | 0   | 6   | 6   | 2   | 0        | 0        | 0        | 0.612453 |
| pseudogeni -          | 0   | 0   | 0   | 0   | 2   | 1   | 0        | 0        | 0        | 0        |
| pseudogeni -          | 0   | 0   | 0   | 6   | 2   | 6   | 0        | 0        | 0        | 0.606498 |
| sense_intrc -         | 2   | 2   | 2   | 2   | 1   | 3   | 0.079006 | 0.101314 | 0.095325 | 0.122628 |
| pseudogeni -          | 0   | 2   | 0   | 0   | 2   | 1   | 0        | 0.248985 | 0        | 0        |
| pseudogeni -          | 0   | 0   | 0   | 2   | 1   | 1   | 0        | 0        | 0        | 0.469547 |
| lincRNA -             | 0   | 0   | 0   | 2   | 1   | 1   | 0        | 0        | 0        | 0.320616 |
| antisense -           | 3   | 1   | 1   | 2   | 0   | 1   | 0.338964 | 0.144891 | 0.136327 | 0.350746 |
| pseudogeni -          | 0   | 0   | 2   | 0   | 0   | 0   | 0        | 0        | 0.107151 | 0        |
| protein_co Uncharacte | 0   | 0   | 0   | 0   | 2   | 1   | 0        | 0        | 0        | 0        |
| 3prime_ovl -          | 11  | 6   | 3   | 3   | 4   | 2   | 0.176098 | 0.123175 | 0.057947 | 0.074544 |
| antisense -           | 0   | 0   | 0   | 0   | 1   | 0   | 0        | 0        | 0        | 0        |
| protein_co protocadhe | 16  | 11  | 20  | 13  | 19  | 9   | 0.163025 | 0.143726 | 0.245874 | 0.205593 |
| processed_ -          | 9   | 1   | 4   | 21  | 39  | 15  | 0.095933 | 0.013669 | 0.051444 | 0.347437 |
| pseudogeni -          | 10  | 12  | 11  | 17  | 40  | 7   | 0.736107 | 1.132743 | 0.976971 | 1.942318 |
| lincRNA -             | 2   | 5   | 2   | 3   | 2   | 2   | 0.017792 | 0.057038 | 0.021467 | 0.041423 |
| pseudogeni -          | 9   | 5   | 6   | 12  | 15  | 5   | 0.735209 | 0.523779 | 0.591382 | 1.521529 |
| processed_ -          | 38  | 32  | 49  | 32  | 40  | 37  | 2.293205 | 2.476388 | 3.567825 | 2.997366 |
| lincRNA long_interf   | 0   | 0   | 0   | 6   | 6   | 5   | 0        | 0        | 0        | 0.37101  |
| processed_ -          | 0   | 0   | 0   | 0   | 1   | 0   | 0        | 0        | 0        | 0        |
| pseudogeni -          | 1   | 0   | 0   | 1   | 0   | 2   | 0.114366 | 0        | 0        | 0.177512 |
| pseudogeni -          | 3   | 2   | 1   | 4   | 5   | 0   | 0.541039 | 0.462537 | 0.217598 | 1.119689 |
| sense_intrc -         | 5   | 8   | 14  | 2   | 7   | 2   | 0.394697 | 0.809829 | 1.333429 | 0.24505  |
| 3prime_ovl -          | 1   | 0   | 0   | 2   | 0   | 3   | 0.009382 | 0        | 0        | 0.029124 |
| antisense -           | 1   | 0   | 0   | 0   | 1   | 1   | 0.08541  | 0        | 0        | 0        |
| lincRNA -             | 6   | 4   | 12  | 15  | 31  | 5   | 0.558214 | 0.477221 | 1.347036 | 2.166066 |
| antisense -           | 3   | 0   | 2   | 3   | 2   | 2   | 0.223641 | 0        | 0.17989  | 0.347121 |
| sense_overl -         | 0   | 0   | 0   | 0   | 1   | 0   | 0        | 0        | 0        | 0        |
| antisense -           | 7   | 0   | 4   | 0   | 1   | 0   | 0.605591 | 0        | 0.417531 | 0        |
| lincRNA -             | 1   | 0   | 0   | 0   | 3   | 1   | 0.013914 | 0        | 0        | 0        |
| lincRNA -             | 13  | 11  | 7   | 5   | 13  | 12  | 1.792854 | 1.945376 | 1.16479  | 1.070291 |
| processed_ -          | 12  | 19  | 12  | 6   | 8   | 2   | 0.210191 | 0.426771 | 0.253607 | 0.163122 |
| antisense -           | 18  | 10  | 11  | 10  | 11  | 9   | 2.900413 | 2.066316 | 2.138593 | 2.501024 |
| antisense -           | 0   | 0   | 0   | 2   | 1   | 0   | 0        | 0        | 0        | 0.29706  |
| pseudogeni -          | 0   | 3   | 3   | 0   | 0   | 0   | 0        | 0.096517 | 0.090811 | 0        |
| antisense -           | 17  | 10  | 17  | 30  | 41  | 25  | 0.727973 | 0.549131 | 0.878341 | 1.993967 |
| pseudogeni -          | 2   | 1   | 0   | 1   | 0   | 0   | 0.157879 | 0.101229 | 0        | 0.122525 |
| sense_intrc -         | 12  | 5   | 2   | 3   | 5   | 5   | 0.288702 | 0.154258 | 0.058056 | 0.112026 |
| lincRNA -             | 0   | 0   | 0   | 3   | 4   | 1   | 0        | 0        | 0        | 0.101932 |
| lincRNA -             | 5   | 6   | 3   | 2   | 4   | 0   | 0.242702 | 0.373477 | 0.1757   | 0.150683 |
| antisense -           | 3   | 1   | 3   | 2   | 2   | 1   | 0.02851  | 0.012187 | 0.034399 | 0.029501 |
| processed_ -          | 16  | 10  | 11  | 1   | 1   | 0   | 1.213981 | 0.972974 | 1.007007 | 0.117767 |
| lincRNA -             | 248 | 206 | 207 | 146 | 154 | 166 | 5.519091 | 5.878851 | 5.558201 | 5.043119 |
| sense_intrc -         | 11  | 12  | 11  | 8   | 9   | 10  | 0.94989  | 1.328835 | 1.146097 | 1.072262 |
| antisense -           | 0   | 1   | 0   | 1   | 0   | 0   | 0        | 0.099388 | 0        | 0.120297 |
| antisense -           | 0   | 0   | 0   | 0   | 1   | 0   | 0        | 0        | 0        | 0        |
| lincRNA -             | 1   | 1   | 1   | 0   | 0   | 1   | 0.026225 | 0.03363  | 0.031642 | 0        |
| antisense -           | 12  | 5   | 8   | 2   | 3   | 13  | 0.987158 | 0.527454 | 0.794042 | 0.255368 |
| lincRNA -             | 3   | 0   | 4   | 1   | 0   | 0   | 0.074626 | 0        | 0.120054 | 0.03861  |
| lincRNA -             | 0   | 0   | 1   | 12  | 8   | 8   | 0        | 0        | 0.074052 | 1.143138 |
| pseudogeni -          | 0   | 0   | 0   | 0   | 2   | 3   | 0        | 0        | 0        | 0        |
| antisense -           | 2   | 1   | 0   | 1   | 1   | 0   | 0.177614 | 0.113882 | 0        | 0.137841 |
| protein_co mitochond  | 46  | 49  | 39  | 71  | 157 | 96  | 2.098191 | 2.866109 | 2.146347 | 5.026621 |
| antisense -           | 3   | 1   | 5   | 0   | 2   | 1   | 0.274211 | 0.117212 | 0.551418 | 0        |
| pseudogeni -          | 0   | 0   | 0   | 0   | 1   | 0   | 0        | 0        | 0        | 0        |
| 3prime_ovl -          | 7   | 6   | 5   | 2   | 8   | 4   | 0.064752 | 0.071174 | 0.055805 | 0.028716 |
| antisense -           | 4   | 3   | 4   | 1   | 7   | 4   | 0.058539 | 0.056301 | 0.070631 | 0.022715 |
| lincRNA -             | 0   | 0   | 0   | 0   | 0   | 1   | 0        | 0        | 0        | 0        |
| processed_ -          | 2   | 1   | 2   | 25  | 17  | 17  | 0.225433 | 0.144543 | 0.271998 | 4.373786 |
| pseudogeni cytochrom  | 1   | 3   | 0   | 1   | 0   | 0   | 0.15949  | 0.613569 | 0        | 0.24755  |
| lincRNA -             | 8   | 0   | 2   | 1   | 10  | 0   | 0.431669 | 0        | 0.130208 | 0.083751 |
| protein_co uncharacte | 0   | 0   | 0   | 98  | 124 | 63  | 0        | 0        | 0        | 5.411548 |
| processed_ -          | 39  | 27  | 23  | 74  | 131 | 61  | 1.171499 | 1.040041 | 0.833592 | 3.450164 |
| processed_ -          | 157 | 131 | 158 | 65  | 103 | 68  | 6.810114 | 7.286775 | 8.26913  | 4.376214 |
| processed_ -          | 0   | 0   | 0   | 0   | 1   | 0   | 0        | 0        | 0        | 0        |

|                         |      |     |      |     |     |      |          |          |          |          |
|-------------------------|------|-----|------|-----|-----|------|----------|----------|----------|----------|
| antisense -             | 0    | 0   | 0    | 2   | 0   | 0    | 0        | 0        | 0        | 0.191778 |
| antisense -             | 4    | 2   | 4    | 8   | 9   | 3    | 0.073669 | 0.047235 | 0.088885 | 0.228688 |
| sense_overl -           | 1    | 0   | 0    | 1   | 2   | 0    | 0.060581 | 0        | 0        | 0.094031 |
| lincRNA -               | 0    | 0   | 0    | 1   | 0   | 0    | 0        | 0        | 0        | 0.113541 |
| pseudogen -             | 1    | 0   | 0    | 1   | 0   | 2    | 0.075024 | 0        | 0        | 0.116448 |
| antisense -             | 50   | 30  | 26   | 15  | 14  | 12   | 2.682495 | 2.063952 | 1.683024 | 1.249081 |
| pseudogen -             | 4    | 2   | 1    | 1   | 0   | 1    | 0.15617  | 0.100133 | 0.047107 | 0.060599 |
| antisense -             | 0    | 1   | 0    | 0   | 0   | 0    | 0        | 0.101571 | 0        | 0        |
| antisense -             | 0    | 0   | 1    | 1   | 0   | 1    | 0        | 0        | 0.137653 | 0.17708  |
| processed_ -            | 0    | 1   | 0    | 3   | 0   | 0    | 0        | 0.111974 | 0        | 0.406591 |
| pseudogen: arachidona   | 3    | 1   | 2    | 95  | 96  | 100  | 0.032517 | 0.0139   | 0.026156 | 1.598262 |
| sense_intrc -           | 339  | 251 | 288  | 129 | 175 | 359  | 8.304972 | 7.88536  | 8.512929 | 4.905222 |
| lincRNA -               | 0    | 1   | 0    | 0   | 0   | 0    | 0        | 0.089213 | 0        | 0        |
| lincRNA -               | 0    | 0   | 0    | 4   | 3   | 4    | 0        | 0        | 0        | 0.471067 |
| pseudogen -             | 4    | 3   | 3    | 2   | 0   | 1    | 0.346691 | 0.333437 | 0.313727 | 0.269057 |
| antisense -             | 0    | 0   | 1    | 2   | 2   | 4    | 0        | 0        | 0.009976 | 0.025667 |
| sense_intrc -           | 1    | 0   | 0    | 1   | 7   | 3    | 0.071807 | 0        | 0        | 0.111455 |
| antisense -             | 0    | 0   | 0    | 5   | 6   | 3    | 0        | 0        | 0        | 0.159675 |
| protein_co zinc_finger  | 166  | 141 | 146  | 92  | 99  | 117  | 2.398688 | 2.612728 | 2.545462 | 2.063403 |
| lincRNA -               | 8    | 1   | 1    | 5   | 15  | 10   | 0.526115 | 0.084334 | 0.079349 | 0.510377 |
| pseudogen: Rho-associ   | 1    | 0   | 4    | 5   | 6   | 4    | 0.083732 | 0        | 0.404111 | 0.64982  |
| sense_overl -           | 2    | 0   | 1    | 2   | 7   | 4    | 0.31053  | 0        | 0.187336 | 0.481985 |
| sense_intrc -           | 23   | 22  | 28   | 11  | 10  | 16   | 0.930518 | 1.141377 | 1.366794 | 0.690749 |
| pseudogen -             | 0    | 1   | 1    | 8   | 5   | 0    | 0        | 0.18057  | 0.169896 | 1.748464 |
| processed_ -            | 0    | 1   | 2    | 0   | 0   | 0    | 0        | 0.099883 | 0.187958 | 0        |
| lincRNA -               | 17   | 16  | 11   | 8   | 7   | 11   | 1.799391 | 2.171731 | 1.404809 | 1.314308 |
| protein_co Uncharacter  | 56   | 31  | 36   | 62  | 98  | 85   | 1.389334 | 0.986256 | 1.077629 | 2.387486 |
| lincRNA -               | 0    | 1   | 1    | 4   | 1   | 0    | 0        | 0.06696  | 0.063002 | 0.324186 |
| antisense -             | 0    | 0   | 2    | 0   | 0   | 0    | 0        | 0        | 0.205729 | 0        |
| antisense -             | 19   | 17  | 16   | 19  | 21  | 2    | 0.244018 | 0.27998  | 0.247934 | 0.37875  |
| antisense -             | 91   | 87  | 104  | 115 | 127 | 151  | 2.680271 | 3.285988 | 3.695887 | 5.257335 |
| antisense -             | 3    | 2   | 2    | 14  | 18  | 12   | 0.197017 | 0.168431 | 0.158475 | 1.427055 |
| lincRNA -               | 0    | 0   | 0    | 22  | 21  | 5    | 0        | 0        | 0        | 0.712258 |
| antisense -             | 2    | 1   | 1    | 4   | 2   | 8    | 0.021906 | 0.014046 | 0.013215 | 0.068003 |
| antisense -             | 0    | 0   | 0    | 0   | 0   | 1    | 0        | 0        | 0        | 0        |
| antisense -             | 3    | 0   | 0    | 3   | 0   | 5    | 0.340605 | 0        | 0        | 0.528667 |
| lincRNA -               | 3    | 1   | 0    | 3   | 16  | 2    | 0.442359 | 0.189087 | 0        | 0.686602 |
| pseudogen -             | 0    | 0   | 0    | 1   | 1   | 0    | 0        | 0        | 0        | 0.454874 |
| sense_intrc -           | 0    | 2   | 1    | 1   | 1   | 0    | 0        | 0.051044 | 0.024013 | 0.030891 |
| 3prime_ov -             | 1    | 5   | 2    | 2   | 5   | 2    | 0.012002 | 0.076951 | 0.028961 | 0.037256 |
| pseudogen -             | 209  | 147 | 169  | 59  | 92  | 75   | 2.088219 | 1.88346  | 2.037345 | 0.914982 |
| lincRNA -               | 0    | 0   | 0    | 414 | 645 | 438  | 0        | 0        | 0        | 23.98952 |
| processed_ -            | 0    | 1   | 1    | 0   | 0   | 1    | 0        | 0.090421 | 0.085076 | 0        |
| antisense -             | 0    | 0   | 0    | 1   | 0   | 0    | 0        | 0        | 0        | 0.298278 |
| lincRNA -               | 2    | 2   | 2    | 0   | 0   | 0    | 0.188313 | 0.241485 | 0.227211 | 0        |
| antisense -             | 5    | 1   | 3    | 1   | 0   | 1    | 0.647652 | 0.166104 | 0.468858 | 0.201049 |
| processed_ -            | 5    | 0   | 3    | 0   | 0   | 0    | 0.405623 | 0        | 0.293644 | 0        |
| pseudogen -             | 0    | 0   | 0    | 0   | 5   | 2    | 0        | 0        | 0        | 0        |
| antisense ZNF205_an     | 2    | 0   | 2    | 4   | 4   | 1    | 0.076932 | 0        | 0.092823 | 0.238818 |
| pseudogen: receptor-lil | 0    | 4   | 5    | 4   | 4   | 2    | 0        | 0.138388 | 0.16276  | 0.167502 |
| antisense -             | 2    | 3   | 3    | 0   | 3   | 2    | 0.183164 | 0.352323 | 0.331497 | 0        |
| pseudogen: ATP_syntha   | 1    | 1   | 0    | 0   | 2   | 0    | 0.031115 | 0.0399   | 0        | 0        |
| sense_overl -           | 2    | 4   | 3    | 4   | 1   | 9    | 0.087809 | 0.225205 | 0.15892  | 0.272584 |
| antisense -             | 0    | 0   | 0    | 0   | 2   | 0    | 0        | 0        | 0        | 0        |
| sense_intrc -           | 1174 | 960 | 1046 | 485 | 699 | 1179 | 9.265928 | 9.716311 | 9.960946 | 5.941458 |
| processed_ -            | 0    | 0   | 0    | 2   | 1   | 0    | 0        | 0        | 0        | 0.250965 |
| protein_co Protein_LO   | 6    | 4   | 4    | 3   | 2   | 0    | 0.180578 | 0.154377 | 0.145252 | 0.140141 |
| antisense -             | 60   | 39  | 40   | 72  | 90  | 119  | 1.451703 | 1.210042 | 1.167709 | 2.703894 |
| sense_overl -           | 8    | 5   | 2    | 1   | 5   | 2    | 0.12413  | 0.099487 | 0.037442 | 0.024083 |
| antisense -             | 1    | 0   | 0    | 2   | 0   | 0    | 0.097081 | 0        | 0        | 0.301366 |
| lincRNA -               | 1    | 0   | 0    | 0   | 1   | 4    | 0.0703   | 0        | 0        | 0        |
| antisense -             | 0    | 5   | 4    | 0   | 0   | 0    | 0        | 0.561961 | 0.422994 | 0        |
| antisense -             | 0    | 3   | 3    | 0   | 3   | 2    | 0        | 0.377384 | 0.355076 | 0        |
| antisense -             | 3    | 7   | 12   | 8   | 6   | 7    | 0.250303 | 0.748948 | 1.208018 | 1.036011 |
| pseudogen -             | 0    | 1   | 0    | 0   | 1   | 0    | 0        | 0.149205 | 0        | 0        |

|                        |    |    |    |    |    |    |          |          |          |          |
|------------------------|----|----|----|----|----|----|----------|----------|----------|----------|
| antisense -            | 0  | 0  | 0  | 4  | 5  | 0  | 0        | 0        | 0        | 0.54011  |
| antisense -            | 9  | 5  | 5  | 13 | 21 | 9  | 0.354929 | 0.252859 | 0.237912 | 0.795742 |
| lincRNA -              | 0  | 2  | 0  | 3  | 3  | 1  | 0        | 0.36114  | 0        | 0.655674 |
| pseudogeni-            | 5  | 5  | 1  | 2  | 2  | 1  | 0.34682  | 0.444747 | 0.083692 | 0.215325 |
| antisense TAPT1_anti   | 46 | 29 | 43 | 36 | 45 | 36 | 0.996278 | 0.805434 | 1.123671 | 1.210195 |
| antisense -            | 0  | 0  | 0  | 0  | 2  | 0  | 0        | 0        | 0        | 0        |
| antisense -            | 7  | 5  | 10 | 3  | 8  | 3  | 0.39262  | 0.359628 | 0.67674  | 0.261172 |
| sense_intrc -          | 0  | 1  | 0  | 0  | 1  | 0  | 0        | 0.107375 | 0        | 0        |
| antisense -            | 0  | 0  | 0  | 0  | 2  | 0  | 0        | 0        | 0        | 0        |
| pseudogeni-            | 0  | 0  | 0  | 0  | 0  | 1  | 0        | 0        | 0        | 0        |
| antisense -            | 11 | 6  | 14 | 6  | 9  | 5  | 0.609681 | 0.426452 | 0.936238 | 0.516169 |
| lincRNA -              | 14 | 6  | 7  | 7  | 16 | 19 | 0.881155 | 0.484267 | 0.531582 | 0.683837 |
| pseudogeni-            | 0  | 0  | 0  | 4  | 2  | 0  | 0        | 0        | 0        | 0.651273 |
| antisense -            | 2  | 0  | 1  | 0  | 1  | 0  | 0.347333 | 0        | 0.209539 | 0        |
| antisense -            | 1  | 3  | 0  | 0  | 1  | 3  | 0.274211 | 1.054909 | 0        | 0        |
| antisense -            | 1  | 1  | 2  | 0  | 8  | 1  | 0.084792 | 0.108734 | 0.204613 | 0        |
| antisense -            | 4  | 2  | 4  | 44 | 62 | 35 | 0.21411  | 0.137283 | 0.258336 | 3.655606 |
| processed_ -           | 15 | 26 | 19 | 37 | 33 | 51 | 0.241701 | 0.537242 | 0.369393 | 0.925379 |
| processed_ -           | 0  | 0  | 0  | 2  | 0  | 0  | 0        | 0        | 0        | 0.281547 |
| processed_ long_interf | 0  | 1  | 2  | 3  | 4  | 3  | 0        | 0.026536 | 0.049934 | 0.096355 |
| antisense -            | 0  | 0  | 0  | 2  | 0  | 0  | 0        | 0        | 0        | 0.450649 |
| lincRNA -              | 1  | 1  | 0  | 0  | 0  | 0  | 0.078411 | 0.100551 | 0        | 0        |
| antisense -            | 5  | 4  | 0  | 0  | 0  | 0  | 0.420161 | 0.431038 | 0        | 0        |
| antisense -            | 7  | 10 | 9  | 1  | 6  | 6  | 0.751099 | 1.375968 | 1.165171 | 0.166544 |
| lincRNA -              | 14 | 9  | 5  | 59 | 86 | 40 | 0.988645 | 0.815012 | 0.42602  | 6.46688  |
| antisense -            | 2  | 0  | 0  | 0  | 3  | 1  | 0.105017 | 0        | 0        | 0        |
| sense_intrc -          | 0  | 0  | 0  | 0  | 1  | 1  | 0        | 0        | 0        | 0        |
| lincRNA -              | 0  | 1  | 0  | 0  | 1  | 1  | 0        | 0.308358 | 0        | 0        |
| antisense -            | 3  | 2  | 3  | 0  | 1  | 2  | 0.099625 | 0.08517  | 0.120203 | 0        |
| lincRNA -              | 0  | 0  | 0  | 1  | 0  | 0  | 0        | 0        | 0        | 0.148834 |
| antisense -            | 0  | 1  | 1  | 0  | 0  | 0  | 0        | 0.106993 | 0.100668 | 0        |
| pseudogeni-            | 0  | 0  | 0  | 0  | 1  | 2  | 0        | 0        | 0        | 0        |
| pseudogeni-            | 0  | 0  | 0  | 1  | 1  | 0  | 0        | 0        | 0        | 0.083463 |
| lincRNA -              | 0  | 0  | 0  | 3  | 5  | 0  | 0        | 0        | 0        | 0.288809 |
| antisense TMEM220_     | 0  | 1  | 1  | 3  | 1  | 0  | 0        | 0.107183 | 0.100848 | 0.389197 |
| antisense -            | 3  | 1  | 4  | 2  | 5  | 3  | 0.169278 | 0.072358 | 0.272325 | 0.175162 |
| pseudogeni:adenylate_  | 4  | 5  | 1  | 7  | 11 | 15 | 0.2812   | 0.450748 | 0.084821 | 0.763806 |
| lincRNA -              | 0  | 0  | 0  | 13 | 8  | 11 | 0        | 0        | 0        | 1.219249 |
| protein_co ubiquitin_f | 66 | 65 | 78 | 30 | 31 | 39 | 2.121139 | 2.678846 | 3.024599 | 1.4965   |
| lincRNA -              | 1  | 0  | 0  | 0  | 0  | 0  | 0.092852 | 0        | 0        | 0        |
| lincRNA -              | 0  | 0  | 1  | 29 | 32 | 39 | 0        | 0        | 0.070455 | 2.628411 |
| antisense -            | 0  | 0  | 0  | 3  | 0  | 1  | 0        | 0        | 0        | 0.267901 |
| lincRNA -              | 17 | 21 | 20 | 21 | 29 | 44 | 1.010305 | 1.600413 | 1.434107 | 1.937105 |
| pseudogeni-            | 2  | 8  | 3  | 1  | 1  | 2  | 0.074193 | 0.380568 | 0.134277 | 0.057579 |
| lincRNA -              | 3  | 2  | 1  | 0  | 4  | 0  | 0.148543 | 0.12699  | 0.059742 | 0        |
| antisense -            | 7  | 8  | 9  | 3  | 2  | 3  | 0.266637 | 0.39077  | 0.413631 | 0.177368 |
| lincRNA -              | 0  | 1  | 2  | 0  | 1  | 2  | 0        | 0.158654 | 0.298551 | 0        |
| pseudogeni-            | 0  | 0  | 2  | 4  | 2  | 2  | 0        | 0        | 0.333779 | 0.858759 |
| antisense -            | 11 | 3  | 3  | 1  | 7  | 1  | 0.895469 | 0.313176 | 0.294664 | 0.126354 |
| sense_intrc -          | 1  | 0  | 0  | 1  | 4  | 2  | 0.347333 | 0        | 0        | 0.53911  |
| antisense -            | 0  | 0  | 0  | 2  | 4  | 7  | 0        | 0        | 0        | 0.446502 |
| processed_ -           | 0  | 1  | 1  | 0  | 0  | 2  | 0        | 0.094544 | 0.088955 | 0        |
| lincRNA -              | 0  | 1  | 0  | 0  | 1  | 0  | 0        | 0.140819 | 0        | 0        |
| antisense -            | 0  | 0  | 0  | 0  | 1  | 0  | 0        | 0        | 0        | 0        |
| antisense -            | 1  | 0  | 1  | 0  | 1  | 2  | 0.180346 | 0        | 0.217598 | 0        |
| antisense -            | 0  | 0  | 0  | 0  | 0  | 1  | 0        | 0        | 0        | 0        |
| protein_co Protein_LO  | 1  | 1  | 3  | 0  | 1  | 0  | 0.012996 | 0.016666 | 0.047042 | 0        |
| sense_intrc -          | 1  | 1  | 2  | 0  | 1  | 1  | 0.111643 | 0.143166 | 0.269407 | 0        |
| lincRNA -              | 0  | 0  | 0  | 0  | 1  | 2  | 0        | 0        | 0        | 0        |
| antisense DLGAP1_ar    | 2  | 0  | 0  | 0  | 0  | 2  | 0.074547 | 0        | 0        | 0        |
| lincRNA -              | 0  | 0  | 0  | 0  | 1  | 0  | 0        | 0        | 0        | 0        |
| sense_intrc -          | 1  | 6  | 2  | 10 | 11 | 2  | 0.174963 | 1.346189 | 0.422205 | 2.715664 |
| pseudogeni-            | 0  | 0  | 0  | 3  | 0  | 2  | 0        | 0        | 0        | 1.505789 |
| lincRNA -              | 29 | 38 | 36 | 49 | 39 | 57 | 0.507014 | 0.851951 | 0.759403 | 1.329683 |
| lincRNA -              | 4  | 2  | 1  | 5  | 7  | 0  | 0.24077  | 0.154377 | 0.072626 | 0.467136 |

|             |             |     |     |     |     |     |     |          |          |          |          |
|-------------|-------------|-----|-----|-----|-----|-----|-----|----------|----------|----------|----------|
| lincRNA     | long_interf | 205 | 126 | 207 | 116 | 137 | 143 | 2.415796 | 1.904085 | 2.943234 | 2.121753 |
| antisense   | -           | 2   | 2   | 3   | 5   | 2   | 8   | 0.12794  | 0.164065 | 0.23155  | 0.496452 |
| sense_intrc | -           | 44  | 34  | 22  | 39  | 39  | 46  | 2.877491 | 2.851343 | 1.735929 | 3.958734 |
| antisense   | -           | 3   | 0   | 0   | 2   | 0   | 0   | 0.258585 | 0        | 0        | 0.267573 |
| protein_co  | KRAB-A_do   | 0   | 4   | 3   | 9   | 0   | 3   | 0        | 0.077914 | 0.054981 | 0.212186 |
| protein_co  | Uncharacte  | 1   | 1   | 1   | 2   | 2   | 5   | 0.020914 | 0.02682  | 0.025234 | 0.064924 |
| pseudogeni  | -           | 2   | 3   | 2   | 8   | 7   | 2   | 0.040685 | 0.07826  | 0.049089 | 0.252598 |
| antisense   | -           | 3   | 5   | 5   | 42  | 49  | 27  | 0.088919 | 0.190044 | 0.17881  | 1.932207 |
| antisense   | -           | 18  | 15  | 19  | 18  | 28  | 24  | 0.351675 | 0.375811 | 0.447889 | 0.545849 |
| antisense   | -           | 27  | 10  | 20  | 42  | 56  | 23  | 0.501001 | 0.237949 | 0.447768 | 1.209637 |
| pseudogeni  | cytokine_ir | 0   | 0   | 0   | 3   | 0   | 0   | 0        | 0        | 0        | 0.234521 |
| antisense   | -           | 18  | 10  | 10  | 14  | 28  | 16  | 1.551508 | 1.105327 | 1.039991 | 1.87301  |
| lincRNA     | long_interf | 22  | 28  | 36  | 26  | 27  | 20  | 0.436186 | 0.711896 | 0.861192 | 0.800116 |
| pseudogeni  | -           | 5   | 0   | 1   | 5   | 0   | 3   | 0.457018 | 0        | 0.110284 | 0.709355 |
| lincRNA     | -           | 3   | 2   | 3   | 5   | 7   | 12  | 0.066011 | 0.056433 | 0.079646 | 0.170764 |
| pseudogeni  | -           | 0   | 0   | 0   | 0   | 1   | 0   | 0        | 0        | 0        | 0        |
| processed_  | -           | 0   | 0   | 1   | 0   | 0   | 0   | 0        | 0        | 0.137319 | 0        |
| sense_intrc | -           | 0   | 0   | 2   | 0   | 0   | 0   | 0        | 0        | 0.340816 | 0        |
| lincRNA     | -           | 86  | 78  | 62  | 28  | 33  | 14  | 1.49686  | 1.740952 | 1.302035 | 0.756434 |
| sense_intrc | -           | 1   | 0   | 2   | 0   | 0   | 1   | 0.100192 | 0        | 0.241776 | 0        |
| lincRNA     | -           | 0   | 0   | 0   | 5   | 5   | 0   | 0        | 0        | 0        | 0.21231  |
| sense_intrc | -           | 7   | 7   | 5   | 1   | 2   | 7   | 0.679565 | 0.871446 | 0.585668 | 0.150683 |
| processed_  | -           | 0   | 0   | 1   | 1   | 1   | 0   | 0        | 0        | 0.090957 | 0.117009 |
| antisense   | -           | 0   | 2   | 4   | 1   | 0   | 1   | 0        | 0.345574 | 0.650293 | 0.209137 |
| lincRNA     | -           | 22  | 11  | 24  | 2   | 4   | 2   | 2.071447 | 1.328168 | 2.72653  | 0.292288 |
| lincRNA     | -           | 1   | 0   | 0   | 13  | 22  | 10  | 0.067082 | 0        | 0        | 1.353559 |
| sense_intrc | -           | 0   | 0   | 0   | 0   | 1   | 0   | 0        | 0        | 0        | 0        |
| antisense   | -           | 0   | 0   | 0   | 0   | 1   | 0   | 0        | 0        | 0        | 0        |
| lincRNA     | -           | 8   | 10  | 6   | 22  | 26  | 24  | 0.820832 | 1.31575  | 0.742786 | 3.503623 |
| antisense   | -           | 3   | 0   | 2   | 3   | 3   | 2   | 0.249858 | 0        | 0.200979 | 0.387814 |
| antisense   | -           | 4   | 9   | 5   | 5   | 7   | 2   | 0.471256 | 1.359719 | 0.710748 | 0.914319 |
| lincRNA     | -           | 7   | 2   | 4   | 0   | 1   | 6   | 0.672603 | 0.246434 | 0.463734 | 0        |
| antisense   | -           | 2   | 0   | 0   | 0   | 0   | 0   | 0.205658 | 0        | 0        | 0        |
| sense_intrc | -           | 0   | 0   | 0   | 5   | 4   | 1   | 0        | 0        | 0        | 0.570375 |
| antisense   | -           | 2   | 0   | 0   | 0   | 1   | 0   | 0.261226 | 0        | 0        | 0        |
| lincRNA     | -           | 0   | 0   | 0   | 6   | 13  | 12  | 0        | 0        | 0        | 0.777009 |
| lincRNA     | -           | 0   | 1   | 2   | 13  | 24  | 7   | 0        | 0.09015  | 0.169642 | 1.418497 |
| pseudogeni  | -           | 0   | 0   | 0   | 0   | 0   | 1   | 0        | 0        | 0        | 0        |
| antisense   | -           | 0   | 1   | 0   | 1   | 7   | 0   | 0        | 0.32155  | 0        | 0.389197 |
| lincRNA     | -           | 12  | 9   | 14  | 0   | 1   | 2   | 0.252663 | 0.243003 | 0.355661 | 0        |
| processed_  | -           | 2   | 0   | 0   | 3   | 0   | 8   | 0.071261 | 0        | 0        | 0.165911 |
| pseudogeni  | -           | 2   | 2   | 1   | 1   | 1   | 0   | 0.156561 | 0.200767 | 0.09445  | 0.121502 |
| protein_co  | -           | 34  | 21  | 35  | 17  | 27  | 17  | 0.637194 | 0.504687 | 0.791424 | 0.494507 |
| pseudogeni  | fibroblast_ | 0   | 0   | 0   | 0   | 0   | 1   | 0        | 0        | 0        | 0        |
| pseudogeni  | dead_end_   | 57  | 46  | 61  | 86  | 98  | 87  | 2.523825 | 2.61187  | 3.258835 | 5.910352 |
| antisense   | -           | 0   | 0   | 0   | 0   | 0   | 1   | 0        | 0        | 0        | 0        |
| antisense   | -           | 12  | 21  | 14  | 1   | 4   | 7   | 0.290041 | 0.65089  | 0.408277 | 0.037515 |
| antisense   | -           | 11  | 4   | 7   | 11  | 9   | 7   | 1.048354 | 0.48886  | 0.804936 | 1.627191 |
| lincRNA     | -           | 157 | 171 | 199 | 503 | 680 | 422 | 1.559029 | 2.177509 | 2.384271 | 7.752698 |
| pseudogeni  | -           | 3   | 6   | 0   | 1   | 2   | 2   | 0.84741  | 2.173366 | 0        | 0.438433 |
| lincRNA     | -           | 0   | 0   | 0   | 0   | 0   | 3   | 0        | 0        | 0        | 0        |
| pseudogeni  | -           | 2   | 1   | 1   | 43  | 44  | 25  | 0.217587 | 0.139512 | 0.131266 | 7.261094 |
| lincRNA     | -           | 0   | 0   | 0   | 0   | 0   | 1   | 0        | 0        | 0        | 0        |
| pseudogeni  | mago-nashi  | 3   | 2   | 4   | 6   | 4   | 1   | 0.322638 | 0.275825 | 0.519041 | 1.001557 |
| antisense   | -           | 0   | 0   | 0   | 2   | 0   | 0   | 0        | 0        | 0        | 0.029376 |
| pseudogeni  | -           | 3   | 0   | 1   | 0   | 0   | 0   | 0.329438 | 0        | 0.132495 | 0        |
| protein_co  | Uncharacte  | 1   | 0   | 2   | 0   | 0   | 0   | 0.027696 | 0        | 0.066835 | 0        |
| sense_intrc | -           | 1   | 3   | 4   | 8   | 2   | 0   | 0.139554 | 0.536873 | 0.673518 | 1.732852 |
| pseudogeni  | -           | 0   | 0   | 0   | 0   | 1   | 1   | 0        | 0        | 0        | 0        |
| antisense   | -           | 0   | 0   | 0   | 0   | 2   | 0   | 0        | 0        | 0        | 0        |
| antisense   | -           | 0   | 0   | 3   | 0   | 3   | 0   | 0        | 0        | 0.271998 | 0        |
| lincRNA     | -           | 0   | 0   | 1   | 21  | 17  | 18  | 0        | 0        | 0.00925  | 0.249898 |
| antisense   | -           | 0   | 1   | 0   | 1   | 0   | 1   | 0        | 0.048728 | 0        | 0.058979 |
| lincRNA     | -           | 0   | 0   | 0   | 1   | 1   | 0   | 0        | 0        | 0        | 0.128586 |
| antisense   | -           | 1   | 1   | 0   | 0   | 0   | 0   | 0.369213 | 0.473463 | 0        | 0        |

|                        |     |     |     |     |     |     |          |          |          |          |
|------------------------|-----|-----|-----|-----|-----|-----|----------|----------|----------|----------|
| pseudogeni -           | 0   | 0   | 0   | 0   | 1   | 0   | 0        | 0        | 0        | 0        |
| lincRNA -              | 0   | 0   | 0   | 1   | 0   | 0   | 0        | 0        | 0        | 0.089191 |
| lincRNA -              | 116 | 64  | 104 | 56  | 72  | 82  | 1.570673 | 1.111264 | 1.699062 | 1.176919 |
| antisense -            | 0   | 0   | 1   | 0   | 0   | 0   | 0        | 0        | 0.123798 | 0        |
| lincRNA -              | 0   | 0   | 0   | 0   | 1   | 0   | 0        | 0        | 0        | 0        |
| antisense -            | 7   | 0   | 3   | 2   | 0   | 2   | 0.498073 | 0        | 0.257552 | 0.22088  |
| antisense -            | 3   | 0   | 6   | 3   | 2   | 5   | 0.248534 | 0        | 0.59974  | 0.385759 |
| antisense -            | 0   | 0   | 0   | 0   | 1   | 1   | 0        | 0        | 0        | 0        |
| antisense -            | 1   | 0   | 1   | 2   | 4   | 1   | 0.101274 | 0        | 0.122193 | 0.314384 |
| protein_co Uncharacte  | 69  | 37  | 44  | 23  | 25  | 24  | 2.498387 | 1.717994 | 1.922257 | 1.292614 |
| pseudogeni -           | 10  | 4   | 8   | 11  | 17  | 7   | 1.175188 | 0.602805 | 1.134346 | 2.006461 |
| sense_intrc -          | 1   | 7   | 5   | 1   | 6   | 4   | 0.100839 | 0.90518  | 0.608339 | 0.156516 |
| pseudogeni -           | 2   | 0   | 0   | 0   | 0   | 0   | 0.210742 | 0        | 0        | 0        |
| pseudogeni -           | 2   | 0   | 0   | 2   | 2   | 0   | 0.432166 | 0        | 0        | 0.670782 |
| antisense -            | 6   | 14  | 10  | 12  | 10  | 15  | 0.500605 | 1.497895 | 1.006682 | 1.554017 |
| protein_co Uncharacte  | 1   | 3   | 0   | 1   | 2   | 3   | 0.009269 | 0.035657 | 0        | 0.014386 |
| lincRNA -              | 15  | 12  | 10  | 0   | 0   | 0   | 1.444251 | 1.481638 | 1.161715 | 0        |
| pseudogeni small_nucl  | 6   | 5   | 9   | 10  | 13  | 19  | 1.244868 | 1.330305 | 2.253007 | 3.220345 |
| lincRNA -              | 179 | 144 | 144 | 127 | 168 | 182 | 2.104115 | 2.170642 | 2.042335 | 2.317131 |
| antisense -            | 4   | 2   | 4   | 5   | 3   | 4   | 0.330794 | 0.212098 | 0.399122 | 0.641797 |
| antisense -            | 0   | 0   | 0   | 0   | 0   | 1   | 0        | 0        | 0        | 0        |
| lincRNA -              | 0   | 0   | 3   | 0   | 1   | 1   | 0        | 0        | 0.344973 | 0        |
| antisense -            | 1   | 1   | 0   | 0   | 0   | 1   | 0.101056 | 0.12959  | 0        | 0        |
| pseudogeni -           | 0   | 1   | 0   | 0   | 0   | 0   | 0        | 0.116984 | 0        | 0        |
| lincRNA -              | 31  | 31  | 29  | 96  | 88  | 77  | 1.005945 | 1.289982 | 1.135425 | 4.835198 |
| antisense -            | 10  | 8   | 6   | 4   | 2   | 2   | 0.756291 | 0.775868 | 0.547505 | 0.469547 |
| lincRNA -              | 0   | 0   | 0   | 0   | 0   | 3   | 0        | 0        | 0        | 0        |
| sense_intrc -          | 10  | 6   | 14  | 13  | 11  | 15  | 0.2823   | 0.217206 | 0.476856 | 0.569619 |
| antisense -            | 2   | 0   | 0   | 0   | 0   | 0   | 0.251421 | 0        | 0        | 0        |
| lincRNA -              | 33  | 35  | 22  | 21  | 13  | 38  | 1.205117 | 1.639052 | 0.969362 | 1.190324 |
| protein_co Uncharacte  | 1   | 1   | 1   | 0   | 0   | 0   | 0.083882 | 0.107567 | 0.101208 | 0        |
| antisense -            | 0   | 0   | 0   | 3   | 2   | 1   | 0        | 0        | 0        | 0.359702 |
| antisense -            | 0   | 0   | 0   | 1   | 1   | 1   | 0        | 0        | 0        | 0.158217 |
| antisense -            | 2   | 4   | 1   | 0   | 0   | 0   | 0.196193 | 0.503178 | 0.118359 | 0        |
| lincRNA -              | 1   | 2   | 1   | 0   | 0   | 0   | 0.085566 | 0.219452 | 0.10324  | 0        |
| processed_ -           | 0   | 0   | 0   | 5   | 6   | 0   | 0        | 0        | 0        | 0.140937 |
| lincRNA -              | 8   | 5   | 1   | 6   | 4   | 2   | 1.019348 | 0.816981 | 0.153738 | 1.186627 |
| antisense -            | 0   | 0   | 0   | 0   | 0   | 2   | 0        | 0        | 0        | 0        |
| pseudogeni -           | 0   | 2   | 3   | 2   | 0   | 2   | 0        | 0.184447 | 0.260317 | 0.223251 |
| pseudogeni -           | 192 | 155 | 159 | 272 | 444 | 305 | 5.771079 | 5.974435 | 5.76635  | 12.68981 |
| sense_intrc -          | 2   | 1   | 2   | 3   | 5   | 2   | 0.054939 | 0.035225 | 0.066286 | 0.127908 |
| antisense -            | 2   | 1   | 2   | 5   | 10  | 2   | 0.039603 | 0.025393 | 0.047783 | 0.153674 |
| antisense -            | 1   | 0   | 3   | 3   | 3   | 0   | 0.066135 | 0        | 0.239389 | 0.307954 |
| pseudogeni sorting_ne  | 0   | 0   | 0   | 0   | 1   | 2   | 0        | 0        | 0        | 0        |
| lincRNA long_interf    | 18  | 15  | 11  | 54  | 64  | 25  | 0.450144 | 0.481038 | 0.33191  | 2.096058 |
| antisense -            | 74  | 59  | 62  | 101 | 138 | 187 | 3.85969  | 3.946227 | 3.901759 | 8.176596 |
| antisense MAPT_anti    | 0   | 0   | 0   | 1   | 0   | 0   | 0        | 0        | 0        | 0.061159 |
| sense_intrc -          | 0   | 0   | 0   | 0   | 1   | 0   | 0        | 0        | 0        | 0        |
| sense_intrc -          | 1   | 0   | 0   | 0   | 0   | 0   | 0.109813 | 0        | 0        | 0        |
| sense_intrc -          | 5   | 4   | 16  | 12  | 27  | 19  | 0.5119   | 0.525151 | 1.976437 | 1.906894 |
| antisense -            | 0   | 2   | 2   | 0   | 1   | 0   | 0        | 0.056914 | 0.05355  | 0        |
| sense_intrc -          | 7   | 7   | 4   | 3   | 5   | 3   | 0.204505 | 0.262248 | 0.140998 | 0.136037 |
| lincRNA -              | 0   | 0   | 0   | 1   | 0   | 0   | 0        | 0        | 0        | 0.237068 |
| pseudogeni keratin_18  | 0   | 0   | 0   | 0   | 0   | 1   | 0        | 0        | 0        | 0        |
| antisense -            | 1   | 1   | 2   | 0   | 1   | 3   | 0.168669 | 0.216294 | 0.407018 | 0        |
| pseudogeni -           | 1   | 0   | 1   | 0   | 0   | 0   | 0.096283 | 0        | 0.116171 | 0        |
| antisense -            | 0   | 1   | 0   | 0   | 0   | 0   | 0        | 0.114971 | 0        | 0        |
| antisense -            | 0   | 0   | 0   | 5   | 1   | 1   | 0        | 0        | 0        | 0.217904 |
| pseudogeni keratin_8_I | 0   | 0   | 0   | 1   | 3   | 0   | 0        | 0        | 0        | 0.069712 |
| antisense -            | 0   | 1   | 0   | 0   | 0   | 3   | 0        | 0.141482 | 0        | 0        |
| lincRNA -              | 0   | 0   | 0   | 0   | 1   | 0   | 0        | 0        | 0        | 0        |
| pseudogeni -           | 0   | 1   | 0   | 8   | 5   | 3   | 0        | 0.031515 | 0        | 0.305156 |
| lincRNA -              | 57  | 48  | 51  | 1   | 5   | 3   | 1.025213 | 1.107108 | 1.106771 | 0.027917 |
| pseudogeni B_double_I  | 0   | 0   | 0   | 3   | 1   | 3   | 0        | 0        | 0        | 0.109718 |
| antisense -            | 0   | 0   | 0   | 2   | 0   | 0   | 0        | 0        | 0        | 0.067202 |

|                         |     |    |    |    |    |     |          |          |          |          |
|-------------------------|-----|----|----|----|----|-----|----------|----------|----------|----------|
| pseudogen: divergent-pr | 7   | 1  | 2  | 5  | 2  | 3   | 0.57787  | 0.105862 | 0.19921  | 0.640667 |
| antisense -             | 0   | 0  | 2  | 1  | 3  | 3   | 0        | 0        | 0.138496 | 0.089082 |
| antisense -             | 4   | 0  | 0  | 0  | 0  | 1   | 1.084162 | 0        | 0        | 0        |
| sense_intrc -           | 0   | 0  | 0  | 0  | 0  | 1   | 0        | 0        | 0        | 0        |
| antisense -             | 41  | 23 | 21 | 14 | 12 | 18  | 3.414726 | 2.456457 | 2.110276 | 1.8098   |
| processed_ -            | 1   | 0  | 0  | 1  | 0  | 0   | 0.010296 | 0        | 0        | 0.015982 |
| pseudogen: peptidylpro  | 0   | 0  | 0  | 6  | 2  | 4   | 0        | 0        | 0        | 0.880401 |
| pseudogen: -            | 2   | 1  | 4  | 1  | 1  | 2   | 0.057996 | 0.037186 | 0.139952 | 0.045009 |
| antisense microRNA_     | 1   | 0  | 0  | 0  | 2  | 2   | 0.061535 | 0        | 0        | 0        |
| sense_intrc -           | 3   | 1  | 1  | 0  | 2  | 0   | 0.206868 | 0.088426 | 0.083199 | 0        |
| antisense -             | 5   | 3  | 2  | 1  | 2  | 0   | 0.666051 | 0.51247  | 0.321452 | 0.206761 |
| antisense -             | 0   | 0  | 0  | 0  | 0  | 1   | 0        | 0        | 0        | 0        |
| sense_intrc -           | 0   | 2  | 1  | 1  | 2  | 4   | 0        | 0.043104 | 0.020278 | 0.026086 |
| antisense -             | 2   | 3  | 9  | 6  | 8  | 6   | 0.046334 | 0.089125 | 0.251571 | 0.21575  |
| processed_ -            | 0   | 0  | 0  | 1  | 3  | 3   | 0        | 0        | 0        | 0.123775 |
| sense_intrc -           | 111 | 91 | 96 | 69 | 86 | 125 | 2.839494 | 2.985167 | 2.963038 | 2.739665 |
| sense_intrc -           | 5   | 6  | 1  | 6  | 8  | 8   | 0.108042 | 0.166258 | 0.026072 | 0.201234 |
| pseudogen: -            | 0   | 0  | 0  | 0  | 0  | 2   | 0        | 0        | 0        | 0        |
| antisense -             | 1   | 3  | 1  | 0  | 1  | 1   | 0.13997  | 0.538476 | 0.168882 | 0        |
| processed_ -            | 75  | 53 | 53 | 31 | 41 | 38  | 0.892803 | 0.809058 | 0.761234 | 0.572778 |
| antisense -             | 8   | 6  | 3  | 9  | 8  | 10  | 0.739882 | 0.711595 | 0.334766 | 1.291949 |
| antisense -             | 2   | 0  | 2  | 5  | 3  | 7   | 0.166572 | 0        | 0.200979 | 0.646357 |
| antisense -             | 6   | 5  | 12 | 16 | 22 | 31  | 1.17225  | 1.252704 | 2.828775 | 4.851987 |
| lincRNA -               | 0   | 0  | 0  | 0  | 0  | 1   | 0        | 0        | 0        | 0        |
| pseudogen: SH3-domai    | 19  | 15 | 18 | 20 | 7  | 13  | 0.823392 | 0.833592 | 0.941182 | 1.345283 |
| lincRNA -               | 10  | 8  | 5  | 20 | 24 | 11  | 1.006224 | 1.032271 | 0.607033 | 3.123597 |
| lincRNA -               | 0   | 1  | 0  | 4  | 2  | 0   | 0        | 0.095142 | 0        | 0.460632 |
| antisense -             | 0   | 0  | 0  | 2  | 1  | 0   | 0        | 0        | 0        | 0.063954 |
| antisense -             | 3   | 0  | 0  | 0  | 2  | 2   | 0.2974   | 0        | 0        | 0        |
| sense_intrc -           | 7   | 1  | 5  | 4  | 5  | 6   | 1.022524 | 0.18732  | 0.881238 | 0.906913 |
| pseudogen: nuclear_re   | 0   | 0  | 0  | 2  | 1  | 0   | 0        | 0        | 0        | 0.495101 |
| lincRNA -               | 0   | 0  | 0  | 0  | 1  | 0   | 0        | 0        | 0        | 0        |
| lincRNA -               | 3   | 3  | 0  | 5  | 7  | 3   | 0.216415 | 0.277522 | 0        | 0.559845 |
| antisense -             | 0   | 0  | 0  | 0  | 2  | 2   | 0        | 0        | 0        | 0        |
| sense_intrc -           | 3   | 0  | 1  | 2  | 0  | 3   | 0.500605 | 0        | 0.201336 | 0.518006 |
| pseudogen: ferritin_lig | 1   | 0  | 0  | 7  | 11 | 5   | 0.104432 | 0        | 0        | 1.134652 |
| protein_co Uncharacte   | 1   | 0  | 0  | 0  | 0  | 0   | 0.054208 | 0        | 0        | 0        |
| antisense -             | 7   | 3  | 9  | 7  | 8  | 3   | 0.250557 | 0.137702 | 0.388687 | 0.3889   |
| sense_intrc -           | 0   | 0  | 0  | 2  | 0  | 0   | 0        | 0        | 0        | 0.340093 |
| antisense -             | 0   | 0  | 0  | 1  | 2  | 0   | 0        | 0        | 0        | 0.129732 |
| protein_co -            | 0   | 0  | 1  | 0  | 0  | 0   | 0        | 0        | 0.056126 | 0        |
| antisense -             | 0   | 0  | 0  | 2  | 0  | 0   | 0        | 0        | 0        | 0.229952 |
| antisense -             | 0   | 0  | 0  | 1  | 0  | 0   | 0        | 0        | 0        | 0.14498  |
| antisense -             | 0   | 0  | 0  | 1  | 1  | 0   | 0        | 0        | 0        | 0.12746  |
| pseudogen: -            | 14  | 11 | 14 | 5  | 9  | 5   | 1.439606 | 1.450499 | 1.736967 | 0.798024 |
| lincRNA -               | 10  | 8  | 4  | 2  | 8  | 15  | 1.730259 | 1.775049 | 0.835063 | 0.53712  |
| antisense hsa-mir-13:   | 5   | 2  | 3  | 5  | 3  | 4   | 0.055478 | 0.028457 | 0.040162 | 0.08611  |
| antisense BZRAP1_an     | 4   | 5  | 6  | 2  | 1  | 5   | 0.080257 | 0.128647 | 0.145252 | 0.062285 |
| sense_intrc -           | 0   | 0  | 0  | 0  | 0  | 1   | 0        | 0        | 0        | 0        |
| lincRNA -               | 3   | 0  | 3  | 6  | 2  | 12  | 0.241287 | 0        | 0.291126 | 0.74902  |
| antisense -             | 29  | 15 | 20 | 24 | 26 | 35  | 0.450716 | 0.298955 | 0.375045 | 0.578958 |
| antisense -             | 7   | 1  | 2  | 7  | 8  | 8   | 0.581968 | 0.106613 | 0.200622 | 0.903295 |
| antisense -             | 14  | 8  | 10 | 6  | 4  | 11  | 1.315552 | 0.964005 | 1.133778 | 0.875108 |
| antisense hsa-mir-14:   | 1   | 1  | 3  | 0  | 0  | 1   | 0.028855 | 0.037003 | 0.104447 | 0        |
| antisense -             | 9   | 1  | 5  | 5  | 1  | 2   | 0.668796 | 0.095293 | 0.4483   | 0.576702 |
| sense_intrc -           | 0   | 3  | 3  | 4  | 0  | 2   | 0        | 0.194595 | 0.183092 | 0.314044 |
| pseudogen: -            | 0   | 0  | 1  | 0  | 0  | 0   | 0        | 0        | 0.04362  | 0        |
| lincRNA -               | 31  | 10 | 19 | 55 | 48 | 59  | 0.873552 | 0.361357 | 0.645994 | 2.405582 |
| lincRNA -               | 0   | 0  | 0  | 2  | 0  | 0   | 0        | 0        | 0        | 0.237068 |
| pseudogen: -            | 2   | 3  | 1  | 2  | 0  | 6   | 0.034139 | 0.065668 | 0.020595 | 0.052989 |
| pseudogen: -            | 0   | 0  | 1  | 0  | 0  | 0   | 0        | 0        | 0.158032 | 0        |
| lincRNA -               | 0   | 0  | 1  | 0  | 0  | 0   | 0        | 0        | 0.142867 | 0        |
| pseudogen: phosphogl    | 0   | 0  | 1  | 0  | 0  | 0   | 0        | 0        | 0.039261 | 0        |
| pseudogen: -            | 1   | 2  | 3  | 3  | 0  | 2   | 0.04983  | 0.1278   | 0.180368 | 0.232029 |
| lincRNA -               | 2   | 2  | 8  | 0  | 1  | 0   | 0.169891 | 0.217862 | 0.819935 | 0        |

|                         |     |     |     |     |     |    |          |          |          |          |
|-------------------------|-----|-----|-----|-----|-----|----|----------|----------|----------|----------|
| pseudogen: arginine-fif | 1   | 4   | 4   | 7   | 7   | 1  | 0.04941  | 0.253445 | 0.238464 | 0.536837 |
| pseudogen: fem-1_hom    | 0   | 0   | 0   | 0   | 4   | 0  | 0        | 0        | 0        | 0        |
| pseudogen: -            | 9   | 7   | 18  | 2   | 2   | 4  | 0.473106 | 0.471871 | 1.141658 | 0.163183 |
| antisense -             | 0   | 1   | 0   | 0   | 0   | 0  | 0        | 0.086893 | 0        | 0        |
| antisense -             | 0   | 0   | 3   | 0   | 0   | 0  | 0        | 0        | 0.293644 | 0        |
| antisense -             | 1   | 1   | 1   | 4   | 2   | 0  | 0.073495 | 0.094247 | 0.088676 | 0.4563   |
| sense_intrc -           | 3   | 2   | 0   | 1   | 1   | 0  | 0.296147 | 0.253178 | 0        | 0.153221 |
| antisense -             | 1   | 0   | 0   | 0   | 5   | 6  | 0.126048 | 0        | 0        | 0        |
| sense_intrc -           | 0   | 0   | 0   | 2   | 3   | 5  | 0        | 0        | 0        | 0.272074 |
| lincRNA -               | 0   | 0   | 0   | 2   | 2   | 1  | 0        | 0        | 0        | 0.262227 |
| antisense -             | 1   | 0   | 0   | 0   | 0   | 1  | 0.121792 | 0        | 0        | 0        |
| processed_ -            | 21  | 12  | 11  | 34  | 38  | 15 | 0.556008 | 0.407429 | 0.351401 | 1.397241 |
| sense_intrc -           | 9   | 8   | 7   | 5   | 6   | 1  | 0.182294 | 0.207792 | 0.171071 | 0.157192 |
| antisense -             | 99  | 97  | 97  | 103 | 81  | 90 | 14.46141 | 18.17006 | 17.09602 | 23.35302 |
| lincRNA -               | 13  | 6   | 13  | 15  | 18  | 27 | 1.325153 | 0.784302 | 1.598873 | 2.373254 |
| antisense -             | 2   | 0   | 0   | 0   | 0   | 0  | 0.251421 | 0        | 0        | 0        |
| antisense -             | 3   | 2   | 1   | 2   | 3   | 9  | 0.206261 | 0.176334 | 0.082955 | 0.213431 |
| antisense -             | 9   | 2   | 5   | 9   | 6   | 7  | 1.182101 | 0.336862 | 0.792374 | 1.834785 |
| pseudogen: -            | 1   | 0   | 3   | 3   | 4   | 3  | 0.048092 | 0        | 0.174078 | 0.223938 |
| antisense -             | 2   | 1   | 1   | 1   | 1   | 3  | 0.18     | 0.115412 | 0.10859  | 0.139693 |
| lincRNA -               | 3   | 0   | 4   | 2   | 1   | 1  | 0.142812 | 0        | 0.229748 | 0.147776 |
| pseudogen: keratin_18   | 0   | 1   | 0   | 0   | 1   | 3  | 0        | 0.030836 | 0        | 0        |
| lincRNA -               | 3   | 3   | 1   | 0   | 0   | 0  | 0.060608 | 0.077721 | 0.024375 | 0        |
| antisense -             | 0   | 0   | 0   | 2   | 1   | 1  | 0        | 0        | 0        | 0.039565 |
| antisense -             | 4   | 1   | 3   | 2   | 4   | 3  | 0.575338 | 0.184447 | 0.520633 | 0.446502 |
| lincRNA -               | 0   | 0   | 1   | 0   | 0   | 0  | 0        | 0        | 0.028545 | 0        |
| antisense hsa-mir-15    | 0   | 2   | 1   | 1   | 4   | 8  | 0        | 0.206632 | 0.097209 | 0.125051 |
| processed_ -            | 0   | 2   | 0   | 1   | 3   | 8  | 0        | 0.034165 | 0        | 0.020676 |
| antisense -             | 10  | 9   | 8   | 31  | 24  | 23 | 0.589812 | 0.680715 | 0.569313 | 2.837955 |
| lincRNA -               | 1   | 1   | 0   | 0   | 0   | 1  | 0.015677 | 0.020104 | 0        | 0        |
| lincRNA -               | 0   | 1   | 0   | 0   | 1   | 0  | 0        | 0.119069 | 0        | 0        |
| lincRNA -               | 0   | 0   | 0   | 2   | 1   | 0  | 0        | 0        | 0        | 0.219547 |
| lincRNA -               | 0   | 0   | 0   | 0   | 1   | 0  | 0        | 0        | 0        | 0        |
| pseudogen: phosphatic   | 1   | 0   | 0   | 0   | 0   | 0  | 0.152736 | 0        | 0        | 0        |
| pseudogen: -            | 0   | 0   | 0   | 5   | 11  | 1  | 0        | 0        | 0        | 0.353643 |
| sense_intrc -           | 180 | 182 | 192 | 99  | 87  | 51 | 3.826021 | 4.960844 | 4.924069 | 3.266183 |
| protein_co Uncharacte   | 0   | 1   | 0   | 1   | 1   | 0  | 0        | 0.064725 | 0        | 0.078342 |
| sense_intrc -           | 3   | 4   | 2   | 2   | 2   | 1  | 0.133717 | 0.22863  | 0.107558 | 0.138365 |
| antisense -             | 0   | 0   | 1   | 0   | 0   | 1  | 0        | 0        | 0.130962 | 0        |
| pseudogen: Tu_translat  | 0   | 0   | 0   | 0   | 1   | 0  | 0        | 0        | 0        | 0        |
| antisense -             | 11  | 6   | 7   | 4   | 6   | 2  | 1.153893 | 0.807111 | 0.88597  | 0.651273 |
| antisense -             | 15  | 20  | 13  | 3   | 5   | 1  | 0.392933 | 0.671841 | 0.410884 | 0.121977 |
| antisense -             | 5   | 3   | 5   | 1   | 8   | 4  | 0.422433 | 0.325026 | 0.509689 | 0.131135 |
| protein_co ribosomal_   | 32  | 27  | 32  | 50  | 71  | 69 | 1.641664 | 1.776263 | 1.980762 | 3.98139  |
| pseudogen: -            | 0   | 2   | 3   | 5   | 6   | 6  | 0        | 0.165419 | 0.233462 | 0.500549 |
| antisense MAFG_anti     | 294 | 229 | 262 | 63  | 105 | 62 | 7.274757 | 7.266345 | 7.822049 | 2.419592 |
| lincRNA -               | 0   | 0   | 0   | 0   | 1   | 0  | 0        | 0        | 0        | 0        |
| lincRNA -               | 1   | 4   | 3   | 21  | 38  | 13 | 0.025906 | 0.132884 | 0.093772 | 0.844407 |
| antisense -             | 1   | 0   | 0   | 1   | 0   | 3  | 0.014909 | 0        | 0        | 0.023141 |
| pseudogen: -            | 5   | 3   | 5   | 9   | 5   | 3  | 0.245497 | 0.188889 | 0.296207 | 0.685883 |
| lincRNA -               | 2   | 0   | 0   | 0   | 0   | 0  | 0.156823 | 0        | 0        | 0        |
| antisense -             | 0   | 3   | 1   | 5   | 3   | 5  | 0        | 0.330383 | 0.103618 | 0.666482 |
| lincRNA -               | 1   | 0   | 0   | 0   | 1   | 0  | 0.114646 | 0        | 0        | 0        |
| processed_ -            | 49  | 48  | 35  | 38  | 45  | 36 | 3.96824  | 4.984854 | 3.419936 | 4.776567 |
| lincRNA -               | 11  | 9   | 14  | 14  | 22  | 7  | 0.701755 | 0.736283 | 1.077629 | 1.386282 |
| antisense -             | 0   | 1   | 0   | 0   | 0   | 1  | 0        | 0.088556 | 0        | 0        |
| lincRNA coxsackie_1     | 0   | 0   | 0   | 0   | 2   | 7  | 0        | 0        | 0        | 0        |
| sense_intrc -           | 0   | 0   | 0   | 0   | 1   | 6  | 0        | 0        | 0        | 0        |
| antisense -             | 6   | 4   | 10  | 22  | 38  | 15 | 0.346052 | 0.295842 | 0.695886 | 1.969441 |
| antisense -             | 1   | 2   | 0   | 1   | 2   | 0  | 0.030019 | 0.076991 | 0        | 0.046594 |
| lincRNA cytochrom       | 0   | 0   | 0   | 1   | 2   | 0  | 0        | 0        | 0        | 0.025306 |
| pseudogen: ribonuclea   | 0   | 0   | 0   | 7   | 6   | 9  | 0        | 0        | 0        | 0.686602 |
| sense_intrc -           | 8   | 8   | 11  | 7   | 31  | 15 | 1.217923 | 1.561813 | 2.020554 | 1.654086 |
| pseudogen: -            | 4   | 6   | 6   | 0   | 3   | 1  | 0.095353 | 0.183416 | 0.172574 | 0        |
| lincRNA -               | 0   | 0   | 0   | 4   | 1   | 3  | 0        | 0        | 0        | 0.371326 |

|                         |    |    |    |       |       |       |          |          |          |          |
|-------------------------|----|----|----|-------|-------|-------|----------|----------|----------|----------|
| sense_intrc -           | 35 | 37 | 32 | 30    | 33    | 32    | 4.102877 | 5.562006 | 4.52604  | 5.458485 |
| sense_intrc -           | 0  | 0  | 0  | 1     | 2     | 2     | 0        | 0        | 0        | 0.169255 |
| protein_co fibrinogen_  | 20 | 11 | 11 | 22    | 9     | 22    | 0.379369 | 0.267568 | 0.251752 | 0.647717 |
| lincRNA -               | 0  | 0  | 0  | 1     | 0     | 0     | 0        | 0        | 0        | 0.129964 |
| antisense -             | 2  | 3  | 7  | 1     | 4     | 2     | 0.137306 | 0.264113 | 0.579837 | 0.106559 |
| pseudogeni -            | 0  | 0  | 0  | 1     | 0     | 0     | 0        | 0        | 0        | 0.438433 |
| pseudogeni -            | 0  | 0  | 0  | 0     | 1     | 0     | 0        | 0        | 0        | 0        |
| antisense -             | 1  | 0  | 0  | 0     | 5     | 0     | 0.084792 | 0        | 0        | 0        |
| antisense -             | 3  | 4  | 0  | 1     | 1     | 0     | 0.209019 | 0.357384 | 0        | 0.108142 |
| antisense -             | 1  | 1  | 2  | 3     | 0     | 2     | 0.07828  | 0.100384 | 0.1889   | 0.364507 |
| processed_ -            | 3  | 1  | 1  | 3     | 0     | 0     | 0.056859 | 0.024305 | 0.022868 | 0.088254 |
| pseudogeni -            | 1  | 1  | 4  | 5     | 4     | 3     | 0.073959 | 0.094842 | 0.356943 | 0.573973 |
| lincRNA long_interf     | 0  | 0  | 0  | 11    | 8     | 1     | 0        | 0        | 0        | 0.341689 |
| pseudogeni -            | 1  | 0  | 2  | 0     | 1     | 0     | 0.271041 | 0        | 0.654052 | 0        |
| pseudogeni ubiquitin-c  | 4  | 0  | 2  | 1     | 2     | 1     | 0.367765 | 0        | 0.221865 | 0.142705 |
| antisense -             | 2  | 0  | 3  | 5     | 3     | 2     | 0.164526 | 0        | 0.297766 | 0.638419 |
| protein_co uncharacte   | 0  | 1  | 0  | 0     | 0     | 0     | 0        | 0.099718 | 0        | 0        |
| antisense -             | 4  | 1  | 4  | 9     | 8     | 10    | 0.229291 | 0.073508 | 0.276653 | 0.800756 |
| lincRNA -               | 0  | 0  | 0  | 1     | 0     | 0     | 0        | 0        | 0        | 0.129964 |
| lincRNA -               | 0  | 0  | 0  | 0     | 1     | 0     | 0        | 0        | 0        | 0        |
| lincRNA -               | 0  | 0  | 0  | 11    | 10    | 4     | 0        | 0        | 0        | 1.437303 |
| lincRNA -               | 0  | 0  | 1  | 0     | 0     | 0     | 0        | 0        | 0.120118 | 0        |
| pseudogeni -            | 21 | 19 | 22 | 8     | 11    | 5     | 10.25719 | 11.90069 | 12.96522 | 6.064983 |
| sense_intrc embryonic   | 0  | 0  | 0  | 13249 | 14202 | 16600 | 0        | 0        | 0        | 307.089  |
| lincRNA -               | 1  | 2  | 1  | 1     | 0     | 2     | 0.026225 | 0.067259 | 0.031642 | 0.040705 |
| antisense -             | 9  | 8  | 4  | 4     | 4     | 8     | 0.868334 | 0.989791 | 0.465642 | 0.599011 |
| lincRNA -               | 0  | 0  | 0  | 0     | 1     | 1     | 0        | 0        | 0        | 0        |
| processed_ -            | 0  | 1  | 0  | 2     | 0     | 0     | 0        | 0.087145 | 0        | 0.210956 |
| antisense -             | 8  | 5  | 5  | 7     | 13    | 9     | 0.487169 | 0.390453 | 0.367373 | 0.661635 |
| pseudogeni polymerase   | 2  | 4  | 6  | 4     | 5     | 1     | 0.025567 | 0.065572 | 0.092544 | 0.079367 |
| protein_co -            | 0  | 0  | 0  | 0     | 1     | 0     | 0        | 0        | 0        | 0        |
| sense_intrc -           | 0  | 0  | 0  | 0     | 0     | 1     | 0        | 0        | 0        | 0        |
| antisense -             | 2  | 0  | 1  | 0     | 3     | 1     | 0.166572 | 0        | 0.100489 | 0        |
| antisense -             | 0  | 0  | 0  | 1     | 0     | 0     | 0        | 0        | 0        | 0.127015 |
| lincRNA -               | 0  | 0  | 1  | 0     | 1     | 1     | 0        | 0        | 0.136656 | 0        |
| lincRNA -               | 0  | 0  | 0  | 1     | 0     | 0     | 0        | 0        | 0        | 0.126574 |
| pseudogeni -            | 0  | 0  | 0  | 2     | 0     | 0     | 0        | 0        | 0        | 0.309044 |
| antisense -             | 1  | 2  | 0  | 0     | 1     | 0     | 0.20933  | 0.536873 | 0        | 0        |
| sense_intrc -           | 0  | 2  | 3  | 1     | 3     | 0     | 0        | 0.328578 | 0.463734 | 0.198852 |
| pseudogeni -            | 3  | 1  | 0  | 1     | 1     | 1     | 0.120643 | 0.051569 | 0        | 0.062418 |
| pseudogeni ras_homolo   | 0  | 0  | 0  | 5     | 1     | 0     | 0        | 0        | 0        | 1.123145 |
| antisense -             | 0  | 2  | 1  | 3     | 0     | 0     | 0        | 0.195227 | 0.091843 | 0.354447 |
| pseudogeni -            | 0  | 2  | 0  | 0     | 0     | 0     | 0        | 0.471606 | 0        | 0        |
| antisense -             | 4  | 10 | 5  | 3     | 4     | 0     | 0.109428 | 0.350816 | 0.165039 | 0.127386 |
| protein_co STE20-relat  | 85 | 58 | 56 | 68    | 104   | 61    | 1.081588 | 0.946412 | 0.859763 | 1.343019 |
| lincRNA -               | 1  | 0  | 0  | 23    | 39    | 9     | 0.113261 | 0        | 0        | 4.043322 |
| pseudogeni -            | 0  | 0  | 0  | 2     | 0     | 2     | 0        | 0        | 0        | 0.15943  |
| protein_co Uncharacte   | 45 | 38 | 30 | 24    | 38    | 24    | 1.007665 | 1.091181 | 0.810537 | 0.834152 |
| lincRNA -               | 0  | 0  | 0  | 0     | 1     | 1     | 0        | 0        | 0        | 0        |
| lincRNA -               | 0  | 0  | 0  | 1     | 0     | 0     | 0        | 0        | 0        | 0.033539 |
| sense_intrc NARF_intrc  | 10 | 4  | 8  | 3     | 4     | 4     | 0.609753 | 0.312769 | 0.588562 | 0.283926 |
| pseudogeni -            | 0  | 0  | 0  | 0     | 0     | 1     | 0        | 0        | 0        | 0        |
| antisense -             | 0  | 0  | 0  | 0     | 2     | 1     | 0        | 0        | 0        | 0        |
| pseudogeni cytochrom    | 0  | 0  | 0  | 0     | 4     | 0     | 0        | 0        | 0        | 0        |
| lincRNA long_interf     | 4  | 2  | 3  | 2     | 5     | 6     | 0.053436 | 0.034262 | 0.048355 | 0.04147  |
| protein_co Uncharacte   | 2  | 0  | 2  | 3     | 1     | 2     | 0.115068 | 0        | 0.138836 | 0.267901 |
| antisense -             | 3  | 2  | 1  | 2     | 1     | 1     | 0.246357 | 0.210612 | 0.099081 | 0.25492  |
| lincRNA -               | 0  | 0  | 1  | 1     | 2     | 0     | 0        | 0        | 0.100848 | 0.129732 |
| lincRNA -               | 1  | 2  | 3  | 0     | 0     | 0     | 0.017782 | 0.045605 | 0.064363 | 0        |
| pseudogeni ubiquitin-li | 1  | 0  | 1  | 1     | 0     | 0     | 0.21411  | 0        | 0.258336 | 0.332328 |
| antisense -             | 0  | 0  | 2  | 0     | 0     | 0     | 0        | 0        | 0.146949 | 0        |
| lincRNA -               | 0  | 1  | 1  | 2     | 0     | 5     | 0        | 0.077387 | 0.072813 | 0.187335 |
| lincRNA -               | 0  | 0  | 1  | 1     | 0     | 1     | 0        | 0        | 0.009255 | 0.011906 |
| pseudogeni ariadne_ho   | 1  | 1  | 2  | 0     | 0     | 0     | 0.031747 | 0.040711 | 0.076609 | 0        |
| sense_intrc hsa-mir-74  | 0  | 0  | 2  | 0     | 0     | 0     | 0        | 0        | 1.154602 | 0        |

|                        |     |     |     |     |     |     |          |          |          |          |
|------------------------|-----|-----|-----|-----|-----|-----|----------|----------|----------|----------|
| lincRNA -              | 1   | 1   | 0   | 0   | 0   | 0   | 0.122109 | 0.156588 | 0        | 0        |
| pseudogeni -           | 0   | 3   | 0   | 0   | 1   | 0   | 0        | 0.125183 | 0        | 0        |
| lincRNA -              | 2   | 2   | 1   | 0   | 0   | 2   | 0.206564 | 0.264889 | 0.124616 | 0        |
| lincRNA -              | 0   | 0   | 1   | 0   | 0   | 0   | 0        | 0        | 0.079237 | 0        |
| antisense -            | 2   | 1   | 0   | 2   | 5   | 0   | 0.140389 | 0.090015 | 0        | 0.217904 |
| lincRNA -              | 0   | 0   | 0   | 0   | 1   | 1   | 0        | 0        | 0        | 0        |
| antisense -            | 0   | 2   | 0   | 1   | 3   | 1   | 0        | 0.25974  | 0        | 0.157192 |
| antisense -            | 0   | 0   | 0   | 1   | 0   | 1   | 0        | 0        | 0        | 0.053047 |
| sense_intrc -          | 1   | 4   | 0   | 1   | 4   | 1   | 0.016867 | 0.086518 | 0        | 0.02618  |
| pseudogeni -           | 0   | 0   | 2   | 0   | 2   | 2   | 0        | 0        | 0.19309  | 0        |
| lincRNA -              | 13  | 5   | 9   | 2   | 2   | 5   | 0.284846 | 0.14049  | 0.237934 | 0.068019 |
| pseudogeni -           | 0   | 0   | 2   | 1   | 3   | 1   | 0        | 0        | 0.378431 | 0.243411 |
| lincRNA -              | 2   | 0   | 0   | 1   | 0   | 0   | 0.169891 | 0        | 0        | 0.131847 |
| lincRNA -              | 0   | 0   | 0   | 21  | 14  | 5   | 0        | 0        | 0        | 3.80193  |
| antisense -            | 1   | 0   | 0   | 1   | 0   | 1   | 0.082553 | 0        | 0        | 0.128133 |
| antisense -            | 0   | 0   | 0   | 5   | 2   | 4   | 0        | 0        | 0        | 0.250102 |
| lincRNA -              | 35  | 27  | 24  | 83  | 135 | 164 | 5.903419 | 5.839944 | 4.884216 | 21.72922 |
| pseudogeni chromobo    | 6   | 12  | 10  | 4   | 13  | 4   | 0.196879 | 0.504939 | 0.39591  | 0.203722 |
| lincRNA -              | 3   | 1   | 0   | 0   | 0   | 1   | 0.154243 | 0.065932 | 0        | 0        |
| antisense -            | 1   | 0   | 0   | 0   | 3   | 0   | 0.023972 | 0        | 0        | 0        |
| antisense -            | 0   | 0   | 1   | 0   | 1   | 2   | 0        | 0        | 0.115225 | 0        |
| antisense -            | 7   | 2   | 2   | 0   | 6   | 2   | 0.391683 | 0.143508 | 0.135025 | 0        |
| sense_intrc -          | 3   | 3   | 3   | 0   | 0   | 0   | 0.323379 | 0.414688 | 0.390176 | 0        |
| antisense -            | 2   | 2   | 2   | 24  | 36  | 6   | 0.04453  | 0.057103 | 0.053728 | 0.829399 |
| antisense -            | 1   | 1   | 0   | 0   | 1   | 0   | 0.048591 | 0.062311 | 0        | 0        |
| antisense -            | 208 | 161 | 160 | 126 | 191 | 225 | 11.34084 | 11.25686 | 10.52568 | 10.66309 |
| antisense -            | 3   | 1   | 1   | 3   | 6   | 8   | 0.204166 | 0.087271 | 0.082112 | 0.316893 |
| pseudogeni -           | 0   | 1   | 0   | 0   | 0   | 0   | 0        | 0.246434 | 0        | 0        |
| lincRNA -              | 7   | 5   | 5   | 1   | 2   | 10  | 0.710455 | 0.650755 | 0.612289 | 0.157532 |
| pseudogeni -           | 0   | 1   | 1   | 0   | 0   | 1   | 0        | 0.127936 | 0.120373 | 0        |
| lincRNA -              | 1   | 0   | 1   | 0   | 3   | 4   | 0.068353 | 0        | 0.082472 | 0        |
| pseudogeni -           | 1   | 0   | 0   | 0   | 1   | 0   | 0.111909 | 0        | 0        | 0        |
| sense_intrc -          | 0   | 0   | 0   | 1   | 0   | 2   | 0        | 0        | 0        | 0.130664 |
| lincRNA -              | 0   | 0   | 0   | 0   | 0   | 1   | 0        | 0        | 0        | 0        |
| pseudogeni -           | 0   | 0   | 1   | 0   | 1   | 0   | 0        | 0        | 0.048149 | 0        |
| antisense -            | 1   | 0   | 0   | 0   | 0   | 0   | 0.020693 | 0        | 0        | 0        |
| antisense -            | 0   | 0   | 1   | 0   | 0   | 0   | 0        | 0        | 0.101572 | 0        |
| pseudogeni -           | 2   | 0   | 3   | 3   | 3   | 1   | 0.117519 | 0        | 0.21269  | 0.273608 |
| lincRNA -              | 11  | 17  | 15  | 13  | 9   | 4   | 1.627098 | 3.224626 | 2.677074 | 2.984661 |
| antisense -            | 1   | 3   | 2   | 4   | 4   | 2   | 0.087809 | 0.337808 | 0.211893 | 0.545167 |
| lincRNA -              | 9   | 7   | 7   | 1   | 1   | 0   | 0.712855 | 0.710994 | 0.668967 | 0.122939 |
| lincRNA -              | 1   | 0   | 1   | 3   | 3   | 2   | 0.054271 | 0        | 0.065481 | 0.252708 |
| lincRNA -              | 0   | 0   | 1   | 0   | 0   | 0   | 0        | 0        | 0.163987 | 0        |
| processed_ -           | 0   | 0   | 0   | 0   | 2   | 0   | 0        | 0        | 0        | 0        |
| antisense -            | 0   | 0   | 1   | 0   | 0   | 0   | 0        | 0        | 0.138665 | 0        |
| antisense -            | 2   | 3   | 1   | 2   | 5   | 6   | 0.27994  | 0.538476 | 0.168882 | 0.434506 |
| pseudogeni ring_finger | 1   | 0   | 0   | 0   | 1   | 0   | 0.021549 | 0        | 0        | 0        |
| protein_co Uncharacte  | 1   | 2   | 0   | 0   | 1   | 0   | 0.101494 | 0.260302 | 0        | 0        |
| processed_ -           | 5   | 2   | 2   | 1   | 0   | 2   | 0.418661 | 0.214749 | 0.202055 | 0.129964 |
| lincRNA -              | 5   | 16  | 7   | 15  | 18  | 50  | 0.771217 | 3.164726 | 1.302725 | 3.591109 |
| antisense -            | 1   | 3   | 0   | 0   | 0   | 0   | 0.135913 | 0.522868 | 0        | 0        |
| lincRNA -              | 1   | 2   | 0   | 2   | 1   | 0   | 0.087156 | 0.223531 | 0        | 0.270557 |
| antisense -            | 0   | 0   | 1   | 2   | 0   | 1   | 0        | 0        | 0.026217 | 0.067451 |
| antisense -            | 4   | 2   | 3   | 5   | 0   | 8   | 0.13359  | 0.085655 | 0.120888 | 0.259187 |
| antisense -            | 0   | 0   | 0   | 2   | 2   | 0   | 0        | 0        | 0        | 0.308389 |
| antisense -            | 0   | 2   | 1   | 8   | 11  | 2   | 0        | 0.154179 | 0.072533 | 0.746459 |
| lincRNA -              | 84  | 77  | 68  | 115 | 141 | 104 | 2.384238 | 2.80266  | 2.328774 | 5.066391 |
| antisense -            | 0   | 0   | 0   | 0   | 1   | 0   | 0        | 0        | 0        | 0        |
| protein_co Putative_u  | 4   | 1   | 5   | 19  | 27  | 7   | 0.019938 | 0.006392 | 0.030071 | 0.146999 |
| antisense -            | 6   | 13  | 14  | 12  | 22  | 15  | 0.396813 | 1.102521 | 1.117147 | 1.231816 |
| antisense -            | 5   | 5   | 9   | 2   | 3   | 0   | 0.094536 | 0.121229 | 0.205314 | 0.058693 |
| lincRNA -              | 2   | 1   | 0   | 1   | 5   | 0   | 0.183523 | 0.117671 | 0        | 0.142426 |
| lincRNA -              | 53  | 67  | 52  | 47  | 60  | 28  | 1.502522 | 2.435729 | 1.778674 | 2.068108 |
| antisense -            | 1   | 0   | 0   | 0   | 1   | 2   | 0.044361 | 0        | 0        | 0        |
| lincRNA -              | 0   | 1   | 1   | 0   | 0   | 0   | 0        | 0.080387 | 0.075636 | 0        |

|                        |    |    |    |    |    |    |          |          |          |          |
|------------------------|----|----|----|----|----|----|----------|----------|----------|----------|
| pseudogen: SH3-domai   | 47 | 35 | 40 | 25 | 24 | 28 | 1.133075 | 1.082027 | 1.163507 | 0.935473 |
| sense_intrc -          | 3  | 4  | 3  | 3  | 3  | 8  | 0.134099 | 0.229284 | 0.161798 | 0.208141 |
| sense_intrc -          | 1  | 1  | 0  | 2  | 1  | 1  | 0.073151 | 0.093806 | 0        | 0.227082 |
| sense_intrc -          | 2  | 2  | 1  | 0  | 0  | 0  | 0.13611  | 0.174542 | 0.082112 | 0        |
| sense_intrc -          | 3  | 0  | 0  | 0  | 2  | 0  | 0.040364 | 0        | 0        | 0        |
| pseudogen: -           | 0  | 0  | 0  | 0  | 1  | 0  | 0        | 0        | 0        | 0        |
| lincRNA -              | 2  | 2  | 1  | 0  | 0  | 0  | 0.03204  | 0.041086 | 0.019329 | 0        |
| lincRNA -              | 0  | 1  | 1  | 6  | 4  | 0  | 0        | 0.129311 | 0.121668 | 0.939094 |
| lincRNA -              | 0  | 0  | 0  | 1  | 0  | 1  | 0        | 0        | 0        | 0.046864 |
| lincRNA -              | 35 | 21 | 28 | 0  | 2  | 1  | 2.552334 | 1.963804 | 2.46363  | 0        |
| sense_intrc -          | 0  | 0  | 0  | 1  | 0  | 0  | 0        | 0        | 0        | 0.259928 |
| antisense -            | 0  | 1  | 0  | 2  | 0  | 0  | 0        | 0.124492 | 0        | 0.301366 |
| antisense -            | 3  | 1  | 0  | 0  | 0  | 1  | 0.173239 | 0.074051 | 0        | 0        |
| antisense -            | 1  | 0  | 0  | 1  | 0  | 0  | 0.082119 | 0        | 0        | 0.12746  |
| pseudogen: integral_m  | 2  | 0  | 0  | 1  | 0  | 0  | 0.141235 | 0        | 0        | 0.109608 |
| pseudogen: -           | 42 | 24 | 28 | 29 | 29 | 18 | 2.664927 | 1.952794 | 2.143592 | 2.856041 |
| lincRNA -              | 0  | 0  | 1  | 14 | 3  | 4  | 0        | 0        | 0.142508 | 2.566542 |
| lincRNA -              | 1  | 3  | 6  | 0  | 0  | 1  | 0.082553 | 0.317587 | 0.597629 | 0        |
| lincRNA -              | 0  | 0  | 3  | 11 | 18 | 6  | 0        | 0        | 0.03228  | 0.152259 |
| pseudogen: -           | 2  | 2  | 6  | 1  | 3  | 5  | 0.254837 | 0.326792 | 0.922427 | 0.197771 |
| processed_ -           | 0  | 0  | 0  | 4  | 1  | 0  | 0        | 0        | 0        | 0.229408 |
| antisense -            | 4  | 1  | 5  | 0  | 6  | 2  | 0.261226 | 0.083746 | 0.39398  | 0        |
| sense_intrc -          | 18 | 17 | 15 | 7  | 19 | 10 | 0.517804 | 0.627121 | 0.520633 | 0.312551 |
| lincRNA -              | 2  | 7  | 5  | 10 | 4  | 19 | 0.239847 | 1.076493 | 0.723472 | 1.861376 |
| sense_intrc -          | 0  | 0  | 1  | 2  | 1  | 2  | 0        | 0        | 0.035294 | 0.090804 |
| antisense -            | 1  | 0  | 0  | 0  | 1  | 0  | 0.098924 | 0        | 0        | 0        |
| antisense -            | 1  | 0  | 1  | 43 | 57 | 21 | 0.056562 | 0        | 0.068245 | 3.775068 |
| lincRNA long_interf    | 7  | 9  | 11 | 26 | 48 | 5  | 0.12892  | 0.212556 | 0.244435 | 0.743234 |
| lincRNA -              | 0  | 1  | 0  | 1  | 1  | 4  | 0        | 0.170823 | 0        | 0.206761 |
| pseudogen: -           | 0  | 2  | 1  | 0  | 2  | 1  | 0        | 0.055394 | 0.02606  | 0        |
| pseudogen: solute_carr | 1  | 0  | 0  | 1  | 0  | 0  | 0.084792 | 0        | 0        | 0.131609 |
| pseudogen: -           | 1  | 3  | 5  | 3  | 9  | 4  | 0.063883 | 0.245762 | 0.385392 | 0.297465 |
| sense_intrc -          | 3  | 1  | 1  | 0  | 1  | 0  | 0.293063 | 0.12527  | 0.117866 | 0        |
| lincRNA -              | 6  | 3  | 4  | 5  | 4  | 1  | 0.252323 | 0.161784 | 0.202961 | 0.326367 |
| lincRNA -              | 1  | 0  | 2  | 4  | 10 | 5  | 0.081832 | 0        | 0.197471 | 0.508061 |
| antisense -            | 6  | 5  | 2  | 32 | 27 | 27 | 0.419911 | 0.44873  | 0.168882 | 3.47605  |
| lincRNA -              | 2  | 4  | 1  | 5  | 4  | 5  | 0.041459 | 0.10633  | 0.025011 | 0.160875 |
| antisense -            | 10 | 4  | 2  | 3  | 1  | 1  | 0.183882 | 0.094321 | 0.044373 | 0.085623 |
| sense_intrc -          | 0  | 0  | 1  | 0  | 0  | 0  | 0        | 0        | 0.115225 | 0        |
| processed_ -           | 9  | 3  | 3  | 12 | 8  | 9  | 0.790281 | 0.337808 | 0.31784  | 1.635501 |
| lincRNA -              | 2  | 0  | 0  | 0  | 2  | 2  | 0.241701 | 0        | 0        | 0        |
| lincRNA -              | 1  | 0  | 0  | 0  | 0  | 0  | 0.081548 | 0        | 0        | 0        |
| lincRNA -              | 89 | 61 | 60 | 41 | 31 | 25 | 8.43073  | 7.409934 | 6.857637 | 6.028226 |
| pseudogen: -           | 2  | 0  | 0  | 1  | 2  | 0  | 0.094919 | 0        | 0        | 0.073664 |
| antisense -            | 1  | 1  | 0  | 6  | 3  | 5  | 0.056494 | 0.072446 | 0        | 0.526119 |
| sense_intrc -          | 12 | 18 | 10 | 1  | 1  | 6  | 0.785866 | 1.511643 | 0.790161 | 0.101648 |
| lincRNA -              | 9  | 2  | 2  | 2  | 2  | 3  | 0.767291 | 0.218654 | 0.205729 | 0.264654 |
| antisense -            | 1  | 3  | 8  | 4  | 5  | 7  | 0.128115 | 0.492867 | 1.236623 | 0.795408 |
| 3prime_ov -            | 28 | 38 | 17 | 19 | 31 | 38 | 0.50342  | 0.876124 | 0.368782 | 0.530221 |
| antisense -            | 0  | 1  | 5  | 0  | 4  | 1  | 0        | 0.176334 | 0.829553 | 0        |
| sense_intrc -          | 0  | 2  | 1  | 0  | 5  | 3  | 0        | 0.163618 | 0.076973 | 0        |
| pseudogen: mitochond   | 9  | 11 | 5  | 0  | 1  | 1  | 0.31564  | 0.49471  | 0.211576 | 0        |
| antisense -            | 13 | 16 | 10 | 11 | 13 | 6  | 0.229334 | 0.361955 | 0.21285  | 0.301196 |
| lincRNA -              | 1  | 1  | 1  | 1  | 7  | 3  | 0.114927 | 0.147377 | 0.138665 | 0.178382 |
| antisense -            | 1  | 1  | 1  | 0  | 0  | 0  | 0.087156 | 0.111765 | 0.105159 | 0        |
| antisense -            | 0  | 0  | 0  | 2  | 8  | 3  | 0        | 0        | 0        | 0.275681 |
| antisense -            | 1  | 1  | 0  | 0  | 0  | 1  | 0.23445  | 0.300649 | 0        | 0        |
| protein_co Uncharacte  | 1  | 0  | 0  | 0  | 1  | 0  | 0.086833 | 0        | 0        | 0        |
| pseudogen: -           | 0  | 0  | 0  | 0  | 1  | 0  | 0        | 0        | 0        | 0        |
| pseudogen: family_witl | 0  | 0  | 1  | 0  | 0  | 0  | 0        | 0        | 0.112925 | 0        |
| protein_co FXYD_dom    | 0  | 0  | 0  | 16 | 25 | 4  | 0        | 0        | 0        | 1.214262 |
| sense_intrc -          | 4  | 2  | 2  | 3  | 5  | 3  | 0.110394 | 0.070783 | 0.066599 | 0.128511 |
| protein_co alanyl-tRNA | 22 | 16 | 18 | 14 | 13 | 23 | 0.780318 | 0.727743 | 0.770317 | 0.770739 |
| sense_intrc -          | 3  | 1  | 2  | 0  | 0  | 0  | 0.079117 | 0.033819 | 0.063639 | 0        |
| antisense -            | 5  | 1  | 6  | 2  | 2  | 4  | 0.49462  | 0.126856 | 0.716146 | 0.307088 |

|                        |     |     |     |     |     |     |          |          |          |          |
|------------------------|-----|-----|-----|-----|-----|-----|----------|----------|----------|----------|
| lincRNA -              | 13  | 5   | 7   | 52  | 51  | 28  | 0.784518 | 0.386936 | 0.509689 | 4.87072  |
| pseudogen: olfactory_r | 0   | 0   | 0   | 0   | 0   | 1   | 0        | 0        | 0        | 0        |
| pseudogen: -           | 0   | 0   | 0   | 16  | 26  | 9   | 0        | 0        | 0        | 0.216607 |
| antisense -            | 2   | 0   | 0   | 0   | 1   | 0   | 0.165689 | 0        | 0        | 0        |
| antisense -            | 2   | 0   | 2   | 2   | 6   | 11  | 0.389129 | 0        | 0.469506 | 0.603982 |
| lincRNA -              | 3   | 1   | 2   | 18  | 34  | 15  | 0.03159  | 0.013503 | 0.02541  | 0.294192 |
| antisense -            | 3   | 2   | 1   | 1   | 3   | 0   | 0.158056 | 0.135123 | 0.063568 | 0.081775 |
| antisense -            | 7   | 5   | 11  | 7   | 13  | 9   | 0.513662 | 0.470499 | 0.973913 | 0.797275 |
| antisense -            | 1   | 1   | 2   | 0   | 0   | 2   | 0.13025  | 0.167027 | 0.314308 | 0        |
| antisense -            | 0   | 0   | 0   | 2   | 0   | 2   | 0        | 0        | 0        | 0.227082 |
| antisense -            | 11  | 19  | 20  | 7   | 11  | 3   | 0.400458 | 0.887008 | 0.878502 | 0.395542 |
| processed_ -           | 1   | 0   | 0   | 0   | 0   | 0   | 0.084335 | 0        | 0        | 0        |
| pseudogen: -           | 3   | 2   | 1   | 0   | 0   | 0   | 0.70335  | 0.601298 | 0.282878 | 0        |
| antisense -            | 6   | 5   | 3   | 4   | 6   | 1   | 0.082287 | 0.087935 | 0.049642 | 0.085147 |
| lincRNA -              | 1   | 0   | 0   | 21  | 17  | 10  | 0.008568 | 0        | 0        | 0.279257 |
| antisense -            | 0   | 0   | 0   | 1   | 0   | 1   | 0        | 0        | 0        | 0.149445 |
| lincRNA -              | 26  | 24  | 29  | 24  | 40  | 34  | 1.023628 | 1.211684 | 1.377573 | 1.466595 |
| antisense -            | 4   | 9   | 6   | 2   | 7   | 2   | 0.056341 | 0.162562 | 0.101968 | 0.043725 |
| lincRNA -              | 0   | 0   | 1   | 0   | 1   | 0   | 0        | 0        | 0.583253 | 0        |
| pseudogen: -           | 0   | 0   | 0   | 0   | 1   | 0   | 0        | 0        | 0        | 0        |
| lincRNA -              | 5   | 1   | 0   | 0   | 3   | 2   | 0.199362 | 0.051131 | 0        | 0        |
| processed_ -           | 5   | 5   | 4   | 5   | 3   | 0   | 0.303299 | 0.388938 | 0.292758 | 0.470762 |
| lincRNA -              | 35  | 18  | 25  | 6   | 6   | 4   | 0.704356 | 0.464522 | 0.607033 | 0.187416 |
| lincRNA -              | 2   | 1   | 3   | 0   | 3   | 0   | 0.196193 | 0.125795 | 0.355076 | 0        |
| lincRNA -              | 14  | 15  | 11  | 0   | 0   | 0   | 0.21404  | 0.294081 | 0.202912 | 0        |
| antisense -            | 0   | 0   | 1   | 0   | 2   | 0   | 0        | 0        | 0.1127   | 0        |
| antisense -            | 10  | 5   | 6   | 1   | 7   | 5   | 0.414223 | 0.265591 | 0.29987  | 0.064293 |
| lincRNA -              | 2   | 5   | 4   | 1   | 2   | 5   | 0.084108 | 0.26964  | 0.202961 | 0.065273 |
| pseudogen: leucine_ri  | 541 | 421 | 435 | 112 | 129 | 104 | 6.810067 | 6.795878 | 6.606804 | 2.188279 |
| antisense -            | 0   | 0   | 0   | 0   | 1   | 0   | 0        | 0        | 0        | 0        |
| antisense -            | 47  | 37  | 54  | 38  | 69  | 49  | 4.516047 | 4.559021 | 6.260404 | 5.66728  |
| antisense -            | 0   | 0   | 1   | 2   | 2   | 0   | 0        | 0        | 0.063927 | 0.164474 |
| lincRNA -              | 0   | 0   | 0   | 0   | 0   | 1   | 0        | 0        | 0        | 0        |
| antisense -            | 0   | 0   | 0   | 0   | 5   | 2   | 0        | 0        | 0        | 0        |
| pseudogen: -           | 4   | 4   | 2   | 12  | 17  | 21  | 0.492284 | 0.631284 | 0.296984 | 2.292277 |
| antisense -            | 2   | 4   | 0   | 0   | 2   | 1   | 0.162249 | 0.416123 | 0        | 0        |
| lincRNA -              | 0   | 3   | 0   | 0   | 0   | 0   | 0        | 0.127755 | 0        | 0        |
| pseudogen: -           | 2   | 0   | 0   | 1   | 4   | 0   | 0.070671 | 0        | 0        | 0.054845 |
| antisense -            | 1   | 0   | 0   | 1   | 1   | 1   | 0.068154 | 0        | 0        | 0.105785 |
| antisense -            | 9   | 5   | 5   | 9   | 18  | 13  | 0.213568 | 0.15215  | 0.143157 | 0.331487 |
| protein_co zinc_finger | 82  | 83  | 65  | 610 | 662 | 463 | 0.498442 | 0.646976 | 0.476719 | 5.755209 |
| antisense -            | 0   | 1   | 1   | 2   | 3   | 2   | 0        | 0.110941 | 0.104383 | 0.26856  |
| antisense -            | 0   | 1   | 1   | 0   | 2   | 3   | 0        | 0.127394 | 0.119863 | 0        |
| lincRNA -              | 3   | 5   | 2   | 3   | 6   | 0   | 0.305804 | 0.653585 | 0.24598  | 0.474651 |
| processed_ -           | 0   | 0   | 2   | 0   | 0   | 0   | 0        | 0        | 0.202417 | 0        |
| antisense -            | 2   | 3   | 6   | 0   | 5   | 2   | 0.219625 | 0.422458 | 0.794972 | 0        |
| lincRNA -              | 0   | 1   | 0   | 32  | 28  | 19  | 0        | 0.026087 | 0        | 1.010392 |
| lincRNA -              | 0   | 0   | 0   | 0   | 1   | 0   | 0        | 0        | 0        | 0        |
| lincRNA -              | 0   | 0   | 0   | 39  | 48  | 11  | 0        | 0        | 0        | 4.236436 |
| pseudogen: -           | 0   | 0   | 1   | 0   | 0   | 0   | 0        | 0        | 0.045552 | 0        |
| lincRNA -              | 1   | 1   | 0   | 0   | 0   | 0   | 0.075629 | 0.096984 | 0        | 0        |
| lincRNA -              | 31  | 15  | 23  | 8   | 8   | 4   | 0.662832 | 0.411285 | 0.593359 | 0.265499 |
| protein_co cytochrom   | 3   | 0   | 9   | 4   | 2   | 6   | 0.105371 | 0        | 0.381408 | 0.218067 |
| protein_co prostaglan  | 4   | 1   | 8   | 5   | 5   | 7   | 0.098457 | 0.031564 | 0.237587 | 0.191023 |
| antisense -            | 0   | 0   | 0   | 0   | 0   | 1   | 0        | 0        | 0        | 0        |
| antisense -            | 0   | 2   | 0   | 1   | 0   | 3   | 0        | 0.078859 | 0        | 0.047724 |
| lincRNA -              | 6   | 3   | 2   | 2   | 0   | 0   | 0.123938 | 0.079467 | 0.049846 | 0.064123 |
| lincRNA -              | 1   | 1   | 0   | 3   | 2   | 1   | 0.074429 | 0.095444 | 0        | 0.34657  |
| lincRNA -              | 0   | 0   | 0   | 9   | 4   | 7   | 0        | 0        | 0        | 0.893613 |
| processed_ -           | 0   | 0   | 0   | 4   | 0   | 4   | 0        | 0        | 0        | 0.548247 |
| lincRNA -              | 1   | 1   | 1   | 0   | 0   | 0   | 0.112988 | 0.144891 | 0.136327 | 0        |
| pseudogen: coiled-coil | 0   | 0   | 0   | 0   | 0   | 2   | 0        | 0        | 0        | 0        |
| antisense ASB16_anti   | 100 | 66  | 88  | 94  | 83  | 76  | 2.118844 | 1.793297 | 2.249726 | 3.091415 |
| antisense -            | 2   | 5   | 4   | 11  | 24  | 5   | 0.164816 | 0.528381 | 0.397719 | 1.406991 |
| pseudogen: -           | 0   | 0   | 0   | 1   | 0   | 1   | 0        | 0        | 0        | 0.056071 |

|                        |     |     |     |     |     |     |          |          |          |          |
|------------------------|-----|-----|-----|-----|-----|-----|----------|----------|----------|----------|
| pseudogeni -           | 0   | 0   | 0   | 0   | 0   | 1   | 0        | 0        | 0        | 0        |
| lincRNA -              | 1   | 1   | 0   | 0   | 0   | 0   | 0.106086 | 0.13604  | 0        | 0        |
| pseudogeni C-terminal_ | 1   | 5   | 4   | 1   | 2   | 1   | 0.037693 | 0.241679 | 0.181915 | 0.058505 |
| antisense -            | 0   | 0   | 0   | 1   | 0   | 0   | 0        | 0        | 0        | 0.161733 |
| lincRNA -              | 5   | 3   | 3   | 7   | 10  | 4   | 0.347333 | 0.267244 | 0.251447 | 0.754753 |
| sense_intrc -          | 10  | 3   | 5   | 8   | 7   | 25  | 0.584664 | 0.224924 | 0.352715 | 0.725983 |
| lincRNA -              | 1   | 0   | 0   | 0   | 0   | 1   | 0.084032 | 0        | 0        | 0        |
| lincRNA ILF3_antise    | 223 | 132 | 149 | 404 | 488 | 405 | 5.273058 | 4.002589 | 4.251009 | 14.82755 |
| pseudogeni -           | 8   | 3   | 4   | 19  | 13  | 10  | 0.598278 | 0.287702 | 0.360928 | 2.205449 |
| protein_co uncharacte  | 99  | 72  | 83  | 81  | 120 | 62  | 1.886271 | 1.759181 | 1.908073 | 2.395434 |
| lincRNA -              | 1   | 0   | 0   | 2   | 1   | 0   | 0.013505 | 0        | 0        | 0.041924 |
| lincRNA -              | 5   | 6   | 4   | 2   | 8   | 6   | 1.395536 | 2.147493 | 1.347036 | 0.866426 |
| lincRNA -              | 0   | 1   | 0   | 0   | 0   | 0   | 0        | 0.08082  | 0        | 0        |
| pseudogeni -           | 0   | 0   | 0   | 0   | 1   | 0   | 0        | 0        | 0        | 0        |
| protein_co Uncharacte  | 7   | 4   | 3   | 6   | 11  | 2   | 0.909225 | 0.666258 | 0.470157 | 1.209637 |
| lincRNA -              | 1   | 0   | 0   | 1   | 5   | 3   | 0.083732 | 0        | 0        | 0.129964 |
| antisense -            | 7   | 2   | 1   | 0   | 2   | 4   | 0.744286 | 0.272697 | 0.128289 | 0        |
| pseudogeni -           | 1   | 1   | 2   | 2   | 4   | 8   | 0.148857 | 0.190888 | 0.35921  | 0.462094 |
| antisense -            | 2   | 2   | 1   | 2   | 1   | 2   | 0.041904 | 0.053735 | 0.025279 | 0.06504  |
| antisense -            | 3   | 1   | 0   | 2   | 1   | 0   | 0.051377 | 0.021961 | 0        | 0.053163 |
| lincRNA -              | 0   | 1   | 0   | 2   | 0   | 0   | 0        | 0.068563 | 0        | 0.165974 |
| protein_co Protein_LO  | 23  | 19  | 23  | 10  | 15  | 20  | 0.486236 | 0.515088 | 0.586671 | 0.328133 |
| antisense RNF157_ar    | 8   | 7   | 7   | 15  | 14  | 9   | 0.20702  | 0.232289 | 0.218559 | 0.602482 |
| lincRNA -              | 0   | 0   | 0   | 1   | 6   | 0   | 0        | 0        | 0        | 0.180148 |
| antisense -            | 4   | 0   | 4   | 1   | 1   | 1   | 0.399064 | 0        | 0.481494 | 0.154851 |
| antisense -            | 27  | 17  | 7   | 0   | 0   | 0   | 0.266814 | 0.215428 | 0.083462 | 0        |
| antisense -            | 8   | 9   | 4   | 0   | 0   | 1   | 0.679565 | 0.980377 | 0.409967 | 0        |
| sense_intrc -          | 1   | 0   | 0   | 0   | 1   | 1   | 0.13914  | 0        | 0        | 0        |
| antisense -            | 19  | 15  | 6   | 6   | 25  | 15  | 1.467727 | 1.485909 | 0.559231 | 0.719405 |
| pseudogeni -           | 0   | 0   | 0   | 0   | 0   | 1   | 0        | 0        | 0        | 0        |
| lincRNA -              | 0   | 1   | 0   | 0   | 0   | 0   | 0        | 0.106236 | 0        | 0        |
| lincRNA -              | 0   | 0   | 0   | 5   | 0   | 0   | 0        | 0        | 0        | 0.475685 |
| processed_ -           | 0   | 1   | 0   | 4   | 6   | 6   | 0        | 0.047309 | 0        | 0.229047 |
| antisense -            | 3   | 1   | 4   | 9   | 10  | 16  | 0.12965  | 0.055419 | 0.208573 | 0.603703 |
| lincRNA -              | 19  | 12  | 8   | 22  | 30  | 21  | 0.655081 | 0.530557 | 0.332797 | 1.17732  |
| antisense -            | 0   | 0   | 3   | 2   | 10  | 0   | 0        | 0        | 0.514323 | 0.44109  |
| antisense -            | 0   | 3   | 2   | 2   | 1   | 3   | 0        | 0.070218 | 0.044045 | 0.05666  |
| lincRNA -              | 56  | 38  | 63  | 16  | 28  | 69  | 1.396724 | 1.215389 | 1.895881 | 0.619403 |
| antisense -            | 6   | 3   | 2   | 0   | 0   | 3   | 0.131529 | 0.084334 | 0.052899 | 0        |
| antisense -            | 0   | 0   | 0   | 2   | 5   | 1   | 0        | 0        | 0        | 0.200772 |
| lincRNA -              | 2   | 0   | 2   | 5   | 5   | 1   | 0.139762 | 0        | 0.16863  | 0.542323 |
| antisense -            | 63  | 56  | 69  | 69  | 72  | 68  | 1.032531 | 1.176955 | 1.364456 | 1.755263 |
| sense_intrc -          | 1   | 0   | 1   | 2   | 2   | 2   | 0.124377 | 0        | 0.150068 | 0.3861   |
| lincRNA -              | 0   | 0   | 0   | 2   | 0   | 4   | 0        | 0        | 0        | 0.056136 |
| 3prime_ov -            | 1   | 0   | 0   | 5   | 7   | 1   | 0.071588 | 0        | 0        | 0.555571 |
| antisense -            | 4   | 5   | 3   | 8   | 8   | 12  | 0.303495 | 0.486487 | 0.274638 | 0.942133 |
| antisense -            | 1   | 1   | 1   | 0   | 0   | 0   | 0.205658 | 0.263727 | 0.248138 | 0        |
| pseudogeni -           | 0   | 1   | 0   | 0   | 1   | 1   | 0        | 0.185015 | 0        | 0        |
| pseudogeni -           | 0   | 0   | 0   | 0   | 2   | 0   | 0        | 0        | 0        | 0        |
| pseudogeni -           | 0   | 0   | 0   | 0   | 0   | 1   | 0        | 0        | 0        | 0        |
| lincRNA -              | 3   | 6   | 2   | 6   | 8   | 9   | 0.261955 | 0.671841 | 0.21071  | 0.813182 |
| pseudogeni protein_ty  | 0   | 0   | 4   | 0   | 0   | 1   | 0        | 0        | 0.473435 | 0        |
| antisense -            | 1   | 5   | 1   | 5   | 10  | 3   | 0.090696 | 0.581526 | 0.10943  | 0.703867 |
| antisense -            | 1   | 0   | 1   | 0   | 2   | 0   | 0.103739 | 0        | 0.125167 | 0        |
| antisense -            | 0   | 2   | 0   | 0   | 0   | 0   | 0        | 0.219853 | 0        | 0        |
| lincRNA -              | 49  | 40  | 54  | 195 | 181 | 182 | 0.917576 | 0.96054  | 1.220079 | 5.667756 |
| lincRNA hsa-mir-21:    | 0   | 4   | 0   | 0   | 0   | 0   | 0        | 2.186538 | 0        | 0        |
| sense_intrc -          | 0   | 0   | 0   | 0   | 1   | 0   | 0        | 0        | 0        | 0        |
| sense_intrc -          | 2   | 7   | 4   | 4   | 14  | 22  | 0.262689 | 1.179016 | 0.633899 | 0.81546  |
| lincRNA -              | 3   | 0   | 0   | 2   | 8   | 3   | 0.223286 | 0        | 0        | 0.231047 |
| antisense -            | 4   | 9   | 7   | 8   | 7   | 4   | 0.0382   | 0.110218 | 0.080658 | 0.118582 |
| lincRNA hsa-mir-13:    | 0   | 1   | 2   | 0   | 0   | 0   | 0        | 0.595345 | 1.120307 | 0        |
| lincRNA -              | 14  | 21  | 17  | 2   | 11  | 3   | 1.769435 | 3.403573 | 2.592409 | 0.392344 |
| antisense -            | 1   | 0   | 0   | 1   | 1   | 0   | 0.109301 | 0        | 0        | 0.16965  |
| lincRNA -              | 0   | 0   | 0   | 0   | 2   | 1   | 0        | 0        | 0        | 0        |

|                              |     |     |     |    |    |    |          |          |          |          |
|------------------------------|-----|-----|-----|----|----|----|----------|----------|----------|----------|
| lincRNA -                    | 1   | 0   | 5   | 7  | 7  | 11 | 0.049306 | 0        | 0.297453 | 0.535708 |
| antisense -                  | 0   | 0   | 0   | 0  | 1  | 0  | 0        | 0        | 0        | 0        |
| protein_co Uncharacterized - | 20  | 18  | 19  | 8  | 19 | 12 | 0.22186  | 0.256053 | 0.254302 | 0.137743 |
| pseudogen -                  | 0   | 0   | 0   | 1  | 0  | 0  | 0        | 0        | 0        | 0.079454 |
| antisense -                  | 5   | 5   | 10  | 3  | 4  | 2  | 0.400769 | 0.51393  | 0.967103 | 0.37323  |
| pseudogen -                  | 0   | 0   | 0   | 1  | 1  | 0  | 0        | 0        | 0        | 0.257172 |
| sense_intrc -                | 5   | 1   | 5   | 38 | 36 | 9  | 0.308082 | 0.079014 | 0.371718 | 3.634208 |
| sense_intrc -                | 3   | 1   | 1   | 0  | 2  | 3  | 0.205658 | 0.087909 | 0.082713 | 0        |
| lincRNA -                    | 1   | 0   | 0   | 0  | 0  | 0  | 0.100839 | 0        | 0        | 0        |
| antisense -                  | 1   | 3   | 8   | 2  | 7  | 10 | 0.063537 | 0.24443  | 0.613285 | 0.197235 |
| protein_co -                 | 2   | 0   | 2   | 1  | 3  | 1  | 0.167166 | 0        | 0.201695 | 0.129732 |
| sense_intrc -                | 0   | 0   | 0   | 0  | 2  | 0  | 0        | 0        | 0        | 0        |
| lincRNA -                    | 0   | 1   | 0   | 0  | 0  | 1  | 0        | 0.162953 | 0        | 0        |
| processed_ -                 | 18  | 9   | 13  | 6  | 7  | 8  | 1.98593  | 1.273337 | 1.730545 | 1.02748  |
| lincRNA -                    | 7   | 9   | 8   | 2  | 4  | 10 | 0.432451 | 0.713002 | 0.596316 | 0.191778 |
| processed_ -                 | 6   | 4   | 5   | 57 | 79 | 52 | 0.090376 | 0.077263 | 0.09087  | 1.332621 |
| processed_ -                 | 36  | 32  | 35  | 43 | 59 | 53 | 0.70335  | 0.801731 | 0.825059 | 1.303971 |
| pseudogen -                  | 0   | 0   | 0   | 0  | 2  | 0  | 0        | 0        | 0        | 0        |
| lincRNA -                    | 11  | 6   | 6   | 5  | 4  | 7  | 0.624443 | 0.436778 | 0.41096  | 0.440556 |
| processed_ -                 | 14  | 16  | 12  | 15 | 19 | 6  | 0.641701 | 0.940446 | 0.663642 | 1.067153 |
| sense_intrc -                | 7   | 9   | 12  | 14 | 34 | 16 | 0.455875 | 0.751622 | 0.942925 | 1.415163 |
| antisense -                  | 9   | 11  | 17  | 9  | 6  | 6  | 0.207376 | 0.325026 | 0.472621 | 0.321876 |
| pseudogen -                  | 3   | 0   | 1   | 2  | 0  | 0  | 0.06626  | 0        | 0.026649 | 0.068563 |
| antisense -                  | 3   | 7   | 6   | 3  | 12 | 7  | 0.165494 | 0.495187 | 0.399357 | 0.25687  |
| antisense -                  | 2   | 1   | 1   | 6  | 4  | 1  | 0.164816 | 0.105676 | 0.09943  | 0.76745  |
| antisense -                  | 4   | 4   | 4   | 0  | 0  | 0  | 0.073467 | 0.09421  | 0.088642 | 0        |
| lincRNA -                    | 0   | 0   | 0   | 0  | 2  | 1  | 0        | 0        | 0        | 0        |
| protein_co Uncharacterized - | 0   | 2   | 0   | 10 | 19 | 9  | 0        | 0.065005 | 0        | 0.393404 |
| sense_intrc -                | 1   | 0   | 0   | 0  | 2  | 0  | 0.061055 | 0        | 0        | 0        |
| pseudogen -                  | 2   | 2   | 2   | 1  | 2  | 2  | 0.179312 | 0.229942 | 0.21635  | 0.139158 |
| antisense -                  | 9   | 8   | 3   | 12 | 27 | 21 | 0.536909 | 0.612008 | 0.215937 | 1.111142 |
| lincRNA -                    | 0   | 1   | 0   | 5  | 0  | 2  | 0        | 0.078807 | 0        | 0.476932 |
| protein_co Uncharacterized - | 48  | 35  | 35  | 57 | 46 | 29 | 0.675284 | 0.631426 | 0.594102 | 1.244659 |
| lincRNA -                    | 6   | 3   | 0   | 7  | 16 | 2  | 0.083533 | 0.05356  | 0        | 0.151264 |
| lincRNA -                    | 0   | 0   | 1   | 1  | 1  | 0  | 0        | 0        | 0.086243 | 0.110945 |
| sense_overl -                | 13  | 5   | 14  | 6  | 2  | 7  | 1.3025   | 0.642412 | 1.69243  | 0.933074 |
| antisense -                  | 2   | 0   | 0   | 0  | 0  | 0  | 0.158145 | 0        | 0        | 0        |
| antisense -                  | 1   | 0   | 2   | 1  | 4  | 3  | 0.068754 | 0        | 0.165911 | 0.106715 |
| antisense MAP3K14_ -         | 36  | 24  | 33  | 50 | 59 | 13 | 0.682037 | 0.583077 | 0.75434  | 1.470299 |
| lincRNA -                    | 30  | 50  | 43  | 8  | 6  | 15 | 1.913878 | 4.090462 | 3.309859 | 0.792161 |
| antisense -                  | 176 | 139 | 161 | 1  | 1  | 0  | 9.584951 | 9.707365 | 10.57916 | 0.084529 |
| antisense -                  | 3   | 0   | 1   | 3  | 0  | 0  | 0.330211 | 0        | 0.132806 | 0.512534 |
| antisense -                  | 9   | 9   | 4   | 7  | 22 | 11 | 0.638442 | 0.818711 | 0.342363 | 0.770739 |
| lincRNA -                    | 0   | 0   | 1   | 24 | 25 | 18 | 0        | 0        | 0.100134 | 3.091531 |
| processed_ -                 | 0   | 1   | 0   | 0  | 0  | 0  | 0        | 0.104756 | 0        | 0        |
| processed_ -                 | 71  | 54  | 65  | 0  | 3  | 1  | 0.798942 | 0.77922  | 0.882507 | 0        |
| antisense -                  | 1   | 1   | 2   | 2  | 3  | 0  | 0.022896 | 0.02936  | 0.05525  | 0.071074 |
| lincRNA -                    | 0   | 1   | 0   | 1  | 2  | 1  | 0        | 0.080173 | 0        | 0.09704  |
| pseudogen -                  | 1   | 1   | 0   | 0  | 0  | 0  | 0.128819 | 0.165192 | 0        | 0        |
| pseudogen -                  | 4   | 9   | 4   | 2  | 2  | 2  | 0.123071 | 0.355097 | 0.148492 | 0.095512 |
| pseudogen -                  | 1   | 0   | 0   | 1  | 0  | 0  | 0.082408 | 0        | 0        | 0.127908 |
| antisense -                  | 2   | 0   | 1   | 4  | 3  | 2  | 0.042666 | 0        | 0.02574  | 0.132447 |
| sense_intrc -                | 0   | 1   | 1   | 0  | 0  | 2  | 0        | 0.107567 | 0.101208 | 0        |
| pseudogen_ribosomal_ -       | 0   | 0   | 0   | 2  | 0  | 1  | 0        | 0        | 0        | 0.314384 |
| lincRNA -                    | 2   | 0   | 1   | 4  | 1  | 1  | 0.058503 | 0        | 0.035294 | 0.181609 |
| antisense -                  | 5   | 4   | 5   | 3  | 4  | 3  | 0.486411 | 0.499002 | 0.586883 | 0.452986 |
| pseudogen -                  | 0   | 0   | 0   | 3  | 3  | 1  | 0        | 0        | 0        | 2.1198   |
| lincRNA -                    | 0   | 0   | 0   | 0  | 1  | 0  | 0        | 0        | 0        | 0        |
| antisense -                  | 11  | 10  | 3   | 26 | 31 | 27 | 0.370539 | 0.431967 | 0.12193  | 1.359393 |
| lincRNA -                    | 1   | 0   | 0   | 0  | 0  | 0  | 0.042627 | 0        | 0        | 0        |
| lincRNA -                    | 108 | 67  | 107 | 80 | 59 | 32 | 2.961475 | 2.355963 | 3.540105 | 3.404903 |
| pseudogen -                  | 1   | 0   | 0   | 0  | 0  | 0  | 0.178289 | 0        | 0        | 0        |
| lincRNA -                    | 1   | 0   | 1   | 1  | 0  | 1  | 0.077632 | 0        | 0.093668 | 0.120496 |
| processed_ -                 | 41  | 38  | 43  | 29 | 52 | 6  | 2.073884 | 2.464868 | 2.624322 | 2.276822 |
| pseudogen -                  | 2   | 1   | 0   | 1  | 0  | 3  | 0.329053 | 0.210982 | 0        | 0.255368 |

|                        |      |      |      |     |      |     |          |          |          |          |
|------------------------|------|------|------|-----|------|-----|----------|----------|----------|----------|
| lincRNA -              | 0    | 0    | 0    | 3   | 3    | 0   | 0        | 0        | 0        | 0.37451  |
| lincRNA -              | 92   | 86   | 82   | 146 | 184  | 171 | 3.323484 | 3.983946 | 3.574107 | 8.186326 |
| antisense -            | 9    | 4    | 10   | 15  | 20   | 19  | 0.261307 | 0.148928 | 0.350313 | 0.675973 |
| pseudogen: solute_carr | 2    | 2    | 3    | 0   | 1    | 0   | 0.11977  | 0.153588 | 0.216764 | 0        |
| lincRNA -              | 109  | 79   | 101  | 46  | 53   | 45  | 1.255468 | 1.166852 | 1.403617 | 0.822371 |
| lincRNA -              | 8    | 2    | 6    | 16  | 13   | 13  | 0.72417  | 0.232161 | 0.655315 | 2.248025 |
| antisense -            | 9    | 3    | 2    | 7   | 8    | 11  | 0.711653 | 0.304198 | 0.190811 | 0.859121 |
| pseudogen: -           | 0    | 0    | 0    | 2   | 3    | 0   | 0        | 0        | 0        | 0.089963 |
| lincRNA -              | 0    | 0    | 0    | 0   | 0    | 1   | 0        | 0        | 0        | 0        |
| pseudogen: -           | 0    | 0    | 0    | 0   | 2    | 0   | 0        | 0        | 0        | 0        |
| processed_ -           | 2    | 0    | 0    | 1   | 0    | 0   | 0.02723  | 0        | 0        | 0.021132 |
| pseudogen: -           | 3    | 6    | 0    | 1   | 2    | 3   | 0.710455 | 1.822115 | 0        | 0.367575 |
| antisense -            | 5    | 3    | 3    | 10  | 8    | 5   | 0.165222 | 0.127124 | 0.11961  | 0.512895 |
| antisense -            | 0    | 1    | 0    | 0   | 1    | 0   | 0        | 0.105122 | 0        | 0        |
| pseudogen: eukaryotic_ | 2    | 1    | 2    | 4   | 4    | 7   | 0.202987 | 0.130151 | 0.244916 | 0.630128 |
| sense_overl -          | 9    | 6    | 1    | 5   | 12   | 4   | 1.002399 | 0.856957 | 0.134384 | 0.864368 |
| processed_ -           | 0    | 1    | 0    | 5   | 6    | 4   | 0        | 0.087145 | 0        | 0.52739  |
| processed_ -           | 471  | 390  | 347  | 357 | 434  | 567 | 8.905322 | 9.455895 | 7.916008 | 10.47677 |
| pseudogen: SH3-domai   | 54   | 32   | 36   | 14  | 14   | 16  | 2.722646 | 2.068982 | 2.19002  | 1.09561  |
| lincRNA -              | 0    | 1    | 0    | 1   | 0    | 1   | 0        | 0.027369 | 0        | 0.033127 |
| pseudogen: ribosomal_  | 6    | 1    | 1    | 3   | 4    | 4   | 0.474435 | 0.101399 | 0.095406 | 0.368195 |
| lincRNA RNA_U6_sr      | 0    | 1    | 0    | 0   | 0    | 1   | 0        | 0.561961 | 0        | 0        |
| protein_co Uncharacte  | 0    | 0    | 0    | 0   | 0    | 1   | 0        | 0        | 0        | 0        |
| lincRNA -              | 1    | 0    | 0    | 0   | 0    | 0   | 0.188313 | 0        | 0        | 0        |
| lincRNA -              | 0    | 0    | 0    | 2   | 3    | 1   | 0        | 0        | 0        | 0.269555 |
| antisense KCNJ2_anti   | 1    | 0    | 6    | 7   | 5    | 0   | 0.019201 | 0        | 0.139006 | 0.208624 |
| antisense -            | 6    | 3    | 5    | 0   | 0    | 0   | 0.5777   | 0.370409 | 0.580857 | 0        |
| pseudogen: -           | 11   | 4    | 3    | 11  | 6    | 6   | 0.724424 | 0.337808 | 0.23838  | 1.124407 |
| lincRNA -              | 0    | 0    | 0    | 1   | 6    | 3   | 0        | 0        | 0        | 0.057946 |
| lincRNA -              | 4    | 0    | 0    | 2   | 1    | 2   | 0.511063 | 0        | 0        | 0.39662  |
| lincRNA long_interf    | 18   | 10   | 8    | 66  | 58   | 41  | 0.366011 | 0.260754 | 0.196272 | 2.08303  |
| antisense -            | 3    | 5    | 5    | 1   | 1    | 0   | 0.581281 | 1.242351 | 1.168915 | 0.300743 |
| pseudogen: ATP_syntha  | 0    | 0    | 0    | 1   | 1    | 1   | 0        | 0        | 0        | 0.475685 |
| lincRNA -              | 9    | 12   | 14   | 15  | 10   | 11  | 0.645275 | 1.103299 | 1.211096 | 1.669261 |
| antisense -            | 20   | 17   | 17   | 200 | 244  | 328 | 0.73959  | 0.806157 | 0.758504 | 11.47946 |
| protein_co Uncharacte  | 0    | 0    | 0    | 1   | 1    | 0   | 0        | 0        | 0        | 0.040366 |
| antisense -            | 0    | 1    | 0    | 0   | 0    | 0   | 0        | 0.044673 | 0        | 0        |
| lincRNA -              | 1    | 0    | 2    | 0   | 2    | 0   | 0.07815  | 0        | 0.188585 | 0        |
| antisense -            | 9    | 9    | 5    | 9   | 5    | 2   | 0.537593 | 0.689386 | 0.360354 | 0.834418 |
| antisense -            | 3    | 0    | 0    | 0   | 0    | 0   | 0.293063 | 0        | 0        | 0        |
| antisense -            | 9    | 10   | 13   | 7   | 11   | 11  | 0.799262 | 1.138822 | 1.392958 | 0.964884 |
| antisense -            | 7    | 3    | 5    | 5   | 3    | 3   | 0.399307 | 0.219452 | 0.344133 | 0.4427   |
| lincRNA -              | 10   | 9    | 10   | 0   | 0    | 2   | 0.291423 | 0.336338 | 0.351619 | 0        |
| lincRNA -              | 9    | 10   | 7    | 0   | 0    | 0   | 0.764511 | 1.089308 | 0.717443 | 0        |
| antisense -            | 0    | 0    | 0    | 2   | 0    | 0   | 0        | 0        | 0        | 0.3271   |
| pseudogen: -           | 0    | 0    | 1    | 0   | 4    | 0   | 0        | 0        | 0.055142 | 0        |
| lincRNA -              | 5    | 2    | 5    | 12  | 8    | 10  | 0.399404 | 0.204872 | 0.481904 | 1.487832 |
| lincRNA -              | 0    | 0    | 0    | 3   | 7    | 2   | 0        | 0        | 0        | 1.331338 |
| pseudogen: -           | 1    | 0    | 1    | 0   | 1    | 0   | 0.096482 | 0        | 0.116411 | 0        |
| processed_ -           | 1    | 1    | 1    | 2   | 0    | 0   | 0.04638  | 0.059476 | 0.05596  | 0.143976 |
| sense_intrc -          | 0    | 0    | 0    | 2   | 0    | 1   | 0        | 0        | 0        | 0.085222 |
| lincRNA -              | 0    | 0    | 1    | 17  | 24   | 16  | 0        | 0        | 0.05074  | 1.109647 |
| lincRNA -              | 21   | 25   | 21   | 4   | 20   | 8   | 0.476848 | 0.727964 | 0.575344 | 0.140978 |
| lincRNA -              | 1    | 8    | 2    | 3   | 4    | 2   | 0.067082 | 0.688181 | 0.161876 | 0.31236  |
| antisense -            | 2    | 0    | 0    | 0   | 0    | 0   | 0.179312 | 0        | 0        | 0        |
| processed_ -           | 10   | 6    | 8    | 6   | 6    | 7   | 0.583935 | 0.449289 | 0.563641 | 0.543809 |
| lincRNA -              | 1    | 0    | 3    | 1   | 0    | 0   | 0.059809 | 0        | 0.216488 | 0.092831 |
| pseudogen: -           | 3    | 2    | 1    | 4   | 4    | 2   | 0.128583 | 0.109927 | 0.051714 | 0.266105 |
| antisense -            | 0    | 0    | 0    | 11  | 23   | 7   | 0        | 0        | 0        | 1.083326 |
| protein_co Uncharacte  | 0    | 0    | 0    | 0   | 1    | 0   | 0        | 0        | 0        | 0        |
| lincRNA -              | 1565 | 1183 | 1241 | 834 | 1089 | 995 | 34.89438 | 33.8248  | 33.38574 | 28.86275 |
| pseudogen: -           | 0    | 0    | 0    | 1   | 0    | 0   | 0        | 0        | 0        | 0.237068 |
| sense_intrc -          | 0    | 1    | 0    | 5   | 2    | 0   | 0        | 0.054515 | 0        | 0.329918 |
| pseudogen: -           | 0    | 3    | 5    | 4   | 3    | 1   | 0        | 0.156452 | 0.24534  | 0.252488 |
| processed_ -           | 0    | 0    | 0    | 2   | 2    | 1   | 0        | 0        | 0        | 0.15618  |

|                        |     |     |     |    |     |    |          |          |          |          |
|------------------------|-----|-----|-----|----|-----|----|----------|----------|----------|----------|
| antisense -            | 0   | 0   | 0   | 1  | 0   | 0  | 0        | 0        | 0        | 0.22815  |
| antisense -            | 8   | 1   | 7   | 7  | 8   | 10 | 0.219112 | 0.035123 | 0.231325 | 0.297581 |
| lincRNA -              | 1   | 0   | 1   | 0  | 0   | 0  | 0.08541  | 0        | 0.103052 | 0        |
| sense_intrc -          | 8   | 6   | 9   | 3  | 6   | 7  | 0.627291 | 0.603309 | 0.851471 | 0.365116 |
| processed_ -           | 0   | 1   | 0   | 0  | 0   | 0  | 0        | 0.202457 | 0        | 0        |
| lincRNA -              | 0   | 0   | 0   | 1  | 1   | 0  | 0        | 0        | 0        | 0.188549 |
| pseudogen: vomeronas   | 0   | 0   | 0   | 1  | 0   | 0  | 0        | 0        | 0        | 0.107662 |
| lincRNA -              | 0   | 0   | 0   | 0  | 0   | 1  | 0        | 0        | 0        | 0        |
| processed_ZNF582_an    | 4   | 5   | 8   | 10 | 17  | 11 | 0.116787 | 0.187204 | 0.281821 | 0.453174 |
| antisense -            | 0   | 0   | 0   | 0  | 1   | 0  | 0        | 0        | 0        | 0        |
| lincRNA -              | 1   | 1   | 1   | 0  | 0   | 0  | 0.086195 | 0.110533 | 0.103999 | 0        |
| lincRNA -              | 0   | 0   | 0   | 8  | 1   | 0  | 0        | 0        | 0        | 1.516246 |
| pseudogen: ubiquitin-c | 0   | 0   | 0   | 2  | 3   | 0  | 0        | 0        | 0        | 0.288809 |
| lincRNA -              | 2   | 0   | 0   | 11 | 11  | 6  | 0.053073 | 0        | 0        | 0.453072 |
| antisense -            | 5   | 5   | 4   | 18 | 36  | 10 | 0.084426 | 0.108264 | 0.081492 | 0.471745 |
| pseudogen: -           | 0   | 1   | 0   | 0  | 0   | 2  | 0        | 0.088949 | 0        | 0        |
| lincRNA -              | 238 | 194 | 179 | 10 | 19  | 15 | 6.560743 | 6.857837 | 5.953566 | 0.427865 |
| sense_intrc -          | 1   | 1   | 3   | 2  | 2   | 5  | 0.052745 | 0.067638 | 0.190918 | 0.163734 |
| lincRNA -              | 10  | 7   | 12  | 4  | 1   | 9  | 0.825528 | 0.741036 | 1.195257 | 0.512534 |
| antisense -            | 7   | 4   | 2   | 1  | 1   | 0  | 0.824699 | 0.60432  | 0.284299 | 0.182864 |
| pseudogen: -           | 1   | 0   | 0   | 0  | 0   | 0  | 0.031941 | 0        | 0        | 0        |
| sense_intrc -          | 0   | 0   | 0   | 0  | 0   | 4  | 0        | 0        | 0        | 0        |
| antisense -            | 9   | 9   | 7   | 19 | 28  | 38 | 0.800778 | 1.026885 | 0.751477 | 2.62394  |
| sense_intrc -          | 2   | 2   | 3   | 0  | 2   | 4  | 0.101824 | 0.130575 | 0.184285 | 0        |
| antisense -            | 0   | 0   | 0   | 0  | 0   | 1  | 0        | 0        | 0        | 0        |
| antisense -            | 17  | 3   | 8   | 2  | 3   | 1  | 0.843524 | 0.190888 | 0.478946 | 0.154031 |
| antisense CIRBP_anti   | 7   | 13  | 17  | 14 | 21  | 22 | 0.511262 | 1.217582 | 1.498105 | 1.587098 |
| protein_co family_witl | 0   | 0   | 0   | 6  | 9   | 7  | 0        | 0        | 0        | 0.581463 |
| lincRNA -              | 0   | 0   | 2   | 0  | 0   | 0  | 0        | 0        | 0.159592 | 0        |
| lincRNA -              | 0   | 0   | 0   | 0  | 2   | 0  | 0        | 0        | 0        | 0        |
| pseudogen: -           | 9   | 1   | 5   | 23 | 21  | 17 | 0.299936 | 0.042736 | 0.20105  | 1.18972  |
| lincRNA -              | 5   | 0   | 3   | 0  | 0   | 1  | 0.316824 | 0        | 0.22936  | 0        |
| antisense -            | 3   | 1   | 5   | 0  | 0   | 0  | 0.211534 | 0.090421 | 0.42538  | 0        |
| sense_intrc -          | 3   | 1   | 0   | 1  | 1   | 0  | 0.127766 | 0.054614 | 0        | 0.066103 |
| lincRNA -              | 3   | 4   | 3   | 9  | 19  | 4  | 0.250303 | 0.42797  | 0.302004 | 1.165513 |
| lincRNA -              | 0   | 0   | 0   | 24 | 11  | 7  | 0        | 0        | 0        | 0.356327 |
| pseudogen: -           | 1   | 0   | 3   | 0  | 0   | 0  | 0.096086 | 0        | 0.3478   | 0        |
| protein_co zinc_finger | 57  | 46  | 44  | 78 | 59  | 24 | 0.444492 | 0.459998 | 0.41399  | 0.944092 |
| lincRNA -              | 0   | 1   | 0   | 0  | 0   | 0  | 0        | 0.104939 | 0        | 0        |
| antisense -            | 10  | 5   | 9   | 9  | 6   | 9  | 1.157778 | 0.742343 | 1.257233 | 1.617329 |
| pseudogen: -           | 1   | 1   | 0   | 0  | 0   | 0  | 0.078675 | 0.100889 | 0        | 0        |
| pseudogen: -           | 2   | 0   | 0   | 0  | 0   | 1  | 0.29215  | 0        | 0        | 0        |
| lincRNA -              | 188 | 172 | 200 | 9  | 24  | 13 | 4.969179 | 5.829946 | 6.378298 | 0.369232 |
| lincRNA -              | 41  | 39  | 47  | 24 | 24  | 26 | 0.856725 | 1.045037 | 1.184959 | 0.778394 |
| lincRNA -              | 0   | 0   | 0   | 16 | 26  | 9  | 0        | 0        | 0        | 1.612849 |
| lincRNA -              | 0   | 0   | 0   | 0  | 0   | 2  | 0        | 0        | 0        | 0        |
| antisense -            | 8   | 7   | 10  | 4  | 9   | 22 | 0.683279 | 0.766682 | 1.030519 | 0.530272 |
| pseudogen: -           | 1   | 4   | 1   | 2  | 2   | 0  | 0.032405 | 0.166219 | 0.039098 | 0.100594 |
| lincRNA -              | 0   | 0   | 0   | 0  | 1   | 1  | 0        | 0        | 0        | 0        |
| processed_ -           | 15  | 7   | 4   | 0  | 0   | 0  | 0.414223 | 0.247885 | 0.133276 | 0        |
| lincRNA -              | 2   | 0   | 1   | 13 | 14  | 10 | 0.113124 | 0        | 0.068245 | 1.1413   |
| antisense mir-497-19   | 0   | 0   | 0   | 2  | 1   | 0  | 0        | 0        | 0        | 0.037926 |
| pseudogen: -           | 0   | 1   | 2   | 0  | 0   | 0  | 0        | 0.052378 | 0.098564 | 0        |
| protein_co sphingosin  | 198 | 168 | 183 | 93 | 114 | 64 | 7.914939 | 8.61194  | 8.826358 | 5.770266 |
| lincRNA long_interf    | 1   | 1   | 0   | 0  | 0   | 0  | 0.054971 | 0.070492 | 0        | 0        |
| lincRNA -              | 0   | 1   | 0   | 3  | 11  | 3  | 0        | 0.325026 | 0        | 1.180213 |
| lincRNA -              | 4   | 0   | 1   | 0  | 0   | 0  | 0.082372 | 0        | 0.024847 | 0        |
| pseudogen: -           | 1   | 0   | 1   | 1  | 1   | 1  | 0.2084   | 0        | 0.251447 | 0.323466 |
| sense_intrc -          | 12  | 8   | 6   | 1  | 1   | 0  | 0.987158 | 0.843927 | 0.595532 | 0.127684 |
| pseudogen: -           | 1   | 1   | 0   | 0  | 0   | 1  | 0.113811 | 0.145946 | 0        | 0        |
| antisense -            | 2   | 7   | 7   | 6  | 6   | 1  | 0.162249 | 0.728216 | 0.68517  | 0.7555   |
| lincRNA -              | 6   | 2   | 0   | 4  | 1   | 10 | 0.523911 | 0.223947 | 0        | 0.542121 |
| 3prime_ov -            | 55  | 31  | 37  | 15 | 27  | 20 | 1.004264 | 0.725866 | 0.815146 | 0.425116 |
| processed_ -           | 2   | 1   | 1   | 0  | 1   | 5  | 0.060503 | 0.038793 | 0.0365   | 0        |
| lincRNA -              | 5   | 2   | 1   | 15 | 4   | 5  | 0.427049 | 0.219052 | 0.103052 | 1.988519 |

|                         |    |    |    |    |    |    |          |          |          |          |
|-------------------------|----|----|----|----|----|----|----------|----------|----------|----------|
| antisense -             | 1  | 0  | 0  | 1  | 0  | 0  | 0.081832 | 0        | 0        | 0.127015 |
| antisense -             | 2  | 3  | 2  | 2  | 2  | 1  | 0.147221 | 0.283186 | 0.177631 | 0.228508 |
| pseudogeni -            | 1  | 0  | 1  | 0  | 0  | 0  | 0.105847 | 0        | 0.12771  | 0        |
| antisense -             | 0  | 1  | 0  | 1  | 0  | 0  | 0        | 0.114971 | 0        | 0.139158 |
| antisense -             | 4  | 6  | 8  | 34 | 33 | 41 | 0.46541  | 0.895233 | 1.123087 | 6.140231 |
| lincRNA -               | 0  | 1  | 0  | 0  | 0  | 0  | 0        | 0.116531 | 0        | 0        |
| processed_ -            | 1  | 0  | 0  | 44 | 35 | 13 | 0.075265 | 0        | 0        | 5.140146 |
| pseudogeni -            | 0  | 0  | 0  | 1  | 0  | 1  | 0        | 0        | 0        | 0.086849 |
| processed_ -            | 3  | 4  | 1  | 1  | 4  | 2  | 0.238829 | 0.408352 | 0.096053 | 0.123565 |
| processed_ -            | 80 | 54 | 56 | 45 | 49 | 39 | 1.56235  | 1.352357 | 1.319545 | 1.364053 |
| antisense -             | 1  | 0  | 0  | 0  | 0  | 0  | 0.028539 | 0        | 0        | 0        |
| antisense -             | 0  | 3  | 0  | 0  | 0  | 0  | 0        | 0.538476 | 0        | 0        |
| antisense -             | 15 | 9  | 18 | 14 | 20 | 10 | 1.953751 | 1.503245 | 2.828775 | 2.830326 |
| lincRNA -               | 0  | 2  | 0  | 1  | 0  | 1  | 0        | 0.172539 | 0        | 0.104419 |
| lincRNA -               | 1  | 1  | 2  | 0  | 0  | 1  | 0.013889 | 0.017811 | 0.033516 | 0        |
| pseudogeni -            | 0  | 1  | 0  | 5  | 6  | 4  | 0        | 0.096827 | 0        | 0.585989 |
| lincRNA microRNA_       | 0  | 2  | 0  | 1  | 0  | 0  | 0        | 0.168904 | 0        | 0.102219 |
| pseudogeni NADH_deh     | 3  | 4  | 4  | 3  | 2  | 0  | 0.558214 | 0.954441 | 0.898024 | 0.866426 |
| pseudogeni -            | 0  | 2  | 0  | 0  | 0  | 1  | 0        | 0.534487 | 0        | 0        |
| pseudogeni -            | 1  | 1  | 2  | 3  | 3  | 2  | 0.586125 | 0.751622 | 1.414388 | 2.729243 |
| pseudogeni ribose_5-pl  | 1  | 0  | 0  | 0  | 0  | 0  | 0.063194 | 0        | 0        | 0        |
| pseudogeni -            | 0  | 0  | 0  | 1  | 0  | 0  | 0        | 0        | 0        | 0.478814 |
| lincRNA -               | 0  | 1  | 1  | 9  | 7  | 3  | 0        | 0.07396  | 0.069589 | 0.80568  |
| processed_ -            | 0  | 0  | 0  | 3  | 0  | 3  | 0        | 0        | 0        | 0.336424 |
| antisense -             | 5  | 1  | 6  | 0  | 0  | 0  | 0.14848  | 0.038081 | 0.21498  | 0        |
| pseudogeni -            | 2  | 0  | 0  | 0  | 0  | 0  | 0.501498 | 0        | 0        | 0        |
| lincRNA -               | 1  | 0  | 0  | 0  | 1  | 1  | 0.07815  | 0        | 0        | 0        |
| antisense -             | 0  | 0  | 0  | 1  | 4  | 0  | 0        | 0        | 0        | 0.248395 |
| pseudogeni -            | 57 | 55 | 27 | 39 | 93 | 52 | 3.287492 | 4.067821 | 1.878891 | 3.491282 |
| lincRNA -               | 0  | 0  | 0  | 0  | 1  | 0  | 0        | 0        | 0        | 0        |
| lincRNA -               | 0  | 0  | 0  | 1  | 3  | 2  | 0        | 0        | 0        | 0.119507 |
| processed_ -            | 0  | 0  | 0  | 2  | 3  | 1  | 0        | 0        | 0        | 0.026911 |
| sense_intrc -           | 12 | 10 | 17 | 6  | 4  | 6  | 0.324125 | 0.34637  | 0.554023 | 0.251543 |
| lincRNA -               | 3  | 1  | 0  | 0  | 3  | 4  | 0.315404 | 0.13482  | 0        | 0        |
| sense_intrc -           | 0  | 1  | 0  | 0  | 0  | 0  | 0        | 0.26964  | 0        | 0        |
| processed_ -            | 0  | 3  | 0  | 1  | 0  | 2  | 0        | 0.502477 | 0        | 0.202729 |
| pseudogeni -            | 0  | 0  | 0  | 0  | 0  | 1  | 0        | 0        | 0        | 0        |
| lincRNA -               | 0  | 0  | 0  | 7  | 11 | 5  | 0        | 0        | 0        | 0.48153  |
| pseudogeni -            | 0  | 1  | 0  | 6  | 7  | 4  | 0        | 0.112603 | 0        | 0.817751 |
| lincRNA -               | 2  | 1  | 0  | 0  | 0  | 0  | 0.037632 | 0.024129 | 0        | 0        |
| antisense -             | 1  | 1  | 0  | 0  | 0  | 0  | 0.018644 | 0.023908 | 0        | 0        |
| pseudogeni -            | 1  | 1  | 2  | 1  | 3  | 1  | 0.053835 | 0.069035 | 0.129909 | 0.083559 |
| lincRNA -               | 0  | 1  | 0  | 0  | 2  | 1  | 0        | 0.070163 | 0        | 0        |
| antisense -             | 4  | 0  | 0  | 0  | 0  | 0  | 0.16072  | 0        | 0        | 0        |
| lincRNA -               | 3  | 3  | 4  | 1  | 0  | 1  | 0.066229 | 0.084929 | 0.106545 | 0.034265 |
| lincRNA -               | 0  | 1  | 1  | 3  | 0  | 1  | 0        | 0.102962 | 0.096876 | 0.373869 |
| sense_intrc -           | 6  | 5  | 3  | 6  | 7  | 20 | 0.394034 | 0.421077 | 0.237712 | 0.611595 |
| lincRNA -               | 1  | 4  | 0  | 0  | 1  | 2  | 0.110329 | 0.565927 | 0        | 0        |
| lincRNA -               | 0  | 0  | 0  | 3  | 1  | 3  | 0        | 0        | 0        | 0.083463 |
| lincRNA -               | 13 | 13 | 6  | 15 | 28 | 7  | 1.088518 | 1.39587  | 0.606166 | 1.949459 |
| lincRNA -               | 0  | 0  | 0  | 3  | 1  | 1  | 0        | 0        | 0        | 0.049176 |
| lincRNA -               | 0  | 2  | 0  | 1  | 2  | 0  | 0        | 0.0639   | 0        | 0.038672 |
| antisense -             | 1  | 3  | 1  | 1  | 1  | 1  | 0.163951 | 0.630732 | 0.197816 | 0.254475 |
| antisense -             | 1  | 0  | 0  | 1  | 0  | 0  | 0.074666 | 0        | 0        | 0.115891 |
| pseudogeni -            | 0  | 0  | 0  | 0  | 2  | 0  | 0        | 0        | 0        | 0        |
| antisense -             | 0  | 0  | 0  | 0  | 1  | 0  | 0        | 0        | 0        | 0        |
| sense_intrc -           | 0  | 0  | 1  | 1  | 2  | 1  | 0        | 0        | 0.046222 | 0.059461 |
| protein_co ferredoxin_  | 1  | 0  | 0  | 0  | 0  | 1  | 0.023972 | 0        | 0        | 0        |
| lincRNA -               | 2  | 0  | 0  | 0  | 0  | 0  | 0.275824 | 0        | 0        | 0        |
| pseudogeni threonine_   | 6  | 4  | 8  | 4  | 10 | 8  | 0.245712 | 0.21006  | 0.395287 | 0.254253 |
| lincRNA -               | 0  | 0  | 2  | 0  | 0  | 0  | 0        | 0        | 0.271345 | 0        |
| protein_co zinc_finger_ | 29 | 21 | 20 | 13 | 7  | 9  | 0.454179 | 0.421752 | 0.377926 | 0.316011 |
| pseudogeni -            | 5  | 1  | 2  | 2  | 2  | 2  | 0.7815   | 0.200433 | 0.37717  | 0.485199 |
| sense_intrc -           | 10 | 4  | 13 | 6  | 2  | 5  | 1.2504   | 0.641384 | 1.961284 | 1.164477 |
| lincRNA -               | 0  | 0  | 0  | 0  | 0  | 1  | 0        | 0        | 0        | 0        |

|                        |    |    |    |    |    |    |          |          |          |          |
|------------------------|----|----|----|----|----|----|----------|----------|----------|----------|
| pseudogeni -           | 0  | 0  | 1  | 0  | 0  | 0  | 0        | 0        | 0.290131 | 0        |
| antisense -            | 6  | 2  | 1  | 0  | 0  | 1  | 0.128466 | 0.054913 | 0.025834 | 0        |
| pseudogeni SHC_(Src_h  | 2  | 2  | 0  | 2  | 4  | 0  | 0.063839 | 0.081865 | 0        | 0.099088 |
| pseudogeni TAF9_RNA_   | 0  | 1  | 0  | 1  | 1  | 1  | 0        | 0.473463 | 0        | 0.573069 |
| antisense -            | 9  | 7  | 4  | 0  | 1  | 5  | 0.84741  | 0.845198 | 0.454422 | 0        |
| lincRNA -              | 0  | 0  | 0  | 1  | 0  | 1  | 0        | 0        | 0        | 0.159256 |
| antisense -            | 3  | 2  | 1  | 9  | 3  | 3  | 0.218771 | 0.187029 | 0.087987 | 1.018691 |
| sense_intrc -          | 1  | 0  | 0  | 1  | 0  | 0  | 0.166868 | 0        | 0        | 0.259003 |
| sense_intrc -          | 25 | 25 | 11 | 0  | 1  | 2  | 0.278114 | 0.356642 | 0.147647 | 0        |
| antisense -            | 0  | 0  | 1  | 0  | 0  | 0  | 0        | 0        | 0        | 0.141086 |
| antisense -            | 0  | 0  | 0  | 2  | 1  | 0  | 0        | 0        | 0        | 0.35416  |
| pseudogeni -           | 2  | 0  | 5  | 3  | 0  | 1  | 0.161969 | 0        | 0.488562 | 0.377097 |
| antisense -            | 1  | 0  | 0  | 0  | 4  | 0  | 0.03947  | 0        | 0        | 0        |
| protein_co Uncharacte  | 24 | 19 | 20 | 13 | 23 | 24 | 1.780634 | 1.8077   | 1.790364 | 1.497053 |
| lincRNA -              | 0  | 0  | 0  | 0  | 5  | 3  | 0        | 0        | 0        | 0        |
| pseudogeni -           | 0  | 0  | 0  | 1  | 0  | 2  | 0        | 0        | 0        | 0.182864 |
| antisense -            | 0  | 0  | 0  | 1  | 10 | 1  | 0        | 0        | 0        | 0.103971 |
| antisense -            | 4  | 2  | 4  | 3  | 14 | 4  | 0.455243 | 0.291892 | 0.549277 | 0.52995  |
| pseudogeni serine/argi | 1  | 4  | 1  | 2  | 0  | 0  | 0.061374 | 0.314816 | 0.074052 | 0.190523 |
| lincRNA -              | 0  | 0  | 0  | 14 | 26 | 9  | 0        | 0        | 0        | 1.625067 |
| antisense -            | 5  | 6  | 2  | 5  | 1  | 0  | 0.110746 | 0.17042  | 0.053449 | 0.171894 |
| antisense -            | 0  | 1  | 0  | 2  | 2  | 12 | 0        | 0.305227 | 0        | 0.738881 |
| lincRNA -              | 3  | 1  | 3  | 6  | 7  | 4  | 0.218093 | 0.093224 | 0.263142 | 0.677021 |
| lincRNA -              | 3  | 0  | 2  | 3  | 0  | 0  | 0.048191 | 0        | 0.038764 | 0.074799 |
| pseudogeni -           | 0  | 0  | 0  | 10 | 9  | 7  | 0        | 0        | 0        | 0.693141 |
| lincRNA -              | 2  | 0  | 3  | 5  | 4  | 4  | 0.125711 | 0        | 0.227515 | 0.4878   |
| lincRNA -              | 4  | 1  | 4  | 3  | 2  | 0  | 0.234744 | 0.075256 | 0.283232 | 0.273266 |
| pseudogeni ubiquitin-c | 3  | 2  | 0  | 0  | 3  | 3  | 0.303168 | 0.25918  | 0        | 0        |
| pseudogeni family_witl | 1  | 0  | 0  | 3  | 5  | 7  | 0.070617 | 0        | 0        | 0.328824 |
| antisense -            | 1  | 0  | 1  | 1  | 0  | 1  | 0.085566 | 0        | 0.10324  | 0.13281  |
| processed_ -           | 2  | 1  | 1  | 2  | 4  | 2  | 0.077376 | 0.049612 | 0.046679 | 0.120099 |
| antisense -            | 0  | 0  | 0  | 1  | 0  | 0  | 0        | 0        | 0        | 0.14355  |
| antisense -            | 1  | 2  | 1  | 2  | 0  | 2  | 0.083583 | 0.214366 | 0.100848 | 0.259465 |
| sense_intrc -          | 0  | 0  | 0  | 2  | 2  | 1  | 0        | 0        | 0        | 0.072202 |
| processed_ -           | 14 | 4  | 7  | 37 | 49 | 31 | 0.12617  | 0.046227 | 0.076115 | 0.517558 |
| antisense -            | 9  | 15 | 17 | 19 | 27 | 19 | 0.58694  | 1.254446 | 1.337668 | 1.923249 |
| sense_intrc -          | 12 | 6  | 8  | 10 | 10 | 19 | 0.291998 | 0.187223 | 0.234875 | 0.377684 |
| pseudogeni -           | 11 | 12 | 15 | 13 | 18 | 14 | 0.621434 | 0.869346 | 1.022449 | 1.139925 |
| antisense -            | 1  | 0  | 1  | 0  | 4  | 1  | 0.094536 | 0        | 0.114064 | 0        |
| sense_intrc -          | 5  | 7  | 8  | 5  | 9  | 14 | 1.019348 | 1.830037 | 1.967844 | 1.58217  |
| lincRNA -              | 0  | 0  | 0  | 1  | 3  | 2  | 0        | 0        | 0        | 0.131371 |
| lincRNA -              | 1  | 1  | 0  | 0  | 1  | 0  | 0.066605 | 0.085412 | 0        | 0        |
| antisense -            | 2  | 0  | 0  | 0  | 2  | 1  | 0.201677 | 0        | 0        | 0        |
| antisense -            | 6  | 5  | 2  | 0  | 1  | 1  | 0.320798 | 0.342815 | 0.129021 | 0        |
| antisense -            | 6  | 4  | 3  | 3  | 8  | 1  | 0.391294 | 0.334519 | 0.236059 | 0.303671 |
| lincRNA -              | 0  | 0  | 0  | 15 | 9  | 13 | 0        | 0        | 0        | 0.525612 |
| antisense -            | 10 | 12 | 8  | 3  | 12 | 14 | 0.919412 | 1.414819 | 0.887459 | 0.428116 |
| pseudogeni -           | 0  | 0  | 0  | 10 | 7  | 2  | 0        | 0        | 0        | 6.556739 |
| sense_intrc -          | 2  | 0  | 1  | 3  | 2  | 4  | 0.161411 | 0        | 0.097376 | 0.375799 |
| lincRNA -              | 2  | 1  | 3  | 1  | 8  | 2  | 0.111114 | 0.071244 | 0.201098 | 0.086232 |
| pseudogeni -           | 1  | 2  | 1  | 1  | 1  | 5  | 0.100839 | 0.258623 | 0.121668 | 0.156516 |
| antisense -            | 0  | 1  | 0  | 1  | 0  | 0  | 0        | 0.190888 | 0        | 0.231047 |
| antisense -            | 0  | 0  | 1  | 0  | 0  | 0  | 0        | 0        | 0.015759 | 0        |
| processed_ -           | 4  | 6  | 5  | 3  | 4  | 3  | 0.37512  | 0.721558 | 0.565755 | 0.436679 |
| antisense -            | 0  | 0  | 2  | 0  | 0  | 0  | 0        | 0        | 0.057263 | 0        |
| lincRNA -              | 0  | 1  | 0  | 0  | 0  | 0  | 0        | 0.232161 | 0        | 0        |
| pseudogeni -           | 5  | 3  | 2  | 4  | 3  | 4  | 0.411316 | 0.316473 | 0.198511 | 0.510735 |
| protein_co Homo_sapi   | 0  | 0  | 0  | 0  | 0  | 2  | 0        | 0        | 0        | 0        |
| protein_co lin-37_hor  | 12 | 8  | 4  | 2  | 4  | 7  | 0.344147 | 0.294213 | 0.138411 | 0.089027 |
| pseudogeni nuclear_rec | 0  | 0  | 0  | 5  | 2  | 10 | 0        | 0        | 0        | 0.423631 |
| sense_intrc -          | 1  | 3  | 0  | 1  | 0  | 2  | 0.066042 | 0.25407  | 0        | 0.102507 |
| pseudogeni -           | 0  | 0  | 0  | 0  | 4  | 2  | 0        | 0        | 0        | 0        |
| pseudogeni -           | 3  | 1  | 0  | 0  | 0  | 2  | 0.515275 | 0.220256 | 0        | 0        |
| antisense -            | 0  | 1  | 0  | 0  | 2  | 1  | 0        | 0.018939 | 0        | 0        |
| lincRNA -              | 0  | 0  | 0  | 1  | 0  | 1  | 0        | 0        | 0        | 0.186615 |

|                        |     |     |     |     |     |     |          |          |          |          |
|------------------------|-----|-----|-----|-----|-----|-----|----------|----------|----------|----------|
| lincRNA -              | 0   | 1   | 0   | 0   | 1   | 0   | 0        | 0.050871 | 0        | 0        |
| pseudogen: NADH_deh    | 53  | 43  | 53  | 62  | 62  | 56  | 2.73999  | 2.850696 | 3.305956 | 4.975025 |
| protein_co -           | 0   | 0   | 1   | 0   | 0   | 0   | 0        | 0        | 0.150868 | 0        |
| lincRNA -              | 3   | 0   | 0   | 1   | 2   | 2   | 0.283038 | 0        | 0        | 0.146438 |
| lincRNA -              | 7   | 1   | 4   | 0   | 2   | 1   | 0.636105 | 0.116531 | 0.43857  | 0        |
| protein_co HCG20223    | 0   | 1   | 0   | 0   | 0   | 0   | 0        | 0.108931 | 0        | 0        |
| protein_co Uncharacte  | 1   | 10  | 3   | 3   | 8   | 12  | 0.09589  | 1.229648 | 0.347089 | 0.446502 |
| protein_co -           | 0   | 0   | 2   | 2   | 0   | 0   | 0        | 0        | 0.454422 | 0.584577 |
| antisense -            | 2   | 2   | 0   | 1   | 2   | 0   | 0.258347 | 0.331294 | 0        | 0.200495 |
| protein_co NADH_deh    | 8   | 2   | 14  | 5   | 14  | 15  | 0.62416  | 0.200099 | 1.317899 | 0.605489 |
| protein_co -           | 1   | 0   | 5   | 6   | 3   | 0   | 0.063796 | 0        | 0.384867 | 0.594121 |
| antisense -            | 22  | 23  | 46  | 10  | 13  | 22  | 0.401862 | 0.538755 | 1.013819 | 0.283521 |
| lincRNA -              | 0   | 1   | 1   | 4   | 3   | 8   | 0        | 0.046361 | 0.04362  | 0.224456 |
| antisense -            | 3   | 4   | 3   | 2   | 12  | 3   | 0.19757  | 0.337808 | 0.23838  | 0.204438 |
| sense_intrc -          | 1   | 0   | 1   | 0   | 0   | 0   | 0.115778 | 0        | 0.139693 | 0        |
| antisense -            | 0   | 0   | 0   | 1   | 1   | 0   | 0        | 0        | 0        | 0.135783 |
| protein_co HCG20187    | 8   | 6   | 4   | 9   | 5   | 22  | 0.168821 | 0.162367 | 0.101846 | 0.294788 |
| protein_co -           | 0   | 0   | 0   | 0   | 1   | 0   | 0        | 0        | 0        | 0        |
| protein_co -           | 0   | 1   | 0   | 1   | 0   | 0   | 0        | 0.160346 | 0        | 0.194079 |
| lincRNA -              | 67  | 43  | 49  | 94  | 120 | 165 | 5.407283 | 4.450226 | 4.771428 | 11.77505 |
| protein_co Uncharacte  | 0   | 0   | 1   | 1   | 1   | 0   | 0        | 0        | 0.392885 | 0.505415 |
| lincRNA -              | 0   | 0   | 0   | 4   | 6   | 6   | 0        | 0        | 0        | 0.506294 |
| antisense -            | 1   | 0   | 1   | 1   | 2   | 2   | 0.029677 | 0        | 0.035807 | 0.046063 |
| protein_co Uncharacte  | 4   | 1   | 0   | 1   | 2   | 0   | 0.264542 | 0.084809 | 0        | 0.102651 |
| antisense -            | 0   | 5   | 4   | 2   | 1   | 7   | 0        | 0.54863  | 0.41296  | 0.26562  |
| lincRNA -              | 2   | 1   | 0   | 6   | 0   | 1   | 0.114506 | 0.073419 | 0        | 0.533185 |
| sense_intrc -          | 97  | 84  | 102 | 70  | 80  | 89  | 8.330278 | 9.250738 | 10.56905 | 9.330744 |
| antisense -            | 0   | 0   | 0   | 8   | 2   | 0   | 0        | 0        | 0        | 1.332353 |
| protein_co zinc_finger | 1   | 1   | 5   | 0   | 1   | 5   | 0.031449 | 0.040329 | 0.189723 | 0        |
| protein_co Homo_sapi   | 0   | 0   | 2   | 15  | 33  | 41  | 0        | 0        | 0.053273 | 0.513982 |
| protein_co -           | 3   | 9   | 3   | 6   | 8   | 1   | 0.226522 | 0.871446 | 0.273312 | 0.703186 |
| lincRNA -              | 1   | 1   | 2   | 1   | 4   | 2   | 0.086513 | 0.110941 | 0.208766 | 0.13428  |
| pseudogen: sorting_ne  | 1   | 2   | 0   | 3   | 4   | 7   | 0.038309 | 0.098251 | 0        | 0.178382 |
| lincRNA -              | 3   | 2   | 3   | 0   | 0   | 0   | 0.423705 | 0.362228 | 0.511224 | 0        |
| lincRNA -              | 0   | 1   | 0   | 8   | 10  | 8   | 0        | 0.026246 | 0        | 0.254142 |
| antisense -            | 2   | 1   | 3   | 0   | 1   | 2   | 0.162249 | 0.104031 | 0.293644 | 0        |
| antisense -            | 9   | 4   | 15  | 10  | 13  | 6   | 0.082199 | 0.046848 | 0.165297 | 0.14176  |
| protein_co Uncharacte  | 0   | 3   | 0   | 1   | 3   | 0   | 0        | 0.770895 | 0        | 0.311025 |
| pseudogen: -           | 6   | 0   | 4   | 0   | 0   | 2   | 0.842336 | 0        | 0.677551 | 0        |
| lincRNA -              | 7   | 10  | 5   | 14  | 18  | 16  | 0.779644 | 1.428261 | 0.671918 | 2.420231 |
| lincRNA -              | 9   | 8   | 8   | 9   | 10  | 9   | 0.311907 | 0.355535 | 0.334519 | 0.484123 |
| protein_co HCG19838    | 1   | 3   | 3   | 2   | 9   | 3   | 0.04018  | 0.154575 | 0.145438 | 0.12473  |
| protein_co Uncharacte  | 26  | 13  | 29  | 6   | 5   | 4   | 5.976179 | 3.831801 | 8.042596 | 2.140582 |
| lincRNA -              | 59  | 55  | 45  | 33  | 43  | 27  | 4.542711 | 5.430441 | 4.180456 | 3.943733 |
| lincRNA microRNA_      | 4   | 5   | 6   | 25  | 16  | 6   | 0.207938 | 0.333314 | 0.376334 | 2.017179 |
| protein_co -           | 0   | 1   | 0   | 0   | 0   | 0   | 0        | 0.031748 | 0        | 0        |
| protein_co Uncharacte  | 0   | 2   | 0   | 0   | 0   | 3   | 0        | 0.48297  | 0        | 0        |
| antisense -            | 5   | 5   | 2   | 8   | 3   | 11  | 0.314276 | 0.403015 | 0.151677 | 0.78048  |
| protein_co Uncharacte  | 0   | 0   | 0   | 1   | 2   | 0   | 0        | 0        | 0        | 0.209137 |
| protein_co Uncharacte  | 5   | 8   | 3   | 4   | 9   | 6   | 3.00577  | 6.167159 | 2.175981 | 3.732297 |
| antisense -            | 0   | 2   | 2   | 0   | 0   | 0   | 0        | 0.309947 | 0.291626 | 0        |
| antisense -            | 0   | 1   | 0   | 1   | 1   | 0   | 0        | 0.075445 | 0        | 0.091317 |
| protein_co hsa-mir-151 | 1   | 0   | 0   | 0   | 0   | 0   | 0.056223 | 0        | 0        | 0        |
| antisense -            | 29  | 17  | 19  | 3   | 1   | 13  | 0.69061  | 0.51915  | 0.545929 | 0.110888 |
| antisense PTOV1_ant    | 140 | 150 | 155 | 135 | 144 | 143 | 2.063691 | 2.835419 | 2.756744 | 3.088737 |
| protein_co Uncharacte  | 1   | 0   | 1   | 2   | 0   | 0   | 0.236818 | 0        | 0.285735 | 0.73515  |
| antisense -            | 7   | 3   | 4   | 7   | 15  | 6   | 0.551647 | 0.303175 | 0.38034  | 0.856233 |
| lincRNA -              | 0   | 0   | 0   | 1   | 0   | 2   | 0        | 0        | 0        | 0.110106 |
| antisense -            | 26  | 27  | 20  | 25  | 41  | 25  | 0.609266 | 0.811347 | 0.565472 | 0.909293 |
| pseudogen: -           | 2   | 2   | 5   | 28  | 18  | 10  | 0.06689  | 0.085777 | 0.201767 | 1.45352  |
| pseudogen: -           | 7   | 1   | 7   | 10  | 7   | 11  | 0.439398 | 0.080495 | 0.530159 | 0.974295 |
| protein_co Uncharacte  | 5   | 5   | 2   | 3   | 13  | 7   | 0.667949 | 0.85655  | 0.322368 | 0.62205  |
| pseudogen: -           | 5   | 1   | 9   | 4   | 7   | 6   | 0.347333 | 0.089081 | 0.75434  | 0.431288 |
| antisense -            | 7   | 4   | 7   | 12  | 16  | 15  | 0.678161 | 0.49694  | 0.818241 | 1.804458 |
| antisense -            | 17  | 15  | 22  | 6   | 11  | 8   | 0.690754 | 0.781583 | 1.078562 | 0.378405 |

|                        |     |     |     |     |     |     |          |          |          |          |
|------------------------|-----|-----|-----|-----|-----|-----|----------|----------|----------|----------|
| sense_intrc -          | 1   | 0   | 0   | 3   | 0   | 2   | 0.077249 | 0        | 0        | 0.359702 |
| pseudogeni -           | 1   | 0   | 0   | 0   | 0   | 0   | 0.024473 | 0        | 0        | 0        |
| antisense -            | 0   | 0   | 0   | 1   | 2   | 0   | 0        | 0        | 0        | 0.131847 |
| antisense -            | 4   | 6   | 2   | 0   | 1   | 0   | 0.401628 | 0.772546 | 0.242293 | 0        |
| pseudogeni -           | 1   | 1   | 2   | 0   | 1   | 2   | 0.084335 | 0.108147 | 0.203509 | 0        |
| antisense NAPA_anti    | 3   | 7   | 5   | 0   | 4   | 3   | 0.080245 | 0.240108 | 0.161368 | 0        |
| processed_FMR1_anti    | 0   | 1   | 0   | 5   | 6   | 1   | 0        | 0.025191 | 0        | 0.15245  |
| protein_co Uncharacte  | 6   | 1   | 0   | 1   | 1   | 0   | 0.260019 | 0.055573 | 0        | 0.067264 |
| pseudogeni -           | 1   | 1   | 2   | 7   | 6   | 3   | 0.081976 | 0.105122 | 0.197816 | 0.890662 |
| protein_co Uncharacte  | 3   | 2   | 1   | 1   | 1   | 1   | 1.267298 | 1.08342  | 0.509689 | 0.655674 |
| protein_co -           | 2   | 0   | 1   | 5   | 2   | 0   | 2.084001 | 0        | 1.257233 | 8.086645 |
| lincRNA -              | 90  | 52  | 52  | 50  | 53  | 76  | 11.22367 | 8.315823 | 7.824272 | 9.678165 |
| processed_ -           | 5   | 8   | 4   | 5   | 8   | 1   | 0.306071 | 0.627987 | 0.295433 | 0.475064 |
| antisense -            | 1   | 2   | 0   | 2   | 7   | 7   | 0.080984 | 0.207702 | 0        | 0.251398 |
| protein_co Uncharacte  | 2   | 2   | 4   | 5   | 13  | 5   | 0.822632 | 1.054909 | 1.985105 | 3.192097 |
| pseudogeni -           | 0   | 1   | 1   | 6   | 6   | 9   | 0        | 0.067109 | 0.063142 | 0.487365 |
| antisense -            | 4   | 0   | 4   | 3   | 2   | 0   | 0.360692 | 0        | 0.435196 | 0.419883 |
| protein_co Uncharacte  | 0   | 0   | 0   | 2   | 6   | 4   | 0        | 0        | 0        | 2.425993 |
| pseudogeni vomeronas   | 1   | 0   | 0   | 3   | 3   | 2   | 0.199532 | 0        | 0        | 0.929104 |
| processed_ -           | 7   | 4   | 9   | 422 | 472 | 321 | 0.069985 | 0.051283 | 0.108567 | 6.54863  |
| protein_co Uncharacte  | 0   | 0   | 1   | 0   | 0   | 0   | 0        | 0        | 0.459963 | 0        |
| protein_co Uncharacte  | 0   | 0   | 0   | 0   | 1   | 1   | 0        | 0        | 0        | 0        |
| pseudogeni polycomb_   | 0   | 0   | 0   | 3   | 1   | 1   | 0        | 0        | 0        | 0.207744 |
| protein_co -           | 0   | 0   | 0   | 1   | 1   | 0   | 0        | 0        | 0        | 3.465705 |
| pseudogeni -           | 0   | 0   | 0   | 4   | 1   | 1   | 0        | 0        | 0        | 0.34452  |
| protein_co -           | 0   | 0   | 0   | 0   | 1   | 2   | 0        | 0        | 0        | 0        |
| antisense -            | 8   | 9   | 7   | 5   | 4   | 6   | 0.759353 | 1.095482 | 0.801677 | 0.736638 |
| protein_co HBcAg-binc  | 1   | 1   | 0   | 4   | 5   | 0   | 0.07934  | 0.101742 | 0        | 0.492587 |
| protein_co Uncharacte  | 1   | 0   | 0   | 0   | 0   | 0   | 0.070617 | 0        | 0        | 0        |
| lincRNA -              | 0   | 0   | 0   | 0   | 1   | 0   | 0        | 0        | 0        | 0        |
| lincRNA -              | 6   | 6   | 9   | 9   | 14  | 3   | 0.428219 | 0.549131 | 0.775007 | 0.996984 |
| protein_co Uncharacte  | 3   | 1   | 0   | 1   | 1   | 0   | 0.3126   | 0.133622 | 0        | 0.161733 |
| protein_co Uncharacte  | 25  | 10  | 18  | 18  | 13  | 28  | 0.569884 | 0.292318 | 0.49507  | 0.636867 |
| pseudogeni -           | 1   | 0   | 1   | 5   | 10  | 1   | 0.084335 | 0        | 0.101755 | 0.654495 |
| protein_co LOC64690:   | 82  | 39  | 57  | 40  | 61  | 43  | 2.615634 | 1.59528  | 2.193744 | 1.980403 |
| protein_co Uncharacte  | 15  | 19  | 13  | 2   | 2   | 0   | 2.093304 | 3.400197 | 2.188933 | 0.433213 |
| protein_co small_integ | 7   | 7   | 1   | 3   | 2   | 0   | 0.305047 | 0.391179 | 0.052579 | 0.202918 |
| lincRNA -              | 0   | 0   | 0   | 1   | 7   | 0   | 0        | 0        | 0        | 0.166544 |
| processed_ -           | 10  | 9   | 12  | 6   | 14  | 9   | 0.264766 | 0.305572 | 0.383346 | 0.246572 |
| antisense -            | 0   | 5   | 1   | 6   | 4   | 6   | 0        | 0.172489 | 0.032459 | 0.250533 |
| sense_intrc -          | 8   | 9   | 13  | 20  | 33  | 7   | 0.682037 | 0.983942 | 1.337239 | 2.646538 |
| antisense -            | 0   | 0   | 0   | 3   | 0   | 2   | 0        | 0        | 0        | 0.259003 |
| lincRNA -              | 164 | 194 | 180 | 195 | 318 | 261 | 1.806003 | 2.739591 | 2.391637 | 3.333035 |
| protein_co -           | 3   | 3   | 6   | 2   | 1   | 0   | 4.262729 | 5.466345 | 10.28646 | 4.410897 |
| protein_co CDNA: _FLJ  | 7   | 15  | 9   | 3   | 6   | 3   | 0.177806 | 0.488595 | 0.275829 | 0.118277 |
| protein_co -           | 1   | 0   | 0   | 0   | 0   | 0   | 1.042    | 0        | 0        | 0        |
| protein_co -           | 44  | 42  | 35  | 32  | 40  | 35  | 0.563705 | 0.690014 | 0.541023 | 0.636326 |
| antisense -            | 58  | 45  | 51  | 39  | 33  | 44  | 1.527019 | 1.519282 | 1.620073 | 1.593718 |
| pseudogeni eukaryotic_ | 0   | 1   | 0   | 0   | 2   | 0   | 0        | 0.043135 | 0        | 0        |
| pseudogeni -           | 2   | 5   | 4   | 54  | 64  | 13  | 0.088472 | 0.283631 | 0.213492 | 3.70765  |
| processed_ -           | 39  | 27  | 23  | 7   | 8   | 11  | 0.550485 | 0.488713 | 0.391703 | 0.153359 |
| sense_intrc -          | 0   | 0   | 0   | 0   | 1   | 0   | 0        | 0        | 0        | 0        |
| antisense antisense_c  | 0   | 0   | 0   | 0   | 2   | 2   | 0        | 0        | 0        | 0        |
| sense_overl -          | 0   | 0   | 1   | 2   | 7   | 0   | 0        | 0        | 0.06451  | 0.165974 |
| protein_co -           | 2   | 4   | 0   | 1   | 3   | 2   | 2.605001 | 6.681088 | 0        | 2.021661 |
| lincRNA -              | 1   | 0   | 0   | 0   | 2   | 0   | 0.086994 | 0        | 0        | 0        |
| pseudogeni -           | 0   | 0   | 0   | 1   | 0   | 0   | 0        | 0        | 0        | 0.129042 |
| pseudogeni -           | 0   | 0   | 0   | 0   | 0   | 6   | 0        | 0        | 0        | 0        |
| lincRNA -              | 17  | 6   | 8   | 4   | 1   | 13  | 1.012872 | 0.458423 | 0.5751   | 0.36991  |
| lincRNA -              | 2   | 0   | 1   | 1   | 0   | 0   | 0.156823 | 0        | 0.094608 | 0.121705 |
| antisense -            | 1   | 1   | 0   | 0   | 1   | 0   | 0.167464 | 0.214749 | 0        | 0        |
| pseudogeni -           | 1   | 0   | 1   | 0   | 0   | 0   | 0.137105 | 0        | 0.165425 | 0        |
| pseudogeni -           | 0   | 0   | 0   | 1   | 0   | 0   | 0        | 0        | 0        | 0.27885  |
| pseudogeni C-type_lect | 0   | 0   | 0   | 9   | 10  | 1   | 0        | 0        | 0        | 0.752894 |
| antisense -            | 0   | 1   | 0   | 0   | 1   | 1   | 0        | 0.163841 | 0        | 0        |

|                        |    |    |    |    |    |     |          |          |          |          |
|------------------------|----|----|----|----|----|-----|----------|----------|----------|----------|
| protein_co Uncharacte  | 2  | 0  | 0  | 0  | 0  | 0   | 0.496191 | 0        | 0        | 0        |
| lincRNA -              | 3  | 1  | 1  | 3  | 7  | 1   | 0.306471 | 0.131002 | 0.123258 | 0.475685 |
| lincRNA -              | 0  | 0  | 0  | 2  | 5  | 0   | 0        | 0        | 0        | 0.263695 |
| lincRNA -              | 0  | 0  | 0  | 0  | 4  | 0   | 0        | 0        | 0        | 0        |
| pseudogeni -           | 3  | 0  | 2  | 0  | 3  | 0   | 0.251646 | 0        | 0.202417 | 0        |
| protein_co HCG17778    | 0  | 0  | 0  | 4  | 9  | 7   | 0        | 0        | 0        | 0.127071 |
| lincRNA -              | 0  | 0  | 1  | 0  | 0  | 0   | 0        | 0        | 0.098392 | 0        |
| protein_co -           | 1  | 4  | 0  | 1  | 0  | 2   | 0.300577 | 1.54179  | 0        | 0.466537 |
| protein_co Uncharacte  | 2  | 0  | 1  | 0  | 2  | 1   | 0.488438 | 0        | 0.294664 | 0        |
| processed_ -           | 7  | 0  | 9  | 16 | 6  | 8   | 0.284675 | 0        | 0.441613 | 1.009954 |
| lincRNA -              | 1  | 0  | 5  | 1  | 1  | 1   | 0.109813 | 0        | 0.662477 | 0.170444 |
| protein_co Uncharacte  | 0  | 0  | 0  | 13 | 26 | 7   | 0        | 0        | 0        | 2.034704 |
| pseudogeni vomeronas   | 11 | 8  | 14 | 14 | 18 | 22  | 1.386533 | 1.293114 | 2.129186 | 2.739025 |
| protein_co HCG16587    | 0  | 0  | 0  | 55 | 46 | 28  | 0        | 0        | 0        | 3.882531 |
| lincRNA -              | 48 | 41 | 45 | 51 | 42 | 92  | 1.144822 | 1.253978 | 1.294963 | 1.887981 |
| antisense -            | 21 | 30 | 25 | 10 | 5  | 6   | 0.541634 | 0.992241 | 0.777991 | 0.400329 |
| antisense -            | 5  | 7  | 7  | 7  | 4  | 3   | 0.420161 | 0.754316 | 0.709729 | 0.913008 |
| protein_co HCG18184    | 2  | 0  | 1  | 1  | 1  | 1   | 0.276637 | 0        | 0.166889 | 0.21469  |
| antisense -            | 0  | 1  | 0  | 1  | 0  | 0   | 0        | 0.231268 | 0        | 0.279922 |
| pseudogeni -           | 0  | 0  | 0  | 1  | 7  | 0   | 0        | 0        | 0        | 0.035125 |
| lincRNA FOXF1_adj      | 0  | 0  | 0  | 0  | 0  | 3   | 0        | 0        | 0        | 0        |
| lincRNA -              | 5  | 4  | 4  | 2  | 2  | 4   | 0.507468 | 0.520604 | 0.489831 | 0.315064 |
| protein_co Uncharacte  | 0  | 0  | 2  | 1  | 0  | 0   | 0        | 0        | 1.50868  | 0.970397 |
| lincRNA -              | 2  | 2  | 1  | 4  | 2  | 3   | 0.17239  | 0.221065 | 0.103999 | 0.535146 |
| protein_co -           | 3  | 4  | 6  | 7  | 8  | 7   | 2.930626 | 5.010816 | 7.071938 | 10.61372 |
| protein_co LOC644656   | 3  | 2  | 3  | 0  | 8  | 9   | 0.532841 | 0.455529 | 0.642903 | 0        |
| protein_co CDNA_FLJ2   | 3  | 1  | 4  | 2  | 3  | 3   | 0.076327 | 0.032626 | 0.12279  | 0.07898  |
| protein_co Uncharacte  | 1  | 1  | 3  | 6  | 5  | 5   | 0.114927 | 0.147377 | 0.415996 | 1.070291 |
| protein_co -           | 0  | 0  | 0  | 0  | 1  | 0   | 0        | 0        | 0        | 0        |
| protein_co Uncharacte  | 0  | 2  | 0  | 0  | 1  | 1   | 0        | 0.18732  | 0        | 0        |
| protein_co Uncharacte  | 0  | 0  | 1  | 2  | 1  | 1   | 0        | 0        | 0.114294 | 0.29406  |
| pseudogeni -           | 0  | 0  | 0  | 1  | 0  | 0   | 0        | 0        | 0        | 0.108303 |
| pseudogeni -           | 3  | 0  | 0  | 2  | 8  | 8   | 0.341432 | 0        | 0        | 0.3533   |
| pseudogeni hepatitis_A | 1  | 5  | 3  | 1  | 2  | 3   | 0.044403 | 0.284705 | 0.160726 | 0.06892  |
| protein_co -           | 0  | 0  | 0  | 2  | 1  | 0   | 0        | 0        | 0        | 2.85411  |
| lincRNA -              | 0  | 0  | 0  | 0  | 3  | 0   | 0        | 0        | 0        | 0        |
| processed_ -           | 3  | 3  | 2  | 1  | 1  | 1   | 0.042041 | 0.053912 | 0.033817 | 0.021751 |
| protein_co Uncharacte  | 1  | 0  | 0  | 2  | 0  | 5   | 0.197848 | 0        | 0        | 0.614176 |
| protein_co -           | 1  | 10 | 3  | 3  | 3  | 7   | 0.042054 | 0.539281 | 0.152221 | 0.19582  |
| pseudogeni -           | 0  | 0  | 0  | 0  | 1  | 3   | 0        | 0        | 0        | 0        |
| protein_co Protein_LO  | 0  | 0  | 1  | 0  | 0  | 0   | 0        | 0        | 0.013381 | 0        |
| lincRNA microRNA_      | 77 | 70 | 57 | 47 | 71 | 38  | 1.20351  | 1.403029 | 1.074935 | 1.140217 |
| protein_co LOC100131   | 0  | 0  | 4  | 1  | 1  | 0   | 0        | 0        | 0.200267 | 0.064407 |
| protein_co Uncharacte  | 2  | 1  | 1  | 0  | 0  | 0   | 0.226522 | 0.145241 | 0.136656 | 0        |
| sense_intrc -          | 0  | 3  | 1  | 11 | 19 | 25  | 0        | 0.373477 | 0.117134 | 1.657511 |
| sense_intrc -          | 0  | 3  | 3  | 1  | 2  | 1   | 0        | 0.417568 | 0.392885 | 0.168472 |
| pseudogeni interferon_ | 0  | 1  | 0  | 0  | 1  | 0   | 0        | 0.12002  | 0        | 0        |
| antisense -            | 62 | 59 | 49 | 69 | 74 | 114 | 1.074743 | 1.311519 | 1.024843 | 1.85649  |
| lincRNA -              | 5  | 4  | 5  | 5  | 7  | 4   | 0.374521 | 0.384216 | 0.451881 | 0.581308 |
| sense_intrc -          | 6  | 0  | 2  | 2  | 3  | 3   | 0.594799 | 0        | 0.23922  | 0.307737 |
| pseudogeni vomeronas   | 2  | 17 | 8  | 10 | 20 | 31  | 0.210742 | 2.297093 | 1.017088 | 1.635501 |
| pseudogeni cytochrom   | 0  | 0  | 0  | 4  | 4  | 2   | 0        | 0        | 0        | 0.356327 |
| lincRNA -              | 0  | 0  | 0  | 1  | 1  | 0   | 0        | 0        | 0        | 0.035244 |
| protein_co -           | 1  | 0  | 0  | 0  | 0  | 1   | 0.09     | 0        | 0        | 0        |
| pseudogeni -           | 0  | 0  | 0  | 0  | 1  | 0   | 0        | 0        | 0        | 0        |
| lincRNA -              | 1  | 1  | 1  | 6  | 3  | 1   | 0.112177 | 0.143851 | 0.135348 | 1.044686 |
| protein_co Uncharacte  | 1  | 0  | 0  | 0  | 1  | 3   | 0.679565 | 0        | 0        | 0        |
| protein_co -           | 4  | 1  | 3  | 1  | 0  | 2   | 0.726977 | 0.233061 | 0.657855 | 0.282092 |
| lincRNA -              | 5  | 4  | 9  | 2  | 2  | 2   | 0.473637 | 0.485897 | 1.028646 | 0.29406  |
| pseudogeni vomeronas   | 3  | 1  | 0  | 0  | 6  | 3   | 0.673062 | 0.287702 | 0        | 0        |
| antisense -            | 86 | 53 | 72 | 7  | 11 | 10  | 2.038696 | 1.611162 | 2.059371 | 0.257562 |
| protein_co Uncharacte  | 3  | 0  | 0  | 0  | 1  | 0   | 0.493579 | 0        | 0        | 0        |
| pseudogeni -           | 0  | 0  | 0  | 0  | 0  | 1   | 0        | 0        | 0        | 0        |
| lincRNA -              | 0  | 0  | 0  | 6  | 12 | 7   | 0        | 0        | 0        | 0.370695 |
| protein_co -           | 2  | 0  | 0  | 0  | 0  | 0   | 3.126001 | 0        | 0        | 0        |

|                            |    |    |    |    |    |    |          |          |          |          |
|----------------------------|----|----|----|----|----|----|----------|----------|----------|----------|
| lincRNA -                  | 0  | 1  | 0  | 0  | 0  | 0  | 0        | 0.095748 | 0        | 0        |
| antisense -                | 2  | 3  | 0  | 0  | 2  | 0  | 0.263427 | 0.506712 | 0        | 0        |
| lincRNA -                  | 2  | 0  | 0  | 1  | 2  | 2  | 0.070617 | 0        | 0        | 0.054804 |
| lincRNA -                  | 14 | 10 | 10 | 39 | 53 | 43 | 0.149808 | 0.13722  | 0.129109 | 0.647744 |
| processed_ -               | 83 | 58 | 91 | 75 | 99 | 48 | 0.766267 | 0.686656 | 1.013658 | 1.074716 |
| protein_co Uncharacterized | 15 | 9  | 11 | 6  | 8  | 7  | 2.605001 | 2.004327 | 2.304928 | 1.617329 |
| antisense -                | 1  | 1  | 1  | 2  | 0  | 0  | 0.082845 | 0.106236 | 0.099957 | 0.257172 |
| antisense -                | 13 | 4  | 4  | 7  | 16 | 10 | 0.766755 | 0.30254  | 0.284657 | 0.640828 |
| protein_co Uncharacterized | 48 | 36 | 32 | 47 | 52 | 17 | 1.293518 | 1.244065 | 1.040469 | 1.965891 |
| pseudogen -                | 2  | 4  | 1  | 4  | 2  | 4  | 0.202987 | 0.520604 | 0.122458 | 0.630128 |
| pseudogen vomeronas        | 2  | 1  | 2  | 2  | 2  | 1  | 0.277456 | 0.177899 | 0.334766 | 0.43065  |
| lincRNA -                  | 0  | 0  | 0  | 1  | 0  | 0  | 0        | 0        | 0        | 0.130899 |
| antisense -                | 1  | 0  | 1  | 1  | 1  | 0  | 0.073726 | 0        | 0.088955 | 0.114434 |
| lincRNA -                  | 0  | 3  | 0  | 5  | 3  | 3  | 0        | 0.46733  | 0        | 0.942744 |
| lincRNA -                  | 1  | 0  | 2  | 1  | 0  | 0  | 0.332553 | 0        | 0.802489 | 0.516169 |
| pseudogen -                | 0  | 0  | 0  | 0  | 0  | 2  | 0        | 0        | 0        | 0        |
| lincRNA -                  | 1  | 0  | 1  | 0  | 0  | 0  | 0.045217 | 0        | 0.054557 | 0        |
| protein_co Uncharacterized | 0  | 0  | 1  | 0  | 0  | 0  | 0        | 0        | 0        | 0.147332 |
| protein_co Uncharacterized | 3  | 8  | 7  | 2  | 1  | 5  | 0.768689 | 2.628625 | 2.16409  | 0.795408 |
| protein_co -               | 0  | 0  | 0  | 1  | 4  | 0  | 0        | 0        | 0        | 0.019891 |
| lincRNA hsa-mir-291        | 15 | 12 | 12 | 43 | 44 | 30 | 1.184091 | 1.214743 | 1.142939 | 5.268571 |
| processed_ -               | 2  | 2  | 0  | 1  | 5  | 1  | 0.102942 | 0.132008 | 0        | 0.07989  |
| lincRNA -                  | 1  | 0  | 1  | 5  | 0  | 1  | 0.095112 | 0        | 0.114758 | 0.738132 |
| protein_co -               | 0  | 3  | 3  | 0  | 4  | 0  | 0        | 2.863324 | 2.694072 | 0        |
| protein_co Uncharacterized | 0  | 1  | 0  | 0  | 1  | 1  | 0        | 0.023162 | 0        | 0        |
| lincRNA -                  | 0  | 0  | 0  | 20 | 20 | 11 | 0        | 0        | 0        | 0.387127 |
| pseudogen -                | 0  | 0  | 0  | 0  | 1  | 0  | 0        | 0        | 0        | 0        |
| protein_co Uncharacterized | 1  | 0  | 1  | 0  | 0  | 0  | 0.347333 | 0        | 0.419078 | 0        |
| sense_intrc -              | 39 | 27 | 26 | 13 | 23 | 29 | 2.673554 | 2.373545 | 2.150531 | 1.383242 |
| protein_co UPF0627_f       | 0  | 0  | 0  | 0  | 1  | 0  | 0        | 0        | 0        | 0        |
| antisense -                | 2  | 2  | 3  | 2  | 1  | 5  | 0.089742 | 0.115081 | 0.162418 | 0.139291 |
| sense_intrc -              | 0  | 0  | 1  | 0  | 0  | 0  | 0        | 0        | 0.136987 | 0        |
| antisense -                | 1  | 2  | 1  | 6  | 5  | 2  | 0.01437  | 0.036856 | 0.017338 | 0.133827 |
| protein_co Uncharacterized | 8  | 10 | 17 | 3  | 6  | 2  | 1.838824 | 2.947539 | 4.714625 | 1.070291 |
| pseudogen -                | 0  | 0  | 0  | 0  | 3  | 0  | 0        | 0        | 0        | 0        |
| lincRNA -                  | 1  | 3  | 0  | 2  | 1  | 0  | 0.092485 | 0.355798 | 0        | 0.2871   |
| pseudogen -                | 0  | 0  | 0  | 0  | 1  | 0  | 0        | 0        | 0        | 0        |
| lincRNA -                  | 30 | 35 | 16 | 45 | 49 | 46 | 1.015668 | 1.519526 | 0.65358  | 2.364687 |
| pseudogen -                | 1  | 0  | 2  | 1  | 1  | 1  | 0.041643 | 0        | 0.100489 | 0.064636 |
| pseudogen -                | 0  | 1  | 0  | 1  | 0  | 0  | 0        | 0.16938  | 0        | 0.205014 |
| protein_co Uncharacterized | 0  | 0  | 0  | 0  | 1  | 0  | 0        | 0        | 0        | 0        |
| pseudogen -                | 0  | 1  | 0  | 2  | 0  | 2  | 0        | 0.152614 | 0        | 0.369441 |
| protein_co Uncharacterized | 1  | 1  | 1  | 0  | 1  | 0  | 0.488438 | 0.626352 | 0.589328 | 0        |
| sense_intrc -              | 6  | 3  | 4  | 8  | 9  | 4  | 0.758329 | 0.486225 | 0.609978 | 1.569376 |
| protein_co Uncharacterized | 1  | 0  | 1  | 0  | 0  | 0  | 0.018083 | 0        | 0.021819 | 0        |
| lincRNA -                  | 5  | 3  | 5  | 2  | 2  | 0  | 0.681541 | 0.524388 | 0.822318 | 0.423138 |
| pseudogen -                | 2  | 1  | 5  | 0  | 0  | 1  | 0.302516 | 0.193967 | 0.912508 | 0        |
| lincRNA secretoglob        | 0  | 0  | 0  | 20 | 19 | 5  | 0        | 0        | 0        | 2.378425 |
| antisense -                | 3  | 2  | 5  | 1  | 3  | 3  | 0.248534 | 0.212473 | 0.499784 | 0.128586 |
| pseudogen egf-like_mc      | 0  | 0  | 0  | 0  | 0  | 1  | 0        | 0        | 0        | 0        |
| protein_co Protein_LO      | 0  | 0  | 1  | 0  | 0  | 0  | 0        | 0        | 0.01035  | 0        |
| antisense -                | 3  | 4  | 2  | 1  | 3  | 1  | 0.428872 | 0.73329  | 0.344973 | 0.22189  |
| pseudogen ribosomal_       | 0  | 0  | 1  | 0  | 0  | 0  | 0        | 0        | 0.077821 | 0        |
| protein_co Small_inte      | 0  | 1  | 1  | 0  | 0  | 1  | 0        | 0.062897 | 0.059179 | 0        |
| protein_co Uncharacterized | 22 | 10 | 18 | 60 | 73 | 45 | 0.9378   | 0.546635 | 0.925781 | 3.969807 |
| protein_co Uncharacterized | 4  | 1  | 1  | 2  | 0  | 2  | 1.894546 | 0.607372 | 0.57147  | 1.470299 |
| lincRNA -                  | 0  | 0  | 0  | 1  | 1  | 0  | 0        | 0        | 0        | 0.038225 |
| protein_co HCG40128        | 1  | 0  | 0  | 1  | 1  | 0  | 0.135913 | 0        | 0        | 0.210956 |
| protein_co Uncharacterized | 13 | 4  | 5  | 4  | 3  | 2  | 0.843112 | 0.332668 | 0.391255 | 0.402655 |
| lincRNA -                  | 17 | 9  | 3  | 5  | 8  | 10 | 1.200497 | 0.815012 | 0.255612 | 0.548041 |
| protein_co Uncharacterized | 0  | 1  | 0  | 3  | 5  | 0  | 0        | 0.911058 | 0        | 3.308173 |
| lincRNA -                  | 4  | 4  | 3  | 1  | 4  | 9  | 0.342889 | 0.439706 | 0.310286 | 0.133053 |
| protein_co HCG20053        | 0  | 0  | 2  | 2  | 1  | 0  | 0        | 0        | 0.089377 | 0.114976 |
| antisense -                | 1  | 1  | 0  | 4  | 7  | 0  | 0.130613 | 0.167492 | 0        | 0.810917 |
| pseudogen sialic_acid_     | 0  | 0  | 0  | 1  | 4  | 0  | 0        | 0        | 0        | 0.132087 |

|                         |     |     |     |    |     |     |          |          |          |          |
|-------------------------|-----|-----|-----|----|-----|-----|----------|----------|----------|----------|
| pseudogen: sialic_acid_ | 0   | 1   | 0   | 0  | 0   | 0   | 0        | 0.084215 | 0        | 0        |
| protein_co CDNA_FLJ2    | 12  | 7   | 13  | 3  | 3   | 6   | 0.288554 | 0.215851 | 0.37717  | 0.111969 |
| protein_co Uncharacter  | 3   | 1   | 3   | 5  | 3   | 0   | 1.065682 | 0.455529 | 1.285807 | 2.756811 |
| protein_co Uncharacter  | 0   | 0   | 0   | 0  | 4   | 1   | 0        | 0        | 0        | 0        |
| protein_co Protein_LO   | 14  | 3   | 6   | 4  | 5   | 9   | 0.276637 | 0.076017 | 0.143048 | 0.12268  |
| pseudogen: -            | 0   | 0   | 0   | 1  | 0   | 0   | 0        | 0        | 0        | 0.075498 |
| pseudogen: espin_pseu   | 1   | 1   | 3   | 53 | 67  | 33  | 0.02327  | 0.029841 | 0.084232 | 1.914307 |
| antisense -             | 0   | 0   | 1   | 0  | 0   | 1   | 0        | 0        | 0.098051 | 0        |
| pseudogen: IGF-like_far | 0   | 1   | 0   | 0  | 0   | 0   | 0        | 0.167027 | 0        | 0        |
| pseudogen: -            | 3   | 2   | 2   | 1  | 0   | 0   | 0.236818 | 0.202457 | 0.19049  | 0.122525 |
| protein_co Uncharacter  | 9   | 9   | 7   | 15 | 28  | 32  | 0.567218 | 0.727377 | 0.532296 | 1.467335 |
| lincRNA -               | 0   | 0   | 0   | 1  | 4   | 1   | 0        | 0        | 0        | 0.130196 |
| protein_co Uncharacter  | 11  | 5   | 10  | 5  | 7   | 7   | 6.612695 | 3.854474 | 7.25327  | 4.665372 |
| antisense PLCE1_anti    | 8   | 3   | 6   | 0  | 0   | 0   | 0.222888 | 0.107183 | 0.201695 | 0        |
| antisense A1BG_anti     | 25  | 19  | 31  | 5  | 10  | 3   | 0.550352 | 0.536369 | 0.823399 | 0.170845 |
| antisense -             | 1   | 2   | 0   | 1  | 2   | 2   | 0.104665 | 0.268437 | 0        | 0.162455 |
| pseudogen: -            | 2   | 2   | 5   | 19 | 34  | 27  | 0.124212 | 0.159284 | 0.374672 | 1.831545 |
| lincRNA -               | 4   | 3   | 7   | 5  | 3   | 9   | 0.074517 | 0.071668 | 0.157341 | 0.144576 |
| lincRNA -               | 24  | 29  | 15  | 38 | 34  | 12  | 2.540317 | 3.936262 | 1.915649 | 6.242963 |
| protein_co Uncharacter  | 0   | 1   | 0   | 1  | 0   | 5   | 0        | 1.002163 | 0        | 1.212997 |
| protein_co -            | 4   | 7   | 2   | 2  | 2   | 2   | 0.044978 | 0.100937 | 0.027135 | 0.034906 |
| antisense -             | 0   | 0   | 1   | 3  | 1   | 1   | 0        | 0        | 0.110715 | 0.427279 |
| antisense -             | 1   | 0   | 1   | 5  | 11  | 0   | 0.111378 | 0        | 0.134384 | 0.864368 |
| protein_co HCG17855     | 18  | 12  | 14  | 0  | 0   | 0   | 0.893143 | 0.763553 | 0.838156 | 0        |
| protein_co CDC28_prc    | 7   | 3   | 6   | 10 | 14  | 11  | 1.367626 | 0.751622 | 1.414388 | 3.032492 |
| lincRNA -               | 3   | 2   | 3   | 5  | 9   | 2   | 0.221528 | 0.189385 | 0.267286 | 0.573069 |
| sense_intrc -           | 1   | 4   | 7   | 8  | 14  | 16  | 0.046152 | 0.236731 | 0.389792 | 0.573069 |
| protein_co Uncharacter  | 5   | 5   | 3   | 7  | 14  | 21  | 0.898276 | 1.151912 | 0.650293 | 1.951949 |
| pseudogen: mitochond    | 2   | 0   | 0   | 1  | 2   | 0   | 0.029962 | 0        | 0        | 0.023252 |
| protein_co HCG17876     | 3   | 0   | 3   | 6  | 5   | 4   | 0.332553 | 0        | 0.401245 | 1.032338 |
| protein_co Uncharacter  | 0   | 0   | 0   | 0  | 1   | 1   | 0        | 0        | 0        | 0        |
| protein_co endogenou    | 0   | 0   | 0   | 6  | 2   | 2   | 0        | 0        | 0        | 0.179629 |
| protein_co Uncharacter  | 0   | 0   | 2   | 1  | 0   | 0   | 0        | 0        | 0.265613 | 0.170845 |
| sense_intrc -           | 29  | 26  | 13  | 69 | 72  | 79  | 2.111507 | 2.4276   | 1.142052 | 7.797836 |
| protein_co HCG19799     | 0   | 1   | 1   | 0  | 0   | 0   | 0        | 0.646557 | 0.608339 | 0        |
| antisense -             | 0   | 0   | 0   | 0  | 0   | 1   | 0        | 0        | 0        | 0        |
| sense_intrc -           | 0   | 1   | 0   | 0  | 0   | 1   | 0        | 0.111351 | 0        | 0        |
| pseudogen: -            | 1   | 0   | 1   | 1  | 4   | 2   | 0.061374 | 0        | 0.074052 | 0.095262 |
| pseudogen: vomeronas    | 12  | 11  | 6   | 4  | 8   | 27  | 1.580562 | 1.857943 | 0.95352  | 0.817751 |
| protein_co Uncharacter  | 24  | 8   | 15  | 20 | 20  | 29  | 3.572573 | 1.527106 | 2.694072 | 4.62094  |
| pseudogen: zinc_finger  | 0   | 0   | 0   | 1  | 5   | 2   | 0        | 0        | 0        | 0.177946 |
| pseudogen: solute_carr  | 0   | 0   | 1   | 1  | 2   | 0   | 0        | 0        | 0.153321 | 0.197235 |
| pseudogen: -            | 1   | 0   | 1   | 0  | 1   | 1   | 0.037009 | 0        | 0.044653 | 0        |
| antisense -             | 2   | 6   | 1   | 7  | 2   | 3   | 0.097994 | 0.376989 | 0.059118 | 0.53235  |
| pseudogen: -            | 0   | 0   | 0   | 2  | 1   | 0   | 0        | 0        | 0        | 0.149445 |
| protein_co Uncharacter  | 0   | 1   | 2   | 1  | 1   | 0   | 0        | 0.098251 | 0.184887 | 0.118921 |
| protein_co MT-RNR2-li   | 10  | 8   | 5   | 7  | 24  | 19  | 0.459706 | 0.471606 | 0.277331 | 0.499469 |
| lincRNA -               | 0   | 0   | 0   | 8  | 13  | 5   | 0        | 0        | 0        | 0.351381 |
| lincRNA -               | 5   | 2   | 9   | 5  | 13  | 7   | 0.518695 | 0.266061 | 1.126503 | 0.805086 |
| pseudogen: -            | 3   | 0   | 0   | 3  | 5   | 2   | 0.252549 | 0        | 0        | 0.391992 |
| sense_intrc -           | 144 | 112 | 141 | 84 | 113 | 147 | 4.602701 | 4.590687 | 5.437727 | 4.167351 |
| protein_co -            | 0   | 0   | 0   | 1  | 0   | 0   | 0        | 0        | 0        | 1.866149 |
| protein_co CDNA_FLJ2    | 2   | 0   | 0   | 1  | 5   | 0   | 0.04006  | 0        | 0        | 0.031089 |
| protein_co -            | 0   | 0   | 0   | 0  | 0   | 1   | 0        | 0        | 0        | 0        |
| lincRNA -               | 2   | 0   | 0   | 12 | 16  | 10  | 0.172073 | 0        | 0        | 1.602491 |
| antisense -             | 9   | 2   | 11  | 6  | 14  | 6   | 0.53419  | 0.152227 | 0.78776  | 0.552758 |
| pseudogen: -            | 0   | 0   | 0   | 1  | 0   | 0   | 0        | 0        | 0        | 0.126574 |
| protein_co calreticulir | 0   | 0   | 0   | 0  | 1   | 0   | 0        | 0        | 0        | 0        |
| protein_co Uncharacter  | 4   | 0   | 0   | 0  | 0   | 0   | 1.453954 | 0        | 0        | 0        |
| antisense -             | 9   | 5   | 4   | 2  | 2   | 5   | 0.69182  | 0.492867 | 0.370987 | 0.238622 |
| antisense -             | 0   | 0   | 0   | 0  | 0   | 2   | 0        | 0        | 0        | 0        |
| pseudogen: -            | 26  | 19  | 25  | 37 | 24  | 17  | 0.597911 | 0.560307 | 0.693667 | 1.320673 |
| antisense -             | 0   | 0   | 0   | 3  | 1   | 0   | 0        | 0        | 0        | 0.123845 |
| protein_co -            | 1   | 0   | 2   | 0  | 0   | 0   | 1.3025   | 0        | 3.143084 | 0        |
| protein_co Uncharacter  | 0   | 0   | 1   | 0  | 0   | 0   | 0        | 0        | 0.57147  | 0        |

|                            |     |     |     |     |     |      |          |          |          |           |
|----------------------------|-----|-----|-----|-----|-----|------|----------|----------|----------|-----------|
| lincRNA -                  | 0   | 0   | 0   | 19  | 21  | 11   | 0        | 0        | 0        | 0.26081   |
| protein_co Uncharacterized | 3   | 3   | 4   | 10  | 19  | 7    | 0.107959 | 0.138442 | 0.173678 | 0.558556  |
| antisense -                | 0   | 2   | 0   | 2   | 0   | 0    | 0        | 0.210982 | 0        | 0.255368  |
| pseudogen -                | 0   | 1   | 0   | 3   | 6   | 2    | 0        | 0.079118 | 0        | 0.287289  |
| antisense -                | 2   | 1   | 6   | 5   | 6   | 8    | 0.209799 | 0.134519 | 0.759403 | 0.814092  |
| protein_co Uncharacterized | 2   | 1   | 1   | 2   | 2   | 3    | 0.488438 | 0.313176 | 0.294664 | 0.758123  |
| protein_co -               | 0   | 0   | 3   | 1   | 0   | 3    | 0        | 0        | 4.351962 | 1.866149  |
| protein_co -               | 0   | 2   | 0   | 9   | 10  | 4    | 0        | 0.385447 | 0        | 2.099417  |
| pseudogen family_witl      | 0   | 0   | 0   | 2   | 0   | 1    | 0        | 0        | 0        | 0.105939  |
| protein_co Uncharacterized | 0   | 0   | 0   | 1   | 1   | 2    | 0        | 0        | 0        | 0.391289  |
| antisense -                | 0   | 0   | 0   | 0   | 1   | 0    | 0        | 0        | 0        | 0         |
| antisense -                | 0   | 0   | 0   | 1   | 1   | 1    | 0        | 0        | 0        | 0.399889  |
| antisense -                | 83  | 67  | 80  | 101 | 97  | 55   | 1.610874 | 1.667507 | 1.873361 | 3.042533  |
| pseudogen -                | 2   | 0   | 0   | 0   | 0   | 0    | 0.119161 | 0        | 0        | 0         |
| antisense -                | 2   | 0   | 0   | 0   | 4   | 5    | 0.295836 | 0        | 0        | 0         |
| antisense -                | 13  | 4   | 9   | 7   | 9   | 6    | 0.797867 | 0.314816 | 0.666465 | 0.666831  |
| pseudogen -                | 1   | 1   | 0   | 4   | 1   | 4    | 0.069364 | 0.088949 | 0        | 0.43065   |
| antisense -                | 7   | 6   | 8   | 5   | 11  | 9    | 0.713544 | 0.784302 | 0.983922 | 0.791085  |
| protein_co HCG17453        | 9   | 3   | 5   | 8   | 7   | 7    | 0.267264 | 0.114243 | 0.17915  | 0.368739  |
| antisense -                | 2   | 5   | 2   | 1   | 0   | 2    | 0.256932 | 0.823696 | 0.310003 | 0.199397  |
| protein_co Uncharacterized | 8   | 4   | 4   | 3   | 3   | 10   | 0.198162 | 0.127057 | 0.119547 | 0.11534   |
| antisense -                | 0   | 2   | 1   | 0   | 1   | 1    | 0        | 0.158236 | 0.074441 | 0         |
| antisense -                | 1   | 0   | 1   | 0   | 0   | 1    | 0.083583 | 0        | 0.100848 | 0         |
| sense_intrc -              | 8   | 5   | 1   | 2   | 13  | 6    | 0.356917 | 0.28606  | 0.05383  | 0.138496  |
| protein_co F-box_prot      | 351 | 310 | 331 | 156 | 215 | 140  | 6.906587 | 7.822172 | 7.858369 | 4.764435  |
| antisense -                | 3   | 4   | 5   | 4   | 11  | 6    | 0.319705 | 0.546635 | 0.642903 | 0.661635  |
| antisense -                | 0   | 0   | 0   | 1   | 0   | 0    | 0        | 0        | 0        | 0.139961  |
| lincRNA -                  | 4   | 2   | 2   | 2   | 2   | 0    | 0.121634 | 0.077989 | 0.073379 | 0.094397  |
| protein_co Uncharacterized | 0   | 1   | 0   | 1   | 3   | 0    | 0        | 0.083514 | 0        | 0.101083  |
| protein_co long_interg     | 0   | 0   | 0   | 1   | 4   | 3    | 0        | 0        | 0        | 0.033694  |
| pseudogen -                | 0   | 0   | 0   | 1   | 3   | 0    | 0        | 0        | 0        | 0.061006  |
| pseudogen -                | 19  | 17  | 12  | 5   | 9   | 7    | 1.774722 | 2.036268 | 1.352403 | 0.724898  |
| antisense -                | 3   | 1   | 8   | 10  | 11  | 6    | 0.201533 | 0.086146 | 0.64843  | 1.042691  |
| pseudogen -                | 0   | 0   | 1   | 0   | 0   | 0    | 0        | 0        | 0.05773  | 0         |
| antisense -                | 13  | 4   | 4   | 7   | 9   | 11   | 0.204074 | 0.080522 | 0.075762 | 0.170559  |
| lincRNA -                  | 0   | 2   | 0   | 1   | 0   | 2    | 0        | 0.695142 | 0        | 0.420692  |
| protein_co -               | 1   | 0   | 0   | 0   | 0   | 0    | 0.2084   | 0        | 0        | 0         |
| lincRNA -                  | 0   | 0   | 1   | 0   | 0   | 0    | 0        | 0        | 0.066795 | 0         |
| protein_co CDNA_FLJ2       | 1   | 2   | 0   | 0   | 1   | 0    | 0.025764 | 0.066077 | 0        | 0         |
| antisense -                | 0   | 0   | 0   | 4   | 1   | 1    | 0        | 0        | 0        | 0.183671  |
| lincRNA -                  | 7   | 4   | 5   | 3   | 2   | 2    | 0.4689   | 0.343599 | 0.404111 | 0.311913  |
| protein_co Uncharacterized | 0   | 0   | 0   | 0   | 1   | 0    | 0        | 0        | 0        | 0         |
| antisense -                | 78  | 62  | 47  | 31  | 26  | 16   | 1.690902 | 1.723554 | 1.229334 | 1.043076  |
| protein_co Uncharacterized | 1   | 2   | 2   | 10  | 14  | 15   | 0.065672 | 0.168431 | 0.158475 | 1.019325  |
| antisense -                | 0   | 0   | 2   | 1   | 2   | 1    | 0        | 0        | 0.200267 | 0.128814  |
| pseudogen -                | 9   | 2   | 1   | 4   | 9   | 5    | 1.327076 | 0.378175 | 0.17791  | 0.915469  |
| protein_co HCG20114        | 2   | 1   | 0   | 4   | 2   | 2    | 0.665107 | 0.426452 | 0        | 0.2064675 |
| antisense -                | 8   | 11  | 10  | 3   | 4   | 5    | 0.20702  | 0.365026 | 0.312227 | 0.120496  |
| pseudogen vomeronas        | 0   | 0   | 0   | 1   | 1   | 1    | 0        | 0        | 0        | 0.134777  |
| antisense -                | 1   | 1   | 1   | 1   | 0   | 2    | 0.130613 | 0.167492 | 0.157592 | 0.202729  |
| protein_co Uncharacterized | 32  | 20  | 31  | 16  | 25  | 21   | 0.633649 | 0.507853 | 0.740642 | 0.491755  |
| protein_co Uncharacterized | 1   | 1   | 1   | 0   | 2   | 0    | 0.822632 | 1.054909 | 0.992553 | 0         |
| protein_co zinc_finger     | 144 | 105 | 142 | 509 | 706 | 1042 | 2.022211 | 1.890874 | 2.406026 | 11.09461  |
| antisense -                | 0   | 0   | 0   | 14  | 14  | 8    | 0        | 0        | 0        | 1.15786   |
| antisense -                | 9   | 9   | 19  | 7   | 20  | 17   | 0.58694  | 0.752668 | 1.495041 | 0.708566  |
| sense_intrc -              | 0   | 0   | 0   | 1   | 0   | 0    | 0        | 0        | 0        | 0.132568  |
| sense_intrc -              | 0   | 0   | 2   | 0   | 0   | 1    | 0        | 0        | 0.174886 | 0         |
| protein_co Uncharacterized | 3   | 2   | 8   | 0   | 1   | 0    | 1.042    | 0.890812 | 3.352623 | 0         |
| protein_co -               | 0   | 0   | 0   | 0   | 0   | 1    | 0        | 0        | 0        | 0         |
| protein_co -               | 1   | 5   | 3   | 3   | 1   | 0    | 0.446572 | 2.863324 | 1.616443 | 2.079423  |
| sense_intrc -              | 2   | 0   | 5   | 1   | 5   | 4    | 0.332553 | 0        | 1.003112 | 0.258084  |
| protein_co Uncharacterized | 3   | 0   | 2   | 0   | 0   | 0    | 1.042    | 0        | 0.838156 | 0         |
| pseudogen -                | 0   | 0   | 1   | 1   | 3   | 3    | 0        | 0        | 0.319636 | 0.411185  |
| pseudogen -                | 1   | 0   | 0   | 0   | 0   | 1    | 0.147918 | 0        | 0        | 0         |
| pseudogen -                | 0   | 0   | 1   | 0   | 0   | 0    | 0        | 0        | 0.088538 | 0         |

|                            |     |    |     |     |     |     |          |          |          |          |
|----------------------------|-----|----|-----|-----|-----|-----|----------|----------|----------|----------|
| sense_intrc -              | 1   | 0  | 0   | 2   | 0   | 3   | 0.07225  | 0        | 0        | 0.224283 |
| pseudogen: integrin_beta   | 114 | 75 | 104 | 37  | 35  | 38  | 8.777442 | 7.405147 | 9.661498 | 4.421761 |
| protein_co Uncharacterized | 0   | 0  | 0   | 0   | 1   | 0   | 0        | 0        | 0        | 0        |
| antisense RAB11B_adapter   | 17  | 14 | 12  | 28  | 15  | 26  | 0.786901 | 0.831014 | 0.670194 | 2.011683 |
| lincRNA -                  | 0   | 0  | 0   | 1   | 0   | 1   | 0        | 0        | 0        | 0.43065  |
| pseudogen: -               | 22  | 13 | 9   | 50  | 63  | 12  | 1.11042  | 0.841429 | 0.548094 | 3.917104 |
| antisense -                | 2   | 0  | 0   | 0   | 1   | 0   | 0.308487 | 0        | 0        | 0        |
| protein_co Protein_LO      | 13  | 5  | 12  | 1   | 9   | 2   | 1.216707 | 0.600098 | 1.355102 | 0.145269 |
| sense_intrc -              | 3   | 2  | 7   | 18  | 17  | 17  | 0.09378  | 0.080173 | 0.264019 | 0.873358 |
| lincRNA -                  | 39  | 26 | 22  | 36  | 65  | 42  | 0.947028 | 0.809619 | 0.644568 | 1.356848 |
| protein_co Uncharacterized | 15  | 4  | 6   | 4   | 13  | 8   | 1.387279 | 0.474397 | 0.669533 | 0.5742   |
| protein_co Uncharacterized | 0   | 0  | 0   | 0   | 1   | 0   | 0        | 0        | 0        | 0        |
| protein_co Spi-B_trans     | 6   | 3  | 6   | 22  | 33  | 31  | 0.074213 | 0.047584 | 0.089542 | 0.422357 |
| protein_co -               | 0   | 3  | 1   | 0   | 0   | 0   | 0        | 3.164726 | 0.992553 | 0        |
| protein_co Uncharacterized | 0   | 0  | 0   | 0   | 1   | 0   | 0        | 0        | 0        | 0        |
| lincRNA -                  | 0   | 1  | 0   | 703 | 730 | 796 | 0        | 0.021739 | 0        | 18.49754 |
| pseudogen: zinc_finger     | 0   | 0  | 0   | 5   | 2   | 0   | 0        | 0        | 0        | 0.381445 |
| protein_co -               | 0   | 0  | 0   | 1   | 1   | 0   | 0        | 0        | 0        | 1.516246 |
| lincRNA -                  | 0   | 0  | 0   | 0   | 1   | 0   | 0        | 0        | 0        | 0        |
| antisense -                | 2   | 1  | 1   | 3   | 4   | 4   | 0.336129 | 0.215519 | 0.20278  | 0.782579 |
| antisense -                | 86  | 66 | 103 | 78  | 90  | 84  | 8.901858 | 8.760633 | 12.86375 | 12.53162 |
| protein_co LRRC3_dov       | 66  | 49 | 49  | 90  | 121 | 95  | 1.366332 | 1.300821 | 1.223929 | 2.891913 |
| pseudogen: -               | 3   | 1  | 0   | 0   | 0   | 0   | 0.251197 | 0.107375 | 0        | 0        |
| lincRNA -                  | 33  | 35 | 35  | 7   | 10  | 3   | 1.996607 | 2.715539 | 2.555023 | 0.657366 |
| sense_overl                | 2   | 2  | 3   | 1   | 1   | 2   | 0.209799 | 0.269037 | 0.379701 | 0.162818 |
| pseudogen: -               | 0   | 0  | 0   | 1   | 1   | 0   | 0        | 0        | 0        | 0.425613 |
| sense_intrc -              | 2   | 3  | 4   | 1   | 2   | 0   | 0.245497 | 0.472224 | 0.592414 | 0.190523 |
| pseudogen: -               | 1   | 1  | 0   | 0   | 0   | 1   | 0.114088 | 0.146301 | 0        | 0        |
| pseudogen: -               | 0   | 0  | 0   | 1   | 0   | 0   | 0        | 0        | 0        | 0.133053 |
| lincRNA -                  | 2   | 8  | 8   | 1   | 7   | 1   | 0.01736  | 0.089048 | 0.083785 | 0.013473 |
| antisense -                | 1   | 0  | 0   | 1   | 2   | 2   | 0.074547 | 0        | 0        | 0.115707 |
| antisense -                | 0   | 6  | 8   | 3   | 3   | 1   | 0        | 0.522111 | 0.654999 | 0.315976 |
| lincRNA -                  | 2   | 2  | 1   | 10  | 15  | 2   | 0.221702 | 0.284302 | 0.133748 | 1.720563 |
| lincRNA -                  | 8   | 6  | 3   | 1   | 3   | 3   | 0.113776 | 0.109426 | 0.051479 | 0.022075 |
| antisense -                | 1   | 1  | 0   | 1   | 5   | 3   | 0.083434 | 0.106993 | 0        | 0.129501 |
| lincRNA -                  | 0   | 0  | 0   | 0   | 0   | 2   | 0        | 0        | 0        | 0        |
| protein_co SBP1;_Uncl      | 8   | 4  | 9   | 3   | 3   | 9   | 1.344517 | 0.862076 | 1.825016 | 0.782579 |
| protein_co HCG17871        | 1   | 0  | 1   | 1   | 1   | 0   | 0.181744 | 0        | 0.219285 | 0.282092 |
| pseudogen: -               | 7   | 7  | 3   | 4   | 8   | 3   | 0.157727 | 0.202263 | 0.08156  | 0.139894 |
| protein_co -               | 0   | 3  | 7   | 5   | 4   | 9   | 0        | 0.04949  | 0.10865  | 0.099835 |
| protein_co Uncharacterized | 3   | 1  | 0   | 5   | 6   | 4   | 1.803462 | 0.770895 | 0        | 4.665372 |
| pseudogen: cytochrom       | 0   | 0  | 0   | 0   | 1   | 1   | 0        | 0        | 0        | 0        |
| lincRNA -                  | 0   | 0  | 3   | 0   | 1   | 1   | 0        | 0        | 0.472776 | 0        |
| protein_co Uncharacterized | 1   | 0  | 1   | 0   | 0   | 0   | 0.127073 | 0        | 0.153321 | 0        |
| protein_co -               | 0   | 1  | 0   | 0   | 0   | 0   | 0        | 2.004327 | 0        | 0        |
| antisense -                | 3   | 2  | 4   | 4   | 5   | 7   | 0.165106 | 0.14115  | 0.265613 | 0.341689 |
| antisense -                | 2   | 3  | 1   | 6   | 6   | 5   | 0.049228 | 0.094693 | 0.029698 | 0.229228 |
| pseudogen: -               | 3   | 1  | 2   | 1   | 0   | 0   | 0.104123 | 0.044508 | 0.083754 | 0.053871 |
| protein_co Uncharacterized | 0   | 0  | 1   | 0   | 1   | 0   | 0        | 0        | 0.038671 | 0        |
| protein_co CDNA_FLJ2       | 0   | 1  | 2   | 2   | 8   | 0   | 0        | 0.019089 | 0.035921 | 0.046209 |
| protein_co Uncharacterized | 105 | 69 | 107 | 66  | 123 | 85  | 2.533943 | 2.135335 | 3.115584 | 2.472191 |
| protein_co Protein_LO      | 0   | 0  | 0   | 0   | 0   | 1   | 0        | 0        | 0        | 0        |
| protein_co Uncharacterized | 0   | 0  | 0   | 0   | 2   | 3   | 0        | 0        | 0        | 0        |
| sense_intrc -              | 0   | 0  | 0   | 3   | 2   | 1   | 0        | 0        | 0        | 0.409642 |
| protein_co CDNA;_FLJ;      | 1   | 3  | 2   | 3   | 3   | 1   | 0.019554 | 0.075225 | 0.047186 | 0.091051 |
| lincRNA -                  | 0   | 0  | 0   | 1   | 4   | 5   | 0        | 0        | 0        | 0.188062 |
| protein_co Uncharacterized | 0   | 0  | 0   | 1   | 1   | 0   | 0        | 0        | 0        | 0.425613 |
| sense_intrc -              | 1   | 1  | 2   | 0   | 2   | 2   | 0.043377 | 0.055624 | 0.104673 | 0        |
| pseudogen: teratocarci     | 0   | 1  | 0   | 2   | 2   | 0   | 0        | 0.107567 | 0        | 0.260393 |
| antisense -                | 6   | 8  | 12  | 21  | 18  | 7   | 0.16938  | 0.289608 | 0.408733 | 0.920154 |
| protein_co -               | 1   | 3  | 3   | 6   | 5   | 2   | 0.067565 | 0.259927 | 0.244563 | 0.62922  |
| antisense -                | 3   | 1  | 2   | 0   | 1   | 1   | 0.158056 | 0.067562 | 0.127136 | 0        |
| protein_co Uncharacterized | 0   | 0  | 1   | 0   | 1   | 0   | 0        | 0        | 0.785771 | 0        |
| pseudogen: -               | 0   | 0  | 0   | 0   | 1   | 0   | 0        | 0        | 0        | 0        |
| processed_ -               | 29  | 31 | 26  | 214 | 235 | 207 | 0.554346 | 0.759896 | 0.599659 | 6.349318 |

|                        |      |     |     |     |     |     |          |          |          |          |
|------------------------|------|-----|-----|-----|-----|-----|----------|----------|----------|----------|
| antisense -            | 0    | 0   | 1   | 0   | 1   | 0   | 0        | 0        | 0.089945 | 0        |
| protein_co CDNA_FLJ2   | 0    | 2   | 2   | 2   | 1   | 1   | 0        | 0.066332 | 0.062411 | 0.080287 |
| lincRNA -              | 0    | 0   | 1   | 0   | 0   | 0   | 0        | 0        | 0.204244 | 0        |
| lincRNA -              | 2    | 1   | 1   | 14  | 21  | 6   | 0.051927 | 0.033294 | 0.031326 | 0.564185 |
| pseudogeni -           | 0    | 0   | 0   | 0   | 0   | 1   | 0        | 0        | 0        | 0        |
| lincRNA -              | 0    | 0   | 1   | 2   | 4   | 5   | 0        | 0        | 0.116411 | 0.299505 |
| protein_co Uncharacte  | 0    | 0   | 1   | 0   | 0   | 0   | 0        | 0        | 0.857205 | 0        |
| antisense -            | 16   | 10  | 13  | 0   | 5   | 0   | 2.623218 | 2.10244  | 2.571614 | 0        |
| sense_intrc -          | 4    | 8   | 7   | 11  | 3   | 2   | 0.099238 | 0.254518 | 0.209539 | 0.423586 |
| antisense -            | 1    | 0   | 1   | 4   | 7   | 6   | 0.086833 | 0        | 0.104769 | 0.53911  |
| protein_co Uncharacte  | 8    | 10  | 14  | 24  | 43  | 2   | 0.104142 | 0.166934 | 0.219894 | 0.484929 |
| pseudogeni -           | 0    | 0   | 0   | 3   | 1   | 0   | 0        | 0        | 0        | 0.394114 |
| protein_co Uncharacte  | 4    | 2   | 0   | 0   | 0   | 1   | 0.762439 | 0.48886  | 0        | 0        |
| antisense -            | 1    | 3   | 3   | 6   | 9   | 2   | 0.068353 | 0.262958 | 0.247415 | 0.636558 |
| sense_intrc -          | 20   | 17  | 22  | 14  | 34  | 40  | 1.902232 | 2.073441 | 2.524668 | 2.066769 |
| protein_co Uncharacte  | 219  | 168 | 179 | 14  | 35  | 12  | 14.14451 | 13.91433 | 13.94906 | 1.403467 |
| protein_co -           | 3    | 6   | 10  | 10  | 12  | 11  | 0.024017 | 0.061598 | 0.096595 | 0.124261 |
| antisense -            | 1    | 7   | 0   | 7   | 7   | 1   | 0.068653 | 0.616264 | 0        | 0.745913 |
| antisense -            | 5    | 6   | 2   | 6   | 6   | 1   | 0.114646 | 0.17642  | 0.055331 | 0.213535 |
| protein_co Uncharacte  | 0    | 1   | 0   | 0   | 0   | 0   | 0        | 0.038644 | 0        | 0        |
| sense_overl -          | 27   | 23  | 26  | 0   | 0   | 0   | 2.857857 | 3.121863 | 3.320459 | 0        |
| lincRNA -              | 0    | 0   | 0   | 0   | 1   | 0   | 0        | 0        | 0        | 0        |
| lincRNA -              | 337  | 277 | 295 | 163 | 200 | 111 | 7.564354 | 7.973171 | 7.98936  | 5.678845 |
| lincRNA -              | 11   | 16  | 16  | 0   | 0   | 0   | 0.842794 | 1.572021 | 1.479098 | 0        |
| lincRNA -              | 0    | 0   | 0   | 0   | 1   | 0   | 0        | 0        | 0        | 0        |
| antisense -            | 36   | 35  | 35  | 19  | 37  | 17  | 1.187089 | 1.479988 | 1.392505 | 0.972445 |
| protein_co Uncharacte  | 2    | 0   | 1   | 0   | 3   | 1   | 0.246142 | 0        | 0.148492 | 0        |
| antisense -            | 3    | 4   | 1   | 3   | 5   | 2   | 0.335728 | 0.574031 | 0.135025 | 0.521096 |
| protein_co Uncharacte  | 0    | 0   | 0   | 0   | 1   | 0   | 0        | 0        | 0        | 0        |
| protein_co Uncharacte  | 1    | 0   | 0   | 1   | 1   | 1   | 0.079745 | 0        | 0        | 0.123775 |
| protein_co -           | 0    | 0   | 1   | 0   | 0   | 0   | 0        | 0        | 1.88585  | 0        |
| lincRNA -              | 42   | 28  | 35  | 11  | 26  | 28  | 6.116089 | 5.228678 | 6.149511 | 2.486267 |
| pseudogeni -           | 0    | 0   | 0   | 0   | 1   | 0   | 0        | 0        | 0        | 0        |
| pseudogeni -           | 0    | 0   | 0   | 0   | 1   | 0   | 0        | 0        | 0        | 0        |
| protein_co CDNA_FLJ2   | 40   | 29  | 31  | 2   | 16  | 2   | 0.960861 | 0.893322 | 0.898484 | 0.074569 |
| protein_co Golgin_sub  | 0    | 0   | 0   | 1   | 0   | 0   | 0        | 0        | 0        | 0.021368 |
| pseudogeni -           | 0    | 1   | 0   | 0   | 1   | 1   | 0        | 0.066368 | 0        | 0        |
| antisense -            | 0    | 0   | 0   | 0   | 1   | 0   | 0        | 0        | 0        | 0        |
| pseudogeni -           | 9    | 6   | 4   | 2   | 3   | 2   | 0.347906 | 0.297427 | 0.186564 | 0.12     |
| protein_co Uncharacte  | 1    | 0   | 1   | 0   | 0   | 0   | 0.744286 | 0        | 0.898024 | 0        |
| pseudogeni -           | 0    | 2   | 0   | 0   | 0   | 0   | 0        | 0.134519 | 0        | 0        |
| antisense -            | 0    | 0   | 0   | 0   | 1   | 0   | 0        | 0        | 0        | 0        |
| antisense -            | 0    | 1   | 0   | 1   | 4   | 1   | 0        | 0.109927 | 0        | 0.133053 |
| antisense -            | 1    | 0   | 1   | 2   | 0   | 1   | 0.131345 | 0        | 0.158475 | 0.40773  |
| protein_co HCG19932    | 0    | 2   | 0   | 0   | 0   | 0   | 0        | 0.911058 | 0        | 0        |
| pseudogeni secretoglob | 0    | 0   | 1   | 0   | 2   | 1   | 0        | 0        | 0.138326 | 0        |
| lincRNA -              | 1    | 2   | 2   | 4   | 4   | 3   | 0.103282 | 0.264889 | 0.249231 | 0.641232 |
| sense_intrc -          | 10   | 5   | 10  | 4   | 8   | 7   | 0.9378   | 0.601298 | 1.13151  | 0.582238 |
| antisense KCNQ1_op     | 1025 | 794 | 947 | 280 | 209 | 271 | 0.524314 | 0.520831 | 0.584474 | 0.222308 |
| sense_intrc -          | 119  | 93  | 107 | 34  | 57  | 61  | 1.959239 | 1.963508 | 2.125554 | 0.86886  |
| protein_co Uncharacte  | 0    | 1   | 5   | 1   | 0   | 3   | 0        | 0.466122 | 2.192849 | 0.564185 |
| protein_co HCG17868    | 3    | 1   | 1   | 0   | 3   | 1   | 0.111114 | 0.047496 | 0.044688 | 0        |
| processed_ -           | 2    | 0   | 3   | 11  | 3   | 2   | 0.034327 | 0        | 0.062125 | 0.293037 |
| antisense -            | 3    | 9   | 4   | 1   | 4   | 1   | 1.12536  | 4.329345 | 1.810416 | 0.582238 |
| pseudogeni -           | 57   | 29  | 33  | 72  | 139 | 186 | 0.925781 | 0.604006 | 0.646689 | 1.815083 |
| lincRNA hsa-mir-51!    | 0    | 0   | 0   | 6   | 15  | 35  | 0        | 0        | 0        | 0.195033 |
| lincRNA -              | 17   | 13  | 6   | 1   | 2   | 0   | 1.653797 | 1.621758 | 0.704259 | 0.150995 |
| pseudogeni -           | 3    | 3   | 1   | 10  | 5   | 4   | 0.052255 | 0.067009 | 0.021016 | 0.270356 |
| protein_co RBL1_prot   | 0    | 0   | 0   | 5   | 1   | 4   | 0        | 0        | 0        | 0.261047 |
| protein_co uncharacte  | 0    | 0   | 0   | 9   | 19  | 1   | 0        | 0        | 0        | 0.688768 |
| protein_co egl_nine_h  | 325  | 287 | 265 | 146 | 199 | 224 | 3.913522 | 4.431754 | 3.850156 | 2.728775 |
| antisense -            | 0    | 0   | 1   | 0   | 0   | 0   | 0        | 0        | 0.113151 | 0        |
| protein_co -           | 0    | 0   | 1   | 0   | 1   | 0   | 0        | 0        | 0.148492 | 0        |
| sense_intrc -          | 69   | 59  | 52  | 37  | 43  | 45  | 4.764965 | 5.224828 | 4.332734 | 3.96591  |
| lincRNA -              | 1    | 0   | 0   | 1   | 3   | 2   | 0.13914  | 0        | 0        | 0.215964 |

|                         |           |     |     |     |     |     |     |          |          |          |          |
|-------------------------|-----------|-----|-----|-----|-----|-----|-----|----------|----------|----------|----------|
| lincRNA                 | microRNA_ | 0   | 0   | 0   | 3   | 0   | 2   | 0        | 0        | 0        | 0.48955  |
| protein_co -            |           | 1   | 2   | 0   | 1   | 2   | 0   | 0.13025  | 0.334054 | 0        | 0.202166 |
| protein_co Uncharacter  |           | 0   | 0   | 0   | 28  | 65  | 35  | 0        | 0        | 0        | 0.880654 |
| sense_intrc -           |           | 1   | 1   | 2   | 5   | 4   | 7   | 0.06558  | 0.084098 | 0.158253 | 0.50895  |
| antisense -             |           | 0   | 0   | 0   | 2   | 0   | 0   | 0        | 0        | 0        | 0.172669 |
| antisense -             |           | 32  | 18  | 14  | 3   | 8   | 2   | 0.379388 | 0.273663 | 0.200267 | 0.055206 |
| protein_co Rho_GTPas    |           | 0   | 0   | 0   | 0   | 1   | 1   | 0        | 0        | 0        | 0        |
| lincRNA -               |           | 4   | 8   | 4   | 1   | 3   | 2   | 0.28548  | 0.732174 | 0.344448 | 0.110776 |
| lincRNA small_nucl      |           | 294 | 200 | 223 | 591 | 724 | 635 | 20.51438 | 17.89577 | 18.77431 | 64.00724 |
| sense_intrc -           |           | 4   | 2   | 4   | 7   | 1   | 3   | 0.339168 | 0.217468 | 0.409226 | 0.921263 |
| lincRNA -               |           | 3   | 2   | 4   | 0   | 1   | 0   | 0.118012 | 0.100889 | 0.189851 | 0        |
| processed_ -            |           | 11  | 18  | 8   | 23  | 28  | 33  | 0.214288 | 0.449662 | 0.188037 | 0.695445 |
| antisense -             |           | 0   | 1   | 0   | 3   | 1   | 0   | 0        | 0.120743 | 0        | 0.438433 |
| sense_intrc -           |           | 21  | 17  | 23  | 2   | 7   | 13  | 4.137354 | 4.294985 | 5.467381 | 0.611595 |
| lincRNA -               |           | 0   | 2   | 0   | 16  | 17  | 8   | 0        | 0.44873  | 0        | 4.345063 |
| antisense -             |           | 2   | 3   | 4   | 0   | 2   | 0   | 0.2084   | 0.400865 | 0.502893 | 0        |
| lincRNA -               |           | 12  | 3   | 6   | 1   | 1   | 0   | 1.065682 | 0.341647 | 0.642903 | 0.137841 |
| lincRNA -               |           | 1   | 6   | 1   | 3   | 3   | 1   | 0.108291 | 0.833207 | 0.130659 | 0.504248 |
| pseudogeni mitogen-ac   |           | 0   | 0   | 0   | 1   | 0   | 4   | 0        | 0        | 0        | 0.028665 |
| sense_intrc -           |           | 15  | 13  | 12  | 15  | 21  | 20  | 1.05292  | 1.170191 | 1.016326 | 1.634277 |
| pseudogeni -            |           | 20  | 11  | 10  | 5   | 12  | 4   | 2.841819 | 2.004327 | 1.714409 | 1.102724 |
| lincRNA -               |           | 0   | 0   | 0   | 4   | 3   | 1   | 0        | 0        | 0        | 0.585753 |
| antisense -             |           | 3   | 8   | 8   | 2   | 0   | 3   | 0.262935 | 0.899137 | 0.845989 | 0.272074 |
| sense_intrc family_witl |           | 0   | 0   | 0   | 2   | 6   | 0   | 0        | 0        | 0        | 0.097691 |
| lincRNA -               |           | 1   | 0   | 0   | 0   | 1   | 0   | 0.105135 | 0        | 0        | 0        |
| lincRNA -               |           | 0   | 1   | 0   | 1   | 0   | 0   | 0        | 0.065788 | 0        | 0.079628 |
| sense_intrc -           |           | 44  | 29  | 35  | 93  | 86  | 79  | 1.02441  | 0.865821 | 0.983189 | 3.360736 |
| lincRNA -               |           | 2   | 1   | 2   | 7   | 3   | 2   | 0.177278 | 0.113667 | 0.213896 | 0.96306  |
| lincRNA -               |           | 0   | 3   | 2   | 0   | 2   | 1   | 0        | 0.063629 | 0.039912 | 0        |
| sense_intrc -           |           | 1   | 1   | 2   | 4   | 2   | 0   | 0.062354 | 0.07996  | 0.150467 | 0.387127 |
| sense_intrc -           |           | 9   | 5   | 7   | 2   | 9   | 5   | 1.073817 | 0.76501  | 1.007706 | 0.370381 |
| lincRNA -               |           | 9   | 7   | 4   | 11  | 29  | 11  | 0.639409 | 0.63774  | 0.342882 | 1.212997 |
| lincRNA -               |           | 6   | 5   | 3   | 2   | 6   | 4   | 0.196056 | 0.209511 | 0.118276 | 0.101435 |
| lincRNA -               |           | 0   | 1   | 0   | 1   | 0   | 0   | 0        | 0.066295 | 0        | 0.080242 |
| lincRNA -               |           | 173 | 146 | 135 | 138 | 167 | 100 | 2.215176 | 2.39731  | 2.085662 | 2.742658 |
| antisense -             |           | 13  | 2   | 5   | 1   | 0   | 0   | 0.411039 | 0.081092 | 0.190747 | 0.049076 |
| antisense -             |           | 0   | 0   | 0   | 9   | 11  | 3   | 0        | 0        | 0        | 0.393404 |
| lincRNA hsa-mir-141     |           | 69  | 70  | 69  | 1   | 1   | 3   | 1.269286 | 1.651269 | 1.531467 | 0.028552 |
| antisense -             |           | 13  | 6   | 13  | 8   | 7   | 3   | 0.168111 | 0.099498 | 0.202836 | 0.160573 |
| sense_intrc -           |           | 3   | 1   | 2   | 1   | 0   | 3   | 0.252549 | 0.107953 | 0.203144 | 0.130664 |
| sense_intrc -           |           | 1   | 3   | 3   | 2   | 0   | 1   | 0.076743 | 0.295236 | 0.277785 | 0.238232 |
| lincRNA -               |           | 0   | 0   | 0   | 1   | 1   | 8   | 0        | 0        | 0        | 0.136547 |
| sense_intrc -           |           | 3   | 0   | 0   | 1   | 0   | 1   | 0.25811  | 0        | 0        | 0.133541 |
| lincRNA -               |           | 0   | 0   | 0   | 1   | 0   | 0   | 0        | 0        | 0        | 0.020077 |
| lincRNA -               |           | 5   | 4   | 3   | 1   | 5   | 9   | 0.99766  | 1.023486 | 0.72224  | 0.309701 |
| lincRNA -               |           | 9   | 15  | 9   | 33  | 58  | 21  | 0.626128 | 1.3382   | 0.755459 | 3.563403 |
| protein_co -            |           | 0   | 0   | 0   | 0   | 3   | 0   | 0        | 0        | 0        | 0        |
| lincRNA -               |           | 2   | 3   | 2   | 10  | 6   | 5   | 0.209799 | 0.403556 | 0.253134 | 1.628183 |
| lincRNA -               |           | 1   | 0   | 0   | 0   | 0   | 0   | 0.064321 | 0        | 0        | 0        |
| sense_intrc -           |           | 18  | 9   | 5   | 2   | 1   | 3   | 1.255983 | 0.80531  | 0.420949 | 0.216607 |
| sense_intrc -           |           | 2   | 3   | 5   | 1   | 1   | 2   | 0.27994  | 0.538476 | 0.844411 | 0.217253 |
| antisense MKNK1_an      |           | 9   | 4   | 5   | 5   | 7   | 5   | 0.172601 | 0.098372 | 0.115696 | 0.148834 |
| sense_intrc -           |           | 220 | 197 | 184 | 100 | 112 | 110 | 12.71986 | 14.60613 | 12.83587 | 8.974082 |
| antisense hsa-mir-121   |           | 6   | 7   | 5   | 3   | 5   | 6   | 0.07101  | 0.106236 | 0.071398 | 0.055108 |
| lincRNA -               |           | 4   | 7   | 4   | 0   | 0   | 4   | 0.369941 | 0.830194 | 0.446355 | 0        |
| lincRNA -               |           | 0   | 0   | 0   | 101 | 153 | 373 | 0        | 0        | 0        | 13.68857 |
| lincRNA -               |           | 20  | 14  | 29  | 36  | 48  | 63  | 1.373061 | 1.232529 | 2.402181 | 3.836124 |
| protein_co -            |           | 0   | 0   | 0   | 4   | 3   | 5   | 0        | 0        | 0        | 0.06065  |
| sense_intrc -           |           | 0   | 1   | 1   | 1   | 1   | 1   | 0        | 0.089612 | 0.084315 | 0.108465 |
| lincRNA -               |           | 4   | 1   | 6   | 3   | 0   | 3   | 0.319523 | 0.102436 | 0.578285 | 0.371958 |
| sense_intrc -           |           | 2   | 0   | 4   | 0   | 0   | 0   | 0.509674 | 0        | 1.229902 | 0        |
| lincRNA -               |           | 60  | 51  | 49  | 55  | 46  | 43  | 0.870752 | 0.949124 | 0.858001 | 1.238901 |
| lincRNA -               |           | 9   | 8   | 12  | 7   | 10  | 7   | 0.57573  | 0.65626  | 0.926202 | 0.695032 |
| lincRNA -               |           | 0   | 1   | 0   | 167 | 265 | 159 | 0        | 0.049735 | 0        | 10.05312 |
| lincRNA -               |           | 3   | 0   | 2   | 2   | 0   | 0   | 0.320433 | 0        | 0.257747 | 0.331571 |

|                        |   |     |     |     |     |     |     |          |          |          |          |
|------------------------|---|-----|-----|-----|-----|-----|-----|----------|----------|----------|----------|
| lincRNA                | - | 1   | 0   | 0   | 2   | 2   | 2   | 0.175618 | 0        | 0        | 0.545167 |
| lincRNA                | - | 17  | 19  | 25  | 15  | 26  | 21  | 1.12589  | 1.613653 | 1.997723 | 1.541945 |
| antisense              | - | 2   | 2   | 5   | 1   | 4   | 4   | 0.273411 | 0.350611 | 0.824716 | 0.212186 |
| antisense              | - | 52  | 50  | 29  | 23  | 30  | 27  | 0.637793 | 0.786422 | 0.429163 | 0.437859 |
| lincRNA                | - | 0   | 0   | 0   | 2   | 2   | 0   | 0        | 0        | 0        | 0.202729 |
| antisense              | - | 21  | 21  | 24  | 11  | 18  | 26  | 0.313296 | 0.401758 | 0.432011 | 0.254718 |
| antisense              | - | 2   | 0   | 0   | 0   | 1   | 0   | 0.072641 | 0        | 0        | 0        |
| antisense              | - | 0   | 1   | 2   | 1   | 1   | 1   | 0        | 0.080711 | 0.151881 | 0.097691 |
| lincRNA                | - | 94  | 84  | 93  | 74  | 73  | 50  | 2.161678 | 2.477147 | 2.580442 | 2.641346 |
| sense_intrc            | - | 3   | 7   | 1   | 2   | 2   | 4   | 0.39075  | 1.16919  | 0.157154 | 0.404332 |
| lincRNA                | - | 0   | 0   | 0   | 41  | 63  | 109 | 0        | 0        | 0        | 6.348876 |
| lincRNA                | - | 0   | 0   | 3   | 33  | 23  | 17  | 0        | 0        | 0.084357 | 1.193704 |
| lincRNA                | - | 241 | 204 | 199 | 194 | 247 | 119 | 8.522243 | 9.250738 | 8.490592 | 10.64803 |
| sense_intrc            | - | 3   | 8   | 8   | 1   | 0   | 1   | 0.254376 | 0.86987  | 0.818452 | 0.131609 |
| lincRNA                | - | 5   | 4   | 7   | 0   | 0   | 0   | 0.269483 | 0.276459 | 0.455205 | 0        |
| antisense              | - | 6   | 3   | 2   | 6   | 5   | 4   | 0.65125  | 0.417568 | 0.261924 | 1.010831 |
| lincRNA                | - | 0   | 0   | 0   | 5   | 3   | 1   | 0        | 0        | 0        | 0.844313 |
| lincRNA                | - | 5   | 8   | 2   | 2   | 3   | 0   | 0.477495 | 0.979712 | 0.23045  | 0.296455 |
| antisense              | - | 7   | 5   | 7   | 7   | 9   | 10  | 0.830962 | 0.761137 | 1.002604 | 1.289769 |
| lincRNA                | - | 7   | 1   | 4   | 0   | 2   | 1   | 0.508096 | 0.09308  | 0.350313 | 0        |
| sense_intrc            | - | 0   | 2   | 0   | 6   | 12  | 5   | 0        | 0.239085 | 0        | 0.868149 |
| protein_co Zinc_finger | - | 2   | 0   | 0   | 0   | 2   | 1   | 0.037968 | 0        | 0        | 0        |
| lincRNA                | - | 41  | 38  | 38  | 33  | 49  | 34  | 0.7081   | 0.841596 | 0.791849 | 0.884616 |
| sense_intrc            | - | 106 | 95  | 86  | 102 | 122 | 76  | 2.624257 | 3.016014 | 2.568898 | 3.919504 |
| antisense              | - | 3   | 2   | 0   | 1   | 0   | 1   | 0.281904 | 0.241001 | 0        | 0.145851 |
| lincRNA                | - | 18  | 10  | 11  | 12  | 35  | 38  | 1.478144 | 1.053061 | 1.089896 | 1.529523 |
| lincRNA                | - | 3   | 3   | 4   | 4   | 6   | 7   | 0.090872 | 0.116531 | 0.14619  | 0.188062 |
| lincRNA                | - | 6   | 4   | 2   | 3   | 5   | 0   | 0.08004  | 0.068427 | 0.032191 | 0.062116 |
| antisense              | - | 6   | 2   | 5   | 0   | 1   | 0   | 0.139484 | 0.059623 | 0.140247 | 0        |
| lincRNA                | - | 0   | 3   | 0   | 2   | 1   | 0   | 0        | 0.271671 | 0        | 0.219216 |
| protein_co Serine/thre | - | 0   | 1   | 0   | 0   | 1   | 0   | 0        | 0.02039  | 0        | 0        |
| antisense              | - | 33  | 24  | 18  | 0   | 2   | 1   | 2.483741 | 2.316397 | 1.634605 | 0        |
| lincRNA                | - | 0   | 0   | 1   | 0   | 2   | 0   | 0        | 0        | 0.095567 | 0        |
| sense_intrc            | - | 3   | 1   | 1   | 0   | 1   | 1   | 0.391839 | 0.167492 | 0.157592 | 0        |
| protein_co Uncharacter | - | 2   | 3   | 4   | 0   | 0   | 0   | 0.018403 | 0.035398 | 0.044408 | 0        |
| lincRNA                | - | 0   | 0   | 0   | 2   | 8   | 5   | 0        | 0        | 0        | 0.255368 |
| lincRNA                | - | 9   | 9   | 8   | 5   | 4   | 9   | 0.730121 | 0.936277 | 0.783052 | 0.629583 |
| sense_intrc            | - | 0   | 0   | 0   | 0   | 2   | 0   | 0        | 0        | 0        | 0        |
| lincRNA                | - | 31  | 22  | 22  | 2   | 9   | 0   | 2.375148 | 2.161529 | 2.03376  | 0.237842 |
| sense_intrc            | - | 1   | 3   | 0   | 0   | 0   | 0   | 0.178289 | 0.685891 | 0        | 0        |
| processed_             | - | 16  | 18  | 17  | 7   | 9   | 3   | 1.077931 | 1.555081 | 1.381873 | 0.731981 |
| lincRNA                | - | 0   | 1   | 0   | 2   | 0   | 0   | 0        | 0.138229 | 0        | 0.33462  |
| sense_intrc            | - | 75  | 40  | 44  | 3   | 4   | 6   | 1.495853 | 1.023051 | 1.058835 | 0.092871 |
| sense_intrc            | - | 0   | 1   | 0   | 3   | 1   | 1   | 0        | 0.133622 | 0        | 0.485199 |
| sense_intrc            | - | 15  | 11  | 17  | 6   | 10  | 15  | 1.225349 | 1.152313 | 1.675581 | 0.760764 |
| sense_intrc            | - | 7   | 2   | 5   | 0   | 1   | 2   | 0.924592 | 0.338759 | 0.796838 | 0        |
| sense_intrc            | - | 21  | 17  | 9   | 3   | 9   | 11  | 1.985263 | 2.0609   | 1.026572 | 0.4402   |
| lincRNA                | - | 7   | 2   | 5   | 16  | 30  | 15  | 0.768689 | 0.281638 | 0.662477 | 2.727112 |
| antisense              | - | 20  | 11  | 19  | 3   | 11  | 24  | 1.401794 | 0.988681 | 1.606778 | 0.326367 |
| antisense              | - | 1   | 0   | 0   | 1   | 1   | 0   | 0.103055 | 0        | 0        | 0.159956 |
| lincRNA                | - | 169 | 182 | 153 | 24  | 27  | 35  | 4.50763  | 6.225041 | 4.923807 | 0.993581 |
| lincRNA                | - | 1   | 1   | 0   | 0   | 0   | 0   | 0.080706 | 0.103494 | 0        | 0        |
| sense_intrc            | - | 3   | 3   | 1   | 0   | 3   | 1   | 0.32714  | 0.41951  | 0.131571 | 0        |
| lincRNA                | - | 0   | 2   | 0   | 6   | 10  | 10  | 0        | 0.170098 | 0        | 0.61765  |
| sense_intrc            | - | 0   | 1   | 0   | 0   | 0   | 0   | 0        | 0.108538 | 0        | 0        |
| lincRNA                | - | 0   | 1   | 0   | 11  | 11  | 2   | 0        | 0.077089 | 0        | 1.026382 |
| lincRNA                | - | 391 | 355 | 372 | 333 | 368 | 323 | 8.587352 | 9.998163 | 9.857652 | 11.3516  |
| sense_intrc            | - | 15  | 15  | 14  | 3   | 4   | 11  | 1.762783 | 2.260519 | 1.985105 | 0.547217 |
| antisense GAS5_antis   | - | 21  | 16  | 16  | 9   | 16  | 19  | 1.418862 | 1.386278 | 1.304334 | 0.94383  |
| lincRNA                | - | 3   | 2   | 3   | 1   | 4   | 5   | 0.206564 | 0.176593 | 0.249231 | 0.106872 |
| pseudogen              | - | 0   | 6   | 1   | 0   | 0   | 0   | 0        | 2.775221 | 0.435196 | 0        |
| sense_intrc            | - | 5   | 1   | 1   | 0   | 1   | 0   | 0.908721 | 0.233061 | 0.219285 | 0        |
| lincRNA                | - | 0   | 0   | 0   | 0   | 1   | 3   | 0        | 0        | 0        | 0        |
| sense_intrc            | - | 34  | 33  | 28  | 34  | 43  | 63  | 2.030905 | 2.527749 | 2.01798  | 3.152246 |
| lincRNA                | - | 3   | 6   | 5   | 15  | 11  | 6   | 0.294906 | 0.75635  | 0.593035 | 2.288673 |

|                        |     |     |     |     |      |     |          |          |          |          |
|------------------------|-----|-----|-----|-----|------|-----|----------|----------|----------|----------|
| lincRNA -              | 0   | 0   | 0   | 1   | 1    | 1   | 0        | 0        | 0        | 0.555571 |
| lincRNA -              | 3   | 1   | 0   | 1   | 3    | 0   | 0.24507  | 0.104756 | 0        | 0.126794 |
| lincRNA -              | 0   | 1   | 0   | 0   | 0    | 0   | 0        | 0.155777 | 0        | 0        |
| sense_intrc -          | 32  | 31  | 47  | 14  | 11   | 10  | 2.718262 | 3.376854 | 4.817117 | 1.845865 |
| lincRNA -              | 3   | 2   | 7   | 7   | 8    | 11  | 0.333341 | 0.284975 | 0.938456 | 1.207248 |
| antisense -            | 15  | 14  | 4   | 4   | 5    | 6   | 0.920616 | 1.101855 | 0.296207 | 0.381046 |
| processed_ -           | 0   | 1   | 1   | 8   | 7    | 2   | 0        | 0.012835 | 0.012076 | 0.124277 |
| lincRNA -              | 11  | 6   | 5   | 8   | 5    | 6   | 1.099766 | 0.769251 | 0.60315  | 1.241447 |
| sense_intrc -          | 7   | 15  | 4   | 1   | 1    | 1   | 0.619302 | 1.701787 | 0.426985 | 0.13732  |
| sense_intrc -          | 0   | 1   | 0   | 1   | 0    | 0   | 0        | 0.080603 | 0        | 0.09756  |
| lincRNA -              | 6   | 2   | 5   | 3   | 1    | 4   | 0.46812  | 0.200099 | 0.470678 | 0.363294 |
| antisense -            | 0   | 0   | 0   | 1   | 4    | 2   | 0        | 0        | 0        | 0.454874 |
| lincRNA -              | 0   | 4   | 4   | 2   | 6    | 7   | 0        | 0.100762 | 0.094806 | 0.06098  |
| sense_intrc -          | 2   | 4   | 4   | 0   | 0    | 1   | 0.177614 | 0.455529 | 0.428602 | 0        |
| lincRNA -              | 1   | 0   | 1   | 0   | 0    | 0   | 0.125711 | 0        | 0.151677 | 0        |
| sense_intrc -          | 1   | 1   | 2   | 4   | 3    | 8   | 0.114646 | 0.147017 | 0.276653 | 0.711783 |
| protein_co C1orf151-M  | 2   | 0   | 0   | 0   | 0    | 0   | 0.057782 | 0        | 0        | 0        |
| sense_intrc -          | 0   | 1   | 0   | 0   | 1    | 0   | 0        | 0.082938 | 0        | 0        |
| sense_intrc -          | 2   | 0   | 2   | 0   | 1    | 1   | 0.25346  | 0        | 0.305814 | 0        |
| lincRNA -              | 15  | 12  | 11  | 4   | 12   | 14  | 1.300093 | 1.333748 | 1.150334 | 0.538113 |
| lincRNA -              | 50  | 45  | 41  | 26  | 26   | 41  | 4.784696 | 5.522124 | 4.733869 | 3.861785 |
| lincRNA -              | 50  | 52  | 47  | 45  | 52   | 112 | 1.613559 | 2.151927 | 1.83004  | 2.25402  |
| lincRNA -              | 0   | 2   | 0   | 1   | 3    | 3   | 0        | 0.214749 | 0        | 0.129964 |
| protein_co Junctional_ | 0   | 0   | 0   | 1   | 1    | 1   | 0        | 0        | 0        | 0.034723 |
| lincRNA -              | 0   | 0   | 0   | 2   | 5    | 1   | 0        | 0        | 0        | 0.220211 |
| lincRNA -              | 9   | 16  | 10  | 18  | 16   | 26  | 0.582887 | 1.328835 | 0.78143  | 1.809443 |
| sense_intrc -          | 17  | 14  | 18  | 14  | 20   | 12  | 0.861762 | 0.910073 | 1.100929 | 1.101532 |
| antisense -            | 1   | 1   | 3   | 2   | 1    | 3   | 0.114927 | 0.147377 | 0.415996 | 0.356764 |
| lincRNA -              | 0   | 0   | 0   | 2   | 0    | 4   | 0        | 0        | 0        | 0.212806 |
| lincRNA -              | 0   | 0   | 0   | 3   | 1    | 0   | 0        | 0        | 0        | 0.127089 |
| sense_intrc -          | 6   | 5   | 10  | 4   | 3    | 11  | 0.494447 | 0.528381 | 0.994297 | 0.511633 |
| lincRNA -              | 0   | 0   | 0   | 1   | 2    | 0   | 0        | 0        | 0        | 0.148228 |
| lincRNA -              | 0   | 0   | 0   | 2   | 0    | 0   | 0        | 0        | 0        | 0.238232 |
| lincRNA -              | 364 | 314 | 299 | 711 | 1179 | 737 | 18.59256 | 20.56727 | 18.4271  | 56.36867 |
| lincRNA -              | 0   | 0   | 0   | 5   | 15   | 1   | 0        | 0        | 0        | 0.211446 |
| lincRNA -              | 225 | 182 | 164 | 63  | 86   | 133 | 4.846235 | 5.026928 | 4.262004 | 2.106168 |
| lincRNA -              | 3   | 1   | 1   | 2   | 3    | 1   | 0.139554 | 0.059653 | 0.056126 | 0.144404 |
| antisense -            | 2   | 1   | 1   | 0   | 0    | 3   | 0.116352 | 0.074603 | 0.070193 | 0        |
| antisense -            | 2   | 2   | 4   | 1   | 8    | 10  | 0.121006 | 0.155174 | 0.292003 | 0.093909 |
| lincRNA -              | 6   | 4   | 3   | 2   | 8    | 8   | 0.198406 | 0.169619 | 0.119694 | 0.102651 |
| lincRNA -              | 4   | 2   | 0   | 2   | 1    | 0   | 0.616974 | 0.395591 | 0        | 0.478814 |
| sense_intrc -          | 0   | 1   | 0   | 1   | 2    | 3   | 0        | 0.093953 | 0        | 0.113718 |
| lincRNA -              | 0   | 0   | 1   | 0   | 0    | 0   | 0        | 0        | 0.089377 | 0        |
| antisense -            | 10  | 21  | 14  | 10  | 15   | 17  | 0.680552 | 1.832693 | 1.149575 | 1.056311 |
| lincRNA -              | 90  | 97  | 78  | 50  | 68   | 24  | 2.321288 | 3.208245 | 2.427332 | 2.001645 |
| lincRNA -              | 3   | 3   | 3   | 0   | 0    | 0   | 0.232129 | 0.297672 | 0.280077 | 0        |
| lincRNA -              | 24  | 15  | 20  | 20  | 16   | 9   | 1.403193 | 1.124622 | 1.41086  | 1.814958 |
| pseudogeni -           | 0   | 0   | 1   | 1   | 1    | 1   | 0        | 0        | 0.08966  | 0.11534  |
| pseudogeni -           | 0   | 0   | 1   | 1   | 1    | 0   | 0        | 0        | 0.096053 | 0.123565 |
| pseudogeni -           | 0   | 0   | 0   | 1   | 0    | 0   | 0        | 0        | 0        | 0.138365 |
| sense_intrc -          | 27  | 45  | 22  | 13  | 13   | 14  | 1.398929 | 2.989879 | 1.375316 | 1.045456 |
| pseudogeni -           | 1   | 0   | 0   | 0   | 0    | 0   | 0.068855 | 0        | 0        | 0        |
| pseudogeni -           | 8   | 7   | 9   | 2   | 2    | 6   | 0.183343 | 0.205723 | 0.248866 | 0.071144 |
| pseudogeni -           | 0   | 1   | 3   | 1   | 5    | 1   | 0        | 0.205924 | 0.581255 | 0.249246 |
| lincRNA -              | 2   | 0   | 2   | 1   | 2    | 0   | 0.187186 | 0        | 0.22585  | 0.145269 |
| pseudogeni -           | 0   | 0   | 0   | 1   | 0    | 0   | 0        | 0        | 0        | 0.212806 |
| sense_intrc -          | 21  | 27  | 23  | 106 | 106  | 129 | 1.926987 | 3.177113 | 2.546451 | 15.09718 |
| pseudogeni -           | 4   | 2   | 0   | 0   | 2    | 3   | 0.458582 | 0.294033 | 0        | 0        |
| pseudogeni -           | 0   | 1   | 1   | 2   | 1    | 1   | 0        | 0.185586 | 0.174616 | 0.449258 |
| pseudogeni -           | 2   | 8   | 9   | 10  | 1    | 2   | 0.512459 | 2.628625 | 2.782402 | 3.977038 |
| pseudogeni NADH_deh    | 4   | 2   | 0   | 4   | 3    | 6   | 0.348625 | 0.223531 | 0        | 0.541114 |
| lincRNA -              | 0   | 0   | 0   | 8   | 8    | 1   | 0        | 0        | 0        | 1.078219 |
| pseudogeni -           | 0   | 1   | 0   | 2   | 4    | 0   | 0        | 0.123217 | 0        | 0.298278 |
| pseudogeni -           | 0   | 0   | 1   | 3   | 1    | 5   | 0        | 0        | 0.098051 | 0.378405 |
| antisense -            | 0   | 2   | 0   | 1   | 0    | 1   | 0        | 0.066885 | 0        | 0.040478 |

|                       |    |    |    |     |     |     |          |          |          |          |
|-----------------------|----|----|----|-----|-----|-----|----------|----------|----------|----------|
| lincRNA -             | 0  | 0  | 0  | 0   | 1   | 4   | 0        | 0        | 0        | 0        |
| pseudogeni -          | 0  | 0  | 0  | 0   | 1   | 0   | 0        | 0        | 0        | 0        |
| pseudogeni -          | 0  | 1  | 0  | 1   | 2   | 0   | 0        | 0.162953 | 0        | 0.197235 |
| pseudogeni -          | 1  | 1  | 3  | 2   | 1   | 1   | 0.20933  | 0.268437 | 0.757708 | 0.64982  |
| pseudogeni -          | 2  | 1  | 0  | 0   | 0   | 0   | 0.077312 | 0.049571 | 0        | 0        |
| pseudogeni -          | 1  | 0  | 0  | 0   | 1   | 0   | 0.07815  | 0        | 0        | 0        |
| lincRNA -             | 0  | 3  | 0  | 0   | 0   | 0   | 0        | 0.291892 | 0        | 0        |
| protein_co -          | 0  | 1  | 2  | 2   | 1   | 5   | 0        | 0.022155 | 0.041692 | 0.053633 |
| pseudogeni -          | 19 | 8  | 7  | 4   | 1   | 1   | 0.630064 | 0.340197 | 0.280077 | 0.205883 |
| pseudogeni -          | 0  | 2  | 1  | 1   | 2   | 0   | 0        | 0.23261  | 0.10943  | 0.140773 |
| lincRNA -             | 0  | 0  | 1  | 0   | 0   | 0   | 0        | 0        | 0.137989 | 0        |
| pseudogeni -          | 0  | 0  | 0  | 1   | 0   | 0   | 0        | 0        | 0        | 0.336944 |
| pseudogeni -          | 0  | 0  | 0  | 0   | 1   | 0   | 0        | 0        | 0        | 0        |
| lincRNA -             | 3  | 1  | 2  | 0   | 0   | 0   | 0.72886  | 0.311553 | 0.586275 | 0        |
| pseudogeni -          | 0  | 6  | 3  | 0   | 0   | 0   | 0        | 1.960754 | 0.922427 | 0        |
| pseudogeni -          | 0  | 0  | 0  | 0   | 0   | 1   | 0        | 0        | 0        | 0        |
| pseudogeni -          | 0  | 0  | 1  | 3   | 2   | 0   | 0        | 0        | 0.102307 | 0.394827 |
| pseudogeni -          | 0  | 0  | 0  | 0   | 1   | 0   | 0        | 0        | 0        | 0        |
| lincRNA -             | 2  | 1  | 0  | 3   | 3   | 4   | 0.013359 | 0.008565 | 0        | 0.031102 |
| pseudogeni -          | 0  | 1  | 0  | 0   | 0   | 0   | 0        | 0.094544 | 0        | 0        |
| pseudogeni -          | 0  | 0  | 0  | 2   | 2   | 4   | 0        | 0        | 0        | 0.215644 |
| antisense -           | 10 | 11 | 4  | 2   | 5   | 3   | 1.387279 | 1.956887 | 0.669533 | 0.43065  |
| lincRNA -             | 28 | 28 | 27 | 21  | 21  | 25  | 0.505553 | 0.6483   | 0.588194 | 0.588516 |
| lincRNA -             | 0  | 0  | 0  | 299 | 419 | 498 | 0        | 0        | 0        | 14.1123  |
| pseudogeni -          | 0  | 0  | 0  | 1   | 3   | 10  | 0        | 0        | 0        | 0.332328 |
| IG_V_pseu immunogl    | 0  | 0  | 0  | 0   | 2   | 0   | 0        | 0        | 0        | 0        |
| lincRNA -             | 0  | 0  | 0  | 0   | 2   | 1   | 0        | 0        | 0        | 0        |
| antisense -           | 18 | 9  | 12 | 20  | 16  | 11  | 0.286497 | 0.183696 | 0.23045  | 0.494092 |
| pseudogeni -          | 0  | 0  | 1  | 2   | 0   | 1   | 0        | 0        | 0.328927 | 0.846277 |
| pseudogeni -          | 0  | 0  | 0  | 0   | 1   | 0   | 0        | 0        | 0        | 0        |
| pseudogeni -          | 1  | 0  | 0  | 0   | 1   | 1   | 0.207478 | 0        | 0        | 0        |
| pseudogeni -          | 1  | 0  | 0  | 0   | 0   | 0   | 0.05465  | 0        | 0        | 0        |
| pseudogeni -          | 0  | 1  | 0  | 7   | 11  | 1   | 0        | 0.068798 | 0        | 0.582905 |
| pseudogeni -          | 0  | 0  | 0  | 0   | 0   | 1   | 0        | 0        | 0        | 0        |
| pseudogeni -          | 1  | 2  | 0  | 2   | 3   | 1   | 0.075997 | 0.19491  | 0        | 0.235915 |
| processed_ -          | 0  | 0  | 0  | 1   | 2   | 1   | 0        | 0        | 0        | 0.128133 |
| pseudogeni -          | 2  | 2  | 0  | 5   | 1   | 1   | 0.112988 | 0.144891 | 0        | 0.438433 |
| pseudogeni -          | 1  | 0  | 0  | 0   | 0   | 0   | 0.144277 | 0        | 0        | 0        |
| pseudogeni -          | 0  | 0  | 0  | 2   | 1   | 0   | 0        | 0        | 0        | 0.673887 |
| pseudogeni -          | 2  | 0  | 0  | 0   | 0   | 0   | 0.218093 | 0        | 0        | 0        |
| lincRNA colon_ader    | 34 | 20 | 20 | 24  | 39  | 14  | 1.779309 | 1.342183 | 1.262846 | 1.949459 |
| pseudogeni -          | 1  | 0  | 2  | 0   | 1   | 3   | 0.13025  | 0        | 0.314308 | 0        |
| pseudogeni -          | 3  | 0  | 6  | 2   | 0   | 1   | 0.220832 | 0        | 0.532893 | 0.228508 |
| sense_intrc           | 8  | 2  | 3  | 0   | 4   | 5   | 0.546822 | 0.175306 | 0.247415 | 0        |
| pseudogeni nuclear_re | 17 | 10 | 9  | 8   | 7   | 10  | 1.011587 | 0.763068 | 0.646167 | 0.738881 |
| pseudogeni -          | 1  | 3  | 0  | 8   | 5   | 2   | 0.035604 | 0.13697  | 0        | 0.442094 |
| pseudogeni -          | 2  | 2  | 1  | 1   | 1   | 0   | 0.050016 | 0.064138 | 0.030174 | 0.038816 |
| pseudogeni -          | 2  | 0  | 0  | 0   | 0   | 0   | 0.315758 | 0        | 0        | 0        |
| pseudogeni -          | 18 | 15 | 18 | 56  | 47  | 10  | 0.469161 | 0.50136  | 0.56607  | 2.265519 |
| pseudogeni -          | 0  | 1  | 0  | 0   | 0   | 0   | 0        | 0.308358 | 0        | 0        |
| pseudogeni -          | 0  | 1  | 0  | 0   | 0   | 0   | 0        | 0.178958 | 0        | 0        |
| lincRNA -             | 0  | 0  | 0  | 0   | 1   | 0   | 0        | 0        | 0        | 0        |
| lincRNA -             | 0  | 0  | 0  | 4   | 4   | 2   | 0        | 0        | 0        | 0.918357 |
| antisense -           | 5  | 3  | 1  | 4   | 1   | 1   | 0.566305 | 0.435723 | 0.136656 | 0.703186 |
| pseudogeni -          | 1  | 0  | 2  | 2   | 4   | 0   | 0.057818 | 0        | 0.13952  | 0.179482 |
| pseudogeni -          | 1  | 1  | 2  | 4   | 2   | 1   | 0.052042 | 0.066737 | 0.125584 | 0.323107 |
| pseudogeni -          | 2  | 0  | 0  | 2   | 2   | 3   | 0.128115 | 0        | 0        | 0.198852 |
| lincRNA -             | 0  | 1  | 0  | 0   | 3   | 3   | 0        | 0.098412 | 0        | 0        |
| antisense -           | 1  | 0  | 0  | 2   | 1   | 2   | 0.363489 | 0        | 0        | 1.128369 |
| pseudogeni -          | 1  | 2  | 3  | 0   | 0   | 0   | 0.021739 | 0.055753 | 0.078686 | 0        |
| pseudogeni -          | 1  | 0  | 0  | 0   | 0   | 0   | 0.15949  | 0        | 0        | 0        |
| pseudogeni -          | 1  | 6  | 0  | 0   | 2   | 0   | 0.09589  | 0.737789 | 0        | 0        |
| pseudogeni -          | 14 | 19 | 35 | 1   | 2   | 1   | 1.323509 | 2.303359 | 3.992223 | 0.146733 |
| pseudogeni -          | 1  | 1  | 3  | 1   | 2   | 1   | 0.032116 | 0.041185 | 0.116251 | 0.049849 |
| pseudogeni -          | 0  | 0  | 0  | 0   | 1   | 1   | 0        | 0        | 0        | 0        |

|                         |     |     |     |     |      |     |          |          |          |          |
|-------------------------|-----|-----|-----|-----|------|-----|----------|----------|----------|----------|
| antisense -             | 390 | 272 | 268 | 14  | 15   | 3   | 6.623364 | 5.923689 | 5.491574 | 0.369039 |
| pseudogeni -            | 2   | 1   | 5   | 3   | 3    | 2   | 0.144055 | 0.092365 | 0.434528 | 0.335391 |
| lincRNA -               | 3   | 1   | 3   | 0   | 0    | 0   | 0.536909 | 0.229503 | 0.647811 | 0        |
| sense_intrc -           | 0   | 2   | 0   | 9   | 2    | 4   | 0        | 0.334054 | 0        | 1.819495 |
| pseudogeni -            | 0   | 0   | 0   | 0   | 0    | 3   | 0        | 0        | 0        | 0        |
| pseudogeni -            | 2   | 0   | 0   | 0   | 0    | 0   | 0.132833 | 0        | 0        | 0        |
| pseudogeni -            | 1   | 1   | 4   | 0   | 0    | 1   | 0.174963 | 0.224365 | 0.844411 | 0        |
| pseudogeni: phosphatic  | 1   | 0   | 0   | 3   | 1    | 0   | 0.084032 | 0        | 0        | 0.391289 |
| antisense -             | 0   | 0   | 0   | 0   | 3    | 1   | 0        | 0        | 0        | 0        |
| pseudogeni -            | 0   | 0   | 0   | 1   | 0    | 0   | 0        | 0        | 0        | 0.203296 |
| lincRNA -               | 1   | 0   | 0   | 0   | 0    | 0   | 0.020142 | 0        | 0        | 0        |
| pseudogeni -            | 2   | 0   | 0   | 0   | 1    | 0   | 0.394034 | 0        | 0        | 0        |
| pseudogeni -            | 2   | 1   | 1   | 1   | 2    | 1   | 0.259778 | 0.166565 | 0.156719 | 0.201606 |
| pseudogeni -            | 0   | 1   | 0   | 0   | 0    | 1   | 0        | 0.054713 | 0        | 0        |
| lincRNA -               | 3   | 7   | 4   | 2   | 1    | 5   | 0.159309 | 0.47668  | 0.256288 | 0.164847 |
| pseudogeni -            | 4   | 5   | 9   | 10  | 4    | 22  | 0.354556 | 0.568335 | 0.962532 | 1.3758   |
| lincRNA -               | 54  | 22  | 44  | 3   | 1    | 1   | 1.026372 | 0.53622  | 1.009048 | 0.088504 |
| sense_intrc -           | 0   | 0   | 0   | 1   | 0    | 0   | 0        | 0        | 0        | 0.057443 |
| antisense -             | 2   | 3   | 0   | 1   | 6    | 9   | 0.027469 | 0.052838 | 0        | 0.021318 |
| antisense -             | 0   | 0   | 0   | 1   | 1    | 0   | 0        | 0        | 0        | 0.034379 |
| pseudogeni -            | 0   | 6   | 3   | 5   | 2    | 1   | 0        | 4.008653 | 1.88585  | 4.043322 |
| pseudogeni -            | 2   | 0   | 1   | 0   | 0    | 0   | 0.362085 | 0        | 0.218438 | 0        |
| pseudogeni -            | 0   | 3   | 2   | 0   | 0    | 0   | 0        | 0.317587 | 0.19921  | 0        |
| processed_ -            | 25  | 28  | 28  | 28  | 23   | 20  | 0.403946 | 0.580163 | 0.54587  | 0.702217 |
| processed_ -            | 43  | 28  | 25  | 1   | 0    | 0   | 4.392747 | 3.668049 | 3.081455 | 0.158562 |
| pseudogeni -            | 4   | 2   | 5   | 6   | 4    | 3   | 0.282045 | 0.180841 | 0.42538  | 0.65666  |
| pseudogeni -            | 10  | 6   | 4   | 5   | 4    | 7   | 1.135352 | 0.873556 | 0.547947 | 0.881111 |
| antisense -             | 12  | 12  | 6   | 5   | 6    | 7   | 0.341225 | 0.437573 | 0.205854 | 0.220679 |
| pseudogeni -            | 0   | 0   | 1   | 1   | 0    | 0   | 0        | 0        | 0.163987 | 0.210956 |
| antisense -             | 0   | 0   | 1   | 1   | 0    | 0   | 0        | 0        | 0.102678 | 0.132087 |
| processed_ HLA_compl    | 0   | 1   | 3   | 0   | 0    | 0   | 0        | 0.082145 | 0.231867 | 0        |
| antisense -             | 16  | 11  | 2   | 42  | 53   | 16  | 0.385728 | 0.340066 | 0.058175 | 1.571595 |
| pseudogeni -            | 2   | 1   | 2   | 3   | 7    | 3   | 0.19061  | 0.122215 | 0.229982 | 0.443779 |
| lincRNA -               | 6   | 4   | 3   | 1   | 4    | 3   | 0.166868 | 0.142657 | 0.100668 | 0.043167 |
| pseudogeni -            | 4   | 2   | 1   | 12  | 6    | 5   | 0.313646 | 0.201103 | 0.094608 | 1.460464 |
| pseudogeni -            | 0   | 0   | 0   | 0   | 0    | 1   | 0        | 0        | 0        | 0        |
| pseudogeni -            | 0   | 0   | 0   | 0   | 1    | 1   | 0        | 0        | 0        | 0        |
| pseudogeni -            | 0   | 0   | 0   | 0   | 1    | 0   | 0        | 0        | 0        | 0        |
| lincRNA -               | 0   | 0   | 2   | 1   | 1    | 4   | 0        | 0        | 0.068618 | 0.044136 |
| pseudogeni -            | 0   | 0   | 0   | 0   | 2    | 0   | 0        | 0        | 0        | 0        |
| sense_intrc -           | 0   | 1   | 1   | 0   | 0    | 0   | 0        | 0.203141 | 0.191133 | 0        |
| lincRNA TSIX_transc     | 0   | 0   | 0   | 1   | 0    | 1   | 0        | 0        | 0        | 0.001966 |
| pseudogeni: divergent-p | 0   | 1   | 0   | 1   | 1    | 0   | 0        | 0.111558 | 0        | 0.135027 |
| pseudogeni -            | 0   | 0   | 2   | 0   | 0    | 0   | 0        | 0        | 0.31695  | 0        |
| lincRNA -               | 0   | 1   | 1   | 10  | 10   | 2   | 0        | 0.087145 | 0.081993 | 1.05478  |
| pseudogeni -            | 0   | 1   | 0   | 0   | 0    | 0   | 0        | 0.064935 | 0        | 0        |
| pseudogeni -            | 0   | 0   | 0   | 0   | 0    | 1   | 0        | 0        | 0        | 0        |
| lincRNA -               | 17  | 13  | 8   | 21  | 28   | 15  | 1.110209 | 1.088701 | 0.630368 | 2.128657 |
| lincRNA -               | 56  | 41  | 48  | 865 | 1131 | 878 | 1.085507 | 1.019149 | 1.122623 | 26.02502 |
| pseudogeni -            | 0   | 2   | 1   | 0   | 1    | 1   | 0        | 0.22863  | 0.107558 | 0        |
| antisense -             | 6   | 6   | 5   | 5   | 9    | 6   | 0.252776 | 0.32415  | 0.254158 | 0.326953 |
| pseudogeni -            | 0   | 0   | 2   | 2   | 2    | 1   | 0        | 0        | 0.764534 | 0.983511 |
| pseudogeni -            | 0   | 0   | 0   | 1   | 0    | 0   | 0        | 0        | 0        | 0.43065  |
| pseudogeni -            | 1   | 1   | 1   | 0   | 0    | 0   | 0.031491 | 0.040383 | 0.037996 | 0        |
| pseudogeni -            | 1   | 2   | 0   | 1   | 2    | 1   | 0.09668  | 0.247958 | 0        | 0.150061 |
| pseudogeni -            | 1   | 0   | 1   | 0   | 0    | 1   | 0.09688  | 0        | 0.116892 | 0        |
| pseudogeni -            | 0   | 0   | 0   | 0   | 0    | 2   | 0        | 0        | 0        | 0        |
| antisense -             | 152 | 143 | 151 | 202 | 248  | 161 | 4.079727 | 4.921901 | 4.890041 | 8.415295 |
| pseudogeni -            | 0   | 0   | 0   | 0   | 1    | 1   | 0        | 0        | 0        | 0        |
| sense_intrc -           | 53  | 36  | 40  | 268 | 281  | 296 | 8.01668  | 6.982815 | 7.300065 | 62.91931 |
| pseudogeni -            | 0   | 0   | 0   | 0   | 1    | 2   | 0        | 0        | 0        | 0        |
| pseudogeni -            | 2   | 0   | 0   | 1   | 6    | 3   | 0.092944 | 0        | 0        | 0.072131 |
| pseudogeni -            | 0   | 0   | 0   | 0   | 2    | 0   | 0        | 0        | 0        | 0        |
| pseudogeni -            | 1   | 4   | 3   | 4   | 4    | 3   | 0.114088 | 0.585205 | 0.41296  | 0.708319 |
| pseudogeni -            | 0   | 0   | 0   | 0   | 1    | 0   | 0        | 0        | 0        | 0        |

|                        |    |    |    |    |    |    |          |          |          |          |
|------------------------|----|----|----|----|----|----|----------|----------|----------|----------|
| pseudogeni -           | 0  | 1  | 0  | 0  | 0  | 0  | 0        | 0.087525 | 0        | 0        |
| lincRNA -              | 6  | 1  | 0  | 1  | 2  | 2  | 0.47847  | 0.102262 | 0        | 0.123775 |
| pseudogeni -           | 1  | 2  | 0  | 0  | 1  | 1  | 0.183882 | 0.471606 | 0        | 0        |
| pseudogeni -           | 37 | 37 | 33 | 23 | 30 | 15 | 3.30463  | 4.237719 | 3.556175 | 3.188448 |
| pseudogeni -           | 2  | 2  | 1  | 2  | 0  | 7  | 0.261955 | 0.335921 | 0.158032 | 0.406591 |
| pseudogeni -           | 0  | 0  | 0  | 0  | 1  | 1  | 0        | 0        | 0        | 0        |
| pseudogeni -           | 2  | 2  | 1  | 1  | 7  | 6  | 0.085879 | 0.110128 | 0.051809 | 0.066648 |
| sense_intrc -          | 2  | 1  | 1  | 3  | 1  | 0  | 0.199532 | 0.127936 | 0.120373 | 0.464552 |
| lincRNA -              | 0  | 1  | 0  | 0  | 0  | 0  | 0        | 0.12002  | 0        | 0        |
| antisense -            | 1  | 2  | 0  | 0  | 0  | 0  | 0.126048 | 0.323278 | 0        | 0        |
| lincRNA -              | 0  | 2  | 0  | 0  | 0  | 0  | 0        | 0.325907 | 0        | 0        |
| antisense -            | 4  | 13 | 11 | 5  | 4  | 12 | 0.494881 | 2.0625   | 1.642033 | 0.960156 |
| lincRNA -              | 3  | 0  | 2  | 12 | 15 | 11 | 0.426273 | 0        | 0.342882 | 2.646538 |
| pseudogeni -           | 1  | 0  | 0  | 0  | 0  | 0  | 0.128466 | 0        | 0        | 0        |
| pseudogeni -           | 0  | 0  | 0  | 0  | 1  | 0  | 0        | 0        | 0        | 0        |
| pseudogeni -           | 0  | 1  | 0  | 0  | 1  | 2  | 0        | 0.056196 | 0        | 0        |
| pseudogeni -           | 1  | 1  | 0  | 3  | 4  | 0  | 0.062188 | 0.079748 | 0        | 0.289575 |
| pseudogeni -           | 0  | 2  | 0  | 2  | 2  | 0  | 0        | 0.212849 | 0        | 0.257628 |
| pseudogeni -           | 0  | 1  | 0  | 1  | 3  | 5  | 0        | 0.199767 | 0        | 0.241793 |
| pseudogeni -           | 1  | 0  | 0  | 0  | 0  | 1  | 0.233284 | 0        | 0        | 0        |
| pseudogeni -           | 1  | 0  | 0  | 0  | 0  | 1  | 0.04839  | 0        | 0        | 0        |
| pseudogeni divergent-p | 0  | 1  | 0  | 0  | 0  | 0  | 0        | 0.105862 | 0        | 0        |
| antisense -            | 0  | 0  | 0  | 1  | 0  | 0  | 0        | 0        | 0        | 0.13043  |
| pseudogeni -           | 0  | 0  | 1  | 1  | 0  | 0  | 0        | 0        | 0.167383 | 0.215325 |
| pseudogeni -           | 1  | 1  | 1  | 1  | 1  | 0  | 0.056156 | 0.072012 | 0.067755 | 0.087161 |
| pseudogeni -           | 8  | 0  | 0  | 1  | 3  | 2  | 1.22189  | 0        | 0        | 0.237068 |
| pseudogeni -           | 20 | 15 | 18 | 6  | 12 | 6  | 1.052526 | 1.012286 | 1.142939 | 0.4901   |
| pseudogeni -           | 17 | 4  | 13 | 2  | 1  | 2  | 2.787169 | 0.840976 | 2.571614 | 0.50895  |
| pseudogeni -           | 0  | 0  | 0  | 0  | 1  | 0  | 0        | 0        | 0        | 0        |
| lincRNA -              | 4  | 1  | 3  | 1  | 0  | 1  | 0.320616 | 0.102786 | 0.290131 | 0.12441  |
| pseudogeni NANOGNB_    | 0  | 1  | 1  | 3  | 0  | 1  | 0        | 0.12347  | 0.116171 | 0.448336 |
| antisense -            | 21 | 18 | 28 | 16 | 12 | 18 | 1.730563 | 1.902173 | 2.784032 | 2.046532 |
| pseudogeni -           | 10 | 7  | 7  | 3  | 2  | 3  | 2.841819 | 2.550961 | 2.400173 | 1.323269 |
| antisense hsa-mir-33l  | 22 | 9  | 7  | 2  | 3  | 1  | 0.39164  | 0.205455 | 0.150353 | 0.055262 |
| pseudogeni neurofibroi | 0  | 0  | 0  | 0  | 1  | 0  | 0        | 0        | 0        | 0        |
| pseudogeni -           | 0  | 0  | 1  | 3  | 1  | 1  | 0        | 0        | 0.099605 | 0.3844   |
| pseudogeni -           | 1  | 0  | 2  | 0  | 1  | 1  | 0.078411 | 0        | 0.189216 | 0        |
| pseudogeni -           | 0  | 1  | 0  | 0  | 1  | 0  | 0        | 0.167027 | 0        | 0        |
| pseudogeni -           | 0  | 0  | 0  | 1  | 0  | 2  | 0        | 0        | 0        | 0.067389 |
| pseudogeni -           | 0  | 0  | 0  | 0  | 1  | 0  | 0        | 0        | 0        | 0        |
| pseudogeni -           | 0  | 0  | 0  | 0  | 0  | 1  | 0        | 0        | 0        | 0        |
| pseudogeni -           | 3  | 1  | 2  | 0  | 0  | 0  | 0.099484 | 0.042525 | 0.080022 | 0        |
| pseudogeni -           | 1  | 0  | 0  | 0  | 0  | 0  | 0.097282 | 0        | 0        | 0        |
| pseudogeni -           | 2  | 1  | 0  | 5  | 9  | 10 | 0.080291 | 0.051481 | 0        | 0.311557 |
| lincRNA -              | 0  | 0  | 0  | 2  | 5  | 0  | 0        | 0        | 0        | 0.232895 |
| pseudogeni -           | 6  | 3  | 5  | 10 | 13 | 14 | 0.223109 | 0.143053 | 0.224328 | 0.577159 |
| pseudogeni -           | 0  | 0  | 0  | 0  | 1  | 0  | 0        | 0        | 0        | 0        |
| lincRNA -              | 0  | 0  | 0  | 0  | 2  | 0  | 0        | 0        | 0        | 0        |
| pseudogeni -           | 11 | 6  | 6  | 0  | 9  | 17 | 0.821322 | 0.574488 | 0.54053  | 0        |
| pseudogeni -           | 0  | 1  | 0  | 1  | 3  | 0  | 0        | 0.075445 | 0        | 0.091317 |
| pseudogeni -           | 0  | 0  | 0  | 0  | 1  | 0  | 0        | 0        | 0        | 0        |
| protein_co Ankyrin_re  | 7  | 4  | 1  | 6  | 4  | 2  | 0.155338 | 0.113828 | 0.026775 | 0.206663 |
| pseudogeni nudix_(nuc  | 0  | 3  | 0  | 1  | 2  | 0  | 0        | 0.308358 | 0        | 0.12441  |
| pseudogeni -           | 0  | 1  | 2  | 0  | 0  | 0  | 0        | 0.250541 | 0.471463 | 0        |
| pseudogeni -           | 0  | 0  | 2  | 0  | 0  | 0  | 0        | 0        | 0.685764 | 0        |
| pseudogeni -           | 11 | 3  | 6  | 3  | 10 | 9  | 0.526854 | 0.184259 | 0.346734 | 0.223023 |
| pseudogeni -           | 0  | 0  | 0  | 0  | 1  | 0  | 0        | 0        | 0        | 0        |
| lincRNA -              | 0  | 0  | 0  | 6  | 4  | 2  | 0        | 0        | 0        | 0.084252 |
| pseudogeni -           | 3  | 0  | 0  | 0  | 0  | 0  | 0.112446 | 0        | 0        | 0        |
| pseudogeni -           | 0  | 1  | 2  | 1  | 0  | 0  | 0        | 0.646557 | 1.216678 | 0.782579 |
| pseudogeni -           | 3  | 1  | 0  | 0  | 0  | 1  | 0.423705 | 0.181114 | 0        | 0        |
| pseudogeni -           | 5  | 4  | 5  | 2  | 1  | 3  | 0.631941 | 0.6483   | 0.762473 | 0.392344 |
| antisense -            | 0  | 0  | 0  | 1  | 0  | 0  | 0        | 0        | 0        | 0.135278 |
| pseudogeni -           | 0  | 0  | 0  | 1  | 1  | 2  | 0        | 0        | 0        | 0.026552 |
| pseudogeni taste_recep | 0  | 1  | 2  | 6  | 10 | 1  | 0        | 0.072796 | 0.136987 | 0.528667 |

|                       |    |    |    |      |      |      |          |          |          |          |
|-----------------------|----|----|----|------|------|------|----------|----------|----------|----------|
| pseudogeni -          | 1  | 1  | 3  | 6    | 5    | 8    | 0.069467 | 0.089081 | 0.251447 | 0.646932 |
| pseudogeni -          | 0  | 0  | 0  | 0    | 0    | 1    | 0        | 0        | 0        | 0        |
| lincRNA -             | 3  | 2  | 3  | 21   | 11   | 8    | 0.188313 | 0.16099  | 0.227211 | 2.046019 |
| pseudogeni -          | 0  | 2  | 0  | 20   | 14   | 9    | 0        | 0.187029 | 0        | 2.263757 |
| pseudogeni -          | 2  | 0  | 2  | 3    | 3    | 4    | 0.336129 | 0        | 0.405559 | 0.782579 |
| pseudogeni -          | 1  | 1  | 3  | 7    | 6    | 3    | 0.059809 | 0.076696 | 0.216488 | 0.64982  |
| lincRNA -             | 79 | 52 | 56 | 37   | 65   | 66   | 1.183108 | 0.998642 | 1.01189  | 0.860062 |
| antisense -           | 0  | 0  | 0  | 2    | 0    | 2    | 0        | 0        | 0        | 0.37323  |
| antisense -           | 2  | 1  | 4  | 0    | 0    | 0    | 0.15053  | 0.096517 | 0.363246 | 0        |
| pseudogeni -          | 0  | 1  | 0  | 0    | 0    | 0    | 0        | 0.028661 | 0        | 0        |
| antisense -           | 0  | 0  | 0  | 1    | 0    | 0    | 0        | 0        | 0        | 0.107822 |
| antisense LPP_antisei | 28 | 21 | 32 | 1    | 4    | 4    | 0.460351 | 0.442751 | 0.634788 | 0.025519 |
| pseudogeni -          | 0  | 2  | 2  | 2    | 3    | 2    | 0        | 0.406282 | 0.382267 | 0.491755 |
| lincRNA -             | 3  | 1  | 4  | 3    | 5    | 8    | 0.091761 | 0.039224 | 0.14762  | 0.142426 |
| pseudogeni -          | 1  | 0  | 0  | 0    | 0    | 0    | 0.163951 | 0        | 0        | 0        |
| pseudogeni -          | 1  | 1  | 0  | 0    | 0    | 1    | 0.104899 | 0.134519 | 0        | 0        |
| pseudogeni -          | 1  | 0  | 1  | 0    | 0    | 0    | 0.052745 | 0        | 0.063639 | 0        |
| pseudogeni -          | 0  | 0  | 0  | 0    | 1    | 0    | 0        | 0        | 0        | 0        |
| pseudogeni -          | 0  | 0  | 0  | 1    | 0    | 1    | 0        | 0        | 0        | 0.114075 |
| pseudogeni -          | 1  | 0  | 1  | 0    | 2    | 1    | 0.063709 | 0        | 0.076869 | 0        |
| lincRNA -             | 0  | 0  | 0  | 1    | 4    | 3    | 0        | 0        | 0        | 0.146438 |
| pseudogeni -          | 2  | 5  | 3  | 2    | 0    | 2    | 0.721385 | 2.312684 | 1.305589 | 1.119689 |
| pseudogeni -          | 0  | 1  | 0  | 1    | 0    | 0    | 0        | 0.064241 | 0        | 0.077756 |
| pseudogeni -          | 0  | 0  | 0  | 1    | 0    | 0    | 0        | 0        | 0        | 0.15618  |
| lincRNA -             | 2  | 2  | 0  | 0    | 3    | 1    | 0.104316 | 0.13377  | 0        | 0        |
| pseudogeni -          | 2  | 0  | 1  | 0    | 2    | 0    | 0.297714 | 0        | 0.179605 | 0        |
| lincRNA -             | 11 | 14 | 11 | 0    | 0    | 3    | 0.266283 | 0.434598 | 0.321286 | 0        |
| pseudogeni -          | 0  | 0  | 0  | 1    | 0    | 0    | 0        | 0        | 0        | 0.075419 |
| pseudogeni -          | 0  | 0  | 0  | 1    | 1    | 0    | 0        | 0        | 0        | 0.568592 |
| pseudogeni -          | 0  | 1  | 0  | 0    | 0    | 1    | 0        | 0.311553 | 0        | 0        |
| lincRNA -             | 12 | 6  | 10 | 1    | 2    | 9    | 1.055685 | 0.676883 | 1.061454 | 0.136547 |
| pseudogeni -          | 0  | 1  | 0  | 0    | 0    | 0    | 0        | 0.130151 | 0        | 0        |
| pseudogeni -          | 0  | 0  | 0  | 0    | 1    | 0    | 0        | 0        | 0        | 0        |
| pseudogeni -          | 1  | 0  | 0  | 0    | 0    | 1    | 0.197848 | 0        | 0        | 0        |
| antisense -           | 4  | 6  | 4  | 31   | 22   | 25   | 0.356578 | 0.685891 | 0.430232 | 4.289304 |
| lincRNA -             | 6  | 7  | 5  | 4    | 5    | 4    | 0.547354 | 0.818888 | 0.550345 | 0.56638  |
| protein_co MT-RNR2-li | 0  | 5  | 1  | 3    | 4    | 2    | 0        | 0.289922 | 0.054557 | 0.210549 |
| pseudogeni -          | 1  | 0  | 0  | 0    | 0    | 2    | 0.091941 | 0        | 0        | 0        |
| pseudogeni -          | 0  | 0  | 0  | 1    | 0    | 0    | 0        | 0        | 0        | 0.190523 |
| pseudogeni -          | 0  | 3  | 2  | 2    | 0    | 0    | 0        | 0.206395 | 0.129463 | 0.166544 |
| lincRNA -             | 0  | 0  | 0  | 1466 | 1772 | 1654 | 0        | 0        | 0        | 143.6005 |
| pseudogeni -          | 2  | 0  | 0  | 0    | 1    | 1    | 0.395696 | 0        | 0        | 0        |
| pseudogeni -          | 0  | 0  | 0  | 0    | 1    | 0    | 0        | 0        | 0        | 0        |
| pseudogeni -          | 0  | 1  | 1  | 0    | 2    | 0    | 0        | 0.28098  | 0.264372 | 0        |
| pseudogeni -          | 4  | 7  | 12 | 3    | 4    | 2    | 0.7815   | 1.753786 | 2.828775 | 0.909748 |
| antisense -           | 0  | 0  | 0  | 2    | 2    | 0    | 0        | 0        | 0        | 0.41948  |
| pseudogeni -          | 1  | 0  | 0  | 0    | 1    | 0    | 0.038848 | 0        | 0        | 0        |
| pseudogeni -          | 15 | 17 | 15 | 2    | 3    | 2    | 0.925461 | 1.345009 | 1.116622 | 0.191526 |
| pseudogeni -          | 0  | 0  | 0  | 1    | 0    | 0    | 0        | 0        | 0        | 0.087792 |
| pseudogeni -          | 0  | 1  | 0  | 1    | 0    | 0    | 0        | 0.029203 | 0        | 0.035347 |
| lincRNA -             | 3  | 0  | 1  | 2    | 5    | 0    | 0.065949 | 0        | 0.026524 | 0.068242 |
| protein_co TMEM56-R'  | 0  | 0  | 0  | 1    | 1    | 0    | 0        | 0        | 0        | 0.048813 |
| pseudogeni -          | 0  | 0  | 0  | 0    | 2    | 0    | 0        | 0        | 0        | 0        |
| pseudogeni -          | 0  | 0  | 0  | 0    | 0    | 1    | 0        | 0        | 0        | 0        |
| pseudogeni:sex_comb_  | 3  | 1  | 1  | 3    | 5    | 0    | 0.2605   | 0.111351 | 0.104769 | 0.404332 |
| lincRNA -             | 0  | 0  | 0  | 61   | 59   | 45   | 0        | 0        | 0        | 7.788716 |
| pseudogeni -          | 0  | 0  | 0  | 0    | 2    | 0    | 0        | 0        | 0        | 0        |
| lincRNA -             | 0  | 0  | 0  | 1    | 5    | 9    | 0        | 0        | 0        | 0.043817 |
| antisense -           | 95 | 97 | 84 | 32   | 48   | 44   | 1.060608 | 1.388712 | 1.13151  | 0.554513 |
| pseudogeni -          | 0  | 2  | 0  | 0    | 0    | 0    | 0        | 0.946926 | 0        | 0        |
| pseudogeni -          | 0  | 0  | 0  | 1    | 0    | 0    | 0        | 0        | 0        | 0.150371 |
| antisense -           | 5  | 13 | 3  | 24   | 20   | 8    | 0.318114 | 1.060634 | 0.230294 | 2.370034 |
| pseudogeni -          | 2  | 1  | 0  | 0    | 4    | 0    | 0.106086 | 0.06802  | 0        | 0        |
| IG_V_pseu immunogl    | 0  | 0  | 0  | 1    | 2    | 0    | 0        | 0        | 0        | 0.183324 |
| pseudogeni -          | 1  | 0  | 1  | 0    | 0    | 0    | 0.118111 | 0        | 0.142508 | 0        |

|                         |    |    |    |    |    |     |          |          |          |          |
|-------------------------|----|----|----|----|----|-----|----------|----------|----------|----------|
| lincRNA -               | 0  | 0  | 0  | 0  | 0  | 1   | 0        | 0        | 0        | 0        |
| lincRNA -               | 1  | 3  | 8  | 2  | 1  | 1   | 0.043905 | 0.168904 | 0.423787 | 0.136292 |
| pseudogeni-             | 0  | 2  | 3  | 0  | 2  | 1   | 0        | 0.264889 | 0.373847 | 0        |
| antisense -             | 5  | 0  | 0  | 2  | 1  | 0   | 0.167225 | 0        | 0        | 0.103823 |
| lincRNA -               | 1  | 2  | 1  | 0  | 0  | 0   | 0.07934  | 0.203485 | 0.095728 | 0        |
| pseudogeni-             | 15 | 10 | 14 | 10 | 18 | 15  | 1.240477 | 1.06049  | 1.396926 | 1.283594 |
| pseudogeni-             | 0  | 0  | 0  | 0  | 1  | 0   | 0        | 0        | 0        | 0        |
| lincRNA -               | 0  | 0  | 0  | 1  | 3  | 0   | 0        | 0        | 0        | 0.158908 |
| lincRNA -               | 0  | 2  | 0  | 0  | 1  | 1   | 0        | 0.235342 | 0        | 0        |
| pseudogeni-             | 0  | 2  | 1  | 2  | 0  | 1   | 0        | 0.48886  | 0.229982 | 0.591706 |
| lincRNA -               | 1  | 1  | 0  | 3  | 1  | 0   | 0.149808 | 0.192108 | 0        | 0.69757  |
| pseudogeni-             | 0  | 0  | 0  | 0  | 0  | 2   | 0        | 0        | 0        | 0        |
| pseudogeni-             | 0  | 0  | 0  | 0  | 0  | 1   | 0        | 0        | 0        | 0        |
| sense_overl-            | 1  | 1  | 4  | 2  | 2  | 2   | 0.13513  | 0.173285 | 0.652167 | 0.41948  |
| lincRNA -               | 0  | 0  | 0  | 0  | 1  | 1   | 0        | 0        | 0        | 0        |
| lincRNA -               | 2  | 5  | 3  | 1  | 1  | 0   | 0.046937 | 0.150475 | 0.084948 | 0.036426 |
| lincRNA -               | 0  | 0  | 1  | 0  | 0  | 0   | 0        | 0        | 0.095245 | 0        |
| pseudogeni-             | 0  | 0  | 3  | 0  | 1  | 0   | 0        | 0        | 0.428602 | 0        |
| lincRNA -               | 0  | 0  | 0  | 21 | 29 | 4   | 0        | 0        | 0        | 2.011021 |
| antisense -             | 3  | 2  | 2  | 2  | 1  | 1   | 0.308487 | 0.263727 | 0.248138 | 0.31921  |
| pseudogeni-             | 0  | 0  | 1  | 0  | 0  | 0   | 0        | 0        | 0.174078 | 0        |
| pseudogeni-             | 2  | 4  | 2  | 0  | 0  | 0   | 0.165982 | 0.425698 | 0.200267 | 0        |
| pseudogeni-             | 1  | 0  | 1  | 1  | 0  | 0   | 0.138728 | 0        | 0.167383 | 0.215325 |
| antisense -             | 0  | 2  | 1  | 2  | 10 | 0   | 0        | 0.390453 | 0.183687 | 0.472596 |
| lincRNA -               | 0  | 0  | 0  | 0  | 1  | 1   | 0        | 0        | 0        | 0        |
| pseudogeni-             | 0  | 2  | 2  | 4  | 0  | 0   | 0        | 0.432588 | 0.407018 | 1.047191 |
| pseudogeni-             | 0  | 0  | 0  | 0  | 0  | 1   | 0        | 0        | 0        | 0        |
| pseudogeni-             | 0  | 0  | 0  | 1  | 0  | 0   | 0        | 0        | 0        | 0.362089 |
| pseudogeni-             | 0  | 0  | 0  | 1  | 0  | 0   | 0        | 0        | 0        | 0.095386 |
| lincRNA -               | 0  | 1  | 1  | 0  | 1  | 0   | 0        | 0.209511 | 0.197127 | 0        |
| pseudogeni-             | 0  | 2  | 0  | 0  | 0  | 0   | 0        | 0.302921 | 0        | 0        |
| lincRNA -               | 3  | 6  | 5  | 0  | 1  | 1   | 0.2605   | 0.668109 | 0.523847 | 0        |
| pseudogeni-             | 0  | 0  | 0  | 1  | 0  | 1   | 0        | 0        | 0        | 0.295853 |
| lincRNA -               | 3  | 0  | 3  | 1  | 0  | 0   | 0.315404 | 0        | 0.380553 | 0.163183 |
| pseudogeni-             | 1  | 3  | 5  | 5  | 4  | 5   | 0.182451 | 0.701904 | 1.100691 | 1.415949 |
| antisense -             | 19 | 11 | 5  | 21 | 35 | 6   | 0.254837 | 0.189196 | 0.080915 | 0.437178 |
| pseudogeni-             | 0  | 0  | 1  | 0  | 0  | 0   | 0        | 0        | 0.077289 | 0        |
| pseudogeni-             | 0  | 0  | 0  | 1  | 2  | 0   | 0        | 0        | 0        | 0.158908 |
| pseudogeni-             | 0  | 1  | 0  | 0  | 0  | 4   | 0        | 0.095142 | 0        | 0        |
| pseudogeni-             | 0  | 1  | 0  | 0  | 2  | 1   | 0        | 0.290482 | 0        | 0        |
| pseudogeni-             | 0  | 0  | 1  | 0  | 3  | 0   | 0        | 0        | 0.145813 | 0        |
| protein_co sulfiredoxir | 15 | 13 | 10 | 17 | 35 | 12  | 0.260693 | 0.289728 | 0.209694 | 0.458583 |
| lincRNA -               | 1  | 0  | 0  | 0  | 0  | 0   | 0.054587 | 0        | 0        | 0        |
| antisense -             | 2  | 1  | 1  | 1  | 4  | 1   | 0.205658 | 0.131864 | 0.124069 | 0.159605 |
| pseudogeni-             | 1  | 0  | 1  | 0  | 0  | 0   | 0.080017 | 0        | 0.096545 | 0        |
| protein_co CTAGE_fam    | 0  | 0  | 0  | 0  | 0  | 1   | 0        | 0        | 0        | 0        |
| lincRNA -               | 2  | 1  | 4  | 0  | 0  | 0   | 0.186813 | 0.11978  | 0.450801 | 0        |
| lincRNA -               | 21 | 14 | 16 | 4  | 3  | 2   | 0.658656 | 0.563088 | 0.60549  | 0.194729 |
| pseudogeni-             | 0  | 0  | 1  | 0  | 5  | 0   | 0        | 0        | 0.189851 | 0        |
| lincRNA -               | 14 | 14 | 14 | 0  | 0  | 0   | 1.095927 | 1.405371 | 1.322299 | 0        |
| antisense -             | 19 | 16 | 13 | 6  | 21 | 10  | 0.804797 | 0.869085 | 0.664392 | 0.39447  |
| pseudogeni-             | 1  | 0  | 0  | 0  | 0  | 0   | 0.042434 | 0        | 0        | 0        |
| sense_intrc-            | 18 | 27 | 17 | 30 | 49 | 23  | 0.950473 | 1.828271 | 1.08309  | 2.458777 |
| lincRNA -               | 2  | 0  | 2  | 0  | 0  | 0   | 0.074017 | 0        | 0.089306 | 0        |
| sense_intrc-            | 22 | 22 | 17 | 83 | 95 | 159 | 3.849181 | 4.936028 | 3.588745 | 22.54001 |
| pseudogeni-             | 1  | 2  | 0  | 0  | 0  | 1   | 0.051023 | 0.130859 | 0        | 0        |
| pseudogeni-             | 0  | 0  | 0  | 0  | 0  | 1   | 0        | 0        | 0        | 0        |
| lincRNA -               | 21 | 20 | 19 | 34 | 26 | 28  | 1.435409 | 1.753055 | 1.56696  | 3.607162 |
| pseudogeni HIV-1_Tat_;  | 14 | 11 | 20 | 6  | 11 | 3   | 1.040349 | 1.048221 | 1.793201 | 0.692042 |
| pseudogeni-             | 0  | 0  | 0  | 1  | 0  | 0   | 0        | 0        | 0        | 0.076772 |
| antisense -             | 0  | 0  | 0  | 6  | 11 | 15  | 0        | 0        | 0        | 0.7066   |
| lincRNA -               | 2  | 3  | 0  | 0  | 0  | 2   | 0.171131 | 0.329178 | 0        | 0        |
| pseudogeni-             | 27 | 20 | 22 | 29 | 19 | 23  | 2.252723 | 2.13985  | 2.214699 | 3.755541 |
| pseudogeni-             | 0  | 0  | 0  | 0  | 1  | 0   | 0        | 0        | 0        | 0        |
| pseudogeni-             | 0  | 0  | 1  | 0  | 0  | 0   | 0        | 0        | 0.208766 | 0        |

|                        |     |     |     |    |     |     |          |          |          |          |
|------------------------|-----|-----|-----|----|-----|-----|----------|----------|----------|----------|
| antisense -            | 0   | 0   | 1   | 0  | 1   | 0   | 0        | 0        | 0.070808 | 0        |
| lincRNA -              | 0   | 1   | 0   | 0  | 0   | 0   | 0        | 0.021684 | 0        | 0        |
| lincRNA -              | 0   | 1   | 1   | 1  | 2   | 1   | 0        | 0.089346 | 0.084065 | 0.108142 |
| lincRNA -              | 4   | 2   | 2   | 4  | 2   | 3   | 0.197017 | 0.126323 | 0.118856 | 0.305797 |
| lincRNA -              | 0   | 0   | 0   | 0  | 1   | 0   | 0        | 0        | 0        | 0        |
| pseudogeni -           | 4   | 6   | 7   | 0  | 0   | 3   | 0.209799 | 0.403556 | 0.442985 | 0        |
| lincRNA -              | 1   | 0   | 0   | 2  | 1   | 1   | 0.110329 | 0        | 0        | 0.342493 |
| pseudogeni -           | 1   | 0   | 0   | 0  | 0   | 0   | 0.056562 | 0        | 0        | 0        |
| lincRNA -              | 0   | 0   | 0   | 0  | 1   | 0   | 0        | 0        | 0        | 0        |
| lincRNA -              | 2   | 0   | 0   | 0  | 1   | 0   | 0.047774 | 0        | 0        | 0        |
| pseudogeni -           | 0   | 1   | 0   | 4  | 1   | 8   | 0        | 0.049449 | 0        | 0.239407 |
| pseudogeni -           | 0   | 0   | 0   | 1  | 3   | 1   | 0        | 0        | 0        | 0.193563 |
| pseudogeni -           | 2   | 0   | 1   | 0  | 1   | 2   | 0.210742 | 0        | 0.127136 | 0        |
| pseudogeni -           | 1   | 0   | 1   | 0  | 2   | 1   | 0.198687 | 0        | 0.239727 | 0        |
| lincRNA -              | 0   | 0   | 1   | 0  | 0   | 0   | 0        | 0        | 0.05635  | 0        |
| lincRNA -              | 2   | 0   | 0   | 0  | 0   | 0   | 0.144277 | 0        | 0        | 0        |
| pseudogeni -           | 0   | 0   | 0   | 1  | 0   | 0   | 0        | 0        | 0        | 0.203296 |
| pseudogeni -           | 0   | 1   | 1   | 0  | 1   | 0   | 0        | 0.125795 | 0.118359 | 0        |
| lincRNA -              | 2   | 1   | 0   | 0  | 1   | 0   | 0.163096 | 0.104574 | 0        | 0        |
| pseudogeni -           | 0   | 1   | 1   | 0  | 1   | 1   | 0        | 0.123217 | 0.115933 | 0        |
| sense_intrc -          | 154 | 130 | 165 | 29 | 46  | 54  | 1.85298  | 2.00587  | 2.395422 | 0.5416   |
| processed_ -           | 0   | 0   | 0   | 0  | 0   | 11  | 0        | 0        | 0        | 0        |
| pseudogeni -           | 0   | 1   | 1   | 1  | 2   | 3   | 0        | 0.111765 | 0.105159 | 0.135278 |
| pseudogeni -           | 1   | 1   | 0   | 0  | 0   | 0   | 0.082263 | 0.105491 | 0        | 0        |
| sense_intrc -          | 10  | 8   | 10  | 7  | 13  | 4   | 1.006224 | 1.032271 | 1.214067 | 1.093259 |
| pseudogeni -           | 0   | 0   | 2   | 0  | 1   | 1   | 0        | 0        | 0.090593 | 0        |
| processed_ -           | 0   | 0   | 0   | 0  | 1   | 0   | 0        | 0        | 0        | 0        |
| antisense -            | 8   | 9   | 12  | 1  | 6   | 1   | 0.112683 | 0.162562 | 0.203937 | 0.021862 |
| pseudogeni -           | 0   | 0   | 1   | 0  | 0   | 1   | 0        | 0        | 0.217598 | 0        |
| pseudogeni -           | 0   | 0   | 0   | 0  | 0   | 1   | 0        | 0        | 0        | 0        |
| pseudogeni -           | 0   | 0   | 0   | 1  | 4   | 0   | 0        | 0        | 0        | 0.064982 |
| pseudogeni -           | 0   | 0   | 0   | 0  | 0   | 2   | 0        | 0        | 0        | 0        |
| pseudogeni -           | 0   | 0   | 1   | 0  | 0   | 0   | 0        | 0        | 0.549277 | 0        |
| pseudogeni -           | 0   | 0   | 0   | 0  | 2   | 0   | 0        | 0        | 0        | 0        |
| pseudogeni -           | 0   | 0   | 2   | 1  | 0   | 0   | 0        | 0        | 0.058719 | 0.037768 |
| pseudogeni -           | 5   | 0   | 4   | 5  | 4   | 8   | 0.118469 | 0        | 0.114352 | 0.18388  |
| pseudogeni -           | 1   | 4   | 0   | 4  | 1   | 0   | 0.19061  | 0.97772  | 0        | 1.183411 |
| pseudogeni -           | 4   | 10  | 5   | 95 | 134 | 230 | 0.315227 | 1.010585 | 0.475424 | 11.6203  |
| pseudogeni -           | 1   | 0   | 0   | 0  | 2   | 0   | 0.087645 | 0        | 0        | 0        |
| pseudogeni -           | 749 | 650 | 703 | 59 | 100 | 191 | 12.85528 | 14.30614 | 14.55805 | 1.571745 |
| pseudogeni -           | 0   | 0   | 0   | 0  | 1   | 1   | 0        | 0        | 0        | 0        |
| sense_intrc -          | 119 | 116 | 113 | 29 | 35  | 85  | 1.514223 | 1.892824 | 1.73488  | 0.572758 |
| pseudogeni -           | 4   | 2   | 3   | 1  | 0   | 4   | 0.320068 | 0.205221 | 0.289636 | 0.124198 |
| lincRNA -              | 0   | 0   | 2   | 0  | 0   | 0   | 0        | 0        | 0.106847 | 0        |
| pseudogeni -           | 0   | 1   | 1   | 2  | 1   | 1   | 0        | 0.284975 | 0.26813  | 0.689856 |
| pseudogeni -           | 2   | 0   | 0   | 0  | 0   | 0   | 0.177278 | 0        | 0        | 0        |
| pseudogeni -           | 2   | 0   | 2   | 0  | 0   | 0   | 0.183523 | 0        | 0.221431 | 0        |
| pseudogeni -           | 12  | 3   | 9   | 5  | 8   | 7   | 0.999432 | 0.320407 | 0.904404 | 0.646357 |
| lincRNA -              | 6   | 6   | 6   | 10 | 9   | 9   | 0.391839 | 0.502477 | 0.472776 | 1.013646 |
| lincRNA -              | 4   | 8   | 7   | 0  | 0   | 1   | 0.168366 | 0.431812 | 0.355501 | 0        |
| antisense -            | 3   | 1   | 4   | 3  | 2   | 5   | 0.365377 | 0.156181 | 0.587797 | 0.567115 |
| sense_intrc -          | 0   | 3   | 1   | 4  | 4   | 0   | 0        | 0.754767 | 0.236718 | 1.218072 |
| pseudogeni -           | 4   | 4   | 0   | 1  | 5   | 2   | 0.522451 | 0.66997  | 0        | 0.202729 |
| lincRNA -              | 18  | 22  | 28  | 69 | 83  | 30  | 0.527183 | 0.826268 | 0.989453 | 3.136669 |
| pseudogeni -           | 11  | 4   | 8   | 10 | 9   | 6   | 0.657896 | 0.306785 | 0.577301 | 0.928314 |
| lincRNA -              | 0   | 0   | 0   | 1  | 4   | 2   | 0        | 0        | 0        | 0.143267 |
| pseudogeni -           | 0   | 2   | 0   | 0  | 0   | 0   | 0        | 0.263727 | 0        | 0        |
| pseudogeni -           | 1   | 0   | 0   | 0  | 0   | 0   | 0.151258 | 0        | 0        | 0        |
| lincRNA -              | 21  | 19  | 25  | 0  | 0   | 0   | 0.664433 | 0.770895 | 0.954378 | 0        |
| pseudogeni -           | 1   | 1   | 0   | 0  | 0   | 0   | 0.369213 | 0.473463 | 0        | 0        |
| protein_co mast_cell_i | 9   | 4   | 14  | 0  | 0   | 0   | 0.668796 | 0.381171 | 1.255241 | 0        |
| pseudogeni -           | 2   | 0   | 2   | 0  | 0   | 0   | 0.301544 | 0        | 0.36383  | 0        |
| pseudogeni -           | 0   | 0   | 0   | 1  | 0   | 0   | 0        | 0        | 0        | 0.240993 |
| lincRNA -              | 42  | 24  | 27  | 10 | 9   | 13  | 0.54223  | 0.397333 | 0.420578 | 0.200385 |
| pseudogeni -           | 0   | 0   | 0   | 0  | 0   | 1   | 0        | 0        | 0        | 0        |

|                       |    |    |    |    |    |    |          |          |          |          |
|-----------------------|----|----|----|----|----|----|----------|----------|----------|----------|
| pseudogeni -          | 0  | 0  | 1  | 0  | 0  | 0  | 0        | 0        | 0.310854 | 0        |
| pseudogeni -          | 0  | 0  | 0  | 1  | 0  | 0  | 0        | 0        | 0        | 0.187577 |
| pseudogeni -          | 0  | 0  | 0  | 0  | 0  | 1  | 0        | 0        | 0        | 0        |
| pseudogeni -          | 0  | 0  | 1  | 0  | 0  | 2  | 0        | 0        | 0.148103 | 0        |
| antisense -           | 0  | 1  | 1  | 0  | 0  | 0  | 0        | 0.098573 | 0.092747 | 0        |
| pseudogeni -          | 0  | 1  | 0  | 0  | 1  | 0  | 0        | 0.038768 | 0        | 0        |
| pseudogeni -          | 1  | 0  | 0  | 0  | 0  | 1  | 0.072924 | 0        | 0        | 0        |
| lincRNA -             | 22 | 12 | 14 | 2  | 3  | 8  | 0.81677  | 0.571304 | 0.627124 | 0.115249 |
| pseudogeni -          | 0  | 2  | 0  | 0  | 0  | 0  | 0        | 1.08342  | 0        | 0        |
| lincRNA -             | 20 | 10 | 30 | 17 | 17 | 16 | 0.374671 | 0.240231 | 0.678092 | 0.494309 |
| pseudogeni -          | 0  | 0  | 0  | 3  | 2  | 0  | 0        | 0        | 0        | 0.58069  |
| lincRNA -             | 0  | 2  | 0  | 0  | 0  | 0  | 0        | 0.099388 | 0        | 0        |
| pseudogeni -          | 0  | 0  | 1  | 4  | 3  | 2  | 0        | 0        | 0.084441 | 0.434506 |
| pseudogeni -          | 0  | 2  | 1  | 0  | 0  | 0  | 0        | 0.304455 | 0.143229 | 0        |
| antisense -           | 4  | 6  | 0  | 4  | 2  | 2  | 0.394034 | 0.757939 | 0        | 0.611595 |
| pseudogeni -          | 0  | 0  | 0  | 0  | 1  | 0  | 0        | 0        | 0        | 0        |
| pseudogeni -          | 9  | 3  | 9  | 9  | 7  | 2  | 0.385397 | 0.164739 | 0.465004 | 0.59819  |
| antisense -           | 0  | 0  | 0  | 2  | 1  | 0  | 0        | 0        | 0        | 0.232895 |
| pseudogeni -          | 2  | 0  | 0  | 0  | 0  | 0  | 0.097282 | 0        | 0        | 0        |
| pseudogeni -          | 0  | 0  | 0  | 0  | 0  | 1  | 0        | 0        | 0        | 0        |
| pseudogeni -          | 1  | 1  | 0  | 0  | 0  | 0  | 0.300577 | 0.385447 | 0        | 0        |
| pseudogeni ATPase_Na- | 0  | 0  | 2  | 0  | 1  | 0  | 0        | 0        | 0.137821 | 0        |
| lincRNA -             | 5  | 4  | 3  | 1  | 4  | 6  | 0.331144 | 0.339716 | 0.239727 | 0.102796 |
| pseudogeni -          | 0  | 1  | 0  | 0  | 0  | 1  | 0        | 0.097613 | 0        | 0        |

| WT_2_fpkn | WT_3_fpkn |
|-----------|-----------|
| 25.66783  | 36.02098  |
| 1.298307  | 2.982653  |
| 31.39104  | 40.92344  |
| 1.714219  | 1.406076  |
| 4.576324  | 4.474593  |
| 0.29576   | 0.100928  |
| 0         | 0         |
| 20.24253  | 21.92052  |
| 13.14034  | 15.49444  |
| 10.93159  | 10.49766  |
| 2.559433  | 1.121692  |
| 2.684655  | 2.437234  |
| 20.87455  | 21.74885  |
| 0.694156  | 0.35532   |
| 38.55527  | 17.06059  |
| 0.070922  | 0.123603  |
| 8.219034  | 6.884681  |
| 1.411945  | 1.029654  |
| 4.146079  | 4.381356  |
| 2.965934  | 4.044745  |
| 0.217018  | 0.032821  |
| 2.46845   | 1.725917  |
| 34.95719  | 39.67199  |
| 65.82706  | 59.34521  |
| 0.25512   | 0.154333  |
| 0.118827  | 0.065893  |
| 0.019729  | 0.175045  |
| 0.826131  | 0.694723  |
| 19.34636  | 14.87207  |
| 77.57461  | 83.92347  |
| 10.45004  | 10.80869  |
| 0.060133  | 0.066691  |
| 26.71809  | 27.43332  |
| 1.548969  | 1.382071  |
| 0.026241  | 0.072758  |
| 8.082914  | 6.163055  |
| 55.63965  | 56.55949  |
| 8.569186  | 7.638237  |
| 0.701724  | 0.441398  |
| 2.770355  | 3.353227  |
| 0.549013  | 1.047647  |
| 14.98937  | 12.64174  |
| 6.64427   | 9.293887  |
| 1.273991  | 0.947917  |
| 4.576449  | 4.201086  |
| 71.59124  | 56.17254  |
| 0.408019  | 0.179122  |
| 47.83665  | 59.33294  |
| 26.00287  | 16.32969  |
| 24.4123   | 29.87821  |
| 0.263639  | 0.036549  |
| 159.1747  | 147.2234  |
| 149.6458  | 131.4585  |
| 21.538    | 21.41864  |
| 5.749966  | 2.649749  |
| 5.702199  | 9.132724  |
| 1.219748  | 3.067559  |
| 0.759937  | 0.421408  |
| 9.635388  | 6.227116  |
| 91.27123  | 102.4702  |
| 0         | 0.038511  |
| 0         | 0         |
| 0.214388  | 0.095108  |
| 0.021369  | 0.154045  |

|          |          |
|----------|----------|
| 0        | 0.095769 |
| 20.52057 | 25.10992 |
| 2.912665 | 4.394189 |
| 7.534764 | 6.053723 |
| 0.02501  | 0.013869 |
| 0.067194 | 0.167674 |
| 11.67026 | 17.81179 |
| 33.90298 | 31.8737  |
| 0.671936 | 0.298087 |
| 62.52804 | 53.0084  |
| 1.180241 | 1.274513 |
| 285.1416 | 284.783  |
| 8.177964 | 9.251864 |
| 0        | 0.300035 |
| 45.16621 | 51.79137 |
| 17.26232 | 23.87605 |
| 0        | 0.101748 |
| 0.097239 | 0.140197 |
| 22.97641 | 19.32575 |
| 6.256612 | 11.57478 |
| 1.505798 | 0.67769  |
| 3.036983 | 2.507155 |
| 33.46204 | 40.92988 |
| 26.27818 | 22.87442 |
| 1.839691 | 1.443742 |
| 0.139365 | 0.154564 |
| 14.12497 | 12.74197 |
| 3.549366 | 4.87562  |
| 14.07487 | 18.70127 |
| 0.700167 | 0.279911 |
| 0.018752 | 0        |
| 0.096709 | 0.160883 |
| 3.705636 | 4.140793 |
| 22.97953 | 16.1916  |
| 1.036411 | 0.520502 |
| 0.44789  | 0.291191 |
| 6.42736  | 3.721265 |
| 27.67131 | 29.18588 |
| 9.851976 | 4.92436  |
| 4.081695 | 5.345775 |
| 14.59146 | 23.50914 |
| 1.855375 | 2.222709 |
| 3.385268 | 5.150109 |
| 0.02382  | 0.026418 |
| 2.653131 | 2.32196  |
| 11.27513 | 7.90505  |
| 1.922245 | 3.270716 |
| 11.07704 | 9.31208  |
| 16.22746 | 14.15756 |
| 5.607006 | 3.636073 |
| 0        | 0        |
| 19.08426 | 19.39403 |
| 24.05395 | 25.69959 |
| 56.54341 | 25.47597 |
| 2.209006 | 1.546514 |
| 16.92897 | 23.32542 |
| 8.454617 | 5.081558 |
| 0.862125 | 0.817353 |
| 0.199436 | 0.138242 |
| 0        | 0        |
| 6.028366 | 5.380457 |
| 0        | 0.022299 |
| 45.44617 | 44.00279 |
| 53.10801 | 52.65356 |
| 0.150331 | 0.778058 |

|          |          |
|----------|----------|
| 12.64433 | 20.15404 |
| 0.21424  | 0.201965 |
| 12.07001 | 9.047481 |
| 6.629563 | 4.281699 |
| 60.34786 | 59.21471 |
| 0        | 0.149432 |
| 5.736742 | 4.013488 |
| 33.13456 | 33.28143 |
| 11.77628 | 7.680477 |
| 2.906138 | 1.463013 |
| 9.149356 | 11.12622 |
| 6.92005  | 7.799986 |
| 0.623405 | 0.316401 |
| 0.612516 | 0.247025 |
| 3.634657 | 3.838446 |
| 0.441585 | 1.371286 |
| 3.126567 | 2.821637 |
| 0.942801 | 0.280533 |
| 60.71071 | 61.34421 |
| 8.422332 | 12.95386 |
| 0.45232  | 0.237624 |
| 6.886493 | 13.71149 |
| 9.63827  | 11.21671 |
| 12.38987 | 7.826922 |
| 19.68389 | 30.6962  |
| 5.574462 | 7.76885  |
| 12.39494 | 6.702316 |
| 41.90616 | 47.36069 |
| 0.118751 | 0.131702 |
| 0.902601 | 1.067775 |
| 4.52947  | 4.084112 |
| 0        | 0.010937 |
| 15.68397 | 19.09108 |
| 0.891062 | 0.988242 |
| 0.025498 | 0.197949 |
| 0        | 0        |
| 25.54275 | 11.9897  |
| 20.31493 | 24.36714 |
| 152.363  | 131.3852 |
| 0        | 0.04072  |
| 19.48333 | 18.40142 |
| 0.475762 | 0.544138 |
| 0.087631 | 0.17008  |
| 15.08794 | 16.22215 |
| 3.491012 | 2.432466 |
| 80.67439 | 37.9789  |
| 20.2008  | 13.62313 |
| 0        | 0.027665 |
| 0.782813 | 0        |
| 1.980735 | 1.226301 |
| 1.796242 | 1.931313 |
| 0.1645   | 0.026063 |
| 0.260116 | 0.736131 |
| 27.5782  | 31.95732 |
| 23.86361 | 19.05566 |
| 27.87899 | 34.71839 |
| 11.4127  | 7.048569 |
| 5.255752 | 2.487607 |
| 58.49054 | 53.45785 |
| 14.51999 | 18.55459 |
| 3.37915  | 3.118639 |
| 29.47202 | 25.76121 |
| 25.3148  | 32.69254 |
| 0        | 0.032994 |
| 22.80516 | 25.04604 |

|          |          |
|----------|----------|
| 0.0491   | 0.217819 |
| 4.257933 | 3.475406 |
| 71.66088 | 83.87979 |
| 2.384229 | 2.536766 |
| 132.06   | 124.1361 |
| 1.274406 | 1.552742 |
| 0.190159 | 0.210898 |
| 0.304233 | 0.103819 |
| 38.17081 | 34.00611 |
| 0        | 0.011878 |
| 0        | 0        |
| 0.135266 | 0.085724 |
| 8.696299 | 4.875859 |
| 1.895732 | 1.534443 |
| 25.37163 | 23.84905 |
| 17.55895 | 21.38906 |
| 5.951275 | 4.719275 |
| 11.03675 | 7.052049 |
| 47.39574 | 39.35968 |
| 15.44688 | 7.569747 |
| 22.77112 | 27.95101 |
| 8.902589 | 4.915385 |
| 69.15533 | 85.40073 |
| 6.752799 | 5.549599 |
| 0.689854 | 0.860727 |
| 0.202091 | 0.112066 |
| 1.434762 | 1.354035 |
| 30.11756 | 24.12166 |
| 1.034032 | 1.246527 |
| 9.266044 | 4.41748  |
| 1.320525 | 1.956826 |
| 48.1269  | 47.24276 |
| 2.49441  | 1.541129 |
| 3.497726 | 2.802192 |
| 7.883749 | 15.49518 |
| 405.9449 | 395.8023 |
| 164.4476 | 179.2261 |
| 20.68375 | 21.46467 |
| 0.611582 | 0.803889 |
| 0.972892 | 0.662354 |
| 0.964152 | 1.728292 |
| 2.90197  | 2.315034 |
| 3.8293   | 2.509548 |
| 0.770915 | 0.458776 |
| 6.893656 | 7.316253 |
| 13.31648 | 18.01582 |
| 2.746369 | 0.966283 |
| 24.53154 | 26.39449 |
| 16.59373 | 12.03303 |
| 0.431759 | 0.319231 |
| 3.140107 | 4.875597 |
| 25.43566 | 32.36974 |
| 2.564161 | 2.881728 |
| 10.01518 | 14.74996 |
| 141.3767 | 145.7642 |
| 7.920199 | 8.557786 |
| 155.4969 | 150.2561 |
| 0        | 0.036921 |
| 62.89263 | 48.65247 |
| 4.705069 | 4.907336 |
| 0.26428  | 0.125615 |
| 8.015912 | 2.068977 |
| 0.82377  | 0.646555 |
| 31.27554 | 23.96521 |
| 0.211446 | 0.112911 |

|          |          |
|----------|----------|
| 14.82672 | 11.92171 |
| 0.028415 | 0        |
| 2.632112 | 1.653897 |
| 0.064272 | 0.142563 |
| 2.940048 | 4.427508 |
| 0.438636 | 0.1769   |
| 1.143405 | 0.549512 |
| 0.12037  | 0.0267   |
| 0.293638 | 0.234477 |
| 7.051111 | 6.852887 |
| 20.46745 | 14.04493 |
| 2.509529 | 1.635938 |
| 0.039672 | 0        |
| 10.67307 | 16.0188  |
| 105.582  | 115.9936 |
| 5.337937 | 9.015815 |
| 16.21641 | 13.55774 |
| 0.03321  | 0        |
| 15.05137 | 13.0453  |
| 4.249601 | 3.945253 |
| 6.41321  | 4.48793  |
| 8.876971 | 9.701167 |
| 4.445274 | 5.256035 |
| 5.191935 | 10.42578 |
| 20.55259 | 14.25256 |
| 15.4352  | 16.40211 |
| 49.89242 | 46.79009 |
| 15.30427 | 10.79457 |
| 33.86007 | 31.88748 |
| 219.3488 | 265.6083 |
| 4.429094 | 8.588883 |
| 11.55016 | 4.48273  |
| 18.27009 | 21.01741 |
| 6.105298 | 11.47496 |
| 11.87749 | 9.109803 |
| 14.08531 | 18.26819 |
| 15.58162 | 15.69696 |
| 9.057703 | 8.061239 |
| 0        | 0        |
| 9.084575 | 10.13496 |
| 26.25578 | 27.80838 |
| 7.008268 | 8.573409 |
| 13.74964 | 10.78178 |
| 0.45034  | 0.532752 |
| 0        | 0        |
| 21.33273 | 12.10317 |
| 2.007119 | 2.188917 |
| 5.777554 | 6.746433 |
| 11.04524 | 8.274489 |
| 0.132989 | 0        |
| 3.517563 | 2.286182 |
| 2.953202 | 2.688202 |
| 4.920176 | 1.786298 |
| 0        | 0.023115 |
| 29.36288 | 21.51556 |
| 63.78568 | 54.32391 |
| 1.36373  | 0.35749  |
| 10.44983 | 9.577687 |
| 4.870499 | 3.453533 |
| 8.067597 | 10.58782 |
| 4.709417 | 6.768474 |
| 7.044371 | 6.00058  |
| 63.88484 | 97.24143 |
| 2.839315 | 2.016056 |
| 0.036365 | 0.080662 |

|          |          |
|----------|----------|
| 7.900406 | 4.825466 |
| 128.7106 | 117.5899 |
| 9.210096 | 1.706432 |
| 10.88938 | 12.46311 |
| 5.805078 | 5.491061 |
| 2.634161 | 1.821976 |
| 2.941773 | 8.285299 |
| 2.484638 | 4.592691 |
| 10.74319 | 8.86492  |
| 3.269274 | 2.438895 |
| 0.949467 | 1.030125 |
| 26.54504 | 29.96696 |
| 13.92123 | 7.602528 |
| 0.126501 | 0.093532 |
| 0.051163 | 0.070929 |
| 0.229103 | 0.042348 |
| 80.12579 | 77.47469 |
| 4.086211 | 4.613365 |
| 11.35938 | 13.26034 |
| 17.73641 | 14.21249 |
| 99.89027 | 87.73499 |
| 0.417224 | 0.506796 |
| 78.2671  | 86.84472 |
| 18.78623 | 26.164   |
| 2.720494 | 1.343271 |
| 13.45067 | 13.75681 |
| 20.37719 | 15.64371 |
| 0.158416 | 0.216238 |
| 7.999357 | 8.8561   |
| 0.470101 | 0.111722 |
| 0.700755 | 0.116577 |
| 13.299   | 14.27985 |
| 53.46984 | 81.83619 |
| 0.049197 | 0.095485 |
| 26.05985 | 13.11584 |
| 0.136963 | 0.094937 |
| 0.027136 | 0.030095 |
| 17.59562 | 17.98811 |
| 0.045072 | 0.174957 |
| 4.605346 | 3.556409 |
| 0.265859 | 0.550393 |
| 0        | 0        |
| 13.13994 | 13.80131 |
| 16.27223 | 17.42177 |
| 3.351531 | 2.770716 |
| 0.025273 | 0.009343 |
| 10.37891 | 19.78831 |
| 0.228337 | 0.069065 |
| 49.42218 | 35.2961  |
| 13.6113  | 8.149758 |
| 1.564183 | 1.239124 |
| 0.086053 | 0.023859 |
| 4.76452  | 4.996664 |
| 5.645716 | 6.421083 |
| 0.069996 | 0        |
| 10.39144 | 11.40862 |
| 6.299168 | 3.709016 |
| 10.42697 | 11.15713 |
| 1.407068 | 1.853123 |
| 0        | 0        |
| 16.11439 | 13.29674 |
| 0        | 0        |
| 0        | 0        |
| 1.277262 | 2.810988 |
| 4.369256 | 1.740194 |

|          |          |
|----------|----------|
| 0.08451  | 0.437393 |
| 13.80507 | 9.090709 |
| 0.051834 | 0.011497 |
| 5.843472 | 4.945211 |
| 15.55965 | 27.33386 |
| 4.168832 | 3.744916 |
| 0.074178 | 0.041134 |
| 13.50542 | 8.522882 |
| 6.998028 | 7.918032 |
| 2.222455 | 4.279378 |
| 0.987096 | 0.34905  |
| 7.03169  | 8.851756 |
| 0.756521 | 1.041552 |
| 7.064487 | 4.232974 |
| 0.10079  | 0.186304 |
| 0.093224 | 0        |
| 5.836192 | 6.688    |
| 0.635702 | 0.875949 |
| 6.545545 | 3.842174 |
| 16.74101 | 15.87965 |
| 0.629295 | 0.520488 |
| 0        | 0        |
| 14.74779 | 12.56518 |
| 21.96964 | 23.2039  |
| 0.188891 | 0.306179 |
| 38.57214 | 46.51235 |
| 6.894855 | 4.959847 |
| 49.73444 | 48.85777 |
| 7.263699 | 5.053048 |
| 7.438982 | 14.59666 |
| 2.033922 | 1.150162 |
| 28.53612 | 22.43503 |
| 17.29997 | 18.90923 |
| 6.840319 | 10.29499 |
| 7.546614 | 7.064555 |
| 19.46922 | 11.41968 |
| 0.011947 | 0.026499 |
| 2.618008 | 4.591469 |
| 2.964361 | 4.140012 |
| 1.940215 | 1.711083 |
| 12.8606  | 10.03258 |
| 117.8187 | 126.5351 |
| 0.046752 | 0.116665 |
| 9.195007 | 4.931485 |
| 9.206044 | 9.786943 |
| 4.358993 | 3.643513 |
| 4.622735 | 3.786014 |
| 6.373214 | 3.034752 |
| 5.392277 | 6.096612 |
| 6.266791 | 6.075718 |
| 5.853906 | 4.061225 |
| 3.96999  | 3.126363 |
| 17.93831 | 10.69731 |
| 2.127478 | 2.084227 |
| 7.956942 | 5.673043 |
| 0.393914 | 0.168029 |
| 39.69734 | 41.77239 |
| 27.70123 | 27.1826  |
| 12.78345 | 16.42241 |
| 19.15285 | 19.33777 |
| 5.053584 | 8.058417 |
| 0.334671 | 0.454983 |
| 0.532935 | 0.21493  |
| 15.97245 | 6.336638 |
| 0.324708 | 0.630212 |

|          |          |
|----------|----------|
| 12.63641 | 6.695839 |
| 5.652156 | 5.217985 |
| 0        | 0        |
| 1.406966 | 0.600158 |
| 9.106077 | 9.66883  |
| 5.910561 | 4.152249 |
| 0.024343 | 0        |
| 6.182565 | 10.10821 |
| 8.26109  | 10.43384 |
| 3.080222 | 2.963411 |
| 3.096729 | 4.166396 |
| 0.691165 | 0.504798 |
| 5.933775 | 8.528024 |
| 2.348164 | 1.017755 |
| 12.82576 | 17.59315 |
| 5.643567 | 6.674634 |
| 13.08859 | 17.97224 |
| 3.256847 | 4.228383 |
| 10.8308  | 38.14075 |
| 7.868484 | 9.429533 |
| 2.760736 | 1.0453   |
| 0.060103 | 0        |
| 14.47531 | 11.65366 |
| 8.759241 | 9.919048 |
| 118.9766 | 140.8497 |
| 27.42864 | 32.61027 |
| 35.02561 | 31.52774 |
| 0        | 0        |
| 0.4489   | 0.424643 |
| 77.20394 | 70.23658 |
| 1.465546 | 3.389357 |
| 3.092016 | 1.611149 |
| 0.531667 | 0.19655  |
| 4.979848 | 8.940035 |
| 81.94677 | 75.00488 |
| 32.58937 | 36.97424 |
| 1.644127 | 2.583203 |
| 11.03249 | 9.981142 |
| 41.95605 | 26.45751 |
| 0.742326 | 0.823285 |
| 5.950671 | 9.615906 |
| 6.896972 | 7.602139 |
| 17.96423 | 24.52561 |
| 9.970157 | 12.04541 |
| 0.200373 | 0.169315 |
| 4.939549 | 4.45192  |
| 5.646011 | 5.781737 |
| 5.972245 | 3.221367 |
| 8.288039 | 6.794042 |
| 8.131434 | 6.411416 |
| 13.71082 | 7.296814 |
| 12.47591 | 12.33331 |
| 16.73233 | 33.74177 |
| 24.30724 | 22.77108 |
| 0        | 0.271095 |
| 1089.802 | 1040.57  |
| 1.698143 | 2.399328 |
| 2.007428 | 1.637965 |
| 2.364914 | 4.37139  |
| 16.51828 | 15.20087 |
| 0        | 0.033057 |
| 4.858211 | 3.793033 |
| 24.33764 | 34.85979 |
| 73.18596 | 93.0125  |
| 17.63973 | 22.07098 |

|          |          |
|----------|----------|
| 0.141252 | 0.08545  |
| 8.732871 | 13.17739 |
| 25.25909 | 27.09741 |
| 0        | 0.091142 |
| 14.50167 | 16.79973 |
| 20.89047 | 23.67615 |
| 8.331343 | 12.60304 |
| 15.71284 | 17.90659 |
| 0.185741 | 0.178531 |
| 0.103337 | 0.072932 |
| 6.514077 | 10.78589 |
| 2.32909  | 1.328453 |
| 0.198321 | 0.013747 |
| 11.85104 | 6.009578 |
| 29.11892 | 34.80027 |
| 7.600529 | 4.361682 |
| 33.78308 | 52.52417 |
| 5.315727 | 4.607566 |
| 4.365388 | 5.305172 |
| 5.353379 | 2.911741 |
| 3.576157 | 8.298972 |
| 0        | 0.142986 |
| 2.32789  | 3.039301 |
| 7.559166 | 7.819483 |
| 5.641591 | 10.48677 |
| 23.78571 | 19.95654 |
| 0.166602 | 0.133446 |
| 14.617   | 14.6554  |
| 9.391341 | 8.647589 |
| 17.6253  | 24.49986 |
| 5.081556 | 4.386696 |
| 0        | 0        |
| 87.69852 | 73.4063  |
| 18.00994 | 29.5341  |
| 0.059573 | 0.057261 |
| 2.97005  | 1.728316 |
| 4.824122 | 2.279107 |
| 0        | 0        |
| 20.72814 | 25.57163 |
| 0.038032 | 0        |
| 46.52086 | 33.24977 |
| 2.076199 | 0.820115 |
| 6.782847 | 5.115362 |
| 10.58828 | 16.93064 |
| 10.10575 | 11.73352 |
| 9.948897 | 8.34741  |
| 5.285834 | 8.192821 |
| 21.24252 | 15.86578 |
| 36.33165 | 40.93628 |
| 0.018059 | 0.060086 |
| 7.429829 | 5.323452 |
| 0.059691 | 0.075658 |
| 48.65474 | 65.16527 |
| 0.018064 | 0.010017 |
| 14.35716 | 21.91817 |
| 0.929294 | 0.668526 |
| 0.57691  | 2.694488 |
| 6.41131  | 4.192531 |
| 3.149026 | 1.761963 |
| 19.48614 | 16.02219 |
| 3.58341  | 4.271755 |
| 1.771454 | 0.972788 |
| 4.17819  | 6.541099 |
| 5.908268 | 4.353611 |
| 95.4123  | 58.92576 |

|          |          |
|----------|----------|
| 100.9327 | 107.4482 |
| 0.019653 | 0.018164 |
| 0.051185 | 0.056767 |
| 0        | 0        |
| 0.052825 | 0.214816 |
| 3.184743 | 5.367368 |
| 9.875494 | 18.64486 |
| 149.6223 | 95.3919  |
| 0.079633 | 0.029439 |
| 8.378202 | 9.585366 |
| 0.108468 | 0.144357 |
| 17.73266 | 8.194419 |
| 133.3149 | 130.8231 |
| 4.746704 | 4.23628  |
| 4.29798  | 5.581757 |
| 0.064128 | 0.308196 |
| 108.3979 | 184.7787 |
| 29.18541 | 29.97118 |
| 10.0033  | 7.532638 |
| 4.752366 | 6.88743  |
| 25.08894 | 27.25091 |
| 0        | 0        |
| 3.91003  | 4.848894 |
| 5.176165 | 4.117662 |
| 4.313132 | 5.173599 |
| 13.77153 | 12.91389 |
| 23.20711 | 23.58355 |
| 26.0106  | 33.25573 |
| 2.056036 | 1.170138 |
| 0.123942 | 0.082476 |
| 8.706001 | 22.05141 |
| 0.1195   | 0.235614 |
| 5.236469 | 3.934156 |
| 7.364561 | 5.237614 |
| 0.596301 | 0.912641 |
| 0.851878 | 0.96331  |
| 1.963542 | 3.311526 |
| 0.188346 | 0.447615 |
| 11.49826 | 8.753592 |
| 0.226702 | 0.131179 |
| 2.381466 | 1.902905 |
| 63.87571 | 54.16789 |
| 5.89313  | 4.741101 |
| 31.48892 | 26.01537 |
| 2.158849 | 2.867242 |
| 19.08002 | 18.40348 |
| 16.4115  | 34.10013 |
| 2.803313 | 3.358294 |
| 21.35456 | 13.93641 |
| 0.797812 | 1.074427 |
| 0        | 0        |
| 1.352523 | 1.483176 |
| 5.747868 | 4.671143 |
| 13.18243 | 16.05602 |
| 6.033522 | 5.057203 |
| 6.961257 | 9.81303  |
| 3.587936 | 2.797705 |
| 2.992382 | 3.639421 |
| 17.54155 | 15.63368 |
| 11.19381 | 13.57015 |
| 6.709771 | 5.62886  |
| 2.248571 | 2.281564 |
| 1.813285 | 3.076897 |
| 0.407628 | 0.461503 |
| 9.524153 | 3.92249  |

|          |          |
|----------|----------|
| 16.24677 | 15.83269 |
| 2.274245 | 0.668951 |
| 0        | 0.035808 |
| 4.194029 | 3.65349  |
| 0        | 0.029636 |
| 21.50934 | 19.81044 |
| 45.4945  | 51.02718 |
| 3.579725 | 2.440357 |
| 36.5928  | 44.48357 |
| 17.97252 | 14.5048  |
| 31.79761 | 42.03459 |
| 13.26964 | 11.8355  |
| 0.573431 | 0.260169 |
| 6.424659 | 2.797802 |
| 32.74845 | 23.06628 |
| 3.212199 | 3.016444 |
| 0.04752  | 0.064414 |
| 7.578807 | 10.02062 |
| 9.863615 | 6.574003 |
| 5.98023  | 5.787859 |
| 32.92997 | 27.94676 |
| 16.38876 | 14.81996 |
| 14.12793 | 13.03386 |
| 10.82519 | 7.053988 |
| 2.684075 | 2.036759 |
| 14.94216 | 15.70724 |
| 0.017785 | 0.029587 |
| 0        | 0        |
| 10.47031 | 11.49781 |
| 8.904326 | 4.589043 |
| 37.97974 | 36.54994 |
| 6.420936 | 6.646462 |
| 5.082146 | 8.579868 |
| 16.50212 | 8.072303 |
| 16.13821 | 16.25733 |
| 3.403281 | 3.860764 |
| 10.99959 | 7.905558 |
| 133.1248 | 87.00943 |
| 28.9347  | 27.14452 |
| 62.27503 | 63.15474 |
| 5.492425 | 4.690285 |
| 8.432025 | 9.30917  |
| 93.32954 | 60.27849 |
| 8.637587 | 8.591635 |
| 18.91258 | 29.97575 |
| 2.277266 | 1.978739 |
| 36.03721 | 69.19196 |
| 11.39209 | 10.06139 |
| 0.053989 | 0.023951 |
| 0.641606 | 0.444738 |
| 22.30752 | 14.99018 |
| 0.332906 | 0.246142 |
| 38.10913 | 28.9184  |
| 25.80025 | 61.66001 |
| 4.510176 | 5.48098  |
| 6.012919 | 6.823779 |
| 1.041006 | 0.51117  |
| 2.532313 | 3.134475 |
| 0.203831 | 0.142095 |
| 9.977528 | 13.2161  |
| 5.528619 | 9.170233 |
| 2.889097 | 1.294406 |
| 17.87427 | 15.11589 |
| 59.62134 | 80.80577 |
| 44.48931 | 36.05111 |

|          |          |
|----------|----------|
| 8.268373 | 2.59656  |
| 0.189344 | 0.099997 |
| 5.700082 | 8.194425 |
| 7.085488 | 3.705724 |
| 3.265185 | 2.628787 |
| 0.219173 | 0.148547 |
| 0.222595 | 0.284852 |
| 22.43368 | 14.39251 |
| 5.115369 | 5.992875 |
| 9.394187 | 9.582318 |
| 5.942496 | 9.536528 |
| 7.62454  | 6.495854 |
| 1.95314  | 2.013247 |
| 0        | 0        |
| 0.020531 | 0.022771 |
| 0.063    | 0.244549 |
| 5.08881  | 4.416887 |
| 1.942894 | 1.473494 |
| 4.0773   | 3.759445 |
| 42.14989 | 93.25801 |
| 37.32726 | 37.17506 |
| 11.0169  | 4.729709 |
| 31.42845 | 36.31682 |
| 2.193932 | 2.123242 |
| 17.48965 | 15.65557 |
| 14.33194 | 16.57556 |
| 8.497069 | 10.1382  |
| 8.804195 | 6.719874 |
| 14.68563 | 18.81459 |
| 2.76363  | 2.56363  |
| 1.555852 | 1.795488 |
| 0.046776 | 0.069169 |
| 17.71156 | 14.90407 |
| 28.62863 | 25.29746 |
| 0.037222 | 0.041282 |
| 0        | 0.023654 |
| 19.28227 | 18.5861  |
| 24.76661 | 19.7651  |
| 2.451856 | 1.976291 |
| 1.098311 | 3.618456 |
| 24.72651 | 11.7796  |
| 0.746142 | 0.391982 |
| 3.867003 | 5.174784 |
| 32.94944 | 30.67358 |
| 2.860133 | 2.708453 |
| 8.65681  | 5.344294 |
| 20.78712 | 22.66859 |
| 12.94068 | 13.36221 |
| 0        | 0        |
| 0.363347 | 0.604461 |
| 6.263531 | 6.978649 |
| 0.05703  | 0.231917 |
| 0.279581 | 0.199332 |
| 155.329  | 168.3015 |
| 0.252483 | 0.173345 |
| 7.664333 | 10.72697 |
| 0.802893 | 0.527245 |
| 36.98876 | 49.61394 |
| 22.17541 | 20.69758 |
| 8.131047 | 6.77578  |
| 3.737927 | 2.735525 |
| 2.593488 | 2.36796  |
| 11.77282 | 12.89673 |
| 51.92411 | 66.88806 |
| 12.56714 | 14.51545 |

|          |          |
|----------|----------|
| 0.591867 | 0.196925 |
| 0.083769 | 0.015484 |
| 29.3271  | 19.40773 |
| 27.48638 | 24.57375 |
| 5.067752 | 3.363054 |
| 13.43098 | 13.64217 |
| 3.166083 | 5.565535 |
| 12.74107 | 13.82509 |
| 18.1641  | 22.54588 |
| 0.051278 | 0.090992 |
| 9.77014  | 4.138721 |
| 8.338569 | 9.275101 |
| 0.970517 | 0.872727 |
| 2.53516  | 1.922804 |
| 51.98317 | 51.58706 |
| 7.806246 | 5.489859 |
| 3.174467 | 3.05826  |
| 0.500073 | 0.850405 |
| 5.794975 | 4.306739 |
| 2.679488 | 3.078805 |
| 252.4407 | 173.6585 |
| 4.096577 | 1.448605 |
| 25.93984 | 26.25526 |
| 67.28264 | 55.70691 |
| 0.559715 | 0.66674  |
| 19.6509  | 15.41216 |
| 17.27508 | 31.20157 |
| 22.2664  | 15.25087 |
| 0.203754 | 0.387388 |
| 5.469504 | 2.918793 |
| 37.3701  | 24.61071 |
| 40.41444 | 53.25077 |
| 0.12769  | 0.196084 |
| 2.415008 | 3.25166  |
| 11.2202  | 16.28696 |
| 6.453938 | 9.44831  |
| 4.459206 | 4.814234 |
| 27.03219 | 41.76099 |
| 23.71576 | 18.52965 |
| 3.558081 | 6.082107 |
| 0        | 0.022562 |
| 0        | 0.129352 |
| 3.973903 | 2.843419 |
| 35.21866 | 39.10104 |
| 23.44701 | 27.79126 |
| 2.72276  | 1.917624 |
| 19.30433 | 14.62604 |
| 16.84917 | 13.60934 |
| 2.386117 | 2.281564 |
| 75.73862 | 65.8821  |
| 16.8906  | 19.52671 |
| 0.28288  | 0.092957 |
| 0.305847 | 0.772628 |
| 56.98914 | 66.58314 |
| 0.054083 | 0.039987 |
| 0.107852 | 0.119615 |
| 8.120561 | 5.681089 |
| 15.82319 | 14.08042 |
| 11.02491 | 11.94072 |
| 2.553357 | 2.374051 |
| 60.8716  | 49.21553 |
| 0.263845 | 0.261818 |
| 194.493  | 163.6958 |
| 1.040679 | 0.323169 |
| 12.45233 | 9.824762 |

|          |          |
|----------|----------|
| 12.7507  | 13.65137 |
| 207.7423 | 182.8395 |
| 12.12108 | 12.73353 |
| 40.19466 | 33.65996 |
| 82.22095 | 127.8501 |
| 150.4914 | 130.439  |
| 16.96214 | 19.94304 |
| 0.844496 | 0.364908 |
| 0.420724 | 0.733242 |
| 3.97596  | 2.939721 |
| 5.499281 | 6.830922 |
| 34.69906 | 28.31515 |
| 3.505467 | 4.177909 |
| 19.82936 | 12.08176 |
| 31.17144 | 37.71081 |
| 0.741652 | 1.363062 |
| 0.040283 | 0.402091 |
| 17.49456 | 18.98577 |
| 24.40847 | 16.42021 |
| 0.453363 | 0.344026 |
| 0.238361 | 0.125222 |
| 0.4108   | 0.124255 |
| 0.112517 | 0        |
| 0        | 0.031543 |
| 2.978119 | 1.378038 |
| 0.482898 | 0.172145 |
| 24.92924 | 13.05826 |
| 3.132201 | 1.86877  |
| 6.875311 | 8.67547  |
| 7.904743 | 7.403314 |
| 44.76644 | 43.31252 |
| 0.068832 | 0        |
| 22.04955 | 21.58314 |
| 38.73192 | 22.90514 |
| 15.68023 | 15.09145 |
| 17.71478 | 23.36202 |
| 25.06904 | 19.1417  |
| 1.812558 | 2.130252 |
| 5.207473 | 4.53098  |
| 0.804234 | 0.713556 |
| 200.759  | 200.8723 |
| 6.877289 | 3.364108 |
| 1.780671 | 1.104824 |
| 9.201242 | 13.44736 |
| 16.2326  | 14.80753 |
| 8.031287 | 8.249829 |
| 0.152373 | 0.033798 |
| 0.041641 | 0        |
| 0        | 0        |
| 26.7294  | 14.56345 |
| 8.181993 | 9.458653 |
| 54.99561 | 37.2015  |
| 0.071323 | 0.118653 |
| 15.63961 | 16.08143 |
| 18.04988 | 14.75842 |
| 76.8501  | 83.19332 |
| 7.021652 | 6.943553 |
| 16.8942  | 9.352655 |
| 34.44746 | 32.07357 |
| 6.56551  | 4.468224 |
| 22.6774  | 29.59654 |
| 82.00682 | 86.04113 |
| 49.26328 | 59.07409 |
| 12.79395 | 17.52688 |
| 4.868764 | 4.961026 |

|          |          |
|----------|----------|
| 85.87082 | 83.80409 |
| 4.161295 | 6.518996 |
| 1.762292 | 2.451785 |
| 0        | 0        |
| 10.21923 | 15.79219 |
| 2.912464 | 1.824057 |
| 18.839   | 18.12485 |
| 0.030198 | 0        |
| 0.08422  | 0.093405 |
| 95.66128 | 108.251  |
| 8.411337 | 10.67202 |
| 15.38264 | 12.34017 |
| 7.837079 | 5.827682 |
| 85.07558 | 67.79581 |
| 10.4561  | 9.676842 |
| 4.427259 | 3.152078 |
| 19.747   | 44.44538 |
| 8.45322  | 10.6073  |
| 7.475512 | 4.228863 |
| 0.131373 | 0.05828  |
| 6.611622 | 6.667695 |
| 2.890964 | 3.511612 |
| 0.129934 | 0.132096 |
| 5.669404 | 3.194977 |
| 6.304517 | 5.090244 |
| 9.261058 | 10.73223 |
| 10.78774 | 9.902335 |
| 7.181626 | 7.787645 |
| 9.054679 | 11.31566 |
| 1.731287 | 2.512474 |
| 33.01497 | 25.90032 |
| 12.10601 | 8.161454 |
| 28.50758 | 19.34703 |
| 4.998658 | 3.139701 |
| 5.631999 | 3.316361 |
| 912.4409 | 898.4089 |
| 4.707435 | 1.5109   |
| 14.33386 | 7.54066  |
| 1.656031 | 1.108317 |
| 30.00608 | 29.82135 |
| 0.239903 | 0.443445 |
| 6.242647 | 4.615651 |
| 61.10246 | 58.50494 |
| 21.80118 | 18.54583 |
| 23.96244 | 33.54029 |
| 0.174893 | 0.11638  |
| 10.30777 | 3.837296 |
| 2.240149 | 1.113724 |
| 3.444519 | 8.494211 |
| 0.007589 | 0        |
| 13.78774 | 16.45695 |
| 0.309771 | 0.294475 |
| 1.77536  | 2.28777  |
| 0.111048 | 0.20937  |
| 0.141107 | 0        |
| 1.753284 | 2.768051 |
| 3.519746 | 2.714695 |
| 8.824744 | 10.0191  |
| 24.52833 | 31.49188 |
| 8.675803 | 13.96741 |
| 14.08156 | 12.84879 |
| 4.736949 | 6.620099 |
| 6.52054  | 6.688586 |
| 14.62551 | 18.70963 |
| 8.60672  | 7.470295 |

|          |          |
|----------|----------|
| 27.22428 | 22.78862 |
| 1.703278 | 1.219881 |
| 18.5788  | 17.39323 |
| 2.29195  | 2.416075 |
| 13.07587 | 8.294276 |
| 3.460123 | 2.15085  |
| 5.89769  | 6.523026 |
| 2.026367 | 1.392811 |
| 17.85085 | 27.32638 |
| 72.08716 | 56.77253 |
| 18.37513 | 43.6311  |
| 0.031987 | 0.053213 |
| 5.427269 | 6.063539 |
| 21.69348 | 14.78919 |
| 10.98486 | 10.35404 |
| 18.60411 | 21.56635 |
| 3.811911 | 3.056395 |
| 19.74603 | 18.02764 |
| 1.614165 | 1.90696  |
| 1.526383 | 0.846426 |
| 2.617388 | 2.250266 |
| 389.6076 | 358.1947 |
| 6.403519 | 11.06082 |
| 9.036253 | 25.37792 |
| 19.94058 | 18.53239 |
| 10.06735 | 14.96303 |
| 13.14687 | 13.2619  |
| 3.771073 | 7.283669 |
| 210.6552 | 197.6917 |
| 12.57721 | 15.35597 |
| 0.531162 | 0.785454 |
| 23.48945 | 14.94985 |
| 1.410258 | 2.799539 |
| 32.06455 | 30.41218 |
| 9.400843 | 10.95601 |
| 0.094828 | 0.077124 |
| 25.20466 | 22.28236 |
| 12.95404 | 11.10863 |
| 159.2817 | 125.4528 |
| 0.110508 | 0.040853 |
| 8.608137 | 10.87234 |
| 18.80821 | 14.51378 |
| 9.631386 | 7.921733 |
| 13.69158 | 17.56273 |
| 5.568175 | 4.019793 |
| 5.183954 | 6.384419 |
| 15.73504 | 12.12596 |
| 2.701605 | 1.94201  |
| 7.105569 | 7.285093 |
| 50.8971  | 45.77469 |
| 23.79592 | 8.855229 |
| 4.392135 | 3.830707 |
| 40.40179 | 36.71596 |
| 30.74346 | 35.28601 |
| 4.792456 | 2.350921 |
| 10.44289 | 13.44109 |
| 10.18711 | 9.88005  |
| 17.89247 | 15.67664 |
| 19.9822  | 20.88011 |
| 19.41388 | 21.77387 |
| 29.55378 | 29.14817 |
| 0.225361 | 0.178528 |
| 19.83584 | 15.98243 |
| 9.959031 | 14.86912 |
| 133.2142 | 130.928  |

|          |          |
|----------|----------|
| 7.488471 | 6.369077 |
| 38.05004 | 37.49865 |
| 0        | 0.018007 |
| 6.0552   | 7.66961  |
| 33.64434 | 28.93587 |
| 13.58151 | 16.7022  |
| 8.596005 | 3.693363 |
| 17.38678 | 18.60402 |
| 1.686987 | 1.423217 |
| 2.400063 | 1.643635 |
| 15.48982 | 11.68862 |
| 3.053453 | 1.755945 |
| 3.009214 | 2.002441 |
| 0.038611 | 0.171289 |
| 0        | 0.023053 |
| 1.162719 | 0.853269 |
| 0        | 0        |
| 9.020924 | 4.719829 |
| 20.41763 | 23.35462 |
| 84.38502 | 81.14363 |
| 10.5218  | 12.48181 |
| 52.78488 | 50.71534 |
| 6.123388 | 1.925865 |
| 2.760709 | 1.208603 |
| 0        | 0        |
| 108.9936 | 101.4353 |
| 1.773911 | 1.26209  |
| 10.79772 | 13.76011 |
| 0.871055 | 0.509861 |
| 0.658428 | 0.463541 |
| 10.56606 | 5.358415 |
| 0.580613 | 0.633203 |
| 0.497017 | 0.297958 |
| 0.249095 | 0        |
| 0.65554  | 0.193876 |
| 78.38032 | 76.62276 |
| 0.626447 | 0.932702 |
| 1.000479 | 1.426619 |
| 22.72222 | 37.79236 |
| 9.460667 | 6.70537  |
| 1.112861 | 1.015254 |
| 38.70552 | 33.30493 |
| 11.36247 | 13.96844 |
| 6.760159 | 6.10927  |
| 1.813701 | 1.32903  |
| 10.00854 | 7.149205 |
| 33.15123 | 33.57504 |
| 10.5248  | 12.06912 |
| 1.861512 | 2.671744 |
| 51.43244 | 40.44388 |
| 0.637515 | 0.439938 |
| 1.6967   | 1.683305 |
| 0        | 0        |
| 0.056623 | 0.125596 |
| 9.403703 | 9.63005  |
| 2.387957 | 2.357713 |
| 11.97411 | 11.28965 |
| 6.994986 | 10.46651 |
| 3.356048 | 2.435577 |
| 0.543986 | 0.281546 |
| 7.075075 | 2.753224 |
| 34.93838 | 38.3912  |
| 58.7926  | 57.66704 |
| 4.188006 | 6.629456 |
| 10.46604 | 10.6575  |

|          |          |
|----------|----------|
| 4.054749 | 2.885335 |
| 19.30666 | 18.94754 |
| 0        | 0.025916 |
| 7.242373 | 5.111421 |
| 0.124969 | 0.0252   |
| 39.14928 | 36.14273 |
| 18.33999 | 24.82494 |
| 58.55563 | 49.13011 |
| 4.636633 | 4.541747 |
| 0.028454 | 0.015779 |
| 0.428261 | 0.26793  |
| 0        | 0        |
| 431.9181 | 393.6868 |
| 8.482919 | 4.256033 |
| 17.05939 | 19.04861 |
| 27.03985 | 27.09785 |
| 2.205162 | 2.847685 |
| 17.66426 | 16.76835 |
| 0.186657 | 0        |
| 78.20104 | 82.47207 |
| 90.29317 | 94.7945  |
| 3.875838 | 3.442907 |
| 1.306299 | 0.710452 |
| 0        | 0        |
| 4.915475 | 5.767425 |
| 4.891373 | 6.795726 |
| 0.078951 | 0.035024 |
| 47.18418 | 36.36675 |
| 28.53605 | 33.61758 |
| 0.844417 | 0.402535 |
| 267.7364 | 271.7353 |
| 100.5968 | 125.6561 |
| 2.5323   | 2.869089 |
| 0.159606 | 0.118009 |
| 1.486203 | 1.740796 |
| 11.15948 | 7.906275 |
| 2.630104 | 7.182977 |
| 4.3604   | 2.129261 |
| 3.152981 | 4.203657 |
| 22.55962 | 27.78424 |
| 3.877982 | 3.831727 |
| 20.3316  | 25.97642 |
| 16.28148 | 16.97433 |
| 117.7587 | 105.7584 |
| 30.10316 | 25.812   |
| 111.7564 | 104.7028 |
| 40.32746 | 49.55212 |
| 14.85321 | 10.71011 |
| 33.40866 | 34.66328 |
| 8.20162  | 6.959892 |
| 64.61992 | 51.94133 |
| 0.102049 | 0.135815 |
| 1.649961 | 1.467081 |
| 0        | 0        |
| 35.71191 | 34.79599 |
| 7.707641 | 7.017701 |
| 25.05017 | 31.04162 |
| 19.95578 | 14.72522 |
| 52.30968 | 36.29109 |
| 0        | 0        |
| 78.99673 | 81.58673 |
| 4.793685 | 6.255949 |
| 4.21713  | 3.56862  |
| 11.59907 | 6.121037 |
| 7.817973 | 4.729422 |

|          |          |
|----------|----------|
| 0.542469 | 0.544333 |
| 0.594844 | 0.082465 |
| 10.48602 | 4.50241  |
| 1.966553 | 1.502893 |
| 23.18774 | 26.82102 |
| 14.17636 | 11.4786  |
| 35.72031 | 58.04032 |
| 0.308361 | 0.141514 |
| 10.8873  | 10.00577 |
| 20.28145 | 22.44891 |
| 5.714409 | 6.92054  |
| 4.816488 | 4.587464 |
| 0        | 0        |
| 22.0642  | 24.92096 |
| 75.60372 | 95.03857 |
| 34.1688  | 22.20995 |
| 13.01402 | 18.51909 |
| 11.22442 | 12.85014 |
| 0.994628 | 0.857969 |
| 3.188696 | 1.871033 |
| 0        | 0        |
| 3.522312 | 2.622442 |
| 7.092526 | 14.24964 |
| 50.28721 | 40.54784 |
| 7.776229 | 5.5791   |
| 12.66633 | 10.331   |
| 5.476018 | 3.247495 |
| 81.34842 | 85.5802  |
| 2.610761 | 1.901081 |
| 4.985832 | 8.359826 |
| 0        | 0.02711  |
| 6.735544 | 5.6682   |
| 1.880209 | 0.854072 |
| 6.23447  | 3.717144 |
| 13.66618 | 18.52767 |
| 6.964935 | 9.194891 |
| 1.158804 | 1.348183 |
| 13.44994 | 11.15689 |
| 18.80468 | 17.00585 |
| 0.762609 | 0.174989 |
| 75.14246 | 116.3682 |
| 0.094071 | 0.052165 |
| 8.038125 | 5.371431 |
| 26.09527 | 18.79842 |
| 0.025295 | 0.028054 |
| 0.088176 | 0.183361 |
| 45.66299 | 30.06565 |
| 2.050039 | 1.254919 |
| 1.379709 | 1.295553 |
| 11.02906 | 12.5315  |
| 54.36999 | 35.19773 |
| 7.346239 | 7.322072 |
| 0.044731 | 0.148829 |
| 5.255045 | 1.967375 |
| 4.193735 | 4.823844 |
| 1.453357 | 0.964104 |
| 2.375657 | 2.857689 |
| 15.27083 | 15.62819 |
| 0        | 0.014421 |
| 0.043357 | 0.024043 |
| 0.178806 | 0.488139 |
| 63.6862  | 45.27684 |
| 0.729251 | 0.899423 |
| 32.35675 | 25.35916 |
| 0        | 0        |

|          |          |
|----------|----------|
| 0.292863 | 0        |
| 0.624628 | 0.50032  |
| 15.48306 | 16.08532 |
| 4.956975 | 5.480299 |
| 14.80259 | 12.13297 |
| 10.86712 | 10.69046 |
| 208.2299 | 206.9055 |
| 64.24081 | 48.57864 |
| 30.20331 | 36.02801 |
| 4.473868 | 4.112066 |
| 54.02068 | 62.33919 |
| 10.81528 | 9.75511  |
| 0.165235 | 0.36651  |
| 8.170508 | 5.128263 |
| 21.1586  | 26.35028 |
| 8.806758 | 11.7005  |
| 24.77524 | 18.16512 |
| 0.474389 | 0.515389 |
| 0.263879 | 0.362338 |
| 1.425508 | 0.400006 |
| 12.10925 | 13.87415 |
| 5.283023 | 10.37713 |
| 3.639994 | 3.759928 |
| 2.303501 | 1.766818 |
| 29.5228  | 35.47798 |
| 1.388525 | 0.559985 |
| 11.94281 | 12.58429 |
| 62.22165 | 62.0684  |
| 0.185639 | 0.133825 |
| 4.313998 | 4.73039  |
| 1149.676 | 1151.718 |
| 0.100697 | 0.335037 |
| 72.33305 | 70.75207 |
| 14.18399 | 10.54195 |
| 3.783688 | 2.727621 |
| 23.14209 | 17.10565 |
| 0.234371 | 0.09452  |
| 0.606369 | 0.190054 |
| 46.02961 | 32.12679 |
| 0.149032 | 0.264458 |
| 9.499495 | 7.908625 |
| 8.330465 | 13.42418 |
| 22.82697 | 24.28877 |
| 19.2794  | 17.95913 |
| 17.38047 | 20.02562 |
| 3.313349 | 6.144789 |
| 27.71166 | 21.28584 |
| 0.479991 | 1.610328 |
| 9.229775 | 8.231317 |
| 9.981195 | 6.922408 |
| 15.3971  | 8.876004 |
| 8.66785  | 6.813866 |
| 0.20578  | 0.09781  |
| 9.857806 | 15.66747 |
| 2.056772 | 2.230016 |
| 11.21697 | 12.84952 |
| 63.11531 | 60.19208 |
| 3.613253 | 1.52391  |
| 3.401163 | 3.253986 |
| 1.512687 | 1.504961 |
| 1.599221 | 1.440465 |
| 25.79447 | 19.67375 |
| 143.4944 | 148.611  |
| 5.79708  | 4.591123 |
| 1.767829 | 1.108628 |

|          |          |
|----------|----------|
| 0.994527 | 0.525234 |
| 2.075686 | 1.364939 |
| 2.153364 | 1.705865 |
| 5.217525 | 3.713345 |
| 518.3372 | 565.7922 |
| 2256.699 | 2793.401 |
| 2.247626 | 1.509066 |
| 0.180269 | 0.188169 |
| 1.23109  | 0.313662 |
| 14.63009 | 12.7545  |
| 10.76715 | 10.92921 |
| 91.13824 | 89.47875 |
| 2.129431 | 2.409379 |
| 0.781121 | 0.406083 |
| 38.96712 | 36.06282 |
| 0.020919 | 0        |
| 0.562236 | 0.400856 |
| 0.029502 | 0.114518 |
| 36.37756 | 29.30756 |
| 0.664515 | 0.535991 |
| 10.11528 | 8.36549  |
| 48.925   | 80.21162 |
| 17.75439 | 19.39415 |
| 3.471326 | 3.122934 |
| 1.795331 | 1.859848 |
| 19.73386 | 15.89094 |
| 27.5034  | 18.23874 |
| 14.25833 | 21.41808 |
| 74.45424 | 107.8798 |
| 0.964938 | 0.42807  |
| 2.359338 | 3.663309 |
| 0.303639 | 0.192431 |
| 0.49769  | 0.48828  |
| 0.553378 | 0.487374 |
| 7.468868 | 8.641355 |
| 5.014249 | 5.527907 |
| 15.18102 | 12.72417 |
| 2.653286 | 1.412475 |
| 75.20144 | 79.20689 |
| 0.042457 | 0.361007 |
| 4.569396 | 5.186051 |
| 9.446379 | 8.403402 |
| 17.31779 | 15.56929 |
| 8.218696 | 8.449806 |
| 55.02701 | 57.3355  |
| 0.291359 | 0.896241 |
| 26.28181 | 12.88516 |
| 5.27753  | 3.207179 |
| 33.19025 | 25.97108 |
| 41.55976 | 31.69597 |
| 17.6133  | 13.42978 |
| 25.05136 | 18.05631 |
| 37.93586 | 32.34987 |
| 8.834342 | 6.604782 |
| 4.003928 | 5.005767 |
| 0.605923 | 0.313602 |
| 0.080528 | 0.08931  |
| 58.54993 | 51.72346 |
| 26.7011  | 30.57745 |
| 16.01726 | 7.17226  |
| 31.44748 | 47.64804 |
| 2.849817 | 1.543126 |
| 13.62567 | 18.92554 |
| 38.47476 | 38.34392 |
| 14.9952  | 16.61191 |

|          |          |
|----------|----------|
| 14.97698 | 16.12094 |
| 1.459207 | 1.017994 |
| 2.053322 | 2.566741 |
| 0.409292 | 0.248929 |
| 132.2554 | 101.142  |
| 53.81234 | 45.57694 |
| 35.98894 | 36.82126 |
| 0.134436 | 0.149097 |
| 17.87904 | 11.34117 |
| 3.409123 | 6.411891 |
| 23.41973 | 16.70051 |
| 0        | 0        |
| 8.563148 | 9.659241 |
| 0.523455 | 0.254873 |
| 156.8985 | 143.1104 |
| 6.455331 | 4.491482 |
| 1.46594  | 2.869089 |
| 28.91865 | 34.22026 |
| 2.431718 | 2.05362  |
| 13.83624 | 14.48548 |
| 124.7631 | 107.5471 |
| 0.064239 | 0        |
| 25.89684 | 29.49333 |
| 0.118233 | 0.032782 |
| 144.441  | 136.4312 |
| 0        | 0.030581 |
| 0        | 0.148082 |
| 0.134263 | 0.283629 |
| 7.743787 | 7.691042 |
| 3.051667 | 2.45778  |
| 24.14771 | 19.46965 |
| 7.215386 | 5.798076 |
| 0.018396 | 0.08161  |
| 0        | 0        |
| 0.410948 | 0.537954 |
| 2.558202 | 2.370557 |
| 33.97319 | 35.44651 |
| 2.472167 | 3.303265 |
| 2.993827 | 6.026058 |
| 14.50671 | 12.69904 |
| 9.244406 | 7.70065  |
| 3.130431 | 5.030433 |
| 15.02668 | 14.24699 |
| 18.52492 | 18.80883 |
| 7.433775 | 6.002002 |
| 0.060587 | 0        |
| 169.3297 | 156.0095 |
| 0.030139 | 0.300837 |
| 0.061079 | 0.06774  |
| 10.68292 | 8.906154 |
| 0.632464 | 0.613761 |
| 3.05314  | 2.080499 |
| 0.331032 | 0.081585 |
| 0        | 0        |
| 15.21092 | 14.5989  |
| 47.50165 | 44.28489 |
| 53.35388 | 66.78613 |
| 9.895666 | 16.7501  |
| 8.777581 | 4.489211 |
| 6.047166 | 2.762091 |
| 3.625936 | 4.36546  |
| 6.023427 | 4.507352 |
| 0.079837 | 0.118059 |
| 2.062638 | 2.764858 |
| 42.96285 | 38.7376  |

|          |          |
|----------|----------|
| 0.236785 | 0.196956 |
| 2.81234  | 0.862718 |
| 12.19382 | 9.485368 |
| 0.530279 | 0.441084 |
| 0.152112 | 0.056234 |
| 4.810766 | 6.769786 |
| 0.100872 | 0        |
| 9.454291 | 14.03808 |
| 1.139209 | 0.8504   |
| 2.745728 | 1.834916 |
| 13.81694 | 12.12035 |
| 191.2131 | 225.9631 |
| 3.004204 | 3.948854 |
| 0.057382 | 0.042426 |
| 4.70024  | 3.495439 |
| 0.739201 | 0.773163 |
| 28.07336 | 22.33603 |
| 35.78606 | 37.32038 |
| 2.55416  | 1.64693  |
| 2.094393 | 0.862074 |
| 0.405797 | 0.195675 |
| 4.298227 | 4.780853 |
| 0.632106 | 0.739991 |
| 14.19582 | 12.22487 |
| 4.9663   | 2.762994 |
| 238.7321 | 279.8628 |
| 33.81417 | 30.66633 |
| 1.245047 | 0.707896 |
| 87.78912 | 75.37286 |
| 0        | 0        |
| 9.831471 | 9.369575 |
| 52.13242 | 33.50906 |
| 35.17596 | 60.42503 |
| 52.97876 | 47.82661 |
| 35.89812 | 35.85814 |
| 0.088004 | 0.097602 |
| 1.542531 | 1.350601 |
| 6.866752 | 6.029053 |
| 6.710752 | 9.372204 |
| 36.66383 | 36.02527 |
| 0.098825 | 0.054802 |
| 0.080071 | 0        |
| 0.013592 | 0        |
| 26.91256 | 28.8052  |
| 1.973485 | 2.980685 |
| 0.187621 | 0.156062 |
| 0.354782 | 0.181604 |
| 1.294172 | 1.131975 |
| 5.019401 | 14.46156 |
| 7.042542 | 8.646264 |
| 0.268176 | 0.216308 |
| 2.412785 | 3.344907 |
| 0.036202 | 0        |
| 8.528321 | 3.806919 |
| 1.619095 | 0.670385 |
| 0.703933 | 0.301129 |
| 16.41245 | 25.53819 |
| 16.31754 | 35.6306  |
| 0        | 0.120311 |
| 3.412646 | 1.741883 |
| 4.478905 | 5.138667 |
| 4.400385 | 5.414308 |
| 7.426319 | 6.820105 |
| 20.52713 | 11.50479 |
| 8.658675 | 7.7948   |

|          |          |
|----------|----------|
| 0.260801 | 0.56041  |
| 437.7391 | 634.9269 |
| 2.031696 | 2.980138 |
| 18.34609 | 10.67737 |
| 4.95234  | 2.675566 |
| 2.197561 | 1.039029 |
| 17.55127 | 20.76523 |
| 2.232482 | 3.04655  |
| 4.482334 | 3.026388 |
| 2.270541 | 1.248503 |
| 0.305847 | 0.339203 |
| 0.124974 | 0.360369 |
| 0.363925 | 0.139178 |
| 4.336781 | 4.268173 |
| 4.141906 | 5.11773  |
| 0.313237 | 0.383967 |
| 0.014936 | 0.033129 |
| 56.75834 | 56.59774 |
| 8.645471 | 6.796808 |
| 6.102427 | 4.646662 |
| 0.173051 | 0.277224 |
| 0.011668 | 0.012941 |
| 0.050346 | 0.022335 |
| 0.022797 | 0.025283 |
| 6.873792 | 7.799922 |
| 3.522993 | 3.138795 |
| 31.08232 | 22.5215  |
| 2.188961 | 2.954916 |
| 0.043203 | 0.139389 |
| 0.269943 | 0.382545 |
| 0.927411 | 1.175492 |
| 12.07517 | 16.97055 |
| 20.58966 | 24.2559  |
| 12.04261 | 12.08135 |
| 4.262375 | 3.884305 |
| 0.805878 | 0.152131 |
| 0.173298 | 0.089692 |
| 0.040447 | 0.119623 |
| 14.38516 | 13.99739 |
| 19.04994 | 13.81251 |
| 2.165457 | 1.322633 |
| 0.368833 | 0.460191 |
| 5.347442 | 3.450035 |
| 5.507007 | 5.613697 |
| 0        | 0        |
| 0        | 0        |
| 14.32358 | 16.21605 |
| 33.07141 | 67.53512 |
| 0        | 0.025043 |
| 0.38079  | 0.241325 |
| 23.27277 | 17.38864 |
| 7.926333 | 8.337653 |
| 6.10367  | 8.720504 |
| 2.864804 | 3.338251 |
| 0        | 0        |
| 8.488244 | 8.179359 |
| 0.338041 | 0.316099 |
| 8.628542 | 9.975356 |
| 0.073497 | 0.244539 |
| 1.272906 | 1.794349 |
| 4.896324 | 3.388743 |
| 10.49769 | 12.16291 |
| 8.259845 | 11.94204 |
| 0.532456 | 0.178531 |
| 63.8686  | 72.86789 |

|          |          |
|----------|----------|
| 13.95413 | 8.621518 |
| 11.13554 | 7.688608 |
| 127.1418 | 141.008  |
| 7.160587 | 7.795811 |
| 45.89628 | 45.05859 |
| 0.213357 | 0.157751 |
| 4.375977 | 6.078545 |
| 0.732881 | 1.032488 |
| 6.793419 | 9.753326 |
| 1.300724 | 1.736131 |
| 2.621266 | 3.601771 |
| 4.829163 | 4.368754 |
| 5.663715 | 4.390309 |
| 2.689998 | 2.285647 |
| 3.677692 | 2.337281 |
| 9.611083 | 9.423799 |
| 15.7785  | 21.01519 |
| 34.54903 | 31.73564 |
| 0.349558 | 0.298216 |
| 3.443907 | 4.71191  |
| 4.674837 | 8.379562 |
| 1.480139 | 2.188752 |
| 4.236469 | 3.968637 |
| 6.951882 | 5.87621  |
| 3.585917 | 6.135419 |
| 7.220258 | 9.674284 |
| 2.891966 | 3.741927 |
| 0.040342 | 0        |
| 1.090244 | 1.65171  |
| 2.319621 | 1.765242 |
| 1.390615 | 4.155076 |
| 2.758942 | 2.846358 |
| 2.424322 | 3.683547 |
| 4.60512  | 6.232193 |
| 0.633217 | 0.614491 |
| 1.319803 | 0.716299 |
| 5.179714 | 3.992896 |
| 444.7724 | 439.6752 |
| 18.94183 | 20.04365 |
| 20.69231 | 23.63407 |
| 15.86718 | 15.19318 |
| 3.295527 | 3.326933 |
| 7.155143 | 6.884333 |
| 10.56756 | 20.69289 |
| 58.49219 | 70.73906 |
| 32.83424 | 20.16344 |
| 14.68823 | 18.12007 |
| 0.0476   | 0.123181 |
| 4.508535 | 3.863088 |
| 588.108  | 558.8528 |
| 190.1327 | 188.1752 |
| 6.392057 | 3.795218 |
| 1.285058 | 0.90532  |
| 55.08545 | 56.05839 |
| 129.0283 | 142.2974 |
| 43.21382 | 40.47975 |
| 2.294704 | 1.980752 |
| 22.61984 | 27.49105 |
| 0.017587 | 0.063392 |
| 3.865234 | 3.394088 |
| 27.24512 | 23.81845 |
| 3.848858 | 2.160988 |
| 29.29292 | 19.27574 |
| 52.02301 | 39.03584 |
| 0.198814 | 0.0315   |

|          |          |
|----------|----------|
| 65.50095 | 59.81158 |
| 3.77378  | 2.729577 |
| 55.12187 | 52.81177 |
| 8.05325  | 6.856165 |
| 4.394092 | 2.045589 |
| 2.726701 | 1.323638 |
| 4.220674 | 10.76749 |
| 23.3956  | 33.92767 |
| 0        | 0        |
| 2.434293 | 3.553791 |
| 2.177157 | 2.811027 |
| 6.392613 | 6.031289 |
| 30.77629 | 28.04102 |
| 4.284672 | 3.586631 |
| 11.73521 | 14.0732  |
| 1.703604 | 1.905549 |
| 23.06275 | 19.26846 |
| 2.629627 | 0.33769  |
| 9.056457 | 13.39759 |
| 12.53047 | 14.85028 |
| 0.803867 | 0.47199  |
| 8.637533 | 12.05222 |
| 0.013366 | 0.088945 |
| 4.543971 | 3.706577 |
| 63.34149 | 74.92336 |
| 11.42429 | 9.966309 |
| 9.225563 | 13.39823 |
| 99.5819  | 107.9381 |
| 0.386032 | 0.3211   |
| 14.97922 | 17.68769 |
| 7.494332 | 5.988881 |
| 0.948042 | 0.909054 |
| 7.640549 | 7.182332 |
| 21.88872 | 33.08768 |
| 2.476499 | 2.591851 |
| 30.15819 | 31.00514 |
| 7.967424 | 8.672722 |
| 1.832501 | 2.225913 |
| 13.22022 | 12.24804 |
| 14.5229  | 14.60023 |
| 21.30517 | 14.04044 |
| 54.65523 | 93.84488 |
| 9.754188 | 6.539966 |
| 25.5331  | 23.23508 |
| 9.736475 | 12.21918 |
| 0.084735 | 0        |
| 15.91804 | 17.67816 |
| 9.677914 | 12.69355 |
| 0.184166 | 0.331908 |
| 31.28689 | 30.67219 |
| 0.161125 | 0.059566 |
| 1.576658 | 1.934068 |
| 2.731238 | 2.596379 |
| 248.6131 | 406.3114 |
| 53.53566 | 39.75793 |
| 2.664176 | 1.413133 |
| 9.042492 | 6.448458 |
| 0.20932  | 0.06159  |
| 16.22424 | 21.87466 |
| 49.19267 | 59.98105 |
| 1.48182  | 0.542784 |
| 42.46034 | 40.64063 |
| 0.029495 | 0.065423 |
| 11.42703 | 15.25487 |
| 0.1289   | 0.023826 |

|          |          |
|----------|----------|
| 1.105623 | 1.06271  |
| 41.02199 | 38.00321 |
| 8.279635 | 10.72456 |
| 0.775221 | 0.921179 |
| 3.110392 | 1.322352 |
| 0.326325 | 0.58221  |
| 4.211488 | 3.996661 |
| 12.72347 | 13.88095 |
| 11.93175 | 9.932019 |
| 15.24589 | 4.171535 |
| 84.2425  | 72.36841 |
| 2.583453 | 2.259553 |
| 927.7676 | 916.4877 |
| 60.38961 | 103.2756 |
| 156.5431 | 100.8533 |
| 8.683266 | 8.388204 |
| 21.11115 | 18.19567 |
| 3.585118 | 2.48762  |
| 0.348803 | 0.902635 |
| 50.86205 | 48.0435  |
| 18.57335 | 17.20329 |
| 33.70843 | 45.15986 |
| 13.99578 | 11.873   |
| 0        | 0        |
| 33.83993 | 30.79382 |
| 0.040056 | 0.044425 |
| 1.289878 | 0.77914  |
| 9.534692 | 6.399088 |
| 9.526135 | 10.46134 |
| 9.625456 | 6.743029 |
| 9.792109 | 13.64318 |
| 38.08651 | 43.10448 |
| 9.71121  | 8.272568 |
| 3.264867 | 4.028292 |
| 110.1467 | 147.0886 |
| 3.613454 | 2.991343 |
| 7.555312 | 6.555571 |
| 101.057  | 96.33484 |
| 3.806909 | 3.513275 |
| 250.1043 | 281.7048 |
| 17.09173 | 18.72308 |
| 0        | 0        |
| 0        | 0.126206 |
| 3.454775 | 5.259806 |
| 19.19364 | 25.25119 |
| 43.48763 | 48.14933 |
| 0.039358 | 0.021825 |
| 6.535462 | 5.995445 |
| 4.618033 | 2.181456 |
| 1.943617 | 1.241619 |
| 14.36539 | 15.44355 |
| 1.11559  | 0.285521 |
| 3.867768 | 5.004522 |
| 27.73773 | 31.76895 |
| 0.520128 | 0.394689 |
| 2.700478 | 2.346525 |
| 21.18439 | 34.51402 |
| 265.731  | 286.2686 |
| 12.4563  | 13.11742 |
| 28.11539 | 21.04849 |
| 8.560152 | 8.092547 |
| 396.4769 | 547.4031 |
| 72.52368 | 64.98069 |
| 1.025288 | 0.459437 |
| 16.09328 | 16.0089  |

|          |          |
|----------|----------|
| 7.282774 | 4.978094 |
| 0.479744 | 0.864606 |
| 4.679751 | 3.174279 |
| 46.70911 | 37.96776 |
| 5.124943 | 5.792483 |
| 1.588517 | 1.211211 |
| 5.986532 | 1.841404 |
| 18.07894 | 14.58571 |
| 0.053801 | 0.029835 |
| 1.646033 | 1.846063 |
| 2.023589 | 3.548225 |
| 11.34129 | 12.76955 |
| 2.153881 | 1.388829 |
| 5.429816 | 3.900339 |
| 7.729581 | 6.198157 |
| 0.027717 | 0        |
| 91.06332 | 112.3296 |
| 10.78635 | 12.88711 |
| 7.806527 | 6.333498 |
| 2.693535 | 1.63399  |
| 1.829102 | 1.061689 |
| 0.768085 | 0.402264 |
| 21.3448  | 22.46313 |
| 12.42617 | 9.620962 |
| 22.28609 | 12.14219 |
| 0.536946 | 0.860175 |
| 54.89312 | 64.14732 |
| 6.458325 | 4.840611 |
| 114.6081 | 156.4821 |
| 5.697661 | 3.192099 |
| 35.37766 | 54.02475 |
| 513.4227 | 578.0243 |
| 0.035847 | 0        |
| 19.9995  | 19.8645  |
| 0.12405  | 0.160508 |
| 13.7263  | 23.85198 |
| 4.309579 | 4.244557 |
| 20.79996 | 23.51636 |
| 3.228304 | 4.549661 |
| 8.438078 | 5.066485 |
| 42.72723 | 50.95899 |
| 1.793363 | 2.08103  |
| 34.93085 | 30.28273 |
| 0.03042  | 0.050606 |
| 1.267079 | 2.833957 |
| 4.1972   | 3.278959 |
| 0        | 0.034602 |
| 54.59352 | 47.88716 |
| 909.3057 | 912.7224 |
| 34.83783 | 24.06312 |
| 3.265046 | 1.414506 |
| 0        | 0.026545 |
| 2.832323 | 2.290472 |
| 7.532525 | 13.49847 |
| 0.730434 | 0.945112 |
| 226.6519 | 252.6286 |
| 1.022608 | 1.35016  |
| 8.157964 | 9.748916 |
| 83.59364 | 96.95702 |
| 2.389921 | 1.155376 |
| 142.6989 | 179.9829 |
| 18.80612 | 14.9772  |
| 46.91882 | 34.16758 |
| 6.258824 | 7.264273 |
| 208.0405 | 109.1493 |

|          |          |
|----------|----------|
| 0.211612 | 0.23469  |
| 11.0379  | 10.13462 |
| 30.00144 | 17.91822 |
| 0.700228 | 0.776596 |
| 0.570186 | 0.316185 |
| 169.5865 | 178.4212 |
| 13.52996 | 10.13993 |
| 3.221401 | 4.175109 |
| 9.756183 | 10.33761 |
| 1.10398  | 0.505723 |
| 132.989  | 123.4382 |
| 1.567211 | 0.596934 |
| 24.99964 | 31.2722  |
| 2.549891 | 1.677061 |
| 6.825787 | 7.042059 |
| 22.94195 | 16.21393 |
| 6.384493 | 2.445781 |
| 7.482784 | 4.822312 |
| 7.887646 | 6.174974 |
| 6.077041 | 4.355559 |
| 30.46387 | 15.03845 |
| 16.27997 | 8.607267 |
| 13.44574 | 13.57036 |
| 26.22466 | 33.26568 |
| 42.67357 | 55.54059 |
| 16.51752 | 16.25086 |
| 16.53102 | 12.92912 |
| 0        | 0        |
| 17.65686 | 9.968643 |
| 24.16512 | 30.4332  |
| 16.02483 | 10.7875  |
| 134.5216 | 151.5644 |
| 18.93471 | 24.61509 |
| 1.527353 | 0.381134 |
| 73.56988 | 63.12629 |
| 0.057335 | 0.151022 |
| 0.081159 | 0.135016 |
| 0        | 0.011455 |
| 14.3748  | 18.62788 |
| 5.404266 | 8.147134 |
| 18.18399 | 10.86852 |
| 37.54161 | 31.73695 |
| 0.189289 | 0        |
| 13.72944 | 21.72602 |
| 4.724194 | 5.769248 |
| 0.23429  | 0.334083 |
| 0.421017 | 0.831726 |
| 0.568001 | 0.678405 |
| 19.67606 | 19.24208 |
| 8.666294 | 10.27134 |
| 1.671902 | 5.861794 |
| 10.30084 | 10.00274 |
| 58.35338 | 71.25437 |
| 0.058025 | 0.112618 |
| 56.65655 | 33.46832 |
| 6.613783 | 8.190848 |
| 23.67274 | 25.77497 |
| 17.83546 | 15.33413 |
| 8.856249 | 9.692994 |
| 161.333  | 111.793  |
| 56.93477 | 43.76871 |
| 13.77963 | 15.10825 |
| 18.17428 | 23.90205 |
| 0.056821 | 0.03361  |
| 10.5281  | 13.25146 |

|          |          |
|----------|----------|
| 16.85292 | 3.690938 |
| 48.22243 | 43.17082 |
| 3.184412 | 2.79086  |
| 6.888829 | 6.767527 |
| 9.941986 | 8.421806 |
| 0        | 0        |
| 6.492578 | 9.826006 |
| 25.4267  | 18.62577 |
| 0.208054 | 0.134601 |
| 15.18274 | 19.98469 |
| 0        | 0        |
| 0.624692 | 0.465328 |
| 33.97227 | 29.22231 |
| 0        | 0        |
| 0.043372 | 0.072153 |
| 11.30957 | 16.00883 |
| 1.765309 | 1.707415 |
| 9.357162 | 10.97695 |
| 0.637398 | 0.215668 |
| 16.36149 | 15.45431 |
| 14.97963 | 14.78934 |
| 0.400745 | 0.317465 |
| 5.258229 | 3.241963 |
| 0        | 0.07341  |
| 31.50987 | 37.82025 |
| 19.18724 | 18.25946 |
| 0.026983 | 0        |
| 47.15243 | 50.75459 |
| 0.287851 | 0.145111 |
| 30.29786 | 27.48813 |
| 0        | 0        |
| 4.871781 | 3.241861 |
| 1.252953 | 0.437287 |
| 53.7863  | 50.40515 |
| 30.17971 | 36.7018  |
| 0.411875 | 0.343824 |
| 0.015722 | 0.244116 |
| 0        | 0        |
| 12.81408 | 16.20191 |
| 0.038408 | 0.117142 |
| 2.922182 | 1.978198 |
| 0.045854 | 0.050855 |
| 22.12057 | 12.11602 |
| 20.32624 | 23.48098 |
| 2.54258  | 3.853339 |
| 0        | 0.073488 |
| 36.89142 | 31.15588 |
| 3.834185 | 7.795965 |
| 6.654867 | 5.912909 |
| 32.5581  | 11.39786 |
| 0.0204   | 0        |
| 0        | 0        |
| 82.26218 | 92.98135 |
| 7.127224 | 10.56755 |
| 32.13879 | 17.32172 |
| 8.541868 | 7.745828 |
| 12.58056 | 18.56455 |
| 6.536025 | 7.569175 |
| 11.64384 | 11.17984 |
| 237.6986 | 268.1505 |
| 0.314842 | 0.436474 |
| 80.02103 | 109.535  |
| 11.55289 | 13.28198 |
| 12.32484 | 10.96319 |
| 0.849586 | 0.396734 |

|          |          |
|----------|----------|
| 13.60298 | 12.29156 |
| 0.320035 | 0.42149  |
| 2.269899 | 1.859484 |
| 135.2949 | 129.547  |
| 3.932255 | 4.873067 |
| 40.86194 | 41.93563 |
| 4.604231 | 4.465912 |
| 0.076935 | 0.042663 |
| 11.9229  | 12.50568 |
| 3.862711 | 1.82757  |
| 250.8466 | 186.913  |
| 95.06664 | 67.16786 |
| 120.2432 | 162.2481 |
| 85.86569 | 112.4448 |
| 17.62122 | 19.02078 |
| 1.286034 | 0.396192 |
| 10.41508 | 14.30875 |
| 1.881421 | 1.671176 |
| 3.448486 | 2.116059 |
| 3.936295 | 4.613419 |
| 69.31664 | 80.13753 |
| 0.43005  | 0.558714 |
| 2.164711 | 2.695012 |
| 25.13634 | 28.53616 |
| 15.26921 | 23.02959 |
| 7.592077 | 6.442206 |
| 10.46723 | 9.155748 |
| 0.071727 | 0.01591  |
| 0        | 0        |
| 15.37161 | 28.18256 |
| 5.941718 | 5.253728 |
| 5.202579 | 5.434647 |
| 0.711695 | 0.620174 |
| 8.942979 | 8.550265 |
| 2.743213 | 0.982037 |
| 26.61733 | 60.63192 |
| 7.642746 | 9.092726 |
| 18.2539  | 15.83322 |
| 49.39849 | 48.97945 |
| 43.04827 | 38.03086 |
| 6.306273 | 8.122863 |
| 81.95537 | 94.80331 |
| 4.126728 | 3.398219 |
| 52.11108 | 41.77966 |
| 32.15256 | 26.2153  |
| 0        | 0        |
| 41.8679  | 38.09536 |
| 7.557473 | 4.93879  |
| 3.264427 | 3.237516 |
| 11.1082  | 14.15962 |
| 0.175104 | 0.166458 |
| 25.98504 | 32.70429 |
| 12.67354 | 4.735087 |
| 1.828423 | 0.705333 |
| 10.52216 | 8.348509 |
| 4.096414 | 3.681908 |
| 21.71126 | 9.036906 |
| 0.131421 | 0.062466 |
| 11.61536 | 12.39651 |
| 2.840315 | 1.833851 |
| 9.642736 | 7.769097 |
| 1.758333 | 2.872238 |
| 0.034802 | 0        |
| 2.095295 | 2.486884 |
| 2.101828 | 5.060843 |

|          |          |
|----------|----------|
| 0.165198 | 0.244286 |
| 8.890059 | 7.200422 |
| 1.546801 | 0.667138 |
| 23.13429 | 20.43084 |
| 0.65326  | 0.090563 |
| 1.25709  | 1.048726 |
| 32.89535 | 29.66712 |
| 4.368039 | 4.637173 |
| 58.72558 | 56.22644 |
| 0.064472 | 0        |
| 5.401833 | 1.516699 |
| 2.242198 | 2.89102  |
| 0.05947  | 0.131912 |
| 0        | 0        |
| 9.450929 | 8.40211  |
| 29.33547 | 26.95329 |
| 10.93599 | 14.74556 |
| 23.38489 | 21.33176 |
| 0.045286 | 0.050225 |
| 7.698273 | 8.746094 |
| 1.11745  | 1.40372  |
| 0        | 0        |
| 1273.571 | 1338.717 |
| 0.109694 | 0        |
| 9.366681 | 12.75746 |
| 17.24921 | 13.13347 |
| 2.162329 | 1.954052 |
| 48.02924 | 38.94885 |
| 17.22782 | 25.78396 |
| 55.51929 | 60.07647 |
| 3.989865 | 5.029859 |
| 0.634379 | 0.690536 |
| 0.021365 | 0        |
| 48.74563 | 41.1047  |
| 80.41389 | 72.08985 |
| 4.833636 | 3.566659 |
| 13.88662 | 16.81444 |
| 3.131378 | 2.773314 |
| 4.087918 | 4.172783 |
| 134.456  | 193.5656 |
| 10.56404 | 8.684347 |
| 15.06868 | 16.37712 |
| 9.874309 | 6.391408 |
| 8.018179 | 9.85097  |
| 0.021111 | 0.140479 |
| 0.088632 | 0        |
| 2.746642 | 5.490232 |
| 0        | 0.026014 |
| 6.874166 | 5.434034 |
| 85.25972 | 67.78005 |
| 5.162761 | 5.903821 |
| 3.764439 | 1.70742  |
| 6.644687 | 4.772137 |
| 19.27411 | 10.52579 |
| 25.19964 | 19.2492  |
| 9.967437 | 4.106693 |
| 0.508506 | 0.090962 |
| 92.01111 | 97.90834 |
| 60.61496 | 56.92736 |
| 4.339692 | 2.406491 |
| 1.862607 | 1.909248 |
| 13.29341 | 16.67837 |
| 10.02565 | 6.031161 |
| 0.11569  | 0.342152 |
| 21.87382 | 11.24608 |

|          |          |
|----------|----------|
| 60.52063 | 76.11869 |
| 68.50292 | 62.61014 |
| 12.9973  | 6.286274 |
| 0.474693 | 0.593316 |
| 0.232245 | 0.085858 |
| 2.520291 | 2.060593 |
| 0.203468 | 0.193422 |
| 249.4355 | 422.4532 |
| 12.70044 | 7.228659 |
| 172.2297 | 171.1728 |
| 33.1744  | 31.75693 |
| 106.3627 | 124.9428 |
| 139.8227 | 108.4139 |
| 6.470342 | 8.120806 |
| 0.562264 | 0.35976  |
| 23.98728 | 21.09186 |
| 139.562  | 126.5455 |
| 79.45487 | 55.57576 |
| 5.939062 | 2.828679 |
| 1.16146  | 0.208374 |
| 0.144792 | 0.1927   |
| 18.70979 | 11.21445 |
| 3.866896 | 4.768949 |
| 21.75307 | 9.901498 |
| 7.531143 | 1.518636 |
| 0.030125 | 0.06682  |
| 56.15579 | 47.02138 |
| 23.56874 | 15.36997 |
| 13.25945 | 13.40457 |
| 134.07   | 186.7425 |
| 13.59612 | 10.04352 |
| 6.289383 | 3.053342 |
| 18.22589 | 15.45317 |
| 0.07643  | 0.056511 |
| 2.377364 | 2.572333 |
| 41.13475 | 37.77176 |
| 12.04529 | 9.428083 |
| 4.758425 | 1.999281 |
| 30.79562 | 28.37634 |
| 113.4307 | 101.1752 |
| 0.067358 | 0.037352 |
| 3.434594 | 3.809174 |
| 0.10737  | 0        |
| 12.00514 | 11.09021 |
| 1.406499 | 1.64903  |
| 0.355459 | 0.722748 |
| 1.362052 | 0.566475 |
| 0.133952 | 0        |
| 28.32922 | 20.63903 |
| 1.004642 | 0.470444 |
| 0.616091 | 0.195224 |
| 46.90252 | 57.17897 |
| 0        | 0.02761  |
| 9.163426 | 5.012264 |
| 0.481843 | 0.361501 |
| 0.050192 | 0        |
| 5.513933 | 6.084711 |
| 11.00852 | 13.90892 |
| 0.072659 | 0        |
| 6.095386 | 1.638343 |
| 68.88369 | 100.065  |
| 62.42431 | 88.1434  |
| 10.28022 | 9.364757 |
| 3.208137 | 1.805172 |
| 20.66022 | 16.21318 |

|          |          |
|----------|----------|
| 10.12371 | 5.324273 |
| 5.147218 | 2.740117 |
| 9.455461 | 11.72722 |
| 0.286445 | 0.158842 |
| 0        | 0        |
| 5.365818 | 6.053182 |
| 7.681262 | 10.24044 |
| 1.486755 | 0.560627 |
| 13.88766 | 11.4345  |
| 2.669478 | 3.094318 |
| 184.5581 | 177.915  |
| 5.512164 | 3.7603   |
| 9.89891  | 11.46359 |
| 0.632464 | 0        |
| 27.8374  | 25.54519 |
| 4.549668 | 5.470595 |
| 6.620215 | 3.505746 |
| 0.190101 | 0.168667 |
| 36.35543 | 18.26849 |
| 11.14043 | 7.821728 |
| 2.253979 | 1.681684 |
| 6.23266  | 7.018744 |
| 49.9191  | 65.1976  |
| 1.409812 | 0.93814  |
| 11.82525 | 14.13262 |
| 24.85725 | 17.83825 |
| 0.619742 | 0.374908 |
| 5.606681 | 4.928672 |
| 1.696784 | 2.159836 |
| 70.08011 | 85.4748  |
| 19.16652 | 14.32717 |
| 35.7604  | 43.22434 |
| 2.048716 | 0.884943 |
| 5.475379 | 5.747215 |
| 5.129915 | 3.334719 |
| 12.51059 | 13.73898 |
| 2.258566 | 1.874287 |
| 0.562022 | 0.623316 |
| 29.92811 | 34.49779 |
| 12.25979 | 10.6642  |
| 0        | 0        |
| 0.054224 | 0.096221 |
| 0.459223 | 0.067907 |
| 4.383449 | 2.908937 |
| 0.302594 | 0.183052 |
| 89.26014 | 82.38174 |
| 1.361669 | 1.190714 |
| 11.856   | 10.39841 |
| 4.73733  | 4.944929 |
| 6.996395 | 7.21681  |
| 63.43095 | 82.27393 |
| 0.24046  | 0.053337 |
| 69.77274 | 58.43277 |
| 70.14256 | 75.95796 |
| 14.9771  | 9.324539 |
| 12.30193 | 11.403   |
| 41.95649 | 28.66626 |
| 56.76412 | 51.04827 |
| 0.535232 | 1.043305 |
| 2.13116  | 2.558058 |
| 20.56724 | 15.05311 |
| 40.74917 | 27.0345  |
| 8.283355 | 7.098077 |
| 42.48963 | 37.55898 |
| 11.88898 | 8.744617 |

|          |          |
|----------|----------|
| 0.187234 | 0.083062 |
| 25.13374 | 20.54345 |
| 30.55893 | 35.73407 |
| 36.93873 | 35.07547 |
| 5.744694 | 3.063084 |
| 1.299493 | 0.960811 |
| 44.26069 | 44.88311 |
| 13.66618 | 14.97697 |
| 14.82318 | 12.29047 |
| 2.625932 | 2.930521 |
| 0.234955 | 0.13029  |
| 2.34536  | 1.58959  |
| 7.735304 | 8.087619 |
| 17.3339  | 19.42409 |
| 10.92039 | 16.38514 |
| 70.26794 | 121.9204 |
| 0.237199 | 0        |
| 4.415336 | 3.756508 |
| 21.51912 | 13.33901 |
| 1.473927 | 0.585254 |
| 106.0888 | 106.6131 |
| 4.88358  | 2.00787  |
| 2.609886 | 1.338963 |
| 0.173306 | 0.048052 |
| 0.171458 | 0.211286 |
| 1567.723 | 1386.766 |
| 2.64146  | 1.395019 |
| 30.58666 | 25.6579  |
| 12.76804 | 7.825145 |
| 20.10104 | 13.91202 |
| 19.52999 | 20.9038  |
| 4.203727 | 2.814323 |
| 15.96047 | 14.7387  |
| 0.018186 | 0        |
| 3.545726 | 2.576417 |
| 0        | 0.045905 |
| 11.50987 | 14.04166 |
| 166.5279 | 134.5584 |
| 0.520749 | 0.226892 |
| 24.41039 | 26.0974  |
| 32.90319 | 37.24527 |
| 7.387427 | 6.571121 |
| 0.015948 | 0.053063 |
| 117.0287 | 116.0523 |
| 5.485547 | 4.840675 |
| 23.58065 | 16.92885 |
| 4.257386 | 2.924477 |
| 3.965213 | 1.851647 |
| 20.29994 | 12.93303 |
| 0        | 0        |
| 0.038278 | 0        |
| 8.736336 | 12.71018 |
| 0.472593 | 0.131034 |
| 7.379326 | 5.81451  |
| 18.91132 | 17.81016 |
| 92.18909 | 94.56262 |
| 0.226429 | 0.284607 |
| 0.763227 | 0.920071 |
| 23.61698 | 28.16826 |
| 4.195488 | 6.598661 |
| 0.147067 | 0.163107 |
| 73.2337  | 86.0319  |
| 39.72762 | 34.29506 |
| 54.88343 | 70.88711 |
| 38.80706 | 32.99605 |

|          |          |
|----------|----------|
| 6.242431 | 12.20922 |
| 18.8822  | 23.45356 |
| 3.131253 | 2.089077 |
| 13.10417 | 15.16208 |
| 26.94152 | 25.99588 |
| 17.25084 | 20.4903  |
| 18.27057 | 12.48275 |
| 0.110503 | 0.087539 |
| 0.115532 | 0.051253 |
| 0.321028 | 0.27059  |
| 18.05714 | 19.6424  |
| 6.67247  | 3.816234 |
| 32.07577 | 40.19451 |
| 4.225948 | 3.478279 |
| 0.136555 | 0        |
| 0        | 0        |
| 11.18735 | 15.4606  |
| 15.9694  | 18.4456  |
| 2.586954 | 1.946882 |
| 1.981496 | 2.991178 |
| 7.691567 | 8.837819 |
| 5.64121  | 6.964019 |
| 2.46583  | 2.24551  |
| 1.270054 | 0.992924 |
| 5.639875 | 5.41205  |
| 46.72812 | 27.26764 |
| 1.010498 | 0.560352 |
| 18.75915 | 31.44186 |
| 8.621391 | 7.046364 |
| 2.648361 | 2.679114 |
| 20.54089 | 22.84546 |
| 25.41312 | 22.2076  |
| 3.119133 | 3.66806  |
| 20.69563 | 36.79898 |
| 0        | 0        |
| 0.040082 | 0.40008  |
| 1.79265  | 2.570057 |
| 58.30051 | 84.95554 |
| 4.675951 | 4.529633 |
| 7.389083 | 9.534996 |
| 6.306062 | 4.422554 |
| 4.314335 | 4.127103 |
| 6.213474 | 3.892289 |
| 0.121074 | 0.590826 |
| 81.97063 | 83.78886 |
| 4.694479 | 4.577892 |
| 0.816396 | 0.203722 |
| 11.04189 | 8.874861 |
| 1.552553 | 1.232323 |
| 33.75883 | 27.70604 |
| 4.451874 | 4.831219 |
| 21.70027 | 24.00325 |
| 5.928801 | 7.009311 |
| 38.87339 | 33.5323  |
| 14.65272 | 11.35774 |
| 5.849094 | 4.391978 |
| 9.177202 | 8.89623  |
| 1.991973 | 1.377659 |
| 0.131077 | 0        |
| 2.237365 | 2.053042 |
| 91.12753 | 109.7041 |
| 23.03325 | 38.85341 |
| 1.613245 | 0.702895 |
| 57.3957  | 93.78641 |
| 0.090903 | 0.168029 |

|          |          |
|----------|----------|
| 29.34637 | 37.66639 |
| 0.023571 | 0.052284 |
| 8.125203 | 7.365041 |
| 15.37881 | 13.26752 |
| 48.70795 | 59.5519  |
| 0.13352  | 0        |
| 12.00583 | 12.33011 |
| 35.59598 | 45.94005 |
| 4.950034 | 4.189372 |
| 0        | 0        |
| 5.829755 | 7.848463 |
| 28.39274 | 32.83093 |
| 39.14293 | 54.32619 |
| 0.997675 | 0.547418 |
| 0.576247 | 0.540771 |
| 26.78139 | 32.76963 |
| 5.417153 | 2.887317 |
| 126.093  | 145.1661 |
| 33.67173 | 29.52972 |
| 75.51074 | 74.49516 |
| 73.58305 | 62.1032  |
| 1.310558 | 2.989639 |
| 208.437  | 274.8597 |
| 22.56481 | 32.68771 |
| 34.96619 | 13.64796 |
| 3.271133 | 5.011645 |
| 15.45556 | 16.40737 |
| 3.712604 | 9.87942  |
| 22.83901 | 25.06353 |
| 0.054702 | 0.030334 |
| 18.13037 | 18.07432 |
| 31.89853 | 20.69867 |
| 0        | 0.026332 |
| 17.51835 | 14.51162 |
| 0.459417 | 0.305713 |
| 14.58524 | 15.29199 |
| 29.57759 | 24.20512 |
| 18.86954 | 17.62708 |
| 3.62193  | 3.135805 |
| 9.506126 | 9.681195 |
| 1.359567 | 0.954967 |
| 16.54177 | 13.75529 |
| 30.43982 | 36.05489 |
| 58.21514 | 75.28952 |
| 9.319886 | 8.664269 |
| 7.788092 | 2.959692 |
| 67.53842 | 54.38419 |
| 26.57961 | 18.5744  |
| 23.74767 | 21.70879 |
| 6.750886 | 4.657357 |
| 0.028784 | 0.031923 |
| 35.43148 | 37.86557 |
| 26.13236 | 31.5808  |
| 63.23067 | 50.741   |
| 16.53501 | 11.08473 |
| 41.65879 | 42.95951 |
| 21.50363 | 18.87398 |
| 8.49082  | 5.12562  |
| 15.41079 | 12.83282 |
| 28.24131 | 31.00029 |
| 0.4407   | 0.057502 |
| 14.70014 | 15.12763 |
| 129.185  | 171.1147 |
| 0.090177 | 0        |
| 0.055767 | 0.16493  |

|          |          |
|----------|----------|
| 11.92535 | 11.02933 |
| 0.045039 | 0.199806 |
| 9.127303 | 5.885311 |
| 0.627057 | 0.274517 |
| 16.6822  | 8.350852 |
| 14.71875 | 14.52743 |
| 9.476522 | 8.447119 |
| 48.8244  | 66.02269 |
| 29.34039 | 38.92462 |
| 26.24466 | 25.33904 |
| 7.590857 | 4.630298 |
| 18.88921 | 23.20314 |
| 37.20881 | 23.16434 |
| 9.701673 | 15.46184 |
| 32.12116 | 41.95041 |
| 17.36836 | 19.32769 |
| 14.91056 | 20.78627 |
| 20.1419  | 14.60069 |
| 57.3957  | 60.66936 |
| 0.053278 | 0.059089 |
| 11.60878 | 11.35399 |
| 5.487182 | 4.091608 |
| 9.771954 | 11.51946 |
| 305.5791 | 320.9341 |
| 8.634334 | 6.101918 |
| 0.330569 | 0.166646 |
| 32.21991 | 21.50765 |
| 20.60294 | 11.52308 |
| 20.12882 | 37.87842 |
| 60.58031 | 58.30517 |
| 7.434251 | 6.347644 |
| 0.136155 | 0.10067  |
| 8.379559 | 5.633848 |
| 52.75684 | 46.2563  |
| 0.601811 | 0.222482 |
| 0.207033 | 0.034017 |
| 1.539936 | 0.529576 |
| 52.48582 | 29.47861 |
| 0.597229 | 0.386378 |
| 11.61661 | 11.91688 |
| 65.21427 | 53.41434 |
| 0.580553 | 0.286164 |
| 12.48993 | 10.9399  |
| 0.359299 | 0.398485 |
| 3.828165 | 5.60593  |
| 6.847356 | 8.546305 |
| 6.365903 | 5.602405 |
| 5.66459  | 6.172158 |
| 4.610469 | 2.892879 |
| 50.92362 | 50.27143 |
| 8.176802 | 5.648167 |
| 0.116924 | 0.648382 |
| 0.064607 | 0.035826 |
| 1.513755 | 1.780595 |
| 10.55704 | 9.160843 |
| 0.490805 | 0.233286 |
| 35.90567 | 44.97211 |
| 1.301659 | 0.435575 |
| 0.042007 | 0        |
| 0        | 0.021246 |
| 23.80816 | 25.11273 |
| 7.545407 | 12.17817 |
| 2.090899 | 0.970166 |
| 0.0486   | 0.053901 |
| 5.883426 | 1.618007 |

|          |          |
|----------|----------|
| 1.330509 | 2.065862 |
| 5.437133 | 11.65822 |
| 0.700123 | 0.248473 |
| 22.89762 | 20.1007  |
| 0.417291 | 0.561972 |
| 7.863024 | 10.90853 |
| 9.227048 | 10.86472 |
| 12.35508 | 13.71693 |
| 0.155867 | 0.115244 |
| 7.548496 | 9.342051 |
| 1.160164 | 0.70366  |
| 92.32837 | 165.1448 |
| 24.38086 | 23.37221 |
| 60.97545 | 59.97459 |
| 70.15842 | 85.13417 |
| 10.00732 | 10.05211 |
| 13.44825 | 14.16139 |
| 5.461101 | 3.557572 |
| 0.605135 | 0.134226 |
| 16.39232 | 15.32694 |
| 45.61637 | 47.12505 |
| 8.478049 | 12.79759 |
| 1.935734 | 0.993911 |
| 57.97542 | 61.36992 |
| 0        | 0        |
| 0        | 0        |
| 0.048242 | 0.107006 |
| 12.53592 | 11.07646 |
| 1.832072 | 0.338647 |
| 0        | 0.183377 |
| 7.885812 | 10.50117 |
| 43.64298 | 46.71915 |
| 176.0003 | 158.4377 |
| 4.449676 | 7.479551 |
| 37.21635 | 44.87543 |
| 0.185472 | 0.034283 |
| 9.336374 | 11.07943 |
| 35.80825 | 40.46083 |
| 3.313404 | 1.924878 |
| 4.554351 | 3.904327 |
| 19.32606 | 21.26501 |
| 6.288287 | 2.913229 |
| 9.234891 | 7.383285 |
| 40.7525  | 43.80851 |
| 0.949997 | 0.832687 |
| 21.15665 | 10.16215 |
| 0.063974 | 0.230591 |
| 19.2604  | 20.93962 |
| 2.582063 | 2.993832 |
| 20.58192 | 25.57308 |
| 15.44201 | 13.46851 |
| 2.165265 | 2.069724 |
| 3.24937  | 2.763611 |
| 4.701739 | 6.611817 |
| 0.414125 | 0.10599  |
| 61.27859 | 58.04478 |
| 2.608062 | 2.642787 |
| 2.331687 | 1.673283 |
| 4.752685 | 4.625098 |
| 13.43064 | 15.41321 |
| 24.3963  | 37.69687 |
| 1.43243  | 3.888888 |
| 22.47313 | 15.67794 |
| 6.507778 | 4.987068 |
| 3.086832 | 5.148395 |

|          |          |
|----------|----------|
| 0.141214 | 0.278426 |
| 6.926673 | 6.311902 |
| 12.09838 | 8.607267 |
| 7.31543  | 14.01001 |
| 5.196971 | 5.968387 |
| 13.49481 | 20.1944  |
| 0.028717 | 0.063699 |
| 2.028776 | 1.532837 |
| 0.249422 | 0.127673 |
| 31.16392 | 33.31558 |
| 0.67027  | 0.853499 |
| 0.190421 | 0.411818 |
| 14.32042 | 13.31148 |
| 9.478645 | 8.871054 |
| 146.0715 | 163.9479 |
| 7.458122 | 11.98679 |
| 11.63349 | 11.20823 |
| 11.43775 | 9.954332 |
| 0.403686 | 0.179085 |
| 3.067443 | 4.373975 |
| 0        | 0.01854  |
| 1.02341  | 1.639479 |
| 8.815087 | 9.082982 |
| 17.75324 | 16.12449 |
| 0.044179 | 0        |
| 4.911272 | 4.340043 |
| 7.851103 | 7.318679 |
| 4.796547 | 4.549712 |
| 12.6218  | 11.49393 |
| 6.812041 | 7.962696 |
| 0.083115 | 0        |
| 4.671425 | 3.123235 |
| 0.019306 | 0        |
| 5.897206 | 5.378164 |
| 10.64053 | 20.32141 |
| 7.899848 | 9.865291 |
| 0.094429 | 0.139636 |
| 6.117185 | 6.633985 |
| 7.201972 | 7.512337 |
| 0.552338 | 0.136128 |
| 1.498477 | 0.969443 |
| 3.394927 | 2.616482 |
| 0        | 0        |
| 0        | 0.040481 |
| 28.47748 | 42.13861 |
| 12.61359 | 11.26911 |
| 14.6271  | 4.464865 |
| 0.939129 | 0.380249 |
| 13.95024 | 16.69797 |
| 1.505707 | 1.330718 |
| 0.095665 | 0.247564 |
| 0.496284 | 0.474491 |
| 40.10773 | 36.43622 |
| 2.322836 | 1.520869 |
| 0        | 0        |
| 6.319763 | 9.387815 |
| 10.24512 | 9.487262 |
| 113.1627 | 147.9703 |
| 4.124343 | 3.311748 |
| 7.751971 | 12.04163 |
| 40.08691 | 39.15463 |
| 0.022095 | 0.073514 |
| 12.59477 | 5.443072 |
| 49.48041 | 50.48265 |
| 13.25389 | 7.831634 |

|          |          |
|----------|----------|
| 0        | 0        |
| 129.1158 | 128.5859 |
| 0.082948 | 0.091995 |
| 11.19927 | 14.51346 |
| 89.26046 | 101.0944 |
| 0.040238 | 0.044626 |
| 25.49159 | 18.55874 |
| 4.051059 | 4.088234 |
| 0.848783 | 1.506163 |
| 9.483286 | 18.03511 |
| 3.754926 | 2.625409 |
| 6.509617 | 5.390233 |
| 65.62572 | 51.78533 |
| 44.70609 | 36.75046 |
| 7.288511 | 8.784051 |
| 0        | 0.024306 |
| 28.25683 | 34.60013 |
| 15.13779 | 14.35558 |
| 2.11296  | 4.639462 |
| 0.965081 | 1.215275 |
| 2.70649  | 1.988601 |
| 26.15637 | 18.10446 |
| 17.75406 | 22.08876 |
| 7.378697 | 5.118716 |
| 0.012497 | 0        |
| 74.28303 | 70.21076 |
| 45.97646 | 71.91567 |
| 1.468365 | 0.99093  |
| 0.02904  | 0.128827 |
| 0.012809 | 0.071032 |
| 0.506031 | 0.790288 |
| 3.445042 | 4.031853 |
| 0.127979 | 0.066237 |
| 0.026522 | 0.029414 |
| 17.73173 | 41.22315 |
| 15.7337  | 22.20388 |
| 6.225334 | 5.741255 |
| 37.30823 | 32.87354 |
| 0.203051 | 0.138582 |
| 0.054654 | 0.101024 |
| 0.079558 | 0.141175 |
| 0        | 0        |
| 3.382896 | 3.573179 |
| 0.024046 | 0        |
| 4.256991 | 5.52092  |
| 0        | 0        |
| 0.715752 | 0.936292 |
| 2.128114 | 1.273763 |
| 0.383468 | 1.797812 |
| 46.66876 | 39.74596 |
| 4.056294 | 1.742731 |
| 4.430812 | 5.689941 |
| 3.199428 | 3.2206   |
| 11.76561 | 12.4007  |
| 0.1177   | 0.048951 |
| 0        | 0.0424   |
| 10.32135 | 9.321132 |
| 13.0332  | 13.51506 |
| 17.04628 | 21.51484 |
| 19.2211  | 13.84978 |
| 19.29277 | 18.42379 |
| 11.50763 | 10.00212 |
| 0.064674 | 0.215182 |
| 4.378311 | 4.653488 |
| 2.092028 | 0.90316  |

|          |          |
|----------|----------|
| 1.463576 | 0.993979 |
| 4.680827 | 9.797707 |
| 4.475298 | 2.376829 |
| 0.54921  | 0.464082 |
| 22.02668 | 17.77169 |
| 1.634669 | 1.812948 |
| 0.154062 | 0.085432 |
| 28.48749 | 24.59602 |
| 6.005443 | 5.629626 |
| 0.396933 | 0.256796 |
| 0.071529 | 0        |
| 2.448255 | 2.715264 |
| 21.55022 | 22.26422 |
| 1.111075 | 0.4929   |
| 6.574194 | 4.434562 |
| 8.111298 | 8.737843 |
| 9.340505 | 7.556114 |
| 14.68578 | 12.51966 |
| 52.86563 | 56.21219 |
| 10.66626 | 10.59535 |
| 0.123335 | 0.246215 |
| 2.864407 | 1.874119 |
| 6.020133 | 4.753471 |
| 9.776981 | 7.926535 |
| 5.482004 | 5.683978 |
| 4.05236  | 2.460391 |
| 2.169153 | 1.270948 |
| 12.20664 | 11.47036 |
| 0.042395 | 0.023509 |
| 11.60791 | 9.756721 |
| 1.009543 | 0.447858 |
| 30.16865 | 38.59832 |
| 19.39293 | 13.52084 |
| 28.97589 | 40.30394 |
| 9.014958 | 7.525479 |
| 8.293079 | 6.66028  |
| 75.70217 | 43.30772 |
| 20.74354 | 24.68833 |
| 16.81104 | 24.38001 |
| 3.109055 | 1.227744 |
| 76.83905 | 59.90465 |
| 8.446535 | 5.935582 |
| 45.98891 | 58.42634 |
| 10.35903 | 14.07501 |
| 8.243675 | 10.44452 |
| 25.32333 | 27.43641 |
| 15.16862 | 28.76704 |
| 3.222949 | 3.917593 |
| 21.27117 | 20.70877 |
| 0.603781 | 0.328498 |
| 2.792425 | 2.84987  |
| 3.001982 | 2.194116 |
| 2.964097 | 2.735793 |
| 23.68566 | 22.94666 |
| 1.767325 | 1.306714 |
| 18.41603 | 15.35564 |
| 9.286021 | 8.942175 |
| 5.503629 | 5.938891 |
| 18.40083 | 13.32633 |
| 26.42673 | 24.92009 |
| 19.21639 | 16.52778 |
| 3.955636 | 3.021843 |
| 28.80213 | 15.08593 |
| 1.473962 | 0.900761 |
| 17.16696 | 13.54073 |

|          |          |
|----------|----------|
| 20.40552 | 19.37888 |
| 2.909732 | 5.0292   |
| 0        | 0.06594  |
| 0.932409 | 0.554362 |
| 28.74867 | 26.50974 |
| 62.6127  | 62.57792 |
| 3.386065 | 1.832612 |
| 19.21305 | 20.82746 |
| 4.181362 | 3.044748 |
| 0        | 0.291772 |
| 251.2167 | 206.3894 |
| 30.88338 | 22.00244 |
| 1.782876 | 2.198778 |
| 4.733247 | 2.460684 |
| 0        | 0.214511 |
| 8.775668 | 6.602835 |
| 4.849735 | 3.19298  |
| 14.85087 | 15.77026 |
| 14.54058 | 6.20005  |
| 16.46076 | 12.4157  |
| 94.8888  | 106.1025 |
| 13.7058  | 5.487942 |
| 4.624605 | 3.922152 |
| 27.91062 | 21.25572 |
| 4.638675 | 2.286477 |
| 7.937818 | 10.5418  |
| 46.97074 | 45.6373  |
| 0.016735 | 0.01856  |
| 7.704212 | 6.808137 |
| 9.87239  | 6.900135 |
| 45.37421 | 34.69033 |
| 10.51447 | 10.27924 |
| 40.34555 | 37.65149 |
| 4.560364 | 3.412439 |
| 1.550355 | 1.249279 |
| 24.71325 | 31.73403 |
| 0        | 0.039235 |
| 18.55867 | 19.50488 |
| 170.1318 | 143.8631 |
| 21.25694 | 20.42803 |
| 0.091371 | 0        |
| 3.03215  | 2.973939 |
| 3.185877 | 2.297631 |
| 19.92448 | 22.57854 |
| 25.56846 | 28.15149 |
| 29.50097 | 34.96153 |
| 32.06581 | 26.17737 |
| 7.947267 | 5.990295 |
| 0.20385  | 0.032297 |
| 5.441778 | 3.775548 |
| 90.59968 | 73.64852 |
| 4.808266 | 3.675776 |
| 11.79487 | 8.296891 |
| 0.878838 | 1.462028 |
| 26.6251  | 13.88392 |
| 21.03447 | 19.20917 |
| 59.28994 | 45.38843 |
| 32.88809 | 28.85689 |
| 22.50029 | 18.67433 |
| 24.1647  | 25.67752 |
| 0.092254 | 0.409261 |
| 1.072986 | 0.608526 |
| 0.606095 | 0.980287 |
| 2.271335 | 3.06505  |
| 22.29008 | 18.39789 |

|          |          |  |
|----------|----------|--|
| 0        | 0.058174 |  |
| 18.46958 | 23.45381 |  |
| 13.06341 | 14.77587 |  |
| 0        | 0        |  |
| 13.19975 | 15.51186 |  |
| 0.29509  | 0.098182 |  |
| 5.52429  | 3.948366 |  |
| 3.352795 | 2.536176 |  |
| 34.55504 | 25.53251 |  |
| 3.556143 | 3.366256 |  |
| 5.859545 | 7.475064 |  |
| 10.17525 | 6.612599 |  |
| 7.325122 | 3.918331 |  |
| 3.174142 | 1.916822 |  |
| 0.507868 | 0.498266 |  |
| 6.487259 | 4.454406 |  |
| 26.37118 | 25.16884 |  |
| 7.767948 | 5.879667 |  |
| 0.601411 | 0.196177 |  |
| 5.758643 | 3.381187 |  |
| 72.68228 | 64.61033 |  |
| 5.018403 | 5.063394 |  |
| 0.329127 | 0.159112 |  |
| 20.25694 | 14.74781 |  |
| 2.573187 | 2.631733 |  |
| 24.36604 | 21.97803 |  |
| 6.010985 | 10.5646  |  |
| 11.78226 | 10.96727 |  |
| 1.520495 | 2.761657 |  |
| 0.053681 | 0.011907 |  |
| 0.07795  | 0.108064 |  |
| 6.718357 | 5.267134 |  |
| 0        | 0        |  |
| 5.502706 | 4.727137 |  |
| 15.29528 | 15.66203 |  |
| 21.04706 | 23.22988 |  |
| 16.51853 | 7.257504 |  |
| 1.070464 | 0.735554 |  |
| 8.459573 | 16.68406 |  |
| 10.04687 | 8.318433 |  |
| 31.24887 | 40.12481 |  |
| 6.285359 | 5.349925 |  |
| 5.425775 | 1.655826 |  |
| 18.8572  | 23.4595  |  |
| 15.32079 | 17.66022 |  |
| 0        | 0.019242 |  |
| 6.2902   | 8.408982 |  |
| 10.69194 | 12.67495 |  |
| 0.885883 | 0.882583 |  |
| 2.11845  | 2.747096 |  |
| 2.999847 | 4.619976 |  |
| 4.838824 | 4.03841  |  |
| 2.766838 | 4.126727 |  |
| 7.032305 | 8.157467 |  |
| 7.444033 | 8.154586 |  |
| 0        | 0        |  |
| 5.243214 | 8.862928 |  |
| 6.504513 | 5.322635 |  |
| 5.873388 | 9.184413 |  |
| 5.838666 | 5.276281 |  |
| 0.258337 | 0.716277 |  |
| 4.086828 | 8.321352 |  |
| 0.249631 | 0.369142 |  |
| 0.669658 | 0.318296 |  |
| 11.77752 | 12.39914 |  |

|          |          |
|----------|----------|
| 2.383528 | 4.1887   |
| 8.736493 | 8.149345 |
| 33.54739 | 37.94255 |
| 219.7402 | 226.4962 |
| 2.100019 | 2.737654 |
| 3.210256 | 3.983529 |
| 0.352381 | 0.300625 |
| 7.422622 | 5.355021 |
| 0.627684 | 2.247536 |
| 5.218815 | 5.583517 |
| 0        | 0.231068 |
| 2.1887   | 1.613963 |
| 3.692019 | 7.17507  |
| 24.29908 | 17.12506 |
| 113.0044 | 194.2907 |
| 5.927095 | 8.538006 |
| 46.34284 | 44.76692 |
| 0        | 0.017913 |
| 2.119964 | 1.832529 |
| 2.605044 | 2.247119 |
| 0.98693  | 0.961891 |
| 5.250713 | 2.942655 |
| 17.64834 | 15.70848 |
| 1.435643 | 0.792661 |
| 0.435188 | 0.250263 |
| 13.5004  | 16.07981 |
| 0.211956 | 0.379732 |
| 1.294976 | 1.675575 |
| 22.7678  | 22.74318 |
| 3.873705 | 2.048639 |
| 28.61031 | 37.53079 |
| 6.375614 | 12.00775 |
| 49.66283 | 61.6723  |
| 0.031612 | 0        |
| 47.61882 | 87.904   |
| 2.352337 | 2.670512 |
| 12.02324 | 11.36994 |
| 3.589764 | 5.581983 |
| 45.80597 | 58.02719 |
| 6.722202 | 6.450843 |
| 14.85154 | 14.67006 |
| 6.610849 | 8.309411 |
| 11.69601 | 14.05902 |
| 42.74704 | 35.22512 |
| 2.768059 | 1.699888 |
| 1.836211 | 6.406395 |
| 38.22398 | 36.04239 |
| 13.51202 | 13.22152 |
| 28.40243 | 31.99677 |
| 14.66619 | 15.7796  |
| 29.36316 | 21.28312 |
| 41.8273  | 26.12659 |
| 7.659012 | 9.759421 |
| 94.5478  | 152.6139 |
| 6.120985 | 5.045814 |
| 20.70356 | 16.49534 |
| 13.86206 | 11.38734 |
| 16.30939 | 12.44492 |
| 0.609782 | 0.06148  |
| 1.876058 | 0.274804 |
| 62.7152  | 57.11509 |
| 2.067648 | 0.89178  |
| 23.90362 | 21.11598 |
| 3.403281 | 2.11675  |
| 0        | 0.088849 |

|          |          |
|----------|----------|
| 32.95753 | 23.86366 |
| 151.9463 | 147.0635 |
| 15.02148 | 17.06607 |
| 0.483166 | 0.669826 |
| 0        | 0        |
| 12.96721 | 5.531316 |
| 0.694214 | 1.071201 |
| 0.127809 | 0        |
| 214.673  | 163.7331 |
| 39.29291 | 49.17358 |
| 5.954278 | 3.842128 |
| 29.70933 | 29.99022 |
| 2.232073 | 0.781739 |
| 12.55737 | 11.22725 |
| 22.69495 | 13.15008 |
| 103.5997 | 97.45275 |
| 0.149878 | 0.041556 |
| 10.1258  | 7.650904 |
| 7.905226 | 4.703907 |
| 4.43148  | 1.791847 |
| 29.72038 | 25.56688 |
| 33.50655 | 23.96515 |
| 61.7393  | 64.15998 |
| 1.3992   | 0.39374  |
| 84.50831 | 70.98825 |
| 4.17833  | 2.231196 |
| 3.053453 | 1.367611 |
| 101.5141 | 82.93565 |
| 2.720237 | 6.5087   |
| 3.200879 | 1.634113 |
| 1.324413 | 0.356086 |
| 101.8023 | 99.56185 |
| 40.44435 | 48.24608 |
| 35.37101 | 27.90946 |
| 0        | 0        |
| 0.065012 | 0        |
| 6.121763 | 5.394605 |
| 0        | 0.023037 |
| 0.050559 | 0.056073 |
| 16.99659 | 17.58546 |
| 0.206354 | 0.200252 |
| 1.155794 | 1.150375 |
| 11.8876  | 10.17467 |
| 28.23632 | 21.06033 |
| 63.20574 | 53.56801 |
| 3.660127 | 1.33251  |
| 82.71146 | 99.29757 |
| 0        | 0        |
| 29.97426 | 23.65387 |
| 0        | 0        |
| 30.1979  | 20.31806 |
| 95.72617 | 109.0845 |
| 49.12308 | 57.54153 |
| 17.14619 | 10.86638 |
| 9.462626 | 5.55598  |
| 27.4099  | 25.18221 |
| 41.32008 | 25.39995 |
| 17.77544 | 12.9442  |
| 41.34859 | 68.85814 |
| 53.93612 | 42.5561  |
| 1.195721 | 1.165384 |
| 2.598315 | 3.877828 |
| 84.19707 | 42.32439 |
| 0.261725 | 0.064504 |
| 14.48135 | 21.14131 |

|          |          |
|----------|----------|
| 14.4824  | 17.23343 |
| 15.5948  | 14.49133 |
| 1.086689 | 1.379151 |
| 3.6617   | 3.306341 |
| 6.353254 | 4.852136 |
| 1.696784 | 0.555997 |
| 6.896505 | 8.035144 |
| 26.13545 | 20.15525 |
| 32.68117 | 23.9648  |
| 13.50027 | 15.56914 |
| 12.47319 | 8.727189 |
| 443.2624 | 430.1832 |
| 75.58403 | 82.46403 |
| 244.0458 | 233.3799 |
| 5.698136 | 5.915126 |
| 0.10251  | 0.037897 |
| 112.2997 | 102.0133 |
| 33.30434 | 35.62434 |
| 134.0279 | 123.9131 |
| 6.296707 | 1.964872 |
| 29.2058  | 26.02615 |
| 15.25883 | 8.659996 |
| 0.209399 | 0.174177 |
| 28.48896 | 38.17449 |
| 1.686489 | 0.668007 |
| 70.26398 | 61.65912 |
| 34.68863 | 24.25642 |
| 7.753045 | 5.339453 |
| 0.077031 | 0.683455 |
| 7.553597 | 4.106969 |
| 4.347126 | 2.91011  |
| 141.7528 | 138.9587 |
| 32.82884 | 16.54586 |
| 22.07328 | 9.640139 |
| 8.63493  | 3.891382 |
| 17.29219 | 16.20416 |
| 30.07936 | 25.82591 |
| 154.3352 | 143.2172 |
| 13.77061 | 9.723636 |
| 38.47495 | 14.42349 |
| 7.46657  | 6.763963 |
| 1.778118 | 1.268638 |
| 38.42581 | 41.10091 |
| 0        | 0        |
| 36.88488 | 26.65191 |
| 14.09759 | 7.174799 |
| 38.21026 | 30.30608 |
| 0.296122 | 0.273681 |
| 479.7192 | 445.6076 |
| 147.703  | 107.1949 |
| 0.36825  | 0        |
| 1.427998 | 0.25248  |
| 2.185542 | 0.930777 |
| 0.013132 | 0.043692 |
| 0        | 0.015429 |
| 13.45497 | 13.70614 |
| 8.555336 | 6.890566 |
| 0        | 0.034654 |
| 114.2121 | 132.0637 |
| 15.94381 | 15.22722 |
| 123.4932 | 91.50332 |
| 20.01806 | 12.94923 |
| 10.86167 | 9.379764 |
| 68.31247 | 51.03934 |
| 13.29585 | 9.611174 |

|          |          |
|----------|----------|
| 26.61028 | 19.86751 |
| 111.6707 | 93.1356  |
| 11.4778  | 14.5206  |
| 18.48899 | 33.05092 |
| 16.9206  | 3.799163 |
| 0.124174 | 0.137716 |
| 8.619532 | 4.901108 |
| 0.94627  | 0.406938 |
| 2.300388 | 1.517679 |
| 27.54708 | 29.4267  |
| 1.92466  | 2.042558 |
| 0.099498 | 0.082762 |
| 0        | 0        |
| 0.529651 | 0.097903 |
| 5.463297 | 3.222941 |
| 1.682688 | 0.945065 |
| 5.402981 | 3.994823 |
| 0.865507 | 0.548514 |
| 5.282053 | 3.98958  |
| 3.223618 | 7.00737  |
| 5.330313 | 1.457095 |
| 0.03802  | 0        |
| 0.189289 | 0.209933 |
| 15.01214 | 8.156665 |
| 16.17314 | 18.23595 |
| 9.550282 | 3.946856 |
| 177.5938 | 161.6624 |
| 27.49181 | 38.12606 |
| 3.61083  | 4.192767 |
| 46.54207 | 20.21171 |
| 27.7423  | 26.71949 |
| 0.011197 | 0        |
| 0.467992 | 0.519031 |
| 13.05254 | 7.783963 |
| 8.273113 | 2.507559 |
| 8.254093 | 7.814639 |
| 26.51688 | 27.36836 |
| 18.23963 | 16.68596 |
| 3.268934 | 1.090169 |
| 1041.596 | 897.5319 |
| 1.423693 | 0.500646 |
| 9.814261 | 6.064285 |
| 3.346198 | 1.39627  |
| 0.100256 | 0.095305 |
| 7.59833  | 1.577248 |
| 0.425751 | 0.2764   |
| 164.9459 | 117.4202 |
| 5.242002 | 5.146834 |
| 7.150507 | 3.539247 |
| 17.03009 | 12.07396 |
| 0.229357 | 0.152622 |
| 1.015321 | 0.394119 |
| 46.30208 | 39.99218 |
| 15.40626 | 29.96536 |
| 0.790412 | 0.219154 |
| 0.35153  | 0.111391 |
| 29.64599 | 39.41077 |
| 34.12515 | 34.44838 |
| 0.041697 | 0        |
| 0        | 0        |
| 0.127961 | 0.028383 |
| 18.94789 | 9.544692 |
| 0        | 0        |
| 61.11324 | 53.3638  |
| 94.85775 | 106.3414 |

|          |          |
|----------|----------|
| 17.86869 | 12.97692 |
| 367.5166 | 251.7941 |
| 21.55759 | 26.1235  |
| 10.64121 | 2.826593 |
| 1.242159 | 2.194868 |
| 3.947721 | 1.174171 |
| 1.076651 | 0.597036 |
| 41.60604 | 35.78173 |
| 17.1426  | 14.10771 |
| 26.061   | 34.80037 |
| 9.887656 | 11.42532 |
| 33.50523 | 20.22572 |
| 12.51532 | 9.198902 |
| 4.307687 | 7.737453 |
| 2.714826 | 3.992725 |
| 17.07532 | 9.990437 |
| 7.282919 | 12.1158  |
| 9.746788 | 8.085647 |
| 0.121175 | 0.218384 |
| 0.222821 | 0.266892 |
| 1.962114 | 2.093814 |
| 0.177233 | 0.061426 |
| 6.892008 | 5.888402 |
| 28.43137 | 27.15885 |
| 8.290534 | 18.2532  |
| 1.600439 | 2.761087 |
| 5.713517 | 6.183023 |
| 17.01902 | 16.68104 |
| 7.024544 | 10.6379  |
| 0        | 0        |
| 0        | 0        |
| 6.456478 | 10.56676 |
| 0.389923 | 0.605428 |
| 9.502871 | 7.253349 |
| 3.540042 | 2.687883 |
| 3.871562 | 4.945736 |
| 3.924411 | 3.196771 |
| 0.883955 | 0.825055 |
| 9.541663 | 9.556302 |
| 0        | 0.44872  |
| 17.53979 | 18.36585 |
| 1.721221 | 2.454349 |
| 13.3483  | 19.49701 |
| 9.519559 | 14.42299 |
| 1.158005 | 1.185506 |
| 0.495111 | 0.680894 |
| 12.03261 | 11.81256 |
| 1.906366 | 2.450638 |
| 44.04442 | 43.79186 |
| 0.97216  | 0.524522 |
| 0.009367 | 0        |
| 44.26384 | 46.30366 |
| 0.545447 | 0.792672 |
| 3.650819 | 10.38984 |
| 3.499698 | 3.103027 |
| 0.851634 | 0.457023 |
| 8.027932 | 10.36167 |
| 0.134387 | 0.298087 |
| 0        | 0        |
| 0        | 0.082072 |
| 56.0895  | 56.85621 |
| 0        | 0.066658 |
| 0        | 0.084411 |
| 6.451603 | 6.720693 |
| 0        | 0.166224 |

|          |          |
|----------|----------|
| 0        | 0        |
| 20.62999 | 16.84198 |
| 2.277003 | 1.740569 |
| 2.030732 | 1.239586 |
| 6.106543 | 5.688923 |
| 37.96305 | 50.19811 |
| 0.014188 | 0.110148 |
| 0        | 0.02579  |
| 0.045787 | 0.253902 |
| 20.99722 | 17.30104 |
| 17.44448 | 25.42271 |
| 14.36443 | 14.59307 |
| 1.371892 | 0.994834 |
| 28.67747 | 25.49222 |
| 10.73205 | 10.75633 |
| 7.485596 | 3.077459 |
| 3.442317 | 3.901036 |
| 11.17564 | 11.08503 |
| 3.141389 | 1.347582 |
| 3.878747 | 1.94177  |
| 76.1354  | 93.9545  |
| 0.343564 | 0.3266   |
| 7.482555 | 4.360286 |
| 0.069507 | 0.057815 |
| 0.577373 | 0.768411 |
| 1.075849 | 0.654326 |
| 7.178359 | 9.823236 |
| 91.09752 | 98.89282 |
| 170.9843 | 116.278  |
| 21.33949 | 9.971678 |
| 97.61736 | 116.1068 |
| 24.96558 | 27.7488  |
| 0.589503 | 0.394744 |
| 0.261812 | 0.331846 |
| 8.148162 | 4.306375 |
| 162.8351 | 189.0887 |
| 18.20445 | 16.82487 |
| 77.1814  | 61.67225 |
| 19.38934 | 24.82262 |
| 34.85699 | 27.62406 |
| 12.38938 | 13.64742 |
| 0        | 0        |
| 23.71972 | 29.56684 |
| 1.665697 | 0.747741 |
| 0        | 0        |
| 22.41592 | 16.30394 |
| 0        | 0        |
| 24.18543 | 18.20574 |
| 0.872926 | 0.544572 |
| 0        | 0.151804 |
| 12.66944 | 16.96931 |
| 7.467288 | 6.09104  |
| 42.13116 | 36.28138 |
| 1.553467 | 2.569976 |
| 16.24575 | 20.8318  |
| 0.214093 | 0.604397 |
| 48.77576 | 35.64173 |
| 0.320336 | 0.064595 |
| 10.7812  | 9.339328 |
| 24.13309 | 20.37446 |
| 18.56459 | 18.44171 |
| 15.40407 | 17.03186 |
| 2.796969 | 1.712567 |
| 0.029907 | 0        |
| 5.170635 | 3.426211 |

|          |          |
|----------|----------|
| 0.061533 | 0        |
| 14.50533 | 17.60102 |
| 8.007237 | 6.245636 |
| 3.542582 | 2.858383 |
| 12.31165 | 20.7085  |
| 2.64904  | 3.378639 |
| 1.661606 | 0.326952 |
| 0        | 0.023286 |
| 37.62994 | 47.23696 |
| 0.024835 | 0.027543 |
| 4.061089 | 4.503995 |
| 0        | 0.012087 |
| 0.775431 | 0.278919 |
| 21.6251  | 21.68061 |
| 158.9815 | 113.9322 |
| 0        | 0.038728 |
| 1.642196 | 1.261741 |
| 71.33387 | 80.14777 |
| 0        | 0        |
| 0.303922 | 0.674136 |
| 7.223803 | 5.209662 |
| 1.066183 | 1.312046 |
| 16.46415 | 24.05249 |
| 23.90624 | 24.33429 |
| 17.57075 | 16.93233 |
| 5.782925 | 4.697639 |
| 15.89976 | 17.38957 |
| 2.607475 | 3.148902 |
| 69.44755 | 60.26331 |
| 6.04901  | 5.521152 |
| 27.38456 | 18.07083 |
| 97.24452 | 99.64966 |
| 0.313967 | 0.87052  |
| 3.298863 | 1.286832 |
| 14.55505 | 24.30082 |
| 54.11876 | 71.20789 |
| 15.30455 | 8.302648 |
| 0        | 0.030307 |
| 48.79451 | 17.79939 |
| 222.1362 | 231.2492 |
| 17.5919  | 12.95937 |
| 0.182922 | 0.304308 |
| 2.018408 | 2.923048 |
| 0.02431  | 0.188726 |
| 1.492311 | 2.281557 |
| 0.529404 | 0.280021 |
| 1.066659 | 1.536526 |
| 35.39119 | 34.69013 |
| 3.755499 | 3.190987 |
| 16.26085 | 11.37281 |
| 0.882939 | 0.913586 |
| 0.483051 | 0.404533 |
| 4.153995 | 3.354786 |
| 17.83827 | 11.85313 |
| 9.84281  | 11.22273 |
| 103.93   | 124.6863 |
| 0.090936 | 0.100854 |
| 0.167181 | 0.046354 |
| 0.175955 | 0.083633 |
| 0.057258 | 0.063503 |
| 15.68511 | 7.02083  |
| 0.190397 | 0.095983 |
| 26.39638 | 25.25997 |
| 1.868171 | 1.278416 |
| 0.736037 | 0.576219 |

|          |          |
|----------|----------|
| 10.06178 | 6.689876 |
| 0        | 0        |
| 24.77051 | 15.40193 |
| 2.557355 | 0.945421 |
| 0.931577 | 0.668526 |
| 4.574077 | 5.525167 |
| 0.738502 | 0.468025 |
| 0.232535 | 0        |
| 16.78744 | 12.63384 |
| 14.06731 | 18.03427 |
| 3.986979 | 3.547607 |
| 9.58979  | 7.943463 |
| 0.401554 | 0.586374 |
| 7.621677 | 6.078815 |
| 9.627139 | 7.329184 |
| 22.30451 | 17.46632 |
| 7.488381 | 4.408513 |
| 0.102835 | 0.042769 |
| 0.652334 | 0.383018 |
| 44.23989 | 45.80256 |
| 0.043554 | 0.072457 |
| 15.11504 | 16.80108 |
| 5.573488 | 4.05221  |
| 7.799052 | 7.463644 |
| 0.077512 | 0.05731  |
| 2.808085 | 3.010029 |
| 237.9102 | 239.3437 |
| 1.470724 | 1.321416 |
| 0.046563 | 0.010328 |
| 9.525879 | 19.27672 |
| 25.4461  | 27.89107 |
| 31.11442 | 15.90003 |
| 0.142532 | 0.137    |
| 4.384051 | 7.063804 |
| 1.960638 | 1.530181 |
| 2.134433 | 0.34812  |
| 7.629514 | 3.943678 |
| 3.190235 | 2.400014 |
| 43.05706 | 32.07184 |
| 27.33818 | 33.0066  |
| 13.90746 | 12.07666 |
| 33.47142 | 38.46823 |
| 40.44561 | 29.46507 |
| 204.1342 | 161.3803 |
| 12.65878 | 18.67453 |
| 0.030797 | 0.068312 |
| 0.423595 | 1.789685 |
| 5.425921 | 3.305256 |
| 13.44685 | 12.01252 |
| 18.87387 | 11.67087 |
| 6.308598 | 3.941535 |
| 6.408226 | 7.979543 |
| 2.222876 | 2.249449 |
| 18.15848 | 30.43249 |
| 8.854242 | 7.180648 |
| 110.1498 | 112.3349 |
| 0.040806 | 0.113142 |
| 0.036372 | 0.017288 |
| 1.388091 | 2.518384 |
| 0.087119 | 0        |
| 0.075777 | 0.084042 |
| 22.38357 | 20.37528 |
| 8.998099 | 8.910214 |
| 12.86809 | 17.21453 |
| 5.068317 | 4.398489 |

|          |          |
|----------|----------|
| 22.95584 | 21.49843 |
| 5.114478 | 4.929281 |
| 24.28953 | 19.84868 |
| 35.03221 | 27.57949 |
| 0.892672 | 0.477944 |
| 0.026482 | 0.014685 |
| 4.173333 | 1.972795 |
| 14.82404 | 13.3457  |
| 10.40988 | 11.42719 |
| 2.673365 | 1.78794  |
| 41.48885 | 36.31049 |
| 11.44044 | 9.580262 |
| 0.424284 | 1.215605 |
| 5.601656 | 6.880863 |
| 0.015879 | 0        |
| 21.68641 | 27.52157 |
| 47.9954  | 29.25361 |
| 1.765314 | 1.757607 |
| 9.996216 | 8.710752 |
| 25.55257 | 17.54444 |
| 9.647586 | 23.93065 |
| 159.7835 | 139.051  |
| 16.8402  | 15.57892 |
| 0.357078 | 0.148508 |
| 13.61393 | 12.22735 |
| 6.176636 | 9.127282 |
| 0.502269 | 0.152739 |
| 11.77601 | 6.442696 |
| 51.03532 | 33.99545 |
| 5.772926 | 2.740006 |
| 1.705011 | 2.371536 |
| 5.815693 | 4.481579 |
| 22.54573 | 12.31126 |
| 13.82644 | 12.40423 |
| 21.7357  | 29.60489 |
| 5.094889 | 6.498124 |
| 22.78467 | 36.63795 |
| 5.89862  | 6.449299 |
| 1.813386 | 0.367116 |
| 4.244517 | 2.227622 |
| 9.069678 | 8.70437  |
| 12.48748 | 7.677901 |
| 4.251428 | 2.379787 |
| 0.104056 | 1.154047 |
| 1.504277 | 0.723994 |
| 49.35277 | 54.59185 |
| 1.169679 | 0.975301 |
| 6.506671 | 7.703235 |
| 11.85372 | 14.34021 |
| 17.85338 | 40.23699 |
| 4.235702 | 4.33092  |
| 13.32563 | 20.75665 |
| 13.79352 | 18.37876 |
| 6.600227 | 8.839896 |
| 23.84701 | 18.1709  |
| 576.9958 | 426.1834 |
| 181.4992 | 155.3964 |
| 24.07451 | 19.30875 |
| 1.24485  | 0.460205 |
| 43.85772 | 51.97374 |
| 1.079981 | 2.182593 |
| 22.94302 | 22.29934 |
| 0        | 0.060138 |
| 0.953915 | 0.796727 |
| 0.025677 | 0        |

|          |          |  |
|----------|----------|--|
| 0        | 0.087941 |  |
| 17.64755 | 17.09078 |  |
| 31.85084 | 23.48267 |  |
| 4.773668 | 5.019051 |  |
| 31.26094 | 34.60596 |  |
| 10.15717 | 7.749406 |  |
| 6.909466 | 7.102309 |  |
| 9.208981 | 11.50362 |  |
| 149.0728 | 163.1038 |  |
| 5.989785 | 10.27136 |  |
| 590.6116 | 627.5444 |  |
| 4.291486 | 2.506492 |  |
| 1.431738 | 0.672516 |  |
| 33.58432 | 48.49145 |  |
| 0        | 0        |  |
| 120.1751 | 119.5003 |  |
| 44.24219 | 43.37929 |  |
| 6.596836 | 5.856729 |  |
| 0.260104 | 0.317319 |  |
| 1.481176 | 0.407591 |  |
| 5.570239 | 10.61093 |  |
| 0.022864 | 0        |  |
| 4.932275 | 6.564233 |  |
| 1.156246 | 0.563455 |  |
| 7.645225 | 6.886993 |  |
| 20.36099 | 17.79868 |  |
| 0.168657 | 0.116907 |  |
| 10.37004 | 14.21909 |  |
| 3.415783 | 4.233995 |  |
| 52.63075 | 89.51894 |  |
| 4.736874 | 7.723869 |  |
| 1.735428 | 1.43634  |  |
| 3.118783 | 4.099461 |  |
| 2.628325 | 1.576245 |  |
| 0.73913  | 0        |  |
| 13.63706 | 10.28255 |  |
| 111.6897 | 111.2761 |  |
| 11.51369 | 10.22664 |  |
| 11.03254 | 9.061628 |  |
| 27.81599 | 16.08904 |  |
| 6.580492 | 4.264097 |  |
| 1.741604 | 1.023431 |  |
| 3.624949 | 5.29678  |  |
| 0        | 0.160415 |  |
| 12.57249 | 10.63883 |  |
| 609.6153 | 740.4783 |  |
| 63.481   | 65.76581 |  |
| 46.76489 | 45.37802 |  |
| 4.693854 | 2.563447 |  |
| 0.606959 | 0.056096 |  |
| 10.24247 | 5.733685 |  |
| 20.14204 | 26.96708 |  |
| 201.1849 | 265.5957 |  |
| 0.047445 | 0.042096 |  |
| 33.93732 | 31.68641 |  |
| 11.14973 | 8.194954 |  |
| 9.46879  | 10.28482 |  |
| 18.93417 | 24.33676 |  |
| 0.638136 | 1.415464 |  |
| 10.05338 | 10.09283 |  |
| 33.05834 | 45.19601 |  |
| 5.80921  | 4.295178 |  |
| 0.144792 | 0.256933 |  |
| 73.56244 | 57.88039 |  |
| 19.36636 | 17.30526 |  |

|          |          |
|----------|----------|
| 10.23309 | 6.717867 |
| 15.21391 | 18.16022 |
| 90.56519 | 162.5656 |
| 16.7506  | 19.03873 |
| 9.741872 | 5.153073 |
| 41.27005 | 55.1302  |
| 22.27899 | 19.44061 |
| 0.937705 | 1.319964 |
| 0        | 0        |
| 1.49607  | 1.451828 |
| 0        | 0.116314 |
| 2.970886 | 2.934515 |
| 0.071344 | 0        |
| 1.874232 | 0.789356 |
| 18.41239 | 15.81367 |
| 12.30519 | 14.11378 |
| 10.25019 | 8.93207  |
| 1.235236 | 0.360514 |
| 0.598188 | 0.234964 |
| 10.34781 | 15.07104 |
| 4.354084 | 1.996834 |
| 0.264951 | 0.816242 |
| 6.25838  | 2.38315  |
| 0.3361   | 0.271095 |
| 9.153261 | 3.957935 |
| 7.263621 | 7.769188 |
| 0.303497 | 0.096171 |
| 16.88885 | 22.20047 |
| 184.4666 | 140.5623 |
| 45.85042 | 45.90542 |
| 32.34377 | 28.13006 |
| 0.974222 | 1.168077 |
| 41.75652 | 27.9518  |
| 0.032586 | 0.012047 |
| 22.26838 | 25.73377 |
| 0.220557 | 0        |
| 14.41755 | 11.93395 |
| 6.364643 | 5.562877 |
| 9.063779 | 9.097316 |
| 0.049197 | 0        |
| 41.93732 | 55.83747 |
| 0.067157 | 0.111722 |
| 0.065234 | 0.180872 |
| 32.8086  | 34.21874 |
| 10.69467 | 7.821874 |
| 1.320277 | 1.070042 |
| 372.8302 | 388.6078 |
| 0.304347 | 1.687699 |
| 12.87139 | 7.628525 |
| 0.163387 | 0.120804 |
| 9.764336 | 8.769045 |
| 7.952611 | 7.991663 |
| 6.56551  | 6.585054 |
| 22.13893 | 21.97145 |
| 0.010307 | 0        |
| 75.07815 | 70.50178 |
| 0.689054 | 0.342181 |
| 26.04347 | 18.7261  |
| 5.953537 | 7.966937 |
| 0.491148 | 0.096126 |
| 8.182391 | 5.619523 |
| 4.933503 | 6.723522 |
| 29.32419 | 55.69882 |
| 24.56435 | 17.72084 |
| 1.40097  | 2.00852  |

|          |          |
|----------|----------|
| 0        | 0        |
| 14.30266 | 10.27365 |
| 28.06753 | 18.55209 |
| 23.3183  | 35.22139 |
| 92.87998 | 117.0906 |
| 7.745701 | 9.621667 |
| 12.94514 | 13.20655 |
| 0.015557 | 0.017253 |
| 0        | 0.03182  |
| 5.421144 | 3.530906 |
| 41.38046 | 48.12163 |
| 0        | 0.027855 |
| 4.374303 | 5.377764 |
| 14.55488 | 14.99751 |
| 0        | 0.156614 |
| 5.979893 | 7.958478 |
| 51.66298 | 41.51741 |
| 14.32774 | 9.95378  |
| 3.423153 | 5.230351 |
| 3.252532 | 2.309318 |
| 0        | 0        |
| 6.777825 | 4.847598 |
| 68.11649 | 69.78691 |
| 0.408168 | 0.536513 |
| 8.201907 | 7.620392 |
| 31.71025 | 30.2932  |
| 0.127401 | 0.141296 |
| 0.257428 | 0.493142 |
| 26.8422  | 18.63775 |
| 0.070306 | 0.101365 |
| 2.396036 | 1.734179 |
| 3.18953  | 3.273728 |
| 8.847574 | 9.98315  |
| 138.1888 | 131.8973 |
| 21.25053 | 14.7136  |
| 0        | 0        |
| 11.99228 | 15.98005 |
| 33.07243 | 52.71248 |
| 23.23923 | 28.40238 |
| 8.368555 | 7.068969 |
| 4.640727 | 7.370044 |
| 18.19216 | 25.38814 |
| 76.02978 | 101.468  |
| 5.32987  | 3.339123 |
| 1.299125 | 0.989773 |
| 0.651261 | 0.388924 |
| 8.757616 | 14.04767 |
| 0.028546 | 0.031659 |
| 5.975411 | 4.067569 |
| 3.687053 | 2.602197 |
| 0.82307  | 0.669412 |
| 0        | 0        |
| 29.88402 | 25.52444 |
| 15.45122 | 14.13911 |
| 3.537202 | 3.12508  |
| 0.066498 | 0.049167 |
| 56.85822 | 56.46811 |
| 0.079446 | 0.110138 |
| 0.529592 | 0.58735  |
| 7.648061 | 5.925625 |
| 0.086714 | 0.128227 |
| 8.333058 | 4.102892 |
| 0.444852 | 0.200014 |
| 7.033693 | 6.598416 |
| 3.891037 | 2.634946 |

|          |          |
|----------|----------|
| 6.707196 | 5.227187 |
| 5.365533 | 3.67611  |
| 11.52224 | 13.72435 |
| 28.34066 | 30.72495 |
| 0.530657 | 0.348759 |
| 5.155721 | 2.480829 |
| 0.554843 | 0.184606 |
| 0.04499  | 0.099794 |
| 19.49983 | 17.84481 |
| 38.4888  | 44.69877 |
| 15.10222 | 14.3985  |
| 0.154271 | 0.062217 |
| 6.522131 | 4.810589 |
| 18.00402 | 24.73166 |
| 27.7435  | 31.91376 |
| 15.72117 | 16.34275 |
| 0.217379 | 0.296722 |
| 20.80517 | 39.33549 |
| 0        | 0.027889 |
| 0.832092 | 0.520577 |
| 8.405919 | 7.344123 |
| 436.0198 | 594.7856 |
| 0.067817 | 0.037607 |
| 6.522802 | 4.472327 |
| 11.67604 | 7.142747 |
| 0.522673 | 0.703012 |
| 3.754458 | 3.024323 |
| 0.82822  | 0.623299 |
| 7.93418  | 5.43103  |
| 11.49036 | 8.326478 |
| 17.68064 | 16.38615 |
| 21.03357 | 18.3423  |
| 17.32533 | 12.64134 |
| 8.186171 | 8.593256 |
| 7.826924 | 7.787361 |
| 10.3815  | 11.1716  |
| 21.53161 | 20.55568 |
| 22.78985 | 27.44102 |
| 1.875453 | 0.499198 |
| 0.051396 | 0.028501 |
| 0        | 0        |
| 9.658661 | 6.126169 |
| 28.44462 | 23.11064 |
| 86.23259 | 111.8485 |
| 27.64883 | 32.192   |
| 75.26991 | 107.8362 |
| 23.13142 | 29.16412 |
| 3.136288 | 6.44136  |
| 0.26308  | 0.375135 |
| 3.751346 | 2.290597 |
| 7.597276 | 10.5323  |
| 0.046647 | 0.258671 |
| 2.641103 | 2.557189 |
| 0        | 0        |
| 13.2739  | 17.92948 |
| 3.747508 | 2.025497 |
| 0.225302 | 0.071393 |
| 0        | 0.046842 |
| 4.473747 | 4.235562 |
| 4.375322 | 5.07737  |
| 0.343996 | 0.342383 |
| 103.0868 | 167.8373 |
| 0.036132 | 0.013358 |
| 2.603484 | 1.567458 |
| 5.944976 | 6.390468 |

|          |          |
|----------|----------|
| 4.598275 | 6.307013 |
| 0.099445 | 0        |
| 33.77975 | 32.22889 |
| 0.194427 | 0.431262 |
| 11.32348 | 8.708617 |
| 30.47998 | 31.0687  |
| 2.69032  | 2.67699  |
| 0.494441 | 0.395059 |
| 2.279033 | 2.759901 |
| 11.36068 | 15.07561 |
| 0.047775 | 0.08831  |
| 6.689017 | 12.35106 |
| 3.633825 | 2.255672 |
| 0.250584 | 0.106889 |
| 1.196456 | 1.22487  |
| 474.5311 | 440.7641 |
| 11.91613 | 11.85168 |
| 10.96989 | 7.281418 |
| 0.27327  | 0.151536 |
| 6.436881 | 12.97582 |
| 13.42039 | 12.20514 |
| 3.463671 | 1.567927 |
| 33.10115 | 35.34323 |
| 10.23287 | 12.63054 |
| 0        | 0        |
| 0.087078 | 0.362157 |
| 0.101394 | 0.074968 |
| 0.083478 | 0.154304 |
| 27.95222 | 43.63064 |
| 24.37921 | 18.4165  |
| 434.6881 | 468.3594 |
| 30.35698 | 14.83185 |
| 18.61805 | 20.57943 |
| 31.83166 | 31.26859 |
| 10.69184 | 7.099307 |
| 17.15365 | 16.11226 |
| 1.340838 | 0.770573 |
| 5.054349 | 5.795353 |
| 6.620935 | 7.989576 |
| 5.982539 | 2.525925 |
| 0.3653   | 0.311646 |
| 0.366294 | 0.722209 |
| 11.81691 | 8.729999 |
| 2.32787  | 1.893283 |
| 7.273922 | 3.880678 |
| 0        | 0.08217  |
| 6.075961 | 6.62412  |
| 0        | 0.08101  |
| 24.38983 | 21.44247 |
| 0.073679 | 0.027238 |
| 37.12132 | 36.28675 |
| 2.439563 | 1.318992 |
| 0        | 0        |
| 7.439419 | 7.219423 |
| 2.537611 | 1.500995 |
| 14.09853 | 16.02189 |
| 13.26592 | 13.78488 |
| 79.0563  | 94.28764 |
| 5.243161 | 12.95384 |
| 9.40542  | 9.198547 |
| 17.51254 | 12.27589 |
| 0.066976 | 0.02476  |
| 2.087455 | 3.108869 |
| 481.7026 | 505.8706 |
| 149.9797 | 155.1425 |

|          |          |
|----------|----------|
| 0.153095 | 0.52481  |
| 6.492031 | 4.189927 |
| 22.68257 | 28.90907 |
| 0.293324 | 0.352424 |
| 0.04238  | 0.141006 |
| 0        | 0.08931  |
| 1.46278  | 1.351927 |
| 138.4466 | 114.3348 |
| 5.248236 | 3.469429 |
| 1.239259 | 1.676785 |
| 5.086554 | 6.975388 |
| 12.82197 | 8.05314  |
| 35.79349 | 49.33463 |
| 18.69009 | 16.46779 |
| 6.969087 | 5.567602 |
| 0.260796 | 0.134978 |
| 6.578029 | 5.650972 |
| 5.857692 | 9.976825 |
| 3.155016 | 0.784648 |
| 5.233075 | 13.6783  |
| 29.22997 | 36.22235 |
| 1.557163 | 2.169806 |
| 0.505199 | 0.501933 |
| 2.708582 | 2.303572 |
| 46.25416 | 56.00211 |
| 22.37296 | 19.14634 |
| 21.15765 | 27.39858 |
| 0        | 0.092676 |
| 15.02864 | 22.12087 |
| 4.318141 | 2.957962 |
| 11.05987 | 10.63569 |
| 1.684093 | 0.601834 |
| 2.958773 | 3.071446 |
| 0.023353 | 0.008633 |
| 13.85122 | 8.800255 |
| 8.914446 | 5.741235 |
| 7.152726 | 4.75292  |
| 15.26021 | 13.00047 |
| 19.83883 | 10.15897 |
| 0        | 0        |
| 7.353619 | 8.350612 |
| 0.129889 | 0.144055 |
| 30.78949 | 46.24858 |
| 3.046881 | 2.549204 |
| 0.107603 | 0.059669 |
| 53.38376 | 65.36203 |
| 0.055443 | 0.020497 |
| 0        | 0        |
| 0.012105 | 0        |
| 0        | 0.245047 |
| 4.066471 | 1.966344 |
| 0.346026 | 0.65788  |
| 10.87313 | 12.18307 |
| 19.27526 | 30.8013  |
| 12.38596 | 16.9719  |
| 36.06982 | 47.52458 |
| 0        | 0        |
| 0.05146  | 0        |
| 22.05514 | 18.92923 |
| 0.130079 | 0.115413 |
| 1.38097  | 6.503968 |
| 14.92424 | 19.51263 |
| 9.804173 | 6.222245 |
| 0.087631 | 0        |
| 56.81752 | 57.06114 |

|          |          |
|----------|----------|
| 0.425996 | 0.250124 |
| 15.5231  | 18.09737 |
| 3.342572 | 2.416794 |
| 2.297938 | 2.949715 |
| 20.00445 | 27.38869 |
| 15.19189 | 16.96463 |
| 32.74601 | 32.77685 |
| 29.88917 | 34.11683 |
| 3.778539 | 5.711423 |
| 80.50527 | 92.61904 |
| 965.211  | 1016.787 |
| 23.07311 | 31.48254 |
| 74.86282 | 69.83136 |
| 1.509614 | 0.249357 |
| 2.967388 | 3.917239 |
| 16.31715 | 15.86295 |
| 11.22577 | 10.63695 |
| 1.103671 | 0.816025 |
| 13.34538 | 14.35233 |
| 4.504231 | 3.473038 |
| 68.56687 | 64.29068 |
| 343.4324 | 396.5104 |
| 6.708564 | 8.044118 |
| 9.296432 | 8.146985 |
| 39.57572 | 24.1381  |
| 33.33573 | 35.67214 |
| 46.05833 | 39.34751 |
| 12.27838 | 8.050578 |
| 15.51102 | 20.6432  |
| 2.877344 | 2.732542 |
| 111.6145 | 113.2341 |
| 28.99586 | 24.64944 |
| 8.38856  | 10.83977 |
| 0        | 0        |
| 575.5753 | 701.968  |
| 7.569687 | 9.680231 |
| 57.11854 | 45.93111 |
| 0.122008 | 0.253715 |
| 0.213174 | 0.20687  |
| 0        | 0.107507 |
| 16.47346 | 15.8175  |
| 0.022024 | 0.073279 |
| 22.83195 | 28.17455 |
| 116.3859 | 95.26218 |
| 15.13722 | 9.606024 |
| 0        | 0.121873 |
| 2.879883 | 3.193965 |
| 190.0136 | 196.6336 |
| 7.350935 | 7.186266 |
| 5.481355 | 6.710453 |
| 0.214388 | 0.047554 |
| 0.38662  | 1.251112 |
| 0.710033 | 0.16658  |
| 25.39119 | 31.246   |
| 0.130755 | 0.072508 |
| 19.07111 | 21.65269 |
| 5.677993 | 6.683803 |
| 0.175821 | 0.414368 |
| 0.483106 | 0.380241 |
| 80.12742 | 68.97514 |
| 16.45302 | 31.94252 |
| 17.59014 | 17.3629  |
| 3.035472 | 2.319789 |
| 2.655114 | 2.595787 |
| 0.614962 | 0.376911 |

|          |          |
|----------|----------|
| 0.225536 | 0.142933 |
| 8.411432 | 10.52404 |
| 1.243046 | 1.832105 |
| 1.979104 | 1.413413 |
| 6.413124 | 6.087593 |
| 3.727194 | 2.801568 |
| 0.036716 | 0.203602 |
| 9.344241 | 14.59825 |
| 29.14047 | 29.41927 |
| 6.535462 | 4.841372 |
| 5.681766 | 3.577046 |
| 1.304488 | 0.798211 |
| 1.849783 | 1.598425 |
| 5.153107 | 5.04537  |
| 12.43808 | 8.398134 |
| 0.177956 | 0.175435 |
| 14.51878 | 16.10221 |
| 3.833983 | 5.90052  |
| 10.70974 | 7.407632 |
| 0.023935 | 0        |
| 11.93605 | 8.519644 |
| 3.675819 | 2.388696 |
| 0.067985 | 0.169648 |
| 13.26839 | 11.33553 |
| 10.65167 | 8.541399 |
| 5.330166 | 4.948697 |
| 236.4078 | 350.7273 |
| 24.63559 | 22.07238 |
| 71.50099 | 68.53787 |
| 134.0873 | 187.7357 |
| 6.86914  | 5.991917 |
| 1.64821  | 1.209048 |
| 0.676618 | 0.224482 |
| 3.300266 | 3.052007 |
| 4.35793  | 6.086824 |
| 2.99002  | 3.706245 |
| 19.89424 | 24.00854 |
| 0.479899 | 0.266118 |
| 3.596122 | 3.715612 |
| 0        | 0.034847 |
| 1.062828 | 0.596927 |
| 0.941754 | 0.713292 |
| 4.231495 | 4.277677 |
| 0.018803 | 0.020853 |
| 2.980537 | 3.75603  |
| 6.084869 | 8.474848 |
| 5.614018 | 6.456892 |
| 0.648089 | 0.287508 |
| 3.107169 | 2.036296 |
| 2.29281  | 1.706397 |
| 3.507959 | 2.033691 |
| 28.26924 | 40.03963 |
| 0        | 0.085168 |
| 13.63713 | 18.41926 |
| 21.59862 | 19.56935 |
| 0.007365 | 0.081682 |
| 10.7848  | 9.306753 |
| 0.122098 | 0        |
| 0.769534 | 0.519497 |
| 1.695294 | 1.373981 |
| 3.870812 | 3.229571 |
| 7.40415  | 7.869501 |
| 1.334628 | 1.736749 |
| 1.206719 | 0.9447   |
| 4.732232 | 2.601348 |

|          |          |
|----------|----------|
| 0        | 0        |
| 0        | 0        |
| 12.96599 | 10.20876 |
| 4.098144 | 3.016288 |
| 1255.146 | 1445.59  |
| 34.09222 | 41.34153 |
| 0.018915 | 0.146841 |
| 57.41315 | 67.93057 |
| 0.010894 | 0.012082 |
| 4.320326 | 1.869213 |
| 0        | 0.021438 |
| 46.52094 | 38.21528 |
| 9.517158 | 10.70892 |
| 1.564094 | 0.909647 |
| 6.011011 | 4.876892 |
| 5.771077 | 6.924491 |
| 10.94923 | 8.118445 |
| 39.00132 | 41.91812 |
| 6.255847 | 5.040432 |
| 7.278128 | 10.89979 |
| 2.720587 | 0.735926 |
| 1.793857 | 1.136855 |
| 2.996534 | 5.750821 |
| 1.093741 | 2.274422 |
| 74.9991  | 69.88715 |
| 0.015452 | 0        |
| 0.3521   | 0.227792 |
| 0.099685 | 0.479077 |
| 24.8614  | 15.27882 |
| 89.52586 | 97.34082 |
| 0        | 0.085063 |
| 17.51135 | 13.07599 |
| 0.202678 | 0.187318 |
| 1.183972 | 0.936732 |
| 96.50337 | 65.94149 |
| 0.885247 | 0.583768 |
| 1.497969 | 0.677652 |
| 26.24558 | 21.19818 |
| 27.87637 | 41.16556 |
| 4.769429 | 4.087408 |
| 12.75669 | 13.93084 |
| 2.566035 | 0.680539 |
| 0.60542  | 0.694601 |
| 2.40551  | 1.992984 |
| 29.92164 | 25.76525 |
| 38.43288 | 28.44517 |
| 68.26971 | 50.22916 |
| 34.51735 | 35.16683 |
| 1.950214 | 0.920925 |
| 20.93839 | 12.26725 |
| 69.75469 | 38.30956 |
| 13.2649  | 10.04781 |
| 17.54174 | 16.52967 |
| 112.1504 | 113.9851 |
| 21.52904 | 17.56677 |
| 16.90379 | 17.92198 |
| 10.43658 | 11.88567 |
| 0.13928  | 0.059412 |
| 4.439516 | 3.174933 |
| 10.01638 | 16.40399 |
| 8.283807 | 16.24867 |
| 97.06541 | 104.6034 |
| 0.098864 | 0.109647 |
| 4.507432 | 5.375049 |
| 0.256048 | 0.262938 |

|          |          |
|----------|----------|
| 1.622327 | 0.863158 |
| 0.068655 | 0.152285 |
| 36.23965 | 37.55786 |
| 1.927058 | 1.562509 |
| 0.051869 | 0        |
| 5.242164 | 2.705069 |
| 0        | 0        |
| 0.014085 | 0.046864 |
| 3.460839 | 3.830318 |
| 15.83942 | 14.19444 |
| 8.82669  | 8.430477 |
| 4.444937 | 4.278985 |
| 9.233957 | 8.345584 |
| 18.65157 | 15.00392 |
| 4.017014 | 2.55247  |
| 0        | 0.113227 |
| 12.60713 | 9.238155 |
| 0.258695 | 0.105703 |
| 59.99725 | 126.9731 |
| 27.12817 | 26.0242  |
| 0.208171 | 0.346311 |
| 14.1351  | 19.80378 |
| 40.6736  | 33.77297 |
| 5.382204 | 4.503447 |
| 17.89066 | 17.88626 |
| 117.1257 | 160.6897 |
| 22.28688 | 25.16777 |
| 21.17016 | 25.66901 |
| 1.691386 | 0.721481 |
| 0.055717 | 0.082391 |
| 0.316397 | 0.485867 |
| 0        | 0        |
| 0.060494 | 0.380185 |
| 3.746049 | 2.876259 |
| 9.950433 | 8.708633 |
| 64.38516 | 71.66753 |
| 42.67683 | 55.57034 |
| 36.04696 | 76.0368  |
| 13.19525 | 14.13474 |
| 11.22102 | 17.82839 |
| 0        | 1.030099 |
| 1.800187 | 1.171869 |
| 4.91735  | 4.552604 |
| 0.102454 | 0.068176 |
| 0.083562 | 0.185352 |
| 0.750547 | 0.393079 |
| 1.968364 | 2.312538 |
| 6.903743 | 3.815358 |
| 0.111176 | 0.123301 |
| 0        | 0.04693  |
| 10.58193 | 8.613325 |
| 4.116478 | 3.147041 |
| 3.438264 | 4.045916 |
| 20.36861 | 26.63136 |
| 5.145003 | 2.970602 |
| 10.86496 | 11.04483 |
| 0        | 0        |
| 0.501375 | 0.308919 |
| 32.67285 | 47.26663 |
| 4.157333 | 4.408805 |
| 1.391196 | 3.861519 |
| 0.382685 | 0.458375 |
| 75.75206 | 75.77757 |
| 41.48576 | 52.38249 |
| 22.23658 | 23.16904 |

|          |          |
|----------|----------|
| 0.234401 | 1.462301 |
| 91.94219 | 97.94698 |
| 1.823469 | 3.633631 |
| 46.18297 | 42.56501 |
| 23.29166 | 32.05215 |
| 0        | 0        |
| 2.390172 | 2.219685 |
| 0.964382 | 0.941211 |
| 48.19865 | 78.78622 |
| 19.13    | 17.85211 |
| 0.662156 | 0.502181 |
| 0.346938 | 0.953575 |
| 5.982722 | 6.730674 |
| 12.26086 | 19.41337 |
| 0.026263 | 0        |
| 0.191364 | 0.282979 |
| 16.27543 | 13.59661 |
| 0        | 0        |
| 5.24214  | 7.05595  |
| 0.068604 | 0.076086 |
| 0.173185 | 0.230487 |
| 24.66808 | 26.75762 |
| 0.264924 | 0.157402 |
| 65.4157  | 79.18855 |
| 18.66495 | 21.36014 |
| 20.98053 | 31.69637 |
| 0.084818 | 0.075255 |
| 1.52533  | 2.78797  |
| 14.61023 | 14.59206 |
| 12.46897 | 18.15235 |
| 1.735405 | 1.474215 |
| 1.186563 | 2.714188 |
| 2.081993 | 2.297569 |
| 0        | 0        |
| 5.716843 | 5.706294 |
| 8.802058 | 7.33607  |
| 1.80651  | 1.159938 |
| 36.59828 | 55.22127 |
| 10.74547 | 8.769031 |
| 5.206886 | 9.336165 |
| 29.616   | 33.77807 |
| 152.3714 | 156.2008 |
| 9.608368 | 7.48394  |
| 23.27107 | 20.11152 |
| 9.863282 | 9.450861 |
| 31.60569 | 28.41745 |
| 1.433526 | 1.469423 |
| 0        | 0.117572 |
| 20.62342 | 26.47651 |
| 7.047951 | 6.171006 |
| 12.92075 | 11.66716 |
| 1.682625 | 1.902439 |
| 2.728212 | 2.291563 |
| 195.1129 | 261.9613 |
| 7.609784 | 5.982268 |
| 5.439932 | 2.041178 |
| 0.435415 | 0.590213 |
| 0.012548 | 0.041749 |
| 17.06794 | 25.19722 |
| 14.78983 | 18.80633 |
| 6.655221 | 6.887711 |
| 2.862737 | 2.544464 |
| 25.46755 | 26.23167 |
| 2.614533 | 4.025289 |
| 0.014533 | 0        |

|          |          |
|----------|----------|
| 2.674878 | 0.906462 |
| 0.092898 | 0.137373 |
| 0        | 0.042076 |
| 0.801121 | 1.251966 |
| 1.611196 | 1.282686 |
| 0.229272 | 0.101711 |
| 30.02033 | 32.45669 |
| 9.303654 | 8.570862 |
| 13.95531 | 15.92852 |
| 3.767378 | 4.690156 |
| 10.8902  | 10.78744 |
| 14.70103 | 11.22761 |
| 19.55275 | 18.80004 |
| 5.92353  | 9.114    |
| 7.135901 | 7.712515 |
| 0.268387 | 0        |
| 15.75435 | 18.61127 |
| 13.64091 | 13.02039 |
| 0.057506 | 0.021259 |
| 22.56071 | 22.55397 |
| 6.101567 | 7.836947 |
| 1.524168 | 1.249127 |
| 0.21839  | 0.370435 |
| 0.687943 | 1.444195 |
| 0        | 0        |
| 12.49547 | 18.42213 |
| 0.024638 | 0        |
| 2.753937 | 2.963111 |
| 4.293795 | 6.394244 |
| 1.639854 | 0.720056 |
| 8.405484 | 6.755213 |
| 9.114904 | 8.491546 |
| 16.09223 | 20.24726 |
| 11.80019 | 11.45367 |
| 6.633585 | 4.808529 |
| 15.99488 | 23.51561 |
| 0.025688 | 0        |
| 97.79563 | 89.78491 |
| 18.7912  | 21.61948 |
| 4.138713 | 4.089224 |
| 2.07203  | 1.559362 |
| 32.86089 | 32.00621 |
| 4.367821 | 4.025757 |
| 403.9158 | 429.3158 |
| 3.604522 | 5.2104   |
| 0.968732 | 1.38693  |
| 66.8424  | 58.7511  |
| 2.316812 | 1.482786 |
| 10.79046 | 8.890642 |
| 5.388746 | 7.051348 |
| 13.89056 | 8.874219 |
| 0.046577 | 0        |
| 1.509189 | 2.139899 |
| 2.170619 | 2.904735 |
| 16.18744 | 25.41378 |
| 24.14241 | 30.89597 |
| 7.16006  | 7.611215 |
| 2.869141 | 4.273571 |
| 1.40436  | 1.138692 |
| 6.941794 | 7.033315 |
| 0.030286 | 0.067179 |
| 27.67407 | 22.3375  |
| 12.80686 | 12.76373 |
| 2.576219 | 1.292536 |
| 32.03751 | 21.86073 |

|          |          |
|----------|----------|
| 0.087942 | 0.195066 |
| 1.894985 | 0.992908 |
| 5.711456 | 9.523885 |
| 47.2646  | 37.2185  |
| 1.591971 | 0.332648 |
| 0.895187 | 0.193999 |
| 0.59658  | 0.638013 |
| 84.17759 | 107.162  |
| 0.375942 | 0.479484 |
| 2.560179 | 2.171967 |
| 0.381732 | 0.682845 |
| 28.11364 | 26.52467 |
| 6.786779 | 5.090629 |
| 9.933902 | 10.43009 |
| 8.929387 | 10.55354 |
| 13.92868 | 9.620159 |
| 0.21876  | 0.121309 |
| 43.12245 | 60.95996 |
| 10.12936 | 7.547531 |
| 5.081351 | 3.141114 |
| 64.79166 | 72.33513 |
| 0        | 0        |
| 5.884901 | 4.86227  |
| 7.599512 | 3.722061 |
| 2.420353 | 2.619895 |
| 0.941461 | 0.659455 |
| 0.270755 | 0.170851 |
| 34.76932 | 46.3625  |
| 2.480319 | 1.750525 |
| 0.768613 | 0.852439 |
| 10.61807 | 11.57723 |
| 5.793518 | 5.253311 |
| 2.277857 | 2.710188 |
| 127.0442 | 183.3179 |
| 35.38075 | 42.80663 |
| 7.706647 | 9.67566  |
| 3.875203 | 3.045589 |
| 2.283898 | 3.848184 |
| 225.9556 | 316.6345 |
| 3.562121 | 4.396821 |
| 31.80325 | 27.20619 |
| 25.1746  | 22.49849 |
| 11.08652 | 11.20764 |
| 7.934755 | 9.62871  |
| 29.07243 | 23.08283 |
| 10.51162 | 9.291861 |
| 0.087693 | 0.129676 |
| 0        | 0        |
| 5.725212 | 4.715263 |
| 1.306914 | 0.489424 |
| 7.308946 | 7.584962 |
| 368.6428 | 509.8643 |
| 22.16596 | 20.6759  |
| 3.222551 | 2.824869 |
| 0.018969 | 0.105191 |
| 16.17327 | 18.72638 |
| 6.814768 | 4.647361 |
| 5.142683 | 6.555444 |
| 1.376442 | 0.733637 |
| 67.16672 | 64.83396 |
| 7.42681  | 12.57919 |
| 0.858172 | 1.020734 |
| 4.049145 | 1.979792 |
| 1.492002 | 1.896286 |
| 0.034705 | 0.028867 |

|          |          |
|----------|----------|
| 5.354621 | 6.588314 |
| 16.41967 | 11.33409 |
| 0.109888 | 0.182809 |
| 5.668359 | 5.268948 |
| 3.101889 | 2.959103 |
| 2.737009 | 1.397932 |
| 16.9805  | 18.66121 |
| 26.33094 | 32.73866 |
| 10.16703 | 10.61824 |
| 53.8072  | 56.40786 |
| 0.013281 | 0.014729 |
| 13.30166 | 9.391635 |
| 0.370535 | 0.427384 |
| 11.78254 | 18.78461 |
| 43.9529  | 47.1968  |
| 0.422041 | 0.208031 |
| 84.92268 | 101.452  |
| 0.01271  | 0        |
| 23.88652 | 12.46958 |
| 4.827772 | 2.025949 |
| 0        | 0        |
| 1.124492 | 0.277797 |
| 0.397218 | 0.306462 |
| 518.5605 | 446.0382 |
| 11.5322  | 10.95785 |
| 7.365209 | 8.337235 |
| 38.98928 | 30.44505 |
| 7.265323 | 6.94569  |
| 16.15619 | 10.0261  |
| 2.944969 | 5.379542 |
| 3.675168 | 4.249432 |
| 0.086774 | 0.064159 |
| 0.058134 | 0.064474 |
| 53.37762 | 53.13648 |
| 26.37319 | 38.9993  |
| 79.24827 | 73.30013 |
| 6.059176 | 5.469087 |
| 1.241029 | 1.828614 |
| 1.409409 | 1.428368 |
| 5.216711 | 3.489192 |
| 9.253334 | 10.04181 |
| 0.026785 | 0.059412 |
| 6.138444 | 11.41904 |
| 0.073244 | 0.054155 |
| 1.299891 | 0.644952 |
| 10.45787 | 9.876462 |
| 9.70067  | 7.561289 |
| 12.18042 | 17.91561 |
| 13.75602 | 12.34164 |
| 1.515995 | 1.222786 |
| 6.471954 | 6.893924 |
| 38.98117 | 48.99131 |
| 15.65857 | 13.14855 |
| 12.85663 | 16.96525 |
| 4.426016 | 3.695712 |
| 0.004852 | 0        |
| 5.830069 | 4.23628  |
| 8.947143 | 8.464605 |
| 189.1864 | 136.5619 |
| 2.386452 | 1.330592 |
| 1.29868  | 2.127234 |
| 7.615306 | 9.85853  |
| 15.80343 | 8.138611 |
| 0.042093 | 0.023342 |
| 135.0143 | 124.1906 |

|          |          |
|----------|----------|
| 7.939105 | 8.548496 |
| 0        | 0        |
| 3.99087  | 4.172816 |
| 0.108506 | 0.096271 |
| 6.637266 | 11.06273 |
| 6.793786 | 7.288691 |
| 0.12085  | 0.100523 |
| 75.66123 | 85.70742 |
| 1.246367 | 0.414689 |
| 13.28401 | 17.83952 |
| 18.57498 | 24.87545 |
| 6.308376 | 6.460849 |
| 26.9261  | 26.02113 |
| 4.418035 | 4.064844 |
| 1.284556 | 2.469395 |
| 3.406849 | 3.865263 |
| 5.474018 | 9.65429  |
| 0        | 0.015533 |
| 0.108649 | 0.080332 |
| 0        | 0        |
| 0        | 0        |
| 0        | 0.071467 |
| 0        | 0        |
| 3.230909 | 4.570792 |
| 2.143727 | 1.675074 |
| 15.21473 | 17.43875 |
| 14.41646 | 18.5943  |
| 0.164687 | 0.205479 |
| 7.576851 | 7.58688  |
| 0        | 0.040096 |
| 77.11168 | 80.24804 |
| 18.60525 | 20.60549 |
| 24.80355 | 18.4855  |
| 46.46771 | 51.69951 |
| 0.691006 | 0.562003 |
| 0.469086 | 0.334443 |
| 24.24461 | 21.15338 |
| 6.502606 | 9.173392 |
| 5.778846 | 3.730236 |
| 30.23606 | 76.12549 |
| 5.290215 | 5.389203 |
| 7.73059  | 11.01152 |
| 37.5808  | 34.2612  |
| 34.36009 | 36.69685 |
| 6.749896 | 5.934883 |
| 35.87521 | 54.16389 |
| 9.184511 | 9.025588 |
| 6.67956  | 4.525166 |
| 1.035376 | 1.702645 |
| 9.539194 | 9.69675  |
| 2.751081 | 3.883238 |
| 0.381235 | 0.453014 |
| 0        | 0.112284 |
| 0        | 0.065799 |
| 33.68628 | 35.96022 |
| 88.42546 | 138.6803 |
| 40.29705 | 27.43027 |
| 0        | 0        |
| 0.557699 | 0.570943 |
| 5.554797 | 2.740743 |
| 0.034397 | 0.228891 |
| 2.219806 | 1.471135 |
| 11.5477  | 11.52959 |
| 31.81547 | 29.65226 |
| 8.854035 | 18.16337 |

|          |          |
|----------|----------|
| 9.299977 | 11.98501 |
| 0.021641 | 0.024001 |
| 22.62583 | 42.22737 |
| 3.211391 | 4.072787 |
| 3.829541 | 4.326581 |
| 3.215436 | 2.249866 |
| 2.203083 | 2.739517 |
| 1.804152 | 3.148105 |
| 15.11088 | 22.41927 |
| 12.70777 | 11.00184 |
| 3.104344 | 2.541193 |
| 0.878361 | 0.960811 |
| 45.69088 | 31.74172 |
| 91.67517 | 106.9184 |
| 0.738003 | 0.188882 |
| 0.05413  | 0.060033 |
| 0        | 0        |
| 5.810445 | 5.864889 |
| 66.74914 | 65.05567 |
| 4.058841 | 3.091691 |
| 4.488714 | 3.861639 |
| 0.939228 | 1.519089 |
| 0.265848 | 0.387506 |
| 17.04671 | 23.1571  |
| 3.147106 | 4.257673 |
| 19.8682  | 16.17804 |
| 0        | 0.28932  |
| 113.4218 | 247.6301 |
| 3.085124 | 3.607427 |
| 6.517342 | 3.686478 |
| 3.906883 | 2.852539 |
| 10.71858 | 8.859597 |
| 50.82624 | 53.91539 |
| 6.108471 | 6.986375 |
| 4.819018 | 7.271121 |
| 0.198729 | 0.341269 |
| 9.705732 | 7.565661 |
| 0.074178 | 0.102835 |
| 6.146834 | 4.941407 |
| 14.42192 | 12.68076 |
| 3.091463 | 2.369782 |
| 29.82581 | 26.98081 |
| 19.41549 | 14.50179 |
| 6.128136 | 5.111492 |
| 0        | 0.074241 |
| 106.8271 | 108.7715 |
| 52.75628 | 67.4293  |
| 164.3573 | 173.6712 |
| 1.242253 | 0.535389 |
| 28.53956 | 24.25676 |
| 7.711896 | 10.83375 |
| 27.5267  | 22.44764 |
| 19.62218 | 27.70741 |
| 163.2634 | 191.132  |
| 0.187322 | 0.046167 |
| 0.734963 | 0.426967 |
| 11.33774 | 8.971514 |
| 84.48186 | 83.94519 |
| 17.2949  | 15.44748 |
| 4.168002 | 1.676814 |
| 2.5382   | 1.866696 |
| 8.170596 | 16.33242 |
| 32.42053 | 46.12361 |
| 5.215101 | 6.112804 |
| 47.26748 | 44.27615 |

|          |          |
|----------|----------|
| 24.54693 | 34.93068 |
| 10.75521 | 9.041816 |
| 15.10351 | 5.857447 |
| 32.88141 | 31.04664 |
| 5.455409 | 5.008593 |
| 2.973848 | 2.404442 |
| 8.115091 | 7.21439  |
| 168.415  | 235.6282 |
| 4.416519 | 1.275734 |
| 6.777798 | 7.597339 |
| 23.74281 | 16.56632 |
| 36.83727 | 31.96985 |
| 6.734319 | 5.598692 |
| 4.488419 | 5.307209 |
| 118.7301 | 167.1414 |
| 0.176634 | 0.195898 |
| 62.44508 | 38.62235 |
| 3.512811 | 4.801949 |
| 3.07259  | 1.92521  |
| 1.345486 | 1.240525 |
| 187.8629 | 202.9834 |
| 1.83785  | 0.911234 |
| 0.747126 | 0.36827  |
| 61.39194 | 54.68966 |
| 58.91086 | 46.06034 |
| 31.96674 | 37.89549 |
| 0.160018 | 0.232075 |
| 51.04276 | 40.00944 |
| 14.52854 | 15.24798 |
| 0.027279 | 0.030254 |
| 0        | 0        |
| 0.705304 | 1.732069 |
| 0.23755  | 0.311359 |
| 23.7391  | 12.38158 |
| 0        | 0.038554 |
| 2.959746 | 2.530812 |
| 3.831175 | 3.850933 |
| 6.282602 | 10.96402 |
| 0        | 0        |
| 5.632755 | 6.045267 |
| 12.0535  | 18.19642 |
| 20.93461 | 40.71058 |
| 49.32252 | 59.94163 |
| 9.385933 | 6.569147 |
| 2.458641 | 2.974671 |
| 26.75484 | 38.65134 |
| 0        | 0        |
| 0.221175 | 0.070085 |
| 24.49133 | 16.17047 |
| 7.410163 | 8.384589 |
| 6.087796 | 7.885007 |
| 16.07087 | 11.70837 |
| 1.449317 | 1.918487 |
| 0.992709 | 0.251651 |
| 0        | 0.042796 |
| 13.75608 | 15.45392 |
| 8.178964 | 8.637729 |
| 7.868313 | 4.384096 |
| 35.95973 | 28.09564 |
| 25.60898 | 30.09447 |
| 53.5176  | 35.30573 |
| 2.562106 | 4.115321 |
| 0.446668 | 0.082564 |
| 7.600408 | 4.120998 |
| 1.188266 | 1.270793 |

|          |          |
|----------|----------|
| 35.69923 | 45.35508 |
| 2.227824 | 2.916345 |
| 14.23559 | 18.05474 |
| 2.779516 | 3.620893 |
| 12.58649 | 15.32562 |
| 5.40874  | 6.427095 |
| 17.68536 | 21.45731 |
| 19.33333 | 11.82472 |
| 1.083136 | 1.683914 |
| 0.063928 | 0.01418  |
| 5.531152 | 5.290743 |
| 0.399148 | 0.1428   |
| 21.45201 | 9.8973   |
| 5.679697 | 5.22869  |
| 0.069024 | 0        |
| 3.508913 | 4.938912 |
| 0.035404 | 0        |
| 1.746841 | 1.674661 |
| 3.317157 | 1.478291 |
| 11.36186 | 4.901443 |
| 4.202097 | 2.71296  |
| 6.853901 | 7.470335 |
| 9.624771 | 13.11959 |
| 1.936594 | 1.707227 |
| 0        | 0.017189 |
| 0.242392 | 0.038404 |
| 13.507   | 17.39482 |
| 2.071944 | 1.109337 |
| 38.28602 | 37.44497 |
| 58.47322 | 62.38181 |
| 20.84506 | 33.01213 |
| 39.97501 | 28.12463 |
| 13.6411  | 11.98555 |
| 0.166811 | 0.370006 |
| 1.228845 | 0.759629 |
| 0.016451 | 0.328417 |
| 15.06425 | 14.67771 |
| 28.567   | 14.67178 |
| 2.922111 | 4.383917 |
| 2.859264 | 3.646763 |
| 7.274485 | 6.817018 |
| 0.033761 | 0        |
| 0        | 0.022688 |
| 0.363326 | 0.650921 |
| 5.866108 | 1.509362 |
| 2.093333 | 2.602271 |
| 22.32373 | 11.21592 |
| 4.421224 | 1.85193  |
| 0.03664  | 0.182863 |
| 20.08756 | 4.446255 |
| 26.83654 | 21.45824 |
| 12.15183 | 6.530479 |
| 9.015028 | 11.69226 |
| 69.23358 | 99.68192 |
| 0.951804 | 1.591532 |
| 14.86721 | 15.69677 |
| 17.36997 | 20.11347 |
| 43.95952 | 47.29059 |
| 20.87493 | 15.71737 |
| 68.58    | 84.71336 |
| 28.46165 | 50.44099 |
| 151.3914 | 150.2324 |
| 0.254715 | 0.070624 |
| 7.093818 | 2.516175 |
| 7.844568 | 6.808008 |

|          |          |
|----------|----------|
| 30.40521 | 34.37244 |
| 64.80274 | 44.15931 |
| 39.56011 | 36.22821 |
| 0.202237 | 0.416545 |
| 103.4098 | 78.21345 |
| 473.4817 | 514.8444 |
| 4.471938 | 6.138183 |
| 0.153776 | 0.12791  |
| 1.829406 | 4.433572 |
| 1.464457 | 0.778249 |
| 7.37398  | 8.909729 |
| 6.226478 | 5.129833 |
| 4.430694 | 5.738178 |
| 2.603906 | 4.501048 |
| 0        | 0        |
| 25.2599  | 22.83236 |
| 96.87275 | 111.9223 |
| 36.59568 | 40.30785 |
| 2.144672 | 3.071067 |
| 6.056564 | 7.363579 |
| 2.611524 | 1.855259 |
| 10.55391 | 8.03717  |
| 0        | 0        |
| 10.47931 | 22.16743 |
| 0.178925 | 0.039688 |
| 148.0724 | 167.4067 |
| 10.14712 | 15.35855 |
| 0        | 0        |
| 4.873518 | 2.574584 |
| 1.683388 | 4.108987 |
| 0.255316 | 0.183222 |
| 0.219715 | 0.859284 |
| 0.03895  | 0.129595 |
| 10.14667 | 9.245531 |
| 18.79695 | 23.16329 |
| 7.8376   | 5.94622  |
| 2.592097 | 3.459708 |
| 5.585773 | 8.15724  |
| 154.7011 | 177.2273 |
| 3.597309 | 3.862979 |
| 10.51504 | 6.646939 |
| 10.9548  | 10.04922 |
| 34.8245  | 24.30034 |
| 12.33182 | 15.76022 |
| 14.10466 | 14.10788 |
| 17.04241 | 15.86976 |
| 0.343385 | 0.486172 |
| 40.31992 | 41.95553 |
| 11.83066 | 28.7204  |
| 27.96036 | 37.65188 |
| 13.41976 | 16.20803 |
| 3.690127 | 1.632557 |
| 6.742863 | 4.402777 |
| 0.049419 | 0.182696 |
| 12.11518 | 14.22865 |
| 35.16357 | 29.28483 |
| 16.50094 | 9.693285 |
| 2.512951 | 3.81381  |
| 10.99683 | 17.5987  |
| 34.71881 | 37.40312 |
| 2.816752 | 2.913936 |
| 0.100453 | 0.026892 |
| 37.81363 | 36.13187 |
| 0.438636 | 0.751823 |
| 1.774497 | 3.99293  |

|          |          |
|----------|----------|
| 77.01011 | 45.07853 |
| 4.411259 | 3.527143 |
| 0.134484 | 0.074576 |
| 4.880937 | 5.943226 |
| 0        | 0        |
| 0.151802 | 0.392834 |
| 0.013404 | 0.014866 |
| 1.696298 | 0.986695 |
| 11.12497 | 11.52386 |
| 400.6345 | 361.7172 |
| 3.601961 | 5.755533 |
| 0.535587 | 0.342691 |
| 5.673457 | 4.321442 |
| 4.906485 | 5.600811 |
| 4.538903 | 3.554976 |
| 4.513586 | 4.449637 |
| 10.77307 | 10.53309 |
| 6.048472 | 10.08285 |
| 4.874128 | 6.739043 |
| 5.494486 | 6.129724 |
| 2.799182 | 3.812643 |
| 0        | 0        |
| 8.036093 | 5.599487 |
| 3.970384 | 3.027336 |
| 20.69563 | 17.02198 |
| 0        | 0        |
| 0.022868 | 0.025362 |
| 0.024618 | 0.018202 |
| 22.88136 | 32.42028 |
| 3.814161 | 1.878246 |
| 3.63296  | 3.734909 |
| 1.125155 | 1.92442  |
| 1.77536  | 3.862956 |
| 39.16031 | 48.09014 |
| 3.109113 | 2.898177 |
| 0.242149 | 0.291577 |
| 7.095208 | 7.699792 |
| 0.034147 | 0.018935 |
| 5.648376 | 8.405493 |
| 0        | 0        |
| 0.322347 | 0.373046 |
| 7.278467 | 8.103734 |
| 0.770483 | 0.947732 |
| 5.170404 | 6.083945 |
| 6.938222 | 2.206629 |
| 1.0314   | 1.218894 |
| 0.14563  | 0.053837 |
| 5.591676 | 6.012822 |
| 13.60198 | 11.45213 |
| 0.283687 | 0.089893 |
| 12.34305 | 14.10135 |
| 0.10914  | 0.105912 |
| 0.284006 | 0.437472 |
| 21.05635 | 17.37219 |
| 35.53009 | 40.1241  |
| 0.095813 | 0.288427 |
| 2.384268 | 1.565303 |
| 2.152388 | 2.861044 |
| 45.50467 | 40.80165 |
| 3.451022 | 4.491508 |
| 85.79821 | 109.4343 |
| 4.634738 | 3.827015 |
| 0.363977 | 0.509903 |
| 0        | 0.121657 |
| 82.3869  | 94.44342 |

|          |          |
|----------|----------|
| 30.24437 | 32.70428 |
| 0        | 0.025751 |
| 0.095372 | 0.126927 |
| 7.662622 | 8.539172 |
| 1.150527 | 0.983907 |
| 8.395162 | 17.25592 |
| 0.417543 | 0.181206 |
| 89.50187 | 71.88869 |
| 0.031807 | 0.105827 |
| 2.229286 | 4.404875 |
| 9.838765 | 9.849076 |
| 5.065666 | 6.799381 |
| 15.64613 | 10.92811 |
| 18.10867 | 14.26937 |
| 1.540936 | 1.488895 |
| 0.367813 | 0.244756 |
| 0.346624 | 0.594946 |
| 10.27183 | 5.198331 |
| 6.565854 | 9.060905 |
| 2.551271 | 3.710029 |
| 48.08859 | 35.09852 |
| 0.123433 | 0.114079 |
| 0.040487 | 0.044903 |
| 3.060187 | 3.428101 |
| 0.020038 | 0.044446 |
| 4.145407 | 7.549318 |
| 28.04189 | 30.91776 |
| 13.44104 | 11.38523 |
| 5.743588 | 5.024843 |
| 8.961248 | 9.746917 |
| 0.206049 | 0.179552 |
| 2.441619 | 1.315268 |
| 0.227512 | 0.039841 |
| 50.76286 | 44.32248 |
| 0.155411 | 0.258541 |
| 3.015539 | 3.004306 |
| 28.45731 | 32.3679  |
| 0.574666 | 0.203949 |
| 7.116173 | 5.894641 |
| 0.419592 | 1.085824 |
| 23.0613  | 21.88182 |
| 0        | 0        |
| 13.49491 | 16.34433 |
| 24.45562 | 16.71498 |
| 69.08089 | 73.27148 |
| 2.601347 | 3.463626 |
| 21.82896 | 30.74024 |
| 2.868701 | 5.032066 |
| 70.5774  | 65.20924 |
| 424.7893 | 489.6132 |
| 134.8367 | 107.1885 |
| 9.684133 | 7.982651 |
| 14.15491 | 11.14688 |
| 1.856122 | 2.040574 |
| 5.629077 | 3.945866 |
| 14.09493 | 16.71904 |
| 9.296197 | 9.95285  |
| 10.73954 | 12.00594 |
| 5.600826 | 2.561205 |
| 12.53444 | 12.87231 |
| 62.39732 | 57.35883 |
| 8.801849 | 3.867169 |
| 0.114976 | 0        |
| 1.572768 | 2.159604 |
| 0.024815 | 0        |

|          |          |
|----------|----------|
| 6.356956 | 5.200331 |
| 53.47336 | 42.47097 |
| 0.162009 | 0.207321 |
| 2.410491 | 1.800819 |
| 11.80445 | 6.848049 |
| 8.253466 | 4.989122 |
| 10.36177 | 12.09544 |
| 0.020443 | 0.022673 |
| 9.061699 | 7.458473 |
| 9.974247 | 13.71362 |
| 0.100128 | 0.183656 |
| 26.38212 | 22.75729 |
| 14.44052 | 12.68225 |
| 19.74004 | 20.313   |
| 5.938559 | 7.727519 |
| 0.135943 | 0.215384 |
| 0.02073  | 0.022991 |
| 25.56065 | 32.68763 |
| 2.239257 | 0.737281 |
| 7.942885 | 6.900496 |
| 0.159915 | 0.066508 |
| 13.48352 | 12.38304 |
| 15.26598 | 7.069086 |
| 6.050393 | 4.369468 |
| 54.08823 | 47.51979 |
| 2.470585 | 1.876325 |
| 175.1518 | 106.5167 |
| 10.14949 | 11.29522 |
| 0.645002 | 0.490294 |
| 10.11643 | 11.78766 |
| 1.792782 | 1.186006 |
| 6.867608 | 8.072414 |
| 2.001699 | 1.93539  |
| 18.82422 | 17.92418 |
| 48.74192 | 51.63147 |
| 1.139651 | 0.836694 |
| 0.458544 | 0.635692 |
| 0.778682 | 0.54695  |
| 105.1529 | 114.8697 |
| 26.76409 | 33.9062  |
| 5.464639 | 3.243182 |
| 0.456042 | 0.216762 |
| 1.373097 | 0.431474 |
| 17.289   | 17.74094 |
| 2.503503 | 3.745372 |
| 0.418026 | 0.574002 |
| 0.429667 | 0.185316 |
| 13.27303 | 9.096218 |
| 0.968732 | 1.888308 |
| 5.505923 | 7.072995 |
| 4.531322 | 3.450995 |
| 56.05432 | 66.12042 |
| 22.61292 | 20.97985 |
| 2.56684  | 2.336911 |
| 2.869725 | 1.978435 |
| 19.2885  | 18.24693 |
| 8.706716 | 10.49011 |
| 27.4541  | 30.64245 |
| 5.085877 | 4.572906 |
| 4.516376 | 3.137951 |
| 7.824456 | 3.482794 |
| 0.921925 | 0.564122 |
| 4.106386 | 4.670116 |
| 5.563341 | 6.240599 |
| 113.4778 | 109.3982 |

|          |          |
|----------|----------|
| 5.606688 | 4.085649 |
| 3.846411 | 3.58175  |
| 3.67442  | 3.236153 |
| 7.109831 | 8.869425 |
| 0.226429 | 0.050225 |
| 0.099498 | 0.579335 |
| 0        | 0.019736 |
| 3.324168 | 5.924676 |
| 17.66662 | 16.11465 |
| 0.368979 | 0.40922  |
| 2.860548 | 1.442055 |
| 0.448017 | 0.17333  |
| 6.924388 | 3.274234 |
| 17.11898 | 19.79968 |
| 2.490948 | 2.923766 |
| 37.47374 | 39.31003 |
| 0        | 0        |
| 13.23795 | 14.65655 |
| 14.71742 | 15.2308  |
| 8.13905  | 4.111639 |
| 11.83085 | 13.76051 |
| 5.290725 | 5.633696 |
| 1.613263 | 1.052474 |
| 0.787096 | 0.436469 |
| 31.88849 | 30.13207 |
| 0.066653 | 0.036961 |
| 1.056618 | 0.328119 |
| 3.787435 | 1.800213 |
| 13.97649 | 13.54219 |
| 0        | 0.151088 |
| 6.573906 | 7.896541 |
| 0        | 0        |
| 1.102134 | 0.488934 |
| 0.339353 | 0.36     |
| 1.659748 | 2.215732 |
| 6.242515 | 6.104808 |
| 10.41873 | 12.70199 |
| 0.249345 | 0.399445 |
| 0.273913 | 0.491844 |
| 5.615168 | 6.969708 |
| 13.23601 | 12.53312 |
| 0.3011   | 0.133575 |
| 11.92869 | 9.847546 |
| 0        | 0        |
| 0        | 0        |
| 0.282797 | 0.171076 |
| 0        | 0        |
| 0        | 0        |
| 0        | 0        |
| 20.08128 | 20.28062 |
| 35.1952  | 34.83029 |
| 7.960834 | 3.823105 |
| 0.058528 | 0.025965 |
| 38.20972 | 38.45505 |
| 0.737802 | 0.589914 |
| 0.061472 | 0.136353 |
| 0.03347  | 0.074241 |
| 13.35752 | 11.92371 |
| 6.558688 | 8.219096 |
| 28.11058 | 19.4639  |
| 0.091607 | 0.203196 |
| 1.156781 | 0.715081 |
| 1.540451 | 0.767566 |
| 0.236973 | 0.283034 |
| 0.043816 | 0.145783 |

|          |          |
|----------|----------|
| 0.161168 | 0.192495 |
| 11.27251 | 11.72053 |
| 5.899886 | 5.151134 |
| 0        | 0        |
| 0        | 0        |
| 3.372372 | 2.763257 |
| 0        | 0.033443 |
| 19.0556  | 35.29521 |
| 117.9626 | 140.1962 |
| 0.208501 | 0.07708  |
| 6.422454 | 6.680346 |
| 0.052262 | 0.057961 |
| 3.420211 | 5.355137 |
| 0        | 0.023951 |
| 0.079268 | 0.13187  |
| 0.239164 | 0.159148 |
| 14.40559 | 20.00385 |
| 0.480523 | 0.551306 |
| 15.41498 | 14.7938  |
| 27.33833 | 37.81858 |
| 11.56739 | 14.08332 |
| 7.164842 | 5.110966 |
| 0        | 0.092676 |
| 0        | 0        |
| 9.807595 | 8.32606  |
| 1.992227 | 3.589275 |
| 0.787683 | 0.194131 |
| 9.453128 | 6.795784 |
| 13.56866 | 12.16038 |
| 0        | 0.069274 |
| 1.920795 | 2.788159 |
| 4.802144 | 3.308972 |
| 0.109694 | 1.45989  |
| 0.82103  | 0.973371 |
| 4.599029 | 6.050183 |
| 26.83864 | 24.11634 |
| 16.56304 | 16.16835 |
| 6.592878 | 9.258237 |
| 5.136184 | 2.857825 |
| 0.421907 | 0.33247  |
| 35.01412 | 44.59003 |
| 8.53793  | 6.079996 |
| 8.124021 | 16.64768 |
| 16.50184 | 22.82009 |
| 44.76218 | 62.56599 |
| 1.878192 | 4.505842 |
| 19.61236 | 24.96206 |
| 5.714706 | 4.29692  |
| 20.70465 | 24.40352 |
| 0.132835 | 0.088393 |
| 29.52613 | 24.115   |
| 1.088202 | 1.338542 |
| 53.23311 | 42.30557 |
| 7.473575 | 7.280075 |
| 1.631183 | 0.938461 |
| 11.08073 | 9.671551 |
| 5.517306 | 10.35352 |
| 44.6405  | 58.97256 |
| 14.48247 | 14.06482 |
| 2.080571 | 2.63712  |
| 1.189919 | 0.59599  |
| 16.33253 | 21.52624 |
| 12.18049 | 15.62641 |
| 2.036713 | 3.351825 |
| 4.549811 | 2.361966 |

|          |          |
|----------|----------|
| 3.767599 | 3.395028 |
| 64.10269 | 62.21824 |
| 27.23976 | 15.42914 |
| 29.83186 | 19.50881 |
| 1.566986 | 1.197533 |
| 0.048734 | 0.270244 |
| 1.871966 | 0.943693 |
| 3.177356 | 2.2043   |
| 3.499802 | 2.65345  |
| 4.223598 | 3.412794 |
| 0.178925 | 1.190631 |
| 10.31943 | 13.23904 |
| 69.45236 | 93.11384 |
| 25.2828  | 19.85789 |
| 11.84296 | 11.16831 |
| 53.71698 | 46.22644 |
| 5.141321 | 8.255909 |
| 5.902127 | 7.852562 |
| 6.367483 | 4.673077 |
| 0.366835 | 0.050855 |
| 22.39622 | 26.13544 |
| 13.47168 | 13.92753 |
| 10.37308 | 10.27948 |
| 14.89829 | 13.93473 |
| 6.293133 | 5.842238 |
| 0.023797 | 0.013196 |
| 14.10498 | 20.18399 |
| 0        | 0.243172 |
| 67.87338 | 75.38589 |
| 0.264628 | 0.265538 |
| 15.9352  | 13.27666 |
| 21.7893  | 22.99936 |
| 8.44044  | 16.62947 |
| 6.880667 | 7.617354 |
| 25.07848 | 16.71659 |
| 5.327467 | 6.131065 |
| 0.02554  | 0.014163 |
| 3.752765 | 2.880065 |
| 0.97932  | 0.410068 |
| 9.046763 | 10.10457 |
| 6.10553  | 6.811315 |
| 6.734885 | 3.219772 |
| 20.08994 | 19.58455 |
| 0        | 0        |
| 0        | 0        |
| 0.767769 | 1.211025 |
| 0.030812 | 0.034173 |
| 0.233898 | 0.317053 |
| 0.365396 | 0.776722 |
| 0        | 0        |
| 39.51687 | 59.8754  |
| 2.097759 | 2.726807 |
| 0.242843 | 0.029925 |
| 4.215709 | 2.716345 |
| 4.36566  | 3.843477 |
| 4.063125 | 3.031184 |
| 0.613593 | 1.759611 |
| 10.1412  | 13.71052 |
| 7.639326 | 5.869116 |
| 1.116037 | 0.86317  |
| 0        | 0        |
| 261.7728 | 294.282  |
| 0.063419 | 0.175838 |
| 4.00768  | 3.232553 |
| 51.29366 | 59.2398  |

|          |          |
|----------|----------|
| 0.022784 | 0        |
| 2.505749 | 5.094885 |
| 28.57944 | 26.31271 |
| 23.76092 | 18.77359 |
| 6.898543 | 5.324505 |
| 30.07748 | 17.47711 |
| 1.26519  | 0.992488 |
| 2.670114 | 1.764826 |
| 8.802191 | 8.399266 |
| 10.84192 | 14.28609 |
| 0.345523 | 0.052856 |
| 4.1749   | 6.427553 |
| 18.09862 | 10.97295 |
| 0.186168 | 0.275295 |
| 18.19541 | 20.25942 |
| 8.392434 | 9.212744 |
| 152.2108 | 146.0082 |
| 9.966031 | 12.96658 |
| 0.023245 | 0.07734  |
| 8.458466 | 8.317134 |
| 2.672486 | 1.417541 |
| 0        | 0.035258 |
| 8.090234 | 8.995393 |
| 3.666602 | 3.114111 |
| 1.29049  | 1.052599 |
| 16.41288 | 15.15148 |
| 0        | 0.035586 |
| 6.191199 | 6.827624 |
| 3.546325 | 2.344354 |
| 15.16436 | 7.444123 |
| 0.920658 | 0.813662 |
| 2.03266  | 1.992679 |
| 1.226512 | 0.891216 |
| 4.788284 | 4.200842 |
| 6.871378 | 4.780824 |
| 6.208689 | 2.829216 |
| 3.615079 | 3.962723 |
| 0.55698  | 0.872082 |
| 1.82073  | 1.655826 |
| 1.712592 | 2.007561 |
| 0.808779 | 0.82709  |
| 0.060716 | 0.028859 |
| 0        | 0.035789 |
| 608.2991 | 590.8282 |
| 14.84686 | 13.97122 |
| 26.14185 | 24.57938 |
| 1.408322 | 1.785046 |
| 7.265185 | 9.015641 |
| 14.23886 | 14.71763 |
| 3.70136  | 5.853474 |
| 0.075947 | 0        |
| 0.023643 | 0        |
| 7.962324 | 5.762634 |
| 28.27982 | 25.40193 |
| 0.079226 | 0.556489 |
| 0.037515 | 0.104015 |
| 0        | 0.045064 |
| 0        | 0.022778 |
| 38.27757 | 34.09525 |
| 41.40854 | 37.44134 |
| 0        | 0.027957 |
| 0.321972 | 0.981987 |
| 19.13755 | 21.93645 |
| 9.801493 | 12.69712 |
| 6.219519 | 2.77972  |

|          |          |
|----------|----------|
| 18.67509 | 17.06377 |
| 0.365486 | 0.316676 |
| 7.156593 | 8.013416 |
| 32.49153 | 35.03133 |
| 16.40997 | 13.29076 |
| 5.312004 | 4.481444 |
| 729.6492 | 811.331  |
| 1.61645  | 1.876965 |
| 0        | 0.030947 |
| 0.094024 | 0.069519 |
| 1.944556 | 3.785107 |
| 0        | 0.23485  |
| 1.574375 | 1.029738 |
| 4.914213 | 12.2538  |
| 1.977289 | 2.815445 |
| 3.453708 | 4.096063 |
| 14.62386 | 13.0704  |
| 1.767179 | 2.650544 |
| 8.695556 | 4.206382 |
| 4.871265 | 5.378411 |
| 15.80855 | 19.52833 |
| 0        | 0        |
| 9.345073 | 16.87893 |
| 4.469213 | 2.471089 |
| 25.04898 | 30.13586 |
| 7.798941 | 3.51386  |
| 64.18757 | 104.355  |
| 229.9803 | 279.9581 |
| 6.283156 | 4.662807 |
| 0.085021 | 0.07072  |
| 0.616466 | 2.051093 |
| 12.97192 | 17.75512 |
| 0        | 0        |
| 0.020477 | 0.23846  |
| 4.41172  | 3.32158  |
| 6.910118 | 9.781861 |
| 2.886392 | 5.030433 |
| 5.327302 | 6.917036 |
| 8.894361 | 5.75601  |
| 0.234644 | 0.416376 |
| 21.06652 | 26.76445 |
| 0.037267 | 0.785297 |
| 11.59443 | 13.7871  |
| 1.424644 | 1.529048 |
| 2.559256 | 2.912095 |
| 80.8772  | 92.02945 |
| 2.667399 | 2.127164 |
| 0.232971 | 0.387569 |
| 0        | 0        |
| 27.24168 | 20.84292 |
| 0.11944  | 0.024085 |
| 0.298136 | 0.137771 |
| 3.804324 | 1.95073  |
| 39.87842 | 26.67749 |
| 4.824912 | 3.114998 |
| 24.31798 | 24.01438 |
| 10.26747 | 13.79301 |
| 39.9657  | 67.93376 |
| 0        | 0.029339 |
| 12.72145 | 11.76886 |
| 0        | 0        |
| 2.346307 | 5.204394 |
| 7.428002 | 4.870327 |
| 0.71955  | 0.513016 |
| 3.251322 | 1.679467 |

|          |          |
|----------|----------|
| 0.204196 | 0.251628 |
| 0        | 0.195342 |
| 9.842737 | 12.49946 |
| 0.209188 | 0.208802 |
| 12.27981 | 17.18649 |
| 19.82891 | 16.76322 |
| 2.882857 | 4.366994 |
| 34.1937  | 62.11629 |
| 10.24847 | 11.77135 |
| 13.80177 | 19.85394 |
| 12.02809 | 9.749895 |
| 3.79553  | 4.010078 |
| 9.169755 | 5.084909 |
| 2.751223 | 1.100975 |
| 0.268774 | 0.298087 |
| 45.71466 | 40.0572  |
| 7.01002  | 4.906052 |
| 0.02138  | 0.142269 |
| 17.37386 | 15.07109 |
| 4.056493 | 4.311444 |
| 1.245945 | 0.789616 |
| 0.244963 | 0.098792 |
| 4.028471 | 5.922153 |
| 4.739284 | 4.778322 |
| 0.93911  | 1.640409 |
| 10.83804 | 8.463996 |
| 10.93542 | 9.388742 |
| 87.78653 | 102.7733 |
| 66.03461 | 89.88104 |
| 108.6079 | 71.5788  |
| 231.192  | 231.1069 |
| 2.298072 | 1.447144 |
| 3.901406 | 3.815113 |
| 54.50215 | 48.47666 |
| 0        | 0        |
| 2.17284  | 1.606541 |
| 97.36628 | 95.16651 |
| 2.572144 | 2.136905 |
| 15.55657 | 22.0796  |
| 0.086502 | 0.191872 |
| 20.63111 | 23.50129 |
| 10.2404  | 12.42941 |
| 4.725727 | 2.56189  |
| 1.430367 | 1.199688 |
| 8.397813 | 12.28144 |
| 6.712861 | 9.455428 |
| 0        | 0.017419 |
| 0.596989 | 0.307402 |
| 0.06577  | 0.043766 |
| 0.113179 | 0.179318 |
| 41.42261 | 40.44546 |
| 13.75342 | 9.21429  |
| 2.435917 | 2.733742 |
| 9.216122 | 3.943292 |
| 0.183611 | 0.872727 |
| 0.050954 | 0        |
| 10.63459 | 9.83309  |
| 33.96295 | 26.64283 |
| 0        | 0.042231 |
| 22.17697 | 19.23625 |
| 3.31943  | 1.540198 |
| 4.440714 | 4.003227 |
| 8.454486 | 8.663394 |
| 67.46464 | 58.95359 |
| 0.899158 | 0.149583 |

|          |          |
|----------|----------|
| 1.35103  | 1.2971   |
| 6.312662 | 3.232873 |
| 0.494358 | 0.174451 |
| 10.91523 | 11.04579 |
| 7.569253 | 10.43744 |
| 28.8246  | 28.78496 |
| 0.088746 | 0        |
| 27.10658 | 64.29163 |
| 8.669907 | 13.0598  |
| 3.265641 | 2.289767 |
| 23.36433 | 21.56075 |
| 68.29783 | 71.81385 |
| 0        | 0.077023 |
| 0.099392 | 0.055116 |
| 0.562046 | 0.836818 |
| 5.045548 | 4.275354 |
| 0.04153  | 0.046059 |
| 11.50998 | 8.10493  |
| 6.966115 | 6.591496 |
| 2.786095 | 4.40883  |
| 2.96499  | 4.636579 |
| 0        | 0.193694 |
| 0.421861 | 0.183079 |
| 1.835117 | 3.34779  |
| 1.76133  | 2.715733 |
| 3.079612 | 2.592577 |
| 0.737562 | 0.847215 |
| 0.358469 | 0.238539 |
| 0.310895 | 0.089393 |
| 9.338531 | 8.094719 |
| 10.04394 | 15.7689  |
| 8.945929 | 4.637976 |
| 3.869095 | 4.156966 |
| 28.71804 | 21.50584 |
| 4.586063 | 3.669069 |
| 2.716301 | 2.474589 |
| 3.983732 | 5.029229 |
| 0.086997 | 0.032162 |
| 20.2495  | 15.57597 |
| 9.633159 | 6.709922 |
| 2.493654 | 1.411027 |
| 257.8682 | 182.4235 |
| 0.200604 | 0.166861 |
| 14.12507 | 20.1397  |
| 67.46514 | 54.68886 |
| 33.10447 | 23.02843 |
| 0.84587  | 0.375249 |
| 0.296216 | 0        |
| 50.22437 | 31.7707  |
| 1.938719 | 1.035261 |
| 21.23185 | 9.49564  |
| 8.807766 | 5.756348 |
| 0        | 0.127045 |
| 0.421132 | 0.300254 |
| 1.398353 | 0.361867 |
| 0.097621 | 0        |
| 13.18786 | 12.90807 |
| 0        | 0        |
| 0.068152 | 0        |
| 8.615405 | 6.429124 |
| 0        | 0.115534 |
| 0.372521 | 0.413149 |
| 2.838428 | 4.153138 |
| 9.225022 | 6.551591 |
| 1.4092   | 1.046984 |

|          |          |
|----------|----------|
| 0.123331 | 0.113985 |
| 0.262247 | 0.339322 |
| 43.74357 | 42.37424 |
| 4.528065 | 3.061711 |
| 30.41841 | 35.80007 |
| 1.850091 | 0.724187 |
| 10.66275 | 34.23661 |
| 8.433677 | 9.891416 |
| 4.278143 | 2.775214 |
| 7.826505 | 8.229158 |
| 7.179765 | 5.976871 |
| 44.12656 | 42.84673 |
| 2.907716 | 2.405409 |
| 38.67155 | 105.3531 |
| 3.316783 | 2.097665 |
| 5.274439 | 5.196253 |
| 2.956518 | 4.913767 |
| 0.070155 | 0.103741 |
| 63.01303 | 107.483  |
| 2.11253  | 1.969645 |
| 13.65489 | 7.528852 |
| 53.88242 | 53.75767 |
| 0.351214 | 0.411158 |
| 6.444368 | 3.594019 |
| 8.588096 | 13.27858 |
| 20.07103 | 12.56658 |
| 1.779836 | 1.418175 |
| 15.78762 | 19.88288 |
| 44.24963 | 43.2621  |
| 0.119628 | 0        |
| 14.54866 | 18.25879 |
| 1.458872 | 0.602038 |
| 0.149427 | 1.325788 |
| 18.40225 | 9.193343 |
| 0.376284 | 0.052165 |
| 0.472593 | 0.262067 |
| 0        | 0        |
| 4.275153 | 1.239231 |
| 0.023625 | 0        |
| 6.030431 | 9.695663 |
| 2.352168 | 4.472052 |
| 45.10362 | 47.88556 |
| 43.57106 | 23.59183 |
| 15.25575 | 16.93101 |
| 7.41476  | 9.212313 |
| 0.408825 | 0.332502 |
| 0.580653 | 0.143107 |
| 5.558219 | 7.172937 |
| 5.702146 | 8.803422 |
| 9.580393 | 5.436169 |
| 5.784492 | 4.364634 |
| 7.752247 | 6.992807 |
| 10.77272 | 16.88189 |
| 0.416291 | 0.197868 |
| 0        | 0        |
| 3.663652 | 3.072388 |
| 66.57438 | 85.17498 |
| 0.047262 | 0        |
| 6.589113 | 2.517494 |
| 3.363241 | 3.381187 |
| 2.771452 | 4.504573 |
| 3.848361 | 1.382041 |
| 0        | 0        |
| 0.101615 | 0        |
| 35.62978 | 23.47268 |

|          |          |
|----------|----------|
| 0.031051 | 0.034438 |
| 27.45012 | 16.22489 |
| 9.792935 | 6.81737  |
| 8.547668 | 3.982196 |
| 4.237127 | 2.953803 |
| 8.255246 | 6.270536 |
| 0.173913 | 0.19288  |
| 28.31672 | 39.5316  |
| 20.62534 | 18.62295 |
| 40.28416 | 81.98812 |
| 0.873438 | 0.645797 |
| 0        | 0.071356 |
| 80.11211 | 107.0764 |
| 6.902769 | 7.128346 |
| 27.7306  | 31.82119 |
| 5.576593 | 5.927646 |
| 0.559341 | 0.354482 |
| 0        | 0.184113 |
| 15.56635 | 8.315244 |
| 28.40014 | 27.86141 |
| 0.755047 | 0.628045 |
| 9.322355 | 11.64178 |
| 2.57829  | 0.922413 |
| 14.12823 | 13.41787 |
| 0.079497 | 0.088167 |
| 2.709357 | 1.418015 |
| 2.861879 | 4.408331 |
| 7.250278 | 6.762853 |
| 4.410071 | 11.50832 |
| 13.07595 | 16.80435 |
| 0.197729 | 1.096467 |
| 15.28203 | 18.97868 |
| 0.196581 | 0        |
| 0.057329 | 0        |
| 12.85121 | 21.92385 |
| 0.6577   | 0.875315 |
| 1.510367 | 0.478597 |
| 125.2145 | 119.3565 |
| 1.274171 | 0.513867 |
| 0        | 0.009688 |
| 0        | 0        |
| 38.54062 | 42.74389 |
| 0.108109 | 0.05995  |
| 1.516757 | 2.443916 |
| 32.29287 | 4.872756 |
| 216.1072 | 127.7604 |
| 79.73783 | 77.85898 |
| 0.223048 | 0.070678 |
| 0.691472 | 0.201812 |
| 11.70249 | 8.331022 |
| 9.426368 | 9.471644 |
| 8.484471 | 13.74712 |
| 0.114693 | 0.127201 |
| 4.328941 | 4.511062 |
| 4.940157 | 5.478935 |
| 0.977977 | 0.694946 |
| 18.61362 | 24.57157 |
| 56.10828 | 94.97882 |
| 8.87779  | 10.80504 |
| 0.098066 | 0.1571   |
| 0        | 0        |
| 0.05087  | 0.084627 |
| 24.29487 | 21.05137 |
| 0.027829 | 0        |
| 5.239971 | 3.645557 |

|          |          |
|----------|----------|
| 2.963402 | 1.96394  |
| 0        | 0        |
| 0        | 0        |
| 1.958874 | 0.96427  |
| 3.526199 | 2.485006 |
| 9.323094 | 10.36467 |
| 0.057863 | 0.149738 |
| 0.052394 | 0        |
| 0.07456  | 0.070878 |
| 45.37598 | 38.97707 |
| 0.064007 | 0.248457 |
| 3.976914 | 2.369727 |
| 30.45026 | 18.53029 |
| 17.67035 | 23.63901 |
| 5.179325 | 5.575947 |
| 65.51654 | 81.49984 |
| 12.8926  | 11.10222 |
| 0.438777 | 0.121657 |
| 1.5886   | 0.66829  |
| 19.20177 | 12.11995 |
| 8.656181 | 8.257455 |
| 1.595517 | 1.8639   |
| 9.937242 | 17.87441 |
| 6.521107 | 13.72213 |
| 33.5776  | 38.6248  |
| 9.501002 | 9.678043 |
| 1.424188 | 0.683032 |
| 0.686775 | 0.320705 |
| 17.10131 | 24.87348 |
| 9.588708 | 6.487021 |
| 16.52035 | 14.34667 |
| 0.018128 | 0.020105 |
| 50.98257 | 45.03646 |
| 0        | 0        |
| 4.297847 | 4.526531 |
| 4.858129 | 12.24863 |
| 0.208433 | 0.549016 |
| 7.8025   | 8.127704 |
| 1.43798  | 1.71989  |
| 3.202957 | 4.059743 |
| 0.477591 | 0.45401  |
| 0.039178 | 0.065176 |
| 3.424207 | 3.066349 |
| 1.337599 | 1.01371  |
| 30.33832 | 49.80886 |
| 15.03271 | 15.42679 |
| 6.278777 | 6.801603 |
| 26.30282 | 37.03476 |
| 3.808848 | 3.781142 |
| 15.00467 | 8.590401 |
| 34.74977 | 31.73234 |
| 5.734933 | 8.710969 |
| 0.575518 | 0.56169  |
| 13.30433 | 18.34262 |
| 11.0813  | 13.76706 |
| 7.053786 | 7.913345 |
| 0        | 0        |
| 22.57978 | 21.06816 |
| 54.36433 | 46.31327 |
| 0.245726 | 0.045421 |
| 2.119321 | 0.531407 |
| 0.1142   | 0.084437 |
| 34.97095 | 19.81014 |
| 0.137767 | 0        |
| 2.621082 | 1.029541 |

|          |          |
|----------|----------|
| 1.820902 | 0.912028 |
| 110.7264 | 75.4425  |
| 0.076134 | 0.042218 |
| 0        | 0        |
| 0.321694 | 0.089194 |
| 5.407935 | 6.86056  |
| 0.805731 | 0.455233 |
| 1.968846 | 2.248429 |
| 8.922095 | 12.3425  |
| 0        | 0.057718 |
| 4.202721 | 2.385432 |
| 0.465652 | 0.344291 |
| 26.32121 | 23.74349 |
| 1.444619 | 1.003558 |
| 48.9693  | 48.88902 |
| 82.16724 | 47.58035 |
| 49.86324 | 43.43281 |
| 0.786859 | 0.581783 |
| 0.228084 | 0.359468 |
| 7.217088 | 13.58994 |
| 12.7276  | 15.07008 |
| 246.6548 | 250.2002 |
| 5.029503 | 4.640542 |
| 0.680032 | 0.301679 |
| 2.359372 | 0.353253 |
| 8.229667 | 7.668427 |
| 49.49835 | 29.515   |
| 24.87097 | 16.50319 |
| 0        | 0.024716 |
| 0.246703 | 0.255368 |
| 5.766117 | 5.6033   |
| 225.6076 | 225.3747 |
| 11.22147 | 5.988934 |
| 12.27946 | 3.725395 |
| 61.17107 | 53.35385 |
| 27.95192 | 23.59526 |
| 1.970271 | 2.143726 |
| 1.798435 | 1.223943 |
| 13.57788 | 14.82988 |
| 0.047    | 0.104252 |
| 0.163818 | 0.817577 |
| 1.051017 | 7.022279 |
| 0.097967 | 0        |
| 0        | 0        |
| 3.903705 | 4.884869 |
| 3.67311  | 3.176411 |
| 0.027742 | 0.123071 |
| 44.40087 | 39.35097 |
| 16.91831 | 21.7168  |
| 0.059356 | 0        |
| 36.35625 | 30.76087 |
| 23.1427  | 19.78368 |
| 1.74113  | 2.254716 |
| 18.66786 | 21.80593 |
| 185.1474 | 204.6749 |
| 12.39954 | 11.04764 |
| 2.083002 | 3.651568 |
| 74.84666 | 57.69823 |
| 0.775871 | 5.774828 |
| 6.162812 | 3.341146 |
| 0.038999 | 0.288351 |
| 12.37745 | 8.05928  |
| 0.091689 | 0.072635 |
| 0        | 0        |
| 18.02222 | 15.79884 |

|          |          |
|----------|----------|
| 2.33494  | 2.339991 |
| 66.7594  | 71.48468 |
| 0.608993 | 0.979346 |
| 33.63506 | 51.86072 |
| 23.06996 | 21.31183 |
| 0.184508 | 0.665049 |
| 5.127098 | 4.440323 |
| 57.52861 | 69.323   |
| 5.470034 | 2.214088 |
| 8.623643 | 10.97282 |
| 4.378382 | 1.353281 |
| 6.757301 | 4.229433 |
| 80.43199 | 74.11262 |
| 0.155801 | 0.043198 |
| 47.39066 | 63.97531 |
| 1.008723 | 0.503431 |
| 21.79456 | 34.50111 |
| 0.289769 | 0.270629 |
| 6.218528 | 7.049502 |
| 3.077583 | 3.235145 |
| 0.02414  | 0        |
| 7.134644 | 7.865934 |
| 10.34781 | 5.432785 |
| 82.76558 | 135.0679 |
| 209.3254 | 162.2354 |
| 39.14358 | 41.10793 |
| 86.14088 | 101.5243 |
| 47.48077 | 45.98602 |
| 127.2906 | 102.8724 |
| 0.105411 | 0.17536  |
| 0        | 0        |
| 0        | 0        |
| 10.25417 | 5.764143 |
| 9.859898 | 10.64555 |
| 6.966845 | 6.090423 |
| 1.802419 | 2.355955 |
| 40.62739 | 34.63239 |
| 1.072776 | 0.991478 |
| 14.52556 | 13.63372 |
| 47.58232 | 60.54723 |
| 4.559958 | 3.321193 |
| 40.41695 | 49.89234 |
| 1.723931 | 1.490192 |
| 2.875886 | 2.682785 |
| 19.50319 | 20.73374 |
| 9.723761 | 7.923982 |
| 22.15696 | 22.05788 |
| 8.06986  | 8.773089 |
| 6.963544 | 5.211452 |
| 0.859476 | 0.272346 |
| 10.37244 | 12.15915 |
| 0.720544 | 0.399564 |
| 0.115618 | 0        |
| 10.19915 | 6.234377 |
| 0.155867 | 0.115244 |
| 74.32299 | 78.91042 |
| 4.389982 | 3.924814 |
| 88.10425 | 83.36753 |
| 3.524307 | 1.544744 |
| 59.53871 | 71.43847 |
| 0        | 0        |
| 0.506418 | 0.898638 |
| 0.067266 | 0        |
| 212.8826 | 209.1553 |
| 6.430654 | 4.951596 |

|          |          |
|----------|----------|
| 0.14286  | 0.190128 |
| 4.166003 | 2.111451 |
| 11.03989 | 7.250172 |
| 266.2853 | 218.4492 |
| 73.97494 | 74.19933 |
| 35.90411 | 31.38628 |
| 333.8551 | 356.2163 |
| 19.62516 | 9.299806 |
| 2.745472 | 2.04443  |
| 77.21209 | 55.52147 |
| 35.9488  | 31.75098 |
| 1.384838 | 0.402251 |
| 0.848998 | 0.226679 |
| 6.460745 | 5.205328 |
| 7.803686 | 11.2723  |
| 0        | 0        |
| 4.749264 | 1.697038 |
| 1.024178 | 0.309784 |
| 11.33135 | 12.92465 |
| 9.769816 | 6.637458 |
| 43.39897 | 31.28289 |
| 10.44738 | 5.762574 |
| 9.431538 | 17.64134 |
| 64.0659  | 76.69075 |
| 13.54956 | 6.46013  |
| 1.107376 | 2.620048 |
| 0.478276 | 0.357737 |
| 15.72011 | 17.45552 |
| 1.852752 | 3.060362 |
| 0.047833 | 0        |
| 12.29237 | 11.39933 |
| 0.307361 | 0.221573 |
| 24.99602 | 20.31251 |
| 55.38248 | 43.03634 |
| 6.839404 | 5.430732 |
| 4.936051 | 8.01554  |
| 16.5439  | 31.40046 |
| 0.062133 | 0.275639 |
| 0        | 0        |
| 39.76234 | 47.45722 |
| 4.025279 | 4.193718 |
| 28.54157 | 9.680454 |
| 5.667557 | 9.344913 |
| 4.91303  | 5.041112 |
| 4.798986 | 2.640394 |
| 15.3596  | 13.24157 |
| 0.080807 | 0.04481  |
| 0.042279 | 0.070335 |
| 9.886447 | 7.372436 |
| 0.13352  | 0.037021 |
| 0.12564  | 0.046447 |
| 6.70217  | 4.187491 |
| 52.17771 | 65.72377 |
| 2.301027 | 0.739923 |
| 9.353879 | 10.89046 |
| 0.246516 | 0.390574 |
| 9.224004 | 7.70486  |
| 87.65582 | 68.59927 |
| 23.54442 | 35.71454 |
| 15.31148 | 14.69788 |
| 2.687132 | 2.164561 |
| 8.619033 | 13.40747 |
| 6.288038 | 8.551227 |
| 106.6554 | 139.3003 |
| 49.74613 | 48.59653 |

|          |          |
|----------|----------|
| 0        | 0        |
| 1.38253  | 1.502018 |
| 2.069563 | 1.602359 |
| 0.076056 | 0.028117 |
| 0.740231 | 0.366501 |
| 0.055439 | 0.078254 |
| 21.80912 | 13.66943 |
| 0        | 0        |
| 3.633916 | 2.39097  |
| 180.1852 | 185.0128 |
| 27.73712 | 17.66398 |
| 12.83327 | 8.13778  |
| 0.685011 | 0.218707 |
| 3.785786 | 3.875692 |
| 2.094956 | 1.88179  |
| 22.33845 | 27.91196 |
| 0.163818 | 0.045421 |
| 0        | 0        |
| 3.585154 | 2.862545 |
| 0.619116 | 0.291669 |
| 7.767827 | 7.286044 |
| 20.65233 | 20.98396 |
| 0.39474  | 0.062541 |
| 0.437232 | 0.623464 |
| 1.295726 | 0.419136 |
| 0.681985 | 0.32     |
| 0.43001  | 0.84376  |
| 1.930734 | 0.67298  |
| 13.56391 | 10.3694  |
| 2.304656 | 2.679185 |
| 7.863556 | 9.534704 |
| 28.95947 | 29.05327 |
| 19.2728  | 21.4823  |
| 11.76707 | 16.21225 |
| 0.165919 | 0.073606 |
| 26.6298  | 23.35001 |
| 16.95737 | 17.43587 |
| 0.642246 | 0.447725 |
| 27.13956 | 22.87664 |
| 7.744118 | 9.020835 |
| 13.33718 | 10.37709 |
| 0.215366 | 0.409464 |
| 0        | 0        |
| 0.125139 | 0.05948  |
| 0.708215 | 0.628363 |
| 20.6515  | 14.09463 |
| 29.1212  | 14.46994 |
| 48.77102 | 42.06671 |
| 2.647411 | 0.592874 |
| 11.91992 | 9.506455 |
| 18.62432 | 5.668615 |
| 30.87766 | 22.67691 |
| 0.126193 | 0.489844 |
| 0.528078 | 0.878506 |
| 13.6087  | 13.29016 |
| 140.3979 | 126.454  |
| 28.08507 | 17.50693 |
| 0.440826 | 0        |
| 2.605137 | 2.273272 |
| 0.682273 | 1.908157 |
| 0        | 0        |
| 0.325915 | 0.18073  |
| 17.85125 | 20.28179 |
| 15.15526 | 18.46137 |
| 0.123584 | 0.168692 |

|          |          |
|----------|----------|
| 60.03556 | 60.42529 |
| 17.94169 | 13.37958 |
| 0        | 0.381531 |
| 2.873947 | 4.66533  |
| 57.55612 | 72.98877 |
| 0        | 0        |
| 1.781732 | 4.178406 |
| 5.603277 | 5.785798 |
| 26.10649 | 39.28365 |
| 0.798853 | 0.992294 |
| 24.05063 | 21.53482 |
| 26.85085 | 29.57706 |
| 82.16949 | 65.45874 |
| 0.072855 | 0.01616  |
| 11.7451  | 9.429617 |
| 0.013949 | 0        |
| 10.12831 | 7.180009 |
| 5.583653 | 4.251643 |
| 7.369398 | 4.76442  |
| 1.487398 | 3.742676 |
| 9.324647 | 8.538262 |
| 1.638256 | 2.557155 |
| 5.465284 | 6.445625 |
| 0.702194 | 1.978728 |
| 5.141771 | 2.586508 |
| 4.345387 | 4.74219  |
| 6.119781 | 4.601498 |
| 1.057837 | 0.992712 |
| 25.7631  | 17.3441  |
| 169.6236 | 215.3569 |
| 38.90679 | 33.90357 |
| 18.58153 | 18.44506 |
| 11.49833 | 10.55681 |
| 6.606532 | 2.979129 |
| 42.66456 | 49.227   |
| 10.48667 | 22.52739 |
| 5.141541 | 2.317834 |
| 0.610691 | 0.112882 |
| 59.64648 | 44.65828 |
| 5.987415 | 3.03149  |
| 128.6015 | 143.9828 |
| 0.128811 | 0.085716 |
| 0        | 0.165657 |
| 0.037119 | 0.013722 |
| 5.427955 | 1.896691 |
| 11.45578 | 4.869856 |
| 0.169174 | 0        |
| 169.3167 | 241.6003 |
| 22.04205 | 10.44294 |
| 0        | 0        |
| 13.5219  | 8.398104 |
| 0        | 0        |
| 1.001753 | 0.893634 |
| 42.93302 | 24.76753 |
| 4.918346 | 2.727373 |
| 22.30983 | 18.41064 |
| 0.697605 | 0.178543 |
| 18.62261 | 11.68711 |
| 0        | 0        |
| 4.879081 | 3.333914 |
| 1.131138 | 0.696945 |
| 1.845869 | 0.902147 |
| 10.8652  | 3.840165 |
| 0        | 0        |
| 3.180397 | 0.945713 |

|          |          |
|----------|----------|
| 0.840147 | 0.792008 |
| 0.033853 | 0.037545 |
| 0        | 0.014233 |
| 23.64775 | 28.71647 |
| 0.947154 | 0.171502 |
| 19.24518 | 15.76464 |
| 0.022198 | 0.024619 |
| 3.229729 | 3.754176 |
| 2.997823 | 3.814201 |
| 48.98839 | 41.9347  |
| 6.424375 | 8.457761 |
| 1.862607 | 0.911046 |
| 9.5936   | 13.3902  |
| 4.412388 | 5.107536 |
| 273.0716 | 264.5626 |
| 0.037397 | 0.431348 |
| 2.633989 | 2.140458 |
| 8.730425 | 10.33836 |
| 4.018172 | 3.512037 |
| 2.995721 | 3.677506 |
| 3.304363 | 5.05869  |
| 8.109572 | 11.35044 |
| 55.34137 | 46.46132 |
| 7.893032 | 4.063109 |
| 47.91885 | 46.80806 |
| 0.891413 | 0.296589 |
| 0.248099 | 1.135024 |
| 3.456212 | 3.417506 |
| 7.185162 | 9.626387 |
| 6.921549 | 10.66169 |
| 5.551565 | 4.900488 |
| 47.99011 | 56.27177 |
| 14.25726 | 19.22662 |
| 0        | 0.27163  |
| 0        | 0.065392 |
| 23.63358 | 25.7353  |
| 0.055708 | 0.108122 |
| 8.296858 | 13.05688 |
| 0.249095 | 0.880583 |
| 1.24914  | 1.949783 |
| 3.810386 | 2.081902 |
| 8.095281 | 11.61278 |
| 11.77148 | 19.50234 |
| 0        | 0.768887 |
| 0        | 0.276956 |
| 0        | 0.248585 |
| 0        | 0.245922 |
| 13.12824 | 12.94822 |
| 5.83695  | 5.497078 |
| 0.22095  | 0.408411 |
| 8.430328 | 7.663126 |
| 5.278733 | 6.676549 |
| 0.031162 | 0        |
| 40.37511 | 34.74838 |
| 2.556152 | 3.309063 |
| 30.36447 | 25.56444 |
| 1.026788 | 0.531926 |
| 1.258249 | 0.663008 |
| 0.131987 | 0.117106 |
| 0.344308 | 0.247085 |
| 5.525048 | 10.1913  |
| 7.113853 | 8.70159  |
| 0.055783 | 0.041245 |
| 0.030301 | 0.033606 |
| 6.048733 | 5.89595  |

|          |          |
|----------|----------|
| 17.98057 | 21.97851 |
| 30.63476 | 29.87841 |
| 54.19228 | 63.53422 |
| 17.08906 | 22.1303  |
| 21.26794 | 36.97823 |
| 39.16036 | 40.77295 |
| 1.732873 | 1.336053 |
| 3.227621 | 2.568715 |
| 1.990132 | 2.788014 |
| 1.65634  | 1.377737 |
| 6.017035 | 3.262482 |
| 0.324383 | 0.323784 |
| 10.3928  | 15.34339 |
| 13.98082 | 13.03247 |
| 19.69087 | 20.37457 |
| 4.553851 | 4.870124 |
| 40.66509 | 26.03992 |
| 2.8559   | 3.242271 |
| 20.41492 | 19.49298 |
| 0.09876  | 0.03651  |
| 0.103421 | 0        |
| 8.16724  | 4.660896 |
| 0.009176 | 0.101771 |
| 0.01166  | 0.168104 |
| 0.042642 | 0        |
| 3.491483 | 7.263009 |
| 33.34179 | 34.81317 |
| 23.03797 | 22.09774 |
| 61.44944 | 64.65171 |
| 12.05302 | 13.0789  |
| 0.080689 | 0.048812 |
| 0.539105 | 0.647725 |
| 25.30976 | 20.2073  |
| 0.523675 | 0.209083 |
| 22.10394 | 25.78689 |
| 32.82551 | 14.93783 |
| 24.81796 | 11.13094 |
| 34.19914 | 26.88589 |
| 22.87213 | 38.13359 |
| 0.025249 | 0.084007 |
| 8.659399 | 10.16001 |
| 3.180273 | 3.862193 |
| 0.572889 | 0.913343 |
| 6.749155 | 8.383846 |
| 1.863745 | 2.792825 |
| 12.63627 | 16.44209 |
| 208.5222 | 243.3948 |
| 52.38991 | 58.61312 |
| 91.84053 | 65.44854 |
| 1.615482 | 2.179055 |
| 1.637522 | 1.452889 |
| 0.986376 | 0.425425 |
| 0.063354 | 0        |
| 1.796149 | 0.619745 |
| 1.078549 | 0.312046 |
| 12.47131 | 16.04945 |
| 0.160847 | 0.035678 |
| 0.117678 | 0.065256 |
| 6.658225 | 5.832247 |
| 6.647861 | 3.801046 |
| 12.63006 | 13.61976 |
| 3.679054 | 2.990526 |
| 13.73437 | 13.24997 |
| 2.605432 | 1.537012 |
| 0.715887 | 1.275151 |

|          |          |
|----------|----------|
| 14.39802 | 15.60352 |
| 12.59598 | 17.09725 |
| 8.7388   | 8.024184 |
| 8.058168 | 12.94423 |
| 0.472368 | 0.556628 |
| 0.506644 | 0.153245 |
| 8.368232 | 10.29878 |
| 102.6005 | 111.0585 |
| 3.390252 | 1.98945  |
| 2.202785 | 1.477517 |
| 6.175309 | 5.516055 |
| 14.87615 | 19.05117 |
| 5.441733 | 4.556788 |
| 0.984771 | 1.040774 |
| 5.712652 | 3.989131 |
| 24.50588 | 16.23618 |
| 12.67959 | 5.931098 |
| 0.097366 | 0.359948 |
| 1.495697 | 1.018171 |
| 4.812515 | 5.850002 |
| 17.19222 | 16.51978 |
| 31.70651 | 30.21736 |
| 8.486697 | 6.58567  |
| 0.047322 | 0        |
| 0.095764 | 1.097482 |
| 44.3175  | 27.1941  |
| 4.199925 | 4.870908 |
| 98.4805  | 96.59458 |
| 0        | 0        |
| 0.174463 | 0.072559 |
| 27.30275 | 20.74328 |
| 85.09823 | 78.18598 |
| 23.90544 | 27.5636  |
| 13.82471 | 17.57992 |
| 8.153297 | 4.599204 |
| 115.5601 | 63.83327 |
| 23.72839 | 19.2504  |
| 0.063322 | 0.140455 |
| 0.229224 | 0.072635 |
| 2.127978 | 0.485894 |
| 1.400665 | 0.584456 |
| 22.45795 | 16.55294 |
| 9.980322 | 13.16027 |
| 5.460043 | 6.305233 |
| 11.51904 | 12.13253 |
| 1.464656 | 0.737313 |
| 0.834782 | 0.57864  |
| 0.086683 | 0.264377 |
| 0.213696 | 0.309925 |
| 2.173254 | 0.283561 |
| 3.612374 | 1.783743 |
| 12.57828 | 8.236209 |
| 3.336088 | 4.518992 |
| 52.1311  | 40.64753 |
| 23.86539 | 29.71096 |
| 17.18635 | 15.73035 |
| 2.177441 | 2.365293 |
| 14.22784 | 9.757971 |
| 35.42605 | 32.40383 |
| 8.666803 | 21.83024 |
| 28.01692 | 34.04546 |
| 0.712006 | 0.236897 |
| 186.9743 | 164.2915 |
| 9.743072 | 7.713006 |
| 28.05283 | 37.83927 |

|          |          |
|----------|----------|
| 205.7147 | 197.224  |
| 1.852527 | 2.840134 |
| 3.792393 | 1.24177  |
| 87.21369 | 77.09542 |
| 649.6509 | 421.1291 |
| 76.44959 | 105.233  |
| 24.42024 | 30.98116 |
| 9.26931  | 11.50868 |
| 0.617968 | 0.811248 |
| 0.879931 | 0.746274 |
| 30.61802 | 29.78829 |
| 0        | 0        |
| 3.169691 | 1.116258 |
| 27.95844 | 44.30534 |
| 394.3578 | 423.1701 |
| 1.493784 | 0.4076   |
| 1.987716 | 1.436415 |
| 82.26072 | 64.99511 |
| 27.75499 | 21.22162 |
| 0.080807 | 0.567594 |
| 35.52174 | 21.01558 |
| 4.217276 | 2.061146 |
| 35.28034 | 32.50128 |
| 5.263063 | 2.124306 |
| 39.24012 | 28.57315 |
| 11.66223 | 12.78215 |
| 69.84775 | 54.91579 |
| 24.7029  | 21.07463 |
| 205.8486 | 195.1304 |
| 3.427254 | 2.637199 |
| 14.21284 | 15.86132 |
| 8.767786 | 6.806806 |
| 5.473807 | 6.355878 |
| 7.407862 | 7.080995 |
| 1.634902 | 1.398135 |
| 0        | 0.121336 |
| 0.06751  | 0.074873 |
| 28.64807 | 24.56927 |
| 0.087942 | 0        |
| 28.3356  | 28.51213 |
| 131.8299 | 110.259  |
| 2.681537 | 3.121216 |
| 15.86595 | 17.94655 |
| 0.513501 | 0.258865 |
| 17.01506 | 12.80801 |
| 3.585157 | 1.635056 |
| 6.828316 | 3.805285 |
| 14.19846 | 8.655472 |
| 10.72583 | 10.88669 |
| 56.78435 | 38.72893 |
| 0        | 0        |
| 21.14853 | 19.524   |
| 58.12894 | 57.97515 |
| 41.52564 | 32.64055 |
| 14.6193  | 1.080913 |
| 9.017131 | 7.369335 |
| 0.202421 | 0.112248 |
| 231.0036 | 174.2385 |
| 151.3658 | 85.83332 |
| 3.123868 | 0.490813 |
| 6.648389 | 3.418608 |
| 6.351724 | 5.619426 |
| 1.399287 | 1.977229 |
| 13.33814 | 8.350779 |
| 15.19047 | 11.31016 |

|          |          |
|----------|----------|
| 12.02046 | 12.72301 |
| 33.12187 | 37.06611 |
| 10.28595 | 4.329364 |
| 9.02354  | 3.611978 |
| 3.700731 | 2.399458 |
| 0.117589 | 0.078248 |
| 0        | 0        |
| 0        | 0        |
| 3.437519 | 8.563278 |
| 0        | 0        |
| 5.05904  | 5.431889 |
| 35.08124 | 34.43941 |
| 30.79006 | 32.38445 |
| 2.024572 | 1.122687 |
| 0.235237 | 0.09566  |
| 0.584843 | 0.233505 |
| 0.082234 | 0        |
| 35.40089 | 26.1745  |
| 0.142794 | 0.253388 |
| 0.343686 | 0.323993 |
| 15.431   | 11.12929 |
| 11.22391 | 8.417647 |
| 2.27293  | 0.504164 |
| 2.756453 | 2.021614 |
| 37.75422 | 27.58303 |
| 12.47993 | 8.654965 |
| 44.38012 | 43.89643 |
| 54.69184 | 43.38098 |
| 0.150453 | 0.02781  |
| 19.93245 | 28.30503 |
| 7.679167 | 6.684474 |
| 21.98159 | 27.54941 |
| 7.214523 | 2.54011  |
| 57.04886 | 44.76215 |
| 68.35882 | 51.43902 |
| 107.7874 | 90.91283 |
| 664.7282 | 642.4511 |
| 33.51239 | 26.09361 |
| 45.34345 | 31.54147 |
| 27.81008 | 17.9123  |
| 79.18359 | 85.53058 |
| 97.76577 | 77.6861  |
| 23.51976 | 33.38815 |
| 4.047232 | 2.049156 |
| 0.241583 | 0.200948 |
| 13.15461 | 7.294634 |
| 17.11902 | 19.54842 |
| 103.0952 | 88.9591  |
| 24.41761 | 11.88516 |
| 8.827827 | 11.05042 |
| 54.28837 | 60.28335 |
| 15.1572  | 9.77778  |
| 7.074563 | 5.126453 |
| 4.603721 | 5.539098 |
| 0.070036 | 0.058256 |
| 25.68829 | 19.84279 |
| 13.18568 | 14.52502 |
| 2.265193 | 4.196578 |
| 154.279  | 154.9082 |
| 0.196064 | 0.217447 |
| 2.437055 | 1.641012 |
| 58.61976 | 65.59858 |
| 7.961183 | 8.514099 |
| 52.2038  | 44.11825 |
| 1.593457 | 0.835423 |

|          |          |
|----------|----------|
| 57.7502  | 82.51219 |
| 3.944798 | 3.20223  |
| 4.338171 | 3.2547   |
| 8.250402 | 5.878134 |
| 10.52842 | 9.122815 |
| 3.253395 | 2.500576 |
| 5.394696 | 3.257043 |
| 62.6551  | 46.57062 |
| 5.738006 | 5.109484 |
| 16.49611 | 32.1042  |
| 25.77022 | 23.74247 |
| 2.714737 | 1.188705 |
| 0.12158  | 0.080904 |
| 0.109404 | 0        |
| 0.236803 | 0.180558 |
| 10.72231 | 6.011425 |
| 0.190305 | 0.158295 |
| 11.93238 | 8.794034 |
| 1.525178 | 1.07778  |
| 218.2025 | 177.4756 |
| 0.083338 | 0.215663 |
| 0.078038 | 0.086549 |
| 4.74647  | 5.90563  |
| 0        | 0        |
| 8.650995 | 13.14228 |
| 0        | 0        |
| 29.10691 | 29.62729 |
| 0.201377 | 0.124078 |
| 3.02079  | 4.633311 |
| 3.419445 | 4.351153 |
| 21.32401 | 9.177465 |
| 0        | 0        |
| 15.90847 | 20.46026 |
| 0.071011 | 0        |
| 38.22817 | 61.04018 |
| 0        | 0.099362 |
| 5.615137 | 3.740257 |
| 14.38197 | 11.18098 |
| 14.54433 | 12.24394 |
| 4.559335 | 1.833262 |
| 6.927855 | 7.810622 |
| 32.45778 | 12.97404 |
| 0.241427 | 0.267757 |
| 0.29481  | 0.326962 |
| 0.097775 | 0.54219  |
| 46.54302 | 58.83884 |
| 2.69322  | 3.009573 |
| 10.64095 | 7.656323 |
| 0.214685 | 0        |
| 4.055507 | 6.352569 |
| 0.130298 | 0.072254 |
| 66.85433 | 64.12916 |
| 21.58168 | 23.65463 |
| 29.29142 | 24.32773 |
| 16.83988 | 24.29226 |
| 39.80762 | 47.42143 |
| 13.30203 | 20.66102 |
| 18.97029 | 21.79161 |
| 0        | 0.023614 |
| 6.060213 | 2.184372 |
| 18.21384 | 7.79086  |
| 15.58191 | 12.11915 |
| 2.398206 | 2.331391 |
| 0.02612  | 0        |
| 73.10456 | 90.41373 |

|          |          |
|----------|----------|
| 38.33978 | 46.46668 |
| 21.90201 | 12.72786 |
| 9.234276 | 10.25793 |
| 0.327852 | 1.045371 |
| 18.33614 | 13.84695 |
| 5.087224 | 3.154496 |
| 8.171385 | 9.886433 |
| 0        | 0        |
| 10.37038 | 9.819717 |
| 2.134099 | 1.293225 |
| 12.71329 | 15.55841 |
| 6.312965 | 4.334239 |
| 3.822487 | 2.578423 |
| 1.87385  | 2.055122 |
| 0.037334 | 0        |
| 6.368601 | 6.197026 |
| 0        | 0        |
| 43.59575 | 35.2616  |
| 1.162633 | 1.175658 |
| 0.094414 | 0.020942 |
| 0.4623   | 0.256359 |
| 33.67822 | 27.51432 |
| 4.442122 | 1.505345 |
| 7.563608 | 4.677043 |
| 2.512924 | 2.133786 |
| 57.60881 | 49.88148 |
| 66.94464 | 61.71185 |
| 78.46611 | 59.36931 |
| 46.48617 | 90.78148 |
| 349.2387 | 357.2016 |
| 7.804707 | 12.64344 |
| 2.791288 | 0.701238 |
| 146.2669 | 172.0104 |
| 75.6772  | 88.93394 |
| 3.835204 | 4.895509 |
| 5.164171 | 2.61749  |
| 0.681026 | 0.629416 |
| 10.42504 | 10.10604 |
| 0.313457 | 0.339366 |
| 34.7202  | 45.53292 |
| 13.06151 | 11.62518 |
| 58.90016 | 45.75315 |
| 16.42298 | 14.18297 |
| 12.45473 | 8.854853 |
| 4.775914 | 4.715173 |
| 0.712897 | 0.402511 |
| 11.22166 | 10.64315 |
| 0.224256 | 0.248714 |
| 5.627371 | 2.973353 |
| 62.13064 | 53.52398 |
| 62.64063 | 49.68952 |
| 4.741622 | 2.921527 |
| 21.11444 | 12.91515 |
| 4.599443 | 4.902481 |
| 12.21204 | 12.13629 |
| 0.047431 | 0        |
| 3.876585 | 3.326892 |
| 4.440171 | 5.812156 |
| 0.758545 | 1.346036 |
| 3.248576 | 3.244076 |
| 0        | 0        |
| 0.091596 | 0.033862 |
| 58.63642 | 72.60121 |
| 26.96848 | 20.9707  |
| 11.4709  | 10.95341 |

|          |          |
|----------|----------|
| 18.46001 | 7.988405 |
| 9.268734 | 5.542916 |
| 22.26506 | 29.47416 |
| 8.028477 | 4.353101 |
| 0.660499 | 0.523238 |
| 17.74217 | 13.86182 |
| 9.902726 | 6.495571 |
| 16.33981 | 20.82551 |
| 3.744096 | 4.441296 |
| 24.93099 | 26.81989 |
| 0.205161 | 0.199094 |
| 21.02314 | 23.2408  |
| 3.094987 | 5.284499 |
| 1.621861 | 2.501377 |
| 0.20484  | 0.295333 |
| 12.87973 | 14.87606 |
| 31.24812 | 25.92395 |
| 45.14022 | 42.1615  |
| 0        | 0        |
| 39.17141 | 40.15195 |
| 0        | 0.178698 |
| 497.9189 | 604.1752 |
| 3.074177 | 5.831115 |
| 12.40756 | 8.65946  |
| 7.836453 | 6.45545  |
| 2.836868 | 2.517008 |
| 0.24001  | 0.098069 |
| 11.76743 | 12.17822 |
| 4.944397 | 2.910176 |
| 5.991395 | 3.977534 |
| 2.08273  | 1.831969 |
| 0        | 0        |
| 0.271517 | 0.200753 |
| 53.14681 | 35.1286  |
| 33.29712 | 30.85048 |
| 8.953184 | 7.02712  |
| 10.9641  | 6.024292 |
| 0.06085  | 0.157467 |
| 3.360054 | 2.109859 |
| 51.99879 | 49.66518 |
| 20.23329 | 12.38331 |
| 0.68786  | 0.331687 |
| 4.157165 | 3.410169 |
| 7.486568 | 7.300967 |
| 1.960113 | 1.440025 |
| 18.96751 | 14.71447 |
| 0.798497 | 1.420272 |
| 0.041199 | 0        |
| 0.499954 | 0.369653 |
| 31.45478 | 29.99151 |
| 56.45908 | 47.99153 |
| 42.38841 | 45.02905 |
| 0.31795  | 0.448796 |
| 0.122399 | 0.169685 |
| 38.74926 | 26.97446 |
| 0        | 0        |
| 5.717564 | 7.723168 |
| 8.452012 | 12.38143 |
| 0.061139 | 0.067807 |
| 5.378762 | 5.907119 |
| 16.1382  | 23.44913 |
| 6.667171 | 7.98179  |
| 0.299937 | 0.221765 |
| 3.842781 | 4.49225  |
| 2.356652 | 2.67665  |

|          |          |
|----------|----------|
| 6.405443 | 13.04425 |
| 3.710599 | 12.18123 |
| 19.02687 | 24.03744 |
| 13.0093  | 16.27891 |
| 32.83302 | 39.78674 |
| 9.662032 | 12.37858 |
| 1.730839 | 1.197174 |
| 6.69817  | 10.05209 |
| 1.273826 | 1.650007 |
| 0.477591 | 1.210693 |
| 1.434965 | 1.603612 |
| 0.29225  | 0.13205  |
| 262.3935 | 354.6155 |
| 5.027476 | 5.467509 |
| 0.088254 | 0.04894  |
| 20.83234 | 13.46977 |
| 34.06369 | 41.86396 |
| 9.388843 | 9.572014 |
| 45.01202 | 57.49876 |
| 42.43081 | 43.78997 |
| 12.19277 | 14.05631 |
| 54.90018 | 46.78333 |
| 8.72226  | 7.448299 |
| 9.442249 | 8.416771 |
| 12.40308 | 11.65475 |
| 9.161885 | 9.129506 |
| 30.24185 | 34.36172 |
| 1.84645  | 1.075108 |
| 46.80552 | 54.32329 |
| 3.55149  | 8.858387 |
| 2.567377 | 4.187319 |
| 0        | 0.033737 |
| 24.83103 | 25.32856 |
| 0        | 0        |
| 11.53766 | 11.40399 |
| 25.64979 | 33.43209 |
| 4.678282 | 1.896245 |
| 28.12112 | 21.89089 |
| 269.511  | 264.3886 |
| 11.97576 | 11.47919 |
| 2.822131 | 0.729301 |
| 17.20602 | 25.59942 |
| 0.093976 | 0.034742 |
| 463.6999 | 453.2971 |
| 5.373526 | 2.348952 |
| 0        | 0        |
| 0.332349 | 0.046074 |
| 0.318997 | 0.148963 |
| 0.282641 | 0.139318 |
| 0        | 0        |
| 12.19871 | 6.963766 |
| 19.79497 | 24.36418 |
| 1.161937 | 1.492899 |
| 0.014452 | 0        |
| 4.638762 | 3.468882 |
| 26.66589 | 17.29386 |
| 1.99924  | 1.923275 |
| 13.81908 | 16.46799 |
| 85.17798 | 73.20549 |
| 33.73656 | 38.59633 |
| 15.4265  | 17.92131 |
| 17.80927 | 32.13571 |
| 13.73696 | 12.14193 |
| 33.29606 | 31.57599 |
| 3.693871 | 2.855295 |

|          |          |
|----------|----------|
| 4.669817 | 2.731599 |
| 2.442546 | 1.757145 |
| 11.02535 | 7.548437 |
| 0.192645 | 0.2747   |
| 10.63587 | 9.168574 |
| 194.0729 | 247.109  |
| 14.0428  | 17.59776 |
| 5.602211 | 7.951747 |
| 0.496144 | 0.336266 |
| 20.93453 | 19.92727 |
| 30.99886 | 31.77561 |
| 1.459362 | 0.823458 |
| 11.70253 | 8.693359 |
| 0.079273 | 0.298924 |
| 99.53115 | 118.1788 |
| 1.811839 | 0.974877 |
| 11.11237 | 10.85498 |
| 52.49164 | 31.73734 |
| 0.771266 | 0.194405 |
| 10.97786 | 10.19624 |
| 4.964581 | 4.047387 |
| 7.79025  | 6.25825  |
| 0.095518 | 0        |
| 0.32813  | 0.181958 |
| 22.40102 | 12.4713  |
| 3.686474 | 4.18092  |
| 29.36067 | 40.6965  |
| 3.092649 | 11.12568 |
| 212.1712 | 265.6279 |
| 26.55349 | 19.77574 |
| 18.6676  | 18.5157  |
| 2.447615 | 1.357277 |
| 1.679234 | 3.699914 |
| 49.73206 | 46.83047 |
| 1.426192 | 0.456945 |
| 15.06068 | 20.62335 |
| 12.40341 | 11.80425 |
| 1.705191 | 0.71665  |
| 0        | 0        |
| 0.08019  | 0.044468 |
| 0        | 0        |
| 10.81575 | 11.74764 |
| 1.518976 | 2.688725 |
| 8.358552 | 6.371705 |
| 0.239564 | 0.132845 |
| 0.066403 | 0        |
| 0.52872  | 0.854444 |
| 0.029799 | 0.148722 |
| 7.592553 | 6.118419 |
| 4.822282 | 2.540397 |
| 2.879674 | 3.162877 |
| 0.119801 | 0        |
| 14.00201 | 14.54726 |
| 0.010881 | 0.060338 |
| 0.5771   | 0.762294 |
| 0.130792 | 0.145056 |
| 3.03975  | 3.392338 |
| 3.809211 | 4.026053 |
| 6.34437  | 8.506251 |
| 0        | 0        |
| 47.47821 | 78.93611 |
| 12.31576 | 5.386938 |
| 0        | 0        |
| 16.70358 | 20.90211 |
| 10.34997 | 8.58398  |

|          |          |
|----------|----------|
| 0        | 0        |
| 0.051248 | 0.014209 |
| 1.004367 | 0.682463 |
| 0        | 0        |
| 59.18331 | 61.39747 |
| 18.21215 | 16.78827 |
| 19.91466 | 26.96845 |
| 25.14066 | 20.99042 |
| 0.032337 | 0.071727 |
| 5.969582 | 5.751616 |
| 4.675835 | 3.436785 |
| 0.022146 | 0        |
| 10.08896 | 6.986407 |
| 0.696236 | 0.328172 |
| 8.254998 | 4.973702 |
| 6.836851 | 7.884335 |
| 2.02526  | 1.895178 |
| 2.728185 | 2.436297 |
| 16.94078 | 19.87471 |
| 0.24279  | 0.49366  |
| 0.244738 | 0.305358 |
| 0.073628 | 0.551192 |
| 5.389487 | 2.928862 |
| 492.2675 | 586.6148 |
| 7.388542 | 5.003199 |
| 0        | 0.013755 |
| 16.64611 | 27.86433 |
| 0.472184 | 0.418944 |
| 1.875213 | 1.765145 |
| 1.230726 | 1.867826 |
| 12.22137 | 15.2805  |
| 0.352641 | 0.244438 |
| 0.716763 | 0.806978 |
| 32.84163 | 32.65392 |
| 0        | 0.049933 |
| 23.13886 | 30.20513 |
| 7.71481  | 6.753625 |
| 4.91822  | 6.130176 |
| 8.13377  | 7.373948 |
| 63.00016 | 69.30449 |
| 72.14528 | 38.94374 |
| 0.279356 | 0.051637 |
| 21.27848 | 9.069703 |
| 17.9165  | 16.42758 |
| 2.82041  | 1.76344  |
| 64.68554 | 63.13294 |
| 103.2696 | 94.48255 |
| 2.039772 | 2.83362  |
| 49.86992 | 59.54105 |
| 37.8189  | 13.71448 |
| 34.1907  | 39.30784 |
| 0.102566 | 0.30334  |
| 49.0709  | 42.37209 |
| 0.330954 | 0.587276 |
| 0.083675 | 0        |
| 0.44854  | 0.189034 |
| 16.97496 | 16.22328 |
| 13.33154 | 18.76852 |
| 2.037027 | 1.417875 |
| 16.7686  | 15.48499 |
| 28.82555 | 19.78754 |
| 0.169482 | 0.062655 |
| 0.144978 | 0.064316 |
| 5.014784 | 3.722061 |
| 3.387911 | 1.610314 |

|          |          |
|----------|----------|
| 32.67731 | 25.50178 |
| 0.241114 | 0        |
| 0.31278  | 0.317985 |
| 0.036097 | 0        |
| 0.181011 | 0.167294 |
| 7.966555 | 5.156394 |
| 56.67868 | 46.39533 |
| 47.78588 | 26.14076 |
| 6.05575  | 4.643084 |
| 2.62811  | 1.662768 |
| 5.99251  | 5.950396 |
| 10.49002 | 25.49477 |
| 11.61593 | 11.89828 |
| 0.057552 | 0.26808  |
| 3.690127 | 2.952021 |
| 13.43071 | 12.80833 |
| 0.096935 | 0.053753 |
| 0.936537 | 0.977578 |
| 10.11831 | 10.1594  |
| 2.792323 | 2.7293   |
| 19.60072 | 13.19831 |
| 13.97975 | 12.53024 |
| 62.66008 | 61.8943  |
| 2.649222 | 1.939931 |
| 3.485175 | 6.092281 |
| 2.307703 | 3.524899 |
| 4.302685 | 5.277848 |
| 0        | 0        |
| 12.20461 | 18.28788 |
| 11.43304 | 10.14113 |
| 1.205727 | 2.282196 |
| 0.018969 | 0.231421 |
| 1.430144 | 1.172347 |
| 0.040793 | 0.090484 |
| 4.932565 | 3.434113 |
| 0.137818 | 0.545887 |
| 79.04361 | 72.27476 |
| 45.47808 | 45.62784 |
| 4.323281 | 2.410986 |
| 0.280357 | 1.04095  |
| 43.58188 | 42.06932 |
| 22.26885 | 9.805281 |
| 1.900965 | 1.167087 |
| 26.25865 | 21.05579 |
| 36.22717 | 28.70178 |
| 20.49127 | 27.32881 |
| 0.936974 | 0.875084 |
| 6.965846 | 7.837511 |
| 0.504882 | 0.809651 |
| 8.46312  | 6.936405 |
| 0.137095 | 0.057018 |
| 96.19347 | 131.5774 |
| 2.675847 | 3.007781 |
| 18.69628 | 13.06681 |
| 8.340494 | 12.8052  |
| 15.3383  | 22.21577 |
| 0        | 0.024636 |
| 20.85308 | 18.14099 |
| 12.53608 | 12.24765 |
| 0.069761 | 0        |
| 5.830768 | 5.137416 |
| 0.058325 | 0.161715 |
| 8.065208 | 5.620039 |
| 3.940694 | 5.02139  |
| 12.35944 | 12.0475  |

|          |          |
|----------|----------|
| 120.6529 | 134.6686 |
| 32.68629 | 36.44039 |
| 0        | 0        |
| 1.123019 | 0.573324 |
| 0.667601 | 0.323929 |
| 9.436078 | 10.63903 |
| 22.7447  | 19.3842  |
| 1.734071 | 2.517991 |
| 11.65291 | 15.76519 |
| 4.768144 | 2.935378 |
| 0        | 0        |
| 0.007748 | 0.017187 |
| 0.064432 | 0.343004 |
| 3.196445 | 3.004282 |
| 7.433098 | 7.156391 |
| 21.98575 | 29.51063 |
| 0.130366 | 0.072292 |
| 1.298307 | 1.285626 |
| 2.673854 | 2.135136 |
| 23.18266 | 29.29426 |
| 2.814136 | 2.622548 |
| 0        | 0        |
| 0.05683  | 0.031514 |
| 0.255687 | 0.21685  |
| 17.37262 | 18.91163 |
| 3.197661 | 2.953034 |
| 42.26556 | 38.7373  |
| 0        | 0        |
| 0        | 0        |
| 14.39978 | 11.8356  |
| 0.227663 | 0.072141 |
| 13.758   | 12.91787 |
| 10.21211 | 10.83669 |
| 0        | 0        |
| 9.420154 | 11.167   |
| 3.656326 | 2.8797   |
| 4.674088 | 3.949599 |
| 0.315073 | 0.4465   |
| 0.02377  | 0.052724 |
| 0.711598 | 0.328835 |
| 2.048999 | 3.29874  |
| 7.157685 | 6.047386 |
| 4.372933 | 3.439868 |
| 8.520711 | 9.530658 |
| 4.834686 | 5.014684 |
| 60.80129 | 76.28911 |
| 17.33515 | 12.2263  |
| 57.10774 | 75.56363 |
| 6.684722 | 5.129725 |
| 222.4313 | 252.283  |
| 7.295905 | 7.520981 |
| 1.046279 | 0.663078 |
| 3.743782 | 5.007412 |
| 0        | 0.039135 |
| 39.46645 | 47.13157 |
| 4.93769  | 4.24659  |
| 0.193752 | 0.334263 |
| 3.534484 | 3.377574 |
| 225.1164 | 290.424  |
| 0        | 0        |
| 0.009348 | 0.031101 |
| 0.322191 | 0.501782 |
| 5.479694 | 14.51501 |
| 0        | 0.031615 |
| 10.0261  | 8.352817 |

|          |          |
|----------|----------|
| 7.834268 | 11.61262 |
| 16.38917 | 24.86316 |
| 0        | 0.007631 |
| 0.682273 | 0.291032 |
| 13.96468 | 11.24251 |
| 0.058261 | 0.021538 |
| 61.98671 | 76.87937 |
| 0        | 0        |
| 3.639077 | 6.010739 |
| 15.1276  | 12.12736 |
| 31.3     | 34.62182 |
| 0.097744 | 0.086723 |
| 5.283508 | 3.74721  |
| 16.12783 | 6.31297  |
| 1.857144 | 0.726948 |
| 8.387312 | 8.956454 |
| 0.033853 | 0.018773 |
| 3.905499 | 3.160778 |
| 7.344919 | 4.350514 |
| 7.633633 | 9.608752 |
| 0.784105 | 0.711508 |
| 0.405502 | 0.174894 |
| 0.204907 | 0.266777 |
| 0.027424 | 0.273729 |
| 0.139271 | 0.061784 |
| 0.038078 | 0        |
| 0.336514 | 0.559822 |
| 0.092254 | 0.306946 |
| 10.57076 | 12.26077 |
| 0        | 0        |
| 58.89173 | 20.6276  |
| 6.341148 | 9.658268 |
| 0.033881 | 0.037576 |
| 64.19663 | 62.17288 |
| 2.862511 | 1.368405 |
| 24.75692 | 26.79292 |
| 20.51955 | 16.26819 |
| 32.7429  | 32.73275 |
| 0.115618 | 0.091591 |
| 0        | 0        |
| 25.79349 | 20.53574 |
| 1.207245 | 0.33038  |
| 82.58438 | 78.21502 |
| 5.053584 | 5.729282 |
| 31.76012 | 38.09648 |
| 35.48927 | 48.84955 |
| 4.912158 | 2.873927 |
| 5.183624 | 7.136228 |
| 0.170501 | 0.324165 |
| 21.2677  | 25.37341 |
| 9.994526 | 7.558174 |
| 18.68241 | 26.64347 |
| 10.75979 | 11.97358 |
| 0        | 0        |
| 13.54781 | 14.75531 |
| 19.8712  | 17.8944  |
| 0.024613 | 0        |
| 1.307935 | 0.720356 |
| 0.014537 | 0        |
| 1.132833 | 2.269932 |
| 1.237488 | 0.734746 |
| 21.22971 | 24.92904 |
| 1.024536 | 0.93294  |
| 2.749935 | 3.549388 |
| 62.4521  | 80.09821 |

|          |          |
|----------|----------|
| 0        | 0        |
| 9.713502 | 14.50557 |
| 0.431659 | 0.51863  |
| 82.19506 | 131.8254 |
| 1.394386 | 1.261585 |
| 0.02243  | 0        |
| 37.25857 | 36.25052 |
| 2.627124 | 2.61292  |
| 0.179387 | 0.785335 |
| 1.258225 | 1.443567 |
| 66.08037 | 51.74501 |
| 6.849193 | 4.89992  |
| 7.817958 | 5.8356   |
| 24.9577  | 19.36209 |
| 44.65128 | 37.61807 |
| 1.83508  | 1.48178  |
| 1.418849 | 1.790637 |
| 12.77711 | 17.52484 |
| 14.51575 | 17.28891 |
| 13.98544 | 14.76651 |
| 3.684317 | 2.676417 |
| 26.56196 | 34.20246 |
| 5.589368 | 4.567647 |
| 0.252614 | 0.996139 |
| 9.598441 | 13.33345 |
| 0.173427 | 0.133159 |
| 0.193958 | 0.215111 |
| 7.767058 | 8.687452 |
| 1.11503  | 3.216503 |
| 31.28733 | 39.52967 |
| 6.598053 | 7.688898 |
| 10.35566 | 11.32844 |
| 5.389808 | 4.617908 |
| 26.85476 | 25.01865 |
| 9.375143 | 12.52911 |
| 11.79304 | 7.1906   |
| 0.084319 | 0.748119 |
| 8.128049 | 8.729833 |
| 8.69007  | 19.77178 |
| 10.45852 | 11.56779 |
| 53.24063 | 63.45528 |
| 6.354745 | 12.53258 |
| 126.5574 | 133.3733 |
| 17.91578 | 19.02566 |
| 9.723529 | 15.1932  |
| 0.085431 | 0.023687 |
| 21.80797 | 15.60411 |
| 5.353294 | 4.162273 |
| 2.339458 | 1.490516 |
| 0.231956 | 0.128627 |
| 40.79995 | 29.92725 |
| 0.601438 | 0.649928 |
| 21.36679 | 17.35043 |
| 0.433806 | 1.268401 |
| 0        | 0        |
| 1.565846 | 1.35599  |
| 8.252662 | 6.190492 |
| 2.879083 | 1.936543 |
| 8.312123 | 5.972964 |
| 4.384718 | 2.21223  |
| 13.67553 | 14.60365 |
| 9.883787 | 16.70505 |
| 16.63129 | 9.898695 |
| 0.502954 | 0.165276 |
| 13.89824 | 10.50036 |

|          |          |
|----------|----------|
| 17.18315 | 21.69874 |
| 0        | 0.011144 |
| 1.803836 | 3.01698  |
| 16.81331 | 14.52555 |
| 0        | 0.227255 |
| 5.027869 | 5.900143 |
| 19.07913 | 12.69223 |
| 1.592283 | 1.712017 |
| 25.15166 | 25.04832 |
| 4.766566 | 5.436169 |
| 1.749893 | 2.010503 |
| 0.619836 | 0.435376 |
| 1.346121 | 1.178629 |
| 0.442616 | 0.133878 |
| 2.661299 | 2.280737 |
| 0.710459 | 2.029953 |
| 40.68459 | 63.65343 |
| 4.740244 | 4.228632 |
| 0.122494 | 0.019408 |
| 3.489323 | 3.358153 |
| 2.337211 | 1.860466 |
| 66.38291 | 42.34237 |
| 9.342692 | 14.03478 |
| 0.763094 | 0.583667 |
| 10.98626 | 12.73125 |
| 0.742515 | 0.367944 |
| 0.703687 | 0.450249 |
| 4.597231 | 2.368585 |
| 30.74868 | 44.61498 |
| 0.03942  | 0        |
| 0.976774 | 0.261487 |
| 99.1909  | 114.4842 |
| 93.38169 | 100.8827 |
| 6.833919 | 5.180486 |
| 175.5352 | 168.655  |
| 0.134097 | 0.021246 |
| 0.971758 | 0.984022 |
| 0.057435 | 0.031849 |
| 6.007335 | 8.747992 |
| 6.061192 | 3.297216 |
| 13.09422 | 10.2147  |
| 0.014825 | 0.032884 |
| 0.562964 | 0.356778 |
| 0.393786 | 0.485258 |
| 0.305984 | 0.262229 |
| 1.465028 | 0.728361 |
| 28.94995 | 40.73111 |
| 8.997738 | 8.320473 |
| 16.98371 | 16.54981 |
| 3.471369 | 3.128092 |
| 0.06676  | 0.01234  |
| 18.21471 | 17.49484 |
| 5.712595 | 3.501261 |
| 0.066703 | 0.014795 |
| 8.783699 | 5.319458 |
| 14.04457 | 14.36698 |
| 0.035097 | 0        |
| 6.123735 | 5.103511 |
| 4.358454 | 3.898219 |
| 662.6769 | 718.7914 |
| 0.07406  | 0.082137 |
| 15.62037 | 9.657946 |
| 18.88276 | 19.21622 |
| 0        | 0.158965 |
| 0.224778 | 0.142453 |

|          |          |
|----------|----------|
| 12.23586 | 29.9367  |
| 29.67756 | 25.13385 |
| 14.14875 | 17.14863 |
| 1.188203 | 0.83991  |
| 10.47199 | 10.59497 |
| 1.814057 | 1.837457 |
| 10.52556 | 14.63043 |
| 8.013347 | 6.68383  |
| 0        | 0        |
| 4.038478 | 3.51616  |
| 24.7724  | 22.60169 |
| 15.75446 | 12.96834 |
| 0.096709 | 0.035752 |
| 2.25648  | 0.634981 |
| 7.911348 | 6.93032  |
| 1.46866  | 0.974106 |
| 237.8927 | 243.3259 |
| 0        | 0.058059 |
| 5.219188 | 2.267783 |
| 23.60882 | 33.91124 |
| 6.285429 | 4.529074 |
| 2.278585 | 2.668607 |
| 0.624274 | 0.157354 |
| 12.28352 | 9.635191 |
| 1.987617 | 4.553803 |
| 9.394248 | 9.639064 |
| 0.018659 | 0.041387 |
| 11.28011 | 9.375752 |
| 15.4643  | 7.429207 |
| 0.069761 | 0.077369 |
| 18.68798 | 25.78278 |
| 0.057399 | 0.02122  |
| 2.284721 | 1.14291  |
| 18.23416 | 21.38186 |
| 0.037447 | 0        |
| 13.06109 | 12.5892  |
| 9.654599 | 6.821513 |
| 2.420541 | 0.879929 |
| 0        | 0        |
| 3.90441  | 3.529261 |
| 14.1624  | 9.484787 |
| 9.710952 | 4.715874 |
| 7.001781 | 12.97914 |
| 6.421273 | 3.347338 |
| 0.074984 | 0.083162 |
| 3.811102 | 5.430619 |
| 5.05452  | 4.320371 |
| 4.550423 | 3.243175 |
| 7.046296 | 10.9339  |
| 51.42519 | 54.60814 |
| 11.86447 | 10.13496 |
| 0        | 0.192341 |
| 0.395551 | 0.471186 |
| 62.81904 | 106.6976 |
| 0.604534 | 0.413691 |
| 1.403639 | 2.562211 |
| 0.462185 | 0.541069 |
| 1.362183 | 1.749283 |
| 5.925402 | 6.178905 |
| 39.51998 | 37.81013 |
| 40.90069 | 29.95578 |
| 2.315646 | 2.74552  |
| 0        | 0.017988 |
| 0.865799 | 1.137107 |
| 20.84954 | 26.66874 |

|          |          |
|----------|----------|
| 0.102725 | 0.045571 |
| 0.12039  | 0.076297 |
| 0.119267 | 0.15117  |
| 13.93736 | 14.07107 |
| 1.592368 | 2.56332  |
| 0.055287 | 0.275923 |
| 260.8067 | 267.6123 |
| 1.182775 | 0.841882 |
| 15.72647 | 17.41861 |
| 10.05954 | 11.77049 |
| 12.81494 | 6.895195 |
| 9.218669 | 3.703205 |
| 27.12448 | 27.87534 |
| 7.774339 | 6.373982 |
| 19.11614 | 15.22582 |
| 151.3473 | 143.4078 |
| 6.259654 | 7.927889 |
| 0.832521 | 0.585951 |
| 3.404122 | 3.673341 |
| 11.78884 | 12.33817 |
| 0        | 0.015928 |
| 5.877434 | 6.437815 |
| 4.199024 | 9.598653 |
| 20.24032 | 25.24798 |
| 0.179962 | 0.239507 |
| 3.698128 | 4.115891 |
| 0.851726 | 0.735922 |
| 4.653959 | 8.54582  |
| 7.987786 | 6.471629 |
| 17.53933 | 17.88256 |
| 1.645339 | 0.903267 |
| 0.030099 | 0.016691 |
| 11.84004 | 16.07603 |
| 4.0718   | 6.553379 |
| 57.83133 | 50.3802  |
| 0.794469 | 0.71239  |
| 6.593976 | 5.633654 |
| 18.38208 | 29.47685 |
| 2.611213 | 1.447997 |
| 4.662651 | 8.42533  |
| 0.167463 | 0.077386 |
| 1.440628 | 1.256479 |
| 42.7714  | 34.56986 |
| 11.52088 | 8.906075 |
| 0.108571 | 1.651357 |
| 4.259073 | 5.300377 |
| 14.59747 | 18.97931 |
| 16.66372 | 22.6175  |
| 60.23804 | 70.19334 |
| 12.46811 | 9.056295 |
| 0.07795  | 0.23774  |
| 3.488027 | 5.690343 |
| 3.941397 | 1.505815 |
| 14.40278 | 23.8967  |
| 12.52535 | 10.29878 |
| 8.873942 | 10.2504  |
| 3.589279 | 3.176113 |
| 7.608687 | 4.162992 |
| 3.768279 | 3.888387 |
| 3.032541 | 3.287027 |
| 0        | 0.022241 |
| 67.64691 | 79.42911 |
| 33.40495 | 36.94641 |
| 17.4009  | 24.77974 |
| 3.096707 | 3.665452 |

|          |          |
|----------|----------|
| 2.574147 | 3.557954 |
| 0.81859  | 1.187209 |
| 1.4259   | 1.046849 |
| 49.17517 | 44.86548 |
| 0.227981 | 0.280939 |
| 13.62247 | 13.60005 |
| 0.210941 | 0.233946 |
| 11.07113 | 8.807817 |
| 44.08899 | 38.00969 |
| 0.086774 | 0.384951 |
| 1.40659  | 1.112796 |
| 147.7203 | 143.5854 |
| 26.3288  | 25.88149 |
| 8.887091 | 9.992462 |
| 0.040659 | 0        |
| 9.719059 | 8.119729 |
| 0.077738 | 0.028739 |
| 33.45186 | 32.05295 |
| 0.17952  | 0.179188 |
| 42.08941 | 42.63993 |
| 22.59569 | 30.74511 |
| 5.478877 | 6.827161 |
| 2.584789 | 0.965166 |
| 4.479964 | 8.075689 |
| 7.901329 | 6.25747  |
| 0.08757  | 0.07284  |
| 141.9532 | 98.03748 |
| 0.23138  | 0.085538 |
| 2.637516 | 3.048765 |
| 0        | 0.054606 |
| 5.419894 | 3.24267  |
| 0.68453  | 0.455511 |
| 58.32096 | 38.73113 |
| 22.1575  | 14.7331  |
| 18.72182 | 17.89185 |
| 1.029379 | 0.624435 |
| 2.993582 | 2.888456 |
| 29.99442 | 22.62235 |
| 6.104142 | 4.132984 |
| 18.68992 | 15.47129 |
| 38.53883 | 40.48291 |
| 1.110782 | 0.108064 |
| 85.23158 | 134.1614 |
| 14.16072 | 13.45404 |
| 0.104114 | 0        |
| 13.17729 | 15.98919 |
| 4.165233 | 2.842767 |
| 31.07766 | 24.15618 |
| 0.818368 | 0.60508  |
| 0        | 0.086832 |
| 24.8892  | 28.05651 |
| 3.089972 | 4.212551 |
| 77.49985 | 77.37063 |
| 0        | 0.04431  |
| 39.84534 | 47.34223 |
| 13.33502 | 13.24064 |
| 24.74412 | 41.21436 |
| 47.50996 | 83.52024 |
| 0.063556 | 0.007832 |
| 0        | 0.019167 |
| 15.52587 | 21.46873 |
| 0.081844 | 0.09077  |
| 0        | 0.033475 |
| 0.008644 | 0        |
| 3.574786 | 3.266876 |

|          |          |
|----------|----------|
| 0.023825 | 0        |
| 0.272789 | 0.92779  |
| 17.86878 | 30.91042 |
| 43.61189 | 44.92121 |
| 0.224208 | 0.476599 |
| 8.634305 | 8.860241 |
| 0        | 0        |
| 17.04191 | 19.3034  |
| 3.539744 | 3.160701 |
| 0.386404 | 0.229578 |
| 5.03458  | 6.917065 |
| 0        | 0.057622 |
| 0        | 0        |
| 0        | 0        |
| 31.72822 | 41.27832 |
| 17.01801 | 15.80589 |
| 7.373036 | 7.461887 |
| 16.91656 | 17.0949  |
| 14.41971 | 11.96077 |
| 29.62111 | 37.68529 |
| 45.66513 | 41.83675 |
| 12.80365 | 16.69479 |
| 15.68511 | 17.66278 |
| 8.001103 | 8.085966 |
| 0.678314 | 1.633882 |
| 11.35817 | 8.570326 |
| 35.52041 | 43.85956 |
| 5.748786 | 7.94517  |
| 4.524396 | 4.891331 |
| 46.48115 | 60.98693 |
| 0.348585 | 0.214779 |
| 52.33694 | 44.12021 |
| 139.0346 | 128.4454 |
| 7.218626 | 4.142262 |
| 28.01512 | 30.41832 |
| 9.506984 | 9.126376 |
| 17.04142 | 23.65378 |
| 6.108951 | 15.77423 |
| 2.140927 | 3.818652 |
| 20.1274  | 22.15666 |
| 4.879935 | 2.684337 |
| 36.44878 | 28.36461 |
| 17.14641 | 12.33827 |
| 0.495323 | 0.126772 |
| 20.50039 | 14.82927 |
| 18.36082 | 9.600329 |
| 13.20633 | 14.86854 |
| 2.060072 | 2.7677   |
| 11.77012 | 14.22442 |
| 0.505335 | 0.747264 |
| 0        | 0        |
| 16.22844 | 17.06939 |
| 0        | 0.02843  |
| 3.407449 | 3.866953 |
| 0        | 0        |
| 4.723005 | 3.254742 |
| 15.52172 | 22.3596  |
| 42.65653 | 41.50918 |
| 9.693242 | 5.745901 |
| 0.03677  | 0.183513 |
| 0.508512 | 0.37598  |
| 89.91101 | 128.4714 |
| 15.6854  | 20.85674 |
| 2.436549 | 1.129525 |
| 10.24844 | 12.8954  |

|          |          |
|----------|----------|
| 24.87958 | 28.2973  |
| 0.347131 | 0.219994 |
| 4.412193 | 5.196239 |
| 0.215542 | 0.167334 |
| 122.8541 | 160.2973 |
| 0.620069 | 0.088735 |
| 1.14937  | 3.291099 |
| 13.58309 | 13.68731 |
| 3.11663  | 2.323478 |
| 3.370879 | 3.651568 |
| 11.07924 | 15.53231 |
| 125.362  | 129.2443 |
| 0.066332 | 0        |
| 10.74878 | 10.15859 |
| 998.9266 | 845.42   |
| 36.62564 | 44.76224 |
| 4.285908 | 3.674647 |
| 24.78007 | 33.7675  |
| 2.723856 | 3.549583 |
| 18.64753 | 26.93026 |
| 7.263929 | 8.218511 |
| 46.35997 | 67.21376 |
| 0.443126 | 0.382242 |
| 0        | 0        |
| 15.25692 | 14.14654 |
| 5.861349 | 7.388406 |
| 14.4563  | 17.02146 |
| 13.8867  | 15.69393 |
| 1.300357 | 0.915667 |
| 19.86726 | 22.71174 |
| 16.59778 | 20.07545 |
| 12.50246 | 12.08359 |
| 28.39404 | 24.95844 |
| 2.773988 | 1.845913 |
| 0.060632 | 0        |
| 9.880698 | 7.138697 |
| 0.1001   | 0.111017 |
| 5.156558 | 5.665655 |
| 1.220381 | 0.169185 |
| 5.200383 | 2.633411 |
| 17.05368 | 15.42873 |
| 27.76292 | 26.61347 |
| 4.211708 | 4.353283 |
| 5.093388 | 4.516041 |
| 28.97009 | 22.55372 |
| 3.494067 | 2.836636 |
| 816.3955 | 934.3756 |
| 78.59238 | 73.90935 |
| 26.54454 | 17.6776  |
| 31.81105 | 44.74393 |
| 8.66529  | 7.527776 |
| 8.088153 | 6.135972 |
| 5.570356 | 5.777138 |
| 68.20186 | 31.57081 |
| 0.245889 | 0.681764 |
| 16.07208 | 16.20292 |
| 0.318202 | 0.24911  |
| 0.680404 | 0.107801 |
| 52.62921 | 56.39457 |
| 13.98811 | 16.64036 |
| 25.87889 | 19.03041 |
| 2.598853 | 2.090449 |
| 11.27876 | 13.97812 |
| 1.04692  | 0.731996 |
| 0        | 0        |

|          |          |
|----------|----------|
| 0.033798 | 0.074968 |
| 0        | 0        |
| 0.414153 | 0.329513 |
| 0.221281 | 0.271248 |
| 24.9993  | 13.90435 |
| 65.707   | 111.5545 |
| 6.696793 | 4.26574  |
| 0        | 0        |
| 0.056778 | 0.094456 |
| 4.702794 | 4.179946 |
| 4.074452 | 8.55761  |
| 369.6321 | 407.8652 |
| 94.90599 | 78.22936 |
| 1590.16  | 1512.87  |
| 3.189266 | 3.578949 |
| 105.9244 | 78.68987 |
| 136.2232 | 60.0851  |
| 15.46435 | 15.74212 |
| 3.190078 | 3.582215 |
| 6.288468 | 6.583941 |
| 8.099987 | 9.264785 |
| 1.010946 | 1.066508 |
| 18.04234 | 19.22535 |
| 149.2258 | 139.5239 |
| 17.71127 | 12.53414 |
| 5.753261 | 5.617917 |
| 5.283425 | 3.651233 |
| 0.637255 | 1.00965  |
| 0.045686 | 0.050668 |
| 0.053157 | 0.176862 |
| 0.55064  | 0.550625 |
| 8.808925 | 8.713175 |
| 0.251304 | 0.278712 |
| 0.23184  | 0.10285  |
| 0        | 0        |
| 0.20801  | 0.184557 |
| 2.010354 | 1.221701 |
| 42.24737 | 26.85385 |
| 0.042272 | 0.011721 |
| 5.866046 | 6.232193 |
| 1.511707 | 1.507224 |
| 1.917389 | 2.312148 |
| 25.02753 | 22.81518 |
| 9.311486 | 7.94253  |
| 0.452328 | 0.861545 |
| 0.66908  | 0.915427 |
| 16.393   | 17.92634 |
| 0.403255 | 0.207645 |
| 7.225326 | 7.078601 |
| 19.34824 | 13.4764  |
| 7.734252 | 11.06977 |
| 51.26092 | 67.05714 |
| 0.184453 | 0.122742 |
| 0.106222 | 0.088355 |
| 12.40192 | 15.89693 |
| 3.292735 | 3.670011 |
| 4.969126 | 2.243015 |
| 11.7049  | 13.60048 |
| 20.27468 | 28.64452 |
| 1.998906 | 2.472705 |
| 1.063587 | 0.862003 |
| 0        | 0        |
| 18.15233 | 13.21718 |
| 0.201363 | 0.260544 |
| 13.42954 | 19.06455 |

|          |          |
|----------|----------|
| 0.834646 | 0.806231 |
| 0        | 0        |
| 0.622851 | 0.313991 |
| 61.52062 | 65.58345 |
| 32.98006 | 30.4019  |
| 0        | 0        |
| 10.43255 | 9.761363 |
| 0.044539 | 0        |
| 0.103032 | 0.045707 |
| 14.26713 | 18.04632 |
| 15.68008 | 24.82196 |
| 6.061508 | 7.130662 |
| 1.549482 | 2.410631 |
| 2.116273 | 1.744448 |
| 0.020064 | 0.044504 |
| 0        | 0        |
| 0        | 0.025353 |
| 0.873661 | 0.695111 |
| 0        | 0        |
| 1.415563 | 3.612562 |
| 9.973053 | 6.982632 |
| 0        | 0.034378 |
| 5.019326 | 7.876128 |
| 21.51407 | 39.10319 |
| 2.203985 | 5.836336 |
| 1.991725 | 1.866177 |
| 43.6335  | 43.21856 |
| 11.2814  | 7.732964 |
| 17.85213 | 22.16431 |
| 0.037156 | 0.096151 |
| 1.913259 | 3.488582 |
| 6.147372 | 9.398464 |
| 33.73293 | 28.22347 |
| 4.549982 | 6.627855 |
| 649.6655 | 649.4845 |
| 1.971372 | 1.470146 |
| 1.156143 | 2.969381 |
| 9.414408 | 9.764993 |
| 14.38406 | 15.93085 |
| 0.374838 | 0.491304 |
| 4.509553 | 5.2693   |
| 8.813137 | 4.495258 |
| 4.586647 | 2.580512 |
| 0.82902  | 0.670938 |
| 0.942719 | 0.686131 |
| 16.46523 | 20.3401  |
| 0.378711 | 0.132004 |
| 0.151186 | 0.027946 |
| 9.118406 | 13.64283 |
| 0.042169 | 0.046768 |
| 3.280396 | 3.652206 |
| 0.162878 | 0.361282 |
| 1.640406 | 0.88209  |
| 57.71153 | 58.3671  |
| 0.195975 | 0.135108 |
| 0.019673 | 0        |
| 33.53483 | 23.77141 |
| 6.870666 | 3.895611 |
| 0.286487 | 0.448083 |
| 28.22448 | 32.94    |
| 10.79772 | 12.14165 |
| 6.250049 | 7.543304 |
| 0        | 0.01863  |
| 13.74173 | 21.65743 |
| 0        | 0        |

|          |          |
|----------|----------|
| 0.710118 | 0.465379 |
| 0.541796 | 0.430363 |
| 0        | 0        |
| 0.789121 | 0.656387 |
| 7.314118 | 9.310136 |
| 0        | 0.017108 |
| 0.195703 | 0        |
| 7.107176 | 6.130671 |
| 13.29908 | 12.41348 |
| 4.975876 | 5.073106 |
| 7.947673 | 8.695454 |
| 3.199009 | 3.113459 |
| 16.21624 | 16.14572 |
| 3.373448 | 3.141599 |
| 9.466713 | 7.70393  |
| 29.03367 | 30.06882 |
| 9.486865 | 13.06603 |
| 1.432939 | 1.755254 |
| 0.020396 | 0.113105 |
| 12.03363 | 11.95363 |
| 4.279814 | 4.593459 |
| 0.911128 | 0.98425  |
| 0.060455 | 0.134096 |
| 46.45733 | 49.8919  |
| 61.26678 | 60.6187  |
| 25.24501 | 19.55148 |
| 32.53268 | 55.11208 |
| 0        | 0        |
| 3.404733 | 4.829839 |
| 0.083087 | 0.023037 |
| 3.846927 | 2.605348 |
| 11.69775 | 10.4773  |
| 4.648341 | 6.165627 |
| 32.34526 | 37.20561 |
| 4.982805 | 7.268882 |
| 40.62354 | 48.98873 |
| 0.490079 | 1.528671 |
| 14.25439 | 10.3816  |
| 41.33833 | 37.9023  |
| 3.395719 | 3.887545 |
| 0.381261 | 0.162631 |
| 0.127041 | 0.311985 |
| 0.4419   | 0.395845 |
| 0.519369 | 0.362065 |
| 0        | 0.04997  |
| 8.349616 | 8.265944 |
| 0.033542 | 0        |
| 16.35883 | 23.37321 |
| 0.085549 | 0.355795 |
| 4.358213 | 7.495877 |
| 31.32268 | 20.9779  |
| 3.462891 | 4.622264 |
| 29.97508 | 27.21826 |
| 8.96706  | 7.334775 |
| 5.075508 | 12.75777 |
| 1.953007 | 1.427593 |
| 1.53172  | 2.355114 |
| 0.062149 | 0.094775 |
| 0.378002 | 0.681245 |
| 8.966036 | 12.50088 |
| 3.823203 | 5.23785  |
| 0.077222 | 0.256933 |
| 19.04874 | 20.14433 |
| 3.604897 | 3.985317 |
| 30.23723 | 28.98126 |

|          |          |
|----------|----------|
| 23.73476 | 33.24186 |
| 10.43326 | 11.05938 |
| 0.275208 | 0        |
| 0.089269 | 0.082504 |
| 0.078757 | 0.029115 |
| 1.531846 | 0.810249 |
| 226.3502 | 259.4537 |
| 12.33984 | 10.14931 |
| 9.827612 | 10.88383 |
| 0        | 0.011452 |
| 0.857215 | 0.665493 |
| 70.65624 | 76.24336 |
| 7.231765 | 6.189022 |
| 6.537244 | 6.636627 |
| 0.132006 | 0.048801 |
| 0        | 0        |
| 0.805644 | 0.429348 |
| 10.64347 | 20.01102 |
| 23.70178 | 19.60195 |
| 49.15527 | 70.00437 |
| 8.149082 | 8.010802 |
| 0.016968 | 0        |
| 13.61076 | 24.92431 |
| 10.02346 | 11.0238  |
| 0.535022 | 0.701258 |
| 0.941254 | 0.70588  |
| 115.0426 | 160.3963 |
| 20.81745 | 19.50227 |
| 9.502105 | 13.15509 |
| 1.294876 | 1.457371 |
| 0        | 0.034707 |
| 8.626764 | 8.183763 |
| 27.20722 | 27.63981 |
| 18.74075 | 14.21834 |
| 7.171344 | 7.091507 |
| 0.072152 | 0.300079 |
| 7.875536 | 8.765755 |
| 3.504905 | 4.499906 |
| 1.104883 | 1.100059 |
| 0        | 0        |
| 39.03123 | 39.86524 |
| 0.550334 | 0.447593 |
| 2.086954 | 3.063387 |
| 6.624866 | 8.371774 |
| 5.519988 | 3.847842 |
| 13.18083 | 12.62694 |
| 4.798471 | 6.060935 |
| 2.231036 | 1.927536 |
| 19.24693 | 13.60637 |
| 5.898921 | 4.093024 |
| 14.03187 | 14.29827 |
| 0        | 0.03092  |
| 3.546523 | 2.849128 |
| 6.236283 | 8.079355 |
| 6.665665 | 3.34383  |
| 13.82372 | 8.454397 |
| 30.61028 | 33.62839 |
| 0.372974 | 0.339785 |
| 2.543676 | 2.633019 |
| 0.511774 | 0.263029 |
| 2.101857 | 1.384083 |
| 3.97653  | 2.606926 |
| 2.094246 | 4.709455 |
| 0        | 0        |
| 4.386776 | 5.258559 |

|          |          |
|----------|----------|
| 7.402503 | 11.22326 |
| 11.08987 | 14.93491 |
| 204.156  | 230.3609 |
| 0.995272 | 0.68236  |
| 0.225842 | 0.533615 |
| 26.02192 | 24.83593 |
| 0        | 0        |
| 0.094393 | 0.235547 |
| 11.77589 | 14.75749 |
| 3.309535 | 3.431895 |
| 1.726372 | 2.235204 |
| 0.066916 | 0.222642 |
| 6.122668 | 6.098276 |
| 7.679936 | 7.630568 |
| 0        | 0.013199 |
| 5.042281 | 3.580546 |
| 7.128926 | 6.149432 |
| 0.101366 | 0.074948 |
| 3.894749 | 2.722383 |
| 23.05635 | 28.15998 |
| 1.421288 | 1.536388 |
| 67.56701 | 92.77446 |
| 30.96019 | 35.34627 |
| 17.84146 | 17.46974 |
| 13.79129 | 9.454802 |
| 3.112209 | 2.006182 |
| 3.798372 | 1.74423  |
| 42.71176 | 70.89184 |
| 0.128468 | 0.081417 |
| 13.83715 | 8.954057 |
| 3.227499 | 5.887324 |
| 15.48485 | 16.19229 |
| 2.415131 | 7.779722 |
| 4.388074 | 5.108362 |
| 2.389166 | 3.277299 |
| 0.035769 | 0.079341 |
| 16.04312 | 22.32996 |
| 0.321416 | 0.594117 |
| 23.02439 | 23.51418 |
| 0.547077 | 0.677293 |
| 43.08116 | 34.89552 |
| 6.058449 | 4.158853 |
| 0        | 0        |
| 28.22734 | 24.54495 |
| 7.03713  | 11.18603 |
| 0.015173 | 0.084138 |
| 16.86028 | 16.7135  |
| 18.05247 | 12.95423 |
| 3.407949 | 1.469853 |
| 25.89674 | 32.11347 |
| 0.024357 | 0.027014 |
| 8.180168 | 9.398646 |
| 0.772522 | 1.417758 |
| 0.07349  | 0.027168 |
| 8.918558 | 6.086907 |
| 0        | 0.09218  |
| 0        | 0.032852 |
| 5.335372 | 4.546942 |
| 38.50005 | 29.3729  |
| 7.645201 | 13.13311 |
| 1.245653 | 1.184147 |
| 23.87507 | 29.33447 |
| 3.48024  | 6.508188 |
| 1.556713 | 1.237317 |
| 0        | 0.014227 |

|          |          |
|----------|----------|
| 135.1268 | 124.5455 |
| 0        | 0.032057 |
| 18.81473 | 12.83957 |
| 0        | 0        |
| 0.151975 | 0.191023 |
| 9.071502 | 7.617774 |
| 21.57919 | 21.40746 |
| 0.157581 | 0.274634 |
| 0.335763 | 2.687621 |
| 5.048904 | 2.880924 |
| 2.830596 | 3.159956 |
| 12.84805 | 8.142443 |
| 1.488225 | 1.547374 |
| 2.646208 | 1.617138 |
| 1.218429 | 0.763785 |
| 0.232014 | 0.051463 |
| 2.024572 | 1.564958 |
| 32.36078 | 26.95461 |
| 3.271368 | 2.989388 |
| 1.50752  | 1.126736 |
| 2.689387 | 3.092486 |
| 7.737414 | 10.8436  |
| 3.244533 | 5.254999 |
| 0.045948 | 0.063699 |
| 7.015467 | 10.72609 |
| 8.803364 | 11.51061 |
| 3.188245 | 2.673117 |
| 1.5199   | 0.992924 |
| 2.453825 | 2.863183 |
| 0.190159 | 0.246047 |
| 0.124506 | 0.069042 |
| 2.800796 | 2.619835 |
| 1.264092 | 1.4905   |
| 0.269299 | 0.253869 |
| 0.008622 | 0        |
| 37.42146 | 29.3899  |
| 3.837905 | 2.346365 |
| 2.801366 | 4.626869 |
| 0        | 0.13735  |
| 0        | 0        |
| 87.9676  | 103.8077 |
| 0.406937 | 0.193422 |
| 5.368286 | 6.220058 |
| 0.134606 | 0.149286 |
| 0        | 0.05571  |
| 3.7271   | 2.860368 |
| 13.29295 | 9.918956 |
| 13.41936 | 10.3436  |
| 20.10996 | 34.01605 |
| 20.38313 | 14.52293 |
| 0.728418 | 0.475211 |
| 6.607412 | 11.26999 |
| 17.10288 | 10.46316 |
| 2.14484  | 1.472565 |
| 2.263962 | 2.410437 |
| 1.394787 | 4.180822 |
| 0.185334 | 0.061664 |
| 9.644944 | 10.17715 |
| 2.951294 | 2.43358  |
| 0.058609 | 0.216671 |
| 18.65902 | 22.24979 |
| 0        | 0.110129 |
| 4.336014 | 4.019826 |
| 8.748607 | 9.389746 |
| 2.442958 | 2.279852 |

|          |          |
|----------|----------|
| 0.397405 | 0.033904 |
| 37.97709 | 44.66374 |
| 1.009543 | 0.150721 |
| 0        | 0.035567 |
| 0.045198 | 0.066836 |
| 0.06084  | 0        |
| 0.132476 | 0.293847 |
| 14.86587 | 16.13802 |
| 0.958005 | 0.248667 |
| 19.68289 | 18.78242 |
| 0.683951 | 1.836802 |
| 7.549253 | 14.89305 |
| 11.12097 | 12.70132 |
| 4.965185 | 1.872276 |
| 0.173246 | 0.072052 |
| 3.910985 | 3.279589 |
| 2.229964 | 1.535966 |
| 19.33563 | 9.049927 |
| 27.39261 | 32.94527 |
| 33.13753 | 37.034   |
| 149.6076 | 173.3938 |
| 9.518846 | 5.722327 |
| 7.744422 | 6.109559 |
| 9.392151 | 8.68039  |
| 2.257705 | 4.192631 |
| 0.826723 | 1.558706 |
| 33.80402 | 35.18004 |
| 3.142828 | 4.125797 |
| 7.440701 | 7.512253 |
| 1.087717 | 0.916822 |
| 6.401881 | 9.738448 |
| 3.167975 | 4.894844 |
| 10.29643 | 11.16865 |
| 0.454546 | 0.25206  |
| 34.46282 | 53.9625  |
| 6.500771 | 6.579077 |
| 15.13912 | 12.48168 |
| 17.08441 | 16.98123 |
| 0.65185  | 0.771679 |
| 0        | 0        |
| 0.119679 | 0.678405 |
| 0        | 0.150127 |
| 21.3202  | 20.00879 |
| 1.849347 | 2.32193  |
| 7.42254  | 4.36617  |
| 25.97688 | 26.23847 |
| 34.16112 | 38.09016 |
| 0.063864 | 0        |
| 2.153887 | 1.907827 |
| 12.14819 | 11.65083 |
| 2.227767 | 1.53973  |
| 0.21172  | 0.23481  |
| 3.117706 | 3.605914 |
| 1.548631 | 1.874617 |
| 0.155997 | 0        |
| 0.047404 | 0.026287 |
| 23.06441 | 34.31845 |
| 4.229616 | 4.153263 |
| 3.94019  | 2.831702 |
| 0.560318 | 0.300691 |
| 2.093461 | 1.802291 |
| 0.135013 | 0.085565 |
| 0.690597 | 0.840035 |
| 5.222641 | 4.134731 |
| 0.023358 | 0.025906 |

|          |          |
|----------|----------|
| 1.123446 | 0.329815 |
| 8.781649 | 8.987531 |
| 26.10652 | 34.14502 |
| 5.787585 | 5.958656 |
| 0.159255 | 0.227088 |
| 0.416391 | 0.478296 |
| 5.599654 | 4.977889 |
| 1.825495 | 2.046833 |
| 0        | 0        |
| 2.338321 | 1.643866 |
| 6.966238 | 3.58251  |
| 2.295333 | 1.460627 |
| 0.065396 | 0.043517 |
| 5.176042 | 5.740546 |
| 0.049158 | 0        |
| 2.728549 | 2.31086  |
| 28.85474 | 34.56269 |
| 0.035723 | 0        |
| 7.669556 | 9.383609 |
| 22.85289 | 25.04707 |
| 4.950311 | 5.32872  |
| 2.813258 | 2.075805 |
| 0.023132 | 0        |
| 22.32823 | 28.69355 |
| 12.92751 | 8.736497 |
| 9.03036  | 10.43603 |
| 109.0301 | 95.37049 |
| 6.081075 | 7.26118  |
| 0        | 0        |
| 0        | 0        |
| 1.341274 | 1.370116 |
| 1.504194 | 2.099684 |
| 0        | 0.037786 |
| 0        | 0        |
| 0.040927 | 0.068086 |
| 4.191478 | 5.378011 |
| 34.22235 | 31.2952  |
| 139.9117 | 201.7793 |
| 21.39606 | 17.96936 |
| 0.333203 | 0.095807 |
| 5.730685 | 4.21732  |
| 24.49606 | 21.7094  |
| 61.20017 | 67.65205 |
| 16.74751 | 23.91362 |
| 10.31475 | 10.9777  |
| 0.411381 | 0.245671 |
| 26.4962  | 24.50832 |
| 0        | 0        |
| 22.15016 | 14.90363 |
| 3.071234 | 2.279232 |
| 27.01601 | 29.65867 |
| 6.877632 | 10.51182 |
| 4.049944 | 3.652    |
| 5.485512 | 2.441927 |
| 12.05671 | 9.971572 |
| 1.779378 | 1.145867 |
| 46.11703 | 28.82644 |
| 34.92523 | 53.90471 |
| 27.86887 | 20.34882 |
| 4.330225 | 0.777867 |
| 73.01621 | 45.61499 |
| 3.093618 | 2.028554 |
| 3.071765 | 2.340007 |
| 17.72842 | 20.62979 |
| 17.3263  | 9.895245 |

|          |          |
|----------|----------|
| 0        | 0.025645 |
| 0.33009  | 0.587962 |
| 1.39087  | 1.699672 |
| 16.6631  | 14.39697 |
| 0.497163 | 0        |
| 1.648324 | 1.453099 |
| 0.402508 | 0.089281 |
| 0        | 0        |
| 15.1781  | 14.67754 |
| 17.16437 | 11.41283 |
| 0.281928 | 0.069483 |
| 24.49274 | 17.42102 |
| 0        | 0.038043 |
| 18.07759 | 23.21403 |
| 4.904402 | 3.539474 |
| 0.077319 | 0.114335 |
| 8.280085 | 10.98313 |
| 0.910301 | 0.971677 |
| 3.352424 | 2.914945 |
| 181.7299 | 123.8892 |
| 11.96823 | 8.530833 |
| 46.34021 | 31.93421 |
| 0.968068 | 0.916822 |
| 1.174579 | 0.842911 |
| 39.07495 | 26.36533 |
| 33.04777 | 29.66431 |
| 3.182415 | 1.414441 |
| 8.379618 | 9.199822 |
| 4.844752 | 6.365613 |
| 37.60143 | 42.4239  |
| 0.084529 | 0.046874 |
| 20.0482  | 24.79039 |
| 2.261253 | 3.411718 |
| 0.075501 | 0.055823 |
| 0        | 0        |
| 1.385812 | 0.706166 |
| 12.84863 | 7.124956 |
| 6.126658 | 7.590885 |
| 15.97557 | 21.07354 |
| 2.068507 | 2.136089 |
| 56.31743 | 58.58866 |
| 18.77313 | 14.55144 |
| 0.471944 | 0.465258 |
| 11.33967 | 12.46546 |
| 0.244511 | 0.187738 |
| 0        | 0.026648 |
| 2.163306 | 1.469533 |
| 22.40679 | 23.93896 |
| 1.676054 | 3.098077 |
| 15.37247 | 10.40439 |
| 1.209819 | 1.170474 |
| 1.542123 | 1.500271 |
| 0.033291 | 0.110764 |
| 9.819313 | 8.252586 |
| 0.243443 | 0.219994 |
| 26.04943 | 26.87147 |
| 5.235807 | 5.6059   |
| 0.0315   | 0.128097 |
| 0.906378 | 0.691094 |
| 9.521056 | 6.344532 |
| 18.17307 | 23.43541 |
| 0        | 0        |
| 1.90578  | 1.913283 |
| 1.383368 | 0.876708 |
| 19.50152 | 22.61047 |

|          |          |
|----------|----------|
| 18.2196  | 17.80978 |
| 0.046554 | 0.326994 |
| 9.214246 | 6.428181 |
| 6.772449 | 4.608136 |
| 0.218445 | 0.053837 |
| 0.727074 | 0.316788 |
| 0.225398 | 0.204529 |
| 48.53341 | 51.67913 |
| 0.48372  | 0.220901 |
| 4.251453 | 4.084989 |
| 1778.861 | 1703.127 |
| 105.0552 | 95.30886 |
| 4.064243 | 4.830815 |
| 0.532861 | 0.266892 |
| 24.70919 | 20.90502 |
| 25.80234 | 37.25062 |
| 3.988334 | 3.805254 |
| 2.624523 | 2.660753 |
| 8.819265 | 7.931734 |
| 14.22438 | 14.00929 |
| 0.242527 | 0.537954 |
| 36.03388 | 56.0795  |
| 4.718427 | 2.941544 |
| 0.993979 | 0.959482 |
| 0.095338 | 0.113869 |
| 8.797216 | 7.462646 |
| 16.38631 | 22.12415 |
| 5.067601 | 5.659217 |
| 1.476794 | 0.716561 |
| 12.43421 | 8.773521 |
| 35.41172 | 38.36042 |
| 21.64914 | 20.7656  |
| 14.40399 | 17.337   |
| 5.662902 | 9.799751 |
| 19.68183 | 10.31261 |
| 0.021865 | 0.012125 |
| 2.826438 | 4.955965 |
| 17.16082 | 13.13813 |
| 6.183068 | 7.330976 |
| 7.687744 | 5.035386 |
| 4.126177 | 4.18739  |
| 0        | 0        |
| 9.473261 | 7.306354 |
| 16.80041 | 16.92276 |
| 0.073606 | 0        |
| 0.277297 | 0.276786 |
| 24.88361 | 15.48244 |
| 2.076885 | 1.587273 |
| 6.860061 | 6.529778 |
| 1.939379 | 1.409204 |
| 0        | 0.012129 |
| 42.62192 | 43.78986 |
| 50.91765 | 53.08998 |
| 0.065355 | 0.072482 |
| 4.919527 | 3.476157 |
| 4.663308 | 7.464932 |
| 23.59017 | 29.00477 |
| 5.228991 | 4.346179 |
| 28.54485 | 31.49437 |
| 2.854569 | 2.064712 |
| 104.9637 | 98.17398 |
| 6.574464 | 3.856477 |
| 14.38705 | 14.53737 |
| 29.25274 | 25.97308 |
| 10.48526 | 15.15663 |

|          |          |
|----------|----------|
| 13.86344 | 22.19498 |
| 0.257236 | 0.16389  |
| 0        | 0.144055 |
| 0.053708 | 0        |
| 0.047071 | 0        |
| 1.297707 | 0.802839 |
| 5.541381 | 7.559536 |
| 23.42873 | 14.21481 |
| 0.197624 | 0.401825 |
| 0.019654 | 0.17438  |
| 4.250166 | 3.598968 |
| 69.67948 | 69.31104 |
| 6.874464 | 9.092959 |
| 0.015635 | 0.034681 |
| 47.67093 | 33.68416 |
| 0.486502 | 0.26978  |
| 0.231764 | 0.02856  |
| 9.658992 | 11.26176 |
| 26.39776 | 18.50424 |
| 27.84575 | 17.22555 |
| 6.080521 | 2.347061 |
| 2.476282 | 1.319474 |
| 55.08953 | 71.22003 |
| 3.614746 | 2.068631 |
| 83.68374 | 89.23379 |
| 23.65383 | 13.28016 |
| 13.3686  | 11.39082 |
| 0.314745 | 0.121416 |
| 2.883029 | 2.952944 |
| 1.222753 | 0.624523 |
| 46.03381 | 57.2636  |
| 28.37413 | 31.81892 |
| 59.965   | 52.80413 |
| 88.12577 | 70.17004 |
| 21.18812 | 16.23696 |
| 34.91491 | 29.92334 |
| 11.59769 | 10.35881 |
| 18.7263  | 16.59658 |
| 29.13877 | 18.80133 |
| 0.802495 | 0.744707 |
| 0.527808 | 0.554562 |
| 3.984587 | 2.195678 |
| 14.95968 | 12.18562 |
| 0.367873 | 0.370903 |
| 49.29512 | 54.6979  |
| 1.631412 | 3.696214 |
| 1.84724  | 0.888375 |
| 13.27644 | 13.14495 |
| 4.048013 | 2.439628 |
| 0.527808 | 1.293978 |
| 13.59456 | 13.7997  |
| 8.949461 | 7.342041 |
| 0.373834 | 0.617676 |
| 4.792745 | 2.935051 |
| 0.116888 | 0.10803  |
| 0.018611 | 0        |
| 93.99088 | 76.84681 |
| 25.67118 | 16.03647 |
| 37.13004 | 35.40479 |
| 13.04887 | 10.52207 |
| 21.20093 | 20.96727 |
| 78.94983 | 94.12474 |
| 37.56215 | 20.8754  |
| 6.273912 | 5.924762 |
| 5.549666 | 3.57205  |

|          |          |
|----------|----------|
| 0.26829  | 0        |
| 3.545711 | 1.986686 |
| 98.54882 | 62.22272 |
| 79.13551 | 89.03313 |
| 46.95106 | 58.34871 |
| 3.307059 | 2.305664 |
| 4.400305 | 0.976041 |
| 91.09328 | 53.74371 |
| 39.79629 | 41.73613 |
| 11.3826  | 10.7503  |
| 1.054277 | 1.126583 |
| 2.960635 | 1.79755  |
| 58.44629 | 50.41594 |
| 2.633776 | 3.953111 |
| 55.37898 | 42.52767 |
| 0.09691  | 0.179131 |
| 0.879106 | 0.121873 |
| 21.54549 | 14.014   |
| 0.087323 | 0.096847 |
| 0        | 0        |
| 64.08571 | 64.91713 |
| 15.56894 | 20.70831 |
| 15.29405 | 19.79972 |
| 17.75513 | 19.0075  |
| 1.347518 | 0.93405  |
| 1.704603 | 1.139153 |
| 9.146412 | 6.31702  |
| 402.3353 | 383.2364 |
| 12.70406 | 7.948766 |
| 3.488972 | 2.75992  |
| 186.5976 | 139.536  |
| 1.749639 | 2.265734 |
| 61.26902 | 63.73124 |
| 71.23578 | 47.51032 |
| 5.072889 | 4.106353 |
| 0.21836  | 0        |
| 0.079842 | 0.033206 |
| 36.42888 | 26.68094 |
| 3.609231 | 2.676067 |
| 284.3538 | 277.434  |
| 3.482036 | 2.078736 |
| 10.002   | 11.55688 |
| 21.81471 | 16.32879 |
| 0        | 0        |
| 3.402021 | 2.593971 |
| 146.0092 | 161.1866 |
| 0.051185 | 0        |
| 6.59362  | 3.312948 |
| 7.006788 | 9.100743 |
| 18.75582 | 7.195435 |
| 7.710557 | 5.82893  |
| 3.757504 | 4.981227 |
| 0.410544 | 0.350245 |
| 9.838819 | 6.005882 |
| 14.86647 | 10.45531 |
| 1.442874 | 0.464068 |
| 2.075417 | 2.461116 |
| 2.450153 | 3.18838  |
| 3.123154 | 2.156983 |
| 77.73742 | 58.17941 |
| 27.14395 | 20.29503 |
| 16.2678  | 14.52626 |
| 126.672  | 100.1986 |
| 7.875613 | 3.858199 |
| 0.492152 | 0.44086  |

|          |          |
|----------|----------|
| 203.7686 | 194.8261 |
| 0.048926 | 0        |
| 0.778832 | 0.531552 |
| 0.50702  | 0.664555 |
| 0        | 0        |
| 1.954682 | 1.868355 |
| 9.645035 | 4.354027 |
| 1132.414 | 1073.105 |
| 0.541062 | 0.150018 |
| 1099.357 | 915.8549 |
| 13.8632  | 10.88797 |
| 41.21714 | 37.89172 |
| 34.92685 | 29.91075 |
| 18.06832 | 7.185841 |
| 3.350475 | 6.031161 |
| 0.04472  | 0.033065 |
| 31.91758 | 31.26328 |
| 0.278129 | 0.047456 |
| 0.052728 | 0        |
| 0.598016 | 0.118435 |
| 0.067559 | 0        |
| 1.129206 | 0.215924 |
| 0.28055  | 0.21645  |
| 0.080716 | 0.053711 |
| 22.60126 | 16.46759 |
| 48.78402 | 38.16864 |
| 33.69991 | 31.53982 |
| 26.8991  | 16.47739 |
| 197.8604 | 233.499  |
| 0.064128 | 0.023707 |
| 24.98481 | 18.14027 |
| 8.385098 | 6.105267 |
| 753.1626 | 771.0172 |
| 0.066569 | 0.073829 |
| 0.065875 | 0        |
| 5.575858 | 5.606225 |
| 25.2937  | 22.70349 |
| 26.44878 | 8.6236   |
| 1.43883  | 2.348463 |
| 0.019792 | 0.087801 |
| 8.599381 | 12.47729 |
| 5.806687 | 2.908373 |
| 0.663064 | 0.133705 |
| 22.49584 | 26.88575 |
| 5.1411   | 2.157435 |
| 13.92704 | 9.8961   |
| 3.823119 | 1.830584 |
| 26.18336 | 14.55311 |
| 16.91082 | 17.89776 |
| 133.0274 | 145.6376 |
| 5.373962 | 5.471523 |
| 17.65003 | 10.61438 |
| 3.948357 | 4.867216 |
| 3.05301  | 3.805476 |
| 2.635333 | 1.302213 |
| 0.254803 | 0.105972 |
| 831.7972 | 795.7283 |
| 46.60193 | 35.86216 |
| 108.5938 | 83.27673 |
| 1.81984  | 0.908241 |
| 0.455485 | 0.312718 |
| 0.028598 | 0.031717 |
| 0.169791 | 0        |
| 0.032506 | 0        |
| 45.83386 | 36.64627 |

|          |          |
|----------|----------|
| 1.490496 | 1.330041 |
| 0        | 0.034794 |
| 26.05391 | 24.40499 |
| 1.871966 | 1.355248 |
| 15.77421 | 11.4194  |
| 8.10418  | 7.785983 |
| 3.169095 | 3.678195 |
| 2.141564 | 1.986096 |
| 0        | 0.070299 |
| 25.10781 | 35.5093  |
| 0        | 0.041331 |
| 0.188305 | 0.238676 |
| 0.247522 | 0.7778   |
| 0        | 0        |
| 8.357623 | 7.00086  |
| 0.094267 | 0.039206 |
| 0.039085 | 0.173392 |
| 10.46382 | 6.381472 |
| 26.66788 | 31.15984 |
| 22.5922  | 21.67658 |
| 13.21727 | 9.800667 |
| 1.617899 | 2.082726 |
| 11.61523 | 11.60481 |
| 5.333141 | 4.364916 |
| 12.67529 | 10.60429 |
| 4.5235   | 4.379452 |
| 0.066474 | 0.049149 |
| 0.030495 | 0.03382  |
| 0.418019 | 0.219604 |
| 25.31879 | 25.66142 |
| 14.57255 | 23.53066 |
| 0.27251  | 0.402974 |
| 0        | 0.365618 |
| 10.82578 | 11.55003 |
| 0.026364 | 0.029239 |
| 0.048279 | 0.080317 |
| 0        | 0        |
| 21.36133 | 22.56954 |
| 0.012282 | 0.054487 |
| 17.15424 | 15.64235 |
| 0.106374 | 0.019663 |
| 23.79812 | 29.60776 |
| 12.88975 | 8.220619 |
| 0.051482 | 0.028548 |
| 13.05433 | 15.24741 |
| 0.413065 | 1.104173 |
| 39.8318  | 50.4798  |
| 103.9061 | 82.89421 |
| 2.149648 | 0.88819  |
| 14.29925 | 9.860354 |
| 0        | 0.031059 |
| 66.75152 | 75.24299 |
| 0.011519 | 0.063876 |
| 13.96542 | 9.134243 |
| 22.32619 | 18.57083 |
| 3.031081 | 4.572486 |
| 0.476126 | 0.563257 |
| 16.09033 | 23.05695 |
| 116.0374 | 97.94237 |
| 227.7128 | 225.6985 |
| 3.686153 | 2.676304 |
| 8.235268 | 7.280728 |
| 5.321002 | 12.42681 |
| 5.486653 | 8.754303 |
| 0.085372 | 0.094683 |

|          |          |
|----------|----------|
| 1.940215 | 2.061055 |
| 0.41286  | 1.050447 |
| 2.919715 | 1.904789 |
| 0.025126 | 0.027867 |
| 12.11906 | 9.580862 |
| 0.059973 | 0.033257 |
| 3.65217  | 4.183281 |
| 45.67927 | 60.96505 |
| 0.222751 | 0.404255 |
| 25.84837 | 20.03774 |
| 23.04654 | 17.38485 |
| 40.52538 | 35.42319 |
| 13.1127  | 11.3759  |
| 9.263358 | 8.706201 |
| 2.559216 | 1.509399 |
| 103.1571 | 117.3846 |
| 6.751765 | 7.121852 |
| 17.88297 | 13.4982  |
| 10.631   | 11.37551 |
| 23.30524 | 22.46526 |
| 45.16718 | 63.5138  |
| 6.612022 | 3.911005 |
| 4.624215 | 2.752817 |
| 6.886398 | 5.891735 |
| 48.62853 | 38.81345 |
| 71.20824 | 89.67685 |
| 1.687144 | 1.060316 |
| 10.89057 | 5.325971 |
| 21.2226  | 20.88059 |
| 9.502965 | 6.69278  |
| 15.02042 | 12.80308 |
| 3.406485 | 2.102539 |
| 0.180199 | 0.054505 |
| 12.00747 | 10.1944  |
| 0.44328  | 0.307265 |
| 1.59538  | 2.569805 |
| 0.945243 | 1.194302 |
| 0.04003  | 0        |
| 12.545   | 18.44549 |
| 1.679465 | 1.892194 |
| 19.15383 | 20.9797  |
| 3.574149 | 6.131734 |
| 72.27302 | 55.16476 |
| 2.729094 | 3.675317 |
| 1.535115 | 3.37597  |
| 0.856371 | 0.455097 |
| 0.556833 | 1.003538 |
| 0.048223 | 0        |
| 12.84692 | 13.05705 |
| 13.2945  | 14.52118 |
| 11.41749 | 7.347108 |
| 58.46877 | 65.16644 |
| 47.66916 | 52.57609 |
| 0        | 0        |
| 137.8019 | 172.5458 |
| 0.0738   | 0.187083 |
| 19.99146 | 17.77169 |
| 15.41144 | 12.55163 |
| 55.85951 | 71.58622 |
| 86.14185 | 96.82622 |
| 54.44691 | 45.8518  |
| 21.68788 | 17.25384 |
| 4.3203   | 2.163892 |
| 0        | 0        |
| 0.712679 | 0.371955 |

|          |          |
|----------|----------|
| 87.09612 | 67.76963 |
| 6.907768 | 4.134435 |
| 192.8848 | 257.4605 |
| 7.15486  | 5.356743 |
| 16.11382 | 16.40793 |
| 0.801444 | 0.305542 |
| 1.853589 | 1.463096 |
| 0.019483 | 0.016206 |
| 0.291488 | 0.831285 |
| 3.808868 | 3.83553  |
| 31.15496 | 25.43144 |
| 2.099464 | 2.772953 |
| 6.027612 | 7.97797  |
| 0.050664 | 0.045974 |
| 10.04677 | 5.594946 |
| 5.510347 | 6.010464 |
| 66.44737 | 74.00475 |
| 23.07265 | 19.14159 |
| 164.9815 | 187.6773 |
| 7.91245  | 14.50805 |
| 7.965865 | 12.17793 |
| 13.38665 | 13.86339 |
| 7.095969 | 8.059345 |
| 199.5075 | 169.2619 |
| 1.520274 | 6.774412 |
| 14.76539 | 14.47273 |
| 11.01411 | 4.209863 |
| 35.19637 | 32.3355  |
| 3.883648 | 3.748978 |
| 3.179586 | 2.638037 |
| 15.30335 | 13.42676 |
| 2.867644 | 1.918895 |
| 216.457  | 227.7642 |
| 8.588896 | 9.134528 |
| 4.731932 | 7.4128   |
| 21.41948 | 31.41858 |
| 1.594778 | 0.67627  |
| 38.90918 | 37.3757  |
| 68.0024  | 50.58062 |
| 11.76304 | 5.844355 |
| 2.393153 | 0.749156 |
| 8.573381 | 6.979139 |
| 0.082453 | 0.018289 |
| 5.920026 | 6.420971 |
| 31.68405 | 14.32464 |
| 0        | 0.032986 |
| 1.118817 | 0.231623 |
| 107.645  | 124.5197 |
| 13.5405  | 13.44567 |
| 0.480363 | 0.488356 |
| 14.25335 | 15.39531 |
| 9.023094 | 8.288479 |
| 9.717947 | 8.336671 |
| 0        | 0        |
| 18.81963 | 18.70052 |
| 51.42648 | 67.28275 |
| 4.323992 | 5.78596  |
| 522.8905 | 622.2779 |
| 0.562548 | 0.789424 |
| 5.648974 | 3.946794 |
| 5.477642 | 5.443666 |
| 5.939851 | 5.942993 |
| 83.67244 | 90.27787 |
| 0.088696 | 0.196738 |
| 0.242954 | 0.538901 |

|          |          |
|----------|----------|
| 0.111667 | 0.082564 |
| 0        | 0        |
| 22.7202  | 21.26388 |
| 3.074927 | 1.502001 |
| 75.01552 | 75.7872  |
| 18.65981 | 19.49733 |
| 0.426812 | 0.157787 |
| 23.65215 | 29.34248 |
| 0        | 0        |
| 8.036255 | 7.446639 |
| 8.413223 | 8.73201  |
| 5.221613 | 11.38978 |
| 0.230892 | 0.179251 |
| 5.594956 | 7.883069 |
| 6.468984 | 5.820997 |
| 0.316453 | 0.309676 |
| 0.365098 | 0.202458 |
| 1.939683 | 0.849169 |
| 13.03189 | 10.66361 |
| 2.491985 | 1.584108 |
| 17.86159 | 13.4309  |
| 0.025362 | 0        |
| 1.881421 | 1.564958 |
| 12.46879 | 29.10331 |
| 0        | 0        |
| 0.121527 | 0.119805 |
| 0.970108 | 0.89659  |
| 2.499913 | 3.342259 |
| 2.213078 | 1.74042  |
| 0        | 0.066983 |
| 0        | 0.035854 |
| 25.00473 | 18.00829 |
| 0.657954 | 0.398024 |
| 0.351075 | 0.397828 |
| 24.16212 | 24.39084 |
| 0.236072 | 1.439999 |
| 1.504512 | 1.371448 |
| 0.518153 | 0.383109 |
| 0.047796 | 0.026504 |
| 27.00126 | 23.61358 |
| 7.757528 | 7.716605 |
| 2.568262 | 2.263761 |
| 15.19662 | 15.6382  |
| 0.053438 | 0.093132 |
| 0.054367 | 0.060296 |
| 2.269228 | 1.700481 |
| 1.362485 | 1.637756 |
| 0.698666 | 0.691094 |
| 0.258388 | 0.491259 |
| 28.22842 | 33.67024 |
| 0.023518 | 0.156496 |
| 2.652557 | 2.54616  |
| 1.931592 | 1.040523 |
| 5.082648 | 8.288565 |
| 4.470597 | 2.993832 |
| 420.1929 | 506.2966 |
| 4.127893 | 4.260422 |
| 10.27244 | 8.268709 |
| 0        | 0.005077 |
| 0.22885  | 0.126904 |
| 1.591971 | 1.196047 |
| 0.312194 | 0.371423 |
| 2.794824 | 2.563713 |
| 2.901134 | 2.666785 |
| 0.020468 | 0.015134 |

|          |          |
|----------|----------|
| 3.015649 | 5.137036 |
| 0        | 0        |
| 4.013771 | 2.847366 |
| 0.817304 | 1.687853 |
| 0.011046 | 0.0245   |
| 69.14927 | 52.89166 |
| 0.192577 | 0.085432 |
| 1.525411 | 1.038808 |
| 20.94656 | 22.77182 |
| 4.918036 | 4.555163 |
| 1.80136  | 1.0988   |
| 17.92775 | 21.78287 |
| 6.078593 | 7.338566 |
| 10.00057 | 8.614199 |
| 30.21105 | 28.91716 |
| 15.95867 | 13.94161 |
| 7.884423 | 6.551703 |
| 19.23948 | 27.97204 |
| 0.530538 | 0.309684 |
| 9.583536 | 11.48588 |
| 7.650933 | 7.746889 |
| 2.603308 | 0.932796 |
| 5.162875 | 5.902126 |
| 0.071666 | 0.105976 |
| 14.98068 | 17.30436 |
| 1.058987 | 0.796969 |
| 0.027539 | 0.106899 |
| 11.15844 | 7.979805 |
| 9.884115 | 8.553133 |
| 0.086112 | 0.019101 |
| 1.690928 | 1.765028 |
| 4.634822 | 5.665266 |
| 19.91576 | 26.59617 |
| 1.156898 | 1.17833  |
| 0        | 0.030241 |
| 5.208524 | 10.8798  |
| 9.821503 | 7.598139 |
| 2.520416 | 3.75551  |
| 17.11241 | 9.091518 |
| 7.182148 | 4.743126 |
| 236.3818 | 254.7458 |
| 14.58398 | 13.35791 |
| 25.46844 | 27.07736 |
| 5.446489 | 6.759186 |
| 7.349649 | 8.275791 |
| 20.6668  | 22.05762 |
| 16.13491 | 13.66675 |
| 1.839344 | 2.489933 |
| 28.01725 | 22.92664 |
| 0.043631 | 0        |
| 5.58897  | 5.876429 |
| 2.096523 | 2.879908 |
| 1.772554 | 1.369089 |
| 0.195892 | 0.506931 |
| 3.221633 | 2.407332 |
| 0.019773 | 0.087717 |
| 0.105321 | 0.009734 |
| 8.886926 | 12.81186 |
| 7.71891  | 6.354091 |
| 1.293477 | 1.341993 |
| 0        | 0        |
| 3.373766 | 5.21357  |
| 0.887736 | 0.908818 |
| 0.401349 | 0.348355 |
| 11.20039 | 16.72269 |

|          |          |
|----------|----------|
| 0.028113 | 0.031179 |
| 1.166154 | 1.401113 |
| 17.09237 | 23.05518 |
| 3.404309 | 2.422074 |
| 0.025741 | 0.028548 |
| 1.467802 | 0.916485 |
| 27.56906 | 33.55189 |
| 0.364106 | 0.104693 |
| 5.733148 | 6.325551 |
| 2.326104 | 1.99058  |
| 0.993496 | 0.749256 |
| 0        | 0.032696 |
| 0.146893 | 0.488741 |
| 3.196398 | 3.040186 |
| 6.333361 | 4.78412  |
| 4.222444 | 3.158267 |
| 12.82724 | 11.80606 |
| 2.40131  | 4.81301  |
| 2.753088 | 2.368973 |
| 0        | 0        |
| 8.842138 | 13.15131 |
| 42.9136  | 51.9288  |
| 0.075947 | 0.08423  |
| 0.376622 | 0.912745 |
| 0.346525 | 0.536595 |
| 4.318543 | 3.540086 |
| 1.65783  | 0.517925 |
| 0.196229 | 0.043526 |
| 0.148776 | 0.177075 |
| 2.982891 | 3.017258 |
| 13.22487 | 17.63246 |
| 0.036287 | 0        |
| 3.694575 | 3.857655 |
| 1.085014 | 0.31755  |
| 13.07092 | 9.446457 |
| 13.12025 | 13.66336 |
| 0.339273 | 0.301019 |
| 31.1028  | 55.42883 |
| 3.100349 | 4.129716 |
| 0.007511 | 0.00833  |
| 0.103901 | 0.025607 |
| 0.326528 | 0.362139 |
| 30.05585 | 30.92409 |
| 3.433856 | 2.61584  |
| 0        | 0        |
| 3.884184 | 3.841489 |
| 0.440919 | 0.336192 |
| 41.91248 | 45.39536 |
| 0        | 0.17459  |
| 0.621877 | 1.174354 |
| 1.977149 | 1.702772 |
| 1.017497 | 0.499129 |
| 0        | 0        |
| 2.537454 | 2.788607 |
| 5.574978 | 3.323068 |
| 6.003244 | 8.966057 |
| 2.098174 | 2.141901 |
| 1.771287 | 4.069595 |
| 0.505264 | 0.537954 |
| 4.106915 | 3.503706 |
| 0.025055 | 0        |
| 52.85265 | 56.10572 |
| 5.782211 | 6.961988 |
| 2.811906 | 5.579414 |
| 2.335108 | 1.34631  |

|          |          |
|----------|----------|
| 11.7296  | 10.20011 |
| 0.897973 | 0.972473 |
| 472.6486 | 398.3064 |
| 201.2331 | 188.4348 |
| 2.985133 | 2.386279 |
| 0.954036 | 1.80205  |
| 13.38033 | 9.639739 |
| 0.007079 | 0.039258 |
| 1.364389 | 0.525635 |
| 0.096184 | 0.106674 |
| 193.9498 | 162.9176 |
| 17.41685 | 16.39272 |
| 13.45456 | 5.49587  |
| 0        | 0.01944  |
| 7.232455 | 7.924425 |
| 12.05153 | 11.84432 |
| 43.71108 | 44.01507 |
| 2.278418 | 2.239756 |
| 63.27434 | 59.50504 |
| 16.17001 | 22.32989 |
| 0.58287  | 0.745891 |
| 0.848513 | 0.443639 |
| 5.558454 | 6.955602 |
| 15.24684 | 15.44634 |
| 0        | 0.077023 |
| 1.744561 | 3.025004 |
| 2.192474 | 2.763168 |
| 16.00495 | 10.65028 |
| 2.404276 | 1.615578 |
| 0.198917 | 0.30334  |
| 0.010286 | 0.05704  |
| 20.22817 | 20.90252 |
| 0.062714 | 0.104331 |
| 9.838633 | 7.066983 |
| 0        | 0.136929 |
| 1.045674 | 1.408227 |
| 3.159312 | 4.829658 |
| 9.143871 | 9.418556 |
| 1.760614 | 4.53955  |
| 4.962168 | 5.66911  |
| 7.248217 | 5.685534 |
| 350.3367 | 398.6758 |
| 1.101001 | 0.703447 |
| 0.057249 | 0        |
| 0.260571 | 0.183902 |
| 4.668187 | 3.719988 |
| 4.218875 | 4.418387 |
| 11.41148 | 15.84347 |
| 6.619926 | 7.008179 |
| 4.308637 | 3.735785 |
| 9.228811 | 8.880253 |
| 8.937197 | 10.54643 |
| 2.598201 | 2.664511 |
| 0        | 0.139743 |
| 0        | 0.511481 |
| 0.27099  | 0.500908 |
| 25.11196 | 37.36422 |
| 0        | 0        |
| 0        | 0        |
| 10.37932 | 10.99672 |
| 0.128598 | 0.25672  |
| 0.134515 | 0.307694 |
| 5.908359 | 6.194742 |
| 2.744172 | 1.634447 |
| 0.068871 | 0.076382 |

|          |          |
|----------|----------|
| 17.15559 | 13.84327 |
| 41.67825 | 50.2113  |
| 1.494269 | 2.485853 |
| 35.9961  | 23.73794 |
| 96.32439 | 74.27126 |
| 26.22258 | 26.52253 |
| 77.74773 | 76.92538 |
| 0.333734 | 0.685428 |
| 0.204168 | 0.168    |
| 0.322436 | 0.317868 |
| 2.763702 | 2.245374 |
| 0.010708 | 0.083133 |
| 0.169636 | 0.094068 |
| 0.164469 | 0.212807 |
| 23.0011  | 20.60392 |
| 7.155403 | 9.8892   |
| 1.844657 | 1.12521  |
| 6.963902 | 6.818471 |
| 0.117737 | 0.021763 |
| 0.371448 | 0.030515 |
| 0.084053 | 0.093219 |
| 39.09878 | 56.38445 |
| 0.791692 | 0.979346 |
| 2.69479  | 2.396867 |
| 0.039571 | 0.014629 |
| 0.455997 | 0.110628 |
| 8.390359 | 8.431809 |
| 24.81617 | 23.50248 |
| 14.95533 | 11.97988 |
| 2.243309 | 1.756212 |
| 29.53229 | 23.31025 |
| 82.24458 | 76.96202 |
| 4.272717 | 5.289715 |
| 0.907324 | 0.460013 |
| 1.300249 | 7.180233 |
| 21.4482  | 27.36004 |
| 18.19811 | 8.788808 |
| 0.598813 | 0.796944 |
| 8.675897 | 9.712305 |
| 0.010811 | 0        |
| 0.024521 | 0        |
| 0.03573  | 0.105671 |
| 0.043034 | 0.047727 |
| 1.39265  | 1.301153 |
| 0.616658 | 0.66723  |
| 18.65188 | 10.52198 |
| 0.116435 | 0.109267 |
| 0.182192 | 0.089805 |
| 34.15056 | 46.05926 |
| 7.481518 | 3.663813 |
| 0.542119 | 0.601243 |
| 9.546673 | 5.851455 |
| 4.346619 | 2.737661 |
| 5.778022 | 11.41084 |
| 1.907431 | 2.141901 |
| 2.909313 | 4.525214 |
| 6.802777 | 5.769472 |
| 0.119782 | 0.154986 |
| 14.07102 | 6.535688 |
| 1.767129 | 1.740467 |
| 19.77355 | 21.93007 |
| 0        | 0        |
| 0.711497 | 0.452759 |
| 0.164197 | 0.204867 |
| 0.036287 | 0.241466 |

|          |          |
|----------|----------|
| 0.822343 | 0.449934 |
| 0        | 0.076594 |
| 0.974021 | 1.74383  |
| 88.68505 | 88.00803 |
| 0        | 0        |
| 15.15465 | 14.33575 |
| 4.363049 | 5.338138 |
| 1.653612 | 0.909273 |
| 2.380175 | 2.53346  |
| 4.464839 | 5.499721 |
| 13.25064 | 13.36196 |
| 1.938826 | 2.061503 |
| 9.318792 | 9.440847 |
| 0.03232  | 0.14338  |
| 17.21994 | 24.3904  |
| 11.90428 | 11.68639 |
| 0        | 0        |
| 24.53589 | 35.36464 |
| 1.379218 | 2.936903 |
| 5.334284 | 3.86283  |
| 49.93329 | 41.83706 |
| 33.68468 | 31.86758 |
| 3.535196 | 2.139192 |
| 3.636518 | 3.246169 |
| 4.325637 | 5.96691  |
| 19.94634 | 16.66228 |
| 3.317113 | 4.193924 |
| 0.174647 | 0.42774  |
| 1.637359 | 1.002618 |
| 53.54304 | 66.9151  |
| 2.058584 | 5.448986 |
| 12.28724 | 9.0241   |
| 1.617494 | 0.827954 |
| 0.03756  | 0.083313 |
| 11.99179 | 6.539188 |
| 166.7549 | 151.7747 |
| 7.902679 | 11.19433 |
| 0.126708 | 0        |
| 10.81231 | 9.402251 |
| 153.5389 | 212.3231 |
| 25.11412 | 22.88948 |
| 0.151653 | 0        |
| 5.164236 | 8.108528 |
| 11.03741 | 14.63092 |
| 3.705352 | 3.238256 |
| 8.056513 | 8.224722 |
| 13.76153 | 14.87657 |
| 31.43327 | 34.7665  |
| 3.72558  | 3.093833 |
| 37.92601 | 56.16655 |
| 0.063254 | 0.015589 |
| 4.973956 | 6.273957 |
| 0.527417 | 0.621496 |
| 0        | 0        |
| 3.222993 | 2.003289 |
| 5.839124 | 5.492256 |
| 15.09152 | 15.61141 |
| 101.595  | 112.5932 |
| 11.69812 | 13.17789 |
| 0.23498  | 0.144782 |
| 18.0481  | 17.15882 |
| 14.82893 | 16.66907 |
| 6.678071 | 8.266305 |
| 2.726597 | 2.519968 |
| 13.96244 | 10.70371 |

|          |          |
|----------|----------|
| 10.20652 | 8.07493  |
| 1.25905  | 0.523636 |
| 8.280876 | 5.719985 |
| 6.309767 | 6.624241 |
| 0.084406 | 0.053492 |
| 0.064299 | 0.171147 |
| 7.938562 | 6.414478 |
| 9.76173  | 14.42247 |
| 0.805016 | 0.976513 |
| 68.93818 | 60.35131 |
| 0        | 0.023859 |
| 0.052919 | 0.029345 |
| 4.700333 | 5.095149 |
| 21.48778 | 18.57576 |
| 0.85711  | 0.504999 |
| 1.748682 | 1.075308 |
| 14.97246 | 11.97271 |
| 2.148645 | 3.202127 |
| 69.06495 | 67.17141 |
| 1.246945 | 0.957418 |
| 0.173427 | 0.256455 |
| 23.29154 | 19.79373 |
| 6.371397 | 6.164    |
| 162.0053 | 191.1108 |
| 6.750953 | 6.689967 |
| 1.070054 | 2.030669 |
| 43.68818 | 56.05634 |
| 0.029231 | 0        |
| 16.07247 | 13.97507 |
| 43.84756 | 39.00802 |
| 1.164938 | 2.057609 |
| 0.091529 | 0.033837 |
| 0.560386 | 0.342898 |
| 3.870817 | 4.648351 |
| 3.924918 | 4.028345 |
| 0        | 0.058753 |
| 64.0037  | 65.83542 |
| 1.109556 | 2.104444 |
| 1.362354 | 1.443567 |
| 0.771022 | 0.507269 |
| 3.04658  | 2.355891 |
| 3.487893 | 3.363148 |
| 0.080554 | 0.111674 |
| 15.2316  | 13.91642 |
| 79.84777 | 94.16389 |
| 4.974029 | 5.603718 |
| 20.56011 | 15.63103 |
| 5.366832 | 5.16436  |
| 0.115834 | 0.064233 |
| 0.840432 | 0.155348 |
| 15.24774 | 13.37    |
| 16.80112 | 25.59424 |
| 5.926412 | 2.523189 |
| 10.33358 | 16.48049 |
| 3.962137 | 5.085732 |
| 462.9464 | 506.8113 |
| 0.146708 | 0.130167 |
| 11.34409 | 13.6181  |
| 16.69261 | 15.62104 |
| 3.194083 | 2.327884 |
| 0        | 0        |
| 0        | 0.028691 |
| 0.740809 | 0.782479 |
| 3.131158 | 4.297638 |
| 0.320697 | 0.213403 |

|          |          |
|----------|----------|
| 9.963767 | 5.025516 |
| 16.38379 | 11.59439 |
| 3.062748 | 2.467274 |
| 0.864319 | 0.918641 |
| 11.31944 | 11.47636 |
| 11.07197 | 12.63098 |
| 1.630135 | 1.238032 |
| 0.038764 | 0.071653 |
| 0.02007  | 0        |
| 0.767233 | 0.654545 |
| 2.320931 | 2.63555  |
| 21.56348 | 25.37594 |
| 24.5506  | 16.79697 |
| 9.410019 | 13.44094 |
| 11.68345 | 7.962237 |
| 0.120948 | 0.178852 |
| 0.149247 | 0.047293 |
| 1.086312 | 0.741407 |
| 9.057381 | 7.857929 |
| 2.758502 | 2.465742 |
| 49.00202 | 127.8458 |
| 128.505  | 169.6191 |
| 576.7652 | 718.2274 |
| 0.047187 | 0.03925  |
| 0.187857 | 0.052086 |
| 0        | 0        |
| 0.054224 | 0.140322 |
| 0.262709 | 0.129493 |
| 14.16228 | 14.64782 |
| 2.578689 | 2.804924 |
| 4.932502 | 6.165104 |
| 0.019957 | 0        |
| 33.20219 | 40.12791 |
| 21.05536 | 24.52415 |
| 43.69135 | 49.62169 |
| 2.236002 | 3.430787 |
| 39.77515 | 44.37408 |
| 6.652166 | 8.265709 |
| 0        | 0.012768 |
| 0        | 0.025371 |
| 0.026754 | 0.039562 |
| 2.971718 | 4.089253 |
| 8.843118 | 7.080792 |
| 2.413745 | 1.115413 |
| 12.57536 | 5.746939 |
| 8.266722 | 3.529219 |
| 9.576267 | 8.48143  |
| 10.65633 | 9.35864  |
| 2.022103 | 1.066722 |
| 0.408803 | 2.947015 |
| 22.66864 | 32.85776 |
| 7.561377 | 9.913633 |
| 0.015875 | 0.246488 |
| 0.290352 | 0.214679 |
| 3.551143 | 2.792707 |
| 0.163387 | 0.120804 |
| 11.40371 | 6.557918 |
| 1.628508 | 1.806115 |
| 0        | 0.048917 |
| 61.41009 | 67.47544 |
| 0.78402  | 1.407803 |
| 4.84586  | 5.860136 |
| 0        | 0.008371 |
| 0.95636  | 0.59397  |
| 6.976346 | 5.234829 |

|          |          |
|----------|----------|
| 15.70873 | 19.51781 |
| 16.59281 | 17.65748 |
| 3.377729 | 4.28461  |
| 0.54746  | 0.441575 |
| 0        | 0.071952 |
| 8.889144 | 10.81074 |
| 4.004186 | 4.47342  |
| 12.08579 | 9.468638 |
| 5.628711 | 2.782512 |
| 16.04771 | 16.88283 |
| 14.3048  | 8.385884 |
| 9.630323 | 14.11114 |
| 38.50959 | 31.24128 |
| 1.241738 | 0.905702 |
| 6.042333 | 4.474613 |
| 5.506336 | 4.482234 |
| 0.343654 | 0.211741 |
| 16.8951  | 27.33059 |
| 100.6623 | 92.00315 |
| 1.979704 | 1.144521 |
| 27.94762 | 30.17662 |
| 19.39293 | 25.51513 |
| 63.47486 | 73.72356 |
| 21.19176 | 30.46737 |
| 27.96541 | 29.90661 |
| 1206.961 | 1179.935 |
| 59.01353 | 56.82801 |
| 10.2057  | 10.78679 |
| 48.12999 | 52.31564 |
| 44.92635 | 48.80731 |
| 34.09464 | 30.19366 |
| 5.633624 | 6.433434 |
| 15.99753 | 13.77733 |
| 10.75982 | 10.44362 |
| 0.365608 | 0.147448 |
| 0.503861 | 0.124181 |
| 10.26199 | 9.606689 |
| 7.395606 | 4.187125 |
| 14.56547 | 12.53924 |
| 29.68246 | 26.01946 |
| 15.25647 | 7.263174 |
| 17.66155 | 17.00732 |
| 19.39585 | 25.09016 |
| 35.01539 | 18.34796 |
| 3.321103 | 2.537545 |
| 10.78899 | 8.533874 |
| 6.054077 | 2.623757 |
| 7.459202 | 7.299449 |
| 0.162673 | 0.120276 |
| 9.504149 | 7.141692 |
| 4.696609 | 7.66502  |
| 23.48682 | 21.53559 |
| 4.000705 | 4.970591 |
| 0        | 0.024522 |
| 0        | 0.012602 |
| 11.58089 | 14.07384 |
| 2.727895 | 1.119399 |
| 15.07455 | 13.89776 |
| 0.029721 | 0.087899 |
| 0.197615 | 0.159394 |
| 13.7598  | 15.11157 |
| 0.055683 | 0        |
| 1.509851 | 1.243201 |
| 0.0836   | 0.061812 |
| 0.09926  | 0.027521 |

|          |          |
|----------|----------|
| 11.9405  | 14.53902 |
| 5.304247 | 3.30769  |
| 0.063306 | 0        |
| 13.36107 | 11.55858 |
| 0.406239 | 0        |
| 37.36654 | 36.45697 |
| 0.031373 | 0.939449 |
| 12.40252 | 10.4811  |
| 7.789928 | 12.62077 |
| 5.195555 | 3.298852 |
| 22.28944 | 20.27481 |
| 0        | 0        |
| 7.333657 | 11.49741 |
| 74.46662 | 70.80328 |
| 0        | 0        |
| 9.542448 | 14.35319 |
| 22.78184 | 24.79393 |
| 0.055683 | 0        |
| 28.40124 | 25.6593  |
| 14.25062 | 12.54854 |
| 0.449629 | 0.160587 |
| 1.091638 | 1.538588 |
| 1.579968 | 0.519194 |
| 2.40595  | 1.593595 |
| 63.38528 | 57.27269 |
| 7.295399 | 5.49938  |
| 27.58382 | 38.61482 |
| 5.494163 | 7.877169 |
| 11.24396 | 6.863727 |
| 30.87507 | 37.16611 |
| 0.031286 | 0.060721 |
| 20.91424 | 15.35569 |
| 6.744262 | 7.204805 |
| 19.65482 | 32.005   |
| 0.353075 | 0.301217 |
| 0.63577  | 0.52883  |
| 7.972761 | 9.238858 |
| 0.045945 | 0.016985 |
| 9.07737  | 9.809219 |
| 14.33238 | 16.19602 |
| 5.907762 | 4.934526 |
| 0.133234 | 0        |
| 0        | 0        |
| 0.625269 | 0.847564 |
| 3.475281 | 3.894239 |
| 20.71492 | 20.00608 |
| 3.630654 | 3.650999 |
| 1.244503 | 1.270688 |
| 49.78206 | 36.00739 |
| 25.77632 | 31.6821  |
| 66.33241 | 56.50254 |
| 20.89971 | 22.65436 |
| 52.12695 | 60.56804 |
| 10.80188 | 11.1318  |
| 7.200236 | 4.678374 |
| 12.70157 | 11.54604 |
| 26.87094 | 37.20561 |
| 36.27539 | 30.57567 |
| 19.93817 | 20.56801 |
| 0.117767 | 0.156733 |
| 3.621898 | 2.658671 |
| 1.84128  | 1.116539 |
| 2.470213 | 3.750884 |
| 0.621615 | 0.441222 |
| 1.889215 | 2.04607  |

|          |          |
|----------|----------|
| 272.9553 | 234.4751 |
| 15.05222 | 13.09197 |
| 7.861826 | 8.321105 |
| 68.33379 | 60.36373 |
| 1136.602 | 1033.66  |
| 0.442455 | 0.635036 |
| 2.100762 | 2.122261 |
| 1.138135 | 1.663354 |
| 0.133568 | 0.172824 |
| 0        | 0.034241 |
| 1.85743  | 4.761647 |
| 3.220754 | 3.179196 |
| 3.946047 | 5.045582 |
| 2.695108 | 2.548033 |
| 1.632704 | 1.272432 |
| 46.26534 | 63.94701 |
| 0.047268 | 0.026212 |
| 0.535047 | 0.53406  |
| 26.31544 | 22.66734 |
| 71.51642 | 77.4464  |
| 0        | 0        |
| 2.144421 | 1.36705  |
| 0        | 0        |
| 5.897226 | 5.365569 |
| 12.75848 | 9.516382 |
| 66.14751 | 66.26864 |
| 4.898719 | 6.985257 |
| 32.54654 | 46.84424 |
| 0.09796  | 0.021729 |
| 0.760383 | 0.439988 |
| 14.14531 | 9.619472 |
| 54.75675 | 44.03516 |
| 0.031774 | 0.070479 |
| 0.038492 | 0.042689 |
| 0.044437 | 0.088709 |
| 19.48889 | 14.45419 |
| 25.64641 | 37.80007 |
| 19.56824 | 12.99463 |
| 53.46018 | 53.69077 |
| 0.648716 | 0.631726 |
| 19.2714  | 26.36744 |
| 18.95487 | 20.84335 |
| 0        | 0.058954 |
| 0.440217 | 0.307402 |
| 0.236973 | 0.367944 |
| 0.031971 | 0.023638 |
| 6.890714 | 5.626175 |
| 3.907968 | 3.972993 |
| 3.313309 | 8.789956 |
| 0.233458 | 0.244535 |
| 2.580979 | 1.073424 |
| 26.79471 | 28.63372 |
| 0.108734 | 0        |
| 0.038629 | 0.064263 |
| 2.624545 | 2.274047 |
| 0.03039  | 0.202227 |
| 11.01173 | 9.34242  |
| 9.38799  | 4.748341 |
| 0.073592 | 0        |
| 0        | 0        |
| 0.067836 | 0.075234 |
| 0        | 0        |
| 42.91511 | 38.86211 |
| 30.11242 | 39.36241 |
| 4.822601 | 3.547513 |

|          |          |
|----------|----------|
| 5.294485 | 6.728986 |
| 0.748035 | 0.553077 |
| 0        | 0.029389 |
| 14.10598 | 9.934756 |
| 14.19992 | 9.549669 |
| 1.721171 | 1.466244 |
| 35.30158 | 40.78485 |
| 20.62189 | 31.23968 |
| 8.490265 | 4.465424 |
| 105.8908 | 90.85191 |
| 28.879   | 27.78659 |
| 67.05109 | 58.98864 |
| 2.986603 | 1.082875 |
| 132.7576 | 126.9485 |
| 547.6828 | 511.0285 |
| 12.40127 | 5.47769  |
| 2.566942 | 0.826518 |
| 9.372644 | 7.465565 |
| 18.49754 | 15.87907 |
| 34.45534 | 32.29724 |
| 31.12015 | 28.6441  |
| 0.061594 | 0        |
| 1.007762 | 1.141966 |
| 0        | 0.022006 |
| 0        | 0        |
| 0        | 0.051291 |
| 0.661701 | 0.590673 |
| 2.639915 | 2.128096 |
| 0.022751 | 0.025232 |
| 0.049765 | 0.044154 |
| 115.1823 | 102.8505 |
| 0        | 0        |
| 0.05365  | 0.029751 |
| 1.156667 | 0.786241 |
| 18.25157 | 26.49399 |
| 0.142401 | 0        |
| 0.401271 | 0.349046 |
| 0        | 0        |
| 0.581206 | 0.389589 |
| 11.16544 | 9.836877 |
| 21.37417 | 17.85796 |
| 2.567041 | 2.528988 |
| 2.489007 | 1.778963 |
| 1.78753  | 2.445059 |
| 7.728471 | 5.247762 |
| 72.7319  | 66.88049 |
| 3.394731 | 2.798284 |
| 0.844576 | 0.796183 |
| 21.5824  | 22.43205 |
| 0.160847 | 0        |
| 0.339582 | 0.836927 |
| 0.722322 | 0.40055  |
| 0.686242 | 0.680971 |
| 8.274853 | 4.541546 |
| 0.690033 | 1.672956 |
| 1.370523 | 1.495867 |
| 0.28538  | 0.158252 |
| 0        | 0.065114 |
| 0.931153 | 0.43307  |
| 0.25192  | 0.228596 |
| 0        | 0        |
| 0.015103 | 0        |
| 0.022134 | 0.245484 |
| 0.810513 | 0.453818 |
| 0        | 0        |

|          |          |
|----------|----------|
| 1.621281 | 2.535449 |
| 11.71835 | 12.00072 |
| 0.392693 | 0.550132 |
| 129.3097 | 160.6315 |
| 2.125381 | 3.892913 |
| 10.87914 | 11.01203 |
| 5.465247 | 4.169327 |
| 21.51733 | 25.5013  |
| 0.067559 | 0.074927 |
| 8.485263 | 9.6685   |
| 43.75647 | 71.1236  |
| 0.073173 | 0.121729 |
| 9.75734  | 12.17417 |
| 15.05631 | 11.8265  |
| 0.115661 | 0.15393  |
| 6.419039 | 4.26776  |
| 11.58378 | 15.59664 |
| 6.962721 | 6.673835 |
| 12.66175 | 14.14429 |
| 1.405702 | 1.194861 |
| 5.321733 | 3.694827 |
| 19.36292 | 32.44656 |
| 142.9408 | 159.5413 |
| 0.645406 | 0.432178 |
| 0.260156 | 0.112903 |
| 1.448372 | 2.991349 |
| 17.21708 | 15.04202 |
| 0.110148 | 0        |
| 0.080296 | 0.029684 |
| 0.031378 | 0.0348   |
| 10.68514 | 5.380573 |
| 0.552702 | 0.367788 |
| 1.308842 | 0.921641 |
| 1.406715 | 0.756987 |
| 6.643841 | 6.398894 |
| 1.144459 | 0.951956 |
| 1.703057 | 1.573995 |
| 0.915328 | 0.440539 |
| 17.56658 | 15.58593 |
| 4.321336 | 3.379415 |
| 2.949854 | 3.331268 |
| 5.208267 | 6.161371 |
| 4.098214 | 4.908782 |
| 4.666893 | 4.535902 |
| 0.283901 | 0.145321 |
| 19.52129 | 17.26137 |
| 14.49392 | 16.50181 |
| 0.364146 | 0.242316 |
| 2.40262  | 2.084524 |
| 3.262936 | 2.847275 |
| 6.283492 | 9.084296 |
| 5.631392 | 3.776992 |
| 6.390267 | 8.043309 |
| 13.12072 | 12.05366 |
| 3.786234 | 4.362238 |
| 7.193841 | 6.157417 |
| 0        | 0.030201 |
| 4.001396 | 7.886729 |
| 0.028592 | 0.079275 |
| 1.337942 | 0.95391  |
| 8.558663 | 8.031759 |
| 7.940466 | 10.65162 |
| 0.851878 | 1.139299 |
| 15.81831 | 15.66951 |
| 7.215746 | 8.451451 |

|          |          |
|----------|----------|
| 0.033219 | 0        |
| 1.248347 | 0.488644 |
| 0        | 0.058653 |
| 1.553405 | 2.242402 |
| 0.241792 | 0.387346 |
| 0        | 0        |
| 2.434225 | 2.236673 |
| 2.911865 | 2.271552 |
| 2.67861  | 2.024751 |
| 0.666003 | 1.272731 |
| 7.406411 | 8.284568 |
| 4.560851 | 4.979961 |
| 5.830749 | 11.69686 |
| 51.21564 | 65.95556 |
| 2.298888 | 3.055779 |
| 0.644298 | 0.43307  |
| 0.498951 | 0.8902   |
| 3.753455 | 3.647511 |
| 0.035137 | 0.103917 |
| 2.6755   | 2.119494 |
| 25.20934 | 31.44833 |
| 30.44599 | 39.27935 |
| 15.59321 | 14.04773 |
| 18.60025 | 15.25063 |
| 3.081049 | 3.650431 |
| 19.28913 | 22.10313 |
| 4.320204 | 2.597301 |
| 0.317661 | 0.440382 |
| 1.006814 | 0.620344 |
| 9.907974 | 16.55128 |
| 0.667601 | 0.535823 |
| 7.919967 | 6.30177  |
| 0        | 0        |
| 0.600599 | 0.366355 |
| 0.252172 | 0.198103 |
| 0        | 0        |
| 0.201998 | 0.081465 |
| 17.70011 | 15.49245 |
| 30.5209  | 35.59996 |
| 2.007078 | 0.839989 |
| 0.097223 | 0.043131 |
| 7.39911  | 10.09213 |
| 1.258275 | 0.976853 |
| 0.450517 | 0.26544  |
| 0.947672 | 0.668835 |
| 1.837886 | 1.349315 |
| 8.021673 | 6.234761 |
| 5.858689 | 3.520059 |
| 5.896041 | 4.876594 |
| 0.023124 | 0.179518 |
| 0.03048  | 0.118313 |
| 0.055584 | 0.277405 |
| 14.68813 | 11.92106 |
| 28.80608 | 54.14221 |
| 4.780753 | 3.488254 |
| 38.98132 | 32.94114 |
| 1.294703 | 1.076928 |
| 4.643657 | 4.837497 |
| 30.10089 | 24.86356 |
| 1.432637 | 0.59583  |
| 0.839012 | 1.359984 |
| 8.493138 | 5.948602 |
| 1.090454 | 0.933825 |
| 0        | 0.109682 |
| 9.084865 | 11.49957 |

|          |          |
|----------|----------|
| 0.022995 | 0.025503 |
| 0.08546  | 0.154019 |
| 1.123511 | 3.002829 |
| 0.120557 | 0.133705 |
| 6.955674 | 7.429139 |
| 0.60975  | 0.397794 |
| 2.020455 | 1.027037 |
| 0.397229 | 0.374468 |
| 3.036435 | 4.202294 |
| 1.448425 | 1.232812 |
| 11.45283 | 11.94509 |
| 1.806145 | 5.067396 |
| 0.78119  | 0.472575 |
| 29.50531 | 33.1682  |
| 21.15446 | 11.75757 |
| 9.447107 | 8.00676  |
| 4.460883 | 4.434769 |
| 0.171227 | 0.094951 |
| 0.135675 | 0.138897 |
| 0.34328  | 0.294192 |
| 0        | 0        |
| 0.132053 | 0.061023 |
| 0        | 0.083693 |
| 5.875419 | 5.722207 |
| 11.25956 | 10.59977 |
| 2.127645 | 2.034214 |
| 0.964704 | 0.373461 |
| 10.51418 | 7.085082 |
| 0.080632 | 0        |
| 0.679974 | 0.754133 |
| 30.13299 | 35.94694 |
| 9.505377 | 7.503453 |
| 8.218106 | 9.878459 |
| 9.419872 | 9.454225 |
| 0.11004  | 0.108481 |
| 1.494154 | 1.269274 |
| 3.927356 | 3.394866 |
| 8.876885 | 9.560469 |
| 9.264469 | 5.841755 |
| 0.03272  | 0.435466 |
| 3.166801 | 5.560943 |
| 0        | 0        |
| 6.441224 | 8.162397 |
| 0.330249 | 0.21976  |
| 0.751917 | 0.774356 |
| 1.373576 | 0.869509 |
| 4.65152  | 5.360335 |
| 2.712892 | 2.681723 |
| 1.076173 | 1.262399 |
| 144.7238 | 155.3435 |
| 40.50824 | 46.45629 |
| 7.01238  | 5.21423  |
| 17.97493 | 17.95194 |
| 0.021314 | 0        |
| 3.886926 | 6.339467 |
| 0        | 0.084696 |
| 4.29939  | 5.063098 |
| 3.193747 | 4.015997 |
| 95.84977 | 104.9112 |
| 15.65328 | 19.48275 |
| 0.188618 | 0.034865 |
| 0.344654 | 0.163818 |
| 6.554348 | 4.052867 |
| 4.749145 | 3.110308 |
| 3.231081 | 5.560549 |

|          |          |
|----------|----------|
| 3.843596 | 3.12604  |
| 0.085245 | 0.189084 |
| 9.781313 | 9.492063 |
| 0.171422 | 0.142588 |
| 6.458703 | 9.200691 |
| 3.515648 | 3.510684 |
| 10.88447 | 10.30355 |
| 3.807215 | 6.37425  |
| 0.138631 | 0.021964 |
| 0.181342 | 0.854756 |
| 0.894256 | 0.979977 |
| 3.17943  | 4.892415 |
| 7.860909 | 6.340528 |
| 5.43034  | 9.100784 |
| 2.382757 | 3.054947 |
| 0.070274 | 0        |
| 5.156152 | 5.151364 |
| 6.877185 | 5.495386 |
| 0.181364 | 0        |
| 7.433366 | 7.466952 |
| 8.504675 | 6.614791 |
| 0.901116 | 0.699575 |
| 4.360593 | 3.700645 |
| 0.481884 | 0.871978 |
| 3.076377 | 3.705737 |
| 24.47527 | 54.62447 |
| 7.691736 | 7.415492 |
| 1.538609 | 0.828547 |
| 36.82885 | 29.09011 |
| 30.4623  | 34.45793 |
| 2.882882 | 2.168278 |
| 0.078541 | 0.105773 |
| 0.069582 | 0.055122 |
| 0.207371 | 0.18399  |
| 0.092598 | 0.051348 |
| 0.027892 | 0.061867 |
| 1.392169 | 1.737001 |
| 0        | 0        |
| 4.105912 | 2.991347 |
| 1.315141 | 1.068488 |
| 194.3972 | 262.0101 |
| 0.143886 | 0.039895 |
| 0.086112 | 0.023876 |
| 5.282692 | 6.887167 |
| 6.724057 | 7.10906  |
| 0.103327 | 0.028649 |
| 3.270665 | 3.895297 |
| 0.18234  | 0.101113 |
| 0.132069 | 0.211571 |
| 1.470886 | 1.537639 |
| 0.248223 | 0.412942 |
| 0.221423 | 0.261943 |
| 0        | 0.086288 |
| 27.62863 | 25.82704 |
| 0.850505 | 0.668859 |
| 3.801512 | 2.189993 |
| 7.855365 | 6.68744  |
| 0.030323 | 0.050446 |
| 0.194901 | 0.09607  |
| 64.12306 | 117.5196 |
| 1.832364 | 1.460029 |
| 8.800548 | 8.499144 |
| 0.089475 | 0.079387 |
| 9.180592 | 11.01641 |
| 16.29915 | 12.51101 |

|          |          |
|----------|----------|
| 1.793045 | 2.180268 |
| 0.026808 | 0        |
| 0.607736 | 0.63528  |
| 0        | 0.079651 |
| 7.874365 | 4.783563 |
| 6.548601 | 7.94435  |
| 10.05857 | 14.21942 |
| 6.815796 | 9.947173 |
| 0.17333  | 0.326797 |
| 0.079125 | 0.087755 |
| 2.525215 | 0.740659 |
| 13.32718 | 16.29156 |
| 19.60567 | 19.37155 |
| 0        | 0        |
| 6.595613 | 6.948426 |
| 2.839693 | 2.581645 |
| 20.96134 | 24.49162 |
| 0.024177 | 0.008938 |
| 1.85758  | 2.956949 |
| 55.06915 | 42.18738 |
| 24.44251 | 24.28866 |
| 50.20707 | 34.63387 |
| 0.192577 | 0.170864 |
| 0.245264 | 0.213724 |
| 2.969543 | 3.163401 |
| 0.985941 | 1.761699 |
| 0.03207  | 0.035567 |
| 2.127517 | 2.232688 |
| 6.164742 | 5.699818 |
| 14.39598 | 14.94052 |
| 5.06996  | 5.117131 |
| 11.72092 | 10.83268 |
| 1.142578 | 1.221932 |
| 10.64565 | 6.823524 |
| 25.57763 | 33.94672 |
| 1.66623  | 0.945974 |
| 0.558335 | 0.371537 |
| 0.022198 | 0.012309 |
| 16.42849 | 12.16651 |
| 100.1648 | 154.8149 |
| 6.897365 | 17.35712 |
| 6.200884 | 7.593201 |
| 3.203269 | 1.567332 |
| 3.454566 | 2.391275 |
| 0.123153 | 0.078048 |
| 0.321879 | 0.337151 |
| 0.25853  | 0.044112 |
| 0.327693 | 0.314974 |
| 24.83185 | 22.49613 |
| 0        | 0.022643 |
| 0.089807 | 0.099602 |
| 0.043076 | 0        |
| 2.137314 | 0.766898 |
| 0        | 0        |
| 0.013275 | 0.014723 |
| 14.48512 | 16.26153 |
| 8.991398 | 7.658502 |
| 7.130119 | 7.387927 |
| 4.19152  | 8.909914 |
| 4.76414  | 4.456151 |
| 85.12876 | 87.08529 |
| 7.059127 | 6.327795 |
| 35.50402 | 35.5707  |
| 30.72607 | 30.45297 |
| 0.232162 | 0.331049 |

|          |          |
|----------|----------|
| 5.622604 | 4.386205 |
| 16.67909 | 13.14783 |
| 0.074356 | 0.247395 |
| 0.397993 | 0.772447 |
| 12.9523  | 11.43192 |
| 0.903786 | 0.984455 |
| 7.532044 | 10.78411 |
| 19.303   | 17.37572 |
| 0.101849 | 0.158139 |
| 16.16006 | 16.46932 |
| 6.403869 | 8.300903 |
| 0.047178 | 0.013081 |
| 5.268396 | 4.69661  |
| 0.318758 | 0.157121 |
| 2.906761 | 2.254535 |
| 15.6454  | 15.13416 |
| 28.43823 | 30.99966 |
| 22.90829 | 21.36563 |
| 0.032729 | 0        |
| 0.647316 | 0.492283 |
| 0        | 0        |
| 2.682153 | 2.071253 |
| 34.47055 | 25.39707 |
| 0        | 0.009955 |
| 0        | 0.034309 |
| 0.927345 | 0.627123 |
| 15.4557  | 15.38394 |
| 3.084445 | 1.743523 |
| 16.03559 | 13.54366 |
| 17.54245 | 26.76727 |
| 1.75459  | 1.317568 |
| 1.774529 | 1.200037 |
| 4.78913  | 1.167087 |
| 8.140984 | 9.801745 |
| 3.365557 | 7.317972 |
| 7.20745  | 9.168674 |
| 0        | 0        |
| 0.032337 | 0        |
| 1.918235 | 1.53353  |
| 5.336744 | 5.5201   |
| 12.61803 | 11.1899  |
| 3.538205 | 4.989324 |
| 5.45912  | 5.709422 |
| 4.741895 | 2.670399 |
| 3.648159 | 2.268802 |
| 19.49178 | 20.76347 |
| 0.188292 | 0.483601 |
| 13.6966  | 11.38501 |
| 0        | 0        |
| 0.097973 | 0.031045 |
| 1.64343  | 1.121639 |
| 10.123   | 8.067238 |
| 3.83559  | 3.947866 |
| 10.26595 | 12.52957 |
| 0.93208  | 0.459437 |
| 14.53539 | 5.008911 |
| 3.91164  | 5.78433  |
| 105.4289 | 57.67886 |
| 0.145063 | 0.131632 |
| 6.173555 | 2.838937 |
| 2.596009 | 2.263132 |
| 31.85367 | 17.95481 |
| 3.368117 | 2.451125 |
| 2.905348 | 2.463003 |
| 4.724783 | 2.530377 |

|          |          |
|----------|----------|
| 0.039546 | 0.029239 |
| 2.636213 | 1.748204 |
| 0.037245 | 0        |
| 6.42998  | 5.17092  |
| 0        | 0.174678 |
| 0.417966 | 0.421408 |
| 0        | 0.016537 |
| 0        | 0        |
| 20.96788 | 20.95886 |
| 0.036613 | 0.13197  |
| 0.370838 | 0.854202 |
| 13.73906 | 10.1583  |
| 3.600995 | 5.398243 |
| 0.127554 | 0.088416 |
| 6.569816 | 5.350649 |
| 1.40282  | 0.85838  |
| 0.423681 | 0.58736  |
| 0.725102 | 0.050261 |
| 0.028594 | 0.010571 |
| 0        | 0        |
| 0.075531 | 0.142407 |
| 0        | 0.020175 |
| 0.254846 | 0.31797  |
| 216.6746 | 289.0034 |
| 7.411994 | 6.224464 |
| 0.782279 | 0.621777 |
| 12.71133 | 14.36438 |
| 0.602785 | 0.907285 |
| 0.136488 | 0.168193 |
| 10.29745 | 8.919848 |
| 0        | 0        |
| 0.042351 | 0.117425 |
| 3.693809 | 2.235006 |
| 19.8837  | 14.40771 |
| 6.36568  | 7.5608   |
| 51.18898 | 45.98229 |
| 3.744235 | 1.121599 |
| 4.581145 | 4.623631 |
| 0.013213 | 0        |
| 56.58523 | 56.32701 |
| 0.024788 | 0.009164 |
| 0.313139 | 0.157859 |
| 0        | 0.035882 |
| 0.040369 | 0.335784 |
| 2.243232 | 1.551582 |
| 30.78305 | 35.25778 |
| 0.195512 | 0.286222 |
| 0.403162 | 0.335348 |
| 0.679558 | 0.867864 |
| 1.725115 | 1.396678 |
| 0.568052 | 0.428939 |
| 1.252    | 1.741371 |
| 21.46241 | 26.25526 |
| 0        | 0        |
| 0.081212 | 0.105081 |
| 0.033095 | 0        |
| 1.785602 | 2.516684 |
| 21.18539 | 28.0211  |
| 14.96775 | 13.07609 |
| 4.193979 | 4.841489 |
| 1.02341  | 1.080975 |
| 0        | 0        |
| 0.076321 | 0.169289 |
| 0.342341 | 0.197432 |
| 0.035069 | 0.031115 |

|          |          |
|----------|----------|
| 0.116423 | 0.055337 |
| 23.61269 | 29.28912 |
| 1.388616 | 1.206645 |
| 21.01159 | 26.69056 |
| 4.183589 | 7.0472   |
| 6.553469 | 14.49261 |
| 0.013712 | 0.288937 |
| 3.486247 | 4.78035  |
| 3.482261 | 2.065175 |
| 0.061457 | 0.01704  |
| 18.11408 | 11.05108 |
| 0.060989 | 0.067641 |
| 7.470686 | 7.442858 |
| 15.82564 | 9.377708 |
| 7.423803 | 6.397485 |
| 5.512665 | 8.181165 |
| 5.372752 | 5.55562  |
| 0.986693 | 0.928499 |
| 28.06175 | 32.50592 |
| 7.993286 | 6.826555 |
| 20.15253 | 27.03449 |
| 4.459011 | 5.267836 |
| 2.481883 | 1.987142 |
| 0.021454 | 0.007931 |
| 3.165904 | 2.795939 |
| 0.071269 | 0.052694 |
| 4.659943 | 5.586173 |
| 3.527919 | 2.579376 |
| 5.301387 | 5.206775 |
| 2.099685 | 2.181294 |
| 1.018444 | 0.494163 |
| 10.23899 | 11.05943 |
| 5.991037 | 6.096944 |
| 0.233629 | 0.302293 |
| 27.06083 | 36.68404 |
| 3.349488 | 2.853386 |
| 0        | 0        |
| 1.14278  | 0.682453 |
| 0.057809 | 0.021371 |
| 9.602346 | 9.685021 |
| 0.03525  | 0.039094 |
| 3.059696 | 1.936999 |
| 0.255152 | 0        |
| 0.255178 | 0.500707 |
| 7.364227 | 7.828638 |
| 1.091089 | 0.743545 |
| 54.44603 | 72.2128  |
| 5.221848 | 8.588862 |
| 4.494505 | 3.593606 |
| 3.991031 | 9.416319 |
| 2.176918 | 0.93707  |
| 39.52169 | 57.93631 |
| 107.6095 | 79.57442 |
| 3.447155 | 2.724754 |
| 19.59396 | 24.29297 |
| 33.76598 | 33.05988 |
| 8.83356  | 8.399739 |
| 21.6793  | 21.5195  |
| 10.08632 | 13.19762 |
| 0.021454 | 0        |
| 0.06279  | 0.041783 |
| 4.032586 | 4.058274 |
| 0        | 0        |
| 10.07626 | 10.03389 |
| 5.716479 | 9.518523 |

|          |          |
|----------|----------|
| 0.05683  | 0.063028 |
| 8.24889  | 7.603966 |
| 3.910985 | 2.103697 |
| 7.810747 | 9.010362 |
| 4.563012 | 3.183652 |
| 19.74228 | 20.54437 |
| 16.77108 | 15.18699 |
| 8.407076 | 4.5089   |
| 64.81517 | 91.91989 |
| 80.31267 | 104.8457 |
| 5.214601 | 6.363575 |
| 0.137971 | 0.153018 |
| 18.36827 | 25.65303 |
| 64.85419 | 59.92625 |
| 1.975585 | 1.734577 |
| 108.2166 | 94.9501  |
| 19.62569 | 14.69719 |
| 0.021754 | 0.024127 |
| 0.785165 | 1.175574 |
| 3.643146 | 4.125534 |
| 4.075933 | 5.992235 |
| 45.44055 | 45.44022 |
| 2.839012 | 3.267627 |
| 2.617333 | 3.296731 |
| 1.072915 | 0.516113 |
| 2.431113 | 4.148081 |
| 1.312272 | 1.879879 |
| 0.054001 | 0.089521 |
| 0        | 0        |
| 184.0364 | 179.368  |
| 3.839384 | 5.518736 |
| 0.046647 | 0.206937 |
| 0.02679  | 0.029712 |
| 3.14658  | 1.686322 |
| 0.831637 | 1.311446 |
| 0.029921 | 0        |
| 0        | 0        |
| 4.652075 | 7.191193 |
| 34.3082  | 40.96442 |
| 0.170371 | 0.169062 |
| 1.522567 | 1.098943 |
| 0.472841 | 0.77056  |
| 15.15892 | 18.07176 |
| 2.866995 | 2.599773 |
| 5.233082 | 4.519778 |
| 2.604883 | 1.883372 |
| 2.489511 | 1.119049 |
| 3.567023 | 4.500719 |
| 0.059159 | 0        |
| 27.80347 | 34.3455  |
| 1.229997 | 1.798186 |
| 6.614837 | 6.011425 |
| 0.951483 | 1.020464 |
| 3.704864 | 2.342698 |
| 6.530174 | 7.948027 |
| 0.19813  | 0.819026 |
| 1.388121 | 1.329578 |
| 27.54507 | 31.44767 |
| 3.206199 | 1.709175 |
| 0.140309 | 0.155612 |
| 0.975612 | 0.821529 |
| 0.435479 | 1.345425 |
| 2.511567 | 1.650166 |
| 5.403812 | 4.056258 |
| 3.624578 | 2.695683 |

|          |          |
|----------|----------|
| 2.08368  | 1.258798 |
| 0.140893 | 0.052086 |
| 0        | 0.032603 |
| 3.562841 | 2.820752 |
| 9.786577 | 7.869501 |
| 15.23286 | 14.52343 |
| 4.46602  | 2.95313  |
| 0.074289 | 0.041195 |
| 16.75996 | 17.78327 |
| 0.121799 | 0.151967 |
| 14.4132  | 11.41493 |
| 0.027742 | 0.153839 |
| 0        | 0.032743 |
| 0.126167 | 0.041978 |
| 1.273109 | 1.155778 |
| 9.657298 | 10.41302 |
| 0.250592 | 0.229588 |
| 0.063354 | 0        |
| 7.475115 | 4.664911 |
| 1.055754 | 1.170896 |
| 0.133592 | 0        |
| 2.90547  | 2.68899  |
| 3.970248 | 3.835957 |
| 9.149937 | 6.376889 |
| 0.782138 | 0.846786 |
| 0.014925 | 0        |
| 0.076134 | 0.084437 |
| 0.186193 | 0.272204 |
| 0        | 0.087328 |
| 0.090308 | 0        |
| 1.982525 | 1.126184 |
| 0        | 0        |
| 1.403814 | 2.774141 |
| 0.581939 | 0.712172 |
| 5.034947 | 11.22199 |
| 120.6127 | 160.005  |
| 0.029664 | 0        |
| 5.811565 | 6.731841 |
| 1.528593 | 0.901757 |
| 6.29492  | 7.469195 |
| 16.85067 | 22.36699 |
| 1.445698 | 1.632257 |
| 0.85746  | 0.525539 |
| 9.688895 | 7.318107 |
| 60.61492 | 27.2921  |
| 6.667575 | 3.653875 |
| 0.625506 | 0.358823 |
| 4.907959 | 7.320199 |
| 29.34064 | 30.88032 |
| 0.019792 | 0.02195  |
| 0.012983 | 0        |
| 1.844474 | 1.040153 |
| 59.7158  | 65.93965 |
| 0.199316 | 0.233334 |
| 0.033588 | 0.149003 |
| 13.92083 | 15.94544 |
| 8.852152 | 7.565838 |
| 11.92087 | 16.82549 |
| 12.39238 | 13.05077 |
| 66.87126 | 43.24218 |
| 0        | 0.013194 |
| 2.225426 | 0.804223 |
| 13.22221 | 17.32542 |
| 5.907466 | 5.335451 |
| 2466.349 | 2355.441 |

|          |          |
|----------|----------|
| 0.04029  | 0.067026 |
| 0.050491 | 0        |
| 138.1713 | 103.9599 |
| 17.51518 | 11.31889 |
| 10.97186 | 11.51735 |
| 0.73968  | 0.49807  |
| 0.968328 | 0.16846  |
| 17.22771 | 43.21727 |
| 35.28651 | 30.37988 |
| 24.03106 | 28.90979 |
| 11.35186 | 12.77171 |
| 19.55202 | 19.51594 |
| 23.23024 | 28.96588 |
| 3.918359 | 4.985505 |
| 5.529413 | 2.913932 |
| 7.352499 | 6.497049 |
| 3.734388 | 2.392784 |
| 0.189752 | 0.252536 |
| 5.88927  | 18.34925 |
| 33.57087 | 27.72606 |
| 7.443165 | 5.402612 |
| 10.12241 | 8.597602 |
| 0.177391 | 0        |
| 4.999572 | 4.797654 |
| 8.911196 | 8.820861 |
| 5.176696 | 9.577035 |
| 0.239362 | 0.132734 |
| 11.2224  | 10.31432 |
| 9.347166 | 10.79366 |
| 8.900193 | 5.232743 |
| 8.154874 | 4.68765  |
| 0.963655 | 1.094198 |
| 4.264826 | 4.767293 |
| 17.99782 | 19.88629 |
| 2.047679 | 3.397834 |
| 0        | 0        |
| 0        | 0        |
| 31.55353 | 40.11597 |
| 11.25886 | 10.06632 |
| 7.7747   | 6.521535 |
| 1.503034 | 1.581472 |
| 9.58821  | 5.769969 |
| 130.2049 | 82.16154 |
| 0.605585 | 0.479736 |
| 43.60249 | 34.67862 |
| 17.70137 | 12.42377 |
| 71.79561 | 63.10596 |
| 10.71051 | 19.17734 |
| 30.70696 | 23.21993 |
| 0        | 0.222842 |
| 9.704708 | 13.47    |
| 0.609976 | 0.483215 |
| 57.45783 | 54.4716  |
| 0.139521 | 0.077369 |
| 3.291139 | 3.502097 |
| 9.812731 | 8.959024 |
| 0        | 0        |
| 4.067497 | 3.258693 |
| 6.557406 | 6.712057 |
| 0.10233  | 0.060528 |
| 0.068955 | 0.06118  |
| 7.489724 | 8.332198 |
| 3.166045 | 3.29015  |
| 77.95797 | 65.95768 |
| 2.993114 | 2.377512 |

|          |          |
|----------|----------|
| 0        | 0        |
| 2.182448 | 7.261403 |
| 2.772163 | 2.155682 |
| 0.774349 | 0.616574 |
| 3.134389 | 4.737036 |
| 7.023403 | 6.186995 |
| 8.25316  | 8.810383 |
| 14.1075  | 12.85599 |
| 0.114005 | 0.025288 |
| 5.561364 | 6.45506  |
| 3.622412 | 2.354381 |
| 77.07044 | 78.80983 |
| 9.88336  | 9.694273 |
| 65.46407 | 52.25248 |
| 1.70199  | 1.348293 |
| 13.2819  | 14.07484 |
| 9.196133 | 3.226825 |
| 0.442775 | 0.381939 |
| 0.264763 | 0.880914 |
| 0.019439 | 0.043117 |
| 4.603809 | 4.294686 |
| 0        | 0.037627 |
| 0.693155 | 0.604019 |
| 5.060833 | 5.145041 |
| 26.73976 | 17.00519 |
| 3.958231 | 2.807687 |
| 6.351778 | 5.960738 |
| 5.25171  | 5.332623 |
| 0.112578 | 0.124856 |
| 6.013049 | 7.785628 |
| 10.16424 | 10.7151  |
| 0.181691 | 0.07447  |
| 4.998081 | 3.56758  |
| 0.521739 | 0.878675 |
| 2.399003 | 2.285903 |
| 3.29702  | 3.388757 |
| 61.16915 | 62.88394 |
| 0.143346 | 0.019872 |
| 7.027758 | 8.639233 |
| 8.229741 | 7.456411 |
| 0.187356 | 0.367627 |
| 3.61195  | 2.538701 |
| 9.754162 | 9.207421 |
| 12.57567 | 11.52106 |
| 9.676762 | 10.75369 |
| 0.073505 | 0.190216 |
| 0        | 0        |
| 0.419339 | 0.519787 |
| 19.44947 | 29.44315 |
| 26.25002 | 24.1956  |
| 0.314793 | 0.18799  |
| 28.74899 | 34.2774  |
| 5.922065 | 5.182604 |
| 1.198796 | 0.892973 |
| 7.809962 | 3.638949 |
| 6.76155  | 3.678945 |
| 2.619667 | 2.344987 |
| 27.53481 | 28.34393 |
| 0.087446 | 0.161639 |
| 0.008271 | 0        |
| 7.920185 | 8.489152 |
| 0.036181 | 0.120381 |
| 4.204223 | 3.955808 |
| 0.387976 | 0.298812 |
| 2.742324 | 2.095602 |

|          |          |
|----------|----------|
| 4.27296  | 3.518473 |
| 5.082112 | 3.776091 |
| 0.165686 | 0.668201 |
| 0.35117  | 0.272628 |
| 11.91747 | 14.00924 |
| 7.312727 | 4.33752  |
| 3.475217 | 3.016352 |
| 14.80972 | 13.91771 |
| 3.79414  | 2.898798 |
| 12.6067  | 8.571757 |
| 0.078393 | 0        |
| 16.73615 | 8.737934 |
| 11.88452 | 13.24706 |
| 12.36017 | 12.08223 |
| 0.049849 | 0.027643 |
| 8.266817 | 6.12495  |
| 29.57267 | 28.29036 |
| 0.029183 | 0        |
| 18.07059 | 11.07345 |
| 0.725338 | 0.458086 |
| 8.211254 | 11.52619 |
| 21.62988 | 30.34083 |
| 18.33185 | 25.04439 |
| 8.43304  | 4.457741 |
| 38.81398 | 32.34971 |
| 24.56566 | 23.35269 |
| 8.654938 | 8.773146 |
| 14.03985 | 11.7456  |
| 29.93939 | 26.72214 |
| 1.333609 | 1.533833 |
| 4.230438 | 3.903435 |
| 0.572158 | 0.154352 |
| 0.020047 | 0.400209 |
| 4.82749  | 5.539882 |
| 0.070155 | 0        |
| 0.571067 | 0.382954 |
| 32.73042 | 38.92286 |
| 2.133317 | 3.100248 |
| 0.562656 | 0.792025 |
| 4.458242 | 5.204697 |
| 0        | 0        |
| 2.240461 | 1.753085 |
| 2.226313 | 1.965216 |
| 4.49568  | 3.89709  |
| 0.472282 | 0.161166 |
| 10.56977 | 7.067167 |
| 17.43782 | 15.717   |
| 0.214304 | 0.237676 |
| 1.864992 | 1.178501 |
| 0.436617 | 0.423705 |
| 9.133138 | 7.520168 |
| 5.975863 | 4.748342 |
| 6.315823 | 6.914104 |
| 1.510846 | 1.163078 |
| 45.22826 | 40.71174 |
| 3.155124 | 3.093735 |
| 3.981332 | 2.928519 |
| 46.94321 | 34.22247 |
| 4.358022 | 3.045648 |
| 1.424504 | 1.579862 |
| 2.396267 | 2.853659 |
| 74.98669 | 107.9979 |
| 0.089023 | 0.197463 |
| 0.32892  | 0.452342 |
| 1.439833 | 1.175712 |

|          |          |
|----------|----------|
| 10.38581 | 10.39474 |
| 19.7881  | 9.007899 |
| 5.502348 | 3.376911 |
| 5.356619 | 3.858618 |
| 0.029162 | 0.064686 |
| 12.16995 | 19.61001 |
| 0.812145 | 0.785427 |
| 3.068934 | 11.34545 |
| 11.02859 | 11.97251 |
| 1.381043 | 3.929043 |
| 5.354282 | 5.390729 |
| 37.16524 | 61.58686 |
| 0.860106 | 0.49462  |
| 3.487109 | 3.353775 |
| 0.104216 | 0        |
| 37.81591 | 29.62039 |
| 0.509048 | 0.16937  |
| 11.30951 | 8.959237 |
| 0.116736 | 0.036991 |
| 10.20455 | 6.387355 |
| 34.55407 | 31.78965 |
| 3.472236 | 1.528143 |
| 6.826857 | 7.554759 |
| 0        | 0        |
| 0.051354 | 0        |
| 3.413307 | 4.014005 |
| 0        | 0        |
| 0.210396 | 0.211119 |
| 0        | 0        |
| 0.136355 | 0.403269 |
| 0.05275  | 0.146258 |
| 0        | 0        |
| 34.48372 | 47.76079 |
| 1.986732 | 1.906924 |
| 36.21957 | 30.16797 |
| 7.956706 | 6.269123 |
| 0        | 0        |
| 2.663004 | 2.588402 |
| 0.399882 | 0.67691  |
| 0.354047 | 0.178481 |
| 0.18378  | 0.03397  |
| 32.59428 | 23.72373 |
| 15.90479 | 13.00229 |
| 28.23392 | 20.38816 |
| 4.116157 | 3.267946 |
| 7.975276 | 8.407734 |
| 0.006829 | 0.045441 |
| 1.581831 | 2.73177  |
| 43.39115 | 63.44908 |
| 5.536217 | 2.938862 |
| 0        | 0        |
| 10.61108 | 5.52349  |
| 34.98547 | 35.24881 |
| 15.04048 | 11.27235 |
| 3.115778 | 1.331511 |
| 0.751051 | 0.242947 |
| 3.236501 | 2.692108 |
| 41.33561 | 37.05664 |
| 28.55241 | 33.7241  |
| 8.694823 | 5.720976 |
| 11.15834 | 9.066376 |
| 5.570601 | 6.290466 |
| 1.542363 | 1.485499 |
| 1.225835 | 1.726965 |
| 1.929187 | 1.748198 |

|          |          |
|----------|----------|
| 0.313084 | 0.480778 |
| 0.409488 | 0.328865 |
| 25.72447 | 18.37647 |
| 13.61654 | 8.109438 |
| 13.46062 | 12.5236  |
| 1.859023 | 2.856669 |
| 1.590502 | 0.667446 |
| 7.824849 | 5.953106 |
| 57.72516 | 46.20568 |
| 0.045236 | 0.025085 |
| 0        | 0.349534 |
| 0        | 0.074281 |
| 6.648891 | 6.916327 |
| 1.206804 | 0.880539 |
| 0.244822 | 0.108609 |
| 35.37404 | 43.2332  |
| 0.233937 | 0.15567  |
| 10.48773 | 16.26179 |
| 8.374311 | 7.10416  |
| 0.572058 | 0.552052 |
| 18.84593 | 17.53386 |
| 46.71299 | 40.09074 |
| 17.65978 | 25.33421 |
| 43.52831 | 40.10008 |
| 5.184243 | 5.419518 |
| 0.638898 | 0.825055 |
| 13.34985 | 13.27178 |
| 1.768114 | 0.884033 |
| 47.03552 | 38.92725 |
| 0.040739 | 0        |
| 11.88065 | 6.293652 |
| 48.75151 | 51.83161 |
| 41.04371 | 44.10577 |
| 9.371605 | 8.356283 |
| 16.43559 | 18.21248 |
| 7.349583 | 10.09414 |
| 4.429067 | 10.55127 |
| 0.355569 | 0.228976 |
| 0.315013 | 0.341244 |
| 46.84885 | 43.1487  |
| 2.095231 | 2.125129 |
| 0.154637 | 0.171502 |
| 32.5858  | 37.7258  |
| 2.932371 | 3.496702 |
| 24.10432 | 31.07527 |
| 3.340226 | 1.909543 |
| 11.72663 | 8.848523 |
| 2.846989 | 0.891945 |
| 3.485662 | 2.438834 |
| 0.307276 | 0.236658 |
| 76.36672 | 81.76592 |
| 0.346854 | 0.480853 |
| 46.33928 | 28.66703 |
| 15.296   | 11.13275 |
| 2.192516 | 0.944046 |
| 2.361807 | 1.706571 |
| 0.021491 | 0.071504 |
| 1.512101 | 2.68322  |
| 3.158447 | 3.956991 |
| 15.30501 | 15.29179 |
| 0.063941 | 0        |
| 0.013977 | 0.09301  |
| 2.026034 | 2.140502 |
| 1.837584 | 0.238489 |
| 1.284113 | 1.15713  |

|          |          |
|----------|----------|
| 4.362015 | 2.882366 |
| 4.857322 | 10.47318 |
| 250.5279 | 189.8889 |
| 0.017323 | 0.019213 |
| 0.027387 | 0        |
| 39.64206 | 35.42541 |
| 3.582329 | 4.608705 |
| 118.9769 | 135.8291 |
| 51.02946 | 35.70038 |
| 3.466904 | 1.110178 |
| 106.6921 | 126.3565 |
| 0.15879  | 0.154094 |
| 4.830506 | 0.457023 |
| 20.84622 | 31.72103 |
| 2.73394  | 2.18442  |
| 0.114763 | 0.021213 |
| 8.750872 | 6.859196 |
| 0.873452 | 0.446757 |
| 4.412659 | 4.579095 |
| 0.062987 | 0.17963  |
| 2.967947 | 3.016591 |
| 16.76346 | 11.39985 |
| 4.453217 | 6.620975 |
| 0.328589 | 0.109328 |
| 0.099022 | 0.109822 |
| 6.752338 | 7.469552 |
| 0.540247 | 0.714392 |
| 29.83029 | 20.77171 |
| 35.93819 | 53.81684 |
| 10.64056 | 12.70445 |
| 1.692805 | 1.039804 |
| 0.040833 | 0.045287 |
| 1.111889 | 0.822102 |
| 0.342004 | 0.116709 |
| 0.019716 | 0.043733 |
| 12.30541 | 10.80572 |
| 4.285291 | 1.510532 |
| 33.15943 | 24.18055 |
| 56.15576 | 47.3582  |
| 0.025924 | 0        |
| 16.9593  | 11.18367 |
| 0.178822 | 0.198324 |
| 3.639681 | 2.220145 |
| 11.79468 | 16.39189 |
| 0        | 0.090128 |
| 1.968865 | 0.666745 |
| 10.78274 | 6.140965 |
| 1.372485 | 0.480685 |
| 16.8046  | 10.85315 |
| 7.074323 | 5.826458 |
| 14.87517 | 18.57449 |
| 106.0931 | 98.88172 |
| 25.77799 | 14.22699 |
| 0.02388  | 0        |
| 0.173913 | 0.137771 |
| 17.20048 | 11.61171 |
| 0.814749 | 0.836672 |
| 0.890975 | 0.468069 |
| 1.049027 | 1.378886 |
| 6.249114 | 2.895554 |
| 0.275534 | 0.254653 |
| 0.538821 | 1.466801 |
| 0.570574 | 0.773424 |
| 0.500345 | 0.881332 |
| 1.652369 | 1.312698 |

|          |          |
|----------|----------|
| 1.877357 | 0.89233  |
| 17.73412 | 15.91894 |
| 0        | 0        |
| 184.3266 | 161.9632 |
| 22.36651 | 17.30586 |
| 14.83065 | 10.21923 |
| 1.651679 | 2.192169 |
| 1.225399 | 1.560382 |
| 10.67857 | 13.31048 |
| 0.319541 | 0.496147 |
| 16.91054 | 29.08195 |
| 63.98727 | 66.95612 |
| 42.46187 | 43.83921 |
| 8.875266 | 7.138545 |
| 0.636322 | 1.134193 |
| 4.237907 | 2.838445 |
| 129.5457 | 100.0219 |
| 7.350871 | 4.044185 |
| 39.23827 | 60.08298 |
| 11.3328  | 12.40819 |
| 1.074426 | 1.051415 |
| 6.320134 | 2.959892 |
| 2.661577 | 1.655244 |
| 2.715743 | 1.268179 |
| 0.559846 | 1.179716 |
| 0.11268  | 0        |
| 0.038889 | 0.064696 |
| 0        | 0        |
| 0.043116 | 0.047818 |
| 16.03007 | 14.37677 |
| 10.04454 | 9.162249 |
| 17.99253 | 29.07344 |
| 15.45287 | 12.72637 |
| 5.661762 | 6.505292 |
| 250.7787 | 236.8554 |
| 50.91019 | 54.20341 |
| 0.05451  | 0        |
| 0.621196 | 0.725204 |
| 29.81098 | 41.34466 |
| 23.1119  | 20.74344 |
| 28.9786  | 28.71052 |
| 37.4875  | 40.8119  |
| 27.92061 | 44.24967 |
| 4.876948 | 3.056647 |
| 8.855569 | 10.41361 |
| 0.065798 | 0.131353 |
| 61.90144 | 71.69638 |
| 4.042663 | 3.462358 |
| 0.876779 | 0.577363 |
| 2.099213 | 4.222247 |
| 3.117847 | 3.15838  |
| 0.181806 | 0.158427 |
| 56.05903 | 60.91011 |
| 7.556733 | 4.154926 |
| 2.604156 | 1.479305 |
| 22.83439 | 20.48103 |
| 35.10626 | 58.9535  |
| 16.00554 | 12.45953 |
| 14.63694 | 14.01518 |
| 12.45912 | 8.517578 |
| 8.278251 | 8.665953 |
| 6.401939 | 3.314028 |
| 0        | 0        |
| 13.53867 | 13.90487 |
| 1.083652 | 0.282785 |

|          |          |
|----------|----------|
| 2.818699 | 1.0746   |
| 25.57695 | 16.29035 |
| 4.23361  | 7.738228 |
| 5.948886 | 8.987902 |
| 4.90671  | 4.687526 |
| 0.080009 | 0        |
| 3.948248 | 4.773247 |
| 10.57853 | 9.287225 |
| 6.263451 | 7.041447 |
| 0.177246 | 0.084247 |
| 0.389763 | 0.76283  |
| 4.457611 | 3.958949 |
| 22.05851 | 12.37207 |
| 49.31743 | 38.90208 |
| 5.526596 | 5.536905 |
| 12.62438 | 11.23654 |
| 13.51418 | 9.910576 |
| 28.55077 | 16.72998 |
| 0.651211 | 0.166669 |
| 12.21976 | 7.447145 |
| 0.983614 | 0.363629 |
| 0.1047   | 0        |
| 0.033835 | 0        |
| 4.089733 | 1.248978 |
| 8.492097 | 6.693231 |
| 7.853058 | 9.768135 |
| 35.10827 | 21.74085 |
| 7.600274 | 6.493178 |
| 0.297591 | 0.434272 |
| 0        | 0        |
| 4.837264 | 4.518755 |
| 12.8203  | 22.00481 |
| 5.387019 | 8.928647 |
| 72.96238 | 73.87718 |
| 0.426714 | 0.89392  |
| 38.22976 | 38.51524 |
| 12.35173 | 7.184697 |
| 28.30844 | 29.26989 |
| 79.5661  | 74.10014 |
| 6.892433 | 9.168887 |
| 12.76028 | 6.360796 |
| 69.58983 | 76.68009 |
| 1.459262 | 0.978032 |
| 14.73838 | 18.89845 |
| 0.391548 | 0.53988  |
| 9.017157 | 9.036979 |
| 14.03334 | 11.01902 |
| 4.524924 | 7.442278 |
| 19.01103 | 15.37825 |
| 0.638316 | 1.203484 |
| 18.97659 | 12.80198 |
| 3.841938 | 4.553679 |
| 35.75228 | 36.55671 |
| 5.099484 | 8.765744 |
| 22.53812 | 18.88742 |
| 0        | 0.018933 |
| 13.44149 | 9.602851 |
| 23.32119 | 22.98126 |
| 6.580099 | 5.708447 |
| 24.96671 | 20.02586 |
| 0.122701 | 0.204125 |
| 23.24494 | 11.35391 |
| 24.1897  | 50.86112 |
| 7.69136  | 10.68843 |
| 0.126773 | 0.03515  |

|          |          |
|----------|----------|
| 0.12252  | 0        |
| 48.90187 | 35.75241 |
| 0.053569 | 0        |
| 0.107324 | 0.148786 |
| 88.8492  | 76.89804 |
| 0.02025  | 0        |
| 0.045585 | 0.050557 |
| 29.43519 | 32.17604 |
| 10.91293 | 13.05113 |
| 40.54581 | 44.57158 |
| 83.04504 | 58.81329 |
| 22.74128 | 17.56074 |
| 21.08132 | 17.09977 |
| 1.354464 | 0.872235 |
| 22.03563 | 16.79346 |
| 35.56016 | 30.02052 |
| 5.167103 | 6.57147  |
| 2.830588 | 1.650709 |
| 57.37713 | 52.02968 |
| 8.079504 | 4.392481 |
| 64.79063 | 54.55281 |
| 4.548849 | 3.018018 |
| 14.09859 | 8.734025 |
| 14.36945 | 4.476948 |
| 4.703325 | 4.900639 |
| 22.97589 | 24.51313 |
| 50.31355 | 43.72162 |
| 2798.502 | 2355.597 |
| 19.46191 | 20.19867 |
| 14.20163 | 11.57459 |
| 0.36859  | 0.295236 |
| 1.381645 | 1.118185 |
| 0        | 0        |
| 21.00057 | 34.60944 |
| 2.67666  | 1.274553 |
| 24.75875 | 19.1921  |
| 0        | 0.011631 |
| 0.400561 | 0.277654 |
| 0.435087 | 0.530792 |
| 0.345976 | 0.27906  |
| 37.72173 | 28.21775 |
| 0.13736  | 0.121873 |
| 28.3846  | 24.44241 |
| 211.3805 | 243.8849 |
| 17.39917 | 19.0062  |
| 4.548083 | 5.007193 |
| 3.490722 | 2.659756 |
| 38.54202 | 40.34484 |
| 0.865658 | 0.560039 |
| 6.810998 | 5.903236 |
| 0.638873 | 0.064414 |
| 7.552487 | 4.112623 |
| 1.955492 | 2.34949  |
| 1.044152 | 0.356316 |
| 12.77184 | 8.954366 |
| 2.062836 | 0.746025 |
| 0.41709  | 0.17622  |
| 8.427249 | 11.6886  |
| 0.229291 | 0.141276 |
| 0.238209 | 0.232486 |
| 27.96661 | 9.931996 |
| 22.24074 | 32.40238 |
| 5.230646 | 4.761703 |
| 15.30119 | 10.23465 |
| 2.53181  | 1.372057 |

|          |          |
|----------|----------|
| 30.58075 | 85.13587 |
| 4.47704  | 7.393281 |
| 8.318673 | 5.783008 |
| 0.18194  | 0.151337 |
| 0        | 0.084282 |
| 0.030183 | 0.2678   |
| 0.104435 | 0        |
| 0.322809 | 0        |
| 14.87288 | 15.52971 |
| 8.57485  | 6.987805 |
| 0.058702 | 0.021701 |
| 11.40168 | 5.825608 |
| 0.024736 | 0.219468 |
| 3.294998 | 2.964853 |
| 0        | 0        |
| 0.625736 | 0.231326 |
| 4.865654 | 1.230737 |
| 21.19552 | 23.56257 |
| 0.551496 | 0.836985 |
| 31.58506 | 29.84485 |
| 1.745414 | 2.972791 |
| 0.560773 | 0.50791  |
| 37.60579 | 21.46369 |
| 16.6918  | 13.11474 |
| 6.975369 | 4.623622 |
| 2.302185 | 2.602483 |
| 1.413012 | 0.807302 |
| 23.82469 | 20.90522 |
| 6.559358 | 9.406791 |
| 7.130517 | 1.496142 |
| 22.71536 | 20.30677 |
| 1.462648 | 1.342482 |
| 19.89999 | 20.16666 |
| 0.022001 | 0        |
| 19.37825 | 16.27427 |
| 0.401424 | 0.247335 |
| 0.051999 | 0        |
| 2.555799 | 0.919717 |
| 3.132062 | 2.028856 |
| 4.621113 | 4.95977  |
| 1.536804 | 0.83671  |
| 0.052108 | 0.028896 |
| 0.267616 | 0.0371   |
| 3.772368 | 1.084685 |
| 0        | 0        |
| 1.158793 | 1.623375 |
| 19.61014 | 15.02647 |
| 2.828738 | 1.612022 |
| 5.162121 | 7.17599  |
| 15.61467 | 19.65412 |
| 0        | 0        |
| 12.22113 | 15.18638 |
| 17.59943 | 26.02512 |
| 1.232772 | 0.403951 |
| 7.631721 | 7.515381 |
| 16.78176 | 16.67585 |
| 2.010911 | 0.896072 |
| 0.019635 | 0        |
| 0.766218 | 0.231759 |
| 0.375309 | 0.683824 |
| 1.384103 | 0.146196 |
| 1.17053  | 0.054091 |
| 23.87293 | 21.52615 |
| 24.33899 | 20.14458 |
| 2.878763 | 2.271544 |

|          |          |
|----------|----------|
| 4.325026 | 3.492347 |
| 0.468934 | 0.346718 |
| 8.892239 | 6.65296  |
| 7.980377 | 5.547111 |
| 19.83664 | 12.42903 |
| 2.92613  | 6.02444  |
| 4.7178   | 2.35321  |
| 9.063981 | 6.367098 |
| 7.166819 | 6.609531 |
| 3.22873  | 2.132861 |
| 3.624515 | 3.431133 |
| 2.467296 | 0.224294 |
| 6.241539 | 7.741986 |
| 0.351966 | 0.312282 |
| 78.17017 | 62.84592 |
| 6.006347 | 8.645653 |
| 13.00675 | 9.203624 |
| 12.03007 | 14.35087 |
| 9.50555  | 16.79752 |
| 16.7157  | 10.939   |
| 0.20934  | 0.048369 |
| 1011.099 | 977.2378 |
| 0.08259  | 0.068698 |
| 6.46954  | 4.970919 |
| 6.950126 | 7.738401 |
| 3.446752 | 1.056261 |
| 9.01165  | 4.897951 |
| 32.84263 | 20.24768 |
| 7.40616  | 6.734754 |
| 19.58769 | 31.0945  |
| 0.024492 | 0        |
| 0.123975 | 0.164996 |
| 11.65453 | 12.76108 |
| 3.654298 | 3.089788 |
| 0.735775 | 0.277794 |
| 17.13138 | 20.40241 |
| 4.779455 | 2.926875 |
| 0.023545 | 0        |
| 16.49589 | 15.91804 |
| 45.0869  | 67.21866 |
| 0.867598 | 1.102768 |
| 0.247728 | 0.137373 |
| 6.61343  | 5.192966 |
| 0.104817 | 0.077499 |
| 0.25035  | 0.57514  |
| 9.722963 | 8.988307 |
| 17.91693 | 20.10105 |
| 8.179893 | 12.91414 |
| 1.33513  | 0.648285 |
| 8.987908 | 17.53238 |
| 1.600452 | 1.419999 |
| 7.225712 | 7.33699  |
| 0.869752 | 0.618338 |
| 46.35018 | 33.10976 |
| 33.79379 | 54.05925 |
| 13.33509 | 8.513469 |
| 9.599609 | 8.501584 |
| 0        | 0        |
| 7.294733 | 6.15829  |
| 1.730645 | 1.519518 |
| 0.053523 | 0        |
| 37.97466 | 29.44407 |
| 0.204233 | 0.135904 |
| 0.145549 | 0.115302 |
| 1.052935 | 0.724822 |

|          |          |
|----------|----------|
| 7.547453 | 13.84474 |
| 37.14412 | 54.28346 |
| 0.028106 | 0.031172 |
| 10.44991 | 9.511455 |
| 0.113416 | 0        |
| 0.251364 | 0.123901 |
| 20.36862 | 15.46938 |
| 17.87523 | 22.8259  |
| 6.385144 | 8.433256 |
| 62.39927 | 76.36468 |
| 34.50286 | 25.70467 |
| 0.453852 | 0.251674 |
| 7.473808 | 4.098147 |
| 0.356629 | 0.494404 |
| 9.435293 | 4.274157 |
| 142.903  | 136.4928 |
| 0.577797 | 0.058256 |
| 0.054391 | 0        |
| 1.500805 | 0.515198 |
| 6.71721  | 3.987214 |
| 23.52565 | 18.15806 |
| 8.547617 | 5.541471 |
| 0.716811 | 0.305764 |
| 0.021321 | 0        |
| 0.031468 | 0        |
| 0        | 0        |
| 1.701548 | 1.125014 |
| 2.330102 | 2.780495 |
| 16.02962 | 18.93532 |
| 7.599435 | 6.445122 |
| 13.57956 | 26.38183 |
| 56.5768  | 83.78104 |
| 0.932761 | 1.853458 |
| 2.6389   | 1.428783 |
| 0.035207 | 0.078093 |
| 0.219582 | 0.030441 |
| 0        | 0.017844 |
| 4.869205 | 9.636124 |
| 0        | 0.290173 |
| 8.767723 | 8.854318 |
| 0.075854 | 0.063095 |
| 0.356442 | 0.790631 |
| 8.806756 | 4.0986   |
| 2.915499 | 4.041833 |
| 0.020336 | 0.022554 |
| 7.843326 | 10.20271 |
| 0.017856 | 0        |
| 0        | 0        |
| 3.065318 | 6.972378 |
| 0        | 0.022477 |
| 7.871771 | 14.25608 |
| 0.239232 | 0.279287 |
| 0.021491 | 0.047669 |
| 0.043493 | 0.168829 |
| 1.034254 | 0.912958 |
| 3.735553 | 5.058474 |
| 0        | 0        |
| 8.724882 | 10.31576 |
| 3.010797 | 3.591992 |
| 0        | 0        |
| 25.0766  | 30.99935 |
| 31.90663 | 28.18916 |
| 0.812352 | 0.44128  |
| 0.028757 | 0.079734 |
| 17.93487 | 16.62042 |

|          |          |
|----------|----------|
| 1.078098 | 0.683244 |
| 0.119112 | 0.049538 |
| 77.46428 | 58.99216 |
| 0.03872  | 0.021471 |
| 21.34093 | 43.55392 |
| 11.14206 | 13.44812 |
| 17.00169 | 26.21653 |
| 35.32209 | 30.93458 |
| 0        | 0        |
| 4.381448 | 2.876353 |
| 0.187291 | 0.173097 |
| 0        | 0.015551 |
| 6.520753 | 3.719269 |
| 4.451661 | 1.878744 |
| 14.09212 | 14.43482 |
| 9.766147 | 7.123256 |
| 11.65958 | 10.90308 |
| 0.561434 | 0.214712 |
| 0        | 0.037813 |
| 0.489538 | 0.224659 |
| 20.93442 | 7.94517  |
| 0.584865 | 0.328538 |
| 6.782601 | 6.264405 |
| 0.170744 | 0.106518 |
| 11.76977 | 6.819235 |
| 5.329476 | 6.929226 |
| 0        | 0        |
| 9.444985 | 5.815201 |
| 0        | 0.74041  |
| 0        | 0        |
| 0.1999   | 0.420664 |
| 11.5909  | 17.47536 |
| 3.367178 | 3.398578 |
| 5.748069 | 6.611068 |
| 0.527651 | 0.260087 |
| 0.173105 | 0.511956 |
| 7.245951 | 7.816031 |
| 2.328258 | 1.251966 |
| 3.956917 | 2.759754 |
| 9.536087 | 9.055503 |
| 0.118486 | 0.065704 |
| 25.62316 | 28.41764 |
| 0        | 0        |
| 0        | 0        |
| 0.031839 | 0.070624 |
| 0.029019 | 0        |
| 12.61281 | 10.63716 |
| 15.18358 | 17.12985 |
| 0.19315  | 0.190413 |
| 12.79322 | 10.41089 |
| 0.373899 | 0.414677 |
| 0.409621 | 0.292047 |
| 10.67509 | 9.859503 |
| 2.873374 | 3.278233 |
| 0.749163 | 0.571221 |
| 0.706618 | 0.36007  |
| 0.246272 | 0.399941 |
| 0        | 0        |
| 0.532239 | 1.00092  |
| 0.15433  | 0.735993 |
| 9.086748 | 3.725241 |
| 36.33656 | 37.62492 |
| 2.283656 | 2.479948 |
| 8.264408 | 11.83715 |
| 0.244223 | 0.240763 |

|          |          |
|----------|----------|
| 8.380033 | 5.380718 |
| 10.84131 | 14.13104 |
| 0.371251 | 0.238376 |
| 0.024731 | 0.06857  |
| 0.02177  | 0.072431 |
| 1.049511 | 0.704509 |
| 0.922368 | 1.05493  |
| 0.746142 | 1.001731 |
| 1.007592 | 0.3991   |
| 8.064019 | 6.354584 |
| 5.730084 | 10.37255 |
| 4.663681 | 7.10831  |
| 4.974806 | 1.088953 |
| 0        | 0        |
| 5.695812 | 5.725663 |
| 0.090243 | 0.66723  |
| 6.847938 | 6.133552 |
| 10.70177 | 14.5664  |
| 24.42464 | 22.00933 |
| 4.707906 | 4.265331 |
| 220.5867 | 239.4326 |
| 0.076344 | 0        |
| 11.50007 | 9.238435 |
| 1.074853 | 0.439186 |
| 0        | 0.031129 |
| 0.075808 | 0.224202 |
| 1.325414 | 0.991784 |
| 5.983096 | 4.786348 |
| 1.341732 | 0.736199 |
| 0.85654  | 0.542831 |
| 0.226182 | 0.104521 |
| 0        | 0.040529 |
| 0.167501 | 0.412819 |
| 0.038756 | 0.257896 |
| 0.024492 | 0.016298 |
| 0.339468 | 0.475567 |
| 8.835965 | 16.79935 |
| 0        | 0.042089 |
| 8.634803 | 8.127592 |
| 5.493204 | 4.455399 |
| 0.014772 | 0.032766 |
| 0.072616 | 0        |
| 9.135467 | 8.37525  |
| 0.215164 | 0.185601 |
| 0.075587 | 0.033532 |
| 0.22414  | 0.497171 |
| 4.552439 | 5.215016 |
| 2.01995  | 2.004432 |
| 0        | 0        |
| 0.316232 | 0.116907 |
| 3.731725 | 2.610998 |
| 14.78259 | 16.97544 |
| 21.84027 | 21.4627  |
| 13.47431 | 17.3602  |
| 15.83746 | 7.759847 |
| 34.73759 | 35.87234 |
| 6.912423 | 9.513599 |
| 3.736106 | 4.143569 |
| 57.27881 | 89.95608 |
| 6.109674 | 8.211064 |
| 0        | 0        |
| 0.625246 | 0.25426  |
| 0        | 0.119338 |
| 0        | 0        |
| 0.100837 | 0.271598 |

|          |          |
|----------|----------|
| 0.026635 | 0.05908  |
| 14.68527 | 13.70948 |
| 31.85794 | 32.36579 |
| 19.11206 | 13.49002 |
| 0.160431 | 0        |
| 0.708889 | 0.524134 |
| 1.788084 | 1.983094 |
| 0.208976 | 0.208591 |
| 0.054904 | 0.030446 |
| 2.341022 | 1.187685 |
| 0.057944 | 0        |
| 3.062894 | 3.067068 |
| 0.867201 | 1.03976  |
| 1.290819 | 1.731233 |
| 1.422499 | 2.385697 |
| 3.026798 | 3.828535 |
| 14.78929 | 13.4519  |
| 3.267731 | 2.472077 |
| 0.147606 | 0.153473 |
| 29.24874 | 26.68253 |
| 23.87214 | 12.81979 |
| 1.676578 | 1.74074  |
| 22.91255 | 19.19535 |
| 9.209897 | 7.546791 |
| 0        | 0.318296 |
| 0.672152 | 0.220876 |
| 0.299673 | 0.151071 |
| 0.259923 | 0.493262 |
| 15.96231 | 22.84591 |
| 0.044127 | 0.293638 |
| 8.378654 | 9.998192 |
| 2.067796 | 4.616024 |
| 2.275436 | 2.253211 |
| 3.11025  | 4.861259 |
| 0        | 0        |
| 75.11133 | 60.22792 |
| 0.64426  | 0.772457 |
| 3.796308 | 4.937576 |
| 0.999704 | 0.816961 |
| 0        | 0        |
| 0.010514 | 0.040813 |
| 91.65364 | 112.9947 |
| 0.678545 | 0.776824 |
| 3.131861 | 2.552356 |
| 0.480983 | 0.222266 |
| 0        | 0.074121 |
| 5.224317 | 3.999226 |
| 68.44915 | 72.06758 |
| 0.688117 | 0.260169 |
| 0.870261 | 1.227147 |
| 0.14422  | 0.079975 |
| 37.42899 | 37.70205 |
| 1.022819 | 0.457727 |
| 0        | 0.38603  |
| 3.386898 | 2.677125 |
| 13.12498 | 14.68298 |
| 75.447   | 84.26306 |
| 1.07474  | 1.28364  |
| 229.9236 | 267.5859 |
| 1.144107 | 1.268885 |
| 21.45279 | 24.15233 |
| 11.06146 | 15.18189 |
| 4.241492 | 7.300386 |
| 1.731216 | 0.707377 |
| 11.1438  | 8.354833 |

|          |          |
|----------|----------|
| 0.014609 | 0.129615 |
| 0.061223 | 0.354589 |
| 0.033043 | 0        |
| 0.092254 | 0.13642  |
| 4.266093 | 7.266012 |
| 0.75179  | 2.419999 |
| 6.208689 | 13.05785 |
| 2.599047 | 2.472806 |
| 3.238031 | 2.294775 |
| 0.091845 | 0        |
| 18.80783 | 14.79018 |
| 7.760861 | 5.234149 |
| 22.5313  | 15.91487 |
| 2.058254 | 1.505096 |
| 34.49434 | 34.34798 |
| 15.01727 | 15.14879 |
| 12.83937 | 9.509692 |
| 1.969717 | 2.010032 |
| 4.979916 | 7.549231 |
| 1.595311 | 2.130378 |
| 8.491972 | 7.328352 |
| 16.84964 | 21.69129 |
| 3.190956 | 1.395363 |
| 26.05141 | 24.07948 |
| 0        | 0.039303 |
| 0.165045 | 0.665618 |
| 1.015155 | 0.540417 |
| 0.351892 | 0.121959 |
| 0.455134 | 0.283164 |
| 12.98438 | 21.72647 |
| 3.157153 | 1.971154 |
| 0.780137 | 0.545754 |
| 25.92261 | 25.67624 |
| 0        | 0        |
| 9.959553 | 13.60035 |
| 8.657782 | 14.93492 |
| 0.08438  | 0.037433 |
| 10.28412 | 12.52316 |
| 8.245914 | 8.083107 |
| 2.69345  | 2.364337 |
| 0.062905 | 0.069765 |
| 0.515309 | 0.138548 |
| 1.588771 | 1.887904 |
| 0.070875 | 0.340622 |
| 6.054202 | 6.529252 |
| 4.194295 | 3.497249 |
| 15.52172 | 10.43439 |
| 10.70389 | 13.5901  |
| 0.320862 | 0.203346 |
| 0.09611  | 0.266479 |
| 2.58471  | 2.418694 |
| 33.86557 | 34.77684 |
| 3.690271 | 4.149447 |
| 18.53259 | 22.37176 |
| 0.142041 | 0.165823 |
| 1.32259  | 0.940987 |
| 3.039365 | 2.71992  |
| 0.060514 | 0        |
| 31.56726 | 33.28633 |
| 1.618625 | 1.218728 |
| 9.923034 | 11.34961 |
| 0.160018 | 0.283951 |
| 1.630135 | 2.358155 |
| 0.127799 | 0.244817 |
| 9.493801 | 8.172376 |

|          |          |
|----------|----------|
| 177.0615 | 173.8564 |
| 20.60812 | 10.22682 |
| 0.275615 | 0.142648 |
| 2.276352 | 1.276178 |
| 1.843866 | 1.424767 |
| 35.55167 | 34.03269 |
| 5.923582 | 5.556542 |
| 4.532696 | 2.059859 |
| 7.769744 | 6.462839 |
| 9.165646 | 5.925478 |
| 5.117505 | 4.851743 |
| 0.235401 | 0.783221 |
| 5.898408 | 5.246983 |
| 12.3588  | 21.20497 |
| 29.47509 | 29.98394 |
| 1.03889  | 1.435358 |
| 0.94587  | 2.433743 |
| 2.152737 | 4.503724 |
| 0        | 0.096305 |
| 0.513964 | 0.798025 |
| 1.483371 | 1.861616 |
| 0.339582 | 0.690464 |
| 2.888378 | 4.525887 |
| 0        | 0        |
| 0        | 0        |
| 16.82276 | 14.36222 |
| 13.30909 | 8.605422 |
| 0.032236 | 0.303891 |
| 7.515538 | 10.8191  |
| 13.04178 | 12.72634 |
| 3.6416   | 2.378083 |
| 0.08757  | 0        |
| 0.06184  | 0.034292 |
| 0.624774 | 0.606298 |
| 19.30237 | 19.44381 |
| 12.00193 | 13.65993 |
| 0.012138 | 0.094234 |
| 0.05967  | 0.363979 |
| 14.38184 | 13.94646 |
| 4.628948 | 8.02065  |
| 0.018326 | 0        |
| 25.53418 | 37.5767  |
| 22.55605 | 25.91252 |
| 4.279715 | 3.256029 |
| 0        | 0.073566 |
| 0.160283 | 0.076185 |
| 1.996902 | 2.975456 |
| 3.416823 | 2.040481 |
| 0        | 0        |
| 0.047    | 0.156377 |
| 1.059129 | 0.958613 |
| 37.40281 | 29.68616 |
| 0.020954 | 0.023239 |
| 1.62941  | 1.079575 |
| 1.061479 | 1.127301 |
| 0.961411 | 0.897906 |
| 11.32448 | 12.38011 |
| 2.248299 | 2.383169 |
| 16.25244 | 12.53909 |
| 16.29948 | 12.78522 |
| 2.155747 | 1.429973 |
| 4.094403 | 4.053497 |
| 13.44686 | 15.77932 |
| 9.020312 | 9.140214 |
| 3.543812 | 2.568317 |

|          |          |
|----------|----------|
| 37.24524 | 36.18682 |
| 5.161847 | 1.926102 |
| 0.237767 | 0.29666  |
| 16.68414 | 12.18415 |
| 0.015421 | 0.085517 |
| 3.091097 | 3.050411 |
| 77.94457 | 88.53189 |
| 7.232791 | 12.26125 |
| 0.610524 | 0.413788 |
| 8.630789 | 7.718432 |
| 0.871282 | 0.644203 |
| 46.86531 | 44.70072 |
| 64.0579  | 50.73278 |
| 29.14315 | 30.67746 |
| 283.6091 | 216.0346 |
| 13.12442 | 8.919702 |
| 5.761391 | 5.149532 |
| 4.982787 | 3.845639 |
| 62.70248 | 107.026  |
| 8.153907 | 11.2399  |
| 7.936402 | 5.029687 |
| 5.982807 | 4.82655  |
| 1.757469 | 0.965946 |
| 29.3947  | 29.67483 |
| 12.681   | 13.14813 |
| 3.253312 | 1.936991 |
| 2.885788 | 1.506125 |
| 14.37022 | 8.398764 |
| 26.40463 | 20.12816 |
| 5.036816 | 3.536385 |
| 4.574658 | 2.571538 |
| 0        | 0        |
| 0.048543 | 0.21535  |
| 1.107767 | 0.556701 |
| 1.910738 | 1.448516 |
| 3.054032 | 0.822304 |
| 4.901596 | 5.789741 |
| 0.424499 | 0.488232 |
| 8.149906 | 8.682886 |
| 11.04407 | 13.50003 |
| 0        | 0.022397 |
| 36.81612 | 34.49075 |
| 2.622578 | 3.814206 |
| 126.8158 | 211.4824 |
| 0        | 0        |
| 0.297383 | 0        |
| 2.184759 | 1.431791 |
| 3.839966 | 4.407317 |
| 16.53463 | 16.02748 |
| 30.67417 | 42.88389 |
| 0        | 0        |
| 25.99385 | 27.93564 |
| 0.312137 | 0.660887 |
| 25.31731 | 26.7499  |
| 15.95951 | 17.17039 |
| 6.685578 | 5.997566 |
| 59.83299 | 64.96325 |
| 40.16803 | 28.73672 |
| 0.626511 | 0.401367 |
| 86.70954 | 83.89145 |
| 1.730645 | 1.583497 |
| 7.008788 | 4.565568 |
| 1.970296 | 1.33446  |
| 1.830944 | 2.549736 |
| 4.158113 | 3.322879 |

|          |          |
|----------|----------|
| 26.35976 | 30.70981 |
| 5.35613  | 5.858528 |
| 1.431856 | 0.676377 |
| 6.161479 | 6.02794  |
| 4.904501 | 2.64099  |
| 1.990572 | 1.850234 |
| 10.05659 | 6.597187 |
| 16.92714 | 13.53739 |
| 2.402704 | 1.162282 |
| 0.147896 | 0.459273 |
| 38.83117 | 43.01846 |
| 11.3675  | 16.58417 |
| 24.03966 | 23.8799  |
| 4.454143 | 3.021224 |
| 0.031247 | 0.127066 |
| 171.6674 | 144.0225 |
| 22.86232 | 18.89249 |
| 0.151247 | 0        |
| 0.044667 | 0.321998 |
| 51.50133 | 66.40189 |
| 101.9042 | 122.1626 |
| 0.051977 | 0.547637 |
| 1.439352 | 1.511818 |
| 0        | 0.078248 |
| 2.14425  | 2.538426 |
| 3.067371 | 2.657736 |
| 0.266643 | 1.683351 |
| 0.547975 | 0.424003 |
| 0.024909 | 0.096691 |
| 0.983879 | 1.136648 |
| 0.058517 | 0.129799 |
| 16.82393 | 24.34714 |
| 0.309095 | 0.319952 |
| 5.210088 | 3.250297 |
| 10.19066 | 9.874225 |
| 10.1272  | 12.80395 |
| 0.018493 | 0.054693 |
| 4.361225 | 3.627648 |
| 16.35699 | 26.27181 |
| 10.52201 | 9.799305 |
| 31.41082 | 32.69743 |
| 9.243189 | 11.25661 |
| 3.026912 | 2.088385 |
| 1.672693 | 1.085069 |
| 2.801566 | 3.705371 |
| 0.022801 | 0.025288 |
| 14.82888 | 13.79493 |
| 1.485254 | 1.520527 |
| 2.265836 | 1.901245 |
| 29.46496 | 29.95523 |
| 0        | 0.03506  |
| 0.675105 | 0.530002 |
| 0        | 0        |
| 4.08161  | 6.717545 |
| 0.177174 | 0.168426 |
| 2.97303  | 3.144158 |
| 2.938965 | 4.231814 |
| 6.254519 | 9.941524 |
| 5.965077 | 9.367939 |
| 0.036213 | 0.080324 |
| 6.629699 | 6.789208 |
| 2.341429 | 5.669652 |
| 18.40005 | 11.05859 |
| 0.043723 | 0.060615 |
| 14.08912 | 13.11107 |

|          |          |
|----------|----------|
| 21.37033 | 26.89106 |
| 6.237605 | 6.123778 |
| 8.502044 | 7.706962 |
| 0.084106 | 0.037311 |
| 27.87574 | 30.41992 |
| 65.96732 | 125.1128 |
| 0.888449 | 0.289807 |
| 0        | 0        |
| 0        | 0.031746 |
| 7.403888 | 8.663825 |
| 0.020224 | 0        |
| 3.14692  | 3.325885 |
| 7.781885 | 5.2853   |
| 10.66835 | 10.20195 |
| 0.867915 | 0.429719 |
| 0        | 0.036783 |
| 15.50489 | 12.5174  |
| 0.063096 | 0.034989 |
| 0.037812 | 0.062903 |
| 48.22012 | 80.37313 |
| 3.661743 | 5.113973 |
| 3.857804 | 3.688829 |
| 0        | 0        |
| 0.125653 | 0.225114 |
| 0.59117  | 0.718085 |
| 9.008485 | 7.791244 |
| 0.035297 | 0        |
| 1.561443 | 2.143023 |
| 7.525149 | 6.821314 |
| 0.035478 | 0.026232 |
| 6.711282 | 3.337767 |
| 7.25387  | 13.40831 |
| 6.281098 | 8.777685 |
| 0.590916 | 0.384177 |
| 3.074128 | 7.692995 |
| 28.8372  | 40.28671 |
| 8.026006 | 8.03239  |
| 13.93787 | 8.380196 |
| 0.058545 | 0.032465 |
| 13.38962 | 11.49212 |
| 0.080354 | 1.455586 |
| 0.025508 | 0.141451 |
| 0        | 0.026866 |
| 0.246866 | 0.189547 |
| 0        | 0        |
| 0        | 0        |
| 13.49223 | 12.03057 |
| 3.336842 | 0.942323 |
| 0.094071 | 0.104331 |
| 18.82497 | 23.24159 |
| 0.450109 | 0.623998 |
| 0.462726 | 0.935819 |
| 0.838559 | 1.041614 |
| 0.050467 | 0.027985 |
| 3.121905 | 4.198139 |
| 0.148818 | 0.594174 |
| 0.249512 | 0.046121 |
| 0.026125 | 0        |
| 31.71157 | 26.96492 |
| 0.203898 | 0.395736 |
| 0.430495 | 0.442078 |
| 4.040956 | 4.538636 |
| 22.67177 | 19.77373 |
| 0.201909 | 0.410536 |
| 4.900619 | 3.129291 |

|          |          |
|----------|----------|
| 5.909017 | 2.644789 |
| 4.244358 | 4.084805 |
| 1.555325 | 1.383068 |
| 0.021387 | 0        |
| 0        | 0        |
| 0        | 0        |
| 0        | 0.031442 |
| 0.033184 | 0        |
| 10.2228  | 16.35292 |
| 0.058559 | 0.048709 |
| 6.857578 | 6.562786 |
| 31.7333  | 57.81098 |
| 0.077852 | 0        |
| 9.217731 | 8.871506 |
| 20.89061 | 11.16744 |
| 246.7352 | 252.34   |
| 0.574347 | 0.305753 |
| 3.820731 | 4.637181 |
| 4.514993 | 3.075613 |
| 1.138494 | 0.761055 |
| 0.100688 | 0.027917 |
| 7.496914 | 12.0361  |
| 9.526266 | 10.19666 |
| 104.1551 | 87.71368 |
| 30.56757 | 15.70884 |
| 0.748464 | 0.632451 |
| 0.259158 | 0.164241 |
| 6.455065 | 3.934751 |
| 0        | 0.037917 |
| 23.17514 | 14.77627 |
| 0.061526 | 0.075818 |
| 4.17928  | 4.716871 |
| 15.7373  | 11.16554 |
| 1.796879 | 2.307508 |
| 40.01425 | 41.18911 |
| 106.1345 | 59.29674 |
| 9.781427 | 10.23001 |
| 7.360395 | 5.073016 |
| 4.233509 | 3.681479 |
| 0.608695 | 0.540064 |
| 0.216708 | 0.180257 |
| 0.289787 | 0.180783 |
| 1.054612 | 1.769438 |
| 1.087578 | 0.79934  |
| 40.99246 | 72.07059 |
| 0.125456 | 0.216438 |
| 0.031946 | 0.017715 |
| 19.44553 | 19.93474 |
| 0.274805 | 0.294266 |
| 2.295817 | 1.955778 |
| 0.440639 | 0.268303 |
| 57.69001 | 40.44049 |
| 8.480905 | 8.112729 |
| 28.18344 | 23.13633 |
| 0.344633 | 2.499121 |
| 0.32515  | 0.7767   |
| 6.117815 | 3.816579 |
| 0.429667 | 0.571832 |
| 0.21321  | 0.094585 |
| 0.55513  | 0.324038 |
| 0.368775 | 0.359914 |
| 6.200195 | 4.945352 |
| 48.24196 | 51.51962 |
| 0        | 0        |
| 7.248723 | 7.689741 |

|          |          |
|----------|----------|
| 0.180936 | 0.745342 |
| 1.192408 | 1.757232 |
| 0.976323 | 0.280726 |
| 0.128014 | 0.081129 |
| 0.008896 | 0.059199 |
| 0.004699 | 0        |
| 18.09051 | 15.60877 |
| 6.321132 | 10.31355 |
| 27.91179 | 30.10777 |
| 3.798565 | 3.583335 |
| 0        | 0        |
| 31.30477 | 27.15274 |
| 2.89284  | 2.436519 |
| 2.85293  | 1.937995 |
| 1.729975 | 1.35016  |
| 0.189482 | 0.105073 |
| 0.731417 | 1.228368 |
| 0.121263 | 0.134489 |
| 0.087354 | 0.121101 |
| 1.103641 | 0.517848 |
| 1.608959 | 1.508896 |
| 0.28334  | 0.510642 |
| 62.50992 | 58.40752 |
| 9.288311 | 9.948787 |
| 29.12096 | 27.79492 |
| 12.26891 | 14.33878 |
| 53.42729 | 40.88314 |
| 0.461803 | 0.056908 |
| 0.511705 | 0.189171 |
| 11.38067 | 17.56782 |
| 37.18459 | 35.41394 |
| 8.107222 | 4.865211 |
| 68.08562 | 71.51932 |
| 0        | 0.149854 |
| 125.8537 | 137.3883 |
| 0.307035 | 0.291875 |
| 4.212336 | 4.617203 |
| 2.54014  | 3.196404 |
| 5.025365 | 6.287979 |
| 10.98821 | 16.2791  |
| 0        | 0        |
| 4.052496 | 2.308299 |
| 10.07756 | 11.42929 |
| 9.092381 | 9.018644 |
| 0.523083 | 0.614256 |
| 2.08081  | 0.966758 |
| 3.832348 | 3.886898 |
| 1.72204  | 2.265168 |
| 8.259469 | 11.59422 |
| 22.34446 | 15.89034 |
| 8.161256 | 7.634107 |
| 1.348542 | 1.256317 |
| 9.772126 | 5.45531  |
| 4.648268 | 7.469138 |
| 12.20907 | 9.369327 |
| 5.577818 | 3.391711 |
| 120.0542 | 160.1343 |
| 0.419506 | 0.54985  |
| 16.3894  | 16.32351 |
| 0.070795 | 0.047109 |
| 2.977193 | 2.51769  |
| 0.531566 | 0.353723 |
| 1.035373 | 1.725718 |
| 6.164022 | 5.482231 |
| 1.809454 | 1.605436 |

|          |          |
|----------|----------|
| 8.973031 | 8.165139 |
| 6.284869 | 8.580864 |
| 3.54998  | 2.233841 |
| 0.073129 | 0        |
| 0        | 0        |
| 1.751345 | 1.961391 |
| 0.067707 | 0        |
| 0.033362 | 0        |
| 0.357017 | 0.320533 |
| 0        | 0        |
| 0.97241  | 0.849697 |
| 2.28041  | 1.896835 |
| 2.708687 | 2.807324 |
| 2.48303  | 1.420137 |
| 2.8634   | 1.200564 |
| 0.974069 | 0.384765 |
| 10.85186 | 6.905544 |
| 203.5023 | 275.0113 |
| 1.274731 | 0.83162  |
| 0.075464 | 0.206446 |
| 0.119112 | 0.046236 |
| 16.72637 | 11.44752 |
| 5.970696 | 7.40908  |
| 5.143292 | 3.92505  |
| 0.097239 | 0.647062 |
| 0        | 0        |
| 0.028717 | 0.063699 |
| 1.48426  | 1.83249  |
| 11.94232 | 6.65897  |
| 101.6012 | 84.25347 |
| 0.087017 | 0        |
| 0.085891 | 0.027217 |
| 0        | 0        |
| 5.19368  | 3.426825 |
| 1.054852 | 0.723025 |
| 0.026854 | 0        |
| 0.610941 | 0.642281 |
| 2.248272 | 2.033137 |
| 0.060959 | 0        |
| 0        | 0        |
| 14.0954  | 14.20952 |
| 32.82362 | 10.27733 |
| 5.260303 | 4.252027 |
| 10.38628 | 4.940379 |
| 39.59314 | 25.06182 |
| 0.49769  | 0.397742 |
| 4.716969 | 5.269177 |
| 5.216912 | 4.870124 |
| 0.650911 | 0.844067 |
| 26.99825 | 27.01901 |
| 0.074445 | 0.041282 |
| 17.2078  | 29.28032 |
| 0.341254 | 0.496744 |
| 4.708913 | 4.19609  |
| 124.3301 | 147.6589 |
| 6.232012 | 7.242779 |
| 154.4885 | 162.2315 |
| 4.702477 | 5.493646 |
| 8.661987 | 7.669842 |
| 24.15225 | 22.56153 |
| 0.066261 | 0.024496 |
| 7.923013 | 2.501115 |
| 7.934588 | 9.16427  |
| 5.791227 | 3.834253 |
| 0.223013 | 0.098934 |

|          |          |
|----------|----------|
| 1.191309 | 1.924128 |
| 56.25583 | 59.00366 |
| 4.818058 | 4.324856 |
| 1.517659 | 1.632478 |
| 0        | 0.045094 |
| 0.05913  | 0.02186  |
| 2.42333  | 3.189526 |
| 5.003914 | 7.367299 |
| 18.22139 | 16.29089 |
| 6.119398 | 5.91533  |
| 6.281645 | 5.156475 |
| 0.067988 | 0.045242 |
| 3.946116 | 4.684377 |
| 26.20866 | 32.91775 |
| 11.01732 | 10.93038 |
| 3.876497 | 2.582355 |
| 5.971716 | 4.374897 |
| 0.104114 | 0.269428 |
| 1.829585 | 1.97963  |
| 0.049989 | 0.055441 |
| 37.16293 | 36.93869 |
| 1.279012 | 0.2837   |
| 0.017396 | 0        |
| 0.215113 | 0.089465 |
| 2.199156 | 1.916355 |
| 5.081463 | 4.153978 |
| 0        | 0.019117 |
| 13.40005 | 16.08813 |
| 12.41738 | 19.25876 |
| 5.113865 | 7.542626 |
| 5.628823 | 6.843657 |
| 0.630324 | 0.455914 |
| 0        | 0.085326 |
| 6.814414 | 7.5576   |
| 148.8088 | 197.621  |
| 17.95763 | 18.66118 |
| 0.322149 | 0.259842 |
| 0.282396 | 0.313195 |
| 6.060225 | 7.018077 |
| 24.86152 | 23.32866 |
| 0.428185 | 0.518055 |
| 6.124887 | 8.26899  |
| 17.8735  | 21.8545  |
| 82.16805 | 81.73369 |
| 4.741586 | 5.10404  |
| 1.175623 | 0.826194 |
| 0.395458 | 0.146196 |
| 0.368286 | 0.102113 |
| 0        | 0.339788 |
| 0.086446 | 0.212293 |
| 1.275501 | 0.956941 |
| 3.585164 | 4.441602 |
| 0.050395 | 0.111783 |
| 3.077522 | 12.27485 |
| 1.628098 | 2.673765 |
| 0        | 0.075752 |
| 15.15549 | 17.53044 |
| 4.589175 | 9.939619 |
| 0.081515 | 0.150674 |
| 0.300663 | 0        |
| 1.969955 | 0.960468 |
| 107.1439 | 116.6977 |
| 1.048643 | 2.606744 |
| 4.192649 | 5.201107 |
| 0.19827  | 0.125654 |

|          |          |
|----------|----------|
| 136.4262 | 140.8086 |
| 23.94942 | 22.34428 |
| 3.386557 | 1.919681 |
| 7.32518  | 5.840835 |
| 0.20405  | 0.699485 |
| 0.225167 | 0.170864 |
| 7.013826 | 6.697098 |
| 15.87122 | 14.45565 |
| 2.711721 | 3.62289  |
| 17.82373 | 22.57705 |
| 56.9607  | 65.50142 |
| 2.863951 | 2.814231 |
| 63.07888 | 70.67019 |
| 11.14094 | 17.07022 |
| 28.71124 | 34.81035 |
| 43.49302 | 53.74148 |
| 0        | 0        |
| 0.176312 | 0.223475 |
| 0.465162 | 0.24437  |
| 6.472796 | 5.842218 |
| 0.025352 | 0.028117 |
| 16.06228 | 21.04406 |
| 3.691326 | 2.281849 |
| 11.02622 | 8.22869  |
| 65.15736 | 58.14131 |
| 0.698638 | 0.367026 |
| 5.068765 | 3.443515 |
| 63.36526 | 99.26037 |
| 26.35459 | 37.10254 |
| 11.31017 | 5.776689 |
| 0.650019 | 0.46822  |
| 5.992274 | 6.176431 |
| 15.08569 | 14.41773 |
| 6.172129 | 8.467142 |
| 0.045023 | 0        |
| 11.42571 | 8.344267 |
| 0        | 0        |
| 33.22    | 25.64003 |
| 51.13739 | 30.82185 |
| 69.4055  | 43.99208 |
| 0.031929 | 0        |
| 1.70543  | 1.073512 |
| 0.22095  | 0.122523 |
| 0.60313  | 0.196738 |
| 1.765341 | 2.566142 |
| 1.285574 | 1.168672 |
| 25.71573 | 21.91561 |
| 108.3905 | 79.19035 |
| 0.639412 | 0.070915 |
| 8.173648 | 10.05657 |
| 0.025645 | 0.028442 |
| 5.994118 | 3.761481 |
| 0        | 0.046494 |
| 4.159925 | 4.61361  |
| 1.378021 | 0.577629 |
| 0.037211 | 0        |
| 10.07068 | 10.44171 |
| 38.14013 | 25.22646 |
| 0        | 0        |
| 6.32767  | 7.485623 |
| 4.204653 | 3.246083 |
| 7.944095 | 5.794992 |
| 0.145942 | 0.110745 |
| 46.68796 | 46.35939 |
| 52.84648 | 43.94033 |

|          |          |
|----------|----------|
| 7.75195  | 5.494421 |
| 12.73891 | 9.748281 |
| 105.3949 | 138.0285 |
| 0.260089 | 0.123623 |
| 0.676933 | 0.288754 |
| 6.020473 | 4.29527  |
| 21.83172 | 23.51127 |
| 0.097621 | 0.108268 |
| 8.911641 | 6.670717 |
| 20.62064 | 15.80078 |
| 0.638754 | 0.08501  |
| 0        | 0        |
| 1.549951 | 1.302929 |
| 0        | 0.040374 |
| 0        | 0.01944  |
| 0.214999 | 0        |
| 0.149202 | 0.47574  |
| 2.498599 | 2.260632 |
| 1.120702 | 0.9391   |
| 1.34911  | 0.879237 |
| 6.919607 | 6.255052 |
| 9.861772 | 13.32954 |
| 26.37568 | 24.63674 |
| 1.279506 | 2.171318 |
| 0        | 0.012241 |
| 15.71405 | 23.6216  |
| 8.283318 | 4.818103 |
| 4.740982 | 6.768968 |
| 13.06801 | 12.79671 |
| 8.229441 | 8.282465 |
| 0        | 0        |
| 15.27752 | 14.88532 |
| 1.164857 | 0.66748  |
| 0.015151 | 0.016803 |
| 10.67767 | 9.718025 |
| 64.29966 | 53.86483 |
| 18.21977 | 14.46866 |
| 0.047214 | 0        |
| 41.66991 | 57.78592 |
| 0.591408 | 0.910983 |
| 0        | 0.088735 |
| 37.51939 | 34.49421 |
| 1.747034 | 0.670696 |
| 5.011666 | 4.666695 |
| 2.511511 | 2.094462 |
| 20.99365 | 20.89615 |
| 17.15153 | 17.72202 |
| 1.308152 | 0.892812 |
| 6.884334 | 4.467624 |
| 0.082783 | 0        |
| 69.86806 | 60.09314 |
| 0.427785 | 0.966451 |
| 0        | 0.270917 |
| 0.982976 | 0.383036 |
| 0.031152 | 0.017275 |
| 19.84006 | 21.52939 |
| 432.9007 | 394.8162 |
| 7.825755 | 16.80403 |
| 4.817959 | 4.523937 |
| 11.59069 | 8.223278 |
| 11.59585 | 14.51581 |
| 11.43161 | 12.81616 |
| 9.694531 | 4.679035 |
| 38.69982 | 42.73506 |
| 1.237708 | 0.319231 |

|          |          |
|----------|----------|
| 4.177369 | 3.13214  |
| 21.11799 | 9.680736 |
| 1.117158 | 1.501813 |
| 62.90093 | 89.36279 |
| 5.303504 | 7.695129 |
| 8.179385 | 14.54821 |
| 36.63063 | 38.09593 |
| 0        | 0.060829 |
| 0.078442 | 0.043499 |
| 15.88646 | 16.36055 |
| 2.624282 | 3.261754 |
| 134.1576 | 189.2734 |
| 24.5632  | 21.90318 |
| 13.33733 | 8.836434 |
| 0.06703  | 0.055756 |
| 4.852768 | 5.487545 |
| 0.010244 | 0.034083 |
| 13.81835 | 12.16267 |
| 6.494318 | 14.63861 |
| 1.380335 | 1.343421 |
| 1.084009 | 1.852982 |
| 14.2954  | 14.74421 |
| 3.402021 | 4.900626 |
| 0.197101 | 0.337832 |
| 11.55808 | 10.16765 |
| 0.84594  | 1.620526 |
| 0.04357  | 0.072482 |
| 13.37669 | 5.484861 |
| 0.316447 | 0.070192 |
| 14.20517 | 12.93111 |
| 2.684017 | 1.825358 |
| 21.97246 | 16.18505 |
| 0.403735 | 0.265862 |
| 2.49508  | 2.445429 |
| 0.185127 | 0.179652 |
| 14.39979 | 14.54201 |
| 0.389166 | 0.398408 |
| 20.83762 | 18.75628 |
| 14.02925 | 14.4493  |
| 6.235801 | 6.749543 |
| 10.92307 | 10.87589 |
| 2.025966 | 0.824819 |
| 11.81257 | 10.21285 |
| 5.953265 | 5.897087 |
| 0.51077  | 0.262257 |
| 7.00981  | 6.959855 |
| 1.116549 | 0.825547 |
| 0        | 0.06533  |
| 0.055934 | 0        |
| 2.685112 | 3.689665 |
| 4.154253 | 2.419811 |
| 4.201243 | 3.930533 |
| 0        | 0        |
| 5.928918 | 3.883673 |
| 0.124995 | 0.613921 |
| 9.583817 | 6.960893 |
| 1.048128 | 1.162438 |
| 0.339803 | 0.21535  |
| 0        | 0.074441 |
| 3.083288 | 2.819047 |
| 1.968387 | 1.669399 |
| 291.5349 | 309.2373 |
| 0.154676 | 0.137236 |
| 0.776895 | 0.682119 |
| 0.797807 | 0.569677 |

|          |          |
|----------|----------|
| 0.665019 | 0.512185 |
| 2.698395 | 1.469936 |
| 181.3856 | 209.5019 |
| 6.311142 | 5.029901 |
| 1.108223 | 0.468224 |
| 1.053131 | 0.141574 |
| 0.788603 | 0.857346 |
| 9.259229 | 12.32286 |
| 12.75818 | 11.04831 |
| 13.43299 | 15.94189 |
| 0.702113 | 0.889927 |
| 6.775106 | 10.58555 |
| 0.496426 | 0.177301 |
| 8.436795 | 16.6729  |
| 6.910247 | 8.691967 |
| 4.347468 | 5.282804 |
| 3.117199 | 4.455107 |
| 31.26488 | 28.80705 |
| 9.423291 | 11.19533 |
| 24.16977 | 31.98251 |
| 1.160867 | 0.855434 |
| 44.8861  | 45.57374 |
| 3.681673 | 2.154036 |
| 251.0771 | 319.4207 |
| 0        | 0.104807 |
| 0.015026 | 0.016665 |
| 0        | 0.031894 |
| 16.28596 | 22.91967 |
| 0.096209 | 0.142269 |
| 6.255138 | 5.048452 |
| 18.00839 | 17.79918 |
| 1.495077 | 1.749524 |
| 0.084789 | 0        |
| 1.031949 | 0.525121 |
| 35.16722 | 32.73431 |
| 0        | 0.105288 |
| 18.95664 | 17.30046 |
| 0        | 0.035024 |
| 1.123477 | 1.836217 |
| 4.982086 | 5.700293 |
| 2.056296 | 0.993146 |
| 8.616591 | 6.435176 |
| 63.84075 | 66.79628 |
| 0.079142 | 0        |
| 58.88742 | 43.06031 |
| 0.082198 | 0.151938 |
| 212.9015 | 296.417  |
| 0        | 0.047885 |
| 32.74696 | 30.22888 |
| 0.222215 | 0.39432  |
| 1.066039 | 1.204196 |
| 3.303395 | 3.081237 |
| 0.10595  | 0.156674 |
| 0.658523 | 0.599255 |
| 163.273  | 202.6867 |
| 0.25035  | 0.246803 |
| 4.230062 | 4.368438 |
| 6.281063 | 4.343051 |
| 2.776956 | 2.804251 |
| 2.387957 | 1.544894 |
| 17.40779 | 15.46278 |
| 8.940638 | 11.82527 |
| 8.697179 | 6.413087 |
| 2.221036 | 2.661458 |
| 0        | 0.110645 |

|          |          |
|----------|----------|
| 0.115672 | 0.064144 |
| 12.05337 | 16.11868 |
| 1.893501 | 1.105267 |
| 0.587689 | 0.407364 |
| 0.256365 | 0.116314 |
| 0        | 0        |
| 3.202485 | 3.609037 |
| 4.498352 | 3.948471 |
| 17.11118 | 22.67705 |
| 1.614259 | 2.306748 |
| 48.72381 | 42.0103  |
| 0.09126  | 0        |
| 34.31756 | 31.51515 |
| 0.122896 | 0.081779 |
| 2.608271 | 3.482404 |
| 6.286759 | 8.704106 |
| 10.49106 | 8.790722 |
| 3.574426 | 1.066019 |
| 0.105125 | 0        |
| 1.291588 | 0.35183  |
| 10.34155 | 8.011927 |
| 0.497953 | 0.203464 |
| 0.894672 | 0.730143 |
| 0.106222 | 0.589035 |
| 136.6963 | 152.7361 |
| 6.919866 | 7.324002 |
| 1.95455  | 1.482009 |
| 2.23197  | 1.84145  |
| 6.816872 | 5.180467 |
| 19.78454 | 25.93723 |
| 10.34781 | 9.233102 |
| 54.95478 | 56.11896 |
| 16.30525 | 12.99432 |
| 0.842974 | 0.121945 |
| 10.61615 | 11.31639 |
| 0        | 0.028883 |
| 1.907277 | 0.779316 |
| 0.135783 | 0.09412  |
| 0.390975 | 0.144538 |
| 12.56177 | 9.176979 |
| 0        | 0.06533  |
| 11.67994 | 9.016835 |
| 14.6886  | 14.76953 |
| 18.66916 | 15.73803 |
| 9.194104 | 10.51811 |
| 4.937029 | 3.595003 |
| 1.507612 | 0.181206 |
| 12.14807 | 9.674552 |
| 37.81942 | 52.08052 |
| 9.34276  | 11.53915 |
| 3.46567  | 3.576889 |
| 95.51675 | 115.7676 |
| 0.184234 | 0.102163 |
| 0        | 0        |
| 10.13049 | 10.62351 |
| 0        | 0.429537 |
| 4.261544 | 0.902995 |
| 25.06403 | 12.25172 |
| 0.064877 | 0.095936 |
| 0        | 0        |
| 12.14349 | 13.37637 |
| 8.049137 | 6.62001  |
| 0.163638 | 0.075618 |
| 13.09917 | 13.45859 |
| 0        | 0        |

|          |          |
|----------|----------|
| 0.054928 | 0.020306 |
| 0        | 0.163171 |
| 0.1059   | 0.437174 |
| 12.50784 | 8.091976 |
| 3.696688 | 3.680182 |
| 10.55606 | 11.26132 |
| 1.694185 | 1.519742 |
| 0        | 0.220598 |
| 88.42887 | 90.65427 |
| 3.885868 | 4.164936 |
| 3.885597 | 5.684693 |
| 90.27337 | 108.4511 |
| 43.58399 | 52.51287 |
| 0.126924 | 0.023461 |
| 0.151848 | 0.252613 |
| 1.944012 | 0.590835 |
| 0.160597 | 0.035622 |
| 0.40399  | 0.424468 |
| 7.276911 | 5.093057 |
| 0.108111 | 0        |
| 20.49595 | 10.7487  |
| 0.067633 | 0.300035 |
| 72.49118 | 80.5099  |
| 49.90128 | 72.83072 |
| 0        | 0.013399 |
| 2.665878 | 2.116318 |
| 3.022428 | 1.910986 |
| 4.288823 | 2.664673 |
| 24.10974 | 19.1769  |
| 6.316258 | 4.190833 |
| 24.79103 | 14.82228 |
| 19.14666 | 30.53473 |
| 8.438416 | 11.89108 |
| 15.31521 | 17.43119 |
| 20.30822 | 30.34733 |
| 5.949446 | 3.550891 |
| 20.59106 | 25.99972 |
| 19.01808 | 12.69058 |
| 0        | 0        |
| 20.24244 | 12.56535 |
| 20.68647 | 18.82661 |
| 23.85776 | 13.07976 |
| 9.656187 | 13.51938 |
| 0.326988 | 0        |
| 6.355902 | 8.448533 |
| 54.71996 | 68.1113  |
| 19.45816 | 22.6451  |
| 0.138742 | 0.076936 |
| 1.163011 | 0.165365 |
| 19.23392 | 10.12213 |
| 5.25382  | 3.156658 |
| 0.332163 | 0.076748 |
| 0.018791 | 0        |
| 0.63465  | 0.392154 |
| 6.317845 | 2.824761 |
| 5.845281 | 5.779051 |
| 0        | 0.036981 |
| 4.151191 | 6.485636 |
| 0.989388 | 1.504153 |
| 7.11185  | 6.99227  |
| 12.06576 | 18.18054 |
| 0        | 0        |
| 6.880625 | 6.319448 |
| 21.35299 | 35.67349 |
| 14.26683 | 7.323433 |

|          |          |
|----------|----------|
| 8.42781  | 6.679598 |
| 18.01383 | 24.33104 |
| 0.14422  | 0.079975 |
| 34.08647 | 35.7891  |
| 1.892269 | 2.060828 |
| 1.64607  | 1.521327 |
| 6.811394 | 4.486767 |
| 45.50372 | 41.97002 |
| 8.395106 | 4.84292  |
| 29.82759 | 33.95058 |
| 3.537767 | 2.73214  |
| 0        | 0.059207 |
| 12.14582 | 5.722207 |
| 4.863473 | 2.685467 |
| 0.497921 | 0.36107  |
| 5.538778 | 4.955511 |
| 1.75698  | 2.571226 |
| 0.887449 | 1.239881 |
| 1.822734 | 3.958816 |
| 21.31628 | 15.30972 |
| 9.166755 | 8.7004   |
| 11.02849 | 9.474567 |
| 2.248272 | 1.726249 |
| 0        | 0.318788 |
| 0.147344 | 0.081706 |
| 1.291235 | 0.954706 |
| 7.838983 | 9.981162 |
| 194.7186 | 240.3335 |
| 6.654519 | 6.820049 |
| 231.1518 | 203.0097 |
| 139.7037 | 151.3971 |
| 0.382241 | 0.060561 |
| 0.072829 | 0.026924 |
| 10.01715 | 5.673462 |
| 50.20911 | 52.40657 |
| 50.65677 | 79.01705 |
| 107.5598 | 68.81563 |
| 12.78966 | 16.11573 |
| 35.93977 | 36.48349 |
| 2.882141 | 3.361448 |
| 0.313043 | 0.277747 |
| 8.81916  | 6.194624 |
| 732.3649 | 631.0408 |
| 1.465516 | 0.90454  |
| 1.89543  | 1.333069 |
| 9.570585 | 9.600251 |
| 26.9932  | 14.6477  |
| 11.5196  | 11.01361 |
| 1.235939 | 0.863054 |
| 7.336198 | 3.549388 |
| 136.9802 | 185.3596 |
| 98.68366 | 110.5556 |
| 0.889236 | 0.885066 |
| 0.167837 | 0        |
| 1.199584 | 2.921932 |
| 14.17901 | 12.11173 |
| 14.63477 | 11.0173  |
| 2.725307 | 1.424412 |
| 0.014875 | 0        |
| 0.020145 | 0.268104 |
| 5.267144 | 3.073513 |
| 99.82554 | 93.58469 |
| 7.287378 | 5.320261 |
| 2.911381 | 3.37908  |
| 3.835384 | 2.141111 |

|          |          |
|----------|----------|
| 0.224478 | 0.103733 |
| 0.095298 | 0.105692 |
| 14.0746  | 11.36094 |
| 31.81551 | 24.85553 |
| 11.28199 | 2.789392 |
| 3.025616 | 1.677796 |
| 8.194913 | 8.729219 |
| 0.797199 | 0.52722  |
| 1.541624 | 0.791887 |
| 22.20674 | 38.7828  |
| 1.437297 | 3.043187 |
| 41.67476 | 25.90343 |
| 55.20465 | 44.11479 |
| 0.358194 | 0        |
| 60.82377 | 38.86516 |
| 0.835999 | 0.463587 |
| 0.304347 | 0.067508 |
| 11.92754 | 6.424043 |
| 49.653   | 56.04448 |
| 1974.398 | 1457.686 |
| 1.377522 | 0.381939 |
| 74.95425 | 87.02646 |
| 15.10988 | 17.82105 |
| 81.12155 | 64.08338 |
| 0.910595 | 0.445227 |
| 70.52921 | 28.88379 |
| 22.74846 | 14.84812 |
| 77.95626 | 67.1571  |
| 14.65725 | 15.48306 |
| 20.14364 | 26.56711 |
| 77.00699 | 55.86939 |
| 0.197624 | 0.438354 |
| 9.195534 | 4.92923  |
| 7.803791 | 6.432967 |
| 8.904613 | 5.40445  |
| 0.897052 | 0.30148  |
| 4.53687  | 6.023681 |
| 1.365547 | 0.681514 |
| 15.09622 | 27.95908 |
| 0.282772 | 0.149988 |
| 5.272772 | 1.68125  |
| 5.298514 | 5.732169 |
| 0.098006 | 0.054347 |
| 69.69623 | 112.3612 |
| 0.334881 | 0.371403 |
| 0.184371 | 0.204479 |
| 0.020565 | 0        |
| 0.238337 | 0.132165 |
| 0.145403 | 0.08063  |
| 0        | 0.044655 |
| 0.807822 | 1.066576 |
| 0.547503 | 0.323848 |
| 4.919987 | 4.293945 |
| 0.127554 | 0.070733 |
| 0        | 0        |
| 0        | 0        |
| 50.65573 | 56.45649 |
| 72.84003 | 68.69948 |
| 2.940784 | 1.392554 |
| 0        | 0        |
| 51.17051 | 40.9007  |
| 3.66322  | 2.942878 |
| 1.846254 | 1.462577 |
| 0        | 0.033688 |
| 0.727719 | 0.3937   |

|          |          |
|----------|----------|
| 107.0182 | 89.49982 |
| 36.80446 | 37.03363 |
| 0.026924 | 0        |
| 5.763697 | 12.87859 |
| 1.403773 | 12.58841 |
| 90.9788  | 78.96428 |
| 8.724457 | 13.05532 |
| 9.988429 | 14.78869 |
| 0        | 0.045391 |
| 0        | 0.148401 |
| 16.0959  | 7.241577 |
| 26.43925 | 31.8759  |
| 31.17096 | 22.06226 |
| 4.470256 | 3.934751 |
| 0.244067 | 0.21863  |
| 53.74301 | 50.53236 |
| 8.693823 | 5.273197 |
| 0.422264 | 0.140495 |
| 68.14414 | 86.10339 |
| 9.068332 | 4.363499 |
| 1.57182  | 2.552607 |
| 0        | 0.06364  |
| 0        | 0        |
| 1.176574 | 2.542866 |
| 7.426997 | 4.755109 |
| 29.46857 | 21.88116 |
| 0        | 0        |
| 2.310926 | 0.626501 |
| 18.55502 | 14.05899 |
| 4.102515 | 2.22123  |
| 53.72452 | 50.79752 |
| 8.615327 | 9.136967 |
| 0.339582 | 0.188308 |
| 64.70574 | 50.67172 |
| 4.217507 | 1.662835 |
| 7.346337 | 2.938114 |
| 17.11017 | 27.29912 |
| 110.0013 | 126.2019 |
| 0.983353 | 1.917949 |
| 0.357308 | 0.177281 |
| 1.954531 | 3.319281 |
| 115.1625 | 112.7617 |
| 11.85394 | 13.19481 |
| 6.583939 | 4.691433 |
| 8.807422 | 2.833916 |
| 0.086053 | 0.035789 |
| 137.8137 | 83.92961 |
| 0.304646 | 0.506807 |
| 30.28531 | 43.63375 |
| 155.0748 | 177.704  |
| 4.034009 | 2.066653 |
| 88.74375 | 72.3963  |
| 2.075441 | 0.872574 |
| 3.356048 | 4.241639 |
| 3.459473 | 0.860645 |
| 0.685318 | 0.242572 |
| 792.9503 | 836.3687 |
| 0.19822  | 0.244264 |
| 130.4341 | 141.3355 |
| 2.045785 | 2.433097 |
| 14.09686 | 10.2109  |
| 7.434216 | 4.137997 |
| 1.334212 | 0.127562 |
| 21.21104 | 12.57562 |
| 0.966709 | 0.160821 |

|          |          |
|----------|----------|
| 0.016085 | 0.035678 |
| 92.12835 | 136.7638 |
| 12.96987 | 7.539846 |
| 4.933743 | 2.328155 |
| 12.89497 | 19.34305 |
| 4.191891 | 5.234259 |
| 0.015421 | 0.017103 |
| 0        | 0.052563 |
| 95.1681  | 88.38076 |
| 40.09377 | 41.59393 |
| 8.537448 | 8.223857 |
| 25.29128 | 27.71202 |
| 2.984743 | 5.094516 |
| 7.535832 | 5.827172 |
| 0.461368 | 0.073098 |
| 0.198361 | 0.146663 |
| 0        | 0.62495  |
| 5.02107  | 1.400504 |
| 38.25948 | 31.41038 |
| 4.336789 | 4.932461 |
| 0.607734 | 1.087119 |
| 0.258158 | 0        |
| 2.690214 | 4.267469 |
| 66.8818  | 62.19371 |
| 5.717962 | 3.653814 |
| 38.87567 | 47.8235  |
| 14.24304 | 5.002851 |
| 37.97493 | 33.83964 |
| 5.874223 | 5.455036 |
| 4.347197 | 4.574059 |
| 0.105518 | 0.023405 |
| 13.02965 | 11.49029 |
| 1.045638 | 1.958141 |
| 0.259235 | 0.287508 |
| 14.82835 | 12.38475 |
| 14.68944 | 13.45456 |
| 1.143002 | 1.591316 |
| 14.13276 | 14.6771  |
| 20.09833 | 29.83674 |
| 0.063679 | 0.070624 |
| 0.738453 | 0.314996 |
| 11.67707 | 7.560662 |
| 0.040395 | 0.089601 |
| 251.8052 | 213.4703 |
| 6.875158 | 5.796532 |
| 2.497096 | 2.517665 |
| 11.33867 | 8.768706 |
| 16.29434 | 15.34927 |
| 0.252013 | 0.076227 |
| 0.778803 | 0.984262 |
| 34.32071 | 29.73503 |
| 40.14424 | 50.78587 |
| 27.66689 | 29.17089 |
| 4.816517 | 2.878236 |
| 2.610022 | 0.964891 |
| 4.088506 | 2.396755 |
| 3.686809 | 3.606179 |
| 59.66366 | 35.66387 |
| 0.358292 | 0.340601 |
| 0.770487 | 0.119235 |
| 4.933522 | 1.76406  |
| 0.01094  | 0.036401 |
| 0.019074 | 0        |
| 0        | 0        |
| 0        | 0.022854 |

|          |          |
|----------|----------|
| 0.131401 | 0.072866 |
| 0.047759 | 0.052968 |
| 0        | 0        |
| 67.17352 | 89.01781 |
| 100.4865 | 108.7292 |
| 0.456197 | 0.554913 |
| 5.335592 | 4.331947 |
| 68.89024 | 80.14819 |
| 7.637589 | 3.048468 |
| 10.16858 | 14.49784 |
| 30.40259 | 31.50249 |
| 0.027211 | 0.070417 |
| 0.239903 | 0.407969 |
| 0.054847 | 0.060829 |
| 33.0913  | 39.42292 |
| 0.915167 | 0.373939 |
| 0        | 0        |
| 0.931769 | 0.93005  |
| 0        | 0        |
| 7.341785 | 7.036426 |
| 6.972324 | 6.365038 |
| 170.2353 | 170.4007 |
| 3.347002 | 3.049167 |
| 0.264575 | 0.141281 |
| 0.165742 | 0.073527 |
| 24.80413 | 23.50177 |
| 35.7635  | 32.57674 |
| 1.702047 | 0.477162 |
| 0.168562 | 0.062315 |
| 0        | 0        |
| 4.227009 | 2.876373 |
| 59.29067 | 51.38015 |
| 4.307278 | 1.893599 |
| 0.149968 | 0.071282 |
| 26.27753 | 18.49992 |
| 42.80642 | 64.17962 |
| 0        | 0.021325 |
| 27.6655  | 16.45453 |
| 36.2929  | 24.65011 |
| 0.729404 | 0.161791 |
| 1.381514 | 1.396991 |
| 3.330169 | 5.121835 |
| 20.703   | 15.38085 |
| 10.61151 | 7.714774 |
| 0.146629 | 0.209083 |
| 0.056005 | 2.472085 |
| 1.65279  | 1.80506  |
| 14.7254  | 14.1886  |
| 7.415743 | 10.32492 |
| 8.078883 | 6.550846 |
| 20.0047  | 18.71145 |
| 10.78074 | 13.83941 |
| 0        | 0        |
| 10.45052 | 11.36245 |
| 0        | 0.041418 |
| 27.65431 | 23.78041 |
| 6.323041 | 5.321647 |
| 1.0629   | 1.365936 |
| 7.051285 | 4.537929 |
| 0.026    | 0        |
| 0.30962  | 0.126511 |
| 0.105153 | 0.051831 |
| 0.090506 | 0.100376 |
| 6.195569 | 11.78624 |
| 332.1875 | 371.3062 |

|          |          |
|----------|----------|
| 1.850194 | 1.71431  |
| 6.643692 | 8.216194 |
| 11.67289 | 11.77367 |
| 0.421728 | 0.380519 |
| 0.265383 | 0        |
| 0.731267 | 0.497076 |
| 0        | 0.014885 |
| 14.65658 | 21.1767  |
| 0.00751  | 0.008329 |
| 50.25713 | 40.45737 |
| 9.991108 | 9.294961 |
| 19.7227  | 19.74642 |
| 0.229551 | 0.164732 |
| 1.631004 | 0.562764 |
| 0.194224 | 0.071802 |
| 48.47249 | 52.75598 |
| 19.34474 | 13.80359 |
| 3.205488 | 2.38156  |
| 0.073288 | 0.135468 |
| 0.13388  | 0.210348 |
| 2.659651 | 2.47776  |
| 0.517644 | 0.472788 |
| 1.972569 | 2.115179 |
| 9.522435 | 8.526746 |
| 1.572914 | 0.440907 |
| 5.434448 | 3.154944 |
| 6.801113 | 6.261987 |
| 2.401914 | 2.740527 |
| 4.914298 | 11.77644 |
| 4.801284 | 2.419777 |
| 0.032523 | 0.216422 |
| 4.634563 | 6.943526 |
| 6.373804 | 9.609028 |
| 15.22409 | 16.85143 |
| 1.611809 | 2.883986 |
| 11.74662 | 14.84123 |
| 0.342706 | 0.126694 |
| 0        | 0.270164 |
| 0.051407 | 0.08552  |
| 0.249679 | 0.184606 |
| 10.88721 | 15.15512 |
| 0.741276 | 0.688804 |
| 2.201124 | 3.956397 |
| 1.985457 | 3.211239 |
| 0.152506 | 0.131552 |
| 62.65727 | 60.66601 |
| 32.86953 | 32.12922 |
| 23.00082 | 18.7133  |
| 7.18957  | 10.16717 |
| 44.35828 | 51.39885 |
| 5.947365 | 5.496658 |
| 0.050891 | 0        |
| 1.434934 | 1.499172 |
| 58.71715 | 164.0724 |
| 14.00111 | 6.363968 |
| 4.970702 | 5.917316 |
| 0.37204  | 0.388343 |
| 8.28613  | 2.301097 |
| 20.55165 | 16.38879 |
| 0        | 0        |
| 0        | 0        |
| 35.13101 | 26.63658 |
| 3.194325 | 2.894038 |
| 0.784777 | 0.595513 |
| 3.243723 | 2.866747 |

|          |          |
|----------|----------|
| 0.901552 | 1.083199 |
| 0        | 0        |
| 16.24407 | 16.00307 |
| 0.038693 | 0.042913 |
| 0.737705 | 0.309574 |
| 1.116825 | 0.371588 |
| 1.451825 | 1.294445 |
| 1.729361 | 0.565957 |
| 0        | 0        |
| 0.039571 | 0.043887 |
| 5.368557 | 4.094719 |
| 13.78256 | 11.24432 |
| 2.755467 | 2.85882  |
| 4.005606 | 6.24721  |
| 70.77093 | 78.03922 |
| 2.632039 | 2.237971 |
| 0.138022 | 0.110554 |
| 30.33336 | 20.63725 |
| 0.534419 | 0.313784 |
| 81.42487 | 114.6976 |
| 15.55027 | 8.646123 |
| 5.478776 | 4.083638 |
| 0.935983 | 0.484429 |
| 35.16864 | 35.84793 |
| 0.133726 | 0.084748 |
| 0        | 0        |
| 9.597835 | 10.34451 |
| 0.042036 | 0        |
| 4.860851 | 3.536975 |
| 5.264466 | 6.776005 |
| 0.017673 | 0        |
| 2.57829  | 1.475861 |
| 77.69955 | 35.70671 |
| 692.6512 | 561.4509 |
| 18.39402 | 13.33852 |
| 2.676266 | 3.311676 |
| 1.807389 | 0.900328 |
| 2.401849 | 1.221741 |
| 2.867955 | 2.448204 |
| 1.45663  | 1.076994 |
| 7.523411 | 5.377809 |
| 5.521502 | 10.55004 |
| 12.778   | 16.25008 |
| 3.715845 | 3.232234 |
| 15.86899 | 8.262976 |
| 64.0655  | 71.40647 |
| 36.95447 | 38.322   |
| 0.024955 | 0        |
| 16.32698 | 10.29774 |
| 11.13546 | 12.58332 |
| 13.93856 | 13.11761 |
| 0.853601 | 0.807475 |
| 0.039748 | 0.044083 |
| 0.417625 | 0.669025 |
| 12.16698 | 9.767948 |
| 0.117035 | 0        |
| 30.19953 | 36.19027 |
| 0.062399 | 0.161476 |
| 51.98331 | 18.27663 |
| 17.80255 | 15.95348 |
| 141.972  | 126.699  |
| 0        | 0        |
| 4.332437 | 1.399863 |
| 158.196  | 120.4062 |
| 1.416431 | 2.519998 |

|          |          |
|----------|----------|
| 0.995443 | 0.637365 |
| 11.03236 | 12.81821 |
| 2.772312 | 1.859098 |
| 0.05293  | 0        |
| 1.684734 | 2.753539 |
| 0        | 0.018803 |
| 0.077319 | 0.085751 |
| 8.536426 | 7.158291 |
| 9.086875 | 12.73234 |
| 0.121679 | 0.101212 |
| 0.533747 | 1.29849  |
| 5.425783 | 5.526965 |
| 1.109237 | 2.022265 |
| 5.833667 | 17.56114 |
| 0.117743 | 0.04018  |
| 0.122883 | 0.034071 |
| 9.168468 | 11.07553 |
| 0.345375 | 0.076608 |
| 0.016931 | 0        |
| 0.10547  | 0        |
| 1.04451  | 0.851783 |
| 0.202898 | 0.13297  |
| 0        | 0.028596 |
| 0.018229 | 0        |
| 6.667048 | 5.120457 |
| 4.404921 | 5.562853 |
| 5.026081 | 3.700539 |
| 18.3671  | 17.29375 |
| 1.907431 | 1.833396 |
| 0.082234 | 0.182406 |
| 35.43526 | 26.87621 |
| 0.038563 | 0        |
| 0.705061 | 0.521304 |
| 22.31223 | 15.87422 |
| 0        | 0.064899 |
| 5.569645 | 4.242676 |
| 0.09476  | 0.063057 |
| 0        | 0        |
| 0.437723 | 1.04128  |
| 0.051791 | 0.034464 |
| 1.174035 | 0.965707 |
| 20.19355 | 19.84421 |
| 0.213724 | 0        |
| 6.627252 | 7.497395 |
| 9.525412 | 14.65365 |
| 0.059271 | 0.131471 |
| 1.662845 | 1.209109 |
| 96.80183 | 92.48158 |
| 0.073043 | 0.040505 |
| 32.5217  | 31.67517 |
| 3.922609 | 2.650789 |
| 0.057809 | 0.096171 |
| 0.038184 | 0.042348 |
| 0        | 0        |
| 0.009886 | 0.120611 |
| 219.897  | 149.2189 |
| 121.0723 | 135.5505 |
| 2.418046 | 3.391638 |
| 0.122098 | 0        |
| 7.26593  | 7.303369 |
| 0.026936 | 0.04481  |
| 3.860733 | 3.298724 |
| 15.32069 | 13.09572 |
| 9.431188 | 10.36574 |
| 0        | 0        |

|          |          |
|----------|----------|
| 3.578155 | 4.230044 |
| 4.9181   | 4.063399 |
| 1.663042 | 0.966122 |
| 2.402863 | 2.192113 |
| 0.794763 | 0.775668 |
| 1.472416 | 1.156708 |
| 0.623541 | 0.531008 |
| 23.37652 | 18.77228 |
| 13.01327 | 16.74635 |
| 10.81426 | 8.980186 |
| 0.101119 | 0.037382 |
| 24.3285  | 25.32467 |
| 0.468476 | 0.794635 |
| 21.07874 | 23.88748 |
| 2.878994 | 3.040933 |
| 71.25408 | 81.79792 |
| 40.40575 | 30.9224  |
| 17.75845 | 13.22607 |
| 366.5955 | 337.0831 |
| 257.974  | 282.3846 |
| 12.86025 | 10.67348 |
| 24.95458 | 25.21914 |
| 49.62686 | 49.90357 |
| 11.33031 | 8.355171 |
| 56.42909 | 41.3369  |
| 6.100127 | 5.332062 |
| 14.73364 | 8.714937 |
| 112.4969 | 102.1501 |
| 1.002577 | 1.192786 |
| 12.6379  | 13.45179 |
| 7.342021 | 6.831164 |
| 1.047085 | 1.336727 |
| 1.636357 | 1.514849 |
| 74.47037 | 97.71998 |
| 0.045821 | 0        |
| 77.75595 | 68.67782 |
| 141.5942 | 185.9545 |
| 4.414035 | 4.83102  |
| 1.897562 | 1.458389 |
| 0.59814  | 0.99506  |
| 0.367215 | 1.700327 |
| 30.65488 | 22.61041 |
| 10.59513 | 5.134737 |
| 15.08653 | 16.60318 |
| 23.60741 | 11.77195 |
| 3.069795 | 2.851815 |
| 8.8671   | 6.34646  |
| 0        | 0        |
| 0        | 0.131409 |
| 0.245726 | 0.090842 |
| 0.560827 | 0.585404 |
| 0.820532 | 0.355341 |
| 4.746614 | 4.386903 |
| 10.55548 | 9.302421 |
| 0.157915 | 0.014595 |
| 2.214661 | 0.254089 |
| 8.479731 | 6.605955 |
| 5.168017 | 6.062652 |
| 0.545819 | 0        |
| 0        | 0.154737 |
| 8.473011 | 4.63934  |
| 2.117215 | 1.063679 |
| 25.78246 | 23.82411 |
| 34.61355 | 27.77717 |
| 15.43757 | 6.709254 |

|          |          |
|----------|----------|
| 0.396065 | 0.447395 |
| 0.01321  | 0        |
| 3.491081 | 2.828516 |
| 1.261929 | 1.924389 |
| 23.12146 | 15.04038 |
| 0.036171 | 0.220635 |
| 4.306254 | 2.39916  |
| 2.101194 | 1.898109 |
| 12.43131 | 7.105943 |
| 139.0847 | 149.3951 |
| 4.339782 | 8.513464 |
| 0.753482 | 0.389973 |
| 2.809361 | 1.702536 |
| 50.77161 | 28.92576 |
| 0        | 0        |
| 22.83947 | 21.05247 |
| 0.203126 | 0.193096 |
| 0.305726 | 0.379757 |
| 5.758324 | 7.660669 |
| 95.52594 | 111.2394 |
| 36.97531 | 46.62178 |
| 16.95076 | 12.6243  |
| 38.12487 | 30.65079 |
| 0        | 0        |
| 1.995469 | 0.980486 |
| 0        | 0.078471 |
| 0        | 0.03061  |
| 0.123778 | 0.027455 |
| 4.345387 | 3.007242 |
| 4.975699 | 2.653055 |
| 12.41738 | 15.65755 |
| 0.151925 | 0.084247 |
| 1.163984 | 1.187654 |
| 3.32266  | 3.094482 |
| 7.861783 | 2.966698 |
| 0        | 0        |
| 0        | 0.056257 |
| 60.60765 | 57.00962 |
| 123.5298 | 144.7377 |
| 4.728047 | 3.514767 |
| 1.752397 | 1.199513 |
| 0.0418   | 0.015453 |
| 0.610851 | 0.406483 |
| 0        | 0.031129 |
| 0        | 0.047034 |
| 6.264535 | 3.500805 |
| 0        | 0.26704  |
| 0        | 0        |
| 2.834613 | 2.907977 |
| 26.91138 | 9.467574 |
| 1.957836 | 2.084505 |
| 0.024415 | 0        |
| 0        | 0.158477 |
| 3.500592 | 3.720604 |
| 3.633173 | 2.328103 |
| 18.52806 | 12.12911 |
| 0        | 0.099362 |
| 4.495809 | 5.021552 |
| 14.29984 | 14.33939 |
| 16.284   | 15.48695 |
| 0        | 0.206574 |
| 3.407301 | 2.872651 |
| 26.78029 | 21.18854 |
| 25.1338  | 19.47822 |
| 3.819904 | 5.787902 |

|          |          |
|----------|----------|
| 2.651339 | 1.677707 |
| 69.85391 | 51.32912 |
| 0.057131 | 0.01584  |
| 0        | 0        |
| 20.883   | 24.15802 |
| 7.245233 | 4.809512 |
| 0.531956 | 0.463549 |
| 11.51974 | 11.89116 |
| 43.18672 | 45.06885 |
| 137.6048 | 95.61444 |
| 6.656085 | 8.612337 |
| 0.06598  | 0        |
| 0.037274 | 0        |
| 3.064079 | 3.234873 |
| 10.96576 | 10.34243 |
| 4.804685 | 7.083645 |
| 37.48983 | 40.69421 |
| 0.383647 | 0.378212 |
| 5.565709 | 9.075858 |
| 4.355321 | 4.621211 |
| 0        | 0.182164 |
| 0.083004 | 0        |
| 0        | 0        |
| 4.084664 | 21.65407 |
| 0.098613 | 0        |
| 0.011151 | 0.012367 |
| 0.201332 | 0.297719 |
| 1.035603 | 1.121201 |
| 6.657837 | 16.64218 |
| 0.087344 | 0.06458  |
| 0        | 0.029364 |
| 0.187574 | 0.208031 |
| 8.893302 | 6.337345 |
| 0.587519 | 0.824075 |
| 0.346854 | 0.202464 |
| 427.753  | 353.1686 |
| 0        | 0        |
| 2.880831 | 1.211903 |
| 0.035177 | 0        |
| 7.341712 | 6.067658 |
| 0.494716 | 0.868728 |
| 0.029692 | 0.098792 |
| 15.08637 | 21.30385 |
| 6.634381 | 5.611983 |
| 2.373332 | 1.905051 |
| 0.03292  | 0.07302  |
| 3.126853 | 3.346427 |
| 7.649869 | 6.817637 |
| 7.462469 | 6.70216  |
| 49.2745  | 49.81824 |
| 0.13161  | 0        |
| 0        | 0        |
| 0.242632 | 0.179396 |
| 0.194435 | 0.172512 |
| 0.437848 | 0.09712  |
| 0.06248  | 0.029697 |
| 14.29665 | 12.71831 |
| 0.12951  | 0        |
| 47.07713 | 59.34572 |
| 17.72949 | 23.40793 |
| 14.55573 | 24.34534 |
| 0.979811 | 0.73465  |
| 50.14412 | 70.28851 |
| 6.256935 | 6.805552 |
| 3.408174 | 2.549216 |

|          |          |
|----------|----------|
| 9.423306 | 10.82162 |
| 13.34323 | 19.29681 |
| 63.07839 | 68.75341 |
| 9.513898 | 11.35572 |
| 1.098135 | 0.843161 |
| 3.493142 | 1.864929 |
| 13.59926 | 9.914899 |
| 57.91998 | 43.24265 |
| 0.170803 | 0        |
| 36.29771 | 20.01849 |
| 111.1773 | 107.7469 |
| 13.26643 | 11.42443 |
| 0.069268 | 0.076822 |
| 0.581156 | 0.161134 |
| 8.64401  | 11.25019 |
| 0.101834 | 0.021176 |
| 0.191508 | 0.212394 |
| 0.015225 | 0.050656 |
| 5.173907 | 4.764267 |
| 16.08261 | 14.77215 |
| 22.65901 | 22.43055 |
| 1.103478 | 0.935866 |
| 58.497   | 41.87629 |
| 3.618664 | 3.047149 |
| 1.868183 | 1.36067  |
| 0.278339 | 0.019293 |
| 3.471685 | 4.097577 |
| 3.537647 | 3.159838 |
| 12.3177  | 22.90007 |
| 0        | 0.074281 |
| 0        | 1.17097  |
| 2.209398 | 0.899498 |
| 16.98353 | 13.26462 |
| 3.9462   | 1.497762 |
| 0.56514  | 0.470081 |
| 18.80479 | 13.58778 |
| 0        | 0.062174 |
| 19.6075  | 24.69848 |
| 5.343459 | 5.310806 |
| 4.684118 | 3.511947 |
| 0        | 0        |
| 40.71595 | 40.99155 |
| 0        | 0.069204 |
| 0.077641 | 0.114811 |
| 0        | 0        |
| 0        | 0.065392 |
| 8.004233 | 11.69083 |
| 2.834348 | 1.951116 |
| 2.296113 | 2.571994 |
| 0.026465 | 0        |
| 0.022301 | 0.049467 |
| 0        | 0        |
| 21.02381 | 14.94079 |
| 1.40633  | 0.895387 |
| 6.921569 | 10.20461 |
| 7.611796 | 4.080274 |
| 13.16425 | 9.862416 |
| 0        | 0        |
| 10.84241 | 13.23841 |
| 2.378971 | 4.475897 |
| 43.64992 | 42.41009 |
| 15.05383 | 19.25862 |
| 0        | 0        |
| 5.24979  | 4.645575 |
| 2.097191 | 1.838445 |

|          |          |
|----------|----------|
| 10.94558 | 15.97278 |
| 8.264125 | 9.87045  |
| 629.8017 | 521.6639 |
| 0        | 0        |
| 1.423727 | 1.167087 |
| 19.60501 | 15.61791 |
| 0.219721 | 0.243684 |
| 8.874794 | 7.158318 |
| 4.268758 | 4.599528 |
| 76.14186 | 61.49325 |
| 3.383811 | 0.804183 |
| 5.713356 | 2.33984  |
| 0.666972 | 0.415277 |
| 3.029684 | 0.984031 |
| 1.112383 | 1.286574 |
| 7.860359 | 3.420837 |
| 0.053385 | 0.059207 |
| 0        | 0        |
| 3.664144 | 3.035277 |
| 8.449538 | 5.082106 |
| 2.077432 | 2.513453 |
| 35.96174 | 55.60265 |
| 0        | 0.025732 |
| 4.623176 | 17.02554 |
| 0.995964 | 1.087591 |
| 0.272789 | 0.363048 |
| 0        | 0.052664 |
| 1.814158 | 0.804805 |
| 2.516469 | 3.302586 |
| 0.263328 | 0.162248 |
| 0.276325 | 0.153231 |
| 4.205741 | 4.56518  |
| 5.397263 | 3.013307 |
| 14.19129 | 11.44357 |
| 0.023688 | 0        |
| 0        | 0        |
| 0.057435 | 0.127397 |
| 4.917226 | 3.722475 |
| 0.154445 | 0.128467 |
| 17.36507 | 20.09336 |
| 0.987465 | 0.650251 |
| 0        | 0.022141 |
| 12.64179 | 7.079391 |
| 1.831675 | 2.127262 |
| 0.086232 | 0        |
| 11.59902 | 11.0263  |
| 7.585778 | 3.806654 |
| 6.703102 | 7.10462  |
| 0.014839 | 0        |
| 8.229731 | 3.973779 |
| 0.483402 | 0.368584 |
| 0.144165 | 0.026648 |
| 4.497403 | 3.259237 |
| 0        | 0        |
| 6.455029 | 7.209614 |
| 0.74724  | 0.682488 |
| 20.31668 | 17.65176 |
| 0.321139 | 0        |
| 37.85015 | 36.39721 |
| 4.190312 | 4.055572 |
| 6.004683 | 5.378875 |
| 51.36998 | 36.66586 |
| 7.590476 | 3.557028 |
| 25.73625 | 14.02964 |
| 11.50352 | 5.449571 |

|          |          |
|----------|----------|
| 5.4616   | 3.059011 |
| 0.663877 | 0.512194 |
| 0.068529 | 0.152005 |
| 0        | 0.108438 |
| 21.75982 | 30.46903 |
| 19.95011 | 22.91964 |
| 25.51857 | 15.44411 |
| 5.012763 | 11.95652 |
| 0.667601 | 0.968229 |
| 6.833666 | 5.048637 |
| 52.48804 | 46.01175 |
| 3.626011 | 3.186823 |
| 20.11101 | 19.97016 |
| 8.091893 | 10.1166  |
| 0        | 0        |
| 0.327204 | 0.090722 |
| 6.063383 | 6.366543 |
| 0.077255 | 0.4284   |
| 1.151553 | 0.685624 |
| 13.39933 | 13.85637 |
| 16.25871 | 5.959581 |
| 0.876131 | 0.761589 |
| 1.867498 | 1.265714 |
| 54.9296  | 38.51194 |
| 13.87907 | 13.32738 |
| 0.010076 | 0.011175 |
| 17.65309 | 27.31127 |
| 7.090673 | 5.053698 |
| 14.51534 | 19.35719 |
| 341.7493 | 377.9672 |
| 23.23949 | 18.82623 |
| 3.245235 | 3.704505 |
| 101.0364 | 93.33002 |
| 0        | 0        |
| 0.803714 | 0.074281 |
| 2.929902 | 2.173105 |
| 1.577657 | 0.672968 |
| 0.050368 | 0.111722 |
| 2.063136 | 1.026457 |
| 0        | 0.037525 |
| 0        | 0.012775 |
| 35.78021 | 39.50877 |
| 60.72698 | 31.20459 |
| 1.277946 | 1.476375 |
| 0        | 0        |
| 0.084472 | 0        |
| 0.463607 | 0.31174  |
| 3.005794 | 2.787115 |
| 1.772714 | 1.591894 |
| 2.068165 | 1.6428   |
| 0.149009 | 0.027543 |
| 7.321966 | 8.062709 |
| 13.52584 | 22.099   |
| 4.821425 | 5.229732 |
| 0.335111 | 0.540594 |
| 8.693905 | 6.371731 |
| 5.560367 | 3.362919 |
| 7.170486 | 8.583424 |
| 1.268602 | 0.413811 |
| 9.760783 | 8.199591 |
| 0        | 0        |
| 0.042496 | 0.047131 |
| 0.473092 | 0.44837  |
| 0        | 0        |
| 35.02337 | 52.90117 |

|          |          |
|----------|----------|
| 9.981056 | 8.71622  |
| 0        | 0        |
| 16.38167 | 19.79246 |
| 0.18194  | 0.151337 |
| 2.043078 | 2.32884  |
| 0.04848  | 0.107535 |
| 13.51248 | 10.53972 |
| 0.064539 | 0.214734 |
| 59.38863 | 71.55141 |
| 0.009947 | 0        |
| 0.315526 | 0.174969 |
| 0.253899 | 0.262817 |
| 23.26426 | 12.0763  |
| 29.52101 | 44.50716 |
| 0        | 0        |
| 0        | 0.018722 |
| 0        | 0.066083 |
| 0        | 0        |
| 15.13727 | 19.06904 |
| 1.489719 | 1.62677  |
| 0.02178  | 0.064414 |
| 0.075257 | 0        |
| 0.131779 | 0.229666 |
| 58.23395 | 47.24188 |
| 107.1921 | 69.998   |
| 6.717975 | 6.301116 |
| 9.715584 | 4.345233 |
| 0        | 0        |
| 20.53841 | 17.83274 |
| 4.681556 | 5.17965  |
| 3.90033  | 1.721453 |
| 0.129456 | 0.086144 |
| 17.5286  | 21.05625 |
| 0.084587 | 0.093812 |
| 7.796129 | 11.13325 |
| 0.16685  | 0.061682 |
| 0        | 0        |
| 0.096809 | 0.035789 |
| 0.110672 | 0.081828 |
| 15.54253 | 7.148269 |
| 26.86119 | 20.92594 |
| 1.215987 | 0.555308 |
| 18.74689 | 10.33088 |
| 23.78636 | 13.11723 |
| 1.773644 | 1.604723 |
| 31.12268 | 35.95808 |
| 0.208871 | 0.289563 |
| 2.384067 | 3.685681 |
| 3.879416 | 9.379108 |
| 9.367383 | 5.389514 |
| 7.654245 | 5.553339 |
| 0        | 0.089717 |
| 3.344527 | 2.145566 |
| 0.346433 | 0.283986 |
| 7.585713 | 9.833049 |
| 2.952739 | 1.954296 |
| 0.025045 | 0        |
| 0        | 0        |
| 0.862058 | 0.332548 |
| 0.290692 | 0.483592 |
| 1.123614 | 1.214204 |
| 0.807188 | 0.442996 |
| 22.47744 | 22.79315 |
| 22.51353 | 33.53579 |
| 415.5045 | 251.9244 |

|          |          |
|----------|----------|
| 11.26027 | 4.895993 |
| 0.013783 | 0.015287 |
| 3.551321 | 4.300804 |
| 0.187506 | 0.149728 |
| 1.847982 | 0.604536 |
| 21.7105  | 8.311808 |
| 0.098006 | 0.108695 |
| 0.059187 | 0.021881 |
| 0.027742 | 0.153839 |
| 16.88199 | 16.08103 |
| 15.04685 | 19.12497 |
| 1.519706 | 1.317712 |
| 0.198361 | 0.329991 |
| 1.595263 | 1.382857 |
| 0.543538 | 0.109603 |
| 41.81948 | 80.85629 |
| 24.35281 | 23.22266 |
| 344.2662 | 318.7953 |
| 0        | 0        |
| 14.62079 | 21.27789 |
| 5.859979 | 6.483817 |
| 94.01663 | 99.08266 |
| 0        | 0.034602 |
| 21.05683 | 24.39267 |
| 7.15039  | 8.552196 |
| 0        | 0.043985 |
| 0.139156 | 0.128611 |
| 4.547174 | 2.762021 |
| 0.47089  | 0.287235 |
| 0.166676 | 0.092427 |
| 0.021618 | 0        |
| 4.416113 | 4.341308 |
| 0        | 0        |
| 5.722988 | 7.286686 |
| 0.053895 | 0        |
| 22.01321 | 13.82865 |
| 4.613267 | 3.553051 |
| 0.337429 | 0.668266 |
| 11.00907 | 12.60615 |
| 1.36403  | 0.417322 |
| 18.00965 | 39.00039 |
| 22.63732 | 30.51608 |
| 0.363644 | 0.474475 |
| 2.200783 | 1.92514  |
| 2.313463 | 2.685109 |
| 8.339388 | 18.3627  |
| 0.074624 | 0.124143 |
| 1.265824 | 0.750683 |
| 0.056035 | 0.062146 |
| 2.38855  | 2.221782 |
| 3.102983 | 2.520673 |
| 55.68424 | 59.12039 |
| 9.471434 | 16.19126 |
| 1.512207 | 0.670852 |
| 16.53389 | 12.94882 |
| 29.14229 | 28.11817 |
| 120.2414 | 112.2714 |
| 30.12467 | 38.69024 |
| 0        | 0        |
| 5.94236  | 5.548945 |
| 0        | 0.011705 |
| 7.730819 | 12.12792 |
| 4.062508 | 3.794163 |
| 0.624774 | 0.086614 |
| 5.016752 | 3.309902 |

|          |          |
|----------|----------|
| 5.631383 | 3.220974 |
| 8.210092 | 8.418285 |
| 48.60291 | 66.69057 |
| 0.175263 | 0.242972 |
| 1.85845  | 2.495057 |
| 1.312888 | 1.831833 |
| 0.089291 | 0.082524 |
| 0        | 0        |
| 0.140654 | 0.168993 |
| 4.111874 | 3.373569 |
| 3.035359 | 3.101166 |
| 3.59156  | 5.81164  |
| 9.989486 | 13.81234 |
| 2.950053 | 2.299834 |
| 0.738342 | 0.501098 |
| 7.348588 | 5.604483 |
| 2.860659 | 4.935225 |
| 0.042294 | 0        |
| 0.110672 | 0.122742 |
| 21.22513 | 11.09527 |
| 1.703493 | 0.401974 |
| 0.045753 | 0.152229 |
| 0.368312 | 0.93367  |
| 38.02878 | 37.74574 |
| 0.033335 | 0.036971 |
| 3.318565 | 1.593048 |
| 9.514517 | 4.17949  |
| 1.305565 | 1.126184 |
| 1.325318 | 1.173516 |
| 9.313033 | 12.43157 |
| 0.248646 | 0.110305 |
| 13.90033 | 14.17544 |
| 366.611  | 282.373  |
| 8.210572 | 8.43443  |
| 2.513082 | 2.176276 |
| 0.129685 | 0.089893 |
| 34.96041 | 31.252   |
| 6.235184 | 9.265974 |
| 1.890099 | 2.79498  |
| 0        | 0        |
| 8.052224 | 7.822499 |
| 99.59353 | 111.6438 |
| 1.081862 | 0.666584 |
| 26.02792 | 20.17145 |
| 0.407879 | 0.254454 |
| 0.201218 | 0.322346 |
| 1.791506 | 1.428077 |
| 0.007461 | 0.01655  |
| 1.129146 | 0.214679 |
| 116.2724 | 96.06407 |
| 0.134169 | 0.037201 |
| 22.13282 | 15.18226 |
| 0.12434  | 0        |
| 0.795583 | 0.650153 |
| 3.136826 | 3.026053 |
| 12.77264 | 11.21055 |
| 1.648017 | 0.500227 |
| 0        | 0.053029 |
| 0.042554 | 0.217099 |
| 0.048167 | 0.13355  |
| 11.75444 | 15.86424 |
| 0        | 0        |
| 0        | 0        |
| 0.504186 | 0.346155 |
| 44.24196 | 58.77587 |

|          |          |
|----------|----------|
| 23.13705 | 18.33556 |
| 4.147454 | 2.937208 |
| 5.071041 | 2.257037 |
| 0        | 0        |
| 0.84612  | 0.532604 |
| 1.912752 | 0.917344 |
| 11.26418 | 14.07977 |
| 1.126385 | 1.399739 |
| 0.536259 | 0.550689 |
| 0.061564 | 0        |
| 12.76781 | 13.3683  |
| 0.029764 | 0        |
| 41.00077 | 48.27065 |
| 0.600643 | 0.095164 |
| 14.84686 | 9.348664 |
| 138.2424 | 130.5718 |
| 51.0962  | 64.22308 |
| 0.416691 | 0.256742 |
| 0.037927 | 0        |
| 0.105232 | 0        |
| 5.2616   | 4.850706 |
| 0.058435 | 0.129615 |
| 0.688397 | 0.44536  |
| 1.001202 | 0.57576  |
| 0.029575 | 0.043733 |
| 40.59924 | 43.13659 |
| 27.44732 | 28.5659  |
| 0.301881 | 0.520807 |
| 1.714947 | 1.773033 |
| 12.13024 | 11.17848 |
| 4.253647 | 2.47974  |
| 0.284802 | 0.126345 |
| 0.127751 | 0.141683 |
| 0        | 0.026403 |
| 145.4834 | 163.8956 |
| 5.43729  | 6.35705  |
| 17.20199 | 10.59072 |
| 4.792162 | 1.625187 |
| 3.308765 | 2.340966 |
| 0.015139 | 0        |
| 0.178925 | 0        |
| 26.41616 | 22.41696 |
| 0        | 0        |
| 0.345613 | 0.232721 |
| 0        | 0.032237 |
| 77.43385 | 55.4671  |
| 6.70376  | 3.744442 |
| 17.71313 | 11.17382 |
| 7.715476 | 6.241527 |
| 2.93698  | 1.413089 |
| 0.160639 | 0.534475 |
| 0        | 0        |
| 0        | 0        |
| 1.233944 | 1.416538 |
| 0.00673  | 0.029854 |
| 279.4619 | 296.8132 |
| 4.673095 | 3.21767  |
| 6.827129 | 6.684641 |
| 0.088585 | 0.061404 |
| 25.6152  | 25.36242 |
| 2.265539 | 0.847817 |
| 0.354782 | 0.03279  |
| 2.669124 | 4.280065 |
| 0        | 0.114446 |
| 2.807293 | 0.95938  |

|          |          |
|----------|----------|
| 17.52201 | 15.06921 |
| 0.848041 | 0.171005 |
| 152.9111 | 148.9584 |
| 0.140978 | 0.250166 |
| 4.58387  | 2.201463 |
| 25.72441 | 14.96309 |
| 0.072637 | 0.161119 |
| 0.971626 | 0.718395 |
| 16.21734 | 9.349968 |
| 8.426868 | 6.137089 |
| 6.624463 | 3.682069 |
| 9.548824 | 12.77758 |
| 2.910323 | 3.165534 |
| 1.180359 | 2.215383 |
| 4.769924 | 4.609976 |
| 36.34639 | 24.59451 |
| 10.69694 | 10.26398 |
| 66.44182 | 121.6511 |
| 0.086152 | 0        |
| 0        | 0        |
| 0        | 0.529678 |
| 2.339635 | 2.675305 |
| 6.133135 | 8.403946 |
| 0.352195 | 0.195303 |
| 12.34842 | 6.716118 |
| 2.705311 | 1.740206 |
| 8.018463 | 11.65643 |
| 0        | 0        |
| 20.00471 | 18.16355 |
| 0.0486   | 0.080851 |
| 8.797861 | 9.496107 |
| 2.269975 | 2.408674 |
| 0.130239 | 0.268252 |
| 0.391222 | 0.694222 |
| 0.059756 | 0.132547 |
| 0.271122 | 0        |
| 2.611591 | 2.40457  |
| 9.275175 | 12.17613 |
| 0.873345 | 0.902552 |
| 1.885461 | 1.013862 |
| 0.027053 | 0.090011 |
| 39.83276 | 24.17611 |
| 0        | 0        |
| 7.496609 | 7.48458  |
| 0.11551  | 0.352297 |
| 42.74087 | 31.38693 |
| 10.68917 | 9.150799 |
| 2.199018 | 1.654421 |
| 4.191173 | 5.217906 |
| 4.961308 | 3.513307 |
| 39.71963 | 31.27081 |
| 3.171052 | 2.476834 |
| 0.210385 | 0.155553 |
| 0.054177 | 0.060086 |
| 0.547197 | 0.266433 |
| 9.572201 | 11.28753 |
| 0        | 0.166458 |
| 0.436135 | 0.2073   |
| 0        | 0        |
| 180.5347 | 134.5411 |
| 0.016668 | 0.203339 |
| 14.40843 | 19.85052 |
| 0.403686 | 0.35817  |
| 7.780004 | 4.653954 |
| 23.77325 | 24.40386 |

|          |          |
|----------|----------|
| 5.337136 | 7.413959 |
| 43.92042 | 29.8898  |
| 14.90305 | 8.233701 |
| 1.113804 | 1.110615 |
| 16.15213 | 15.72173 |
| 1.804115 | 1.298813 |
| 12.18145 | 11.24051 |
| 5.163292 | 5.21781  |
| 3.576417 | 2.954444 |
| 0        | 0.068086 |
| 0.069933 | 0.155121 |
| 158.6251 | 142.7359 |
| 0.009953 | 0.011038 |
| 11.41022 | 6.904666 |
| 0.10871  | 0.075354 |
| 0        | 0        |
| 1.125345 | 0.142637 |
| 2.021627 | 2.831528 |
| 4.314864 | 4.056537 |
| 4.683396 | 3.920892 |
| 22.73807 | 20.99722 |
| 6.663937 | 2.113264 |
| 2.799953 | 6.54884  |
| 0        | 0.058305 |
| 0.104611 | 0        |
| 0.085519 | 0        |
| 0        | 0.022299 |
| 0        | 0.028002 |
| 4.399591 | 3.146186 |
| 0.778519 | 0        |
| 0.496695 | 0.484094 |
| 24.42376 | 19.98866 |
| 4.222534 | 3.468924 |
| 0.73716  | 0.567283 |
| 34.53665 | 26.97309 |
| 8.757994 | 6.585186 |
| 1.316446 | 1.332267 |
| 3.175608 | 2.01518  |
| 6.434744 | 6.875885 |
| 1.975193 | 1.703807 |
| 8.531158 | 11.0813  |
| 24.67968 | 14.951   |
| 16.41417 | 20.76163 |
| 0.794458 | 0.396496 |
| 0        | 0        |
| 0        | 0        |
| 1.420359 | 0.644426 |
| 0.333352 | 0        |
| 0.219388 | 0.364972 |
| 46.67706 | 45.82269 |
| 6.503085 | 4.629528 |
| 2.941451 | 4.003078 |
| 5.999407 | 9.593718 |
| 18.07642 | 20.21957 |
| 0.043677 | 0        |
| 0        | 0.102012 |
| 0.853026 | 1.22431  |
| 2.790018 | 1.487389 |
| 1.009631 | 0.433449 |
| 0.015315 | 0        |
| 50.43585 | 45.97955 |
| 483.8604 | 452.5564 |
| 39.08534 | 40.85455 |
| 76.96826 | 84.99524 |
| 3.314062 | 4.154077 |

|          |          |
|----------|----------|
| 4.105171 | 2.95994  |
| 64.93718 | 52.36517 |
| 15.951   | 14.23269 |
| 7.435587 | 4.43772  |
| 3.948431 | 2.86098  |
| 1.809372 | 0.630205 |
| 4.445103 | 1.122251 |
| 5.626429 | 5.617036 |
| 28.39406 | 32.46343 |
| 2.808514 | 1.453579 |
| 7.225896 | 7.154092 |
| 0.733238 | 0.996176 |
| 2.015349 | 1.568522 |
| 0.974944 | 1.201413 |
| 17.08224 | 15.21487 |
| 17.68988 | 12.64416 |
| 0.048373 | 0        |
| 3.940167 | 3.461295 |
| 0        | 0        |
| 20.30772 | 13.58725 |
| 6.694483 | 6.258337 |
| 0        | 0.026535 |
| 4.273575 | 2.263318 |
| 0.086835 | 0.048153 |
| 0.837459 | 0.56456  |
| 31.74578 | 21.10214 |
| 0        | 0        |
| 0.023447 | 0.026004 |
| 13.11465 | 13.74995 |
| 0.193216 | 0.119049 |
| 11.32589 | 15.04293 |
| 357.8807 | 344.6916 |
| 0.150279 | 0.02381  |
| 148.2246 | 164.8841 |
| 25.62294 | 38.48092 |
| 0.106923 | 0.316226 |
| 1.065216 | 0.822753 |
| 61.3962  | 73.14365 |
| 2.059551 | 1.820196 |
| 0        | 0        |
| 0.14886  | 0.632862 |
| 2.346228 | 3.654986 |
| 0        | 0        |
| 5.238497 | 4.298076 |
| 113.9818 | 94.49443 |
| 0        | 0        |
| 0.073825 | 0.081877 |
| 19.49064 | 17.52358 |
| 21.41347 | 15.24783 |
| 0.092163 | 0.170357 |
| 0        | 0.012909 |
| 39.95968 | 37.61311 |
| 76.02403 | 80.53468 |
| 2.337954 | 1.696312 |
| 0.836453 | 0.507597 |
| 0        | 0.033606 |
| 112.8756 | 145.0158 |
| 3.970032 | 2.935338 |
| 8.235985 | 5.379797 |
| 1.481198 | 0.650251 |
| 1.641135 | 0.612713 |
| 0.093    | 0.123771 |
| 4.310205 | 3.481591 |
| 17.79386 | 19.43087 |
| 4.385603 | 4.383167 |

|          |          |
|----------|----------|
| 0.3521   | 0.130167 |
| 0.415297 | 0.345442 |
| 0.400008 | 0.380257 |
| 5.835131 | 5.382849 |
| 2.555405 | 0.419867 |
| 2.703186 | 2.505177 |
| 22.13691 | 16.10855 |
| 76.31179 | 75.63423 |
| 23.00759 | 19.78147 |
| 13.55888 | 11.87264 |
| 5.81318  | 11.83453 |
| 67.35916 | 64.23269 |
| 2.458191 | 1.428053 |
| 1.081513 | 0.999554 |
| 3.07771  | 2.116945 |
| 1.253536 | 2.126261 |
| 1.105784 | 3.317687 |
| 2.059754 | 3.975437 |
| 1.036427 | 0.839288 |
| 11.58864 | 13.40802 |
| 5.20973  | 5.176279 |
| 0.076714 | 0.02836  |
| 0        | 0        |
| 1.169795 | 1.167637 |
| 24.05324 | 17.81644 |
| 5.351483 | 3.679237 |
| 1.015506 | 0.938548 |
| 2.375774 | 2.459219 |
| 6.251841 | 7.085419 |
| 0.337062 | 0        |
| 0.079957 | 0.022169 |
| 79.56569 | 80.08501 |
| 5.56138  | 8.796854 |
| 1.038036 | 0.661111 |
| 0.182126 | 0.161591 |
| 0.043206 | 0.119795 |
| 3.722162 | 2.334748 |
| 0.036619 | 0        |
| 1.826801 | 1.296662 |
| 0        | 0.171483 |
| 35.90479 | 41.19372 |
| 10.34781 | 12.09787 |
| 13.5652  | 10.67269 |
| 13.53137 | 5.640257 |
| 0        | 0        |
| 0.031682 | 0.011713 |
| 3.937664 | 4.113207 |
| 5.747782 | 6.299467 |
| 1.418116 | 0.614366 |
| 0.014916 | 0.049627 |
| 1.809899 | 2.183604 |
| 8.604519 | 4.895633 |
| 0.107046 | 0.047488 |
| 11.3661  | 23.09151 |
| 0        | 0.021915 |
| 24.01997 | 21.36229 |
| 0.708805 | 0.515883 |
| 4.006104 | 4.30006  |
| 5.430877 | 2.296973 |
| 0.202237 | 0.044859 |
| 0        | 0        |
| 10.9918  | 15.9671  |
| 85.2204  | 84.82176 |
| 2.084291 | 1.011993 |
| 0        | 0        |

|          |          |
|----------|----------|
| 25.47276 | 23.99122 |
| 49.28366 | 65.01647 |
| 0        | 0.023429 |
| 8.575272 | 9.032317 |
| 0        | 0        |
| 11.07056 | 4.47416  |
| 5.389348 | 3.065753 |
| 0.810905 | 0.727713 |
| 68.12931 | 22.57791 |
| 0.688706 | 0.305527 |
| 3.764994 | 3.151402 |
| 0.022079 | 0        |
| 0.5183   | 1.028636 |
| 0.169998 | 0.062846 |
| 1.365505 | 1.514428 |
| 0.024    | 0        |
| 2.856184 | 3.635045 |
| 0.231884 | 0.064293 |
| 0.548229 | 0.570018 |
| 10.01113 | 12.68909 |
| 2.482234 | 1.952873 |
| 24.99361 | 27.1028  |
| 0.192145 | 0.239738 |
| 1.225698 | 1.661456 |
| 0        | 0.056441 |
| 0.112205 | 0.041481 |
| 0.385306 | 0.932353 |
| 0        | 0        |
| 39.5503  | 44.667   |
| 8.997351 | 13.03134 |
| 781.9761 | 807.2105 |
| 8.237835 | 9.254913 |
| 0.054702 | 0        |
| 0        | 0        |
| 0        | 0        |
| 6.225591 | 2.186964 |
| 0.278292 | 0.339507 |
| 14.24472 | 15.56163 |
| 0.079152 | 0.087784 |
| 0.897445 | 0.565523 |
| 0.225141 | 0.134451 |
| 0.372244 | 0.355236 |
| 56.84713 | 44.76778 |
| 1.005004 | 0.846278 |
| 0.308833 | 0.3552   |
| 0.025875 | 0        |
| 0.379041 | 0.218597 |
| 3.814897 | 3.439195 |
| 0.133635 | 0.237135 |
| 0.142271 | 0.205123 |
| 4.875699 | 2.381261 |
| 39.54561 | 50.37336 |
| 0        | 0.048526 |
| 1.000912 | 0.672771 |
| 3.796933 | 3.041299 |
| 0.092667 | 0        |
| 92.0544  | 130.4059 |
| 0.075188 | 0.062541 |
| 8.839309 | 8.39447  |
| 1.271098 | 0.635369 |
| 0        | 0        |
| 1.199301 | 1.125467 |
| 0.270301 | 0.052136 |
| 6.383638 | 7.938903 |
| 12.64845 | 13.10058 |

|          |          |
|----------|----------|
| 0.030713 | 0.017031 |
| 1.408895 | 1.69497  |
| 0.852721 | 1.206607 |
| 4.740103 | 4.59993  |
| 11.08871 | 16.51609 |
| 13.30108 | 10.76066 |
| 0        | 0        |
| 0        | 0.168357 |
| 29.1257  | 20.30517 |
| 28.32127 | 41.1959  |
| 0.072616 | 0        |
| 25.36326 | 20.16958 |
| 0.246377 | 0.136623 |
| 5.064248 | 20.64196 |
| 31.12331 | 35.16726 |
| 40.204   | 44.96747 |
| 4.888545 | 6.272926 |
| 0.558994 | 0.320668 |
| 24.77325 | 39.56406 |
| 392.148  | 393.1976 |
| 0.250534 | 0.353637 |
| 22.00484 | 29.82177 |
| 0.04787  | 0.106181 |
| 27.88688 | 36.70244 |
| 0.72008  | 0.354939 |
| 1.659025 | 0.654901 |
| 0.099392 | 0        |
| 1.924361 | 1.940212 |
| 1.719054 | 2.785523 |
| 3.557193 | 3.24565  |
| 3.131043 | 2.207337 |
| 0.044096 | 0.048905 |
| 0.327714 | 0.198248 |
| 0        | 0        |
| 4.321407 | 4.792704 |
| 7.908649 | 9.479954 |
| 7.655826 | 11.73522 |
| 0.006507 | 0        |
| 57.66789 | 58.07608 |
| 6.762745 | 6.099638 |
| 0.359495 | 0.187624 |
| 3.174018 | 4.264282 |
| 6.15461  | 7.682637 |
| 0.049354 | 0        |
| 0.418375 | 0.0464   |
| 39.90637 | 36.40184 |
| 0.17824  | 0.131786 |
| 26.37899 | 23.37831 |
| 27.02443 | 18.29044 |
| 1.479025 | 1.711647 |
| 35.00452 | 21.26794 |
| 16.16697 | 10.61497 |
| 5.943444 | 3.568202 |
| 0.172944 | 0.082202 |
| 0.42772  | 0.237184 |
| 0.104289 | 0        |
| 1.534062 | 0.708903 |
| 5.322569 | 2.919092 |
| 12.17209 | 17.09948 |
| 1.70592  | 1.73298  |
| 3.914974 | 3.013821 |
| 7.186477 | 6.281379 |
| 0.032103 | 0        |
| 14.48418 | 10.83759 |
| 0.063744 | 0.070696 |

|          |          |
|----------|----------|
| 72.83237 | 72.36767 |
| 21.58778 | 10.03774 |
| 1.918131 | 1.184957 |
| 2.506356 | 2.946651 |
| 137.8837 | 135.3961 |
| 97.68165 | 103.5253 |
| 2.328778 | 1.199137 |
| 2.516698 | 2.992025 |
| 1.904334 | 1.273425 |
| 1.07713  | 0.551355 |
| 1.073716 | 0.901158 |
| 20.36826 | 24.62602 |
| 0.026    | 0        |
| 1.838319 | 2.262035 |
| 0.975187 | 0.859687 |
| 1.474797 | 1.520454 |
| 8.939362 | 13.45284 |
| 16.63849 | 12.99713 |
| 412.7919 | 522.414  |
| 25.13901 | 20.71424 |
| 0        | 0.062034 |
| 0.104806 | 0.046494 |
| 0.321324 | 0.197982 |
| 0.628198 | 0.558819 |
| 0.346209 | 0        |
| 102.032  | 117.8115 |
| 0.036934 | 0.040963 |
| 4.13497  | 2.189265 |
| 7.800963 | 3.70789  |
| 18.62117 | 23.01147 |
| 0.280513 | 0.138269 |
| 37.19066 | 43.04851 |
| 1.132775 | 0.897369 |
| 17.72131 | 15.36938 |
| 0        | 0.185103 |
| 42.14437 | 39.02295 |
| 0        | 0.080536 |
| 11.77159 | 15.3958  |
| 48.06392 | 38.04071 |
| 39.20864 | 31.67803 |
| 27.0055  | 31.62374 |
| 44.0238  | 41.10308 |
| 17.34703 | 20.84095 |
| 15.74731 | 8.457961 |
| 0.202384 | 0.124698 |
| 1.416257 | 0.228007 |
| 2.578168 | 2.731791 |
| 0.013326 | 0.029559 |
| 21.72957 | 23.7647  |
| 2.409089 | 2.109337 |
| 11.91236 | 15.28717 |
| 3.900442 | 2.582584 |
| 0.071119 | 0        |
| 0.689854 | 0.951193 |
| 7.705027 | 7.381196 |
| 0.021147 | 0        |
| 0.245403 | 0.544333 |
| 1.400314 | 1.217242 |
| 2.790422 | 2.490636 |
| 6.335396 | 7.860718 |
| 0        | 0.020348 |
| 169.5429 | 162.0998 |
| 0        | 0.040151 |
| 0.810448 | 0.668054 |
| 5.901682 | 7.140354 |

|          |          |
|----------|----------|
| 1.858206 | 1.771619 |
| 9.377134 | 11.59823 |
| 0.45077  | 0.455819 |
| 7.397952 | 11.11461 |
| 5.404001 | 5.75386  |
| 37.68032 | 35.89025 |
| 0.31501  | 0.183001 |
| 1.270935 | 0.755566 |
| 23.22525 | 24.97206 |
| 2.795497 | 3.425306 |
| 1.04931  | 0.966807 |
| 0.378579 | 0.197584 |
| 5.575821 | 6.940608 |
| 0.485054 | 0.153701 |
| 48.22905 | 46.86034 |
| 6.930798 | 6.506175 |
| 1.484286 | 1.454749 |
| 1.281213 | 0.422443 |
| 0.222933 | 0        |
| 0.23138  | 0        |
| 1.038408 | 1.041976 |
| 1.07743  | 0.672151 |
| 0.08895  | 0        |
| 1.290117 | 1.108884 |
| 0        | 0        |
| 0        | 0.08931  |
| 2.256596 | 3.449671 |
| 0.869177 | 0.766794 |
| 0.043539 | 0.048288 |
| 1.71632  | 1.062421 |
| 156.5042 | 120.1014 |
| 0.031254 | 0.034663 |
| 0.284042 | 0.078755 |
| 30.20602 | 36.13993 |
| 28.53159 | 14.97101 |
| 21.11569 | 15.91918 |
| 7.978908 | 8.777442 |
| 28.86426 | 24.30029 |
| 0.443478 | 0.569503 |
| 9.188413 | 2.269142 |
| 1.341327 | 1.344965 |
| 2.817206 | 2.323311 |
| 142.2299 | 94.19748 |
| 0.125809 | 0.034883 |
| 11.50669 | 12.86398 |
| 0.439553 | 0.633739 |
| 5.975077 | 5.368643 |
| 71.67457 | 46.52078 |
| 0        | 0.162401 |
| 0        | 0.034224 |
| 1.698729 | 0.886585 |
| 0.042007 | 0        |
| 1.922771 | 1.822918 |
| 0.754771 | 0.48055  |
| 0.032053 | 0        |
| 6.992721 | 4.062328 |
| 15.65157 | 12.44285 |
| 3.231357 | 2.589431 |
| 0        | 0.039699 |
| 15.26744 | 16.86128 |
| 0        | 0        |
| 0.741247 | 0.657671 |
| 2.756966 | 4.647618 |
| 0.066545 | 0.129155 |
| 0        | 0        |

|          |          |
|----------|----------|
| 0        | 0        |
| 181.5115 | 156.4082 |
| 0.286555 | 0.466117 |
| 0.437848 | 0.21852  |
| 0.950206 | 1.076259 |
| 0.254142 | 0.140929 |
| 0.185611 | 0.205854 |
| 2.872788 | 4.380883 |
| 3.32937  | 3.506922 |
| 1.783055 | 1.36905  |
| 38.60942 | 46.99034 |
| 14.21152 | 7.278541 |
| 0.06591  | 0.073098 |
| 1.492123 | 2.139204 |
| 0        | 0.009357 |
| 20.49155 | 13.69973 |
| 147.9196 | 140.6928 |
| 0.027053 | 0.030004 |
| 12.97426 | 12.74664 |
| 0        | 0        |
| 7.826078 | 6.570362 |
| 1.154849 | 1.341788 |
| 1.922381 | 1.399149 |
| 0.44807  | 0.280877 |
| 0        | 0        |
| 0        | 0.053316 |
| 0.386112 | 0.342578 |
| 1.070236 | 1.421417 |
| 1.533782 | 0.53809  |
| 2.866212 | 2.318375 |
| 7.266988 | 3.795022 |
| 0.115355 | 0.02843  |
| 10.01401 | 3.716289 |
| 0.794215 | 0.26808  |
| 0.121169 | 0.107507 |
| 25.96833 | 47.83866 |
| 31.95716 | 28.81756 |
| 1.54795  | 0.62428  |
| 0        | 0        |
| 0        | 0        |
| 21.20315 | 24.68824 |
| 0.735412 | 0.346358 |
| 0.186307 | 0.189407 |
| 0        | 0.16877  |
| 0        | 0        |
| 147.6824 | 184.8951 |
| 2.434494 | 3.282038 |
| 18.11701 | 16.07429 |
| 2.657594 | 4.64983  |
| 0.162701 | 0.072178 |
| 0        | 0        |
| 0        | 0.215856 |
| 0.067929 | 0.150674 |
| 4.821278 | 5.484784 |
| 0.29495  | 0.327117 |
| 1.653716 | 1.447951 |
| 27.7445  | 17.65646 |
| 2.246147 | 1.927088 |
| 0.036266 | 0.040221 |
| 26.3144  | 33.69613 |
| 11.46749 | 8.214942 |
| 12.17772 | 14.85024 |
| 101.4616 | 92.81135 |
| 19.91131 | 16.1744  |
| 20.47703 | 22.51731 |

|          |          |
|----------|----------|
| 8.395162 | 7.738264 |
| 0        | 0        |
| 4.529289 | 4.148421 |
| 2.061235 | 1.731844 |
| 0        | 0        |
| 0.423641 | 0.313229 |
| 5.935919 | 7.74321  |
| 4.871714 | 2.742138 |
| 0.930756 | 0.789379 |
| 3.56662  | 3.789182 |
| 0.045496 | 0.016819 |
| 0.766505 | 0.475056 |
| 2.704824 | 1.10085  |
| 75.53196 | 63.20209 |
| 0        | 0        |
| 5.288883 | 2.14954  |
| 0        | 0.076171 |
| 1.081713 | 3.751397 |
| 4.26627  | 4.70148  |
| 13.38298 | 9.347046 |
| 0.771474 | 0.892812 |
| 3.56792  | 2.659958 |
| 0.072447 | 0.080348 |
| 3.569291 | 2.812662 |
| 22.99951 | 28.5688  |
| 0.024785 | 0        |
| 11.44012 | 14.32215 |
| 0.204233 | 0        |
| 1.672254 | 1.716521 |
| 0.688303 | 0.907193 |
| 0        | 0        |
| 2.447139 | 2.446736 |
| 0        | 0.118823 |
| 52.65752 | 38.97887 |
| 0.224952 | 0        |
| 0.041567 | 0.030733 |
| 0        | 0        |
| 2.759417 | 1.836217 |
| 15.53393 | 17.82402 |
| 0.091845 | 0.076396 |
| 0.528309 | 0.328119 |
| 4.770437 | 8.291404 |
| 29.24619 | 24.20907 |
| 8.524611 | 7.428389 |
| 47.12157 | 39.57853 |
| 0.029286 | 0.03248  |
| 15.57657 | 11.47056 |
| 2.777997 | 2.363072 |
| 0.499358 | 0.479976 |
| 2.058436 | 0.802111 |
| 1.047454 | 1.591946 |
| 29.6815  | 31.88562 |
| 2.834059 | 4.889335 |
| 4.344013 | 7.865756 |
| 12.69264 | 2.54402  |
| 0.164323 | 0.212619 |
| 0.056515 | 0.050142 |
| 18.45143 | 22.14571 |
| 30.58761 | 19.66379 |
| 1.95425  | 1.81737  |
| 0.407573 | 0.210944 |
| 3.743345 | 4.086729 |
| 15.72365 | 12.83998 |
| 38.72652 | 25.43026 |
| 11.3693  | 7.782739 |

|          |          |
|----------|----------|
| 0.278417 | 0        |
| 7.140831 | 2.39183  |
| 17.53825 | 14.89601 |
| 8.159232 | 4.303634 |
| 2.228388 | 1.868633 |
| 0.233673 | 0.259157 |
| 0.018678 | 0        |
| 0        | 0        |
| 1.861256 | 1.048167 |
| 7.3653   | 3.129915 |
| 3.885136 | 2.538549 |
| 0        | 0.015732 |
| 145.1618 | 150.1729 |
| 8.594463 | 7.62093  |
| 21.17405 | 20.99726 |
| 0.028389 | 0        |
| 0.516247 | 0.297146 |
| 2.782035 | 2.934937 |
| 10.65845 | 9.642367 |
| 0        | 0        |
| 0.369912 | 0.064777 |
| 0        | 0        |
| 0.1679   | 0.159609 |
| 0.184453 | 0.245484 |
| 1.224542 | 0.953554 |
| 2.194437 | 3.111741 |
| 0.689265 | 0.735036 |
| 5.07662  | 4.080482 |
| 0.182608 | 0.067508 |
| 34.60465 | 39.72985 |
| 0.316037 | 0.063728 |
| 2.574841 | 2.763537 |
| 8.443234 | 6.457973 |
| 0.063744 | 0        |
| 0        | 0        |
| 6.445552 | 4.282737 |
| 0.11665  | 0.064686 |
| 0.098498 | 0        |
| 0.105411 | 0.077938 |
| 4.677005 | 2.444668 |
| 0.122669 | 0.081628 |
| 0        | 0.038022 |
| 13.80206 | 12.37508 |
| 100.5689 | 100.6473 |
| 0.361671 | 0.279565 |
| 0        | 0        |
| 0.101325 | 0        |
| 17.76242 | 25.44939 |
| 0        | 0.078337 |
| 0.103435 | 0.286789 |
| 34.31117 | 18.99035 |
| 5.171091 | 6.484735 |
| 0.270885 | 0.060086 |
| 27.73496 | 21.15709 |
| 0.78484  | 0.267826 |
| 43.55625 | 32.61244 |
| 24.05773 | 32.15037 |
| 0.295652 | 1.5739   |
| 0.810371 | 0.783526 |
| 38.80725 | 38.83233 |
| 0        | 0.075132 |
| 1.115333 | 0.712196 |
| 9.489583 | 1.958051 |
| 7.01827  | 7.986026 |
| 0.217849 | 0.241607 |

|          |          |
|----------|----------|
| 1.237347 | 0.796815 |
| 0.012098 | 0.013417 |
| 0.198765 | 0.781568 |
| 0.489301 | 0.542665 |
| 0.020051 | 0.033356 |
| 52.90632 | 38.60361 |
| 14.62147 | 16.71343 |
| 0.195119 | 0.605917 |
| 0.103375 | 0.068789 |
| 0.308452 | 0.293221 |
| 23.15868 | 19.58809 |
| 15.77554 | 7.318884 |
| 0        | 0.036471 |
| 0        | 0        |
| 29.77989 | 28.79415 |
| 0        | 0        |
| 5.344509 | 7.675462 |
| 0.03054  | 0.06774  |
| 2.938504 | 3.86394  |
| 0.407127 | 0.225764 |
| 47.78207 | 27.13011 |
| 6.93448  | 5.524147 |
| 6.187457 | 4.406652 |
| 4.904342 | 3.703295 |
| 18.57848 | 13.44581 |
| 3.703152 | 3.189495 |
| 3.541663 | 5.80649  |
| 2.635502 | 2.15374  |
| 3.195558 | 7.468345 |
| 24.23489 | 30.09266 |
| 6.833546 | 3.774664 |
| 0.636931 | 0.307128 |
| 0.080995 | 0.029943 |
| 26.59522 | 15.08719 |
| 14.92411 | 7.362303 |
| 36.08982 | 35.66156 |
| 0        | 0        |
| 14.88007 | 14.35937 |
| 4.909064 | 3.367377 |
| 0.204666 | 0.113494 |
| 0.051854 | 0        |
| 0.800383 | 0.634053 |
| 4.434778 | 3.839555 |
| 201.6209 | 205.1932 |
| 33.80286 | 26.11681 |
| 0.214648 | 0.297572 |
| 2.960434 | 1.824057 |
| 0.034283 | 0.038022 |
| 3.771633 | 2.078441 |
| 1.358358 | 0.440927 |
| 36.51321 | 54.70877 |
| 0        | 0        |
| 1.477583 | 2.452841 |
| 1.023059 | 2.269269 |
| 0        | 0        |
| 20.83338 | 19.42315 |
| 0        | 0.03607  |
| 10.34781 | 9.202738 |
| 1.788749 | 0.991916 |
| 16.50567 | 14.28179 |
| 0.241222 | 0.123475 |
| 7.483165 | 10.39572 |
| 0.037023 | 0        |
| 0.072068 | 0.319713 |
| 16.11871 | 18.86129 |

|          |          |
|----------|----------|
| 17.87706 | 11.91802 |
| 0        | 0        |
| 1.13135  | 0.869353 |
| 0.198678 | 0.110173 |
| 1.547435 | 1.225857 |
| 0.761802 | 0.59142  |
| 0        | 0        |
| 21.47418 | 21.22578 |
| 0        | 0.013166 |
| 2.356132 | 0.855477 |
| 0.096073 | 0.026638 |
| 0.026796 | 0.059437 |
| 15.46661 | 25.95422 |
| 0.137709 | 0.130909 |
| 11.41255 | 5.121078 |
| 64.33989 | 45.63234 |
| 0.011409 | 0.063265 |
| 2.363444 | 1.472586 |
| 0        | 0        |
| 74.09998 | 64.95084 |
| 0.721941 | 0.133446 |
| 18.32206 | 14.46707 |
| 42.43628 | 32.36105 |
| 6.3305   | 3.643504 |
| 1.257253 | 1.631709 |
| 0        | 1.06117  |
| 0        | 0        |
| 1.390404 | 0.355856 |
| 0.775645 | 0.742933 |
| 0.06612  | 0        |
| 4.804789 | 3.039083 |
| 0.061109 | 0.022591 |
| 1.235429 | 0.728812 |
| 0.254454 | 2.69663  |
| 20.09552 | 13.31113 |
| 17.09183 | 19.89111 |
| 0.208579 | 0.077109 |
| 4.360737 | 4.558829 |
| 0        | 0        |
| 0.306224 | 0        |
| 0.453537 | 0.608895 |
| 0.414507 | 0.611012 |
| 18.78223 | 27.71177 |
| 21.1104  | 23.88859 |
| 9.15567  | 10.64238 |
| 2.740896 | 1.191152 |
| 4.390849 | 4.584198 |
| 0.157315 | 0.058157 |
| 11.48311 | 14.07832 |
| 0.805323 | 0.652389 |
| 0        | 0.025926 |
| 0.275208 | 0.427311 |
| 14.00269 | 7.581134 |
| 0.175884 | 0        |
| 876.1326 | 938.0048 |
| 9.866099 | 8.483747 |
| 9.945867 | 11.15498 |
| 13.79541 | 19.92512 |
| 13.68689 | 13.21964 |
| 0        | 0        |
| 3.932169 | 6.656287 |
| 0.189984 | 0.168563 |
| 8.753897 | 12.73904 |
| 3.621194 | 3.464107 |
| 20.93098 | 16.54515 |

|          |          |  |
|----------|----------|--|
| 0        | 0.091082 |  |
| 75.82834 | 69.22834 |  |
| 0.026907 | 0.059682 |  |
| 16.5439  | 6.001747 |  |
| 2.291168 | 3.124235 |  |
| 19.16042 | 11.65509 |  |
| 0        | 0.504086 |  |
| 0.764146 | 0.635614 |  |
| 0.175493 | 0.166828 |  |
| 62.91333 | 50.79386 |  |
| 0        | 0.036241 |  |
| 74.26761 | 76.42327 |  |
| 44.52833 | 32.18886 |  |
| 5.40549  | 10.76848 |  |
| 0        | 0.104252 |  |
| 0.833754 | 0.708924 |  |
| 0        | 0.058157 |  |
| 16.7564  | 16.23644 |  |
| 68.69918 | 54.41348 |  |
| 55.99494 | 42.66615 |  |
| 311.3348 | 290.9692 |  |
| 0.113504 | 0.251766 |  |
| 2.859949 | 3.431373 |  |
| 0.031938 | 0        |  |
| 5.653002 | 3.326686 |  |
| 0        | 0        |  |
| 0.619836 | 0        |  |
| 0.572229 | 0.317319 |  |
| 4.31103  | 1.519258 |  |
| 0.028546 | 0        |  |
| 0        | 0        |  |
| 0.04692  | 0.039028 |  |
| 2.445015 | 2.772606 |  |
| 23.0127  | 23.90664 |  |
| 0.633089 | 0.424546 |  |
| 4.376833 | 5.774794 |  |
| 3.642471 | 6.067895 |  |
| 6.406838 | 2.30748  |  |
| 1.556751 | 1.929653 |  |
| 12.80323 | 12.64344 |  |
| 0.612945 | 0.348187 |  |
| 0.503264 | 0.616903 |  |
| 25.44486 | 25.11531 |  |
| 25.29096 | 24.85467 |  |
| 0.443595 | 0.491974 |  |
| 33.80869 | 47.02461 |  |
| 0.016438 | 0        |  |
| 24.52487 | 20.54697 |  |
| 2.444004 | 2.214252 |  |
| 1.873181 | 1.507842 |  |
| 0.930056 | 1.43402  |  |
| 0.040673 | 0        |  |
| 8.452844 | 7.957885 |  |
| 1079.02  | 1004.447 |  |
| 22.0146  | 29.95692 |  |
| 32.91095 | 41.11795 |  |
| 2.540458 | 2.264551 |  |
| 0.150644 | 0.143206 |  |
| 0.757157 | 0.079975 |  |
| 0.519939 | 0.440963 |  |
| 0.013865 | 0.061508 |  |
| 0.143057 | 0.063464 |  |
| 0        | 0        |  |
| 0.180398 | 0.100036 |  |
| 0.02006  | 0.022248 |  |

|          |          |  |
|----------|----------|--|
| 6.729771 | 2.760877 |  |
| 6.669703 | 11.02759 |  |
| 0.185565 | 0.111476 |  |
| 0        | 0.035189 |  |
| 254.5449 | 208.7956 |  |
| 1.666825 | 1.096633 |  |
| 4.318379 | 3.682374 |  |
| 0.048505 | 0        |  |
| 8.763755 | 7.734562 |  |
| 8.343758 | 6.039863 |  |
| 0.505376 | 0.296731 |  |
| 14.83035 | 11.05505 |  |
| 0.697003 | 0.178389 |  |
| 0.05913  | 0.065579 |  |
| 0        | 0.081153 |  |
| 5.682445 | 2.055058 |  |
| 12.63264 | 5.905716 |  |
| 4.467948 | 4.682104 |  |
| 7.479678 | 7.217425 |  |
| 0        | 0.192341 |  |
| 0.065389 | 0.07252  |  |
| 0.096859 | 0        |  |
| 2.834115 | 1.242663 |  |
| 0.079092 | 0.131576 |  |
| 13.32363 | 9.267148 |  |
| 5.111269 | 6.224464 |  |
| 0.964275 | 0.965946 |  |
| 4.520977 | 2.477055 |  |
| 0.040238 | 0.066939 |  |
| 0        | 0        |  |
| 1.747704 | 1.89707  |  |
| 13.43504 | 8.705178 |  |
| 1.890295 | 1.122045 |  |
| 12.33929 | 11.28075 |  |
| 0.020383 | 0.067818 |  |
| 0.094573 | 0.052443 |  |
| 5.351339 | 5.620109 |  |
| 47.13213 | 28.53397 |  |
| 0.062352 | 0.034576 |  |
| 0.372734 | 0.177165 |  |
| 0.721432 | 0.339442 |  |
| 3.631209 | 3.481485 |  |
| 4.172949 | 2.911876 |  |
| 9.032573 | 4.848411 |  |
| 0.335281 | 0.185924 |  |
| 55.08959 | 67.59081 |  |
| 2.740131 | 5.66698  |  |
| 1.192903 | 0.413438 |  |
| 1.500241 | 1.023913 |  |
| 19.2336  | 21.39697 |  |
| 3.124287 | 1.720225 |  |
| 1.332163 | 0.268627 |  |
| 21.26263 | 9.467557 |  |
| 0        | 0        |  |
| 3.608371 | 5.399393 |  |
| 0.892005 | 0.93329  |  |
| 0.179739 | 0.284773 |  |
| 0.077706 | 0.517082 |  |
| 0.029593 | 0        |  |
| 13.76904 | 7.246588 |  |
| 0.070875 | 0.131009 |  |
| 0        | 0.060217 |  |
| 0.475306 | 0.395358 |  |
| 11.83987 | 25.88917 |  |
| 0        | 0.371871 |  |

|          |          |
|----------|----------|
| 10.25489 | 9.87158  |
| 0.947891 | 0.963663 |
| 0.225907 | 0.292303 |
| 1.988548 | 3.553178 |
| 76.95346 | 72.45916 |
| 21.6758  | 20.31268 |
| 4.229763 | 4.691065 |
| 0.35332  | 0.189171 |
| 0        | 0.038297 |
| 2.213951 | 1.921622 |
| 4.334922 | 2.071607 |
| 11.02387 | 10.05213 |
| 3.074382 | 2.658392 |
| 44.61275 | 43.68594 |
| 2.973826 | 3.041631 |
| 4.381262 | 2.474702 |
| 2.996262 | 3.137909 |
| 0.102352 | 0.153245 |
| 1.663042 | 0.798168 |
| 16.5772  | 12.78466 |
| 0        | 0.029433 |
| 0        | 0        |
| 32.98366 | 37.84465 |
| 1.079772 | 0.496121 |
| 0.082819 | 0.122469 |
| 0.549928 | 0.121981 |
| 0.23686  | 0.098509 |
| 0.139745 | 0.110704 |
| 0.051418 | 0        |
| 0.072616 | 0.402679 |
| 0.6057   | 0.257021 |
| 0.664592 | 0.504313 |
| 0.994242 | 1.063294 |
| 0.09189  | 0.169852 |
| 7.921573 | 10.6254  |
| 1.698942 | 1.905166 |
| 3.217248 | 3.845152 |
| 1.260804 | 0.750312 |
| 39.87082 | 32.40781 |
| 33.66194 | 32.60965 |
| 0        | 0        |
| 0.055336 | 0        |
| 0.25687  | 0.519494 |
| 0        | 0        |
| 91.5145  | 95.19583 |
| 0.321694 | 0.237852 |
| 6.620448 | 3.31307  |
| 7.467313 | 5.940587 |
| 10.85379 | 7.880994 |
| 0        | 0        |
| 6.098862 | 4.250182 |
| 0.866833 | 3.124453 |
| 0        | 0        |
| 0.049022 | 0        |
| 13.70934 | 12.01536 |
| 0.241771 | 0.107256 |
| 0.048067 | 0        |
| 13.59353 | 7.956333 |
| 10.94018 | 7.267675 |
| 0.468974 | 0.288956 |
| 0.75812  | 0.350334 |
| 1.411763 | 2.45071  |
| 0.240543 | 0.192672 |
| 5.491857 | 3.910937 |
| 13.11695 | 14.0949  |

|          |          |
|----------|----------|
| 11.16841 | 12.07736 |
| 23.91738 | 25.49628 |
| 2.0198   | 1.227175 |
| 0        | 0.019953 |
| 46.48136 | 65.70433 |
| 1.142879 | 0.918954 |
| 16.30014 | 18.09376 |
| 0        | 0        |
| 0        | 0        |
| 4.012418 | 4.450016 |
| 3.793843 | 1.867419 |
| 40.70171 | 36.92483 |
| 11.65704 | 8.978735 |
| 179.0956 | 185.7939 |
| 0        | 0        |
| 7.033848 | 9.857034 |
| 4.814743 | 3.990528 |
| 0.681204 | 0.242838 |
| 5.627968 | 3.538322 |
| 0.119283 | 0.165365 |
| 61.71481 | 70.86638 |
| 122.2555 | 135.1737 |
| 24.37355 | 29.97773 |
| 9.171532 | 8.506382 |
| 0.168829 | 0.070216 |
| 144.8528 | 128.3992 |
| 0.309    | 0.220307 |
| 175.8674 | 211.4136 |
| 5.470626 | 8.133263 |
| 3.660117 | 6.960733 |
| 2.764683 | 2.248548 |
| 0        | 0.177013 |
| 0.149247 | 0.165524 |
| 27.2541  | 45.90542 |
| 1.409941 | 0.905306 |
| 40.68415 | 69.86643 |
| 222.8717 | 269.283  |
| 0.304347 | 0.128587 |
| 0        | 0.042505 |
| 0.163941 | 0        |
| 0.508909 | 0.564411 |
| 0.489258 | 0.054262 |
| 0        | 0        |
| 0.217156 | 0        |
| 0.127227 | 0.201575 |
| 59.80516 | 43.15287 |
| 0        | 0        |
| 155.0817 | 133.9952 |
| 13.42776 | 9.464885 |
| 0.201974 | 0.067201 |
| 0.465652 | 1.377163 |
| 1.349498 | 0.676275 |
| 1.854447 | 0.74041  |
| 69.93452 | 79.87142 |
| 4.024749 | 4.128616 |
| 0        | 0        |
| 0.044364 | 0.024601 |
| 53.17023 | 42.37541 |
| 0.0841   | 0.023318 |
| 0        | 0        |
| 0        | 0.054823 |
| 0.221607 | 0        |
| 17.50576 | 18.50002 |
| 2.104926 | 2.409194 |
| 0.083788 | 0        |

|          |          |
|----------|----------|
| 4.276625 | 2.724724 |
| 0.029453 | 0        |
| 1.05373  | 0.891865 |
| 12.61874 | 9.379595 |
| 22.85109 | 24.38613 |
| 0        | 0        |
| 373.6632 | 498.2898 |
| 0.158587 | 0.175883 |
| 39.53484 | 33.98425 |
| 1.34292  | 0.603456 |
| 5.688846 | 8.104157 |
| 6.713127 | 6.218489 |
| 0        | 0        |
| 0        | 0        |
| 76.70184 | 52.6887  |
| 0        | 0        |
| 170.3838 | 143.3695 |
| 0        | 0.083667 |
| 0.066474 | 0        |
| 1.744831 | 0.618164 |
| 14.42986 | 14.3819  |
| 27.42569 | 28.76895 |
| 0.499693 | 0.360224 |
| 11.33279 | 6.572991 |
| 0        | 0        |
| 1.896748 | 1.425779 |
| 18.84554 | 12.18241 |
| 3.765926 | 1.542723 |
| 10.04998 | 6.127592 |
| 0        | 0        |
| 1.256711 | 1.33446  |
| 0.129079 | 0.715781 |
| 64.42732 | 68.45508 |
| 0.064573 | 0.035808 |
| 0.085284 | 0.189171 |
| 20.41454 | 17.4864  |
| 6.08336  | 7.277816 |
| 0.014319 | 0        |
| 0.149023 | 0.351212 |
| 0.128945 | 0.095338 |
| 14.69936 | 11.4789  |
| 1.610932 | 0.966533 |
| 0.018451 | 0        |
| 15.66286 | 19.14748 |
| 0        | 0        |
| 0        | 0        |
| 7.214565 | 8.232202 |
| 0        | 0        |
| 0.104114 | 0.03849  |
| 0        | 0        |
| 1.581336 | 2.098808 |
| 6.158709 | 5.060206 |
| 0        | 0        |
| 1.260197 | 0.492125 |
| 0.347409 | 0.027521 |
| 0        | 0        |
| 4.532364 | 2.140543 |
| 36.79483 | 29.06477 |
| 0        | 0        |
| 1.278333 | 0.458684 |
| 0.827341 | 0.740497 |
| 0.525603 | 0.607215 |
| 7.571936 | 9.592674 |
| 0.415575 | 0.184359 |
| 0.21836  | 0.242174 |

|          |          |
|----------|----------|
| 0.078941 | 0.080254 |
| 7.866451 | 3.259441 |
| 0.042179 | 0.093557 |
| 0.072758 | 0.107591 |
| 0.443806 | 0.50918  |
| 9.999935 | 7.660257 |
| 1.207742 | 1.141021 |
| 6.747864 | 2.754325 |
| 0.83035  | 1.066316 |
| 120.4925 | 84.63976 |
| 0.183039 | 0        |
| 0.625417 | 0.882797 |
| 0        | 0        |
| 0.558163 | 0.338536 |
| 3.413712 | 3.224028 |
| 6.389817 | 3.906053 |
| 4.276049 | 1.755061 |
| 0        | 0        |
| 13.44786 | 21.57174 |
| 0.125365 | 0        |
| 0.141321 | 0.052244 |
| 0.208906 | 0.278027 |
| 0.045242 | 0.117077 |
| 2.672372 | 2.760822 |
| 0.062841 | 0.069694 |
| 0.206956 | 0.083464 |
| 0        | 0        |
| 5.471549 | 6.236845 |
| 23.28745 | 26.34591 |
| 2.07595  | 1.452255 |
| 3.144065 | 1.464275 |
| 38.62557 | 35.78536 |
| 0.954816 | 0.794211 |
| 0.423892 | 0.132222 |
| 0.501278 | 0.222379 |
| 0.564649 | 0.353956 |
| 40.13989 | 14.99933 |
| 0.003613 | 0        |
| 0        | 0.017069 |
| 8.520215 | 8.393156 |
| 25.10224 | 24.01763 |
| 22.80422 | 14.47707 |
| 0.129889 | 0.144055 |
| 4.432438 | 4.613144 |
| 5.25438  | 3.22871  |
| 1.255126 | 0.556804 |
| 0        | 0        |
| 1.015937 | 0.926832 |
| 31.71274 | 32.52609 |
| 0.092991 | 0.13751  |
| 11.1824  | 11.75461 |
| 0.068059 | 0.245315 |
| 11.12942 | 10.62835 |
| 0.099101 | 0.054955 |
| 0.036245 | 0.16079  |
| 0.056468 | 0.031313 |
| 3.02231  | 2.317617 |
| 8.201405 | 9.580774 |
| 87.72475 | 111.0808 |
| 0.615102 | 0.440578 |
| 30.48456 | 41.41631 |
| 6.546487 | 5.28561  |
| 12.41738 | 9.748455 |
| 0.402934 | 0.252583 |
| 3.453155 | 2.728897 |

|          |          |
|----------|----------|
| 2.209872 | 1.147636 |
| 1.105561 | 1.381834 |
| 0        | 0        |
| 4.432815 | 5.718709 |
| 3.934632 | 2.235307 |
| 0.597512 | 0.783163 |
| 0        | 0.649605 |
| 20.86841 | 32.66184 |
| 0.06868  | 0        |
| 0.26502  | 0.160322 |
| 0        | 0.456014 |
| 0.363081 | 0.115051 |
| 0.067266 | 0.074603 |
| 2.473642 | 1.584708 |
| 0        | 0        |
| 0.304248 | 0.359925 |
| 0.181408 | 0.125745 |
| 8.46086  | 12.52273 |
| 5.962415 | 8.30179  |
| 0.062876 | 0.023245 |
| 0.020283 | 0.022495 |
| 0        | 0        |
| 0        | 0.02843  |
| 0.156193 | 0.086614 |
| 9.512249 | 3.701893 |
| 0        | 0        |
| 0.27827  | 0.127078 |
| 11.47021 | 9.021244 |
| 9.61019  | 10.83359 |
| 0.105054 | 0.466045 |
| 21.30522 | 22.51326 |
| 61.1045  | 70.33505 |
| 0.273109 | 0.504825 |
| 0.153453 | 0.204226 |
| 0        | 0.03834  |
| 0        | 0.277654 |
| 21.53419 | 20.57188 |
| 3.286369 | 3.660494 |
| 10.51529 | 4.49767  |
| 0        | 0.09465  |
| 0        | 0        |
| 2.186969 | 2.502075 |
| 4.632452 | 4.626128 |
| 0.472307 | 0.04762  |
| 0.115475 | 0        |
| 0.530657 | 0.220699 |
| 0.899492 | 1.167912 |
| 28.05362 | 27.28341 |
| 0        | 0.055576 |
| 0.1289   | 0.428874 |
| 8.648029 | 8.135976 |
| 0        | 0.032557 |
| 0.215181 | 0.238649 |
| 18.47265 | 15.93842 |
| 0.149968 | 0        |
| 2.324905 | 2.016489 |
| 0.027327 | 0.015154 |
| 0.481116 | 0.381134 |
| 2.248388 | 0.788673 |
| 12.54804 | 9.458838 |
| 18.17399 | 14.97404 |
| 3.422739 | 4.877451 |
| 0        | 0        |
| 6.075122 | 5.423594 |
| 0        | 0        |

|          |          |
|----------|----------|
| 18.31637 | 19.59431 |
| 0.359844 | 0.245593 |
| 2.020112 | 2.905554 |
| 0.689376 | 0.764559 |
| 0.031436 | 0        |
| 0        | 0        |
| 0.561434 | 0.601194 |
| 10.21599 | 6.530071 |
| 27.89833 | 19.26542 |
| 0.038009 | 0.105384 |
| 1.259828 | 0.91357  |
| 0.023797 | 0.026393 |
| 1.737681 | 1.302158 |
| 0.093504 | 0.207404 |
| 0.469309 | 0.214321 |
| 1.521618 | 1.543945 |
| 0.055287 | 0        |
| 4.221205 | 1.170393 |
| 2.56322  | 3.084309 |
| 0        | 0        |
| 2.686719 | 1.806368 |
| 0.072082 | 0.026648 |
| 9.305588 | 22.53989 |
| 1.333332 | 1.028693 |
| 3.301805 | 3.159289 |
| 4.601468 | 2.995193 |
| 1.224779 | 1.77631  |
| 0.788405 | 0.382545 |
| 8.866922 | 12.06244 |
| 0.102793 | 0.266008 |
| 0.799783 | 1.379791 |
| 0.932197 | 1.260464 |
| 0.751979 | 0.647569 |
| 0.19938  | 0.199012 |
| 0.024511 | 0.081553 |
| 0.149504 | 0.118435 |
| 0        | 0.128707 |
| 3.306169 | 2.517465 |
| 0.526718 | 1.606446 |
| 0        | 0.034971 |
| 22.58834 | 23.94946 |
| 0        | 0.077325 |
| 0.201862 | 0.063965 |
| 0.84587  | 0.281437 |
| 5.709388 | 1.781644 |
| 2.408665 | 1.005687 |
| 1.762673 | 1.405598 |
| 2.016497 | 0.536217 |
| 0.018533 | 0.061664 |
| 3.296956 | 2.309384 |
| 0.636888 | 0.246151 |
| 7.61213  | 8.410518 |
| 2.872862 | 1.765005 |
| 15.24766 | 18.56849 |
| 0.014243 | 0        |
| 0        | 0.019064 |
| 0.23852  | 0.1984   |
| 1.586502 | 1.922173 |
| 0        | 0.164732 |
| 0        | 0.363367 |
| 0.727013 | 0.542421 |
| 89.96361 | 98.17872 |
| 0        | 0.462374 |
| 6.245107 | 6.342787 |
| 0.018434 | 0.143114 |

|          |          |
|----------|----------|
| 5.23518  | 4.37091  |
| 0.289225 | 1.283071 |
| 1.632025 | 3.12874  |
| 0        | 0        |
| 2.59038  | 2.416875 |
| 0.064696 | 0.023917 |
| 0.059556 | 0.049538 |
| 0.271834 | 0.844145 |
| 36.67179 | 33.73549 |
| 0.162064 | 0.107844 |
| 2.906331 | 2.320066 |
| 6.447023 | 7.245222 |
| 67.33417 | 50.68687 |
| 20.30848 | 23.73569 |
| 4.503995 | 4.359451 |
| 0.071611 | 0        |
| 0.625991 | 0.662704 |
| 2.639553 | 2.969852 |
| 0.269474 | 0.119545 |
| 34.78798 | 33.58874 |
| 0.854407 | 0.157932 |
| 0        | 0.064293 |
| 0.17062  | 0.105127 |
| 1.29863  | 1.577427 |
| 25.27187 | 26.16892 |
| 36.98793 | 50.31941 |
| 3.070359 | 3.977084 |
| 0.119975 | 0.133059 |
| 92.35099 | 90.75445 |
| 0.757437 | 0.458206 |
| 0        | 0        |
| 0.796218 | 0.582013 |
| 1.943608 | 1.493251 |
| 0        | 0.032434 |
| 0.066403 | 0.29458  |
| 0.065081 | 0        |
| 9.594471 | 14.25874 |
| 51.05935 | 34.65454 |
| 11.38508 | 18.6198  |
| 1.547199 | 1.07859  |
| 4.099326 | 2.162852 |
| 0        | 0        |
| 12.69006 | 7.909381 |
| 0.206326 | 0.019069 |
| 9.834907 | 8.473012 |
| 41.10486 | 61.13479 |
| 0.031474 | 0.034906 |
| 0.059872 | 0        |
| 4.462495 | 2.336258 |
| 33.17318 | 31.47876 |
| 0.569314 | 0.35078  |
| 0        | 0.06731  |
| 10.69175 | 8.253605 |
| 0.038691 | 0        |
| 6.083736 | 8.700979 |
| 0.001417 | 0.001572 |
| 958.9916 | 1138.157 |
| 27.76444 | 27.3433  |
| 28.37776 | 18.88627 |
| 0.051782 | 0.344578 |
| 0.236973 | 0        |
| 0        | 0.11233  |
| 0.027249 | 0.030221 |
| 23.90846 | 22.62878 |
| 11.48073 | 7.634242 |

|          |          |
|----------|----------|
| 64.12916 | 59.46143 |
| 0.091709 | 0.457698 |
| 0.577319 | 0.292303 |
| 0.342811 | 0.211221 |
| 0        | 0        |
| 1.963162 | 1.479212 |
| 45.52287 | 77.44978 |
| 10.416   | 3.769224 |
| 3.453219 | 1.308131 |
| 2.880319 | 2.531897 |
| 0.698587 | 0.677928 |
| 0        | 0.07012  |
| 0.104543 | 0.167475 |
| 8.967887 | 2.726407 |
| 0.258965 | 0.191472 |
| 0        | 0        |
| 0.083436 | 0.080969 |
| 0.192276 | 0.223401 |
| 6.105166 | 3.503257 |
| 8.877831 | 11.22739 |
| 3.379798 | 3.785886 |
| 1.042681 | 0.367944 |
| 1.606204 | 0.799001 |
| 0.314657 | 0.055101 |
| 0        | 0.022614 |
| 0.486384 | 0.836115 |
| 152.5351 | 230.8676 |
| 4.353405 | 6.272137 |
| 1.68166  | 1.894904 |
| 14.94187 | 11.29419 |
| 7.876395 | 19.92206 |
| 6.290269 | 4.642924 |
| 0        | 0.063231 |
| 7.092478 | 3.041926 |
| 0        | 0.064054 |
| 3.092065 | 3.763552 |
| 2.507071 | 2.126261 |
| 0.089753 | 0.074656 |
| 1.320998 | 1.671092 |
| 9.117017 | 12.46221 |
| 0.450784 | 0.423032 |
| 0.578661 | 0.490765 |
| 97.68337 | 70.74268 |
| 50.49194 | 71.32537 |
| 0.257678 | 0.210575 |
| 0        | 0        |
| 0        | 0.015234 |
| 0        | 0        |
| 0        | 0.024689 |
| 3.779314 | 4.579059 |
| 11.44219 | 12.32957 |
| 0.325987 | 0.391667 |
| 0        | 0        |
| 15.32502 | 10.35252 |
| 3.340922 | 1.551706 |
| 7.110381 | 7.661119 |
| 0        | 0        |
| 0.083004 | 0.092056 |
| 0        | 0        |
| 0.11268  | 0.249939 |
| 9.285889 | 11.05913 |
| 6.679075 | 4.403849 |
| 1.659555 | 0.947341 |
| 3.845571 | 3.353375 |
| 0.696736 | 0.472219 |

|          |          |
|----------|----------|
| 10.23681 | 7.714738 |
| 46.31055 | 40.02339 |
| 4.317531 | 2.736231 |
| 1.791899 | 1.07423  |
| 0.176097 | 0.0279   |
| 0.136944 | 0.360713 |
| 42.89303 | 36.41404 |
| 0        | 0        |
| 3.817194 | 3.97847  |
| 4.582727 | 5.714249 |
| 8.499547 | 5.959671 |
| 0        | 0        |
| 18.01849 | 16.29853 |
| 1.993449 | 0.984836 |
| 3.428537 | 5.893106 |
| 39.87379 | 38.49324 |
| 7.064432 | 5.573269 |
| 11.51298 | 11.72687 |
| 3.603859 | 2.664599 |
| 0.026567 | 0.029464 |
| 18.94459 | 13.20567 |
| 50.00447 | 65.67395 |
| 15.16947 | 14.3967  |
| 5.022019 | 8.343834 |
| 0.037651 | 0.125273 |
| 1.329484 | 1.130433 |
| 14.29673 | 19.29541 |
| 0        | 0        |
| 84.04523 | 110.8709 |
| 3.730262 | 4.510358 |
| 11.51191 | 6.775685 |
| 2.646115 | 4.623946 |
| 1.237902 | 0.05801  |
| 0.293509 | 0        |
| 0.272226 | 1.078267 |
| 0        | 0.047918 |
| 40.28503 | 26.88892 |
| 0.399916 | 0.83162  |
| 0        | 0.116118 |
| 0        | 0        |
| 43.44133 | 39.89936 |
| 12.98599 | 11.84564 |
| 31.60136 | 25.59709 |
| 3.81764  | 1.819875 |
| 7.096041 | 5.267162 |
| 0.079548 | 0.044112 |
| 0.027705 | 0.215086 |
| 107.6098 | 123.5947 |
| 3.860733 | 2.621503 |
| 0.400759 | 0.239328 |
| 8.531176 | 7.257599 |
| 3.907566 | 8.340708 |
| 51.58311 | 47.92049 |
| 2.829551 | 4.586519 |
| 90.1785  | 64.60225 |
| 6.491815 | 7.952316 |
| 0.103527 | 0.06561  |
| 7.406857 | 2.496611 |
| 0.025149 | 0.146432 |
| 0        | 0.079147 |
| 34.55659 | 26.28227 |
| 23.37911 | 21.53958 |
| 0.239652 | 0.132894 |
| 0.188199 | 0.020872 |
| 47.54337 | 51.39525 |

|          |          |
|----------|----------|
| 0.249345 | 0.380241 |
| 1.387149 | 1.034464 |
| 0.096859 | 0.214846 |
| 33.5813  | 28.79979 |
| 0.139365 | 0.231846 |
| 5.675657 | 6.735941 |
| 102.1816 | 103.6702 |
| 7.980923 | 5.727331 |
| 0.146431 | 0.121801 |
| 0.672118 | 1.229942 |
| 29.2191  | 30.8924  |
| 1.871112 | 0.848936 |
| 3.397174 | 4.94507  |
| 0        | 0        |
| 8.23538  | 5.820618 |
| 15.49913 | 12.95475 |
| 0.537476 | 0.325989 |
| 0.014882 | 0        |
| 0.402759 | 0.274883 |
| 0        | 0.024444 |
| 0.05284  | 0.058603 |
| 2.337373 | 2.476756 |
| 0.111969 | 0.186271 |
| 29.54716 | 21.99302 |
| 37.10634 | 42.218   |
| 23.33187 | 28.68017 |
| 0.026065 | 0.072269 |
| 2.62919  | 2.740273 |
| 1.113245 | 1.814796 |
| 24.60118 | 24.03207 |
| 0.517391 | 0.662097 |
| 8.370143 | 8.330328 |
| 1.291795 | 1.544607 |
| 1.638657 | 0.53848  |
| 0.024182 | 0.01341  |
| 0        | 0        |
| 0        | 0        |
| 0.678636 | 0.385503 |
| 9.786877 | 9.675501 |
| 0.015471 | 0.017159 |
| 1.007904 | 0.447131 |
| 18.02466 | 16.44735 |
| 0.058107 | 0.032222 |
| 48.28729 | 42.65028 |
| 5.011497 | 2.298702 |
| 0        | 0        |
| 0.870989 | 0.504361 |
| 0.144894 | 0        |
| 0.081032 | 0.017974 |
| 5.012972 | 4.42041  |
| 0.032609 | 0.07233  |
| 0.428555 | 0.594117 |
| 29.39542 | 32.16612 |
| 0        | 0.039964 |
| 0.577254 | 0.391239 |
| 0.106985 | 0.062151 |
| 0.944116 | 0.398889 |
| 12.63692 | 18.08776 |
| 0        | 0        |
| 261.6447 | 275.5167 |
| 0.248699 | 0.146023 |
| 0.122863 | 0.272526 |
| 0.544431 | 0.386436 |
| 1.499184 | 1.892022 |
| 26.52988 | 20.50614 |

|          |          |
|----------|----------|
| 0.068985 | 0        |
| 2.123771 | 1.449472 |
| 1.149071 | 0.781077 |
| 3.226148 | 2.896472 |
| 85.21533 | 74.03266 |
| 4.950785 | 7.451694 |
| 0.03048  | 0.033804 |
| 0.086774 | 0        |
| 10.8907  | 7.60225  |
| 12.38354 | 17.26144 |
| 10.29704 | 10.94702 |
| 0.211901 | 0.235011 |
| 4.05891  | 6.618922 |
| 5.783178 | 6.101024 |
| 0.029108 | 0        |
| 0        | 0        |
| 0.502173 | 0.202524 |
| 8.132787 | 5.491051 |
| 0        | 0        |
| 1.458337 | 1.047322 |
| 0.077823 | 0.120834 |
| 7.797503 | 2.844706 |
| 0.128411 | 0.213624 |
| 0.734756 | 0.373491 |
| 0        | 0        |
| 0.105411 | 0        |
| 1.160503 | 0.346518 |
| 4.167556 | 1.848829 |
| 17.30492 | 13.85621 |
| 0.25035  | 0.416481 |
| 0.687671 | 0.871622 |
| 2.008568 | 1.699036 |
| 0.299937 | 0        |
| 14.80055 | 17.59599 |
| 0.122556 | 0.380582 |
| 26.27006 | 25.63012 |
| 1.059753 | 1.621145 |
| 0.274068 | 0.420865 |
| 0.48632  | 0.179786 |
| 3.114076 | 2.676617 |
| 2.126879 | 2.24588  |
| 0.57199  | 0.538255 |
| 0.645394 | 0.38175  |
| 2.077136 | 2.555634 |
| 2.412467 | 1.968818 |
| 0.071694 | 0        |
| 0.475762 | 0.311792 |
| 15.58286 | 18.69671 |
| 37.22045 | 43.30958 |
| 0        | 0        |
| 0.219954 | 0.06653  |
| 0        | 0.036656 |
| 0.289511 | 0.175137 |
| 3.126    | 2.318245 |
| 0.130304 | 0.062832 |
| 7.380588 | 2.053715 |
| 14.45126 | 15.16165 |
| 0.106422 | 0.047212 |
| 0        | 0.067146 |
| 0.276888 | 0.259842 |
| 0.712083 | 0.589174 |
| 3.742589 | 2.668345 |
| 0.303074 | 0.720273 |
| 9.394726 | 5.29678  |
| 8.982478 | 12.03423 |

|          |          |
|----------|----------|
| 14.71805 | 11.54381 |
| 10.33565 | 10.86138 |
| 0        | 0        |
| 9.541774 | 7.538154 |
| 0.027219 | 0        |
| 0.081053 | 0.089893 |
| 17.17913 | 17.03947 |
| 28.89362 | 19.67829 |
| 0.154573 | 0.028572 |
| 74.57568 | 62.6362  |
| 37.46422 | 32.74758 |
| 3.763674 | 1.767156 |
| 0.182073 | 0        |
| 0.274721 | 0        |
| 0.452412 | 0.324663 |
| 0.05213  | 0        |
| 376.7123 | 409.9383 |
| 0.697046 | 0.441752 |
| 0.328904 | 0.477012 |
| 4.989618 | 9.412043 |
| 3.860156 | 1.475018 |
| 1.153555 | 0.511745 |
| 3.692508 | 2.866651 |
| 5.838654 | 4.171182 |
| 3.073183 | 3.706279 |
| 0        | 0.327896 |
| 29.59697 | 30.55874 |
| 0.024677 | 0        |
| 44.44518 | 61.12636 |
| 0.051912 | 0        |
| 36.94803 | 26.25041 |
| 4.113626 | 3.905936 |
| 19.32495 | 21.67589 |
| 0.045341 | 0.217905 |
| 11.40281 | 13.47809 |
| 73.48531 | 53.41533 |
| 0.02206  | 0        |
| 9.82099  | 7.630975 |
| 7.635686 | 8.863563 |
| 0.540827 | 0.575817 |
| 78.97189 | 49.73088 |
| 24.23812 | 25.02052 |
| 0.075839 | 0        |
| 1.134747 | 0.719145 |
| 0.035888 | 0.119407 |
| 16.57007 | 18.42237 |
| 0.243837 | 0.326769 |
| 0        | 0        |
| 1.449066 | 1.434029 |
| 0        | 0        |
| 0.351767 | 0.292598 |
| 2.022881 | 1.664133 |
| 5.10478  | 3.786136 |
| 4.454357 | 2.997871 |
| 0.043327 | 0        |
| 0        | 0.09781  |
| 5.5719   | 6.338027 |
| 0.018245 | 0        |
| 0.721242 | 0.633255 |
| 0.108988 | 0        |
| 16.25743 | 14.12985 |
| 0        | 0.139107 |
| 16.91349 | 11.51124 |
| 0.02768  | 0.010233 |
| 0.132695 | 0.091979 |

|          |          |
|----------|----------|
| 0.662431 | 0.189594 |
| 7.997275 | 6.495046 |
| 0.174963 | 0.110883 |
| 1.250879 | 0.293467 |
| 0.010234 | 0.028374 |
| 0        | 0.072254 |
| 0        | 0        |
| 0.150124 | 0.04757  |
| 2.187299 | 1.329724 |
| 1.083395 | 0.523753 |
| 0.017684 | 0        |
| 3.155758 | 2.044902 |
| 0.278729 | 0.231846 |
| 0.029764 | 0        |
| 3.628123 | 3.173708 |
| 0.045871 | 0.025437 |
| 8.274499 | 5.618524 |
| 1.542491 | 1.710716 |
| 0        | 0        |
| 11.88645 | 9.359785 |
| 6.789184 | 8.353866 |
| 10.85156 | 7.775057 |
| 0.857159 | 0.760513 |
| 0.047351 | 0.063018 |
| 93.32996 | 82.00428 |
| 1.44026  | 1.554165 |
| 0.192101 | 0.213051 |
| 0.136455 | 0        |
| 0.016219 | 0        |
| 0.010734 | 0        |
| 28.95464 | 16.09433 |
| 0.269591 | 1.166074 |
| 68.58801 | 68.6835  |
| 42.75974 | 46.81606 |
| 2.307283 | 1.240687 |
| 0.076025 | 0.056211 |
| 0.05967  | 0.066178 |
| 13.63377 | 11.10162 |
| 1.337256 | 1.207666 |
| 42.17156 | 53.28078 |
| 2.398811 | 1.251966 |
| 4.323774 | 2.640906 |
| 7.51901  | 7.606321 |
| 0.331893 | 0.126927 |
| 1.271909 | 1.328611 |
| 0        | 0.148561 |
| 14.81729 | 19.32123 |
| 2.243476 | 1.832359 |
| 0.073694 | 0        |
| 0        | 0.161368 |
| 2.825362 | 2.8773   |
| 0.140787 | 0.07807  |
| 1.667082 | 0.396192 |
| 25.93551 | 28.4714  |
| 0.162107 | 0.179786 |
| 0.656508 | 0.416061 |
| 6.448193 | 5.10817  |
| 1.631545 | 0.684669 |
| 6.813244 | 7.98201  |
| 11.06652 | 9.599342 |
| 0.032842 | 0.036423 |
| 0.929618 | 0.88924  |
| 46.45106 | 59.55957 |
| 0        | 0        |
| 2.193648 | 2.137994 |

|          |          |
|----------|----------|
| 0.385757 | 0.265548 |
| 2.127135 | 1.905445 |
| 0        | 0.923385 |
| 0.030294 | 0.016799 |
| 4.690168 | 6.298    |
| 2.540767 | 1.643755 |
| 0.654734 | 0.150236 |
| 0.192134 | 0.182648 |
| 0        | 0.056472 |
| 0.50415  | 0.271095 |
| 16.28426 | 12.98045 |
| 3.782815 | 3.114746 |
| 0.363081 | 0.20134  |
| 9.332275 | 6.526585 |
| 0.550588 | 0.694448 |
| 13.94654 | 10.08925 |
| 20.32661 | 25.81754 |
| 14.26788 | 21.2904  |
| 8.619674 | 6.366802 |
| 0.380679 | 0.321673 |
| 0.318721 | 0.141392 |
| 0.385633 | 0        |
| 0.379865 | 0.889398 |
| 3.110269 | 3.975112 |
| 5.188005 | 2.59547  |
| 0.083731 | 0        |
| 27.39762 | 24.66739 |
| 0.905777 | 0.152206 |
| 8.763395 | 5.708863 |
| 7.607753 | 4.694187 |
| 2.536196 | 2.259096 |
| 0.453189 | 1.005228 |
| 0.642978 | 0.237701 |
| 10.65908 | 14.85275 |
| 9.485496 | 1.103496 |
| 42.44918 | 53.12856 |
| 0.835575 | 0.423061 |
| 35.6475  | 28.30987 |
| 2.334237 | 2.206856 |
| 0        | 0        |
| 0.031149 | 0.017273 |
| 0        | 0        |
| 0        | 0        |
| 2.118376 | 3.610834 |
| 24.77886 | 28.56605 |
| 0.356616 | 0.276856 |
| 9.400595 | 9.014956 |
| 0.021365 | 0.04739  |
| 0        | 0        |
| 0        | 0        |
| 7.792395 | 8.300281 |
| 4.043973 | 4.643307 |
| 0        | 0.024331 |
| 0.108212 | 0.330039 |
| 0.183472 | 0.162785 |
| 122.6996 | 158.2165 |
| 15.03734 | 10.30685 |
| 1.20316  | 0.677779 |
| 0.951649 | 0.764282 |
| 14.6625  | 19.77629 |
| 0.281676 | 0.181391 |
| 1.66544  | 1.390271 |
| 0.588501 | 0.881123 |
| 16.10053 | 9.379054 |
| 26.75082 | 24.02207 |

|          |          |
|----------|----------|
| 0.115532 | 0.205011 |
| 0.100573 | 0.148722 |
| 4.080649 | 5.435056 |
| 7.606201 | 3.824202 |
| 4.175731 | 3.240294 |
| 0        | 0        |
| 18.75475 | 18.36082 |
| 0.062799 | 0.023216 |
| 2.892433 | 1.058156 |
| 11.7677  | 15.22628 |
| 33.95377 | 25.71421 |
| 2.000743 | 3.399236 |
| 0.544622 | 0.362411 |
| 0.076976 | 0        |
| 3.357196 | 4.336036 |
| 0.50085  | 1.193239 |
| 1.030844 | 0.809816 |
| 1.487973 | 1.597019 |
| 0.089141 | 0.098863 |
| 0.0923   | 0.136488 |
| 0.033078 | 0        |
| 1.120276 | 1.569416 |
| 4.759558 | 2.285597 |
| 0.044475 | 0.073988 |
| 0.961656 | 0.933218 |
| 6.508489 | 4.073325 |
| 0.080242 | 0.022248 |
| 4.212231 | 4.961183 |
| 1.063306 | 0.888492 |
| 14.77692 | 9.9124   |
| 0.6127   | 0.566268 |
| 0.266107 | 0.108732 |
| 1.175198 | 0.936221 |
| 0.044603 | 0.024734 |
| 0.203786 | 0.251124 |
| 6.695132 | 8.179442 |
| 11.46845 | 13.13015 |
| 12.04826 | 9.647959 |
| 0.021908 | 0        |
| 19.01675 | 23.05336 |
| 3.519036 | 2.607281 |
| 9.526143 | 4.356731 |
| 3.119084 | 3.090126 |
| 0.013754 | 0.076272 |
| 10.64994 | 5.026141 |
| 0.080334 | 0.216375 |
| 0        | 0        |
| 0.045667 | 0.013813 |
| 0        | 0.028105 |
| 0.171918 | 0.027238 |
| 0        | 0        |
| 0.380038 | 0.624422 |
| 0        | 0        |
| 0        | 0.121801 |
| 16.38904 | 13.0843  |
| 9.728264 | 6.578803 |
| 0.737259 | 0.348513 |
| 5.866477 | 3.524235 |
| 10.94931 | 5.427242 |
| 0.490691 | 0.44817  |
| 21.32825 | 31.37205 |
| 0.060514 | 0        |
| 1.475027 | 1.354882 |
| 52.1473  | 42.93775 |
| 2046.39  | 2266.275 |

|          |          |
|----------|----------|
| 2.606116 | 3.187877 |
| 17.17848 | 14.08369 |
| 0        | 0.0126   |
| 0.870038 | 1.15255  |
| 0        | 0.148241 |
| 12.92448 | 9.680454 |
| 16.75928 | 11.50943 |
| 0.677158 | 0.281628 |
| 2.804192 | 3.040908 |
| 61.07018 | 63.14502 |
| 1.132775 | 0.931555 |
| 0        | 0.226507 |
| 0.220725 | 0.174856 |
| 0        | 0        |
| 0        | 0        |
| 11.18725 | 12.89459 |
| 0.284802 | 0.631726 |
| 0.974676 | 0.43239  |
| 122.9526 | 87.11155 |
| 0.099144 | 0.084582 |
| 1.153367 | 1.080975 |
| 0.520963 | 0.469446 |
| 21.83403 | 10.84508 |
| 8.92623  | 7.699792 |
| 5.034072 | 2.193358 |
| 11.24762 | 14.49645 |
| 3.948851 | 5.31179  |
| 3.121342 | 5.072675 |
| 1.408983 | 0.584405 |
| 3.640769 | 2.088006 |
| 7.320209 | 6.263457 |
| 5.230872 | 4.416941 |
| 0.136066 | 0.090543 |
| 43.50863 | 40.19881 |
| 1.884446 | 2.15917  |
| 8.676649 | 6.563987 |
| 22.62632 | 25.90163 |
| 16.5565  | 20.834   |
| 0.518072 | 0.151204 |
| 0.051079 | 0.141625 |
| 0        | 0.121657 |
| 1.19607  | 1.406909 |
| 4.032574 | 2.645243 |
| 2.753088 | 1.123068 |
| 0.382367 | 0.37106  |
| 0.852452 | 3.308972 |
| 19.47645 | 6.084666 |
| 0        | 0        |
| 3.262662 | 2.777292 |
| 0.080181 | 0.088926 |
| 5.624247 | 6.104445 |
| 29.57044 | 29.52813 |
| 0.810612 | 1.198691 |
| 0        | 0        |
| 0.267328 | 1.062397 |
| 0.043176 | 0.047885 |
| 0.6332   | 0.979464 |
| 0.169897 | 0.153097 |
| 3.210174 | 2.712593 |
| 0.219093 | 0.011571 |
| 3.533569 | 3.27347  |
| 0        | 0        |
| 0.332683 | 0.338218 |
| 24.10314 | 40.45902 |
| 0.620485 | 0.305059 |

|          |          |
|----------|----------|
| 0.9448   | 2.544757 |
| 2.47882  | 2.155447 |
| 0        | 0        |
| 0.455803 | 0.108324 |
| 3.116501 | 1.15213  |
| 0.379157 | 0.508113 |
| 2.507071 | 2.224396 |
| 0.049042 | 0        |
| 2.910807 | 6.147435 |
| 12.28071 | 4.42073  |
| 2.201787 | 1.763606 |
| 0.282213 | 0.031299 |
| 0        | 0        |
| 8.636613 | 6.727959 |
| 1.409213 | 1.795401 |
| 0.493733 | 0.342237 |
| 37.36229 | 30.44147 |
| 45.91329 | 40.0956  |
| 0        | 0        |
| 12.53159 | 13.26496 |
| 0.228156 | 0.126519 |
| 10.31666 | 11.74784 |
| 1.150941 | 0.354573 |
| 0.305621 | 0.152528 |
| 0        | 0        |
| 14.37671 | 11.92417 |
| 0.793443 | 1.627956 |
| 0        | 0.042322 |
| 0.06075  | 0        |
| 20.9903  | 27.97297 |
| 0.030427 | 0.151856 |
| 32.37435 | 19.81609 |
| 0.030023 | 0.033297 |
| 3.552984 | 2.070419 |
| 5.255386 | 4.376248 |
| 0        | 0        |
| 0.438937 | 0.503594 |
| 5.13998  | 3.499348 |
| 6.497465 | 4.964191 |
| 1.872158 | 2.097525 |
| 1.468398 | 2.004361 |
| 0.051739 | 0        |
| 1.898639 | 1.383311 |
| 0.292544 | 0.274534 |
| 9.89659  | 9.890945 |
| 0        | 0.083414 |
| 0.028757 | 0.191361 |
| 0        | 0        |
| 0.301221 | 0.137559 |
| 0.117478 | 0.08686  |
| 33.44406 | 35.74955 |
| 0.058206 | 0.129109 |
| 0.300464 | 1.226905 |
| 0.534573 | 1.439838 |
| 0.096859 | 0        |
| 53.18252 | 45.46882 |
| 0.407573 | 0.234382 |
| 0.329373 | 0.182648 |
| 23.68652 | 22.55237 |
| 0.770855 | 0.537382 |
| 0.279951 | 0.137992 |
| 0.290805 | 0.16126  |
| 9.744179 | 7.293416 |
| 9.12077  | 14.32811 |
| 166.9639 | 142.1079 |

|          |          |
|----------|----------|
| 0.026153 | 0        |
| 13.36258 | 15.92725 |
| 0.736208 | 0.748458 |
| 0.643626 | 0.484378 |
| 4.162167 | 3.865777 |
| 3.293533 | 4.227056 |
| 2.346063 | 4.119718 |
| 0        | 0        |
| 432.6446 | 541.0848 |
| 9.857218 | 5.641914 |
| 4.822446 | 4.304798 |
| 0.154062 | 0.284773 |
| 0.917088 | 1.383265 |
| 0        | 0.090794 |
| 2.80712  | 1.666513 |
| 0.029314 | 0.032511 |
| 6.082513 | 4.207729 |
| 42.53677 | 43.53393 |
| 0.154665 | 0        |
| 0.032303 | 0.071653 |
| 1.173742 | 1.256863 |
| 1.776218 | 1.522221 |
| 27.00923 | 32.9694  |
| 1.98209  | 1.083649 |
| 4.19158  | 3.823689 |
| 0        | 0.098509 |
| 6.90871  | 6.799551 |
| 0        | 0        |
| 0.135858 | 0.452023 |
| 0.012545 | 0.027827 |
| 15.99376 | 14.90489 |
| 0.034002 | 0.113129 |
| 107.2295 | 107.2373 |
| 4.927531 | 2.623167 |
| 0.045945 | 0.084926 |
| 0        | 0        |
| 10.29064 | 5.658921 |
| 0.044269 | 0        |
| 10.52828 | 8.14845  |
| 37.20268 | 32.75872 |
| 4.444282 | 11.86497 |
| 4.469124 | 7.340685 |
| 3.306402 | 3.74849  |
| 221.7153 | 139.9567 |
| 1.170053 | 1.051269 |
| 52.74121 | 61.46551 |
| 5.272685 | 3.263848 |
| 16.19903 | 11.33029 |
| 0        | 0        |
| 1.983297 | 0.777906 |
| 5.001    | 1.805535 |
| 1.628219 | 1.301851 |
| 0.468698 | 0.225253 |
| 5.878048 | 5.500502 |
| 0.55066  | 0.229018 |
| 0.09044  | 0.050152 |
| 0        | 0        |
| 1.317882 | 0.605314 |
| 0.43308  | 0.246827 |
| 0.139591 | 0.111811 |
| 0        | 0        |
| 37.20648 | 39.2812  |
| 3.237033 | 4.851442 |
| 66.23919 | 65.67838 |
| 0        | 0        |

|          |          |
|----------|----------|
| 1.160597 | 1.287173 |
| 3.971615 | 1.932702 |
| 0.342077 | 0.252922 |
| 16.23373 | 23.55673 |
| 0        | 0        |
| 7.798217 | 6.256064 |
| 0        | 0.140336 |
| 0        | 0        |
| 23.23611 | 14.70623 |
| 0.053833 | 0.019901 |
| 1.336458 | 1.165624 |
| 11.34164 | 13.79831 |
| 0.102804 | 0.076011 |
| 0.829995 | 0.812219 |
| 2.399817 | 2.096523 |
| 0.034483 | 0.057366 |
| 2.94227  | 1.991079 |
| 2.27143  | 2.074154 |
| 0.197352 | 0.043775 |
| 0        | 0        |
| 27.23538 | 19.1363  |
| 0        | 0.012844 |
| 0.703933 | 0.234211 |
| 7.717295 | 9.497674 |
| 0.242934 | 0.192449 |
| 0.39953  | 0.336758 |
| 47.41484 | 33.65665 |
| 1.106155 | 1.612356 |
| 0        | 0        |
| 1.12157  | 0.444246 |
| 0.541599 | 0.081909 |
| 0.414505 | 0.459711 |
| 11.7746  | 9.656341 |
| 1.61021  | 2.479344 |
| 14.64759 | 16.58045 |
| 16.11222 | 13.96342 |
| 4.902205 | 2.949231 |
| 4.680396 | 1.933325 |
| 0.690231 | 0.313733 |
| 12.08469 | 11.73127 |
| 0.253209 | 0.028082 |
| 2.016193 | 1.20573  |
| 21.38507 | 15.15616 |
| 38.08691 | 32.70313 |
| 10.35031 | 9.651768 |
| 0.806085 | 0.528271 |
| 4.892846 | 5.663542 |
| 0.411171 | 0.912028 |
| 2.689752 | 1.975017 |
| 0.068491 | 0.05697  |
| 3.901719 | 7.280761 |
| 1.335202 | 0.524457 |
| 3.9467   | 2.438998 |
| 0.129348 | 0        |
| 8.869555 | 11.85096 |
| 9.515614 | 9.287621 |
| 0.184143 | 0        |
| 0.44944  | 0.071208 |
| 33.78697 | 22.05526 |
| 6.149436 | 3.214682 |
| 0.115296 | 0        |
| 38.34501 | 35.31722 |
| 0        | 0        |
| 4.680049 | 3.58774  |
| 5.703774 | 5.055288 |

|          |          |
|----------|----------|
| 2.091847 | 3.731111 |
| 19.88366 | 29.77989 |
| 72.1924  | 80.38037 |
| 8.35986  | 9.188811 |
| 2.085285 | 1.679467 |
| 5.080963 | 8.246483 |
| 0        | 0.020433 |
| 0.26184  | 0.085411 |
| 30.31517 | 15.69234 |
| 0.075571 | 0.51485  |
| 34.56222 | 26.23374 |
| 0.499358 | 0.646122 |
| 2.51126  | 0.503695 |
| 0        | 0.036961 |
| 0.935043 | 0.622212 |
| 60.47237 | 37.1061  |
| 1834.501 | 1740.439 |
| 1.900619 | 1.264741 |
| 7.460616 | 4.924204 |
| 40.40176 | 55.60546 |
| 0.035831 | 0        |
| 3.440776 | 3.582828 |
| 0.766032 | 0.573464 |
| 18.99369 | 20.40622 |
| 0        | 0.062277 |
| 51.54479 | 24.56409 |
| 26.10833 | 33.87223 |
| 13.0197  | 15.51905 |
| 8.429831 | 11.08582 |
| 0.13368  | 0        |
| 5.961013 | 5.819653 |
| 0.112273 | 0.456564 |
| 46.17843 | 41.94086 |
| 6.604301 | 1.629672 |
| 1.962813 | 2.291452 |
| 2.88598  | 1.671176 |
| 0.605135 | 0.498555 |
| 0        | 0        |
| 3.284929 | 4.272638 |
| 7.665048 | 7.207373 |
| 7.098255 | 15.30556 |
| 0        | 0.046652 |
| 2.797936 | 2.088904 |
| 3.622976 | 3.852973 |
| 6.493328 | 10.72826 |
| 0.072222 | 0        |
| 11.04312 | 5.261887 |
| 0.035992 | 0        |
| 3.216623 | 4.10591  |
| 0.322555 | 0.227648 |
| 3.815939 | 6.218609 |
| 2.586954 | 1.289011 |
| 18.3003  | 20.44964 |
| 4.710727 | 5.749696 |
| 0        | 0.073214 |
| 0.788514 | 0.608355 |
| 21.81651 | 25.94341 |
| 10.95829 | 8.493958 |
| 4.582535 | 2.039297 |
| 5.039378 | 7.984253 |
| 0.121102 | 0.042735 |
| 1.28203  | 0.446867 |
| 4.260281 | 1.189488 |
| 0        | 0        |
| 5.074211 | 3.797492 |

|          |          |
|----------|----------|
| 2.159778 | 2.981732 |
| 0.01177  | 0.156644 |
| 0        | 0        |
| 1.826085 | 2.592306 |
| 0.81446  | 0.347417 |
| 0.713642 | 1.068488 |
| 1.32741  | 0.401845 |
| 3.169572 | 2.218464 |
| 17.45096 | 16.32924 |
| 0        | 0.049681 |
| 18.21841 | 13.84365 |
| 0.165712 | 0.061262 |
| 13.3395  | 12.16312 |
| 0.132759 | 0.073619 |
| 2.328258 | 1.787663 |
| 0.349159 | 0.211221 |
| 13.33476 | 10.85258 |
| 0.705232 | 0.674601 |
| 130.5661 | 132.2404 |
| 47.75046 | 53.52155 |
| 16.52945 | 14.29349 |
| 0.149607 | 0        |
| 0.983042 | 0.401672 |
| 0.081729 | 0.075535 |
| 0        | 0        |
| 0        | 0        |
| 10.09947 | 11.56817 |
| 58.97281 | 44.4448  |
| 39.00445 | 49.66326 |
| 0.851234 | 0.53104  |
| 3.399916 | 3.850602 |
| 31.84289 | 18.03249 |
| 1.489609 | 0.90313  |
| 11.6837  | 3.997911 |
| 6.165672 | 1.709526 |
| 21.18209 | 24.34776 |
| 0.35357  | 0.235278 |
| 3.991863 | 3.30729  |
| 0.19738  | 0.072969 |
| 0.149247 | 0.137937 |
| 0.813156 | 0.530494 |
| 0.045089 | 0        |
| 2.093296 | 1.642488 |
| 40.85786 | 45.62936 |
| 9.198367 | 11.10196 |
| 17.35594 | 21.50316 |
| 9.06313  | 9.115388 |
| 1.188019 | 0.515577 |
| 2.304074 | 2.243254 |
| 0.022225 | 0.024649 |
| 0.094966 | 0.117026 |
| 0.493287 | 0.39788  |
| 4.417249 | 3.439195 |
| 0.093645 | 0.103858 |
| 0.352766 | 0.216211 |
| 0.283104 | 0.120761 |
| 0.425424 | 0.610592 |
| 0        | 0.01636  |
| 168.2847 | 214.7475 |
| 0        | 0        |
| 8.657238 | 6.716862 |
| 13.28152 | 11.95902 |
| 33.77619 | 29.92298 |
| 1.517398 | 1.061822 |
| 0.33105  | 0.178014 |

|          |          |
|----------|----------|
| 6.718942 | 9.404949 |
| 24.22129 | 13.50183 |
| 0.084808 | 0.179563 |
| 75.73914 | 87.68951 |
| 0.692477 | 0.645818 |
| 8.450389 | 7.809997 |
| 0.806323 | 0.335348 |
| 4.518103 | 1.950946 |
| 1.259734 | 1.097738 |
| 1.031179 | 0.784068 |
| 11.09638 | 9.181085 |
| 0.124236 | 0.034446 |
| 0        | 0.157751 |
| 1.696096 | 2.025771 |
| 1.185102 | 1.231339 |
| 2.78637  | 1.926864 |
| 2.192842 | 0.943759 |
| 1.215318 | 0.586027 |
| 233.6791 | 123.9446 |
| 0        | 0        |
| 38.20914 | 44.04451 |
| 0        | 0.215856 |
| 9.188193 | 8.418046 |
| 0        | 0.161449 |
| 3.338521 | 1.624892 |
| 11.32602 | 8.163049 |
| 2.295466 | 0.484916 |
| 12.13543 | 13.76518 |
| 5.530644 | 8.394332 |
| 0.946859 | 0.300035 |
| 0        | 0        |
| 23.8962  | 20.88685 |
| 0        | 0        |
| 0.055042 | 0        |
| 0.281077 | 0.45028  |
| 0.015682 | 0        |
| 3.241825 | 2.484766 |
| 0.488134 | 0.853699 |
| 18.44244 | 8.401893 |
| 0.06184  | 0        |
| 0        | 0        |
| 0        | 0        |
| 0        | 0.25503  |
| 13.81426 | 10.2639  |
| 0.095961 | 0.31928  |
| 2.82811  | 2.115345 |
| 0        | 0        |
| 0.040463 | 0.062827 |
| 6.595975 | 12.2146  |
| 0.383252 | 0.294266 |
| 10.14782 | 8.872201 |
| 0.547503 | 0.323848 |
| 6.977847 | 6.528206 |
| 2.606446 | 0.889448 |
| 0        | 0.17862  |
| 0.08345  | 0.046276 |
| 1.064955 | 1.41732  |
| 1.607427 | 2.700319 |
| 0.155266 | 0.258299 |
| 2.323221 | 2.668614 |
| 0.242583 | 0.237387 |
| 0        | 0        |
| 1.842823 | 2.043803 |
| 0.098551 | 0.109299 |
| 0.047455 | 0.017543 |

|          |          |
|----------|----------|
| 16.92443 | 17.7501  |
| 1.817022 | 1.461306 |
| 0        | 0        |
| 8.846367 | 10.89129 |
| 0        | 0        |
| 0.412955 | 0.338516 |
| 0.015766 | 0.122399 |
| 0.125175 | 0.138827 |
| 6.035112 | 3.168955 |
| 0.138032 | 0        |
| 6.265649 | 6.085627 |
| 21.11932 | 14.78823 |
| 0.077415 | 0.114477 |
| 0        | 0        |
| 2.82763  | 4.075141 |
| 2.159544 | 1.975929 |
| 0.0657   | 0.072866 |
| 12.64547 | 20.31148 |
| 0        | 0        |
| 3.251932 | 2.552356 |
| 0.032574 | 0        |
| 2.331738 | 2.972016 |
| 10.87653 | 12.02408 |
| 16.06006 | 15.47157 |
| 56.18145 | 47.72276 |
| 22.33479 | 23.97053 |
| 12.58974 | 8.589507 |
| 0        | 0.037699 |
| 39.88876 | 28.50723 |
| 1.283035 | 0.689248 |
| 0.594449 | 0.146507 |
| 12.15591 | 14.49913 |
| 0.977746 | 0.424323 |
| 26.06364 | 17.99398 |
| 4.487919 | 3.992548 |
| 0.050368 | 0.055861 |
| 0.280619 | 0        |
| 1.611365 | 0.437658 |
| 2.561375 | 1.79208  |
| 0.115942 | 0.042862 |
| 1.038544 | 2.103303 |
| 0.473565 | 0.552855 |
| 1.730427 | 0.716791 |
| 0.154971 | 0.046874 |
| 14.54164 | 14.43392 |
| 0.083264 | 0.030781 |
| 10.65656 | 9.425368 |
| 135.7388 | 118.046  |
| 0.827148 | 0.434538 |
| 3.775554 | 1.134066 |
| 9.222455 | 12.73315 |
| 10.26595 | 13.40119 |
| 2.37903  | 1.962779 |
| 1.720465 | 0.853441 |
| 0.104876 | 0        |
| 0.042907 | 0        |
| 0        | 0.419867 |
| 0.01745  | 0.019353 |
| 0.036298 | 0.040256 |
| 9.295404 | 16.26953 |
| 21.02561 | 17.20857 |
| 0.773936 | 0.524543 |
| 0.128358 | 0.071179 |
| 1.564102 | 1.23486  |
| 0        | 0.204761 |

|          |          |
|----------|----------|
| 0        | 0.035096 |
| 1.188    | 1.699289 |
| 0.553171 | 0.788786 |
| 12.16014 | 14.29682 |
| 0.141936 | 0        |
| 0        | 0        |
| 0.245546 | 0.121034 |
| 5.792121 | 5.871624 |
| 0.149878 | 0.083112 |
| 8.371809 | 11.64631 |
| 1.923045 | 1.581445 |
| 0        | 0.029693 |
| 3.34576  | 3.088506 |
| 4.347093 | 4.901277 |
| 0.154381 | 0.513654 |
| 0.037222 | 0.020641 |
| 0        | 0        |
| 8.205208 | 6.723795 |
| 0.045154 | 0        |
| 12.5366  | 16.26791 |
| 0.932386 | 1.92042  |
| 1.296478 | 0.753172 |
| 0        | 0.140958 |
| 0.166589 | 0.309267 |
| 0.053066 | 0        |
| 1.014882 | 1.3573   |
| 16.91404 | 46.32483 |
| 0.309524 | 0.242316 |
| 0.017581 | 0.058495 |
| 10.03903 | 10.08263 |
| 0.267232 | 0.098792 |
| 10.02591 | 15.81258 |
| 0.689854 | 0.292535 |
| 0.268442 | 0.297719 |
| 23.52111 | 26.15317 |
| 0.778031 | 0.604019 |
| 0.036883 | 0        |
| 3.019346 | 1.111523 |
| 7.010266 | 6.753877 |
| 0.374017 | 0        |
| 0.039842 | 0.058916 |
| 12.72517 | 13.18741 |
| 1.931929 | 0.81924  |
| 14.63293 | 11.8516  |
| 7.891339 | 3.148859 |
| 1.016776 | 0.140958 |
| 38.61898 | 28.44693 |
| 0.165502 | 2.097735 |
| 19.18047 | 19.89744 |
| 3.011995 | 1.544187 |
| 10.35874 | 9.052627 |
| 0.135434 | 0.311138 |
| 22.61913 | 15.59368 |
| 1.445968 | 1.824862 |
| 1.812966 | 1.404291 |
| 0.129168 | 0.047752 |
| 2.957805 | 1.917303 |
| 0.0436   | 0        |
| 7.791509 | 5.015555 |
| 6.779602 | 7.71686  |
| 24.66208 | 14.44605 |
| 0.620042 | 0.504287 |
| 0.110034 | 0.122035 |
| 2.525233 | 2.112213 |
| 2.854569 | 2.482839 |

|          |          |
|----------|----------|
| 1.240234 | 0.708589 |
| 0.28706  | 0.591252 |
| 0        | 0        |
| 1.432665 | 0.157318 |
| 50.27793 | 43.24781 |
| 0.318511 | 0.12616  |
| 0        | 0        |
| 0.447473 | 0.372206 |
| 1.254475 | 0.920392 |
| 4.705151 | 6.623226 |
| 9.96561  | 10.0163  |
| 4.639243 | 3.065227 |
| 0        | 0.034777 |
| 0.959118 | 0.780061 |
| 5.3186   | 2.493244 |
| 18.38827 | 12.11611 |
| 2.81495  | 1.465406 |
| 8.224044 | 6.776311 |
| 0.046542 | 0.017206 |
| 0        | 0        |
| 0.072744 | 0.040339 |
| 0.04725  | 0        |
| 10.75654 | 10.83598 |
| 6.558474 | 2.78827  |
| 0.419034 | 0.116184 |
| 0.037357 | 0        |
| 4.606703 | 4.91465  |
| 1.038146 | 0.415771 |
| 11.00192 | 9.133514 |
| 0.218104 | 0.16126  |
| 1.275259 | 0.66676  |
| 5.22039  | 7.011126 |
| 0        | 0        |
| 0.605726 | 0.671787 |
| 0.421285 | 0.233615 |
| 0.208812 | 0        |
| 0.420928 | 0.200072 |
| 6.031136 | 2.844344 |
| 4.155654 | 5.499224 |
| 0.084129 | 0.419867 |
| 0.113643 | 0.084025 |
| 7.192678 | 5.27034  |
| 0.070261 | 0.103898 |
| 0.272311 | 0.151005 |
| 1.285238 | 0.424881 |
| 0.088338 | 0.13063  |
| 0        | 0.043719 |
| 0.192517 | 0.427027 |
| 1.522886 | 0.649605 |
| 0.084884 | 0.080693 |
| 6.772305 | 1.334173 |
| 5.571534 | 2.566732 |
| 0        | 0.048052 |
| 0.250977 | 0.053019 |
| 0.296661 | 0.117505 |
| 0        | 0        |
| 11.27094 | 4.894759 |
| 0.181806 | 0        |
| 0.097775 | 0.108438 |
| 0.247586 | 0.021122 |
| 0.02454  | 0        |
| 6.256326 | 7.960071 |
| 22.03298 | 25.0505  |
| 0        | 0        |
| 0.103824 | 0.115147 |

|          |          |
|----------|----------|
| 0.015037 | 0.10006  |
| 0.526071 | 0.501762 |
| 10.62654 | 10.45651 |
| 9.832163 | 5.115416 |
| 0.243956 | 0.135281 |
| 2.093652 | 1.060807 |
| 0.103177 | 0.100126 |
| 1.145514 | 0.078181 |
| 139.2718 | 152.621  |
| 0        | 0        |
| 3.601924 | 1.963136 |
| 0.05484  | 0.060821 |
| 1.692863 | 1.353144 |
| 0.259274 | 0.205393 |
| 4.506306 | 4.581287 |
| 18.07365 | 21.70963 |
| 0.154402 | 0.076107 |
| 50.33154 | 66.64602 |
| 21.9854  | 19.76866 |
| 0        | 0        |
| 2.630934 | 3.564339 |
| 0        | 0        |
| 0.63354  | 0.351317 |
| 0.094862 | 0.052604 |
| 0.040713 | 0.045153 |
| 0.46364  | 0.105866 |
| 6.222281 | 9.580845 |
| 1.00662  | 1.275889 |
| 2.359967 | 1.637283 |
| 0.060455 | 0.067048 |
| 2.80166  | 3.554805 |
| 12.34147 | 9.222755 |
| 0.857905 | 2.552352 |
| 0        | 0        |
| 0.768878 | 0.575594 |
| 36.15186 | 23.9696  |
| 11.34878 | 11.18304 |
| 34.21991 | 13.81928 |
| 11.14828 | 5.326579 |
| 0.031796 | 0.035264 |
| 0        | 0        |
| 0.075967 | 0.084252 |
| 6.545097 | 9.746231 |
| 1.14019  | 0.612511 |
| 4.850397 | 4.154973 |
| 0.321822 | 0.219643 |
| 0.039122 | 0.065083 |
| 28.62349 | 25.79035 |
| 5.379515 | 2.781241 |
| 0.236973 | 0        |
| 0        | 0.094977 |
| 0.440092 | 0.337908 |
| 5.253335 | 1.302921 |
| 0.300906 | 0.111241 |
| 42.47299 | 36.24446 |
| 0        | 0.019213 |
| 0.918672 | 1.146221 |
| 1998.78  | 1609.596 |
| 0        | 0        |
| 16.40216 | 24.66452 |
| 7.479262 | 8.095078 |
| 0.012978 | 0        |
| 3.68959  | 2.610401 |
| 12.26422 | 5.801331 |
| 0        | 0.094068 |

|          |          |
|----------|----------|
| 0.451541 | 0.417322 |
| 6.923975 | 1.523129 |
| 0.356139 | 0.26332  |
| 1.123882 | 0.370567 |
| 55.65105 | 57.92888 |
| 0.480053 | 0.266204 |
| 0.84373  | 1.193885 |
| 0.805576 | 1.021066 |
| 1.213919 | 0.701203 |
| 0.102454 | 0        |
| 3.811569 | 3.236498 |
| 10.58154 | 8.059371 |
| 5.426879 | 6.91528  |
| 4.720637 | 7.050112 |
| 31.69837 | 23.53379 |
| 7.623219 | 2.442444 |
| 0        | 0        |
| 0.014671 | 0.016271 |
| 1.147882 | 0.936081 |
| 3.555291 | 4.725843 |
| 0.009271 | 0.020564 |
| 4.214657 | 3.92039  |
| 1.53331  | 0.836771 |
| 0.18237  | 0.112366 |
| 1.129353 | 0.702634 |
| 20.659   | 15.35597 |
| 0        | 0        |
| 0.068059 | 0        |
| 1.325087 | 1.581785 |
| 1.444899 | 1.634855 |
| 52.4809  | 57.50728 |
| 0        | 0        |
| 0.0372   | 0.020629 |
| 0.596989 | 0.122611 |
| 0        | 0        |
| 0.226241 | 0.179225 |
| 0.325204 | 0.090168 |
| 0.400064 | 0.307174 |
| 47.53216 | 43.11926 |
| 0        | 0.028466 |
| 0        | 0.012023 |
| 2.200035 | 1.541823 |
| 0.165565 | 0.183622 |
| 1.29821  | 0.539923 |
| 67.84342 | 72.13157 |
| 0.058767 | 0.032588 |
| 9.077829 | 7.74354  |
| 18.99939 | 20.62559 |
| 0.123188 | 0        |
| 0.067303 | 0        |
| 0        | 0        |
| 0        | 0        |
| 0.066474 | 0        |
| 16.65772 | 13.71348 |
| 23.60542 | 30.27006 |
| 0.154215 | 0.171034 |
| 0.234086 | 0.219675 |
| 41.48418 | 51.71387 |
| 0        | 0        |
| 0.102454 | 0.113627 |
| 1.091388 | 1.462182 |
| 1.204671 | 1.524471 |
| 1.479552 | 1.91189  |
| 0.512186 | 0.180112 |
| 3.284193 | 2.688416 |

|          |          |
|----------|----------|
| 6.603325 | 4.723434 |
| 0        | 0        |
| 0.029979 | 0        |
| 1.967923 | 1.319121 |
| 0.621434 | 0.313276 |
| 0.090407 | 0.125333 |
| 0.739606 | 1.130639 |
| 0.224288 | 0.022614 |
| 39.52526 | 41.57827 |
| 0        | 0        |
| 152.4172 | 140.2141 |
| 0.798117 | 0.626989 |
| 1.503879 | 1.682272 |
| 0        | 0.034343 |
| 4.989429 | 6.289018 |
| 38.53669 | 28.06684 |
| 0        | 0        |
| 0        | 0        |
| 0.319028 | 0.239685 |
| 0        | 0.466045 |
| 0.016156 | 0.035836 |
| 0.060133 | 0.133381 |
| 0        | 0        |
| 0.046426 | 0.051489 |
| 0        | 0        |
| 0        | 0.060668 |
| 4.680069 | 4.448984 |
| 0.301881 | 0.334805 |
| 3.321751 | 2.731973 |
| 13.13725 | 10.32089 |
| 3.687189 | 4.142563 |
| 0.533262 | 0.380198 |
| 0.146087 | 0        |
| 15.49747 | 9.360403 |
| 0        | 0.074081 |
| 0.01911  | 0        |
| 2.750685 | 1.249325 |
| 1.132103 | 0.881102 |
| 1.25569  | 2.166323 |
| 5.322907 | 2.917524 |
| 0        | 0        |
| 0.403162 | 0.223565 |
| 0.019312 | 0        |
| 0.113318 | 0.062838 |
| 0.876333 | 0.942455 |
| 0        | 0        |
| 3.040163 | 4.870271 |
| 0.071584 | 0        |
| 0.453465 | 0.37719  |
| 0        | 0.160883 |
| 17.6924  | 14.84741 |
| 6.070612 | 1.716173 |
| 0        | 0.087383 |
| 0.043509 | 0.144761 |
| 0.366338 | 0.308781 |
| 0.430615 | 0.260497 |
| 0.007397 | 0.008204 |
| 10.04096 | 13.33236 |
| 0.042967 | 0.047653 |
| 1.286775 | 0.570845 |
| 0        | 0        |
| 3.948089 | 2.542454 |
| 0.079213 | 0.087852 |
| 17.97428 | 22.19201 |
| 0.288106 | 0        |

|          |          |
|----------|----------|
| 0.258034 | 0.044027 |
| 0.01179  | 0.013076 |
| 0.712586 | 0.815794 |
| 0.880098 | 0.399306 |
| 0.179962 | 0        |
| 0        | 0.036298 |
| 0.064497 | 0.019508 |
| 19.34591 | 20.49112 |
| 0        | 0        |
| 0.058079 | 0.064414 |
| 5.435584 | 4.595685 |
| 0.069351 | 0.076915 |
| 1.524406 | 1.280071 |
| 5.650357 | 5.246941 |
| 0.200604 | 0.05562  |
| 81.30728 | 61.64604 |
| 1.459867 | 0.864558 |
| 0.28071  | 0.110693 |
| 0        | 0        |
| 0.893224 | 1.320853 |
| 2.092816 | 2.413441 |
| 3.077113 | 0.785224 |
| 1.818489 | 0.441551 |
| 3.807887 | 2.9359   |
| 116.179  | 97.156   |
| 23.56529 | 26.18929 |
| 0.172029 | 0.086723 |
| 1.736002 | 1.141447 |
| 0.376109 | 0.278085 |
| 2.823068 | 2.605319 |
| 2.025779 | 2.687847 |
| 186.2912 | 223.8651 |
| 1.069147 | 1.496302 |
| 5.62621  | 3.009791 |
| 16.34412 | 13.51816 |
| 3.51794  | 1.159938 |
| 0.15234  | 0.018773 |
| 0.569604 | 0.157932 |
| 0.599632 | 0.526481 |
| 0        | 0        |
| 0        | 0.101102 |
| 0.069604 | 0.019299 |
| 1.615135 | 1.578758 |
| 10.80551 | 1.721453 |
| 5.600867 | 7.199928 |
| 0.04843  | 0.107423 |
| 0.067966 | 0.150757 |
| 1.02699  | 0.816934 |
| 16.51572 | 16.6826  |
| 0.777002 | 1.040595 |
| 0.067024 | 0.099112 |
| 2.387957 | 3.101106 |
| 108.7515 | 73.69972 |
| 0.703819 | 0.529678 |
| 26.18749 | 29.95714 |
| 5.079969 | 5.081961 |
| 8.708052 | 7.443818 |
| 0.90698  | 0.36578  |
| 2.190182 | 1.936195 |
| 1.177162 | 0.447615 |
| 0.058962 | 0.130785 |
| 2.351776 | 1.238925 |
| 0.012911 | 0.028637 |
| 0.365437 | 0.363724 |
| 0        | 0.02033  |

|          |          |
|----------|----------|
| 0.036978 | 0        |
| 0.029369 | 0.097717 |
| 0        | 0.058853 |
| 0.098394 | 0.272814 |
| 0.188428 | 0        |
| 0.025487 | 0        |
| 1.756961 | 2.897558 |
| 0.079497 | 0        |
| 4.880899 | 3.822601 |
| 0.21961  | 0.139178 |
| 0.116123 | 0.193181 |
| 0.198361 | 0.329991 |
| 0.645005 | 1.107638 |
| 0        | 0.05784  |
| 6.607917 | 2.773665 |
| 211.4185 | 236.1826 |
| 0.231197 | 0        |
| 0.429667 | 0.387178 |
| 23.81538 | 18.93411 |
| 0.927259 | 1.094028 |
| 0.910273 | 0.417744 |
| 0.2529   | 0.560962 |
| 0.066144 | 0        |
| 0.390484 | 0        |
| 1.354379 | 1.279006 |
| 14.26607 | 8.996278 |
| 1.058687 | 0.340882 |
| 35.7741  | 54.57142 |
| 0.388043 | 0.215182 |
| 0.843133 | 0.756027 |
| 0.346232 | 0.054856 |
| 16.51738 | 12.82176 |
| 4.269403 | 4.766437 |
| 16.18685 | 19.24829 |
| 3.392503 | 1.85858  |
| 0.059795 | 0.044211 |
| 0        | 0        |
| 0.974259 | 0.720342 |
| 0        | 0        |
| 0.513468 | 0.450829 |
| 0.221667 | 0.067048 |
| 9.624252 | 5.191915 |
| 0.142371 | 0.200962 |
| 149.0849 | 130.7034 |
| 3.113066 | 3.556753 |
| 0        | 0.117405 |
| 0.093787 | 0.416061 |
| 0.098084 | 0        |
| 0.127803 | 0.028348 |
| 9.931642 | 11.91703 |
| 0.028145 | 0.062428 |
| 8.180733 | 4.987108 |
| 9.517977 | 8.429474 |
| 0        | 0.055823 |
| 0        | 0.050949 |
| 0.554701 | 0.65914  |
| 0.035407 | 0.019634 |
| 0        | 0        |
| 0.274417 | 0.076086 |
| 0        | 0.333723 |
| 0.029121 | 0.032297 |
| 9.898964 | 6.619422 |
| 3.132824 | 2.368973 |
| 0        | 0        |
| 0.113297 | 0.09424  |

|          |          |
|----------|----------|
| 12.20989 | 16.46223 |
| 0        | 0.073253 |
| 0.146976 | 0.139719 |
| 8.887026 | 11.77024 |
| 0.021626 | 0.23984  |
| 0.151063 | 1.172766 |
| 0.280936 | 0        |
| 1.058846 | 0.640541 |
| 7.457303 | 9.748348 |
| 0        | 0        |
| 7.42022  | 3.969083 |
| 3.392808 | 1.989161 |
| 7.597551 | 4.99293  |
| 0.041285 | 0.081764 |
| 0.302273 | 0.201144 |
| 3.108044 | 0.902788 |
| 3.165316 | 3.16523  |
| 0.015364 | 0.01704  |
| 3.154714 | 1.411268 |
| 1.896091 | 1.342264 |
| 0.137057 | 0.405346 |
| 0.08058  | 0.044684 |
| 0.021096 | 0        |
| 0.236521 | 0.374738 |
| 0.5845   | 0.216082 |
| 0.09723  | 0.035945 |
| 0        | 0.087717 |
| 2.038345 | 2.240282 |
| 2.422105 | 2.686262 |
| 0        | 0        |
| 1.909159 | 1.334235 |
| 0.680292 | 0.263615 |
| 14.07475 | 15.60975 |
| 5.860554 | 4.093848 |
| 0.533917 | 0.422962 |
| 0.033148 | 0.018382 |
| 2.00995  | 1.632375 |
| 0.167954 | 0.620903 |
| 0        | 0.012871 |
| 0.816367 | 0.071479 |
| 7.443289 | 4.947382 |
| 0.304182 | 0.18742  |
| 0.101865 | 0.056487 |
| 0.591095 | 0.29136  |
| 770.3016 | 897.2942 |
| 15.30036 | 9.796474 |
| 18.5981  | 8.219552 |
| 0.592782 | 0.438288 |
| 1.014492 | 0.825097 |
| 0.026739 | 0.029655 |
| 0.094934 | 0.105288 |
| 1.634204 | 0.585116 |
| 13.19735 | 6.863874 |
| 1.197664 | 0.478182 |
| 0.023341 | 0.017258 |
| 29.70161 | 27.91329 |
| 2.572369 | 1.164639 |
| 0.047457 | 0.045113 |
| 0        | 0.082962 |
| 0.392069 | 0.217414 |
| 0.282021 | 0.172028 |
| 8.039898 | 6.380599 |
| 0.686373 | 0.761229 |
| 11.71148 | 10.67568 |
| 0.177576 | 0.089519 |

|          |          |
|----------|----------|
| 0.457699 | 0.203046 |
| 13.26432 | 18.06563 |
| 0        | 0.028751 |
| 0.068554 | 0.050687 |
| 2.784318 | 2.428958 |
| 62.48592 | 67.15348 |
| 0.215852 | 0.174104 |
| 0.113416 | 0.107815 |
| 1.85334  | 2.008752 |
| 80.35856 | 60.94634 |
| 0.169174 | 0.938122 |
| 0.042482 | 0        |
| 0.338246 | 0.125045 |
| 0.111969 | 0.020697 |
| 1.854999 | 4.211963 |
| 0.545153 | 0.604608 |
| 0.58883  | 0.576219 |
| 0.095764 | 0.106208 |
| 4.359612 | 4.36824  |
| 0.137209 | 0.152173 |
| 0.06868  | 0.203121 |
| 0        | 0.037876 |
| 0        | 0        |
| 1.463215 | 2.858332 |
| 72.05577 | 74.22455 |
| 0.21751  | 0.268035 |
| 12.16024 | 7.723518 |
| 0.975187 | 1.048767 |
| 0.101383 | 0        |
| 0        | 0        |
| 0.123412 | 0.059509 |
| 1.424011 | 8.172955 |
| 0        | 0        |
| 261.49   | 166.5722 |
| 29.97661 | 24.59845 |
| 0        | 0        |
| 9.253334 | 6.148048 |
| 6.286279 | 6.238824 |
| 0.480053 | 0.591565 |
| 44.49159 | 46.20184 |
| 0.502219 | 0.34812  |
| 0.124798 | 0.11534  |
| 3.294114 | 3.282741 |
| 1.226248 | 0.375785 |
| 0.126129 | 0.052457 |
| 2.847297 | 2.806956 |
| 0.075762 | 0        |
| 0.548675 | 0.54446  |
| 12.85585 | 6.798149 |
| 2.220914 | 1.751558 |
| 0.152174 | 0        |
| 0.122459 | 0        |
| 0.047467 | 0        |
| 0.079484 | 0.066114 |
| 105.3226 | 126.9168 |
| 0.640311 | 1.020025 |
| 0        | 0.025588 |
| 0.198487 | 0.132081 |
| 0.640071 | 0.157751 |
| 11.31437 | 11.8547  |
| 5.237344 | 8.014875 |
| 4.64653  | 3.625953 |
| 1.183688 | 1.043033 |
| 0.307361 | 0.127831 |
| 0        | 0        |

|          |          |
|----------|----------|
| 0.047588 | 0.035186 |
| 2.025749 | 1.440619 |
| 6.516004 | 5.458423 |
| 1.108694 | 0.541028 |
| 3.439717 | 3.43337  |
| 0        | 0.017715 |
| 29.28873 | 36.54077 |
| 45.10037 | 51.92861 |
| 0.095518 | 0.052968 |
| 0        | 0.020348 |
| 0        | 0.050818 |
| 0.506749 | 0.562015 |
| 3.173628 | 3.519746 |
| 2.97168  | 3.266348 |
| 16.10567 | 22.40924 |
| 3.080531 | 2.180264 |
| 0        | 0.064838 |
| 11.79777 | 6.998654 |
| 0        | 0        |
| 0.033237 | 0        |
| 0.509745 | 0.621872 |
| 5.189352 | 3.071781 |
| 16.8183  | 15.89203 |
| 993.7938 | 682.3148 |
| 0.089786 | 0.099578 |
| 0.117413 | 0.162772 |
| 0.765014 | 0.803791 |
| 1.079772 | 1.026457 |
| 0        | 0.010465 |
| 12.5309  | 16.29449 |
| 0.066784 | 0.024689 |
| 1.341669 | 0.872271 |
| 0.052975 | 0.058753 |
| 9.954321 | 13.94147 |
| 0.110279 | 0        |
| 147.521  | 194.3902 |
| 3.447018 | 1.754061 |
| 7.390099 | 5.222439 |
| 0.149824 | 0.099698 |
| 0.247753 | 0.219818 |
| 0.687504 | 0.586526 |
| 0.154062 | 0.683455 |
| 2.822131 | 2.645524 |
| 0.021862 | 0        |
| 0        | 0        |
| 16.65671 | 19.05166 |
| 0.033458 | 0.037107 |
| 10.37776 | 13.80152 |
| 1.546325 | 1.109685 |
| 0.073015 | 0.161956 |
| 4.633241 | 2.613641 |
| 0        | 0        |
| 2.016888 | 1.637283 |
| 0.998419 | 0.348597 |
| 0.466819 | 0.172577 |
| 0.825882 | 0.772274 |
| 0.352433 | 0.325724 |
| 6.523495 | 5.411668 |
| 1.060883 | 0.672333 |
| 0        | 0        |
| 0.928981 | 0.257574 |
| 0        | 0        |
| 0.034998 | 0.038815 |
| 0.962055 | 0.952658 |
| 52.62888 | 55.17839 |

|          |          |
|----------|----------|
| 1.678024 | 1.374133 |
| 3.78342  | 2.366998 |
| 2.181108 | 2.418982 |
| 4.193949 | 3.648113 |
| 1.393805 | 0.792726 |
| 0.881839 | 1.708321 |
| 0.135561 | 0.125288 |
| 0.511284 | 0.13231  |
| 2.398616 | 2.80859  |
| 0.667601 | 0        |
| 1.706091 | 2.374013 |
| 8.433137 | 9.537927 |
| 0.139365 | 0        |
| 13.27399 | 20.4142  |
| 4.910508 | 4.402748 |
| 0.184234 | 0.408654 |
| 0.196064 | 0.072482 |
| 16.72754 | 16.32434 |
| 3.658203 | 5.137818 |
| 104.429  | 91.16719 |
| 9.842864 | 6.363128 |
| 0        | 0        |
| 10.81042 | 13.26242 |
| 2.644658 | 1.670292 |
| 1.018523 | 0.803451 |
| 0        | 0        |
| 4.254012 | 3.9695   |
| 0.067855 | 0        |
| 1126.525 | 1372.016 |
| 2.355102 | 2.240081 |
| 56.82016 | 65.18758 |
| 4.212706 | 2.879146 |
| 1.579171 | 4.711822 |
| 471.1168 | 590.0939 |
| 0.019751 | 0.010952 |
| 0        | 0        |
| 1.471606 | 1.570123 |
| 2.323778 | 3.057011 |
| 0        | 0        |
| 0.157049 | 0.367708 |
| 0.102599 | 0.146299 |
| 4.781912 | 6.081652 |
| 0.140787 | 0        |
| 20.73258 | 25.00206 |
| 1.939253 | 0.990028 |
| 2.47575  | 1.441036 |
| 62.35358 | 76.60763 |
| 18.24691 | 9.724241 |
| 16.90541 | 18.37592 |
| 11.6842  | 9.351105 |
| 1.063587 | 4.423435 |
| 0.016636 | 0.129155 |
| 0.330054 | 0.020336 |
| 6.235662 | 4.663278 |
| 0        | 0        |
| 1.892784 | 2.653722 |
| 5.173907 | 5.064566 |
| 0.525869 | 0.418398 |
| 0.26197  | 0.072635 |
| 0.492949 | 0.956743 |
| 0.971727 | 0.201172 |
| 0.590804 | 0.131047 |
| 35.01377 | 41.25806 |
| 100.92   | 96.7759  |
| 0.748326 | 0.508672 |

|          |          |
|----------|----------|
| 13.36066 | 12.00414 |
| 24.60046 | 22.54851 |
| 7.586329 | 5.368251 |
| 2.423103 | 1.434782 |
| 17.21906 | 7.678425 |
| 1.252874 | 2.779028 |
| 4.939311 | 4.66907  |
| 2.627217 | 2.076461 |
| 0.019729 | 0.065642 |
| 3.917595 | 5.799601 |
| 1.520169 | 0.488041 |
| 0.659261 | 0.258057 |
| 15.42936 | 17.1121  |
| 0        | 0        |
| 27.67426 | 21.89927 |
| 0        | 0.100965 |
| 1.661934 | 0.962858 |
| 0        | 0        |
| 0.77702  | 0.828618 |
| 56.57542 | 61.08471 |
| 3.817061 | 2.5797   |
| 2.812866 | 5.289824 |
| 4.041322 | 7.122197 |
| 212.3193 | 252.3273 |
| 0.349785 | 0        |
| 0.519435 | 0.288042 |
| 21.41318 | 10.05228 |
| 13.58752 | 11.44078 |
| 0.842116 | 0.254716 |
| 0.313118 | 0        |
| 1.478259 | 1.25372  |
| 1.467703 | 1.797331 |
| 3.52272  | 3.359386 |
| 9.860458 | 13.99034 |
| 13.34686 | 13.35418 |
| 9.569923 | 8.554062 |
| 48.71729 | 35.54915 |
| 3.2467   | 2.470694 |
| 2.277318 | 3.146028 |
| 0.095616 | 0.035348 |
| 28.64085 | 23.95524 |
| 0.670222 | 0.489913 |
| 1.010456 | 0.871622 |
| 4.59354  | 4.909634 |
| 11.35303 | 9.53084  |
| 0.179572 | 0.22405  |
| 0.034058 | 0.075544 |
| 76.99544 | 52.77437 |
| 0.273407 | 0.311889 |
| 0.987073 | 1.14946  |
| 17.43494 | 25.13733 |
| 2.892246 | 3.469043 |
| 8.186723 | 6.5982   |
| 19.16639 | 22.74919 |
| 0.336438 | 0.404225 |
| 7.557541 | 8.667765 |
| 7.656956 | 6.790079 |
| 69.85126 | 92.51027 |
| 0.135266 | 0        |
| 0        | 0        |
| 11.25361 | 7.86743  |
| 3.821655 | 2.662899 |
| 8.925193 | 6.263103 |
| 6.428588 | 3.065    |
| 1.811144 | 2.339364 |

|          |          |
|----------|----------|
| 4.116687 | 2.756623 |
| 0.054367 | 0.060296 |
| 17.54162 | 13.21967 |
| 0.249436 | 0.251491 |
| 9.423564 | 8.868199 |
| 0.070075 | 0.116577 |
| 1.668102 | 1.621452 |
| 41.60201 | 30.58324 |
| 17.50842 | 9.826777 |
| 6.657794 | 7.747997 |
| 10.71921 | 7.72419  |
| 14.08497 | 9.889282 |
| 33.9799  | 38.24367 |
| 0.088822 | 0.098509 |
| 1.208432 | 0.882587 |
| 0.061609 | 0.085411 |
| 2.771736 | 1.776103 |
| 0        | 0        |
| 0        | 0        |
| 0.203951 | 0.178574 |
| 15.11188 | 15.13193 |
| 2.277413 | 2.240424 |
| 10.39805 | 7.554339 |
| 0.013179 | 0        |
| 92.21058 | 81.5696  |
| 1.370457 | 2.058625 |
| 0.24664  | 0.126249 |
| 6.378638 | 6.058439 |
| 0.018987 | 0.021058 |
| 19.49089 | 23.29867 |
| 9.973233 | 19.47345 |
| 1.367256 | 1.342361 |
| 0.153091 | 0.056596 |
| 6.125773 | 5.1053   |
| 0.01239  | 0        |
| 0.086532 | 0        |
| 4.626387 | 1.422867 |
| 7.119914 | 5.138667 |
| 0.356821 | 0.593605 |
| 1.985618 | 3.025748 |
| 195.438  | 202.0606 |
| 0.727777 | 0.640152 |
| 0.059556 | 0.066051 |
| 2.245363 | 3.555836 |
| 0.519369 | 0.378522 |
| 9.827455 | 14.03656 |
| 23.36659 | 16.7702  |
| 7.884049 | 9.496438 |
| 0.612196 | 0.396062 |
| 4.117472 | 2.920583 |
| 10.17766 | 9.723483 |
| 4.016991 | 3.895872 |
| 26.8816  | 24.39585 |
| 0.045568 | 0.012635 |
| 9.588    | 8.397334 |
| 1.303925 | 1.112409 |
| 15.45798 | 12.30115 |
| 1.403093 | 2.204498 |
| 3.851254 | 3.624112 |
| 0.49769  | 0.413977 |
| 9.641181 | 17.87477 |
| 2.293605 | 2.499508 |
| 4.779083 | 4.15799  |
| 0.3338   | 0.222123 |
| 0.035367 | 0        |

|          |          |
|----------|----------|
| 3.014813 | 2.360792 |
| 63.57008 | 50.33914 |
| 2.540083 | 2.132952 |
| 2.218379 | 2.644841 |
| 7.913341 | 7.683666 |
| 1.74124  | 5.3899   |
| 0.229951 | 0.102012 |
| 1.999259 | 2.54624  |
| 0.658747 | 0.395736 |
| 3.693422 | 4.562889 |
| 3.890898 | 3.029244 |
| 38.47757 | 30.34558 |
| 14.34663 | 6.769105 |
| 11.59466 | 12.43427 |
| 0        | 0.20778  |
| 5.064841 | 4.155747 |
| 0.500701 | 0.444246 |
| 0.011363 | 0.012602 |
| 3.011363 | 2.722922 |
| 1.124432 | 0.75835  |
| 0.444953 | 0.052873 |
| 0.848568 | 0.784261 |
| 2.51545  | 1.6999   |
| 0.129798 | 0.079975 |
| 0.13736  | 1.066387 |
| 2.464443 | 2.164925 |
| 0.238556 | 0.25307  |
| 8.53534  | 6.700481 |
| 0        | 0.038127 |
| 2.037785 | 3.594897 |
| 32.0217  | 41.30042 |
| 276.94   | 260.5347 |
| 0.301334 | 0.38767  |
| 0.178411 | 0.395736 |
| 0.053671 | 0.059525 |
| 2.62427  | 1.747825 |
| 18.26959 | 22.81544 |
| 6.010068 | 6.642704 |
| 0        | 0.065767 |
| 17.6591  | 22.8682  |
| 0        | 0.138757 |
| 0.013085 | 0.058047 |
| 0        | 0        |
| 83.01464 | 64.04132 |
| 1.521864 | 1.845181 |
| 1.075098 | 5.961743 |
| 1.052642 | 1.125374 |
| 5.543472 | 4.00338  |
| 0        | 0.019037 |
| 4.513735 | 4.469649 |
| 1.166413 | 0.966321 |
| 74.84446 | 57.24876 |
| 0.019057 | 0        |
| 0.804389 | 1.552943 |
| 0.446347 | 0.099005 |
| 5.282361 | 0.764147 |
| 0.087735 | 0.032434 |
| 1.713993 | 1.94565  |
| 23.11498 | 21.46978 |
| 5.578682 | 5.280368 |
| 3.920399 | 4.718    |
| 1.727771 | 1.819912 |
| 3.876759 | 3.094382 |
| 1.91286  | 4.614514 |
| 14.79869 | 13.53835 |

|          |          |
|----------|----------|
| 33.02835 | 32.27844 |
| 4.969555 | 9.181887 |
| 42.02178 | 41.74508 |
| 0.199545 | 0.079038 |
| 6.660414 | 11.21852 |
| 0.385035 | 0.133446 |
| 0.372894 | 0        |
| 0.526904 | 1.733628 |
| 0.497453 | 0.236445 |
| 6.071309 | 4.144922 |
| 0.014322 | 0.015884 |
| 3.889781 | 2.986618 |
| 2.432179 | 2.820045 |
| 12.92245 | 13.71698 |
| 0.064472 | 0        |
| 15.77026 | 10.57194 |
| 0        | 0.373215 |
| 5.036791 | 3.203315 |
| 20.50213 | 22.24578 |
| 0.089334 | 0        |
| 0.026197 | 0        |
| 5.20336  | 1.872802 |
| 0.080632 | 0.178852 |
| 41.55875 | 33.35053 |
| 0.048302 | 0        |
| 50.03023 | 57.66081 |
| 10.13753 | 9.45335  |
| 38.32835 | 28.74751 |
| 3.617453 | 3.403634 |
| 18.50138 | 15.32989 |
| 2.783944 | 3.891426 |
| 2.00502  | 2.554066 |
| 15.82538 | 20.82704 |
| 0        | 0.030065 |
| 0        | 0.162978 |
| 1.080712 | 0.179786 |
| 3.973953 | 4.352944 |
| 0.84472  | 0.390352 |
| 5.621362 | 6.175618 |
| 2.378808 | 5.012661 |
| 117.6186 | 96.59156 |
| 2.024161 | 1.741385 |
| 0.093551 | 0.276678 |
| 0.38299  | 0.094391 |
| 16.34607 | 23.27049 |
| 0        | 0        |
| 0.289922 | 0.144694 |
| 3.895648 | 1.35016  |
| 2.239874 | 0.698249 |
| 0.095309 | 0.045301 |
| 8.093784 | 4.631919 |
| 2.249872 | 1.6458   |
| 0.310293 | 0.156425 |
| 0.012846 | 0        |
| 0.030154 | 0        |
| 7.669494 | 6.261967 |
| 6.923258 | 8.387556 |
| 28.09693 | 28.72528 |
| 2.656123 | 6.075718 |
| 0        | 0        |
| 2.240668 | 1.536205 |
| 0        | 0.058487 |
| 0        | 0        |
| 0.205076 | 0.341163 |
| 14.17162 | 11.34692 |

|          |          |
|----------|----------|
| 2.343542 | 1.657417 |
| 5.01471  | 14.64181 |
| 26.07508 | 15.55365 |
| 2.246299 | 2.177066 |
| 2.445758 | 2.451049 |
| 14.06295 | 14.0952  |
| 0.11881  | 0.18824  |
| 0.278774 | 0.353345 |
| 1.161512 | 0.853799 |
| 9.99115  | 11.60989 |
| 0.564793 | 0.656218 |
| 2.164858 | 2.9294   |
| 0        | 0.062202 |
| 5.831785 | 7.219573 |
| 0.183327 | 0.169434 |
| 5.258046 | 4.548048 |
| 0.170867 | 0.06891  |
| 11.81579 | 11.45296 |
| 7.366393 | 6.309829 |
| 12.30148 | 14.68974 |
| 0.257089 | 0.183296 |
| 0        | 0        |
| 7.954644 | 9.259066 |
| 15.61011 | 24.61158 |
| 11.44076 | 5.337598 |
| 0.430887 | 0.217218 |
| 0        | 0        |
| 0.244116 | 0.40611  |
| 6.378519 | 7.315082 |
| 5.136615 | 4.72577  |
| 4.861784 | 7.542304 |
| 0.719934 | 0.204562 |
| 0        | 0        |
| 1.207525 | 0.803531 |
| 4.188015 | 3.155304 |
| 0.901843 | 1.489185 |
| 16.16891 | 16.616   |
| 0        | 0.089387 |
| 0.088611 | 0.524134 |
| 3.598356 | 2.908546 |
| 0.071777 | 2.467748 |
| 0.160233 | 0.154529 |
| 0        | 0.018016 |
| 0.960411 | 0.81935  |
| 0        | 0        |
| 1.957403 | 2.529702 |
| 0        | 0.058853 |
| 4.487488 | 1.681085 |
| 0        | 0        |
| 0.059356 | 0        |
| 0.32256  | 0.211993 |
| 16.52745 | 13.62662 |
| 0        | 0        |
| 0.358194 | 0.430363 |
| 7.334186 | 5.652915 |
| 434.5045 | 478.0963 |
| 0        | 0.146663 |
| 29.2951  | 31.81826 |
| 2.629562 | 5.508651 |
| 138.7999 | 99.06012 |
| 2.373692 | 3.70205  |
| 0.036869 | 0.04089  |
| 4.414979 | 2.503134 |
| 0.280813 | 0.110511 |
| 1.468522 | 1.443135 |

|          |          |  |
|----------|----------|--|
| 0        | 0.026212 |  |
| 0.246753 | 0.273664 |  |
| 9.005584 | 9.969842 |  |
| 4.647988 | 2.490748 |  |
| 1.795029 | 0.849016 |  |
| 16.30237 | 24.60183 |  |
| 0        | 0        |  |
| 0        | 0.05636  |  |
| 0.031137 | 0.034533 |  |
| 19.06317 | 11.67362 |  |
| 5.764304 | 4.432831 |  |
| 0.306602 | 0.136016 |  |
| 0.476544 | 0.075502 |  |
| 3.280251 | 2.860411 |  |
| 0        | 0.022666 |  |
| 0        | 0        |  |
| 15.86462 | 13.92814 |  |
| 0.585098 | 0.943868 |  |
| 0.171324 | 0.066282 |  |
| 1.274511 | 0.47117  |  |
| 17.61832 | 12.26623 |  |
| 3.126353 | 3.54242  |  |
| 4.068081 | 3.535403 |  |
| 0.380632 | 0.422144 |  |
| 5.669404 | 2.913819 |  |
| 0        | 0        |  |
| 9.832696 | 12.66936 |  |
| 0.02119  | 0.047002 |  |
| 1.024536 | 2.272546 |  |
| 0.19463  | 0.242838 |  |
| 0.11434  | 0        |  |
| 23.65856 | 23.07718 |  |
| 1.852697 | 1.170732 |  |
| 0        | 0.044947 |  |
| 6.715929 | 6.291794 |  |
| 0.083115 | 0        |  |
| 0.024215 | 0.214846 |  |
| 7.947548 | 12.48202 |  |
| 0.623628 | 0.691642 |  |
| 0.897209 | 1.233874 |  |
| 2.723109 | 3.304338 |  |
| 0.065469 | 0.121016 |  |
| 0        | 0.023181 |  |
| 0        | 0        |  |
| 1.23511  | 1.369813 |  |
| 1.313327 | 0.9996   |  |
| 24.10478 | 22.18786 |  |
| 0.027954 | 0        |  |
| 0        | 0        |  |
| 1.097335 | 1.234649 |  |
| 0        | 0        |  |
| 0.721941 | 1.008259 |  |
| 0.035062 | 0.029165 |  |
| 0.510216 | 0.601227 |  |
| 0.238162 | 0.081273 |  |
| 0        | 0        |  |
| 54.77559 | 56.22715 |  |
| 19.90199 | 14.48932 |  |
| 0.624617 | 0.831285 |  |
| 0.789964 | 1.25498  |  |
| 2.841123 | 3.799709 |  |
| 3.470069 | 2.187747 |  |
| 3.909174 | 1.904225 |  |
| 13.38892 | 17.02021 |  |
| 2.464942 | 2.240459 |  |

|          |          |
|----------|----------|
| 3.993284 | 3.774104 |
| 0.403162 | 0.670696 |
| 6.024603 | 4.714277 |
| 0.383252 | 0        |
| 160.3739 | 234.2549 |
| 0        | 0        |
| 23.92339 | 21.05753 |
| 223.3481 | 195.3784 |
| 43.23355 | 51.67225 |
| 0.219879 | 0.038504 |
| 324.7392 | 304.9495 |
| 0.021096 | 0.397753 |
| 2.294058 | 0.886986 |
| 2.054002 | 0.414184 |
| 1.54445  | 0.171289 |
| 0.105054 | 0.174767 |
| 24.80154 | 30.35249 |
| 1.338413 | 3.103707 |
| 0.023072 | 0.025588 |
| 0.821773 | 0.650997 |
| 17.88749 | 22.78206 |
| 0.836103 | 1.202722 |
| 52.15108 | 55.30795 |
| 9.977326 | 13.93216 |
| 1.474704 | 1.200773 |
| 1.516957 | 0.96137  |
| 0.087446 | 0.29095  |
| 0.189001 | 0.078605 |
| 3.516582 | 3.495891 |
| 4.310786 | 4.673968 |
| 0        | 0        |
| 0        | 0        |
| 0.182207 | 0.252598 |
| 1.294826 | 2.907982 |
| 0.357026 | 0.43556  |
| 2.560284 | 2.93544  |
| 0.127751 | 0.283367 |
| 0.051956 | 0.288109 |
| 3.127656 | 2.606957 |
| 0.692419 | 0.298641 |
| 6.862781 | 5.354353 |
| 1.438973 | 1.808696 |
| 47.9545  | 46.52398 |
| 0.392587 | 0.16126  |
| 2.463495 | 2.455172 |
| 0.899514 | 1.383058 |
| 1.884684 | 1.672184 |
| 1.768213 | 1.371265 |
| 40.24485 | 27.78416 |
| 0        | 0.077325 |
| 0        | 0        |
| 2.129287 | 1.641537 |
| 0        | 0.033153 |
| 0        | 0        |
| 3.308461 | 1.551178 |
| 0.022174 | 0.024592 |
| 93.3918  | 101.3364 |
| 0.028864 | 0        |
| 67.53842 | 164.8397 |
| 51.72683 | 54.96428 |
| 43.57789 | 37.4959  |
| 1.403093 | 2.334174 |
| 0        | 0.007156 |
| 0        | 0        |
| 0.190159 | 0.527245 |

|          |          |
|----------|----------|
| 1.02623  | 0.517341 |
| 2.87999  | 2.705113 |
| 11.28959 | 6.918386 |
| 4.927531 | 5.181565 |
| 0.922463 | 0.824138 |
| 0.145573 | 0.221993 |
| 2.686945 | 2.297546 |
| 2.072745 | 2.813005 |
| 0.131401 | 0        |
| 3.300347 | 2.02994  |
| 6.783567 | 4.558664 |
| 5.090027 | 3.095318 |
| 0        | 0        |
| 11.53174 | 9.310684 |
| 411.6019 | 386.5741 |
| 0.12185  | 0.117121 |
| 62.62857 | 51.32177 |
| 19.14655 | 13.74414 |
| 1.689963 | 2.75073  |
| 3.897462 | 1.743066 |
| 35.28886 | 35.3878  |
| 0.497068 | 0.413459 |
| 0.02155  | 0.047802 |
| 28.27196 | 27.33937 |
| 8.808964 | 14.25649 |
| 0.273898 | 0.271223 |
| 0.375347 | 0.538719 |
| 4.320966 | 10.10858 |
| 1.542066 | 1.012864 |
| 3.626807 | 2.109624 |
| 0.153195 | 0.108738 |
| 20.69563 | 22.11887 |
| 2.85075  | 3.142259 |
| 0        | 0.065956 |
| 8.437089 | 11.68879 |
| 0        | 0        |
| 294.0599 | 335.5132 |
| 0.489482 | 0.428578 |
| 3.354708 | 4.930221 |
| 4.603202 | 8.229903 |
| 5.50708  | 9.834412 |
| 0        | 0        |
| 0.055509 | 0.061563 |
| 5.453578 | 4.618113 |
| 50.82717 | 37.90829 |
| 16.17914 | 24.07316 |
| 10.89604 | 7.120836 |
| 0        | 0        |
| 0        | 0        |
| 1.835903 | 2.036128 |
| 0        | 0        |
| 5.77225  | 5.933354 |
| 9.728322 | 11.13283 |
| 1.521217 | 1.530181 |
| 7.911643 | 4.485616 |
| 0        | 0.065956 |
| 9.574237 | 12.38456 |
| 0.057728 | 0.064024 |
| 0.591304 | 0.327896 |
| 1.93229  | 1.138483 |
| 0.215651 | 0.170836 |
| 0.306403 | 0.143082 |
| 3.906624 | 1.162023 |
| 1.655878 | 1.419951 |
| 0        | 0.172577 |

|          |          |
|----------|----------|
| 0.06612  | 0        |
| 5.76272  | 7.510686 |
| 6.935478 | 15.66862 |
| 0.381557 | 0.186195 |
| 0        | 0.210575 |
| 9.807406 | 7.961676 |
| 24.05168 | 19.96493 |
| 1.201903 | 0.418938 |
| 2.819959 | 2.676933 |
| 0.092391 | 0.034156 |
| 12.38233 | 22.38051 |
| 4.889124 | 6.77792  |
| 3.243345 | 3.452542 |
| 2.55676  | 2.759784 |
| 5.949901 | 3.336198 |
| 43.73655 | 41.3887  |
| 29.89455 | 44.1545  |
| 0.094501 | 0        |
| 3.670581 | 4.370693 |
| 3.062502 | 3.830937 |
| 4.08423  | 3.945188 |
| 1.7391   | 1.900734 |
| 0.195058 | 0.270414 |
| 1.515187 | 0.89976  |
| 2.241774 | 1.527096 |
| 0.038396 | 0.114976 |
| 36.7378  | 41.88918 |
| 3.856156 | 1.661456 |
| 0.569107 | 0.180336 |
| 0.471845 | 0.479696 |
| 40.91407 | 57.45852 |
| 0.784668 | 0.326342 |
| 31.24218 | 28.16924 |
| 7.674896 | 6.528862 |
| 0.094071 | 0.104331 |
| 8.654071 | 11.39838 |
| 80.11349 | 94.64432 |
| 3.807936 | 3.300803 |
| 1.108694 | 1.116107 |
| 22.97278 | 26.25349 |
| 20.05096 | 16.89122 |
| 1.783411 | 3.452964 |
| 9.232401 | 15.3813  |
| 0        | 0        |
| 0.070155 | 0.311223 |
| 4.198046 | 3.626692 |
| 10.03001 | 5.540796 |
| 0        | 0        |
| 3.795705 | 4.109438 |
| 0.067486 | 0.074846 |
| 3.05118  | 4.101751 |
| 0.466151 | 0.51699  |
| 4.673424 | 4.880856 |
| 0.037267 | 0.330651 |
| 0.864406 | 0.875315 |
| 41.04182 | 28.22341 |
| 88.59181 | 94.17659 |
| 0.029067 | 0.064474 |
| 14.96447 | 13.75025 |
| 0.264763 | 0.146819 |
| 13.88128 | 9.613584 |
| 17.54659 | 17.02008 |
| 0        | 0.120171 |
| 16.58745 | 12.34616 |
| 5.737352 | 2.939372 |

|          |          |
|----------|----------|
| 0.047576 | 0.10553  |
| 1.379709 | 0        |
| 1.484047 | 3.376929 |
| 0        | 0.047554 |
| 2.670722 | 1.890866 |
| 0.122058 | 0.090247 |
| 1.728812 | 3.167808 |
| 54.32904 | 53.04191 |
| 0        | 0.02954  |
| 0.046138 | 0.034114 |
| 8.959773 | 10.28713 |
| 5.252423 | 3.375046 |
| 2.224008 | 3.939645 |
| 38.76134 | 47.26849 |
| 45.26823 | 26.90223 |
| 0.151555 | 0.336167 |
| 0        | 0        |
| 1.118683 | 0.802798 |
| 0        | 0        |
| 4.272741 | 4.152495 |
| 2.437349 | 7.571779 |
| 5.846019 | 5.643125 |
| 38.69225 | 39.76902 |
| 8.67987  | 6.46312  |
| 0        | 0.051158 |
| 1.789091 | 1.214578 |
| 7.465384 | 6.694747 |
| 5.617594 | 5.140366 |
| 4.73733  | 4.161982 |
| 0        | 0.052185 |
| 0.069656 | 0        |
| 62.76613 | 87.57342 |
| 2.586954 | 2.407985 |
| 15.94547 | 20.43464 |
| 0        | 0        |
| 1.414528 | 1.472256 |
| 0.30318  | 0.264192 |
| 6.562628 | 5.908552 |
| 0.48471  | 0.684183 |
| 0.323216 | 0.065176 |
| 6.982551 | 8.878556 |
| 9.427456 | 13.1316  |
| 0        | 0.034412 |
| 0.162201 | 0.239854 |
| 2.58145  | 2.969515 |
| 0        | 0        |
| 5.886481 | 6.90643  |
| 0.556914 | 0        |
| 5.093748 | 4.824919 |
| 0.153018 | 0.084853 |
| 13.1712  | 15.19335 |
| 2.905076 | 3.367621 |
| 47.78975 | 48.65148 |
| 15.63607 | 18.97003 |
| 0.459477 | 0.254794 |
| 0.014554 | 0.032282 |
| 0        | 0.177928 |
| 2.233115 | 1.796451 |
| 1.220511 | 0.823944 |
| 7.084624 | 6.180009 |
| 10.97627 | 12.1373  |
| 11.55287 | 11.96488 |
| 0.734756 | 0.185202 |
| 0.037666 | 0.041774 |
| 56.06103 | 34.12919 |

|          |          |
|----------|----------|
| 8.367783 | 9.990731 |
| 0        | 0.048697 |
| 11.74491 | 14.45213 |
| 96.62116 | 126.793  |
| 8.455762 | 7.302833 |
| 7.679962 | 5.73533  |
| 0.78349  | 1.07266  |
| 0.059527 | 0        |
| 5.980348 | 5.052812 |
| 0.188285 | 0        |
| 1.753716 | 1.405117 |
| 11.29591 | 8.417997 |
| 0.031176 | 0.051864 |
| 4.671645 | 5.449591 |
| 59.86218 | 69.08539 |
| 0.009567 | 0        |
| 0.150404 | 0.300254 |
| 7.779902 | 12.94861 |
| 8.451486 | 5.064333 |
| 0        | 0        |
| 11.35141 | 10.20056 |
| 0.046041 | 0.025531 |
| 3.103681 | 3.29507  |
| 5.427479 | 5.24804  |
| 0.016989 | 0.018842 |
| 5.778735 | 8.618204 |
| 1126.67  | 1051.234 |
| 12.59655 | 16.87882 |
| 0.710859 | 1.498799 |
| 1.813638 | 1.005718 |
| 5483.252 | 6311.291 |
| 20.0118  | 21.72208 |
| 0.88626  | 1.533781 |
| 15.49238 | 15.51152 |
| 16.67112 | 10.13376 |
| 3.770134 | 3.985587 |
| 18.54825 | 18.53915 |
| 0.73957  | 0.164046 |
| 1460.701 | 2090.185 |
| 67.90159 | 55.62894 |
| 0.461613 | 0.447962 |
| 15.47434 | 16.15599 |
| 0.067743 | 0.206612 |
| 0.026461 | 0        |
| 22.16454 | 21.63007 |
| 0        | 0        |
| 0.113973 | 2.275257 |
| 10.44113 | 6.094658 |
| 8.008418 | 8.737794 |
| 3.99107  | 2.528487 |
| 3.972653 | 3.902381 |
| 8.247057 | 11.64393 |
| 3.92955  | 3.813346 |
| 24.63999 | 20.59223 |
| 0.243402 | 0.086383 |
| 0.272013 | 0.377098 |
| 846.7397 | 762.2705 |
| 0.275835 | 0.372422 |
| 0.23302  | 0.344578 |
| 1898.059 | 1982.48  |
| 0.035257 | 0.019551 |
| 1.703493 | 1.165724 |
| 0.257458 | 0.131786 |
| 0.136006 | 0.03771  |
| 9.981581 | 11.41505 |

|          |          |
|----------|----------|
| 12.28998 | 14.4199  |
| 0.079906 | 0.230413 |
| 1007.164 | 974.1602 |
| 0.007188 | 0        |
| 29.43795 | 43.35801 |
| 27.86883 | 29.38723 |
| 18.425   | 18.14896 |
| 28.51612 | 23.00629 |
| 3.862108 | 2.502133 |
| 0        | 0.07543  |
| 0.01745  | 0.058059 |
| 0        | 0.119597 |
| 4.660186 | 5.399042 |
| 6687.627 | 8291.422 |
| 18.4837  | 26.78857 |
| 0.110034 | 0.213561 |
| 0        | 0.026566 |
| 1.189147 | 1.374562 |
| 8.909329 | 8.259889 |
| 8.865016 | 9.021332 |
| 19.25754 | 15.71762 |
| 0.212481 | 0.282785 |
| 0.407318 | 0.22587  |
| 9.244193 | 15.90572 |
| 5.761159 | 4.991341 |
| 17.29548 | 20.38425 |
| 0        | 0        |
| 186.0531 | 290.7599 |
| 7.078505 | 2.927302 |
| 5.615317 | 5.216525 |
| 0.470565 | 0.276292 |
| 11.47632 | 14.00073 |
| 24.95009 | 16.44824 |
| 0.19154  | 0.438136 |
| 6.158302 | 5.215585 |
| 1584.113 | 1371.988 |
| 8.476273 | 8.55705  |
| 0        | 0.082683 |
| 10.73858 | 15.40326 |
| 0.567959 | 0.165763 |
| 1.487921 | 0.800095 |
| 0        | 0        |
| 0.046982 | 0.026053 |
| 4.659821 | 3.34761  |
| 1.762251 | 1.99559  |
| 65.54576 | 73.78114 |
| 1.8648   | 0.425801 |
| 78.19869 | 53.83454 |
| 9.186325 | 9.309901 |
| 2.505569 | 5.584292 |
| 8.044696 | 8.706201 |
| 0        | 0        |
| 0.637352 | 0.26812  |
| 1.497197 | 0.778351 |
| 6.230942 | 7.87714  |
| 13.90055 | 11.661   |
| 3.495424 | 2.060007 |
| 0.096618 | 0.064293 |
| 3.484468 | 3.289605 |
| 3909.446 | 3627.844 |
| 4.362125 | 6.22177  |
| 2304.489 | 3367.494 |
| 1.65369  | 2.200852 |
| 24.65595 | 33.65934 |
| 4.490998 | 1.643147 |

|          |          |
|----------|----------|
| 5.702139 | 4.251829 |
| 18.77649 | 25.91528 |
| 4650.864 | 5043.833 |
| 49.81235 | 53.07124 |
| 16.92312 | 12.754   |
| 3.449271 | 4.201286 |
| 7.654548 | 5.731032 |
| 23.2416  | 14.53118 |
| 77.2845  | 83.81626 |
| 6.973463 | 6.199003 |
| 0.062575 | 0.04164  |
| 6.868286 | 5.268386 |
| 17.99158 | 17.57602 |
| 121.2883 | 137.1769 |
| 5.315102 | 6.911555 |
| 4.651086 | 5.002454 |
| 3.908247 | 3.933428 |
| 18.99894 | 17.81516 |
| 2.289587 | 1.573122 |
| 151.2507 | 153.8583 |
| 0.965565 | 1.024812 |
| 5.95106  | 7.402124 |
| 5.387913 | 3.108762 |
| 20.7625  | 19.35592 |
| 5751.511 | 6646.128 |
| 0.996866 | 0.283483 |
| 0.053895 | 0.059773 |
| 5.12581  | 2.621425 |
| 0.765187 | 0.804233 |
| 3.7146   | 2.942655 |
| 13.96703 | 10.19637 |
| 42.19021 | 63.48119 |
| 17.34709 | 20.65201 |
| 0.466118 | 0.499721 |
| 4.959222 | 7.500108 |
| 12.19133 | 12.78854 |
| 2.854569 | 2.818415 |
| 5.73773  | 3.292096 |
| 0.117589 | 0        |
| 0        | 0.243315 |
| 0        | 0        |
| 0.725691 | 0.447131 |
| 0.321694 | 0.158568 |
| 5.048588 | 1.667844 |
| 0.392128 | 0.072482 |
| 0        | 0        |
| 0        | 0        |
| 0.198996 | 0        |
| 0        | 0.138827 |
| 0.16476  | 0.030455 |
| 0.610791 | 0.237091 |
| 0.31357  | 0.463691 |
| 0        | 1.020121 |
| 1.009543 | 5.0384   |
| 0.713642 | 0        |
| 0.690814 | 0.287308 |
| 0.994982 | 0.772447 |
| 3.110953 | 3.923798 |
| 0.135561 | 0        |
| 0        | 0        |
| 0        | 0        |
| 0.530657 | 0        |
| 4.452696 | 2.295271 |
| 0        | 0.559822 |
| 0.717767 | 0.341163 |

|          |          |
|----------|----------|
| 0        | 0        |
| 1.702468 | 2.094656 |
| 1.123599 | 0.53406  |
| 0.076603 | 0.042479 |
| 0        | 0        |
| 0.667601 | 0        |
| 0.667601 | 0        |
| 0.667601 | 0.74041  |
| 0        | 0        |
| 0        | 0        |
| 0        | 0        |
| 2.492019 | 1.895178 |
| 0        | 0        |
| 0        | 0        |
| 0        | 0.314421 |
| 0        | 0        |
| 3.46733  | 4.927022 |
| 0        | 0.459054 |
| 0        | 0.900106 |
| 27.40222 | 16.96398 |
| 0        | 0        |
| 1.75567  | 0.885066 |
| 1.469512 | 1.787499 |
| 0        | 0        |
| 0        | 0.079605 |
| 0        | 0        |
| 0.26197  | 0        |
| 0.757157 | 0.279911 |
| 0        | 0.306036 |
| 0.068227 | 0.378341 |
| 0        | 0.035294 |
| 0        | 0.079882 |
| 0        | 0.260826 |
| 0.930141 | 0.257896 |
| 0.032169 | 0.053517 |
| 0        | 0.646555 |
| 0.673029 | 0.74643  |
| 0        | 0        |
| 0        | 0        |
| 0        | 0        |
| 0.189482 | 0        |
| 0        | 0        |
| 0.572757 | 0.762267 |
| 0.109501 | 0.303607 |
| 0        | 0        |
| 0        | 0        |
| 0        | 0        |
| 0        | 0.394038 |
| 0.036223 | 0        |
| 5.552486 | 3.918756 |
| 0.374017 | 0.207404 |
| 0.841286 | 0.485179 |
| 1.324218 | 1.300794 |
| 2.741143 | 2.128066 |
| 0        | 0        |
| 0.434174 | 0        |
| 0        | 0        |
| 0.054224 | 0        |
| 0        | 0        |
| 1.21818  | 1.272876 |
| 1.250705 | 1.517967 |
| 5.456067 | 9.193408 |
| 0        | 0.347768 |
| 0.427074 | 0.294915 |
| 0.024281 | 0.053859 |

|          |          |
|----------|----------|
| 0.113782 | 0.168254 |
| 0        | 0        |
| 7.51072  | 5.072847 |
| 1.197268 | 1.517535 |
| 0.097102 | 0.021538 |
| 0.041557 | 0.138269 |
| 1.280771 | 0.608765 |
| 0.131447 | 0.388754 |
| 0        | 0        |
| 0.31677  | 0.468423 |
| 0.03059  | 0.022617 |
| 0.024835 | 0.110173 |
| 0.100627 | 0.063772 |
| 0        | 0        |
| 1.402514 | 1.024336 |
| 0.25035  | 0.416481 |
| 0        | 0        |
| 0        | 0        |
| 46.44099 | 56.83092 |
| 1.153693 | 0.976472 |
| 1.213552 | 2.170811 |
| 2.319408 | 2.897295 |
| 1.058968 | 0.695976 |
| 0.100954 | 0        |
| 0        | 0.027292 |
| 1.713577 | 1.362957 |
| 0        | 0.115534 |
| 0.421929 | 0.163781 |
| 0.069565 | 0.038576 |
| 0.126708 | 0.562107 |
| 0.08164  | 0.181086 |
| 0.108544 | 0        |
| 2.375498 | 0.838273 |
| 0        | 0        |
| 0.339273 | 0.250849 |
| 2.100191 | 6.259831 |
| 0.177899 | 0.197301 |
| 0.196477 | 0.653716 |
| 0.349645 | 0.387777 |
| 0.963417 | 1.662093 |
| 0.064843 | 0.161808 |
| 0.055399 | 0.070219 |
| 0.301276 | 0.093557 |
| 0        | 0.029252 |
| 0        | 0        |
| 0        | 0        |
| 0.037492 | 0        |
| 0.221739 | 0.06148  |
| 0.036956 | 0        |
| 0.055534 | 0        |
| 0        | 0.028221 |
| 0.982582 | 0.272436 |
| 0.163093 | 0.20944  |
| 0.397993 | 0.264839 |
| 0.814411 | 0.318788 |
| 287.265  | 296.1101 |
| 0.292036 | 0.064777 |
| 0.561026 | 1.140722 |
| 30.82219 | 24.40242 |
| 16.55973 | 12.79331 |
| 1.585504 | 0.19982  |
| 0.038043 | 0        |
| 0.369932 | 0.205138 |
| 0.060989 | 0        |
| 2.194529 | 0.709878 |

|          |          |
|----------|----------|
| 0.142565 | 0        |
| 0        | 0.107928 |
| 0.134874 | 0.548472 |
| 0        | 0        |
| 1.071148 | 0.659982 |
| 42.82198 | 34.70583 |
| 0.693708 | 0.769365 |
| 0        | 0        |
| 0.458085 | 0.544333 |
| 0        | 0        |
| 0        | 0        |
| 0.115618 | 0.192341 |
| 27.77342 | 17.69809 |
| 3.139771 | 2.003034 |
| 0        | 0        |
| 0.023652 | 0        |
| 0.031484 | 0        |
| 0.184782 | 0        |
| 8.993895 | 5.041016 |
| 0        | 0.057526 |
| 0        | 0        |
| 0.034734 | 0        |
| 0        | 0        |
| 0        | 0        |
| 0        | 0.017521 |
| 0.444612 | 0.140886 |
| 0.064607 | 0.107479 |
| 0.585449 | 0.551904 |
| 0.231021 | 0        |
| 2.045799 | 1.3751   |
| 4.124971 | 2.590169 |
| 3.831885 | 0.804015 |
| 3.295708 | 3.419325 |
| 4.153325 | 5.102352 |
| 0.168409 | 0.062259 |
| 0.189578 | 0.210254 |
| 6.957329 | 6.835938 |
| 0.040316 | 0        |
| 0.266467 | 0.472846 |
| 0.11207  | 0.124293 |
| 0.296405 | 0.021915 |
| 10.10078 | 8.056788 |
| 5.208972 | 3.379343 |
| 0.462472 | 0.256455 |
| 0.050683 | 0        |
| 1.123538 | 1.479077 |
| 4.161401 | 2.088652 |
| 11.40387 | 9.177589 |
| 5.488737 | 5.533949 |
| 1.324249 | 0.282437 |
| 1.582445 | 1.6482   |
| 2.341134 | 1.177062 |
| 0.017851 | 0        |
| 16.20879 | 12.49236 |
| 0.412537 | 0        |
| 0.935899 | 1.334532 |
| 4.777681 | 6.164879 |
| 0.128332 | 0.113862 |
| 0.712732 | 1.756585 |
| 18.37851 | 17.02235 |
| 1.036305 | 1.639479 |
| 0.24316  | 0.359573 |
| 2.052459 | 2.020218 |
| 0.111645 | 0.151337 |
| 0.056289 | 0        |

|          |          |
|----------|----------|
| 0.031742 | 0.070407 |
| 5.277144 | 1.784352 |
| 0.649481 | 0.175212 |
| 0.091461 | 0.16906  |
| 5.880581 | 8.209535 |
| 1.569985 | 1.540301 |
| 0        | 0        |
| 0.129348 | 0.143454 |
| 0.124672 | 0        |
| 0.045485 | 0        |
| 40.91604 | 47.67102 |
| 4.290447 | 2.397208 |
| 0.159299 | 0.044168 |
| 27.75268 | 28.58601 |
| 21.93595 | 21.41991 |
| 9.97153  | 4.938311 |
| 11.08084 | 8.429676 |
| 16.02618 | 12.26536 |
| 0.112578 | 0.062428 |
| 0.975996 | 0.514427 |
| 7.580686 | 4.776059 |
| 7.540632 | 8.675656 |
| 38.90254 | 50.76495 |
| 1.216688 | 0.793754 |
| 0.098006 | 0.054347 |
| 5.673503 | 8.472256 |
| 7.169174 | 4.841986 |
| 0.546155 | 0.49669  |
| 3.754955 | 3.669685 |
| 15.26793 | 14.68133 |
| 0.042322 | 0        |
| 0.18041  | 0        |
| 0.50572  | 0.237293 |
| 0.533559 | 1.129704 |
| 0        | 0.047163 |
| 0.045228 | 0.050161 |
| 0.085716 | 0.063376 |
| 0.266941 | 0.285845 |
| 54.43551 | 39.02022 |
| 3.421193 | 2.112742 |
| 86.0782  | 80.29119 |
| 14.12875 | 12.41433 |
| 0.831235 | 0.567317 |
| 1.294407 | 0.420772 |
| 7.108833 | 7.116194 |
| 0.953665 | 0.802372 |
| 0.128633 | 0.36458  |
| 0.206612 | 0.343718 |
| 0.397014 | 2.845098 |
| 0.063    | 0        |
| 6.457823 | 5.27161  |
| 1.410284 | 2.517804 |
| 4.271625 | 4.309802 |
| 21.02165 | 19.8309  |
| 7.3708   | 14.73827 |
| 44.8833  | 42.61409 |
| 0        | 0.030294 |
| 0        | 0        |
| 14.27171 | 12.92697 |
| 21.31405 | 23.97354 |
| 70.77815 | 59.85271 |
| 4.681154 | 2.732466 |
| 0.091596 | 0.152378 |
| 1.429256 | 1.363214 |
| 1.437851 | 1.045682 |

|          |          |
|----------|----------|
| 12.53574 | 10.81502 |
| 98.5843  | 103.1237 |
| 25.96809 | 11.7496  |
| 12.63738 | 5.759457 |
| 1.293477 | 0.595471 |
| 59.39362 | 65.39951 |
| 115.621  | 99.71016 |
| 0.590902 | 0.187242 |
| 0        | 0.131034 |
| 0        | 0        |
| 1.053188 | 0.940929 |
| 0.778812 | 0.673725 |
| 0.466429 | 0.172433 |
| 0        | 0.069413 |
| 0.192305 | 0.152341 |
| 0.826086 | 0.62686  |
| 0        | 0        |
| 1.940215 | 1.998116 |
| 19.98429 | 19.40256 |
| 6.547344 | 6.371116 |
| 5.5006   | 4.920846 |
| 1.573147 | 1.395773 |
| 0.076674 | 0        |
| 0.028704 | 0        |
| 0        | 0.031115 |
| 123.8058 | 103.9525 |
| 0.140787 | 0.312282 |
| 0.134133 | 0.353309 |
| 173.6956 | 119.8349 |
| 0.894472 | 0.641898 |
| 0.113194 | 0        |
| 0.135561 | 0        |
| 10.96392 | 5.49747  |
| 0.390075 | 0.432617 |
| 7.223077 | 11.68794 |
| 13.42762 | 6.897074 |
| 6.488923 | 8.584636 |
| 5.957832 | 5.117163 |
| 2.315715 | 1.883397 |
| 20.11219 | 15.30995 |
| 0.523498 | 0.928946 |
| 0        | 0.082072 |
| 1079.668 | 969.5445 |
| 0        | 0        |
| 2.338    | 2.112802 |
| 26.15289 | 13.57143 |
| 0.161966 | 0.17963  |
| 0        | 0        |
| 0.081117 | 0.071971 |
| 0.017005 | 0        |
| 3.517671 | 3.901311 |
| 18.56299 | 23.12594 |
| 9.259672 | 8.215632 |
| 29.57804 | 38.40659 |
| 34.5354  | 47.49309 |
| 0        | 0        |
| 0.117367 | 0.130167 |
| 63.12137 | 84.80173 |
| 2.534898 | 4.297358 |
| 0.0436   | 0.072533 |
| 116.0013 | 90.48836 |
| 0.041036 | 0.045511 |
| 0        | 0        |
| 0.768695 | 0.918108 |
| 0.076462 | 0.056534 |

|          |          |
|----------|----------|
| 11.0828  | 11.0412  |
| 38.40746 | 19.93471 |
| 0.095813 | 0        |
| 3.319497 | 6.856595 |
| 3.338914 | 4.499919 |
| 0.168257 | 0.093304 |
| 4.855237 | 5.527712 |
| 0        | 1.007163 |
| 0.017509 | 0        |
| 0.029764 | 0        |
| 0.12156  | 0        |
| 1.097638 | 0.530638 |
| 12.66128 | 12.96808 |
| 0.242257 | 0.15353  |
| 0.04754  | 0        |
| 0.851463 | 0.634247 |
| 2.404899 | 2.006987 |
| 0        | 0.208978 |
| 690.3264 | 730.7471 |
| 0.118036 | 0.130909 |
| 24.0152  | 19.24696 |
| 1.416285 | 0.849052 |
| 0.31357  | 0.278215 |
| 0        | 0        |
| 15.49197 | 7.073201 |
| 0        | 0.156141 |
| 0.596989 | 0.331049 |
| 0.099379 | 0.303097 |
| 0.175222 | 0.323886 |
| 0.158183 | 0.263152 |
| 0.114799 | 0.106099 |
| 0.053662 | 0        |
| 0.203564 | 0        |
| 19.49596 | 25.89747 |
| 0        | 0.136804 |
| 11.60272 | 23.8045  |
| 8.853221 | 11.1231  |
| 1.118358 | 1.320348 |
| 0.041063 | 0        |
| 0        | 0        |
| 0.384897 | 0.197019 |
| 0.266467 | 0        |
| 1.065063 | 0.764318 |
| 5.973996 | 9.22841  |
| 18.94687 | 22.59561 |
| 0.026641 | 0.08864  |
| 1.316847 | 1.550615 |
| 0.21026  | 0.066626 |
| 1.899683 | 2.019684 |
| 0        | 0        |
| 0        | 0        |
| 0.063064 | 0.209827 |
| 0.663524 | 0.525635 |
| 0        | 0        |
| 0.030767 | 0        |
| 2.154288 | 1.78763  |
| 1.303564 | 1.259852 |
| 11.34537 | 4.210749 |
| 0.274842 | 0.091445 |
| 0.048868 | 0.135494 |
| 0.325915 | 0.18073  |
| 0.132948 | 0.245746 |
| 0        | 0        |
| 0.815068 | 0.589539 |
| 0        | 0.124517 |

|          |          |
|----------|----------|
| 0.854897 | 0.7111   |
| 0.377115 | 0.228133 |
| 1.018356 | 1.202285 |
| 1.897149 | 1.230673 |
| 12.05558 | 8.069084 |
| 34.74756 | 38.94415 |
| 0        | 0.03946  |
| 3.169847 | 0.856186 |
| 1.386592 | 0.817987 |
| 4.955118 | 4.347208 |
| 10.37281 | 9.896278 |
| 3.070925 | 1.2822   |
| 0        | 0.035864 |
| 0.114172 | 0.075974 |
| 0.040981 | 0.090902 |
| 19.30932 | 15.99402 |
| 0.953349 | 0.132165 |
| 0.102793 | 0        |
| 0        | 0        |
| 1.219735 | 1.220136 |
| 1.763832 | 1.534862 |
| 0.545619 | 0.277349 |
| 0        | 0        |
| 0.065997 | 0.036597 |
| 0.187889 | 0.254687 |
| 0.300057 | 0.332782 |
| 0.028945 | 0        |
| 3.305164 | 3.294426 |
| 3.856328 | 4.084442 |
| 0        | 0        |
| 2.78001  | 2.08661  |
| 0        | 0.059825 |
| 6.144387 | 6.695642 |
| 0.067456 | 0.194515 |
| 0.112937 | 0.125254 |
| 3.519693 | 3.671524 |
| 0        | 0        |
| 0.369333 | 0.107793 |
| 0.318697 | 0.144    |
| 0.249727 | 0.131887 |
| 0.226073 | 0.118766 |
| 1.087792 | 1.25888  |
| 0.319061 | 0.170376 |
| 0.271483 | 0.248727 |
| 3.160444 | 4.265044 |
| 0.066904 | 0        |
| 2.299514 | 1.275151 |
| 0.043146 | 0        |
| 6.794052 | 3.341801 |
| 0        | 0        |
| 0.513115 | 0.509173 |
| 0        | 0        |
| 0        | 0        |
| 0.028273 | 0.062712 |
| 0.017903 | 0.099276 |
| 0.014244 | 0.031596 |
| 2.293223 | 1.412958 |
| 0        | 0        |
| 0.796445 | 0.873381 |
| 0.027892 | 0        |
| 0        | 0.00648  |
| 7.508521 | 7.638522 |
| 0.219777 | 0.243746 |
| 6.657335 | 3.290424 |
| 3.36278  | 3.200027 |

|          |          |
|----------|----------|
| 0.028918 | 0.032072 |
| 0.016686 | 0        |
| 0.34273  | 0.263152 |
| 8.733671 | 2.781178 |
| 0        | 0        |
| 0        | 0        |
| 0.02939  | 0        |
| 0.118864 | 0.175771 |
| 8.202536 | 3.638845 |
| 1.916262 | 1.335872 |
| 1.657003 | 1.35016  |
| 19.54282 | 17.22975 |
| 0.352016 | 0.048801 |
| 0.551067 | 0.237676 |
| 0        | 0        |
| 2.371374 | 1.972499 |
| 0        | 0        |
| 0        | 0        |
| 3.253863 | 2.82718  |
| 10.84449 | 7.998574 |
| 0.148711 | 0.137441 |
| 0.243391 | 0.417173 |
| 16.11206 | 27.48506 |
| 0        | 0        |
| 0        | 0        |
| 0.611693 | 1.017608 |
| 0.331425 | 0.588112 |
| 0.035157 | 0        |
| 0.135709 | 0        |
| 1.888981 | 1.699713 |
| 14.62175 | 17.79369 |
| 37.6795  | 48.84583 |
| 1.168302 | 0.462756 |
| 21.24781 | 19.85319 |
| 2.23489  | 1.391656 |
| 0.012689 | 0.070364 |
| 0.746237 | 0.165524 |
| 0.100831 | 0.055914 |
| 0.114996 | 0.041141 |
| 0.040316 | 0        |
| 0.029439 | 0        |
| 23.04917 | 26.88962 |
| 18.27666 | 6.259831 |
| 0        | 0.02695  |
| 0        | 0        |
| 0.775394 | 1.474215 |
| 0        | 0.045936 |
| 0.151961 | 0.048153 |
| 0.245767 | 0.102214 |
| 56.12991 | 51.29603 |
| 27.09246 | 28.29443 |
| 4.899605 | 3.377867 |
| 4.63202  | 4.840816 |
| 0.046178 | 0.051215 |
| 0        | 0.521653 |
| 5.014277 | 3.311689 |
| 0.224681 | 1.245925 |
| 0.026241 | 0        |
| 0        | 0        |
| 0        | 0.055778 |
| 3.455088 | 2.810062 |
| 0.053739 | 0        |
| 0.032186 | 0.107089 |
| 0.053043 | 0.029414 |
| 0.077852 | 0        |

|          |          |
|----------|----------|
| 0        | 0        |
| 0        | 0.059929 |
| 0.93377  | 0.449415 |
| 11.1258  | 10.7303  |
| 1.124044 | 0.879976 |
| 0.954467 | 1.316747 |
| 0.013703 | 0        |
| 0        | 0        |
| 0.063161 | 0        |
| 0.235922 | 0.305261 |
| 0        | 0        |
| 0.03356  | 0        |
| 0.03356  | 0        |
| 20.56536 | 10.45603 |
| 81.89238 | 100.8603 |
| 0.411853 | 0.848288 |
| 1150.322 | 1072.399 |
| 5.953537 | 2.964538 |
| 0        | 0        |
| 1.396418 | 1.429581 |
| 0.317526 | 0.23477  |
| 0.035539 | 0        |
| 0.114578 | 0        |
| 2.644515 | 3.458228 |
| 0.657352 | 0.583235 |
| 1.072907 | 0.920503 |
| 0.459903 | 0.25503  |
| 0        | 0        |
| 110.1649 | 108.0523 |
| 2.253979 | 3.257316 |
| 0        | 0        |
| 0.009518 | 0.024631 |
| 0.709564 | 0.36537  |
| 3.830296 | 4.470441 |
| 0.317151 | 0.227596 |
| 0        | 0.036023 |
| 33.13466 | 30.80377 |
| 0.144978 | 0        |
| 0.219079 | 0.218674 |
| 0.265102 | 0.176409 |
| 8.774946 | 4.884337 |
| 0.214093 | 0        |
| 3.961564 | 4.666665 |
| 0        | 0        |
| 17.37355 | 18.74554 |
| 0        | 0        |
| 0.247358 | 0.137168 |
| 6.385889 | 4.412557 |
| 0.059728 | 0.066242 |
| 0.214948 | 0.073351 |
| 0        | 0        |
| 0        | 0        |
| 1.393204 | 0.554669 |
| 0.57564  | 0.228007 |
| 2.236874 | 2.904385 |
| 1.4168   | 0.365923 |
| 7.972956 | 7.353232 |
| 1.549549 | 1.047238 |
| 0.099339 | 0.036724 |
| 15.55877 | 7.324834 |
| 0        | 0        |
| 0.872415 | 0.870805 |
| 0.059987 | 0.133059 |
| 5.315492 | 3.63403  |
| 0.047649 | 0.052846 |

|          |          |
|----------|----------|
| 5.342718 | 8.027537 |
| 1.577525 | 0.70816  |
| 0        | 0        |
| 0.262823 | 0.269065 |
| 0.242212 | 0.134314 |
| 0.038492 | 0        |
| 0.997744 | 0.27664  |
| 6.168822 | 3.700049 |
| 0.75143  | 1.06777  |
| 0.072616 | 0.040268 |
| 0        | 0        |
| 1.120585 | 0.666427 |
| 0        | 0        |
| 0.05827  | 0        |
| 0.528012 | 0.323088 |
| 0.073825 | 0        |
| 0.239718 | 0.053172 |
| 0.715512 | 0.324632 |
| 0        | 0        |
| 0.077127 | 0        |
| 0.055884 | 0.061979 |
| 0.221344 | 0        |
| 0        | 0.073098 |
| 0.156785 | 0.086942 |
| 3.624424 | 3.276337 |
| 0.12812  | 0        |
| 0.117256 | 0.065022 |
| 0.694827 | 0.626933 |
| 4.137773 | 2.474484 |
| 0.183508 | 0        |
| 0.216331 | 0        |
| 3.854618 | 0.305358 |
| 14.51783 | 11.51061 |
| 0.299596 | 0.586359 |
| 0.572229 | 1.00965  |
| 0.022392 | 0        |
| 0.209367 | 0.042218 |
| 0.031929 | 0        |
| 0.101242 | 0        |
| 68.28255 | 67.90894 |
| 0.171195 | 0.189866 |
| 0        | 0.031413 |
| 0.988274 | 0.343861 |
| 0        | 0        |
| 0.503748 | 0.391081 |
| 8.953092 | 6.669345 |
| 17.06437 | 18.12279 |
| 0.421786 | 0.280672 |
| 0        | 0        |
| 0        | 0        |
| 0.198361 | 0.073331 |
| 0.523793 | 0.503462 |
| 42.54905 | 66.26531 |
| 0.572229 | 0        |
| 0.215082 | 0        |
| 0        | 0.03937  |
| 0        | 0        |
| 0.295327 | 0.201561 |
| 0.378066 | 0.465887 |
| 0.586984 | 0.384682 |
| 0.15545  | 0.068962 |
| 0.873779 | 0.323025 |
| 0.550713 | 0.451442 |
| 0.057595 | 0.031938 |
| 0.266467 | 0.443293 |

|          |          |
|----------|----------|
| 2.645306 | 3.677213 |
| 1.18386  | 0.729429 |
| 0.366294 | 0.609364 |
| 0.092117 | 0        |
| 1.497019 | 0.349534 |
| 0.144725 | 0        |
| 0.040766 | 0        |
| 1.413151 | 1.078771 |
| 0.030023 | 0.116539 |
| 0        | 0        |
| 1.149757 | 1.275151 |
| 0        | 0        |
| 0.098084 | 0.217561 |
| 0        | 0        |
| 1.544275 | 2.063019 |
| 1.051132 | 0.336778 |
| 0.363613 | 0.604903 |
| 0.505358 | 0.120101 |
| 0        | 0        |
| 0.025921 | 0.035935 |
| 1.217858 | 1.297711 |
| 41.11041 | 24.55307 |
| 7.605172 | 6.17421  |
| 0        | 0.265349 |
| 46.69811 | 41.4697  |
| 9.859228 | 10.56245 |
| 0.054467 | 0.073832 |
| 0.155509 | 0.043117 |
| 0.580251 | 0.965301 |
| 3.230766 | 2.2745   |
| 0.668628 | 1.774421 |
| 0.377811 | 0.116393 |
| 97.49821 | 89.38126 |
| 0.144725 | 0.28089  |
| 7.916929 | 9.220948 |
| 0.532681 | 0.547014 |
| 1.822451 | 2.363787 |
| 1.570991 | 1.488236 |
| 5.286833 | 6.879463 |
| 0.545853 | 0.363231 |
| 7.741885 | 9.554277 |
| 0        | 0.02163  |
| 48.25184 | 29.40915 |
| 1.281343 | 0.344506 |
| 0        | 0        |
| 0.58711  | 0.195342 |
| 6.848179 | 8.287976 |
| 19.30142 | 17.77222 |
| 28.93757 | 37.91224 |
| 5.321733 | 2.722298 |
| 0.163818 | 0        |
| 0.153301 | 0        |
| 0        | 0.119063 |
| 0        | 0.124743 |
| 0.270728 | 0        |
| 0.231236 | 0.256455 |
| 0.13352  | 0.148082 |
| 0        | 0        |
| 0        | 0        |
| 0        | 0        |
| 0.151431 | 0        |
| 0.160431 | 0        |
| 0        | 1.29921  |
| 6.798432 | 4.36041  |
| 0        | 0        |



|          |          |
|----------|----------|
| 0.712006 | 0.789658 |
| 19.28164 | 11.42544 |
| 1057.986 | 648.4721 |
| 0.603781 | 1.023396 |
| 0        | 0        |
| 0.138897 | 0        |
| 0        | 0        |
| 0        | 0        |
| 2.302455 | 2.171996 |
| 2.051405 | 1.593879 |
| 0.89981  | 0.83162  |
| 0.1669   | 0        |
| 1.045874 | 1.581734 |
| 0        | 0        |
| 0        | 0        |
| 16.85716 | 14.03385 |
| 1.868355 | 0.159394 |
| 3.288171 | 4.192364 |
| 4.834896 | 2.71653  |
| 37.06189 | 38.74469 |
| 1.043477 | 0.77152  |
| 0        | 0        |
| 0.137057 | 0.456014 |
| 0        | 0        |
| 0        | 0        |
| 0.112476 | 0.498972 |
| 0.240181 | 0.532752 |
| 0.046093 | 0        |
| 0.249775 | 0.286909 |
| 0.065286 | 0        |
| 0        | 0        |
| 0.16623  | 0.184359 |
| 0.183689 | 0.101861 |
| 0.047851 | 0.079605 |
| 0        | 0.57864  |
| 0.293555 | 0.162785 |
| 0        | 0.177013 |
| 0.594133 | 0.51773  |
| 0        | 0        |
| 4.30039  | 4.17322  |
| 7.586437 | 10.45946 |
| 0.149607 | 0        |
| 0.110279 | 0        |
| 0.519121 | 0.230295 |
| 0.262191 | 0.581572 |
| 0.495743 | 0.615787 |
| 0.107046 | 0        |
| 0        | 0.030188 |
| 0        | 0        |
| 10.19429 | 15.10656 |
| 0.622567 | 0.627695 |
| 0.252044 | 0        |
| 0.699177 | 0.775429 |
| 0        | 0.069694 |
| 0.130572 | 0.036203 |
| 0.085993 | 0.095371 |
| 0.067364 | 0        |
| 5.352588 | 5.988419 |
| 0.287107 | 0.398024 |
| 0.191478 | 0.106181 |
| 0        | 0        |
| 0.528149 | 0.065083 |
| 0.143057 | 0        |
| 0        | 0        |
| 2.79391  | 0.860727 |

|          |          |
|----------|----------|
| 0.175387 | 0.291772 |
| 0.082126 | 0        |
| 0.142728 | 0        |
| 6.562029 | 10.0768  |
| 0        | 0.127989 |
| 0.565896 | 0.448295 |
| 0.569604 | 0.884416 |
| 0        | 0.030727 |
| 0.341512 | 0.075752 |
| 0        | 0.080068 |
| 0.15639  | 0.086723 |
| 16.99509 | 14.69379 |
| 0.224952 | 0        |
| 0        | 0        |
| 0.310434 | 0.229527 |
| 9.843043 | 10.24475 |
| 4.547209 | 6.624705 |
| 0.537881 | 0.170441 |
| 2.790422 | 2.514483 |
| 4.909621 | 6.273666 |
| 0.089591 | 0        |
| 0.178925 | 0.496096 |
| 0.862318 | 0.339355 |
| 0        | 0        |
| 0.120323 | 0.053378 |
| 0        | 0.053753 |
| 0        | 0        |
| 0.506057 | 0.491092 |
| 0.702208 | 0.746342 |
| 10.44572 | 11.86819 |
| 0.162958 | 0        |
| 0.253934 | 0.046938 |
| 1.330001 | 1.206861 |
| 0.166676 | 0.154045 |
| 0        | 0        |
| 0.080319 | 0.059386 |
| 0.144053 | 0.039941 |
| 0.057382 | 0        |
| 0.307361 | 0        |
| 0.085284 | 0.094585 |
| 0.899989 | 0.656313 |
| 8.729197 | 13.15974 |
| 0        | 0.056165 |
| 0        | 0        |
| 0.49769  | 0.827954 |
| 0        | 0.094326 |
| 1.291555 | 1.330098 |
| 0.11413  | 0.253155 |
| 0.077609 | 0        |
| 0.156785 | 0        |
| 0.34429  | 0        |
| 0        | 0.028944 |
| 0.41576  | 0.307402 |
| 24.96593 | 29.11264 |
| 0.043509 | 0        |
| 0.151802 | 0.168357 |
| 0        | 0.05672  |
| 0        | 0        |
| 3.517845 | 5.681139 |
| 0.31357  | 0.173884 |
| 1.169245 | 1.556116 |
| 0        | 0        |
| 0        | 0        |
| 0.135266 | 0        |
| 0.068302 | 0        |

|          |          |
|----------|----------|
| 2.224957 | 2.702623 |
| 0.137971 | 0        |
| 0        | 0        |
| 0        | 0.158842 |
| 0        | 0        |
| 0.475187 | 0.42993  |
| 0.057863 | 0        |
| 22.25238 | 31.65308 |
| 3.511209 | 5.286941 |
| 0        | 0        |
| 15.41956 | 7.009692 |
| 0.246621 | 0.205138 |
| 0        | 0        |
| 0.11268  | 0        |
| 0.087201 | 0        |
| 1.537444 | 0.653363 |
| 0        | 0        |
| 0        | 0        |
| 0        | 0        |
| 9.531587 | 9.857722 |
| 0.214093 | 0.079147 |
| 0.15639  | 0.173446 |
| 11.8555  | 8.412533 |
| 0.1669   | 0        |
| 0        | 0.156141 |
| 0.204618 | 0.291772 |
| 6.179849 | 3.609683 |
| 0        | 0.15721  |
| 0.191037 | 0        |
| 1.970249 | 1.812056 |
| 0.134097 | 0.594887 |
| 0.075257 | 0        |
| 0.068453 | 0.037959 |
| 0.196105 | 0.173994 |
| 57.08462 | 26.18894 |
| 0        | 0        |
| 0        | 0        |
| 0.899289 | 0.757998 |
| 0.835785 | 0.794517 |
| 0        | 0        |
| 0        | 0        |
| 0.157182 | 0.174324 |
| 49.84595 | 52.71378 |
| 1.912629 | 0.979026 |
| 28.52779 | 16.79698 |
| 0        | 0.331846 |
| 0.531566 | 0.707447 |
| 0        | 0        |
| 2.30628  | 1.89936  |
| 8.029506 | 7.249967 |
| 38.27343 | 25.2891  |
| 0        | 0        |
| 4.495362 | 4.350668 |
| 0.045352 | 0.075447 |
| 0.068003 | 0        |
| 0        | 0        |
| 0        | 0        |
| 0.127488 | 0.282785 |
| 0        | 0        |
| 0.766007 | 0.625983 |
| 0.016731 | 0.018555 |
| 4.408609 | 5.823957 |
| 0        | 0        |
| 18.46834 | 19.08309 |
| 0.098864 | 0        |

|          |          |
|----------|----------|
| 0        | 0        |
| 0.052075 | 0.245458 |
| 0        | 0        |
| 0.125937 | 0.419015 |
| 0.078195 | 0.260169 |
| 0        | 0        |
| 0.496695 | 0        |
| 1.883903 | 2.679835 |
| 18.15749 | 19.05508 |
| 0.111667 | 0        |
| 0.081053 | 0.089893 |
| 18.70631 | 15.54592 |
| 0.20323  | 0        |
| 0        | 0.150674 |
| 153.9615 | 152.7008 |
| 16.61899 | 19.97799 |
| 0.140893 | 0.208345 |
| 0.509954 | 0.56557  |
| 24.14693 | 47.23092 |
| 0        | 0        |
| 0.86472  | 0.767222 |
| 0.068909 | 0.229272 |
| 0.078097 | 0.086614 |
| 20.69563 | 19.22393 |
| 1.305843 | 1.184939 |
| 0.530196 | 0.478389 |
| 35.27265 | 36.93972 |
| 0.584622 | 0.259353 |
| 0.630679 | 0.621744 |
| 4.231365 | 3.679784 |
| 13.9288  | 15.18964 |
| 10.55247 | 11.74589 |
| 16.48291 | 24.31777 |
| 0        | 0.078248 |
| 0.080737 | 0        |
| 0.245889 | 0        |
| 0        | 0        |
| 0        | 0.113627 |
| 7.0668   | 3.638845 |
| 0        | 0        |
| 0.074356 | 0.16493  |
| 0        | 0        |
| 0.060691 | 0        |
| 0        | 0        |
| 17.07441 | 15.66528 |
| 16.84675 | 19.70749 |
| 0.651831 | 0.36146  |
| 1.89341  | 3.071505 |
| 0.19927  | 1.010298 |
| 1.416209 | 0.8501   |
| 0.106496 | 0.11811  |
| 4.348312 | 4.946198 |
| 0.909698 | 1.00891  |
| 0        | 0.252228 |
| 0        | 0        |
| 4.300868 | 5.381453 |
| 7.283936 | 3.000522 |
| 0.715699 | 0.297658 |
| 0        | 0        |
| 112.831  | 121.9142 |
| 0        | 0.268977 |
| 81.50743 | 56.57952 |
| 0        | 0        |
| 0        | 0        |
| 0.642278 | 0.118721 |

|          |          |  |
|----------|----------|--|
| 0        | 0.247691 |  |
| 0.963417 | 0.771686 |  |
| 216.6715 | 171.8948 |  |
| 0.306043 | 0.221361 |  |
| 0.247358 | 0        |  |
| 11.38827 | 9.252419 |  |
| 0.086472 | 0.143854 |  |
| 0.127751 | 0.283367 |  |
| 0.552234 | 0.349978 |  |
| 0.742853 | 0.737146 |  |
| 0        | 0.752548 |  |
| 13.89822 | 17.91826 |  |
| 0.055287 | 0.49053  |  |
| 0        | 0        |  |
| 0.769961 | 0.698673 |  |
| 0        | 0        |  |
| 0.138535 | 0.281681 |  |
| 0        | 0.117106 |  |
| 0.104435 | 0.057913 |  |
| 2.140927 | 3.249204 |  |
| 2.405129 | 4.632071 |  |
| 0        | 0.066723 |  |
| 0.94071  | 0        |  |
| 0        | 0        |  |
| 4.384667 | 3.112232 |  |
| 0.125175 | 0.20824  |  |
| 0.416691 | 0.646989 |  |
| 4.396377 | 3.166653 |  |
| 0.146087 | 0        |  |
| 0        | 0.259842 |  |
| 2.625109 | 1.309004 |  |
| 0.550416 | 0.488356 |  |
| 0.470355 | 0.173884 |  |
| 0        | 0        |  |
| 0        | 0        |  |
| 2.436107 | 1.500995 |  |
| 2.929227 | 2.189336 |  |
| 0.416132 | 0.461516 |  |
| 0.151802 | 0.505072 |  |
| 0        | 0        |  |
| 1.140517 | 1.581128 |  |
| 0.508076 | 0.676185 |  |
| 5.358278 | 6.479413 |  |
| 7.438982 | 4.477718 |  |
| 0.309403 | 0.171573 |  |
| 0        | 0        |  |
| 0.088233 | 0.097856 |  |
| 1.661693 | 2.02721  |  |
| 0.286595 | 0.202269 |  |
| 0.281118 | 0.334047 |  |
| 3.320224 | 2.663504 |  |
| 0        | 0        |  |
| 0        | 0        |  |
| 124.8411 | 80.28104 |  |
| 0        | 0        |  |
| 0.03378  | 0.149854 |  |
| 2.22603  | 1.878437 |  |
| 0.411171 | 0        |  |
| 2.93777  | 2.552789 |  |
| 0.105321 | 0.116808 |  |
| 0.154445 | 0.685156 |  |
| 0        | 0        |  |
| 0.097087 | 0.053837 |  |
| 0.617473 | 1.078583 |  |
| 0        | 0.139389 |  |

|          |          |
|----------|----------|
| 0        | 0        |
| 0        | 0        |
| 0.202898 | 0        |
| 0        | 0        |
| 2.19721  | 1.183608 |
| 3.163343 | 2.867929 |
| 0        | 0.156496 |
| 1.615992 | 2.987056 |
| 3.062108 | 4.25484  |
| 0.360708 | 0.25003  |
| 0.077415 | 0        |
| 0.028363 | 0        |
| 4.593451 | 3.904327 |
| 0.314364 | 0.058108 |
| 15.29326 | 20.15069 |
| 0.141751 | 0.314421 |
| 10.46067 | 11.47204 |
| 0.40735  | 0.150592 |
| 0.252728 | 0.09343  |
| 0        | 0.040914 |
| 2.092816 | 2.063165 |
| 2.683276 | 2.106033 |
| 0.141428 | 0        |
| 0.480466 | 0.118415 |
| 0.078097 | 0.043307 |
| 2.092288 | 0.625746 |
| 60.97415 | 51.24618 |
| 0        | 0.092303 |
| 72.1532  | 76.87535 |
| 0.116268 | 0        |
| 0.980002 | 0.852784 |
| 0.21118  | 0        |
| 0        | 0        |
| 9.952689 | 12.94811 |
| 0        | 0        |
| 0.161055 | 0.02977  |
| 1.186374 | 0.738673 |
| 0.171511 | 0.095108 |
| 30.89812 | 22.56424 |
| 0        | 0        |
| 0.060632 | 0        |
| 2.946214 | 0.553819 |
| 1.163765 | 1.742427 |
| 52.11467 | 38.64679 |
| 8.453144 | 12.43149 |
| 0.271715 | 0        |
| 0        | 0        |
| 0        | 0        |
| 0.020283 | 0.022495 |
| 0        | 0        |
| 0.878174 | 0.389579 |
| 0        | 0.184507 |
| 0.238337 | 0        |
| 0.323369 | 0.179318 |
| 2.675086 | 2.345868 |
| 26.56101 | 31.07634 |
| 3.862415 | 5.093499 |
| 0.258561 | 0.107535 |
| 0.833381 | 0        |
| 0        | 0        |
| 0.074498 | 0.066099 |
| 0        | 0        |
| 11.20124 | 8.163594 |
| 1.233636 | 0.326729 |
| 0        | 0        |

|          |          |
|----------|----------|
| 0.021558 | 0.119545 |
| 0.076888 | 0.042637 |
| 32.08615 | 38.6693  |
| 2.537858 | 0.965019 |
| 0.941086 | 1.016255 |
| 0        | 0        |
| 27.40772 | 22.33237 |
| 2.704133 | 2.159314 |
| 0.051782 | 0.028715 |
| 0.039395 | 0.218459 |
| 0.115159 | 0.23719  |
| 0        | 0        |
| 0.42332  | 0.312992 |
| 4.531034 | 3.638933 |
| 22.3977  | 17.82589 |
| 0.062667 | 0.069501 |
| 1.891205 | 1.330098 |
| 0        | 0        |
| 0.025837 | 0.05731  |
| 0.25383  | 0.168908 |
| 0        | 0.047163 |
| 0.604252 | 0        |
| 8.906435 | 11.23776 |
| 2.868396 | 2.839158 |
| 0.057971 | 0.128587 |
| 14.11066 | 11.47636 |
| 0.499693 | 0.138548 |
| 0.183418 | 0.116241 |
| 0.719848 | 0.598766 |
| 65.91712 | 61.45846 |
| 1.919493 | 2.283659 |
| 0        | 0.059055 |
| 11.547   | 13.27825 |
| 0        | 0        |
| 0        | 0        |
| 0.711306 | 0.169046 |
| 0.354493 | 0.098289 |
| 0.372894 | 0        |
| 0        | 0        |
| 0.062025 | 0        |
| 0.260504 | 0.288915 |
| 0.276556 | 0        |
| 1.624621 | 0.535672 |
| 4.498163 | 2.81677  |
| 0.243956 | 0.090187 |
| 0.713642 | 0        |
| 1.189105 | 1.189073 |
| 0        | 0        |
| 1.656755 | 1.97525  |
| 0.052571 | 0        |
| 0.136155 | 0        |
| 2.557294 | 3.01163  |
| 12.04671 | 4.93312  |
| 0.010507 | 0.011653 |
| 0        | 0        |
| 0.289225 | 0        |
| 0.230283 | 0.212832 |
| 0        | 0        |
| 3.74029  | 1.779335 |
| 0        | 0.255978 |
| 0        | 0        |
| 1.314651 | 2.09515  |
| 0.156587 | 0.086832 |
| 0.188205 | 0.023192 |
| 5.385087 | 6.850682 |

|          |          |
|----------|----------|
| 0.153966 | 0.128068 |
| 0.652565 | 1.550859 |
| 0.050259 | 0        |
| 0        | 0        |
| 1.857863 | 1.709763 |
| 0.091777 | 0        |
| 0        | 0        |
| 2.21245  | 4.043098 |
| 0.822343 | 1.140035 |
| 0.172543 | 0.063787 |
| 1.514314 | 0.530358 |
| 0        | 0.028643 |
| 0.520281 | 0.865535 |
| 6.039052 | 4.741052 |
| 0.326773 | 0.390289 |
| 0        | 0        |
| 0        | 2.550301 |
| 10.29335 | 11.95957 |
| 1.123581 | 0.844145 |
| 0.243002 | 0        |
| 0        | 0.185601 |
| 0.022585 | 0.100194 |
| 0        | 0        |
| 8.313978 | 7.760337 |
| 0        | 0.113627 |
| 17.74363 | 8.559035 |
| 0        | 0        |
| 0.09019  | 0        |
| 0.47637  | 1.408862 |
| 0        | 0        |
| 0.403162 | 0.111783 |
| 0        | 0.014148 |
| 0        | 0        |
| 0.150331 | 0.074101 |
| 0.01918  | 0        |
| 0        | 0.173446 |
| 0        | 0        |
| 0.268823 | 0.173916 |
| 0.05087  | 0.070522 |
| 1.149757 | 0.76509  |
| 0        | 0        |
| 0.15671  | 0.215182 |
| 0.31695  | 0.078115 |
| 0.158385 | 0        |
| 0        | 0        |
| 0.21118  | 0        |
| 0        | 0.370205 |
| 0        | 0        |
| 0.193719 | 0.322269 |
| 0.218424 | 0.787296 |
| 2.686158 | 3.859306 |
| 5.099812 | 4.091817 |
| 0        | 0        |
| 0        | 0        |
| 0        | 0        |
| 0.124617 | 0.184277 |
| 0.19463  | 0.071952 |
| 1.487921 | 0.150018 |
| 26.22659 | 36.92612 |
| 0.232971 | 0.086126 |
| 0.146278 | 0.018026 |
| 21.66846 | 17.90922 |
| 3.392511 | 2.78919  |
| 0.246377 | 0.728658 |
| 2.220561 | 0.394038 |

|          |          |
|----------|----------|
| 0.048696 | 0.162019 |
| 12.07448 | 11.54378 |
| 0.070393 | 0        |
| 2.466169 | 3.574865 |
| 0.122459 | 0        |
| 3.304691 | 4.237776 |
| 1.063739 | 0.432575 |
| 1.228508 | 0.943262 |
| 0.347826 | 0.09644  |
| 0.260571 | 0.140116 |
| 0        | 0.071061 |
| 0.729756 | 1.384404 |
| 0.075994 | 0.337127 |
| 0.055188 | 0        |
| 12.07903 | 11.52014 |
| 0        | 0.057622 |
| 0        | 0.442818 |
| 0        | 0        |
| 0        | 0        |
| 2.736612 | 1.960149 |
| 0.03202  | 0        |
| 6.368291 | 7.062822 |
| 0.218424 | 0.242245 |
| 0.767859 | 0.851602 |
| 0        | 0.145886 |
| 0.401078 | 0.978604 |
| 0.08336  | 0.01849  |
| 0        | 0        |
| 0.093224 | 0        |
| 0.140278 | 0.155576 |
| 0.084934 | 0.470986 |
| 0.031709 | 0.070335 |
| 0        | 0.129921 |
| 0.387801 | 0.36558  |
| 1.443881 | 1.33446  |
| 0.572091 | 0.066788 |
| 0.761135 | 0.241184 |
| 0.684422 | 0.216876 |
| 0.101615 | 0.150263 |
| 0        | 0        |
| 0        | 0        |
| 0        | 0        |
| 0        | 0        |
| 0        | 0.032184 |
| 0.156884 | 0.043499 |
| 0.438003 | 0.121443 |
| 5.781996 | 5.863915 |
| 0.502091 | 0.224402 |
| 0.06584  | 0        |
| 0.366983 | 0.407007 |
| 0.077127 | 0.256614 |
| 0.200388 | 0.444485 |
| 0        | 0        |
| 0        | 0        |
| 0        | 0        |
| 2.612875 | 1.793899 |
| 0        | 0        |
| 4.830385 | 3.982833 |
| 0.61778  | 0        |
| 0.305471 | 0        |
| 0.022834 | 0.025325 |
| 0        | 0        |
| 0.412995 | 0        |
| 0        | 0        |
| 0.155997 | 0.230681 |

|          |          |
|----------|----------|
| 0        | 0        |
| 5.508667 | 4.962657 |
| 0.548363 | 0.675742 |
| 0.319362 | 0.273694 |
| 237.6316 | 283.0986 |
| 0.336059 | 0        |
| 0        | 0        |
| 10.05495 | 12.12596 |
| 0.037789 | 0        |
| 0.630324 | 0.524301 |
| 3.856551 | 2.886745 |
| 3.056533 | 0.492385 |
| 0.210821 | 0        |
| 0.15512  | 0        |
| 0.141026 | 0.039102 |
| 0.112558 | 0.0749   |
| 0.753656 | 0.915455 |
| 0.153744 | 0.312604 |
| 0        | 0        |
| 0.208345 | 0.077023 |
| 0        | 0        |
| 0.048392 | 0        |
| 0        | 0.062827 |
| 0.278417 | 0.247025 |
| 1.365911 | 0.688581 |
| 0.398189 | 0.566174 |
| 6.370399 | 8.124934 |
| 0        | 0.044568 |
| 0.074669 | 0.082812 |
| 0.534656 | 0.148241 |
| 0.336286 | 0.466203 |
| 0        | 0        |
| 2.666031 | 3.031963 |
| 7.506336 | 3.693613 |
| 2.830596 | 2.189251 |
| 0.210821 | 0.233814 |
| 0        | 0.067707 |
| 0        | 0        |
| 0        | 0        |
| 0        | 0        |
| 0.305095 | 0.338369 |
| 0.756448 | 0.354939 |
| 0.447588 | 0.070915 |
| 0.497263 | 1.680748 |
| 18.36914 | 24.53233 |
| 0.126665 | 0.163892 |
| 0        | 0.038793 |
| 0        | 0        |
| 0        | 0        |
| 0        | 0        |
| 0.130161 | 0.028871 |
| 0.632806 | 0.255207 |
| 0        | 0        |
| 0.173913 | 0.04822  |
| 0        | 0        |
| 0.574879 | 0.173884 |
| 0.937161 | 0.692912 |
| 0.262055 | 0.245922 |
| 0.035662 | 0.098877 |
| 8.814005 | 10.13465 |
| 1.502411 | 1.209899 |
| 1.175558 | 0.845033 |
| 0        | 0        |
| 0.163818 | 0.181684 |
| 0        | 0        |

|          |          |
|----------|----------|
| 0        | 0.131283 |
| 1.240997 | 0.390306 |
| 0.223067 | 0.247395 |
| 0.107231 | 0        |
| 0.399273 | 0.442818 |
| 0        | 0        |
| 0        | 0.091324 |
| 0        | 0        |
| 59.7822  | 89.60336 |
| 0.082672 | 0        |
| 0.056597 | 0.313847 |
| 8.03743  | 7.536836 |
| 4.703552 | 3.129915 |
| 0.148889 | 0        |
| 0        | 0.079882 |
| 0        | 0.055937 |
| 0.049909 | 0.055352 |
| 0.569866 | 0.442411 |
| 0        | 0        |
| 0.026208 | 0        |
| 0        | 0.041531 |
| 0.089981 | 0        |
| 0.13007  | 0.240426 |
| 2.058361 | 1.81696  |
| 0        | 0        |
| 0.111467 | 0.556305 |
| 0        | 0        |
| 0.572789 | 0.134752 |
| 0        | 0        |
| 0.167576 | 0.092926 |
| 4.342809 | 8.979391 |
| 1.367036 | 1.637417 |
| 1.78509  | 2.034013 |
| 2.889612 | 2.116903 |
| 0.052527 | 0.058256 |
| 0.135266 | 0        |
| 4.677779 | 3.207091 |
| 0        | 0.079789 |
| 0.524614 | 1.214251 |
| 0        | 0.049825 |
| 1.188266 | 0.539124 |
| 0        | 0.151005 |
| 0.90879  | 1.488948 |
| 0.246499 | 0.170864 |
| 0.122218 | 0        |
| 0.852256 | 0.236301 |
| 0.276556 | 0.153359 |
| 0        | 0.392354 |
| 0.080737 | 0.044771 |
| 0.182287 | 0.040433 |
| 0        | 0.028847 |
| 0.11605  | 0.042902 |
| 4.497002 | 2.715679 |
| 0.042848 | 0.047521 |
| 0.131819 | 0.146196 |
| 0.242338 | 0.053753 |
| 0        | 0        |
| 5.201694 | 3.476189 |
| 0        | 0        |
| 0        | 0.018525 |
| 0        | 0.263824 |
| 0.069037 | 0.178653 |
| 0        | 0        |
| 0        | 0.219119 |
| 0        | 0.01352  |

|          |          |
|----------|----------|
| 0.077415 | 0.085858 |
| 0        | 0        |
| 0.262385 | 0.509252 |
| 0.512691 | 0.284303 |
| 0.938417 | 0.167865 |
| 0.6577   | 0        |
| 0.201799 | 0        |
| 6.03958  | 6.315504 |
| 7.877357 | 6.226272 |
| 0.143388 | 0        |
| 0        | 0.015819 |
| 0.108506 | 0        |
| 0        | 0        |
| 3.73611  | 1.726489 |
| 0.125682 | 0        |
| 2.673854 | 1.957208 |
| 4.093312 | 2.551529 |
| 0.148711 | 0.041232 |
| 0.302617 | 0        |
| 0        | 0        |
| 0        | 0        |
| 8.684893 | 5.555243 |
| 0        | 0.079238 |
| 0.057648 | 0        |
| 0.057541 | 0.021272 |
| 0        | 0        |
| 0.080632 | 0        |
| 0.378386 | 0.244798 |
| 0.051058 | 0        |
| 0        | 0.077894 |
| 0        | 0        |
| 14.05164 | 10.58704 |
| 0        | 0        |
| 0        | 0        |
| 0        | 0.365295 |
| 0.561872 | 0.49852  |
| 3.618037 | 5.564676 |
| 0.049511 | 0.219643 |
| 0        | 0        |
| 0        | 0        |
| 0.127227 | 0.282205 |
| 1.672374 | 1.037204 |
| 0        | 0        |
| 0        | 0        |
| 1.518093 | 0.584126 |
| 0        | 0        |
| 0.757157 | 0        |
| 0        | 0.083922 |
| 16.35876 | 10.69133 |
| 0.258695 | 0.0151   |
| 0.066456 | 0.055278 |
| 0.276187 | 0.122523 |
| 0.386132 | 0.124905 |
| 3.65217  | 4.500532 |
| 0.184052 | 0        |
| 0        | 0        |
| 0        | 6.350993 |
| 0        | 0        |
| 0.089721 | 0        |
| 0        | 0        |
| 0        | 0        |
| 0        | 0        |
| 0.501712 | 0        |
| 0.104173 | 0        |
| 0        | 0.110173 |

|          |          |
|----------|----------|
| 0        | 0        |
| 0.058683 | 0        |
| 0.627774 | 0        |
| 0        | 0        |
| 0        | 0.09218  |
| 0        | 0        |
| 0.335605 | 0.496275 |
| 0        | 0.079238 |
| 3.330096 | 1.676704 |
| 0.083004 | 0.092056 |
| 0        | 0.027281 |
| 0.15639  | 0.346892 |
| 0.285129 | 0.158113 |
| 0        | 0        |
| 3.585992 | 1.715605 |
| 0.320862 | 1.067568 |
| 3.510866 | 2.254284 |
| 0.028533 | 0        |
| 0.104348 | 0.694368 |
| 0.077647 | 0.034446 |
| 0        | 0.295528 |
| 0.037045 | 0.041085 |
| 0.567868 | 0        |
| 0        | 0        |
| 0.183147 | 0        |
| 0.288776 | 0.480406 |
| 0        | 0.178389 |
| 1.755993 | 1.251966 |
| 3.20486  | 2.143402 |
| 0.374017 | 0.138269 |
| 0        | 0        |
| 0.778445 | 0.340105 |
| 0.259235 | 0.71877  |
| 0.394202 | 0        |
| 0        | 0        |
| 0        | 0.318296 |
| 0        | 0.188726 |
| 0.224952 | 0.249486 |
| 0.879774 | 0.278778 |
| 0.124423 | 0.413977 |
| 0.053895 | 0        |
| 0.483794 | 0        |
| 0.343781 | 0.228765 |
| 0        | 0        |
| 0.160431 | 0.355856 |
| 0.692934 | 0.307402 |
| 0.106678 | 0.236626 |
| 0        | 0.069694 |
| 0.149427 | 0.082862 |
| 0        | 0        |
| 0.277794 | 0        |
| 0.15368  | 0        |
| 2.320138 | 2.058539 |
| 1.046776 | 1.197217 |
| 0.253416 | 0.374738 |
| 0.515244 | 0.285718 |
| 0        | 0        |
| 0.054558 | 0.423556 |
| 1.809154 | 1.003231 |
| 0        | 0.074603 |
| 1.131138 | 0.557556 |
| 0        | 0.042742 |
| 0        | 0.149692 |
| 0        | 0        |
| 0        | 0        |

|          |          |
|----------|----------|
| 2.798999 | 0.903058 |
| 0        | 0        |
| 0.068378 | 0.227505 |
| 0        | 0.259842 |
| 0.072872 | 0        |
| 0.07211  | 0.399873 |
| 0.215579 | 0        |
| 0        | 0        |
| 7.780118 | 11.61874 |
| 0.053965 | 0        |
| 0.241897 | 0.178852 |
| 0        | 0        |
| 0        | 0        |
| 0        | 0        |
| 0.127751 | 0.566734 |
| 0.053248 | 0        |
| 0.035117 | 0        |
| 0        | 0        |
| 2.339506 | 1.796299 |
| 0        | 0.047228 |
| 0.199252 | 0        |
| 0.277794 | 0        |
| 2.287118 | 3.46456  |
| 0.735378 | 1.048601 |
| 0.090572 | 0.150674 |
| 0.463335 | 0.513867 |
| 21.31628 | 27.34387 |
| 0        | 0.080114 |
| 0.132664 | 0.220699 |
| 11.33359 | 10.44626 |
| 0        | 0.074121 |
| 0.178667 | 0.198153 |
| 0.164862 | 0.109705 |
| 0        | 0        |
| 0.153909 | 0.341389 |
| 0.031495 | 0.058216 |
| 1.263855 | 0.901088 |
| 0.214834 | 0        |
| 18.19549 | 16.17473 |
| 0        | 0.802231 |
| 0.246377 | 0        |
| 0        | 0        |
| 0        | 0.060243 |
| 0.160431 | 0.177928 |
| 18.31975 | 10.06087 |
| 0        | 0        |
| 0        | 0.10067  |
| 0.168257 | 0.093304 |
| 0        | 0.171716 |
| 0.061655 | 0        |
| 0        | 0        |
| 0.985506 | 1.275151 |
| 0        | 0        |
| 0.083901 | 0        |
| 0        | 0        |
| 0.040793 | 0.045242 |
| 0        | 0.136083 |
| 1.427285 | 2.572287 |
| 0        | 0        |
| 0        | 0        |
| 0        | 0        |
| 1.690776 | 1.133826 |
| 0        | 0.224294 |
| 0.113504 | 0        |
| 0        | 0.134489 |

|          |          |
|----------|----------|
| 0        | 0        |
| 0.094934 | 0        |
| 0        | 0        |
| 0.043703 | 0        |
| 0        | 0.059258 |
| 0.083958 | 0        |
| 41.56566 | 15.63492 |
| 0.376284 | 0.139107 |
| 0.188142 | 0.208661 |
| 0        | 0        |
| 0        | 0        |
| 0.310953 | 0.344865 |
| 0.041226 | 0.251474 |
| 0.475155 | 0        |
| 0        | 0.182648 |
| 0        | 0.050893 |
| 0.141107 | 0        |
| 0.071038 | 0        |
| 0.175222 | 0.194332 |
| 0.128544 | 0        |
| 0        | 0        |
| 0        | 0        |
| 0        | 0        |
| 0.130435 | 0.28932  |
| 2.450065 | 2.964296 |
| 0        | 0        |
| 0.058739 | 0        |
| 0.071777 | 0        |
| 0        | 0.083162 |
| 0        | 0        |
| 0.84587  | 0.375249 |
| 0        | 0.192341 |
| 0        | 0        |
| 0.067194 | 0        |
| 0.473946 | 1.314087 |
| 0.205586 | 0.912028 |
| 0.15639  | 0        |
| 0.257622 | 0.190479 |
| 0        | 0        |
| 0.091845 | 0.101861 |
| 0        | 0.075091 |
| 28.94878 | 19.36798 |
| 14.37256 | 12.20634 |
| 0        | 0.804417 |
| 0.985506 | 1.327198 |
| 4.19704  | 3.250215 |
| 0.845541 | 0.535861 |
| 0        | 0.384682 |
| 0.214834 | 0        |
| 2.264657 | 3.033542 |
| 0.111868 | 0        |
| 0.01264  | 0.014018 |
| 0        | 0        |
| 0.286115 | 0.237989 |
| 0.481294 | 0        |
| 0.213602 | 0.342185 |
| 0.155411 | 0.129271 |
| 2.312736 | 2.0141   |
| 0.129528 | 0        |
| 0.637879 | 0.943262 |
| 0        | 0        |
| 0.274114 | 0        |
| 0.253003 | 0.056119 |
| 0        | 0        |
| 0.306602 | 0.34004  |

|          |          |
|----------|----------|
| 0.166676 | 0.092427 |
| 0        | 0        |
| 0.135858 | 0        |
| 0        | 0        |
| 0.063289 | 0        |
| 0.974206 | 0.581783 |
| 0.16735  | 0        |
| 0        | 0.395736 |
| 0.107046 | 0        |
| 0        | 0        |
| 0.142401 | 0        |
| 4.488209 | 0.460898 |
| 0.717422 | 0.331527 |
| 0.249345 | 0        |
| 0.192219 | 0        |
| 0.129213 | 0.071653 |
| 0.597308 | 0.478437 |
| 0.080877 | 0.298993 |
| 7.440045 | 8.571287 |
| 0        | 0.174767 |
| 0.157182 | 0.232433 |
| 0.251874 | 1.117373 |
| 0.291488 | 0.323278 |
| 0        | 0        |
| 0        | 0        |
| 0        | 0        |
| 0        | 0        |
| 0        | 0        |
| 0.340202 | 0.377305 |
| 0        | 0        |
| 0        | 0.206162 |
| 0.47467  | 0.105288 |
| 0        | 0        |
| 0.050192 | 0        |
| 0        | 0        |
| 0        | 0.271095 |
| 0        | 0        |
| 0.342077 | 0.569076 |
| 0.362023 | 0        |
| 0        | 1.22961  |
| 0        | 0        |
| 0        | 0        |
| 0        | 0.115923 |
| 0.168166 | 0.447615 |
| 0        | 0        |
| 0.159812 | 0.088621 |
| 0.067633 | 0.075009 |
| 0        | 0        |
| 0        | 0.154564 |
| 5.602684 | 4.057938 |
| 1.940215 | 1.88284  |
| 0        | 0        |
| 7.973811 | 4.198667 |
| 0.343021 | 0.887674 |
| 0.502728 | 0.390289 |
| 16.60996 | 18.04032 |
| 2.564458 | 1.796299 |
| 0.677311 | 1.251966 |
| 0        | 0        |
| 0.665217 | 0        |
| 0        | 0        |
| 0        | 0.069274 |
| 0        | 0.575416 |
| 0.138278 | 0.153359 |
| 0.121027 | 0        |

|          |          |
|----------|----------|
| 0.066904 | 0        |
| 0.761802 | 0.844885 |
| 2.847912 | 5.594305 |
| 0.249847 | 0.692738 |
| 9.03082  | 3.380309 |
| 15.7117  | 22.91475 |
| 0.031661 | 0        |
| 24.49494 | 23.60701 |
| 0.049472 | 0        |
| 4.117264 | 5.253262 |
| 0.170238 | 0.255441 |
| 0.073216 | 0.0406   |
| 0.067194 | 0.074522 |
| 0        | 0        |
| 0.282727 | 0        |
| 0.084015 | 0        |
| 0.085569 | 0.219771 |
| 4.361475 | 2.244687 |
| 0        | 0.027587 |
| 0.173105 | 0        |
| 0.427382 | 0.344722 |
| 1.567961 | 0.893634 |
| 1.82073  | 2.524125 |
| 6.472751 | 3.988153 |
| 1.952733 | 3.248549 |
| 17.58603 | 17.12715 |
| 2.924685 | 0.370703 |
| 0.751725 | 0.277903 |
| 4.008729 | 2.55587  |
| 0.114693 | 0.339203 |
| 0        | 0.130167 |
| 0        | 0        |
| 0.122701 | 0        |
| 1.876809 | 1.659571 |
| 3.185376 | 1.735399 |
| 0.528149 | 0.130167 |
| 0.84798  | 1.431137 |
| 0.549928 | 0.06099  |
| 3.08296  | 4.130698 |
| 0        | 0        |
| 0        | 0.022437 |
| 6.799881 | 4.431593 |
| 1.064727 | 0.221409 |
| 0        | 0        |
| 0        | 0.041356 |
| 25.17224 | 37.44509 |
| 164.9176 | 184.3075 |
| 0.090506 | 0.050188 |
| 2.734981 | 3.564863 |
| 1.269434 | 1.791847 |
| 0.444908 | 0.444087 |
| 0.290832 | 0.399963 |
| 0        | 0        |
| 0        | 0        |
| 0        | 0.043362 |
| 0.140787 | 0.156141 |
| 0.210147 | 0.362548 |
| 1.7083   | 1.584017 |
| 0        | 0.039848 |
| 0        | 0.022378 |
| 0.120323 | 0.133446 |
| 0        | 0        |
| 0.674369 | 0.149583 |
| 1.637456 | 1.210693 |
| 0        | 0        |

|          |          |
|----------|----------|
| 0        | 0        |
| 0        | 0        |
| 0        | 0.097579 |
| 0.020073 | 0        |
| 3.030476 | 0.882258 |
| 0.283243 | 0.942402 |
| 0        | 0        |
| 0.49769  | 0.413977 |
| 0        | 0        |
| 0.166631 | 0.332648 |
| 0.148238 | 0        |
| 0.555765 | 0.352216 |
| 0.247687 | 0        |
| 1.29049  | 1.431231 |
| 0.06676  | 0.074041 |
| 0        | 0        |
| 0.101119 | 0        |
| 1.545149 | 1.713664 |
| 0        | 0        |
| 14.28493 | 20.43797 |
| 0        | 0        |
| 0        | 0        |
| 0        | 0.18073  |
| 0.390975 | 1.040677 |
| 0        | 0.147764 |
| 1.158337 | 0.3854   |
| 0.178411 | 0        |
| 0.094142 | 0.234922 |
| 0.3344   | 0        |
| 0        | 0.161639 |
| 0        | 0        |
| 0.535232 | 0        |
| 0.160018 | 0        |
| 0        | 0.194515 |
| 0        | 0.163753 |
| 0.386433 | 0        |
| 0        | 0        |
| 0        | 0.291772 |
| 0.3347   | 0        |
| 0        | 0        |
| 0        | 0.283367 |
| 1.335202 | 1.203166 |
| 1.066785 | 0.473252 |
| 0        | 0        |
| 0        | 0        |
| 2.042916 | 1.87168  |
| 0        | 0        |
| 2.707277 | 1.000845 |
| 2.282606 | 1.01262  |
| 7.391296 | 6.98936  |
| 0        | 0        |
| 2.376421 | 3.32648  |
| 0.880665 | 0        |
| 0        | 0        |
| 41.96343 | 47.02606 |
| 9.448813 | 12.08834 |
| 0        | 0.327117 |
| 0        | 0.416061 |
| 0.378579 | 0.419867 |
| 1.494433 | 1.205394 |
| 0.296889 | 0.123475 |
| 0.24316  | 0.629252 |
| 0.279042 | 0        |
| 0.506832 | 0.281054 |
| 0        | 0        |

|          |          |
|----------|----------|
| 0.057836 | 0        |
| 0.061069 | 0.112882 |
| 0.1177   | 0.032634 |
| 0        | 0        |
| 1.179398 | 1.121164 |
| 0.370889 | 0.329071 |
| 0.044731 | 0        |
| 0        | 0.124743 |
| 0.098394 | 0        |
| 0        | 0        |
| 1.211596 | 1.802569 |
| 2.429079 | 2.933232 |
| 0.077901 | 0.086397 |
| 0.401857 | 0.445684 |
| 0.189289 | 0        |
| 0.172224 | 0.095504 |
| 0        | 0        |
| 0.021528 | 0.023876 |
| 0.033202 | 0        |
| 0        | 0        |
| 0.246377 | 0.136623 |
| 0.476858 | 0.634637 |
| 4.808403 | 3.675317 |
| 0.232847 | 0.166012 |
| 0.129753 | 0        |
| 0.559341 | 1.085601 |
| 0.696302 | 0.38612  |
| 0        | 0.107759 |
| 0        | 0        |
| 0.365217 | 0        |
| 1.429475 | 1.2683   |
| 0        | 0        |
| 0        | 0        |
| 0.21836  | 0.080725 |
| 0.569169 | 0.736451 |
| 0        | 0        |
| 0.050601 | 0.392834 |
| 1.058299 | 1.564958 |
| 0        | 0.098651 |
| 0        | 0        |
| 0        | 0.983688 |
| 0        | 0.037001 |
| 0        | 0        |
| 0.210108 | 0.233022 |
| 0        | 0.059929 |
| 0        | 0        |
| 0.052021 | 0        |
| 0        | 0        |
| 0.127358 | 0.070624 |
| 0.106131 | 0        |
| 0.151431 | 0        |
| 0        | 0.081974 |
| 0        | 0        |
| 0        | 0        |
| 0        | 0        |
| 0.840147 | 0        |
| 0        | 0        |
| 0        | 0        |
| 0        | 0        |
| 0        | 0        |
| 0        | 0        |
| 1.01544  | 0.965301 |
| 0.121739 | 0        |
| 0.080319 | 0.356316 |
| 0        | 0.053049 |

|          |          |
|----------|----------|
| 0.025924 | 0.345009 |
| 0.041097 | 0        |
| 6.37453  | 4.914333 |
| 0        | 0.08501  |
| 0.148711 | 0.082465 |
| 0        | 0.111964 |
| 0.431159 | 0.478182 |
| 0        | 0        |
| 0.153301 | 0        |
| 0.100954 | 0.111964 |
| 0.062809 | 0.069659 |
| 0.167576 | 0.092926 |
| 0.939693 | 0.372206 |
| 0.094862 | 0.052604 |
| 0        | 0.218597 |
| 0.108354 | 0.360514 |
| 0        | 0        |
| 0.082126 | 0        |
| 3.988764 | 0.972769 |
| 3.104344 | 6.614005 |
| 0.051058 | 0        |
| 0.580251 | 0.257414 |
| 0        | 0.205547 |
| 0        | 0        |
| 57.62364 | 46.75989 |
| 0.218616 | 0.034637 |
| 0.033725 | 0.074805 |
| 1.609163 | 0.644461 |
| 3.972489 | 3.564188 |
| 0        | 0.025974 |
| 0        | 0.191273 |
| 3.477351 | 2.802757 |
| 0        | 0        |
| 0.043116 | 0        |
| 0        | 0        |
| 0.036832 | 0.040849 |
| 0.324496 | 0        |
| 0        | 0.600725 |
| 0        | 0        |
| 0.478819 | 0.26552  |
| 0.609891 | 0.473484 |
| 0        | 0        |
| 1.868917 | 1.022912 |
| 0        | 0        |
| 1.826085 | 1.059356 |
| 0.034685 | 0.038468 |
| 0        | 0.172145 |
| 0        | 0        |
| 0        | 0        |
| 2.723722 | 1.781482 |
| 1.983119 | 1.015108 |
| 0.169174 | 0.375249 |
| 0.556439 | 0.129921 |
| 0        | 0.186103 |
| 0.038325 | 0        |
| 0.246866 | 0.136895 |
| 0.229951 | 0        |
| 0        | 0.276539 |
| 0.29495  | 0        |
| 0.183689 | 0        |
| 0        | 0        |
| 0.172022 | 0.10273  |
| 0.055139 | 0        |
| 0        | 0.395736 |
| 0.059756 | 0        |

|          |          |
|----------|----------|
| 2.231303 | 1.571207 |
| 0        | 0        |
| 0.174401 | 0        |
| 14.60634 | 13.55093 |
| 0        | 0        |
| 0        | 0.110704 |
| 1.396638 | 0.563257 |
| 0.264763 | 0.146819 |
| 0.223737 | 0.124069 |
| 1.206873 | 0.297443 |
| 3.813398 | 2.290866 |
| 0        | 0        |
| 0        | 0.059207 |
| 0.065492 | 0.072635 |
| 0.118261 | 0.262317 |
| 0.149247 | 0        |
| 0        | 0.025122 |
| 0        | 0.450053 |
| 0.032136 | 0        |
| 0.150696 | 0.167131 |
| 0.111667 | 0.247691 |
| 0.482228 | 0        |
| 0        | 0        |
| 0.152298 | 0.450421 |
| 0.109308 | 0.121229 |
| 0.029565 | 0        |
| 0.085874 | 0.095239 |
| 0.071364 | 0        |
| 0        | 0        |
| 0        | 0        |
| 0.425447 | 0.786411 |
| 0.240647 | 0        |
| 0.227842 | 0.126345 |
| 4.90798  | 8.920306 |
| 3.279128 | 4.425859 |
| 0.058711 | 0.065114 |
| 0.044796 | 0.099362 |
| 1.517679 | 1.224145 |
| 0.037469 | 0        |
| 0        | 0        |
| 0.327347 | 0        |
| 0.220166 | 0.122089 |
| 0        | 0        |
| 0        | 0.199012 |
| 0.073259 | 0.040624 |
| 0        | 0        |
| 0.208345 | 0        |
| 0        | 0        |
| 0        | 0        |
| 0.076274 | 0.042296 |
| 0        | 0        |
| 1.478259 | 0.273247 |
| 0        | 0        |
| 0.195242 | 0        |
| 0        | 0        |
| 0.162958 | 0.36146  |
| 0.640071 | 1.656381 |
| 0.050891 | 0.056441 |
| 0        | 0        |
| 1.500589 | 1.248184 |
| 0        | 0.026484 |
| 0        | 0        |
| 0        | 0        |
| 0        | 0.190743 |
| 12.79797 | 11.64257 |

|          |          |   |
|----------|----------|---|
| 0        | 0.199012 |   |
| 0        | 0.038554 |   |
| 0        |          | 0 |
| 0        |          | 0 |
| 0        | 0.047228 |   |
| 0.214093 | 0.712326 |   |
| 0.381682 | 1.058271 |   |
| 1.13032  | 1.701306 |   |
| 0.30635  | 0.113254 |   |
| 1.157552 | 0.116709 |   |
| 9.837511 | 8.143497 |   |
| 0        |          | 0 |
| 0        |          | 0 |
| 0        |          | 0 |
| 0.097775 |          | 0 |
| 0.524256 | 0.913679 |   |
| 0.15639  |          | 0 |
| 0        |          | 0 |
| 0        |          | 0 |
| 0.027006 | 0.089854 |   |
| 0        |          | 0 |
| 0.020947 |          | 0 |
| 62.43798 | 83.34311 |   |
| 0.643017 | 0.792384 |   |
| 0.138897 | 0.30809  |   |
| 1.259463 | 0.569076 |   |
| 0        |          | 0 |
| 0.136193 | 0.037762 |   |
| 0        |          | 0 |
| 0.429965 | 0.095371 |   |
| 0        | 0.342578 |   |
| 0        |          | 0 |
| 0.12158  |          | 0 |
| 0        |          | 0 |
| 0.142075 |          | 0 |
| 0        | 0.130413 |   |
| 0.477591 | 0.132419 |   |
| 7.920549 | 7.650904 |   |
| 0.933437 | 0.606354 |   |
| 0.430163 |          | 0 |
| 0        |          | 0 |
| 0        |          | 0 |
| 1.032324 | 0.817793 |   |
| 0.149247 | 0.165524 |   |
| 0.149576 | 0.086551 |   |
| 2.123696 | 2.355308 |   |
| 0        |          | 0 |
| 0.265329 | 0.588531 |   |
| 0        |          | 0 |
| 0        | 0.400338 |   |
| 0        |          | 0 |
| 0        |          | 0 |
| 1.371397 | 0.737437 |   |
| 0        |          | 0 |
| 0.300663 |          | 0 |
| 0        |          | 0 |
| 0        |          | 0 |
| 0.026647 | 0.014776 |   |
| 0.076556 |          | 0 |
| 0        |          | 0 |
| 0.093364 |          | 0 |
| 0.388043 | 0.573818 |   |
| 0        |          | 0 |
| 0.200361 | 0.138883 |   |
| 0        |          | 0 |

|          |          |
|----------|----------|
| 0.01466  | 0.048778 |
| 2.232337 | 2.630536 |
| 0.532935 | 0.886585 |
| 0        | 0.072254 |
| 0        | 0.266892 |
| 0        | 0        |
| 0.056545 | 0.062712 |
| 0.069604 | 0        |
| 0.280302 | 0.362684 |
| 0        | 0        |
| 0        | 0        |
| 0.599873 | 0        |
| 0.170101 | 0        |
| 0.355459 | 0        |
| 0.040968 | 0        |
| 0.066191 | 0.146819 |
| 0        | 0        |
| 0.091574 | 0.203121 |
| 0        | 0        |
| 0        | 0.100279 |
| 0        | 0.126345 |
| 0.61963  | 0.687207 |
| 0        | 0        |
| 0        | 0        |
| 0.253416 | 0.281054 |
| 0        | 0.310872 |
| 0        | 0        |
| 0.353915 | 0        |
| 0.688761 | 0.218251 |
| 0        | 0.419867 |
| 0        | 0        |
| 0.993552 | 1.079422 |
| 0        | 0        |
| 3.330448 | 2.304308 |
| 0        | 0.210898 |
| 0        | 0        |
| 0        | 0.046589 |
| 0.243478 | 0        |
| 1.277946 | 0.35433  |
| 0        | 0        |
| 0.042715 | 0        |
| 0        | 0        |
| 0.971488 | 0.391796 |
| 0.339737 | 0.094197 |
| 0        | 0        |
| 0.710919 | 0.525635 |
| 0        | 0        |
| 0        | 0        |
| 0.061655 | 0.068379 |
| 0        | 0.118211 |
| 0        | 0.204327 |
| 0.064741 | 0        |
| 0        | 0        |
| 7.666904 | 4.501622 |
| 0        | 0        |
| 0.177899 | 0        |
| 0.123433 | 0        |
| 0.078525 | 0.087089 |
| 0.057755 | 0.192162 |
| 0        | 0        |
| 0        | 0        |
| 0.114183 | 0        |
| 0.028119 | 0.031186 |
| 0        | 0        |
| 0.993012 | 0.209773 |

|          |          |
|----------|----------|
| 0        | 0        |
| 0.059565 | 0.022021 |
| 3.09789  | 1.861031 |
| 0        | 0        |
| 0.487593 | 0.180257 |
| 0.034114 | 0        |
| 0.104876 | 0        |
| 0        | 0        |
| 0        | 0        |
| 0.167802 | 0.279155 |
| 0        | 0        |
| 0.367545 | 0.470342 |
| 0        | 0        |
| 0.028247 | 0.093983 |
| 0        | 0.024001 |
| 0.210108 | 0.116511 |
| 0        | 0        |
| 0.340069 | 0.377157 |
| 2.023787 | 3.00603  |
| 0.528399 | 0.586027 |
| 0.360237 | 0.099881 |
| 0.158116 | 0.350721 |
| 0.084645 | 0        |
| 0        | 0        |
| 1.04788  | 0.871622 |
| 0        | 0.272705 |
| 0.338348 | 0        |
| 0        | 0        |
| 0        | 0.174324 |
| 0.118036 | 0.392727 |
| 0.327347 | 0.121016 |
| 0.30966  | 0        |
| 0.194325 | 0        |
| 1.85334  | 0.342578 |
| 0        | 0        |
| 0        | 0        |
| 0.947891 | 0.262817 |
| 0.108924 | 0        |
| 7.01934  | 8.807131 |
| 0        | 0        |
| 3.68312  | 1.167087 |
| 0.202898 | 0        |
| 0        | 0        |
| 0        | 0        |
| 0.419821 | 0.051734 |
| 0        | 0.04922  |
| 0.054944 | 0.091405 |
| 0.185334 | 0        |
| 0        | 0        |
| 0.227842 | 0.126345 |
| 0.108924 | 0.120804 |
| 0.883799 | 1.306916 |
| 0.92078  | 0.437658 |
| 0        | 0.026302 |
| 0.142728 | 0        |
| 0        | 0        |
| 0        | 0.14276  |
| 0.115189 | 0        |
| 0        | 0        |
| 4.067579 | 2.924193 |
| 0.036479 | 0        |
| 0        | 0.056257 |
| 0.475155 | 0.175659 |
| 2.991338 | 4.275987 |
| 0.507522 | 0.562873 |

|          |          |
|----------|----------|
| 3.456729 | 1.488825 |
| 0        | 0        |
| 0.227009 | 0.125883 |
| 0        | 0        |
| 30.64028 | 28.14795 |
| 0        | 0        |
| 0.390484 | 0        |
| 0        | 0        |
| 0.03455  | 0.038318 |
| 0.674857 | 0.873201 |
| 0        | 0        |
| 17.31399 | 15.80187 |
| 0        | 0.421151 |
| 0.282856 | 0        |
| 4.502084 | 0.928946 |
| 0.723142 | 0.45829  |
| 0.134971 | 0        |
| 0.215729 | 0.023926 |
| 1.226408 | 1.700201 |
| 0.194022 | 0.322773 |
| 0        | 0.123957 |
| 0        | 0        |
| 0.444324 | 0.229965 |
| 1.320998 | 0.162785 |
| 0        | 0.183622 |
| 0.342391 | 0.126577 |
| 0        | 0        |
| 0.040874 | 0        |
| 0.596989 | 3.641536 |
| 7.130119 | 5.596244 |
| 0.309815 | 0.515405 |
| 0.091574 | 0        |
| 0.136155 | 0.302009 |
| 0.205586 | 0        |
| 0.413913 | 0        |
| 0.240088 | 0.053255 |
| 0.255502 | 0        |
| 0        | 0        |
| 0.245226 | 0.420319 |
| 0        | 0.245922 |
| 0.78591  | 2.832771 |
| 0        | 0.298087 |
| 0        | 0.022148 |
| 0        | 0        |
| 0        | 0        |
| 0.052571 | 0.11661  |
| 1.178865 | 0.435811 |
| 0        | 0        |
| 0.218616 | 0.727375 |
| 0.365486 | 0.050668 |
| 0        | 0        |
| 0.319898 | 0.26609  |
| 0        | 0        |
| 0.029593 | 0.131283 |
| 0        | 0        |
| 0.175884 | 0.390131 |
| 0.845678 | 0.156318 |
| 0        | 0.119338 |
| 0.152548 | 0        |
| 0.776086 | 0.860727 |
| 0.069371 | 0        |
| 0.322529 | 0.178852 |
| 0.026364 | 0        |
| 0.748035 | 0        |
| 0.056908 | 0        |

|          |          |
|----------|----------|
| 1.592523 | 0.883103 |
| 0.028757 | 0.031894 |
| 0.049749 | 0.165524 |
| 0        | 0        |
| 0.222534 | 0        |
| 0.122138 | 0.31607  |
| 1.468354 | 0.135708 |
| 0        | 0.283367 |
| 0.113091 | 0.250849 |
| 0.788847 | 0.514635 |
| 0.52394  | 0        |
| 0.090726 | 0.03354  |
| 0.49769  | 0.275985 |
| 0.077222 | 0        |
| 0.223133 | 0.061867 |
| 0        | 0        |
| 0.094645 | 0        |
| 0.081159 | 0        |
| 0.114026 | 0.063231 |
| 0.127488 | 0.141392 |
| 1.483304 | 2.115096 |
| 0        | 0        |
| 0        | 0.035348 |
| 0        | 0        |
| 0.397144 | 0        |
| 0        | 0        |
| 0.850505 | 0.628841 |
| 0.03492  | 0        |
| 0.23429  | 0        |
| 0.385633 | 0.641535 |
| 0        | 0        |
| 0.077803 | 0        |
| 0.187857 | 0        |
| 0.121263 | 0.134489 |
| 0        | 0        |
| 0        | 0.160883 |
| 0        | 0.055914 |
| 0.018814 | 0        |
| 2.907078 | 1.381769 |
| 0.163172 | 0        |
| 0.035397 | 0.039258 |
| 3.267731 | 2.04587  |
| 0.823433 | 0.913238 |
| 2.97351  | 2.374419 |
| 0.124672 | 0        |
| 0.858909 | 1.632999 |
| 1.224593 | 0.679074 |
| 0        | 0.102927 |
| 0.450994 | 0        |
| 3.944343 | 1.296153 |
| 0        | 0        |
| 0        | 0        |
| 0.378579 | 0        |
| 0.385633 | 0        |
| 0.145744 | 0        |
| 1.7667   | 4.478578 |
| 8.601621 | 6.670632 |
| 0        | 0.121981 |
| 0.642721 | 1.140507 |
| 0        | 0        |
| 11.36959 | 13.87671 |
| 0.107417 | 0        |
| 0.094501 | 0.104807 |
| 58.31643 | 59.19384 |
| 0.346531 | 0.32027  |

|          |          |
|----------|----------|
| 0.120557 | 0.133705 |
| 0.259416 | 0.767222 |
| 4.290557 | 0.979689 |
| 0.013733 | 0.045692 |
| 0.080112 | 0        |
| 0.384677 | 0.085326 |
| 0.164469 | 0.091203 |
| 0        | 0        |
| 0.362746 | 0.381134 |
| 0.413913 | 0        |
| 0        | 0        |
| 0.16735  | 0        |
| 0        | 0        |
| 2.470424 | 1.964421 |
| 0        | 0.190216 |
| 2.304411 | 2.723321 |
| 0.061963 | 0        |
| 0.57311  | 0.423742 |
| 0        | 0        |
| 0.084472 | 0        |
| 2.330589 | 1.964421 |
| 0        | 0.122742 |
| 0        | 0        |
| 0.595642 | 0.36916  |
| 0        | 0        |
| 6.580149 | 6.591548 |
| 0.027053 | 0        |
| 0        | 0        |
| 2.662302 | 2.729813 |
| 0.031452 | 0.017441 |
| 0        | 0        |
| 0.088696 | 0        |
| 0        | 0        |
| 0        | 0.19562  |
| 0.131819 | 0        |
| 0        | 0        |
| 0.284585 | 0.315622 |
| 1.971012 | 1.748778 |
| 0        | 1.027733 |
| 0        | 0        |
| 0.03947  | 0.043775 |
| 0.317851 | 0.117505 |
| 0.163818 | 0.181684 |
| 0        | 0        |
| 0        | 0        |
| 0        | 0        |
| 0.233849 | 0        |
| 0        | 0        |
| 1.166895 | 1.071027 |
| 0        | 0        |
| 1.712742 | 1.994512 |
| 0        | 0.197301 |
| 0        | 0.059004 |
| 0.028157 | 0        |
| 0.839012 | 0.310172 |
| 0        | 0        |
| 0        | 0.076213 |
| 0        | 1.162163 |
| 1.061607 | 0.911525 |
| 0.997016 | 0.301568 |
| 0.985506 | 1.092986 |
| 0.138587 | 0.153701 |
| 0        | 0        |
| 0        | 0        |
| 0.415993 | 0.346021 |

|          |          |
|----------|----------|
| 0.049491 | 0        |
| 0        | 0        |
| 0.090506 | 0.100376 |
| 0        | 0        |
| 0        | 0.460077 |
| 0.429667 | 0.238263 |
| 11.82607 | 9.308012 |
| 0.772225 | 0.171289 |
| 0        | 0.247691 |
| 0.787723 | 0.873633 |
| 0.174893 | 0        |
| 2.488452 | 1.793899 |
| 1.79962  | 1.995888 |
| 0.037045 | 0.041085 |
| 0        | 0        |
| 0.072872 | 0.161639 |
| 0.206269 | 0        |
| 0.089851 | 0        |
| 0        | 0        |
| 0        | 0        |
| 0        | 0.070263 |
| 0        | 0.440457 |
| 0.166453 | 0        |
| 0.625036 | 1.386405 |
| 0.153301 | 0.17002  |
| 0        | 0        |
| 0.25035  | 0.416481 |
| 0.272311 | 0.604019 |
| 0.473946 | 0        |
| 0.171986 | 0        |
| 2.086526 | 2.257644 |
| 0        | 0        |
| 0        | 0.070551 |
| 0.588501 | 0.466203 |
| 0.371575 | 0.187318 |
| 5.934445 | 3.315761 |
| 0        | 0        |
| 0        | 0        |
| 10.87579 | 6.508575 |
| 0.298495 | 0        |
| 0.208112 | 0.051291 |
| 0        | 0        |
| 0.859334 | 0.555948 |
| 0.138587 | 0        |
| 0        | 0        |
| 0.821255 | 0.546493 |
| 0.537549 | 0.149044 |
| 2.889799 | 1.165441 |
| 4.197805 | 3.904714 |
| 0        | 0        |
| 0.236222 | 0.130992 |
| 0.072194 | 0.080068 |
| 3.774996 | 2.917607 |
| 0.31357  | 0.347768 |
| 0        | 0.079789 |
| 1.325699 | 0.980187 |
| 0.693155 | 0.878573 |
| 0        | 0        |
| 1.33329  | 1.03509  |
| 0        | 0        |
| 0.013278 | 0.029452 |
| 0.356309 | 0.296376 |
| 0        | 0        |
| 0        | 0        |
| 0.161097 | 0        |

|          |          |   |
|----------|----------|---|
| 4.139126 | 9.905907 |   |
| 0.145403 |          | 0 |
| 0.667601 | 0.74041  |   |
| 0.350773 | 0.648382 |   |
| 0.135858 | 0.075337 |   |
| 3.350504 | 1.895874 |   |
| 0.155997 |          | 0 |
| 0        | 0.101113 |   |
| 0.636789 | 0.353119 |   |
| 0        |          | 0 |
| 0.50791  | 0.585835 |   |
| 0        |          | 0 |
| 0        | 0.122523 |   |
| 0.225361 | 0.062485 |   |
| 0.187291 | 0.103858 |   |
| 0.662008 | 0.62932  |   |
| 0        |          | 0 |
| 0        |          | 0 |
| 0.327635 | 0.090842 |   |
| 0.24316  |          | 0 |
| 0        |          | 0 |
| 0.451541 |          | 0 |
| 3.525438 | 0.760263 |   |
| 0.788405 |          | 0 |
| 0.67121  | 0.744412 |   |
| 0        | 0.120381 |   |
| 0        |          | 0 |
| 0        | 0.035132 |   |
| 0        | 0.419228 |   |
| 0        | 0.369213 |   |
| 0.247852 | 0.137441 |   |
| 0.077512 |          | 0 |
| 0        |          | 0 |
| 0.097011 |          | 0 |
| 0.570652 | 0.379732 |   |
| 2.08635  | 0.398946 |   |
| 0.146778 |          | 0 |
| 0.154253 | 0.684304 |   |
| 0        |          | 0 |
| 11.0688  | 11.19795 |   |
| 0.177391 | 0.432823 |   |
| 0.116486 |          | 0 |
| 0.141751 | 0.15721  |   |
| 0.363081 | 0.402679 |   |
| 0        | 0.076002 |   |
| 1.488894 | 1.085123 |   |
| 0        | 0.073201 |   |
| 0.274721 |          | 0 |
| 0.710219 | 0.711449 |   |
| 0        |          | 0 |
| 1.696908 | 2.214088 |   |
| 0.230806 |          | 0 |
| 4.644295 | 2.34949  |   |
| 0        |          | 0 |
| 0        |          | 0 |
| 0.179183 | 0.496812 |   |
| 0.148889 | 0.165127 |   |
| 0        | 0.15167  |   |
| 0        |          | 0 |
| 0        | 0.105773 |   |
| 0.090638 | 0.301568 |   |
| 0        |          | 0 |
| 0        | 0.503349 |   |
| 1.345216 |          | 0 |
| 0        |          | 0 |

|          |          |
|----------|----------|
| 0.064719 | 0.095703 |
| 0        | 0        |
| 0        | 0.215856 |
| 0.129889 | 0        |
| 0.319852 | 0.039415 |
| 0.107417 | 0.059566 |
| 0        | 0        |
| 0.034979 | 0.038793 |
| 0        | 0        |
| 5.954008 | 1.526788 |
| 0.058683 | 0.130167 |
| 0.650124 | 0.540771 |
| 0        | 0        |
| 0.124174 | 0        |
| 0        | 0.115923 |
| 0.680777 | 0.453014 |
| 0.099498 | 0        |
| 0.145193 | 0.03716  |
| 6.452056 | 7.532339 |
| 0.383083 | 0.303473 |
| 0.128811 | 0.142859 |
| 0        | 0.176559 |
| 4.268941 | 4.153084 |
| 11.10956 | 11.39955 |
| 0.289546 | 0.09175  |
| 0.336819 | 0        |
| 0.642278 | 0.158295 |
| 0        | 0.034865 |
| 0.253416 | 0        |
| 0        | 0.118721 |
| 0        | 0        |
| 0        | 0.026192 |
| 0.155801 | 0        |
| 0.134825 | 0.448587 |
| 4.485364 | 4.319997 |
| 0.074326 | 0        |
| 0.275942 | 0.459054 |
| 0        | 0        |
| 0.939129 | 0.694368 |
| 0        | 0.123181 |
| 0.757997 | 0.076424 |
| 0.601326 | 0.333453 |
| 0        | 0        |
| 0        | 0.066691 |
| 0        | 0        |
| 0.65933  | 0.365618 |
| 0.209223 | 0        |
| 0        | 0        |
| 0        | 0.073331 |
| 0.057276 | 0        |
| 0.968732 | 0.097671 |
| 0        | 0        |
| 0        | 0        |
| 6.746089 | 6.84777  |
| 0.052661 | 0        |
| 0        | 1.564958 |
| 2.956518 | 0.546493 |
| 0        | 0.146196 |
| 2.36757  | 0.901387 |
| 0        | 0        |
| 0.407573 | 0        |
| 0.075166 | 0        |
| 0.160431 | 0.22241  |
| 0.174262 | 0        |
| 0.335605 | 0.186103 |

|          |          |
|----------|----------|
| 0        | 0        |
| 0.662849 | 0.857664 |
| 0        | 0.343718 |
| 0.052705 | 0        |
| 0        | 0        |
| 0.050518 | 0        |
| 0.088067 | 0        |
| 0.335605 | 0.082712 |
| 0        | 0        |
| 0        | 0.230295 |
| 1.10811  | 0.445952 |
| 0.187574 | 0        |
| 0.170101 | 0.188652 |
| 0        | 0.200315 |
| 20.45775 | 19.78682 |
| 0        | 0.185936 |
| 0        | 0        |
| 0        | 0        |
| 0        | 0        |
| 1.028354 | 0.142563 |
| 0.608695 | 0.67508  |
| 0        | 0        |
| 2.825424 | 8.195484 |
| 0        | 0        |
| 0.064139 | 0.142269 |
| 0.177138 | 0        |
| 0.080112 | 0        |
| 0.199636 | 0.221409 |
| 0        | 0        |
| 0        | 0        |
| 0.812819 | 0.577863 |
| 1.087124 | 0.26793  |
| 0.701547 | 0        |
| 0.055042 | 0        |
| 0        | 0.116709 |
| 0.070956 | 0        |
| 0.657004 | 0.364329 |
| 0.248348 | 0.413149 |
| 0        | 0        |
| 0        | 0.00933  |
| 0.256557 | 0.142269 |
| 0.257889 | 0.429023 |
| 6.774704 | 7.137881 |
| 0.548229 | 1.064033 |
| 0.380318 | 0.351496 |
| 0        | 0        |
| 0.172224 | 0.095504 |
| 0.079803 | 0        |
| 0.428185 | 0.593605 |
| 0        | 0        |
| 0        | 0        |
| 0.49016  | 0.181206 |
| 0        | 0        |
| 0.070795 | 0        |
| 27.63783 | 22.6077  |
| 0.111868 | 0        |
| 0.084818 | 0        |
| 0.409364 | 0.832351 |
| 0.078393 | 0        |
| 0.42988  | 0.068109 |
| 0.445067 | 0.74041  |
| 0.086835 | 0.19261  |
| 0.545819 | 0        |
| 0        | 0        |
| 0.957862 | 0.225342 |

|          |          |
|----------|----------|
| 0        | 0        |
| 0.421404 | 0.778938 |
| 0        | 0.285127 |
| 0.170101 | 0        |
| 0        | 0.139672 |
| 0.345311 | 0        |
| 0.246866 | 0.136895 |
| 0.01094  | 0        |
| 0.140309 | 0.116709 |
| 0.138366 | 0.087689 |
| 0.167802 | 0.744412 |
| 7.122732 | 2.588246 |
| 0.844361 | 1.141295 |
| 0        | 0        |
| 4.207696 | 2.488848 |
| 0.101615 | 0.112697 |
| 0.697605 | 0.309475 |
| 0        | 0        |
| 0.091103 | 0        |
| 0        | 0        |
| 0.862318 | 1.275151 |
| 1.390524 | 1.773502 |
| 2.554207 | 0        |
| 0.229668 | 0.084905 |
| 0.36379  | 0.134489 |
| 0.185519 | 0.17146  |
| 0        | 0        |
| 0        | 0.072103 |
| 1.305197 | 0.898475 |
| 0.612495 | 0.6449   |
| 0.187009 | 0        |
| 0        | 0        |
| 0        | 0        |
| 0.152298 | 0.337816 |
| 4.038171 | 3.246969 |
| 0        | 0        |
| 0.358884 | 0.398024 |
| 1.657003 | 3.525417 |
| 0        | 0        |
| 0        | 0        |
| 0.759805 | 0.28089  |
| 0.201909 | 0        |
| 0        | 0        |
| 0.057302 | 0        |
| 0        | 0.094068 |
| 0.033148 | 0        |
| 0.895711 | 0.627409 |
| 0.701547 | 0.680801 |
| 0        | 0.077806 |
| 0.079497 | 0.2645   |
| 0        | 0        |
| 5.118866 | 5.310867 |
| 0        | 0.650833 |
| 1.972994 | 2.492853 |
| 0        | 0        |
| 0        | 0.231846 |
| 0.343021 | 0.126811 |
| 0.30889  | 0        |
| 0.569604 | 0.157932 |
| 3.261129 | 2.08661  |
| 0.107727 | 0.159302 |
| 0.189868 | 0.421151 |
| 0.681697 | 2.558917 |
| 0.181541 | 0        |
| 0        | 0        |

|          |          |  |
|----------|----------|--|
| 0.174893 | 0.145475 |  |
| 0.041474 | 0        |  |
| 0        | 0        |  |
| 0.092529 | 0        |  |
| 0        | 0.185103 |  |
| 0.047491 | 0.035114 |  |
| 0.308124 | 0.341728 |  |
| 0.148179 | 0.164339 |  |
| 2.444131 | 1.05783  |  |
| 2.131129 | 0.945421 |  |
| 0.152548 | 0.676738 |  |
| 0.129348 | 0        |  |
| 0.786859 | 0.540227 |  |
| 0        | 0.308781 |  |
| 0        | 0        |  |
| 0        | 0        |  |
| 8.348224 | 4.047318 |  |
| 1.001401 | 0        |  |
| 0        | 0.216535 |  |
| 3.504905 | 3.331845 |  |
| 5.161958 | 2.941976 |  |
| 0        | 0        |  |
| 1.218884 | 0.506931 |  |
| 0.571352 | 0.422443 |  |
| 0        | 0.073175 |  |
| 0.49869  | 0        |  |
| 0        | 0        |  |
| 0        | 0.219293 |  |
| 0.973912 | 0.270032 |  |
| 3.021928 | 1.52341  |  |
| 0.953553 | 0.235011 |  |
| 0.082967 | 0.245374 |  |
| 0.584347 | 0.162019 |  |
| 0.035058 | 0        |  |
| 0        | 0        |  |
| 0        | 0        |  |
| 0.337225 | 0.415559 |  |
| 0        | 0        |  |
| 0        | 0        |  |
| 0        | 0        |  |
| 0.050745 | 0.05628  |  |
| 0.765324 | 0.127319 |  |
| 1.023812 | 3.000885 |  |
| 0        | 0        |  |
| 0.713642 | 0.263824 |  |
| 0.67121  | 0.372206 |  |
| 0        | 0.07302  |  |
| 0.175057 | 0.302009 |  |
| 0        | 0        |  |
| 0        | 0        |  |
| 0.725691 | 0.58127  |  |
| 0.102033 | 0.169741 |  |
| 0.150575 | 0.055665 |  |
| 2.322675 | 2.476911 |  |
| 0.226044 | 0.250697 |  |
| 0        | 0.054606 |  |
| 0.379239 | 0.480685 |  |
| 0        | 0.065145 |  |
| 6.339504 | 7.030896 |  |
| 14.90085 | 8.847227 |  |
| 0.075531 | 0        |  |
| 0        | 0        |  |
| 0        | 0.119753 |  |
| 3.541388 | 4.358972 |  |
| 0        | 0.066755 |  |

|          |          |
|----------|----------|
| 1.53301  | 5.950703 |
| 0        | 0.238263 |
| 0        | 0        |
| 0        | 0        |
| 0.018205 | 0.030285 |
| 1.033768 | 0.337209 |
| 0        | 0.026393 |
| 0        | 0        |
| 0        | 0        |
| 0.078691 | 0        |
| 4.285693 | 2.422843 |
| 0.667601 | 0        |
| 0.135561 | 0.150345 |
| 0        | 0        |
| 0.757868 | 0.258622 |
| 0        | 0        |
| 0        | 0.457529 |
| 0        | 0.390131 |
| 0.147475 | 0        |
| 0.0567   | 0        |
| 0        | 0.42505  |
| 0.071611 | 0.119132 |
| 1.514314 | 2.900897 |
| 0.193191 | 0.187478 |
| 2.030879 | 2.091485 |
| 0.927735 | 1.820388 |
| 0.11268  | 0        |
| 0.170921 | 0.142171 |
| 0.027207 | 0        |
| 0.089163 | 0.164811 |
| 0.47637  | 0.176108 |
| 0        | 0        |
| 16.81164 | 15.23444 |
| 0        | 0        |
| 0.16735  | 0.371203 |
| 0.094142 | 0.156614 |
| 3.827274 | 5.816783 |
| 0.171986 | 0        |
| 0.124423 | 0        |
| 0        | 0        |
| 0.066976 | 0.02476  |
| 0        | 0        |
| 0        | 0        |
| 0.801917 | 0.20524  |
| 0.085401 | 0        |
| 0        | 0.246803 |
| 0.572229 | 0.317319 |
| 0        | 0        |
| 0        | 0        |
| 0.171511 | 0        |
| 0        | 0        |
| 0        | 0        |
| 0        | 0        |
| 0.065562 | 0.799831 |
| 1.975224 | 2.157947 |
| 0        | 0        |
| 0.095225 | 0.211221 |
| 2.786942 | 1.202012 |
| 0.257089 | 0        |
| 0.655271 | 0.363367 |
| 0.249345 | 0        |
| 0        | 0        |
| 0.349457 | 0        |
| 0        | 0        |
| 2.596188 | 2.528193 |

|          |          |
|----------|----------|
| 0.090112 | 0.099939 |
| 0        | 0.456014 |
| 0        | 0        |
| 0.086593 | 0        |
| 0.041557 | 0        |
| 0.212991 | 0        |
| 0.050933 | 0        |
| 0.373455 | 0        |
| 0.695002 | 0.1927   |
| 0.800875 | 0.507554 |
| 0.244116 | 0.360986 |
| 0        | 0        |
| 7.840491 | 2.717369 |
| 1.100381 | 0.657133 |
| 2.299514 | 0.566734 |
| 0        | 0        |
| 1.276382 | 1.314473 |
| 0.113921 | 0.126345 |
| 0.61778  | 0.342578 |
| 0.145573 | 0        |
| 0        | 0        |
| 0        | 0.732533 |
| 0.077609 | 0        |
| 0        | 0        |
| 0.424768 | 0.392578 |
| 1.999731 | 1.795381 |
| 0.102454 | 0.227255 |
| 0.055385 | 0.061426 |
| 0.091912 | 0.101937 |
| 0        | 0        |
| 0.210108 | 0.349534 |
| 0.027867 | 0.030906 |
| 3.225293 | 1.117827 |
| 1.007024 | 0.859116 |
| 2.261443 | 1.140035 |
| 0.048581 | 0        |
| 1.416431 | 1.047272 |
| 0        | 0.521653 |
| 0        | 0        |
| 1.364547 | 0.605346 |
| 0        | 0        |
| 0        | 0        |
| 0.829669 | 0.306718 |
| 0        | 0        |
| 0        | 0        |
| 0.209047 | 0        |
| 0        | 0        |
| 4.221908 | 5.784083 |
| 2.647628 | 0.146819 |
| 2.307464 | 1.101016 |
| 0.138432 | 0.46059  |
| 0.109888 | 0        |
| 0        | 0.235547 |
| 0        | 0        |
| 0.192883 | 0.118844 |
| 0        | 0.493607 |
| 0        | 0.342578 |
| 0        | 0        |
| 0        | 0        |
| 0.062211 | 0        |
| 0.126708 | 0.21079  |
| 1.000057 | 0.369708 |
| 0.075531 | 0.335076 |
| 0.147475 | 0.490676 |
| 0        | 0.078605 |

|          |          |
|----------|----------|
| 0.977746 | 0.18073  |
| 0.194022 | 0.215182 |
| 0.54599  | 0.346021 |
| 0.09313  | 0.034429 |
| 3.248732 | 1.467906 |
| 1.007904 | 0.335348 |
| 0.587028 | 0.459565 |
| 0.496254 | 0.42807  |
| 6.555396 | 7.755022 |
| 0.360551 | 0.239924 |
| 0        | 0.47271  |
| 0.029735 | 0        |
| 0.070155 | 0        |
| 0        | 0.42505  |
| 0        | 0        |
| 0.313175 | 0.086832 |
| 1.691741 | 1.970056 |
| 2.726526 | 2.85109  |
| 0.546677 | 0.519684 |
| 0.10079  | 0        |
| 0.846159 | 0.351916 |
| 0.646738 | 0        |
| 0.114551 | 0.635223 |
| 0.411853 | 0.45677  |
| 0.390484 | 0.541338 |
| 0.045619 | 0        |
| 0        | 0.117505 |
| 0        | 0.368883 |
| 0.86472  | 2.589373 |
| 0.274114 | 0        |
| 1.795283 | 0.829616 |
| 0        | 0.401505 |
| 0.106496 | 0.11811  |
| 0        | 0        |
| 0.147475 | 0.381637 |
| 0        | 0        |
| 5.684011 | 3.313596 |
| 0.793081 | 0.376961 |
| 0        | 0        |
| 0        | 0        |
| 0.261602 | 0.193422 |
| 0.425253 | 0.471631 |
| 0.052229 | 0.057925 |
| 0        | 0        |
| 0.100464 | 0        |
| 1.646243 | 0.260826 |
| 0.147826 | 0.163948 |
| 0        | 0        |
| 0.064741 | 0        |
| 0        | 0        |
| 0.481294 | 0        |
| 0.104348 | 0.173592 |
| 0.645897 | 0.179085 |
| 0.358406 | 0.275188 |
| 0.139521 | 0.309475 |
| 0.066976 | 0.074281 |
| 0.053248 | 0.059055 |
| 0        | 0        |
| 0.92667  | 0.256933 |
| 0.889072 | 0.821696 |
| 0.0657   | 0.072866 |
| 0.339737 | 0.235493 |
| 0.142728 | 0.158295 |
| 0.028056 | 0.031115 |
| 0        | 0.412324 |

|          |          |
|----------|----------|
| 0.415297 | 0.230295 |
| 0.061199 | 0.067874 |
| 0.064607 | 0.053739 |
| 0.091439 | 0        |
| 46.66365 | 36.85396 |
| 0.160743 | 0.103993 |
| 0.605135 | 0.402679 |
| 0        | 0        |
| 0.061533 | 0        |
| 0        | 0.105127 |
| 0        | 0        |
| 0        | 0        |
| 0.950123 | 0.810573 |
| 0.292794 | 0.064945 |
| 0.113504 | 0.314708 |
| 4.134374 | 2.687918 |
| 6.898543 | 6.750798 |
| 3.711716 | 0.748458 |
| 0.097621 | 0        |
| 0        | 0        |
| 0.055584 | 0        |
| 0.853428 | 0.473252 |
| 0.544414 | 0.236265 |
| 0        | 0        |
| 0        | 0        |
| 0        | 0.105288 |
| 0        | 0        |
| 0        | 0        |
| 0        | 0.02726  |
| 2.290812 | 1.498332 |
| 2.019086 | 1.679467 |
| 0.181276 | 0        |
| 0.152816 | 0.072635 |
| 0.263303 | 0.292019 |
| 0.385633 | 0        |
| 4.86956  | 4.872315 |
| 0.105143 | 0.058305 |
| 0.122218 | 0        |
| 0.396089 | 0        |
| 0.027929 | 0        |
| 0        | 0        |
| 0        | 0.054563 |
| 0        | 0        |
| 0.299158 | 0.331785 |
| 0.47637  | 0        |
| 0.115189 | 0        |
| 0        | 0.471631 |
| 0        | 0        |
| 0        | 0        |
| 0.370005 | 0.123108 |
| 0        | 0        |
| 0        | 0        |
| 0        | 0        |
| 0        | 0        |
| 23.8606  | 26.01839 |
| 0        | 0        |
| 0        | 0.087052 |
| 0.227187 | 0.395943 |
| 0.41576  | 0.614805 |
| 0.690622 | 0.765941 |
| 0        | 0        |
| 0.01491  | 0        |
| 0.061079 | 0        |
| 0        | 0        |
| 0        | 0        |

|          |          |
|----------|----------|
| 0.391304 | 0        |
| 9.410807 | 8.810588 |
| 0        | 0        |
| 0        | 0.080536 |
| 0.034512 | 0        |
| 0.769672 | 0.284538 |
| 0        | 0        |
| 0        | 0        |
| 0        | 0.295528 |
| 0        | 0        |
| 0.065492 | 0        |
| 0.046299 | 0.025674 |
| 0.774703 | 0        |
| 0.106617 | 0.118245 |
| 0.442687 | 0.859192 |
| 0.957638 | 0.796559 |
| 0.089981 | 0        |
| 0        | 0.65788  |
| 0.065286 | 0        |
| 0        | 0.395736 |
| 0.327635 | 0.181684 |
| 0.427448 | 0.474066 |
| 0        | 0        |
| 0        | 0        |
| 0        | 0        |
| 0.299937 | 0        |
| 4.344461 | 3.66764  |
| 0.377428 | 0.209295 |
| 0.066427 | 0.049114 |
| 0.074803 | 0        |
| 0.195858 | 0        |
| 0.330249 | 0        |
| 0        | 0        |
| 0.277174 | 0.153701 |
| 0.262373 | 0.105814 |
| 0.228261 | 0        |
| 0        | 0.120381 |
| 1.948333 | 2.016766 |
| 0        | 0        |
| 0        | 0        |
| 0        | 0.197584 |
| 0        | 0.079975 |
| 0.071364 | 0        |
| 0.025116 | 0.027855 |
| 0        | 0.359573 |
| 0        | 0        |
| 0        | 0        |
| 1.520647 | 1.357418 |
| 0.080528 | 0        |
| 0.492753 | 0.364329 |
| 0        | 0        |
| 166.8143 | 228.9259 |
| 0        | 0        |
| 0.812352 | 0.257414 |
| 0        | 0.018241 |
| 0        | 0.106099 |
| 175.9128 | 185.5344 |
| 0.111267 | 0.123402 |
| 0        | 0.459054 |
| 0        | 0        |
| 0        | 0        |
| 0.284151 | 0.31514  |
| 0        | 0        |
| 0.046682 | 0        |
| 0        | 0        |

|          |          |
|----------|----------|
| 0.869869 | 1.447106 |
| 0.416691 | 0.462135 |
| 0.247194 | 0        |
| 0.05947  | 0.065956 |
| 0        | 0        |
| 0.290805 | 0.16126  |
| 0        | 0.118721 |
| 0        | 0.123181 |
| 0        | 0        |
| 0.080528 | 0        |
| 0.845359 | 0.520863 |
| 0.216331 | 0.079975 |
| 2.686452 | 2.317341 |
| 0.977746 | 1.897665 |
| 1.599102 | 1.773502 |
| 0        | 0        |
| 0.132806 | 0.14729  |
| 0        | 0        |
| 0.15879  | 0        |
| 0.328937 | 0.364811 |
| 0.439965 | 0.373137 |
| 0        | 0        |
| 0        | 0        |
| 0        | 0        |
| 0.632249 | 1.542647 |
| 6.125629 | 5.659937 |
| 0.305095 | 0.169185 |
| 0.494716 | 0.274335 |
| 0.237881 | 0        |
| 29.75326 | 44.70815 |
| 0.882752 | 0.081585 |
| 200.8693 | 304.0109 |
| 0        | 0        |
| 0.196167 | 0.217561 |
| 0.171511 | 0        |
| 0.691776 | 0.383611 |
| 0.26704  | 0        |
| 0        | 0        |
| 0.16735  | 0        |
| 32.58597 | 27.79987 |
| 0        | 0        |
| 0.581338 | 0        |
| 0.218616 | 0        |
| 0.120091 | 0        |
| 100.2687 | 103.8395 |
| 0.181099 | 0.100425 |
| 0.231408 | 0.256646 |
| 0.549441 | 0.406243 |
| 2.140927 | 2.968023 |
| 0.058426 | 0.043198 |
| 0        | 0        |
| 0.481827 | 0.305358 |
| 0        | 0.165923 |
| 0.123679 | 0.137168 |
| 1.746444 | 1.279429 |
| 0        | 0        |
| 0.143057 | 0        |
| 0        | 0.0836   |
| 0        | 0        |
| 0        | 0        |
| 0        | 0        |
| 0.047944 | 0.106345 |
| 0        | 0.090603 |
| 0        | 0.709878 |
| 0        | 0        |

|          |          |
|----------|----------|
| 0.027693 | 0.122851 |
| 0        | 0        |
| 0.149968 | 0.166324 |
| 0        | 0        |
| 0        | 0.089194 |
| 0        | 0        |
| 13.90492 | 5.37295  |
| 0.163387 | 0.181206 |
| 0.124672 | 0.414808 |
| 0        | 0        |
| 0        | 0.124743 |
| 0.125682 | 0        |
| 0.358292 | 0.340601 |
| 0.077706 | 0.172361 |
| 0.854557 | 0.619687 |
| 0.332906 | 0        |
| 0.270531 | 0.300035 |
| 0.161685 | 0        |
| 0        | 0.065022 |
| 0.024093 | 0        |
| 1.147632 | 0.763676 |
| 0        | 0        |
| 0        | 0        |
| 0        | 0.159026 |
| 0.782102 | 0.600507 |
| 0.129348 | 0.286909 |
| 0.056187 | 0.623151 |
| 0.250856 | 1.391073 |
| 0        | 0.072482 |
| 0.108734 | 0.361777 |
| 0.089462 | 0        |
| 12.18755 | 10.89063 |
| 0.02612  | 0        |
| 0.072027 | 0.279586 |
| 0        | 0        |
| 0        | 0        |
| 0.016304 | 0.036165 |
| 0.243956 | 0.135281 |
| 0        | 0.168152 |
| 0.185651 | 0.176484 |
| 0        | 0        |
| 0.140787 | 0        |
| 0.322949 | 0.089542 |
| 0.15879  | 0        |
| 0.373268 | 0        |
| 0        | 0.109125 |
| 0        | 0.069483 |
| 0        | 0.35555  |
| 0.217747 | 0.193196 |
| 0        | 0.156852 |
| 0.054319 | 0        |
| 0        | 0        |
| 0.42332  | 0.156496 |
| 0.712732 | 0.351317 |
| 0.219388 | 0        |
| 1.456359 | 0.42505  |
| 0.444802 | 0.287765 |
| 0.05213  | 0.173446 |
| 0        | 0        |
| 0        | 0        |
| 0.508909 | 0.376274 |
| 0.112476 | 0.124743 |
| 0        | 0.144508 |
| 0        | 0        |
| 0.083171 | 0        |

|          |          |
|----------|----------|
| 0.171986 | 0        |
| 0        | 0        |
| 0.18031  | 0.066658 |
| 2.974222 | 2.061621 |
| 0        | 0.144055 |
| 0        | 0.258218 |
| 0.263639 | 1.461956 |
| 0.120091 | 0.088792 |
| 11.45316 | 10.96519 |
| 0        | 0        |
| 0.318213 | 0.431344 |
| 0.282213 | 0.625983 |
| 0.148533 | 0        |
| 0        | 0        |
| 0.259778 | 0        |
| 0        | 0        |
| 0.272311 | 0.302009 |
| 0        | 0        |
| 17.10856 | 13.33192 |
| 0.180485 | 0.400338 |
| 0        | 0.139107 |
| 0        | 0.040648 |
| 1.012286 | 1.24743  |
| 0.252386 | 0.279911 |
| 0.058025 | 0        |
| 0.759473 | 0.842301 |
| 0.795986 | 0.504455 |
| 0.276187 | 0.122523 |
| 0.533392 | 0        |
| 0        | 0        |
| 0.554112 | 0.43896  |
| 0        | 0        |
| 0.874463 | 0        |
| 0.159675 | 0.531267 |
| 0        | 0        |
| 5.362736 | 2.429302 |
| 0.699571 | 0.5819   |
| 0        | 0        |
| 0        | 0        |
| 0.319213 | 0        |
| 0.111667 | 0.371537 |
| 0.119628 | 0        |
| 0        | 0        |
| 0.217467 | 0.120592 |
| 0        | 0        |
| 0.985506 | 0.780704 |
| 0.274518 | 0.3552   |
| 0        | 0.057478 |
| 0        | 0        |
| 0        | 0.056211 |
| 2.43478  | 4.500532 |
| 0        | 0.034619 |
| 0        | 0        |
| 0        | 0        |
| 0.150331 | 0        |
| 0.107603 | 0        |
| 0.101532 | 0        |
| 1.479727 | 1.094072 |
| 0        | 0        |
| 0.095079 | 0        |
| 0.366944 | 0.162785 |
| 0        | 0        |
| 0.319487 | 0        |
| 0.081159 | 0        |
| 19.69378 | 18.48494 |

|          |          |  |
|----------|----------|--|
| 0        | 0.166727 |  |
| 0.447312 | 0.099219 |  |
| 0.934178 | 0.637575 |  |
| 0.462185 | 1.537775 |  |
| 0.127445 | 0.164901 |  |
| 0        | 0        |  |
| 0.199636 | 0.442818 |  |
| 0.281786 | 0.208345 |  |
| 0        | 0.147448 |  |
| 0        | 0        |  |
| 1.776795 | 0.69418  |  |
| 0.128279 | 0        |  |
| 0        | 0        |  |
| 0.317174 | 0.087941 |  |
| 1.874014 | 0.813285 |  |
| 0.090243 | 0        |  |
| 1.161141 | 2.196794 |  |
| 0.347988 | 0.675395 |  |
| 0        | 0.041707 |  |
| 0        | 0.025315 |  |
| 0.34703  | 0.244922 |  |
| 0.477591 | 0.176559 |  |
| 0        | 0.11344  |  |
| 0.079803 | 0        |  |
| 0        | 0        |  |
| 0        | 0.060668 |  |
| 0.083338 | 0.369708 |  |
| 0        | 0.197868 |  |
| 0.24703  | 0        |  |
| 0.151063 | 0        |  |
| 0.414834 | 0        |  |
| 3.064028 | 1.073114 |  |
| 0.539105 | 0.7972   |  |
| 0        | 0        |  |
| 1.24485  | 2.588652 |  |
| 0.188714 | 0        |  |
| 0        | 0        |  |
| 0        | 0.028117 |  |
| 0.571853 | 0.543617 |  |
| 0.468227 | 0.311575 |  |
| 0.017372 | 0        |  |
| 0        | 0        |  |
| 0.124923 | 0        |  |
| 1.164129 | 1.506272 |  |
| 0.265612 | 0.44187  |  |
| 6.790753 | 12.1488  |  |
| 0        | 0        |  |
| 0        | 0        |  |
| 0        | 0        |  |
| 0.260869 | 0.09644  |  |
| 0.196477 | 0        |  |
| 8.560786 | 9.21242  |  |
| 0        | 1.754347 |  |
| 0.161474 | 0        |  |
| 0        | 0        |  |
| 0.080319 | 0        |  |
| 0        | 0.128707 |  |
| 0.99738  | 0.138269 |  |
| 0        | 0.104015 |  |
| 0        | 0        |  |
| 0.818471 | 0.129676 |  |
| 1.730645 | 0.479848 |  |
| 0        | 0.033854 |  |
| 0.416691 | 1.078315 |  |
| 0.480363 | 0.133188 |  |

|          |          |
|----------|----------|
| 0        | 0        |
| 0.193417 | 0.514827 |
| 0        | 0        |
| 0.414834 | 0.613436 |
| 0.121027 | 0        |
| 2.369728 | 0.657043 |
| 0.113297 | 0        |
| 0        | 0        |
| 0.168257 | 0.062202 |
| 4.219497 | 1.337051 |
| 0        | 0        |
| 0.024706 | 0.027401 |
| 0        | 0.231846 |
| 0        | 0        |
| 0.472144 | 1.352726 |
| 0.017795 | 0        |
| 0.095372 | 0.211546 |
| 0        | 0        |
| 0.193719 | 0.107423 |
| 0        | 0.306036 |
| 0        | 0        |
| 0        | 0        |
| 0        | 0        |
| 0.41576  | 0        |
| 9.340505 | 7.350454 |
| 0.100464 | 0.334263 |
| 0        | 0        |
| 0.333084 | 0.369411 |
| 0        | 0.8501   |
| 0.172464 | 0.382545 |
| 0.241583 | 0.08931  |
| 0        | 0.064114 |
| 0        | 0        |
| 0.476259 | 0.864328 |
| 0        | 0        |
| 0.133234 | 0        |
| 0.291351 | 0.064625 |
| 0.126708 | 0.140527 |
| 0        | 0        |
| 0        | 0        |
| 0.090112 | 0.299818 |
| 0.187517 | 0.332748 |
| 0.456337 | 0.436776 |
| 0        | 0.190216 |
| 4.472682 | 6.72607  |
| 0        | 0        |
| 0        | 0        |
| 0.449905 | 0        |
| 0        | 0.414808 |
| 0.934239 | 0.592073 |
| 0.915736 | 0.203121 |
| 0.121739 | 0.270032 |
| 0        | 0.129676 |
| 0.486956 | 0        |
| 0        | 0.158295 |
| 0.186727 | 0.51773  |
| 0.769672 | 0        |
| 1.022608 | 0.243029 |
| 0        | 0        |
| 0.337062 | 0.373823 |
| 0        | 0        |
| 3.089861 | 1.713422 |
| 0        | 0        |
| 0.244116 | 0.060164 |
| 0        | 0        |

|          |          |
|----------|----------|
| 0.04599  | 0        |
| 0.055435 | 0.122961 |
| 0.124423 | 0        |
| 0        | 0.05439  |
| 0        | 0.162785 |
| 0        | 0        |
| 0        | 0.242886 |
| 0.108165 | 0        |
| 0        | 0.120171 |
| 0.26308  | 0.097257 |
| 0.10322  | 0        |
| 0        | 0        |
| 10.73311 | 6.959067 |
| 0        | 0        |
| 0.219777 | 0.121873 |
| 0.651261 | 0.240763 |
| 0.143277 | 0        |
| 0        | 0.091445 |
| 0.06868  | 0.228512 |
| 0.543034 | 0.200753 |
| 0.220166 | 0.244178 |
| 0.118895 | 0.263723 |
| 0.10677  | 0.029604 |
| 0        | 0        |
| 0.31357  | 0.173884 |
| 0.224952 | 0.166324 |
| 0        | 0        |
| 0.541849 | 0.250393 |
| 0.332015 | 0.184113 |
| 0        | 0        |
| 0        | 0.089776 |
| 0.193417 | 0.429023 |
| 0.103478 | 0.229527 |
| 1.541164 | 0.488356 |
| 0.084529 | 0        |
| 0        | 0.441398 |
| 0        | 0        |
| 0.492753 | 0.364329 |
| 0.017588 | 0        |
| 0.206612 | 0.057286 |
| 0.147125 | 0.326342 |
| 0        | 0        |
| 0.253934 | 0.140814 |
| 0        | 0        |
| 0        | 0.439988 |
| 2.233814 | 1.603047 |
| 0.468328 | 0.371003 |
| 0.350773 | 0.583544 |
| 0        | 0        |
| 0.089981 | 0.099794 |
| 0.129889 | 0        |
| 0        | 0        |
| 0.760248 | 0.843161 |
| 0        | 0.054736 |
| 0.901443 | 1.374663 |
| 0.103824 | 0        |
| 0        | 0        |
| 0        | 0.104807 |
| 1.82162  | 2.076407 |
| 0.239102 | 0.618751 |
| 0        | 0.247691 |
| 0        | 0.346892 |
| 0        | 0.258865 |
| 0        | 0.042518 |
| 0.3338   | 0        |

|          |          |
|----------|----------|
| 0.3338   | 0        |
| 0        | 0.733834 |
| 0        | 0.190216 |
| 0.758313 | 0        |
| 0        | 0        |
| 0.721941 | 1.120946 |
| 2.347483 | 1.795519 |
| 1.145899 | 0.577669 |
| 0        | 0        |
| 1.893291 | 1.013684 |
| 0.165712 | 0.061262 |
| 0        | 0        |
| 0.770309 | 0        |
| 0        | 0.065455 |
| 0.13154  | 0        |
| 0.108924 | 0        |
| 1.096941 | 0.243315 |
| 0.044475 | 0.147976 |
| 0        | 0        |
| 0.061411 | 0.068109 |
| 1.11438  | 0.353119 |
| 0        | 0        |
| 0.035972 | 0        |
| 0.145006 | 0        |
| 0.488421 | 0.127456 |
| 0.102538 | 0.113721 |
| 0.987746 | 1.564958 |
| 0        | 0.02207  |
| 0.279042 | 0.61895  |
| 0.350773 | 1.167087 |
| 0        | 0        |
| 0.258561 | 0.21507  |
| 0.843285 | 2.104323 |
| 0        | 0        |
| 0.126193 | 0        |
| 0.49869  | 0        |
| 0        | 0        |
| 3.321521 | 2.078023 |
| 0        | 0        |
| 0        | 0        |
| 0.108734 | 0        |
| 0.101782 | 0        |
| 0        | 0        |
| 0        | 0.128467 |
| 0        | 0.354026 |
| 0.525448 | 0.396272 |
| 0.814789 | 0.72292  |
| 0.084818 | 0.094068 |
| 0.102861 | 0.022816 |
| 0.07618  | 0.084489 |
| 0.964681 | 0.898708 |
| 0.147826 | 0.81974  |
| 0.176383 | 0.19562  |
| 0        | 0.166324 |
| 3.628454 | 4.024177 |
| 4.513501 | 2.342806 |
| 1.420894 | 1.644373 |
| 0.372521 | 0.550865 |
| 0        | 0        |
| 0.107977 | 0.479013 |
| 0        | 0.116314 |
| 0        | 0        |
| 0.586833 | 0.520666 |
| 0.427858 | 0.263622 |
| 60.88714 | 31.60156 |

|          |          |
|----------|----------|
| 0.239718 | 0.265862 |
| 0.325403 | 0.288713 |
| 0.051524 | 0.114287 |
| 1.693279 | 1.669288 |
| 0        | 0.155524 |
| 2.014895 | 1.039368 |
| 0.126708 | 0.281054 |
| 0.143057 | 0        |
| 0        | 0        |
| 0.178411 | 0.098934 |
| 13.69564 | 7.916845 |
| 0        | 0        |
| 0        | 0        |
| 0.483166 | 0.26793  |
| 0        | 0        |
| 0        | 0        |
| 35.94504 | 34.03333 |
| 0.616327 | 0.791473 |
| 1.039506 | 0.943262 |
| 0.02587  | 0        |
| 0        | 0.197301 |
| 0.069682 | 0.051521 |
| 2.816491 | 1.830162 |
| 0        | 0        |
| 0        | 0        |
| 0.565712 | 0.156852 |
| 2.592846 | 2.195931 |
| 0.049749 | 0        |
| 0        | 0        |
| 0        | 0        |
| 0.134679 | 0        |
| 0        | 0        |
| 10.8997  | 18.82122 |
| 0        | 0        |
| 3.167698 | 2.107902 |
| 0.097775 | 0.759066 |
| 0        | 0        |
| 0.103306 | 0        |
| 0.22577  | 0        |
| 0.031872 | 0.070696 |
| 0        | 0        |
| 0.47637  | 0.880539 |
| 4.537119 | 6.091297 |
| 0        | 0        |
| 0.521508 | 0.395736 |
| 0        | 0.111964 |
| 0        | 0        |
| 0        | 0.170582 |
| 0.102963 | 0.342578 |
| 0.088611 | 0.19655  |
| 2.71517  | 2.609784 |
| 0.44805  | 0.354939 |
| 0        | 0        |
| 0        | 0.810096 |
| 6.27951  | 10.00145 |
| 0.205178 | 0.136533 |
| 0        | 0.067774 |
| 0.180485 | 0.400338 |
| 0        | 0        |
| 1.627746 | 1.805269 |
| 0.315964 | 0        |
| 1.043477 | 1.01262  |
| 0        | 0        |
| 1.407068 | 1.75559  |
| 0        | 0        |

|          |          |
|----------|----------|
| 0.598909 | 0.295212 |
| 0.492753 | 0        |
| 0        | 0.059981 |
| 0.709933 | 1.073672 |
| 0.455628 | 0.336879 |
| 0.347826 | 0.09644  |
| 0.102117 | 0.113254 |
| 0.332538 | 0.173555 |
| 2.180738 | 1.28042  |
| 0        | 0        |
| 0        | 0        |
| 0.137543 | 0.122035 |
| 0        | 0        |
| 0.239718 | 0.265862 |
| 37.07506 | 27.6169  |
| 1.284556 | 0.474884 |
| 0        | 0.045905 |
| 0        | 0        |
| 0        | 0.086869 |
| 0        | 0.172145 |
| 1.28203  | 0.507803 |
| 0.781951 | 0.693785 |
| 0.281893 | 0.351716 |
| 0        | 0        |
| 0.689854 | 1.000503 |
| 0        | 0.521653 |
| 0        | 0        |
| 1.340969 | 1.090626 |
| 1.591971 | 0.798721 |
| 0.121739 | 0.135016 |
| 0        | 0        |
| 0.035806 | 0        |
| 0        | 0        |
| 0        | 0        |
| 1.229443 | 1.363527 |
| 0        | 0        |
| 0.623989 | 1.384083 |
| 0.793081 | 0.125654 |
| 0.189289 | 0        |
| 0.437848 | 0.19424  |
| 0        | 0        |
| 0        | 0        |
| 0.226319 | 0.418336 |
| 0        | 0        |
| 0.104085 | 0.317452 |
| 0.230806 | 0        |
| 2.094201 | 0.737766 |
| 0        | 0        |
| 0.424671 | 0.282592 |
| 0.417391 | 0.347184 |
| 0        | 0        |
| 0        | 0.117305 |
| 0        | 0        |
| 2.681025 | 0.938975 |
| 0.892623 | 1.594957 |
| 5.686799 | 9.420591 |
| 46.06638 | 22.1601  |
| 3.595015 | 0.538796 |
| 0.083675 | 0        |
| 0        | 0        |
| 0.46858  | 0.259842 |
| 0.111467 | 0.494493 |
| 0.598474 | 0.428222 |
| 0.022684 | 0.050317 |
| 2.290738 | 2.715779 |

|          |          |
|----------|----------|
| 0.642721 | 0.142563 |
| 0.061049 | 0        |
| 0        | 0        |
| 0        | 0        |
| 3.855331 | 4.127331 |
| 39.913   | 43.24127 |
| 0        | 0        |
| 0.435697 | 0.724822 |
| 0.286115 | 0        |
| 0        | 0.085326 |
| 0.480363 | 0.532752 |
| 3.727343 | 2.95275  |
| 0        | 0        |
| 22.10899 | 13.09984 |
| 6.689087 | 12.4093  |
| 0        | 0        |
| 0.205813 | 0.380432 |
| 0        | 0        |
| 0.754092 | 0.278778 |
| 1.002872 | 0.30334  |
| 0        | 0        |
| 0        | 0        |
| 5.137303 | 2.223963 |
| 0        | 0        |
| 0.074356 | 0.082465 |
| 0.249847 | 0        |
| 0        | 0        |
| 0        | 0        |
| 1.579317 | 0.218945 |
| 0.103478 | 0        |
| 0.169559 | 0.094026 |
| 0.103421 | 0.038233 |
| 0.203898 | 0.678405 |
| 0.179962 | 0        |
| 1.494684 | 0.76509  |
| 4.765441 | 4.756648 |
| 0.156785 | 0        |
| 23.44307 | 37.0396  |
| 0        | 0.165127 |
| 0.3338   | 0        |
| 0        | 0        |
| 0.474463 | 0.451036 |
| 0.125682 | 0.278778 |
| 0.075623 | 0.167742 |
| 0.713642 | 0.791473 |
| 0.072278 | 0.080161 |
| 0.099818 | 0.110704 |
| 0        | 0        |
| 0        | 0.040011 |
| 0.073216 | 0        |
| 0.154445 | 0        |
| 0.306148 | 0.237676 |
| 0        | 0        |
| 0.130161 | 0        |
| 0.083788 | 0        |
| 0        | 0        |
| 0        | 0        |
| 0.167125 | 0        |
| 0.329373 | 0.121765 |
| 0.310047 | 0.257896 |
| 1.831264 | 2.421557 |
| 0.082921 | 0.091964 |
| 0.350114 | 0.258865 |
| 0        | 0        |
| 0.30635  | 0.283134 |

|          |          |
|----------|----------|
| 0.078691 | 0.174545 |
| 1.033842 | 1.146593 |
| 0.614722 | 0.954469 |
| 3.382939 | 1.250629 |
| 0        | 0.160508 |
| 0        | 0.102467 |
| 0        | 0        |
| 0.241583 | 0.26793  |
| 0.112783 | 0.250166 |
| 0.269943 | 0        |
| 1.196279 | 0.796048 |
| 0.308124 | 0.170864 |
| 0.022826 | 0.075946 |
| 0.111533 | 0        |
| 0        | 0.373215 |
| 0        | 0.447131 |
| 0.138587 | 0.06148  |
| 0        | 0        |
| 0.239718 | 0        |
| 0.598068 | 0.248735 |
| 0.183961 | 0.306036 |
| 1.344842 | 0.372878 |
| 0.6694   | 0.371203 |
| 0        | 0.119132 |
| 0        | 0        |
| 0.165565 | 0        |
| 0.273511 | 0.30334  |
| 0.039295 | 0        |
| 0        | 0.088507 |
| 0        | 0        |
| 0        | 0        |
| 0        | 0        |
| 0.530657 | 0.68662  |
| 0.578449 | 0        |
| 0.148533 | 0.164732 |
| 0.600841 | 0.444246 |
| 0.069293 | 0.076851 |
| 0        | 0        |
| 0.691472 | 1.372319 |
| 0        | 0        |
| 0        | 0.141103 |
| 0.816677 | 0.172523 |
| 1.238984 | 1.22143  |
| 0.485054 | 0.268977 |
| 0        | 0        |
| 0.023598 | 0        |
| 0.431492 | 0.106345 |
| 0.169174 | 0.225149 |
| 0.409364 | 0.151337 |
| 0        | 0        |
| 0.287439 | 0        |
| 0        | 0        |
| 0.360272 | 0.266376 |
| 0.027484 | 0        |
| 0.117812 | 1.306606 |
| 0.119628 | 0        |
| 0        | 0        |
| 0        | 0        |
| 0        | 0        |
| 1.261929 | 1.119644 |
| 0.279671 | 0.310172 |
| 3.38454  | 2.9537   |
| 0.703353 | 0.378212 |
| 0.10779  | 0        |
| 0.101782 | 0.112882 |

|          |          |
|----------|----------|
| 0        | 0        |
| 0.067929 | 0.037669 |
| 0.458206 | 0.508178 |
| 0        | 0.439988 |
| 0        | 0        |
| 0        | 0.139956 |
| 0.124756 | 0        |
| 0.810149 | 0.163364 |
| 0        | 0        |
| 0.103824 | 0.46059  |
| 0        | 0        |
| 0.135858 | 0        |
| 10.32288 | 7.466545 |
| 0        | 0        |
| 0        | 0.218829 |
| 3.085063 | 3.074024 |
| 0.080112 | 0.088849 |
| 0        | 0        |
| 0.124174 | 0.275433 |
| 0        | 0        |
| 0.759008 | 0.589251 |
| 0        | 0        |
| 0        | 0.17002  |
| 0        | 0.096847 |
| 0.051782 | 0.05743  |
| 0.186307 | 0.051657 |
| 2.239199 | 1.429841 |
| 0.01511  | 0        |
| 0        | 0.222842 |
| 0        | 0        |
| 0.363081 | 0        |
| 0.363933 | 0.484348 |
| 0        | 0        |
| 0.895915 | 0.927382 |
| 1.905593 | 1.425329 |
| 0.141428 | 0        |
| 0        | 0        |
| 0        | 0        |
| 0.072979 | 0        |
| 0.363081 | 0.402679 |
| 0        | 0.048732 |
| 3.806417 | 3.752487 |
| 1.233514 | 1.368042 |
| 0.234733 | 0.3905   |
| 0        | 0.054347 |
| 0        | 0        |
| 0        | 0        |
| 0        | 0        |
| 0.987746 | 1.408462 |
| 0.141428 | 0.039213 |
| 0.136605 | 0        |
| 0.089077 | 0.197584 |
| 0        | 0        |
| 0.229103 | 0.127045 |
| 0.252386 | 0        |
| 1.492799 | 0.526784 |
| 767.2482 | 804.4285 |
| 0        | 0.111602 |
| 5.892993 | 5.835435 |
| 0.187574 | 0        |
| 0.915736 | 1.218728 |
| 0.413606 | 0.254841 |
| 0.254107 | 0.28182  |
| 0        | 0        |
| 2.603973 | 3.114472 |

|          |          |  |
|----------|----------|--|
| 0        | 0.101561 |  |
| 9.877459 | 5.477352 |  |
| 0.137665 | 0        |  |
| 25.4883  | 20.29503 |  |
| 1.237283 | 1.084056 |  |
| 0.056391 | 0.062541 |  |
| 0.164251 | 0        |  |
| 0        | 0        |  |
| 0.151431 | 0        |  |
| 0        | 0        |  |
| 2.613514 | 3.534812 |  |
| 0.260869 | 0        |  |
| 0.085637 | 0        |  |
| 0.073737 | 0        |  |
| 0.662386 | 0.537852 |  |
| 2.594889 | 4.277231 |  |
| 0.111467 | 0        |  |
| 2.060091 | 1.516612 |  |
| 0.290805 | 0        |  |
| 0        | 0        |  |
| 0.430163 | 0        |  |
| 0.248546 | 0.110261 |  |
| 0        | 0        |  |
| 5.729206 | 2.808867 |  |
| 0.205416 | 0.227818 |  |
| 0.82893  | 0.091933 |  |
| 0.066474 | 0        |  |
| 0.144612 | 0.160384 |  |
| 0        | 0        |  |
| 0.350773 | 0        |  |
| 0        | 0        |  |
| 0        | 0.8501   |  |
| 0.076274 | 0        |  |
| 0.614722 | 0        |  |
| 0        | 0.041208 |  |
| 0        | 0        |  |
| 0        | 0        |  |
| 0.175325 | 0.097223 |  |
| 0        | 0        |  |
| 0        | 0        |  |
| 0.064472 | 0.071504 |  |
| 0.454849 | 0.126114 |  |
| 0.310262 | 0.649966 |  |
| 0.113504 | 0        |  |
| 0.13736  | 0        |  |
| 0.453189 | 0.335076 |  |
| 12.60716 | 14.2828  |  |
| 0        | 0        |  |
| 0        | 0.227255 |  |
| 0        | 0.17301  |  |
| 0        | 0        |  |
| 0.121263 | 0        |  |
| 0.939416 | 1.515447 |  |
| 0.11551  | 0        |  |
| 0        | 0        |  |
| 3.022125 | 3.35172  |  |
| 0.192219 | 0.426366 |  |
| 0        | 0.188394 |  |
| 0        | 0        |  |
| 0.629867 | 0.498972 |  |
| 0.687309 | 0.635223 |  |
| 0.23429  | 0.519684 |  |
| 0.128279 | 0        |  |
| 0        | 0        |  |
| 0.063875 | 0.495892 |  |

|          |          |
|----------|----------|
| 5.034072 | 6.203436 |
| 4.551824 | 4.543425 |
| 0        | 0.126345 |
| 0        | 0        |
| 0.395962 | 0.087829 |
| 1.260465 | 0.8787   |
| 0        | 0        |
| 0.117812 | 0        |
| 0        | 0        |
| 0        | 0        |
| 0.05058  | 0.280481 |
| 0.108544 | 0.240763 |
| 0.163818 | 0        |
| 0.067121 | 0        |
| 0.180485 | 0.200169 |
| 0.076368 | 0        |
| 0        | 0.133965 |
| 0        | 0        |
| 0.222534 | 0.082268 |
| 0        | 0.122742 |
| 0        | 0        |
| 0.138742 | 0.230809 |
| 0        | 0        |
| 0.383252 | 0        |
| 3.785786 | 1.119644 |
| 0.171827 | 0.127045 |
| 0.218104 | 0        |
| 0.089663 | 0.110491 |
| 0.099339 | 0        |
| 0        | 0        |
| 0.339737 | 1.036169 |
| 0.047925 | 0.053152 |
| 0        | 0        |
| 0        | 0        |
| 0.231667 | 0        |
| 0.397144 | 0.146819 |
| 1.420753 | 1.418131 |
| 0.159606 | 0        |
| 0.282213 | 0.312992 |
| 0.62714  | 0        |
| 0.332608 | 0.286909 |
| 0        | 0        |
| 0.136155 | 0        |
| 1.619658 | 2.395066 |
| 0.112273 | 0        |
| 0.088696 | 0        |
| 0.547755 | 0.607494 |
| 0        | 0        |
| 1.910366 | 0.706237 |
| 0        | 0        |
| 0        | 0        |
| 0.38393  | 0.851602 |
| 0.400561 | 0        |
| 0        | 0        |
| 0.167125 | 0.278027 |
| 0        | 0        |
| 0        | 0        |
| 0.554347 | 0        |
| 0.041951 | 0        |
| 0.492753 | 1.092986 |
| 0.928981 | 3.090889 |
| 0        | 0.160883 |
| 0        | 0.160883 |
| 0.320035 | 0        |
| 0.27197  | 0        |

|          |          |
|----------|----------|
| 0        | 0.292391 |
| 0        | 0.07542  |
| 1.760673 | 0.30832  |
| 0.551393 | 0.85614  |
| 1.548652 | 2.029832 |
| 4.558278 | 8.672639 |
| 11.76095 | 14.25697 |
| 0        | 0        |
| 0        | 0        |
| 0.06075  | 0.269503 |
| 0        | 0        |
| 0        | 0.239091 |
| 0.367378 | 0        |
| 0        | 0        |
| 0        | 0.135281 |
| 0        | 0        |
| 0        | 0.205547 |
| 0        | 0        |
| 1.924027 | 1.203718 |
| 1.686707 | 0.445395 |
| 0.184508 | 0        |
| 0        | 0        |
| 0.40686  | 0.631726 |
| 1.472416 | 0        |
| 0.126193 | 0.279911 |
| 0        | 0        |
| 0.214093 | 0.118721 |
| 0.882752 | 0.163171 |
| 0.078492 | 0.087052 |
| 0        | 0.119753 |
| 0        | 0        |
| 0.195549 | 0        |
| 0        | 0        |
| 0        | 0        |
| 0        | 0.724822 |
| 0.124174 | 0        |
| 0        | 0        |
| 0.124923 | 0.046183 |
| 6.812041 | 10.03731 |
| 4.883781 | 5.791806 |
| 0.444536 | 0.109559 |
| 0.066003 | 0.048801 |
| 2.126263 | 0        |
| 0.236973 | 0.065704 |
| 0        | 0.122523 |
| 0.708754 | 0.314421 |
| 0.109888 | 0        |
| 0.479435 | 0.354482 |
| 0        | 0.095725 |
| 0        | 0.218597 |
| 0        | 0        |
| 0.450721 | 0.499878 |
| 0        | 0        |
| 1.21739  | 0        |
| 0.055139 | 0        |
| 0.206269 | 1.143823 |
| 1.772422 | 1.098493 |
| 0        | 0.122742 |
| 0        | 0        |
| 0.035438 | 0.039303 |
| 0.027545 | 0        |
| 0        | 0        |
| 0.226319 | 0        |
| 0        | 0        |
| 0        | 0.108268 |

|          |          |
|----------|----------|
| 0.037823 | 0.041948 |
| 0.127032 | 0.035222 |
| 0.034861 | 0.115988 |
| 0        | 0        |
| 0.298974 | 0        |
| 0.483166 | 0.401896 |
| 0        | 0.091689 |
| 1.034781 | 0.286909 |
| 1.713364 | 1.300154 |
| 0        | 0.219293 |
| 0.130985 | 0.435811 |
| 0        | 0        |
| 0        | 0        |
| 0        | 0.277095 |
| 0        | 0        |
| 0        | 0        |
| 0.078891 | 0        |
| 0.420928 | 0.700252 |
| 0.948696 | 0.467627 |
| 0        | 0        |
| 0        | 0        |
| 0.173913 | 0        |
| 0        | 0.504455 |
| 0.287439 | 0.159394 |
| 0        | 0        |
| 0.247358 | 0        |
| 4.236517 | 2.754325 |
| 0        | 0        |
| 0        | 0        |
| 0.251364 | 0        |
| 0        | 0        |
| 0        | 0        |
| 0        | 0        |
| 0.287439 | 0.159394 |
| 0        | 0        |
| 0.091036 | 0.100965 |
| 1.932473 | 1.758548 |
| 0        | 0        |
| 0.284565 | 0.286909 |
| 0.128279 | 0.142269 |
| 0.945486 | 0        |
| 0        | 0        |
| 0        | 0        |
| 0.125175 | 0.138827 |
| 0.342077 | 0.796706 |
| 0.070234 | 0.116841 |
| 0.405797 | 0        |
| 0.110606 | 0.081779 |
| 0.126514 | 0.070156 |
| 0        | 0.096575 |
| 0        | 0.071578 |
| 0.634349 | 0.61559  |
| 1.532782 | 1.228878 |
| 0        | 0.080068 |
| 0        | 0        |
| 0        | 0        |
| 0.10595  | 0.117505 |
| 0.640071 | 0.354939 |
| 0.057881 | 0.042796 |
| 0.152548 | 0.169185 |
| 0.664742 | 0        |
| 0        | 0        |
| 2.230667 | 0.515405 |
| 4.504985 | 1.907679 |
| 0.182073 | 0        |

|          |          |   |
|----------|----------|---|
| 0        | 0.0464   |   |
| 0.139898 |          | 0 |
| 0.405797 |          | 0 |
| 0        | 0.071504 |   |
| 27.1834  | 19.35505 |   |
| 0.178411 |          | 0 |
| 0.072278 | 0.160322 |   |
| 0        | 0.061701 |   |
| 0        | 0.087829 |   |
| 0        |          | 0 |
| 0.253416 | 0.562107 |   |
| 0        |          | 0 |
| 0.408466 | 0.151005 |   |
| 0.103478 |          | 0 |
| 0        | 0.275985 |   |
| 0        | 0.152341 |   |
| 0        | 0.279155 |   |
| 0        |          | 0 |
| 0.046542 | 0.206471 |   |
| 2.598986 | 3.005615 |   |
| 0.049889 |          | 0 |
| 0.175387 | 0.194515 |   |
| 0        |          | 0 |
| 0.879972 | 0.433752 |   |
| 0.504771 | 0.373215 |   |
| 0.865322 | 0.959695 |   |
| 0        |          | 0 |
| 0.93434  | 0.932616 |   |
| 1.017818 | 0.564411 |   |
| 0        |          | 0 |
| 0        |          | 0 |
| 0        | 0.022945 |   |
| 0.081909 | 0.090842 |   |
| 0.0657   |          | 0 |
| 1.147632 | 1.018235 |   |
| 0        | 0.155086 |   |
| 0.131819 |          | 0 |
| 0.146087 |          | 0 |
| 0        |          | 0 |
| 1.03869  | 1.709376 |   |
| 0        |          | 0 |
| 0        |          | 0 |
| 0.646738 | 0.573818 |   |
| 1.148906 | 0.152905 |   |
| 0        |          | 0 |
| 0.121739 |          | 0 |
| 0        |          | 0 |
| 0.391715 | 1.737745 |   |
| 0.106496 | 0.11811  |   |
| 1.051132 | 0.621744 |   |
| 0.725314 |          | 0 |
| 0.718598 | 0.159394 |   |
| 2.151088 | 0.98042  |   |
| 0        |          | 0 |
| 0.181753 | 0.040315 |   |
| 0.011508 |          | 0 |
| 0.024934 |          | 0 |
| 0.123926 |          | 0 |
| 0        | 0.151005 |   |
| 0        |          | 0 |
| 0        |          | 0 |
| 0        |          | 0 |
| 0.412995 |          | 0 |
| 0        | 0.04961  |   |
| 0.116924 |          | 0 |

|          |          |   |
|----------|----------|---|
| 0        | 0.160135 |   |
| 0.636789 |          | 0 |
| 2.992139 | 3.733272 |   |
| 0.089077 |          | 0 |
| 11.34434 | 10.21327 |   |
| 0.419506 |          | 0 |
| 0.095518 |          | 0 |
| 0        |          | 0 |
| 0.036891 | 0.040914 |   |
| 0.269163 | 0.099506 |   |
| 0.183282 | 0.152453 |   |
| 0.238063 | 0.158416 |   |
| 1.773911 | 0.931915 |   |
| 0.390484 | 1.082675 |   |
| 0        |          | 0 |
| 0.294251 | 0.979026 |   |
| 0.303356 | 0.224294 |   |
| 0.429965 | 0.476857 |   |
| 0.17605  | 0.19525  |   |
| 0.736051 | 0.375068 |   |
| 0.237426 |          | 0 |
| 1.18386  |          | 0 |
| 0        |          | 0 |
| 0.023288 | 0.025828 |   |
| 0        |          | 0 |
| 0        | 0.676027 |   |
| 0.323369 | 0.358636 |   |
| 0.434174 | 0.240763 |   |
| 0        |          | 0 |
| 0        | 1.939666 |   |
| 0        |          | 0 |
| 0        | 0.266892 |   |
| 0        |          | 0 |
| 0.084243 |          | 0 |
| 0.465593 | 0.929469 |   |
| 0.535232 | 0.949767 |   |
| 0.747135 | 0.248585 |   |
| 0        |          | 0 |
| 0        |          | 0 |
| 0        |          | 0 |
| 0        |          | 0 |
| 0.772225 | 0.599511 |   |
| 0.235624 | 0.261321 |   |
| 0.135413 |          | 0 |
| 0.206956 |          | 0 |
| 0.053066 | 0.058853 |   |
| 0        |          | 0 |
| 0        |          | 0 |
| 0        |          | 0 |
| 0.05475  |          | 0 |
| 1.121013 | 0.76509  |   |
| 0        | 0.206781 |   |
| 0        |          | 0 |
| 0        |          | 0 |
| 0        |          | 0 |
| 0        |          | 0 |
| 0        |          | 0 |
| 1.783465 | 2.472465 |   |
| 0        |          | 0 |
| 0        |          | 0 |
| 0.515957 | 0.381486 |   |
| 0.359715 | 0.478736 |   |
| 0.131262 | 0.145577 |   |
| 0.488873 | 1.08438  |   |
| 0        |          | 0 |

|          |          |
|----------|----------|
| 0        | 0        |
| 0.718901 | 1.159716 |
| 0.401857 | 0.111421 |
| 21.61252 | 17.1419  |
| 0        | 0        |
| 0.389259 | 0.26982  |
| 0.112273 | 0        |
| 0.610191 | 0.169185 |
| 1.02341  | 0.252228 |
| 0        | 0        |
| 0        | 0.055688 |
| 2.031934 | 1.752753 |
| 0        | 0        |
| 0        | 0.074603 |
| 0        | 0        |
| 0        | 0.035357 |
| 0.074178 | 0.082268 |
| 0.290397 | 0.064414 |
| 0.057917 | 0.064233 |
| 0        | 0.053213 |
| 0.079192 | 0.087829 |
| 0.989432 | 0.274335 |
| 0        | 0        |
| 0.338164 | 0.225027 |
| 0        | 0        |
| 0.272311 | 0        |
| 0.918833 | 1.310197 |
| 0        | 0        |
| 1.417509 | 0.471631 |
| 0        | 0.034275 |
| 1.945743 | 1.569416 |
| 0.500701 | 1.665923 |
| 0        | 0        |
| 0.055783 | 0        |
| 0.126193 | 0.139956 |
| 0        | 0.075696 |
| 0.705533 | 0.782479 |
| 0.343021 | 0        |
| 0.285457 | 0.158295 |
| 0.067559 | 0        |
| 0.259778 | 0.480182 |
| 0        | 0        |
| 6.13146  | 9.499464 |
| 0.208645 | 0.033057 |
| 0.135858 | 0        |
| 0.290126 | 0.160883 |
| 0.144388 | 0        |
| 0.283502 | 0        |
| 0        | 0        |
| 0        | 0        |
| 3.638792 | 7.062373 |
| 0        | 0        |
| 0.382465 | 0.848355 |
| 0.088696 | 0.098369 |
| 0.034474 | 0.076467 |
| 0.67154  | 0.677071 |
| 0.082562 | 0.732533 |
| 0.047358 | 0.105047 |
| 0.075531 | 0        |
| 0.129889 | 0.288109 |
| 0.075762 | 0        |
| 0.557905 | 0.707144 |
| 0        | 0.178389 |
| 1.368504 | 1.357991 |
| 0        | 0        |

|          |          |  |
|----------|----------|--|
| 0.140627 | 0.077982 |  |
| 0        | 0        |  |
| 0        | 0        |  |
| 0.701547 | 0.389029 |  |
| 0        | 0        |  |
| 0        | 0        |  |
| 0        | 0        |  |
| 4.557442 | 3.2964   |  |
| 0.130025 | 0        |  |
| 0.957638 | 0.708053 |  |
| 0.023063 | 0.051158 |  |
| 0        | 0.413562 |  |
| 1.83689  | 0.543259 |  |
| 0.113297 | 0        |  |
| 0        | 0        |  |
| 0        | 0        |  |
| 0.364788 | 0.323658 |  |
| 0.103134 | 0        |  |
| 0.099022 | 0.054911 |  |
| 0.222933 | 0.082415 |  |
| 0        | 0        |  |
| 0.376353 | 0.151781 |  |
| 0.085051 | 0.094326 |  |
| 0        | 0.295528 |  |
| 3.735416 | 2.609784 |  |
| 1.087999 | 0.393475 |  |
| 0        | 0        |  |
| 0.157581 | 0.058256 |  |
| 0.801121 | 0        |  |
| 0.023949 | 0        |  |
| 0.069526 | 0        |  |
| 0        | 0        |  |
| 0        | 0        |  |
| 0.359387 | 0.350269 |  |
| 0        | 0        |  |
| 0        | 0.124517 |  |
| 0.499693 | 0        |  |
| 0        | 0        |  |
| 0        | 0        |  |
| 0        | 0        |  |
| 0        | 0        |  |
| 0.447151 | 0.29755  |  |
| 0.891587 | 0.389537 |  |
| 0        | 0.293638 |  |
| 0        | 0        |  |
| 0.063679 | 0        |  |
| 0        | 0        |  |
| 0.014382 | 0.01595  |  |
| 0        | 0        |  |
| 0        | 0.134226 |  |
| 0.323369 | 0.179318 |  |
| 0.095372 | 0.105773 |  |
| 0.373455 | 1.656737 |  |
| 0        | 0        |  |
| 0.07618  | 0        |  |
| 0.278001 | 0.15416  |  |
| 0.110279 | 0.061153 |  |
| 2.19274  | 2.886365 |  |
| 0.119577 | 0.088412 |  |
| 1.797252 | 2.446276 |  |
| 0.11894  | 0.131912 |  |
| 0.359403 | 1.993    |  |
| 1.92092  | 0.989122 |  |
| 0.126107 | 0        |  |
| 0        | 0.057239 |  |

|          |          |
|----------|----------|
| 0.145744 | 0        |
| 0.332015 | 0.306854 |
| 0.127961 | 0.08515  |
| 0.38278  | 0.084905 |
| 0        | 0.07233  |
| 1.577872 | 2.677964 |
| 0        | 0        |
| 0        | 0        |
| 0.112885 | 0        |
| 0.173427 | 0.384682 |
| 0.017425 | 0.057978 |
| 0        | 0        |
| 0        | 0        |
| 0.123679 | 0.137168 |
| 2.031473 | 1.548956 |
| 0        | 0        |
| 0        | 0.559822 |
| 0.453189 | 0.251307 |
| 25.10416 | 15.89034 |
| 0.413913 | 0.172145 |
| 7.149399 | 5.842509 |
| 0        | 0.606146 |
| 0.2642   | 0        |
| 0.284151 | 0        |
| 0        | 0.159394 |
| 0.280936 | 0        |
| 0        | 0        |
| 0        | 0        |
| 0.836589 | 0.19882  |
| 0        | 0        |
| 0.891199 | 0.988394 |
| 0        | 0        |
| 0.019836 | 0.021999 |
| 0        | 0.07542  |
| 0.266363 | 0.134279 |
| 0        | 0.206162 |
| 0.030555 | 0        |
| 0.084549 | 0.031257 |
| 0.123515 | 0.091324 |
| 0.211901 | 0.156674 |
| 1.082124 | 0.300035 |
| 0.067266 | 0        |
| 0.136155 | 0.151005 |
| 0.162107 | 0.179786 |
| 0.933637 | 0.51773  |
| 0        | 0.121657 |
| 0        | 0        |
| 1.421837 | 0        |
| 0.101782 | 0        |
| 0        | 0        |
| 0.11413  | 0.126577 |
| 0.95895  | 0.226284 |
| 1.222383 | 2.428958 |
| 0        | 0.190743 |
| 0.606465 | 1.513366 |
| 0        | 0        |
| 16.16463 | 10.72937 |
| 0        | 0        |
| 4.549772 | 4.91659  |
| 0.295183 | 0        |
| 0.842515 | 0.575016 |
| 7.944677 | 9.277104 |
| 0.132664 | 0        |
| 0        | 0.15757  |
| 0.159402 | 0.132589 |

|          |          |  |
|----------|----------|--|
| 0        | 0.142269 |  |
| 1.006814 | 0.093052 |  |
| 0.284151 | 0.15757  |  |
| 0        | 0.214511 |  |
| 0.099979 | 0.110883 |  |
| 0.252386 | 0.279911 |  |
| 0.37935  | 0.560962 |  |
| 0.074803 | 0        |  |
| 0        | 0.038085 |  |
| 0        | 0        |  |
| 2.064131 | 0.120487 |  |
| 0        | 0        |  |
| 0.054534 | 0.060481 |  |
| 0        | 0.090011 |  |
| 0        | 0        |  |
| 0        | 0        |  |
| 0        | 0        |  |
| 0.050683 | 0.056211 |  |
| 0.598716 | 0.53121  |  |
| 0.158558 | 0.226094 |  |
| 166.5987 | 157.3273 |  |
| 0.445067 | 0.246803 |  |
| 0        | 0.278778 |  |
| 0.63354  | 0.351317 |  |
| 0        | 0.054999 |  |
| 0        | 0.259842 |  |
| 0.439294 | 0.324803 |  |
| 0        | 0.040221 |  |
| 0        | 0        |  |
| 0        | 0        |  |
| 0.183961 | 0.102012 |  |
| 0.157581 | 0        |  |
| 0.112273 | 0        |  |
| 0.05003  | 0.055486 |  |
| 0.183689 | 0        |  |
| 0        | 0.167538 |  |
| 0.164687 | 0.182648 |  |
| 0        | 0        |  |
| 0        | 0.398024 |  |
| 2.540806 | 1.986987 |  |
| 0.10779  | 0        |  |
| 0.274316 | 0.101411 |  |
| 0.173815 | 0.038554 |  |
| 0        | 0        |  |
| 0.865322 | 0.239924 |  |
| 0        | 0.135815 |  |
| 0.227703 | 0        |  |
| 0.083675 | 0.278402 |  |
| 0        | 0        |  |
| 0        | 0        |  |
| 0.102708 | 0.056955 |  |
| 0.042121 | 0        |  |
| 0.048129 | 0.160135 |  |
| 0.148889 | 0.066051 |  |
| 0        | 0.038382 |  |
| 0        | 0        |  |
| 0        | 0        |  |
| 1.119163 | 1.103306 |  |
| 0        | 0.236762 |  |
| 0.049709 | 0.055131 |  |
| 1.349715 | 0.921179 |  |
| 0.541062 | 0        |  |
| 0        | 0.14466  |  |
| 0.184508 | 0.20463  |  |
| 0.071943 | 0        |  |

|          |          |
|----------|----------|
| 0.446291 | 0.116462 |
| 0.243478 | 0.67508  |
| 0.908589 | 0        |
| 0        | 0.226507 |
| 0        | 0        |
| 2.965571 | 1.770999 |
| 0.018774 | 0.187397 |
| 0.235475 | 0.261156 |
| 0        | 0.053503 |
| 0        | 0        |
| 0.819629 | 0.454509 |
| 0.023491 | 0        |
| 9.439135 | 1.419119 |
| 0.253934 | 0.140814 |
| 0        | 0        |
| 0.190256 | 0.211006 |
| 0.341137 | 0        |
| 2.483475 | 1.180425 |
| 0.074534 | 0        |
| 0.409814 | 0.227255 |
| 0.646738 | 0        |
| 0.11894  | 0.131912 |
| 0.086352 | 0.095769 |
| 0        | 0        |
| 0        | 0        |
| 1.753867 | 0.778058 |
| 0        | 0.122742 |
| 0.667601 | 0.74041  |
| 0        | 0        |
| 0.132381 | 0        |
| 28.72573 | 28.69196 |
| 0.600011 | 0.570385 |
| 0.124423 | 0.137992 |
| 0        | 0.209614 |
| 0        | 0        |
| 0.074894 | 0        |
| 0.411171 | 0        |
| 0.08345  | 0.647859 |
| 0.827825 | 0.550865 |
| 0        | 0        |
| 0.077127 | 0        |
| 0        | 0        |
| 0.147826 | 0        |
| 2.069563 | 2.942655 |
| 0        | 0        |
| 0.157182 | 0.130743 |
| 0        | 0        |
| 0.035662 | 0.039551 |
| 1.577265 | 1.749283 |
| 0        | 0        |
| 0        | 0        |
| 0.068529 | 0.152005 |
| 0        | 0        |
| 0        | 0.037301 |
| 0.148002 | 0.082072 |
| 0.408466 | 0.151005 |
| 0.220688 | 0.407927 |
| 0        | 0        |
| 3.036859 | 1.122687 |
| 4.622676 | 7.279532 |
| 0.242883 | 0.134686 |
| 1.489169 | 0.635223 |
| 0        | 0        |
| 0.165125 | 0.732533 |
| 0.808423 | 0.179318 |

|          |          |
|----------|----------|
| 0.117812 | 0.06533  |
| 0        | 0        |
| 0.149968 | 0        |
| 0        | 0        |
| 0.069371 | 0.076936 |
| 0.250451 | 0.055553 |
| 0.076556 | 0        |
| 0.796771 | 1.019617 |
| 5.486323 | 5.476199 |
| 0        | 0.07505  |
| 0.274569 | 0.114193 |
| 0.125301 | 0        |
| 0        | 0        |
| 0.15639  | 0.173446 |
| 0.275942 | 0        |
| 0        | 0.070624 |
| 0        | 0.15439  |
| 0.11268  | 0        |
| 0.406683 | 1.052417 |
| 0.154062 | 0        |
| 0        | 0        |
| 1.293477 | 1.434545 |
| 0.101449 | 0        |
| 0        | 0        |
| 0.069604 | 0        |
| 0        | 0.465258 |
| 0.982199 | 0.297087 |
| 0.169174 | 0.562873 |
| 0.262191 | 0.174472 |
| 0        | 0.050372 |
| 0.086593 | 0        |
| 1.695205 | 0.235011 |
| 1.118683 | 0.482489 |
| 0        | 0.204024 |
| 0.060045 | 0.199782 |
| 0        | 0.062541 |
| 0.970108 | 0.537954 |
| 1.215556 | 1.451828 |
| 0.444271 | 1.108628 |
| 2.101079 | 0.699067 |
| 0.556833 | 0.205854 |
| 0.131819 | 0.292391 |
| 0        | 0        |
| 0        | 0.124969 |
| 0.192219 | 0        |
| 0.183147 | 0.304682 |
| 0        | 0        |
| 0.171629 | 0.047587 |
| 3.039088 | 4.549186 |
| 0        | 0        |
| 0.174893 | 0        |
| 0        | 0        |
| 0        | 0        |
| 0.11434  | 0        |
| 0.120091 | 0.266376 |
| 0        | 0        |
| 0        | 0        |
| 0.937161 | 0.606298 |
| 0.380901 | 1.408142 |
| 0.834181 | 0.330413 |
| 1.282787 | 0        |
| 0.091619 | 0.03387  |
| 0.113504 | 0        |
| 0.144725 | 0.080254 |
| 0        | 0        |

|          |          |
|----------|----------|
| 0.22577  | 0        |
| 0.04963  | 0.128432 |
| 0        | 0        |
| 14.00414 | 7.170765 |
| 0        | 0        |
| 0        | 0.238263 |
| 1.859182 | 0.813926 |
| 0.023607 | 0        |
| 0.111134 | 0        |
| 0.245403 | 0        |
| 0.113504 | 0        |
| 0.198361 | 0        |
| 0        | 0        |
| 0.119859 | 0        |
| 0        | 0        |
| 0.573993 | 0.371346 |
| 0.088569 | 0.196457 |
| 0.449905 | 0        |
| 3.601385 | 1.504647 |
| 0        | 0.10901  |
| 0        | 0        |
| 0        | 0.23461  |
| 1.313016 | 2.704398 |
| 0.224681 | 0.083062 |
| 0        | 0.194515 |
| 0.134097 | 0        |
| 0.359924 | 0        |
| 0        | 0        |
| 0        | 0        |
| 0.631198 | 0.509117 |
| 0.145232 | 0.080536 |
| 0        | 0.986506 |
| 0.067437 | 0.274236 |
| 0        | 0        |
| 0.122944 | 0.136353 |
| 0        | 0        |
| 0.30889  | 0.342578 |
| 2.028983 | 0.225027 |
| 0.057863 | 0.064173 |
| 1.131596 | 1.589678 |
| 0        | 0        |
| 0        | 0        |
| 1.02623  | 0.569076 |
| 0        | 0        |
| 0        | 0        |
| 1.721221 | 0.74994  |
| 0        | 0        |
| 0.107046 | 0.118721 |
| 0.243002 | 0        |
| 0.630136 | 0.698859 |
| 0.091439 | 0        |
| 0        | 0.398792 |
| 0        | 0        |
| 0.132381 | 0        |
| 0.09918  | 0        |
| 0.059699 | 0.06621  |
| 0        | 0.655792 |
| 0.618806 | 0        |
| 1.591971 | 0.441398 |
| 0.188714 | 0.41859  |
| 0        | 0.037464 |
| 0.02651  | 0        |
| 0.091912 | 0        |
| 0.124174 | 0.137716 |
| 0        | 0        |

|          |          |
|----------|----------|
| 0        | 0        |
| 0.113366 | 0        |
| 0        | 0        |
| 0.020237 | 0        |
| 1.264733 | 0.701333 |
| 0        | 0        |
| 0.338041 | 0        |
| 0.599873 | 0.110883 |
| 0.210464 | 0        |
| 0        | 0        |
| 0        | 0.022049 |
| 0        | 0        |
| 0.17051  | 0.047276 |
| 0.043417 | 0.096305 |
| 0.099979 | 0        |
| 0.55719  | 1.324195 |
| 0.609691 | 1.239672 |
| 0        | 0.117908 |
| 0.230806 | 0        |
| 0.380235 | 0.060243 |
| 0.447473 | 0        |
| 1.201682 | 0.888492 |
| 0.084015 | 0        |
| 4.319088 | 4.790131 |
| 1030.676 | 1062.8   |
| 0.717767 | 0.398024 |
| 0        | 0        |
| 0        | 0.196177 |
| 0.163818 | 0        |
| 0.414834 | 1.533589 |
| 0        | 0.133965 |
| 0.239718 | 0.265862 |
| 0.217849 | 0        |
| 0        | 0        |
| 0.010178 | 0        |
| 0.684153 | 1.517535 |
| 0.30309  | 0        |
| 0        | 0        |
| 0.106678 | 0        |
| 0.083115 | 0.09218  |
| 0        | 0        |
| 0        | 0        |
| 0.151186 | 0        |
| 0        | 0        |
| 0.515244 | 0.228575 |
| 0.079855 | 0.088564 |
| 0.125428 | 0.278215 |
| 0        | 0        |
| 0        | 0        |
| 0.064607 | 0        |
| 0.079701 | 0.088393 |
| 0.219388 | 0        |
| 0        | 0        |
| 0.791925 | 1.194478 |
| 0.288776 | 0        |
| 0        | 0        |
| 0.097775 | 0.216876 |
| 4.246357 | 1.926601 |
| 10.82911 | 8.00676  |
| 0.201974 | 1.030408 |
| 0.255765 | 0        |
| 0.671728 | 2.50103  |
| 0.030008 | 0.099843 |
| 1.868836 | 2.878685 |
| 0        | 0        |

|          |          |
|----------|----------|
| 0        | 0        |
| 0        | 0        |
| 0.086593 | 0        |
| 0        | 0        |
| 0        | 0.402679 |
| 0        | 0.119753 |
| 0.725556 | 0.402343 |
| 3.488027 | 3.094748 |
| 0        | 0        |
| 1.525476 | 0.169185 |
| 0.085167 | 0.094456 |
| 0        | 0.056441 |
| 0        | 0        |
| 0.14372  | 0        |
| 0        | 0        |
| 0.198044 | 0        |
| 0.352766 | 0.19562  |
| 0.539886 | 1.437039 |
| 0        | 0        |
| 0.074445 | 0        |
| 0        | 0        |
| 0        | 0        |
| 0.020171 | 0.089484 |
| 0        | 0        |
| 0.315162 | 0        |
| 0.125682 | 0.348472 |
| 0.13154  | 0.145886 |
| 13.03754 | 11.88018 |
| 0.107139 | 0.059412 |
| 0.278417 | 0        |
| 0.070634 | 0        |
| 8.823992 | 21.2234  |
| 0        | 0        |
| 1.209485 | 0        |
| 0.075716 | 0        |
| 0.113504 | 0        |
| 0        | 0        |
| 0.420216 | 0.349534 |
| 0.221212 | 0        |
| 0.816933 | 0.319775 |
| 0.161055 | 0.580516 |
| 0        | 0        |
| 1.286775 | 2.854223 |
| 0.495987 | 0.392914 |
| 0.229951 | 0        |
| 0        | 0        |
| 0.303109 | 0.168083 |
| 0.787905 | 0        |
| 1.04814  | 1.025692 |
| 0        | 0.090424 |
| 0.140468 | 0        |
| 0.081075 | 0.017983 |
| 0.232535 | 0.515791 |
| 1.842019 | 1.562226 |
| 0.102285 | 0.22688  |
| 0        | 0.191805 |
| 1.925175 | 1.677607 |
| 0        | 0.061646 |
| 0.149968 | 0.166324 |
| 0.111167 | 0.308228 |
| 0.027172 | 0.210944 |
| 0.012472 | 0.013832 |
| 1.186374 | 1.315761 |
| 0        | 0        |
| 0        | 0.149044 |

|          |          |          |
|----------|----------|----------|
| 1.387106 | 1.846063 |          |
| 0.008149 |          | 0        |
|          | 0        | 0        |
| 0.123188 |          | 0        |
|          | 0        | 0.705514 |
| 0.115964 | 0.257221 |          |
|          | 0        | 0        |
| 4.562295 | 3.153248 |          |
| 2.455715 | 1.243354 |          |
|          | 0        | 0.038043 |
| 1.492473 | 0.331049 |          |
|          | 0.41495  | 0.115051 |
| 1.782124 | 1.657696 |          |
|          | 0        | 0        |
|          | 0        | 0        |
| 0.591304 | 1.03053  |          |
|          | 0        | 0        |
| 0.030435 |          | 0        |
| 0.147826 | 0.163948 |          |
| 0.182073 | 0.40386  |          |
| 0.022463 |          | 0        |
|          | 0        | 0        |
|          | 0        | 0        |
| 0.081479 | 0.090365 |          |
|          | 0        | 0.23622  |
| 0.207302 | 0.114955 |          |
|          | 0        | 0.298734 |
| 0.479435 |          | 0        |
|          | 1.31866  | 1.096855 |
| 0.654695 | 0.968128 |          |
| 0.253416 |          | 0        |
| 0.157581 |          | 0        |
| 0.108354 |          | 0        |
| 0.276277 | 0.139276 |          |
| 1.415086 |          | 0        |
| 0.074001 | 0.410358 |          |
|          | 0        | 0.076255 |
| 0.064228 | 0.142465 |          |
|          | 0        | 0.546493 |
| 0.077222 |          | 0        |
|          | 0        | 0.165127 |
| 0.344927 |          | 0        |
|          | 0        | 0.197301 |
| 3.145433 | 1.351392 |          |
| 0.089077 | 0.345773 |          |
|          | 0        | 0        |
|          | 0        | 0.078605 |
|          | 0        | 0        |
| 0.199636 |          | 0        |
| 0.305095 | 0.084592 |          |
| 0.064139 | 0.355672 |          |
| 2.920242 | 1.126513 |          |
|          | 0        | 0        |
|          | 0        | 0        |
| 0.145744 |          | 0        |
| 0.031524 | 0.034962 |          |
|          | 0        | 0        |
|          | 25.469   | 16.41311 |
| 0.256557 | 0.569076 |          |
|          | 0        | 0        |
| 2.43478  | 2.700319 |          |
|          | 0        | 0.095769 |
| 1.284556 | 1.899535 |          |
| 0.130025 | 0.072103 |          |
|          | 0        | 0.115147 |

|          |          |
|----------|----------|
| 0        | 0        |
| 0        | 0.15051  |
| 0        | 0        |
| 0.060103 | 0        |
| 1.540072 | 1.415227 |
| 0        | 0        |
| 0        | 0.414808 |
| 0.835785 | 1.059356 |
| 0.351767 | 0.195066 |
| 0        | 0.321767 |
| 0        | 0.067376 |
| 0.679783 | 0.502614 |
| 0.045652 | 0        |
| 0.010284 | 0        |
| 0.343654 | 0.635223 |
| 0.404475 | 0.224294 |
| 0.085167 | 0        |
| 6.961257 | 2.921254 |
| 0        | 0        |
| 0.031184 | 0        |
| 0.95274  | 0.176108 |
| 0.616129 | 0.683325 |
| 0        | 0        |
| 2.037863 | 1.657417 |
| 0        | 0.343718 |
| 0.025373 | 0        |
| 0.364788 | 0.323658 |
| 0        | 0.068858 |
| 0.050151 | 0.278102 |
| 0.118713 | 0.13166  |
| 0        | 0.038276 |
| 0        | 0        |
| 0        | 0        |
| 0        | 0.088054 |
| 0.018478 | 0.020493 |
| 1.078067 | 0.760863 |
| 0        | 0        |
| 2.217389 | 2.576325 |
| 0        | 0.072103 |
| 0.246377 | 0.136623 |
| 0        | 0.407445 |
| 0        | 0        |
| 0.093716 | 0.051968 |
| 0.992983 | 1.256587 |
| 0        | 0        |
| 0.081212 | 0.060046 |
| 0        | 0        |
| 0        | 0        |
| 0        | 0        |
| 0        | 0.101173 |
| 0        | 0        |
| 0.640071 | 0        |
| 0.309403 | 0.114382 |
| 0.057435 | 0.063699 |
| 0.892053 | 0.989341 |
| 0.081372 | 0.090247 |
| 0.219001 | 0.364329 |
| 0.607504 | 0.404255 |
| 0        | 0        |
| 0        | 0.039258 |
| 0.111267 | 0.246803 |
| 0.321694 | 0.475704 |
| 0        | 0        |
| 0        | 0.184606 |
| 1.057441 | 1.088997 |

|          |          |
|----------|----------|
| 0.348803 | 0.193422 |
| 3.125656 | 1.373111 |
| 0.822343 | 0.912028 |
| 2.586954 | 1.372173 |
| 0.102963 | 0        |
| 0.005256 | 0        |
| 15.79245 | 25.42146 |
| 0        | 0        |
| 0.066403 | 0.073645 |
| 0        | 0        |
| 0        | 0        |
| 10.71411 | 14.68567 |
| 0.699352 | 0        |
| 1.591971 | 0.706237 |
| 0.123926 | 0        |
| 0.160018 | 0        |
| 0.270335 | 0.199878 |
| 0        | 0.118721 |
| 0        | 0        |
| 0.234881 | 0        |
| 0.227216 | 0.377995 |
| 0.010835 | 0        |
| 0        | 0.216535 |
| 0.142975 | 0.138747 |
| 0        | 0.256933 |
| 0.207648 | 0.690884 |
| 0.073957 | 0.041011 |
| 0.066904 | 0        |
| 0.087201 | 0.193422 |
| 0.874463 | 0.484916 |
| 0        | 0        |
| 0.657272 | 0.841101 |
| 1.462191 | 0.623715 |
| 0        | 0.239507 |
| 0        | 0        |
| 0        | 0        |
| 0.086472 | 0        |
| 0.26197  | 2.324325 |
| 0.050436 | 0        |
| 0.144725 | 0        |
| 0.190062 | 0        |
| 0.466819 | 0.931915 |
| 0.697605 | 0        |
| 0.61778  | 1.712889 |
| 0.222964 | 0.076086 |
| 0        | 0        |
| 0        | 0.016118 |
| 1.084487 | 0.638967 |
| 0.153225 | 0        |
| 0.042907 | 0.047587 |
| 0        | 0.354939 |
| 0.289225 | 0.42769  |
| 0.659096 | 0.146196 |
| 0        | 0        |
| 0.088506 | 0        |
| 0.116705 | 0.129433 |
| 0.139569 | 0.035721 |
| 0        | 0        |
| 0        | 0        |
| 0        | 0        |
| 0.08345  | 0.092551 |
| 0        | 0        |
| 0.156785 | 0.173884 |
| 0.580854 | 0.286312 |
| 0.721941 | 1.091831 |

|          |          |
|----------|----------|
| 0.072531 | 0        |
| 0.142205 | 0.378515 |
| 63.97577 | 44.44811 |
| 0.063419 | 0.14067  |
| 1.120124 | 1.242286 |
| 0        | 0.122306 |
| 0        | 0        |
| 0        | 0.444246 |
| 1.210271 | 0.536906 |
| 0        | 0.124069 |
| 1.554217 | 4.626831 |
| 0        | 0        |
| 0        | 0.148082 |
| 0.118261 | 0.131158 |
| 0        | 0        |
| 0.1321   | 0.146507 |
| 0        | 0.076765 |
| 0.363933 | 0.322899 |
| 1.067833 | 0.169185 |
| 2.286486 | 1.07286  |
| 2.204268 | 1.222334 |
| 0.229951 | 0.08501  |
| 0        | 0.085858 |
| 0        | 0        |
| 0.113921 | 0        |
| 0.378579 | 0.279911 |
| 3.621735 | 3.251634 |
| 0        | 0        |
| 0        | 0.13166  |
| 0.160847 | 0        |
| 0        | 0        |
| 0.469762 | 0.173665 |
| 0.143021 | 0.017624 |
| 0.318394 | 0        |
| 59.628   | 55.63192 |
| 0.112783 | 0        |
| 0        | 0        |
| 0        | 0.175212 |
| 0.210464 | 0        |
| 0.090903 | 0        |
| 0        | 0        |
| 0.125428 | 0        |
| 0.245403 | 0        |
| 0.190451 | 1.267328 |
| 0        | 0        |
| 0.070593 | 0        |
| 0        | 0        |
| 0.367378 | 0        |
| 0.364299 | 0.461748 |
| 0.614302 | 0.939722 |
| 0        | 0        |
| 1.540323 | 0.131409 |
| 7.441125 | 4.556156 |
| 85.77678 | 50.59364 |
| 0.249012 | 0.644394 |
| 0.086593 | 0.096036 |
| 0        | 0.113721 |
| 0.176886 | 0.588531 |
| 0.323932 | 0.239507 |
| 0.264575 | 0        |
| 0.644906 | 0.845284 |
| 0        | 0        |
| 0.489837 | 0.203722 |
| 0.500701 | 0.370205 |
| 0.103306 | 0.229145 |

|          |          |
|----------|----------|
| 1.393471 | 0.515148 |
| 3.388222 | 4.976473 |
| 0.095813 | 0.106263 |
| 0.111467 | 0.37087  |
| 0        | 0        |
| 0.413913 | 0        |
| 0.076525 | 0        |
| 0.163387 | 0.362411 |
| 0        | 0        |
| 0.323932 | 0.479013 |
| 0.657391 | 0.162019 |
| 0.371778 | 0        |
| 0        | 0        |
| 0.362023 | 0.53534  |
| 0        | 0        |
| 0.079294 | 0        |
| 0        | 0        |
| 0.026624 | 0.019685 |
| 0.674857 | 0        |
| 0.138587 | 0.153701 |
| 0        | 0.039013 |
| 0.137665 | 0        |
| 0.36139  | 0.240482 |
| 1.334098 | 0.910521 |
| 0.045418 | 0        |
| 0        | 0        |
| 0        | 0.19562  |
| 0        | 0        |
| 13.50965 | 11.90141 |
| 0.133377 | 0.147923 |
| 0.236072 | 0.392727 |
| 0        | 0        |
| 0        | 0        |
| 1.446469 | 1.357418 |
| 1.041726 | 2.541743 |
| 0.121739 | 0        |
| 0        | 0        |
| 10.56384 | 12.7941  |
| 0        | 0        |
| 2.550545 | 2.645368 |
| 0.449905 | 0.213845 |
| 0.123926 | 0        |
| 28.91517 | 32.71982 |
| 0.030721 | 0        |
| 0.274721 | 0        |
| 1.817177 | 0        |
| 0        | 0        |
| 0.129348 | 0.239091 |
| 0.134484 | 0.198868 |
| 0        | 0        |
| 1.142066 | 0.518163 |
| 0.930141 | 0.128948 |
| 2.461102 | 1.364756 |
| 1.118683 | 0        |
| 0.233409 | 1.294326 |
| 0.637738 | 0.205342 |
| 0.060989 | 0.067641 |
| 0        | 0.064054 |
| 0.560351 | 0        |
| 0.106678 | 0.354939 |
| 0.212082 | 0        |
| 0.691776 | 0        |
| 0.078591 | 0.087162 |
| 0.06129  | 0        |
| 0.795136 | 2.351612 |

|          |          |
|----------|----------|
| 0.055418 | 0.020487 |
| 0.372792 | 0.501151 |
| 11.40057 | 12.3022  |
| 0        | 0.086942 |
| 0.241583 | 0.26793  |
| 0        | 0        |
| 1.888152 | 1.724533 |
| 5.618723 | 2.959965 |
| 0.09327  | 0.068962 |
| 0        | 0.06533  |
| 0        | 0.061535 |
| 0.099818 | 0.442818 |
| 0        | 0        |
| 31.79339 | 45.7458  |
| 0        | 0.122523 |
| 0.240958 | 0.089079 |
| 0.283243 | 0.157067 |
| 0.402291 | 0.297443 |
| 0.403162 | 0.149044 |
| 0        | 0        |
| 0.115189 | 0.447131 |
| 0.351435 | 0.129921 |
| 0        | 0        |
| 0.670485 | 0        |
| 0        | 0        |
| 0        | 0        |
| 0.073129 | 0        |
| 0        | 0.119615 |
| 0.651587 | 0.722649 |
| 0.127204 | 0.102601 |
| 0.15483  | 0        |
| 0.036034 | 0        |
| 0        | 0        |
| 0.244629 | 0        |
| 0.057863 | 0.064173 |
| 0        | 0.024178 |
| 0.203786 | 0.075337 |
| 0.685502 | 0.705959 |
| 0        | 0.07012  |
| 0.46917  | 0.260169 |
| 0.413913 | 0.114764 |
| 0.035559 | 0.078875 |
| 0.180485 | 0        |
| 0        | 0        |
| 0.096558 | 0        |
| 0        | 0.19288  |
| 0.126386 | 0.140169 |
| 0.063096 | 0.069978 |
| 0        | 0.056627 |
| 0.330249 | 1.0988   |
| 0        | 0.088507 |
| 0.761802 | 0.422443 |
| 0.037515 | 0.083212 |
| 0        | 0.05936  |
| 0.165125 | 0.183133 |
| 0        | 0.302673 |
| 0.099339 | 0        |
| 0        | 0        |
| 0        | 0        |
| 0.49406  | 0.182648 |
| 2.777937 | 2.618766 |
| 0        | 0        |
| 0        | 0        |
| 0        | 0        |
| 0        | 0        |

|          |          |
|----------|----------|
| 0.043723 | 0        |
| 0        | 0        |
| 0        | 0        |
| 0.31583  | 0.145948 |
| 0.344927 | 0.127515 |
| 0.694678 | 0.288915 |
| 2.227332 | 1.466709 |
| 0        | 0        |
| 0        | 0        |
| 0        | 0        |
| 0.152923 | 0        |
| 0.371037 | 0.320058 |
| 0.038853 | 0        |
| 0.230521 | 0        |
| 0        | 0        |
| 0        | 0        |
| 0.446026 | 0.098934 |
| 0.088317 | 0.024487 |
| 0        | 0        |
| 0.593607 | 0.170682 |
| 0.027643 | 0.122632 |
| 0        | 0        |
| 0.413913 | 0        |
| 0.20545  | 0.136714 |
| 0.232438 | 0.171859 |
| 0.288776 | 0.160135 |
| 0        | 0        |
| 0.157182 | 0        |
| 0        | 0        |
| 0.717767 | 1.592096 |
| 0.172944 | 0        |
| 0.299937 | 0.221765 |
| 0        | 0        |
| 0.214834 | 0        |
| 1.788511 | 1.841884 |
| 0.328502 | 0        |
| 0.380901 | 0.422443 |
| 0        | 0        |
| 1.055899 | 2.576325 |
| 0.599391 | 0.33238  |
| 1.657861 | 1.011268 |
| 0.556833 | 0.823416 |
| 0.36097  | 0.133446 |
| 0        | 0        |
| 0.049551 | 0        |
| 0        | 0        |
| 0        | 0        |
| 0        | 0        |
| 0.031839 | 0.070624 |
| 0.316905 | 0.644355 |
| 0.441115 | 0        |
| 0.137604 | 0.244178 |
| 0        | 0        |
| 0.245403 | 0.181444 |
| 4.314194 | 2.080306 |
| 0        | 0        |
| 0        | 0        |
| 0        | 0.038706 |
| 0        | 0        |
| 7.173068 | 11.66787 |
| 0        | 0        |
| 0        | 0        |
| 0.396299 | 0        |
| 0.070674 | 0.039191 |
| 0.089248 | 0.032994 |

|          |          |  |
|----------|----------|--|
| 0.151802 | 0        |  |
| 0        | 0        |  |
| 1.375887 | 0        |  |
| 0        | 0        |  |
| 0.775547 | 1.337979 |  |
| 0        | 0        |  |
| 0        | 0        |  |
| 0        | 0        |  |
| 0.277174 | 0.153701 |  |
| 0        | 0        |  |
| 0        | 0        |  |
| 0.103134 | 0.343147 |  |
| 0.444112 | 0.541802 |  |
| 0.138355 | 0.34525  |  |
| 17.54343 | 22.31974 |  |
| 0.130161 | 0        |  |
| 0.111267 | 0        |  |
| 0        | 0        |  |
| 0        | 0        |  |
| 0.655617 | 0.727119 |  |
| 0.035048 | 0.058305 |  |
| 0.035048 | 0        |  |
| 0.120557 | 0        |  |
| 0.043296 | 0.032012 |  |
| 0        | 0        |  |
| 0        | 0.32557  |  |
| 0        | 0        |  |
| 0        | 0        |  |
| 0        | 0        |  |
| 14.46469 | 7.527502 |  |
| 0        | 0        |  |
| 1.505839 | 0.411093 |  |
| 0        | 0.153701 |  |
| 0.021255 | 0        |  |
| 0.302126 | 0        |  |
| 0        | 0        |  |
| 0        | 0        |  |
| 0        | 0        |  |
| 0        | 0.137716 |  |
| 0.161265 | 0        |  |
| 0.090374 | 0        |  |
| 0.027594 | 0.030604 |  |
| 0        | 0        |  |
| 0.26197  | 0        |  |
| 0        | 0        |  |
| 0.268194 | 0.148722 |  |
| 0        | 0        |  |
| 0        | 0        |  |
| 0.033872 | 0.018783 |  |
| 0        | 0        |  |
| 0        | 0        |  |
| 3.731543 | 3.417965 |  |
| 0        | 0        |  |
| 0        | 1.668165 |  |
| 0        | 0        |  |
| 0        | 0        |  |
| 0        | 0        |  |
| 0        | 0        |  |
| 0        | 0        |  |
| 0.263919 | 0.317094 |  |
| 0.352766 | 0        |  |
| 13.12694 | 9.097144 |  |
| 0        | 0        |  |
| 0        | 0        |  |
| 0        | 0        |  |

|          |          |
|----------|----------|
| 0        | 0        |
| 0.124423 | 0.275985 |
| 0.499894 | 0        |
| 0        | 0.214511 |
| 0.174401 | 0        |
| 0        | 0        |
| 1.037664 | 0.191805 |
| 0.83525  | 0.617562 |
| 0.061994 | 0        |
| 0.023315 | 0        |
| 0.973276 | 0.719615 |
| 0.157182 | 0.058108 |
| 0        | 0        |
| 0.637879 | 0        |
| 0        | 0        |
| 0.413086 | 0        |
| 0.570652 | 0.379732 |
| 0        | 0.26741  |
| 0.436208 | 0.483781 |
| 0        | 0        |
| 0.173913 | 0        |
| 0        | 0        |
| 0.192816 | 0.213845 |
| 0.070956 | 0.026232 |
| 0.653546 | 0        |
| 0.043754 | 0.097052 |
| 0.329782 | 0.146299 |
| 23.59119 | 11.96651 |
| 0        | 0.282785 |
| 0.860823 | 0.755809 |
| 0        | 0        |
| 4.353654 | 4.303634 |
| 1.510964 | 0.990217 |
| 0        | 0.048974 |
| 0.377811 | 0.186229 |
| 0        | 0        |
| 0.158587 | 0        |
| 0        | 0        |
| 0.050891 | 0.338647 |
| 0.569604 | 1.579315 |
| 0.121145 | 0.134357 |
| 0        | 0        |
| 0        | 0        |
| 0.273511 | 0        |
| 0        | 0        |
| 0.633971 | 0.374993 |
| 0        | 0        |
| 0.145403 | 0.322521 |
| 5.118274 | 2.96164  |
| 0        | 0        |
| 286.7591 | 258.7287 |
| 0        | 0        |
| 0.743119 | 1.001925 |
| 0.397144 | 0.440457 |
| 0        | 0        |
| 0.127817 | 0.177195 |
| 0.051782 | 0.05743  |
| 0        | 0.798818 |
| 0.11413  | 0.126577 |
| 0        | 0.133705 |
| 0.684153 | 0.569076 |
| 0        | 0        |
| 0        | 0        |
| 0        | 0        |
| 0.139835 | 0        |

|          |          |
|----------|----------|
| 0.013112 | 0.101797 |
| 5.430768 | 2.441778 |
| 0.365217 | 0.202524 |
| 0.180171 | 0.239785 |
| 0        | 0        |
| 0.041641 | 0.138548 |
| 0.355459 | 0.919861 |
| 0.276146 | 0.306263 |
| 0.430163 | 0.159026 |
| 0        | 0.384682 |
| 0.185334 | 0        |
| 0.263825 | 0.097533 |
| 0        | 0        |
| 0.02554  | 0        |
| 0.063843 | 0        |
| 0        | 0        |
| 0        | 0        |
| 7.675252 | 6.390789 |
| 0        | 0        |
| 0.369565 | 0.204935 |
| 0.515296 | 0.334533 |
| 1.078432 | 2.050366 |
| 0.224952 | 0        |
| 0.046437 | 0        |
| 10.63132 | 5.482711 |
| 1.566412 | 1.026555 |
| 0        | 0        |
| 0.106862 | 0        |
| 0.285457 | 0.554031 |
| 0        | 0.275433 |
| 0.068909 | 0        |
| 0        | 0.107591 |
| 0        | 0        |
| 1.082911 | 0.266892 |
| 0        | 0        |
| 2.458321 | 1.902158 |
| 0.057223 | 0        |
| 0        | 0.077456 |
| 0.346854 | 0.256455 |
| 0.075623 | 0.083871 |
| 0        | 0        |
| 0        | 0        |
| 0.203965 | 0.271451 |
| 0.22577  | 0.166929 |
| 0.23333  | 0.164676 |
| 0        | 0        |
| 0        | 0        |
| 0        | 0        |
| 0        | 0        |
| 1.335202 | 5.18287  |
| 0.49769  | 0.137992 |
| 0.096483 | 0        |
| 0        | 0        |
| 0.561872 | 0.103858 |
| 19.9341  | 14.95404 |
| 0.167501 | 0.123846 |
| 1.822931 | 0.832482 |
| 0        | 0        |
| 0.281254 | 0        |
| 0.030375 | 0        |
| 0        | 0        |
| 0.138278 | 0        |
| 8.319643 | 5.784083 |
| 0        | 0        |
| 0        | 0        |

|          |          |
|----------|----------|
| 0        | 0        |
| 0.49829  | 0.552634 |
| 0.664031 | 0        |
| 0        | 0        |
| 0.344927 | 0.191273 |
| 0.119628 | 0        |
| 0        | 0        |
| 0        | 0        |
| 0.080842 | 0        |
| 0.087078 | 0        |
| 1.803104 | 1.533143 |
| 0        | 0        |
| 0.087201 | 0.096711 |
| 1.311695 | 3.030728 |
| 0.254194 | 0.176198 |
| 0        | 0.449075 |
| 0        | 0.252228 |
| 0        | 0.081682 |
| 0        | 0        |
| 0.230521 | 0.04261  |
| 0.519918 | 1.153242 |
| 0        | 0.10067  |
| 0        | 0.261818 |
| 0        | 0        |
| 0        | 0        |
| 0.655847 | 0.363687 |
| 0        | 0        |
| 0.042789 | 0.047456 |
| 0        | 0.119753 |
| 0.253934 | 0        |
| 0.041419 | 0.137808 |
| 0.194022 | 0.430363 |
| 0.748536 | 0.553448 |
| 0        | 0        |
| 0        | 0.119545 |
| 0.100302 | 0.333723 |
| 0        | 0.278778 |
| 9.66148  | 5.738178 |
| 0.085993 | 0.095371 |
| 0        | 0        |
| 0.080842 | 0.089659 |
| 6.396831 | 2.08661  |
| 0.667601 | 0.641689 |
| 1.159599 | 0.696619 |
| 0.365217 | 0        |
| 0        | 0        |
| 0.70287  | 0.649605 |
| 0.12645  | 0        |
| 0        | 0        |
| 0        | 0        |
| 0        | 0        |
| 0        | 0        |
| 0        | 0        |
| 0.266467 | 0        |
| 0        | 0        |
| 0.922082 | 0.511323 |
| 0        | 0.32027  |
| 0        | 0        |
| 0        | 0        |
| 0.390975 | 0.607062 |
| 0.057782 | 0.032042 |
| 0.458206 | 0.254089 |
| 0        | 0        |
| 1.105212 | 0.144206 |
| 0.059987 | 0        |

|          |          |
|----------|----------|
| 0.161265 | 0.178852 |
| 0.582975 | 0.323278 |
| 0        | 0        |
| 0.457362 | 0.253621 |
| 0.210464 | 0        |
| 0        | 0.035078 |
| 0.036055 | 0        |
| 0.321278 | 0.178158 |
| 0        | 0        |
| 0.031645 | 0        |
| 0        | 0.124743 |
| 0.139208 | 0        |
| 0        | 0        |
| 0        | 0.061207 |
| 0        | 0.402679 |
| 2.600745 | 3.041715 |
| 0        | 0        |
| 0.167514 | 0.202673 |
| 0        | 0        |
| 0        | 0        |
| 0        | 0        |
| 0        | 0        |
| 0.587573 | 0.217218 |
| 0.065149 | 0.36127  |
| 0.07879  | 0.26215  |
| 3.908755 | 2.198937 |
| 10.13402 | 6.828906 |
| 0.097775 | 0        |
| 0        | 0.285245 |
| 0.05606  | 0.031087 |
| 0.090374 | 0        |
| 0.127751 | 0        |
| 0.178411 | 0        |
| 0.552585 | 0.26265  |
| 0.277174 | 0.102467 |
| 0.651261 | 0        |
| 0.118036 | 0.654545 |
| 0.22095  | 0.163364 |
| 0        | 0        |
| 0        | 0        |
| 0        | 0        |
| 0.245986 | 0.218251 |
| 0        | 0        |
| 1.141626 | 1.363527 |
| 0.162107 | 0.539359 |
| 0        | 0.035567 |
| 2.259348 | 1.804143 |
| 6.124787 | 5.769195 |
| 3.022355 | 1.426373 |
| 0.076935 | 0        |
| 0        | 0.06533  |
| 0.192219 | 0        |
| 0        | 0.122306 |
| 0.246377 | 0.273247 |
| 0.127488 | 0        |
| 0        | 0.16877  |
| 0.202237 | 0        |
| 0.098239 | 0        |
| 0.153301 | 0.17002  |
| 0        | 0.26793  |
| 0        | 0        |
| 0.503407 | 0        |
| 0.111868 | 0.124069 |
| 0.034851 | 0        |
| 5.26399  | 6.463595 |

|          |          |
|----------|----------|
| 0.159197 | 0        |
| 2.549769 | 3.110635 |
| 0        | 0        |
| 0.023012 | 0        |
| 0.066474 | 0.036862 |
| 0        | 0        |
| 0        | 0.090011 |
| 0.46449  | 0.171716 |
| 0.572229 | 0        |
| 0.366835 | 0.305132 |
| 0        | 0.076424 |
| 0.210108 | 0.029128 |
| 6.201798 | 5.731809 |
| 0        | 0        |
| 0.913042 | 2.151817 |
| 0.26197  | 0.290541 |
| 0        | 0.307402 |
| 2.339748 | 3.521681 |
| 0        | 0        |
| 0        | 0.162785 |
| 0.453741 | 0.167742 |
| 0.212869 | 0.31478  |
| 0.042848 | 0.237606 |
| 343.0881 | 286.3739 |
| 1.128852 | 0.973751 |
| 2.336603 | 0        |
| 0.137057 | 0.060802 |
| 0        | 0        |
| 5.339472 | 2.410035 |
| 0        | 0        |
| 0        | 0        |
| 1.006037 | 0.956363 |
| 4.692613 | 2.402028 |
| 0        | 0        |
| 0.373268 | 0.689961 |
| 0        | 0        |
| 6.113588 | 3.616182 |
| 3.71222  | 3.293663 |
| 0.819328 | 0.504825 |
| 0        | 0        |
| 3.769148 | 0.743719 |
| 0        | 0        |
| 0        | 0        |
| 0        | 0        |
| 0.138432 | 0.15353  |
| 0.160847 | 0.178389 |
| 0        | 0        |
| 0        | 0        |
| 0.111667 | 0        |
| 0.182608 | 0.405048 |
| 0.068832 | 0        |
| 0.073259 | 0.040624 |
| 0.102117 | 0.113254 |
| 0.110475 | 0        |
| 0.499894 | 0.332648 |
| 0        | 0.183622 |
| 0.601326 | 0        |
| 0        | 0.533784 |
| 0        | 0.050631 |
| 2.78729  | 3.245838 |
| 0        | 0.571437 |
| 0        | 0        |
| 0        | 0        |
| 0.842808 | 1.038584 |
| 1.230967 | 0.853261 |

|          |          |  |
|----------|----------|--|
| 0.137665 | 0        |  |
| 0        | 0        |  |
| 0        | 0.222123 |  |
| 0.118261 | 0        |  |
| 0.585725 | 0        |  |
| 0.726162 | 0        |  |
| 0.359403 | 0.1993   |  |
| 0.083338 | 0        |  |
| 0        | 0.109647 |  |
| 0.257622 | 0        |  |
| 0.642664 | 0.712753 |  |
| 0.137057 | 0        |  |
| 0        | 0        |  |
| 0        | 0        |  |
| 6.492746 | 6.278242 |  |
| 0.113712 | 0        |  |
| 0        | 0        |  |
| 0.070795 | 0        |  |
| 0.645618 | 0.477353 |  |
| 0.99339  | 0.183622 |  |
| 0.26197  | 0        |  |
| 0        | 0        |  |
| 0        | 0.394603 |  |
| 0.206269 | 0        |  |
| 0        | 0        |  |
| 0.678545 | 0        |  |
| 0.159935 | 0.106427 |  |
| 20.29695 | 40.30913 |  |
| 0.405797 | 0.450053 |  |
| 0.044411 | 0        |  |
| 0.122218 | 0.135548 |  |
| 0.351767 | 0        |  |
| 1.034781 | 1.377163 |  |
| 0.262524 | 0        |  |
| 0.089721 | 0.099506 |  |
| 0        | 0.304682 |  |
| 0        | 0        |  |
| 0        | 0.364329 |  |
| 0        | 0        |  |
| 0.123679 | 0.411503 |  |
| 21.69818 | 18.34629 |  |
| 0        | 0.323278 |  |
| 0        | 0.162401 |  |
| 1.38682  | 1.064817 |  |
| 0.419506 | 0.465258 |  |
| 0        | 0        |  |
| 12.08817 | 14.03405 |  |
| 0        | 0        |  |
| 0.183689 | 0        |  |
| 0        | 0.075132 |  |
| 0        | 0.02829  |  |
| 0        | 0        |  |
| 0.4419   | 0        |  |
| 0        | 0        |  |
| 0.614722 | 0.511323 |  |
| 0        | 0.51291  |  |
| 0.554347 | 0.368883 |  |
| 0.205813 | 0.152173 |  |
| 0        | 0        |  |
| 1.102134 | 1.222334 |  |
| 0.429667 | 0        |  |
| 0        | 0.034012 |  |
| 0        | 0        |  |
| 0.182608 | 0.50631  |  |
| 0.878269 | 0.749272 |  |

|          |          |
|----------|----------|
| 0        | 0        |
| 0.097353 | 0.188948 |
| 0.256204 | 0.189431 |
| 0        | 0        |
| 0        | 0        |
| 0        | 0        |
| 0.385265 | 0.624489 |
| 1.15618  | 1.02582  |
| 0        | 0.219994 |
| 0        | 0        |
| 0.369565 | 0.40987  |
| 0        | 0.122742 |
| 0        | 0        |
| 0        | 0.114764 |
| 0.047036 | 0        |
| 0        | 0        |
| 3.174551 | 3.588477 |
| 0        | 0        |
| 0        | 0.165657 |
| 0.486956 | 0.540064 |
| 0.19463  | 0        |
| 0        | 0        |
| 0.213357 | 0.236626 |
| 1.280142 | 1.952164 |
| 0.256557 | 0.284538 |
| 0.574879 | 0.557878 |
| 0.443478 | 0        |
| 1.165069 | 1.625586 |
| 0.434174 | 0.481525 |
| 5.843472 | 7.02083  |
| 0        | 0.075173 |
| 0.269943 | 0.149692 |
| 0.016645 | 0        |
| 0        | 0        |
| 0        | 0        |
| 0.311681 | 0.414808 |
| 0        | 0.036685 |
| 0        | 0        |
| 0        | 0        |
| 0        | 0.067974 |
| 0        | 0.255978 |
| 0        | 0        |
| 0.181364 | 0.067048 |
| 0.036825 | 0.040841 |
| 0.336819 | 0.124517 |
| 0.867557 | 1.255009 |
| 0.393952 | 0.873834 |
| 0.092117 | 0        |
| 0        | 0.089194 |
| 0.084266 | 0.018691 |
| 0.083115 | 0        |
| 1.316877 | 0.601381 |
| 0.17773  | 0.262817 |
| 0.12258  | 0        |
| 0.546135 | 0.286909 |
| 1.096457 | 0.228007 |
| 0.141107 | 0.156496 |
| 0.080948 | 0.179552 |
| 0.18234  | 0.404453 |
| 0        | 0.089542 |
| 0.154445 | 0.171289 |
| 0.069682 | 0.077282 |
| 1.27107  | 2.385636 |
| 0.062071 | 0.068841 |
| 0.083226 | 0        |

|          |          |
|----------|----------|
| 0.023589 | 0.078486 |
| 0        | 0.108438 |
| 0.046682 | 0.155319 |
| 0        | 0        |
| 0.34707  | 0.384921 |
| 0.089721 | 0.099506 |
| 0        | 0.211221 |
| 0.098239 | 0.544764 |
| 0.294251 | 0.108781 |
| 0        | 0.035845 |
| 0        | 0        |
| 0        | 0        |
| 1.420219 | 1.951255 |
| 0.071446 | 0.158477 |
| 0.141751 | 0.15721  |
| 3.348506 | 2.166323 |
| 0.986625 | 0.729485 |
| 0.119398 | 0        |
| 0        | 0.132292 |
| 0.680647 | 0.656417 |
| 0        | 0        |
| 0.112988 | 0.062655 |
| 0.286775 | 0.636103 |
| 0.129889 | 0        |
| 0.151987 | 0        |
| 0.082691 | 0.229272 |
| 0.811593 | 0        |
| 1.074168 | 0        |
| 0        | 0        |
| 2.663952 | 2.289061 |
| 0.193417 | 0        |
| 0.443478 | 0.81974  |
| 0.202073 | 0        |
| 0.094645 | 0.209933 |
| 0.232101 | 0.257414 |
| 0        | 0.083263 |
| 0        | 0        |
| 0        | 0        |
| 0.016721 | 0.074181 |
| 0.500125 | 0.237715 |
| 0        | 0        |
| 1.623187 | 0.67508  |
| 1.395211 | 0.580265 |
| 0.067412 | 0        |
| 0.160431 | 0.088964 |
| 0        | 0        |
| 0.19463  | 0.061673 |
| 0.528899 | 0.162939 |
| 0.257089 | 0.142563 |
| 0.705533 | 0        |
| 0        | 0        |
| 0        | 0        |
| 0        | 0        |
| 1.286775 | 1.605501 |
| 0.6332   | 0.110883 |
| 0.306602 | 0.34004  |
| 9.591072 | 17.22868 |
| 2.077256 | 1.535869 |
| 0        | 0.346892 |
| 0.082234 | 0.045601 |
| 0.171038 | 0        |
| 0        | 0        |
| 0        | 0.093177 |
| 0        | 0        |
| 0        | 0        |

|          |          |
|----------|----------|
| 0        | 0        |
| 0        | 0.03483  |
| 0        | 0        |
| 0        | 0        |
| 0        | 0        |
| 0.452822 | 0.76261  |
| 0        | 0        |
| 0        | 0.041783 |
| 0        | 0        |
| 0        | 0        |
| 2.483475 | 2.065744 |
| 0        | 0.122306 |
| 4.809356 | 1.9889   |
| 0.088569 | 0.491142 |
| 0        | 0        |
| 0.162531 | 0.180257 |
| 4.049145 | 3.265999 |
| 7.662732 | 6.803372 |
| 0.082783 | 0.183622 |
| 0.559341 | 0.775429 |
| 0.566142 | 0.104648 |
| 0.226594 | 0        |
| 0        | 0        |
| 0.515957 | 0.381486 |
| 0.829405 | 1.314087 |
| 0        | 0        |
| 0.453698 | 0.464473 |
| 0.069216 | 0.46059  |
| 0        | 0.111151 |
| 0.162319 | 0        |
| 12.57456 | 6.537165 |
| 0.916895 | 1.162163 |
| 0        | 0.068858 |
| 0        | 0        |
| 13.64547 | 15.13366 |
| 0.077512 | 0.128948 |
| 0.026796 | 0.014859 |
| 0        | 0        |
| 0.153301 | 0.17002  |
| 0.709114 | 0.174767 |
| 0        | 0        |
| 0        | 0        |
| 0.685664 | 0.570332 |
| 0        | 0.078875 |
| 0        | 0.32027  |
| 0.164077 | 0.072789 |
| 0.727013 | 1.451342 |
| 0.19463  | 0.215856 |
| 1.033216 | 1.145899 |
| 0.459903 | 0.93511  |
| 0.43826  | 0        |
| 0.094501 | 0        |
| 0.145915 | 0        |
| 0        | 0.098651 |
| 0        | 0.206162 |
| 0.129079 | 0.286312 |
| 0.322949 | 0.35817  |
| 0.200928 | 0        |
| 0        | 0.065579 |
| 0.155997 | 0.230681 |
| 0        | 0.026242 |
| 0        | 0        |
| 0.096184 | 0.213348 |
| 0.407573 | 0.301349 |
| 96.45772 | 94.44676 |

|          |          |
|----------|----------|
| 0.559341 | 0.248137 |
| 0.934641 | 0.888492 |
| 6.943136 | 6.765635 |
| 0.219388 | 0.32442  |
| 0.201909 | 0        |
| 3.887179 | 3.113585 |
| 0        | 0.015866 |
| 0.05011  | 0        |
| 0.250014 | 0        |
| 0.673108 | 0.730289 |
| 0.332015 | 0.092056 |
| 1.110736 | 1.521727 |
| 0.147826 | 0.163948 |
| 0.135413 | 0.075091 |
| 0.168257 | 0.933037 |
| 7.108078 | 7.078874 |
| 0        | 0        |
| 0        | 0.15769  |
| 6.302938 | 17.83517 |
| 0.079599 | 0.08828  |
| 0.924698 | 0.293013 |
| 0.635702 | 1.880086 |
| 7.172771 | 11.97533 |
| 0.567004 | 0.471631 |
| 0        | 0        |
| 0        | 0        |
| 0.167673 | 0.106263 |
| 0.336514 | 0        |
| 0.054534 | 0.090722 |
| 0        | 0.243746 |
| 0.204457 | 0.15117  |
| 0        | 0        |
| 0.02904  | 0.032207 |
| 0.076274 | 0.338369 |
| 0.163387 | 0.090603 |
| 0.185334 | 0        |
| 0.026454 | 0.029339 |
| 0.954449 | 0.635125 |
| 0        | 0        |
| 0        | 0        |
| 0        | 0        |
| 0        | 0.399178 |
| 0.062071 | 0.068841 |
| 0.126321 | 0.046699 |
| 0.224952 | 0        |
| 0        | 0        |
| 0.188714 | 0.156971 |
| 0.038804 | 0.086073 |
| 0        | 0.282205 |
| 0.035438 | 0        |
| 0        | 0.179318 |
| 0.14334  | 0.068131 |
| 0        | 0        |
| 0.150879 | 0        |
| 0        | 0        |
| 0.462707 | 0.046652 |
| 2.409169 | 3.927393 |
| 0.024904 | 0.027621 |
| 0        | 0.177928 |
| 0.312518 | 0.231068 |
| 0        | 0        |
| 0.130709 | 0.434893 |
| 0.20312  | 0.150181 |
| 0        | 0.251307 |
| 1.559972 | 1.038062 |

|          |          |
|----------|----------|
| 0.131959 | 0.146351 |
| 0        | 0        |
| 0        | 0.182648 |
| 0        | 0.040174 |
| 0.791374 | 0.558525 |
| 0.245403 | 0        |
| 0        | 0        |
| 0.238612 | 0.158781 |
| 0        | 0        |
| 4.260865 | 9.451117 |
| 8.303802 | 2.550301 |
| 0.105054 | 0.233022 |
| 0.210623 | 0.05191  |
| 1.054874 | 0.501394 |
| 0        | 0        |
| 0.249488 | 0.316226 |
| 0.078393 | 0        |
| 0        | 0.173884 |
| 0        | 0.12091  |
| 0.158993 | 0.2645   |
| 0.347751 | 0.267007 |
| 0        | 0        |
| 0.404914 | 0        |
| 0.865145 | 0.451529 |
| 0.827825 | 0.76509  |
| 0.706994 | 0        |
| 0.142238 | 0.039438 |
| 0        | 0.143156 |
| 0.0156   | 0.017301 |
| 0.247897 | 0.499878 |
| 0        | 0.130413 |
| 0.156587 | 0.086832 |
| 0.435087 | 0.410157 |
| 0        | 0        |
| 2.296364 | 2.829786 |
| 0.277311 | 0.068346 |
| 0.166008 | 0        |
| 0.284802 | 0        |
| 0        | 0        |
| 11.27367 | 5.889183 |
| 0.143057 | 0.158659 |
| 0.136056 | 0.150894 |
| 3.787435 | 5.700674 |
| 0        | 0.136353 |
| 0        | 0        |
| 0.233849 | 0.129676 |
| 0.544622 | 1.359042 |
| 0.029893 | 0        |
| 0.06868  | 0        |
| 0        | 0.082465 |
| 0.245403 | 0        |
| 0.130709 | 0.144964 |
| 0.145573 | 0        |
| 0.889072 | 0.493018 |
| 0.131819 | 0.219293 |
| 0.063744 | 0        |
| 0.102285 | 0.34032  |
| 0        | 0        |
| 0.6127   | 0.453014 |
| 0.134387 | 0.298087 |
| 0        | 0.179318 |
| 0        | 0.133446 |
| 0.192219 | 0        |
| 0.630781 | 0.199878 |
| 0.077127 | 0        |

|          |          |
|----------|----------|
| 1.433275 | 0.650287 |
| 0.176634 | 0.195898 |
| 0        | 0.03382  |
| 1.510555 | 0.170949 |
| 0.239164 | 0.212198 |
| 0.074624 | 0        |
| 0        | 0.05478  |
| 3.908153 | 4.055171 |
| 1.678496 | 2.152423 |
| 1.678024 | 0.697887 |
| 0        | 0        |
| 0.356309 | 0.098792 |
| 0        | 0.100085 |
| 0.274569 | 0.266449 |
| 0.037858 | 0.12596  |
| 0        | 0        |
| 0        | 0        |
| 0.176886 | 0.196177 |
| 1.352271 | 1.597561 |
| 0.335605 | 0        |
| 0.071078 | 0        |
| 0.151247 | 0.083871 |
| 0        | 0        |
| 8.12139  | 6.818471 |
| 0        | 0        |
| 0        | 0        |
| 9.544836 | 9.779267 |
| 1.130433 | 1.4466   |
| 4.54849  | 2.270048 |
| 0        | 0.210147 |
| 1.520896 | 2.149266 |
| 39.40129 | 50.31941 |
| 0        | 0        |
| 0        | 0        |
| 0        | 0        |
| 0        | 0        |
| 0.239102 | 0.265179 |
| 0.894227 | 0.625567 |
| 0        | 0        |
| 0.403162 | 0.447131 |
| 0        | 0.018788 |
| 0        | 0        |
| 0.176383 | 0.391239 |
| 0        | 0.651654 |
| 4.971427 | 4.095322 |
| 0.075623 | 0        |
| 0.241583 | 0.535861 |
| 0        | 0        |
| 0.783078 | 0.372206 |
| 4.809547 | 4.364248 |
| 0.713642 | 0.791473 |
| 0.977746 | 0.271095 |
| 0.228541 | 0.225303 |
| 4.463115 | 2.639929 |
| 0.209047 | 0        |
| 0.154573 | 0.228575 |
| 0.795986 | 0.504455 |
| 0.296688 | 0.175491 |
| 0.169636 | 0        |
| 0.164469 | 0.182406 |
| 0        | 0        |
| 0.31278  | 0        |
| 0.026544 | 0.029439 |
| 0        | 0        |
| 0.120091 | 0.133188 |

|          |          |
|----------|----------|
| 0.175387 | 0.583544 |
| 0        | 0        |
| 0.155217 | 0.172145 |
| 0.348803 | 1.16053  |
| 0.721941 | 2.402028 |
| 0.129889 | 0        |
| 0.171392 | 0.095042 |
| 0.161055 | 0.08931  |
| 0        | 0        |
| 0.089851 | 0        |
| 0.749842 | 0        |
| 0.955183 | 0.529678 |
| 0.583889 | 1.295137 |
| 0        | 0        |
| 0        | 0.434893 |
| 0        | 0.11602  |
| 1.395211 | 4.255278 |
| 0.119859 | 0.053172 |
| 2.428743 | 0.758767 |
| 0.460585 | 0        |
| 0        | 0        |
| 0.757157 | 0        |
| 0.829053 | 0.102163 |
| 0        | 0        |
| 0.096558 | 0.214178 |
| 0        | 0.066658 |
| 0        | 0        |
| 0        | 0.056487 |
| 0        | 0        |
| 1.275758 | 1.06117  |
| 0.363081 | 0        |
| 0        | 0        |
| 0        | 0.09712  |
| 0.528399 | 0.293013 |
| 30.35359 | 20.50442 |
| 0        | 0        |
| 1.400456 | 0        |
| 0        | 0        |
| 0        | 0        |
| 0.166076 | 0.325872 |
| 0.898879 | 0.640872 |
| 0.058298 | 0        |
| 0.502646 | 0.780452 |
| 0.082948 | 0        |
| 3.547822 | 3.278959 |
| 0.154062 | 0.085432 |
| 0.127751 | 0.141683 |
| 0.313043 | 0.28932  |
| 0.26813  | 0.594744 |
| 0.14372  | 0.159394 |
| 4.565212 | 4.050479 |
| 0        | 0        |
| 0.053755 | 0.059617 |
| 0        | 0.422011 |
| 0.071119 | 0        |
| 0        | 0.18073  |
| 0        | 0        |
| 0        | 0        |
| 1.174617 | 2.605443 |
| 0.215579 | 0        |
| 0.121501 | 0.673759 |
| 0        | 0.356778 |
| 0        | 0        |
| 0        | 0.143754 |
| 0.02659  | 0.02949  |

|          |          |
|----------|----------|
| 9.624054 | 9.111663 |
| 0.151431 | 0.083973 |
| 0.687943 | 0        |
| 0.175387 | 0.129676 |
| 0.077706 | 0        |
| 2.614185 | 0.724822 |
| 0        | 0        |
| 0.558782 | 1.10173  |
| 0.280429 | 0.435417 |
| 0        | 0.060668 |
| 0.037997 | 0        |
| 0        | 0.217218 |
| 0.130709 | 0        |
| 0.097011 | 0        |
| 0.253934 | 0.140814 |
| 3.987862 | 3.240831 |
| 0.369879 | 0.058603 |
| 1.269959 | 0.312992 |
| 0.479806 | 0.212854 |
| 0        | 0        |
| 0.120557 | 0        |
| 0.149427 | 0        |
| 2.456184 | 2.875395 |
| 0.032815 | 0.072789 |
| 0.822343 | 1.27684  |
| 1.546648 | 2.940561 |
| 0        | 0.120381 |
| 3.661534 | 6.003017 |
| 6.456514 | 5.135428 |
| 0        | 0        |
| 0.561237 | 0.233417 |
| 1.367553 | 1.213359 |
| 0.099339 | 0.16526  |
| 0.730434 | 0.694368 |
| 0.069761 | 0.232106 |
| 0        | 0.130909 |
| 0        | 0        |
| 0.058656 | 0        |
| 1.870087 | 0.829616 |
| 0.053895 | 0.179318 |
| 0.088275 | 0.048951 |
| 0.037178 | 0.144313 |
| 0.606712 | 0.560734 |
| 0        | 0        |
| 0.26704  | 0.592328 |
| 0        | 0.165127 |
| 0        | 0        |
| 12.67518 | 15.4077  |
| 0.120091 | 0.199782 |
| 0.205586 | 0        |
| 0.500701 | 0.74041  |
| 2.191302 | 0.428874 |
| 0.033184 | 0        |
| 0.437232 | 0.181844 |
| 0.676062 | 0.405626 |
| 0.462472 | 0.128227 |
| 0.286379 | 0        |
| 0        | 0        |
| 0        | 0.15439  |
| 0.315162 | 0        |
| 1.065869 | 1.182114 |
| 0.555449 | 0.27379  |
| 2.739127 | 3.216557 |
| 0        | 0        |
| 0        | 0.069344 |

|          |          |
|----------|----------|
| 0.016434 | 0        |
| 0.042967 | 0.047653 |
| 7.876694 | 6.78304  |
| 0.141751 | 0        |
| 0.050232 | 0.111421 |
| 0.03109  | 0.103442 |
| 0.183364 | 0.162689 |
| 0        | 0.222123 |
| 0.111969 | 0.620903 |
| 0        | 0.994341 |
| 0.114078 | 0.03163  |
| 0.20028  | 0        |
| 0        | 0        |
| 0        | 0.107591 |
| 0        | 0.054262 |
| 1.02623  | 0.853613 |
| 0.095225 | 0.105611 |
| 0        | 0.158659 |
| 0.774326 | 0.624564 |
| 0        | 0.065736 |
| 0.067855 | 0.025085 |
| 0.048317 | 0        |
| 0        | 0        |
| 0.35529  | 0.246274 |
| 0.694678 | 0.288915 |
| 44.28702 | 55.38296 |
| 0.217849 | 0.241607 |
| 0.275942 | 0.51006  |
| 0.385633 | 0        |
| 0.10577  | 0.351916 |
| 0        | 0.09965  |
| 0.084129 | 0.559822 |
| 1.708813 | 0.631726 |
| 0.060249 | 0        |
| 0.919806 | 0        |
| 29.29287 | 10.61347 |
| 0.602785 | 0.222842 |
| 0.103478 | 0        |
| 0        | 0.444246 |
| 0        | 0.140958 |
| 0.836554 | 0.463895 |
| 0.072787 | 0.080725 |
| 0.03895  | 0        |
| 2.993427 | 0.741048 |
| 0        | 0.012697 |
| 0        | 0        |
| 0        | 0.101561 |
| 0        | 0        |
| 0.057917 | 0        |
| 0.78924  | 0.291772 |
| 0        | 0        |
| 0        | 0        |
| 0        | 0        |
| 0        | 0.027643 |
| 0        | 0        |
| 2.868701 | 3.181564 |
| 0.219259 | 0.162115 |
| 0.046542 | 0.051618 |
| 0.221739 | 0.245922 |
| 0        | 0        |
| 0.068018 | 0        |
| 2.861147 | 1.586593 |
| 0        | 0        |
| 0        | 0        |
| 0.033651 | 0        |

|          |          |
|----------|----------|
| 1.079772 | 2.155559 |
| 0.155023 | 0.085965 |
| 0.145915 | 0.161829 |
| 0        | 0        |
| 0.110083 | 0.366267 |
| 0.368468 | 0.715144 |
| 0.071201 | 0.157932 |
| 0.092529 | 0.307861 |
| 0        | 0.196738 |
| 0.157848 | 0        |
| 0.283502 | 0.104807 |
| 0        | 0.145577 |
| 1.182607 | 0.327896 |
| 11.1956  | 9.393427 |
| 0        | 0        |
| 0.190451 | 0.844885 |
| 0.237174 | 0.233814 |
| 0        | 0.076002 |
| 0.039953 | 0        |
| 0        | 0.106263 |
| 0        | 0        |
| 0        | 0.425927 |
| 0.072278 | 0.160322 |
| 1.351184 | 0.299709 |
| 4.42759  | 4.129256 |
| 0        | 0.314421 |
| 3.977096 | 2.205421 |
| 0        | 0        |
| 0.182493 | 0.130112 |
| 1.115333 | 0.824648 |
| 0.319624 | 0.177241 |
| 0        | 0.088621 |
| 0        | 0        |
| 0.154445 | 0.942089 |
| 0        | 0        |
| 0.566142 | 1.925516 |
| 0        | 0.16877  |
| 0        | 0.048766 |
| 2.147097 | 0.694535 |
| 0        | 0        |
| 0.237621 | 0.075296 |
| 0        | 0        |
| 0.100464 | 0        |
| 0.33246  | 0.09218  |
| 0.303851 | 0.561649 |
| 0.168714 | 0.093557 |
| 0.840635 | 0.665939 |
| 0        | 0.489223 |
| 0.646738 | 1.075908 |
| 2.096028 | 1.373641 |
| 0        | 0        |
| 0.166008 | 0        |
| 0        | 0.402679 |
| 0.162531 | 0.090128 |
| 0.028684 | 0        |
| 0        | 0        |
| 0.150696 | 0        |
| 1.332046 | 1.176848 |
| 0.063549 | 0.105719 |
| 0.751051 | 0        |
| 0        | 0.047034 |
| 0        | 0        |
| 2.087577 | 1.445563 |
| 0        | 0        |
| 2.586954 | 0.717272 |

|          |          |
|----------|----------|
| 0.20788  | 0.268977 |
| 0.330396 | 0.610715 |
| 0        | 0        |
| 0        | 0        |
| 0        | 0        |
| 0.059018 | 0        |
| 0.487913 | 0        |
| 0.115834 | 0.128467 |
| 0.362375 | 0        |
| 3.233096 | 5.362684 |
| 0.147475 | 0        |
| 0.082234 | 0        |
| 0.977746 | 0.609964 |
| 0.063096 | 0.069978 |
| 2.313409 | 1.629573 |
| 0.574879 | 0.239091 |
| 0        | 0.316832 |
| 0        | 0.174767 |
| 0.070242 | 0.015581 |
| 0.301759 | 0.502003 |
| 0.542244 | 0.451036 |
| 3.843474 | 2.459219 |
| 0.324214 | 0.359573 |
| 0.321694 | 0.118926 |
| 0        | 0        |
| 0.413361 | 0        |
| 0        | 0.086942 |
| 0        | 0.350721 |
| 1.065216 | 0.16877  |
| 0.085401 | 0        |
| 0.527053 | 0.116907 |
| 0        | 0        |
| 0.049119 | 0        |
| 0.074445 | 0.247691 |
| 0.093504 | 0        |
| 0        | 0        |
| 0.1047   | 0        |
| 0        | 0        |
| 0.565454 | 0        |
| 0.242527 | 0        |
| 0.282213 | 0        |
| 0.118827 | 0.065893 |
| 0.073913 | 0.245922 |
| 0.284802 | 0        |
| 0        | 0        |
| 0        | 0.185352 |
| 0        | 0.598766 |
| 0        | 0.235816 |
| 0        | 0        |
| 0.022487 | 0        |
| 0        | 0        |
| 0        | 0        |
| 2.895592 | 0.074683 |
| 0        | 0        |
| 1.076891 | 0.849817 |
| 0        | 0        |
| 0.906378 | 0        |
| 0.079701 | 0        |
| 0        | 0        |
| 8.665465 | 5.116957 |
| 0.248916 | 0.867628 |
| 0.053871 | 0.029873 |
| 0        | 0        |
| 0        | 0.413562 |
| 0        | 0.072406 |

|          |          |
|----------|----------|
| 0        | 0.395736 |
| 0.072194 | 0.080068 |
| 0        | 0.11811  |
| 0.097775 | 0        |
| 0.304347 | 0.33754  |
| 0.130161 | 0.144357 |
| 0.136906 | 0.151837 |
| 0.148415 | 0.274335 |
| 0.162958 | 0.36146  |
| 3.873485 | 2.711366 |
| 0        | 0        |
| 0.937161 | 0.519684 |
| 9.257488 | 4.654427 |
| 1.119213 | 0.653303 |
| 0.757157 | 1.00768  |
| 0        | 0        |
| 0.115189 | 0        |
| 0        | 0        |
| 0.827825 | 0.262317 |
| 1.237239 | 1.122687 |
| 0        | 0.055531 |
| 0        | 0        |
| 1.471253 | 0.571098 |
| 0        | 0        |
| 0.120323 | 0        |
| 0        | 0        |
| 0.363081 | 0.402679 |
| 0.096671 | 0.08041  |
| 0        | 0.655792 |
| 0.968943 | 0.661303 |
| 0        | 0        |
| 0.350413 | 0.31797  |
| 0        | 0        |
| 0.080528 | 0        |
| 0.243478 | 0.540064 |
| 0        | 0.206781 |
| 0.04029  | 0        |
| 0        | 0        |
| 0        | 0        |
| 0        | 0        |
| 0.150029 | 0.027732 |
| 0        | 0.179085 |
| 0        | 0        |
| 0.044285 | 0.049114 |
| 0        | 0        |
| 0.098122 | 0.13603  |
| 0        | 0        |
| 1.506963 | 1.22563  |
| 0.165125 | 0.366267 |
| 0        | 0        |
| 0.872007 | 0.193422 |
| 0.77007  | 0.960811 |
| 0        | 0.082962 |
| 0.040686 | 0.045123 |
| 0.3338   | 0.925513 |
| 0.061901 | 0        |
| 0        | 0        |
| 0.226801 | 0.062884 |
| 0        | 0.27163  |
| 10.97538 | 15.67426 |
| 0.088317 | 0        |
| 0.811593 | 1.038584 |
| 0.034151 | 0.113627 |
| 0        | 0        |
| 3.196886 | 0.933037 |

|          |          |
|----------|----------|
| 0        | 0.160135 |
| 0.644501 | 1.191317 |
| 0        | 0        |
| 1.293477 | 2.151817 |
| 0        | 0        |
| 0.3338   | 0.370205 |
| 0.166453 | 0.553819 |
| 0.229103 | 0        |
| 0.070075 | 0        |
| 0.878897 | 0.88746  |
| 0        | 0        |
| 1.682571 | 0.373215 |
| 1.629102 | 1.405268 |
| 0        | 0.047358 |
| 0        | 0.230681 |
| 0.14372  | 0.053131 |
| 0        | 0        |
| 1.789247 | 1.190631 |
| 0        | 0        |
| 1.523775 | 0.952522 |
| 0        | 0.329465 |
| 0        | 0.134489 |
| 0.869869 | 0.723553 |
| 1.077017 | 0.491844 |
| 0        | 0.101611 |
| 0        | 0        |
| 0.207648 | 0.230295 |
| 0        | 0        |
| 0.643387 | 0.951408 |
| 0.369565 | 0.204935 |
| 0        | 0        |
| 0        | 0.068858 |
| 0.300845 | 0.917552 |
| 1.764389 | 0.804468 |
| 0.269552 | 0.29895  |
| 0.236521 | 0        |
| 0        | 0.137441 |
| 0.324743 | 0.38267  |
| 0        | 0        |
| 0.045286 | 0        |
| 0.265948 | 0.375395 |
| 0        | 0.158295 |
| 0.134825 | 0        |
| 5.813486 | 8.321417 |
| 2.69943  | 1.924606 |
| 0        | 0        |
| 0.382465 | 0.141392 |
| 0        | 0.028691 |
| 0        | 0        |
| 0        | 0        |
| 0.08838  | 0        |
| 0.212263 | 0.117706 |
| 0.192219 | 0        |
| 0        | 0        |
| 0        | 0        |
| 0.144388 | 0        |
| 0        | 0.366267 |
| 0        | 0        |
| 0.108924 | 0        |
| 0        | 0        |
| 0.143831 | 0.053172 |
| 0        | 0.18289  |
| 0.709876 | 0.726735 |
| 0.081532 | 0        |
| 0        | 0.468423 |

|          |          |
|----------|----------|
| 0.516776 | 0        |
| 0        | 0        |
| 0        | 0        |
| 0        | 0        |
| 0.124298 | 0.206781 |
| 0.195365 | 0.086669 |
| 0.387075 | 0.42929  |
| 0        | 0        |
| 0        | 0        |
| 0        | 0        |
| 0.073563 | 0.571098 |
| 0        | 0        |
| 0        | 0        |
| 0        | 0        |
| 0        | 0        |
| 0.722641 | 0.86824  |
| 0        | 0.098651 |
| 0        | 0        |
| 0.237361 | 0.188034 |
| 0        | 0        |
| 0.219388 | 0        |
| 0        | 0.357705 |
| 0        | 0.046049 |
| 0.154062 | 0.170864 |
| 0.277174 | 0.153701 |
| 0        | 0        |
| 3.221489 | 4.060032 |
| 0.019174 | 0        |
| 1.869283 | 1.851025 |
| 0.351435 | 0        |
| 0        | 0        |
| 0.423079 | 0.117305 |
| 0.158183 | 0.087717 |
| 0.068878 | 0.015278 |
| 0.682273 | 0.756683 |
| 73.14484 | 76.05899 |
| 0        | 0        |
| 0        | 0.377399 |
| 0        | 0.736451 |
| 0        | 0        |
| 2.236022 | 2.314559 |
| 0.032053 | 0.071098 |
| 0        | 0.056119 |
| 0.169482 | 0.125311 |
| 0.567004 | 0.314421 |
| 0        | 0.076509 |
| 0        | 0.048766 |
| 1.910366 | 0.529678 |
| 0        | 0        |
| 0.667601 | 0.951956 |
| 0        | 0        |
| 7.517391 | 5.659328 |
| 0        | 0        |
| 0.335605 | 0.99255  |
| 0.114551 | 0.762267 |
| 1.671249 | 1.513705 |
| 0.108924 | 0.120804 |
| 0        | 0        |
| 0        | 0        |
| 0.402508 | 0.892812 |
| 0        | 0.25503  |
| 0        | 0        |
| 0.299937 | 0.665296 |
| 0.268774 | 0        |
| 0.441376 | 0.163171 |

|          |          |
|----------|----------|
| 0.695002 | 0.3854   |
| 0        | 0.032087 |
| 0.120713 | 0.089252 |
| 0.096184 | 0.213348 |
| 0.111768 | 0.061979 |
| 59.44718 | 61.77815 |
| 0        | 0        |
| 1.333609 | 1.643392 |
| 0.556833 | 0.308781 |
| 0.100302 | 0        |
| 0.161564 | 0.153587 |
| 0        | 0.101711 |
| 3.71094  | 4.432248 |
| 0.011384 | 0.025251 |
| 0        | 0.153359 |
| 0.12645  | 0.140241 |
| 0.088443 | 0.294266 |
| 0        | 0        |
| 0.246377 | 0.273247 |
| 0        | 0        |
| 0.749372 | 0.523285 |
| 0        | 0.133188 |
| 0        | 0        |
| 0        | 0        |
| 0        | 0        |
| 0.095813 | 0        |
| 0        | 0        |
| 0        | 0.203722 |
| 0.282856 | 0        |
| 0.193417 | 0.536278 |
| 0.547021 | 0.842611 |
| 0.101339 | 0        |
| 0        | 0        |
| 0        | 0        |
| 0.086472 | 0        |
| 0        | 0.052443 |
| 0.81859  | 0.349179 |
| 0.268774 | 0        |
| 0.049432 | 0        |
| 0        | 0.449075 |
| 0.4797   | 0.304009 |
| 0        | 0        |
| 0.05913  | 0.03279  |
| 0        | 0.095504 |
| 0.05302  | 0        |
| 0        | 0        |
| 0        | 0.058157 |
| 0        | 0        |
| 0        | 0        |
| 2.6197   | 2.324325 |
| 0        | 0.091445 |
| 0        | 0        |
| 0.372224 | 1.073328 |
| 0.520281 | 0.641137 |
| 0.248845 | 0.068996 |
| 0.424526 | 0.176559 |
| 0.165565 | 0        |
| 0.34139  | 0.158612 |
| 2.316945 | 2.047676 |
| 0.106793 | 0.05922  |
| 0.084415 | 0        |
| 0.15368  | 0        |
| 0        | 0        |
| 0        | 0        |
| 0.101284 | 0        |

|          |          |
|----------|----------|
| 0.70287  | 1.559052 |
| 7.48119  | 6.862551 |
| 0.203786 | 0        |
| 0.257622 | 0        |
| 0        | 0        |
| 0        | 0        |
| 2.633693 | 2.21774  |
| 0        | 0        |
| 1.102787 | 1.223057 |
| 0        | 0.146196 |
| 0.26704  | 1.48082  |
| 2.042332 | 1.208037 |
| 3.52385  | 5.955298 |
| 0.382073 | 0.211871 |
| 0.15368  | 0        |
| 0.323369 | 0.358636 |
| 0        | 0        |
| 0        | 0        |
| 0        | 0        |
| 0.295652 | 0.327896 |
| 0        | 1.370311 |
| 9.109673 | 6.938746 |
| 0.129618 | 0.143754 |
| 0.144676 | 0.022922 |
| 0.275942 | 0.306036 |
| 0.256823 | 0.35604  |
| 0        | 0        |
| 0        | 0        |
| 0.049354 | 0        |
| 4.131257 | 2.356362 |
| 0.119169 | 0.132165 |
| 0        | 0        |
| 0        | 0.204935 |
| 0        | 0        |
| 0        | 0.193422 |
| 0        | 0        |
| 0        | 0        |
| 0.537549 | 0        |
| 0.091304 | 0        |
| 0.175884 | 0.195066 |
| 1.497513 | 1.660833 |
| 0.367922 | 0.306036 |
| 1.128852 | 1.408462 |
| 0        | 0.066146 |
| 0        | 0        |
| 0.233409 | 0.647163 |
| 0        | 0        |
| 0        | 0        |
| 0.103651 | 0.114955 |
| 0        | 0        |
| 0        | 0        |
| 0.385035 | 0        |
| 0.266754 | 0.295846 |
| 0.727865 | 1.130145 |
| 0.523204 | 1.644085 |
| 0.123926 | 0        |
| 0.245889 | 0.340882 |
| 0        | 0        |
| 0.298495 | 0.11035  |
| 0.386834 | 0.643534 |
| 13.87495 | 9.170722 |
| 0        | 0        |
| 0        | 0.093812 |
| 0        | 0        |
| 2.902763 | 3.040489 |

|          |          |
|----------|----------|
| 0.050395 | 0        |
| 0.194115 | 0.149044 |
| 0.05967  | 0        |
| 0.439087 | 0        |
| 0.198996 | 0.220699 |
| 0.153112 | 0        |
| 1.141828 | 1.108062 |
| 1.48584  | 1.294768 |
| 0.596352 | 0.220464 |
| 2.365215 | 1.639479 |
| 0        | 0        |
| 0        | 0        |
| 0.059018 | 0        |
| 0        | 0        |
| 0.275635 | 0        |
| 0.072701 | 0        |
| 0        | 0.018397 |
| 0        | 0.174324 |
| 0.070333 | 0.058503 |
| 0        | 0.100817 |
| 0.556833 | 0        |
| 10.00452 | 5.547812 |
| 0        | 0.228765 |
| 11.74908 | 8.846358 |
| 0        | 0        |
| 1.306601 | 1.345593 |
| 0        | 0        |
| 0        | 0        |
| 0.178631 | 0.056603 |
| 1.117094 | 0.717272 |
| 0.352195 | 0        |
| 0.05696  | 0        |
| 0.287439 | 0.318788 |
| 0        | 0.026093 |
| 0.698727 | 1.162396 |
| 0        | 0        |
| 0        | 0.186103 |
| 0.551067 | 0        |
| 0.032119 | 0        |
| 12.76964 | 13.99953 |
| 0.10079  | 0        |
| 0.218616 | 0.484916 |
| 0.178411 | 0.395736 |
| 0.061351 | 0.170104 |
| 0.065012 | 0.072103 |
| 0.186447 | 0        |
| 0        | 0.229527 |
| 1.200907 | 0.665939 |
| 0.626437 | 0.308781 |
| 0.240491 | 0        |
| 0        | 0        |
| 0        | 0        |
| 0.198361 | 0        |
| 0.125175 | 0        |
| 0.106313 | 0        |
| 3.83121  | 1.510772 |
| 0        | 0.094197 |
| 0.281426 | 0.504191 |
| 1.703424 | 1.498332 |
| 40.10518 | 35.02025 |
| 0.046299 | 0        |
| 0.227424 | 0.504455 |
| 0.097163 | 0        |
| 0.424526 | 0.353119 |
| 0        | 0        |

|          |          |
|----------|----------|
| 0.144388 | 0        |
| 0        | 0        |
| 0        | 0        |
| 0        | 0        |
| 0        | 0        |
| 0        | 0        |
| 7.280547 | 8.07457  |
| 0.021641 | 0.024001 |
| 0        | 0        |
| 0.159812 | 0        |
| 0.498912 | 0.614805 |
| 0.107603 | 0.238676 |
| 0        | 0        |
| 0.78591  | 1.045946 |
| 0        | 0.022021 |
| 0        | 0        |
| 0        | 0        |
| 0        | 0        |
| 0        | 0.154045 |
| 0.121145 | 0        |
| 0        | 0        |
| 0.114869 | 0.063699 |
| 0.11268  | 0.374908 |
| 0        | 0.098792 |
| 0.252386 | 0        |
| 0        | 0        |
| 0.541455 | 0.040034 |
| 0.902426 | 0.600507 |
| 0        | 0.514827 |
| 0        | 0        |
| 0        | 0        |
| 0.064073 | 0        |
| 5.208457 | 2.902618 |
| 0.054391 | 0        |
| 0.205246 | 0        |
| 0.114551 | 0        |
| 0.308744 | 0.32611  |
| 0.189289 | 0.254919 |
| 0        | 0.137716 |
| 0.087293 | 0.048406 |
| 0        | 0        |
| 0        | 0        |
| 0.046368 | 0        |
| 2.41449  | 0.892605 |
| 0        | 0.125425 |
| 0.081909 | 0.454209 |
| 0.085755 | 0.190216 |
| 0.122459 | 0.135815 |
| 0.055336 | 0        |
| 0        | 0.142859 |
| 0        | 0        |
| 0.99339  | 0.137716 |
| 1.015736 | 0.281628 |
| 0.154062 | 0.854319 |
| 0        | 0.243315 |
| 1.616846 | 1.55409  |
| 0.049749 | 0.662097 |
| 0.03131  | 0.173621 |
| 0.877553 | 1.338232 |
| 0.12037  | 0.186897 |
| 0        | 0.094585 |
| 0.072362 | 0.401271 |
| 0.157182 | 0        |
| 0.177899 | 0        |
| 0.075531 | 0.251307 |

|          |          |
|----------|----------|
| 0        | 0        |
| 0        | 0.413562 |
| 0.13352  | 0.444246 |
| 0.282213 | 0.104331 |
| 0.011115 | 0.036981 |
| 4.60907  | 10.82486 |
| 0.259846 | 0.072046 |
| 0        | 0        |
| 0        | 0.324803 |
| 0.054702 | 0.121336 |
| 0        | 0.146819 |
| 0.028784 | 0.063846 |
| 0.071777 | 0.079605 |
| 0.267232 | 0        |
| 0        | 0        |
| 0        | 0.255978 |
| 0.122701 | 0.136083 |
| 0        | 0        |
| 0.123728 | 0.247    |
| 0        | 0        |
| 0.219388 | 0        |
| 4.039388 | 4.64585  |
| 0.506006 | 1.178501 |
| 0.113879 | 0.328377 |
| 3.638157 | 2.978168 |
| 22.10354 | 19.09458 |
| 0        | 0        |
| 0.176886 | 0        |
| 0        | 0        |
| 0.045171 | 0.050097 |
| 0.306602 | 0        |
| 0.354108 | 0.523636 |
| 0.040212 | 0.044597 |
| 0.02587  | 0.028691 |
| 1.049356 | 0.387933 |
| 0        | 0        |
| 1.361555 | 0.302009 |
| 0        | 0.262817 |
| 0.097011 | 0        |
| 0.139521 | 0        |
| 0.075808 | 0.084076 |
| 0.545963 | 0.339083 |
| 1.325935 | 0.698508 |
| 0        | 0.07542  |
| 0.411171 | 0.912028 |
| 0.128945 | 0.143008 |
| 0        | 0        |
| 0.188142 | 0.417322 |
| 0.122701 | 0        |
| 4.998265 | 6.411621 |
| 0.148533 | 0.082366 |
| 7.101128 | 5.108486 |
| 0        | 0        |
| 6.923159 | 7.442739 |
| 1.243547 | 0.95288  |
| 0.151308 | 0        |
| 0.287306 | 0.286776 |
| 0        | 0.167742 |
| 0        | 0        |
| 0.525048 | 0.145577 |
| 0.10559  | 0.234211 |
| 0        | 0        |
| 0        | 0        |
| 0        | 0        |
| 0        | 0        |

|          |          |
|----------|----------|
| 0.092254 | 0.102315 |
| 0        | 0        |
| 0.256204 | 0.473577 |
| 0        | 0        |
| 0        | 0        |
| 0.692419 | 0.127989 |
| 0.368833 | 0.545411 |
| 0        | 0.118926 |
| 0        | 0        |
| 0        | 0        |
| 0.256184 | 0.033426 |
| 0.242527 | 0        |
| 4.860895 | 4.574206 |
| 0.677619 | 0.18788  |
| 0        | 0        |
| 0.453741 | 0        |
| 0        | 0        |
| 0.212626 | 0.707447 |
| 3.165214 | 2.430287 |
| 0.202237 | 0.089717 |
| 0.103824 | 0        |
| 0        | 0.121016 |
| 0.055683 | 0        |
| 0        | 0        |
| 0.273913 | 0.405048 |
| 0        | 0.676738 |
| 0        | 0        |
| 0        | 0.129676 |
| 0        | 0.078966 |
| 54.35471 | 43.48801 |
| 0        | 0        |
| 0.042967 | 0.015884 |
| 0.119628 | 0.132675 |
| 0.272909 | 0        |
| 0        | 0.370205 |
| 0.374017 | 0.207404 |
| 0.695868 | 1.114764 |
| 0.072872 | 0        |
| 0.10394  | 0.076851 |
| 8.866222 | 14.30986 |
| 0        | 0        |
| 0.25035  | 0.431906 |
| 0        | 0        |
| 0        | 0        |
| 0        | 0        |
| 0.112273 | 0.041506 |
| 0.1186   | 0.098651 |
| 0        | 0        |
| 0.042613 | 0        |
| 0.100302 | 0        |
| 0        | 0        |
| 0.29495  | 0        |
| 0        | 0        |
| 1.546225 | 1.714858 |
| 0.189289 | 0.419867 |
| 0.243956 | 0.135281 |
| 0        | 0        |
| 0.085284 | 0        |
| 0.046161 | 0.102391 |
| 0.175387 | 0        |
| 0        | 0        |
| 0        | 0.032102 |
| 0.368468 | 0.408654 |
| 0.039147 | 0        |
| 1.57848  | 2.236917 |

|          |          |
|----------|----------|
| 0        | 0        |
| 0.184782 | 0.40987  |
| 0        | 0        |
| 0        | 0.02296  |
| 1.443167 | 0.544872 |
| 0.397144 | 0        |
| 0.418563 | 0.103158 |
| 1.189404 | 1.84677  |
| 0        | 0        |
| 0.170921 | 0.142171 |
| 4.171266 | 4.881907 |
| 0.055188 | 0.122414 |
| 0.084934 | 0.094197 |
| 0        | 0        |
| 0        | 0        |
| 0        | 0.218597 |
| 0.561872 | 0.311575 |
| 0        | 0        |
| 0.051956 | 0        |
| 0        | 0.198438 |
| 0        | 0        |
| 0        | 0        |
| 0        | 0        |
| 0.064674 | 0        |
| 0.093787 | 0.104015 |
| 0.130052 | 0.173083 |
| 0        | 0        |
| 3.679223 | 3.060362 |
| 0.080737 | 0        |
| 0.117812 | 0.261321 |
| 0.112988 | 0.187966 |
| 0.465652 | 0.172145 |
| 0        | 0        |
| 0        | 0        |
| 0.189289 | 0.104967 |
| 0        | 0        |
| 0        | 0        |
| 0        | 0        |
| 0        | 0        |
| 12.48773 | 5.559368 |
| 0        | 0        |
| 0.139835 | 0        |
| 0        | 0        |
| 0.258695 | 0.143454 |
| 2.747207 | 2.335895 |
| 1.370864 | 1.373239 |
| 0.543668 | 0.964737 |
| 0.129618 | 0        |
| 0        | 0        |
| 1.487796 | 2.348158 |
| 0.402788 | 0.446716 |
| 0        | 0        |
| 1.03306  | 0.343718 |
| 12.53516 | 2.239289 |
| 0.270531 | 0        |
| 0        | 0.525635 |
| 0        | 0        |
| 0.790916 | 1.169565 |
| 0        | 0.318051 |
| 0.548471 | 0        |
| 0.541455 | 0        |
| 0.199636 | 0.664226 |
| 0        | 0        |
| 0.336514 | 0.559822 |
| 0        | 0        |

|          |          |
|----------|----------|
| 3.807581 | 7.756236 |
| 0        | 0        |
| 0        | 0        |
| 0        | 0        |
| 0        | 0        |
| 0.758479 | 0.600856 |
| 0        | 0.11811  |
| 0.673811 | 0.427027 |
| 0.457783 | 0.158659 |
| 0        | 0.062999 |
| 14.30245 | 16.89547 |
| 1.218057 | 0.815068 |
| 0.251364 | 0.139389 |
| 0.136755 | 0        |
| 0.137158 | 0.304233 |
| 21.24554 | 16.15466 |
| 0.02073  | 0        |
| 0.200928 | 0.557105 |
| 1.874737 | 2.813032 |
| 3.155869 | 3.714339 |
| 0        | 0        |
| 0.262524 | 0        |
| 0        | 0        |
| 0.310745 | 0.103391 |
| 0.072787 | 0        |
| 0        | 0.217905 |
| 0        | 0        |
| 0        | 0        |
| 0.491638 | 0.077894 |
| 0        | 0        |
| 0.201581 | 0        |
| 0        | 0        |
| 0        | 0        |
| 0        | 0.075173 |
| 0        | 0.174767 |
| 0        | 0        |
| 0        | 0        |
| 0        | 0        |
| 0.825075 | 1.258205 |
| 0.120557 | 0        |
| 0.175635 | 0.097395 |
| 0        | 0        |
| 0.059987 | 0        |
| 0.023953 | 0        |
| 0.654695 | 0.60508  |
| 1.843241 | 2.328911 |
| 2.019086 | 0.279911 |
| 0        | 0        |
| 0.239718 | 0        |
| 0        | 0.095636 |
| 0        | 0        |
| 0.2799   | 0.084662 |
| 0        | 0.083769 |
| 0        | 0        |
| 0        | 0.211221 |
| 0        | 0        |
| 1.796727 | 1.992679 |
| 0.127619 | 0.141538 |
| 0.212384 | 0.137402 |
| 0        | 0.087162 |
| 0        | 0        |
| 0.481294 | 1.601352 |
| 0        | 0        |
| 0        | 0.214734 |
| 0.174157 | 0.482876 |

|          |          |
|----------|----------|
| 0.865208 | 0.85025  |
| 0.109116 | 0        |
| 0        | 0        |
| 0.051553 | 0.076234 |
| 0.73993  | 0.223808 |
| 0        | 0        |
| 0        | 0        |
| 0.281674 | 0.065767 |
| 0.253416 | 0        |
| 0.679075 | 0.537954 |
| 2.829634 | 1.98755  |
| 0        | 0        |
| 0.267424 | 0.098863 |
| 0.271715 | 0        |
| 0.02158  | 0.143604 |
| 0.243956 | 0        |
| 0.113297 | 0        |
| 0.078146 | 0        |
| 5.779364 | 7.325334 |
| 0        | 0        |
| 0        | 0.209933 |
| 0.122315 | 0.027131 |
| 0.116486 | 0.516759 |
| 0        | 0.101561 |
| 0.179702 | 0.29895  |
| 4.893548 | 2.204817 |
| 0.15879  | 0        |
| 0        | 0.242458 |
| 0.710919 | 1.576904 |
| 0        | 0        |
| 0.167501 | 0        |
| 0        | 0.019085 |
| 0        | 0        |
| 0.144725 | 0.963051 |
| 0        | 0        |
| 0.138432 | 0        |
| 0        | 0        |
| 2.155379 | 3.320064 |
| 0        | 0.064353 |
| 0        | 0        |
| 0.765455 | 0.235816 |
| 1.02341  | 0.756683 |
| 0.102963 | 0        |
| 0        | 0        |
| 0        | 0        |
| 0        | 0        |
| 0.21148  | 0.175908 |
| 0.075747 | 0.280025 |
| 0.142075 | 0.787851 |
| 0.15368  | 0        |
| 0        | 0.248585 |
| 22.46565 | 9.966309 |
| 0.209753 | 0.697887 |
| 0.016517 | 0.018318 |
| 0        | 0        |
| 0        | 0        |
| 0.252181 | 0.055937 |
| 0        | 0.137716 |
| 0.204099 | 0.045272 |
| 0        | 0        |
| 0        | 0        |
| 40.38704 | 35.97862 |
| 0.184052 | 0.204125 |
| 0.134679 | 0.074683 |
| 0        | 0        |

|          |          |
|----------|----------|
| 0.062211 | 0        |
| 0        | 0        |
| 0.204907 | 0        |
| 0        | 0        |
| 0        | 0.107844 |
| 0        | 0        |
| 0.480053 | 1.064817 |
| 0.120792 | 0.937757 |
| 0        | 0        |
| 0        | 0        |
| 0.898363 | 0.664226 |
| 0.074654 | 0        |
| 0        | 0        |
| 0.222461 | 0.672881 |
| 0        | 0.14466  |
| 0.125937 | 0        |
| 0        | 0        |
| 0.06184  | 0.068584 |
| 3.417627 | 2.737479 |
| 8.600426 | 5.177987 |
| 0.116924 | 0        |
| 0        | 0        |
| 0        | 0        |
| 0.07186  | 0.079697 |
| 0.923607 | 0.113815 |
| 0.178925 | 0.198438 |
| 0.091126 | 0        |
| 0        | 0        |
| 0        | 0        |
| 0.063419 | 0        |
| 0        | 0        |
| 0.126837 | 0.211006 |
| 0        | 0.386843 |
| 0        | 0.165326 |
| 4.679916 | 1.441753 |
| 0.630324 | 0.349534 |
| 3.250376 | 4.127309 |
| 0.019865 | 0        |
| 1.913957 | 0.51773  |
| 0.416691 | 0.154045 |
| 0        | 0.07865  |
| 0.114869 | 0        |
| 4.73402  | 1.788825 |
| 0.055859 | 0.030975 |
| 0.11207  | 0.124293 |
| 0.760248 | 0.42158  |
| 0.194022 | 0        |
| 0.574879 | 0.478182 |
| 0.153018 | 0        |
| 0.386593 | 0        |
| 0.2529   | 0.701203 |
| 2.015101 | 1.011731 |
| 29.00169 | 46.82256 |
| 0        | 0.28932  |
| 0.219971 | 0        |
| 0        | 0.031923 |
| 0.896921 | 0.773687 |
| 0.082893 | 0        |
| 0.077319 | 0.171502 |
| 0.325062 | 0.180257 |
| 0.185889 | 0        |
| 0        | 0.04697  |
| 0        | 0        |
| 2.956518 | 5.738178 |
| 0.410677 | 0.393357 |

|          |          |
|----------|----------|
| 0.175773 | 0.238263 |
| 0.247875 | 0.026182 |
| 0        | 0.044713 |
| 0.701547 | 0.194515 |
| 0.027619 | 0        |
| 0.383591 | 1.033176 |
| 0.678208 | 0.649605 |
| 0        | 0.035294 |
| 0.322949 | 0.447712 |
| 0.157182 | 0.348649 |
| 0        | 0        |
| 3.856913 | 1.356297 |
| 0.222534 | 0.123402 |
| 0        | 0.055891 |
| 0.459053 | 0.636397 |
| 0.56597  | 0.439386 |
| 0.859929 | 1.144457 |
| 2.020579 | 1.426056 |
| 0.099979 | 0        |
| 0.260869 | 0.57864  |
| 0.189868 | 0        |
| 0        | 0.267306 |
| 0        | 0.025926 |
| 1.14584  | 0.782034 |
| 1.062013 | 0.543617 |
| 0.310434 | 0.344291 |
| 1.514314 | 0.933037 |
| 0        | 0        |
| 0.073476 | 0.162978 |
| 0.473946 | 0.175212 |
| 0.050436 | 0        |
| 0        | 0        |
| 4.892717 | 2.71316  |
| 0.089981 | 0.399178 |
| 0        | 0.791473 |
| 0.762738 | 0.422962 |
| 0.138278 | 0        |
| 0.074089 | 0        |
| 0.193417 | 0.858045 |
| 0        | 0.127436 |
| 0.21118  | 0        |
| 0.396721 | 0.219994 |
| 0.309918 | 0.572863 |
| 0.072194 | 0.080068 |
| 0        | 0        |
| 0.801591 | 0.161639 |
| 0.179442 | 0        |
| 0        | 0        |
| 0        | 0        |
| 1.108694 | 0.204935 |
| 0.505594 | 0.224294 |
| 3.735518 | 3.66672  |
| 9.850868 | 13.81349 |
| 0        | 0.251307 |
| 0        | 0        |
| 0.178411 | 0        |
| 2.35284  | 0.739991 |
| 0.213357 | 0        |
| 0.348383 | 0.027598 |
| 0.112885 | 0        |
| 0.402726 | 0.347392 |
| 0        | 0        |
| 0.918833 | 0.291155 |
| 3.579019 | 1.951037 |
| 3.503546 | 3.325217 |

|          |          |
|----------|----------|
| 0        | 0        |
| 0.111868 | 0        |
| 0        | 0.273247 |
| 0        | 0.142563 |
| 0        | 0.174324 |
| 0.341137 | 0        |
| 0        | 0.531723 |
| 0.288106 | 0.479291 |
| 0.177222 | 0.19655  |
| 0        | 0.159026 |
| 0.159197 | 0        |
| 0        | 0        |
| 0        | 0        |
| 5.216667 | 2.655686 |
| 0        | 0        |
| 0        | 0        |
| 4.618033 | 0.853613 |
| 0.622425 | 0.345154 |
| 6.588628 | 5.651785 |
| 0        | 0        |
| 37.27672 | 52.6867  |
| 0.024657 | 0        |
| 10.95651 | 10.23279 |
| 0.882752 | 0.522147 |
| 1.193979 | 2.206992 |
| 0.25035  | 0        |
| 0        | 0.30334  |
| 0        | 0.107214 |
| 0        | 0        |
| 0        | 0        |
| 0        | 0        |
| 0        | 0        |
| 0.13168  | 0.365101 |
| 0.159688 | 0.035421 |
| 0.103134 | 0        |
| 0.169174 | 0        |
| 0.210464 | 0.116709 |
| 0        | 0        |
| 0        | 0.091567 |
| 0.515244 | 0.142859 |
| 0.21118  | 0        |
| 0        | 0.040865 |
| 0.199958 | 0.332648 |
| 0        | 0.056165 |
| 0.130847 | 0.072559 |
| 4.83361  | 5.453195 |
| 0        | 0.09712  |
| 0        | 0        |
| 0.165125 | 0.5494   |
| 0.329129 | 0.175212 |
| 0.350114 | 0.172577 |
| 0.266467 | 0.295528 |
| 0.865567 | 1.089692 |
| 0        | 0.090128 |
| 0.033078 | 0        |
| 0.533632 | 0.205854 |
| 0.108165 | 0        |
| 0        | 0        |
| 2.252245 | 2.081564 |
| 0.769094 | 0.852972 |
| 0.324496 | 0.119962 |
| 0.114551 | 0.127045 |
| 0.049354 | 0        |
| 0.15639  | 0.173446 |
| 0.27533  | 0        |

|          |          |
|----------|----------|
| 0.284802 | 0        |
| 0.234881 | 0.173665 |
| 0.299937 | 0.110883 |
| 0.761802 | 0.211221 |
| 0        | 0        |
| 0.108734 | 0        |
| 0.210108 | 0        |
| 7.103552 | 5.744268 |
| 0.539886 | 0.399178 |
| 0.399824 | 0.126694 |
| 0.077512 | 0        |
| 0.204907 | 0.454509 |
| 0.018223 | 0        |
| 0.02798  | 0.186187 |
| 2.815568 | 3.763177 |
| 4.454133 | 5.315563 |
| 0        | 0.273247 |
| 0.035257 | 0        |
| 0.18387  | 0.135949 |
| 0.308379 | 0.342011 |
| 0        | 0.126577 |
| 0.120933 | 0.107297 |
| 0.180836 | 0        |
| 0.093589 | 0.062277 |
| 0.953553 | 0.822537 |
| 0.189868 | 0.210575 |
| 0.580745 | 0.702634 |
| 1.993061 | 1.674566 |
| 0        | 0        |
| 1.560532 | 1.730725 |
| 0.01499  | 0.033249 |
| 0.296357 | 0        |
| 0.327924 | 0        |
| 0.363081 | 0        |
| 0.04959  | 0.38499  |
| 274.0893 | 209.1631 |
| 9.109098 | 12.61561 |
| 0        | 0.090962 |
| 1.762813 | 1.159786 |
| 0.390484 | 0        |
| 0.117589 | 0.652066 |
| 0.906693 | 0.957693 |
| 0.538326 | 0.99506  |
| 0.493536 | 0.656834 |
| 0        | 0        |
| 0        | 0        |
| 0        | 0        |
| 0.143057 | 0.237989 |
| 0.079701 | 0.88393  |
| 0.783078 | 0.558309 |
| 0.030375 | 0        |
| 0        | 0.076765 |
| 0        | 0.077109 |
| 0.049119 | 0        |
| 0        | 0        |
| 0.469936 | 0.521188 |
| 1.105404 | 0.61298  |
| 0.580251 | 0.214511 |
| 0        | 0.128707 |
| 3.381288 | 5.285791 |
| 0.430412 | 0.358015 |
| 0.215579 | 0        |
| 0.392955 | 0.871622 |
| 0        | 0        |
| 1.126293 | 0.780704 |

|          |          |
|----------|----------|
| 0        | 0        |
| 0.178411 | 0        |
| 1.564618 | 2.287384 |
| 0.271122 | 0.601381 |
| 0        | 0        |
| 0        | 0.370703 |
| 0.031389 | 0.208872 |
| 0        | 0.194515 |
| 0        | 0        |
| 0.47095  | 0.261156 |
| 0.10577  | 0        |
| 1.143979 | 2.768166 |
| 0.762738 | 0.169185 |
| 0        | 0        |
| 0        | 0        |
| 0.369016 | 0.20463  |
| 0.559341 | 0.103391 |
| 107.3656 | 249.3849 |
| 0.065469 | 0        |
| 0.107977 | 0.598766 |
| 0.194935 | 0.108098 |
| 0.067682 | 0.050042 |
| 0.230806 | 0        |
| 0.498023 | 1.01262  |
| 0.210464 | 0        |
| 0        | 0.170864 |
| 0        | 0        |
| 0.089462 | 0        |
| 0        | 0        |
| 0        | 0        |
| 0        | 0        |
| 0        | 0.150674 |
| 0.086232 | 0.143454 |
| 0        | 0        |
| 0        | 0        |
| 0.495704 | 0.274883 |
| 0.129348 | 0        |
| 2.424006 | 2.688371 |
| 0.92078  | 0.729429 |
| 2.050805 | 1.581033 |
| 0.085051 | 0.094326 |
| 0.185889 | 0        |
| 0        | 0.013106 |
| 0        | 0        |
| 0        | 0        |
| 0.652173 | 1.01262  |
| 3.860324 | 4.281335 |
| 0.197101 | 0        |
| 1.862607 | 1.032872 |
| 0.217764 | 0.107339 |
| 0        | 0        |
| 0.15483  | 0        |
| 1.219229 | 1.040153 |
| 0        | 0.204935 |
| 0.133779 | 0.252228 |
| 0.173185 | 0        |
| 1.411066 | 0.728515 |
| 1.248874 | 0.395736 |
| 0        | 0        |
| 0        | 0        |
| 1.616846 | 0.358636 |
| 0.176886 | 0        |
| 1.070464 | 0.949767 |
| 0.652173 | 0        |
| 0.518471 | 0.287508 |

|          |          |
|----------|----------|
| 10.66719 | 8.312093 |
| 6.885502 | 5.597164 |
| 0.421516 | 0.178745 |
| 0.25035  | 0        |
| 0        | 0        |
| 0        | 0.81974  |
| 0.144725 | 0        |
| 0.03756  | 0.249939 |
| 0.050601 | 0.056119 |
| 0.113022 | 0        |
| 0.165786 | 0.030644 |
| 0.210668 | 0.233644 |
| 0.030706 | 0        |
| 0.077512 | 0        |
| 0.89981  | 0.285127 |
| 0.563402 | 1.499633 |
| 0.403817 | 0.111964 |
| 0.112885 | 0        |
| 0        | 0.288109 |
| 0.112273 | 0.249035 |
| 0.561026 | 0.207404 |
| 0        | 0        |
| 0        | 0        |
| 0.196167 | 0        |
| 0        | 0        |
| 0.169174 | 0.093812 |
| 1.998199 | 3.79907  |
| 0.661202 | 0.439988 |
| 0.298495 | 0        |
| 0        | 0.276539 |
| 0        | 0.359677 |
| 0        | 0.14527  |
| 0.279251 | 0.206471 |
| 1.141828 | 2.691008 |
| 0.162107 | 1.078718 |
| 0        | 0        |
| 1.739128 | 1.15728  |
| 0.588873 | 0.152389 |
| 2.82793  | 4.952126 |
| 0        | 0.285127 |
| 0.274114 | 0.608019 |
| 0        | 0.384682 |
| 0.726162 | 0.402679 |
| 0.304846 | 0.638619 |
| 0.159197 | 0        |
| 2.708015 | 2.502795 |
| 0.069448 | 0.077023 |
| 0.300663 | 0        |
| 0        | 0        |
| 0        | 0.184113 |
| 0        | 0        |
| 0.082398 | 0.045692 |
| 0        | 0        |
| 0.072152 | 0        |
| 0        | 0.021171 |
| 0.870377 | 0.804417 |
| 0        | 0        |
| 0.646738 | 0.239091 |
| 0        | 0        |
| 8.979508 | 12.02172 |
| 0.42236  | 0        |
| 0        | 0        |
| 2.288459 | 1.103496 |
| 1.207245 | 0.573818 |
| 0.035951 | 0        |

|          |          |
|----------|----------|
| 0.272528 | 0.192341 |
| 0        | 0.037545 |
| 0.145063 | 0        |
| 0.42937  | 0.571437 |
| 0        | 0        |
| 0        | 0        |
| 0.140151 | 0        |
| 0.111667 | 0.123846 |
| 0.116924 | 0.259353 |
| 141.5917 | 178.4612 |
| 0        | 0        |
| 0        | 0        |
| 0        | 0.135548 |
| 0        | 0.281628 |
| 0.045385 | 0        |
| 0.049551 | 0.329728 |
| 0.137971 | 0.459054 |
| 0        | 0        |
| 0.052483 | 0        |
| 0.181541 | 0.604019 |
| 0        | 0        |
| 0.772225 | 0.342578 |
| 3.302494 | 0.366267 |
| 9.672025 | 14.3683  |
| 0        | 0.498972 |
| 2.342901 | 2.59842  |
| 0.400192 | 0.317026 |
| 0.559902 | 0.17249  |
| 0        | 0        |
| 0.103306 | 0        |
| 0.182608 | 0.162019 |
| 0.251025 | 0.525871 |
| 0.133808 | 0.074201 |
| 0        | 0        |
| 0.48023  | 0.83695  |
| 5.210864 | 3.658089 |
| 0.108165 | 0.359886 |
| 0.163602 | 0        |
| 0        | 0        |
| 0.186447 | 0        |
| 0.088067 | 0        |
| 1.669002 | 1.357418 |
| 14.95027 | 8.461672 |
| 0.404475 | 0        |
| 0.624198 | 0.369213 |
| 0.734756 | 0        |
| 0        | 0.056096 |
| 1.002706 | 0.699523 |
| 0.343021 | 0        |
| 0.5087   | 0.310299 |
| 0.072958 | 0        |
| 4.617029 | 2.290779 |
| 0.147009 | 0.108695 |
| 0        | 0.153701 |
| 0.236973 | 0.262817 |
| 0        | 0.122089 |
| 0.200928 | 0.111421 |
| 1.233514 | 0.912028 |
| 20.0539  | 21.2624  |
| 0        | 0.163948 |
| 0.373315 | 0.310521 |
| 0        | 0        |
| 0        | 0.128707 |
| 0.072278 | 0.080161 |
| 3.184491 | 1.469606 |

|          |          |
|----------|----------|
| 0.05947  | 0.065956 |
| 0        | 1.043305 |
| 0        | 0        |
| 1.222924 | 1.356297 |
| 0        | 0        |
| 0.063614 | 0.141103 |
| 0        | 0        |
| 0.205813 | 0.380432 |
| 0.215131 | 0.334031 |
| 0        | 0.113534 |
| 0.110672 | 0.245484 |
| 0        | 0.073803 |
| 0        | 0        |
| 0        | 0        |
| 1.061314 | 0.882797 |
| 1.448836 | 0.519862 |
| 28.8793  | 44.50977 |
| 2.403363 | 1.48082  |
| 0        | 0        |
| 0.164832 | 0.182809 |
| 0.136155 | 0.226507 |
| 0        | 0.289929 |
| 0.36097  | 0        |
| 0        | 0        |
| 0        | 0.122523 |
| 0        | 0.118926 |
| 0.679288 | 0.452023 |
| 0        | 0.142563 |
| 0.030301 | 0        |
| 0        | 0        |
| 0.413683 | 0.152933 |
| 2.317585 | 3.38203  |
| 0.144053 | 0.159764 |
| 1.019011 | 0.215266 |
| 0.310953 | 0.114955 |
| 0        | 0        |
| 0        | 0        |
| 0        | 0        |
| 0.586833 | 0.260333 |
| 0        | 0.367243 |
| 0        | 0.018656 |
| 75.54756 | 84.55553 |
| 0        | 0        |
| 14.02959 | 6.01289  |
| 0.07684  | 0        |
| 18.26263 | 9.237067 |
| 0        | 0.067048 |
| 0.095469 | 0        |
| 0.623989 | 1.211073 |
| 0.249847 | 0.831285 |
| 1.085435 | 0.84267  |
| 1.701011 | 2.305752 |
| 0        | 0.122961 |
| 0.194022 | 0        |
| 0.232535 | 0.515791 |
| 0.654925 | 0.14527  |
| 0        | 0        |
| 0.269943 | 0        |
| 0.269357 | 0        |
| 0.091439 | 0.101411 |
| 0        | 0.209933 |
| 0.401424 | 0.148401 |
| 0.064843 | 0.179786 |
| 4.483202 | 3.05605  |
| 10.46464 | 10.73595 |

|          |          |  |
|----------|----------|--|
| 0        | 0.080725 |  |
| 5.959849 | 5.41734  |  |
| 3.247937 | 4.550097 |  |
| 1.022006 | 1.473507 |  |
| 0        | 0.116314 |  |
| 23.09939 | 25.56703 |  |
| 0        | 0        |  |
| 0        | 0.245047 |  |
| 0.422935 | 0        |  |
| 0        | 0.36757  |  |
| 0        | 0        |  |
| 0.152174 | 0        |  |
| 0        | 0        |  |
| 0        | 0        |  |
| 0        | 0        |  |
| 0        | 0        |  |
| 0        | 0        |  |
| 0.048111 | 0        |  |
| 0        | 0        |  |
| 0        | 0        |  |
| 21.77938 | 25.90478 |  |
| 0        | 0.13166  |  |
| 0.559341 | 0.155086 |  |
| 0        | 0        |  |
| 1.981753 | 1.956654 |  |
| 9.12177  | 9.810653 |  |
| 0        | 0.43307  |  |
| 0.036171 | 0.020058 |  |
| 0.402291 | 0        |  |
| 0.503407 | 0.186103 |  |
| 0.55066  | 0.763394 |  |
| 0        | 0.157031 |  |
| 0.173427 | 0.384682 |  |
| 0        | 0        |  |
| 0        | 0.209933 |  |
| 3.52217  | 1.889322 |  |
| 0.078195 | 0        |  |
| 0        | 0        |  |
| 0.139993 | 0.232891 |  |
| 0.181959 | 0.172974 |  |
| 0.667601 | 0        |  |
| 0.157182 | 0.087162 |  |
| 0        | 0        |  |
| 15.34989 | 12.95854 |  |
| 3.460581 | 2.483408 |  |
| 0.77963  | 0        |  |
| 0.311212 | 0.258865 |  |
| 3.332347 | 3.112232 |  |
| 2.065628 | 1.472726 |  |
| 0.405797 | 0        |  |
| 0.246377 | 0.273247 |  |
| 0.105262 | 0.058371 |  |
| 0.20028  | 0.111062 |  |
| 0        | 0        |  |
| 0        | 0        |  |
| 0.254148 | 0.082902 |  |
| 0.541849 | 0.450708 |  |
| 31.09095 | 38.67014 |  |
| 0        | 0        |  |
| 0.340513 | 0        |  |
| 0.230236 | 0        |  |
| 0        | 0        |  |
| 0        | 0.145424 |  |
| 0.022793 | 0        |  |
| 0.227424 | 0        |  |

|          |          |
|----------|----------|
| 0        | 0        |
| 2.879816 | 1.948815 |
| 0.165125 | 0.183133 |
| 0.765193 | 0.377176 |
| 0.850505 | 0.943262 |
| 0.178925 | 0.595315 |
| 0.552702 | 1.021634 |
| 0        | 0        |
| 0.705533 | 0.782479 |
| 7.888533 | 3.084999 |
| 0.600195 | 0.147923 |
| 0        | 0.067409 |
| 3.772315 | 2.519482 |
| 6.389524 | 6.083583 |
| 0.201581 | 0.111783 |
| 31.8784  | 42.732   |
| 0.455962 | 0.084282 |
| 0.087446 | 0        |
| 0        | 0.088167 |
| 0        | 0        |
| 0.067929 | 1.205394 |
| 0        | 0        |
| 0        | 0.105127 |
| 0.505169 | 0.578336 |
| 1.727161 | 1.411441 |
| 8.927526 | 8.400993 |
| 0.535232 | 0        |
| 0        | 0.43307  |
| 0        | 0        |
| 0        | 0        |
| 0.159197 | 0.353119 |
| 0.155997 | 0.519031 |
| 0.449905 | 0        |
| 0        | 0        |
| 1.302522 | 0.722288 |
| 0        | 0.200169 |
| 0        | 0        |
| 0.677311 | 0.250393 |
| 0.136155 | 0.302009 |
| 43.63904 | 43.9645  |
| 1.964775 | 0.14527  |
| 0        | 0.020318 |
| 0.163387 | 0        |
| 0        | 0.119753 |
| 0        | 0.404255 |
| 0.583523 | 0.647163 |
| 0.101782 | 0.225764 |
| 0.036694 | 0.040696 |
| 1.71904  | 1.936309 |
| 0        | 0        |
| 0.355459 | 0.262817 |
| 0        | 0        |
| 0.487913 | 0        |
| 0.148533 | 0.164732 |
| 0.111868 | 0        |
| 0.388529 | 0.430902 |
| 0.196477 | 0.054476 |
| 3.001179 | 4.056597 |
| 0.572229 | 0        |
| 32.382   | 46.73243 |
| 0.453662 | 0.359385 |
| 2.58114  | 1.573163 |
| 0        | 0.065988 |
| 0        | 0        |
| 0.788498 | 0.647772 |

|          |          |
|----------|----------|
| 0.227842 | 0        |
| 0        | 0.067841 |
| 0        | 0        |
| 0.473946 | 1.051269 |
| 0        | 0.096171 |
| 3.695212 | 2.880924 |
| 0.325488 | 1.173205 |
| 0        | 0        |
| 0        | 0.069554 |
| 1.313376 | 0.926936 |
| 0.106678 | 0.354939 |
| 0.093364 | 0.051773 |
| 0.257089 | 0        |
| 0.027177 | 0.030141 |
| 0.096935 | 0        |
| 0        | 0.311106 |
| 0.116705 | 0        |
| 0        | 0.097257 |
| 7.998522 | 5.27161  |
| 0.305202 | 0.725331 |
| 0.195242 | 0.43307  |
| 0.397483 | 0.7935   |
| 0.067559 | 0.074927 |
| 0.102623 | 0.113815 |
| 9.09323  | 7.680587 |
| 1.350605 | 1.043993 |
| 0.249847 | 0.092365 |
| 3.350922 | 3.295654 |
| 0.14372  | 0        |
| 0.847432 | 0.912211 |
| 0        | 0.175659 |
| 0.111068 | 0        |
| 0.204907 | 0.227255 |
| 0.794967 | 0.7935   |
| 0        | 0        |
| 0        | 0        |
| 0.044731 | 0.148829 |
| 1.023209 | 1.094273 |
| 0.09876  | 0.876244 |
| 0        | 0        |
| 3.271735 | 3.417591 |
| 0.145573 | 0        |
| 0.398815 | 0.616074 |
| 0.518832 | 0.575416 |
| 0.260869 | 0        |
| 0        | 0        |
| 0.1599   | 0.152005 |
| 0        | 0.116314 |
| 0        | 0        |
| 0.622945 | 0.644825 |
| 0.182608 | 0.101262 |
| 0.242054 | 0.671132 |
| 0.267232 | 0.889129 |
| 0.217087 | 2.64839  |
| 4.289041 | 8.589018 |
| 0.74657  | 1.444172 |
| 0.535232 | 0.395736 |
| 0.324819 | 0.051463 |
| 0.07587  | 0.084144 |
| 3.211391 | 4.748837 |
| 0.043723 | 0.036369 |
| 0.163387 | 0.362411 |
| 0        | 0.387569 |
| 0        | 0.12919  |
| 0        | 0.077109 |

|          |          |   |
|----------|----------|---|
| 0.228821 | 0.084592 |   |
| 0        | 0.093304 |   |
| 0        |          | 0 |
| 0        |          | 0 |
| 0.52616  | 0.583544 |   |
| 0.377046 |          | 0 |
| 0        |          | 0 |
| 0.444536 | 0.184882 |   |
| 0.463335 | 0.171289 |   |
| 0.466819 |          | 0 |
| 0.196477 |          | 0 |
| 0        | 0.250393 |   |
| 0        |          | 0 |
| 0        |          | 0 |
| 0        | 0.124517 |   |
| 0.152923 |          | 0 |
| 0.181011 |          | 0 |
| 20.15507 | 28.5196  |   |
| 0.287439 |          | 0 |
| 0        |          | 0 |
| 0        |          | 0 |
| 0.227258 | 0.100817 |   |
| 0.075808 |          | 0 |
| 0.087078 |          | 0 |
| 0.163818 | 0.545051 |   |
| 0.095372 | 0.105773 |   |
| 0.359403 | 0.69755  |   |
| 0.091304 | 0.202524 |   |
| 0.143388 |          | 0 |
| 0.129348 | 0.143454 |   |
| 0.352766 | 0.391239 |   |
| 0.27806  | 0.17622  |   |
| 0        |          | 0 |
| 0        |          | 0 |
| 0.307361 | 0.340882 |   |
| 0        | 0.094846 |   |
| 0.195365 | 0.433343 |   |
| 0        |          | 0 |
| 0.095912 | 0.035457 |   |
| 0.027065 |          | 0 |
| 0        | 0.143754 |   |
| 0        | 0.101113 |   |
| 24.95399 | 26.63648 |   |
| 0.603958 | 0.133965 |   |
| 0.102454 | 0.056814 |   |
| 3.878376 | 3.258823 |   |
| 0        |          | 0 |
| 0.098472 | 0.218424 |   |
| 0.438003 | 1.214429 |   |
| 0        |          | 0 |
| 0        |          | 0 |
| 0.114763 |          | 0 |
| 4.353218 | 6.015194 |   |
| 0        |          | 0 |
| 0.84587  | 0.312707 |   |
| 0        | 0.297443 |   |
| 0.580251 | 0.643534 |   |
| 2.485555 | 2.202999 |   |
| 0        |          | 0 |
| 3.028368 | 0.973176 |   |
| 0.094789 |          | 0 |
| 0.657004 |          | 0 |
| 0.13736  |          | 0 |
| 0        |          | 0 |
| 2.92775  | 2.061621 |   |

|          |          |
|----------|----------|
| 0        | 0        |
| 0        | 0        |
| 0        | 0        |
| 0        | 0        |
| 9.771936 | 8.502483 |
| 0        | 0        |
| 0.233996 | 0.086505 |
| 0        | 0.077982 |
| 0        | 0        |
| 0        | 0        |
| 20.54072 | 24.84253 |
| 0        | 0.07933  |
| 0        | 0        |
| 0.110279 | 0.027179 |
| 1.974855 | 1.625012 |
| 0        | 0        |
| 0.25035  | 0        |
| 13.0761  | 8.83216  |
| 0.081159 | 0        |
| 0.177391 | 0        |
| 0        | 0        |
| 0.292174 | 0.162019 |
| 0        | 0        |
| 0.215954 | 0        |
| 0.178411 | 0        |
| 1.153317 | 0.852732 |
| 0        | 0        |
| 0        | 0        |
| 0        | 0        |
| 0        | 0.123181 |
| 0.079906 | 0        |
| 0.530657 | 0.294266 |
| 0.068453 | 0        |
| 0.348411 | 0.386409 |
| 0.607504 | 0.404255 |
| 0.269708 | 0.358948 |
| 0.080181 | 0.096336 |
| 0        | 0        |
| 50.24222 | 40.56423 |
| 2.664447 | 1.17031  |
| 0        | 0.081393 |
| 0.380901 | 0.422443 |
| 7.06153  | 2.988897 |
| 0.059642 | 0        |
| 0        | 0.324038 |
| 0.100627 | 0.055801 |
| 1.177003 | 0.652684 |
| 0        | 0.159394 |
| 0        | 0        |
| 0        | 0        |
| 0.819629 | 0.113627 |
| 0.073913 | 0        |
| 0        | 0        |
| 0        | 0.204327 |
| 0        | 0.197868 |
| 0        | 0.086942 |
| 0.134387 | 0        |
| 8.611604 | 5.237532 |
| 0        | 0        |
| 1.505839 | 1.199022 |
| 0        | 0        |
| 0        | 0        |
| 0.80469  | 0.61356  |
| 0        | 0.214511 |
| 0.146778 | 0        |

|          |          |   |
|----------|----------|---|
| 0        | 0.293013 |   |
| 0        |          | 0 |
| 0.367378 | 0.814889 |   |
| 1.030488 | 0.666676 |   |
| 0        |          | 0 |
| 2.026945 | 1.17588  |   |
| 0        |          | 0 |
| 0.016027 |          | 0 |
| 0.072915 |          | 0 |
| 0.440333 |          | 0 |
| 0.361891 | 0.175595 |   |
| 0.069293 |          | 0 |
| 0.158993 | 0.440833 |   |
| 2.813534 | 2.517281 |   |
| 0.158993 |          | 0 |
| 0        |          | 0 |
| 1.218796 | 3.260027 |   |
| 22.64442 | 13.15063 |   |
| 0.099075 | 0.048836 |   |
| 0        |          | 0 |
| 0        |          | 0 |
| 0.272211 | 0.276741 |   |
| 0.265941 | 0.068064 |   |
| 4.391139 | 17.57449 |   |
| 0.146293 | 0.048674 |   |
| 0.128544 |          | 0 |
| 0.089635 | 0.09941  |   |
| 2.284206 | 2.533323 |   |
| 0.263639 | 0.292391 |   |
| 0.129618 | 0.143754 |   |
| 0.05284  | 0.019534 |   |
| 0        |          | 0 |
| 0        |          | 0 |
| 0.419597 | 0.28522  |   |
| 0.595082 | 0.109997 |   |
| 0        | 0.203121 |   |
| 0.280429 | 0.062202 |   |
| 0        | 0.015264 |   |
| 0.105054 |          | 0 |
| 0        |          | 0 |
| 1.860915 | 2.439117 |   |
| 0.350773 | 0.291772 |   |
| 0        |          | 0 |
| 0        |          | 0 |
| 0.343021 |          | 0 |
| 0        |          | 0 |
| 0.327924 | 0.121229 |   |
| 5.085023 | 2.008248 |   |
| 0.748035 |          | 0 |
| 1.169445 | 0.353723 |   |
| 3.472236 | 3.484167 |   |
| 0.317987 |          | 0 |
| 0        |          | 0 |
| 1.279568 | 0.493607 |   |
| 0.157581 | 0.034953 |   |
| 0.089981 | 0.099794 |   |
| 0.212142 | 0.078426 |   |
| 0        |          | 0 |
| 0        | 0.093685 |   |
| 10.16369 | 7.683966 |   |
| 6.622359 | 6.922034 |   |
| 0.3344   |          | 0 |
| 0.304646 | 0.135148 |   |
| 0.515244 | 0.095239 |   |
| 0        |          | 0 |

|          |          |   |
|----------|----------|---|
| 0        | 0.294266 |   |
| 0        |          | 0 |
| 0.076368 | 0.084696 |   |
| 0        | 0.088833 |   |
| 0        |          | 0 |
| 0.355072 | 0.50631  |   |
| 0.439613 | 0.600071 |   |
| 0        | 0.529678 |   |
| 5.524331 | 5.555288 |   |
| 1.463587 | 0.256296 |   |
| 0        | 0.285127 |   |
| 3.96844  | 4.685193 |   |
| 0        |          | 0 |
| 0        |          | 0 |
| 121.9638 | 130.6615 |   |
| 0        |          | 0 |
| 1.040686 | 0.491142 |   |
| 1.518644 | 2.274856 |   |
| 0        |          | 0 |
| 0.140309 |          | 0 |
| 0.894624 | 0.396877 |   |
| 0.675907 | 0.321267 |   |
| 0.205927 | 0.114193 |   |
| 0        |          | 0 |
| 0.221475 | 0.163753 |   |
| 0.047649 | 0.105692 |   |
| 0        |          | 0 |
| 0.695651 | 0.19288  |   |
| 0.09117  | 0.202227 |   |
| 0        |          | 0 |
| 0        |          | 0 |
| 0        |          | 0 |
| 0.517391 | 1.147636 |   |
| 0.825623 | 1.465067 |   |
| 0.614722 |          | 0 |
| 0.192517 |          | 0 |
| 0.163387 | 0.181206 |   |
| 0.073043 |          | 0 |
| 0.119628 | 0.796048 |   |
| 0.139208 |          | 0 |
| 0        | 0.159026 |   |
| 0.151431 | 0.167947 |   |
| 0.52394  |          | 0 |
| 0.401749 | 0.482694 |   |
| 0        | 0.121657 |   |
| 1.85334  | 6.768865 |   |
| 0.483942 | 0.189431 |   |
| 0        |          | 0 |
| 0.52616  | 0.291772 |   |
| 40.25657 | 31.67967 |   |
| 11.67756 | 8.526825 |   |
| 0        |          | 0 |
| 0.443478 | 0.983688 |   |
| 0.084934 |          | 0 |
| 0.094501 | 0.052403 |   |
| 0.053157 | 0.117908 |   |
| 0        |          | 0 |
| 0.134971 | 0.149692 |   |
| 0        | 0.043554 |   |
| 0.782813 | 0.108523 |   |
| 0.079192 | 0.087829 |   |
| 0        |          | 0 |
| 0.027371 | 0.010119 |   |
| 0        | 0.156141 |   |
| 0        | 0.639549 |   |

|          |          |
|----------|----------|
| 0        | 0        |
| 1.131056 | 1.612813 |
| 2.9725   | 4.253784 |
| 0        | 0        |
| 2.024572 | 1.197533 |
| 0.397483 | 0.088167 |
| 0.73139  | 0.510728 |
| 0.432798 | 0        |
| 0        | 0.016149 |
| 16.20742 | 18.25155 |
| 0        | 0        |
| 0.962587 | 0.960811 |
| 1.173845 | 3.905597 |
| 0.457362 | 0        |
| 1.762719 | 1.303309 |
| 0        | 0        |
| 0.992779 | 0.677571 |
| 0.571702 | 0.634053 |
| 0.030183 | 0.100425 |
| 0        | 0.077806 |
| 0.075623 | 0        |
| 0        | 0        |
| 0.063354 | 0        |
| 32.30065 | 33.89279 |
| 27.079   | 20.04943 |
| 0.048849 | 0.054176 |
| 0.079497 | 0.088167 |
| 0.884149 | 1.525338 |
| 1.608469 | 0.832482 |
| 21.8264  | 29.21975 |
| 0        | 0.499878 |
| 0        | 0        |
| 0.155314 | 0.12919  |
| 11.75146 | 9.12316  |
| 0.178283 | 0.098863 |
| 0.027742 | 0.061535 |
| 19.79244 | 13.95074 |
| 0        | 0        |
| 15.36757 | 11.41499 |
| 0        | 0        |
| 0.387236 | 0.572625 |
| 0.146662 | 0        |
| 0        | 0.376274 |
| 0.178925 | 0        |
| 0.378579 | 0        |
| 0.643976 | 0.756221 |
| 0.21608  | 0        |
| 0.464987 | 0.073671 |
| 0        | 0        |
| 1.918691 | 1.41863  |
| 0.346854 | 0        |
| 0        | 0.159394 |
| 0.210583 | 0.369786 |
| 0.123679 | 0.137168 |
| 5.215298 | 2.892042 |
| 0.274721 | 0.038085 |
| 0        | 0.106923 |
| 1.252473 | 0.793754 |
| 0.063289 | 0.140384 |
| 0.571702 | 0.285324 |
| 0.925749 | 1.163607 |
| 10.90026 | 9.261207 |
| 0.552702 | 0.408654 |
| 0.129708 | 0.239757 |
| 0.260869 | 0        |

|          |          |
|----------|----------|
| 0.080842 | 0        |
| 0        | 0        |
| 0.209611 | 0.069742 |
| 0.147125 | 0.326342 |
| 0.11413  | 0        |
| 1.787201 | 0.787416 |
| 0        | 0.321267 |
| 0.215913 | 0.425707 |
| 0.345781 | 0.234356 |
| 0.047686 | 0        |
| 0        | 0        |
| 0.564426 | 1.251966 |
| 0.081372 | 0.27074  |
| 0        | 0.148401 |
| 7.405789 | 7.875931 |
| 0        | 0        |
| 1.559482 | 0.324293 |
| 0.564426 | 0        |
| 0.079599 | 0.037834 |
| 0        | 0        |
| 0        | 0        |
| 0.109501 | 0        |
| 6.340639 | 5.918407 |
| 0        | 0        |
| 0.341137 | 0        |
| 0        | 0        |
| 9.138329 | 3.815516 |
| 0.914265 | 0.460898 |
| 0.065149 | 0.108381 |
| 6.124625 | 3.862449 |
| 0.347383 | 0.840588 |
| 0.339273 | 0.188137 |
| 0        | 0        |
| 0.228561 | 0.14485  |
| 0.134971 | 0        |
| 0        | 0        |
| 0.578344 | 0.264113 |
| 0.031921 | 0        |
| 0        | 0.126577 |
| 5.840348 | 3.09144  |
| 0        | 0        |
| 0        | 0        |
| 0.141945 | 0.125941 |
| 0.0657   | 0.364329 |
| 0.134533 | 0.124338 |
| 0.068078 | 0.113254 |
| 0.252564 | 0.207037 |
| 0.155662 | 0.197301 |
| 0.486089 | 0.637122 |
| 1.707694 | 0.980789 |
| 0.64934  | 0.692459 |
| 0.956102 | 0.331367 |
| 0.29509  | 0.261818 |
| 0        | 0.024505 |
| 0        | 0.256933 |
| 0.640511 | 0.236789 |
| 0.322949 | 0.179085 |
| 0        | 0        |
| 0.042222 | 0.07024  |
| 0        | 0.032087 |
| 0.047944 | 0        |
| 0        | 0        |
| 0.34421  | 0.477187 |
| 0.107463 | 0        |
| 0.05235  | 0.309649 |

|          |          |
|----------|----------|
| 1.020995 | 0.460205 |
| 0.428678 | 0.396192 |
| 0.354598 | 0.250263 |
| 2.056969 | 2.467533 |
| 0.041391 | 0.045905 |
| 0.941602 | 0.652684 |
| 0.320586 | 0.474066 |
| 0.047613 | 0.158416 |
| 0.947658 | 1.05101  |
| 0.065816 | 0        |
| 0.177037 | 0.039269 |
| 0        | 0        |
| 0        | 0.245922 |
| 0.579878 | 0.842708 |
| 0.317093 | 0.351676 |
| 0.085167 | 0.094456 |
| 2.618631 | 2.248429 |
| 0.431159 | 0.191273 |
| 0.156311 | 0        |
| 0.028878 | 0.096081 |
| 0.182877 | 0.101411 |
| 0.027041 | 0.02999  |
| 0        | 0        |
| 0        | 0        |
| 0.070795 | 0.026172 |
| 9.709504 | 3.11088  |
| 0.559341 | 0.310172 |
| 0        | 0        |
| 0        | 0        |
| 0        | 0.132726 |
| 0.130732 | 0.217485 |
| 80.96207 | 61.95107 |
| 0.036847 | 0        |
| 1.293042 | 0.578251 |
| 0        | 0        |
| 3.266356 | 2.289475 |
| 0.561872 | 0.311575 |
| 0.08895  | 0.591904 |
| 0.053431 | 0        |
| 3.754091 | 3.202704 |
| 0.478024 | 0        |
| 0.50115  | 0.123512 |
| 5.506255 | 2.910704 |
| 0.321694 | 0.342507 |
| 0        | 0        |
| 0.168206 | 0.062184 |
| 0.635943 | 0.156733 |
| 0.056882 | 0.1104   |
| 1.353487 | 0.692815 |
| 0.297422 | 0.439812 |
| 0        | 0        |
| 0        | 0        |
| 0.087446 | 0        |
| 0.538653 | 0.345863 |
| 4.183589 | 2.387172 |
| 0.572969 | 0.305019 |
| 0.372255 | 0.560302 |
| 0        | 0.116314 |
| 0.148652 | 0.384682 |
| 0.080009 | 0        |
| 2.178487 | 0.836334 |
| 0.303027 | 0.186709 |
| 0.021603 | 0        |
| 0        | 0.023413 |
| 0.066832 | 0.111181 |

|          |          |
|----------|----------|
| 0        | 0        |
| 0.046368 | 0.10285  |
| 0        | 0        |
| 0        | 0.027765 |
| 0        | 0        |
| 0.109694 | 0        |
| 4.908579 | 3.285965 |
| 2.352345 | 2.553385 |
| 0.20165  | 0.223642 |
| 0.456894 | 0.281513 |
| 0.06819  | 0        |
| 0.674857 | 0.249486 |
| 0        | 0.066083 |
| 0.042467 | 0.023549 |
| 1.125017 | 0.701838 |
| 0.970108 | 0.391239 |
| 0.504259 | 0.454394 |
| 1.382944 | 0.565073 |
| 0.226698 | 0.251422 |
| 0.024511 | 0        |
| 0.097315 | 0.035976 |
| 1.950622 | 1.9523   |
| 20.43023 | 15.3874  |
| 0.273073 | 0.110129 |
| 0.049689 | 0        |
| 0.274721 | 0.541657 |
| 0.063646 | 0        |
| 0.064361 | 0.261728 |
| 0.064051 | 0.189431 |
| 2.538537 | 1.328389 |
| 0.080528 | 0.044655 |
| 2.06769  | 2.118712 |
| 0.051621 | 0.042938 |
| 0.126514 | 0.140312 |
| 0.155801 | 0.129595 |
| 0.429502 | 0.740979 |
| 0        | 0.032072 |
| 0.900542 | 0.56005  |
| 0.757157 | 0.167947 |
| 1.213729 | 0.911205 |
| 0.060455 | 0.033524 |
| 29.20937 | 30.41109 |
| 0.367106 | 0.712501 |
| 3.609231 | 4.137785 |
| 4.297108 | 1.471777 |
| 0.387179 | 0.245374 |
| 9.519427 | 8.595588 |
| 0.865699 | 1.230145 |
| 0.03057  | 0        |
| 0.016904 | 0        |
| 0        | 0        |
| 0.061079 | 0        |
| 0        | 0.069227 |
| 4.541592 | 6.296128 |
| 2.850142 | 2.306662 |
| 0.753622 | 0.9644   |
| 0.0276   | 0.015305 |
| 0        | 0        |
| 0.278886 | 0        |
| 0.022229 | 0        |
| 0        | 0        |
| 0.322436 | 0.198667 |
| 0        | 0        |
| 0.509431 | 0.282495 |
| 0.747263 | 0.639329 |

|          |          |  |
|----------|----------|--|
| 0        | 0.352216 |  |
| 0.032103 | 0.035604 |  |
| 0.209753 | 0.077543 |  |
| 0.035559 | 0        |  |
| 0        | 0        |  |
| 30.55471 | 21.47089 |  |
| 1.814964 | 0.978496 |  |
| 0.683212 | 0.284146 |  |
| 16.91187 | 11.22826 |  |
| 0        | 0.076255 |  |
| 17.16773 | 12.78436 |  |
| 0.225443 | 0.350041 |  |
| 0.495374 | 0.183133 |  |
| 1.276487 | 0.511225 |  |
| 0.069345 | 0        |  |
| 4.459279 | 3.899425 |  |
| 0.128014 | 0.141976 |  |
| 3.364314 | 0        |  |
| 2.149432 | 0.976988 |  |
| 2.662678 | 1.999964 |  |
| 0.057461 | 0.031864 |  |
| 0.049789 | 0.055219 |  |
| 0        | 0        |  |
| 0.336461 | 0.460957 |  |
| 0        | 0        |  |
| 6.428615 | 3.752487 |  |
| 0.169636 | 0.156781 |  |
| 0        | 0.104967 |  |
| 0.118713 | 0        |  |
| 3.921533 | 2.323185 |  |
| 0.318394 | 0.353119 |  |
| 0        | 0        |  |
| 0.252044 | 0.186355 |  |
| 0.563245 | 0.768828 |  |
| 0.179269 | 0        |  |
| 0.662587 | 1.115883 |  |
| 3.102711 | 3.767094 |  |
| 0.121705 | 0.096413 |  |
| 0.077367 | 0        |  |
| 0.466068 | 0.443055 |  |
| 1.247014 | 1.356418 |  |
| 0.814983 | 1.705019 |  |
| 0        | 0        |  |
| 0.126107 | 0.04662  |  |
| 2.20886  | 1.787663 |  |
| 0.059046 | 0.065486 |  |
| 0.483435 | 0.306377 |  |
| 0.023527 | 0.078278 |  |
| 8.029451 | 8.278027 |  |
| 0        | 0        |  |
| 0.083338 | 0        |  |
| 0        | 0        |  |
| 0.024667 | 0        |  |
| 4.683748 | 1.328841 |  |
| 1.785474 | 2.640266 |  |
| 0        | 0        |  |
| 0        | 0.569076 |  |
| 8.849382 | 8.874817 |  |
| 0        | 0        |  |
| 0        | 0        |  |
| 0.369565 | 0.175659 |  |
| 0        | 0        |  |
| 0.184508 | 0.102315 |  |
| 0        | 0        |  |
| 1.113167 | 1.574077 |  |

|          |          |
|----------|----------|
| 0.124798 | 0        |
| 0        | 0        |
| 0        | 0        |
| 0.641725 | 0        |
| 0.095813 | 0        |
| 0.209047 | 0.309127 |
| 0        | 0.241184 |
| 0.212772 | 0.047195 |
| 0.088067 | 0        |
| 0.099818 | 0.885635 |
| 0        | 0.06364  |
| 0.397285 | 0.489571 |
| 1.890971 | 1.135984 |
| 0        | 0        |
| 0.114551 | 0        |
| 0.083394 | 0.046245 |
| 0        | 0        |
| 0        | 0        |
| 0.042701 | 0.047358 |
| 0        | 0        |
| 0        | 0.134489 |
| 0        | 0        |
| 0.435392 | 0        |
| 0        | 0.120804 |
| 0.146087 | 0        |
| 0        | 0        |
| 0.70287  | 1.559052 |
| 0.063    | 0        |
| 0        | 0        |
| 1.098883 | 0.487491 |
| 9.155315 | 6.826085 |
| 0.084129 | 0.373215 |
| 0        | 0        |
| 1.395211 | 1.740796 |
| 0        | 0.083667 |
| 0.512585 | 0.071061 |
| 0        | 0.628841 |
| 0.168485 | 0.280291 |
| 0.060929 | 0.067574 |
| 0.601754 | 0.196289 |
| 0.062937 | 0.139601 |
| 0        | 0.015775 |
| 0        | 0        |
| 3.674627 | 12.49079 |
| 31.43409 | 27.06379 |
| 0.314417 | 0.023247 |
| 0.33425  | 0.370703 |
| 0        | 0.09343  |
| 0.666705 | 0.831843 |
| 0.05913  | 0.131158 |
| 6.319276 | 4.205077 |
| 0        | 0        |
| 0.992067 | 1.100263 |
| 1.780941 | 1.494374 |
| 0        | 0        |
| 0.138278 | 0        |
| 0.684782 | 0.50631  |
| 0.564426 | 0        |
| 0        | 0        |
| 0.099818 | 0        |
| 0.09117  | 0.033704 |
| 0.083788 | 0.092926 |
| 0.098707 | 0        |
| 0.494224 | 0.411093 |
| 0.218232 | 0.726096 |

|          |          |
|----------|----------|
| 0.095665 | 0.106099 |
| 0        | 0.023606 |
| 0        | 0        |
| 0        | 0        |
| 12.02843 | 15.01778 |
| 0.183611 | 0.116364 |
| 0.214462 | 0.356778 |
| 0        | 0        |
| 0        | 0        |
| 0        | 0        |
| 0.053708 | 0        |
| 0        | 0        |
| 0.107977 | 0.119753 |
| 0.03756  | 0        |
| 0.290578 | 0        |
| 0.529364 | 0.670968 |
| 0.115726 | 0.19252  |
| 0.183147 | 0        |
| 0        | 0        |
| 0.046542 | 0.154853 |
| 1.046408 | 0.53191  |
| 2.567503 | 1.359042 |
| 0.389667 | 0        |
| 0        | 0        |
| 0        | 0        |
| 0.098864 | 0.438587 |
| 0.052549 | 0.174841 |
| 2.143699 | 0.802404 |
| 2.412159 | 1.163144 |
| 0.408466 | 0        |
| 0        | 0        |
| 0.186634 | 0        |
| 0        | 0.012228 |
| 292.8386 | 216.888  |
| 0.508215 | 0.09394  |
| 0        | 0        |
| 0        | 0        |
| 0.266467 | 0.394038 |
| 0        | 0        |
| 6.34883  | 4.238873 |
| 0.149427 | 0.165724 |
| 0.224952 | 0        |
| 0        | 0.195342 |
| 0.111667 | 0        |
| 0        | 0        |
| 0.325631 | 0.481525 |
| 0.221344 | 0.122742 |
| 0        | 0        |
| 1.193979 | 1.191775 |
| 0        | 0.043887 |
| 1.019908 | 0.706962 |
| 0        | 0        |
| 0.265329 | 0.294266 |
| 0.026186 | 0        |
| 0        | 0        |
| 0.308124 | 0        |
| 0        | 0        |
| 0.392458 | 0.174104 |
| 0        | 0        |
| 0.213137 | 0.141829 |
| 0.278209 | 0.231413 |
| 0.176383 | 0.052165 |
| 2.359864 | 2.181027 |
| 0.085472 | 0.075835 |
| 0        | 0        |

|          |          |
|----------|----------|
| 0.031872 | 0.035348 |
| 0.380901 | 0.079208 |
| 11.96973 | 8.526321 |
| 0        | 0        |
| 0        | 0        |
| 0        | 0        |
| 0        | 0        |
| 0        | 0        |
| 0        | 0.571437 |
| 0.457362 | 0.253621 |
| 0        | 0        |
| 0        | 0.591904 |
| 0        | 0.257896 |
| 0        | 0.107089 |
| 0.087693 | 0.048629 |
| 0.268001 | 0.198153 |
| 1.149757 | 1.275151 |
| 0        | 0.836334 |
| 1.308152 | 1.227617 |
| 0.065631 | 0        |
| 0.409005 | 0.181444 |
| 1.244226 | 0.413977 |
| 0.458841 | 0.413467 |
| 0        | 0        |
| 0        | 0        |
| 0.037492 | 0.706877 |
| 0.204907 | 0.113627 |
| 0        | 0        |
| 0        | 0.186103 |
| 0        | 0.036981 |
| 0        | 0        |
| 0        | 0        |
| 1.423509 | 1.052505 |
| 0        | 0        |
| 0.206612 | 0.229145 |
| 0        | 0        |
| 0        | 0        |
| 0.020891 | 0.023169 |
| 0        | 0        |
| 0        | 0        |
| 0.03932  | 0.043609 |
| 0        | 0.1562   |
| 0.187574 | 0        |
| 0.031677 | 0.035132 |
| 0        | 0.017752 |
| 1.413743 | 1.437267 |
| 15.94449 | 6.006109 |
| 0.279042 | 0.464212 |
| 0        | 0        |
| 0.321694 | 0.356778 |
| 0        | 0        |
| 0.315964 | 0.525635 |
| 2.502542 | 0.925157 |
| 0        | 0        |
| 1.342978 | 0.802008 |
| 0        | 0        |
| 0.58161  | 0        |
| 0.047981 | 0        |
| 0.229951 | 0.25503  |
| 0        | 0        |
| 0.659673 | 0.516436 |
| 0        | 0.444246 |
| 0.087477 | 0.291052 |
| 0        | 0        |
| 0.07879  | 0.087383 |

|          |          |
|----------|----------|
| 0        | 0        |
| 0.884096 | 0.536509 |
| 4.030406 | 2.842174 |
| 0.766505 | 0.212525 |
| 0.078991 | 0.262817 |
| 0        | 0        |
| 0        | 0.122523 |
| 0        | 0.050557 |
| 0.174401 | 0        |
| 0        | 0        |
| 1.663042 | 1.352571 |
| 0.249095 | 0.207196 |
| 0.284802 | 0        |
| 0.770162 | 0.985565 |
| 0        | 0.216535 |
| 0        | 0        |
| 0.333084 | 0        |
| 0        | 0        |
| 0.097698 | 0.054176 |
| 0.170257 | 0.629416 |
| 0.378117 | 0.754839 |
| 0        | 0.348355 |
| 0        | 0        |
| 0.577903 | 0.562903 |
| 0.213724 | 0.7111   |
| 0        | 0        |
| 0        | 0.532408 |
| 0.049849 | 0.027643 |
| 0.513964 | 0.494015 |
| 0        | 0.131912 |
| 0        | 0.088167 |
| 0.1672   | 0.123623 |
| 2.887762 | 2.859557 |
| 0.116268 | 0.386843 |
| 0        | 0        |
| 0.136755 | 0        |
| 0        | 0        |
| 0.022635 | 0        |
| 0.06651  | 0        |
| 0        | 0        |
| 0        | 0.200169 |
| 0        | 0.127515 |
| 0.348314 | 0.531164 |
| 0.516673 | 0.191007 |
| 0        | 0        |
| 1.873311 | 0.890407 |
| 0        | 0.112882 |
| 0        | 0        |
| 0.43236  | 0.287708 |
| 0.429172 | 0.317319 |
| 0.726162 | 0        |
| 0.22687  | 0        |
| 0        | 0        |
| 0        | 0        |
| 0.894256 | 0.708417 |
| 0        | 0.269503 |
| 0.162958 | 0.36146  |
| 0        | 0.130661 |
| 0.216331 | 0.719771 |
| 0.906378 | 1.005228 |
| 0        | 0        |
| 0        | 0        |
| 0        | 0        |
| 0        | 0.478182 |
| 0.21528  | 0.191007 |

|          |          |
|----------|----------|
| 0        | 0        |
| 0        | 0.131158 |
| 1.564309 | 0.658071 |
| 5.098376 | 4.774834 |
| 0        | 0        |
| 0.078393 | 0        |
| 0        | 0.104648 |
| 0        | 0        |
| 0        | 0        |
| 0.109888 | 0.121873 |
| 0.494716 | 0.274335 |
| 0.560659 | 0.05407  |
| 0.124423 | 0        |
| 0.170568 | 0.094585 |
| 0        | 0        |
| 0.217087 | 0.240763 |
| 0.06676  | 0        |
| 0.223871 | 0.082762 |
| 0        | 0        |
| 9.225371 | 10.46298 |
| 3.067823 | 5.346632 |
| 0.594702 | 0.395736 |
| 1.028354 | 1.283071 |
| 0.150696 | 0        |
| 0        | 0        |
| 0.10595  | 0.117505 |
| 0        | 0.114764 |
| 0        | 0        |
| 0.26308  | 0        |
| 0.449091 | 0.249035 |
| 25.60076 | 22.02119 |
| 0        | 0        |
| 2.834478 | 3.746134 |
| 0.386433 | 0.285718 |
| 0        | 0        |
| 0        | 0        |
| 0        | 0        |
| 0.113504 | 0        |
| 0.372894 | 0        |
| 1.379709 | 1.020121 |
| 0        | 0.040034 |
| 0        | 0.391239 |
| 0.027339 | 0        |
| 0        | 0        |
| 0        | 0        |
| 0.393786 | 0        |
| 0.407127 | 0.301019 |
| 1.411066 | 0        |
| 0        | 0        |
| 0.077706 | 0        |
| 0        | 0        |
| 0        | 0        |
| 0        | 0        |
| 0.199636 | 0.147606 |
| 0        | 0        |
| 0        | 0        |
| 1.497573 | 0.968858 |
| 0        | 0.058937 |
| 0        | 0.036685 |
| 0.081159 | 0.360043 |
| 0.295652 | 1.092986 |
| 0.246703 | 0.364811 |
| 0.081266 | 0        |
| 0.359143 | 0.199156 |
| 0.012487 | 0        |

|          |          |
|----------|----------|
| 0.123433 | 0        |
| 0        | 0        |
| 0.062462 | 0        |
| 0        | 0        |
| 0        | 0.211221 |
| 0.134387 | 0        |
| 0.140787 | 0.156141 |
| 0        | 0        |
| 0        | 0        |
| 0.119169 | 0.132165 |
| 0.539105 | 0.09965  |
| 0        | 0        |
| 0.141751 | 0        |
| 0        | 0.074201 |
| 0.341763 | 0.08423  |
| 0.029204 | 0        |
| 0.124423 | 0        |
| 0.046196 | 0        |
| 0        | 0        |
| 0.512378 | 0.345897 |
| 23.7127  | 26.96252 |
| 0        | 0.070696 |
| 0.022767 | 0        |
| 0.141751 | 0.235816 |
| 0.199508 | 0.044253 |
| 0.159606 | 0        |
| 0        | 0        |
| 0.290805 | 0        |
| 0.094043 | 0.083439 |
| 0        | 0.141392 |
| 0.454017 | 0.881183 |
| 0.235178 | 0        |
| 0.111267 | 0        |
| 6.347371 | 4.02264  |
| 0.074001 | 0.328287 |
| 0.110475 | 0        |
| 0        | 0.126577 |
| 0        | 0        |
| 0.327347 | 0.121016 |
| 0.164687 | 0        |
| 0.294251 | 0.163171 |
| 0        | 0        |
| 0        | 0        |
| 6.477258 | 4.029865 |
| 0        | 0.048594 |
| 0.124923 | 0.277095 |
| 0.133234 | 0        |
| 33.46527 | 26.27353 |
| 0.141936 | 0.16866  |
| 0        | 0        |
| 0.177899 | 0        |
| 0.140468 | 0        |
| 6.152754 | 3.349855 |
| 2.563648 | 2.856165 |
| 0.153388 | 0.091601 |
| 0.109501 | 0.121443 |
| 0.889308 | 1.15068  |
| 0.045393 | 0.012586 |
| 0        | 0        |
| 0        | 0        |
| 0.097315 | 0.107928 |
| 0        | 0        |
| 0        | 0        |
| 0        | 0        |
| 0.386433 | 0.428578 |

|          |          |
|----------|----------|
| 0.252386 | 0.559822 |
| 0        | 0.084801 |
| 0        | 0        |
| 0        | 0        |
| 0.33113  | 0.275433 |
| 0.053569 | 0        |
| 0        | 0        |
| 0.181276 | 0        |
| 0        | 0        |
| 0.326201 | 0        |
| 0.244437 | 0        |
| 0.192816 | 0        |
| 0.327924 | 0.848604 |
| 0        | 0        |
| 5.723635 | 5.594724 |
| 0        | 0        |
| 0        | 0        |
| 1.427285 | 1.319121 |
| 0.059584 | 0.066083 |
| 0.946286 | 1.399319 |
| 0        | 0        |
| 0.924944 | 0.897592 |
| 0.086794 | 0.032087 |
| 0        | 1.159228 |
| 0        | 0        |
| 5.72646  | 6.462414 |
| 0.465506 | 0.193603 |
| 0.202237 | 0        |
| 0        | 0        |
| 2.600498 | 2.34334  |
| 0        | 0.021881 |
| 0.268774 | 0        |
| 0.337429 | 0.249486 |
| 0.069878 | 0        |
| 0        | 0        |
| 0        | 0.11811  |
| 0        | 0        |
| 0.091103 | 0        |
| 0.580639 | 0.505972 |
| 0        | 0.028489 |
| 0.33246  | 0        |
| 0        | 0        |
| 0        | 0        |
| 1.583272 | 3.76274  |
| 0        | 0        |
| 0        | 0        |
| 0.102285 | 0        |
| 0        | 0.213845 |
| 0.105054 | 0.349534 |
| 2.148726 | 3.135616 |
| 0        | 0.018865 |
| 0        | 0        |
| 0        | 0        |
| 3.32953  | 4.388368 |
| 0        | 0.147448 |
| 0        | 0        |
| 0.472743 | 0        |
| 1.012837 | 1.684946 |
| 0.682273 | 0.151337 |
| 0.084319 | 0.093515 |
| 0        | 0        |
| 0.075257 | 0.083464 |
| 0        | 0.040386 |
| 0.037912 | 0.042046 |
| 0        | 0        |

|          |          |
|----------|----------|
| 0.575945 | 0.76651  |
| 0.148078 | 0.164227 |
| 0        | 0        |
| 0.402601 | 0.201992 |
| 0.4419   | 0        |
| 0.319213 | 0.53104  |
| 0        | 0        |
| 0.161685 | 0.179318 |
| 0        | 0        |
| 0.193719 | 0        |
| 0.135561 | 0        |
| 0        | 0.087162 |
| 0        | 0        |
| 0.114976 | 0        |
| 0        | 0        |
| 0        | 0        |
| 0        | 0        |
| 1.103767 | 2.142253 |
| 1.128852 | 0.75118  |
| 0.189001 | 0.104807 |
| 0        | 0        |
| 0        | 0        |
| 0.732    | 0.221409 |
| 0.035847 | 0        |
| 0        | 0        |
| 0        | 0        |
| 0.130709 | 0.362411 |
| 0        | 0        |
| 338.7702 | 294.3581 |
| 0.67121  | 0.372206 |
| 0        | 0        |
| 0        | 0        |
| 0.653546 | 0.362411 |
| 0        | 0        |
| 0.159606 | 0        |
| 0.212991 | 0        |
| 0.417251 | 0.185103 |
| 0.022953 | 0.025456 |
| 0        | 0.118517 |
| 0.548229 | 0.760024 |
| 0        | 0        |
| 0.095961 | 0.106427 |
| 0.127227 | 0        |
| 1.196949 | 1.241845 |
| 0        | 0        |
| 0        | 0.159764 |
| 0        | 0.053296 |
| 0.061963 | 0.343603 |
| 1.273251 | 1.12969  |
| 1.797015 | 0.946675 |
| 0.146778 | 0        |
| 0        | 0        |
| 10.67061 | 8.065197 |
| 0        | 0        |
| 1.760498 | 0.97625  |
| 0        | 0        |
| 0        | 0        |
| 0.352766 | 0.547735 |
| 0        | 0        |
| 0.169636 | 0.188137 |
| 0        | 0        |
| 0        | 0        |
| 0.137971 | 0        |
| 0.219388 | 0        |
| 0.390024 | 0.21628  |

|          |          |
|----------|----------|
| 1.243473 | 0.54522  |
| 0.050849 | 0.056395 |
| 0.551883 | 0        |
| 0.09611  | 0.106592 |
| 11.61551 | 13.96193 |
| 0.441115 | 0.122306 |
| 0        | 0        |
| 0        | 0        |
| 0        | 0        |
| 0        | 0        |
| 0.039774 | 0        |
| 0        | 0        |
| 0.065562 | 0.072712 |
| 2.683227 | 2.810536 |
| 0        | 0        |
| 0        | 0        |
| 0.380901 | 0.422443 |
| 0        | 0        |
| 0        | 0.054198 |
| 0        | 0        |
| 0.13736  | 0.304682 |
| 0        | 0        |
| 0.351767 | 0.390131 |
| 0        | 0        |
| 0        | 0.137992 |
| 3.835483 | 1.70911  |
| 0        | 0.21832  |
| 0        | 0        |
| 0        | 0        |
| 0.571702 | 0        |
| 0.419506 | 0.155086 |
| 0        | 1.671314 |
| 0.091709 | 0        |
| 0        | 0        |
| 0.086472 | 0.287708 |
| 0.559341 | 0.354482 |
| 0.201581 | 0        |
| 0.209399 | 0.154824 |
| 0        | 0.044386 |
| 0        | 0        |
| 0.033131 | 0.073488 |
| 0        | 0        |
| 0        | 0.088621 |
| 0.233409 | 0.388298 |
| 1.929728 | 3.256804 |
| 0.125979 | 0        |
| 0.046127 | 0        |
| 0.245403 | 0.068042 |
| 0        | 0        |
| 0        | 0        |
| 0.295652 | 0.218597 |
| 0        | 0        |
| 2.040414 | 1.442316 |
| 1.67157  | 1.324195 |
| 0.020525 | 0.091052 |
| 0.336514 | 0.124405 |
| 0        | 0        |
| 0.041585 | 0.184483 |
| 0.155919 | 0.034585 |
| 0        | 0        |
| 0.510303 | 0.188652 |
| 0.279671 | 0        |
| 0.123188 | 0.054649 |
| 0        | 0        |
| 0        | 0        |

|          |          |
|----------|----------|
| 0.340513 | 0.251766 |
| 8.437771 | 12.57045 |
| 0.107046 | 0        |
| 0.11894  | 0        |
| 0.086653 | 0        |
| 0        | 0        |
| 0        | 0        |
| 0.449609 | 0.36265  |
| 1.418048 | 1.087786 |
| 0        | 0.016881 |
| 0.277587 | 0        |
| 0.123926 | 0.412324 |
| 2.528295 | 2.103025 |
| 0.273644 | 0.168605 |
| 0        | 0.032946 |
| 0.685656 | 0.49661  |
| 0.146087 | 0        |
| 0.044096 | 0        |
| 0        | 0        |
| 3.646807 | 2.123379 |
| 0.163172 | 0        |
| 0.108165 | 0        |
| 0        | 0        |
| 0.161348 | 0.107367 |
| 0        | 0.108609 |
| 0.202898 | 0        |
| 0.082343 | 0        |
| 0        | 0        |
| 2.681939 | 1.933382 |
| 0        | 0        |
| 0        | 0        |
| 0        | 0        |
| 0.841856 | 1.167087 |
| 0        | 0        |
| 0.110279 | 0.244611 |
| 0.26871  | 0.745039 |
| 0        | 0        |
| 0.209047 | 0.231846 |
| 0.092529 | 0        |
| 0.725102 | 1.809411 |
| 0.042496 | 0.094262 |
| 0.791925 | 0.175659 |
| 0.105725 | 0.029314 |
| 0.915286 | 0.169185 |
| 0        | 0        |
| 0.352266 | 0.146507 |
| 0.175884 | 0        |
| 0        | 0.190216 |
| 9.646966 | 4.562628 |
| 0.404914 | 0.299383 |
| 0        | 0        |
| 0        | 0        |
| 0        | 0.061316 |
| 0.132381 | 1.174552 |
| 0.113366 | 0.20955  |
| 0        | 0.778058 |
| 0        | 0        |
| 0        | 0        |
| 0        | 0        |
| 0        | 0.122089 |
| 0.173185 | 0        |
| 0.034227 | 0.113878 |
| 0.038078 | 0.126694 |
| 0.067756 | 0.200387 |
| 0.233142 | 0.05746  |

|          |          |
|----------|----------|
| 0        | 0        |
| 3.283998 | 4.520556 |
| 32.86953 | 30.04719 |
| 0.507246 | 0.112513 |
| 3.292486 | 3.651568 |
| 0.874463 | 0.484916 |
| 0        | 0        |
| 0        | 0.111783 |
| 0        | 0        |
| 0.490805 | 0.544333 |
| 0.359299 | 0.318788 |
| 1.395211 | 0.725331 |
| 0        | 0.383611 |
| 0        | 0        |
| 0        | 0.043609 |
| 0        | 0        |
| 14.15272 | 7.869501 |
| 0        | 0.327896 |
| 0.071943 | 0        |
| 0.399916 | 0.110883 |
| 0        | 0.164339 |
| 0.082126 | 0.091082 |
| 0.761802 | 0        |
| 0        | 0        |
| 0.511846 | 0.283834 |
| 18.04151 | 12.64302 |
| 0.023046 | 0        |
| 0        | 0        |
| 0.083115 | 0.09218  |
| 0.155997 | 0        |
| 0        | 0        |
| 0.140468 | 0.311575 |
| 0        | 0.120804 |
| 0.217849 | 0.120804 |
| 0.632617 | 1.035712 |
| 0        | 0        |
| 0        | 0.092926 |
| 0.545963 | 0.629726 |
| 0        | 0        |
| 0        | 0        |
| 0        | 0.3986   |
| 0.22577  | 0        |
| 0.740389 | 0        |
| 0.119169 | 0.264331 |
| 0.088192 | 0        |
| 0        | 0.139672 |
| 1.804084 | 1.976438 |
| 0.632464 | 0.935255 |
| 0        | 0.033297 |
| 0        | 0        |
| 0.086352 | 0.095769 |
| 0        | 0        |
| 0        | 0.090247 |
| 0        | 0        |
| 0.217214 | 0.281054 |
| 0        | 0        |
| 0        | 0.068652 |
| 0.420724 | 0.066658 |
| 0        | 0.251307 |
| 0        | 0        |
| 1.001401 | 1.110615 |
| 0        | 0.713556 |
| 0.140946 | 0        |
| 0.255502 | 0        |
| 0        | 0        |

|          |          |
|----------|----------|
| 0        | 0        |
| 11.08126 | 7.056342 |
| 0        | 0.121336 |
| 0        | 0        |
| 0.656853 | 0.253388 |
| 0        | 0.028466 |
| 0.058999 | 0        |
| 0        | 0.014402 |
| 0.321456 | 0.611167 |
| 0.156983 | 0.087052 |
| 0.324562 | 0.46583  |
| 0.077031 | 0        |
| 0.381314 | 0.124382 |
| 0.429073 | 0.14276  |
| 0        | 0        |
| 3.158806 | 2.416075 |
| 0        | 0        |
| 0        | 0.043225 |
| 0        | 0.15439  |
| 0.184782 | 0.102467 |
| 0.273029 | 0.060561 |
| 1.003513 | 0.774231 |
| 0        | 0        |
| 0.257089 | 0        |
| 0.133281 | 0.098545 |
| 0.012167 | 0.013494 |
| 0        | 0.09781  |
| 0        | 0        |
| 1.006814 | 0.558309 |
| 0.556833 | 0.720489 |
| 2.606904 | 2.920718 |
| 0.985506 | 0.437195 |
| 0.528399 | 1.0988   |
| 3.486233 | 1.88895  |
| 0.189868 | 0.210575 |
| 1.05232  | 0.722482 |
| 0.409814 | 0.227255 |
| 28.42448 | 17.89227 |
| 0        | 0.063173 |
| 0        | 0        |
| 0.07684  | 0.04261  |
| 2.310868 | 1.046079 |
| 0.581805 | 0.276539 |
| 0        | 0        |
| 0        | 0.076086 |
| 0.085089 | 0.062913 |
| 0        | 0        |
| 0        | 0        |
| 0.137057 | 0.456014 |
| 0.22577  | 0.250393 |
| 0        | 0.085538 |
| 0        | 0        |
| 0        | 0.093052 |
| 1.076029 | 1.909411 |
| 0.060632 | 0        |
| 0        | 0.314421 |
| 0        | 0        |
| 0.409364 | 0.151337 |
| 0.041036 | 0        |
| 2.641995 | 2.319689 |
| 0.183689 | 0.27163  |
| 0        | 0        |
| 0.029369 | 0        |
| 0.470355 | 0        |
| 1.02623  | 0.426807 |

|          |          |
|----------|----------|
| 0.245403 | 0        |
| 0.140309 | 0        |
| 0.306602 | 0.34004  |
| 0        | 0        |
| 0        | 0        |
| 3.42004  | 2.042402 |
| 0.092254 | 0.102315 |
| 0        | 0.064173 |
| 0        | 0        |
| 0.094501 | 0        |
| 0        | 0        |
| 0        | 0        |
| 0        | 0        |
| 0        | 0        |
| 1.561467 | 1.50086  |
| 0        | 0        |
| 0.097468 | 0.108098 |
| 1.422476 | 1.763214 |
| 0        | 0        |
| 0        | 0.024814 |
| 0.11605  | 0.128707 |
| 0        | 0.088621 |
| 0.128544 | 0        |
| 0.408168 | 0.352087 |
| 0        | 0        |
| 0        | 0        |
| 0.405797 | 0        |
| 0.107977 | 0        |
| 0        | 0        |
| 0        | 0.0315   |
| 0        | 0        |
| 0        | 0.258865 |
| 0.065997 | 0.054896 |
| 0.967781 | 0.908201 |
| 0        | 0        |
| 0        | 0        |
| 0.026959 | 0.029899 |
| 0.061391 | 0.068086 |
| 0        | 0        |
| 0        | 0        |
| 0        | 0.345442 |
| 0.066904 | 0.074201 |
| 9.007603 | 3.751027 |
| 0.166602 | 0.06159  |
| 1.859745 | 0.475978 |
| 1.781053 | 1.905988 |
| 0        | 0        |
| 0.097011 | 0        |
| 0        | 0.124069 |
| 0.327924 | 0.242458 |
| 0.11207  | 0.124293 |
| 0        | 0        |
| 0.990748 | 0        |
| 0.145744 | 0        |
| 0        | 0        |
| 0        | 0        |
| 4.061759 | 2.574136 |
| 0        | 0        |
| 0.05275  | 0        |
| 0.36127  | 0.400671 |
| 0.084015 | 0        |
| 0.454849 | 0.126114 |
| 0        | 0        |
| 0        | 0.029202 |
| 0.12819  | 0        |

|          |          |
|----------|----------|
| 0        | 0        |
| 0.080563 | 0.029783 |
| 0        | 0        |
| 0        | 1.031583 |
| 0        | 0        |
| 0.718901 | 0.144964 |
| 0.21608  | 0.559173 |
| 1.21739  | 1.725204 |
| 12.20889 | 16.24456 |
| 0        | 0.093304 |
| 0        | 0        |
| 0.16623  | 0.117319 |
| 0.130161 | 0.43307  |
| 0        | 0        |
| 0.369565 | 0.546493 |
| 0.147826 | 0.081974 |
| 0        | 0        |
| 0.389667 | 0.144055 |
| 0.315696 | 0.116709 |
| 0        | 0        |
| 0        | 0        |
| 0        | 0        |
| 0        | 0        |
| 0.385234 | 0.142416 |
| 0.61963  | 0        |
| 0.106177 | 0.029439 |
| 0        | 0.778058 |
| 0.099022 | 0.329465 |
| 0        | 0        |
| 0        | 0.163948 |
| 0.433416 | 0.480685 |
| 0        | 0        |
| 0.1047   | 0        |
| 3.04891  | 1.383311 |
| 0        | 0        |
| 0        | 0.080442 |
| 0.327924 | 0.121229 |
| 0.453189 | 0        |
| 0        | 0        |
| 0.116705 | 0.129433 |
| 0        | 0        |
| 0        | 0        |
| 0.795986 | 0        |
| 0.061109 | 0.045183 |
| 0        | 0.089542 |
| 0.878135 | 0.456518 |
| 2.436321 | 1.220271 |
| 0.326773 | 0.241607 |
| 0.53662  | 0.238058 |
| 0        | 0.127752 |
| 1.478259 | 4.339799 |
| 0        | 0        |
| 0        | 0        |
| 1.53617  | 1.419755 |
| 0.891199 | 0.823662 |
| 0        | 0.128467 |
| 0        | 0        |
| 0.628728 | 0.871622 |
| 0.162958 | 0        |
| 0        | 0.056743 |
| 0        | 0        |
| 0.442845 | 0        |
| 0        | 0.086073 |
| 7.661786 | 7.165508 |
| 0        | 0.043623 |

|          |          |
|----------|----------|
| 0        | 0        |
| 0.324496 | 0        |
| 7.116271 | 11.09508 |
| 0.030465 | 0.016894 |
| 0        | 0.30334  |
| 0.026522 | 0        |
| 0.596989 | 0.220699 |
| 0        | 0        |
| 0.044958 | 0.124653 |
| 0        | 0.051734 |
| 0.067929 | 0.150674 |
| 0        | 0        |
| 0        | 0.133705 |
| 0        | 0.096847 |
| 0.033416 | 0        |
| 4.786434 | 0.796267 |
| 0        | 0        |
| 0.202457 | 0        |
| 0.103998 | 0.11534  |
| 0.098239 | 0.326858 |
| 0        | 0        |
| 0.071038 | 0.078785 |
| 0        | 0        |
| 0.307361 | 0        |
| 0.338348 | 0.469061 |
| 0.13154  | 0.291772 |
| 0.070155 | 0        |
| 0.718523 | 0.742552 |
| 0.128544 | 0.142563 |
| 0.801121 | 1.15504  |
| 0.132006 | 0.048801 |
| 0        | 0        |
| 0.220557 | 0        |
| 0        | 0        |
| 0.061793 | 0        |
| 0.667601 | 1.48082  |
| 0        | 0.015895 |
| 0        | 0        |
| 0.527053 | 0.350721 |
| 0        | 0        |
| 0.123188 | 0.045541 |
| 0.103134 | 0        |
| 0.194935 | 0        |
| 0.188142 | 0        |
| 0.516315 | 0.286312 |
| 0.248348 | 0.091811 |
| 0        | 0.146819 |
| 0        | 0        |
| 11.5143  | 11.51809 |
| 0.11207  | 0        |
| 0        | 0        |
| 1.646301 | 2.214686 |
| 0        | 0        |
| 2.638693 | 12.73876 |
| 0        | 0.019724 |
| 0        | 0        |
| 0.203564 | 0        |
| 0.07211  | 0.159949 |
| 0.034039 | 0.075502 |
| 0.42332  | 0.625983 |
| 0        | 0.295528 |
| 0.033706 | 0.056073 |
| 1.103767 | 2.065744 |
| 0        | 0        |
| 0.181011 | 0        |

|          |          |
|----------|----------|
| 0.130709 | 0        |
| 0.968182 | 1.405667 |
| 0        | 0        |
| 0        | 0        |
| 0        | 0        |
| 0        | 0        |
| 0        | 0        |
| 0.565454 | 0.752548 |
| 0.125937 | 0        |
| 1.401774 | 2.97975  |
| 0.158385 | 1.053951 |
| 2.82948  | 1.344885 |
| 0.118036 | 0.130909 |
| 0        | 0.086505 |
| 0        | 0        |
| 0.961097 | 0.497427 |
| 0        | 0.055486 |
| 0.582975 | 0.646555 |
| 0.047576 | 0        |
| 0.109308 | 0.121229 |
| 0.06868  | 0.152341 |
| 0.269943 | 0.299383 |
| 0        | 0        |
| 0.158993 | 0        |
| 0        | 0        |
| 0        | 0        |
| 8.522882 | 4.600476 |
| 0.529364 | 0.167742 |
| 0        | 0        |
| 0        | 0        |
| 0.120792 | 0.401896 |
| 2.073402 | 3.960301 |
| 0.699571 | 0.096983 |
| 0        | 0.193694 |
| 0        | 0.181684 |
| 0.182394 | 0        |
| 0.023679 | 0        |
| 0.186447 | 0        |
| 0.159402 | 0.088393 |
| 0        | 0        |
| 1.791788 | 0.536229 |
| 0.099339 | 0        |
| 7.850066 | 4.550969 |
| 0.294118 | 0.077665 |
| 1.730645 | 2.367248 |
| 0.036978 | 0.041011 |
| 0.602785 | 0.668526 |
| 0        | 0        |
| 0.239102 | 0.176786 |
| 0.112273 | 0        |
| 0        | 0        |
| 0        | 0        |
| 0.304846 | 0.084523 |
| 0        | 0        |
| 0.0405   | 0.044917 |
| 0.133904 | 0.049503 |
| 0.218177 | 0.069135 |
| 0.105462 | 0        |
| 0        | 0.114764 |
| 0.391539 | 0.310172 |
| 1.763832 | 1.173718 |
| 0.486956 | 0.270032 |
| 0.064339 | 0.035678 |
| 0        | 0.102012 |
| 0.019932 | 0        |

|          |          |
|----------|----------|
| 0.648024 | 0.342237 |
| 0.016849 | 0        |
| 0        | 0        |
| 0        | 0        |
| 0        | 1.197533 |
| 0        | 0        |
| 0.197101 | 0.874389 |
| 0.186727 | 0.621276 |
| 0.618806 | 0        |
| 0.169438 | 0.080536 |
| 0.111267 | 0        |
| 0.916412 | 0.254089 |
| 0.046093 | 0        |
| 0.171748 | 0.095239 |
| 0.394063 | 0.922641 |
| 5.379688 | 3.301083 |
| 0.126193 | 0        |
| 0        | 0        |
| 0.203898 | 1.017608 |
| 0.07879  | 0.087383 |
| 0        | 0        |
| 0        | 0        |
| 0.377811 | 0.977702 |
| 0.198361 | 0.062855 |
| 0.081909 | 0.454209 |
| 0.383252 | 0        |
| 0        | 0        |
| 0        | 0        |
| 0.231236 | 0.769365 |
| 0        | 0        |
| 0.253934 | 0.140814 |
| 0        | 0        |
| 1.554165 | 0.176786 |
| 0.704199 | 0        |
| 0.281361 | 0.485405 |
| 0        | 0.012488 |
| 0        | 0        |
| 0.212626 | 0        |
| 0        | 0.047521 |
| 0.100302 | 0.111241 |
| 1.612646 | 2.459219 |
| 0        | 0.190216 |
| 0.424284 | 1.097966 |
| 36.30528 | 30.00089 |
| 0.212869 | 0.236085 |
| 0.055733 | 0        |
| 0        | 0        |
| 0        | 0        |
| 0        | 0        |
| 0        | 0        |
| 0.588501 | 0        |
| 0.488873 | 0.406643 |
| 0        | 0.128227 |
| 0.021962 | 0        |
| 0.107541 | 0        |
| 0.021618 | 0        |
| 0.382526 | 0.554781 |
| 0.054367 | 0.090444 |
| 0.213357 | 0        |
| 0.047649 | 0        |
| 1.062479 | 1.933708 |
| 17.97252 | 14.72296 |
| 1.034781 | 0.971076 |
| 1.156898 | 0.598766 |
| 4.162249 | 0.577023 |

|          |          |
|----------|----------|
| 0.081855 | 0.045391 |
| 0.352921 | 0.270976 |
| 0.231236 | 0        |
| 0.067486 | 0        |
| 0        | 0.097671 |
| 0        | 0.120804 |
| 0        | 0        |
| 0        | 0        |
| 0.174218 | 0.458893 |
| 0        | 0        |
| 0.054993 | 0.101651 |
| 0.265329 | 0        |
| 0        | 0.370205 |
| 0        | 0        |
| 0.085637 | 0        |
| 0.6473   | 0.299123 |
| 0.996617 | 0.815824 |
| 0        | 0        |
| 0.750043 | 0.462135 |
| 0.326429 | 0.144812 |
| 0.894749 | 0.822909 |
| 0        | 0        |
| 3.833678 | 2.903656 |
| 0        | 0.150674 |
| 0        | 0        |
| 0.420216 | 0.116511 |
| 2.033072 | 1.734462 |
| 0        | 0        |
| 11.01542 | 10.21766 |
| 0.163818 | 0.136263 |
| 0        | 0        |
| 0        | 0.096305 |
| 1.001827 | 0.409348 |
| 0        | 0        |
| 0        | 0.845923 |
| 0        | 0        |
| 0.063225 | 0.07012  |
| 0.093084 | 0.103236 |
| 0        | 0.042244 |
| 0.888542 | 0.492724 |
| 0        | 0        |
| 0        | 0        |
| 0        | 0        |
| 0.071777 | 0        |
| 0        | 0.143156 |
| 0        | 0        |
| 0.222346 | 0.072528 |
| 0.056804 | 0        |
| 0        | 0        |
| 0        | 0        |
| 0        | 0.117305 |
| 0.084472 | 0        |
| 2.601736 | 6.295601 |
| 0        | 0        |
| 0.160431 | 0.177928 |
| 0.491638 | 0.389469 |
| 0.165565 | 0        |
| 0.086593 | 0        |
| 0        | 0.157932 |
| 0        | 0        |
| 0        | 0.118619 |
| 0        | 0        |
| 0.065081 | 0        |
| 0        | 0        |
| 0        | 0.146196 |

|          |          |
|----------|----------|
| 0        | 0        |
| 0        | 0        |
| 0.180616 | 0.250393 |
| 1.908218 | 3.04545  |
| 0.224952 | 0        |
| 0        | 0        |
| 0        | 0.086614 |
| 3.442441 | 1.227175 |
| 0.222334 | 0.431519 |
| 0.121501 | 0.202128 |
| 0        | 0        |
| 13.40809 | 5.452474 |
| 0        | 0.304682 |
| 0.449905 | 0        |
| 0        | 0        |
| 0        | 0        |
| 2.014004 | 3.003878 |
| 0.597665 | 0.77982  |
| 1.135736 | 4.828467 |
| 0        | 0        |
| 0.116486 | 0        |
| 0        | 0        |
| 0        | 0.194149 |
| 0        | 0.256614 |
| 1.921877 | 0.97625  |
| 0        | 0        |
| 0.195785 | 0.268229 |
| 0        | 0        |
| 0        | 0.352285 |
| 0.13154  | 0        |
| 0.054177 | 0        |
| 0        | 0        |
| 32.68499 | 25.78472 |
| 2.092513 | 2.006304 |
| 0.15639  | 1.38757  |
| 0.246051 | 0.363847 |
| 0.785224 | 1.02101  |
| 7.771363 | 6.103123 |
| 0        | 0.086288 |
| 3.28502  | 1.821644 |
| 0.049949 | 0.110793 |
| 0.061778 | 0        |
| 0.420928 | 0.466835 |
| 0.504316 | 0.248585 |
| 0.16735  | 0        |
| 0        | 0        |
| 0.227842 | 0.126345 |
| 0.434174 | 0.275157 |
| 0.605135 | 0.536906 |
| 1.237612 | 0.343147 |
| 0.086232 | 0.095636 |
| 12.99086 | 16.99302 |
| 0.124672 | 0        |
| 0        | 0.581081 |
| 0.155997 | 0.346021 |
| 0.655271 | 0        |
| 0.776086 | 0.537954 |
| 39.60496 | 32.56519 |
| 0.104523 | 0.463691 |
| 0        | 0        |
| 0        | 0        |
| 0.409544 | 0.545051 |
| 0.449154 | 0.22991  |
| 0        | 0.444246 |
| 0        | 0        |

|          |          |
|----------|----------|
| 0.241897 | 0.089426 |
| 0        | 0        |
| 0.197101 | 0        |
| 0.240027 | 0.088735 |
| 0        | 0        |
| 0        | 0.160135 |
| 0        | 0        |
| 0.140787 | 0.624564 |
| 0.16735  | 0.185601 |
| 0        | 0        |
| 0        | 0.239091 |
| 0.07618  | 0        |
| 0        | 0.135016 |
| 0        | 0        |
| 0.191331 | 0        |
| 0        | 0        |
| 4.058949 | 4.584985 |
| 0.242054 | 0.536906 |
| 0        | 0        |
| 0        | 0.062598 |
| 0        | 0.132675 |
| 0.580251 | 0.643534 |
| 0.031168 | 0.034567 |
| 0        | 0        |
| 0        | 0        |
| 0        | 0.200169 |
| 0        | 0        |
| 0        | 0        |
| 0.137209 | 0.076086 |
| 0.110213 | 0.122233 |
| 0        | 0.119338 |
| 0        | 0        |
| 0.246377 | 0.273247 |
| 0.438777 | 0.48663  |
| 0.352766 | 0        |
| 2.751773 | 0.953714 |
| 0        | 0        |
| 0        | 0.135681 |
| 0        | 0.132675 |
| 0.150696 | 0.167131 |
| 0.134913 | 0.074813 |
| 0        | 0        |
| 0.210464 | 0        |
| 0        | 0        |
| 0.242527 | 0.268977 |
| 0        | 0        |
| 0.179442 | 0        |
| 0        | 0        |
| 46.35446 | 31.4691  |
| 0        | 0        |
| 0        | 0        |
| 0.155606 | 0        |
| 0.141107 | 0        |
| 0.201909 | 0.074643 |
| 1.284556 | 0.712326 |
| 0.026983 | 0        |
| 0        | 0        |
| 0.22095  | 0.245047 |
| 0.104348 | 0        |
| 0.167576 | 0        |
| 0.223334 | 0        |
| 0.080895 | 0.044859 |
| 0        | 0        |
| 1.942238 | 2.513071 |
| 0        | 0        |

|          |          |
|----------|----------|
| 0.735378 | 0.815579 |
| 0        | 0        |
| 0        | 0        |
| 0.338118 | 0.046874 |
| 1.923518 | 0.592583 |
| 0        | 0        |
| 0        | 0        |
| 0.438003 | 0.242886 |
| 0.140151 | 0        |
| 0.574879 | 0.637575 |
| 0        | 0        |
| 0        | 0.167947 |
| 0        | 0.260826 |
| 0.615941 | 0        |
| 0.170101 | 0        |
| 0        | 0        |
| 0        | 0        |
| 0.118562 | 0.087662 |
| 0.155997 | 0        |
| 0.420928 | 0        |
| 0.145063 | 0.187697 |
| 0        | 0.123623 |
| 0        | 0        |
| 0        | 0        |
| 0        | 0        |
| 0.256557 | 0.142269 |
| 0.46449  | 0.171716 |
| 0        | 0        |
| 0        | 0.175212 |
| 0.486066 | 0.95237  |
| 0        | 0        |
| 0        | 0        |
| 0.67121  | 0.279155 |
| 0        | 0        |
| 2.799071 | 4.443086 |
| 0.246377 | 0.273247 |
| 0.061798 | 0.022846 |
| 0.110475 | 0.612617 |
| 0.079192 | 0        |
| 0        | 0.056673 |
| 0.110573 | 0.122632 |
| 0        | 0.128707 |
| 0.204457 | 0.075585 |
| 0        | 0        |
| 0        | 0        |
| 0        | 0        |
| 0        | 0        |
| 0        | 0.040244 |
| 0.475858 | 0.499978 |
| 0.044828 | 0.024859 |
| 0.10577  | 0.117305 |
| 0        | 0        |
| 6.467384 | 7.531359 |
| 0.578531 | 0.72912  |
| 0        | 0        |
| 0        | 0        |
| 0.228541 | 0.844885 |
| 0        | 0        |
| 0        | 0.206781 |
| 0        | 0        |
| 0.138819 | 0        |
| 0.30933  | 0.441084 |
| 0.212991 | 0.35433  |
| 1.533847 | 1.445208 |
| 0.126708 | 0.281054 |

|          |          |
|----------|----------|
| 3.694575 | 2.698359 |
| 0.173427 | 0.192341 |
| 28.93895 | 27.40828 |
| 1.470181 | 1.003397 |
| 0        | 0        |
| 0        | 0        |
| 50.53178 | 50.04806 |
| 0.340513 | 0.629416 |
| 0.242685 | 0.119623 |
| 0.069604 | 0.15439  |
| 0.016726 | 0        |
| 0.176383 | 0        |
| 2.251103 | 3.446934 |
| 1.160503 | 3.21767  |
| 0        | 0.153359 |
| 0.021846 | 0        |
| 0        | 0        |
| 0        | 0        |
| 1.111175 | 0.61618  |
| 0.109694 | 0        |
| 1.226132 | 0.494493 |
| 0.094377 | 0.089717 |
| 0.109308 | 0        |
| 0.322529 | 0.715409 |
| 0        | 0        |
| 0.201254 | 0.111602 |
| 0.127227 | 0.282205 |
| 0.07186  | 0        |
| 0        | 0        |
| 0        | 0        |
| 0        | 0        |
| 5.356384 | 6.102457 |
| 0.084129 | 0.186607 |
| 0        | 0        |
| 0        | 0        |
| 3.245689 | 3.251312 |
| 0        | 0        |
| 0        | 0.290541 |
| 0.320862 | 0.533784 |
| 0        | 0        |
| 0.15879  | 0.176108 |
| 0.102454 | 0        |
| 0        | 0        |
| 0.028389 | 0.06297  |
| 4.86956  | 2.700319 |
| 0.753057 | 1.312436 |
| 0.23429  | 0.519684 |
| 0        | 0.111602 |
| 2.512568 | 1.173302 |
| 0.125175 | 0.138827 |
| 0        | 0        |
| 0        | 0.126114 |
| 0        | 0        |
| 0.10559  | 0.351317 |
| 0.190159 | 0        |
| 0.993769 | 0.6298   |
| 0        | 0        |
| 4.290913 | 1.165441 |
| 0        | 0        |
| 0        | 0        |
| 0.209047 | 0        |
| 0.156785 | 0        |
| 0        | 0        |
| 0        | 0        |
| 0.096784 | 0        |

|          |          |
|----------|----------|
| 0.215206 | 0.358015 |
| 0.090374 | 0.400921 |
| 0.41823  | 0.314216 |
| 0        | 0.457529 |
| 0        | 0        |
| 0.483435 | 0.536159 |
| 0.027112 | 0.030069 |
| 0.217849 | 0        |
| 0        | 0        |
| 0        | 0        |
| 0.779741 | 0.216195 |
| 0.570652 | 1.518929 |
| 0        | 0        |
| 0        | 0        |
| 0.247358 | 0.823006 |
| 0        | 0.135016 |
| 3.431117 | 2.355673 |
| 1.627441 | 1.323616 |
| 0.604921 | 0.182971 |
| 0.174696 | 0.116249 |
| 0        | 0        |
| 1.059112 | 0.349211 |
| 0.125682 | 0        |
| 0.869023 | 0.428355 |
| 0.108924 | 0        |
| 0.510812 | 0.360514 |
| 0.655755 | 0.058182 |
| 0        | 0.127752 |
| 0.720743 | 0.913541 |
| 0.129348 | 0        |
| 0        | 0        |
| 0.246866 | 1.095159 |
| 3.327532 | 2.700319 |
| 10.47478 | 7.74478  |
| 0        | 0.485405 |
| 0.17367  | 0        |
| 0.115189 | 0.511007 |
| 0        | 0.335076 |
| 0        | 0.123402 |
| 0        | 0        |
| 0.10779  | 0.119545 |
| 3.418833 | 4.630242 |
| 0        | 0.074603 |
| 0        | 0        |
| 0.156785 | 0.40573  |
| 3.807215 | 1.136809 |
| 0        | 0        |
| 0.212626 | 0        |
| 0        | 0        |
| 0.10014  | 0.444246 |
| 0        | 0        |
| 0.090638 | 0        |
| 0.226594 | 0.376961 |
| 1.105404 | 0.204327 |
| 0        | 0        |
| 0.157182 | 0        |
| 0        | 0        |
| 0        | 0        |
| 0        | 0.15167  |
| 0.097929 | 0.434436 |
| 0.117589 | 0        |
| 0.430163 | 0.636103 |
| 3.134484 | 3.342628 |
| 0.402291 | 0.148722 |
| 0.066617 | 0.110823 |

|          |          |
|----------|----------|
| 0.550253 | 0        |
| 15.27502 | 17.23733 |
| 0        | 0.093621 |
| 0        | 0        |
| 10.60902 | 15.24238 |
| 1.413743 | 0.914624 |
| 0.541455 | 0        |
| 0.231236 | 0.128227 |
| 0        | 0        |
| 0.36132  | 0.200363 |
| 0        | 0.431712 |
| 0        | 0.189171 |
| 0        | 0        |
| 0        | 0        |
| 3.269153 | 2.816651 |
| 0        | 0        |
| 0.196477 | 0        |
| 0.129889 | 0.144055 |
| 0.443478 | 1.475531 |
| 0        | 0.127045 |
| 0        | 0        |
| 0        | 0        |
| 0        | 0        |
| 0.009995 | 0        |
| 0.016486 | 0.018284 |
| 0        | 0.149692 |
| 0        | 0.150674 |
| 0.876933 | 0.486286 |
| 0.169174 | 0        |
| 0        | 0        |
| 0.128014 | 0        |
| 0.107417 | 0.476527 |
| 0.185519 | 0.651546 |
| 0.084357 | 0        |
| 0.84472  | 0.234211 |
| 14.4818  | 16.40293 |
| 0.682273 | 0        |
| 0.849807 | 0.565492 |
| 0.78591  | 1.307433 |
| 0.663321 | 0.441398 |
| 0        | 0.286909 |
| 0.257005 | 0.345041 |
| 0.160431 | 0.177928 |
| 0.363613 | 0        |
| 0        | 0        |
| 0        | 0        |
| 0        | 0.092676 |
| 0.15483  | 0.944438 |
| 0        | 0.020005 |
| 0        | 0.166324 |
| 0.105232 | 0.466835 |
| 0.049551 | 0        |
| 0.080895 | 0.134576 |
| 0.074534 | 0        |
| 0        | 1.201551 |
| 0.071201 | 0        |
| 0.420453 | 0.932616 |
| 0.664742 | 1.032135 |
| 0.185242 | 0.513611 |
| 0        | 0        |
| 0.20028  | 0        |
| 0.429172 | 0.158659 |
| 0        | 0        |
| 0.655271 | 0.181684 |
| 0.274114 | 0.152005 |

|          |          |
|----------|----------|
| 0.755315 | 0.368584 |
| 63.62369 | 63.31881 |
| 0.661672 | 0.122306 |
| 0.325062 | 0        |
| 0.557025 | 0.665296 |
| 0.540827 | 0.719771 |
| 0        | 0        |
| 0        | 0        |
| 0.041009 | 0.045481 |
| 0        | 0        |
| 0        | 0.531313 |
| 0        | 0        |
| 0        | 0        |
| 0        | 0        |
| 0        | 0        |
| 0.302863 | 0        |
| 0.12645  | 0        |
| 0.067707 | 0        |
| 0        | 0        |
| 0        | 0        |
| 0.184508 | 0.306946 |
| 0        | 0.378341 |
| 0.792599 | 0.293013 |
| 0.332015 | 0.736451 |
| 0.337429 | 1.122687 |
| 0        | 0        |
| 0        | 0        |
| 2.53112  | 1.155892 |
| 100.1744 | 103.405  |
| 0.190743 | 0.105773 |
| 0.713642 | 0.527649 |
| 0        | 0        |
| 1.231883 | 0        |
| 0.242527 | 0.268977 |
| 0.175304 | 0.226827 |
| 0        | 0        |
| 0.910365 | 0.80772  |
| 0.35127  | 0.292184 |
| 0.327924 | 0        |
| 0.106496 | 0        |
| 0.237426 | 1.053279 |
| 0        | 0        |
| 0.850505 | 0.134752 |
| 0        | 0        |
| 0.372894 | 0        |
| 1.945681 | 3.079219 |
| 0.268194 | 0.743608 |
| 1.197714 | 0.430812 |
| 0        | 0        |
| 0.831985 | 0.461361 |
| 0.113712 | 0.126114 |
| 0        | 0.076002 |
| 0.075166 | 0        |
| 0        | 0        |
| 0        | 0        |
| 0.293902 | 0        |
| 0.03051  | 0        |
| 0        | 0        |
| 0        | 0        |
| 0.517391 | 0.860727 |
| 1.614044 | 1.551396 |
| 0        | 0.15757  |
| 0        | 0        |
| 0        | 0.125197 |
| 0.071201 | 0.473795 |

|          |          |
|----------|----------|
| 3.20525  | 5.134737 |
| 54.84751 | 29.2579  |
| 0.171986 | 0.190743 |
| 1.237612 | 0.457529 |
| 0.375829 | 0.666907 |
| 0.124223 | 0        |
| 0.067855 | 0.075255 |
| 1.213424 | 0.224294 |
| 0.304347 | 0        |
| 0        | 0.045692 |
| 0        | 0        |
| 0        | 0        |
| 0        | 0.176108 |
| 0.239256 | 0.751823 |
| 0.456521 | 0        |
| 0.106131 | 0.353119 |
| 0.806323 | 1.660771 |
| 0.258695 | 0.717272 |
| 1.53387  | 1.314529 |
| 5.033025 | 1.545766 |
| 0        | 0        |
| 0.183147 | 0.338536 |
| 0        | 0        |
| 0.070634 | 0        |
| 0        | 0        |
| 0.671936 | 0.298087 |
| 0        | 0        |
| 0.441376 | 0        |
| 0.374469 | 0.166123 |
| 0        | 0        |
| 0        | 0.127279 |
| 0.157581 | 0.174767 |
| 0.218616 | 0        |
| 0        | 0.498972 |
| 0.148061 | 0        |
| 1.871966 | 1.28522  |
| 0        | 0.058084 |
| 0.363613 | 0.504086 |
| 0        | 0.178389 |
| 1.577265 | 2.067334 |
| 0.130985 | 1.307433 |
| 0.308124 | 0.170864 |
| 0        | 0        |
| 0        | 0        |
| 0.590367 | 0.436502 |
| 0.323706 | 0.071802 |
| 0        | 0        |
| 5.579961 | 3.57365  |
| 0        | 0        |
| 0.992084 | 0.947078 |
| 0        | 0        |
| 0.94071  | 1.043305 |
| 0.214339 | 0.158477 |
| 0.207648 | 0        |
| 0        | 0        |
| 0        | 0        |
| 0.207648 | 0        |
| 0.126193 | 0.279911 |
| 0        | 0        |
| 0.618549 | 0.686009 |
| 0.472006 | 0.563751 |
| 0.112476 | 0.498972 |
| 2.542808 | 3.211813 |
| 0.069355 | 0        |
| 0.388043 | 0        |

|          |          |
|----------|----------|
| 0.060337 | 0        |
| 0.184782 | 0.204935 |
| 0        | 0        |
| 0        | 0        |
| 0        | 0        |
| 2.374908 | 3.386466 |
| 0        | 0        |
| 0        | 0        |
| 0.124923 | 0.138548 |
| 0        | 0.083616 |
| 0.044763 | 0.049645 |
| 0.04787  | 0        |
| 0        | 0.087941 |
| 0.559341 | 0.775429 |
| 1.991125 | 1.204516 |
| 0.535232 | 0        |
| 0.087693 | 0.097257 |
| 0        | 0.158295 |
| 2.425617 | 1.875706 |
| 0.115189 | 0        |
| 0.094789 | 0        |
| 0        | 0        |
| 0.152174 | 0        |
| 0.174893 | 0        |
| 0.409364 | 0.908019 |
| 7.546472 | 4.184749 |
| 0.427007 | 0.331504 |
| 2.87352  | 2.298754 |
| 0        | 0.117505 |
| 0        | 0        |
| 0        | 0.140241 |
| 0.115403 | 0        |
| 0.317851 | 0.282013 |
| 5.30881  | 6.706276 |
| 0        | 0        |
| 0        | 0        |
| 0.190159 | 0.316347 |
| 0.165125 | 0.183133 |
| 0.274721 | 0.121873 |
| 0.170101 | 0        |
| 0        | 0        |
| 0.014807 | 0.016422 |
| 0        | 0.664226 |
| 0        | 0.364329 |
| 4.221683 | 2.497122 |
| 0        | 0        |
| 0.556002 | 0.61664  |
| 0.144725 | 0        |
| 0.223468 | 0.165226 |
| 0        | 0        |
| 0.137209 | 0.456518 |
| 2.208124 | 1.973875 |
| 18.62607 | 18.83473 |
| 2.069563 | 1.311584 |
| 0        | 0        |
| 0.616247 | 0.726171 |
| 0.075166 | 0        |
| 0.253934 | 0.422443 |
| 0        | 0        |
| 0.279671 | 1.085601 |
| 0.563402 | 0.624847 |
| 0        | 0        |
| 0.171511 | 0.760863 |
| 0        | 0        |
| 0.425253 | 0.117908 |

|          |          |
|----------|----------|
| 0        | 0.053378 |
| 0.240336 | 0.177698 |
| 0.345567 | 0        |
| 0        | 0.310872 |
| 0.088569 | 0.196457 |
| 0        | 0.137304 |
| 0        | 0        |
| 0.206497 | 0.305358 |
| 0.065149 | 0.144508 |
| 0.298495 | 0.331049 |
| 39.46836 | 29.68411 |
| 0        | 0.645545 |
| 0        | 0.159394 |
| 0.321139 | 0        |
| 0.110869 | 0        |
| 0        | 0.073566 |
| 0.794531 | 0.125883 |
| 0.079803 | 0        |
| 0.171274 | 0        |
| 0        | 0        |
| 0        | 0        |
| 0.120323 | 0.266892 |
| 0        | 0        |
| 0.116814 | 0        |
| 0.378579 | 0.559822 |
| 0        | 0        |
| 0.614722 | 0.340882 |
| 0.067048 | 0.148722 |
| 0.028298 | 0.062769 |
| 0.16735  | 0.649605 |
| 0        | 0.061371 |
| 0        | 0.196177 |
| 1.518429 | 1.871145 |
| 0        | 0.637575 |
| 0.059187 | 0.065642 |
| 0        | 0        |
| 0        | 0        |
| 0.619983 | 0.294685 |
| 0        | 0.055219 |
| 0        | 0        |
| 0.561872 | 0.031158 |
| 0        | 0.107591 |
| 0        | 0        |
| 0        | 0        |
| 0.299394 | 0.041506 |
| 0.055435 | 0        |
| 0.436463 | 0.121016 |
| 1.519174 | 0.46955  |
| 0.026394 | 0.019515 |
| 0        | 0        |
| 0.084549 | 0        |
| 0        | 0.03718  |
| 0        | 0.441398 |
| 0        | 0        |
| 0.168257 | 0        |
| 1.132972 | 3.518299 |
| 0.111868 | 0.124069 |
| 2.018121 | 0.921619 |
| 0.259235 | 0        |
| 0.535232 | 0.296802 |
| 21.20272 | 21.37098 |
| 0.249345 | 0        |
| 2.004705 | 1.569416 |
| 0        | 0        |
| 0.459903 | 0.051006 |

|          |          |
|----------|----------|
| 0        | 0        |
| 0        | 0.527649 |
| 0.059338 | 0.175491 |
| 0.089807 | 0.199204 |
| 0.117849 | 0.609942 |
| 0.089205 | 0.197868 |
| 0        | 0        |
| 0.618806 | 0.228765 |
| 0.10595  | 0.352516 |
| 0.45877  | 1.017608 |
| 0        | 0        |
| 0.081801 | 0.090722 |
| 0.224256 | 0.426366 |
| 0        | 0        |
| 0.06344  | 0.140718 |
| 0.043816 | 0        |
| 0.143057 | 0        |
| 0.115618 | 0.384682 |
| 0.721941 | 1.247565 |
| 0        | 0.279911 |
| 0        | 0.173884 |
| 0        | 0.174989 |
| 3.283441 | 2.64839  |
| 3.167698 | 0.878293 |
| 3.693554 | 3.706245 |
| 0        | 0        |
| 0        | 0        |
| 0.042554 | 0        |
| 7.41746  | 4.189378 |
| 0.194022 | 0        |
| 0.096259 | 0.106757 |
| 0        | 0        |
| 204.311  | 201.656  |
| 0.605205 | 0.631726 |
| 1.801628 | 1.22961  |
| 0.408466 | 0.181206 |
| 0        | 0.120592 |
| 0        | 0        |
| 0        | 0        |
| 0.124025 | 0.302613 |
| 0        | 0        |
| 0        | 0        |
| 0        | 1.496916 |
| 0.071038 | 0.15757  |
| 0.074089 | 0        |
| 0        | 0        |
| 0        | 0        |
| 0.480496 | 0.152257 |
| 0        | 0        |
| 0        | 0        |
| 0        | 0        |
| 3.505817 | 1.88137  |
| 0        | 0        |
| 0.164687 | 0.182648 |
| 0.271913 | 1.40732  |
| 0        | 0        |
| 0.329082 | 0.364972 |
| 37.45788 | 37.27019 |
| 0        | 0        |
| 0.327924 | 0.121229 |
| 0.079294 | 0        |
| 0        | 0        |
| 0.343621 | 0.26075  |
| 0.067764 | 0.108556 |
| 0        | 0        |

|          |          |
|----------|----------|
| 0        | 0        |
| 93.10515 | 103.5944 |
| 0.120557 | 0.066853 |
| 0.386834 | 0.429023 |
| 0.080009 | 0        |
| 0.080737 | 0        |
| 0        | 0        |
| 0        | 0        |
| 0.338964 | 0.501242 |
| 0.101284 | 0        |
| 7.799092 | 2.120017 |
| 0        | 0.121016 |
| 0        | 0        |
| 0.784916 | 0.348208 |
| 0.098864 | 0.219293 |
| 0        | 0        |
| 0.123679 | 0.137168 |
| 0        | 0.144964 |
| 0        | 0        |
| 0        | 0        |
| 0.306224 | 0.339621 |
| 0.26465  | 0.293513 |
| 0        | 0.136623 |
| 0        | 0        |
| 1.707694 | 2.029218 |
| 0.296357 | 0.164339 |
| 0.121263 | 0        |
| 0        | 0.087273 |
| 0        | 0.146196 |
| 0.025757 | 0.042849 |
| 0.173185 | 0.096036 |
| 0.179183 | 0        |
| 0        | 0        |
| 0        | 0        |
| 0        | 0        |
| 0        | 0        |
| 0        | 0        |
| 0.221344 | 0        |
| 6.573906 | 3.72644  |
| 0.923912 | 1.639479 |
| 0        | 0.20193  |
| 3.391822 | 3.394738 |
| 0.213357 | 0        |
| 0        | 0        |
| 0        | 0        |
| 14.25112 | 15.39951 |
| 0        | 0.240763 |
| 0        | 0.696945 |
| 1.096457 | 2.786753 |
| 6.008408 | 5.923281 |
| 0.125175 | 0        |
| 0.167125 | 0.092676 |
| 0.22577  | 0.37559  |
| 0        | 0.119132 |
| 0        | 0        |
| 4.1423   | 3.907594 |
| 0        | 0        |
| 0        | 0.529678 |
| 0.723142 | 1.260299 |
| 0.073216 | 0        |
| 8.963248 | 3.394415 |
| 0        | 0        |
| 0.228261 | 0.632887 |
| 0        | 0.036433 |
| 0        | 0        |

|          |          |
|----------|----------|
| 1.272272 | 1.316959 |
| 0.136605 | 0.227255 |
| 2.314208 | 1.173302 |
| 0.019022 | 0.021096 |
| 0        | 0.631726 |
| 0.6127   | 0.075502 |
| 0        | 0.08101  |
| 0.042701 | 0        |
| 0        | 0        |
| 0.141428 | 0.156852 |
| 0.267616 | 0        |
| 0        | 0.180257 |
| 0.492043 | 0.545706 |
| 0        | 0        |
| 0        | 0        |
| 0        | 0.157091 |
| 0        | 0        |
| 0.038635 | 0        |
| 0.287439 | 0.159394 |
| 5.286875 | 5.562775 |
| 0        | 0        |
| 0.218873 | 0        |
| 4.350037 | 4.824455 |
| 0        | 0.204761 |
| 4.650703 | 1.934217 |
| 0.095813 | 0        |
| 0        | 0.077456 |
| 0        | 0.088964 |
| 0        | 0        |
| 0.22095  | 0.122523 |
| 0.285238 | 0.210898 |
| 0        | 0        |
| 1.57182  | 1.416386 |
| 0        | 0        |
| 0.046982 | 0.026053 |
| 1.352164 | 0        |
| 0.280513 | 0        |
| 0.667601 | 0.888492 |
| 0.39771  | 0.416579 |
| 0.985506 | 0.273247 |
| 0.333203 | 0.246362 |
| 0.202657 | 0.081731 |
| 0        | 0        |
| 0.709564 | 0        |
| 0        | 0.139389 |
| 0.108354 | 0        |
| 0.023907 | 0.053029 |
| 0        | 0.256933 |
| 0        | 0        |
| 0.014211 | 0        |
| 0.179442 | 0        |
| 0.519556 | 0        |
| 0.375999 | 0.052126 |
| 9.982597 | 5.490649 |
| 0        | 0        |
| 0.886956 | 0        |
| 0.106131 | 0        |
| 12.99556 | 17.31941 |
| 0        | 0.07012  |
| 1.260221 | 1.397662 |
| 0.057541 | 0        |
| 0        | 0        |
| 4.995128 | 4.54556  |
| 0        | 0        |
| 0        | 0        |

|          |          |   |
|----------|----------|---|
| 9.93689  | 43.58529 |   |
| 0.415451 |          | 0 |
| 1.251121 | 1.561016 |   |
| 0.090112 |          | 0 |
| 0.090374 | 0.20046  |   |
| 0        |          | 0 |
| 0.572229 | 0.211546 |   |
| 0        |          | 0 |
| 0        | 0.166525 |   |
| 0.49406  | 0.547943 |   |
| 0        |          | 0 |
| 0.385633 |          | 0 |
| 0.089721 | 0.099506 |   |
| 0.139835 |          | 0 |
| 0        | 0.30334  |   |
| 0        | 0.217905 |   |
| 0.032729 |          | 0 |
| 0.021678 |          | 0 |
| 0.185889 | 1.03081  |   |
| 0        |          | 0 |
| 0        | 0.055308 |   |
| 0        | 0.201634 |   |
| 0.719848 |          | 0 |
| 0.365217 | 0.270032 |   |
| 0.640071 | 0.532408 |   |
| 0        |          | 0 |
| 0.074773 |          | 0 |
| 2.147461 | 1.400979 |   |
| 0        |          | 0 |
| 0.240647 |          | 0 |
| 0        |          | 0 |
| 0        | 0.140527 |   |
| 0.059527 |          | 0 |
| 0        | 0.122523 |   |
| 0        |          | 0 |
| 0.589838 | 0.312862 |   |
| 0        |          | 0 |
| 0.200558 | 0.063552 |   |
| 0        |          | 0 |
| 0.600288 | 0.855971 |   |
| 0        |          | 0 |
| 0.037881 | 0.042012 |   |
| 0.306893 | 0.157091 |   |
| 0.392955 | 0.217905 |   |
| 0        | 0.282785 |   |
| 0.050252 | 0.027867 |   |
| 0.094645 |          | 0 |
| 0        |          | 0 |
| 1.089244 |          | 0 |
| 0.730434 | 0.648077 |   |
| 0.998419 | 1.189331 |   |
| 0        |          | 0 |
| 0.341137 | 0.126114 |   |
| 0.214462 | 0.118926 |   |
| 0        | 0.040127 |   |
| 0.203814 | 0.056511 |   |
| 0.085167 |          | 0 |
| 0.10577  |          | 0 |
| 0.275534 | 0.101861 |   |
| 0.174401 | 0.193422 |   |
| 0.917157 | 0.672375 |   |
| 0.155997 |          | 0 |
| 0.87776  | 0.259597 |   |
| 0.08345  |          | 0 |
| 0.064405 |          | 0 |

|          |          |   |
|----------|----------|---|
| 2.036971 | 2.801315 |   |
| 0.174893 |          | 0 |
| 1.074168 | 0.476527 |   |
| 1.292441 | 1.433396 |   |
| 0        |          | 0 |
| 0        |          | 0 |
| 0.06598  |          | 0 |
| 0        |          | 0 |
| 0        | 0.228765 |   |
| 0.501804 | 0.455344 |   |
| 0        |          | 0 |
| 0        |          | 0 |
| 0.106496 | 0.11811  |   |
| 0.181806 | 0.100817 |   |
| 0.196167 | 0.149573 |   |
| 0.721941 | 1.695549 |   |
| 0.108544 |          | 0 |
| 0.32885  | 0.656486 |   |
| 0.11413  |          | 0 |
| 0        |          | 0 |
| 0        | 0.062485 |   |
| 0.328502 |          | 0 |
| 0        |          | 0 |
| 0.060337 |          | 0 |
| 4.997706 | 5.526362 |   |
| 1.074168 | 0.238263 |   |
| 0        |          | 0 |
| 0.162531 |          | 0 |
| 0        | 0.187624 |   |
| 0        |          | 0 |
| 0.713964 | 0.093156 |   |
| 0        | 0.125883 |   |
| 0.066832 | 0.222362 |   |
| 0.064809 |          | 0 |
| 0        |          | 0 |
| 0.936656 |          | 0 |
| 0.095932 | 0.191509 |   |
| 0.445227 | 0.641919 |   |
| 0        | 0.060243 |   |
| 0        |          | 0 |
| 0.492753 | 1.092986 |   |
| 0.310434 | 0.895156 |   |
| 0.091371 | 0.253341 |   |
| 0        |          | 0 |
| 0.564426 | 0.417322 |   |
| 0.971056 | 0.33655  |   |
| 0.055484 | 0.030768 |   |
| 0.142184 | 0.052563 |   |
| 0.110869 | 0.122961 |   |
| 0.182608 | 0.405048 |   |
| 0.129186 | 0.11462  |   |
| 0.06081  | 0.022481 |   |
| 0        |          | 0 |
| 0.134387 | 0.149044 |   |
| 0        | 0.261321 |   |
| 0        |          | 0 |
| 0.281361 | 0.208031 |   |
| 0.436208 | 0.16126  |   |
| 0.071282 | 0.158113 |   |
| 1.897852 | 3.608287 |   |
| 0.083562 |          | 0 |
| 0        |          | 0 |
| 0.052284 |          | 0 |
| 0        |          | 0 |
| 3.856328 | 4.276903 |   |

|          |          |
|----------|----------|
| 0.22577  | 0.125197 |
| 1.205571 | 0.167131 |
| 0        | 0.417322 |
| 0.036883 | 0.013635 |
| 0.688325 | 0.458036 |
| 0        | 0.038837 |
| 0        | 0        |
| 1.808356 | 2.540397 |
| 41.89968 | 58.48464 |
| 0        | 0        |
| 0.202073 | 0.336167 |
| 0        | 0        |
| 0        | 0        |
| 0        | 0        |
| 0        | 0        |
| 0.436463 | 0.363048 |
| 0        | 0        |
| 0        | 0        |
| 0.942495 | 0.783964 |
| 0        | 0        |
| 1.695205 | 1.52757  |
| 0        | 0        |
| 0        | 0.491844 |
| 0        | 0.271095 |
| 0.382073 | 0        |
| 0.110475 | 0        |
| 5.783305 | 13.67621 |
| 0        | 0        |
| 0.110475 | 0        |
| 0        | 0        |
| 0.048129 | 0.106757 |
| 1.486804 | 1.421514 |
| 0.134874 | 0.498611 |
| 0        | 0        |
| 0.214834 | 0        |
| 0        | 0.193967 |
| 0        | 0.097533 |
| 0.827825 | 0        |
| 0        | 0        |
| 0        | 0.045183 |
| 0.076087 | 0        |
| 2.281826 | 2.118712 |
| 0        | 0        |
| 0        | 0        |
| 0.149247 | 0.579335 |
| 0        | 0        |
| 0.280682 | 0.186776 |
| 0        | 0.026576 |
| 0        | 0        |
| 0        | 0.120804 |
| 0        | 0        |
| 0.427448 | 0.829616 |
| 0.514532 | 0.126811 |
| 0        | 0        |
| 0.111467 | 0.865363 |
| 0.086472 | 0        |
| 0        | 0        |
| 0.886956 | 0        |
| 0.130161 | 0.144357 |
| 0.11207  | 0        |
| 1.30513  | 0.103391 |
| 0.106496 | 0.23622  |
| 0        | 0        |
| 0        | 0.274883 |
| 0        | 0.144055 |

|          |          |
|----------|----------|
| 0.116159 | 0.128827 |
| 0        | 0        |
| 0.520645 | 1.010497 |
| 0.027172 | 0.090405 |
| 0.560785 | 0.888492 |
| 0        | 0.021964 |
| 2.217389 | 2.459219 |
| 0.31677  | 0.117106 |
| 0        | 0.138269 |
| 0        | 0        |
| 0.30933  | 0.245047 |
| 0.209989 | 0.155261 |
| 0.612124 | 1.551733 |
| 2.040414 | 1.454749 |
| 0        | 0.051579 |
| 0.112885 | 0.625983 |
| 0.491777 | 0        |
| 0        | 1.785211 |
| 2.002803 | 3.331845 |
| 4.653193 | 12.23817 |
| 0        | 0.148882 |
| 0        | 0        |
| 0.132948 | 0.147448 |
| 0.064741 | 0        |
| 0        | 0        |
| 0.293555 | 0        |
| 0.272909 | 0.45401  |
| 0        | 0        |
| 0        | 0        |
| 0.411171 | 0.228007 |
| 1.008859 | 0.722614 |
| 0.103608 | 0.08618  |
| 0        | 0        |
| 3.666645 | 3.356937 |
| 0        | 0        |
| 1.638552 | 1.066649 |
| 0.12461  | 0.10365  |
| 0.075166 | 0.050018 |
| 0        | 0.124293 |
| 1.597824 | 0.253155 |
| 0.273511 | 0.910019 |
| 0.420074 | 0.465887 |
| 1.678396 | 1.922474 |
| 0.091439 | 0        |
| 1.164129 | 1.040045 |
| 0.252386 | 0        |
| 0.720743 | 0.570963 |
| 0.432661 | 0        |
| 0.164687 | 0.091324 |
| 0.067266 | 0        |
| 0.874463 | 0.323278 |
| 0        | 0.077543 |
| 0.344927 | 0.095636 |
| 0.158385 | 1.22961  |
| 1.497457 | 0.255503 |
| 0.256557 | 0.189692 |
| 0.054993 | 0.06099  |
| 0        | 0        |
| 0        | 0        |
| 0        | 0.245047 |
| 0        | 0        |
| 0.024716 | 0        |
| 0.783078 | 0.744412 |
| 0.064339 | 0.035678 |
| 0.141428 | 0        |

|          |          |
|----------|----------|
| 0        | 0        |
| 1.375342 | 1.525338 |
| 7.580376 | 11.6098  |
| 0        | 0.081634 |
| 0        | 0        |
| 0        | 0        |
| 0.032362 | 0        |
| 0.07186  | 0.318788 |
| 0.110475 | 0        |
| 0.125937 | 0        |
| 0        | 0.293638 |
| 0        | 0.039872 |
| 0.044893 | 0.049789 |
| 1.07649  | 1.907127 |
| 7.880196 | 6.639956 |
| 1.001401 | 1.903912 |
| 0.266467 | 0.098509 |
| 0.026624 | 0.029528 |
| 0        | 0        |
| 0.019817 | 0.087913 |
| 0.13154  | 0        |
| 2.263584 | 0.717272 |
| 0.10577  | 0.117305 |
| 0.05509  | 0        |
| 0        | 0        |
| 0.100627 | 0        |
| 0        | 0        |
| 0        | 0        |
| 0.339273 | 0.188137 |
| 0        | 0        |
| 30.98465 | 29.17994 |
| 0.611693 | 0.565338 |
| 0.108924 | 0        |
| 0.975825 | 0.676406 |
| 0        | 0.248585 |
| 1.053436 | 0.949264 |
| 0        | 0.402679 |
| 3.635288 | 4.880546 |
| 0        | 0.111062 |
| 1.59009  | 1.546459 |
| 0.283502 | 0.314421 |
| 0        | 0        |
| 1.4856   | 2.300452 |
| 0        | 0        |
| 0        | 0        |
| 0        | 0        |
| 0        | 0.142859 |
| 0        | 0        |
| 0        | 0.738821 |
| 0        | 0.08454  |
| 3.762842 | 2.08661  |
| 0.332015 | 0.736451 |
| 1.251752 | 0.277654 |
| 1.424945 | 1.806115 |
| 0.421929 | 0.210575 |
| 0        | 0        |
| 0.181011 | 0        |
| 0        | 0.066562 |
| 0.972641 | 0.898931 |
| 0.286775 | 0.318051 |
| 0        | 0        |
| 0        | 0.062034 |
| 0.108544 | 0        |
| 0.835062 | 0.509374 |
| 3.818382 | 2.456194 |

|          |          |
|----------|----------|
| 35.02337 | 47.67102 |
| 0        | 0.040696 |
| 0        | 0        |
| 0.827825 | 0        |
| 0.026065 | 0        |
| 1.627277 | 0.763548 |
| 0        | 0        |
| 0.034493 | 0.038255 |
| 0.285676 | 0.422443 |
| 0        | 0        |
| 0        | 0        |
| 0        | 0        |
| 0.085755 | 0.190216 |
| 0.364859 | 0.202326 |
| 0        | 0.150427 |
| 0        | 0        |
| 7.073189 | 5.665543 |
| 0.145403 | 0        |
| 58.63848 | 61.41588 |
| 0.174157 | 0        |
| 0        | 0        |
| 0.084818 | 0.094068 |
| 0        | 0        |
| 0.208345 | 0        |
| 13.37863 | 10.97911 |
| 0.197415 | 0.273681 |
| 0.117145 | 0.064961 |
| 0.234585 | 0.433615 |
| 0.292036 | 0        |
| 0        | 0.137716 |
| 6.326883 | 5.166288 |
| 0.500701 | 0.999554 |
| 0        | 0        |
| 0.102963 | 0.685156 |
| 0.482228 | 0        |
| 0        | 0.09941  |
| 0.546465 | 0.372962 |
| 0.268387 | 0.099219 |
| 0        | 0.382545 |
| 0.197101 | 0.218597 |
| 0.367741 | 0        |
| 0.140627 | 0.077982 |
| 1.164723 | 1.054489 |
| 0.137604 | 0.091567 |
| 0        | 0        |
| 0.211901 | 0.352516 |
| 0.271122 | 0.150345 |
| 0.114763 | 0        |
| 0.126022 | 0        |
| 0        | 0.119132 |
| 0.036902 | 0.040926 |
| 0        | 0        |
| 0.053616 | 0        |
| 0.078591 | 0.087162 |
| 0.280513 | 0.414808 |
| 0        | 0.028337 |
| 0        | 0        |
| 0        | 0        |
| 0        | 0        |
| 0.381161 | 0.422731 |
| 0        | 0.074683 |
| 0        | 0        |
| 0.412081 | 0.457023 |
| 8.508041 | 16.83952 |
| 1.788149 | 1.885634 |

|          |          |
|----------|----------|
| 0        | 0        |
| 3.104344 | 3.098616 |
| 0        | 0.159394 |
| 0        | 0        |
| 2.071333 | 4.09379  |
| 0.329665 | 0.731237 |
| 0.117145 | 0        |
| 0.056391 | 0        |
| 0.170101 | 0        |
| 0.039596 | 0.131744 |
| 0.207302 | 0        |
| 1.128852 | 0.536557 |
| 0        | 0        |
| 0        | 0        |
| 0.299454 | 0        |
| 0        | 0        |
| 0        | 0.167674 |
| 0        | 0        |
| 0        | 0        |
| 1.940215 | 2.151817 |
| 0        | 0.501699 |
| 0.504771 | 0.279911 |
| 0        | 0        |
| 0.115189 | 0.127752 |
| 0        | 0.394226 |
| 0        | 0        |
| 4.781343 | 10.13598 |
| 0.146778 | 0.162785 |
| 0        | 0.114004 |
| 0.613507 | 0.73485  |
| 0        | 0.135548 |
| 0        | 0.140241 |
| 0.382073 | 0        |
| 0        | 0.257896 |
| 0        | 0        |
| 0.129957 | 0        |
| 0.125682 | 0        |
| 0        | 0        |
| 0        | 0.016481 |
| 1.523872 | 1.352053 |
| 0.854407 | 1.684603 |
| 0.328502 | 0.364329 |
| 0.329082 | 0        |
| 3.664144 | 0.790175 |
| 0.116705 | 0.388298 |
| 0.231667 | 0        |
| 1.125928 | 0.178389 |
| 0.449905 | 0        |
| 0        | 0        |
| 0.108165 | 0.239924 |
| 0        | 0        |
| 1.05232  | 0        |
| 0.215829 | 0        |
| 0        | 0.159764 |
| 0.140627 | 0.077982 |
| 0        | 0.17002  |
| 0.10595  | 0        |
| 0        | 0        |
| 0.658165 | 0.97326  |
| 1.574968 | 0.367734 |
| 1.112668 | 0.493607 |
| 1.374617 | 2.413846 |
| 0        | 0        |
| 0        | 0.208661 |
| 1.598443 | 0.839733 |

|          |          |
|----------|----------|
| 0.06081  | 0        |
| 0.272909 | 0.302673 |
| 0        | 0        |
| 0.04499  | 0        |
| 0.138278 | 0.460077 |
| 0.064674 | 0.035864 |
| 0.663144 | 0.2758   |
| 0.772866 | 0        |
| 0.077222 | 0        |
| 0.082126 | 0.136623 |
| 0.072027 | 0.399409 |
| 0.990221 | 0.768751 |
| 0        | 0.09712  |
| 0.036629 | 0.040624 |
| 0        | 0        |
| 0        | 0        |
| 0        | 0.137992 |
| 0.074713 | 0        |
| 0.241114 | 0        |
| 0        | 0        |
| 0.620869 | 0        |
| 0        | 0.041606 |
| 0.47637  | 0.176108 |
| 0        | 0.034224 |
| 0        | 0.088849 |
| 0        | 0        |
| 0.022717 | 0        |
| 0.185334 | 0.411093 |
| 0.26704  | 0        |
| 0        | 0        |
| 0        | 0        |
| 0.354782 | 0        |
| 2.329168 | 1.130145 |
| 0.167916 | 0.372458 |
| 8.98626  | 8.12594  |
| 0.200928 | 0.222842 |
| 0.20457  | 0        |
| 0        | 0.078921 |
| 0        | 0.239924 |
| 65.47097 | 58.48509 |
| 0.503327 | 0.065673 |
| 0.723342 | 0.26741  |
| 0.683734 | 1.516606 |
| 0        | 0        |
| 0        | 0        |
| 0        | 0        |
| 0.643387 | 0.277494 |
| 0        | 0        |
| 0.214834 | 0.119132 |
| 0.13736  | 0        |
| 0.404663 | 0.51291  |
| 20.1937  | 32.34155 |
| 0        | 0        |
| 0        | 0.108781 |
| 1.664528 | 2.522952 |
| 0.164687 | 0        |
| 0.026087 | 0.14466  |
| 0        | 0        |
| 0        | 0        |
| 0.216331 | 0.119962 |
| 0.086714 | 0.288512 |
| 0        | 0        |
| 0.066904 | 0.148401 |
| 0        | 0        |
| 0        | 0        |

|          |          |
|----------|----------|
| 0        | 0        |
| 7.100759 | 9.959779 |
| 0        | 0        |
| 0        | 0        |
| 0        | 0.114764 |
| 0.332015 | 0.184113 |
| 0        | 0.049343 |
| 0        | 0.258865 |
| 0        | 0        |
| 0.028208 | 0.156425 |
| 0.918106 | 0.127279 |
| 0.329373 | 0.365295 |
| 0.228821 | 0.084592 |
| 0        | 0.211871 |
| 0.1047   | 0.232237 |
| 0        | 0        |
| 1.947236 | 2.325727 |
| 0        | 0        |
| 0.114763 | 0        |
| 2.423376 | 3.520849 |
| 6.557491 | 8.974768 |
| 0.10595  | 0.117505 |
| 0        | 0.114573 |
| 0.045352 | 0        |
| 0.103577 | 0.098463 |
| 0        | 0        |
| 0.630324 | 0.699067 |
| 0        | 0.089542 |
| 0.578899 | 0.802542 |
| 0.039521 | 0.058441 |
| 0        | 0.073331 |
| 1.989054 | 3.466542 |
| 0        | 0        |
| 0.336    | 0.502259 |
| 0        | 0        |
| 0        | 0        |
| 0.092117 | 0        |
| 0.033043 | 0        |
| 0.040615 | 0.022522 |
| 0.91081  | 0.817735 |
| 0        | 0.21079  |
| 0.207417 | 0.230038 |
| 0        | 0        |
| 0.04273  | 0        |
| 0.447473 | 1.240687 |
| 0.217849 | 0        |
| 0.394342 | 0.291566 |
| 0        | 0.102315 |
| 0.400561 | 0.177698 |
| 0.219388 | 0        |
| 0        | 0        |
| 0.034359 | 0        |
| 0.175884 | 0.065022 |
| 0.169868 | 0        |
| 0        | 0        |
| 0.650806 | 0.481189 |
| 0        | 0        |
| 0.697605 | 0.386843 |
| 0        | 0        |
| 0.07528  | 0.041745 |
| 0.164905 | 0.457225 |
| 0.223737 | 0        |
| 2.966731 | 3.052433 |
| 0.206956 | 0        |
| 0.228261 | 0        |

|          |          |
|----------|----------|
| 0.177899 | 0.789205 |
| 0.121263 | 0.134489 |
| 0.813365 | 0        |
| 0.191626 | 0.212525 |
| 0        | 0        |
| 30.96736 | 21.77132 |
| 1.274171 | 2.826267 |
| 0        | 0        |
| 0        | 0        |
| 2.207831 | 1.33561  |
| 0.662849 | 0.122523 |
| 0.91754  | 0.508804 |
| 0.034589 | 0.038361 |
| 0        | 0        |
| 0.146778 | 0        |
| 3.403629 | 1.561999 |
| 0        | 0        |
| 0.556002 | 0.479609 |
| 0        | 0.12155  |
| 0.054993 | 0        |
| 0        | 0        |
| 0        | 0        |
| 0        | 0        |
| 0.701547 | 0.389029 |
| 0.329373 | 0.091324 |
| 0.103191 | 0        |
| 0        | 0.048423 |
| 1.638176 | 0.908419 |
| 0        | 0        |
| 0.123679 | 0        |
| 0        | 0.029977 |
| 0.386032 | 0.214067 |
| 0.156522 | 0.347184 |
| 0.073216 | 0        |
| 0        | 0        |
| 0        | 0        |
| 0.17824  | 0        |
| 0.072958 | 0.080914 |
| 0.122459 | 0        |
| 0.162107 | 0        |
| 0.106496 | 0        |
| 0.296004 | 0.369323 |
| 0.045999 | 0.102031 |
| 0.593187 | 0        |
| 1.436023 | 1.498953 |
| 0        | 0        |
| 0        | 0.283367 |
| 0.487338 | 0.108098 |
| 0        | 0        |
| 0.296122 | 0        |
| 6.447002 | 8.235155 |
| 0        | 0        |
| 0        | 0        |
| 0.509745 | 0.565338 |
| 0.10779  | 0.119545 |
| 0        | 0        |
| 30.67994 | 36.9286  |
| 0.508909 | 0        |
| 0.131262 | 0        |
| 0        | 0        |
| 0        | 0        |
| 0        | 0        |
| 0.073345 | 0        |
| 0        | 0.041732 |
| 0        | 0.126694 |

|          |          |
|----------|----------|
| 1.1778   | 0.186607 |
| 0.148533 | 0.329465 |
| 1.063412 | 1.179388 |
| 0.089419 | 0.066114 |
| 19.33732 | 11.58592 |
| 0        | 0        |
| 0.094645 | 0        |
| 0.118036 | 0.785454 |
| 0        | 0        |
| 4.211021 | 6.378918 |
| 0        | 0        |
| 0.110475 | 0        |
| 0.337888 | 0        |
| 2.415279 | 4.411963 |
| 0.991803 | 1.814951 |
| 0.088317 | 0.195898 |
| 0.150331 | 0        |
| 0.219777 | 0.365618 |
| 0        | 0        |
| 0        | 0        |
| 0.07544  | 0.167334 |
| 0        | 0.129921 |
| 0        | 0        |
| 0.055934 | 0.062034 |
| 0.435916 | 0.448925 |
| 0.051696 | 0.229336 |
| 0.085401 | 0.094715 |
| 0        | 0        |
| 0.344927 | 0.25503  |
| 2.179721 | 2.495425 |
| 0.093364 | 0        |
| 0        | 0.505845 |
| 0.318394 | 0.070624 |
| 0        | 0        |
| 0.023332 | 0        |
| 0.227703 | 0.084179 |
| 0.37477  | 0        |
| 0        | 0        |
| 0.381905 | 0.242032 |
| 0        | 0        |
| 0        | 0        |
| 0.488873 | 0        |
| 0        | 0        |
| 0.218232 | 0.121016 |
| 0.496128 | 0.15721  |
| 0        | 0        |
| 0        | 0        |
| 0.053755 | 0.178852 |
| 0        | 1.064817 |
| 0.083338 | 0        |
| 0.266467 | 0        |
| 0.543668 | 0.120592 |
| 0.088108 | 0.162862 |
| 0        | 0.085115 |
| 10.62903 | 7.630334 |
| 0        | 0        |
| 0        | 0        |
| 1.474359 | 4.36041  |
| 0        | 0        |
| 0.249847 | 0.346369 |
| 0.168229 | 0.291525 |
| 1.30847  | 0.217676 |
| 0.610691 | 0.677293 |
| 0.191922 | 0.425707 |
| 0.322529 | 0        |

|          |          |
|----------|----------|
| 0.094357 | 0.104648 |
| 0.871395 | 1.208037 |
| 0        | 0.108438 |
| 0.290578 | 0.107423 |
| 0.113297 | 0.125654 |
| 0        | 0        |
| 0        | 0.072827 |
| 0        | 0        |
| 0.051956 | 0.057622 |
| 0.22577  | 0        |
| 0.138432 | 0.076765 |
| 0        | 0        |
| 0        | 0        |
| 0.070393 | 0        |
| 0.083788 | 0        |
| 0.098864 | 0        |
| 0        | 0        |
| 0        | 0.15439  |
| 1.788511 | 0.283367 |
| 0.279251 | 0.309707 |
| 0.175387 | 0.194515 |
| 4.50542  | 3.290566 |
| 2.387957 | 2.378146 |
| 0.141198 | 0.111855 |
| 0        | 0        |
| 0.457194 | 0.405644 |
| 0        | 0        |
| 0        | 0        |
| 0        | 0        |
| 0.056804 | 0        |
| 0        | 0.198725 |
| 0        | 0        |
| 0        | 0.092801 |
| 0        | 0        |
| 0        | 0        |
| 0.544622 | 0.302009 |
| 0        | 0.219643 |
| 0.384043 | 0.993829 |
| 0.829053 | 1.328124 |
| 0.933    | 0        |
| 0.222534 | 0        |
| 0        | 0.335076 |
| 0.572229 | 0        |
| 0        | 0.054823 |
| 0        | 0        |
| 0.110018 | 0        |
| 0.108354 | 0        |
| 0.416691 | 0.277281 |
| 0        | 0.059258 |
| 0.295652 | 0.286909 |
| 0        | 0.122089 |
| 0        | 0.135815 |
| 0.201581 | 0.223565 |
| 0        | 0.035457 |
| 0.016681 | 0.037001 |
| 0.135266 | 0        |
| 0        | 0        |
| 0.377811 | 0.139672 |
| 0        | 0        |
| 0        | 0        |
| 0        | 0.054736 |
| 0        | 1.255771 |
| 0        | 0        |
| 3.081235 | 0.683455 |
| 0.22577  | 0        |

|          |          |
|----------|----------|
| 0        | 0        |
| 0.131262 | 0.363944 |
| 0        | 0        |
| 0        | 0        |
| 0        | 0        |
| 0.109308 | 0.121229 |
| 0        | 0        |
| 0.210464 | 0.233417 |
| 0        | 0        |
| 0        | 0        |
| 0.078591 | 0        |
| 0        | 0.127045 |
| 0.144388 | 0        |
| 0        | 0        |
| 0        | 0        |
| 0.117367 | 0.130167 |
| 0        | 1.22961  |
| 0.29481  | 0.326962 |
| 3.856328 | 4.23617  |
| 0        | 0.070192 |
| 3.344569 | 2.443448 |
| 0        | 0        |
| 2.628604 | 1.970895 |
| 0.363506 | 0.08063  |
| 0.159402 | 0.265179 |
| 0.180136 | 0        |
| 0.073432 | 0.02036  |
| 0.158993 | 0.205722 |
| 0.055139 | 0.122306 |
| 0.42236  | 0.468423 |
| 0.208345 | 0.115534 |
| 0.282856 | 0.313704 |
| 0        | 0.082366 |
| 0.074516 | 0.082643 |
| 0.251874 | 0        |
| 0.265897 | 0.147448 |
| 1.53301  | 0.971543 |
| 0        | 0        |
| 0        | 0.114764 |
| 0.461041 | 0.170441 |
| 0.085109 | 0        |
| 1.392975 | 0.220699 |
| 0.079599 | 0        |
| 0.607504 | 0.943262 |
| 0.077999 | 0.259516 |
| 0.07406  | 0.068447 |
| 0.553359 | 0.122742 |
| 0        | 0.631726 |
| 0.364146 | 0.20193  |
| 0        | 0.613436 |
| 0.200496 | 0.259422 |
| 0.025352 | 0        |
| 0.059399 | 0.082346 |
| 0        | 0        |
| 0.119398 | 0        |
| 0.803408 | 0.314481 |
| 0        | 0        |
| 0        | 0.149692 |
| 0.336211 | 0        |
| 0        | 0        |
| 0        | 0        |
| 1.826842 | 2.16876  |
| 0.323369 | 0        |
| 2.069563 | 1.147636 |
| 0        | 0        |

|          |          |
|----------|----------|
| 0.354782 | 0.78695  |
| 0.589899 | 0.163559 |
| 15.81661 | 26.10425 |
| 0.521009 | 1.348271 |
| 0.115189 | 0        |
| 0.114551 | 0.381134 |
| 2.941259 | 5.026327 |
| 0.135266 | 0        |
| 0.397568 | 0        |
| 0.100464 | 0        |
| 0        | 0.227255 |
| 0.121501 | 0.539007 |
| 1.548301 | 1.888877 |
| 0.135709 | 0        |
| 0.596989 | 0.397258 |
| 0        | 0.189692 |
| 0.729719 | 0.539535 |
| 1.219229 | 0.312046 |
| 0.047993 | 0        |
| 0        | 0        |
| 0.023562 | 0.078396 |
| 0        | 0.61664  |
| 0.10559  | 0.351317 |
| 0        | 0.098509 |
| 4.668575 | 3.248025 |
| 0        | 0        |
| 0.248845 | 0.275985 |
| 0.350773 | 0        |
| 0        | 0.118721 |
| 0        | 0.048119 |
| 0.203341 | 0.225518 |
| 14839.39 | 4985.1   |
| 0.337888 | 0        |
| 0        | 0        |
| 0        | 0.04431  |
| 0        | 0        |
| 0        | 0        |
| 0.201581 | 0        |
| 0.251364 | 0        |
| 0        | 0        |
| 0        | 0        |
| 0.909222 | 0.720273 |
| 0.32225  | 0.119132 |
| 0.449905 | 0.623715 |
| 0        | 0.405844 |
| 0.031184 | 0.034585 |
| 0.289787 | 0.160696 |
| 0.078294 | 0.607827 |
| 0        | 0        |
| 1.706856 | 0.709878 |
| 0        | 0.635614 |
| 0        | 0        |
| 0.181434 | 0.040244 |
| 0.590741 | 0.556893 |
| 0        | 0        |
| 0        | 0        |
| 0        | 0        |
| 0        | 0        |
| 0.363347 | 0.503717 |
| 0.113297 | 0        |
| 0.257408 | 0.171289 |
| 0.164832 | 0.182809 |
| 0.102793 | 0        |
| 2.359087 | 1.664964 |
| 0        | 0.127515 |

|          |          |   |
|----------|----------|---|
| 0        | 0.391239 |   |
| 0        |          | 0 |
| 0        |          | 0 |
| 0.211901 |          | 0 |
| 0        |          | 0 |
| 0        |          | 0 |
| 0        |          | 0 |
| 0        |          | 0 |
| 0.726489 | 0.43385  |   |
| 0.17824  | 0.395358 |   |
| 0        | 0.119132 |   |
| 0        | 0.124293 |   |
| 0.213724 |          | 0 |
| 0.499894 | 0.221765 |   |
| 0.129889 | 0.288109 |   |
| 0        | 0.25503  |   |
| 0.176886 | 0.196177 |   |
| 1.082911 | 1.921622 |   |
| 0.364859 | 0.539535 |   |
| 0.149247 |          | 0 |
| 0.686043 |          | 0 |
| 0        |          | 0 |
| 0.42236  | 0.156141 |   |
| 1.346787 | 0.448101 |   |
| 0        |          | 0 |
| 0.394202 | 0.655792 |   |
| 0        |          | 0 |
| 0        |          | 0 |
| 0        |          | 0 |
| 0.179183 |          | 0 |
| 5.596067 | 2.743873 |   |
| 3.045772 | 4.157472 |   |
| 0        | 0.349534 |   |
| 0        | 0.145886 |   |
| 0.045452 |          | 0 |
| 0.608695 |          | 0 |
| 0.888769 | 0.563257 |   |
| 0.22414  | 0.124293 |   |
| 39.75431 | 44.08996 |   |
| 0        | 0.829616 |   |
| 0.115834 |          | 0 |
| 0.033606 |          | 0 |
| 0.753814 |          | 0 |
| 0.677311 | 0.400629 |   |
| 0.155606 | 0.172577 |   |
| 0        | 0.027621 |   |
| 3.67325  | 2.980872 |   |
| 0.378579 |          | 0 |
| 0.465943 | 1.421087 |   |
| 0        |          | 0 |
| 0.643758 | 1.745252 |   |
| 0        |          | 0 |
| 0.107231 |          | 0 |
| 0.097468 |          | 0 |
| 0.062714 | 0.069554 |   |
| 0        | 0.017468 |   |
| 2.048005 | 3.586361 |   |
| 0        | 0.060033 |   |
| 0.305972 | 0.098975 |   |
| 0        |          | 0 |
| 0.039799 | 0.02207  |   |
| 0.482541 |          | 0 |
| 0        |          | 0 |
| 0.239256 |          | 0 |
| 1.705684 | 0.756683 |   |

|          |          |  |
|----------|----------|--|
| 0        | 0.351317 |  |
| 0.271122 | 0.601381 |  |
| 0        | 0        |  |
| 0.493144 | 0.273464 |  |
| 0.266379 | 0.022725 |  |
| 2.368156 | 1.370311 |  |
| 0.613124 | 0.39368  |  |
| 0        | 0.040493 |  |
| 0        | 0        |  |
| 0        | 0        |  |
| 0        | 0        |  |
| 0.366414 | 0.361223 |  |
| 0.057435 | 0.021233 |  |
| 0.145279 | 0.131828 |  |
| 0        | 0.127989 |  |
| 2.463765 | 0.546493 |  |
| 0.421786 | 0.654901 |  |
| 0        | 0.138269 |  |
| 0.030198 | 0        |  |
| 0        | 0        |  |
| 0.733194 | 0.455368 |  |
| 0.191233 | 0        |  |
| 0        | 0.184606 |  |
| 1.101668 | 0.436363 |  |
| 0.08895  | 0.098651 |  |
| 0.348151 | 0.128707 |  |
| 0.94071  | 0.894262 |  |
| 1.239672 | 1.489444 |  |
| 0.161265 | 0        |  |
| 0.017841 | 0        |  |
| 0.102454 | 0.227255 |  |
| 0.243478 | 0        |  |
| 0        | 0.086234 |  |
| 0.664811 | 0.251766 |  |
| 0.27533  | 0        |  |
| 0        | 0        |  |
| 0        | 0        |  |
| 0        | 0        |  |
| 0        | 0.105611 |  |
| 0        | 0        |  |
| 0        | 0        |  |
| 0        | 0.123181 |  |
| 0.86472  | 0.863124 |  |
| 0.096583 | 0.071411 |  |
| 0        | 0        |  |
| 0.444748 | 0.098651 |  |
| 0        | 0        |  |
| 0        | 0        |  |
| 0.127488 | 0        |  |
| 1.639258 | 1.590782 |  |
| 0        | 0        |  |
| 0        | 0.146507 |  |
| 0        | 0        |  |
| 0        | 0        |  |
| 0.217087 | 0.361144 |  |
| 0        | 0        |  |
| 0.228962 | 0.021161 |  |
| 0.125682 | 0.836334 |  |
| 0.957023 | 0.928722 |  |
| 0.3417   | 0.11369  |  |
| 0.088192 | 0        |  |
| 0.150696 | 0.167131 |  |
| 0        | 0        |  |
| 0.338656 | 0.75118  |  |
| 0.074984 | 0.083162 |  |

|          |          |
|----------|----------|
| 0.115618 | 0        |
| 0.409702 | 0.378653 |
| 0        | 0        |
| 0        | 0        |
| 0.160639 | 0.089079 |
| 0        | 0.249035 |
| 0        | 0        |
| 0        | 0        |
| 0        | 0        |
| 0.371778 | 0.137441 |
| 0.173427 | 0.288512 |
| 0        | 0        |
| 0        | 0        |
| 0.182073 | 0        |
| 0        | 0        |
| 0.06129  | 0        |
| 0        | 0.112697 |
| 0.280513 | 0        |
| 0        | 0        |
| 0        | 0        |
| 9.395736 | 10.60956 |
| 0.052497 | 0.07763  |
| 0        | 0        |
| 0.533698 | 0.197301 |
| 0.081053 | 1.168611 |
| 0        | 0        |
| 0        | 0.747442 |
| 1.747286 | 2.454605 |
| 0.089334 | 0        |
| 2.444366 | 1.08438  |
| 0.078891 | 0.524967 |
| 0        | 0        |
| 0        | 0        |
| 2.59416  | 1.981989 |
| 0.267616 | 0.742006 |
| 0.209399 | 0        |
| 0        | 0.040174 |
| 0.026983 | 0.029925 |
| 0        | 0.204327 |
| 0        | 0        |
| 0.021656 | 0        |
| 0.045686 | 0        |
| 0.229103 | 0.084696 |
| 0        | 0        |
| 0.159812 | 0.265862 |
| 0        | 0        |
| 0.518087 | 1.07504  |
| 0.517391 | 0.382545 |
| 0.101865 | 0.22595  |
| 0.217087 | 0        |
| 0.020856 | 0        |
| 0        | 0        |
| 0.034002 | 0.113129 |
| 0.109694 | 0.243315 |
| 0        | 0.258865 |
| 0.353771 | 0        |
| 0        | 0        |
| 0        | 0        |
| 0.113921 | 0        |
| 0        | 0        |
| 0        | 0        |
| 0        | 0.32027  |
| 0        | 0        |
| 1.125442 | 1.040153 |
| 0.126193 | 0.139956 |

|          |          |  |
|----------|----------|--|
| 0        | 0.023728 |  |
| 6.446179 | 2.257644 |  |
| 0.791546 | 0.438936 |  |
| 0        | 0        |  |
| 0.024785 | 0        |  |
| 0.064139 | 0.023711 |  |
| 0.103306 | 0        |  |
| 0        | 0        |  |
| 0.875834 | 2.914059 |  |
| 0        | 0        |  |
| 0.421643 | 0.116907 |  |
| 0        | 0        |  |
| 0.044285 | 0        |  |
| 0        | 0.57864  |  |
| 1.289001 | 0.476527 |  |
| 0        | 0        |  |
| 0        | 0        |  |
| 0.148533 | 0        |  |
| 0        | 0        |  |
| 0.04103  | 0.009101 |  |
| 0.112273 | 0        |  |
| 0.352766 | 0.586859 |  |
| 0        | 0.461104 |  |
| 0.217087 | 0        |  |
| 0.222534 | 0        |  |
| 0.175387 | 0        |  |
| 4.824586 | 9.385759 |  |
| 0        | 0        |  |
| 0.186447 | 0.206781 |  |
| 0        | 0.091082 |  |
| 0        | 0        |  |
| 0        | 0        |  |
| 0.207302 | 0.22991  |  |
| 0.181541 | 0.20134  |  |
| 1.408603 | 0.240343 |  |
| 0.217849 | 0        |  |
| 0.027631 | 0.061289 |  |
| 1.531291 | 2.933418 |  |
| 0        | 0        |  |
| 0.098394 | 0.218251 |  |
| 0.011421 | 0        |  |
| 0.03878  | 0        |  |
| 0.15639  | 0        |  |
| 0.165786 | 0        |  |
| 1.171451 | 0.909447 |  |
| 0.413913 | 0.306036 |  |
| 0        | 0        |  |
| 1.108694 | 0.307402 |  |
| 0        | 0        |  |
| 0        | 0        |  |
| 2.6197   | 0.387388 |  |
| 0        | 0        |  |
| 0.277174 | 0.614805 |  |
| 0        | 0        |  |
| 0.667601 | 0.370205 |  |
| 0.311994 | 0.865052 |  |
| 0.908272 | 0.719521 |  |
| 0        | 0        |  |
| 0        | 0        |  |
| 0.098239 | 0        |  |
| 0.096259 | 0.427027 |  |
| 0        | 0        |  |
| 0.903865 | 0.787632 |  |
| 0        | 0.125425 |  |
| 0        | 0        |  |

|          |          |
|----------|----------|
| 0        | 0        |
| 0.169174 | 0        |
| 1.045234 | 0.347768 |
| 0.242054 | 0.671132 |
| 0.268001 | 1.238456 |
| 14.21385 | 6.020982 |
| 0.354782 | 0.655792 |
| 0.040927 | 0        |
| 0.348803 | 0        |
| 0        | 0        |
| 0.069761 | 0        |
| 0.301149 | 0        |
| 0.031168 | 0.034567 |
| 0        | 0        |
| 0.098394 | 0.109125 |
| 0        | 0        |
| 0.215746 | 0.132931 |
| 0.024638 | 0.027325 |
| 0        | 0        |
| 0.542244 | 0        |
| 0        | 0        |
| 0.192517 | 0.32027  |
| 0        | 0        |
| 0.094789 | 0.735888 |
| 0.23849  | 0.2645   |
| 0        | 0        |
| 0.356821 | 0.791473 |
| 0        | 0        |
| 0        | 0.189171 |
| 0.07211  | 0.079975 |
| 0.121739 | 0.135016 |
| 0.13154  | 0.583544 |
| 23.4454  | 29.01191 |
| 0.604742 | 0        |
| 0.166008 | 0.184113 |
| 0.031082 | 0        |
| 0.623362 | 0.138269 |
| 0        | 0.283367 |
| 0.26197  | 0        |
| 0        | 0.352216 |
| 0.253416 | 0        |
| 0        | 0.115099 |
| 0        | 0        |
| 0.051956 | 0.115244 |
| 0        | 0        |
| 0        | 0        |
| 0        | 0        |
| 1.278145 | 0.644337 |
| 0.209047 | 0.695537 |
| 0.034531 | 0        |
| 0.154445 | 0        |
| 0.442687 | 0.368225 |
| 0.072616 | 0        |
| 0.032203 | 0        |
| 0        | 0        |
| 0.309232 | 0.457276 |
| 2.291029 | 2.286802 |
| 0        | 0        |
| 0        | 0        |
| 0        | 0        |
| 0        | 0        |
| 0.232535 | 0.257896 |
| 1.108694 | 2.356752 |
| 0        | 0        |
| 0.286115 | 0.158659 |

|          |          |
|----------|----------|
| 0        | 0        |
| 0.218616 | 0        |
| 0.082672 | 0        |
| 0        | 0        |
| 0        | 0.148082 |
| 0        | 0        |
| 1.666762 | 2.618766 |
| 0        | 0        |
| 1.222601 | 0.412677 |
| 0.499091 | 0.774931 |
| 0.03985  | 0.070714 |
| 0        | 0.355856 |
| 0.279251 | 0.206471 |
| 0.08476  | 0        |
| 0.148415 | 0        |
| 0.15368  | 0        |
| 0.153871 | 0        |
| 0.522994 | 0.165724 |
| 0.036891 | 0.122742 |
| 0        | 0        |
| 2.322979 | 2.107902 |
| 0.091777 | 0.135714 |
| 0.33246  | 0.09218  |
| 0.138278 | 0.613436 |
| 0.087487 | 0.129372 |
| 0.142075 | 0.078785 |
| 2.569113 | 1.009128 |
| 23.83133 | 21.44572 |
| 0.245819 | 0.038947 |
| 0        | 0        |
| 0        | 0        |
| 0        | 0        |
| 0        | 0        |
| 0.080737 | 0.35817  |
| 0.6127   | 0.226507 |
| 1.261562 | 0.599635 |
| 0        | 0.092926 |
| 0        | 0        |
| 0.780266 | 0.494493 |
| 0        | 0.064233 |
| 0.413913 | 0.153018 |
| 0        | 0        |
| 0        | 0.038663 |
| 0.025249 | 0        |
| 0        | 0        |
| 0        | 0        |
| 0.032557 | 0.018054 |
| 0.560182 | 0.931915 |
| 1.063132 | 2.240248 |
| 0.446668 | 0        |
| 2.474477 | 2.744346 |
| 0        | 0.104331 |
| 0        | 0.046245 |
| 0        | 0        |
| 0.358366 | 0.099362 |
| 1.896748 | 0        |
| 0        | 0.118517 |
| 0        | 0        |
| 0        | 0        |
| 0.101615 | 0.225395 |
| 0        | 0        |
| 0.185889 | 0.206162 |
| 0.180485 | 0        |
| 0        | 0.07233  |
| 0.391304 | 0.14466  |

|          |          |
|----------|----------|
| 0.169636 | 0.188137 |
| 0.488873 | 0.54219  |
| 0.354108 | 0.130909 |
| 0.136755 | 0        |
| 0.034531 | 0.038297 |
| 0.463335 | 0        |
| 0        | 0.357148 |
| 0.686043 | 1.268106 |
| 0        | 0        |
| 0        | 0        |
| 0        | 0.094846 |
| 0.144725 | 0.160508 |
| 0.290465 | 0.724822 |
| 0.045056 | 0.019988 |
| 0.343654 | 0        |
| 0.345407 | 0        |
| 0.184625 | 0.087755 |
| 5.204889 | 1.855459 |
| 0.07879  | 0.034953 |
| 0.139678 | 0.309823 |
| 0.537217 | 0.085115 |
| 0.574879 | 0.159394 |
| 2.605044 | 1.661263 |
| 0.109501 | 0.242886 |
| 0        | 0        |
| 0.075901 | 0        |
| 0.095274 | 0.070443 |
| 0.21533  | 0.716443 |
| 2.586954 | 2.988634 |
| 0.157982 | 0.087606 |
| 0.070714 | 0        |
| 0.625991 | 0.252459 |
| 1.652503 | 1.30909  |
| 0        | 0        |
| 0        | 0.151337 |
| 3.979929 | 1.324195 |
| 0.063322 | 0        |
| 0        | 0        |
| 0.083226 | 0.092303 |
| 1.302522 | 1.564958 |
| 0        | 0        |
| 0        | 0        |
| 0        | 0        |
| 0.02904  | 0.09662  |
| 0        | 0.332648 |
| 0        | 0        |
| 0.229951 | 0        |
| 0        | 0        |
| 0        | 0        |
| 0.046024 | 0        |
| 0.955183 | 0.423742 |
| 0.950309 | 0.702634 |
| 0.767181 | 0.850851 |
| 0.233409 | 0        |
| 0.260869 | 0.14466  |
| 0        | 0        |
| 0.473317 | 0.547761 |
| 4.395532 | 3.534311 |
| 0.247687 | 0.8241   |
| 0.346106 | 0.668646 |
| 3.987231 | 2.684836 |
| 0.907053 | 0.533784 |
| 0.094789 | 0.315381 |
| 0.088822 | 0        |
| 0        | 0.222482 |

|          |          |
|----------|----------|
| 0        | 0        |
| 0        | 0.275985 |
| 0        | 0        |
| 0.081909 | 0        |
| 0.299937 | 0.083162 |
| 0        | 0.256455 |
| 0        | 0.127989 |
| 0        | 0        |
| 0.425253 | 0        |
| 0.098551 | 0.109299 |
| 0.279671 | 0        |
| 0.085578 | 0.189823 |
| 1.317261 | 4.674951 |
| 0        | 0.038554 |
| 0.350773 | 0.389029 |
| 0.051761 | 0.028703 |
| 0.119245 | 0.220417 |
| 0.13154  | 0.291772 |
| 0        | 0        |
| 0        | 0.092138 |
| 0        | 0        |
| 0        | 0        |
| 0        | 0        |
| 0        | 0        |
| 0.220166 | 0.122089 |
| 0        | 0        |
| 0.103824 | 0        |
| 0        | 0.228765 |
| 0.115189 | 0.127752 |
| 0        | 0        |
| 0.436003 | 0.290133 |
| 0.062714 | 0.139107 |
| 1.49104  | 2.381261 |
| 0.714669 | 1.981529 |
| 0.748035 | 0.553077 |
| 0        | 0        |
| 0        | 0        |
| 0.159606 | 0        |
| 0        | 0        |
| 0.129079 | 0        |
| 0.503748 | 0.279343 |
| 0.022953 | 0.127279 |
| 0.115942 | 0.042862 |
| 0.14372  | 0.079697 |
| 0.052086 | 0        |
| 0.132664 | 0.147133 |
| 0        | 0        |
| 0        | 0.170864 |
| 0.848844 | 0.537954 |
| 0.907703 | 0.503349 |
| 0.298017 | 0        |
| 0        | 0        |
| 1.415662 | 0.672881 |
| 3.585299 | 2.327599 |
| 0.267616 | 0        |
| 0.260869 | 0.14466  |
| 0        | 0        |
| 0        | 0.900106 |
| 0.248348 | 0.275433 |
| 0.209047 | 0.927382 |
| 0.236072 | 0        |
| 2.648758 | 2.796627 |
| 0.152923 | 0.169601 |
| 0        | 0        |
| 0.034493 | 0        |

|          |          |
|----------|----------|
| 1.196205 | 1.797416 |
| 0        | 0        |
| 0.130709 | 0        |
| 0.328029 | 0.099219 |
| 0.138381 | 0.306946 |
| 0        | 0.099219 |
| 0.19463  | 0        |
| 0.182073 | 0        |
| 0.235178 | 0.782479 |
| 0        | 0.141392 |
| 0.250687 | 0        |
| 1.208771 | 0.243746 |
| 2.682153 | 0.440692 |
| 0.855715 | 1.581734 |
| 0.008255 | 0.009155 |
| 0        | 0.020366 |
| 0.183012 | 0.152229 |
| 1.342419 | 0.372206 |
| 0.216582 | 0        |
| 0.235848 | 0.130785 |
| 0.280594 | 0.035907 |
| 0        | 0        |
| 0        | 0        |
| 0.083226 | 0.092303 |
| 0        | 0        |
| 0.31758  | 0.176108 |
| 0.064007 | 0        |
| 0.717175 | 0.909018 |
| 0.352766 | 0        |
| 0        | 0        |
| 0.434174 | 0.19261  |
| 0.277174 | 0        |
| 0.255735 | 0.220598 |
| 0.092529 | 0.020524 |
| 0.219388 | 0        |
| 1.30939  | 1.210161 |
| 0.06612  | 0        |
| 0        | 0.072559 |
| 0        | 0        |
| 0.171038 | 0        |
| 0.30889  | 0.342578 |
| 0.127817 | 0.070878 |
| 0        | 0.144417 |
| 0        | 0.324803 |
| 0.208112 | 0.153873 |
| 0        | 0        |
| 0.391098 | 0.54219  |
| 0        | 0.412324 |
| 0.15483  | 0        |
| 4.86956  | 1.35016  |
| 0        | 0        |
| 0.383252 | 0.283367 |
| 0        | 0        |
| 0        | 0        |
| 0.253416 | 0.281054 |
| 0.572757 | 0.508178 |
| 0        | 0        |
| 0        | 0        |
| 0.42993  | 0.154265 |
| 0        | 0.056211 |
| 0.023825 | 0.052846 |
| 0        | 0.116118 |
| 0.294251 | 0.326342 |
| 0        | 0.277095 |
| 0.945006 | 0.628841 |

|          |          |
|----------|----------|
| 0.077609 | 0.258218 |
| 0.164469 | 0.273608 |
| 0        | 0        |
| 0.401857 | 0.222842 |
| 0        | 0        |
| 0.049314 | 0.054693 |
| 0.593187 | 0.109647 |
| 0.086232 | 0.095636 |
| 0        | 0        |
| 0        | 0        |
| 18.4746  | 15.52366 |
| 0        | 0        |
| 0        | 0        |
| 0.879774 | 0.418167 |
| 0        | 0        |
| 0.194325 | 0        |
| 0.820532 | 0.60668  |
| 3.225293 | 1.192349 |
| 0.138587 | 0.153701 |
| 0.390484 | 0        |
| 0        | 0.056814 |
| 0.268387 | 0.297658 |
| 34.21506 | 56.38693 |
| 0.076368 | 0        |
| 0        | 0        |
| 0        | 0        |
| 0        | 0        |
| 0        | 0        |
| 0        | 0        |
| 0.642721 | 0.285127 |
| 0.027172 | 0.090405 |
| 0.222268 | 0.451933 |
| 0.725314 | 0.643534 |
| 0.128544 | 0.42769  |
| 2.275436 | 0.120171 |
| 3.927805 | 2.521996 |
| 4.455997 | 2.470986 |
| 0.483435 | 0.689347 |
| 5.507708 | 9.440228 |
| 0        | 0        |
| 0        | 0        |
| 0        | 0        |
| 0.356309 | 0.493961 |
| 0        | 0.089601 |
| 0        | 0        |
| 0        | 0.03835  |
| 0.754614 | 0.473517 |
| 0        | 0.092551 |
| 0        | 0        |
| 0.444669 | 0.308228 |
| 0.015537 | 0        |
| 0.054638 | 0.100995 |
| 0        | 0.235011 |
| 0.178359 | 0.039562 |
| 0.187009 | 0        |
| 0.278417 | 0        |
| 0.778356 | 0.287748 |
| 0        | 0        |
| 0.082783 | 0        |
| 0.009373 | 0        |
| 0.632464 | 0.233814 |
| 0        | 0        |
| 0.15483  | 0.300503 |
| 4.036146 | 3.592118 |
| 0        | 0        |

|          |          |
|----------|----------|
| 0        | 0        |
| 0        | 0        |
| 0        | 0.122306 |
| 0.845242 | 0.909018 |
| 0.072588 | 0.026835 |
| 0        | 0.26793  |
| 0.090374 | 0        |
| 0.045568 | 0        |
| 0.872415 | 0.967562 |
| 1.271404 | 0.235011 |
| 0        | 0        |
| 1.474946 | 1.172841 |
| 0.065286 | 0        |
| 0        | 0.690307 |
| 0.209239 | 0.210962 |
| 0        | 0        |
| 1.069115 | 0.925435 |
| 0        | 0.194332 |
| 0.172105 | 0.572625 |
| 0.325062 | 0.180257 |
| 0.260869 | 0.86796  |
| 0.084587 | 0.125083 |
| 1.107282 | 1.052608 |
| 0        | 0.200753 |
| 0        | 0.071183 |
| 0.031758 | 0.017611 |
| 0        | 0        |
| 0        | 0        |
| 0.175884 | 0.097533 |
| 0        | 0        |
| 0        | 0.762267 |
| 0.103478 | 0        |
| 0.06075  | 0.471631 |
| 0        | 0        |
| 0.215954 | 0.059877 |
| 3.90813  | 1.697994 |
| 0        | 0        |
| 0        | 0        |
| 0.470355 | 0.214798 |
| 0.047485 | 0        |
| 2.590633 | 2.579323 |
| 0.150879 | 0.083667 |
| 0        | 0        |
| 0.379736 | 1.052877 |
| 1.005826 | 1.521166 |
| 0.01264  | 0.224294 |
| 0.036978 | 0.041011 |
| 0        | 0.096983 |
| 0        | 0.87904  |
| 0.129483 | 0        |
| 0        | 0.450053 |
| 2.071333 | 1.88491  |
| 0.742666 | 0.65893  |
| 0.165345 | 0        |
| 0.024367 | 0.027024 |
| 0.727955 | 0.446165 |
| 0.145403 | 0.16126  |
| 1.964516 | 0.635474 |
| 1.921737 | 0.710441 |
| 0.165345 | 0.21394  |
| 0.791806 | 1.472211 |
| 0.031726 | 0.175928 |
| 1.034781 | 0.191273 |
| 0        | 0        |
| 3.036034 | 2.020288 |

|          |          |
|----------|----------|
| 0        | 0.190743 |
| 2.264205 | 1.321653 |
| 0        | 0        |
| 0        | 0        |
| 0        | 0        |
| 7.469099 | 5.004727 |
| 0.782608 | 0.86796  |
| 6.106907 | 7.337342 |
| 0        | 0.136083 |
| 0        | 0.210307 |
| 0        | 0.060086 |
| 0.289449 | 0.160508 |
| 55.47002 | 46.35253 |
| 0.132381 | 0.734095 |
| 0.273945 | 0.218752 |
| 0        | 0.380958 |
| 0        | 0        |
| 0.520281 | 0.577023 |
| 0        | 0        |
| 0        | 0        |
| 1.416017 | 1.449645 |
| 0.230378 | 0.127752 |
| 0.028428 | 0.031528 |
| 10.52588 | 9.830607 |
| 0        | 0        |
| 1.341613 | 1.322605 |
| 0.09313  | 0.37872  |
| 0        | 0        |
| 1.768683 | 1.758656 |
| 0.123188 | 0.045541 |
| 0        | 0        |
| 0.088067 | 0.097671 |
| 0        | 0        |
| 0        | 0        |
| 4.305007 | 2.321553 |
| 0        | 0        |
| 1.233514 | 0.729623 |
| 0.206956 | 0        |
| 0.738612 | 0.481862 |
| 0.340513 | 0        |
| 1.526727 | 0.645041 |
| 0.337429 | 0.280672 |
| 0.221739 | 0.081974 |
| 0        | 0        |
| 0.689089 | 0.305696 |
| 0.032937 | 0.03653  |
| 1.563901 | 1.040677 |
| 0.229951 | 0        |
| 0.128811 | 0.07143  |
| 0.065115 | 0        |
| 0.330152 | 0.264448 |
| 0.162744 | 0.030082 |
| 0        | 0        |
| 0.492319 | 0.485344 |
| 0.13007  | 0.096171 |
| 0.134606 | 0.298572 |
| 0        | 0        |
| 0.415993 | 0.11534  |
| 0.27182  | 0.088666 |
| 0.092117 | 0        |
| 0        | 0        |
| 0.163818 | 0.181684 |
| 0        | 0        |
| 0.340202 | 0.660284 |
| 0.346854 | 0        |

|          |          |
|----------|----------|
| 0        | 0        |
| 0.060396 | 0        |
| 0.311994 | 0.05767  |
| 0        | 0        |
| 0.26308  | 0        |
| 0.102117 | 0        |
| 0.338041 | 0.124969 |
| 0        | 0        |
| 0.735845 | 1.224145 |
| 0.109694 | 0        |
| 0.013871 | 0.015384 |
| 2.822131 | 3.521155 |
| 0        | 0        |
| 2.962652 | 1.571451 |
| 0.056187 | 0        |
| 0        | 0        |
| 0        | 0        |
| 0.325631 | 0.240763 |
| 0.677456 | 0.397768 |
| 0.249345 | 0        |
| 0.45877  | 0.169601 |
| 0        | 0        |
| 0        | 0        |
| 0        | 0.045005 |
| 0.151431 | 0.25192  |
| 0.536072 | 0.324293 |
| 0.252044 | 0        |
| 0.19382  | 0.143305 |
| 0.58221  | 0.464909 |
| 0.034939 | 0.03875  |
| 0        | 0.120381 |
| 0.172464 | 0.25503  |
| 0.0491   | 0.326729 |
| 0.314762 | 1.134545 |
| 0.054295 | 0.015054 |
| 3.44096  | 6.471006 |
| 0        | 0        |
| 0.249847 | 0.277095 |
| 0.131959 | 0.06098  |
| 2.791301 | 1.330872 |
| 0.703353 | 0.425488 |
| 0.227424 | 0.324293 |
| 0        | 0        |
| 0.915736 | 1.421849 |
| 0.6473   | 0.658071 |
| 0.047631 | 0.039619 |
| 0        | 0        |
| 0        | 0.186607 |
| 0        | 0.183377 |
| 0.170257 | 0.314708 |
| 3.630812 | 4.026792 |
| 0        | 0        |
| 0.602785 | 0.573022 |
| 77.51784 | 87.18004 |
| 1.044221 | 0.549609 |
| 0.174157 | 0        |
| 0.23849  | 0.352667 |
| 3.242755 | 3.68413  |
| 0.707013 | 1.733318 |
| 1.641425 | 0.568887 |
| 0.472144 | 0.698181 |
| 0        | 0.048119 |
| 0.213602 | 0.315863 |
| 0.130252 | 0.19261  |
| 1.465337 | 1.835816 |

|          |          |
|----------|----------|
| 0.241114 | 0.133705 |
| 0.107046 | 0.326483 |
| 4.478905 | 4.796089 |
| 0.502728 | 0.278778 |
| 0.372894 | 0        |
| 0.101782 | 0.112882 |
| 0.87102  | 0.559271 |
| 0        | 0.084592 |
| 0.077754 | 0        |
| 0.442845 | 0.196457 |
| 0.369565 | 0.683116 |
| 0.965915 | 1.725917 |
| 0        | 0        |
| 0.170101 | 0.848936 |
| 0        | 0.077572 |
| 0.037289 | 0.165425 |
| 0.142728 | 0        |
| 0.03911  | 0.021688 |
| 0.034397 | 0.038149 |
| 1.443881 | 0.32027  |
| 0        | 0        |
| 0.211324 | 0.234371 |
| 0.075808 | 0.336303 |
| 0.816933 | 0.453014 |
| 4.306971 | 2.212733 |
| 0.065183 | 0.162657 |
| 0.169636 | 0.094068 |
| 0.023201 | 0        |
| 2.208289 | 3.767887 |
| 0.288776 | 0        |
| 0.124423 | 0        |
| 0.402291 | 0.743608 |
| 0.456521 | 0.50631  |
| 0.054558 | 0        |
| 0.434727 | 0.175323 |
| 0        | 0.219119 |
| 0.214586 | 0.753632 |
| 54.18492 | 26.81294 |
| 0.079497 | 0.529    |
| 0        | 0.502614 |
| 0.398845 | 0.442343 |
| 0        | 0.120592 |
| 0.187197 | 0.553633 |
| 0.207648 | 0.230295 |
| 0.394955 | 0        |
| 0        | 0        |
| 0.064339 | 0        |
| 0.352195 | 0.362705 |
| 0        | 0        |
| 0        | 0.033041 |
| 0        | 0.027131 |
| 0        | 0.046059 |
| 0.101782 | 0.056441 |
| 0        | 0.073724 |
| 0.561677 | 0.047918 |
| 0.049617 | 0.091713 |
| 4.057966 | 3.570422 |
| 0.277091 | 0.245849 |
| 0.687309 | 0.635223 |
| 2.246147 | 2.773126 |
| 0.155023 | 0.042983 |
| 0.244677 | 0.067841 |
| 0.196477 | 0.174324 |
| 0.144367 | 0.090063 |
| 1.215687 | 0.746364 |

|          |          |
|----------|----------|
| 0.179702 | 0.11958  |
| 1.328062 | 2.209352 |
| 0        | 0        |
| 0.099045 | 0.047077 |
| 0.570914 | 0.791473 |
| 0        | 0        |
| 0        | 0        |
| 0.176383 | 0        |
| 0.32225  | 0.387178 |
| 0        | 0.239924 |
| 0        | 0        |
| 0.044096 | 0.09781  |
| 0        | 0.021404 |
| 0.271715 | 0.150674 |
| 3.449271 | 1.974427 |
| 0.428185 | 0.474884 |
| 0        | 0.109822 |
| 0.648427 | 0.539359 |
| 0        | 0.144964 |
| 0        | 0.049361 |
| 0.864096 | 0.177469 |
| 0.71494  | 0.500786 |
| 5.259426 | 7.397982 |
| 0        | 0        |
| 0.779986 | 0.432526 |
| 0.035157 | 0.155964 |
| 0.11894  | 0.131912 |
| 0        | 0        |
| 2.631814 | 1.592096 |
| 0.201487 | 0        |
| 0.060455 | 0.469335 |
| 0.14372  | 0.079697 |
| 3.050147 | 2.935487 |
| 0        | 0        |
| 0.11434  | 0        |
| 0.413224 | 0.114573 |
| 0.122459 | 0.27163  |
| 0.641173 | 0.237033 |
| 0.196477 | 0.163429 |
| 0.171748 | 0.190479 |
| 0.299714 | 0.306832 |
| 0        | 0        |
| 0.107977 | 0.119753 |
| 0.508909 | 0        |
| 0        | 0        |
| 0        | 0.023646 |
| 0.094429 | 0        |
| 0.176886 | 0        |
| 0.093206 | 0.064607 |
| 0.074267 | 0.027455 |
| 0        | 0        |
| 0        | 0        |
| 0        | 0        |
| 0        | 0.047785 |
| 0        | 0        |
| 0.762364 | 0.574945 |
| 3.894644 | 3.6573   |
| 0.035018 | 0        |
| 0.489781 | 0.223669 |
| 1.21739  | 2.100248 |
| 20.11655 | 19.43441 |
| 0.564426 | 0        |
| 0.448821 | 0.49777  |
| 0.453189 | 0.335076 |
| 0        | 0        |

|          |          |
|----------|----------|
| 0.014456 | 0        |
| 5.097445 | 3.392026 |
| 0.020396 | 0        |
| 0.84472  | 2.498254 |
| 0.347501 | 0.256933 |
| 1.662578 | 0.518597 |
| 0.345051 | 0.320959 |
| 0        | 0.255978 |
| 0        | 0.138269 |
| 0        | 0.120452 |
| 0.903082 | 0.625983 |
| 0.606012 | 0.411935 |
| 0.94071  | 2.260494 |
| 0        | 0        |
| 0.05634  | 0.124969 |
| 0.668799 | 0.741739 |
| 0.177899 | 0        |
| 1.05232  | 0.894767 |
| 0.478512 | 0.132675 |
| 1.810113 | 0.602258 |
| 0.098084 | 0        |
| 1.068161 | 0.444246 |
| 0        | 0        |
| 0        | 0.025693 |
| 0        | 0.034515 |
| 0        | 0        |
| 0.15879  | 0        |
| 0        | 0.009739 |
| 1.327273 | 1.14491  |
| 0.121978 | 0        |
| 0.079243 | 0        |
| 2.56322  | 1.36874  |
| 0        | 0        |
| 0.391098 | 0.433752 |
| 0        | 0        |
| 0.095961 | 0.106427 |
| 0        | 0        |
| 0.148711 | 0.206162 |
| 1.303351 | 0.952713 |
| 1.116671 | 0.495382 |
| 0.042179 | 0        |
| 0.58711  | 0.162785 |
| 0.894946 | 0.124069 |
| 0.076963 | 0.048775 |
| 0.080319 | 0.178158 |
| 0        | 0        |
| 0.584898 | 0.22704  |
| 0.182073 | 0.20193  |
| 0.082893 | 0.091933 |
| 0.077107 | 0.085517 |
| 0        | 0        |
| 0.388853 | 0.143754 |
| 0.691134 | 0.319379 |
| 0        | 0        |
| 0.258695 | 0        |
| 0        | 0        |
| 0.019246 | 0        |
| 0.11207  | 0        |
| 0.323983 | 0.06533  |
| 0.358884 | 0.796048 |
| 0        | 0.028209 |
| 0        | 0        |
| 0        | 0        |
| 0.67121  | 0.148882 |
| 0.09117  | 0        |

|          |          |
|----------|----------|
| 0.285064 | 0.600691 |
| 0        | 0.294896 |
| 0        | 0        |
| 0        | 0        |
| 0.041838 | 0.0464   |
| 0.093929 | 0.208345 |
| 14.17805 | 7.502454 |
| 0        | 0        |
| 0.673969 | 0.543617 |
| 0        | 0        |
| 0        | 0        |
| 4.68651  | 2.785927 |
| 0        | 0        |
| 1.107282 | 0.438587 |
| 4.162249 | 7.180737 |
| 0.042584 | 0        |
| 0.172703 | 0        |
| 0        | 0        |
| 0.047796 | 0.159026 |
| 0        | 0        |
| 0.02062  | 0.045738 |
| 0        | 0        |
| 0.237881 | 0.219854 |
| 0.325062 | 0        |
| 0.140468 | 0.623151 |
| 6.040886 | 2.481374 |
| 0.666949 | 1.344885 |
| 0.219388 | 0.16221  |
| 0.094071 | 0.020866 |
| 0.049989 | 0        |
| 0.741537 | 0.523352 |
| 0.745043 | 0.826298 |
| 0.301706 | 0.549718 |
| 1.286775 | 0.648687 |
| 0.045385 | 0.025167 |
| 1.143405 | 3.170264 |
| 0.288478 | 0.071098 |
| 0        | 0.075009 |
| 0        | 0        |
| 0        | 0.066885 |
| 0.091574 | 0.152341 |
| 0.131633 | 0.048663 |
| 0.01627  | 0        |
| 1.313642 | 0.690115 |
| 0        | 0        |
| 0.459903 | 1.530181 |
| 0.4419   | 0.612617 |
| 0        | 0.095769 |
| 0.089013 | 0        |
| 0.14863  | 0.104898 |
| 0.080319 | 0.089079 |
| 2.070878 | 5.905876 |
| 1.37317  | 0.543903 |
| 1.314008 | 0.910822 |
| 3.682555 | 1.848044 |
| 0.441115 | 0.611529 |
| 0.088067 | 0        |
| 0.371778 | 1.236973 |
| 0        | 0        |
| 0        | 0.192341 |
| 0        | 0        |
| 8.489764 | 5.910868 |
| 0.110672 | 0        |
| 0.098707 | 1.094724 |
| 0.083078 | 0.030713 |

|          |          |
|----------|----------|
| 0        | 0        |
| 6.279443 | 6.081488 |
| 135.0866 | 121.9567 |
| 0.439765 | 0.177355 |
| 0.056511 | 0        |
| 0.24127  | 0.289882 |
| 0.518569 | 0.784261 |
| 4.550871 | 4.085823 |
| 0.107293 | 0.138827 |
| 0.486683 | 0.925305 |
| 0        | 0        |
| 0        | 0.19288  |
| 0.376284 | 0        |
| 0        | 0.073098 |
| 0.346467 | 0.076851 |
| 0.364757 | 0.173373 |
| 0.314762 | 0.087273 |
| 0        | 0        |
| 0.50205  | 0        |
| 0.079294 | 0.087941 |
| 0        | 0        |
| 0.850505 | 0        |
| 2.299514 | 0.805358 |
| 0        | 0.748458 |
| 0.499091 | 0        |
| 0        | 0.06209  |
| 0.136455 | 0.126114 |
| 0        | 0        |
| 0.016211 | 0        |
| 2.316995 | 1.25312  |
| 0        | 0        |
| 0.221739 | 0.081974 |
| 0.067486 | 0.112269 |
| 0        | 0        |
| 0.026635 | 0.02954  |
| 0.538715 | 0        |
| 2.401325 | 2.417919 |
| 0.37314  | 0.353274 |
| 1.113666 | 0.942594 |
| 0.00887  | 0        |
| 0.124672 | 0.276539 |
| 1.852961 | 1.26681  |
| 0        | 0        |
| 0.060396 | 0.100474 |
| 2.633727 | 3.351926 |
| 0.645618 | 0.358015 |
| 0.026877 | 0.029809 |
| 0        | 0.066918 |
| 0.160018 | 0.532408 |
| 0.304596 | 0.225211 |
| 0        | 0        |
| 0.620869 | 0.344291 |
| 0        | 0        |
| 0        | 0        |
| 1.740015 | 0.175435 |
| 1.319346 | 0.964014 |
| 0        | 0        |
| 0.281573 | 0.273247 |
| 1.074168 | 0.476527 |
| 0.54522  | 0.529097 |
| 0.221344 | 0        |
| 0.307361 | 0        |
| 0.141107 | 0        |
| 0        | 0.107675 |
| 0.692148 | 1.400596 |

|          |          |
|----------|----------|
| 0        | 0        |
| 0.050416 | 0.083871 |
| 0.290805 | 1.128822 |
| 0.192916 | 0.071319 |
| 0.512057 | 0.141976 |
| 0.207648 | 0        |
| 0.538548 | 0.255978 |
| 0        | 0        |
| 0.033488 | 0.074281 |
| 0        | 0        |
| 0        | 0        |
| 0.301759 | 0.167334 |
| 0        | 0        |
| 1.135736 | 1.109648 |
| 0.537671 | 0.690464 |
| 0        | 0.259842 |
| 0        | 0        |
| 0.848246 | 0.470378 |
| 0        | 0        |
| 0        | 0.050335 |
| 0.293324 | 0.108438 |
| 0        | 0        |
| 0.146431 | 0        |
| 0.104876 | 0        |
| 0        | 0        |
| 0        | 0        |
| 0.197101 | 0.437195 |
| 0.619321 | 0.171716 |
| 0        | 0.245047 |
| 0.417531 | 0.347301 |
| 0        | 0.065736 |
| 0        | 0.058133 |
| 0        | 0.026877 |
| 0.197206 | 0.036452 |
| 0.079142 | 0.175547 |
| 0        | 0        |
| 8.671353 | 14.52176 |
| 0        | 0        |
| 0.11434  | 0.126811 |
| 0.10551  | 0.091013 |
| 2.241515 | 0.476763 |
| 8.438994 | 12.81341 |
| 0        | 0        |
| 0.594133 | 0.856608 |
| 0.409364 | 0.378341 |
| 0.078757 | 0.203808 |
| 0        | 0        |
| 0        | 0        |
| 0        | 0        |
| 0.813173 | 0.292495 |
| 6.035772 | 3.582215 |
| 0.060337 | 0        |
| 1.090337 | 1.3129   |
| 0.222889 | 0.054933 |
| 0.32993  | 0.76509  |
| 0.190743 | 0.423091 |
| 0.466819 | 0        |
| 0        | 0        |
| 0.189694 | 0.021038 |
| 0.339273 | 0        |
| 1.670499 | 1.646831 |
| 0.088822 | 0        |
| 5.598287 | 4.174011 |
| 0.899344 | 0.819316 |
| 0.076368 | 0.169393 |

|          |          |
|----------|----------|
| 0.570258 | 0.553395 |
| 0.857215 | 0.27163  |
| 0.282856 | 0.03137  |
| 0.104173 | 0        |
| 0.246377 | 1.366233 |
| 0.035909 | 0.02655  |
| 1.291795 | 0.59695  |
| 0.193417 | 0        |
| 0.223737 | 0.186103 |
| 0.183388 | 0.542368 |
| 0.110606 | 0.020445 |
| 1.623187 | 2.100248 |
| 0        | 0.116118 |
| 0.16708  | 0.074121 |
| 0        | 0.649605 |
| 0        | 0.017941 |
| 0.114869 | 0.254794 |
| 0        | 0.148561 |
| 0.229668 | 0.254716 |
| 0        | 0        |
| 0.042996 | 0.095371 |
| 0.983236 | 1.209429 |
| 0.121263 | 0.134489 |
| 0        | 0        |
| 3.794784 | 4.44246  |
| 1.564204 | 0.934122 |
| 1.693279 | 0.625983 |
| 0.076354 | 0.036292 |
| 3.862326 | 2.891399 |
| 0.12484  | 0.276909 |
| 0.731096 | 0.686087 |
| 0.054702 | 0.060668 |
| 3.20823  | 1.186041 |
| 3.425966 | 4.497491 |
| 0.362023 | 0.100376 |
| 0        | 0        |
| 0        | 0        |
| 0.551695 | 0.188266 |
| 0        | 0        |
| 1.208771 | 0.731237 |
| 0        | 0.088054 |
| 0.130709 | 0.082837 |
| 0.350773 | 0.194515 |
| 0        | 0        |
| 0.038043 | 0        |
| 1.293477 | 1.793181 |
| 0.082126 | 0.091082 |
| 0.640071 | 0.811289 |
| 12.94446 | 8.011958 |
| 0        | 0        |
| 0.302547 | 0.167771 |
| 0        | 0.272526 |
| 0        | 0.026222 |
| 0.973618 | 0.49837  |
| 0.764931 | 1.272532 |
| 0.136155 | 0        |
| 0.106041 | 0.058803 |
| 0        | 0.251307 |
| 0.208345 | 0        |
| 0        | 0.195066 |
| 0.130985 | 0        |
| 0.261418 | 0.144964 |
| 0.018848 | 0        |
| 0.169752 | 0.51773  |
| 1.421837 | 2.365356 |

|          |          |
|----------|----------|
| 0.103049 | 0.171431 |
| 0.134785 | 0.149485 |
| 0.032523 | 0        |
| 0.310434 | 0.172145 |
| 0.525048 | 0.291155 |
| 0.141751 | 0.471631 |
| 0.309918 | 0.687436 |
| 0        | 0        |
| 0        | 0.158659 |
| 0.212869 | 0.15739  |
| 0.343194 | 0.311419 |
| 0.103547 | 0.045936 |
| 0        | 0        |
| 0        | 0.034292 |
| 0.123679 | 0        |
| 0        | 0.105611 |
| 0        | 0        |
| 0.060989 | 0.067641 |
| 0.074178 | 0.164536 |
| 13.293   | 5.101906 |
| 0.109888 | 0.121873 |
| 0.201385 | 0.156343 |
| 0.090046 | 0.249667 |
| 0.087323 | 0        |
| 0.028519 | 0        |
| 0.617666 | 1.014858 |
| 0        | 0.051968 |
| 0.615851 | 0.16443  |
| 0        | 0        |
| 0        | 0.101411 |
| 0        | 0        |
| 0        | 0.314421 |
| 0        | 0        |
| 0.1808   | 0.280726 |
| 0        | 0        |
| 1.303662 | 0.451825 |
| 0.485528 | 0.774065 |
| 0        | 0        |
| 0.376284 | 0.417322 |
| 1.723548 | 0.825429 |
| 0        | 0.129921 |
| 1.893718 | 1.050124 |
| 0.287973 | 0.447131 |
| 2.541568 | 1.006698 |
| 0.354686 | 0.243514 |
| 0        | 0.09781  |
| 0.0567   | 0.062884 |
| 0.066593 | 0.123093 |
| 0.05475  | 0.060721 |
| 0.071364 | 0.158295 |
| 1.758049 | 0.410481 |
| 1.664623 | 4.006577 |
| 0        | 0.043198 |
| 0        | 0        |
| 0.348476 | 0.772963 |
| 0        | 0        |
| 0.487593 | 0        |
| 1.167047 | 2.329787 |
| 0.24127  | 0.267583 |
| 0        | 0        |
| 0        | 0.288109 |
| 0.115189 | 0        |
| 0.684782 | 0.759465 |
| 0.117145 | 0.389763 |
| 0.530657 | 0.294266 |

|          |          |
|----------|----------|
| 0.086714 | 0        |
| 0        | 0.071653 |
| 0        | 0        |
| 0.128544 | 0.213845 |
| 0        | 0        |
| 0.191184 | 0.247373 |
| 1.453996 | 2.067398 |
| 0        | 0.093557 |
| 0.515957 | 0.190743 |
| 0.759008 | 0.505072 |
| 0.226182 | 0        |
| 0.080112 | 0.385013 |
| 0        | 0        |
| 0        | 0.031073 |
| 0        | 0        |
| 0        | 0        |
| 0.286725 | 0.464762 |
| 0        | 0        |
| 0.664031 | 0.368225 |
| 0        | 0.254559 |
| 0.110083 | 0.122089 |
| 0.03142  | 0        |
| 0        | 0        |
| 1.279849 | 0.946287 |
| 0        | 0        |
| 0        | 0        |
| 0.223938 | 0.248361 |
| 0.160951 | 0.044626 |
| 0.064339 | 0        |
| 0        | 0        |
| 0        | 0        |
| 0        | 0.014837 |
| 6.611104 | 5.029761 |
| 0        | 0        |
| 1.196686 | 1.092986 |
| 0        | 0.215182 |
| 0.039445 | 0.218736 |
| 0.451541 | 0.500786 |
| 0.0356   | 0.078966 |
| 0        | 0        |
| 0.032404 | 0.107815 |
| 1.863771 | 1.033518 |
| 0.025508 | 0.02829  |
| 0        | 0        |
| 4.286622 | 0.766794 |
| 0.36436  | 0.161639 |
| 0        | 0        |
| 0.124672 | 0.414808 |
| 0.597431 | 0.611619 |
| 0        | 0        |
| 0.352584 | 0.284391 |
| 0.243478 | 0.540064 |
| 0.601411 | 1.078974 |
| 0        | 0        |
| 0.270728 | 0.100085 |
| 2.697692 | 3.612448 |
| 2.887762 | 2.07743  |
| 1.278494 | 0.265862 |
| 0.143057 | 0.158659 |
| 0        | 0.216308 |
| 0.071804 | 0.132726 |
| 0.672421 | 0        |
| 0        | 0        |
| 0.578449 | 0.267306 |
| 0        | 0.381486 |

|          |          |
|----------|----------|
| 0.427596 | 0.284538 |
| 0.038732 | 0.085912 |
| 0.143454 | 0.254559 |
| 0.065718 | 0.018221 |
| 0        | 0        |
| 0.392955 | 0.435811 |
| 0        | 0        |
| 0        | 0        |
| 0.23596  | 0.163559 |
| 0.170803 | 0        |
| 0        | 0        |
| 0        | 0.100085 |
| 0        | 0        |
| 0        | 0        |
| 3.303749 | 2.093748 |
| 0.125767 | 0.232472 |
| 0.872123 | 0.690884 |
| 0        | 0.208661 |
| 0.644501 | 0.476527 |
| 0.576658 | 0.639549 |
| 0.654925 | 0.14527  |
| 0.295495 | 0.036414 |
| 0.886956 | 0.655792 |
| 0.2529   | 0.560962 |
| 0.725729 | 0.83773  |
| 0        | 0        |
| 0.117367 | 0.650833 |
| 0.432159 | 0.279586 |
| 7.531074 | 4.472162 |
| 1.198589 | 1.595169 |
| 0.193618 | 0.58694  |
| 0.242054 | 0        |
| 0.689113 | 0.3205   |
| 0        | 0        |
| 0.469644 | 0.416691 |
| 0.272976 | 0.386843 |
| 0.316125 | 0        |
| 0.409043 | 0.518461 |
| 0        | 0.025713 |
| 6.448362 | 5.054057 |
| 0.174206 | 0.154564 |
| 0        | 0.034412 |
| 0.05696  | 0        |
| 0.115964 | 0.077166 |
| 0.035157 | 0        |
| 0.150696 | 0.668526 |
| 0        | 0        |
| 0.389667 | 0        |
| 0.386834 | 0.107256 |
| 0        | 0        |
| 0.208345 | 0.115534 |
| 0.113504 | 0.503533 |
| 0        | 0        |
| 0        | 0        |
| 0.076999 | 0.056931 |
| 0        | 0        |
| 0        | 0.545411 |
| 0        | 0        |
| 1.370094 | 1.599492 |
| 0        | 0.239507 |
| 0        | 0        |
| 0.093881 | 0        |
| 0.681338 | 0.188911 |
| 0        | 0        |
| 0.031121 | 0.04602  |

|          |          |
|----------|----------|
| 0.158143 | 0.070156 |
| 0        | 0        |
| 1.843977 | 1.960749 |
| 0.036383 | 0.242103 |
| 0.091371 | 0.253341 |
| 2.994038 | 2.79627  |
| 0        | 0        |
| 0.62841  | 0.278778 |
| 0.096935 | 0.017918 |
| 0.965081 | 1.902816 |
| 0.027012 | 0        |
| 0        | 0        |
| 0.47637  | 0        |
| 0.030345 | 0        |
| 0        | 0        |
| 1.641937 | 1.020565 |
| 0        | 0        |
| 4.608511 | 3.691364 |
| 0.149607 | 0.49777  |
| 0.073541 | 0.061171 |
| 0        | 0        |
| 0        | 0        |
| 0.049909 | 0        |
| 8.147885 | 4.789345 |
| 0.232826 | 0.086073 |
| 0        | 0.130167 |
| 0.266467 | 0.147764 |
| 1.522342 | 1.551476 |
| 0.198044 | 0.878573 |
| 0        | 0        |
| 0        | 0        |
| 1.971012 | 2.342113 |
| 0.186517 | 0.310288 |
| 0        | 0.116314 |
| 0.452246 | 0.214958 |
| 0.014276 | 0        |
| 0.060026 | 0.110954 |
| 0.176383 | 0.19562  |
| 1.101132 | 0.28182  |
| 0        | 0.136895 |
| 0.270237 | 0.549466 |
| 0.075716 | 0.167947 |
| 0.039408 | 0        |
| 0        | 0        |
| 0.579574 | 0.723131 |
| 0.547656 | 1.1828   |
| 0.048543 | 0.053837 |
| 0        | 0        |
| 0.798912 | 0.886042 |
| 0.084679 | 0.093915 |
| 0.078393 | 0.173884 |
| 0        | 0        |
| 1.203901 | 1.335199 |
| 0.126622 | 0.374483 |
| 0        | 0.395736 |
| 0.639522 | 0.177317 |
| 0.332015 | 0.368225 |
| 0.26957  | 0.163074 |
| 1.317762 | 0.477791 |
| 0.472503 | 0        |
| 0        | 0        |
| 0.326945 | 0.471383 |
| 0.019354 | 0        |
| 0        | 0.894262 |
| 0.051912 | 0.057574 |

|          |          |
|----------|----------|
| 2.17402  | 1.933241 |
| 2.685692 | 2.27775  |
| 0.258337 | 0.095504 |
| 0        | 0.010458 |
| 1.585197 | 1.855751 |
| 0        | 0        |
| 0        | 0        |
| 0        | 0        |
| 0.522287 | 0.144812 |
| 0.26197  | 0        |
| 0.316366 | 0.087717 |
| 0.074001 | 0        |
| 4.731622 | 3.276315 |
| 0        | 0.288713 |
| 0.207648 | 0        |
| 0        | 0        |
| 0.087817 | 0        |
| 0.608695 | 0.16877  |
| 1.141703 | 0.783849 |
| 0.028018 | 0        |
| 0.581338 | 0.257896 |
| 0        | 0        |
| 0        | 0.250849 |
| 0.514661 | 0.467011 |
| 0        | 0        |
| 0.219388 | 0.121657 |
| 0.217214 | 0.040151 |
| 0.174739 | 0.181684 |
| 0.471546 | 0        |
| 0.140257 | 0.285181 |
| 0.332015 | 1.196732 |
| 0.4635   | 1.052577 |
| 0        | 0        |
| 0.485054 | 0.403466 |
| 0.059451 | 0.13187  |
| 0.620352 | 0.28667  |
| 0.067412 | 0.074765 |
| 1.490085 | 0        |
| 1.390005 | 0.513867 |
| 0        | 0        |
| 25.2424  | 8.955035 |
| 0        | 0        |
| 2.841702 | 2.992448 |
| 0.299214 | 0.995539 |
| 0.211901 | 0.470021 |
| 0        | 0.035976 |
| 8.265437 | 9.684603 |
| 0.151431 | 0.50384  |
| 0.63354  | 0        |
| 0        | 0.112882 |
| 0        | 0        |
| 0        | 0        |
| 0.650124 | 0        |
| 1.444611 | 1.288696 |
| 0.280302 | 0        |
| 0        | 0        |
| 0.721941 | 1.701437 |
| 0        | 0        |
| 0.312308 | 0.138548 |
| 0.110584 | 0.068136 |
| 0.724045 | 0.200753 |
| 0.21163  | 0.088016 |
| 0.506143 | 0        |
| 0        | 0        |
| 0        | 0        |

|          |          |
|----------|----------|
| 0        | 0        |
| 0.105173 | 0.077762 |
| 0        | 0        |
| 0.106131 | 0.117706 |
| 0        | 0.116314 |
| 0        | 0.078159 |
| 0.790916 | 0        |
| 2.14766  | 2.59842  |
| 0.215954 | 0        |
| 0.165076 | 0.061026 |
| 0.264904 | 0.073449 |
| 0.883799 | 0.122523 |
| 0        | 0.642333 |
| 1.821963 | 1.709796 |
| 4.635618 | 3.792676 |
| 0.632106 | 0.701044 |
| 0.133616 | 0.049396 |
| 0.040316 | 0.044713 |
| 3.835483 | 2.126892 |
| 1.167446 | 0.706237 |
| 0.877209 | 2.378146 |
| 0.302094 | 0.116536 |
| 0        | 0        |
| 0.173508 | 0.224503 |
| 0.176886 | 0.098089 |
| 0.788763 | 0.374908 |
| 0.123433 | 0        |
| 0.166453 | 0        |
| 2.464041 | 1.212427 |
| 1.263396 | 2.402028 |
| 1.340005 | 1.733838 |
| 0.46449  | 0.171716 |
| 0.062025 | 0        |
| 0.083004 | 0        |
| 0        | 0        |
| 0.452363 | 0.627123 |
| 0        | 0        |
| 0        | 0        |
| 0.377046 | 0        |
| 0.046455 | 0.025761 |
| 0.229103 | 0        |
| 1.235236 | 0.576822 |
| 0.30966  | 0        |
| 0        | 0.074846 |
| 0        | 0.17301  |
| 1.502493 | 0.268767 |
| 0.30635  | 0.792775 |
| 0.257195 | 2.681303 |
| 1.429632 | 0.679521 |
| 0.123433 | 0        |
| 0.261418 | 0.144964 |
| 0        | 0        |
| 0.580251 | 0.321767 |
| 0        | 0        |
| 0.095629 | 0.212116 |
| 1.149757 | 0.991784 |
| 0        | 0        |
| 0.953716 | 0.74041  |
| 0.919586 | 0.230295 |
| 0        | 0        |
| 0.187857 | 0        |
| 0.608695 | 0.135016 |
| 0.234955 | 0.586304 |
| 0        | 0        |
| 0        | 0.331049 |

|          |          |
|----------|----------|
| 0.52247  | 0.19315  |
| 0.086292 | 0.047851 |
| 0.172464 | 0.573818 |
| 0.052306 | 0.174031 |
| 0.257089 | 0.142563 |
| 0.20028  | 0.222123 |
| 0.136755 | 0.15167  |
| 0        | 0.165923 |
| 0        | 0        |
| 0.145232 | 0.080536 |
| 0.084789 | 0.047018 |
| 0.068003 | 0        |
| 0.256334 | 0.134664 |
| 0.550441 | 0.234797 |
| 3.898706 | 0.756683 |
| 0.023558 | 0.026127 |
| 1.62248  | 0.59981  |
| 3.196236 | 3.278959 |
| 0.316501 | 0.292515 |
| 0.027742 | 0        |
| 0        | 0.335893 |
| 1.193979 | 0        |
| 0.731664 | 0.231846 |
| 0        | 0.041331 |
| 0.113091 | 0.125425 |
| 3.818836 | 0.683116 |
| 0.197415 | 0.218945 |
| 0.10595  | 0        |
| 0.114551 | 0        |
| 0.05527  | 0.020433 |
| 2.37391  | 2.430287 |
| 0.185542 | 0.051444 |
| 2.346927 | 2.129633 |
| 0.126708 | 0        |
| 0        | 0        |
| 2.324714 | 1.572104 |
| 0        | 0        |
| 0.159279 | 0.17665  |
| 0.115942 | 0.032147 |
| 0.257089 | 0        |
| 0.025167 | 0.013956 |
| 0.100464 | 0        |
| 4.537912 | 5.424988 |
| 1.029064 | 1.268106 |
| 0        | 0        |
| 0.085051 | 0        |
| 0        | 0.038511 |
| 0.326773 | 1.570449 |
| 0        | 0        |
| 0.650124 | 0.721028 |
| 0.158993 | 0.2645   |
| 0.117589 | 0        |
| 9.482141 | 6.430332 |
| 0.242054 | 0.134226 |
| 0.223334 | 0        |
| 0.097987 | 0.054337 |
| 0.135646 | 0.085965 |
| 0        | 0.058108 |
| 2.537204 | 2.813914 |
| 0        | 0        |
| 0.714464 | 0        |
| 5.841255 | 3.291398 |
| 5.210366 | 2.690805 |
| 5.915772 | 4.331502 |
| 0.031436 | 0        |

|          |          |
|----------|----------|
| 0        | 0        |
| 0.219474 | 0.081137 |
| 0.160431 | 0        |
| 0        | 0        |
| 0        | 0.220346 |
| 0.994527 | 0.945421 |
| 0        | 0.057334 |
| 0        | 0        |
| 0        | 0.167538 |
| 0        | 0        |
| 1.377795 | 1.591728 |
| 5.676701 | 12.9154  |
| 0        | 0        |
| 0.301393 | 0.445684 |
| 0        | 0.127279 |
| 0.021896 | 0.048569 |
| 0.665556 | 0.316347 |
| 0.163458 | 0.090643 |
| 1.894176 | 2.482712 |
| 1.306176 | 0.965752 |
| 0.665217 | 0.491844 |
| 1.4391   | 0.912028 |
| 0.535694 | 0.950587 |
| 0.932236 | 0        |
| 0        | 0        |
| 0.981057 | 1.709796 |
| 3.21932  | 3.096795 |
| 0.069139 | 0        |
| 0        | 0        |
| 0.357114 | 0.03772  |
| 4.952911 | 6.531142 |
| 1.565216 | 1.15728  |
| 0.579993 | 0.153154 |
| 0.029006 | 0.128677 |
| 0        | 0.039574 |
| 0        | 0.833634 |
| 3.123868 | 0.43307  |
| 0.388043 | 0        |
| 0.026353 | 0        |
| 0.079456 | 0.035249 |
| 1.217131 | 1.100439 |
| 31.88379 | 24.01263 |
| 0        | 0.103546 |
| 0        | 0        |
| 0        | 0        |
| 0        | 0.190216 |
| 0        | 0        |
| 0.344927 | 0.153018 |
| 0.203731 | 0.056487 |
| 0.142893 | 0.079238 |
| 0.36379  | 0.268977 |
| 0.082398 | 0        |
| 0.058134 | 0.580265 |
| 0.201909 | 0        |
| 7.304954 | 13.665   |
| 0.107046 | 0        |
| 0.079701 | 0        |
| 2.883292 | 4.228131 |
| 0.102725 | 0.045571 |
| 0        | 0        |
| 0.093084 | 0.412942 |
| 0        | 0        |
| 0.389667 | 0.288109 |
| 0.662849 | 0.857664 |
| 0.154062 | 0        |

|          |          |
|----------|----------|
| 0.575945 | 0        |
| 1.096572 | 0.521214 |
| 0.559341 | 0.206781 |
| 0.183689 | 0.101861 |
| 1.29049  | 1.144985 |
| 0.306602 | 0        |
| 0.594133 | 0.247099 |
| 0.110869 | 0        |
| 0.299214 | 0        |
| 0        | 0.245922 |
| 0.660499 | 0.406963 |
| 1.33341  | 1.756114 |
| 0.277794 | 0        |
| 0.229951 | 0        |
| 0.363081 | 1.208037 |
| 0.898183 | 0.124517 |
| 4.394277 | 2.751181 |
| 0.704078 | 1.206792 |
| 0        | 0        |
| 0.109597 | 0.091163 |
| 0        | 0        |
| 0        | 0        |
| 0        | 0        |
| 0.852452 | 0.945421 |
| 8.041374 | 4.148081 |
| 0.208579 | 0.077109 |
| 0.207648 | 0.230295 |
| 0.318394 | 0.353119 |
| 0.043971 | 0.097533 |
| 0        | 0        |
| 0        | 0        |
| 0.042179 | 0.093557 |
| 0.071201 | 0        |
| 0.410628 | 0        |
| 0.110672 | 0        |
| 0.373567 | 0.248585 |
| 1.023922 | 1.548534 |
| 0.640071 | 0.976082 |
| 1.319187 | 1.840622 |
| 0        | 0        |
| 2.474197 | 3.344293 |
| 0        | 0.084489 |
| 2.282027 | 3.839997 |
| 0.049119 | 0.108953 |
| 0.262247 | 0        |
| 0.100872 | 0.16781  |
| 0.163818 | 0.363367 |
| 0.366294 | 0.406243 |
| 0.754528 | 0.119545 |
| 1.839611 | 1.020121 |
| 0.761802 | 1.478549 |
| 0        | 0.216535 |
| 0.145403 | 0        |
| 0.059756 | 0        |
| 0.238796 | 0.529678 |
| 0        | 0.213183 |
| 0.017208 | 0        |
| 0.147826 | 0.163948 |
| 0.082893 | 0.183867 |
| 0        | 0.109472 |
| 0.128014 | 0        |
| 2.548342 | 0.513867 |
| 0        | 0.949767 |
| 0.902829 | 1.463428 |
| 0.557905 | 0        |

|          |          |
|----------|----------|
| 2.137699 | 2.47467  |
| 0.169405 | 0.751521 |
| 3.377111 | 4.417677 |
| 0        | 0        |
| 0        | 0.066918 |
| 0.055385 | 0.153564 |
| 0.18855  | 0.059747 |
| 1.923045 | 1.175202 |
| 0.724347 | 0.688581 |
| 1.375887 | 0.626726 |
| 0        | 0        |
| 3.195649 | 2.025239 |
| 0.708814 | 0.58231  |
| 0        | 0.402679 |
| 0.203946 | 0.387751 |
| 0.034208 | 0        |
| 0        | 0        |
| 0        | 0        |
| 0.76053  | 0.357837 |
| 0        | 0.147133 |
| 0.181117 | 0        |
| 0.257089 | 0.997944 |
| 0.099818 | 0        |
| 0        | 0.197868 |
| 0.49869  | 0.276539 |
| 1.954094 | 0.985095 |
| 0.080009 | 0        |
| 0.122701 | 0        |
| 3.532295 | 3.616182 |
| 0.330836 | 0.244611 |
| 1.09198  | 0.346021 |
| 0.127227 | 0.846616 |
| 0        | 0        |
| 0.389259 | 0.107928 |
| 0.172944 | 0        |
| 1.436174 | 1.47028  |
| 2.234011 | 0.722649 |
| 0        | 0.282205 |
| 2.324108 | 0        |
| 0.027879 | 0.061839 |
| 0        | 0.41859  |
| 0.103651 | 0        |
| 0.670002 | 0.467861 |
| 0        | 0.239091 |
| 5.745529 | 5.656901 |
| 0        | 0.143454 |
| 0.128014 | 0.248457 |
| 1.135736 | 0.979689 |
| 8.940932 | 6.153777 |
| 0.748035 | 0.829616 |
| 0        | 0.152792 |
| 6.338336 | 3.994091 |
| 0        | 0.104015 |
| 0.569604 | 0.157932 |
| 0        | 0        |
| 0        | 0        |
| 0        | 0        |
| 0.369565 | 0        |
| 0.245403 | 0.272167 |
| 0.085815 | 0        |
| 0.298495 | 0        |
| 0.172576 | 0.202656 |
| 0        | 0.055801 |
| 0.109694 | 0        |
| 0        | 0        |

|          |          |
|----------|----------|
| 0.099022 | 0        |
| 0        | 0        |
| 1.290862 | 1.630484 |
| 0        | 0        |
| 0.124174 | 0        |
| 0        | 0.208978 |
| 0.219388 | 0.608287 |
| 0.121027 | 0.134226 |
| 0.536388 | 0.148722 |
| 1.198589 | 1.276135 |
| 2.645306 | 1.208037 |
| 0.801121 | 0.592328 |
| 0        | 0        |
| 0.572229 | 0        |
| 1.104749 | 1.837851 |
| 0.024545 | 0.040833 |
| 0        | 0        |
| 3.57137  | 5.788958 |
| 2.61484  | 3.141685 |
| 0.328502 | 0.485772 |
| 0        | 0.181206 |
| 0.126193 | 0.139956 |
| 0        | 0.148401 |
| 0        | 0        |
| 3.78107  | 3.669257 |
| 0.20028  | 0.222123 |
| 0        | 0.294685 |
| 0.411171 | 0.621837 |
| 0        | 0        |
| 0.628606 | 2.037858 |
| 0        | 0        |
| 0.20457  | 0.11344  |
| 0.134971 | 0.149692 |
| 0        | 0        |
| 0        | 0        |
| 0.144276 | 0        |
| 0.674857 | 0.374229 |
| 0        | 0.053461 |
| 0        | 0.211221 |
| 17.67088 | 13.46265 |
| 0.18186  | 0.080677 |
| 0.262191 | 0.058157 |
| 0.262709 | 0        |
| 0.02087  | 0.046291 |
| 2.119232 | 0.918108 |
| 9.530579 | 14.32311 |
| 0        | 0        |
| 0.038492 | 0        |
| 0        | 0        |
| 3.660144 | 2.85656  |
| 0.029383 | 0        |
| 0.193417 | 0.128707 |
| 0        | 0        |
| 0        | 0.055263 |
| 0.223334 | 0.743073 |
| 0        | 0        |
| 0        | 0        |
| 0.037178 | 0.041232 |
| 0.178411 | 0        |
| 0        | 0.486057 |
| 0.030375 | 0        |
| 0.162701 | 0.108268 |
| 0.119077 | 0.079238 |
| 0.031199 | 0.103806 |
| 0        | 0        |

|          |          |
|----------|----------|
| 0.218616 | 0.363687 |
| 0.227981 | 0.252845 |
| 0        | 0.398024 |
| 0        | 0.112513 |
| 1.323344 | 2.201503 |
| 0        | 0        |
| 0.25035  | 0.555308 |
| 0.038396 | 0.085168 |
| 0.162958 | 0.18073  |
| 0.182608 | 0        |
| 0.352766 | 0        |
| 0        | 0.083667 |
| 0.044507 | 0.098721 |
| 0.245403 | 0.204125 |
| 0.31677  | 0.351317 |
| 2.912969 | 4.695727 |
| 0.228892 | 0.253855 |
| 0        | 0.209295 |
| 0.185334 | 0.205547 |
| 0.646246 | 0.664283 |
| 0.979675 | 1.358149 |
| 0.330836 | 0.85614  |
| 5.691298 | 8.894176 |
| 0        | 0.118517 |
| 0.401671 | 0.827316 |
| 3.197608 | 1.625407 |
| 0.196477 | 0        |
| 0.027279 | 0        |
| 0.262524 | 0.291155 |
| 0.967085 | 1.287068 |
| 0.21118  | 0        |
| 0.016767 | 0        |
| 0.668628 | 0.317807 |
| 0.054106 | 0.060007 |
| 0        | 0.73514  |
| 1.52106  | 0.766794 |
| 0        | 0        |
| 0.379157 | 0.15769  |
| 0        | 0        |
| 0.221344 | 0        |
| 0        | 0        |
| 0        | 0        |
| 0        | 0        |
| 0.108734 | 0        |
| 1.225399 | 0.755023 |
| 1.832823 | 3.811336 |
| 0.044075 | 0.065176 |
| 0.026567 | 0.147322 |
| 0        | 0.104648 |
| 0.212991 | 1.41732  |
| 0.535054 | 0.798818 |
| 0.880665 | 0.976711 |
| 0.49769  | 1.517915 |
| 0        | 0.042374 |
| 0.098394 | 0.218251 |
| 0        | 0.148561 |
| 0        | 0        |
| 1.790968 | 2.441484 |
| 0        | 0        |
| 0        | 0.1504   |
| 0        | 0        |
| 0        | 0        |
| 0        | 0        |
| 0        | 0.146351 |
| 0.112476 | 0        |

|          |          |
|----------|----------|
| 0.457964 | 0.072559 |
| 0.12436  | 0        |
| 0.139208 | 0.308781 |
| 0        | 0        |
| 0        | 0        |
| 0.19463  | 0        |
| 0.130709 | 0        |
| 0.834501 | 1.110615 |
| 0.348151 | 0.643534 |
| 0.223737 | 0.124069 |
| 0        | 0.178852 |
| 1.332186 | 0.583214 |
| 0.160916 | 0.029744 |
| 15.66678 | 19.30602 |
| 2.429487 | 4.041673 |
| 0        | 0        |
| 0.273109 | 0.908685 |
| 1.043477 | 1.35016  |
| 0.254715 | 0.211871 |
| 0.119169 | 0.396496 |
| 0.063032 | 0.069907 |
| 0.031839 | 0.105936 |
| 0        | 0        |
| 0.016876 | 0.018717 |
| 0.761802 | 0.633664 |
| 0        | 0        |
| 0.426714 | 0.946504 |
| 0.052915 | 0.156496 |
| 1.874321 | 1.992122 |
| 0        | 0.023022 |
| 0.122944 | 0        |
| 0.093645 | 0        |
| 0.206269 | 0        |
| 0        | 0        |
| 0.663708 | 0.066918 |
| 2.448576 | 1.591915 |
| 0.066832 | 0        |
| 0.118036 | 0.065455 |
| 0        | 0.159394 |
| 0.046093 | 0        |
| 0.833381 | 0.30809  |
| 0.173427 | 0.038468 |
| 0.894946 | 0.496275 |
| 4.822942 | 5.198262 |
| 0.512409 | 0.568293 |
| 3.44017  | 2.252878 |
| 0.1669   | 0        |
| 1.303482 | 0.494561 |
| 0        | 0.065683 |
| 0.325062 | 0.216308 |
| 0        | 0        |
| 0.341137 | 0.630569 |
| 0.151802 | 0        |
| 4.825406 | 4.281335 |
| 1.858383 | 0.655792 |
| 0        | 0.101411 |
| 0.063516 | 0.246551 |
| 0.115834 | 0.7708   |
| 2.90197  | 1.270445 |
| 0.079497 | 0        |
| 0.043176 | 0        |
| 0.50205  | 0.835207 |
| 6.249005 | 3.353481 |
| 0.094693 | 0.035007 |
| 0.079192 | 0.263488 |

|          |          |
|----------|----------|
| 5.122168 | 5.508651 |
| 0.288776 | 0.32027  |
| 0.226044 | 0.612815 |
| 0        | 0        |
| 0.363613 | 0.201634 |
| 0        | 0        |
| 0.102285 | 0        |
| 0.561364 | 0        |
| 0.092254 | 0        |
| 0        | 0.22991  |
| 0        | 0        |
| 0.391715 | 0.325827 |
| 0.211991 | 0.029389 |
| 0.358884 | 0        |
| 0.243478 | 0.135016 |
| 0.326773 | 0.241607 |
| 0        | 0        |
| 0.607207 | 0.841787 |
| 0        | 0        |
| 0.174893 | 0        |
| 1.114666 | 0.494493 |
| 0        | 0        |
| 7.114122 | 3.586361 |
| 280.8146 | 364.0271 |
| 0        | 0.077023 |
| 0.511003 | 1.133467 |
| 0.029286 | 0.03248  |
| 0        | 0        |
| 1.04822  | 0.804835 |
| 0.084633 | 0.018773 |
| 0.03842  | 0        |
| 0        | 0.098228 |
| 0.330836 | 0.122306 |
| 0        | 0        |
| 0.149968 | 0.166324 |
| 0        | 0        |
| 0        | 0        |
| 0.277174 | 0        |
| 0.508909 | 0        |
| 0.053248 | 0.059055 |
| 0.191626 | 0        |
| 0        | 0        |
| 0        | 0        |
| 0.144894 | 0        |
| 1.752249 | 1.13985  |
| 5.848765 | 1.496916 |
| 0        | 0.150839 |
| 1.126696 | 0.789205 |
| 0.022767 | 0.025251 |
| 0        | 0        |
| 0.322949 | 0.35817  |
| 0        | 0.055891 |
| 0.228681 | 0.126811 |
| 1.113666 | 0        |
| 0.088443 | 0.117706 |
| 0.07618  | 0.168977 |
| 0.108734 | 0.120592 |
| 0.221344 | 0        |
| 0        | 0        |
| 0        | 0        |
| 0        | 0        |
| 0        | 0.443103 |
| 0        | 0.011264 |
| 0        | 0        |
| 0        | 0        |

|          |          |
|----------|----------|
| 0        | 0        |
| 0.043086 | 0        |
| 0        | 0.30334  |
| 0        | 0        |
| 0.464722 | 0        |
| 0.108354 | 0.120171 |
| 0.402291 | 0.148722 |
| 0        | 0.050188 |
| 0.089334 | 0.024769 |
| 0.211901 | 0.235011 |
| 0.058025 | 0.160883 |
| 0.622945 | 0.230295 |
| 0        | 0        |
| 2.16223  | 0.856444 |
| 0        | 0.121229 |
| 0.085343 | 0.189301 |
| 30.15011 | 40.62135 |
| 0.564821 | 0.192745 |
| 0        | 0.075502 |
| 0.095225 | 0        |
| 0.12645  | 0.280481 |
| 0.444536 | 0.164339 |
| 0        | 0        |
| 1.061314 | 0.196177 |
| 0.064339 | 0        |
| 13.78906 | 18.01521 |
| 0.54067  | 0.799514 |
| 0        | 0        |
| 0.268774 | 1.490436 |
| 0        | 0.146507 |
| 0.271517 | 0.401505 |
| 0.148179 | 0        |
| 0        | 0.247246 |
| 0        | 0.159026 |
| 0.05284  | 0        |
| 0        | 0        |
| 0        | 0        |
| 0.233409 | 0.086288 |
| 1.762719 | 0.868872 |
| 0.46507  | 0.257896 |
| 0.104876 | 0        |
| 0.215579 | 0.159394 |
| 0        | 0        |
| 0.231236 | 0        |
| 0        | 0        |
| 0.92667  | 1.23328  |
| 0.028533 | 0        |
| 0.134387 | 0        |
| 0        | 0.245922 |
| 3.676197 | 11.32535 |
| 0        | 0        |
| 0.115403 | 0        |
| 0        | 0.031908 |
| 0        | 0.392354 |
| 0.26308  | 0        |
| 0.875584 | 0.176559 |
| 5.299183 | 4.334895 |
| 0.113504 | 0        |
| 0.178202 | 0.051239 |
| 1.926532 | 1.456801 |
| 0.075105 | 0        |
| 0.607504 | 0        |
| 2.252245 | 1.165676 |
| 0.058739 | 0.13029  |
| 0        | 0        |

|          |          |
|----------|----------|
| 0.766111 | 0.991274 |
| 0.17756  | 0.525134 |
| 0.096859 | 0.107423 |
| 0        | 0        |
| 0.035631 | 0        |
| 0.271122 | 0        |
| 0        | 0        |
| 0.534081 | 0        |
| 0        | 0.044339 |
| 0.193116 | 0.107089 |
| 0        | 0        |
| 0        | 0        |
| 0        | 0.084801 |
| 0        | 0        |
| 0        | 0        |
| 2.436427 | 1.677194 |
| 0.46917  | 0.693785 |
| 0        | 0.121229 |
| 0.212545 | 0.078575 |
| 0.506143 | 0.935573 |
| 0.048926 | 0        |
| 0.518832 | 0.191805 |
| 0.723712 | 0.422443 |
| 0.63516  | 3.346048 |
| 0.038732 | 0.085912 |
| 0.130985 | 0        |
| 4.268941 | 1.744295 |
| 1.17053  | 0.135228 |
| 0.176383 | 0.782479 |
| 0.057197 | 0.031717 |
| 0        | 0        |
| 0.761283 | 0.375249 |
| 0.129348 | 0        |
| 0.222733 | 0.061756 |
| 1.083541 | 0.600856 |
| 2.502009 | 2.77488  |
| 0.109791 | 0.152206 |
| 0.024348 | 0.027003 |
| 0        | 0        |
| 0.930141 | 1.16053  |
| 0.320035 | 0.354939 |
| 0        | 0        |
| 3.88827  | 3.477684 |
| 0.125682 | 0        |
| 0.22441  | 0.414808 |
| 0.086714 | 0.577023 |
| 0.22577  | 0.37559  |
| 0.848181 | 1.316959 |
| 0.737996 | 1.003301 |
| 0.728292 | 0.20193  |
| 0.42236  | 0.281054 |
| 0.046437 | 0.051502 |
| 0.30366  | 0.155436 |
| 1.065216 | 0.50631  |
| 0        | 0        |
| 0.94071  | 0.391239 |
| 0        | 0.344291 |
| 0.114976 | 0        |
| 0.403162 | 0        |
| 0        | 0        |
| 1.618532 | 0.287208 |
| 0.182716 | 0.121586 |
| 0.610537 | 1.197986 |
| 0        | 0        |
| 0.26197  | 0.581081 |

|          |          |
|----------|----------|
| 4.075201 | 2.481374 |
| 0        | 0.073488 |
| 0.300271 | 0.115276 |
| 0.109694 | 0        |
| 1.545732 | 3.142902 |
| 0.474052 | 0.23195  |
| 0.209282 | 0        |
| 1.263113 | 0.969833 |
| 0        | 0.382545 |
| 0        | 0.214846 |
| 0.530245 | 0.160384 |
| 0        | 0        |
| 0        | 0        |
| 0.108956 | 0.02014  |
| 0.192852 | 0.125814 |
| 0        | 0.141392 |
| 2.085202 | 1.965723 |
| 0.130552 | 0.041369 |
| 0.640071 | 0        |
| 0.138587 | 0        |
| 0.158385 | 0.117106 |
| 0.240958 | 0        |
| 0.15988  | 0.118211 |
| 0.389667 | 0        |
| 0        | 0        |
| 0.247358 | 0        |
| 0.38393  | 0.304144 |
| 0.111367 | 0.308781 |
| 2.150123 | 1.922482 |
| 0.140468 | 0        |
| 8.778678 | 6.914034 |
| 0.140309 | 0        |
| 0        | 0.286909 |
| 0.783925 | 0.347768 |
| 2.770281 | 3.79533  |
| 0.214834 | 0.119132 |
| 0        | 0        |
| 0.18715  | 0        |
| 0.090243 | 0.100085 |
| 0.565569 | 0.453014 |
| 5.328172 | 4.132916 |
| 0.343654 | 0.254089 |
| 0.26308  | 0.437658 |
| 0.809829 | 0        |
| 0        | 0        |
| 0.727013 | 0.322521 |
| 0.754201 | 0.567594 |
| 0.165565 | 0        |
| 4.448016 | 1.130507 |
| 0        | 0        |
| 0        | 0        |
| 0.226491 | 0.125596 |
| 0.093014 | 0.309475 |
| 0.162958 | 0.253022 |
| 0        | 0.124069 |
| 0        | 0.135459 |
| 0        | 0        |
| 0.197101 | 0.109299 |
| 0.33881  | 0.657581 |
| 0        | 0.518705 |
| 0        | 0        |
| 0        | 0.32027  |
| 2.328609 | 2.364762 |
| 2.618779 | 0.60508  |
| 0        | 0.053049 |

|          |          |   |
|----------|----------|---|
| 0        | 0.156141 |   |
| 0        |          | 0 |
| 0.099818 | 0.055352 |   |
| 0        |          | 0 |
| 0.919806 | 0.408048 |   |
| 0.541905 | 2.146451 |   |
| 0        | 0.123402 |   |
| 15.27907 | 14.06331 |   |
| 1.287288 | 1.098216 |   |
| 3.027398 | 1.734744 |   |
| 0.017882 |          | 0 |
| 2.956518 | 2.459219 |   |
| 0        |          | 0 |
| 0.236973 |          | 0 |
| 1.891844 | 0.381486 |   |
| 0.554347 | 0.368883 |   |
| 0.281573 | 0.624564 |   |
| 0.788405 | 1.748778 |   |
| 0.027742 | 0.061535 |   |
| 0.022676 |          | 0 |
| 0        |          | 0 |
| 0.419884 | 0.620903 |   |
| 0.4797   | 0.342011 |   |
| 0.922082 |          | 0 |
| 0.1321   | 0.146507 |   |
| 0        |          | 0 |
| 0        | 0.124743 |   |
| 0.184234 | 0.204327 |   |
| 2.55712  | 1.701601 |   |
| 0        | 0.068927 |   |
| 0        |          | 0 |
| 0        |          | 0 |
| 0.293093 | 0.325058 |   |
| 0.572229 | 1.01542  |   |
| 1.369564 | 1.063251 |   |
| 1.881421 |          | 0 |
| 0.024168 | 0.08041  |   |
| 0.924698 | 2.52724  |   |
| 0        | 0.096575 |   |
| 0.428185 | 0.094977 |   |
| 0.462644 | 0.10262  |   |
| 1.56248  | 1.636614 |   |
| 0.329373 | 0.365295 |   |
| 0        | 0.106222 |   |
| 0.663524 | 0.105127 |   |
| 0.803714 | 1.337051 |   |
| 0        |          | 0 |
| 0.191037 | 0.211871 |   |
| 0.623989 |          | 0 |
| 0        | 0.327896 |   |
| 0.924944 | 1.154047 |   |
| 0        | 0.144055 |   |
| 1.200907 | 0.399564 |   |
| 0.274721 |          | 0 |
| 0        |          | 0 |
| 4.48791  | 5.004865 |   |
| 0        |          | 0 |
| 0.165565 |          | 0 |
| 2.43478  | 4.243359 |   |
| 0.788405 | 0.327896 |   |
| 0.088515 | 0.056096 |   |
| 0        |          | 0 |
| 1.840851 | 0.556804 |   |
| 0.144725 |          | 0 |
| 0.320035 | 0.177469 |   |

|          |          |
|----------|----------|
| 0.457001 | 0.796466 |
| 0.136755 | 0        |
| 0.279075 | 0.195481 |
| 0        | 0        |
| 0.424526 | 0.235412 |
| 0.219388 | 0        |
| 2.937093 | 0.814354 |
| 0.181541 | 0.302009 |
| 0        | 0        |
| 0.5889   | 0.933037 |
| 0.332015 | 0.122742 |
| 0.078244 | 0        |
| 0        | 0.186607 |
| 1.022608 | 1.296153 |
| 0.327204 | 0.907222 |
| 1.575607 | 1.150216 |
| 1.526303 | 1.520617 |
| 0.341137 | 0        |
| 0.300663 | 0.583544 |
| 1.153129 | 0.40386  |
| 2.931881 | 1.530181 |
| 0.183057 | 0.203022 |
| 0        | 0        |
| 0.876521 | 0.567067 |
| 0.436463 | 0.121016 |
| 0        | 0        |
| 0.046127 | 0.025579 |
| 0.637649 | 0.334986 |
| 0.161685 | 0        |
| 0.237426 | 0.26332  |
| 2.132756 | 1.839721 |
| 0        | 0.180493 |
| 0.856885 | 0.599126 |
| 0.29495  | 0.04089  |
| 0.094645 | 0        |
| 0.265329 | 1.029929 |
| 0        | 0        |
| 0.364146 | 0.302895 |
| 1.480051 | 0.361679 |
| 0.506832 | 1.405268 |
| 0.07211  | 0        |
| 0        | 0        |
| 2.066432 | 1.145899 |
| 2.747207 | 2.193711 |
| 0        | 0        |
| 0.044699 | 0.016525 |
| 0.090948 | 0        |
| 0.165565 | 0.091811 |
| 0        | 0        |
| 0.081479 | 0.090365 |
| 0        | 0        |
| 0.084741 | 0.062655 |
| 0        | 0.246362 |
| 0        | 0.148722 |
| 0.038732 | 0.042956 |
| 0.515244 | 0.428578 |
| 1.808356 | 0.668526 |
| 0.140787 | 0        |
| 1.382682 | 1.33561  |
| 0        | 0        |
| 2.142179 | 1.288573 |
| 0        | 0        |
| 0        | 0.114004 |
| 3.482759 | 0.445684 |
| 0        | 0.724822 |

|          |          |
|----------|----------|
| 0.319487 | 0        |
| 8.801223 | 9.071449 |
| 0.768878 | 0.810096 |
| 0.079294 | 0        |
| 0.808304 | 0.761144 |
| 1.558165 | 1.7281   |
| 0.837597 | 1.277301 |
| 0.115118 | 0        |
| 0        | 0.066983 |
| 0.116814 | 0        |
| 0        | 0        |
| 0.62714  | 1.043305 |
| 0.350032 | 0.242629 |
| 0.108544 | 0        |
| 0.537549 | 1.043305 |
| 1.769697 | 0.654234 |
| 0.539886 | 0.399178 |
| 10.8652  | 15.74297 |
| 0.934641 | 1.184656 |
| 0        | 0.031342 |
| 0.418799 | 0.464473 |
| 0        | 0.643534 |
| 0        | 0.071356 |
| 0        | 0        |
| 0.344927 | 0.127515 |
| 0.127123 | 0        |
| 0        | 0        |
| 0.523204 | 0.580265 |
| 0.296593 | 0.16447  |
| 0.169174 | 0.375249 |
| 1.561596 | 1.224277 |
| 0.256557 | 0        |
| 0.405797 | 0.450053 |
| 0.949341 | 1.158164 |
| 11.94732 | 17.81188 |
| 0.034435 | 0        |
| 0        | 0        |
| 0.206956 | 0        |
| 0.395458 | 0.175435 |
| 0        | 0        |
| 1.293477 | 1.434545 |
| 0.226594 | 0.251307 |
| 0        | 0.085591 |
| 0        | 0        |
| 0        | 0        |
| 0.242054 | 0        |
| 0.846159 | 1.173052 |
| 2.65005  | 0.839733 |
| 0.127751 | 0        |
| 0        | 0        |
| 0        | 0.040315 |
| 1.336399 | 0.988099 |
| 0.601326 | 0.266763 |
| 0.35529  | 0.197019 |
| 0        | 0        |
| 0.463912 | 0.600258 |
| 0        | 0        |
| 0.227009 | 0.125883 |
| 1.932339 | 0.652242 |
| 0.01454  | 0        |
| 32.15056 | 32.5791  |
| 0        | 0        |
| 0.112578 | 0        |
| 0.161544 | 0.059721 |
| 0.133234 | 0.073882 |

|          |          |
|----------|----------|
| 0        | 0        |
| 0.290126 | 0.402209 |
| 0        | 0        |
| 0.622945 | 0.806032 |
| 0        | 0        |
| 0.160847 | 0        |
| 0        | 0        |
| 0        | 0.162019 |
| 0.657209 | 0.471631 |
| 0.109308 | 0        |
| 0        | 0        |
| 0.161685 | 0        |
| 0.369565 | 0        |
| 0.386506 | 0.233814 |
| 0.804871 | 0.247959 |
| 0        | 0.203722 |
| 0.693504 | 0.607215 |
| 0.139678 | 0.387279 |
| 0.109308 | 1.091062 |
| 0.155997 | 0        |
| 0        | 0        |
| 0        | 0.670152 |
| 3.298734 | 4.965103 |
| 0.134825 | 0.299058 |
| 0        | 0.065022 |
| 0.197101 | 0.072866 |
| 2.030879 | 2.359625 |
| 0.744051 | 0.64182  |
| 0        | 0        |
| 0.330249 | 0        |
| 0.92667  | 0.831975 |
| 0        | 0.093052 |
| 0        | 0        |
| 0.056391 | 0        |
| 2.099023 | 0.490093 |
| 0.139322 | 0.098329 |
| 0        | 0        |
| 0.609201 | 0.274837 |
| 0        | 0        |
| 0.919806 | 1.530181 |
| 0        | 0        |
| 0        | 0.214511 |
| 0.839958 | 0.504597 |
| 0.664031 | 0.797822 |
| 2.235816 | 0.858342 |
| 0        | 0.082912 |
| 1.017818 | 2.759342 |
| 0.085815 | 0        |
| 0.115618 | 0.128227 |
| 0        | 0        |
| 1.048512 | 0.830617 |
| 0.016177 | 0        |
| 0        | 0        |
| 6.03402  | 3.756966 |
| 0        | 0        |
| 3.691653 | 1.116618 |
| 0        | 0        |
| 0.275942 | 0.306036 |
| 0.108924 | 0        |
| 0        | 0.167131 |
| 0.644501 | 0.119132 |
| 0.115618 | 1.282274 |
| 0.652783 | 0.536278 |
| 0.040056 | 0.222123 |
| 0.452363 | 0.627123 |

|          |          |
|----------|----------|
| 0        | 0        |
| 0.194935 | 0.108098 |
| 0        | 0        |
| 0        | 0        |
| 5.084038 | 7.005418 |
| 0        | 0        |
| 3.488027 | 1.436847 |
| 0        | 0.08217  |
| 0.421643 | 0.233814 |
| 1.267079 | 1.118479 |
| 0        | 0        |
| 0        | 0        |
| 3.449271 | 1.912726 |
| 0        | 0.098792 |
| 0        | 0.020396 |
| 0.599873 | 0.443531 |
| 0        | 0        |
| 0.492753 | 0        |
| 0        | 0.306036 |
| 2.328258 | 1.721453 |
| 0        | 0        |
| 0        | 0        |
| 0.534573 | 0.254089 |
| 0        | 0.318296 |
| 0        | 0        |
| 0        | 0        |
| 0.103478 | 0.114764 |
| 0.847603 | 0        |
| 7.10219  | 4.40421  |
| 0.109308 | 0        |
| 0.305847 | 0.226135 |
| 0.034435 | 0.01273  |
| 0.143057 | 0.237989 |
| 0.417625 | 0.617562 |
| 0        | 0        |
| 0        | 0.383611 |
| 0        | 0.033313 |
| 0.645516 | 0.325417 |
| 0.813873 | 0.515791 |
| 0        | 0        |
| 0        | 0        |
| 0.213847 | 0.079056 |
| 0.144894 | 0.080348 |
| 0        | 0        |
| 0        | 0.032419 |
| 0        | 0.117908 |
| 0.608695 | 1.928799 |
| 0.146087 | 0.324038 |
| 0.023734 | 0.078966 |
| 3.104344 | 0.860727 |
| 0.013984 | 0.015509 |
| 0.06598  | 0        |
| 0.217087 | 0.240763 |
| 0        | 0        |
| 0.129483 | 0        |
| 0.119859 | 0        |
| 0.101449 | 0.056257 |
| 0        | 0.035204 |
| 0        | 0        |
| 0.542244 | 0.481105 |
| 0        | 0        |
| 0.14516  | 0.206988 |
| 0.413913 | 0.459054 |
| 0.33113  | 0.918108 |
| 0        | 0.141392 |

|          |          |
|----------|----------|
| 0        | 0        |
| 0        | 0.031442 |
| 0.169059 | 0        |
| 0.488873 | 0.54219  |
| 0.124672 | 0.691347 |
| 0        | 0.150674 |
| 0.289674 | 0.321267 |
| 0        | 0        |
| 0.01473  | 0.032673 |
| 0        | 0        |
| 0.151063 | 0        |
| 0        | 0.118926 |
| 0.209047 | 0        |
| 2.259491 | 2.614866 |
| 0.787905 | 0.524301 |
| 0        | 0.346021 |
| 0.886956 | 0.098369 |
| 2.109749 | 0.668526 |
| 0        | 0        |
| 2.574576 | 0.988394 |
| 0.029328 | 0        |
| 0.630324 | 4.194404 |
| 0.673811 | 0.427027 |
| 0        | 0        |
| 0.532173 | 0.459054 |
| 0.332906 | 0.369213 |
| 0.155411 | 0        |
| 0.401424 | 0.445203 |
| 0.467522 | 0.725914 |
| 0        | 0.125654 |
| 0.204907 | 0.113627 |
| 0        | 0        |
| 0        | 0.245484 |
| 0.061594 | 0.034156 |
| 0.584712 | 0.410264 |
| 2.331496 | 1.819617 |
| 0.322195 | 0.678933 |
| 1.346463 | 1.161463 |
| 0.500701 | 0.138827 |
| 2.429487 | 4.191365 |
| 0.336211 | 0.248585 |
| 0.088192 | 0        |
| 0.26704  | 0.148082 |
| 0.070795 | 0.078516 |
| 0.690814 | 0.095769 |
| 0.269033 | 0.430985 |
| 1.460868 | 1.890223 |
| 3.915389 | 1.240687 |
| 0.213724 | 0.474066 |
| 0.588501 | 0.163171 |
| 0.13352  | 0.74041  |
| 0        | 0        |
| 0        | 0        |
| 0.496695 | 0.413149 |
| 0        | 0        |
| 0        | 0        |
| 0.326773 | 0.483215 |
| 0        | 0.159764 |
| 0.151895 | 0.294805 |
| 0.144556 | 0.801608 |
| 0        | 0.193967 |
| 0.177391 | 0.098369 |
| 0        | 0.504455 |
| 0.03911  | 0.021688 |
| 0        | 0.176559 |

|          |          |
|----------|----------|
| 0.052527 | 0        |
| 4.244087 | 4.25144  |
| 0        | 0        |
| 0.249847 | 0.277095 |
| 0.240647 | 0.133446 |
| 0        | 0        |
| 1.015736 | 1.68977  |
| 0        | 0        |
| 0.342077 | 0        |
| 1.446284 | 1.718589 |
| 0.253416 | 0        |
| 0.314425 | 0.590136 |
| 0.143609 | 0.424723 |
| 1.046408 | 0.290133 |
| 0        | 0        |
| 0.115834 | 0        |
| 0.139709 | 0.681764 |
| 0.175387 | 0        |
| 0        | 0        |
| 12.82345 | 19.55524 |
| 0.431159 | 0        |
| 0.647863 | 0.71852  |
| 0.078591 | 0.087162 |
| 0.175139 | 0        |
| 0.113297 | 0.879575 |
| 0        | 0.084076 |
| 9.09698  | 11.22413 |
| 0.284151 | 0        |
| 0.041641 | 0.230913 |
| 0.964627 | 1.329182 |
| 0.799831 | 0.110883 |
| 0.458206 | 0.254089 |
| 0.202898 | 0.393797 |
| 0        | 0        |
| 0.271003 | 0.240447 |
| 0.107417 | 0.238263 |
| 0.157213 | 0.080473 |
| 0.795986 | 0        |
| 0        | 0.412324 |
| 2.654546 | 2.616936 |
| 0.458883 | 0.458036 |
| 0.478819 | 0.177013 |
| 1.521737 | 1.35016  |
| 4.383803 | 3.052824 |
| 1.101319 | 0.458036 |
| 0        | 0        |
| 0        | 0.829616 |
| 0.249679 | 1.015334 |
| 0.356821 | 0        |
| 7.163871 | 5.29678  |
| 0        | 0        |
| 0.077901 | 0        |
| 0        | 0        |
| 0.031532 | 0.454625 |
| 2.810598 | 3.095477 |
| 0        | 0        |
| 1.565216 | 0.694368 |
| 0        | 0.208345 |
| 1.272145 | 0.860297 |
| 0.797121 | 0.491142 |
| 0.581805 | 1.013975 |
| 2.299514 | 1.373239 |
| 0.643864 | 0.612072 |
| 2.052459 | 2.134033 |
| 0.591816 | 0.477353 |

|          |          |   |
|----------|----------|---|
| 0        | 0.22688  |   |
| 0        |          | 0 |
| 0.224952 |          | 0 |
| 0.132948 |          | 0 |
| 0.111667 | 0.247691 |   |
| 0.14167  | 0.117841 |   |
| 0.156063 | 0.028847 |   |
| 0.057382 |          | 0 |
| 0.651261 | 0.361144 |   |
| 0.559341 | 0.620344 |   |
| 2.759417 |          | 0 |
| 8.751609 | 13.91813 |   |
| 0.648427 | 0.089893 |   |
| 0.750619 | 0.832482 |   |
| 7.080083 | 3.020094 |   |
| 0.41576  | 0.691655 |   |
| 0.238796 |          | 0 |
| 6.208689 | 4.590542 |   |
| 0.792599 | 0.586027 |   |
| 6.248403 | 4.712892 |   |
| 0        |          | 0 |
| 1.034781 | 1.147636 |   |
| 0.059074 | 0.065517 |   |
| 2.956518 |          | 0 |
| 0.073476 | 0.081489 |   |
| 0.165565 | 0.367243 |   |
| 0.502728 | 0.836334 |   |
| 0.52527  |          | 0 |
| 0        |          | 0 |
| 0.100302 |          | 0 |
| 1.323008 | 0.314421 |   |
| 0.137971 |          | 0 |
| 0.392382 | 0.937301 |   |
| 1.116671 | 0.123846 |   |
| 2.576395 | 2.014218 |   |
| 0.369565 |          | 0 |
| 0.115403 |          | 0 |
| 0.994527 |          | 0 |
| 0.490805 | 0.349928 |   |
| 0.142483 | 0.237033 |   |
| 3.725213 | 0.876376 |   |
| 0        | 0.163364 |   |
| 4.636832 | 4.220755 |   |
| 1.881421 |          | 0 |
| 0.201799 | 0.111904 |   |
| 0        |          | 0 |
| 0.678545 | 0.658479 |   |
| 1.150403 | 1.701156 |   |
| 0.089077 |          | 0 |
| 3.748642 | 0.844487 |   |
| 0.149517 | 0.228007 |   |
| 0.076368 |          | 0 |
| 0.028389 | 0.031485 |   |
| 0.495562 |          | 0 |
| 5.173907 | 3.825452 |   |
| 0.230378 |          | 0 |
| 0        |          | 0 |
| 0        | 0.30223  |   |
| 0.078891 | 1.137428 |   |
| 0        |          | 0 |
| 0.221739 |          | 0 |
| 0        |          | 0 |
| 0        |          | 0 |
| 0.713642 | 0.079147 |   |
| 0.169174 | 0.187624 |   |

|          |          |
|----------|----------|
| 0        | 0        |
| 0.946859 | 0.150018 |
| 0.562381 | 0        |
| 0.271418 | 0        |
| 0.333203 | 0        |
| 0.243903 | 0.210392 |
| 0        | 0        |
| 0        | 0.882797 |
| 0.646738 | 0.358636 |
| 0.323089 | 0.477767 |
| 0.145403 | 0.16126  |
| 3.471525 | 1.036574 |
| 3.004204 | 4.072255 |
| 2.770123 | 1.870056 |
| 1.326373 | 3.222253 |
| 0.170756 | 0.227255 |
| 0.445067 | 0.370205 |
| 0.183147 | 0.203121 |
| 0        | 0        |
| 0.209753 | 0        |
| 0        | 0.066745 |
| 0.268774 | 0.596174 |
| 0        | 0        |
| 0.228261 | 0.379732 |
| 10.34781 | 10.04181 |
| 1.881421 | 2.347436 |
| 0.101064 | 0.112086 |
| 0.760869 | 0.84385  |
| 1.089244 | 0        |
| 0.096709 | 0.107256 |
| 0.125428 | 0.139107 |
| 0        | 0        |
| 1.205571 | 1.337051 |
| 0.117589 | 0.19562  |
| 1.21739  | 0        |
| 0.561026 | 0        |
| 0.018556 | 0.020579 |
| 0        | 1.452703 |
| 0.16705  | 0.432293 |
| 0.11413  | 0.379732 |
| 0        | 0        |
| 1.46939  | 0.872203 |
| 0.054944 | 0        |
| 0        | 0        |
| 2.442341 | 3.564086 |
| 0.287439 | 0.159394 |
| 0.123926 | 0        |
| 1.698495 | 2.90197  |
| 0.694262 | 0.439988 |
| 0.393786 | 0.436732 |
| 2.790422 | 4.796859 |
| 0.303975 | 0.168563 |
| 0.030066 | 0        |
| 0        | 0.132165 |
| 0.092667 | 0        |
| 0.4456   | 0.164732 |
| 0.89981  | 2.993832 |
| 0        | 0.533784 |
| 0.250856 | 0.278215 |
| 1.782399 | 0.988394 |
| 0.345276 | 0.34812  |
| 0.217849 | 0        |
| 0        | 0.088621 |
| 0.632464 | 0.409174 |
| 0        | 0        |

|          |          |
|----------|----------|
| 0        | 0        |
| 0.348803 | 0        |
| 0.093504 | 0.103702 |
| 0.750937 | 0.675696 |
| 1.210199 | 0.650756 |
| 1.839611 | 1.785211 |
| 0        | 0        |
| 1.249547 | 0.86614  |
| 1.85547  | 0.672752 |
| 0.268774 | 0.596174 |
| 0.367378 | 0.203722 |
| 0        | 0        |
| 0.097621 | 0        |
| 0.482541 | 0.535167 |
| 0        | 0        |
| 0        | 0.649605 |
| 0        | 0        |
| 0        | 0        |
| 0.339273 | 1.88137  |
| 0.067873 | 0        |
| 4.599029 | 3.477684 |
| 0.340762 | 0.075585 |
| 0        | 0.139672 |
| 3.942024 | 0        |
| 0.023916 | 0.026525 |
| 0.330249 | 0.201447 |
| 0.028506 | 0        |
| 0        | 0        |
| 2.087717 | 2.919424 |
| 0.121739 | 0        |
| 0.059413 | 0.329465 |
| 0        | 0        |
| 0.095138 | 0.042205 |
| 1.826085 | 0.67508  |
| 0.336211 | 0        |
| 0.122459 | 0        |
| 0.192816 | 0        |
| 2.196576 | 2.286985 |
| 0.055139 | 0.061153 |
| 0        | 0        |
| 0.766505 | 0        |
| 0        | 0.349534 |
| 0.646738 | 0        |
| 1.506151 | 0.742406 |
| 0        | 0        |
| 0.36097  | 0        |
| 0        | 0.222123 |
| 1.927534 | 0.562566 |
| 0.329082 | 0.364972 |
| 0        | 0.025204 |
| 0        | 0        |
| 0.567868 | 0.209933 |
| 0        | 0        |
| 0        | 0.072027 |
| 4.120311 | 2.816924 |
| 0        | 1.391073 |
| 0.032609 | 0        |
| 0.179962 | 0        |
| 0.257622 | 0.190479 |
| 0.748035 | 1.03702  |
| 4.703552 | 0        |
| 0.454017 | 1.132949 |
| 0.049042 | 0        |
| 1.210608 | 0        |
| 0.450721 | 0        |

|          |          |
|----------|----------|
| 0        | 0        |
| 0.095518 | 0.211871 |
| 1.411066 | 0        |
| 0.202237 | 0.056073 |
| 0.130819 | 0.261156 |
| 0        | 0        |
| 2.064427 | 1.127701 |
| 0        | 0.119338 |
| 0        | 0        |
| 0        | 0        |
| 2.336603 | 2.96164  |
| 0.444271 | 0.123181 |
| 5.5719   | 6.179576 |
| 0        | 0        |
| 0.291488 | 0.096983 |
| 0.277174 | 0.307402 |
| 2.795966 | 2.462476 |
| 0.074001 | 0.246215 |
| 4.765133 | 1.865232 |
| 0        | 5.738178 |
| 0.029778 | 0.033025 |
| 0.121501 | 0.134752 |
| 1.622223 | 0        |
| 0        | 0        |
| 3.621735 | 3.155998 |
| 0.879972 | 0.216876 |
| 0.855528 | 1.08438  |
| 3.330331 | 5.54031  |
| 0.039672 | 0        |
| 0.733888 | 0.651141 |
| 0.156785 | 0.173884 |
| 0.051079 | 0.05665  |
| 0        | 0        |
| 6.941391 | 8.446883 |
| 0        | 0        |
| 0        | 0.17002  |
| 0        | 0.127515 |
| 0.325062 | 0.180257 |
| 1.395211 | 5.222387 |
| 3.942024 | 6.339321 |
| 0.759008 | 0.336715 |
| 0.336514 | 0        |
| 0.049003 | 0.054347 |
| 0.129753 | 0.215856 |
| 0.063744 | 0        |
| 0.101449 | 0        |
| 1.460868 | 1.282652 |
| 0.487103 | 0.20778  |
| 1.785685 | 1.066387 |
| 0.557333 | 0.247246 |
| 4.782425 | 6.899895 |
| 0        | 0        |
| 0.132608 | 0        |
| 0        | 0.323278 |
| 1.822734 | 1.263452 |
| 1.100274 | 0.522973 |
| 0        | 0        |
| 0.048055 | 0        |
| 0        | 0        |
| 0.203564 | 0.564411 |
| 0        | 0.253155 |
| 0.730792 | 0.574099 |
| 0.035217 | 0        |
| 0        | 0        |
| 0        | 0        |

|          |          |
|----------|----------|
| 0.245912 | 0.142859 |
| 0.905334 | 0.369921 |
| 0        | 0        |
| 0.49016  | 0.181206 |
| 0.833381 | 1.23236  |
| 0.646738 | 1.075908 |
| 0        | 5.29678  |
| 1.989964 | 0.882797 |
| 0        | 0.050115 |
| 0.3338   | 0.74041  |
| 0.13154  | 0        |
| 0.341137 | 0.378341 |
| 2.492727 | 1.567549 |
| 0        | 0        |
| 0.783431 | 1.08609  |
| 0.73139  | 0.540771 |
| 0.091845 | 0.407445 |
| 1.484686 | 1.347224 |
| 0.275243 | 0.305261 |
| 0        | 0.377305 |
| 0.098394 | 0.363751 |
| 0.081693 | 0.090603 |
| 0        | 0.122742 |
| 0.767963 | 0.393101 |
| 5.601628 | 4.045379 |
| 1.552172 | 0.938975 |
| 0        | 0        |
| 0.080528 | 0        |
| 0.258695 | 0        |
| 0.114976 | 0.095636 |
| 0.156128 | 0        |
| 1.113111 | 0.960173 |
| 0.978447 | 0.591904 |
| 0        | 0        |
| 0.187071 | 0.253579 |
| 0        | 0.796048 |
| 0        | 0        |
| 0        | 0        |
| 0.034114 | 0        |
| 0.039172 | 0.043444 |
| 0.177391 | 0.196738 |
| 0.232535 | 0        |
| 0.746306 | 0.509353 |
| 1.21739  | 1.4466   |
| 0.219777 | 0.121873 |
| 1.757176 | 1.082675 |
| 0.880665 | 0.976711 |
| 0.137057 | 0.190006 |
| 0.114976 | 0.127515 |
| 0        | 0.383611 |
| 0.655478 | 0.610651 |
| 2.178487 | 0        |
| 13.12769 | 21.48852 |
| 0.987746 | 0.625983 |
| 1.727034 | 1.628078 |
| 0        | 0        |
| 0        | 0.106427 |
| 0.459903 | 0        |
| 0        | 0.034724 |
| 0.591304 | 0        |
| 1.100831 | 0.976711 |
| 0        | 0        |
| 1.05232  | 1.167087 |
| 0        | 0.217218 |
| 0        | 0        |

|          |          |  |
|----------|----------|--|
| 0        | 0.318296 |  |
| 3.568212 | 4.296567 |  |
| 0.204907 | 0        |  |
| 0.919352 | 1.767336 |  |
| 0        | 0.407445 |  |
| 4.210413 | 0.889448 |  |
| 0.204233 | 0        |  |
| 1.115333 | 0.274883 |  |
| 0.703651 | 0.780392 |  |
| 2.089926 | 1.497691 |  |
| 1.591971 | 1.086519 |  |
| 0.11268  | 0        |  |
| 0.540456 | 0.563071 |  |
| 0        | 0        |  |
| 0.193417 | 0        |  |
| 16.38591 | 19.81601 |  |
| 0.130161 | 0        |  |
| 1.293477 | 0        |  |
| 0.100954 | 0        |  |
| 0.890135 | 0.987213 |  |
| 12.33514 | 12.7684  |  |
| 3.316783 | 2.88809  |  |
| 0        | 0        |  |
| 0.801121 | 0.266548 |  |
| 0.138897 | 0.30809  |  |
| 0.363081 | 0        |  |
| 0.325062 | 0        |  |
| 0        | 0.167538 |  |
| 0        | 0        |  |
| 0.080453 | 0.012747 |  |
| 0.197415 | 0.218945 |  |
| 0.269552 | 0.09965  |  |
| 2.201663 | 0.32557  |  |
| 0.056494 | 0.062655 |  |
| 0.552374 | 0.36757  |  |
| 0        | 0.250849 |  |
| 0.667601 | 2.22123  |  |
| 0.240647 | 0        |  |
| 0.238681 | 0.099267 |  |
| 0.068134 | 0.17002  |  |
| 4.775914 | 3.531186 |  |
| 0.034724 | 0.038511 |  |
| 0.172944 | 0.191805 |  |
| 0        | 0        |  |
| 0        | 0        |  |
| 0.36436  | 0.565736 |  |
| 0.195549 | 0.18073  |  |
| 0        | 0        |  |
| 0.042438 | 0        |  |
| 0.157681 | 0        |  |
| 3.930359 | 3.012322 |  |
| 0        | 0.076002 |  |
| 0.163602 | 0.272167 |  |
| 0.232971 | 0.12919  |  |
| 0.077673 | 0.028715 |  |
| 0.641725 | 0.88964  |  |
| 0.363081 | 0        |  |
| 0.114869 | 0.127397 |  |
| 0.222136 | 0        |  |
| 0.672826 | 0.290191 |  |
| 0.447312 | 0.198438 |  |
| 0.069761 | 0.077369 |  |
| 0.862318 | 0        |  |
| 0.137057 | 0        |  |
| 5.947989 | 5.810695 |  |

|          |          |
|----------|----------|
| 0.098707 | 0        |
| 0.034245 | 0.03798  |
| 0        | 0        |
| 0.721941 | 0.228765 |
| 0        | 0.089893 |
| 0.511003 | 0.708417 |
| 0        | 0        |
| 1.085435 | 0        |
| 0.098551 | 0.072866 |
| 0.80483  | 0.76509  |
| 0.741182 | 0.038233 |
| 0.11207  | 0        |
| 0        | 0.279911 |
| 0.814551 | 0.200753 |
| 4.281854 | 5.586867 |
| 2.993169 | 1.138151 |
| 0.127206 | 0.129322 |
| 0.636322 | 0.100817 |
| 0.182162 | 0.033671 |
| 0        | 0        |
| 0        | 0        |
| 0.072531 | 0        |
| 5.944173 | 3.65881  |
| 0        | 0        |
| 0.081801 | 0        |
| 1.615482 | 0.823199 |
| 0.488873 | 0.18073  |
| 0.740894 | 0.328678 |
| 0.134387 | 0        |
| 0.10559  | 0.117106 |
| 0        | 0        |
| 5.013227 | 5.987664 |
| 0.206956 | 0        |
| 0.022684 | 0        |
| 0.508909 | 0.070551 |
| 0        | 0        |
| 0.068529 | 0.076002 |
| 0.095961 | 0        |
| 0.153554 | 0.113534 |
| 0        | 0        |
| 0        | 0        |
| 0.111068 | 0        |
| 0.454017 | 0.125883 |
| 0        | 0.19288  |
| 0        | 0        |
| 0.303603 | 0.168357 |
| 0.547021 | 0.45501  |
| 0.99339  | 0.964014 |
| 0.141558 | 0.203569 |
| 1.24261  | 1.474841 |
| 0        | 1.601352 |
| 0.147125 | 0.05439  |
| 0.068177 | 0.050409 |
| 1.98678  | 0.550865 |
| 2.989289 | 4.436305 |
| 0.415946 | 1.076389 |
| 0.257622 | 0        |
| 0.115317 | 0.102315 |
| 0.044539 | 0.197584 |
| 1.240432 | 0.072406 |
| 3.172905 | 3.961023 |
| 0        | 0        |
| 0.162958 | 0        |
| 3.931865 | 4.563499 |
| 0.552702 | 0.408654 |

|          |          |
|----------|----------|
| 0        | 0.308781 |
| 0.344927 | 0        |
| 1.744014 | 1.041502 |
| 0.347339 | 0.674136 |
| 0        | 0        |
| 0.125587 | 0.034821 |
| 0.006932 | 0.007688 |
| 0.283502 | 0.209614 |
| 66.89123 | 65.06684 |
| 0.112273 | 0.373552 |
| 0.052086 | 0        |
| 0.72224  | 0.944046 |
| 0.124672 | 0        |
| 1.826085 | 3.761159 |
| 3.938347 | 2.055467 |
| 0.275942 | 0        |
| 0.117589 | 0        |
| 0.430163 | 0.159026 |
| 0        | 0.108481 |
| 1.951833 | 2.061621 |
| 2.257705 | 0.834644 |
| 0.37477  | 0.138548 |
| 0        | 0.38612  |
| 0.250014 | 0        |
| 0.139208 | 0        |
| 0        | 0        |
| 2.651178 | 2.700989 |
| 0.3521   | 0.260333 |
| 0.0438   | 0.024289 |
| 0.165125 | 0        |
| 1.421837 | 0.876058 |
| 2.72806  | 1.147636 |
| 0.259597 | 0.191939 |
| 0        | 0        |
| 2.831379 | 1.880342 |
| 0        | 0        |
| 0.410184 | 0.124069 |
| 0.024357 | 0.081041 |
| 0.119859 | 0.05697  |
| 0        | 0.37087  |
| 0        | 0.112697 |
| 0.116486 | 1.033518 |
| 0        | 0.126345 |
| 0        | 0        |
| 1.320998 | 2.63712  |
| 5.342788 | 2.145432 |
| 0.087323 | 0        |
| 0.833381 | 0.770225 |
| 0        | 0        |
| 0.092391 | 0.307402 |
| 0.185334 | 0.411093 |
| 0.177754 | 0.140814 |
| 8.574268 | 9.339575 |
| 0.078353 | 0.104278 |
| 0        | 0.543259 |
| 17.68956 | 47.82884 |
| 4.363354 | 6.351483 |
| 0.038804 | 0.071727 |
| 0.092529 | 0.10262  |
| 0        | 0.351916 |
| 0        | 0        |
| 0.883936 | 0.916404 |
| 0.847024 | 0.657581 |
| 13.60879 | 9.055785 |
| 0        | 0        |

|          |          |
|----------|----------|
| 0.46507  | 0.515791 |
| 2.280027 | 2.042402 |
| 0.724045 | 0.80301  |
| 0.487211 | 0.486312 |
| 0.172944 | 0        |
| 0.355572 | 0.569619 |
| 0.048092 | 0        |
| 0.083338 | 0.092427 |
| 2.222826 | 1.688527 |
| 0.344927 | 0.76509  |
| 8.322285 | 15.96923 |
| 0.709741 | 0.581803 |
| 11.5652  | 6.179576 |
| 0        | 0.124517 |
| 0        | 0        |
| 0.718598 | 0.637575 |
| 0.432159 | 0.159764 |
| 0.37935  | 0        |
| 1.414638 | 1.743244 |
| 0.192219 | 0.106592 |
| 1.481198 | 0.684475 |
| 0.050273 | 0.027878 |
| 1.120537 | 0.862312 |
| 3.999261 | 2.763051 |
| 0        | 0.137992 |
| 3.805676 | 4.582503 |
| 0.240647 | 0.311374 |
| 0.088317 | 0        |
| 0.030782 | 0        |
| 0.093504 | 0        |
| 0.021054 | 0        |
| 0.199316 | 0.110527 |
| 0.209753 | 0        |
| 0.172944 | 0.191805 |
| 0        | 0        |
| 0.871395 | 0.604019 |
| 0.429667 | 1.072186 |
| 0.278417 | 0        |
| 0.913042 | 0        |
| 0        | 0        |
| 0.802848 | 0.296802 |
| 0        | 0        |
| 0.105635 | 0.175733 |
| 0.137971 | 0.153018 |
| 1.081653 | 1.799429 |
| 0.174893 | 0.387933 |
| 1.126577 | 1.527096 |
| 4.362076 | 2.418904 |
| 1.020861 | 2.470247 |
| 0.136455 | 0        |
| 0.953553 | 1.370896 |
| 0        | 0        |
| 0.433164 | 0.160135 |
| 0.878174 | 0.973948 |
| 0        | 0        |
| 0.875584 | 0.176559 |
| 10.70163 | 10.41741 |
| 0.622425 | 1.898345 |
| 1.431398 | 1.885165 |
| 0.364681 | 0.505566 |
| 0        | 0        |
| 0.240647 | 0        |
| 0.179442 | 0.597036 |
| 3.400938 | 5.526194 |
| 1.431773 | 0.86614  |

|          |          |
|----------|----------|
| 0.473946 | 0.525635 |
| 0.324496 | 0        |
| 0        | 0        |
| 1.237239 | 1.24743  |
| 1.177003 | 1.79488  |
| 0.406328 | 0.540771 |
| 0.092766 | 0.029395 |
| 0.661907 | 0.880914 |
| 0.117145 | 0.129921 |
| 0        | 0        |
| 0.103306 | 0.45829  |
| 1.552172 | 0.860727 |
| 0.156063 | 0.20193  |
| 0        | 0.130413 |
| 0        | 0        |
| 0.455405 | 1.346858 |
| 0        | 0        |
| 0.085637 | 0        |
| 0.167802 | 0.186103 |
| 1.377158 | 1.781911 |
| 3.294406 | 5.761599 |
| 2.221967 | 5.307716 |
| 0.332608 | 0.368883 |
| 0.029622 | 0.032852 |
| 0.469644 | 0.104173 |
| 1.372086 | 2.472806 |
| 1.342419 | 0.893295 |
| 0.152174 | 0.50631  |
| 0        | 0.402679 |
| 0.036139 | 0        |
| 0.327347 | 1.331177 |
| 0.2529   | 0        |
| 0        | 0        |
| 79.73904 | 55.28153 |
| 0.541141 | 0.040011 |
| 2.452674 | 4.206767 |
| 0.184782 | 0.068312 |
| 0        | 0.256296 |
| 0.640897 | 0.888492 |
| 0.350279 | 0.38848  |
| 0.204233 | 0        |
| 0.194022 | 0.322773 |
| 0        | 0        |
| 1.351674 | 1.698967 |
| 2.322282 | 0.909018 |
| 0        | 0        |
| 1.238641 | 0.772722 |
| 0.098394 | 0.109125 |
| 0.105411 | 0        |
| 0        | 0        |
| 0.891856 | 1.065209 |
| 0        | 0        |
| 0.060691 | 0.20193  |
| 1.063132 | 0.235816 |
| 0.247852 | 0        |
| 0        | 0        |
| 12.87908 | 17.38297 |
| 0.303603 | 0.505072 |
| 0.191626 | 0.212525 |
| 0.339273 | 0.752548 |
| 0.346209 | 0.767935 |
| 0.919806 | 0.127515 |
| 0.508909 | 0        |
| 0.107603 | 0.596691 |
| 0        | 0.038297 |

|          |          |
|----------|----------|
| 0.038349 | 0.170125 |
| 0.101782 | 0        |
| 0.336514 | 0        |
| 0.277174 | 0.307402 |
| 0        | 0        |
| 0.103478 | 0        |
| 0        | 0        |
| 0.022877 | 0.126857 |
| 0.043909 | 0.048697 |
| 0.240181 | 0        |
| 0        | 0        |
| 0        | 0        |
| 0.055985 | 0        |
| 0        | 0        |
| 0        | 0        |
| 0        | 0.197868 |
| 0.224546 | 0        |
| 0.321694 | 0        |
| 0.026533 | 0.039235 |
| 0        | 0        |
| 0.183961 | 0.408048 |
| 0.918445 | 0.611167 |
| 0.50205  | 0.662862 |
| 16.87056 | 22.23823 |
| 0.850505 | 3.144207 |
| 0.356821 | 0        |
| 0.179962 | 0.099794 |
| 0.3372   | 0.257108 |
| 0        | 0.400338 |
| 0.667601 | 0        |
| 0.274721 | 0.304682 |
| 0        | 0        |
| 0.781414 | 0.078785 |
| 0        | 0.810096 |
| 0.301881 | 0.111602 |
| 0.218616 | 0.121229 |
| 0.074803 | 0.082962 |
| 0        | 0        |
| 0.287439 | 0        |
| 0        | 0        |
| 2.702443 | 1.075908 |
| 0.172464 | 0.573818 |
| 0        | 0.108098 |
| 0.362023 | 0.501881 |
| 0.551533 | 0.873834 |
| 0.235713 | 0.104568 |
| 0.033113 | 0        |
| 0        | 0        |
| 1.622059 | 0.382758 |
| 0        | 0        |
| 0        | 0        |
| 0.183689 | 0        |
| 0.783431 | 0.434436 |
| 0.149968 | 0.166324 |
| 0.306224 | 0        |
| 0.137818 | 0.076424 |
| 0.169636 | 0.282205 |
| 0.304846 | 0.338092 |
| 0.481294 | 1.067568 |
| 0        | 0        |
| 0        | 0        |
| 0.253934 | 0        |
| 0.25035  | 0.138827 |
| 0.085051 | 0.047163 |
| 0.048849 | 0.054176 |

|          |          |
|----------|----------|
| 0.337307 | 0.074819 |
| 0.286115 | 0.211546 |
| 0        | 0        |
| 0.344927 | 0.76509  |
| 0        | 0.191627 |
| 0        | 0        |
| 0        | 0.256933 |
| 0.111267 | 0        |
| 0.120713 | 0.044626 |
| 0        | 0        |
| 0        | 0        |
| 0.260869 | 0        |
| 0.343972 | 0.190743 |
| 0        | 0.062655 |
| 0.070314 | 0.38991  |
| 0.469466 | 2.863665 |
| 0.025167 | 0.027912 |
| 0        | 0        |
| 0.109116 | 0.181524 |
| 0.029328 | 0        |
| 1.379709 | 0.76509  |
| 0        | 0        |
| 0        | 0        |
| 0.492074 | 0.474556 |
| 0        | 0        |
| 0.373455 | 0.310638 |
| 0.601326 | 1.167087 |
| 0.225907 | 0.292303 |
| 0        | 0        |
| 0        | 0        |
| 0        | 0        |
| 1.691828 | 0.566442 |
| 0.88335  | 0.419867 |
| 0.1473   | 0.122523 |
| 0.622945 | 0.575737 |
| 0        | 0.113254 |
| 0.109308 | 0.121229 |
| 0.244437 | 0        |
| 0.037651 | 0.16703  |
| 0.097087 | 0        |
| 0        | 0        |
| 0        | 0.00186  |
| 0.115189 | 0        |
| 0        | 0        |
| 0.89981  | 0.199589 |
| 0        | 0        |
| 0        | 0.291772 |
| 2.421216 | 1.43854  |
| 29.02863 | 24.99274 |
| 0.118036 | 0.130909 |
| 0.50205  | 0.371203 |
| 0.839012 | 0.465258 |
| 0        | 0        |
| 0        | 0        |
| 0.256028 | 0.141976 |
| 0        | 0.142269 |
| 0        | 0.671787 |
| 8.813708 | 6.345827 |
| 0.204907 | 0.227255 |
| 56.27876 | 65.74841 |
| 1.478259 | 3.278959 |
| 0.369199 | 0.204732 |
| 0.175387 | 0        |
| 0.604252 | 0.502614 |
| 0.082343 | 0        |

|          |          |
|----------|----------|
| 0        | 0        |
| 0.21118  | 0.234211 |
| 0.243478 | 0.270032 |
| 3.547822 | 1.967375 |
| 0        | 1.346388 |
| 0.167802 | 0.186103 |
| 0.397993 | 0.378341 |
| 0.1321   | 0        |
| 0        | 0        |
| 0        | 0        |
| 0        | 0        |
| 0.655271 | 2.180205 |
| 2.822131 | 2.295271 |
| 0        | 0        |
| 0.559341 | 0        |
| 0.058025 | 0.128707 |
| 0.329373 | 0        |
| 0.219777 | 0        |
| 0.618806 | 1.143823 |
| 0        | 0.342578 |
| 0        | 0.071061 |
| 0        | 0        |
| 0        | 0        |
| 0        | 0        |
| 0.074356 | 0        |
| 0.606712 | 0.448587 |
| 0.836187 | 0.463691 |
| 0.217087 | 0.481525 |
| 0.135858 | 0        |
| 0        | 0.117706 |
| 0        | 0.141392 |
| 1.30939  | 2.178289 |
| 0.752568 | 1.251966 |
| 0.070714 | 0.026142 |
| 0.023473 | 0        |
| 0.109308 | 0.121229 |
| 0.103824 | 0.115147 |
| 0.172464 | 0        |
| 0        | 0.127515 |
| 0.142075 | 0        |
| 0        | 0.295528 |
| 0        | 0        |
| 0        | 0        |
| 0.478409 | 0.589539 |
| 0.496695 | 0        |
| 0.640071 | 0.764484 |
| 0.100302 | 0        |
| 0.268194 | 0        |
| 0.88978  | 1.863994 |
| 0.233702 | 0        |
| 0.459903 | 0        |
| 0.117533 | 0.065176 |
| 0.212263 | 0        |
| 0        | 0        |
| 0        | 0        |
| 0.634187 | 0.633017 |
| 0.174893 | 0        |
| 0.047916 | 0.026571 |
| 0        | 0        |
| 0        | 0        |
| 0        | 0.207404 |
| 0.16735  | 0.556804 |
| 0        | 0        |
| 0.022651 | 0.050243 |
| 0.751657 | 0.083363 |

|          |          |
|----------|----------|
| 0.459903 | 0.816096 |
| 0        | 0.072559 |
| 0.914265 | 0.737437 |
| 1.351814 | 0.9638   |
| 0.667601 | 0.987213 |
| 0.475155 | 0.263488 |
| 1.288932 | 1.451497 |
| 0        | 0.353119 |
| 0        | 0        |
| 0        | 0        |
| 0        | 0        |
| 0.087078 | 0.096575 |
| 0.629259 | 0.465258 |
| 0.202501 | 0.359338 |
| 0        | 0        |
| 0        | 0.154045 |
| 0        | 0        |
| 0.184234 | 0        |
| 0        | 0.107928 |
| 0.168714 | 0.093557 |
| 0.499693 | 0.415643 |
| 0        | 1.059356 |
| 0        | 0        |
| 0        | 0        |
| 0.207186 | 0.076594 |
| 0.394202 | 0        |
| 0        | 0.106647 |
| 0        | 0        |
| 0.485054 | 0        |
| 0        | 0.356778 |
| 0.232971 | 1.162708 |
| 0        | 0        |
| 0.080423 | 0        |
| 0        | 0.290541 |
| 2.59679  | 3.272725 |
| 0.603958 | 0.535861 |
| 0.239487 | 0.132803 |
| 0        | 0.270032 |
| 0        | 0        |
| 0        | 0        |
| 148.0726 | 153.2858 |
| 0.26197  | 0.290541 |
| 0.203564 | 0        |
| 0.580251 | 0        |
| 1.034781 | 0.573818 |
| 0.357849 | 0        |
| 0.051439 | 0        |
| 0.24508  | 0.181206 |
| 0        | 0        |
| 0        | 0        |
| 0.145539 | 0        |
| 0.041641 | 0        |
| 0.554347 | 0        |
| 0        | 0.407445 |
| 0.574879 | 0        |
| 6.426537 | 5.436169 |
| 0.184508 | 0        |
| 0.186896 | 0.373102 |
| 0.709564 | 0.721371 |
| 0        | 0        |
| 0        | 0        |
| 1.684854 | 0.747442 |
| 0.280936 | 0        |
| 0.31278  | 0        |
| 0        | 0        |

|          |          |  |
|----------|----------|--|
| 0        | 0.117908 |  |
| 0.058134 | 0.064474 |  |
| 0.273511 | 0.15167  |  |
| 0.044285 | 0        |  |
| 0        | 0        |  |
| 1.971012 | 1.821644 |  |
| 0.11413  | 0        |  |
| 0.406683 | 0        |  |
| 0.121501 | 0.134752 |  |
| 0        | 0.279911 |  |
| 0.198361 | 0        |  |
| 0        | 0.193422 |  |
| 0        | 0.08101  |  |
| 0.357849 | 0.396877 |  |
| 0.145403 | 0.16126  |  |
| 0.031075 | 0        |  |
| 0        | 0        |  |
| 0.156785 | 0        |  |
| 2.369105 | 0.362411 |  |
| 0.136155 | 0.151005 |  |
| 0        | 0        |  |
| 0        | 0        |  |
| 0        | 0        |  |
| 2.015808 | 0        |  |
| 0.124174 | 0.137716 |  |
| 0        | 0        |  |
| 0        | 0.11344  |  |
| 0        | 0        |  |
| 0        | 0        |  |
| 0.216331 | 0        |  |
| 0        | 0        |  |
| 0.114976 | 0.127515 |  |
| 0        | 0.279911 |  |
| 0        | 0        |  |
| 0.966333 | 1.339652 |  |
| 0.621579 | 0.118178 |  |
| 0        | 0        |  |
| 0.271122 | 0        |  |
| 0        | 0.435811 |  |
| 0.599873 | 0.332648 |  |
| 0.480053 | 0        |  |
| 0.805427 | 0.306263 |  |
| 0        | 0        |  |
| 0.544622 | 0.151005 |  |
| 0        | 0        |  |
| 0        | 0.026403 |  |
| 0        | 0        |  |
| 0.124589 | 0.092118 |  |
| 1.041726 | 0        |  |
| 0        | 0        |  |
| 1.1778   | 0.622025 |  |
| 0        | 0        |  |
| 3.425966 | 1.783488 |  |
| 0        | 0        |  |
| 22.00841 | 40.8524  |  |
| 0        | 0.074927 |  |
| 0        | 0.274335 |  |
| 2.353147 | 2.810536 |  |
| 1.082339 | 0.327376 |  |
| 0        | 0        |  |
| 1.105106 | 1.671314 |  |
| 0        | 0.251307 |  |
| 2.099023 | 2.818038 |  |
| 0.163818 | 0        |  |
| 0        | 0        |  |

|          |          |
|----------|----------|
| 0.077706 | 0        |
| 0        | 0        |
| 0.184508 | 0.102315 |
| 0.130435 | 0.21699  |
| 0.124423 | 0        |
| 0        | 0.231068 |
| 0.146087 | 0.162019 |
| 0        | 0        |
| 0.134097 | 0        |
| 0.031629 | 0        |
| 0.051058 | 0.453014 |
| 0.495374 | 0.183133 |
| 0.139521 | 0.309475 |
| 0.52616  | 0.291772 |
| 0        | 0        |
| 0        | 0        |
| 0        | 0        |
| 0.129889 | 0        |
| 0.107977 | 0        |
| 0.127227 | 0.141103 |
| 0.732871 | 0.954154 |
| 0        | 0.557351 |
| 0.230806 | 0.383967 |
| 0        | 0        |
| 1.732038 | 0.591057 |
| 0.049709 | 0.055131 |
| 0.060989 | 0        |
| 0.111902 | 0.020684 |
| 0        | 0.264839 |
| 0        | 0.422443 |
| 0.221739 | 0        |
| 0        | 0.172361 |
| 0        | 0        |
| 0.090243 | 0        |
| 0        | 0        |
| 0.125491 | 0.278355 |
| 0.252386 | 0        |
| 13.98259 | 26.61743 |
| 0.232101 | 0        |
| 2.27258  | 4.814021 |
| 0.222534 | 0.246803 |
| 0.589699 | 1.588315 |
| 0        | 0.470021 |
| 0        | 0        |
| 0.294251 | 0.326342 |
| 0        | 0        |
| 0        | 0        |
| 0.882229 | 0.85614  |
| 0.778248 | 0.863124 |
| 0        | 0.061812 |
| 0.322529 | 0.894262 |
| 1.039111 | 0        |
| 0.86472  | 0.383611 |
| 3.218745 | 1.290284 |
| 0.712732 | 0.526976 |
| 0.488873 | 0.271095 |
| 0        | 0        |
| 0        | 0        |
| 0        | 0        |
| 0        | 0        |
| 0        | 0        |
| 0        | 0        |
| 0        | 0        |
| 0        | 0        |
| 0.15385  | 0.246464 |
| 0        | 0.062655 |

|          |          |
|----------|----------|
| 0        | 0        |
| 0        | 0        |
| 0        | 0.108609 |
| 0        | 0.360514 |
| 0        | 0        |
| 0.04003  | 0        |
| 0        | 0.107089 |
| 0.147475 | 0.436156 |
| 0        | 0        |
| 0.421685 | 0.440164 |
| 0.330249 | 0        |
| 0        | 0        |
| 0.278001 | 0.205547 |
| 0        | 0        |
| 0.260869 | 0.28932  |
| 0.058025 | 0        |
| 0.396902 | 0.125768 |
| 0.099339 | 0        |
| 0        | 0        |
| 0        | 0.083973 |
| 0        | 0        |
| 0.075623 | 0        |
| 0.350773 | 0.583544 |
| 0        | 0.111783 |
